# Supplementary material for: Proteomic Analysis of Excretory-Secretory Products of Heligmosomoides polygyrus Assessed with Next-Generation Sequencing Transcriptomic Information
Source: PubMed Central journal article supplement (PMC3201918; doi:10.1371/journal.pntd.0001370), 2011-10-25
Supplement: pntd.0001370.s002.pdf [file pntd.0001370.s002.pdf]

| Table S2. <i>H. polygyrus</i> RNA-seq assembly automated annotation. |             |                       |                           |                  |            |         |                  |           |                                 |
|----------------------------------------------------------------------|-------------|-----------------------|---------------------------|------------------|------------|---------|------------------|-----------|---------------------------------|
| Seq. Name                                                            | Seq. Length | #Hits Blastx (Max 20) | Closest Blastx Hit eValue | Accession Number | Similarity | Score   | BLASTX           |           |                                 |
|                                                                      |             |                       |                           |                  |            |         | Alignment length | Positives | Blastx Hit description          |
| Locus_1_Transcript_1/1_Conf_1.000                                    | 487         | 0                     |                           |                  |            |         |                  |           |                                 |
| Locus_10_Transcript_1/3_Conf_0.714                                   | 1415        | 0                     |                           |                  |            |         |                  |           |                                 |
| Locus_10_Transcript_2/3_Conf_0.714                                   | 1412        | 0                     |                           |                  |            |         |                  |           |                                 |
| Locus_10_Transcript_3/3_Conf_0.714                                   | 1412        | 0                     |                           |                  |            |         |                  |           |                                 |
| Locus_100_Transcript_1/1_Conf_1.000                                  | 670         | 20                    | 1.95E-64                  | P51535.1         | 97         | 135.961 | 70               | 68        | Myoglobin                       |
| Locus_1000_Transcript_1/1_Conf_1.000                                 | 1191        | 20                    | 9.94E-145                 | XP_002641637.1   | 93         | 517.694 | 308              | 289       | Hypothetical protein CBG09959   |
| Locus_10000_Transcript_1/1_Conf_1.000                                | 296         | 2                     | 3.67E-04                  | XP_001893253.1   | 53         | 48.1358 | 89               | 48        | hypothetical protein Bm1_08910  |
| Locus_10001_Transcript_1/1_Conf_1.000                                | 1203        | 20                    | 2.20E-99                  | EFO22809.1       | 70         | 367.081 | 374              | 262       | hypothetical protein LOAG_05677 |
| Locus_10002_Transcript_1/1_Conf_1.000                                | 1304        | 20                    | 1.62E-159                 | CAB59919.1       | 83         | 567     | 386              | 324       | hypothetical protein            |
| Locus_10003_Transcript_1/1_Conf_1.000                                | 517         | 20                    | 3.87E-47                  | XP_002630442.1   | 73         | 191.045 | 156              | 114       | Hypothetical protein CBG11175   |
| Locus_10004_Transcript_1/1_Conf_1.000                                | 2212        | 0                     |                           |                  |            |         |                  |           |                                 |
| Locus_10005_Transcript_1/1_Conf_1.000                                | 226         | 0                     |                           |                  |            |         |                  |           |                                 |
| Locus_10006_Transcript_1/1_Conf_1.000                                | 254         | 0                     |                           |                  |            |         |                  |           |                                 |
| Locus_10007_Transcript_1/1_Conf_1.000                                | 140         | 17                    | 1.84E-16                  | AAA69729.1       | 100        | 88.9669 | 43               | 43        | immunoglobulin heavy chain      |
| Locus_10008_Transcript_1/1_Conf_1.000                                | 575         | 0                     |                           |                  |            |         |                  |           |                                 |
| Locus_10009_Transcript_1/1_Conf_1.000                                | 1649        | 20                    | 1.54E-168                 | NP_510624.1      | 76         | 597.43  | 509              | 391       | hypothetical protein B0395.3    |

|                                       |      |    |           |                |     |         |     |     |                                           |
|---------------------------------------|------|----|-----------|----------------|-----|---------|-----|-----|-------------------------------------------|
| Locus_1001_Transcript_1/1_Conf_1.000  | 2115 | 20 | 0         | XP_001892620.1 | 83  | 790.801 | 592 | 496 | Vinculin family protein                   |
| Locus_10010_Transcript_1/1_Conf_1.000 | 416  | 0  |           |                |     |         |     |     |                                           |
| Locus_10011_Transcript_1/1_Conf_1.000 | 508  | 0  |           |                |     |         |     |     |                                           |
| Locus_10012_Transcript_1/1_Conf_1.000 | 401  | 3  | 4.34E-05  | YP_002722239.1 | 39  | 51.2174 | 98  | 39  | hypothetical protein BHWA1_02076          |
| Locus_10013_Transcript_1/1_Conf_1.000 | 1561 | 20 | 1.93E-165 | ACY40006.1     | 83  | 587.03  | 444 | 372 | K+/cl- cotransporter protein 2, isoform a |
| Locus_10014_Transcript_1/1_Conf_1.000 | 543  | 20 | 3.06E-27  | EFO17297.1     | 75  | 125.176 | 100 | 75  | abhydrolase domain-containing protein 2   |
| Locus_10015_Transcript_1/1_Conf_1.000 | 260  | 0  |           |                |     |         |     |     |                                           |
| Locus_10016_Transcript_1/1_Conf_1.000 | 2578 | 20 | 0         | XP_002641770.1 | 77  | 798.89  | 844 | 650 | C. briggsae CBR-EMB-9 protein             |
| Locus_10017_Transcript_1/1_Conf_1.000 | 562  | 20 | 7.35E-75  | XP_002631736.1 | 91  | 283.493 | 184 | 168 | C. briggsae CBR-RAS-1 protein             |
| Locus_10018_Transcript_1/1_Conf_1.000 | 179  | 0  |           |                |     |         |     |     |                                           |
| Locus_10019_Transcript_1/1_Conf_1.000 | 427  | 0  |           |                |     |         |     |     |                                           |
| Locus_1002_Transcript_1/1_Conf_1.000  | 306  | 2  | 4.72E-04  | AAO63578.1     | 47  | 47.7506 | 69  | 33  | secreted protein 6 precursor              |
| Locus_10020_Transcript_1/1_Conf_1.000 | 561  | 4  | 3.36E-11  | NP_001122450.1 | 41  | 72.0182 | 179 | 74  | hypothetical protein F10G8.8              |
| Locus_10021_Transcript_1/1_Conf_1.000 | 166  | 20 | 1.09E-24  | XP_002923590.1 | 100 | 116.316 | 55  | 55  | PREDICTED: DAZ-associated protein 1-like  |
| Locus_10022_Transcript_1/1_Conf_1.000 | 484  | 4  | 9.71E-05  | XP_002645151.1 | 56  | 50.0618 | 87  | 49  | C. briggsae CBR-TNT-3 protein             |

|                                       |      |    |           |                |    |         |     |     |                                    |
|---------------------------------------|------|----|-----------|----------------|----|---------|-----|-----|------------------------------------|
| Locus_10023_Transcript_1/1_Conf_1.000 | 914  | 20 | 3.68E-63  | ACI49197.1     | 71 | 246.128 | 304 | 217 | hypothetical protein Csp3_JD03.006 |
| Locus_10024_Transcript_1/1_Conf_1.000 | 148  | 20 | 7.00E-11  | NP_495256.1    | 86 | 70.4774 | 46  | 40  | hypothetical protein F13H8.2       |
| Locus_10025_Transcript_1/1_Conf_1.000 | 270  | 0  |           |                |    |         |     |     |                                    |
| Locus_10026_Transcript_1/1_Conf_1.000 | 604  | 20 | 2.55E-37  | EFO24023.1     | 74 | 159.073 | 164 | 122 | hypothetical protein LOAG_04465    |
| Locus_10027_Transcript_1/1_Conf_1.000 | 139  | 0  |           |                |    |         |     |     |                                    |
| Locus_10028_Transcript_1/1_Conf_1.000 | 384  | 20 | 3.83E-46  | XP_002630180.1 | 90 | 187.578 | 121 | 109 | Hypothetical protein CBG00585      |
| Locus_10029_Transcript_1/1_Conf_1.000 | 1272 | 20 | 1.43E-128 | NP_493169.2    | 76 | 464.151 | 379 | 290 | hypothetical protein T27F6.6       |
| Locus_1003_Transcript_1/1_Conf_1.000  | 173  | 0  |           |                |    |         |     |     |                                    |
| Locus_10030_Transcript_1/2_Conf_1.000 | 820  | 20 | 1.05E-55  | XP_002632396.1 | 97 | 221.09  | 114 | 111 | C. briggsae CBR-UAF-2 protein      |
| Locus_10030_Transcript_2/2_Conf_1.000 | 814  | 20 | 7.05E-97  | XP_002632396.1 | 93 | 357.836 | 191 | 179 | C. briggsae CBR-UAF-2 protein      |

|                                       |      |    |           |                |    |         |     |     |                                                                         |
|---------------------------------------|------|----|-----------|----------------|----|---------|-----|-----|-------------------------------------------------------------------------|
| Locus_10031_Transcript_1/1_Conf_1.000 | 805  | 5  | 2.46E-17  | NP_741607.1    | 66 | 93.5893 | 145 | 97  | hypothetical protein T07C12.12                                          |
| Locus_10032_Transcript_1/1_Conf_1.000 | 867  | 20 | 1.39E-24  | EFO23381.1     | 57 | 117.857 | 180 | 103 | hypothetical protein LOAG_05102                                         |
| Locus_10033_Transcript_1/1_Conf_1.000 | 997  | 20 | 3.89E-141 | EFO24933.1     | 93 | 505.368 | 294 | 275 | AGC/PKN protein kinase                                                  |
| Locus_10034_Transcript_1/1_Conf_1.000 | 1208 | 20 | 4.99E-59  | NP_496704.1    | 80 | 233.032 | 183 | 147 | Regulator of G protein Signaling family member (rgs-4)                  |
| Locus_10035_Transcript_1/1_Conf_1.000 | 512  | 20 | 1.61E-26  | XP_001895780.1 | 78 | 122.479 | 97  | 76  | transcription elongation factor B polypeptide 1                         |
| Locus_10036_Transcript_1/1_Conf_1.000 | 1041 | 20 | 5.84E-119 | ACI49224.1     | 76 | 431.795 | 347 | 266 | hypothetical protein Csp3_JD05.009                                      |
| Locus_10037_Transcript_1/1_Conf_1.000 | 564  | 0  |           |                |    |         |     |     |                                                                         |
| Locus_10038_Transcript_1/1_Conf_1.000 | 674  | 0  |           |                |    |         |     |     |                                                                         |
| Locus_10039_Transcript_1/1_Conf_1.000 | 384  | 14 | 2.34E-11  | XP_002827014.1 | 97 | 72.0182 | 73  | 71  | PREDICTED: macrophage scavenger receptor 1 isoform 3                    |
| Locus_1004_Transcript_1/1_Conf_1.000  | 855  | 20 | 3.92E-48  | CBK19457.1     | 73 | 196.052 | 176 | 130 | C. elegans protein K01A6.2e, partially confirmed by transcript evidence |
| Locus_10040_Transcript_1/2_Conf_1.000 | 419  | 20 | 1.21E-47  | AAK62032.1     | 76 | 192.586 | 139 | 106 | metalloprotease 1 precursor                                             |
| Locus_10040_Transcript_2/2_Conf_1.000 | 419  | 20 | 1.21E-47  | AAK62032.1     | 76 | 192.586 | 139 | 106 | metalloprotease 1 precursor                                             |
| Locus_10041_Transcript_1/1_Conf_1.000 | 543  | 20 | 4.13E-32  | NP_492142.1    | 72 | 141.354 | 153 | 111 | hypothetical protein T23G11.4                                           |
| Locus_10042_Transcript_1/1_Conf_1.000 | 378  | 0  |           |                |    |         |     |     |                                                                         |
| Locus_10043_Transcript_1/1_Conf_1.000 | 326  | 0  |           |                |    |         |     |     |                                                                         |
| Locus_10044_Transcript_1/1_Conf_1.000 | 385  | 20 | 1.23E-36  | NP_740947.2    | 73 | 155.992 | 126 | 92  | hypothetical protein Y105E8A.19                                         |

|                                       |      |    |           |                |     |         |     |     |                                                                               |
|---------------------------------------|------|----|-----------|----------------|-----|---------|-----|-----|-------------------------------------------------------------------------------|
| Locus_10045_Transcript_1/1_Conf_1.000 | 1082 | 20 | 1.57E-138 | AAC47238.1     | 83  | 496.893 | 360 | 301 | non-muscle myosin heavy chain II                                              |
| Locus_10046_Transcript_1/1_Conf_1.000 | 809  | 2  | 3.35E-06  | EFO28415.1     | 40  | 56.6102 | 206 | 84  | hypothetical protein LOAG_00061                                               |
| Locus_10047_Transcript_1/1_Conf_1.000 | 456  | 20 | 2.94E-22  | XP_001901176.1 | 76  | 108.227 | 95  | 73  | Sec63 domain containing protein                                               |
| Locus_10048_Transcript_1/1_Conf_1.000 | 1603 | 20 | 6.27E-135 | XP_002649084.1 | 72  | 485.723 | 441 | 320 | Hypothetical protein CBG22670                                                 |
| Locus_10049_Transcript_1/1_Conf_1.000 | 950  | 0  |           |                |     |         |     |     |                                                                               |
| Locus_1005_Transcript_1/1_Conf_1.000  | 2715 | 20 | 5.29E-58  | NP_496514.1    | 56  | 231.106 | 401 | 228 | yeast PAT1(protein associated with topo II)<br>Related family member (patr-1) |
| Locus_10050_Transcript_1/1_Conf_1.000 | 527  | 0  |           |                |     |         |     |     |                                                                               |
| Locus_10051_Transcript_1/2_Conf_1.000 | 1023 | 20 | 7.32E-74  | XP_002641487.1 | 63  | 281.952 | 341 | 217 | Hypothetical protein CBG09778                                                 |
| Locus_10051_Transcript_2/2_Conf_1.000 | 1023 | 20 | 7.32E-74  | XP_002641487.1 | 63  | 281.952 | 341 | 217 | Hypothetical protein CBG09778                                                 |
| Locus_10052_Transcript_1/1_Conf_1.000 | 447  | 20 | 5.76E-50  | NP_001009108.2 | 100 | 200.29  | 91  | 91  | ribonuclease pancreatic precursor                                             |
| Locus_10053_Transcript_1/1_Conf_1.000 | 1360 | 20 | 5.34E-60  | AAK84590.1     | 71  | 236.498 | 180 | 129 | AC084153_8Hypothetical protein<br>Y22D7AL.16                                  |

|                                       |      |    |          |                |    |         |     |     |                                        |
|---------------------------------------|------|----|----------|----------------|----|---------|-----|-----|----------------------------------------|
| Locus_10054_Transcript_1/1_Conf_1.000 | 1183 | 20 | 3.37E-36 | EFO25544.1     | 76 | 157.147 | 119 | 91  | hypothetical protein LOAG_02944        |
| Locus_10055_Transcript_1/1_Conf_1.000 | 630  | 20 | 1.88E-65 | XP_002633222.1 | 84 | 252.677 | 200 | 169 | Hypothetical protein CBG05941          |
| Locus_10056_Transcript_1/1_Conf_1.000 | 351  | 10 | 5.26E-19 | P34288.4       | 58 | 97.4413 | 112 | 66  | GTPase-activating protein pac-1        |
| Locus_10057_Transcript_1/1_Conf_1.000 | 176  | 0  |          |                |    |         |     |     |                                        |
| Locus_10058_Transcript_1/1_Conf_1.000 | 236  | 0  |          |                |    |         |     |     |                                        |
| Locus_10059_Transcript_1/1_Conf_1.000 | 470  | 0  |          |                |    |         |     |     |                                        |
| Locus_1006_Transcript_1/3_Conf_0.583  | 142  | 0  |          |                |    |         |     |     |                                        |
| Locus_1006_Transcript_3/3_Conf_0.667  | 200  | 0  |          |                |    |         |     |     |                                        |
| Locus_10060_Transcript_1/1_Conf_1.000 | 997  | 20 | 1.61E-78 | XP_002642022.1 | 80 | 297.36  | 215 | 174 | Hypothetical protein CBG17958          |
| Locus_10061_Transcript_1/1_Conf_1.000 | 769  | 20 | 1.13E-77 | EFO22550.1     | 74 | 293.893 | 256 | 191 | TATA binding protein associated factor |
| Locus_10062_Transcript_1/1_Conf_1.000 | 1124 | 20 | 1.05E-23 | XP_001895613.1 | 54 | 115.546 | 183 | 100 | Zinc finger, C2H2 type family protein  |

|                                       |      |    |           |                |    |         |     |     |                                 |
|---------------------------------------|------|----|-----------|----------------|----|---------|-----|-----|---------------------------------|
| Locus_10063_Transcript_1/1_Conf_1.000 | 980  | 20 | 7.43E-105 | XP_002638488.1 | 94 | 384.8   | 209 | 197 | C. briggsae CBR-SEC-23 protein  |
| Locus_10064_Transcript_1/1_Conf_1.000 | 170  | 20 | 2.35E-11  | EFO21941.1     | 75 | 72.0182 | 52  | 39  | hypothetical protein LOAG_06543 |
| Locus_10065_Transcript_1/1_Conf_1.000 | 561  | 5  | 9.13E-17  | EFO26231.1     | 70 | 90.5077 | 80  | 56  | hypothetical protein LOAG_02257 |
| Locus_10066_Transcript_1/1_Conf_1.000 | 1224 | 20 | 8.66E-75  | XP_002637804.1 | 75 | 285.419 | 224 | 170 | Hypothetical protein CBG04590   |
| Locus_10067_Transcript_1/1_Conf_1.000 | 632  | 20 | 7.91E-64  | NP_502658.1    | 95 | 247.284 | 134 | 128 | hypothetical protein Y45F10D.4  |
| Locus_10068_Transcript_1/1_Conf_1.000 | 195  | 0  |           |                |    |         |     |     |                                 |
| Locus_10069_Transcript_1/1_Conf_1.000 | 533  | 0  |           |                |    |         |     |     |                                 |
| Locus_1007_Transcript_1/1_Conf_1.000  | 192  | 0  |           |                |    |         |     |     |                                 |
| Locus_10070_Transcript_1/1_Conf_1.000 | 735  | 0  |           |                |    |         |     |     |                                 |
| Locus_10071_Transcript_1/1_Conf_1.000 | 910  | 20 | 1.44E-59  | EFO15252.1     | 63 | 234.187 | 267 | 169 | hypothetical protein LOAG_13260 |

|                                       |      |    |           |                |    |         |     |     |                                 |
|---------------------------------------|------|----|-----------|----------------|----|---------|-----|-----|---------------------------------|
| Locus_10072_Transcript_1/1_Conf_1.000 | 951  | 8  | 7.01E-20  | EFO20947.1     | 50 | 102.449 | 293 | 147 | hypothetical protein LOAG_07543 |
| Locus_10073_Transcript_1/1_Conf_1.000 | 718  | 7  | 7.32E-57  | NP_492628.1    | 76 | 224.557 | 204 | 156 | hypothetical protein Y106G6A.5  |
| Locus_10074_Transcript_1/1_Conf_1.000 | 523  | 0  |           |                |    |         |     |     |                                 |
| Locus_10075_Transcript_1/1_Conf_1.000 | 285  | 19 | 3.35E-13  | NP_510156.2    | 73 | 78.1814 | 56  | 41  | hypothetical protein F11C1.4    |
| Locus_10076_Transcript_1/1_Conf_1.000 | 521  | 3  | 1.97E-30  | NP_504395.2    | 60 | 135.576 | 178 | 107 | hypothetical protein Y47A7.1    |
| Locus_10077_Transcript_1/1_Conf_1.000 | 130  | 0  |           |                |    |         |     |     |                                 |
| Locus_10078_Transcript_1/1_Conf_1.000 | 690  | 0  |           |                |    |         |     |     |                                 |
| Locus_10079_Transcript_1/1_Conf_1.000 | 743  | 3  | 1.27E-14  | NP_001024476.1 | 50 | 84.3445 | 212 | 108 | hypothetical protein C46H3.2    |
| Locus_1008_Transcript_1/1_Conf_1.000  | 1080 | 20 | 1.98E-149 | XP_002641166.1 | 90 | 533.102 | 347 | 313 | C. briggsae CBR-EFT-1 protein   |



|                                       |      |    |           |                |     |         |     |     |                                                       |
|---------------------------------------|------|----|-----------|----------------|-----|---------|-----|-----|-------------------------------------------------------|
| Locus_10080_Transcript_1/1_Conf_1.000 | 261  | 20 | 1.17E-42  | BAG36500.1     | 100 | 176.022 | 87  | 87  | unnamed protein product                               |
| Locus_10081_Transcript_1/1_Conf_1.000 | 596  | 20 | 1.03E-27  | EFO26895.1     | 59  | 127.102 | 187 | 112 | organic solute transporter alpha-like protein         |
| Locus_10082_Transcript_1/1_Conf_1.000 | 816  | 20 | 1.38E-108 | NP_510580.1    | 86  | 396.741 | 253 | 219 | hypothetical protein F59D12.1                         |
| Locus_10083_Transcript_1/1_Conf_1.000 | 379  | 0  |           |                |     |         |     |     |                                                       |
| Locus_10084_Transcript_1/2_Conf_1.000 | 589  | 20 | 3.54E-41  | NP_503101.1    | 70  | 171.785 | 151 | 107 | hypothetical protein C30H6.8                          |
| Locus_10084_Transcript_2/2_Conf_1.000 | 589  | 20 | 3.54E-41  | NP_503101.1    | 70  | 171.785 | 151 | 107 | hypothetical protein C30H6.8                          |
| Locus_10085_Transcript_1/1_Conf_1.000 | 133  | 6  | 7.54E-10  | XP_002639323.1 | 81  | 67.0106 | 43  | 35  | C. briggsae CBR-HUM-7 protein                         |
| Locus_10086_Transcript_1/1_Conf_1.000 | 249  | 2  | 1.84E-08  | XP_002632297.1 | 57  | 62.3882 | 75  | 43  | C. briggsae CBR-NOL-6 protein                         |
| Locus_10087_Transcript_1/1_Conf_1.000 | 405  | 2  | 2.60E-10  | XP_001898097.1 | 47  | 68.5514 | 135 | 64  | Asparaginase family protein                           |
| Locus_10088_Transcript_1/1_Conf_1.000 | 884  | 20 | 5.34E-64  | NP_497461.1    | 63  | 248.825 | 238 | 151 | PDGF/VEGF growth factor related family member (pvf-1) |
| Locus_10089_Transcript_1/1_Conf_1.000 | 366  | 3  | 1.56E-07  | XP_001892279.1 | 63  | 59.3066 | 66  | 42  | GrpE protein homolog, mitochondrial precursor         |
| Locus_1009_Transcript_1/1_Conf_1.000  | 823  | 0  |           |                |     |         |     |     |                                                       |
| Locus_10090_Transcript_1/2_Conf_1.000 | 1358 | 20 | 7.89E-88  | NP_001040656.2 | 76  | 328.946 | 363 | 276 | hypothetical protein F27D4.4                          |

|                                       |      |    |          |                |    |         |     |     |                                                                 |
|---------------------------------------|------|----|----------|----------------|----|---------|-----|-----|-----------------------------------------------------------------|
| Locus_10090_Transcript_2/2_Conf_1.000 | 1358 | 20 | 7.88E-88 | NP_001040656.2 | 76 | 328.946 | 363 | 276 | hypothetical protein F27D4.4                                    |
| Locus_10091_Transcript_1/1_Conf_1.000 | 431  | 20 | 7.76E-39 | NP_001022773.1 | 85 | 163.31  | 122 | 104 | Myc and Mondo-Like family member (mml-1)                        |
| Locus_10092_Transcript_1/1_Conf_1.000 | 508  | 20 | 5.34E-54 | XP_001900544.1 | 84 | 213.772 | 149 | 126 | Type III restriction enzyme, res subunit family protein         |
| Locus_10093_Transcript_1/1_Conf_1.000 | 827  | 0  |          |                |    |         |     |     |                                                                 |
| Locus_10094_Transcript_1/1_Conf_1.000 | 804  | 20 | 2.88E-42 | XP_002632817.1 | 82 | 176.407 | 111 | 92  | C. briggsae CBR-CKA-1 protein                                   |
| Locus_10095_Transcript_1/3_Conf_0.667 | 639  | 20 | 2.62E-86 | NP_499324.1    | 86 | 322.013 | 200 | 173 | 4-HydroxyPhenylpyruvate Dioxygenase (HPD) family member (hpd-1) |
| Locus_10095_Transcript_2/3_Conf_0.667 | 639  | 20 | 9.97E-86 | NP_499324.1    | 86 | 320.087 | 200 | 173 | 4-HydroxyPhenylpyruvate Dioxygenase (HPD) family member (hpd-1) |
| Locus_10095_Transcript_3/3_Conf_0.667 | 639  | 20 | 9.97E-86 | NP_499324.1    | 86 | 320.087 | 200 | 173 | 4-HydroxyPhenylpyruvate Dioxygenase (HPD) family member (hpd-1) |
| Locus_10096_Transcript_1/1_Conf_1.000 | 957  | 2  | 5.27E-07 | EFO20717.1     | 55 | 59.6918 | 145 | 81  | hypothetical protein LOAG_07773                                 |

|                                       |      |    |          |                |    |         |     |     |                                 |
|---------------------------------------|------|----|----------|----------------|----|---------|-----|-----|---------------------------------|
| Locus_10097_Transcript_1/1_Conf_1.000 | 568  | 0  |          |                |    |         |     |     |                                 |
| Locus_10098_Transcript_1/1_Conf_1.000 | 712  | 3  | 4.12E-12 | XP_002639131.1 | 44 | 75.8702 | 219 | 98  | Hypothetical protein CBG14951   |
| Locus_10099_Transcript_1/1_Conf_1.000 | 318  | 0  |          |                |    |         |     |     |                                 |
| Locus_101_Transcript_1/1_Conf_1.000   | 334  | 0  |          |                |    |         |     |     |                                 |
| Locus_1010_Transcript_1/1_Conf_1.000  | 901  | 20 | 1.01E-49 | XP_002639673.1 | 83 | 201.445 | 139 | 116 | Hypothetical protein CBG12391   |
| Locus_10100_Transcript_1/1_Conf_1.000 | 767  | 20 | 3.99E-59 | EFO23920.1     | 67 | 232.261 | 252 | 171 | hypothetical protein LOAG_04569 |
| Locus_10101_Transcript_1/1_Conf_1.000 | 672  | 16 | 6.14E-68 | XP_002647278.1 | 72 | 261.151 | 224 | 163 | C. briggsae CBR-KETN-1 protein  |
| Locus_10102_Transcript_1/1_Conf_1.000 | 973  | 20 | 4.66E-67 | XP_002646453.1 | 80 | 259.225 | 184 | 149 | C. briggsae CBR-SMD-1 protein   |
| Locus_10103_Transcript_1/1_Conf_1.000 | 330  | 0  |          |                |    |         |     |     |                                 |
| Locus_10104_Transcript_1/1_Conf_1.000 | 452  | 20 | 2.10E-60 | XP_002630896.1 | 89 | 234.958 | 134 | 120 | Hypothetical protein CBG02618   |
| Locus_10105_Transcript_1/1_Conf_1.000 | 302  | 13 | 1.42E-16 | NP_502242.2    | 64 | 89.3521 | 92  | 59  | hypothetical protein F38H4.6    |
| Locus_10106_Transcript_1/1_Conf_1.000 | 290  | 4  | 7.68E-10 | XP_002639822.1 | 60 | 67.0106 | 87  | 53  | C. briggsae CBR-APH-2 protein   |
| Locus_10107_Transcript_1/1_Conf_1.000 | 128  | 0  |          |                |    |         |     |     |                                 |
| Locus_10108_Transcript_1/1_Conf_1.000 | 946  | 0  |          |                |    |         |     |     |                                 |
| Locus_10109_Transcript_1/1_Conf_1.000 | 1428 | 20 | 0        | XP_002637424.1 | 80 | 646.351 | 471 | 381 | Hypothetical protein CBG19133   |
| Locus_1011_Transcript_1/1_Conf_1.000  | 1290 | 5  | 4.22E-35 |                | 48 | 153.68  | 406 | 197 | DNA topoisomerase II            |
| Locus_10110_Transcript_1/1_Conf_1.000 | 455  | 0  |          |                |    |         |     |     |                                 |
| Locus_10111_Transcript_1/1_Conf_1.000 | 184  | 0  |          |                |    |         |     |     |                                 |

|                                       |      |    |           |                |    |         |     |     |                                                                                                    |
|---------------------------------------|------|----|-----------|----------------|----|---------|-----|-----|----------------------------------------------------------------------------------------------------|
| Locus_10112_Transcript_1/2_Conf_1.000 | 2126 | 20 | 1.47E-20  | XP_002420141.1 | 48 | 106.301 | 458 | 221 | ER to Golgi vesicle transport protein, putative; intracellular protein transport protein, putative |
| Locus_10112_Transcript_2/2_Conf_1.000 | 2099 | 20 | 1.45E-20  | XP_002420141.1 | 48 | 106.301 | 458 | 221 | ER to Golgi vesicle transport protein, putative; intracellular protein transport protein, putative |
| Locus_10113_Transcript_1/1_Conf_1.000 | 250  | 2  | 9.14E-08  | ADG63133.1     | 75 | 60.077  | 57  | 43  | calcium-dependent apyrase                                                                          |
| Locus_10114_Transcript_1/1_Conf_1.000 | 371  | 0  |           |                |    |         |     |     |                                                                                                    |
| Locus_10115_Transcript_1/1_Conf_1.000 | 177  | 2  | 1.12E-05  | EFO13974.1     | 65 | 53.1434 | 58  | 38  | hypothetical protein LOAG_14552                                                                    |
| Locus_10116_Transcript_1/1_Conf_1.000 | 642  | 6  | 3.92E-05  | EEC79812.1     | 42 | 52.373  | 145 | 62  | hypothetical protein Osl_21251                                                                     |
| Locus_10117_Transcript_1/3_Conf_0.714 | 956  | 20 | 3.52E-112 | XP_002634865.1 | 78 | 409.068 | 314 | 247 | C. briggsae CBR-PLX-1 protein                                                                      |
| Locus_10117_Transcript_2/3_Conf_0.714 | 956  | 20 | 7.10E-113 | XP_002634865.1 | 78 | 411.379 | 314 | 248 | C. briggsae CBR-PLX-1 protein                                                                      |
| Locus_10117_Transcript_3/3_Conf_0.714 | 956  | 20 | 7.10E-113 | XP_002634865.1 | 78 | 411.379 | 314 | 248 | C. briggsae CBR-PLX-1 protein                                                                      |
| Locus_10118_Transcript_1/1_Conf_1.000 | 515  | 20 | 3.30E-51  | NP_741193.1    | 91 | 204.527 | 122 | 112 | hypothetical protein C16A3.10                                                                      |
| Locus_10119_Transcript_1/1_Conf_1.000 | 716  | 0  |           |                |    |         |     |     |                                                                                                    |

|                                       |     |    |          |            |    |         |     |     |                                      |
|---------------------------------------|-----|----|----------|------------|----|---------|-----|-----|--------------------------------------|
| Locus_1012_Transcript_1/1_Conf_1.000  | 609 | 20 | 5.29E-38 | EFO28242.1 | 88 | 161.384 | 107 | 95  | hypothetical protein LOAG_00237      |
| Locus_10120_Transcript_1/1_Conf_1.000 | 502 | 20 | 1.54E-42 | EFO18902.1 | 71 | 175.637 | 150 | 107 | glycosyl hydrolase family 85 protein |
| Locus_10121_Transcript_1/1_Conf_1.000 | 567 | 20 | 2.24E-34 | AAC47238.1 | 77 | 149.058 | 163 | 127 | non-muscle myosin heavy chain II     |
| Locus_10122_Transcript_1/1_Conf_1.000 | 596 | 20 | 1.93E-42 | EFO22910.1 | 85 | 176.022 | 127 | 109 | hypothetical protein LOAG_05577      |

|                                       |      |    |           |                |     |         |     |     |                                                              |
|---------------------------------------|------|----|-----------|----------------|-----|---------|-----|-----|--------------------------------------------------------------|
| Locus_10123_Transcript_1/1_Conf_1.000 | 1861 | 20 | 0         | NP_001022671.1 | 90  | 808.135 | 478 | 433 | hypothetical protein K08E3.5                                 |
| Locus_10124_Transcript_1/1_Conf_1.000 | 201  | 0  |           |                |     |         |     |     |                                                              |
| Locus_10125_Transcript_1/1_Conf_1.000 | 136  | 20 | 1.51E-18  | 1WZV           | 100 | 95.9005 | 44  | 44  | CrystalStructure Of Ubch8                                    |
| Locus_10126_Transcript_1/1_Conf_1.000 | 867  | 0  |           |                |     |         |     |     |                                                              |
| Locus_10127_Transcript_1/1_Conf_1.000 | 821  | 0  |           |                |     |         |     |     |                                                              |
| Locus_10128_Transcript_1/1_Conf_1.000 | 150  | 19 | 2.02E-18  | XP_002344856.1 | 91  | 95.5153 | 48  | 44  | PREDICTED: similar to hCG2042717                             |
| Locus_10129_Transcript_1/1_Conf_1.000 | 1173 | 20 | 4.94E-56  | NP_504952.1    | 75  | 223.016 | 258 | 195 | hypothetical protein F19F10.9                                |
| Locus_1013_Transcript_1/1_Conf_1.000  | 1634 | 20 | 3.28E-155 | CAA84656.2     | 73  | 553.132 | 525 | 384 | C. elegans protein F10F2.2, confirmed by transcript evidence |
| Locus_10130_Transcript_1/1_Conf_1.000 | 217  | 0  |           |                |     |         |     |     |                                                              |
| Locus_10131_Transcript_1/1_Conf_1.000 | 1770 | 0  |           |                |     |         |     |     |                                                              |
| Locus_10132_Transcript_1/1_Conf_1.000 | 219  | 0  |           |                |     |         |     |     |                                                              |
| Locus_10133_Transcript_1/1_Conf_1.000 | 515  | 20 | 3.63E-74  | XP_001897106.1 | 86  | 280.796 | 169 | 147 | hypothetical protein                                         |
| Locus_10134_Transcript_1/1_Conf_1.000 | 300  | 3  | 2.86E-25  | NP_495991.1    | 72  | 118.242 | 100 | 72  | hypothetical protein F42A8.1                                 |

|                                       |      |    |          |                |    |         |     |     |                                                           |
|---------------------------------------|------|----|----------|----------------|----|---------|-----|-----|-----------------------------------------------------------|
| Locus_10135_Transcript_1/1_Conf_1.000 | 553  | 20 | 3.09E-78 | XP_002640158.1 | 82 | 294.664 | 183 | 151 | C. briggsae CBR-TRE-1 protein                             |
| Locus_10136_Transcript_1/1_Conf_1.000 | 563  | 20 | 3.07E-89 | NP_491857.1    | 95 | 331.257 | 180 | 172 | RAB family member (rab-10)                                |
| Locus_10137_Transcript_1/1_Conf_1.000 | 1208 | 20 | 7.94E-65 | ACZ54690.1     | 59 | 252.292 | 357 | 214 | Uncoordinated protein 82, isoform h                       |
| Locus_10138_Transcript_1/1_Conf_1.000 | 445  | 20 | 8.91E-59 | NP_503352.1    | 80 | 229.565 | 147 | 118 | Flavin-containing MonoOxygenase family member (fmo-5)     |
| Locus_10139_Transcript_1/1_Conf_1.000 | 620  | 20 | 2.03E-24 | Q9NA80.3       | 51 | 116.316 | 225 | 115 | Stress-activated map kinase-interacting protein 1 homolog |
| Locus_1014_Transcript_1/2_Conf_1.000  | 838  | 20 | 3.04E-90 | CAR63714.1     | 88 | 335.88  | 226 | 201 | hypothetical protein                                      |
| Locus_1014_Transcript_2/2_Conf_1.000  | 869  | 20 | 4.25E-90 | CAR63714.1     | 88 | 335.495 | 229 | 203 | hypothetical protein                                      |
| Locus_10140_Transcript_1/1_Conf_1.000 | 341  | 20 | 9.11E-16 | EFO21559.1     | 58 | 86.6557 | 113 | 66  | hypothetical protein LOAG_06930                           |
| Locus_10141_Transcript_1/3_Conf_0.400 | 422  | 0  |          |                |    |         |     |     |                                                           |
| Locus_10141_Transcript_2/3_Conf_0.400 | 233  | 0  |          |                |    |         |     |     |                                                           |
| Locus_10141_Transcript_3/3_Conf_0.400 | 433  | 0  |          |                |    |         |     |     |                                                           |
| Locus_10142_Transcript_1/1_Conf_1.000 | 348  | 0  |          |                |    |         |     |     |                                                           |

|                                       |     |    |           |                |     |         |     |     |                                                 |
|---------------------------------------|-----|----|-----------|----------------|-----|---------|-----|-----|-------------------------------------------------|
| Locus_10143_Transcript_1/1_Conf_1.000 | 598 | 20 | 1.58E-92  | XP_002834351.1 | 100 | 342.428 | 164 | 164 | PREDICTED: hypothetical protein<br>LOC100438152 |
| Locus_10144_Transcript_1/1_Conf_1.000 | 256 | 7  | 3.58E-07  | NP_499886.1    | 50  | 58.151  | 76  | 38  | hypothetical protein R02D3.7                    |
| Locus_10145_Transcript_1/1_Conf_1.000 | 851 | 20 | 1.94E-124 | A8WVU9.2       | 92  | 449.514 | 274 | 254 | Rho-associated protein kinase let-502           |
| Locus_10146_Transcript_1/1_Conf_1.000 | 394 | 0  |           |                |     |         |     |     |                                                 |
| Locus_10147_Transcript_1/1_Conf_1.000 | 294 | 0  |           |                |     |         |     |     |                                                 |
| Locus_10148_Transcript_1/1_Conf_1.000 | 141 | 0  |           |                |     |         |     |     |                                                 |



|                                       |      |    |          |                |    |         |     |     |                                                                         |
|---------------------------------------|------|----|----------|----------------|----|---------|-----|-----|-------------------------------------------------------------------------|
| Locus_10149_Transcript_1/1_Conf_1.000 | 1208 | 15 | 3.60E-33 | XP_002638550.1 | 50 | 147.132 | 253 | 129 | Hypothetical protein CBG05586                                           |
| Locus_1015_Transcript_1/3_Conf_0.714  | 795  | 0  |          |                |    |         |     |     |                                                                         |
| Locus_1015_Transcript_2/3_Conf_0.429  | 535  | 0  |          |                |    |         |     |     |                                                                         |
| Locus_1015_Transcript_3/3_Conf_0.714  | 976  | 0  |          |                |    |         |     |     |                                                                         |
| Locus_10150_Transcript_1/1_Conf_1.000 | 385  | 0  |          |                |    |         |     |     |                                                                         |
| Locus_10151_Transcript_1/2_Conf_1.000 | 619  | 20 | 5.34E-33 | XP_001900984.1 | 89 | 144.821 | 91  | 81  | HMG box family protein                                                  |
| Locus_10151_Transcript_2/2_Conf_1.000 | 610  | 20 | 5.13E-33 | XP_001900984.1 | 89 | 144.821 | 91  | 81  | HMG box family protein                                                  |
| Locus_10152_Transcript_1/2_Conf_1.000 | 971  | 20 | 1.01E-37 | EFO16052.1     | 60 | 161.77  | 178 | 108 | hypothetical protein LOAG_12456                                         |
| Locus_10152_Transcript_2/2_Conf_1.000 | 911  | 20 | 8.21E-39 | XP_002633000.1 | 65 | 165.236 | 203 | 132 | C. briggsae CBR-ICL-1 protein                                           |
| Locus_10153_Transcript_1/2_Conf_1.000 | 1095 | 20 | 3.43E-48 | CBB15981.1     | 74 | 196.823 | 169 | 126 | C. elegans protein B0285.1c, partially confirmed by transcript evidence |

|                                       |      |    |          |                |    |         |     |     |                                                                         |
|---------------------------------------|------|----|----------|----------------|----|---------|-----|-----|-------------------------------------------------------------------------|
| Locus_10153_Transcript_2/2_Conf_1.000 | 1199 | 20 | 3.91E-48 | CBB15981.1     | 74 | 196.823 | 169 | 126 | C. elegans protein B0285.1c, partially confirmed by transcript evidence |
| Locus_10154_Transcript_1/1_Conf_1.000 | 752  | 6  | 6.13E-89 | NP_501400.1    | 81 | 331.257 | 246 | 200 | hypothetical protein F35H10.10                                          |
| Locus_10155_Transcript_1/1_Conf_1.000 | 226  | 18 | 5.13E-22 | NP_001021991.1 | 75 | 107.457 | 74  | 56  | hypothetical protein C26D10.6                                           |
| Locus_10156_Transcript_1/1_Conf_1.000 | 254  | 0  |          |                |    |         |     |     |                                                                         |
| Locus_10157_Transcript_1/1_Conf_1.000 | 421  | 20 | 1.44E-32 | NP_497814.3    | 64 | 142.51  | 154 | 100 | UNCoordinated family member (unc-79)                                    |
| Locus_10158_Transcript_1/1_Conf_1.000 | 1123 | 20 | 2.83E-45 | NP_494847.2    | 94 | 187.193 | 141 | 133 | hypothetical protein F41C3.4                                            |
| Locus_10159_Transcript_1/1_Conf_1.000 | 414  | 0  |          |                |    |         |     |     |                                                                         |
| Locus_1016_Transcript_1/1_Conf_1.000  | 706  | 20 | 1.75E-23 | XP_001896558.1 | 61 | 113.62  | 126 | 78  | Ser/Thr protein phosphatase family protein                              |
| Locus_10160_Transcript_1/1_Conf_1.000 | 164  | 20 | 2.07E-15 | XP_001899041.1 | 87 | 85.5001 | 54  | 47  | Transcription initiation factor IID, 18kD subunit family protein        |
| Locus_10161_Transcript_1/2_Conf_1.000 | 360  | 0  |          |                |    |         |     |     |                                                                         |
| Locus_10161_Transcript_2/2_Conf_1.000 | 366  | 0  |          |                |    |         |     |     |                                                                         |
| Locus_10162_Transcript_1/1_Conf_1.000 | 562  | 0  |          |                |    |         |     |     |                                                                         |
| Locus_10163_Transcript_1/1_Conf_1.000 | 159  | 0  |          |                |    |         |     |     |                                                                         |
| Locus_10164_Transcript_1/1_Conf_1.000 | 385  | 0  |          |                |    |         |     |     |                                                                         |
| Locus_10165_Transcript_1/1_Conf_1.000 | 373  | 20 | 2.45E-24 | NP_491935.1    | 96 | 115.161 | 62  | 60  | G Protein, Gamma subunit family member (gpc-2)                          |
| Locus_10166_Transcript_1/1_Conf_1.000 | 482  | 20 | 1.49E-58 | CAR63593.1     | 89 | 228.794 | 155 | 139 | putative PQ loop repeat family protein                                  |
| Locus_10167_Transcript_1/1_Conf_1.000 | 168  | 0  |          |                |    |         |     |     |                                                                         |

|                                       |      |    |           |                |    |         |     |     |                                                                        |
|---------------------------------------|------|----|-----------|----------------|----|---------|-----|-----|------------------------------------------------------------------------|
| Locus_10168_Transcript_1/1_Conf_1.000 | 1250 | 9  | 1.88E-40  | CAA10033.1     | 49 | 171.4   | 430 | 212 | DYS-1 protein                                                          |
| Locus_10169_Transcript_1/1_Conf_1.000 | 374  | 4  | 1.00E-09  | CAA91482.3     | 71 | 66.6254 | 59  | 42  | C. elegans protein T04F8.6, partially confirmed by transcript evidence |
| Locus_1017_Transcript_1/1_Conf_1.000  | 186  | 20 | 1.04E-14  | XP_002631360.1 | 81 | 83.1889 | 61  | 50  | Hypothetical protein CBG03195                                          |
| Locus_10170_Transcript_1/1_Conf_1.000 | 398  | 20 | 1.48E-53  | XP_002641446.1 | 92 | 212.231 | 127 | 118 | Hypothetical protein CBG13315                                          |
| Locus_10171_Transcript_1/1_Conf_1.000 | 369  | 0  |           |                |    |         |     |     |                                                                        |
| Locus_10172_Transcript_1/1_Conf_1.000 | 359  | 3  | 4.15E-08  | XP_002634119.1 | 84 | 61.2326 | 57  | 48  | Hypothetical protein CBG01673                                          |
| Locus_10173_Transcript_1/1_Conf_1.000 | 700  | 20 | 4.63E-101 | XP_002630114.1 | 96 | 371.318 | 233 | 224 | C. briggsae CBR-PYR-1 protein                                          |
| Locus_10174_Transcript_1/1_Conf_1.000 | 270  | 20 | 2.04E-39  | EFO25642.1     | 98 | 165.236 | 89  | 88  | hypothetical protein LOAG_02841                                        |
| Locus_10175_Transcript_1/1_Conf_1.000 | 1220 | 20 | 3.40E-164 | XP_001899489.1 | 81 | 582.408 | 411 | 337 | Trehalose 6-phosphate synthase protein 1                               |
| Locus_10176_Transcript_1/1_Conf_1.000 | 226  | 0  |           |                |    |         |     |     |                                                                        |
| Locus_10177_Transcript_1/1_Conf_1.000 | 227  | 0  |           |                |    |         |     |     |                                                                        |
| Locus_10178_Transcript_1/1_Conf_1.000 | 765  | 20 | 3.80E-118 | XP_002638375.1 | 86 | 428.328 | 254 | 219 | Hypothetical protein CBG18580                                          |

|                                       |      |    |          |                |    |         |     |     |                                                                         |
|---------------------------------------|------|----|----------|----------------|----|---------|-----|-----|-------------------------------------------------------------------------|
| Locus_10179_Transcript_1/1_Conf_1.000 | 541  | 20 | 1.26E-41 | XP_002642775.1 | 75 | 172.94  | 148 | 112 | C. briggsae CBR-NEX-1 protein                                           |
| Locus_1018_Transcript_1/2_Conf_1.000  | 548  | 0  |          |                |    |         |     |     |                                                                         |
| Locus_1018_Transcript_2/2_Conf_1.000  | 599  | 0  |          |                |    |         |     |     |                                                                         |
| Locus_10180_Transcript_1/1_Conf_1.000 | 671  | 20 | 3.97E-43 | NP_504518.3    | 69 | 178.718 | 202 | 141 | Nuclear Hormone Receptor family member (nhr-142)                        |
| Locus_10181_Transcript_1/1_Conf_1.000 | 354  | 0  |          |                |    |         |     |     |                                                                         |
| Locus_10182_Transcript_1/1_Conf_1.000 | 183  | 0  |          |                |    |         |     |     |                                                                         |
| Locus_10183_Transcript_1/1_Conf_1.000 | 293  | 0  |          |                |    |         |     |     |                                                                         |
| Locus_10184_Transcript_1/1_Conf_1.000 | 276  | 20 | 6.99E-32 | CBA11613.1     | 77 | 140.198 | 88  | 68  | C. elegans protein F54F3.1c, partially confirmed by transcript evidence |
| Locus_10185_Transcript_1/1_Conf_1.000 | 314  | 5  | 3.96E-14 | XP_002639081.1 | 67 | 81.2629 | 91  | 61  | Hypothetical protein CBG14899                                           |
| Locus_10186_Transcript_1/1_Conf_1.000 | 193  | 0  |          |                |    |         |     |     |                                                                         |
| Locus_10187_Transcript_1/1_Conf_1.000 | 491  | 0  |          |                |    |         |     |     |                                                                         |
| Locus_10188_Transcript_1/1_Conf_1.000 | 534  | 5  | 5.64E-23 | NP_506872.1    | 72 | 110.923 | 102 | 74  | hypothetical protein F28F8.5                                            |
| Locus_10189_Transcript_1/1_Conf_1.000 | 670  | 20 | 1.55E-63 | EFO27261.1     | 78 | 246.514 | 185 | 146 | APB-1 protein                                                           |
| Locus_1019_Transcript_1/2_Conf_1.000  | 1234 | 20 | 4.97E-70 | AAK84571.2     | 76 | 269.626 | 190 | 146 | AC006685_2Hypothetical protein T13G4.2                                  |
| Locus_1019_Transcript_2/2_Conf_1.000  | 1183 | 17 | 1.96E-60 | AAK84571.2     | 82 | 237.654 | 151 | 124 | AC006685_2Hypothetical protein T13G4.2                                  |
| Locus_10190_Transcript_1/1_Conf_1.000 | 328  | 0  |          |                |    |         |     |     |                                                                         |
| Locus_10191_Transcript_1/1_Conf_1.000 | 591  | 20 | 1.11E-50 | NP_506089.1    | 74 | 203.371 | 162 | 120 | hypothetical protein R04F11.5                                           |
| Locus_10192_Transcript_1/1_Conf_1.000 | 1275 | 2  | 1.25E-23 | XP_002647382.1 | 47 | 115.546 | 425 | 201 | Hypothetical protein CBG06447                                           |
| Locus_10193_Transcript_1/1_Conf_1.000 | 338  | 20 | 2.40E-24 | NP_001021246.1 | 88 | 115.161 | 71  | 63  | Kinesin-Associated Protein family member (kap-1)                        |
| Locus_10194_Transcript_1/1_Conf_1.000 | 249  | 0  |          |                |    |         |     |     |                                                                         |

|                                       |      |    |          |                |    |         |     |     |                                                           |
|---------------------------------------|------|----|----------|----------------|----|---------|-----|-----|-----------------------------------------------------------|
| Locus_10195_Transcript_1/1_Conf_1.000 | 1026 | 20 | 1.43E-77 | XP_002636449.1 | 65 | 294.278 | 301 | 196 | Hypothetical protein CBG23110                             |
| Locus_10196_Transcript_1/1_Conf_1.000 | 779  | 20 | 2.51E-48 | XP_002630873.1 | 74 | 196.438 | 167 | 124 | Hypothetical protein CBG02590                             |
| Locus_10197_Transcript_1/1_Conf_1.000 | 360  | 5  | 2.83E-41 | NP_506424.2    | 84 | 171.4   | 119 | 100 | Nose Resistant to Fluoxetine family member (nrf-5)        |
| Locus_10198_Transcript_1/1_Conf_1.000 | 326  | 20 | 1.02E-30 | XP_002639478.1 | 76 | 136.346 | 110 | 84  | C. briggsae CBR-CYP-36A1 protein                          |
| Locus_10199_Transcript_1/1_Conf_1.000 | 1546 | 2  | 2.87E-12 | XP_002638680.1 | 43 | 78.1814 | 314 | 138 | Hypothetical protein CBG11872                             |
| Locus_102_Transcript_1/2_Conf_1.000   | 2142 | 20 | 0        | XP_002636957.1 | 95 | 1261.13 | 713 | 683 | C. briggsae CBR-EAT-6 protein                             |
| Locus_102_Transcript_2/2_Conf_1.000   | 1125 | 20 | 0        | NP_506269.1    | 97 | 671.774 | 374 | 366 | EATing: abnormal pharyngeal pumping family member (eat-6) |

|                                       |      |    |          |                |    |         |     |     |                                                        |
|---------------------------------------|------|----|----------|----------------|----|---------|-----|-----|--------------------------------------------------------|
| Locus_1020_Transcript_1/1_Conf_1.000  | 436  | 20 | 1.19E-31 | XP_002636877.1 | 84 | 139.428 | 84  | 71  | Hypothetical protein CBG09336                          |
| Locus_10200_Transcript_1/2_Conf_1.000 | 2648 | 20 | 0        | NP_495537.1    | 77 | 899.042 | 731 | 568 | HAIF transporter (PGP related) family member (haf-2)   |
| Locus_10200_Transcript_2/2_Conf_1.000 | 635  | 4  | 1.34E-10 | NP_495537.1    | 54 | 70.4774 | 113 | 62  | HAIF transporter (PGP related) family member (haf-2)   |
| Locus_10201_Transcript_1/1_Conf_1.000 | 238  | 0  |          |                |    |         |     |     |                                                        |
| Locus_10202_Transcript_1/1_Conf_1.000 | 402  | 5  | 8.37E-25 | NP_001022999.1 | 63 | 116.701 | 132 | 84  | hypothetical protein ZK418.2                           |
| Locus_10203_Transcript_1/2_Conf_1.000 | 638  | 0  |          |                |    |         |     |     |                                                        |
| Locus_10203_Transcript_2/2_Conf_1.000 | 641  | 0  |          |                |    |         |     |     |                                                        |
| Locus_10204_Transcript_1/1_Conf_1.000 | 510  | 20 | 3.92E-65 | NP_500247.2    | 89 | 250.751 | 144 | 129 | hypothetical protein Y94H6A.8                          |
| Locus_10205_Transcript_1/1_Conf_1.000 | 362  | 20 | 3.59E-36 | NP_493616.1    | 76 | 154.451 | 121 | 92  | hypothetical protein F33H2.5                           |
| Locus_10206_Transcript_1/1_Conf_1.000 | 446  | 20 | 6.59E-62 | XP_002642996.1 | 89 | 239.965 | 148 | 133 | C. briggsae CBR-UNC-45 protein                         |
| Locus_10207_Transcript_1/2_Conf_1.000 | 360  | 9  | 3.47E-31 | XP_002644619.1 | 91 | 137.887 | 90  | 82  | C. briggsae CBR-LFI-1 protein                          |
| Locus_10207_Transcript_2/2_Conf_1.000 | 473  | 14 | 1.42E-32 | NP_001024981.1 | 55 | 142.51  | 216 | 119 | Lin-5 (Five) Interacting protein family member (lfi-1) |
| Locus_10208_Transcript_1/1_Conf_1.000 | 1004 | 20 | 3.23E-18 | AAM98045.2     | 57 | 97.0561 | 106 | 61  | Hypothetical protein C34H4.5                           |
| Locus_10209_Transcript_1/1_Conf_1.000 | 1087 | 20 | 8.04E-58 | NP_491700.2    | 57 | 228.794 | 384 | 219 | hypothetical protein F33D11.9                          |

|                                       |      |    |           |                |     |         |     |     |                                                        |
|---------------------------------------|------|----|-----------|----------------|-----|---------|-----|-----|--------------------------------------------------------|
| Locus_1021_Transcript_1/1_Conf_1.000  | 1285 | 20 | 1.70E-153 | XP_002631561.1 | 80  | 546.969 | 364 | 293 | C. briggsae CBR-GLN-2 protein                          |
| Locus_10210_Transcript_1/1_Conf_1.000 | 194  | 2  | 3.81E-09  | EFO17919.1     | 73  | 64.6994 | 64  | 47  | hypothetical protein LOAG_10578                        |
| Locus_10211_Transcript_1/3_Conf_0.667 | 576  | 4  | 2.00E-09  | XP_002638722.1 | 71  | 66.2402 | 66  | 47  | C. briggsae CBR-RLBP-1 protein                         |
| Locus_10211_Transcript_2/3_Conf_0.667 | 731  | 4  | 3.46E-09  | XP_002638722.1 | 71  | 66.2402 | 66  | 47  | C. briggsae CBR-RLBP-1 protein                         |
| Locus_10211_Transcript_3/3_Conf_0.667 | 731  | 4  | 3.46E-09  | XP_002638722.1 | 71  | 66.2402 | 66  | 47  | C. briggsae CBR-RLBP-1 protein                         |
| Locus_10212_Transcript_1/1_Conf_1.000 | 678  | 20 | 1.65E-68  | XP_002763858.1 | 100 | 263.077 | 128 | 128 | PREDICTED: ADP/ATP translocase 3-like, partial         |
| Locus_10213_Transcript_1/1_Conf_1.000 | 256  | 0  |           |                |     |         |     |     |                                                        |
| Locus_10214_Transcript_1/1_Conf_1.000 | 412  | 20 | 3.70E-33  | NP_491412.1    | 92  | 144.436 | 85  | 79  | Acyl-Coenzyme A Binding Protein family member (acbp-1) |
| Locus_10215_Transcript_1/1_Conf_1.000 | 400  | 20 | 7.83E-39  | XP_002630251.1 | 78  | 163.31  | 123 | 96  | Hypothetical protein CBG00670                          |
| Locus_10216_Transcript_1/2_Conf_1.000 | 1174 | 20 | 2.46E-47  | NP_504203.1    | 56  | 194.126 | 296 | 168 | hypothetical protein F32D1.9                           |
| Locus_10216_Transcript_2/2_Conf_1.000 | 1174 | 20 | 2.46E-47  | NP_504203.1    | 56  | 194.126 | 296 | 168 | hypothetical protein F32D1.9                           |
| Locus_10217_Transcript_1/1_Conf_1.000 | 262  | 0  |           |                |     |         |     |     |                                                        |
| Locus_10218_Transcript_1/1_Conf_1.000 | 273  | 0  |           |                |     |         |     |     |                                                        |
| Locus_10219_Transcript_1/1_Conf_1.000 | 283  | 20 | 5.18E-14  | NP_001024551.1 | 60  | 80.8777 | 93  | 56  | Nuclear Hormone Receptor family member (nhr-25)        |
| Locus_1022_Transcript_1/1_Conf_1.000  | 499  | 0  |           |                |     |         |     |     |                                                        |
| Locus_10220_Transcript_1/1_Conf_1.000 | 446  | 0  |           |                |     |         |     |     |                                                        |
| Locus_10221_Transcript_1/1_Conf_1.000 | 766  | 0  |           |                |     |         |     |     |                                                        |
| Locus_10222_Transcript_1/1_Conf_1.000 | 1189 | 20 | 1.65E-115 | ACS36091.1     | 78  | 420.624 | 343 | 268 | cysteine proteinase                                    |
| Locus_10223_Transcript_1/1_Conf_1.000 | 389  | 0  |           |                |     |         |     |     |                                                        |
| Locus_10224_Transcript_1/1_Conf_1.000 | 407  | 20 | 3.40E-10  | EFO23403.1     | 56  | 68.1662 | 101 | 57  | hypothetical protein LOAG_05077                        |
| Locus_10225_Transcript_1/1_Conf_1.000 | 144  | 20 | 1.67E-12  | XP_002642817.1 | 79  | 75.8702 | 48  | 38  | C. briggsae CBR-NAS-1 protein                          |
| Locus_10226_Transcript_1/1_Conf_1.000 | 1967 | 20 | 8.40E-124 | XP_001901370.1 | 70  | 449.129 | 459 | 324 | Lateral signaling target protein 2                     |

|                                       |     |    |          |                |     |         |     |     |                                                                  |
|---------------------------------------|-----|----|----------|----------------|-----|---------|-----|-----|------------------------------------------------------------------|
| Locus_10227_Transcript_1/1_Conf_1.000 | 270 | 20 | 1.12E-45 | NP_001021871.1 | 100 | 186.037 | 90  | 90  | UNCoordinated family member (unc-13)                             |
| Locus_10228_Transcript_1/1_Conf_1.000 | 307 | 18 | 5.21E-11 | XP_002634644.1 | 60  | 70.8626 | 98  | 59  | Hypothetical protein CBG03497                                    |
| Locus_10229_Transcript_1/1_Conf_1.000 | 204 | 20 | 1.38E-11 | NP_501554.2    | 72  | 72.7886 | 68  | 49  | hypothetical protein D1046.5                                     |
| Locus_1023_Transcript_1/1_Conf_1.000  | 844 | 20 | 2.37E-74 | NP_508168.1    | 80  | 283.108 | 192 | 154 | hypothetical protein F56F10.3                                    |
| Locus_10230_Transcript_1/1_Conf_1.000 | 159 | 0  |          |                |     |         |     |     |                                                                  |
| Locus_10231_Transcript_1/1_Conf_1.000 | 325 | 0  |          |                |     |         |     |     |                                                                  |
| Locus_10232_Transcript_1/1_Conf_1.000 | 346 | 20 | 2.54E-21 | NP_492549.2    | 62  | 105.145 | 117 | 73  | hypothetical protein K07A1.9                                     |
| Locus_10233_Transcript_1/1_Conf_1.000 | 532 | 20 | 7.38E-31 | XP_002631098.1 | 63  | 137.117 | 158 | 100 | Hypothetical protein CBG02872                                    |
| Locus_10234_Transcript_1/1_Conf_1.000 | 149 | 0  |          |                |     |         |     |     |                                                                  |
| Locus_10235_Transcript_1/1_Conf_1.000 | 658 | 0  |          |                |     |         |     |     |                                                                  |
| Locus_10236_Transcript_1/1_Conf_1.000 | 353 | 20 | 7.83E-31 | XP_001896501.1 | 78  | 136.732 | 99  | 78  | Hypothetical subtilase-type proteinase F21H12.6 in chromosome II |



|                                       |      |    |          |                |    |         |     |     |                                |
|---------------------------------------|------|----|----------|----------------|----|---------|-----|-----|--------------------------------|
| Locus_10237_Transcript_1/1_Conf_1.000 | 176  | 20 | 1.46E-21 | XP_002640668.1 | 94 | 105.916 | 58  | 55  | C. briggsae CBR-UNC-54 protein |
| Locus_10238_Transcript_1/1_Conf_1.000 | 588  | 19 | 7.59E-52 | XP_002640213.1 | 74 | 207.223 | 195 | 145 | Hypothetical protein CBG12724  |
| Locus_10239_Transcript_1/1_Conf_1.000 | 428  | 20 | 8.12E-12 | AAO63577.1     | 53 | 73.559  | 145 | 77  | secreted protein 5 precursor   |
| Locus_1024_Transcript_1/1_Conf_1.000  | 1081 | 20 | 1.14E-88 | XP_002633118.1 | 84 | 331.257 | 206 | 175 | C. briggsae CBR-CAP-1 protein  |

|                                       |     |    |           |                |    |         |     |     |                                         |
|---------------------------------------|-----|----|-----------|----------------|----|---------|-----|-----|-----------------------------------------|
| Locus_10240_Transcript_1/1_Conf_1.000 | 926 | 20 | 1.80E-73  | XP_002647138.1 | 91 | 280.411 | 164 | 150 | Hypothetical protein CBG16436           |
| Locus_10241_Transcript_1/1_Conf_1.000 | 289 | 0  |           |                |    |         |     |     |                                         |
| Locus_10242_Transcript_1/1_Conf_1.000 | 668 | 0  |           |                |    |         |     |     |                                         |
| Locus_10243_Transcript_1/1_Conf_1.000 | 283 | 20 | 3.12E-35  | NP_509361.1    | 89 | 151.369 | 93  | 83  | hypothetical protein K07E3.4            |
| Locus_10244_Transcript_1/1_Conf_1.000 | 407 | 0  |           |                |    |         |     |     |                                         |
| Locus_10245_Transcript_1/1_Conf_1.000 | 972 | 20 | 1.41E-47  | NP_493972.3    | 67 | 194.512 | 207 | 140 | NucleOLar protein family member (nol-6) |
| Locus_10246_Transcript_1/1_Conf_1.000 | 768 | 6  | 3.68E-20  | XP_002647225.1 | 47 | 102.834 | 255 | 122 | Hypothetical protein CBG23815           |
| Locus_10247_Transcript_1/1_Conf_1.000 | 592 | 20 | 4.23E-50  | NP_497138.1    | 77 | 201.445 | 187 | 145 | hypothetical protein F54C4.1            |
| Locus_10248_Transcript_1/1_Conf_1.000 | 221 | 0  |           |                |    |         |     |     |                                         |
| Locus_10249_Transcript_1/1_Conf_1.000 | 538 | 20 | 3.27E-18  | XP_001892089.1 | 57 | 95.1301 | 127 | 73  | S-antigen protein precursor             |
| Locus_1025_Transcript_1/1_Conf_1.000  | 796 | 3  | 1.42E-102 | NP_501020.2    | 83 | 376.711 | 265 | 222 | hypothetical protein C01B10.3           |
| Locus_10250_Transcript_1/1_Conf_1.000 | 901 | 20 | 1.11E-88  | NP_501399.1    | 66 | 330.872 | 321 | 215 | Vacuolar H ATPase family member (vha-5) |
| Locus_10251_Transcript_1/1_Conf_1.000 | 312 | 20 | 1.55E-34  | NP_501176.1    | 81 | 149.058 | 105 | 86  | hypothetical protein T12B3.3            |
| Locus_10252_Transcript_1/1_Conf_1.000 | 673 | 20 | 3.40E-34  | XP_640893.1    | 57 | 149.058 | 221 | 126 | hypothetical protein DDB_G0281219       |
| Locus_10253_Transcript_1/1_Conf_1.000 | 307 | 0  |           |                |    |         |     |     |                                         |
| Locus_10254_Transcript_1/1_Conf_1.000 | 571 | 0  |           |                |    |         |     |     |                                         |

|                                       |      |    |           |                |     |         |     |     |                                             |
|---------------------------------------|------|----|-----------|----------------|-----|---------|-----|-----|---------------------------------------------|
| Locus_10255_Transcript_1/1_Conf_1.000 | 213  | 20 | 2.74E-28  | XP_002640693.1 | 94  | 128.257 | 69  | 65  | Hypothetical protein CBG19758               |
| Locus_10256_Transcript_1/1_Conf_1.000 | 493  | 0  |           |                |     |         |     |     |                                             |
| Locus_10257_Transcript_1/1_Conf_1.000 | 926  | 20 | 1.13E-75  | XP_002641397.1 | 79  | 287.73  | 239 | 190 | Hypothetical protein CBG13259               |
| Locus_10258_Transcript_1/1_Conf_1.000 | 274  | 2  | 2.68E-07  | ACZ64269.1     | 68  | 58.5362 | 83  | 57  | astacin metalloprotease b                   |
| Locus_10259_Transcript_1/1_Conf_1.000 | 1718 | 20 | 1.54E-126 | XP_002631305.1 | 62  | 457.988 | 576 | 361 | C. briggsae CBR-DNA-2 protein               |
| Locus_1026_Transcript_1/1_Conf_1.000  | 256  | 20 | 1.35E-38  | BAC01681.1     | 96  | 162.54  | 85  | 82  | immunoglobulin kappa light chain VLJ region |
| Locus_10260_Transcript_1/2_Conf_1.000 | 672  | 20 | 1.59E-15  | XP_002637557.1 | 52  | 87.0409 | 185 | 97  | Hypothetical protein CBG19289               |
| Locus_10260_Transcript_2/2_Conf_1.000 | 284  | 0  |           |                |     |         |     |     |                                             |
| Locus_10261_Transcript_1/1_Conf_1.000 | 538  | 20 | 2.81E-70  | AAG44663.1     | 100 | 268.085 | 131 | 131 | AF260332_1DC33                              |
| Locus_10262_Transcript_1/1_Conf_1.000 | 616  | 20 | 2.88E-39  | EFO21094.1     | 66  | 165.622 | 176 | 117 | cyclophilin                                 |
| Locus_10263_Transcript_1/1_Conf_1.000 | 1100 | 20 | 3.72E-18  | NP_495696.2    | 61  | 97.0561 | 109 | 67  | hypothetical protein K02C4.3                |
| Locus_10264_Transcript_1/1_Conf_1.000 | 511  | 20 | 2.62E-77  | XP_002630855.1 | 90  | 291.197 | 169 | 153 | Hypothetical protein CBG02570               |

|                                       |      |    |           |                |    |         |     |     |                                                |
|---------------------------------------|------|----|-----------|----------------|----|---------|-----|-----|------------------------------------------------|
| Locus_10265_Transcript_1/1_Conf_1.000 | 276  | 2  | 7.76E-15  | NP_740947.2    | 65 | 83.5741 | 90  | 59  | hypothetical protein Y105E8A.19                |
| Locus_10266_Transcript_1/1_Conf_1.000 | 347  | 20 | 3.65E-44  | NP_001022207.1 | 96 | 181.03  | 89  | 86  | hypothetical protein F56D1.3                   |
| Locus_10267_Transcript_1/1_Conf_1.000 | 739  | 20 | 2.68E-57  | NP_497019.1    | 67 | 226.098 | 250 | 168 | hypothetical protein F57C2.5                   |
| Locus_10268_Transcript_1/1_Conf_1.000 | 198  | 0  |           |                |    |         |     |     |                                                |
| Locus_10269_Transcript_1/1_Conf_1.000 | 376  | 0  |           |                |    |         |     |     |                                                |
| Locus_1027_Transcript_1/1_Conf_1.000  | 488  | 2  | 6.05E-07  | XP_002637168.1 | 65 | 57.3806 | 46  | 30  | Hypothetical protein CBG09680                  |
| Locus_10270_Transcript_1/1_Conf_1.000 | 907  | 20 | 9.88E-69  | XP_001898880.1 | 67 | 264.618 | 302 | 204 | RhoGAP domain containing protein               |
| Locus_10271_Transcript_1/1_Conf_1.000 | 197  | 0  |           |                |    |         |     |     |                                                |
| Locus_10272_Transcript_1/1_Conf_1.000 | 586  | 20 | 5.31E-37  | XP_002646234.1 | 63 | 157.918 | 187 | 118 | Hypothetical protein CBG11927                  |
| Locus_10273_Transcript_1/1_Conf_1.000 | 872  | 11 | 2.02E-23  | AAM12418.1     | 53 | 114.005 | 226 | 121 | spliced leader 30 kDa protein                  |
| Locus_10274_Transcript_1/1_Conf_1.000 | 329  | 0  |           |                |    |         |     |     |                                                |
| Locus_10275_Transcript_1/1_Conf_1.000 | 153  | 4  | 9.06E-19  | EFO26119.1     | 97 | 96.6709 | 49  | 48  | myotactin form A                               |
| Locus_10276_Transcript_1/1_Conf_1.000 | 424  | 11 | 1.29E-33  | XP_001900740.1 | 73 | 145.976 | 131 | 96  | BTB/POZ domain containing protein              |
| Locus_10277_Transcript_1/1_Conf_1.000 | 542  | 20 | 2.01E-31  | EFO18735.1     | 67 | 139.043 | 137 | 92  | amidase                                        |
| Locus_10278_Transcript_1/1_Conf_1.000 | 1362 | 20 | 1.52E-155 | XP_002631669.1 | 82 | 553.903 | 455 | 374 | C. briggsae CBR-MOG-4 protein                  |
| Locus_10279_Transcript_1/1_Conf_1.000 | 795  | 0  |           |                |    |         |     |     |                                                |
| Locus_1028_Transcript_1/1_Conf_1.000  | 779  | 20 | 2.12E-47  | XP_002633078.1 | 66 | 193.356 | 224 | 149 | Hypothetical protein CBG05761                  |
| Locus_10280_Transcript_1/1_Conf_1.000 | 535  | 0  |           |                |    |         |     |     |                                                |
| Locus_10281_Transcript_1/1_Conf_1.000 | 997  | 20 | 1.23E-86  | EFO23979.1     | 70 | 324.324 | 334 | 234 | metallopeptidase family M24 containing protein |
| Locus_10282_Transcript_1/1_Conf_1.000 | 435  | 4  | 2.50E-05  | XP_843162.1    | 53 | 51.9878 | 91  | 49  | proteophosphoglycan ppg4                       |

|                                       |      |    |          |                |    |         |     |     |                                                                         |
|---------------------------------------|------|----|----------|----------------|----|---------|-----|-----|-------------------------------------------------------------------------|
| Locus_10283_Transcript_1/1_Conf_1.000 | 508  | 20 | 1.52E-16 | NP_491203.1    | 50 | 89.3521 | 171 | 87  | human HUS1 related family member (hus-1)                                |
| Locus_10284_Transcript_1/1_Conf_1.000 | 1041 | 20 | 9.13E-72 | XP_002633355.1 | 62 | 275.018 | 329 | 206 | Hypothetical protein CBG06099                                           |
| Locus_10285_Transcript_1/1_Conf_1.000 | 240  | 0  |          |                |    |         |     |     |                                                                         |
| Locus_10286_Transcript_1/1_Conf_1.000 | 327  | 20 | 4.56E-39 | AAK31527.3     | 84 | 164.081 | 110 | 93  | Neuronal symmetry protein 1, partially confirmed by transcript evidence |
| Locus_10287_Transcript_1/1_Conf_1.000 | 462  | 20 | 1.98E-74 | XP_002643587.1 | 96 | 281.567 | 154 | 148 | Hypothetical protein CBG16309                                           |
| Locus_10288_Transcript_1/1_Conf_1.000 | 303  | 2  | 2.43E-08 | NP_507813.1    | 58 | 62.003  | 73  | 43  | hypothetical protein Y43F8C.13                                          |
| Locus_10289_Transcript_1/1_Conf_1.000 | 215  | 0  |          |                |    |         |     |     |                                                                         |
| Locus_1029_Transcript_1/1_Conf_1.000  | 1027 | 20 | 2.13E-97 | ACO15780.1     | 78 | 360.147 | 286 | 224 | Lethal protein 767, isoform b, confirmed by transcript evidence         |
| Locus_10290_Transcript_1/1_Conf_1.000 | 299  | 0  |          |                |    |         |     |     |                                                                         |
| Locus_10291_Transcript_1/1_Conf_1.000 | 141  | 0  |          |                |    |         |     |     |                                                                         |
| Locus_10292_Transcript_1/1_Conf_1.000 | 943  | 20 | 4.02E-76 | XP_002644619.1 | 84 | 289.271 | 275 | 231 | C. briggsae CBR-LFI-1 protein                                           |
| Locus_10293_Transcript_1/2_Conf_1.000 | 2047 | 20 | 0        | NP_001023608.1 | 88 | 915.99  | 564 | 498 | CCR (yeast CCR4/NOT complex component) homolog family member (ccr-4)    |

|                                       |      |    |          |                |    |         |     |     |                                                                      |
|---------------------------------------|------|----|----------|----------------|----|---------|-----|-----|----------------------------------------------------------------------|
| Locus_10293_Transcript_2/2_Conf_1.000 | 2030 | 20 | 0        | NP_001023608.1 | 88 | 915.99  | 564 | 498 | CCR (yeast CCR4/NOT complex component) homolog family member (ccr-4) |
| Locus_10294_Transcript_1/1_Conf_1.000 | 364  | 14 | 3.26E-05 | XP_002076888.1 | 59 | 51.6026 | 92  | 55  | GD24585                                                              |
| Locus_10295_Transcript_1/1_Conf_1.000 | 806  | 20 | 7.06E-57 | NP_507527.2    | 75 | 224.942 | 193 | 146 | hypothetical protein Y59A8B.8                                        |
| Locus_10296_Transcript_1/1_Conf_1.000 | 360  | 20 | 3.68E-57 | NP_492775.2    | 86 | 224.172 | 119 | 103 | LAMinin related. See also lmb- family member (lam-3)                 |
| Locus_10297_Transcript_1/1_Conf_1.000 | 198  | 0  |          |                |    |         |     |     |                                                                      |
| Locus_10298_Transcript_1/1_Conf_1.000 | 916  | 5  | 3.52E-05 | XP_002029777.1 | 42 | 53.5286 | 213 | 91  | GM25090                                                              |
| Locus_10299_Transcript_1/1_Conf_1.000 | 349  | 2  | 2.81E-12 | NP_510633.1    | 69 | 75.0998 | 83  | 58  | hypothetical protein ZK1073.2                                        |
| Locus_103_Transcript_1/1_Conf_1.000   | 867  | 0  |          |                |    |         |     |     |                                                                      |
| Locus_1030_Transcript_1/2_Conf_1.000  | 1305 | 20 | 1.25E-18 | XP_001894934.1 | 60 | 98.9821 | 128 | 77  | chromobox protein homolog 3                                          |
| Locus_1030_Transcript_2/2_Conf_1.000  | 1305 | 20 | 1.25E-18 | XP_001894934.1 | 60 | 98.9821 | 128 | 77  | chromobox protein homolog 3                                          |
| Locus_10300_Transcript_1/2_Conf_1.000 | 308  | 0  |          |                |    |         |     |     |                                                                      |
| Locus_10300_Transcript_2/2_Conf_1.000 | 308  | 0  |          |                |    |         |     |     |                                                                      |
| Locus_10301_Transcript_1/1_Conf_1.000 | 464  | 0  |          |                |    |         |     |     |                                                                      |
| Locus_10302_Transcript_1/1_Conf_1.000 | 254  | 2  | 3.59E-07 | NP_491456.2    | 71 | 58.151  | 56  | 40  | hypothetical protein F57C9.6                                         |
| Locus_10303_Transcript_1/1_Conf_1.000 | 167  | 2  | 2.44E-08 | NP_500298.3    | 83 | 62.003  | 36  | 30  | hypothetical protein Y67D8B.4                                        |
| Locus_10304_Transcript_1/1_Conf_1.000 | 785  | 0  |          |                |    |         |     |     |                                                                      |

|                                       |      |    |          |                |    |         |     |     |                                                       |
|---------------------------------------|------|----|----------|----------------|----|---------|-----|-----|-------------------------------------------------------|
| Locus_10305_Transcript_1/1_Conf_1.000 | 456  | 0  |          |                |    |         |     |     |                                                       |
| Locus_10306_Transcript_1/1_Conf_1.000 | 1038 | 0  |          |                |    |         |     |     |                                                       |
| Locus_10307_Transcript_1/1_Conf_1.000 | 130  | 3  | 1.63E-04 | NP_505377.2    | 77 | 49.2914 | 44  | 34  | hypothetical protein B0222.9                          |
| Locus_10308_Transcript_1/2_Conf_1.000 | 1079 | 0  |          |                |    |         |     |     |                                                       |
| Locus_10308_Transcript_2/2_Conf_1.000 | 1025 | 0  |          |                |    |         |     |     |                                                       |
| Locus_10309_Transcript_1/1_Conf_1.000 | 398  | 4  | 7.16E-16 | NP_501455.1    | 73 | 87.0409 | 71  | 52  | Temporarily Assigned Gene name family member (tag-77) |
| Locus_1031_Transcript_1/1_Conf_1.000  | 650  | 20 | 1.13E-15 | NP_499437.2    | 70 | 87.4261 | 92  | 65  | hypothetical protein Y47D3A.29                        |
| Locus_10310_Transcript_1/1_Conf_1.000 | 1034 | 20 | 4.39E-50 | EFO24890.1     | 60 | 202.986 | 242 | 146 | RING finger protein 170                               |
| Locus_10311_Transcript_1/1_Conf_1.000 | 620  | 0  |          |                |    |         |     |     |                                                       |
| Locus_10312_Transcript_1/1_Conf_1.000 | 314  | 20 | 6.74E-22 | EFO15797.1     | 70 | 107.071 | 98  | 69  | hypothetical protein LOAG_12712                       |
| Locus_10313_Transcript_1/1_Conf_1.000 | 315  | 20 | 1.27E-20 | CAR63649.1     | 94 | 102.834 | 53  | 50  | hypothetical protein                                  |
| Locus_10314_Transcript_1/1_Conf_1.000 | 335  | 19 | 1.37E-19 | ADI61822.1     | 64 | 99.3673 | 111 | 72  | endonuclease-reverse transcriptase                    |
| Locus_10315_Transcript_1/1_Conf_1.000 | 313  | 0  |          |                |    |         |     |     |                                                       |
| Locus_10316_Transcript_1/1_Conf_1.000 | 163  | 3  | 1.94E-05 | XP_002634631.1 | 64 | 52.373  | 53  | 34  | Hypothetical protein CBG18490                         |
| Locus_10317_Transcript_1/1_Conf_1.000 | 1241 | 0  |          |                |    |         |     |     |                                                       |

|                                       |      |    |           |                |    |         |     |     |                                             |
|---------------------------------------|------|----|-----------|----------------|----|---------|-----|-----|---------------------------------------------|
| Locus_10318_Transcript_1/1_Conf_1.000 | 438  | 2  | 1.23E-04  | NP_001023357.2 | 56 | 49.6766 | 73  | 41  | hypothetical protein T04C4.1                |
| Locus_10319_Transcript_1/1_Conf_1.000 | 281  | 0  |           |                |    |         |     |     |                                             |
| Locus_1032_Transcript_1/1_Conf_1.000  | 1008 | 20 | 4.63E-73  | NP_506393.1    | 76 | 279.256 | 259 | 197 | hypothetical protein T01D3.5                |
| Locus_10320_Transcript_1/1_Conf_1.000 | 203  | 20 | 4.90E-25  | XP_002648832.1 | 95 | 117.472 | 67  | 64  | Hypothetical protein CBG16947               |
| Locus_10321_Transcript_1/1_Conf_1.000 | 566  | 20 | 9.18E-57  | 2ON7           | 77 | 223.402 | 187 | 145 | Structure Of Nagst-1                        |
| Locus_10322_Transcript_1/1_Conf_1.000 | 128  | 0  |           |                |    |         |     |     |                                             |
| Locus_10323_Transcript_1/1_Conf_1.000 | 131  | 20 | 1.29E-17  | XP_002631390.1 | 97 | 92.8189 | 43  | 42  | Hypothetical protein CBG03232               |
| Locus_10324_Transcript_1/1_Conf_1.000 | 159  | 0  |           |                |    |         |     |     |                                             |
| Locus_10325_Transcript_1/1_Conf_1.000 | 1205 | 20 | 8.95E-101 | NP_001024679.1 | 71 | 371.703 | 337 | 242 | DiacylGlycerol Kinase family member (dkg-2) |
| Locus_10326_Transcript_1/1_Conf_1.000 | 862  | 20 | 3.09E-109 | XP_002633235.1 | 87 | 399.053 | 273 | 240 | Hypothetical protein CBG05956               |
| Locus_10327_Transcript_1/1_Conf_1.000 | 398  | 20 | 1.58E-47  | NP_492590.1    | 89 | 192.2   | 114 | 102 | hypothetical protein K02A11.3               |
| Locus_10328_Transcript_1/1_Conf_1.000 | 256  | 5  | 2.32E-06  | XP_002645945.1 | 57 | 55.4546 | 84  | 48  | C. briggsae CBR-GOB-1 protein               |



|                                       |      |    |           |                |    |         |     |     |                                                           |
|---------------------------------------|------|----|-----------|----------------|----|---------|-----|-----|-----------------------------------------------------------|
| Locus_10329_Transcript_1/1_Conf_1.000 | 805  | 20 | 1.63E-53  | NP_491160.1    | 75 | 213.772 | 179 | 135 | SEParase family member (sep-1)                            |
| Locus_1033_Transcript_1/1_Conf_1.000  | 482  | 0  |           |                |    |         |     |     |                                                           |
| Locus_10330_Transcript_1/1_Conf_1.000 | 129  | 0  |           |                |    |         |     |     |                                                           |
| Locus_10331_Transcript_1/1_Conf_1.000 | 591  | 20 | 1.62E-25  | NP_001024529.1 | 68 | 119.783 | 132 | 90  | SLOWpoke potassium channel family member (slo-2)          |
| Locus_10332_Transcript_1/1_Conf_1.000 | 304  | 0  |           |                |    |         |     |     |                                                           |
| Locus_10333_Transcript_1/3_Conf_0.714 | 2944 | 20 | 3.56E-116 | XP_694117.3    | 50 | 424.476 | 949 | 483 | PREDICTED: KIAA1033-like                                  |
| Locus_10333_Transcript_2/3_Conf_0.714 | 2944 | 20 | 6.08E-116 | XP_694117.3    | 50 | 423.705 | 949 | 483 | PREDICTED: KIAA1033-like                                  |
| Locus_10333_Transcript_3/3_Conf_0.714 | 2944 | 20 | 6.08E-116 | XP_694117.3    | 50 | 423.705 | 949 | 483 | PREDICTED: KIAA1033-like                                  |
| Locus_10334_Transcript_1/1_Conf_1.000 | 200  | 0  |           |                |    |         |     |     |                                                           |
| Locus_10335_Transcript_1/1_Conf_1.000 | 404  |    |           |                |    |         |     |     |                                                           |
| Locus_10336_Transcript_1/1_Conf_1.000 | 264  | 20 | 1.25E-20  | XP_002636692.1 | 79 | 102.834 | 73  | 58  | Hypothetical protein CBG23406                             |
| Locus_10337_Transcript_1/1_Conf_1.000 | 438  | 0  |           |                |    |         |     |     |                                                           |
| Locus_10338_Transcript_1/1_Conf_1.000 | 998  | 4  | 7.36E-15  | ACI49256.1     | 38 | 85.8853 | 372 | 145 | hypothetical protein Csp3_JD07.006                        |
| Locus_10339_Transcript_1/1_Conf_1.000 | 610  | 6  | 2.31E-25  | EFO24329.1     | 60 | 119.398 | 145 | 87  | hypothetical protein LOAG_04162                           |
| Locus_1034_Transcript_1/1_Conf_1.000  | 1330 | 20 | 4.75E-122 | CAA96571.1     | 66 | 442.58  | 427 | 282 | parasite pepsinogen                                       |
| Locus_10340_Transcript_1/1_Conf_1.000 | 175  | 20 | 1.73E-06  | XP_002813545.1 | 72 | 55.8398 | 48  | 35  | PREDICTED: histone-lysine N-methyltransferase SETMAR-like |

|                                       |     |    |          |                |    |         |     |     |                                                                |
|---------------------------------------|-----|----|----------|----------------|----|---------|-----|-----|----------------------------------------------------------------|
| Locus_10341_Transcript_1/2_Conf_1.000 | 765 | 20 | 1.05E-59 | CBL43465.1     | 63 | 234.187 | 242 | 154 | C. elegans protein Y55D9A.1d, confirmed by transcript evidence |
| Locus_10341_Transcript_2/2_Conf_1.000 | 765 | 20 | 2.76E-60 | CBL43465.1     | 64 | 236.113 | 242 | 155 | C. elegans protein Y55D9A.1d, confirmed by transcript evidence |
| Locus_10342_Transcript_1/1_Conf_1.000 | 777 | 3  | 4.48E-05 | XP_787339.1    | 70 | 52.7582 | 54  | 38  | PREDICTED: similar to replication factor C p37 subunit         |
| Locus_10343_Transcript_1/2_Conf_1.000 | 526 | 20 | 3.25E-68 | XP_002641367.1 | 84 | 261.151 | 193 | 163 | C. briggsae CBR-GBF-1 protein                                  |
| Locus_10343_Transcript_2/2_Conf_1.000 | 511 | 20 | 1.22E-66 | XP_002641367.1 | 84 | 255.758 | 189 | 159 | C. briggsae CBR-GBF-1 protein                                  |
| Locus_10344_Transcript_1/1_Conf_1.000 | 727 | 20 | 9.02E-10 | XP_001493987.1 | 57 | 68.1662 | 94  | 54  | PREDICTED: similar to C-type lectin domain family 9, member A  |

|                                       |      |    |           |                |    |         |     |     |                                                              |  |
|---------------------------------------|------|----|-----------|----------------|----|---------|-----|-----|--------------------------------------------------------------|--|
| Locus_10345_Transcript_1/1_Conf_1.000 | 459  |    |           |                |    |         |     |     |                                                              |  |
| Locus_10346_Transcript_1/1_Conf_1.000 | 232  | 0  |           |                |    |         |     |     |                                                              |  |
| Locus_10347_Transcript_1/1_Conf_1.000 | 213  | 0  |           |                |    |         |     |     |                                                              |  |
| Locus_10348_Transcript_1/1_Conf_1.000 | 188  | 0  |           |                |    |         |     |     |                                                              |  |
| Locus_10349_Transcript_1/1_Conf_1.000 | 1012 | 4  | 1.09E-05  | CAP09614.1     | 39 | 55.4546 | 297 | 116 | novel protein containing multiple sushi domains (SCR repeat) |  |
| Locus_1035_Transcript_1/4_Conf_0.400  | 669  | 20 | 4.49E-79  | NP_502255.1    | 81 | 298.13  | 203 | 165 | FATty acid desaturase family member (fat-6)                  |  |
| Locus_1035_Transcript_2/4_Conf_0.400  | 669  | 20 | 2.91E-78  | NP_502255.1    | 81 | 295.434 | 201 | 164 | FATty acid desaturase family member (fat-6)                  |  |
| Locus_1035_Transcript_3/4_Conf_0.400  | 1246 | 20 | 4.62E-140 | NP_502255.1    | 81 | 502.286 | 339 | 277 | FATty acid desaturase family member (fat-6)                  |  |
| Locus_1035_Transcript_4/4_Conf_0.400  | 1204 | 20 | 4.39E-140 | NP_502255.1    | 81 | 502.286 | 339 | 277 | FATty acid desaturase family member (fat-6)                  |  |
| Locus_10350_Transcript_1/1_Conf_1.000 | 2138 | 20 | 6.01E-147 | NP_501725.2    | 61 | 526.168 | 683 | 421 | hypothetical protein ZK1251.9                                |  |
| Locus_10351_Transcript_1/1_Conf_1.000 | 287  | 20 | 9.36E-32  | NP_496465.1    | 86 | 139.813 | 92  | 80  | hypothetical protein F54D5.12                                |  |
| Locus_10352_Transcript_1/1_Conf_1.000 | 334  | 0  |           |                |    |         |     |     |                                                              |  |
| Locus_10353_Transcript_1/1_Conf_1.000 | 366  | 20 | 6.47E-46  | XP_002640448.1 | 88 | 186.808 | 117 | 104 | Hypothetical protein CBG08504                                |  |
| Locus_10354_Transcript_1/1_Conf_1.000 | 604  | 20 | 1.04E-22  | XP_001902019.1 | 64 | 110.538 | 96  | 62  | PRPF39 protein                                               |  |

|                                       |      |    |           |                |     |         |     |     |                                                         |
|---------------------------------------|------|----|-----------|----------------|-----|---------|-----|-----|---------------------------------------------------------|
| Locus_10355_Transcript_1/1_Conf_1.000 | 153  | 20 | 4.34E-21  | NP_497235.2    | 98  | 104.375 | 50  | 49  | G-protein-coupled Receptor Kinase family member (grk-2) |
| Locus_10356_Transcript_1/1_Conf_1.000 | 137  | 0  |           |                |     |         |     |     |                                                         |
| Locus_10357_Transcript_1/1_Conf_1.000 | 247  | 0  |           |                |     |         |     |     |                                                         |
| Locus_10358_Transcript_1/1_Conf_1.000 | 301  | 20 | 3.86E-30  | O61570.1       | 100 | 134.42  | 70  | 70  | 60S ribosomal protein L38                               |
| Locus_10359_Transcript_1/1_Conf_1.000 | 581  | 20 | 2.98E-77  | NP_492474.2    | 82  | 291.582 | 193 | 160 | hypothetical protein F14B4.1                            |
| Locus_1036_Transcript_1/1_Conf_1.000  | 1476 | 20 | 1.17E-39  | XP_002646159.1 | 47  | 169.088 | 510 | 241 | Hypothetical protein CBG08044                           |
| Locus_10360_Transcript_1/1_Conf_1.000 | 196  | 0  |           |                |     |         |     |     |                                                         |
| Locus_10361_Transcript_1/1_Conf_1.000 | 1040 | 20 | 6.95E-72  | NP_001129806.1 | 69  | 275.404 | 266 | 184 | hypothetical protein C08H9.16                           |
| Locus_10362_Transcript_1/1_Conf_1.000 | 737  | 20 | 4.68E-62  | XP_002639998.1 | 87  | 241.891 | 177 | 154 | Hypothetical protein CBG10828                           |
| Locus_10363_Transcript_1/1_Conf_1.000 | 993  | 20 | 1.54E-89  | EFO18920.1     | 78  | 333.954 | 283 | 222 | hypothetical protein LOAG_09572                         |
| Locus_10364_Transcript_1/1_Conf_1.000 | 1147 | 20 | 9.17E-100 | XP_002631224.1 | 67  | 368.237 | 385 | 260 | Hypothetical protein CBG03022                           |
| Locus_10365_Transcript_1/1_Conf_1.000 | 196  | 0  |           |                |     |         |     |     |                                                         |

|                                       |      |    |           |                |     |         |     |     |                                                                     |
|---------------------------------------|------|----|-----------|----------------|-----|---------|-----|-----|---------------------------------------------------------------------|
| Locus_10366_Transcript_1/1_Conf_1.000 | 1067 | 20 | 1.32E-119 | EAX03629.1     | 100 | 398.282 | 189 | 189 | major histocompatibility complex, class II, DR alpha, isoform CRA_a |
| Locus_10367_Transcript_1/1_Conf_1.000 | 360  | 0  |           |                |     |         |     |     |                                                                     |
| Locus_10368_Transcript_1/3_Conf_0.333 | 518  | 3  | 4.61E-16  | XP_001894994.1 | 53  | 87.8113 | 123 | 66  | hypothetical protein Bm1_17685                                      |
| Locus_10368_Transcript_2/3_Conf_0.333 | 857  | 2  | 7.46E-15  | EFO17899.1     | 54  | 85.5001 | 182 | 100 | hypothetical protein LOAG_10600                                     |
| Locus_10368_Transcript_3/3_Conf_0.667 | 1374 | 3  | 1.82E-39  | EFO17899.1     | 51  | 168.318 | 390 | 200 | hypothetical protein LOAG_10600                                     |
| Locus_10369_Transcript_1/1_Conf_1.000 | 333  | 20 | 2.42E-08  | XP_002076646.1 | 66  | 62.003  | 71  | 47  | GD15089                                                             |
| Locus_1037_Transcript_1/1_Conf_1.000  | 1779 | 20 | 1.87E-42  | EFO25902.1     | 47  | 178.718 | 312 | 147 | hypothetical protein LOAG_02587                                     |
| Locus_10370_Transcript_1/1_Conf_1.000 | 509  | 20 | 6.55E-44  | XP_002640526.1 | 72  | 180.259 | 170 | 123 | Hypothetical protein CBG18688                                       |
| Locus_10371_Transcript_1/1_Conf_1.000 | 261  | 2  | 2.63E-10  | NP_741595.1    | 80  | 68.5514 | 36  | 29  | hypothetical protein K06A4.7                                        |
| Locus_10372_Transcript_1/1_Conf_1.000 | 288  | 20 | 4.64E-23  | XP_002645469.1 | 77  | 110.923 | 93  | 72  | C. briggsae CBR-CDD-1 protein                                       |
| Locus_10373_Transcript_1/2_Conf_1.000 | 1858 | 20 | 2.07E-116 | NP_499770.1    | 66  | 424.476 | 439 | 293 | hypothetical protein F45G2.3                                        |
| Locus_10373_Transcript_2/2_Conf_1.000 | 1786 | 20 | 5.73E-116 | NP_499770.1    | 63  | 422.935 | 471 | 301 | hypothetical protein F45G2.3                                        |
| Locus_10374_Transcript_1/1_Conf_1.000 | 337  | 0  |           |                |     |         |     |     |                                                                     |
| Locus_10375_Transcript_1/1_Conf_1.000 | 848  | 20 | 5.54E-47  | AAC46544.4     | 56  | 192.2   | 278 | 158 | Hypothetical protein F48E8.4                                        |
| Locus_10376_Transcript_1/1_Conf_1.000 | 476  | 20 | 8.04E-20  | EFO24692.1     | 63  | 100.138 | 117 | 74  | protein-tyrosine phosphatase                                        |
| Locus_10377_Transcript_1/3_Conf_0.667 | 1121 | 20 | 1.97E-123 | NP_001041037.1 | 83  | 446.817 | 268 | 223 | GLYcosylation related family member (gly-10)                        |

|                                       |      |    |           |                |    |         |     |     |                                              |
|---------------------------------------|------|----|-----------|----------------|----|---------|-----|-----|----------------------------------------------|
| Locus_10377_Transcript_2/3_Conf_0.667 | 1097 | 20 | 2.66E-117 | NP_001041037.1 | 82 | 426.402 | 260 | 215 | GLYcosylation related family member (gly-10) |
| Locus_10377_Transcript_3/3_Conf_0.667 | 1121 | 20 | 1.51E-123 | NP_001041037.1 | 83 | 447.203 | 268 | 223 | GLYcosylation related family member (gly-10) |
| Locus_10378_Transcript_1/1_Conf_1.000 | 340  | 0  |           |                |    |         |     |     |                                              |
| Locus_10379_Transcript_1/2_Conf_1.000 | 404  | 20 | 9.80E-58  | XP_002642327.1 | 95 | 226.098 | 120 | 114 | C. briggsae CBR-TAT-3 protein                |
| Locus_10379_Transcript_2/2_Conf_1.000 | 416  | 20 | 2.99E-67  | XP_002642327.1 | 94 | 257.684 | 137 | 129 | C. briggsae CBR-TAT-3 protein                |
| Locus_1038_Transcript_1/2_Conf_1.000  | 511  | 2  | 3.85E-12  | NP_505787.1    | 65 | 74.7146 | 98  | 64  | hypothetical protein F58B4.4                 |
| Locus_1038_Transcript_2/2_Conf_1.000  | 523  | 2  | 4.22E-12  | NP_505787.1    | 65 | 74.7146 | 98  | 64  | hypothetical protein F58B4.4                 |
| Locus_10380_Transcript_1/1_Conf_1.000 | 429  | 20 | 5.03E-38  | XP_002640436.1 | 70 | 160.614 | 140 | 99  | Hypothetical protein CBG08488                |
| Locus_10381_Transcript_1/2_Conf_1.000 | 260  | 0  |           |                |    |         |     |     |                                              |
| Locus_10381_Transcript_2/2_Conf_1.000 | 455  | 0  |           |                |    |         |     |     |                                              |
| Locus_10382_Transcript_1/1_Conf_1.000 | 526  | 20 | 8.34E-40  | NP_872133.1    | 69 | 166.777 | 176 | 122 | hypothetical protein F32D8.13                |
| Locus_10383_Transcript_1/1_Conf_1.000 | 1145 | 20 | 8.89E-79  | NP_001023510.1 | 62 | 298.516 | 325 | 202 | hypothetical protein Y5F3AM.6                |
| Locus_10384_Transcript_1/1_Conf_1.000 | 939  | 4  | 2.30E-23  | XP_002639960.1 | 52 | 114.005 | 224 | 118 | Hypothetical protein CBG10780                |
| Locus_10385_Transcript_1/1_Conf_1.000 | 192  | 0  |           |                |    |         |     |     |                                              |
| Locus_10386_Transcript_1/2_Conf_1.000 | 676  | 6  | 2.08E-47  | NP_496952.1    | 65 | 192.971 | 227 | 148 | hypothetical protein K09E4.1                 |

|                                       |     |    |          |                |    |         |     |     |                                                                                 |
|---------------------------------------|-----|----|----------|----------------|----|---------|-----|-----|---------------------------------------------------------------------------------|
| Locus_10386_Transcript_2/2_Conf_1.000 | 676 | 6  | 2.08E-47 | NP_496952.1    | 65 | 192.971 | 227 | 148 | hypothetical protein K09E4.1                                                    |
| Locus_10387_Transcript_1/1_Conf_1.000 | 720 | 20 | 1.18E-54 | XP_002112403.1 | 70 | 217.238 | 188 | 133 | hypothetical protein TRIADDRAFT_25844                                           |
| Locus_10388_Transcript_1/1_Conf_1.000 | 935 | 20 | 3.03E-68 | NP_497589.3    | 66 | 263.077 | 252 | 167 | hypothetical protein Y71H2B.5                                                   |
| Locus_10389_Transcript_1/1_Conf_1.000 | 375 | 0  |          |                |    |         |     |     |                                                                                 |
| Locus_1039_Transcript_1/1_Conf_1.000  | 260 | 0  |          |                |    |         |     |     |                                                                                 |
| Locus_10390_Transcript_1/1_Conf_1.000 | 331 | 20 | 1.20E-39 | ACJ65168.1     | 84 | 166.007 | 110 | 93  | Uncoordinated protein 68, isoform b, partially confirmed by transcript evidence |
| Locus_10391_Transcript_1/1_Conf_1.000 | 239 | 0  |          |                |    |         |     |     |                                                                                 |
| Locus_10392_Transcript_1/1_Conf_1.000 | 475 | 0  |          |                |    |         |     |     |                                                                                 |
| Locus_10393_Transcript_1/1_Conf_1.000 | 371 | 20 | 7.37E-45 | XP_002633716.1 | 81 | 183.341 | 119 | 97  | C. briggsae CBR-GTA-1 protein                                                   |
| Locus_10394_Transcript_1/1_Conf_1.000 | 383 | 0  |          |                |    |         |     |     |                                                                                 |
| Locus_10395_Transcript_1/1_Conf_1.000 | 985 | 20 | 6.24E-51 | NP_505460.1    | 75 | 205.682 | 178 | 135 | hypothetical protein C50F4.12                                                   |
| Locus_10396_Transcript_1/1_Conf_1.000 | 726 | 0  |          |                |    |         |     |     |                                                                                 |

|                                       |      |    |          |                |    |         |     |     |                                                              |
|---------------------------------------|------|----|----------|----------------|----|---------|-----|-----|--------------------------------------------------------------|
| Locus_10397_Transcript_1/3_Conf_0.714 | 1981 | 20 | 0        | NP_001040912.1 | 78 | 675.241 | 508 | 398 | hypothetical protein C08F8.2                                 |
| Locus_10397_Transcript_2/3_Conf_0.714 | 1981 | 20 | 0        | NP_001040912.1 | 78 | 675.241 | 508 | 398 | hypothetical protein C08F8.2                                 |
| Locus_10397_Transcript_3/3_Conf_0.714 | 1981 | 20 | 0        | NP_001040912.1 | 78 | 675.241 | 508 | 398 | hypothetical protein C08F8.2                                 |
| Locus_10398_Transcript_1/1_Conf_1.000 | 1271 | 20 | 1.19E-66 | NP_001021632.1 | 59 | 258.455 | 392 | 234 | RaB GAP related family member (rbg-2)                        |
| Locus_10399_Transcript_1/1_Conf_1.000 | 143  | 0  |          |                |    |         |     |     |                                                              |
| Locus_104_Transcript_1/1_Conf_1.000   | 885  | 20 | 5.71E-82 | NP_497701.1    | 81 | 308.531 | 238 | 195 | Conserved Regulator of Innate immunity family member (cri-3) |
| Locus_1040_Transcript_1/1_Conf_1.000  | 2567 | 20 | 0        | XP_002647804.1 | 78 | 1044.65 | 860 | 678 | Hypothetical protein CBG23578                                |
| Locus_10400_Transcript_1/1_Conf_1.000 | 628  | 2  | 6.29E-05 | XP_002645190.1 | 45 | 51.6026 | 148 | 68  | C. briggsae CBR-PPK-3 protein                                |



|                                       |      |    |           |                |    |         |     |     |                                                  |
|---------------------------------------|------|----|-----------|----------------|----|---------|-----|-----|--------------------------------------------------|
| Locus_10401_Transcript_1/1_Conf_1.000 | 1318 | 20 | 1.77E-145 | NP_493982.1    | 82 | 520.39  | 399 | 328 | hypothetical protein H17B01.1                    |
| Locus_10402_Transcript_1/1_Conf_1.000 | 355  | 20 | 5.24E-19  | XP_001891914.1 | 66 | 97.4413 | 112 | 74  | ThiF family protein                              |
| Locus_10403_Transcript_1/1_Conf_1.000 | 1042 | 20 | 5.60E-146 | XP_002638849.1 | 84 | 521.546 | 347 | 293 | Hypothetical protein CBG22061                    |
| Locus_10404_Transcript_1/1_Conf_1.000 | 404  | 20 | 1.29E-17  | XP_001898675.1 | 61 | 92.8189 | 121 | 74  | MGC82625 protein                                 |
| Locus_10405_Transcript_1/1_Conf_1.000 | 598  | 20 | 1.18E-63  | EFO20819.1     | 74 | 246.514 | 198 | 148 | CK1/TTBKL protein kinase                         |
| Locus_10406_Transcript_1/1_Conf_1.000 | 1276 | 20 | 1.46E-72  | NP_492469.1    | 71 | 278.1   | 256 | 183 | Anterior PHarynx defective family member (aph-1) |
| Locus_10407_Transcript_1/1_Conf_1.000 | 185  | 20 | 3.46E-26  | XP_001894250.1 | 88 | 121.324 | 61  | 54  | Low-density lipoprotein receptor-related protein |
| Locus_10408_Transcript_1/1_Conf_1.000 | 822  | 20 | 4.74E-48  | XP_001894112.1 | 68 | 195.667 | 235 | 162 | RING finger domain containing protein            |
| Locus_10409_Transcript_1/1_Conf_1.000 | 844  | 20 | 1.35E-53  | XP_002642327.1 | 74 | 214.157 | 183 | 137 | C. briggsae CBR-TAT-3 protein                    |
| Locus_1041_Transcript_1/2_Conf_1.000  | 668  | 20 | 1.48E-58  | NP_496281.1    | 70 | 229.95  | 200 | 140 | hypothetical protein C14A4.14                    |
| Locus_1041_Transcript_2/2_Conf_1.000  | 668  | 20 | 3.30E-58  | NP_496281.1    | 69 | 228.794 | 200 | 139 | hypothetical protein C14A4.14                    |

|                                       |      |    |           |                |    |         |     |     |                                                                          |
|---------------------------------------|------|----|-----------|----------------|----|---------|-----|-----|--------------------------------------------------------------------------|
| Locus_10410_Transcript_1/1_Conf_1.000 | 354  | 11 | 4.31E-05  | XP_647112.1    | 55 | 51.2174 | 78  | 43  | N-terminal kinase-like protein                                           |
| Locus_10411_Transcript_1/1_Conf_1.000 | 355  | 0  |           |                |    |         |     |     |                                                                          |
| Locus_10412_Transcript_1/1_Conf_1.000 | 533  | 20 | 1.70E-27  | NP_494840.1    | 57 | 125.946 | 175 | 100 | Temporarily Assigned Gene name family member (tag-151)                   |
| Locus_10413_Transcript_1/1_Conf_1.000 | 282  | 20 | 7.69E-34  | CBW44372.1     | 90 | 146.747 | 94  | 85  | C. elegans protein F21A10.2e, partially confirmed by transcript evidence |
| Locus_10414_Transcript_1/1_Conf_1.000 | 308  | 0  |           |                |    |         |     |     |                                                                          |
| Locus_10415_Transcript_1/1_Conf_1.000 | 975  | 0  |           |                |    |         |     |     |                                                                          |
| Locus_10416_Transcript_1/1_Conf_1.000 | 254  | 0  |           |                |    |         |     |     |                                                                          |
| Locus_10417_Transcript_1/1_Conf_1.000 | 836  | 20 | 2.25E-61  | XP_002635871.1 | 66 | 239.965 | 271 | 180 | Hypothetical protein CBG01087                                            |
| Locus_10418_Transcript_1/1_Conf_1.000 | 275  | 0  |           |                |    |         |     |     |                                                                          |
| Locus_10419_Transcript_1/1_Conf_1.000 | 479  | 0  |           |                |    |         |     |     |                                                                          |
| Locus_1042_Transcript_1/1_Conf_1.000  | 1305 | 20 | 8.61E-52  | NP_001024476.1 | 78 | 209.149 | 148 | 116 | hypothetical protein C46H3.2                                             |
| Locus_10420_Transcript_1/1_Conf_1.000 | 345  | 20 | 6.07E-15  | AAD51334.1     | 79 | 83.9593 | 54  | 43  | Kunitz type serine protease inhibitor                                    |
| Locus_10421_Transcript_1/1_Conf_1.000 | 620  | 0  |           |                |    |         |     |     |                                                                          |
| Locus_10422_Transcript_1/1_Conf_1.000 | 475  | 0  |           |                |    |         |     |     |                                                                          |
| Locus_10423_Transcript_1/1_Conf_1.000 | 631  | 20 | 1.15E-46  | XP_002645686.1 | 74 | 190.274 | 208 | 154 | C. briggsae CBR-SYN-2 protein                                            |
| Locus_10424_Transcript_1/1_Conf_1.000 | 294  | 0  |           |                |    |         |     |     |                                                                          |
| Locus_10425_Transcript_1/1_Conf_1.000 | 579  | 20 | 4.04E-66  | AAK73885.2     | 79 | 254.603 | 192 | 153 | AF003142_2Hypothetical protein F57C9.1b                                  |
| Locus_10426_Transcript_1/1_Conf_1.000 | 613  | 0  |           |                |    |         |     |     |                                                                          |
| Locus_10427_Transcript_1/1_Conf_1.000 | 1274 | 20 | 2.53E-117 | XP_002633543.1 | 72 | 426.787 | 383 | 276 | Hypothetical protein CBG05410                                            |
| Locus_10428_Transcript_1/1_Conf_1.000 | 816  | 20 | 4.40E-139 | AAA72418.1     | 96 | 498.049 | 269 | 259 | unnamed protein product                                                  |
| Locus_10429_Transcript_1/1_Conf_1.000 | 868  | 2  | 1.60E-04  | XP_001897166.1 | 48 | 51.2174 | 125 | 60  | hypothetical protein Bm1_28590                                           |
| Locus_1043_Transcript_1/1_Conf_1.000  | 994  | 20 | 1.27E-75  | XP_001897099.1 | 67 | 287.73  | 333 | 226 | amidase                                                                  |
| Locus_10430_Transcript_1/1_Conf_1.000 | 183  | 0  |           |                |    |         |     |     |                                                                          |

|                                       |      |    |          |                |    |         |     |     |                                        |
|---------------------------------------|------|----|----------|----------------|----|---------|-----|-----|----------------------------------------|
| Locus_10431_Transcript_1/1_Conf_1.000 | 505  | 0  |          |                |    |         |     |     |                                        |
| Locus_10432_Transcript_1/1_Conf_1.000 | 401  | 4  | 1.44E-08 | XP_002634229.1 | 76 | 62.7734 | 55  | 42  | C. briggsae CBR-UNC-26 protein         |
| Locus_10433_Transcript_1/1_Conf_1.000 | 1434 | 5  | 9.23E-26 | XP_001902031.1 | 49 | 122.865 | 248 | 122 | hypothetical protein                   |
| Locus_10434_Transcript_1/2_Conf_1.000 | 1040 | 0  |          |                |    |         |     |     |                                        |
| Locus_10434_Transcript_2/2_Conf_1.000 | 1040 | 0  |          |                |    |         |     |     |                                        |
| Locus_10435_Transcript_1/1_Conf_1.000 | 618  | 4  | 2.17E-26 | NP_502212.1    | 54 | 122.865 | 200 | 108 | hypothetical protein ZK792.5           |
| Locus_10436_Transcript_1/1_Conf_1.000 | 809  |    |          |                |    |         |     |     |                                        |
| Locus_10437_Transcript_1/1_Conf_1.000 | 287  | 0  |          |                |    |         |     |     |                                        |
| Locus_10438_Transcript_1/1_Conf_1.000 | 210  | 3  | 2.19E-09 | ACI49256.1     | 73 | 65.4698 | 53  | 39  | hypothetical protein Csp3_JD07.006     |
| Locus_10439_Transcript_1/1_Conf_1.000 | 580  | 6  | 1.84E-10 | XP_001902168.1 | 70 | 69.707  | 64  | 45  | myotactin form B                       |
| Locus_1044_Transcript_1/1_Conf_1.000  | 684  | 4  | 5.28E-46 | A8X3A7.2       | 65 | 188.348 | 241 | 157 | Integrin alpha pat-2                   |
| Locus_10440_Transcript_1/1_Conf_1.000 | 391  | 0  |          |                |    |         |     |     |                                        |
| Locus_10441_Transcript_1/1_Conf_1.000 | 340  | 0  |          |                |    |         |     |     |                                        |
| Locus_10442_Transcript_1/4_Conf_0.167 | 403  | 13 | 8.62E-33 | ZP_03149866.1  | 67 | 126.716 | 118 | 80  | hypothetical protein G11MC16DRAFT_3625 |
| Locus_10442_Transcript_2/4_Conf_0.167 | 763  | 20 | 1.04E-67 | ACR38454.1     | 78 | 260.766 | 199 | 156 | unknown                                |
| Locus_10442_Transcript_3/4_Conf_0.500 | 322  | 20 | 2.21E-33 | ABO20854.1     | 92 | 145.206 | 78  | 72  | hypothetical protein                   |
| Locus_10442_Transcript_4/4_Conf_0.722 | 757  | 19 | 6.26E-33 | ABO20854.1     | 92 | 145.206 | 78  | 72  | hypothetical protein                   |
| Locus_10443_Transcript_1/1_Conf_1.000 | 387  | 20 | 4.80E-57 | EFO27005.1     | 94 | 223.787 | 128 | 121 | intermediate filament protein          |
| Locus_10444_Transcript_1/1_Conf_1.000 | 264  | 0  |          |                |    |         |     |     |                                        |
| Locus_10445_Transcript_1/1_Conf_1.000 | 267  | 6  | 1.48E-05 | XP_002640597.1 | 67 | 52.7582 | 59  | 40  | C. briggsae CBR-DLK-1 protein          |
| Locus_10446_Transcript_1/1_Conf_1.000 | 317  | 0  |          |                |    |         |     |     |                                        |
| Locus_10447_Transcript_1/1_Conf_1.000 | 246  | 0  |          |                |    |         |     |     |                                        |

|                                       |      |    |           |                |    |         |     |     |                                         |
|---------------------------------------|------|----|-----------|----------------|----|---------|-----|-----|-----------------------------------------|
| Locus_10448_Transcript_1/1_Conf_1.000 | 835  | 20 | 1.40E-95  | XP_002635350.1 | 81 | 353.599 | 249 | 204 | Hypothetical protein CBG01521           |
| Locus_10449_Transcript_1/1_Conf_1.000 | 403  | 0  |           |                |    |         |     |     |                                         |
| Locus_1045_Transcript_1/2_Conf_1.000  | 1283 | 20 | 2.37E-147 | EFO18658.1     | 80 | 526.554 | 368 | 297 | F-box domain-containing protein         |
| Locus_1045_Transcript_2/2_Conf_1.000  | 1176 | 20 | 4.41E-121 | EFO18658.1     | 81 | 439.113 | 303 | 247 | F-box domain-containing protein         |
| Locus_10450_Transcript_1/1_Conf_1.000 | 135  | 0  |           |                |    |         |     |     |                                         |
| Locus_10451_Transcript_1/1_Conf_1.000 | 401  | 7  | 2.36E-35  | NP_495958.1    | 69 | 151.754 | 139 | 97  | yeast SEC homolog family member (sec-5) |
| Locus_10452_Transcript_1/1_Conf_1.000 | 225  | 0  |           |                |    |         |     |     |                                         |
| Locus_10453_Transcript_1/1_Conf_1.000 | 228  | 0  |           |                |    |         |     |     |                                         |
| Locus_10454_Transcript_1/1_Conf_1.000 | 716  | 0  |           |                |    |         |     |     |                                         |
| Locus_10455_Transcript_1/1_Conf_1.000 | 795  | 20 | 1.48E-67  | NP_495540.1    | 77 | 260.381 | 187 | 145 | hypothetical protein F43E2.5            |
| Locus_10456_Transcript_1/1_Conf_1.000 | 190  | 0  |           |                |    |         |     |     |                                         |
| Locus_10457_Transcript_1/1_Conf_1.000 | 194  | 0  |           |                |    |         |     |     |                                         |
| Locus_10458_Transcript_1/1_Conf_1.000 | 443  | 0  |           |                |    |         |     |     |                                         |
| Locus_10459_Transcript_1/2_Conf_1.000 | 849  | 20 | 5.89E-89  | XP_002640838.1 | 88 | 331.643 | 200 | 176 | C. briggsae CBR-UBC-20 protein          |
| Locus_10459_Transcript_2/2_Conf_1.000 | 848  | 20 | 5.85E-89  | XP_002640838.1 | 88 | 331.643 | 200 | 176 | C. briggsae CBR-UBC-20 protein          |
| Locus_1046_Transcript_1/1_Conf_1.000  | 1631 | 20 | 6.30E-82  | EFO27811.1     | 56 | 309.686 | 501 | 281 | 3'-5' exonuclease                       |

|                                       |      |    |          |                |    |         |     |     |                                                       |
|---------------------------------------|------|----|----------|----------------|----|---------|-----|-----|-------------------------------------------------------|
| Locus_10460_Transcript_1/1_Conf_1.000 | 790  | 20 | 3.99E-49 | NP_741083.1    | 85 | 199.134 | 132 | 113 | Aldehyde deHydrogenase family member (alh-11)         |
| Locus_10461_Transcript_1/1_Conf_1.000 | 279  | 20 | 1.78E-11 | XP_002632331.1 | 67 | 72.4034 | 64  | 43  | C. briggsae CBR-ROM-4 protein                         |
| Locus_10462_Transcript_1/2_Conf_1.000 | 798  | 20 | 1.40E-65 | NP_496560.1    | 78 | 253.832 | 206 | 161 | hypothetical protein Y17G7B.12                        |
| Locus_10462_Transcript_2/2_Conf_1.000 | 798  | 20 | 1.40E-65 | NP_496560.1    | 78 | 253.832 | 206 | 161 | hypothetical protein Y17G7B.12                        |
| Locus_10463_Transcript_1/1_Conf_1.000 | 608  | 20 | 1.06E-22 | EFO18313.1     | 66 | 110.538 | 130 | 87  | nuclear DNA-binding protein C1D                       |
| Locus_10464_Transcript_1/2_Conf_1.000 | 424  | 0  |          |                |    |         |     |     |                                                       |
| Locus_10464_Transcript_2/2_Conf_1.000 | 424  | 0  |          |                |    |         |     |     |                                                       |
| Locus_10465_Transcript_1/1_Conf_1.000 | 287  | 0  |          |                |    |         |     |     |                                                       |
| Locus_10466_Transcript_1/1_Conf_1.000 | 366  | 0  |          |                |    |         |     |     |                                                       |
| Locus_10467_Transcript_1/1_Conf_1.000 | 854  | 20 | 1.13E-63 | NP_507692.1    | 63 | 247.669 | 282 | 178 | hypothetical protein Y80D3A.9                         |
| Locus_10468_Transcript_1/1_Conf_1.000 | 659  | 20 | 1.15E-79 | XP_002639222.1 | 78 | 300.056 | 233 | 184 | Hypothetical protein CBG03773                         |
| Locus_10469_Transcript_1/1_Conf_1.000 | 238  | 20 | 4.29E-13 | ZP_02737110.1  | 69 | 77.7962 | 69  | 48  | Pyridoxal-5'-phosphate-dependent enzyme, beta subunit |
| Locus_1047_Transcript_1/1_Conf_1.000  | 2165 | 20 | 1.05E-90 | EFO26769.1     | 53 | 339.347 | 744 | 399 | hypothetical protein LOAG_01716                       |
| Locus_10470_Transcript_1/1_Conf_1.000 | 394  | 20 | 1.03E-46 | XP_002630612.1 | 80 | 189.504 | 130 | 104 | Hypothetical protein CBG02276                         |
| Locus_10471_Transcript_1/1_Conf_1.000 | 371  | 0  |          |                |    |         |     |     |                                                       |
| Locus_10472_Transcript_1/1_Conf_1.000 | 280  | 2  | 4.54E-07 | XP_002641621.1 | 64 | 57.7658 | 75  | 48  | Hypothetical protein CBG09941                         |

|                                       |      |    |           |                |    |         |     |     |                                            |
|---------------------------------------|------|----|-----------|----------------|----|---------|-----|-----|--------------------------------------------|
| Locus_10473_Transcript_1/1_Conf_1.000 | 431  | 5  | 5.04E-30  | XP_002810887.1 | 68 | 134.035 | 116 | 79  | PREDICTED: cofilin-1-like                  |
| Locus_10474_Transcript_1/1_Conf_1.000 | 406  | 0  |           |                |    |         |     |     |                                            |
| Locus_10475_Transcript_1/1_Conf_1.000 | 179  | 0  |           |                |    |         |     |     |                                            |
| Locus_10476_Transcript_1/1_Conf_1.000 | 1826 | 20 | 1.27E-126 | NP_499625.2    | 67 | 458.373 | 473 | 318 | hypothetical protein Y49E10.20             |
| Locus_10477_Transcript_1/1_Conf_1.000 | 254  | 0  |           |                |    |         |     |     |                                            |
| Locus_10478_Transcript_1/1_Conf_1.000 | 231  | 20 | 1.49E-13  | EFO25902.1     | 68 | 79.337  | 72  | 49  | hypothetical protein LOAG_02587            |
| Locus_10479_Transcript_1/1_Conf_1.000 | 585  | 5  | 2.02E-36  | CAG28316.1     | 71 | 155.992 | 162 | 116 | spindle assembly abnormal protein 5, SAS-5 |
| Locus_1048_Transcript_1/1_Conf_1.000  | 301  | 20 | 3.88E-14  | EFO22751.1     | 88 | 81.2629 | 50  | 44  | hypothetical protein LOAG_05734            |
| Locus_10480_Transcript_1/1_Conf_1.000 | 408  | 20 | 2.11E-36  | XP_002642327.1 | 68 | 155.221 | 151 | 103 | C. briggsae CBR-TAT-3 protein              |
| Locus_10481_Transcript_1/1_Conf_1.000 | 311  | 0  |           |                |    |         |     |     |                                            |
| Locus_10482_Transcript_1/1_Conf_1.000 | 344  | 20 | 1.88E-40  | XP_001892739.1 | 89 | 168.703 | 103 | 92  | Zinc finger, C2H2 type family protein      |
| Locus_10483_Transcript_1/1_Conf_1.000 | 1178 | 5  | 8.58E-08  | XP_002632964.1 | 37 | 62.7734 | 266 | 101 | Hypothetical protein CBG21722              |
| Locus_10484_Transcript_1/1_Conf_1.000 | 913  | 20 | 1.12E-11  | XP_001899507.1 | 47 | 75.0998 | 242 | 114 | hypothetical protein                       |
| Locus_10485_Transcript_1/1_Conf_1.000 | 487  | 2  | 6.61E-46  | XP_002634524.1 | 78 | 186.808 | 146 | 115 | Hypothetical protein CBG08318              |
| Locus_10486_Transcript_1/1_Conf_1.000 | 336  | 1  | 9.80E-10  | XP_002645528.1 | 72 | 66.6254 | 59  | 43  | C. briggsae CBR-FLP-5 protein              |
| Locus_10487_Transcript_1/1_Conf_1.000 | 225  | 0  |           |                |    |         |     |     |                                            |
| Locus_10488_Transcript_1/1_Conf_1.000 | 196  | 0  |           |                |    |         |     |     |                                            |
| Locus_10489_Transcript_1/1_Conf_1.000 | 447  | 1  | 3.66E-04  | NP_495162.1    | 55 | 48.1358 | 79  | 44  | hypothetical protein ZK1248.15             |

|                                       |      |    |           |                |     |         |     |     |                                                                      |
|---------------------------------------|------|----|-----------|----------------|-----|---------|-----|-----|----------------------------------------------------------------------|
| Locus_1049_Transcript_1/1_Conf_1.000  | 1318 | 20 | 3.34E-136 | XP_002640719.1 | 91  | 489.574 | 284 | 259 | C. briggsae CBR-EXC-4 protein                                        |
| Locus_10490_Transcript_1/1_Conf_1.000 | 201  | 0  |           |                |     |         |     |     |                                                                      |
| Locus_10491_Transcript_1/1_Conf_1.000 | 368  | 20 | 3.23E-21  | XP_002802296.1 | 100 | 104.76  | 50  | 50  | PREDICTED: SH3 domain-binding glutamic acid-rich-like protein 3-like |
| Locus_10492_Transcript_1/1_Conf_1.000 | 189  | 0  |           |                |     |         |     |     |                                                                      |
| Locus_10493_Transcript_1/1_Conf_1.000 | 1062 | 20 | 7.25E-173 | NP_498740.2    | 88  | 610.912 | 352 | 310 | CalPain family member (clp-1)                                        |
| Locus_10494_Transcript_1/1_Conf_1.000 | 921  | 20 | 1.68E-63  | NP_493578.1    | 92  | 247.284 | 139 | 129 | Ubiquitin E2 (conjugating enzyme) variant family member (uev-1)      |
| Locus_10495_Transcript_1/1_Conf_1.000 | 729  | 0  |           |                |     |         |     |     |                                                                      |
| Locus_10496_Transcript_1/1_Conf_1.000 | 357  | 0  |           |                |     |         |     |     |                                                                      |
| Locus_10497_Transcript_1/1_Conf_1.000 | 973  | 4  | 6.79E-34  | EFO25502.1     | 53  | 149.058 | 252 | 134 | F/Y-rich family protein                                              |
| Locus_10498_Transcript_1/1_Conf_1.000 | 503  | 0  |           |                |     |         |     |     |                                                                      |
| Locus_10499_Transcript_1/1_Conf_1.000 | 767  | 20 | 9.76E-82  | XP_002633444.1 | 85  | 307.375 | 188 | 160 | Hypothetical protein CBG06212                                        |
| Locus_105_Transcript_1/1_Conf_1.000   | 621  | 8  | 8.50E-23  | NP_500399.2    | 66  | 110.923 | 120 | 80  | hypothetical protein Y37E11AL.2                                      |

|                                       |     |    |          |                |     |         |     |     |                                                                     |
|---------------------------------------|-----|----|----------|----------------|-----|---------|-----|-----|---------------------------------------------------------------------|
| Locus_1050_Transcript_1/1_Conf_1.000  | 967 | 20 | 4.93E-61 | XP_002630909.1 | 98  | 239.195 | 119 | 117 | C. briggsae CBR-LGG-1 protein                                       |
| Locus_10500_Transcript_1/1_Conf_1.000 | 279 | 20 | 5.67E-50 | P00736.2       | 100 | 200.29  | 92  | 92  | Complement C1r subcomponent                                         |
| Locus_10501_Transcript_1/1_Conf_1.000 | 215 | 20 | 1.78E-19 | XP_002639413.1 | 79  | 98.9821 | 68  | 54  | C. briggsae CBR-CPS-6 protein                                       |
| Locus_10502_Transcript_1/1_Conf_1.000 | 251 | 7  | 3.45E-31 |                | 92  | 137.887 | 76  | 70  | hypothetical protein F09E10.7                                       |
| Locus_10503_Transcript_1/1_Conf_1.000 | 709 | 20 | 1.51E-99 | NP_496447.1    | 93  | 366.311 | 221 | 206 | hypothetical protein W02B12.9                                       |
| Locus_10504_Transcript_1/1_Conf_1.000 | 291 | 7  | 1.03E-14 | NP_001041154.2 | 71  | 83.1889 | 77  | 55  | hypothetical protein R31.2                                          |
| Locus_10505_Transcript_1/1_Conf_1.000 | 789 | 20 | 6.41E-31 | NP_498099.1    | 54  | 138.658 | 185 | 101 | Caffeine Induced Death (S. pombe Cid) homolog family member (cid-1) |
| Locus_10506_Transcript_1/1_Conf_1.000 | 337 | 0  |          |                |     |         |     |     |                                                                     |
| Locus_10507_Transcript_1/1_Conf_1.000 | 549 | 0  |          |                |     |         |     |     |                                                                     |



|                                       |      |    |           |                |     |         |     |     |                                                                                 |
|---------------------------------------|------|----|-----------|----------------|-----|---------|-----|-----|---------------------------------------------------------------------------------|
| Locus_10508_Transcript_1/1_Conf_1.000 | 1312 | 20 | 1.22E-130 | XP_002636654.1 | 82  | 471.085 | 357 | 294 | C. briggsae CBR-CLH-6 protein                                                   |
| Locus_10509_Transcript_1/1_Conf_1.000 | 1024 | 20 | 6.82E-88  | XP_001899663.1 | 68  | 328.561 | 335 | 231 | Pyridine nucleotide-disulphide oxidoreductase family protein                    |
| Locus_1051_Transcript_1/1_Conf_1.000  | 258  | 20 | 1.39E-43  | XP_002753304.1 | 100 | 179.104 | 85  | 85  | PREDICTED: 60S ribosomal protein L4-like                                        |
| Locus_10510_Transcript_1/1_Conf_1.000 | 145  | 0  |           |                |     |         |     |     |                                                                                 |
| Locus_10511_Transcript_1/4_Conf_0.667 | 589  | 0  |           |                |     |         |     |     |                                                                                 |
| Locus_10511_Transcript_2/4_Conf_0.667 | 604  | 0  |           |                |     |         |     |     |                                                                                 |
| Locus_10511_Transcript_3/4_Conf_0.556 | 422  | 0  |           |                |     |         |     |     |                                                                                 |
| Locus_10511_Transcript_4/4_Conf_0.667 | 605  | 0  |           |                |     |         |     |     |                                                                                 |
| Locus_10512_Transcript_1/1_Conf_1.000 | 511  | 0  |           |                |     |         |     |     |                                                                                 |
| Locus_10513_Transcript_1/2_Conf_1.000 | 756  | 20 | 2.87E-70  | XP_001894547.1 | 73  | 269.24  | 234 | 171 | Cyclin C                                                                        |
| Locus_10513_Transcript_2/2_Conf_1.000 | 756  | 20 | 2.87E-70  | XP_001894547.1 | 73  | 269.24  | 234 | 171 | Cyclin C                                                                        |
| Locus_10514_Transcript_1/1_Conf_1.000 | 444  | 0  |           |                |     |         |     |     |                                                                                 |
| Locus_10515_Transcript_1/1_Conf_1.000 | 510  | 20 | 9.45E-27  | AAC24231.1     | 64  | 123.25  | 135 | 87  | cytoplasmic signalling transducer                                               |
| Locus_10516_Transcript_1/1_Conf_1.000 | 433  | 4  | 5.01E-38  | XP_002636981.1 | 83  | 160.614 | 124 | 103 | C. briggsae CBR-LIN-33 protein                                                  |
| Locus_10517_Transcript_1/1_Conf_1.000 | 447  | 20 | 4.03E-19  | XP_002635349.1 | 57  | 97.8265 | 140 | 81  | Hypothetical protein CBG01520                                                   |
| Locus_10518_Transcript_1/1_Conf_1.000 | 1026 | 20 | 2.18E-126 | XP_002639452.1 | 86  | 456.447 | 312 | 271 | Hypothetical protein CBG04047                                                   |
| Locus_10519_Transcript_1/3_Conf_0.500 | 407  | 20 | 1.13E-55  | NP_498300.2    | 97  | 208.764 | 96  | 94  | MLP/CRP family (Muscle LIM Protein/Cysteine-rich Protein) family member (mlp-1) |

|                                       |      |    |          |                |    |         |     |     |                                                                                 |
|---------------------------------------|------|----|----------|----------------|----|---------|-----|-----|---------------------------------------------------------------------------------|
| Locus_10519_Transcript_2/3_Conf_0.500 | 495  | 20 | 4.98E-54 | XP_002641170.1 | 97 | 213.772 | 97  | 95  | C. briggsae CBR-MLP-1 protein                                                   |
| Locus_10519_Transcript_3/3_Conf_0.667 | 489  | 20 | 1.56E-63 | NP_498300.2    | 98 | 245.358 | 113 | 111 | MLP/CRP family (Muscle LIM Protein/Cysteine-rich Protein) family member (mlp-1) |
| Locus_1052_Transcript_1/1_Conf_1.000  | 715  | 20 | 3.95E-79 | XP_002646318.1 | 91 | 298.516 | 193 | 176 | C. briggsae CBR-RAB-8 protein                                                   |
| Locus_10520_Transcript_1/1_Conf_1.000 | 536  | 20 | 2.22E-11 | XP_001942770.1 | 69 | 72.4034 | 85  | 59  | PREDICTED: similar to CG32795 CG32795-PB                                        |
| Locus_10521_Transcript_1/1_Conf_1.000 | 383  | 0  |          |                |    |         |     |     |                                                                                 |
| Locus_10522_Transcript_1/1_Conf_1.000 | 523  | 0  |          |                |    |         |     |     |                                                                                 |
| Locus_10523_Transcript_1/1_Conf_1.000 | 366  | 0  |          |                |    |         |     |     |                                                                                 |
| Locus_10524_Transcript_1/1_Conf_1.000 | 387  | 0  |          |                |    |         |     |     |                                                                                 |
| Locus_10525_Transcript_1/1_Conf_1.000 | 520  | 20 | 2.26E-18 | XP_002432666.1 | 79 | 95.5153 | 67  | 53  | 5'-nucleotidase domain-containing protein, putative                             |
| Locus_10526_Transcript_1/1_Conf_1.000 | 579  | 20 | 2.08E-46 | EFO16762.1     | 72 | 189.119 | 152 | 110 | zinc knuckle family protein                                                     |
| Locus_10527_Transcript_1/1_Conf_1.000 | 264  | 0  |          |                |    |         |     |     |                                                                                 |
| Locus_10528_Transcript_1/2_Conf_1.000 | 287  | 0  |          |                |    |         |     |     |                                                                                 |
| Locus_10528_Transcript_2/2_Conf_1.000 | 811  | 20 | 6.60E-71 | XP_002633717.1 | 84 | 271.552 | 189 | 159 | Hypothetical protein CBG03401                                                   |
| Locus_10529_Transcript_1/1_Conf_1.000 | 484  | 0  |          |                |    |         |     |     |                                                                                 |
| Locus_1053_Transcript_1/1_Conf_1.000  | 1542 | 20 | 7.52E-21 | EFN82558.1     | 52 | 106.686 | 211 | 110 | Choline transporter-like protein 1                                              |
| Locus_10530_Transcript_1/1_Conf_1.000 | 308  | 20 | 3.58E-36 | NP_509947.1    | 85 | 154.451 | 102 | 87  | hypothetical protein T04F8.2                                                    |
| Locus_10531_Transcript_1/1_Conf_1.000 | 400  | 20 | 9.93E-26 | XP_001901258.1 | 98 | 119.783 | 75  | 74  | polyprotein                                                                     |

|                                       |      |    |          |                |    |         |     |     |                                 |
|---------------------------------------|------|----|----------|----------------|----|---------|-----|-----|---------------------------------|
| Locus_10532_Transcript_1/1_Conf_1.000 | 593  | 4  | 1.91E-34 | EFO21187.1     | 72 | 149.443 | 204 | 147 | hypothetical protein LOAG_07303 |
| Locus_10533_Transcript_1/1_Conf_1.000 | 1129 | 2  | 1.32E-50 | NP_500393.2    | 53 | 204.912 | 321 | 173 | hypothetical protein Y37E11AL.5 |
| Locus_10534_Transcript_1/1_Conf_1.000 | 371  | 0  |          |                |    |         |     |     |                                 |
| Locus_10535_Transcript_1/1_Conf_1.000 | 178  | 0  |          |                |    |         |     |     |                                 |
| Locus_10536_Transcript_1/1_Conf_1.000 | 168  | 20 | 5.07E-06 | XP_001487335.1 | 65 | 54.299  | 52  | 34  | hypothetical protein PGUG_00712 |
| Locus_10537_Transcript_1/2_Conf_1.000 | 1172 | 20 | 2.15E-43 | EFO24463.1     | 51 | 181.03  | 324 | 166 | hypothetical protein LOAG_04022 |
| Locus_10537_Transcript_2/2_Conf_1.000 | 1298 | 20 | 3.13E-54 | EFO24463.1     | 50 | 217.238 | 407 | 207 | hypothetical protein LOAG_04022 |
| Locus_10538_Transcript_1/1_Conf_1.000 | 1087 | 0  |          |                |    |         |     |     |                                 |
| Locus_10539_Transcript_1/1_Conf_1.000 | 983  | 0  |          |                |    |         |     |     |                                 |
| Locus_1054_Transcript_1/1_Conf_1.000  | 395  | 20 | 2.91E-33 | NP_001040743.1 | 71 | 144.821 | 126 | 90  | hypothetical protein C17C3.1    |
| Locus_10540_Transcript_1/1_Conf_1.000 | 741  | 20 | 3.17E-90 | NP_502165.2    | 79 | 335.495 | 247 | 196 | hypothetical protein C10C6.6    |
| Locus_10541_Transcript_1/1_Conf_1.000 | 214  | 0  |          |                |    |         |     |     |                                 |
| Locus_10542_Transcript_1/1_Conf_1.000 | 520  | 0  |          |                |    |         |     |     |                                 |

|                                       |      |    |           |                |    |         |     |     |                                                               |
|---------------------------------------|------|----|-----------|----------------|----|---------|-----|-----|---------------------------------------------------------------|
| Locus_10543_Transcript_1/1_Conf_1.000 | 191  | 20 | 1.22E-23  | XP_001893730.1 | 93 | 112.849 | 63  | 59  | hypothetical protein                                          |
| Locus_10544_Transcript_1/1_Conf_1.000 | 1113 | 20 | 1.19E-96  | AAR86713.1     | 72 | 357.836 | 309 | 223 | LIN-45 isoform 3                                              |
| Locus_10545_Transcript_1/1_Conf_1.000 | 484  | 20 | 1.21E-63  | CBJ25054.1     | 83 | 245.743 | 161 | 135 | C. elegans protein C10C6.1b, confirmed by transcript evidence |
| Locus_10546_Transcript_1/1_Conf_1.000 | 644  | 20 | 5.76E-65  | XP_002642138.1 | 73 | 251.136 | 230 | 169 | C. briggsae CBR-HSE-5 protein                                 |
| Locus_10547_Transcript_1/1_Conf_1.000 | 219  | 0  |           |                |    |         |     |     |                                                               |
| Locus_10548_Transcript_1/2_Conf_1.000 | 593  | 20 | 2.56E-55  | NP_001022992.1 | 76 | 218.779 | 198 | 151 | CYtoKinesis defect family member (cyk-3)                      |
| Locus_10548_Transcript_2/2_Conf_1.000 | 593  | 20 | 4.22E-58  | NP_001022992.1 | 75 | 228.024 | 198 | 150 | CYtoKinesis defect family member (cyk-3)                      |
| Locus_10549_Transcript_1/1_Conf_1.000 | 853  | 0  |           |                |    |         |     |     |                                                               |
| Locus_1055_Transcript_1/2_Conf_1.000  | 1953 | 20 | 1.42E-139 | NP_495443.1    | 67 | 501.516 | 621 | 420 | hypothetical protein ZK1127.9                                 |
| Locus_1055_Transcript_2/2_Conf_1.000  | 1953 | 20 | 1.41E-139 | NP_495443.1    | 67 | 501.516 | 621 | 420 | hypothetical protein ZK1127.9                                 |

|                                       |      |    |          |                |    |         |     |     |                                                    |
|---------------------------------------|------|----|----------|----------------|----|---------|-----|-----|----------------------------------------------------|
| Locus_10550_Transcript_1/1_Conf_1.000 | 351  | 0  |          |                |    |         |     |     |                                                    |
| Locus_10551_Transcript_1/1_Conf_1.000 | 138  | 0  |          |                |    |         |     |     |                                                    |
| Locus_10552_Transcript_1/1_Conf_1.000 | 740  | 20 | 1.17E-36 | NP_507534.1    | 59 | 157.532 | 206 | 122 | hypothetical protein Y37H2A.1                      |
| Locus_10553_Transcript_1/1_Conf_1.000 | 769  | 20 | 2.77E-76 | ADF56010.1     | 90 | 289.271 | 193 | 175 | nicotinic acetylcholine receptor alpha subunit 63a |
| Locus_10554_Transcript_1/1_Conf_1.000 | 682  | 5  | 3.37E-61 | NP_498608.1    | 76 | 238.81  | 192 | 146 | hypothetical protein B0361.9                       |
| Locus_10555_Transcript_1/2_Conf_1.000 | 593  | 20 | 5.86E-76 | XP_002634704.1 | 90 | 287.345 | 159 | 144 | Hypothetical protein CBG19690                      |
| Locus_10555_Transcript_2/2_Conf_1.000 | 441  | 20 | 1.58E-47 | XP_002634704.1 | 93 | 192.2   | 102 | 95  | Hypothetical protein CBG19690                      |
| Locus_10556_Transcript_1/1_Conf_1.000 | 427  | 13 | 1.38E-19 | NP_505729.1    | 67 | 99.3673 | 107 | 72  | hypothetical protein F29F11.3                      |
| Locus_10557_Transcript_1/1_Conf_1.000 | 658  | 20 | 5.59E-26 | XP_001893620.1 | 57 | 121.709 | 168 | 97  | TAP C-terminal domain containing protein           |
| Locus_10558_Transcript_1/1_Conf_1.000 | 599  | 20 | 3.70E-41 | NP_491404.2    | 80 | 171.785 | 135 | 108 | hypothetical protein D1007.16                      |
| Locus_10559_Transcript_1/1_Conf_1.000 | 475  | 20 | 2.33E-27 | AAN10061.1     | 48 | 125.176 | 172 | 84  | Kunitz-like protease inhibitor precursor           |
| Locus_1056_Transcript_1/2_Conf_1.000  | 1610 | 3  | 1.16E-96 | NP_495676.1    | 64 | 358.607 | 400 | 259 | hypothetical protein DH11.2                        |
| Locus_1056_Transcript_2/2_Conf_1.000  | 383  | 0  |          |                |    |         |     |     |                                                    |
| Locus_10560_Transcript_1/1_Conf_1.000 | 138  | 0  |          |                |    |         |     |     |                                                    |
| Locus_10561_Transcript_1/1_Conf_1.000 | 389  | 20 | 1.95E-66 | XP_002632356.1 | 94 | 254.988 | 128 | 121 | Hypothetical protein CBG00370                      |
| Locus_10562_Transcript_1/1_Conf_1.000 | 421  | 20 | 4.59E-55 | XP_002636678.1 | 87 | 217.238 | 138 | 121 | C. briggsae CBR-CHE-11 protein                     |
| Locus_10563_Transcript_1/1_Conf_1.000 | 923  | 1  | 6.50E-07 | XP_002647226.1 | 55 | 59.3066 | 68  | 38  | Hypothetical protein CBG23816                      |

|                                       |      |    |          |                |    |         |     |     |                                                            |
|---------------------------------------|------|----|----------|----------------|----|---------|-----|-----|------------------------------------------------------------|
| Locus_10564_Transcript_1/1_Conf_1.000 | 693  | 20 | 1.07E-17 | CAR63567.1     | 73 | 94.3597 | 64  | 47  | putative COLLAGEN                                          |
| Locus_10565_Transcript_1/1_Conf_1.000 | 436  | 20 | 1.27E-33 | NP_497617.1    | 68 | 145.976 | 142 | 97  | hypothetical protein Y71H2AM.20                            |
| Locus_10566_Transcript_1/1_Conf_1.000 | 393  | 14 | 8.21E-20 | NP_496207.1    | 62 | 100.138 | 124 | 77  | hypothetical protein T01E8.4                               |
| Locus_10567_Transcript_1/1_Conf_1.000 | 1264 | 19 | 1.32E-25 | NP_001020993.1 | 41 | 122.094 | 452 | 187 | Suppressor of PResenilin defect family member (spr-4)      |
| Locus_10568_Transcript_1/1_Conf_1.000 | 894  | 5  | 1.73E-09 | XP_002645552.1 | 42 | 67.781  | 182 | 78  | Hypothetical protein CBG05235                              |
| Locus_10569_Transcript_1/1_Conf_1.000 | 587  | 20 | 2.71E-57 | P34578.3       | 75 | 225.328 | 195 | 147 | Rap guanine nucleotide exchange factor 1                   |
| Locus_1057_Transcript_1/1_Conf_1.000  | 637  | 20 | 3.22E-28 | XP_001901523.1 | 95 | 129.028 | 66  | 63  | U6 snRNA-associated Sm-like protein LSM5                   |
| Locus_10570_Transcript_1/2_Conf_1.000 | 359  | 1  | 3.51E-07 | NP_502367.2    | 81 | 58.151  | 60  | 49  | hypothetical protein F28D1.9                               |
| Locus_10570_Transcript_2/2_Conf_1.000 | 359  | 1  | 9.24E-08 | NP_502367.2    | 81 | 60.077  | 60  | 49  | hypothetical protein F28D1.9                               |
| Locus_10571_Transcript_1/1_Conf_1.000 | 199  | 2  | 1.22E-07 | NP_505304.1    | 78 | 59.6918 | 42  | 33  | TransThyretin-Related family domain family member (ttr-47) |
| Locus_10572_Transcript_1/1_Conf_1.000 | 226  | 20 | 7.16E-24 | EFO24987.1     | 89 | 113.62  | 74  | 66  | hypothetical protein LOAG_03502                            |
| Locus_10573_Transcript_1/1_Conf_1.000 | 461  | 20 | 1.89E-37 | NP_500964.1    | 92 | 158.688 | 96  | 89  | LSM Sm-like protein family member (lsm-8)                  |
| Locus_10574_Transcript_1/1_Conf_1.000 | 265  | 0  |          |                |    |         |     |     |                                                            |

|                                       |     |    |          |                |    |         |     |     |                                                    |
|---------------------------------------|-----|----|----------|----------------|----|---------|-----|-----|----------------------------------------------------|
| Locus_10575_Transcript_1/1_Conf_1.000 | 215 | 20 | 2.83E-25 | NP_491658.2    | 92 | 118.242 | 71  | 66  | PaTched Related family member (ptr-10)             |
| Locus_10576_Transcript_1/1_Conf_1.000 | 293 | 0  |          |                |    |         |     |     |                                                    |
| Locus_10577_Transcript_1/1_Conf_1.000 | 434 | 3  | 2.12E-04 | NP_001021684.1 | 66 | 48.9062 | 65  | 43  | hypothetical protein Y105E8A.24                    |
| Locus_10578_Transcript_1/1_Conf_1.000 | 444 | 20 | 1.33E-46 | NP_494807.1    | 75 | 189.119 | 160 | 120 | Variable ABnormal morphology family member (vab-1) |
| Locus_10579_Transcript_1/1_Conf_1.000 | 804 | 20 | 9.79E-83 | NP_509268.1    | 76 | 310.842 | 263 | 202 | hypothetical protein F48E3.3                       |
| Locus_1058_Transcript_1/1_Conf_1.000  | 944 | 0  |          |                |    |         |     |     |                                                    |
| Locus_10580_Transcript_1/1_Conf_1.000 | 466 | 20 | 6.02E-31 | CAA75875.1     | 98 | 137.117 | 90  | 89  | COL1A1 and PDGFB fusion transcript                 |

|                                       |      |    |           |                |    |         |     |     |                                                                         |
|---------------------------------------|------|----|-----------|----------------|----|---------|-----|-----|-------------------------------------------------------------------------|
| Locus_10581_Transcript_1/2_Conf_1.000 | 538  | 0  |           |                |    |         |     |     |                                                                         |
| Locus_10581_Transcript_2/2_Conf_1.000 | 1550 | 20 | 5.99E-135 | NP_001129871.1 | 90 | 485.723 | 302 | 272 | related to yeast Vacuolar Protein Sorting factor family member (vps-26) |
| Locus_10582_Transcript_1/1_Conf_1.000 | 205  | 0  |           |                |    |         |     |     |                                                                         |
| Locus_10583_Transcript_1/1_Conf_1.000 | 374  | 20 | 1.34E-46  | 2WS2           | 84 | 189.119 | 124 | 105 | The 2 AngstromStructure Of A Nu-Class Gst From Haemonchus Contortus     |
| Locus_10584_Transcript_1/1_Conf_1.000 | 868  | 20 | 6.23E-33  | NP_510225.2    | 61 | 145.591 | 187 | 115 | hypothetical protein C49F8.2                                            |
| Locus_10585_Transcript_1/1_Conf_1.000 | 350  | 0  |           |                |    |         |     |     |                                                                         |
| Locus_10586_Transcript_1/1_Conf_1.000 | 302  | 0  |           |                |    |         |     |     |                                                                         |
| Locus_10587_Transcript_1/1_Conf_1.000 | 701  | 20 | 2.69E-24  | XP_002639987.1 | 73 | 116.316 | 96  | 71  | C. briggsae CBR-AAP-1 protein                                           |
| Locus_10588_Transcript_1/1_Conf_1.000 | 1545 | 1  | 3.76E-04  | NP_496209.1    | 42 | 51.2174 | 224 | 95  | hypothetical protein T01E8.5                                            |
| Locus_10589_Transcript_1/1_Conf_1.000 | 171  | 0  |           |                |    |         |     |     |                                                                         |
| Locus_1059_Transcript_1/1_Conf_1.000  | 1512 | 20 | 1.62E-76  | EFO22174.1     | 52 | 291.582 | 561 | 293 | hypothetical protein LOAG_06316                                         |
| Locus_10590_Transcript_1/1_Conf_1.000 | 167  | 0  |           |                |    |         |     |     |                                                                         |
| Locus_10591_Transcript_1/1_Conf_1.000 | 348  | 20 | 7.32E-45  | XP_002641854.1 | 85 | 183.341 | 114 | 97  | Hypothetical protein CBG16528                                           |
| Locus_10592_Transcript_1/1_Conf_1.000 | 344  | 2  | 2.03E-10  | NP_506363.1    | 64 | 68.9366 | 70  | 45  | hypothetical protein C50B8.4                                            |
| Locus_10593_Transcript_1/1_Conf_1.000 | 204  | 20 | 1.05E-27  | XP_001900447.1 | 95 | 126.331 | 67  | 64  | cyclin fold protein 1 variant b                                         |
| Locus_10594_Transcript_1/1_Conf_1.000 | 676  | 20 | 3.31E-53  | NP_491872.1    | 62 | 212.231 | 229 | 142 | hypothetical protein C55B7.3                                            |
| Locus_10595_Transcript_1/1_Conf_1.000 | 532  | 20 | 9.25E-58  | XP_002631571.1 | 86 | 226.483 | 137 | 118 | C. briggsae CBR-HOT-3 protein                                           |
| Locus_10596_Transcript_1/1_Conf_1.000 | 908  | 0  |           |                |    |         |     |     |                                                                         |
| Locus_10597_Transcript_1/3_Conf_0.667 | 1299 | 20 | 5.39E-30  | NP_498099.1    | 51 | 136.732 | 283 | 145 | Caffeine Induced Death (S. pombe Cid) homolog family member (cid-1)     |
| Locus_10597_Transcript_2/3_Conf_0.667 | 1140 | 20 | 8.12E-32  | NP_498099.1    | 48 | 142.51  | 347 | 168 | Caffeine Induced Death (S. pombe Cid) homolog family member (cid-1)     |
| Locus_10597_Transcript_3/3_Conf_0.667 | 1281 | 20 | 9.63E-32  | NP_498099.1    | 48 | 142.51  | 347 | 168 | Caffeine Induced Death (S. pombe Cid) homolog family member (cid-1)     |
| Locus_10598_Transcript_1/1_Conf_1.000 | 517  | 20 | 7.01E-65  | NP_497837.1    | 89 | 249.98  | 169 | 151 | Leucyl tRNA Synthetase family member (Irs-1)                            |



|                                       |      |    |           |                |    |         |     |     |                                                                               |
|---------------------------------------|------|----|-----------|----------------|----|---------|-----|-----|-------------------------------------------------------------------------------|
| Locus_10599_Transcript_1/1_Conf_1.000 | 921  | 20 | 4.31E-43  | EFO17749.1     | 67 | 179.489 | 190 | 129 | hypothetical protein LOAG_10750                                               |
| Locus_106_Transcript_1/1_Conf_1.000   | 1858 | 20 | 0         | ABC86956.1     | 98 | 882.863 | 493 | 484 | protein disulfide isomerase                                                   |
| Locus_1060_Transcript_1/6_Conf_0.462  | 757  | 0  |           |                |    |         |     |     |                                                                               |
| Locus_1060_Transcript_2/6_Conf_0.154  | 387  | 0  |           |                |    |         |     |     |                                                                               |
| Locus_1060_Transcript_3/6_Conf_0.231  | 760  | 0  |           |                |    |         |     |     |                                                                               |
| Locus_1060_Transcript_4/6_Conf_0.385  | 760  | 0  |           |                |    |         |     |     |                                                                               |
| Locus_1060_Transcript_5/6_Conf_0.308  | 760  | 0  |           |                |    |         |     |     |                                                                               |
| Locus_1060_Transcript_6/6_Conf_0.615  | 778  | 0  |           |                |    |         |     |     |                                                                               |
| Locus_10600_Transcript_1/1_Conf_1.000 | 309  | 0  |           |                |    |         |     |     |                                                                               |
| Locus_10601_Transcript_1/1_Conf_1.000 | 361  | 20 | 5.54E-29  | EFO20355.1     | 70 | 130.568 | 120 | 85  | aminotransferase                                                              |
| Locus_10602_Transcript_1/1_Conf_1.000 | 668  |    |           |                |    |         |     |     |                                                                               |
| Locus_10603_Transcript_1/1_Conf_1.000 | 184  | 1  | 8.01E-07  | NP_509241.1    | 63 | 56.9954 | 61  | 39  | AuTophagy (yeast Atg homolog) family member (atg-11)                          |
| Locus_10604_Transcript_1/1_Conf_1.000 | 728  | 0  |           |                |    |         |     |     |                                                                               |
| Locus_10605_Transcript_1/1_Conf_1.000 | 649  | 4  | 1.37E-29  | XP_002639894.1 | 61 | 133.65  | 214 | 131 | C. briggsae CBR-CDC-48.3 protein                                              |
| Locus_10606_Transcript_1/1_Conf_1.000 | 557  | 11 | 8.65E-44  | CAR63705.1     | 88 | 180.259 | 139 | 123 | putative CREB Homolog family member                                           |
| Locus_10607_Transcript_1/1_Conf_1.000 | 311  | 20 | 8.24E-25  | XP_002642057.1 | 76 | 116.701 | 103 | 79  | C. briggsae CBR-COL-89 protein                                                |
| Locus_10608_Transcript_1/1_Conf_1.000 | 134  | 0  |           |                |    |         |     |     |                                                                               |
| Locus_10609_Transcript_1/1_Conf_1.000 | 424  | 0  |           |                |    |         |     |     |                                                                               |
| Locus_1061_Transcript_1/1_Conf_1.000  | 143  | 0  |           |                |    |         |     |     |                                                                               |
| Locus_10610_Transcript_1/1_Conf_1.000 | 673  | 20 | 1.72E-78  | NP_497896.1    | 72 | 296.204 | 228 | 165 | PDCD (mammalian Programmed Cell Death protein) homolog family member (pdcd-2) |
| Locus_10611_Transcript_1/1_Conf_1.000 | 568  | 3  | 1.08E-12  | NP_740803.1    | 46 | 77.0258 | 195 | 90  | Nuclear Pore complex Protein family member (npp-13)                           |
| Locus_10612_Transcript_1/1_Conf_1.000 | 1135 | 20 | 5.05E-175 | XP_002632772.1 | 87 | 618.231 | 383 | 334 | C. briggsae CBR-TAT-2 protein                                                 |

|                                       |      |    |          |                |    |         |     |     |                                                |
|---------------------------------------|------|----|----------|----------------|----|---------|-----|-----|------------------------------------------------|
| Locus_10613_Transcript_1/1_Conf_1.000 | 331  | 5  | 5.42E-08 | XP_001637135.1 | 60 | 60.8474 | 74  | 45  | predicted protein                              |
| Locus_10614_Transcript_1/1_Conf_1.000 | 155  | 0  |          |                |    |         |     |     |                                                |
| Locus_10615_Transcript_1/1_Conf_1.000 | 513  | 20 | 3.44E-24 | EFO25156.1     | 76 | 114.775 | 96  | 73  | hypothetical protein LOAG_03329                |
| Locus_10616_Transcript_1/1_Conf_1.000 | 942  | 20 | 2.46E-41 | NP_493396.1    | 54 | 173.711 | 303 | 164 | hypothetical protein W04A4.5                   |
| Locus_10617_Transcript_1/1_Conf_1.000 | 986  | 20 | 1.53E-73 | AAK62032.1     | 66 | 280.796 | 299 | 199 | metalloprotease 1 precursor                    |
| Locus_10618_Transcript_1/1_Conf_1.000 | 654  | 16 | 4.64E-49 | NP_741081.1    | 69 | 198.364 | 227 | 158 | GEX Interacting protein family member (gei-16) |
| Locus_10619_Transcript_1/2_Conf_1.000 | 1872 | 20 | 1.26E-44 | EFO20169.1     | 46 | 186.037 | 505 | 233 | hypothetical protein LOAG_08321                |
| Locus_10619_Transcript_2/2_Conf_1.000 | 212  | 0  |          |                |    |         |     |     |                                                |
| Locus_1062_Transcript_1/1_Conf_1.000  | 500  | 20 | 9.02E-64 | NP_497837.1    | 87 | 246.128 | 166 | 146 | Leucyl tRNA Synthetase family member (lrs-1)   |
| Locus_10620_Transcript_1/1_Conf_1.000 | 515  | 20 | 1.58E-53 | XP_002637051.1 | 80 | 212.231 | 144 | 116 | C. briggsae CBR-TAG-315 protein                |
| Locus_10621_Transcript_1/1_Conf_1.000 | 449  | 20 | 1.97E-66 | NP_494777.1    | 87 | 254.988 | 149 | 130 | MolTing defective family member (mlt-7)        |
| Locus_10622_Transcript_1/2_Conf_1.000 | 376  | 0  |          |                |    |         |     |     |                                                |
| Locus_10622_Transcript_2/2_Conf_1.000 | 376  | 0  |          |                |    |         |     |     |                                                |
| Locus_10623_Transcript_1/1_Conf_1.000 | 134  | 0  |          |                |    |         |     |     |                                                |
| Locus_10624_Transcript_1/1_Conf_1.000 | 134  | 2  | 1.13E-05 | XP_002644763.1 | 79 | 53.1434 | 39  | 31  | Hypothetical protein CBG14774                  |
| Locus_10625_Transcript_1/1_Conf_1.000 | 237  | 0  |          |                |    |         |     |     |                                                |
| Locus_10626_Transcript_1/1_Conf_1.000 | 243  | 2  | 2.51E-05 | NP_507767.2    | 72 | 51.9878 | 55  | 40  | hypothetical protein C14B4.2                   |
| Locus_10627_Transcript_1/1_Conf_1.000 | 493  | 0  |          |                |    |         |     |     |                                                |
| Locus_10628_Transcript_1/1_Conf_1.000 | 298  | 0  |          |                |    |         |     |     |                                                |

|                                       |     |    |           |                |    |         |     |     |                                 |
|---------------------------------------|-----|----|-----------|----------------|----|---------|-----|-----|---------------------------------|
| Locus_10629_Transcript_1/1_Conf_1.000 | 299 | 20 | 3.50E-39  | XP_002640690.1 | 88 | 164.466 | 99  | 88  | Hypothetical protein CBG19753   |
| Locus_1063_Transcript_1/2_Conf_1.000  | 392 | 20 | 7.20E-29  | CAC51087.1     | 87 | 130.183 | 80  | 70  | ES protein                      |
| Locus_1063_Transcript_2/2_Conf_1.000  | 794 | 20 | 1.70E-39  | CAC51087.1     | 74 | 167.162 | 150 | 111 | ES protein                      |
| Locus_10630_Transcript_1/1_Conf_1.000 | 375 | 20 | 2.78E-36  | EFO20071.1     | 79 | 154.836 | 114 | 91  | hypothetical protein LOAG_08420 |
| Locus_10631_Transcript_1/1_Conf_1.000 | 710 | 20 | 4.53E-112 | Q61YG1.2       | 88 | 407.912 | 236 | 209 | Leishmanolysin-like peptidase   |
| Locus_10632_Transcript_1/1_Conf_1.000 | 209 | 0  |           |                |    |         |     |     |                                 |

|                                       |      |    |           |                |    |         |     |     |                                    |
|---------------------------------------|------|----|-----------|----------------|----|---------|-----|-----|------------------------------------|
| Locus_10633_Transcript_1/1_Conf_1.000 | 231  | 20 | 3.43E-10  | XP_001950127.1 | 77 | 68.1662 | 53  | 41  | PREDICTED: similar to neuralized   |
| Locus_10634_Transcript_1/1_Conf_1.000 | 151  | 0  |           |                |    |         |     |     |                                    |
| Locus_10635_Transcript_1/1_Conf_1.000 | 341  | 3  | 3.83E-14  | XP_002631596.1 | 61 | 81.2629 | 107 | 66  | Hypothetical protein CBG20777      |
| Locus_10636_Transcript_1/1_Conf_1.000 | 2072 | 20 | 2.07E-128 | ACI49231.1     | 62 | 464.537 | 636 | 395 | hypothetical protein Csp3_JD05.016 |
| Locus_10637_Transcript_1/1_Conf_1.000 | 776  | 20 | 1.23E-47  | NP_504560.1    | 78 | 194.126 | 173 | 135 | hypothetical protein F29G9.2       |
| Locus_10638_Transcript_1/1_Conf_1.000 | 145  | 0  |           |                |    |         |     |     |                                    |
| Locus_10639_Transcript_1/1_Conf_1.000 | 354  | 0  |           |                |    |         |     |     |                                    |
| Locus_1064_Transcript_1/1_Conf_1.000  | 249  | 0  |           |                |    |         |     |     |                                    |
| Locus_10640_Transcript_1/1_Conf_1.000 | 675  | 20 | 1.27E-12  | NP_001022292.1 | 72 | 77.411  | 81  | 59  | hypothetical protein T01B7.5       |
| Locus_10641_Transcript_1/5_Conf_0.167 | 440  | 0  |           |                |    |         |     |     |                                    |
| Locus_10641_Transcript_2/5_Conf_0.667 | 1651 | 20 | 5.81E-75  | EFO23614.1     | 60 | 286.574 | 370 | 223 | hypothetical protein LOAG_04870    |

|                                       |      |    |           |                |    |         |     |     |                                 |
|---------------------------------------|------|----|-----------|----------------|----|---------|-----|-----|---------------------------------|
| Locus_10641_Transcript_3/5_Conf_0.667 | 1651 | 20 | 5.81E-75  | EFO23614.1     | 60 | 286.574 | 370 | 223 | hypothetical protein LOAG_04870 |
| Locus_10641_Transcript_4/5_Conf_0.667 | 1651 | 20 | 5.81E-75  | EFO23614.1     | 60 | 286.574 | 370 | 223 | hypothetical protein LOAG_04870 |
| Locus_10641_Transcript_5/5_Conf_0.667 | 1651 | 20 | 5.82E-75  | EFO23614.1     | 60 | 286.574 | 370 | 223 | hypothetical protein LOAG_04870 |
| Locus_10642_Transcript_1/1_Conf_1.000 | 178  | 20 | 6.98E-24  | XP_002632085.1 | 98 | 113.62  | 57  | 56  | Hypothetical protein CBG17053   |
| Locus_10643_Transcript_1/1_Conf_1.000 | 182  | 1  | 4.88E-04  | NP_501925.2    | 68 | 47.7506 | 48  | 33  | hypothetical protein F13B12.2   |
| Locus_10644_Transcript_1/1_Conf_1.000 | 380  | 0  |           |                |    |         |     |     |                                 |
| Locus_10645_Transcript_1/1_Conf_1.000 | 182  | 0  |           |                |    |         |     |     |                                 |
| Locus_10646_Transcript_1/1_Conf_1.000 | 591  | 20 | 8.84E-40  | NP_501552.1    | 77 | 167.162 | 150 | 116 | hypothetical protein D1046.3    |
| Locus_10647_Transcript_1/3_Conf_0.500 | 239  | 0  |           |                |    |         |     |     |                                 |
| Locus_10647_Transcript_2/3_Conf_0.333 | 1328 | 20 | 7.09E-110 | XP_002646340.1 | 69 | 402.134 | 383 | 266 | C. briggsae CBR-INX-15 protein  |
| Locus_10647_Transcript_3/3_Conf_0.500 | 337  | 15 | 3.48E-07  | NP_001021592.1 | 72 | 58.151  | 44  | 32  | INneXin family member (inx-17)  |
| Locus_10648_Transcript_1/1_Conf_1.000 | 988  | 19 | 1.32E-08  | XP_001892028.1 | 50 | 65.0846 | 196 | 99  | hypothetical protein Bm1_02630  |
| Locus_10649_Transcript_1/1_Conf_1.000 | 145  | 0  |           |                |    |         |     |     |                                 |
| Locus_1065_Transcript_1/2_Conf_1.000  | 1061 | 20 | 1.57E-34  | NP_505463.1    | 96 | 151.369 | 103 | 99  | HIStone family member (his-35)  |

|                                       |      |    |          |                |    |         |     |     |                                         |
|---------------------------------------|------|----|----------|----------------|----|---------|-----|-----|-----------------------------------------|
| Locus_1065_Transcript_2/2_Conf_1.000  | 1061 | 20 | 8.30E-36 | NP_505463.1    | 96 | 155.606 | 104 | 100 | HIStone family member (his-35)          |
| Locus_10650_Transcript_1/1_Conf_1.000 | 211  | 20 | 1.73E-14 | XP_002428738.1 | 72 | 82.4185 | 70  | 51  | Sex-determining protein fem-1, putative |
| Locus_10651_Transcript_1/1_Conf_1.000 | 577  | 18 | 1.69E-16 | XP_002630479.1 | 60 | 89.7373 | 193 | 116 | Hypothetical protein CBG11215           |
| Locus_10652_Transcript_1/2_Conf_1.000 | 297  | 0  |          |                |    |         |     |     |                                         |
| Locus_10652_Transcript_2/2_Conf_1.000 | 286  | 0  |          |                |    |         |     |     |                                         |
| Locus_10653_Transcript_1/2_Conf_1.000 | 426  | 20 | 2.85E-57 | NP_496822.2    | 85 | 224.557 | 141 | 121 | hypothetical protein Y48C3A.14          |
| Locus_10653_Transcript_2/2_Conf_1.000 | 397  | 20 | 6.20E-52 | NP_496822.2    | 84 | 206.838 | 132 | 112 | hypothetical protein Y48C3A.14          |
| Locus_10654_Transcript_1/1_Conf_1.000 | 347  | 20 | 3.56E-15 | XP_002429463.1 | 55 | 84.7297 | 106 | 59  | set domain protein, putative            |

|                                       |     |    |          |                |    |         |     |     |                                  |
|---------------------------------------|-----|----|----------|----------------|----|---------|-----|-----|----------------------------------|
| Locus_10655_Transcript_1/1_Conf_1.000 | 436 | 20 | 4.68E-28 | AAC47238.1     | 73 | 127.487 | 114 | 84  | non-muscle myosin heavy chain II |
| Locus_10656_Transcript_1/1_Conf_1.000 | 145 | 0  |          |                |    |         |     |     |                                  |
| Locus_10657_Transcript_1/1_Conf_1.000 | 153 | 0  |          |                |    |         |     |     |                                  |
| Locus_10658_Transcript_1/1_Conf_1.000 | 566 | 20 | 3.16E-49 | XP_001901789.1 | 70 | 198.364 | 185 | 130 | protein F41H10.5                 |
| Locus_1066_Transcript_1/1_Conf_1.000  | 781 | 20 | 2.95E-97 | XP_002639719.1 | 91 | 358.992 | 199 | 182 | Hypothetical protein CBG12445    |
| Locus_10660_Transcript_1/1_Conf_1.000 | 353 | 20 | 1.33E-38 | NP_496500.1    | 82 | 162.54  | 117 | 96  | hypothetical protein VF13D12L.3  |
| Locus_10661_Transcript_1/1_Conf_1.000 | 451 | 9  | 6.40E-17 | XP_002632202.1 | 54 | 90.5077 | 121 | 66  | Hypothetical protein CBG07069    |
| Locus_10662_Transcript_1/1_Conf_1.000 | 607 | 20 | 2.58E-53 | XP_002639587.1 | 75 | 212.231 | 183 | 138 | Hypothetical protein CBG04225    |

|                                       |      |    |           |                |     |         |     |     |                                        |
|---------------------------------------|------|----|-----------|----------------|-----|---------|-----|-----|----------------------------------------|
| Locus_10663_Transcript_1/1_Conf_1.000 | 242  | 20 | 4.58E-07  | Q90WA0.1       | 63  | 57.7658 | 57  | 36  | Textilinin-2                           |
| Locus_10664_Transcript_1/1_Conf_1.000 | 484  | 20 | 5.68E-13  | NP_500023.1    | 64  | 77.411  | 94  | 61  | hypothetical protein Y55F3AM.9         |
| Locus_10665_Transcript_1/1_Conf_1.000 | 435  | 20 | 2.32E-27  | NP_871792.1    | 90  | 125.176 | 81  | 73  | hypothetical protein F08A10.1          |
| Locus_10666_Transcript_1/1_Conf_1.000 | 468  | 20 | 8.99E-11  | XP_001604140.1 | 63  | 70.0922 | 82  | 52  | PREDICTED: similar to GM05135p         |
| Locus_10667_Transcript_1/1_Conf_1.000 | 686  | 2  | 8.79E-17  | NP_505881.3    | 63  | 91.2781 | 82  | 52  | hypothetical protein T02E9.5           |
| Locus_10668_Transcript_1/1_Conf_1.000 | 380  | 3  | 2.53E-05  | AAK93849.3     | 49  | 51.9878 | 69  | 34  | U12964_12Hypothetical protein F26F4.9a |
| Locus_10669_Transcript_1/1_Conf_1.000 | 514  | 20 | 4.20E-30  | XP_001899440.1 | 62  | 134.42  | 159 | 99  | CPSF A subunit region family protein   |
| Locus_1067_Transcript_1/1_Conf_1.000  | 503  | 20 | 1.18E-42  | NP_496168.1    | 78  | 176.022 | 140 | 110 | hypothetical protein F52H3.5           |
| Locus_10670_Transcript_1/1_Conf_1.000 | 660  | 1  | 7.82E-04  | ZP_05807298.1  | 50  | 48.1358 | 81  | 41  | glycosyl transferase family 51         |
| Locus_10671_Transcript_1/1_Conf_1.000 | 370  | 0  |           |                |     |         |     |     |                                        |
| Locus_10672_Transcript_1/2_Conf_1.000 | 1034 | 0  |           |                |     |         |     |     |                                        |
| Locus_10672_Transcript_2/2_Conf_1.000 | 1034 | 0  |           |                |     |         |     |     |                                        |
| Locus_10673_Transcript_1/1_Conf_1.000 | 662  | 1  | 2.69E-04  | YP_031621.1    | 50  | 49.6766 | 51  | 26  | hypothetical protein FV3gorf43R        |
| Locus_10674_Transcript_1/1_Conf_1.000 | 140  | 0  |           |                |     |         |     |     |                                        |
| Locus_10675_Transcript_1/1_Conf_1.000 | 698  | 2  | 1.79E-12  | NP_497036.1    | 46  | 77.0258 | 150 | 70  | hypothetical protein F19H8.2           |
| Locus_10676_Transcript_1/1_Conf_1.000 | 903  | 20 | 1.21E-159 | AAD39095.1     | 100 | 566.614 | 278 | 278 | AF105337_1galectin GAL-1               |
| Locus_10677_Transcript_1/1_Conf_1.000 | 243  | 0  |           |                |     |         |     |     |                                        |
| Locus_10678_Transcript_1/1_Conf_1.000 | 242  | 0  |           |                |     |         |     |     |                                        |



|                                       |      |    |          |                |    |         |     |     |                                                     |
|---------------------------------------|------|----|----------|----------------|----|---------|-----|-----|-----------------------------------------------------|
| Locus_10679_Transcript_1/1_Conf_1.000 | 149  | 20 | 4.23E-16 | NP_502747.1    | 85 | 87.8113 | 48  | 41  | hypothetical protein F55B11.1                       |
| Locus_1068_Transcript_1/1_Conf_1.000  | 1134 | 20 | 4.40E-78 | NP_492519.2    | 74 | 296.204 | 315 | 236 | hypothetical protein F30A10.3                       |
| Locus_10680_Transcript_1/1_Conf_1.000 | 783  | 20 | 7.66E-53 | XP_002631256.1 | 66 | 211.46  | 245 | 164 | C. briggsae CBR-CRN-3 protein                       |
| Locus_10681_Transcript_1/1_Conf_1.000 | 411  | 0  |          |                |    |         |     |     |                                                     |
| Locus_10682_Transcript_1/1_Conf_1.000 | 1489 | 4  | 2.57E-10 | NP_492568.1    | 46 | 71.633  | 179 | 83  | Nuclear Pore complex Protein family member (npp-14) |
| Locus_10683_Transcript_1/1_Conf_1.000 | 483  | 0  |          |                |    |         |     |     |                                                     |
| Locus_10684_Transcript_1/1_Conf_1.000 | 1015 | 3  | 3.53E-12 | NP_499551.1    | 55 | 77.0258 | 177 | 99  | Nuclear Pore complex Protein family member (npp-16) |
| Locus_10685_Transcript_1/1_Conf_1.000 | 262  | 0  |          |                |    |         |     |     |                                                     |
| Locus_10686_Transcript_1/1_Conf_1.000 | 769  | 20 | 9.71E-13 | NP_493412.2    | 55 | 78.1814 | 114 | 63  | hypothetical protein Y37H9A.3                       |
| Locus_10687_Transcript_1/1_Conf_1.000 | 481  | 6  | 7.46E-18 | XP_001899819.1 | 56 | 93.5893 | 141 | 79  | protein ZK524.3                                     |
| Locus_10688_Transcript_1/1_Conf_1.000 | 152  | 0  |          |                |    |         |     |     |                                                     |
| Locus_10689_Transcript_1/1_Conf_1.000 | 886  | 7  | 1.72E-70 | XP_002646401.1 | 69 | 270.396 | 321 | 223 | C. briggsae CBR-DYS-1 protein                       |

|                                       |     |    |           |                |    |         |     |     |                                          |
|---------------------------------------|-----|----|-----------|----------------|----|---------|-----|-----|------------------------------------------|
| Locus_1069_Transcript_1/1_Conf_1.000  | 984 | 20 | 9.76E-121 | XP_002637163.1 | 88 | 437.573 | 296 | 262 | C. briggsae CBR-SQV-4 protein            |
| Locus_10690_Transcript_1/1_Conf_1.000 | 409 | 20 | 5.97E-15  | NP_508961.2    | 70 | 83.9593 | 74  | 52  | Cytochrome P450 family member (cyp-43A1) |
| Locus_10691_Transcript_1/1_Conf_1.000 | 596 | 20 | 3.74E-70  | NP_001021801.1 | 85 | 268.085 | 187 | 159 | hypothetical protein Y6B3B.5             |
| Locus_10692_Transcript_1/1_Conf_1.000 | 314 | 20 | 5.17E-14  | ABO70952.1     | 96 | 80.8777 | 89  | 86  | NADH dehydrogenase subunit 3             |
| Locus_10693_Transcript_1/2_Conf_0.500 | 650 | 20 | 9.14E-50  | AAK94765.1     | 64 | 200.675 | 208 | 135 | GLY-2                                    |
| Locus_10693_Transcript_2/2_Conf_0.500 | 650 | 20 | 9.14E-50  | AAK94765.1     | 64 | 200.675 | 208 | 135 | GLY-2                                    |
| Locus_10694_Transcript_1/1_Conf_1.000 | 236 | 0  |           |                |    |         |     |     |                                          |
| Locus_10695_Transcript_1/1_Conf_1.000 | 401 | 7  | 1.59E-07  | XP_002630536.1 | 56 | 59.3066 | 96  | 54  | Hypothetical protein CBG12976            |

|                                       |      |    |          |                |    |         |      |      |                                                   |
|---------------------------------------|------|----|----------|----------------|----|---------|------|------|---------------------------------------------------|
| Locus_10696_Transcript_1/2_Conf_1.000 | 371  | 20 | 6.91E-35 | NP_508412.1    | 92 | 150.214 | 84   | 78   | Vacuolar H ATPase family member (vha-15)          |
| Locus_10696_Transcript_2/2_Conf_1.000 | 238  | 17 | 1.17E-10 | NP_508412.1    | 90 | 69.707  | 40   | 36   | Vacuolar H ATPase family member (vha-15)          |
| Locus_10697_Transcript_1/1_Conf_1.000 | 693  | 20 | 1.93E-67 | NP_001122528.1 | 74 | 259.61  | 233  | 173  | Cation transporting ATPase family member (catp-1) |
| Locus_10698_Transcript_1/1_Conf_1.000 | 429  | 0  |          |                |    |         |      |      |                                                   |
| Locus_10699_Transcript_1/1_Conf_1.000 | 178  | 10 | 2.93E-22 | ABD62754.1     | 91 | 108.227 | 58   | 53   | Hc38                                              |
| Locus_107_Transcript_1/2_Conf_1.000   | 4141 | 20 | 0        | XP_002631199.1 | 79 | 1784.62 | 1356 | 1082 | C. briggsae CBR-PTP-3 protein                     |
| Locus_107_Transcript_2/2_Conf_1.000   | 1751 | 20 | 0        | XP_002631199.1 | 77 | 707.212 | 532  | 414  | C. briggsae CBR-PTP-3 protein                     |
| Locus_1070_Transcript_1/1_Conf_1.000  | 271  | 0  |          |                |    |         |      |      |                                                   |

|                                       |      |    |           |                |     |         |     |     |                                              |
|---------------------------------------|------|----|-----------|----------------|-----|---------|-----|-----|----------------------------------------------|
| Locus_10700_Transcript_1/1_Conf_1.000 | 737  | 20 | 1.27E-67  | XP_001099416.2 | 100 | 260.381 | 141 | 141 | PREDICTED: profilin-1 isoform 1              |
| Locus_10701_Transcript_1/1_Conf_1.000 | 935  | 0  |           |                |     |         |     |     |                                              |
| Locus_10702_Transcript_1/1_Conf_1.000 | 601  | 20 | 1.05E-75  | NP_001023382.1 | 84  | 286.574 | 200 | 169 | Amino Acid Transporter family member (aat-4) |
| Locus_10703_Transcript_1/1_Conf_1.000 | 663  | 20 | 2.26E-59  | NP_498961.2    | 87  | 232.646 | 142 | 124 | hypothetical protein ZK637.2                 |
| Locus_10704_Transcript_1/2_Conf_1.000 | 770  | 20 | 2.68E-87  | NP_502782.2    | 88  | 325.865 | 212 | 188 | hypothetical protein Y57G11C.34              |
| Locus_10704_Transcript_2/2_Conf_1.000 | 770  | 20 | 2.67E-87  | NP_502782.2    | 88  | 325.865 | 212 | 188 | hypothetical protein Y57G11C.34              |
| Locus_10705_Transcript_1/1_Conf_1.000 | 265  | 0  |           |                |     |         |     |     |                                              |
| Locus_10706_Transcript_1/1_Conf_1.000 | 1172 | 20 | 7.09E-63  | XP_002630790.1 | 57  | 245.743 | 383 | 222 | Hypothetical protein CBG02487                |
| Locus_10707_Transcript_1/1_Conf_1.000 | 299  | 0  |           |                |     |         |     |     |                                              |
| Locus_10708_Transcript_1/3_Conf_0.714 | 971  | 20 | 1.86E-108 | XP_002641258.1 | 79  | 396.741 | 323 | 256 | Hypothetical protein CBG05169                |
| Locus_10708_Transcript_2/3_Conf_0.714 | 969  | 20 | 7.81E-107 | XP_002641258.1 | 78  | 391.349 | 322 | 254 | Hypothetical protein CBG05169                |
| Locus_10708_Transcript_3/3_Conf_0.714 | 971  | 20 | 1.86E-108 | XP_002641258.1 | 79  | 396.741 | 323 | 257 | Hypothetical protein CBG05169                |

|                                       |      |    |           |                |     |         |     |     |                                              |
|---------------------------------------|------|----|-----------|----------------|-----|---------|-----|-----|----------------------------------------------|
| Locus_10709_Transcript_1/1_Conf_1.000 | 132  | 20 | 4.71E-20  | XP_002818641.1 | 100 | 100.908 | 43  | 43  | PREDICTED: LOW QUALITY PROTEIN: zyxin-like   |
| Locus_1071_Transcript_1/1_Conf_1.000  | 643  | 20 | 3.61E-59  | XP_002637505.1 | 70  | 231.876 | 195 | 138 | C. briggsae CBR-ASP-2 protein                |
| Locus_10710_Transcript_1/1_Conf_1.000 | 966  | 20 | 2.85E-109 | XP_002636903.1 | 91  | 399.438 | 241 | 220 | C. briggsae CBR-PAS-6 protein                |
| Locus_10711_Transcript_1/1_Conf_1.000 | 183  | 20 | 3.14E-19  | CAR63581.1     | 100 | 98.2117 | 49  | 49  | putative COLLAGEN                            |
| Locus_10712_Transcript_1/1_Conf_1.000 | 259  | 2  | 6.06E-23  | NP_499479.2    | 97  | 110.538 | 70  | 68  | hypothetical protein Y66D12A.24              |
| Locus_10713_Transcript_1/1_Conf_1.000 | 148  | 0  |           |                |     |         |     |     |                                              |
| Locus_10714_Transcript_1/1_Conf_1.000 | 728  | 3  | 1.13E-36  | XP_002630207.1 | 87  | 157.532 | 125 | 109 | Hypothetical protein CBG00617                |
| Locus_10715_Transcript_1/3_Conf_0.400 | 195  | 0  |           |                |     |         |     |     |                                              |
| Locus_10715_Transcript_2/3_Conf_0.400 | 392  | 2  | 8.84E-11  | NP_495177.2    | 87  | 70.0922 | 48  | 42  | hypothetical protein F59G1.4                 |
| Locus_10715_Transcript_3/3_Conf_0.600 | 433  | 2  | 8.90E-11  | NP_495177.2    | 87  | 70.0922 | 48  | 42  | hypothetical protein F59G1.4                 |
| Locus_10716_Transcript_1/1_Conf_1.000 | 186  | 0  |           |                |     |         |     |     |                                              |
| Locus_10717_Transcript_1/1_Conf_1.000 | 272  | 0  |           |                |     |         |     |     |                                              |
| Locus_10718_Transcript_1/1_Conf_1.000 | 341  | 7  | 3.95E-19  | NP_500997.1    | 65  | 97.8265 | 110 | 72  | hypothetical protein C01G5.8                 |
| Locus_10719_Transcript_1/1_Conf_1.000 | 945  | 10 | 4.83E-37  | XP_002640248.1 | 59  | 159.458 | 300 | 179 | Hypothetical protein CBG12766                |
| Locus_1072_Transcript_1/2_Conf_1.000  | 2564 | 3  | 1.89E-33  | NP_498678.3    | 48  | 149.443 | 305 | 148 | abnormal cell lineage family member (lin-13) |

|                                       |      |    |           |                |     |         |     |     |                                                                   |
|---------------------------------------|------|----|-----------|----------------|-----|---------|-----|-----|-------------------------------------------------------------------|
| Locus_1072_Transcript_2/2_Conf_1.000  | 1280 | 20 | 4.40E-69  | XP_002635275.1 | 73  | 266.544 | 234 | 171 | Hypothetical protein CBG11519                                     |
| Locus_10720_Transcript_1/1_Conf_1.000 | 251  | 1  | 1.61E-04  | XP_002639641.1 | 76  | 49.2914 | 76  | 58  | C. briggsae CBR-PRP-4 protein                                     |
| Locus_10721_Transcript_1/1_Conf_1.000 | 458  | 20 | 1.56E-31  | ACS36089.1     | 69  | 139.043 | 140 | 97  | cysteine proteinase                                               |
| Locus_10722_Transcript_1/1_Conf_1.000 | 321  | 3  | 2.54E-05  | NP_506163.1    | 63  | 51.9878 | 60  | 38  | CCCH-type zinc finger transcription factor family member (ccch-3) |
| Locus_10723_Transcript_1/1_Conf_1.000 | 352  | 20 | 2.20E-33  | EFN83153.1     | 100 | 145.206 | 74  | 74  | Histone H3.3                                                      |
| Locus_10724_Transcript_1/1_Conf_1.000 | 371  | 20 | 7.87E-47  | EFO19031.1     | 86  | 189.889 | 123 | 107 | hypothetical protein LOAG_09464                                   |
| Locus_10725_Transcript_1/1_Conf_1.000 | 358  | 0  |           |                |     |         |     |     |                                                                   |
| Locus_10726_Transcript_1/1_Conf_1.000 | 676  | 20 | 3.26E-101 | XP_002823818.1 | 100 | 371.703 | 218 | 218 | PREDICTED: 60S ribosomal protein L6-like isoform 1                |
| Locus_10727_Transcript_1/1_Conf_1.000 | 408  | 20 | 1.01E-54  | CAA10033.1     | 87  | 216.083 | 136 | 119 | DYS-1 protein                                                     |
| Locus_10728_Transcript_1/1_Conf_1.000 | 254  | 0  |           |                |     |         |     |     |                                                                   |
| Locus_10729_Transcript_1/1_Conf_1.000 | 301  | 20 | 2.88E-09  | EFN62060.1     | 76  | 65.0846 | 47  | 36  | tRNA (cytosine-5-)-methyltransferase                              |

|                                       |      |    |           |                |    |         |     |     |                                                           |
|---------------------------------------|------|----|-----------|----------------|----|---------|-----|-----|-----------------------------------------------------------|
| Locus_1073_Transcript_1/3_Conf_0.571  | 293  | 20 | 7.17E-08  | XP_002639373.1 | 66 | 60.4622 | 51  | 34  | C. briggsae CBR-CEJ-1 protein                             |
| Locus_1073_Transcript_2/3_Conf_0.571  | 306  | 20 | 4.12E-08  | XP_002639373.1 | 57 | 61.2326 | 70  | 40  | C. briggsae CBR-CEJ-1 protein                             |
| Locus_1073_Transcript_3/3_Conf_0.714  | 321  | 20 | 4.19E-08  | XP_002639373.1 | 57 | 61.2326 | 70  | 40  | C. briggsae CBR-CEJ-1 protein                             |
| Locus_10730_Transcript_1/1_Conf_1.000 | 129  | 2  | 1.25E-04  | XP_002646625.1 | 66 | 49.6766 | 42  | 28  | Hypothetical protein CBG11055                             |
| Locus_10731_Transcript_1/1_Conf_1.000 | 172  | 0  |           |                |    |         |     |     |                                                           |
| Locus_10732_Transcript_1/1_Conf_1.000 | 653  |    |           |                |    |         |     |     |                                                           |
| Locus_10733_Transcript_1/2_Conf_1.000 | 1085 | 20 | 5.61E-136 | XP_002630855.1 | 92 | 488.419 | 284 | 263 | Hypothetical protein CBG02570                             |
| Locus_10733_Transcript_2/2_Conf_1.000 | 1087 | 20 | 2.80E-135 | XP_002630855.1 | 92 | 486.108 | 284 | 262 | Hypothetical protein CBG02570                             |
| Locus_10734_Transcript_1/1_Conf_1.000 | 409  | 0  |           |                |    |         |     |     |                                                           |
| Locus_10735_Transcript_1/1_Conf_1.000 | 311  | 20 | 6.10E-28  | NP_505267.1    | 81 | 127.102 | 88  | 72  | Regulator of Presynaptic Morphology family member (rpm-1) |
| Locus_10736_Transcript_1/1_Conf_1.000 | 927  | 4  | 1.67E-10  | NP_505473.1    | 62 | 71.2478 | 110 | 69  | hypothetical protein F25B3.6                              |
| Locus_10737_Transcript_1/1_Conf_1.000 | 902  | 20 | 1.16E-61  | EFO21137.1     | 71 | 241.121 | 261 | 186 | hypothetical protein LOAG_07352                           |
| Locus_10738_Transcript_1/1_Conf_1.000 | 137  | 0  |           |                |    |         |     |     |                                                           |
| Locus_10739_Transcript_1/1_Conf_1.000 | 253  | 3  | 6.53E-17  | NP_001076639.1 | 67 | 90.5077 | 89  | 60  | TWiK family of potassium channels family member (twk-39)  |
| Locus_1074_Transcript_1/2_Conf_1.000  | 1338 | 20 | 3.59E-85  | EFO26413.1     | 69 | 320.087 | 289 | 202 | F-box only protein 11                                     |

|                                       |      |    |          |                |    |         |     |     |                                            |
|---------------------------------------|------|----|----------|----------------|----|---------|-----|-----|--------------------------------------------|
| Locus_1074_Transcript_2/2_Conf_1.000  | 1332 | 20 | 3.57E-85 | EFO26413.1     | 69 | 320.087 | 289 | 202 | F-box only protein 11                      |
| Locus_10740_Transcript_1/1_Conf_1.000 | 843  | 20 | 2.53E-84 | NP_508198.1    | 88 | 316.235 | 214 | 189 | hypothetical protein F55A4.1               |
| Locus_10741_Transcript_3/7_Conf_0.346 | 106  | 0  |          |                |    |         |     |     |                                            |
| Locus_10741_Transcript_4/7_Conf_0.346 | 107  | 0  |          |                |    |         |     |     |                                            |
| Locus_10741_Transcript_6/7_Conf_0.308 | 111  | 0  |          |                |    |         |     |     |                                            |
| Locus_10742_Transcript_1/1_Conf_1.000 | 314  | 20 | 3.01E-38 | XP_002753447.1 | 98 | 161.384 | 91  | 90  | PREDICTED: 40S ribosomal protein S27-like  |
| Locus_10743_Transcript_1/1_Conf_1.000 | 1003 | 20 | 7.20E-10 | XP_001849742.1 | 41 | 69.3218 | 294 | 122 | conserved hypothetical protein             |
| Locus_10744_Transcript_1/2_Conf_1.000 | 1228 | 20 | 1.39E-56 | XP_002640319.1 | 68 | 224.942 | 241 | 166 | C. briggsae CBR-DHS-1 protein              |
| Locus_10744_Transcript_2/2_Conf_1.000 | 1228 | 20 | 8.17E-57 | XP_002640319.1 | 69 | 225.713 | 241 | 167 | C. briggsae CBR-DHS-1 protein              |
| Locus_10745_Transcript_1/1_Conf_1.000 | 393  | 15 | 4.67E-07 | XP_002639228.1 | 57 | 57.7658 | 105 | 60  | Hypothetical protein CBG03783              |
| Locus_10746_Transcript_1/1_Conf_1.000 | 685  | 20 | 1.73E-89 | XP_002634879.1 | 85 | 332.798 | 218 | 186 | Hypothetical protein CBG10547              |
| Locus_10747_Transcript_1/1_Conf_1.000 | 476  | 0  |          |                |    |         |     |     |                                            |
| Locus_10748_Transcript_1/1_Conf_1.000 | 501  | 0  |          |                |    |         |     |     |                                            |
| Locus_10749_Transcript_1/1_Conf_1.000 | 357  | 3  | 1.02E-06 | ABH10655.1     | 71 | 56.6102 | 52  | 37  | FMRFamide-related peptide FLP-32 precursor |
| Locus_1075_Transcript_1/2_Conf_1.000  | 2643 | 20 | 3.43E-54 | XP_001898464.1 | 50 | 218.394 | 385 | 196 | Innexin inx-3                              |
| Locus_1075_Transcript_2/2_Conf_1.000  | 2484 | 20 | 3.19E-54 | XP_001898464.1 | 50 | 218.394 | 385 | 196 | Innexin inx-3                              |
| Locus_10750_Transcript_1/1_Conf_1.000 | 786  | 0  |          |                |    |         |     |     |                                            |



|                                       |      |    |           |                |     |         |     |     |                                       |
|---------------------------------------|------|----|-----------|----------------|-----|---------|-----|-----|---------------------------------------|
| Locus_10751_Transcript_1/1_Conf_1.000 | 241  | 0  |           |                |     |         |     |     |                                       |
| Locus_10752_Transcript_1/1_Conf_1.000 | 202  | 0  |           |                |     |         |     |     |                                       |
| Locus_10753_Transcript_1/1_Conf_1.000 | 257  | 0  |           |                |     |         |     |     |                                       |
| Locus_10754_Transcript_1/1_Conf_1.000 | 275  | 5  | 4.71E-20  | XP_002642379.1 | 69  | 100.908 | 91  | 63  | Hypothetical protein CBG18383         |
| Locus_10755_Transcript_1/1_Conf_1.000 | 1057 | 20 | 5.08E-102 | NP_496236.1    | 88  | 375.555 | 229 | 202 | hypothetical protein T09F3.2          |
| Locus_10756_Transcript_1/1_Conf_1.000 | 714  | 20 | 3.87E-34  | NP_494539.1    | 57  | 149.058 | 231 | 132 | hypothetical protein C16C8.18         |
| Locus_10757_Transcript_1/1_Conf_1.000 | 437  | 0  |           |                |     |         |     |     |                                       |
| Locus_10758_Transcript_1/1_Conf_1.000 | 154  | 0  |           |                |     |         |     |     |                                       |
| Locus_10759_Transcript_1/1_Conf_1.000 | 194  | 20 | 1.39E-19  | NP_509702.3    | 90  | 99.3673 | 52  | 47  | UNCoordinated family member (unc-115) |
| Locus_1076_Transcript_1/1_Conf_1.000  | 462  | 20 | 1.39E-27  | ABF69516.1     | 100 | 125.946 | 63  | 63  | acidic ribosomal protein P1           |
| Locus_10760_Transcript_1/1_Conf_1.000 | 325  | 0  |           |                |     |         |     |     |                                       |
| Locus_10761_Transcript_1/1_Conf_1.000 | 582  | 18 | 1.41E-58  | XP_002633595.1 | 79  | 229.565 | 154 | 123 | Hypothetical protein CBG05472         |
| Locus_10762_Transcript_1/2_Conf_1.000 | 541  | 20 | 6.44E-46  | NP_001041131.1 | 79  | 187.193 | 144 | 115 | ADDucin family member (add-2)         |
| Locus_10762_Transcript_2/2_Conf_1.000 | 521  | 20 | 5.71E-46  | NP_001041131.1 | 79  | 187.193 | 144 | 115 | ADDucin family member (add-2)         |
| Locus_10763_Transcript_1/1_Conf_1.000 | 457  | 3  | 5.57E-05  | NP_741332.1    | 81  | 50.8322 | 38  | 31  | hypothetical protein F52C12.2         |
| Locus_10764_Transcript_1/1_Conf_1.000 | 319  | 0  |           |                |     |         |     |     |                                       |
| Locus_10765_Transcript_1/1_Conf_1.000 | 309  | 3  | 1.46E-13  | NP_493616.1    | 57  | 79.337  | 106 | 61  | hypothetical protein F33H2.5          |
| Locus_10766_Transcript_1/1_Conf_1.000 | 171  | 0  |           |                |     |         |     |     |                                       |

|                                       |      |    |          |                |    |         |     |     |                                               |
|---------------------------------------|------|----|----------|----------------|----|---------|-----|-----|-----------------------------------------------|
| Locus_10767_Transcript_1/1_Conf_1.000 | 346  | 20 | 2.00E-42 | XP_002636771.1 | 90 | 175.252 | 102 | 92  | C. briggsae CBR-ATN-1 protein                 |
| Locus_10768_Transcript_1/1_Conf_1.000 | 153  | 0  |          |                |    |         |     |     |                                               |
| Locus_10769_Transcript_1/1_Conf_1.000 | 914  | 20 | 1.59E-82 | NP_493618.1    | 66 | 310.457 | 316 | 211 | Deletions Of G-rich DNA family member (dog-1) |
| Locus_1077_Transcript_1/1_Conf_1.000  | 1873 | 20 | 2.01E-34 | XP_001898097.1 | 47 | 152.14  | 461 | 218 | Asparaginase family protein                   |
| Locus_10770_Transcript_1/2_Conf_1.000 | 464  | 1  | 8.23E-04 | NP_502410.2    | 43 | 46.9802 | 150 | 65  | hypothetical protein K08E7.6                  |
| Locus_10770_Transcript_2/2_Conf_1.000 | 416  | 0  |          |                |    |         |     |     |                                               |
| Locus_10771_Transcript_1/1_Conf_1.000 | 440  | 20 | 1.60E-28 | XP_002631177.1 | 90 | 129.028 | 82  | 74  | C. briggsae CBR-LSM-1 protein                 |
| Locus_10772_Transcript_1/1_Conf_1.000 | 352  | 0  |          |                |    |         |     |     |                                               |
| Locus_10773_Transcript_1/1_Conf_1.000 | 384  | 20 | 2.27E-14 | EFO23261.1     | 58 | 82.0333 | 85  | 50  | hypothetical protein LOAG_05224               |
| Locus_10774_Transcript_1/1_Conf_1.000 | 582  | 20 | 1.33E-48 | NP_506007.1    | 73 | 196.438 | 163 | 120 | Cyclin L family member (cyl-1)                |
| Locus_10775_Transcript_1/1_Conf_1.000 | 235  | 0  |          |                |    |         |     |     |                                               |
| Locus_10776_Transcript_1/1_Conf_1.000 | 212  | 0  |          |                |    |         |     |     |                                               |

|                                       |      |    |          |                |    |         |     |     |                                                                          |
|---------------------------------------|------|----|----------|----------------|----|---------|-----|-----|--------------------------------------------------------------------------|
| Locus_10777_Transcript_1/2_Conf_1.000 | 454  | 20 | 5.36E-40 | NP_509572.1    | 86 | 167.162 | 149 | 129 | AdaPtin, Alpha chain (clathrin associated complex) family member (apa-2) |
| Locus_10777_Transcript_2/2_Conf_1.000 | 454  | 20 | 5.36E-40 | NP_509572.1    | 86 | 167.162 | 149 | 129 | AdaPtin, Alpha chain (clathrin associated complex) family member (apa-2) |
| Locus_10778_Transcript_1/1_Conf_1.000 | 967  | 20 | 8.19E-40 | XP_002631527.1 | 71 | 168.703 | 145 | 104 | Hypothetical protein CBG20693                                            |
| Locus_10779_Transcript_1/1_Conf_1.000 | 815  | 0  |          |                |    |         |     |     |                                                                          |
| Locus_1078_Transcript_1/1_Conf_1.000  | 3058 | 20 | 1.14E-72 | XP_002634123.1 | 50 | 280.026 | 638 | 324 | Hypothetical protein CBG01680                                            |
| Locus_10780_Transcript_1/2_Conf_1.000 | 280  | 0  |          |                |    |         |     |     |                                                                          |
| Locus_10780_Transcript_2/2_Conf_1.000 | 234  | 0  |          |                |    |         |     |     |                                                                          |
| Locus_10781_Transcript_1/2_Conf_1.000 | 572  | 20 | 2.19E-45 | EFO27189.1     | 70 | 185.652 | 190 | 133 | hypothetical protein LOAG_01295                                          |
| Locus_10781_Transcript_2/2_Conf_1.000 | 566  | 20 | 6.59E-47 | EFO27189.1     | 70 | 190.66  | 188 | 133 | hypothetical protein LOAG_01295                                          |
| Locus_10782_Transcript_1/1_Conf_1.000 | 376  | 20 | 2.62E-18 | NP_001032980.2 | 64 | 95.1301 | 103 | 66  | hypothetical protein T23H2.3                                             |
| Locus_10783_Transcript_1/1_Conf_1.000 | 150  | 0  |          |                |    |         |     |     |                                                                          |

|                                       |     |    |          |                |     |         |     |     |                                                                                                    |
|---------------------------------------|-----|----|----------|----------------|-----|---------|-----|-----|----------------------------------------------------------------------------------------------------|
| Locus_10784_Transcript_1/1_Conf_1.000 | 196 | 20 | 8.68E-30 | XP_002758725.1 | 100 | 133.265 | 65  | 65  | PREDICTED: dolichyl-diphosphooligosaccharide--protein glycosyltransferase subunit 1-like isoform 2 |
| Locus_10785_Transcript_1/1_Conf_1.000 | 430 | 0  |          |                |     |         |     |     |                                                                                                    |
| Locus_10786_Transcript_1/1_Conf_1.000 | 691 | 3  | 5.45E-14 | XP_002631728.1 | 47  | 82.0333 | 223 | 107 | Hypothetical protein CBG20930                                                                      |
| Locus_10787_Transcript_1/1_Conf_1.000 | 185 | 0  |          |                |     |         |     |     |                                                                                                    |
| Locus_10788_Transcript_1/1_Conf_1.000 | 781 | 20 | 5.13E-25 | NP_503033.1    | 68  | 119.013 | 115 | 79  | Splicing Factor family member (sfa-1)                                                              |
| Locus_10789_Transcript_1/1_Conf_1.000 | 174 | 5  | 2.19E-09 | XP_002634414.1 | 70  | 65.4698 | 57  | 40  | C. briggsae CBR-EPI-1 protein                                                                      |
| Locus_1079_Transcript_1/1_Conf_1.000  | 838 | 20 | 1.05E-66 | XP_001896264.1 | 83  | 257.684 | 181 | 152 | cyclophilin-type peptidyl-prolyl cis-trans isomerase-15, Bmcp-5                                    |
| Locus_10790_Transcript_1/1_Conf_1.000 | 241 | 3  | 3.63E-04 | AAQ06435.1     | 70  | 48.1358 | 44  | 31  | ABC6 protein                                                                                       |
| Locus_10791_Transcript_1/1_Conf_1.000 | 732 | 0  |          |                |     |         |     |     |                                                                                                    |
| Locus_10792_Transcript_1/1_Conf_1.000 | 139 | 0  |          |                |     |         |     |     |                                                                                                    |

|                                       |      |    |           |                |     |         |     |     |                                                   |
|---------------------------------------|------|----|-----------|----------------|-----|---------|-----|-----|---------------------------------------------------|
| Locus_10793_Transcript_1/1_Conf_1.000 | 281  | 7  | 9.16E-08  | NP_510369.2    | 55  | 60.077  | 79  | 44  | Cytochrome P450 family member (cyp-13B2)          |
| Locus_10794_Transcript_1/1_Conf_1.000 | 315  | 20 | 2.16E-20  | XP_002633256.1 | 70  | 102.064 | 100 | 70  | Hypothetical protein CBG05981                     |
| Locus_10795_Transcript_1/2_Conf_1.000 | 519  | 20 | 2.49E-33  | XP_002636807.1 | 76  | 145.206 | 113 | 87  | Hypothetical protein CBG09249                     |
| Locus_10795_Transcript_2/2_Conf_1.000 | 816  | 20 | 3.00E-79  | XP_002636807.1 | 78  | 299.286 | 230 | 181 | Hypothetical protein CBG09249                     |
| Locus_10796_Transcript_1/1_Conf_1.000 | 187  | 3  | 6.33E-04  | NP_001122796.1 | 68  | 47.3654 | 50  | 34  | Kinesin-Like Protein family member (klp-12)       |
| Locus_10797_Transcript_1/1_Conf_1.000 | 275  | 13 | 2.68E-07  | XP_001989288.1 | 61  | 58.5362 | 59  | 36  | GH11645                                           |
| Locus_10798_Transcript_1/1_Conf_1.000 | 215  | 20 | 3.69E-33  | NP_001123995.1 | 100 | 144.436 | 71  | 71  | cold shock domain-containing protein E1 isoform 3 |
| Locus_10799_Transcript_1/1_Conf_1.000 | 496  | 5  | 1.92E-13  | XP_001900701.1 | 55  | 78.9518 | 136 | 76  | hypothetical protein Bm1_46195                    |
| Locus_108_Transcript_1/6_Conf_0.333   | 475  | 0  |           |                |     |         |     |     |                                                   |
| Locus_108_Transcript_2/6_Conf_0.333   | 475  | 0  |           |                |     |         |     |     |                                                   |
| Locus_108_Transcript_3/6_Conf_0.333   | 342  | 2  | 2.32E-06  | XP_002648823.1 | 50  | 55.4546 | 60  | 30  | Hypothetical protein CBG16936                     |
| Locus_108_Transcript_4/6_Conf_0.333   | 342  | 2  | 2.32E-06  | XP_002648823.1 | 50  | 55.4546 | 60  | 30  | Hypothetical protein CBG16936                     |
| Locus_108_Transcript_5/6_Conf_0.333   | 291  | 0  |           |                |     |         |     |     |                                                   |
| Locus_108_Transcript_6/6_Conf_0.333   | 333  | 1  | 1.24E-04  | XP_002648823.1 | 46  | 49.6766 | 60  | 28  | Hypothetical protein CBG16936                     |
| Locus_1080_Transcript_1/1_Conf_1.000  | 1309 | 7  | 2.24E-108 | NP_492018.1    | 66  | 397.127 | 474 | 313 | UNCoordinated family member (unc-14)              |
| Locus_10800_Transcript_1/1_Conf_1.000 | 502  | 20 | 7.67E-18  | XP_002645115.1 | 73  | 93.5893 | 84  | 62  | Hypothetical protein CBG16808                     |
| Locus_10801_Transcript_1/1_Conf_1.000 | 531  | 20 | 2.46E-18  | XP_002634401.1 | 74  | 95.5153 | 82  | 61  | C. briggsae CBR-PQN-55 protein                    |

|                                       |      |    |           |                |    |         |     |     |                                                 |
|---------------------------------------|------|----|-----------|----------------|----|---------|-----|-----|-------------------------------------------------|
| Locus_10802_Transcript_1/1_Conf_1.000 | 744  | 20 | 8.72E-80  | NP_508573.1    | 82 | 300.827 | 195 | 160 | Discoidin Domain Receptor family member (ddr-2) |
| Locus_10803_Transcript_1/1_Conf_1.000 | 216  | 0  |           |                |    |         |     |     |                                                 |
| Locus_10804_Transcript_1/1_Conf_1.000 | 1267 | 20 | 1.57E-127 | XP_002642404.1 | 75 | 460.685 | 398 | 299 | Hypothetical protein CBG06798                   |
| Locus_10805_Transcript_1/1_Conf_1.000 | 295  | 20 | 1.74E-38  | XP_002640025.1 | 89 | 162.155 | 97  | 87  | Hypothetical protein CBG12497                   |
| Locus_10806_Transcript_1/1_Conf_1.000 | 257  | 20 | 5.90E-10  | ACI49231.1     | 67 | 67.3958 | 80  | 54  | hypothetical protein Csp3_JD05.016              |
| Locus_10807_Transcript_1/1_Conf_1.000 | 144  | 0  |           |                |    |         |     |     |                                                 |
| Locus_10808_Transcript_1/1_Conf_1.000 | 842  | 20 | 2.77E-91  | NP_741746.1    | 80 | 339.347 | 255 | 204 | Kinesin-Like Protein family member (klp-4)      |
| Locus_10809_Transcript_1/1_Conf_1.000 | 138  | 9  | 1.20E-07  | NP_499580.1    | 82 | 59.6918 | 45  | 37  | hypothetical protein Y75B8A.7                   |

|                                       |     |    |          |                |    |         |     |     |                                                       |
|---------------------------------------|-----|----|----------|----------------|----|---------|-----|-----|-------------------------------------------------------|
| Locus_1081_Transcript_1/2_Conf_1.000  | 268 | 14 | 5.81E-10 | Q94637.1       | 63 | 67.3958 | 87  | 55  | Vitellogenin-6                                        |
| Locus_1081_Transcript_2/2_Conf_1.000  | 159 | 0  |          |                |    |         |     |     |                                                       |
| Locus_10810_Transcript_1/1_Conf_1.000 | 713 | 0  |          |                |    |         |     |     |                                                       |
| Locus_10811_Transcript_1/2_Conf_1.000 | 501 | 0  |          |                |    |         |     |     |                                                       |
| Locus_10811_Transcript_2/2_Conf_1.000 | 501 | 0  |          |                |    |         |     |     |                                                       |
| Locus_10812_Transcript_1/1_Conf_1.000 | 606 | 3  | 2.70E-10 | EFO20116.1     | 59 | 69.3218 | 98  | 58  | hypothetical protein LOAG_08374                       |
| Locus_10813_Transcript_1/1_Conf_1.000 | 365 | 0  |          |                |    |         |     |     |                                                       |
| Locus_10814_Transcript_1/1_Conf_1.000 | 287 | 2  | 5.00E-09 | NP_495751.1    | 94 | 64.3142 | 34  | 32  | hypothetical protein F14F11.2                         |
| Locus_10815_Transcript_1/1_Conf_1.000 | 510 | 20 | 1.23E-50 | NP_500615.1    | 87 | 202.601 | 125 | 109 | hypothetical protein T22B11.2                         |
| Locus_10816_Transcript_1/1_Conf_1.000 | 319 | 2  | 3.56E-15 | XP_001894519.1 | 67 | 84.7297 | 101 | 68  | hypothetical protein Bm1_15295                        |
| Locus_10817_Transcript_1/1_Conf_1.000 | 659 | 20 | 7.27E-42 | XP_002631454.1 | 74 | 174.481 | 154 | 115 | Hypothetical protein CBG25152                         |
| Locus_10818_Transcript_1/1_Conf_1.000 | 842 | 12 | 1.39E-42 | NP_499555.1    | 79 | 177.563 | 181 | 143 | hypothetical protein Y56A3A.22                        |
| Locus_10819_Transcript_1/1_Conf_1.000 | 939 | 20 | 1.34E-55 | XP_002644604.1 | 95 | 221.09  | 124 | 118 | C. briggsae CBR-TSP-14 protein                        |
| Locus_1082_Transcript_1/1_Conf_1.000  | 577 | 3  | 4.92E-24 | XP_002633740.1 | 60 | 114.775 | 179 | 109 | Hypothetical protein CBG03425                         |
| Locus_10820_Transcript_1/1_Conf_1.000 | 548 | 4  | 7.64E-50 | XP_002641200.1 | 80 | 200.29  | 170 | 137 | Hypothetical protein CBG09061                         |
| Locus_10821_Transcript_1/1_Conf_1.000 | 283 | 20 | 6.52E-25 | XP_001900378.1 | 75 | 117.087 | 94  | 71  | DNA gyrase/topoisomerase IV, A subunit family protein |
| Locus_10822_Transcript_1/1_Conf_1.000 | 435 | 20 | 2.31E-51 | NP_505697.2    | 84 | 204.912 | 143 | 121 | hypothetical protein C35A5.7                          |

|                                       |     |    |          |                |    |         |     |     |                                            |
|---------------------------------------|-----|----|----------|----------------|----|---------|-----|-----|--------------------------------------------|
| Locus_10823_Transcript_1/1_Conf_1.000 | 756 | 20 | 1.69E-54 | NP_872058.1    | 70 | 216.853 | 226 | 160 | hypothetical protein 2RSSE.1               |
| Locus_10824_Transcript_1/1_Conf_1.000 | 776 | 2  | 2.52E-08 | NP_498032.1    | 47 | 63.5438 | 191 | 90  | hypothetical protein F26F4.2               |
| Locus_10825_Transcript_1/1_Conf_1.000 | 220 | 0  |          |                |    |         |     |     |                                            |
| Locus_10826_Transcript_1/1_Conf_1.000 | 833 | 20 | 8.78E-66 | XP_001894435.1 | 71 | 254.603 | 238 | 170 | Ser/Thr protein phosphatase family protein |
| Locus_10827_Transcript_1/1_Conf_1.000 | 451 | 20 | 7.54E-26 | EFO21349.1     | 82 | 120.168 | 102 | 84  | hypothetical protein LOAG_07141            |
| Locus_10828_Transcript_1/4_Conf_0.625 | 958 | 0  |          |                |    |         |     |     |                                            |
| Locus_10828_Transcript_2/4_Conf_0.625 | 958 | 0  |          |                |    |         |     |     |                                            |
| Locus_10828_Transcript_3/4_Conf_0.625 | 621 | 0  |          |                |    |         |     |     |                                            |
| Locus_10828_Transcript_4/4_Conf_0.625 | 958 | 0  |          |                |    |         |     |     |                                            |
| Locus_10829_Transcript_1/2_Conf_1.000 | 717 | 20 | 4.77E-40 | EFO15133.1     | 64 | 168.703 | 179 | 115 | hypothetical protein LOAG_13378            |
| Locus_10829_Transcript_2/2_Conf_1.000 | 719 | 20 | 4.77E-40 | EFO15133.1     | 64 | 168.703 | 179 | 115 | hypothetical protein LOAG_13378            |
| Locus_1083_Transcript_1/1_Conf_1.000  | 151 | 0  |          |                |    |         |     |     |                                            |
| Locus_10830_Transcript_1/1_Conf_1.000 | 453 | 0  |          |                |    |         |     |     |                                            |
| Locus_10831_Transcript_1/2_Conf_1.000 | 194 | 3  | 1.54E-18 | CAR63588.1     | 83 | 95.9005 | 65  | 54  | hypothetical protein                       |
| Locus_10831_Transcript_2/2_Conf_1.000 | 513 | 10 | 2.29E-52 | CAR63588.1     | 83 | 208.379 | 136 | 113 | hypothetical protein                       |
| Locus_10832_Transcript_1/1_Conf_1.000 | 448 | 6  | 9.61E-13 | EFO28040.1     | 69 | 76.6406 | 71  | 49  | sema domain-containing protein             |
| Locus_10833_Transcript_1/1_Conf_1.000 | 202 | 0  |          |                |    |         |     |     |                                            |
| Locus_10834_Transcript_1/1_Conf_1.000 | 561 | 20 | 2.43E-86 | P29190.1       | 92 | 321.627 | 173 | 160 | Phosphoenolpyruvate carboxylase            |
| Locus_10835_Transcript_1/1_Conf_1.000 | 738 | 20 | 2.43E-50 | NP_509589.1    | 79 | 202.986 | 147 | 117 | hypothetical protein ZK899.2               |
| Locus_10836_Transcript_1/1_Conf_1.000 | 848 | 0  |          |                |    |         |     |     |                                            |
| Locus_10837_Transcript_1/1_Conf_1.000 | 414 | 20 | 5.87E-39 | AAS99337.1     | 94 | 163.696 | 97  | 92  | putative calmodulin isoform a              |
| Locus_10838_Transcript_1/1_Conf_1.000 | 688 | 0  |          |                |    |         |     |     |                                            |
| Locus_10839_Transcript_1/1_Conf_1.000 | 226 | 2  | 2.31E-06 | NP_871818.1    | 81 | 55.4546 | 38  | 31  | FMRF-Like Peptide family member (flp-33)   |
| Locus_1084_Transcript_1/1_Conf_1.000  | 415 | 0  |          |                |    |         |     |     |                                            |
| Locus_10840_Transcript_1/1_Conf_1.000 | 311 | 5  | 1.77E-27 | NP_872143.2    | 92 | 125.561 | 76  | 70  | TropoMoDulin family member (tmd-2)         |
| Locus_10841_Transcript_1/1_Conf_1.000 | 534 | 2  | 7.90E-09 | XP_001893258.1 | 58 | 63.929  | 103 | 60  | hypothetical protein Bm1_08935             |



|                                       |      |    |           |                |    |         |     |     |                                                                             |
|---------------------------------------|------|----|-----------|----------------|----|---------|-----|-----|-----------------------------------------------------------------------------|
| Locus_10842_Transcript_1/2_Conf_1.000 | 1371 | 20 | 8.86E-87  | NP_510462.2    | 59 | 325.479 | 465 | 278 | EGR (Early Growth factor Response factor)<br>Homolog family member (egrh-1) |
| Locus_10842_Transcript_2/2_Conf_1.000 | 1493 | 20 | 1.38E-88  | NP_510462.2    | 59 | 331.643 | 471 | 282 | EGR (Early Growth factor Response factor)<br>Homolog family member (egrh-1) |
| Locus_10843_Transcript_1/1_Conf_1.000 | 342  | 3  | 1.26E-36  | NP_495991.1    | 75 | 155.992 | 109 | 82  | hypothetical protein F42A8.1                                                |
| Locus_10844_Transcript_1/2_Conf_1.000 | 330  | 20 | 8.28E-41  | NP_499203.1    | 82 | 169.859 | 108 | 89  | TransThyretin-Related family domain family<br>member (ttr-2)                |
| Locus_10844_Transcript_2/2_Conf_1.000 | 330  | 20 | 8.28E-41  | NP_499203.1    | 82 | 169.859 | 108 | 89  | TransThyretin-Related family domain family<br>member (ttr-2)                |
| Locus_10845_Transcript_1/2_Conf_1.000 | 1363 | 2  | 1.33E-26  | EFO27879.1     | 46 | 125.561 | 471 | 219 | hypothetical protein LOAG_00601                                             |
| Locus_10845_Transcript_2/2_Conf_1.000 | 1312 | 2  | 1.18E-24  | EFO27879.1     | 46 | 119.013 | 452 | 208 | hypothetical protein LOAG_00601                                             |
| Locus_10846_Transcript_1/1_Conf_1.000 | 182  | 20 | 9.16E-19  | XP_001898349.1 | 86 | 96.6709 | 60  | 52  | calpain D                                                                   |
| Locus_10847_Transcript_1/1_Conf_1.000 | 1188 | 20 | 1.44E-127 | XP_001899692.1 | 81 | 460.685 | 382 | 310 | WW domain containing protein                                                |

|                                       |      |    |           |             |    |         |     |     |                                                      |
|---------------------------------------|------|----|-----------|-------------|----|---------|-----|-----|------------------------------------------------------|
| Locus_10848_Transcript_1/1_Conf_1.000 | 818  | 20 | 2.78E-109 | NP_491881.2 | 90 | 399.053 | 232 | 209 | NADH Ubiquinone Oxidoreductase family member (nuo-2) |
| Locus_10849_Transcript_1/1_Conf_1.000 | 319  | 20 | 8.74E-22  | EFO20229.1  | 71 | 106.686 | 106 | 76  | hypothetical protein LOAG_08261                      |
| Locus_1085_Transcript_1/4_Conf_0.667  | 1807 | 20 | 0         | NP_502997.1 | 85 | 669.078 | 431 | 367 | Methionine AminoPeptidase family member (map-2)      |
| Locus_1085_Transcript_2/4_Conf_0.667  | 1807 | 20 | 0         | NP_502997.1 | 85 | 669.078 | 431 | 367 | Methionine AminoPeptidase family member (map-2)      |
| Locus_1085_Transcript_3/4_Conf_0.667  | 1561 | 20 | 0         | NP_502997.1 | 85 | 669.078 | 431 | 367 | Methionine AminoPeptidase family member (map-2)      |

|                                       |      |    |           |                |    |         |     |     |                                                      |
|---------------------------------------|------|----|-----------|----------------|----|---------|-----|-----|------------------------------------------------------|
| Locus_1085_Transcript_4/4_Conf_0.667  | 1807 | 20 | 0         | NP_502997.1    | 85 | 669.078 | 431 | 367 | Methionine AminoPeptidase family member (map-2)      |
| Locus_10850_Transcript_1/1_Conf_1.000 | 321  | 0  |           |                |    |         |     |     |                                                      |
| Locus_10851_Transcript_1/1_Conf_1.000 | 907  | 20 | 1.01E-113 | NP_497751.1    | 78 | 414.075 | 304 | 239 | hypothetical protein C14B1.10                        |
| Locus_10852_Transcript_1/1_Conf_1.000 | 371  | 0  |           |                |    |         |     |     |                                                      |
| Locus_10853_Transcript_1/1_Conf_1.000 | 434  | 1  | 1.63E-04  | XP_002642900.1 | 60 | 49.2914 | 78  | 47  | Hypothetical protein CBG15174                        |
| Locus_10854_Transcript_1/1_Conf_1.000 | 177  | 0  |           |                |    |         |     |     |                                                      |
| Locus_10855_Transcript_1/1_Conf_1.000 | 805  | 8  | 1.69E-34  | NP_497963.1    | 57 | 150.599 | 241 | 139 | Suppressor/Enhancer of Lin-12 family member (sel-13) |
| Locus_10856_Transcript_1/1_Conf_1.000 | 267  | 7  | 8.93E-27  | AAL77521.1     | 87 | 123.25  | 71  | 62  | L80003_1guanylyl cyclase                             |
| Locus_10857_Transcript_1/1_Conf_1.000 | 145  | 0  |           |                |    |         |     |     |                                                      |
| Locus_10858_Transcript_1/1_Conf_1.000 | 1455 | 0  |           |                |    |         |     |     |                                                      |
| Locus_10859_Transcript_1/1_Conf_1.000 | 329  | 20 | 3.27E-37  | XP_002636129.1 | 84 | 157.918 | 108 | 91  | C. briggsae CBR-ATGR-9 protein                       |
| Locus_1086_Transcript_1/1_Conf_1.000  | 1090 | 4  | 2.38E-09  | EFO19781.1     | 47 | 67.781  | 224 | 107 | hypothetical protein LOAG_08708                      |
| Locus_10860_Transcript_1/1_Conf_1.000 | 329  | 20 | 5.56E-45  | XP_002637938.1 | 88 | 183.726 | 109 | 96  | Hypothetical protein CBG04750                        |
| Locus_10861_Transcript_1/2_Conf_1.000 | 451  | 0  |           |                |    |         |     |     |                                                      |
| Locus_10861_Transcript_2/2_Conf_1.000 | 460  | 0  |           |                |    |         |     |     |                                                      |

|                                       |     |    |          |                |     |         |     |     |                                                              |
|---------------------------------------|-----|----|----------|----------------|-----|---------|-----|-----|--------------------------------------------------------------|
| Locus_10862_Transcript_1/1_Conf_1.000 | 554 | 20 | 2.63E-53 | AAP36737.1     | 100 | 211.846 | 105 | 105 | Homo sapiens S100 calcium binding protein A11 (calgizzarin)  |
| Locus_10863_Transcript_1/1_Conf_1.000 | 219 | 0  |          |                |     |         |     |     |                                                              |
| Locus_10864_Transcript_1/1_Conf_1.000 | 401 | 0  |          |                |     |         |     |     |                                                              |
| Locus_10865_Transcript_1/2_Conf_1.000 | 458 | 2  | 6.16E-04 | XP_001592033.1 | 54  | 47.3654 | 104 | 57  | hypothetical protein SS1G_07480                              |
| Locus_10865_Transcript_2/2_Conf_1.000 | 485 | 2  | 6.29E-04 | XP_001592033.1 | 54  | 47.3654 | 104 | 57  | hypothetical protein SS1G_07480                              |
| Locus_10866_Transcript_1/1_Conf_1.000 | 915 | 2  | 2.79E-10 | XP_002631368.1 | 59  | 70.4774 | 147 | 88  | Hypothetical protein CBG03210                                |
| Locus_10867_Transcript_1/1_Conf_1.000 | 873 | 20 | 1.53E-87 | NP_001023891.2 | 75  | 327.02  | 291 | 219 | HIF (hypoxia inducible factor) homolog family member (hif-1) |
| Locus_10868_Transcript_1/1_Conf_1.000 | 248 | 0  |          |                |     |         |     |     |                                                              |
| Locus_10869_Transcript_1/1_Conf_1.000 | 264 | 20 | 8.11E-28 | XP_002632407.1 | 82  | 126.716 | 88  | 73  | Hypothetical protein CBG00431                                |
| Locus_1087_Transcript_1/1_Conf_1.000  | 375 | 20 | 3.50E-55 | NP_502165.2    | 93  | 217.624 | 125 | 117 | hypothetical protein C10C6.6                                 |
| Locus_10870_Transcript_1/1_Conf_1.000 | 438 | 10 | 3.52E-76 | NP_509848.2    | 97  | 287.345 | 143 | 139 | hypothetical protein C09F12.2                                |
| Locus_10871_Transcript_1/1_Conf_1.000 | 409 | 7  | 2.57E-42 | ABM91438.1     | 80  | 174.866 | 120 | 97  | defective mitochondrial respiration family member protein 1  |

|                                       |      |    |          |                |    |         |     |     |                                                                           |
|---------------------------------------|------|----|----------|----------------|----|---------|-----|-----|---------------------------------------------------------------------------|
| Locus_10872_Transcript_1/1_Conf_1.000 | 481  | 20 | 4.49E-39 | NP_491212.1    | 67 | 164.081 | 154 | 104 | INneXin family member (inx-13)                                            |
| Locus_10873_Transcript_1/1_Conf_1.000 | 623  | 0  |          |                |    |         |     |     |                                                                           |
| Locus_10874_Transcript_1/1_Conf_1.000 | 960  | 20 | 5.97E-59 | XP_001894229.1 | 61 | 232.261 | 326 | 199 | Variant SH3 domain containing protein                                     |
| Locus_10875_Transcript_1/1_Conf_1.000 | 587  | 20 | 3.20E-58 | AAV28323.2     | 72 | 228.409 | 187 | 136 | Hypothetical protein T15B7.1                                              |
| Locus_10876_Transcript_1/1_Conf_1.000 | 228  | 0  |          |                |    |         |     |     |                                                                           |
| Locus_10877_Transcript_1/2_Conf_1.000 | 791  | 5  | 1.87E-22 | XP_002639505.1 | 67 | 110.538 | 167 | 112 | Hypothetical protein CBG04107                                             |
| Locus_10877_Transcript_2/2_Conf_1.000 | 789  | 5  | 1.87E-22 | XP_002639505.1 | 67 | 110.538 | 167 | 112 | Hypothetical protein CBG04107                                             |
| Locus_10878_Transcript_1/1_Conf_1.000 | 500  | 13 | 4.06E-56 | XP_002632942.1 | 69 | 220.705 | 166 | 116 | Hypothetical protein CBG21698                                             |
| Locus_10879_Transcript_1/1_Conf_1.000 | 157  | 0  |          |                |    |         |     |     |                                                                           |
| Locus_1088_Transcript_1/1_Conf_1.000  | 140  | 0  |          |                |    |         |     |     |                                                                           |
| Locus_10880_Transcript_1/1_Conf_1.000 | 145  | 0  |          |                |    |         |     |     |                                                                           |
| Locus_10881_Transcript_1/5_Conf_0.636 | 1386 | 20 | 6.09E-51 | CBG22751.1     | 63 | 206.453 | 206 | 130 | C. elegans protein Y59A8B.13b, partially confirmed by transcript evidence |
| Locus_10881_Transcript_2/5_Conf_0.636 | 1213 | 20 | 8.59E-51 | EFO25339.1     | 54 | 205.682 | 293 | 161 | zinc finger protein                                                       |
| Locus_10881_Transcript_3/5_Conf_0.636 | 1358 | 20 | 1.01E-50 | EFO25339.1     | 54 | 205.682 | 293 | 161 | zinc finger protein                                                       |
| Locus_10881_Transcript_4/5_Conf_0.636 | 1386 | 20 | 7.96E-51 | EFO25339.1     | 55 | 206.068 | 293 | 162 | zinc finger protein                                                       |
| Locus_10881_Transcript_5/5_Conf_0.636 | 1386 | 20 | 1.04E-50 | EFO25339.1     | 54 | 205.682 | 293 | 161 | zinc finger protein                                                       |
| Locus_10882_Transcript_1/1_Conf_1.000 | 434  | 0  |          |                |    |         |     |     |                                                                           |
| Locus_10883_Transcript_1/1_Conf_1.000 | 175  | 0  |          |                |    |         |     |     |                                                                           |
| Locus_10884_Transcript_1/1_Conf_1.000 | 333  | 0  |          |                |    |         |     |     |                                                                           |
| Locus_10885_Transcript_1/1_Conf_1.000 | 444  | 20 | 4.29E-45 | NP_499344.2    | 77 | 184.111 | 147 | 114 | hypothetical protein Y39A1A.9                                             |
| Locus_10886_Transcript_1/1_Conf_1.000 | 331  | 0  |          |                |    |         |     |     |                                                                           |
| Locus_10887_Transcript_1/1_Conf_1.000 | 284  | 2  | 2.18E-04 | XP_002642364.1 | 70 | 48.9062 | 47  | 33  | Hypothetical protein CBG18362                                             |

|                                       |      |    |           |                |     |         |     |     |                                                                                 |
|---------------------------------------|------|----|-----------|----------------|-----|---------|-----|-----|---------------------------------------------------------------------------------|
| Locus_10888_Transcript_1/1_Conf_1.000 | 203  | 20 | 1.38E-27  | EDM06125.1     | 100 | 125.946 | 62  | 62  | rCG35185, isoform CRA_c                                                         |
| Locus_10889_Transcript_1/1_Conf_1.000 | 371  | 20 | 1.82E-27  | XP_002637830.1 | 81  | 125.561 | 88  | 72  | C. briggsae CBR-DHS-22 protein                                                  |
| Locus_1089_Transcript_1/1_Conf_1.000  | 1208 | 20 | 1.64E-86  | XP_002648569.1 | 68  | 324.324 | 330 | 227 | Hypothetical protein CBG24890                                                   |
| Locus_10890_Transcript_1/1_Conf_1.000 | 272  | 0  |           |                |     |         |     |     |                                                                                 |
| Locus_10891_Transcript_1/1_Conf_1.000 | 621  | 4  | 3.81E-31  | XP_002640017.1 | 54  | 138.658 | 217 | 119 | Hypothetical protein CBG12487                                                   |
| Locus_10892_Transcript_1/2_Conf_1.000 | 1303 | 20 | 3.27E-43  | XP_002633896.1 | 63  | 180.644 | 346 | 221 | Hypothetical protein CBG19958                                                   |
| Locus_10892_Transcript_2/2_Conf_1.000 | 1303 | 20 | 2.50E-43  | XP_002633896.1 | 63  | 181.03  | 346 | 221 | Hypothetical protein CBG19958                                                   |
| Locus_10893_Transcript_1/1_Conf_1.000 | 295  | 20 | 5.83E-18  | XP_002646426.1 | 78  | 93.9745 | 74  | 58  | C. briggsae CBR-EYA-1 protein                                                   |
| Locus_10894_Transcript_1/2_Conf_1.000 | 271  | 20 | 8.09E-12  | XP_002598195.1 | 62  | 73.559  | 83  | 52  | hypothetical protein BRAFLDRAFT_261117                                          |
| Locus_10894_Transcript_2/2_Conf_1.000 | 260  | 20 | 8.20E-12  | ZP_01160100.1  | 64  | 73.559  | 76  | 49  | Alkaline phosphatase                                                            |
| Locus_10895_Transcript_1/1_Conf_1.000 | 312  | 20 | 1.11E-24  | XP_002647071.1 | 86  | 116.316 | 82  | 71  | C. briggsae CBR-NIT-1 protein                                                   |
| Locus_10896_Transcript_1/1_Conf_1.000 | 921  | 20 | 1.19E-101 | NP_496800.1    | 76  | 374.015 | 306 | 234 | hypothetical protein W09H1.5                                                    |
| Locus_10897_Transcript_1/1_Conf_1.000 | 295  | 0  |           |                |     |         |     |     |                                                                                 |
| Locus_10898_Transcript_1/1_Conf_1.000 | 548  | 20 | 6.74E-22  | CAD21647.3     | 60  | 107.457 | 153 | 93  | C. elegans protein T03F6.6, confirmed by transcript evidence                    |
| Locus_10899_Transcript_1/1_Conf_1.000 | 396  | 20 | 3.53E-39  | XP_002647861.1 | 84  | 164.466 | 107 | 90  | Hypothetical protein CBG23659                                                   |
| Locus_109_Transcript_1/8_Conf_0.100   | 106  | 7  | 1.16E-05  | NP_501859.1    | 89  | 53.1434 | 37  | 33  | RACK1 (mammalian Receptor of Activated C Kinase) homolog family member (rack-1) |

|                                     |     |    |          |                |    |         |     |     |                                                                                 |
|-------------------------------------|-----|----|----------|----------------|----|---------|-----|-----|---------------------------------------------------------------------------------|
| Locus_109_Transcript_2/8_Conf_0.100 | 148 | 20 | 3.04E-06 | NP_501859.1    | 85 | 55.0694 | 41  | 35  | RACK1 (mammalian Receptor of Activated C Kinase) homolog family member (rack-1) |
| Locus_109_Transcript_3/8_Conf_0.450 | 837 | 20 | 1.85E-71 | XP_002633718.1 | 97 | 273.478 | 134 | 131 | C. briggsae CBR-RACK-1 protein                                                  |
| Locus_109_Transcript_4/8_Conf_0.450 | 837 | 20 | 6.37E-72 | XP_002633718.1 | 95 | 275.018 | 138 | 132 | C. briggsae CBR-RACK-1 protein                                                  |
| Locus_109_Transcript_5/8_Conf_0.100 | 283 | 20 | 1.78E-14 | NP_501859.1    | 92 | 82.4185 | 54  | 50  | RACK1 (mammalian Receptor of Activated C Kinase) homolog family member (rack-1) |

|                                       |      |    |           |                |     |         |     |     |                                                                                 |
|---------------------------------------|------|----|-----------|----------------|-----|---------|-----|-----|---------------------------------------------------------------------------------|
| Locus_109_Transcript_6/8_Conf_0.100   | 283  | 20 | 1.78E-14  | NP_501859.1    | 92  | 82.4185 | 54  | 50  | RACK1 (mammalian Receptor of Activated C Kinase) homolog family member (rack-1) |
| Locus_109_Transcript_7/8_Conf_0.300   | 842  | 20 | 4.35E-145 | XP_002633718.1 | 93  | 518.079 | 280 | 263 | C. briggsae CBR-RACK-1 protein                                                  |
| Locus_109_Transcript_8/8_Conf_0.350   | 948  | 20 | 1.85E-145 | XP_002633718.1 | 92  | 519.62  | 284 | 264 | C. briggsae CBR-RACK-1 protein                                                  |
| Locus_1090_Transcript_1/1_Conf_1.000  | 824  | 20 | 7.76E-75  | CAM84573.1     | 65  | 284.648 | 302 | 198 | intestinal prolyl carboxypeptidase 1                                            |
| Locus_10900_Transcript_1/3_Conf_0.714 | 447  | 4  | 3.09E-11  | NP_505417.1    | 60  | 71.633  | 121 | 73  | hypothetical protein K07B1.6                                                    |
| Locus_10900_Transcript_2/3_Conf_0.429 | 322  | 0  |           |                |     |         |     |     |                                                                                 |
| Locus_10900_Transcript_3/3_Conf_0.714 | 322  | 0  |           |                |     |         |     |     |                                                                                 |
| Locus_10901_Transcript_1/1_Conf_1.000 | 224  | 0  |           |                |     |         |     |     |                                                                                 |
| Locus_10902_Transcript_1/1_Conf_1.000 | 995  | 20 | 1.49E-100 | XP_002636180.1 | 75  | 370.548 | 326 | 245 | Hypothetical protein CBG01437                                                   |
| Locus_10903_Transcript_1/1_Conf_1.000 | 150  | 20 | 3.69E-20  | XP_002914026.1 | 100 | 101.293 | 49  | 49  | PREDICTED: polyadenylate-binding protein 1-like                                 |
| Locus_10904_Transcript_1/1_Conf_1.000 | 1255 | 20 | 6.83E-67  | XP_002640612.1 | 68  | 259.225 | 314 | 214 | Hypothetical protein CBG08723                                                   |



|                                       |      |    |           |                |    |         |     |     |                                                               |
|---------------------------------------|------|----|-----------|----------------|----|---------|-----|-----|---------------------------------------------------------------|
| Locus_10905_Transcript_1/1_Conf_1.000 | 482  | 0  |           |                |    |         |     |     |                                                               |
| Locus_10906_Transcript_1/1_Conf_1.000 | 1876 | 20 | 6.50E-134 | XP_002645956.1 | 72 | 482.641 | 431 | 311 | C. briggsae CBR-ENT-2 protein                                 |
| Locus_10907_Transcript_1/1_Conf_1.000 | 423  | 3  | 1.88E-08  | NP_495495.1    | 59 | 62.3882 | 83  | 49  | hypothetical protein E04F6.6                                  |
| Locus_10908_Transcript_1/1_Conf_1.000 | 1041 | 0  |           |                |    |         |     |     |                                                               |
| Locus_10909_Transcript_1/1_Conf_1.000 | 1410 | 20 | 2.96E-69  | CAA10033.1     | 65 | 267.314 | 369 | 240 | DYS-1 protein                                                 |
| Locus_1091_Transcript_1/1_Conf_1.000  | 410  | 20 | 1.99E-10  | EFO19957.1     | 60 | 68.9366 | 115 | 69  | hypothetical protein LOAG_08536                               |
| Locus_10910_Transcript_1/1_Conf_1.000 | 730  | 20 | 9.18E-95  | XP_002638788.1 | 88 | 350.517 | 205 | 181 | Hypothetical protein CBG05143                                 |
| Locus_10911_Transcript_1/1_Conf_1.000 | 706  | 20 | 3.86E-55  | NP_491763.1    | 66 | 218.779 | 235 | 156 | hypothetical protein T27A3.6                                  |
| Locus_10912_Transcript_1/1_Conf_1.000 | 731  | 0  |           |                |    |         |     |     |                                                               |
| Locus_10913_Transcript_1/1_Conf_1.000 | 691  | 0  |           |                |    |         |     |     |                                                               |
| Locus_10914_Transcript_1/1_Conf_1.000 | 996  | 20 | 2.80E-14  | XP_001463473.1 | 50 | 83.9593 | 106 | 53  | hypothetical protein                                          |
| Locus_10915_Transcript_1/1_Conf_1.000 | 417  | 0  |           |                |    |         |     |     |                                                               |
| Locus_10916_Transcript_1/1_Conf_1.000 | 316  | 20 | 4.66E-15  | EFO23801.1     | 62 | 84.3445 | 105 | 66  | replication factor C                                          |
| Locus_10917_Transcript_1/1_Conf_1.000 | 568  | 20 | 7.38E-62  | NP_872022.1    | 76 | 240.35  | 188 | 143 | CysTiNoSin (lysosomal protein) homolog family member (ctns-1) |
| Locus_10918_Transcript_1/1_Conf_1.000 | 559  | 2  | 2.35E-25  | NP_498100.1    | 65 | 119.013 | 124 | 81  | Poly(U) Polymerase family member (pup-2)                      |
| Locus_10919_Transcript_1/1_Conf_1.000 | 813  | 0  |           |                |    |         |     |     |                                                               |
| Locus_1092_Transcript_1/1_Conf_1.000  | 2516 | 20 | 0         | NP_001022033.1 | 86 | 1185.24 | 715 | 620 | Threonyl tRNA Synthetase family member (trs-1)                |
| Locus_10920_Transcript_1/1_Conf_1.000 | 156  | 0  |           |                |    |         |     |     |                                                               |
| Locus_10921_Transcript_1/1_Conf_1.000 | 752  | 20 | 5.25E-48  | ACI48997.1     | 67 | 195.282 | 233 | 157 | hypothetical protein Cbre_JD01.004                            |
| Locus_10922_Transcript_1/1_Conf_1.000 | 1450 | 20 | 1.88E-151 | NP_502613.2    | 73 | 540.421 | 489 | 359 | QUInine non-avoider family member (qui-1)                     |
| Locus_10923_Transcript_1/1_Conf_1.000 | 638  | 3  | 1.55E-22  | XP_002634007.1 | 72 | 110.153 | 92  | 67  | Hypothetical protein CBG01539                                 |

|                                       |      |    |           |                |    |         |     |     |                                                                 |
|---------------------------------------|------|----|-----------|----------------|----|---------|-----|-----|-----------------------------------------------------------------|
| Locus_10924_Transcript_1/1_Conf_1.000 | 603  | 20 | 1.31E-49  | NP_501913.1    | 72 | 199.904 | 159 | 115 | hypothetical protein R11A8.5                                    |
| Locus_10925_Transcript_1/1_Conf_1.000 | 543  | 20 | 6.12E-60  | XP_002639515.1 | 77 | 233.802 | 179 | 138 | Hypothetical protein CBG04121                                   |
| Locus_10926_Transcript_1/1_Conf_1.000 | 447  | 0  |           |                |    |         |     |     |                                                                 |
| Locus_10927_Transcript_1/1_Conf_1.000 | 278  | 3  | 2.12E-04  | NP_490888.1    | 73 | 48.9062 | 41  | 30  | Mitochondrial Processing Peptidase Alpha family member (mppa-1) |
| Locus_10928_Transcript_1/1_Conf_1.000 | 929  | 20 | 2.56E-43  | NP_491522.1    | 56 | 180.259 | 308 | 174 | phosphoinositide kinase AdAPter subunit family member (aap-1)   |
| Locus_10929_Transcript_1/1_Conf_1.000 | 505  | 0  |           |                |    |         |     |     |                                                                 |
| Locus_1093_Transcript_1/1_Conf_1.000  | 785  | 20 | 5.45E-75  | NP_671477.1    | 99 | 285.034 | 136 | 135 | rRNA promoter binding protein                                   |
| Locus_10930_Transcript_1/1_Conf_1.000 | 157  | 0  |           |                |    |         |     |     |                                                                 |
| Locus_10931_Transcript_1/1_Conf_1.000 | 1156 | 20 | 7.26E-145 | XP_002638763.1 | 82 | 518.079 | 388 | 322 | C. briggsae CBR-BLI-3 protein                                   |
| Locus_10932_Transcript_1/1_Conf_1.000 | 163  | 0  |           |                |    |         |     |     |                                                                 |
| Locus_10933_Transcript_1/2_Conf_1.000 | 255  | 0  |           |                |    |         |     |     |                                                                 |
| Locus_10933_Transcript_2/2_Conf_1.000 | 209  | 0  |           |                |    |         |     |     |                                                                 |
| Locus_10934_Transcript_1/1_Conf_1.000 | 358  | 0  |           |                |    |         |     |     |                                                                 |
| Locus_10935_Transcript_1/1_Conf_1.000 | 554  | 20 | 1.51E-24  | NP_500522.1    | 66 | 116.316 | 130 | 86  | TransThyretin-Related family domain family member (ttr-20)      |
| Locus_10936_Transcript_1/1_Conf_1.000 | 428  | 1  | 5.09E-14  | NP_502212.1    | 63 | 80.8777 | 111 | 70  | hypothetical protein ZK792.5                                    |
| Locus_10937_Transcript_1/1_Conf_1.000 | 340  | 0  |           |                |    |         |     |     |                                                                 |
| Locus_10938_Transcript_1/1_Conf_1.000 | 784  | 20 | 5.50E-43  | EFO19864.1     | 79 | 178.718 | 139 | 111 | hypothetical protein LOAG_08632                                 |

|                                       |      |    |          |                |    |         |     |     |                                                                     |
|---------------------------------------|------|----|----------|----------------|----|---------|-----|-----|---------------------------------------------------------------------|
| Locus_10939_Transcript_1/1_Conf_1.000 | 411  | 20 | 2.91E-54 | NP_001022641.1 | 83 | 214.542 | 136 | 113 | LEThal family member (let-805)                                      |
| Locus_1094_Transcript_1/1_Conf_1.000  | 533  | 20 | 4.89E-67 | NP_500005.1    | 89 | 257.299 | 156 | 139 | MAP kinase Activated protein Kinase family member (mak-2)           |
| Locus_10940_Transcript_1/1_Conf_1.000 | 139  | 0  |          |                |    |         |     |     |                                                                     |
| Locus_10941_Transcript_1/1_Conf_1.000 | 181  | 2  | 1.68E-04 | XP_001949404.1 | 71 | 49.2914 | 39  | 28  | PREDICTED: similar to GA19830-PA                                    |
| Locus_10942_Transcript_1/1_Conf_1.000 | 320  | 20 | 1.71E-17 | ADI61822.1     | 61 | 92.4337 | 93  | 57  | endonuclease-reverse transcriptase                                  |
| Locus_10943_Transcript_1/1_Conf_1.000 | 1180 | 20 | 4.76E-99 | XP_002642360.1 | 89 | 365.925 | 214 | 192 | C. briggsae CBR-RAB-30 protein                                      |
| Locus_10944_Transcript_1/1_Conf_1.000 | 835  | 0  |          |                |    |         |     |     |                                                                     |
| Locus_10945_Transcript_1/1_Conf_1.000 | 432  | 20 | 4.09E-48 | 2WS2           | 90 | 194.126 | 116 | 105 | The 2 AngstromStructure Of A Nu-Class Gst From Haemonchus Contortus |
| Locus_10946_Transcript_1/1_Conf_1.000 | 281  | 0  |          |                |    |         |     |     |                                                                     |
| Locus_10947_Transcript_1/1_Conf_1.000 | 316  | 20 | 1.49E-29 | NP_741839.2    | 69 | 132.494 | 105 | 73  | hypothetical protein F48E3.8                                        |
| Locus_10948_Transcript_1/1_Conf_1.000 | 134  | 0  |          |                |    |         |     |     |                                                                     |
| Locus_10949_Transcript_1/2_Conf_1.000 | 442  | 20 | 5.13E-22 | AAO63576.1     | 56 | 107.457 | 150 | 85  | secreted protein 4 precursor                                        |
| Locus_10949_Transcript_2/2_Conf_1.000 | 442  | 20 | 6.69E-22 | AAO63576.1     | 56 | 107.071 | 150 | 85  | secreted protein 4 precursor                                        |
| Locus_1095_Transcript_1/1_Conf_1.000  | 383  | 7  | 1.01E-38 | XP_002639089.1 | 74 | 162.925 | 134 | 100 | C. briggsae CBR-TAG-163 protein                                     |
| Locus_10950_Transcript_1/2_Conf_1.000 | 671  | 20 | 2.58E-34 | EFO27619.1     | 62 | 149.443 | 216 | 134 | hypothetical protein LOAG_00870                                     |
| Locus_10950_Transcript_2/2_Conf_1.000 | 487  | 6  | 1.10E-16 | EFO27619.1     | 52 | 89.7373 | 155 | 81  | hypothetical protein LOAG_00870                                     |
| Locus_10951_Transcript_1/1_Conf_1.000 | 458  | 0  |          |                |    |         |     |     |                                                                     |

|                                       |      |    |          |                |     |         |     |     |                                                                        |
|---------------------------------------|------|----|----------|----------------|-----|---------|-----|-----|------------------------------------------------------------------------|
| Locus_10952_Transcript_1/1_Conf_1.000 | 320  | 20 | 1.82E-27 | XP_513188.2    | 63  | 125.561 | 106 | 67  | PREDICTED: complement component 1, q subcomponent, gamma polypeptide   |
| Locus_10953_Transcript_1/1_Conf_1.000 | 1854 | 20 | 0        | XP_002644381.1 | 86  | 868.226 | 578 | 498 | C. briggsae CBR-SAX-3 protein                                          |
| Locus_10954_Transcript_1/1_Conf_1.000 | 864  | 20 | 2.49E-66 | XP_002640643.1 | 68  | 256.529 | 251 | 171 | C. briggsae CBR-TAG-271 protein                                        |
| Locus_10955_Transcript_1/4_Conf_0.429 | 538  | 20 | 7.17E-66 | XP_508190.1    | 99  | 253.447 | 126 | 125 | PREDICTED: interferon induced transmembrane protein 2 (1-8D) isoform 9 |
| Locus_10955_Transcript_2/4_Conf_0.571 | 657  | 20 | 3.03E-64 | AAX37033.1     | 99  | 248.825 | 125 | 124 | interferon induced transmembrane protein 1                             |
| Locus_10955_Transcript_3/4_Conf_0.571 | 563  | 20 | 1.30E-63 | AAP36548.1     | 100 | 246.128 | 133 | 133 | Homo sapiens interferon induced transmembrane protein 3 (1-8U)         |
| Locus_10955_Transcript_4/4_Conf_0.571 | 603  | 20 | 3.09E-75 | XP_508190.1    | 97  | 285.034 | 146 | 142 | PREDICTED: interferon induced transmembrane protein 2 (1-8D) isoform 9 |
| Locus_10956_Transcript_1/1_Conf_1.000 | 908  | 20 | 3.74E-84 | NP_495106.1    | 70  | 315.849 | 301 | 213 | FUcosyl Transferase family member (fut-3)                              |
| Locus_10957_Transcript_1/1_Conf_1.000 | 290  | 20 | 3.69E-12 | XP_002639821.1 | 61  | 74.7146 | 76  | 47  | C. briggsae CBR-ERS-2 protein                                          |

|                                       |      |    |          |                |    |         |     |     |                                                                 |
|---------------------------------------|------|----|----------|----------------|----|---------|-----|-----|-----------------------------------------------------------------|
| Locus_10958_Transcript_1/2_Conf_1.000 | 314  | 20 | 7.70E-26 | XP_002640523.1 | 82 | 120.168 | 81  | 67  | Hypothetical protein CBG18685                                   |
| Locus_10958_Transcript_2/2_Conf_1.000 | 385  | 20 | 7.51E-26 | XP_002640523.1 | 82 | 120.168 | 81  | 67  | Hypothetical protein CBG18685                                   |
| Locus_10959_Transcript_1/1_Conf_1.000 | 311  | 20 | 1.18E-39 | NP_001040812.1 | 85 | 166.007 | 103 | 88  | hypothetical protein T27A1.5                                    |
| Locus_1096_Transcript_1/1_Conf_1.000  | 1771 | 20 | 3.88E-40 | NP_490728.2    | 74 | 171.014 | 213 | 158 | TAF (TBP-associated transcription factor) family member (taf-4) |
| Locus_10960_Transcript_1/1_Conf_1.000 | 588  | 20 | 2.99E-40 | XP_001898597.1 | 64 | 168.703 | 184 | 118 | Steroid receptor seven-up type 2                                |
| Locus_10961_Transcript_1/1_Conf_1.000 | 665  | 0  |          |                |    |         |     |     |                                                                 |
| Locus_10962_Transcript_1/1_Conf_1.000 | 165  | 6  | 3.65E-04 | NP_001020987.1 | 81 | 48.1358 | 38  | 31  | UNCoordinated family member (unc-89)                            |
| Locus_10963_Transcript_1/1_Conf_1.000 | 323  | 12 | 1.53E-26 | NP_001021703.1 | 87 | 122.479 | 107 | 94  | EXOCyst component family member (exoc-8)                        |
| Locus_10964_Transcript_1/1_Conf_1.000 | 298  | 7  | 8.68E-14 | NP_491337.1    | 70 | 80.1073 | 74  | 52  | EXOCyst component family member (exoc-7)                        |
| Locus_10965_Transcript_1/1_Conf_1.000 | 240  | 0  |          |                |    |         |     |     |                                                                 |

|                                       |      |    |           |                |     |         |     |     |                                                                         |
|---------------------------------------|------|----|-----------|----------------|-----|---------|-----|-----|-------------------------------------------------------------------------|
| Locus_10966_Transcript_1/1_Conf_1.000 | 218  | 20 | 7.94E-28  | XP_002929945.1 | 100 | 126.716 | 63  | 63  | PREDICTED: endothelial differentiation-related factor 1-like            |
| Locus_10967_Transcript_1/1_Conf_1.000 | 250  | 18 | 1.83E-24  | XP_002636962.1 | 84  | 115.546 | 82  | 69  | C. briggsae CBR-MAX-1 protein                                           |
| Locus_10968_Transcript_1/1_Conf_1.000 | 179  | 20 | 1.27E-25  | XP_002723429.1 | 100 | 119.398 | 59  | 59  | PREDICTED: non-POU domain containing, octamer-binding-like              |
| Locus_10969_Transcript_1/1_Conf_1.000 | 178  | 0  |           |                |     |         |     |     |                                                                         |
| Locus_1097_Transcript_1/1_Conf_1.000  | 1110 | 20 | 2.82E-114 | CAT00983.1     | 80  | 416.387 | 336 | 271 | C. elegans protein C34C6.2c, partially confirmed by transcript evidence |
| Locus_10970_Transcript_1/1_Conf_1.000 | 884  | 20 | 7.45E-66  | EFO20497.1     | 64  | 254.988 | 297 | 191 | serologically defined colon cancer antigen 1                            |
| Locus_10971_Transcript_1/1_Conf_1.000 | 179  | 20 | 3.58E-20  | ACF22787.1     | 98  | 101.293 | 58  | 57  | MDR-like ABC transporter                                                |
| Locus_10972_Transcript_1/1_Conf_1.000 | 996  | 20 | 7.16E-111 | NP_490929.1    | 95  | 404.831 | 252 | 240 | mitochondrial ProHiBitin complex family member (phb-1)                  |
| Locus_10973_Transcript_1/1_Conf_1.000 | 528  | 0  |           |                |     |         |     |     |                                                                         |
| Locus_10974_Transcript_1/1_Conf_1.000 | 260  | 11 | 6.68E-30  | XP_002631379.1 | 91  | 133.65  | 73  | 67  | Hypothetical protein CBG03221                                           |
| Locus_10975_Transcript_1/1_Conf_1.000 | 426  | 20 | 2.87E-33  | NP_001129936.1 | 80  | 144.821 | 105 | 84  | SMALL family member (sma-9)                                             |
| Locus_10976_Transcript_1/1_Conf_1.000 | 132  | 3  | 2.59E-18  | XP_002830627.1 | 93  | 95.1301 | 44  | 41  | PREDICTED: hypothetical protein LOC100438967                            |
| Locus_10977_Transcript_1/1_Conf_1.000 | 482  | 4  | 5.71E-18  | NP_503722.1    | 63  | 93.9745 | 105 | 67  | hypothetical protein W02H5.2                                            |

|                                       |      |    |           |                |     |         |     |     |                                                                         |
|---------------------------------------|------|----|-----------|----------------|-----|---------|-----|-----|-------------------------------------------------------------------------|
| Locus_10978_Transcript_1/1_Conf_1.000 | 694  | 20 | 1.79E-89  | XP_002633161.1 | 77  | 332.798 | 231 | 179 | C. briggsae CBR-TAG-224 protein                                         |
| Locus_10979_Transcript_1/1_Conf_1.000 | 214  | 0  |           |                |     |         |     |     |                                                                         |
| Locus_1098_Transcript_1/2_Conf_1.000  | 1905 | 20 | 2.02E-98  | NP_496095.1    | 63  | 364.77  | 401 | 256 | WEE homolog family member (wee-1.3)                                     |
| Locus_1098_Transcript_2/2_Conf_1.000  | 1905 | 20 | 2.02E-98  | NP_496095.1    | 63  | 364.77  | 401 | 256 | WEE homolog family member (wee-1.3)                                     |
| Locus_10980_Transcript_1/1_Conf_1.000 | 247  | 0  |           |                |     |         |     |     |                                                                         |
| Locus_10981_Transcript_1/1_Conf_1.000 | 488  | 20 | 9.62E-21  | NP_001040707.1 | 54  | 103.219 | 160 | 87  | CDT (S. pombe CDC10 Dependent Transcript) homolog family member (cdt-1) |
| Locus_10982_Transcript_1/2_Conf_1.000 | 466  | 20 | 1.18E-10  | XP_002641354.1 | 72  | 69.707  | 51  | 37  | Hypothetical protein CBG13208                                           |
| Locus_10982_Transcript_2/2_Conf_1.000 | 481  | 20 | 1.15E-10  | XP_002641354.1 | 72  | 69.707  | 51  | 37  | Hypothetical protein CBG13208                                           |
| Locus_10983_Transcript_1/1_Conf_1.000 | 291  | 2  | 5.68E-05  | NP_506635.1    | 55  | 50.8322 | 72  | 40  | hypothetical protein Y50E8A.1                                           |
| Locus_10984_Transcript_1/2_Conf_1.000 | 254  | 20 | 1.46E-08  | NP_663214.1    | 70  | 62.7734 | 67  | 47  | viral ubiquitin                                                         |
| Locus_10984_Transcript_2/2_Conf_1.000 | 204  | 20 | 2.52E-05  | XP_321091.3    | 73  | 51.9878 | 46  | 34  | AGAP001970-PA                                                           |
| Locus_10985_Transcript_1/1_Conf_1.000 | 680  | 20 | 4.15E-112 | NP_492779.1    | 93  | 407.912 | 224 | 210 | hypothetical protein B0511.6                                            |
| Locus_10986_Transcript_1/1_Conf_1.000 | 612  | 2  | 5.99E-05  | NP_035608.1    | 45  | 51.6026 | 122 | 55  | small proline-rich protein 3                                            |
| Locus_10987_Transcript_1/1_Conf_1.000 | 138  | 20 | 3.59E-20  | XP_002928409.1 | 100 | 101.293 | 45  | 45  | PREDICTED: heterogeneous nuclear ribonucleoprotein M-like               |

|                                       |      |    |           |                |    |         |     |     |                                                                           |
|---------------------------------------|------|----|-----------|----------------|----|---------|-----|-----|---------------------------------------------------------------------------|
| Locus_10988_Transcript_1/1_Conf_1.000 | 866  | 20 | 4.57E-44  | EFO19733.1     | 60 | 182.57  | 243 | 148 | hypothetical protein LOAG_08758                                           |
| Locus_10989_Transcript_1/1_Conf_1.000 | 1446 | 20 | 1.50E-124 | NP_501147.2    | 82 | 451.055 | 322 | 267 | fatty acid ELONGation family member (elo-3)                               |
| Locus_1099_Transcript_1/2_Conf_1.000  | 833  | 20 | 1.14E-81  | XP_002640453.1 | 93 | 307.375 | 186 | 173 | C. briggsae CBR-RPL-17 protein                                            |
| Locus_1099_Transcript_2/2_Conf_1.000  | 492  | 20 | 5.56E-37  | NP_740781.1    | 89 | 157.147 | 91  | 81  | Ribosomal Protein, Large subunit family member (rpl-17)                   |
| Locus_10990_Transcript_1/1_Conf_1.000 | 1051 | 20 | 1.23E-124 | XP_002630800.1 | 84 | 450.669 | 268 | 227 | Hypothetical protein CBG02500                                             |
| Locus_10991_Transcript_1/1_Conf_1.000 | 331  | 1  | 1.63E-04  | XP_001902364.1 | 60 | 49.2914 | 112 | 68  | Myotubularin-related family protein                                       |
| Locus_10992_Transcript_1/1_Conf_1.000 | 138  | 0  |           |                |    |         |     |     |                                                                           |
| Locus_10993_Transcript_1/1_Conf_1.000 | 1141 | 0  |           |                |    |         |     |     |                                                                           |
| Locus_10994_Transcript_1/1_Conf_1.000 | 479  | 0  |           |                |    |         |     |     |                                                                           |
| Locus_10995_Transcript_1/1_Conf_1.000 | 387  | 20 | 8.56E-22  | EFO22859.1     | 96 | 106.686 | 61  | 59  | hypothetical protein LOAG_05624                                           |
| Locus_10996_Transcript_1/1_Conf_1.000 | 232  | 0  |           |                |    |         |     |     |                                                                           |
| Locus_10997_Transcript_1/2_Conf_1.000 | 182  | 0  |           |                |    |         |     |     |                                                                           |
| Locus_10997_Transcript_2/2_Conf_1.000 | 763  | 4  | 5.39E-32  | NP_001122673.1 | 72 | 142.124 | 195 | 141 | hypothetical protein B0353.1                                              |
| Locus_10998_Transcript_1/1_Conf_1.000 | 406  | 4  | 1.09E-16  | NP_001021652.1 | 57 | 89.7373 | 142 | 81  | FANCI (Fanconi anemia complex component I) homolog family member (fnci-1) |
| Locus_10999_Transcript_1/1_Conf_1.000 | 464  | 20 | 2.69E-55  | XP_002643394.1 | 84 | 218.009 | 148 | 125 | Hypothetical protein CBG16008                                             |



|                                      |     |    |          |                |    |         |    |    |                                                                          |
|--------------------------------------|-----|----|----------|----------------|----|---------|----|----|--------------------------------------------------------------------------|
| Locus_11_Transcript_10/14_Conf_0.176 | 364 | 12 | 4.78E-09 | NP_001023275.1 | 75 | 50.8322 | 45 | 34 | VITellogenin structural genes (yolk protein genes) family member (vit-6) |
| Locus_11_Transcript_11/14_Conf_0.147 | 276 | 8  | 3.86E-06 | NP_001023275.1 | 71 | 54.6842 | 46 | 33 | VITellogenin structural genes (yolk protein genes) family member (vit-6) |
| Locus_11_Transcript_12/14_Conf_0.147 | 276 | 8  | 3.86E-06 | NP_001023275.1 | 71 | 54.6842 | 46 | 33 | VITellogenin structural genes (yolk protein genes) family member (vit-6) |
| Locus_11_Transcript_13/14_Conf_0.176 | 364 | 8  | 3.70E-07 | Q94637.1       | 71 | 52.373  | 49 | 35 | Vitellogenin-6                                                           |
| Locus_11_Transcript_14/14_Conf_0.176 | 364 | 20 | 4.36E-15 | Q94637.1       | 76 | 68.5514 | 52 | 40 | Vitellogenin-6                                                           |
| Locus_11_Transcript_5/14_Conf_0.088  | 407 | 20 | 4.57E-23 | EFO25665.1     | 92 | 110.923 | 63 | 58 | ribosomal protein S13                                                    |
| Locus_11_Transcript_6/14_Conf_0.059  | 354 | 20 | 4.58E-23 | EFO25665.1     | 92 | 110.923 | 63 | 58 | ribosomal protein S13                                                    |
| Locus_11_Transcript_7/14_Conf_0.176  | 364 | 20 | 1.11E-16 | Q94637.1       | 78 | 73.9442 | 56 | 44 | Vitellogenin-6                                                           |

|                                     |     |    |          |            |    |         |    |    |                       |
|-------------------------------------|-----|----|----------|------------|----|---------|----|----|-----------------------|
| Locus_11_Transcript_8/14_Conf_0.088 | 448 | 20 | 6.38E-41 | EFO25665.1 | 95 | 170.244 | 91 | 87 | ribosomal protein S13 |
| Locus_11_Transcript_9/14_Conf_0.088 | 448 | 20 | 6.38E-41 | EFO25665.1 | 95 | 170.244 | 91 | 87 | ribosomal protein S13 |
| Locus_110_Transcript_1/3_Conf_0.833 | 457 | 20 | 1.56E-15 | ADK91433.1 | 71 | 85.8853 | 73 | 52 | c-type lectin 1       |
| Locus_110_Transcript_2/3_Conf_0.722 | 452 | 20 | 1.58E-15 | ADK91433.1 | 71 | 85.8853 | 73 | 52 | c-type lectin 1       |
| Locus_110_Transcript_3/3_Conf_0.889 | 394 | 20 | 1.60E-15 | ADK91433.1 | 71 | 85.8853 | 73 | 52 | c-type lectin 1       |

|                                        |      |    |          |                |     |         |     |     |                                                                          |
|----------------------------------------|------|----|----------|----------------|-----|---------|-----|-----|--------------------------------------------------------------------------|
| Locus_1100_Transcript_1/1_Conf_1.000   | 742  | 20 | 1.18E-44 | XP_002644771.1 | 80  | 184.111 | 129 | 104 | C. briggsae CBR-MIG-23 protein                                           |
| Locus_11000_Transcript_1/1_Conf_1.000  | 752  | 20 | 1.68E-70 | NP_001023373.1 | 75  | 270.011 | 240 | 180 | Histidyl tRNA Synthetase family member (hrs-1)                           |
| Locus_11001_Transcript_1/1_Conf_1.000  | 481  | 20 | 2.93E-22 | XP_001898035.1 | 56  | 108.227 | 176 | 99  | hypothetical protein Bm1_32955                                           |
| Locus_11002_Transcript_1/1_Conf_1.000  | 410  | 20 | 2.94E-38 | XP_002643586.1 | 72  | 161.384 | 133 | 97  | C. briggsae CBR-SYM-4 protein                                            |
| Locus_11003_Transcript_1/1_Conf_1.000  | 284  | 6  | 1.56E-10 | EFO21753.1     | 57  | 69.3218 | 97  | 56  | hypothetical protein LOAG_06732                                          |
| Locus_11004_Transcript_1/1_Conf_1.000  | 1122 | 20 | 1.72E-34 | XP_002639508.1 | 52  | 151.369 | 382 | 199 | Hypothetical protein CBG04113                                            |
| Locus_11005_Transcript_1/1_Conf_1.000  | 156  | 0  |          |                |     |         |     |     |                                                                          |
| Locus_11006_Transcript_1/1_Conf_1.000  | 1610 | 20 | 6.01E-69 | Q61CW2.3       | 62  | 266.544 | 361 | 225 | Serine/threonine-protein kinase smg-1                                    |
| Locus_11007_Transcript_1/1_Conf_1.000  | 421  | 20 | 1.82E-19 | NP_502282.1    | 77  | 98.9821 | 85  | 66  | hypothetical protein T12G3.4                                             |
| Locus_11008_Transcript_1/1_Conf_1.000  | 524  | 2  | 1.11E-04 | XP_422062.2    | 46  | 50.0618 | 102 | 47  | PREDICTED: similar to mKIAA0236 protein                                  |
| Locus_11009_Transcript_1/1_Conf_1.000  | 342  | 16 | 4.97E-25 | XP_002646276.1 | 82  | 117.472 | 74  | 61  | C. briggsae CBR-ABF-2 protein                                            |
| Locus_1101_Transcript_1/10_Conf_0.250  | 306  | 20 | 3.70E-41 | CAI17777.2     | 100 | 171.014 | 101 | 101 | major histocompatibility complex, class I, A                             |
| Locus_1101_Transcript_10/10_Conf_0.321 | 716  | 20 | 7.08E-69 | XP_002746334.1 | 88  | 208.764 | 150 | 132 | PREDICTED: CHLA class I histocompatibility antigen, A-2 alpha chain-like |

|                                       |     |    |          |            |     |         |     |     |                                              |
|---------------------------------------|-----|----|----------|------------|-----|---------|-----|-----|----------------------------------------------|
| Locus_1101_Transcript_2/10_Conf_0.250 | 575 | 20 | 9.48E-30 | CAQ09232.1 | 100 | 100.908 | 73  | 73  | major histocompatibility complex, class I, C |
| Locus_1101_Transcript_3/10_Conf_0.321 | 368 | 20 | 3.26E-67 | CBW44123.1 | 94  | 182.57  | 91  | 86  | MHC class I antigen                          |
| Locus_1101_Transcript_4/10_Conf_0.286 | 246 | 20 | 5.43E-42 | CBW44123.1 | 100 | 98.5969 | 37  | 37  | MHC class I antigen                          |
| Locus_1101_Transcript_5/10_Conf_0.321 | 779 | 20 | 2.94E-76 | ABQ95441.1 | 92  | 238.424 | 166 | 153 | MHC class I antigen                          |
| Locus_1101_Transcript_6/10_Conf_0.107 | 465 | 20 | 3.27E-61 | CAA34947.1 | 99  | 237.654 | 138 | 137 | leukocyte antigen F                          |

|                                       |     |    |          |                |     |         |     |     |                                              |
|---------------------------------------|-----|----|----------|----------------|-----|---------|-----|-----|----------------------------------------------|
| Locus_1101_Transcript_7/10_Conf_0.393 | 716 | 20 | 1.41E-60 | CBM41445.1     | 100 | 167.933 | 76  | 76  | MHC class I antigen                          |
| Locus_1101_Transcript_8/10_Conf_0.250 | 246 | 20 | 2.45E-42 | CBW44123.1     | 100 | 98.5969 | 37  | 37  | MHC class I antigen                          |
| Locus_1101_Transcript_9/10_Conf_0.250 | 718 | 20 | 3.53E-77 | CAM24816.1     | 100 | 214.157 | 118 | 118 | major histocompatibility complex, class I, C |
| Locus_11010_Transcript_1/1_Conf_1.000 | 303 | 0  |          |                |     |         |     |     |                                              |
| Locus_11011_Transcript_1/1_Conf_1.000 | 654 | 20 | 7.31E-95 | NP_502560.1    | 86  | 350.517 | 217 | 187 | FATty acid desaturase family member (fat-2)  |
| Locus_11012_Transcript_1/1_Conf_1.000 | 643 | 20 | 1.23E-83 | XP_002630183.1 | 89  | 313.153 | 212 | 189 | C. briggsae CBR-FLI-1 protein                |
| Locus_11013_Transcript_1/1_Conf_1.000 | 291 | 2  | 1.03E-06 | NP_506151.1    | 70  | 56.6102 | 51  | 36  | hypothetical protein C14C10.4                |
| Locus_11014_Transcript_1/1_Conf_1.000 | 403 |    |          |                |     |         |     |     |                                              |
| Locus_11015_Transcript_1/1_Conf_1.000 | 590 | 2  | 1.49E-31 | NP_497506.3    | 60  | 139.813 | 194 | 118 | hypothetical protein Y48G9A.3                |

|                                       |      |    |           |                |    |         |     |     |                                              |
|---------------------------------------|------|----|-----------|----------------|----|---------|-----|-----|----------------------------------------------|
| Locus_11016_Transcript_1/1_Conf_1.000 | 412  | 20 | 2.82E-57  | NP_741553.1    | 88 | 224.557 | 136 | 120 | Aldehyde deHydrogenase family member (alh-4) |
| Locus_11017_Transcript_1/1_Conf_1.000 | 1942 | 20 | 6.58E-105 | XP_002644943.1 | 57 | 386.341 | 627 | 362 | Hypothetical protein CBG10898                |
| Locus_11018_Transcript_1/1_Conf_1.000 | 377  | 7  | 2.29E-14  | AAC61752.1     | 57 | 82.0333 | 121 | 69  | nuclear hormone receptor                     |
| Locus_11019_Transcript_1/1_Conf_1.000 | 442  | 20 | 1.35E-30  | NP_498057.1    | 66 | 135.961 | 141 | 94  | hypothetical protein C27F2.10                |
| Locus_1102_Transcript_1/1_Conf_1.000  | 2206 | 20 | 0         | XP_002633545.1 | 76 | 638.647 | 693 | 531 | Hypothetical protein CBG05413                |
| Locus_11020_Transcript_1/1_Conf_1.000 | 427  | 2  | 1.29E-33  | XP_002636965.1 | 78 | 145.976 | 106 | 83  | Hypothetical protein CBG09443                |
| Locus_11021_Transcript_1/1_Conf_1.000 | 576  | 20 | 4.29E-36  | EFO19461.1     | 90 | 154.836 | 90  | 81  | hypothetical protein LOAG_09031              |
| Locus_11022_Transcript_1/1_Conf_1.000 | 627  | 1  | 4.81E-05  | XP_002645117.1 | 52 | 51.9878 | 93  | 49  | C. briggsae CBR-XPC-1 protein                |
| Locus_11023_Transcript_1/1_Conf_1.000 | 371  | 0  |           |                |    |         |     |     |                                              |
| Locus_11024_Transcript_1/1_Conf_1.000 | 441  | 20 | 6.03E-39  | NP_872248.2    | 72 | 163.696 | 138 | 100 | hypothetical protein R57.1                   |
| Locus_11025_Transcript_1/1_Conf_1.000 | 154  | 0  |           |                |    |         |     |     |                                              |
| Locus_11026_Transcript_1/1_Conf_1.000 | 376  | 0  |           |                |    |         |     |     |                                              |
| Locus_11027_Transcript_1/1_Conf_1.000 | 560  | 20 | 2.11E-50  | NP_495951.2    | 84 | 202.216 | 136 | 115 | hypothetical protein W07A12.4                |
| Locus_11028_Transcript_1/1_Conf_1.000 | 338  | 9  | 3.60E-12  | AAN61521.1     | 72 | 74.7146 | 66  | 48  | 301kDa_2 protein                             |
| Locus_11029_Transcript_1/1_Conf_1.000 | 259  | 20 | 3.22E-16  | EFO26239.1     | 67 | 88.1965 | 85  | 57  | hypothetical protein LOAG_02251              |
| Locus_1103_Transcript_1/1_Conf_1.000  | 386  | 0  |           |                |    |         |     |     |                                              |
| Locus_11030_Transcript_1/1_Conf_1.000 | 572  | 0  |           |                |    |         |     |     |                                              |
| Locus_11031_Transcript_1/2_Conf_1.000 | 184  | 0  |           |                |    |         |     |     |                                              |
| Locus_11031_Transcript_2/2_Conf_1.000 | 435  | 0  |           |                |    |         |     |     |                                              |

|                                       |     |    |           |                |    |         |     |     |                                 |
|---------------------------------------|-----|----|-----------|----------------|----|---------|-----|-----|---------------------------------|
| Locus_11032_Transcript_1/1_Conf_1.000 | 516 | 20 | 5.62E-22  | NP_495931.2    | 56 | 107.457 | 156 | 88  | hypothetical protein T24B8.7    |
| Locus_11033_Transcript_1/1_Conf_1.000 | 168 | 4  | 8.36E-09  | XP_002633975.1 | 75 | 63.5438 | 45  | 34  | Hypothetical protein CBG20077   |
| Locus_11034_Transcript_1/1_Conf_1.000 | 329 | 0  |           |                |    |         |     |     |                                 |
| Locus_11035_Transcript_1/1_Conf_1.000 | 433 | 0  |           |                |    |         |     |     |                                 |
| Locus_11036_Transcript_1/1_Conf_1.000 | 309 | 0  |           |                |    |         |     |     |                                 |
| Locus_11037_Transcript_1/1_Conf_1.000 | 729 | 20 | 4.08E-18  | EFO19311.1     | 72 | 95.9005 | 83  | 60  | hypothetical protein LOAG_09182 |
| Locus_11038_Transcript_1/3_Conf_0.667 | 611 | 0  |           |                |    |         |     |     |                                 |
| Locus_11038_Transcript_2/3_Conf_0.667 | 808 | 0  |           |                |    |         |     |     |                                 |
| Locus_11038_Transcript_3/3_Conf_0.667 | 799 | 0  |           |                |    |         |     |     |                                 |
| Locus_11039_Transcript_1/1_Conf_1.000 | 795 | 20 | 1.57E-101 | XP_002643079.1 | 91 | 373.244 | 224 | 204 | C. briggsae CBR-ABCE-1 protein  |
| Locus_1104_Transcript_1/1_Conf_1.000  | 695 | 20 | 1.52E-72  | XP_002647023.1 | 92 | 276.559 | 150 | 139 | C. briggsae CBR-MLC-3 protein   |
| Locus_11040_Transcript_1/1_Conf_1.000 | 274 | 0  |           |                |    |         |     |     |                                 |
| Locus_11041_Transcript_1/1_Conf_1.000 | 232 | 0  |           |                |    |         |     |     |                                 |

|                                       |      |    |           |                |     |         |     |     |                                          |
|---------------------------------------|------|----|-----------|----------------|-----|---------|-----|-----|------------------------------------------|
| Locus_11042_Transcript_1/1_Conf_1.000 | 1063 | 20 | 1.56E-58  | XP_002635593.1 | 81  | 231.106 | 161 | 132 | Hypothetical protein CBG20581            |
| Locus_11043_Transcript_1/1_Conf_1.000 | 543  | 20 | 7.55E-26  | NP_498946.1    | 76  | 120.553 | 106 | 81  | hypothetical protein F54F2.7             |
| Locus_11044_Transcript_1/1_Conf_1.000 | 282  | 0  |           |                |     |         |     |     |                                          |
| Locus_11045_Transcript_1/1_Conf_1.000 | 248  | 0  |           |                |     |         |     |     |                                          |
| Locus_11046_Transcript_1/2_Conf_1.000 | 981  | 20 | 3.94E-122 | NP_500161.1    | 84  | 442.195 | 326 | 275 | hypothetical protein R05C11.3            |
| Locus_11046_Transcript_2/2_Conf_1.000 | 981  | 20 | 3.94E-122 | NP_500161.1    | 84  | 442.195 | 326 | 275 | hypothetical protein R05C11.3            |
| Locus_11047_Transcript_1/1_Conf_1.000 | 159  | 0  |           |                |     |         |     |     |                                          |
| Locus_11048_Transcript_1/1_Conf_1.000 | 377  | 0  |           |                |     |         |     |     |                                          |
| Locus_11049_Transcript_1/2_Conf_1.000 | 395  | 20 | 1.83E-19  | XP_002640352.1 | 61  | 98.9821 | 116 | 71  | C. briggsae CBR-ARI-1 protein            |
| Locus_11049_Transcript_2/2_Conf_1.000 | 461  | 20 | 4.99E-22  | XP_002640352.1 | 68  | 107.457 | 105 | 72  | C. briggsae CBR-ARI-1 protein            |
| Locus_1105_Transcript_1/1_Conf_1.000  | 223  | 0  |           |                |     |         |     |     |                                          |
| Locus_11050_Transcript_1/1_Conf_1.000 | 624  | 20 | 2.47E-78  | NP_001122513.1 | 90  | 295.434 | 172 | 156 | UNCoordinated family member (unc-57)     |
| Locus_11051_Transcript_1/1_Conf_1.000 | 289  | 20 | 2.54E-29  | NP_490714.1    | 92  | 131.724 | 96  | 89  | hypothetical protein C53D5.5             |
| Locus_11052_Transcript_1/1_Conf_1.000 | 167  | 0  |           |                |     |         |     |     |                                          |
| Locus_11053_Transcript_1/1_Conf_1.000 | 829  | 0  |           |                |     |         |     |     |                                          |
| Locus_11054_Transcript_1/1_Conf_1.000 | 245  | 20 | 2.66E-23  | NP_510625.2    | 75  | 111.694 | 79  | 60  | hypothetical protein T27A8.1             |
| Locus_11055_Transcript_1/1_Conf_1.000 | 644  | 20 | 2.27E-53  | XP_001899300.1 | 71  | 212.616 | 212 | 152 | Negative elongation factor B homolog     |
| Locus_11056_Transcript_1/1_Conf_1.000 | 183  | 10 | 6.56E-09  | EFO27462.1     | 63  | 63.929  | 61  | 39  | hypothetical protein LOAG_01021          |
| Locus_11057_Transcript_1/1_Conf_1.000 | 299  | 20 | 1.02E-46  | XP_002750287.1 | 100 | 189.504 | 94  | 94  | PREDICTED: elongation factor 1-beta-like |
| Locus_11058_Transcript_1/1_Conf_1.000 | 488  | 20 | 5.77E-58  | XP_002639764.1 | 80  | 226.868 | 153 | 123 | Hypothetical protein CBG02210            |



|                                       |     |    |          |                |    |         |     |     |                                                               |
|---------------------------------------|-----|----|----------|----------------|----|---------|-----|-----|---------------------------------------------------------------|
| Locus_11059_Transcript_1/1_Conf_1.000 | 975 | 20 | 2.06E-22 | EFO20991.1     | 54 | 110.923 | 205 | 112 | hypothetical protein LOAG_07497                               |
| Locus_1106_Transcript_1/1_Conf_1.000  | 460 | 20 | 1.15E-18 | CBH29662.1     | 72 | 96.2857 | 88  | 64  | C. elegans protein F44G4.4c, confirmed by transcript evidence |
| Locus_11060_Transcript_1/1_Conf_1.000 | 293 | 20 | 7.64E-18 | XP_002631109.1 | 94 | 93.5893 | 52  | 49  | Hypothetical protein CBG02884                                 |
| Locus_11061_Transcript_1/1_Conf_1.000 | 720 | 20 | 1.51E-17 | CAA10734.1     | 83 | 93.9745 | 66  | 55  | centaurin beta 1A                                             |
| Locus_11062_Transcript_1/1_Conf_1.000 | 588 | 20 | 9.82E-84 | EFO22295.1     | 91 | 313.153 | 180 | 165 | hypothetical protein LOAG_06193                               |
| Locus_11063_Transcript_1/2_Conf_1.000 | 906 | 20 | 3.34E-16 | XP_001891812.1 | 60 | 90.1225 | 108 | 65  | hypothetical protein Bm1_01480                                |
| Locus_11063_Transcript_2/2_Conf_1.000 | 840 | 20 | 2.93E-16 | XP_001891812.1 | 60 | 90.1225 | 108 | 65  | hypothetical protein Bm1_01480                                |
| Locus_11064_Transcript_1/1_Conf_1.000 | 235 | 0  |          |                |    |         |     |     |                                                               |
| Locus_11065_Transcript_1/1_Conf_1.000 | 389 | 4  | 5.00E-30 | NP_497649.1    | 87 | 134.035 | 85  | 74  | hypothetical protein Y55D5A.4                                 |
| Locus_11066_Transcript_1/1_Conf_1.000 | 336 | 3  | 5.74E-10 | CAR63610.1     | 55 | 67.3958 | 93  | 52  | putative IQ calmodulin-binding motif domain protein           |

|                                       |      |    |           |                |    |         |     |     |                                                      |
|---------------------------------------|------|----|-----------|----------------|----|---------|-----|-----|------------------------------------------------------|
| Locus_11067_Transcript_1/2_Conf_1.000 | 1594 | 20 | 4.50E-101 | NP_497068.2    | 69 | 373.244 | 389 | 271 | TBC (Tre-2/Bub2/Cdc16) domain family member (tbc-20) |
| Locus_11067_Transcript_2/2_Conf_1.000 | 1588 | 20 | 9.98E-101 | NP_497068.2    | 71 | 372.089 | 370 | 263 | TBC (Tre-2/Bub2/Cdc16) domain family member (tbc-20) |
| Locus_11068_Transcript_1/1_Conf_1.000 | 312  | 20 | 4.36E-29  | CAR63568.1     | 89 | 130.954 | 83  | 74  | putative Tubulin-specific chaperone A                |
| Locus_11069_Transcript_1/1_Conf_1.000 | 219  | 0  |           |                |    |         |     |     |                                                      |
| Locus_1107_Transcript_1/2_Conf_1.000  | 2145 | 20 | 0         | NP_509671.3    | 83 | 827.78  | 597 | 500 | hypothetical protein ZC506.1                         |
| Locus_1107_Transcript_2/2_Conf_1.000  | 2009 | 20 | 0         | NP_509671.3    | 81 | 854.744 | 645 | 527 | hypothetical protein ZC506.1                         |
| Locus_11070_Transcript_1/1_Conf_1.000 | 569  | 20 | 7.71E-27  | XP_001896497.1 | 66 | 124.02  | 126 | 84  | pold2-prov protein                                   |
| Locus_11071_Transcript_1/2_Conf_1.000 | 1137 | 0  |           |                |    |         |     |     |                                                      |
| Locus_11071_Transcript_2/2_Conf_1.000 | 1135 | 0  |           |                |    |         |     |     |                                                      |
| Locus_11072_Transcript_1/1_Conf_1.000 | 972  | 20 | 9.41E-60  | NP_500420.3    | 62 | 234.958 | 329 | 204 | hypothetical protein M02B7.5                         |
| Locus_11073_Transcript_1/1_Conf_1.000 | 330  | 20 | 7.08E-08  | XP_001301920.1 | 68 | 60.4622 | 60  | 41  | ankyrin repeat protein                               |
| Locus_11074_Transcript_1/1_Conf_1.000 | 418  | 0  |           |                |    |         |     |     |                                                      |
| Locus_11075_Transcript_1/1_Conf_1.000 | 236  | 20 | 5.24E-27  | XP_002643972.1 | 88 | 124.02  | 78  | 69  | C. briggsae CBR-SLO-2 protein                        |

|                                       |      |    |           |                |    |         |     |     |                                                                          |
|---------------------------------------|------|----|-----------|----------------|----|---------|-----|-----|--------------------------------------------------------------------------|
| Locus_11076_Transcript_1/1_Conf_1.000 | 729  | 20 | 6.66E-53  | XP_002630580.1 | 61 | 211.46  | 244 | 151 | Hypothetical protein CBG13036                                            |
| Locus_11077_Transcript_1/1_Conf_1.000 | 1623 | 1  | 1.93E-06  | XP_002416346.1 | 45 | 58.9214 | 199 | 90  | conserved hypothetical protein                                           |
| Locus_11078_Transcript_1/1_Conf_1.000 | 130  | 0  |           |                |    |         |     |     |                                                                          |
| Locus_11079_Transcript_1/1_Conf_1.000 | 1000 |    |           |                |    |         |     |     |                                                                          |
| Locus_1108_Transcript_1/1_Conf_1.000  | 1100 | 20 | 1.77E-36  | EFO17908.1     | 51 | 157.918 | 293 | 151 | hypothetical protein LOAG_10591                                          |
| Locus_11080_Transcript_1/1_Conf_1.000 | 460  | 20 | 1.26E-57  | XP_002639234.1 | 85 | 225.713 | 149 | 128 | Hypothetical protein CBG03790                                            |
| Locus_11081_Transcript_1/1_Conf_1.000 | 428  | 0  |           |                |    |         |     |     |                                                                          |
| Locus_11082_Transcript_1/1_Conf_1.000 | 146  | 0  |           |                |    |         |     |     |                                                                          |
| Locus_11083_Transcript_1/1_Conf_1.000 | 433  | 1  | 7.30E-05  | XP_002638904.1 | 43 | 50.447  | 116 | 50  | Hypothetical protein CBG22130                                            |
| Locus_11084_Transcript_1/1_Conf_1.000 | 920  | 20 | 5.64E-128 | XP_001897894.1 | 84 | 461.455 | 313 | 265 | ancient conserved domain protein 4                                       |
| Locus_11085_Transcript_1/1_Conf_1.000 | 177  | 0  |           |                |    |         |     |     |                                                                          |
| Locus_11086_Transcript_1/1_Conf_1.000 | 356  | 0  |           |                |    |         |     |     |                                                                          |
| Locus_11087_Transcript_1/1_Conf_1.000 | 1777 | 20 | 2.46E-135 | NP_500645.1    | 63 | 487.263 | 541 | 341 | Egl-1 suppressor/DiO uptake defective/raf enhancer family member (eor-1) |
| Locus_11088_Transcript_1/1_Conf_1.000 | 679  | 20 | 1.51E-37  | XP_002631497.1 | 76 | 160.229 | 143 | 110 | Hypothetical protein CBG20661                                            |
| Locus_11089_Transcript_1/1_Conf_1.000 | 199  | 0  |           |                |    |         |     |     |                                                                          |
| Locus_1109_Transcript_1/4_Conf_0.556  | 596  | 20 | 4.78E-25  | XP_002635171.1 | 91 | 118.242 | 67  | 61  | Hypothetical protein CBG11408                                            |
| Locus_1109_Transcript_2/4_Conf_0.667  | 2042 | 20 | 0         | NP_001041134.1 | 93 | 769.615 | 433 | 406 | hypothetical protein F58E10.3                                            |

|                                       |      |    |          |                |    |         |     |     |                                                                          |
|---------------------------------------|------|----|----------|----------------|----|---------|-----|-----|--------------------------------------------------------------------------|
| Locus_1109_Transcript_3/4_Conf_0.222  | 1916 | 20 | 0        | XP_002635171.1 | 94 | 660.218 | 366 | 346 | Hypothetical protein CBG11408                                            |
| Locus_1109_Transcript_4/4_Conf_0.667  | 2028 | 20 | 0        | NP_001041134.1 | 93 | 769.615 | 433 | 406 | hypothetical protein F58E10.3                                            |
| Locus_11090_Transcript_1/1_Conf_1.000 | 1154 | 2  | 6.29E-48 | NP_507188.3    | 48 | 196.052 | 391 | 191 | hypothetical protein Y32B12B.2                                           |
| Locus_11091_Transcript_1/1_Conf_1.000 | 592  | 2  | 1.52E-15 | XP_002630921.1 | 76 | 86.6557 | 75  | 57  | Hypothetical protein CBG02647                                            |
| Locus_11092_Transcript_1/1_Conf_1.000 | 243  | 0  |          |                |    |         |     |     |                                                                          |
| Locus_11093_Transcript_1/2_Conf_1.000 | 661  | 0  |          |                |    |         |     |     |                                                                          |
| Locus_11093_Transcript_2/2_Conf_1.000 | 657  | 0  |          |                |    |         |     |     |                                                                          |
| Locus_11094_Transcript_1/2_Conf_1.000 | 514  | 3  | 7.44E-11 | EFO17966.1     | 69 | 70.4774 | 66  | 46  | hypothetical protein LOAG_10533                                          |
| Locus_11094_Transcript_2/2_Conf_1.000 | 258  | 3  | 1.11E-08 | EFO17966.1     | 69 | 63.1586 | 59  | 41  | hypothetical protein LOAG_10533                                          |
| Locus_11095_Transcript_1/1_Conf_1.000 | 376  | 0  |          |                |    |         |     |     |                                                                          |
| Locus_11096_Transcript_1/1_Conf_1.000 | 693  | 20 | 9.69E-19 | XP_001895742.1 | 74 | 97.8265 | 97  | 72  | KH domain containing protein                                             |
| Locus_11097_Transcript_1/1_Conf_1.000 | 362  | 0  |          |                |    |         |     |     |                                                                          |
| Locus_11098_Transcript_1/1_Conf_1.000 | 455  | 7  | 2.42E-16 | NP_509836.1    | 51 | 88.5817 | 155 | 80  | VEGF (vascular endothelial growth factor) Receptor family member (ver-3) |
| Locus_11099_Transcript_1/1_Conf_1.000 | 249  | 20 | 4.81E-33 | XP_002630901.1 | 86 | 144.05  | 87  | 75  | Hypothetical protein CBG02625                                            |
| Locus_111_Transcript_1/1_Conf_1.000   | 1415 | 20 | 0        | XP_002647388.1 | 81 | 655.981 | 465 | 381 | Hypothetical protein CBG06453                                            |
| Locus_1110_Transcript_1/2_Conf_1.000  | 3146 | 5  | 6.29E-10 | NP_498207.1    | 41 | 71.633  | 272 | 112 | Germline-enhanced AT-Hook protein family member (gak-1)                  |

|                                       |      |    |           |                |    |         |     |     |                                                                     |
|---------------------------------------|------|----|-----------|----------------|----|---------|-----|-----|---------------------------------------------------------------------|
| Locus_1110_Transcript_2/2_Conf_1.000  | 3035 | 5  | 6.08E-10  | NP_498207.1    | 41 | 71.633  | 272 | 112 | Germline-enhanced AT-Hook protein family member (gak-1)             |
| Locus_11100_Transcript_1/1_Conf_1.000 | 347  | 0  |           |                |    |         |     |     |                                                                     |
| Locus_11101_Transcript_1/1_Conf_1.000 | 466  | 20 | 5.58E-61  | ACJ65180.1     | 87 | 236.884 | 154 | 135 | Gaba b receptor subunit protein 2, confirmed by transcript evidence |
| Locus_11102_Transcript_1/1_Conf_1.000 | 713  | 7  | 1.62E-08  | XP_002641190.1 | 66 | 63.929  | 54  | 36  | Hypothetical protein CBG09051                                       |
| Locus_11103_Transcript_1/1_Conf_1.000 | 150  | 0  |           |                |    |         |     |     |                                                                     |
| Locus_11104_Transcript_1/1_Conf_1.000 | 946  | 20 | 2.64E-51  | XP_002641428.1 | 59 | 206.838 | 276 | 164 | C. briggsae CBR-MAA-1 protein                                       |
| Locus_11105_Transcript_1/1_Conf_1.000 | 595  | 0  |           |                |    |         |     |     |                                                                     |
| Locus_11106_Transcript_1/1_Conf_1.000 | 233  | 0  |           |                |    |         |     |     |                                                                     |
| Locus_11107_Transcript_1/1_Conf_1.000 | 302  | 20 | 2.75E-52  | AAO85518.1     | 96 | 207.994 | 100 | 96  | AF496634_1putative serine/threonine phosphatase                     |
| Locus_11108_Transcript_1/1_Conf_1.000 | 312  | 20 | 3.02E-30  | EFO25269.1     | 91 | 134.806 | 95  | 87  | HT004 protein                                                       |
| Locus_11109_Transcript_1/1_Conf_1.000 | 130  | 20 | 1.20E-15  | NP_499263.1    | 93 | 86.2705 | 43  | 40  | hypothetical protein T20G5.4                                        |
| Locus_1111_Transcript_1/1_Conf_1.000  | 1166 | 4  | 4.48E-09  | NP_498170.2    | 45 | 67.0106 | 244 | 111 | hypothetical protein R02F2.7                                        |
| Locus_11110_Transcript_1/1_Conf_1.000 | 175  | 20 | 1.16E-10  | XP_002631813.1 | 86 | 69.707  | 44  | 38  | Hypothetical protein CBG21034                                       |
| Locus_11111_Transcript_1/1_Conf_1.000 | 311  | 0  |           |                |    |         |     |     |                                                                     |
| Locus_11112_Transcript_1/1_Conf_1.000 | 184  | 20 | 5.92E-18  | CBA12962.1     | 78 | 93.9745 | 61  | 48  | LEV-9 protein                                                       |
| Locus_11113_Transcript_1/1_Conf_1.000 | 1147 | 20 | 6.79E-103 | XP_002642274.1 | 64 | 378.637 | 334 | 217 | C. briggsae CBR-PDR-1 protein                                       |
| Locus_11114_Transcript_1/1_Conf_1.000 | 405  | 20 | 1.52E-18  | XP_001901920.1 | 88 | 95.9005 | 51  | 45  | hypothetical protein Bm1_52260                                      |

|                                       |     |    |          |                |    |         |     |     |                                    |
|---------------------------------------|-----|----|----------|----------------|----|---------|-----|-----|------------------------------------|
| Locus_11115_Transcript_1/1_Conf_1.000 | 558 | 20 | 1.98E-40 | XP_002639086.1 | 89 | 169.088 | 106 | 95  | C. briggsae CBR-VHA-10 protein     |
| Locus_11116_Transcript_1/1_Conf_1.000 | 783 | 20 | 1.83E-46 | XP_002642305.1 | 59 | 190.274 | 267 | 158 | Hypothetical protein CBG18297      |
| Locus_11117_Transcript_1/1_Conf_1.000 | 139 | 20 | 1.01E-14 | P29190.1       | 94 | 83.1889 | 39  | 37  | Phosphoenolpyruvate carboxylase    |
| Locus_11118_Transcript_1/1_Conf_1.000 | 511 | 20 | 1.55E-37 | NP_495841.1    | 65 | 159.073 | 163 | 106 | hypothetical protein D2085.3       |
| Locus_11119_Transcript_1/1_Conf_1.000 | 371 | 20 | 4.95E-33 | XP_002631287.1 | 98 | 144.05  | 89  | 88  | C. briggsae CBR-TNC-2 protein      |
| Locus_1112_Transcript_1/1_Conf_1.000  | 557 | 3  | 3.21E-06 | XP_002642465.1 | 59 | 55.4546 | 89  | 53  | C. briggsae CBR-LIN-9 protein      |
| Locus_11120_Transcript_1/1_Conf_1.000 | 490 | 20 | 2.20E-33 | XP_001898147.1 | 76 | 145.206 | 125 | 96  | SRB protein.                       |
| Locus_11121_Transcript_1/1_Conf_1.000 | 759 | 4  | 2.81E-65 | NP_498072.1    | 67 | 252.677 | 248 | 168 | hypothetical protein C45G9.5       |
| Locus_11122_Transcript_1/1_Conf_1.000 | 570 | 20 | 4.50E-99 | CAR63542.1     | 96 | 363.999 | 189 | 182 | putative Pre-mRNA splicing protein |
| Locus_11123_Transcript_1/1_Conf_1.000 | 200 | 0  |          |                |    |         |     |     |                                    |
| Locus_11124_Transcript_1/1_Conf_1.000 | 593 | 0  |          |                |    |         |     |     |                                    |
| Locus_11125_Transcript_1/1_Conf_1.000 | 339 | 2  | 3.03E-11 | XP_002629898.1 | 55 | 71.633  | 100 | 55  | Hypothetical protein CBG21936      |
| Locus_11126_Transcript_1/1_Conf_1.000 | 294 | 2  | 4.79E-04 | XP_001554686.1 | 50 | 47.7506 | 101 | 51  | hypothetical protein BC1G_06829    |

|                                       |      |    |          |                |     |         |     |     |                                               |
|---------------------------------------|------|----|----------|----------------|-----|---------|-----|-----|-----------------------------------------------|
| Locus_11127_Transcript_1/1_Conf_1.000 | 224  | 10 | 2.64E-26 | NP_001022643.1 | 86  | 121.709 | 74  | 64  | LEThal family member (let-805)                |
| Locus_11128_Transcript_1/1_Conf_1.000 | 407  | 8  | 4.01E-19 | EFO26895.1     | 61  | 97.8265 | 123 | 76  | organic solute transporter alpha-like protein |
| Locus_11129_Transcript_1/1_Conf_1.000 | 155  | 0  |          |                |     |         |     |     |                                               |
| Locus_1113_Transcript_1/1_Conf_1.000  | 1578 | 20 | 0        | CAR63639.1     | 98  | 686.797 | 354 | 347 | hypothetical protein                          |
| Locus_11130_Transcript_1/2_Conf_1.000 | 525  | 0  |          |                |     |         |     |     |                                               |
| Locus_11130_Transcript_2/2_Conf_1.000 | 525  | 0  |          |                |     |         |     |     |                                               |
| Locus_11131_Transcript_1/1_Conf_1.000 | 447  | 0  |          |                |     |         |     |     |                                               |
| Locus_11132_Transcript_1/1_Conf_1.000 | 481  | 20 | 2.25E-14 | EFO24820.1     | 62  | 82.0333 | 116 | 72  | hypothetical protein LOAG_03664               |
| Locus_11133_Transcript_1/2_Conf_1.000 | 1221 | 20 | 3.06E-80 | XP_001898803.1 | 69  | 303.523 | 371 | 256 | G-patch domain containing protein             |
| Locus_11133_Transcript_2/2_Conf_1.000 | 1221 | 20 | 3.06E-80 | XP_001898803.1 | 69  | 303.523 | 371 | 256 | G-patch domain containing protein             |
| Locus_11134_Transcript_1/1_Conf_1.000 | 584  | 20 | 9.06E-98 | CAI40836.1     | 100 | 359.762 | 194 | 194 | prosaposin                                    |

|                                       |      |    |          |                |    |         |     |     |                                                                     |
|---------------------------------------|------|----|----------|----------------|----|---------|-----|-----|---------------------------------------------------------------------|
| Locus_11135_Transcript_1/1_Conf_1.000 | 610  | 20 | 4.01E-78 | NP_496338.1    | 91 | 294.664 | 183 | 167 | hypothetical protein F59E10.3                                       |
| Locus_11136_Transcript_1/1_Conf_1.000 | 532  | 4  | 1.27E-06 | NP_493601.2    | 40 | 56.6102 | 190 | 76  | FERM domain (protein4.1-ezrin-radixin-moesin) family member (frm-1) |
| Locus_11137_Transcript_1/1_Conf_1.000 | 461  | 20 | 3.09E-64 | NP_502290.1    | 93 | 247.669 | 153 | 143 | hypothetical protein F11A10.2                                       |
| Locus_11138_Transcript_1/1_Conf_1.000 | 1540 | 20 | 2.51E-24 | XP_001894571.1 | 48 | 118.242 | 400 | 192 | UBX domain containing protein                                       |
| Locus_11139_Transcript_1/1_Conf_1.000 | 338  | 4  | 7.01E-16 | NP_491339.2    | 63 | 87.0409 | 105 | 67  | hypothetical protein C43E11.11                                      |
| Locus_1114_Transcript_1/1_Conf_1.000  | 541  | 1  | 2.48E-05 | CAR63546.1     | 55 | 52.373  | 65  | 36  | hypothetical protein                                                |
| Locus_11140_Transcript_1/1_Conf_1.000 | 901  | 0  |          |                |    |         |     |     |                                                                     |
| Locus_11141_Transcript_1/1_Conf_1.000 | 497  | 20 | 2.54E-74 | NP_491989.1    | 93 | 281.182 | 165 | 155 | hypothetical protein C30F12.7                                       |
| Locus_11142_Transcript_1/1_Conf_1.000 | 248  | 0  |          |                |    |         |     |     |                                                                     |
| Locus_11143_Transcript_1/1_Conf_1.000 | 333  | 20 | 8.57E-22 | NP_499157.2    | 87 | 106.686 | 110 | 96  | hypothetical protein T05G5.8                                        |
| Locus_11144_Transcript_1/1_Conf_1.000 | 292  | 0  |          |                |    |         |     |     |                                                                     |
| Locus_11145_Transcript_1/1_Conf_1.000 | 506  | 0  |          |                |    |         |     |     |                                                                     |



|                                       |      |    |           |                |    |         |      |     |                                                                              |
|---------------------------------------|------|----|-----------|----------------|----|---------|------|-----|------------------------------------------------------------------------------|
| Locus_11146_Transcript_1/1_Conf_1.000 | 962  | 20 | 4.30E-41  | XP_002631725.1 | 51 | 172.94  | 301  | 155 | Hypothetical protein CBG20927                                                |
| Locus_11147_Transcript_1/1_Conf_1.000 | 639  | 20 | 4.25E-36  | XP_002630784.1 | 70 | 155.221 | 144  | 101 | Hypothetical protein CBG02480                                                |
| Locus_11148_Transcript_1/1_Conf_1.000 | 902  | 20 | 4.99E-81  | NP_492213.1    | 79 | 305.449 | 221  | 176 | Acyl protein THioesterase family member (ath-1)                              |
| Locus_11149_Transcript_1/1_Conf_1.000 | 215  | 0  |           |                |    |         |      |     |                                                                              |
| Locus_1115_Transcript_1/1_Conf_1.000  | 113  | 0  |           |                |    |         |      |     |                                                                              |
| Locus_11150_Transcript_1/1_Conf_1.000 | 1900 | 20 | 2.99E-102 | EFO23042.1     | 57 | 377.481 | 622  | 356 | hypothetical protein LOAG_05445                                              |
| Locus_11151_Transcript_1/1_Conf_1.000 | 724  | 0  |           |                |    |         |      |     |                                                                              |
| Locus_11152_Transcript_1/1_Conf_1.000 | 910  | 20 | 1.41E-131 | NP_502028.1    | 87 | 473.396 | 298  | 260 | hypothetical protein ZK596.2                                                 |
| Locus_11153_Transcript_1/1_Conf_1.000 | 350  | 20 | 1.74E-46  | EFO20855.1     | 88 | 188.734 | 115  | 102 | hypothetical protein LOAG_07635                                              |
| Locus_11154_Transcript_1/1_Conf_1.000 | 261  | 20 | 7.13E-24  | XP_001900101.1 | 82 | 113.62  | 80   | 66  | ADP-specific Phosphofructokinase/Glucokinase conserved region family protein |
| Locus_11155_Transcript_1/1_Conf_1.000 | 3521 | 20 | 2.71E-33  | NP_491539.1    | 40 | 149.443 | 1174 | 475 | SPindle Defective family member (spd-5)                                      |
| Locus_11156_Transcript_1/1_Conf_1.000 | 162  | 20 | 8.40E-17  | EFO20302.1     | 86 | 90.1225 | 53   | 46  | hypothetical protein LOAG_08188                                              |
| Locus_11157_Transcript_1/1_Conf_1.000 | 232  | 20 | 2.15E-12  | NP_001022541.1 | 73 | 75.485  | 60   | 44  | hypothetical protein ZK970.8                                                 |
| Locus_11158_Transcript_1/1_Conf_1.000 | 143  | 0  |           |                |    |         |      |     |                                                                              |
| Locus_11159_Transcript_1/1_Conf_1.000 | 238  | 0  |           |                |    |         |      |     |                                                                              |
| Locus_1116_Transcript_1/1_Conf_1.000  | 1338 | 20 | 2.04E-72  | EFO21147.1     | 59 | 277.715 | 386  | 229 | RNA binding protein                                                          |
| Locus_11160_Transcript_1/1_Conf_1.000 | 252  | 2  | 3.25E-08  | NP_001023399.1 | 88 | 61.6178 | 34   | 30  | hypothetical protein T23B5.4                                                 |
| Locus_11161_Transcript_1/1_Conf_1.000 | 636  | 20 | 2.34E-87  | XP_002639436.1 | 84 | 325.479 | 209  | 177 | Hypothetical protein CBG04029                                                |

|                                       |      |    |           |                |    |         |     |     |                                                                         |
|---------------------------------------|------|----|-----------|----------------|----|---------|-----|-----|-------------------------------------------------------------------------|
| Locus_11162_Transcript_1/3_Conf_0.667 | 681  | 0  |           |                |    |         |     |     |                                                                         |
| Locus_11162_Transcript_2/3_Conf_0.667 | 666  | 1  | 7.99E-04  | ZP_04667639.1  | 42 | 48.1358 | 212 | 90  | 1,4-alpha-glucan branching enzyme                                       |
| Locus_11162_Transcript_3/3_Conf_0.667 | 666  | 0  |           |                |    |         |     |     |                                                                         |
| Locus_11163_Transcript_1/1_Conf_1.000 | 608  | 20 | 3.56E-87  | NP_497886.2    | 95 | 324.709 | 161 | 153 | hypothetical protein R07E5.4                                            |
| Locus_11164_Transcript_1/1_Conf_1.000 | 481  | 20 | 1.56E-15  | XP_002638710.1 | 81 | 85.8853 | 59  | 48  | Hypothetical protein CBG00291                                           |
| Locus_11165_Transcript_1/1_Conf_1.000 | 180  | 2  | 7.53E-05  | XP_002642697.1 | 59 | 50.447  | 59  | 35  | C. briggsae CBR-NPP-15 protein                                          |
| Locus_11166_Transcript_1/1_Conf_1.000 | 153  | 0  |           |                |    |         |     |     |                                                                         |
| Locus_11167_Transcript_1/1_Conf_1.000 | 253  | 20 | 6.73E-30  | XP_002647042.1 | 86 | 133.65  | 84  | 73  | Hypothetical protein CBG03560                                           |
| Locus_11168_Transcript_1/1_Conf_1.000 | 559  | 20 | 5.32E-94  | CAR63641.1     | 96 | 347.051 | 185 | 179 | putative 26S proteasome regulatory chain 4                              |
| Locus_11169_Transcript_1/1_Conf_1.000 | 1069 | 8  | 4.80E-15  | NP_497463.3    | 45 | 86.6557 | 288 | 131 | hypothetical protein Y39A3CL.1                                          |
| Locus_1117_Transcript_1/6_Conf_0.250  | 340  | 0  |           |                |    |         |     |     |                                                                         |
| Locus_1117_Transcript_3/6_Conf_0.708  | 1535 | 0  |           |                |    |         |     |     |                                                                         |
| Locus_1117_Transcript_4/6_Conf_0.542  | 1276 | 0  |           |                |    |         |     |     |                                                                         |
| Locus_1117_Transcript_5/6_Conf_0.667  | 1547 | 0  |           |                |    |         |     |     |                                                                         |
| Locus_1117_Transcript_6/6_Conf_0.667  | 1547 | 0  |           |                |    |         |     |     |                                                                         |
| Locus_11170_Transcript_1/1_Conf_1.000 | 667  | 0  |           |                |    |         |     |     |                                                                         |
| Locus_11171_Transcript_1/1_Conf_1.000 | 129  | 0  |           |                |    |         |     |     |                                                                         |
| Locus_11172_Transcript_1/1_Conf_1.000 | 314  | 0  |           |                |    |         |     |     |                                                                         |
| Locus_11173_Transcript_1/1_Conf_1.000 | 303  | 20 | 2.49E-37  | NP_501339.2    | 88 | 158.303 | 99  | 88  | neuRonal IGCAM family member (rig-4)                                    |
| Locus_11174_Transcript_1/1_Conf_1.000 | 1037 | 20 | 3.15E-56  | EFO24512.1     | 77 | 223.402 | 204 | 159 | hypothetical protein LOAG_03972                                         |
| Locus_11175_Transcript_1/1_Conf_1.000 | 404  | 20 | 1.37E-43  | CAX65056.1     | 78 | 179.104 | 136 | 107 | C. elegans protein F25C8.3d, partially confirmed by transcript evidence |
| Locus_11176_Transcript_1/1_Conf_1.000 | 409  | 20 | 3.04E-35  | XP_002638650.1 | 77 | 151.369 | 135 | 105 | C. briggsae CBR-TGT-2 protein                                           |
| Locus_11177_Transcript_1/1_Conf_1.000 | 261  | 0  |           |                |    |         |     |     |                                                                         |
| Locus_11178_Transcript_1/1_Conf_1.000 | 209  | 0  |           |                |    |         |     |     |                                                                         |
| Locus_11179_Transcript_1/3_Conf_0.600 | 489  | 20 | 1.91E-61  | CAR63538.1     | 75 | 238.424 | 162 | 123 | putative MFP2                                                           |
| Locus_11179_Transcript_2/3_Conf_0.600 | 843  | 20 | 7.07E-103 | CAR63538.1     | 79 | 377.867 | 249 | 198 | putative MFP2                                                           |
| Locus_11179_Transcript_3/3_Conf_0.600 | 843  | 20 | 1.21E-102 | CAR63538.1     | 79 | 377.096 | 249 | 198 | putative MFP2                                                           |

|                                       |      |    |           |                |    |         |     |     |                                         |
|---------------------------------------|------|----|-----------|----------------|----|---------|-----|-----|-----------------------------------------|
| Locus_1118_Transcript_1/2_Conf_1.000  | 4155 | 20 | 0         | ABA18180.1     | 90 | 1613.59 | 925 | 841 | argonaute-like                          |
| Locus_1118_Transcript_2/2_Conf_1.000  | 4149 | 20 | 0         | ABA18180.1     | 90 | 1613.59 | 925 | 841 | argonaute-like                          |
| Locus_11180_Transcript_1/1_Conf_1.000 | 215  | 20 | 1.84E-16  | XP_002642051.1 | 66 | 88.9669 | 72  | 48  | Hypothetical protein CBG17988           |
| Locus_11181_Transcript_1/1_Conf_1.000 | 181  | 5  | 2.49E-24  | EFO16149.1     | 93 | 115.161 | 59  | 55  | hypothetical protein LOAG_12360         |
| Locus_11182_Transcript_1/1_Conf_1.000 | 974  | 20 | 2.56E-57  | NP_498602.1    | 73 | 226.868 | 223 | 164 | hypothetical protein B0361.6            |
| Locus_11183_Transcript_1/1_Conf_1.000 | 173  | 0  |           |                |    |         |     |     |                                         |
| Locus_11184_Transcript_1/1_Conf_1.000 | 145  | 0  |           |                |    |         |     |     |                                         |
| Locus_11185_Transcript_1/1_Conf_1.000 | 988  | 20 | 3.98E-122 | NP_508530.1    | 84 | 442.195 | 328 | 276 | yeast SEC homolog family member (sec-3) |
| Locus_11186_Transcript_1/1_Conf_1.000 | 582  | 5  | 7.11E-10  | XP_002637083.1 | 56 | 67.781  | 127 | 72  | Hypothetical protein CBG09582           |
| Locus_11187_Transcript_1/2_Conf_1.000 | 645  | 20 | 5.62E-76  | NP_502165.2    | 87 | 287.73  | 219 | 192 | hypothetical protein C10C6.6            |
| Locus_11187_Transcript_2/2_Conf_1.000 | 645  | 20 | 5.62E-76  | NP_502165.2    | 87 | 287.73  | 219 | 192 | hypothetical protein C10C6.6            |
| Locus_11188_Transcript_1/1_Conf_1.000 | 530  | 20 | 4.71E-14  | EFO26499.1     | 95 | 81.2629 | 45  | 43  | Cab39 protein                           |
| Locus_11189_Transcript_1/1_Conf_1.000 | 154  | 0  |           |                |    |         |     |     |                                         |
| Locus_1119_Transcript_1/1_Conf_1.000  | 521  | 20 | 2.57E-38  | NP_001022966.1 | 93 | 161.77  | 116 | 109 | hypothetical protein Y82E9BR.3          |

|                                       |     |    |          |                |    |         |     |     |                                                           |
|---------------------------------------|-----|----|----------|----------------|----|---------|-----|-----|-----------------------------------------------------------|
| Locus_11190_Transcript_1/1_Conf_1.000 | 178 | 20 | 1.90E-13 | EFO22275.1     | 80 | 78.9518 | 56  | 45  | hypothetical protein LOAG_06211                           |
| Locus_11191_Transcript_1/1_Conf_1.000 | 228 | 0  |          |                |    |         |     |     |                                                           |
| Locus_11192_Transcript_1/1_Conf_1.000 | 352 | 20 | 5.80E-26 | NP_510321.1    | 69 | 120.553 | 91  | 63  | Erythroid-Like Transcription factor family member (elt-3) |
| Locus_11193_Transcript_1/1_Conf_1.000 | 425 | 20 | 6.23E-20 | XP_002640260.1 | 67 | 100.523 | 139 | 94  | Hypothetical protein CBG12785                             |
| Locus_11194_Transcript_1/1_Conf_1.000 | 598 | 5  | 1.46E-29 | XP_002639411.1 | 62 | 133.265 | 161 | 100 | Hypothetical protein CBG04000                             |
| Locus_11195_Transcript_1/1_Conf_1.000 | 891 | 20 | 2.44E-64 | ACO15781.1     | 72 | 249.98  | 238 | 172 | Hypothetical protein F40G9.17                             |
| Locus_11196_Transcript_1/1_Conf_1.000 | 251 | 1  | 2.31E-27 | NP_001024262.1 | 83 | 125.176 | 83  | 69  | hypothetical protein Y51A2D.21                            |
| Locus_11197_Transcript_1/1_Conf_1.000 | 618 | 20 | 6.48E-55 | ACJ65179.1     | 92 | 217.624 | 153 | 142 | Hypothetical protein Y67D8C.10d                           |
| Locus_11198_Transcript_1/2_Conf_1.000 | 955 | 20 | 1.46E-33 | NP_496477.2    | 50 | 147.902 | 296 | 150 | hypothetical protein D1043.1                              |
| Locus_11198_Transcript_2/2_Conf_1.000 | 622 | 16 | 7.20E-22 | NP_496477.2    | 53 | 107.842 | 186 | 99  | hypothetical protein D1043.1                              |
| Locus_11199_Transcript_1/1_Conf_1.000 | 582 | 0  |          |                |    |         |     |     |                                                           |
| Locus_112_Transcript_1/2_Conf_1.000   | 899 | 3  | 1.24E-15 | XP_002630206.1 | 59 | 88.1965 | 144 | 86  | Hypothetical protein CBG00616                             |
| Locus_112_Transcript_2/2_Conf_1.000   | 601 | 3  | 1.59E-15 | XP_002630206.1 | 60 | 86.6557 | 141 | 85  | Hypothetical protein CBG00616                             |

|                                       |     |    |          |                |    |         |     |     |                                |
|---------------------------------------|-----|----|----------|----------------|----|---------|-----|-----|--------------------------------|
| Locus_1120_Transcript_1/1_Conf_1.000  | 249 | 0  |          |                |    |         |     |     |                                |
| Locus_11200_Transcript_1/1_Conf_1.000 | 299 | 0  |          |                |    |         |     |     |                                |
| Locus_11201_Transcript_1/4_Conf_0.571 | 334 | 20 | 7.74E-31 | NP_498870.1    | 77 | 136.732 | 110 | 85  | hypothetical protein C30C11.1  |
| Locus_11201_Transcript_2/4_Conf_0.571 | 469 | 20 | 3.87E-38 | NP_498870.1    | 79 | 160.999 | 116 | 92  | hypothetical protein C30C11.1  |
| Locus_11201_Transcript_3/4_Conf_0.429 | 334 | 20 | 7.74E-31 | NP_498870.1    | 77 | 136.732 | 110 | 85  | hypothetical protein C30C11.1  |
| Locus_11201_Transcript_4/4_Conf_0.571 | 469 | 20 | 3.87E-38 | NP_498870.1    | 79 | 160.999 | 116 | 92  | hypothetical protein C30C11.1  |
| Locus_11202_Transcript_1/1_Conf_1.000 | 191 | 0  |          |                |    |         |     |     |                                |
| Locus_11203_Transcript_1/1_Conf_1.000 | 341 | 0  |          |                |    |         |     |     |                                |
| Locus_11204_Transcript_1/1_Conf_1.000 | 232 | 0  |          |                |    |         |     |     |                                |
| Locus_11205_Transcript_1/1_Conf_1.000 | 267 | 4  | 2.70E-07 | XP_001894559.1 | 66 | 58.5362 | 56  | 37  | Bromodomain containing protein |
| Locus_11206_Transcript_1/1_Conf_1.000 | 904 | 20 | 9.15E-83 | NP_496402.1    | 82 | 311.227 | 220 | 182 | hypothetical protein T06D8.5   |

|                                       |      |    |           |                |     |         |     |     |                                                    |
|---------------------------------------|------|----|-----------|----------------|-----|---------|-----|-----|----------------------------------------------------|
| Locus_11207_Transcript_1/1_Conf_1.000 | 581  | 20 | 3.48E-118 | 3K9M           | 100 | 427.557 | 193 | 193 | Cathepsin B In Complex With Stefin A               |
| Locus_11208_Transcript_1/1_Conf_1.000 | 899  | 0  |           |                |     |         |     |     |                                                    |
| Locus_11209_Transcript_1/1_Conf_1.000 | 249  | 20 | 1.97E-10  | XP_002845397.1 | 67  | 68.9366 | 73  | 49  | phosphoethanolamine transferase 7                  |
| Locus_1121_Transcript_1/1_Conf_1.000  | 588  | 6  | 1.40E-21  | NP_001023357.2 | 68  | 106.686 | 163 | 111 | hypothetical protein T04C4.1                       |
| Locus_11210_Transcript_1/1_Conf_1.000 | 328  | 0  |           |                |     |         |     |     |                                                    |
| Locus_11211_Transcript_1/2_Conf_1.000 | 204  | 0  |           |                |     |         |     |     |                                                    |
| Locus_11211_Transcript_2/2_Conf_1.000 | 216  | 0  |           |                |     |         |     |     |                                                    |
| Locus_11212_Transcript_1/1_Conf_1.000 | 170  | 0  |           |                |     |         |     |     |                                                    |
| Locus_11213_Transcript_1/1_Conf_1.000 | 1483 | 20 | 3.34E-127 | NP_506619.1    | 81  | 459.914 | 365 | 299 | RFC (DNA replication factor) family member (rfc-1) |
| Locus_11214_Transcript_1/1_Conf_1.000 | 404  | 0  |           |                |     |         |     |     |                                                    |
| Locus_11215_Transcript_1/1_Conf_1.000 | 355  | 0  |           |                |     |         |     |     |                                                    |
| Locus_11216_Transcript_1/1_Conf_1.000 | 258  | 0  |           |                |     |         |     |     |                                                    |

|                                       |      |    |          |                |     |         |     |     |                                             |
|---------------------------------------|------|----|----------|----------------|-----|---------|-----|-----|---------------------------------------------|
| Locus_11217_Transcript_1/1_Conf_1.000 | 628  | 20 | 3.73E-82 | NP_508190.1    | 85  | 308.145 | 209 | 179 | Diacylglycerol Kinase family member (dgg-1) |
| Locus_11218_Transcript_1/1_Conf_1.000 | 1034 | 5  | 2.04E-39 | XP_002641460.1 | 54  | 167.548 | 340 | 186 | Hypothetical protein CBG13329               |
| Locus_11219_Transcript_1/1_Conf_1.000 | 552  | 20 | 2.30E-57 | Q09261.2       | 79  | 225.328 | 152 | 121 | Uncharacterized protein C32A3.2             |
| Locus_1122_Transcript_1/1_Conf_1.000  | 771  | 0  |          |                |     |         |     |     |                                             |
| Locus_11220_Transcript_1/1_Conf_1.000 | 236  | 20 | 9.30E-08 | BAH16150.1     | 100 | 60.077  | 51  | 51  | NADH dehydrogenase subunit 6                |
| Locus_11221_Transcript_1/1_Conf_1.000 | 281  | 0  |          |                |     |         |     |     |                                             |
| Locus_11222_Transcript_1/1_Conf_1.000 | 242  | 20 | 1.92E-21 | XP_002642159.1 | 78  | 105.531 | 79  | 62  | Hypothetical protein CBG18119               |
| Locus_11223_Transcript_1/1_Conf_1.000 | 1356 | 20 | 0        | XP_002644007.1 | 90  | 706.057 | 410 | 371 | Hypothetical protein CBG17397               |
| Locus_11224_Transcript_1/1_Conf_1.000 | 188  | 0  |          |                |     |         |     |     |                                             |
| Locus_11225_Transcript_1/1_Conf_1.000 | 1096 | 2  | 7.91E-45 | XP_002644320.1 | 52  | 185.652 | 330 | 174 | Hypothetical protein CBG14129               |
| Locus_11226_Transcript_1/1_Conf_1.000 | 586  | 20 | 5.11E-56 | NP_498463.1    | 79  | 221.09  | 174 | 138 | hypothetical protein C13B9.3                |
| Locus_11227_Transcript_1/1_Conf_1.000 | 481  | 20 | 3.93E-43 | XP_002640121.1 | 79  | 177.563 | 123 | 98  | C. briggsae CBR-RBX-2 protein               |

|                                       |      |    |           |                |    |         |     |     |                                                                   |
|---------------------------------------|------|----|-----------|----------------|----|---------|-----|-----|-------------------------------------------------------------------|
| Locus_11228_Transcript_1/1_Conf_1.000 | 1204 | 2  | 1.50E-47  | NP_500551.2    | 52 | 194.897 | 412 | 215 | hypothetical protein F55F10.1                                     |
| Locus_11229_Transcript_1/1_Conf_1.000 | 566  | 0  |           |                |    |         |     |     |                                                                   |
| Locus_1123_Transcript_1/1_Conf_1.000  | 956  | 20 | 1.17E-107 | ACI49193.1     | 75 | 394.045 | 317 | 239 | hypothetical protein Csp3_JD03.002                                |
| Locus_11230_Transcript_1/1_Conf_1.000 | 523  | 7  | 1.31E-29  | XP_001891702.1 | 65 | 132.88  | 132 | 87  | Hypothetical 30.5 kDa protein ZK1321.3 in chromosome II, putative |
| Locus_11231_Transcript_1/1_Conf_1.000 | 287  | 7  | 9.11E-11  | NP_504680.1    | 56 | 70.0922 | 94  | 53  | hypothetical protein ZK1055.7                                     |
| Locus_11232_Transcript_1/1_Conf_1.000 | 149  | 0  |           |                |    |         |     |     |                                                                   |
| Locus_11233_Transcript_1/1_Conf_1.000 | 340  | 20 | 2.38E-40  | XP_002631516.1 | 83 | 168.318 | 112 | 94  | Hypothetical protein CBG20680                                     |
| Locus_11234_Transcript_1/1_Conf_1.000 | 988  | 20 | 1.03E-77  | NP_499890.2    | 69 | 294.664 | 267 | 186 | hypothetical protein T21D12.3                                     |
| Locus_11235_Transcript_1/1_Conf_1.000 | 183  | 3  | 1.51E-05  | XP_001901405.1 | 83 | 52.7582 | 37  | 31  | Conserved hypothetical protein                                    |
| Locus_11236_Transcript_1/1_Conf_1.000 | 1171 | 4  | 1.14E-28  | NP_493404.2    | 50 | 132.109 | 320 | 160 | hypothetical protein Y6B3B.9                                      |
| Locus_11237_Transcript_1/1_Conf_1.000 | 170  | 0  |           |                |    |         |     |     |                                                                   |
| Locus_11238_Transcript_1/2_Conf_1.000 | 750  | 20 | 1.15E-103 | NP_001021395.1 | 87 | 380.178 | 246 | 216 | Receptor Mediated Endocytosis family member (rme-8)               |
| Locus_11238_Transcript_2/2_Conf_1.000 | 538  | 20 | 1.65E-70  | NP_001021395.1 | 88 | 268.855 | 176 | 155 | Receptor Mediated Endocytosis family member (rme-8)               |
| Locus_11239_Transcript_1/1_Conf_1.000 | 1041 | 20 | 1.40E-104 | NP_001033378.1 | 78 | 384.03  | 315 | 247 | Acyl CoA DeHydrogenase family member (acdh-11)                    |
| Locus_1124_Transcript_1/1_Conf_1.000  | 857  | 20 | 3.68E-30  | NP_495106.1    | 72 | 136.346 | 102 | 74  | FUcosyl Transferase family member (fut-3)                         |
| Locus_11240_Transcript_1/1_Conf_1.000 | 317  | 0  |           |                |    |         |     |     |                                                                   |
| Locus_11241_Transcript_1/1_Conf_1.000 | 604  | 20 | 3.56E-47  | CAR63674.1     | 79 | 191.815 | 157 | 125 | putative PeRoXisome assembly factor                               |
| Locus_11242_Transcript_1/1_Conf_1.000 | 947  | 20 | 0         | NP_492020.1    | 99 | 672.159 | 315 | 314 | hypothetical protein K10D3.4                                      |
| Locus_11243_Transcript_1/1_Conf_1.000 | 340  | 0  |           |                |    |         |     |     |                                                                   |
| Locus_11244_Transcript_1/2_Conf_0.667 | 168  | 0  |           |                |    |         |     |     |                                                                   |



|                                       |      |    |          |                |    |         |     |     |                                                                        |
|---------------------------------------|------|----|----------|----------------|----|---------|-----|-----|------------------------------------------------------------------------|
| Locus_11244_Transcript_2/2_Conf_0.667 | 168  | 0  |          |                |    |         |     |     |                                                                        |
| Locus_11245_Transcript_1/3_Conf_0.667 | 1205 | 20 | 3.06E-08 | XP_001900670.1 | 46 | 64.3142 | 191 | 89  | BRCA2 repeat family protein                                            |
| Locus_11245_Transcript_2/3_Conf_0.500 | 743  | 20 | 1.67E-06 | YP_001158279.1 | 35 | 57.3806 | 202 | 72  | hypothetical protein Strop_1435                                        |
| Locus_11245_Transcript_3/3_Conf_0.667 | 1151 | 20 | 3.48E-06 | YP_001158279.1 | 35 | 57.3806 | 202 | 72  | hypothetical protein Strop_1435                                        |
| Locus_11246_Transcript_1/1_Conf_1.000 | 671  | 20 | 2.31E-67 | XP_002633298.1 | 78 | 259.225 | 209 | 165 | C. briggsae CBR-PRX-14 protein                                         |
| Locus_11247_Transcript_1/1_Conf_1.000 | 526  | 20 | 8.93E-34 | XP_001949820.1 | 63 | 146.747 | 152 | 96  | PREDICTED: similar to conserved hypothetical protein                   |
| Locus_11248_Transcript_1/1_Conf_1.000 | 377  | 0  |          |                |    |         |     |     |                                                                        |
| Locus_11249_Transcript_1/1_Conf_1.000 | 249  | 0  |          |                |    |         |     |     |                                                                        |
| Locus_1125_Transcript_1/1_Conf_1.000  | 253  | 3  | 3.35E-21 | NP_001041068.1 | 80 | 104.76  | 73  | 59  | hypothetical protein ZK822.5                                           |
| Locus_11250_Transcript_1/1_Conf_1.000 | 318  | 0  |          |                |    |         |     |     |                                                                        |
| Locus_11251_Transcript_1/1_Conf_1.000 | 334  | 3  | 1.62E-04 | NP_492725.2    | 40 | 49.2914 | 84  | 34  | hypothetical protein F25D7.5                                           |
| Locus_11252_Transcript_1/1_Conf_1.000 | 792  | 20 | 2.08E-29 | XP_001892702.1 | 51 | 133.65  | 267 | 137 | zyg-9 protein                                                          |
| Locus_11253_Transcript_1/1_Conf_1.000 | 813  | 20 | 7.93E-40 | NP_001022052.1 | 61 | 168.318 | 244 | 149 | SREBP Cleavage activating Protein (SCAP) homolog family member (scp-1) |
| Locus_11254_Transcript_1/1_Conf_1.000 | 387  | 0  |          |                |    |         |     |     |                                                                        |
| Locus_11255_Transcript_1/1_Conf_1.000 | 317  | 4  | 1.50E-05 | NP_741096.1    | 55 | 52.7582 | 65  | 36  | hypothetical protein W04B5.3                                           |
| Locus_11256_Transcript_1/1_Conf_1.000 | 1021 | 20 | 8.10E-57 | NP_001023357.2 | 64 | 225.328 | 265 | 172 | hypothetical protein T04C4.1                                           |
| Locus_11257_Transcript_1/1_Conf_1.000 | 891  | 0  |          |                |    |         |     |     |                                                                        |

|                                       |      |    |          |                |    |         |     |     |                                                             |
|---------------------------------------|------|----|----------|----------------|----|---------|-----|-----|-------------------------------------------------------------|
| Locus_11258_Transcript_1/1_Conf_1.000 | 433  | 20 | 3.35E-42 | AAA27985.1     | 90 | 174.481 | 102 | 92  | alpha-collagen                                              |
| Locus_11259_Transcript_1/1_Conf_1.000 | 338  | 10 | 1.16E-10 | EFO17726.1     | 54 | 69.707  | 112 | 61  | hypothetical protein LOAG_10772                             |
| Locus_1126_Transcript_1/3_Conf_0.500  | 1243 | 7  | 9.87E-42 | NP_001123026.1 | 45 | 175.637 | 499 | 225 | RETiculon protein family member (ret-1)                     |
| Locus_1126_Transcript_2/3_Conf_0.667  | 2209 | 20 | 2.04E-89 | NP_506656.2    | 50 | 335.109 | 718 | 366 | RETiculon protein family member (ret-1)                     |
| Locus_1126_Transcript_3/3_Conf_0.333  | 1027 | 20 | 2.30E-59 | NP_506657.3    | 74 | 233.802 | 249 | 185 | RETiculon protein family member (ret-1)                     |
| Locus_11260_Transcript_1/1_Conf_1.000 | 372  | 20 | 2.79E-44 | NP_491777.3    | 80 | 181.415 | 118 | 95  | hypothetical protein T09B4.8                                |
| Locus_11261_Transcript_1/1_Conf_1.000 | 509  | 20 | 2.09E-66 |                | 93 | 254.988 | 169 | 158 | hypothetical protein Y18D10A.15 -<br>Caenorhabditis elegans |
| Locus_11262_Transcript_1/1_Conf_1.000 | 692  | 20 | 2.18E-63 | NP_001021719.1 | 73 | 246.128 | 218 | 160 | hypothetical protein Y110A7A.9                              |
| Locus_11263_Transcript_1/1_Conf_1.000 | 135  | 0  |          |                |    |         |     |     |                                                             |
| Locus_11264_Transcript_1/1_Conf_1.000 | 187  | 10 | 5.00E-09 | NP_001022133.1 | 59 | 64.3142 | 62  | 37  | hypothetical protein F32A5.1                                |
| Locus_11265_Transcript_1/1_Conf_1.000 | 195  | 20 | 8.70E-22 | XP_002604687.1 | 85 | 106.686 | 64  | 55  | hypothetical protein BRAFLDRAFT_282362                      |
| Locus_11266_Transcript_1/1_Conf_1.000 | 154  | 0  |          |                |    |         |     |     |                                                             |
| Locus_11267_Transcript_1/1_Conf_1.000 | 381  | 20 | 5.58E-29 | XP_002632484.1 | 73 | 130.568 | 126 | 93  | Hypothetical protein CBG13719                               |

|                                       |     |    |          |                |     |         |     |     |                                                       |
|---------------------------------------|-----|----|----------|----------------|-----|---------|-----|-----|-------------------------------------------------------|
| Locus_11268_Transcript_1/1_Conf_1.000 | 238 | 3  | 3.63E-12 | EFO17234.1     | 75  | 74.7146 | 62  | 47  | RecQ helicase                                         |
| Locus_11269_Transcript_1/1_Conf_1.000 | 142 | 0  |          |                |     |         |     |     |                                                       |
| Locus_1127_Transcript_1/1_Conf_1.000  | 854 | 20 | 1.30E-35 | NP_502208.1    | 61  | 154.451 | 173 | 107 | AuTophagy (yeast Atg homolog) family member (atg-4.2) |
| Locus_11270_Transcript_1/1_Conf_1.000 | 682 | 20 | 4.72E-55 | ACI49113.1     | 86  | 218.394 | 131 | 113 | hypothetical protein Cbre_JD14.001                    |
| Locus_11271_Transcript_1/1_Conf_1.000 | 186 | 0  |          |                |     |         |     |     |                                                       |
| Locus_11272_Transcript_1/1_Conf_1.000 | 278 | 20 | 6.51E-46 | BAE88120.1     | 100 | 186.808 | 92  | 92  | unnamed protein product                               |
| Locus_11273_Transcript_1/1_Conf_1.000 | 250 | 20 | 2.74E-20 | NP_490990.2    | 78  | 101.679 | 83  | 65  | hypothetical protein Y23H5B.5                         |
| Locus_11274_Transcript_1/2_Conf_1.000 | 602 | 1  | 2.15E-04 | EFO27879.1     | 43  | 49.6766 | 133 | 58  | hypothetical protein LOAG_00601                       |
| Locus_11274_Transcript_2/2_Conf_1.000 | 602 | 1  | 2.15E-04 | EFO27879.1     | 43  | 49.6766 | 133 | 58  | hypothetical protein LOAG_00601                       |
| Locus_11275_Transcript_1/1_Conf_1.000 | 577 | 20 | 2.21E-24 | XP_310936.4    | 79  | 115.931 | 84  | 67  | AGAP000199-PA                                         |
| Locus_11276_Transcript_1/1_Conf_1.000 | 133 | 0  |          |                |     |         |     |     |                                                       |
| Locus_11277_Transcript_1/1_Conf_1.000 | 436 | 20 | 2.09E-44 | XP_002640736.1 | 84  | 181.8   | 119 | 101 | Hypothetical protein CBG19806                         |
| Locus_11278_Transcript_1/1_Conf_1.000 | 779 | 20 | 3.85E-65 | NP_509509.1    | 83  | 252.292 | 167 | 140 | hypothetical protein D1009.1                          |

|                                       |      |    |           |                |     |         |     |     |                                                                 |
|---------------------------------------|------|----|-----------|----------------|-----|---------|-----|-----|-----------------------------------------------------------------|
| Locus_11279_Transcript_1/1_Conf_1.000 | 858  | 20 | 9.30E-82  | NP_495015.1    | 78  | 307.76  | 257 | 202 | NuDiX family member (ndx-6)                                     |
| Locus_1128_Transcript_1/1_Conf_1.000  | 118  | 0  |           |                |     |         |     |     |                                                                 |
| Locus_11280_Transcript_1/1_Conf_1.000 | 153  | 20 | 3.44E-18  | NP_491363.1    | 98  | 94.7449 | 50  | 49  | Dynein Heavy Chain family member (dhc-1)                        |
| Locus_11281_Transcript_1/1_Conf_1.000 | 257  | 0  |           |                |     |         |     |     |                                                                 |
| Locus_11282_Transcript_1/1_Conf_1.000 | 709  | 15 | 8.25E-05  | XP_002318326.1 | 39  | 51.6026 | 258 | 103 | predicted protein                                               |
| Locus_11283_Transcript_1/1_Conf_1.000 | 518  | 3  | 9.29E-17  | NP_001129848.1 | 64  | 90.1225 | 109 | 70  | hypothetical protein C27H2.2                                    |
| Locus_11284_Transcript_1/1_Conf_1.000 | 257  | 0  |           |                |     |         |     |     |                                                                 |
| Locus_11285_Transcript_1/1_Conf_1.000 | 495  | 0  |           |                |     |         |     |     |                                                                 |
| Locus_11286_Transcript_1/1_Conf_1.000 | 227  | 3  | 7.16E-24  | NP_503052.1    | 79  | 113.62  | 78  | 62  | hypothetical protein C52D10.12                                  |
| Locus_11287_Transcript_1/1_Conf_1.000 | 136  | 0  |           |                |     |         |     |     |                                                                 |
| Locus_11288_Transcript_1/1_Conf_1.000 | 804  | 20 | 9.06E-121 | EFO21494.1     | 86  | 437.187 | 265 | 228 | hypothetical protein LOAG_06995                                 |
| Locus_11289_Transcript_1/1_Conf_1.000 | 328  | 20 | 2.85E-49  | 3LQZ           | 100 | 197.978 | 109 | 109 | CrystalStructure Of Hla-Dp2                                     |
| Locus_1129_Transcript_1/1_Conf_1.000  | 1118 | 20 | 1.32E-103 | CAV31790.1     | 84  | 380.948 | 248 | 210 | C. elegans protein Y105E8B.8c, confirmed by transcript evidence |

|                                       |      |    |          |                |     |         |     |     |                                |
|---------------------------------------|------|----|----------|----------------|-----|---------|-----|-----|--------------------------------|
| Locus_11290_Transcript_1/1_Conf_1.000 | 292  | 0  |          |                |     |         |     |     |                                |
| Locus_11291_Transcript_1/1_Conf_1.000 | 458  | 0  |          |                |     |         |     |     |                                |
| Locus_11292_Transcript_1/1_Conf_1.000 | 151  | 5  | 7.45E-13 | XP_002643017.1 | 84  | 77.0258 | 50  | 42  | C. briggsae CBR-POLK-1 protein |
| Locus_11293_Transcript_1/1_Conf_1.000 | 288  | 20 | 2.46E-24 | XP_002632657.1 | 84  | 115.161 | 85  | 72  | C. briggsae CBR-TRA-3 protein  |
| Locus_11294_Transcript_1/1_Conf_1.000 | 253  | 20 | 2.16E-28 | XP_002644773.1 | 94  | 128.642 | 67  | 63  | Hypothetical protein CBG14786  |
| Locus_11295_Transcript_1/2_Conf_1.000 | 627  | 0  |          |                |     |         |     |     |                                |
| Locus_11295_Transcript_2/2_Conf_1.000 | 335  | 1  | 2.77E-04 | XP_001892902.1 | 52  | 48.521  | 71  | 37  | ATPase, AAA family protein     |
| Locus_11296_Transcript_1/1_Conf_1.000 | 278  | 0  |          |                |     |         |     |     |                                |
| Locus_11297_Transcript_1/1_Conf_1.000 | 842  | 20 | 1.59E-46 | XP_002644816.1 | 60  | 190.66  | 265 | 161 | Hypothetical protein CBG14834  |
| Locus_11298_Transcript_1/1_Conf_1.000 | 656  | 0  |          |                |     |         |     |     |                                |
| Locus_11299_Transcript_1/1_Conf_1.000 | 1014 | 20 | 2.26E-51 | NP_495391.1    | 81  | 207.223 | 159 | 130 | hypothetical protein F31E8.4   |
| Locus_113_Transcript_1/2_Conf_1.000   | 919  | 5  | 2.13E-26 | NP_492097.1    | 63  | 124.02  | 261 | 166 | hypothetical protein ZK524.4   |
| Locus_113_Transcript_2/2_Conf_1.000   | 787  | 5  | 2.34E-25 | NP_492097.1    | 63  | 120.168 | 259 | 164 | hypothetical protein ZK524.4   |
| Locus_1130_Transcript_1/1_Conf_1.000  | 612  | 4  | 1.29E-15 | XP_002639202.1 | 65  | 87.0409 | 104 | 68  | Hypothetical protein CBG03746  |
| Locus_11300_Transcript_1/1_Conf_1.000 | 403  | 0  |          |                |     |         |     |     |                                |
| Locus_11301_Transcript_1/1_Conf_1.000 | 408  | 20 | 5.31E-72 | BAG62064.1     | 100 | 273.478 | 135 | 135 | unnamed protein product        |
| Locus_11302_Transcript_1/1_Conf_1.000 | 301  | 2  | 2.60E-18 | NP_493074.2    | 69  | 95.1301 | 99  | 69  | hypothetical protein R05D7.1   |
| Locus_11303_Transcript_1/1_Conf_1.000 | 185  | 0  |          |                |     |         |     |     |                                |
| Locus_11304_Transcript_1/1_Conf_1.000 | 214  | 0  |          |                |     |         |     |     |                                |
| Locus_11305_Transcript_1/1_Conf_1.000 | 226  | 0  |          |                |     |         |     |     |                                |

|                                       |      |    |           |                |    |         |     |     |                                                                   |
|---------------------------------------|------|----|-----------|----------------|----|---------|-----|-----|-------------------------------------------------------------------|
| Locus_11306_Transcript_1/1_Conf_1.000 | 276  | 20 | 1.03E-22  | XP_001900667.1 | 92 | 102.064 | 57  | 53  | Hypothetical 26.6 kDa protein T19C3.4 in chromosome III, putative |
| Locus_11307_Transcript_1/1_Conf_1.000 | 578  | 20 | 5.04E-53  | EFO20071.1     | 77 | 211.075 | 171 | 133 | hypothetical protein LOAG_08420                                   |
| Locus_11308_Transcript_1/1_Conf_1.000 | 471  | 0  |           |                |    |         |     |     |                                                                   |
| Locus_11309_Transcript_1/1_Conf_1.000 | 653  | 20 | 1.66E-107 | NP_508927.2    | 92 | 392.504 | 217 | 200 | DihydroPYrimidine Dehydrogenase family member (dpyd-1)            |
| Locus_1131_Transcript_1/1_Conf_1.000  | 1513 | 20 | 6.24E-137 | XP_002635005.1 | 70 | 492.271 | 458 | 323 | C. briggsae CBR-ERS-3 protein                                     |
| Locus_11310_Transcript_1/1_Conf_1.000 | 477  | 20 | 2.81E-65  | NP_001122979.1 | 96 | 251.136 | 132 | 127 | hypothetical protein M03F8.3                                      |
| Locus_11311_Transcript_1/1_Conf_1.000 | 357  | 20 | 3.50E-15  | NP_493404.2    | 64 | 84.7297 | 113 | 73  | hypothetical protein Y6B3B.9                                      |
| Locus_11312_Transcript_1/1_Conf_1.000 | 252  | 20 | 2.65E-18  | NP_001023351.1 | 67 | 95.1301 | 74  | 50  | hypothetical protein T01G1.4                                      |
| Locus_11313_Transcript_1/1_Conf_1.000 | 233  | 2  | 1.76E-14  | XP_002643270.1 | 79 | 82.4185 | 62  | 49  | Hypothetical protein CBG08142                                     |
| Locus_11314_Transcript_1/1_Conf_1.000 | 329  | 20 | 2.86E-33  | NP_495799.1    | 79 | 144.821 | 106 | 84  | hypothetical protein T13H5.4                                      |
| Locus_11315_Transcript_1/1_Conf_1.000 | 167  | 0  |           |                |    |         |     |     |                                                                   |

|                                       |     |    |           |                |    |         |     |     |                                                                  |
|---------------------------------------|-----|----|-----------|----------------|----|---------|-----|-----|------------------------------------------------------------------|
| Locus_11316_Transcript_1/1_Conf_1.000 | 557 | 20 | 2.48E-91  | A8X4H1.2       | 91 | 338.191 | 185 | 170 | Dual specificity tyrosine-phosphorylation-regulated kinase mbk-1 |
| Locus_11317_Transcript_1/1_Conf_1.000 | 314 | 0  |           |                |    |         |     |     |                                                                  |
| Locus_11318_Transcript_1/1_Conf_1.000 | 375 | 0  |           |                |    |         |     |     |                                                                  |
| Locus_11319_Transcript_1/1_Conf_1.000 | 629 | 0  |           |                |    |         |     |     |                                                                  |
| Locus_1132_Transcript_1/1_Conf_1.000  | 992 | 20 | 8.54E-40  | XP_001897511.1 | 77 | 168.703 | 130 | 101 | hypothetical protein Bm1_30365                                   |
| Locus_11320_Transcript_1/1_Conf_1.000 | 423 | 0  |           |                |    |         |     |     |                                                                  |
| Locus_11321_Transcript_1/1_Conf_1.000 | 252 | 0  |           |                |    |         |     |     |                                                                  |
| Locus_11322_Transcript_1/1_Conf_1.000 | 979 | 20 | 3.55E-123 | AAA03517.1     | 91 | 445.662 | 320 | 293 | kinesin-related protein                                          |
| Locus_11323_Transcript_1/1_Conf_1.000 | 390 | 0  |           |                |    |         |     |     |                                                                  |
| Locus_11324_Transcript_1/1_Conf_1.000 | 643 | 20 | 1.06E-42  | XP_002631498.1 | 62 | 177.178 | 169 | 106 | C. briggsae CBR-JMJD-2 protein                                   |
| Locus_11325_Transcript_1/1_Conf_1.000 | 372 | 20 | 1.70E-17  | XP_002647384.1 | 92 | 92.4337 | 51  | 47  | Hypothetical protein CBG06449                                    |
| Locus_11326_Transcript_1/1_Conf_1.000 | 977 | 20 | 1.40E-95  | XP_002631498.1 | 68 | 353.984 | 320 | 220 | C. briggsae CBR-JMJD-2 protein                                   |
| Locus_11327_Transcript_1/1_Conf_1.000 | 696 | 20 | 1.33E-116 | NP_496968.1    | 93 | 422.935 | 231 | 217 | hypothetical protein Y48B6A.12                                   |
| Locus_11328_Transcript_1/1_Conf_1.000 | 471 | 0  |           |                |    |         |     |     |                                                                  |
| Locus_11329_Transcript_1/1_Conf_1.000 | 283 | 0  |           |                |    |         |     |     |                                                                  |

|                                       |     |    |          |                |    |         |     |     |                                                                                                  |
|---------------------------------------|-----|----|----------|----------------|----|---------|-----|-----|--------------------------------------------------------------------------------------------------|
| Locus_1133_Transcript_1/1_Conf_1.000  | 457 | 20 | 3.79E-62 | XP_002638971.1 | 93 | 240.736 | 133 | 125 | C. briggsae CBR-RPL-27 protein                                                                   |
| Locus_11330_Transcript_1/1_Conf_1.000 | 619 | 4  | 9.11E-33 | EFO26206.1     | 60 | 144.05  | 170 | 103 | hypothetical protein LOAG_02278                                                                  |
| Locus_11331_Transcript_1/1_Conf_1.000 | 349 | 7  | 3.30E-29 | ADI24623.1     | 77 | 131.339 | 119 | 92  | Copine domain protein, atypical protein 2, isoform c, partially confirmed by transcript evidence |
| Locus_11332_Transcript_1/1_Conf_1.000 | 757 | 20 | 2.61E-55 | CBA11992.1     | 61 | 219.55  | 250 | 154 | endonuclease-reverse transcriptase HmRTE-e01                                                     |
| Locus_11333_Transcript_1/1_Conf_1.000 | 618 | 20 | 4.77E-74 | NP_506610.1    | 79 | 281.182 | 203 | 162 | Patterned Expression Site family member (pes-9)                                                  |
| Locus_11334_Transcript_1/2_Conf_1.000 | 141 | 0  |          |                |    |         |     |     |                                                                                                  |
| Locus_11334_Transcript_2/2_Conf_1.000 | 165 | 0  |          |                |    |         |     |     |                                                                                                  |
| Locus_11335_Transcript_1/1_Conf_1.000 | 299 | 0  |          |                |    |         |     |     |                                                                                                  |
| Locus_11336_Transcript_1/1_Conf_1.000 | 389 | 20 | 2.18E-17 | NP_507807.1    | 80 | 92.0485 | 71  | 57  | hypothetical protein Y43F8C.7                                                                    |
| Locus_11337_Transcript_1/1_Conf_1.000 | 486 | 20 | 7.30E-53 | NP_495988.1    | 79 | 209.92  | 161 | 128 | Eukaryotic Initiation Factor family member (eif-3.F)                                             |
| Locus_11338_Transcript_1/1_Conf_1.000 | 161 | 20 | 1.44E-08 | XP_002643286.1 | 71 | 62.7734 | 53  | 38  | Hypothetical protein CBG08162                                                                    |
| Locus_11339_Transcript_1/1_Conf_1.000 | 559 | 3  | 9.28E-14 | XP_002641618.1 | 56 | 80.4925 | 187 | 105 | Hypothetical protein CBG09938                                                                    |
| Locus_1134_Transcript_1/6_Conf_0.357  | 495 | 20 | 1.60E-52 | NP_509242.1    | 77 | 208.764 | 164 | 127 | hypothetical protein C07D8.6                                                                     |



|                                       |      |    |           |                |     |         |     |     |                                                     |
|---------------------------------------|------|----|-----------|----------------|-----|---------|-----|-----|-----------------------------------------------------|
| Locus_1134_Transcript_2/6_Conf_0.357  | 537  | 20 | 1.83E-53  | NP_509242.1    | 77  | 212.231 | 166 | 129 | hypothetical protein C07D8.6                        |
| Locus_1134_Transcript_3/6_Conf_0.357  | 1046 | 20 | 6.96E-104 | NP_509242.1    | 76  | 381.719 | 306 | 235 | hypothetical protein C07D8.6                        |
| Locus_1134_Transcript_4/6_Conf_0.357  | 1046 | 20 | 6.96E-104 | NP_509242.1    | 76  | 381.719 | 306 | 235 | hypothetical protein C07D8.6                        |
| Locus_1134_Transcript_5/6_Conf_0.357  | 1046 | 20 | 1.07E-104 | NP_509242.1    | 76  | 384.415 | 306 | 235 | hypothetical protein C07D8.6                        |
| Locus_1134_Transcript_6/6_Conf_0.357  | 1046 | 20 | 1.07E-104 | NP_509242.1    | 76  | 384.415 | 306 | 235 | hypothetical protein C07D8.6                        |
| Locus_11340_Transcript_1/1_Conf_1.000 | 559  | 20 | 4.00E-41  | NP_505918.2    | 66  | 171.4   | 197 | 131 | Tubulin Tyrosine Ligase Like family member (ttl1-5) |
| Locus_11341_Transcript_1/1_Conf_1.000 | 932  |    |           |                |     |         |     |     |                                                     |
| Locus_11342_Transcript_1/1_Conf_1.000 | 323  | 0  |           |                |     |         |     |     |                                                     |
| Locus_11343_Transcript_1/2_Conf_1.000 | 688  | 20 | 4.46E-93  | XP_002630033.1 | 84  | 344.739 | 226 | 191 | C. briggsae CBR-PUF-12 protein                      |
| Locus_11343_Transcript_2/2_Conf_1.000 | 688  | 20 | 7.60E-93  | XP_002630033.1 | 84  | 343.969 | 226 | 191 | C. briggsae CBR-PUF-12 protein                      |
| Locus_11344_Transcript_1/1_Conf_1.000 | 1079 | 20 | 6.98E-38  | EFO17895.1     | 52  | 162.54  | 260 | 137 | hypothetical protein LOAG_10603                     |
| Locus_11345_Transcript_1/1_Conf_1.000 | 223  | 0  |           |                |     |         |     |     |                                                     |
| Locus_11346_Transcript_1/1_Conf_1.000 | 354  | 0  |           |                |     |         |     |     |                                                     |
| Locus_11347_Transcript_1/1_Conf_1.000 | 550  | 0  |           |                |     |         |     |     |                                                     |
| Locus_11348_Transcript_1/1_Conf_1.000 | 502  | 20 | 1.64E-52  | XP_002636901.1 | 80  | 208.764 | 166 | 134 | Hypothetical protein CBG09363                       |
| Locus_11349_Transcript_1/1_Conf_1.000 | 222  | 0  |           |                |     |         |     |     |                                                     |
| Locus_1135_Transcript_1/1_Conf_1.000  | 997  | 20 | 1.40E-98  | NP_498051.1    | 80  | 363.999 | 283 | 228 | hypothetical protein C27F2.4                        |
| Locus_11350_Transcript_1/1_Conf_1.000 | 648  | 0  |           |                |     |         |     |     |                                                     |
| Locus_11351_Transcript_1/1_Conf_1.000 | 250  | 0  |           |                |     |         |     |     |                                                     |
| Locus_11352_Transcript_1/1_Conf_1.000 | 325  | 4  | 6.39E-41  | EFO17984.1     | 84  | 170.244 | 107 | 90  | hypothetical protein LOAG_10513                     |
| Locus_11353_Transcript_1/1_Conf_1.000 | 307  | 2  | 1.67E-17  | XP_002631009.1 | 60  | 92.4337 | 113 | 68  | Hypothetical protein CBG02761                       |
| Locus_11354_Transcript_1/1_Conf_1.000 | 377  | 20 | 1.52E-58  | ADG29194.1     | 100 | 228.794 | 114 | 114 | 40S ribosomal protein S23                           |

|                                       |      |    |          |                |    |         |     |     |                                                                 |
|---------------------------------------|------|----|----------|----------------|----|---------|-----|-----|-----------------------------------------------------------------|
| Locus_11355_Transcript_1/1_Conf_1.000 | 777  | 20 | 6.88E-22 | EFO23574.1     | 59 | 108.612 | 126 | 75  | hypothetical protein LOAG_04910                                 |
| Locus_11356_Transcript_1/1_Conf_1.000 | 944  | 20 | 5.23E-92 | NP_871684.1    | 87 | 342.043 | 231 | 201 | COenzyme Q (ubiquinone) biosynthesis family member (coq-2)      |
| Locus_11357_Transcript_1/1_Conf_1.000 | 178  | 20 | 2.94E-14 | XP_002643972.1 | 81 | 81.6481 | 61  | 50  | C. briggsae CBR-SLO-2 protein                                   |
| Locus_11358_Transcript_1/1_Conf_1.000 | 438  | 0  |          |                |    |         |     |     |                                                                 |
| Locus_11359_Transcript_1/1_Conf_1.000 | 329  | 20 | 6.62E-22 | NP_001041137.1 | 82 | 107.071 | 101 | 83  | Alpha MANnosidase family member (aman-2)                        |
| Locus_1136_Transcript_1/1_Conf_1.000  | 1684 | 4  | 2.30E-34 | NP_490917.3    | 55 | 151.754 | 207 | 114 | hypothetical protein Y20F4.2                                    |
| Locus_11360_Transcript_1/1_Conf_1.000 | 687  | 20 | 5.54E-35 | EFO23859.1     | 63 | 151.754 | 183 | 116 | hypothetical protein LOAG_04629                                 |
| Locus_11361_Transcript_1/1_Conf_1.000 | 169  | 0  |          |                |    |         |     |     |                                                                 |
| Locus_11362_Transcript_1/1_Conf_1.000 | 359  | 0  |          |                |    |         |     |     |                                                                 |
| Locus_11363_Transcript_1/1_Conf_1.000 | 395  | 0  |          |                |    |         |     |     |                                                                 |
| Locus_11364_Transcript_1/2_Conf_1.000 | 691  | 20 | 3.40E-24 | NP_509021.2    | 51 | 115.931 | 239 | 122 | hypothetical protein C15H9.4                                    |
| Locus_11364_Transcript_2/2_Conf_1.000 | 679  | 20 | 5.56E-24 | XP_002644813.1 | 54 | 115.161 | 242 | 131 | Hypothetical protein CBG14831                                   |
| Locus_11365_Transcript_1/1_Conf_1.000 | 137  | 1  | 4.27E-05 | NP_494994.1    | 62 | 51.2174 | 45  | 28  | hypothetical protein ZK622.1                                    |
| Locus_11366_Transcript_1/1_Conf_1.000 | 937  | 2  | 8.69E-23 | NP_510225.2    | 52 | 112.079 | 317 | 167 | hypothetical protein C49F8.2                                    |
| Locus_11367_Transcript_1/1_Conf_1.000 | 404  | 2  | 2.07E-07 | NP_509527.1    | 47 | 58.9214 | 120 | 57  | Sodium:Neurotransmitter symporter Family family member (snf-12) |
| Locus_11368_Transcript_1/1_Conf_1.000 | 529  | 20 | 7.45E-44 | XP_002642085.1 | 70 | 180.259 | 151 | 107 | Hypothetical protein CBG18026                                   |

|                                       |      |    |          |                |    |         |     |     |                                                                     |
|---------------------------------------|------|----|----------|----------------|----|---------|-----|-----|---------------------------------------------------------------------|
| Locus_11369_Transcript_1/1_Conf_1.000 | 2162 | 20 | 0        | NP_492839.4    | 82 | 769.615 | 580 | 476 | Leucine-rich repeats, Ras-like domain, Kinase family member (Irk-1) |
| Locus_1137_Transcript_1/1_Conf_1.000  | 1703 | 20 | 0        | NP_498568.1    | 86 | 863.988 | 560 | 484 | fatty Acid CoA Synthetase family member (acs-16)                    |
| Locus_11370_Transcript_1/1_Conf_1.000 | 461  | 20 | 1.61E-20 | NP_497688.2    | 62 | 102.449 | 134 | 84  | hypothetical protein Y53G8AR.5                                      |
| Locus_11371_Transcript_1/1_Conf_1.000 | 237  | 2  | 3.40E-10 | XP_001898035.1 | 61 | 68.1662 | 77  | 47  | hypothetical protein Bm1_32955                                      |
| Locus_11372_Transcript_1/1_Conf_1.000 | 168  | 0  |          |                |    |         |     |     |                                                                     |
| Locus_11373_Transcript_1/3_Conf_0.500 | 171  | 0  |          |                |    |         |     |     |                                                                     |
| Locus_11373_Transcript_2/3_Conf_0.500 | 171  | 0  |          |                |    |         |     |     |                                                                     |
| Locus_11373_Transcript_3/3_Conf_0.667 | 171  | 0  |          |                |    |         |     |     |                                                                     |
| Locus_11374_Transcript_1/1_Conf_1.000 | 195  | 0  |          |                |    |         |     |     |                                                                     |
| Locus_11375_Transcript_1/1_Conf_1.000 | 753  | 14 | 1.86E-45 | NP_506662.1    | 59 | 186.808 | 231 | 137 | hypothetical protein ZC412.3                                        |
| Locus_11376_Transcript_1/1_Conf_1.000 | 1024 | 4  | 7.69E-23 | XP_002629901.1 | 52 | 112.464 | 252 | 132 | Hypothetical protein CBG21942                                       |
| Locus_11377_Transcript_1/1_Conf_1.000 | 733  | 2  | 2.67E-09 | CAP34328.1     | 66 | 66.6254 | 59  | 39  | Hypothetical protein CBG16019                                       |
| Locus_11378_Transcript_1/1_Conf_1.000 | 233  | 0  |          |                |    |         |     |     |                                                                     |
| Locus_11379_Transcript_1/1_Conf_1.000 | 299  | 20 | 6.16E-44 | NP_502268.1    | 89 | 180.259 | 99  | 89  | TRNA Guanine Transglycosylase family member (tgt-1)                 |
| Locus_1138_Transcript_1/1_Conf_1.000  | 1471 | 20 | 0        | XP_002640255.1 | 86 | 706.442 | 435 | 378 | C. briggsae CBR-UNC-87 protein                                      |
| Locus_11380_Transcript_1/1_Conf_1.000 | 252  | 9  | 2.25E-09 | XP_001896064.1 | 69 | 65.4698 | 59  | 41  | hypothetical protein Bm1_23035                                      |
| Locus_11381_Transcript_1/1_Conf_1.000 | 361  | 3  | 1.02E-14 | NP_491456.2    | 70 | 83.1889 | 75  | 53  | hypothetical protein F57C9.6                                        |
| Locus_11382_Transcript_1/1_Conf_1.000 | 354  | 2  | 4.31E-05 | NP_508627.5    | 74 | 51.2174 | 39  | 29  | Sensory AXon guidance family member (sax-1)                         |
| Locus_11383_Transcript_1/1_Conf_1.000 | 327  | 6  | 9.25E-16 | NP_490834.1    | 60 | 86.6557 | 100 | 60  | hypothetical protein Y48G8AL.1                                      |
| Locus_11384_Transcript_1/1_Conf_1.000 | 198  | 0  |          |                |    |         |     |     |                                                                     |
| Locus_11385_Transcript_1/1_Conf_1.000 | 652  | 20 | 5.56E-79 | XP_002633800.1 | 81 | 297.745 | 219 | 178 | C. briggsae CBR-RBD-1 protein                                       |
| Locus_11386_Transcript_1/1_Conf_1.000 | 1033 | 0  |          |                |    |         |     |     |                                                                     |
| Locus_11387_Transcript_1/1_Conf_1.000 | 568  | 20 | 5.10E-71 | NP_493701.1    | 80 | 270.781 | 189 | 152 | hypothetical protein K01A2.5                                        |

|                                       |      |    |           |                |    |         |     |     |                                                               |
|---------------------------------------|------|----|-----------|----------------|----|---------|-----|-----|---------------------------------------------------------------|
| Locus_11388_Transcript_1/1_Conf_1.000 | 239  | 8  | 9.85E-26  | NP_001040987.1 | 84 | 119.783 | 79  | 67  | ALP/Enigma encoding family member (alp-1)                     |
| Locus_11389_Transcript_1/1_Conf_1.000 | 589  | 20 | 2.37E-37  | NP_503059.2    | 88 | 159.073 | 92  | 81  | hypothetical protein ZK550.3                                  |
| Locus_1139_Transcript_1/1_Conf_1.000  | 1014 | 20 | 4.79E-102 | EFO22864.1     | 81 | 375.555 | 274 | 223 | 3'-phosphoadenosine 5'-phosphosulfate synthase 2              |
| Locus_11390_Transcript_1/1_Conf_1.000 | 178  | 0  |           |                |    |         |     |     |                                                               |
| Locus_11391_Transcript_1/1_Conf_1.000 | 309  | 20 | 5.15E-35  | XP_001900807.1 | 84 | 150.599 | 102 | 86  | peptidyl-prolyl cis-trans isomerase, FKBP-type family protein |
| Locus_11392_Transcript_1/1_Conf_1.000 | 546  | 20 | 2.91E-41  | XP_002646691.1 | 78 | 171.785 | 134 | 105 | Hypothetical protein CBG13068                                 |
| Locus_11393_Transcript_1/1_Conf_1.000 | 639  | 20 | 1.76E-90  | EFO23380.1     | 92 | 335.88  | 193 | 178 | BTB/POZ domain-containing protein                             |
| Locus_11394_Transcript_1/1_Conf_1.000 | 609  | 0  |           |                |    |         |     |     |                                                               |
| Locus_11395_Transcript_1/1_Conf_1.000 | 289  | 0  |           |                |    |         |     |     |                                                               |
| Locus_11396_Transcript_1/1_Conf_1.000 | 354  | 20 | 1.37E-43  | XP_002630114.1 | 86 | 179.104 | 111 | 96  | C. briggsae CBR-PYR-1 protein                                 |
| Locus_11397_Transcript_1/1_Conf_1.000 | 243  | 1  | 2.42E-08  | CAR63594.1     | 62 | 62.003  | 79  | 49  | hypothetical protein                                          |
| Locus_11398_Transcript_1/1_Conf_1.000 | 2886 | 20 | 1.65E-158 | NP_510290.1    | 63 | 565.074 | 807 | 511 | Germinal Center Kinase family member (gck-4)                  |
| Locus_11399_Transcript_1/1_Conf_1.000 | 787  | 0  |           |                |    |         |     |     |                                                               |
| Locus_114_Transcript_1/1_Conf_1.000   | 1512 | 20 | 1.35E-123 | NP_497506.3    | 64 | 447.973 | 540 | 346 | hypothetical protein Y48G9A.3                                 |

|                                       |      |    |          |                |     |         |     |     |                                                                         |
|---------------------------------------|------|----|----------|----------------|-----|---------|-----|-----|-------------------------------------------------------------------------|
| Locus_1140_Transcript_1/1_Conf_1.000  | 961  | 20 | 1.04E-95 | XP_002634374.1 | 100 | 354.369 | 177 | 177 | C. briggsae CBR-ARF-3 protein                                           |
| Locus_11400_Transcript_1/1_Conf_1.000 | 134  | 0  |          |                |     |         |     |     |                                                                         |
| Locus_11401_Transcript_1/1_Conf_1.000 | 1973 | 20 | 0        | NP_499392.1    | 82  | 837.025 | 625 | 516 | OXidative stress Induced family member (oxi-1)                          |
| Locus_11402_Transcript_1/1_Conf_1.000 | 562  | 20 | 1.13E-91 | AAT02163.1     | 96  | 339.347 | 176 | 169 | hypothetical protein L3ni56 isoform a                                   |
| Locus_11403_Transcript_1/1_Conf_1.000 | 397  | 0  |          |                |     |         |     |     |                                                                         |
| Locus_11404_Transcript_1/1_Conf_1.000 | 485  | 0  |          |                |     |         |     |     |                                                                         |
| Locus_11405_Transcript_1/1_Conf_1.000 | 664  | 20 | 3.23E-98 | XP_002646363.1 | 90  | 361.688 | 220 | 200 | Hypothetical protein CBG12078                                           |
| Locus_11406_Transcript_1/1_Conf_1.000 | 441  | 2  | 1.43E-48 | CAR63706.1     | 93  | 195.667 | 138 | 129 | putative FOS (B-Zip transcription factor) homolog family member         |
| Locus_11407_Transcript_1/1_Conf_1.000 | 565  | 20 | 3.30E-22 | EFO23808.1     | 61  | 108.612 | 136 | 84  | hypothetical protein LOAG_04674                                         |
| Locus_11408_Transcript_1/1_Conf_1.000 | 478  | 5  | 1.24E-04 | XP_805431.1    | 43  | 49.6766 | 112 | 49  | hypothetical protein                                                    |
| Locus_11409_Transcript_1/1_Conf_1.000 | 1904 | 20 | 0        | NP_504245.3    | 72  | 738.799 | 636 | 464 | hypothetical protein Y61A9LA.10                                         |
| Locus_1141_Transcript_1/1_Conf_1.000  | 259  | 0  |          |                |     |         |     |     |                                                                         |
| Locus_11410_Transcript_1/1_Conf_1.000 | 613  | 20 | 4.47E-93 | XP_001896600.1 | 93  | 344.354 | 183 | 172 | peptidyl-prolyl cis-trans isomerase 11                                  |
| Locus_11411_Transcript_1/1_Conf_1.000 | 363  | 0  |          |                |     |         |     |     |                                                                         |
| Locus_11412_Transcript_1/1_Conf_1.000 | 855  | 20 | 2.09E-25 | CAZ65529.1     | 69  | 120.553 | 133 | 92  | C. elegans protein T28C6.7b, partially confirmed by transcript evidence |

|                                       |      |    |          |                |    |         |     |     |                                                                    |
|---------------------------------------|------|----|----------|----------------|----|---------|-----|-----|--------------------------------------------------------------------|
| Locus_11413_Transcript_1/1_Conf_1.000 | 523  | 20 | 5.46E-44 | EFO22205.1     | 94 | 180.644 | 113 | 107 | small Nuclear Ribonucleoprotein family member                      |
| Locus_11414_Transcript_1/1_Conf_1.000 | 673  | 20 | 3.30E-29 | XP_002642913.1 | 58 | 132.494 | 176 | 103 | C. briggsae CBR-SMI-1 protein                                      |
| Locus_11415_Transcript_1/1_Conf_1.000 | 1268 | 9  | 6.57E-25 | ABJ99064.1     | 44 | 119.783 | 427 | 192 | Hypothetical protein W03A3.2                                       |
| Locus_11416_Transcript_1/1_Conf_1.000 | 341  | 4  | 4.82E-25 | XP_002635120.1 | 67 | 117.472 | 110 | 74  | Hypothetical protein CBG11342                                      |
| Locus_11417_Transcript_1/1_Conf_1.000 | 998  | 20 | 3.96E-85 | XP_002631495.1 | 68 | 319.316 | 329 | 226 | Hypothetical protein CBG20655                                      |
| Locus_11418_Transcript_1/1_Conf_1.000 | 573  | 5  | 3.23E-36 | EFO27097.1     | 72 | 155.221 | 131 | 95  | hypothetical protein LOAG_01386                                    |
| Locus_11419_Transcript_1/1_Conf_1.000 | 569  | 6  | 8.80E-31 | NP_001122953.1 | 73 | 137.117 | 142 | 104 | hypothetical protein F53H10.2                                      |
| Locus_1142_Transcript_1/1_Conf_1.000  | 1041 | 20 | 2.18E-65 | XP_001891854.1 | 65 | 253.832 | 353 | 230 | Conserved oligomeric Golgi complex component 4                     |
| Locus_11420_Transcript_1/1_Conf_1.000 | 630  | 3  | 1.78E-31 | NP_508493.1    | 60 | 139.813 | 215 | 131 | protein KINase family member (kin-29)                              |
| Locus_11421_Transcript_1/1_Conf_1.000 | 326  | 20 | 8.40E-17 | XP_001896013.1 | 66 | 90.1225 | 115 | 76  | Protein kinase domain containing protein                           |
| Locus_11422_Transcript_1/1_Conf_1.000 | 256  | 20 | 5.31E-27 | NP_001041301.1 | 82 | 124.02  | 85  | 70  | hypothetical protein ZK54.1                                        |
| Locus_11423_Transcript_1/1_Conf_1.000 | 240  | 0  |          |                |    |         |     |     |                                                                    |
| Locus_11424_Transcript_1/1_Conf_1.000 | 1067 | 20 | 1.45E-96 | NP_510510.1    | 73 | 357.451 | 282 | 208 | DHHC-types zinc finger transcription factor family member (dhhc-1) |
| Locus_11425_Transcript_1/1_Conf_1.000 | 142  | 0  |          |                |    |         |     |     |                                                                    |
| Locus_11426_Transcript_1/1_Conf_1.000 | 491  | 20 | 1.47E-45 | NP_509186.3    | 72 | 185.652 | 165 | 120 | Carbonic AnHydrase family member (cah-5)                           |
| Locus_11427_Transcript_1/1_Conf_1.000 | 133  | 0  |          |                |    |         |     |     |                                                                    |
| Locus_11428_Transcript_1/1_Conf_1.000 | 271  | 0  |          |                |    |         |     |     |                                                                    |
| Locus_11429_Transcript_1/1_Conf_1.000 | 289  | 0  |          |                |    |         |     |     |                                                                    |

|                                       |      |    |           |                |    |         |     |     |                                                                          |
|---------------------------------------|------|----|-----------|----------------|----|---------|-----|-----|--------------------------------------------------------------------------|
| Locus_1143_Transcript_1/1_Conf_1.000  | 1662 | 20 | 1.56E-51  | EFO23026.1     | 46 | 208.764 | 447 | 208 | MYND finger family protein                                               |
| Locus_11430_Transcript_1/1_Conf_1.000 | 481  | 0  |           |                |    |         |     |     |                                                                          |
| Locus_11431_Transcript_1/1_Conf_1.000 | 239  | 0  |           |                |    |         |     |     |                                                                          |
| Locus_11432_Transcript_1/1_Conf_1.000 | 299  | 0  |           |                |    |         |     |     |                                                                          |
| Locus_11433_Transcript_1/1_Conf_1.000 | 1881 | 20 | 0         | XP_001896664.1 | 85 | 874.389 | 583 | 496 | Protein kinase domain containing protein                                 |
| Locus_11434_Transcript_1/1_Conf_1.000 | 908  | 20 | 3.88E-73  | CAE12199.1     | 64 | 279.256 | 286 | 185 | aspartyl protease precursor                                              |
| Locus_11435_Transcript_1/1_Conf_1.000 | 854  | 20 | 3.38E-76  | NP_508767.1    | 99 | 289.271 | 142 | 141 | AdaPtin, Small chain (clathrin associated complex) family member (aps-2) |
| Locus_11436_Transcript_1/1_Conf_1.000 | 337  | 20 | 6.34E-17  | Q61CX7.2       | 63 | 90.5077 | 96  | 61  | Protein lin-28                                                           |
| Locus_11437_Transcript_1/1_Conf_1.000 | 268  | 4  | 2.07E-07  | NP_498921.3    | 64 | 58.9214 | 88  | 57  | hypothetical protein B0303.11                                            |
| Locus_11438_Transcript_1/1_Conf_1.000 | 936  | 20 | 1.11E-102 | EFO20614.1     | 80 | 377.481 | 302 | 243 | hypothetical protein LOAG_07877                                          |

|                                       |      |    |          |                |    |         |     |     |                                                                         |
|---------------------------------------|------|----|----------|----------------|----|---------|-----|-----|-------------------------------------------------------------------------|
| Locus_11439_Transcript_1/1_Conf_1.000 | 379  | 0  |          |                |    |         |     |     |                                                                         |
| Locus_1144_Transcript_1/1_Conf_1.000  | 856  | 20 | 3.76E-68 | NP_497103.1    | 75 | 232.646 | 244 | 185 | hypothetical protein Y53F4B.18                                          |
| Locus_11440_Transcript_1/2_Conf_1.000 | 350  | 0  |          |                |    |         |     |     |                                                                         |
| Locus_11440_Transcript_2/2_Conf_1.000 | 683  | 0  |          |                |    |         |     |     |                                                                         |
| Locus_11441_Transcript_1/1_Conf_1.000 | 942  | 20 | 5.78E-91 | CAR97821.1     | 75 | 338.576 | 273 | 206 | C. elegans protein F11C1.5d, partially confirmed by transcript evidence |
| Locus_11442_Transcript_1/2_Conf_1.000 | 357  | 0  |          |                |    |         |     |     |                                                                         |
| Locus_11442_Transcript_2/2_Conf_1.000 | 300  | 0  |          |                |    |         |     |     |                                                                         |
| Locus_11443_Transcript_1/1_Conf_1.000 | 528  | 20 | 3.69E-51 | XP_002636692.1 | 72 | 204.527 | 158 | 115 | Hypothetical protein CBG23406                                           |
| Locus_11444_Transcript_1/1_Conf_1.000 | 376  | 0  |          |                |    |         |     |     |                                                                         |
| Locus_11445_Transcript_1/1_Conf_1.000 | 1420 | 20 | 0        | CAR64255.1     | 86 | 659.062 | 454 | 391 | protein RIO1 kinase                                                     |
| Locus_11446_Transcript_1/1_Conf_1.000 | 570  | 20 | 6.16E-56 | NP_497037.1    | 91 | 220.705 | 141 | 129 | ARF-Like family member (arl-3)                                          |
| Locus_11447_Transcript_1/1_Conf_1.000 | 662  | 8  | 4.10E-45 | XP_002639056.1 | 68 | 185.267 | 170 | 117 | C. briggsae CBR-HOT-5 protein                                           |
| Locus_11448_Transcript_1/1_Conf_1.000 | 1248 | 20 | 0        | XP_001895795.1 | 92 | 640.573 | 371 | 343 | actin 1                                                                 |
| Locus_11449_Transcript_1/1_Conf_1.000 | 460  | 20 | 1.59E-52 | NP_491634.1    | 85 | 208.764 | 154 | 131 | hypothetical protein M01E11.2                                           |
| Locus_1145_Transcript_1/2_Conf_1.000  | 777  | 4  | 2.29E-17 | NP_504957.2    | 55 | 93.5893 | 164 | 91  | hypothetical protein C50E3.5                                            |



|                                       |      |    |           |                |     |         |     |     |                                                                                  |
|---------------------------------------|------|----|-----------|----------------|-----|---------|-----|-----|----------------------------------------------------------------------------------|
| Locus_1145_Transcript_2/2_Conf_1.000  | 1739 | 6  | 8.99E-50  | NP_504957.2    | 54  | 202.986 | 396 | 217 | hypothetical protein C50E3.5                                                     |
| Locus_11450_Transcript_1/1_Conf_1.000 | 474  | 0  |           |                |     |         |     |     |                                                                                  |
| Locus_11451_Transcript_1/1_Conf_1.000 | 616  | 20 | 2.69E-53  | AAX29387.1     | 100 | 212.231 | 156 | 156 | ribosomal protein L29                                                            |
| Locus_11452_Transcript_1/1_Conf_1.000 | 741  | 5  | 1.56E-04  | XP_001950169.1 | 38  | 50.8322 | 144 | 56  | PREDICTED: similar to replication factors MCM                                    |
| Locus_11453_Transcript_1/1_Conf_1.000 | 270  | 0  |           |                |     |         |     |     |                                                                                  |
| Locus_11454_Transcript_1/1_Conf_1.000 | 399  | 0  |           |                |     |         |     |     |                                                                                  |
| Locus_11455_Transcript_1/1_Conf_1.000 | 414  | 20 | 1.27E-25  | XP_001233556.1 | 62  | 119.398 | 140 | 87  | PREDICTED: hypothetical protein                                                  |
| Locus_11456_Transcript_1/1_Conf_1.000 | 513  | 20 | 6.42E-63  | NP_871854.1    | 87  | 243.432 | 167 | 146 | SCP(Small C-terminal domain Phosphatase)-Like phosphatase family member (scpl-3) |
| Locus_11457_Transcript_1/1_Conf_1.000 | 537  | 20 | 9.35E-74  | NP_498688.1    | 84  | 279.641 | 178 | 151 | Prolyl Carboxy Peptidase like family member (pcp-1)                              |
| Locus_11458_Transcript_1/1_Conf_1.000 | 189  | 5  | 7.96E-07  | NP_506519.1    | 72  | 56.9954 | 51  | 37  | hypothetical protein T16A9.5                                                     |
| Locus_11459_Transcript_1/1_Conf_1.000 | 237  | 0  |           |                |     |         |     |     |                                                                                  |
| Locus_1146_Transcript_1/1_Conf_1.000  | 969  | 0  |           |                |     |         |     |     |                                                                                  |
| Locus_11460_Transcript_1/1_Conf_1.000 | 914  | 20 | 2.21E-100 | XP_001893912.1 | 81  | 369.777 | 274 | 222 | mRNA capping enzyme, C-terminal domain containing protein                        |
| Locus_11461_Transcript_1/1_Conf_1.000 | 174  | 0  |           |                |     |         |     |     |                                                                                  |
| Locus_11462_Transcript_1/1_Conf_1.000 | 942  | 4  | 1.31E-18  | A8WZU5.2       | 48  | 98.2117 | 290 | 141 | Fanconi-associated nuclease 1 homolog                                            |
| Locus_11463_Transcript_1/1_Conf_1.000 | 421  | 20 | 6.46E-25  | NP_001040864.1 | 69  | 117.087 | 107 | 74  | SMALL family member (sma-4)                                                      |
| Locus_11464_Transcript_1/1_Conf_1.000 | 1249 | 20 | 3.51E-63  | XP_001897220.1 | 58  | 246.899 | 397 | 232 | P120                                                                             |
| Locus_11465_Transcript_1/1_Conf_1.000 | 365  | 4  | 2.75E-12  | XP_001895046.1 | 62  | 75.0998 | 118 | 74  | hypothetical protein                                                             |
| Locus_11466_Transcript_1/1_Conf_1.000 | 225  | 0  |           |                |     |         |     |     |                                                                                  |

|                                       |      |    |           |                |    |         |     |     |                                                 |
|---------------------------------------|------|----|-----------|----------------|----|---------|-----|-----|-------------------------------------------------|
| Locus_11467_Transcript_1/1_Conf_1.000 | 152  | 0  |           |                |    |         |     |     |                                                 |
| Locus_11468_Transcript_1/1_Conf_1.000 | 414  | 20 | 2.18E-09  | XP_002638816.1 | 55 | 65.4698 | 99  | 55  | Hypothetical protein CBG22019                   |
| Locus_11469_Transcript_1/1_Conf_1.000 | 140  | 0  |           |                |    |         |     |     |                                                 |
| Locus_1147_Transcript_1/2_Conf_1.000  | 375  | 20 | 2.88E-33  | ABA00169.1     | 66 | 144.821 | 124 | 83  | Plexin protein 1                                |
| Locus_1147_Transcript_2/2_Conf_1.000  | 375  | 20 | 2.88E-33  | ABA00169.1     | 66 | 144.821 | 124 | 83  | Plexin protein 1                                |
| Locus_11470_Transcript_1/1_Conf_1.000 | 650  | 20 | 3.71E-51  | XP_002636678.1 | 66 | 205.297 | 216 | 144 | C. briggsae CBR-CHE-11 protein                  |
| Locus_11471_Transcript_1/1_Conf_1.000 | 412  | 20 | 1.24E-12  | NP_001020168.1 | 49 | 76.2554 | 159 | 79  | coiled-coil domain-containing protein 93        |
| Locus_11472_Transcript_1/1_Conf_1.000 | 1419 | 20 | 1.43E-79  | XP_002645548.1 | 55 | 301.597 | 467 | 260 | Hypothetical protein CBG05229                   |
| Locus_11473_Transcript_1/1_Conf_1.000 | 1166 | 20 | 7.30E-52  | XP_001893792.1 | 50 | 209.149 | 375 | 189 | Zinc finger, C2H2 type family protein           |
| Locus_11474_Transcript_1/1_Conf_1.000 | 740  | 20 | 2.06E-41  | XP_001900557.1 | 51 | 173.326 | 277 | 143 | Bromodomain containing protein                  |
| Locus_11475_Transcript_1/1_Conf_1.000 | 357  | 0  |           |                |    |         |     |     |                                                 |
| Locus_11476_Transcript_1/1_Conf_1.000 | 1183 | 20 | 2.21E-104 | NP_501491.3    | 75 | 383.645 | 301 | 228 | Heparan SulphoTransferase family member (hst-1) |
| Locus_11477_Transcript_1/1_Conf_1.000 | 239  | 8  | 9.26E-08  | XP_002636450.1 | 75 | 60.077  | 48  | 36  | Hypothetical protein CBG23111                   |
| Locus_11478_Transcript_1/1_Conf_1.000 | 177  | 0  |           |                |    |         |     |     |                                                 |
| Locus_11479_Transcript_1/1_Conf_1.000 | 359  | 0  |           |                |    |         |     |     |                                                 |
| Locus_1148_Transcript_1/1_Conf_1.000  | 324  | 0  |           |                |    |         |     |     |                                                 |

|                                       |     |    |          |                |     |         |     |     |                                           |
|---------------------------------------|-----|----|----------|----------------|-----|---------|-----|-----|-------------------------------------------|
| Locus_11480_Transcript_1/1_Conf_1.000 | 987 | 20 | 5.99E-94 | XP_002632141.1 | 69  | 348.591 | 309 | 215 | C. briggsae CBR-TRE-5 protein             |
| Locus_11481_Transcript_1/1_Conf_1.000 | 284 | 2  | 2.48E-16 | XP_002631194.1 | 78  | 88.5817 | 66  | 52  | C. briggsae CBR-NLP-18 protein            |
| Locus_11482_Transcript_1/2_Conf_1.000 | 501 | 0  |          |                |     |         |     |     |                                           |
| Locus_11482_Transcript_2/2_Conf_1.000 | 501 | 0  |          |                |     |         |     |     |                                           |
| Locus_11483_Transcript_1/2_Conf_1.000 | 480 | 20 | 2.56E-26 | EFO22039.1     | 64  | 121.709 | 146 | 94  | hypothetical protein LOAG_06449           |
| Locus_11483_Transcript_2/2_Conf_1.000 | 480 | 20 | 3.34E-26 | EFO22039.1     | 64  | 121.324 | 146 | 94  | hypothetical protein LOAG_06449           |
| Locus_11484_Transcript_1/1_Conf_1.000 | 841 | 0  |          |                |     |         |     |     |                                           |
| Locus_11485_Transcript_1/1_Conf_1.000 | 178 | 2  | 1.01E-06 | XP_002630757.1 | 66  | 56.6102 | 59  | 39  | Hypothetical protein CBG02451             |
| Locus_11486_Transcript_1/1_Conf_1.000 | 193 | 0  |          |                |     |         |     |     |                                           |
| Locus_11487_Transcript_1/1_Conf_1.000 | 893 | 20 | 5.09E-62 | ACI49172.1     | 67  | 242.276 | 262 | 176 | hypothetical protein Csp3_JD01.004        |
| Locus_11488_Transcript_1/1_Conf_1.000 | 385 | 20 | 3.72E-33 | NP_490883.1    | 100 | 144.436 | 74  | 74  | LSM Sm-like protein family member (Ism-6) |

|                                       |      |    |          |                |    |         |     |     |                                                          |
|---------------------------------------|------|----|----------|----------------|----|---------|-----|-----|----------------------------------------------------------|
| Locus_11489_Transcript_1/1_Conf_1.000 | 301  | 2  | 6.63E-06 | NP_495103.1    | 69 | 53.9138 | 55  | 38  | ZYGote defective: embryonic lethal family member (zyg-1) |
| Locus_1149_Transcript_1/1_Conf_1.000  | 1404 | 20 | 2.92E-85 | NP_494767.1    | 58 | 320.472 | 466 | 273 | hypothetical protein H20J04.2                            |
| Locus_11490_Transcript_1/1_Conf_1.000 | 441  | 20 | 4.61E-39 | XP_002638772.1 | 73 | 164.081 | 142 | 105 | C. briggsae CBR-PTR-21 protein                           |
| Locus_11491_Transcript_1/1_Conf_1.000 | 478  | 20 | 1.31E-38 | XP_002643084.1 | 76 | 162.54  | 119 | 91  | C. briggsae CBR-TAG-174 protein                          |
| Locus_11492_Transcript_1/1_Conf_1.000 | 689  | 20 | 8.68E-97 | ABS50363.1     | 91 | 357.066 | 229 | 210 | LIM domain protein variant                               |
| Locus_11493_Transcript_1/1_Conf_1.000 | 494  | 0  |          |                |    |         |     |     |                                                          |
| Locus_11494_Transcript_1/1_Conf_1.000 | 580  | 0  |          |                |    |         |     |     |                                                          |
| Locus_11495_Transcript_1/1_Conf_1.000 | 297  | 20 | 3.89E-22 | NP_001024903.1 | 67 | 107.842 | 93  | 63  | abnormal DAuer Formation family member (daf-9)           |
| Locus_11496_Transcript_1/1_Conf_1.000 | 195  | 20 | 2.21E-25 | XP_002640668.1 | 96 | 118.627 | 64  | 62  | C. briggsae CBR-UNC-54 protein                           |
| Locus_11497_Transcript_1/1_Conf_1.000 | 448  | 4  | 4.92E-17 | NP_740830.2    | 47 | 90.8929 | 184 | 88  | hypothetical protein Y47G6A.29                           |
| Locus_11498_Transcript_1/1_Conf_1.000 | 146  | 0  |          |                |    |         |     |     |                                                          |
| Locus_11499_Transcript_1/1_Conf_1.000 | 187  | 0  |          |                |    |         |     |     |                                                          |
| Locus_115_Transcript_1/6_Conf_0.235   | 1107 | 20 | 0        | CAR63627.1     | 99 | 652.129 | 326 | 324 | putative Elongation FacTor                               |

|                                       |      |    |           |                |    |         |      |     |                                         |
|---------------------------------------|------|----|-----------|----------------|----|---------|------|-----|-----------------------------------------|
| Locus_115_Transcript_2/6_Conf_0.235   | 770  | 20 | 5.37E-96  | NP_001021266.1 | 72 | 354.755 | 306  | 222 | UNCoordinated family member (unc-44)    |
| Locus_115_Transcript_3/6_Conf_0.412   | 3662 | 20 | 0         | NP_001021268.1 | 77 | 1289.63 | 1034 | 802 | UNCoordinated family member (unc-44)    |
| Locus_115_Transcript_4/6_Conf_0.118   | 1655 | 5  | 9.39E-41  | NP_001021266.1 | 65 | 172.94  | 283  | 185 | UNCoordinated family member (unc-44)    |
| Locus_115_Transcript_5/6_Conf_0.412   | 3644 | 20 | 0         | NP_500898.1    | 77 | 1278.46 | 1028 | 796 | UNCoordinated family member (unc-44)    |
| Locus_115_Transcript_6/6_Conf_0.353   | 2780 | 20 | 0         | NP_492457.1    | 96 | 1558.12 | 852  | 824 | Elongation FacTor family member (eft-2) |
| Locus_1150_Transcript_1/3_Conf_0.750  | 2164 | 2  | 6.08E-22  | XP_002635564.1 | 44 | 110.923 | 347  | 156 | C. briggsae CBR-TAM-1 protein           |
| Locus_1150_Transcript_2/3_Conf_0.750  | 2188 | 2  | 6.17E-22  | XP_002635564.1 | 44 | 110.923 | 347  | 156 | C. briggsae CBR-TAM-1 protein           |
| Locus_1150_Transcript_3/3_Conf_0.750  | 2176 | 2  | 6.13E-22  | XP_002635564.1 | 44 | 110.923 | 347  | 156 | C. briggsae CBR-TAM-1 protein           |
| Locus_11500_Transcript_1/2_Conf_1.000 | 857  | 20 | 3.13E-13  | XP_002646949.1 | 52 | 80.1073 | 177  | 93  | C. briggsae CBR-APD-3 protein           |
| Locus_11500_Transcript_2/2_Conf_1.000 | 670  | 20 | 1.47E-13  | XP_002646949.1 | 52 | 80.4925 | 177  | 93  | C. briggsae CBR-APD-3 protein           |
| Locus_11501_Transcript_1/1_Conf_1.000 | 602  | 3  | 3.90E-22  | NP_491469.2    | 52 | 108.612 | 200  | 104 | hypothetical protein F25F8.1            |
| Locus_11502_Transcript_1/2_Conf_1.000 | 830  | 20 | 2.27E-106 | NP_001022869.1 | 84 | 389.423 | 256  | 217 | hypothetical protein Y42G9A.4           |

|                                       |     |    |           |                |     |         |     |     |                                                         |
|---------------------------------------|-----|----|-----------|----------------|-----|---------|-----|-----|---------------------------------------------------------|
| Locus_11502_Transcript_2/2_Conf_1.000 | 767 | 20 | 7.67E-111 | NP_001022869.1 | 92  | 404.06  | 235 | 218 | hypothetical protein Y42G9A.4                           |
| Locus_11503_Transcript_1/1_Conf_1.000 | 512 | 20 | 1.20E-21  | NP_001024866.1 | 55  | 106.301 | 177 | 98  | hypothetical protein R57.1                              |
| Locus_11504_Transcript_1/4_Conf_0.333 | 548 | 20 | 4.24E-08  | XP_001956624.1 | 50  | 61.6178 | 142 | 71  | GF24494                                                 |
| Locus_11504_Transcript_2/4_Conf_0.333 | 720 | 19 | 3.97E-10  | NP_496398.2    | 43  | 69.3218 | 246 | 107 | hypothetical protein T06D8.1                            |
| Locus_11504_Transcript_3/4_Conf_0.222 | 702 | 0  |           |                |     |         |     |     |                                                         |
| Locus_11504_Transcript_4/4_Conf_0.333 | 378 | 3  | 5.10E-06  | NP_496398.2    | 52  | 54.299  | 97  | 51  | hypothetical protein T06D8.1                            |
| Locus_11505_Transcript_1/1_Conf_1.000 | 398 | 0  |           |                |     |         |     |     |                                                         |
| Locus_11506_Transcript_1/1_Conf_1.000 | 281 | 20 | 1.59E-52  | XP_002930069.1 | 100 | 208.764 | 93  | 93  | PREDICTED: casein kinase II subunit beta-like isoform 1 |

|                                       |      |    |           |                |    |         |     |     |                                                                     |
|---------------------------------------|------|----|-----------|----------------|----|---------|-----|-----|---------------------------------------------------------------------|
| Locus_11507_Transcript_1/1_Conf_1.000 | 526  | 20 | 3.98E-58  | AAF34687.1     | 81 | 227.639 | 175 | 143 | AF223064_1putative microtubule severing protein katanin p60 subunit |
| Locus_11508_Transcript_1/1_Conf_1.000 | 816  | 20 | 2.24E-42  | XP_002117005.1 | 55 | 176.792 | 240 | 134 | hypothetical protein TRIADDRAFT_60996                               |
| Locus_11509_Transcript_1/1_Conf_1.000 | 307  | 1  | 4.72E-04  | EFA84933.1     | 58 | 47.7506 | 58  | 34  | hypothetical protein PPL_01926                                      |
| Locus_1151_Transcript_1/3_Conf_0.667  | 2997 | 20 | 1.12E-165 | XP_002630883.1 | 66 | 588.956 | 735 | 486 | Hypothetical protein CBG02604                                       |
| Locus_1151_Transcript_2/3_Conf_0.667  | 2997 | 20 | 6.54E-166 | XP_002630883.1 | 66 | 589.726 | 735 | 487 | Hypothetical protein CBG02604                                       |
| Locus_1151_Transcript_3/3_Conf_0.667  | 2997 | 20 | 2.49E-165 | XP_002630883.1 | 66 | 587.8   | 735 | 486 | Hypothetical protein CBG02604                                       |
| Locus_11510_Transcript_1/1_Conf_1.000 | 213  | 0  |           |                |    |         |     |     |                                                                     |
| Locus_11511_Transcript_1/1_Conf_1.000 | 227  | 0  |           |                |    |         |     |     |                                                                     |
| Locus_11512_Transcript_1/1_Conf_1.000 | 327  | 0  |           |                |    |         |     |     |                                                                     |
| Locus_11513_Transcript_1/2_Conf_1.000 | 1022 | 20 | 9.58E-50  | XP_001309767.1 | 54 | 201.83  | 323 | 176 | ankyrin repeat protein                                              |
| Locus_11513_Transcript_2/2_Conf_1.000 | 1022 | 20 | 9.58E-50  | XP_001309767.1 | 54 | 201.83  | 323 | 176 | ankyrin repeat protein                                              |

|                                       |      |    |          |                |    |         |     |     |                                                              |
|---------------------------------------|------|----|----------|----------------|----|---------|-----|-----|--------------------------------------------------------------|
| Locus_11514_Transcript_1/1_Conf_1.000 | 828  | 20 | 6.47E-61 | NP_499648.3    | 71 | 238.424 | 228 | 162 | Elongator complex Protein Component family member (elpc-2)   |
| Locus_11515_Transcript_1/1_Conf_1.000 | 128  | 0  |          |                |    |         |     |     |                                                              |
| Locus_11516_Transcript_1/1_Conf_1.000 | 781  | 20 | 5.87E-21 | EFO28351.1     | 65 | 105.531 | 111 | 73  | 2Fe-2S iron-sulfur cluster binding domain-containing protein |
| Locus_11517_Transcript_1/1_Conf_1.000 | 426  | 20 | 5.82E-10 | XP_002595762.1 | 49 | 67.3958 | 143 | 71  | hypothetical protein BRAFLDRAFT_200800                       |
| Locus_11518_Transcript_1/1_Conf_1.000 | 263  | 20 | 3.11E-21 | EDL15956.1     | 85 | 63.929  | 40  | 34  | procollagen, type I, alpha 1, isoform CRA_a                  |
| Locus_11519_Transcript_1/1_Conf_1.000 | 217  | 0  |          |                |    |         |     |     |                                                              |
| Locus_1152_Transcript_1/4_Conf_0.750  | 1007 | 20 | 7.93E-41 | AAN05752.1     | 71 | 172.17  | 147 | 105 | heat shock protein 20                                        |
| Locus_1152_Transcript_2/4_Conf_0.750  | 1007 | 20 | 1.00E-43 | CAG25499.1     | 73 | 181.8   | 157 | 115 | heat shock protein 20                                        |
| Locus_1152_Transcript_3/4_Conf_0.450  | 584  | 20 | 3.38E-44 | CAG25499.1     | 73 | 181.8   | 157 | 115 | heat shock protein 20                                        |
| Locus_1152_Transcript_4/4_Conf_0.750  | 993  | 20 | 9.81E-44 | CAG25499.1     | 73 | 181.8   | 157 | 115 | heat shock protein 20                                        |
| Locus_11520_Transcript_1/2_Conf_1.000 | 426  | 0  |          |                |    |         |     |     |                                                              |
| Locus_11520_Transcript_2/2_Conf_1.000 | 455  | 0  |          |                |    |         |     |     |                                                              |
| Locus_11521_Transcript_1/1_Conf_1.000 | 337  | 0  |          |                |    |         |     |     |                                                              |
| Locus_11522_Transcript_1/1_Conf_1.000 | 144  | 0  |          |                |    |         |     |     |                                                              |
| Locus_11523_Transcript_1/1_Conf_1.000 | 619  | 3  | 2.18E-18 | NP_498056.2    | 57 | 96.2857 | 141 | 81  | hypothetical protein C27F2.7                                 |
| Locus_11524_Transcript_1/1_Conf_1.000 | 293  | 20 | 3.64E-44 | ACC44546.1     | 96 | 181.03  | 97  | 94  | SPC-1                                                        |
| Locus_11525_Transcript_1/1_Conf_1.000 | 196  | 0  |          |                |    |         |     |     |                                                              |



|                                       |      |    |          |                |    |         |     |     |                                                                         |
|---------------------------------------|------|----|----------|----------------|----|---------|-----|-----|-------------------------------------------------------------------------|
| Locus_11526_Transcript_1/1_Conf_1.000 | 227  | 20 | 1.10E-24 | XP_002637346.1 | 84 | 116.316 | 75  | 63  | Hypothetical protein CBG19044                                           |
| Locus_11527_Transcript_1/1_Conf_1.000 | 426  | 0  |          |                |    |         |     |     |                                                                         |
| Locus_11528_Transcript_1/1_Conf_1.000 | 1200 | 20 | 1.01E-19 | AAP48996.1     | 41 | 102.449 | 395 | 162 | cellulosomal scaffoldin anchoring protein C                             |
| Locus_11529_Transcript_1/1_Conf_1.000 | 227  | 0  |          |                |    |         |     |     |                                                                         |
| Locus_1153_Transcript_1/1_Conf_1.000  | 784  | 4  | 4.38E-24 | NP_508979.2    | 48 | 115.931 | 233 | 112 | DAF-16/FOXO Controlled, germline Tumor affecting family member (dct-11) |
| Locus_11530_Transcript_1/1_Conf_1.000 | 595  | 5  | 2.82E-09 | NP_505962.2    | 42 | 65.855  | 198 | 85  | Nuclear Pore complex Protein family member (npp-22)                     |
| Locus_11531_Transcript_1/1_Conf_1.000 | 253  | 0  |          |                |    |         |     |     |                                                                         |
| Locus_11532_Transcript_1/1_Conf_1.000 | 197  | 20 | 6.47E-09 | EFO25376.1     | 69 | 63.929  | 65  | 45  | hypothetical protein LOAG_03111                                         |
| Locus_11533_Transcript_1/1_Conf_1.000 | 534  | 0  |          |                |    |         |     |     |                                                                         |
| Locus_11534_Transcript_1/1_Conf_1.000 | 832  | 20 | 1.85E-31 | NP_508153.1    | 58 | 140.584 | 178 | 105 | hypothetical protein T04G9.4                                            |
| Locus_11535_Transcript_1/1_Conf_1.000 | 570  | 20 | 2.05E-51 | NP_504500.1    | 79 | 205.682 | 133 | 106 | C-type LECTin family member (clec-1)                                    |
| Locus_11536_Transcript_1/1_Conf_1.000 | 743  | 20 | 1.31E-27 | NP_510604.1    | 95 | 127.487 | 65  | 62  | hypothetical protein F59F4.2                                            |
| Locus_11537_Transcript_1/1_Conf_1.000 | 305  | 1  | 6.19E-04 | CAH23216.1     | 45 | 47.3654 | 97  | 44  | putative L3 ES protein                                                  |

|                                       |      |    |          |                |     |         |     |     |                                                                      |
|---------------------------------------|------|----|----------|----------------|-----|---------|-----|-----|----------------------------------------------------------------------|
| Locus_11538_Transcript_1/1_Conf_1.000 | 594  | 20 | 9.92E-39 | XP_002640158.1 | 86  | 163.696 | 110 | 95  | C. briggsae CBR-TRE-1 protein                                        |
| Locus_11539_Transcript_1/1_Conf_1.000 | 310  | 20 | 2.92E-30 | XP_002645186.1 | 89  | 134.806 | 102 | 91  | Hypothetical protein CBG16916                                        |
| Locus_1154_Transcript_1/1_Conf_1.000  | 335  | 13 | 8.83E-35 | NP_492132.1    | 79  | 149.828 | 108 | 86  | Enhancer of Glp-One (glp-1) family member (ego-1)                    |
| Locus_11540_Transcript_1/1_Conf_1.000 | 262  | 20 | 4.93E-33 | EFO21345.1     | 90  | 144.05  | 87  | 79  | hypothetical protein LOAG_07143                                      |
| Locus_11541_Transcript_1/1_Conf_1.000 | 151  | 0  |          |                |     |         |     |     |                                                                      |
| Locus_11542_Transcript_1/1_Conf_1.000 | 324  | 0  |          |                |     |         |     |     |                                                                      |
| Locus_11543_Transcript_1/1_Conf_1.000 | 790  | 20 | 2.29E-12 | EFO26136.1     | 53  | 77.0258 | 195 | 104 | hypothetical protein LOAG_02353                                      |
| Locus_11544_Transcript_1/1_Conf_1.000 | 267  | 0  |          |                |     |         |     |     |                                                                      |
| Locus_11545_Transcript_1/1_Conf_1.000 | 138  | 15 | 1.84E-16 | EAW72008.1     | 100 | 88.9669 | 39  | 39  | natural killer cell group 7 sequence, isoform CRA_c                  |
| Locus_11546_Transcript_1/1_Conf_1.000 | 518  | 0  |          |                |     |         |     |     |                                                                      |
| Locus_11547_Transcript_1/1_Conf_1.000 | 237  | 0  |          |                |     |         |     |     |                                                                      |
| Locus_11548_Transcript_1/1_Conf_1.000 | 715  | 20 | 1.62E-48 | XP_002637050.1 | 73  | 196.823 | 183 | 135 | Hypothetical protein CBG09545                                        |
| Locus_11549_Transcript_1/1_Conf_1.000 | 888  | 0  |          |                |     |         |     |     |                                                                      |
| Locus_1155_Transcript_1/1_Conf_1.000  | 519  | 20 | 3.46E-43 | NP_492582.1    | 78  | 177.948 | 127 | 100 | Farnesylated-proteins Converting Enzyme (FACE) family member (fce-1) |
| Locus_11550_Transcript_1/1_Conf_1.000 | 1195 | 20 | 1.16E-76 | XP_002636710.1 | 67  | 291.582 | 317 | 214 | C. briggsae CBR-TSFM-1 protein                                       |
| Locus_11551_Transcript_1/1_Conf_1.000 | 295  | 0  |          |                |     |         |     |     |                                                                      |
| Locus_11552_Transcript_1/1_Conf_1.000 | 405  | 0  |          |                |     |         |     |     |                                                                      |
| Locus_11553_Transcript_1/1_Conf_1.000 | 388  | 20 | 2.67E-15 | NP_495088.1    | 55  | 85.1149 | 127 | 71  | hypothetical protein C17G10.1                                        |
| Locus_11554_Transcript_1/1_Conf_1.000 | 582  | 20 | 6.19E-30 | NP_490812.1    | 89  | 134.42  | 104 | 93  | GLutaRedoXin family member (glrx-10)                                 |

|                                       |      |    |           |                |     |         |     |     |                                                     |
|---------------------------------------|------|----|-----------|----------------|-----|---------|-----|-----|-----------------------------------------------------|
| Locus_11555_Transcript_1/1_Conf_1.000 | 1338 | 20 | 3.00E-132 | XP_002633301.1 | 82  | 476.478 | 342 | 283 | Hypothetical protein CBG06032                       |
| Locus_11556_Transcript_1/1_Conf_1.000 | 190  | 0  |           |                |     |         |     |     |                                                     |
| Locus_11557_Transcript_1/1_Conf_1.000 | 225  | 0  |           |                |     |         |     |     |                                                     |
| Locus_11558_Transcript_1/1_Conf_1.000 | 1590 | 20 | 6.37E-47  | XP_002640788.1 | 45  | 193.356 | 552 | 252 | C. briggsae CBR-FBXA-1 protein                      |
| Locus_11559_Transcript_1/1_Conf_1.000 | 262  | 20 | 2.70E-31  | XP_001896078.1 | 90  | 138.272 | 83  | 75  | A-macroglobulin complement component family protein |
| Locus_1156_Transcript_1/1_Conf_1.000  | 412  | 0  |           |                |     |         |     |     |                                                     |
| Locus_11560_Transcript_1/1_Conf_1.000 | 777  | 12 | 2.84E-84  | AAA96224.2     | 73  | 315.849 | 245 | 181 | Hypothetical protein T07H6.4                        |
| Locus_11561_Transcript_1/1_Conf_1.000 | 143  | 9  | 2.74E-12  | NP_001122601.1 | 91  | 75.0998 | 47  | 43  | Multiple PDZ domain protein family member (mpz-1)   |
| Locus_11562_Transcript_1/1_Conf_1.000 | 782  | 20 | 2.31E-134 | AAX28980.1     | 100 | 482.256 | 243 | 243 | ribosomal protein S3                                |
| Locus_11563_Transcript_1/1_Conf_1.000 | 294  | 20 | 1.39E-11  | XP_002637534.1 | 64  | 72.7886 | 88  | 57  | C. briggsae CBR-TRY-5 protein                       |
| Locus_11564_Transcript_1/1_Conf_1.000 | 1581 | 20 | 3.22E-75  | EFO23010.1     | 56  | 287.345 | 536 | 305 | hypothetical protein LOAG_05474                     |

|                                       |      |    |           |                |    |         |     |     |                                                     |
|---------------------------------------|------|----|-----------|----------------|----|---------|-----|-----|-----------------------------------------------------|
| Locus_11565_Transcript_1/1_Conf_1.000 | 580  |    |           |                |    |         |     |     |                                                     |
| Locus_11566_Transcript_1/1_Conf_1.000 | 424  | 20 | 2.60E-34  | EFO19620.1     | 81 | 148.288 | 111 | 91  | histone acetyltransferase                           |
| Locus_11567_Transcript_1/1_Conf_1.000 | 793  | 0  |           |                |    |         |     |     |                                                     |
| Locus_11568_Transcript_1/1_Conf_1.000 | 674  | 20 | 3.72E-73  | XP_002644648.1 | 79 | 278.485 | 224 | 179 | Hypothetical protein CBG14624                       |
| Locus_11569_Transcript_1/1_Conf_1.000 | 1232 | 20 | 4.45E-95  | NP_497827.1    | 75 | 352.829 | 282 | 213 | GLyOxalase Domain containing family member (glod-4) |
| Locus_1157_Transcript_1/3_Conf_0.714  | 1297 | 2  | 2.51E-11  | NP_499710.1    | 59 | 74.7146 | 148 | 88  | hypothetical protein Y39E4B.6                       |
| Locus_1157_Transcript_2/3_Conf_0.571  | 1513 | 2  | 3.10E-11  | NP_499710.1    | 59 | 74.7146 | 148 | 88  | hypothetical protein Y39E4B.6                       |
| Locus_1157_Transcript_3/3_Conf_0.571  | 1235 | 20 | 2.12E-12  | NP_499710.1    | 57 | 78.1814 | 215 | 124 | hypothetical protein Y39E4B.6                       |
| Locus_11570_Transcript_1/1_Conf_1.000 | 713  | 0  |           |                |    |         |     |     |                                                     |
| Locus_11571_Transcript_1/1_Conf_1.000 | 788  | 20 | 1.18E-77  | XP_002637336.1 | 79 | 293.893 | 215 | 170 | Hypothetical protein CBG19031                       |
| Locus_11572_Transcript_1/1_Conf_1.000 | 227  | 0  |           |                |    |         |     |     |                                                     |
| Locus_11573_Transcript_1/1_Conf_1.000 | 157  | 0  |           |                |    |         |     |     |                                                     |
| Locus_11574_Transcript_1/2_Conf_1.000 | 586  | 20 | 1.23E-17  | NP_495042.2    | 50 | 93.5893 | 165 | 83  | hypothetical protein F56D1.1                        |
| Locus_11574_Transcript_2/2_Conf_1.000 | 586  | 20 | 2.48E-18  | XP_002630725.1 | 46 | 95.9005 | 156 | 73  | Hypothetical protein CBG02409                       |
| Locus_11575_Transcript_1/1_Conf_1.000 | 437  | 20 | 1.79E-11  | XP_002641852.1 | 77 | 72.4034 | 49  | 38  | C. briggsae CBR-LARP-1 protein                      |
| Locus_11576_Transcript_1/1_Conf_1.000 | 215  | 0  |           |                |    |         |     |     |                                                     |
| Locus_11577_Transcript_1/1_Conf_1.000 | 809  | 20 | 8.82E-124 | XP_002630114.1 | 87 | 447.203 | 269 | 236 | C. briggsae CBR-PYR-1 protein                       |
| Locus_11578_Transcript_1/2_Conf_1.000 | 479  | 2  | 1.62E-04  | ZP_05026437.1  | 53 | 49.2914 | 113 | 61  | DNA sulfur modification protein DndD                |
| Locus_11578_Transcript_2/2_Conf_1.000 | 479  | 1  | 3.61E-04  | XP_689920.3    | 54 | 48.1358 | 91  | 50  | PREDICTED: cingulin-like                            |
| Locus_11579_Transcript_1/1_Conf_1.000 | 251  | 0  |           |                |    |         |     |     |                                                     |

|                                       |      |    |           |                |    |         |     |     |                                                                          |
|---------------------------------------|------|----|-----------|----------------|----|---------|-----|-----|--------------------------------------------------------------------------|
| Locus_1158_Transcript_1/1_Conf_1.000  | 762  | 20 | 2.88E-118 | NP_491363.1    | 91 | 428.713 | 253 | 232 | Dynein Heavy Chain family member (dhc-1)                                 |
| Locus_11580_Transcript_1/1_Conf_1.000 | 289  | 10 | 2.73E-07  | XP_002641560.1 | 51 | 58.5362 | 96  | 49  | Hypothetical protein CBG09859                                            |
| Locus_11581_Transcript_1/1_Conf_1.000 | 680  | 0  |           |                |    |         |     |     |                                                                          |
| Locus_11582_Transcript_1/1_Conf_1.000 | 204  | 0  |           |                |    |         |     |     |                                                                          |
| Locus_11583_Transcript_1/1_Conf_1.000 | 682  | 0  |           |                |    |         |     |     |                                                                          |
| Locus_11584_Transcript_1/1_Conf_1.000 | 727  | 20 | 1.01E-85  | A8XKG6.2       | 83 | 320.472 | 242 | 203 | DPYD_CAEBRRecName: Full=Probable dihydropyrimidine dehydrogenase         |
| Locus_11585_Transcript_1/1_Conf_1.000 | 513  | 6  | 9.35E-30  | CAR97833.1     | 69 | 133.265 | 134 | 93  | C. elegans protein F46G10.5b, partially confirmed by transcript evidence |
| Locus_11586_Transcript_1/1_Conf_1.000 | 279  | 20 | 2.39E-32  | XP_002639664.1 | 86 | 141.739 | 92  | 80  | C. briggsae CBR-HUM-1 protein                                            |
| Locus_11587_Transcript_1/1_Conf_1.000 | 274  | 0  |           |                |    |         |     |     |                                                                          |
| Locus_11588_Transcript_1/1_Conf_1.000 | 225  | 0  |           |                |    |         |     |     |                                                                          |
| Locus_11589_Transcript_1/1_Conf_1.000 | 225  | 2  | 5.88E-10  | NP_492200.1    | 64 | 67.3958 | 71  | 46  | hypothetical protein C54G4.5                                             |
| Locus_1159_Transcript_1/1_Conf_1.000  | 1346 | 4  | 4.33E-38  | NP_499275.2    | 63 | 163.696 | 242 | 154 | hypothetical protein K10G9.2                                             |
| Locus_11590_Transcript_1/1_Conf_1.000 | 208  | 0  |           |                |    |         |     |     |                                                                          |
| Locus_11591_Transcript_1/1_Conf_1.000 | 364  | 18 | 6.74E-35  | NP_741076.1    | 78 | 150.214 | 120 | 94  | GEX Interacting protein family member (gei-16)                           |
| Locus_11592_Transcript_1/1_Conf_1.000 | 773  | 20 | 7.15E-64  | XP_002630082.1 | 90 | 248.054 | 153 | 138 | Hypothetical protein CBG13461                                            |

|                                       |      |    |          |                |    |         |     |     |                                                        |
|---------------------------------------|------|----|----------|----------------|----|---------|-----|-----|--------------------------------------------------------|
| Locus_11593_Transcript_1/1_Conf_1.000 | 275  | 20 | 1.08E-24 | XP_002634119.1 | 84 | 116.316 | 71  | 60  | Hypothetical protein CBG01673                          |
| Locus_11594_Transcript_1/1_Conf_1.000 | 370  | 20 | 1.49E-29 | XP_002640278.1 | 85 | 132.494 | 85  | 73  | Hypothetical protein CBG12804                          |
| Locus_11595_Transcript_1/1_Conf_1.000 | 365  | 20 | 5.00E-30 | NP_498090.1    | 95 | 134.035 | 84  | 80  | Temporarily Assigned Gene name family member (tag-262) |
| Locus_11596_Transcript_1/1_Conf_1.000 | 613  | 20 | 9.52E-19 | XP_973445.1    | 51 | 97.4413 | 195 | 101 | PREDICTED: similar to vesicular mannose-binding lectin |
| Locus_11597_Transcript_1/1_Conf_1.000 | 683  | 0  |          |                |    |         |     |     |                                                        |
| Locus_11598_Transcript_1/1_Conf_1.000 | 179  | 0  |          |                |    |         |     |     |                                                        |
| Locus_11599_Transcript_1/1_Conf_1.000 | 1092 | 20 | 1.34E-52 | XP_002635267.1 | 69 | 211.46  | 266 | 185 | C. briggsae CBR-LETM-1 protein                         |
| Locus_116_Transcript_1/1_Conf_1.000   | 550  | 20 | 3.26E-56 | NP_498030.1    | 79 | 221.476 | 183 | 145 | hypothetical protein F26F4.12                          |
| Locus_1160_Transcript_1/2_Conf_1.000  | 386  | 20 | 6.59E-14 | EFO23006.1     | 70 | 80.4925 | 87  | 61  | mast family protein                                    |
| Locus_1160_Transcript_2/2_Conf_1.000  | 1120 | 20 | 4.47E-59 | XP_001900462.1 | 74 | 233.032 | 222 | 165 | CLASP1                                                 |
| Locus_11600_Transcript_1/1_Conf_1.000 | 497  | 1  | 5.59E-05 | XP_001476928.1 | 53 | 50.8322 | 97  | 52  | PREDICTED: hypothetical protein                        |
| Locus_11601_Transcript_1/1_Conf_1.000 | 201  | 0  |          |                |    |         |     |     |                                                        |
| Locus_11602_Transcript_1/1_Conf_1.000 | 496  | 20 | 1.96E-42 | XP_001902364.1 | 73 | 175.252 | 159 | 117 | Myotubularin-related family protein                    |
| Locus_11603_Transcript_1/1_Conf_1.000 | 157  | 0  |          |                |    |         |     |     |                                                        |

|                                       |      |    |           |                |     |         |     |     |                                                        |
|---------------------------------------|------|----|-----------|----------------|-----|---------|-----|-----|--------------------------------------------------------|
| Locus_11604_Transcript_1/1_Conf_1.000 | 351  | 7  | 4.30E-29  | NP_001022438.1 | 87  | 130.954 | 97  | 85  | Ligand-Gated ion Channel family member (lgc-35)        |
| Locus_11605_Transcript_1/1_Conf_1.000 | 213  | 20 | 2.66E-15  | NP_501562.1    | 73  | 85.1149 | 67  | 49  | hypothetical protein C53B4.6                           |
| Locus_11606_Transcript_1/1_Conf_1.000 | 183  | 20 | 1.83E-27  | 2XDU           | 100 | 125.561 | 60  | 60  | Structure Of Hsp90 With Small Molecule Inhibitor Bound |
| Locus_11607_Transcript_1/1_Conf_1.000 | 438  | 2  | 2.40E-08  | NP_491834.1    | 55  | 62.003  | 101 | 56  | MUTator family member (mut-2)                          |
| Locus_11608_Transcript_1/1_Conf_1.000 | 1236 | 20 | 5.27E-112 | XP_002640687.1 | 75  | 409.068 | 352 | 264 | Hypothetical protein CBG19749                          |
| Locus_11609_Transcript_1/1_Conf_1.000 | 348  | 20 | 5.58E-61  | 2I07           | 100 | 236.884 | 115 | 115 | Human Complement Component C3b                         |
| Locus_1161_Transcript_1/1_Conf_1.000  | 881  | 20 | 1.63E-113 | NP_001122649.1 | 77  | 413.305 | 294 | 229 | abnormal cell LINeage family member (lin-29)           |
| Locus_11610_Transcript_1/1_Conf_1.000 | 586  | 20 | 2.44E-66  | NP_493947.1    | 80  | 255.373 | 194 | 157 | hypothetical protein F56D12.6                          |
| Locus_11611_Transcript_1/1_Conf_1.000 | 488  | 20 | 2.79E-28  | XP_001601941.1 | 66  | 128.257 | 136 | 91  | PREDICTED: similar to rCG44212                         |

|                                       |      |    |           |                |     |         |     |     |                                                               |
|---------------------------------------|------|----|-----------|----------------|-----|---------|-----|-----|---------------------------------------------------------------|
| Locus_11612_Transcript_1/1_Conf_1.000 | 358  | 20 | 3.73E-33  | NP_001122663.1 | 73  | 144.436 | 115 | 85  | hypothetical protein Y53F4B.39                                |
| Locus_11613_Transcript_1/1_Conf_1.000 | 409  | 20 | 4.86E-33  | EFO26089.1     | 82  | 144.05  | 98  | 81  | hypothetical protein LOAG_02401                               |
| Locus_11614_Transcript_1/1_Conf_1.000 | 369  | 20 | 3.01E-22  | NP_505803.1    | 78  | 108.227 | 114 | 90  | hypothetical protein F53B7.3                                  |
| Locus_11615_Transcript_1/1_Conf_1.000 | 1161 | 20 | 1.48E-137 | NP_491777.3    | 83  | 493.812 | 330 | 277 | hypothetical protein T09B4.8                                  |
| Locus_11616_Transcript_1/1_Conf_1.000 | 412  | 0  |           |                |     |         |     |     |                                                               |
| Locus_11617_Transcript_1/1_Conf_1.000 | 149  | 20 | 2.40E-19  | XP_002930267.1 | 100 | 98.5969 | 49  | 49  | PREDICTED: histone H2A type 2-B-like isoform 1                |
| Locus_11618_Transcript_1/1_Conf_1.000 | 233  | 3  | 1.59E-07  | XP_002647560.1 | 69  | 59.3066 | 66  | 46  | Hypothetical protein CBG06646                                 |
| Locus_11619_Transcript_1/1_Conf_1.000 | 265  | 20 | 3.91E-14  | XP_418636.2    | 80  | 81.2629 | 61  | 49  | PREDICTED: similar to ABC transporter protein; P-glycoprotein |
| Locus_1162_Transcript_1/1_Conf_1.000  | 981  | 20 | 7.12E-156 | XP_002641617.1 | 95  | 554.288 | 326 | 312 | C. briggsae CBR-MOG-1 protein                                 |
| Locus_11620_Transcript_1/1_Conf_1.000 | 1363 | 20 | 0         | NP_509898.1    | 86  | 699.893 | 454 | 393 | ACOnitase family member (aco-1)                               |
| Locus_11621_Transcript_1/2_Conf_1.000 | 378  | 20 | 2.50E-45  | XP_002643138.1 | 84  | 184.882 | 123 | 104 | Hypothetical protein CBG15316                                 |
| Locus_11621_Transcript_2/2_Conf_1.000 | 384  | 20 | 2.03E-47  | XP_002643138.1 | 85  | 191.815 | 123 | 105 | Hypothetical protein CBG15316                                 |
| Locus_11622_Transcript_1/1_Conf_1.000 | 297  | 20 | 1.74E-22  | NP_499461.1    | 72  | 108.997 | 100 | 72  | hypothetical protein T28D6.4                                  |
| Locus_11623_Transcript_1/1_Conf_1.000 | 228  | 0  |           |                |     |         |     |     |                                                               |
| Locus_11624_Transcript_1/1_Conf_1.000 | 244  |    |           |                |     |         |     |     |                                                               |
| Locus_11625_Transcript_1/1_Conf_1.000 | 224  | 0  |           |                |     |         |     |     |                                                               |
| Locus_11626_Transcript_1/1_Conf_1.000 | 138  | 0  |           |                |     |         |     |     |                                                               |
| Locus_11627_Transcript_1/1_Conf_1.000 | 491  | 20 | 1.84E-64  | XP_002630183.1 | 89  | 248.44  | 162 | 145 | C. briggsae CBR-FLI-1 protein                                 |



|                                       |      |    |          |                |    |         |     |     |                                                            |
|---------------------------------------|------|----|----------|----------------|----|---------|-----|-----|------------------------------------------------------------|
| Locus_11628_Transcript_1/1_Conf_1.000 | 230  | 20 | 1.95E-05 | YP_743833.1    | 86 | 52.373  | 36  | 31  | tRNA (5-carboxymethylaminomethyl-2-thiouridylate) synthase |
| Locus_11629_Transcript_1/1_Conf_1.000 | 626  | 0  |          |                |    |         |     |     |                                                            |
| Locus_1163_Transcript_1/1_Conf_1.000  | 360  | 0  |          |                |    |         |     |     |                                                            |
| Locus_11630_Transcript_1/1_Conf_1.000 | 132  | 0  |          |                |    |         |     |     |                                                            |
| Locus_11631_Transcript_1/1_Conf_1.000 | 150  | 0  |          |                |    |         |     |     |                                                            |
| Locus_11632_Transcript_1/1_Conf_1.000 | 342  | 2  | 1.45E-08 | XP_002636650.1 | 52 | 62.7734 | 97  | 51  | Hypothetical protein CBG23361                              |
| Locus_11633_Transcript_1/1_Conf_1.000 | 290  | 4  | 1.60E-15 | XP_002633091.1 | 74 | 85.8853 | 78  | 58  | Hypothetical protein CBG05778                              |
| Locus_11634_Transcript_1/1_Conf_1.000 | 879  | 20 | 8.66E-99 | NP_500551.2    | 77 | 364.385 | 292 | 225 | hypothetical protein F55F10.1                              |
| Locus_11635_Transcript_1/1_Conf_1.000 | 532  | 0  |          |                |    |         |     |     |                                                            |
| Locus_11636_Transcript_1/1_Conf_1.000 | 507  | 16 | 1.38E-09 | XP_002129449.1 | 50 | 66.2402 | 163 | 83  | PREDICTED: hypothetical protein                            |
| Locus_11637_Transcript_1/1_Conf_1.000 | 389  | 0  |          |                |    |         |     |     |                                                            |
| Locus_11638_Transcript_1/1_Conf_1.000 | 478  | 20 | 1.39E-64 | XP_002633391.1 | 90 | 248.825 | 160 | 144 | Hypothetical protein CBG06150                              |
| Locus_11639_Transcript_1/1_Conf_1.000 | 1464 | 20 | 0        | NP_497853.1    | 97 | 892.493 | 488 | 477 | hypothetical protein T08A11.2                              |
| Locus_1164_Transcript_1/2_Conf_1.000  | 401  | 20 | 3.41E-34 | XP_002638772.1 | 70 | 147.902 | 133 | 94  | C. briggsae CBR-PTR-21 protein                             |

|                                       |      |    |           |                |    |         |     |     |                                                    |
|---------------------------------------|------|----|-----------|----------------|----|---------|-----|-----|----------------------------------------------------|
| Locus_1164_Transcript_2/2_Conf_1.000  | 291  | 20 | 1.35E-22  | NP_490751.1    | 75 | 109.383 | 91  | 69  | PaTched Related family member (ptr-21)             |
| Locus_11640_Transcript_1/1_Conf_1.000 | 629  | 0  |           |                |    |         |     |     |                                                    |
| Locus_11641_Transcript_1/1_Conf_1.000 | 667  | 20 | 3.31E-58  | EFO27604.1     | 74 | 228.794 | 221 | 164 | hypothetical protein LOAG_00873                    |
| Locus_11642_Transcript_1/1_Conf_1.000 | 378  | 4  | 1.75E-14  | XP_002633359.1 | 94 | 82.4185 | 50  | 47  | Hypothetical protein CBG06103                      |
| Locus_11643_Transcript_1/1_Conf_1.000 | 134  | 4  | 3.74E-09  | XP_002643366.1 | 79 | 64.6994 | 44  | 35  | Hypothetical protein CBG15976                      |
| Locus_11644_Transcript_1/1_Conf_1.000 | 268  | 2  | 2.29E-06  | XP_002636286.1 | 63 | 55.4546 | 73  | 46  | Hypothetical protein CBG08576                      |
| Locus_11645_Transcript_1/1_Conf_1.000 | 823  | 0  |           |                |    |         |     |     |                                                    |
| Locus_11646_Transcript_1/1_Conf_1.000 | 667  | 6  | 2.62E-55  | XP_002637345.1 | 64 | 219.164 | 232 | 149 | C. briggsae CBR-UNC-68 protein                     |
| Locus_11647_Transcript_1/2_Conf_1.000 | 1354 | 20 | 1.08E-145 | NP_492121.1    | 72 | 521.161 | 456 | 330 | Piwi (fruitfly) Related Gene family member (prg-1) |
| Locus_11647_Transcript_2/2_Conf_1.000 | 1354 | 20 | 1.08E-145 | NP_492121.1    | 72 | 521.161 | 456 | 330 | Piwi (fruitfly) Related Gene family member (prg-1) |
| Locus_11648_Transcript_1/1_Conf_1.000 | 479  | 0  |           |                |    |         |     |     |                                                    |
| Locus_11649_Transcript_1/1_Conf_1.000 | 734  | 20 | 2.72E-62  | EFO22517.1     | 73 | 242.662 | 204 | 149 | DREV methyltransferase                             |
| Locus_1165_Transcript_1/1_Conf_1.000  | 412  | 20 | 6.92E-64  | XP_002634177.1 | 93 | 246.514 | 132 | 124 | C. briggsae CBR-RPL-20 protein                     |
| Locus_11650_Transcript_1/1_Conf_1.000 | 404  | 13 | 5.10E-06  | XP_001900016.1 | 47 | 54.299  | 134 | 64  | Leucine Rich Repeat family protein                 |
| Locus_11651_Transcript_1/1_Conf_1.000 | 452  | 15 | 7.58E-10  | XP_001897754.1 | 49 | 67.0106 | 158 | 78  | Poly                                               |

|                                       |      |    |          |                |     |         |     |     |                                                              |
|---------------------------------------|------|----|----------|----------------|-----|---------|-----|-----|--------------------------------------------------------------|
| Locus_11652_Transcript_1/2_Conf_1.000 | 688  | 20 | 1.67E-23 | XP_002646274.1 | 72  | 113.62  | 106 | 77  | Hypothetical protein CBG11979                                |
| Locus_11652_Transcript_2/2_Conf_1.000 | 646  | 20 | 6.87E-74 | XP_002646274.1 | 80  | 280.796 | 210 | 169 | Hypothetical protein CBG11979                                |
| Locus_11653_Transcript_1/1_Conf_1.000 | 349  | 0  |          |                |     |         |     |     |                                                              |
| Locus_11654_Transcript_1/1_Conf_1.000 | 1089 | 20 | 4.85E-95 | XP_002645831.1 | 63  | 352.443 | 404 | 257 | C. briggsae CBR-RBC-1 protein                                |
| Locus_11655_Transcript_1/1_Conf_1.000 | 294  | 20 | 5.43E-32 | NP_001123000.1 | 84  | 140.584 | 96  | 81  | hypothetical protein T05C3.6                                 |
| Locus_11656_Transcript_1/1_Conf_1.000 | 335  | 20 | 8.56E-30 | NP_507684.4    | 78  | 133.265 | 107 | 84  | abnormal EMBroygenesis family member (emb-4)                 |
| Locus_11657_Transcript_1/1_Conf_1.000 | 291  | 4  | 2.23E-09 | XP_002637600.1 | 72  | 65.4698 | 68  | 49  | C. briggsae CBR-SULP-8 protein                               |
| Locus_11658_Transcript_1/1_Conf_1.000 | 1545 | 1  | 8.37E-04 | XP_001604445.1 | 37  | 50.0618 | 354 | 132 | PREDICTED: hypothetical protein                              |
| Locus_11659_Transcript_1/2_Conf_1.000 | 625  | 3  | 5.82E-13 | CAR63732.1     | 62  | 67.3958 | 82  | 51  | hypothetical protein                                         |
| Locus_11659_Transcript_2/2_Conf_1.000 | 575  | 3  | 1.84E-15 | CAR63732.1     | 51  | 86.2705 | 152 | 78  | hypothetical protein                                         |
| Locus_1166_Transcript_1/4_Conf_0.222  | 262  | 0  |          |                |     |         |     |     |                                                              |
| Locus_1166_Transcript_2/4_Conf_0.222  | 900  | 1  | 9.95E-05 | NP_505827.1    | 50  | 51.9878 | 102 | 52  | hypothetical protein H19N07.3                                |
| Locus_1166_Transcript_3/4_Conf_0.222  | 892  | 20 | 1.48E-61 | NP_491562.2    | 60  | 240.736 | 294 | 179 | LEThal family member (let-526)                               |
| Locus_1166_Transcript_4/4_Conf_0.444  | 2031 | 0  |          |                |     |         |     |     |                                                              |
| Locus_11660_Transcript_1/1_Conf_1.000 | 146  | 6  | 1.51E-13 | NP_871966.2    | 89  | 79.337  | 48  | 43  | hypothetical protein Y48B6A.6                                |
| Locus_11661_Transcript_1/1_Conf_1.000 | 256  | 0  |          |                |     |         |     |     |                                                              |
| Locus_11662_Transcript_1/1_Conf_1.000 | 131  | 0  |          |                |     |         |     |     |                                                              |
| Locus_11663_Transcript_1/1_Conf_1.000 | 770  | 20 | 1.68E-73 | NP_501418.1    | 97  | 280.026 | 142 | 138 | SQuashed Vulva family member (sqv-1)                         |
| Locus_11664_Transcript_1/1_Conf_1.000 | 427  | 20 | 7.56E-26 | XP_002642911.1 | 83  | 120.168 | 77  | 64  | Hypothetical protein CBG15186                                |
| Locus_11665_Transcript_1/1_Conf_1.000 | 1134 | 3  | 1.53E-30 | CAA91299.3     | 46  | 138.272 | 400 | 187 | C. elegans protein T01B7.6, confirmed by transcript evidence |
| Locus_11666_Transcript_1/1_Conf_1.000 | 174  | 20 | 1.78E-27 | NP_001163801.1 | 100 | 125.561 | 57  | 57  | hypothetical protein LOC401152 isoform 1                     |
| Locus_11667_Transcript_1/2_Conf_1.000 | 803  | 2  | 2.88E-18 | NP_505117.2    | 68  | 96.6709 | 116 | 79  | hypothetical protein K07C11.8                                |
| Locus_11667_Transcript_2/2_Conf_1.000 | 526  | 2  | 1.06E-18 | NP_505117.2    | 68  | 96.6709 | 116 | 79  | hypothetical protein K07C11.8                                |

|                                       |     |    |          |                |    |         |     |     |                                |
|---------------------------------------|-----|----|----------|----------------|----|---------|-----|-----|--------------------------------|
| Locus_11668_Transcript_1/1_Conf_1.000 | 786 | 20 | 3.25E-43 | XP_002640253.1 | 53 | 179.489 | 269 | 145 | C. briggsae CBR-CYE-1 protein  |
| Locus_11669_Transcript_1/1_Conf_1.000 | 434 | 5  | 9.75E-42 | NP_495343.1    | 76 | 172.94  | 144 | 110 | hypothetical protein C56C10.12 |
| Locus_1167_Transcript_1/2_Conf_1.000  | 577 | 0  |          |                |    |         |     |     |                                |
| Locus_1167_Transcript_2/2_Conf_1.000  | 577 | 0  |          |                |    |         |     |     |                                |
| Locus_11670_Transcript_1/2_Conf_1.000 | 308 | 0  |          |                |    |         |     |     |                                |
| Locus_11670_Transcript_2/2_Conf_1.000 | 307 | 0  |          |                |    |         |     |     |                                |
| Locus_11671_Transcript_1/1_Conf_1.000 | 448 | 0  |          |                |    |         |     |     |                                |
| Locus_11672_Transcript_1/1_Conf_1.000 | 611 | 20 | 7.54E-85 | NP_491342.1    | 92 | 317.005 | 178 | 165 | hypothetical protein C43E11.9  |
| Locus_11673_Transcript_1/1_Conf_1.000 | 307 |    |          |                |    |         |     |     |                                |
| Locus_11674_Transcript_1/1_Conf_1.000 | 328 | 20 | 4.75E-12 | NP_495768.1    | 52 | 74.3294 | 117 | 61  | hypothetical protein F49E12.1  |

|                                       |      |    |           |                |    |         |     |     |                                                                            |
|---------------------------------------|------|----|-----------|----------------|----|---------|-----|-----|----------------------------------------------------------------------------|
| Locus_11675_Transcript_1/1_Conf_1.000 | 238  | 20 | 2.97E-22  | XP_002723288.1 | 82 | 108.227 | 63  | 52  | PREDICTED: COX6B protein (predicted)-like                                  |
| Locus_11676_Transcript_1/1_Conf_1.000 | 509  | 0  |           |                |    |         |     |     |                                                                            |
| Locus_11677_Transcript_1/1_Conf_1.000 | 260  | 20 | 2.39E-11  | XP_002643075.1 | 58 | 72.0182 | 87  | 51  | Hypothetical protein CBG22995                                              |
| Locus_11678_Transcript_1/1_Conf_1.000 | 140  | 20 | 7.74E-15  | NP_496814.1    | 93 | 83.5741 | 46  | 43  | Member of AAA family binding CED-4 family member (mac-1)                   |
| Locus_11679_Transcript_1/1_Conf_1.000 | 370  | 1  | 1.11E-08  | EFO23989.1     | 59 | 63.1586 | 91  | 54  | hypothetical protein LOAG_04493                                            |
| Locus_1168_Transcript_1/1_Conf_1.000  | 1984 | 20 | 9.92E-165 | XP_002643237.1 | 62 | 585.104 | 650 | 405 | C. briggsae CBR-IGCM-1 protein                                             |
| Locus_11680_Transcript_1/1_Conf_1.000 | 1479 | 20 | 0         | CBJ25106.1     | 86 | 700.664 | 494 | 425 | C. elegans protein Y105C5B.21d, partially confirmed by transcript evidence |
| Locus_11681_Transcript_1/1_Conf_1.000 | 1026 | 20 | 5.25E-88  | XP_002635050.1 | 65 | 328.946 | 360 | 234 | Hypothetical protein CBG11250                                              |
| Locus_11682_Transcript_1/1_Conf_1.000 | 818  | 20 | 3.81E-58  | XP_002644069.1 | 69 | 229.18  | 198 | 137 | C. briggsae CBR-PXN-2 protein                                              |
| Locus_11683_Transcript_1/1_Conf_1.000 | 371  | 20 | 7.14E-40  | NP_498263.2    | 80 | 166.777 | 110 | 88  | ALdehyde deHydrogenase family member (alh-9)                               |
| Locus_11684_Transcript_1/1_Conf_1.000 | 133  | 0  |           |                |    |         |     |     |                                                                            |
| Locus_11685_Transcript_1/1_Conf_1.000 | 517  | 0  |           |                |    |         |     |     |                                                                            |
| Locus_11686_Transcript_1/1_Conf_1.000 | 451  | 2  | 1.25E-04  | NP_501585.1    | 58 | 49.6766 | 58  | 34  | hypothetical protein C01F6.2                                               |
| Locus_11687_Transcript_1/1_Conf_1.000 | 921  | 20 | 4.58E-61  | XP_001891577.1 | 82 | 239.195 | 172 | 142 | Protein set-1                                                              |
| Locus_11688_Transcript_1/1_Conf_1.000 | 216  | 0  |           |                |    |         |     |     |                                                                            |
| Locus_11689_Transcript_1/1_Conf_1.000 | 126  | 0  |           |                |    |         |     |     |                                                                            |
| Locus_1169_Transcript_1/1_Conf_1.000  | 728  | 0  |           |                |    |         |     |     |                                                                            |
| Locus_11690_Transcript_1/1_Conf_1.000 | 447  | 2  | 1.94E-05  | EFO16740.1     | 49 | 52.373  | 77  | 38  | hypothetical protein LOAG_11764                                            |
| Locus_11691_Transcript_1/1_Conf_1.000 | 1172 | 20 | 4.64E-147 | XP_002645119.1 | 84 | 525.398 | 393 | 331 | Hypothetical protein CBG16813                                              |
| Locus_11692_Transcript_1/1_Conf_1.000 | 837  | 20 | 3.01E-13  | NP_492529.2    | 46 | 80.1073 | 239 | 111 | SET (trithorax/polycomb) domain containing family member (set-32)          |
| Locus_11693_Transcript_1/1_Conf_1.000 | 347  | 6  | 7.94E-07  | XP_002129449.1 | 46 | 56.9954 | 115 | 54  | PREDICTED: hypothetical protein                                            |

|                                       |      |    |           |                |    |         |     |     |                                                    |
|---------------------------------------|------|----|-----------|----------------|----|---------|-----|-----|----------------------------------------------------|
| Locus_11694_Transcript_1/1_Conf_1.000 | 271  | 0  |           |                |    |         |     |     |                                                    |
| Locus_11695_Transcript_1/1_Conf_1.000 | 1172 | 20 | 1.03E-146 | NP_507860.3    | 85 | 524.242 | 362 | 308 | DeHydrogenases, Short chain family member (dhs-24) |
| Locus_11696_Transcript_1/1_Conf_1.000 | 390  | 20 | 4.06E-48  | XP_002639529.1 | 85 | 194.126 | 130 | 111 | Hypothetical protein CBG04158                      |
| Locus_11697_Transcript_1/1_Conf_1.000 | 226  | 3  | 2.91E-25  | NP_500037.2    | 85 | 118.242 | 74  | 63  | hypothetical protein Y55F3AR.1                     |
| Locus_11698_Transcript_1/1_Conf_1.000 | 446  | 20 | 8.17E-12  | XP_002631215.1 | 56 | 73.559  | 96  | 54  | C. briggsae CBR-ECT-2 protein                      |
| Locus_11699_Transcript_1/1_Conf_1.000 | 696  | 20 | 5.80E-96  | EFO22056.1     | 86 | 354.369 | 232 | 200 | hypothetical protein LOAG_06429                    |
| Locus_117_Transcript_1/1_Conf_1.000   | 191  | 0  |           |                |    |         |     |     |                                                    |
| Locus_1170_Transcript_1/1_Conf_1.000  | 1015 | 0  |           |                |    |         |     |     |                                                    |

|                                       |      |    |           |                |    |         |     |     |                                                               |
|---------------------------------------|------|----|-----------|----------------|----|---------|-----|-----|---------------------------------------------------------------|
| Locus_11700_Transcript_1/1_Conf_1.000 | 1894 | 20 | 1.95E-77  | EFO28277.1     | 52 | 295.049 | 578 | 302 | piwi domain-containing protein                                |
| Locus_11701_Transcript_1/1_Conf_1.000 | 150  | 5  | 3.46E-10  | A8XKF2.2       | 83 | 68.1662 | 43  | 36  | Choline transporter-like protein 1                            |
| Locus_11702_Transcript_1/1_Conf_1.000 | 231  | 4  | 4.47E-10  | NP_492367.1    | 77 | 67.781  | 57  | 44  | Glycogen Synthase Kinase Alpha subunit family member (gska-3) |
| Locus_11703_Transcript_1/1_Conf_1.000 | 551  | 20 | 3.87E-41  | NP_001040716.1 | 69 | 171.4   | 183 | 127 | hypothetical protein ZC328.3                                  |
| Locus_11704_Transcript_1/1_Conf_1.000 | 210  | 0  |           |                |    |         |     |     |                                                               |
| Locus_11705_Transcript_1/1_Conf_1.000 | 700  | 20 | 3.14E-65  | NP_505697.2    | 73 | 252.292 | 234 | 172 | hypothetical protein C35A5.7                                  |
| Locus_11706_Transcript_1/1_Conf_1.000 | 757  | 8  | 5.54E-106 | AAT02162.1     | 89 | 387.882 | 249 | 222 | hypothetical protein L3ni51                                   |
| Locus_11707_Transcript_1/1_Conf_1.000 | 682  | 20 | 7.46E-85  | NP_496454.1    | 82 | 317.39  | 223 | 185 | hypothetical protein B0334.3                                  |
| Locus_11708_Transcript_1/1_Conf_1.000 | 344  | 1  | 2.10E-07  | NP_001122817.1 | 67 | 58.9214 | 56  | 38  | hypothetical protein Y54G2A.52                                |
| Locus_11709_Transcript_1/1_Conf_1.000 | 692  | 20 | 2.13E-34  | XP_001898340.1 | 67 | 149.828 | 169 | 114 | LD47622p                                                      |
| Locus_1171_Transcript_1/1_Conf_1.000  | 1900 | 20 | 7.84E-119 | XP_002640096.1 | 71 | 432.565 | 440 | 313 | C. briggsae CBR-PNK-1 protein                                 |
| Locus_11710_Transcript_1/2_Conf_1.000 | 1819 | 20 | 2.14E-25  | NP_504250.2    | 43 | 122.094 | 497 | 216 | Suppressor Of Clr family member (soc-1)                       |

|                                       |      |    |          |                |     |         |     |     |                                                      |
|---------------------------------------|------|----|----------|----------------|-----|---------|-----|-----|------------------------------------------------------|
| Locus_11710_Transcript_2/2_Conf_1.000 | 1801 | 20 | 1.62E-25 | NP_504250.2    | 44  | 122.479 | 496 | 219 | Suppressor Of Clr family member (soc-1)              |
| Locus_11711_Transcript_1/1_Conf_1.000 | 243  | 0  |          |                |     |         |     |     |                                                      |
| Locus_11712_Transcript_1/1_Conf_1.000 | 164  | 5  | 1.88E-08 | NP_497046.1    | 66  | 62.3882 | 53  | 35  | UNCoordinated family member (unc-52)                 |
| Locus_11713_Transcript_1/1_Conf_1.000 | 375  | 7  | 1.95E-05 | XP_001895231.1 | 88  | 52.373  | 34  | 30  | Bucentaur or craniofacial development family protein |
| Locus_11714_Transcript_1/1_Conf_1.000 | 386  | 20 | 1.37E-11 | XP_001902350.1 | 60  | 72.7886 | 119 | 72  | Myosin XVIIIa                                        |
| Locus_11715_Transcript_1/1_Conf_1.000 | 322  | 0  |          |                |     |         |     |     |                                                      |
| Locus_11716_Transcript_1/1_Conf_1.000 | 320  | 0  |          |                |     |         |     |     |                                                      |
| Locus_11717_Transcript_1/1_Conf_1.000 | 168  | 20 | 9.83E-26 | BAH14701.1     | 100 | 119.783 | 55  | 55  | unnamed protein product                              |
| Locus_11718_Transcript_1/1_Conf_1.000 | 982  | 20 | 1.68E-64 | NP_492260.1    | 64  | 250.751 | 304 | 197 | hypothetical protein F52B5.3                         |
| Locus_11719_Transcript_1/1_Conf_1.000 | 364  | 3  | 8.25E-25 | NP_508493.1    | 74  | 116.701 | 122 | 91  | protein KINase family member (kin-29)                |



|                                       |      |    |          |                |    |         |     |     |                                                                          |
|---------------------------------------|------|----|----------|----------------|----|---------|-----|-----|--------------------------------------------------------------------------|
| Locus_1172_Transcript_1/1_Conf_1.000  | 503  | 20 | 1.34E-38 | XP_002637575.1 | 75 | 162.54  | 148 | 111 | C. briggsae CBR-EHBP-1 protein                                           |
| Locus_11720_Transcript_1/1_Conf_1.000 | 150  | 0  |          |                |    |         |     |     |                                                                          |
| Locus_11721_Transcript_1/1_Conf_1.000 | 476  | 20 | 3.50E-15 | XP_002199801.1 | 62 | 84.7297 | 86  | 54  | PREDICTED: ELMO/CED-12 domain containing 1                               |
| Locus_11722_Transcript_1/1_Conf_1.000 | 805  | 20 | 1.43E-41 | XP_002408201.1 | 62 | 174.096 | 265 | 165 | Ran-binding protein, putative                                            |
| Locus_11723_Transcript_1/1_Conf_1.000 | 569  | 0  |          |                |    |         |     |     |                                                                          |
| Locus_11724_Transcript_1/1_Conf_1.000 | 395  | 0  |          |                |    |         |     |     |                                                                          |
| Locus_11725_Transcript_1/2_Conf_1.000 | 635  | 20 | 4.02E-23 | XP_001900825.1 | 78 | 112.079 | 89  | 70  | CG3579-PA                                                                |
| Locus_11725_Transcript_2/2_Conf_1.000 | 635  | 20 | 4.02E-23 | XP_001900825.1 | 78 | 112.079 | 89  | 70  | CG3579-PA                                                                |
| Locus_11726_Transcript_1/2_Conf_1.000 | 1272 | 0  |          |                |    |         |     |     |                                                                          |
| Locus_11726_Transcript_2/2_Conf_1.000 | 1272 | 0  |          |                |    |         |     |     |                                                                          |
| Locus_11727_Transcript_1/1_Conf_1.000 | 303  | 20 | 5.03E-30 | EFO21314.1     | 81 | 134.035 | 100 | 81  | male sterility protein                                                   |
| Locus_11728_Transcript_1/1_Conf_1.000 | 222  | 6  | 2.64E-18 | XP_001896269.1 | 85 | 95.1301 | 57  | 49  | BTB/POZ domain containing protein                                        |
| Locus_11729_Transcript_1/1_Conf_1.000 | 727  | 20 | 7.24E-76 | XP_002647628.1 | 74 | 287.73  | 227 | 169 | Hypothetical protein CBG06721                                            |
| Locus_1173_Transcript_1/1_Conf_1.000  | 2987 | 20 | 0        | XP_001900046.1 | 66 | 670.618 | 769 | 515 | Kinesin motor domain containing protein                                  |
| Locus_11730_Transcript_1/1_Conf_1.000 | 663  | 0  |          |                |    |         |     |     |                                                                          |
| Locus_11731_Transcript_1/1_Conf_1.000 | 353  | 4  | 1.75E-14 | NP_496498.1    | 63 | 82.4185 | 99  | 63  | hypothetical protein C47D12.8                                            |
| Locus_11732_Transcript_1/1_Conf_1.000 | 1115 | 20 | 2.19E-74 | CAX32485.1     | 67 | 283.878 | 359 | 243 | C. elegans protein T20D3.11b, partially confirmed by transcript evidence |
| Locus_11733_Transcript_1/1_Conf_1.000 | 877  | 0  |          |                |    |         |     |     |                                                                          |
| Locus_11734_Transcript_1/1_Conf_1.000 | 469  | 2  | 8.13E-12 | XP_002638516.1 | 46 | 73.559  | 139 | 65  | Hypothetical protein CBG05542                                            |
| Locus_11735_Transcript_1/1_Conf_1.000 | 332  | 20 | 8.89E-27 | NP_496968.1    | 96 | 123.25  | 63  | 61  | hypothetical protein Y48B6A.12                                           |

|                                       |     |    |          |                |     |         |     |     |                                                                         |
|---------------------------------------|-----|----|----------|----------------|-----|---------|-----|-----|-------------------------------------------------------------------------|
| Locus_11736_Transcript_1/1_Conf_1.000 | 393 | 1  | 9.74E-05 | NP_499759.1    | 72  | 50.0618 | 44  | 32  | DNaJ domain (prokaryotic heat shock protein) family member (dnj-17)     |
| Locus_11737_Transcript_1/1_Conf_1.000 | 608 | 20 | 3.48E-50 | NP_497589.3    | 68  | 201.83  | 196 | 134 | hypothetical protein Y71H2B.5                                           |
| Locus_11738_Transcript_1/1_Conf_1.000 | 675 | 20 | 5.67E-37 | EFO18191.1     | 71  | 158.303 | 168 | 120 | hypothetical protein LOAG_10303                                         |
| Locus_11739_Transcript_1/1_Conf_1.000 | 273 | 20 | 4.56E-23 | EFO18946.1     | 74  | 110.923 | 90  | 67  | hypothetical protein LOAG_09552                                         |
| Locus_1174_Transcript_1/1_Conf_1.000  | 663 | 20 | 2.85E-70 | XP_002640874.1 | 83  | 268.855 | 173 | 144 | C. briggsae CBR-CCO-2 protein                                           |
| Locus_11740_Transcript_1/1_Conf_1.000 | 202 | 0  |          |                |     |         |     |     |                                                                         |
| Locus_11741_Transcript_1/1_Conf_1.000 | 323 | 20 | 2.98E-38 | NP_495409.3    | 86  | 161.384 | 108 | 93  | hypothetical protein C44B7.10                                           |
| Locus_11742_Transcript_1/1_Conf_1.000 | 553 | 20 | 1.81E-78 | NP_493616.1    | 87  | 295.434 | 184 | 161 | hypothetical protein F33H2.5                                            |
| Locus_11743_Transcript_1/1_Conf_1.000 | 799 | 20 | 2.01E-72 | EFO27128.1     | 77  | 276.559 | 244 | 188 | cyclin domain-containing protein                                        |
| Locus_11744_Transcript_1/1_Conf_1.000 | 154 | 20 | 3.01E-14 | XP_002919374.1 | 100 | 81.6481 | 38  | 38  | PREDICTED: pleckstrin homology domain-containing family O member 1-like |
| Locus_11745_Transcript_1/1_Conf_1.000 | 514 | 20 | 8.44E-39 | XP_001894255.1 | 82  | 163.31  | 128 | 105 | trafficking protein particle complex subunit 1                          |

|                                       |     |    |           |                |     |         |     |     |                                                              |
|---------------------------------------|-----|----|-----------|----------------|-----|---------|-----|-----|--------------------------------------------------------------|
| Locus_11746_Transcript_1/1_Conf_1.000 | 283 | 20 | 1.66E-20  | XP_002192510.1 | 100 | 102.449 | 80  | 80  | PREDICTED: heterogeneous nuclear ribonucleoprotein K         |
| Locus_11747_Transcript_1/1_Conf_1.000 | 390 | 20 | 4.65E-36  | NP_500022.1    | 71  | 154.066 | 127 | 91  | Inner Mitochondrial Membrane Protease family member (immp-2) |
| Locus_11748_Transcript_1/1_Conf_1.000 | 251 | 20 | 2.63E-39  | ADN23570.1     | 100 | 164.851 | 83  | 83  | ubiquitin                                                    |
| Locus_11749_Transcript_1/1_Conf_1.000 | 509 | 20 | 5.75E-32  | EFO22933.1     | 66  | 140.584 | 171 | 113 | hypothetical protein LOAG_05552                              |
| Locus_1175_Transcript_1/1_Conf_1.000  | 807 | 20 | 2.18E-114 | ACI49174.1     | 91  | 416.001 | 245 | 225 | hypothetical protein Csp3_JD02.002                           |
| Locus_11750_Transcript_1/1_Conf_1.000 | 468 | 20 | 5.21E-51  | NP_498688.1    | 72  | 203.756 | 153 | 111 | Prolyl Carboxy Peptidase like family member (pcp-1)          |

|                                       |      |    |           |                |     |         |     |     |                                                                   |
|---------------------------------------|------|----|-----------|----------------|-----|---------|-----|-----|-------------------------------------------------------------------|
| Locus_11751_Transcript_1/1_Conf_1.000 | 205  | 20 | 7.53E-26  | NP_495261.1    | 89  | 120.168 | 67  | 60  | hypothetical protein F13H8.7                                      |
| Locus_11752_Transcript_1/1_Conf_1.000 | 614  | 20 | 5.21E-25  | NP_502214.2    | 53  | 118.242 | 186 | 100 | hypothetical protein ZK792.7                                      |
| Locus_11753_Transcript_1/1_Conf_1.000 | 800  | 20 | 2.58E-27  | EFO17580.1     | 69  | 126.716 | 137 | 95  | hypothetical protein LOAG_10920                                   |
| Locus_11754_Transcript_1/1_Conf_1.000 | 589  | 3  | 2.01E-28  | NP_493625.4    | 56  | 129.413 | 185 | 105 | hypothetical protein F31C3.3                                      |
| Locus_11755_Transcript_1/2_Conf_1.000 | 312  | 0  |           |                |     |         |     |     |                                                                   |
| Locus_11755_Transcript_2/2_Conf_1.000 | 279  | 0  |           |                |     |         |     |     |                                                                   |
| Locus_11756_Transcript_1/1_Conf_1.000 | 678  | 20 | 1.35E-78  | NP_502573.1    | 78  | 296.59  | 223 | 176 | hypothetical protein Y62E10A.6                                    |
| Locus_11757_Transcript_1/1_Conf_1.000 | 303  | 0  |           |                |     |         |     |     |                                                                   |
| Locus_11758_Transcript_1/1_Conf_1.000 | 608  | 20 | 9.13E-67  | XP_002641059.1 | 79  | 256.914 | 193 | 153 | Hypothetical protein CBG22470                                     |
| Locus_11759_Transcript_1/1_Conf_1.000 | 313  | 20 | 3.92E-54  | XP_002760567.1 | 100 | 214.157 | 104 | 104 | PREDICTED: 60S ribosomal protein L5-like isoform 1                |
| Locus_1176_Transcript_1/2_Conf_1.000  | 708  | 20 | 1.49E-38  | XP_001896392.1 | 63  | 163.696 | 215 | 136 | Dual specificity phosphatase, catalytic domain containing protein |
| Locus_1176_Transcript_2/2_Conf_1.000  | 708  | 20 | 1.14E-38  | XP_001896392.1 | 63  | 164.081 | 213 | 136 | Dual specificity phosphatase, catalytic domain containing protein |
| Locus_11760_Transcript_1/1_Conf_1.000 | 1085 | 20 | 7.27E-160 | CBI70492.1     | 93  | 567.77  | 361 | 337 | vacuolar ATPase a subunit                                         |
| Locus_11761_Transcript_1/2_Conf_1.000 | 263  | 0  |           |                |     |         |     |     |                                                                   |
| Locus_11761_Transcript_2/2_Conf_1.000 | 530  | 0  |           |                |     |         |     |     |                                                                   |
| Locus_11762_Transcript_1/1_Conf_1.000 | 273  | 6  | 1.37E-19  | XP_002632822.1 | 70  | 99.3673 | 91  | 64  | C. briggsae CBR-NHR-97 protein                                    |
| Locus_11763_Transcript_1/1_Conf_1.000 | 217  | 0  |           |                |     |         |     |     |                                                                   |

|                                       |      |    |           |                |    |         |     |     |                                                                         |
|---------------------------------------|------|----|-----------|----------------|----|---------|-----|-----|-------------------------------------------------------------------------|
| Locus_11764_Transcript_1/1_Conf_1.000 | 887  | 20 | 4.96E-110 | XP_002636649.1 | 79 | 401.749 | 296 | 235 | Hypothetical protein CBG23360                                           |
| Locus_11765_Transcript_1/1_Conf_1.000 | 400  | 2  | 4.95E-09  | XP_002639986.1 | 78 | 64.3142 | 42  | 33  | Hypothetical protein CBG10814                                           |
| Locus_11766_Transcript_1/1_Conf_1.000 | 307  | 0  |           |                |    |         |     |     |                                                                         |
| Locus_11767_Transcript_1/1_Conf_1.000 | 244  | 7  | 4.71E-12  | NP_001122977.1 | 76 | 74.3294 | 80  | 61  | Variable ABnormal morphology family member (vab-8)                      |
| Locus_11768_Transcript_1/1_Conf_1.000 | 1119 | 20 | 3.70E-138 | CBL87054.2     | 86 | 495.738 | 311 | 270 | C. elegans protein F54E4.1, partially confirmed by transcript evidence  |
| Locus_11769_Transcript_1/1_Conf_1.000 | 545  | 14 | 2.77E-36  | NP_001123010.1 | 68 | 155.221 | 157 | 107 | related to yeast Vacuolar Protein Sorting factor family member (vps-39) |
| Locus_1177_Transcript_1/1_Conf_1.000  | 472  | 20 | 5.00E-62  | XP_002646355.1 | 83 | 240.35  | 154 | 128 | Hypothetical protein CBG12069                                           |
| Locus_11770_Transcript_1/1_Conf_1.000 | 181  | 0  |           |                |    |         |     |     |                                                                         |
| Locus_11771_Transcript_1/2_Conf_1.000 | 272  | 0  |           |                |    |         |     |     |                                                                         |
| Locus_11771_Transcript_2/2_Conf_1.000 | 268  | 0  |           |                |    |         |     |     |                                                                         |
| Locus_11772_Transcript_1/1_Conf_1.000 | 628  | 1  | 1.22E-08  | NP_001021391.1 | 56 | 63.929  | 144 | 81  | hypothetical protein F16C3.3                                            |
| Locus_11773_Transcript_1/1_Conf_1.000 | 434  | 3  | 1.92E-13  | XP_002636820.1 | 58 | 78.9518 | 148 | 86  | Hypothetical protein CBG09264                                           |
| Locus_11774_Transcript_1/1_Conf_1.000 | 801  | 20 | 3.81E-87  | NP_498566.3    | 84 | 325.479 | 234 | 198 | hypothetical protein K04G7.11                                           |
| Locus_11775_Transcript_1/1_Conf_1.000 | 188  | 0  |           |                |    |         |     |     |                                                                         |
| Locus_11776_Transcript_1/1_Conf_1.000 | 268  | 20 | 1.47E-37  | XP_002641474.1 | 88 | 159.073 | 87  | 77  | C. briggsae CBR-PTP-1 protein                                           |

|                                       |      |    |          |                |     |         |     |     |                                                                  |
|---------------------------------------|------|----|----------|----------------|-----|---------|-----|-----|------------------------------------------------------------------|
| Locus_11777_Transcript_1/1_Conf_1.000 | 410  | 20 | 2.91E-70 | NP_501549.1    | 100 | 267.7   | 134 | 134 | RAP homolog (vertebrate Rap GTPase family) family member (rap-1) |
| Locus_11778_Transcript_1/1_Conf_1.000 | 990  | 20 | 5.38E-26 | NP_501282.1    | 49  | 122.865 | 289 | 143 | hypothetical protein C33H5.8                                     |
| Locus_11779_Transcript_1/1_Conf_1.000 | 314  | 0  |          |                |     |         |     |     |                                                                  |
| Locus_1178_Transcript_1/2_Conf_1.000  | 643  | 20 | 2.04E-78 | NP_497574.2    | 89  | 295.819 | 174 | 156 | hypothetical protein Y54F10AM.5                                  |
| Locus_1178_Transcript_2/2_Conf_1.000  | 643  | 20 | 2.04E-78 | NP_497574.2    | 89  | 295.819 | 174 | 156 | hypothetical protein Y54F10AM.5                                  |
| Locus_11780_Transcript_1/2_Conf_1.000 | 933  | 0  |          |                |     |         |     |     |                                                                  |
| Locus_11780_Transcript_2/2_Conf_1.000 | 581  | 0  |          |                |     |         |     |     |                                                                  |
| Locus_11781_Transcript_1/2_Conf_1.000 | 652  | 20 | 1.02E-56 | XP_002638616.1 | 84  | 223.787 | 171 | 144 | Hypothetical protein CBG05668                                    |
| Locus_11781_Transcript_2/2_Conf_1.000 | 885  | 20 | 8.03E-60 | XP_002638616.1 | 78  | 234.958 | 213 | 167 | Hypothetical protein CBG05668                                    |
| Locus_11782_Transcript_1/1_Conf_1.000 | 696  | 7  | 7.46E-35 | XP_002641835.1 | 60  | 151.369 | 230 | 138 | C. briggsae CBR-CYK-1 protein                                    |
| Locus_11783_Transcript_1/1_Conf_1.000 | 518  | 20 | 6.39E-42 | NP_494918.2    | 75  | 173.711 | 171 | 129 | hypothetical protein T27F7.3                                     |
| Locus_11784_Transcript_1/1_Conf_1.000 | 197  | 0  |          |                |     |         |     |     |                                                                  |
| Locus_11785_Transcript_1/1_Conf_1.000 | 217  | 0  |          |                |     |         |     |     |                                                                  |
| Locus_11786_Transcript_1/1_Conf_1.000 | 183  | 0  |          |                |     |         |     |     |                                                                  |
| Locus_11787_Transcript_1/1_Conf_1.000 | 245  | 0  |          |                |     |         |     |     |                                                                  |
| Locus_11788_Transcript_1/1_Conf_1.000 | 319  | 0  |          |                |     |         |     |     |                                                                  |
| Locus_11789_Transcript_1/1_Conf_1.000 | 309  | 20 | 7.71E-23 | XP_002639369.1 | 66  | 110.153 | 96  | 64  | C. briggsae CBR-ZIG-7 protein                                    |
| Locus_1179_Transcript_1/1_Conf_1.000  | 2249 | 5  | 5.22E-24 | XP_002636796.1 | 45  | 117.857 | 389 | 178 | C. briggsae CBR-RIL-2 protein                                    |
| Locus_11790_Transcript_1/1_Conf_1.000 | 279  | 0  |          |                |     |         |     |     |                                                                  |

|                                       |      |    |           |                |    |         |     |     |                                                                       |
|---------------------------------------|------|----|-----------|----------------|----|---------|-----|-----|-----------------------------------------------------------------------|
| Locus_11791_Transcript_1/1_Conf_1.000 | 1017 | 20 | 1.02E-59  | EFO16811.1     | 63 | 234.958 | 264 | 167 | hypothetical protein LOAG_11692                                       |
| Locus_11792_Transcript_1/1_Conf_1.000 | 188  | 0  |           |                |    |         |     |     |                                                                       |
| Locus_11793_Transcript_1/1_Conf_1.000 | 359  | 5  | 2.42E-24  | XP_002636405.1 | 96 | 115.161 | 58  | 56  | Hypothetical protein CBG23057                                         |
| Locus_11794_Transcript_1/1_Conf_1.000 | 1503 | 20 | 0         | NP_001024792.2 | 87 | 655.596 | 422 | 371 | yeast SMF (divalent cation transporter) homolog family member (smf-1) |
| Locus_11795_Transcript_1/1_Conf_1.000 | 1026 | 20 | 3.84E-14  | XP_002129449.1 | 47 | 83.5741 | 184 | 87  | PREDICTED: hypothetical protein                                       |
| Locus_11796_Transcript_1/1_Conf_1.000 | 432  | 2  | 5.59E-05  | NP_740989.1    | 54 | 50.8322 | 141 | 77  | hypothetical protein F07F6.8                                          |
| Locus_11797_Transcript_1/1_Conf_1.000 | 164  | 0  |           |                |    |         |     |     |                                                                       |
| Locus_11798_Transcript_1/1_Conf_1.000 | 435  | 20 | 1.03E-67  | XP_002644717.1 | 93 | 259.225 | 145 | 136 | Hypothetical protein CBG14711                                         |
| Locus_11799_Transcript_1/1_Conf_1.000 | 252  | 3  | 8.53E-17  | XP_001898467.1 | 78 | 90.1225 | 80  | 63  | FYVE zinc finger family protein                                       |
| Locus_118_Transcript_1/1_Conf_1.000   | 471  | 0  |           |                |    |         |     |     |                                                                       |
| Locus_1180_Transcript_1/1_Conf_1.000  | 1449 | 20 | 1.23E-118 | Q5QQ52.1       | 68 | 431.409 | 402 | 277 | Xylosyltransferase sqv-6                                              |
| Locus_11800_Transcript_1/1_Conf_1.000 | 266  | 0  |           |                |    |         |     |     |                                                                       |
| Locus_11801_Transcript_1/1_Conf_1.000 | 142  | 0  |           |                |    |         |     |     |                                                                       |
| Locus_11802_Transcript_1/1_Conf_1.000 | 487  | 0  |           |                |    |         |     |     |                                                                       |
| Locus_11803_Transcript_1/1_Conf_1.000 | 202  | 0  |           |                |    |         |     |     |                                                                       |
| Locus_11804_Transcript_1/1_Conf_1.000 | 316  | 5  | 5.17E-06  | NP_001021675.1 | 71 | 54.299  | 63  | 45  | hypothetical protein W10C8.6                                          |
| Locus_11805_Transcript_1/1_Conf_1.000 | 152  | 0  |           |                |    |         |     |     |                                                                       |
| Locus_11806_Transcript_1/1_Conf_1.000 | 227  | 20 | 4.48E-26  | NP_503148.1    | 90 | 120.939 | 66  | 60  | hypothetical protein Y108G3AL.2                                       |
| Locus_11807_Transcript_1/1_Conf_1.000 | 183  | 20 | 6.11E-23  | XP_002640829.1 | 96 | 110.538 | 58  | 56  | C. briggsae CBR-ADS-1 protein                                         |

|                                       |      |    |           |                |    |         |     |     |                                                                        |
|---------------------------------------|------|----|-----------|----------------|----|---------|-----|-----|------------------------------------------------------------------------|
| Locus_11808_Transcript_1/2_Conf_1.000 | 449  | 2  | 8.42E-09  | XP_002642114.1 | 48 | 63.5438 | 141 | 69  | C. briggsae CBR-PQN-45 protein                                         |
| Locus_11808_Transcript_2/2_Conf_1.000 | 449  | 2  | 1.75E-06  | XP_002642114.1 | 48 | 55.8398 | 141 | 68  | C. briggsae CBR-PQN-45 protein                                         |
| Locus_11809_Transcript_1/1_Conf_1.000 | 372  | 0  |           |                |    |         |     |     |                                                                        |
| Locus_1181_Transcript_1/1_Conf_1.000  | 1290 | 20 | 5.04E-113 | XP_002638266.1 | 87 | 412.535 | 275 | 240 | C. briggsae CBR-HAF-3 protein                                          |
| Locus_11810_Transcript_1/1_Conf_1.000 | 748  | 20 | 1.37E-40  | NP_001022051.1 | 59 | 170.629 | 250 | 148 | SREBP Cleavage activating Protein (SCAP) homolog family member (scp-1) |
| Locus_11811_Transcript_1/1_Conf_1.000 | 143  | 0  |           |                |    |         |     |     |                                                                        |
| Locus_11812_Transcript_1/2_Conf_1.000 | 367  | 0  |           |                |    |         |     |     |                                                                        |
| Locus_11812_Transcript_2/2_Conf_1.000 | 367  | 0  |           |                |    |         |     |     |                                                                        |
| Locus_11813_Transcript_1/1_Conf_1.000 | 604  | 20 | 9.93E-74  | CAA86821.1     | 90 | 280.026 | 178 | 161 | excretory/secretory antigen                                            |
| Locus_11814_Transcript_1/1_Conf_1.000 | 1129 | 20 | 2.94E-50  | XP_002634649.1 | 71 | 203.756 | 225 | 161 | C. briggsae CBR-DGK-4 protein                                          |
| Locus_11815_Transcript_1/1_Conf_1.000 | 319  | 7  | 1.71E-09  | XP_001898068.1 | 69 | 65.855  | 71  | 49  | Homeobox domain containing protein                                     |
| Locus_11816_Transcript_1/1_Conf_1.000 | 291  | 4  | 2.63E-10  | NP_491254.1    | 58 | 68.5514 | 80  | 47  | hypothetical protein C50F2.4                                           |
| Locus_11817_Transcript_1/1_Conf_1.000 | 143  | 0  |           |                |    |         |     |     |                                                                        |
| Locus_11818_Transcript_1/1_Conf_1.000 | 636  | 12 | 1.45E-20  | NP_499391.1    | 76 | 103.605 | 86  | 66  | hypothetical protein Y39A1C.1                                          |
| Locus_11819_Transcript_1/1_Conf_1.000 | 232  | 12 | 6.03E-15  | XP_002631617.1 | 72 | 83.9593 | 75  | 54  | Hypothetical protein CBG20802                                          |
| Locus_1182_Transcript_1/1_Conf_1.000  | 231  | 8  | 6.88E-19  | XP_002631304.1 | 92 | 97.0561 | 53  | 49  | Hypothetical protein CBG03118                                          |
| Locus_11820_Transcript_1/1_Conf_1.000 | 283  | 0  |           |                |    |         |     |     |                                                                        |
| Locus_11821_Transcript_1/1_Conf_1.000 | 713  | 20 | 2.21E-98  | EFO22809.1     | 88 | 362.459 | 237 | 210 | hypothetical protein LOAG_05677                                        |
| Locus_11822_Transcript_1/1_Conf_1.000 | 750  | 20 | 7.74E-92  | XP_002630011.1 | 80 | 340.887 | 250 | 201 | Hypothetical protein CBG13376                                          |



|                                       |     |    |           |                |    |         |     |     |                                                                         |
|---------------------------------------|-----|----|-----------|----------------|----|---------|-----|-----|-------------------------------------------------------------------------|
| Locus_11823_Transcript_1/1_Conf_1.000 | 414 | 20 | 2.38E-40  | NP_497425.1    | 72 | 168.318 | 136 | 99  | SphingoMyelin Synthase family member (sms-3)                            |
| Locus_11824_Transcript_1/1_Conf_1.000 | 566 | 20 | 1.02E-23  | XP_001902442.1 | 60 | 113.62  | 169 | 103 | hypothetical protein Bm1_54925                                          |
| Locus_11825_Transcript_1/1_Conf_1.000 | 823 | 20 | 4.09E-92  | NP_505433.3    | 80 | 342.043 | 243 | 196 | Heavy chain, Unconventional Myosin family member (hum-2)                |
| Locus_11826_Transcript_1/1_Conf_1.000 | 300 | 0  |           |                |    |         |     |     |                                                                         |
| Locus_11827_Transcript_1/1_Conf_1.000 | 527 | 4  | 1.74E-37  | CAB07693.3     | 74 | 159.073 | 131 | 97  | C. elegans protein Y48E1B.7, partially confirmed by transcript evidence |
| Locus_11828_Transcript_1/2_Conf_1.000 | 831 | 20 | 2.39E-71  | NP_493713.2    | 81 | 273.092 | 204 | 167 | CalPoNin family member (cpn-2)                                          |
| Locus_11828_Transcript_2/2_Conf_1.000 | 734 | 20 | 1.88E-71  | NP_493713.2    | 81 | 273.092 | 204 | 167 | CalPoNin family member (cpn-2)                                          |
| Locus_11829_Transcript_1/1_Conf_1.000 | 607 | 20 | 2.77E-31  | XP_002643253.1 | 75 | 139.043 | 128 | 96  | C. briggsae CBR-AEX-3 protein                                           |
| Locus_1183_Transcript_1/1_Conf_1.000  | 965 | 20 | 1.70E-37  | XP_002189824.1 | 55 | 160.999 | 280 | 156 | PREDICTED: centrosomal protein 97kDa                                    |
| Locus_11830_Transcript_1/1_Conf_1.000 | 935 | 20 | 3.77E-119 | NP_510560.2    | 81 | 432.18  | 304 | 249 | Gut OBstructed or defective family member (gob-1)                       |
| Locus_11831_Transcript_1/1_Conf_1.000 | 183 | 20 | 6.53E-25  | XP_002637927.1 | 96 | 117.087 | 61  | 59  | Hypothetical protein CBG04739                                           |

|                                       |      |    |           |                |     |         |     |     |                                                                                                  |
|---------------------------------------|------|----|-----------|----------------|-----|---------|-----|-----|--------------------------------------------------------------------------------------------------|
| Locus_11832_Transcript_1/1_Conf_1.000 | 339  | 0  |           |                |     |         |     |     |                                                                                                  |
| Locus_11833_Transcript_1/1_Conf_1.000 | 756  | 20 | 2.43E-77  | EFO21654.1     | 76  | 292.738 | 249 | 191 | hypothetical protein LOAG_06832                                                                  |
| Locus_11834_Transcript_1/1_Conf_1.000 | 209  | 0  |           |                |     |         |     |     |                                                                                                  |
| Locus_11835_Transcript_1/1_Conf_1.000 | 281  | 0  |           |                |     |         |     |     |                                                                                                  |
| Locus_11836_Transcript_1/1_Conf_1.000 | 160  | 0  |           |                |     |         |     |     |                                                                                                  |
| Locus_11837_Transcript_1/1_Conf_1.000 | 1289 | 20 | 3.26E-104 | XP_001898591.1 | 70  | 383.259 | 396 | 279 | Polyprenyl synthetase family protein                                                             |
| Locus_11838_Transcript_1/1_Conf_1.000 | 765  | 20 | 4.93E-25  | NP_496945.3    | 62  | 119.013 | 166 | 103 | XRN (mouse/S. cerevisiae) ribonuclease related family member (xrn-1)                             |
| Locus_11839_Transcript_1/1_Conf_1.000 | 600  | 20 | 1.04E-99  | AAV38432.1     | 100 | 366.311 | 173 | 173 | tissue inhibitor of metalloproteinase 1 (erythroid potentiating activity, collagenase inhibitor) |
| Locus_1184_Transcript_1/1_Conf_1.000  | 621  | 20 | 6.01E-69  | NP_001023176.1 | 91  | 264.233 | 157 | 143 | hypothetical protein F33D4.8                                                                     |
| Locus_11840_Transcript_1/1_Conf_1.000 | 493  | 17 | 4.43E-18  | XP_002632297.1 | 56  | 94.3597 | 151 | 85  | C. briggsae CBR-NOL-6 protein                                                                    |
| Locus_11841_Transcript_1/1_Conf_1.000 | 441  | 0  |           |                |     |         |     |     |                                                                                                  |
| Locus_11842_Transcript_1/1_Conf_1.000 | 681  | 20 | 1.91E-72  | XP_001896094.1 | 74  | 276.174 | 225 | 168 | Protein kinase domain containing protein                                                         |
| Locus_11843_Transcript_1/1_Conf_1.000 | 133  | 6  | 9.22E-08  | XP_002642608.1 | 82  | 60.077  | 41  | 34  | C. briggsae CBR-LIG-4 protein                                                                    |
| Locus_11844_Transcript_1/1_Conf_1.000 | 1224 | 0  |           |                |     |         |     |     |                                                                                                  |
| Locus_11845_Transcript_1/1_Conf_1.000 | 1117 | 20 | 6.22E-61  | CAB01684.2     | 74  | 239.195 | 201 | 150 | C. elegans protein C35C5.3a, confirmed by transcript evidence                                    |
| Locus_11846_Transcript_1/1_Conf_1.000 | 234  | 0  |           |                |     |         |     |     |                                                                                                  |

|                                       |      |    |          |                |    |         |     |     |                                                 |
|---------------------------------------|------|----|----------|----------------|----|---------|-----|-----|-------------------------------------------------|
| Locus_11847_Transcript_1/1_Conf_1.000 | 625  | 20 | 4.48E-96 | EFO19031.1     | 91 | 354.369 | 208 | 190 | hypothetical protein LOAG_09464                 |
| Locus_11848_Transcript_1/1_Conf_1.000 | 401  | 20 | 3.08E-35 | XP_002639450.1 | 96 | 151.369 | 80  | 77  | Hypothetical protein CBG04045                   |
| Locus_11849_Transcript_1/1_Conf_1.000 | 181  | 0  |          |                |    |         |     |     |                                                 |
| Locus_1185_Transcript_1/1_Conf_1.000  | 2272 | 20 | 6.64E-43 | XP_002644054.1 | 83 | 180.644 | 132 | 110 | Hypothetical protein CBG17518                   |
| Locus_11850_Transcript_1/1_Conf_1.000 | 131  | 0  |          |                |    |         |     |     |                                                 |
| Locus_11851_Transcript_1/1_Conf_1.000 | 495  | 0  |          |                |    |         |     |     |                                                 |
| Locus_11852_Transcript_1/1_Conf_1.000 | 348  | 20 | 1.52E-50 | NP_506259.2    | 92 | 202.216 | 115 | 106 | hypothetical protein W07G4.3                    |
| Locus_11853_Transcript_1/1_Conf_1.000 | 889  | 4  | 1.98E-82 | XP_002643042.1 | 77 | 310.071 | 289 | 223 | Hypothetical protein CBG22957                   |
| Locus_11854_Transcript_1/1_Conf_1.000 | 410  | 3  | 7.49E-34 | A8WRV1.2       | 75 | 146.747 | 128 | 96  | Serine/threonine-protein kinase kin-29          |
| Locus_11855_Transcript_1/1_Conf_1.000 | 368  | 0  |          |                |    |         |     |     |                                                 |
| Locus_11856_Transcript_1/1_Conf_1.000 | 203  | 0  |          |                |    |         |     |     |                                                 |
| Locus_11857_Transcript_1/1_Conf_1.000 | 222  | 20 | 2.02E-18 | NP_001021770.1 | 92 | 95.5153 | 54  | 50  | hypothetical protein Y47G6A.7                   |
| Locus_11858_Transcript_1/1_Conf_1.000 | 557  | 20 | 2.99E-20 | NP_499961.2    | 73 | 102.064 | 82  | 60  | Nuclear Hormone Receptor family member (nhr-76) |
| Locus_11859_Transcript_1/1_Conf_1.000 | 675  | 20 | 2.28E-70 | NP_506561.1    | 87 | 269.24  | 170 | 149 | Cyclophilin family member (cyn-1)               |

|                                       |      |    |          |                |    |         |     |     |                                                     |
|---------------------------------------|------|----|----------|----------------|----|---------|-----|-----|-----------------------------------------------------|
| Locus_1186_Transcript_1/1_Conf_1.000  | 677  | 20 | 1.94E-61 | NP_490749.1    | 92 | 239.58  | 166 | 153 | hypothetical protein Y65B4BR.5                      |
| Locus_11860_Transcript_1/1_Conf_1.000 | 897  | 20 | 2.11E-31 | XP_001892919.1 | 53 | 140.584 | 240 | 129 | TPR Domain containing protein                       |
| Locus_11861_Transcript_1/1_Conf_1.000 | 524  | 20 | 3.22E-28 | ACI49081.1     | 67 | 128.257 | 137 | 93  | hypothetical protein Cbre_JD11.005                  |
| Locus_11862_Transcript_1/1_Conf_1.000 | 201  | 0  |          |                |    |         |     |     |                                                     |
| Locus_11863_Transcript_1/1_Conf_1.000 | 297  | 0  |          |                |    |         |     |     |                                                     |
| Locus_11864_Transcript_1/1_Conf_1.000 | 621  | 12 | 2.72E-45 | NP_505034.1    | 79 | 185.652 | 204 | 163 | hypothetical protein F40A3.7                        |
| Locus_11865_Transcript_1/1_Conf_1.000 | 2213 | 20 | 5.02E-88 | XP_001893141.1 | 62 | 330.487 | 466 | 289 | DEAD/DEAH box helicase family protein               |
| Locus_11866_Transcript_1/1_Conf_1.000 | 650  | 2  | 2.68E-25 | NP_492698.2    | 54 | 119.398 | 183 | 100 | hypothetical protein ZC247.1                        |
| Locus_11867_Transcript_1/1_Conf_1.000 | 389  | 2  | 1.91E-13 | NP_491039.1    | 55 | 78.9518 | 118 | 65  | hypothetical protein Y71F9B.1                       |
| Locus_11868_Transcript_1/1_Conf_1.000 | 555  | 20 | 2.01E-16 | NP_496567.2    | 48 | 89.3521 | 184 | 90  | hypothetical protein Y17G7B.11                      |
| Locus_11869_Transcript_1/1_Conf_1.000 | 526  | 2  | 3.18E-23 | XP_001895430.1 | 53 | 111.694 | 186 | 100 | hypothetical protein Bm1_19875                      |
| Locus_1187_Transcript_1/1_Conf_1.000  | 825  | 0  |          |                |    |         |     |     |                                                     |
| Locus_11870_Transcript_1/1_Conf_1.000 | 661  | 20 | 6.91E-85 | NP_510667.2    | 87 | 317.39  | 217 | 189 | TBC (Tre-2/Bub2/Cdc16) domain family member (tbc-4) |
| Locus_11871_Transcript_1/2_Conf_1.000 | 860  | 9  | 7.20E-42 | XP_002642351.1 | 66 | 175.252 | 170 | 113 | Hypothetical protein CBG18348                       |
| Locus_11871_Transcript_2/2_Conf_1.000 | 860  | 9  | 1.60E-41 | XP_002642351.1 | 66 | 174.096 | 170 | 113 | Hypothetical protein CBG18348                       |
| Locus_11872_Transcript_1/1_Conf_1.000 | 307  | 20 | 4.68E-36 | NP_490795.2    | 82 | 154.066 | 102 | 84  | Nematode ASTacin protease family member (nas-30)    |
| Locus_11873_Transcript_1/1_Conf_1.000 | 302  | 20 | 1.33E-30 | XP_002634824.1 | 82 | 135.961 | 86  | 71  | Hypothetical protein CBG13932                       |

|                                       |      |    |           |                |    |         |     |     |                                |
|---------------------------------------|------|----|-----------|----------------|----|---------|-----|-----|--------------------------------|
| Locus_11874_Transcript_1/1_Conf_1.000 | 265  | 20 | 3.63E-36  | NP_505689.1    | 91 | 154.451 | 87  | 80  | hypothetical protein Y32F6B.1  |
| Locus_11875_Transcript_1/1_Conf_1.000 | 764  | 20 | 1.17E-18  | ABB53347.1     | 51 | 97.8265 | 183 | 95  | secreted protein 5 precursor   |
| Locus_11876_Transcript_1/1_Conf_1.000 | 221  | 0  |           |                |    |         |     |     |                                |
| Locus_11877_Transcript_1/1_Conf_1.000 | 194  | 20 | 5.47E-24  | NP_500274.2    | 92 | 114.005 | 63  | 58  | hypothetical protein Y54G2A.4  |
| Locus_11878_Transcript_1/1_Conf_1.000 | 333  | 9  | 8.87E-19  | NP_509416.2    | 77 | 96.6709 | 103 | 80  | hypothetical protein F55E10.7  |
| Locus_11879_Transcript_1/1_Conf_1.000 | 141  | 0  |           |                |    |         |     |     |                                |
| Locus_1188_Transcript_1/1_Conf_1.000  | 817  | 20 | 1.77E-47  | XP_002637575.1 | 60 | 193.741 | 269 | 162 | C. briggsae CBR-EHBP-1 protein |
| Locus_11880_Transcript_1/1_Conf_1.000 | 200  | 0  |           |                |    |         |     |     |                                |
| Locus_11881_Transcript_1/1_Conf_1.000 | 615  | 20 | 7.66E-08  | NP_001021233.1 | 76 | 61.2326 | 47  | 36  | hypothetical protein D2045.9   |
| Locus_11882_Transcript_1/1_Conf_1.000 | 1167 | 20 | 9.61E-153 | NP_504650.1    | 78 | 544.273 | 389 | 304 | hypothetical protein W01A11.1  |
| Locus_11883_Transcript_1/1_Conf_1.000 | 481  | 0  |           |                |    |         |     |     |                                |
| Locus_11884_Transcript_1/1_Conf_1.000 | 166  | 0  |           |                |    |         |     |     |                                |
| Locus_11885_Transcript_1/1_Conf_1.000 | 1563 | 20 | 0         | AAV27339.1     | 80 | 653.67  | 521 | 420 | Hc38                           |
| Locus_11886_Transcript_1/1_Conf_1.000 | 434  | 0  |           |                |    |         |     |     |                                |
| Locus_11887_Transcript_1/1_Conf_1.000 | 342  | 20 | 1.31E-33  | NP_502290.1    | 98 | 145.976 | 70  | 69  | hypothetical protein F11A10.2  |

|                                       |      |    |           |                |    |         |     |     |                                                                           |
|---------------------------------------|------|----|-----------|----------------|----|---------|-----|-----|---------------------------------------------------------------------------|
| Locus_11888_Transcript_1/1_Conf_1.000 | 429  | 20 | 8.58E-38  | NP_001040974.1 | 81 | 159.844 | 141 | 115 | hypothetical protein K09B11.9                                             |
| Locus_11889_Transcript_1/1_Conf_1.000 | 491  | 20 | 1.63E-36  | CAA21622.4     | 62 | 155.606 | 176 | 110 | C. elegans protein Y43F8C.12, partially confirmed by transcript evidence  |
| Locus_1189_Transcript_1/1_Conf_1.000  | 1045 | 20 | 6.25E-129 | XP_002644986.1 | 86 | 464.922 | 316 | 273 | C. briggsae CBR-TAG-320 protein                                           |
| Locus_11890_Transcript_1/1_Conf_1.000 | 257  | 3  | 1.19E-10  | XP_002632648.1 | 69 | 69.707  | 59  | 41  | Hypothetical protein CBG21570                                             |
| Locus_11891_Transcript_1/1_Conf_1.000 | 223  | 0  |           |                |    |         |     |     |                                                                           |
| Locus_11892_Transcript_1/1_Conf_1.000 | 646  | 11 | 3.33E-36  | NP_501400.1    | 67 | 155.606 | 192 | 130 | hypothetical protein F35H10.10                                            |
| Locus_11893_Transcript_1/1_Conf_1.000 | 581  | 20 | 3.00E-61  | XP_002648243.1 | 85 | 238.424 | 163 | 139 | Hypothetical protein CBG24373                                             |
| Locus_11894_Transcript_1/1_Conf_1.000 | 595  | 0  |           |                |    |         |     |     |                                                                           |
| Locus_11895_Transcript_1/1_Conf_1.000 | 681  | 3  | 1.54E-05  | XP_002648983.1 | 83 | 53.9138 | 37  | 31  | Hypothetical protein CBG21314                                             |
| Locus_11896_Transcript_1/1_Conf_1.000 | 783  | 20 | 2.46E-51  | NP_001024128.1 | 77 | 206.453 | 164 | 127 | EEA1 (Early Endosome Antigen, Rab effector) homolog family member (eea-1) |

|                                       |      |    |          |                |    |         |     |     |                                                  |
|---------------------------------------|------|----|----------|----------------|----|---------|-----|-----|--------------------------------------------------|
| Locus_11897_Transcript_1/1_Conf_1.000 | 550  | 20 | 5.55E-64 | NP_491714.1    | 76 | 247.284 | 181 | 138 | Aurora/Ipl1 Related kinase family member (air-2) |
| Locus_11898_Transcript_1/1_Conf_1.000 | 739  | 2  | 2.70E-41 | NP_499274.3    | 61 | 172.94  | 212 | 131 | Connector/eNhancer of KSR family member (cnk-1)  |
| Locus_11899_Transcript_1/1_Conf_1.000 | 1098 | 20 | 3.42E-72 | XP_001898576.1 | 64 | 276.559 | 303 | 195 | Fructosamine kinase family protein               |
| Locus_119_Transcript_1/10_Conf_0.167  | 708  | 20 | 9.80E-99 | CAD22112.1     | 97 | 363.614 | 200 | 195 | tubulin                                          |

|                                       |      |    |          |                |    |         |     |     |                               |
|---------------------------------------|------|----|----------|----------------|----|---------|-----|-----|-------------------------------|
| Locus_119_Transcript_10/10_Conf_0.542 | 2840 | 20 | 0        | XP_002646073.1 | 96 | 807.364 | 441 | 424 | Hypothetical protein CBG07939 |
| Locus_119_Transcript_2/10_Conf_0.167  | 666  | 20 | 5.04E-99 | CAD22112.1     | 97 | 364.385 | 198 | 194 | tubulin                       |
| Locus_119_Transcript_3/10_Conf_0.542  | 2940 | 20 | 0        | XP_002646073.1 | 96 | 807.364 | 441 | 424 | Hypothetical protein CBG07939 |



|                                      |      |    |           |                |    |         |     |     |                                                                |
|--------------------------------------|------|----|-----------|----------------|----|---------|-----|-----|----------------------------------------------------------------|
| Locus_119_Transcript_4/10_Conf_0.542 | 2940 | 20 | 0         | XP_002646073.1 | 96 | 807.364 | 441 | 424 | Hypothetical protein CBG07939                                  |
| Locus_119_Transcript_5/10_Conf_0.083 | 1395 | 20 | 4.88E-125 | CBL87050.1     | 79 | 452.595 | 334 | 265 | C. elegans protein C50F4.14b, confirmed by transcript evidence |
| Locus_119_Transcript_6/10_Conf_0.083 | 1395 | 20 | 4.88E-125 | CBL87050.1     | 79 | 452.595 | 334 | 265 | C. elegans protein C50F4.14b, confirmed by transcript evidence |
| Locus_119_Transcript_7/10_Conf_0.542 | 2840 | 20 | 0         | XP_002646073.1 | 96 | 809.29  | 441 | 424 | Hypothetical protein CBG07939                                  |
| Locus_119_Transcript_8/10_Conf_0.292 | 1992 | 20 | 0         | XP_002646073.1 | 95 | 655.596 | 360 | 344 | Hypothetical protein CBG07939                                  |

|                                       |      |    |          |                |    |         |     |     |                                                     |
|---------------------------------------|------|----|----------|----------------|----|---------|-----|-----|-----------------------------------------------------|
| Locus_119_Transcript_9/10_Conf_0.292  | 1992 | 20 | 0        | XP_002646073.1 | 95 | 653.67  | 360 | 344 | Hypothetical protein CBG07939                       |
| Locus_1190_Transcript_1/1_Conf_1.000  | 362  | 7  | 8.28E-25 | NP_001022814.1 | 70 | 116.701 | 119 | 84  | ODoRant response abnormal family member (odr-4)     |
| Locus_11900_Transcript_1/3_Conf_0.600 | 666  | 20 | 6.19E-81 | NP_491093.1    | 93 | 304.294 | 174 | 163 | RNA Polymerase II (B) subunit family member (rpb-7) |
| Locus_11900_Transcript_2/3_Conf_0.400 | 353  | 20 | 2.59E-50 | NP_491093.1    | 96 | 201.445 | 115 | 111 | RNA Polymerase II (B) subunit family member (rpb-7) |

|                                       |      |    |          |                |    |         |     |     |                                                                        |
|---------------------------------------|------|----|----------|----------------|----|---------|-----|-----|------------------------------------------------------------------------|
| Locus_11900_Transcript_3/3_Conf_0.600 | 646  | 20 | 5.80E-81 | NP_491093.1    | 93 | 304.294 | 174 | 163 | RNA Polymerase II (B) subunit family member (rpb-7)                    |
| Locus_11901_Transcript_1/1_Conf_1.000 | 293  | 2  | 6.25E-20 | EFO16669.1     | 71 | 100.523 | 96  | 69  | BTB/POZ domain-containing protein                                      |
| Locus_11902_Transcript_1/2_Conf_1.000 | 277  | 0  |          |                |    |         |     |     |                                                                        |
| Locus_11902_Transcript_2/2_Conf_1.000 | 283  | 0  |          |                |    |         |     |     |                                                                        |
| Locus_11903_Transcript_1/1_Conf_1.000 | 347  | 0  |          |                |    |         |     |     |                                                                        |
| Locus_11904_Transcript_1/1_Conf_1.000 | 379  | 2  | 4.46E-10 | XP_002630789.1 | 55 | 67.781  | 113 | 63  | Hypothetical protein CBG02486                                          |
| Locus_11905_Transcript_1/1_Conf_1.000 | 305  | 0  |          |                |    |         |     |     |                                                                        |
| Locus_11906_Transcript_1/1_Conf_1.000 | 134  | 0  |          |                |    |         |     |     |                                                                        |
| Locus_11907_Transcript_1/1_Conf_1.000 | 1126 | 20 | 5.49E-73 | NP_491118.2    | 61 | 279.256 | 367 | 226 | hypothetical protein Y54E10A.11                                        |
| Locus_11908_Transcript_1/1_Conf_1.000 | 318  | 20 | 1.64E-28 | NP_500157.2    | 75 | 129.028 | 106 | 80  | Cleavage and Polyadenylation Specificity Factor family member (cpsf-1) |
| Locus_11909_Transcript_1/1_Conf_1.000 | 115  | 0  |          |                |    |         |     |     |                                                                        |
| Locus_1191_Transcript_1/1_Conf_1.000  | 455  | 20 | 1.20E-23 | NP_509947.1    | 68 | 112.849 | 117 | 80  | hypothetical protein T04F8.2                                           |
| Locus_11910_Transcript_1/1_Conf_1.000 | 1299 | 20 | 8.65E-12 | XP_002151267.1 | 50 | 76.2554 | 114 | 58  | histone acetyltransferase, putative                                    |
| Locus_11911_Transcript_1/1_Conf_1.000 | 185  | 0  |          |                |    |         |     |     |                                                                        |
| Locus_11912_Transcript_1/1_Conf_1.000 | 165  | 0  |          |                |    |         |     |     |                                                                        |
| Locus_11913_Transcript_1/1_Conf_1.000 | 696  | 20 | 1.15E-27 | XP_001902469.1 | 54 | 127.487 | 231 | 125 | G protein pathway suppressor 1                                         |

|                                       |      |    |          |                |    |         |     |     |                                               |
|---------------------------------------|------|----|----------|----------------|----|---------|-----|-----|-----------------------------------------------|
| Locus_11914_Transcript_1/2_Conf_1.000 | 1426 | 20 | 3.73E-11 | XP_002643523.1 | 45 | 74.3294 | 183 | 83  | Hypothetical protein CBG16200                 |
| Locus_11914_Transcript_2/2_Conf_1.000 | 1401 | 20 | 8.09E-19 | NP_741906.1    | 40 | 99.7525 | 509 | 206 | Maternal Effect Sterile family member (mes-1) |

|                                       |      |    |          |                |    |         |     |     |                                    |
|---------------------------------------|------|----|----------|----------------|----|---------|-----|-----|------------------------------------|
| Locus_11915_Transcript_1/1_Conf_1.000 | 1677 | 20 | 1.25E-40 | AAA93318.1     | 56 | 172.555 | 278 | 156 | serine/threonine kinase            |
| Locus_11916_Transcript_1/2_Conf_1.000 | 763  | 0  |          |                |    |         |     |     |                                    |
| Locus_11916_Transcript_2/2_Conf_1.000 | 288  | 0  |          |                |    |         |     |     |                                    |
| Locus_11917_Transcript_1/1_Conf_1.000 | 299  | 0  |          |                |    |         |     |     |                                    |
| Locus_11918_Transcript_1/1_Conf_1.000 | 785  | 20 | 3.77E-76 | XP_002639317.1 | 72 | 288.886 | 250 | 181 | C. briggsae CBR-ABT-2 protein      |
| Locus_11919_Transcript_1/1_Conf_1.000 | 305  | 0  |          |                |    |         |     |     |                                    |
| Locus_1192_Transcript_1/3_Conf_0.714  | 752  | 0  |          |                |    |         |     |     |                                    |
| Locus_1192_Transcript_2/3_Conf_0.714  | 804  | 0  |          |                |    |         |     |     |                                    |
| Locus_1192_Transcript_3/3_Conf_0.714  | 752  | 0  |          |                |    |         |     |     |                                    |
| Locus_11920_Transcript_1/1_Conf_1.000 | 836  | 20 | 1.31E-85 | XP_002633781.1 | 73 | 320.472 | 278 | 205 | Hypothetical protein CBG03472      |
| Locus_11921_Transcript_1/2_Conf_1.000 | 492  | 20 | 2.95E-38 | ACI49052.1     | 70 | 161.384 | 144 | 102 | hypothetical protein Cbre_JD08.004 |
| Locus_11921_Transcript_2/2_Conf_1.000 | 492  | 20 | 6.57E-38 | ACI49052.1     | 70 | 160.229 | 144 | 102 | hypothetical protein Cbre_JD08.004 |
| Locus_11922_Transcript_1/1_Conf_1.000 | 996  | 20 | 1.01E-64 | NP_504952.1    | 76 | 251.521 | 224 | 171 | hypothetical protein F19F10.9      |
| Locus_11923_Transcript_1/1_Conf_1.000 | 362  | 20 | 7.46E-42 | NP_510509.2    | 88 | 173.326 | 94  | 83  | hypothetical protein F09B12.3      |
| Locus_11924_Transcript_1/1_Conf_1.000 | 175  | 0  |          |                |    |         |     |     |                                    |

|                                       |      |    |           |                |    |         |     |     |                                                                                    |
|---------------------------------------|------|----|-----------|----------------|----|---------|-----|-----|------------------------------------------------------------------------------------|
| Locus_11925_Transcript_1/1_Conf_1.000 | 560  | 20 | 1.01E-60  | ACI49101.1     | 77 | 236.498 | 189 | 146 | hypothetical protein Cbre_JD13.003                                                 |
| Locus_11926_Transcript_1/1_Conf_1.000 | 498  | 3  | 8.29E-09  | XP_002630376.1 | 67 | 63.5438 | 78  | 53  | Hypothetical protein CBG04315                                                      |
| Locus_11927_Transcript_1/1_Conf_1.000 | 159  | 0  |           |                |    |         |     |     |                                                                                    |
| Locus_11928_Transcript_1/2_Conf_1.000 | 638  | 0  |           |                |    |         |     |     |                                                                                    |
| Locus_11928_Transcript_2/2_Conf_1.000 | 438  | 0  |           |                |    |         |     |     |                                                                                    |
| Locus_11929_Transcript_1/1_Conf_1.000 | 884  | 0  |           |                |    |         |     |     |                                                                                    |
| Locus_1193_Transcript_1/1_Conf_1.000  | 995  | 20 | 5.93E-166 | ABC86838.1     | 93 | 587.8   | 331 | 311 | depsiphilin                                                                        |
| Locus_11930_Transcript_1/1_Conf_1.000 | 246  | 0  |           |                |    |         |     |     |                                                                                    |
| Locus_11931_Transcript_1/1_Conf_1.000 | 175  | 4  | 7.26E-13  | XP_002645979.1 | 78 | 77.0258 | 56  | 44  | C. briggsae CBR-NHR-48 protein                                                     |
| Locus_11932_Transcript_1/1_Conf_1.000 | 482  | 0  |           |                |    |         |     |     |                                                                                    |
| Locus_11933_Transcript_1/1_Conf_1.000 | 567  | 7  | 1.78E-15  | XP_001898423.1 | 47 | 86.2705 | 189 | 90  | Mediator complex subunit rgr-1                                                     |
| Locus_11934_Transcript_1/1_Conf_1.000 | 522  | 20 | 1.76E-34  | XP_002642109.1 | 73 | 149.058 | 132 | 97  | C. briggsae CBR-CDH-4 protein                                                      |
| Locus_11935_Transcript_1/2_Conf_1.000 | 339  | 0  |           |                |    |         |     |     |                                                                                    |
| Locus_11935_Transcript_2/2_Conf_1.000 | 470  | 0  |           |                |    |         |     |     |                                                                                    |
| Locus_11936_Transcript_1/1_Conf_1.000 | 681  | 0  |           |                |    |         |     |     |                                                                                    |
| Locus_11937_Transcript_1/1_Conf_1.000 | 302  | 0  |           |                |    |         |     |     |                                                                                    |
| Locus_11938_Transcript_1/1_Conf_1.000 | 315  | 5  | 9.10E-11  | ADG63133.1     | 59 | 70.0922 | 105 | 62  | calcium-dependent apyrase                                                          |
| Locus_11939_Transcript_1/1_Conf_1.000 | 704  | 20 | 4.72E-69  | NP_508706.2    | 69 | 265.003 | 247 | 172 | NCK (Non-Catalytic region of tyrosine Kinase) adaptor protein family member (nck1) |
| Locus_1194_Transcript_1/1_Conf_1.000  | 1108 | 20 | 2.06E-24  | ACI49169.1     | 62 | 117.857 | 148 | 92  | hypothetical protein Csp3_JD01.001                                                 |
| Locus_11940_Transcript_1/1_Conf_1.000 | 311  | 9  | 5.01E-14  | XP_002632974.1 | 61 | 80.8777 | 105 | 65  | Hypothetical protein CBG21734                                                      |

|                                       |      |    |          |                |    |         |     |     |                                           |
|---------------------------------------|------|----|----------|----------------|----|---------|-----|-----|-------------------------------------------|
| Locus_11941_Transcript_1/1_Conf_1.000 | 896  | 20 | 4.96E-57 | XP_002630704.1 | 59 | 225.713 | 304 | 180 | C. briggsae CBR-PINK-1 protein            |
| Locus_11942_Transcript_1/1_Conf_1.000 | 556  | 20 | 5.06E-52 | NP_501797.1    | 79 | 207.608 | 141 | 112 | DiHydroPyrimidinase family member (dhp-2) |
| Locus_11943_Transcript_1/1_Conf_1.000 | 278  | 0  |          |                |    |         |     |     |                                           |
| Locus_11944_Transcript_1/1_Conf_1.000 | 362  | 0  |          |                |    |         |     |     |                                           |
| Locus_11945_Transcript_1/1_Conf_1.000 | 248  | 14 | 6.55E-14 | ACT34056.1     | 92 | 80.4925 | 50  | 46  | glutamate dehydrogenase                   |
| Locus_11946_Transcript_1/1_Conf_1.000 | 352  | 0  |          |                |    |         |     |     |                                           |
| Locus_11947_Transcript_1/1_Conf_1.000 | 390  | 20 | 1.04E-27 | XP_002646193.1 | 72 | 126.331 | 103 | 75  | Hypothetical protein CBG24498             |
| Locus_11948_Transcript_1/2_Conf_1.000 | 1448 | 2  | 4.20E-18 | XP_001891812.1 | 52 | 97.4413 | 218 | 114 | hypothetical protein Bm1_01480            |
| Locus_11948_Transcript_2/2_Conf_1.000 | 1448 | 2  | 4.20E-18 | XP_001891812.1 | 52 | 97.4413 | 218 | 114 | hypothetical protein Bm1_01480            |
| Locus_11949_Transcript_1/1_Conf_1.000 | 359  | 3  | 1.02E-14 | XP_002647546.1 | 60 | 83.1889 | 102 | 62  | C. briggsae CBR-PME-5 protein             |
| Locus_1195_Transcript_1/1_Conf_1.000  | 439  | 20 | 2.22E-54 | NP_491454.2    | 84 | 214.927 | 132 | 111 | hypothetical protein F54D7.2              |
| Locus_11950_Transcript_1/1_Conf_1.000 | 538  | 20 | 3.93E-72 | XP_002634910.1 | 84 | 274.248 | 172 | 145 | Hypothetical protein CBG22508             |
| Locus_11951_Transcript_1/1_Conf_1.000 | 728  | 0  |          |                |    |         |     |     |                                           |

|                                       |     |    |          |                |    |         |     |     |                                                   |
|---------------------------------------|-----|----|----------|----------------|----|---------|-----|-----|---------------------------------------------------|
| Locus_11952_Transcript_1/1_Conf_1.000 | 384 | 20 | 3.62E-12 | NP_496283.1    | 60 | 74.7146 | 94  | 57  | Cell-death-Related Nuclease family member (crn-3) |
| Locus_11953_Transcript_1/1_Conf_1.000 | 819 | 0  |          |                |    |         |     |     |                                                   |
| Locus_11954_Transcript_1/1_Conf_1.000 | 330 | 0  |          |                |    |         |     |     |                                                   |
| Locus_11955_Transcript_1/1_Conf_1.000 | 309 | 0  |          |                |    |         |     |     |                                                   |
| Locus_11956_Transcript_1/1_Conf_1.000 | 228 | 0  |          |                |    |         |     |     |                                                   |
| Locus_11957_Transcript_1/1_Conf_1.000 | 366 | 20 | 5.51E-21 | XP_002634905.1 | 84 | 103.99  | 73  | 62  | Hypothetical protein CBG22501                     |
| Locus_11958_Transcript_1/1_Conf_1.000 | 211 | 0  |          |                |    |         |     |     |                                                   |
| Locus_11959_Transcript_1/1_Conf_1.000 | 454 | 20 | 3.72E-33 | EFO18399.1     | 74 | 144.436 | 136 | 101 | geranylgeranyl pyrophosphate synthetase           |
| Locus_1196_Transcript_1/1_Conf_1.000  | 391 | 18 | 1.19E-15 | NP_001122782.1 | 62 | 86.2705 | 123 | 77  | hypothetical protein F58G6.9                      |
| Locus_11960_Transcript_1/1_Conf_1.000 | 147 | 7  | 2.49E-08 | XP_002641319.1 | 72 | 62.003  | 48  | 35  | Hypothetical protein CBG24620                     |
| Locus_11961_Transcript_1/1_Conf_1.000 | 430 | 20 | 7.46E-58 | NP_491864.2    | 90 | 226.483 | 140 | 126 | hypothetical protein K06A5.8                      |
| Locus_11962_Transcript_1/1_Conf_1.000 | 713 | 20 | 5.10E-87 | XP_002637195.1 | 81 | 324.709 | 233 | 189 | C. briggsae CBR-LIG-1 protein                     |
| Locus_11963_Transcript_1/1_Conf_1.000 | 198 | 20 | 9.61E-13 | EFO27986.1     | 73 | 76.6406 | 60  | 44  | hypothetical protein LOAG_00494                   |



|                                       |      |    |          |                |    |         |     |     |                                                                                |
|---------------------------------------|------|----|----------|----------------|----|---------|-----|-----|--------------------------------------------------------------------------------|
| Locus_11964_Transcript_1/1_Conf_1.000 | 365  | 20 | 2.75E-20 | XP_002639618.1 | 69 | 101.679 | 110 | 76  | Hypothetical protein CBG12331                                                  |
| Locus_11965_Transcript_1/1_Conf_1.000 | 321  | 20 | 1.33E-46 | NP_492433.1    | 87 | 189.119 | 106 | 93  | HomoGentisate Oxidase family member (hgo-1)                                    |
| Locus_11966_Transcript_1/1_Conf_1.000 | 352  | 20 | 2.36E-27 | XP_002640036.1 | 74 | 125.176 | 115 | 86  | Hypothetical protein CBG12508                                                  |
| Locus_11967_Transcript_1/1_Conf_1.000 | 551  | 0  |          |                |    |         |     |     |                                                                                |
| Locus_11968_Transcript_1/1_Conf_1.000 | 205  | 0  |          |                |    |         |     |     |                                                                                |
| Locus_11969_Transcript_1/1_Conf_1.000 | 303  | 20 | 1.08E-24 | NP_508181.1    | 81 | 116.316 | 82  | 67  | hypothetical protein F53H8.3                                                   |
| Locus_1197_Transcript_1/1_Conf_1.000  | 2172 | 6  | 6.52E-32 | XP_002639900.1 | 44 | 144.05  | 510 | 227 | <i>C. briggsae</i> CBR-APR-1 protein                                           |
| Locus_11970_Transcript_1/1_Conf_1.000 | 713  | 3  | 9.84E-06 | AAZ42336.1     | 66 | 54.6842 | 57  | 38  | twitchin kinase                                                                |
| Locus_11971_Transcript_1/1_Conf_1.000 | 334  | 2  | 4.73E-04 | XP_001894907.1 | 71 | 47.7506 | 45  | 32  | RNA binding protein                                                            |
| Locus_11972_Transcript_1/1_Conf_1.000 | 1334 | 7  | 3.94E-92 | XP_002631715.1 | 60 | 343.199 | 450 | 273 | Hypothetical protein CBG20916                                                  |
| Locus_11973_Transcript_1/1_Conf_1.000 | 693  | 15 | 6.71E-20 | CAN99691.2     | 50 | 101.679 | 222 | 112 | <i>C. elegans</i> protein F54B3.1b, partially confirmed by transcript evidence |
| Locus_11974_Transcript_1/1_Conf_1.000 | 530  | 3  | 9.51E-07 | Q60YF6.3       | 51 | 56.9954 | 102 | 53  | Mediator of RNA polymerase II transcription subunit 29                         |
| Locus_11975_Transcript_1/1_Conf_1.000 | 278  | 0  |          |                |    |         |     |     |                                                                                |
| Locus_11976_Transcript_1/1_Conf_1.000 | 689  | 4  | 3.49E-13 | NP_001023362.1 | 72 | 79.337  | 103 | 75  | Temporarily Assigned Gene name family member (tag-261)                         |

|                                       |     |    |          |             |    |         |     |    |                              |
|---------------------------------------|-----|----|----------|-------------|----|---------|-----|----|------------------------------|
| Locus_11977_Transcript_1/3_Conf_0.600 | 421 | 20 | 2.29E-30 | NP_492796.1 | 72 | 135.191 | 117 | 85 | hypothetical protein C34B2.6 |
| Locus_11977_Transcript_2/3_Conf_0.600 | 526 | 20 | 3.51E-30 | NP_492796.1 | 74 | 134.806 | 113 | 84 | hypothetical protein C34B2.6 |

|                                       |      |    |          |                |    |         |     |     |                                      |
|---------------------------------------|------|----|----------|----------------|----|---------|-----|-----|--------------------------------------|
| Locus_11977_Transcript_3/3_Conf_0.600 | 421  | 20 | 2.29E-30 | NP_492796.1    | 72 | 135.191 | 117 | 85  | hypothetical protein C34B2.6         |
| Locus_11978_Transcript_1/1_Conf_1.000 | 387  | 20 | 2.16E-49 | A8XV40.2       | 85 | 198.364 | 128 | 110 | Probable spastin homolog spas-1      |
| Locus_11979_Transcript_1/1_Conf_1.000 | 938  | 20 | 5.02E-79 | XP_002636597.1 | 87 | 298.901 | 194 | 169 | C. briggsae CBR-SKP-1 protein        |
| Locus_1198_Transcript_1/1_Conf_1.000  | 1408 | 20 | 0        | XP_002642332.1 | 91 | 777.704 | 468 | 429 | Hypothetical protein CBG18327        |
| Locus_11980_Transcript_1/1_Conf_1.000 | 231  | 8  | 2.99E-14 | NP_502273.2    | 81 | 81.6481 | 74  | 60  | UNCoordinated family member (unc-22) |

|                                       |      |    |          |                |    |         |     |     |                                           |
|---------------------------------------|------|----|----------|----------------|----|---------|-----|-----|-------------------------------------------|
| Locus_11981_Transcript_1/1_Conf_1.000 | 217  | 3  | 8.24E-17 | XP_001900400.1 | 73 | 90.1225 | 69  | 51  | Zinc finger, C2H2 type family protein     |
| Locus_11982_Transcript_1/1_Conf_1.000 | 363  | 20 | 2.10E-28 | NP_507513.2    | 68 | 128.642 | 120 | 82  | hypothetical protein E01B7.1              |
| Locus_11983_Transcript_1/1_Conf_1.000 | 602  | 20 | 2.15E-12 | XP_002633896.1 | 51 | 76.2554 | 208 | 107 | Hypothetical protein CBG19958             |
| Locus_11984_Transcript_1/1_Conf_1.000 | 178  | 0  |          |                |    |         |     |     |                                           |
| Locus_11985_Transcript_1/1_Conf_1.000 | 620  | 0  |          |                |    |         |     |     |                                           |
| Locus_11986_Transcript_1/1_Conf_1.000 | 281  | 0  |          |                |    |         |     |     |                                           |
| Locus_11987_Transcript_1/1_Conf_1.000 | 638  | 6  | 2.55E-25 | EFO27989.1     | 56 | 119.398 | 148 | 83  | hypothetical protein LOAG_00497           |
| Locus_11988_Transcript_1/1_Conf_1.000 | 856  | 0  |          |                |    |         |     |     |                                           |
| Locus_11989_Transcript_1/2_Conf_1.000 | 558  | 0  |          |                |    |         |     |     |                                           |
| Locus_11989_Transcript_2/2_Conf_1.000 | 561  | 0  |          |                |    |         |     |     |                                           |
| Locus_1199_Transcript_1/2_Conf_1.000  | 2933 | 20 | 0        | NP_001040844.1 | 68 | 730.709 | 792 | 540 | Tousled-Like Kinase family member (tlk-1) |
| Locus_1199_Transcript_2/2_Conf_1.000  | 2912 | 20 | 0        | NP_001040844.1 | 68 | 733.791 | 785 | 541 | Tousled-Like Kinase family member (tlk-1) |
| Locus_11990_Transcript_1/1_Conf_1.000 | 453  | 0  |          |                |    |         |     |     |                                           |
| Locus_11991_Transcript_1/1_Conf_1.000 | 791  | 20 | 1.00E-92 | NP_495958.1    | 80 | 343.969 | 257 | 208 | yeast SEC homolog family member (sec-5)   |
| Locus_11992_Transcript_1/1_Conf_1.000 | 374  | 0  |          |                |    |         |     |     |                                           |
| Locus_11993_Transcript_1/1_Conf_1.000 | 296  | 0  |          |                |    |         |     |     |                                           |
| Locus_11994_Transcript_1/1_Conf_1.000 | 292  | 0  |          |                |    |         |     |     |                                           |
| Locus_11995_Transcript_1/1_Conf_1.000 | 363  | 2  | 6.78E-11 | XP_002635317.1 | 62 | 70.4774 | 80  | 50  | C. briggsae CBR-TAG-196 protein           |
| Locus_11996_Transcript_1/1_Conf_1.000 | 754  | 4  | 1.81E-24 | NP_508542.1    | 85 | 117.087 | 121 | 103 | hypothetical protein C15C7.5              |
| Locus_11997_Transcript_1/1_Conf_1.000 | 614  | 20 | 2.09E-74 | NP_491711.2    | 78 | 282.337 | 205 | 161 | hypothetical protein C34G6.1              |
| Locus_11998_Transcript_1/1_Conf_1.000 | 304  | 20 | 4.55E-31 | XP_002424477.1 | 94 | 137.502 | 79  | 75  | Surfeit locus protein, putative           |

|                                       |      |    |           |                |    |         |     |     |                                             |
|---------------------------------------|------|----|-----------|----------------|----|---------|-----|-----|---------------------------------------------|
| Locus_11999_Transcript_1/1_Conf_1.000 | 236  | 0  |           |                |    |         |     |     |                                             |
| Locus_12_Transcript_1/1_Conf_1.000    | 1554 | 20 | 7.66E-106 | NP_492481.1    | 95 | 389.037 | 208 | 199 | RAB family member (rab-5)                   |
| Locus_120_Transcript_1/8_Conf_0.410   | 575  | 20 | 3.03E-26  | AAO63576.1     | 54 | 122.094 | 199 | 108 | secreted protein 4 precursor                |
| Locus_120_Transcript_2/8_Conf_0.308   | 404  | 16 | 9.93E-10  | AAO63576.1     | 51 | 66.6254 | 137 | 71  | secreted protein 4 precursor                |
| Locus_120_Transcript_3/8_Conf_0.179   | 166  | 0  |           |                |    |         |     |     |                                             |
| Locus_120_Transcript_4/8_Conf_0.179   | 179  | 0  |           |                |    |         |     |     |                                             |
| Locus_120_Transcript_5/8_Conf_0.436   | 584  | 20 | 5.42E-26  | AAO63576.1     | 54 | 121.324 | 199 | 108 | secreted protein 4 precursor                |
| Locus_120_Transcript_6/8_Conf_0.462   | 584  | 20 | 3.51E-25  | AAO63576.1     | 53 | 118.627 | 199 | 106 | secreted protein 4 precursor                |
| Locus_120_Transcript_8/8_Conf_0.462   | 584  | 20 | 3.18E-26  | AAO63576.1     | 54 | 122.094 | 199 | 108 | secreted protein 4 precursor                |
| Locus_1200_Transcript_1/2_Conf_1.000  | 705  | 7  | 1.94E-06  | XP_001897045.1 | 52 | 56.9954 | 159 | 84  | hypothetical protein Bm1_27970              |
| Locus_1200_Transcript_2/2_Conf_1.000  | 917  | 20 | 1.02E-28  | NP_498671.2    | 80 | 131.724 | 83  | 67  | Uridine PhosPhorylase family member (upp-1) |
| Locus_12000_Transcript_1/1_Conf_1.000 | 415  | 2  | 6.56E-06  | XP_002637729.1 | 57 | 53.9138 | 84  | 48  | Hypothetical protein CBG11595               |
| Locus_12001_Transcript_1/1_Conf_1.000 | 1113 | 4  | 4.65E-16  | EFO27437.1     | 45 | 90.1225 | 341 | 156 | origin recognition complex subunit 5        |
| Locus_12002_Transcript_1/1_Conf_1.000 | 573  | 0  |           |                |    |         |     |     |                                             |
| Locus_12003_Transcript_1/1_Conf_1.000 | 183  | 0  |           |                |    |         |     |     |                                             |
| Locus_12004_Transcript_1/1_Conf_1.000 | 140  | 0  |           |                |    |         |     |     |                                             |
| Locus_12005_Transcript_1/1_Conf_1.000 | 345  | 0  |           |                |    |         |     |     |                                             |
| Locus_12006_Transcript_1/1_Conf_1.000 | 249  | 0  |           |                |    |         |     |     |                                             |
| Locus_12007_Transcript_1/2_Conf_1.000 | 1111 | 1  | 1.82E-04  | NP_498338.1    | 53 | 51.6026 | 76  | 41  | hypothetical protein F42A10.5               |
| Locus_12007_Transcript_2/2_Conf_1.000 | 1105 | 1  | 1.38E-04  | NP_498338.1    | 55 | 51.9878 | 76  | 42  | hypothetical protein F42A10.5               |
| Locus_12008_Transcript_1/1_Conf_1.000 | 138  | 0  |           |                |    |         |     |     |                                             |

|                                       |     |    |           |                |     |         |     |     |                                                                         |
|---------------------------------------|-----|----|-----------|----------------|-----|---------|-----|-----|-------------------------------------------------------------------------|
| Locus_12009_Transcript_1/1_Conf_1.000 | 805 | 20 | 3.42E-27  | NP_501545.1    | 59  | 126.331 | 267 | 159 | RADiation sensitivity abnormal/yeast RAD-related family member (rad-26) |
| Locus_1201_Transcript_1/1_Conf_1.000  | 930 | 20 | 1.95E-67  | EFO26146.1     | 72  | 260.381 | 237 | 172 | hypothetical protein LOAG_02340                                         |
| Locus_12010_Transcript_1/1_Conf_1.000 | 634 | 5  | 6.44E-13  | XP_002639170.1 | 72  | 78.1814 | 80  | 58  | Hypothetical protein CBG03709                                           |
| Locus_12011_Transcript_1/1_Conf_1.000 | 415 | 20 | 1.14E-50  | CAA84656.2     | 84  | 202.601 | 132 | 112 | C. elegans protein F10F2.2, confirmed by transcript evidence            |
| Locus_12012_Transcript_1/1_Conf_1.000 | 621 | 0  |           |                |     |         |     |     |                                                                         |
| Locus_12013_Transcript_1/1_Conf_1.000 | 254 | 0  |           |                |     |         |     |     |                                                                         |
| Locus_12014_Transcript_1/2_Conf_1.000 | 440 | 3  | 2.03E-15  | NP_492118.1    | 56  | 85.5001 | 146 | 82  | hypothetical protein D2030.3                                            |
| Locus_12014_Transcript_2/2_Conf_1.000 | 440 | 3  | 1.55E-15  | NP_492118.1    | 56  | 85.8853 | 146 | 83  | hypothetical protein D2030.3                                            |
| Locus_12015_Transcript_1/1_Conf_1.000 | 428 | 20 | 5.04E-46  | XP_002743343.1 | 100 | 187.193 | 96  | 96  | PREDICTED: hypothetical protein LOC100413255                            |
| Locus_12016_Transcript_1/1_Conf_1.000 | 334 | 3  | 4.12E-16  | XP_002631490.1 | 71  | 87.8113 | 70  | 50  | C. briggsae CBR-EGG-3 protein                                           |
| Locus_12017_Transcript_1/1_Conf_1.000 | 740 | 20 | 6.09E-110 | NP_498645.1    | 80  | 400.979 | 246 | 198 | MUScle Positioning family member (mup-4)                                |
| Locus_12018_Transcript_1/1_Conf_1.000 | 217 | 0  |           |                |     |         |     |     |                                                                         |
| Locus_12019_Transcript_1/1_Conf_1.000 | 392 | 0  |           |                |     |         |     |     |                                                                         |
| Locus_1202_Transcript_1/1_Conf_1.000  | 179 | 20 | 1.72E-22  | NP_491853.2    | 94  | 108.997 | 57  | 54  | SyNapTotagmin family member (snt-4)                                     |
| Locus_12020_Transcript_1/1_Conf_1.000 | 152 | 0  |           |                |     |         |     |     |                                                                         |

|                                       |      |    |          |                |     |         |      |     |                                                                         |
|---------------------------------------|------|----|----------|----------------|-----|---------|------|-----|-------------------------------------------------------------------------|
| Locus_12021_Transcript_1/1_Conf_1.000 | 486  | 8  | 4.74E-44 | XP_002631275.1 | 66  | 180.644 | 163  | 108 | Hypothetical protein CBG03085                                           |
| Locus_12022_Transcript_1/1_Conf_1.000 | 274  | 20 | 6.34E-33 | NP_498117.3    | 86  | 143.665 | 91   | 79  | Gro-1 OPeron gene family member (gop-1)                                 |
| Locus_12023_Transcript_1/1_Conf_1.000 | 393  | 20 | 2.02E-18 | NP_494788.2    | 58  | 95.5153 | 137  | 80  | related to yeast Vacuolar Protein Sorting factor family member (vps-18) |
| Locus_12024_Transcript_1/1_Conf_1.000 | 305  | 0  |          |                |     |         |      |     |                                                                         |
| Locus_12025_Transcript_1/1_Conf_1.000 | 863  | 20 | 1.27E-62 | BAE91269.1     | 100 | 244.202 | 116  | 116 | unnamed protein product                                                 |
| Locus_12026_Transcript_1/1_Conf_1.000 | 309  | 20 | 2.32E-19 | XP_002633895.1 | 69  | 98.5969 | 92   | 64  | C. briggsae CBR-SAND-1 protein                                          |
| Locus_12027_Transcript_1/1_Conf_1.000 | 162  | 0  |          |                |     |         |      |     |                                                                         |
| Locus_12028_Transcript_1/1_Conf_1.000 | 585  | 0  |          |                |     |         |      |     |                                                                         |
| Locus_12029_Transcript_1/1_Conf_1.000 | 529  | 0  |          |                |     |         |      |     |                                                                         |
| Locus_1203_Transcript_1/2_Conf_1.000  | 3600 | 20 | 1.36E-64 | NP_497706.1    | 45  | 253.447 | 1002 | 459 | hypothetical protein F59A2.6                                            |
| Locus_1203_Transcript_2/2_Conf_1.000  | 3525 | 20 | 3.89E-56 | NP_497706.1    | 44  | 225.328 | 984  | 436 | hypothetical protein F59A2.6                                            |
| Locus_12030_Transcript_1/1_Conf_1.000 | 430  | 0  |          |                |     |         |      |     |                                                                         |
| Locus_12031_Transcript_1/1_Conf_1.000 | 592  | 20 | 5.21E-24 | XP_001892273.1 | 54  | 114.775 | 202  | 110 | hypothetical protein                                                    |
| Locus_12032_Transcript_1/1_Conf_1.000 | 210  | 20 | 1.12E-13 | XP_002755896.1 | 70  | 79.7221 | 68   | 48  | PREDICTED: dnaJ homolog subfamily A member 3, mitochondrial             |
| Locus_12033_Transcript_1/1_Conf_1.000 | 407  | 2  | 2.20E-09 | NP_501176.1    | 80  | 65.4698 | 47   | 38  | hypothetical protein T12B3.3                                            |
| Locus_12034_Transcript_1/1_Conf_1.000 | 250  | 3  | 1.84E-16 | AAC39119.1     | 67  | 88.9669 | 83   | 56  | low-affinity peptide transporter                                        |
| Locus_12035_Transcript_1/1_Conf_1.000 | 277  | 0  |          |                |     |         |      |     |                                                                         |
| Locus_12036_Transcript_1/1_Conf_1.000 | 1417 | 20 | 4.58E-78 | NP_508977.1    | 57  | 296.59  | 402  | 230 | hypothetical protein F13D11.1                                           |
| Locus_12037_Transcript_1/1_Conf_1.000 | 269  | 9  | 6.66E-06 | CBM41222.1     | 50  | 53.9138 | 63   | 32  | C. elegans protein T10G3.3b, partially confirmed by transcript evidence |
| Locus_12038_Transcript_1/1_Conf_1.000 | 203  | 0  |          |                |     |         |      |     |                                                                         |
| Locus_12039_Transcript_1/1_Conf_1.000 | 574  | 10 | 1.54E-54 | XP_002629691.1 | 74  | 216.083 | 194  | 144 | Hypothetical protein CBG00912                                           |

|                                       |      |    |           |                |     |         |      |     |                                                                         |
|---------------------------------------|------|----|-----------|----------------|-----|---------|------|-----|-------------------------------------------------------------------------|
| Locus_1204_Transcript_1/2_Conf_1.000  | 4436 | 20 | 0         | NP_001021649.1 | 81  | 1652.88 | 1207 | 982 | HaMmeRhead embryonic lethal family member (hmr-1)                       |
| Locus_1204_Transcript_2/2_Conf_1.000  | 4558 | 20 | 0         | NP_001021649.1 | 81  | 1652.88 | 1207 | 982 | HaMmeRhead embryonic lethal family member (hmr-1)                       |
| Locus_12040_Transcript_1/1_Conf_1.000 | 296  | 0  |           |                |     |         |      |     |                                                                         |
| Locus_12041_Transcript_1/1_Conf_1.000 | 975  | 20 | 5.20E-167 | XP_001898368.1 | 93  | 591.267 | 324  | 303 | cpsf3-prov protein                                                      |
| Locus_12042_Transcript_1/1_Conf_1.000 | 824  | 8  | 3.52E-35  | CAX51629.1     | 57  | 152.91  | 266  | 152 | C. elegans protein C48B4.4d, partially confirmed by transcript evidence |
| Locus_12043_Transcript_1/1_Conf_1.000 | 794  | 20 | 1.16E-96  | CAA45963.1     | 100 | 357.066 | 208  | 208 | BBC1                                                                    |
| Locus_12044_Transcript_1/1_Conf_1.000 | 835  | 20 | 4.68E-75  | NP_495741.2    | 88  | 285.419 | 210  | 186 | hypothetical protein K01C8.1                                            |
| Locus_12045_Transcript_1/1_Conf_1.000 | 171  | 0  |           |                |     |         |      |     |                                                                         |
| Locus_12046_Transcript_1/1_Conf_1.000 | 308  | 20 | 7.46E-34  | XP_002636068.1 | 79  | 146.747 | 102  | 81  | Hypothetical protein CBG01308                                           |
| Locus_12047_Transcript_1/1_Conf_1.000 | 967  | 20 | 2.03E-22  | XP_001702729.1 | 70  | 110.923 | 100  | 70  | ubiquitin-related modifier                                              |
| Locus_12048_Transcript_1/1_Conf_1.000 | 380  | 0  |           |                |     |         |      |     |                                                                         |



|                                       |      |    |           |                |    |         |     |     |                                                     |
|---------------------------------------|------|----|-----------|----------------|----|---------|-----|-----|-----------------------------------------------------|
| Locus_12049_Transcript_1/1_Conf_1.000 | 240  | 20 | 1.57E-15  | NP_510155.3    | 73 | 85.8853 | 78  | 57  | PIP Kinase family member (ppk-3)                    |
| Locus_1205_Transcript_1/1_Conf_1.000  | 205  | 7  | 3.40E-10  | EFO26077.1     | 80 | 68.1662 | 51  | 41  | leucine Rich Repeat family protein                  |
| Locus_12050_Transcript_1/1_Conf_1.000 | 2566 | 20 | 3.31E-179 | XP_002639041.1 | 73 | 633.639 | 596 | 437 | C. briggsae CBR-XNP-1 protein                       |
| Locus_12051_Transcript_1/1_Conf_1.000 | 750  | 20 | 1.14E-18  | NP_499886.1    | 50 | 97.8265 | 196 | 98  | hypothetical protein R02D3.7                        |
| Locus_12052_Transcript_1/1_Conf_1.000 | 645  | 20 | 6.67E-61  | NP_498248.2    | 67 | 237.654 | 214 | 144 | hypothetical protein Y37B11A.2                      |
| Locus_12053_Transcript_1/1_Conf_1.000 | 188  | 0  |           |                |    |         |     |     |                                                     |
| Locus_12054_Transcript_1/1_Conf_1.000 | 687  | 20 | 8.18E-71  | NP_504753.3    | 77 | 270.781 | 239 | 185 | UNCoordinated family member (unc-68)                |
| Locus_12055_Transcript_1/1_Conf_1.000 | 464  | 20 | 9.22E-72  | XP_001900091.1 | 90 | 272.707 | 153 | 139 | U5 small nuclear ribonucleoprotein 200 kDa helicase |
| Locus_12056_Transcript_1/1_Conf_1.000 | 688  | 20 | 2.90E-76  | CAR63592.1     | 82 | 288.886 | 194 | 160 | hypothetical protein                                |

|                                       |     |    |          |                |    |         |     |     |                                                                |
|---------------------------------------|-----|----|----------|----------------|----|---------|-----|-----|----------------------------------------------------------------|
| Locus_12057_Transcript_1/1_Conf_1.000 | 214 | 20 | 2.48E-21 | NP_499949.2    | 87 | 105.145 | 71  | 62  | Gut on EXterior family member (gex-2)                          |
| Locus_12058_Transcript_1/1_Conf_1.000 | 280 | 20 | 5.14E-43 | NP_492127.1    | 95 | 177.178 | 93  | 89  | Low-density lipoprotein Receptor Related family member (Irp-1) |
| Locus_12059_Transcript_1/1_Conf_1.000 | 619 | 20 | 4.21E-46 | EFO25304.1     | 70 | 188.348 | 211 | 149 | leucine Rich Repeat family protein                             |
| Locus_1206_Transcript_1/4_Conf_0.625  | 596 | 20 | 1.59E-20 | XP_001895554.1 | 56 | 103.219 | 158 | 90  | SWIRM domain containing protein                                |
| Locus_1206_Transcript_2/4_Conf_0.625  | 592 | 20 | 1.46E-26 | XP_001895554.1 | 62 | 123.25  | 155 | 97  | SWIRM domain containing protein                                |
| Locus_1206_Transcript_3/4_Conf_0.625  | 732 | 20 | 8.83E-29 | EFO20641.1     | 63 | 131.339 | 154 | 98  | hypothetical protein LOAG_07849                                |

|                                       |      |    |          |                |    |         |     |     |                                          |
|---------------------------------------|------|----|----------|----------------|----|---------|-----|-----|------------------------------------------|
| Locus_1206_Transcript_4/4_Conf_0.625  | 592  | 20 | 4.12E-29 | EFO20641.1     | 63 | 131.724 | 156 | 99  | hypothetical protein LOAG_07849          |
| Locus_12060_Transcript_1/1_Conf_1.000 | 580  | 20 | 1.23E-14 | XP_001900371.1 | 51 | 83.5741 | 198 | 102 | hypothetical protein                     |
| Locus_12061_Transcript_1/1_Conf_1.000 | 152  | 0  |          |                |    |         |     |     |                                          |
| Locus_12062_Transcript_1/1_Conf_1.000 | 755  | 20 | 6.33E-78 | NP_506083.1    | 77 | 294.664 | 254 | 196 | hypothetical protein F55C5.8             |
| Locus_12063_Transcript_1/1_Conf_1.000 | 264  | 9  | 6.24E-12 | NP_001022773.1 | 58 | 73.9442 | 107 | 63  | Myc and Mondo-Like family member (mml-1) |
| Locus_12064_Transcript_1/1_Conf_1.000 | 1005 | 20 | 2.87E-91 | EFO27641.1     | 75 | 339.732 | 333 | 251 | sympleskin                               |
| Locus_12065_Transcript_1/1_Conf_1.000 | 586  | 0  |          |                |    |         |     |     |                                          |
| Locus_12066_Transcript_1/1_Conf_1.000 | 653  | 0  |          |                |    |         |     |     |                                          |
| Locus_12067_Transcript_1/1_Conf_1.000 | 386  | 20 | 1.24E-28 | XP_002643566.1 | 69 | 129.413 | 114 | 79  | Hypothetical protein CBG16268            |
| Locus_12068_Transcript_1/1_Conf_1.000 | 446  | 2  | 3.93E-06 | XP_001900477.1 | 64 | 54.6842 | 57  | 37  | HMG box family protein                   |
| Locus_12069_Transcript_1/1_Conf_1.000 | 286  | 3  | 2.47E-24 | XP_002631432.1 | 90 | 115.161 | 76  | 69  | Hypothetical protein CBG03290            |
| Locus_1207_Transcript_1/1_Conf_1.000  | 199  | 1  | 1.94E-05 | XP_001624571.1 | 73 | 52.373  | 42  | 31  | predicted protein                        |
| Locus_12070_Transcript_1/1_Conf_1.000 | 502  | 20 | 3.92E-30 | XP_002629838.1 | 86 | 134.42  | 83  | 72  | Hypothetical protein CBG18727            |
| Locus_12071_Transcript_1/1_Conf_1.000 | 350  | 0  |          |                |    |         |     |     |                                          |
| Locus_12072_Transcript_1/2_Conf_1.000 | 1412 | 7  | 1.86E-47 | XP_002635238.1 | 58 | 194.897 | 258 | 151 | Hypothetical protein CBG11482            |
| Locus_12072_Transcript_2/2_Conf_1.000 | 1388 | 7  | 1.08E-47 | XP_002635238.1 | 56 | 195.667 | 279 | 159 | Hypothetical protein CBG11482            |

|                                       |      |    |           |                |    |         |     |     |                                                                         |
|---------------------------------------|------|----|-----------|----------------|----|---------|-----|-----|-------------------------------------------------------------------------|
| Locus_12073_Transcript_1/1_Conf_1.000 | 1207 | 20 | 3.07E-117 | XP_001897522.1 | 81 | 426.402 | 306 | 248 | Zinc knuckle family protein                                             |
| Locus_12074_Transcript_1/2_Conf_1.000 | 538  | 20 | 7.22E-42  | XP_002399529.1 | 75 | 173.711 | 140 | 105 | tpr repeat nuclear phosphoprotein, putative                             |
| Locus_12074_Transcript_2/2_Conf_1.000 | 776  | 4  | 6.81E-30  | CAX51623.1     | 61 | 135.191 | 202 | 125 | C. elegans protein B0464.2d, partially confirmed by transcript evidence |
| Locus_12075_Transcript_1/1_Conf_1.000 | 183  | 0  |           |                |    |         |     |     |                                                                         |
| Locus_12076_Transcript_1/1_Conf_1.000 | 147  | 0  |           |                |    |         |     |     |                                                                         |
| Locus_12077_Transcript_1/1_Conf_1.000 | 1383 | 20 | 5.17E-143 | NP_496090.1    | 76 | 512.301 | 435 | 333 | hypothetical protein ZK1320.9                                           |
| Locus_12078_Transcript_1/1_Conf_1.000 | 483  | 20 | 4.19E-24  | XP_001899004.1 | 65 | 114.39  | 122 | 80  | co-chaperone protein HscB, mitochondrial precursor                      |
| Locus_12079_Transcript_1/1_Conf_1.000 | 193  | 0  |           |                |    |         |     |     |                                                                         |
| Locus_1208_Transcript_1/1_Conf_1.000  | 610  | 20 | 5.58E-88  | NP_508413.1    | 96 | 327.405 | 191 | 185 | Ribosomal Protein, Large subunit family member (rpl-11.2)               |
| Locus_12080_Transcript_1/1_Conf_1.000 | 1569 | 20 | 4.79E-164 | XP_002634686.1 | 74 | 582.408 | 522 | 390 | Hypothetical protein CBG19672                                           |
| Locus_12081_Transcript_1/1_Conf_1.000 | 803  | 20 | 1.19E-64  | NP_502781.1    | 84 | 250.751 | 224 | 190 | hypothetical protein Y57G11C.4                                          |
| Locus_12082_Transcript_1/1_Conf_1.000 | 1005 | 20 | 9.39E-34  | EFO13829.1     | 65 | 148.673 | 156 | 102 | hypothetical protein LOAG_14699                                         |
| Locus_12083_Transcript_1/1_Conf_1.000 | 460  | 20 | 1.15E-10  | EFO17978.1     | 69 | 69.707  | 49  | 34  | dual specificity phosphatase                                            |

|                                       |      |    |           |                |    |         |     |     |                                                                     |
|---------------------------------------|------|----|-----------|----------------|----|---------|-----|-----|---------------------------------------------------------------------|
| Locus_12084_Transcript_1/1_Conf_1.000 | 301  | 0  |           |                |    |         |     |     |                                                                     |
| Locus_12085_Transcript_1/2_Conf_1.000 | 475  | 0  |           |                |    |         |     |     |                                                                     |
| Locus_12085_Transcript_2/2_Conf_1.000 | 489  | 0  |           |                |    |         |     |     |                                                                     |
| Locus_12086_Transcript_1/1_Conf_1.000 | 161  | 0  |           |                |    |         |     |     |                                                                     |
| Locus_12087_Transcript_1/1_Conf_1.000 | 464  | 0  |           |                |    |         |     |     |                                                                     |
| Locus_12088_Transcript_1/1_Conf_1.000 | 776  | 0  |           |                |    |         |     |     |                                                                     |
| Locus_12089_Transcript_1/1_Conf_1.000 | 290  | 0  |           |                |    |         |     |     |                                                                     |
| Locus_1209_Transcript_1/1_Conf_1.000  | 779  | 20 | 1.17E-37  | NP_494880.1    | 74 | 160.999 | 204 | 151 | COLLagen family member (col-73)                                     |
| Locus_12090_Transcript_1/1_Conf_1.000 | 1134 | 20 | 2.51E-57  | NP_497893.1    | 76 | 227.254 | 185 | 141 | hypothetical protein R07E5.1                                        |
| Locus_12091_Transcript_1/2_Conf_1.000 | 195  | 0  |           |                |    |         |     |     |                                                                     |
| Locus_12091_Transcript_2/2_Conf_1.000 | 397  | 0  |           |                |    |         |     |     |                                                                     |
| Locus_12092_Transcript_1/1_Conf_1.000 | 814  | 0  |           |                |    |         |     |     |                                                                     |
| Locus_12093_Transcript_1/1_Conf_1.000 | 309  | 0  |           |                |    |         |     |     |                                                                     |
| Locus_12094_Transcript_1/1_Conf_1.000 | 428  | 20 | 2.42E-48  | EFO18868.1     | 84 | 194.897 | 130 | 110 | hypothetical protein LOAG_09629                                     |
| Locus_12095_Transcript_1/1_Conf_1.000 | 134  | 0  |           |                |    |         |     |     |                                                                     |
| Locus_12096_Transcript_1/1_Conf_1.000 | 559  | 3  | 1.69E-15  | NP_500893.2    | 84 | 86.2705 | 50  | 42  | hypothetical protein K02B2.1                                        |
| Locus_12097_Transcript_1/2_Conf_1.000 | 1557 | 3  | 1.52E-53  | NP_498952.1    | 68 | 215.312 | 199 | 136 | hypothetical protein F44E2.4                                        |
| Locus_12097_Transcript_2/2_Conf_1.000 | 1554 | 3  | 1.52E-53  | NP_498952.1    | 68 | 215.312 | 199 | 136 | hypothetical protein F44E2.4                                        |
| Locus_12098_Transcript_1/1_Conf_1.000 | 1068 | 20 | 4.85E-100 | NP_495424.2    | 75 | 369.007 | 299 | 226 | hypothetical protein F22D3.6                                        |
| Locus_12099_Transcript_1/1_Conf_1.000 | 426  | 0  |           |                |    |         |     |     |                                                                     |
| Locus_121_Transcript_1/7_Conf_0.375   | 150  | 0  |           |                |    |         |     |     |                                                                     |
| Locus_121_Transcript_2/7_Conf_0.375   | 156  | 0  |           |                |    |         |     |     |                                                                     |
| Locus_121_Transcript_3/7_Conf_0.375   | 310  | 0  |           |                |    |         |     |     |                                                                     |
| Locus_121_Transcript_4/7_Conf_0.667   | 423  | 0  |           |                |    |         |     |     |                                                                     |
| Locus_121_Transcript_5/7_Conf_0.167   | 162  | 0  |           |                |    |         |     |     |                                                                     |
| Locus_121_Transcript_6/7_Conf_0.375   | 259  | 0  |           |                |    |         |     |     |                                                                     |
| Locus_121_Transcript_7/7_Conf_0.375   | 150  | 0  |           |                |    |         |     |     |                                                                     |
| Locus_1210_Transcript_1/1_Conf_1.000  | 736  | 6  | 1.09E-26  | NP_500907.1    | 63 | 124.405 | 135 | 86  | Prion-like-(Q/N-rich)-domain-bearing protein family member (pqn-22) |
| Locus_12100_Transcript_1/1_Conf_1.000 | 360  | 0  |           |                |    |         |     |     |                                                                     |
| Locus_12101_Transcript_1/1_Conf_1.000 | 444  | 0  |           |                |    |         |     |     |                                                                     |
| Locus_12102_Transcript_1/1_Conf_1.000 | 532  | 20 | 3.16E-82  | XP_002638801.1 | 89 | 307.76  | 177 | 159 | Hypothetical protein CBG05158                                       |
| Locus_12103_Transcript_1/1_Conf_1.000 | 1160 | 20 | 9.14E-55  | XP_002632325.1 | 76 | 218.779 | 184 | 140 | Hypothetical protein CBG00332                                       |

|                                       |      |    |          |                |    |         |     |     |                                                                          |
|---------------------------------------|------|----|----------|----------------|----|---------|-----|-----|--------------------------------------------------------------------------|
| Locus_12104_Transcript_1/1_Conf_1.000 | 235  | 3  | 4.91E-25 | XP_002644048.1 | 55 | 117.472 | 128 | 71  | Hypothetical protein CBG17510                                            |
| Locus_12105_Transcript_1/1_Conf_1.000 | 210  | 0  |          |                |    |         |     |     |                                                                          |
| Locus_12106_Transcript_1/1_Conf_1.000 | 438  | 20 | 8.76E-35 | EFO24963.1     | 82 | 149.828 | 111 | 92  | hypothetical protein LOAG_03520                                          |
| Locus_12107_Transcript_1/1_Conf_1.000 | 358  | 20 | 9.17E-32 | XP_002642780.1 | 75 | 139.813 | 115 | 87  | Hypothetical protein CBG21174                                            |
| Locus_12108_Transcript_1/1_Conf_1.000 | 287  | 20 | 1.31E-25 | CAA22110.2     | 78 | 119.398 | 91  | 71  | C. elegans protein Y75B8A.26, partially confirmed by transcript evidence |
| Locus_12109_Transcript_1/1_Conf_1.000 | 323  | 20 | 4.47E-18 | XP_002637707.1 | 67 | 94.3597 | 107 | 72  | Hypothetical protein CBG11572                                            |
| Locus_1211_Transcript_1/1_Conf_1.000  | 1856 | 20 | 0        | EFO19100.1     | 95 | 1095.49 | 605 | 575 | U5 snRNP-specific protein                                                |
| Locus_12110_Transcript_1/1_Conf_1.000 | 578  | 0  |          |                |    |         |     |     |                                                                          |
| Locus_12111_Transcript_1/1_Conf_1.000 | 406  | 0  |          |                |    |         |     |     |                                                                          |
| Locus_12112_Transcript_1/1_Conf_1.000 | 486  | 4  | 3.41E-26 | XP_002639317.1 | 63 | 121.324 | 144 | 92  | C. briggsae CBR-ABT-2 protein                                            |
| Locus_12113_Transcript_1/1_Conf_1.000 | 390  | 4  | 2.10E-20 | XP_002646179.1 | 65 | 102.064 | 125 | 82  | Hypothetical protein CBG23745                                            |
| Locus_12114_Transcript_1/1_Conf_1.000 | 1113 | 20 | 4.80E-21 | XP_001892006.1 | 60 | 106.686 | 172 | 104 | 1300013D05Rik protein                                                    |
| Locus_12115_Transcript_1/1_Conf_1.000 | 182  | 0  |          |                |    |         |     |     |                                                                          |

|                                       |      |    |          |                |     |         |     |     |                                                                     |
|---------------------------------------|------|----|----------|----------------|-----|---------|-----|-----|---------------------------------------------------------------------|
| Locus_12116_Transcript_1/1_Conf_1.000 | 201  | 20 | 1.09E-24 | NP_001822.2    | 100 | 116.316 | 66  | 66  | clusterin isoform 1                                                 |
| Locus_12117_Transcript_1/1_Conf_1.000 | 1033 | 4  | 1.74E-22 | ABS19466.2     | 46  | 111.309 | 305 | 142 | Hypothetical protein F49D11.10                                      |
| Locus_12118_Transcript_1/1_Conf_1.000 | 692  | 0  |          |                |     |         |     |     |                                                                     |
| Locus_12119_Transcript_1/1_Conf_1.000 | 657  | 0  |          |                |     |         |     |     |                                                                     |
| Locus_1212_Transcript_1/2_Conf_1.000  | 1732 | 6  | 1.80E-58 | NP_494278.3    | 52  | 231.876 | 336 | 177 | Prion-like-(Q/N-rich)-domain-bearing protein family member (pqn-42) |
| Locus_1212_Transcript_2/2_Conf_1.000  | 1179 | 6  | 4.07E-58 | NP_494278.3    | 52  | 229.95  | 324 | 171 | Prion-like-(Q/N-rich)-domain-bearing protein family member (pqn-42) |
| Locus_12120_Transcript_1/1_Conf_1.000 | 227  | 0  |          |                |     |         |     |     |                                                                     |
| Locus_12121_Transcript_1/1_Conf_1.000 | 257  | 20 | 4.07E-27 | XP_001898425.1 | 89  | 124.405 | 85  | 76  | RuvB-like 2                                                         |
| Locus_12122_Transcript_1/1_Conf_1.000 | 388  | 20 | 2.85E-09 | NP_001007899.1 | 54  | 65.0846 | 96  | 52  | methyltransferase like 9                                            |
| Locus_12123_Transcript_1/1_Conf_1.000 | 343  | 20 | 2.72E-31 | CBM41226.1     | 76  | 138.272 | 113 | 87  | C. elegans protein T21C9.2b, confirmed by transcript evidence       |
| Locus_12124_Transcript_1/1_Conf_1.000 | 408  | 20 | 5.32E-64 | XP_002636978.1 | 92  | 246.899 | 134 | 124 | Hypothetical protein CBG09461                                       |

|                                       |     |    |          |                |    |         |     |     |                                                       |
|---------------------------------------|-----|----|----------|----------------|----|---------|-----|-----|-------------------------------------------------------|
| Locus_12125_Transcript_1/1_Conf_1.000 | 496 | 20 | 9.42E-45 | XP_001895465.1 | 70 | 182.956 | 164 | 115 | EGF-like domain containing protein                    |
| Locus_12126_Transcript_1/1_Conf_1.000 | 236 | 20 | 1.34E-14 | ADI61822.1     | 70 | 82.8037 | 77  | 54  | endonuclease-reverse transcriptase                    |
| Locus_12127_Transcript_1/1_Conf_1.000 | 531 | 20 | 4.31E-47 | XP_002633395.1 | 84 | 191.045 | 167 | 141 | C. briggsae CBR-KIN-4 protein                         |
| Locus_12128_Transcript_1/1_Conf_1.000 | 510 | 20 | 3.03E-33 | NP_504831.1    | 76 | 144.821 | 117 | 90  | hypothetical protein C13F10.2                         |
| Locus_12129_Transcript_1/1_Conf_1.000 | 149 | 20 | 1.56E-10 | NP_491508.2    | 79 | 69.3218 | 48  | 38  | PHaryngeal gland Toxin-related family member (phat-1) |
| Locus_1213_Transcript_1/4_Conf_0.375  | 536 | 20 | 1.58E-30 | XP_002630755.1 | 64 | 132.494 | 122 | 79  | C. briggsae CBR-LYS-8 protein                         |
| Locus_1213_Transcript_2/4_Conf_0.250  | 234 | 0  |          |                |    |         |     |     |                                                       |
| Locus_1213_Transcript_3/4_Conf_0.500  | 968 | 20 | 4.18E-60 | XP_002630755.1 | 67 | 236.113 | 208 | 140 | C. briggsae CBR-LYS-8 protein                         |
| Locus_1213_Transcript_4/4_Conf_0.500  | 962 | 20 | 1.28E-61 | XP_002630755.1 | 67 | 241.121 | 206 | 140 | C. briggsae CBR-LYS-8 protein                         |
| Locus_12130_Transcript_1/1_Conf_1.000 | 249 | 20 | 6.53E-14 | XP_002631442.1 | 80 | 80.4925 | 81  | 65  | Hypothetical protein CBG03304                         |
| Locus_12131_Transcript_1/1_Conf_1.000 | 592 | 0  |          |                |    |         |     |     |                                                       |
| Locus_12132_Transcript_1/1_Conf_1.000 | 377 | 0  |          |                |    |         |     |     |                                                       |
| Locus_12133_Transcript_1/1_Conf_1.000 | 411 | 0  |          |                |    |         |     |     |                                                       |
| Locus_12134_Transcript_1/2_Conf_1.000 | 962 |    |          |                |    |         |     |     |                                                       |
| Locus_12134_Transcript_2/2_Conf_1.000 | 978 |    |          |                |    |         |     |     |                                                       |
| Locus_12135_Transcript_1/1_Conf_1.000 | 407 | 0  |          |                |    |         |     |     |                                                       |



|                                       |     |    |           |             |    |         |     |     |                                                                                   |
|---------------------------------------|-----|----|-----------|-------------|----|---------|-----|-----|-----------------------------------------------------------------------------------|
| Locus_12136_Transcript_1/1_Conf_1.000 | 880 | 20 | 1.23E-153 | NP_494939.1 | 93 | 546.584 | 292 | 274 | PhosphoLipase D family member (pld-1)                                             |
| Locus_12137_Transcript_1/1_Conf_1.000 | 729 | 20 | 3.98E-45  | NP_505512.3 | 65 | 152.14  | 195 | 128 | AQuaPorin or aquaglyceroporin related family member (aqp-4)                       |
| Locus_12138_Transcript_1/1_Conf_1.000 | 757 | 20 | 1.05E-96  | NP_502164.1 | 85 | 357.066 | 239 | 204 | WHITe (Drosophila) related ABC transport family member (wht-2)                    |
| Locus_12139_Transcript_1/1_Conf_1.000 | 204 | 0  |           |             |    |         |     |     |                                                                                   |
| Locus_1214_Transcript_1/2_Conf_1.000  | 493 | 20 | 5.93E-47  | NP_499522.2 | 93 | 190.274 | 121 | 113 | GBF1(Golgi-specific Brefeldin-A-resistant Factor 1) homolog family member (gbf-1) |

|                                       |      |    |          |                |    |         |     |     |                                                                                   |
|---------------------------------------|------|----|----------|----------------|----|---------|-----|-----|-----------------------------------------------------------------------------------|
| Locus_1214_Transcript_2/2_Conf_1.000  | 493  | 20 | 5.93E-47 | NP_499522.2    | 93 | 190.274 | 121 | 113 | GBF1(Golgi-specific Brefeldin-A-resistant Factor 1) homolog family member (gbf-1) |
| Locus_12140_Transcript_1/1_Conf_1.000 | 1133 | 0  |          |                |    |         |     |     |                                                                                   |
| Locus_12141_Transcript_1/1_Conf_1.000 | 409  | 5  | 3.38E-18 | NP_491750.3    | 64 | 94.7449 | 134 | 87  | hypothetical protein C27A12.9                                                     |
| Locus_12142_Transcript_1/1_Conf_1.000 | 463  | 1  | 8.49E-09 | NP_498245.2    | 57 | 63.5438 | 142 | 81  | related to Islet cell Diabetes Autoantigen family member (ida-1)                  |
| Locus_12143_Transcript_1/1_Conf_1.000 | 181  | 0  |          |                |    |         |     |     |                                                                                   |
| Locus_12144_Transcript_1/1_Conf_1.000 | 1954 | 20 | 1.00E-60 | NP_494841.3    | 49 | 239.58  | 643 | 316 | hypothetical protein F10G7.10                                                     |
| Locus_12145_Transcript_1/1_Conf_1.000 | 751  | 20 | 2.86E-78 | EFO16473.1     | 76 | 295.819 | 226 | 173 | zinc finger protein                                                               |
| Locus_12146_Transcript_1/1_Conf_1.000 | 646  | 20 | 4.81E-35 | XP_002640142.1 | 66 | 151.754 | 160 | 107 | C. briggsae CBR-DBR-1 protein                                                     |
| Locus_12147_Transcript_1/1_Conf_1.000 | 558  | 20 | 2.26E-44 | EFO25953.1     | 64 | 182.185 | 189 | 122 | TK/Met protein kinase                                                             |
| Locus_12148_Transcript_1/1_Conf_1.000 | 345  | 20 | 2.90E-33 | NP_498634.1    | 80 | 144.821 | 111 | 89  | hypothetical protein T20B12.3                                                     |

|                                       |      |    |           |                |    |         |     |     |                                                             |
|---------------------------------------|------|----|-----------|----------------|----|---------|-----|-----|-------------------------------------------------------------|
| Locus_12149_Transcript_1/1_Conf_1.000 | 252  | 4  | 2.57E-13  | XP_001894170.1 | 64 | 78.5666 | 82  | 53  | Ribonucleases P/MRP protein subunit POP1 containing protein |
| Locus_1215_Transcript_1/3_Conf_0.600  | 1864 | 20 | 0         | CAB40412.1     | 91 | 759.214 | 472 | 434 | hexokinase                                                  |
| Locus_1215_Transcript_2/3_Conf_0.400  | 1728 | 20 | 0         | CAB40412.1     | 94 | 750.74  | 448 | 423 | hexokinase                                                  |
| Locus_1215_Transcript_3/3_Conf_0.600  | 1863 | 20 | 0         | CAB40412.1     | 92 | 775.778 | 483 | 446 | hexokinase                                                  |
| Locus_12150_Transcript_1/1_Conf_1.000 | 331  | 0  |           |                |    |         |     |     |                                                             |
| Locus_12151_Transcript_1/1_Conf_1.000 | 575  | 0  |           |                |    |         |     |     |                                                             |
| Locus_12152_Transcript_1/1_Conf_1.000 | 451  | 20 | 2.96E-30  | NP_001041050.1 | 70 | 134.806 | 117 | 82  | hypothetical protein Y57G11C.3                              |
| Locus_12153_Transcript_1/1_Conf_1.000 | 1755 | 20 | 1.86E-127 | NP_496546.2    | 68 | 461.07  | 487 | 336 | hypothetical protein W03C9.6                                |
| Locus_12154_Transcript_1/1_Conf_1.000 | 397  | 20 | 2.38E-11  | XP_002638990.1 | 61 | 72.0182 | 88  | 54  | Hypothetical protein CBG22236                               |
| Locus_12155_Transcript_1/1_Conf_1.000 | 503  | 20 | 1.71E-25  | XP_002641945.1 | 64 | 119.013 | 121 | 78  | C. briggsae CBR-TAG-198 protein                             |
| Locus_12156_Transcript_1/1_Conf_1.000 | 665  | 20 | 1.75E-27  | XP_001894040.1 | 56 | 126.716 | 166 | 93  | F-box domain containing protein                             |
| Locus_12157_Transcript_1/1_Conf_1.000 | 138  | 0  |           |                |    |         |     |     |                                                             |

|                                       |      |    |           |                |    |         |     |     |                                                    |
|---------------------------------------|------|----|-----------|----------------|----|---------|-----|-----|----------------------------------------------------|
| Locus_12158_Transcript_1/1_Conf_1.000 | 875  | 20 | 2.11E-20  | XP_002640302.1 | 48 | 103.99  | 286 | 139 | Hypothetical protein CBG12832                      |
| Locus_12159_Transcript_1/1_Conf_1.000 | 1760 | 20 | 1.15E-169 | XP_002634860.1 | 72 | 601.282 | 536 | 386 | Hypothetical protein CBG13978                      |
| Locus_1216_Transcript_1/1_Conf_1.000  | 1826 | 20 | 1.18E-124 | NP_509391.1    | 58 | 451.825 | 569 | 335 | hypothetical protein M60.2                         |
| Locus_12160_Transcript_1/1_Conf_1.000 | 422  | 0  |           |                |    |         |     |     |                                                    |
| Locus_12161_Transcript_1/2_Conf_1.000 | 925  | 20 | 2.16E-34  | NP_499533.1    | 85 | 150.599 | 91  | 78  | SR Protein (splicing factor) family member (rsp-8) |
| Locus_12161_Transcript_2/2_Conf_1.000 | 318  | 0  |           |                |    |         |     |     |                                                    |
| Locus_12162_Transcript_1/1_Conf_1.000 | 454  | 13 | 4.12E-24  | NP_492324.2    | 58 | 114.39  | 138 | 81  | hypothetical protein R05D11.9                      |
| Locus_12163_Transcript_1/1_Conf_1.000 | 407  | 20 | 8.63E-22  | EFO25480.1     | 65 | 106.686 | 117 | 77  | hypothetical protein LOAG_03009                    |
| Locus_12164_Transcript_1/1_Conf_1.000 | 146  | 0  |           |                |    |         |     |     |                                                    |

|                                       |      |    |          |                |     |         |     |     |                                                                         |
|---------------------------------------|------|----|----------|----------------|-----|---------|-----|-----|-------------------------------------------------------------------------|
| Locus_12165_Transcript_1/1_Conf_1.000 | 128  | 20 | 7.83E-15 | XP_001110023.2 | 100 | 83.5741 | 42  | 42  | PREDICTED: sentrin-specific protease 3-like isoform 3                   |
| Locus_12166_Transcript_1/1_Conf_1.000 | 593  | 20 | 2.57E-47 | NP_501908.2    | 67  | 192.2   | 182 | 123 | hypothetical protein Y43C5B.3                                           |
| Locus_12167_Transcript_1/1_Conf_1.000 | 470  | 20 | 3.59E-68 | XP_001231438.1 | 100 | 260.766 | 148 | 148 | PREDICTED: similar to ribosomal protein L26 isoform 1                   |
| Locus_12168_Transcript_1/1_Conf_1.000 | 313  | 0  |          |                |     |         |     |     |                                                                         |
| Locus_12169_Transcript_1/1_Conf_1.000 | 355  | 0  |          |                |     |         |     |     |                                                                         |
| Locus_1217_Transcript_1/1_Conf_1.000  | 1216 | 20 | 1.67E-70 | EFO17798.1     | 60  | 271.166 | 346 | 210 | hypothetical protein LOAG_10699                                         |
| Locus_12170_Transcript_1/1_Conf_1.000 | 279  | 0  |          |                |     |         |     |     |                                                                         |
| Locus_12171_Transcript_1/1_Conf_1.000 | 442  | 0  |          |                |     |         |     |     |                                                                         |
| Locus_12172_Transcript_1/1_Conf_1.000 | 217  | 20 | 5.89E-23 | NP_499273.3    | 84  | 110.538 | 71  | 60  | hypothetical protein R01H10.7                                           |
| Locus_12173_Transcript_1/1_Conf_1.000 | 251  | 3  | 2.25E-06 | EFO15975.1     | 64  | 55.4546 | 68  | 44  | hypothetical protein LOAG_12534                                         |
| Locus_12174_Transcript_1/2_Conf_1.000 | 1249 | 2  | 1.31E-17 | NP_507948.2    | 48  | 95.5153 | 179 | 87  | DAF-16/FOXO Controlled, germline Tumor affecting family member (dct-10) |
| Locus_12174_Transcript_2/2_Conf_1.000 | 1249 | 2  | 2.64E-18 | NP_507948.2    | 48  | 97.8265 | 179 | 87  | DAF-16/FOXO Controlled, germline Tumor affecting family member (dct-10) |
| Locus_12175_Transcript_1/1_Conf_1.000 | 989  | 20 | 1.58E-78 | XP_002641183.1 | 89  | 297.36  | 213 | 191 | Hypothetical protein CBG09044                                           |
| Locus_12176_Transcript_1/1_Conf_1.000 | 412  | 4  | 2.50E-05 | XP_001900130.1 | 68  | 51.9878 | 44  | 30  | hypothetical protein                                                    |
| Locus_12177_Transcript_1/1_Conf_1.000 | 403  | 0  |          |                |     |         |     |     |                                                                         |

|                                       |      |    |          |                |    |         |      |     |                                        |
|---------------------------------------|------|----|----------|----------------|----|---------|------|-----|----------------------------------------|
| Locus_12178_Transcript_1/1_Conf_1.000 | 822  | 20 | 1.72E-90 | XP_002640833.1 | 85 | 336.65  | 276  | 236 | C. briggsae CBR-KLP-20 protein         |
| Locus_12179_Transcript_1/1_Conf_1.000 | 566  | 0  |          |                |    |         |      |     |                                        |
| Locus_1218_Transcript_1/1_Conf_1.000  | 4106 | 20 | 0        | XP_001893907.1 | 68 | 1054.66 | 1287 | 886 | hypothetical protein                   |
| Locus_12180_Transcript_1/1_Conf_1.000 | 188  | 20 | 4.24E-08 | P34569.4       | 60 | 61.2326 | 61   | 37  | Kelch repeat-containing protein kel-10 |
| Locus_12181_Transcript_1/1_Conf_1.000 | 371  | 20 | 3.43E-34 | NP_497510.2    | 80 | 147.902 | 111  | 89  | hypothetical protein C39B5.6           |
| Locus_12182_Transcript_1/1_Conf_1.000 | 133  | 0  |          |                |    |         |      |     |                                        |
| Locus_12183_Transcript_1/1_Conf_1.000 | 593  | 2  | 2.06E-04 | EFO24041.1     | 56 | 49.6766 | 55   | 31  | hypothetical protein LOAG_04441        |
| Locus_12184_Transcript_1/2_Conf_1.000 | 1770 | 20 | 1.13E-39 | EFO23952.1     | 45 | 169.474 | 526  | 237 | hypothetical protein LOAG_04537        |

|                                       |      |    |          |                |    |         |     |     |                                                                               |
|---------------------------------------|------|----|----------|----------------|----|---------|-----|-----|-------------------------------------------------------------------------------|
| Locus_12184_Transcript_2/2_Conf_1.000 | 1770 | 20 | 1.13E-39 | EFO23952.1     | 45 | 169.474 | 526 | 237 | hypothetical protein LOAG_04537                                               |
| Locus_12185_Transcript_1/1_Conf_1.000 | 528  | 20 | 2.64E-57 | NP_501339.2    | 77 | 224.942 | 171 | 132 | neuRonal IGCAM family member (rig-4)                                          |
| Locus_12186_Transcript_1/1_Conf_1.000 | 390  | 1  | 7.48E-10 | NP_001129792.1 | 73 | 67.0106 | 56  | 41  | hypothetical protein T23G11.11                                                |
| Locus_12187_Transcript_1/1_Conf_1.000 | 896  | 3  | 1.12E-16 | NP_500551.2    | 62 | 91.6633 | 293 | 183 | hypothetical protein F55F10.1                                                 |
| Locus_12188_Transcript_1/1_Conf_1.000 | 299  | 0  |          |                |    |         |     |     |                                                                               |
| Locus_12189_Transcript_1/1_Conf_1.000 | 723  | 19 | 8.04E-27 | NP_503051.1    | 72 | 124.79  | 123 | 89  | FMRF-Like Peptide family member (flp-17)                                      |
| Locus_1219_Transcript_1/1_Conf_1.000  | 177  | 0  |          |                |    |         |     |     |                                                                               |
| Locus_12190_Transcript_1/1_Conf_1.000 | 187  | 0  |          |                |    |         |     |     |                                                                               |
| Locus_12191_Transcript_1/2_Conf_1.000 | 1129 | 20 | 1.78E-55 | XP_002636552.1 | 62 | 221.09  | 297 | 185 | C. briggsae CBR-SULP-4 protein                                                |
| Locus_12191_Transcript_2/2_Conf_1.000 | 494  | 20 | 2.78E-12 | NP_505493.1    | 68 | 75.0998 | 74  | 51  | SULfate Permease family member (sulp-8)                                       |
| Locus_12192_Transcript_1/1_Conf_1.000 | 757  | 20 | 6.67E-43 | ABC69942.1     | 63 | 178.333 | 190 | 120 | STIP                                                                          |
| Locus_12193_Transcript_1/1_Conf_1.000 | 425  | 20 | 5.82E-26 | NP_494922.1    | 59 | 120.553 | 127 | 76  | hypothetical protein F59A6.4                                                  |
| Locus_12194_Transcript_1/1_Conf_1.000 | 276  | 20 | 5.74E-18 | NP_495183.1    | 80 | 93.9745 | 66  | 53  | FRataxin (involved in human Friedrich's ataxia) Homolog family member (frh-1) |

|                                       |      |    |           |                |    |         |     |     |                                                                          |
|---------------------------------------|------|----|-----------|----------------|----|---------|-----|-----|--------------------------------------------------------------------------|
| Locus_12195_Transcript_1/1_Conf_1.000 | 1120 | 20 | 1.15E-155 | NP_497603.3    | 88 | 553.903 | 373 | 329 | hypothetical protein Y71H2AM.9                                           |
| Locus_12196_Transcript_1/1_Conf_1.000 | 315  | 20 | 1.59E-31  | XP_002637541.1 | 78 | 139.043 | 104 | 82  | C. briggsae CBR-HUM-2 protein                                            |
| Locus_12197_Transcript_1/1_Conf_1.000 | 138  | 1  | 1.62E-04  | NP_500104.1    | 81 | 49.2914 | 43  | 35  | Nuclear Pore complex Protein family member (npp-8)                       |
| Locus_12198_Transcript_1/1_Conf_1.000 | 370  | 20 | 3.01E-22  | XP_002632893.1 | 82 | 108.227 | 74  | 61  | Hypothetical protein CBG15101                                            |
| Locus_12199_Transcript_1/1_Conf_1.000 | 578  | 0  |           |                |    |         |     |     |                                                                          |
| Locus_122_Transcript_1/10_Conf_0.500  | 1018 | 20 | 3.88E-43  | NP_509305.1    | 72 | 179.874 | 170 | 124 | ViTellogenin structural genes (yolk protein genes) family member (vit-1) |
| Locus_122_Transcript_10/10_Conf_0.312 | 573  | 20 | 1.00E-45  | NP_509305.1    | 69 | 186.808 | 191 | 133 | ViTellogenin structural genes (yolk protein genes) family member (vit-1) |
| Locus_122_Transcript_2/10_Conf_0.500  | 1018 | 20 | 2.87E-46  | NP_509305.1    | 72 | 190.274 | 182 | 132 | ViTellogenin structural genes (yolk protein genes) family member (vit-1) |
| Locus_122_Transcript_3/10_Conf_0.312  | 244  | 2  | 7.29E-05  | NP_509305.1    | 77 | 50.447  | 45  | 35  | ViTellogenin structural genes (yolk protein genes) family member (vit-1) |
| Locus_122_Transcript_4/10_Conf_0.312  | 244  | 13 | 1.57E-07  | NP_509305.1    | 73 | 59.3066 | 57  | 42  | ViTellogenin structural genes (yolk protein genes) family member (vit-1) |



|                                       |      |    |          |                |    |         |     |     |                                                                          |
|---------------------------------------|------|----|----------|----------------|----|---------|-----|-----|--------------------------------------------------------------------------|
| Locus_122_Transcript_5/10_Conf_0.281  | 1052 | 20 | 1.77E-30 | NP_509305.1    | 75 | 137.887 | 119 | 90  | VITellogenin structural genes (yolk protein genes) family member (vit-1) |
| Locus_122_Transcript_6/10_Conf_0.281  | 1094 | 20 | 1.39E-33 | NP_509305.1    | 74 | 148.288 | 131 | 98  | VITellogenin structural genes (yolk protein genes) family member (vit-1) |
| Locus_122_Transcript_7/10_Conf_0.281  | 1052 | 20 | 1.77E-30 | NP_509305.1    | 75 | 137.887 | 119 | 90  | VITellogenin structural genes (yolk protein genes) family member (vit-1) |
| Locus_122_Transcript_8/10_Conf_0.062  | 564  | 6  | 3.91E-07 | NP_001040703.1 | 66 | 58.5362 | 74  | 49  | bZIP transcription factor family member (zip4)                           |
| Locus_122_Transcript_9/10_Conf_0.312  | 573  | 20 | 1.82E-47 | NP_509305.1    | 69 | 192.586 | 198 | 138 | VITellogenin structural genes (yolk protein genes) family member (vit-1) |
| Locus_1220_Transcript_1/2_Conf_1.000  | 486  | 20 | 1.82E-11 | CAD26968.1     | 52 | 72.4034 | 106 | 56  | transposase                                                              |
| Locus_1220_Transcript_2/2_Conf_1.000  | 317  | 20 | 7.44E-13 | CAD26968.1     | 58 | 77.0258 | 89  | 52  | transposase                                                              |
| Locus_12200_Transcript_1/1_Conf_1.000 | 194  | 0  |          |                |    |         |     |     |                                                                          |
| Locus_12201_Transcript_1/1_Conf_1.000 | 1099 | 20 | 4.97E-55 | NP_496426.1    | 77 | 219.55  | 175 | 135 | hypothetical protein B0491.1                                             |
| Locus_12202_Transcript_1/1_Conf_1.000 | 241  | 20 | 1.16E-18 | EFO26239.1     | 77 | 96.2857 | 71  | 55  | hypothetical protein LOAG_02251                                          |
| Locus_12203_Transcript_1/1_Conf_1.000 | 270  | 0  |          |                |    |         |     |     |                                                                          |
| Locus_12204_Transcript_1/1_Conf_1.000 | 291  | 4  | 4.19E-16 | XP_002646250.1 | 65 | 87.8113 | 91  | 60  | C. briggsae CBR-AEX-1 protein                                            |

|                                       |      |    |           |                |    |         |     |     |                                             |
|---------------------------------------|------|----|-----------|----------------|----|---------|-----|-----|---------------------------------------------|
| Locus_12205_Transcript_1/1_Conf_1.000 | 528  | 20 | 2.38E-66  | NP_498192.2    | 95 | 254.988 | 144 | 137 | hypothetical protein F09F7.3                |
| Locus_12206_Transcript_1/1_Conf_1.000 | 242  | 6  | 1.13E-05  | XP_001897023.1 | 53 | 53.1434 | 76  | 41  | RNA dependent RNA polymerase family protein |
| Locus_12207_Transcript_1/1_Conf_1.000 | 524  | 0  |           |                |    |         |     |     |                                             |
| Locus_12208_Transcript_1/1_Conf_1.000 | 562  | 20 | 1.65E-50  | XP_002633700.1 | 77 | 202.601 | 173 | 134 | Hypothetical protein CBG03383               |
| Locus_12209_Transcript_1/1_Conf_1.000 | 293  | 20 | 2.29E-22  | XP_002639062.1 | 70 | 108.612 | 95  | 67  | Hypothetical protein CBG14873               |
| Locus_1221_Transcript_1/1_Conf_1.000  | 260  | 0  |           |                |    |         |     |     |                                             |
| Locus_12210_Transcript_1/1_Conf_1.000 | 1963 | 20 | 3.52E-122 | EFO20200.1     | 59 | 443.736 | 620 | 370 | hypothetical protein LOAG_08289             |
| Locus_12211_Transcript_1/1_Conf_1.000 | 252  | 0  |           |                |    |         |     |     |                                             |
| Locus_12212_Transcript_1/2_Conf_1.000 | 336  | 0  |           |                |    |         |     |     |                                             |
| Locus_12212_Transcript_2/2_Conf_1.000 | 833  | 20 | 2.50E-28  | XP_001896132.1 | 78 | 130.183 | 108 | 85  | hypothetical protein                        |
| Locus_12213_Transcript_1/1_Conf_1.000 | 686  | 0  |           |                |    |         |     |     |                                             |
| Locus_12214_Transcript_1/1_Conf_1.000 | 401  | 5  | 4.15E-40  | XP_001898210.1 | 76 | 167.548 | 117 | 89  | hypothetical protein Bm1_33815              |
| Locus_12215_Transcript_1/1_Conf_1.000 | 391  | 20 | 2.82E-33  |                | 67 | 144.821 | 121 | 82  | DNA topoisomerase II                        |
| Locus_12216_Transcript_1/3_Conf_0.429 | 449  | 20 | 4.44E-26  | NP_491633.1    | 73 | 120.939 | 101 | 74  | Kinesin-Like Protein family member (klp-15) |
| Locus_12216_Transcript_2/3_Conf_0.429 | 847  | 20 | 7.21E-63  | NP_491633.1    | 63 | 244.973 | 274 | 173 | Kinesin-Like Protein family member (klp-15) |

|                                       |      |    |           |                |     |         |     |     |                                                                         |
|---------------------------------------|------|----|-----------|----------------|-----|---------|-----|-----|-------------------------------------------------------------------------|
| Locus_12216_Transcript_3/3_Conf_0.286 | 416  | 20 | 2.48E-21  | NP_491633.1    | 72  | 105.145 | 90  | 65  | Kinesin-Like Protein family member (klp-15)                             |
| Locus_12217_Transcript_1/1_Conf_1.000 | 444  | 12 | 5.64E-21  | NP_871630.1    | 69  | 103.99  | 123 | 85  | Nuclear Hormone Receptor family member (nhr-80)                         |
| Locus_12218_Transcript_1/1_Conf_1.000 | 348  | 20 | 1.29E-41  | NP_055217.2    | 100 | 172.555 | 82  | 82  | cytochrome b-c1 complex subunit 8                                       |
| Locus_12219_Transcript_1/1_Conf_1.000 | 274  | 2  | 1.73E-22  | NP_498411.1    | 81  | 108.997 | 91  | 74  | related to yeast Vacuolar Protein Sorting factor family member (vps-16) |
| Locus_1222_Transcript_1/1_Conf_1.000  | 1102 | 20 | 1.66E-167 | XP_002647836.1 | 91  | 593.193 | 350 | 319 | Hypothetical protein CBG23625                                           |
| Locus_12220_Transcript_1/1_Conf_1.000 | 139  | 0  |           |                |     |         |     |     |                                                                         |
| Locus_12221_Transcript_1/1_Conf_1.000 | 643  | 20 | 4.70E-75  | NP_493334.1    | 87  | 284.648 | 213 | 187 | hypothetical protein M01E5.2                                            |
| Locus_12222_Transcript_1/1_Conf_1.000 | 553  | 0  |           |                |     |         |     |     |                                                                         |
| Locus_12223_Transcript_1/1_Conf_1.000 | 549  | 20 | 5.34E-83  | BAG61260.1     | 100 | 310.457 | 181 | 181 | unnamed protein product                                                 |
| Locus_12224_Transcript_1/1_Conf_1.000 | 418  | 20 | 3.11E-27  | XP_002637376.1 | 69  | 124.79  | 135 | 94  | Hypothetical protein CBG19078                                           |

|                                       |      |    |           |                |    |         |     |     |                                                                          |
|---------------------------------------|------|----|-----------|----------------|----|---------|-----|-----|--------------------------------------------------------------------------|
| Locus_12225_Transcript_1/1_Conf_1.000 | 1107 | 20 | 1.02E-23  | XP_001638909.1 | 49 | 115.546 | 236 | 117 | predicted protein                                                        |
| Locus_12226_Transcript_1/1_Conf_1.000 | 766  | 20 | 3.96E-91  | XP_002630470.1 | 77 | 338.576 | 259 | 201 | Hypothetical protein CBG11204                                            |
| Locus_12227_Transcript_1/1_Conf_1.000 | 147  | 0  |           |                |    |         |     |     |                                                                          |
| Locus_12228_Transcript_1/1_Conf_1.000 | 508  | 20 | 5.33E-62  | NP_505267.1    | 80 | 240.35  | 168 | 136 | Regulator of Presynaptic Morphology family member (rpm-1)                |
| Locus_12229_Transcript_1/1_Conf_1.000 | 844  | 0  |           |                |    |         |     |     |                                                                          |
| Locus_1223_Transcript_1/1_Conf_1.000  | 286  | 18 | 3.12E-27  | NP_499455.1    | 79 | 124.79  | 94  | 75  | Tumorous Enhancer of Glp-1(gf) family member (teg-1)                     |
| Locus_12230_Transcript_1/1_Conf_1.000 | 147  | 0  |           |                |    |         |     |     |                                                                          |
| Locus_12231_Transcript_1/1_Conf_1.000 | 151  | 0  |           |                |    |         |     |     |                                                                          |
| Locus_12232_Transcript_1/1_Conf_1.000 | 405  | 0  |           |                |    |         |     |     |                                                                          |
| Locus_12233_Transcript_1/1_Conf_1.000 | 229  | 2  | 2.08E-15  | BAE00363.1     | 97 | 85.5001 | 40  | 39  | unnamed protein product                                                  |
| Locus_12234_Transcript_1/1_Conf_1.000 | 292  | 20 | 3.19E-40  | XP_002642536.1 | 86 | 167.933 | 95  | 82  | C. briggsae CBR-LRS-1 protein                                            |
| Locus_12235_Transcript_1/1_Conf_1.000 | 958  | 20 | 4.24E-65  | XP_001895121.1 | 61 | 252.677 | 309 | 191 | hypothetical protein                                                     |
| Locus_12236_Transcript_1/1_Conf_1.000 | 1034 | 20 | 4.23E-178 | AAB99830.2     | 93 | 628.246 | 332 | 309 | thrombospondin                                                           |
| Locus_12237_Transcript_1/1_Conf_1.000 | 139  | 0  |           |                |    |         |     |     |                                                                          |
| Locus_12238_Transcript_1/1_Conf_1.000 | 195  | 20 | 6.90E-19  | XP_001899845.1 | 88 | 97.0561 | 51  | 45  | CG7224                                                                   |
| Locus_12239_Transcript_1/1_Conf_1.000 | 168  | 2  | 7.08E-08  | CAA21622.4     | 73 | 60.4622 | 56  | 41  | C. elegans protein Y43F8C.12, partially confirmed by transcript evidence |
| Locus_1224_Transcript_1/1_Conf_1.000  | 2034 | 20 | 4.79E-29  | AAO63577.1     | 47 | 134.42  | 250 | 118 | secreted protein 5 precursor                                             |
| Locus_12240_Transcript_1/1_Conf_1.000 | 208  | 0  |           |                |    |         |     |     |                                                                          |

|                                       |     |    |          |                |     |         |     |     |                                                                           |
|---------------------------------------|-----|----|----------|----------------|-----|---------|-----|-----|---------------------------------------------------------------------------|
| Locus_12241_Transcript_1/1_Conf_1.000 | 937 | 20 | 7.28E-62 | NP_500367.1    | 61  | 241.891 | 318 | 196 | hypothetical protein M57.2                                                |
| Locus_12242_Transcript_1/1_Conf_1.000 | 689 | 20 | 1.08E-22 | XP_002645890.1 | 51  | 110.923 | 179 | 93  | Hypothetical protein CBG07640                                             |
| Locus_12243_Transcript_1/1_Conf_1.000 | 389 | 4  | 7.76E-15 | XP_002631400.1 | 76  | 83.5741 | 64  | 49  | Hypothetical protein CBG03250                                             |
| Locus_12244_Transcript_1/1_Conf_1.000 | 226 | 0  |          |                |     |         |     |     |                                                                           |
| Locus_12245_Transcript_1/1_Conf_1.000 | 325 | 0  |          |                |     |         |     |     |                                                                           |
| Locus_12246_Transcript_1/1_Conf_1.000 | 194 | 0  |          |                |     |         |     |     |                                                                           |
| Locus_12247_Transcript_1/1_Conf_1.000 | 240 | 0  |          |                |     |         |     |     |                                                                           |
| Locus_12248_Transcript_1/1_Conf_1.000 | 608 | 0  |          |                |     |         |     |     |                                                                           |
| Locus_12249_Transcript_1/1_Conf_1.000 | 260 | 8  | 1.23E-07 | ABB53347.1     | 51  | 59.6918 | 81  | 42  | secreted protein 5 precursor                                              |
| Locus_1225_Transcript_1/3_Conf_0.750  | 707 | 15 | 4.82E-25 | ACU24256.1     | 100 | 88.1965 | 41  | 41  | unknown                                                                   |
| Locus_1225_Transcript_2/3_Conf_0.750  | 772 | 19 | 1.93E-21 | XP_002118239.1 | 81  | 68.5514 | 86  | 70  | predicted protein                                                         |
| Locus_1225_Transcript_3/3_Conf_0.750  | 708 | 19 | 1.63E-21 | XP_002118239.1 | 81  | 68.5514 | 86  | 70  | predicted protein                                                         |
| Locus_12250_Transcript_1/1_Conf_1.000 | 992 | 20 | 4.85E-35 | EFO19997.1     | 54  | 152.91  | 339 | 184 | hypothetical protein LOAG_08495                                           |
| Locus_12251_Transcript_1/1_Conf_1.000 | 743 | 0  |          |                |     |         |     |     |                                                                           |
| Locus_12252_Transcript_1/1_Conf_1.000 | 292 | 0  |          |                |     |         |     |     |                                                                           |
| Locus_12253_Transcript_1/1_Conf_1.000 | 168 | 2  | 1.48E-05 | NP_509318.1    | 62  | 52.7582 | 54  | 34  | ADAM (disintegrin plus metalloprotease) family member (adm-4)             |
| Locus_12254_Transcript_1/1_Conf_1.000 | 253 | 20 | 2.24E-17 | XP_001896328.1 | 94  | 92.0485 | 85  | 80  | calcium ATPase                                                            |
| Locus_12255_Transcript_1/1_Conf_1.000 | 420 | 0  |          |                |     |         |     |     |                                                                           |
| Locus_12256_Transcript_1/1_Conf_1.000 | 321 | 0  |          |                |     |         |     |     |                                                                           |
| Locus_12257_Transcript_1/1_Conf_1.000 | 659 | 20 | 4.01E-24 | CBI63237.1     | 57  | 115.546 | 203 | 117 | C. elegans protein Y111B2A.4a, partially confirmed by transcript evidence |
| Locus_12258_Transcript_1/1_Conf_1.000 | 936 | 20 | 2.19E-58 | EFO25095.1     | 65  | 230.335 | 252 | 165 | hypothetical protein LOAG_03392                                           |
| Locus_12259_Transcript_1/1_Conf_1.000 | 195 | 0  |          |                |     |         |     |     |                                                                           |

|                                       |      |    |           |                |    |         |     |     |                                                                          |
|---------------------------------------|------|----|-----------|----------------|----|---------|-----|-----|--------------------------------------------------------------------------|
| Locus_1226_Transcript_1/3_Conf_0.667  | 2576 | 20 | 1.23E-157 | XP_002640115.1 | 67 | 561.992 | 544 | 365 | C. briggsae CBR-GLD-2 protein                                            |
| Locus_1226_Transcript_2/3_Conf_0.667  | 2278 | 20 | 1.82E-149 | XP_002640115.1 | 74 | 534.643 | 422 | 315 | C. briggsae CBR-GLD-2 protein                                            |
| Locus_1226_Transcript_3/3_Conf_0.667  | 2654 | 20 | 2.18E-149 | XP_002640115.1 | 74 | 534.643 | 422 | 315 | C. briggsae CBR-GLD-2 protein                                            |
| Locus_12260_Transcript_1/1_Conf_1.000 | 130  | 0  |           |                |    |         |     |     |                                                                          |
| Locus_12261_Transcript_1/1_Conf_1.000 | 563  | 20 | 3.18E-56  | ACI48999.1     | 85 | 173.326 | 113 | 97  | hypothetical protein Cbre_JD01.006                                       |
| Locus_12262_Transcript_1/1_Conf_1.000 | 559  | 20 | 4.53E-69  | NP_495779.1    | 84 | 264.233 | 184 | 155 | abnormal Eversion of Vulva family member (evl-20)                        |
| Locus_12263_Transcript_1/1_Conf_1.000 | 612  | 20 | 1.72E-52  | CBL43463.1     | 73 | 209.534 | 165 | 122 | C. elegans protein Y52B11C.1, partially confirmed by transcript evidence |

|                                       |      |    |          |                |     |         |     |     |                                                                   |
|---------------------------------------|------|----|----------|----------------|-----|---------|-----|-----|-------------------------------------------------------------------|
| Locus_12264_Transcript_1/1_Conf_1.000 | 212  | 20 | 3.60E-20 | NP_497809.1    | 87  | 101.293 | 70  | 61  | Heavy chain, Unconventional Myosin family member (hum-5)          |
| Locus_12265_Transcript_1/1_Conf_1.000 | 214  | 0  |          |                |     |         |     |     |                                                                   |
| Locus_12266_Transcript_1/1_Conf_1.000 | 237  | 0  |          |                |     |         |     |     |                                                                   |
| Locus_12267_Transcript_1/1_Conf_1.000 | 568  | 20 | 1.35E-47 | XP_002633481.1 | 93  | 192.971 | 103 | 96  | C. briggsae CBR-PHY-2 protein                                     |
| Locus_12268_Transcript_1/1_Conf_1.000 | 205  | 0  |          |                |     |         |     |     |                                                                   |
| Locus_12269_Transcript_1/1_Conf_1.000 | 386  | 20 | 2.33E-22 | XP_001269594.1 | 75  | 72.0182 | 54  | 41  | hypothetical protein ACLA_028940                                  |
| Locus_1227_Transcript_1/1_Conf_1.000  | 326  | 0  |          |                |     |         |     |     |                                                                   |
| Locus_12270_Transcript_1/1_Conf_1.000 | 151  | 4  | 1.36E-06 | NP_499647.1    | 95  | 56.225  | 46  | 44  | TAF (TBP-associated transcription factor) family member (taf-7.2) |
| Locus_12271_Transcript_1/1_Conf_1.000 | 161  | 20 | 5.46E-16 | NP_492067.1    | 88  | 87.4261 | 52  | 46  | hypothetical protein F13G3.11                                     |
| Locus_12272_Transcript_1/1_Conf_1.000 | 138  | 0  |          |                |     |         |     |     |                                                                   |
| Locus_12273_Transcript_1/1_Conf_1.000 | 437  | 20 | 7.64E-63 | BAG59449.1     | 100 | 243.047 | 119 | 119 | unnamed protein product                                           |
| Locus_12274_Transcript_1/2_Conf_1.000 | 1580 | 20 | 0        | XP_002647008.1 | 82  | 690.649 | 515 | 427 | Hypothetical protein CBG23794                                     |
| Locus_12274_Transcript_2/2_Conf_1.000 | 573  | 20 | 1.59E-59 | NP_499267.1    | 81  | 232.646 | 186 | 151 | hypothetical protein Y70G10A.3                                    |

|                                       |      |    |           |                |     |         |     |     |                                                                   |
|---------------------------------------|------|----|-----------|----------------|-----|---------|-----|-----|-------------------------------------------------------------------|
| Locus_12275_Transcript_1/1_Conf_1.000 | 954  | 20 | 6.19E-125 | ACY39994.1     | 76  | 451.44  | 351 | 268 | C. elegans FLN-2 protein, isoform d                               |
| Locus_12276_Transcript_1/1_Conf_1.000 | 235  | 20 | 4.92E-17  | NP_506788.1    | 67  | 90.8929 | 77  | 52  | Cytochrome P450 family member (cyp-34A2)                          |
| Locus_12277_Transcript_1/1_Conf_1.000 | 201  | 20 | 3.28E-29  | XP_002819700.1 | 100 | 131.339 | 67  | 67  | PREDICTED: stomatin-like protein 2-like isoform 2                 |
| Locus_12278_Transcript_1/1_Conf_1.000 | 159  | 20 | 7.90E-07  | CAD99040.1     | 83  | 56.9954 | 37  | 31  | putative scj1 protein                                             |
| Locus_12279_Transcript_1/1_Conf_1.000 | 212  | 20 | 1.73E-22  | EFO21588.1     | 82  | 108.997 | 70  | 58  | coiled-coil domain-containing protein 101                         |
| Locus_1228_Transcript_1/1_Conf_1.000  | 1671 | 20 | 0         | XP_002637091.1 | 89  | 723.391 | 475 | 424 | Hypothetical protein CBG09590                                     |
| Locus_12280_Transcript_1/1_Conf_1.000 | 214  | 0  |           |                |     |         |     |     |                                                                   |
| Locus_12281_Transcript_1/1_Conf_1.000 | 781  | 20 | 7.18E-19  | NP_498090.1    | 48  | 98.5969 | 258 | 125 | Temporarily Assigned Gene name family member (tag-262)            |
| Locus_12282_Transcript_1/1_Conf_1.000 | 197  | 0  |           |                |     |         |     |     |                                                                   |
| Locus_12283_Transcript_1/1_Conf_1.000 | 293  | 0  |           |                |     |         |     |     |                                                                   |
| Locus_12284_Transcript_1/1_Conf_1.000 | 274  | 2  | 6.81E-19  | XP_002636840.1 | 70  | 97.0561 | 91  | 64  | Hypothetical protein CBG09291                                     |
| Locus_12285_Transcript_1/1_Conf_1.000 | 1973 | 7  | 2.83E-95  | NP_510336.2    | 53  | 354.369 | 617 | 330 | TBC (Tre-2/Bub2/Cdc16) domain family member (tbc-19)              |
| Locus_12286_Transcript_1/1_Conf_1.000 | 143  | 2  | 1.32E-06  | XP_002632345.1 | 76  | 56.225  | 43  | 33  | Hypothetical protein CBG00357                                     |
| Locus_12287_Transcript_1/1_Conf_1.000 | 252  | 0  |           |                |     |         |     |     |                                                                   |
| Locus_12288_Transcript_1/1_Conf_1.000 | 171  | 0  |           |                |     |         |     |     |                                                                   |
| Locus_12289_Transcript_1/1_Conf_1.000 | 196  | 0  |           |                |     |         |     |     |                                                                   |
| Locus_1229_Transcript_1/1_Conf_1.000  | 2030 | 20 | 4.67E-101 | XP_001894842.1 | 62  | 373.629 | 481 | 301 | Dual specificity phosphatase, catalytic domain containing protein |
| Locus_12290_Transcript_1/1_Conf_1.000 | 188  | 4  | 2.17E-20  | NP_505746.2    | 93  | 102.064 | 62  | 58  | hypothetical protein F28H7.8                                      |
| Locus_12291_Transcript_1/1_Conf_1.000 | 356  | 20 | 2.42E-40  | NP_510442.2    | 93  | 168.318 | 90  | 84  | hypothetical protein F40E10.6                                     |
| Locus_12292_Transcript_1/1_Conf_1.000 | 530  | 0  |           |                |     |         |     |     |                                                                   |
| Locus_12293_Transcript_1/1_Conf_1.000 | 528  | 20 | 2.75E-30  | XP_001897467.1 | 63  | 135.191 | 177 | 113 | CAP-Gly domain containing protein                                 |
| Locus_12294_Transcript_1/1_Conf_1.000 | 136  | 0  |           |                |     |         |     |     |                                                                   |
| Locus_12295_Transcript_1/1_Conf_1.000 | 143  | 0  |           |                |     |         |     |     |                                                                   |



|                                       |      |    |           |                |     |         |     |     |                                                         |
|---------------------------------------|------|----|-----------|----------------|-----|---------|-----|-----|---------------------------------------------------------|
| Locus_12296_Transcript_1/1_Conf_1.000 | 383  | 20 | 1.33E-30  | NP_498702.1    | 83  | 135.961 | 123 | 103 | Ribosomal Protein, Large subunit family member (rpl-35) |
| Locus_12297_Transcript_1/1_Conf_1.000 | 807  | 20 | 2.11E-101 | NP_001023058.1 | 77  | 372.859 | 263 | 204 | hypothetical protein C42C1.11                           |
| Locus_12298_Transcript_1/1_Conf_1.000 | 363  | 20 | 1.01E-30  | NP_497603.3    | 87  | 136.346 | 85  | 74  | hypothetical protein Y71H2AM.9                          |
| Locus_12299_Transcript_1/1_Conf_1.000 | 430  | 3  | 1.09E-16  | XP_002639154.1 | 92  | 89.7373 | 55  | 51  | Hypothetical protein CBG14981                           |
| Locus_123_Transcript_1/8_Conf_0.267   | 1728 | 20 | 8.41E-141 | ADI54942.1     | 98  | 505.368 | 263 | 258 | heat shock protein 70                                   |
| Locus_123_Transcript_2/8_Conf_0.267   | 1728 | 20 | 8.41E-141 | ADI54942.1     | 98  | 505.368 | 263 | 258 | heat shock protein 70                                   |
| Locus_123_Transcript_3/8_Conf_0.167   | 477  | 20 | 4.50E-47  | BAI81971.1     | 100 | 190.66  | 99  | 99  | heat shock protein 70                                   |
| Locus_123_Transcript_4/8_Conf_0.167   | 519  | 20 | 6.08E-56  | BAI81971.1     | 100 | 220.32  | 113 | 113 | heat shock protein 70                                   |
| Locus_123_Transcript_5/8_Conf_0.267   | 1739 | 20 | 0         | XP_002632429.1 | 98  | 846.655 | 478 | 473 | C. briggsae CBR-HSP-1 protein                           |

|                                       |      |    |           |                |    |         |     |     |                                          |
|---------------------------------------|------|----|-----------|----------------|----|---------|-----|-----|------------------------------------------|
| Locus_123_Transcript_6/8_Conf_0.267   | 1739 | 20 | 0         | XP_002632429.1 | 98 | 840.877 | 478 | 473 | C. briggsae CBR-HSP-1 protein            |
| Locus_123_Transcript_7/8_Conf_0.400   | 1830 | 20 | 0         | NP_503068.1    | 98 | 1019.22 | 574 | 565 | Heat Shock Protein family member (hsp-1) |
| Locus_123_Transcript_8/8_Conf_0.400   | 1872 | 20 | 0         | NP_503068.1    | 98 | 1039.64 | 588 | 579 | Heat Shock Protein family member (hsp-1) |
| Locus_1230_Transcript_1/4_Conf_0.300  | 1373 | 20 | 5.97E-67  | XP_002632730.1 | 72 | 259.61  | 245 | 178 | C. briggsae CBR-LST-3 protein            |
| Locus_1230_Transcript_2/4_Conf_0.700  | 3319 | 20 | 9.72E-110 | XP_001901214.1 | 58 | 403.29  | 787 | 462 | SAP domain containing protein            |
| Locus_1230_Transcript_3/4_Conf_0.700  | 3320 | 20 | 9.72E-110 | XP_001901214.1 | 58 | 403.29  | 787 | 462 | SAP domain containing protein            |
| Locus_1230_Transcript_4/4_Conf_0.700  | 3320 | 20 | 9.72E-110 | XP_001901214.1 | 58 | 403.29  | 787 | 462 | SAP domain containing protein            |
| Locus_12300_Transcript_1/1_Conf_1.000 | 340  | 20 | 1.55E-31  | XP_002633760.1 | 63 | 139.043 | 117 | 74  | C. briggsae CBR-GON-1 protein            |
| Locus_12301_Transcript_1/1_Conf_1.000 | 231  | 0  |           |                |    |         |     |     |                                          |
| Locus_12302_Transcript_1/2_Conf_1.000 | 252  | 0  |           |                |    |         |     |     |                                          |
| Locus_12302_Transcript_2/2_Conf_1.000 | 387  | 0  |           |                |    |         |     |     |                                          |
| Locus_12303_Transcript_1/1_Conf_1.000 | 248  | 3  | 7.74E-15  | XP_002639235.1 | 59 | 83.5741 | 82  | 49  | Hypothetical protein CBG03793            |
| Locus_12304_Transcript_1/1_Conf_1.000 | 763  | 20 | 1.32E-54  | NP_001022234.1 | 69 | 217.238 | 237 | 164 | hypothetical protein K05F1.6             |

|                                       |      |    |          |                |    |         |     |     |                                        |
|---------------------------------------|------|----|----------|----------------|----|---------|-----|-----|----------------------------------------|
| Locus_12305_Transcript_1/1_Conf_1.000 | 552  | 2  | 1.32E-28 | NP_505498.1    | 59 | 129.798 | 162 | 97  | hypothetical protein ZK287.7           |
| Locus_12306_Transcript_1/1_Conf_1.000 | 1228 | 20 | 8.71E-67 | NP_001122711.1 | 52 | 258.84  | 405 | 213 | CBP/p300 homolog family member (cbp-1) |
| Locus_12307_Transcript_1/2_Conf_1.000 | 668  | 20 | 6.91E-48 | EFO24728.1     | 67 | 194.512 | 219 | 148 | blistered cuticle protein 3            |
| Locus_12307_Transcript_2/2_Conf_1.000 | 668  | 20 | 6.91E-48 | EFO24728.1     | 67 | 194.512 | 219 | 148 | blistered cuticle protein 3            |
| Locus_12308_Transcript_1/1_Conf_1.000 | 309  | 0  |          |                |    |         |     |     |                                        |
| Locus_12309_Transcript_1/1_Conf_1.000 | 342  | 20 | 1.87E-56 | AAZ82849.1     | 96 | 221.861 | 113 | 109 | Cam kinase kinase protein 1, isoform b |
| Locus_1231_Transcript_1/1_Conf_1.000  | 712  | 20 | 1.62E-16 | XP_001656054.1 | 48 | 90.5077 | 233 | 112 | brain chitinase and chia               |
| Locus_12310_Transcript_1/1_Conf_1.000 | 161  | 0  |          |                |    |         |     |     |                                        |
| Locus_12311_Transcript_1/1_Conf_1.000 | 585  | 0  |          |                |    |         |     |     |                                        |
| Locus_12312_Transcript_1/1_Conf_1.000 | 553  | 0  |          |                |    |         |     |     |                                        |

|                                       |      |    |           |                |    |         |     |     |                                            |
|---------------------------------------|------|----|-----------|----------------|----|---------|-----|-----|--------------------------------------------|
| Locus_12313_Transcript_1/2_Conf_1.000 | 1509 | 20 | 8.47E-110 | NP_502354.2    | 73 | 402.134 | 334 | 244 | yeast SEC homolog family member (sec-24.2) |
| Locus_12313_Transcript_2/2_Conf_1.000 | 1509 | 20 | 8.47E-110 | NP_502354.2    | 73 | 402.134 | 334 | 244 | yeast SEC homolog family member (sec-24.2) |
| Locus_12314_Transcript_1/1_Conf_1.000 | 243  | 2  | 1.16E-10  | XP_002643753.1 | 76 | 69.707  | 64  | 49  | C. briggsae CBR-PSSY-1 protein             |
| Locus_12315_Transcript_1/1_Conf_1.000 | 235  | 4  | 5.44E-16  | XP_002644415.1 | 66 | 87.4261 | 75  | 50  | C. briggsae CBR-TSP-17 protein             |
| Locus_12316_Transcript_1/1_Conf_1.000 | 309  | 0  |           |                |    |         |     |     |                                            |
| Locus_12317_Transcript_1/1_Conf_1.000 | 887  | 0  |           |                |    |         |     |     |                                            |
| Locus_12318_Transcript_1/1_Conf_1.000 | 507  | 0  |           |                |    |         |     |     |                                            |
| Locus_12319_Transcript_1/1_Conf_1.000 | 171  | 0  |           |                |    |         |     |     |                                            |
| Locus_12322_Transcript_1/1_Conf_1.000 | 520  | 20 | 3.83E-42  | NP_510335.2    | 78 | 174.481 | 129 | 101 | hypothetical protein C31E10.7              |
| Locus_12320_Transcript_1/1_Conf_1.000 | 486  | 14 | 2.46E-08  | XP_002648923.1 | 49 | 62.003  | 160 | 79  | Hypothetical protein CBG17840              |
| Locus_12321_Transcript_1/1_Conf_1.000 | 527  | 0  |           |                |    |         |     |     |                                            |
| Locus_12322_Transcript_1/1_Conf_1.000 | 612  | 20 | 5.54E-43  | NP_499696.2    | 77 | 177.948 | 160 | 124 | hypothetical protein ZK1010.3              |

|                                       |     |    |           |                |    |         |     |     |                                                                          |
|---------------------------------------|-----|----|-----------|----------------|----|---------|-----|-----|--------------------------------------------------------------------------|
| Locus_12323_Transcript_1/1_Conf_1.000 | 685 | 20 | 4.40E-101 | NP_001023295.1 | 95 | 371.318 | 196 | 187 | UNCoordinated family member (unc-43)                                     |
| Locus_12324_Transcript_1/1_Conf_1.000 | 241 | 5  | 4.90E-09  | XP_001898554.1 | 84 | 64.3142 | 38  | 32  | DOMON domain containing protein                                          |
| Locus_12325_Transcript_1/1_Conf_1.000 | 264 | 20 | 1.64E-20  | NP_001022870.1 | 79 | 102.449 | 87  | 69  | hypothetical protein Y43F4A.1                                            |
| Locus_12326_Transcript_1/1_Conf_1.000 | 592 | 20 | 2.17E-54  | NP_504292.2    | 76 | 215.698 | 198 | 151 | hypothetical protein C37H5.5                                             |
| Locus_12327_Transcript_1/1_Conf_1.000 | 852 | 0  |           |                |    |         |     |     |                                                                          |
| Locus_12328_Transcript_1/1_Conf_1.000 | 354 | 4  | 2.35E-27  | XP_002641855.1 | 72 | 125.176 | 106 | 77  | Hypothetical protein CBG16529                                            |
| Locus_12329_Transcript_1/1_Conf_1.000 | 181 | 0  |           |                |    |         |     |     |                                                                          |
| Locus_1233_Transcript_1/1_Conf_1.000  | 510 | 20 | 8.51E-44  | ACI49119.1     | 85 | 179.874 | 115 | 98  | hypothetical protein Cbre_JD14.007                                       |
| Locus_12330_Transcript_1/1_Conf_1.000 | 683 | 20 | 8.43E-12  | EFA08418.1     | 47 | 74.7146 | 223 | 106 | hypothetical protein TcasGA2_TC006065                                    |
| Locus_12331_Transcript_1/1_Conf_1.000 | 356 | 20 | 4.73E-28  | XP_002074576.1 | 64 | 127.487 | 118 | 76  | GK23146                                                                  |
| Locus_12332_Transcript_1/1_Conf_1.000 | 232 | 1  | 1.81E-19  | EFO17857.1     | 68 | 98.9821 | 77  | 53  | CK1/TTBK protein kinase                                                  |
| Locus_12333_Transcript_1/1_Conf_1.000 | 814 | 4  | 1.72E-18  | CAB54509.2     | 48 | 97.4413 | 215 | 104 | C. elegans protein Y79H2A.3a, partially confirmed by transcript evidence |
| Locus_12334_Transcript_1/1_Conf_1.000 | 609 | 0  |           |                |    |         |     |     |                                                                          |
| Locus_12335_Transcript_1/1_Conf_1.000 | 194 | 4  | 4.20E-16  | NP_497814.3    | 82 | 87.8113 | 56  | 46  | UNCoordinated family member (unc-79)                                     |
| Locus_12336_Transcript_1/1_Conf_1.000 | 419 | 3  | 1.27E-04  | NP_001084750.1 | 60 | 49.6766 | 58  | 35  | TSC22 domain family, member 2                                            |
| Locus_12337_Transcript_1/1_Conf_1.000 | 342 | 20 | 6.46E-41  | NP_491314.1    | 82 | 170.244 | 108 | 89  | INneXin family member (inx-16)                                           |

|                                       |      |    |           |                |    |         |     |     |                                                    |
|---------------------------------------|------|----|-----------|----------------|----|---------|-----|-----|----------------------------------------------------|
| Locus_12338_Transcript_1/1_Conf_1.000 | 165  | 0  |           |                |    |         |     |     |                                                    |
| Locus_12339_Transcript_1/1_Conf_1.000 | 434  | 3  | 2.67E-23  | XP_002647006.1 | 62 | 111.694 | 155 | 97  | Hypothetical protein CBG22464                      |
| Locus_1234_Transcript_1/1_Conf_1.000  | 310  | 20 | 3.84E-14  | XP_001847954.1 | 72 | 81.2629 | 74  | 54  | shc transforming protein                           |
| Locus_12340_Transcript_1/1_Conf_1.000 | 248  | 0  |           |                |    |         |     |     |                                                    |
| Locus_12341_Transcript_1/1_Conf_1.000 | 492  | 0  |           |                |    |         |     |     |                                                    |
| Locus_12342_Transcript_1/1_Conf_1.000 | 646  | 15 | 9.65E-52  | XP_002644812.1 | 66 | 207.223 | 219 | 146 | Hypothetical protein CBG14830                      |
| Locus_12343_Transcript_1/1_Conf_1.000 | 210  | 20 | 7.76E-15  | XP_002595182.1 | 68 | 83.5741 | 69  | 47  | hypothetical protein BRAFLDRAFT_285565             |
| Locus_12344_Transcript_1/1_Conf_1.000 | 165  | 0  |           |                |    |         |     |     |                                                    |
| Locus_12345_Transcript_1/1_Conf_1.000 | 1449 | 20 | 6.31E-123 | XP_002640311.1 | 68 | 445.662 | 510 | 347 | C. briggsae CBR-LET-363 protein                    |
| Locus_12346_Transcript_1/1_Conf_1.000 | 866  | 20 | 2.24E-91  | XP_002644316.1 | 74 | 339.732 | 289 | 214 | C. briggsae CBR-TAG-312 protein                    |
| Locus_12347_Transcript_1/1_Conf_1.000 | 334  | 0  |           |                |    |         |     |     |                                                    |
| Locus_12348_Transcript_1/1_Conf_1.000 | 682  | 20 | 8.31E-60  | NP_497539.3    | 71 | 234.187 | 198 | 142 | F-box A protein family member (fbxa-1)             |
| Locus_12349_Transcript_1/1_Conf_1.000 | 326  | 20 | 2.21E-25  | NP_496059.2    | 81 | 118.627 | 91  | 74  | UDP-GlucuronosylTransferase family member (ugt-58) |
| Locus_1235_Transcript_1/1_Conf_1.000  | 728  | 20 | 2.20E-40  | XP_002639923.1 | 59 | 169.859 | 251 | 149 | C. briggsae CBR-JPH-1 protein                      |
| Locus_12350_Transcript_1/1_Conf_1.000 | 436  | 0  |           |                |    |         |     |     |                                                    |
| Locus_12351_Transcript_1/1_Conf_1.000 | 247  | 0  |           |                |    |         |     |     |                                                    |
| Locus_12352_Transcript_1/1_Conf_1.000 | 382  | 20 | 9.47E-45  | NP_510091.2    | 90 | 182.956 | 114 | 103 | hypothetical protein T18D3.3                       |
| Locus_12353_Transcript_1/1_Conf_1.000 | 367  | 0  |           |                |    |         |     |     |                                                    |

|                                       |      |    |           |                |    |         |     |     |                                                                         |
|---------------------------------------|------|----|-----------|----------------|----|---------|-----|-----|-------------------------------------------------------------------------|
| Locus_12354_Transcript_1/1_Conf_1.000 | 496  | 20 | 6.32E-41  | XP_002641474.1 | 69 | 170.244 | 162 | 112 | C. briggsae CBR-PTP-1 protein                                           |
| Locus_12355_Transcript_1/1_Conf_1.000 | 751  | 20 | 2.84E-102 | EFO15747.1     | 95 | 375.555 | 205 | 196 | RPB-5 protein                                                           |
| Locus_12356_Transcript_1/1_Conf_1.000 | 1087 | 14 | 2.21E-23  | EFO22475.1     | 49 | 114.39  | 314 | 154 | PH domain-containing protein                                            |
| Locus_12357_Transcript_1/1_Conf_1.000 | 390  | 20 | 6.31E-25  | XP_002639764.1 | 85 | 117.087 | 101 | 86  | Hypothetical protein CBG02210                                           |
| Locus_12358_Transcript_1/1_Conf_1.000 | 875  | 20 | 7.48E-26  | EFO26243.1     | 50 | 122.094 | 287 | 146 | ku P80 DNA helicase                                                     |
| Locus_12359_Transcript_1/1_Conf_1.000 | 165  | 0  |           |                |    |         |     |     |                                                                         |
| Locus_1236_Transcript_1/1_Conf_1.000  | 1606 | 20 | 9.23E-78  | EFO24996.1     | 65 | 295.819 | 423 | 276 | hypothetical protein LOAG_03490                                         |
| Locus_12360_Transcript_1/1_Conf_1.000 | 316  | 3  | 2.10E-07  | CBM41222.1     | 51 | 58.9214 | 86  | 44  | C. elegans protein T10G3.3b, partially confirmed by transcript evidence |
| Locus_12361_Transcript_1/1_Conf_1.000 | 939  | 20 | 2.43E-65  | NP_001040941.1 | 72 | 253.447 | 202 | 147 | PhosphatidylSerine Receptor family member (psr-1)                       |
| Locus_12362_Transcript_1/1_Conf_1.000 | 235  | 0  |           |                |    |         |     |     |                                                                         |
| Locus_12363_Transcript_1/1_Conf_1.000 | 274  | 20 | 1.67E-25  | XP_002643815.1 | 78 | 119.013 | 90  | 71  | Hypothetical protein CBG02030                                           |
| Locus_12364_Transcript_1/1_Conf_1.000 | 510  | 0  |           |                |    |         |     |     |                                                                         |
| Locus_12365_Transcript_1/1_Conf_1.000 | 459  | 20 | 1.60E-28  | XP_002639084.1 | 62 | 129.028 | 151 | 95  | Hypothetical protein CBG14902                                           |
| Locus_12366_Transcript_1/1_Conf_1.000 | 133  | 0  |           |                |    |         |     |     |                                                                         |
| Locus_12367_Transcript_1/1_Conf_1.000 | 492  | 8  | 7.07E-16  | XP_002629751.1 | 86 | 87.0409 | 50  | 43  | Hypothetical protein CBG00985                                           |

|                                       |      |    |           |                |     |         |     |     |                                                                   |
|---------------------------------------|------|----|-----------|----------------|-----|---------|-----|-----|-------------------------------------------------------------------|
| Locus_12368_Transcript_1/1_Conf_1.000 | 441  | 20 | 7.61E-42  | XP_001899686.1 | 73  | 173.326 | 145 | 106 | Abnormal embryonic partitioning of cytoplasm protein 3, isoform b |
| Locus_12369_Transcript_1/2_Conf_1.000 | 1028 | 20 | 2.59E-111 | XP_002634540.1 | 85  | 406.371 | 265 | 226 | C. briggsae CBR-EGL-21 protein                                    |
| Locus_12369_Transcript_2/2_Conf_1.000 | 1028 | 20 | 2.59E-111 | XP_002634540.1 | 85  | 406.371 | 265 | 226 | C. briggsae CBR-EGL-21 protein                                    |
| Locus_1237_Transcript_1/2_Conf_1.000  | 1379 | 20 | 5.70E-17  | XP_002639868.1 | 43  | 93.5893 | 181 | 79  | C. briggsae CBR-DAO-5 protein                                     |
| Locus_1237_Transcript_2/2_Conf_1.000  | 1567 | 20 | 4.36E-16  | XP_002639868.1 | 52  | 90.8929 | 165 | 87  | C. briggsae CBR-DAO-5 protein                                     |
| Locus_12370_Transcript_1/1_Conf_1.000 | 224  | 0  |           |                |     |         |     |     |                                                                   |
| Locus_12371_Transcript_1/1_Conf_1.000 | 363  | 0  |           |                |     |         |     |     |                                                                   |
| Locus_12372_Transcript_1/1_Conf_1.000 | 906  | 20 | 1.42E-91  | NP_741241.1    | 73  | 340.502 | 302 | 222 | Dipeptidyl Peptidase Four (IV) family member (dpf-6)              |
| Locus_12373_Transcript_1/1_Conf_1.000 | 171  | 0  |           |                |     |         |     |     |                                                                   |
| Locus_12374_Transcript_1/1_Conf_1.000 | 516  | 20 | 1.52E-51  | XP_002647980.1 | 72  | 205.682 | 172 | 125 | C. briggsae CBR-PUS-1 protein                                     |
| Locus_12375_Transcript_1/1_Conf_1.000 | 445  | 20 | 6.85E-43  | NP_510130.2    | 85  | 176.792 | 105 | 90  | hypothetical protein F22E10.5                                     |
| Locus_12376_Transcript_1/1_Conf_1.000 | 154  | 20 | 1.18E-18  | XP_002920956.1 | 100 | 96.2857 | 46  | 46  | PREDICTED: RNA-binding protein 42-like isoform 2                  |
| Locus_12377_Transcript_1/1_Conf_1.000 | 373  | 0  |           |                |     |         |     |     |                                                                   |
| Locus_12378_Transcript_1/1_Conf_1.000 | 594  | 0  |           |                |     |         |     |     |                                                                   |
| Locus_12379_Transcript_1/1_Conf_1.000 | 132  | 4  | 4.42E-10  | NP_001021692.1 | 88  | 67.781  | 42  | 37  | EATing: abnormal pharyngeal pumping family member (eat-18)        |
| Locus_1238_Transcript_1/1_Conf_1.000  | 1257 | 20 | 7.26E-101 | XP_002630425.1 | 76  | 372.089 | 303 | 231 | Hypothetical protein CBG11150                                     |



|                                       |     |    |          |                |    |         |     |     |                                                 |
|---------------------------------------|-----|----|----------|----------------|----|---------|-----|-----|-------------------------------------------------|
| Locus_12380_Transcript_1/1_Conf_1.000 | 374 | 20 | 1.21E-39 | XP_002642385.1 | 83 | 166.007 | 126 | 105 | Hypothetical protein CBG18389                   |
| Locus_12381_Transcript_1/1_Conf_1.000 | 589 | 0  |          |                |    |         |     |     |                                                 |
| Locus_12382_Transcript_1/1_Conf_1.000 | 213 | 15 | 2.66E-15 | NP_001022735.1 | 73 | 85.1149 | 71  | 52  | hypothetical protein R155.1                     |
| Locus_12383_Transcript_1/1_Conf_1.000 | 650 | 0  |          |                |    |         |     |     |                                                 |
| Locus_12384_Transcript_1/1_Conf_1.000 | 694 | 20 | 1.83E-09 | XP_002642093.1 | 52 | 67.0106 | 174 | 91  | C. briggsae CBR-SMC-4 protein                   |
| Locus_12385_Transcript_1/1_Conf_1.000 | 304 | 0  |          |                |    |         |     |     |                                                 |
| Locus_12386_Transcript_1/1_Conf_1.000 | 625 | 20 | 1.56E-56 | NP_001023008.1 | 72 | 223.016 | 197 | 143 | CULLin family member (cul-2)                    |
| Locus_12387_Transcript_1/1_Conf_1.000 | 897 | 20 | 3.44E-74 | NP_495578.2    | 68 | 282.722 | 260 | 177 | hypothetical protein ZK1290.5                   |
| Locus_12388_Transcript_1/1_Conf_1.000 | 226 | 1  | 1.27E-12 | NP_499274.3    | 74 | 76.2554 | 67  | 50  | Connector/eNhancer of KSR family member (cnk-1) |
| Locus_12389_Transcript_1/1_Conf_1.000 | 474 | 14 | 7.46E-50 | EFO27980.1     | 79 | 199.904 | 158 | 125 | hypothetical protein LOAG_00505                 |
| Locus_1239_Transcript_1/1_Conf_1.000  | 159 | 0  |          |                |    |         |     |     |                                                 |
| Locus_12390_Transcript_1/1_Conf_1.000 | 329 | 0  |          |                |    |         |     |     |                                                 |
| Locus_12391_Transcript_1/1_Conf_1.000 | 363 | 20 | 6.35E-09 | XP_002176123.1 | 67 | 63.929  | 55  | 37  | chromo domain-containing protein                |

|                                       |      |    |          |                |     |         |     |     |                                                                     |
|---------------------------------------|------|----|----------|----------------|-----|---------|-----|-----|---------------------------------------------------------------------|
| Locus_12392_Transcript_1/1_Conf_1.000 | 353  | 20 | 9.25E-32 | NP_509229.1    | 75  | 139.813 | 114 | 86  | Suppressor of activated let-60 Ras family member (sur-5)            |
| Locus_12393_Transcript_1/1_Conf_1.000 | 138  | 16 | 2.11E-12 | XP_002631560.1 | 86  | 75.485  | 46  | 40  | Hypothetical protein CBG20736                                       |
| Locus_12394_Transcript_1/1_Conf_1.000 | 177  | 20 | 3.70E-25 | NP_501715.1    | 96  | 117.857 | 58  | 56  | Acetylcholine-gated Chloride Channel family member (acc-1)          |
| Locus_12395_Transcript_1/1_Conf_1.000 | 502  | 20 | 5.42E-64 | XP_001154691.1 | 99  | 246.899 | 125 | 124 | PREDICTED: hypothetical protein isoform 2                           |
| Locus_12396_Transcript_1/1_Conf_1.000 | 202  | 20 | 1.29E-25 | XP_002818734.1 | 100 | 119.398 | 58  | 58  | PREDICTED: chondroitin sulfate glucuronyltransferase-like isoform 2 |
| Locus_12397_Transcript_1/1_Conf_1.000 | 376  | 20 | 8.89E-59 | NP_492127.1    | 89  | 229.565 | 126 | 113 | Low-density lipoprotein Receptor Related family member (lrp-1)      |
| Locus_12398_Transcript_1/1_Conf_1.000 | 177  | 0  |          |                |     |         |     |     |                                                                     |
| Locus_12399_Transcript_1/1_Conf_1.000 | 229  | 0  |          |                |     |         |     |     |                                                                     |
| Locus_124_Transcript_1/1_Conf_1.000   | 237  | 0  |          |                |     |         |     |     |                                                                     |
| Locus_1240_Transcript_1/1_Conf_1.000  | 2279 | 20 | 1.82E-32 | XP_001901591.1 | 67  | 145.976 | 159 | 107 | WH1 domain containing protein                                       |
| Locus_12400_Transcript_1/1_Conf_1.000 | 980  | 20 | 1.81E-34 | NP_490916.4    | 47  | 150.984 | 381 | 182 | GTPase Activating Protein family member (gap-3)                     |
| Locus_12401_Transcript_1/1_Conf_1.000 | 1105 | 20 | 2.38E-97 | XP_001895783.1 | 73  | 360.147 | 342 | 252 | BTB/POZ domain containing protein 9                                 |

|                                       |      |    |          |                |    |         |     |     |                                                                    |
|---------------------------------------|------|----|----------|----------------|----|---------|-----|-----|--------------------------------------------------------------------|
| Locus_12402_Transcript_1/1_Conf_1.000 | 453  | 20 | 2.11E-36 | XP_002645055.1 | 67 | 155.221 | 152 | 102 | Hypothetical protein CBG16715                                      |
| Locus_12403_Transcript_1/1_Conf_1.000 | 224  | 0  |          |                |    |         |     |     |                                                                    |
| Locus_12404_Transcript_1/1_Conf_1.000 | 197  | 0  |          |                |    |         |     |     |                                                                    |
| Locus_12405_Transcript_1/1_Conf_1.000 | 352  | 20 | 3.63E-36 | NP_491357.1    | 88 | 154.451 | 93  | 82  | hypothetical protein ZK973.3                                       |
| Locus_12406_Transcript_1/2_Conf_1.000 | 635  | 20 | 1.69E-29 | XP_001902631.1 | 56 | 133.265 | 211 | 119 | ARID/BRIGHT DNA binding domain containing protein                  |
| Locus_12406_Transcript_2/2_Conf_1.000 | 292  | 20 | 3.66E-20 | EFO18078.1     | 83 | 101.293 | 59  | 49  | arid/bright DNA binding domain-containing protein                  |
| Locus_12407_Transcript_1/1_Conf_1.000 | 1137 | 20 | 2.25E-98 | XP_002643956.1 | 64 | 363.614 | 380 | 246 | Hypothetical protein CBG17315                                      |
| Locus_12408_Transcript_1/1_Conf_1.000 | 181  | 20 | 1.12E-24 | XP_002646598.1 | 94 | 116.316 | 59  | 56  | Hypothetical protein CBG20482                                      |
| Locus_12409_Transcript_1/1_Conf_1.000 | 1260 | 20 | 1.50E-21 | XP_001364696.1 | 52 | 108.612 | 266 | 140 | PREDICTED: similar to SCY1-like 3 (S. cerevisiae)                  |
| Locus_1241_Transcript_1/1_Conf_1.000  | 1559 | 5  | 6.60E-57 | NP_493282.1    | 74 | 226.483 | 179 | 134 | hypothetical protein W05B5.1                                       |
| Locus_12410_Transcript_1/1_Conf_1.000 | 306  | 0  |          |                |    |         |     |     |                                                                    |
| Locus_12411_Transcript_1/1_Conf_1.000 | 520  | 3  | 3.06E-07 | NP_491907.1    | 52 | 58.5362 | 88  | 46  | Protein Phosphatase Four Regulatory subunit family member (ppfr-2) |
| Locus_12412_Transcript_1/1_Conf_1.000 | 254  | 1  | 2.25E-09 | EFO23711.1     | 55 | 65.4698 | 84  | 47  | hypothetical protein LOAG_04772                                    |
| Locus_12413_Transcript_1/1_Conf_1.000 | 374  | 0  |          |                |    |         |     |     |                                                                    |
| Locus_12414_Transcript_1/1_Conf_1.000 | 714  | 20 | 4.38E-70 | XP_002645904.1 | 76 | 268.47  | 217 | 167 | C. briggsae CBR-MRP-5 protein                                      |
| Locus_12415_Transcript_1/1_Conf_1.000 | 164  | 0  |          |                |    |         |     |     |                                                                    |
| Locus_12416_Transcript_1/1_Conf_1.000 | 438  | 20 | 5.15E-27 | NP_492346.2    | 70 | 124.02  | 116 | 82  | hypothetical protein F39H2.3                                       |

|                                       |      |    |          |                |    |         |     |     |                                                |
|---------------------------------------|------|----|----------|----------------|----|---------|-----|-----|------------------------------------------------|
| Locus_12417_Transcript_1/1_Conf_1.000 | 585  | 20 | 4.04E-61 | EFO19790.1     | 74 | 238.039 | 197 | 147 | exostosin-1                                    |
| Locus_12418_Transcript_1/1_Conf_1.000 | 686  | 5  | 6.46E-44 | NP_001023038.1 | 74 | 181.415 | 156 | 116 | EXCretory canal abnormal family member (exc-5) |
| Locus_12419_Transcript_1/1_Conf_1.000 | 222  | 2  | 4.38E-05 | CAR63563.1     | 80 | 51.2174 | 35  | 28  | hypothetical protein                           |
| Locus_1242_Transcript_1/1_Conf_1.000  | 2496 | 20 | 0        | NP_491559.1    | 88 | 840.877 | 572 | 509 | Ezrin/Radixin/Moesin family member (erm-1)     |
| Locus_12420_Transcript_1/1_Conf_1.000 | 713  | 20 | 9.99E-67 | NP_001041123.2 | 68 | 257.299 | 238 | 163 | hypothetical protein F55A11.6                  |
| Locus_12421_Transcript_1/1_Conf_1.000 | 139  | 0  |          |                |    |         |     |     |                                                |
| Locus_12422_Transcript_1/1_Conf_1.000 | 851  | 20 | 2.50E-55 | XP_002629711.1 | 72 | 219.935 | 220 | 159 | C. briggsae CBR-RHY-1 protein                  |
| Locus_12423_Transcript_1/2_Conf_1.000 | 729  | 20 | 1.03E-53 | XP_002636561.1 | 64 | 214.157 | 214 | 139 | Hypothetical protein CBG23253                  |
| Locus_12423_Transcript_2/2_Conf_1.000 | 526  | 20 | 2.69E-30 | XP_002636561.1 | 61 | 135.191 | 147 | 91  | Hypothetical protein CBG23253                  |
| Locus_12424_Transcript_1/1_Conf_1.000 | 692  | 0  |          |                |    |         |     |     |                                                |
| Locus_12425_Transcript_1/1_Conf_1.000 | 235  | 0  |          |                |    |         |     |     |                                                |

|                                       |      |    |           |                |    |         |     |     |                                                                         |
|---------------------------------------|------|----|-----------|----------------|----|---------|-----|-----|-------------------------------------------------------------------------|
| Locus_12426_Transcript_1/1_Conf_1.000 | 488  | 20 | 1.13E-53  | NP_497733.1    | 87 | 212.616 | 131 | 115 | Protein Tyrosine Phosphatase family member (ptp-1)                      |
| Locus_12427_Transcript_1/2_Conf_1.000 | 470  | 2  | 2.07E-07  | XP_001892427.1 | 70 | 58.9214 | 55  | 39  | hypothetical protein Bm1_04745                                          |
| Locus_12427_Transcript_2/2_Conf_1.000 | 632  | 2  | 6.80E-07  | EFO16594.1     | 72 | 58.151  | 51  | 37  | hypothetical protein LOAG_11910                                         |
| Locus_12428_Transcript_1/1_Conf_1.000 | 237  | 0  |           |                |    |         |     |     |                                                                         |
| Locus_12429_Transcript_1/1_Conf_1.000 | 1179 | 20 | 3.74E-120 | ACI49192.1     | 74 | 436.032 | 393 | 292 | hypothetical protein Csp3_JD03.001                                      |
| Locus_1243_Transcript_1/1_Conf_1.000  | 353  | 20 | 9.92E-18  | BAE87571.1     | 60 | 93.2041 | 110 | 66  | unnamed protein product                                                 |
| Locus_12430_Transcript_1/1_Conf_1.000 | 224  | 5  | 3.22E-24  | NP_001022641.1 | 82 | 114.775 | 75  | 62  | LEThal family member (let-805)                                          |
| Locus_12431_Transcript_1/1_Conf_1.000 | 291  | 0  |           |                |    |         |     |     |                                                                         |
| Locus_12432_Transcript_1/1_Conf_1.000 | 342  | 20 | 1.65E-36  | EFO24987.1     | 84 | 155.606 | 108 | 91  | hypothetical protein LOAG_03502                                         |
| Locus_12433_Transcript_1/1_Conf_1.000 | 289  | 4  | 3.33E-13  | XP_002638865.1 | 72 | 78.1814 | 65  | 47  | Hypothetical protein CBG22082                                           |
| Locus_12434_Transcript_1/1_Conf_1.000 | 263  | 0  |           |                |    |         |     |     |                                                                         |
| Locus_12435_Transcript_1/1_Conf_1.000 | 145  | 0  |           |                |    |         |     |     |                                                                         |
| Locus_12436_Transcript_1/1_Conf_1.000 | 380  | 19 | 5.42E-24  | NP_494788.2    | 69 | 114.005 | 133 | 93  | related to yeast Vacuolar Protein Sorting factor family member (vps-18) |
| Locus_12437_Transcript_1/1_Conf_1.000 | 476  | 0  |           |                |    |         |     |     |                                                                         |
| Locus_12438_Transcript_1/1_Conf_1.000 | 139  | 0  |           |                |    |         |     |     |                                                                         |
| Locus_12439_Transcript_1/1_Conf_1.000 | 716  | 20 | 7.45E-78  | AAN11402.1     | 75 | 294.278 | 235 | 178 | secreted-protein 1 precursor                                            |
| Locus_1244_Transcript_1/1_Conf_1.000  | 2806 | 20 | 1.07E-53  | NP_741023.2    | 47 | 216.853 | 768 | 361 | Nuclear Pore complex Protein family member (npp-21)                     |
| Locus_12440_Transcript_1/1_Conf_1.000 | 485  | 0  |           |                |    |         |     |     |                                                                         |
| Locus_12441_Transcript_1/1_Conf_1.000 | 243  | 0  |           |                |    |         |     |     |                                                                         |
| Locus_12442_Transcript_1/1_Conf_1.000 | 467  | 4  | 4.96E-09  | EFO27500.1     | 50 | 64.3142 | 144 | 72  | hypothetical protein LOAG_00978                                         |

|                                       |      |    |           |                |    |         |     |     |                                                                |
|---------------------------------------|------|----|-----------|----------------|----|---------|-----|-----|----------------------------------------------------------------|
| Locus_12443_Transcript_1/1_Conf_1.000 | 477  | 20 | 1.36E-43  | NP_501913.1    | 76 | 179.104 | 151 | 115 | hypothetical protein R11A8.5                                   |
| Locus_12444_Transcript_1/1_Conf_1.000 | 1002 | 20 | 2.97E-72  | XP_002634026.1 | 83 | 276.559 | 187 | 156 | C. briggsae CBR-PCT-1 protein                                  |
| Locus_12445_Transcript_1/1_Conf_1.000 | 308  | 2  | 2.18E-25  | XP_002631591.1 | 82 | 118.627 | 92  | 76  | C. briggsae CBR-DRR-1 protein                                  |
| Locus_12446_Transcript_1/1_Conf_1.000 | 895  | 6  | 6.11E-31  | NP_001122672.1 | 58 | 139.043 | 202 | 119 | Regulator of G protein Signaling family member (rgs-5)         |
| Locus_12447_Transcript_1/1_Conf_1.000 | 280  | 0  |           |                |    |         |     |     |                                                                |
| Locus_12448_Transcript_1/1_Conf_1.000 | 1022 | 20 | 1.89E-122 | NP_503577.1    | 81 | 443.351 | 320 | 261 | hypothetical protein F22F7.1                                   |
| Locus_12449_Transcript_1/1_Conf_1.000 | 497  | 16 | 2.84E-33  | XP_002832705.1 | 96 | 144.821 | 89  | 86  | PREDICTED: hypothetical protein LOC100439353, partial          |
| Locus_1245_Transcript_1/3_Conf_0.818  | 3794 | 20 | 1.53E-90  | NP_741537.1    | 53 | 339.732 | 653 | 348 | human MLK (Mixed Lineage Kinase) homolog family member (mlk-1) |
| Locus_1245_Transcript_2/3_Conf_0.818  | 3818 | 20 | 1.54E-90  | NP_741537.1    | 53 | 339.732 | 653 | 348 | human MLK (Mixed Lineage Kinase) homolog family member (mlk-1) |
| Locus_1245_Transcript_3/3_Conf_0.455  | 640  | 0  |           |                |    |         |     |     |                                                                |
| Locus_12450_Transcript_1/1_Conf_1.000 | 505  | 2  | 1.94E-08  | XP_002643645.1 | 78 | 62.3882 | 51  | 40  | Hypothetical protein CBG16393                                  |

|                                       |      |    |          |                |    |         |     |     |                                                  |
|---------------------------------------|------|----|----------|----------------|----|---------|-----|-----|--------------------------------------------------|
| Locus_12451_Transcript_1/1_Conf_1.000 | 280  | 0  |          |                |    |         |     |     |                                                  |
| Locus_12452_Transcript_1/1_Conf_1.000 | 670  | 0  |          |                |    |         |     |     |                                                  |
| Locus_12453_Transcript_1/3_Conf_0.714 | 1973 | 20 | 3.64E-26 | XP_001900501.1 | 51 | 124.79  | 291 | 150 | hypothetical protein Bm1_45195                   |
| Locus_12453_Transcript_2/3_Conf_0.714 | 1973 | 20 | 3.64E-26 | XP_001900501.1 | 51 | 124.79  | 291 | 150 | hypothetical protein Bm1_45195                   |
| Locus_12453_Transcript_3/3_Conf_0.714 | 1973 | 20 | 3.64E-26 | XP_001900501.1 | 51 | 124.79  | 291 | 150 | hypothetical protein Bm1_45195                   |
| Locus_12454_Transcript_1/2_Conf_1.000 | 526  | 0  |          |                |    |         |     |     |                                                  |
| Locus_12454_Transcript_2/2_Conf_1.000 | 532  | 0  |          |                |    |         |     |     |                                                  |
| Locus_12455_Transcript_1/1_Conf_1.000 | 729  | 4  | 1.08E-10 | XP_001894822.1 | 51 | 71.2478 | 176 | 91  | SNF2 family N-terminal domain containing protein |
| Locus_12456_Transcript_1/1_Conf_1.000 | 386  | 20 | 1.66E-49 | XP_002643641.1 | 89 | 198.749 | 128 | 115 | C. briggsae CBR-IFA-3 protein                    |

|                                       |      |    |           |                |    |         |     |     |                                                                              |
|---------------------------------------|------|----|-----------|----------------|----|---------|-----|-----|------------------------------------------------------------------------------|
| Locus_12457_Transcript_1/1_Conf_1.000 | 380  | 0  |           |                |    |         |     |     |                                                                              |
| Locus_12458_Transcript_1/1_Conf_1.000 | 132  | 0  |           |                |    |         |     |     |                                                                              |
| Locus_12459_Transcript_1/1_Conf_1.000 | 145  | 0  |           |                |    |         |     |     |                                                                              |
| Locus_1246_Transcript_1/2_Conf_1.000  | 920  | 1  | 1.54E-08  | XP_002643611.1 | 48 | 64.6994 | 170 | 82  | C. briggsae CBR-AIN-1 protein                                                |
| Locus_1246_Transcript_2/2_Conf_1.000  | 842  | 1  | 2.25E-08  | XP_002643611.1 | 44 | 63.929  | 165 | 74  | C. briggsae CBR-AIN-1 protein                                                |
| Locus_12460_Transcript_1/1_Conf_1.000 | 262  | 19 | 3.43E-10  | XP_002633069.1 | 87 | 68.1662 | 40  | 35  | C. briggsae CBR-TIN-9.1 protein                                              |
| Locus_12461_Transcript_1/1_Conf_1.000 | 355  | 0  |           |                |    |         |     |     |                                                                              |
| Locus_12462_Transcript_1/1_Conf_1.000 | 665  | 20 | 1.47E-58  | NP_492769.1    | 69 | 229.95  | 213 | 149 | RTEL (mammalian Regulator of TELomere length) homolog family member (rtel-1) |
| Locus_12463_Transcript_1/1_Conf_1.000 | 274  | 0  |           |                |    |         |     |     |                                                                              |
| Locus_12464_Transcript_1/1_Conf_1.000 | 130  | 20 | 1.93E-05  | XP_002576412.1 | 76 | 52.373  | 43  | 33  | tyrosine kinase                                                              |
| Locus_12465_Transcript_1/1_Conf_1.000 | 621  | 0  |           |                |    |         |     |     |                                                                              |
| Locus_12466_Transcript_1/1_Conf_1.000 | 134  | 0  |           |                |    |         |     |     |                                                                              |
| Locus_12467_Transcript_1/1_Conf_1.000 | 279  | 0  |           |                |    |         |     |     |                                                                              |
| Locus_12468_Transcript_1/3_Conf_0.714 | 1279 | 20 | 2.22E-129 | NP_499995.2    | 83 | 466.848 | 369 | 309 | hypothetical protein Y55F3BL.2                                               |
| Locus_12468_Transcript_2/3_Conf_0.714 | 1279 | 20 | 2.22E-129 | NP_499995.2    | 83 | 466.848 | 369 | 309 | hypothetical protein Y55F3BL.2                                               |
| Locus_12468_Transcript_3/3_Conf_0.714 | 1279 | 20 | 2.22E-129 | NP_499995.2    | 83 | 466.848 | 369 | 309 | hypothetical protein Y55F3BL.2                                               |



|                                       |      |    |          |                |     |         |     |     |                                                |
|---------------------------------------|------|----|----------|----------------|-----|---------|-----|-----|------------------------------------------------|
| Locus_12469_Transcript_1/1_Conf_1.000 | 447  | 0  |          |                |     |         |     |     |                                                |
| Locus_1247_Transcript_1/2_Conf_1.000  | 429  | 20 | 3.58E-60 | ABJ97284.1     | 99  | 234.187 | 110 | 109 | major sperm protein                            |
| Locus_1247_Transcript_2/2_Conf_1.000  | 534  | 20 | 4.57E-57 | BAI81973.1     | 100 | 224.172 | 104 | 104 | major sperm protein 1                          |
| Locus_12470_Transcript_1/1_Conf_1.000 | 390  | 20 | 4.20E-45 | XP_002636522.1 | 86  | 184.111 | 115 | 99  | Hypothetical protein CBG23203                  |
| Locus_12471_Transcript_1/1_Conf_1.000 | 405  | 20 | 8.61E-30 | XP_002634543.1 | 70  | 133.265 | 134 | 94  | C. briggsae CBR-CED-5 protein                  |
| Locus_12472_Transcript_1/1_Conf_1.000 | 479  | 19 | 1.01E-22 | XP_002640716.1 | 59  | 109.768 | 152 | 90  | Hypothetical protein CBG19783                  |
| Locus_12473_Transcript_1/1_Conf_1.000 | 875  | 20 | 8.77E-51 | XP_001902022.1 | 64  | 204.912 | 293 | 188 | hypothetical protein Bm1_52770                 |
| Locus_12474_Transcript_1/1_Conf_1.000 | 131  | 20 | 1.57E-15 | XP_002742370.1 | 95  | 85.8853 | 43  | 41  | PREDICTED: urocanase domain containing 1-like  |
| Locus_12475_Transcript_1/1_Conf_1.000 | 540  | 20 | 2.80E-41 | XP_001896506.1 | 68  | 171.785 | 179 | 123 | Cullin family protein                          |
| Locus_12476_Transcript_1/1_Conf_1.000 | 212  | 20 | 5.55E-21 | XP_002927000.1 | 100 | 103.99  | 49  | 49  | PREDICTED: LOW QUALITY PROTEIN: lamin-A/C-like |
| Locus_12477_Transcript_1/1_Conf_1.000 | 152  | 0  |          |                |     |         |     |     |                                                |
| Locus_12478_Transcript_1/1_Conf_1.000 | 375  | 0  |          |                |     |         |     |     |                                                |
| Locus_12479_Transcript_1/1_Conf_1.000 | 1504 | 20 | 8.66E-14 | BAA36710.1     | 42  | 83.1889 | 375 | 161 | DEAD-Box Protein                               |

|                                       |      |    |           |                |    |         |     |     |                                                                                                                                                     |
|---------------------------------------|------|----|-----------|----------------|----|---------|-----|-----|-----------------------------------------------------------------------------------------------------------------------------------------------------|
| Locus_1248_Transcript_1/1_Conf_1.000  | 465  | 5  | 1.34E-22  | NP_497291.1    | 66 | 109.383 | 100 | 66  | hypothetical protein F23H11.5                                                                                                                       |
| Locus_12480_Transcript_1/1_Conf_1.000 | 859  | 0  |           |                |    |         |     |     |                                                                                                                                                     |
| Locus_12481_Transcript_1/1_Conf_1.000 | 877  | 20 | 1.91E-106 | XP_002640662.1 | 85 | 389.808 | 275 | 235 | Hypothetical protein CBG19722                                                                                                                       |
| Locus_12482_Transcript_1/1_Conf_1.000 | 179  | 0  |           |                |    |         |     |     |                                                                                                                                                     |
| Locus_12483_Transcript_1/1_Conf_1.000 | 422  | 0  |           |                |    |         |     |     |                                                                                                                                                     |
| Locus_12484_Transcript_1/1_Conf_1.000 | 1238 | 0  |           |                |    |         |     |     |                                                                                                                                                     |
| Locus_12485_Transcript_1/1_Conf_1.000 | 595  | 5  | 8.44E-22  | XP_002648817.1 | 60 | 107.457 | 123 | 74  | Hypothetical protein CBG15628                                                                                                                       |
| Locus_12486_Transcript_1/1_Conf_1.000 | 1033 | 10 | 1.31E-86  | NP_505475.2    | 88 | 324.324 | 218 | 192 | hypothetical protein K09G1.1                                                                                                                        |
| Locus_12487_Transcript_1/1_Conf_1.000 | 325  | 20 | 3.89E-22  | XP_001902301.1 | 84 | 107.842 | 73  | 62  | ubiquitin-like protein                                                                                                                              |
| Locus_12488_Transcript_1/1_Conf_1.000 | 577  | 20 | 2.09E-07  | XP_001122201.1 | 79 | 53.9138 | 43  | 34  | PREDICTED: similar to Lysine-specific histone demethylase 1 (Amine oxidase flavin-containing domain protein 2) (BRAF35-HDAC complex protein BHC110) |
| Locus_12489_Transcript_1/1_Conf_1.000 | 453  | 0  |           |                |    |         |     |     |                                                                                                                                                     |
| Locus_1249_Transcript_1/4_Conf_0.667  | 1470 | 20 | 0         | NP_001021985.1 | 93 | 720.694 | 409 | 384 | HElicase family member (hel-1)                                                                                                                      |

|                                      |      |    |           |                |    |         |     |     |                                |
|--------------------------------------|------|----|-----------|----------------|----|---------|-----|-----|--------------------------------|
| Locus_1249_Transcript_2/4_Conf_0.222 | 961  | 20 | 1.50E-110 | NP_001021986.1 | 91 | 403.675 | 230 | 210 | HELicase family member (hel-1) |
| Locus_1249_Transcript_3/4_Conf_0.667 | 1470 | 20 | 0         | NP_001021985.1 | 93 | 720.694 | 409 | 384 | HELicase family member (hel-1) |

|                                       |      |    |          |                |    |         |     |     |                                                           |
|---------------------------------------|------|----|----------|----------------|----|---------|-----|-----|-----------------------------------------------------------|
| Locus_1249_Transcript_4/4_Conf_0.667  | 1470 | 20 | 0        | NP_001021985.1 | 93 | 720.694 | 409 | 384 | HElicase family member (hel-1)                            |
| Locus_12490_Transcript_1/3_Conf_0.429 | 1555 | 20 | 1.44E-11 | EAX02636.1     | 44 | 75.8702 | 310 | 137 | glycosyltransferase 28 domain containing 1, isoform CRA_c |
| Locus_12490_Transcript_2/3_Conf_0.286 | 1364 | 20 | 1.21E-11 | BAH13833.1     | 44 | 75.8702 | 310 | 137 | unnamed protein product                                   |
| Locus_12490_Transcript_3/3_Conf_0.571 | 274  | 0  |          |                |    |         |     |     |                                                           |
| Locus_12491_Transcript_1/1_Conf_1.000 | 391  | 20 | 1.45E-37 | BAA08309.1     | 80 | 159.073 | 120 | 96  | ryanodine receptor                                        |
| Locus_12492_Transcript_1/1_Conf_1.000 | 606  | 0  |          |                |    |         |     |     |                                                           |
| Locus_12493_Transcript_1/1_Conf_1.000 | 278  | 5  | 8.25E-33 | XP_002637129.1 | 85 | 143.28  | 91  | 78  | Hypothetical protein CBG09631                             |
| Locus_12494_Transcript_1/1_Conf_1.000 | 352  | 20 | 1.48E-21 | XP_001898517.1 | 63 | 105.916 | 117 | 74  | DRIM protein                                              |

|                                       |      |    |           |                |    |         |     |     |                                                                                               |
|---------------------------------------|------|----|-----------|----------------|----|---------|-----|-----|-----------------------------------------------------------------------------------------------|
| Locus_12495_Transcript_1/1_Conf_1.000 | 349  | 17 | 1.18E-10  | NP_493130.2    | 51 | 69.707  | 133 | 68  | hypothetical protein T09E11.6                                                                 |
| Locus_12496_Transcript_1/2_Conf_1.000 | 237  | 20 | 2.51E-21  | EFO19548.1     | 75 | 105.145 | 78  | 59  | ubiquinone biosynthesis O-methyltransferase                                                   |
| Locus_12496_Transcript_2/2_Conf_1.000 | 243  | 20 | 8.02E-20  | EFO19548.1     | 73 | 100.138 | 80  | 59  | ubiquinone biosynthesis O-methyltransferase                                                   |
| Locus_12497_Transcript_1/1_Conf_1.000 | 706  | 15 | 3.19E-25  | NP_501506.1    | 65 | 119.398 | 135 | 88  | hypothetical protein F21D5.6                                                                  |
| Locus_12498_Transcript_1/1_Conf_1.000 | 301  | 20 | 3.17E-24  | NP_502574.1    | 70 | 114.775 | 99  | 70  | MAternally affected Uncoordination family member (mau-8)                                      |
| Locus_12499_Transcript_1/1_Conf_1.000 | 445  | 0  |           |                |    |         |     |     |                                                                                               |
| Locus_125_Transcript_1/2_Conf_1.000   | 970  | 20 | 4.14E-108 | AAC48257.3     | 90 | 395.586 | 252 | 228 | Pcna (proliferating cell nuclear antigen) homolog protein 1, confirmed by transcript evidence |
| Locus_125_Transcript_2/2_Conf_1.000   | 970  | 20 | 4.14E-108 | AAC48257.3     | 90 | 395.586 | 252 | 228 | Pcna (proliferating cell nuclear antigen) homolog protein 1, confirmed by transcript evidence |
| Locus_1250_Transcript_1/1_Conf_1.000  | 1214 | 2  | 4.04E-08  | XP_002640249.1 | 68 | 63.929  | 61  | 42  | C. briggsae CBR-PQN-20 protein                                                                |
| Locus_12500_Transcript_1/1_Conf_1.000 | 399  | 0  |           |                |    |         |     |     |                                                                                               |
| Locus_12501_Transcript_1/1_Conf_1.000 | 130  | 0  |           |                |    |         |     |     |                                                                                               |
| Locus_12502_Transcript_1/1_Conf_1.000 | 170  | 20 | 1.68E-25  | ACJ65168.1     | 98 | 119.013 | 56  | 55  | Uncoordinated protein 68, isoform b, partially confirmed by transcript evidence               |
| Locus_12503_Transcript_1/1_Conf_1.000 | 237  | 1  | 2.70E-07  | NP_491118.2    | 52 | 58.5362 | 78  | 41  | hypothetical protein Y54E10A.11                                                               |

|                                       |      |    |           |                |    |         |     |     |                                           |
|---------------------------------------|------|----|-----------|----------------|----|---------|-----|-----|-------------------------------------------|
| Locus_12504_Transcript_1/2_Conf_1.000 | 810  | 20 | 2.59E-67  | NP_491541.1    | 78 | 259.61  | 187 | 146 | hypothetical protein F56A3.2              |
| Locus_12504_Transcript_2/2_Conf_1.000 | 781  | 20 | 2.43E-67  | NP_491541.1    | 78 | 259.61  | 187 | 146 | hypothetical protein F56A3.2              |
| Locus_12505_Transcript_1/1_Conf_1.000 | 344  | 0  |           |                |    |         |     |     |                                           |
| Locus_12506_Transcript_1/1_Conf_1.000 | 175  | 0  |           |                |    |         |     |     |                                           |
| Locus_12507_Transcript_1/1_Conf_1.000 | 280  | 8  | 3.97E-11  | XP_001894571.1 | 70 | 71.2478 | 62  | 44  | UBX domain containing protein             |
| Locus_12508_Transcript_1/1_Conf_1.000 | 931  | 20 | 8.44E-87  | NP_497567.1    | 88 | 324.709 | 234 | 206 | hypothetical protein Y54F10AL.1           |
| Locus_12509_Transcript_1/1_Conf_1.000 | 232  | 0  |           |                |    |         |     |     |                                           |
| Locus_1251_Transcript_1/1_Conf_1.000  | 499  | 0  |           |                |    |         |     |     |                                           |
| Locus_12510_Transcript_1/1_Conf_1.000 | 564  | 0  |           |                |    |         |     |     |                                           |
| Locus_12511_Transcript_1/1_Conf_1.000 | 932  | 20 | 1.96E-59  | NP_491606.2    | 60 | 233.802 | 316 | 192 | hypothetical protein C09D4.4              |
| Locus_12512_Transcript_1/1_Conf_1.000 | 201  | 20 | 1.25E-20  | NP_499993.1    | 89 | 102.834 | 66  | 59  | Enoyl-CoA Hydratase family member (ech-5) |
| Locus_12513_Transcript_1/1_Conf_1.000 | 1304 | 20 | 2.20E-140 | NP_001040974.1 | 80 | 503.442 | 435 | 348 | hypothetical protein K09B11.9             |
| Locus_12514_Transcript_1/1_Conf_1.000 | 391  | 20 | 6.33E-09  | AAA97925.1     | 79 | 63.929  | 39  | 31  | hum-1                                     |
| Locus_12515_Transcript_1/1_Conf_1.000 | 1130 | 20 | 2.58E-46  | XP_001898245.1 | 57 | 190.66  | 379 | 217 | Protein kinase domain containing protein  |
| Locus_12516_Transcript_1/1_Conf_1.000 | 182  | 0  |           |                |    |         |     |     |                                           |
| Locus_12517_Transcript_1/1_Conf_1.000 | 130  | 0  |           |                |    |         |     |     |                                           |

|                                       |      |    |          |                |    |         |     |     |                                                     |
|---------------------------------------|------|----|----------|----------------|----|---------|-----|-----|-----------------------------------------------------|
| Locus_12518_Transcript_1/1_Conf_1.000 | 390  | 20 | 2.30E-51 | NP_001022641.1 | 86 | 204.912 | 130 | 112 | LEThal family member (let-805)                      |
| Locus_12519_Transcript_1/1_Conf_1.000 | 193  | 0  |          |                |    |         |     |     |                                                     |
| Locus_1252_Transcript_1/5_Conf_0.333  | 1413 | 1  | 4.36E-04 | XP_002639136.1 | 53 | 50.8322 | 128 | 68  | C. briggsae CBR-TAG-63 protein                      |
| Locus_1252_Transcript_2/5_Conf_0.222  | 385  | 0  |          |                |    |         |     |     |                                                     |
| Locus_1252_Transcript_3/5_Conf_0.222  | 1257 | 0  |          |                |    |         |     |     |                                                     |
| Locus_1252_Transcript_4/5_Conf_0.222  | 2044 | 20 | 0        | XP_002638874.1 | 84 | 843.958 | 571 | 483 | Hypothetical protein CBG22093                       |
| Locus_1252_Transcript_5/5_Conf_0.333  | 1566 | 20 | 2.03E-05 | XP_002813170.1 | 40 | 55.4546 | 230 | 92  | PREDICTED: hypothetical protein LOC100442257        |
| Locus_12520_Transcript_1/1_Conf_1.000 | 195  | 0  |          |                |    |         |     |     |                                                     |
| Locus_12521_Transcript_1/1_Conf_1.000 | 332  | 8  | 1.86E-08 | XP_002639634.1 | 62 | 62.3882 | 94  | 59  | C. briggsae CBR-CLE-1 protein                       |
| Locus_12522_Transcript_1/1_Conf_1.000 | 210  | 4  | 3.86E-06 | XP_001898470.1 | 55 | 54.6842 | 84  | 47  | hypothetical protein Bm1_35105                      |
| Locus_12523_Transcript_1/1_Conf_1.000 | 662  | 2  | 5.74E-31 | NP_505701.2    | 62 | 138.272 | 225 | 140 | hypothetical protein F25D1.2                        |
| Locus_12524_Transcript_1/2_Conf_1.000 | 442  | 1  | 1.50E-05 | YP_003009133.1 | 44 | 52.7582 | 92  | 41  | Collagen triple helix repeat protein                |
| Locus_12524_Transcript_2/2_Conf_1.000 | 365  | 1  | 4.71E-04 | YP_003009133.1 | 44 | 47.7506 | 86  | 38  | Collagen triple helix repeat protein                |
| Locus_12525_Transcript_1/1_Conf_1.000 | 171  | 0  |          |                |    |         |     |     |                                                     |
| Locus_12526_Transcript_1/1_Conf_1.000 | 129  | 0  |          |                |    |         |     |     |                                                     |
| Locus_12527_Transcript_1/1_Conf_1.000 | 282  | 4  | 3.59E-15 | XP_001895046.1 | 72 | 84.7297 | 70  | 51  | hypothetical protein                                |
| Locus_12528_Transcript_1/1_Conf_1.000 | 679  | 20 | 2.76E-31 | NP_492764.2    | 91 | 139.428 | 82  | 75  | UBiquitin Conjugating enzyme family member (ubc-25) |
| Locus_12529_Transcript_1/1_Conf_1.000 | 134  | 16 | 1.68E-09 | XP_001898554.1 | 75 | 65.855  | 45  | 34  | DOMON domain containing protein                     |
| Locus_1253_Transcript_1/2_Conf_1.000  | 487  | 0  |          |                |    |         |     |     |                                                     |
| Locus_1253_Transcript_2/2_Conf_1.000  | 487  | 1  | 1.49E-05 | XP_002738888.1 | 41 | 52.7582 | 128 | 53  | PREDICTED: selectin, platelet-like                  |
| Locus_12530_Transcript_1/1_Conf_1.000 | 367  | 0  |          |                |    |         |     |     |                                                     |
| Locus_12531_Transcript_1/1_Conf_1.000 | 280  | 2  | 3.15E-08 | XP_002630287.1 | 86 | 61.6178 | 44  | 38  | Hypothetical protein CBG00720                       |
| Locus_12532_Transcript_1/1_Conf_1.000 | 145  | 0  |          |                |    |         |     |     |                                                     |
| Locus_12533_Transcript_1/1_Conf_1.000 | 843  | 0  |          |                |    |         |     |     |                                                     |

|                                       |      |    |           |                |    |         |     |     |                                                                         |
|---------------------------------------|------|----|-----------|----------------|----|---------|-----|-----|-------------------------------------------------------------------------|
| Locus_12534_Transcript_1/1_Conf_1.000 | 733  | 20 | 1.57E-126 | XP_002647010.1 | 93 | 456.062 | 242 | 227 | C. briggsae CBR-COR-1 protein                                           |
| Locus_12535_Transcript_1/1_Conf_1.000 | 787  | 0  |           |                |    |         |     |     |                                                                         |
| Locus_12536_Transcript_1/1_Conf_1.000 | 1674 | 2  | 1.88E-04  | XP_002505186.1 | 38 | 52.373  | 236 | 90  | predicted protein                                                       |
| Locus_12537_Transcript_1/1_Conf_1.000 | 553  | 20 | 2.04E-05  | XP_790476.1    | 54 | 52.7582 | 130 | 71  | PREDICTED: hypothetical protein                                         |
| Locus_12538_Transcript_1/1_Conf_1.000 | 338  | 20 | 2.57E-18  | EFA09973.1     | 64 | 95.1301 | 110 | 71  | hypothetical protein TcasGA2_TCO12131                                   |
| Locus_12539_Transcript_1/1_Conf_1.000 | 438  | 8  | 1.11E-13  | CBA11608.1     | 57 | 79.7221 | 137 | 79  | C. elegans protein F45H7.2d, partially confirmed by transcript evidence |
| Locus_1254_Transcript_1/4_Conf_0.667  | 797  | 0  |           |                |    |         |     |     |                                                                         |
| Locus_1254_Transcript_2/4_Conf_0.444  | 271  | 0  |           |                |    |         |     |     |                                                                         |
| Locus_1254_Transcript_3/4_Conf_0.667  | 848  | 0  |           |                |    |         |     |     |                                                                         |
| Locus_1254_Transcript_4/4_Conf_0.667  | 788  | 0  |           |                |    |         |     |     |                                                                         |
| Locus_12540_Transcript_1/1_Conf_1.000 | 429  | 5  | 3.89E-06  | XP_002636697.1 | 47 | 54.6842 | 141 | 67  | Hypothetical protein CBG23415                                           |
| Locus_12541_Transcript_1/1_Conf_1.000 | 2523 | 14 | 2.06E-08  | XP_002666563.1 | 37 | 66.2402 | 325 | 121 | PREDICTED: wu:fo94f09                                                   |
| Locus_12542_Transcript_1/1_Conf_1.000 | 391  | 20 | 1.26E-41  | XP_002639098.1 | 78 | 172.555 | 129 | 101 | C. briggsae CBR-UNC-40 protein                                          |
| Locus_12543_Transcript_1/1_Conf_1.000 | 746  | 20 | 2.82E-62  | CBM41226.1     | 66 | 242.662 | 263 | 175 | C. elegans protein T21C9.2b, confirmed by transcript evidence           |
| Locus_12544_Transcript_1/1_Conf_1.000 | 574  | 4  | 1.37E-10  | XP_001900000.1 | 58 | 70.0922 | 92  | 54  | 60S ribosomal protein L44                                               |
| Locus_12545_Transcript_1/1_Conf_1.000 | 313  | 20 | 4.23E-16  | XP_002641332.1 | 61 | 87.8113 | 99  | 61  | Hypothetical protein CBG13180                                           |
| Locus_12546_Transcript_1/1_Conf_1.000 | 438  | 3  | 8.55E-06  | NP_001023785.1 | 45 | 53.5286 | 150 | 68  | hypothetical protein F11A3.2                                            |



|                                       |     |    |           |                |    |         |     |     |                                                                          |
|---------------------------------------|-----|----|-----------|----------------|----|---------|-----|-----|--------------------------------------------------------------------------|
| Locus_12547_Transcript_1/1_Conf_1.000 | 994 | 20 | 1.13E-116 | NP_494571.1    | 82 | 424.091 | 328 | 269 | AdaPtin, Delta chain (clathrin associated complex) family member (apd-3) |
| Locus_12548_Transcript_1/1_Conf_1.000 | 890 | 20 | 5.58E-69  | XP_002630482.1 | 65 | 265.388 | 306 | 200 | Hypothetical protein CBG11218                                            |
| Locus_12549_Transcript_1/1_Conf_1.000 | 225 | 3  | 2.64E-10  | POC656.2       | 62 | 68.5514 | 72  | 45  | Mediator of RNA polymerase II transcription subunit 12                   |
| Locus_1255_Transcript_1/1_Conf_1.000  | 612 | 20 | 3.71E-47  | XP_002642127.1 | 78 | 191.815 | 142 | 112 | C. briggsae CBR-RNP-4 protein                                            |
| Locus_12550_Transcript_1/1_Conf_1.000 | 709 | 20 | 3.10E-44  | NP_001021008.1 | 72 | 182.57  | 184 | 133 | PolyBRoMo domain containing family member (pbrm-1)                       |
| Locus_12551_Transcript_1/1_Conf_1.000 | 294 | 1  | 6.90E-11  | NP_001129840.1 | 69 | 70.4774 | 63  | 44  | hypothetical protein R08D7.4                                             |
| Locus_12552_Transcript_1/1_Conf_1.000 | 544 | 5  | 5.05E-30  | XP_002630594.1 | 63 | 134.42  | 195 | 123 | C. briggsae CBR-AKA-1 protein                                            |
| Locus_12553_Transcript_1/1_Conf_1.000 | 237 | 0  |           |                |    |         |     |     |                                                                          |

|                                       |      |    |           |                |     |         |     |     |                                                      |
|---------------------------------------|------|----|-----------|----------------|-----|---------|-----|-----|------------------------------------------------------|
| Locus_12554_Transcript_1/1_Conf_1.000 | 1477 | 20 | 8.09E-158 | XP_002641701.1 | 81  | 561.607 | 438 | 356 | C. briggsae CBR-TBG-1 protein                        |
| Locus_12555_Transcript_1/1_Conf_1.000 | 302  | 0  |           |                |     |         |     |     |                                                      |
| Locus_12556_Transcript_1/1_Conf_1.000 | 282  | 20 | 3.81E-41  | XP_002630326.1 | 96  | 171.014 | 93  | 90  | Hypothetical protein CBG04253                        |
| Locus_12557_Transcript_1/1_Conf_1.000 | 380  | 0  |           |                |     |         |     |     |                                                      |
| Locus_12558_Transcript_1/1_Conf_1.000 | 273  | 0  |           |                |     |         |     |     |                                                      |
| Locus_12559_Transcript_1/1_Conf_1.000 | 235  | 3  | 1.30E-09  | XP_002639005.1 | 60  | 66.2402 | 80  | 48  | Hypothetical protein CBG22251                        |
| Locus_1256_Transcript_1/1_Conf_1.000  | 1268 | 20 | 2.92E-57  | NP_503731.1    | 63  | 227.254 | 269 | 171 | hypothetical protein Y45G12B.2                       |
| Locus_12560_Transcript_1/1_Conf_1.000 | 594  | 0  |           |                |     |         |     |     |                                                      |
| Locus_12561_Transcript_1/1_Conf_1.000 | 531  | 20 | 1.49E-23  | EFO15643.1     | 89  | 112.849 | 68  | 61  | K+ channel tetramerisation domain-containing protein |
| Locus_12562_Transcript_1/1_Conf_1.000 | 312  | 0  |           |                |     |         |     |     |                                                      |
| Locus_12563_Transcript_1/1_Conf_1.000 | 295  | 20 | 4.15E-40  | XP_002834805.1 | 100 | 167.548 | 86  | 86  | PREDICTED: cytochrome c oxidase subunit 6C-like      |
| Locus_12564_Transcript_1/1_Conf_1.000 | 813  | 0  |           |                |     |         |     |     |                                                      |
| Locus_12565_Transcript_1/1_Conf_1.000 | 268  | 0  |           |                |     |         |     |     |                                                      |
| Locus_12566_Transcript_1/2_Conf_1.000 | 634  | 0  |           |                |     |         |     |     |                                                      |
| Locus_12566_Transcript_2/2_Conf_1.000 | 619  | 0  |           |                |     |         |     |     |                                                      |
| Locus_12567_Transcript_1/1_Conf_1.000 | 194  | 0  |           |                |     |         |     |     |                                                      |
| Locus_12568_Transcript_1/1_Conf_1.000 | 181  | 0  |           |                |     |         |     |     |                                                      |
| Locus_12569_Transcript_1/1_Conf_1.000 | 130  | 0  |           |                |     |         |     |     |                                                      |
| Locus_1257_Transcript_1/1_Conf_1.000  | 240  | 0  |           |                |     |         |     |     |                                                      |
| Locus_12570_Transcript_1/1_Conf_1.000 | 257  | 0  |           |                |     |         |     |     |                                                      |
| Locus_12571_Transcript_1/1_Conf_1.000 | 682  | 20 | 1.06E-22  | EFO19565.1     | 60  | 110.923 | 108 | 65  | hypothetical protein LOAG_08928                      |
| Locus_12572_Transcript_1/1_Conf_1.000 | 624  | 20 | 1.32E-55  | XP_002630212.1 | 89  | 219.935 | 129 | 115 | Hypothetical protein CBG00622                        |
| Locus_12573_Transcript_1/1_Conf_1.000 | 276  | 0  |           |                |     |         |     |     |                                                      |
| Locus_12574_Transcript_1/1_Conf_1.000 | 1074 | 20 | 3.50E-98  | NP_494995.1    | 72  | 362.844 | 362 | 261 | Guanylyl CYclase family member (gcy-12)              |

|                                       |      |    |          |                |    |         |     |     |                                                         |
|---------------------------------------|------|----|----------|----------------|----|---------|-----|-----|---------------------------------------------------------|
| Locus_12575_Transcript_1/1_Conf_1.000 | 984  | 20 | 5.53E-07 | XP_001581848.1 | 42 | 59.6918 | 339 | 143 | hypothetical protein                                    |
| Locus_12576_Transcript_1/1_Conf_1.000 | 164  | 0  |          |                |    |         |     |     |                                                         |
| Locus_12577_Transcript_1/1_Conf_1.000 | 351  | 20 | 6.66E-14 | EFO26156.1     | 65 | 80.4925 | 106 | 69  | hypothetical protein LOAG_02329                         |
| Locus_12578_Transcript_1/1_Conf_1.000 | 450  | 0  |          |                |    |         |     |     |                                                         |
| Locus_12579_Transcript_1/1_Conf_1.000 | 465  | 1  | 1.04E-43 | XP_001164327.1 | 95 | 129.798 | 86  | 82  | PREDICTED: prolyl 4-hydroxylase, beta subunit isoform 5 |
| Locus_1258_Transcript_1/1_Conf_1.000  | 1433 | 20 | 6.74E-61 | XP_001900112.1 | 58 | 239.58  | 355 | 208 | UV excision repair protein Rad23 containing protein     |
| Locus_12580_Transcript_1/2_Conf_1.000 | 1040 | 20 | 3.04E-51 | EFO25759.1     | 60 | 206.838 | 279 | 168 | hypothetical protein LOAG_02720                         |
| Locus_12580_Transcript_2/2_Conf_1.000 | 1040 | 20 | 3.04E-51 | EFO25759.1     | 60 | 206.838 | 279 | 168 | hypothetical protein LOAG_02720                         |
| Locus_12581_Transcript_1/1_Conf_1.000 | 358  | 5  | 2.43E-16 | XP_002632410.1 | 56 | 88.5817 | 121 | 68  | Hypothetical protein CBG00435                           |
| Locus_12582_Transcript_1/1_Conf_1.000 | 278  | 0  |          |                |    |         |     |     |                                                         |
| Locus_12583_Transcript_1/1_Conf_1.000 | 915  | 20 | 1.77E-73 | XP_001896686.1 | 68 | 280.411 | 310 | 211 | hypothetical protein                                    |
| Locus_12584_Transcript_1/1_Conf_1.000 | 526  | 0  |          |                |    |         |     |     |                                                         |
| Locus_12585_Transcript_1/1_Conf_1.000 | 296  | 2  | 2.71E-07 | XP_002639374.1 | 57 | 58.5362 | 76  | 44  | Hypothetical protein CBG03958                           |
| Locus_12586_Transcript_1/1_Conf_1.000 | 336  | 20 | 6.99E-24 | NP_496444.1    | 67 | 113.62  | 106 | 72  | Alanyl tRNA Synthetase family member (ars-1)            |

|                                       |      |    |           |                |    |         |     |     |                                      |
|---------------------------------------|------|----|-----------|----------------|----|---------|-----|-----|--------------------------------------|
| Locus_12587_Transcript_1/1_Conf_1.000 | 949  | 20 | 1.21E-112 | XP_002646059.1 | 92 | 410.609 | 239 | 221 | C. briggsae CBR-PMR-1 protein        |
| Locus_12588_Transcript_1/1_Conf_1.000 | 398  | 2  | 3.09E-35  | NP_500395.2    | 76 | 151.369 | 131 | 100 | hypothetical protein Y37E11AL.6      |
| Locus_12589_Transcript_1/1_Conf_1.000 | 131  | 0  |           |                |    |         |     |     |                                      |
| Locus_1259_Transcript_1/4_Conf_0.400  | 276  | 14 | 1.12E-05  | NP_001174125.1 | 40 | 53.1434 | 88  | 36  | Os04g0654400                         |
| Locus_1259_Transcript_2/4_Conf_0.500  | 399  | 20 | 1.14E-05  | BAJ05299.1     | 39 | 53.1434 | 138 | 54  | oocyte maturation arresting factor   |
| Locus_1259_Transcript_3/4_Conf_0.300  | 399  | 0  |           |                |    |         |     |     |                                      |
| Locus_1259_Transcript_4/4_Conf_0.600  | 522  | 6  | 4.23E-04  | ZP_06212340.1  | 46 | 48.1358 | 83  | 39  | UreE urease accessory domain protein |
| Locus_12590_Transcript_1/1_Conf_1.000 | 2848 | 20 | 0         | XP_001900373.1 | 71 | 875.159 | 832 | 597 | TPR Domain containing protein        |
| Locus_12591_Transcript_1/1_Conf_1.000 | 353  | 20 | 4.45E-26  | XP_002640398.1 | 60 | 120.939 | 120 | 73  | Hypothetical protein CBG08444        |
| Locus_12592_Transcript_1/1_Conf_1.000 | 223  | 20 | 1.27E-20  | XP_002637343.1 | 78 | 102.834 | 70  | 55  | Hypothetical protein CBG19039        |
| Locus_12593_Transcript_1/1_Conf_1.000 | 429  | 0  |           |                |    |         |     |     |                                      |
| Locus_12594_Transcript_1/1_Conf_1.000 | 290  | 0  |           |                |    |         |     |     |                                      |

|                                       |      |    |           |                |    |         |     |     |                                       |
|---------------------------------------|------|----|-----------|----------------|----|---------|-----|-----|---------------------------------------|
| Locus_12595_Transcript_1/1_Conf_1.000 | 283  | 0  |           |                |    |         |     |     |                                       |
| Locus_12596_Transcript_1/1_Conf_1.000 | 423  | 20 | 1.64E-28  | NP_497201.1    | 75 | 129.028 | 133 | 101 | hypothetical protein Y55B1BR.4        |
| Locus_12597_Transcript_1/1_Conf_1.000 | 1170 | 20 | 1.71E-125 | NP_491652.1    | 75 | 453.751 | 395 | 299 | hypothetical protein F55F8.2          |
| Locus_12598_Transcript_1/1_Conf_1.000 | 771  | 20 | 1.03E-78  | XP_001900477.1 | 79 | 297.36  | 240 | 190 | HMG box family protein                |
| Locus_12599_Transcript_1/1_Conf_1.000 | 220  | 0  |           |                |    |         |     |     |                                       |
| Locus_126_Transcript_1/1_Conf_1.000   | 2058 | 20 | 6.05E-80  | XP_001896711.1 | 65 | 303.523 | 317 | 209 | Dcp2, box A domain containing protein |
| Locus_1260_Transcript_1/1_Conf_1.000  | 1398 | 20 | 1.13E-129 | XP_002635578.1 | 86 | 468.003 | 301 | 260 | C. briggsae CBR-TAG-253 protein       |
| Locus_12600_Transcript_1/1_Conf_1.000 | 1892 | 20 | 6.35E-20  | XP_002647615.1 | 43 | 103.99  | 301 | 132 | C. briggsae CBR-MES-4 protein         |
| Locus_12601_Transcript_1/1_Conf_1.000 | 725  | 20 | 3.35E-57  | XP_002634017.1 | 71 | 225.713 | 225 | 161 | C. briggsae CBR-SPH-1 protein         |
| Locus_12602_Transcript_1/1_Conf_1.000 | 459  | 4  | 5.91E-15  | NP_490674.3    | 53 | 83.9593 | 156 | 84  | hypothetical protein Y48G1C.8         |
| Locus_12603_Transcript_1/1_Conf_1.000 | 623  | 20 | 2.45E-62  | XP_002639152.1 | 75 | 242.276 | 196 | 148 | Hypothetical protein CBG14979         |
| Locus_12604_Transcript_1/1_Conf_1.000 | 368  | 20 | 6.91E-48  | XP_002641646.1 | 84 | 193.356 | 123 | 104 | C. briggsae CBR-CBP-1 protein         |

|                                       |      |    |           |                |     |         |     |     |                                                         |
|---------------------------------------|------|----|-----------|----------------|-----|---------|-----|-----|---------------------------------------------------------|
| Locus_12605_Transcript_1/1_Conf_1.000 | 231  | 20 | 1.80E-35  | NP_510459.1    | 98  | 152.14  | 76  | 75  | EPsiN (endocytic protein) homolog family member (epn-1) |
| Locus_12606_Transcript_1/1_Conf_1.000 | 516  | 0  |           |                |     |         |     |     |                                                         |
| Locus_12607_Transcript_1/1_Conf_1.000 | 379  | 0  |           |                |     |         |     |     |                                                         |
| Locus_12608_Transcript_1/1_Conf_1.000 | 261  | 0  |           |                |     |         |     |     |                                                         |
| Locus_12609_Transcript_1/1_Conf_1.000 | 199  | 20 | 6.64E-22  | XP_002927828.1 | 100 | 107.071 | 50  | 50  | PREDICTED: 60S ribosomal protein L17-like               |
| Locus_1261_Transcript_1/3_Conf_0.625  | 360  | 20 | 1.24E-12  | AAD51334.1     | 72  | 76.2554 | 59  | 43  | Kunitz type serine protease inhibitor                   |
| Locus_1261_Transcript_2/3_Conf_0.250  | 1504 | 20 | 2.78E-137 | NP_506041.1    | 74  | 493.426 | 430 | 319 | hypothetical protein C13C4.5                            |
| Locus_1261_Transcript_3/3_Conf_0.625  | 1417 | 20 | 2.65E-118 | XP_001898133.1 | 77  | 430.254 | 354 | 274 | Innexin family protein                                  |
| Locus_12610_Transcript_1/1_Conf_1.000 | 481  | 0  |           |                |     |         |     |     |                                                         |
| Locus_12611_Transcript_1/1_Conf_1.000 | 411  | 20 | 6.33E-25  | XP_002636649.1 | 60  | 117.087 | 124 | 75  | Hypothetical protein CBG23360                           |
| Locus_12612_Transcript_1/1_Conf_1.000 | 764  | 0  |           |                |     |         |     |     |                                                         |
| Locus_12613_Transcript_1/1_Conf_1.000 | 652  | 20 | 1.09E-66  | NP_490879.2    | 75  | 256.914 | 203 | 154 | hypothetical protein Y71G12B.17                         |
| Locus_12614_Transcript_1/1_Conf_1.000 | 371  | 0  |           |                |     |         |     |     |                                                         |

|                                       |      |    |          |                |     |         |     |     |                                                   |
|---------------------------------------|------|----|----------|----------------|-----|---------|-----|-----|---------------------------------------------------|
| Locus_12615_Transcript_1/1_Conf_1.000 | 179  | 20 | 5.72E-18 | XP_002813487.1 | 100 | 93.9745 | 44  | 44  | PREDICTED: protein SEC13 homolog isoform 4        |
| Locus_12616_Transcript_1/1_Conf_1.000 | 474  | 20 | 1.08E-24 | XP_002630102.1 | 69  | 116.316 | 155 | 107 | Hypothetical protein CBG13485                     |
| Locus_12617_Transcript_1/2_Conf_1.000 | 566  | 20 | 3.28E-38 | EFO27624.1     | 69  | 161.77  | 129 | 90  | hypothetical protein LOAG_00857                   |
| Locus_12617_Transcript_2/2_Conf_1.000 | 795  | 20 | 7.18E-38 | EFO27624.1     | 69  | 161.77  | 129 | 90  | hypothetical protein LOAG_00857                   |
| Locus_12618_Transcript_1/2_Conf_1.000 | 546  | 0  |          |                |     |         |     |     |                                                   |
| Locus_12618_Transcript_2/2_Conf_1.000 | 254  | 0  |          |                |     |         |     |     |                                                   |
| Locus_12619_Transcript_1/1_Conf_1.000 | 421  | 0  |          |                |     |         |     |     |                                                   |
| Locus_1262_Transcript_1/1_Conf_1.000  | 1527 | 20 | 2.45E-72 | XP_002635160.1 | 64  | 277.715 | 391 | 252 | Hypothetical protein CBG11393                     |
| Locus_12620_Transcript_1/1_Conf_1.000 | 311  | 0  |          |                |     |         |     |     |                                                   |
| Locus_12621_Transcript_1/1_Conf_1.000 | 638  | 0  |          |                |     |         |     |     |                                                   |
| Locus_12622_Transcript_1/1_Conf_1.000 | 303  | 0  |          |                |     |         |     |     |                                                   |
| Locus_12623_Transcript_1/1_Conf_1.000 | 393  | 0  |          |                |     |         |     |     |                                                   |
| Locus_12624_Transcript_1/1_Conf_1.000 | 209  | 2  | 1.13E-05 | NP_495673.2    | 79  | 53.1434 | 69  | 55  | hypothetical protein DH11.4                       |
| Locus_12625_Transcript_1/1_Conf_1.000 | 401  | 0  |          |                |     |         |     |     |                                                   |
| Locus_12626_Transcript_1/2_Conf_0.500 | 1445 | 2  | 4.07E-05 | XP_002647016.1 | 38  | 54.299  | 338 | 129 | Hypothetical protein CBG24039                     |
| Locus_12626_Transcript_2/2_Conf_0.500 | 919  | 0  |          |                |     |         |     |     |                                                   |
| Locus_12627_Transcript_1/1_Conf_1.000 | 458  | 20 | 9.39E-45 | XP_001895623.1 | 83  | 182.956 | 120 | 100 | DNA-directed RNA polymerase II 33 kDa polypeptide |
| Locus_12628_Transcript_1/1_Conf_1.000 | 494  | 20 | 1.09E-08 | ZP_07656264.1  | 53  | 63.1586 | 136 | 73  | chromosome segregation protein SMC                |

|                                       |      |    |           |                |     |         |     |     |                                                      |
|---------------------------------------|------|----|-----------|----------------|-----|---------|-----|-----|------------------------------------------------------|
| Locus_12629_Transcript_1/1_Conf_1.000 | 870  | 2  | 7.21E-13  | XP_002639099.1 | 44  | 78.9518 | 295 | 132 | C. briggsae CBR-NPP-7 protein                        |
| Locus_1263_Transcript_1/1_Conf_1.000  | 979  | 0  |           |                |     |         |     |     |                                                      |
| Locus_12630_Transcript_1/1_Conf_1.000 | 615  | 0  |           |                |     |         |     |     |                                                      |
| Locus_12631_Transcript_1/1_Conf_1.000 | 314  | 3  | 6.77E-06  | XP_002642902.1 | 47  | 53.9138 | 117 | 55  | Hypothetical protein CBG15176                        |
| Locus_12632_Transcript_1/1_Conf_1.000 | 944  | 20 | 2.87E-90  | NP_493664.2    | 77  | 336.265 | 271 | 210 | hypothetical protein K10B4.3                         |
| Locus_12633_Transcript_1/1_Conf_1.000 | 1558 | 20 | 5.25E-155 | NP_495455.2    | 84  | 552.362 | 390 | 331 | 3-Ketoacyl-coA Thiolase family member (kat-1)        |
| Locus_12634_Transcript_1/1_Conf_1.000 | 273  | 20 | 2.10E-44  | XP_002749580.1 | 100 | 181.8   | 89  | 89  | PREDICTED: 60S ribosomal protein L10a-like isoform 1 |
| Locus_12635_Transcript_1/1_Conf_1.000 | 743  | 6  | 2.48E-18  | EFO22616.1     | 43  | 96.6709 | 341 | 147 | TK/ABL protein kinase                                |
| Locus_12636_Transcript_1/1_Conf_1.000 | 1284 | 20 | 1.85E-91  | XP_001895766.1 | 68  | 340.887 | 389 | 265 | double-strand break repair protein mre-11            |



|                                       |     |    |          |                |    |         |     |    |                                                                |
|---------------------------------------|-----|----|----------|----------------|----|---------|-----|----|----------------------------------------------------------------|
| Locus_12637_Transcript_1/1_Conf_1.000 | 912 | 20 | 9.17E-22 | CAX65090.1     | 55 | 108.612 | 177 | 98 | C. elegans protein Y56A3A.4b, confirmed by transcript evidence |
| Locus_12638_Transcript_1/3_Conf_0.600 | 546 | 20 | 1.35E-38 | XP_002643489.1 | 83 | 162.925 | 106 | 88 | C. briggsae CBR-APA-2 protein                                  |
| Locus_12638_Transcript_2/3_Conf_0.600 | 551 | 20 | 1.38E-38 | XP_002643489.1 | 83 | 162.925 | 106 | 88 | C. briggsae CBR-APA-2 protein                                  |

|                                       |      |    |           |                |    |         |     |     |                                                                       |
|---------------------------------------|------|----|-----------|----------------|----|---------|-----|-----|-----------------------------------------------------------------------|
| Locus_12638_Transcript_3/3_Conf_0.600 | 551  | 20 | 1.38E-38  | XP_002643489.1 | 83 | 162.925 | 106 | 88  | C. briggsae CBR-APA-2 protein                                         |
| Locus_12639_Transcript_1/1_Conf_1.000 | 813  | 0  |           |                |    |         |     |     |                                                                       |
| Locus_1264_Transcript_1/2_Conf_1.000  | 674  | 20 | 9.52E-53  | XP_002631659.1 | 90 | 210.69  | 116 | 105 | C. briggsae CBR-MEX-1 protein                                         |
| Locus_1264_Transcript_2/2_Conf_1.000  | 680  | 20 | 9.73E-53  | XP_002631659.1 | 90 | 210.69  | 116 | 105 | C. briggsae CBR-MEX-1 protein                                         |
| Locus_12640_Transcript_1/1_Conf_1.000 | 597  | 20 | 5.71E-42  | NP_001024929.1 | 69 | 174.481 | 191 | 132 | Choline Kinase C family member (ckc-1)                                |
| Locus_12641_Transcript_1/2_Conf_1.000 | 244  | 0  |           |                |    |         |     |     |                                                                       |
| Locus_12641_Transcript_2/2_Conf_1.000 | 244  | 0  |           |                |    |         |     |     |                                                                       |
| Locus_12642_Transcript_1/1_Conf_1.000 | 398  | 0  |           |                |    |         |     |     |                                                                       |
| Locus_12643_Transcript_1/1_Conf_1.000 | 1113 | 20 | 6.49E-127 | NP_001122812.1 | 79 | 458.373 | 359 | 287 | TBC (Tre-2/Bub2/Cdc16) domain family member (tbc-9)                   |
| Locus_12644_Transcript_1/1_Conf_1.000 | 227  | 0  |           |                |    |         |     |     |                                                                       |
| Locus_12645_Transcript_1/1_Conf_1.000 | 475  | 20 | 9.70E-66  | EFO26601.1     | 83 | 252.677 | 156 | 131 | CK1/WORM6 protein kinase                                              |
| Locus_12646_Transcript_1/1_Conf_1.000 | 283  | 0  |           |                |    |         |     |     |                                                                       |
| Locus_12647_Transcript_1/1_Conf_1.000 | 402  | 0  |           |                |    |         |     |     |                                                                       |
| Locus_12648_Transcript_1/1_Conf_1.000 | 1086 | 2  | 2.71E-13  | XP_001900007.1 | 42 | 80.8777 | 288 | 121 | hypothetical protein Bm1_42720                                        |
| Locus_12649_Transcript_1/1_Conf_1.000 | 186  | 0  |           |                |    |         |     |     |                                                                       |
| Locus_1265_Transcript_1/2_Conf_0.333  | 2359 | 20 | 3.74E-113 | XP_001898107.1 | 65 | 414.075 | 464 | 303 | PDZ-domain protein scribble                                           |
| Locus_1265_Transcript_2/2_Conf_0.667  | 1272 | 20 | 5.40E-144 | NP_491319.1    | 90 | 515.383 | 323 | 292 | proteasome Regulatory Particle, Non-ATPase-like family member (rpn-8) |

|                                       |      |    |           |                |    |         |     |     |                                                                         |
|---------------------------------------|------|----|-----------|----------------|----|---------|-----|-----|-------------------------------------------------------------------------|
| Locus_12650_Transcript_1/1_Conf_1.000 | 190  | 2  | 1.66E-04  | XP_002410801.1 | 56 | 49.2914 | 60  | 34  | factor for adipocyte differentiation, putative                          |
| Locus_12651_Transcript_1/1_Conf_1.000 | 344  | 20 | 2.23E-25  | NP_499570.1    | 87 | 118.627 | 79  | 69  | ARp2/3 complex component family member (arx-3)                          |
| Locus_12652_Transcript_1/1_Conf_1.000 | 438  | 0  |           |                |    |         |     |     |                                                                         |
| Locus_12653_Transcript_1/1_Conf_1.000 | 154  | 2  | 3.34E-05  | XP_002643365.1 | 64 | 51.6026 | 57  | 37  | C. briggsae CBR-PQN-34 protein                                          |
| Locus_12654_Transcript_1/2_Conf_1.000 | 1788 | 20 | 0         | NP_495749.1    | 80 | 681.404 | 552 | 447 | mammalian NucleoSTemin (stem cell marker) related family member (nst-1) |
| Locus_12654_Transcript_2/2_Conf_1.000 | 1788 | 20 | 0         | NP_495749.1    | 81 | 681.404 | 552 | 448 | mammalian NucleoSTemin (stem cell marker) related family member (nst-1) |
| Locus_12655_Transcript_1/1_Conf_1.000 | 366  | 20 | 3.01E-35  | NP_001129924.1 | 90 | 151.369 | 121 | 110 | SLOWpoke potassium channel family member (slo-2)                        |
| Locus_12656_Transcript_1/1_Conf_1.000 | 256  | 0  |           |                |    |         |     |     |                                                                         |
| Locus_12657_Transcript_1/1_Conf_1.000 | 265  | 0  |           |                |    |         |     |     |                                                                         |
| Locus_12658_Transcript_1/1_Conf_1.000 | 411  | 6  | 2.41E-16  | XP_001901424.1 | 72 | 88.5817 | 127 | 92  | tRNA modification GTPase TrmE family protein                            |
| Locus_12659_Transcript_1/1_Conf_1.000 | 510  | 0  |           |                |    |         |     |     |                                                                         |
| Locus_1266_Transcript_1/1_Conf_1.000  | 900  | 20 | 2.63E-106 | NP_001022302.1 | 92 | 389.423 | 259 | 239 | MethylMalonic Aciduria type A protein family member (mmaa-1)            |
| Locus_12660_Transcript_1/1_Conf_1.000 | 247  | 3  | 1.46E-05  | NP_491382.1    | 75 | 52.7582 | 48  | 36  | hypothetical protein Y119C1B.5                                          |
| Locus_12661_Transcript_1/1_Conf_1.000 | 507  | 0  |           |                |    |         |     |     |                                                                         |
| Locus_12662_Transcript_1/1_Conf_1.000 | 694  | 20 | 5.13E-28  | XP_001891849.1 | 58 | 128.642 | 173 | 102 | Retinoblastoma-associated protein A domain containing protein           |
| Locus_12663_Transcript_1/1_Conf_1.000 | 889  | 0  |           |                |    |         |     |     |                                                                         |
| Locus_12664_Transcript_1/1_Conf_1.000 | 133  | 0  |           |                |    |         |     |     |                                                                         |
| Locus_12665_Transcript_1/1_Conf_1.000 | 1434 | 20 | 1.51E-177 | NP_506191.1    | 81 | 627.091 | 433 | 351 | hypothetical protein F18E2.1                                            |
| Locus_12666_Transcript_1/1_Conf_1.000 | 235  | 0  |           |                |    |         |     |     |                                                                         |
| Locus_12667_Transcript_1/1_Conf_1.000 | 321  | 0  |           |                |    |         |     |     |                                                                         |

|                                       |      |    |          |                |    |         |     |     |                                |
|---------------------------------------|------|----|----------|----------------|----|---------|-----|-----|--------------------------------|
| Locus_12668_Transcript_1/1_Conf_1.000 | 375  | 0  |          |                |    |         |     |     |                                |
| Locus_12669_Transcript_1/1_Conf_1.000 | 340  | 0  |          |                |    |         |     |     |                                |
| Locus_1267_Transcript_1/2_Conf_1.000  | 2235 | 20 | 0        | XP_002640959.1 | 94 | 882.478 | 528 | 497 | C. briggsae CBR-HSP-60 protein |
| Locus_1267_Transcript_2/2_Conf_1.000  | 937  | 0  |          |                |    |         |     |     |                                |
| Locus_12670_Transcript_1/1_Conf_1.000 | 1490 | 0  |          |                |    |         |     |     |                                |
| Locus_12671_Transcript_1/3_Conf_0.600 | 849  | 20 | 3.13E-90 | NP_741744.2    | 78 | 335.88  | 274 | 214 | hypothetical protein C15C7.7   |
| Locus_12671_Transcript_2/3_Conf_0.600 | 773  | 20 | 2.07E-87 | NP_741744.2    | 79 | 326.25  | 250 | 199 | hypothetical protein C15C7.7   |

|                                       |      |    |          |                |    |         |     |     |                                                      |
|---------------------------------------|------|----|----------|----------------|----|---------|-----|-----|------------------------------------------------------|
| Locus_12671_Transcript_3/3_Conf_0.600 | 849  | 20 | 5.70E-92 | NP_741744.2    | 78 | 341.658 | 274 | 216 | hypothetical protein C15C7.7                         |
| Locus_12672_Transcript_1/1_Conf_1.000 | 394  | 0  |          |                |    |         |     |     |                                                      |
| Locus_12673_Transcript_1/1_Conf_1.000 | 233  | 18 | 7.37E-13 | NP_741861.2    | 83 | 77.0258 | 53  | 44  | Nuclear Hormone Receptor family member (nhr-14)      |
| Locus_12674_Transcript_1/1_Conf_1.000 | 701  | 13 | 5.22E-36 | ACV31115.1     | 81 | 155.221 | 126 | 103 | Hypothetical protein H06I04.6b                       |
| Locus_12675_Transcript_1/1_Conf_1.000 | 379  | 0  |          |                |    |         |     |     |                                                      |
| Locus_12676_Transcript_1/1_Conf_1.000 | 210  | 0  |          |                |    |         |     |     |                                                      |
| Locus_12677_Transcript_1/1_Conf_1.000 | 295  | 0  |          |                |    |         |     |     |                                                      |
| Locus_12678_Transcript_1/1_Conf_1.000 | 438  | 20 | 1.58E-68 | XP_002639744.1 | 83 | 261.922 | 142 | 118 | C. briggsae CBR-LAM-3 protein                        |
| Locus_12679_Transcript_1/1_Conf_1.000 | 1321 | 20 | 0        | NP_497570.1    | 86 | 693.345 | 416 | 359 | hypothetical protein Y54F10AM.8                      |
| Locus_1268_Transcript_1/1_Conf_1.000  | 164  | 19 | 4.45E-18 | XP_001894499.1 | 94 | 94.3597 | 51  | 48  | unc-45 protein                                       |
| Locus_12680_Transcript_1/1_Conf_1.000 | 241  | 3  | 1.86E-08 | NP_508175.1    | 94 | 62.3882 | 38  | 36  | Suppressor/Enhancer of Lin-12 family member (sel-12) |
| Locus_12681_Transcript_1/2_Conf_1.000 | 534  | 20 | 5.60E-47 | XP_002634543.1 | 74 | 190.66  | 169 | 126 | C. briggsae CBR-CED-5 protein                        |

|                                       |     |    |          |                |    |         |     |     |                                                                        |
|---------------------------------------|-----|----|----------|----------------|----|---------|-----|-----|------------------------------------------------------------------------|
| Locus_12681_Transcript_2/2_Conf_1.000 | 534 | 20 | 5.60E-47 | XP_002634543.1 | 74 | 190.66  | 169 | 126 | C. briggsae CBR-CED-5 protein                                          |
| Locus_12682_Transcript_1/1_Conf_1.000 | 386 | 4  | 6.16E-20 | EFO26621.1     | 53 | 100.523 | 151 | 81  | AIDA-1b                                                                |
| Locus_12683_Transcript_1/1_Conf_1.000 | 316 | 0  |          |                |    |         |     |     |                                                                        |
| Locus_12684_Transcript_1/1_Conf_1.000 | 137 | 12 | 4.27E-05 | XP_002609440.1 | 60 | 51.2174 | 43  | 26  | hypothetical protein BRAFLDRAFT_93487                                  |
| Locus_12685_Transcript_1/1_Conf_1.000 | 413 | 20 | 5.19E-19 | CAL53402.1     | 59 | 97.4413 | 108 | 64  | putative SMC protein (ISS)                                             |
| Locus_12686_Transcript_1/1_Conf_1.000 | 133 | 0  |          |                |    |         |     |     |                                                                        |
| Locus_12687_Transcript_1/1_Conf_1.000 | 207 | 0  |          |                |    |         |     |     |                                                                        |
| Locus_12688_Transcript_1/1_Conf_1.000 | 219 | 0  |          |                |    |         |     |     |                                                                        |
| Locus_12689_Transcript_1/1_Conf_1.000 | 175 | 0  |          |                |    |         |     |     |                                                                        |
| Locus_1269_Transcript_1/1_Conf_1.000  | 803 | 20 | 5.86E-96 | XP_002633299.1 | 83 | 354.755 | 240 | 200 | Hypothetical protein CBG06029                                          |
| Locus_12690_Transcript_1/1_Conf_1.000 | 250 | 0  |          |                |    |         |     |     |                                                                        |
| Locus_12691_Transcript_1/1_Conf_1.000 | 457 | 3  | 4.87E-09 | NP_498641.1    | 53 | 64.3142 | 89  | 48  | hypothetical protein H14A12.3                                          |
| Locus_12692_Transcript_1/3_Conf_0.714 | 953 | 20 | 2.99E-79 | NP_502288.1    | 80 | 299.671 | 211 | 170 | hypothetical protein K08E4.6                                           |
| Locus_12692_Transcript_2/3_Conf_0.714 | 953 | 20 | 6.03E-80 | NP_502288.1    | 81 | 301.982 | 211 | 171 | hypothetical protein K08E4.6                                           |
| Locus_12692_Transcript_3/3_Conf_0.714 | 953 | 20 | 6.03E-80 | NP_502288.1    | 81 | 301.982 | 211 | 171 | hypothetical protein K08E4.6                                           |
| Locus_12693_Transcript_1/1_Conf_1.000 | 546 | 4  | 2.00E-66 | NP_001033357.2 | 82 | 255.373 | 181 | 150 | DAF-16/FOXO Controlled, germline Tumor affecting family member (dct-6) |
| Locus_12694_Transcript_1/1_Conf_1.000 | 464 | 0  |          |                |    |         |     |     |                                                                        |
| Locus_12695_Transcript_1/1_Conf_1.000 | 242 | 0  |          |                |    |         |     |     |                                                                        |
| Locus_12696_Transcript_1/3_Conf_0.333 | 224 | 0  |          |                |    |         |     |     |                                                                        |

|                                       |      |    |           |                |    |         |     |     |                                                             |
|---------------------------------------|------|----|-----------|----------------|----|---------|-----|-----|-------------------------------------------------------------|
| Locus_12696_Transcript_2/3_Conf_0.667 | 751  | 0  |           |                |    |         |     |     |                                                             |
| Locus_12696_Transcript_3/3_Conf_0.500 | 566  | 0  |           |                |    |         |     |     |                                                             |
| Locus_12697_Transcript_1/1_Conf_1.000 | 224  | 2  | 9.73E-13  | XP_002632085.1 | 88 | 76.6406 | 42  | 37  | Hypothetical protein CBG17053                               |
| Locus_12698_Transcript_1/1_Conf_1.000 | 264  | 0  |           |                |    |         |     |     |                                                             |
| Locus_12699_Transcript_1/1_Conf_1.000 | 500  | 20 | 9.04E-56  | XP_002632430.1 | 81 | 219.55  | 166 | 136 | Hypothetical protein CBG00458                               |
| Locus_127_Transcript_1/4_Conf_0.250   | 497  | 20 | 2.80E-81  | DAA05878.1     | 98 | 304.294 | 151 | 148 | TPA_inf: eukaryotic translation elongation factor 1A        |
| Locus_127_Transcript_2/4_Conf_0.250   | 539  | 20 | 3.54E-81  | DAA05878.1     | 98 | 304.294 | 151 | 148 | TPA_inf: eukaryotic translation elongation factor 1A        |
| Locus_127_Transcript_3/4_Conf_0.450   | 1010 | 20 | 6.93E-178 | ABX79382.1     | 97 | 627.476 | 323 | 315 | elongation factor 1 alpha                                   |
| Locus_127_Transcript_4/4_Conf_0.450   | 1010 | 20 | 6.93E-178 | ABX79382.1     | 97 | 627.476 | 323 | 315 | elongation factor 1 alpha                                   |
| Locus_1270_Transcript_1/1_Conf_1.000  | 1122 | 20 | 5.19E-23  | NP_001023207.1 | 62 | 113.235 | 176 | 110 | MiniBrain Kinase (Drosophila) homolog family member (mbk-2) |
| Locus_12700_Transcript_1/1_Conf_1.000 | 396  | 0  |           |                |    |         |     |     |                                                             |

|                                       |     |    |          |                |    |         |     |     |                                                                         |
|---------------------------------------|-----|----|----------|----------------|----|---------|-----|-----|-------------------------------------------------------------------------|
| Locus_12701_Transcript_1/1_Conf_1.000 | 600 | 16 | 2.13E-36 | ACI49203.1     | 92 | 155.992 | 92  | 85  | hypothetical protein Csp3_JD04.002                                      |
| Locus_12702_Transcript_1/1_Conf_1.000 | 148 | 20 | 7.72E-18 | NP_508515.2    | 93 | 93.5893 | 48  | 45  | AQuaPorin or aquaglyceroporin related family member (aqp-7)             |
| Locus_12703_Transcript_1/1_Conf_1.000 | 408 | 3  | 2.35E-11 | NP_498613.2    | 53 | 72.0182 | 114 | 61  | hypothetical protein F56C9.8                                            |
| Locus_12704_Transcript_1/1_Conf_1.000 | 778 | 20 | 7.04E-59 | XP_002639543.1 | 75 | 231.491 | 244 | 185 | Hypothetical protein CBG04172                                           |
| Locus_12705_Transcript_1/1_Conf_1.000 | 389 | 0  |          |                |    |         |     |     |                                                                         |
| Locus_12706_Transcript_1/1_Conf_1.000 | 474 | 0  |          |                |    |         |     |     |                                                                         |
| Locus_12707_Transcript_1/1_Conf_1.000 | 285 | 0  |          |                |    |         |     |     |                                                                         |
| Locus_12708_Transcript_1/1_Conf_1.000 | 632 | 20 | 3.99E-07 | ABA06434.1     | 48 | 58.9214 | 129 | 63  | telomerase reverse transcriptase                                        |
| Locus_12709_Transcript_1/1_Conf_1.000 | 379 | 20 | 1.39E-11 | ACM79010.1     | 64 | 72.7886 | 67  | 43  | Kunitz protein 8                                                        |
| Locus_1271_Transcript_1/1_Conf_1.000  | 645 | 20 | 6.41E-80 | NP_001022987.1 | 89 | 300.827 | 183 | 164 | related to yeast Vacuolar Protein Sorting factor family member (vps-29) |



|                                       |      |    |           |                |    |         |     |     |                                                                   |
|---------------------------------------|------|----|-----------|----------------|----|---------|-----|-----|-------------------------------------------------------------------|
| Locus_12710_Transcript_1/1_Conf_1.000 | 230  | 20 | 8.14E-28  | AAY84711.2     | 86 | 126.716 | 74  | 64  | dual oxidase                                                      |
| Locus_12711_Transcript_1/1_Conf_1.000 | 1057 | 20 | 2.33E-22  | XP_001894604.1 | 50 | 110.923 | 240 | 121 | exonuclease family protein                                        |
| Locus_12712_Transcript_1/1_Conf_1.000 | 239  | 0  |           |                |    |         |     |     |                                                                   |
| Locus_12713_Transcript_1/1_Conf_1.000 | 232  | 2  | 2.45E-08  | NP_494772.1    | 71 | 62.003  | 66  | 47  | NOT-Like (yeast CCR4/NOT complex component) family member (ntl-2) |
| Locus_12714_Transcript_1/1_Conf_1.000 | 397  | 20 | 3.31E-29  | EFO19311.1     | 63 | 131.339 | 128 | 81  | hypothetical protein LOAG_09182                                   |
| Locus_12715_Transcript_1/1_Conf_1.000 | 203  | 11 | 1.34E-06  | ADI61824.1     | 59 | 56.225  | 67  | 40  | endonuclease-reverse transcriptase                                |
| Locus_12716_Transcript_1/1_Conf_1.000 | 1234 | 20 | 1.23E-177 | CAA06162.1     | 89 | 627.091 | 397 | 354 | CB-CYP-4                                                          |

|                                       |     |    |           |                |    |         |     |     |                                                                   |
|---------------------------------------|-----|----|-----------|----------------|----|---------|-----|-----|-------------------------------------------------------------------|
| Locus_12717_Transcript_1/1_Conf_1.000 | 397 | 20 | 2.09E-07  | XP_002630114.1 | 97 | 58.9214 | 34  | 33  | C. briggsae CBR-PYR-1 protein                                     |
| Locus_12718_Transcript_1/1_Conf_1.000 | 428 | 20 | 6.79E-51  | NP_504643.1    | 80 | 203.371 | 142 | 115 | ACyltransferase-like family member (acl-8)                        |
| Locus_12719_Transcript_1/1_Conf_1.000 | 158 | 0  |           |                |    |         |     |     |                                                                   |
| Locus_1272_Transcript_1/1_Conf_1.000  | 689 | 20 | 2.36E-102 | NP_498785.1    | 93 | 375.555 | 205 | 192 | yeast PRP (splicing factor) related family member (prp-8)         |
| Locus_12720_Transcript_1/1_Conf_1.000 | 294 | 0  |           |                |    |         |     |     |                                                                   |
| Locus_12721_Transcript_1/1_Conf_1.000 | 205 | 0  |           |                |    |         |     |     |                                                                   |
| Locus_12722_Transcript_1/1_Conf_1.000 | 353 | 0  |           |                |    |         |     |     |                                                                   |
| Locus_12723_Transcript_1/1_Conf_1.000 | 277 | 0  |           |                |    |         |     |     |                                                                   |
| Locus_12724_Transcript_1/1_Conf_1.000 | 158 | 0  |           |                |    |         |     |     |                                                                   |
| Locus_12725_Transcript_1/1_Conf_1.000 | 471 | 20 | 6.82E-27  | NP_505188.3    | 60 | 123.635 | 160 | 96  | PeroXidasiN (Drosophila peroxidase) homolog family member (pxn-1) |

|                                       |     |    |           |                |     |         |     |     |                                  |
|---------------------------------------|-----|----|-----------|----------------|-----|---------|-----|-----|----------------------------------|
| Locus_12726_Transcript_1/1_Conf_1.000 | 591 | 20 | 2.82E-62  | NP_001023646.1 | 80  | 241.891 | 196 | 158 | AKT kinase family member (akt-1) |
| Locus_12727_Transcript_1/1_Conf_1.000 | 882 | 20 | 3.52E-124 | BAG63399.1     | 100 | 448.743 | 222 | 222 | unnamed protein product          |
| Locus_12728_Transcript_1/1_Conf_1.000 | 945 | 20 | 2.81E-61  | EFA79727.1     | 64  | 239.965 | 266 | 171 | hypothetical protein PPL_07418   |
| Locus_12729_Transcript_1/1_Conf_1.000 | 170 | 0  |           |                |     |         |     |     |                                  |
| Locus_1273_Transcript_1/1_Conf_1.000  | 692 | 20 | 8.85E-65  | XP_002631500.1 | 81  | 250.751 | 200 | 162 | Hypothetical protein CBG20664    |
| Locus_12730_Transcript_1/1_Conf_1.000 | 380 | 1  | 2.07E-07  | NP_499670.1    | 75  | 58.9214 | 45  | 34  | hypothetical protein Y37D8A.4    |
| Locus_12731_Transcript_1/1_Conf_1.000 | 364 | 20 | 4.23E-29  | NP_507527.2    | 83  | 130.954 | 112 | 93  | hypothetical protein Y59A8B.8    |
| Locus_12732_Transcript_1/1_Conf_1.000 | 168 | 0  |           |                |     |         |     |     |                                  |
| Locus_12733_Transcript_1/1_Conf_1.000 | 917 | 1  | 3.19E-06  | XP_001900252.1 | 40  | 56.9954 | 333 | 134 | hypothetical protein Bm1_43950   |

|                                       |     |    |          |                |    |         |     |     |                                                                           |
|---------------------------------------|-----|----|----------|----------------|----|---------|-----|-----|---------------------------------------------------------------------------|
| Locus_12734_Transcript_1/1_Conf_1.000 | 608 | 20 | 7.02E-51 | NP_506230.1    | 84 | 204.142 | 157 | 132 | hypothetical protein F54F3.4                                              |
| Locus_12735_Transcript_1/1_Conf_1.000 | 133 | 0  |          |                |    |         |     |     |                                                                           |
| Locus_12736_Transcript_1/1_Conf_1.000 | 380 | 0  |          |                |    |         |     |     |                                                                           |
| Locus_12737_Transcript_1/1_Conf_1.000 | 361 | 0  |          |                |    |         |     |     |                                                                           |
| Locus_12738_Transcript_1/1_Conf_1.000 | 272 | 20 | 7.50E-42 | XP_002637342.1 | 97 | 173.326 | 90  | 88  | C. briggsae CBR-UNC-70 protein                                            |
| Locus_12739_Transcript_1/1_Conf_1.000 | 333 | 1  | 1.24E-12 | EFO14895.1     | 85 | 76.2554 | 49  | 42  | CMGC/CDK/CDK9 protein kinase                                              |
| Locus_1274_Transcript_1/1_Conf_1.000  | 520 | 20 | 1.19E-35 | XP_002634275.1 | 68 | 152.91  | 168 | 115 | Hypothetical protein CBG01851                                             |
| Locus_12740_Transcript_1/1_Conf_1.000 | 367 | 3  | 2.66E-07 | NP_001021652.1 | 46 | 58.5362 | 118 | 55  | FANCI (Fanconi anemia complex component I) homolog family member (fnci-1) |
| Locus_12741_Transcript_1/1_Conf_1.000 | 290 | 0  |          |                |    |         |     |     |                                                                           |
| Locus_12742_Transcript_1/2_Conf_1.000 | 808 | 20 | 3.94E-23 | XP_002640836.1 | 56 | 112.849 | 230 | 131 | Hypothetical protein CBG15724                                             |
| Locus_12742_Transcript_2/2_Conf_1.000 | 808 | 20 | 3.94E-23 | XP_002640836.1 | 56 | 112.849 | 230 | 131 | Hypothetical protein CBG15724                                             |
| Locus_12743_Transcript_1/1_Conf_1.000 | 671 | 20 | 3.45E-63 | XP_002639870.1 | 69 | 245.358 | 223 | 155 | C. briggsae CBR-IRS-2 protein                                             |
| Locus_12744_Transcript_1/1_Conf_1.000 | 537 | 20 | 6.55E-35 | XP_002633331.1 | 70 | 150.599 | 139 | 98  | Hypothetical protein CBG06070                                             |
| Locus_12745_Transcript_1/1_Conf_1.000 | 600 | 0  |          |                |    |         |     |     |                                                                           |

|                                       |     |    |          |                |    |         |     |     |                                                                          |
|---------------------------------------|-----|----|----------|----------------|----|---------|-----|-----|--------------------------------------------------------------------------|
| Locus_12746_Transcript_1/1_Conf_1.000 | 419 | 20 | 1.09E-72 | NP_001122711.1 | 94 | 275.789 | 136 | 129 | CBP/p300 homolog family member (cbp-1)                                   |
| Locus_12747_Transcript_1/1_Conf_1.000 | 446 | 4  | 3.65E-28 | XP_002634339.1 | 72 | 127.872 | 134 | 97  | C. briggsae CBR-RIC-3 protein                                            |
| Locus_12748_Transcript_1/1_Conf_1.000 | 133 | 0  |          |                |    |         |     |     |                                                                          |
| Locus_12749_Transcript_1/1_Conf_1.000 | 257 | 0  |          |                |    |         |     |     |                                                                          |
| Locus_1275_Transcript_1/2_Conf_1.000  | 212 | 6  | 1.16E-10 | NP_001023274.1 | 64 | 69.707  | 70  | 45  | VITellogenin structural genes (yolk protein genes) family member (vit-6) |
| Locus_1275_Transcript_2/2_Conf_1.000  | 205 | 6  | 3.40E-10 | NP_001023274.1 | 64 | 68.1662 | 68  | 44  | VITellogenin structural genes (yolk protein genes) family member (vit-6) |
| Locus_12750_Transcript_1/1_Conf_1.000 | 178 | 0  |          |                |    |         |     |     |                                                                          |
| Locus_12751_Transcript_1/1_Conf_1.000 | 271 | 7  | 1.25E-12 | CAD44516.1     | 65 | 76.2554 | 89  | 58  | VAB-10B protein                                                          |
| Locus_12752_Transcript_1/1_Conf_1.000 | 924 | 20 | 3.21E-46 | XP_002636564.1 | 80 | 189.889 | 149 | 120 | Hypothetical protein CBG23256                                            |
| Locus_12753_Transcript_1/1_Conf_1.000 | 237 | 0  |          |                |    |         |     |     |                                                                          |
| Locus_12754_Transcript_1/1_Conf_1.000 | 601 | 20 | 1.06E-35 | NP_496466.1    | 79 | 153.68  | 116 | 92  | hypothetical protein F54D5.11                                            |
| Locus_12755_Transcript_1/1_Conf_1.000 | 264 | 20 | 2.29E-14 | NP_502268.1    | 64 | 82.0333 | 82  | 53  | TRNA Guanine Transglycosylase family member (tgt-1)                      |
| Locus_12756_Transcript_1/2_Conf_1.000 | 695 | 4  | 3.31E-35 | XP_002639709.1 | 62 | 152.525 | 202 | 127 | Hypothetical protein CBG12430                                            |
| Locus_12756_Transcript_2/2_Conf_1.000 | 695 | 4  | 2.54E-35 | XP_002639709.1 | 63 | 152.91  | 202 | 128 | Hypothetical protein CBG12430                                            |

|                                       |     |    |          |                |     |         |     |     |                                   |
|---------------------------------------|-----|----|----------|----------------|-----|---------|-----|-----|-----------------------------------|
| Locus_12757_Transcript_1/1_Conf_1.000 | 219 | 3  | 3.70E-20 | CAR63585.1     | 91  | 101.293 | 72  | 66  | putative MAD-Like family member   |
| Locus_12758_Transcript_1/1_Conf_1.000 | 433 | 20 | 1.50E-42 | NP_499178.1    | 87  | 175.637 | 132 | 115 | ARF-Like family member (arl-5)    |
| Locus_12759_Transcript_1/1_Conf_1.000 | 417 | 20 | 1.54E-42 | XP_001896370.1 | 80  | 175.637 | 138 | 111 | hypothetical protein              |
| Locus_1276_Transcript_1/1_Conf_1.000  | 221 | 4  | 2.74E-15 | XP_002631558.1 | 75  | 85.1149 | 73  | 55  | Hypothetical protein CBG20734     |
| Locus_12760_Transcript_1/1_Conf_1.000 | 271 | 1  | 1.68E-17 | EAW48404.1     | 100 | 92.4337 | 42  | 42  | hCG2030753                        |
| Locus_12761_Transcript_1/1_Conf_1.000 | 304 | 20 | 1.42E-16 | EFO22213.1     | 72  | 89.3521 | 101 | 73  | arginine-tRNA-protein transferase |
| Locus_12762_Transcript_1/1_Conf_1.000 | 663 | 20 | 4.47E-15 | XP_001897733.1 | 48  | 85.5001 | 219 | 107 | hypothetical protein Bm1_31440    |
| Locus_12763_Transcript_1/1_Conf_1.000 | 235 | 7  | 8.70E-06 | XP_002631981.1 | 75  | 53.5286 | 37  | 28  | Hypothetical protein CBG10259     |
| Locus_12764_Transcript_1/1_Conf_1.000 | 246 | 1  | 4.71E-04 | NP_505419.3    | 69  | 47.7506 | 42  | 29  | hypothetical protein K07B1.7      |

|                                       |      |    |          |                |    |         |     |     |                                                                                   |
|---------------------------------------|------|----|----------|----------------|----|---------|-----|-----|-----------------------------------------------------------------------------------|
| Locus_12765_Transcript_1/1_Conf_1.000 | 676  | 20 | 4.44E-74 | AAL06642.1     | 80 | 281.567 | 201 | 162 | serine-threonine protein kinase                                                   |
| Locus_12766_Transcript_1/1_Conf_1.000 | 452  | 0  |          |                |    |         |     |     |                                                                                   |
| Locus_12767_Transcript_1/1_Conf_1.000 | 158  | 9  | 5.29E-19 | XP_002488965.1 | 91 | 97.4413 | 46  | 42  | hypothetical protein<br>SORBIDRAFT_1138s002030                                    |
| Locus_12768_Transcript_1/1_Conf_1.000 | 215  | 16 | 1.97E-10 | NP_493125.2    | 66 | 68.9366 | 63  | 42  | hypothetical protein T09E11.9                                                     |
| Locus_12769_Transcript_1/1_Conf_1.000 | 387  | 0  |          |                |    |         |     |     |                                                                                   |
| Locus_1277_Transcript_1/1_Conf_1.000  | 519  | 20 | 1.15E-46 | XP_002633893.1 | 77 | 189.504 | 132 | 102 | C. briggsae CBR-ELO-5 protein                                                     |
| Locus_12770_Transcript_1/1_Conf_1.000 | 748  | 20 | 2.09E-97 | NP_001021052.1 | 88 | 359.377 | 218 | 192 | UDP-GALactose 4-Epimerase family<br>member (gale-1)                               |
| Locus_12771_Transcript_1/1_Conf_1.000 | 259  | 0  |          |                |    |         |     |     |                                                                                   |
| Locus_12772_Transcript_1/1_Conf_1.000 | 198  | 0  |          |                |    |         |     |     |                                                                                   |
| Locus_12773_Transcript_1/1_Conf_1.000 | 477  | 20 | 3.92E-67 | EFO21314.1     | 87 | 257.299 | 159 | 139 | male sterility protein                                                            |
| Locus_12774_Transcript_1/1_Conf_1.000 | 1144 | 20 | 3.39E-70 | XP_002639112.1 | 57 | 270.011 | 411 | 236 | Hypothetical protein CBG14931                                                     |
| Locus_12775_Transcript_1/1_Conf_1.000 | 282  | 20 | 7.24E-08 | XP_002630318.1 | 71 | 60.4622 | 69  | 49  | Hypothetical protein CBG04241                                                     |
| Locus_12776_Transcript_1/2_Conf_1.000 | 523  | 0  |          |                |    |         |     |     |                                                                                   |
| Locus_12776_Transcript_2/2_Conf_1.000 | 450  | 0  |          |                |    |         |     |     |                                                                                   |
| Locus_12777_Transcript_1/1_Conf_1.000 | 177  | 20 | 1.85E-08 | ZP_04173150.1  | 60 | 62.3882 | 56  | 34  | LPXTG-motif cell wall anchor domain<br>protein                                    |
| Locus_12778_Transcript_1/1_Conf_1.000 | 502  | 1  | 8.24E-04 | XP_002123338.1 | 56 | 46.9802 | 79  | 45  | PREDICTED: similar to phosphatidylinositol<br>glycan anchor biosynthesis, class G |
| Locus_12779_Transcript_1/1_Conf_1.000 | 264  | 3  | 9.65E-05 | AAD37914.1     | 51 | 50.0618 | 102 | 53  | R151.8B protein                                                                   |
| Locus_1278_Transcript_1/1_Conf_1.000  | 707  | 20 | 2.78E-37 | XP_001898151.1 | 70 | 159.458 | 140 | 98  | Conserved hypothetical protein                                                    |
| Locus_12780_Transcript_1/1_Conf_1.000 | 306  | 20 | 2.25E-22 | NP_001022063.1 | 72 | 108.612 | 101 | 73  | Acyl CoA DeHydrogenase family member<br>(acdh-12)                                 |
| Locus_12781_Transcript_1/1_Conf_1.000 | 397  | 20 | 1.63E-60 | XP_002634622.1 | 93 | 235.343 | 132 | 123 | Hypothetical protein CBG18478                                                     |
| Locus_12782_Transcript_1/1_Conf_1.000 | 138  | 3  | 4.69E-12 | CBA10134.1     | 82 | 74.3294 | 47  | 39  | DAF-16A transcription factor                                                      |

|                                       |      |    |           |                |    |         |     |     |                                                          |
|---------------------------------------|------|----|-----------|----------------|----|---------|-----|-----|----------------------------------------------------------|
| Locus_12783_Transcript_1/1_Conf_1.000 | 740  | 6  | 5.80E-44  | NP_001032983.1 | 57 | 181.8   | 277 | 160 | hypothetical protein W05F2.4                             |
| Locus_12784_Transcript_1/1_Conf_1.000 | 386  | 0  |           |                |    |         |     |     |                                                          |
| Locus_12785_Transcript_1/1_Conf_1.000 | 219  | 0  |           |                |    |         |     |     |                                                          |
| Locus_12786_Transcript_1/1_Conf_1.000 | 535  | 0  |           |                |    |         |     |     |                                                          |
| Locus_12787_Transcript_1/1_Conf_1.000 | 206  | 0  |           |                |    |         |     |     |                                                          |
| Locus_12788_Transcript_1/2_Conf_1.000 | 3164 | 20 | 1.68E-103 | NP_500284.2    | 55 | 382.489 | 732 | 409 | Enhancer of Efl-1 mutant phenotype family member (eel-1) |
| Locus_12788_Transcript_2/2_Conf_1.000 | 3164 | 20 | 1.68E-103 | NP_500284.2    | 55 | 382.489 | 732 | 409 | Enhancer of Efl-1 mutant phenotype family member (eel-1) |
| Locus_12789_Transcript_1/1_Conf_1.000 | 1004 | 20 | 1.09E-82  | NP_500551.2    | 75 | 311.227 | 305 | 229 | hypothetical protein F55F10.1                            |
| Locus_1279_Transcript_1/1_Conf_1.000  | 970  | 20 | 4.07E-55  | XP_002637784.1 | 59 | 219.55  | 326 | 194 | C. briggsae CBR-RFC-1 protein                            |
| Locus_12790_Transcript_1/1_Conf_1.000 | 150  | 0  |           |                |    |         |     |     |                                                          |
| Locus_12791_Transcript_1/2_Conf_1.000 | 754  | 20 | 1.10E-13  | XP_002646295.1 | 47 | 81.2629 | 165 | 79  | Hypothetical protein CBG12001                            |
| Locus_12791_Transcript_2/2_Conf_1.000 | 742  | 20 | 7.46E-15  | XP_002646295.1 | 52 | 85.1149 | 175 | 91  | Hypothetical protein CBG12001                            |
| Locus_12792_Transcript_1/1_Conf_1.000 | 494  | 4  | 2.13E-12  | NP_502353.1    | 67 | 75.485  | 84  | 57  | hypothetical protein ZC518.1                             |
| Locus_12793_Transcript_1/1_Conf_1.000 | 378  | 20 | 2.97E-30  | XP_002631828.1 | 78 | 134.806 | 100 | 78  | Hypothetical protein CBG17763                            |
| Locus_12794_Transcript_1/1_Conf_1.000 | 314  | 0  |           |                |    |         |     |     |                                                          |
| Locus_12795_Transcript_1/1_Conf_1.000 | 405  | 0  |           |                |    |         |     |     |                                                          |
| Locus_12796_Transcript_1/1_Conf_1.000 | 635  | 1  | 4.04E-07  | EFO17551.1     | 67 | 58.9214 | 71  | 48  | hypothetical protein LOAG_10948                          |
| Locus_12797_Transcript_1/1_Conf_1.000 | 710  | 20 | 9.01E-44  | AAD00842.1     | 66 | 181.03  | 195 | 130 | OvB8                                                     |



|                                       |      |    |          |                |    |         |     |     |                                                        |
|---------------------------------------|------|----|----------|----------------|----|---------|-----|-----|--------------------------------------------------------|
| Locus_12798_Transcript_1/1_Conf_1.000 | 917  | 4  | 1.46E-51 | NP_510523.1    | 66 | 207.608 | 245 | 162 | hypothetical protein T10B10.3                          |
| Locus_12799_Transcript_1/1_Conf_1.000 | 357  | 20 | 3.73E-25 | XP_002630560.1 | 71 | 117.857 | 115 | 82  | C. briggsae CBR-NPP-21 protein                         |
| Locus_128_Transcript_1/1_Conf_1.000   | 148  | 0  |          |                |    |         |     |     |                                                        |
| Locus_1280_Transcript_1/1_Conf_1.000  | 519  | 20 | 2.25E-42 | EFO20386.1     | 65 | 175.252 | 157 | 103 | hypothetical protein LOAG_08104                        |
| Locus_12800_Transcript_1/1_Conf_1.000 | 373  | 0  |          |                |    |         |     |     |                                                        |
| Locus_12801_Transcript_1/1_Conf_1.000 | 790  | 15 | 7.81E-37 | NP_506593.2    | 57 | 158.303 | 240 | 139 | hypothetical protein R02D5.3                           |
| Locus_12802_Transcript_1/1_Conf_1.000 | 296  | 20 | 1.48E-29 | EFO21682.1     | 75 | 132.494 | 95  | 72  | hypothetical protein LOAG_06805                        |
| Locus_12803_Transcript_1/1_Conf_1.000 | 265  | 0  |          |                |    |         |     |     |                                                        |
| Locus_12804_Transcript_1/1_Conf_1.000 | 128  | 0  |          |                |    |         |     |     |                                                        |
| Locus_12805_Transcript_1/1_Conf_1.000 | 184  | 0  |          |                |    |         |     |     |                                                        |
| Locus_12806_Transcript_1/2_Conf_0.667 | 1081 | 20 | 2.19E-31 | XP_002600898.1 | 59 | 140.969 | 191 | 113 | hypothetical protein BRAFLDRAFT_215136                 |
| Locus_12806_Transcript_2/2_Conf_0.833 | 1482 | 20 | 3.43E-31 | XP_002600898.1 | 59 | 140.969 | 191 | 113 | hypothetical protein BRAFLDRAFT_215136                 |
| Locus_12807_Transcript_1/1_Conf_1.000 | 229  | 20 | 6.25E-20 | XP_002645118.1 | 80 | 100.523 | 75  | 60  | Hypothetical protein CBG16811                          |
| Locus_12808_Transcript_1/1_Conf_1.000 | 556  | 20 | 1.38E-41 | XP_002632423.1 | 55 | 172.94  | 205 | 114 | C. briggsae CBR-SNF-9 protein                          |
| Locus_12809_Transcript_1/1_Conf_1.000 | 958  | 20 | 1.46E-65 | NP_498963.1    | 61 | 254.218 | 322 | 197 | Temporarily Assigned Gene name family member (tag-256) |
| Locus_1281_Transcript_1/1_Conf_1.000  | 342  | 20 | 9.65E-37 | XP_002633235.1 | 79 | 156.377 | 116 | 92  | Hypothetical protein CBG05956                          |
| Locus_12810_Transcript_1/1_Conf_1.000 | 444  | 0  |          |                |    |         |     |     |                                                        |
| Locus_12811_Transcript_1/1_Conf_1.000 | 247  | 10 | 3.14E-16 | XP_001892618.1 | 74 | 88.1965 | 79  | 59  | Acyltransferase family protein                         |

|                                       |      |    |           |                |    |         |     |     |                                                                                                                      |
|---------------------------------------|------|----|-----------|----------------|----|---------|-----|-----|----------------------------------------------------------------------------------------------------------------------|
| Locus_12812_Transcript_1/1_Conf_1.000 | 357  | 19 | 3.49E-31  | NP_496395.1    | 75 | 137.887 | 95  | 72  | Lln-26 Related family member (lir-3)                                                                                 |
| Locus_12813_Transcript_1/2_Conf_1.000 | 321  | 0  |           |                |    |         |     |     |                                                                                                                      |
| Locus_12813_Transcript_2/2_Conf_1.000 | 793  | 20 | 3.54E-29  | XP_001902329.1 | 54 | 132.88  | 250 | 136 | TPR Domain containing protein                                                                                        |
| Locus_12814_Transcript_1/1_Conf_1.000 | 402  | 0  |           |                |    |         |     |     |                                                                                                                      |
| Locus_12815_Transcript_1/1_Conf_1.000 | 524  | 20 | 1.38E-71  | XP_002638567.1 | 87 | 272.322 | 174 | 152 | Hypothetical protein CBG05609                                                                                        |
| Locus_12816_Transcript_1/1_Conf_1.000 | 484  | 20 | 1.02E-78  | XP_002640630.1 | 95 | 295.819 | 161 | 154 | C. briggsae CBR-APG-1 protein                                                                                        |
| Locus_12817_Transcript_1/1_Conf_1.000 | 553  | 20 | 1.59E-66  | EFO24958.1     | 83 | 255.758 | 183 | 153 | hypothetical protein LOAG_03524                                                                                      |
| Locus_12818_Transcript_1/1_Conf_1.000 | 386  | 0  |           |                |    |         |     |     |                                                                                                                      |
| Locus_12819_Transcript_1/3_Conf_0.667 | 1139 | 20 | 6.73E-119 | ADE60689.1     | 80 | 431.795 | 309 | 250 | Larp (rna binding la related protein)<br>homolog protein 1, isoform a, partially<br>confirmed by transcript evidence |
| Locus_12819_Transcript_2/3_Conf_0.333 | 438  | 20 | 2.70E-68  | ADE60689.1     | 90 | 261.151 | 146 | 132 | Larp (rna binding la related protein)<br>homolog protein 1, isoform a, partially<br>confirmed by transcript evidence |
| Locus_12819_Transcript_3/3_Conf_0.667 | 1322 | 20 | 1.37E-129 | ADE60688.1     | 77 | 467.618 | 373 | 289 | Larp (rna binding la related protein)<br>homolog protein 1, isoform b, partially<br>confirmed by transcript evidence |
| Locus_1282_Transcript_1/1_Conf_1.000  | 501  | 20 | 2.70E-47  | NP_492215.1    | 77 | 191.43  | 167 | 129 | hypothetical protein K04G2.6                                                                                         |
| Locus_12820_Transcript_1/1_Conf_1.000 | 134  | 0  |           |                |    |         |     |     |                                                                                                                      |
| Locus_12821_Transcript_1/1_Conf_1.000 | 232  | 20 | 7.37E-13  | NP_497336.3    | 79 | 77.0258 | 74  | 59  | hypothetical protein Y71D11A.3                                                                                       |
| Locus_12822_Transcript_1/1_Conf_1.000 | 571  | 20 | 1.13E-25  | NP_741242.1    | 72 | 120.168 | 100 | 72  | Dipeptidyl Peptidase Four (IV) family<br>member (dpf-6)                                                              |
| Locus_12823_Transcript_1/1_Conf_1.000 | 401  | 20 | 1.43E-40  | NP_505591.1    | 78 | 169.088 | 133 | 104 | hypothetical protein R04B5.5                                                                                         |
| Locus_12824_Transcript_1/1_Conf_1.000 | 155  | 0  |           |                |    |         |     |     |                                                                                                                      |

|                                       |      |    |          |                |    |         |     |     |                                  |
|---------------------------------------|------|----|----------|----------------|----|---------|-----|-----|----------------------------------|
| Locus_12825_Transcript_1/1_Conf_1.000 | 333  | 20 | 1.67E-33 | AAB23867.2     | 79 | 145.591 | 110 | 87  | UNC-5                            |
| Locus_12826_Transcript_1/1_Conf_1.000 | 876  | 0  |          |                |    |         |     |     |                                  |
| Locus_12827_Transcript_1/1_Conf_1.000 | 297  | 0  |          |                |    |         |     |     |                                  |
| Locus_12828_Transcript_1/1_Conf_1.000 | 134  | 20 | 6.59E-14 | YP_003434088.1 | 93 | 80.4925 | 44  | 41  | cytochrome c oxidase subunit III |
| Locus_12829_Transcript_1/1_Conf_1.000 | 537  | 20 | 7.24E-34 | XP_002633416.1 | 67 | 147.132 | 178 | 120 | Hypothetical protein CBG06181    |
| Locus_1283_Transcript_1/1_Conf_1.000  | 1057 | 20 | 3.46E-50 | XP_002633732.1 | 55 | 203.371 | 372 | 206 | Hypothetical protein CBG03417    |
| Locus_12830_Transcript_1/1_Conf_1.000 | 258  | 7  | 7.42E-13 | CAA10033.1     | 71 | 77.0258 | 78  | 56  | DYS-1 protein                    |
| Locus_12831_Transcript_1/1_Conf_1.000 | 249  | 0  |          |                |    |         |     |     |                                  |
| Locus_12832_Transcript_1/1_Conf_1.000 | 584  | 20 | 1.07E-82 | XP_002639182.1 | 93 | 309.686 | 184 | 172 | C. briggsae CBR-TAG-316 protein  |
| Locus_12833_Transcript_1/1_Conf_1.000 | 317  | 0  |          |                |    |         |     |     |                                  |
| Locus_12834_Transcript_1/1_Conf_1.000 | 157  | 3  | 6.25E-20 | CAR63690.1     | 92 | 100.523 | 52  | 48  | putative Sna protein             |
| Locus_12835_Transcript_1/1_Conf_1.000 | 282  | 4  | 1.61E-07 | EFO25881.1     | 56 | 59.3066 | 96  | 54  | SPRY domain-containing protein   |
| Locus_12836_Transcript_1/2_Conf_1.000 | 760  | 20 | 2.91E-54 | XP_002634768.1 | 74 | 216.083 | 243 | 182 | C. briggsae CBR-HLH-30 protein   |

|                                       |      |    |           |                |    |         |     |     |                                               |
|---------------------------------------|------|----|-----------|----------------|----|---------|-----|-----|-----------------------------------------------|
| Locus_12836_Transcript_2/2_Conf_1.000 | 751  | 20 | 6.84E-56  | XP_002634768.1 | 75 | 221.476 | 240 | 182 | C. briggsae CBR-HLH-30 protein                |
| Locus_12837_Transcript_1/1_Conf_1.000 | 159  | 0  |           |                |    |         |     |     |                                               |
| Locus_12838_Transcript_1/1_Conf_1.000 | 568  | 3  | 8.56E-10  | NP_001023556.1 | 88 | 67.3958 | 42  | 37  | Membrane Calcium ATPase family member (mca-3) |
| Locus_12839_Transcript_1/1_Conf_1.000 | 153  | 0  |           |                |    |         |     |     |                                               |
| Locus_1284_Transcript_1/2_Conf_1.000  | 1061 | 7  | 1.51E-37  | NP_492729.1    | 54 | 161.384 | 231 | 126 | hypothetical protein Y106G6H.4                |
| Locus_1284_Transcript_2/2_Conf_1.000  | 920  | 7  | 1.38E-41  | NP_492729.1    | 65 | 174.481 | 184 | 121 | hypothetical protein Y106G6H.4                |
| Locus_12840_Transcript_1/1_Conf_1.000 | 495  | 20 | 1.78E-35  | AAC78238.2     | 89 | 152.14  | 102 | 91  | Guanylyl cyclase protein 28, isoform d        |
| Locus_12841_Transcript_1/1_Conf_1.000 | 1362 | 20 | 3.25E-174 | NP_501303.1    | 83 | 615.92  | 416 | 347 | hypothetical protein C06A6.5                  |
| Locus_12842_Transcript_1/1_Conf_1.000 | 152  | 0  |           |                |    |         |     |     |                                               |
| Locus_12843_Transcript_1/1_Conf_1.000 | 360  | 4  | 1.28E-17  | XP_002639414.1 | 79 | 92.8189 | 73  | 58  | C. briggsae CBR-EIF-3.H protein               |
| Locus_12844_Transcript_1/1_Conf_1.000 | 1312 | 20 | 1.77E-129 | XP_002633684.1 | 70 | 467.233 | 455 | 319 | C. briggsae CBR-EEL-1 protein                 |

|                                       |      |    |           |                |     |         |     |     |                                          |
|---------------------------------------|------|----|-----------|----------------|-----|---------|-----|-----|------------------------------------------|
| Locus_12845_Transcript_1/1_Conf_1.000 | 845  | 20 | 6.15E-123 | XP_002635231.1 | 88  | 444.506 | 280 | 248 | Hypothetical protein CBG11474            |
| Locus_12846_Transcript_1/1_Conf_1.000 | 333  | 20 | 6.51E-54  | NP_001138309.1 | 100 | 213.386 | 110 | 110 | keratin, type I cytoskeletal 17          |
| Locus_12847_Transcript_1/1_Conf_1.000 | 134  | 2  | 7.30E-05  | XP_002645884.1 | 69  | 50.447  | 43  | 30  | Hypothetical protein CBG07632            |
| Locus_12848_Transcript_1/1_Conf_1.000 | 269  | 0  |           |                |     |         |     |     |                                          |
| Locus_12849_Transcript_1/1_Conf_1.000 | 154  | 0  |           |                |     |         |     |     |                                          |
| Locus_1285_Transcript_1/1_Conf_1.000  | 2370 | 20 | 0         | XP_002638699.1 | 93  | 1173.3  | 690 | 642 | Hypothetical protein CBG11896            |
| Locus_12850_Transcript_1/1_Conf_1.000 | 407  | 20 | 5.04E-38  | EFO20415.1     | 69  | 160.614 | 142 | 99  | hyaluronidase                            |
| Locus_12851_Transcript_1/2_Conf_1.000 | 475  | 20 | 4.25E-29  | P34578.3       | 66  | 130.954 | 149 | 99  | Rap guanine nucleotide exchange factor 1 |
| Locus_12851_Transcript_2/2_Conf_1.000 | 881  | 20 | 4.51E-47  | P34578.3       | 56  | 192.586 | 308 | 173 | Rap guanine nucleotide exchange factor 1 |
| Locus_12852_Transcript_1/1_Conf_1.000 | 133  | 0  |           |                |     |         |     |     |                                          |
| Locus_12853_Transcript_1/1_Conf_1.000 | 246  | 0  |           |                |     |         |     |     |                                          |

|                                       |      |    |           |                |    |         |     |     |                                         |
|---------------------------------------|------|----|-----------|----------------|----|---------|-----|-----|-----------------------------------------|
| Locus_12854_Transcript_1/1_Conf_1.000 | 228  | 2  | 3.93E-06  | NP_490772.2    | 62 | 54.6842 | 74  | 46  | hypothetical protein Y18H1A.3           |
| Locus_12855_Transcript_1/1_Conf_1.000 | 687  | 2  | 5.04E-12  | EFO22475.1     | 55 | 75.485  | 135 | 75  | PH domain-containing protein            |
| Locus_12856_Transcript_1/1_Conf_1.000 | 1229 | 20 | 7.08E-93  | EFO21585.1     | 65 | 345.51  | 413 | 271 | hypothetical protein LOAG_06905         |
| Locus_12857_Transcript_1/1_Conf_1.000 | 158  | 0  |           |                |    |         |     |     |                                         |
| Locus_12858_Transcript_1/1_Conf_1.000 | 676  | 4  | 1.15E-21  | XP_002640452.1 | 58 | 107.457 | 198 | 115 | Hypothetical protein CBG08509           |
| Locus_12859_Transcript_1/1_Conf_1.000 | 819  | 2  | 1.43E-12  | XP_002639525.1 | 43 | 77.7962 | 252 | 110 | Hypothetical protein CBG04150           |
| Locus_1286_Transcript_1/3_Conf_0.714  | 2169 | 20 | 4.10E-127 | XP_002636551.1 | 58 | 460.299 | 652 | 383 | Hypothetical protein CBG23241           |
| Locus_1286_Transcript_2/3_Conf_0.714  | 2169 | 20 | 1.84E-127 | AAX34423.1     | 58 | 461.455 | 653 | 381 | anion transporter Sulp-5                |
| Locus_1286_Transcript_3/3_Conf_0.714  | 2169 | 20 | 1.08E-127 | XP_002636551.1 | 58 | 462.225 | 652 | 384 | Hypothetical protein CBG23241           |
| Locus_12860_Transcript_1/1_Conf_1.000 | 406  | 0  |           |                |    |         |     |     |                                         |
| Locus_12861_Transcript_1/1_Conf_1.000 | 288  | 0  |           |                |    |         |     |     |                                         |
| Locus_12862_Transcript_1/1_Conf_1.000 | 305  | 20 | 1.12E-29  | XP_002639182.1 | 93 | 132.88  | 79  | 74  | C. briggsae CBR-TAG-316 protein         |
| Locus_12863_Transcript_1/1_Conf_1.000 | 472  | 20 | 4.25E-45  | XP_001900983.1 | 85 | 184.111 | 132 | 113 | La domain containing protein            |
| Locus_12864_Transcript_1/1_Conf_1.000 | 322  | 0  |           |                |    |         |     |     |                                         |
| Locus_12865_Transcript_1/1_Conf_1.000 | 686  | 20 | 3.29E-72  | NP_508530.1    | 75 | 275.404 | 228 | 173 | yeast SEC homolog family member (sec-3) |

|                                       |     |    |           |                |    |         |     |     |                                                                        |
|---------------------------------------|-----|----|-----------|----------------|----|---------|-----|-----|------------------------------------------------------------------------|
| Locus_12866_Transcript_1/1_Conf_1.000 | 449 | 20 | 2.49E-61  | NP_496269.1    | 89 | 238.039 | 152 | 136 | hypothetical protein R166.2                                            |
| Locus_12867_Transcript_1/1_Conf_1.000 | 421 | 20 | 2.52E-53  | EFO17199.1     | 90 | 211.46  | 117 | 106 | histone methyltransferase                                              |
| Locus_12868_Transcript_1/1_Conf_1.000 | 843 | 20 | 5.34E-151 | XP_537399.1    | 99 | 537.724 | 266 | 265 | PREDICTED: similar to 40S ribosomal protein S4, X isoform              |
| Locus_12869_Transcript_1/1_Conf_1.000 | 327 | 20 | 2.77E-36  | XP_002637153.1 | 84 | 154.836 | 104 | 88  | Hypothetical protein CBG09655                                          |
| Locus_1287_Transcript_1/1_Conf_1.000  | 255 | 20 | 4.96E-33  | XP_002698352.1 | 87 | 144.05  | 85  | 74  | PREDICTED: hypothetical protein                                        |
| Locus_12870_Transcript_1/1_Conf_1.000 | 642 | 20 | 3.29E-36  | XP_001899664.1 | 69 | 155.606 | 136 | 95  | Smad1                                                                  |
| Locus_12871_Transcript_1/1_Conf_1.000 | 298 | 20 | 7.77E-47  | XP_002644145.1 | 92 | 189.889 | 98  | 91  | C. briggsae CBR-DAF-12 protein                                         |
| Locus_12872_Transcript_1/1_Conf_1.000 | 356 | 20 | 2.13E-12  | CAB07705.2     | 76 | 75.485  | 52  | 40  | C. elegans protein ZC101.1, partially confirmed by transcript evidence |
| Locus_12873_Transcript_1/1_Conf_1.000 | 788 | 0  |           |                |    |         |     |     |                                                                        |
| Locus_12874_Transcript_1/1_Conf_1.000 | 467 | 0  |           |                |    |         |     |     |                                                                        |
| Locus_12875_Transcript_1/1_Conf_1.000 | 285 | 18 | 5.00E-09  | NP_501190.1    | 82 | 64.3142 | 39  | 32  | Temporarily Assigned Gene name family member (tag-224)                 |

|                                       |      |    |           |                |    |         |     |     |                                        |
|---------------------------------------|------|----|-----------|----------------|----|---------|-----|-----|----------------------------------------|
| Locus_12876_Transcript_1/1_Conf_1.000 | 637  | 20 | 1.40E-23  | AAA51433.1     | 95 | 113.62  | 63  | 60  | guanine nucleotide regulatory protein  |
| Locus_12877_Transcript_1/1_Conf_1.000 | 1310 | 20 | 7.19E-107 | XP_001897028.1 | 67 | 392.119 | 394 | 267 | Peptidase family M1 containing protein |
| Locus_12878_Transcript_1/1_Conf_1.000 | 366  | 0  |           |                |    |         |     |     |                                        |



|                                       |      |    |           |                |    |         |     |     |                                                 |
|---------------------------------------|------|----|-----------|----------------|----|---------|-----|-----|-------------------------------------------------|
| Locus_12879_Transcript_1/1_Conf_1.000 | 844  | 20 | 1.28E-11  | NP_497036.1    | 62 | 74.7146 | 91  | 57  | hypothetical protein F19H8.2                    |
| Locus_1288_Transcript_1/1_Conf_1.000  | 804  | 20 | 1.22E-16  | EFO16079.1     | 49 | 91.2781 | 186 | 92  | hypothetical protein LOAG_12429                 |
| Locus_12880_Transcript_1/1_Conf_1.000 | 128  | 20 | 5.09E-06  | ZP_01004740.1  | 66 | 54.299  | 45  | 30  | ribosomal RNA large subunit methyltransferase J |
| Locus_12881_Transcript_1/1_Conf_1.000 | 1570 | 20 | 1.15E-133 | XP_002643167.1 | 73 | 481.485 | 435 | 319 | Hypothetical protein CBG15348                   |
| Locus_12882_Transcript_1/1_Conf_1.000 | 291  | 0  |           |                |    |         |     |     |                                                 |
| Locus_12883_Transcript_1/1_Conf_1.000 | 1272 | 0  |           |                |    |         |     |     |                                                 |

|                                       |     |    |          |                |    |         |     |     |                                                           |
|---------------------------------------|-----|----|----------|----------------|----|---------|-----|-----|-----------------------------------------------------------|
| Locus_12884_Transcript_1/1_Conf_1.000 | 202 | 20 | 2.06E-23 | AAA18956.1     | 91 | 112.079 | 62  | 57  | Sur-1 MAP kinase                                          |
| Locus_12885_Transcript_1/1_Conf_1.000 | 375 | 20 | 1.30E-17 | XP_001901741.1 | 66 | 92.8189 | 125 | 83  | Eukaryotic-type DNA primase, large subunit family protein |
| Locus_12886_Transcript_1/1_Conf_1.000 | 348 | 20 | 3.28E-53 | XP_002646356.1 | 91 | 211.075 | 116 | 106 | Hypothetical protein CBG12070                             |
| Locus_12887_Transcript_1/1_Conf_1.000 | 475 | 4  | 5.92E-39 | NP_491915.2    | 88 | 163.696 | 157 | 139 | hypothetical protein ZC581.9                              |
| Locus_12888_Transcript_1/1_Conf_1.000 | 804 | 20 | 3.90E-31 | NP_001184122.1 | 73 | 139.428 | 116 | 85  | sestrin-3                                                 |
| Locus_12889_Transcript_1/1_Conf_1.000 | 681 | 20 | 3.65E-23 | EFO19714.1     | 70 | 112.464 | 106 | 75  | hypothetical protein LOAG_08776                           |
| Locus_1289_Transcript_1/1_Conf_1.000  | 357 | 20 | 2.50E-29 | NP_499668.1    | 71 | 131.724 | 111 | 79  | hypothetical protein Y37D8A.2                             |
| Locus_12890_Transcript_1/1_Conf_1.000 | 138 | 20 | 1.05E-11 | NP_509287.1    | 88 | 73.1738 | 42  | 37  | hypothetical protein C44E12.1                             |
| Locus_12891_Transcript_1/1_Conf_1.000 | 372 | 8  | 1.49E-29 | EFO20596.1     | 97 | 132.494 | 69  | 67  | MYND finger family protein                                |
| Locus_12892_Transcript_1/1_Conf_1.000 | 448 | 0  |          |                |    |         |     |     |                                                           |

|                                       |      |    |          |                |     |         |     |     |                                              |
|---------------------------------------|------|----|----------|----------------|-----|---------|-----|-----|----------------------------------------------|
| Locus_12893_Transcript_1/1_Conf_1.000 | 241  | 19 | 1.12E-21 | NP_492014.4    | 75  | 106.301 | 79  | 60  | hypothetical protein F22D6.11                |
| Locus_12894_Transcript_1/1_Conf_1.000 | 345  | 0  |          |                |     |         |     |     |                                              |
| Locus_12895_Transcript_1/1_Conf_1.000 | 544  | 4  | 2.87E-25 | NP_508889.1    | 61  | 118.627 | 168 | 103 | hypothetical protein Y34B4A.7                |
| Locus_12896_Transcript_1/1_Conf_1.000 | 822  | 0  |          |                |     |         |     |     |                                              |
| Locus_12897_Transcript_1/1_Conf_1.000 | 1391 | 20 | 9.61E-73 | XP_002641571.1 | 66  | 278.87  | 294 | 196 | Hypothetical protein CBG09872                |
| Locus_12898_Transcript_1/1_Conf_1.000 | 128  | 20 | 1.29E-17 | XP_002813872.1 | 100 | 92.8189 | 42  | 42  | PREDICTED: lactotransferrin-like isoform 2   |
| Locus_12899_Transcript_1/1_Conf_1.000 | 608  | 3  | 1.30E-04 | XP_968882.1    | 45  | 50.447  | 203 | 93  | PREDICTED: similar to cp27, putative         |
| Locus_129_Transcript_1/1_Conf_1.000   | 197  | 6  | 3.77E-25 | NP_492295.1    | 95  | 117.857 | 65  | 62  | hypothetical protein F10D11.6                |
| Locus_1290_Transcript_1/1_Conf_1.000  | 304  | 1  | 2.35E-11 | NP_490917.3    | 50  | 72.0182 | 104 | 53  | hypothetical protein Y20F4.2                 |
| Locus_12900_Transcript_1/1_Conf_1.000 | 266  | 20 | 3.39E-42 | NP_508537.1    | 100 | 174.481 | 88  | 88  | SPeCtrin family member (spc-1)               |
| Locus_12901_Transcript_1/1_Conf_1.000 | 148  | 0  |          |                |     |         |     |     |                                              |
| Locus_12902_Transcript_1/1_Conf_1.000 | 334  | 1  | 1.74E-06 | XP_002803306.1 | 48  | 55.8398 | 92  | 45  | PREDICTED: hypothetical protein LOC100426317 |
| Locus_12903_Transcript_1/1_Conf_1.000 | 696  | 0  |          |                |     |         |     |     |                                              |
| Locus_12904_Transcript_1/1_Conf_1.000 | 601  | 16 | 9.29E-24 | EFO26799.1     | 51  | 114.005 | 185 | 95  | HMG box family protein                       |
| Locus_12905_Transcript_1/1_Conf_1.000 | 604  | 20 | 1.14E-69 | NP_500088.1    | 85  | 266.544 | 174 | 148 | hypothetical protein Y77E11A.1               |
| Locus_12906_Transcript_1/1_Conf_1.000 | 209  | 0  |          |                |     |         |     |     |                                              |
| Locus_12907_Transcript_1/1_Conf_1.000 | 264  | 17 | 2.08E-07 | CAA88613.1     | 45  | 58.9214 | 73  | 33  | salivary gland secretion protein 4           |

|                                       |      |    |          |                |    |         |     |     |                                                               |
|---------------------------------------|------|----|----------|----------------|----|---------|-----|-----|---------------------------------------------------------------|
| Locus_12908_Transcript_1/1_Conf_1.000 | 189  | 20 | 1.11E-24 | XP_001898310.1 | 95 | 116.316 | 62  | 59  | DNA-directed RNA polymerase II largest subunit                |
| Locus_12909_Transcript_1/1_Conf_1.000 | 165  | 20 | 1.38E-19 | XP_002912840.1 | 94 | 99.3673 | 54  | 51  | PREDICTED: LOW QUALITY PROTEIN: protein unc-13 homolog A-like |
| Locus_1291_Transcript_1/1_Conf_1.000  | 855  | 20 | 3.78E-51 | NP_001122835.1 | 69 | 206.068 | 195 | 135 | UNCoordinated family member (unc-22)                          |
| Locus_12910_Transcript_1/2_Conf_1.000 | 275  | 0  |          |                |    |         |     |     |                                                               |
| Locus_12910_Transcript_2/2_Conf_1.000 | 248  | 0  |          |                |    |         |     |     |                                                               |
| Locus_12911_Transcript_1/1_Conf_1.000 | 292  | 0  |          |                |    |         |     |     |                                                               |
| Locus_12912_Transcript_1/1_Conf_1.000 | 696  | 20 | 2.32E-36 | NP_001022303.1 | 80 | 156.377 | 114 | 92  | MethylMalonic Aciduria type A protein family member (mmaa-1)  |
| Locus_12913_Transcript_1/1_Conf_1.000 | 451  | 1  | 4.76E-04 | XP_001901417.1 | 63 | 47.7506 | 66  | 42  | hypothetical protein Bm1_49755                                |
| Locus_12914_Transcript_1/1_Conf_1.000 | 346  | 6  | 1.65E-20 | CAR63710.1     | 86 | 102.449 | 65  | 56  | putative C2 domain containing protein                         |
| Locus_12915_Transcript_1/1_Conf_1.000 | 161  | 0  |          |                |    |         |     |     |                                                               |
| Locus_12916_Transcript_1/1_Conf_1.000 | 367  | 0  |          |                |    |         |     |     |                                                               |
| Locus_12917_Transcript_1/2_Conf_1.000 | 988  | 0  |          |                |    |         |     |     |                                                               |
| Locus_12917_Transcript_2/2_Conf_1.000 | 859  | 0  |          |                |    |         |     |     |                                                               |
| Locus_12918_Transcript_1/1_Conf_1.000 | 190  | 15 | 1.04E-14 | NP_496066.2    | 80 | 83.1889 | 60  | 48  | Nuclear Hormone Receptor family member (nhr-19)               |
| Locus_12919_Transcript_1/1_Conf_1.000 | 757  | 20 | 7.13E-45 | NP_509296.1    | 63 | 184.882 | 257 | 164 | hypothetical protein F27D9.2                                  |
| Locus_1292_Transcript_1/2_Conf_1.000  | 1832 | 0  |          |                |    |         |     |     |                                                               |
| Locus_1292_Transcript_2/2_Conf_1.000  | 1826 | 0  |          |                |    |         |     |     |                                                               |
| Locus_12920_Transcript_1/1_Conf_1.000 | 376  | 3  | 4.02E-35 | NP_502233.2    | 77 | 150.984 | 117 | 91  | hypothetical protein H01G02.1                                 |
| Locus_12921_Transcript_1/1_Conf_1.000 | 148  | 0  |          |                |    |         |     |     |                                                               |
| Locus_12922_Transcript_1/1_Conf_1.000 | 229  | 0  |          |                |    |         |     |     |                                                               |
| Locus_12923_Transcript_1/1_Conf_1.000 | 164  | 0  |          |                |    |         |     |     |                                                               |
| Locus_12924_Transcript_1/1_Conf_1.000 | 383  | 0  |          |                |    |         |     |     |                                                               |

|                                       |     |    |          |                |    |         |     |     |                                            |
|---------------------------------------|-----|----|----------|----------------|----|---------|-----|-----|--------------------------------------------|
| Locus_12925_Transcript_1/1_Conf_1.000 | 405 | 20 | 1.98E-26 | NP_001119697.1 | 74 | 122.094 | 89  | 66  | casein kinase II beta subunit              |
| Locus_12926_Transcript_1/1_Conf_1.000 | 651 | 6  | 1.28E-91 | CAR63586.1     | 89 | 339.732 | 217 | 195 | hypothetical protein                       |
| Locus_12927_Transcript_1/1_Conf_1.000 | 355 | 20 | 1.34E-06 | XP_001894185.1 | 46 | 56.225  | 107 | 50  | Major Sperm Protein (MSP) cytoskeletal MSP |
| Locus_12928_Transcript_1/1_Conf_1.000 | 142 | 3  | 1.78E-11 | NP_508432.1    | 85 | 72.4034 | 47  | 40  | hypothetical protein F47G3.1               |
| Locus_12929_Transcript_1/2_Conf_1.000 | 764 | 0  |          |                |    |         |     |     |                                            |
| Locus_12929_Transcript_2/2_Conf_1.000 | 383 | 0  |          |                |    |         |     |     |                                            |
| Locus_1293_Transcript_1/1_Conf_1.000  | 679 | 20 | 1.44E-80 | XP_002632216.1 | 78 | 303.138 | 225 | 176 | Hypothetical protein CBG07084              |
| Locus_12930_Transcript_1/1_Conf_1.000 | 233 | 0  |          |                |    |         |     |     |                                            |
| Locus_12931_Transcript_1/1_Conf_1.000 | 208 | 0  |          |                |    |         |     |     |                                            |
| Locus_12932_Transcript_1/1_Conf_1.000 | 588 | 20 | 6.02E-49 | XP_002631639.1 | 67 | 197.593 | 187 | 126 | Hypothetical protein CBG20828              |
| Locus_12933_Transcript_1/1_Conf_1.000 | 298 | 0  |          |                |    |         |     |     |                                            |
| Locus_12934_Transcript_1/1_Conf_1.000 | 135 | 0  |          |                |    |         |     |     |                                            |

|                                       |     |    |          |                |    |         |     |     |                                          |
|---------------------------------------|-----|----|----------|----------------|----|---------|-----|-----|------------------------------------------|
| Locus_12935_Transcript_1/1_Conf_1.000 | 347 | 20 | 8.78E-06 | NP_001128605.1 | 46 | 53.5286 | 123 | 57  | breast cancer anti-estrogen resistance 1 |
| Locus_12936_Transcript_1/1_Conf_1.000 | 213 | 7  | 2.17E-25 | EFO23509.1     | 95 | 118.627 | 69  | 66  | STAT protein                             |
| Locus_12937_Transcript_1/1_Conf_1.000 | 735 | 20 | 3.68E-83 | XP_001898650.1 | 82 | 311.997 | 243 | 201 | SD04925p                                 |
| Locus_12938_Transcript_1/1_Conf_1.000 | 685 | 20 | 2.70E-66 | NP_496968.1    | 80 | 255.758 | 185 | 149 | hypothetical protein Y48B6A.12           |
| Locus_12939_Transcript_1/1_Conf_1.000 | 133 | 0  |          |                |    |         |     |     |                                          |

|                                       |      |    |           |                |    |         |     |     |                                |
|---------------------------------------|------|----|-----------|----------------|----|---------|-----|-----|--------------------------------|
| Locus_1294_Transcript_1/2_Conf_1.000  | 1511 | 20 | 6.79E-176 | AAF00540.1     | 99 | 621.698 | 319 | 318 | AF187691_1casein kinase I      |
| Locus_1294_Transcript_2/2_Conf_1.000  | 1501 | 20 | 6.74E-176 | AAF00540.1     | 99 | 621.698 | 319 | 318 | AF187691_1casein kinase I      |
| Locus_12940_Transcript_1/1_Conf_1.000 | 833  | 20 | 2.40E-55  | XP_002635067.1 | 75 | 219.935 | 239 | 180 | Hypothetical protein CBG11281  |
| Locus_12941_Transcript_1/1_Conf_1.000 | 945  | 20 | 3.43E-67  | XP_002629865.1 | 65 | 259.61  | 242 | 158 | C. briggsae CBR-ZTF-2 protein  |
| Locus_12942_Transcript_1/1_Conf_1.000 | 196  | 0  |           |                |    |         |     |     |                                |
| Locus_12943_Transcript_1/1_Conf_1.000 | 729  | 20 | 5.63E-52  | XP_002645831.1 | 65 | 208.379 | 230 | 151 | C. briggsae CBR-RBC-1 protein  |
| Locus_12944_Transcript_1/1_Conf_1.000 | 207  | 0  |           |                |    |         |     |     |                                |
| Locus_12945_Transcript_1/1_Conf_1.000 | 307  | 0  |           |                |    |         |     |     |                                |
| Locus_12946_Transcript_1/1_Conf_1.000 | 385  | 3  | 2.68E-15  | AAT12422.1     | 73 | 85.1149 | 105 | 77  | hypothetical protein isoform a |

|                                       |     |    |          |                |     |         |     |     |                                                                                                   |
|---------------------------------------|-----|----|----------|----------------|-----|---------|-----|-----|---------------------------------------------------------------------------------------------------|
| Locus_12947_Transcript_1/1_Conf_1.000 | 542 | 6  | 4.65E-20 | NP_491731.2    | 72  | 101.293 | 86  | 62  | hypothetical protein C06A5.3                                                                      |
| Locus_12948_Transcript_1/1_Conf_1.000 | 483 | 20 | 4.46E-42 | NP_500460.1    | 72  | 174.096 | 155 | 113 | hypothetical protein W02C12.1                                                                     |
| Locus_12949_Transcript_1/1_Conf_1.000 | 351 | 0  |          |                |     |         |     |     |                                                                                                   |
| Locus_1295_Transcript_1/1_Conf_1.000  | 564 | 20 | 2.04E-64 | NP_001021182.1 | 82  | 248.825 | 188 | 155 | hypothetical protein C24A1.3                                                                      |
| Locus_12950_Transcript_1/1_Conf_1.000 | 369 |    |          |                |     |         |     |     |                                                                                                   |
| Locus_12951_Transcript_1/1_Conf_1.000 | 300 | 0  |          |                |     |         |     |     |                                                                                                   |
| Locus_12952_Transcript_1/1_Conf_1.000 | 449 | 3  | 6.67E-06 | ZP_06280939.1  | 45  | 53.9138 | 79  | 36  | LPXTG-motif cell wall anchor domain protein                                                       |
| Locus_12953_Transcript_1/1_Conf_1.000 | 356 | 20 | 7.32E-21 | XP_002644943.1 | 81  | 103.605 | 111 | 90  | Hypothetical protein CBG10898                                                                     |
| Locus_12954_Transcript_1/1_Conf_1.000 | 918 | 20 | 2.25E-76 | ACM46026.1     | 68  | 290.041 | 304 | 208 | Temporarily assigned gene name protein 233, isoform a, partially confirmed by transcript evidence |
| Locus_12955_Transcript_1/1_Conf_1.000 | 178 | 0  |          |                |     |         |     |     |                                                                                                   |
| Locus_12956_Transcript_1/1_Conf_1.000 | 421 | 2  | 1.35E-06 | XP_002641991.1 | 51  | 56.225  | 147 | 75  | Hypothetical protein CBG09214                                                                     |
| Locus_12957_Transcript_1/1_Conf_1.000 | 558 | 0  |          |                |     |         |     |     |                                                                                                   |
| Locus_12958_Transcript_1/1_Conf_1.000 | 210 | 20 | 9.47E-21 | EAX00648.1     | 100 | 103.219 | 50  | 50  | hCG23722                                                                                          |
| Locus_12959_Transcript_1/1_Conf_1.000 | 177 | 20 | 2.75E-12 | XP_002629697.1 | 77  | 75.0998 | 59  | 46  | C. briggsae CBR-AQP-2 protein                                                                     |
| Locus_1296_Transcript_1/1_Conf_1.000  | 429 | 0  |          |                |     |         |     |     |                                                                                                   |
| Locus_12960_Transcript_1/1_Conf_1.000 | 167 | 0  |          |                |     |         |     |     |                                                                                                   |
| Locus_12961_Transcript_1/1_Conf_1.000 | 360 | 0  |          |                |     |         |     |     |                                                                                                   |
| Locus_12962_Transcript_1/1_Conf_1.000 | 329 | 20 | 7.80E-31 | NP_493554.1    | 81  | 136.732 | 98  | 80  | hypothetical protein Y54E5A.6                                                                     |
| Locus_12963_Transcript_1/1_Conf_1.000 | 131 | 0  |          |                |     |         |     |     |                                                                                                   |
| Locus_12964_Transcript_1/1_Conf_1.000 | 302 | 7  | 2.12E-28 | XP_002635247.1 | 73  | 128.642 | 99  | 73  | Hypothetical protein CBG11491                                                                     |
| Locus_12965_Transcript_1/1_Conf_1.000 | 436 | 2  | 7.01E-16 | NP_504797.1    | 49  | 87.0409 | 144 | 71  | hypothetical protein VC5.2                                                                        |
| Locus_12966_Transcript_1/1_Conf_1.000 | 277 | 20 | 3.59E-28 | NP_500389.1    | 85  | 127.872 | 90  | 77  | hypothetical protein ZC416.1                                                                      |
| Locus_12967_Transcript_1/1_Conf_1.000 | 326 | 1  | 2.22E-09 | NP_502613.2    | 64  | 65.4698 | 73  | 47  | QUinine non-avoider family member (qui-1)                                                         |
| Locus_12968_Transcript_1/1_Conf_1.000 | 495 | 0  |          |                |     |         |     |     |                                                                                                   |



|                                       |      |    |           |                |    |         |     |     |                                                       |
|---------------------------------------|------|----|-----------|----------------|----|---------|-----|-----|-------------------------------------------------------|
| Locus_12969_Transcript_1/1_Conf_1.000 | 156  | 0  |           |                |    |         |     |     |                                                       |
| Locus_1297_Transcript_1/1_Conf_1.000  | 957  | 20 | 6.30E-85  | NP_492334.1    | 87 | 318.546 | 214 | 187 | hypothetical protein F43G9.5                          |
| Locus_12970_Transcript_1/1_Conf_1.000 | 421  | 0  |           |                |    |         |     |     |                                                       |
| Locus_12971_Transcript_1/1_Conf_1.000 | 564  | 20 | 1.29E-26  | NP_505444.1    | 63 | 123.25  | 138 | 87  | FMRF-Like Peptide family member (flp-6)               |
| Locus_12972_Transcript_1/1_Conf_1.000 | 424  | 20 | 2.12E-52  | XP_002643051.1 | 83 | 208.379 | 139 | 116 | C. briggsae CBR-DPF-6 protein                         |
| Locus_12973_Transcript_1/1_Conf_1.000 | 899  | 20 | 4.40E-37  | XP_001900313.1 | 61 | 159.458 | 219 | 134 | Piwi domain containing protein                        |
| Locus_12974_Transcript_1/1_Conf_1.000 | 539  | 0  |           |                |    |         |     |     |                                                       |
| Locus_12975_Transcript_1/1_Conf_1.000 | 790  | 20 | 3.57E-90  | XP_001896878.1 | 80 | 335.495 | 250 | 201 | vesicle-fusing ATPase                                 |
| Locus_12976_Transcript_1/1_Conf_1.000 | 250  | 0  |           |                |    |         |     |     |                                                       |
| Locus_12977_Transcript_1/1_Conf_1.000 | 604  | 4  | 1.78E-14  | EFO26702.1     | 61 | 83.1889 | 142 | 88  | GTP-ase activating protein for Arf containing protein |
| Locus_12978_Transcript_1/1_Conf_1.000 | 432  | 0  |           |                |    |         |     |     |                                                       |
| Locus_12979_Transcript_1/1_Conf_1.000 | 171  | 20 | 5.38E-24  | NP_001024141.1 | 98 | 114.005 | 56  | 55  | Germinal Center Kinase family member (gck-1)          |
| Locus_1298_Transcript_1/3_Conf_0.667  | 577  | 3  | 4.16E-23  | NP_495792.1    | 65 | 111.694 | 123 | 81  | hypothetical protein M05D6.6                          |
| Locus_1298_Transcript_2/3_Conf_0.667  | 565  | 3  | 1.34E-23  | NP_495792.1    | 65 | 113.235 | 123 | 81  | hypothetical protein M05D6.6                          |
| Locus_1298_Transcript_3/3_Conf_0.667  | 565  | 3  | 3.89E-23  | NP_495792.1    | 65 | 111.694 | 123 | 81  | hypothetical protein M05D6.6                          |
| Locus_12980_Transcript_1/1_Conf_1.000 | 458  | 20 | 5.36E-24  | XP_001900529.1 | 56 | 114.005 | 141 | 79  | CG17219-PA                                            |
| Locus_12981_Transcript_1/1_Conf_1.000 | 698  | 20 | 1.60E-53  | NP_502420.2    | 76 | 213.386 | 194 | 149 | hypothetical protein C26H9A.2                         |
| Locus_12982_Transcript_1/1_Conf_1.000 | 1663 | 20 | 6.14E-149 | NP_495532.2    | 80 | 532.332 | 454 | 366 | hypothetical protein F21D12.3                         |
| Locus_12983_Transcript_1/1_Conf_1.000 | 644  | 2  | 4.93E-24  | NP_001033409.1 | 65 | 115.161 | 152 | 100 | hypothetical protein F29B9.12                         |

|                                       |      |    |           |                |    |         |     |     |                                 |
|---------------------------------------|------|----|-----------|----------------|----|---------|-----|-----|---------------------------------|
| Locus_12984_Transcript_1/1_Conf_1.000 | 256  | 20 | 7.18E-24  | NP_001022680.1 | 83 | 113.62  | 77  | 64  | hypothetical protein K11H3.6    |
| Locus_12985_Transcript_1/1_Conf_1.000 | 182  | 0  |           |                |    |         |     |     |                                 |
| Locus_12986_Transcript_1/1_Conf_1.000 | 479  | 4  | 1.08E-08  | NP_492518.1    | 88 | 63.1586 | 36  | 32  | hypothetical protein F30A10.6   |
| Locus_12987_Transcript_1/1_Conf_1.000 | 185  | 0  |           |                |    |         |     |     |                                 |
| Locus_12988_Transcript_1/1_Conf_1.000 | 149  | 20 | 1.08E-11  | XP_002640991.1 | 75 | 73.1738 | 48  | 36  | Hypothetical protein CBG11740   |
| Locus_12989_Transcript_1/1_Conf_1.000 | 228  | 0  |           |                |    |         |     |     |                                 |
| Locus_1299_Transcript_1/1_Conf_1.000  | 1862 | 20 | 8.03E-60  | NP_506181.2    | 56 | 236.498 | 420 | 238 | hypothetical protein R11D1.10   |
| Locus_12990_Transcript_1/1_Conf_1.000 | 1454 | 20 | 0         | XP_001898240.1 | 84 | 707.212 | 483 | 410 | XPA-binding protein 2           |
| Locus_12991_Transcript_1/1_Conf_1.000 | 215  | 0  |           |                |    |         |     |     |                                 |
| Locus_12992_Transcript_1/1_Conf_1.000 | 162  | 0  |           |                |    |         |     |     |                                 |
| Locus_12993_Transcript_1/1_Conf_1.000 | 175  | 0  |           |                |    |         |     |     |                                 |
| Locus_12994_Transcript_1/1_Conf_1.000 | 391  | 0  |           |                |    |         |     |     |                                 |
| Locus_12995_Transcript_1/1_Conf_1.000 | 367  | 4  | 1.00E-30  | XP_002639732.1 | 68 | 136.346 | 124 | 85  | C. briggsae CBR-TAG-264 protein |
| Locus_12996_Transcript_1/1_Conf_1.000 | 878  | 20 | 3.34E-26  | XP_001892273.1 | 48 | 123.25  | 294 | 144 | hypothetical protein            |
| Locus_12997_Transcript_1/1_Conf_1.000 | 879  | 0  |           |                |    |         |     |     |                                 |
| Locus_12998_Transcript_1/2_Conf_1.000 | 2488 | 20 | 4.26E-99  | XP_002636770.1 | 56 | 367.466 | 651 | 365 | Hypothetical protein CBG23501   |
| Locus_12998_Transcript_2/2_Conf_1.000 | 2473 | 20 | 6.31E-95  | XP_002636770.1 | 55 | 353.599 | 651 | 361 | Hypothetical protein CBG23501   |
| Locus_12999_Transcript_1/1_Conf_1.000 | 274  | 0  |           |                |    |         |     |     |                                 |
| Locus_13_Transcript_1/1_Conf_1.000    | 251  | 0  |           |                |    |         |     |     |                                 |
| Locus_130_Transcript_1/6_Conf_0.250   | 885  | 20 | 5.66E-114 | XP_002634359.1 | 96 | 414.846 | 221 | 214 | C. briggsae CBR-RPS-2 protein   |

|                                       |      |    |           |                |    |         |     |     |                               |
|---------------------------------------|------|----|-----------|----------------|----|---------|-----|-----|-------------------------------|
| Locus_130_Transcript_2/6_Conf_0.375   | 1992 | 20 | 4.50E-149 | XP_002636413.1 | 78 | 533.102 | 392 | 307 | Hypothetical protein CBG23066 |
| Locus_130_Transcript_3/6_Conf_0.250   | 1031 | 20 | 1.47E-114 | XP_002634359.1 | 96 | 417.157 | 222 | 215 | C. briggsae CBR-RPS-2 protein |
| Locus_130_Transcript_4/6_Conf_0.375   | 2180 | 20 | 5.00E-149 | XP_002636413.1 | 78 | 533.102 | 392 | 307 | Hypothetical protein CBG23066 |
| Locus_130_Transcript_5/6_Conf_0.250   | 1031 | 20 | 7.31E-114 | XP_002634359.1 | 96 | 414.846 | 221 | 214 | C. briggsae CBR-RPS-2 protein |
| Locus_130_Transcript_6/6_Conf_0.375   | 2180 | 20 | 5.00E-149 | XP_002636413.1 | 78 | 533.102 | 392 | 307 | Hypothetical protein CBG23066 |
| Locus_1300_Transcript_1/1_Conf_1.000  | 983  | 0  |           |                |    |         |     |     |                               |
| Locus_13000_Transcript_1/1_Conf_1.000 | 301  | 0  |           |                |    |         |     |     |                               |

|                                       |      |    |          |                |     |         |     |     |                                                                                                                            |
|---------------------------------------|------|----|----------|----------------|-----|---------|-----|-----|----------------------------------------------------------------------------------------------------------------------------|
| Locus_13001_Transcript_1/1_Conf_1.000 | 391  | 20 | 1.30E-62 | 1LYA           | 100 | 242.276 | 117 | 117 | CrystalStructures Of Native And Inhibited Forms Of Human Cathepsin D: Implications For Lysosomal Targeting And Drug Design |
| Locus_13002_Transcript_1/1_Conf_1.000 | 178  | 0  |          |                |     |         |     |     |                                                                                                                            |
| Locus_13003_Transcript_1/1_Conf_1.000 | 299  | 20 | 1.13E-21 | NP_495836.2    | 80  | 106.301 | 89  | 72  | Variable ABnormal morphology family member (vab-9)                                                                         |
| Locus_13004_Transcript_1/1_Conf_1.000 | 406  | 20 | 2.05E-23 | ACI49193.1     | 84  | 112.079 | 72  | 61  | hypothetical protein Csp3_JD03.002                                                                                         |
| Locus_13005_Transcript_1/1_Conf_1.000 | 248  | 0  |          |                |     |         |     |     |                                                                                                                            |
| Locus_13006_Transcript_1/1_Conf_1.000 | 218  | 9  | 2.57E-10 | CAD28559.2     | 81  | 68.5514 | 48  | 39  | metalloprotease I                                                                                                          |
| Locus_13007_Transcript_1/1_Conf_1.000 | 228  | 0  |          |                |     |         |     |     |                                                                                                                            |
| Locus_13008_Transcript_1/1_Conf_1.000 | 433  | 20 | 8.29E-25 | NP_504567.1    | 61  | 116.701 | 143 | 88  | hypothetical protein R01B10.4                                                                                              |
| Locus_13009_Transcript_1/1_Conf_1.000 | 307  | 0  |          |                |     |         |     |     |                                                                                                                            |
| Locus_1301_Transcript_1/1_Conf_1.000  | 1108 | 4  | 3.28E-38 | XP_002643523.1 | 51  | 163.696 | 345 | 177 | Hypothetical protein CBG16200                                                                                              |
| Locus_13010_Transcript_1/1_Conf_1.000 | 289  | 0  |          |                |     |         |     |     |                                                                                                                            |
| Locus_13011_Transcript_1/1_Conf_1.000 | 628  | 2  | 1.34E-31 | NP_506277.1    | 54  | 140.198 | 214 | 116 | High Incidence of Males (increased X chromosome loss) family member (him-17)                                               |
| Locus_13012_Transcript_1/1_Conf_1.000 | 296  | 0  |          |                |     |         |     |     |                                                                                                                            |
| Locus_13013_Transcript_1/1_Conf_1.000 | 752  |    |          |                |     |         |     |     |                                                                                                                            |
| Locus_13014_Transcript_1/1_Conf_1.000 | 203  | 0  |          |                |     |         |     |     |                                                                                                                            |
| Locus_13015_Transcript_1/1_Conf_1.000 | 550  | 1  | 2.22E-04 | XP_002637364.1 | 56  | 49.2914 | 69  | 39  | Hypothetical protein CBG19064                                                                                              |
| Locus_13016_Transcript_1/1_Conf_1.000 | 175  | 0  |          |                |     |         |     |     |                                                                                                                            |
| Locus_13017_Transcript_1/1_Conf_1.000 | 584  | 20 | 3.19E-18 | ACJ01664.1     | 67  | 95.5153 | 81  | 55  | DAF-12 C4                                                                                                                  |
| Locus_13018_Transcript_1/1_Conf_1.000 | 204  | 0  |          |                |     |         |     |     |                                                                                                                            |
| Locus_13019_Transcript_1/1_Conf_1.000 | 276  | 0  |          |                |     |         |     |     |                                                                                                                            |
| Locus_1302_Transcript_1/2_Conf_1.000  | 1289 | 0  |          |                |     |         |     |     |                                                                                                                            |
| Locus_1302_Transcript_2/2_Conf_1.000  | 1279 | 0  |          |                |     |         |     |     |                                                                                                                            |
| Locus_13020_Transcript_1/1_Conf_1.000 | 139  | 4  | 1.24E-12 | NP_505034.1    | 73  | 76.2554 | 46  | 34  | hypothetical protein F40A3.7                                                                                               |
| Locus_13021_Transcript_1/1_Conf_1.000 | 468  | 4  | 6.44E-09 | XP_002630296.1 | 58  | 63.929  | 98  | 57  | C. briggsae CBR-EMB-27 protein                                                                                             |
| Locus_13022_Transcript_1/1_Conf_1.000 | 645  | 3  | 2.83E-19 | XP_001902425.1 | 58  | 99.3673 | 144 | 84  | hypothetical protein Bm1_54835                                                                                             |
| Locus_13023_Transcript_1/1_Conf_1.000 | 327  | 0  |          |                |     |         |     |     |                                                                                                                            |

|                                       |      |    |          |                |     |         |     |     |                                                          |
|---------------------------------------|------|----|----------|----------------|-----|---------|-----|-----|----------------------------------------------------------|
| Locus_13024_Transcript_1/1_Conf_1.000 | 753  | 20 | 2.95E-67 | XP_001899456.1 | 73  | 259.225 | 248 | 182 | Tetraspanin family protein                               |
| Locus_13025_Transcript_1/1_Conf_1.000 | 365  | 20 | 1.12E-21 | XP_002633316.1 | 78  | 106.301 | 85  | 67  | C. briggsae CBR-GTL-2 protein                            |
| Locus_13026_Transcript_1/1_Conf_1.000 | 257  | 0  |          |                |     |         |     |     |                                                          |
| Locus_13027_Transcript_1/1_Conf_1.000 | 741  | 20 | 9.52E-95 | NP_494897.3    | 79  | 350.517 | 249 | 197 | hypothetical protein R05F9.12                            |
| Locus_13028_Transcript_1/1_Conf_1.000 | 268  | 16 | 1.93E-13 | XP_002629956.1 | 88  | 78.9518 | 45  | 40  | C. briggsae CBR-MLT-7 protein                            |
| Locus_13029_Transcript_1/1_Conf_1.000 | 289  | 20 | 5.87E-18 | NP_495990.1    | 63  | 93.9745 | 95  | 60  | Tubulin Tyrosine Ligase Like family member (ttll-12)     |
| Locus_1303_Transcript_1/1_Conf_1.000  | 1421 | 20 | 3.62E-91 | NP_496549.1    | 94  | 340.117 | 190 | 179 | RAB family member (rab-7)                                |
| Locus_13030_Transcript_1/1_Conf_1.000 | 263  | 0  |          |                |     |         |     |     |                                                          |
| Locus_13031_Transcript_1/1_Conf_1.000 | 788  | 20 | 1.56E-45 | ABB88219.1     | 72  | 187.193 | 168 | 121 | Hypothetical protein Y48G1C.12                           |
| Locus_13032_Transcript_1/1_Conf_1.000 | 1755 | 20 | 1.26E-91 | XP_001901778.1 | 65  | 342.043 | 430 | 281 | Probable molybdopterin binding domain containing protein |
| Locus_13033_Transcript_1/1_Conf_1.000 | 1226 | 20 | 0        | XP_001118006.2 | 100 | 673.315 | 327 | 327 | PREDICTED: elongation factor 2                           |
| Locus_13034_Transcript_1/1_Conf_1.000 | 796  | 1  | 1.61E-05 | CBI55964.1     | 42  | 54.299  | 156 | 66  | unnamed protein product                                  |
| Locus_13035_Transcript_1/1_Conf_1.000 | 848  | 0  |          |                |     |         |     |     |                                                          |

|                                       |      |    |          |                |    |         |     |     |                                                            |
|---------------------------------------|------|----|----------|----------------|----|---------|-----|-----|------------------------------------------------------------|
| Locus_13036_Transcript_1/1_Conf_1.000 | 576  | 20 | 1.03E-05 | YP_002522680.1 | 51 | 53.9138 | 127 | 66  | hypothetical protein trd_1477                              |
| Locus_13037_Transcript_1/1_Conf_1.000 | 248  | 2  | 1.32E-06 | NP_502588.1    | 59 | 56.225  | 74  | 44  | NucleOLar protein family member (nol-9)                    |
| Locus_13038_Transcript_1/1_Conf_1.000 | 316  | 0  |          |                |    |         |     |     |                                                            |
| Locus_13039_Transcript_1/1_Conf_1.000 | 480  | 20 | 3.12E-32 | EFO26003.1     | 68 | 141.354 | 157 | 107 | SPRY domain-containing protein                             |
| Locus_1304_Transcript_1/1_Conf_1.000  | 769  | 20 | 1.49E-29 | XP_002648943.1 | 60 | 134.035 | 165 | 99  | Hypothetical protein CBG21256                              |
| Locus_13040_Transcript_1/1_Conf_1.000 | 710  | 20 | 1.20E-96 | NP_498704.1    | 85 | 356.681 | 233 | 199 | COenzyme Q (ubiquinone) biosynthesis family member (coq-5) |
| Locus_13041_Transcript_1/1_Conf_1.000 | 297  | 0  |          |                |    |         |     |     |                                                            |
| Locus_13042_Transcript_1/2_Conf_1.000 | 302  | 0  |          |                |    |         |     |     |                                                            |
| Locus_13042_Transcript_2/2_Conf_1.000 | 441  | 0  |          |                |    |         |     |     |                                                            |
| Locus_13043_Transcript_1/1_Conf_1.000 | 139  | 0  |          |                |    |         |     |     |                                                            |
| Locus_13044_Transcript_1/2_Conf_1.000 | 238  | 0  |          |                |    |         |     |     |                                                            |
| Locus_13044_Transcript_2/2_Conf_1.000 | 376  | 0  |          |                |    |         |     |     |                                                            |
| Locus_13045_Transcript_1/1_Conf_1.000 | 878  | 20 | 7.09E-77 | NP_505070.2    | 68 | 291.582 | 296 | 202 | Valyl tRNA Synthetase family member (vrs-1)                |
| Locus_13046_Transcript_1/1_Conf_1.000 | 567  | 0  |          |                |    |         |     |     |                                                            |
| Locus_13047_Transcript_1/1_Conf_1.000 | 211  | 2  | 1.67E-09 | EFO27604.1     | 71 | 65.855  | 70  | 50  | hypothetical protein LOAG_00873                            |
| Locus_13048_Transcript_1/1_Conf_1.000 | 1552 | 20 | 0        | XP_002647888.1 | 87 | 853.588 | 516 | 450 | C. briggsae CBR-IRS-1 protein                              |
| Locus_13049_Transcript_1/1_Conf_1.000 | 393  | 6  | 1.19E-18 | NP_001021427.1 | 82 | 96.2857 | 119 | 98  | hypothetical protein F28H1.4                               |

|                                       |      |    |          |                |     |         |     |     |                                                                         |
|---------------------------------------|------|----|----------|----------------|-----|---------|-----|-----|-------------------------------------------------------------------------|
| Locus_1305_Transcript_1/2_Conf_1.000  | 2638 | 19 | 4.39E-09 | YP_867496.1    | 38  | 68.5514 | 565 | 218 | Zinc finger-domain-containing protein                                   |
| Locus_1305_Transcript_2/2_Conf_1.000  | 472  | 0  |          |                |     |         |     |     |                                                                         |
| Locus_13050_Transcript_1/1_Conf_1.000 | 355  | 20 | 1.47E-29 | NP_503604.2    | 78  | 132.494 | 114 | 90  | hypothetical protein F44C8.7                                            |
| Locus_13051_Transcript_1/1_Conf_1.000 | 415  | 0  |          |                |     |         |     |     |                                                                         |
| Locus_13052_Transcript_1/1_Conf_1.000 | 1019 | 20 | 8.53E-91 | NP_001021798.2 | 74  | 338.191 | 327 | 243 | Arf-1 Guanine nucleotide Exchange Factor homolog family member (agef-1) |
| Locus_13053_Transcript_1/1_Conf_1.000 | 368  | 20 | 9.96E-55 | BAA08392.1     | 100 | 216.083 | 107 | 107 | vacuolar ATPase                                                         |
| Locus_13054_Transcript_1/1_Conf_1.000 | 501  | 5  | 7.60E-50 | NP_496398.2    | 79  | 199.904 | 140 | 111 | hypothetical protein T06D8.1                                            |
| Locus_13055_Transcript_1/1_Conf_1.000 | 396  | 0  |          |                |     |         |     |     |                                                                         |
| Locus_13056_Transcript_1/1_Conf_1.000 | 305  | 8  | 9.52E-13 | XP_001900282.1 | 68  | 76.6406 | 67  | 46  | hypothetical protein Bm1_44100                                          |
| Locus_13057_Transcript_1/1_Conf_1.000 | 838  | 20 | 4.39E-89 | NP_001022911.1 | 76  | 332.028 | 279 | 214 | HELicase family member (hel-308)                                        |
| Locus_13058_Transcript_1/1_Conf_1.000 | 472  | 20 | 1.16E-50 | NP_492624.2    | 77  | 202.601 | 158 | 122 | hypothetical protein F52F12.7                                           |
| Locus_13059_Transcript_1/1_Conf_1.000 | 146  | 3  | 8.27E-20 | EEE74739.1     | 100 | 100.138 | 48  | 48  | predicted protein                                                       |

|                                       |      |    |           |                |    |         |     |     |                                                                            |
|---------------------------------------|------|----|-----------|----------------|----|---------|-----|-----|----------------------------------------------------------------------------|
| Locus_1306_Transcript_1/1_Conf_1.000  | 1387 | 20 | 5.91E-38  | EFO24120.1     | 61 | 163.31  | 239 | 148 | CAMK/TRBL protein kinase                                                   |
| Locus_13060_Transcript_1/1_Conf_1.000 | 144  | 0  |           |                |    |         |     |     |                                                                            |
| Locus_13061_Transcript_1/1_Conf_1.000 | 419  | 20 | 1.22E-39  | NP_510447.1    | 74 | 166.007 | 139 | 103 | hypothetical protein C05G5.1                                               |
| Locus_13062_Transcript_1/1_Conf_1.000 | 721  | 20 | 1.55E-38  | XP_002641616.1 | 60 | 163.696 | 252 | 152 | C. briggsae CBR-ALX-1 protein                                              |
| Locus_13063_Transcript_1/1_Conf_1.000 | 433  | 20 | 7.73E-39  | NP_490837.2    | 79 | 163.31  | 129 | 103 | GRainyHead (Drosophila transcription factor) homolog family member (grh-1) |
| Locus_13064_Transcript_1/1_Conf_1.000 | 181  | 0  |           |                |    |         |     |     |                                                                            |
| Locus_13065_Transcript_1/3_Conf_0.667 | 797  | 20 | 6.81E-105 | NP_496077.1    | 80 | 384.415 | 268 | 216 | hypothetical protein ZK1307.9                                              |
| Locus_13065_Transcript_2/3_Conf_0.556 | 821  | 20 | 1.39E-108 | NP_496077.1    | 81 | 396.741 | 274 | 222 | hypothetical protein ZK1307.9                                              |
| Locus_13065_Transcript_3/3_Conf_0.667 | 821  | 20 | 1.39E-108 | NP_496077.1    | 81 | 396.741 | 274 | 222 | hypothetical protein ZK1307.9                                              |
| Locus_13066_Transcript_1/1_Conf_1.000 | 737  | 8  | 3.28E-23  | XP_002642159.1 | 50 | 112.849 | 217 | 110 | Hypothetical protein CBG18119                                              |
| Locus_13067_Transcript_1/1_Conf_1.000 | 732  | 5  | 6.33E-27  | A8WN14.3       | 57 | 125.176 | 248 | 143 | E3 UFM1-protein ligase 1 homolog                                           |
| Locus_13068_Transcript_1/2_Conf_1.000 | 343  | 20 | 1.45E-16  | EFO27351.1     | 66 | 89.3521 | 89  | 59  | hypothetical protein LOAG_01121                                            |
| Locus_13068_Transcript_2/2_Conf_1.000 | 771  | 20 | 2.74E-31  | EFO27351.1     | 65 | 139.813 | 144 | 95  | hypothetical protein LOAG_01121                                            |
| Locus_13069_Transcript_1/1_Conf_1.000 | 393  | 0  |           |                |    |         |     |     |                                                                            |
| Locus_1307_Transcript_1/1_Conf_1.000  | 498  | 20 | 1.22E-44  | NP_500024.1    | 76 | 182.57  | 133 | 102 | AuTophagy (yeast Atg homolog) family member (atg-3)                        |
| Locus_13070_Transcript_1/2_Conf_1.000 | 1052 | 20 | 1.49E-37  | EFO27069.1     | 58 | 161.384 | 203 | 119 | Ulp1 protease                                                              |



|                                       |      |    |          |                |    |         |     |     |                                      |
|---------------------------------------|------|----|----------|----------------|----|---------|-----|-----|--------------------------------------|
| Locus_13070_Transcript_2/2_Conf_1.000 | 995  | 20 | 1.37E-37 | EFO27069.1     | 58 | 161.384 | 203 | 119 | Ulp1 protease                        |
| Locus_13071_Transcript_1/1_Conf_1.000 | 796  | 20 | 5.87E-40 | EFO26083.1     | 76 | 168.703 | 142 | 108 | hypothetical protein LOAG_02395      |
| Locus_13072_Transcript_1/1_Conf_1.000 | 272  | 0  |          |                |    |         |     |     |                                      |
| Locus_13073_Transcript_1/1_Conf_1.000 | 168  | 3  | 3.29E-05 | XP_002630736.1 | 66 | 51.6026 | 54  | 36  | Hypothetical protein CBG02420        |
| Locus_13074_Transcript_1/1_Conf_1.000 | 396  | 20 | 3.75E-57 | NP_001021410.2 | 88 | 224.172 | 132 | 117 | LIM domain family member (lim-9)     |
| Locus_13075_Transcript_1/1_Conf_1.000 | 191  | 0  |          |                |    |         |     |     |                                      |
| Locus_13076_Transcript_1/1_Conf_1.000 | 837  | 0  |          |                |    |         |     |     |                                      |
| Locus_13077_Transcript_1/1_Conf_1.000 | 297  | 20 | 9.57E-21 | AAF36480.1     | 88 | 103.219 | 61  | 54  | glutathione S-transferase 2          |
| Locus_13078_Transcript_1/1_Conf_1.000 | 887  | 20 | 3.17E-48 | EFO25981.1     | 64 | 196.438 | 214 | 139 | MBD3 protein                         |
| Locus_13079_Transcript_1/1_Conf_1.000 | 463  | 20 | 2.21E-41 | EFO25969.1     | 77 | 171.785 | 148 | 115 | abnormal epithelia family member     |
| Locus_1308_Transcript_1/1_Conf_1.000  | 353  | 2  | 2.71E-07 | XP_002643980.1 | 53 | 58.5362 | 101 | 54  | C. briggsae CBR-OCT-2 protein        |
| Locus_13080_Transcript_1/1_Conf_1.000 | 521  | 3  | 6.82E-07 | XP_002647552.1 | 55 | 57.3806 | 95  | 53  | Hypothetical protein CBG06638        |
| Locus_13081_Transcript_1/1_Conf_1.000 | 2063 | 20 | 0        | EFO26190.1     | 76 | 647.121 | 510 | 390 | BTB/POZ domain-containing protein 2  |
| Locus_13082_Transcript_1/2_Conf_1.000 | 895  | 20 | 3.45E-50 | EFO21942.1     | 75 | 202.986 | 160 | 121 | kynurenine-oxoglutarate transaminase |
| Locus_13082_Transcript_2/2_Conf_1.000 | 895  | 20 | 3.45E-50 | EFO21942.1     | 75 | 202.986 | 160 | 121 | kynurenine-oxoglutarate transaminase |
| Locus_13083_Transcript_1/1_Conf_1.000 | 790  | 0  |          |                |    |         |     |     |                                      |
| Locus_13084_Transcript_1/1_Conf_1.000 | 193  | 2  | 7.92E-15 | NP_498089.2    | 77 | 83.5741 | 62  | 48  | hypothetical protein Y54H5A.2        |
| Locus_13085_Transcript_1/1_Conf_1.000 | 880  | 20 | 6.31E-41 | XP_001900446.1 | 95 | 172.17  | 86  | 82  | MYND finger family protein           |
| Locus_13086_Transcript_1/1_Conf_1.000 | 229  | 20 | 4.63E-15 | NP_500708.1    | 71 | 84.3445 | 63  | 45  | hypothetical protein C09B9.4         |
| Locus_13087_Transcript_1/1_Conf_1.000 | 372  | 0  |          |                |    |         |     |     |                                      |

|                                       |      |    |          |                |    |         |     |     |                                                                         |
|---------------------------------------|------|----|----------|----------------|----|---------|-----|-----|-------------------------------------------------------------------------|
| Locus_13088_Transcript_1/1_Conf_1.000 | 479  | 20 | 1.50E-34 | NP_503037.2    | 72 | 149.058 | 121 | 88  | ITSN (intersectin) family member (itsn-1)                               |
| Locus_13089_Transcript_1/1_Conf_1.000 | 406  | 0  |          |                |    |         |     |     |                                                                         |
| Locus_1309_Transcript_1/1_Conf_1.000  | 2613 | 20 | 0        | XP_002637775.1 | 90 | 640.958 | 390 | 351 | C. briggsae CBR-UNC-112 protein                                         |
| Locus_13090_Transcript_1/1_Conf_1.000 | 526  | 18 | 4.91E-24 | XP_002643238.1 | 88 | 114.39  | 70  | 62  | Hypothetical protein CBG08105                                           |
| Locus_13091_Transcript_1/1_Conf_1.000 | 530  | 0  |          |                |    |         |     |     |                                                                         |
| Locus_13092_Transcript_1/1_Conf_1.000 | 334  | 0  |          |                |    |         |     |     |                                                                         |
| Locus_13093_Transcript_1/2_Conf_1.000 | 579  | 20 | 3.25E-10 | NP_502107.1    | 65 | 62.7734 | 55  | 36  | COLLAGEN family member (col-125)                                        |
| Locus_13093_Transcript_2/2_Conf_1.000 | 579  | 20 | 1.49E-10 | NP_502107.1    | 65 | 63.929  | 55  | 36  | COLLAGEN family member (col-125)                                        |
| Locus_13094_Transcript_1/1_Conf_1.000 | 176  | 20 | 1.20E-15 | XP_001898544.1 | 84 | 86.2705 | 58  | 49  | Probable methylenetetrahydrofolate reductase                            |
| Locus_13095_Transcript_1/1_Conf_1.000 | 305  | 0  |          |                |    |         |     |     |                                                                         |
| Locus_13096_Transcript_1/1_Conf_1.000 | 310  | 0  |          |                |    |         |     |     |                                                                         |
| Locus_13097_Transcript_1/1_Conf_1.000 | 460  | 20 | 1.19E-23 | CAV31771.1     | 96 | 112.849 | 52  | 50  | C. elegans protein F25D7.3b, partially confirmed by transcript evidence |
| Locus_13098_Transcript_1/1_Conf_1.000 | 473  | 5  | 2.97E-22 | NP_497202.2    | 65 | 108.227 | 110 | 72  | hypothetical protein F10C5.2                                            |
| Locus_13099_Transcript_1/1_Conf_1.000 | 322  | 0  |          |                |    |         |     |     |                                                                         |

|                                       |      |    |           |                |     |         |     |     |                                              |
|---------------------------------------|------|----|-----------|----------------|-----|---------|-----|-----|----------------------------------------------|
| Locus_131_Transcript_1/1_Conf_1.000   | 1566 | 20 | 2.64E-130 | ADD54353.1     | 97  | 470.315 | 385 | 375 | NADH dehydrogenase subunit 4                 |
| Locus_1310_Transcript_1/2_Conf_0.857  | 546  | 19 | 3.36E-05  | EFO26634.1     | 40  | 51.9878 | 106 | 43  | hypothetical protein LOAG_01858              |
| Locus_1310_Transcript_2/2_Conf_0.857  | 516  | 5  | 1.07E-04  | XP_539701.2    | 54  | 50.0618 | 55  | 30  | PREDICTED: similar to CG31690-PB, isoform B  |
| Locus_13100_Transcript_1/1_Conf_1.000 | 315  | 20 | 2.71E-39  | NP_001041037.1 | 86  | 164.851 | 105 | 91  | GLYcosylation related family member (gly-10) |
| Locus_13101_Transcript_1/1_Conf_1.000 | 440  | 20 | 9.96E-55  | NP_508530.1    | 85  | 216.083 | 138 | 118 | yeast SEC homolog family member (sec-3)      |
| Locus_13102_Transcript_1/1_Conf_1.000 | 207  | 4  | 1.20E-15  | XP_002642004.1 | 100 | 86.2705 | 41  | 41  | C. briggsae CBR-TOH-1 protein                |
| Locus_13103_Transcript_1/1_Conf_1.000 | 253  | 20 | 3.81E-33  | XP_002640505.1 | 91  | 144.436 | 84  | 77  | Hypothetical protein CBG13644                |
| Locus_13104_Transcript_1/1_Conf_1.000 | 161  | 20 | 1.45E-21  | CAB93148.1     | 97  | 79.337  | 35  | 34  | HDJ2 protein                                 |
| Locus_13105_Transcript_1/1_Conf_1.000 | 174  | 0  |           |                |     |         |     |     |                                              |
| Locus_13106_Transcript_1/1_Conf_1.000 | 579  | 2  | 1.19E-09  | XP_002642979.1 | 80  | 67.0106 | 50  | 40  | Hypothetical protein CBG15263                |

|                                       |      |    |           |                |    |         |     |     |                                                                                          |
|---------------------------------------|------|----|-----------|----------------|----|---------|-----|-----|------------------------------------------------------------------------------------------|
| Locus_13107_Transcript_1/1_Conf_1.000 | 301  | 20 | 5.03E-38  | XP_001899774.1 | 92 | 160.614 | 93  | 86  | Guanine nucleotide exchange factor for Ras-like GTPases; N-terminal motif family protein |
| Locus_13108_Transcript_1/1_Conf_1.000 | 241  | 0  |           |                |    |         |     |     |                                                                                          |
| Locus_13109_Transcript_1/1_Conf_1.000 | 1259 | 20 | 5.19E-107 | NP_496341.1    | 68 | 392.504 | 393 | 268 | EGG sterile (unfertilizable) family member (egg-3)                                       |
| Locus_13111_Transcript_1/1_Conf_1.000 | 1046 | 18 | 4.94E-17  | ABB53347.1     | 38 | 93.2041 | 306 | 119 | secreted protein 5 precursor                                                             |
| Locus_13110_Transcript_1/1_Conf_1.000 | 328  | 8  | 3.17E-32  | NP_001024859.1 | 79 | 141.354 | 110 | 87  | hypothetical protein R11G1.6                                                             |
| Locus_13111_Transcript_1/1_Conf_1.000 | 219  | 0  |           |                |    |         |     |     |                                                                                          |
| Locus_13112_Transcript_1/1_Conf_1.000 | 185  | 11 | 1.36E-14  | XP_002631488.1 | 80 | 82.8037 | 61  | 49  | C. briggsae CBR-PTR-8 protein                                                            |
| Locus_13113_Transcript_1/1_Conf_1.000 | 414  | 2  | 2.48E-21  | XP_002633521.1 | 76 | 105.145 | 86  | 66  | Hypothetical protein CBG05384                                                            |
| Locus_13114_Transcript_1/1_Conf_1.000 | 929  | 20 | 7.07E-102 | NP_001024859.1 | 75 | 374.785 | 317 | 239 | hypothetical protein R11G1.6                                                             |
| Locus_13115_Transcript_1/2_Conf_1.000 | 785  | 20 | 4.39E-16  | XP_002158068.1 | 51 | 89.3521 | 176 | 90  | PREDICTED: similar to Forkhead box protein J1                                            |
| Locus_13115_Transcript_2/2_Conf_1.000 | 776  | 20 | 6.61E-17  | XP_002158068.1 | 50 | 92.0485 | 173 | 87  | PREDICTED: similar to Forkhead box protein J1                                            |

|                                       |      |    |          |                |     |         |     |     |                                                                         |
|---------------------------------------|------|----|----------|----------------|-----|---------|-----|-----|-------------------------------------------------------------------------|
| Locus_13116_Transcript_1/1_Conf_1.000 | 597  | 20 | 8.14E-81 | CAB07859.3     | 83  | 303.523 | 206 | 173 | C. elegans protein W09D10.2, partially confirmed by transcript evidence |
| Locus_13117_Transcript_1/1_Conf_1.000 | 234  | 0  |          |                |     |         |     |     |                                                                         |
| Locus_13118_Transcript_1/1_Conf_1.000 | 464  | 20 | 5.99E-63 | NP_502809.2    | 88  | 243.432 | 153 | 135 | hypothetical protein Y41E3.3                                            |
| Locus_13119_Transcript_1/1_Conf_1.000 | 502  | 20 | 8.96E-59 | XP_002630065.1 | 82  | 229.565 | 156 | 129 | Hypothetical protein CBG13441                                           |
| Locus_1312_Transcript_1/4_Conf_0.250  | 1458 | 5  | 7.02E-13 | XP_002642206.1 | 40  | 80.1073 | 228 | 92  | C. briggsae CBR-BRP-1 protein                                           |
| Locus_1312_Transcript_2/4_Conf_0.250  | 1496 | 5  | 7.27E-13 | XP_002642206.1 | 40  | 80.1073 | 228 | 92  | C. briggsae CBR-BRP-1 protein                                           |
| Locus_1312_Transcript_3/4_Conf_0.667  | 1503 | 5  | 7.33E-13 | XP_002642206.1 | 40  | 80.1073 | 228 | 92  | C. briggsae CBR-BRP-1 protein                                           |
| Locus_1312_Transcript_4/4_Conf_0.667  | 1509 | 5  | 7.37E-13 | XP_002642206.1 | 40  | 80.1073 | 228 | 92  | C. briggsae CBR-BRP-1 protein                                           |
| Locus_13120_Transcript_1/1_Conf_1.000 | 205  | 0  |          |                |     |         |     |     |                                                                         |
| Locus_13121_Transcript_1/1_Conf_1.000 | 261  | 0  |          |                |     |         |     |     |                                                                         |
| Locus_13122_Transcript_1/1_Conf_1.000 | 451  | 5  | 1.25E-12 | XP_001901679.1 | 89  | 76.2554 | 46  | 41  | Immunoglobulin I-set domain containing protein                          |
| Locus_13123_Transcript_1/1_Conf_1.000 | 750  | 20 | 7.85E-44 | NP_001122771.1 | 59  | 181.415 | 251 | 149 | hypothetical protein F13H10.4                                           |
| Locus_13124_Transcript_1/1_Conf_1.000 | 610  | 20 | 5.60E-72 | XP_002637344.1 | 83  | 274.248 | 181 | 152 | C. briggsae CBR-ODC-1 protein                                           |
| Locus_13125_Transcript_1/1_Conf_1.000 | 563  | 20 | 4.00E-97 | EFB27138.1     | 100 | 357.451 | 175 | 175 | hypothetical protein PANDA_001098                                       |

|                                       |      |    |          |                |     |         |     |     |                                        |
|---------------------------------------|------|----|----------|----------------|-----|---------|-----|-----|----------------------------------------|
| Locus_13126_Transcript_1/1_Conf_1.000 | 329  | 20 | 3.25E-53 | EAW77587.1     | 100 | 211.075 | 109 | 109 | annexin A2, isoform CRA_c              |
| Locus_13127_Transcript_1/1_Conf_1.000 | 284  | 0  |          |                |     |         |     |     |                                        |
| Locus_13128_Transcript_1/2_Conf_1.000 | 417  | 0  |          |                |     |         |     |     |                                        |
| Locus_13128_Transcript_2/2_Conf_1.000 | 869  | 6  | 1.44E-21 | XP_002635348.1 | 57  | 107.842 | 208 | 120 | C. briggsae CBR-DNJ-22 protein         |
| Locus_13129_Transcript_1/1_Conf_1.000 | 437  | 13 | 6.14E-12 | XP_002412316.1 | 59  | 73.9442 | 105 | 62  | conserved hypothetical protein         |
| Locus_1313_Transcript_1/2_Conf_1.000  | 1167 | 20 | 1.16E-73 | XP_002641912.1 | 82  | 281.567 | 242 | 200 | C. briggsae CBR-RNP-7 protein          |
| Locus_1313_Transcript_2/2_Conf_1.000  | 835  | 20 | 3.77E-16 | XP_001896769.1 | 69  | 89.7373 | 95  | 66  | hypothetical protein Bm1_26580         |
| Locus_13130_Transcript_1/1_Conf_1.000 | 129  | 20 | 6.40E-09 | XP_002603055.1 | 86  | 63.929  | 38  | 33  | hypothetical protein BRAFLDRAFT_274883 |

|                                       |      |    |          |                |    |         |     |     |                                                                         |
|---------------------------------------|------|----|----------|----------------|----|---------|-----|-----|-------------------------------------------------------------------------|
| Locus_13131_Transcript_1/1_Conf_1.000 | 261  | 0  |          |                |    |         |     |     |                                                                         |
| Locus_13132_Transcript_1/1_Conf_1.000 | 645  | 15 | 3.83E-16 | XP_002646317.1 | 68 | 88.9669 | 147 | 101 | Hypothetical protein CBG12024                                           |
| Locus_13133_Transcript_1/1_Conf_1.000 | 281  | 2  | 1.01E-06 | XP_002639296.1 | 54 | 56.6102 | 95  | 52  | Hypothetical protein CBG03866                                           |
| Locus_13134_Transcript_1/1_Conf_1.000 | 768  | 20 | 9.91E-58 | XP_001893225.1 | 64 | 227.639 | 257 | 165 | Myb-like DNA-binding domain containing protein                          |
| Locus_13135_Transcript_1/1_Conf_1.000 | 410  | 20 | 6.34E-33 | XP_002632976.1 | 70 | 143.665 | 122 | 86  | Hypothetical protein CBG21736                                           |
| Locus_13136_Transcript_1/1_Conf_1.000 | 203  | 20 | 7.11E-08 | NP_001079447.1 | 69 | 60.4622 | 56  | 39  | phosphatidylinositol-specific phospholipase C, X domain containing 2    |
| Locus_13137_Transcript_1/1_Conf_1.000 | 1025 | 0  |          |                |    |         |     |     |                                                                         |
| Locus_13138_Transcript_1/1_Conf_1.000 | 130  | 4  | 5.78E-18 | NP_001022641.1 | 95 | 93.9745 | 43  | 41  | LEThal family member (let-805)                                          |
| Locus_13139_Transcript_1/1_Conf_1.000 | 239  | 20 | 4.41E-34 | NP_496717.1    | 98 | 147.517 | 79  | 78  | hypothetical protein Y46G5A.12                                          |
| Locus_1314_Transcript_1/1_Conf_1.000  | 933  | 4  | 1.75E-07 | NP_741911.1    | 65 | 61.2326 | 66  | 43  | Suppressor of Constitutive Dauer formation family member (scd-1)        |
| Locus_13140_Transcript_1/1_Conf_1.000 | 275  | 7  | 1.47E-05 | NP_740998.1    | 63 | 52.7582 | 46  | 29  | hypothetical protein C25H3.7                                            |
| Locus_13141_Transcript_1/1_Conf_1.000 | 143  | 20 | 1.32E-06 | CAB00874.2     | 63 | 56.225  | 47  | 30  | C. elegans protein R09H10.5, partially confirmed by transcript evidence |

|                                       |      |    |          |                |    |         |     |     |                                                   |
|---------------------------------------|------|----|----------|----------------|----|---------|-----|-----|---------------------------------------------------|
| Locus_13142_Transcript_1/1_Conf_1.000 | 148  | 8  | 7.72E-18 | XP_002640908.1 | 95 | 93.5893 | 48  | 46  | Hypothetical protein CBG00466                     |
| Locus_13143_Transcript_1/1_Conf_1.000 | 239  | 0  |          |                |    |         |     |     |                                                   |
| Locus_13144_Transcript_1/1_Conf_1.000 | 312  | 20 | 4.20E-40 |                | 87 | 167.548 | 102 | 89  | protein K10D6.2b                                  |
| Locus_13145_Transcript_1/2_Conf_1.000 | 787  | 20 | 2.22E-92 | XP_002631607.1 | 78 | 342.813 | 261 | 204 | Hypothetical protein CBG20788                     |
| Locus_13145_Transcript_2/2_Conf_1.000 | 787  | 20 | 4.94E-92 | XP_002631607.1 | 77 | 341.658 | 261 | 203 | Hypothetical protein CBG20788                     |
| Locus_13146_Transcript_1/1_Conf_1.000 | 661  | 20 | 1.31E-67 | XP_002641643.1 | 81 | 259.996 | 180 | 147 | C. briggsae CBR-SQV-3 protein                     |
| Locus_13147_Transcript_1/1_Conf_1.000 | 181  | 0  |          |                |    |         |     |     |                                                   |
| Locus_13148_Transcript_1/1_Conf_1.000 | 450  | 0  |          |                |    |         |     |     |                                                   |
| Locus_13149_Transcript_1/1_Conf_1.000 | 598  | 1  | 8.06E-04 | XP_002063859.1 | 40 | 47.7506 | 159 | 64  | GK15899                                           |
| Locus_1315_Transcript_1/1_Conf_1.000  | 1262 | 0  |          |                |    |         |     |     |                                                   |
| Locus_13150_Transcript_1/2_Conf_1.000 | 374  | 0  |          |                |    |         |     |     |                                                   |
| Locus_13150_Transcript_2/2_Conf_1.000 | 281  | 0  |          |                |    |         |     |     |                                                   |
| Locus_13151_Transcript_1/1_Conf_1.000 | 720  | 20 | 3.04E-10 | XP_001323102.1 | 48 | 69.707  | 235 | 115 | viral A-type inclusion protein                    |
| Locus_13152_Transcript_1/1_Conf_1.000 | 288  | 2  | 1.66E-04 | XP_001898158.1 | 53 | 49.2914 | 86  | 46  | hypothetical protein Bm1_33560                    |
| Locus_13153_Transcript_1/2_Conf_1.000 | 1066 | 20 | 1.62E-71 | NP_509394.1    | 78 | 274.248 | 224 | 175 | hypothetical protein M60.7                        |
| Locus_13153_Transcript_2/2_Conf_1.000 | 1065 | 20 | 1.62E-71 | NP_509394.1    | 78 | 274.248 | 224 | 175 | hypothetical protein M60.7                        |
| Locus_13154_Transcript_1/1_Conf_1.000 | 331  | 20 | 3.85E-38 | NP_492132.1    | 90 | 160.999 | 110 | 99  | Enhancer of Glp-One (glp-1) family member (ego-1) |
| Locus_13155_Transcript_1/2_Conf_1.000 | 584  | 0  |          |                |    |         |     |     |                                                   |
| Locus_13155_Transcript_2/2_Conf_1.000 | 584  | 0  |          |                |    |         |     |     |                                                   |
| Locus_13156_Transcript_1/1_Conf_1.000 | 197  | 0  |          |                |    |         |     |     |                                                   |
| Locus_13157_Transcript_1/1_Conf_1.000 | 135  | 20 | 1.24E-12 | XP_002643051.1 | 88 | 76.2554 | 45  | 40  | C. briggsae CBR-DPF-6 protein                     |
| Locus_13158_Transcript_1/1_Conf_1.000 | 168  | 0  |          |                |    |         |     |     |                                                   |



|                                       |      |    |          |                |     |         |     |     |                                                                                         |
|---------------------------------------|------|----|----------|----------------|-----|---------|-----|-----|-----------------------------------------------------------------------------------------|
| Locus_13159_Transcript_1/1_Conf_1.000 | 581  | 20 | 1.34E-77 | NP_501968.2    | 83  | 292.738 | 193 | 161 | Flavin-containing MonoOxygenase family member (fmo-1)                                   |
| Locus_1316_Transcript_1/1_Conf_1.000  | 1659 | 20 | 0        | CAD29445.1     | 90  | 844.729 | 488 | 440 | protein disulfide isomerase 1                                                           |
| Locus_13160_Transcript_1/1_Conf_1.000 | 151  | 0  |          |                |     |         |     |     |                                                                                         |
| Locus_13161_Transcript_1/1_Conf_1.000 | 533  | 2  | 3.56E-17 | XP_002632168.1 | 64  | 91.6633 | 127 | 82  | C. briggsae CBR-PQN-85 protein                                                          |
| Locus_13162_Transcript_1/1_Conf_1.000 | 369  | 20 | 2.47E-16 | XP_001626861.1 | 67  | 88.5817 | 87  | 59  | predicted protein                                                                       |
| Locus_13163_Transcript_1/2_Conf_1.000 | 507  | 20 | 1.57E-21 | XP_002926282.1 | 61  | 105.916 | 131 | 81  | PREDICTED: poly(ADP-ribose) glycohydrolase-like                                         |
| Locus_13163_Transcript_2/2_Conf_1.000 | 507  | 20 | 5.39E-22 | XP_002926282.1 | 61  | 107.457 | 131 | 81  | PREDICTED: poly(ADP-ribose) glycohydrolase-like                                         |
| Locus_13164_Transcript_1/1_Conf_1.000 | 146  | 9  | 6.55E-17 | XP_002805525.1 | 100 | 90.5077 | 42  | 42  | PREDICTED: hypothetical protein LOC100426852                                            |
| Locus_13165_Transcript_1/1_Conf_1.000 | 399  | 0  |          |                |     |         |     |     |                                                                                         |
| Locus_13166_Transcript_1/1_Conf_1.000 | 472  | 20 | 7.26E-45 | XP_002645831.1 | 72  | 183.341 | 162 | 117 | C. briggsae CBR-RBC-1 protein                                                           |
| Locus_13167_Transcript_1/1_Conf_1.000 | 412  | 0  |          |                |     |         |     |     |                                                                                         |
| Locus_13168_Transcript_1/1_Conf_1.000 | 195  | 1  | 2.08E-15 | EAW79999.1     | 97  | 85.5001 | 40  | 39  | MYC-associated zinc finger protein (purine-binding transcription factor), isoform CRA_f |
| Locus_13169_Transcript_1/1_Conf_1.000 | 539  | 0  |          |                |     |         |     |     |                                                                                         |
| Locus_1317_Transcript_1/2_Conf_1.000  | 3302 | 20 | 0        | NP_507869.1    | 68  | 815.839 | 899 | 615 | UNCoordinated family member (unc-51)                                                    |

|                                       |      |    |          |                |    |         |     |     |                                                                               |
|---------------------------------------|------|----|----------|----------------|----|---------|-----|-----|-------------------------------------------------------------------------------|
| Locus_1317_Transcript_2/2_Conf_1.000  | 3296 | 20 | 0        | NP_507869.1    | 66 | 815.068 | 917 | 612 | UNCoordinated family member (unc-51)                                          |
| Locus_13170_Transcript_1/1_Conf_1.000 | 475  | 0  |          |                |    |         |     |     |                                                                               |
| Locus_13171_Transcript_1/1_Conf_1.000 | 438  | 0  |          |                |    |         |     |     |                                                                               |
| Locus_13172_Transcript_1/1_Conf_1.000 | 320  | 20 | 2.63E-18 | XP_002635663.1 | 72 | 95.1301 | 79  | 57  | Hypothetical protein CBG21858                                                 |
| Locus_13173_Transcript_1/1_Conf_1.000 | 823  | 20 | 1.19E-99 | XP_002643926.1 | 87 | 367.081 | 244 | 214 | C. briggsae CBR-SFXN-1.5 protein                                              |
| Locus_13174_Transcript_1/1_Conf_1.000 | 445  | 0  |          |                |    |         |     |     |                                                                               |
| Locus_13175_Transcript_1/2_Conf_1.000 | 537  | 20 | 7.99E-41 | NP_501090.1    | 72 | 170.244 | 166 | 121 | hypothetical protein C06G3.9                                                  |
| Locus_13175_Transcript_2/2_Conf_1.000 | 537  | 20 | 3.04E-40 | NP_501090.1    | 71 | 168.318 | 166 | 119 | hypothetical protein C06G3.9                                                  |
| Locus_13176_Transcript_1/1_Conf_1.000 | 686  | 0  |          |                |    |         |     |     |                                                                               |
| Locus_13177_Transcript_1/1_Conf_1.000 | 390  | 20 | 6.95E-32 | NP_501302.1    | 78 | 140.198 | 125 | 98  | MVB (yeast MultiVesicular Body sorting factor) related family member (mvb-12) |

|                                       |      |    |           |                |    |         |     |     |                                                                         |
|---------------------------------------|------|----|-----------|----------------|----|---------|-----|-----|-------------------------------------------------------------------------|
| Locus_13178_Transcript_1/1_Conf_1.000 | 1520 | 20 | 2.12E-84  | XP_002636129.1 | 61 | 317.775 | 396 | 243 | C. briggsae CBR-ATGR-9 protein                                          |
| Locus_13179_Transcript_1/1_Conf_1.000 | 199  | 0  |           |                |    |         |     |     |                                                                         |
| Locus_1318_Transcript_1/1_Conf_1.000  | 553  | 20 | 1.31E-44  | NP_741320.1    | 65 | 182.956 | 183 | 119 | SET (trithorax/polycomb) domain containing family member (set-23)       |
| Locus_13180_Transcript_1/1_Conf_1.000 | 843  | 20 | 6.24E-75  | XP_002639128.1 | 78 | 285.034 | 223 | 174 | C. briggsae CBR-SPG-7 protein                                           |
| Locus_13181_Transcript_1/1_Conf_1.000 | 866  | 20 | 1.28E-62  | XP_002637088.1 | 67 | 244.202 | 248 | 168 | Hypothetical protein CBG09587                                           |
| Locus_13182_Transcript_1/1_Conf_1.000 | 721  | 20 | 1.81E-79  | NP_508983.2    | 75 | 299.671 | 253 | 192 | CTBP (CtBP) transcriptional co-repressor homolog family member (ctbp-1) |
| Locus_13183_Transcript_1/1_Conf_1.000 | 267  | 0  |           |                |    |         |     |     |                                                                         |
| Locus_13184_Transcript_1/1_Conf_1.000 | 333  | 0  |           |                |    |         |     |     |                                                                         |
| Locus_13185_Transcript_1/1_Conf_1.000 | 425  | 0  |           |                |    |         |     |     |                                                                         |
| Locus_13186_Transcript_1/1_Conf_1.000 | 196  | 0  |           |                |    |         |     |     |                                                                         |
| Locus_13187_Transcript_1/1_Conf_1.000 | 807  | 0  |           |                |    |         |     |     |                                                                         |
| Locus_13188_Transcript_1/1_Conf_1.000 | 344  | 4  | 1.83E-11  | NP_504395.2    | 56 | 72.4034 | 115 | 65  | hypothetical protein Y47A7.1                                            |
| Locus_13189_Transcript_1/2_Conf_1.000 | 280  | 2  | 1.24E-04  | EFO19653.1     | 80 | 49.6766 | 41  | 33  | pre-B cell enhancing factor                                             |
| Locus_13189_Transcript_2/2_Conf_1.000 | 222  | 0  |           |                |    |         |     |     |                                                                         |
| Locus_1319_Transcript_1/2_Conf_1.000  | 999  | 20 | 6.04E-142 | XP_002630817.1 | 88 | 508.064 | 311 | 276 | C. briggsae CBR-LEC-5 protein                                           |
| Locus_1319_Transcript_2/2_Conf_1.000  | 1023 | 20 | 1.27E-118 | XP_002630817.1 | 79 | 430.639 | 319 | 254 | C. briggsae CBR-LEC-5 protein                                           |
| Locus_13190_Transcript_1/1_Conf_1.000 | 170  | 0  |           |                |    |         |     |     |                                                                         |
| Locus_13191_Transcript_1/1_Conf_1.000 | 217  | 0  |           |                |    |         |     |     |                                                                         |
| Locus_13192_Transcript_1/1_Conf_1.000 | 318  | 0  |           |                |    |         |     |     |                                                                         |
| Locus_13193_Transcript_1/1_Conf_1.000 | 269  | 20 | 1.25E-20  | NP_001129924.1 | 80 | 102.834 | 89  | 72  | SLOWpoke potassium channel family member (slo-2)                        |
| Locus_13194_Transcript_1/1_Conf_1.000 | 995  | 5  | 6.55E-56  | EFO22136.1     | 64 | 222.246 | 273 | 176 | hypothetical protein LOAG_06352                                         |
| Locus_13195_Transcript_1/1_Conf_1.000 | 286  | 0  |           |                |    |         |     |     |                                                                         |
| Locus_13196_Transcript_1/1_Conf_1.000 | 332  | 0  |           |                |    |         |     |     |                                                                         |

|                                       |     |    |          |                |    |         |     |     |                                                 |
|---------------------------------------|-----|----|----------|----------------|----|---------|-----|-----|-------------------------------------------------|
| Locus_13197_Transcript_1/1_Conf_1.000 | 306 | 4  | 7.04E-08 | XP_002637153.1 | 81 | 60.4622 | 37  | 30  | Hypothetical protein CBG09655                   |
| Locus_13198_Transcript_1/1_Conf_1.000 | 220 | 20 | 3.03E-22 | XP_002630183.1 | 80 | 108.227 | 73  | 59  | C. briggsae CBR-FLI-1 protein                   |
| Locus_13199_Transcript_1/1_Conf_1.000 | 520 | 2  | 8.34E-05 | XP_002644141.1 | 56 | 50.447  | 65  | 37  | C. briggsae CBR-FLP-19 protein                  |
| Locus_132_Transcript_1/3_Conf_0.600   | 418 | 20 | 1.03E-30 | XP_002635598.1 | 80 | 136.346 | 130 | 105 | C. briggsae CBR-RPS-30 protein                  |
| Locus_132_Transcript_2/3_Conf_0.600   | 478 | 20 | 1.01E-30 | XP_002635598.1 | 80 | 136.346 | 130 | 105 | C. briggsae CBR-RPS-30 protein                  |
| Locus_132_Transcript_3/3_Conf_0.600   | 487 | 20 | 1.02E-30 | XP_002635598.1 | 80 | 136.346 | 130 | 105 | C. briggsae CBR-RPS-30 protein                  |
| Locus_1320_Transcript_1/1_Conf_1.000  | 360 | 4  | 2.50E-13 | NP_504235.2    | 64 | 78.5666 | 117 | 75  | Drosophila SOS homolog family member (sos-1)    |
| Locus_13200_Transcript_1/1_Conf_1.000 | 247 | 0  |          |                |    |         |     |     |                                                 |
| Locus_13201_Transcript_1/1_Conf_1.000 | 555 | 4  | 3.52E-37 | NP_493486.2    | 83 | 158.303 | 130 | 108 | hypothetical protein C49A1.10                   |
| Locus_13202_Transcript_1/1_Conf_1.000 | 345 | 0  |          |                |    |         |     |     |                                                 |
| Locus_13203_Transcript_1/1_Conf_1.000 | 221 | 0  |          |                |    |         |     |     |                                                 |
| Locus_13204_Transcript_1/1_Conf_1.000 | 451 | 6  | 6.85E-11 | XP_002632899.1 | 79 | 70.4774 | 54  | 43  | C. briggsae CBR-DAF-15 protein                  |
| Locus_13205_Transcript_1/2_Conf_1.000 | 231 | 20 | 2.07E-15 | XP_001898420.1 | 82 | 85.5001 | 64  | 53  | ATP-dependent DNA helicase, RecQ family protein |
| Locus_13205_Transcript_2/2_Conf_1.000 | 236 | 20 | 7.85E-15 | XP_001898420.1 | 82 | 83.5741 | 63  | 52  | ATP-dependent DNA helicase, RecQ family protein |
| Locus_13206_Transcript_1/1_Conf_1.000 | 218 | 0  |          |                |    |         |     |     |                                                 |
| Locus_13207_Transcript_1/1_Conf_1.000 | 423 | 0  |          |                |    |         |     |     |                                                 |
| Locus_13208_Transcript_1/1_Conf_1.000 | 616 | 20 | 2.70E-37 | EFO15564.1     | 60 | 159.073 | 202 | 123 | hypothetical protein LOAG_12944                 |

|                                       |      |    |          |                |    |         |     |     |                                                        |
|---------------------------------------|------|----|----------|----------------|----|---------|-----|-----|--------------------------------------------------------|
| Locus_13209_Transcript_1/1_Conf_1.000 | 358  | 20 | 2.76E-28 | NP_505501.1    | 72 | 128.257 | 119 | 86  | Temporarily Assigned Gene name family member (tag-120) |
| Locus_1321_Transcript_1/2_Conf_1.000  | 1618 | 20 | 6.21E-98 | NP_500797.1    | 81 | 362.844 | 246 | 200 | fatty acid ELongation family member (elo-6)            |
| Locus_1321_Transcript_2/2_Conf_1.000  | 1618 | 20 | 6.21E-98 | NP_500797.1    | 81 | 362.844 | 246 | 200 | fatty acid ELongation family member (elo-6)            |
| Locus_13210_Transcript_1/1_Conf_1.000 | 362  | 20 | 1.32E-38 | NP_497625.3    | 87 | 162.54  | 101 | 88  | hypothetical protein Y71H2AM.1                         |
| Locus_13211_Transcript_1/1_Conf_1.000 | 236  | 0  |          |                |    |         |     |     |                                                        |
| Locus_13212_Transcript_1/1_Conf_1.000 | 201  | 0  |          |                |    |         |     |     |                                                        |
| Locus_13213_Transcript_1/1_Conf_1.000 | 178  | 2  | 5.03E-06 | XP_002639575.1 | 65 | 54.299  | 60  | 39  | C. briggsae CBR-BAM-2 protein                          |
| Locus_13214_Transcript_1/1_Conf_1.000 | 663  | 20 | 1.86E-53 | NP_001024840.1 | 74 | 213.001 | 213 | 159 | hypothetical protein R07E4.1                           |
| Locus_13215_Transcript_1/1_Conf_1.000 | 606  | 20 | 1.43E-11 | XP_002632653.1 | 46 | 73.559  | 188 | 88  | Hypothetical protein CBG21575                          |
| Locus_13216_Transcript_1/1_Conf_1.000 | 418  | 0  |          |                |    |         |     |     |                                                        |
| Locus_13217_Transcript_1/1_Conf_1.000 | 563  | 0  |          |                |    |         |     |     |                                                        |
| Locus_13218_Transcript_1/1_Conf_1.000 | 320  | 0  |          |                |    |         |     |     |                                                        |
| Locus_13219_Transcript_1/1_Conf_1.000 | 166  | 0  |          |                |    |         |     |     |                                                        |
| Locus_1322_Transcript_1/1_Conf_1.000  | 1273 | 20 | 2.72E-95 | NP_504655.1    | 91 | 353.599 | 202 | 184 | DumPY : shorter than wild-type family member (dpy-11)  |
| Locus_13220_Transcript_1/1_Conf_1.000 | 333  | 0  |          |                |    |         |     |     |                                                        |
| Locus_13221_Transcript_1/1_Conf_1.000 | 400  | 20 | 2.90E-09 | XP_002720026.1 | 53 | 65.0846 | 94  | 50  | PREDICTED: heterochromatin protein 1-beta-like         |
| Locus_13222_Transcript_1/1_Conf_1.000 | 369  | 0  |          |                |    |         |     |     |                                                        |
| Locus_13223_Transcript_1/2_Conf_1.000 | 497  | 20 | 1.22E-68 | ACY40004.1     | 87 | 262.307 | 162 | 142 | K+/cl- cotransporter protein 2, isoform c              |

|                                       |     |    |          |                |    |         |     |     |                                           |
|---------------------------------------|-----|----|----------|----------------|----|---------|-----|-----|-------------------------------------------|
| Locus_13223_Transcript_2/2_Conf_1.000 | 497 | 20 | 1.22E-68 | ACY40004.1     | 87 | 262.307 | 162 | 142 | K+/cl- cotransporter protein 2, isoform c |
| Locus_13224_Transcript_1/1_Conf_1.000 | 236 | 3  | 1.87E-08 | NP_001024264.1 | 58 | 62.3882 | 77  | 45  | hypothetical protein Y58G8A.4             |
| Locus_13225_Transcript_1/1_Conf_1.000 | 303 | 0  |          |                |    |         |     |     |                                           |
| Locus_13226_Transcript_1/1_Conf_1.000 | 276 | 0  |          |                |    |         |     |     |                                           |
| Locus_13227_Transcript_1/1_Conf_1.000 | 377 | 20 | 2.37E-19 | EFO22101.1     | 68 | 98.5969 | 95  | 65  | hypothetical protein LOAG_06386           |
| Locus_13228_Transcript_1/1_Conf_1.000 | 175 | 0  |          |                |    |         |     |     |                                           |
| Locus_13229_Transcript_1/1_Conf_1.000 | 352 | 20 | 5.64E-13 | EFO19207.1     | 78 | 77.411  | 60  | 47  | hypothetical protein LOAG_09288           |
| Locus_1323_Transcript_1/2_Conf_1.000  | 261 | 20 | 5.83E-26 | EFO20001.1     | 80 | 120.553 | 86  | 69  | Sel1l protein                             |
| Locus_1323_Transcript_2/2_Conf_1.000  | 261 | 20 | 5.83E-26 | EFO20001.1     | 80 | 120.553 | 86  | 69  | Sel1l protein                             |
| Locus_13230_Transcript_1/1_Conf_1.000 | 304 | 2  | 7.26E-29 | NP_508948.2    | 80 | 130.183 | 100 | 80  | hypothetical protein T21F4.1              |
| Locus_13231_Transcript_1/1_Conf_1.000 | 418 | 20 | 4.21E-16 | XP_001893741.1 | 60 | 87.8113 | 110 | 67  | LIM domain containing protein             |
| Locus_13232_Transcript_1/1_Conf_1.000 | 305 | 4  | 7.03E-24 | XP_002636973.1 | 68 | 113.62  | 101 | 69  | Hypothetical protein CBG09454             |
| Locus_13233_Transcript_1/1_Conf_1.000 | 178 | 0  |          |                |    |         |     |     |                                           |
| Locus_13234_Transcript_1/1_Conf_1.000 | 248 | 0  |          |                |    |         |     |     |                                           |

|                                       |      |    |          |                |    |         |     |     |                                     |
|---------------------------------------|------|----|----------|----------------|----|---------|-----|-----|-------------------------------------|
| Locus_13235_Transcript_1/1_Conf_1.000 | 542  | 20 | 1.52E-79 | XP_002630154.1 | 95 | 298.901 | 160 | 153 | C. briggsae CBR-ARL-1 protein       |
| Locus_13236_Transcript_1/1_Conf_1.000 | 1407 | 20 | 4.01E-42 | XP_002632130.1 | 75 | 177.178 | 185 | 140 | C. briggsae CBR-COL-68 protein      |
| Locus_13237_Transcript_1/1_Conf_1.000 | 413  | 20 | 4.99E-38 | NP_491552.2    | 87 | 160.614 | 137 | 120 | LEThal family member (let-363)      |
| Locus_13238_Transcript_1/1_Conf_1.000 | 349  | 20 | 6.85E-43 | XP_002760231.1 | 98 | 176.792 | 114 | 112 | PREDICTED: prefoldin subunit 2-like |
| Locus_13239_Transcript_1/1_Conf_1.000 | 155  | 2  | 3.34E-05 | NP_498595.1    | 66 | 51.6026 | 53  | 35  | hypothetical protein T20H4.5        |
| Locus_1324_Transcript_1/1_Conf_1.000  | 370  | 0  |          |                |    |         |     |     |                                     |
| Locus_13240_Transcript_1/1_Conf_1.000 | 134  | 0  |          |                |    |         |     |     |                                     |
| Locus_13241_Transcript_1/1_Conf_1.000 | 483  | 20 | 3.44E-18 | XP_002639738.1 | 63 | 94.7449 | 101 | 64  | Hypothetical protein CBG12466       |
| Locus_13242_Transcript_1/1_Conf_1.000 | 391  | 20 | 6.31E-25 | XP_002639033.1 | 77 | 117.087 | 93  | 72  | Hypothetical protein CBG22282       |
| Locus_13243_Transcript_1/1_Conf_1.000 | 748  | 4  | 5.58E-42 | XP_001892872.1 | 71 | 175.252 | 170 | 121 | hypothetical protein Bm1_07015      |
| Locus_13244_Transcript_1/1_Conf_1.000 | 265  | 7  | 2.22E-09 | XP_001901023.1 | 95 | 65.4698 | 40  | 38  | hypothetical protein Bm1_47805      |
| Locus_13245_Transcript_1/1_Conf_1.000 | 575  | 20 | 6.01E-83 | NP_493544.2    | 90 | 310.457 | 181 | 164 | hypothetical protein Y105E88.3      |

|                                       |      |    |           |                |    |         |     |     |                                   |
|---------------------------------------|------|----|-----------|----------------|----|---------|-----|-----|-----------------------------------|
| Locus_13246_Transcript_1/2_Conf_1.000 | 558  | 10 | 3.30E-11  | NP_499177.3    | 41 | 72.0182 | 198 | 82  | hypothetical protein ZK632.7      |
| Locus_13246_Transcript_2/2_Conf_1.000 | 522  | 14 | 9.41E-12  | NP_499177.3    | 40 | 73.559  | 202 | 82  | hypothetical protein ZK632.7      |
| Locus_13247_Transcript_1/1_Conf_1.000 | 178  | 0  |           |                |    |         |     |     |                                   |
| Locus_13248_Transcript_1/1_Conf_1.000 | 424  | 1  | 2.15E-04  | AAK18978.3     | 53 | 48.9062 | 125 | 67  | Hypothetical protein T20F7.1      |
| Locus_13249_Transcript_1/1_Conf_1.000 | 728  | 20 | 5.90E-94  | AAV70493.1     | 82 | 347.821 | 230 | 190 | acetylcholine/choline transporter |
| Locus_1325_Transcript_1/1_Conf_1.000  | 679  | 20 | 6.08E-63  | XP_002631415.1 | 70 | 244.588 | 217 | 154 | Hypothetical protein CBG03266     |
| Locus_13250_Transcript_1/2_Conf_1.000 | 1727 | 20 | 0         | XP_002640216.1 | 81 | 750.74  | 529 | 433 | Hypothetical protein CBG12727     |
| Locus_13250_Transcript_2/2_Conf_1.000 | 1023 | 20 | 1.19E-140 | XP_002640216.1 | 83 | 503.827 | 323 | 271 | Hypothetical protein CBG12727     |
| Locus_13251_Transcript_1/1_Conf_1.000 | 401  | 0  |           |                |    |         |     |     |                                   |
| Locus_13252_Transcript_1/1_Conf_1.000 | 442  | 0  |           |                |    |         |     |     |                                   |
| Locus_13253_Transcript_1/1_Conf_1.000 | 185  | 0  |           |                |    |         |     |     |                                   |
| Locus_13254_Transcript_1/1_Conf_1.000 | 255  | 3  | 3.82E-09  | XP_002640308.1 | 75 | 64.6994 | 57  | 43  | Hypothetical protein CBG12847     |



|                                       |     |    |          |                |    |         |    |    |                      |
|---------------------------------------|-----|----|----------|----------------|----|---------|----|----|----------------------|
| Locus_13255_Transcript_1/2_Conf_1.000 | 251 | 20 | 1.55E-23 | XP_001901686.1 | 83 | 112.464 | 83 | 69 | Cohesin subunit SA-1 |
| Locus_13255_Transcript_2/2_Conf_1.000 | 251 | 20 | 1.55E-23 | XP_001901686.1 | 83 | 112.464 | 83 | 69 | Cohesin subunit SA-1 |
| Locus_13256_Transcript_1/1_Conf_1.000 | 325 | 0  |          |                |    |         |    |    |                      |
| Locus_13257_Transcript_1/1_Conf_1.000 | 316 | 0  |          |                |    |         |    |    |                      |

|                                       |      |    |           |                |    |         |     |     |                                                                     |
|---------------------------------------|------|----|-----------|----------------|----|---------|-----|-----|---------------------------------------------------------------------|
| Locus_13258_Transcript_1/1_Conf_1.000 | 690  | 20 | 7.06E-38  | EFO24692.1     | 65 | 161.384 | 164 | 108 | protein-tyrosine phosphatase                                        |
| Locus_13259_Transcript_1/1_Conf_1.000 | 1507 | 20 | 3.66E-113 | XP_002630297.1 | 72 | 413.305 | 410 | 299 | C. briggsae CBR-PCH-2 protein                                       |
| Locus_1326_Transcript_1/1_Conf_1.000  | 1316 | 20 | 1.64E-50  | NP_499287.2    | 57 | 204.912 | 254 | 147 | T BoX family member (tbx-8)                                         |
| Locus_13260_Transcript_1/1_Conf_1.000 | 2594 | 3  | 7.10E-04  | NP_001032352.2 | 51 | 51.2174 | 105 | 54  | tripartite motif-containing protein 71                              |
| Locus_13261_Transcript_1/1_Conf_1.000 | 2647 | 12 | 7.76E-14  | CAR63553.1     | 43 | 84.3445 | 252 | 110 | putative major allergen                                             |
| Locus_13262_Transcript_1/1_Conf_1.000 | 167  | 0  |           |                |    |         |     |     |                                                                     |
| Locus_13263_Transcript_1/1_Conf_1.000 | 482  | 20 | 3.83E-14  | XP_001902194.1 | 57 | 81.2629 | 138 | 79  | 3'-5' exoribonuclease CSL4 homolog                                  |
| Locus_13264_Transcript_1/1_Conf_1.000 | 441  | 20 | 1.49E-29  | NP_497626.1    | 65 | 132.494 | 125 | 82  | hypothetical protein Y71H2AR.1                                      |
| Locus_13265_Transcript_1/1_Conf_1.000 | 746  | 0  |           |                |    |         |     |     |                                                                     |
| Locus_13266_Transcript_1/1_Conf_1.000 | 271  | 20 | 6.15E-36  | CAR63585.1     | 95 | 153.68  | 88  | 84  | putative MAD-Like family member                                     |
| Locus_13267_Transcript_1/1_Conf_1.000 | 315  | 0  |           |                |    |         |     |     |                                                                     |
| Locus_13268_Transcript_1/1_Conf_1.000 | 311  | 5  | 1.40E-40  | NP_495954.1    | 93 | 169.088 | 103 | 96  | Regulator of HYpoxia-inducible factor (hif-1) family member (rhy-1) |

|                                       |      |    |           |                |     |         |     |     |                                 |
|---------------------------------------|------|----|-----------|----------------|-----|---------|-----|-----|---------------------------------|
| Locus_13269_Transcript_1/1_Conf_1.000 | 875  | 20 | 5.87E-55  | NP_498653.2    | 56  | 218.779 | 298 | 169 | LIGase family member (lig-4)    |
| Locus_1327_Transcript_1/1_Conf_1.000  | 1858 | 20 | 1.51E-50  | EFO27065.1     | 54  | 205.682 | 362 | 196 | hypothetical protein LOAG_01420 |
| Locus_13270_Transcript_1/1_Conf_1.000 | 1352 | 20 | 6.71E-47  | NP_499810.2    | 52  | 192.971 | 437 | 228 | hypothetical protein T25C8.1    |
| Locus_13271_Transcript_1/1_Conf_1.000 | 361  | 1  | 3.04E-27  | NP_493572.2    | 68  | 124.79  | 118 | 81  | hypothetical protein F39B2.8    |
| Locus_13272_Transcript_1/1_Conf_1.000 | 849  | 20 | 2.30E-109 | XP_002646355.1 | 81  | 399.438 | 283 | 230 | Hypothetical protein CBG12069   |
| Locus_13273_Transcript_1/1_Conf_1.000 | 306  | 0  |           |                |     |         |     |     |                                 |
| Locus_13274_Transcript_1/1_Conf_1.000 | 231  | 8  | 3.10E-11  | AAT72456.1     | 72  | 71.633  | 59  | 43  | FOG-3                           |
| Locus_13275_Transcript_1/1_Conf_1.000 | 727  | 2  | 2.61E-25  | XP_002636407.1 | 63  | 119.783 | 157 | 99  | Hypothetical protein CBG23059   |
| Locus_13276_Transcript_1/1_Conf_1.000 | 303  | 20 | 3.49E-23  | EFO20885.1     | 80  | 111.309 | 76  | 61  | hypothetical protein LOAG_07603 |
| Locus_13277_Transcript_1/1_Conf_1.000 | 247  | 0  |           |                |     |         |     |     |                                 |
| Locus_13278_Transcript_1/1_Conf_1.000 | 197  | 0  |           |                |     |         |     |     |                                 |
| Locus_13279_Transcript_1/1_Conf_1.000 | 1020 | 0  |           |                |     |         |     |     |                                 |
| Locus_1328_Transcript_1/2_Conf_0.500  | 1269 | 20 | 0         | NP_509217.2    | 89  | 652.129 | 381 | 341 | hypothetical protein F46H5.3    |
| Locus_1328_Transcript_2/2_Conf_0.500  | 1269 | 20 | 0         | NP_509217.2    | 89  | 649.047 | 381 | 340 | hypothetical protein F46H5.3    |
| Locus_13280_Transcript_1/1_Conf_1.000 | 233  | 10 | 1.88E-16  | XP_002642915.1 | 68  | 88.9669 | 76  | 52  | Hypothetical protein CBG15190   |
| Locus_13281_Transcript_1/1_Conf_1.000 | 350  | 6  | 1.75E-22  | XP_002636985.1 | 77  | 108.997 | 105 | 81  | Hypothetical protein CBG09473   |
| Locus_13282_Transcript_1/1_Conf_1.000 | 536  | 20 | 9.77E-84  | NP_000230.1    | 100 | 312.768 | 148 | 148 | lysozyme C precursor            |
| Locus_13283_Transcript_1/1_Conf_1.000 | 142  | 9  | 7.98E-12  | XP_002647278.1 | 82  | 73.559  | 46  | 38  | C. briggsae CBR-KETN-1 protein  |

|                                       |      |    |          |                |     |         |     |     |                                                                                                                  |
|---------------------------------------|------|----|----------|----------------|-----|---------|-----|-----|------------------------------------------------------------------------------------------------------------------|
| Locus_13284_Transcript_1/1_Conf_1.000 | 508  | 20 | 9.74E-56 | NP_496100.1    | 79  | 219.55  | 173 | 137 | hypothetical protein Y53C12B.1                                                                                   |
| Locus_13285_Transcript_1/1_Conf_1.000 | 564  | 20 | 9.16E-65 | AAP36795.1     | 100 | 249.98  | 128 | 128 | Homo sapiens CD59 antigen p18-20 (antigen identified by monoclonal antibodies 16.3A5, EJ16, EJ30, EL32 and G344) |
| Locus_13286_Transcript_1/1_Conf_1.000 | 588  | 12 | 1.14E-39 | XP_002638395.1 | 58  | 166.777 | 201 | 117 | Hypothetical protein CBG18604                                                                                    |
| Locus_13287_Transcript_1/2_Conf_1.000 | 1848 | 20 | 0        | XP_001896443.1 | 79  | 755.747 | 568 | 451 | DNA topoisomerase III beta-1                                                                                     |
| Locus_13287_Transcript_2/2_Conf_1.000 | 1848 | 20 | 0        | XP_001896443.1 | 79  | 754.977 | 568 | 450 | DNA topoisomerase III beta-1                                                                                     |
| Locus_13288_Transcript_1/1_Conf_1.000 | 156  | 20 | 1.31E-09 | AAK31527.3     | 80  | 66.2402 | 52  | 42  | Neuronal symmetry protein 1, partially confirmed by transcript evidence                                          |
| Locus_13289_Transcript_1/1_Conf_1.000 | 488  |    |          |                |     |         |     |     |                                                                                                                  |
| Locus_1329_Transcript_1/2_Conf_1.000  | 458  | 20 | 1.08E-24 | AAX30301.1     | 96  | 116.316 | 55  | 53  | unknown                                                                                                          |
| Locus_1329_Transcript_2/2_Conf_1.000  | 469  | 20 | 1.86E-32 | BAA10929.1     | 74  | 142.124 | 120 | 89  | cytochrome P450 like_TBP                                                                                         |
| Locus_13290_Transcript_1/1_Conf_1.000 | 137  | 0  |          |                |     |         |     |     |                                                                                                                  |
| Locus_13291_Transcript_1/1_Conf_1.000 | 146  | 20 | 1.56E-10 | XP_002640635.1 | 76  | 69.3218 | 46  | 35  | Hypothetical protein CBG08753                                                                                    |
| Locus_13292_Transcript_1/1_Conf_1.000 | 832  | 20 | 1.76E-82 | NP_498112.1    | 74  | 310.071 | 241 | 179 | PRotein arginine MethylTransferase family member (prmt-5)                                                        |
| Locus_13293_Transcript_1/1_Conf_1.000 | 460  | 20 | 1.31E-22 | EFO19933.1     | 63  | 109.383 | 138 | 87  | helix-loop-helix DNA-binding domain-containing protein                                                           |
| Locus_13294_Transcript_1/1_Conf_1.000 | 152  | 0  |          |                |     |         |     |     |                                                                                                                  |
| Locus_13295_Transcript_1/1_Conf_1.000 | 315  | 0  |          |                |     |         |     |     |                                                                                                                  |
| Locus_13296_Transcript_1/1_Conf_1.000 | 822  | 20 | 8.96E-39 | NP_501996.2    | 54  | 164.851 | 282 | 155 | UDP-GlucuronosylTransferase family member (ugt-54)                                                               |

|                                       |      |    |           |                |    |         |     |     |                                                                          |
|---------------------------------------|------|----|-----------|----------------|----|---------|-----|-----|--------------------------------------------------------------------------|
| Locus_13297_Transcript_1/1_Conf_1.000 | 632  | 20 | 2.85E-21  | CAR97823.1     | 54 | 105.916 | 166 | 91  | C. elegans protein F26H11.2i, partially confirmed by transcript evidence |
| Locus_13298_Transcript_1/1_Conf_1.000 | 463  | 20 | 2.35E-59  | XP_002634350.1 | 85 | 231.491 | 131 | 112 | C. briggsae CBR-ILYS-4 protein                                           |
| Locus_13299_Transcript_1/1_Conf_1.000 | 392  | 0  |           |                |    |         |     |     |                                                                          |
| Locus_133_Transcript_1/1_Conf_1.000   | 1211 | 20 | 3.47E-52  | NP_493028.2    | 59 | 210.305 | 373 | 222 | WAVE (actin cytoskeleton modulator) homolog family member (wve-1)        |
| Locus_1330_Transcript_1/1_Conf_1.000  | 1727 | 20 | 0         | NP_740787.2    | 78 | 707.597 | 556 | 438 | hypothetical protein C53H9.2                                             |
| Locus_13300_Transcript_1/1_Conf_1.000 | 624  | 0  |           |                |    |         |     |     |                                                                          |
| Locus_13301_Transcript_1/1_Conf_1.000 | 610  | 20 | 1.64E-55  | NP_741176.2    | 67 | 219.55  | 210 | 141 | hypothetical protein C23G10.7                                            |
| Locus_13302_Transcript_1/1_Conf_1.000 | 185  | 0  |           |                |    |         |     |     |                                                                          |
| Locus_13303_Transcript_1/1_Conf_1.000 | 885  | 20 | 2.23E-110 | NP_496279.1    | 84 | 402.905 | 266 | 224 | Temporarily Assigned Gene name family member (tag-242)                   |
| Locus_13304_Transcript_1/1_Conf_1.000 | 815  | 20 | 7.38E-54  | CAA92456.3     | 71 | 214.927 | 203 | 146 | C. elegans protein C53B4.4b, partially confirmed by transcript evidence  |
| Locus_13305_Transcript_1/1_Conf_1.000 | 484  | 20 | 9.99E-31  | NP_490911.1    | 68 | 130.183 | 150 | 103 | SCAMP (synaptic vesicle protein) homolog family member (scm-1)           |
| Locus_13306_Transcript_1/1_Conf_1.000 | 153  | 0  |           |                |    |         |     |     |                                                                          |
| Locus_13307_Transcript_1/1_Conf_1.000 | 140  | 0  |           |                |    |         |     |     |                                                                          |
| Locus_13308_Transcript_1/1_Conf_1.000 | 177  | 0  |           |                |    |         |     |     |                                                                          |
| Locus_13309_Transcript_1/1_Conf_1.000 | 205  | 0  |           |                |    |         |     |     |                                                                          |
| Locus_1331_Transcript_1/1_Conf_1.000  | 811  | 20 | 3.27E-78  | NP_509260.1    | 71 | 295.819 | 248 | 178 | ACyLtransferase-like family member (acl-12)                              |

|                                       |      |    |          |                |    |         |     |     |                                                          |
|---------------------------------------|------|----|----------|----------------|----|---------|-----|-----|----------------------------------------------------------|
| Locus_13310_Transcript_1/1_Conf_1.000 | 389  | 20 | 7.21E-37 | EFO23898.1     | 78 | 156.762 | 120 | 94  | FolC protein                                             |
| Locus_13311_Transcript_1/1_Conf_1.000 | 1583 | 20 | 9.77E-40 | NP_498165.2    | 46 | 169.474 | 458 | 213 | hypothetical protein F48E8.2                             |
| Locus_13312_Transcript_1/2_Conf_1.000 | 221  | 0  |          |                |    |         |     |     |                                                          |
| Locus_13312_Transcript_2/2_Conf_1.000 | 173  | 0  |          |                |    |         |     |     |                                                          |
| Locus_13313_Transcript_1/1_Conf_1.000 | 735  | 20 | 2.32E-61 | NP_509122.1    | 70 | 239.58  | 244 | 173 | hypothetical protein F38B6.4                             |
| Locus_13314_Transcript_1/1_Conf_1.000 | 241  | 7  | 3.37E-26 | XP_002631168.1 | 84 | 121.324 | 70  | 59  | C. briggsae CBR-PQM-1 protein                            |
| Locus_13315_Transcript_1/1_Conf_1.000 | 413  | 20 | 1.61E-36 | NP_501320.2    | 74 | 155.606 | 135 | 100 | eXPORtin (nuclear export receptor) family member (xpo-3) |
| Locus_13316_Transcript_1/1_Conf_1.000 | 362  | 20 | 2.85E-17 | AAO63576.1     | 59 | 91.6633 | 111 | 66  | secreted protein 4 precursor                             |
| Locus_13317_Transcript_1/1_Conf_1.000 | 203  | 20 | 8.11E-12 | NP_001021562.1 | 67 | 73.559  | 74  | 50  | hypothetical protein K07A3.3                             |
| Locus_13318_Transcript_1/1_Conf_1.000 | 384  | 0  |          |                |    |         |     |     |                                                          |
| Locus_13319_Transcript_1/1_Conf_1.000 | 572  | 0  |          |                |    |         |     |     |                                                          |
| Locus_1332_Transcript_1/1_Conf_1.000  | 622  | 15 | 4.24E-06 | XP_002637664.1 | 47 | 55.4546 | 143 | 68  | Hypothetical protein CBG19420                            |
| Locus_13320_Transcript_1/1_Conf_1.000 | 279  | 0  |          |                |    |         |     |     |                                                          |
| Locus_13321_Transcript_1/1_Conf_1.000 | 633  | 6  | 9.27E-20 | NP_510700.3    | 57 | 100.908 | 227 | 131 | Histone DeAcetylase family member (hda-4)                |
| Locus_13322_Transcript_1/1_Conf_1.000 | 513  | 20 | 8.15E-42 | XP_001951535.1 | 70 | 173.326 | 172 | 122 | PREDICTED: similar to dynein heavy chain                 |
| Locus_13323_Transcript_1/1_Conf_1.000 | 184  | 3  | 3.71E-12 | NP_491803.1    | 87 | 74.7146 | 48  | 42  | SaPosin-like Protein family member (spp-15)              |
| Locus_13324_Transcript_1/1_Conf_1.000 | 472  | 3  | 2.34E-35 | NP_501123.1    | 74 | 151.754 | 157 | 117 | COLLagen family member (col-113)                         |
| Locus_13325_Transcript_1/1_Conf_1.000 | 646  | 4  | 2.63E-41 | XP_001897455.1 | 80 | 172.555 | 123 | 99  | hypothetical protein                                     |
| Locus_13326_Transcript_1/1_Conf_1.000 | 170  | 0  |          |                |    |         |     |     |                                                          |
| Locus_13327_Transcript_1/2_Conf_1.000 | 1263 | 2  | 2.33E-22 | NP_499581.2    | 54 | 111.309 | 211 | 116 | hypothetical protein Y75B8A.8                            |
| Locus_13327_Transcript_2/2_Conf_1.000 | 1263 | 2  | 2.33E-22 | NP_499581.2    | 54 | 111.309 | 211 | 116 | hypothetical protein Y75B8A.8                            |
| Locus_13328_Transcript_1/1_Conf_1.000 | 185  | 0  |          |                |    |         |     |     |                                                          |

|                                       |      |    |          |                |    |         |     |     |                                                                        |
|---------------------------------------|------|----|----------|----------------|----|---------|-----|-----|------------------------------------------------------------------------|
| Locus_13329_Transcript_1/1_Conf_1.000 | 293  | 3  | 9.66E-13 | CAA92756.3     | 75 | 76.6406 | 62  | 47  | C. elegans protein T24B8.4, partially confirmed by transcript evidence |
| Locus_1333_Transcript_1/3_Conf_0.714  | 1891 | 20 | 0        | XP_002640606.1 | 94 | 917.916 | 529 | 499 | Hypothetical protein CBG08717                                          |
| Locus_1333_Transcript_2/3_Conf_0.714  | 1891 | 20 | 0        | XP_002640606.1 | 94 | 917.916 | 529 | 499 | Hypothetical protein CBG08717                                          |
| Locus_1333_Transcript_3/3_Conf_0.714  | 1891 | 20 | 0        | XP_002640606.1 | 94 | 917.916 | 529 | 499 | Hypothetical protein CBG08717                                          |
| Locus_13330_Transcript_1/1_Conf_1.000 | 343  | 0  |          |                |    |         |     |     |                                                                        |
| Locus_13331_Transcript_1/1_Conf_1.000 | 547  | 2  | 1.15E-13 | NP_001033437.1 | 60 | 80.1073 | 87  | 53  | hypothetical protein W09G12.10                                         |
| Locus_13332_Transcript_1/1_Conf_1.000 | 158  | 0  |          |                |    |         |     |     |                                                                        |
| Locus_13333_Transcript_1/1_Conf_1.000 | 129  | 0  |          |                |    |         |     |     |                                                                        |

|                                       |      |    |           |                |     |         |     |     |                                        |
|---------------------------------------|------|----|-----------|----------------|-----|---------|-----|-----|----------------------------------------|
| Locus_13334_Transcript_1/1_Conf_1.000 | 239  | 20 | 5.95E-39  | BAG65521.1     | 100 | 163.696 | 79  | 79  | unnamed protein product                |
| Locus_13335_Transcript_1/1_Conf_1.000 | 153  | 0  |           |                |     |         |     |     |                                        |
| Locus_13336_Transcript_1/1_Conf_1.000 | 363  | 4  | 1.56E-23  | XP_002631126.1 | 81  | 112.464 | 125 | 102 | C. briggsae CBR-SHN-1 protein          |
| Locus_13337_Transcript_1/1_Conf_1.000 | 164  | 0  |           |                |     |         |     |     |                                        |
| Locus_13338_Transcript_1/1_Conf_1.000 | 1913 | 20 | 8.31E-177 | NP_491489.1    | 69  | 625.165 | 613 | 425 | AminoPeptidase P family member (app-1) |
| Locus_13339_Transcript_1/1_Conf_1.000 | 136  | 0  |           |                |     |         |     |     |                                        |
| Locus_1334_Transcript_1/1_Conf_1.000  | 1090 | 20 | 3.95E-105 | XP_002629729.1 | 71  | 385.956 | 325 | 231 | C. briggsae CBR-TAG-124 protein        |
| Locus_13340_Transcript_1/1_Conf_1.000 | 353  | 0  |           |                |     |         |     |     |                                        |
| Locus_13341_Transcript_1/1_Conf_1.000 | 1304 | 20 | 1.16E-157 | NP_506859.2    | 79  | 560.836 | 437 | 347 | hypothetical protein C06B8.7           |
| Locus_13342_Transcript_1/1_Conf_1.000 | 606  | 2  | 6.63E-17  | NP_500233.1    | 58  | 91.2781 | 110 | 64  | hypothetical protein Y69A2AR.28        |
| Locus_13343_Transcript_1/1_Conf_1.000 | 289  | 2  | 1.36E-06  | XP_001894940.1 | 51  | 56.225  | 95  | 49  | Trypsin family protein                 |
| Locus_13344_Transcript_1/1_Conf_1.000 | 139  | 0  |           |                |     |         |     |     |                                        |
| Locus_13345_Transcript_1/1_Conf_1.000 | 240  | 0  |           |                |     |         |     |     |                                        |
| Locus_13346_Transcript_1/2_Conf_1.000 | 501  | 6  | 5.29E-35  | NP_495914.1    | 57  | 150.599 | 167 | 96  | hypothetical protein C18E9.8           |
| Locus_13346_Transcript_2/2_Conf_1.000 | 501  | 6  | 5.29E-35  | NP_495914.1    | 57  | 150.599 | 167 | 96  | hypothetical protein C18E9.8           |
| Locus_13347_Transcript_1/1_Conf_1.000 | 174  | 0  |           |                |     |         |     |     |                                        |



|                                       |      |    |           |                |     |         |     |     |                                                   |
|---------------------------------------|------|----|-----------|----------------|-----|---------|-----|-----|---------------------------------------------------|
| Locus_13348_Transcript_1/1_Conf_1.000 | 1009 | 20 | 5.79E-108 | NP_497663.1    | 80  | 395.201 | 304 | 245 | MEChanosensory abnormality family member (mec-12) |
| Locus_13349_Transcript_1/1_Conf_1.000 | 555  | 0  |           |                |     |         |     |     |                                                   |
| Locus_1335_Transcript_1/1_Conf_1.000  | 570  | 20 | 9.13E-76  | ACD88888.1     | 97  | 286.574 | 149 | 145 | troponin C                                        |
| Locus_13350_Transcript_1/1_Conf_1.000 | 145  | 0  |           |                |     |         |     |     |                                                   |
| Locus_13351_Transcript_1/1_Conf_1.000 | 437  | 0  |           |                |     |         |     |     |                                                   |
| Locus_13352_Transcript_1/2_Conf_1.000 | 233  | 20 | 7.88E-15  | ZP_04113472.1  | 64  | 83.5741 | 76  | 49  | LPXTG-motif cell wall anchor domain protein       |
| Locus_13352_Transcript_2/2_Conf_1.000 | 676  | 20 | 6.09E-23  | ZP_04113472.1  | 53  | 111.694 | 130 | 69  | LPXTG-motif cell wall anchor domain protein       |
| Locus_13353_Transcript_1/1_Conf_1.000 | 985  | 20 | 7.47E-121 | NP_494897.3    | 75  | 437.958 | 328 | 248 | hypothetical protein R05F9.12                     |
| Locus_13354_Transcript_1/1_Conf_1.000 | 377  | 0  |           |                |     |         |     |     |                                                   |
| Locus_13355_Transcript_1/1_Conf_1.000 | 299  | 0  |           |                |     |         |     |     |                                                   |
| Locus_13356_Transcript_1/1_Conf_1.000 | 228  | 0  |           |                |     |         |     |     |                                                   |
| Locus_13357_Transcript_1/1_Conf_1.000 | 250  | 0  |           |                |     |         |     |     |                                                   |
| Locus_13358_Transcript_1/4_Conf_0.375 | 367  | 20 | 6.44E-62  | EFO26582.1     | 100 | 239.965 | 122 | 122 | TATA-box binding protein                          |
| Locus_13358_Transcript_2/4_Conf_0.625 | 925  | 20 | 3.50E-93  | XP_002642588.1 | 73  | 345.895 | 320 | 235 | C. briggsae CBR-TBP-1 protein                     |

|                                       |     |    |           |                |    |         |     |     |                                                      |
|---------------------------------------|-----|----|-----------|----------------|----|---------|-----|-----|------------------------------------------------------|
| Locus_13358_Transcript_3/4_Conf_0.625 | 925 | 20 | 3.50E-93  | XP_002642588.1 | 73 | 345.895 | 320 | 235 | C. briggsae CBR-TBP-1 protein                        |
| Locus_13358_Transcript_4/4_Conf_0.625 | 925 | 20 | 3.50E-93  | XP_002642588.1 | 73 | 345.895 | 320 | 235 | C. briggsae CBR-TBP-1 protein                        |
| Locus_13359_Transcript_1/1_Conf_1.000 | 154 | 4  | 9.08E-11  | EFO21130.1     | 88 | 70.0922 | 42  | 37  | hypothetical protein LOAG_07358                      |
| Locus_1336_Transcript_1/1_Conf_1.000  | 190 | 0  |           |                |    |         |     |     |                                                      |
| Locus_13360_Transcript_1/1_Conf_1.000 | 219 | 0  |           |                |    |         |     |     |                                                      |
| Locus_13361_Transcript_1/1_Conf_1.000 | 639 | 0  |           |                |    |         |     |     |                                                      |
| Locus_13362_Transcript_1/1_Conf_1.000 | 717 | 20 | 1.29E-45  | EFO23663.1     | 63 | 187.193 | 228 | 144 | myosin xviii                                         |
| Locus_13363_Transcript_1/1_Conf_1.000 | 221 | 0  |           |                |    |         |     |     |                                                      |
| Locus_13364_Transcript_1/1_Conf_1.000 | 380 | 20 | 9.53E-37  | NP_492244.1    | 78 | 156.377 | 113 | 89  | hypothetical protein ZK265.3                         |
| Locus_13365_Transcript_1/1_Conf_1.000 | 254 | 20 | 3.12E-27  | NP_495261.1    | 83 | 124.79  | 80  | 67  | hypothetical protein F13H8.7                         |
| Locus_13366_Transcript_1/1_Conf_1.000 | 161 | 16 | 3.20E-16  | AAS49411.1     | 86 | 88.1965 | 51  | 44  | putative neuromuscular acetylcholinesterase          |
| Locus_13367_Transcript_1/1_Conf_1.000 | 325 | 6  | 1.52E-34  | NP_492775.2    | 84 | 149.058 | 105 | 89  | LAMinin related. See also lmb- family member (lam-3) |
| Locus_13368_Transcript_1/1_Conf_1.000 | 132 | 0  |           |                |    |         |     |     |                                                      |
| Locus_13369_Transcript_1/1_Conf_1.000 | 785 | 20 | 3.74E-108 | XP_002631013.1 | 88 | 395.201 | 260 | 230 | C. briggsae CBR-PTR-18 protein                       |
| Locus_1337_Transcript_1/3_Conf_0.667  | 921 | 0  |           |                |    |         |     |     |                                                      |
| Locus_1337_Transcript_2/3_Conf_0.667  | 967 | 0  |           |                |    |         |     |     |                                                      |
| Locus_1337_Transcript_3/3_Conf_0.667  | 969 | 0  |           |                |    |         |     |     |                                                      |

|                                       |      |    |           |                |     |         |     |     |                                                                             |
|---------------------------------------|------|----|-----------|----------------|-----|---------|-----|-----|-----------------------------------------------------------------------------|
| Locus_13370_Transcript_1/1_Conf_1.000 | 451  | 20 | 5.38E-40  | NP_496146.1    | 68  | 167.162 | 149 | 102 | Ubiquitin Fusion Degradation (yeast UFD homolog) family member (ufd-3)      |
| Locus_13371_Transcript_1/1_Conf_1.000 | 204  | 0  |           |                |     |         |     |     |                                                                             |
| Locus_13372_Transcript_1/1_Conf_1.000 | 395  | 20 | 1.54E-34  | XP_002644371.1 | 72  | 149.058 | 129 | 94  | C. briggsae CBR-DHS-27 protein                                              |
| Locus_13373_Transcript_1/1_Conf_1.000 | 477  | 20 | 4.99E-38  | XP_001898260.1 | 74  | 160.614 | 125 | 93  | MSP domain containing protein                                               |
| Locus_13374_Transcript_1/1_Conf_1.000 | 281  | 20 | 1.54E-47  | BAG51482.1     | 100 | 192.2   | 88  | 88  | unnamed protein product                                                     |
| Locus_13375_Transcript_1/1_Conf_1.000 | 730  | 20 | 1.87E-63  | NP_510828.1    | 93  | 246.514 | 152 | 142 | Myosin Light Chain family member (mlc-2)                                    |
| Locus_13376_Transcript_1/1_Conf_1.000 | 271  | 0  |           |                |     |         |     |     |                                                                             |
| Locus_13377_Transcript_1/1_Conf_1.000 | 617  | 3  | 5.44E-38  | XP_002631029.1 | 71  | 161.384 | 151 | 108 | Hypothetical protein CBG02786                                               |
| Locus_13378_Transcript_1/1_Conf_1.000 | 888  | 6  | 4.31E-45  | XP_002641960.1 | 66  | 186.037 | 201 | 134 | C. briggsae CBR-UNC-36 protein                                              |
| Locus_13379_Transcript_1/1_Conf_1.000 | 236  | 2  | 7.37E-05  | EFO22556.1     | 58  | 50.447  | 77  | 45  | hypothetical protein LOAG_05929                                             |
| Locus_1338_Transcript_1/1_Conf_1.000  | 535  | 18 | 7.08E-42  | NP_001040754.1 | 65  | 173.711 | 177 | 116 | DNaJ domain (prokaryotic heat shock protein) family member (dnj-8)          |
| Locus_13380_Transcript_1/1_Conf_1.000 | 697  | 0  |           |                |     |         |     |     |                                                                             |
| Locus_13381_Transcript_1/1_Conf_1.000 | 348  | 0  |           |                |     |         |     |     |                                                                             |
| Locus_13382_Transcript_1/1_Conf_1.000 | 332  | 5  | 2.27E-22  | NP_491451.2    | 64  | 108.612 | 109 | 70  | 2 (Zwei) IG-domain protein family member (zig-7)                            |
| Locus_13383_Transcript_1/1_Conf_1.000 | 1055 | 20 | 1.17E-74  | AAK29933.3     | 67  | 284.648 | 308 | 208 | Rab connectin related protein 2, partially confirmed by transcript evidence |
| Locus_13384_Transcript_1/1_Conf_1.000 | 379  | 0  |           |                |     |         |     |     |                                                                             |
| Locus_13385_Transcript_1/1_Conf_1.000 | 306  | 6  | 1.28E-25  | AAT02161.1     | 80  | 119.398 | 76  | 61  | hypothetical protein L3ni22                                                 |
| Locus_13386_Transcript_1/1_Conf_1.000 | 136  | 0  |           |                |     |         |     |     |                                                                             |
| Locus_13387_Transcript_1/1_Conf_1.000 | 1009 | 20 | 1.47E-127 | NP_506318.1    | 81  | 460.299 | 301 | 245 | CathePsin Z family member (cpz-2)                                           |
| Locus_13388_Transcript_1/1_Conf_1.000 | 523  | 20 | 1.63E-64  | XP_002631314.1 | 84  | 248.825 | 163 | 137 | C. briggsae CBR-LDH-1 protein                                               |
| Locus_13389_Transcript_1/1_Conf_1.000 | 177  | 0  |           |                |     |         |     |     |                                                                             |

|                                       |      |    |          |                |    |         |     |     |                                                             |
|---------------------------------------|------|----|----------|----------------|----|---------|-----|-----|-------------------------------------------------------------|
| Locus_1339_Transcript_1/1_Conf_1.000  | 612  | 0  |          |                |    |         |     |     |                                                             |
| Locus_13390_Transcript_1/1_Conf_1.000 | 175  | 20 | 2.66E-23 | XP_002642408.1 | 92 | 111.694 | 57  | 53  | C. briggsae CBR-NHL-1 protein                               |
| Locus_13391_Transcript_1/1_Conf_1.000 | 247  | 20 | 2.10E-28 | XP_001900058.1 | 82 | 128.642 | 80  | 66  | Immunoglobulin I-set domain containing protein              |
| Locus_13392_Transcript_1/1_Conf_1.000 | 170  | 0  |          |                |    |         |     |     |                                                             |
| Locus_13393_Transcript_1/1_Conf_1.000 | 1188 | 3  | 9.40E-95 | XP_002639760.1 | 69 | 351.673 | 312 | 216 | Hypothetical protein CBG02206                               |
| Locus_13394_Transcript_1/2_Conf_1.000 | 307  | 0  |          |                |    |         |     |     |                                                             |
| Locus_13394_Transcript_2/2_Conf_1.000 | 310  | 0  |          |                |    |         |     |     |                                                             |
| Locus_13395_Transcript_1/1_Conf_1.000 | 484  | 17 | 1.60E-07 | NP_001133980.1 | 71 | 59.3066 | 45  | 32  | SH2 domain-containing protein 4A                            |
| Locus_13396_Transcript_1/1_Conf_1.000 | 300  | 20 | 2.76E-44 | EFO23652.1     | 92 | 181.415 | 99  | 92  | vacuolar proton pump                                        |
| Locus_13397_Transcript_1/1_Conf_1.000 | 172  | 0  |          |                |    |         |     |     |                                                             |
| Locus_13398_Transcript_1/1_Conf_1.000 | 481  | 6  | 1.70E-62 | XP_002636539.1 | 80 | 241.891 | 160 | 129 | Hypothetical protein CBG23226                               |
| Locus_13399_Transcript_1/1_Conf_1.000 | 362  | 20 | 4.87E-17 | XP_002630266.1 | 60 | 90.8929 | 126 | 76  | Hypothetical protein CBG00693                               |
| Locus_134_Transcript_1/1_Conf_1.000   | 716  | 4  | 2.79E-16 | NP_001022219.1 | 50 | 89.7373 | 182 | 92  | hypothetical protein F59B10.4                               |
| Locus_1340_Transcript_1/5_Conf_0.444  | 1411 | 0  |          |                |    |         |     |     |                                                             |
| Locus_1340_Transcript_2/5_Conf_0.556  | 1507 | 0  |          |                |    |         |     |     |                                                             |
| Locus_1340_Transcript_3/5_Conf_0.444  | 1429 | 0  |          |                |    |         |     |     |                                                             |
| Locus_1340_Transcript_4/5_Conf_0.556  | 1501 | 0  |          |                |    |         |     |     |                                                             |
| Locus_1340_Transcript_5/5_Conf_0.556  | 1507 | 0  |          |                |    |         |     |     |                                                             |
| Locus_13400_Transcript_1/1_Conf_1.000 | 477  | 3  | 1.79E-11 | NP_494767.1    | 63 | 72.4034 | 112 | 71  | hypothetical protein H20J04.2                               |
| Locus_13401_Transcript_1/2_Conf_1.000 | 847  | 20 | 2.05E-17 | NP_510460.2    | 66 | 93.9745 | 83  | 55  | MiniBrain Kinase (Drosophila) homolog family member (mbk-1) |
| Locus_13401_Transcript_2/2_Conf_1.000 | 771  | 20 | 1.73E-17 | NP_510460.2    | 66 | 93.9745 | 83  | 55  | MiniBrain Kinase (Drosophila) homolog family member (mbk-1) |
| Locus_13402_Transcript_1/1_Conf_1.000 | 450  | 0  |          |                |    |         |     |     |                                                             |

|                                       |      |    |          |                |    |         |     |     |                                          |
|---------------------------------------|------|----|----------|----------------|----|---------|-----|-----|------------------------------------------|
| Locus_13403_Transcript_1/1_Conf_1.000 | 578  | 20 | 2.95E-53 | XP_002643681.1 | 72 | 211.846 | 182 | 132 | Hypothetical protein CBG01860            |
| Locus_13404_Transcript_1/1_Conf_1.000 | 134  | 0  |          |                |    |         |     |     |                                          |
| Locus_13405_Transcript_1/1_Conf_1.000 | 967  | 20 | 5.27E-63 | XP_002639862.1 | 63 | 245.743 | 320 | 204 | C. briggsae CBR-CED-12 protein           |
| Locus_13406_Transcript_1/1_Conf_1.000 | 208  | 0  |          |                |    |         |     |     |                                          |
| Locus_13407_Transcript_1/1_Conf_1.000 | 1122 | 8  | 3.04E-31 | CAR63527.1     | 94 | 140.584 | 108 | 102 | putative TolA protein                    |
| Locus_13408_Transcript_1/1_Conf_1.000 | 256  | 0  |          |                |    |         |     |     |                                          |
| Locus_13409_Transcript_1/1_Conf_1.000 | 607  | 20 | 2.74E-71 | XP_002633090.1 | 95 | 271.937 | 164 | 156 | C. briggsae CBR-CYN-12 protein           |
| Locus_1341_Transcript_1/1_Conf_1.000  | 285  | 20 | 4.08E-19 | XP_001898944.1 | 67 | 97.8265 | 94  | 63  | Protein kinase domain containing protein |
| Locus_13410_Transcript_1/1_Conf_1.000 | 641  | 2  | 1.92E-04 | DAA21469.1     | 36 | 50.0618 | 158 | 57  | complement factor H precursor            |
| Locus_13411_Transcript_1/1_Conf_1.000 | 186  | 0  |          |                |    |         |     |     |                                          |

|                                       |     |    |          |                |    |         |     |    |                                                           |
|---------------------------------------|-----|----|----------|----------------|----|---------|-----|----|-----------------------------------------------------------|
| Locus_13412_Transcript_1/2_Conf_1.000 | 372 | 20 | 1.07E-19 | NP_506362.1    | 64 | 99.7525 | 99  | 64 | BIR (baculovirus inhibitory repeat) family member (bir-2) |
| Locus_13412_Transcript_2/2_Conf_1.000 | 644 | 20 | 3.31E-20 | NP_506362.1    | 60 | 102.449 | 128 | 77 | BIR (baculovirus inhibitory repeat) family member (bir-2) |
| Locus_13413_Transcript_1/1_Conf_1.000 | 251 | 0  |          |                |    |         |     |    |                                                           |
| Locus_13414_Transcript_1/2_Conf_1.000 | 299 | 2  | 7.87E-07 | XP_002647590.1 | 61 | 56.9954 | 77  | 47 | Hypothetical protein CBG06678                             |
| Locus_13414_Transcript_2/2_Conf_1.000 | 367 | 2  | 1.32E-06 | XP_002647590.1 | 61 | 56.225  | 77  | 47 | Hypothetical protein CBG06678                             |

|                                       |      |    |           |                |    |         |     |     |                                                                         |
|---------------------------------------|------|----|-----------|----------------|----|---------|-----|-----|-------------------------------------------------------------------------|
| Locus_13415_Transcript_1/1_Conf_1.000 | 643  | 20 | 1.46E-76  | CAA21686.2     | 81 | 289.656 | 216 | 177 | C. elegans protein Y54E2A.4, partially confirmed by transcript evidence |
| Locus_13416_Transcript_1/1_Conf_1.000 | 830  | 8  | 1.32E-13  | EFO16199.1     | 50 | 81.2629 | 175 | 89  | acetyltransferase                                                       |
| Locus_13417_Transcript_1/1_Conf_1.000 | 378  | 0  |           |                |    |         |     |     |                                                                         |
| Locus_13418_Transcript_1/1_Conf_1.000 | 250  | 0  |           |                |    |         |     |     |                                                                         |
| Locus_13419_Transcript_1/1_Conf_1.000 | 257  | 0  |           |                |    |         |     |     |                                                                         |
| Locus_1342_Transcript_1/1_Conf_1.000  | 454  | 20 | 5.72E-42  | O01358.1       | 93 | 173.711 | 125 | 117 | 60S ribosomal protein L27a                                              |
| Locus_13420_Transcript_1/1_Conf_1.000 | 302  | 0  |           |                |    |         |     |     |                                                                         |
| Locus_13421_Transcript_1/1_Conf_1.000 | 475  | 17 | 5.39E-16  | ACI49188.1     | 67 | 87.4261 | 97  | 65  | hypothetical protein Csp3_JD02.016                                      |
| Locus_13422_Transcript_1/1_Conf_1.000 | 285  | 0  |           |                |    |         |     |     |                                                                         |
| Locus_13423_Transcript_1/1_Conf_1.000 | 196  | 0  |           |                |    |         |     |     |                                                                         |
| Locus_13424_Transcript_1/1_Conf_1.000 | 422  | 20 | 3.01E-14  | XP_002660885.1 | 68 | 81.6481 | 88  | 60  | PREDICTED: hypothetical protein                                         |
| Locus_13425_Transcript_1/1_Conf_1.000 | 1300 | 20 | 8.71E-105 | AAM18101.1     | 74 | 385.185 | 347 | 257 | AF497823_1putative Na-H exchanger isoform 1                             |
| Locus_13426_Transcript_1/1_Conf_1.000 | 297  | 20 | 6.22E-12  | ACD12702.1     | 85 | 73.9442 | 48  | 41  | histone H1                                                              |
| Locus_13427_Transcript_1/1_Conf_1.000 | 331  | 0  |           |                |    |         |     |     |                                                                         |
| Locus_13428_Transcript_1/1_Conf_1.000 | 1601 | 20 | 4.84E-103 | NP_508710.2    | 60 | 379.793 | 529 | 319 | Multidrug Resistance Protein family member (mrp-6)                      |
| Locus_13429_Transcript_1/1_Conf_1.000 | 163  | 0  |           |                |    |         |     |     |                                                                         |
| Locus_1343_Transcript_1/1_Conf_1.000  | 499  | 20 | 2.38E-56  | XP_002648101.1 | 85 | 221.476 | 152 | 130 | C. briggsae CBR-DHS-13 protein                                          |
| Locus_13430_Transcript_1/1_Conf_1.000 | 388  | 0  |           |                |    |         |     |     |                                                                         |
| Locus_13431_Transcript_1/2_Conf_1.000 | 551  | 20 | 4.41E-53  | NP_499799.1    | 77 | 211.075 | 180 | 140 | fatty Acid CoA Synthetase family member (acs-14)                        |

|                                       |      |    |           |                |    |         |     |     |                                                                        |
|---------------------------------------|------|----|-----------|----------------|----|---------|-----|-----|------------------------------------------------------------------------|
| Locus_13431_Transcript_2/2_Conf_1.000 | 534  | 20 | 8.92E-53  | NP_499799.1    | 78 | 209.92  | 175 | 138 | fatty Acid CoA Synthetase family member (acs-14)                       |
| Locus_13432_Transcript_1/1_Conf_1.000 | 945  | 3  | 5.54E-25  | CAB03203.2     | 55 | 119.398 | 245 | 135 | C. elegans protein M02B1.4, partially confirmed by transcript evidence |
| Locus_13433_Transcript_1/1_Conf_1.000 | 542  | 15 | 2.87E-70  | XP_002642952.1 | 82 | 268.085 | 180 | 148 | Hypothetical protein CBG15235                                          |
| Locus_13434_Transcript_1/1_Conf_1.000 | 128  | 0  |           |                |    |         |     |     |                                                                        |
| Locus_13435_Transcript_1/1_Conf_1.000 | 402  | 20 | 2.33E-59  | XP_002642823.1 | 92 | 231.491 | 131 | 121 | Hypothetical protein CBG21221                                          |
| Locus_13436_Transcript_1/1_Conf_1.000 | 370  | 0  |           |                |    |         |     |     |                                                                        |
| Locus_13437_Transcript_1/1_Conf_1.000 | 429  | 20 | 2.33E-43  | XP_002639695.1 | 78 | 178.333 | 146 | 114 | C. briggsae CBR-FCP-1 protein                                          |
| Locus_13438_Transcript_1/1_Conf_1.000 | 654  | 20 | 7.25E-10  | XP_002634943.1 | 44 | 68.1662 | 134 | 60  | Hypothetical protein CBG22545                                          |
| Locus_13439_Transcript_1/1_Conf_1.000 | 992  | 20 | 1.31E-173 | ADF56003.1     | 99 | 613.224 | 310 | 309 | nicotinic acetylcholine receptor alpha subunit 63b                     |
| Locus_1344_Transcript_1/1_Conf_1.000  | 1056 | 20 | 8.92E-115 | Q94125.6       | 72 | 417.927 | 375 | 272 | Phosphatidylinositol 3-kinase age-1                                    |



|                                       |      |    |          |                |    |         |     |     |                                                             |
|---------------------------------------|------|----|----------|----------------|----|---------|-----|-----|-------------------------------------------------------------|
| Locus_13440_Transcript_1/1_Conf_1.000 | 221  | 20 | 3.34E-29 | XP_002629937.1 | 89 | 131.339 | 73  | 65  | Hypothetical protein CBG03655                               |
| Locus_13441_Transcript_1/1_Conf_1.000 | 230  | 0  |          |                |    |         |     |     |                                                             |
| Locus_13442_Transcript_1/1_Conf_1.000 | 163  | 0  |          |                |    |         |     |     |                                                             |
| Locus_13443_Transcript_1/1_Conf_1.000 | 220  | 0  |          |                |    |         |     |     |                                                             |
| Locus_13444_Transcript_1/1_Conf_1.000 | 701  | 10 | 2.06E-16 | XP_001891682.1 | 47 | 90.1225 | 225 | 106 | MRG family protein                                          |
| Locus_13445_Transcript_1/1_Conf_1.000 | 225  | 0  |          |                |    |         |     |     |                                                             |
| Locus_13446_Transcript_1/1_Conf_1.000 | 404  | 20 | 3.98E-59 | XP_002630309.1 | 92 | 230.72  | 131 | 121 | Hypothetical protein CBG00745                               |
| Locus_13447_Transcript_1/1_Conf_1.000 | 246  | 0  |          |                |    |         |     |     |                                                             |
| Locus_13448_Transcript_1/1_Conf_1.000 | 481  | 0  |          |                |    |         |     |     |                                                             |
| Locus_13449_Transcript_1/1_Conf_1.000 | 192  | 0  |          |                |    |         |     |     |                                                             |
| Locus_1345_Transcript_1/1_Conf_1.000  | 288  | 0  |          |                |    |         |     |     |                                                             |
| Locus_13450_Transcript_1/1_Conf_1.000 | 446  | 20 | 1.75E-22 | XP_002635322.1 | 59 | 108.997 | 145 | 86  | Hypothetical protein CBG01489                               |
| Locus_13451_Transcript_1/1_Conf_1.000 | 357  | 0  |          |                |    |         |     |     |                                                             |
| Locus_13452_Transcript_1/1_Conf_1.000 | 459  | 4  | 2.75E-04 | XP_002547545.1 | 42 | 48.521  | 147 | 62  | predicted protein                                           |
| Locus_13453_Transcript_1/1_Conf_1.000 | 255  | 0  |          |                |    |         |     |     |                                                             |
| Locus_13454_Transcript_1/1_Conf_1.000 | 1224 | 20 | 0        | NP_001021621.1 | 89 | 686.026 | 403 | 361 | Nuclear/nucleolar GTP-binding Protein family member (ngp-1) |
| Locus_13455_Transcript_1/1_Conf_1.000 | 146  | 0  |          |                |    |         |     |     |                                                             |
| Locus_13456_Transcript_1/1_Conf_1.000 | 403  | 2  | 1.59E-07 | NP_509349.1    | 65 | 59.3066 | 58  | 38  | hypothetical protein F45E1.1                                |
| Locus_13457_Transcript_1/1_Conf_1.000 | 600  | 20 | 2.88E-33 | EFO23325.1     | 63 | 145.591 | 149 | 94  | hypothetical protein LOAG_05163                             |
| Locus_13458_Transcript_1/1_Conf_1.000 | 870  | 0  |          |                |    |         |     |     |                                                             |
| Locus_13459_Transcript_1/1_Conf_1.000 | 612  | 0  |          |                |    |         |     |     |                                                             |

|                                       |      |    |          |                |    |         |     |     |                                             |
|---------------------------------------|------|----|----------|----------------|----|---------|-----|-----|---------------------------------------------|
| Locus_1346_Transcript_1/3_Conf_0.714  | 1080 | 20 | 1.88E-91 | NP_493246.1    | 68 | 340.502 | 407 | 278 | hypothetical protein Y18D10A.8              |
| Locus_1346_Transcript_2/3_Conf_0.714  | 1086 | 20 | 5.15E-97 | NP_493246.1    | 69 | 358.992 | 407 | 281 | hypothetical protein Y18D10A.8              |
| Locus_1346_Transcript_3/3_Conf_0.714  | 1110 | 20 | 4.37E-99 | NP_493246.1    | 70 | 365.925 | 407 | 287 | hypothetical protein Y18D10A.8              |
| Locus_13460_Transcript_1/1_Conf_1.000 | 475  | 0  |          |                |    |         |     |     |                                             |
| Locus_13461_Transcript_1/1_Conf_1.000 | 2719 | 20 | 0        | XP_002638375.1 | 78 | 1257.66 | 963 | 754 | Hypothetical protein CBG18580               |
| Locus_13462_Transcript_1/1_Conf_1.000 | 216  | 5  | 8.82E-11 | NP_001021862.1 | 57 | 70.0922 | 101 | 58  | PMR-type Golgi ATPase family member (pmr-1) |
| Locus_13463_Transcript_1/1_Conf_1.000 | 1376 | 20 | 0        | NP_740958.1    | 94 | 647.506 | 366 | 345 | protein KINase family member (kin-1)        |
| Locus_13464_Transcript_1/1_Conf_1.000 | 526  | 0  |          |                |    |         |     |     |                                             |
| Locus_13465_Transcript_1/1_Conf_1.000 | 319  | 0  |          |                |    |         |     |     |                                             |

|                                       |      |    |           |                |    |         |     |     |                                                               |
|---------------------------------------|------|----|-----------|----------------|----|---------|-----|-----|---------------------------------------------------------------|
| Locus_13466_Transcript_1/1_Conf_1.000 | 602  | 20 | 1.46E-85  | AAU87825.2     | 88 | 319.316 | 186 | 165 | Hypothetical protein C54E4.5                                  |
| Locus_13467_Transcript_1/1_Conf_1.000 | 547  | 1  | 8.28E-04  | XP_640723.1    | 62 | 47.3654 | 95  | 59  | hypothetical protein DDB_G0281503                             |
| Locus_13468_Transcript_1/1_Conf_1.000 | 300  | 20 | 7.78E-31  | EFO26621.1     | 81 | 136.732 | 93  | 76  | AIDA-1b                                                       |
| Locus_13469_Transcript_1/1_Conf_1.000 | 701  | 20 | 3.22E-86  | XP_001895373.1 | 81 | 322.013 | 233 | 189 | PCI domain containing protein                                 |
| Locus_1347_Transcript_1/1_Conf_1.000  | 1004 | 20 | 3.25E-103 | A8WLV5.2       | 80 | 379.407 | 267 | 215 | Probable eukaryotic translation initiation factor 3 subunit G |
| Locus_13470_Transcript_1/1_Conf_1.000 | 216  | 20 | 2.24E-14  | ADF56007.1     | 95 | 82.0333 | 70  | 67  | nicotinic acetylcholine receptor non-alpha subunit 29.3       |
| Locus_13471_Transcript_1/1_Conf_1.000 | 383  | 20 | 8.61E-30  | XP_002640484.1 | 90 | 133.265 | 85  | 77  | C. briggsae CBR-TAF-1 protein                                 |
| Locus_13472_Transcript_1/1_Conf_1.000 | 238  | 8  | 1.34E-06  | CAR63562.1     | 67 | 56.225  | 78  | 53  | putative COLLAGEN                                             |
| Locus_13473_Transcript_1/1_Conf_1.000 | 144  | 0  |           |                |    |         |     |     |                                                               |
| Locus_13474_Transcript_1/1_Conf_1.000 | 306  | 1  | 1.28E-09  | EFO19473.1     | 67 | 66.2402 | 99  | 67  | AGC/DMPK/GEK protein kinase                                   |
| Locus_13475_Transcript_1/2_Conf_1.000 | 170  | 0  |           |                |    |         |     |     |                                                               |
| Locus_13475_Transcript_2/2_Conf_1.000 | 991  | 0  |           |                |    |         |     |     |                                                               |
| Locus_13476_Transcript_1/1_Conf_1.000 | 138  | 19 | 3.72E-09  | EFO15479.1     | 91 | 64.6994 | 34  | 31  | hypothetical protein LOAG_13032                               |
| Locus_13477_Transcript_1/1_Conf_1.000 | 564  | 7  | 4.05E-04  | XP_002935260.1 | 42 | 48.521  | 171 | 72  | PREDICTED: bromodomain-containing protein 3                   |
| Locus_13478_Transcript_1/1_Conf_1.000 | 352  | 0  |           |                |    |         |     |     |                                                               |

|                                       |      |    |           |                |    |         |     |     |                                          |
|---------------------------------------|------|----|-----------|----------------|----|---------|-----|-----|------------------------------------------|
| Locus_13479_Transcript_1/1_Conf_1.000 | 158  | 0  |           |                |    |         |     |     |                                          |
| Locus_1348_Transcript_1/1_Conf_1.000  | 289  | 0  |           |                |    |         |     |     |                                          |
| Locus_13480_Transcript_1/1_Conf_1.000 | 130  | 7  | 1.58E-07  | NP_510233.1    | 73 | 59.3066 | 42  | 31  | Cytochrome P450 family member (cyp-13B1) |
| Locus_13481_Transcript_1/1_Conf_1.000 | 128  | 0  |           |                |    |         |     |     |                                          |
| Locus_13482_Transcript_1/1_Conf_1.000 | 509  | 20 | 5.67E-80  | XP_002633437.1 | 91 | 300.056 | 169 | 155 | C. briggsae CBR-UNC-22 protein           |
| Locus_13483_Transcript_1/1_Conf_1.000 | 380  | 20 | 7.05E-40  | NP_497647.1    | 78 | 166.777 | 127 | 100 | hypothetical protein Y55D5A.3            |
| Locus_13484_Transcript_1/1_Conf_1.000 | 132  | 0  |           |                |    |         |     |     |                                          |
| Locus_13485_Transcript_1/1_Conf_1.000 | 838  | 20 | 2.89E-32  | XP_001897363.1 | 52 | 143.28  | 226 | 119 | hypothetical protein Bm1_29605           |
| Locus_13486_Transcript_1/1_Conf_1.000 | 132  | 0  |           |                |    |         |     |     |                                          |
| Locus_13487_Transcript_1/1_Conf_1.000 | 354  | 20 | 6.18E-28  | NP_001021940.1 | 70 | 127.102 | 121 | 85  | hypothetical protein C08H9.3             |
| Locus_13488_Transcript_1/1_Conf_1.000 | 224  | 0  |           |                |    |         |     |     |                                          |
| Locus_13489_Transcript_1/1_Conf_1.000 | 845  | 20 | 9.65E-68  | NP_001021145.1 | 72 | 261.151 | 239 | 174 | hypothetical protein C05D11.1            |
| Locus_1349_Transcript_1/1_Conf_1.000  | 1533 | 3  | 3.63E-116 | NP_502736.1    | 60 | 423.32  | 520 | 314 | hypothetical protein Y64G10A.6           |
| Locus_13490_Transcript_1/1_Conf_1.000 | 267  | 0  |           |                |    |         |     |     |                                          |
| Locus_13491_Transcript_1/1_Conf_1.000 | 305  | 0  |           |                |    |         |     |     |                                          |
| Locus_13492_Transcript_1/1_Conf_1.000 | 452  | 20 | 1.12E-53  | NP_493642.1    | 86 | 212.616 | 150 | 129 | hypothetical protein F23F1.6             |
| Locus_13493_Transcript_1/1_Conf_1.000 | 1078 | 20 | 6.21E-95  | EFO23108.1     | 66 | 352.058 | 363 | 243 | Paf1 family protein                      |
| Locus_13494_Transcript_1/2_Conf_1.000 | 1385 | 20 | 0         | NP_001021410.2 | 98 | 698.738 | 319 | 313 | LIM domain family member (lim-9)         |
| Locus_13494_Transcript_2/2_Conf_1.000 | 1385 | 20 | 0         | NP_001021410.2 | 98 | 698.738 | 319 | 313 | LIM domain family member (lim-9)         |
| Locus_13495_Transcript_1/1_Conf_1.000 | 150  | 0  |           |                |    |         |     |     |                                          |
| Locus_13496_Transcript_1/2_Conf_1.000 | 230  | 20 | 2.01E-10  | ACA30304.1     | 63 | 68.9366 | 74  | 47  | serine protease                          |

|                                       |      |    |           |                |    |         |     |     |                                          |
|---------------------------------------|------|----|-----------|----------------|----|---------|-----|-----|------------------------------------------|
| Locus_13496_Transcript_2/2_Conf_1.000 | 256  | 20 | 3.13E-11  | ACA30304.1     | 64 | 71.633  | 78  | 50  | serine protease                          |
| Locus_13497_Transcript_1/1_Conf_1.000 | 372  | 0  |           |                |    |         |     |     |                                          |
| Locus_13498_Transcript_1/1_Conf_1.000 | 153  | 0  |           |                |    |         |     |     |                                          |
| Locus_13499_Transcript_1/1_Conf_1.000 | 142  | 0  |           |                |    |         |     |     |                                          |
| Locus_135_Transcript_1/1_Conf_1.000   | 1283 | 20 | 1.43E-168 | ABX79385.1     | 96 | 597.045 | 341 | 330 | glyceraldehyde-3-phosphate dehydrogenase |
| Locus_1350_Transcript_1/1_Conf_1.000  | 1668 | 20 | 9.88E-139 | XP_001900571.1 | 69 | 498.434 | 495 | 342 | HIRA protein.                            |
| Locus_13500_Transcript_1/1_Conf_1.000 | 689  | 20 | 1.94E-80  | NP_496210.2    | 85 | 302.753 | 235 | 200 | hypothetical protein F54B3.3             |
| Locus_13501_Transcript_1/1_Conf_1.000 | 363  | 1  | 4.71E-04  | XP_758895.1    | 52 | 47.7506 | 67  | 35  | hypothetical protein UM02748.1           |
| Locus_13502_Transcript_1/1_Conf_1.000 | 330  | 0  |           |                |    |         |     |     |                                          |
| Locus_13503_Transcript_1/1_Conf_1.000 | 286  | 0  |           |                |    |         |     |     |                                          |
| Locus_13504_Transcript_1/1_Conf_1.000 | 340  | 0  |           |                |    |         |     |     |                                          |
| Locus_13505_Transcript_1/1_Conf_1.000 | 786  | 4  | 3.37E-32  | XP_002630374.1 | 54 | 142.895 | 269 | 147 | Hypothetical protein CBG04313            |
| Locus_13506_Transcript_1/1_Conf_1.000 | 1287 | 1  | 4.67E-18  | NP_491884.1    | 41 | 97.0561 | 449 | 185 | hypothetical protein T10E9.2             |
| Locus_13507_Transcript_1/1_Conf_1.000 | 220  | 0  |           |                |    |         |     |     |                                          |

|                                       |      |    |           |                |    |         |     |     |                                                                                           |
|---------------------------------------|------|----|-----------|----------------|----|---------|-----|-----|-------------------------------------------------------------------------------------------|
| Locus_13508_Transcript_1/1_Conf_1.000 | 1148 | 20 | 1.34E-175 | NP_509023.1    | 86 | 620.157 | 382 | 331 | hypothetical protein C15H9.7                                                              |
| Locus_13509_Transcript_1/1_Conf_1.000 | 443  | 0  |           |                |    |         |     |     |                                                                                           |
| Locus_1351_Transcript_1/1_Conf_1.000  | 2915 | 20 | 0         | XP_002641964.1 | 98 | 1678.3  | 858 | 841 | C. briggsae CBR-PRP-8 protein                                                             |
| Locus_13510_Transcript_1/1_Conf_1.000 | 865  | 2  | 9.01E-08  | EFO28197.1     | 56 | 62.003  | 92  | 52  | hypothetical protein LOAG_00279                                                           |
| Locus_13511_Transcript_1/1_Conf_1.000 | 182  | 0  |           |                |    |         |     |     |                                                                                           |
| Locus_13512_Transcript_1/1_Conf_1.000 | 378  | 0  |           |                |    |         |     |     |                                                                                           |
| Locus_13513_Transcript_1/1_Conf_1.000 | 148  | 0  |           |                |    |         |     |     |                                                                                           |
| Locus_13514_Transcript_1/1_Conf_1.000 | 640  | 2  | 3.16E-15  | NP_001041016.1 | 79 | 85.8853 | 63  | 50  | hypothetical protein Y116A8C.30                                                           |
| Locus_13515_Transcript_1/1_Conf_1.000 | 170  | 0  |           |                |    |         |     |     |                                                                                           |
| Locus_13516_Transcript_1/1_Conf_1.000 | 388  | 4  | 8.31E-09  | NP_001022032.1 | 46 | 63.5438 | 121 | 56  | TRRAP-like (transcription/transformation domain-associated protein) family member (trr-1) |
| Locus_13517_Transcript_1/1_Conf_1.000 | 573  | 0  |           |                |    |         |     |     |                                                                                           |
| Locus_13518_Transcript_1/1_Conf_1.000 | 145  | 2  | 4.41E-05  | XP_002642155.1 | 70 | 51.2174 | 48  | 34  | C. briggsae CBR-GLR-1 protein                                                             |
| Locus_13519_Transcript_1/1_Conf_1.000 | 135  | 0  |           |                |    |         |     |     |                                                                                           |
| Locus_1352_Transcript_1/1_Conf_1.000  | 587  | 20 | 9.11E-13  | XP_002195631.1 | 58 | 77.411  | 129 | 76  | PREDICTED: RAD51-like 3 (S. cerevisiae)                                                   |

|                                       |      |    |           |                |    |         |     |     |                                            |
|---------------------------------------|------|----|-----------|----------------|----|---------|-----|-----|--------------------------------------------|
| Locus_13520_Transcript_1/1_Conf_1.000 | 346  | 2  | 6.08E-07  | NP_502515.1    | 53 | 57.3806 | 103 | 55  | hypothetical protein C39E9.11              |
| Locus_13521_Transcript_1/1_Conf_1.000 | 1096 | 20 | 1.21E-77  | EFO19790.1     | 61 | 294.664 | 378 | 232 | exostosin-1                                |
| Locus_13522_Transcript_1/1_Conf_1.000 | 441  | 20 | 3.66E-36  | XP_002640257.1 | 67 | 154.451 | 149 | 100 | Hypothetical protein CBG12782              |
| Locus_13523_Transcript_1/1_Conf_1.000 | 527  | 20 | 6.82E-42  | EFO20779.1     | 66 | 173.711 | 175 | 117 | hypothetical protein LOAG_07709            |
| Locus_13524_Transcript_1/1_Conf_1.000 | 385  | 20 | 2.49E-37  | XP_002641238.1 | 74 | 158.303 | 133 | 99  | C. briggsae CBR-THOC-2 protein             |
| Locus_13525_Transcript_1/1_Conf_1.000 | 243  | 0  |           |                |    |         |     |     |                                            |
| Locus_13526_Transcript_1/1_Conf_1.000 | 487  | 0  |           |                |    |         |     |     |                                            |
| Locus_13527_Transcript_1/1_Conf_1.000 | 265  | 0  |           |                |    |         |     |     |                                            |
| Locus_13528_Transcript_1/1_Conf_1.000 | 492  | 0  |           |                |    |         |     |     |                                            |
| Locus_13529_Transcript_1/1_Conf_1.000 | 363  | 0  |           |                |    |         |     |     |                                            |
| Locus_1353_Transcript_2/3_Conf_0.667  | 798  | 20 | 8.63E-116 | NP_001076672.1 | 89 | 420.624 | 249 | 224 | hypothetical protein F01G4.6               |
| Locus_1353_Transcript_3/3_Conf_0.667  | 798  | 20 | 8.64E-116 | NP_001076672.1 | 89 | 420.624 | 249 | 224 | hypothetical protein F01G4.6               |
| Locus_13530_Transcript_1/1_Conf_1.000 | 955  | 1  | 6.55E-42  | CAG28316.1     | 65 | 175.637 | 202 | 132 | spindle assembly abnormal protein 5, SAS-5 |
| Locus_13531_Transcript_1/2_Conf_1.000 | 470  | 0  |           |                |    |         |     |     |                                            |
| Locus_13531_Transcript_2/2_Conf_1.000 | 470  | 0  |           |                |    |         |     |     |                                            |
| Locus_13532_Transcript_1/1_Conf_1.000 | 331  | 2  | 2.78E-12  | NP_508464.2    | 64 | 75.0998 | 96  | 62  | hypothetical protein F52H2.7               |

|                                       |     |    |          |                |    |         |     |     |                                                                         |
|---------------------------------------|-----|----|----------|----------------|----|---------|-----|-----|-------------------------------------------------------------------------|
| Locus_13533_Transcript_1/1_Conf_1.000 | 475 | 3  | 2.68E-07 | NP_001021054.1 | 48 | 58.5362 | 154 | 75  | Suppressor with Morphological effect on Genitalia family member (smg-1) |
| Locus_13534_Transcript_1/1_Conf_1.000 | 486 | 0  |          |                |    |         |     |     |                                                                         |
| Locus_13535_Transcript_1/1_Conf_1.000 | 155 | 2  | 1.66E-04 | XP_002634292.1 | 72 | 49.2914 | 51  | 37  | C. briggsae CBR-UGT-54 protein                                          |
| Locus_13536_Transcript_1/1_Conf_1.000 | 230 | 0  |          |                |    |         |     |     |                                                                         |
| Locus_13537_Transcript_1/1_Conf_1.000 | 400 | 20 | 9.23E-48 | XP_001898337.1 | 82 | 192.971 | 133 | 110 | oxidoreductase, short chain dehydrogenase/reductase family protein      |
| Locus_13538_Transcript_1/1_Conf_1.000 | 895 | 20 | 2.30E-70 | Q610N4.2       | 77 | 270.011 | 253 | 195 | Transmembrane protein 104 homolog                                       |
| Locus_13539_Transcript_1/1_Conf_1.000 | 381 | 0  |          |                |    |         |     |     |                                                                         |
| Locus_1354_Transcript_1/1_Conf_1.000  | 472 | 20 | 2.11E-44 | XP_002634364.1 | 96 | 181.8   | 82  | 79  | C. briggsae CBR-EXC-9 protein                                           |
| Locus_13540_Transcript_1/1_Conf_1.000 | 438 | 20 | 4.04E-56 | XP_002637802.1 | 94 | 220.705 | 137 | 130 | C. briggsae CBR-HDA-1 protein                                           |
| Locus_13541_Transcript_1/1_Conf_1.000 | 686 | 0  |          |                |    |         |     |     |                                                                         |
| Locus_13542_Transcript_1/1_Conf_1.000 | 161 | 0  |          |                |    |         |     |     |                                                                         |
| Locus_13543_Transcript_1/1_Conf_1.000 | 465 | 20 | 3.29E-37 | XP_002631639.1 | 77 | 157.918 | 149 | 116 | Hypothetical protein CBG20828                                           |
| Locus_13544_Transcript_1/1_Conf_1.000 | 145 | 2  | 1.08E-11 | NP_492142.1    | 85 | 73.1738 | 47  | 40  | hypothetical protein T23G11.4                                           |
| Locus_13545_Transcript_1/1_Conf_1.000 | 149 | 0  |          |                |    |         |     |     |                                                                         |
| Locus_13546_Transcript_1/1_Conf_1.000 | 145 | 0  |          |                |    |         |     |     |                                                                         |
| Locus_13547_Transcript_1/1_Conf_1.000 | 497 | 6  | 6.75E-43 | NP_498388.1    | 69 | 176.792 | 166 | 116 | hypothetical protein C56G2.3                                            |
| Locus_13548_Transcript_1/1_Conf_1.000 | 688 | 20 | 1.54E-85 | XP_002636924.1 | 81 | 319.701 | 229 | 186 | C. briggsae CBR-ACL-6 protein                                           |
| Locus_13549_Transcript_1/1_Conf_1.000 | 201 | 4  | 1.99E-26 | XP_002632215.1 | 95 | 122.094 | 66  | 63  | Hypothetical protein CBG07083                                           |
| Locus_1355_Transcript_1/1_Conf_1.000  | 229 | 0  |          |                |    |         |     |     |                                                                         |
| Locus_13550_Transcript_1/1_Conf_1.000 | 248 | 0  |          |                |    |         |     |     |                                                                         |
| Locus_13551_Transcript_1/1_Conf_1.000 | 382 | 0  |          |                |    |         |     |     |                                                                         |



|                                       |      |    |           |                |    |         |     |     |                                                          |
|---------------------------------------|------|----|-----------|----------------|----|---------|-----|-----|----------------------------------------------------------|
| Locus_13552_Transcript_1/1_Conf_1.000 | 570  | 20 | 3.37E-62  | ACA81684.1     | 84 | 241.506 | 161 | 136 | cholecystokinin receptor 2 splice isoform b              |
| Locus_13553_Transcript_1/1_Conf_1.000 | 263  | 0  |           |                |    |         |     |     |                                                          |
| Locus_13554_Transcript_1/1_Conf_1.000 | 631  | 20 | 2.10E-32  | EFO24248.1     | 61 | 142.895 | 175 | 107 | repair protein Rad1/Rec1/Rad17 containing protein        |
| Locus_13555_Transcript_1/1_Conf_1.000 | 514  | 20 | 3.54E-37  | CAR63581.1     | 77 | 157.918 | 143 | 111 | putative COLLAGEN                                        |
| Locus_13556_Transcript_1/1_Conf_1.000 | 295  | 7  | 5.45E-16  | NP_490710.2    | 75 | 87.4261 | 80  | 60  | hypothetical protein C53D5.2                             |
| Locus_13557_Transcript_1/1_Conf_1.000 | 268  | 20 | 1.64E-04  | DAA32996.1     | 44 | 49.2914 | 83  | 37  | ubiquitin-associated and SH3 domain-containing protein A |
| Locus_13558_Transcript_1/1_Conf_1.000 | 547  | 20 | 1.27E-12  | XP_001704397.1 | 47 | 76.6406 | 141 | 67  | Tenascin-X precursor                                     |
| Locus_13559_Transcript_1/2_Conf_1.000 | 1350 | 20 | 9.68E-163 | XP_002638613.1 | 83 | 577.785 | 407 | 340 | C. briggsae CBR-PGP-9 protein                            |
| Locus_13559_Transcript_2/2_Conf_1.000 | 1350 | 20 | 9.68E-163 | XP_002638613.1 | 83 | 577.785 | 407 | 340 | C. briggsae CBR-PGP-9 protein                            |

|                                       |      |    |   |             |    |         |     |     |                                |
|---------------------------------------|------|----|---|-------------|----|---------|-----|-----|--------------------------------|
| Locus_1356_Transcript_1/2_Conf_1.000  | 2814 | 20 | 0 | NP_490865.3 | 78 | 1028.08 | 758 | 592 | hypothetical protein Y92H12A.2 |
| Locus_1356_Transcript_2/2_Conf_1.000  | 2754 | 20 | 0 | NP_490865.3 | 80 | 1030.78 | 743 | 598 | hypothetical protein Y92H12A.2 |
| Locus_13560_Transcript_1/1_Conf_1.000 | 326  | 0  |   |             |    |         |     |     |                                |

|                                       |      |    |          |                |     |         |     |     |                                                                                                |
|---------------------------------------|------|----|----------|----------------|-----|---------|-----|-----|------------------------------------------------------------------------------------------------|
| Locus_13561_Transcript_1/1_Conf_1.000 | 1146 | 20 | 1.69E-69 | EFO24820.1     | 66  | 267.7   | 296 | 196 | hypothetical protein LOAG_03664                                                                |
| Locus_13562_Transcript_1/1_Conf_1.000 | 221  | 3  | 1.16E-05 | NP_492441.1    | 52  | 53.1434 | 70  | 37  | related to vertebrate MEF2 transcription factor family member (mef-2)                          |
| Locus_13563_Transcript_1/1_Conf_1.000 | 231  | 2  | 1.49E-05 | XP_002630854.1 | 68  | 52.7582 | 50  | 34  | <i>C. briggsae</i> CBR-RAN-5 protein                                                           |
| Locus_13564_Transcript_1/1_Conf_1.000 | 265  | 20 | 8.66E-30 | XP_002629838.1 | 85  | 133.265 | 87  | 74  | Hypothetical protein CBG18727                                                                  |
| Locus_13565_Transcript_1/1_Conf_1.000 | 128  | 2  | 6.42E-09 | XP_002636472.1 | 80  | 63.929  | 42  | 34  | Hypothetical protein CBG23143                                                                  |
| Locus_13566_Transcript_1/1_Conf_1.000 | 319  | 4  | 3.09E-35 | CAR63626.1     | 89  | 151.369 | 108 | 97  | hypothetical protein                                                                           |
| Locus_13567_Transcript_1/1_Conf_1.000 | 347  | 0  |          |                |     |         |     |     |                                                                                                |
| Locus_13568_Transcript_1/1_Conf_1.000 | 484  | 5  | 6.92E-19 | NP_509847.1    | 60  | 97.0561 | 128 | 77  | Claudin-like in <i>Caenorhabditis</i> family member (clc-1)                                    |
| Locus_13569_Transcript_1/1_Conf_1.000 | 243  | 0  |          |                |     |         |     |     |                                                                                                |
| Locus_1357_Transcript_1/5_Conf_0.688  | 3471 | 20 | 9.63E-92 | XP_002641165.1 | 57  | 343.584 | 600 | 347 | <i>C. briggsae</i> CBR-NPP-10 protein                                                          |
| Locus_1357_Transcript_2/5_Conf_0.125  | 492  | 5  | 9.25E-08 | XP_002641165.1 | 55  | 60.077  | 85  | 47  | <i>C. briggsae</i> CBR-NPP-10 protein                                                          |
| Locus_1357_Transcript_3/5_Conf_0.188  | 1343 | 20 | 2.37E-36 | ACZ54696.1     | 64  | 157.918 | 242 | 156 | Nuclear pore complex protein protein 10, isoform c, partially confirmed by transcript evidence |
| Locus_1357_Transcript_4/5_Conf_0.562  | 2980 | 20 | 6.44E-81 | XP_002641165.1 | 63  | 307.375 | 417 | 264 | <i>C. briggsae</i> CBR-NPP-10 protein                                                          |
| Locus_1357_Transcript_5/5_Conf_0.688  | 3492 | 20 | 9.69E-92 | XP_002641165.1 | 57  | 343.584 | 600 | 347 | <i>C. briggsae</i> CBR-NPP-10 protein                                                          |
| Locus_13570_Transcript_1/1_Conf_1.000 | 221  | 20 | 6.73E-30 | XP_002826714.1 | 100 | 133.65  | 63  | 63  | PREDICTED: 60S ribosomal protein L21-like isoform 1                                            |
| Locus_13571_Transcript_1/1_Conf_1.000 | 211  | 0  |          |                |     |         |     |     |                                                                                                |
| Locus_13572_Transcript_1/1_Conf_1.000 | 591  | 1  | 2.87E-06 | NP_504410.1    | 48  | 55.8398 | 108 | 52  | hypothetical protein B0238.11                                                                  |
| Locus_13573_Transcript_1/1_Conf_1.000 | 185  | 19 | 7.48E-13 | NP_491270.2    | 79  | 77.0258 | 48  | 38  | Low-density lipoprotein Receptor Related family member (Irp-2)                                 |
| Locus_13574_Transcript_1/1_Conf_1.000 | 211  | 1  | 6.16E-04 | XP_002646401.1 | 58  | 47.3654 | 70  | 41  | <i>C. briggsae</i> CBR-DYS-1 protein                                                           |

|                                       |      |    |           |                |    |         |     |     |                                                                |
|---------------------------------------|------|----|-----------|----------------|----|---------|-----|-----|----------------------------------------------------------------|
| Locus_13575_Transcript_1/1_Conf_1.000 | 676  | 20 | 1.79E-107 | NP_497185.1    | 93 | 392.504 | 223 | 208 | Alkyl-Dihydroxyacetonephosphate Synthase family member (ads-1) |
| Locus_13576_Transcript_1/1_Conf_1.000 | 574  | 20 | 1.83E-39  | EFO22852.1     | 65 | 166.007 | 194 | 127 | WD domain-containing protein                                   |
| Locus_13577_Transcript_1/3_Conf_0.667 | 1150 | 20 | 1.10E-177 | XP_002641484.1 | 89 | 627.091 | 386 | 345 | Hypothetical protein CBG09775                                  |
| Locus_13577_Transcript_2/3_Conf_0.667 | 1150 | 20 | 3.00E-175 | XP_002641484.1 | 89 | 619.002 | 385 | 344 | Hypothetical protein CBG09775                                  |
| Locus_13577_Transcript_3/3_Conf_0.667 | 1150 | 20 | 3.00E-175 | XP_002641484.1 | 89 | 619.002 | 385 | 344 | Hypothetical protein CBG09775                                  |
| Locus_13578_Transcript_1/1_Conf_1.000 | 203  | 0  |           |                |    |         |     |     |                                                                |
| Locus_13579_Transcript_1/2_Conf_1.000 | 631  | 20 | 3.13E-36  | CBA11992.1     | 72 | 155.606 | 122 | 89  | endonuclease-reverse transcriptase HmRTE-e01                   |
| Locus_13579_Transcript_2/2_Conf_1.000 | 313  | 2  | 6.77E-06  | XP_002632164.1 | 68 | 53.9138 | 60  | 41  | Hypothetical protein CBG07023                                  |
| Locus_1358_Transcript_1/6_Conf_0.286  | 753  | 20 | 5.14E-104 | NP_741155.2    | 95 | 381.333 | 227 | 216 | hypothetical protein F01F1.12                                  |
| Locus_1358_Transcript_2/6_Conf_0.286  | 711  | 20 | 1.34E-103 | NP_741155.2    | 95 | 379.793 | 224 | 213 | hypothetical protein F01F1.12                                  |
| Locus_1358_Transcript_3/6_Conf_0.357  | 1287 | 20 | 2.85E-108 | XP_002641199.1 | 94 | 396.741 | 228 | 215 | Hypothetical protein CBG09060                                  |

|                                       |      |    |           |                |    |         |     |     |                                                                                 |
|---------------------------------------|------|----|-----------|----------------|----|---------|-----|-----|---------------------------------------------------------------------------------|
| Locus_1358_Transcript_4/6_Conf_0.357  | 1287 | 20 | 1.42E-107 | XP_002641199.1 | 94 | 394.43  | 228 | 215 | Hypothetical protein CBG09060                                                   |
| Locus_1358_Transcript_5/6_Conf_0.357  | 1288 | 20 | 6.04E-167 | NP_001021240.1 | 94 | 591.652 | 361 | 340 | hypothetical protein F01F1.12                                                   |
| Locus_1358_Transcript_6/6_Conf_0.357  | 1288 | 20 | 1.49E-165 | NP_001021240.1 | 94 | 587.03  | 361 | 340 | hypothetical protein F01F1.12                                                   |
| Locus_13580_Transcript_1/1_Conf_1.000 | 326  | 0  |           |                |    |         |     |     |                                                                                 |
| Locus_13581_Transcript_1/1_Conf_1.000 | 685  | 0  |           |                |    |         |     |     |                                                                                 |
| Locus_13582_Transcript_1/1_Conf_1.000 | 494  | 20 | 4.86E-41  | XP_001901777.1 | 80 | 170.629 | 110 | 88  | Melibiase family protein                                                        |
| Locus_13583_Transcript_1/1_Conf_1.000 | 175  | 0  |           |                |    |         |     |     |                                                                                 |
| Locus_13584_Transcript_1/1_Conf_1.000 | 171  | 20 | 4.55E-23  | AAF59456.4     | 96 | 110.923 | 57  | 55  | Smg-associated and lethal protein 2, partially confirmed by transcript evidence |
| Locus_13585_Transcript_1/1_Conf_1.000 | 439  | 0  |           |                |    |         |     |     |                                                                                 |
| Locus_13586_Transcript_1/1_Conf_1.000 | 502  | 0  |           |                |    |         |     |     |                                                                                 |
| Locus_13588_Transcript_1/1_Conf_1.000 | 541  | 20 | 6.96E-08  | ZP_04297130.1  | 45 | 60.8474 | 140 | 63  | Cell divisionFtsK/SpoIIIE                                                       |
| Locus_13589_Transcript_1/1_Conf_1.000 | 316  | 5  | 7.46E-05  | EFO12242.1     | 66 | 50.447  | 56  | 37  | hypothetical protein LOAG_16291                                                 |
| Locus_1359_Transcript_1/5_Conf_0.444  | 887  | 20 | 5.77E-50  | CBA11992.1     | 59 | 202.216 | 264 | 158 | endonuclease-reverse transcriptase HmRTE-e01                                    |

|                                       |      |    |           |                |    |         |     |     |                                                            |
|---------------------------------------|------|----|-----------|----------------|----|---------|-----|-----|------------------------------------------------------------|
| Locus_1359_Transcript_2/5_Conf_0.444  | 673  | 13 | 2.21E-25  | CBA11992.1     | 58 | 119.783 | 163 | 96  | endonuclease-reverse transcriptase HmRTE-e01               |
| Locus_1359_Transcript_3/5_Conf_0.222  | 271  | 0  |           |                |    |         |     |     |                                                            |
| Locus_1359_Transcript_4/5_Conf_0.333  | 1219 | 20 | 9.52E-66  | CBA11992.1     | 55 | 255.373 | 358 | 199 | endonuclease-reverse transcriptase HmRTE-e01               |
| Locus_1359_Transcript_5/5_Conf_0.444  | 953  | 20 | 5.03E-50  | CBA11992.1     | 60 | 202.601 | 265 | 159 | endonuclease-reverse transcriptase HmRTE-e01               |
| Locus_13590_Transcript_1/1_Conf_1.000 | 189  | 0  |           |                |    |         |     |     |                                                            |
| Locus_13591_Transcript_1/2_Conf_1.000 | 774  | 3  | 1.80E-22  | NP_001022822.1 | 42 | 110.538 | 328 | 140 | hypothetical protein Y111B2A.9                             |
| Locus_13591_Transcript_2/2_Conf_1.000 | 774  | 3  | 1.37E-22  | NP_001022822.1 | 42 | 110.923 | 328 | 140 | hypothetical protein Y111B2A.9                             |
| Locus_13592_Transcript_1/2_Conf_1.000 | 1066 | 20 | 6.87E-147 | XP_001899040.1 | 92 | 524.628 | 336 | 310 | vinculin                                                   |
| Locus_13592_Transcript_2/2_Conf_1.000 | 1066 | 20 | 6.87E-147 | XP_001899040.1 | 92 | 524.628 | 336 | 310 | vinculin                                                   |
| Locus_13593_Transcript_1/1_Conf_1.000 | 481  | 20 | 1.27E-33  | XP_002636940.1 | 92 | 145.976 | 79  | 73  | Hypothetical protein CBG09413                              |
| Locus_13594_Transcript_1/1_Conf_1.000 | 501  | 3  | 7.43E-13  | CAR63585.1     | 76 | 77.0258 | 56  | 43  | putative MAD-Like family member                            |
| Locus_13595_Transcript_1/2_Conf_1.000 | 152  | 0  |           |                |    |         |     |     |                                                            |
| Locus_13595_Transcript_2/2_Conf_1.000 | 144  | 0  |           |                |    |         |     |     |                                                            |
| Locus_13596_Transcript_1/1_Conf_1.000 | 172  | 0  |           |                |    |         |     |     |                                                            |
| Locus_13597_Transcript_1/1_Conf_1.000 | 227  | 0  |           |                |    |         |     |     |                                                            |
| Locus_13598_Transcript_1/1_Conf_1.000 | 454  | 20 | 1.52E-18  | NP_509240.2    | 57 | 95.9005 | 142 | 81  | TransThyretin-Related family domain family member (ttr-30) |
| Locus_13599_Transcript_1/1_Conf_1.000 | 230  | 0  |           |                |    |         |     |     |                                                            |
| Locus_136_Transcript_1/2_Conf_1.000   | 645  | 0  |           |                |    |         |     |     |                                                            |
| Locus_136_Transcript_2/2_Conf_1.000   | 907  | 0  |           |                |    |         |     |     |                                                            |
| Locus_1360_Transcript_1/1_Conf_1.000  | 294  | 0  |           |                |    |         |     |     |                                                            |
| Locus_13600_Transcript_1/1_Conf_1.000 | 358  | 0  |           |                |    |         |     |     |                                                            |
| Locus_13601_Transcript_1/1_Conf_1.000 | 356  | 0  |           |                |    |         |     |     |                                                            |

|                                       |      |    |          |                |     |         |     |     |                                                                             |
|---------------------------------------|------|----|----------|----------------|-----|---------|-----|-----|-----------------------------------------------------------------------------|
| Locus_13602_Transcript_1/1_Conf_1.000 | 177  | 20 | 4.83E-25 | 2XA7           | 100 | 117.472 | 58  | 58  | Ap2 Clathrin Adaptor Core In Active Complex With Cargo Peptides             |
| Locus_13603_Transcript_1/2_Conf_1.000 | 644  | 0  |          |                |     |         |     |     |                                                                             |
| Locus_13603_Transcript_2/2_Conf_1.000 | 641  | 0  |          |                |     |         |     |     |                                                                             |
| Locus_13604_Transcript_1/2_Conf_1.000 | 578  | 4  | 1.54E-09 | XP_002641258.1 | 94  | 66.6254 | 35  | 33  | Hypothetical protein CBG05169                                               |
| Locus_13604_Transcript_2/2_Conf_1.000 | 488  | 4  | 9.98E-10 | XP_002641258.1 | 94  | 66.6254 | 35  | 33  | Hypothetical protein CBG05169                                               |
| Locus_13605_Transcript_1/2_Conf_1.000 | 344  | 0  |          |                |     |         |     |     |                                                                             |
| Locus_13605_Transcript_2/2_Conf_1.000 | 344  | 0  |          |                |     |         |     |     |                                                                             |
| Locus_13606_Transcript_1/1_Conf_1.000 | 860  | 20 | 3.01E-56 | CAA22108.2     | 63  | 223.016 | 300 | 189 | C. elegans protein Y75B8A.24, partially confirmed by transcript evidence    |
| Locus_13607_Transcript_1/1_Conf_1.000 | 405  | 20 | 3.48E-47 | XP_002641892.1 | 83  | 191.045 | 130 | 109 | Hypothetical protein CBG16586                                               |
| Locus_13608_Transcript_1/1_Conf_1.000 | 891  | 20 | 1.22E-31 | EFO23701.1     | 52  | 141.354 | 291 | 153 | TPR Domain containing protein                                               |
| Locus_13609_Transcript_1/1_Conf_1.000 | 880  | 20 | 3.50E-07 | XP_692550.3    | 42  | 60.077  | 325 | 138 | PREDICTED: si:key-230p4.1                                                   |
| Locus_1361_Transcript_1/1_Conf_1.000  | 1005 | 20 | 2.30E-56 | NP_001022708.1 | 56  | 223.787 | 352 | 199 | Inhibitor of NFKappaB Kinase Epsilon subunit homolog family member (ikke-1) |
| Locus_13610_Transcript_1/1_Conf_1.000 | 310  | 0  |          |                |     |         |     |     |                                                                             |
| Locus_13611_Transcript_1/1_Conf_1.000 | 837  | 20 | 1.75E-37 | EFO26887.1     | 53  | 160.614 | 247 | 132 | hypothetical protein LOAG_01595                                             |
| Locus_13612_Transcript_1/1_Conf_1.000 | 450  | 0  |          |                |     |         |     |     |                                                                             |

|                                       |     |    |          |                |    |         |     |     |                                                |
|---------------------------------------|-----|----|----------|----------------|----|---------|-----|-----|------------------------------------------------|
| Locus_13613_Transcript_1/1_Conf_1.000 | 494 | 1  | 4.75E-04 | EFO15567.1     | 48 | 47.7506 | 78  | 38  | hypothetical protein LOAG_12942                |
| Locus_13614_Transcript_1/1_Conf_1.000 | 728 | 2  | 9.00E-18 | NP_502746.1    | 50 | 94.7449 | 253 | 128 | hypothetical protein Y67A10A.9                 |
| Locus_13615_Transcript_1/1_Conf_1.000 | 416 | 20 | 1.35E-51 | EFO20693.1     | 87 | 205.682 | 139 | 121 | hypothetical protein LOAG_07794                |
| Locus_13616_Transcript_1/1_Conf_1.000 | 237 | 0  |          |                |    |         |     |     |                                                |
| Locus_13617_Transcript_1/1_Conf_1.000 | 185 | 20 | 6.75E-22 | EFO21414.1     | 91 | 107.071 | 61  | 56  | hypothetical protein LOAG_07072                |
| Locus_13618_Transcript_1/1_Conf_1.000 | 200 | 20 | 1.06E-19 | EFO24572.1     | 78 | 99.7525 | 65  | 51  | carboxyl transferase domain-containing protein |
| Locus_13619_Transcript_1/1_Conf_1.000 | 204 | 20 | 5.22E-27 | CAR63646.1     | 88 | 124.02  | 67  | 59  | putative Homeobox family member                |
| Locus_1362_Transcript_1/1_Conf_1.000  | 135 | 2  | 3.27E-05 | NP_492659.1    | 78 | 51.6026 | 41  | 32  | hypothetical protein B0379.1                   |
| Locus_13620_Transcript_1/1_Conf_1.000 | 263 | 0  |          |                |    |         |     |     |                                                |
| Locus_13621_Transcript_1/1_Conf_1.000 | 395 | 20 | 2.21E-57 | XP_002644998.1 | 89 | 224.942 | 131 | 117 | C. briggsae CBR-LAM-2 protein                  |
| Locus_13622_Transcript_1/1_Conf_1.000 | 300 | 0  |          |                |    |         |     |     |                                                |



|                                       |      |    |           |                |    |         |     |     |                                                                |
|---------------------------------------|------|----|-----------|----------------|----|---------|-----|-----|----------------------------------------------------------------|
| Locus_13623_Transcript_1/1_Conf_1.000 | 214  | 20 | 6.34E-09  | NP_491270.2    | 59 | 63.929  | 71  | 42  | Low-density lipoprotein Receptor Related family member (Irp-2) |
| Locus_13624_Transcript_1/1_Conf_1.000 | 346  | 4  | 1.30E-33  | XP_002641415.1 | 83 | 145.976 | 101 | 84  | Hypothetical protein CBG13282                                  |
| Locus_13625_Transcript_1/1_Conf_1.000 | 431  | 20 | 7.05E-24  | XP_002631495.1 | 72 | 113.62  | 144 | 105 | Hypothetical protein CBG20655                                  |
| Locus_13626_Transcript_1/1_Conf_1.000 | 392  | 0  |           |                |    |         |     |     |                                                                |
| Locus_13627_Transcript_1/1_Conf_1.000 | 983  | 20 | 3.23E-116 | XP_002647755.1 | 75 | 422.55  | 328 | 247 | C. briggsae CBR-ASP-1 protein                                  |
| Locus_13628_Transcript_1/2_Conf_1.000 | 712  | 0  |           |                |    |         |     |     |                                                                |
| Locus_13628_Transcript_2/2_Conf_1.000 | 1566 | 0  |           |                |    |         |     |     |                                                                |
| Locus_13629_Transcript_1/1_Conf_1.000 | 904  | 20 | 6.12E-87  | XP_002640327.1 | 70 | 325.094 | 301 | 213 | C. briggsae CBR-GLH-1 protein                                  |
| Locus_1363_Transcript_1/1_Conf_1.000  | 514  | 2  | 2.74E-05  | XP_002631254.1 | 51 | 51.9878 | 116 | 60  | Hypothetical protein CBG03058                                  |
| Locus_13630_Transcript_1/1_Conf_1.000 | 624  | 0  |           |                |    |         |     |     |                                                                |
| Locus_13631_Transcript_1/1_Conf_1.000 | 1361 | 1  | 2.13E-08  | XP_001901492.1 | 44 | 65.0846 | 213 | 94  | hypothetical protein                                           |
| Locus_13632_Transcript_1/1_Conf_1.000 | 272  | 0  |           |                |    |         |     |     |                                                                |
| Locus_13633_Transcript_1/1_Conf_1.000 | 329  | 2  | 2.98E-06  | XP_002636840.1 | 68 | 55.0694 | 61  | 42  | Hypothetical protein CBG09291                                  |

|                                       |      |    |          |                |     |         |     |     |                                                                                                    |
|---------------------------------------|------|----|----------|----------------|-----|---------|-----|-----|----------------------------------------------------------------------------------------------------|
| Locus_13634_Transcript_1/1_Conf_1.000 | 499  | 20 | 3.24E-29 | NP_505373.1    | 57  | 131.339 | 153 | 88  | hypothetical protein B0222.5                                                                       |
| Locus_13635_Transcript_1/1_Conf_1.000 | 146  | 0  |          |                |     |         |     |     |                                                                                                    |
| Locus_13636_Transcript_1/1_Conf_1.000 | 192  | 0  |          |                |     |         |     |     |                                                                                                    |
| Locus_13637_Transcript_1/1_Conf_1.000 | 1292 | 20 | 0        | AAR07614.1     | 99  | 801.586 | 408 | 406 | UNC-18                                                                                             |
| Locus_13638_Transcript_1/1_Conf_1.000 | 159  | 0  |          |                |     |         |     |     |                                                                                                    |
| Locus_13639_Transcript_1/1_Conf_1.000 | 422  | 5  | 9.67E-13 | XP_002645040.1 | 54  | 76.6406 | 142 | 77  | C. briggsae CBR-CLC-5 protein                                                                      |
| Locus_1364_Transcript_1/1_Conf_1.000  | 348  | 20 | 2.22E-17 | NP_491097.3    | 75  | 92.0485 | 73  | 55  | hypothetical protein Y54E10BR.1                                                                    |
| Locus_13640_Transcript_1/1_Conf_1.000 | 181  | 0  |          |                |     |         |     |     |                                                                                                    |
| Locus_13641_Transcript_1/1_Conf_1.000 | 321  | 0  |          |                |     |         |     |     |                                                                                                    |
| Locus_13642_Transcript_1/1_Conf_1.000 | 559  | 20 | 2.13E-26 | XP_002637392.1 | 64  | 122.479 | 145 | 93  | Hypothetical protein CBG19099                                                                      |
| Locus_13643_Transcript_1/1_Conf_1.000 | 179  | 0  |          |                |     |         |     |     |                                                                                                    |
| Locus_13644_Transcript_1/1_Conf_1.000 | 186  | 20 | 3.70E-12 | XP_002631121.1 | 72  | 74.7146 | 58  | 42  | Hypothetical protein CBG02899                                                                      |
| Locus_13645_Transcript_1/1_Conf_1.000 | 172  | 20 | 2.41E-24 | XP_002758725.1 | 100 | 115.161 | 57  | 57  | PREDICTED: dolichyl-diphosphooligosaccharide--protein glycosyltransferase subunit 1-like isoform 2 |
| Locus_13646_Transcript_1/2_Conf_1.000 | 504  | 0  |          |                |     |         |     |     |                                                                                                    |
| Locus_13646_Transcript_2/2_Conf_1.000 | 477  | 0  |          |                |     |         |     |     |                                                                                                    |
| Locus_13647_Transcript_1/1_Conf_1.000 | 170  | 0  |          |                |     |         |     |     |                                                                                                    |
| Locus_13648_Transcript_1/1_Conf_1.000 | 176  | 0  |          |                |     |         |     |     |                                                                                                    |
| Locus_13649_Transcript_1/1_Conf_1.000 | 229  | 0  |          |                |     |         |     |     |                                                                                                    |
| Locus_1365_Transcript_1/5_Conf_0.222  | 672  | 20 | 2.19E-65 | AAG36874.1     | 83  | 252.677 | 182 | 152 | AF242767_1SF2                                                                                      |
| Locus_1365_Transcript_2/5_Conf_0.333  | 534  | 0  |          |                |     |         |     |     |                                                                                                    |
| Locus_1365_Transcript_3/5_Conf_0.222  | 748  | 20 | 2.75E-65 | AAG36874.1     | 83  | 252.677 | 182 | 152 | AF242767_1SF2                                                                                      |

|                                       |      |    |           |                |    |         |     |     |                                                                        |
|---------------------------------------|------|----|-----------|----------------|----|---------|-----|-----|------------------------------------------------------------------------|
| Locus_1365_Transcript_4/5_Conf_0.556  | 1140 | 20 | 6.14E-72  | AAG36874.1     | 83 | 275.789 | 198 | 165 | AF242767_1SF2                                                          |
| Locus_1365_Transcript_5/5_Conf_0.556  | 975  | 20 | 4.83E-72  | AAG36874.1     | 83 | 275.789 | 198 | 165 | AF242767_1SF2                                                          |
| Locus_13650_Transcript_1/1_Conf_1.000 | 142  | 0  |           |                |    |         |     |     |                                                                        |
| Locus_13651_Transcript_1/1_Conf_1.000 | 395  | 20 | 1.26E-28  | XP_001901742.1 | 77 | 129.413 | 94  | 73  | PWI domain containing protein                                          |
| Locus_13652_Transcript_1/1_Conf_1.000 | 377  | 20 | 6.63E-38  | NP_001023236.1 | 80 | 160.229 | 125 | 101 | hypothetical protein F56H11.1                                          |
| Locus_13653_Transcript_1/1_Conf_1.000 | 459  | 14 | 8.77E-35  | XP_002640654.1 | 72 | 149.828 | 153 | 111 | Hypothetical protein CBG19712                                          |
| Locus_13654_Transcript_1/1_Conf_1.000 | 339  | 0  |           |                |    |         |     |     |                                                                        |
| Locus_13655_Transcript_1/1_Conf_1.000 | 366  | 20 | 6.28E-33  | NP_001022691.1 | 87 | 143.665 | 94  | 82  | AVEugle (Drosophila eye differentiation) homolog family member (ave-1) |
| Locus_13656_Transcript_1/1_Conf_1.000 | 258  | 4  | 5.50E-08  | EFO22604.1     | 67 | 60.8474 | 76  | 51  | RPN-3 protein                                                          |
| Locus_13657_Transcript_1/1_Conf_1.000 | 171  | 5  | 9.20E-16  | NP_495035.1    | 83 | 86.6557 | 55  | 46  | DeHydrogenases, Short chain family member (dhs-5)                      |
| Locus_13658_Transcript_1/1_Conf_1.000 | 952  | 20 | 5.77E-115 | XP_002645892.1 | 82 | 418.313 | 317 | 260 | Hypothetical protein CBG07642                                          |
| Locus_13659_Transcript_1/1_Conf_1.000 | 721  | 2  | 1.78E-10  | EFO16155.1     | 50 | 70.4774 | 145 | 73  | hypothetical protein LOAG_12354                                        |
| Locus_1366_Transcript_1/1_Conf_1.000  | 362  | 5  | 3.72E-25  | CAR63528.1     | 96 | 117.857 | 64  | 62  | hypothetical protein                                                   |

|                                       |      |    |           |                |    |         |     |     |                               |
|---------------------------------------|------|----|-----------|----------------|----|---------|-----|-----|-------------------------------|
| Locus_13660_Transcript_1/1_Conf_1.000 | 420  | 20 | 1.64E-36  | XP_002636220.1 | 70 | 155.606 | 128 | 90  | Hypothetical protein CBG12141 |
| Locus_13661_Transcript_1/1_Conf_1.000 | 131  | 0  |           |                |    |         |     |     |                               |
| Locus_13662_Transcript_1/1_Conf_1.000 | 314  | 0  |           |                |    |         |     |     |                               |
| Locus_13663_Transcript_1/1_Conf_1.000 | 194  | 0  |           |                |    |         |     |     |                               |
| Locus_13664_Transcript_1/1_Conf_1.000 | 957  | 2  | 1.10E-04  | XP_001270159.1 | 40 | 51.9878 | 275 | 112 | GAS2 domain protein           |
| Locus_13665_Transcript_1/2_Conf_1.000 | 1756 | 20 | 1.06E-114 | XP_001898777.1 | 73 | 418.698 | 343 | 251 | daf-18 protein                |

|                                       |      |    |           |                |    |         |     |     |                                                                          |
|---------------------------------------|------|----|-----------|----------------|----|---------|-----|-----|--------------------------------------------------------------------------|
| Locus_13665_Transcript_2/2_Conf_1.000 | 1666 | 20 | 9.93E-115 | XP_001898777.1 | 73 | 418.698 | 343 | 251 | daf-18 protein                                                           |
| Locus_13666_Transcript_1/1_Conf_1.000 | 138  | 0  |           |                |    |         |     |     |                                                                          |
| Locus_13667_Transcript_1/1_Conf_1.000 | 152  | 0  |           |                |    |         |     |     |                                                                          |
| Locus_13668_Transcript_1/1_Conf_1.000 | 760  | 20 | 5.15E-43  | NP_001123112.1 | 78 | 178.718 | 119 | 94  | hypothetical protein C17H11.6                                            |
| Locus_13669_Transcript_1/1_Conf_1.000 | 381  | 20 | 8.63E-22  | XP_001899513.1 | 66 | 106.686 | 116 | 77  | AIDA-1b                                                                  |
| Locus_1367_Transcript_1/3_Conf_0.714  | 1556 | 0  |           |                |    |         |     |     |                                                                          |
| Locus_1367_Transcript_2/3_Conf_0.571  | 1020 | 0  |           |                |    |         |     |     |                                                                          |
| Locus_1367_Transcript_3/3_Conf_0.714  | 1553 | 0  |           |                |    |         |     |     |                                                                          |
| Locus_13670_Transcript_1/1_Conf_1.000 | 493  | 20 | 4.09E-64  | EFO26413.1     | 91 | 247.284 | 135 | 123 | F-box only protein 11                                                    |
| Locus_13671_Transcript_1/1_Conf_1.000 | 130  | 0  |           |                |    |         |     |     |                                                                          |
| Locus_13672_Transcript_1/1_Conf_1.000 | 231  | 0  |           |                |    |         |     |     |                                                                          |
| Locus_13673_Transcript_1/1_Conf_1.000 | 138  | 0  |           |                |    |         |     |     |                                                                          |
| Locus_13674_Transcript_1/1_Conf_1.000 | 379  | 20 | 1.24E-36  | NP_509879.2    | 81 | 155.992 | 125 | 102 | hypothetical protein C03A3.2                                             |
| Locus_13675_Transcript_1/1_Conf_1.000 | 268  | 0  |           |                |    |         |     |     |                                                                          |
| Locus_13676_Transcript_1/1_Conf_1.000 | 328  | 0  |           |                |    |         |     |     |                                                                          |
| Locus_13677_Transcript_1/1_Conf_1.000 | 237  | 5  | 4.58E-23  | XP_002631799.1 | 81 | 110.923 | 79  | 64  | Hypothetical protein CBG21018                                            |
| Locus_13678_Transcript_1/1_Conf_1.000 | 452  | 7  | 2.35E-19  | CAB60494.2     | 63 | 98.5969 | 136 | 87  | C. elegans protein Y39C12A.1, partially confirmed by transcript evidence |

|                                       |      |    |          |                |    |         |     |     |                                                         |
|---------------------------------------|------|----|----------|----------------|----|---------|-----|-----|---------------------------------------------------------|
| Locus_13679_Transcript_1/1_Conf_1.000 | 846  | 20 | 1.45E-63 | NP_503370.1    | 65 | 247.284 | 238 | 155 | hypothetical protein K10C9.3                            |
| Locus_1368_Transcript_1/1_Conf_1.000  | 838  | 20 | 2.77E-67 | XP_002630597.1 | 73 | 259.61  | 236 | 174 | Hypothetical protein CBG13057                           |
| Locus_13680_Transcript_1/1_Conf_1.000 | 145  | 20 | 1.08E-11 | XP_002630906.1 | 75 | 73.1738 | 48  | 36  | Hypothetical protein CBG02630                           |
| Locus_13681_Transcript_1/1_Conf_1.000 | 609  | 0  |          |                |    |         |     |     |                                                         |
| Locus_13682_Transcript_1/1_Conf_1.000 | 312  | 0  |          |                |    |         |     |     |                                                         |
| Locus_13683_Transcript_1/1_Conf_1.000 | 553  | 20 | 4.53E-21 | EFO23361.1     | 59 | 104.76  | 140 | 83  | cyclin domain-containing protein                        |
| Locus_13684_Transcript_1/1_Conf_1.000 | 203  | 0  |          |                |    |         |     |     |                                                         |
| Locus_13685_Transcript_1/1_Conf_1.000 | 410  | 20 | 1.46E-45 | XP_001896252.1 | 82 | 185.652 | 134 | 110 | MED7 protein                                            |
| Locus_13686_Transcript_1/1_Conf_1.000 | 280  | 20 | 3.46E-31 | XP_001897202.1 | 86 | 137.887 | 93  | 80  | CG8090-PA                                               |
| Locus_13687_Transcript_1/1_Conf_1.000 | 274  | 2  | 1.37E-11 | NP_495410.4    | 62 | 72.7886 | 82  | 51  | hypothetical protein C44B7.11                           |
| Locus_13688_Transcript_1/1_Conf_1.000 | 308  | 0  |          |                |    |         |     |     |                                                         |
| Locus_13689_Transcript_1/1_Conf_1.000 | 593  | 20 | 1.71E-67 | XP_002641317.1 | 80 | 259.225 | 200 | 160 | C. briggsae CBR-PAD-2 protein                           |
| Locus_1369_Transcript_1/1_Conf_1.000  | 616  | 20 | 3.87E-60 | NP_496176.1    | 74 | 234.958 | 203 | 151 | beta-LACTamase domain containing family member (lact-2) |
| Locus_13690_Transcript_1/1_Conf_1.000 | 1069 | 20 | 8.71E-33 | XP_002647217.1 | 68 | 145.591 | 208 | 142 | Hypothetical protein CBG22401                           |
| Locus_13691_Transcript_1/1_Conf_1.000 | 279  | 20 | 2.04E-15 | EFO22882.1     | 76 | 85.5001 | 60  | 46  | TK/FER protein kinase                                   |
| Locus_13692_Transcript_1/1_Conf_1.000 | 707  | 20 | 4.59E-32 | XP_002643629.1 | 88 | 142.124 | 124 | 110 | C. briggsae CBR-LET-2 protein                           |

|                                       |     |    |          |                |    |         |     |     |                                                                   |
|---------------------------------------|-----|----|----------|----------------|----|---------|-----|-----|-------------------------------------------------------------------|
| Locus_13693_Transcript_1/1_Conf_1.000 | 551 | 0  |          |                |    |         |     |     |                                                                   |
| Locus_13694_Transcript_1/1_Conf_1.000 | 461 | 20 | 2.08E-44 | NP_510159.1    | 83 | 181.8   | 118 | 98  | hypothetical protein F11C1.1                                      |
| Locus_13695_Transcript_1/1_Conf_1.000 | 633 | 20 | 3.04E-71 | XP_001902705.1 | 86 | 271.937 | 181 | 157 | Ras-related protein Rab-11B                                       |
| Locus_13696_Transcript_1/1_Conf_1.000 | 525 | 20 | 1.05E-50 | NP_491216.2    | 76 | 202.986 | 171 | 130 | Resistance to Inhibitors of Cholinesterase family member (ric-19) |
| Locus_13697_Transcript_1/1_Conf_1.000 | 734 | 20 | 5.14E-53 | NP_493372.1    | 70 | 211.846 | 220 | 155 | NuDiX family member (ndx-8)                                       |
| Locus_13698_Transcript_1/2_Conf_1.000 | 296 | 0  |          |                |    |         |     |     |                                                                   |
| Locus_13698_Transcript_2/2_Conf_1.000 | 308 | 0  |          |                |    |         |     |     |                                                                   |
| Locus_13699_Transcript_1/2_Conf_1.000 | 783 | 20 | 9.29E-75 | AAN11401.1     | 69 | 284.263 | 259 | 181 | metalloprotease 1 precursor                                       |
| Locus_13699_Transcript_2/2_Conf_1.000 | 783 | 20 | 4.17E-75 | AAN11401.1     | 70 | 285.419 | 259 | 182 | metalloprotease 1 precursor                                       |
| Locus_137_Transcript_10/15_Conf_0.375 | 380 | 20 | 1.56E-55 | ABM92348.1     | 99 | 218.779 | 106 | 105 | beta tubulin isotype 1                                            |
| Locus_137_Transcript_11/15_Conf_0.375 | 380 | 20 | 1.56E-55 | ABM92348.1     | 99 | 218.779 | 106 | 105 | beta tubulin isotype 1                                            |
| Locus_137_Transcript_12/15_Conf_0.375 | 380 | 20 | 1.56E-55 | ABM92348.1     | 99 | 218.779 | 106 | 105 | beta tubulin isotype 1                                            |

|                                       |      |    |           |            |     |         |     |     |                        |
|---------------------------------------|------|----|-----------|------------|-----|---------|-----|-----|------------------------|
| Locus_137_Transcript_13/15_Conf_0.375 | 380  | 20 | 1.56E-55  | ABM92348.1 | 99  | 218.779 | 106 | 105 | beta tubulin isotype 1 |
| Locus_137_Transcript_14/15_Conf_0.375 | 380  | 20 | 1.56E-55  | ABM92348.1 | 99  | 218.779 | 106 | 105 | beta tubulin isotype 1 |
| Locus_137_Transcript_15/15_Conf_0.375 | 380  | 20 | 1.56E-55  | ABM92348.1 | 99  | 218.779 | 106 | 105 | beta tubulin isotype 1 |
| Locus_137_Transcript_2/15_Conf_1.000  | 1082 | 20 | 1.66E-180 | AAP20434.1 | 99  | 636.336 | 333 | 332 | beta-tubulin isotype 1 |
| Locus_137_Transcript_3/15_Conf_1.000  | 1082 | 20 | 0         | AAP20434.1 | 99  | 638.262 | 333 | 332 | beta-tubulin isotype 1 |
| Locus_137_Transcript_4/15_Conf_1.000  | 167  | 20 | 4.89E-25  | ACS50329.1 | 100 | 117.472 | 55  | 55  | beta-tubulin           |
| Locus_137_Transcript_5/15_Conf_1.000  | 221  | 20 | 9.41E-24  | ABM92348.1 | 98  | 113.235 | 53  | 52  | beta tubulin isotype 1 |
| Locus_137_Transcript_6/15_Conf_0.375  | 380  | 20 | 1.56E-55  | ABM92348.1 | 99  | 218.779 | 106 | 105 | beta tubulin isotype 1 |
| Locus_137_Transcript_7/15_Conf_0.375  | 380  | 20 | 1.56E-55  | ABM92348.1 | 99  | 218.779 | 106 | 105 | beta tubulin isotype 1 |



|                                       |      |    |          |                |    |         |     |     |                                 |
|---------------------------------------|------|----|----------|----------------|----|---------|-----|-----|---------------------------------|
| Locus_137_Transcript_8/15_Conf_0.375  | 380  | 20 | 1.56E-55 | ABM92348.1     | 99 | 218.779 | 106 | 105 | beta tubulin isotype 1          |
| Locus_137_Transcript_9/15_Conf_0.375  | 380  | 20 | 1.56E-55 | ABM92348.1     | 99 | 218.779 | 106 | 105 | beta tubulin isotype 1          |
| Locus_1370_Transcript_1/2_Conf_1.000  | 1722 | 20 | 3.34E-89 | NP_505054.1    | 71 | 333.954 | 292 | 210 | hypothetical protein Y97E10AL.2 |
| Locus_1370_Transcript_2/2_Conf_1.000  | 1722 | 20 | 3.34E-89 | NP_505054.1    | 71 | 333.954 | 292 | 210 | hypothetical protein Y97E10AL.2 |
| Locus_13700_Transcript_1/1_Conf_1.000 | 141  | 0  |          |                |    |         |     |     |                                 |
| Locus_13701_Transcript_1/1_Conf_1.000 | 173  | 0  |          |                |    |         |     |     |                                 |
| Locus_13702_Transcript_1/1_Conf_1.000 | 512  | 0  |          |                |    |         |     |     |                                 |
| Locus_13703_Transcript_1/1_Conf_1.000 | 155  | 2  | 2.39E-11 | NP_501239.3    | 72 | 72.0182 | 51  | 37  | hypothetical protein F45E4.5    |
| Locus_13704_Transcript_1/1_Conf_1.000 | 367  | 19 | 1.97E-10 | XP_002631639.1 | 55 | 68.9366 | 103 | 57  | Hypothetical protein CBG20828   |
| Locus_13705_Transcript_1/1_Conf_1.000 | 405  | 20 | 1.42E-40 | NP_496968.1    | 83 | 169.088 | 135 | 113 | hypothetical protein Y48B6A.12  |
| Locus_13706_Transcript_1/1_Conf_1.000 | 237  | 0  |          |                |    |         |     |     |                                 |
| Locus_13707_Transcript_1/1_Conf_1.000 | 357  | 0  |          |                |    |         |     |     |                                 |
| Locus_13708_Transcript_1/1_Conf_1.000 | 137  | 0  |          |                |    |         |     |     |                                 |
| Locus_13709_Transcript_1/1_Conf_1.000 | 465  | 20 | 1.92E-61 | NP_491989.1    | 91 | 238.424 | 136 | 124 | hypothetical protein C30F12.7   |

|                                       |      |    |          |                |    |         |     |     |                                                                                         |
|---------------------------------------|------|----|----------|----------------|----|---------|-----|-----|-----------------------------------------------------------------------------------------|
| Locus_1371_Transcript_1/1_Conf_1.000  | 488  | 20 | 6.86E-35 | XP_002636128.1 | 70 | 150.214 | 134 | 94  | Hypothetical protein CBG01378                                                           |
| Locus_13710_Transcript_1/1_Conf_1.000 | 128  | 20 | 1.58E-07 | AAD01617.2     | 92 | 59.3066 | 42  | 39  | cyclophilin-16                                                                          |
| Locus_13711_Transcript_1/1_Conf_1.000 | 407  | 0  |          |                |    |         |     |     |                                                                                         |
| Locus_13712_Transcript_1/1_Conf_1.000 | 341  | 20 | 3.13E-24 | EFO24293.1     | 80 | 114.775 | 85  | 68  | hypothetical protein LOAG_04190                                                         |
| Locus_13713_Transcript_1/1_Conf_1.000 | 177  | 0  |          |                |    |         |     |     |                                                                                         |
| Locus_13714_Transcript_1/1_Conf_1.000 | 145  | 0  |          |                |    |         |     |     |                                                                                         |
| Locus_13715_Transcript_1/1_Conf_1.000 | 309  | 14 | 1.72E-14 | CAD44516.1     | 59 | 82.4185 | 102 | 61  | VAB-10B protein                                                                         |
| Locus_13716_Transcript_1/1_Conf_1.000 | 954  | 20 | 4.09E-60 | NP_500156.2    | 78 | 236.113 | 184 | 145 | XPC (Xeroderma Pigmentosum group C)<br>DNA repair gene homolog family member<br>(xpc-1) |
| Locus_13717_Transcript_1/1_Conf_1.000 | 461  | 20 | 1.35E-51 | XP_002631622.1 | 76 | 205.682 | 151 | 116 | Hypothetical protein CBG20808                                                           |
| Locus_13718_Transcript_1/1_Conf_1.000 | 498  | 0  |          |                |    |         |     |     |                                                                                         |
| Locus_13719_Transcript_1/1_Conf_1.000 | 180  | 0  |          |                |    |         |     |     |                                                                                         |
| Locus_1372_Transcript_1/1_Conf_1.000  | 1716 | 20 | 1.61E-91 | EFO25336.1     | 68 | 341.658 | 317 | 218 | EBF3-S                                                                                  |
| Locus_13720_Transcript_1/1_Conf_1.000 | 864  | 20 | 6.66E-11 | EFN66847.1     | 49 | 72.4034 | 131 | 65  | hypothetical protein EAG_08499                                                          |
| Locus_13721_Transcript_1/1_Conf_1.000 | 230  | 0  |          |                |    |         |     |     |                                                                                         |
| Locus_13722_Transcript_1/1_Conf_1.000 | 464  | 8  | 1.30E-25 | NP_507480.1    | 69 | 119.398 | 129 | 90  | TWiK family of potassium channels family<br>member (twk-33)                             |
| Locus_13723_Transcript_1/1_Conf_1.000 | 391  | 0  |          |                |    |         |     |     |                                                                                         |

|                                       |      |    |          |                |     |         |     |     |                                                                  |
|---------------------------------------|------|----|----------|----------------|-----|---------|-----|-----|------------------------------------------------------------------|
| Locus_13724_Transcript_1/1_Conf_1.000 | 382  | 3  | 1.34E-06 | XP_002643776.1 | 67  | 56.225  | 43  | 29  | C. briggsae CBR-FLP-2 protein                                    |
| Locus_13725_Transcript_1/1_Conf_1.000 | 152  | 20 | 4.67E-15 | NP_505261.2    | 84  | 84.3445 | 50  | 42  | hypothetical protein B0507.2                                     |
| Locus_13726_Transcript_1/1_Conf_1.000 | 254  | 0  |          |                |     |         |     |     |                                                                  |
| Locus_13727_Transcript_1/1_Conf_1.000 | 657  | 1  | 1.21E-12 | XP_002647382.1 | 45  | 77.411  | 200 | 91  | Hypothetical protein CBG06447                                    |
| Locus_13728_Transcript_1/1_Conf_1.000 | 244  | 0  |          |                |     |         |     |     |                                                                  |
| Locus_13729_Transcript_1/1_Conf_1.000 | 1080 | 20 | 4.78E-95 | AAA97973.2     | 64  | 352.443 | 363 | 233 | Hypothetical protein F21C10.7                                    |
| Locus_1373_Transcript_1/1_Conf_1.000  | 993  | 20 | 6.49E-88 | NP_001122884.1 | 69  | 328.561 | 291 | 203 | Temporarily Assigned Gene name family member (tag-333)           |
| Locus_13730_Transcript_1/1_Conf_1.000 | 460  | 16 | 3.47E-15 | NP_495156.1    | 66  | 84.7297 | 112 | 74  | TBC (Tre-2/Bub2/Cdc16) domain family member (tbc-2)              |
| Locus_13731_Transcript_1/1_Conf_1.000 | 397  | 2  | 1.40E-11 | XP_002640811.1 | 52  | 72.7886 | 116 | 61  | Hypothetical protein CBG15695                                    |
| Locus_13732_Transcript_1/1_Conf_1.000 | 180  | 0  |          |                |     |         |     |     |                                                                  |
| Locus_13733_Transcript_1/1_Conf_1.000 | 256  | 0  |          |                |     |         |     |     |                                                                  |
| Locus_13734_Transcript_1/1_Conf_1.000 | 220  | 6  | 1.46E-08 | EFO21023.1     | 70  | 62.7734 | 51  | 36  | hypothetical protein LOAG_07466                                  |
| Locus_13735_Transcript_1/1_Conf_1.000 | 770  | 0  |          |                |     |         |     |     |                                                                  |
| Locus_13736_Transcript_1/1_Conf_1.000 | 187  | 5  | 2.16E-28 | NP_502312.2    | 98  | 128.642 | 62  | 61  | Neurexin Like receptor family member (nlr-1)                     |
| Locus_13737_Transcript_1/1_Conf_1.000 | 158  | 20 | 1.07E-11 | CAQ48388.2     | 80  | 73.1738 | 51  | 41  | C. elegans protein C26H9A.1b, confirmed by transcript evidence   |
| Locus_13738_Transcript_1/1_Conf_1.000 | 948  | 19 | 1.20E-35 | NP_001129935.1 | 55  | 154.836 | 229 | 128 | SMALL family member (sma-9)                                      |
| Locus_13739_Transcript_1/1_Conf_1.000 | 376  | 20 | 9.52E-53 | XP_001086913.2 | 100 | 209.534 | 103 | 103 | PREDICTED: translocon-associated protein subunit delta isoform 2 |
| Locus_1374_Transcript_1/2_Conf_1.000  | 513  | 1  | 3.58E-05 | CAR63546.1     | 52  | 51.6026 | 93  | 49  | hypothetical protein                                             |
| Locus_1374_Transcript_2/2_Conf_1.000  | 404  | 1  | 3.31E-05 | CAR63546.1     | 52  | 51.6026 | 93  | 49  | hypothetical protein                                             |
| Locus_13740_Transcript_1/1_Conf_1.000 | 975  | 13 | 5.06E-29 | XP_002634908.1 | 89  | 132.88  | 85  | 76  | Hypothetical protein CBG22506                                    |
| Locus_13741_Transcript_1/1_Conf_1.000 | 253  | 0  |          |                |     |         |     |     |                                                                  |
| Locus_13742_Transcript_1/1_Conf_1.000 | 404  | 0  |          |                |     |         |     |     |                                                                  |
| Locus_13743_Transcript_1/1_Conf_1.000 | 134  | 0  |          |                |     |         |     |     |                                                                  |
| Locus_13744_Transcript_1/1_Conf_1.000 | 454  | 0  |          |                |     |         |     |     |                                                                  |
| Locus_13745_Transcript_1/1_Conf_1.000 | 198  | 2  | 4.33E-05 | NP_497805.2    | 86  | 51.2174 | 36  | 31  | hypothetical protein C36E8.4                                     |

|                                       |      |    |           |                |    |         |     |     |                                |
|---------------------------------------|------|----|-----------|----------------|----|---------|-----|-----|--------------------------------|
| Locus_13746_Transcript_1/1_Conf_1.000 | 413  | 20 | 2.25E-22  | NP_001153506.1 | 73 | 108.612 | 87  | 64  | uridine-cytidine kinase 2      |
| Locus_13747_Transcript_1/2_Conf_1.000 | 273  | 0  |           |                |    |         |     |     |                                |
| Locus_13747_Transcript_2/2_Conf_1.000 | 273  | 0  |           |                |    |         |     |     |                                |
| Locus_13748_Transcript_1/1_Conf_1.000 | 357  | 0  |           |                |    |         |     |     |                                |
| Locus_13749_Transcript_1/1_Conf_1.000 | 547  | 0  |           |                |    |         |     |     |                                |
| Locus_1375_Transcript_1/4_Conf_0.667  | 3239 | 2  | 4.99E-10  | XP_001891820.1 | 52 | 72.0182 | 114 | 60  | GRAM domain containing protein |
| Locus_1375_Transcript_2/4_Conf_0.667  | 3293 | 2  | 5.08E-10  | XP_001891820.1 | 52 | 72.0182 | 114 | 60  | GRAM domain containing protein |
| Locus_1375_Transcript_3/4_Conf_0.667  | 3293 | 2  | 5.08E-10  | XP_001891820.1 | 52 | 72.0182 | 114 | 60  | GRAM domain containing protein |
| Locus_1375_Transcript_4/4_Conf_0.667  | 3293 | 2  | 5.08E-10  | XP_001891820.1 | 52 | 72.0182 | 114 | 60  | GRAM domain containing protein |
| Locus_13750_Transcript_1/1_Conf_1.000 | 134  | 0  |           |                |    |         |     |     |                                |
| Locus_13751_Transcript_1/1_Conf_1.000 | 332  | 4  | 1.17E-10  | NP_498501.1    | 62 | 69.707  | 114 | 71  | hypothetical protein T07E3.4   |
| Locus_13752_Transcript_1/1_Conf_1.000 | 227  | 0  |           |                |    |         |     |     |                                |
| Locus_13753_Transcript_1/3_Conf_0.667 | 916  | 20 | 1.38E-118 | XP_002639923.1 | 89 | 430.254 | 257 | 230 | C. briggsae CBR-JPH-1 protein  |
| Locus_13753_Transcript_2/3_Conf_0.667 | 865  | 20 | 5.30E-109 | XP_002639923.1 | 89 | 398.282 | 239 | 213 | C. briggsae CBR-JPH-1 protein  |
| Locus_13753_Transcript_3/3_Conf_0.667 | 865  | 20 | 5.30E-109 | XP_002639923.1 | 89 | 398.282 | 239 | 213 | C. briggsae CBR-JPH-1 protein  |
| Locus_13754_Transcript_1/1_Conf_1.000 | 135  | 0  |           |                |    |         |     |     |                                |
| Locus_13755_Transcript_1/1_Conf_1.000 | 691  | 20 | 5.60E-35  | XP_002631614.1 | 57 | 151.754 | 238 | 136 | C. briggsae CBR-MAC-1 protein  |
| Locus_13756_Transcript_1/1_Conf_1.000 | 211  | 0  |           |                |    |         |     |     |                                |
| Locus_13757_Transcript_1/1_Conf_1.000 | 1383 | 10 | 1.47E-113 | ACP34146.1     | 70 | 414.461 | 435 | 306 | Hypothetical protein F56B3.4a  |
| Locus_13758_Transcript_1/1_Conf_1.000 | 534  | 9  | 2.54E-07  | XP_002639002.1 | 62 | 58.9214 | 56  | 35  | Hypothetical protein CBG22248  |
| Locus_13759_Transcript_1/1_Conf_1.000 | 303  | 0  |           |                |    |         |     |     |                                |
| Locus_1376_Transcript_1/1_Conf_1.000  | 526  | 2  | 3.26E-60  | CAR63590.1     | 72 | 234.572 | 170 | 123 | hypothetical protein           |
| Locus_13760_Transcript_1/1_Conf_1.000 | 340  | 0  |           |                |    |         |     |     |                                |
| Locus_13761_Transcript_1/1_Conf_1.000 | 1057 | 0  |           |                |    |         |     |     |                                |

|                                       |      |    |          |                |    |         |     |     |                                          |
|---------------------------------------|------|----|----------|----------------|----|---------|-----|-----|------------------------------------------|
| Locus_13762_Transcript_1/1_Conf_1.000 | 429  | 20 | 5.57E-29 | EFO19478.1     | 78 | 130.568 | 96  | 75  | U5 snRNP-associated protein              |
| Locus_13763_Transcript_1/1_Conf_1.000 | 336  | 20 | 1.66E-33 | XP_002631318.1 | 79 | 145.591 | 106 | 84  | Hypothetical protein CBG03140            |
| Locus_13764_Transcript_1/1_Conf_1.000 | 452  | 20 | 6.84E-19 | NP_491248.1    | 90 | 97.0561 | 55  | 50  | hypothetical protein T03F1.1             |
| Locus_13765_Transcript_1/1_Conf_1.000 | 977  | 20 | 7.97E-75 | CAR63535.1     | 67 | 285.034 | 309 | 208 | putative transcription factor yin yang 2 |
| Locus_13766_Transcript_1/1_Conf_1.000 | 439  | 20 | 2.45E-53 | XP_002631343.1 | 88 | 211.46  | 143 | 127 | C. briggsae CBR-SGN-1 protein            |
| Locus_13767_Transcript_1/1_Conf_1.000 | 984  | 20 | 5.42E-79 | XP_002631146.1 | 64 | 298.901 | 343 | 221 | Hypothetical protein CBG02930            |
| Locus_13768_Transcript_1/1_Conf_1.000 | 356  | 6  | 1.25E-12 | NP_741018.1    | 65 | 76.2554 | 85  | 56  | Homeobox family member (ceh-38)          |
| Locus_13769_Transcript_1/1_Conf_1.000 | 810  | 20 | 8.08E-61 | XP_002630102.1 | 69 | 238.039 | 270 | 187 | Hypothetical protein CBG13485            |
| Locus_1377_Transcript_1/1_Conf_1.000  | 2561 | 4  | 1.15E-14 | XP_002638877.1 | 38 | 87.0409 | 708 | 272 | Hypothetical protein CBG22096            |
| Locus_13770_Transcript_1/1_Conf_1.000 | 256  | 0  |          |                |    |         |     |     |                                          |

|                                       |     |    |           |                |     |         |     |     |                                                                            |
|---------------------------------------|-----|----|-----------|----------------|-----|---------|-----|-----|----------------------------------------------------------------------------|
| Locus_13771_Transcript_1/1_Conf_1.000 | 942 | 20 | 7.05E-97  | NP_001129916.1 | 77  | 358.221 | 294 | 227 | TWiK family of potassium channels family member (twk-46)                   |
| Locus_13772_Transcript_1/1_Conf_1.000 | 235 | 0  |           |                |     |         |     |     |                                                                            |
| Locus_13773_Transcript_1/1_Conf_1.000 | 143 | 20 | 2.56E-18  | XP_002816314.1 | 100 | 95.1301 | 47  | 47  | PREDICTED: PRELI domain-containing protein 1, mitochondrial-like isoform 2 |
| Locus_13774_Transcript_1/1_Conf_1.000 | 930 | 20 | 3.52E-109 | NP_494780.1    | 84  | 399.053 | 301 | 254 | Temporarily Assigned Gene name family member (tag-231)                     |
| Locus_13775_Transcript_1/1_Conf_1.000 | 232 | 20 | 1.06E-27  | NP_497182.2    | 89  | 126.331 | 76  | 68  | hypothetical protein Y50D7A.2                                              |
| Locus_13776_Transcript_1/1_Conf_1.000 | 466 | 0  |           |                |     |         |     |     |                                                                            |
| Locus_13777_Transcript_1/1_Conf_1.000 | 268 | 4  | 1.17E-10  | NP_497704.1    | 57  | 69.707  | 88  | 51  | hypothetical protein F59A2.5                                               |
| Locus_13778_Transcript_1/1_Conf_1.000 | 543 | 20 | 4.59E-15  | XP_421797.2    | 63  | 84.7297 | 110 | 70  | PREDICTED: hypothetical protein                                            |
| Locus_13779_Transcript_1/1_Conf_1.000 | 130 | 3  | 1.99E-10  | NP_491646.3    | 80  | 68.9366 | 42  | 34  | hypothetical protein F46F11.7                                              |
| Locus_1378_Transcript_1/1_Conf_1.000  | 170 | 0  |           |                |     |         |     |     |                                                                            |
| Locus_13780_Transcript_1/1_Conf_1.000 | 495 | 4  | 1.84E-32  | NP_497919.1    | 73  | 142.124 | 110 | 81  | hypothetical protein M88.2                                                 |
| Locus_13781_Transcript_1/1_Conf_1.000 | 334 | 0  |           |                |     |         |     |     |                                                                            |
| Locus_13782_Transcript_1/1_Conf_1.000 | 157 | 0  |           |                |     |         |     |     |                                                                            |
| Locus_13783_Transcript_1/1_Conf_1.000 | 436 | 20 | 4.38E-26  | XP_002821384.1 | 100 | 120.939 | 62  | 62  | PREDICTED: 60S acidic ribosomal protein P2-like                            |
| Locus_13784_Transcript_1/1_Conf_1.000 | 550 | 20 | 5.08E-25  | NP_491930.1    | 76  | 117.857 | 90  | 69  | DiHydroOrotate Dehydrogenas family member (dhod-1)                         |
| Locus_13785_Transcript_1/1_Conf_1.000 | 444 | 20 | 7.37E-21  | XP_002639995.1 | 62  | 103.605 | 147 | 92  | C. briggsae CBR-ELPC-1 protein                                             |
| Locus_13786_Transcript_1/1_Conf_1.000 | 406 | 3  | 2.79E-04  | A8WRV1.2       | 56  | 48.521  | 81  | 46  | Serine/threonine-protein kinase kin-29                                     |
| Locus_13787_Transcript_1/1_Conf_1.000 | 478 | 0  |           |                |     |         |     |     |                                                                            |

|                                       |      |    |           |                |    |         |     |     |                                              |
|---------------------------------------|------|----|-----------|----------------|----|---------|-----|-----|----------------------------------------------|
| Locus_13788_Transcript_1/1_Conf_1.000 | 692  | 20 | 1.49E-120 | AAL06642.1     | 97 | 436.032 | 230 | 225 | serine-threonine protein kinase              |
| Locus_13789_Transcript_1/1_Conf_1.000 | 1181 | 0  |           |                |    |         |     |     |                                              |
| Locus_1379_Transcript_1/1_Conf_1.000  | 700  | 0  |           |                |    |         |     |     |                                              |
| Locus_13790_Transcript_1/1_Conf_1.000 | 572  | 20 | 1.12E-49  | CBA11992.1     | 68 | 199.904 | 187 | 128 | endonuclease-reverse transcriptase HmRTE-e01 |
| Locus_13791_Transcript_1/1_Conf_1.000 | 437  | 4  | 1.04E-27  | NP_001023419.1 | 78 | 126.331 | 104 | 82  | hypothetical protein W03F8.10                |
| Locus_13792_Transcript_1/1_Conf_1.000 | 690  | 5  | 1.80E-33  | XP_002641216.1 | 64 | 146.747 | 167 | 107 | Hypothetical protein CBG09080                |
| Locus_13793_Transcript_1/1_Conf_1.000 | 214  | 0  |           |                |    |         |     |     |                                              |
| Locus_13794_Transcript_1/1_Conf_1.000 | 266  | 0  |           |                |    |         |     |     |                                              |
| Locus_13795_Transcript_1/1_Conf_1.000 | 1514 | 20 | 9.32E-133 | Q24702.1       | 75 | 478.404 | 453 | 342 | DVA-1 polyprotein                            |
| Locus_13796_Transcript_1/1_Conf_1.000 | 164  | 0  |           |                |    |         |     |     |                                              |
| Locus_13797_Transcript_1/1_Conf_1.000 | 355  | 20 | 3.08E-11  | NP_001122952.1 | 67 | 71.633  | 70  | 47  | hypothetical protein F53H10.2                |
| Locus_13798_Transcript_1/1_Conf_1.000 | 232  | 0  |           |                |    |         |     |     |                                              |
| Locus_13799_Transcript_1/1_Conf_1.000 | 525  | 20 | 4.24E-68  | NP_509350.2    | 96 | 260.766 | 125 | 120 | hypothetical protein C34D10.2                |

|                                       |      |    |           |                |    |         |     |     |                                                                |
|---------------------------------------|------|----|-----------|----------------|----|---------|-----|-----|----------------------------------------------------------------|
| Locus_138_Transcript_1/1_Conf_1.000   | 2455 | 20 | 3.09E-110 | EFO16992.1     | 80 | 404.445 | 298 | 241 | CCR4-NOT transcription complex component                       |
| Locus_1380_Transcript_1/2_Conf_1.000  | 1408 | 20 | 5.30E-119 | NP_492252.1    | 71 | 432.565 | 410 | 292 | hypothetical protein T01G9.2                                   |
| Locus_1380_Transcript_2/2_Conf_1.000  | 1408 | 20 | 2.63E-118 | NP_492252.1    | 70 | 430.254 | 410 | 291 | hypothetical protein T01G9.2                                   |
| Locus_13800_Transcript_1/1_Conf_1.000 | 365  | 20 | 1.07E-56  | XP_001135032.1 | 99 | 222.631 | 121 | 120 | PREDICTED: similar to Ribosomal protein L14                    |
| Locus_13801_Transcript_1/1_Conf_1.000 | 424  | 0  |           |                |    |         |     |     |                                                                |
| Locus_13802_Transcript_1/1_Conf_1.000 | 148  | 0  |           |                |    |         |     |     |                                                                |
| Locus_13803_Transcript_1/1_Conf_1.000 | 372  | 4  | 3.54E-23  | NP_493560.1    | 77 | 111.309 | 87  | 67  | hypothetical protein K05C4.11                                  |
| Locus_13804_Transcript_1/1_Conf_1.000 | 177  | 0  |           |                |    |         |     |     |                                                                |
| Locus_13805_Transcript_1/1_Conf_1.000 | 179  | 0  |           |                |    |         |     |     |                                                                |
| Locus_13806_Transcript_1/2_Conf_1.000 | 360  | 1  | 2.77E-04  | XP_002634943.1 | 44 | 48.521  | 109 | 48  | Hypothetical protein CBG22545                                  |
| Locus_13806_Transcript_2/2_Conf_1.000 | 1075 | 20 | 5.55E-11  | XP_002634943.1 | 42 | 73.1738 | 198 | 85  | Hypothetical protein CBG22545                                  |
| Locus_13807_Transcript_1/1_Conf_1.000 | 432  | 0  |           |                |    |         |     |     |                                                                |
| Locus_13808_Transcript_1/1_Conf_1.000 | 533  | 4  | 3.53E-41  | XP_002636840.1 | 70 | 171.4   | 178 | 126 | Hypothetical protein CBG09291                                  |
| Locus_13809_Transcript_1/1_Conf_1.000 | 134  | 0  |           |                |    |         |     |     |                                                                |
| Locus_1381_Transcript_1/1_Conf_1.000  | 541  | 0  |           |                |    |         |     |     |                                                                |
| Locus_13810_Transcript_1/1_Conf_1.000 | 171  | 2  | 4.73E-04  | CAX65058.1     | 66 | 47.7506 | 48  | 32  | C. elegans protein F55D12.2b, confirmed by transcript evidence |
| Locus_13811_Transcript_1/1_Conf_1.000 | 1124 | 20 | 2.78E-101 | NP_001021584.1 | 74 | 373.244 | 285 | 212 | EXOnuclease family member (exo-3)                              |
| Locus_13812_Transcript_1/1_Conf_1.000 | 199  | 1  | 2.15E-04  | XP_002643566.1 | 73 | 48.9062 | 46  | 34  | Hypothetical protein CBG16268                                  |
| Locus_13813_Transcript_1/1_Conf_1.000 | 165  | 0  |           |                |    |         |     |     |                                                                |
| Locus_13814_Transcript_1/1_Conf_1.000 | 982  | 2  | 1.04E-13  | NP_504241.1    | 75 | 82.0333 | 68  | 51  | hypothetical protein Y61A9LA.3                                 |
| Locus_13815_Transcript_1/1_Conf_1.000 | 665  | 20 | 4.07E-109 | NP_510020.2    | 91 | 397.897 | 221 | 203 | hypothetical protein W03G11.3                                  |
| Locus_13816_Transcript_1/1_Conf_1.000 | 1056 | 20 | 4.60E-103 | NP_490719.1    | 71 | 379.022 | 343 | 244 | hypothetical protein Y48G1A.3                                  |
| Locus_13817_Transcript_1/1_Conf_1.000 | 401  | 0  |           |                |    |         |     |     |                                                                |
| Locus_13818_Transcript_1/1_Conf_1.000 | 192  | 0  |           |                |    |         |     |     |                                                                |
| Locus_13819_Transcript_1/1_Conf_1.000 | 726  | 2  | 6.69E-05  | XP_001901708.1 | 47 | 51.9878 | 134 | 63  | F-box domain containing protein                                |



|                                       |      |    |           |                |     |         |     |     |                                                                                        |
|---------------------------------------|------|----|-----------|----------------|-----|---------|-----|-----|----------------------------------------------------------------------------------------|
| Locus_1382_Transcript_1/1_Conf_1.000  | 672  | 20 | 1.80E-51  | XP_002644536.1 | 88  | 206.453 | 125 | 110 | C. briggsae CBR-DPY-23 protein                                                         |
| Locus_13820_Transcript_1/2_Conf_1.000 | 434  | 20 | 8.58E-22  | NP_497868.1    | 79  | 106.686 | 74  | 59  | Temporarily Assigned Gene name family member (tag-131)                                 |
| Locus_13820_Transcript_2/2_Conf_1.000 | 434  | 20 | 8.58E-22  | NP_497868.1    | 79  | 106.686 | 74  | 59  | Temporarily Assigned Gene name family member (tag-131)                                 |
| Locus_13821_Transcript_1/1_Conf_1.000 | 332  | 0  |           |                |     |         |     |     |                                                                                        |
| Locus_13822_Transcript_1/1_Conf_1.000 | 682  | 20 | 4.67E-87  |                | 90  | 324.709 | 199 | 180 | hypothetical protein C25H3.9 - Caenorhabditis elegans                                  |
| Locus_13823_Transcript_1/1_Conf_1.000 | 142  | 4  | 6.99E-08  | NP_500284.2    | 84  | 60.4622 | 39  | 33  | Enhancer of Efl-1 mutant phenotype family member (eel-1)                               |
| Locus_13824_Transcript_1/1_Conf_1.000 | 660  | 0  |           |                |     |         |     |     |                                                                                        |
| Locus_13825_Transcript_1/1_Conf_1.000 | 651  | 20 | 1.20E-65  | ADE60684.1     | 78  | 253.447 | 182 | 142 | Diacylglycerol kinase protein 4, isoform b, partially confirmed by transcript evidence |
| Locus_13826_Transcript_1/1_Conf_1.000 | 757  | 20 | 7.03E-93  | NP_496968.1    | 90  | 344.354 | 202 | 183 | hypothetical protein Y48B6A.12                                                         |
| Locus_13827_Transcript_1/1_Conf_1.000 | 327  | 0  |           |                |     |         |     |     |                                                                                        |
| Locus_13828_Transcript_1/1_Conf_1.000 | 1116 | 20 | 1.07E-129 | NP_497714.2    | 83  | 467.618 | 304 | 254 | Protein PHosphatase family member (pph-6)                                              |
| Locus_13829_Transcript_1/1_Conf_1.000 | 561  | 20 | 8.25E-18  | XP_392369.1    | 97  | 93.9745 | 43  | 42  | PREDICTED: similar to Protein yippee-like 1                                            |
| Locus_1383_Transcript_1/1_Conf_1.000  | 1683 | 0  |           |                |     |         |     |     |                                                                                        |
| Locus_13830_Transcript_1/1_Conf_1.000 | 213  | 0  |           |                |     |         |     |     |                                                                                        |
| Locus_13831_Transcript_1/1_Conf_1.000 | 418  | 20 | 3.56E-23  | XP_001893552.1 | 75  | 111.309 | 86  | 65  | haloacid dehalogenase-like hydrolase domain containing 2, putative                     |
| Locus_13832_Transcript_1/1_Conf_1.000 | 353  | 20 | 2.87E-41  | 3MNG           | 100 | 171.4   | 85  | 85  | Wild Type Human Prxv With Dtt Bound As A Competitive Inhibitor                         |

|                                       |     |    |          |                |     |         |     |     |                                                                     |
|---------------------------------------|-----|----|----------|----------------|-----|---------|-----|-----|---------------------------------------------------------------------|
| Locus_13833_Transcript_1/1_Conf_1.000 | 229 | 20 | 2.45E-32 | NP_741109.1    | 90  | 141.739 | 75  | 68  | FERM domain (protein4.1-ezrin-radixin-moesin) family member (frm-8) |
| Locus_13834_Transcript_1/1_Conf_1.000 | 296 | 20 | 4.02E-35 | XP_002632369.1 | 87  | 150.984 | 98  | 86  | C. briggsae CBR-PMP-4 protein                                       |
| Locus_13835_Transcript_1/1_Conf_1.000 | 667 | 0  |          |                |     |         |     |     |                                                                     |
| Locus_13836_Transcript_1/1_Conf_1.000 | 332 | 2  | 1.48E-05 | XP_002643723.1 | 62  | 52.7582 | 53  | 33  | Hypothetical protein CBG01914                                       |
| Locus_13837_Transcript_1/1_Conf_1.000 | 880 | 20 | 2.17E-33 | XP_001984068.1 | 84  | 147.132 | 82  | 69  | GH15211                                                             |
| Locus_13838_Transcript_1/1_Conf_1.000 | 858 | 20 | 2.08E-73 | XP_001894604.1 | 67  | 280.026 | 273 | 185 | exonuclease family protein                                          |
| Locus_13839_Transcript_1/1_Conf_1.000 | 657 | 0  |          |                |     |         |     |     |                                                                     |
| Locus_1384_Transcript_1/1_Conf_1.000  | 466 | 20 | 3.86E-62 | BAG54741.1     | 100 | 240.736 | 146 | 146 | unnamed protein product                                             |
| Locus_13840_Transcript_1/1_Conf_1.000 | 150 | 0  |          |                |     |         |     |     |                                                                     |
| Locus_13841_Transcript_1/2_Conf_1.000 | 295 | 0  |          |                |     |         |     |     |                                                                     |
| Locus_13841_Transcript_2/2_Conf_1.000 | 295 | 0  |          |                |     |         |     |     |                                                                     |
| Locus_13842_Transcript_1/1_Conf_1.000 | 557 | 20 | 9.60E-27 | NP_495774.1    | 58  | 123.635 | 176 | 103 | hypothetical protein F14E5.4                                        |
| Locus_13843_Transcript_1/1_Conf_1.000 | 377 | 20 | 1.75E-30 | NP_509361.1    | 81  | 135.576 | 124 | 101 | hypothetical protein K07E3.4                                        |
| Locus_13844_Transcript_1/1_Conf_1.000 | 179 | 3  | 9.46E-13 | NP_495112.1    | 77  | 76.6406 | 57  | 44  | hypothetical protein C25H3.11                                       |

|                                       |      |    |          |                |    |         |     |     |                                                                |
|---------------------------------------|------|----|----------|----------------|----|---------|-----|-----|----------------------------------------------------------------|
| Locus_13845_Transcript_1/1_Conf_1.000 | 298  | 20 | 1.09E-24 | XP_002632973.1 | 78 | 116.316 | 84  | 66  | Hypothetical protein CBG21733                                  |
| Locus_13846_Transcript_1/1_Conf_1.000 | 461  | 0  |          |                |    |         |     |     |                                                                |
| Locus_13847_Transcript_1/1_Conf_1.000 | 397  | 0  |          |                |    |         |     |     |                                                                |
| Locus_13848_Transcript_1/1_Conf_1.000 | 142  | 0  |          |                |    |         |     |     |                                                                |
| Locus_13849_Transcript_1/1_Conf_1.000 | 131  | 5  | 3.29E-05 | AAK71410.2     | 63 | 51.6026 | 41  | 26  | AC024881_1Hypothetical protein Y97E10B.1                       |
| Locus_1385_Transcript_1/1_Conf_1.000  | 537  | 3  | 2.68E-04 | XP_002939048.1 | 47 | 48.9062 | 130 | 62  | PREDICTED: macrophage mannose receptor 1-like                  |
| Locus_13850_Transcript_1/2_Conf_1.000 | 385  | 20 | 1.37E-27 | XP_002128408.1 | 93 | 125.946 | 91  | 85  | PREDICTED: similar to U6 snRNA-associated Sm-like protein LSm3 |
| Locus_13850_Transcript_2/2_Conf_1.000 | 385  | 20 | 1.37E-27 | XP_002128408.1 | 93 | 125.946 | 91  | 85  | PREDICTED: similar to U6 snRNA-associated Sm-like protein LSm3 |
| Locus_13851_Transcript_1/2_Conf_1.000 | 585  | 20 | 3.31E-55 | XP_002632393.1 | 73 | 218.394 | 192 | 142 | Hypothetical protein CBG00415                                  |
| Locus_13851_Transcript_2/2_Conf_1.000 | 585  | 20 | 3.31E-55 | XP_002632393.1 | 73 | 218.394 | 192 | 142 | Hypothetical protein CBG00415                                  |
| Locus_13852_Transcript_1/1_Conf_1.000 | 430  | 20 | 1.72E-46 | NP_001020988.1 | 81 | 188.734 | 137 | 111 | UNCoordinated family member (unc-89)                           |
| Locus_13853_Transcript_1/2_Conf_1.000 | 598  | 20 | 2.85E-25 | XP_002740677.1 | 70 | 119.013 | 104 | 73  | PREDICTED: cyclin-dependent kinase 2-like                      |
| Locus_13853_Transcript_2/2_Conf_1.000 | 276  | 0  |          |                |    |         |     |     |                                                                |
| Locus_13854_Transcript_1/1_Conf_1.000 | 259  | 20 | 3.42E-34 | NP_492433.1    | 86 | 147.902 | 86  | 74  | HomoGentisate Oxidase family member (hgo-1)                    |
| Locus_13855_Transcript_1/1_Conf_1.000 | 1287 | 20 | 3.91E-57 | NP_001020983.1 | 57 | 226.868 | 405 | 233 | TOL1 (Drosophila) family member (tol-1)                        |
| Locus_13856_Transcript_1/1_Conf_1.000 | 453  | 20 | 7.75E-31 | XP_002648358.1 | 84 | 136.732 | 92  | 78  | Hypothetical protein CBG24564                                  |
| Locus_13857_Transcript_1/1_Conf_1.000 | 212  | 0  |          |                |    |         |     |     |                                                                |

|                                       |      |    |           |                |     |         |     |     |                                                                  |
|---------------------------------------|------|----|-----------|----------------|-----|---------|-----|-----|------------------------------------------------------------------|
| Locus_13858_Transcript_1/1_Conf_1.000 | 243  | 20 | 3.05E-19  | XP_002632237.1 | 81  | 98.2117 | 64  | 52  | Hypothetical protein CBG07111                                    |
| Locus_13859_Transcript_1/1_Conf_1.000 | 609  | 20 | 9.41E-11  | XP_001899546.1 | 44  | 70.8626 | 207 | 93  | hypothetical protein                                             |
| Locus_1386_Transcript_1/1_Conf_1.000  | 1651 | 20 | 2.99E-180 | XP_002639432.1 | 74  | 636.336 | 483 | 361 | C. briggsae CBR-TYR-4 protein                                    |
| Locus_13860_Transcript_1/1_Conf_1.000 | 677  | 20 | 1.95E-37  | NP_504260.1    | 65  | 159.844 | 177 | 116 | TAF (TBP-associated transcription factor) family member (taf-10) |
| Locus_13861_Transcript_1/1_Conf_1.000 | 217  | 20 | 6.31E-17  | DAA16569.1     | 100 | 90.5077 | 72  | 72  | heat shock protein HSP 90-beta                                   |
| Locus_13862_Transcript_1/1_Conf_1.000 | 313  | 0  |           |                |     |         |     |     |                                                                  |
| Locus_13863_Transcript_1/1_Conf_1.000 | 762  | 20 | 1.68E-142 | NP_001164609.1 | 100 | 509.22  | 239 | 239 | clusterin isoform 3                                              |
| Locus_13864_Transcript_1/1_Conf_1.000 | 552  | 0  |           |                |     |         |     |     |                                                                  |
| Locus_13865_Transcript_1/1_Conf_1.000 | 268  | 0  |           |                |     |         |     |     |                                                                  |
| Locus_13866_Transcript_1/1_Conf_1.000 | 440  | 20 | 8.78E-27  | XP_002633460.1 | 71  | 123.25  | 142 | 101 | Hypothetical protein CBG06228                                    |
| Locus_13867_Transcript_1/1_Conf_1.000 | 1178 | 20 | 3.95E-37  | NP_492228.1    | 61  | 160.229 | 210 | 129 | MAternally affected Uncoordination family member (mau-2)         |
| Locus_13868_Transcript_1/1_Conf_1.000 | 246  | 4  | 1.91E-13  | NP_497420.1    | 77  | 78.9518 | 61  | 47  | hypothetical protein Y67D2.6                                     |

|                                       |      |    |          |                |    |         |     |     |                                     |
|---------------------------------------|------|----|----------|----------------|----|---------|-----|-----|-------------------------------------|
| Locus_13869_Transcript_1/1_Conf_1.000 | 157  | 20 | 3.11E-11 | NP_491902.3    | 88 | 71.633  | 44  | 39  | hypothetical protein D2092.5        |
| Locus_1387_Transcript_1/3_Conf_0.286  | 322  | 0  |          |                |    |         |     |     |                                     |
| Locus_1387_Transcript_2/3_Conf_0.714  | 1422 | 20 | 5.15E-37 | NP_502566.1    | 47 | 160.229 | 381 | 182 | Muscle EXcess family member (mex-5) |
| Locus_1387_Transcript_3/3_Conf_0.714  | 1422 | 20 | 5.15E-37 | NP_502566.1    | 47 | 160.229 | 381 | 182 | Muscle EXcess family member (mex-5) |
| Locus_13870_Transcript_1/1_Conf_1.000 | 399  | 2  | 2.62E-18 | XP_002642086.1 | 78 | 95.1301 | 132 | 104 | Hypothetical protein CBG18027       |
| Locus_13871_Transcript_1/1_Conf_1.000 | 227  | 0  |          |                |    |         |     |     |                                     |
| Locus_13872_Transcript_1/1_Conf_1.000 | 233  | 20 | 1.87E-32 | NP_502000.1    | 90 | 142.124 | 76  | 69  | hypothetical protein C06G8.1        |
| Locus_13873_Transcript_1/1_Conf_1.000 | 672  | 20 | 1.73E-62 | NP_492446.3    | 76 | 243.047 | 221 | 168 | hypothetical protein ZK858.1        |
| Locus_13874_Transcript_1/1_Conf_1.000 | 379  | 20 | 2.51E-29 | XP_002644672.1 | 69 | 131.724 | 126 | 87  | C. briggsae CBR-VPS-41 protein      |
| Locus_13875_Transcript_1/1_Conf_1.000 | 204  | 0  |          |                |    |         |     |     |                                     |
| Locus_13876_Transcript_1/1_Conf_1.000 | 911  | 20 | 1.89E-35 | NP_509877.2    | 54 | 154.066 | 266 | 144 | hypothetical protein C34F6.10       |
| Locus_13877_Transcript_1/1_Conf_1.000 | 671  | 0  |          |                |    |         |     |     |                                     |
| Locus_13878_Transcript_1/1_Conf_1.000 | 302  | 20 | 5.59E-21 | XP_002632832.1 | 53 | 103.99  | 143 | 76  | Hypothetical protein CBG15024       |

|                                       |     |    |          |                |    |         |     |     |                                |
|---------------------------------------|-----|----|----------|----------------|----|---------|-----|-----|--------------------------------|
| Locus_13879_Transcript_1/1_Conf_1.000 | 425 | 20 | 6.64E-30 | NP_001040880.1 | 79 | 133.65  | 89  | 71  | hypothetical protein Y39A3CL.4 |
| Locus_1388_Transcript_1/1_Conf_1.000  | 941 | 0  |          |                |    |         |     |     |                                |
| Locus_13880_Transcript_1/1_Conf_1.000 | 410 | 0  |          |                |    |         |     |     |                                |
| Locus_13881_Transcript_1/1_Conf_1.000 | 358 | 20 | 1.51E-34 | Q9BI88.2       | 74 | 149.058 | 109 | 81  | UPF0587 protein F46B6.12       |
| Locus_13882_Transcript_1/1_Conf_1.000 | 520 | 20 | 8.83E-39 | NP_001021589.1 | 64 | 163.31  | 171 | 111 | hypothetical protein R11A5.4   |
| Locus_13883_Transcript_1/1_Conf_1.000 | 185 | 0  |          |                |    |         |     |     |                                |
| Locus_13884_Transcript_1/1_Conf_1.000 | 655 | 0  |          |                |    |         |     |     |                                |
| Locus_13885_Transcript_1/1_Conf_1.000 | 213 | 0  |          |                |    |         |     |     |                                |
| Locus_13886_Transcript_1/1_Conf_1.000 | 345 | 2  | 7.44E-05 | XP_002647702.1 | 55 | 50.447  | 93  | 52  | Hypothetical protein CBG17891  |
| Locus_13887_Transcript_1/1_Conf_1.000 | 176 | 0  |          |                |    |         |     |     |                                |
| Locus_13888_Transcript_1/1_Conf_1.000 | 497 | 1  | 2.77E-04 | ABI21593.1     | 53 | 39.2762 | 45  | 24  | hypothetical protein           |
| Locus_13889_Transcript_1/1_Conf_1.000 | 309 | 20 | 2.74E-28 | EFO23898.1     | 74 | 128.257 | 99  | 74  | FolC protein                   |
| Locus_1389_Transcript_1/1_Conf_1.000  | 567 | 20 | 2.84E-13 | XP_002637364.1 | 50 | 78.9518 | 183 | 93  | Hypothetical protein CBG19064  |
| Locus_13890_Transcript_1/1_Conf_1.000 | 692 | 0  |          |                |    |         |     |     |                                |
| Locus_13891_Transcript_1/1_Conf_1.000 | 162 | 0  |          |                |    |         |     |     |                                |
| Locus_13892_Transcript_1/1_Conf_1.000 | 203 | 0  |          |                |    |         |     |     |                                |
| Locus_13893_Transcript_1/1_Conf_1.000 | 295 | 20 | 5.80E-34 | XP_002636626.1 | 90 | 147.132 | 98  | 89  | C. briggsae CBR-AMAN-2 protein |
| Locus_13894_Transcript_1/1_Conf_1.000 | 392 | 20 | 2.02E-31 | XP_001898856.1 | 77 | 138.658 | 129 | 100 | cation channel family protein  |
| Locus_13895_Transcript_1/1_Conf_1.000 | 814 | 0  |          |                |    |         |     |     |                                |

|                                       |      |    |          |                |    |         |     |     |                                |
|---------------------------------------|------|----|----------|----------------|----|---------|-----|-----|--------------------------------|
| Locus_13896_Transcript_1/1_Conf_1.000 | 324  | 20 | 7.55E-42 | XP_002629880.1 | 84 | 173.326 | 104 | 88  | Hypothetical protein CBG21917  |
| Locus_13897_Transcript_1/1_Conf_1.000 | 347  | 0  |          |                |    |         |     |     |                                |
| Locus_13898_Transcript_1/1_Conf_1.000 | 498  | 4  | 1.19E-39 | NP_498063.1    | 71 | 166.007 | 151 | 108 | hypothetical protein R144.11   |
| Locus_13899_Transcript_1/1_Conf_1.000 | 395  | 20 | 1.22E-31 | XP_002642778.1 | 70 | 139.428 | 131 | 93  | C. briggsae CBR-PRMT-5 protein |
| Locus_139_Transcript_1/1_Conf_1.000   | 1544 | 20 | 8.25E-44 | XP_002647887.1 | 61 | 182.956 | 239 | 148 | Hypothetical protein CBG23753  |
| Locus_1390_Transcript_1/2_Conf_1.000  | 711  | 5  | 1.67E-21 | XP_002641213.1 | 77 | 107.071 | 80  | 62  | C. briggsae CBR-MDT-15 protein |
| Locus_1390_Transcript_2/2_Conf_1.000  | 893  | 9  | 4.64E-39 | XP_001902687.1 | 67 | 166.007 | 154 | 104 | hypothetical protein           |

|                                       |     |    |           |                |    |         |     |     |                                              |
|---------------------------------------|-----|----|-----------|----------------|----|---------|-----|-----|----------------------------------------------|
| Locus_13900_Transcript_1/1_Conf_1.000 | 797 | 9  | 1.41E-17  | NP_491541.1    | 64 | 94.3597 | 102 | 66  | hypothetical protein F56A3.2                 |
| Locus_13901_Transcript_1/1_Conf_1.000 | 315 | 20 | 6.52E-09  | XP_002113412.1 | 57 | 63.929  | 97  | 56  | hypothetical protein TRIADDRAFT_57554        |
| Locus_13902_Transcript_1/2_Conf_1.000 | 899 | 20 | 1.09E-112 | XP_002631657.1 | 88 | 410.609 | 261 | 230 | Hypothetical protein CBG20848                |
| Locus_13902_Transcript_2/2_Conf_1.000 | 874 | 20 | 5.41E-109 | XP_002631657.1 | 88 | 398.282 | 252 | 222 | Hypothetical protein CBG20848                |
| Locus_13903_Transcript_1/1_Conf_1.000 | 186 | 0  |           |                |    |         |     |     |                                              |
| Locus_13904_Transcript_1/2_Conf_1.000 | 251 | 0  |           |                |    |         |     |     |                                              |
| Locus_13904_Transcript_2/2_Conf_1.000 | 257 | 0  |           |                |    |         |     |     |                                              |
| Locus_13905_Transcript_1/2_Conf_1.000 | 627 | 20 | 4.31E-38  | XP_002640628.1 | 60 | 161.77  | 200 | 120 | C. briggsae CBR-EAT-18 protein               |
| Locus_13905_Transcript_2/2_Conf_1.000 | 483 | 20 | 3.30E-45  | XP_002640628.1 | 78 | 184.496 | 152 | 120 | C. briggsae CBR-EAT-18 protein               |
| Locus_13906_Transcript_1/1_Conf_1.000 | 648 | 20 | 2.51E-23  | NP_001129749.1 | 95 | 112.849 | 60  | 57  | abnormal cell LiNeage family member (lin-10) |
| Locus_13907_Transcript_1/1_Conf_1.000 | 484 | 20 | 7.31E-61  | XP_002642567.1 | 89 | 236.498 | 161 | 144 | C. briggsae CBR-UNC-79 protein               |
| Locus_13908_Transcript_1/1_Conf_1.000 | 132 | 0  |           |                |    |         |     |     |                                              |
| Locus_13909_Transcript_1/1_Conf_1.000 | 200 | 0  |           |                |    |         |     |     |                                              |
| Locus_1391_Transcript_1/1_Conf_1.000  | 311 | 0  |           |                |    |         |     |     |                                              |
| Locus_13910_Transcript_1/1_Conf_1.000 | 264 | 0  |           |                |    |         |     |     |                                              |
| Locus_13911_Transcript_1/1_Conf_1.000 | 293 | 20 | 6.04E-23  | AAN05752.1     | 75 | 110.538 | 95  | 72  | heat shock protein 20                        |
| Locus_13912_Transcript_1/1_Conf_1.000 | 318 | 20 | 2.80E-28  | XP_002645500.1 | 70 | 128.257 | 106 | 75  | Hypothetical protein CBG22750                |
| Locus_13913_Transcript_1/1_Conf_1.000 | 372 | 20 | 2.73E-07  | NP_491642.2    | 53 | 58.5362 | 129 | 69  | hypothetical protein F46F11.9                |
| Locus_13914_Transcript_1/1_Conf_1.000 | 368 | 0  |           |                |    |         |     |     |                                              |
| Locus_13915_Transcript_1/1_Conf_1.000 | 589 | 20 | 6.00E-57  | XP_002644776.1 | 74 | 224.172 | 199 | 149 | Hypothetical protein CBG14789                |
| Locus_13916_Transcript_1/1_Conf_1.000 | 458 | 0  |           |                |    |         |     |     |                                              |
| Locus_13917_Transcript_1/1_Conf_1.000 | 131 | 0  |           |                |    |         |     |     |                                              |
| Locus_13918_Transcript_1/1_Conf_1.000 | 580 | 20 | 2.62E-65  | NP_508919.2    | 77 | 251.906 | 192 | 148 | hypothetical protein C03F11.3                |
| Locus_13919_Transcript_1/1_Conf_1.000 | 207 | 0  |           |                |    |         |     |     |                                              |
| Locus_1392_Transcript_1/1_Conf_1.000  | 946 | 20 | 4.19E-65  | XP_001623486.1 | 65 | 252.677 | 310 | 204 | predicted protein                            |



|                                       |      |    |           |                |    |         |     |     |                                                |
|---------------------------------------|------|----|-----------|----------------|----|---------|-----|-----|------------------------------------------------|
| Locus_13920_Transcript_1/1_Conf_1.000 | 755  | 5  | 3.21E-05  | XP_001895157.1 | 63 | 53.1434 | 55  | 35  | TAZ zinc finger family protein                 |
| Locus_13921_Transcript_1/1_Conf_1.000 | 1344 | 20 | 7.87E-165 | XP_002636651.1 | 78 | 584.719 | 451 | 353 | C. briggsae CBR-DRS-2 protein                  |
| Locus_13922_Transcript_1/1_Conf_1.000 | 264  | 0  |           |                |    |         |     |     |                                                |
| Locus_13923_Transcript_1/1_Conf_1.000 | 325  | 0  |           |                |    |         |     |     |                                                |
| Locus_13924_Transcript_1/1_Conf_1.000 | 616  | 20 | 1.29E-39  | XP_002642330.1 | 72 | 166.777 | 153 | 111 | Hypothetical protein CBG18325                  |
| Locus_13925_Transcript_1/1_Conf_1.000 | 191  | 0  |           |                |    |         |     |     |                                                |
| Locus_13926_Transcript_1/1_Conf_1.000 | 254  | 20 | 1.04E-38  | A8XJL7.2       | 97 | 162.925 | 84  | 82  | Serine/threonine-protein kinase sax-1          |
| Locus_13927_Transcript_1/2_Conf_1.000 | 1105 | 20 | 1.87E-110 | XP_002634178.1 | 79 | 403.675 | 311 | 246 | Hypothetical protein CBG01746                  |
| Locus_13927_Transcript_2/2_Conf_1.000 | 1106 | 20 | 2.45E-110 | XP_002634178.1 | 79 | 403.29  | 311 | 246 | Hypothetical protein CBG01746                  |
| Locus_13928_Transcript_1/1_Conf_1.000 | 833  | 1  | 3.29E-04  | XP_002405770.1 | 40 | 50.0618 | 170 | 68  | secreted mucin MUC17, putative                 |
| Locus_13929_Transcript_1/1_Conf_1.000 | 213  | 0  |           |                |    |         |     |     |                                                |
| Locus_1393_Transcript_1/1_Conf_1.000  | 509  | 2  | 1.33E-04  | NP_683559.2    | 42 | 49.6766 | 118 | 50  | RNA recognition motif (RRM)-containing protein |
| Locus_13930_Transcript_1/1_Conf_1.000 | 703  | 20 | 1.54E-19  | NP_001076765.1 | 70 | 100.523 | 100 | 70  | Phasmid Socket Absent family member (psa-3)    |

|                                       |     |    |           |                |    |         |     |     |                                                  |
|---------------------------------------|-----|----|-----------|----------------|----|---------|-----|-----|--------------------------------------------------|
| Locus_13931_Transcript_1/1_Conf_1.000 | 712 | 20 | 2.78E-101 | NP_001024342.1 | 92 | 372.089 | 237 | 219 | Aboc, EXpulsion defective family member (aex-3)  |
| Locus_13932_Transcript_1/1_Conf_1.000 | 458 | 20 | 3.95E-43  | EFO23801.1     | 79 | 177.563 | 144 | 114 | replication factor C                             |
| Locus_13933_Transcript_1/1_Conf_1.000 | 275 | 2  | 1.24E-12  | NP_495888.2    | 62 | 76.2554 | 88  | 55  | hypothetical protein T07D4.1                     |
| Locus_13934_Transcript_1/1_Conf_1.000 | 348 | 20 | 4.60E-39  | NP_491924.1    | 79 | 164.081 | 116 | 92  | hypothetical protein W02D3.4                     |
| Locus_13935_Transcript_1/1_Conf_1.000 | 195 | 0  |           |                |    |         |     |     |                                                  |
| Locus_13936_Transcript_1/1_Conf_1.000 | 145 | 2  | 1.46E-08  | NP_501792.2    | 70 | 62.7734 | 47  | 33  | abnormal GONad development family member (gon-1) |
| Locus_13937_Transcript_1/1_Conf_1.000 | 151 | 0  |           |                |    |         |     |     |                                                  |
| Locus_13938_Transcript_1/1_Conf_1.000 | 594 | 0  |           |                |    |         |     |     |                                                  |
| Locus_13939_Transcript_1/1_Conf_1.000 | 205 | 10 | 3.63E-12  | XP_002639106.1 | 73 | 74.7146 | 63  | 46  | Hypothetical protein CBG14925                    |
| Locus_1394_Transcript_1/1_Conf_1.000  | 936 | 20 | 7.42E-107 | NP_501650.1    | 76 | 391.349 | 301 | 230 | hypothetical protein C10C5.3                     |
| Locus_13940_Transcript_1/1_Conf_1.000 | 455 | 0  |           |                |    |         |     |     |                                                  |
| Locus_13941_Transcript_1/1_Conf_1.000 | 427 | 20 | 4.60E-15  | NP_495055.1    | 57 | 84.3445 | 143 | 82  | hypothetical protein ZK177.8                     |
| Locus_13942_Transcript_1/1_Conf_1.000 | 184 | 0  |           |                |    |         |     |     |                                                  |
| Locus_13944_Transcript_1/1_Conf_1.000 | 185 | 4  | 1.84E-11  | XP_002630706.1 | 74 | 72.4034 | 63  | 47  | C. briggsae CBR-MOG-5 protein                    |
| Locus_13945_Transcript_1/1_Conf_1.000 | 260 | 3  | 6.93E-19  | XP_002638537.1 | 90 | 97.0561 | 52  | 47  | Hypothetical protein CBG05572                    |
| Locus_13946_Transcript_1/1_Conf_1.000 | 534 | 0  |           |                |    |         |     |     |                                                  |

|                                       |     |    |          |                |     |         |     |     |                                        |
|---------------------------------------|-----|----|----------|----------------|-----|---------|-----|-----|----------------------------------------|
| Locus_13947_Transcript_1/1_Conf_1.000 | 398 | 20 | 9.86E-66 | EFO27677.1     | 96  | 252.677 | 130 | 126 | hypothetical protein LOAG_00808        |
| Locus_13948_Transcript_1/1_Conf_1.000 | 324 | 0  |          |                |     |         |     |     |                                        |
| Locus_13949_Transcript_1/1_Conf_1.000 | 151 | 0  |          |                |     |         |     |     |                                        |
| Locus_1395_Transcript_1/2_Conf_1.000  | 820 | 20 | 1.15E-62 | NP_498755.1    | 81  | 244.202 | 178 | 145 | hypothetical protein K12H4.4           |
| Locus_1395_Transcript_2/2_Conf_1.000  | 821 | 20 | 1.15E-62 | NP_498755.1    | 81  | 244.202 | 178 | 145 | hypothetical protein K12H4.4           |
| Locus_13950_Transcript_1/2_Conf_1.000 | 431 | 20 | 2.96E-30 | XP_002641823.1 | 70  | 134.806 | 144 | 101 | Hypothetical protein CBG16490          |
| Locus_13950_Transcript_2/2_Conf_1.000 | 423 | 20 | 1.13E-29 | XP_002641823.1 | 70  | 132.88  | 141 | 99  | Hypothetical protein CBG16490          |
| Locus_13951_Transcript_1/1_Conf_1.000 | 537 | 0  |          |                |     |         |     |     |                                        |
| Locus_13952_Transcript_1/1_Conf_1.000 | 145 | 0  |          |                |     |         |     |     |                                        |
| Locus_13953_Transcript_1/1_Conf_1.000 | 170 | 0  |          |                |     |         |     |     |                                        |
| Locus_13954_Transcript_1/1_Conf_1.000 | 461 | 20 | 3.14E-16 | XP_002612934.1 | 55  | 88.1965 | 102 | 57  | hypothetical protein BRAFLDRAFT_278667 |
| Locus_13955_Transcript_1/1_Conf_1.000 | 887 | 20 | 8.92E-43 | XP_002665162.1 | 55  | 178.333 | 271 | 150 | PREDICTED: kelch-like 10-like          |
| Locus_13956_Transcript_1/1_Conf_1.000 | 440 | 0  |          |                |     |         |     |     |                                        |
| Locus_13957_Transcript_1/1_Conf_1.000 | 135 | 4  | 7.50E-18 | EFO16626.1     | 100 | 93.5893 | 44  | 44  | INX-1 protein                          |
| Locus_13958_Transcript_1/1_Conf_1.000 | 141 | 0  |          |                |     |         |     |     |                                        |

|                                       |      |    |          |                |     |         |     |     |                                 |
|---------------------------------------|------|----|----------|----------------|-----|---------|-----|-----|---------------------------------|
| Locus_13959_Transcript_1/1_Conf_1.000 | 216  | 20 | 2.56E-18 | XP_002640829.1 | 75  | 95.1301 | 70  | 53  | C. briggsae CBR-ADS-1 protein   |
| Locus_1396_Transcript_1/1_Conf_1.000  | 1615 | 6  | 2.82E-50 | EFO24916.1     | 48  | 204.527 | 512 | 246 | hypothetical protein LOAG_03568 |
| Locus_13960_Transcript_1/1_Conf_1.000 | 240  | 0  |          |                |     |         |     |     |                                 |
| Locus_13961_Transcript_1/1_Conf_1.000 | 399  | 20 | 4.43E-50 | NP_001022450.1 | 86  | 200.675 | 132 | 114 | hypothetical protein Y48E1A.1   |
| Locus_13962_Transcript_1/1_Conf_1.000 | 170  | 0  |          |                |     |         |     |     |                                 |
| Locus_13963_Transcript_1/1_Conf_1.000 | 425  | 20 | 7.53E-58 | EFO26325.1     | 85  | 226.483 | 140 | 119 | hypothetical protein LOAG_02163 |
| Locus_13964_Transcript_1/1_Conf_1.000 | 186  | 0  |          |                |     |         |     |     |                                 |
| Locus_13965_Transcript_1/1_Conf_1.000 | 131  | 20 | 6.39E-17 | XP_002713121.1 | 100 | 90.5077 | 43  | 43  | PREDICTED: beta-catenin         |

|                                       |      |    |           |                |    |         |     |     |                                                                         |
|---------------------------------------|------|----|-----------|----------------|----|---------|-----|-----|-------------------------------------------------------------------------|
| Locus_13966_Transcript_1/3_Conf_0.500 | 1025 | 20 | 1.53E-55  | NP_510746.2    | 69 | 221.09  | 199 | 138 | hypothetical protein K02H8.1                                            |
| Locus_13966_Transcript_2/3_Conf_0.333 | 627  | 20 | 1.06E-60  | NP_001129932.1 | 70 | 236.884 | 211 | 149 | hypothetical protein K02H8.1                                            |
| Locus_13966_Transcript_3/3_Conf_0.500 | 692  | 8  | 1.26E-10  | NP_001129931.1 | 60 | 70.8626 | 83  | 50  | hypothetical protein K02H8.1                                            |
| Locus_13967_Transcript_1/1_Conf_1.000 | 207  | 0  |           |                |    |         |     |     |                                                                         |
| Locus_13968_Transcript_1/1_Conf_1.000 | 237  | 20 | 4.15E-16  | XP_002632592.1 | 71 | 87.8113 | 78  | 56  | C. briggsae CBR-EPS-8 protein                                           |
| Locus_13969_Transcript_1/1_Conf_1.000 | 477  | 20 | 2.56E-42  | CAN99691.2     | 65 | 174.866 | 167 | 110 | C. elegans protein F54B3.1b, partially confirmed by transcript evidence |
| Locus_1397_Transcript_1/2_Conf_1.000  | 3125 | 20 | 4.35E-104 | NP_001041165.1 | 56 | 384.415 | 707 | 401 | hypothetical protein T09E.1                                             |
| Locus_1397_Transcript_2/2_Conf_1.000  | 1860 | 20 | 6.13E-68  | XP_002636951.1 | 64 | 263.462 | 357 | 230 | Hypothetical protein CBG09427                                           |
| Locus_13970_Transcript_1/1_Conf_1.000 | 162  | 3  | 8.69E-14  | NP_508964.2    | 90 | 80.1073 | 52  | 47  | Regulator of G protein Signaling family member (rgs-6)                  |
| Locus_13971_Transcript_1/1_Conf_1.000 | 134  | 0  |           |                |    |         |     |     |                                                                         |
| Locus_13972_Transcript_1/1_Conf_1.000 | 379  | 1  | 8.70E-06  | XP_001892617.1 | 55 | 53.5286 | 58  | 32  | Protein kinase domain containing protein                                |
| Locus_13973_Transcript_1/1_Conf_1.000 | 980  | 0  |           |                |    |         |     |     |                                                                         |
| Locus_13974_Transcript_1/1_Conf_1.000 | 259  | 0  |           |                |    |         |     |     |                                                                         |
| Locus_13975_Transcript_1/1_Conf_1.000 | 256  | 5  | 1.11E-08  | XP_002639252.1 | 94 | 63.1586 | 39  | 37  | C. briggsae CBR-GFI-2 protein                                           |
| Locus_13976_Transcript_1/1_Conf_1.000 | 226  | 0  |           |                |    |         |     |     |                                                                         |
| Locus_13977_Transcript_1/1_Conf_1.000 | 334  | 2  | 5.40E-08  | NP_495385.1    | 78 | 60.8474 | 42  | 33  | hypothetical protein F41G3.1                                            |

|                                       |      |    |           |                |     |         |     |     |                                                      |
|---------------------------------------|------|----|-----------|----------------|-----|---------|-----|-----|------------------------------------------------------|
| Locus_13978_Transcript_1/1_Conf_1.000 | 155  | 20 | 6.48E-25  | NP_001158888.1 | 100 | 117.087 | 51  | 51  | L-lactate dehydrogenase A chain isoform 5            |
| Locus_13979_Transcript_1/1_Conf_1.000 | 214  | 20 | 1.50E-34  | XP_002927231.1 | 100 | 149.058 | 71  | 71  | PREDICTED: tubulin alpha-1B chain-like               |
| Locus_1398_Transcript_1/2_Conf_1.000  | 1828 | 20 | 7.68E-132 | NP_502079.1    | 70  | 475.707 | 431 | 303 | IntraMembrane Protease (IMPAS) family member (imp-2) |
| Locus_1398_Transcript_2/2_Conf_1.000  | 1809 | 20 | 5.85E-128 | NP_502079.1    | 74  | 389.037 | 313 | 234 | IntraMembrane Protease (IMPAS) family member (imp-2) |
| Locus_13980_Transcript_1/1_Conf_1.000 | 139  | 0  |           |                |     |         |     |     |                                                      |
| Locus_13981_Transcript_1/1_Conf_1.000 | 308  | 4  | 1.20E-15  | XP_002639235.1 | 69  | 86.2705 | 65  | 45  | Hypothetical protein CBG03793                        |

|                                       |     |    |          |                |    |         |     |     |                                          |
|---------------------------------------|-----|----|----------|----------------|----|---------|-----|-----|------------------------------------------|
| Locus_13982_Transcript_1/1_Conf_1.000 | 388 | 20 | 2.91E-54 | EFO19497.1     | 89 | 214.542 | 128 | 115 | DNA polymerase epsilon catalytic subunit |
| Locus_13983_Transcript_1/1_Conf_1.000 | 248 | 9  | 1.01E-14 | NP_506678.2    | 65 | 83.1889 | 78  | 51  | hypothetical protein W09D12.1            |
| Locus_13984_Transcript_1/1_Conf_1.000 | 337 | 0  |          |                |    |         |     |     |                                          |
| Locus_13985_Transcript_1/1_Conf_1.000 | 361 | 0  |          |                |    |         |     |     |                                          |
| Locus_13986_Transcript_1/1_Conf_1.000 | 735 | 20 | 9.50E-39 | XP_002641664.1 | 64 | 164.466 | 216 | 139 | Hypothetical protein CBG09992            |
| Locus_13987_Transcript_1/1_Conf_1.000 | 444 | 20 | 1.38E-51 | XP_002640280.1 | 83 | 205.682 | 121 | 101 | Hypothetical protein CBG12806            |
| Locus_13988_Transcript_1/1_Conf_1.000 | 839 | 20 | 1.17E-49 | NP_494767.1    | 58 | 201.06  | 286 | 166 | hypothetical protein H20J04.2            |

|                                       |      |    |          |                |    |         |     |     |                                 |
|---------------------------------------|------|----|----------|----------------|----|---------|-----|-----|---------------------------------|
| Locus_13989_Transcript_1/1_Conf_1.000 | 1524 | 20 | 5.44E-72 |                | 54 | 276.559 | 508 | 278 | hypothetical protein Y106G6D.5  |
| Locus_1399_Transcript_1/3_Conf_0.500  | 1802 | 4  | 1.41E-37 | NP_001122735.1 | 57 | 162.54  | 407 | 236 | hypothetical protein Y56A3A.7   |
| Locus_1399_Transcript_2/3_Conf_0.625  | 1579 | 5  | 2.03E-45 | NP_001122735.1 | 58 | 188.348 | 448 | 261 | hypothetical protein Y56A3A.7   |
| Locus_1399_Transcript_3/3_Conf_0.500  | 1870 | 5  | 2.52E-45 | NP_001122735.1 | 58 | 188.348 | 448 | 261 | hypothetical protein Y56A3A.7   |
| Locus_13990_Transcript_1/1_Conf_1.000 | 220  | 0  |          |                |    |         |     |     |                                 |
| Locus_13991_Transcript_1/1_Conf_1.000 | 335  | 0  |          |                |    |         |     |     |                                 |
| Locus_13992_Transcript_1/1_Conf_1.000 | 729  | 20 | 1.47E-84 | XP_002647042.1 | 76 | 316.62  | 247 | 190 | Hypothetical protein CBG03560   |
| Locus_13993_Transcript_1/1_Conf_1.000 | 162  | 0  |          |                |    |         |     |     |                                 |
| Locus_13994_Transcript_1/1_Conf_1.000 | 357  | 20 | 2.75E-44 | EFO19977.1     | 91 | 181.415 | 117 | 107 | hypothetical protein LOAG_08511 |
| Locus_13995_Transcript_1/1_Conf_1.000 | 151  | 20 | 8.78E-22 | XP_002638784.1 | 96 | 106.686 | 50  | 48  | Hypothetical protein CBG05137   |
| Locus_13996_Transcript_1/1_Conf_1.000 | 576  | 20 | 2.79E-19 | NP_508889.1    | 52 | 98.9821 | 155 | 82  | hypothetical protein Y34B4A.7   |
| Locus_13997_Transcript_1/1_Conf_1.000 | 978  | 20 | 1.86E-39 | EFO19488.1     | 60 | 167.548 | 233 | 142 | hypothetical protein LOAG_09005 |
| Locus_13998_Transcript_1/1_Conf_1.000 | 211  | 0  |          |                |    |         |     |     |                                 |
| Locus_13999_Transcript_1/1_Conf_1.000 | 402  | 4  | 4.78E-04 | XP_001899942.1 | 54 | 47.7506 | 97  | 53  | hypothetical protein Bm1_42390  |



|                                       |      |    |          |                |    |         |     |     |                               |
|---------------------------------------|------|----|----------|----------------|----|---------|-----|-----|-------------------------------|
| Locus_14_Transcript_1/1_Conf_1.000    | 2309 | 20 | 0        | XP_002641511.1 | 94 | 973.77  | 599 | 569 | C. briggsae CBR-CHC-1 protein |
| Locus_140_Transcript_1/1_Conf_1.000   | 1282 | 20 | 0        | AAS55927.1     | 96 | 765.763 | 399 | 386 | cytoskeletal beta actin       |
| Locus_1400_Transcript_1/1_Conf_1.000  | 893  | 0  |          |                |    |         |     |     |                               |
| Locus_14000_Transcript_1/1_Conf_1.000 | 349  | 20 | 2.52E-37 | XP_002636973.1 | 86 | 158.303 | 115 | 99  | Hypothetical protein CBG09454 |
| Locus_14001_Transcript_1/1_Conf_1.000 | 259  | 20 | 1.31E-17 | XP_002641885.1 | 73 | 92.8189 | 86  | 63  | Hypothetical protein CBG16572 |

|                                       |      |    |           |                |    |         |     |     |                                     |
|---------------------------------------|------|----|-----------|----------------|----|---------|-----|-----|-------------------------------------|
| Locus_14002_Transcript_1/1_Conf_1.000 | 960  | 20 | 2.10E-138 | XP_001155090.1 | 98 | 381.333 | 197 | 195 | PREDICTED: similar to ANXA2 protein |
| Locus_14003_Transcript_1/1_Conf_1.000 | 335  | 0  |           |                |    |         |     |     |                                     |
| Locus_14004_Transcript_1/1_Conf_1.000 | 191  | 0  |           |                |    |         |     |     |                                     |
| Locus_14005_Transcript_1/1_Conf_1.000 | 151  | 1  | 6.32E-04  | XP_002642982.1 | 58 | 47.3654 | 50  | 29  | Hypothetical protein CBG15266       |
| Locus_14006_Transcript_1/1_Conf_1.000 | 148  | 0  |           |                |    |         |     |     |                                     |
| Locus_14007_Transcript_1/1_Conf_1.000 | 266  | 1  | 8.17E-04  | XP_001901545.1 | 64 | 46.9802 | 54  | 35  | hypothetical protein Bm1_50385      |
| Locus_14008_Transcript_1/1_Conf_1.000 | 574  | 20 | 1.17E-70  | XP_001895692.1 | 74 | 269.626 | 204 | 152 | jmjC domain containing protein      |
| Locus_14009_Transcript_1/1_Conf_1.000 | 139  | 20 | 9.14E-16  | EFO23246.1     | 95 | 86.6557 | 45  | 43  | degenerin unc-8                     |
| Locus_1401_Transcript_1/1_Conf_1.000  | 1167 | 20 | 1.73E-85  | XP_002641620.1 | 60 | 320.857 | 392 | 239 | C. briggsae CBR-BUB-1 protein       |
| Locus_14010_Transcript_1/1_Conf_1.000 | 388  | 0  |           |                |    |         |     |     |                                     |
| Locus_14011_Transcript_1/1_Conf_1.000 | 448  | 0  |           |                |    |         |     |     |                                     |
| Locus_14012_Transcript_1/1_Conf_1.000 | 423  | 0  |           |                |    |         |     |     |                                     |
| Locus_14013_Transcript_1/1_Conf_1.000 | 161  | 0  |           |                |    |         |     |     |                                     |

|                                       |     |    |          |                |    |         |     |     |                                                                         |
|---------------------------------------|-----|----|----------|----------------|----|---------|-----|-----|-------------------------------------------------------------------------|
| Locus_14014_Transcript_1/1_Conf_1.000 | 619 | 20 | 3.19E-86 | XP_001896258.1 | 81 | 321.627 | 205 | 167 | Cytoplasmic polyadenylation element binding protein 1                   |
| Locus_14015_Transcript_1/1_Conf_1.000 | 669 | 0  |          |                |    |         |     |     |                                                                         |
| Locus_14016_Transcript_1/3_Conf_0.600 | 335 | 1  | 2.51E-05 | NP_491118.2    | 56 | 51.9878 | 110 | 62  | hypothetical protein Y54E10A.11                                         |
| Locus_14016_Transcript_2/3_Conf_0.600 | 342 | 1  | 4.38E-05 | NP_491118.2    | 55 | 51.2174 | 110 | 61  | hypothetical protein Y54E10A.11                                         |
| Locus_14016_Transcript_3/3_Conf_0.600 | 335 | 1  | 4.28E-05 | NP_491118.2    | 55 | 51.2174 | 110 | 61  | hypothetical protein Y54E10A.11                                         |
| Locus_14017_Transcript_1/1_Conf_1.000 | 440 | 10 | 3.79E-46 | NP_001129848.1 | 79 | 187.578 | 144 | 114 | hypothetical protein C27H2.2                                            |
| Locus_14018_Transcript_1/1_Conf_1.000 | 476 | 20 | 3.16E-24 | XP_317488.4    | 76 | 114.775 | 89  | 68  | AGAP007978-PA                                                           |
| Locus_14019_Transcript_1/1_Conf_1.000 | 161 | 0  |          |                |    |         |     |     |                                                                         |
| Locus_1402_Transcript_1/1_Conf_1.000  | 560 | 20 | 1.72E-60 | XP_002639413.1 | 85 | 235.728 | 151 | 129 | C. briggsae CBR-CPS-6 protein                                           |
| Locus_14020_Transcript_1/1_Conf_1.000 | 270 | 6  | 5.60E-13 | AAK31527.3     | 57 | 77.411  | 113 | 65  | Neuronal symmetry protein 1, partially confirmed by transcript evidence |
| Locus_14021_Transcript_1/1_Conf_1.000 | 149 | 20 | 1.66E-12 | XP_001899592.1 | 85 | 75.8702 | 48  | 41  | C2 domain containing protein                                            |
| Locus_14022_Transcript_1/1_Conf_1.000 | 128 | 0  |          |                |    |         |     |     |                                                                         |
| Locus_14023_Transcript_1/1_Conf_1.000 | 458 | 20 | 2.94E-22 | NP_498986.2    | 68 | 108.227 | 128 | 88  | hypothetical protein R08D7.5                                            |
| Locus_14024_Transcript_1/1_Conf_1.000 | 333 | 18 | 1.24E-28 | NP_506118.1    | 81 | 129.413 | 90  | 73  | hypothetical protein C54D10.5                                           |
| Locus_14025_Transcript_1/1_Conf_1.000 | 395 | 20 | 1.27E-20 | XP_002638798.1 | 74 | 102.834 | 111 | 83  | C. briggsae CBR-PIF-1 protein                                           |
| Locus_14026_Transcript_1/1_Conf_1.000 | 173 | 0  |          |                |    |         |     |     |                                                                         |
| Locus_14027_Transcript_1/1_Conf_1.000 | 194 | 20 | 2.30E-14 | XP_002646723.1 | 75 | 82.0333 | 58  | 44  | C. briggsae CBR-CLH-3 protein                                           |
| Locus_14028_Transcript_1/1_Conf_1.000 | 146 | 0  |          |                |    |         |     |     |                                                                         |
| Locus_14029_Transcript_1/1_Conf_1.000 | 496 | 0  |          |                |    |         |     |     |                                                                         |

|                                       |      |    |          |                |     |         |     |     |                                                                |
|---------------------------------------|------|----|----------|----------------|-----|---------|-----|-----|----------------------------------------------------------------|
| Locus_1403_Transcript_1/1_Conf_1.000  | 302  | 2  | 4.30E-05 | XP_002642297.1 | 58  | 51.2174 | 51  | 30  | Hypothetical protein CBG18289                                  |
| Locus_14030_Transcript_1/1_Conf_1.000 | 148  | 0  |          |                |     |         |     |     |                                                                |
| Locus_14031_Transcript_1/1_Conf_1.000 | 283  | 0  |          |                |     |         |     |     |                                                                |
| Locus_14032_Transcript_1/1_Conf_1.000 | 392  | 20 | 4.50E-39 | EFO23299.1     | 73  | 164.081 | 130 | 96  | hypothetical protein LOAG_05186                                |
| Locus_14033_Transcript_1/2_Conf_1.000 | 1212 | 20 | 1.14E-95 | XP_002636970.1 | 60  | 354.755 | 446 | 271 | Hypothetical protein CBG09451                                  |
| Locus_14033_Transcript_2/2_Conf_1.000 | 1212 | 20 | 1.14E-95 | XP_002636970.1 | 60  | 354.755 | 446 | 271 | Hypothetical protein CBG09451                                  |
| Locus_14034_Transcript_1/1_Conf_1.000 | 1029 | 20 | 8.42E-86 | XP_002634139.1 | 73  | 321.627 | 300 | 221 | Hypothetical protein CBG01700                                  |
| Locus_14035_Transcript_1/1_Conf_1.000 | 270  | 20 | 7.54E-26 | EFO21211.1     | 78  | 120.168 | 89  | 70  | hypothetical protein LOAG_07280                                |
| Locus_14036_Transcript_1/1_Conf_1.000 | 496  | 0  |          |                |     |         |     |     |                                                                |
| Locus_14037_Transcript_1/1_Conf_1.000 | 147  | 20 | 2.17E-20 | 3IE3           | 100 | 102.064 | 48  | 48  | l Basis ForThe Binding OfThe Anti-Cancer Compound 6-(7-Nitro-2 |
| Locus_14038_Transcript_1/1_Conf_1.000 | 595  | 20 | 1.85E-69 | XP_002630445.1 | 81  | 265.774 | 180 | 146 | Hypothetical protein CBG11178                                  |
| Locus_14039_Transcript_1/1_Conf_1.000 | 950  | 7  | 6.37E-21 | XP_001894575.1 | 57  | 105.916 | 158 | 91  | MGC80099 protein                                               |
| Locus_1404_Transcript_1/1_Conf_1.000  | 302  | 20 | 2.33E-43 | AAO85518.1     | 100 | 178.333 | 87  | 87  | AF496634_1putative serine/threonine phosphatase                |
| Locus_14040_Transcript_1/1_Conf_1.000 | 399  | 20 | 5.44E-32 | ABQ01576.1     | 72  | 140.584 | 109 | 79  | scramblase 1                                                   |
| Locus_14041_Transcript_1/1_Conf_1.000 | 320  | 0  |          |                |     |         |     |     |                                                                |

|                                       |      |    |           |                |     |         |     |     |                                                                 |
|---------------------------------------|------|----|-----------|----------------|-----|---------|-----|-----|-----------------------------------------------------------------|
| Locus_14042_Transcript_1/1_Conf_1.000 | 184  | 20 | 2.17E-28  | EFB20679.1     | 100 | 128.642 | 60  | 60  | hypothetical protein PANDA_013768                               |
| Locus_14043_Transcript_1/1_Conf_1.000 | 131  | 0  |           |                |     |         |     |     |                                                                 |
| Locus_14044_Transcript_1/1_Conf_1.000 | 430  | 20 | 2.31E-67  | AAO85518.1     | 98  | 258.07  | 127 | 125 | AF496634_1putative serine/threonine phosphatase                 |
| Locus_14045_Transcript_1/1_Conf_1.000 | 194  | 6  | 2.30E-14  | NP_510479.1    | 93  | 82.0333 | 63  | 59  | Multidrug Resistance Protein family member (mrp-5)              |
| Locus_14046_Transcript_1/1_Conf_1.000 | 172  | 20 | 2.19E-09  | XP_001897369.1 | 75  | 65.4698 | 52  | 39  | Protein kinase domain containing protein                        |
| Locus_14047_Transcript_1/1_Conf_1.000 | 165  | 3  | 2.88E-09  | XP_002646710.1 | 74  | 65.0846 | 43  | 32  | C. briggsae CBR-MAOC-1 protein                                  |
| Locus_14048_Transcript_1/1_Conf_1.000 | 1358 | 20 | 6.92E-76  | NP_001041223.1 | 67  | 289.271 | 300 | 201 | mammalian VAV (oncogene) related family member (vav-1)          |
| Locus_14049_Transcript_1/1_Conf_1.000 | 531  | 4  | 1.18E-12  | NP_500378.1    | 65  | 76.6406 | 78  | 51  | TAF (TBP-associated transcription factor) family member (taf-2) |
| Locus_1405_Transcript_1/1_Conf_1.000  | 1277 | 20 | 6.07E-103 | EFO28398.1     | 72  | 379.022 | 425 | 307 | hypothetical protein LOAG_00087                                 |
| Locus_14050_Transcript_1/1_Conf_1.000 | 190  | 0  |           |                |     |         |     |     |                                                                 |
| Locus_14051_Transcript_1/1_Conf_1.000 | 934  | 3  | 1.81E-12  | XP_001896205.1 | 57  | 77.7962 | 90  | 52  | hypothetical protein Bm1_23740                                  |
| Locus_14052_Transcript_1/1_Conf_1.000 | 146  | 0  |           |                |     |         |     |     |                                                                 |

|                                       |      |    |          |                |     |         |     |     |                                                            |
|---------------------------------------|------|----|----------|----------------|-----|---------|-----|-----|------------------------------------------------------------|
| Locus_14053_Transcript_1/1_Conf_1.000 | 192  | 20 | 5.66E-21 | NP_493596.1    | 100 | 103.99  | 53  | 53  | UNCoordinated family member (unc-54)                       |
| Locus_14054_Transcript_1/1_Conf_1.000 | 267  | 0  |          |                |     |         |     |     |                                                            |
| Locus_14055_Transcript_1/1_Conf_1.000 | 204  | 0  |          |                |     |         |     |     |                                                            |
| Locus_14056_Transcript_1/1_Conf_1.000 | 811  | 20 | 9.91E-51 | NP_001024382.1 | 83  | 204.527 | 157 | 131 | DiacylGlycerol Kinase family member (dkg-1)                |
| Locus_14057_Transcript_1/1_Conf_1.000 | 177  | 1  | 3.60E-04 | NP_492172.1    | 71  | 48.1358 | 49  | 35  | Aspergillus NUclear Division related family member (nud-2) |
| Locus_14058_Transcript_1/1_Conf_1.000 | 408  | 0  |          |                |     |         |     |     |                                                            |
| Locus_14059_Transcript_1/1_Conf_1.000 | 309  | 19 | 5.93E-07 | CAB40845.1     | 52  | 57.3806 | 75  | 39  | conidiospore surface protein                               |
| Locus_1406_Transcript_1/1_Conf_1.000  | 1498 | 20 | 1.06E-96 | XP_001899812.1 | 67  | 358.607 | 410 | 276 | hypothetical protein Bm1_41765                             |
| Locus_14060_Transcript_1/1_Conf_1.000 | 534  | 20 | 1.25E-38 | XP_001897852.1 | 56  | 162.925 | 177 | 100 | notch-like transmembrane receptor                          |

|                                       |     |    |           |                |    |         |     |     |                                              |
|---------------------------------------|-----|----|-----------|----------------|----|---------|-----|-----|----------------------------------------------|
| Locus_14061_Transcript_1/1_Conf_1.000 | 410 | 0  |           |                |    |         |     |     |                                              |
| Locus_14062_Transcript_1/1_Conf_1.000 | 139 | 1  | 2.58E-10  | AAT12422.1     | 83 | 68.5514 | 42  | 35  | hypothetical protein isoform a               |
| Locus_14063_Transcript_1/1_Conf_1.000 | 479 | 5  | 9.18E-08  | XP_002638736.1 | 56 | 60.077  | 90  | 51  | C. briggsae CBR-EGO-1 protein                |
| Locus_14064_Transcript_1/1_Conf_1.000 | 260 | 20 | 8.17E-28  | NP_498761.1    | 86 | 126.716 | 86  | 74  | DiCer Related family member (dcr-1)          |
| Locus_14065_Transcript_1/1_Conf_1.000 | 161 | 8  | 1.95E-05  | NP_001020988.1 | 84 | 52.373  | 53  | 45  | UNCoordinated family member (unc-89)         |
| Locus_14066_Transcript_1/1_Conf_1.000 | 355 | 0  |           |                |    |         |     |     |                                              |
| Locus_14067_Transcript_1/1_Conf_1.000 | 634 | 20 | 4.15E-28  | XP_002641256.1 | 85 | 128.642 | 82  | 70  | Hypothetical protein CBG05167                |
| Locus_14068_Transcript_1/1_Conf_1.000 | 177 | 0  |           |                |    |         |     |     |                                              |
| Locus_14069_Transcript_1/1_Conf_1.000 | 914 | 20 | 1.64E-87  | EFO27866.1     | 76 | 327.02  | 283 | 216 | GTPase activating protein and VPS9 domains 1 |
| Locus_1407_Transcript_1/2_Conf_1.000  | 706 | 20 | 1.49E-107 | CAR63530.1     | 98 | 392.889 | 197 | 195 | putative synaptic vesicle 2-related protein  |
| Locus_1407_Transcript_2/2_Conf_1.000  | 861 | 20 | 2.97E-128 | CAR63530.1     | 97 | 462.225 | 243 | 236 | putative synaptic vesicle 2-related protein  |
| Locus_14070_Transcript_1/1_Conf_1.000 | 387 | 20 | 2.84E-33  | XP_002642740.1 | 79 | 144.821 | 112 | 89  | Hypothetical protein CBG21119                |
| Locus_14071_Transcript_1/1_Conf_1.000 | 372 | 0  |           |                |    |         |     |     |                                              |
| Locus_14072_Transcript_1/1_Conf_1.000 | 293 | 6  | 5.12E-14  | XP_002639127.1 | 71 | 80.8777 | 83  | 59  | Hypothetical protein CBG14946                |

|                                       |     |    |          |                |     |         |     |     |                                                                        |
|---------------------------------------|-----|----|----------|----------------|-----|---------|-----|-----|------------------------------------------------------------------------|
| Locus_14073_Transcript_1/1_Conf_1.000 | 478 | 20 | 1.76E-67 | XP_002912365.1 | 100 | 258.455 | 129 | 129 | PREDICTED: 60S ribosomal protein L23a-like                             |
| Locus_14074_Transcript_1/1_Conf_1.000 | 345 | 9  | 1.39E-35 | XP_002641524.1 | 87  | 152.525 | 87  | 76  | Hypothetical protein CBG09820                                          |
| Locus_14075_Transcript_1/1_Conf_1.000 | 364 | 0  |          |                |     |         |     |     |                                                                        |
| Locus_14076_Transcript_1/1_Conf_1.000 | 483 | 2  | 1.40E-19 | XP_002639186.1 | 57  | 99.3673 | 173 | 99  | C. briggsae CBR-LEM-3 protein                                          |
| Locus_14077_Transcript_1/1_Conf_1.000 | 351 | 0  |          |                |     |         |     |     |                                                                        |
| Locus_14078_Transcript_1/1_Conf_1.000 | 285 | 0  |          |                |     |         |     |     |                                                                        |
| Locus_14079_Transcript_1/1_Conf_1.000 | 415 | 20 | 3.57E-28 | NP_001022052.1 | 64  | 127.872 | 134 | 87  | SREBP Cleavage activating Protein (SCAP) homolog family member (scp-1) |
| Locus_1408_Transcript_1/2_Conf_1.000  | 317 | 20 | 1.23E-15 | P82968.1       | 79  | 86.2705 | 53  | 42  | Four-domain proteases inhibitor                                        |
| Locus_1408_Transcript_2/2_Conf_1.000  | 316 | 20 | 2.09E-15 | P82968.1       | 79  | 85.5001 | 53  | 42  | Four-domain proteases inhibitor                                        |
| Locus_14080_Transcript_1/1_Conf_1.000 | 471 | 20 | 1.98E-42 | XP_002648986.1 | 76  | 175.252 | 160 | 122 | C. briggsae CBR-SAX-2 protein                                          |
| Locus_14081_Transcript_1/1_Conf_1.000 | 383 | 20 | 4.01E-19 | XP_395372.2    | 59  | 97.8265 | 127 | 76  | PREDICTED: similar to CG7565-PA                                        |
| Locus_14082_Transcript_1/1_Conf_1.000 | 622 | 20 | 2.62E-56 | XP_001894163.1 | 76  | 222.246 | 193 | 148 | hypothetical protein Bm1_13490                                         |
| Locus_14083_Transcript_1/2_Conf_1.000 | 649 | 20 | 1.19E-49 | NP_502541.2    | 78  | 200.29  | 149 | 117 | hypothetical protein JC8.2                                             |
| Locus_14083_Transcript_2/2_Conf_1.000 | 626 | 20 | 1.08E-49 | NP_502541.2    | 78  | 200.29  | 149 | 117 | hypothetical protein JC8.2                                             |
| Locus_14084_Transcript_1/1_Conf_1.000 | 812 | 20 | 2.86E-82 | XP_002631390.1 | 84  | 309.301 | 258 | 217 | Hypothetical protein CBG03232                                          |



|                                       |     |    |           |                |     |         |     |     |                                                                        |
|---------------------------------------|-----|----|-----------|----------------|-----|---------|-----|-----|------------------------------------------------------------------------|
| Locus_14085_Transcript_1/1_Conf_1.000 | 162 | 0  |           |                |     |         |     |     |                                                                        |
| Locus_14086_Transcript_1/1_Conf_1.000 | 630 | 0  |           |                |     |         |     |     |                                                                        |
| Locus_14087_Transcript_1/2_Conf_1.000 | 428 | 0  |           |                |     |         |     |     |                                                                        |
| Locus_14087_Transcript_2/2_Conf_1.000 | 428 | 0  |           |                |     |         |     |     |                                                                        |
| Locus_14088_Transcript_1/1_Conf_1.000 | 672 | 20 | 4.02E-35  | CAB16467.2     | 63  | 152.14  | 180 | 115 | C. elegans protein W10C6.1, partially confirmed by transcript evidence |
| Locus_14089_Transcript_1/1_Conf_1.000 | 254 | 20 | 5.89E-26  | EFO25124.1     | 80  | 120.553 | 83  | 67  | bromodomain containing protein                                         |
| Locus_1409_Transcript_1/1_Conf_1.000  | 616 | 20 | 3.45E-109 | BAG61974.1     | 100 | 397.897 | 192 | 192 | unnamed protein product                                                |
| Locus_14090_Transcript_1/1_Conf_1.000 | 224 | 13 | 8.50E-17  | XP_002641658.1 | 74  | 90.1225 | 71  | 53  | Hypothetical protein CBG09986                                          |
| Locus_14091_Transcript_1/1_Conf_1.000 | 225 | 0  |           |                |     |         |     |     |                                                                        |
| Locus_14092_Transcript_1/1_Conf_1.000 | 246 | 0  |           |                |     |         |     |     |                                                                        |
| Locus_14093_Transcript_1/1_Conf_1.000 | 439 | 20 | 1.15E-18  | XP_002646219.1 | 65  | 96.2857 | 101 | 66  | Hypothetical protein CBG11908                                          |
| Locus_14094_Transcript_1/1_Conf_1.000 | 144 | 20 | 6.35E-12  | CAF98408.1     | 83  | 73.9442 | 48  | 40  | unnamed protein product                                                |
| Locus_14095_Transcript_1/1_Conf_1.000 | 157 | 0  |           |                |     |         |     |     |                                                                        |
| Locus_14096_Transcript_1/2_Conf_1.000 | 621 | 20 | 5.51E-22  | XP_002632140.1 | 74  | 108.227 | 105 | 78  | C. briggsae CBR-SPTL-1 protein                                         |
| Locus_14096_Transcript_2/2_Conf_1.000 | 260 | 0  |           |                |     |         |     |     |                                                                        |
| Locus_14097_Transcript_1/1_Conf_1.000 | 356 | 9  | 4.05E-49  | XP_519474.2    | 96  | 126.716 | 62  | 60  | PREDICTED: hepatocellular carcinoma-associated antigen 112             |
| Locus_14098_Transcript_1/1_Conf_1.000 | 165 | 0  |           |                |     |         |     |     |                                                                        |

|                                       |      |    |           |                |     |         |     |     |                                                     |
|---------------------------------------|------|----|-----------|----------------|-----|---------|-----|-----|-----------------------------------------------------|
| Locus_14099_Transcript_1/1_Conf_1.000 | 275  | 20 | 6.39E-09  | XP_001893875.1 | 61  | 63.929  | 81  | 50  | Bromodomain associated family protein               |
| Locus_141_Transcript_1/1_Conf_1.000   | 2163 | 20 | 4.62E-163 | NP_872090.1    | 74  | 579.711 | 527 | 391 | Lateral Signaling Target family member (lst-4)      |
| Locus_1410_Transcript_1/1_Conf_1.000  | 200  | 0  |           |                |     |         |     |     |                                                     |
| Locus_14100_Transcript_1/1_Conf_1.000 | 488  | 20 | 1.44E-08  | NP_001021459.2 | 44  | 62.7734 | 159 | 71  | hypothetical protein F36H2.3                        |
| Locus_14101_Transcript_1/1_Conf_1.000 | 212  | 0  |           |                |     |         |     |     |                                                     |
| Locus_14102_Transcript_1/1_Conf_1.000 | 270  | 0  |           |                |     |         |     |     |                                                     |
| Locus_14103_Transcript_1/1_Conf_1.000 | 439  | 20 | 2.29E-59  | NP_004543.1    | 100 | 231.491 | 106 | 106 | NADH dehydrogenase ubiquinone iron-sulfur protein 5 |
| Locus_14104_Transcript_1/1_Conf_1.000 | 1783 | 20 | 2.65E-12  | XP_002661927.1 | 41  | 78.5666 | 439 | 182 | PREDICTED: hypothetical protein                     |
| Locus_14105_Transcript_1/1_Conf_1.000 | 369  | 0  |           |                |     |         |     |     |                                                     |
| Locus_14106_Transcript_1/1_Conf_1.000 | 133  | 0  |           |                |     |         |     |     |                                                     |
| Locus_14107_Transcript_1/1_Conf_1.000 | 132  | 0  |           |                |     |         |     |     |                                                     |
| Locus_14108_Transcript_1/1_Conf_1.000 | 621  | 15 | 1.29E-87  | NP_495267.1    | 89  | 326.25  | 191 | 171 | hypothetical protein C29F5.1                        |
| Locus_14109_Transcript_1/1_Conf_1.000 | 222  | 0  |           |                |     |         |     |     |                                                     |
| Locus_1411_Transcript_1/1_Conf_1.000  | 987  | 20 | 2.23E-48  | XP_002634004.1 | 80  | 197.208 | 180 | 144 | Hypothetical protein CBG20111                       |
| Locus_14110_Transcript_1/1_Conf_1.000 | 449  | 0  |           |                |     |         |     |     |                                                     |

|                                       |      |    |          |                |    |         |     |     |                                 |
|---------------------------------------|------|----|----------|----------------|----|---------|-----|-----|---------------------------------|
| Locus_14111_Transcript_1/1_Conf_1.000 | 339  | 20 | 2.17E-17 | EFO24980.1     | 72 | 92.0485 | 79  | 57  | hypothetical protein LOAG_03505 |
| Locus_14112_Transcript_1/1_Conf_1.000 | 978  | 0  |          |                |    |         |     |     |                                 |
| Locus_14113_Transcript_1/1_Conf_1.000 | 667  | 20 | 5.18E-25 | NP_502063.1    | 45 | 94.3597 | 163 | 74  | hypothetical protein Y5F2A.4    |
| Locus_14114_Transcript_1/1_Conf_1.000 | 189  | 20 | 7.69E-10 | XP_002640423.1 | 73 | 67.0106 | 56  | 41  | Hypothetical protein CBG08474   |
| Locus_14115_Transcript_1/1_Conf_1.000 | 363  | 20 | 1.04E-35 | XP_002631218.1 | 81 | 152.91  | 121 | 99  | Hypothetical protein CBG03015   |
| Locus_14116_Transcript_1/1_Conf_1.000 | 777  | 5  | 3.29E-32 | NP_496398.2    | 76 | 142.895 | 102 | 78  | hypothetical protein T06D8.1    |
| Locus_14117_Transcript_1/1_Conf_1.000 | 336  | 0  |          |                |    |         |     |     |                                 |
| Locus_14118_Transcript_1/1_Conf_1.000 | 328  | 20 | 3.74E-33 | ACD88896.1     | 81 | 144.436 | 91  | 74  | conserved hypothetical protein  |
| Locus_14119_Transcript_1/1_Conf_1.000 | 332  | 0  |          |                |    |         |     |     |                                 |
| Locus_1412_Transcript_1/1_Conf_1.000  | 1338 | 20 | 1.66E-90 | XP_001894513.1 | 68 | 337.806 | 363 | 247 | DZF family protein              |

|                                       |      |    |          |                |    |         |     |     |                                                 |
|---------------------------------------|------|----|----------|----------------|----|---------|-----|-----|-------------------------------------------------|
| Locus_14120_Transcript_1/1_Conf_1.000 | 442  | 20 | 1.25E-44 | XP_002633800.1 | 79 | 182.57  | 147 | 117 | C. briggsae CBR-RBD-1 protein                   |
| Locus_14121_Transcript_1/1_Conf_1.000 | 473  | 0  |          |                |    |         |     |     |                                                 |
| Locus_14122_Transcript_1/1_Conf_1.000 | 652  | 20 | 1.56E-81 | NP_001122814.1 | 82 | 306.22  | 217 | 178 | STAT transcription factor family member (sta-1) |
| Locus_14123_Transcript_1/1_Conf_1.000 | 282  | 20 | 1.32E-09 | CAJ98743.1     | 77 | 66.2402 | 54  | 42  | serine/threonine phosphatase                    |
| Locus_14124_Transcript_1/1_Conf_1.000 | 267  | 0  |          |                |    |         |     |     |                                                 |
| Locus_14125_Transcript_1/1_Conf_1.000 | 543  | 20 | 3.59E-60 | NP_505435.1    | 84 | 234.572 | 175 | 148 | hypothetical protein F36D4.2                    |
| Locus_14126_Transcript_1/1_Conf_1.000 | 289  | 0  |          |                |    |         |     |     |                                                 |
| Locus_14127_Transcript_1/1_Conf_1.000 | 464  | 20 | 5.25E-59 | NP_494756.1    | 84 | 230.335 | 154 | 130 | hypothetical protein C01F1.1                    |
| Locus_14128_Transcript_1/1_Conf_1.000 | 310  | 20 | 2.03E-23 | NP_493573.1    | 73 | 112.079 | 100 | 73  | hypothetical protein F39B2.7                    |
| Locus_14129_Transcript_1/1_Conf_1.000 | 223  | 0  |          |                |    |         |     |     |                                                 |
| Locus_1413_Transcript_1/1_Conf_1.000  | 1479 | 6  | 1.00E-14 | NP_001129872.1 | 46 | 86.2705 | 366 | 169 | hypothetical protein T23B5.3                    |
| Locus_14130_Transcript_1/1_Conf_1.000 | 566  | 20 | 3.59E-69 | CBA12962.1     | 75 | 264.618 | 200 | 151 | LEV-9 protein                                   |
| Locus_14131_Transcript_1/1_Conf_1.000 | 313  | 0  |          |                |    |         |     |     |                                                 |
| Locus_14132_Transcript_1/1_Conf_1.000 | 453  | 20 | 3.59E-36 | NP_509859.1    | 73 | 154.451 | 118 | 87  | hypothetical protein R08B4.3                    |
| Locus_14133_Transcript_1/1_Conf_1.000 | 132  | 0  |          |                |    |         |     |     |                                                 |

|                                       |      |    |           |                |     |         |     |     |                                                                                                  |
|---------------------------------------|------|----|-----------|----------------|-----|---------|-----|-----|--------------------------------------------------------------------------------------------------|
| Locus_14134_Transcript_1/1_Conf_1.000 | 968  | 20 | 1.30E-61  | XP_001896873.1 | 69  | 241.121 | 267 | 185 | Origin recognition complex subunit 1                                                             |
| Locus_14135_Transcript_1/1_Conf_1.000 | 585  | 0  |           |                |     |         |     |     |                                                                                                  |
| Locus_14136_Transcript_1/1_Conf_1.000 | 1051 | 20 | 5.42E-80  | NP_001023527.1 | 67  | 302.368 | 298 | 202 | hypothetical protein Y57G11C.43                                                                  |
| Locus_14137_Transcript_1/1_Conf_1.000 | 442  | 20 | 4.75E-52  | AAX37111.1     | 100 | 207.223 | 118 | 118 | small nuclear ribonucleoprotein D2 polypeptide                                                   |
| Locus_14138_Transcript_1/1_Conf_1.000 | 375  | 7  | 2.62E-10  | ADI24623.1     | 64  | 68.5514 | 70  | 45  | Copine domain protein, atypical protein 2, isoform c, partially confirmed by transcript evidence |
| Locus_14139_Transcript_1/1_Conf_1.000 | 963  | 20 | 2.30E-34  | EFO26310.1     | 75  | 150.599 | 129 | 97  | rap/ran-GAP family protein                                                                       |
| Locus_1414_Transcript_1/1_Conf_1.000  | 790  | 20 | 5.30E-110 | NP_001129887.1 | 86  | 401.364 | 262 | 227 | SEC(selenocysteine)-tRNA Synthase family member (secs-1)                                         |
| Locus_14140_Transcript_1/1_Conf_1.000 | 139  | 20 | 1.67E-17  | BAG60581.1     | 100 | 92.4337 | 46  | 46  | unnamed protein product                                                                          |
| Locus_14141_Transcript_1/1_Conf_1.000 | 264  |    |           |                |     |         |     |     |                                                                                                  |
| Locus_14142_Transcript_1/1_Conf_1.000 | 448  | 20 | 9.61E-13  | XP_002674131.1 | 55  | 76.6406 | 86  | 48  | hypothetical protein NAEGRDRAFT_80725                                                            |
| Locus_14143_Transcript_1/1_Conf_1.000 | 168  | 0  |           |                |     |         |     |     |                                                                                                  |
| Locus_14144_Transcript_1/1_Conf_1.000 | 391  | 3  | 6.54E-14  | NP_500183.2    | 75  | 80.4925 | 60  | 45  | hypothetical protein M70.4                                                                       |
| Locus_14145_Transcript_1/1_Conf_1.000 | 260  | 0  |           |                |     |         |     |     |                                                                                                  |
| Locus_14146_Transcript_1/1_Conf_1.000 | 266  | 20 | 1.13E-21  | XP_002645292.1 | 73  | 106.301 | 88  | 65  | C. briggsae CBR-SNF-12 protein                                                                   |
| Locus_14147_Transcript_1/1_Conf_1.000 | 208  | 0  |           |                |     |         |     |     |                                                                                                  |
| Locus_14148_Transcript_1/1_Conf_1.000 | 1051 | 20 | 1.11E-08  | XP_002635706.1 | 39  | 65.4698 | 215 | 85  | Hypothetical protein CBG22445                                                                    |

|                                       |      |    |          |                |    |         |     |     |                                                                        |
|---------------------------------------|------|----|----------|----------------|----|---------|-----|-----|------------------------------------------------------------------------|
| Locus_14149_Transcript_1/1_Conf_1.000 | 366  | 4  | 2.09E-36 | NP_001033357.2 | 79 | 155.221 | 118 | 94  | DAF-16/FOXO Controlled, germline Tumor affecting family member (dct-6) |
| Locus_1415_Transcript_1/1_Conf_1.000  | 1034 | 20 | 9.68E-82 | NP_492732.2    | 72 | 308.145 | 321 | 233 | yeast SEC homolog family member (sec-8)                                |
| Locus_14150_Transcript_1/1_Conf_1.000 | 190  | 0  |          |                |    |         |     |     |                                                                        |
| Locus_14151_Transcript_1/1_Conf_1.000 | 146  | 13 | 1.98E-05 | XP_001901649.1 | 74 | 52.373  | 47  | 35  | WGR domain containing protein                                          |
| Locus_14152_Transcript_1/1_Conf_1.000 | 138  | 0  |          |                |    |         |     |     |                                                                        |
| Locus_14153_Transcript_1/1_Conf_1.000 | 139  | 4  | 1.61E-12 | CAA86821.1     | 95 | 75.8702 | 43  | 41  | excretory/secretory antigen                                            |
| Locus_14154_Transcript_1/1_Conf_1.000 | 342  | 0  |          |                |    |         |     |     |                                                                        |
| Locus_14155_Transcript_1/1_Conf_1.000 | 154  | 0  |          |                |    |         |     |     |                                                                        |
| Locus_14156_Transcript_1/1_Conf_1.000 | 525  | 20 | 9.48E-60 | NP_492590.1    | 79 | 233.032 | 162 | 129 | hypothetical protein K02A11.3                                          |
| Locus_14157_Transcript_1/1_Conf_1.000 | 673  | 20 | 3.64E-36 | EFO26611.1     | 60 | 155.606 | 220 | 134 | hypothetical protein LOAG_01867                                        |
| Locus_14158_Transcript_1/1_Conf_1.000 | 219  | 0  |          |                |    |         |     |     |                                                                        |
| Locus_14159_Transcript_1/1_Conf_1.000 | 234  | 20 | 2.88E-17 | NP_501645.1    | 75 | 91.6633 | 69  | 52  | hypothetical protein T20D3.8                                           |
| Locus_1416_Transcript_1/1_Conf_1.000  | 508  | 2  | 1.40E-62 | XP_001145371.1 | 98 | 242.276 | 118 | 116 | PREDICTED: hypothetical protein                                        |
| Locus_14160_Transcript_1/1_Conf_1.000 | 577  | 20 | 2.25E-69 | NP_496170.1    | 80 | 265.388 | 191 | 154 | LEThal family member (let-268)                                         |
| Locus_14161_Transcript_1/1_Conf_1.000 | 800  | 20 | 2.77E-13 | XP_001902864.1 | 65 | 80.1073 | 87  | 57  | hypothetical protein Bm1_57035                                         |
| Locus_14162_Transcript_1/1_Conf_1.000 | 842  | 20 | 4.07E-26 | XP_002641927.1 | 63 | 122.865 | 138 | 88  | Hypothetical protein CBG16626                                          |
| Locus_14163_Transcript_1/1_Conf_1.000 | 128  | 20 | 1.48E-13 | NP_503406.2    | 92 | 79.337  | 42  | 39  | SyNapTotagmin family member (snt-3)                                    |
| Locus_14164_Transcript_1/1_Conf_1.000 | 169  | 0  |          |                |    |         |     |     |                                                                        |
| Locus_14165_Transcript_1/1_Conf_1.000 | 254  | 0  |          |                |    |         |     |     |                                                                        |
| Locus_14166_Transcript_1/1_Conf_1.000 | 194  | 0  |          |                |    |         |     |     |                                                                        |
| Locus_14167_Transcript_1/1_Conf_1.000 | 226  | 4  | 5.13E-22 | XP_002631267.1 | 80 | 107.457 | 75  | 60  | C. briggsae CBR-PRO-1 protein                                          |
| Locus_14168_Transcript_1/1_Conf_1.000 | 593  | 0  |          |                |    |         |     |     |                                                                        |
| Locus_14169_Transcript_1/1_Conf_1.000 | 198  | 0  |          |                |    |         |     |     |                                                                        |

|                                       |      |    |          |                |     |         |     |     |                                                                 |
|---------------------------------------|------|----|----------|----------------|-----|---------|-----|-----|-----------------------------------------------------------------|
| Locus_1417_Transcript_1/1_Conf_1.000  | 1934 | 20 | 1.35E-17 | CAX12544.1     | 44  | 96.2857 | 258 | 114 | nuclear oncoprotein skia                                        |
| Locus_14170_Transcript_1/2_Conf_1.000 | 291  | 0  |          |                |     |         |     |     |                                                                 |
| Locus_14170_Transcript_2/2_Conf_1.000 | 333  | 0  |          |                |     |         |     |     |                                                                 |
| Locus_14171_Transcript_1/1_Conf_1.000 | 156  | 1  | 1.76E-22 | XP_002343179.1 | 100 | 108.997 | 51  | 51  | PREDICTED: hypothetical protein XP_002343179                    |
| Locus_14172_Transcript_1/1_Conf_1.000 | 570  | 3  | 9.97E-06 | XP_002637821.1 | 51  | 53.9138 | 152 | 78  | Hypothetical protein CBG04610                                   |
| Locus_14173_Transcript_1/1_Conf_1.000 | 469  | 0  |          |                |     |         |     |     |                                                                 |
| Locus_14174_Transcript_1/1_Conf_1.000 | 322  | 11 | 1.70E-25 | XP_002634211.1 | 83  | 119.013 | 90  | 75  | C. briggsae CBR-MAU-8 protein                                   |
| Locus_14175_Transcript_1/1_Conf_1.000 | 452  | 20 | 3.39E-26 | NP_491902.3    | 69  | 121.324 | 120 | 83  | hypothetical protein D2092.5                                    |
| Locus_14176_Transcript_1/1_Conf_1.000 | 404  | 20 | 7.07E-32 | NP_741383.1    | 74  | 140.198 | 111 | 83  | tYrosinyl tRNA Synthetase family member (yrs-1)                 |
| Locus_14177_Transcript_1/1_Conf_1.000 | 164  | 0  |          |                |     |         |     |     |                                                                 |
| Locus_14178_Transcript_1/1_Conf_1.000 | 405  | 20 | 2.42E-32 | NP_495663.1    | 72  | 141.739 | 134 | 97  | REV1 (translesion DNA polymerase) homolog family member (rev-1) |
| Locus_14179_Transcript_1/1_Conf_1.000 | 913  | 20 | 8.32E-15 | EFO17283.1     | 60  | 85.5001 | 202 | 122 | hypothetical protein LOAG_11216                                 |
| Locus_1418_Transcript_1/1_Conf_1.000  | 881  | 2  | 7.01E-24 | NP_502443.2    | 51  | 115.546 | 257 | 133 | hypothetical protein F07C6.4                                    |
| Locus_14180_Transcript_1/1_Conf_1.000 | 370  | 20 | 1.89E-24 | EFO19846.1     | 79  | 115.546 | 92  | 73  | cleavage and polyadenylation specificity factor subunit 2       |
| Locus_14181_Transcript_1/1_Conf_1.000 | 382  | 5  | 1.52E-18 | XP_002643698.1 | 74  | 95.9005 | 78  | 58  | Hypothetical protein CBG01887                                   |
| Locus_14182_Transcript_1/1_Conf_1.000 | 694  | 20 | 1.65E-26 | XP_001900728.1 | 75  | 123.635 | 96  | 72  | RhoGAP domain containing protein                                |
| Locus_14183_Transcript_1/1_Conf_1.000 | 337  | 20 | 3.01E-51 | AAD00776.1     | 89  | 204.527 | 112 | 100 | 2,5 dihydroxyphenylacetate oxidase                              |
| Locus_14184_Transcript_1/1_Conf_1.000 | 266  | 20 | 1.17E-42 | XP_002347521.1 | 100 | 176.022 | 84  | 84  | PREDICTED: hypothetical protein XP_002347521                    |

|                                       |     |    |          |                |    |         |     |     |                                 |
|---------------------------------------|-----|----|----------|----------------|----|---------|-----|-----|---------------------------------|
| Locus_14185_Transcript_1/1_Conf_1.000 | 194 | 2  | 9.06E-11 | XP_002638788.1 | 84 | 70.0922 | 46  | 39  | Hypothetical protein CBG05143   |
| Locus_14186_Transcript_1/1_Conf_1.000 | 233 | 0  |          |                |    |         |     |     |                                 |
| Locus_14187_Transcript_1/1_Conf_1.000 | 408 | 0  |          |                |    |         |     |     |                                 |
| Locus_14188_Transcript_1/1_Conf_1.000 | 480 | 20 | 4.36E-26 | XP_002634144.1 | 77 | 120.939 | 131 | 101 | Hypothetical protein CBG01705   |
| Locus_14189_Transcript_1/1_Conf_1.000 | 224 | 0  |          |                |    |         |     |     |                                 |
| Locus_1419_Transcript_1/1_Conf_1.000  | 588 | 20 | 5.41E-66 | NP_499418.1    | 86 | 254.218 | 153 | 133 | hypothetical protein Y48A6B.7   |
| Locus_14190_Transcript_1/1_Conf_1.000 | 129 | 0  |          |                |    |         |     |     |                                 |
| Locus_14191_Transcript_1/1_Conf_1.000 | 335 | 0  |          |                |    |         |     |     |                                 |
| Locus_14192_Transcript_1/1_Conf_1.000 | 631 | 20 | 2.08E-21 | XP_002633194.1 | 58 | 84.7297 | 105 | 61  | Hypothetical protein CBG05911   |
| Locus_14193_Transcript_1/2_Conf_1.000 | 631 | 2  | 5.39E-04 | EFO27009.1     | 71 | 48.521  | 35  | 25  | hypothetical protein LOAG_01466 |
| Locus_14193_Transcript_2/2_Conf_1.000 | 571 | 2  | 4.19E-04 | EFO27009.1     | 71 | 48.521  | 35  | 25  | hypothetical protein LOAG_01466 |
| Locus_14194_Transcript_1/1_Conf_1.000 | 358 | 4  | 1.56E-39 | NP_496830.2    | 83 | 165.622 | 119 | 99  | hypothetical protein Y48E1C.4   |
| Locus_14195_Transcript_1/1_Conf_1.000 | 313 | 0  |          |                |    |         |     |     |                                 |
| Locus_14196_Transcript_1/1_Conf_1.000 | 194 | 0  |          |                |    |         |     |     |                                 |
| Locus_14197_Transcript_1/1_Conf_1.000 | 468 | 20 | 5.92E-71 | AAC38987.1     | 91 | 270.011 | 156 | 142 | P-glycoprotein                  |
| Locus_14198_Transcript_1/1_Conf_1.000 | 545 | 20 | 1.46E-45 | XP_002640390.1 | 72 | 186.037 | 182 | 132 | Hypothetical protein CBG08435   |
| Locus_14199_Transcript_1/1_Conf_1.000 | 221 | 6  | 1.97E-05 | XP_002639496.1 | 69 | 52.373  | 66  | 46  | Hypothetical protein CBG04097   |



|                                       |      |    |          |                |     |         |     |     |                                                          |
|---------------------------------------|------|----|----------|----------------|-----|---------|-----|-----|----------------------------------------------------------|
| Locus_142_Transcript_1/1_Conf_1.000   | 1491 | 20 | 1.49E-66 | NP_496763.1    | 59  | 258.455 | 337 | 200 | CYclin D family member (cyd-1)                           |
| Locus_1420_Transcript_1/1_Conf_1.000  | 487  | 20 | 8.63E-46 | NP_510298.1    | 68  | 186.422 | 160 | 110 | AMP-Activated Kinase Beta subunit family member (aakb-1) |
| Locus_14200_Transcript_1/1_Conf_1.000 | 256  | 0  |          |                |     |         |     |     |                                                          |
| Locus_14201_Transcript_1/1_Conf_1.000 | 154  | 0  |          |                |     |         |     |     |                                                          |
| Locus_14202_Transcript_1/1_Conf_1.000 | 1023 | 1  | 1.96E-10 | NP_498298.1    | 41  | 71.2478 | 321 | 134 | hypothetical protein F25B5.2                             |
| Locus_14203_Transcript_1/1_Conf_1.000 | 202  | 0  |          |                |     |         |     |     |                                                          |
| Locus_14204_Transcript_1/1_Conf_1.000 | 935  | 20 | 6.54E-63 | NP_491315.1    | 64  | 245.358 | 304 | 197 | INneXin family member (inx-17)                           |
| Locus_14205_Transcript_1/1_Conf_1.000 | 282  | 5  | 8.86E-06 | XP_002631238.1 | 62  | 53.5286 | 64  | 40  | Hypothetical protein CBG03041                            |
| Locus_14206_Transcript_1/1_Conf_1.000 | 685  | 20 | 4.59E-74 | 1TW9           | 84  | 281.567 | 204 | 172 | Glutathione Transferase-2                                |
| Locus_14207_Transcript_1/1_Conf_1.000 | 424  | 0  |          |                |     |         |     |     |                                                          |
| Locus_14208_Transcript_1/1_Conf_1.000 | 185  | 20 | 1.83E-27 | XP_002914026.1 | 100 | 125.561 | 61  | 61  | PREDICTED: polyadenylate-binding protein 1-like          |
| Locus_14209_Transcript_1/1_Conf_1.000 | 362  | 0  |          |                |     |         |     |     |                                                          |
| Locus_1421_Transcript_1/1_Conf_1.000  | 603  | 0  |          |                |     |         |     |     |                                                          |
| Locus_14210_Transcript_1/1_Conf_1.000 | 264  | 20 | 1.21E-31 | XP_001894470.1 | 86  | 139.428 | 87  | 75  | GCD14 protein                                            |
| Locus_14211_Transcript_1/1_Conf_1.000 | 468  | 9  | 9.54E-37 | NP_499059.2    | 60  | 156.377 | 168 | 102 | hypothetical protein K04H4.2                             |

|                                       |     |    |           |                |     |         |     |     |                                                                                        |
|---------------------------------------|-----|----|-----------|----------------|-----|---------|-----|-----|----------------------------------------------------------------------------------------|
| Locus_14212_Transcript_1/1_Conf_1.000 | 341 | 0  |           |                |     |         |     |     |                                                                                        |
| Locus_14213_Transcript_1/1_Conf_1.000 | 901 | 20 | 9.16E-59  | XP_002638852.1 | 63  | 231.491 | 290 | 184 | Hypothetical protein CBG22064                                                          |
| Locus_14214_Transcript_1/1_Conf_1.000 | 204 | 0  |           |                |     |         |     |     |                                                                                        |
| Locus_14215_Transcript_1/1_Conf_1.000 | 388 | 20 | 5.52E-37  | NP_001040927.1 | 75  | 157.147 | 128 | 96  | hypothetical protein C47A4.2                                                           |
| Locus_14216_Transcript_1/1_Conf_1.000 | 172 | 0  |           |                |     |         |     |     |                                                                                        |
| Locus_14217_Transcript_1/1_Conf_1.000 | 274 | 20 | 1.42E-16  | XP_002641416.1 | 78  | 89.3521 | 65  | 51  | C. briggsae CBR-SBP-1 protein                                                          |
| Locus_14218_Transcript_1/1_Conf_1.000 | 222 | 0  |           |                |     |         |     |     |                                                                                        |
| Locus_14219_Transcript_1/1_Conf_1.000 | 227 | 20 | 6.06E-23  | XP_002606421.1 | 89  | 110.538 | 73  | 65  | hypothetical protein BRAFLDRAFT_67673                                                  |
| Locus_1422_Transcript_1/1_Conf_1.000  | 865 | 20 | 3.31E-119 | NP_871640.1    | 84  | 432.18  | 288 | 242 | Glycyl tRNA Synthetase family member (grs-1)                                           |
| Locus_14220_Transcript_1/1_Conf_1.000 | 364 | 20 | 6.06E-52  | NP_001023252.1 | 91  | 206.838 | 120 | 110 | Transbilayer Amphipath Transporters (subfamily IV P-type ATPase) family member (tat-2) |
| Locus_14221_Transcript_1/1_Conf_1.000 | 204 | 2  | 1.09E-08  | NP_499474.1    | 85  | 63.1586 | 35  | 30  | BED-type zinc finger transcription factor family member (bed-2)                        |
| Locus_14222_Transcript_1/1_Conf_1.000 | 396 | 20 | 4.73E-68  | XP_002927413.1 | 100 | 260.381 | 131 | 131 | PREDICTED: eukaryotic translation initiation factor 3 subunit C-like                   |
| Locus_14223_Transcript_1/1_Conf_1.000 | 390 | 6  | 4.53E-15  | EFO16157.1     | 52  | 84.3445 | 142 | 74  | ribonuclease P/MRP protein subunit POP1 containing protein                             |

|                                       |      |    |           |                |    |         |     |     |                                                                               |
|---------------------------------------|------|----|-----------|----------------|----|---------|-----|-----|-------------------------------------------------------------------------------|
| Locus_14224_Transcript_1/1_Conf_1.000 | 329  | 20 | 1.13E-29  | XP_001900386.1 | 80 | 132.88  | 105 | 84  | Phosphatidylcholine:ceramide<br>cholinephosphotransferase 3, putative         |
| Locus_14225_Transcript_1/1_Conf_1.000 | 266  | 17 | 1.86E-40  | EFO27230.1     | 97 | 168.703 | 88  | 86  | fasciclin domain-containing protein                                           |
| Locus_14226_Transcript_1/1_Conf_1.000 | 432  | 2  | 6.60E-06  | NP_499664.2    | 48 | 53.9138 | 116 | 56  | hypothetical protein BE10.2                                                   |
| Locus_14227_Transcript_1/1_Conf_1.000 | 400  | 9  | 1.35E-06  | XP_002630073.1 | 52 | 56.225  | 91  | 48  | Hypothetical protein CBG13452                                                 |
| Locus_14228_Transcript_1/1_Conf_1.000 | 187  | 0  |           |                |    |         |     |     |                                                                               |
| Locus_14229_Transcript_1/1_Conf_1.000 | 197  | 0  |           |                |    |         |     |     |                                                                               |
| Locus_1423_Transcript_1/1_Conf_1.000  | 1472 | 20 | 1.30E-115 | NP_001024665.1 | 67 | 421.394 | 449 | 303 | SynDaPiN (synaptic dynamin binding<br>protein) homolog family member (sdpn-1) |
| Locus_14230_Transcript_1/1_Conf_1.000 | 443  | 20 | 6.07E-15  | XP_001520430.1 | 62 | 83.9593 | 80  | 50  | PREDICTED: similar to N-<br>acetylglucosaminyltransferase V, partial          |
| Locus_14231_Transcript_1/1_Conf_1.000 | 505  | 0  |           |                |    |         |     |     |                                                                               |
| Locus_14232_Transcript_1/1_Conf_1.000 | 285  | 20 | 2.31E-22  | NP_491075.2    | 77 | 108.612 | 94  | 73  | hypothetical protein Y71F9AL.1                                                |
| Locus_14233_Transcript_1/1_Conf_1.000 | 523  | 0  |           |                |    |         |     |     |                                                                               |
| Locus_14234_Transcript_1/1_Conf_1.000 | 741  | 20 | 2.38E-37  | XP_001900728.1 | 51 | 159.844 | 269 | 139 | RhoGAP domain containing protein                                              |
| Locus_14235_Transcript_1/1_Conf_1.000 | 805  | 20 | 8.46E-10  | XP_862879.1    | 44 | 68.5514 | 218 | 97  | PREDICTED: similar to Syntaxin-18 isoform 4                                   |

|                                       |      |    |          |                |    |         |     |     |                                 |
|---------------------------------------|------|----|----------|----------------|----|---------|-----|-----|---------------------------------|
| Locus_14236_Transcript_1/1_Conf_1.000 | 250  | 20 | 2.09E-36 | AAH02110.2     | 98 | 155.221 | 75  | 74  | Rpl24 protein                   |
| Locus_14237_Transcript_1/1_Conf_1.000 | 283  | 3  | 4.99E-25 | NP_001041206.1 | 75 | 117.472 | 96  | 72  | hypothetical protein ZC487.1    |
| Locus_14238_Transcript_1/1_Conf_1.000 | 361  | 20 | 8.32E-09 | EFO24006.1     | 61 | 63.5438 | 72  | 44  | hypothetical protein LOAG_04478 |
| Locus_14239_Transcript_1/3_Conf_0.600 | 780  | 20 | 5.95E-90 | XP_002631584.1 | 82 | 334.724 | 264 | 219 | Hypothetical protein CBG20762   |
| Locus_14239_Transcript_2/3_Conf_0.600 | 781  | 20 | 5.95E-90 | XP_002631584.1 | 82 | 334.724 | 264 | 219 | Hypothetical protein CBG20762   |
| Locus_14239_Transcript_3/3_Conf_0.600 | 781  | 20 | 5.95E-90 | XP_002631584.1 | 82 | 334.724 | 264 | 219 | Hypothetical protein CBG20762   |
| Locus_1424_Transcript_1/2_Conf_1.000  | 1073 | 5  | 1.70E-36 | XP_002641061.1 | 72 | 157.918 | 154 | 112 | Hypothetical protein CBG22473   |
| Locus_1424_Transcript_2/2_Conf_1.000  | 1152 | 5  | 1.90E-36 | XP_002641061.1 | 72 | 157.918 | 154 | 112 | Hypothetical protein CBG22473   |
| Locus_14240_Transcript_1/1_Conf_1.000 | 765  | 20 | 1.20E-55 | XP_002631403.1 | 70 | 220.705 | 220 | 154 | Hypothetical protein CBG03253   |
| Locus_14241_Transcript_1/1_Conf_1.000 | 824  | 0  |          |                |    |         |     |     |                                 |
| Locus_14242_Transcript_1/1_Conf_1.000 | 364  | 0  |          |                |    |         |     |     |                                 |
| Locus_14243_Transcript_1/1_Conf_1.000 | 284  | 0  |          |                |    |         |     |     |                                 |
| Locus_14244_Transcript_1/1_Conf_1.000 | 202  | 4  | 2.61E-10 | NP_499313.2    | 70 | 68.5514 | 67  | 47  | hypothetical protein F43D9.1    |

|                                       |     |    |          |            |     |         |     |     |                         |
|---------------------------------------|-----|----|----------|------------|-----|---------|-----|-----|-------------------------|
| Locus_14245_Transcript_1/1_Conf_1.000 | 373 | 20 | 6.17E-68 | BAG59411.1 | 100 | 259.996 | 119 | 119 | unnamed protein product |
| Locus_14246_Transcript_1/1_Conf_1.000 | 337 | 20 | 6.47E-62 | CAA68491.1 | 100 | 239.965 | 112 | 112 | glutathione peroxidase  |
| Locus_14247_Transcript_1/1_Conf_1.000 | 326 | 0  |          |            |     |         |     |     |                         |

|                                       |      |    |           |                |     |         |     |     |                                                                        |
|---------------------------------------|------|----|-----------|----------------|-----|---------|-----|-----|------------------------------------------------------------------------|
| Locus_14248_Transcript_1/1_Conf_1.000 | 198  | 20 | 5.07E-30  | XP_002923753.1 | 100 | 134.035 | 65  | 65  | PREDICTED: rRNA 2'-O-methyltransferase fibrillar-like                  |
| Locus_14249_Transcript_1/1_Conf_1.000 | 741  | 20 | 2.65E-12  | XP_002416765.1 | 49  | 76.6406 | 147 | 73  | Sin3p-Rpd3p histone-deacetylase complex, DNA binding subunit, putative |
| Locus_1425_Transcript_1/1_Conf_1.000  | 356  | 7  | 2.79E-04  | XP_002782358.1 | 69  | 48.521  | 42  | 29  | conserved hypothetical protein                                         |
| Locus_14250_Transcript_1/1_Conf_1.000 | 483  | 0  |           |                |     |         |     |     |                                                                        |
| Locus_14251_Transcript_1/1_Conf_1.000 | 377  | 20 | 3.87E-54  | XP_002638687.1 | 93  | 214.157 | 124 | 116 | Hypothetical protein CBG11882                                          |
| Locus_14252_Transcript_1/1_Conf_1.000 | 317  | 0  |           |                |     |         |     |     |                                                                        |
| Locus_14253_Transcript_1/1_Conf_1.000 | 258  | 0  |           |                |     |         |     |     |                                                                        |
| Locus_14254_Transcript_1/2_Conf_1.000 | 464  | 0  |           |                |     |         |     |     |                                                                        |
| Locus_14254_Transcript_2/2_Conf_1.000 | 351  | 0  |           |                |     |         |     |     |                                                                        |
| Locus_14255_Transcript_1/1_Conf_1.000 | 253  | 0  |           |                |     |         |     |     |                                                                        |
| Locus_14256_Transcript_1/1_Conf_1.000 | 181  | 0  |           |                |     |         |     |     |                                                                        |
| Locus_14257_Transcript_1/1_Conf_1.000 | 626  | 0  |           |                |     |         |     |     |                                                                        |
| Locus_14258_Transcript_1/1_Conf_1.000 | 465  | 20 | 3.63E-44  | NP_490714.1    | 87  | 181.03  | 107 | 94  | hypothetical protein C53D5.5                                           |
| Locus_14259_Transcript_1/1_Conf_1.000 | 546  | 20 | 6.91E-51  | XP_002631157.1 | 85  | 203.756 | 144 | 123 | C. briggsae CBR-RPN-9 protein                                          |
| Locus_1426_Transcript_1/1_Conf_1.000  | 180  | 0  |           |                |     |         |     |     |                                                                        |
| Locus_14260_Transcript_1/1_Conf_1.000 | 131  | 0  |           |                |     |         |     |     |                                                                        |
| Locus_14261_Transcript_1/1_Conf_1.000 | 195  | 0  |           |                |     |         |     |     |                                                                        |
| Locus_14262_Transcript_1/1_Conf_1.000 | 354  | 0  |           |                |     |         |     |     |                                                                        |
| Locus_14263_Transcript_1/1_Conf_1.000 | 341  | 20 | 5.14E-35  | XP_002639310.1 | 87  | 150.599 | 113 | 99  | Hypothetical protein CBG03881                                          |
| Locus_14264_Transcript_1/1_Conf_1.000 | 178  | 0  |           |                |     |         |     |     |                                                                        |
| Locus_14265_Transcript_1/1_Conf_1.000 | 154  | 0  |           |                |     |         |     |     |                                                                        |
| Locus_14266_Transcript_1/1_Conf_1.000 | 1401 | 20 | 4.04E-111 | XP_002631389.1 | 75  | 406.371 | 319 | 241 | C. briggsae CBR-OOC-5 protein                                          |
| Locus_14267_Transcript_1/1_Conf_1.000 | 676  | 1  | 7.48E-05  | NP_505951.1    | 68  | 51.6026 | 89  | 61  | hypothetical protein T27F2.4                                           |
| Locus_14268_Transcript_1/1_Conf_1.000 | 138  | 0  |           |                |     |         |     |     |                                                                        |
| Locus_14269_Transcript_1/1_Conf_1.000 | 363  | 3  | 1.01E-06  | NP_507800.2    | 70  | 56.6102 | 50  | 35  | hypothetical protein B0399.1                                           |

|                                       |      |    |           |                |    |         |     |     |                                                    |
|---------------------------------------|------|----|-----------|----------------|----|---------|-----|-----|----------------------------------------------------|
| Locus_1427_Transcript_1/1_Conf_1.000  | 1976 | 20 | 9.60E-144 | NP_001033327.1 | 71 | 515.383 | 500 | 359 | CAN cell Migration defective family member (cam-1) |
| Locus_14270_Transcript_1/1_Conf_1.000 | 175  | 14 | 4.71E-12  | NP_505743.1    | 78 | 74.3294 | 56  | 44  | hypothetical protein F28H7.3                       |
| Locus_14271_Transcript_1/1_Conf_1.000 | 284  | 0  |           |                |    |         |     |     |                                                    |
| Locus_14272_Transcript_1/1_Conf_1.000 | 203  | 0  |           |                |    |         |     |     |                                                    |
| Locus_14273_Transcript_1/1_Conf_1.000 | 212  | 6  | 9.51E-05  | NP_001122663.1 | 59 | 50.0618 | 66  | 39  | hypothetical protein Y53F4B.39                     |
| Locus_14274_Transcript_1/1_Conf_1.000 | 416  | 20 | 5.15E-35  | XP_002634297.1 | 87 | 150.599 | 109 | 95  | Hypothetical protein CBG17635                      |
| Locus_14275_Transcript_1/1_Conf_1.000 | 408  | 0  |           |                |    |         |     |     |                                                    |
| Locus_14276_Transcript_1/1_Conf_1.000 | 725  | 20 | 2.45E-100 | NP_491653.2    | 84 | 369.007 | 241 | 203 | hypothetical protein F55F8.3                       |
| Locus_14277_Transcript_1/1_Conf_1.000 | 222  | 0  |           |                |    |         |     |     |                                                    |
| Locus_14278_Transcript_1/2_Conf_1.000 | 202  | 0  |           |                |    |         |     |     |                                                    |
| Locus_14278_Transcript_2/2_Conf_1.000 | 154  | 0  |           |                |    |         |     |     |                                                    |
| Locus_14279_Transcript_1/1_Conf_1.000 | 182  | 0  |           |                |    |         |     |     |                                                    |
| Locus_1428_Transcript_1/1_Conf_1.000  | 226  | 0  |           |                |    |         |     |     |                                                    |
| Locus_14280_Transcript_1/1_Conf_1.000 | 301  | 0  |           |                |    |         |     |     |                                                    |
| Locus_14281_Transcript_1/1_Conf_1.000 | 910  | 20 | 2.16E-39  | EFO22896.1     | 62 | 167.162 | 260 | 163 | hypothetical protein LOAG_05591                    |
| Locus_14282_Transcript_1/1_Conf_1.000 | 461  | 20 | 3.68E-41  | CAD44516.1     | 76 | 171.014 | 152 | 117 | VAB-10B protein                                    |

|                                       |     |    |          |                |     |         |     |     |                                                                   |
|---------------------------------------|-----|----|----------|----------------|-----|---------|-----|-----|-------------------------------------------------------------------|
| Locus_14283_Transcript_1/1_Conf_1.000 | 177 | 7  | 4.39E-10 | NP_509266.1    | 72  | 67.781  | 58  | 42  | hypothetical protein F48E3.2                                      |
| Locus_14284_Transcript_1/1_Conf_1.000 | 582 | 4  | 6.42E-19 | NP_491128.4    | 57  | 97.8265 | 192 | 111 | Conserved Oligomeric Golgi (COG) Component family member (cogc-1) |
| Locus_14285_Transcript_1/1_Conf_1.000 | 460 | 20 | 2.48E-13 | XP_001380323.1 | 53  | 78.5666 | 132 | 71  | PREDICTED: hypothetical protein                                   |
| Locus_14286_Transcript_1/1_Conf_1.000 | 622 | 0  |          |                |     |         |     |     |                                                                   |
| Locus_14287_Transcript_1/1_Conf_1.000 | 263 | 0  |          |                |     |         |     |     |                                                                   |
| Locus_14288_Transcript_1/1_Conf_1.000 | 407 | 20 | 2.34E-27 | XP_002630954.1 | 69  | 125.176 | 143 | 100 | C. briggsae CBR-TAG-184 protein                                   |
| Locus_14289_Transcript_1/1_Conf_1.000 | 249 | 20 | 4.99E-22 | XP_001902912.1 | 82  | 107.457 | 80  | 66  | aminotransferase, class V family protein                          |
| Locus_1429_Transcript_1/1_Conf_1.000  | 524 | 20 | 2.06E-67 | CAR63531.1     | 93  | 258.455 | 147 | 138 | putative Prion-like-(Q/N-rich)-domain-bearing protein             |
| Locus_14290_Transcript_1/1_Conf_1.000 | 193 | 20 | 1.49E-13 | XP_002762172.1 | 100 | 79.337  | 38  | 38  | PREDICTED: 26S protease regulatory subunit 6B                     |
| Locus_14291_Transcript_1/1_Conf_1.000 | 329 | 0  |          |                |     |         |     |     |                                                                   |
| Locus_14292_Transcript_1/2_Conf_1.000 | 922 | 20 | 5.23E-65 | XP_002648431.1 | 84  | 252.292 | 217 | 183 | C. briggsae CBR-LPD-8 protein                                     |
| Locus_14292_Transcript_2/2_Conf_1.000 | 922 | 20 | 5.23E-65 | XP_002648431.1 | 84  | 252.292 | 217 | 183 | C. briggsae CBR-LPD-8 protein                                     |
| Locus_14293_Transcript_1/2_Conf_1.000 | 442 | 3  | 9.07E-11 | NP_001023436.1 | 55  | 70.0922 | 128 | 71  | hypothetical protein Y37E11AL.3                                   |
| Locus_14293_Transcript_2/2_Conf_1.000 | 442 | 3  | 9.07E-11 | NP_001023436.1 | 55  | 70.0922 | 128 | 71  | hypothetical protein Y37E11AL.3                                   |
| Locus_14294_Transcript_1/1_Conf_1.000 | 458 | 4  | 2.50E-13 | XP_002640105.1 | 52  | 78.5666 | 149 | 78  | C. briggsae CBR-MUT-2 protein                                     |
| Locus_14295_Transcript_1/1_Conf_1.000 | 551 | 20 | 1.02E-25 | NP_498886.2    | 53  | 120.168 | 163 | 88  | hypothetical protein C06E1.3                                      |
| Locus_14296_Transcript_1/1_Conf_1.000 | 372 | 0  |          |                |     |         |     |     |                                                                   |
| Locus_14297_Transcript_1/1_Conf_1.000 | 279 | 1  | 2.85E-09 | EAX01292.1     | 72  | 65.0846 | 47  | 34  | hCG1648136                                                        |
| Locus_14298_Transcript_1/1_Conf_1.000 | 177 | 0  |          |                |     |         |     |     |                                                                   |
| Locus_14299_Transcript_1/1_Conf_1.000 | 185 | 0  |          |                |     |         |     |     |                                                                   |



|                                       |      |    |           |                |    |         |      |     |                                                    |
|---------------------------------------|------|----|-----------|----------------|----|---------|------|-----|----------------------------------------------------|
| Locus_143_Transcript_1/4_Conf_0.727   | 3170 | 20 | 0         | AAM73861.1     | 85 | 1433.31 | 1045 | 889 | AF457202_1putative serine/threonine protein kinase |
| Locus_143_Transcript_2/4_Conf_0.727   | 3347 | 20 | 0         | AAM73859.1     | 91 | 1497.26 | 963  | 884 | AF457200_1putative serine/threonine protein kinase |
| Locus_143_Transcript_3/4_Conf_0.727   | 3251 | 20 | 0         | AAM73861.1     | 91 | 1519.6  | 1030 | 940 | AF457202_1putative serine/threonine protein kinase |
| Locus_143_Transcript_4/4_Conf_0.727   | 3125 | 20 | 0         | AAM73861.1     | 86 | 1439.86 | 1030 | 895 | AF457202_1putative serine/threonine protein kinase |
| Locus_1430_Transcript_1/1_Conf_1.000  | 539  | 3  | 3.83E-43  | XP_002633338.1 | 77 | 177.948 | 144  | 112 | Hypothetical protein CBG06077                      |
| Locus_14300_Transcript_1/1_Conf_1.000 | 206  | 0  |           |                |    |         |      |     |                                                    |
| Locus_14301_Transcript_1/1_Conf_1.000 | 205  | 0  |           |                |    |         |      |     |                                                    |
| Locus_14302_Transcript_1/1_Conf_1.000 | 265  | 0  |           |                |    |         |      |     |                                                    |
| Locus_14303_Transcript_1/1_Conf_1.000 | 1465 | 20 | 1.09E-21  | NP_001090490.1 | 66 | 109.383 | 89   | 59  | inhibitor of growth family, member 1-like          |
| Locus_14304_Transcript_1/1_Conf_1.000 | 146  | 17 | 1.37E-14  | A8WQT4.2       | 92 | 82.8037 | 42   | 39  | Calcium uptake protein 1 homolog                   |
| Locus_14305_Transcript_1/1_Conf_1.000 | 247  | 1  | 7.26E-05  | NP_502613.2    | 56 | 50.447  | 80   | 45  | QUInine non-avoider family member (qui-1)          |
| Locus_14306_Transcript_1/1_Conf_1.000 | 838  | 20 | 2.56E-113 | XP_002640628.1 | 84 | 412.535 | 279  | 236 | C. briggsae CBR-EAT-18 protein                     |
| Locus_14307_Transcript_1/1_Conf_1.000 | 377  | 0  |           |                |    |         |      |     |                                                    |
| Locus_14308_Transcript_1/1_Conf_1.000 | 323  | 5  | 1.03E-06  | XP_001893560.1 | 74 | 56.6102 | 47   | 35  | hypothetical protein Bm1_10440                     |
| Locus_14309_Transcript_1/1_Conf_1.000 | 224  | 0  |           |                |    |         |      |     |                                                    |

|                                       |     |    |          |                |    |         |     |     |                                                                      |
|---------------------------------------|-----|----|----------|----------------|----|---------|-----|-----|----------------------------------------------------------------------|
| Locus_1431_Transcript_1/1_Conf_1.000  | 755 | 20 | 3.72E-70 | XP_002640472.1 | 82 | 268.855 | 214 | 177 | C. briggsae CBR-RPS-6 protein                                        |
| Locus_14310_Transcript_1/2_Conf_1.000 | 997 | 20 | 1.02E-56 | NP_741459.2    | 61 | 224.942 | 326 | 202 | WASP (actin cytoskeleton modulator)<br>homolog family member (wsp-1) |
| Locus_14310_Transcript_2/2_Conf_1.000 | 988 | 20 | 1.44E-55 | NP_741459.2    | 60 | 221.09  | 323 | 197 | WASP (actin cytoskeleton modulator)<br>homolog family member (wsp-1) |
| Locus_14311_Transcript_1/1_Conf_1.000 | 172 | 0  |          |                |    |         |     |     |                                                                      |
| Locus_14312_Transcript_1/1_Conf_1.000 | 174 | 0  |          |                |    |         |     |     |                                                                      |
| Locus_14313_Transcript_1/1_Conf_1.000 | 500 | 3  | 8.50E-38 | NP_493074.2    | 77 | 159.844 | 132 | 102 | hypothetical protein R05D7.1                                         |
| Locus_14314_Transcript_1/1_Conf_1.000 | 144 | 0  |          |                |    |         |     |     |                                                                      |
| Locus_14315_Transcript_1/1_Conf_1.000 | 256 | 2  | 1.72E-09 | EFO18967.1     | 61 | 65.855  | 85  | 52  | LIM domain-containing protein                                        |
| Locus_14316_Transcript_1/1_Conf_1.000 | 624 | 0  |          |                |    |         |     |     |                                                                      |

|                                       |      |    |           |                |     |         |     |     |                                                     |
|---------------------------------------|------|----|-----------|----------------|-----|---------|-----|-----|-----------------------------------------------------|
| Locus_14317_Transcript_1/1_Conf_1.000 | 238  | 20 | 5.43E-08  | XP_002930758.1 | 100 | 60.8474 | 45  | 45  | PREDICTED: melanoma-associated antigen D1-like      |
| Locus_14318_Transcript_1/2_Conf_1.000 | 651  | 0  |           |                |     |         |     |     |                                                     |
| Locus_14318_Transcript_2/2_Conf_1.000 | 636  | 0  |           |                |     |         |     |     |                                                     |
| Locus_14319_Transcript_1/1_Conf_1.000 | 1110 | 20 | 1.27E-106 | NP_497939.2    | 76  | 390.963 | 341 | 260 | Suppressor/Enhancer of Lin-12 family member (sel-2) |
| Locus_1432_Transcript_1/1_Conf_1.000  | 1709 | 20 | 3.59E-168 | NP_502152.3    | 77  | 596.275 | 470 | 362 | Cytochrome P450 family member (cyp-31A2)            |
| Locus_14320_Transcript_1/2_Conf_1.000 | 352  | 20 | 1.06E-19  | XP_001900152.1 | 62  | 99.7525 | 114 | 71  | Actin family protein                                |
| Locus_14320_Transcript_2/2_Conf_1.000 | 427  | 20 | 2.69E-23  | XP_002629986.1 | 81  | 111.694 | 79  | 64  | Hypothetical protein CBG13348                       |
| Locus_14321_Transcript_1/1_Conf_1.000 | 853  | 20 | 1.81E-37  | NP_496498.1    | 68  | 160.614 | 183 | 125 | hypothetical protein C47D12.8                       |
| Locus_14322_Transcript_1/1_Conf_1.000 | 973  | 20 | 1.76E-82  | XP_002638826.1 | 73  | 310.457 | 326 | 240 | Hypothetical protein CBG22031                       |
| Locus_14323_Transcript_1/1_Conf_1.000 | 512  | 20 | 9.41E-43  | ACI49172.1     | 68  | 176.407 | 168 | 115 | hypothetical protein Csp3_JD01.004                  |
| Locus_14324_Transcript_1/1_Conf_1.000 | 156  | 0  |           |                |     |         |     |     |                                                     |
| Locus_14325_Transcript_1/1_Conf_1.000 | 235  | 0  |           |                |     |         |     |     |                                                     |
| Locus_14326_Transcript_1/1_Conf_1.000 | 772  | 0  |           |                |     |         |     |     |                                                     |
| Locus_14327_Transcript_1/1_Conf_1.000 | 469  | 4  | 2.70E-15  | XP_002639461.1 | 62  | 85.1149 | 91  | 57  | Hypothetical protein CBG04056                       |
| Locus_14328_Transcript_1/1_Conf_1.000 | 213  | 0  |           |                |     |         |     |     |                                                     |
| Locus_14329_Transcript_1/1_Conf_1.000 | 620  | 0  |           |                |     |         |     |     |                                                     |
| Locus_1433_Transcript_1/1_Conf_1.000  | 202  | 20 | 8.38E-17  | XP_002634622.1 | 77  | 90.1225 | 67  | 52  | Hypothetical protein CBG18478                       |
| Locus_14330_Transcript_1/1_Conf_1.000 | 534  | 0  |           |                |     |         |     |     |                                                     |
| Locus_14331_Transcript_1/1_Conf_1.000 | 229  | 0  |           |                |     |         |     |     |                                                     |

|                                       |      |    |           |                |     |         |     |     |                                 |
|---------------------------------------|------|----|-----------|----------------|-----|---------|-----|-----|---------------------------------|
| Locus_14332_Transcript_1/1_Conf_1.000 | 261  | 20 | 3.41E-34  | NP_504245.3    | 95  | 147.902 | 86  | 82  | hypothetical protein Y61A9LA.10 |
| Locus_14333_Transcript_1/1_Conf_1.000 | 188  | 0  |           |                |     |         |     |     |                                 |
| Locus_14334_Transcript_1/1_Conf_1.000 | 816  | 20 | 8.97E-100 | NP_001022287.1 | 79  | 367.466 | 272 | 216 | hypothetical protein R53.1      |
| Locus_14335_Transcript_1/1_Conf_1.000 | 368  | 20 | 9.69E-34  | XP_002639434.1 | 82  | 146.362 | 112 | 92  | Hypothetical protein CBG04027   |
| Locus_14336_Transcript_1/1_Conf_1.000 | 442  | 20 | 9.91E-50  | AAB59518.1     | 100 | 199.519 | 100 | 100 | apolipoprotein E                |
| Locus_14337_Transcript_1/1_Conf_1.000 | 578  | 20 | 7.50E-65  | NP_001023936.1 | 81  | 250.366 | 192 | 157 | hypothetical protein F46B6.6    |
| Locus_14338_Transcript_1/1_Conf_1.000 | 180  | 0  |           |                |     |         |     |     |                                 |
| Locus_14339_Transcript_1/1_Conf_1.000 | 165  | 0  |           |                |     |         |     |     |                                 |
| Locus_1434_Transcript_1/2_Conf_1.000  | 1010 | 1  | 2.68E-04  | XP_001899348.1 | 64  | 50.8322 | 54  | 35  | Probable coatomer beta' subunit |

|                                       |     |    |          |                |     |         |     |     |                                                                          |
|---------------------------------------|-----|----|----------|----------------|-----|---------|-----|-----|--------------------------------------------------------------------------|
| Locus_1434_Transcript_2/2_Conf_1.000  | 959 | 1  | 2.45E-04 | XP_001899348.1 | 64  | 50.8322 | 54  | 35  | Probable coatomer beta' subunit                                          |
| Locus_14340_Transcript_1/1_Conf_1.000 | 341 | 20 | 2.30E-51 | XP_002638788.1 | 91  | 204.912 | 113 | 103 | Hypothetical protein CBG05143                                            |
| Locus_14341_Transcript_1/1_Conf_1.000 | 574 | 0  |          |                |     |         |     |     |                                                                          |
| Locus_14342_Transcript_1/1_Conf_1.000 | 192 | 0  |          |                |     |         |     |     |                                                                          |
| Locus_14343_Transcript_1/1_Conf_1.000 | 293 | 6  | 9.98E-18 | Q8IOP7.3       | 75  | 93.2041 | 84  | 63  | Probable 3',5'-cyclic phosphodiesterase pde-3                            |
| Locus_14344_Transcript_1/1_Conf_1.000 | 355 | 0  |          |                |     |         |     |     |                                                                          |
| Locus_14345_Transcript_1/1_Conf_1.000 | 305 | 6  | 8.61E-14 | ADI24640.1     | 57  | 80.1073 | 96  | 55  | Hypothetical protein C56E6.9                                             |
| Locus_14346_Transcript_1/1_Conf_1.000 | 175 | 0  |          |                |     |         |     |     |                                                                          |
| Locus_14347_Transcript_1/1_Conf_1.000 | 221 | 20 | 9.07E-35 | XP_002759394.1 | 100 | 149.828 | 73  | 73  | PREDICTED: polyadenylate-binding protein 1-like                          |
| Locus_14348_Transcript_1/1_Conf_1.000 | 217 | 20 | 1.45E-13 | ADI61822.1     | 68  | 79.337  | 69  | 47  | endonuclease-reverse transcriptase                                       |
| Locus_14349_Transcript_1/1_Conf_1.000 | 144 | 0  |          |                |     |         |     |     |                                                                          |
| Locus_1435_Transcript_1/1_Conf_1.000  | 718 | 0  |          |                |     |         |     |     |                                                                          |
| Locus_14350_Transcript_1/1_Conf_1.000 | 485 | 20 | 1.26E-28 | NP_001076607.1 | 69  | 129.413 | 116 | 81  | hypothetical protein K12C11.6                                            |
| Locus_14351_Transcript_1/1_Conf_1.000 | 260 | 0  |          |                |     |         |     |     |                                                                          |
| Locus_14352_Transcript_1/1_Conf_1.000 | 723 | 20 | 7.17E-76 | AAA28103.1     | 95  | 287.73  | 185 | 176 | ras protein                                                              |
| Locus_14353_Transcript_1/2_Conf_1.000 | 663 | 20 | 1.15E-79 | BAD92215.1     | 100 | 300.056 | 145 | 145 | HLA class II histocompatibility antigen, DP beta chain precursor variant |

|                                       |      |    |           |                |     |         |     |     |                                                                          |
|---------------------------------------|------|----|-----------|----------------|-----|---------|-----|-----|--------------------------------------------------------------------------|
| Locus_14353_Transcript_2/2_Conf_1.000 | 553  | 20 | 7.35E-80  | BAD92215.1     | 100 | 300.056 | 145 | 145 | HLA class II histocompatibility antigen, DP beta chain precursor variant |
| Locus_14354_Transcript_1/1_Conf_1.000 | 258  | 20 | 9.94E-42  | BAI45345.1     | 100 | 172.94  | 85  | 85  | mannosidase, alpha, class 2B, member 1                                   |
| Locus_14355_Transcript_1/1_Conf_1.000 | 513  | 3  | 3.78E-47  | EFO27774.1     | 67  | 191.045 | 171 | 116 | rap/ran-GAP family protein                                               |
| Locus_14356_Transcript_1/1_Conf_1.000 | 686  | 20 | 5.95E-98  | XP_001894292.1 | 87  | 360.918 | 226 | 198 | cyclin-dependent kinase 7 homolog                                        |
| Locus_14357_Transcript_1/1_Conf_1.000 | 544  | 20 | 1.08E-48  | NP_504578.1    | 72  | 196.438 | 180 | 131 | hypothetical protein F17A9.4                                             |
| Locus_14358_Transcript_1/1_Conf_1.000 | 268  | 20 | 6.86E-19  | NP_505920.1    | 72  | 97.0561 | 87  | 63  | hypothetical protein C55A6.6                                             |
| Locus_14359_Transcript_1/1_Conf_1.000 | 905  | 2  | 5.43E-43  | NP_492185.2    | 59  | 179.104 | 295 | 175 | SMG-associated and Lethal family member (smgl-1)                         |
| Locus_1436_Transcript_1/2_Conf_1.000  | 1214 | 20 | 1.17E-124 | XP_002639724.1 | 84  | 451.055 | 354 | 299 | C. briggsae CBR-MEL-26 protein                                           |

|                                       |      |    |           |                |    |         |     |     |                                                                        |
|---------------------------------------|------|----|-----------|----------------|----|---------|-----|-----|------------------------------------------------------------------------|
| Locus_1436_Transcript_2/2_Conf_1.000  | 2114 | 20 | 2.42E-124 | XP_002639724.1 | 84 | 451.055 | 354 | 299 | C. briggsae CBR-MEL-26 protein                                         |
| Locus_14360_Transcript_1/1_Conf_1.000 | 239  | 20 | 4.71E-36  | XP_002640668.1 | 97 | 154.066 | 79  | 77  | C. briggsae CBR-UNC-54 protein                                         |
| Locus_14361_Transcript_1/1_Conf_1.000 | 534  | 8  | 2.37E-13  | NP_496318.1    | 52 | 78.9518 | 171 | 89  | ECT2 (mammalian Rho GEF) homolog family member (ect-2)                 |
| Locus_14362_Transcript_1/1_Conf_1.000 | 203  | 0  |           |                |    |         |     |     |                                                                        |
| Locus_14363_Transcript_1/1_Conf_1.000 | 333  | 2  | 2.25E-38  | NP_498952.1    | 80 | 161.77  | 111 | 89  | hypothetical protein F44E2.4                                           |
| Locus_14364_Transcript_1/1_Conf_1.000 | 225  | 0  |           |                |    |         |     |     |                                                                        |
| Locus_14365_Transcript_1/1_Conf_1.000 | 262  | 20 | 1.76E-06  | CAA85409.2     | 64 | 55.8398 | 45  | 29  | C. elegans protein D2089.2, partially confirmed by transcript evidence |
| Locus_14366_Transcript_1/1_Conf_1.000 | 373  | 11 | 4.47E-26  | NP_001021875.1 | 68 | 120.939 | 126 | 86  | Leucyl tRNA Synthetase family member (lrs-2)                           |
| Locus_14367_Transcript_1/1_Conf_1.000 | 164  | 0  |           |                |    |         |     |     |                                                                        |
| Locus_14368_Transcript_1/1_Conf_1.000 | 269  | 0  |           |                |    |         |     |     |                                                                        |
| Locus_14369_Transcript_1/1_Conf_1.000 | 697  | 20 | 2.42E-09  | XP_002631402.1 | 50 | 66.6254 | 180 | 90  | Hypothetical protein CBG03252                                          |
| Locus_1437_Transcript_1/1_Conf_1.000  | 955  | 20 | 3.37E-30  | AAA92672.1     | 68 | 136.732 | 147 | 101 | HMG CoA synthase                                                       |
| Locus_14370_Transcript_1/1_Conf_1.000 | 374  | 2  | 4.65E-07  | XP_002647555.1 | 75 | 57.7658 | 48  | 36  | Hypothetical protein CBG06641                                          |
| Locus_14371_Transcript_1/1_Conf_1.000 | 709  | 0  |           |                |    |         |     |     |                                                                        |
| Locus_14372_Transcript_1/1_Conf_1.000 | 152  | 0  |           |                |    |         |     |     |                                                                        |
| Locus_14373_Transcript_1/1_Conf_1.000 | 132  | 0  |           |                |    |         |     |     |                                                                        |
| Locus_14374_Transcript_1/1_Conf_1.000 | 1714 | 20 | 3.62E-152 | NP_496363.1    | 74 | 543.117 | 575 | 427 | LEThal family member (let-858)                                         |

|                                       |     |    |          |                |     |         |     |     |                                                        |
|---------------------------------------|-----|----|----------|----------------|-----|---------|-----|-----|--------------------------------------------------------|
| Locus_14375_Transcript_1/1_Conf_1.000 | 527 | 20 | 2.87E-32 | NP_499126.1    | 63  | 141.739 | 157 | 99  | DNA PRImase homolog family member (pri-1)              |
| Locus_14376_Transcript_1/1_Conf_1.000 | 143 | 0  |          |                |     |         |     |     |                                                        |
| Locus_14377_Transcript_1/1_Conf_1.000 | 180 | 19 | 3.97E-22 | NP_498645.1    | 86  | 107.842 | 59  | 51  | MUScle Positioning family member (mup-4)               |
| Locus_14378_Transcript_1/1_Conf_1.000 | 562 | 20 | 8.46E-47 | NP_001022572.1 | 69  | 190.274 | 195 | 136 | Elongation Factor Kinase family member (efk-1)         |
| Locus_14379_Transcript_1/1_Conf_1.000 | 271 | 0  |          |                |     |         |     |     |                                                        |
| Locus_1438_Transcript_1/1_Conf_1.000  | 219 | 20 | 1.04E-38 | XP_002762091.1 | 100 | 162.925 | 73  | 73  | PREDICTED: glucose-6-phosphate isomerase like, partial |
| Locus_14380_Transcript_1/1_Conf_1.000 | 417 | 0  |          |                |     |         |     |     |                                                        |
| Locus_14381_Transcript_1/1_Conf_1.000 | 525 | 0  |          |                |     |         |     |     |                                                        |
| Locus_14382_Transcript_1/1_Conf_1.000 | 248 | 3  | 9.49E-05 | NP_508523.1    | 55  | 50.0618 | 83  | 46  | Temporarily Assigned Gene name family member (tag-312) |
| Locus_14383_Transcript_1/1_Conf_1.000 | 509 | 20 | 1.84E-46 | NP_001021940.1 | 72  | 188.734 | 168 | 122 | hypothetical protein C08H9.3                           |
| Locus_14384_Transcript_1/1_Conf_1.000 | 401 | 0  |          |                |     |         |     |     |                                                        |
| Locus_14385_Transcript_1/1_Conf_1.000 | 231 | 20 | 2.89E-25 | XP_002639432.1 | 80  | 118.242 | 77  | 62  | C. briggsae CBR-TYR-4 protein                          |
| Locus_14386_Transcript_1/1_Conf_1.000 | 652 | 20 | 7.03E-74 | XP_001901411.1 | 70  | 280.796 | 223 | 157 | Thioredoxin family protein                             |
| Locus_14387_Transcript_1/1_Conf_1.000 | 155 | 0  |          |                |     |         |     |     |                                                        |



|                                       |      |    |          |                |    |         |     |     |                                                    |
|---------------------------------------|------|----|----------|----------------|----|---------|-----|-----|----------------------------------------------------|
| Locus_14388_Transcript_1/1_Conf_1.000 | 705  | 20 | 2.85E-66 | NP_001122776.1 | 87 | 255.758 | 148 | 130 | hypothetical protein F35G2.1                       |
| Locus_14389_Transcript_1/1_Conf_1.000 | 598  | 20 | 9.67E-66 | XP_001900850.1 | 79 | 253.447 | 198 | 157 | ERCC4 domain containing protein                    |
| Locus_1439_Transcript_1/1_Conf_1.000  | 561  | 20 | 4.50E-40 | XP_002639226.1 | 96 | 167.933 | 91  | 88  | Hypothetical protein CBG03777                      |
| Locus_14390_Transcript_1/1_Conf_1.000 | 500  | 20 | 4.24E-21 | Q61SU7.3       | 60 | 104.375 | 141 | 85  | ATP-dependent RNA helicase SUV3 homolog            |
| Locus_14391_Transcript_1/1_Conf_1.000 | 264  | 20 | 2.06E-31 | XP_002646681.1 | 91 | 138.658 | 85  | 78  | C. briggsae CBR-PRX-5 protein                      |
| Locus_14392_Transcript_1/1_Conf_1.000 | 1037 | 20 | 3.77E-17 |                | 46 | 93.5893 | 283 | 131 | hypothetical protein ZC13.1                        |
| Locus_14393_Transcript_1/2_Conf_1.000 | 398  | 0  |          |                |    |         |     |     |                                                    |
| Locus_14393_Transcript_2/2_Conf_1.000 | 398  | 0  |          |                |    |         |     |     |                                                    |
| Locus_14394_Transcript_1/1_Conf_1.000 | 563  | 20 | 2.38E-49 | XP_001901731.1 | 72 | 198.749 | 188 | 136 | Guanine nucleotide-binding protein alpha-3 subunit |

|                                       |      |    |           |                |    |         |     |     |                                                          |
|---------------------------------------|------|----|-----------|----------------|----|---------|-----|-----|----------------------------------------------------------|
| Locus_14395_Transcript_1/1_Conf_1.000 | 258  | 0  |           |                |    |         |     |     |                                                          |
| Locus_14396_Transcript_1/1_Conf_1.000 | 458  | 0  |           |                |    |         |     |     |                                                          |
| Locus_14397_Transcript_1/1_Conf_1.000 | 278  | 0  |           |                |    |         |     |     |                                                          |
| Locus_14398_Transcript_1/1_Conf_1.000 | 133  | 20 | 2.50E-13  | NP_001023736.1 | 90 | 78.5666 | 44  | 40  | Na/H exchanger family member (nhx-3)                     |
| Locus_14399_Transcript_1/1_Conf_1.000 | 139  | 0  |           |                |    |         |     |     |                                                          |
| Locus_144_Transcript_1/1_Conf_1.000   | 1533 | 20 | 0         | XP_001895190.1 | 81 | 681.404 | 483 | 396 | Receptor family ligand binding region containing protein |
| Locus_1440_Transcript_1/1_Conf_1.000  | 1065 | 20 | 1.82E-123 | XP_002637266.1 | 78 | 446.817 | 330 | 260 | Hypothetical protein CBG18949                            |
| Locus_14400_Transcript_1/1_Conf_1.000 | 172  | 0  |           |                |    |         |     |     |                                                          |
| Locus_14401_Transcript_1/1_Conf_1.000 | 262  | 0  |           |                |    |         |     |     |                                                          |
| Locus_14402_Transcript_1/1_Conf_1.000 | 369  | 20 | 6.96E-11  | NP_493178.1    | 67 | 70.4774 | 78  | 53  | hypothetical protein W02D9.3                             |
| Locus_14403_Transcript_1/1_Conf_1.000 | 208  | 0  |           |                |    |         |     |     |                                                          |
| Locus_14404_Transcript_1/1_Conf_1.000 | 767  | 0  |           |                |    |         |     |     |                                                          |
| Locus_14405_Transcript_1/3_Conf_0.667 | 518  | 1  | 2.71E-08  | NP_001122478.1 | 74 | 62.003  | 43  | 32  | hypothetical protein F45H11.3                            |
| Locus_14405_Transcript_2/3_Conf_0.667 | 525  | 1  | 2.89E-08  | NP_001122478.1 | 74 | 62.003  | 43  | 32  | hypothetical protein F45H11.3                            |
| Locus_14405_Transcript_3/3_Conf_0.667 | 534  | 1  | 3.00E-08  | NP_001122478.1 | 74 | 62.003  | 43  | 32  | hypothetical protein F45H11.3                            |
| Locus_14406_Transcript_1/1_Conf_1.000 | 238  | 0  |           |                |    |         |     |     |                                                          |
| Locus_14407_Transcript_1/1_Conf_1.000 | 243  | 0  |           |                |    |         |     |     |                                                          |
| Locus_14408_Transcript_1/2_Conf_1.000 | 509  | 20 | 3.35E-48  | NP_499553.1    | 85 | 194.512 | 123 | 105 | yeast CCR4 Associated Factor family member (ccf-1)       |

|                                       |      |    |          |                |    |         |     |     |                                                    |
|---------------------------------------|------|----|----------|----------------|----|---------|-----|-----|----------------------------------------------------|
| Locus_14408_Transcript_2/2_Conf_1.000 | 509  | 20 | 3.35E-48 | NP_499553.1    | 85 | 194.512 | 123 | 105 | yeast CCR4 Associated Factor family member (ccf-1) |
| Locus_14409_Transcript_1/1_Conf_1.000 | 351  | 5  | 1.14E-13 | XP_002639084.1 | 65 | 79.7221 | 88  | 58  | Hypothetical protein CBG14902                      |
| Locus_1441_Transcript_1/1_Conf_1.000  | 856  | 20 | 8.07E-86 | NP_499133.1    | 98 | 321.242 | 162 | 160 | UBiquitin Conjugating enzyme family member (ubc-7) |
| Locus_14410_Transcript_1/1_Conf_1.000 | 432  | 20 | 6.54E-38 | NP_498982.1    | 80 | 160.229 | 111 | 89  | hypothetical protein R08D7.1                       |
| Locus_14411_Transcript_1/1_Conf_1.000 | 1595 | 20 | 0        | XP_002643273.1 | 85 | 742.265 | 523 | 447 | C. briggsae CBR-MRP-1 protein                      |
| Locus_14412_Transcript_1/1_Conf_1.000 | 539  | 18 | 5.31E-69 | XP_002640063.1 | 90 | 263.848 | 166 | 151 | Hypothetical protein CBG12545                      |
| Locus_14413_Transcript_1/1_Conf_1.000 | 767  | 20 | 1.62E-52 | EFO24017.1     | 65 | 210.305 | 238 | 157 | hypothetical protein LOAG_04469                    |
| Locus_14414_Transcript_1/1_Conf_1.000 | 1089 | 4  | 2.69E-53 | NP_509401.2    | 54 | 213.772 | 339 | 184 | hypothetical protein R09F10.3                      |
| Locus_14415_Transcript_1/1_Conf_1.000 | 310  | 0  |          |                |    |         |     |     |                                                    |
| Locus_14416_Transcript_1/1_Conf_1.000 | 128  | 0  |          |                |    |         |     |     |                                                    |
| Locus_14417_Transcript_1/1_Conf_1.000 | 257  | 19 | 5.50E-24 | EFO18138.1     | 83 | 114.005 | 85  | 71  | hypothetical protein LOAG_10361                    |

|                                       |      |    |          |                |    |         |     |     |                                                                 |
|---------------------------------------|------|----|----------|----------------|----|---------|-----|-----|-----------------------------------------------------------------|
| Locus_14418_Transcript_1/1_Conf_1.000 | 318  | 4  | 2.55E-05 | XP_001895677.1 | 86 | 51.9878 | 36  | 31  | Actin family protein                                            |
| Locus_14419_Transcript_1/1_Conf_1.000 | 451  | 20 | 2.25E-62 | EFO28147.1     | 98 | 241.506 | 120 | 118 | pre-mRNA splicing factor PRP8                                   |
| Locus_1442_Transcript_1/1_Conf_1.000  | 1047 | 20 | 1.13E-45 | NP_495323.1    | 56 | 188.348 | 352 | 199 | Temporarily Assigned Gene name family member (tag-184)          |
| Locus_14420_Transcript_1/1_Conf_1.000 | 152  | 2  | 8.52E-09 | XP_002629821.1 | 81 | 63.5438 | 48  | 39  | C. briggsae CBR-SQV-8 protein                                   |
| Locus_14421_Transcript_1/2_Conf_1.000 | 448  | 0  |          |                |    |         |     |     |                                                                 |
| Locus_14421_Transcript_2/2_Conf_1.000 | 448  | 0  |          |                |    |         |     |     |                                                                 |
| Locus_14422_Transcript_1/1_Conf_1.000 | 168  | 20 | 5.60E-13 | XP_001607068.1 | 81 | 77.411  | 60  | 49  | PREDICTED: similar to polyribonucleotide nucleotidyltransferase |
| Locus_14423_Transcript_1/1_Conf_1.000 | 664  | 2  | 1.44E-11 | NP_492348.1    | 51 | 73.559  | 117 | 60  | hypothetical protein K07A12.2                                   |
| Locus_14424_Transcript_1/1_Conf_1.000 | 502  | 20 | 1.03E-22 | XP_002639569.1 | 82 | 109.768 | 112 | 92  | Hypothetical protein CBG04200                                   |
| Locus_14425_Transcript_1/2_Conf_1.000 | 666  | 20 | 4.07E-32 | XP_002640276.1 | 72 | 142.124 | 177 | 128 | Hypothetical protein CBG12801                                   |
| Locus_14425_Transcript_2/2_Conf_1.000 | 587  | 20 | 1.11E-34 | XP_002640276.1 | 72 | 150.214 | 170 | 123 | Hypothetical protein CBG12801                                   |
| Locus_14426_Transcript_1/1_Conf_1.000 | 558  | 0  |          |                |    |         |     |     |                                                                 |
| Locus_14427_Transcript_1/1_Conf_1.000 | 813  | 20 | 5.00E-18 | XP_001623641.1 | 37 | 95.9005 | 264 | 99  | predicted protein                                               |
| Locus_14428_Transcript_1/1_Conf_1.000 | 264  | 0  |          |                |    |         |     |     |                                                                 |
| Locus_14429_Transcript_1/1_Conf_1.000 | 573  | 20 | 8.19E-48 | CBA11992.1     | 62 | 193.741 | 191 | 120 | endonuclease-reverse transcriptase HmRTE-e01                    |
| Locus_1443_Transcript_1/1_Conf_1.000  | 681  | 20 | 1.58E-34 | NP_498150.1    | 64 | 150.214 | 170 | 110 | hypothetical protein Y32H12A.7                                  |
| Locus_14430_Transcript_1/1_Conf_1.000 | 277  | 4  | 3.61E-12 | XP_001896695.1 | 62 | 74.7146 | 91  | 57  | Hr1 repeat family protein                                       |
| Locus_14431_Transcript_1/1_Conf_1.000 | 337  | 0  |          |                |    |         |     |     |                                                                 |

|                                       |      |    |          |                |     |         |     |     |                                                                                       |
|---------------------------------------|------|----|----------|----------------|-----|---------|-----|-----|---------------------------------------------------------------------------------------|
| Locus_14432_Transcript_1/1_Conf_1.000 | 241  | 3  | 2.42E-16 | EFO23234.1     | 69  | 88.5817 | 66  | 46  | hypothetical protein LOAG_05253                                                       |
| Locus_14433_Transcript_1/1_Conf_1.000 | 219  | 20 | 4.50E-34 | EAW69389.1     | 100 | 147.517 | 71  | 71  | LSM7 homolog, U6 small nuclear RNA associated ( <i>S. cerevisiae</i> ), isoform CRA_a |
| Locus_14434_Transcript_1/1_Conf_1.000 | 261  | 2  | 1.14E-05 | XP_002634568.1 | 84  | 53.1434 | 52  | 44  | Hypothetical protein CBG08374                                                         |
| Locus_14435_Transcript_1/1_Conf_1.000 | 270  | 20 | 5.04E-30 | XP_001898305.1 | 79  | 134.035 | 87  | 69  | Transmembrane 9 superfamily protein member 2 precursor, putative                      |
| Locus_14436_Transcript_1/1_Conf_1.000 | 281  | 0  |          |                |     |         |     |     |                                                                                       |
| Locus_14437_Transcript_1/1_Conf_1.000 | 338  | 0  |          |                |     |         |     |     |                                                                                       |
| Locus_14438_Transcript_1/1_Conf_1.000 | 165  | 7  | 1.17E-18 | XP_002639508.1 | 96  | 96.2857 | 51  | 49  | Hypothetical protein CBG04113                                                         |
| Locus_14439_Transcript_1/1_Conf_1.000 | 221  | 20 | 1.50E-29 | NP_494777.1    | 90  | 132.494 | 73  | 66  | MolTing defective family member (mlt-7)                                               |
| Locus_1444_Transcript_1/2_Conf_1.000  | 800  | 20 | 2.46E-78 | NP_498360.2    | 81  | 296.204 | 227 | 184 | hypothetical protein T12A2.7                                                          |
| Locus_1444_Transcript_2/2_Conf_1.000  | 800  | 20 | 2.46E-78 | NP_498360.2    | 81  | 296.204 | 227 | 184 | hypothetical protein T12A2.7                                                          |
| Locus_14440_Transcript_1/1_Conf_1.000 | 394  | 20 | 9.94E-50 | EFO26261.1     | 87  | 199.519 | 131 | 115 | hypothetical protein LOAG_02219                                                       |
| Locus_14441_Transcript_1/1_Conf_1.000 | 251  | 3  | 4.49E-39 | XP_002830960.1 | 95  | 164.081 | 83  | 79  | PREDICTED: hypothetical protein LOC100438111                                          |
| Locus_14442_Transcript_1/1_Conf_1.000 | 323  | 20 | 5.25E-43 | XP_002633186.1 | 92  | 177.178 | 104 | 96  | Hypothetical protein CBG05900                                                         |
| Locus_14443_Transcript_1/1_Conf_1.000 | 1117 | 20 | 4.32E-54 | NP_741217.1    | 67  | 216.468 | 223 | 151 | EXOSome (multiexonuclease complex) component family member (exos-9)                   |
| Locus_14444_Transcript_1/2_Conf_1.000 | 898  | 8  | 9.44E-48 | NP_871881.1    | 70  | 194.897 | 244 | 172 | hypothetical protein F30F8.9                                                          |
| Locus_14444_Transcript_2/2_Conf_1.000 | 568  | 10 | 7.43E-38 | NP_492165.1    | 65  | 160.614 | 186 | 121 | hypothetical protein F30F8.9                                                          |

|                                       |      |    |          |                |    |         |     |     |                                                     |
|---------------------------------------|------|----|----------|----------------|----|---------|-----|-----|-----------------------------------------------------|
| Locus_14445_Transcript_1/1_Conf_1.000 | 218  | 20 | 2.02E-23 | XP_001898626.1 | 88 | 112.079 | 72  | 64  | Pyruvate kinase, muscle isozyme                     |
| Locus_14446_Transcript_1/2_Conf_1.000 | 597  | 0  |          |                |    |         |     |     |                                                     |
| Locus_14446_Transcript_2/2_Conf_1.000 | 511  | 0  |          |                |    |         |     |     |                                                     |
| Locus_14447_Transcript_1/1_Conf_1.000 | 161  | 0  |          |                |    |         |     |     |                                                     |
| Locus_14448_Transcript_1/1_Conf_1.000 | 129  | 0  |          |                |    |         |     |     |                                                     |
| Locus_14449_Transcript_1/1_Conf_1.000 | 218  | 0  |          |                |    |         |     |     |                                                     |
| Locus_1445_Transcript_1/2_Conf_1.000  | 2002 | 20 | 6.72E-93 | XP_002643215.1 | 68 | 342.813 | 326 | 223 | Hypothetical protein CBG08080                       |
| Locus_1445_Transcript_2/2_Conf_1.000  | 1973 | 20 | 4.66E-98 | XP_002643215.1 | 66 | 363.614 | 365 | 242 | Hypothetical protein CBG08080                       |
| Locus_14450_Transcript_1/1_Conf_1.000 | 186  | 0  |          |                |    |         |     |     |                                                     |
| Locus_14451_Transcript_1/1_Conf_1.000 | 148  | 0  |          |                |    |         |     |     |                                                     |
| Locus_14452_Transcript_1/1_Conf_1.000 | 200  | 20 | 2.89E-17 | XP_002634283.1 | 78 | 91.6633 | 65  | 51  | C. briggsae CBR-HRS-1 protein                       |
| Locus_14453_Transcript_1/1_Conf_1.000 | 922  | 20 | 4.39E-96 | NP_509283.1    | 76 | 355.525 | 273 | 208 | APYrase family member (apy-1)                       |
| Locus_14454_Transcript_1/1_Conf_1.000 | 130  | 2  | 9.57E-05 | NP_498688.1    | 67 | 50.0618 | 43  | 29  | Prolyl Carboxy Peptidase like family member (pcp-1) |
| Locus_14455_Transcript_1/1_Conf_1.000 | 886  |    |          |                |    |         |     |     |                                                     |
| Locus_14456_Transcript_1/1_Conf_1.000 | 422  | 0  |          |                |    |         |     |     |                                                     |
| Locus_14457_Transcript_1/1_Conf_1.000 | 572  | 20 | 6.34E-69 | NP_505519.3    | 81 | 263.848 | 186 | 152 | UNCoordinated family member (unc-42)                |
| Locus_14458_Transcript_1/1_Conf_1.000 | 469  | 0  |          |                |    |         |     |     |                                                     |
| Locus_14459_Transcript_1/1_Conf_1.000 | 477  | 2  | 1.08E-08 | XP_002637934.1 | 48 | 63.1586 | 152 | 74  | Hypothetical protein CBG04746                       |

|                                       |      |    |           |                |    |         |     |     |                                                    |
|---------------------------------------|------|----|-----------|----------------|----|---------|-----|-----|----------------------------------------------------|
| Locus_1446_Transcript_1/2_Conf_1.000  | 1659 | 20 | 3.77E-160 | XP_001896639.1 | 93 | 557.755 | 309 | 289 | hypothetical protein                               |
| Locus_1446_Transcript_2/2_Conf_1.000  | 1595 | 20 | 8.91E-166 | XP_001896639.1 | 92 | 588.186 | 329 | 305 | hypothetical protein                               |
| Locus_14460_Transcript_1/1_Conf_1.000 | 381  | 20 | 5.05E-30  | NP_498764.1    | 70 | 134.035 | 125 | 88  | GTP exchange factor for ARFs family member (grp-1) |
| Locus_14461_Transcript_1/1_Conf_1.000 | 270  | 0  |           |                |    |         |     |     |                                                    |
| Locus_14462_Transcript_1/1_Conf_1.000 | 540  | 0  |           |                |    |         |     |     |                                                    |
| Locus_14463_Transcript_1/1_Conf_1.000 | 490  | 0  |           |                |    |         |     |     |                                                    |
| Locus_14464_Transcript_1/1_Conf_1.000 | 137  | 0  |           |                |    |         |     |     |                                                    |
| Locus_14465_Transcript_1/1_Conf_1.000 | 258  | 20 | 8.74E-22  | NP_506083.1    | 77 | 106.686 | 76  | 59  | hypothetical protein F55C5.8                       |
| Locus_14466_Transcript_1/1_Conf_1.000 | 324  | 0  |           |                |    |         |     |     |                                                    |
| Locus_14467_Transcript_1/1_Conf_1.000 | 166  | 20 | 2.44E-08  | ACO51818.1     | 70 | 62.003  | 55  | 39  | Rho GDP-dissociation inhibitor 2                   |
| Locus_14468_Transcript_1/1_Conf_1.000 | 262  | 0  |           |                |    |         |     |     |                                                    |

|                                       |     |    |          |                |     |         |     |     |                                                              |
|---------------------------------------|-----|----|----------|----------------|-----|---------|-----|-----|--------------------------------------------------------------|
| Locus_14469_Transcript_1/2_Conf_1.000 | 948 | 20 | 4.99E-58 | XP_002638726.1 | 73  | 229.18  | 240 | 176 | Hypothetical protein CBG00309                                |
| Locus_14469_Transcript_2/2_Conf_1.000 | 948 | 20 | 4.99E-58 | XP_002638726.1 | 73  | 229.18  | 240 | 176 | Hypothetical protein CBG00309                                |
| Locus_1447_Transcript_1/1_Conf_1.000  | 615 | 0  |          |                |     |         |     |     |                                                              |
| Locus_14470_Transcript_1/1_Conf_1.000 | 151 | 0  |          |                |     |         |     |     |                                                              |
| Locus_14471_Transcript_1/1_Conf_1.000 | 158 | 0  |          |                |     |         |     |     |                                                              |
| Locus_14472_Transcript_1/1_Conf_1.000 | 132 | 0  |          |                |     |         |     |     |                                                              |
| Locus_14473_Transcript_1/1_Conf_1.000 | 158 | 20 | 3.00E-22 | XP_002814804.1 | 100 | 108.227 | 52  | 52  | PREDICTED: insulin-like growth factor-binding protein 7-like |
| Locus_14474_Transcript_1/1_Conf_1.000 | 387 | 0  |          |                |     |         |     |     |                                                              |
| Locus_14475_Transcript_1/1_Conf_1.000 | 206 | 0  |          |                |     |         |     |     |                                                              |
| Locus_14476_Transcript_1/1_Conf_1.000 | 536 | 20 | 3.08E-37 | EFO23539.1     | 71  | 158.303 | 156 | 111 | hypothetical protein LOAG_04946                              |
| Locus_14477_Transcript_1/1_Conf_1.000 | 294 | 0  |          |                |     |         |     |     |                                                              |
| Locus_14478_Transcript_1/1_Conf_1.000 | 231 | 0  |          |                |     |         |     |     |                                                              |
| Locus_14479_Transcript_1/1_Conf_1.000 | 207 | 0  |          |                |     |         |     |     |                                                              |
| Locus_1448_Transcript_1/1_Conf_1.000  | 618 | 20 | 9.05E-57 | XP_002630759.1 | 68  | 223.787 | 206 | 141 | Hypothetical protein CBG02453                                |
| Locus_14480_Transcript_1/1_Conf_1.000 | 890 | 20 | 1.99E-66 | EFO26982.1     | 90  | 256.914 | 152 | 138 | PAR-6 protein                                                |



|                                       |     |    |          |                |    |         |     |     |                                                    |
|---------------------------------------|-----|----|----------|----------------|----|---------|-----|-----|----------------------------------------------------|
| Locus_14481_Transcript_1/1_Conf_1.000 | 708 | 20 | 8.65E-71 | NP_509361.1    | 87 | 270.781 | 195 | 171 | hypothetical protein K07E3.4                       |
| Locus_14482_Transcript_1/1_Conf_1.000 | 165 | 0  |          |                |    |         |     |     |                                                    |
| Locus_14483_Transcript_1/1_Conf_1.000 | 264 | 3  | 8.72E-06 | NP_504274.2    | 70 | 53.5286 | 50  | 35  | UDP-GlucuronosylTransferase family member (ugt-61) |
| Locus_14484_Transcript_1/1_Conf_1.000 | 183 | 20 | 5.92E-18 | NP_001022451.1 | 92 | 93.9745 | 54  | 50  | hypothetical protein Y48E1A.1                      |
| Locus_14485_Transcript_1/1_Conf_1.000 | 244 | 20 | 6.79E-19 | XP_001641772.1 | 74 | 97.0561 | 79  | 59  | predicted protein                                  |
| Locus_14486_Transcript_1/1_Conf_1.000 | 215 | 6  | 5.19E-11 | AAL56427.1     | 77 | 70.8626 | 54  | 42  | AF370722_1intracellular globin                     |
| Locus_14487_Transcript_1/1_Conf_1.000 | 416 | 0  |          |                |    |         |     |     |                                                    |
| Locus_14488_Transcript_1/1_Conf_1.000 | 484 | 0  |          |                |    |         |     |     |                                                    |
| Locus_14489_Transcript_1/1_Conf_1.000 | 630 | 20 | 6.93E-60 | XP_002637479.1 | 72 | 234.187 | 211 | 152 | Hypothetical protein CBG19196                      |
| Locus_1449_Transcript_1/1_Conf_1.000  | 667 | 0  |          |                |    |         |     |     |                                                    |
| Locus_14490_Transcript_1/1_Conf_1.000 | 248 | 3  | 1.91E-13 | XP_002647006.1 | 75 | 78.9518 | 64  | 48  | Hypothetical protein CBG22464                      |
| Locus_14491_Transcript_1/1_Conf_1.000 | 261 | 1  | 4.34E-05 | XP_001899770.1 | 54 | 51.2174 | 82  | 45  | hAT family dimerisation domain containing protein  |
| Locus_14492_Transcript_1/1_Conf_1.000 | 314 | 1  | 2.85E-04 | NP_497581.3    | 50 | 48.521  | 81  | 41  | hypothetical protein Y54F10AR.2                    |
| Locus_14493_Transcript_1/1_Conf_1.000 | 221 | 0  |          |                |    |         |     |     |                                                    |
| Locus_14494_Transcript_1/2_Conf_1.000 | 160 | 0  |          |                |    |         |     |     |                                                    |
| Locus_14494_Transcript_2/2_Conf_1.000 | 347 | 0  |          |                |    |         |     |     |                                                    |
| Locus_14495_Transcript_1/1_Conf_1.000 | 183 | 5  | 3.47E-18 | NP_001023620.1 | 81 | 94.7449 | 60  | 49  | hypothetical protein ZK792.4                       |
| Locus_14496_Transcript_1/1_Conf_1.000 | 602 | 20 | 8.42E-17 | EFO27042.1     | 46 | 90.8929 | 189 | 88  | hypothetical protein LOAG_01440                    |
| Locus_14497_Transcript_1/1_Conf_1.000 | 386 | 0  |          |                |    |         |     |     |                                                    |
| Locus_14498_Transcript_1/1_Conf_1.000 | 249 | 20 | 4.99E-22 | XP_002427316.1 | 70 | 107.457 | 81  | 57  | transportin-2, putative                            |
| Locus_14499_Transcript_1/1_Conf_1.000 | 200 | 0  |          |                |    |         |     |     |                                                    |

|                                       |      |    |          |                |    |         |     |     |                                                       |
|---------------------------------------|------|----|----------|----------------|----|---------|-----|-----|-------------------------------------------------------|
| Locus_145_Transcript_1/3_Conf_0.600   | 897  | 0  |          |                |    |         |     |     |                                                       |
| Locus_145_Transcript_2/3_Conf_0.600   | 1436 | 20 | 1.17E-12 | NP_001021459.2 | 37 | 79.337  | 359 | 134 | hypothetical protein F36H2.3                          |
| Locus_145_Transcript_3/3_Conf_0.600   | 908  | 0  |          |                |    |         |     |     |                                                       |
| Locus_1450_Transcript_1/1_Conf_1.000  | 1424 | 20 | 0        | NP_741215.1    | 83 | 681.789 | 436 | 366 | NADH Ubiquinone Oxidoreductase family member (nuo-4)  |
| Locus_14500_Transcript_1/1_Conf_1.000 | 417  | 20 | 9.98E-34 | EFO21654.1     | 70 | 146.362 | 137 | 97  | hypothetical protein LOAG_06832                       |
| Locus_14501_Transcript_1/1_Conf_1.000 | 401  | 3  | 1.39E-19 | NP_507813.1    | 62 | 99.3673 | 116 | 72  | hypothetical protein Y43F8C.13                        |
| Locus_14502_Transcript_1/1_Conf_1.000 | 264  | 9  | 5.65E-05 | NP_504738.1    | 60 | 50.8322 | 70  | 42  | COLLAGEN family member (col-143)                      |
| Locus_14503_Transcript_1/1_Conf_1.000 | 478  | 4  | 5.56E-13 | EFO24423.1     | 63 | 77.411  | 119 | 76  | hypothetical protein LOAG_04059                       |
| Locus_14504_Transcript_1/1_Conf_1.000 | 900  | 20 | 1.11E-80 | NP_503421.1    | 73 | 304.294 | 278 | 204 | Hydroxy-Acyl-CoA Dehydrogenase family member (hacd-1) |
| Locus_14505_Transcript_1/1_Conf_1.000 | 466  | 20 | 1.74E-54 | AAD45606.1     | 92 | 215.312 | 124 | 115 | galectin 3                                            |
| Locus_14506_Transcript_1/1_Conf_1.000 | 139  | 0  |          |                |    |         |     |     |                                                       |
| Locus_14507_Transcript_1/1_Conf_1.000 | 351  | 20 | 1.69E-33 | NP_496144.1    | 94 | 145.591 | 87  | 82  | hypothetical protein C05C10.3                         |
| Locus_14508_Transcript_1/1_Conf_1.000 | 190  | 20 | 6.07E-23 | CAR63575.1     | 87 | 110.538 | 63  | 55  | hypothetical protein                                  |
| Locus_14509_Transcript_1/1_Conf_1.000 | 285  | 0  |          |                |    |         |     |     |                                                       |

|                                       |      |    |          |                |    |         |     |     |                                                                   |
|---------------------------------------|------|----|----------|----------------|----|---------|-----|-----|-------------------------------------------------------------------|
| Locus_1451_Transcript_1/2_Conf_1.000  | 1673 | 20 | 5.98E-35 | XP_002635620.1 | 61 | 153.68  | 212 | 130 | Hypothetical protein CBG21813                                     |
| Locus_1451_Transcript_2/2_Conf_1.000  | 1673 | 20 | 5.98E-35 | XP_002635620.1 | 61 | 153.68  | 212 | 130 | Hypothetical protein CBG21813                                     |
| Locus_14510_Transcript_1/1_Conf_1.000 | 137  | 2  | 2.11E-12 | CAE17761.2     | 91 | 75.485  | 36  | 33  | C. elegans protein C48D5.3, confirmed by transcript evidence      |
| Locus_14511_Transcript_1/1_Conf_1.000 | 309  | 0  |          |                |    |         |     |     |                                                                   |
| Locus_14512_Transcript_1/1_Conf_1.000 | 409  | 20 | 1.50E-58 | AAH71725.1     | 97 | 228.794 | 131 | 128 | IGL@ protein                                                      |
| Locus_14513_Transcript_1/1_Conf_1.000 | 712  | 20 | 3.36E-30 | NP_499239.1    | 78 | 135.961 | 85  | 67  | hypothetical protein T16H12.4                                     |
| Locus_14514_Transcript_1/1_Conf_1.000 | 938  | 20 | 1.05E-68 | NP_499903.3    | 62 | 264.618 | 314 | 197 | Defecation Suppressor of Clk-1 family member (dsc-4)              |
| Locus_14515_Transcript_1/1_Conf_1.000 | 139  | 0  |          |                |    |         |     |     |                                                                   |
| Locus_14516_Transcript_1/1_Conf_1.000 | 556  | 0  |          |                |    |         |     |     |                                                                   |
| Locus_14517_Transcript_1/1_Conf_1.000 | 344  | 20 | 1.27E-12 | EFO18793.1     | 69 | 76.2554 | 75  | 52  | hypothetical protein LOAG_09702                                   |
| Locus_14518_Transcript_1/1_Conf_1.000 | 149  | 0  |          |                |    |         |     |     |                                                                   |
| Locus_14519_Transcript_1/1_Conf_1.000 | 197  | 0  |          |                |    |         |     |     |                                                                   |
| Locus_1452_Transcript_1/1_Conf_1.000  | 545  | 20 | 1.93E-13 | XP_001902112.1 | 95 | 79.337  | 40  | 38  | Iron-sulfur cluster assembly accessory protein                    |
| Locus_14520_Transcript_1/1_Conf_1.000 | 607  | 0  |          |                |    |         |     |     |                                                                   |
| Locus_14521_Transcript_1/1_Conf_1.000 | 208  | 20 | 1.33E-06 | XP_002739131.1 | 59 | 56.225  | 67  | 40  | PREDICTED: major facilitator superfamily domain containing 5-like |
| Locus_14522_Transcript_1/1_Conf_1.000 | 565  | 4  | 3.64E-29 | NP_510486.2    | 54 | 131.724 | 172 | 93  | hypothetical protein F20D1.3                                      |

|                                       |      |    |          |                |    |         |     |     |                                                        |
|---------------------------------------|------|----|----------|----------------|----|---------|-----|-----|--------------------------------------------------------|
| Locus_14523_Transcript_1/2_Conf_1.000 | 692  | 3  | 6.45E-07 | EFO21590.1     | 43 | 58.5362 | 211 | 92  | hypothetical protein LOAG_06899                        |
| Locus_14523_Transcript_2/2_Conf_1.000 | 692  | 4  | 2.89E-07 | EFO21590.1     | 44 | 59.6918 | 211 | 93  | hypothetical protein LOAG_06899                        |
| Locus_14524_Transcript_1/1_Conf_1.000 | 577  | 20 | 9.81E-57 | XP_002629673.1 | 82 | 223.402 | 149 | 123 | Hypothetical protein CBG00891                          |
| Locus_14525_Transcript_1/1_Conf_1.000 | 444  | 20 | 1.99E-50 | NP_492361.2    | 78 | 201.83  | 148 | 116 | RNA Polymerase II (B) subunit family member (rpb-3)    |
| Locus_14526_Transcript_1/1_Conf_1.000 | 241  | 2  | 3.87E-14 | XP_002643403.1 | 75 | 81.2629 | 58  | 44  | Hypothetical protein CBG16021                          |
| Locus_14527_Transcript_1/1_Conf_1.000 | 210  | 0  |          |                |    |         |     |     |                                                        |
| Locus_14528_Transcript_1/1_Conf_1.000 | 287  | 5  | 5.72E-05 | XP_002637333.1 | 65 | 50.8322 | 49  | 32  | C. briggsae CBR-COL-142 protein                        |
| Locus_14529_Transcript_1/1_Conf_1.000 | 684  | 20 | 6.82E-86 | NP_499668.1    | 79 | 320.857 | 228 | 181 | hypothetical protein Y37D8A.2                          |
| Locus_1453_Transcript_1/2_Conf_1.000  | 1438 | 20 | 7.44E-84 | NP_504551.3    | 82 | 315.849 | 224 | 184 | Protein Carboxymethyltransferase family member (pcm-1) |
| Locus_1453_Transcript_2/2_Conf_1.000  | 1482 | 20 | 7.78E-84 | NP_504551.3    | 82 | 315.849 | 224 | 184 | Protein Carboxymethyltransferase family member (pcm-1) |
| Locus_14530_Transcript_1/1_Conf_1.000 | 242  | 20 | 2.67E-23 | XP_002709090.1 | 83 | 111.694 | 80  | 67  | PREDICTED: N-acetyltransferase 10                      |
| Locus_14531_Transcript_1/1_Conf_1.000 | 235  | 0  |          |                |    |         |     |     |                                                        |
| Locus_14532_Transcript_1/1_Conf_1.000 | 357  | 0  |          |                |    |         |     |     |                                                        |
| Locus_14533_Transcript_1/1_Conf_1.000 | 299  | 20 | 5.05E-38 | EFO27760.1     | 83 | 160.614 | 93  | 78  | glycosyl hydrolase family 31 protein                   |
| Locus_14534_Transcript_1/1_Conf_1.000 | 239  | 20 | 6.39E-25 | XP_002644187.1 | 87 | 117.087 | 73  | 64  | Hypothetical protein CBG17169                          |
| Locus_14535_Transcript_1/1_Conf_1.000 | 221  | 0  |          |                |    |         |     |     |                                                        |
| Locus_14536_Transcript_1/1_Conf_1.000 | 235  | 0  |          |                |    |         |     |     |                                                        |
| Locus_14537_Transcript_1/2_Conf_1.000 | 1575 | 20 | 4.02E-94 | NP_001022260.1 | 59 | 350.132 | 545 | 323 | Initiation Factor 4G (eIF4G) family member (ifg-1)     |
| Locus_14537_Transcript_2/2_Conf_1.000 | 1581 | 20 | 3.09E-94 | NP_001022260.1 | 59 | 350.517 | 545 | 322 | Initiation Factor 4G (eIF4G) family member (ifg-1)     |

|                                       |      |    |           |                |    |         |     |     |                                                                                 |
|---------------------------------------|------|----|-----------|----------------|----|---------|-----|-----|---------------------------------------------------------------------------------|
| Locus_14538_Transcript_1/1_Conf_1.000 | 180  | 5  | 8.59E-09  | CAA16382.5     | 66 | 63.5438 | 60  | 40  | C. elegans protein Y45F10D.7, partially confirmed by transcript evidence        |
| Locus_14539_Transcript_1/1_Conf_1.000 | 303  | 20 | 4.25E-29  | NP_509429.1    | 89 | 130.954 | 74  | 66  | Temporarily Assigned Gene name family member (tag-123)                          |
| Locus_1454_Transcript_1/2_Conf_1.000  | 821  | 20 | 6.98E-68  | XP_002635374.1 | 68 | 261.536 | 286 | 195 | C. briggsae CBR-TAG-117 protein                                                 |
| Locus_1454_Transcript_2/2_Conf_1.000  | 1175 | 20 | 6.21E-75  | XP_002635374.1 | 60 | 285.804 | 427 | 257 | C. briggsae CBR-TAG-117 protein                                                 |
| Locus_14540_Transcript_1/1_Conf_1.000 | 730  | 20 | 7.01E-103 | NP_001021145.1 | 85 | 377.481 | 240 | 206 | hypothetical protein C05D11.1                                                   |
| Locus_14541_Transcript_1/1_Conf_1.000 | 189  | 20 | 4.80E-28  | ACJ65168.1     | 96 | 127.487 | 62  | 60  | Uncoordinated protein 68, isoform b, partially confirmed by transcript evidence |
| Locus_14542_Transcript_1/3_Conf_0.667 | 1307 | 20 | 1.48E-128 | XP_001898423.1 | 74 | 464.151 | 434 | 323 | Mediator complex subunit rgr-1                                                  |
| Locus_14542_Transcript_2/3_Conf_0.667 | 1467 | 20 | 1.24E-142 | XP_001898423.1 | 73 | 511.146 | 490 | 360 | Mediator complex subunit rgr-1                                                  |
| Locus_14542_Transcript_3/3_Conf_0.667 | 1467 | 20 | 1.24E-142 | XP_001898423.1 | 73 | 511.146 | 490 | 360 | Mediator complex subunit rgr-1                                                  |
| Locus_14543_Transcript_1/1_Conf_1.000 | 352  | 20 | 1.02E-38  | XP_002631360.1 | 78 | 162.925 | 123 | 97  | Hypothetical protein CBG03195                                                   |

|                                       |      |    |           |                |    |         |     |     |                                                                                                         |
|---------------------------------------|------|----|-----------|----------------|----|---------|-----|-----|---------------------------------------------------------------------------------------------------------|
| Locus_14544_Transcript_1/1_Conf_1.000 | 391  | 20 | 2.15E-49  | AAN11401.1     | 81 | 198.364 | 128 | 104 | metalloprotease 1 precursor                                                                             |
| Locus_14545_Transcript_1/1_Conf_1.000 | 1738 | 20 | 1.46E-100 | NP_001123105.1 | 64 | 371.703 | 487 | 312 | CDC-42 Guanine nucleotide Exchange Factor family member (cgef-1)                                        |
| Locus_14546_Transcript_1/1_Conf_1.000 | 315  | 20 | 1.60E-23  | EFO20067.1     | 68 | 112.464 | 112 | 77  | hypothetical protein LOAG_08425                                                                         |
| Locus_14547_Transcript_1/1_Conf_1.000 | 283  | 20 | 3.71E-12  | XP_002120612.1 | 60 | 74.7146 | 80  | 48  | PREDICTED: similar to ATPase, aminophospholipid transporter (APLT), class I, type 8A, member 1, partial |
| Locus_14548_Transcript_1/1_Conf_1.000 | 191  | 0  |           |                |    |         |     |     |                                                                                                         |
| Locus_14549_Transcript_1/1_Conf_1.000 | 161  | 0  |           |                |    |         |     |     |                                                                                                         |
| Locus_1455_Transcript_1/1_Conf_1.000  | 496  | 20 | 8.78E-59  | NP_497791.1    | 81 | 229.565 | 153 | 124 | NIITrilase family member (nit-1)                                                                        |
| Locus_14550_Transcript_1/2_Conf_1.000 | 1052 | 20 | 2.34E-91  | NP_500791.2    | 75 | 340.117 | 324 | 244 | SAND endocytosis protein family member (sand-1)                                                         |
| Locus_14550_Transcript_2/2_Conf_1.000 | 459  | 20 | 3.46E-23  | NP_500791.2    | 71 | 111.309 | 121 | 86  | SAND endocytosis protein family member (sand-1)                                                         |
| Locus_14551_Transcript_1/1_Conf_1.000 | 302  | 20 | 2.28E-06  | XP_002003728.1 | 49 | 55.4546 | 99  | 49  | GI18068                                                                                                 |
| Locus_14552_Transcript_1/1_Conf_1.000 | 152  | 3  | 1.50E-05  | NP_494220.2    | 68 | 52.7582 | 50  | 34  | hypothetical protein F54A3.1                                                                            |
| Locus_14553_Transcript_1/1_Conf_1.000 | 238  | 20 | 3.75E-17  | YP_003797541.1 | 80 | 91.2781 | 71  | 57  | ATP-dependent protease La                                                                               |
| Locus_14554_Transcript_1/1_Conf_1.000 | 525  | 20 | 2.97E-37  | EFO26437.1     | 70 | 158.303 | 170 | 120 | CK1 protein kinase                                                                                      |
| Locus_14555_Transcript_1/1_Conf_1.000 | 448  | 14 | 5.77E-42  | NP_501544.1    | 79 | 173.711 | 121 | 96  | hypothetical protein C27B7.2                                                                            |
| Locus_14556_Transcript_1/1_Conf_1.000 | 258  | 0  |           |                |    |         |     |     |                                                                                                         |
| Locus_14557_Transcript_1/1_Conf_1.000 | 245  | 0  |           |                |    |         |     |     |                                                                                                         |
| Locus_14558_Transcript_1/1_Conf_1.000 | 247  | 2  | 1.19E-15  | EFO24527.1     | 66 | 86.2705 | 80  | 53  | hypothetical protein LOAG_03957                                                                         |
| Locus_14559_Transcript_1/1_Conf_1.000 | 170  | 0  |           |                |    |         |     |     |                                                                                                         |
| Locus_1456_Transcript_1/1_Conf_1.000  | 302  | 1  | 1.48E-05  | XP_002129449.1 | 53 | 52.7582 | 102 | 55  | PREDICTED: hypothetical protein                                                                         |
| Locus_14560_Transcript_1/1_Conf_1.000 | 640  | 20 | 3.23E-60  | EFO27810.1     | 74 | 235.343 | 206 | 153 | plasmid Maintenance protein containing protein                                                          |
| Locus_14561_Transcript_1/1_Conf_1.000 | 795  | 0  |           |                |    |         |     |     |                                                                                                         |

|                                       |      |    |          |                |    |         |     |     |                                                    |
|---------------------------------------|------|----|----------|----------------|----|---------|-----|-----|----------------------------------------------------|
| Locus_14562_Transcript_1/1_Conf_1.000 | 1201 | 4  | 2.28E-88 | XP_002635496.1 | 70 | 330.487 | 375 | 264 | Hypothetical protein CBG08796                      |
| Locus_14563_Transcript_1/1_Conf_1.000 | 184  | 0  |          |                |    |         |     |     |                                                    |
| Locus_14564_Transcript_1/1_Conf_1.000 | 552  | 20 | 5.32E-46 | XP_002647377.1 | 93 | 187.578 | 133 | 124 | Hypothetical protein CBG06437                      |
| Locus_14565_Transcript_1/1_Conf_1.000 | 423  | 20 | 8.97E-27 | NP_502633.1    | 72 | 123.25  | 114 | 83  | UDP-GlucuronosylTransferase family member (ugt-22) |
| Locus_14566_Transcript_1/2_Conf_1.000 | 228  | 0  |          |                |    |         |     |     |                                                    |
| Locus_14566_Transcript_2/2_Conf_1.000 | 746  | 0  |          |                |    |         |     |     |                                                    |
| Locus_14567_Transcript_1/1_Conf_1.000 | 303  | 0  |          |                |    |         |     |     |                                                    |
| Locus_14568_Transcript_1/1_Conf_1.000 | 848  | 20 | 4.71E-30 | 3N9L           | 67 | 135.961 | 151 | 102 | Cekdm7a From C.Elegans                             |
| Locus_14569_Transcript_1/1_Conf_1.000 | 340  | 0  |          |                |    |         |     |     |                                                    |
| Locus_1457_Transcript_1/1_Conf_1.000  | 1198 | 20 | 7.36E-55 | NP_741338.1    | 65 | 219.164 | 236 | 154 | hypothetical protein Y69A2AR.7                     |
| Locus_14570_Transcript_1/1_Conf_1.000 | 138  | 6  | 2.41E-16 | NP_872196.2    | 95 | 88.5817 | 46  | 44  | hypothetical protein D1054.9                       |
| Locus_14571_Transcript_1/1_Conf_1.000 | 497  | 14 | 3.99E-19 | NP_499088.1    | 72 | 97.8265 | 81  | 59  | Neuropeptide-Like Protein family member (nlp-36)   |
| Locus_14572_Transcript_1/1_Conf_1.000 | 380  | 0  |          |                |    |         |     |     |                                                    |
| Locus_14573_Transcript_1/1_Conf_1.000 | 509  | 0  |          |                |    |         |     |     |                                                    |
| Locus_14574_Transcript_1/2_Conf_1.000 | 619  | 20 | 1.51E-19 | XP_001645325.1 | 47 | 100.138 | 204 | 97  | hypothetical protein Kpol_1058p4                   |

|                                       |      |    |           |                |    |         |     |     |                                               |
|---------------------------------------|------|----|-----------|----------------|----|---------|-----|-----|-----------------------------------------------|
| Locus_14574_Transcript_2/2_Conf_1.000 | 412  | 15 | 4.56E-07  | XP_001645325.1 | 44 | 57.7658 | 134 | 60  | hypothetical protein Kpol_1058p4              |
| Locus_14575_Transcript_1/1_Conf_1.000 | 237  | 4  | 1.06E-11  | EFO22550.1     | 67 | 73.1738 | 77  | 52  | TATA binding protein associated factor        |
| Locus_14576_Transcript_1/1_Conf_1.000 | 630  | 0  |           |                |    |         |     |     |                                               |
| Locus_14577_Transcript_1/1_Conf_1.000 | 654  | 20 | 1.57E-97  | NP_498645.1    | 83 | 359.377 | 218 | 183 | MUscle Positioning family member (mup-4)      |
| Locus_14578_Transcript_1/1_Conf_1.000 | 178  | 8  | 3.84E-14  | NP_504908.1    | 81 | 81.2629 | 59  | 48  | hypothetical protein F18E3.7                  |
| Locus_14579_Transcript_1/1_Conf_1.000 | 1211 | 20 | 2.81E-94  | XP_002640721.1 | 62 | 350.132 | 392 | 245 | Hypothetical protein CBG19789                 |
| Locus_1458_Transcript_1/2_Conf_1.000  | 1009 | 20 | 3.08E-101 | NP_492354.1    | 86 | 372.859 | 236 | 205 | Proteasome Beta Subunit family member (pbs-7) |
| Locus_1458_Transcript_2/2_Conf_1.000  | 2245 | 20 | 3.79E-83  | NP_741955.2    | 71 | 314.309 | 320 | 229 | hypothetical protein H18N23.2                 |



|                                       |     |    |          |                |     |         |     |     |                                                    |
|---------------------------------------|-----|----|----------|----------------|-----|---------|-----|-----|----------------------------------------------------|
| Locus_14580_Transcript_1/1_Conf_1.000 | 305 | 20 | 7.75E-31 | XP_001891560.1 | 98  | 136.732 | 67  | 66  | DNA-directed RNA polymerase II 7.6 kDa polypeptide |
| Locus_14581_Transcript_1/2_Conf_1.000 | 461 | 0  |          |                |     |         |     |     |                                                    |
| Locus_14581_Transcript_2/2_Conf_1.000 | 460 | 0  |          |                |     |         |     |     |                                                    |
| Locus_14582_Transcript_1/1_Conf_1.000 | 559 | 0  |          |                |     |         |     |     |                                                    |
| Locus_14583_Transcript_1/1_Conf_1.000 | 429 | 20 | 4.12E-32 | NP_495516.2    | 78  | 140.969 | 127 | 100 | hypothetical protein F32A5.8                       |
| Locus_14584_Transcript_1/3_Conf_0.600 | 245 | 0  |          |                |     |         |     |     |                                                    |
| Locus_14584_Transcript_2/3_Conf_0.400 | 376 | 0  |          |                |     |         |     |     |                                                    |
| Locus_14584_Transcript_3/3_Conf_0.600 | 245 | 0  |          |                |     |         |     |     |                                                    |
| Locus_14585_Transcript_1/1_Conf_1.000 | 198 | 0  |          |                |     |         |     |     |                                                    |
| Locus_14586_Transcript_1/1_Conf_1.000 | 222 | 20 | 1.26E-28 | NP_496968.1    | 94  | 129.413 | 74  | 70  | hypothetical protein Y48B6A.12                     |
| Locus_14587_Transcript_1/1_Conf_1.000 | 448 | 20 | 1.12E-61 | XP_002641528.1 | 84  | 239.195 | 149 | 126 | Hypothetical protein CBG09825                      |
| Locus_14588_Transcript_1/1_Conf_1.000 | 277 | 20 | 2.11E-12 | EFO21272.1     | 62  | 75.485  | 74  | 46  | hypothetical protein LOAG_07212                    |
| Locus_14589_Transcript_1/1_Conf_1.000 | 195 | 0  |          |                |     |         |     |     |                                                    |
| Locus_1459_Transcript_1/1_Conf_1.000  | 229 | 20 | 2.61E-34 | XP_002925190.1 | 100 | 148.288 | 73  | 73  | PREDICTED: 40S ribosomal protein S13-like          |
| Locus_14590_Transcript_1/1_Conf_1.000 | 227 | 0  |          |                |     |         |     |     |                                                    |
| Locus_14591_Transcript_1/2_Conf_1.000 | 233 | 0  |          |                |     |         |     |     |                                                    |
| Locus_14591_Transcript_2/2_Conf_1.000 | 430 | 20 | 6.78E-43 | NP_001021848.1 | 82  | 176.792 | 107 | 88  | hypothetical protein ZC334.7                       |
| Locus_14592_Transcript_1/1_Conf_1.000 | 191 | 0  |          |                |     |         |     |     |                                                    |

|                                       |      |    |          |                |     |         |     |     |                                                                                  |
|---------------------------------------|------|----|----------|----------------|-----|---------|-----|-----|----------------------------------------------------------------------------------|
| Locus_14593_Transcript_1/1_Conf_1.000 | 254  | 20 | 2.74E-15 | CAA84704.4     | 87  | 85.1149 | 57  | 50  | C. elegans protein F43D9.3a, confirmed by transcript evidence                    |
| Locus_14594_Transcript_1/1_Conf_1.000 | 325  | 0  |          |                |     |         |     |     |                                                                                  |
| Locus_14595_Transcript_1/1_Conf_1.000 | 379  | 20 | 1.46E-61 | XP_002831613.1 | 100 | 238.81  | 114 | 114 | PREDICTED: LOW QUALITY PROTEIN: ubiquitin-like modifier-activating enzyme 1-like |
| Locus_14596_Transcript_1/1_Conf_1.000 | 152  | 0  |          |                |     |         |     |     |                                                                                  |
| Locus_14597_Transcript_1/1_Conf_1.000 | 154  | 0  |          |                |     |         |     |     |                                                                                  |
| Locus_14598_Transcript_1/1_Conf_1.000 | 209  | 0  |          |                |     |         |     |     |                                                                                  |
| Locus_14599_Transcript_1/1_Conf_1.000 | 1985 | 20 | 0        | NP_001041007.1 | 71  | 662.529 | 655 | 468 | Juxtamembrane domain-Associated Catenin family member (jac-1)                    |
| Locus_146_Transcript_1/1_Conf_1.000   | 2367 | 20 | 0        | XP_002639688.1 | 93  | 1111.29 | 626 | 586 | C. briggsae CBR-FASN-1 protein                                                   |
| Locus_1460_Transcript_1/1_Conf_1.000  | 294  | 4  | 8.71E-14 | XP_002646111.1 | 72  | 80.1073 | 69  | 50  | C. briggsae CBR-PAD-1 protein                                                    |
| Locus_14600_Transcript_1/2_Conf_1.000 | 657  | 6  | 2.00E-07 | ZP_02160840.1  | 45  | 60.077  | 159 | 72  | hypothetical protein KAOT1_18882                                                 |
| Locus_14600_Transcript_2/2_Conf_1.000 | 657  | 3  | 2.00E-07 | ZP_02160840.1  | 45  | 60.077  | 159 | 72  | hypothetical protein KAOT1_18882                                                 |
| Locus_14601_Transcript_1/1_Conf_1.000 | 128  | 0  |          |                |     |         |     |     |                                                                                  |
| Locus_14602_Transcript_1/1_Conf_1.000 | 245  | 0  |          |                |     |         |     |     |                                                                                  |
| Locus_14603_Transcript_1/1_Conf_1.000 | 450  | 20 | 2.76E-36 | NP_494905.2    | 74  | 154.836 | 151 | 112 | MeDiaTor family member (mdt-4)                                                   |
| Locus_14604_Transcript_1/1_Conf_1.000 | 245  | 4  | 2.04E-23 | NP_741205.1    | 96  | 112.079 | 61  | 59  | PDF (arthropod Pigment Dispersing Factor) homolog family member (pdf-1)          |
| Locus_14605_Transcript_1/1_Conf_1.000 | 317  | 0  |          |                |     |         |     |     |                                                                                  |
| Locus_14606_Transcript_1/1_Conf_1.000 | 280  | 20 | 4.22E-29 | NP_501217.2    | 82  | 130.954 | 93  | 77  | hypothetical protein R05G6.10                                                    |
| Locus_14607_Transcript_1/1_Conf_1.000 | 143  | 0  |          |                |     |         |     |     |                                                                                  |
| Locus_14608_Transcript_1/1_Conf_1.000 | 250  | 0  |          |                |     |         |     |     |                                                                                  |

|                                       |      |    |          |                |     |         |     |     |                                                               |
|---------------------------------------|------|----|----------|----------------|-----|---------|-----|-----|---------------------------------------------------------------|
| Locus_14609_Transcript_1/1_Conf_1.000 | 1321 | 2  | 6.15E-05 | NP_495931.2    | 46  | 53.5286 | 213 | 98  | hypothetical protein T24B8.7                                  |
| Locus_1461_Transcript_1/2_Conf_1.000  | 909  | 20 | 5.33E-30 | NP_498126.1    | 73  | 135.961 | 137 | 101 | hypothetical protein ZC395.10                                 |
| Locus_1461_Transcript_2/2_Conf_1.000  | 894  | 20 | 5.17E-30 | NP_498126.1    | 73  | 135.961 | 137 | 101 | hypothetical protein ZC395.10                                 |
| Locus_14610_Transcript_1/1_Conf_1.000 | 442  | 20 | 2.81E-28 | XP_002643824.1 | 69  | 128.257 | 123 | 86  | Hypothetical protein CBG02040                                 |
| Locus_14611_Transcript_1/1_Conf_1.000 | 312  | 20 | 6.10E-23 | XP_001902677.1 | 76  | 110.538 | 97  | 74  | 5'-nucleotidase, cytosolic III                                |
| Locus_14612_Transcript_1/1_Conf_1.000 | 427  | 0  |          |                |     |         |     |     |                                                               |
| Locus_14613_Transcript_1/1_Conf_1.000 | 136  | 0  |          |                |     |         |     |     |                                                               |
| Locus_14614_Transcript_1/1_Conf_1.000 | 143  | 20 | 4.99E-22 | BAG61003.1     | 100 | 107.457 | 47  | 47  | unnamed protein product                                       |
| Locus_14615_Transcript_1/1_Conf_1.000 | 383  | 2  | 4.42E-26 | XP_002631382.1 | 69  | 120.939 | 126 | 87  | Hypothetical protein CBG03224                                 |
| Locus_14616_Transcript_1/2_Conf_1.000 | 210  | 9  | 1.12E-05 | XP_002634231.1 | 74  | 53.1434 | 47  | 35  | C. briggsae CBR-TTR-45 protein                                |
| Locus_14616_Transcript_2/2_Conf_1.000 | 216  | 19 | 9.13E-08 | XP_002634231.1 | 76  | 60.077  | 47  | 36  | C. briggsae CBR-TTR-45 protein                                |
| Locus_14617_Transcript_1/1_Conf_1.000 | 388  | 0  |          |                |     |         |     |     |                                                               |
| Locus_14618_Transcript_1/1_Conf_1.000 | 177  | 0  |          |                |     |         |     |     |                                                               |
| Locus_14619_Transcript_1/1_Conf_1.000 | 310  | 20 | 3.72E-09 | CAF95080.1     | 61  | 64.6994 | 91  | 56  | unnamed protein product                                       |
| Locus_1462_Transcript_1/1_Conf_1.000  | 1438 | 8  | 1.77E-85 | ADM53747.1     | 62  | 321.242 | 339 | 213 | Zinc finger transcription factor family protein 12, isoform c |
| Locus_14620_Transcript_1/2_Conf_1.000 | 404  | 20 | 1.17E-18 | XP_002591927.1 | 58  | 96.2857 | 134 | 78  | hypothetical protein BRAFLDRAFT_265245                        |
| Locus_14620_Transcript_2/2_Conf_1.000 | 404  | 20 | 1.17E-18 | XP_002591927.1 | 58  | 96.2857 | 134 | 78  | hypothetical protein BRAFLDRAFT_265245                        |

|                                       |      |    |          |                |    |         |     |     |                                                        |
|---------------------------------------|------|----|----------|----------------|----|---------|-----|-----|--------------------------------------------------------|
| Locus_14621_Transcript_1/1_Conf_1.000 | 170  | 20 | 5.41E-16 | ABE91946.1     | 88 | 87.4261 | 53  | 47  | Ras GTPase; Sigma-54 factor, interaction region        |
| Locus_14622_Transcript_1/1_Conf_1.000 | 804  | 0  |          |                |    |         |     |     |                                                        |
| Locus_14623_Transcript_1/1_Conf_1.000 | 554  | 0  |          |                |    |         |     |     |                                                        |
| Locus_14624_Transcript_1/1_Conf_1.000 | 167  | 0  |          |                |    |         |     |     |                                                        |
| Locus_14625_Transcript_1/1_Conf_1.000 | 439  | 20 | 5.62E-74 | NP_501665.1    | 97 | 280.026 | 144 | 141 | hypothetical protein F59B8.2                           |
| Locus_14626_Transcript_1/1_Conf_1.000 | 149  | 5  | 1.11E-16 | NP_491711.2    | 87 | 89.7373 | 49  | 43  | hypothetical protein C34G6.1                           |
| Locus_14627_Transcript_1/1_Conf_1.000 | 977  | 20 | 2.32E-74 | AAV41897.1     | 65 | 283.493 | 319 | 210 | SAX-2                                                  |
| Locus_14628_Transcript_1/1_Conf_1.000 | 524  | 0  |          |                |    |         |     |     |                                                        |
| Locus_14629_Transcript_1/1_Conf_1.000 | 585  | 20 | 1.60E-33 | NP_496652.1    | 73 | 146.362 | 134 | 98  | Temporarily Assigned Gene name family member (tag-281) |
| Locus_1463_Transcript_1/1_Conf_1.000  | 2295 | 20 | 0        | NP_510527.1    | 79 | 679.093 | 535 | 423 | hypothetical protein H03A11.1                          |
| Locus_14630_Transcript_1/1_Conf_1.000 | 294  | 20 | 1.25E-36 | CAB57358.1     | 85 | 155.992 | 95  | 81  | microsomal aminopeptidase                              |
| Locus_14631_Transcript_1/1_Conf_1.000 | 184  | 0  |          |                |    |         |     |     |                                                        |
| Locus_14632_Transcript_1/1_Conf_1.000 | 282  | 6  | 3.97E-14 | NP_495914.1    | 68 | 81.2629 | 74  | 51  | hypothetical protein C18E9.8                           |
| Locus_14633_Transcript_1/1_Conf_1.000 | 418  | 0  |          |                |    |         |     |     |                                                        |
| Locus_14634_Transcript_1/1_Conf_1.000 | 232  | 4  | 3.19E-24 | XP_002630898.1 | 91 | 114.775 | 62  | 57  | Hypothetical protein CBG02620                          |
| Locus_14635_Transcript_1/1_Conf_1.000 | 328  | 2  | 1.42E-32 | NP_504605.1    | 77 | 142.51  | 109 | 84  | hypothetical protein K12B6.4                           |
| Locus_14636_Transcript_1/1_Conf_1.000 | 181  | 0  |          |                |    |         |     |     |                                                        |
| Locus_14637_Transcript_1/1_Conf_1.000 | 306  | 0  |          |                |    |         |     |     |                                                        |
| Locus_14638_Transcript_1/1_Conf_1.000 | 671  | 20 | 1.49E-82 | CAC10528.1     | 80 | 309.686 | 227 | 182 | putative inositol 1,4,5-trisphosphate receptor         |

|                                       |      |    |           |                |    |         |     |     |                                                         |  |
|---------------------------------------|------|----|-----------|----------------|----|---------|-----|-----|---------------------------------------------------------|--|
| Locus_14639_Transcript_1/1_Conf_1.000 | 189  | 0  |           |                |    |         |     |     |                                                         |  |
| Locus_1464_Transcript_2/4_Conf_0.667  | 3362 | 1  | 7.52E-09  | NP_509922.2    | 35 | 68.1662 | 600 | 214 | hypothetical protein F29G6.3                            |  |
| Locus_1464_Transcript_3/4_Conf_0.250  | 2174 | 0  |           |                |    |         |     |     |                                                         |  |
| Locus_1464_Transcript_4/4_Conf_0.667  | 3317 | 1  | 9.05E-07  | NP_509922.2    | 35 | 61.2326 | 579 | 208 | hypothetical protein F29G6.3                            |  |
| Locus_14640_Transcript_1/1_Conf_1.000 | 164  | 0  |           |                |    |         |     |     |                                                         |  |
| Locus_14641_Transcript_1/1_Conf_1.000 | 226  | 0  |           |                |    |         |     |     |                                                         |  |
| Locus_14642_Transcript_1/1_Conf_1.000 | 255  | 0  |           |                |    |         |     |     |                                                         |  |
| Locus_14643_Transcript_1/1_Conf_1.000 | 512  | 0  |           |                |    |         |     |     |                                                         |  |
| Locus_14644_Transcript_1/1_Conf_1.000 | 196  | 20 | 2.45E-16  | NP_494786.4    | 93 | 88.5817 | 63  | 59  | TWiK family of potassium channels family member (twk-2) |  |
| Locus_14645_Transcript_1/1_Conf_1.000 | 246  | 1  | 3.61E-04  | NP_509416.2    | 71 | 48.1358 | 42  | 30  | hypothetical protein F55E10.7                           |  |
| Locus_14646_Transcript_1/1_Conf_1.000 | 428  | 20 | 5.18E-67  | XP_002634991.1 | 99 | 256.914 | 125 | 124 | Hypothetical protein CBG13531                           |  |
| Locus_14647_Transcript_1/1_Conf_1.000 | 576  | 0  |           |                |    |         |     |     |                                                         |  |
| Locus_14648_Transcript_1/1_Conf_1.000 | 548  | 20 | 4.22E-24  | XP_002642540.1 | 88 | 114.775 | 76  | 67  | Hypothetical protein CBG20163                           |  |
| Locus_14649_Transcript_1/1_Conf_1.000 | 254  | 5  | 2.03E-10  | NP_508729.2    | 66 | 68.9366 | 80  | 53  | hypothetical protein C52B9.4                            |  |
| Locus_1465_Transcript_1/1_Conf_1.000  | 2135 | 20 | 2.59E-174 | NP_499577.1    | 67 | 617.076 | 682 | 458 | hypothetical protein Y75B8A.4                           |  |
| Locus_14650_Transcript_1/1_Conf_1.000 | 776  | 20 | 6.76E-54  | XP_002640868.1 | 79 | 214.927 | 157 | 125 | Hypothetical protein CBG15759                           |  |
| Locus_14651_Transcript_1/1_Conf_1.000 | 1026 | 20 | 1.30E-78  | NP_492757.2    | 79 | 297.745 | 239 | 189 | ToLlIp homolog family member (tli-1)                    |  |

|                                       |     |    |          |                |     |         |     |     |                                                                         |
|---------------------------------------|-----|----|----------|----------------|-----|---------|-----|-----|-------------------------------------------------------------------------|
| Locus_14652_Transcript_1/1_Conf_1.000 | 378 | 20 | 2.12E-36 | BAG58382.1     | 100 | 155.221 | 74  | 74  | unnamed protein product                                                 |
| Locus_14653_Transcript_1/1_Conf_1.000 | 153 | 0  |          |                |     |         |     |     |                                                                         |
| Locus_14654_Transcript_1/1_Conf_1.000 | 627 | 20 | 8.02E-85 | ACO11472.1     | 83  | 317.005 | 201 | 167 | Beta-ureidopropionase                                                   |
| Locus_14655_Transcript_1/1_Conf_1.000 | 140 | 3  | 8.57E-06 | XP_002640263.1 | 67  | 53.5286 | 46  | 31  | Hypothetical protein CBG12788                                           |
| Locus_14656_Transcript_1/1_Conf_1.000 | 446 | 20 | 1.86E-56 | XP_001894541.1 | 83  | 221.861 | 148 | 124 | LIM domain containing protein                                           |
| Locus_14657_Transcript_1/1_Conf_1.000 | 427 | 0  |          |                |     |         |     |     |                                                                         |
| Locus_14658_Transcript_1/1_Conf_1.000 | 366 | 6  | 5.89E-23 | XP_002633327.1 | 86  | 110.538 | 90  | 78  | C. briggsae CBR-DNJ-1 protein                                           |
| Locus_14659_Transcript_1/1_Conf_1.000 | 156 | 0  |          |                |     |         |     |     |                                                                         |
| Locus_1466_Transcript_1/1_Conf_1.000  | 383 | 0  |          |                |     |         |     |     |                                                                         |
| Locus_14660_Transcript_1/1_Conf_1.000 | 349 | 0  |          |                |     |         |     |     |                                                                         |
| Locus_14661_Transcript_1/1_Conf_1.000 | 436 | 20 | 1.30E-62 | CAL49442.3     | 91  | 242.276 | 144 | 132 | C. elegans protein F36H1.2c, partially confirmed by transcript evidence |
| Locus_14662_Transcript_1/1_Conf_1.000 | 534 | 20 | 1.43E-42 | EFO22680.1     | 77  | 176.022 | 126 | 98  | hypothetical protein LOAG_05804                                         |
| Locus_14663_Transcript_1/1_Conf_1.000 | 190 | 0  |          |                |     |         |     |     |                                                                         |
| Locus_14664_Transcript_1/1_Conf_1.000 | 152 | 0  |          |                |     |         |     |     |                                                                         |
| Locus_14665_Transcript_1/1_Conf_1.000 | 160 | 0  |          |                |     |         |     |     |                                                                         |
| Locus_14666_Transcript_1/1_Conf_1.000 | 503 | 20 | 2.87E-73 | XP_001892755.1 | 89  | 277.715 | 167 | 149 | TBC domain containing protein                                           |
| Locus_14667_Transcript_1/1_Conf_1.000 | 623 | 20 | 1.87E-56 | CAB66478.1     | 100 | 180.644 | 91  | 91  | hypothetical protein                                                    |
| Locus_14668_Transcript_1/1_Conf_1.000 | 319 | 0  |          |                |     |         |     |     |                                                                         |
| Locus_14669_Transcript_1/1_Conf_1.000 | 372 | 0  |          |                |     |         |     |     |                                                                         |

|                                       |      |    |          |                |     |         |     |     |                                                                          |
|---------------------------------------|------|----|----------|----------------|-----|---------|-----|-----|--------------------------------------------------------------------------|
| Locus_1467_Transcript_1/3_Conf_0.714  | 3136 | 20 | 9.44E-99 | EFO28201.1     | 61  | 366.696 | 472 | 292 | hypothetical protein LOAG_00283                                          |
| Locus_1467_Transcript_2/3_Conf_0.714  | 3142 | 20 | 9.46E-99 | EFO28201.1     | 61  | 366.696 | 472 | 292 | hypothetical protein LOAG_00283                                          |
| Locus_1467_Transcript_3/3_Conf_0.714  | 3142 | 20 | 9.46E-99 | EFO28201.1     | 61  | 366.696 | 472 | 292 | hypothetical protein LOAG_00283                                          |
| Locus_14670_Transcript_1/1_Conf_1.000 | 466  | 20 | 1.80E-51 | NP_001023266.1 | 81  | 205.297 | 156 | 127 | UNCoordinated family member (unc-26)                                     |
| Locus_14671_Transcript_1/2_Conf_1.000 | 435  | 20 | 9.64E-66 | XP_002633333.1 | 92  | 252.677 | 145 | 134 | Hypothetical protein CBG06072                                            |
| Locus_14671_Transcript_2/2_Conf_1.000 | 435  | 20 | 9.64E-66 | XP_002633333.1 | 92  | 252.677 | 145 | 134 | Hypothetical protein CBG06072                                            |
| Locus_14672_Transcript_1/1_Conf_1.000 | 223  | 0  |          |                |     |         |     |     |                                                                          |
| Locus_14673_Transcript_1/1_Conf_1.000 | 381  | 0  |          |                |     |         |     |     |                                                                          |
| Locus_14674_Transcript_1/1_Conf_1.000 | 216  | 20 | 1.27E-33 | XP_002913180.1 | 100 | 145.976 | 72  | 72  | PREDICTED: cyclin-dependent kinase 2-associated protein 1-like           |
| Locus_14675_Transcript_1/1_Conf_1.000 | 300  | 20 | 2.19E-33 | XP_002822876.1 | 100 | 145.206 | 71  | 71  | PREDICTED: protein C10-like isoform 2                                    |
| Locus_14676_Transcript_1/1_Conf_1.000 | 671  | 20 | 2.37E-88 | CAA91463.2     | 86  | 328.946 | 223 | 192 | C. elegans protein F42E11.1a, partially confirmed by transcript evidence |
| Locus_14677_Transcript_1/1_Conf_1.000 | 291  | 20 | 1.39E-27 | NP_493472.1    | 75  | 125.946 | 92  | 69  | hypothetical protein C37A5.1                                             |
| Locus_14678_Transcript_1/2_Conf_1.000 | 430  | 20 | 3.50E-23 | XP_002631584.1 | 74  | 111.309 | 108 | 80  | Hypothetical protein CBG20762                                            |
| Locus_14678_Transcript_2/2_Conf_1.000 | 430  | 20 | 2.96E-22 | XP_002631584.1 | 73  | 108.227 | 108 | 79  | Hypothetical protein CBG20762                                            |
| Locus_14679_Transcript_1/1_Conf_1.000 | 268  | 0  |          |                |     |         |     |     |                                                                          |
| Locus_1468_Transcript_1/1_Conf_1.000  | 1016 | 0  |          |                |     |         |     |     |                                                                          |
| Locus_14680_Transcript_1/1_Conf_1.000 | 181  | 0  |          |                |     |         |     |     |                                                                          |

|                                       |     |    |          |                |    |         |     |     |                                                                      |
|---------------------------------------|-----|----|----------|----------------|----|---------|-----|-----|----------------------------------------------------------------------|
| Locus_14681_Transcript_1/1_Conf_1.000 | 316 | 20 | 8.77E-22 | BAE75796.1     | 70 | 106.686 | 98  | 69  | Slc26a6 A                                                            |
| Locus_14682_Transcript_1/1_Conf_1.000 | 304 | 0  |          |                |    |         |     |     |                                                                      |
| Locus_14683_Transcript_1/1_Conf_1.000 | 169 | 0  |          |                |    |         |     |     |                                                                      |
| Locus_14684_Transcript_1/1_Conf_1.000 | 612 | 20 | 1.70E-92 | XP_002644330.1 | 90 | 342.428 | 203 | 183 | C. briggsae CBR-SPC-1 protein                                        |
| Locus_14685_Transcript_1/1_Conf_1.000 | 177 | 9  | 8.00E-12 | EFO23504.1     | 71 | 73.559  | 59  | 42  | TK protein kinase                                                    |
| Locus_14686_Transcript_1/1_Conf_1.000 | 487 | 20 | 1.38E-51 | NP_502547.2    | 73 | 205.682 | 170 | 125 | hypothetical protein JC8.5                                           |
| Locus_14687_Transcript_1/1_Conf_1.000 | 724 | 20 | 8.06E-19 | EFN63743.1     | 49 | 98.2117 | 220 | 109 | RCC1 domain-containing protein 1                                     |
| Locus_14688_Transcript_1/1_Conf_1.000 | 603 | 20 | 2.23E-41 | NP_001023110.1 | 64 | 172.555 | 197 | 128 | Homolog Of ELAC2 (cancer susceptibility locus) family member (hoe-1) |
| Locus_14689_Transcript_1/1_Conf_1.000 | 272 | 0  |          |                |    |         |     |     |                                                                      |
| Locus_1469_Transcript_1/1_Conf_1.000  | 498 | 0  |          |                |    |         |     |     |                                                                      |
| Locus_14690_Transcript_1/1_Conf_1.000 | 175 | 0  |          |                |    |         |     |     |                                                                      |
| Locus_14691_Transcript_1/1_Conf_1.000 | 132 | 0  |          |                |    |         |     |     |                                                                      |



|                                       |      |    |           |                |    |         |     |     |                                                                            |
|---------------------------------------|------|----|-----------|----------------|----|---------|-----|-----|----------------------------------------------------------------------------|
| Locus_14692_Transcript_1/1_Conf_1.000 | 1236 | 20 | 6.00E-124 | XP_002643227.1 | 74 | 448.743 | 423 | 315 | C. briggsae CBR-SEL-12 protein                                             |
| Locus_14693_Transcript_1/1_Conf_1.000 | 222  | 0  |           |                |    |         |     |     |                                                                            |
| Locus_14694_Transcript_1/1_Conf_1.000 | 206  | 0  |           |                |    |         |     |     |                                                                            |
| Locus_14695_Transcript_1/1_Conf_1.000 | 865  |    |           |                |    |         |     |     |                                                                            |
| Locus_14696_Transcript_1/1_Conf_1.000 | 197  | 0  |           |                |    |         |     |     |                                                                            |
| Locus_14697_Transcript_1/1_Conf_1.000 | 179  | 0  |           |                |    |         |     |     |                                                                            |
| Locus_14698_Transcript_1/1_Conf_1.000 | 423  | 4  | 9.97E-10  | NP_493393.1    | 57 | 66.6254 | 135 | 78  | hypothetical protein W09C5.7                                               |
| Locus_14699_Transcript_1/1_Conf_1.000 | 602  | 20 | 4.11E-72  | NP_001122494.1 | 84 | 274.633 | 179 | 152 | TOMosyn synaptic protein family member (tom-1)                             |
| Locus_147_Transcript_1/1_Conf_1.000   | 1067 | 20 | 5.14E-110 | XP_002642221.1 | 86 | 402.134 | 251 | 216 | Hypothetical protein CBG18195                                              |
| Locus_1470_Transcript_1/3_Conf_0.500  | 529  | 0  |           |                |    |         |     |     |                                                                            |
| Locus_1470_Transcript_2/3_Conf_0.500  | 516  | 0  |           |                |    |         |     |     |                                                                            |
| Locus_1470_Transcript_3/3_Conf_0.667  | 516  | 0  |           |                |    |         |     |     |                                                                            |
| Locus_14700_Transcript_1/1_Conf_1.000 | 471  | 2  | 3.74E-25  | XP_002642486.1 | 61 | 117.857 | 127 | 78  | Hypothetical protein CBG06905                                              |
| Locus_14701_Transcript_1/1_Conf_1.000 | 283  | 3  | 1.04E-14  | NP_001024665.1 | 86 | 83.1889 | 53  | 46  | SynDaPiN (synaptic dynamin binding protein) homolog family member (sdpn-1) |
| Locus_14702_Transcript_1/1_Conf_1.000 | 144  | 0  |           |                |    |         |     |     |                                                                            |
| Locus_14703_Transcript_1/1_Conf_1.000 | 400  | 0  |           |                |    |         |     |     |                                                                            |

|                                       |      |    |           |                |    |         |     |     |                               |
|---------------------------------------|------|----|-----------|----------------|----|---------|-----|-----|-------------------------------|
| Locus_14704_Transcript_1/1_Conf_1.000 | 881  | 20 | 2.61E-95  | XP_002642921.1 | 83 | 352.829 | 296 | 248 | Hypothetical protein CBG15197 |
| Locus_14705_Transcript_1/1_Conf_1.000 | 1243 | 20 | 3.17E-165 | NP_499162.2    | 83 | 585.874 | 405 | 338 | hypothetical protein R10E11.3 |
| Locus_14706_Transcript_1/1_Conf_1.000 | 1024 | 20 | 1.04E-11  | CBH12501.1     | 45 | 75.485  | 341 | 156 | kinesin K39, putative         |
| Locus_14707_Transcript_1/4_Conf_0.250 | 239  | 0  |           |                |    |         |     |     |                               |
| Locus_14707_Transcript_2/4_Conf_0.625 | 1388 | 20 | 1.72E-29  | XP_001897896.1 | 45 | 135.191 | 397 | 181 | RNA binding motif protein 21  |
| Locus_14707_Transcript_3/4_Conf_0.625 | 1399 | 20 | 1.02E-29  | XP_001897896.1 | 45 | 135.961 | 401 | 183 | RNA binding motif protein 21  |

|                                       |      |    |           |                |    |         |     |     |                                                   |
|---------------------------------------|------|----|-----------|----------------|----|---------|-----|-----|---------------------------------------------------|
| Locus_14707_Transcript_4/4_Conf_0.625 | 1399 | 20 | 1.02E-29  | XP_001897896.1 | 45 | 135.961 | 401 | 183 | RNA binding motif protein 21                      |
| Locus_14708_Transcript_1/1_Conf_1.000 | 467  | 0  |           |                |    |         |     |     |                                                   |
| Locus_14709_Transcript_1/1_Conf_1.000 | 570  | 3  | 1.59E-11  | NP_494749.2    | 56 | 73.1738 | 88  | 50  | hypothetical protein C16A11.7                     |
| Locus_1471_Transcript_1/1_Conf_1.000  | 3092 | 20 | 1.17E-133 | CAA78521.1     | 74 | 482.641 | 523 | 388 | hypothetical polypeptide II                       |
| Locus_14710_Transcript_1/1_Conf_1.000 | 143  | 0  |           |                |    |         |     |     |                                                   |
| Locus_14711_Transcript_1/1_Conf_1.000 | 197  | 0  |           |                |    |         |     |     |                                                   |
| Locus_14712_Transcript_1/1_Conf_1.000 | 353  | 0  |           |                |    |         |     |     |                                                   |
| Locus_14713_Transcript_1/1_Conf_1.000 | 756  | 20 | 1.37E-96  | NP_504476.1    | 87 | 356.681 | 224 | 197 | Cell-death-Related Nuclease family member (crn-2) |
| Locus_14714_Transcript_1/1_Conf_1.000 | 605  | 0  |           |                |    |         |     |     |                                                   |
| Locus_14715_Transcript_1/1_Conf_1.000 | 804  | 20 | 3.06E-60  | XP_002639513.1 | 61 | 236.113 | 265 | 164 | Hypothetical protein CBG04119                     |
| Locus_14716_Transcript_1/1_Conf_1.000 | 413  | 0  |           |                |    |         |     |     |                                                   |
| Locus_14717_Transcript_1/1_Conf_1.000 | 1313 | 20 | 0         | NP_001023732.1 | 93 | 780.015 | 433 | 406 | EGg Laying defective family member (egl-3)        |
| Locus_14718_Transcript_1/1_Conf_1.000 | 173  | 0  |           |                |    |         |     |     |                                                   |
| Locus_14719_Transcript_1/1_Conf_1.000 | 453  | 20 | 2.94E-38  | XP_002640798.1 | 77 | 161.384 | 109 | 85  | C. briggsae CBR-NHR-121 protein                   |
| Locus_1472_Transcript_1/1_Conf_1.000  | 384  | 0  |           |                |    |         |     |     |                                                   |
| Locus_14720_Transcript_1/1_Conf_1.000 | 307  | 0  |           |                |    |         |     |     |                                                   |
| Locus_14721_Transcript_1/1_Conf_1.000 | 575  | 20 | 7.65E-54  | XP_002113404.1 | 73 | 213.772 | 160 | 117 | hypothetical protein TRIADDRAFT_57530             |
| Locus_14722_Transcript_1/1_Conf_1.000 | 254  | 0  |           |                |    |         |     |     |                                                   |
| Locus_14723_Transcript_1/1_Conf_1.000 | 238  | 0  |           |                |    |         |     |     |                                                   |
| Locus_14724_Transcript_1/1_Conf_1.000 | 610  | 20 | 3.81E-20  | EFO20693.1     | 55 | 102.064 | 167 | 93  | hypothetical protein LOAG_07794                   |
| Locus_14725_Transcript_1/1_Conf_1.000 | 263  | 0  |           |                |    |         |     |     |                                                   |

|                                       |      |    |           |                |     |         |     |     |                                                                        |
|---------------------------------------|------|----|-----------|----------------|-----|---------|-----|-----|------------------------------------------------------------------------|
| Locus_14726_Transcript_1/1_Conf_1.000 | 359  | 20 | 2.96E-22  | NP_001041045.1 | 63  | 108.227 | 119 | 76  | COenzyme Q (ubiquinone) biosynthesis family member (coq-3)             |
| Locus_14727_Transcript_1/1_Conf_1.000 | 1012 | 20 | 1.28E-139 | NP_494712.1    | 94  | 500.36  | 313 | 297 | proteasome Regulatory Particle, Non-ATPase-like family member (rpn-11) |
| Locus_14728_Transcript_1/1_Conf_1.000 | 413  | 0  |           |                |     |         |     |     |                                                                        |
| Locus_14729_Transcript_1/1_Conf_1.000 | 137  | 20 | 2.85E-17  | XP_001103566.2 | 100 | 91.6633 | 45  | 45  | PREDICTED: fas-activated serine/threonine kinase                       |
| Locus_1473_Transcript_1/1_Conf_1.000  | 945  | 20 | 2.50E-126 | XP_002633756.1 | 83  | 456.062 | 301 | 252 | C. briggsae CBR-DHP-2 protein                                          |
| Locus_14730_Transcript_1/1_Conf_1.000 | 147  | 0  |           |                |     |         |     |     |                                                                        |
| Locus_14731_Transcript_1/1_Conf_1.000 | 271  | 0  |           |                |     |         |     |     |                                                                        |
| Locus_14732_Transcript_1/1_Conf_1.000 | 333  | 13 | 6.81E-11  | NP_491252.1    | 64  | 70.4774 | 62  | 40  | AntiBacterial Factor related family member (abf-2)                     |
| Locus_14733_Transcript_1/1_Conf_1.000 | 418  | 20 | 3.30E-53  | NP_493616.1    | 83  | 211.075 | 139 | 116 | hypothetical protein F33H2.5                                           |
| Locus_14734_Transcript_1/2_Conf_1.000 | 740  | 20 | 7.79E-65  | NP_501092.1    | 73  | 251.136 | 228 | 167 | Conserved Oligomeric Golgi (COG) Component family member (cogc-2)      |

|                                       |      |    |          |                |    |         |     |     |                                                                                 |
|---------------------------------------|------|----|----------|----------------|----|---------|-----|-----|---------------------------------------------------------------------------------|
| Locus_14734_Transcript_2/2_Conf_1.000 | 740  | 20 | 7.79E-65 | NP_501092.1    | 73 | 251.136 | 228 | 167 | Conserved Oligomeric Golgi (COG) Component family member (cogc-2)               |
| Locus_14735_Transcript_1/1_Conf_1.000 | 613  | 0  |          |                |    |         |     |     |                                                                                 |
| Locus_14736_Transcript_1/1_Conf_1.000 | 311  | 20 | 4.67E-28 | EFO27919.1     | 92 | 127.487 | 76  | 70  | hypothetical protein LOAG_00556                                                 |
| Locus_14737_Transcript_1/1_Conf_1.000 | 425  | 20 | 2.28E-30 | XP_002637013.1 | 65 | 135.191 | 146 | 96  | <i>C. briggsae</i> CBR-NID-1 protein                                            |
| Locus_14738_Transcript_1/1_Conf_1.000 | 142  | 20 | 4.23E-13 | XP_002645201.1 | 91 | 77.7962 | 46  | 42  | <i>C. briggsae</i> CBR-BCAT-1 protein                                           |
| Locus_14739_Transcript_1/1_Conf_1.000 | 307  | 0  |          |                |    |         |     |     |                                                                                 |
| Locus_1474_Transcript_1/2_Conf_1.000  | 1463 | 0  |          |                |    |         |     |     |                                                                                 |
| Locus_1474_Transcript_2/2_Conf_1.000  | 1433 | 0  |          |                |    |         |     |     |                                                                                 |
| Locus_14740_Transcript_1/1_Conf_1.000 | 814  | 20 | 4.47E-59 | EFO26681.1     | 64 | 232.261 | 278 | 179 | glycosyl transferase                                                            |
| Locus_14741_Transcript_1/1_Conf_1.000 | 448  | 20 | 8.91E-43 | NP_001021685.1 | 94 | 176.407 | 100 | 94  | ZO-1 (Zonula Occludens tight junctional protein) Ortholog family member (zoo-1) |
| Locus_14742_Transcript_1/1_Conf_1.000 | 544  | 20 | 1.09E-24 | ADI24640.1     | 59 | 116.701 | 175 | 104 | Hypothetical protein C56E6.9                                                    |
| Locus_14743_Transcript_1/1_Conf_1.000 | 219  | 20 | 5.89E-26 | EFO13953.1     | 91 | 120.553 | 72  | 66  | hypothetical protein LOAG_14573                                                 |
| Locus_14744_Transcript_1/1_Conf_1.000 | 402  | 0  |          |                |    |         |     |     |                                                                                 |
| Locus_14745_Transcript_1/1_Conf_1.000 | 298  | 0  |          |                |    |         |     |     |                                                                                 |
| Locus_14746_Transcript_1/1_Conf_1.000 | 234  | 0  |          |                |    |         |     |     |                                                                                 |
| Locus_14747_Transcript_1/1_Conf_1.000 | 193  | 0  |          |                |    |         |     |     |                                                                                 |
| Locus_14748_Transcript_1/1_Conf_1.000 | 182  | 0  |          |                |    |         |     |     |                                                                                 |
| Locus_14749_Transcript_1/1_Conf_1.000 | 141  | 0  |          |                |    |         |     |     |                                                                                 |

|                                       |     |    |          |                |     |         |     |     |                                                 |
|---------------------------------------|-----|----|----------|----------------|-----|---------|-----|-----|-------------------------------------------------|
| Locus_1475_Transcript_1/1_Conf_1.000  | 826 | 20 | 9.88E-70 | EFO26807.1     | 81  | 267.7   | 202 | 164 | wnt-4 protein                                   |
| Locus_14750_Transcript_1/1_Conf_1.000 | 261 | 0  |          |                |     |         |     |     |                                                 |
| Locus_14751_Transcript_1/1_Conf_1.000 | 666 | 0  |          |                |     |         |     |     |                                                 |
| Locus_14752_Transcript_1/1_Conf_1.000 | 281 | 2  | 8.57E-06 | XP_002645909.1 | 64  | 53.5286 | 51  | 33  | Hypothetical protein CBG07665                   |
| Locus_14753_Transcript_1/1_Conf_1.000 | 173 | 20 | 1.28E-25 | ADM64582.1     | 100 | 119.398 | 56  | 56  | ribosomal protein L27                           |
| Locus_14754_Transcript_1/1_Conf_1.000 | 177 | 0  |          |                |     |         |     |     |                                                 |
| Locus_14755_Transcript_1/2_Conf_1.000 | 265 | 0  |          |                |     |         |     |     |                                                 |
| Locus_14755_Transcript_2/2_Conf_1.000 | 265 | 0  |          |                |     |         |     |     |                                                 |
| Locus_14756_Transcript_1/1_Conf_1.000 | 412 | 10 | 1.23E-28 | NP_001123020.1 | 69  | 129.413 | 105 | 73  | hypothetical protein T23B12.8                   |
| Locus_14757_Transcript_1/2_Conf_1.000 | 426 | 20 | 1.17E-18 | EFO16664.1     | 53  | 96.2857 | 183 | 98  | lenep protein                                   |
| Locus_14757_Transcript_2/2_Conf_1.000 | 339 | 20 | 3.58E-20 | XP_002629740.1 | 66  | 101.293 | 106 | 71  | Hypothetical protein CBG00973                   |
| Locus_14758_Transcript_1/1_Conf_1.000 | 302 | 20 | 6.35E-41 | NP_509597.1    | 91  | 170.244 | 100 | 91  | GTPase Activating Protein family member (gap-2) |

|                                       |      |    |           |                |    |         |     |     |                                                                   |
|---------------------------------------|------|----|-----------|----------------|----|---------|-----|-----|-------------------------------------------------------------------|
| Locus_14759_Transcript_1/1_Conf_1.000 | 1202 | 20 | 4.81E-155 | NP_495846.1    | 83 | 551.977 | 369 | 307 | hypothetical protein C34C6.4                                      |
| Locus_1476_Transcript_1/2_Conf_1.000  | 1330 | 0  |           |                |    |         |     |     |                                                                   |
| Locus_1476_Transcript_2/2_Conf_1.000  | 1330 | 0  |           |                |    |         |     |     |                                                                   |
| Locus_14760_Transcript_1/2_Conf_1.000 | 247  | 0  |           |                |    |         |     |     |                                                                   |
| Locus_14760_Transcript_2/2_Conf_1.000 | 360  | 0  |           |                |    |         |     |     |                                                                   |
| Locus_14761_Transcript_1/1_Conf_1.000 | 423  | 20 | 1.86E-40  | NP_492533.2    | 74 | 168.703 | 136 | 101 | Iroquois subclass of homeobox family member (irx-1)               |
| Locus_14762_Transcript_1/1_Conf_1.000 | 285  | 0  |           |                |    |         |     |     |                                                                   |
| Locus_14763_Transcript_1/1_Conf_1.000 | 651  | 20 | 5.29E-21  | XP_002740067.1 | 58 | 105.145 | 140 | 82  | PREDICTED: RETRansposon-like family member (retr-1)-like, partial |
| Locus_14764_Transcript_1/1_Conf_1.000 | 356  | 20 | 7.04E-40  | Q5K2C1.1       | 88 | 166.777 | 109 | 96  | Alpha,alpha-trehalose-phosphate synthase UDP-forming 2            |
| Locus_14765_Transcript_1/1_Conf_1.000 | 236  | 2  | 8.68E-14  | XP_002647167.1 | 69 | 80.1073 | 78  | 54  | Hypothetical protein CBG22317                                     |
| Locus_14766_Transcript_1/2_Conf_1.000 | 517  | 4  | 1.29E-26  | NP_506375.1    | 71 | 122.865 | 116 | 83  | hypothetical protein F53F4.11                                     |
| Locus_14766_Transcript_2/2_Conf_1.000 | 517  | 4  | 1.29E-26  | NP_506375.1    | 71 | 122.865 | 116 | 83  | hypothetical protein F53F4.11                                     |
| Locus_14767_Transcript_1/1_Conf_1.000 | 677  | 0  |           |                |    |         |     |     |                                                                   |
| Locus_14768_Transcript_1/1_Conf_1.000 | 144  | 0  |           |                |    |         |     |     |                                                                   |
| Locus_14769_Transcript_1/1_Conf_1.000 | 590  | 20 | 9.54E-71  | NP_001041018.1 | 80 | 270.011 | 196 | 158 | hypothetical protein Y11D7A.3                                     |

|                                       |      |    |          |                |    |         |     |     |                                 |
|---------------------------------------|------|----|----------|----------------|----|---------|-----|-----|---------------------------------|
| Locus_1477_Transcript_1/3_Conf_0.714  | 3328 | 20 | 0        | XP_002635268.1 | 69 | 780.015 | 789 | 547 | Hypothetical protein CBG11512   |
| Locus_1477_Transcript_2/3_Conf_0.714  | 3352 | 20 | 0        | XP_002635268.1 | 70 | 778.474 | 790 | 556 | Hypothetical protein CBG11512   |
| Locus_1477_Transcript_3/3_Conf_0.714  | 3334 | 20 | 0        | XP_002635268.1 | 69 | 781.556 | 790 | 548 | Hypothetical protein CBG11512   |
| Locus_14770_Transcript_1/1_Conf_1.000 | 536  | 20 | 2.21E-35 | EFO24456.1     | 79 | 152.14  | 102 | 81  | hypothetical protein LOAG_04032 |
| Locus_14771_Transcript_1/1_Conf_1.000 | 228  | 11 | 1.03E-06 | NP_001020992.1 | 76 | 56.6102 | 42  | 32  | hypothetical protein C09D4.1    |



|                                       |      |    |          |                |    |         |     |     |                                                        |
|---------------------------------------|------|----|----------|----------------|----|---------|-----|-----|--------------------------------------------------------|
| Locus_14772_Transcript_1/1_Conf_1.000 | 231  | 20 | 8.38E-33 | NP_500265.2    | 93 | 143.28  | 76  | 71  | hypothetical protein Y54G2A.17                         |
| Locus_14773_Transcript_1/1_Conf_1.000 | 214  | 0  |          |                |    |         |     |     |                                                        |
| Locus_14774_Transcript_1/2_Conf_1.000 | 618  | 20 | 3.76E-95 | NP_508927.2    | 85 | 351.288 | 218 | 187 | DihydroPYrimidine Dehydrogenase family member (dpyd-1) |
| Locus_14774_Transcript_2/2_Conf_1.000 | 618  | 20 | 1.43E-94 | NP_508927.2    | 85 | 349.362 | 218 | 187 | DihydroPYrimidine Dehydrogenase family member (dpyd-1) |
| Locus_14775_Transcript_1/2_Conf_1.000 | 492  | 0  |          |                |    |         |     |     |                                                        |
| Locus_14775_Transcript_2/2_Conf_1.000 | 479  | 0  |          |                |    |         |     |     |                                                        |
| Locus_14776_Transcript_1/1_Conf_1.000 | 414  | 20 | 3.10E-56 | XP_002642176.1 | 87 | 221.09  | 137 | 120 | Hypothetical protein CBG18143                          |
| Locus_14777_Transcript_1/1_Conf_1.000 | 401  | 5  | 3.09E-19 | NP_492332.1    | 64 | 98.2117 | 91  | 59  | hypothetical protein F43G9.4                           |
| Locus_14778_Transcript_1/1_Conf_1.000 | 583  | 0  |          |                |    |         |     |     |                                                        |
| Locus_14779_Transcript_1/1_Conf_1.000 | 527  | 0  |          |                |    |         |     |     |                                                        |
| Locus_1478_Transcript_1/2_Conf_1.000  | 1381 | 20 | 1.25E-88 | NP_001016570.1 | 66 | 331.643 | 322 | 213 | aurora kinase A                                        |

|                                       |      |    |           |                |     |         |     |     |                                                                             |
|---------------------------------------|------|----|-----------|----------------|-----|---------|-----|-----|-----------------------------------------------------------------------------|
| Locus_1478_Transcript_2/2_Conf_1.000  | 1324 | 20 | 3.90E-92  | NP_001081565.1 | 72  | 343.199 | 290 | 209 | serine/threonine-protein kinase 6                                           |
| Locus_14780_Transcript_1/1_Conf_1.000 | 927  | 2  | 6.57E-07  | NP_502860.2    | 42  | 59.3066 | 185 | 78  | hypothetical protein Y73F8A.25                                              |
| Locus_14781_Transcript_1/1_Conf_1.000 | 493  | 0  |           |                |     |         |     |     |                                                                             |
| Locus_14782_Transcript_1/1_Conf_1.000 | 234  | 20 | 5.44E-16  | AAK29933.3     | 71  | 87.4261 | 76  | 54  | Rab connectin related protein 2, partially confirmed by transcript evidence |
| Locus_14783_Transcript_1/1_Conf_1.000 | 353  | 20 | 6.19E-36  | XP_002646888.1 | 75  | 153.68  | 123 | 93  | C. briggsae CBR-PTC-3 protein                                               |
| Locus_14784_Transcript_1/1_Conf_1.000 | 250  | 20 | 1.40E-40  | BAI45831.1     | 100 | 169.088 | 83  | 83  | lipolysis stimulated lipoprotein receptor                                   |
| Locus_14785_Transcript_1/1_Conf_1.000 | 186  | 0  |           |                |     |         |     |     |                                                                             |
| Locus_14786_Transcript_1/1_Conf_1.000 | 249  | 0  |           |                |     |         |     |     |                                                                             |
| Locus_14787_Transcript_1/1_Conf_1.000 | 169  | 0  |           |                |     |         |     |     |                                                                             |
| Locus_14788_Transcript_1/1_Conf_1.000 | 406  | 0  |           |                |     |         |     |     |                                                                             |
| Locus_14789_Transcript_1/1_Conf_1.000 | 658  | 0  |           |                |     |         |     |     |                                                                             |
| Locus_1479_Transcript_1/1_Conf_1.000  | 651  | 0  |           |                |     |         |     |     |                                                                             |
| Locus_14790_Transcript_1/1_Conf_1.000 | 357  | 20 | 6.98E-56  | ACZ54691.1     | 96  | 219.935 | 118 | 114 | Uncoordinated protein 82, isoform f                                         |
| Locus_14791_Transcript_1/1_Conf_1.000 | 222  | 0  |           |                |     |         |     |     |                                                                             |
| Locus_14792_Transcript_1/1_Conf_1.000 | 640  | 19 | 4.40E-33  | XP_002631813.1 | 54  | 145.206 | 208 | 114 | Hypothetical protein CBG21034                                               |
| Locus_14793_Transcript_1/1_Conf_1.000 | 1754 | 20 | 8.87E-138 | NP_740853.2    | 79  | 495.352 | 435 | 347 | TOMosyn synaptic protein family member (tom-1)                              |
| Locus_14794_Transcript_1/1_Conf_1.000 | 521  | 4  | 1.51E-30  | XP_002631397.1 | 63  | 135.961 | 150 | 95  | C. briggsae CBR-DEP-1 protein                                               |
| Locus_14795_Transcript_1/1_Conf_1.000 | 222  | 0  |           |                |     |         |     |     |                                                                             |
| Locus_14796_Transcript_1/1_Conf_1.000 | 220  | 0  |           |                |     |         |     |     |                                                                             |
| Locus_14797_Transcript_1/1_Conf_1.000 | 496  | 0  |           |                |     |         |     |     |                                                                             |

|                                       |      |    |           |                |     |         |     |     |                                                                          |
|---------------------------------------|------|----|-----------|----------------|-----|---------|-----|-----|--------------------------------------------------------------------------|
| Locus_14798_Transcript_1/1_Conf_1.000 | 673  | 20 | 1.48E-37  | XP_002629759.1 | 59  | 160.229 | 223 | 133 | Hypothetical protein CBG00995                                            |
| Locus_14799_Transcript_1/1_Conf_1.000 | 273  | 5  | 2.43E-08  | XP_002634384.1 | 52  | 62.003  | 88  | 46  | C. briggsae CBR-ELPC-4 protein                                           |
| Locus_148_Transcript_1/4_Conf_0.545   | 557  | 0  |           |                |     |         |     |     |                                                                          |
| Locus_148_Transcript_2/4_Conf_0.545   | 553  | 0  |           |                |     |         |     |     |                                                                          |
| Locus_148_Transcript_3/4_Conf_0.545   | 359  | 0  |           |                |     |         |     |     |                                                                          |
| Locus_148_Transcript_4/4_Conf_0.545   | 563  | 0  |           |                |     |         |     |     |                                                                          |
| Locus_1480_Transcript_1/1_Conf_1.000  | 1606 | 20 | 0         | NP_496376.1    | 94  | 885.174 | 474 | 447 | NADH Ubiquinone Oxidoreductase family member (nuo-1)                     |
| Locus_14800_Transcript_1/1_Conf_1.000 | 258  | 20 | 1.94E-29  | EFO25600.1     | 100 | 132.109 | 66  | 66  | beige/BEACH domain-containing protein                                    |
| Locus_14801_Transcript_1/1_Conf_1.000 | 1658 | 20 | 2.37E-84  | NP_503398.1    | 62  | 317.775 | 452 | 281 | hypothetical protein C39F7.5                                             |
| Locus_14802_Transcript_1/2_Conf_1.000 | 1197 | 20 | 4.94E-168 | AAV68383.1     | 85  | 595.119 | 391 | 335 | antigen h11                                                              |
| Locus_14802_Transcript_2/2_Conf_1.000 | 1090 | 20 | 2.00E-157 | CAB57358.1     | 86  | 559.681 | 355 | 307 | microsomal aminopeptidase                                                |
| Locus_14803_Transcript_1/1_Conf_1.000 | 1065 | 20 | 5.00E-89  | NP_001022488.1 | 62  | 332.413 | 370 | 230 | UNCoordinated family member (unc-52)                                     |
| Locus_14804_Transcript_1/1_Conf_1.000 | 545  | 20 | 1.98E-34  | EFO15307.1     | 72  | 149.058 | 133 | 97  | hypothetical protein LOAG_13207                                          |
| Locus_14805_Transcript_1/1_Conf_1.000 | 278  | 0  |           |                |     |         |     |     |                                                                          |
| Locus_14806_Transcript_1/1_Conf_1.000 | 205  | 0  |           |                |     |         |     |     |                                                                          |
| Locus_14807_Transcript_1/1_Conf_1.000 | 422  | 4  | 1.45E-08  | NP_493601.2    | 54  | 62.7734 | 75  | 41  | FERM domain (protein4.1-ezrin-radixin-moesin) family member (frm-1)      |
| Locus_14808_Transcript_1/1_Conf_1.000 | 187  | 0  |           |                |     |         |     |     |                                                                          |
| Locus_14809_Transcript_1/2_Conf_1.000 | 180  | 0  |           |                |     |         |     |     |                                                                          |
| Locus_14809_Transcript_2/2_Conf_1.000 | 309  | 0  |           |                |     |         |     |     |                                                                          |
| Locus_1481_Transcript_1/1_Conf_1.000  | 400  | 7  | 5.06E-46  | NP_501821.2    | 84  | 187.193 | 132 | 111 | hypothetical protein T04B2.5                                             |
| Locus_14810_Transcript_1/3_Conf_0.667 | 634  | 20 | 2.18E-61  | CAA22108.2     | 75  | 239.195 | 213 | 161 | C. elegans protein Y75B8A.24, partially confirmed by transcript evidence |

|                                       |      |    |           |                |    |         |     |     |                                           |
|---------------------------------------|------|----|-----------|----------------|----|---------|-----|-----|-------------------------------------------|
| Locus_14810_Transcript_2/3_Conf_0.500 | 962  | 20 | 9.12E-92  | XP_002647048.1 | 75 | 341.273 | 325 | 244 | Hypothetical protein CBG03566             |
| Locus_14810_Transcript_3/3_Conf_0.667 | 1108 | 20 | 1.30E-111 | XP_002647048.1 | 75 | 407.527 | 374 | 283 | Hypothetical protein CBG03566             |
| Locus_14811_Transcript_1/1_Conf_1.000 | 395  | 20 | 1.35E-38  | NP_001023370.1 | 71 | 162.54  | 130 | 93  | ALP/Enigma encoding family member (alp-1) |
| Locus_14812_Transcript_1/1_Conf_1.000 | 285  | 0  |           |                |    |         |     |     |                                           |
| Locus_14813_Transcript_1/1_Conf_1.000 | 185  | 2  | 3.37E-05  | NP_497903.1    | 62 | 51.6026 | 59  | 37  | anNEXin family member (nex-3)             |
| Locus_14814_Transcript_1/1_Conf_1.000 | 574  | 0  |           |                |    |         |     |     |                                           |
| Locus_14815_Transcript_1/1_Conf_1.000 | 175  | 19 | 9.49E-13  | XP_002636796.1 | 75 | 76.6406 | 57  | 43  | C. briggsae CBR-RIL-2 protein             |
| Locus_14816_Transcript_1/1_Conf_1.000 | 592  | 20 | 1.72E-43  | EFN62425.1     | 80 | 179.489 | 125 | 101 | Nuclear factor 1 A-type                   |
| Locus_14817_Transcript_1/1_Conf_1.000 | 741  | 0  |           |                |    |         |     |     |                                           |
| Locus_14818_Transcript_1/1_Conf_1.000 | 222  | 0  |           |                |    |         |     |     |                                           |
| Locus_14819_Transcript_1/1_Conf_1.000 | 206  | 4  | 6.41E-09  | XP_001892631.1 | 83 | 63.929  | 65  | 54  | hypothetical protein Bm1_05795            |
| Locus_1482_Transcript_1/1_Conf_1.000  | 919  | 20 | 5.63E-19  | EFO24485.1     | 76 | 99.3673 | 84  | 64  | hypothetical protein LOAG_03999           |
| Locus_14820_Transcript_1/1_Conf_1.000 | 616  | 20 | 1.13E-51  | XP_002630011.1 | 79 | 206.838 | 179 | 142 | Hypothetical protein CBG13376             |
| Locus_14821_Transcript_1/1_Conf_1.000 | 269  | 20 | 1.33E-30  | XP_002644858.1 | 81 | 135.961 | 86  | 70  | Hypothetical protein CBG05031             |
| Locus_14822_Transcript_1/1_Conf_1.000 | 144  | 0  |           |                |    |         |     |     |                                           |
| Locus_14823_Transcript_1/1_Conf_1.000 | 625  | 20 | 1.08E-41  | EFO25741.1     | 75 | 173.711 | 150 | 113 | hypothetical protein LOAG_02746           |
| Locus_14824_Transcript_1/1_Conf_1.000 | 614  | 20 | 9.80E-32  | NP_001041088.1 | 57 | 140.584 | 194 | 111 | hypothetical protein C27A7.3              |

|                                       |      |    |          |                |    |         |     |     |                                                   |
|---------------------------------------|------|----|----------|----------------|----|---------|-----|-----|---------------------------------------------------|
| Locus_14825_Transcript_1/1_Conf_1.000 | 638  | 20 | 2.01E-46 | NP_741492.1    | 64 | 189.504 | 214 | 139 | hypothetical protein T12G3.8                      |
| Locus_14826_Transcript_1/1_Conf_1.000 | 454  | 20 | 2.31E-59 | NP_498636.2    | 84 | 231.491 | 151 | 128 | hypothetical protein T20B12.1                     |
| Locus_14827_Transcript_1/1_Conf_1.000 | 519  | 0  |          |                |    |         |     |     |                                                   |
| Locus_14828_Transcript_1/1_Conf_1.000 | 357  | 20 | 1.08E-32 | XP_002630470.1 | 73 | 142.895 | 116 | 85  | Hypothetical protein CBG11204                     |
| Locus_14829_Transcript_1/1_Conf_1.000 | 193  | 0  |          |                |    |         |     |     |                                                   |
| Locus_1483_Transcript_1/2_Conf_1.000  | 1709 | 20 | 7.27E-36 | NP_001021928.1 | 60 | 156.762 | 264 | 160 | Maternal Effect Lethal family member (mel-11)     |
| Locus_1483_Transcript_2/2_Conf_1.000  | 1442 | 20 | 1.30E-19 | NP_001021929.1 | 63 | 102.449 | 166 | 105 | Maternal Effect Lethal family member (mel-11)     |
| Locus_14830_Transcript_1/1_Conf_1.000 | 154  | 0  |          |                |    |         |     |     |                                                   |
| Locus_14831_Transcript_1/1_Conf_1.000 | 154  | 0  |          |                |    |         |     |     |                                                   |
| Locus_14832_Transcript_1/1_Conf_1.000 | 266  | 0  |          |                |    |         |     |     |                                                   |
| Locus_14833_Transcript_1/1_Conf_1.000 | 720  | 20 | 1.11E-44 | EFO25648.1     | 63 | 184.111 | 209 | 133 | platelet-activating factor acetylhydrolase        |
| Locus_14834_Transcript_1/1_Conf_1.000 | 471  | 20 | 3.75E-17 | XP_001896547.1 | 64 | 91.2781 | 102 | 66  | Transcription factor TFIIIB repeat family protein |
| Locus_14835_Transcript_1/1_Conf_1.000 | 142  | 3  | 2.17E-09 | XP_002631490.1 | 77 | 65.4698 | 45  | 35  | C. briggsae CBR-EGG-3 protein                     |
| Locus_14836_Transcript_1/1_Conf_1.000 | 194  | 0  |          |                |    |         |     |     |                                                   |
| Locus_14837_Transcript_1/1_Conf_1.000 | 193  | 0  |          |                |    |         |     |     |                                                   |
| Locus_14838_Transcript_1/1_Conf_1.000 | 306  | 20 | 1.61E-20 | NP_510072.1    | 69 | 102.449 | 99  | 69  | hypothetical protein F42F12.4                     |

|                                       |      |    |          |                |    |         |     |     |                                                                   |
|---------------------------------------|------|----|----------|----------------|----|---------|-----|-----|-------------------------------------------------------------------|
| Locus_14839_Transcript_1/2_Conf_1.000 | 605  | 20 | 2.35E-91 | XP_002643185.1 | 97 | 338.576 | 168 | 164 | Hypothetical protein CBG24154                                     |
| Locus_14839_Transcript_2/2_Conf_1.000 | 501  | 20 | 3.17E-72 | EFO25025.1     | 98 | 274.248 | 133 | 131 | NADH-ubiquinone oxidoreductase 23 kDa subunit                     |
| Locus_1484_Transcript_1/1_Conf_1.000  | 1577 | 20 | 2.28E-89 | NP_001022864.1 | 68 | 334.339 | 363 | 250 | hypothetical protein Y42G9A.3                                     |
| Locus_14840_Transcript_1/1_Conf_1.000 | 386  | 20 | 6.39E-09 | XP_641859.1    | 53 | 63.929  | 128 | 69  | hypothetical protein DDB_G0279091                                 |
| Locus_14840_Transcript_2/2_Conf_1.000 | 212  | 0  |          |                |    |         |     |     |                                                                   |
| Locus_14841_Transcript_1/1_Conf_1.000 | 251  | 0  |          |                |    |         |     |     |                                                                   |
| Locus_14842_Transcript_1/1_Conf_1.000 | 366  | 13 | 3.31E-35 | XP_849940.1    | 96 | 128.642 | 65  | 63  | PREDICTED: similar to Small EDRK-rich factor 2 (4F5rel) isoform 2 |
| Locus_14843_Transcript_1/1_Conf_1.000 | 310  | 0  |          |                |    |         |     |     |                                                                   |
| Locus_14844_Transcript_1/1_Conf_1.000 | 139  | 0  |          |                |    |         |     |     |                                                                   |
| Locus_14845_Transcript_1/1_Conf_1.000 | 399  | 20 | 2.79E-28 | XP_002548749.1 | 83 | 128.257 | 101 | 84  | ADP-ribosylation factor                                           |

|                                       |      |    |          |                |    |         |     |     |                                                               |
|---------------------------------------|------|----|----------|----------------|----|---------|-----|-----|---------------------------------------------------------------|
| Locus_14846_Transcript_1/2_Conf_1.000 | 478  | 20 | 7.46E-34 | CAD56609.2     | 66 | 146.747 | 142 | 94  | C. elegans protein Y39A1A.5, confirmed by transcript evidence |
| Locus_14846_Transcript_2/2_Conf_1.000 | 478  | 20 | 7.46E-34 | CAD56609.2     | 66 | 146.747 | 142 | 94  | C. elegans protein Y39A1A.5, confirmed by transcript evidence |
| Locus_14847_Transcript_1/1_Conf_1.000 | 532  | 0  |          |                |    |         |     |     |                                                               |
| Locus_14848_Transcript_1/1_Conf_1.000 | 267  | 0  |          |                |    |         |     |     |                                                               |
| Locus_14849_Transcript_1/1_Conf_1.000 | 134  | 0  |          |                |    |         |     |     |                                                               |
| Locus_1485_Transcript_1/1_Conf_1.000  | 483  | 20 | 2.13E-52 | NP_495985.1    | 84 | 208.379 | 152 | 129 | Temporarily Assigned Gene name family member (tag-175)        |
| Locus_14850_Transcript_1/1_Conf_1.000 | 555  | 20 | 2.41E-70 | XP_002633243.1 | 95 | 268.47  | 141 | 135 | Hypothetical protein CBG05964                                 |
| Locus_14851_Transcript_1/1_Conf_1.000 | 154  | 0  |          |                |    |         |     |     |                                                               |
| Locus_14852_Transcript_1/1_Conf_1.000 | 1020 | 20 | 2.27E-75 | EFA02360.1     | 62 | 286.96  | 378 | 238 | hypothetical protein TcasGA2_TC008035                         |
| Locus_14853_Transcript_1/1_Conf_1.000 | 353  | 20 | 1.38E-27 | XP_002647028.1 | 76 | 125.946 | 115 | 88  | C. briggsae CBR-EMB-8 protein                                 |
| Locus_14854_Transcript_1/1_Conf_1.000 | 175  | 0  |          |                |    |         |     |     |                                                               |
| Locus_14855_Transcript_1/1_Conf_1.000 | 207  | 5  | 4.14E-08 | XP_002641493.1 | 86 | 61.2326 | 38  | 33  | Hypothetical protein CBG09784                                 |

|                                       |      |    |          |                |    |         |     |     |                                                                    |
|---------------------------------------|------|----|----------|----------------|----|---------|-----|-----|--------------------------------------------------------------------|
| Locus_14856_Transcript_1/1_Conf_1.000 | 615  | 20 | 4.91E-47 | XP_001899238.1 | 60 | 191.43  | 208 | 126 | Low-density lipoprotein receptor repeat class B containing protein |
| Locus_14857_Transcript_1/1_Conf_1.000 | 296  | 0  |          |                |    |         |     |     |                                                                    |
| Locus_14858_Transcript_1/1_Conf_1.000 | 317  | 2  | 5.17E-06 | XP_002642239.1 | 57 | 54.299  | 71  | 41  | Hypothetical protein CBG18221                                      |
| Locus_14859_Transcript_1/1_Conf_1.000 | 232  | 0  |          |                |    |         |     |     |                                                                    |
| Locus_1486_Transcript_1/3_Conf_0.667  | 1060 | 20 | 6.71E-78 | EFO24879.1     | 67 | 295.434 | 325 | 218 | hypothetical protein LOAG_03607                                    |
| Locus_1486_Transcript_2/3_Conf_0.667  | 1134 | 20 | 9.79E-78 | EFO24879.1     | 67 | 295.049 | 325 | 218 | hypothetical protein LOAG_03607                                    |
| Locus_1486_Transcript_3/3_Conf_0.667  | 1060 | 20 | 8.77E-78 | EFO24879.1     | 67 | 295.049 | 325 | 218 | hypothetical protein LOAG_03607                                    |
| Locus_14860_Transcript_1/1_Conf_1.000 | 1048 | 20 | 1.52E-82 | ACF74367.1     | 66 | 310.842 | 364 | 243 | Hypothetical protein R13F6.4d                                      |
| Locus_14861_Transcript_1/1_Conf_1.000 | 163  | 0  |          |                |    |         |     |     |                                                                    |
| Locus_14862_Transcript_1/1_Conf_1.000 | 254  | 11 | 2.17E-20 | NP_001122684.1 | 76 | 102.064 | 76  | 58  | UNCoordinated family member (unc-103)                              |
| Locus_14863_Transcript_1/1_Conf_1.000 | 154  | 0  |          |                |    |         |     |     |                                                                    |
| Locus_14864_Transcript_1/1_Conf_1.000 | 230  | 20 | 4.17E-32 | XP_002638742.1 | 94 | 140.969 | 76  | 72  | C. briggsae CBR-PDE-6 protein                                      |
| Locus_14865_Transcript_1/1_Conf_1.000 | 132  | 0  |          |                |    |         |     |     |                                                                    |
| Locus_14866_Transcript_1/1_Conf_1.000 | 517  | 20 | 1.48E-30 | NP_510020.2    | 69 | 135.961 | 141 | 98  | hypothetical protein W03G11.3                                      |
| Locus_14867_Transcript_1/1_Conf_1.000 | 179  | 0  |          |                |    |         |     |     |                                                                    |
| Locus_14868_Transcript_1/1_Conf_1.000 | 257  | 4  | 8.80E-14 | EFO27378.1     | 76 | 80.1073 | 64  | 49  | hypothetical protein LOAG_01103                                    |
| Locus_14869_Transcript_1/1_Conf_1.000 | 140  | 0  |          |                |    |         |     |     |                                                                    |
| Locus_1487_Transcript_1/1_Conf_1.000  | 227  | 0  |          |                |    |         |     |     |                                                                    |



|                                       |      |    |           |                |     |         |     |     |                                                                       |
|---------------------------------------|------|----|-----------|----------------|-----|---------|-----|-----|-----------------------------------------------------------------------|
| Locus_14870_Transcript_1/1_Conf_1.000 | 140  | 16 | 1.37E-11  | AAP36667.1     | 100 | 72.7886 | 36  | 36  | Homo sapiens vesicle-associated membrane protein 8 (endobrevin)       |
| Locus_14871_Transcript_1/1_Conf_1.000 | 665  | 0  |           |                |     |         |     |     |                                                                       |
| Locus_14872_Transcript_1/1_Conf_1.000 | 288  | 0  |           |                |     |         |     |     |                                                                       |
| Locus_14873_Transcript_1/1_Conf_1.000 | 144  | 1  | 2.57E-21  | EAX03766.1     | 100 | 105.145 | 47  | 47  | high mobility group AT-hook 1, isoform CRA_e                          |
| Locus_14874_Transcript_1/1_Conf_1.000 | 754  | 20 | 7.31E-42  | CAA90662.2     | 62  | 174.866 | 205 | 129 | C. elegans protein R166.1, partially confirmed by transcript evidence |
| Locus_14875_Transcript_1/1_Conf_1.000 | 169  | 3  | 1.58E-07  | XP_002642375.1 | 70  | 59.3066 | 50  | 35  | Hypothetical protein CBG18379                                         |
| Locus_14876_Transcript_1/1_Conf_1.000 | 228  | 0  |           |                |     |         |     |     |                                                                       |
| Locus_14877_Transcript_1/1_Conf_1.000 | 147  | 0  |           |                |     |         |     |     |                                                                       |
| Locus_14878_Transcript_1/1_Conf_1.000 | 280  | 3  | 2.40E-16  | NP_740874.1    | 81  | 88.5817 | 55  | 45  | hypothetical protein F57B10.14                                        |
| Locus_14879_Transcript_1/1_Conf_1.000 | 413  | 20 | 1.72E-30  | NP_503523.2    | 73  | 135.576 | 126 | 93  | hypothetical protein Y32G9A.8                                         |
| Locus_1488_Transcript_1/1_Conf_1.000  | 1213 | 20 | 4.78E-118 | NP_492517.2    | 86  | 429.098 | 322 | 279 | STomatin-Like family member (stl-1)                                   |

|                                       |     |    |           |                |     |         |     |     |                                                             |
|---------------------------------------|-----|----|-----------|----------------|-----|---------|-----|-----|-------------------------------------------------------------|
| Locus_14880_Transcript_1/1_Conf_1.000 | 212 | 20 | 1.73E-14  | EFO26533.1     | 81  | 82.4185 | 58  | 47  | hypothetical protein LOAG_01953                             |
| Locus_14881_Transcript_1/1_Conf_1.000 | 274 | 2  | 3.74E-09  | NP_492101.1    | 61  | 64.6994 | 89  | 55  | hypothetical protein T28F4.4                                |
| Locus_14882_Transcript_1/1_Conf_1.000 | 189 | 2  | 2.39E-19  | NP_503543.1    | 85  | 98.5969 | 63  | 54  | hypothetical protein T08B1.1                                |
| Locus_14883_Transcript_1/1_Conf_1.000 | 139 | 0  |           |                |     |         |     |     |                                                             |
| Locus_14884_Transcript_1/1_Conf_1.000 | 359 | 0  |           |                |     |         |     |     |                                                             |
| Locus_14885_Transcript_1/2_Conf_1.000 | 641 | 20 | 1.88E-84  | EFO20001.1     | 84  | 315.849 | 213 | 181 | Sel1l protein                                               |
| Locus_14885_Transcript_2/2_Conf_1.000 | 641 | 20 | 1.88E-84  | EFO20001.1     | 84  | 315.849 | 213 | 181 | Sel1l protein                                               |
| Locus_14886_Transcript_1/1_Conf_1.000 | 235 | 0  |           |                |     |         |     |     |                                                             |
| Locus_14887_Transcript_1/1_Conf_1.000 | 256 | 20 | 7.41E-29  | XP_002810117.1 | 100 | 130.183 | 73  | 73  | PREDICTED: keratinocyte-associated protein 2-like isoform 1 |
| Locus_14888_Transcript_1/1_Conf_1.000 | 134 | 0  |           |                |     |         |     |     |                                                             |
| Locus_14889_Transcript_1/1_Conf_1.000 | 328 | 2  | 6.86E-11  | NP_509148.2    | 86  | 70.4774 | 45  | 39  | hypothetical protein F41B4.1                                |
| Locus_1489_Transcript_1/1_Conf_1.000  | 552 | 20 | 3.32E-56  | EFO21483.1     | 81  | 221.476 | 155 | 126 | inner mitochondrial membrane protease family member         |
| Locus_14890_Transcript_1/1_Conf_1.000 | 295 | 0  |           |                |     |         |     |     |                                                             |
| Locus_14891_Transcript_1/1_Conf_1.000 | 138 | 0  |           |                |     |         |     |     |                                                             |
| Locus_14892_Transcript_1/1_Conf_1.000 | 243 | 20 | 3.36E-26  | EFO16124.1     | 84  | 121.324 | 79  | 67  | protein-tyrosine phosphatase                                |
| Locus_14893_Transcript_1/1_Conf_1.000 | 466 |    |           |                |     |         |     |     |                                                             |
| Locus_14894_Transcript_1/1_Conf_1.000 | 745 | 20 | 7.59E-100 | ACY40006.1     | 86  | 367.466 | 250 | 217 | K+/Cl- cotransporter protein 2, isoform a                   |
| Locus_14895_Transcript_1/1_Conf_1.000 | 197 | 0  |           |                |     |         |     |     |                                                             |

|                                       |      |    |          |                |    |         |     |     |                                                                         |
|---------------------------------------|------|----|----------|----------------|----|---------|-----|-----|-------------------------------------------------------------------------|
| Locus_14896_Transcript_1/1_Conf_1.000 | 236  | 2  | 4.31E-13 | NP_501715.1    | 74 | 77.7962 | 77  | 57  | Acetylcholine-gated Chloride Channel family member (acc-1)              |
| Locus_14897_Transcript_1/1_Conf_1.000 | 222  | 2  | 5.90E-10 | NP_508526.2    | 81 | 67.3958 | 43  | 35  | TWiK family of potassium channels family member (twk-16)                |
| Locus_14898_Transcript_1/1_Conf_1.000 | 384  | 20 | 3.84E-38 | CAA88959.2     | 75 | 160.999 | 119 | 90  | C. elegans protein M03C11.2, partially confirmed by transcript evidence |
| Locus_14899_Transcript_1/2_Conf_1.000 | 584  | 0  |          |                |    |         |     |     |                                                                         |
| Locus_14899_Transcript_2/2_Conf_1.000 | 432  | 0  |          |                |    |         |     |     |                                                                         |
| Locus_149_Transcript_1/1_Conf_1.000   | 747  | 20 | 3.16E-45 | XP_001896912.1 | 70 | 186.037 | 189 | 134 | hypothetical protein                                                    |
| Locus_1490_Transcript_1/2_Conf_1.000  | 2340 | 7  | 2.01E-34 | NP_001122680.1 | 57 | 152.525 | 190 | 109 | hypothetical protein C29E4.13                                           |
| Locus_1490_Transcript_2/2_Conf_1.000  | 2340 | 7  | 2.01E-34 | NP_001122680.1 | 57 | 152.525 | 190 | 109 | hypothetical protein C29E4.13                                           |
| Locus_14900_Transcript_1/1_Conf_1.000 | 422  | 0  |          |                |    |         |     |     |                                                                         |
| Locus_14901_Transcript_1/1_Conf_1.000 | 205  | 4  | 1.74E-06 | XP_001894167.1 | 75 | 55.8398 | 48  | 36  | Rad9 family protein                                                     |
| Locus_14902_Transcript_1/1_Conf_1.000 | 176  | 0  |          |                |    |         |     |     |                                                                         |
| Locus_14903_Transcript_1/1_Conf_1.000 | 321  | 0  |          |                |    |         |     |     |                                                                         |
| Locus_14904_Transcript_1/1_Conf_1.000 | 185  | 0  |          |                |    |         |     |     |                                                                         |
| Locus_14905_Transcript_1/2_Conf_1.000 | 246  | 0  |          |                |    |         |     |     |                                                                         |
| Locus_14905_Transcript_2/2_Conf_1.000 | 255  | 0  |          |                |    |         |     |     |                                                                         |
| Locus_14906_Transcript_1/1_Conf_1.000 | 403  | 0  |          |                |    |         |     |     |                                                                         |
| Locus_14907_Transcript_1/1_Conf_1.000 | 144  | 20 | 2.49E-16 | NP_499865.1    | 93 | 88.5817 | 48  | 45  | hypothetical protein F29C4.6                                            |
| Locus_14908_Transcript_1/1_Conf_1.000 | 507  | 0  |          |                |    |         |     |     |                                                                         |
| Locus_14909_Transcript_1/1_Conf_1.000 | 262  | 20 | 1.48E-29 | NP_496100.1    | 87 | 132.494 | 87  | 76  | hypothetical protein Y53C12B.1                                          |

|                                       |     |    |          |                |     |         |     |     |                                                                                    |
|---------------------------------------|-----|----|----------|----------------|-----|---------|-----|-----|------------------------------------------------------------------------------------|
| Locus_1491_Transcript_1/2_Conf_1.000  | 286 | 20 | 6.74E-14 | NP_501767.1    | 77  | 80.4925 | 66  | 51  | Sperm-Specific family, class P family member (ssp-10)                              |
| Locus_1491_Transcript_2/2_Conf_1.000  | 284 | 20 | 6.76E-14 | NP_501767.1    | 77  | 80.4925 | 66  | 51  | Sperm-Specific family, class P family member (ssp-10)                              |
| Locus_14910_Transcript_1/1_Conf_1.000 | 227 | 0  |          |                |     |         |     |     |                                                                                    |
| Locus_14911_Transcript_1/1_Conf_1.000 | 405 | 0  |          |                |     |         |     |     |                                                                                    |
| Locus_14912_Transcript_1/1_Conf_1.000 | 230 | 0  |          |                |     |         |     |     |                                                                                    |
| Locus_14913_Transcript_1/1_Conf_1.000 | 136 | 0  |          |                |     |         |     |     |                                                                                    |
| Locus_14914_Transcript_1/1_Conf_1.000 | 330 | 20 | 2.04E-31 | NP_001022715.1 | 87  | 138.658 | 109 | 95  | ALIX (Apoptosis-linked gene 2 interacting protein X) homolog family member (alx-1) |
| Locus_14915_Transcript_1/1_Conf_1.000 | 349 | 0  |          |                |     |         |     |     |                                                                                    |
| Locus_14916_Transcript_1/1_Conf_1.000 | 827 | 3  | 2.67E-91 | CAR63525.1     | 78  | 339.347 | 265 | 207 | hypothetical protein                                                               |
| Locus_14917_Transcript_1/1_Conf_1.000 | 514 | 0  |          |                |     |         |     |     |                                                                                    |
| Locus_14918_Transcript_1/1_Conf_1.000 | 518 | 0  |          |                |     |         |     |     |                                                                                    |
| Locus_14919_Transcript_1/1_Conf_1.000 | 289 | 20 | 4.33E-29 | XP_002920245.1 | 100 | 130.954 | 61  | 61  | PREDICTED: STIP1 homology and U box-containing protein 1-like                      |
| Locus_1492_Transcript_1/1_Conf_1.000  | 657 | 20 | 9.15E-53 | NP_001040786.1 | 66  | 210.69  | 218 | 144 | RNase H family member (rnh-1.0)                                                    |

|                                       |      |    |          |                |     |         |     |     |                                                            |
|---------------------------------------|------|----|----------|----------------|-----|---------|-----|-----|------------------------------------------------------------|
| Locus_14920_Transcript_1/1_Conf_1.000 | 168  | 9  | 7.55E-18 | ACI49073.1     | 92  | 93.5893 | 52  | 48  | hypothetical protein Cbre_JD10.005                         |
| Locus_14921_Transcript_1/1_Conf_1.000 | 293  | 1  | 4.35E-05 | NP_498089.2    | 48  | 51.2174 | 110 | 53  | hypothetical protein Y54H5A.2                              |
| Locus_14922_Transcript_1/1_Conf_1.000 | 469  | 20 | 7.09E-24 | NP_496299.1    | 64  | 113.62  | 117 | 75  | beta-LACTamase domain containing family member (lact-3)    |
| Locus_14923_Transcript_1/1_Conf_1.000 | 618  | 20 | 3.78E-71 | EFO14607.1     | 78  | 271.552 | 205 | 160 | TRE-2 protein                                              |
| Locus_14924_Transcript_1/1_Conf_1.000 | 788  | 20 | 1.70E-84 | EFO16211.1     | 73  | 316.62  | 261 | 193 | oxidoreductase                                             |
| Locus_14925_Transcript_1/1_Conf_1.000 | 680  | 2  | 3.62E-07 | NP_502401.1    | 50  | 59.3066 | 136 | 69  | HSN Abnormal Migration family member (ham-1)               |
| Locus_14926_Transcript_1/1_Conf_1.000 | 362  | 20 | 1.78E-43 | XP_002631054.1 | 89  | 178.718 | 107 | 96  | C. briggsae CBR-BTF-1 protein                              |
| Locus_14927_Transcript_1/1_Conf_1.000 | 299  | 2  | 4.60E-15 | NP_498014.2    | 64  | 84.3445 | 90  | 58  | COenzyme Q (ubiquinone) biosynthesis family member (coq-8) |
| Locus_14928_Transcript_1/1_Conf_1.000 | 595  | 20 | 1.13E-42 | XP_002647701.1 | 65  | 176.792 | 201 | 131 | Hypothetical protein CBG17890                              |
| Locus_14929_Transcript_1/2_Conf_1.000 | 323  | 0  |          |                |     |         |     |     |                                                            |
| Locus_14929_Transcript_2/2_Conf_1.000 | 323  | 0  |          |                |     |         |     |     |                                                            |
| Locus_1493_Transcript_1/1_Conf_1.000  | 1584 | 20 | 2.64E-77 | XP_002647056.1 | 55  | 294.278 | 454 | 250 | Hypothetical protein CBG03577                              |
| Locus_14930_Transcript_1/1_Conf_1.000 | 144  | 20 | 7.74E-18 | XP_002815470.1 | 100 | 93.5893 | 47  | 47  | PREDICTED: t-complex protein 1 subunit epsilon-like        |
| Locus_14931_Transcript_1/1_Conf_1.000 | 662  | 20 | 2.08E-81 | CAD44515.1     | 84  | 305.834 | 220 | 186 | VAB-10A protein                                            |
| Locus_14932_Transcript_1/1_Conf_1.000 | 217  | 0  |          |                |     |         |     |     |                                                            |
| Locus_14933_Transcript_1/1_Conf_1.000 | 437  | 5  | 8.28E-17 | XP_002642061.1 | 65  | 90.1225 | 137 | 90  | Hypothetical protein CBG17999                              |
| Locus_14934_Transcript_1/1_Conf_1.000 | 142  | 0  |          |                |     |         |     |     |                                                            |
| Locus_14935_Transcript_1/1_Conf_1.000 | 303  | 0  |          |                |     |         |     |     |                                                            |
| Locus_14936_Transcript_1/1_Conf_1.000 | 354  | 11 | 2.00E-10 | EFO17518.1     | 56  | 68.9366 | 96  | 54  | hypothetical protein LOAG_10981                            |
| Locus_14937_Transcript_1/1_Conf_1.000 | 215  | 1  | 1.62E-04 | EFO24319.1     | 67  | 49.2914 | 49  | 33  | hypothetical protein LOAG_04165                            |

|                                       |      |    |          |                |    |         |     |     |                                 |
|---------------------------------------|------|----|----------|----------------|----|---------|-----|-----|---------------------------------|
| Locus_14938_Transcript_1/1_Conf_1.000 | 443  | 20 | 7.17E-16 | EFO24199.1     | 57 | 87.0409 | 108 | 62  | hypothetical protein LOAG_04289 |
| Locus_14939_Transcript_1/1_Conf_1.000 | 322  | 2  | 3.00E-14 | NP_491418.1    | 68 | 81.6481 | 74  | 51  | hypothetical protein B0041.5    |
| Locus_1494_Transcript_1/4_Conf_0.444  | 946  | 20 | 2.32E-31 | XP_001896932.1 | 80 | 140.584 | 105 | 85  | PDZ domain containing protein   |
| Locus_1494_Transcript_2/4_Conf_0.444  | 1817 | 20 | 0        | CAP24558.1     | 89 | 716.457 | 419 | 376 | C. briggsae CBR-LIN-53 protein  |
| Locus_1494_Transcript_3/4_Conf_0.333  | 1078 | 20 | 1.01E-31 | EFO21602.1     | 79 | 132.494 | 107 | 85  | hypothetical protein LOAG_06884 |

|                                       |      |    |          |                |    |         |     |     |                                                     |
|---------------------------------------|------|----|----------|----------------|----|---------|-----|-----|-----------------------------------------------------|
| Locus_1494_Transcript_4/4_Conf_0.444  | 1817 | 20 | 0        | CAP24558.1     | 89 | 716.457 | 419 | 376 | C. briggsae CBR-LIN-53 protein                      |
| Locus_14940_Transcript_1/1_Conf_1.000 | 462  | 0  |          |                |    |         |     |     |                                                     |
| Locus_14941_Transcript_1/1_Conf_1.000 | 277  | 0  |          |                |    |         |     |     |                                                     |
| Locus_14942_Transcript_1/1_Conf_1.000 | 1104 | 7  | 6.14E-45 | NP_493565.1    | 58 | 186.037 | 284 | 167 | hypothetical protein K05C4.7                        |
| Locus_14943_Transcript_1/1_Conf_1.000 | 312  | 5  | 1.12E-08 | NP_506662.1    | 54 | 63.1586 | 98  | 53  | hypothetical protein ZC412.3                        |
| Locus_14944_Transcript_1/1_Conf_1.000 | 710  | 20 | 9.22E-81 | NP_492436.1    | 78 | 303.908 | 241 | 189 | hypothetical protein W06D4.4                        |
| Locus_14945_Transcript_1/1_Conf_1.000 | 566  | 20 | 2.99E-15 | XP_002633158.1 | 86 | 85.5001 | 46  | 40  | C. briggsae CBR-UNC-82 protein                      |
| Locus_14946_Transcript_1/1_Conf_1.000 | 297  | 4  | 5.99E-23 | NP_741662.1    | 68 | 110.538 | 99  | 68  | TRNA Guanine Transglycosylase family member (tgt-2) |
| Locus_14947_Transcript_1/1_Conf_1.000 | 170  | 0  |          |                |    |         |     |     |                                                     |
| Locus_14948_Transcript_1/1_Conf_1.000 | 767  | 20 | 3.05E-67 | NP_001021875.1 | 68 | 259.225 | 257 | 177 | Leucyl tRNA Synthetase family member (Irs-2)        |

|                                       |     |    |          |                |     |         |     |     |                                                       |
|---------------------------------------|-----|----|----------|----------------|-----|---------|-----|-----|-------------------------------------------------------|
| Locus_14949_Transcript_1/1_Conf_1.000 | 727 | 20 | 5.12E-05 | XP_001950365.1 | 45  | 52.373  | 139 | 63  | PREDICTED: similar to IRA1 protein                    |
| Locus_1495_Transcript_1/1_Conf_1.000  | 293 | 6  | 1.18E-18 | CAD44516.1     | 74  | 96.2857 | 81  | 60  | VAB-10B protein                                       |
| Locus_14950_Transcript_1/1_Conf_1.000 | 612 | 20 | 9.71E-64 | NP_001021995.1 | 77  | 246.899 | 181 | 140 | hypothetical protein C27D6.11                         |
| Locus_14951_Transcript_1/1_Conf_1.000 | 679 | 20 | 2.11E-39 | NP_495410.4    | 58  | 166.392 | 234 | 138 | hypothetical protein C44B7.11                         |
| Locus_14952_Transcript_1/1_Conf_1.000 | 545 | 20 | 5.98E-23 | XP_002641267.1 | 62  | 110.923 | 141 | 88  | Hypothetical protein CBG05179                         |
| Locus_14953_Transcript_1/1_Conf_1.000 | 289 | 5  | 1.95E-21 | NP_498783.1    | 72  | 105.531 | 91  | 66  | hypothetical protein C50C3.7                          |
| Locus_14954_Transcript_1/1_Conf_1.000 | 188 | 20 | 6.29E-28 | XP_002923753.1 | 100 | 127.102 | 62  | 62  | PREDICTED: rRNA 2'-O-methyltransferase fibrillar-like |
| Locus_14955_Transcript_1/1_Conf_1.000 | 195 | 16 | 6.90E-19 | NP_500647.2    | 82  | 97.0561 | 64  | 53  | Dipeptidyl Peptidase Four (IV) family member (dpf-5)  |
| Locus_14956_Transcript_1/1_Conf_1.000 | 482 | 2  | 9.46E-05 | AAO63578.1     | 37  | 50.0618 | 141 | 53  | secreted protein 6 precursor                          |



|                                       |     |    |          |                |    |         |     |     |                                                                         |
|---------------------------------------|-----|----|----------|----------------|----|---------|-----|-----|-------------------------------------------------------------------------|
| Locus_14957_Transcript_1/1_Conf_1.000 | 254 | 6  | 2.24E-25 | NP_492295.1    | 88 | 118.627 | 75  | 66  | hypothetical protein F10D11.6                                           |
| Locus_14958_Transcript_1/1_Conf_1.000 | 508 | 20 | 1.71E-76 | ADD13547.1     | 90 | 288.5   | 169 | 153 | Inositol triphosphate receptor protein 1, isoform h                     |
| Locus_14959_Transcript_1/1_Conf_1.000 | 450 | 20 | 1.91E-53 | XP_002638883.1 | 78 | 211.846 | 144 | 113 | Hypothetical protein CBG22103                                           |
| Locus_1496_Transcript_1/1_Conf_1.000  | 295 | 0  |          |                |    |         |     |     |                                                                         |
| Locus_14960_Transcript_1/1_Conf_1.000 | 339 | 2  | 3.59E-04 | NP_001040692.2 | 50 | 48.1358 | 89  | 45  | hypothetical protein T28B8.3                                            |
| Locus_14961_Transcript_1/1_Conf_1.000 | 307 | 0  |          |                |    |         |     |     |                                                                         |
| Locus_14962_Transcript_1/1_Conf_1.000 | 423 | 0  |          |                |    |         |     |     |                                                                         |
| Locus_14963_Transcript_1/1_Conf_1.000 | 213 | 0  |          |                |    |         |     |     |                                                                         |
| Locus_14964_Transcript_1/1_Conf_1.000 | 161 | 0  |          |                |    |         |     |     |                                                                         |
| Locus_14965_Transcript_1/1_Conf_1.000 | 304 | 5  | 6.17E-12 | CAB55048.3     | 56 | 73.9442 | 88  | 50  | C. elegans protein Y50E8A.5, partially confirmed by transcript evidence |
| Locus_14966_Transcript_1/1_Conf_1.000 | 689 | 3  | 6.17E-10 | NP_491340.2    | 49 | 68.5514 | 191 | 94  | histone METHyltransferase-like family member (met-1)                    |
| Locus_14967_Transcript_1/1_Conf_1.000 | 148 | 0  |          |                |    |         |     |     |                                                                         |
| Locus_14968_Transcript_1/1_Conf_1.000 | 382 | 0  |          |                |    |         |     |     |                                                                         |
| Locus_14969_Transcript_1/1_Conf_1.000 | 324 | 5  | 2.34E-51 | NP_740906.1    | 93 | 204.912 | 108 | 101 | hypothetical protein F26E4.7                                            |
| Locus_1497_Transcript_1/1_Conf_1.000  | 230 | 20 | 1.35E-06 | XP_002643187.1 | 78 | 56.225  | 41  | 32  | Hypothetical protein CBG24156                                           |
| Locus_14970_Transcript_1/1_Conf_1.000 | 174 | 0  |          |                |    |         |     |     |                                                                         |

|                                       |     |    |          |                |     |         |     |     |                                                                        |
|---------------------------------------|-----|----|----------|----------------|-----|---------|-----|-----|------------------------------------------------------------------------|
| Locus_14971_Transcript_1/1_Conf_1.000 | 242 | 20 | 1.32E-38 | ADG03678.1     | 100 | 162.54  | 80  | 80  | alpha actinin 4 short isoform                                          |
| Locus_14972_Transcript_1/1_Conf_1.000 | 619 | 4  | 3.56E-53 | NP_001033357.2 | 67  | 211.846 | 206 | 140 | DAF-16/FOXO Controlled, germline Tumor affecting family member (dct-6) |
| Locus_14973_Transcript_1/1_Conf_1.000 | 143 | 20 | 9.41E-21 | XP_002642408.1 | 100 | 103.219 | 47  | 47  | C. briggsae CBR-NHL-1 protein                                          |
| Locus_14974_Transcript_1/1_Conf_1.000 | 456 | 0  |          |                |     |         |     |     |                                                                        |
| Locus_14975_Transcript_1/1_Conf_1.000 | 869 | 20 | 2.14E-33 | EFO16257.1     | 68  | 147.132 | 150 | 102 | hypothetical protein LOAG_12250                                        |
| Locus_14976_Transcript_1/1_Conf_1.000 | 158 | 5  | 1.82E-19 | NP_001022619.1 | 88  | 98.9821 | 52  | 46  | NorDiHydroGuaiaretic acid resistant family member (ndg-4)              |
| Locus_14977_Transcript_1/1_Conf_1.000 | 761 | 0  |          |                |     |         |     |     |                                                                        |
| Locus_14978_Transcript_1/1_Conf_1.000 | 326 | 0  |          |                |     |         |     |     |                                                                        |
| Locus_14979_Transcript_1/1_Conf_1.000 | 400 | 0  |          |                |     |         |     |     |                                                                        |
| Locus_1498_Transcript_1/2_Conf_1.000  | 472 | 20 | 4.44E-10 | P34473.3       | 59  | 67.781  | 89  | 53  | Uncharacterized protein F58A4.6                                        |
| Locus_1498_Transcript_2/2_Conf_1.000  | 472 | 20 | 3.40E-10 | P34473.3       | 59  | 68.1662 | 89  | 53  | Uncharacterized protein F58A4.6                                        |
| Locus_14980_Transcript_1/1_Conf_1.000 | 398 | 2  | 4.21E-08 | NP_001122443.1 | 91  | 61.2326 | 36  | 33  | hypothetical protein F02E9.5                                           |
| Locus_14981_Transcript_1/1_Conf_1.000 | 223 | 20 | 2.47E-16 | XP_001902364.1 | 79  | 88.5817 | 74  | 59  | Myotubularin-related family protein                                    |
| Locus_14982_Transcript_1/1_Conf_1.000 | 419 | 0  |          |                |     |         |     |     |                                                                        |
| Locus_14983_Transcript_1/1_Conf_1.000 | 348 | 20 | 2.21E-33 | CAR63547.1     | 72  | 145.206 | 118 | 86  | putative COLLAGEN                                                      |

|                                       |      |    |           |                |    |         |     |     |                                       |
|---------------------------------------|------|----|-----------|----------------|----|---------|-----|-----|---------------------------------------|
| Locus_14984_Transcript_1/1_Conf_1.000 | 310  | 20 | 2.17E-25  | NP_001020988.1 | 83 | 118.627 | 103 | 86  | UNCoordinated family member (unc-89)  |
| Locus_14985_Transcript_1/1_Conf_1.000 | 236  | 0  |           |                |    |         |     |     |                                       |
| Locus_14986_Transcript_1/1_Conf_1.000 | 293  | 0  |           |                |    |         |     |     |                                       |
| Locus_14987_Transcript_1/1_Conf_1.000 | 241  | 0  |           |                |    |         |     |     |                                       |
| Locus_14988_Transcript_1/1_Conf_1.000 | 391  | 20 | 1.39E-48  | XP_002632959.1 | 85 | 195.667 | 128 | 109 | C. briggsae CBR-RAD-26 protein        |
| Locus_14989_Transcript_1/1_Conf_1.000 | 314  | 20 | 3.02E-30  | NP_499492.1    | 78 | 134.806 | 102 | 80  | hypothetical protein Y66D12A.10       |
| Locus_1499_Transcript_1/1_Conf_1.000  | 1283 | 20 | 7.71E-106 | EFO24882.1     | 68 | 388.652 | 435 | 300 | hypothetical protein LOAG_03599       |
| Locus_14990_Transcript_1/1_Conf_1.000 | 163  | 0  |           |                |    |         |     |     |                                       |
| Locus_14991_Transcript_1/1_Conf_1.000 | 437  | 0  |           |                |    |         |     |     |                                       |
| Locus_14992_Transcript_1/1_Conf_1.000 | 251  | 20 | 6.10E-20  | XP_002644341.1 | 71 | 100.523 | 85  | 61  | Hypothetical protein CBG14163         |
| Locus_14993_Transcript_1/1_Conf_1.000 | 374  | 20 | 2.53E-29  | XP_002641856.1 | 69 | 131.724 | 116 | 81  | Hypothetical protein CBG16531         |
| Locus_14994_Transcript_1/1_Conf_1.000 | 475  | 0  |           |                |    |         |     |     |                                       |
| Locus_14995_Transcript_1/1_Conf_1.000 | 398  | 0  |           |                |    |         |     |     |                                       |
| Locus_14996_Transcript_1/1_Conf_1.000 | 144  | 0  |           |                |    |         |     |     |                                       |
| Locus_14997_Transcript_1/1_Conf_1.000 | 605  | 20 | 3.35E-21  | XP_001950752.1 | 57 | 105.531 | 207 | 119 | PREDICTED: similar to galactokinase 1 |
| Locus_14998_Transcript_1/1_Conf_1.000 | 226  | 0  |           |                |    |         |     |     |                                       |
| Locus_14999_Transcript_1/1_Conf_1.000 | 380  | 20 | 9.55E-29  | XP_002639263.1 | 83 | 129.798 | 84  | 70  | C. briggsae CBR-MOM-5 protein         |
| Locus_15_Transcript_1/3_Conf_0.429    | 424  | 0  |           |                |    |         |     |     |                                       |
| Locus_15_Transcript_2/3_Conf_0.429    | 598  | 0  |           |                |    |         |     |     |                                       |
| Locus_15_Transcript_3/3_Conf_0.500    | 349  | 0  |           |                |    |         |     |     |                                       |
| Locus_150_Transcript_1/6_Conf_0.500   | 1513 | 20 | 0         | Q9N358.3       | 88 | 641.728 | 414 | 368 | T-complex protein 1 subunitTheta      |
| Locus_150_Transcript_2/6_Conf_0.571   | 1550 | 20 | 0         | Q9N358.3       | 91 | 805.053 | 503 | 461 | T-complex protein 1 subunitTheta      |

|                                       |      |    |           |                |    |         |     |     |                                                        |
|---------------------------------------|------|----|-----------|----------------|----|---------|-----|-----|--------------------------------------------------------|
| Locus_150_Transcript_3/6_Conf_0.571   | 1550 | 20 | 0         | Q9N358.3       | 91 | 803.512 | 503 | 461 | T-complex protein 1 subunitTheta                       |
| Locus_150_Transcript_4/6_Conf_0.571   | 1550 | 20 | 0         | Q9N358.3       | 91 | 801.971 | 503 | 461 | T-complex protein 1 subunitTheta                       |
| Locus_150_Transcript_5/6_Conf_0.143   | 2282 | 20 | 3.04E-104 | XP_001900116.1 | 54 | 384.415 | 763 | 415 | SMC proteins Flexible Hinge Domain containing protein  |
| Locus_150_Transcript_6/6_Conf_0.571   | 1550 | 20 | 0         | Q9N358.3       | 91 | 803.512 | 503 | 461 | T-complex protein 1 subunitTheta                       |
| Locus_1500_Transcript_1/1_Conf_1.000  | 1364 | 20 | 0         | NP_508841.1    | 99 | 758.444 | 376 | 375 | ACTin family member (act-4)                            |
| Locus_15000_Transcript_1/1_Conf_1.000 | 136  | 0  |           |                |    |         |     |     |                                                        |
| Locus_15001_Transcript_1/1_Conf_1.000 | 307  | 0  |           |                |    |         |     |     |                                                        |
| Locus_15002_Transcript_1/1_Conf_1.000 | 180  | 0  |           |                |    |         |     |     |                                                        |
| Locus_15003_Transcript_1/1_Conf_1.000 | 305  | 7  | 1.57E-15  | XP_001894313.1 | 63 | 85.8853 | 86  | 55  | NLI interacting factor-like phosphatase family protein |
| Locus_15004_Transcript_1/1_Conf_1.000 | 235  | 0  |           |                |    |         |     |     |                                                        |
| Locus_15005_Transcript_1/1_Conf_1.000 | 571  | 0  |           |                |    |         |     |     |                                                        |
| Locus_15006_Transcript_1/1_Conf_1.000 | 222  | 0  |           |                |    |         |     |     |                                                        |
| Locus_15007_Transcript_1/1_Conf_1.000 | 267  | 0  |           |                |    |         |     |     |                                                        |
| Locus_15008_Transcript_1/1_Conf_1.000 | 184  | 1  | 3.60E-07  | EFO17857.1     | 67 | 58.151  | 61  | 41  | CK1/TTBK protein kinase                                |

|                                       |      |    |          |                |     |         |     |     |                                                      |
|---------------------------------------|------|----|----------|----------------|-----|---------|-----|-----|------------------------------------------------------|
| Locus_15009_Transcript_1/1_Conf_1.000 | 1054 | 20 | 3.08E-91 | XP_002640663.1 | 68  | 339.732 | 332 | 228 | C. briggsae CBR-DOG-1 protein                        |
| Locus_1501_Transcript_1/3_Conf_0.667  | 1640 | 20 | 1.59E-16 | ACX37244.1     | 40  | 92.4337 | 404 | 164 | eIF4G                                                |
| Locus_1501_Transcript_2/3_Conf_0.667  | 1634 | 20 | 2.07E-16 | ACX37244.1     | 40  | 92.0485 | 402 | 164 | eIF4G                                                |
| Locus_1501_Transcript_3/3_Conf_0.333  | 366  | 0  |          |                |     |         |     |     |                                                      |
| Locus_15010_Transcript_1/1_Conf_1.000 | 331  | 20 | 6.74E-59 | BAF84240.1     | 100 | 229.95  | 109 | 109 | unnamed protein product                              |
| Locus_15011_Transcript_1/1_Conf_1.000 | 345  | 2  | 8.18E-20 | XP_001897339.1 | 65  | 100.138 | 101 | 66  | Negative elongation factor A homolog                 |
| Locus_15012_Transcript_1/1_Conf_1.000 | 315  | 0  |          |                |     |         |     |     |                                                      |
| Locus_15013_Transcript_1/1_Conf_1.000 | 479  | 20 | 1.51E-18 | EFO24760.1     | 82  | 95.9005 | 76  | 63  | hypothetical protein LOAG_03731                      |
| Locus_15014_Transcript_1/1_Conf_1.000 | 900  | 16 | 8.69E-09 | XP_001921732.1 | 45  | 65.4698 | 170 | 77  | PREDICTED: zonadhesin-like                           |
| Locus_15015_Transcript_1/1_Conf_1.000 | 239  | 0  |          |                |     |         |     |     |                                                      |
| Locus_15016_Transcript_1/1_Conf_1.000 | 409  | 20 | 3.38E-18 | XP_001362642.1 | 46  | 94.7449 | 122 | 57  | PREDICTED: similar to OTTHUMP00000028801             |
| Locus_15017_Transcript_1/1_Conf_1.000 | 406  | 6  | 2.20E-09 | EFO22525.1     | 58  | 65.4698 | 77  | 45  | hypothetical protein LOAG_05962                      |
| Locus_15018_Transcript_1/1_Conf_1.000 | 979  | 20 | 3.96E-90 | NP_001076724.1 | 70  | 335.88  | 327 | 230 | Na-K-Cl Cotransporter homolog family member (nkcc-1) |
| Locus_15019_Transcript_1/1_Conf_1.000 | 489  | 20 | 9.46E-61 | XP_002637665.1 | 90  | 236.113 | 151 | 137 | C. briggsae CBR-APT-10 protein                       |

|                                       |      |    |           |                |     |         |     |     |                                                                         |
|---------------------------------------|------|----|-----------|----------------|-----|---------|-----|-----|-------------------------------------------------------------------------|
| Locus_1502_Transcript_1/1_Conf_1.000  | 576  | 20 | 2.00E-25  | XP_001901168.1 | 78  | 119.398 | 111 | 87  | Groucho/TLE N-terminal Q-rich domain containing protein                 |
| Locus_15020_Transcript_1/1_Conf_1.000 | 615  | 9  | 9.37E-06  | AAD13340.1     | 42  | 54.299  | 187 | 79  | ancylostoma secreted protein 1 precursor                                |
| Locus_15021_Transcript_1/1_Conf_1.000 | 778  | 1  | 2.44E-27  | NP_497506.3    | 55  | 126.716 | 246 | 137 | hypothetical protein Y48G9A.3                                           |
| Locus_15022_Transcript_1/1_Conf_1.000 | 391  | 0  |           |                |     |         |     |     |                                                                         |
| Locus_15023_Transcript_1/1_Conf_1.000 | 889  | 20 | 2.31E-115 | NP_741249.1    | 82  | 419.468 | 297 | 245 | hypothetical protein C02F5.7                                            |
| Locus_15024_Transcript_1/1_Conf_1.000 | 252  | 20 | 1.36E-14  | XP_002643359.1 | 57  | 82.8037 | 101 | 58  | Hypothetical protein CBG15962                                           |
| Locus_15025_Transcript_1/3_Conf_0.667 | 924  | 20 | 1.06E-49  | NP_498711.1    | 62  | 201.445 | 199 | 124 | TYRosinase family member (tyr-1)                                        |
| Locus_15025_Transcript_2/3_Conf_0.667 | 924  | 20 | 1.06E-49  | NP_498711.1    | 62  | 201.445 | 199 | 124 | TYRosinase family member (tyr-1)                                        |
| Locus_15025_Transcript_3/3_Conf_0.667 | 924  | 20 | 1.06E-49  | NP_498711.1    | 62  | 201.445 | 199 | 124 | TYRosinase family member (tyr-1)                                        |
| Locus_15026_Transcript_1/1_Conf_1.000 | 544  | 4  | 2.11E-44  | XP_002641787.1 | 71  | 182.185 | 152 | 109 | Hypothetical protein CBG10134                                           |
| Locus_15027_Transcript_1/1_Conf_1.000 | 130  | 2  | 1.09E-08  | NP_491911.3    | 79  | 63.1586 | 43  | 34  | hypothetical protein ZC581.3                                            |
| Locus_15028_Transcript_1/1_Conf_1.000 | 1009 | 1  | 7.76E-20  | NP_495158.3    | 45  | 102.449 | 320 | 147 | hypothetical protein ZK1248.13                                          |
| Locus_15029_Transcript_1/1_Conf_1.000 | 422  | 20 | 4.43E-58  | ABS45067.1     | 94  | 227.254 | 140 | 132 | latrophilin-like protein 2                                              |
| Locus_1503_Transcript_1/1_Conf_1.000  | 2692 | 20 | 0         | NP_741616.2    | 65  | 1031.55 | 913 | 597 | CRiM (Cysteine Rich motor neuron protein) homolog family member (crm-1) |
| Locus_15030_Transcript_1/1_Conf_1.000 | 563  | 0  |           |                |     |         |     |     |                                                                         |
| Locus_15031_Transcript_1/1_Conf_1.000 | 479  | 20 | 2.56E-42  | NP_501928.1    | 74  | 174.866 | 139 | 103 | hypothetical protein F13B12.4                                           |
| Locus_15032_Transcript_1/1_Conf_1.000 | 693  | 6  | 7.33E-59  | NP_502752.1    | 64  | 231.106 | 211 | 137 | hypothetical protein LLC1.2                                             |
| Locus_15033_Transcript_1/1_Conf_1.000 | 156  | 0  |           |                |     |         |     |     |                                                                         |
| Locus_15034_Transcript_1/1_Conf_1.000 | 147  | 20 | 6.31E-20  | XP_002833008.1 | 100 | 100.523 | 48  | 48  | PREDICTED: heme-binding protein 2-like isoform 2                        |
| Locus_15035_Transcript_1/1_Conf_1.000 | 589  | 5  | 1.75E-40  | NP_505776.1    | 85  | 169.474 | 149 | 127 | hypothetical protein F32D8.5                                            |
| Locus_15036_Transcript_1/1_Conf_1.000 | 843  | 2  | 5.95E-09  | EFO24331.1     | 64  | 65.855  | 78  | 50  | hypothetical protein LOAG_04146                                         |
| Locus_15037_Transcript_1/1_Conf_1.000 | 193  | 20 | 4.97E-09  | XP_002737095.1 | 70  | 64.3142 | 57  | 40  | PREDICTED: glutathione S-transferase kappa 1-like                       |

|                                       |      |    |           |                |    |         |     |     |                                                                        |
|---------------------------------------|------|----|-----------|----------------|----|---------|-----|-----|------------------------------------------------------------------------|
| Locus_15038_Transcript_1/1_Conf_1.000 | 280  | 2  | 3.59E-12  | XP_002631029.1 | 68 | 74.7146 | 67  | 46  | Hypothetical protein CBG02786                                          |
| Locus_15039_Transcript_1/1_Conf_1.000 | 288  | 20 | 3.32E-29  | XP_002633438.1 | 82 | 131.339 | 95  | 78  | Hypothetical protein CBG06206                                          |
| Locus_1504_Transcript_1/1_Conf_1.000  | 1163 | 20 | 9.59E-129 | XP_002636865.1 | 74 | 464.537 | 390 | 292 | Hypothetical protein CBG09322                                          |
| Locus_15040_Transcript_1/1_Conf_1.000 | 488  | 0  |           |                |    |         |     |     |                                                                        |
| Locus_15041_Transcript_1/1_Conf_1.000 | 257  | 20 | 6.11E-07  | XP_002159471.1 | 50 | 57.3806 | 91  | 46  | PREDICTED: similar to alkaline phosphatase, liver/bone/kidney, partial |
| Locus_15042_Transcript_1/1_Conf_1.000 | 303  | 0  |           |                |    |         |     |     |                                                                        |
| Locus_15043_Transcript_1/1_Conf_1.000 | 294  | 20 | 3.66E-12  | NP_495668.1    | 56 | 74.7146 | 98  | 55  | hypothetical protein ZK669.2                                           |
| Locus_15044_Transcript_1/2_Conf_1.000 | 720  | 0  |           |                |    |         |     |     |                                                                        |
| Locus_15044_Transcript_2/2_Conf_1.000 | 485  | 0  |           |                |    |         |     |     |                                                                        |

|                                       |     |    |          |                |    |         |     |     |                                                                         |
|---------------------------------------|-----|----|----------|----------------|----|---------|-----|-----|-------------------------------------------------------------------------|
| Locus_15045_Transcript_1/1_Conf_1.000 | 686 | 19 | 1.50E-16 | XP_002648013.1 | 45 | 90.5077 | 212 | 97  | Hypothetical protein CBG23963                                           |
| Locus_15046_Transcript_1/1_Conf_1.000 | 331 | 20 | 1.45E-53 | NP_491646.3    | 87 | 212.231 | 109 | 95  | hypothetical protein F46F11.7                                           |
| Locus_15047_Transcript_1/2_Conf_1.000 | 557 | 20 | 1.13E-51 | XP_002647223.1 | 73 | 206.453 | 180 | 132 | Hypothetical protein CBG23813                                           |
| Locus_15047_Transcript_2/2_Conf_1.000 | 555 | 20 | 1.13E-51 | XP_002647223.1 | 74 | 206.453 | 175 | 130 | Hypothetical protein CBG23813                                           |
| Locus_15048_Transcript_1/1_Conf_1.000 | 436 | 20 | 4.84E-25 | XP_002972906.1 | 68 | 117.472 | 125 | 85  | hypothetical protein SELMODRAFT_98330                                   |
| Locus_15049_Transcript_1/1_Conf_1.000 | 557 | 20 | 1.85E-70 | XP_002630469.1 | 86 | 268.855 | 166 | 143 | C. briggsae CBR-SQV-7 protein                                           |
| Locus_1505_Transcript_1/1_Conf_1.000  | 451 | 20 | 5.37E-48 | XP_002640609.1 | 85 | 193.741 | 149 | 128 | C. briggsae CBR-PRI-2 protein                                           |
| Locus_15050_Transcript_1/1_Conf_1.000 | 327 | 0  |          |                |    |         |     |     |                                                                         |
| Locus_15051_Transcript_1/1_Conf_1.000 | 192 | 0  |          |                |    |         |     |     |                                                                         |
| Locus_15052_Transcript_1/1_Conf_1.000 | 303 | 0  |          |                |    |         |     |     |                                                                         |
| Locus_15053_Transcript_1/1_Conf_1.000 | 746 | 0  |          |                |    |         |     |     |                                                                         |
| Locus_15054_Transcript_1/1_Conf_1.000 | 340 | 6  | 3.71E-09 | CBM41222.1     | 55 | 64.6994 | 90  | 50  | C. elegans protein T10G3.3b, partially confirmed by transcript evidence |
| Locus_15055_Transcript_1/1_Conf_1.000 | 377 | 20 | 1.17E-26 | XP_002641207.1 | 70 | 122.865 | 108 | 76  | Hypothetical protein CBG09068                                           |
| Locus_15056_Transcript_1/1_Conf_1.000 | 748 | 0  |          |                |    |         |     |     |                                                                         |
| Locus_15057_Transcript_1/1_Conf_1.000 | 198 | 13 | 1.81E-11 | EFO18099.1     | 63 | 72.4034 | 63  | 40  | hypothetical protein LOAG_10400                                         |
| Locus_15058_Transcript_1/1_Conf_1.000 | 140 | 0  |          |                |    |         |     |     |                                                                         |



|                                       |     |    |          |                |    |         |     |     |                                                 |
|---------------------------------------|-----|----|----------|----------------|----|---------|-----|-----|-------------------------------------------------|
| Locus_15059_Transcript_1/1_Conf_1.000 | 439 | 20 | 1.55E-23 | NP_509583.1    | 71 | 112.464 | 112 | 80  | hypothetical protein B0272.4                    |
| Locus_1506_Transcript_1/1_Conf_1.000  | 419 | 20 | 7.93E-23 | XP_002636649.1 | 80 | 110.153 | 70  | 56  | Hypothetical protein CBG23360                   |
| Locus_15060_Transcript_1/1_Conf_1.000 | 129 | 2  | 2.35E-11 | XP_002640624.1 | 88 | 72.0182 | 42  | 37  | Hypothetical protein CBG08742                   |
| Locus_15061_Transcript_1/1_Conf_1.000 | 512 | 20 | 2.54E-64 | XP_002641212.1 | 83 | 248.054 | 159 | 132 | Hypothetical protein CBG09074                   |
| Locus_15062_Transcript_1/1_Conf_1.000 | 520 | 6  | 7.54E-06 | XP_002598663.1 | 42 | 53.9138 | 124 | 53  | hypothetical protein BRAFLDRAFT_67064           |
| Locus_15063_Transcript_1/1_Conf_1.000 | 289 | 0  |          |                |    |         |     |     |                                                 |
| Locus_15064_Transcript_1/1_Conf_1.000 | 388 | 20 | 1.91E-21 | NP_497585.1    | 68 | 105.531 | 123 | 84  | G Protein, Alpha subunit family member (gpa-17) |

|                                       |      |    |          |                |     |         |     |     |                                                                              |
|---------------------------------------|------|----|----------|----------------|-----|---------|-----|-----|------------------------------------------------------------------------------|
| Locus_15065_Transcript_1/1_Conf_1.000 | 572  | 20 | 3.89E-26 | CAA94882.2     | 60  | 121.709 | 193 | 117 | C. elegans protein B0024.10, confirmed by transcript evidence                |
| Locus_15066_Transcript_1/1_Conf_1.000 | 205  | 5  | 7.28E-29 | CAR63715.1     | 100 | 130.183 | 67  | 67  | putative NHL (ring finger b-box coiled coil) domain containing family member |
| Locus_15067_Transcript_1/1_Conf_1.000 | 533  | 20 | 8.44E-27 | XP_002639475.1 | 61  | 123.635 | 172 | 105 | Hypothetical protein CBG04073                                                |
| Locus_15068_Transcript_1/1_Conf_1.000 | 237  | 6  | 3.88E-14 | ACJ65180.1     | 73  | 81.2629 | 79  | 58  | Gaba b receptor subunit protein 2, confirmed by transcript evidence          |
| Locus_15069_Transcript_1/1_Conf_1.000 | 303  | 20 | 8.57E-30 | XP_001898220.1 | 83  | 133.265 | 100 | 83  | multidrug Resistance Protein family member (mrp-5)                           |
| Locus_1507_Transcript_1/2_Conf_1.000  | 1909 | 8  | 2.19E-44 | XP_002641295.1 | 63  | 185.267 | 282 | 180 | Hypothetical protein CBG05210                                                |
| Locus_1507_Transcript_2/2_Conf_1.000  | 1215 | 8  | 1.21E-44 | XP_002641295.1 | 63  | 185.267 | 282 | 180 | Hypothetical protein CBG05210                                                |
| Locus_15070_Transcript_1/1_Conf_1.000 | 163  | 20 | 2.53E-13 | NP_493802.2    | 85  | 78.5666 | 54  | 46  | SyNapTotagmin family member (snt-6)                                          |
| Locus_15071_Transcript_1/1_Conf_1.000 | 140  | 0  |          |                |     |         |     |     |                                                                              |
| Locus_15072_Transcript_1/1_Conf_1.000 | 308  | 20 | 1.41E-24 | AAL15593.1     | 72  | 115.931 | 103 | 75  | AF322256_14Sim15                                                             |
| Locus_15073_Transcript_1/1_Conf_1.000 | 414  | 0  |          |                |     |         |     |     |                                                                              |

|                                       |      |    |           |                |    |         |     |     |                                                                |
|---------------------------------------|------|----|-----------|----------------|----|---------|-----|-----|----------------------------------------------------------------|
| Locus_15074_Transcript_1/1_Conf_1.000 | 513  | 20 | 5.10E-52  | NP_496057.1    | 83 | 207.223 | 155 | 130 | EXCretry canal abnormal family member (exc-7)                  |
| Locus_15075_Transcript_1/1_Conf_1.000 | 181  | 13 | 7.75E-18  | NP_001021395.1 | 88 | 93.5893 | 52  | 46  | Receptor Mediated Endocytosis family member (rme-8)            |
| Locus_15076_Transcript_1/1_Conf_1.000 | 410  | 0  |           |                |    |         |     |     |                                                                |
| Locus_15077_Transcript_1/1_Conf_1.000 | 755  | 20 | 4.72E-57  | NP_499177.3    | 68 | 225.328 | 252 | 173 | hypothetical protein ZK632.7                                   |
| Locus_15078_Transcript_1/1_Conf_1.000 | 181  | 0  |           |                |    |         |     |     |                                                                |
| Locus_15079_Transcript_1/1_Conf_1.000 | 186  | 0  |           |                |    |         |     |     |                                                                |
| Locus_1508_Transcript_1/1_Conf_1.000  | 1272 | 20 | 3.15E-51  | XP_002641264.1 | 72 | 207.223 | 211 | 152 | C. briggsae CBR-DNJ-24 protein                                 |
| Locus_15080_Transcript_1/1_Conf_1.000 | 286  | 3  | 2.24E-17  | XP_002645893.1 | 78 | 92.0485 | 92  | 72  | Hypothetical protein CBG07646                                  |
| Locus_15081_Transcript_1/1_Conf_1.000 | 1005 | 20 | 3.31E-63  | XP_001902019.1 | 62 | 246.514 | 295 | 184 | PRPF39 protein                                                 |
| Locus_15082_Transcript_1/1_Conf_1.000 | 278  | 20 | 1.85E-08  | CBI63218.1     | 76 | 62.3882 | 52  | 40  | C. elegans protein F46G10.7c, confirmed by transcript evidence |
| Locus_15083_Transcript_1/1_Conf_1.000 | 425  | 1  | 1.65E-04  | EFN74469.1     | 45 | 49.2914 | 81  | 37  | hypothetical protein EAG_09297                                 |
| Locus_15084_Transcript_1/1_Conf_1.000 | 350  | 0  |           |                |    |         |     |     |                                                                |
| Locus_15085_Transcript_1/1_Conf_1.000 | 467  | 20 | 1.94E-29  | XP_002639128.1 | 84 | 132.109 | 88  | 74  | C. briggsae CBR-SPG-7 protein                                  |
| Locus_15086_Transcript_1/1_Conf_1.000 | 810  | 0  |           |                |    |         |     |     |                                                                |
| Locus_15087_Transcript_1/1_Conf_1.000 | 169  | 20 | 8.61E-22  | NP_001076639.1 | 96 | 106.686 | 55  | 53  | TWiK family of potassium channels family member (twk-39)       |
| Locus_15088_Transcript_1/1_Conf_1.000 | 238  | 0  |           |                |    |         |     |     |                                                                |
| Locus_15089_Transcript_1/1_Conf_1.000 | 138  | 0  |           |                |    |         |     |     |                                                                |
| Locus_1509_Transcript_1/1_Conf_1.000  | 1131 | 20 | 1.05E-156 | NP_001022735.1 | 84 | 557.37  | 376 | 316 | hypothetical protein R155.1                                    |

|                                       |      |    |          |                |    |         |     |     |                                               |
|---------------------------------------|------|----|----------|----------------|----|---------|-----|-----|-----------------------------------------------|
| Locus_15090_Transcript_1/1_Conf_1.000 | 500  | 20 | 7.90E-60 | NP_509931.1    | 98 | 233.032 | 116 | 114 | abnormal cell MIGration family member (mig-2) |
| Locus_15091_Transcript_1/1_Conf_1.000 | 290  | 0  |          |                |    |         |     |     |                                               |
| Locus_15092_Transcript_1/1_Conf_1.000 | 262  | 20 | 2.22E-17 | XP_002632484.1 | 75 | 92.0485 | 70  | 53  | Hypothetical protein CBG13719                 |
| Locus_15093_Transcript_1/1_Conf_1.000 | 389  | 0  |          |                |    |         |     |     |                                               |
| Locus_15094_Transcript_1/1_Conf_1.000 | 162  | 20 | 5.27E-11 | NP_501217.2    | 81 | 70.8626 | 54  | 44  | hypothetical protein R05G6.10                 |
| Locus_15095_Transcript_1/1_Conf_1.000 | 183  | 0  |          |                |    |         |     |     |                                               |
| Locus_15096_Transcript_1/1_Conf_1.000 | 409  | 0  |          |                |    |         |     |     |                                               |
| Locus_15097_Transcript_1/1_Conf_1.000 | 298  | 0  |          |                |    |         |     |     |                                               |
| Locus_15098_Transcript_1/1_Conf_1.000 | 183  | 20 | 9.15E-11 | XP_002640025.1 | 87 | 70.0922 | 40  | 35  | Hypothetical protein CBG12497                 |
| Locus_15099_Transcript_1/1_Conf_1.000 | 159  | 1  | 3.32E-05 | EFO20471.1     | 69 | 51.6026 | 53  | 37  | hypothetical protein LOAG_08020               |
| Locus_151_Transcript_1/1_Conf_1.000   | 814  | 0  |          |                |    |         |     |     |                                               |
| Locus_1510_Transcript_1/1_Conf_1.000  | 1331 | 20 | 2.01E-88 | XP_002639683.1 | 62 | 330.872 | 444 | 277 | C. briggsae CBR-GEI-11 protein                |
| Locus_15100_Transcript_1/1_Conf_1.000 | 128  | 2  | 3.65E-04 | NP_499641.2    | 64 | 48.1358 | 37  | 24  | hypothetical protein Y111B2A.10               |
| Locus_15101_Transcript_1/1_Conf_1.000 | 879  | 20 | 5.20E-19 | XP_002637508.1 | 75 | 99.3673 | 79  | 60  | C. briggsae CBR-TAG-232 protein               |
| Locus_15102_Transcript_1/1_Conf_1.000 | 314  | 0  |          |                |    |         |     |     |                                               |
| Locus_15103_Transcript_1/1_Conf_1.000 | 523  | 0  |          |                |    |         |     |     |                                               |
| Locus_15104_Transcript_1/1_Conf_1.000 | 350  | 20 | 1.87E-32 | NP_508492.1    | 71 | 142.124 | 116 | 83  | hypothetical protein Y71H10B.1                |

|                                       |      |    |          |                |     |         |     |     |                                                                         |
|---------------------------------------|------|----|----------|----------------|-----|---------|-----|-----|-------------------------------------------------------------------------|
| Locus_15105_Transcript_1/1_Conf_1.000 | 315  | 20 | 9.35E-32 | AAL72637.1     | 73  | 139.813 | 105 | 77  | AF411588_inositol polyphosphate 5-phosphatase type I                    |
| Locus_15106_Transcript_1/1_Conf_1.000 | 326  | 20 | 3.40E-26 | NP_492719.1    | 85  | 121.324 | 70  | 60  | hypothetical protein F45H11.5                                           |
| Locus_15107_Transcript_1/1_Conf_1.000 | 185  | 0  |          |                |     |         |     |     |                                                                         |
| Locus_15108_Transcript_1/1_Conf_1.000 | 196  | 0  |          |                |     |         |     |     |                                                                         |
| Locus_15109_Transcript_1/1_Conf_1.000 | 955  | 20 | 5.47E-89 | CAB05198.3     | 80  | 332.028 | 240 | 193 | C. elegans protein F52B11.2, partially confirmed by transcript evidence |
| Locus_1511_Transcript_1/2_Conf_1.000  | 1744 | 3  | 1.11E-23 | XP_001898374.1 | 48  | 116.316 | 346 | 168 | hypothetical protein Bm1_34635                                          |
| Locus_1511_Transcript_2/2_Conf_1.000  | 1645 | 20 | 4.06E-28 | NP_504644.1    | 80  | 130.954 | 94  | 76  | ACyLtransferase-like family member (acl-9)                              |
| Locus_15110_Transcript_1/1_Conf_1.000 | 381  | 20 | 1.41E-48 | XP_002648358.1 | 88  | 195.667 | 125 | 111 | Hypothetical protein CBG24564                                           |
| Locus_15111_Transcript_1/1_Conf_1.000 | 316  | 20 | 2.99E-54 | CAI15061.1     | 100 | 214.542 | 105 | 105 | guanylate kinase 1                                                      |
| Locus_15112_Transcript_1/1_Conf_1.000 | 176  | 0  |          |                |     |         |     |     |                                                                         |
| Locus_15113_Transcript_1/2_Conf_1.000 | 448  | 0  |          |                |     |         |     |     |                                                                         |
| Locus_15113_Transcript_2/2_Conf_1.000 | 472  | 0  |          |                |     |         |     |     |                                                                         |
| Locus_15114_Transcript_1/1_Conf_1.000 | 316  | 20 | 1.49E-37 | NP_741746.1    | 98  | 159.073 | 105 | 103 | Kinesin-Like Protein family member (klp-4)                              |
| Locus_15115_Transcript_1/1_Conf_1.000 | 1793 | 20 | 3.41E-76 | NP_872042.1    | 58  | 290.812 | 499 | 294 | hypothetical protein C27H5.2                                            |
| Locus_15116_Transcript_1/1_Conf_1.000 | 352  | 2  | 3.09E-11 | NP_495375.3    | 53  | 71.633  | 115 | 61  | hypothetical protein T14B4.1                                            |
| Locus_15117_Transcript_1/1_Conf_1.000 | 366  | 20 | 6.98E-16 | EFO23847.1     | 72  | 87.0409 | 75  | 54  | hypothetical protein LOAG_04634                                         |

|                                       |      |    |          |                |     |         |     |     |                                                                         |
|---------------------------------------|------|----|----------|----------------|-----|---------|-----|-----|-------------------------------------------------------------------------|
| Locus_15118_Transcript_1/1_Conf_1.000 | 157  | 20 | 1.50E-05 | XP_002004206.1 | 69  | 52.7582 | 46  | 32  | GI19788                                                                 |
| Locus_15119_Transcript_1/1_Conf_1.000 | 271  | 8  | 9.89E-10 | NP_491880.1    | 60  | 66.6254 | 82  | 50  | hypothetical protein T10E9.6                                            |
| Locus_1512_Transcript_1/1_Conf_1.000  | 2516 | 20 | 0        | EFO26683.1     | 88  | 916.376 | 614 | 545 | elongation factor Tu GTP binding domain-containing protein              |
| Locus_15120_Transcript_1/1_Conf_1.000 | 263  | 5  | 3.66E-20 | NP_001123142.1 | 74  | 101.293 | 81  | 60  | related to yeast Vacuolar Protein Sorting factor family member (vps-41) |
| Locus_15121_Transcript_1/1_Conf_1.000 | 172  | 20 | 3.15E-24 | XP_002631669.1 | 100 | 114.775 | 56  | 56  | C. briggsae CBR-MOG-4 protein                                           |
| Locus_15122_Transcript_1/3_Conf_0.571 | 674  | 0  |          |                |     |         |     |     |                                                                         |
| Locus_15122_Transcript_2/3_Conf_0.714 | 790  | 0  |          |                |     |         |     |     |                                                                         |
| Locus_15122_Transcript_3/3_Conf_0.714 | 789  | 0  |          |                |     |         |     |     |                                                                         |
| Locus_15123_Transcript_1/1_Conf_1.000 | 385  | 0  |          |                |     |         |     |     |                                                                         |

|                                       |      |    |           |                |     |         |     |     |                                          |
|---------------------------------------|------|----|-----------|----------------|-----|---------|-----|-----|------------------------------------------|
| Locus_15124_Transcript_1/1_Conf_1.000 | 1032 | 20 | 1.25E-121 | XP_002643017.1 | 76  | 440.654 | 340 | 260 | C. briggsae CBR-POLK-1 protein           |
| Locus_15125_Transcript_1/1_Conf_1.000 | 620  | 2  | 5.89E-40  | XP_002634811.1 | 77  | 167.933 | 120 | 93  | Hypothetical protein CBG13916            |
| Locus_15126_Transcript_1/1_Conf_1.000 | 697  | 20 | 1.28E-10  | XP_002642710.1 | 70  | 70.8626 | 75  | 53  | C. briggsae CBR-MCM-5 protein            |
| Locus_15127_Transcript_1/1_Conf_1.000 | 297  | 0  |           |                |     |         |     |     |                                          |
| Locus_15128_Transcript_1/1_Conf_1.000 | 613  | 20 | 3.43E-85  | XP_002645218.1 | 94  | 318.161 | 191 | 180 | Hypothetical protein CBG00076            |
| Locus_15129_Transcript_1/1_Conf_1.000 | 172  | 3  | 3.38E-10  | XP_002642486.1 | 78  | 68.1662 | 55  | 43  | Hypothetical protein CBG06905            |
| Locus_1513_Transcript_1/2_Conf_1.000  | 593  | 0  |           |                |     |         |     |     |                                          |
| Locus_1513_Transcript_2/2_Conf_1.000  | 2315 | 20 | 1.12E-170 | XP_002639813.1 | 63  | 605.134 | 665 | 422 | C. briggsae CBR-WTS-1 protein            |
| Locus_15130_Transcript_1/1_Conf_1.000 | 308  | 3  | 1.47E-05  | XP_001607761.1 | 82  | 52.7582 | 34  | 28  | PREDICTED: similar to ENSANGP00000004989 |
| Locus_15131_Transcript_1/1_Conf_1.000 | 152  | 0  |           |                |     |         |     |     |                                          |
| Locus_15132_Transcript_1/1_Conf_1.000 | 184  | 0  |           |                |     |         |     |     |                                          |
| Locus_15133_Transcript_1/1_Conf_1.000 | 358  | 0  |           |                |     |         |     |     |                                          |
| Locus_15134_Transcript_1/1_Conf_1.000 | 171  | 20 | 4.41E-18  | CAL38390.1     | 100 | 94.3597 | 45  | 45  | hypothetical protein                     |
| Locus_15135_Transcript_1/1_Conf_1.000 | 421  | 20 | 1.35E-14  | EFO20607.1     | 74  | 82.8037 | 71  | 53  | hypothetical protein LOAG_07879          |
| Locus_15136_Transcript_1/1_Conf_1.000 | 606  | 20 | 5.51E-80  | XP_002636870.1 | 85  | 300.827 | 201 | 172 | Hypothetical protein CBG09328            |
| Locus_15137_Transcript_1/1_Conf_1.000 | 204  | 0  |           |                |     |         |     |     |                                          |
| Locus_15138_Transcript_1/1_Conf_1.000 | 255  | 0  |           |                |     |         |     |     |                                          |
| Locus_15139_Transcript_1/1_Conf_1.000 | 168  | 0  |           |                |     |         |     |     |                                          |
| Locus_1514_Transcript_1/1_Conf_1.000  | 1282 | 20 | 1.42E-83  | NP_503108.1    | 81  | 314.694 | 230 | 187 | hypothetical protein C06A12.3            |
| Locus_15140_Transcript_1/1_Conf_1.000 | 293  | 0  |           |                |     |         |     |     |                                          |
| Locus_15141_Transcript_1/1_Conf_1.000 | 137  | 0  |           |                |     |         |     |     |                                          |

|                                       |      |    |          |                |     |         |     |     |                                    |
|---------------------------------------|------|----|----------|----------------|-----|---------|-----|-----|------------------------------------|
| Locus_15142_Transcript_1/1_Conf_1.000 | 768  | 20 | 5.13E-30 | XP_002647111.1 | 63  | 135.576 | 158 | 100 | C. briggsae CBR-HEH-1 protein      |
| Locus_15143_Transcript_1/1_Conf_1.000 | 117  | 0  |          |                |     |         |     |     |                                    |
| Locus_15144_Transcript_1/1_Conf_1.000 | 470  | 0  |          |                |     |         |     |     |                                    |
| Locus_15145_Transcript_1/1_Conf_1.000 | 271  | 0  |          |                |     |         |     |     |                                    |
| Locus_15146_Transcript_1/1_Conf_1.000 | 348  | 0  |          |                |     |         |     |     |                                    |
| Locus_15147_Transcript_1/1_Conf_1.000 | 186  | 0  |          |                |     |         |     |     |                                    |
| Locus_15148_Transcript_1/1_Conf_1.000 | 303  | 20 | 1.67E-25 | XP_001177751.1 | 81  | 119.013 | 101 | 82  | PREDICTED: hypothetical protein    |
| Locus_15149_Transcript_1/1_Conf_1.000 | 406  | 6  | 3.50E-23 | XP_001898115.1 | 64  | 111.309 | 134 | 87  | hypothetical protein               |
| Locus_1515_Transcript_1/3_Conf_0.500  | 242  | 0  |          |                |     |         |     |     |                                    |
| Locus_1515_Transcript_2/3_Conf_0.667  | 352  | 0  |          |                |     |         |     |     |                                    |
| Locus_1515_Transcript_3/3_Conf_0.667  | 298  | 0  |          |                |     |         |     |     |                                    |
| Locus_15150_Transcript_1/1_Conf_1.000 | 137  | 0  |          |                |     |         |     |     |                                    |
| Locus_15151_Transcript_1/1_Conf_1.000 | 1100 | 20 | 1.29E-95 | XP_002648242.1 | 86  | 354.369 | 227 | 196 | C. briggsae CBR-SRF-3 protein      |
| Locus_15152_Transcript_1/1_Conf_1.000 | 496  | 0  |          |                |     |         |     |     |                                    |
| Locus_15153_Transcript_1/1_Conf_1.000 | 479  | 0  |          |                |     |         |     |     |                                    |
| Locus_15154_Transcript_1/1_Conf_1.000 | 390  | 20 | 2.23E-38 | XP_002832332.1 | 75  | 161.77  | 134 | 101 | PREDICTED: host cell factor 1-like |
| Locus_15155_Transcript_1/1_Conf_1.000 | 684  | 0  |          |                |     |         |     |     |                                    |
| Locus_15156_Transcript_1/1_Conf_1.000 | 377  | 20 | 7.56E-42 | AAH29482.1     | 100 | 173.326 | 83  | 83  | Hypothetical protein HSPC152       |
| Locus_15157_Transcript_1/1_Conf_1.000 | 553  | 6  | 2.26E-12 | XP_002630815.1 | 53  | 75.8702 | 145 | 77  | Hypothetical protein CBG02516      |
| Locus_15158_Transcript_1/1_Conf_1.000 | 253  | 0  |          |                |     |         |     |     |                                    |
| Locus_15159_Transcript_1/1_Conf_1.000 | 985  | 20 | 1.74E-93 | NP_496492.1    | 78  | 347.051 | 338 | 266 | hypothetical protein C47D12.2      |
| Locus_1516_Transcript_1/1_Conf_1.000  | 225  | 5  | 1.77E-14 | XP_002631813.1 | 68  | 82.4185 | 73  | 50  | Hypothetical protein CBG21034      |



|                                       |      |    |           |                |    |         |     |     |                                                                                 |
|---------------------------------------|------|----|-----------|----------------|----|---------|-----|-----|---------------------------------------------------------------------------------|
| Locus_15160_Transcript_1/1_Conf_1.000 | 420  | 10 | 5.47E-24  | NP_500401.1    | 81 | 114.005 | 121 | 99  | hypothetical protein Y37E11AL.1                                                 |
| Locus_15161_Transcript_1/1_Conf_1.000 | 338  | 14 | 6.78E-11  |                | 62 | 70.4774 | 85  | 53  | hypothetical protein Y105C5B.d                                                  |
| Locus_15162_Transcript_1/1_Conf_1.000 | 185  | 0  |           |                |    |         |     |     |                                                                                 |
| Locus_15163_Transcript_1/1_Conf_1.000 | 671  | 20 | 3.61E-20  | XP_002630952.1 | 54 | 102.449 | 173 | 94  | C. briggsae CBR-ABCX-1 protein                                                  |
| Locus_15164_Transcript_1/1_Conf_1.000 | 564  | 20 | 1.73E-55  | NP_500586.2    | 81 | 219.164 | 185 | 150 | hypothetical protein ZK185.2                                                    |
| Locus_15165_Transcript_1/1_Conf_1.000 | 220  | 0  |           |                |    |         |     |     |                                                                                 |
| Locus_15166_Transcript_1/1_Conf_1.000 | 379  | 20 | 1.10E-16  | EFO21580.1     | 66 | 89.7373 | 75  | 50  | hypothetical protein LOAG_06910                                                 |
| Locus_15167_Transcript_1/1_Conf_1.000 | 440  | 20 | 5.49E-37  | NP_504599.2    | 86 | 157.147 | 104 | 90  | Myotonic dystrophy-Related, Cdc42-binding Kinase homolog family member (mrck-1) |
| Locus_15168_Transcript_1/1_Conf_1.000 | 264  | 4  | 1.53E-26  | NP_491513.2    | 81 | 122.479 | 88  | 72  | Formin HOMology Domain family member (fhod-1)                                   |
| Locus_15169_Transcript_1/2_Conf_1.000 | 226  | 0  |           |                |    |         |     |     |                                                                                 |
| Locus_15169_Transcript_2/2_Conf_1.000 | 127  | 0  |           |                |    |         |     |     |                                                                                 |
| Locus_1517_Transcript_1/1_Conf_1.000  | 1362 | 20 | 4.44E-131 | XP_002631365.1 | 69 | 472.626 | 459 | 321 | C. briggsae CBR-RHA-1 protein                                                   |
| Locus_15170_Transcript_1/1_Conf_1.000 | 492  | 20 | 5.96E-31  | EFO14143.1     | 64 | 137.117 | 164 | 106 | hypothetical protein LOAG_14379                                                 |
| Locus_15171_Transcript_1/1_Conf_1.000 | 342  | 5  | 1.23E-07  | XP_001892437.1 | 64 | 59.6918 | 64  | 41  | Gem-associated protein 7                                                        |
| Locus_15172_Transcript_1/1_Conf_1.000 | 406  | 20 | 2.13E-20  | NP_503751.1    | 63 | 102.064 | 119 | 75  | hypothetical protein R05D8.7                                                    |

|                                       |      |    |           |                |    |         |     |     |                                             |
|---------------------------------------|------|----|-----------|----------------|----|---------|-----|-----|---------------------------------------------|
| Locus_15173_Transcript_1/1_Conf_1.000 | 186  | 4  | 5.52E-16  | XP_002630757.1 | 77 | 87.4261 | 62  | 48  | Hypothetical protein CBG02451               |
| Locus_15174_Transcript_1/1_Conf_1.000 | 187  | 0  |           |                |    |         |     |     |                                             |
| Locus_15175_Transcript_1/1_Conf_1.000 | 418  | 1  | 3.23E-08  | NP_491852.1    | 52 | 61.6178 | 125 | 65  | hypothetical protein F37E3.3                |
| Locus_15176_Transcript_1/1_Conf_1.000 | 709  | 5  | 4.35E-22  | XP_002645124.1 | 60 | 108.997 | 130 | 78  | Hypothetical protein CBG16818               |
| Locus_15177_Transcript_1/1_Conf_1.000 | 281  | 0  |           |                |    |         |     |     |                                             |
| Locus_15178_Transcript_1/1_Conf_1.000 | 314  | 0  |           |                |    |         |     |     |                                             |
| Locus_15179_Transcript_1/1_Conf_1.000 | 169  | 0  |           |                |    |         |     |     |                                             |
| Locus_1518_Transcript_1/1_Conf_1.000  | 1195 | 20 | 7.42E-132 | XP_002632159.1 | 89 | 474.937 | 304 | 271 | Hypothetical protein CBG07018               |
| Locus_15180_Transcript_1/1_Conf_1.000 | 1008 | 20 | 4.42E-116 | XP_002638881.1 | 79 | 422.165 | 334 | 264 | C. briggsae CBR-VPS-34 protein              |
| Locus_15181_Transcript_1/1_Conf_1.000 | 146  | 0  |           |                |    |         |     |     |                                             |
| Locus_15182_Transcript_1/1_Conf_1.000 | 731  | 20 | 6.69E-37  | NP_506278.1    | 89 | 158.303 | 87  | 78  | hypothetical protein T09E8.3                |
| Locus_15183_Transcript_1/1_Conf_1.000 | 704  | 2  | 1.95E-14  | EFO28233.1     | 48 | 83.5741 | 246 | 120 | TTK protein kinase                          |
| Locus_15184_Transcript_1/1_Conf_1.000 | 194  | 0  |           |                |    |         |     |     |                                             |
| Locus_15185_Transcript_1/1_Conf_1.000 | 321  | 0  |           |                |    |         |     |     |                                             |
| Locus_15186_Transcript_1/1_Conf_1.000 | 141  | 0  |           |                |    |         |     |     |                                             |
| Locus_15187_Transcript_1/1_Conf_1.000 | 262  | 0  |           |                |    |         |     |     |                                             |
| Locus_15188_Transcript_1/1_Conf_1.000 | 232  | 0  |           |                |    |         |     |     |                                             |
| Locus_15189_Transcript_1/1_Conf_1.000 | 401  | 20 | 1.62E-68  | XP_002640864.1 | 96 | 261.922 | 133 | 129 | C. briggsae CBR-UNC-25 protein              |
| Locus_1519_Transcript_1/2_Conf_1.000  | 935  | 20 | 7.67E-88  | NP_505412.2    | 85 | 328.176 | 206 | 176 | ACyLtransferase-like family member (acl-14) |
| Locus_1519_Transcript_2/2_Conf_1.000  | 1107 | 20 | 2.40E-73  | NP_505413.1    | 82 | 280.411 | 180 | 149 | hypothetical protein K07B1.4                |

|                                       |     |    |          |                |     |         |     |     |                                                          |
|---------------------------------------|-----|----|----------|----------------|-----|---------|-----|-----|----------------------------------------------------------|
| Locus_15190_Transcript_1/1_Conf_1.000 | 290 | 20 | 3.44E-18 | XP_002818294.1 | 100 | 94.7449 | 96  | 96  | PREDICTED: collagen alpha-2(I) chain-like                |
| Locus_15191_Transcript_1/1_Conf_1.000 | 279 | 20 | 1.77E-27 | XP_001900518.1 | 79  | 125.561 | 92  | 73  | 3'-5'-cyclic nucleotide phosphodiesterase family protein |
| Locus_15192_Transcript_1/1_Conf_1.000 | 325 | 20 | 9.27E-24 | AAP41124.1     | 78  | 113.235 | 84  | 66  | aldose reductase                                         |
| Locus_15193_Transcript_1/1_Conf_1.000 | 678 | 20 | 3.26E-24 | XP_002640845.1 | 52  | 115.931 | 224 | 118 | C. briggsae CBR-CDH-1 protein                            |
| Locus_15194_Transcript_1/2_Conf_1.000 | 283 | 20 | 1.32E-17 | XP_002630522.1 | 63  | 92.8189 | 97  | 62  | Hypothetical protein CBG12960                            |
| Locus_15194_Transcript_2/2_Conf_1.000 | 283 | 20 | 1.32E-17 | XP_002630522.1 | 63  | 92.8189 | 97  | 62  | Hypothetical protein CBG12960                            |
| Locus_15195_Transcript_1/1_Conf_1.000 | 265 | 0  |          |                |     |         |     |     |                                                          |
| Locus_15196_Transcript_1/1_Conf_1.000 | 342 | 0  |          |                |     |         |     |     |                                                          |
| Locus_15197_Transcript_1/1_Conf_1.000 | 132 | 20 | 2.87E-09 | AAC72298.1     | 83  | 65.0846 | 43  | 36  | reverse transcriptase                                    |
| Locus_15198_Transcript_1/1_Conf_1.000 | 764 | 20 | 2.35E-11 | EFN52362.1     | 43  | 73.559  | 250 | 109 | hypothetical protein CHLNCRAFT_138782                    |
| Locus_15199_Transcript_1/1_Conf_1.000 | 139 | 0  |          |                |     |         |     |     |                                                          |

|                                       |      |    |          |                |    |         |     |     |                                                                            |
|---------------------------------------|------|----|----------|----------------|----|---------|-----|-----|----------------------------------------------------------------------------|
| Locus_152_Transcript_1/1_Conf_1.000   | 305  | 20 | 1.29E-09 | XP_002122773.1 | 63 | 66.2402 | 63  | 40  | PREDICTED: similar to glucosidase, beta, acid                              |
| Locus_1520_Transcript_1/1_Conf_1.000  | 357  | 20 | 2.04E-31 | EFO22150.1     | 78 | 138.658 | 105 | 82  | SET domain-containing protein                                              |
| Locus_15200_Transcript_1/1_Conf_1.000 | 254  | 20 | 2.40E-19 | XP_001998853.1 | 73 | 98.5969 | 76  | 56  | GI23404                                                                    |
| Locus_15201_Transcript_1/1_Conf_1.000 | 1292 | 20 | 3.09E-78 | XP_001896605.1 | 62 | 296.975 | 402 | 251 | HYPOTHETICAL 59.2KD PROTEIN IN PFK26-SGA1 INTERGENIC REGION, putative      |
| Locus_15202_Transcript_1/1_Conf_1.000 | 179  | 0  |          |                |    |         |     |     |                                                                            |
| Locus_15203_Transcript_1/1_Conf_1.000 | 383  | 20 | 5.96E-31 | NP_505237.1    | 68 | 137.117 | 126 | 86  | human CLN (neuronal ceroid lipofuscinosis) related family member (cln-3.3) |
| Locus_15204_Transcript_1/1_Conf_1.000 | 989  | 20 | 7.11E-79 | XP_001897597.1 | 84 | 298.516 | 200 | 169 | Lung seven transmembrane receptor family protein                           |
| Locus_15205_Transcript_1/1_Conf_1.000 | 609  | 20 | 8.39E-60 | EFO27604.1     | 75 | 233.802 | 203 | 153 | hypothetical protein LOAG_00873                                            |
| Locus_15206_Transcript_1/1_Conf_1.000 | 478  | 20 | 8.51E-38 | EFO19811.1     | 75 | 159.844 | 132 | 99  | hemimethylated DNA binding domain-containing protein                       |
| Locus_15207_Transcript_1/1_Conf_1.000 | 136  | 4  | 1.02E-06 | XP_001896000.1 | 79 | 56.6102 | 44  | 35  | hypothetical protein                                                       |
| Locus_15208_Transcript_1/1_Conf_1.000 | 277  | 20 | 2.24E-38 | NP_492839.4    | 92 | 161.77  | 91  | 84  | Leucine-rich repeats, Ras-like domain, Kinase family member (Irk-1)        |
| Locus_15209_Transcript_1/2_Conf_1.000 | 1065 | 20 | 2.24E-97 | XP_002646179.1 | 73 | 360.147 | 322 | 238 | Hypothetical protein CBG23745                                              |

|                                       |      |    |          |                |     |         |     |     |                                                                 |
|---------------------------------------|------|----|----------|----------------|-----|---------|-----|-----|-----------------------------------------------------------------|
| Locus_15209_Transcript_2/2_Conf_1.000 | 948  | 20 | 1.26E-77 | XP_002646179.1 | 63  | 294.278 | 322 | 204 | Hypothetical protein CBG23745                                   |
| Locus_1521_Transcript_1/1_Conf_1.000  | 1019 | 20 | 3.84E-83 | NP_496604.1    | 72  | 312.768 | 266 | 193 | hypothetical protein Y57A10A.26                                 |
| Locus_15210_Transcript_1/1_Conf_1.000 | 210  | 0  |          |                |     |         |     |     |                                                                 |
| Locus_15211_Transcript_1/1_Conf_1.000 | 352  | 20 | 1.21E-23 | XP_002630751.1 | 63  | 112.849 | 114 | 72  | Hypothetical protein CBG02443                                   |
| Locus_15212_Transcript_1/1_Conf_1.000 | 460  | 5  | 4.54E-07 | XP_002643565.1 | 66  | 57.7658 | 54  | 36  | Hypothetical protein CBG16267                                   |
| Locus_15213_Transcript_1/1_Conf_1.000 | 209  | 0  |          |                |     |         |     |     |                                                                 |
| Locus_15214_Transcript_1/1_Conf_1.000 | 138  | 0  |          |                |     |         |     |     |                                                                 |
| Locus_15215_Transcript_1/1_Conf_1.000 | 156  | 0  |          |                |     |         |     |     |                                                                 |
| Locus_15216_Transcript_1/1_Conf_1.000 | 471  | 20 | 8.26E-57 | NP_500720.1    | 87  | 223.016 | 147 | 128 | IsoValeryl-CoA Dehydrogenase family member (ivd-1)              |
| Locus_15217_Transcript_1/1_Conf_1.000 | 529  | 20 | 1.61E-30 | XP_002633897.1 | 66  | 135.961 | 168 | 112 | Hypothetical protein CBG19959                                   |
| Locus_15218_Transcript_1/1_Conf_1.000 | 182  | 0  |          |                |     |         |     |     |                                                                 |
| Locus_15219_Transcript_1/1_Conf_1.000 | 145  | 20 | 2.18E-20 | XP_002759346.1 | 100 | 102.064 | 48  | 48  | PREDICTED: eukaryotic translation initiation factor 3 subunit E |
| Locus_1522_Transcript_1/2_Conf_1.000  | 2182 | 20 | 7.02E-26 | ZP_02995497.1  | 54  | 124.02  | 127 | 69  | hypothetical protein CLOSPO_02619                               |
| Locus_1522_Transcript_2/2_Conf_1.000  | 2188 | 20 | 7.04E-26 | ZP_02995497.1  | 54  | 124.02  | 127 | 69  | hypothetical protein CLOSPO_02619                               |
| Locus_15220_Transcript_1/1_Conf_1.000 | 246  | 20 | 1.23E-20 | XP_002646069.1 | 85  | 102.834 | 67  | 57  | C. briggsae CBR-GALE-1 protein                                  |
| Locus_15221_Transcript_1/2_Conf_1.000 | 343  | 0  |          |                |     |         |     |     |                                                                 |
| Locus_15221_Transcript_2/2_Conf_1.000 | 207  | 0  |          |                |     |         |     |     |                                                                 |
| Locus_15222_Transcript_1/1_Conf_1.000 | 436  | 20 | 5.16E-35 | XP_001900114.1 | 70  | 150.599 | 132 | 93  | MGC14327-like protein                                           |
| Locus_15223_Transcript_1/2_Conf_1.000 | 431  | 20 | 1.01E-38 | NP_498705.1    | 92  | 162.925 | 93  | 86  | Temporarily Assigned Gene name family member (tag-277)          |

|                                       |      |    |          |                |     |         |     |     |                                                           |
|---------------------------------------|------|----|----------|----------------|-----|---------|-----|-----|-----------------------------------------------------------|
| Locus_15223_Transcript_2/2_Conf_1.000 | 386  | 20 | 1.01E-38 | NP_498705.1    | 92  | 162.925 | 93  | 86  | Temporarily Assigned Gene name family member (tag-277)    |
| Locus_15224_Transcript_1/1_Conf_1.000 | 224  | 0  |          |                |     |         |     |     |                                                           |
| Locus_15225_Transcript_1/2_Conf_1.000 | 896  | 20 | 8.53E-33 | NP_491838.1    | 74  | 145.206 | 114 | 85  | hypothetical protein K04F10.7                             |
| Locus_15225_Transcript_2/2_Conf_1.000 | 896  | 20 | 8.53E-33 | NP_491838.1    | 74  | 145.206 | 114 | 85  | hypothetical protein K04F10.7                             |
| Locus_15226_Transcript_1/1_Conf_1.000 | 235  | 12 | 2.61E-18 | NP_502380.1    | 85  | 95.1301 | 63  | 54  | hypothetical protein C25G4.6                              |
| Locus_15227_Transcript_1/1_Conf_1.000 | 305  | 20 | 1.51E-26 | XP_002832428.1 | 100 | 122.479 | 58  | 58  | PREDICTED: neudesin-like                                  |
| Locus_15228_Transcript_1/1_Conf_1.000 | 212  | 20 | 2.33E-19 | EFO17543.1     | 87  | 98.5969 | 57  | 50  | aspartate aminotransferase                                |
| Locus_15229_Transcript_1/1_Conf_1.000 | 359  | 16 | 6.35E-33 | XP_002639055.1 | 82  | 143.665 | 103 | 85  | C. briggsae CBR-GCY-28 protein                            |
| Locus_1523_Transcript_1/1_Conf_1.000  | 1218 | 20 | 9.22E-61 | NP_498568.1    | 83  | 238.81  | 160 | 134 | fatty Acid CoA Synthetase family member (acs-16)          |
| Locus_15230_Transcript_1/1_Conf_1.000 | 190  | 20 | 2.56E-13 | NP_498621.1    | 81  | 78.5666 | 64  | 52  | GOlgi Snap Receptor complex member family member (gosr-1) |
| Locus_15231_Transcript_1/1_Conf_1.000 | 133  | 0  |          |                |     |         |     |     |                                                           |
| Locus_15232_Transcript_1/1_Conf_1.000 | 725  | 20 | 1.23E-51 | XP_001892945.1 | 71  | 207.223 | 239 | 170 | exosome complex exonuclease RRP40                         |
| Locus_15233_Transcript_1/1_Conf_1.000 | 169  | 0  |          |                |     |         |     |     |                                                           |
| Locus_15234_Transcript_1/1_Conf_1.000 | 491  | 0  |          |                |     |         |     |     |                                                           |
| Locus_15235_Transcript_1/1_Conf_1.000 | 385  | 20 | 1.55E-55 | NP_491165.2    | 99  | 218.779 | 128 | 127 | human SPG (spastic paraplegia) family member (spg-7)      |

|                                       |      |    |          |                |    |         |     |     |                                                                  |
|---------------------------------------|------|----|----------|----------------|----|---------|-----|-----|------------------------------------------------------------------|
| Locus_15236_Transcript_1/1_Conf_1.000 | 129  | 6  | 5.61E-05 | ZP_01471425.1  | 79 | 50.8322 | 39  | 31  | short-chain dehydrogenase/reductase (SDR) superfamily protein    |
| Locus_15237_Transcript_1/1_Conf_1.000 | 385  | 20 | 7.24E-37 | NP_491915.2    | 82 | 156.762 | 124 | 102 | hypothetical protein ZC581.9                                     |
| Locus_15238_Transcript_1/1_Conf_1.000 | 251  | 20 | 6.95E-32 | XP_002644493.1 | 96 | 140.198 | 83  | 80  | Hypothetical protein CBG14380                                    |
| Locus_15239_Transcript_1/1_Conf_1.000 | 446  | 20 | 5.22E-59 | XP_002633481.1 | 86 | 230.335 | 147 | 127 | C. briggsae CBR-PHY-2 protein                                    |
| Locus_1524_Transcript_1/2_Conf_1.000  | 607  | 3  | 8.62E-33 | CAR63637.1     | 75 | 144.05  | 115 | 87  | hypothetical protein                                             |
| Locus_1524_Transcript_2/2_Conf_1.000  | 247  | 0  |          |                |    |         |     |     |                                                                  |
| Locus_15240_Transcript_1/1_Conf_1.000 | 223  | 0  |          |                |    |         |     |     |                                                                  |
| Locus_15241_Transcript_1/1_Conf_1.000 | 1252 | 0  |          |                |    |         |     |     |                                                                  |
| Locus_15242_Transcript_1/1_Conf_1.000 | 216  | 13 | 3.95E-19 | XP_002639744.1 | 81 | 97.8265 | 70  | 57  | C. briggsae CBR-LAM-3 protein                                    |
| Locus_15243_Transcript_1/1_Conf_1.000 | 259  | 0  |          |                |    |         |     |     |                                                                  |
| Locus_15244_Transcript_1/1_Conf_1.000 | 959  | 20 | 2.20E-29 | NP_001076617.1 | 63 | 134.035 | 131 | 83  | hypothetical protein W01A8.8                                     |
| Locus_15245_Transcript_1/1_Conf_1.000 | 346  | 16 | 3.02E-06 | XP_002636866.1 | 66 | 55.0694 | 66  | 44  | Hypothetical protein CBG09323                                    |
| Locus_15246_Transcript_1/1_Conf_1.000 | 619  | 20 | 2.23E-55 | CAO00417.1     | 71 | 219.164 | 190 | 135 | two-domain activation associated secreted protein ASP4 precursor |
| Locus_15247_Transcript_1/1_Conf_1.000 | 489  | 20 | 2.24E-78 | XP_002643972.1 | 96 | 294.664 | 162 | 156 | C. briggsae CBR-SLO-2 protein                                    |
| Locus_15248_Transcript_1/2_Conf_1.000 | 403  | 0  |          |                |    |         |     |     |                                                                  |
| Locus_15248_Transcript_2/2_Conf_1.000 | 397  | 0  |          |                |    |         |     |     |                                                                  |

|                                       |      |    |          |                |    |         |     |     |                                                               |
|---------------------------------------|------|----|----------|----------------|----|---------|-----|-----|---------------------------------------------------------------|
| Locus_15249_Transcript_1/1_Conf_1.000 | 1090 | 20 | 3.36E-96 | NP_501359.1    | 72 | 356.295 | 359 | 262 | hypothetical protein F42G8.6                                  |
| Locus_1525_Transcript_1/1_Conf_1.000  | 1322 | 20 | 4.25E-14 | XP_001899731.1 | 81 | 83.9593 | 55  | 45  | Protein cec-1.                                                |
| Locus_15250_Transcript_1/1_Conf_1.000 | 365  | 20 | 1.08E-24 | NP_495704.1    | 81 | 116.316 | 72  | 59  | CysTiNoSin (lysosomal protein) homolog family member (ctns-1) |
| Locus_15251_Transcript_1/1_Conf_1.000 | 146  | 3  | 1.56E-10 | XP_002641998.1 | 92 | 69.3218 | 39  | 36  | Hypothetical protein CBG09222                                 |
| Locus_15252_Transcript_1/1_Conf_1.000 | 247  | 20 | 8.01E-12 | EFO25925.1     | 75 | 73.559  | 64  | 48  | SMC protein Flexible Hinge Domain containing protein          |
| Locus_15253_Transcript_1/1_Conf_1.000 | 575  | 0  |          |                |    |         |     |     |                                                               |
| Locus_15254_Transcript_1/1_Conf_1.000 | 533  | 20 | 2.81E-22 | ACS37721.1     | 51 | 108.612 | 175 | 90  | C-type lectin-1                                               |
| Locus_15255_Transcript_1/1_Conf_1.000 | 387  | 20 | 1.66E-41 | A8XST1.2       | 76 | 172.17  | 128 | 98  | Post-GPI attachment to proteins factor 2                      |
| Locus_15256_Transcript_1/1_Conf_1.000 | 307  | 0  |          |                |    |         |     |     |                                                               |
| Locus_15257_Transcript_1/2_Conf_1.000 | 1142 | 4  | 5.86E-06 | NP_505144.2    | 52 | 56.6102 | 119 | 62  | hypothetical protein W02D7.6                                  |
| Locus_15257_Transcript_2/2_Conf_1.000 | 1142 | 4  | 5.86E-06 | NP_505144.2    | 52 | 56.6102 | 119 | 62  | hypothetical protein W02D7.6                                  |
| Locus_15258_Transcript_1/1_Conf_1.000 | 139  | 0  |          |                |    |         |     |     |                                                               |
| Locus_15259_Transcript_1/1_Conf_1.000 | 190  | 0  |          |                |    |         |     |     |                                                               |
| Locus_1526_Transcript_1/2_Conf_1.000  | 1264 | 20 | 1.90E-32 | NP_507998.1    | 61 | 144.821 | 233 | 143 | hypothetical protein F53F8.5                                  |
| Locus_1526_Transcript_2/2_Conf_1.000  | 1177 | 20 | 2.04E-17 | NP_507998.1    | 50 | 94.7449 | 233 | 118 | hypothetical protein F53F8.5                                  |



|                                       |     |    |          |                |    |         |     |     |                                                     |
|---------------------------------------|-----|----|----------|----------------|----|---------|-----|-----|-----------------------------------------------------|
| Locus_15260_Transcript_1/1_Conf_1.000 | 256 | 20 | 5.70E-13 | XP_002645055.1 | 54 | 77.411  | 82  | 45  | Hypothetical protein CBG16715                       |
| Locus_15261_Transcript_1/1_Conf_1.000 | 227 | 0  |          |                |    |         |     |     |                                                     |
| Locus_15262_Transcript_1/1_Conf_1.000 | 258 | 0  |          |                |    |         |     |     |                                                     |
| Locus_15263_Transcript_1/1_Conf_1.000 | 329 | 0  |          |                |    |         |     |     |                                                     |
| Locus_15264_Transcript_1/1_Conf_1.000 | 520 | 20 | 1.19E-43 | XP_002630483.1 | 83 | 179.489 | 109 | 91  | Hypothetical protein CBG11219                       |
| Locus_15265_Transcript_1/1_Conf_1.000 | 944 | 20 | 2.52E-70 | EFO21354.1     | 67 | 270.011 | 313 | 210 | hypothetical protein LOAG_07131                     |
| Locus_15266_Transcript_1/1_Conf_1.000 | 379 | 20 | 1.57E-47 | XP_002634501.1 | 87 | 192.2   | 127 | 111 | C. briggsae CBR-SMGL-2 protein                      |
| Locus_15267_Transcript_1/1_Conf_1.000 | 130 | 0  |          |                |    |         |     |     |                                                     |
| Locus_15268_Transcript_1/1_Conf_1.000 | 499 | 20 | 2.91E-46 | XP_001899325.1 | 72 | 187.963 | 165 | 120 | GDP-fucose protein O-fucosyltransferase 2 precursor |
| Locus_15269_Transcript_1/1_Conf_1.000 | 438 | 20 | 7.40E-42 | XP_002645831.1 | 77 | 173.326 | 142 | 110 | C. briggsae CBR-RBC-1 protein                       |
| Locus_1527_Transcript_1/1_Conf_1.000  | 582 | 0  |          |                |    |         |     |     |                                                     |
| Locus_15270_Transcript_1/1_Conf_1.000 | 203 | 0  |          |                |    |         |     |     |                                                     |
| Locus_15271_Transcript_1/1_Conf_1.000 | 495 | 17 | 8.33E-09 | EFN69196.1     | 60 | 63.5438 | 86  | 52  | hypothetical protein EAG_13720                      |
| Locus_15272_Transcript_1/1_Conf_1.000 | 177 | 0  |          |                |    |         |     |     |                                                     |
| Locus_15273_Transcript_1/1_Conf_1.000 | 449 | 13 | 7.11E-16 | NP_496492.1    | 70 | 87.0409 | 75  | 53  | hypothetical protein C47D12.2                       |
| Locus_15274_Transcript_1/1_Conf_1.000 | 284 | 3  | 2.10E-15 | NP_497247.2    | 56 | 85.5001 | 93  | 53  | GEX Interacting protein family member (gei-16)      |
| Locus_15275_Transcript_1/1_Conf_1.000 | 235 | 0  |          |                |    |         |     |     |                                                     |

|                                       |      |    |           |                |    |         |     |     |                                                                             |
|---------------------------------------|------|----|-----------|----------------|----|---------|-----|-----|-----------------------------------------------------------------------------|
| Locus_15276_Transcript_1/1_Conf_1.000 | 458  | 20 | 2.95E-06  | NP_499181.1    | 54 | 55.0694 | 85  | 46  | hypothetical protein ZK632.10                                               |
| Locus_15277_Transcript_1/1_Conf_1.000 | 502  | 20 | 1.53E-50  | NP_495899.1    | 81 | 202.216 | 140 | 114 | hypothetical protein T21B10.1                                               |
| Locus_15278_Transcript_1/1_Conf_1.000 | 272  | 0  |           |                |    |         |     |     |                                                                             |
| Locus_15279_Transcript_1/1_Conf_1.000 | 205  | 1  | 8.10E-04  | NP_001023900.1 | 66 | 46.9802 | 66  | 44  | hypothetical protein F39G3.5                                                |
| Locus_1528_Transcript_1/1_Conf_1.000  | 430  | 20 | 2.86E-25  | NP_001122693.1 | 73 | 118.242 | 117 | 86  | POLK (DNA polymerase kappa) homolog family member (polk-1)                  |
| Locus_15280_Transcript_1/1_Conf_1.000 | 442  | 20 | 1.06E-35  | XP_002643964.1 | 72 | 152.91  | 137 | 100 | C. briggsae CBR-HUM-4 protein                                               |
| Locus_15281_Transcript_1/2_Conf_1.000 | 1053 | 20 | 2.59E-114 | NP_501835.2    | 73 | 416.387 | 356 | 263 | DIS3 (yeast disjunction abnormal) exonuclease homolog family member (dis-3) |
| Locus_15281_Transcript_2/2_Conf_1.000 | 1011 | 20 | 6.26E-86  | NP_501835.2    | 71 | 322.013 | 300 | 213 | DIS3 (yeast disjunction abnormal) exonuclease homolog family member (dis-3) |
| Locus_15282_Transcript_1/1_Conf_1.000 | 243  | 0  |           |                |    |         |     |     |                                                                             |
| Locus_15283_Transcript_1/1_Conf_1.000 | 988  | 10 | 2.17E-35  | ABF71718.3     | 69 | 154.066 | 297 | 205 | Collagen protein 46, partially confirmed by transcript evidence             |
| Locus_15284_Transcript_1/2_Conf_1.000 | 682  | 20 | 8.56E-73  | EFO23808.1     | 78 | 277.33  | 227 | 179 | hypothetical protein LOAG_04674                                             |
| Locus_15284_Transcript_2/2_Conf_1.000 | 682  | 20 | 8.56E-73  | EFO23808.1     | 78 | 277.33  | 227 | 179 | hypothetical protein LOAG_04674                                             |
| Locus_15285_Transcript_1/1_Conf_1.000 | 259  | 0  |           |                |    |         |     |     |                                                                             |
| Locus_15286_Transcript_1/1_Conf_1.000 | 1200 | 20 | 5.45E-74  | XP_001896288.1 | 62 | 282.722 | 351 | 220 | mbt repeat family protein                                                   |
| Locus_15287_Transcript_1/1_Conf_1.000 | 221  | 0  |           |                |    |         |     |     |                                                                             |
| Locus_15288_Transcript_1/1_Conf_1.000 | 227  | 20 | 2.24E-09  | XP_002647659.1 | 70 | 65.4698 | 47  | 33  | Hypothetical protein CBG06766                                               |
| Locus_15289_Transcript_1/1_Conf_1.000 | 384  | 20 | 7.29E-13  | ADI24665.1     | 63 | 77.0258 | 77  | 49  | Hypothetical protein Y38C1AA.13                                             |

|                                       |     |    |           |                |     |         |     |     |                                                                          |
|---------------------------------------|-----|----|-----------|----------------|-----|---------|-----|-----|--------------------------------------------------------------------------|
| Locus_1529_Transcript_1/1_Conf_1.000  | 435 | 20 | 1.83E-32  | XP_002641208.1 | 70  | 142.124 | 125 | 88  | C. briggsae CBR-DPF-4 protein                                            |
| Locus_15290_Transcript_1/1_Conf_1.000 | 199 | 0  |           |                |     |         |     |     |                                                                          |
| Locus_15291_Transcript_1/2_Conf_1.000 | 413 | 0  |           |                |     |         |     |     |                                                                          |
| Locus_15291_Transcript_2/2_Conf_1.000 | 413 | 0  |           |                |     |         |     |     |                                                                          |
| Locus_15292_Transcript_1/1_Conf_1.000 | 160 | 0  |           |                |     |         |     |     |                                                                          |
| Locus_15293_Transcript_1/1_Conf_1.000 | 810 | 20 | 6.95E-121 | NP_510603.1    | 88  | 437.573 | 269 | 239 | hypothetical protein F59F4.1                                             |
| Locus_15294_Transcript_1/1_Conf_1.000 | 356 | 4  | 3.29E-13  | XP_001895370.1 | 64  | 78.1814 | 116 | 75  | hypothetical protein Bm1_19575                                           |
| Locus_15295_Transcript_1/1_Conf_1.000 | 218 | 0  |           |                |     |         |     |     |                                                                          |
| Locus_15296_Transcript_1/1_Conf_1.000 | 147 | 0  |           |                |     |         |     |     |                                                                          |
| Locus_15297_Transcript_1/1_Conf_1.000 | 139 | 0  |           |                |     |         |     |     |                                                                          |
| Locus_15298_Transcript_1/1_Conf_1.000 | 367 | 20 | 9.98E-47  | NP_001023627.1 | 89  | 189.504 | 119 | 106 | Na/H eXchanger family member (nhx-9)                                     |
| Locus_15299_Transcript_1/1_Conf_1.000 | 183 | 0  |           |                |     |         |     |     |                                                                          |
| Locus_153_Transcript_1/3_Conf_0.333   | 166 | 0  |           |                |     |         |     |     |                                                                          |
| Locus_153_Transcript_2/3_Conf_0.833   | 411 | 20 | 2.59E-15  | NP_508612.1    | 68  | 81.6481 | 80  | 55  | ViTellogenin structural genes (yolk protein genes) family member (vit-4) |
| Locus_153_Transcript_3/3_Conf_0.833   | 402 | 20 | 5.75E-15  | NP_508612.1    | 69  | 80.4925 | 78  | 54  | ViTellogenin structural genes (yolk protein genes) family member (vit-4) |
| Locus_1530_Transcript_1/1_Conf_1.000  | 509 | 5  | 2.94E-36  | NP_496819.1    | 65  | 154.836 | 159 | 104 | hypothetical protein Y48C3A.20                                           |
| Locus_15300_Transcript_1/1_Conf_1.000 | 252 | 20 | 2.65E-26  | XP_002629711.1 | 79  | 121.709 | 83  | 66  | C. briggsae CBR-RHY-1 protein                                            |
| Locus_15301_Transcript_1/1_Conf_1.000 | 226 | 0  |           |                |     |         |     |     |                                                                          |
| Locus_15302_Transcript_1/1_Conf_1.000 | 304 | 0  |           |                |     |         |     |     |                                                                          |
| Locus_15303_Transcript_1/1_Conf_1.000 | 203 | 20 | 1.48E-13  | NP_001022166.1 | 79  | 79.337  | 59  | 47  | Temporarily Assigned Gene name family member (tag-169)                   |
| Locus_15304_Transcript_1/1_Conf_1.000 | 157 | 0  |           |                |     |         |     |     |                                                                          |
| Locus_15305_Transcript_1/1_Conf_1.000 | 575 | 20 | 3.46E-30  | XP_002631433.1 | 64  | 135.191 | 153 | 99  | C. briggsae CBR-REV-1 protein                                            |
| Locus_15306_Transcript_1/1_Conf_1.000 | 153 | 20 | 2.16E-20  | XP_002829638.1 | 100 | 102.064 | 51  | 51  | PREDICTED: prostate tumor-overexpressed gene 1 protein-like              |
| Locus_15307_Transcript_1/1_Conf_1.000 | 154 | 3  | 8.79E-06  | XP_002641552.1 | 68  | 53.5286 | 47  | 32  | C. briggsae CBR-RBC-2 protein                                            |

|                                       |      |    |          |                |    |         |     |     |                                            |  |
|---------------------------------------|------|----|----------|----------------|----|---------|-----|-----|--------------------------------------------|--|
| Locus_15308_Transcript_1/1_Conf_1.000 | 342  | 0  |          |                |    |         |     |     |                                            |  |
| Locus_15309_Transcript_1/1_Conf_1.000 | 136  | 0  |          |                |    |         |     |     |                                            |  |
| Locus_1531_Transcript_1/3_Conf_0.714  | 691  | 0  |          |                |    |         |     |     |                                            |  |
| Locus_1531_Transcript_2/3_Conf_0.714  | 1342 | 4  | 3.80E-18 | NP_872051.1    | 50 | 97.4413 | 213 | 107 | hypothetical protein Y17G7B.20             |  |
| Locus_1531_Transcript_3/3_Conf_0.714  | 615  | 0  |          |                |    |         |     |     |                                            |  |
| Locus_15310_Transcript_1/1_Conf_1.000 | 439  | 20 | 3.67E-41 | NP_498122.2    | 80 | 171.014 | 134 | 108 | abnormal GROwth rate family member (gro-1) |  |
| Locus_15311_Transcript_1/1_Conf_1.000 | 280  | 20 | 8.51E-30 | XP_002634229.1 | 80 | 133.265 | 90  | 72  | C. briggsae CBR-UNC-26 protein             |  |
| Locus_15312_Transcript_1/1_Conf_1.000 | 142  | 0  |          |                |    |         |     |     |                                            |  |
| Locus_15313_Transcript_1/1_Conf_1.000 | 145  | 1  | 1.28E-04 | XP_002638613.1 | 86 | 49.6766 | 43  | 37  | C. briggsae CBR-PGP-9 protein              |  |
| Locus_15314_Transcript_1/1_Conf_1.000 | 533  | 20 | 4.76E-46 | NP_502386.1    | 73 | 187.578 | 171 | 126 | hypothetical protein T04A11.2              |  |
| Locus_15315_Transcript_1/1_Conf_1.000 | 395  | 20 | 8.21E-20 | NP_494781.1    | 74 | 100.138 | 86  | 64  | hypothetical protein ZK430.7               |  |
| Locus_15316_Transcript_1/1_Conf_1.000 | 342  | 0  |          |                |    |         |     |     |                                            |  |
| Locus_15317_Transcript_1/1_Conf_1.000 | 384  | 0  |          |                |    |         |     |     |                                            |  |
| Locus_15318_Transcript_1/1_Conf_1.000 | 797  | 20 | 1.60E-45 | EFO17307.1     | 59 | 187.193 | 278 | 165 | hypothetical protein LOAG_11192            |  |
| Locus_15319_Transcript_1/1_Conf_1.000 | 395  | 2  | 3.45E-18 | NP_500196.2    | 77 | 94.7449 | 72  | 56  | hypothetical protein Y38F2AR.3             |  |
| Locus_1532_Transcript_1/1_Conf_1.000  | 755  | 20 | 1.09E-37 | CAB71314.1     | 70 | 160.999 | 136 | 96  | galectin                                   |  |
| Locus_15320_Transcript_1/1_Conf_1.000 | 198  | 0  |          |                |    |         |     |     |                                            |  |

|                                       |     |    |          |                |    |         |     |     |                                                                     |
|---------------------------------------|-----|----|----------|----------------|----|---------|-----|-----|---------------------------------------------------------------------|
| Locus_15321_Transcript_1/1_Conf_1.000 | 263 | 19 | 8.75E-06 | XP_002934628.1 | 52 | 53.5286 | 71  | 37  | PREDICTED: regenerating islet-derived protein 4-like                |
| Locus_15322_Transcript_1/1_Conf_1.000 | 383 | 20 | 1.28E-41 | XP_002636935.1 | 84 | 172.555 | 126 | 106 | C. briggsae CBR-UIG-1 protein                                       |
| Locus_15323_Transcript_1/1_Conf_1.000 | 226 | 0  |          |                |    |         |     |     |                                                                     |
| Locus_15324_Transcript_1/1_Conf_1.000 | 390 | 8  | 5.72E-18 | NP_001021405.1 | 82 | 93.9745 | 114 | 94  | asparaginyl tRNA Synthetase family member (nrs-1)                   |
| Locus_15325_Transcript_1/1_Conf_1.000 | 271 | 5  | 2.20E-09 | EFO23808.1     | 57 | 65.4698 | 91  | 52  | hypothetical protein LOAG_04674                                     |
| Locus_15326_Transcript_1/1_Conf_1.000 | 165 | 0  |          |                |    |         |     |     |                                                                     |
| Locus_15327_Transcript_1/1_Conf_1.000 | 556 | 3  | 1.75E-28 | NP_506256.3    | 72 | 129.413 | 177 | 128 | CaDHerin family member (cdh-6)                                      |
| Locus_15328_Transcript_1/1_Conf_1.000 | 200 | 0  |          |                |    |         |     |     |                                                                     |
| Locus_15329_Transcript_1/1_Conf_1.000 | 529 | 20 | 1.04E-29 | XP_002640799.1 | 65 | 133.265 | 155 | 101 | Hypothetical protein CBG15679                                       |
| Locus_1533_Transcript_1/3_Conf_0.333  | 409 | 0  |          |                |    |         |     |     |                                                                     |
| Locus_1533_Transcript_3/3_Conf_0.667  | 418 | 0  |          |                |    |         |     |     |                                                                     |
| Locus_15330_Transcript_1/1_Conf_1.000 | 370 | 0  |          |                |    |         |     |     |                                                                     |
| Locus_15331_Transcript_1/1_Conf_1.000 | 609 | 20 | 2.54E-40 | NP_495248.1    | 80 | 169.088 | 131 | 106 | hypothetical protein T24H7.3                                        |
| Locus_15332_Transcript_1/1_Conf_1.000 | 313 | 20 | 4.67E-23 | EFO18094.1     | 82 | 110.923 | 64  | 53  | hypothetical protein LOAG_10404                                     |
| Locus_15333_Transcript_1/1_Conf_1.000 | 194 | 0  |          |                |    |         |     |     |                                                                     |
| Locus_15334_Transcript_1/1_Conf_1.000 | 296 | 20 | 7.07E-40 | XP_002644104.1 | 90 | 166.777 | 97  | 88  | C. briggsae CBR-PLC-1 protein                                       |
| Locus_15335_Transcript_1/1_Conf_1.000 | 558 | 20 | 3.29E-19 | XP_392522.2    | 49 | 98.5969 | 199 | 98  | PREDICTED: similar to CG3894-PA, isoform A                          |
| Locus_15336_Transcript_1/1_Conf_1.000 | 213 | 0  |          |                |    |         |     |     |                                                                     |
| Locus_15337_Transcript_1/1_Conf_1.000 | 279 | 4  | 3.03E-19 | NP_492839.4    | 78 | 98.2117 | 71  | 56  | Leucine-rich repeats, Ras-like domain, Kinase family member (lrk-1) |
| Locus_15338_Transcript_1/1_Conf_1.000 | 385 | 20 | 1.01E-30 | EFO16233.1     | 78 | 136.346 | 124 | 97  | variant SH3 domain-containing protein                               |
| Locus_15339_Transcript_1/1_Conf_1.000 | 340 | 20 | 1.72E-14 | AAN10061.1     | 72 | 82.4185 | 54  | 39  | Kunitz-like protease inhibitor precursor                            |
| Locus_1534_Transcript_1/1_Conf_1.000  | 253 | 0  |          |                |    |         |     |     |                                                                     |

|                                       |      |    |          |                |     |         |     |     |                                           |
|---------------------------------------|------|----|----------|----------------|-----|---------|-----|-----|-------------------------------------------|
| Locus_15340_Transcript_1/1_Conf_1.000 | 291  | 20 | 8.14E-28 | NP_500084.2    | 79  | 126.716 | 97  | 77  | hypothetical protein Y77E11A.2            |
| Locus_15341_Transcript_1/1_Conf_1.000 | 1280 | 3  | 4.49E-05 | EFO24673.1     | 58  | 53.9138 | 84  | 49  | hypothetical protein LOAG_03814           |
| Locus_15342_Transcript_1/1_Conf_1.000 | 169  | 3  | 4.01E-11 |                | 75  | 71.2478 | 56  | 42  | myoblast city protein homolog             |
| Locus_15343_Transcript_1/1_Conf_1.000 | 539  | 0  |          |                |     |         |     |     |                                           |
| Locus_15344_Transcript_1/1_Conf_1.000 | 151  | 0  |          |                |     |         |     |     |                                           |
| Locus_15345_Transcript_1/1_Conf_1.000 | 443  | 0  |          |                |     |         |     |     |                                           |
| Locus_15346_Transcript_1/1_Conf_1.000 | 427  | 20 | 2.52E-21 | NP_001022683.1 | 67  | 105.145 | 123 | 83  | hypothetical protein M01A8.2              |
| Locus_15347_Transcript_1/1_Conf_1.000 | 247  | 0  |          |                |     |         |     |     |                                           |
| Locus_15348_Transcript_1/1_Conf_1.000 | 142  | 0  |          |                |     |         |     |     |                                           |
| Locus_15349_Transcript_1/1_Conf_1.000 | 418  | 0  |          |                |     |         |     |     |                                           |
| Locus_1535_Transcript_1/1_Conf_1.000  | 1998 | 20 | 0        | EFO18359.1     | 78  | 710.294 | 534 | 421 | hypothetical protein LOAG_10137           |
| Locus_15350_Transcript_1/1_Conf_1.000 | 298  | 0  |          |                |     |         |     |     |                                           |
| Locus_15351_Transcript_1/1_Conf_1.000 | 179  | 0  |          |                |     |         |     |     |                                           |
| Locus_15352_Transcript_1/1_Conf_1.000 | 195  | 20 | 5.09E-30 | EAX09318.1     | 100 | 134.035 | 64  | 64  | collagen, type VI, alpha 2, isoform CRA_c |
| Locus_15353_Transcript_1/1_Conf_1.000 | 267  | 0  |          |                |     |         |     |     |                                           |
| Locus_15354_Transcript_1/1_Conf_1.000 | 369  | 0  |          |                |     |         |     |     |                                           |
| Locus_15355_Transcript_1/1_Conf_1.000 | 517  | 0  |          |                |     |         |     |     |                                           |
| Locus_15356_Transcript_1/1_Conf_1.000 | 150  | 0  |          |                |     |         |     |     |                                           |
| Locus_15357_Transcript_1/1_Conf_1.000 | 364  | 6  | 1.31E-30 | XP_002631359.1 | 74  | 135.961 | 118 | 88  | Hypothetical protein CBG03194             |
| Locus_15358_Transcript_1/1_Conf_1.000 | 179  | 0  |          |                |     |         |     |     |                                           |
| Locus_15359_Transcript_1/1_Conf_1.000 | 245  | 0  |          |                |     |         |     |     |                                           |
| Locus_1536_Transcript_1/1_Conf_1.000  | 279  | 0  |          |                |     |         |     |     |                                           |

|                                       |      |    |          |                |     |         |     |     |                                                                                  |
|---------------------------------------|------|----|----------|----------------|-----|---------|-----|-----|----------------------------------------------------------------------------------|
| Locus_15360_Transcript_1/1_Conf_1.000 | 237  | 0  |          |                |     |         |     |     |                                                                                  |
| Locus_15361_Transcript_1/1_Conf_1.000 | 169  | 0  |          |                |     |         |     |     |                                                                                  |
| Locus_15362_Transcript_1/1_Conf_1.000 | 552  | 20 | 5.67E-56 | XP_002923059.1 | 100 | 220.705 | 106 | 106 | PREDICTED: LOW QUALITY PROTEIN:<br>cellular retinoic acid-binding protein 1-like |
| Locus_15363_Transcript_1/1_Conf_1.000 | 1027 | 0  |          |                |     |         |     |     |                                                                                  |
| Locus_15364_Transcript_1/1_Conf_1.000 | 1141 | 20 | 2.52E-33 | XP_002647599.1 | 54  | 147.517 | 381 | 206 | C. briggsae CBR-EEA-1 protein                                                    |
| Locus_15365_Transcript_1/1_Conf_1.000 | 217  | 0  |          |                |     |         |     |     |                                                                                  |
| Locus_15366_Transcript_1/1_Conf_1.000 | 286  | 0  |          |                |     |         |     |     |                                                                                  |
| Locus_15367_Transcript_1/1_Conf_1.000 | 439  | 20 | 6.94E-32 | XP_002639196.1 | 64  | 140.198 | 137 | 89  | Hypothetical protein CBG03739                                                    |
| Locus_15368_Transcript_1/1_Conf_1.000 | 812  | 20 | 2.08E-32 | XP_001900821.1 | 57  | 143.665 | 236 | 135 | hypothetical protein Bm1_46790                                                   |
| Locus_15369_Transcript_1/1_Conf_1.000 | 148  | 0  |          |                |     |         |     |     |                                                                                  |
| Locus_1537_Transcript_1/1_Conf_1.000  | 322  | 0  |          |                |     |         |     |     |                                                                                  |
| Locus_15370_Transcript_1/1_Conf_1.000 | 405  | 0  |          |                |     |         |     |     |                                                                                  |
| Locus_15371_Transcript_1/1_Conf_1.000 | 234  | 0  |          |                |     |         |     |     |                                                                                  |
| Locus_15372_Transcript_1/1_Conf_1.000 | 412  | 20 | 3.30E-16 | XP_002712017.1 | 60  | 77.0258 | 92  | 56  | PREDICTED: thiamin pyrophosphokinase 1-<br>like                                  |
| Locus_15373_Transcript_1/1_Conf_1.000 | 180  | 20 | 3.49E-10 | CAG04255.1     | 71  | 68.1662 | 56  | 40  | unnamed protein product                                                          |
| Locus_15374_Transcript_1/1_Conf_1.000 | 842  | 4  | 6.53E-08 | XP_002644385.1 | 53  | 62.3882 | 91  | 49  | Hypothetical protein CBG14225                                                    |
| Locus_15375_Transcript_1/1_Conf_1.000 | 148  | 0  |          |                |     |         |     |     |                                                                                  |
| Locus_15376_Transcript_1/1_Conf_1.000 | 238  | 0  |          |                |     |         |     |     |                                                                                  |
| Locus_15377_Transcript_1/1_Conf_1.000 | 210  | 2  | 1.24E-04 | NP_502000.1    | 62  | 49.6766 | 69  | 43  | hypothetical protein C06G8.1                                                     |

|                                       |      |    |          |                |     |         |     |     |                                                   |
|---------------------------------------|------|----|----------|----------------|-----|---------|-----|-----|---------------------------------------------------|
| Locus_15378_Transcript_1/1_Conf_1.000 | 631  | 20 | 2.07E-80 | XP_002632140.1 | 86  | 302.368 | 192 | 167 | C. briggsae CBR-SPTL-1 protein                    |
| Locus_15379_Transcript_1/1_Conf_1.000 | 484  | 20 | 5.97E-71 | XP_002914026.1 | 100 | 270.011 | 161 | 161 | PREDICTED: polyadenylate-binding protein 1-like   |
| Locus_1538_Transcript_1/1_Conf_1.000  | 1115 | 0  |          |                |     |         |     |     |                                                   |
| Locus_15380_Transcript_1/1_Conf_1.000 | 420  | 1  | 2.16E-04 | NP_497921.1    | 42  | 48.9062 | 123 | 52  | hypothetical protein M88.3                        |
| Locus_15381_Transcript_1/1_Conf_1.000 | 515  | 20 | 2.09E-13 | EFO16274.1     | 49  | 78.9518 | 148 | 73  | hypothetical protein LOAG_12234                   |
| Locus_15382_Transcript_1/1_Conf_1.000 | 259  | 0  |          |                |     |         |     |     |                                                   |
| Locus_15383_Transcript_1/1_Conf_1.000 | 191  | 0  |          |                |     |         |     |     |                                                   |
| Locus_15384_Transcript_1/1_Conf_1.000 | 195  | 0  |          |                |     |         |     |     |                                                   |
| Locus_15385_Transcript_1/1_Conf_1.000 | 492  | 5  | 1.29E-17 | NP_508573.1    | 60  | 92.8189 | 147 | 89  | Discoidin Domain Receptor family member (ddr-2)   |
| Locus_15386_Transcript_1/1_Conf_1.000 | 928  | 9  | 7.42E-51 | NP_492132.1    | 56  | 205.297 | 331 | 186 | Enhancer of Glp-One (glp-1) family member (ego-1) |
| Locus_15387_Transcript_1/1_Conf_1.000 | 285  | 0  |          |                |     |         |     |     |                                                   |
| Locus_15388_Transcript_1/1_Conf_1.000 | 506  | 20 | 3.41E-21 | Q17678.6       | 71  | 104.76  | 102 | 73  | UPF0632 protein C05G5.5                           |



|                                       |     |    |           |                |     |         |     |     |                                                      |
|---------------------------------------|-----|----|-----------|----------------|-----|---------|-----|-----|------------------------------------------------------|
| Locus_15389_Transcript_1/1_Conf_1.000 | 212 | 20 | 5.56E-13  | 3LTV           | 100 | 77.411  | 37  | 37  | Mouse-Human Sod1 Chimera                             |
| Locus_1539_Transcript_1/1_Conf_1.000  | 501 | 20 | 4.01E-67  | XP_002634908.1 | 83  | 257.299 | 161 | 135 | Hypothetical protein CBG22506                        |
| Locus_15390_Transcript_1/1_Conf_1.000 | 326 | 20 | 1.98E-58  | XP_002831943.1 | 100 | 228.409 | 108 | 108 | PREDICTED: 60S ribosomal protein L36a-like isoform 1 |
| Locus_15391_Transcript_1/1_Conf_1.000 | 830 | 20 | 9.86E-102 | P34288.4       | 83  | 374.015 | 275 | 230 | GTPase-activating protein pac-1                      |
| Locus_15392_Transcript_1/1_Conf_1.000 | 539 | 20 | 4.23E-50  | NP_506859.2    | 79  | 201.06  | 177 | 140 | hypothetical protein C06B8.7                         |
| Locus_15393_Transcript_1/1_Conf_1.000 | 615 | 20 | 1.47E-67  | EFO23641.1     | 76  | 259.61  | 210 | 161 | hypothetical protein LOAG_04841                      |
| Locus_15394_Transcript_1/1_Conf_1.000 | 329 | 0  |           |                |     |         |     |     |                                                      |

|                                       |     |    |          |                |    |         |     |     |                                |
|---------------------------------------|-----|----|----------|----------------|----|---------|-----|-----|--------------------------------|
| Locus_15395_Transcript_1/1_Conf_1.000 | 481 | 20 | 1.81E-64 | XP_002630872.1 | 92 | 248.44  | 140 | 129 | Hypothetical protein CBG02589  |
| Locus_15396_Transcript_1/1_Conf_1.000 | 365 | 20 | 4.69E-20 | EFO25500.1     | 78 | 100.908 | 80  | 63  | STE/STE20/TAO protein kinase   |
| Locus_15397_Transcript_1/1_Conf_1.000 | 150 | 0  |          |                |    |         |     |     |                                |
| Locus_15398_Transcript_1/1_Conf_1.000 | 303 | 6  | 1.24E-12 | CAA10033.1     | 67 | 76.2554 | 100 | 67  | DYS-1 protein                  |
| Locus_15399_Transcript_1/1_Conf_1.000 | 312 | 20 | 1.90E-24 | NP_506256.3    | 66 | 115.546 | 104 | 69  | CaDHerin family member (cdh-6) |
| Locus_154_Transcript_1/1_Conf_1.000   | 366 | 20 | 1.07E-32 | XP_001897933.1 | 77 | 142.895 | 115 | 89  | RE01069p                       |
| Locus_1540_Transcript_1/1_Conf_1.000  | 534 | 0  |          |                |    |         |     |     |                                |

|                                       |      |    |           |                |    |         |      |     |                                                      |
|---------------------------------------|------|----|-----------|----------------|----|---------|------|-----|------------------------------------------------------|
| Locus_15400_Transcript_1/1_Conf_1.000 | 669  | 20 | 9.29E-101 | CAR63641.1     | 97 | 370.163 | 206  | 200 | putative 26S proteasome regulatory chain 4           |
| Locus_15401_Transcript_1/1_Conf_1.000 | 401  | 0  |           |                |    |         |      |     |                                                      |
| Locus_15402_Transcript_1/1_Conf_1.000 | 1057 | 20 | 7.41E-69  | NP_493723.3    | 85 | 265.388 | 199  | 170 | hypothetical protein C03H5.2                         |
| Locus_15403_Transcript_1/1_Conf_1.000 | 217  | 0  |           |                |    |         |      |     |                                                      |
| Locus_15404_Transcript_1/1_Conf_1.000 | 194  | 0  |           |                |    |         |      |     |                                                      |
| Locus_15405_Transcript_1/1_Conf_1.000 | 273  | 0  |           |                |    |         |      |     |                                                      |
| Locus_15406_Transcript_1/1_Conf_1.000 | 105  | 0  |           |                |    |         |      |     |                                                      |
| Locus_15407_Transcript_1/1_Conf_1.000 | 617  | 0  |           |                |    |         |      |     |                                                      |
| Locus_15408_Transcript_1/1_Conf_1.000 | 214  | 20 | 6.55E-14  | EFO25803.1     | 84 | 80.4925 | 53   | 45  | enoyl-CoA hydratase/isomerase                        |
| Locus_15409_Transcript_1/1_Conf_1.000 | 313  | 20 | 1.78E-06  | XP_002940157.1 | 56 | 55.8398 | 83   | 47  | PREDICTED: PI-PLC X domain-containing protein 2-like |
| Locus_1541_Transcript_1/1_Conf_1.000  | 4728 | 20 | 0         | NP_494819.3    | 57 | 843.958 | 1579 | 910 | abnormal DYE Filling family member (dyf-14)          |
| Locus_15410_Transcript_1/1_Conf_1.000 | 336  | 0  |           |                |    |         |      |     |                                                      |
| Locus_15411_Transcript_1/1_Conf_1.000 | 250  | 0  |           |                |    |         |      |     |                                                      |
| Locus_15412_Transcript_1/1_Conf_1.000 | 668  | 20 | 6.68E-51  | NP_001041018.1 | 72 | 204.527 | 200  | 144 | hypothetical protein Y11D7A.3                        |
| Locus_15413_Transcript_1/1_Conf_1.000 | 315  | 20 | 5.32E-19  | NP_498593.1    | 74 | 97.4413 | 103  | 77  | hypothetical protein R151.10                         |
| Locus_15414_Transcript_1/1_Conf_1.000 | 205  | 0  |           |                |    |         |      |     |                                                      |
| Locus_15415_Transcript_1/2_Conf_1.000 | 201  | 1  | 5.63E-05  | XP_002638777.1 | 65 | 50.8322 | 38   | 25  | C. briggsae CBR-NAS-30 protein                       |
| Locus_15415_Transcript_2/2_Conf_1.000 | 336  | 5  | 5.92E-23  | XP_002638777.1 | 71 | 110.538 | 107  | 76  | C. briggsae CBR-NAS-30 protein                       |

|                                       |      |    |           |                |    |         |     |     |                                                                           |
|---------------------------------------|------|----|-----------|----------------|----|---------|-----|-----|---------------------------------------------------------------------------|
| Locus_15416_Transcript_1/1_Conf_1.000 | 280  | 4  | 2.32E-19  | CBM41243.1     | 68 | 98.5969 | 89  | 61  | C. elegans protein Y39B6A.43c, partially confirmed by transcript evidence |
| Locus_15417_Transcript_1/1_Conf_1.000 | 452  | 0  |           |                |    |         |     |     |                                                                           |
| Locus_15418_Transcript_1/1_Conf_1.000 | 286  | 20 | 7.45E-13  | XP_002637159.1 | 78 | 77.0258 | 82  | 64  | C. briggsae CBR-AQP-6 protein                                             |
| Locus_15419_Transcript_1/1_Conf_1.000 | 179  | 0  |           |                |    |         |     |     |                                                                           |
| Locus_1542_Transcript_1/3_Conf_0.556  | 533  | 20 | 3.37E-84  | XP_002638552.1 | 94 | 314.309 | 170 | 161 | C. briggsae CBR-RPL-2 protein                                             |
| Locus_1542_Transcript_2/3_Conf_0.778  | 633  | 20 | 3.02E-87  | XP_002638552.1 | 94 | 325.094 | 193 | 182 | C. briggsae CBR-RPL-2 protein                                             |
| Locus_1542_Transcript_3/3_Conf_0.667  | 633  | 20 | 3.02E-87  | XP_002638552.1 | 94 | 325.094 | 193 | 182 | C. briggsae CBR-RPL-2 protein                                             |
| Locus_15420_Transcript_1/1_Conf_1.000 | 264  | 0  |           |                |    |         |     |     |                                                                           |
| Locus_15421_Transcript_1/1_Conf_1.000 | 420  | 0  |           |                |    |         |     |     |                                                                           |
| Locus_15422_Transcript_1/1_Conf_1.000 | 457  | 0  |           |                |    |         |     |     |                                                                           |
| Locus_15423_Transcript_1/1_Conf_1.000 | 151  | 0  |           |                |    |         |     |     |                                                                           |
| Locus_15424_Transcript_1/1_Conf_1.000 | 131  | 20 | 2.13E-12  | XP_002641501.1 | 93 | 75.485  | 43  | 40  | Hypothetical protein CBG09795                                             |
| Locus_15425_Transcript_1/1_Conf_1.000 | 312  | 0  |           |                |    |         |     |     |                                                                           |
| Locus_15426_Transcript_1/1_Conf_1.000 | 251  | 3  | 2.03E-23  | XP_002642237.1 | 80 | 112.079 | 83  | 67  | Hypothetical protein CBG18219                                             |
| Locus_15427_Transcript_1/1_Conf_1.000 | 379  | 0  |           |                |    |         |     |     |                                                                           |
| Locus_15428_Transcript_1/1_Conf_1.000 | 167  | 0  |           |                |    |         |     |     |                                                                           |
| Locus_15429_Transcript_1/1_Conf_1.000 | 310  | 0  |           |                |    |         |     |     |                                                                           |
| Locus_1543_Transcript_1/1_Conf_1.000  | 1050 | 20 | 2.03E-119 | XP_002642557.1 | 78 | 433.335 | 343 | 268 | Hypothetical protein CBG20194                                             |
| Locus_15430_Transcript_1/1_Conf_1.000 | 449  | 10 | 1.58E-31  | CBK55579.1     | 68 | 139.043 | 132 | 91  | C. elegans protein C25G4.3b, confirmed by transcript evidence             |

|                                       |      |    |          |                |    |         |     |     |                                         |
|---------------------------------------|------|----|----------|----------------|----|---------|-----|-----|-----------------------------------------|
| Locus_15431_Transcript_1/1_Conf_1.000 | 515  | 19 | 5.14E-20 | XP_002639725.1 | 63 | 100.908 | 146 | 92  | Hypothetical protein CBG12452           |
| Locus_15432_Transcript_1/1_Conf_1.000 | 284  | 20 | 4.66E-31 | EFO15717.1     | 84 | 137.502 | 93  | 79  | hypothetical protein LOAG_12793         |
| Locus_15433_Transcript_1/1_Conf_1.000 | 270  | 3  | 5.23E-19 | NP_501219.1    | 69 | 97.4413 | 81  | 56  | hypothetical protein R05G6.1            |
| Locus_15434_Transcript_1/1_Conf_1.000 | 311  | 20 | 1.18E-39 | XP_002641970.1 | 91 | 166.007 | 92  | 84  | Hypothetical protein CBG16677           |
| Locus_15435_Transcript_1/2_Conf_1.000 | 1069 | 3  | 4.90E-60 | NP_509393.3    | 89 | 236.113 | 157 | 140 | hypothetical protein M60.6              |
| Locus_15435_Transcript_2/2_Conf_1.000 | 239  | 3  | 3.07E-19 | NP_509393.3    | 86 | 98.2117 | 66  | 57  | hypothetical protein M60.6              |
| Locus_15436_Transcript_1/1_Conf_1.000 | 155  | 0  |          |                |    |         |     |     |                                         |
| Locus_15437_Transcript_1/1_Conf_1.000 | 215  | 0  |          |                |    |         |     |     |                                         |
| Locus_15438_Transcript_1/1_Conf_1.000 | 807  | 0  |          |                |    |         |     |     |                                         |
| Locus_15439_Transcript_1/2_Conf_1.000 | 550  | 20 | 5.35E-75 | NP_741437.1    | 88 | 283.878 | 182 | 161 | Dense Body family member (deb-1)        |
| Locus_15439_Transcript_2/2_Conf_1.000 | 555  | 20 | 3.25E-75 | NP_741437.1    | 88 | 284.648 | 184 | 162 | Dense Body family member (deb-1)        |
| Locus_1544_Transcript_1/1_Conf_1.000  | 310  | 0  |          |                |    |         |     |     |                                         |
| Locus_15440_Transcript_1/1_Conf_1.000 | 185  | 0  |          |                |    |         |     |     |                                         |
| Locus_15441_Transcript_1/1_Conf_1.000 | 425  | 20 | 1.25E-44 | XP_002645045.1 | 78 | 182.57  | 132 | 104 | C. briggsae CBR-MEK-1 protein           |
| Locus_15442_Transcript_1/1_Conf_1.000 | 150  | 0  |          |                |    |         |     |     |                                         |
| Locus_15443_Transcript_1/1_Conf_1.000 | 322  | 20 | 1.26E-12 | NP_001024271.1 | 70 | 76.2554 | 71  | 50  | Checkpoint Kinase family member (chk-2) |
| Locus_15444_Transcript_1/1_Conf_1.000 | 138  | 20 | 5.92E-15 | ADD20480.1     | 95 | 83.9593 | 45  | 43  | hypothetical conserved protein          |
| Locus_15445_Transcript_1/1_Conf_1.000 | 320  | 20 | 9.02E-27 | NP_506082.2    | 75 | 123.25  | 104 | 79  | hypothetical protein F55C5.7            |

|                                       |     |    |           |                |     |         |     |     |                                               |
|---------------------------------------|-----|----|-----------|----------------|-----|---------|-----|-----|-----------------------------------------------|
| Locus_15446_Transcript_1/1_Conf_1.000 | 664 | 20 | 2.10E-81  | EAX09318.1     | 100 | 305.834 | 166 | 166 | collagen, type VI, alpha 2, isoform CRA_c     |
| Locus_15447_Transcript_1/2_Conf_1.000 | 328 | 0  |           |                |     |         |     |     |                                               |
| Locus_15447_Transcript_2/2_Conf_1.000 | 328 | 0  |           |                |     |         |     |     |                                               |
| Locus_15448_Transcript_1/1_Conf_1.000 | 203 | 20 | 2.69E-15  | XP_002643273.1 | 86  | 85.1149 | 67  | 58  | C. briggsae CBR-MRP-1 protein                 |
| Locus_15449_Transcript_1/1_Conf_1.000 | 497 | 20 | 6.33E-33  | XP_001896024.1 | 68  | 143.665 | 150 | 102 | DNA ligase III                                |
| Locus_1545_Transcript_1/1_Conf_1.000  | 865 | 20 | 1.18E-116 | XP_002637027.1 | 84  | 423.705 | 257 | 218 | Hypothetical protein CBG09520                 |
| Locus_15450_Transcript_1/1_Conf_1.000 | 355 | 0  |           |                |     |         |     |     |                                               |
| Locus_15451_Transcript_1/2_Conf_1.000 | 424 | 20 | 7.63E-10  | XP_001892560.1 | 66  | 67.0106 | 69  | 46  | GPI transamidase subunit PIG-U family protein |
| Locus_15451_Transcript_2/2_Conf_1.000 | 409 | 20 | 5.78E-10  | XP_001892560.1 | 66  | 67.3958 | 69  | 46  | GPI transamidase subunit PIG-U family protein |
| Locus_15452_Transcript_1/1_Conf_1.000 | 883 | 20 | 4.00E-27  | XP_002636475.1 | 60  | 126.331 | 192 | 117 | Hypothetical protein CBG23146                 |
| Locus_15453_Transcript_1/1_Conf_1.000 | 281 | 0  |           |                |     |         |     |     |                                               |
| Locus_15454_Transcript_1/1_Conf_1.000 | 157 | 0  |           |                |     |         |     |     |                                               |
| Locus_15455_Transcript_1/1_Conf_1.000 | 268 | 0  |           |                |     |         |     |     |                                               |
| Locus_15456_Transcript_1/1_Conf_1.000 | 577 | 20 | 2.78E-27  | XP_002641517.1 | 86  | 125.561 | 79  | 68  | Hypothetical protein CBG09813                 |
| Locus_15457_Transcript_1/1_Conf_1.000 | 342 | 20 | 8.42E-49  | XP_002634599.1 | 89  | 196.438 | 112 | 100 | Hypothetical protein CBG08414                 |

|                                       |     |    |          |                |     |         |     |     |                                                 |
|---------------------------------------|-----|----|----------|----------------|-----|---------|-----|-----|-------------------------------------------------|
| Locus_15458_Transcript_1/1_Conf_1.000 | 365 | 20 | 3.92E-59 | ABM84473.1     | 100 | 230.72  | 121 | 121 | cathepsin D (lysosomal aspartyl peptidase)      |
| Locus_15459_Transcript_1/1_Conf_1.000 | 134 | 0  |          |                |     |         |     |     |                                                 |
| Locus_1546_Transcript_1/1_Conf_1.000  | 961 | 6  | 1.92E-49 | NP_492029.2    | 93  | 200.675 | 117 | 109 | hypothetical protein M05B5.2                    |
| Locus_15460_Transcript_1/1_Conf_1.000 | 292 | 0  |          |                |     |         |     |     |                                                 |
| Locus_15461_Transcript_1/1_Conf_1.000 | 305 | 20 | 1.33E-22 | ACO15791.1     | 73  | 109.383 | 100 | 73  | Hypothetical protein Y71F9B.9b                  |
| Locus_15462_Transcript_1/1_Conf_1.000 | 141 | 0  |          |                |     |         |     |     |                                                 |
| Locus_15463_Transcript_1/1_Conf_1.000 | 260 | 2  | 1.49E-29 | NP_500538.2    | 93  | 132.494 | 86  | 80  | Ligand-Gated ion Channel family member (lgc-22) |
| Locus_15464_Transcript_1/1_Conf_1.000 | 286 | 0  |          |                |     |         |     |     |                                                 |
| Locus_15465_Transcript_1/1_Conf_1.000 | 194 | 0  |          |                |     |         |     |     |                                                 |
| Locus_15466_Transcript_1/2_Conf_1.000 | 409 | 9  | 1.24E-28 | NP_506123.2    | 74  | 129.413 | 99  | 74  | hypothetical protein C54D10.10                  |
| Locus_15466_Transcript_2/2_Conf_1.000 | 416 | 9  | 1.23E-28 | NP_506123.2    | 74  | 129.413 | 99  | 74  | hypothetical protein C54D10.10                  |
| Locus_15467_Transcript_1/1_Conf_1.000 | 381 | 20 | 7.07E-16 | NP_001023850.1 | 79  | 87.0409 | 98  | 78  | LEThal family member (let-413)                  |

|                                       |      |    |           |                |     |         |     |     |                                                                                                     |
|---------------------------------------|------|----|-----------|----------------|-----|---------|-----|-----|-----------------------------------------------------------------------------------------------------|
| Locus_15468_Transcript_1/1_Conf_1.000 | 141  | 20 | 3.24E-13  | XP_002925604.1 | 100 | 78.1814 | 36  | 36  | PREDICTED: receptor-type tyrosine-protein phosphatase F-like isoform 2                              |
| Locus_15469_Transcript_1/1_Conf_1.000 | 485  | 0  |           |                |     |         |     |     |                                                                                                     |
| Locus_1547_Transcript_1/1_Conf_1.000  | 550  | 2  | 1.26E-07  | XP_002644421.1 | 64  | 60.077  | 74  | 48  | C. briggsae CBR-NLP-1 protein                                                                       |
| Locus_15470_Transcript_1/1_Conf_1.000 | 166  | 0  |           |                |     |         |     |     |                                                                                                     |
| Locus_15471_Transcript_1/1_Conf_1.000 | 220  | 0  |           |                |     |         |     |     |                                                                                                     |
| Locus_15472_Transcript_1/1_Conf_1.000 | 171  | 0  |           |                |     |         |     |     |                                                                                                     |
| Locus_15473_Transcript_1/1_Conf_1.000 | 224  | 0  |           |                |     |         |     |     |                                                                                                     |
| Locus_15474_Transcript_1/1_Conf_1.000 | 595  | 20 | 1.93E-50  | NP_506382.1    | 93  | 202.601 | 141 | 132 | LETM1 (Leucine zipper, EF-hand, TransMembrane mitochondrial protein) homolog family member (letm-1) |
| Locus_15475_Transcript_1/1_Conf_1.000 | 278  | 0  |           |                |     |         |     |     |                                                                                                     |
| Locus_15476_Transcript_1/1_Conf_1.000 | 594  | 1  | 3.11E-08  | XP_002813353.1 | 55  | 62.3882 | 83  | 46  | PREDICTED: hypothetical protein LOC100439541                                                        |
| Locus_15477_Transcript_1/1_Conf_1.000 | 187  | 2  | 6.53E-09  | NP_504708.1    | 80  | 63.929  | 57  | 46  | hypothetical protein T25F10.3                                                                       |
| Locus_15478_Transcript_1/1_Conf_1.000 | 325  | 1  | 7.52E-04  | AAB61392.1     | 59  | 45.4394 | 54  | 32  | transposase                                                                                         |
| Locus_15479_Transcript_1/1_Conf_1.000 | 249  | 0  |           |                |     |         |     |     |                                                                                                     |
| Locus_1548_Transcript_1/1_Conf_1.000  | 1383 | 20 | 6.32E-141 | NP_510669.1    | 86  | 505.368 | 322 | 277 | hypothetical protein F38E9.5                                                                        |
| Locus_15480_Transcript_1/1_Conf_1.000 | 265  | 0  |           |                |     |         |     |     |                                                                                                     |
| Locus_15481_Transcript_1/1_Conf_1.000 | 267  | 0  |           |                |     |         |     |     |                                                                                                     |
| Locus_15482_Transcript_1/1_Conf_1.000 | 338  | 3  | 2.66E-15  | NP_497943.2    | 61  | 85.1149 | 116 | 71  | hypothetical protein F10F2.4                                                                        |



|                                       |      |    |           |                |    |         |     |     |                                               |
|---------------------------------------|------|----|-----------|----------------|----|---------|-----|-----|-----------------------------------------------|
| Locus_15483_Transcript_1/1_Conf_1.000 | 291  | 20 | 1.06E-43  | NP_499783.1    | 96 | 179.489 | 96  | 93  | Cyclin-Dependent Kinase family member (cdk-5) |
| Locus_15484_Transcript_1/1_Conf_1.000 | 348  | 3  | 7.86E-31  | NP_500393.2    | 75 | 136.732 | 115 | 87  | hypothetical protein Y37E11AL.5               |
| Locus_15485_Transcript_1/1_Conf_1.000 | 145  | 2  | 1.62E-07  | XP_002642776.1 | 80 | 59.3066 | 46  | 37  | C. briggsae CBR-WRS-2 protein                 |
| Locus_15486_Transcript_1/1_Conf_1.000 | 409  | 0  |           |                |    |         |     |     |                                               |
| Locus_15487_Transcript_1/1_Conf_1.000 | 1319 | 20 | 1.15E-144 | XP_002636212.1 | 74 | 517.694 | 438 | 327 | Hypothetical protein CBR12133                 |
| Locus_15488_Transcript_1/1_Conf_1.000 | 251  | 5  | 4.52E-15  | XP_002629829.1 | 68 | 84.3445 | 83  | 57  | C. briggsae CBR-PLC-3 protein                 |
| Locus_15489_Transcript_1/2_Conf_1.000 | 751  | 20 | 3.50E-68  | NP_499676.1    | 82 | 262.307 | 177 | 146 | hypothetical protein Y37D8A.10                |

|                                       |      |    |           |                |     |         |     |     |                                                      |
|---------------------------------------|------|----|-----------|----------------|-----|---------|-----|-----|------------------------------------------------------|
| Locus_15489_Transcript_2/2_Conf_1.000 | 573  | 20 | 1.88E-68  | NP_499676.1    | 82  | 262.307 | 177 | 146 | hypothetical protein Y37D8A.10                       |
| Locus_1549_Transcript_1/2_Conf_1.000  | 1206 | 20 | 5.20E-141 | XP_002631017.1 | 81  | 505.368 | 402 | 326 | Hypothetical protein CBG02769                        |
| Locus_1549_Transcript_2/2_Conf_1.000  | 1206 | 20 | 5.20E-141 | XP_002631017.1 | 80  | 505.368 | 402 | 324 | Hypothetical protein CBG02769                        |
| Locus_15490_Transcript_1/1_Conf_1.000 | 266  | 0  |           |                |     |         |     |     |                                                      |
| Locus_15491_Transcript_1/1_Conf_1.000 | 302  | 0  |           |                |     |         |     |     |                                                      |
| Locus_15492_Transcript_1/1_Conf_1.000 | 247  | 0  |           |                |     |         |     |     |                                                      |
| Locus_15493_Transcript_1/1_Conf_1.000 | 314  | 0  |           |                |     |         |     |     |                                                      |
| Locus_15494_Transcript_1/1_Conf_1.000 | 284  | 16 | 7.21E-24  | XP_002646276.1 | 74  | 113.62  | 85  | 63  | C. briggsae CBR-ABF-2 protein                        |
| Locus_15495_Transcript_1/1_Conf_1.000 | 1353 | 20 | 0         | NP_740900.1    | 86  | 639.802 | 450 | 389 | hypothetical protein T08G11.1                        |
| Locus_15496_Transcript_1/1_Conf_1.000 | 378  | 20 | 2.88E-25  | NP_498264.1    | 80  | 118.242 | 82  | 66  | Dipeptidyl Peptidase Four (IV) family member (dpf-4) |
| Locus_15497_Transcript_1/1_Conf_1.000 | 158  | 0  |           |                |     |         |     |     |                                                      |
| Locus_15498_Transcript_1/1_Conf_1.000 | 140  | 20 | 5.92E-15  | XP_001098677.2 | 100 | 83.9593 | 38  | 38  | PREDICTED: serine incorporator 2                     |
| Locus_15499_Transcript_1/1_Conf_1.000 | 372  | 0  |           |                |     |         |     |     |                                                      |

|                                       |     |    |           |                |    |         |     |     |                                |
|---------------------------------------|-----|----|-----------|----------------|----|---------|-----|-----|--------------------------------|
| Locus_155_Transcript_1/1_Conf_1.000   | 842 | 20 | 6.83E-82  | XP_002636957.1 | 96 | 308.145 | 150 | 145 | C. briggsae CBR-EAT-6 protein  |
| Locus_1550_Transcript_1/1_Conf_1.000  | 301 | 15 | 8.94E-11  | XP_002634040.1 | 66 | 70.0922 | 104 | 69  | C. briggsae CBR-VIT-6 protein  |
| Locus_15500_Transcript_1/1_Conf_1.000 | 419 | 5  | 1.82E-27  | ACT20210.1     | 67 | 125.561 | 139 | 94  | Hypothetical protein Y34B4A.8b |
| Locus_15501_Transcript_1/2_Conf_1.000 | 509 | 0  |           |                |    |         |     |     |                                |
| Locus_15501_Transcript_2/2_Conf_1.000 | 509 | 0  |           |                |    |         |     |     |                                |
| Locus_15502_Transcript_1/1_Conf_1.000 | 300 | 20 | 2.19E-25  | XP_001891853.1 | 78 | 118.627 | 97  | 76  | Patched family protein         |
| Locus_15503_Transcript_1/1_Conf_1.000 | 438 | 20 | 4.50E-31  | NP_001032972.1 | 76 | 137.502 | 98  | 75  | hypothetical protein C36B1.14  |
| Locus_15504_Transcript_1/1_Conf_1.000 | 647 | 0  |           |                |    |         |     |     |                                |
| Locus_15505_Transcript_1/1_Conf_1.000 | 940 | 20 | 6.54E-103 | NP_492779.1    | 92 | 378.252 | 240 | 223 | hypothetical protein B0511.6   |

|                                       |     |    |          |                |     |         |     |     |                                              |
|---------------------------------------|-----|----|----------|----------------|-----|---------|-----|-----|----------------------------------------------|
| Locus_15506_Transcript_1/1_Conf_1.000 | 191 | 20 | 1.03E-30 | CAX12872.1     | 100 | 136.346 | 63  | 63  | major histocompatibility complex, class I, F |
| Locus_15507_Transcript_1/1_Conf_1.000 | 278 | 0  |          |                |     |         |     |     |                                              |
| Locus_15508_Transcript_1/1_Conf_1.000 | 254 |    |          |                |     |         |     |     |                                              |
| Locus_15509_Transcript_1/2_Conf_1.000 | 235 | 6  | 2.28E-22 | EFO24879.1     | 76  | 108.612 | 78  | 60  | hypothetical protein LOAG_03607              |
| Locus_15509_Transcript_2/2_Conf_1.000 | 235 | 6  | 2.28E-22 | EFO24879.1     | 76  | 108.612 | 78  | 60  | hypothetical protein LOAG_03607              |
| Locus_1551_Transcript_1/1_Conf_1.000  | 689 | 2  | 3.27E-11 | XP_002637606.1 | 53  | 72.7886 | 116 | 62  | Hypothetical protein CBG19344                |
| Locus_15510_Transcript_1/1_Conf_1.000 | 150 | 0  |          |                |     |         |     |     |                                              |
| Locus_15511_Transcript_1/1_Conf_1.000 | 326 | 0  |          |                |     |         |     |     |                                              |
| Locus_15512_Transcript_1/1_Conf_1.000 | 371 | 1  | 1.31E-09 | NP_001022291.1 | 58  | 66.2402 | 102 | 60  | hypothetical protein T01B7.5                 |
| Locus_15513_Transcript_1/1_Conf_1.000 | 454 | 0  |          |                |     |         |     |     |                                              |
| Locus_15514_Transcript_1/1_Conf_1.000 | 528 | 20 | 1.50E-44 | NP_493617.2    | 86  | 182.57  | 119 | 103 | hypothetical protein F33H2.6                 |
| Locus_15515_Transcript_1/1_Conf_1.000 | 667 | 20 | 7.79E-92 | BAB32114.1     | 92  | 340.502 | 200 | 185 | unnamed protein product                      |
| Locus_15516_Transcript_1/1_Conf_1.000 | 135 | 0  |          |                |     |         |     |     |                                              |
| Locus_15517_Transcript_1/1_Conf_1.000 | 439 | 2  | 9.45E-05 | AAX33674.1     | 39  | 50.0618 | 113 | 45  | plus agglutinin                              |
| Locus_15518_Transcript_1/1_Conf_1.000 | 552 | 20 | 9.39E-43 | NP_497829.1    | 84  | 176.792 | 118 | 100 | hypothetical protein C16C10.8                |

|                                       |      |    |          |                |    |         |     |     |                                                                      |
|---------------------------------------|------|----|----------|----------------|----|---------|-----|-----|----------------------------------------------------------------------|
| Locus_15519_Transcript_1/2_Conf_1.000 | 702  | 20 | 7.80E-64 | NP_492861.1    | 76 | 247.669 | 238 | 183 | hypothetical protein Y52B11A.10                                      |
| Locus_15519_Transcript_2/2_Conf_1.000 | 702  | 20 | 7.80E-64 | NP_492861.1    | 76 | 247.669 | 238 | 183 | hypothetical protein Y52B11A.10                                      |
| Locus_1552_Transcript_1/1_Conf_1.000  | 415  | 0  |          |                |    |         |     |     |                                                                      |
| Locus_15520_Transcript_1/1_Conf_1.000 | 332  | 0  |          |                |    |         |     |     |                                                                      |
| Locus_15521_Transcript_1/1_Conf_1.000 | 671  | 0  |          |                |    |         |     |     |                                                                      |
| Locus_15522_Transcript_1/1_Conf_1.000 | 551  | 0  |          |                |    |         |     |     |                                                                      |
| Locus_15523_Transcript_1/1_Conf_1.000 | 269  | 6  | 3.39E-26 | NP_502119.2    | 86 | 121.324 | 79  | 68  | hypothetical protein F54D1.6                                         |
| Locus_15524_Transcript_1/1_Conf_1.000 | 324  | 20 | 6.42E-25 | NP_491660.1    | 79 | 117.087 | 94  | 75  | hypothetical protein F55F8.9                                         |
| Locus_15525_Transcript_1/1_Conf_1.000 | 138  | 0  |          |                |    |         |     |     |                                                                      |
| Locus_15526_Transcript_1/1_Conf_1.000 | 271  | 0  |          |                |    |         |     |     |                                                                      |
| Locus_15527_Transcript_1/1_Conf_1.000 | 501  | 0  |          |                |    |         |     |     |                                                                      |
| Locus_15528_Transcript_1/1_Conf_1.000 | 284  | 0  |          |                |    |         |     |     |                                                                      |
| Locus_15529_Transcript_1/1_Conf_1.000 | 391  | 0  |          |                |    |         |     |     |                                                                      |
| Locus_1553_Transcript_1/1_Conf_1.000  | 2756 | 20 | 0        | NP_741743.1    | 93 | 922.924 | 532 | 495 | Propionyl Coenzyme A Carboxylase Beta subunit family member (pccb-1) |
| Locus_15530_Transcript_1/1_Conf_1.000 | 285  | 0  |          |                |    |         |     |     |                                                                      |
| Locus_15531_Transcript_1/1_Conf_1.000 | 381  | 20 | 1.24E-44 | XP_002640754.1 | 84 | 182.57  | 123 | 104 | Hypothetical protein CBG24191                                        |
| Locus_15532_Transcript_1/1_Conf_1.000 | 252  | 0  |          |                |    |         |     |     |                                                                      |
| Locus_15533_Transcript_1/1_Conf_1.000 | 278  | 20 | 5.18E-27 | XP_002635871.1 | 86 | 124.02  | 88  | 76  | Hypothetical protein CBG01087                                        |
| Locus_15534_Transcript_1/1_Conf_1.000 | 273  | 0  |          |                |    |         |     |     |                                                                      |
| Locus_15535_Transcript_1/1_Conf_1.000 | 361  | 0  |          |                |    |         |     |     |                                                                      |
| Locus_15536_Transcript_1/1_Conf_1.000 | 220  | 0  |          |                |    |         |     |     |                                                                      |

|                                       |      |    |          |                |    |         |     |     |                                                                           |
|---------------------------------------|------|----|----------|----------------|----|---------|-----|-----|---------------------------------------------------------------------------|
| Locus_15537_Transcript_1/1_Conf_1.000 | 129  | 20 | 2.78E-12 | EFO25124.1     | 90 | 75.0998 | 42  | 38  | bromodomain containing protein                                            |
| Locus_15538_Transcript_1/1_Conf_1.000 | 411  | 20 | 1.19E-31 | XP_002631305.1 | 67 | 139.428 | 139 | 94  | C. briggsae CBR-DNA-2 protein                                             |
| Locus_15539_Transcript_1/1_Conf_1.000 | 135  | 0  |          |                |    |         |     |     |                                                                           |
| Locus_1554_Transcript_1/1_Conf_1.000  | 1072 | 3  | 5.95E-98 | NP_499903.3    | 70 | 362.073 | 357 | 252 | Defecation Suppressor of Clk-1 family member (dsc-4)                      |
| Locus_15540_Transcript_1/1_Conf_1.000 | 216  | 0  |          |                |    |         |     |     |                                                                           |
| Locus_15541_Transcript_1/1_Conf_1.000 | 636  | 20 | 1.59E-51 | NP_508877.1    | 73 | 206.453 | 176 | 130 | hypothetical protein T03G11.4                                             |
| Locus_15542_Transcript_1/1_Conf_1.000 | 131  | 0  |          |                |    |         |     |     |                                                                           |
| Locus_15543_Transcript_1/1_Conf_1.000 | 151  | 7  | 5.70E-13 | XP_001900069.1 | 85 | 77.411  | 49  | 42  | protein C18H9.7                                                           |
| Locus_15544_Transcript_1/1_Conf_1.000 | 394  | 0  |          |                |    |         |     |     |                                                                           |
| Locus_15545_Transcript_1/1_Conf_1.000 | 479  | 6  | 1.67E-17 | CBM41243.1     | 60 | 92.4337 | 120 | 72  | C. elegans protein Y39B6A.43c, partially confirmed by transcript evidence |
| Locus_15546_Transcript_1/2_Conf_1.000 | 363  | 20 | 2.82E-49 | NP_498923.1    | 93 | 197.978 | 108 | 101 | hypothetical protein B0303.15                                             |

|                                       |     |    |          |             |    |         |     |     |                                                               |
|---------------------------------------|-----|----|----------|-------------|----|---------|-----|-----|---------------------------------------------------------------|
| Locus_15546_Transcript_2/2_Conf_1.000 | 345 | 20 | 2.61E-50 | NP_498923.1 | 92 | 201.445 | 113 | 104 | hypothetical protein B0303.15                                 |
| Locus_15547_Transcript_1/1_Conf_1.000 | 138 | 0  |          |             |    |         |     |     |                                                               |
| Locus_15548_Transcript_1/1_Conf_1.000 | 342 | 0  |          |             |    |         |     |     |                                                               |
| Locus_15549_Transcript_1/1_Conf_1.000 | 665 | 20 | 8.05E-57 | NP_741241.1 | 67 | 224.172 | 221 | 150 | Dipeptidyl Peptidase Four (IV) family member (dpf-6)          |
| Locus_1555_Transcript_1/1_Conf_1.000  | 237 | 20 | 5.78E-26 | NP_491399.1 | 85 | 120.553 | 78  | 67  | Ribosomal Protein, Large subunit family member (rpl-24.1)     |
| Locus_15550_Transcript_1/1_Conf_1.000 | 249 | 20 | 3.23E-29 | NP_509693.1 | 85 | 131.339 | 81  | 69  | hypothetical protein W07E11.1                                 |
| Locus_15551_Transcript_1/1_Conf_1.000 | 669 | 0  |          |             |    |         |     |     |                                                               |
| Locus_15552_Transcript_1/1_Conf_1.000 | 186 | 20 | 2.73E-23 | NP_497696.2 | 91 | 111.694 | 62  | 57  | Pim (mammalian oncogene) Related Kinase family member (prk-2) |
| Locus_15553_Transcript_1/1_Conf_1.000 | 464 | 20 | 1.05E-67 | NP_505493.1 | 90 | 259.225 | 154 | 140 | SULfate Permease family member (sulp-8)                       |
| Locus_15554_Transcript_1/1_Conf_1.000 | 149 | 0  |          |             |    |         |     |     |                                                               |
| Locus_15555_Transcript_1/1_Conf_1.000 | 852 | 20 | 8.57E-88 | EFO26794.1  | 75 | 327.791 | 280 | 211 | galactoside-binding lectin family protein                     |
| Locus_15556_Transcript_1/1_Conf_1.000 | 405 | 0  |          |             |    |         |     |     |                                                               |
| Locus_15557_Transcript_1/1_Conf_1.000 | 597 | 20 | 7.64E-71 | NP_496968.1 | 82 | 270.396 | 188 | 155 | hypothetical protein Y48B6A.12                                |

|                                       |      |    |          |                |    |         |     |     |                                                |
|---------------------------------------|------|----|----------|----------------|----|---------|-----|-----|------------------------------------------------|
| Locus_15558_Transcript_1/2_Conf_1.000 | 267  | 0  |          |                |    |         |     |     |                                                |
| Locus_15558_Transcript_2/2_Conf_1.000 | 290  | 0  |          |                |    |         |     |     |                                                |
| Locus_15559_Transcript_1/1_Conf_1.000 | 741  | 5  | 5.18E-08 | XP_001897464.1 | 51 | 62.3882 | 107 | 55  | hypothetical protein Bm1_30125                 |
| Locus_1556_Transcript_1/1_Conf_1.000  | 1175 | 20 | 3.30E-68 | NP_504349.1    | 79 | 263.462 | 216 | 172 | hypothetical protein K11D12.5                  |
| Locus_15560_Transcript_1/1_Conf_1.000 | 534  | 20 | 3.76E-35 | EFO27810.1     | 70 | 151.369 | 144 | 101 | plasmid Maintenance protein containing protein |
| Locus_15561_Transcript_1/1_Conf_1.000 | 501  | 0  |          |                |    |         |     |     |                                                |
| Locus_15562_Transcript_1/1_Conf_1.000 | 289  | 20 | 3.80E-25 | XP_002632959.1 | 77 | 117.857 | 93  | 72  | C. briggsae CBR-RAD-26 protein                 |
| Locus_15563_Transcript_1/1_Conf_1.000 | 414  | 0  |          |                |    |         |     |     |                                                |
| Locus_15564_Transcript_1/1_Conf_1.000 | 718  | 20 | 1.74E-66 | NP_001021021.1 | 80 | 256.529 | 189 | 152 | hypothetical protein C32F10.8                  |
| Locus_15565_Transcript_1/1_Conf_1.000 | 179  | 0  |          |                |    |         |     |     |                                                |
| Locus_15566_Transcript_1/1_Conf_1.000 | 164  | 20 | 1.21E-15 | XP_001900591.1 | 88 | 86.2705 | 53  | 47  | Blistered cuticle protein 3                    |
| Locus_15567_Transcript_1/1_Conf_1.000 | 582  | 20 | 2.07E-09 | XP_001895583.1 | 73 | 66.2402 | 49  | 36  | Surfeit locus protein 4 homolog                |
| Locus_15568_Transcript_1/1_Conf_1.000 | 614  |    |          |                |    |         |     |     |                                                |



|                                       |      |    |           |                |     |         |     |     |                                                                                |
|---------------------------------------|------|----|-----------|----------------|-----|---------|-----|-----|--------------------------------------------------------------------------------|
| Locus_15569_Transcript_1/1_Conf_1.000 | 294  | 0  |           |                |     |         |     |     |                                                                                |
| Locus_1557_Transcript_1/1_Conf_1.000  | 1009 | 0  |           |                |     |         |     |     |                                                                                |
| Locus_15570_Transcript_1/1_Conf_1.000 | 195  | 3  | 3.93E-06  | NP_504274.2    | 82  | 54.6842 | 39  | 32  | UDP-GlucuronosylTransferase family member (ugt-61)                             |
| Locus_15571_Transcript_1/1_Conf_1.000 | 1578 | 20 | 1.67E-140 | EFO23974.1     | 71  | 504.212 | 471 | 337 | hypothetical protein LOAG_04507                                                |
| Locus_15572_Transcript_1/1_Conf_1.000 | 338  | 10 | 5.52E-29  | NP_001021303.1 | 69  | 130.568 | 108 | 75  | Nuclear Hormone Receptor family member (nhr-105)                               |
| Locus_15573_Transcript_1/1_Conf_1.000 | 328  | 20 | 8.58E-46  | XP_001111129.1 | 100 | 186.422 | 103 | 103 | PREDICTED: CD63 antigen isoform 1                                              |
| Locus_15574_Transcript_1/1_Conf_1.000 | 204  | 20 | 7.07E-16  | NP_508272.1    | 88  | 87.0409 | 52  | 46  | human SEDL (spondyloepiphyseal dysplasia tarda) related family member (sedl-1) |
| Locus_15575_Transcript_1/1_Conf_1.000 | 768  | 20 | 4.71E-92  | NP_507487.1    | 84  | 341.658 | 252 | 214 | P-GlycoProtein related family member (pgp-9)                                   |
| Locus_15576_Transcript_1/1_Conf_1.000 | 402  | 20 | 1.09E-32  | XP_002632873.1 | 69  | 142.895 | 132 | 92  | Hypothetical protein CBG15077                                                  |
| Locus_15577_Transcript_1/1_Conf_1.000 | 557  | 6  | 6.25E-10  | CAD44516.1     | 55  | 67.781  | 184 | 102 | VAB-10B protein                                                                |
| Locus_15578_Transcript_1/1_Conf_1.000 | 167  | 0  |           |                |     |         |     |     |                                                                                |
| Locus_15579_Transcript_1/1_Conf_1.000 | 353  | 0  |           |                |     |         |     |     |                                                                                |
| Locus_1558_Transcript_1/1_Conf_1.000  | 3022 | 17 | 1.53E-21  | EFO26551.1     | 60  | 110.153 | 157 | 95  | hypothetical protein LOAG_01926                                                |
| Locus_15580_Transcript_1/1_Conf_1.000 | 197  | 0  |           |                |     |         |     |     |                                                                                |
| Locus_15581_Transcript_1/1_Conf_1.000 | 160  | 0  |           |                |     |         |     |     |                                                                                |
| Locus_15582_Transcript_1/1_Conf_1.000 | 696  | 20 | 4.08E-41  | XP_002640039.1 | 76  | 172.17  | 170 | 130 | Hypothetical protein CBG12511                                                  |
| Locus_15583_Transcript_1/1_Conf_1.000 | 207  | 0  |           |                |     |         |     |     |                                                                                |
| Locus_15584_Transcript_1/1_Conf_1.000 | 426  | 0  |           |                |     |         |     |     |                                                                                |
| Locus_15585_Transcript_1/1_Conf_1.000 | 135  | 3  | 1.28E-09  | NP_001041140.1 | 84  | 66.2402 | 44  | 37  | hypothetical protein F58H1.7                                                   |
| Locus_15586_Transcript_1/1_Conf_1.000 | 302  | 0  |           |                |     |         |     |     |                                                                                |

|                                       |      |    |          |                |     |         |     |     |                                                             |
|---------------------------------------|------|----|----------|----------------|-----|---------|-----|-----|-------------------------------------------------------------|
| Locus_15587_Transcript_1/1_Conf_1.000 | 290  | 20 | 1.76E-22 | XP_001897819.1 | 88  | 108.997 | 79  | 70  | Surfeit locus protein 5 containing protein                  |
| Locus_15588_Transcript_1/1_Conf_1.000 | 270  | 2  | 9.05E-39 | CAH93159.1     | 100 | 135.961 | 67  | 67  | hypothetical protein                                        |
| Locus_15589_Transcript_1/1_Conf_1.000 | 235  | 0  |          |                |     |         |     |     |                                                             |
| Locus_1559_Transcript_1/1_Conf_1.000  | 2882 | 20 | 0        | EFO24169.1     | 70  | 836.639 | 887 | 627 | hypothetical protein LOAG_04317                             |
| Locus_15590_Transcript_1/1_Conf_1.000 | 172  | 0  |          |                |     |         |     |     |                                                             |
| Locus_15591_Transcript_1/1_Conf_1.000 | 133  | 0  |          |                |     |         |     |     |                                                             |
| Locus_15592_Transcript_1/1_Conf_1.000 | 222  | 20 | 6.50E-25 | NP_494991.1    | 92  | 117.087 | 69  | 64  | Phosphoethanolamine Methyltransferase family member (pmt-1) |
| Locus_15593_Transcript_1/1_Conf_1.000 | 196  | 0  |          |                |     |         |     |     |                                                             |
| Locus_15594_Transcript_1/1_Conf_1.000 | 265  | 0  |          |                |     |         |     |     |                                                             |
| Locus_15595_Transcript_1/1_Conf_1.000 | 491  | 20 | 1.56E-55 | XP_002633256.1 | 80  | 218.779 | 155 | 125 | Hypothetical protein CBG05981                               |
| Locus_15596_Transcript_1/1_Conf_1.000 | 487  | 0  |          |                |     |         |     |     |                                                             |
| Locus_15597_Transcript_1/1_Conf_1.000 | 300  | 0  |          |                |     |         |     |     |                                                             |
| Locus_15598_Transcript_1/1_Conf_1.000 | 638  | 20 | 1.02E-82 | XP_002630211.1 | 86  | 310.071 | 213 | 184 | C. briggsae CBR-FRS-2 protein                               |
| Locus_15599_Transcript_1/1_Conf_1.000 | 500  | 0  |          |                |     |         |     |     |                                                             |
| Locus_156_Transcript_1/2_Conf_1.000   | 391  | 0  |          |                |     |         |     |     |                                                             |
| Locus_156_Transcript_2/2_Conf_1.000   | 366  | 0  |          |                |     |         |     |     |                                                             |
| Locus_1560_Transcript_1/1_Conf_1.000  | 331  | 0  |          |                |     |         |     |     |                                                             |

|                                       |      |    |           |                |    |         |     |     |                                 |
|---------------------------------------|------|----|-----------|----------------|----|---------|-----|-----|---------------------------------|
| Locus_15600_Transcript_1/1_Conf_1.000 | 327  | 20 | 3.16E-40  | EFO23513.1     | 85 | 167.933 | 108 | 92  | CMGC/CDK/CRK7 protein kinase    |
| Locus_15601_Transcript_1/1_Conf_1.000 | 173  | 0  |           |                |    |         |     |     |                                 |
| Locus_15602_Transcript_1/1_Conf_1.000 | 378  | 0  |           |                |    |         |     |     |                                 |
| Locus_15603_Transcript_1/1_Conf_1.000 | 312  | 0  |           |                |    |         |     |     |                                 |
| Locus_15604_Transcript_1/1_Conf_1.000 | 301  | 0  |           |                |    |         |     |     |                                 |
| Locus_15605_Transcript_1/1_Conf_1.000 | 184  | 0  |           |                |    |         |     |     |                                 |
| Locus_15606_Transcript_1/1_Conf_1.000 | 379  | 20 | 1.73E-46  | P51535.1       | 90 | 188.734 | 113 | 102 | Myoglobin                       |
| Locus_15607_Transcript_1/1_Conf_1.000 | 396  | 0  |           |                |    |         |     |     |                                 |
| Locus_15608_Transcript_1/1_Conf_1.000 | 509  | 20 | 1.20E-13  | XP_001897610.1 | 67 | 79.7221 | 87  | 59  | SNARE-associated protein Snapin |
| Locus_15609_Transcript_1/1_Conf_1.000 | 438  | 2  | 1.61E-04  | XP_002067139.1 | 52 | 49.2914 | 110 | 58  | GK24176                         |
| Locus_1561_Transcript_1/1_Conf_1.000  | 1253 | 20 | 3.52E-71  | NP_495686.2    | 72 | 273.478 | 266 | 194 | hypothetical protein T05H10.1   |
| Locus_15610_Transcript_1/1_Conf_1.000 | 188  | 0  |           |                |    |         |     |     |                                 |
| Locus_15611_Transcript_1/1_Conf_1.000 | 232  | 20 | 5.83E-18  | NP_499865.1    | 75 | 93.9745 | 79  | 60  | hypothetical protein F29C4.6    |
| Locus_15612_Transcript_1/1_Conf_1.000 | 140  | 0  |           |                |    |         |     |     |                                 |
| Locus_15613_Transcript_1/1_Conf_1.000 | 229  | 0  |           |                |    |         |     |     |                                 |
| Locus_15614_Transcript_1/1_Conf_1.000 | 398  | 20 | 4.17E-40  | XP_002632119.1 | 77 | 167.548 | 134 | 104 | Hypothetical protein CBG06974   |
| Locus_15615_Transcript_1/1_Conf_1.000 | 921  | 20 | 1.96E-112 | NP_490973.2    | 90 | 409.838 | 255 | 231 | hypothetical protein F23C8.5    |
| Locus_15616_Transcript_1/1_Conf_1.000 | 135  | 0  |           |                |    |         |     |     |                                 |
| Locus_15617_Transcript_1/1_Conf_1.000 | 343  | 0  |           |                |    |         |     |     |                                 |
| Locus_15618_Transcript_1/1_Conf_1.000 | 391  | 2  | 1.66E-33  | NP_496432.2    | 69 | 145.591 | 123 | 86  | hypothetical protein C05D12.1   |
| Locus_15619_Transcript_1/1_Conf_1.000 | 553  | 20 | 1.50E-48  | XP_002635580.1 | 70 | 196.052 | 151 | 106 | C. briggsae CBR-PPN-1 protein   |

|                                       |      |    |           |                |    |         |     |     |                                                                             |  |
|---------------------------------------|------|----|-----------|----------------|----|---------|-----|-----|-----------------------------------------------------------------------------|--|
| Locus_1562_Transcript_1/1_Conf_1.000  | 359  | 0  |           |                |    |         |     |     |                                                                             |  |
| Locus_15620_Transcript_1/1_Conf_1.000 | 839  | 0  |           |                |    |         |     |     |                                                                             |  |
| Locus_15621_Transcript_1/1_Conf_1.000 | 278  | 0  |           |                |    |         |     |     |                                                                             |  |
| Locus_15622_Transcript_1/1_Conf_1.000 | 282  | 0  |           |                |    |         |     |     |                                                                             |  |
| Locus_15623_Transcript_1/1_Conf_1.000 | 473  | 20 | 4.26E-37  | XP_001894688.1 | 66 | 157.532 | 155 | 103 | Protein-tyrosine phosphatase containing protein                             |  |
| Locus_15624_Transcript_1/1_Conf_1.000 | 347  | 20 | 3.29E-53  | NP_001122975.1 | 98 | 211.075 | 114 | 112 | hypothetical protein K10C8.3                                                |  |
| Locus_15625_Transcript_1/1_Conf_1.000 | 326  | 0  |           |                |    |         |     |     |                                                                             |  |
| Locus_15626_Transcript_1/1_Conf_1.000 | 277  | 0  |           |                |    |         |     |     |                                                                             |  |
| Locus_15627_Transcript_1/1_Conf_1.000 | 558  | 0  |           |                |    |         |     |     |                                                                             |  |
| Locus_15628_Transcript_1/1_Conf_1.000 | 715  |    |           |                |    |         |     |     |                                                                             |  |
| Locus_15629_Transcript_1/1_Conf_1.000 | 245  | 0  |           |                |    |         |     |     |                                                                             |  |
| Locus_1563_Transcript_1/2_Conf_1.000  | 3044 | 20 | 1.65E-148 |                | 56 | 531.946 | 842 | 475 | hypothetical protein H15N14.1a - Caenorhabditis elegans                     |  |
| Locus_1563_Transcript_2/2_Conf_1.000  | 3038 | 20 | 4.94E-153 |                | 56 | 546.969 | 842 | 474 | hypothetical protein H15N14.1a - Caenorhabditis elegans                     |  |
| Locus_15630_Transcript_1/2_Conf_1.000 | 280  | 0  |           |                |    |         |     |     |                                                                             |  |
| Locus_15630_Transcript_2/2_Conf_1.000 | 280  | 0  |           |                |    |         |     |     |                                                                             |  |
| Locus_15631_Transcript_1/1_Conf_1.000 | 242  | 0  |           |                |    |         |     |     |                                                                             |  |
| Locus_15632_Transcript_1/2_Conf_1.000 | 834  | 20 | 8.20E-96  | XP_002631134.1 | 86 | 354.369 | 229 | 199 | Hypothetical protein CBG02918                                               |  |
| Locus_15632_Transcript_2/2_Conf_1.000 | 232  | 20 | 7.60E-26  | NP_496427.1    | 74 | 120.168 | 95  | 71  | hypothetical protein B0491.7                                                |  |
| Locus_15633_Transcript_1/1_Conf_1.000 | 145  | 20 | 2.58E-13  | NP_499028.1    | 85 | 78.5666 | 48  | 41  | NHL (ring finger b-box coiled coil) domain containing family member (nhl-1) |  |
| Locus_15634_Transcript_1/1_Conf_1.000 | 282  | 0  |           |                |    |         |     |     |                                                                             |  |
| Locus_15635_Transcript_1/1_Conf_1.000 | 410  | 0  |           |                |    |         |     |     |                                                                             |  |
| Locus_15636_Transcript_1/2_Conf_1.000 | 695  | 20 | 4.12E-94  | NP_493832.1    | 84 | 348.206 | 231 | 196 | Acyl CoA DeHydrogenase family member (acdh-9)                               |  |
| Locus_15636_Transcript_2/2_Conf_1.000 | 695  | 20 | 1.41E-94  | NP_493832.1    | 84 | 349.747 | 231 | 196 | Acyl CoA DeHydrogenase family member (acdh-9)                               |  |
| Locus_15637_Transcript_1/1_Conf_1.000 | 385  | 20 | 1.42E-24  | NP_001122663.1 | 76 | 115.931 | 91  | 70  | hypothetical protein Y53F4B.39                                              |  |
| Locus_15638_Transcript_1/1_Conf_1.000 | 309  | 0  |           |                |    |         |     |     |                                                                             |  |
| Locus_15639_Transcript_1/1_Conf_1.000 | 542  | 0  |           |                |    |         |     |     |                                                                             |  |

|                                       |      |    |          |                |    |         |     |     |                                                                                                                                                     |
|---------------------------------------|------|----|----------|----------------|----|---------|-----|-----|-----------------------------------------------------------------------------------------------------------------------------------------------------|
| Locus_1564_Transcript_1/1_Conf_1.000  | 785  | 20 | 5.12E-57 | XP_001899636.1 | 71 | 225.328 | 207 | 147 | Chain A, Two Seven-Bladed Beta-Propeller Domains Revealed By The Structure Of A C. Elegans Homologue Of Yeast Actin Interacting Protein 1, putative |
| Locus_15640_Transcript_1/1_Conf_1.000 | 266  | 0  |          |                |    |         |     |     |                                                                                                                                                     |
| Locus_15641_Transcript_1/1_Conf_1.000 | 279  | 0  |          |                |    |         |     |     |                                                                                                                                                     |
| Locus_15642_Transcript_1/1_Conf_1.000 | 426  | 20 | 2.94E-62 | XP_001896500.1 | 87 | 241.121 | 139 | 122 | leucyl-tRNA synthetase                                                                                                                              |
| Locus_15643_Transcript_1/1_Conf_1.000 | 319  | 20 | 6.63E-54 | EFO21255.1     | 97 | 213.386 | 106 | 103 | hypothetical protein LOAG_07233                                                                                                                     |
| Locus_15644_Transcript_1/1_Conf_1.000 | 618  | 20 | 1.35E-44 | NP_497787.1    | 88 | 183.341 | 109 | 97  | Paralysed Arrest at Two-fold family member (pat-3)                                                                                                  |
| Locus_15645_Transcript_1/1_Conf_1.000 | 527  | 0  |          |                |    |         |     |     |                                                                                                                                                     |
| Locus_15646_Transcript_1/1_Conf_1.000 | 266  | 0  |          |                |    |         |     |     |                                                                                                                                                     |
| Locus_15647_Transcript_1/1_Conf_1.000 | 332  | 8  | 2.78E-04 | NP_001174833.1 | 59 | 48.521  | 54  | 32  | Os06g0534900                                                                                                                                        |
| Locus_15648_Transcript_1/1_Conf_1.000 | 290  | 0  |          |                |    |         |     |     |                                                                                                                                                     |
| Locus_15649_Transcript_1/1_Conf_1.000 | 495  | 20 | 5.74E-26 | XP_002646337.1 | 55 | 120.553 | 170 | 95  | Hypothetical protein CBG12050                                                                                                                       |
| Locus_1565_Transcript_1/1_Conf_1.000  | 2446 | 20 | 8.87E-25 | XP_001464299.1 | 41 | 120.553 | 806 | 333 | kinesin K39                                                                                                                                         |
| Locus_15650_Transcript_1/1_Conf_1.000 | 849  | 3  | 1.93E-23 | NP_001022400.1 | 45 | 114.005 | 284 | 130 | Polarity and Osmotic sensitivity Defect family member (pod-2)                                                                                       |
| Locus_15651_Transcript_1/1_Conf_1.000 | 568  | 20 | 8.14E-69 | NP_001129905.1 | 80 | 263.462 | 190 | 152 | hypothetical protein T03D8.6                                                                                                                        |
| Locus_15652_Transcript_1/1_Conf_1.000 | 200  | 0  |          |                |    |         |     |     |                                                                                                                                                     |
| Locus_15653_Transcript_1/1_Conf_1.000 | 209  | 0  |          |                |    |         |     |     |                                                                                                                                                     |
| Locus_15654_Transcript_1/1_Conf_1.000 | 784  | 20 | 2.91E-52 | XP_002639833.1 | 64 | 209.534 | 219 | 141 | C. briggsae CBR-MET-1 protein                                                                                                                       |
| Locus_15655_Transcript_1/1_Conf_1.000 | 159  | 0  |          |                |    |         |     |     |                                                                                                                                                     |

|                                       |      |    |          |                |     |         |     |     |                                                                     |
|---------------------------------------|------|----|----------|----------------|-----|---------|-----|-----|---------------------------------------------------------------------|
| Locus_15656_Transcript_1/2_Conf_1.000 | 592  | 20 | 1.22E-73 | NP_499759.1    | 78  | 279.641 | 198 | 156 | DNAJ domain (prokaryotic heat shock protein) family member (dnj-17) |
| Locus_15656_Transcript_2/2_Conf_1.000 | 744  | 20 | 2.53E-95 | NP_499759.1    | 81  | 352.443 | 248 | 201 | DNAJ domain (prokaryotic heat shock protein) family member (dnj-17) |
| Locus_15657_Transcript_1/1_Conf_1.000 | 428  | 20 | 9.86E-34 | XP_001901272.1 | 73  | 146.362 | 143 | 105 | DEAD                                                                |
| Locus_15658_Transcript_1/1_Conf_1.000 | 214  | 0  |          |                |     |         |     |     |                                                                     |
| Locus_15659_Transcript_1/1_Conf_1.000 | 188  | 0  |          |                |     |         |     |     |                                                                     |
| Locus_1566_Transcript_1/2_Conf_1.000  | 979  | 0  |          |                |     |         |     |     |                                                                     |
| Locus_1566_Transcript_2/2_Conf_1.000  | 1193 | 0  |          |                |     |         |     |     |                                                                     |
| Locus_15660_Transcript_1/1_Conf_1.000 | 446  | 2  | 5.29E-11 | XP_001902408.1 | 50  | 70.8626 | 162 | 81  | hypothetical protein Bm1_54750                                      |
| Locus_15661_Transcript_1/1_Conf_1.000 | 678  | 20 | 7.40E-77 | XP_001892908.1 | 86  | 290.812 | 195 | 169 | K+ channel tetramerisation domain containing protein                |
| Locus_15662_Transcript_1/1_Conf_1.000 | 444  | 20 | 3.18E-40 | XP_001899240.1 | 76  | 167.933 | 131 | 100 | Tetraspanin family protein                                          |
| Locus_15663_Transcript_1/1_Conf_1.000 | 152  | 20 | 4.82E-20 | XP_002927000.1 | 100 | 100.908 | 50  | 50  | PREDICTED: LOW QUALITY PROTEIN: lamin-A/C-like                      |
| Locus_15664_Transcript_1/1_Conf_1.000 | 515  | 0  |          |                |     |         |     |     |                                                                     |
| Locus_15665_Transcript_1/1_Conf_1.000 | 440  | 0  |          |                |     |         |     |     |                                                                     |
| Locus_15666_Transcript_1/1_Conf_1.000 | 329  | 0  |          |                |     |         |     |     |                                                                     |

|                                       |     |    |          |                |     |         |     |     |                                              |
|---------------------------------------|-----|----|----------|----------------|-----|---------|-----|-----|----------------------------------------------|
| Locus_15667_Transcript_1/1_Conf_1.000 | 144 | 20 | 5.93E-18 | XP_002687731.1 | 100 | 93.9745 | 47  | 47  | PREDICTED: myosin, heavy chain 9, non-muscle |
| Locus_15668_Transcript_1/1_Conf_1.000 | 504 | 20 | 3.38E-53 | XP_002645216.1 | 87  | 211.075 | 143 | 125 | Hypothetical protein CBG00074                |
| Locus_15669_Transcript_1/1_Conf_1.000 | 155 | 0  |          |                |     |         |     |     |                                              |
| Locus_1567_Transcript_1/1_Conf_1.000  | 255 | 20 | 2.47E-24 | CAG25499.1     | 76  | 115.161 | 85  | 65  | heat shock protein 20                        |
| Locus_15670_Transcript_1/1_Conf_1.000 | 383 | 6  | 1.13E-13 | XP_002644887.1 | 61  | 79.7221 | 92  | 57  | C. briggsae CBR-OPT-2 protein                |
| Locus_15671_Transcript_1/1_Conf_1.000 | 167 | 0  |          |                |     |         |     |     |                                              |
| Locus_15672_Transcript_1/1_Conf_1.000 | 174 | 20 | 5.73E-26 | NP_502576.1    | 100 | 120.553 | 58  | 58  | RAB family member (rab-19)                   |

|                                       |      |    |          |                |    |         |     |     |                                                                          |
|---------------------------------------|------|----|----------|----------------|----|---------|-----|-----|--------------------------------------------------------------------------|
| Locus_15673_Transcript_1/1_Conf_1.000 | 265  | 20 | 1.26E-12 | EFO23269.1     | 83 | 76.2554 | 53  | 44  | vacuolar protein sorting-associated protein 45                           |
| Locus_15674_Transcript_1/1_Conf_1.000 | 134  | 0  |          |                |    |         |     |     |                                                                          |
| Locus_15675_Transcript_1/1_Conf_1.000 | 285  | 0  |          |                |    |         |     |     |                                                                          |
| Locus_15676_Transcript_1/1_Conf_1.000 | 735  | 15 | 4.99E-72 | XP_002631027.1 | 78 | 275.018 | 230 | 181 | Hypothetical protein CBG02784                                            |
| Locus_15677_Transcript_1/1_Conf_1.000 | 183  | 20 | 1.12E-08 | 2G64           | 87 | 63.1586 | 39  | 34  | Structure Of Caenorhabditis Elegans 6-Pyruvoyl Tetrahydropterin Synthase |
| Locus_15678_Transcript_1/1_Conf_1.000 | 421  | 0  |          |                |    |         |     |     |                                                                          |
| Locus_15679_Transcript_1/1_Conf_1.000 | 436  | 0  |          |                |    |         |     |     |                                                                          |
| Locus_1568_Transcript_1/1_Conf_1.000  | 1301 | 20 | 5.29E-94 | NP_498963.1    | 79 | 349.362 | 254 | 202 | Temporarily Assigned Gene name family member (tag-256)                   |
| Locus_15680_Transcript_1/1_Conf_1.000 | 310  | 0  |          |                |    |         |     |     |                                                                          |
| Locus_15681_Transcript_1/1_Conf_1.000 | 168  | 0  |          |                |    |         |     |     |                                                                          |
| Locus_15682_Transcript_1/1_Conf_1.000 | 381  | 20 | 1.19E-55 | XP_002630466.1 | 92 | 219.164 | 126 | 116 | Hypothetical protein CBG11199                                            |



|                                       |      |    |          |                |     |         |     |     |                                                                          |
|---------------------------------------|------|----|----------|----------------|-----|---------|-----|-----|--------------------------------------------------------------------------|
| Locus_15683_Transcript_1/1_Conf_1.000 | 253  | 20 | 1.50E-29 | AAV83778.1     | 100 | 132.494 | 83  | 83  | HSD48                                                                    |
| Locus_15684_Transcript_1/1_Conf_1.000 | 289  | 2  | 1.60E-07 | XP_002630551.1 | 75  | 59.3066 | 49  | 37  | Hypothetical protein CBG12993                                            |
| Locus_15685_Transcript_1/1_Conf_1.000 | 420  | 20 | 4.60E-47 | XP_002629647.1 | 95  | 190.66  | 103 | 98  | C. briggsae CBR-VHA-9 protein                                            |
| Locus_15686_Transcript_1/1_Conf_1.000 | 149  | 0  |          |                |     |         |     |     |                                                                          |
| Locus_15687_Transcript_1/1_Conf_1.000 | 655  | 0  |          |                |     |         |     |     |                                                                          |
| Locus_15688_Transcript_1/1_Conf_1.000 | 183  | 0  |          |                |     |         |     |     |                                                                          |
| Locus_15689_Transcript_1/1_Conf_1.000 | 302  | 20 | 6.83E-19 | NP_741553.1    | 71  | 97.0561 | 100 | 71  | ALdehyde deHydrogenase family member (alh-4)                             |
| Locus_1569_Transcript_1/1_Conf_1.000  | 478  | 0  |          |                |     |         |     |     |                                                                          |
| Locus_15690_Transcript_1/1_Conf_1.000 | 339  | 0  |          |                |     |         |     |     |                                                                          |
| Locus_15691_Transcript_1/1_Conf_1.000 | 1207 | 14 | 3.37E-31 | NP_504556.3    | 45  | 140.584 | 279 | 128 | Chondroitin ProteoGlycan family member (cpg-4)                           |
| Locus_15692_Transcript_1/1_Conf_1.000 | 172  | 0  |          |                |     |         |     |     |                                                                          |
| Locus_15693_Transcript_1/1_Conf_1.000 | 800  | 20 | 1.11E-70 | XP_001900427.1 | 70  | 270.781 | 251 | 176 | Histone acetyltransferase type B catalytic subunit                       |
| Locus_15694_Transcript_1/1_Conf_1.000 | 465  | 5  | 2.62E-18 | XP_001902197.1 | 61  | 95.1301 | 117 | 72  | hypothetical protein Bm1_53660                                           |
| Locus_15695_Transcript_1/1_Conf_1.000 | 203  | 0  |          |                |     |         |     |     |                                                                          |
| Locus_15696_Transcript_1/1_Conf_1.000 | 646  | 20 | 1.96E-28 | NP_509836.1    | 56  | 129.798 | 208 | 117 | VEGF (vascular endothelial growth factor) Receptor family member (ver-3) |
| Locus_15697_Transcript_1/1_Conf_1.000 | 843  |    |          |                |     |         |     |     |                                                                          |
| Locus_15698_Transcript_1/1_Conf_1.000 | 279  | 0  |          |                |     |         |     |     |                                                                          |
| Locus_15699_Transcript_1/1_Conf_1.000 | 295  | 20 | 8.13E-20 | XP_001895480.1 | 65  | 100.138 | 96  | 63  | Immunoglobulin I-set domain containing protein                           |

|                                       |      |    |           |                |     |         |     |     |                                                                |
|---------------------------------------|------|----|-----------|----------------|-----|---------|-----|-----|----------------------------------------------------------------|
| Locus_157_Transcript_1/1_Conf_1.000   | 1611 | 20 | 2.46E-163 | XP_002642099.1 | 88  | 580.096 | 383 | 339 | Hypothetical protein CBG18040                                  |
| Locus_1570_Transcript_1/1_Conf_1.000  | 574  | 20 | 1.07E-55  | ACO56244.1     | 74  | 219.935 | 169 | 126 | putative DEAD-box RNA helicase                                 |
| Locus_15700_Transcript_1/1_Conf_1.000 | 198  | 0  |           |                |     |         |     |     |                                                                |
| Locus_15701_Transcript_1/1_Conf_1.000 | 382  | 20 | 2.86E-25  | XP_002638481.1 | 76  | 118.242 | 126 | 96  | Hypothetical protein CBG12909                                  |
| Locus_15702_Transcript_1/1_Conf_1.000 | 494  | 20 | 3.56E-76  | BAC56579.1     | 100 | 287.345 | 144 | 144 | similar to ribosomal protein S14                               |
| Locus_15703_Transcript_1/1_Conf_1.000 | 476  | 20 | 3.50E-07  | EFA75185.1     | 45  | 58.151  | 91  | 41  | Scar1                                                          |
| Locus_15704_Transcript_1/1_Conf_1.000 | 484  | 5  | 4.21E-08  | XP_002737158.1 | 72  | 61.2326 | 69  | 50  | PREDICTED: intracisternal A particle-promoted polypeptide-like |

|                                       |     |    |          |                |    |         |     |     |                                                                                                  |
|---------------------------------------|-----|----|----------|----------------|----|---------|-----|-----|--------------------------------------------------------------------------------------------------|
| Locus_15705_Transcript_1/1_Conf_1.000 | 752 | 20 | 3.40E-55 | ADI61822.1     | 62 | 219.164 | 240 | 151 | endonuclease-reverse transcriptase                                                               |
| Locus_15706_Transcript_1/1_Conf_1.000 | 301 | 3  | 1.25E-12 | EFO20394.1     | 73 | 76.2554 | 60  | 44  | hypothetical protein LOAG_08094                                                                  |
| Locus_15707_Transcript_1/1_Conf_1.000 | 230 | 0  |          |                |    |         |     |     |                                                                                                  |
| Locus_15708_Transcript_1/1_Conf_1.000 | 263 | 20 | 2.54E-13 | NP_001123686.1 | 62 | 78.5666 | 79  | 49  | inhibitor of kappa light polypeptide gene enhancer in B-cells, kinase complex-associated protein |
| Locus_15709_Transcript_1/1_Conf_1.000 | 297 | 20 | 5.60E-29 | XP_001892618.1 | 76 | 130.568 | 98  | 75  | Acyltransferase family protein                                                                   |
| Locus_1571_Transcript_1/1_Conf_1.000  | 542 | 20 | 2.87E-70 | XP_001072155.2 | 99 | 268.085 | 140 | 139 | PREDICTED: histone cluster 2, H3c2-like                                                          |
| Locus_15710_Transcript_1/1_Conf_1.000 | 587 | 0  |          |                |    |         |     |     |                                                                                                  |
| Locus_15711_Transcript_1/1_Conf_1.000 | 266 | 0  |          |                |    |         |     |     |                                                                                                  |
| Locus_15712_Transcript_1/1_Conf_1.000 | 230 | 20 | 6.72E-06 | AAN10061.1     | 65 | 52.373  | 38  | 25  | Kunitz-like protease inhibitor precursor                                                         |

|                                       |     |    |          |                |    |         |     |     |                                                                        |
|---------------------------------------|-----|----|----------|----------------|----|---------|-----|-----|------------------------------------------------------------------------|
| Locus_15713_Transcript_1/2_Conf_1.000 | 372 | 2  | 3.33E-05 | CAE17836.3     | 64 | 51.6026 | 51  | 33  | C. elegans protein F46F2.5, partially confirmed by transcript evidence |
| Locus_15713_Transcript_2/2_Conf_1.000 | 385 | 0  |          |                |    |         |     |     |                                                                        |
| Locus_15714_Transcript_1/1_Conf_1.000 | 370 | 12 | 1.50E-13 | NP_001023075.1 | 59 | 79.337  | 96  | 57  | inorganic PYroPhosphatase family member (pyp-1)                        |
| Locus_15715_Transcript_1/1_Conf_1.000 | 841 | 0  |          |                |    |         |     |     |                                                                        |
| Locus_15716_Transcript_1/1_Conf_1.000 | 138 | 20 | 1.61E-12 | EFO19409.1     | 94 | 75.8702 | 39  | 37  | hypothetical protein LOAG_09084                                        |
| Locus_15717_Transcript_1/1_Conf_1.000 | 715 | 20 | 1.28E-61 | CBL87054.2     | 68 | 240.35  | 245 | 169 | C. elegans protein F54E4.1, partially confirmed by transcript evidence |
| Locus_15718_Transcript_1/1_Conf_1.000 | 610 | 20 | 1.71E-28 | EFO24963.1     | 70 | 129.798 | 121 | 85  | hypothetical protein LOAG_03520                                        |
| Locus_15719_Transcript_1/1_Conf_1.000 | 752 | 0  |          |                |    |         |     |     |                                                                        |
| Locus_1572_Transcript_1/1_Conf_1.000  | 784 | 20 | 4.75E-87 | NP_495701.2    | 73 | 325.094 | 265 | 195 | IRE1 kinase related family member (ire-1)                              |
| Locus_15720_Transcript_1/1_Conf_1.000 | 500 | 20 | 7.43E-42 | NP_495514.1    | 95 | 173.326 | 92  | 88  | LSM Sm-like protein family member (lsm-4)                              |
| Locus_15721_Transcript_1/1_Conf_1.000 | 706 | 0  |          |                |    |         |     |     |                                                                        |

|                                       |      |    |          |                |     |         |     |     |                                                    |
|---------------------------------------|------|----|----------|----------------|-----|---------|-----|-----|----------------------------------------------------|
| Locus_15722_Transcript_1/1_Conf_1.000 | 206  | 3  | 1.02E-06 | NP_496984.1    | 87  | 56.6102 | 39  | 34  | hypothetical protein R06A4.8                       |
| Locus_15723_Transcript_1/1_Conf_1.000 | 464  | 6  | 2.31E-14 | EFO19081.1     | 76  | 82.0333 | 56  | 43  | hypothetical protein LOAG_09412                    |
| Locus_15724_Transcript_1/1_Conf_1.000 | 186  | 0  |          |                |     |         |     |     |                                                    |
| Locus_15725_Transcript_1/1_Conf_1.000 | 667  | 0  |          |                |     |         |     |     |                                                    |
| Locus_15726_Transcript_1/1_Conf_1.000 | 360  | 0  |          |                |     |         |     |     |                                                    |
| Locus_15727_Transcript_1/1_Conf_1.000 | 704  | 20 | 3.89E-47 | XP_002635830.1 | 53  | 192.2   | 228 | 123 | Hypothetical protein CBG10495                      |
| Locus_15728_Transcript_1/2_Conf_1.000 | 1048 | 20 | 1.38E-51 | XP_002738625.1 | 66  | 207.994 | 227 | 150 | PREDICTED: 5-nucleotidase domain containing 2-like |
| Locus_15728_Transcript_2/2_Conf_1.000 | 584  | 20 | 7.53E-44 | NP_499552.1    | 88  | 180.644 | 108 | 96  | hypothetical protein Y56A3A.18                     |
| Locus_15729_Transcript_1/1_Conf_1.000 | 188  | 0  |          |                |     |         |     |     |                                                    |
| Locus_1573_Transcript_1/1_Conf_1.000  | 648  | 3  | 1.37E-45 | NP_505986.1    | 59  | 186.808 | 222 | 132 | hypothetical protein R13H4.5                       |
| Locus_15730_Transcript_1/1_Conf_1.000 | 448  | 20 | 5.62E-21 | XP_002634599.1 | 86  | 103.99  | 59  | 51  | Hypothetical protein CBG08414                      |
| Locus_15731_Transcript_1/1_Conf_1.000 | 333  | 1  | 8.33E-09 | NP_741828.1    | 69  | 63.5438 | 65  | 45  | hypothetical protein C54D1.7                       |
| Locus_15732_Transcript_1/1_Conf_1.000 | 150  | 20 | 2.39E-19 | XP_002831109.1 | 100 | 98.5969 | 49  | 49  | PREDICTED: LOW QUALITY PROTEIN: myosin 9-like      |
| Locus_15733_Transcript_1/1_Conf_1.000 | 549  | 0  |          |                |     |         |     |     |                                                    |

|                                       |     |    |           |                |     |         |     |     |                                                     |
|---------------------------------------|-----|----|-----------|----------------|-----|---------|-----|-----|-----------------------------------------------------|
| Locus_15734_Transcript_1/1_Conf_1.000 | 724 | 20 | 8.53E-53  | XP_002633447.1 | 66  | 211.075 | 209 | 140 | Hypothetical protein CBG06215                       |
| Locus_15735_Transcript_1/1_Conf_1.000 | 395 | 1  | 7.97E-07  | EFO23365.1     | 56  | 56.9954 | 105 | 59  | hypothetical protein LOAG_05120                     |
| Locus_15736_Transcript_1/1_Conf_1.000 | 340 | 0  |           |                |     |         |     |     |                                                     |
| Locus_15737_Transcript_1/1_Conf_1.000 | 240 | 0  |           |                |     |         |     |     |                                                     |
| Locus_15738_Transcript_1/1_Conf_1.000 | 567 | 0  |           |                |     |         |     |     |                                                     |
| Locus_15739_Transcript_1/1_Conf_1.000 | 176 | 0  |           |                |     |         |     |     |                                                     |
| Locus_1574_Transcript_1/2_Conf_1.000  | 981 | 20 | 1.41E-111 | CAR63577.1     | 85  | 407.142 | 266 | 227 | putative Thyroglobulin type-1 repeat family protein |
| Locus_1574_Transcript_2/2_Conf_1.000  | 529 | 1  | 2.49E-23  | CAR63577.1     | 78  | 112.079 | 111 | 87  | putative Thyroglobulin type-1 repeat family protein |
| Locus_15740_Transcript_1/1_Conf_1.000 | 418 | 13 | 9.05E-27  | NP_501395.1    | 67  | 123.25  | 138 | 93  | hypothetical protein K07H8.1                        |
| Locus_15741_Transcript_1/1_Conf_1.000 | 255 | 8  | 7.21E-08  | CAR63553.1     | 55  | 60.4622 | 79  | 44  | putative major allergen                             |
| Locus_15742_Transcript_1/1_Conf_1.000 | 233 | 0  |           |                |     |         |     |     |                                                     |
| Locus_15743_Transcript_1/1_Conf_1.000 | 384 | 20 | 2.12E-20  | NP_001041018.1 | 78  | 102.064 | 70  | 55  | hypothetical protein Y11D7A.3                       |
| Locus_15744_Transcript_1/2_Conf_1.000 | 862 | 20 | 1.36E-56  | XP_001897063.1 | 64  | 224.172 | 269 | 174 | Bromodomain containing protein                      |
| Locus_15744_Transcript_2/2_Conf_1.000 | 553 | 20 | 2.65E-37  | XP_001897063.1 | 63  | 158.688 | 184 | 117 | Bromodomain containing protein                      |
| Locus_15745_Transcript_1/1_Conf_1.000 | 504 | 20 | 3.29E-32  | XP_002922306.1 | 100 | 141.354 | 70  | 70  | PREDICTED: triosephosphate isomerase-like, partial  |
| Locus_15746_Transcript_1/1_Conf_1.000 | 545 | 20 | 7.55E-26  | XP_001920862.2 | 62  | 120.553 | 159 | 99  | PREDICTED: zgc:172302                               |
| Locus_15747_Transcript_1/1_Conf_1.000 | 235 | 0  |           |                |     |         |     |     |                                                     |
| Locus_15748_Transcript_1/1_Conf_1.000 | 356 | 0  |           |                |     |         |     |     |                                                     |

|                                       |      |    |          |                |     |         |     |     |                                                          |
|---------------------------------------|------|----|----------|----------------|-----|---------|-----|-----|----------------------------------------------------------|
| Locus_15749_Transcript_1/1_Conf_1.000 | 318  | 3  | 3.93E-14 | XP_002635581.1 | 76  | 81.2629 | 56  | 43  | Hypothetical protein CBG20567                            |
| Locus_1575_Transcript_1/1_Conf_1.000  | 399  | 20 | 8.43E-17 | NP_500284.2    | 97  | 90.1225 | 43  | 42  | Enhancer of Efl-1 mutant phenotype family member (eel-1) |
| Locus_15750_Transcript_1/1_Conf_1.000 | 231  | 20 | 9.61E-21 | XP_002923753.1 | 100 | 103.219 | 50  | 50  | PREDICTED: rRNA 2'-O-methyltransferase fibrillar-like    |
| Locus_15751_Transcript_1/1_Conf_1.000 | 901  | 5  | 2.29E-09 | XP_001896365.1 | 44  | 67.3958 | 227 | 100 | hypothetical protein Bm1_24535                           |
| Locus_15752_Transcript_1/1_Conf_1.000 | 188  | 0  |          |                |     |         |     |     |                                                          |
| Locus_15753_Transcript_1/1_Conf_1.000 | 469  | 0  |          |                |     |         |     |     |                                                          |
| Locus_15754_Transcript_1/1_Conf_1.000 | 379  | 20 | 4.59E-23 | XP_001898623.1 | 70  | 110.923 | 96  | 68  | Piwi domain containing protein                           |
| Locus_15755_Transcript_1/2_Conf_1.000 | 583  | 20 | 7.01E-58 | NP_495708.1    | 75  | 227.254 | 180 | 135 | hypothetical protein F10B5.2                             |
| Locus_15755_Transcript_2/2_Conf_1.000 | 532  | 20 | 2.69E-57 | NP_495708.1    | 78  | 224.942 | 162 | 127 | hypothetical protein F10B5.2                             |
| Locus_15756_Transcript_1/1_Conf_1.000 | 167  | 0  |          |                |     |         |     |     |                                                          |
| Locus_15757_Transcript_1/2_Conf_1.000 | 391  | 20 | 5.90E-23 | NP_504643.1    | 86  | 110.538 | 69  | 60  | ACyLtransferase-like family member (acl-8)               |
| Locus_15757_Transcript_2/2_Conf_1.000 | 388  | 20 | 1.27E-41 | NP_504643.1    | 88  | 172.555 | 104 | 92  | ACyLtransferase-like family member (acl-8)               |
| Locus_15758_Transcript_1/1_Conf_1.000 | 289  | 0  |          |                |     |         |     |     |                                                          |
| Locus_15759_Transcript_1/1_Conf_1.000 | 134  | 0  |          |                |     |         |     |     |                                                          |
| Locus_1576_Transcript_1/1_Conf_1.000  | 936  | 0  |          |                |     |         |     |     |                                                          |
| Locus_15760_Transcript_1/1_Conf_1.000 | 174  | 0  |          |                |     |         |     |     |                                                          |
| Locus_15761_Transcript_1/2_Conf_1.000 | 1313 | 18 | 6.06E-21 | NP_499234.1    | 54  | 106.686 | 243 | 133 | Enhancer of Ksr-1 Lethality family member (ekl-6)        |
| Locus_15761_Transcript_2/2_Conf_1.000 | 222  | 0  |          |                |     |         |     |     |                                                          |
| Locus_15762_Transcript_1/1_Conf_1.000 | 305  | 2  | 7.29E-13 | XP_002649028.1 | 67  | 77.0258 | 65  | 44  | Hypothetical protein CBG21482                            |
| Locus_15763_Transcript_1/1_Conf_1.000 | 186  | 0  |          |                |     |         |     |     |                                                          |
| Locus_15764_Transcript_1/1_Conf_1.000 | 554  | 20 | 3.53E-74 | NP_001021681.1 | 85  | 281.182 | 183 | 156 | hypothetical protein Y105E8A.10                          |
| Locus_15765_Transcript_1/1_Conf_1.000 | 209  | 0  |          |                |     |         |     |     |                                                          |
| Locus_15766_Transcript_1/1_Conf_1.000 | 412  | 20 | 3.24E-37 | XP_002641220.1 | 82  | 157.918 | 120 | 99  | Hypothetical protein CBG09084                            |
| Locus_15767_Transcript_1/1_Conf_1.000 | 266  | 0  |          |                |     |         |     |     |                                                          |
| Locus_15768_Transcript_1/2_Conf_1.000 | 515  | 0  |          |                |     |         |     |     |                                                          |
| Locus_15768_Transcript_2/2_Conf_1.000 | 464  | 0  |          |                |     |         |     |     |                                                          |

|                                       |      |    |          |                |     |         |     |     |                                           |
|---------------------------------------|------|----|----------|----------------|-----|---------|-----|-----|-------------------------------------------|
| Locus_15769_Transcript_1/1_Conf_1.000 | 483  | 20 | 1.67E-89 | XP_002818294.1 | 100 | 331.643 | 161 | 161 | PREDICTED: collagen alpha-2(I) chain-like |
| Locus_1577_Transcript_1/4_Conf_0.786  | 2137 | 20 | 4.05E-10 | XP_001660048.1 | 57  | 71.633  | 100 | 57  | hypothetical protein AaeL_AAEL009430      |
| Locus_1577_Transcript_2/4_Conf_0.786  | 2121 | 20 | 1.29E-08 | XP_001660048.1 | 55  | 66.6254 | 102 | 57  | hypothetical protein AaeL_AAEL009430      |
| Locus_1577_Transcript_3/4_Conf_0.214  | 397  | 20 | 2.64E-10 | EFO16022.1     | 61  | 68.5514 | 80  | 49  | hypothetical protein LOAG_12486           |
| Locus_1577_Transcript_4/4_Conf_0.786  | 2115 | 20 | 4.00E-10 | XP_001660048.1 | 57  | 71.633  | 100 | 57  | hypothetical protein AaeL_AAEL009430      |
| Locus_15770_Transcript_1/1_Conf_1.000 | 431  | 0  |          |                |     |         |     |     |                                           |
| Locus_15771_Transcript_1/1_Conf_1.000 | 172  | 7  | 3.74E-09 | NP_491336.2    | 80  | 64.6994 | 50  | 40  | NuDiX family member (ndx-7)               |
| Locus_15772_Transcript_1/1_Conf_1.000 | 265  | 20 | 1.06E-11 | XP_002638233.1 | 65  | 73.1738 | 87  | 57  | Hypothetical protein CBG15892             |
| Locus_15773_Transcript_1/1_Conf_1.000 | 183  | 2  | 1.01E-17 | NP_492177.2    | 81  | 93.2041 | 55  | 45  | hypothetical protein R11A5.7              |
| Locus_15774_Transcript_1/1_Conf_1.000 | 570  | 20 | 2.14E-16 | EFO22249.1     | 72  | 89.3521 | 72  | 52  | hypothetical protein LOAG_06236           |
| Locus_15775_Transcript_1/1_Conf_1.000 | 136  | 0  |          |                |     |         |     |     |                                           |



|                                       |      |    |          |                |     |         |     |     |                                                                                                                                    |
|---------------------------------------|------|----|----------|----------------|-----|---------|-----|-----|------------------------------------------------------------------------------------------------------------------------------------|
| Locus_15776_Transcript_1/1_Conf_1.000 | 439  | 20 | 6.31E-17 | XP_002108517.1 | 69  | 90.5077 | 83  | 58  | hypothetical protein TRIADDRAFT_51503                                                                                              |
| Locus_15777_Transcript_1/1_Conf_1.000 | 270  | 0  |          |                |     |         |     |     |                                                                                                                                    |
| Locus_15778_Transcript_1/1_Conf_1.000 | 189  | 0  |          |                |     |         |     |     |                                                                                                                                    |
| Locus_15779_Transcript_1/1_Conf_1.000 | 458  | 20 | 9.72E-42 | NP_077275.1    | 100 | 172.94  | 91  | 91  | pancreatic progenitor cell differentiation and proliferation factor                                                                |
| Locus_1578_Transcript_1/1_Conf_1.000  | 1339 | 20 | 1.62E-69 | EFO20046.1     | 86  | 268.085 | 159 | 138 | hypothetical protein LOAG_08445                                                                                                    |
| Locus_15780_Transcript_1/1_Conf_1.000 | 163  | 20 | 4.03E-19 | EFO17870.1     | 100 | 97.8265 | 48  | 48  | calmodulin-like protein                                                                                                            |
| Locus_15781_Transcript_1/1_Conf_1.000 | 212  | 20 | 2.57E-34 | XP_001142642.1 | 100 | 148.288 | 70  | 70  | PREDICTED: Tu translation elongation factor, mitochondrial isoform 1                                                               |
| Locus_15782_Transcript_1/1_Conf_1.000 | 467  | 0  |          |                |     |         |     |     |                                                                                                                                    |
| Locus_15783_Transcript_1/1_Conf_1.000 | 292  | 20 | 1.58E-47 | BAG60492.1     | 100 | 192.2   | 92  | 92  | unnamed protein product                                                                                                            |
| Locus_15784_Transcript_1/1_Conf_1.000 | 383  | 20 | 2.25E-46 | XP_002631604.1 | 96  | 188.348 | 96  | 93  | Hypothetical protein CBG20785                                                                                                      |
| Locus_15785_Transcript_1/1_Conf_1.000 | 336  | 20 | 5.16E-35 | XP_002630326.1 | 83  | 150.599 | 104 | 87  | Hypothetical protein CBG04253                                                                                                      |
| Locus_15786_Transcript_1/1_Conf_1.000 | 555  | 20 | 2.35E-41 | NP_001024131.1 | 64  | 172.17  | 187 | 121 | Peroxisomal Membrane Protein related family member (pmp-5)                                                                         |
| Locus_15787_Transcript_1/1_Conf_1.000 | 141  | 0  |          |                |     |         |     |     |                                                                                                                                    |
| Locus_15788_Transcript_1/1_Conf_1.000 | 130  | 20 | 2.87E-17 | 3BJ5           | 100 | 91.6633 | 43  | 43  | Alternative Conformations OfThe X Region Of Human Protein Disulphide-Isomerase Modulate Exposure OfThe Substrate Binding B' Domain |

|                                       |      |    |          |                |    |         |     |     |                                                                         |
|---------------------------------------|------|----|----------|----------------|----|---------|-----|-----|-------------------------------------------------------------------------|
| Locus_15789_Transcript_1/1_Conf_1.000 | 637  | 20 | 3.77E-61 | XP_002631214.1 | 86 | 238.424 | 157 | 136 | C. briggsae CBR-MPZ-1 protein                                           |
| Locus_1579_Transcript_1/1_Conf_1.000  | 970  | 20 | 1.49E-57 | XP_002646929.1 | 91 | 227.639 | 129 | 118 | Hypothetical protein CBG19634                                           |
| Locus_15790_Transcript_1/1_Conf_1.000 | 300  | 20 | 6.15E-36 | XP_002641343.1 | 88 | 153.68  | 99  | 88  | C. briggsae CBR-DPY-18 protein                                          |
| Locus_15791_Transcript_1/1_Conf_1.000 | 505  | 20 | 1.69E-20 | XP_002735371.1 | 55 | 102.449 | 165 | 91  | PREDICTED: hypothetical protein                                         |
| Locus_15792_Transcript_1/1_Conf_1.000 | 279  | 0  |          |                |    |         |     |     |                                                                         |
| Locus_15793_Transcript_1/1_Conf_1.000 | 498  | 2  | 9.44E-21 | XP_002632353.1 | 54 | 103.219 | 180 | 98  | Hypothetical protein CBG00367                                           |
| Locus_15794_Transcript_1/1_Conf_1.000 | 496  | 3  | 2.12E-04 | XP_001639273.1 | 45 | 48.9062 | 70  | 32  | predicted protein                                                       |
| Locus_15795_Transcript_1/1_Conf_1.000 | 231  | 0  |          |                |    |         |     |     |                                                                         |
| Locus_15796_Transcript_1/1_Conf_1.000 | 702  | 20 | 2.91E-18 | XP_001902854.1 | 52 | 96.2857 | 192 | 100 | cytoplasmic intermediate filament protein                               |
| Locus_15797_Transcript_1/1_Conf_1.000 | 368  | 20 | 3.09E-56 | CAB05601.2     | 96 | 221.09  | 122 | 118 | C. elegans protein R11A5.1b, partially confirmed by transcript evidence |
| Locus_15798_Transcript_1/1_Conf_1.000 | 147  | 0  |          |                |    |         |     |     |                                                                         |
| Locus_15799_Transcript_1/1_Conf_1.000 | 233  | 0  |          |                |    |         |     |     |                                                                         |
| Locus_158_Transcript_1/3_Conf_0.727   | 486  | 20 | 5.46E-16 | XP_002641290.1 | 47 | 87.4261 | 147 | 70  | Hypothetical protein CBG05204                                           |
| Locus_158_Transcript_2/3_Conf_0.636   | 476  | 20 | 5.96E-15 | XP_002641290.1 | 46 | 83.9593 | 147 | 69  | Hypothetical protein CBG05204                                           |
| Locus_158_Transcript_3/3_Conf_0.818   | 500  | 20 | 5.36E-16 | XP_002641290.1 | 47 | 87.4261 | 147 | 70  | Hypothetical protein CBG05204                                           |
| Locus_1580_Transcript_1/2_Conf_1.000  | 1109 | 0  |          |                |    |         |     |     |                                                                         |
| Locus_1580_Transcript_2/2_Conf_1.000  | 1115 | 0  |          |                |    |         |     |     |                                                                         |

|                                       |      |    |           |                |    |         |     |     |                                                                         |
|---------------------------------------|------|----|-----------|----------------|----|---------|-----|-----|-------------------------------------------------------------------------|
| Locus_15800_Transcript_1/2_Conf_1.000 | 842  | 20 | 5.85E-41  | CAX51676.1     | 62 | 172.17  | 222 | 139 | C. elegans protein F56A8.9, confirmed by transcript evidence            |
| Locus_15800_Transcript_2/2_Conf_1.000 | 700  | 20 | 3.38E-35  | CAX51676.1     | 68 | 152.525 | 161 | 110 | C. elegans protein F56A8.9, confirmed by transcript evidence            |
| Locus_15801_Transcript_1/1_Conf_1.000 | 256  | 2  | 9.75E-05  | XP_002639508.1 | 58 | 50.0618 | 67  | 39  | Hypothetical protein CBG04113                                           |
| Locus_15802_Transcript_1/1_Conf_1.000 | 149  | 3  | 2.33E-06  | AAG12204.1     | 68 | 55.4546 | 41  | 28  | AF287482_5Orf122                                                        |
| Locus_15803_Transcript_1/1_Conf_1.000 | 251  | 0  |           |                |    |         |     |     |                                                                         |
| Locus_15804_Transcript_1/1_Conf_1.000 | 215  | 0  |           |                |    |         |     |     |                                                                         |
| Locus_15805_Transcript_1/1_Conf_1.000 | 139  | 0  |           |                |    |         |     |     |                                                                         |
| Locus_15806_Transcript_1/1_Conf_1.000 | 164  | 20 | 4.45E-18  | Q8I0P7.3       | 94 | 94.3597 | 50  | 47  | Probable 3'                                                             |
| Locus_15807_Transcript_1/1_Conf_1.000 | 329  | 15 | 1.69E-09  | XP_002641343.1 | 67 | 65.855  | 67  | 45  | C. briggsae CBR-DPY-18 protein                                          |
| Locus_15808_Transcript_1/1_Conf_1.000 | 287  | 20 | 6.91E-43  | ADD13547.1     | 96 | 176.792 | 93  | 90  | Inositol triphosphate receptor protein 1, isoform h                     |
| Locus_15809_Transcript_1/1_Conf_1.000 | 238  | 1  | 1.80E-11  | CAB07859.3     | 94 | 72.4034 | 36  | 34  | C. elegans protein W09D10.2, partially confirmed by transcript evidence |
| Locus_1581_Transcript_1/1_Conf_1.000  | 1270 | 20 | 2.83E-177 | EFO21688.1     | 87 | 625.935 | 422 | 369 | phosphatidylinositol 3                                                  |
| Locus_15810_Transcript_1/1_Conf_1.000 | 815  | 20 | 9.58E-78  | XP_002636833.1 | 72 | 294.278 | 273 | 197 | C. briggsae CBR-PST-1 protein                                           |
| Locus_15811_Transcript_1/1_Conf_1.000 | 239  | 0  |           |                |    |         |     |     |                                                                         |

|                                       |     |    |          |                |     |         |     |     |                                                       |
|---------------------------------------|-----|----|----------|----------------|-----|---------|-----|-----|-------------------------------------------------------|
| Locus_15812_Transcript_1/1_Conf_1.000 | 352 | 20 | 2.80E-12 | XP_002812714.1 | 100 | 75.0998 | 35  | 35  | PREDICTED: collagen alpha-1(III) chain-like isoform 2 |
| Locus_15813_Transcript_1/1_Conf_1.000 | 355 | 0  |          |                |     |         |     |     |                                                       |
| Locus_15814_Transcript_1/1_Conf_1.000 | 532 | 0  |          |                |     |         |     |     |                                                       |
| Locus_15815_Transcript_1/1_Conf_1.000 | 497 | 20 | 3.36E-34 | XP_002631025.1 | 72  | 147.902 | 122 | 89  | Hypothetical protein CBG02782                         |
| Locus_15816_Transcript_1/1_Conf_1.000 | 279 | 0  |          |                |     |         |     |     |                                                       |
| Locus_15817_Transcript_1/2_Conf_1.000 | 258 | 0  |          |                |     |         |     |     |                                                       |
| Locus_15817_Transcript_2/2_Conf_1.000 | 252 | 0  |          |                |     |         |     |     |                                                       |
| Locus_15818_Transcript_1/1_Conf_1.000 | 292 | 2  | 4.96E-09 | NP_001032977.1 | 72  | 64.3142 | 50  | 36  | hypothetical protein K02A11.4                         |
| Locus_15819_Transcript_1/1_Conf_1.000 | 491 | 20 | 4.01E-27 | EFO20863.1     | 65  | 124.405 | 166 | 109 | hypothetical protein LOAG_07626                       |
| Locus_1582_Transcript_1/1_Conf_1.000  | 407 | 0  |          |                |     |         |     |     |                                                       |
| Locus_15820_Transcript_1/1_Conf_1.000 | 416 | 0  |          |                |     |         |     |     |                                                       |
| Locus_15821_Transcript_1/1_Conf_1.000 | 474 | 20 | 1.99E-10 | XP_001900444.1 | 45  | 68.9366 | 130 | 59  | Calponin homology                                     |
| Locus_15822_Transcript_1/1_Conf_1.000 | 443 | 20 | 2.81E-28 | EFO20355.1     | 69  | 128.257 | 143 | 100 | aminotransferase                                      |
| Locus_15823_Transcript_1/2_Conf_1.000 | 398 | 20 | 5.61E-53 | NP_493832.1    | 90  | 210.305 | 132 | 120 | Acyl CoA DeHydrogenase family member (acdh-9)         |
| Locus_15823_Transcript_2/2_Conf_1.000 | 398 | 20 | 5.61E-53 | NP_493832.1    | 90  | 210.305 | 132 | 120 | Acyl CoA DeHydrogenase family member (acdh-9)         |

|                                       |     |    |          |                |     |         |     |     |                                                                         |
|---------------------------------------|-----|----|----------|----------------|-----|---------|-----|-----|-------------------------------------------------------------------------|
| Locus_15824_Transcript_1/1_Conf_1.000 | 448 | 20 | 2.66E-71 | XP_002638706.1 | 97  | 271.166 | 144 | 140 | Hypothetical protein CBG00285                                           |
| Locus_15825_Transcript_1/1_Conf_1.000 | 567 | 0  |          |                |     |         |     |     |                                                                         |
| Locus_15826_Transcript_1/1_Conf_1.000 | 532 | 0  |          |                |     |         |     |     |                                                                         |
| Locus_15827_Transcript_1/1_Conf_1.000 | 381 | 20 | 1.33E-30 | CAB03414.3     | 69  | 135.961 | 132 | 92  | Hypothetical protein T23G11.5a                                          |
| Locus_15828_Transcript_1/1_Conf_1.000 | 521 | 5  | 3.06E-15 | XP_002636819.1 | 81  | 85.1149 | 55  | 45  | C. briggsae CBR-DHS-17 protein                                          |
| Locus_15829_Transcript_1/1_Conf_1.000 | 265 | 20 | 7.55E-42 | XP_002813776.1 | 100 | 173.326 | 82  | 82  | PREDICTED: guanine nucleotide-binding protein G(i) subunit alpha-2-like |
| Locus_1583_Transcript_1/1_Conf_1.000  | 398 | 0  |          |                |     |         |     |     |                                                                         |
| Locus_15830_Transcript_1/1_Conf_1.000 | 283 | 0  |          |                |     |         |     |     |                                                                         |
| Locus_15831_Transcript_1/1_Conf_1.000 | 535 | 0  |          |                |     |         |     |     |                                                                         |
| Locus_15832_Transcript_1/1_Conf_1.000 | 473 | 20 | 4.89E-25 | XP_002646472.1 | 74  | 117.472 | 127 | 95  | C. briggsae CBR-NSF-1 protein                                           |
| Locus_15833_Transcript_1/1_Conf_1.000 | 178 | 0  |          |                |     |         |     |     |                                                                         |
| Locus_15834_Transcript_1/1_Conf_1.000 | 131 | 0  |          |                |     |         |     |     |                                                                         |
| Locus_15835_Transcript_1/1_Conf_1.000 | 263 | 11 | 9.35E-08 | XP_002633270.1 | 71  | 60.077  | 74  | 53  | C. briggsae CBR-TTR-17 protein                                          |
| Locus_15836_Transcript_1/1_Conf_1.000 | 773 | 20 | 5.10E-78 | XP_001893993.1 | 83  | 295.049 | 213 | 177 | Flavoprotein                                                            |
| Locus_15837_Transcript_1/1_Conf_1.000 | 329 | 0  |          |                |     |         |     |     |                                                                         |
| Locus_15838_Transcript_1/1_Conf_1.000 | 314 | 20 | 7.68E-34 | NP_492127.1    | 89  | 146.747 | 98  | 88  | Low-density lipoprotein Receptor Related family member (Irp-1)          |
| Locus_15839_Transcript_1/1_Conf_1.000 | 800 | 20 | 3.22E-62 | XP_001900232.1 | 67  | 242.662 | 268 | 181 | transportin-SR                                                          |

|                                       |      |    |           |                |     |         |     |     |                                                                                                                      |
|---------------------------------------|------|----|-----------|----------------|-----|---------|-----|-----|----------------------------------------------------------------------------------------------------------------------|
| Locus_1584_Transcript_1/1_Conf_1.000  | 625  | 0  |           |                |     |         |     |     |                                                                                                                      |
| Locus_15840_Transcript_1/1_Conf_1.000 | 503  | 0  |           |                |     |         |     |     |                                                                                                                      |
| Locus_15841_Transcript_1/1_Conf_1.000 | 196  | 0  |           |                |     |         |     |     |                                                                                                                      |
| Locus_15842_Transcript_1/1_Conf_1.000 | 392  | 14 | 9.10E-24  | EFO22879.1     | 67  | 113.235 | 118 | 80  | hypothetical protein LOAG_05602                                                                                      |
| Locus_15843_Transcript_1/1_Conf_1.000 | 297  | 0  |           |                |     |         |     |     |                                                                                                                      |
| Locus_15844_Transcript_1/1_Conf_1.000 | 687  | 20 | 2.38E-70  | AAF81283.1     | 81  | 269.24  | 190 | 155 | glutathione S-transferase                                                                                            |
| Locus_15845_Transcript_1/1_Conf_1.000 | 136  | 0  |           |                |     |         |     |     |                                                                                                                      |
| Locus_15846_Transcript_1/1_Conf_1.000 | 557  | 4  | 1.47E-51  | XP_002641427.1 | 77  | 206.068 | 188 | 145 | Hypothetical protein CBG13296                                                                                        |
| Locus_15847_Transcript_1/1_Conf_1.000 | 441  | 20 | 1.94E-37  | XP_002750116.1 | 100 | 158.688 | 93  | 93  | PREDICTED: vimentin-like isoform 2                                                                                   |
| Locus_15848_Transcript_1/1_Conf_1.000 | 411  | 0  |           |                |     |         |     |     |                                                                                                                      |
| Locus_15849_Transcript_1/1_Conf_1.000 | 187  | 20 | 3.96E-14  | 3KM6           | 100 | 81.2629 | 39  | 39  | CrystalStructure OfThe Human Gst Pi C47sY108V DOUBLE Mutant In Complex WithThe Ethacrynic Acid-Glutathione Conjugate |
| Locus_1585_Transcript_1/1_Conf_1.000  | 2712 | 20 | 0         | NP_495269.1    | 75  | 837.795 | 712 | 541 | hypothetical protein C32D5.3                                                                                         |
| Locus_15850_Transcript_1/1_Conf_1.000 | 267  | 0  |           |                |     |         |     |     |                                                                                                                      |
| Locus_15851_Transcript_1/1_Conf_1.000 | 112  | 0  |           |                |     |         |     |     |                                                                                                                      |
| Locus_15852_Transcript_1/1_Conf_1.000 | 181  | 0  |           |                |     |         |     |     |                                                                                                                      |
| Locus_15853_Transcript_1/1_Conf_1.000 | 142  | 0  |           |                |     |         |     |     |                                                                                                                      |
| Locus_15854_Transcript_1/1_Conf_1.000 | 447  | 13 | 1.29E-41  | NP_499880.3    | 80  | 172.555 | 136 | 110 | hypothetical protein R02D3.3                                                                                         |
| Locus_15855_Transcript_1/1_Conf_1.000 | 215  | 0  |           |                |     |         |     |     |                                                                                                                      |
| Locus_15856_Transcript_1/1_Conf_1.000 | 397  | 0  |           |                |     |         |     |     |                                                                                                                      |
| Locus_15857_Transcript_1/2_Conf_1.000 | 167  | 0  |           |                |     |         |     |     |                                                                                                                      |
| Locus_15857_Transcript_2/2_Conf_1.000 | 205  | 0  |           |                |     |         |     |     |                                                                                                                      |
| Locus_15858_Transcript_1/1_Conf_1.000 | 1007 | 20 | 1.45E-151 | XP_002638687.1 | 88  | 540.036 | 328 | 290 | Hypothetical protein CBG11882                                                                                        |
| Locus_15859_Transcript_1/1_Conf_1.000 | 261  | 0  |           |                |     |         |     |     |                                                                                                                      |

|                                       |      |    |           |                |    |         |     |     |                                                           |
|---------------------------------------|------|----|-----------|----------------|----|---------|-----|-----|-----------------------------------------------------------|
| Locus_1586_Transcript_1/1_Conf_1.000  | 453  | 12 | 2.12E-20  | NP_495986.3    | 68 | 102.064 | 110 | 75  | EATing: abnormal pharyngeal pumping family member (eat-3) |
| Locus_15860_Transcript_1/1_Conf_1.000 | 358  | 20 | 2.60E-10  | XP_001895583.1 | 75 | 68.5514 | 49  | 37  | Surfeit locus protein 4 homolog                           |
| Locus_15861_Transcript_1/1_Conf_1.000 | 467  | 20 | 4.00E-59  | XP_002631703.1 | 93 | 230.72  | 125 | 117 | Hypothetical protein CBG20902                             |
| Locus_15862_Transcript_1/1_Conf_1.000 | 351  | 0  |           |                |    |         |     |     |                                                           |
| Locus_15863_Transcript_1/2_Conf_1.000 | 346  | 0  |           |                |    |         |     |     |                                                           |
| Locus_15863_Transcript_2/2_Conf_1.000 | 343  | 0  |           |                |    |         |     |     |                                                           |
| Locus_15864_Transcript_1/1_Conf_1.000 | 1083 | 20 | 1.82E-110 | NP_504268.1    | 75 | 403.675 | 354 | 269 | PeRoXisome assembly factor family member (prx-6)          |
| Locus_15865_Transcript_1/1_Conf_1.000 | 145  | 20 | 4.25E-16  | NP_497837.1    | 91 | 87.8113 | 48  | 44  | Leucyl tRNA Synthetase family member (lrs-1)              |

|                                       |      |    |           |                |    |         |     |     |                                          |
|---------------------------------------|------|----|-----------|----------------|----|---------|-----|-----|------------------------------------------|
| Locus_15866_Transcript_1/1_Conf_1.000 | 614  | 20 | 1.19E-61  | XP_001891579.1 | 73 | 239.965 | 205 | 151 | ImpB/MucB/SamB family protein            |
| Locus_15867_Transcript_1/1_Conf_1.000 | 194  | 5  | 3.22E-08  | AAF43009.1     | 70 | 61.6178 | 57  | 40  | DNase II homolog F09G8.2                 |
| Locus_15868_Transcript_1/1_Conf_1.000 | 173  | 0  |           |                |    |         |     |     |                                          |
| Locus_15869_Transcript_1/1_Conf_1.000 | 213  | 20 | 5.01E-14  | XP_002643380.1 | 75 | 80.8777 | 65  | 49  | Hypothetical protein CBG15993            |
| Locus_1587_Transcript_1/1_Conf_1.000  | 657  | 20 | 2.01E-100 | XP_002643349.1 | 91 | 369.007 | 217 | 198 | Hypothetical protein CBG15946            |
| Locus_15870_Transcript_1/1_Conf_1.000 | 580  | 0  |           |                |    |         |     |     |                                          |
| Locus_15871_Transcript_1/1_Conf_1.000 | 334  | 0  |           |                |    |         |     |     |                                          |
| Locus_15872_Transcript_1/2_Conf_1.000 | 571  | 0  |           |                |    |         |     |     |                                          |
| Locus_15872_Transcript_2/2_Conf_1.000 | 567  | 0  |           |                |    |         |     |     |                                          |
| Locus_15873_Transcript_1/1_Conf_1.000 | 130  | 0  |           |                |    |         |     |     |                                          |
| Locus_15874_Transcript_1/2_Conf_1.000 | 366  | 0  |           |                |    |         |     |     |                                          |
| Locus_15874_Transcript_2/2_Conf_1.000 | 427  | 0  |           |                |    |         |     |     |                                          |
| Locus_15875_Transcript_1/1_Conf_1.000 | 391  | 20 | 2.48E-21  | EFO22018.1     | 65 | 105.145 | 129 | 84  | hypothetical protein LOAG_06465          |
| Locus_15876_Transcript_1/1_Conf_1.000 | 325  | 3  | 5.11E-06  | XP_002639283.1 | 51 | 54.299  | 111 | 57  | C. briggsae CBR-NAS-5 protein            |
| Locus_15877_Transcript_1/1_Conf_1.000 | 271  | 20 | 2.35E-11  | NP_491197.2    | 67 | 72.0182 | 85  | 57  | SeMaPhorin related family member (smp-2) |
| Locus_15878_Transcript_1/1_Conf_1.000 | 753  | 20 | 2.50E-58  | XP_002645084.1 | 75 | 229.565 | 186 | 141 | Hypothetical protein CBG16758            |
| Locus_15879_Transcript_1/1_Conf_1.000 | 1170 | 0  |           |                |    |         |     |     |                                          |
| Locus_1588_Transcript_1/2_Conf_1.000  | 1627 | 20 | 2.40E-65  | EFO13989.1     | 74 | 254.603 | 229 | 170 | hypothetical protein LOAG_14538          |
| Locus_1588_Transcript_2/2_Conf_1.000  | 1612 | 20 | 2.37E-65  | EFO13989.1     | 74 | 254.603 | 229 | 170 | hypothetical protein LOAG_14538          |
| Locus_15880_Transcript_1/1_Conf_1.000 | 331  | 4  | 2.97E-14  |                | 61 | 81.6481 | 105 | 65  | myoblast city protein homolog            |
| Locus_15881_Transcript_1/1_Conf_1.000 | 200  | 0  |           |                |    |         |     |     |                                          |



|                                       |      |    |          |                |    |         |      |     |                                                                  |
|---------------------------------------|------|----|----------|----------------|----|---------|------|-----|------------------------------------------------------------------|
| Locus_15882_Transcript_1/1_Conf_1.000 | 157  | 10 | 2.23E-09 | XP_001902320.1 | 68 | 65.4698 | 50   | 34  | Protein-tyrosine phosphatase containing protein                  |
| Locus_15883_Transcript_1/1_Conf_1.000 | 419  | 20 | 3.89E-62 | XP_001897890.1 | 86 | 240.736 | 139  | 120 | Serine/threonine protein phosphatase PP1-alpha catalytic subunit |
| Locus_15884_Transcript_1/1_Conf_1.000 | 369  | 20 | 1.59E-39 | NP_497814.3    | 72 | 165.622 | 122  | 89  | UNCoordinated family member (unc-79)                             |
| Locus_15885_Transcript_1/1_Conf_1.000 | 147  | 0  |          |                |    |         |      |     |                                                                  |
| Locus_15886_Transcript_1/1_Conf_1.000 | 368  | 20 | 2.91E-38 | EFO25550.1     | 80 | 161.384 | 114  | 92  | nucleolar protein 10                                             |
| Locus_15887_Transcript_1/1_Conf_1.000 | 214  | 20 | 3.24E-21 | ABJ99064.1     | 83 | 104.76  | 71   | 59  | Hypothetical protein W03A3.2                                     |
| Locus_15888_Transcript_1/1_Conf_1.000 | 328  | 2  | 1.21E-15 | XP_002648567.1 | 58 | 86.2705 | 103  | 60  | Hypothetical protein CBG24887                                    |
| Locus_15889_Transcript_1/1_Conf_1.000 | 330  | 0  |          |                |    |         |      |     |                                                                  |
| Locus_1589_Transcript_1/1_Conf_1.000  | 1848 | 8  | 1.74E-06 | XP_002647483.1 | 41 | 59.3066 | 388  | 161 | Hypothetical protein CBG06557                                    |
| Locus_15890_Transcript_1/1_Conf_1.000 | 3179 | 20 | 0        | XP_002646198.1 | 64 | 877.085 | 1095 | 710 | Hypothetical protein CBG04359                                    |
| Locus_15891_Transcript_1/2_Conf_1.000 | 309  | 0  |          |                |    |         |      |     |                                                                  |
| Locus_15891_Transcript_2/2_Conf_1.000 | 309  | 0  |          |                |    |         |      |     |                                                                  |
| Locus_15892_Transcript_1/1_Conf_1.000 | 616  | 20 | 2.86E-71 | XP_002629988.1 | 80 | 271.937 | 206  | 166 | C. briggsae CBR-NRF-6 protein                                    |
| Locus_15893_Transcript_1/1_Conf_1.000 | 171  | 0  |          |                |    |         |      |     |                                                                  |
| Locus_15894_Transcript_1/1_Conf_1.000 | 280  | 20 | 1.05E-11 | CBW48338.1     | 61 | 73.1738 | 93   | 57  | Hypothetical protein C27A7.1d                                    |
| Locus_15895_Transcript_1/1_Conf_1.000 | 161  | 0  |          |                |    |         |      |     |                                                                  |
| Locus_15896_Transcript_1/1_Conf_1.000 | 799  | 20 | 5.56E-22 | BAB68205.1     | 68 | 108.997 | 117  | 80  | keratin-like protein                                             |
| Locus_15897_Transcript_1/1_Conf_1.000 | 145  | 0  |          |                |    |         |      |     |                                                                  |
| Locus_15898_Transcript_1/1_Conf_1.000 | 141  | 0  |          |                |    |         |      |     |                                                                  |
| Locus_15899_Transcript_1/1_Conf_1.000 | 239  | 0  |          |                |    |         |      |     |                                                                  |

|                                       |      |    |          |                |    |         |     |     |                                                   |
|---------------------------------------|------|----|----------|----------------|----|---------|-----|-----|---------------------------------------------------|
| Locus_159_Transcript_1/1_Conf_1.000   | 1797 | 20 | 0        | XP_002641211.1 | 91 | 829.706 | 538 | 493 | C. briggsae CBR-CCT-6 protein                     |
| Locus_1590_Transcript_1/1_Conf_1.000  | 826  | 20 | 9.23E-76 | NP_492339.1    | 88 | 287.73  | 184 | 163 | CalPoNin family member (cpn-1)                    |
| Locus_15900_Transcript_1/1_Conf_1.000 | 450  | 0  |          |                |    |         |     |     |                                                   |
| Locus_15901_Transcript_1/1_Conf_1.000 | 250  | 20 | 2.24E-22 | XP_001892089.1 | 81 | 108.612 | 79  | 64  | S-antigen protein precursor                       |
| Locus_15902_Transcript_1/1_Conf_1.000 | 458  | 20 | 7.39E-66 | ACI49151.1     | 90 | 253.062 | 151 | 137 | hypothetical protein Cbre_JD20.006                |
| Locus_15903_Transcript_1/1_Conf_1.000 | 300  | 20 | 1.52E-18 | NP_493981.1    | 77 | 95.9005 | 70  | 54  | hypothetical protein H17B01.1                     |
| Locus_15904_Transcript_1/1_Conf_1.000 | 135  | 0  |          |                |    |         |     |     |                                                   |
| Locus_15905_Transcript_1/1_Conf_1.000 | 381  | 0  |          |                |    |         |     |     |                                                   |
| Locus_15906_Transcript_1/1_Conf_1.000 | 150  | 0  |          |                |    |         |     |     |                                                   |
| Locus_15907_Transcript_1/1_Conf_1.000 | 461  | 0  |          |                |    |         |     |     |                                                   |
| Locus_15908_Transcript_1/1_Conf_1.000 | 420  | 2  | 4.06E-11 | NP_491994.2    | 70 | 71.2478 | 62  | 44  | hypothetical protein H06O01.2                     |
| Locus_15909_Transcript_1/1_Conf_1.000 | 559  | 20 | 8.26E-71 | NP_499212.1    | 89 | 270.011 | 183 | 164 | Masculinisation Of Germline family member (mog-1) |
| Locus_1591_Transcript_1/1_Conf_1.000  | 628  | 20 | 1.33E-55 | XP_002630918.1 | 89 | 219.935 | 155 | 138 | Hypothetical protein CBG02643                     |

|                                       |     |    |          |                |    |         |     |     |                                                                            |
|---------------------------------------|-----|----|----------|----------------|----|---------|-----|-----|----------------------------------------------------------------------------|
| Locus_15910_Transcript_1/1_Conf_1.000 | 278 | 20 | 2.49E-29 | XP_001892891.1 | 82 | 131.724 | 92  | 76  | cullin homolog 3                                                           |
| Locus_15911_Transcript_1/1_Conf_1.000 | 224 | 20 | 2.10E-07 | XP_539278.2    | 74 | 58.9214 | 50  | 37  | PREDICTED: similar to 2-aminoadipic 6-semialdehyde dehydrogenase isoform 1 |
| Locus_15912_Transcript_1/1_Conf_1.000 | 182 | 4  | 1.37E-22 | NP_503059.2    | 93 | 109.383 | 60  | 56  | hypothetical protein ZK550.3                                               |
| Locus_15913_Transcript_1/1_Conf_1.000 | 392 | 20 | 1.34E-59 | EFO27533.1     | 90 | 232.261 | 130 | 117 | hypothetical protein LOAG_00947                                            |
| Locus_15914_Transcript_1/1_Conf_1.000 | 222 | 20 | 2.46E-32 | XP_002634980.1 | 97 | 141.739 | 74  | 72  | C. briggsae CBR-ARK-1 protein                                              |
| Locus_15915_Transcript_1/1_Conf_1.000 | 310 | 20 | 5.17E-19 | NP_497751.1    | 69 | 97.4413 | 102 | 71  | hypothetical protein C14B1.10                                              |
| Locus_15916_Transcript_1/1_Conf_1.000 | 561 | 20 | 1.22E-53 | XP_002640778.1 | 85 | 213.001 | 171 | 147 | C. briggsae CBR-FRL-1 protein                                              |

|                                       |      |    |          |                |    |         |     |     |                                                  |
|---------------------------------------|------|----|----------|----------------|----|---------|-----|-----|--------------------------------------------------|
| Locus_15917_Transcript_1/1_Conf_1.000 | 551  | 20 | 2.13E-31 | AAO63576.1     | 58 | 139.043 | 179 | 105 | secreted protein 4 precursor                     |
| Locus_15918_Transcript_1/1_Conf_1.000 | 138  | 20 | 1.97E-10 | NP_505688.1    | 82 | 68.9366 | 46  | 38  | Cdc-42 Related Protein family member (crp-1)     |
| Locus_15919_Transcript_1/1_Conf_1.000 | 782  | 4  | 9.06E-22 | NP_001022206.1 | 48 | 108.227 | 251 | 122 | hypothetical protein F56D1.2                     |
| Locus_1592_Transcript_1/1_Conf_1.000  | 716  | 20 | 1.72E-74 | XP_002649016.1 | 82 | 283.108 | 207 | 171 | Hypothetical protein CBG21464                    |
| Locus_15920_Transcript_1/1_Conf_1.000 | 303  | 12 | 4.14E-08 | BAB68205.1     | 69 | 61.2326 | 66  | 46  | keratin-like protein                             |
| Locus_15921_Transcript_1/1_Conf_1.000 | 177  | 0  |          |                |    |         |     |     |                                                  |
| Locus_15922_Transcript_1/1_Conf_1.000 | 139  | 0  |          |                |    |         |     |     |                                                  |
| Locus_15923_Transcript_1/1_Conf_1.000 | 253  | 0  |          |                |    |         |     |     |                                                  |
| Locus_15924_Transcript_1/1_Conf_1.000 | 151  | 4  | 2.17E-04 | XP_002755675.1 | 98 | 48.9062 | 50  | 49  | PREDICTED: uncharacterized protein C11orf24-like |
| Locus_15925_Transcript_1/1_Conf_1.000 | 305  | 0  |          |                |    |         |     |     |                                                  |
| Locus_15926_Transcript_1/1_Conf_1.000 | 453  | 0  |          |                |    |         |     |     |                                                  |
| Locus_15927_Transcript_1/1_Conf_1.000 | 1028 | 20 | 5.36E-16 | XP_002158612.1 | 53 | 89.7373 | 137 | 73  | PREDICTED: hypothetical protein, partial         |
| Locus_15928_Transcript_1/1_Conf_1.000 | 287  | 2  | 3.57E-15 | XP_001897687.1 | 68 | 84.7297 | 85  | 58  | Zinc finger, C2H2 type family protein            |
| Locus_15929_Transcript_1/1_Conf_1.000 | 312  | 0  |          |                |    |         |     |     |                                                  |
| Locus_1593_Transcript_1/1_Conf_1.000  | 261  | 0  |          |                |    |         |     |     |                                                  |
| Locus_15930_Transcript_1/1_Conf_1.000 | 502  | 3  | 4.50E-18 | NP_497077.2    | 85 | 94.3597 | 69  | 59  | hypothetical protein R05H10.2                    |
| Locus_15931_Transcript_1/1_Conf_1.000 | 192  | 5  | 3.80E-17 | XP_002636415.1 | 81 | 91.2781 | 60  | 49  | Hypothetical protein CBG23068                    |
| Locus_15932_Transcript_1/1_Conf_1.000 | 361  | 20 | 7.46E-42 | NP_491219.1    | 89 | 173.326 | 119 | 106 | hypothetical protein C32E8.3                     |
| Locus_15933_Transcript_1/1_Conf_1.000 | 262  | 4  | 6.05E-15 | XP_002646198.1 | 80 | 83.9593 | 67  | 54  | Hypothetical protein CBG04359                    |
| Locus_15934_Transcript_1/1_Conf_1.000 | 452  | 20 | 3.48E-47 | NP_498398.1    | 77 | 191.045 | 150 | 116 | LEThal family member (let-716)                   |

|                                       |      |    |           |                |    |         |     |     |                                                         |
|---------------------------------------|------|----|-----------|----------------|----|---------|-----|-----|---------------------------------------------------------|
| Locus_15935_Transcript_1/1_Conf_1.000 | 587  | 3  | 8.25E-14  | XP_002640845.1 | 48 | 80.8777 | 211 | 103 | C. briggsae CBR-CDH-1 protein                           |
| Locus_15936_Transcript_1/1_Conf_1.000 | 233  | 0  |           |                |    |         |     |     |                                                         |
| Locus_15937_Transcript_1/1_Conf_1.000 | 135  | 0  |           |                |    |         |     |     |                                                         |
| Locus_15938_Transcript_1/1_Conf_1.000 | 443  | 0  |           |                |    |         |     |     |                                                         |
| Locus_15939_Transcript_1/1_Conf_1.000 | 217  | 0  |           |                |    |         |     |     |                                                         |
| Locus_1594_Transcript_1/2_Conf_1.000  | 812  | 20 | 6.55E-95  | NP_741371.2    | 92 | 351.288 | 234 | 217 | Ribosomal Protein, Large subunit family member (rpl-7A) |
| Locus_1594_Transcript_2/2_Conf_1.000  | 812  | 20 | 6.55E-95  | NP_741371.2    | 92 | 351.288 | 234 | 217 | Ribosomal Protein, Large subunit family member (rpl-7A) |
| Locus_15940_Transcript_1/2_Conf_1.000 | 587  | 3  | 2.24E-27  | NP_508028.2    | 89 | 125.946 | 69  | 62  | hypothetical protein F31D4.9                            |
| Locus_15940_Transcript_2/2_Conf_1.000 | 587  | 3  | 2.24E-27  | NP_508028.2    | 89 | 125.946 | 69  | 62  | hypothetical protein F31D4.9                            |
| Locus_15941_Transcript_1/1_Conf_1.000 | 363  | 0  |           |                |    |         |     |     |                                                         |
| Locus_15942_Transcript_1/1_Conf_1.000 | 160  | 20 | 3.54E-15  | EFO21962.1     | 87 | 84.7297 | 48  | 42  | TK/EGFR protein kinase                                  |
| Locus_15943_Transcript_1/1_Conf_1.000 | 421  | 2  | 2.55E-13  | NP_491418.1    | 75 | 78.5666 | 66  | 50  | hypothetical protein B0041.5                            |
| Locus_15944_Transcript_1/1_Conf_1.000 | 1391 | 20 | 1.05E-127 | XP_002647378.1 | 96 | 461.455 | 300 | 288 | C. briggsae CBR-TTB-1 protein                           |
| Locus_15945_Transcript_1/1_Conf_1.000 | 459  | 20 | 1.14E-50  | XP_002643561.1 | 83 | 202.601 | 156 | 131 | Hypothetical protein CBG16259                           |
| Locus_15946_Transcript_1/1_Conf_1.000 | 235  | 0  |           |                |    |         |     |     |                                                         |

|                                       |      |    |          |                |     |         |      |     |                                                             |
|---------------------------------------|------|----|----------|----------------|-----|---------|------|-----|-------------------------------------------------------------|
| Locus_15947_Transcript_1/1_Conf_1.000 | 421  | 20 | 4.92E-41 | NP_491082.2    | 92  | 170.629 | 96   | 89  | hypothetical protein Y71F9AR.2                              |
| Locus_15948_Transcript_1/1_Conf_1.000 | 784  | 0  |          |                |     |         |      |     |                                                             |
| Locus_15949_Transcript_1/1_Conf_1.000 | 623  | 20 | 3.00E-52 | EFO17715.1     | 72  | 208.764 | 193  | 140 | oxidoreductase                                              |
| Locus_1595_Transcript_1/2_Conf_1.000  | 1643 | 20 | 1.37E-76 | XP_002636911.1 | 61  | 291.967 | 345  | 213 | Hypothetical protein CBG09375                               |
| Locus_1595_Transcript_2/2_Conf_1.000  | 1583 | 20 | 1.26E-79 | NP_504461.1    | 67  | 301.982 | 325  | 218 | hypothetical protein C24G6.8                                |
| Locus_15950_Transcript_1/1_Conf_1.000 | 371  | 0  |          |                |     |         |      |     |                                                             |
| Locus_15951_Transcript_1/1_Conf_1.000 | 635  | 20 | 4.08E-92 | XP_002642342.1 | 91  | 341.273 | 210  | 192 | Hypothetical protein CBG18338                               |
| Locus_15952_Transcript_1/1_Conf_1.000 | 321  | 2  | 1.18E-18 | NP_504827.2    | 64  | 96.2857 | 102  | 66  | hypothetical protein F09G2.1                                |
| Locus_15953_Transcript_1/1_Conf_1.000 | 196  | 0  |          |                |     |         |      |     |                                                             |
| Locus_15954_Transcript_1/1_Conf_1.000 | 410  | 0  |          |                |     |         |      |     |                                                             |
| Locus_15955_Transcript_1/1_Conf_1.000 | 150  | 0  |          |                |     |         |      |     |                                                             |
| Locus_15956_Transcript_1/1_Conf_1.000 | 421  | 0  |          |                |     |         |      |     |                                                             |
| Locus_15957_Transcript_1/1_Conf_1.000 | 289  | 20 | 5.44E-48 | XP_002816866.1 | 100 | 193.741 | 96   | 96  | PREDICTED: 60S ribosomal protein L10a-like                  |
| Locus_15958_Transcript_1/1_Conf_1.000 | 171  | 0  |          |                |     |         |      |     |                                                             |
| Locus_15959_Transcript_1/1_Conf_1.000 | 482  | 6  | 3.24E-13 | XP_001900333.1 | 53  | 78.1814 | 145  | 77  | Anaphase promoting complex subunit 8 / cdc23 family protein |
| Locus_1596_Transcript_1/1_Conf_1.000  | 3277 | 20 | 0        | NP_509658.1    | 75  | 1268.06 | 1107 | 841 | Multidrug Resistance Protein family member (mrp-4)          |

|                                       |     |    |          |                |    |         |     |     |                                      |
|---------------------------------------|-----|----|----------|----------------|----|---------|-----|-----|--------------------------------------|
| Locus_15960_Transcript_1/1_Conf_1.000 | 308 | 2  | 1.37E-11 | XP_001899300.1 | 62 | 72.7886 | 83  | 52  | Negative elongation factor B homolog |
| Locus_15961_Transcript_1/1_Conf_1.000 | 151 | 0  |          |                |    |         |     |     |                                      |
| Locus_15962_Transcript_1/1_Conf_1.000 | 431 | 20 | 6.57E-38 | XP_002636980.1 | 78 | 160.229 | 119 | 93  | Hypothetical protein CBG09463        |
| Locus_15963_Transcript_1/1_Conf_1.000 | 301 | 0  |          |                |    |         |     |     |                                      |
| Locus_15964_Transcript_1/1_Conf_1.000 | 224 | 20 | 3.03E-06 | XP_001635789.1 | 60 | 55.0694 | 70  | 42  | predicted protein                    |
| Locus_15965_Transcript_1/1_Conf_1.000 | 567 | 3  | 1.16E-06 | XP_002642235.1 | 51 | 56.9954 | 74  | 38  | C. briggsae CBR-BRD-1 protein        |
| Locus_15966_Transcript_1/1_Conf_1.000 | 352 | 0  |          |                |    |         |     |     |                                      |
| Locus_15967_Transcript_1/1_Conf_1.000 | 569 | 20 | 9.07E-44 | EFO17782.1     | 72 | 180.259 | 128 | 93  | hypothetical protein LOAG_10716      |
| Locus_15968_Transcript_1/1_Conf_1.000 | 241 | 0  |          |                |    |         |     |     |                                      |
| Locus_15969_Transcript_1/1_Conf_1.000 | 656 | 20 | 3.47E-20 | NP_001123073.1 | 50 | 102.449 | 204 | 104 | hypothetical protein ZC250.5         |
| Locus_1597_Transcript_1/1_Conf_1.000  | 227 | 20 | 5.87E-18 | NP_491756.2    | 76 | 93.9745 | 72  | 55  | hypothetical protein ZK484.6         |
| Locus_15970_Transcript_1/1_Conf_1.000 | 370 | 20 | 1.48E-61 | XP_002634817.1 | 95 | 238.81  | 123 | 118 | C. briggsae CBR-CLP-7 protein        |
| Locus_15971_Transcript_1/1_Conf_1.000 | 144 | 0  |          |                |    |         |     |     |                                      |
| Locus_15972_Transcript_1/1_Conf_1.000 | 150 | 0  |          |                |    |         |     |     |                                      |

|                                       |      |    |           |                |     |         |     |     |                                                                |
|---------------------------------------|------|----|-----------|----------------|-----|---------|-----|-----|----------------------------------------------------------------|
| Locus_15973_Transcript_1/1_Conf_1.000 | 186  | 20 | 7.68E-26  | NP_001132929.1 | 100 | 120.168 | 62  | 62  | B-cell receptor-associated protein 31 isoform a                |
| Locus_15974_Transcript_1/1_Conf_1.000 | 370  | 0  |           |                |     |         |     |     |                                                                |
| Locus_15975_Transcript_1/1_Conf_1.000 | 213  | 0  |           |                |     |         |     |     |                                                                |
| Locus_15976_Transcript_1/1_Conf_1.000 | 243  | 0  |           |                |     |         |     |     |                                                                |
| Locus_15977_Transcript_1/1_Conf_1.000 | 170  | 0  |           |                |     |         |     |     |                                                                |
| Locus_15978_Transcript_1/1_Conf_1.000 | 150  | 0  |           |                |     |         |     |     |                                                                |
| Locus_15979_Transcript_1/1_Conf_1.000 | 199  | 0  |           |                |     |         |     |     |                                                                |
| Locus_1598_Transcript_1/1_Conf_1.000  | 1524 | 20 | 4.39E-122 | XP_002639175.1 | 78  | 442.965 | 385 | 303 | C. briggsae CBR-ILE-1 protein                                  |
| Locus_15980_Transcript_1/1_Conf_1.000 | 379  | 20 | 2.51E-37  | XP_002632404.1 | 78  | 158.303 | 125 | 98  | Hypothetical protein CBG00428                                  |
| Locus_15981_Transcript_1/1_Conf_1.000 | 181  | 0  |           |                |     |         |     |     |                                                                |
| Locus_15982_Transcript_1/1_Conf_1.000 | 379  | 20 | 8.54E-70  | XP_002927427.1 | 100 | 266.159 | 126 | 126 | PREDICTED: transcription elongation factor SPT5-like isoform 2 |



|                                       |      |    |           |                |     |         |     |     |                                                             |
|---------------------------------------|------|----|-----------|----------------|-----|---------|-----|-----|-------------------------------------------------------------|
| Locus_15983_Transcript_1/1_Conf_1.000 | 170  | 20 | 1.68E-25  | XP_002811271.1 | 100 | 119.013 | 56  | 56  | PREDICTED: nuclear migration protein nudC-like              |
| Locus_15984_Transcript_1/1_Conf_1.000 | 194  | 0  |           |                |     |         |     |     |                                                             |
| Locus_15985_Transcript_1/2_Conf_1.000 | 611  | 0  |           |                |     |         |     |     |                                                             |
| Locus_15985_Transcript_2/2_Conf_1.000 | 592  | 0  |           |                |     |         |     |     |                                                             |
| Locus_15986_Transcript_1/1_Conf_1.000 | 995  | 11 | 1.86E-18  | NP_492646.1    | 51  | 97.8265 | 180 | 93  | Feminization Of Germline family member (fog-3)              |
| Locus_15987_Transcript_1/1_Conf_1.000 | 280  | 0  |           |                |     |         |     |     |                                                             |
| Locus_15988_Transcript_1/1_Conf_1.000 | 214  | 0  |           |                |     |         |     |     |                                                             |
| Locus_15989_Transcript_1/1_Conf_1.000 | 152  | 0  |           |                |     |         |     |     |                                                             |
| Locus_1599_Transcript_1/1_Conf_1.000  | 1238 | 20 | 1.47E-146 | EFO21722.1     | 75  | 523.857 | 413 | 312 | A-macroglobulin complement component family protein         |
| Locus_15990_Transcript_1/1_Conf_1.000 | 238  | 20 | 8.93E-19  | XP_002637127.1 | 85  | 96.6709 | 78  | 67  | Hypothetical protein CBG09629                               |
| Locus_15991_Transcript_1/1_Conf_1.000 | 171  | 20 | 2.87E-09  | NP_497334.1    | 71  | 65.0846 | 56  | 40  | INverted Formin/formin Three-related family member (inft-1) |
| Locus_15992_Transcript_1/1_Conf_1.000 | 210  | 0  |           |                |     |         |     |     |                                                             |
| Locus_15993_Transcript_1/1_Conf_1.000 | 303  | 2  | 2.05E-15  | EFO18627.1     | 77  | 85.5001 | 88  | 68  | hypothetical protein LOAG_09870                             |
| Locus_15994_Transcript_1/1_Conf_1.000 | 171  | 0  |           |                |     |         |     |     |                                                             |
| Locus_15995_Transcript_1/1_Conf_1.000 | 562  | 0  |           |                |     |         |     |     |                                                             |
| Locus_15996_Transcript_1/1_Conf_1.000 | 256  | 20 | 1.88E-32  | NP_493778.1    | 83  | 142.124 | 85  | 71  | hypothetical protein K07E8.7                                |
| Locus_15997_Transcript_1/1_Conf_1.000 | 288  | 0  |           |                |     |         |     |     |                                                             |
| Locus_15998_Transcript_1/1_Conf_1.000 | 294  | 0  |           |                |     |         |     |     |                                                             |
| Locus_15999_Transcript_1/1_Conf_1.000 | 514  | 4  | 2.32E-04  | XP_002647225.1 | 43  | 48.9062 | 162 | 71  | Hypothetical protein CBG23815                               |
| Locus_16_Transcript_1/2_Conf_1.000    | 549  | 2  | 4.94E-04  | AAD13339.1     | 52  | 48.1358 | 65  | 34  | ancylostoma-secreted protein 1 precursor                    |
| Locus_16_Transcript_2/2_Conf_1.000    | 225  | 2  | 6.30E-04  | AAN11402.1     | 55  | 47.3654 | 54  | 30  | secreted-protein 1 precursor                                |
| Locus_160_Transcript_1/5_Conf_0.133   | 609  | 20 | 4.80E-31  | NP_001122684.1 | 96  | 138.272 | 95  | 92  | UNCoordinated family member (unc-103)                       |
| Locus_160_Transcript_2/5_Conf_0.467   | 537  | 20 | 3.36E-31  | AAO63577.1     | 60  | 138.272 | 160 | 97  | secreted protein 5 precursor                                |
| Locus_160_Transcript_3/5_Conf_0.600   | 740  | 20 | 8.11E-38  | AAO63577.1     | 59  | 161.384 | 192 | 115 | secreted protein 5 precursor                                |

|                                       |      |    |          |             |    |         |     |     |                                                                                |
|---------------------------------------|------|----|----------|-------------|----|---------|-----|-----|--------------------------------------------------------------------------------|
| Locus_160_Transcript_4/5_Conf_0.733   | 791  | 20 | 2.43E-38 | AAO63577.1  | 60 | 163.31  | 192 | 116 | secreted protein 5 precursor                                                   |
| Locus_160_Transcript_5/5_Conf_0.733   | 740  | 20 | 2.79E-38 | AAO63577.1  | 59 | 162.925 | 192 | 115 | secreted protein 5 precursor                                                   |
| Locus_1600_Transcript_1/1_Conf_1.000  | 2966 | 20 | 4.13E-96 | NP_490758.1 | 46 | 357.836 | 921 | 431 | Synthetic secondary siRNA-deficient<br>ArgONaute mutant family member (sago-2) |
| Locus_16000_Transcript_1/1_Conf_1.000 | 326  | 0  |          |             |    |         |     |     |                                                                                |
| Locus_16001_Transcript_1/1_Conf_1.000 | 239  | 20 | 1.05E-27 | NP_501689.1 | 82 | 126.331 | 79  | 65  | fatty acid ELongation family member (elo-1)                                    |
| Locus_16002_Transcript_1/1_Conf_1.000 | 342  | 0  |          |             |    |         |     |     |                                                                                |
| Locus_16003_Transcript_1/1_Conf_1.000 | 350  | 0  |          |             |    |         |     |     |                                                                                |
| Locus_16004_Transcript_1/1_Conf_1.000 | 561  | 20 | 9.00E-65 | AAN11401.1  | 78 | 249.98  | 184 | 145 | metalloprotease 1 precursor                                                    |
| Locus_16005_Transcript_1/1_Conf_1.000 | 128  | 0  |          |             |    |         |     |     |                                                                                |
| Locus_16006_Transcript_1/1_Conf_1.000 | 1297 | 20 | 0        | NP_506128.1 | 95 | 787.719 | 412 | 393 | AcTiniN family member (atn-1)                                                  |

|                                       |      |    |          |                |    |         |     |     |                                                               |
|---------------------------------------|------|----|----------|----------------|----|---------|-----|-----|---------------------------------------------------------------|
| Locus_16007_Transcript_1/1_Conf_1.000 | 511  | 20 | 2.95E-12 | XP_001182427.1 | 54 | 75.0998 | 111 | 60  | PREDICTED: similar to mannose receptor, partial               |
| Locus_16008_Transcript_1/1_Conf_1.000 | 287  | 0  |          |                |    |         |     |     |                                                               |
| Locus_16009_Transcript_1/1_Conf_1.000 | 145  | 0  |          |                |    |         |     |     |                                                               |
| Locus_1601_Transcript_1/1_Conf_1.000  | 1644 | 5  | 4.07E-20 | XP_002640451.1 | 45 | 104.375 | 320 | 144 | Hypothetical protein CBG08508                                 |
| Locus_16010_Transcript_1/1_Conf_1.000 | 695  | 5  | 1.11E-14 | EFO21657.1     | 52 | 84.3445 | 161 | 85  | hypothetical protein LOAG_06828                               |
| Locus_16011_Transcript_1/1_Conf_1.000 | 211  | 20 | 1.24E-20 | NP_497751.1    | 81 | 102.834 | 70  | 57  | hypothetical protein C14B1.10                                 |
| Locus_16012_Transcript_1/1_Conf_1.000 | 269  | 20 | 5.96E-39 | EFO21248.1     | 93 | 163.696 | 89  | 83  | CMGC/CDK/CDK5 protein kinase                                  |
| Locus_16013_Transcript_1/1_Conf_1.000 | 330  | 20 | 1.33E-06 | XP_001764884.1 | 57 | 56.225  | 92  | 53  | predicted protein                                             |
| Locus_16014_Transcript_1/1_Conf_1.000 | 598  | 20 | 1.62E-12 | XP_001896971.1 | 64 | 76.6406 | 102 | 66  | hypothetical protein Bm1_27600                                |
| Locus_16015_Transcript_1/1_Conf_1.000 | 515  | 20 | 3.43E-40 | NP_509417.2    | 81 | 167.933 | 118 | 96  | hypothetical protein F40B5.2                                  |
| Locus_16016_Transcript_1/1_Conf_1.000 | 734  | 20 | 1.36E-29 | CAB07368.3     | 53 | 134.035 | 258 | 138 | C. elegans protein F22G12.4, confirmed by transcript evidence |

|                                       |      |    |           |                |    |         |     |     |                                                 |
|---------------------------------------|------|----|-----------|----------------|----|---------|-----|-----|-------------------------------------------------|
| Locus_16017_Transcript_1/1_Conf_1.000 | 750  | 20 | 5.17E-104 | NP_492752.1    | 93 | 381.333 | 218 | 203 | hypothetical protein F59C6.5                    |
| Locus_16018_Transcript_1/1_Conf_1.000 | 1576 | 4  | 1.12E-27  | XP_002641592.1 | 52 | 129.413 | 288 | 151 | Hypothetical protein CBG09896                   |
| Locus_16019_Transcript_1/1_Conf_1.000 | 173  | 0  |           |                |    |         |     |     |                                                 |
| Locus_1602_Transcript_1/1_Conf_1.000  | 580  | 20 | 5.34E-26  | XP_001899692.1 | 62 | 121.324 | 135 | 85  | WW domain containing protein                    |
| Locus_16020_Transcript_1/1_Conf_1.000 | 287  | 20 | 2.82E-28  | NP_001022571.1 | 94 | 128.257 | 69  | 65  | NeuroFibroMatosis homolog family member (nfm-1) |
| Locus_16021_Transcript_1/1_Conf_1.000 | 478  | 0  |           |                |    |         |     |     |                                                 |
| Locus_16022_Transcript_1/1_Conf_1.000 | 485  | 20 | 3.08E-51  | XP_002633387.1 | 81 | 204.527 | 149 | 121 | C. briggsae CBR-TWK-25 protein                  |
| Locus_16023_Transcript_1/1_Conf_1.000 | 147  | 0  |           |                |    |         |     |     |                                                 |
| Locus_16024_Transcript_1/1_Conf_1.000 | 586  | 0  |           |                |    |         |     |     |                                                 |
| Locus_16025_Transcript_1/1_Conf_1.000 | 590  | 20 | 1.39E-29  | NP_001122554.1 | 61 | 133.265 | 198 | 121 | hypothetical protein Y71G12A.2                  |
| Locus_16026_Transcript_1/1_Conf_1.000 | 423  | 12 | 1.22E-07  | XP_001744572.1 | 48 | 59.6918 | 117 | 57  | hypothetical protein                            |
| Locus_16027_Transcript_1/1_Conf_1.000 | 187  | 2  | 2.84E-04  | EFO23538.1     | 63 | 48.521  | 60  | 38  | hypothetical protein LOAG_04945                 |
| Locus_16028_Transcript_1/1_Conf_1.000 | 317  | 5  | 8.21E-20  | XP_002643599.1 | 65 | 100.138 | 113 | 74  | C. briggsae CBR-HDA-4 protein                   |
| Locus_16029_Transcript_1/1_Conf_1.000 | 379  | 0  |           |                |    |         |     |     |                                                 |
| Locus_1603_Transcript_1/1_Conf_1.000  | 656  | 20 | 1.78E-16  | XP_002634226.1 | 53 | 90.1225 | 143 | 77  | Hypothetical protein CBG01796                   |
| Locus_16030_Transcript_1/1_Conf_1.000 | 225  | 0  |           |                |    |         |     |     |                                                 |
| Locus_16031_Transcript_1/1_Conf_1.000 | 670  | 20 | 2.03E-55  | NP_001024971.1 | 74 | 219.55  | 224 | 167 | abnormal cell MIGration family member (mig-15)  |
| Locus_16032_Transcript_1/1_Conf_1.000 | 277  | 2  | 1.92E-05  | EFO19241.1     | 52 | 52.373  | 88  | 46  | hypothetical protein LOAG_09252                 |
| Locus_16033_Transcript_1/1_Conf_1.000 | 411  | 4  | 1.97E-18  | XP_002633725.1 | 53 | 95.5153 | 142 | 76  | Hypothetical protein CBG03410                   |
| Locus_16034_Transcript_1/1_Conf_1.000 | 270  | 0  |           |                |    |         |     |     |                                                 |

|                                       |      |    |           |                |     |         |     |     |                                                                         |
|---------------------------------------|------|----|-----------|----------------|-----|---------|-----|-----|-------------------------------------------------------------------------|
| Locus_16035_Transcript_1/1_Conf_1.000 | 136  | 20 | 6.15E-12  | EFO13686.1     | 86  | 73.9442 | 44  | 38  | CAMK/TSSK protein kinase                                                |
| Locus_16036_Transcript_1/1_Conf_1.000 | 258  | 20 | 2.22E-25  | XP_001902207.1 | 92  | 118.627 | 76  | 70  | Hypothetical GTP-binding protein C02F5.3 in chromosome III, putative    |
| Locus_16037_Transcript_1/1_Conf_1.000 | 860  | 0  |           |                |     |         |     |     |                                                                         |
| Locus_16038_Transcript_1/1_Conf_1.000 | 476  | 20 | 9.52E-13  | CAA84693.3     | 64  | 76.6406 | 88  | 57  | C. elegans protein D2045.2, partially confirmed by transcript evidence  |
| Locus_16039_Transcript_1/1_Conf_1.000 | 1002 | 20 | 5.14E-141 | XP_002629752.1 | 90  | 504.982 | 334 | 302 | Hypothetical protein CBG00986                                           |
| Locus_1604_Transcript_1/1_Conf_1.000  | 350  | 20 | 3.51E-47  | XP_002630779.1 | 88  | 191.045 | 113 | 100 | Hypothetical protein CBG02475                                           |
| Locus_16040_Transcript_1/1_Conf_1.000 | 130  | 0  |           |                |     |         |     |     |                                                                         |
| Locus_16041_Transcript_1/1_Conf_1.000 | 417  | 20 | 4.49E-26  | NP_508948.2    | 83  | 120.939 | 96  | 80  | hypothetical protein T21F4.1                                            |
| Locus_16042_Transcript_1/1_Conf_1.000 | 295  | 1  | 1.44E-08  | CAL22705.2     | 62  | 62.7734 | 93  | 58  | C. elegans protein K03H1.13, partially confirmed by transcript evidence |
| Locus_16043_Transcript_1/1_Conf_1.000 | 479  | 0  |           |                |     |         |     |     |                                                                         |
| Locus_16044_Transcript_1/1_Conf_1.000 | 560  | 0  |           |                |     |         |     |     |                                                                         |
| Locus_16045_Transcript_1/1_Conf_1.000 | 291  | 20 | 1.09E-48  | XP_001110023.2 | 100 | 196.052 | 97  | 97  | PREDICTED: sentrin-specific protease 3-like isoform 3                   |
| Locus_16046_Transcript_1/1_Conf_1.000 | 247  | 10 | 4.38E-26  | XP_002633733.1 | 87  | 120.939 | 78  | 68  | Hypothetical protein CBG03418                                           |
| Locus_16047_Transcript_1/2_Conf_1.000 | 643  | 6  | 1.58E-38  | NP_509272.1    | 66  | 163.31  | 204 | 136 | hypothetical protein F46C8.3                                            |
| Locus_16047_Transcript_2/2_Conf_1.000 | 788  | 6  | 1.91E-35  | NP_509272.1    | 68  | 153.68  | 175 | 120 | hypothetical protein F46C8.3                                            |
| Locus_16048_Transcript_1/1_Conf_1.000 | 545  | 17 | 4.60E-07  | XP_396560.3    | 50  | 58.151  | 106 | 53  | PREDICTED: similar to CG1402-PA                                         |
| Locus_16049_Transcript_1/1_Conf_1.000 | 168  | 0  |           |                |     |         |     |     |                                                                         |

|                                       |      |    |          |                |     |         |     |     |                                                                                 |
|---------------------------------------|------|----|----------|----------------|-----|---------|-----|-----|---------------------------------------------------------------------------------|
| Locus_1605_Transcript_1/1_Conf_1.000  | 719  | 20 | 2.44E-44 | NP_494841.3    | 63  | 182.956 | 174 | 111 | hypothetical protein F10G7.10                                                   |
| Locus_16050_Transcript_1/1_Conf_1.000 | 783  | 20 | 2.39E-38 | NP_001022548.1 | 58  | 163.31  | 210 | 123 | hypothetical protein F25B5.6                                                    |
| Locus_16051_Transcript_1/2_Conf_1.000 | 759  | 20 | 6.87E-88 | ACY39993.1     | 76  | 327.791 | 252 | 192 | C. elegans FLN-2 protein, isoform a, partially confirmed by transcript evidence |
| Locus_16051_Transcript_2/2_Conf_1.000 | 443  | 20 | 7.37E-37 | ACY39994.1     | 90  | 156.762 | 92  | 83  | C. elegans FLN-2 protein, isoform d                                             |
| Locus_16052_Transcript_1/1_Conf_1.000 | 291  | 0  |          |                |     |         |     |     |                                                                                 |
| Locus_16053_Transcript_1/1_Conf_1.000 | 396  | 0  |          |                |     |         |     |     |                                                                                 |
| Locus_16054_Transcript_1/1_Conf_1.000 | 469  | 20 | 9.14E-72 | NP_000032.1    | 100 | 272.707 | 137 | 137 | apolipoprotein E precursor                                                      |
| Locus_16055_Transcript_1/1_Conf_1.000 | 310  | 19 | 1.32E-22 | XP_002646997.1 | 72  | 109.383 | 97  | 70  | Hypothetical protein CBG22453                                                   |
| Locus_16056_Transcript_1/1_Conf_1.000 | 456  | 3  | 2.26E-06 | XP_001893605.1 | 43  | 55.4546 | 150 | 65  | Trypsin family protein                                                          |
| Locus_16057_Transcript_1/1_Conf_1.000 | 281  | 0  |          |                |     |         |     |     |                                                                                 |
| Locus_16058_Transcript_1/1_Conf_1.000 | 312  | 20 | 2.25E-09 | NP_500767.1    | 55  | 65.4698 | 95  | 53  | hypothetical protein F36H12.3                                                   |
| Locus_16059_Transcript_1/1_Conf_1.000 | 365  | 0  |          |                |     |         |     |     |                                                                                 |
| Locus_1606_Transcript_1/2_Conf_1.000  | 1071 | 20 | 3.18E-67 | XP_002640805.1 | 65  | 259.996 | 264 | 173 | Hypothetical protein CBG15687                                                   |

|                                       |      |    |           |                |     |         |      |     |                                                                      |
|---------------------------------------|------|----|-----------|----------------|-----|---------|------|-----|----------------------------------------------------------------------|
| Locus_1606_Transcript_2/2_Conf_1.000  | 987  | 20 | 5.46E-71  | NP_497690.1    | 68  | 272.322 | 263  | 180 | hypothetical protein Y53G8AR.9                                       |
| Locus_16060_Transcript_1/1_Conf_1.000 | 1121 | 20 | 4.50E-152 | XP_002639404.1 | 85  | 541.962 | 370  | 317 | Hypothetical protein CBG03992                                        |
| Locus_16061_Transcript_1/1_Conf_1.000 | 199  | 0  |           |                |     |         |      |     |                                                                      |
| Locus_16062_Transcript_1/1_Conf_1.000 | 174  | 0  |           |                |     |         |      |     |                                                                      |
| Locus_16063_Transcript_1/1_Conf_1.000 | 253  | 0  |           |                |     |         |      |     |                                                                      |
| Locus_16064_Transcript_1/1_Conf_1.000 | 382  | 2  | 5.80E-10  | NP_491209.3    | 89  | 67.3958 | 39   | 35  | LARP (RNA binding La related protein) homolog family member (larp-5) |
| Locus_16065_Transcript_1/1_Conf_1.000 | 212  | 0  |           |                |     |         |      |     |                                                                      |
| Locus_16066_Transcript_1/1_Conf_1.000 | 220  | 4  | 1.23E-07  | NP_509283.1    | 82  | 59.6918 | 41   | 34  | APYrase family member (apy-1)                                        |
| Locus_16067_Transcript_1/1_Conf_1.000 | 220  | 0  |           |                |     |         |      |     |                                                                      |
| Locus_16068_Transcript_1/1_Conf_1.000 | 212  | 0  |           |                |     |         |      |     |                                                                      |
| Locus_16069_Transcript_1/1_Conf_1.000 | 316  | 0  |           |                |     |         |      |     |                                                                      |
| Locus_1607_Transcript_1/3_Conf_0.714  | 3501 | 20 | 1.99E-145 | NP_001022562.1 | 50  | 521.931 | 1152 | 585 | Suppressor/Enhancer of Lin-12 family member (sel-5)                  |
| Locus_1607_Transcript_2/3_Conf_0.714  | 3411 | 20 | 1.58E-147 | NP_001022562.1 | 50  | 528.865 | 1145 | 578 | Suppressor/Enhancer of Lin-12 family member (sel-5)                  |
| Locus_1607_Transcript_3/3_Conf_0.714  | 3417 | 20 | 6.03E-147 | NP_001022562.1 | 50  | 526.939 | 1147 | 580 | Suppressor/Enhancer of Lin-12 family member (sel-5)                  |
| Locus_16070_Transcript_1/1_Conf_1.000 | 217  | 20 | 1.83E-24  | NP_005006.3    | 100 | 115.546 | 72   | 72  | mitochondrial inner membrane protein OXA1L                           |
| Locus_16071_Transcript_1/1_Conf_1.000 | 147  | 0  |           |                |     |         |      |     |                                                                      |
| Locus_16072_Transcript_1/1_Conf_1.000 | 287  | 0  |           |                |     |         |      |     |                                                                      |
| Locus_16073_Transcript_1/1_Conf_1.000 | 247  | 20 | 1.61E-28  | AAL06641.1     | 100 | 129.028 | 82   | 82  | serine-threonine protein kinase                                      |

|                                       |      |    |           |                |    |         |     |     |                                                                         |
|---------------------------------------|------|----|-----------|----------------|----|---------|-----|-----|-------------------------------------------------------------------------|
| Locus_16074_Transcript_1/1_Conf_1.000 | 197  | 2  | 5.85E-10  | NP_506090.1    | 97 | 67.3958 | 38  | 37  | hypothetical protein R04F11.2                                           |
| Locus_16075_Transcript_1/1_Conf_1.000 | 268  | 20 | 3.40E-18  | XP_002636870.1 | 80 | 94.7449 | 71  | 57  | Hypothetical protein CBG09328                                           |
| Locus_16076_Transcript_1/1_Conf_1.000 | 1189 | 20 | 1.49E-108 | EDL03932.1     | 97 | 397.512 | 206 | 200 | mCG15678, isoform CRA_c                                                 |
| Locus_16077_Transcript_1/1_Conf_1.000 | 598  | 20 | 5.88E-55  | XP_002639150.1 | 78 | 217.624 | 188 | 147 | C. briggsae CBR-ROM-5 protein                                           |
| Locus_16078_Transcript_1/1_Conf_1.000 | 317  | 3  | 4.96E-33  | XP_002645845.1 | 82 | 144.05  | 104 | 86  | Hypothetical protein CBG07579                                           |
| Locus_16079_Transcript_1/1_Conf_1.000 | 511  | 2  | 4.71E-10  | NP_505787.1    | 65 | 67.781  | 101 | 66  | hypothetical protein F58B4.4                                            |
| Locus_1608_Transcript_1/1_Conf_1.000  | 350  | 3  | 2.30E-06  | NP_491341.1    | 63 | 55.4546 | 63  | 40  | MUS (Drosophila mutagen sensitive) related family member (mus-81)       |
| Locus_16080_Transcript_1/1_Conf_1.000 | 483  | 20 | 1.34E-46  | NP_001020956.1 | 86 | 189.119 | 124 | 107 | related to yeast Vacuolar Protein Sorting factor family member (vps-34) |
| Locus_16081_Transcript_1/1_Conf_1.000 | 254  | 0  |           |                |    |         |     |     |                                                                         |
| Locus_16082_Transcript_1/1_Conf_1.000 | 236  | 0  |           |                |    |         |     |     |                                                                         |
| Locus_16083_Transcript_1/1_Conf_1.000 | 267  | 20 | 2.52E-21  | CAA72916.2     | 73 | 105.145 | 88  | 65  | serine protease inhibitor-like protein                                  |



|                                       |      |    |          |                |    |         |     |     |                                        |
|---------------------------------------|------|----|----------|----------------|----|---------|-----|-----|----------------------------------------|
| Locus_16084_Transcript_1/1_Conf_1.000 | 215  | 5  | 1.24E-04 | EFN81442.1     | 65 | 49.6766 | 44  | 29  | Protein TRS85-like protein             |
| Locus_16085_Transcript_1/1_Conf_1.000 | 186  | 0  |          |                |    |         |     |     |                                        |
| Locus_16086_Transcript_1/1_Conf_1.000 | 730  | 0  |          |                |    |         |     |     |                                        |
| Locus_16087_Transcript_1/1_Conf_1.000 | 533  | 20 | 3.89E-56 | NP_510385.1    | 77 | 221.09  | 176 | 137 | hypothetical protein C11H1.3           |
| Locus_16088_Transcript_1/1_Conf_1.000 | 320  | 0  |          |                |    |         |     |     |                                        |
| Locus_16089_Transcript_1/1_Conf_1.000 | 226  | 6  | 1.60E-07 | EFO26306.1     | 80 | 59.3066 | 40  | 32  | hypothetical protein LOAG_02178        |
| Locus_1609_Transcript_1/1_Conf_1.000  | 1841 | 20 | 3.46E-39 | EFO23299.1     | 58 | 167.933 | 225 | 132 | hypothetical protein LOAG_05186        |
| Locus_16090_Transcript_1/1_Conf_1.000 | 231  | 20 | 6.44E-17 | XP_002632463.1 | 91 | 90.5077 | 71  | 65  | Hypothetical protein CBG13687          |
| Locus_16091_Transcript_1/1_Conf_1.000 | 159  | 0  |          |                |    |         |     |     |                                        |
| Locus_16092_Transcript_1/1_Conf_1.000 | 253  | 0  |          |                |    |         |     |     |                                        |
| Locus_16093_Transcript_1/1_Conf_1.000 | 325  | 0  |          |                |    |         |     |     |                                        |
| Locus_16094_Transcript_1/1_Conf_1.000 | 227  | 0  |          |                |    |         |     |     |                                        |
| Locus_16095_Transcript_1/1_Conf_1.000 | 149  | 0  |          |                |    |         |     |     |                                        |
| Locus_16096_Transcript_1/1_Conf_1.000 | 359  | 3  | 4.57E-15 | NP_501984.1    | 60 | 84.3445 | 120 | 73  | Na/Ca eXchangers family member (ncx-3) |
| Locus_16097_Transcript_1/1_Conf_1.000 | 605  | 20 | 7.06E-96 | XP_002645162.1 | 85 | 353.599 | 205 | 176 | Hypothetical protein CBG16872          |
| Locus_16098_Transcript_1/1_Conf_1.000 | 406  | 2  | 7.09E-08 | NP_501059.1    | 86 | 60.4622 | 36  | 31  | hypothetical protein T05A12.3          |
| Locus_16099_Transcript_1/1_Conf_1.000 | 150  | 0  |          |                |    |         |     |     |                                        |
| Locus_161_Transcript_1/1_Conf_1.000   | 941  | 0  |          |                |    |         |     |     |                                        |
| Locus_1610_Transcript_1/2_Conf_1.000  | 901  | 20 | 1.73E-41 | NP_498985.3    | 57 | 174.096 | 273 | 158 | hypothetical protein R08D7.4           |
| Locus_1610_Transcript_2/2_Conf_1.000  | 854  | 20 | 9.61E-39 | NP_498985.3    | 57 | 164.851 | 264 | 152 | hypothetical protein R08D7.4           |
| Locus_16100_Transcript_1/1_Conf_1.000 | 150  | 20 | 7.96E-15 | XP_002634817.1 | 89 | 83.5741 | 48  | 43  | C. briggsae CBR-CLP-7 protein          |
| Locus_16101_Transcript_1/1_Conf_1.000 | 466  | 0  |          |                |    |         |     |     |                                        |
| Locus_16102_Transcript_1/1_Conf_1.000 | 529  | 0  |          |                |    |         |     |     |                                        |
| Locus_16103_Transcript_1/1_Conf_1.000 | 214  | 0  |          |                |    |         |     |     |                                        |

|                                       |     |    |          |                |    |         |     |     |                                                       |
|---------------------------------------|-----|----|----------|----------------|----|---------|-----|-----|-------------------------------------------------------|
| Locus_16104_Transcript_1/1_Conf_1.000 | 528 | 20 | 1.30E-88 | XP_002638687.1 | 96 | 328.946 | 175 | 168 | Hypothetical protein CBG11882                         |
| Locus_16105_Transcript_1/1_Conf_1.000 | 335 | 20 | 3.59E-36 | XP_002636068.1 | 76 | 154.451 | 111 | 85  | Hypothetical protein CBG01308                         |
| Locus_16106_Transcript_1/1_Conf_1.000 | 235 | 0  |          |                |    |         |     |     |                                                       |
| Locus_16107_Transcript_1/1_Conf_1.000 | 301 | 10 | 2.11E-36 | CAR63539.1     | 78 | 155.221 | 97  | 76  | hypothetical protein                                  |
| Locus_16108_Transcript_1/1_Conf_1.000 | 523 | 20 | 8.45E-37 | XP_001894795.1 | 77 | 156.762 | 119 | 92  | Aspartyl aminopeptidase                               |
| Locus_16109_Transcript_1/1_Conf_1.000 | 152 | 8  | 6.51E-17 | NP_495365.1    | 92 | 90.5077 | 50  | 46  | RaPsYn family member ( <i>rpy-1</i> )                 |
| Locus_1611_Transcript_1/1_Conf_1.000  | 884 | 20 | 2.24E-62 | POC5E6.2       | 70 | 243.432 | 244 | 171 | Mediator of RNA polymerase II transcription subunit 8 |
| Locus_16110_Transcript_1/1_Conf_1.000 | 354 | 20 | 2.36E-11 | XP_001112673.1 | 71 | 72.0182 | 56  | 40  | PREDICTED: UPF0587 protein C1orf123-like isoform 3    |

|                                       |     |    |          |                |     |         |     |     |                                                      |
|---------------------------------------|-----|----|----------|----------------|-----|---------|-----|-----|------------------------------------------------------|
| Locus_16111_Transcript_1/1_Conf_1.000 | 549 | 16 | 1.73E-57 | NP_497035.3    | 83  | 225.713 | 169 | 141 | Trehalose 6-Phosphate Synthase family member (tps-2) |
| Locus_16112_Transcript_1/1_Conf_1.000 | 801 | 20 | 1.30E-10 | XP_002802251.1 | 43  | 71.2478 | 303 | 132 | PREDICTED: rootletin-like                            |
| Locus_16113_Transcript_1/1_Conf_1.000 | 334 | 0  |          |                |     |         |     |     |                                                      |
| Locus_16114_Transcript_1/1_Conf_1.000 | 189 | 20 | 2.72E-23 | XP_002822850.1 | 100 | 111.694 | 62  | 62  | PREDICTED: CD9 antigen-like                          |
| Locus_16115_Transcript_1/1_Conf_1.000 | 258 | 20 | 2.80E-36 | NP_497814.3    | 94  | 154.836 | 85  | 80  | UNCoordinated family member (unc-79)                 |
| Locus_16116_Transcript_1/1_Conf_1.000 | 194 | 20 | 6.94E-11 | XP_001422216.1 | 67  | 70.4774 | 64  | 43  | predicted protein                                    |
| Locus_16117_Transcript_1/1_Conf_1.000 | 593 | 20 | 2.64E-60 | NP_493583.1    | 85  | 235.343 | 168 | 143 | SeMaPhorin related family member (smp-1)             |
| Locus_16118_Transcript_1/1_Conf_1.000 | 155 | 0  |          |                |     |         |     |     |                                                      |
| Locus_16119_Transcript_1/1_Conf_1.000 | 480 | 20 | 6.09E-28 | XP_640893.1    | 61  | 127.102 | 159 | 97  | hypothetical protein DDB_G0281219                    |

|                                       |     |    |          |                |     |         |     |     |                                                               |
|---------------------------------------|-----|----|----------|----------------|-----|---------|-----|-----|---------------------------------------------------------------|
| Locus_1612_Transcript_1/1_Conf_1.000  | 282 | 20 | 6.29E-36 | NP_001041183.1 | 85  | 153.68  | 95  | 81  | Na/Ca eXchangers family member (ncx-1)                        |
| Locus_16120_Transcript_1/1_Conf_1.000 | 370 | 20 | 4.08E-11 | XP_001983598.1 | 79  | 71.2478 | 49  | 39  | GH15492                                                       |
| Locus_16121_Transcript_1/1_Conf_1.000 | 177 | 20 | 7.97E-28 | EAW98190.1     | 100 | 126.716 | 59  | 59  | cytochrome c oxidase subunit VIa polypeptide 1, isoform CRA_a |
| Locus_16122_Transcript_1/1_Conf_1.000 | 434 | 0  |          |                |     |         |     |     |                                                               |
| Locus_16123_Transcript_1/1_Conf_1.000 | 137 | 1  | 4.72E-04 | NP_494220.2    | 69  | 47.7506 | 43  | 30  | hypothetical protein F54A3.1                                  |
| Locus_16124_Transcript_1/1_Conf_1.000 | 331 | 0  |          |                |     |         |     |     |                                                               |
| Locus_16125_Transcript_1/2_Conf_1.000 | 293 | 0  |          |                |     |         |     |     |                                                               |
| Locus_16125_Transcript_2/2_Conf_1.000 | 293 | 0  |          |                |     |         |     |     |                                                               |
| Locus_16126_Transcript_1/1_Conf_1.000 | 284 | 0  |          |                |     |         |     |     |                                                               |
| Locus_16127_Transcript_1/1_Conf_1.000 | 627 | 20 | 2.97E-63 | XP_002635377.1 | 78  | 245.358 | 210 | 165 | Hypothetical protein CBG00768                                 |
| Locus_16128_Transcript_1/2_Conf_1.000 | 817 | 20 | 2.90E-82 | ADG63133.1     | 71  | 309.301 | 269 | 193 | calcium-dependent apyrase                                     |
| Locus_16128_Transcript_2/2_Conf_1.000 | 817 | 20 | 3.79E-82 | ADG63133.1     | 71  | 308.916 | 269 | 193 | calcium-dependent apyrase                                     |
| Locus_16129_Transcript_1/1_Conf_1.000 | 220 | 2  | 3.04E-06 | XP_001900855.1 | 61  | 55.0694 | 67  | 41  | hypothetical protein Bm1_46970                                |
| Locus_1613_Transcript_1/1_Conf_1.000  | 301 | 6  | 2.60E-18 | AAT02162.1     | 97  | 95.1301 | 43  | 42  | hypothetical protein L3ni51                                   |
| Locus_16130_Transcript_1/1_Conf_1.000 | 505 | 2  | 8.72E-09 | XP_002640245.1 | 61  | 63.5438 | 123 | 76  | Hypothetical protein CBG12763                                 |

|                                       |      |    |          |                |    |         |     |     |                                                     |
|---------------------------------------|------|----|----------|----------------|----|---------|-----|-----|-----------------------------------------------------|
| Locus_16131_Transcript_1/1_Conf_1.000 | 287  | 20 | 2.81E-44 | EFO21966.1     | 97 | 181.415 | 94  | 92  | pre-mRNA splicing factor ATP-dependent RNA helicase |
| Locus_16132_Transcript_1/1_Conf_1.000 | 496  | 4  | 9.51E-13 | XP_002639360.1 | 58 | 76.6406 | 167 | 97  | Hypothetical protein CBG03940                       |
| Locus_16133_Transcript_1/1_Conf_1.000 | 218  | 4  | 1.07E-24 | CAR63710.1     | 88 | 116.316 | 71  | 63  | putative C2 domain containing protein               |
| Locus_16134_Transcript_1/1_Conf_1.000 | 257  | 0  |          |                |    |         |     |     |                                                     |
| Locus_16135_Transcript_1/1_Conf_1.000 | 261  | 0  |          |                |    |         |     |     |                                                     |
| Locus_16136_Transcript_1/1_Conf_1.000 | 936  | 20 | 2.39E-97 | XP_002639541.1 | 79 | 359.762 | 284 | 227 | Hypothetical protein CBG04170                       |
| Locus_16137_Transcript_1/1_Conf_1.000 | 228  | 0  |          |                |    |         |     |     |                                                     |
| Locus_16138_Transcript_1/1_Conf_1.000 | 515  | 20 | 5.27E-49 | NP_498761.1    | 79 | 197.208 | 174 | 138 | DiCer Related family member (dcr-1)                 |
| Locus_16139_Transcript_1/1_Conf_1.000 | 158  | 0  |          |                |    |         |     |     |                                                     |
| Locus_1614_Transcript_1/1_Conf_1.000  | 2487 | 20 | 0        | XP_002639688.1 | 91 | 1379.39 | 828 | 761 | C. briggsae CBR-FASN-1 protein                      |

|                                       |     |    |          |                |     |         |     |     |                                              |
|---------------------------------------|-----|----|----------|----------------|-----|---------|-----|-----|----------------------------------------------|
| Locus_16140_Transcript_1/1_Conf_1.000 | 499 | 20 | 3.94E-43 | CAD24794.1     | 93  | 177.563 | 94  | 88  | HOM-C transcription factor                   |
| Locus_16141_Transcript_1/1_Conf_1.000 | 461 | 20 | 5.46E-61 | XP_002634990.1 | 86  | 236.884 | 152 | 131 | Hypothetical protein CBG13530                |
| Locus_16142_Transcript_1/1_Conf_1.000 | 324 | 20 | 4.04E-11 | AAD49436.1     | 64  | 71.2478 | 109 | 70  | AF083642_1P-glycoprotein                     |
| Locus_16143_Transcript_1/1_Conf_1.000 | 302 | 0  |          |                |     |         |     |     |                                              |
| Locus_16144_Transcript_1/1_Conf_1.000 | 170 | 0  |          |                |     |         |     |     |                                              |
| Locus_16145_Transcript_1/1_Conf_1.000 | 368 | 20 | 6.72E-27 | NP_497575.2    | 69  | 123.635 | 121 | 84  | Homeobox family member (ceh-44)              |
| Locus_16146_Transcript_1/1_Conf_1.000 | 201 | 0  |          |                |     |         |     |     |                                              |
| Locus_16147_Transcript_1/1_Conf_1.000 | 257 | 0  |          |                |     |         |     |     |                                              |
| Locus_16148_Transcript_1/1_Conf_1.000 | 591 | 2  | 8.30E-30 | XP_002638587.1 | 61  | 134.035 | 201 | 123 | Hypothetical protein CBG05635                |
| Locus_16149_Transcript_1/1_Conf_1.000 | 359 | 0  |          |                |     |         |     |     |                                              |
| Locus_1615_Transcript_1/1_Conf_1.000  | 937 | 20 | 2.65E-88 | XP_002647046.1 | 72  | 329.717 | 309 | 225 | Hypothetical protein CBG03564                |
| Locus_16150_Transcript_1/1_Conf_1.000 | 302 | 0  |          |                |     |         |     |     |                                              |
| Locus_16151_Transcript_1/1_Conf_1.000 | 260 | 20 | 4.18E-32 | XP_001902960.1 | 96  | 140.969 | 86  | 83  | Rap/ran-GAP family protein                   |
| Locus_16152_Transcript_1/1_Conf_1.000 | 270 | 19 | 3.67E-23 | YP_173415.1    | 100 | 77.411  | 36  | 36  | hypothetical protein NitaMp073               |
| Locus_16153_Transcript_1/1_Conf_1.000 | 375 | 7  | 9.02E-11 | NP_001021225.1 | 48  | 70.0922 | 154 | 74  | CELL Death abnormality family member (ced-7) |
| Locus_16154_Transcript_1/1_Conf_1.000 | 174 | 0  |          |                |     |         |     |     |                                              |
| Locus_16155_Transcript_1/1_Conf_1.000 | 328 | 7  | 3.19E-08 | XP_001897687.1 | 60  | 61.6178 | 84  | 51  | Zinc finger, C2H2 type family protein        |
| Locus_16156_Transcript_1/1_Conf_1.000 | 147 | 0  |          |                |     |         |     |     |                                              |

|                                       |     |    |           |                |    |         |     |     |                                                                          |
|---------------------------------------|-----|----|-----------|----------------|----|---------|-----|-----|--------------------------------------------------------------------------|
| Locus_16157_Transcript_1/1_Conf_1.000 | 225 | 20 | 6.28E-12  | XP_002612934.1 | 78 | 73.9442 | 60  | 47  | hypothetical protein BRAFLDRAFT_278667                                   |
| Locus_16158_Transcript_1/1_Conf_1.000 | 175 | 0  |           |                |    |         |     |     |                                                                          |
| Locus_16159_Transcript_1/1_Conf_1.000 | 137 | 0  |           |                |    |         |     |     |                                                                          |
| Locus_1616_Transcript_1/1_Conf_1.000  | 480 | 20 | 2.02E-31  | NP_001041137.1 | 67 | 138.658 | 156 | 105 | Alpha MANnosidase family member (aman-2)                                 |
| Locus_16160_Transcript_1/1_Conf_1.000 | 350 | 6  | 2.53E-21  | XP_002641319.1 | 73 | 105.145 | 113 | 83  | Hypothetical protein CBG24620                                            |
| Locus_16161_Transcript_1/1_Conf_1.000 | 152 | 0  |           |                |    |         |     |     |                                                                          |
| Locus_16162_Transcript_1/1_Conf_1.000 | 259 | 0  |           |                |    |         |     |     |                                                                          |
| Locus_16163_Transcript_1/1_Conf_1.000 | 160 | 0  |           |                |    |         |     |     |                                                                          |
| Locus_16164_Transcript_1/1_Conf_1.000 | 166 | 0  |           |                |    |         |     |     |                                                                          |
| Locus_16165_Transcript_1/1_Conf_1.000 | 369 | 3  | 6.10E-07  | NP_496477.2    | 57 | 57.3806 | 103 | 59  | hypothetical protein D1043.1                                             |
| Locus_16166_Transcript_1/1_Conf_1.000 | 249 | 20 | 1.67E-09  | CAA22110.2     | 62 | 65.855  | 82  | 51  | C. elegans protein Y75B8A.26, partially confirmed by transcript evidence |
| Locus_16167_Transcript_1/1_Conf_1.000 | 223 | 4  | 1.50E-13  | NP_493592.1    | 69 | 79.337  | 72  | 50  | hypothetical protein F32A7.4                                             |
| Locus_16168_Transcript_1/1_Conf_1.000 | 133 | 20 | 5.05E-14  | NP_492007.1    | 93 | 80.8777 | 44  | 41  | NADH Ubiquinone oxidoreductase Fe-S protein family member (nduf-6)       |
| Locus_16169_Transcript_1/1_Conf_1.000 | 493 | 0  |           |                |    |         |     |     |                                                                          |
| Locus_1617_Transcript_1/1_Conf_1.000  | 675 | 20 | 1.81E-67  | CAN99708.2     | 93 | 259.61  | 176 | 164 | C. elegans protein Y54G11A.10a, confirmed by transcript evidence         |
| Locus_16170_Transcript_1/1_Conf_1.000 | 967 | 20 | 1.55E-131 | CAA60046.1     | 96 | 473.396 | 261 | 251 | cytoplasmic intermediate filament protein                                |
| Locus_16171_Transcript_1/1_Conf_1.000 | 196 | 20 | 3.00E-14  | NP_491127.1    | 76 | 81.6481 | 65  | 50  | hypothetical protein Y54E10A.3                                           |
| Locus_16172_Transcript_1/1_Conf_1.000 | 209 | 0  |           |                |    |         |     |     |                                                                          |
| Locus_16173_Transcript_1/1_Conf_1.000 | 380 | 4  | 1.42E-40  | NP_505267.1    | 88 | 169.088 | 127 | 112 | Regulator of Presynaptic Morphology family member (rpm-1)                |
| Locus_16174_Transcript_1/1_Conf_1.000 | 334 | 0  |           |                |    |         |     |     |                                                                          |
| Locus_16175_Transcript_1/1_Conf_1.000 | 143 | 0  |           |                |    |         |     |     |                                                                          |

|                                       |      |    |          |                |    |         |     |     |                                                       |
|---------------------------------------|------|----|----------|----------------|----|---------|-----|-----|-------------------------------------------------------|
| Locus_16176_Transcript_1/1_Conf_1.000 | 734  | 20 | 7.93E-54 | AAA68328.2     | 66 | 214.542 | 239 | 158 | Hypothetical protein F35D2.4                          |
| Locus_16177_Transcript_1/1_Conf_1.000 | 453  | 20 | 3.03E-51 | XP_002638651.1 | 84 | 204.527 | 132 | 112 | Hypothetical protein CBG23705                         |
| Locus_16178_Transcript_1/1_Conf_1.000 | 157  | 0  |          |                |    |         |     |     |                                                       |
| Locus_16179_Transcript_1/1_Conf_1.000 | 258  | 20 | 8.45E-25 | EFO26733.1     | 77 | 116.701 | 83  | 64  | GTP1/OBG family protein                               |
| Locus_1618_Transcript_1/2_Conf_1.000  | 731  | 2  | 1.15E-04 | XP_002642452.1 | 76 | 51.2174 | 38  | 29  | Hypothetical protein CBG06862                         |
| Locus_1618_Transcript_2/2_Conf_1.000  | 731  | 2  | 1.15E-04 | XP_002642452.1 | 76 | 51.2174 | 38  | 29  | Hypothetical protein CBG06862                         |
| Locus_16180_Transcript_1/2_Conf_1.000 | 608  | 0  |          |                |    |         |     |     |                                                       |
| Locus_16180_Transcript_2/2_Conf_1.000 | 562  | 0  |          |                |    |         |     |     |                                                       |
| Locus_16181_Transcript_1/1_Conf_1.000 | 221  | 0  |          |                |    |         |     |     |                                                       |
| Locus_16182_Transcript_1/1_Conf_1.000 | 596  | 4  | 2.64E-07 | EFO21213.1     | 49 | 59.3066 | 161 | 80  | hypothetical protein LOAG_07275                       |
| Locus_16183_Transcript_1/1_Conf_1.000 | 394  | 16 | 4.65E-23 | XP_001900825.1 | 64 | 110.923 | 113 | 73  | CG3579-PA                                             |
| Locus_16184_Transcript_1/1_Conf_1.000 | 442  | 0  |          |                |    |         |     |     |                                                       |
| Locus_16185_Transcript_1/1_Conf_1.000 | 388  | 0  |          |                |    |         |     |     |                                                       |
| Locus_16186_Transcript_1/1_Conf_1.000 | 272  | 4  | 9.23E-16 | NP_495925.1    | 63 | 86.6557 | 90  | 57  | hypothetical protein F44G4.8                          |
| Locus_16187_Transcript_1/1_Conf_1.000 | 544  | 20 | 2.04E-55 | XP_002646278.1 | 72 | 218.779 | 177 | 128 | Hypothetical protein CBG11983                         |
| Locus_16188_Transcript_1/1_Conf_1.000 | 240  | 1  | 2.46E-05 | XP_002764298.1 | 69 | 46.595  | 39  | 27  | PREDICTED: hypothetical protein LOC100405620, partial |
| Locus_16189_Transcript_1/1_Conf_1.000 | 473  | 0  |          |                |    |         |     |     |                                                       |
| Locus_1619_Transcript_1/4_Conf_0.571  | 2187 | 20 | 0        | XP_002640691.1 | 82 | 891.338 | 676 | 561 | Hypothetical protein CBG19756                         |
| Locus_1619_Transcript_2/4_Conf_0.571  | 2176 | 20 | 0        | XP_002640691.1 | 82 | 891.338 | 676 | 561 | Hypothetical protein CBG19756                         |
| Locus_1619_Transcript_3/4_Conf_0.571  | 2264 | 20 | 0        | XP_002640691.1 | 81 | 893.264 | 701 | 571 | Hypothetical protein CBG19756                         |



|                                       |      |    |          |                |    |         |     |     |                                                                          |
|---------------------------------------|------|----|----------|----------------|----|---------|-----|-----|--------------------------------------------------------------------------|
| Locus_1619_Transcript_4/4_Conf_0.571  | 2176 | 20 | 0        | XP_002640691.1 | 82 | 891.338 | 676 | 561 | Hypothetical protein CBG19756                                            |
| Locus_16190_Transcript_1/1_Conf_1.000 | 199  | 3  | 1.70E-09 | CAA22108.2     | 98 | 65.855  | 50  | 49  | C. elegans protein Y75B8A.24, partially confirmed by transcript evidence |
| Locus_16191_Transcript_1/1_Conf_1.000 | 254  | 20 | 8.53E-17 |                | 74 | 90.1225 | 74  | 55  | myoblast city protein homolog                                            |
| Locus_16192_Transcript_1/1_Conf_1.000 | 460  | 0  |          |                |    |         |     |     |                                                                          |
| Locus_16193_Transcript_1/1_Conf_1.000 | 147  | 0  |          |                |    |         |     |     |                                                                          |
| Locus_16194_Transcript_1/1_Conf_1.000 | 300  | 0  |          |                |    |         |     |     |                                                                          |
| Locus_16195_Transcript_1/1_Conf_1.000 | 232  | 0  |          |                |    |         |     |     |                                                                          |
| Locus_16196_Transcript_1/1_Conf_1.000 | 138  | 0  |          |                |    |         |     |     |                                                                          |
| Locus_16197_Transcript_1/1_Conf_1.000 | 906  | 8  | 1.07E-22 | XP_002636857.1 | 49 | 111.694 | 239 | 118 | Hypothetical protein CBG09313                                            |
| Locus_16198_Transcript_1/1_Conf_1.000 | 207  | 20 | 8.30E-25 | XP_002643153.1 | 97 | 116.701 | 68  | 66  | C. briggsae CBR-RHA-2 protein                                            |
| Locus_16199_Transcript_1/1_Conf_1.000 | 189  | 0  |          |                |    |         |     |     |                                                                          |
| Locus_162_Transcript_1/8_Conf_0.083   | 303  | 0  |          |                |    |         |     |     |                                                                          |
| Locus_162_Transcript_2/8_Conf_0.083   | 261  | 0  |          |                |    |         |     |     |                                                                          |
| Locus_162_Transcript_3/8_Conf_0.333   | 1458 | 20 | 9.49E-10 | XP_001753823.1 | 32 | 69.707  | 359 | 117 | predicted protein                                                        |
| Locus_162_Transcript_4/8_Conf_0.333   | 1500 | 20 | 9.87E-10 | XP_001753823.1 | 32 | 69.707  | 359 | 117 | predicted protein                                                        |
| Locus_162_Transcript_5/8_Conf_0.292   | 1567 | 6  | 3.13E-06 | XP_001753823.1 | 31 | 58.151  | 370 | 115 | predicted protein                                                        |
| Locus_162_Transcript_6/8_Conf_0.292   | 1567 | 6  | 3.13E-06 | XP_001753823.1 | 31 | 58.151  | 370 | 115 | predicted protein                                                        |
| Locus_162_Transcript_7/8_Conf_0.333   | 1488 | 6  | 2.94E-06 | XP_001753823.1 | 31 | 58.151  | 370 | 115 | predicted protein                                                        |
| Locus_162_Transcript_8/8_Conf_0.333   | 1446 | 6  | 2.82E-06 | XP_001753823.1 | 31 | 58.151  | 370 | 115 | predicted protein                                                        |
| Locus_1620_Transcript_1/3_Conf_0.333  | 245  | 6  | 1.85E-08 | ACF74367.1     | 64 | 62.3882 | 82  | 53  | Hypothetical protein R13F6.4d                                            |
| Locus_1620_Transcript_2/3_Conf_0.667  | 2034 | 20 | 1.01E-95 | XP_002641869.1 | 55 | 355.91  | 628 | 349 | C. briggsae CBR-TEN-1 protein                                            |
| Locus_1620_Transcript_3/3_Conf_0.667  | 2034 | 20 | 1.01E-95 | XP_002641869.1 | 55 | 355.91  | 628 | 349 | C. briggsae CBR-TEN-1 protein                                            |
| Locus_16200_Transcript_1/1_Conf_1.000 | 316  | 20 | 5.49E-24 | XP_002732970.1 | 75 | 114.005 | 101 | 76  | PREDICTED: Cell-death-Related Nuclease family member (crn-2)-like        |

|                                       |      |    |          |                |    |         |     |     |                                                              |
|---------------------------------------|------|----|----------|----------------|----|---------|-----|-----|--------------------------------------------------------------|
| Locus_16201_Transcript_1/2_Conf_1.000 | 313  | 4  | 1.27E-12 | NP_498871.2    | 57 | 76.2554 | 102 | 59  | hypothetical protein F42H10.5                                |
| Locus_16201_Transcript_2/2_Conf_1.000 | 313  | 4  | 1.27E-12 | NP_498871.2    | 57 | 76.2554 | 102 | 59  | hypothetical protein F42H10.5                                |
| Locus_16202_Transcript_1/1_Conf_1.000 | 134  | 0  |          |                |    |         |     |     |                                                              |
| Locus_16203_Transcript_1/1_Conf_1.000 | 1426 | 20 | 1.81E-82 | EFO22071.1     | 61 | 311.227 | 479 | 295 | hypothetical protein LOAG_06415                              |
| Locus_16204_Transcript_1/1_Conf_1.000 | 253  | 0  |          |                |    |         |     |     |                                                              |
| Locus_16205_Transcript_1/1_Conf_1.000 | 144  | 0  |          |                |    |         |     |     |                                                              |
| Locus_16206_Transcript_1/1_Conf_1.000 | 202  | 0  |          |                |    |         |     |     |                                                              |
| Locus_16207_Transcript_1/1_Conf_1.000 | 378  | 20 | 6.65E-14 | EFO28351.1     | 80 | 80.4925 | 51  | 41  | 2Fe-2S iron-sulfur cluster binding domain-containing protein |
| Locus_16208_Transcript_1/1_Conf_1.000 | 469  | 20 | 1.22E-07 | XP_001892000.1 | 76 | 59.6918 | 47  | 36  | linker histone H1 and H5 family protein                      |
| Locus_16209_Transcript_1/1_Conf_1.000 | 481  | 0  |          |                |    |         |     |     |                                                              |
| Locus_1621_Transcript_1/2_Conf_1.000  | 985  | 20 | 1.15E-12 | XP_001897369.1 | 82 | 78.5666 | 52  | 43  | Protein kinase domain containing protein                     |
| Locus_1621_Transcript_2/2_Conf_1.000  | 435  | 20 | 3.68E-49 | XP_001897369.1 | 79 | 197.593 | 142 | 113 | Protein kinase domain containing protein                     |
| Locus_16210_Transcript_1/1_Conf_1.000 | 303  | 20 | 5.38E-24 | XP_002632297.1 | 73 | 114.005 | 87  | 64  | C. briggsae CBR-NOL-6 protein                                |
| Locus_16211_Transcript_1/1_Conf_1.000 | 533  | 20 | 3.79E-27 | XP_002640768.1 | 69 | 124.79  | 136 | 95  | C. briggsae CBR-HYL-1 protein                                |

|                                       |      |    |          |                |     |         |     |     |                                                         |
|---------------------------------------|------|----|----------|----------------|-----|---------|-----|-----|---------------------------------------------------------|
| Locus_16212_Transcript_1/1_Conf_1.000 | 603  | 11 | 9.44E-16 | EFO22836.1     | 47  | 87.4261 | 189 | 90  | hypothetical protein LOAG_05647                         |
| Locus_16213_Transcript_1/1_Conf_1.000 | 2075 | 20 | 9.21E-44 | EFO25547.1     | 50  | 183.341 | 352 | 176 | hypothetical protein LOAG_02935                         |
| Locus_16214_Transcript_1/1_Conf_1.000 | 380  | 20 | 1.25E-20 | NP_502406.1    | 77  | 102.834 | 77  | 60  | Heat Shock factor Binding protein family member (hsb-1) |
| Locus_16215_Transcript_1/1_Conf_1.000 | 523  | 20 | 2.10E-11 | NP_001123062.1 | 48  | 72.4034 | 101 | 49  | hypothetical protein Y69H2.3                            |
| Locus_16216_Transcript_1/1_Conf_1.000 | 827  | 0  |          |                |     |         |     |     |                                                         |
| Locus_16217_Transcript_1/1_Conf_1.000 | 272  | 0  |          |                |     |         |     |     |                                                         |
| Locus_16218_Transcript_1/1_Conf_1.000 | 198  | 1  | 3.66E-04 | ACI49251.1     | 72  | 48.1358 | 44  | 32  | hypothetical protein Csp3_JD07.001                      |
| Locus_16219_Transcript_1/1_Conf_1.000 | 149  | 0  |          |                |     |         |     |     |                                                         |
| Locus_1622_Transcript_1/1_Conf_1.000  | 508  | 20 | 3.10E-86 | AAH00553.2     | 100 | 320.857 | 154 | 154 | PLD3 protein                                            |

|                                       |      |    |           |                |    |         |     |     |                                                        |
|---------------------------------------|------|----|-----------|----------------|----|---------|-----|-----|--------------------------------------------------------|
| Locus_16220_Transcript_1/1_Conf_1.000 | 358  | 20 | 2.59E-18  | AAB23867.2     | 80 | 95.1301 | 77  | 62  | UNC-5                                                  |
| Locus_16221_Transcript_1/1_Conf_1.000 | 406  | 0  |           |                |    |         |     |     |                                                        |
| Locus_16222_Transcript_1/1_Conf_1.000 | 968  | 20 | 1.94E-166 | NP_492476.1    | 92 | 589.341 | 322 | 299 | hypothetical protein F14B4.3                           |
| Locus_16223_Transcript_1/1_Conf_1.000 | 1019 | 20 | 3.23E-98  | NP_502432.1    | 77 | 362.844 | 339 | 262 | RBD (RNA binding domain) protein family member (rbd-1) |
| Locus_16224_Transcript_1/1_Conf_1.000 | 192  | 8  | 4.33E-21  | CAR63588.1     | 82 | 104.375 | 63  | 52  | hypothetical protein                                   |
| Locus_16225_Transcript_1/1_Conf_1.000 | 239  | 0  |           |                |    |         |     |     |                                                        |
| Locus_16226_Transcript_1/1_Conf_1.000 | 149  | 0  |           |                |    |         |     |     |                                                        |
| Locus_16227_Transcript_1/1_Conf_1.000 | 147  | 5  | 6.78E-06  | XP_001898552.1 | 71 | 53.9138 | 49  | 35  | hypothetical protein Bm1_35525                         |
| Locus_16228_Transcript_1/1_Conf_1.000 | 1087 | 20 | 2.99E-137 | XP_002637530.1 | 89 | 492.656 | 312 | 278 | C. briggsae CBR-UCP-4 protein                          |
| Locus_16229_Transcript_1/1_Conf_1.000 | 141  | 0  |           |                |    |         |     |     |                                                        |
| Locus_1623_Transcript_1/1_Conf_1.000  | 722  | 20 | 6.00E-83  | XP_002644219.1 | 88 | 311.227 | 177 | 157 | Hypothetical protein CBG17217                          |
| Locus_16230_Transcript_1/1_Conf_1.000 | 210  | 20 | 7.76E-15  | NP_496490.2    | 72 | 83.5741 | 69  | 50  | NEPrilysin metallopeptidase family member (nep-1)      |
| Locus_16231_Transcript_1/1_Conf_1.000 | 185  | 20 | 1.72E-25  | AAA03517.1     | 98 | 119.013 | 61  | 60  | kinesin-related protein                                |
| Locus_16232_Transcript_1/1_Conf_1.000 | 400  | 0  |           |                |    |         |     |     |                                                        |
| Locus_16233_Transcript_1/1_Conf_1.000 | 225  | 0  |           |                |    |         |     |     |                                                        |
| Locus_16234_Transcript_1/1_Conf_1.000 | 332  | 0  |           |                |    |         |     |     |                                                        |
| Locus_16235_Transcript_1/1_Conf_1.000 | 236  | 0  |           |                |    |         |     |     |                                                        |

|                                       |      |    |           |                |    |         |     |     |                                              |
|---------------------------------------|------|----|-----------|----------------|----|---------|-----|-----|----------------------------------------------|
| Locus_16236_Transcript_1/1_Conf_1.000 | 440  | 0  |           |                |    |         |     |     |                                              |
| Locus_16237_Transcript_1/1_Conf_1.000 | 188  | 0  |           |                |    |         |     |     |                                              |
| Locus_16238_Transcript_1/1_Conf_1.000 | 215  | 5  | 3.59E-20  | AAD01960.1     | 88 | 101.293 | 70  | 62  | UNC-45                                       |
| Locus_16239_Transcript_1/1_Conf_1.000 | 303  | 2  | 7.31E-05  | AAB63465.1     | 74 | 50.447  | 35  | 26  | O-linked GlcNAc transferase                  |
| Locus_1624_Transcript_1/1_Conf_1.000  | 623  | 3  | 1.11E-14  | NP_492344.2    | 93 | 83.9593 | 44  | 41  | FMRF-Like Peptide family member (flp-22)     |
| Locus_16240_Transcript_1/1_Conf_1.000 | 293  | 20 | 3.79E-17  | NP_491902.3    | 69 | 91.2781 | 94  | 65  | hypothetical protein D2092.5                 |
| Locus_16241_Transcript_1/1_Conf_1.000 | 142  | 0  |           |                |    |         |     |     |                                              |
| Locus_16242_Transcript_1/1_Conf_1.000 | 129  | 0  |           |                |    |         |     |     |                                              |
| Locus_16243_Transcript_1/1_Conf_1.000 | 423  | 0  |           |                |    |         |     |     |                                              |
| Locus_16244_Transcript_1/1_Conf_1.000 | 510  | 20 | 3.22E-59  | ACI49130.1     | 82 | 231.106 | 173 | 142 | hypothetical protein Cbre_JD16.002           |
| Locus_16245_Transcript_1/2_Conf_1.000 | 1365 | 20 | 2.45E-129 | XP_002631212.1 | 77 | 466.848 | 386 | 298 | C. briggsae CBR-ECH-4 protein                |
| Locus_16245_Transcript_2/2_Conf_1.000 | 1428 | 20 | 2.59E-129 | XP_002631212.1 | 77 | 466.848 | 386 | 298 | C. briggsae CBR-ECH-4 protein                |
| Locus_16246_Transcript_1/1_Conf_1.000 | 129  | 0  |           |                |    |         |     |     |                                              |
| Locus_16247_Transcript_1/1_Conf_1.000 | 178  | 1  | 1.12E-05  | CBA11992.1     | 79 | 53.1434 | 44  | 35  | endonuclease-reverse transcriptase HmRTE-e01 |

|                                       |     |    |          |                |    |         |     |     |                                                                                                |
|---------------------------------------|-----|----|----------|----------------|----|---------|-----|-----|------------------------------------------------------------------------------------------------|
| Locus_16248_Transcript_1/1_Conf_1.000 | 231 | 20 | 1.81E-19 | 3HOF           | 97 | 98.9821 | 48  | 47  | Structure Of Macrophage Migration Inhibitory Factor (Mif) With Caffeic Acid At 1.9a Resolution |
| Locus_16249_Transcript_1/1_Conf_1.000 | 148 | 0  |          |                |    |         |     |     |                                                                                                |
| Locus_1625_Transcript_1/1_Conf_1.000  | 321 | 20 | 5.63E-29 | XP_001901345.1 | 79 | 130.568 | 104 | 83  | Beta-tubulin cofactor D family protein                                                         |
| Locus_16250_Transcript_1/1_Conf_1.000 | 566 | 20 | 3.64E-29 | XP_002634284.1 | 88 | 131.724 | 81  | 72  | Hypothetical protein CBG17617                                                                  |
| Locus_16251_Transcript_1/1_Conf_1.000 | 407 | 20 | 2.76E-36 | NP_495979.1    | 74 | 154.836 | 135 | 100 | hypothetical protein C01G6.7                                                                   |
| Locus_16252_Transcript_1/2_Conf_1.000 | 517 | 20 | 5.36E-50 | XP_002632657.1 | 82 | 162.925 | 109 | 90  | C. briggsae CBR-TRA-3 protein                                                                  |
| Locus_16252_Transcript_2/2_Conf_1.000 | 419 | 20 | 3.20E-48 | XP_002632657.1 | 79 | 194.512 | 139 | 111 | C. briggsae CBR-TRA-3 protein                                                                  |
| Locus_16253_Transcript_1/1_Conf_1.000 | 152 | 0  |          |                |    |         |     |     |                                                                                                |
| Locus_16254_Transcript_1/1_Conf_1.000 | 202 | 0  |          |                |    |         |     |     |                                                                                                |
| Locus_16255_Transcript_1/2_Conf_1.000 | 332 | 0  |          |                |    |         |     |     |                                                                                                |
| Locus_16255_Transcript_2/2_Conf_1.000 | 332 | 0  |          |                |    |         |     |     |                                                                                                |

|                                       |     |    |          |                |     |         |     |     |                                              |
|---------------------------------------|-----|----|----------|----------------|-----|---------|-----|-----|----------------------------------------------|
| Locus_16256_Transcript_1/1_Conf_1.000 | 247 | 20 | 2.75E-20 | NP_001040934.1 | 73  | 101.679 | 78  | 57  | hypothetical protein F13E9.13                |
| Locus_16257_Transcript_1/1_Conf_1.000 | 624 | 1  | 1.06E-04 | NP_497287.2    | 42  | 50.8322 | 126 | 54  | hypothetical protein F23H11.2                |
| Locus_16258_Transcript_1/1_Conf_1.000 | 477 | 4  | 1.65E-49 | NP_506653.1    | 84  | 198.749 | 158 | 134 | hypothetical protein W06A7.2                 |
| Locus_16259_Transcript_1/1_Conf_1.000 | 132 | 0  |          |                |     |         |     |     |                                              |
| Locus_1626_Transcript_1/1_Conf_1.000  | 249 | 20 | 7.71E-15 | AAD51334.1     | 86  | 83.5741 | 50  | 43  | Kunitz type serine protease inhibitor        |
| Locus_16260_Transcript_1/1_Conf_1.000 | 129 | 0  |          |                |     |         |     |     |                                              |
| Locus_16261_Transcript_1/1_Conf_1.000 | 163 | 0  |          |                |     |         |     |     |                                              |
| Locus_16262_Transcript_1/1_Conf_1.000 | 372 | 3  | 1.22E-07 | ABS19466.2     | 59  | 59.6918 | 91  | 54  | Hypothetical protein F49D11.10               |
| Locus_16263_Transcript_1/1_Conf_1.000 | 437 | 15 | 9.80E-10 | AAN11402.1     | 51  | 66.6254 | 105 | 54  | secreted-protein 1 precursor                 |
| Locus_16264_Transcript_1/1_Conf_1.000 | 280 | 0  |          |                |     |         |     |     |                                              |
| Locus_16265_Transcript_1/1_Conf_1.000 | 207 | 20 | 6.81E-19 | XP_002634252.1 | 83  | 97.0561 | 65  | 54  | Hypothetical protein CBG01823                |
| Locus_16266_Transcript_1/1_Conf_1.000 | 391 | 0  |          |                |     |         |     |     |                                              |
| Locus_16267_Transcript_1/1_Conf_1.000 | 337 | 20 | 2.94E-22 | XP_002647284.1 | 70  | 108.227 | 114 | 80  | Hypothetical protein CBG06324                |
| Locus_16268_Transcript_1/1_Conf_1.000 | 276 | 0  |          |                |     |         |     |     |                                              |
| Locus_16269_Transcript_1/1_Conf_1.000 | 147 | 0  |          |                |     |         |     |     |                                              |
| Locus_1627_Transcript_1/1_Conf_1.000  | 421 | 20 | 7.41E-13 | NP_497719.1    | 63  | 77.0258 | 98  | 62  | GLYcosylation related family member (gly-14) |
| Locus_16270_Transcript_1/1_Conf_1.000 | 187 | 3  | 2.17E-12 | ACI49212.1     | 74  | 75.485  | 62  | 46  | hypothetical protein Csp3_JD04.011           |
| Locus_16271_Transcript_1/1_Conf_1.000 | 412 | 20 | 2.31E-51 | NP_497659.1    | 82  | 204.912 | 136 | 112 | hypothetical protein Y53G8B.2                |
| Locus_16272_Transcript_1/1_Conf_1.000 | 135 | 0  |          |                |     |         |     |     |                                              |
| Locus_16273_Transcript_1/1_Conf_1.000 | 192 | 20 | 1.03E-14 | BAG59226.1     | 100 | 83.1889 | 63  | 63  | unnamed protein product                      |
| Locus_16274_Transcript_1/1_Conf_1.000 | 198 | 20 | 1.94E-05 | XP_001121729.1 | 66  | 52.373  | 53  | 35  | PREDICTED: similar to CG10979-PA             |
| Locus_16275_Transcript_1/1_Conf_1.000 | 185 | 20 | 7.47E-21 | XP_002630326.1 | 90  | 103.605 | 61  | 55  | Hypothetical protein CBG04253                |
| Locus_16276_Transcript_1/1_Conf_1.000 | 205 | 0  |          |                |     |         |     |     |                                              |

|                                       |     |    |          |                |    |         |     |     |                                                       |
|---------------------------------------|-----|----|----------|----------------|----|---------|-----|-----|-------------------------------------------------------|
| Locus_16277_Transcript_1/1_Conf_1.000 | 297 | 20 | 1.98E-50 | XP_002643622.1 | 94 | 201.83  | 98  | 93  | C. briggsae CBR-NAS-39 protein                        |
| Locus_16278_Transcript_1/1_Conf_1.000 | 159 | 0  |          |                |    |         |     |     |                                                       |
| Locus_16279_Transcript_1/1_Conf_1.000 | 294 | 20 | 3.63E-36 | NP_001022234.1 | 86 | 154.451 | 99  | 86  | hypothetical protein K05F1.6                          |
| Locus_1628_Transcript_1/2_Conf_1.000  | 375 | 0  |          |                |    |         |     |     |                                                       |
| Locus_1628_Transcript_2/2_Conf_1.000  | 262 | 0  |          |                |    |         |     |     |                                                       |
| Locus_16280_Transcript_1/1_Conf_1.000 | 657 | 20 | 2.39E-85 | XP_002643273.1 | 85 | 318.931 | 218 | 187 | C. briggsae CBR-MRP-1 protein                         |
| Locus_16281_Transcript_1/1_Conf_1.000 | 287 | 0  |          |                |    |         |     |     |                                                       |
| Locus_16282_Transcript_1/2_Conf_1.000 | 328 | 20 | 5.04E-38 | XP_001891848.1 | 81 | 160.614 | 99  | 81  | cytoplasmic polyadenylation element binding protein 3 |
| Locus_16282_Transcript_2/2_Conf_1.000 | 328 | 20 | 5.04E-38 | XP_001891848.1 | 81 | 160.614 | 99  | 81  | cytoplasmic polyadenylation element binding protein 3 |
| Locus_16283_Transcript_1/1_Conf_1.000 | 554 | 3  | 5.87E-53 | NP_497506.3    | 72 | 210.69  | 193 | 139 | hypothetical protein Y48G9A.3                         |
| Locus_16284_Transcript_1/1_Conf_1.000 | 225 | 0  |          |                |    |         |     |     |                                                       |
| Locus_16285_Transcript_1/1_Conf_1.000 | 404 | 20 | 8.62E-38 | XP_002633240.1 | 92 | 159.844 | 99  | 92  | C. briggsae CBR-LSM-7 protein                         |
| Locus_16286_Transcript_1/1_Conf_1.000 | 421 | 20 | 6.84E-59 | XP_002635072.1 | 92 | 229.95  | 140 | 130 | C. briggsae CBR-TMD-2 protein                         |
| Locus_16287_Transcript_1/1_Conf_1.000 | 167 | 0  |          |                |    |         |     |     |                                                       |
| Locus_16288_Transcript_1/1_Conf_1.000 | 156 | 3  | 3.01E-06 | NP_499405.4    | 68 | 55.0694 | 47  | 32  | 2 (Zwei) IG-domain protein family member (zig-5)      |
| Locus_16289_Transcript_1/1_Conf_1.000 | 195 | 1  | 6.27E-04 | XP_001896346.1 | 62 | 47.3654 | 53  | 33  | laminin alpha chain                                   |



|                                       |      |    |           |                |     |         |     |     |                                                      |
|---------------------------------------|------|----|-----------|----------------|-----|---------|-----|-----|------------------------------------------------------|
| Locus_1629_Transcript_1/1_Conf_1.000  | 1366 | 20 | 4.49E-107 | XP_001895824.1 | 67  | 392.889 | 419 | 282 | SH2 domain containing protein                        |
| Locus_16290_Transcript_1/1_Conf_1.000 | 168  | 10 | 6.40E-09  | NP_508180.1    | 81  | 63.929  | 49  | 40  | hypothetical protein F35H12.1                        |
| Locus_16291_Transcript_1/1_Conf_1.000 | 242  | 20 | 5.74E-34  | XP_001368223.1 | 100 | 147.132 | 72  | 72  | PREDICTED: similar to ribosomal protein S21          |
| Locus_16292_Transcript_1/1_Conf_1.000 | 362  | 0  |           |                |     |         |     |     |                                                      |
| Locus_16293_Transcript_1/1_Conf_1.000 | 326  | 20 | 8.06E-44  | XP_002633498.1 | 88  | 179.874 | 108 | 96  | Hypothetical protein CBG06270                        |
| Locus_16294_Transcript_1/1_Conf_1.000 | 141  | 0  |           |                |     |         |     |     |                                                      |
| Locus_16295_Transcript_1/1_Conf_1.000 | 500  | 0  |           |                |     |         |     |     |                                                      |
| Locus_16296_Transcript_1/1_Conf_1.000 | 991  | 20 | 2.79E-99  | EFO27969.1     | 81  | 366.311 | 323 | 263 | hypothetical protein LOAG_00509                      |
| Locus_16297_Transcript_1/1_Conf_1.000 | 230  | 0  |           |                |     |         |     |     |                                                      |
| Locus_16298_Transcript_1/1_Conf_1.000 | 162  | 2  | 4.62E-07  | NP_505112.1    | 68  | 57.7658 | 54  | 37  | hypothetical protein F20D6.11                        |
| Locus_16299_Transcript_1/1_Conf_1.000 | 339  | 0  |           |                |     |         |     |     |                                                      |
| Locus_163_Transcript_1/1_Conf_1.000   | 3210 | 20 | 0         | NP_495343.1    | 68  | 718.768 | 770 | 525 | hypothetical protein C56C10.12                       |
| Locus_1630_Transcript_1/2_Conf_1.000  | 1919 | 20 | 4.83E-108 | XP_001898078.1 | 57  | 396.741 | 647 | 374 | Ubiquitin carboxyl-terminal hydrolase family protein |
| Locus_1630_Transcript_2/2_Conf_1.000  | 1898 | 20 | 1.38E-107 | XP_001898078.1 | 57  | 395.201 | 647 | 370 | Ubiquitin carboxyl-terminal hydrolase family protein |
| Locus_16300_Transcript_1/1_Conf_1.000 | 382  | 4  | 6.38E-25  | NP_497649.1    | 73  | 117.087 | 106 | 78  | hypothetical protein Y55D5A.4                        |
| Locus_16301_Transcript_1/1_Conf_1.000 | 502  | 20 | 4.48E-34  | EFO18114.1     | 61  | 147.517 | 164 | 101 | hypothetical protein LOAG_10384                      |

|                                       |      |    |           |                |    |         |     |     |                                                             |
|---------------------------------------|------|----|-----------|----------------|----|---------|-----|-----|-------------------------------------------------------------|
| Locus_16302_Transcript_1/2_Conf_1.000 | 546  | 20 | 5.17E-14  | NP_501018.1    | 67 | 81.2629 | 78  | 53  | Dicer Related Helicase family member (drh-1)                |
| Locus_16302_Transcript_2/2_Conf_1.000 | 487  | 20 | 7.33E-37  | XP_002633533.1 | 63 | 156.762 | 161 | 103 | C. briggsae CBR-DRH-1 protein                               |
| Locus_16303_Transcript_1/1_Conf_1.000 | 270  | 20 | 2.12E-20  | NP_496477.2    | 75 | 102.064 | 86  | 65  | hypothetical protein D1043.1                                |
| Locus_16304_Transcript_1/1_Conf_1.000 | 572  | 6  | 1.94E-17  | XP_002638739.1 | 58 | 92.8189 | 129 | 76  | Hypothetical protein CBG18539                               |
| Locus_16305_Transcript_1/1_Conf_1.000 | 264  | 0  |           |                |    |         |     |     |                                                             |
| Locus_16306_Transcript_1/1_Conf_1.000 | 129  | 0  |           |                |    |         |     |     |                                                             |
| Locus_16307_Transcript_1/1_Conf_1.000 | 254  | 0  |           |                |    |         |     |     |                                                             |
| Locus_16308_Transcript_1/2_Conf_1.000 | 723  | 20 | 5.34E-55  | NP_491590.1    | 75 | 218.394 | 182 | 138 | hypothetical protein F27C1.6                                |
| Locus_16308_Transcript_2/2_Conf_1.000 | 726  | 20 | 1.42E-55  | NP_491590.1    | 75 | 220.32  | 182 | 138 | hypothetical protein F27C1.6                                |
| Locus_16309_Transcript_1/1_Conf_1.000 | 577  | 0  |           |                |    |         |     |     |                                                             |
| Locus_1631_Transcript_1/1_Conf_1.000  | 1308 | 20 | 4.49E-125 | NP_495181.2    | 72 | 452.595 | 374 | 271 | Ceramide Glucosyl Transferase family member (cgt-3)         |
| Locus_16310_Transcript_1/1_Conf_1.000 | 289  | 5  | 1.31E-17  | NP_498650.2    | 68 | 92.8189 | 92  | 63  | CLock (biological timing) abnormality family member (clk-2) |

|                                       |      |    |          |                |    |         |     |     |                                                       |
|---------------------------------------|------|----|----------|----------------|----|---------|-----|-----|-------------------------------------------------------|
| Locus_16311_Transcript_1/1_Conf_1.000 | 323  | 20 | 8.97E-35 | NP_503027.1    | 92 | 149.828 | 82  | 76  | Small Nuclear Ribonucleoprotein family member (snr-1) |
| Locus_16312_Transcript_1/1_Conf_1.000 | 253  | 0  |          |                |    |         |     |     |                                                       |
| Locus_16313_Transcript_1/1_Conf_1.000 | 131  | 20 | 1.29E-09 | ADN00780.1     | 83 | 66.2402 | 43  | 36  | class 3 lipase protein                                |
| Locus_16314_Transcript_1/1_Conf_1.000 | 174  | 0  |          |                |    |         |     |     |                                                       |
| Locus_16315_Transcript_1/1_Conf_1.000 | 356  | 20 | 2.05E-39 | ACT20206.1     | 84 | 165.236 | 109 | 92  | Hypothetical protein F55F1.5                          |
| Locus_16316_Transcript_1/1_Conf_1.000 | 199  | 0  |          |                |    |         |     |     |                                                       |
| Locus_16317_Transcript_1/1_Conf_1.000 | 731  | 20 | 2.09E-22 | XP_002641983.1 | 48 | 110.153 | 218 | 105 | Hypothetical protein CBG09205                         |
| Locus_16318_Transcript_1/1_Conf_1.000 | 197  | 20 | 6.03E-23 | EFO18009.1     | 87 | 110.538 | 64  | 56  | hypothetical protein LOAG_10489                       |
| Locus_16319_Transcript_1/1_Conf_1.000 | 1397 | 20 | 0        | NP_491859.1    | 91 | 656.366 | 394 | 360 | Acyl CoA DeHydrogenase family member (acdh-3)         |

|                                       |      |    |           |                |     |         |     |     |                                                                                        |
|---------------------------------------|------|----|-----------|----------------|-----|---------|-----|-----|----------------------------------------------------------------------------------------|
| Locus_1632_Transcript_1/1_Conf_1.000  | 447  | 20 | 3.51E-31  | NP_491662.1    | 85  | 137.887 | 94  | 80  | DNAJ domain (prokaryotic heat shock protein) family member (dnj-21)                    |
| Locus_16320_Transcript_1/1_Conf_1.000 | 1301 | 20 | 1.81E-118 | XP_002634047.1 | 85  | 430.639 | 363 | 312 | Hypothetical protein CBG01586                                                          |
| Locus_16321_Transcript_1/1_Conf_1.000 | 813  | 20 | 8.13E-69  | NP_502174.2    | 69  | 264.618 | 245 | 170 | hypothetical protein M04B2.2                                                           |
| Locus_16322_Transcript_1/1_Conf_1.000 | 174  | 0  |           |                |     |         |     |     |                                                                                        |
| Locus_16323_Transcript_1/1_Conf_1.000 | 173  | 2  | 2.27E-06  | NP_506118.1    | 75  | 55.4546 | 45  | 34  | hypothetical protein C54D10.5                                                          |
| Locus_16324_Transcript_1/1_Conf_1.000 | 541  | 20 | 1.99E-71  | 2IG8           | 100 | 271.937 | 132 | 132 | CrystallographicStructure Of Human C1q Globular Heads Complexed To Phosphatidyl-Serine |
| Locus_16325_Transcript_1/1_Conf_1.000 | 159  | 20 | 6.04E-15  | NP_504512.1    | 88  | 83.9593 | 52  | 46  | hypothetical protein F44E7.2                                                           |
| Locus_16326_Transcript_1/1_Conf_1.000 | 465  | 0  |           |                |     |         |     |     |                                                                                        |
| Locus_16327_Transcript_1/1_Conf_1.000 | 201  | 0  |           |                |     |         |     |     |                                                                                        |
| Locus_16328_Transcript_1/1_Conf_1.000 | 255  | 0  |           |                |     |         |     |     |                                                                                        |
| Locus_16329_Transcript_1/1_Conf_1.000 | 429  | 2  | 6.18E-20  | NP_500393.2    | 65  | 100.523 | 114 | 75  | hypothetical protein Y37E11AL5                                                         |
| Locus_1633_Transcript_1/1_Conf_1.000  | 250  | 0  |           |                |     |         |     |     |                                                                                        |
| Locus_16330_Transcript_1/1_Conf_1.000 | 1137 | 20 | 2.54E-25  | XP_001900089.1 | 49  | 120.939 | 305 | 150 | hypothetical protein Bm1_43135                                                         |
| Locus_16331_Transcript_1/1_Conf_1.000 | 518  | 20 | 3.75E-34  | XP_001901404.1 | 71  | 147.902 | 129 | 92  | ribonuclease P protein subunit p29                                                     |

|                                       |      |    |          |                |    |         |     |     |                                                                    |
|---------------------------------------|------|----|----------|----------------|----|---------|-----|-----|--------------------------------------------------------------------|
| Locus_16332_Transcript_1/1_Conf_1.000 | 1073 | 20 | 9.37E-27 | EFO25858.1     | 50 | 125.561 | 234 | 119 | low-density lipoprotein receptor repeat class B containing protein |
| Locus_16333_Transcript_1/1_Conf_1.000 | 141  | 20 | 1.08E-16 | XP_001896000.1 | 95 | 89.7373 | 46  | 44  | hypothetical protein                                               |
| Locus_16334_Transcript_1/2_Conf_1.000 | 487  | 20 | 3.91E-14 | EFO25573.1     | 58 | 81.2629 | 93  | 54  | RING finger protein 20                                             |

|                                       |     |    |          |                |    |         |     |    |                                                     |
|---------------------------------------|-----|----|----------|----------------|----|---------|-----|----|-----------------------------------------------------|
| Locus_16334_Transcript_2/2_Conf_1.000 | 487 | 20 | 3.91E-14 | EFO25573.1     | 58 | 81.2629 | 93  | 54 | RING finger protein 20                              |
| Locus_16335_Transcript_1/1_Conf_1.000 | 206 | 20 | 9.25E-08 | CBN79121.1     | 63 | 60.077  | 65  | 41 | conserved unknown protein                           |
| Locus_16336_Transcript_1/1_Conf_1.000 | 202 | 0  |          |                |    |         |     |    |                                                     |
| Locus_16337_Transcript_1/1_Conf_1.000 | 336 | 20 | 1.66E-33 | XP_001899441.1 | 83 | 145.591 | 112 | 93 | Xeroderma Pigmentosum Group E Complementing protein |
| Locus_16338_Transcript_1/1_Conf_1.000 | 389 | 20 | 2.17E-41 | NP_001024707.1 | 79 | 171.785 | 121 | 96 | UNCoordinated family member (unc-84)                |

|                                       |      |    |           |                |    |         |     |     |                                                                         |
|---------------------------------------|------|----|-----------|----------------|----|---------|-----|-----|-------------------------------------------------------------------------|
| Locus_16339_Transcript_1/1_Conf_1.000 | 633  | 20 | 6.18E-40  | AAL34093.1     | 69 | 167.933 | 164 | 114 | SKR-1                                                                   |
| Locus_1634_Transcript_1/2_Conf_1.000  | 1756 | 20 | 2.51E-165 | NP_491749.2    | 88 | 491.5   | 280 | 247 | ARI (ubiquitin ligase Ariadne) homolog family member (ari-1)            |
| Locus_1634_Transcript_2/2_Conf_1.000  | 1752 | 20 | 4.98E-173 | NP_491749.2    | 83 | 612.453 | 385 | 320 | ARI (ubiquitin ligase Ariadne) homolog family member (ari-1)            |
| Locus_16340_Transcript_1/1_Conf_1.000 | 170  | 0  |           |                |    |         |     |     |                                                                         |
| Locus_16341_Transcript_1/1_Conf_1.000 | 347  | 0  |           |                |    |         |     |     |                                                                         |
| Locus_16342_Transcript_1/1_Conf_1.000 | 159  | 0  |           |                |    |         |     |     |                                                                         |
| Locus_16343_Transcript_1/1_Conf_1.000 | 560  | 11 | 9.94E-08  | YP_002478296.1 | 47 | 60.4622 | 180 | 86  | Transposase and inactivated derivatives-like protein                    |
| Locus_16344_Transcript_1/1_Conf_1.000 | 292  | 0  |           |                |    |         |     |     |                                                                         |
| Locus_16345_Transcript_1/1_Conf_1.000 | 505  | 20 | 2.97E-41  | EFO24017.1     | 73 | 171.4   | 168 | 123 | hypothetical protein LOAG_04469                                         |
| Locus_16346_Transcript_1/2_Conf_1.000 | 758  | 20 | 2.30E-27  | EFO16973.1     | 59 | 126.716 | 238 | 141 | calpain                                                                 |
| Locus_16346_Transcript_2/2_Conf_1.000 | 2555 | 20 | 0         | EFO16973.1     | 77 | 950.658 | 795 | 618 | calpain                                                                 |
| Locus_16347_Transcript_1/1_Conf_1.000 | 354  | 0  |           |                |    |         |     |     |                                                                         |
| Locus_16348_Transcript_1/1_Conf_1.000 | 333  | 0  |           |                |    |         |     |     |                                                                         |
| Locus_16349_Transcript_1/1_Conf_1.000 | 542  | 2  | 3.57E-12  | NP_740830.2    | 47 | 75.0998 | 219 | 104 | hypothetical protein Y47G6A.29                                          |
| Locus_1635_Transcript_1/1_Conf_1.000  | 1696 | 20 | 8.02E-11  | NP_038835.2    | 46 | 73.559  | 212 | 98  | serine/threonine-protein kinase PLK3                                    |
| Locus_16350_Transcript_1/1_Conf_1.000 | 595  | 20 | 1.44E-29  | CAZ65501.2     | 58 | 133.265 | 200 | 117 | C. elegans protein F46C3.3c, partially confirmed by transcript evidence |

|                                       |      |    |          |                |    |         |     |     |                                                                   |
|---------------------------------------|------|----|----------|----------------|----|---------|-----|-----|-------------------------------------------------------------------|
| Locus_16351_Transcript_1/1_Conf_1.000 | 187  | 5  | 3.83E-09 | XP_001896129.1 | 70 | 64.6994 | 62  | 44  | Hypothetical 216.3 kDa protein R06F6.8 in chromosome II, putative |
| Locus_16352_Transcript_1/1_Conf_1.000 | 198  | 0  |          |                |    |         |     |     |                                                                   |
| Locus_16353_Transcript_1/1_Conf_1.000 | 799  | 2  | 5.04E-15 | NP_510529.1    | 44 | 85.8853 | 284 | 126 | hypothetical protein F39B1.1                                      |
| Locus_16354_Transcript_1/1_Conf_1.000 | 180  | 0  |          |                |    |         |     |     |                                                                   |
| Locus_16355_Transcript_1/1_Conf_1.000 | 198  | 20 | 1.17E-26 | XP_001898798.1 | 92 | 122.865 | 65  | 60  | glucose-6-phosphate dehydrogenase                                 |
| Locus_16356_Transcript_1/2_Conf_1.000 | 545  | 20 | 2.42E-40 | NP_506573.1    | 80 | 168.703 | 165 | 132 | hypothetical protein C15H11.9                                     |
| Locus_16356_Transcript_2/2_Conf_1.000 | 544  | 20 | 2.42E-40 | NP_506573.1    | 80 | 168.703 | 165 | 132 | hypothetical protein C15H11.9                                     |
| Locus_16357_Transcript_1/1_Conf_1.000 | 472  | 20 | 1.96E-66 | NP_495840.1    | 91 | 254.988 | 147 | 134 | hypothetical protein D2085.6                                      |
| Locus_16358_Transcript_1/1_Conf_1.000 | 212  | 0  |          |                |    |         |     |     |                                                                   |
| Locus_16359_Transcript_1/1_Conf_1.000 | 961  | 20 | 6.58E-66 | XP_002636770.1 | 66 | 255.373 | 289 | 193 | Hypothetical protein CBG23501                                     |
| Locus_1636_Transcript_1/1_Conf_1.000  | 2059 | 20 | 0        | XP_002642663.1 | 82 | 752.281 | 518 | 425 | C. briggsae CBR-NCL-1 protein                                     |
| Locus_16360_Transcript_1/2_Conf_1.000 | 873  | 20 | 3.81E-46 | NP_495437.2    | 78 | 189.504 | 151 | 118 | hypothetical protein C52E12.4                                     |
| Locus_16360_Transcript_2/2_Conf_1.000 | 896  | 20 | 1.55E-50 | NP_495437.2    | 79 | 204.142 | 158 | 126 | hypothetical protein C52E12.4                                     |



|                                       |      |    |           |                |    |         |     |     |                                                                                   |
|---------------------------------------|------|----|-----------|----------------|----|---------|-----|-----|-----------------------------------------------------------------------------------|
| Locus_16361_Transcript_1/1_Conf_1.000 | 283  | 20 | 3.13E-27  | XP_001900557.1 | 86 | 124.79  | 94  | 81  | Bromodomain containing protein                                                    |
| Locus_16362_Transcript_1/1_Conf_1.000 | 197  | 0  |           |                |    |         |     |     |                                                                                   |
| Locus_16363_Transcript_1/1_Conf_1.000 | 477  | 2  | 1.42E-08  | XP_002631345.1 | 80 | 62.7734 | 41  | 33  | Hypothetical protein CBG03175                                                     |
| Locus_16364_Transcript_1/1_Conf_1.000 | 146  | 0  |           |                |    |         |     |     |                                                                                   |
| Locus_16365_Transcript_1/1_Conf_1.000 | 158  | 0  |           |                |    |         |     |     |                                                                                   |
| Locus_16366_Transcript_1/1_Conf_1.000 | 373  | 20 | 1.75E-46  | XP_002630247.1 | 86 | 188.734 | 124 | 107 | Hypothetical protein CBG00666                                                     |
| Locus_16367_Transcript_1/1_Conf_1.000 | 524  | 20 | 8.37E-69  | NP_001041257.1 | 90 | 263.077 | 171 | 155 | Regulator of G protein Signaling family member (rgs-7)                            |
| Locus_16368_Transcript_1/1_Conf_1.000 | 496  | 0  |           |                |    |         |     |     |                                                                                   |
| Locus_16369_Transcript_1/1_Conf_1.000 | 739  | 20 | 2.74E-94  | NP_500379.1    | 82 | 348.977 | 245 | 201 | hypothetical protein Y37E11B.5                                                    |
| Locus_1637_Transcript_1/1_Conf_1.000  | 132  | 0  |           |                |    |         |     |     |                                                                                   |
| Locus_16370_Transcript_1/1_Conf_1.000 | 298  | 0  |           |                |    |         |     |     |                                                                                   |
| Locus_16371_Transcript_1/1_Conf_1.000 | 363  | 20 | 3.34E-34  | XP_002636220.1 | 78 | 147.902 | 107 | 84  | Hypothetical protein CBG12141                                                     |
| Locus_16372_Transcript_1/1_Conf_1.000 | 189  | 0  |           |                |    |         |     |     |                                                                                   |
| Locus_16373_Transcript_1/1_Conf_1.000 | 913  | 7  | 4.95E-76  | CBK19481.1     | 79 | 288.886 | 210 | 167 | <i>C. elegans</i> protein Y105C5A.15a, partially confirmed by transcript evidence |
| Locus_16374_Transcript_1/1_Conf_1.000 | 298  | 3  | 3.90E-06  | NP_495170.1    | 51 | 54.6842 | 77  | 40  | Temporarily Assigned Gene name family member (tag-234)                            |
| Locus_16375_Transcript_1/1_Conf_1.000 | 171  | 16 | 5.06E-06  | NP_502508.1    | 69 | 54.299  | 39  | 27  | SCP-Like extracellular protein family member (scl-6)                              |
| Locus_16376_Transcript_1/1_Conf_1.000 | 517  | 20 | 5.45E-17  | XP_002638473.1 | 56 | 90.8929 | 175 | 98  | Hypothetical protein CBG12901                                                     |
| Locus_16377_Transcript_1/1_Conf_1.000 | 267  | 1  | 4.77E-04  | NP_001021551.1 | 66 | 47.7506 | 48  | 32  | hypothetical protein K07A1.15                                                     |
| Locus_16378_Transcript_1/1_Conf_1.000 | 226  | 0  |           |                |    |         |     |     |                                                                                   |
| Locus_16379_Transcript_1/1_Conf_1.000 | 162  | 2  | 1.10E-08  | XP_002645729.1 | 92 | 63.1586 | 53  | 49  | Hypothetical protein CBG07396                                                     |
| Locus_1638_Transcript_1/1_Conf_1.000  | 2637 | 20 | 2.90E-170 | XP_001893842.1 | 62 | 603.979 | 675 | 419 | hypothetical protein                                                              |
| Locus_16380_Transcript_1/1_Conf_1.000 | 196  | 20 | 2.01E-18  | NP_501419.2    | 76 | 95.5153 | 65  | 50  | hypothetical protein D2096.3                                                      |

|                                       |     |    |          |                |    |         |     |     |                                                                      |
|---------------------------------------|-----|----|----------|----------------|----|---------|-----|-----|----------------------------------------------------------------------|
| Locus_16381_Transcript_1/1_Conf_1.000 | 380 | 20 | 1.42E-40 | NP_508799.1    | 86 | 169.088 | 111 | 96  | hypothetical protein F16H11.1                                        |
| Locus_16382_Transcript_1/1_Conf_1.000 | 545 | 0  |          |                |    |         |     |     |                                                                      |
| Locus_16383_Transcript_1/1_Conf_1.000 | 523 | 20 | 1.22E-27 | NP_493278.2    | 78 | 126.331 | 98  | 77  | Neuropeptide-Like Protein family member (nlp-15)                     |
| Locus_16384_Transcript_1/1_Conf_1.000 | 255 | 0  |          |                |    |         |     |     |                                                                      |
| Locus_16385_Transcript_1/1_Conf_1.000 | 383 | 20 | 7.82E-15 | XP_002312307.1 | 65 | 83.5741 | 84  | 55  | predicted protein                                                    |
| Locus_16386_Transcript_1/1_Conf_1.000 | 281 | 20 | 3.35E-18 | NP_498265.1    | 68 | 94.7449 | 94  | 64  | hypothetical protein F01F1.9                                         |
| Locus_16387_Transcript_1/1_Conf_1.000 | 568 | 20 | 2.70E-80 | XP_001896559.1 | 84 | 301.597 | 191 | 161 | hypothetical protein                                                 |
| Locus_16388_Transcript_1/1_Conf_1.000 | 617 | 5  | 9.05E-09 | NP_495641.1    | 49 | 64.3142 | 139 | 69  | CKI family (Cyclin-dependent Kinase Inhibitor) family member (cki-1) |
| Locus_16389_Transcript_1/1_Conf_1.000 | 176 | 0  |          |                |    |         |     |     |                                                                      |
| Locus_1639_Transcript_1/2_Conf_1.000  | 537 | 20 | 4.22E-58 | XP_002631526.1 | 75 | 227.639 | 177 | 133 | C. briggsae CBR-MIG-14 protein                                       |
| Locus_1639_Transcript_2/2_Conf_1.000  | 537 | 20 | 8.49E-59 | XP_002631526.1 | 75 | 229.95  | 177 | 134 | C. briggsae CBR-MIG-14 protein                                       |
| Locus_16390_Transcript_1/1_Conf_1.000 | 392 | 0  |          |                |    |         |     |     |                                                                      |
| Locus_16391_Transcript_1/1_Conf_1.000 | 505 | 20 | 1.21E-34 | XP_002645124.1 | 68 | 149.443 | 164 | 113 | Hypothetical protein CBG16818                                        |

|                                       |      |    |          |                |    |         |     |     |                                                                              |
|---------------------------------------|------|----|----------|----------------|----|---------|-----|-----|------------------------------------------------------------------------------|
| Locus_16392_Transcript_1/2_Conf_1.000 | 1400 | 20 | 3.91E-98 | NP_741868.1    | 59 | 363.229 | 475 | 282 | Apical Junction Molecule family member (ajm-1)                               |
| Locus_16392_Transcript_2/2_Conf_1.000 | 1435 | 20 | 4.34E-92 | XP_002645282.1 | 58 | 343.199 | 484 | 282 | C. briggsae CBR-AJM-1 protein                                                |
| Locus_16393_Transcript_1/1_Conf_1.000 | 366  | 20 | 9.13E-08 | ACI49172.1     | 51 | 60.077  | 124 | 64  | hypothetical protein Csp3_JD01.004                                           |
| Locus_16394_Transcript_1/1_Conf_1.000 | 471  | 20 | 5.41E-24 | XP_002425539.1 | 90 | 114.005 | 55  | 50  | Early growth response protein, putative                                      |
| Locus_16395_Transcript_1/1_Conf_1.000 | 516  | 20 | 1.09E-33 | NP_492769.1    | 65 | 146.362 | 167 | 109 | RTEL (mammalian Regulator of TELomere length) homolog family member (rtel-1) |
| Locus_16396_Transcript_1/1_Conf_1.000 | 283  | 0  |          |                |    |         |     |     |                                                                              |
| Locus_16397_Transcript_1/1_Conf_1.000 | 280  | 0  |          |                |    |         |     |     |                                                                              |
| Locus_16398_Transcript_1/1_Conf_1.000 | 525  | 0  |          |                |    |         |     |     |                                                                              |
| Locus_16399_Transcript_1/1_Conf_1.000 | 467  | 20 | 5.84E-18 | XP_001897531.1 | 55 | 93.9745 | 154 | 86  | WW domain containing protein                                                 |
| Locus_164_Transcript_1/2_Conf_1.000   | 1686 | 20 | 7.35E-57 | NP_499083.2    | 48 | 226.483 | 496 | 241 | hypothetical protein B0464.6                                                 |
| Locus_164_Transcript_2/2_Conf_1.000   | 1686 | 20 | 2.14E-56 | NP_499083.2    | 51 | 224.942 | 428 | 220 | hypothetical protein B0464.6                                                 |
| Locus_1640_Transcript_1/1_Conf_1.000  | 441  | 20 | 8.46E-17 | XP_002641151.1 | 52 | 90.1225 | 144 | 75  | Hypothetical protein CBG09003                                                |
| Locus_16400_Transcript_1/1_Conf_1.000 | 545  | 3  | 3.52E-07 | XP_002636981.1 | 86 | 58.5362 | 36  | 31  | C. briggsae CBR-LIN-33 protein                                               |
| Locus_16401_Transcript_1/1_Conf_1.000 | 237  | 0  |          |                |    |         |     |     |                                                                              |
| Locus_16402_Transcript_1/1_Conf_1.000 | 231  | 3  | 2.89E-25 | XP_002641969.1 | 81 | 118.242 | 76  | 62  | Hypothetical protein CBG16676                                                |
| Locus_16403_Transcript_1/1_Conf_1.000 | 688  | 2  | 5.76E-16 | XP_002635026.1 | 63 | 88.5817 | 136 | 87  | Hypothetical protein CBG13570                                                |

|                                       |      |    |          |                |    |         |     |     |                                                                                 |
|---------------------------------------|------|----|----------|----------------|----|---------|-----|-----|---------------------------------------------------------------------------------|
| Locus_16404_Transcript_1/1_Conf_1.000 | 348  | 0  |          |                |    |         |     |     |                                                                                 |
| Locus_16405_Transcript_1/1_Conf_1.000 | 198  | 7  | 1.76E-06 | XP_002642555.1 | 54 | 55.8398 | 77  | 42  | C. briggsae CBR-UNC-103.2 protein                                               |
| Locus_16406_Transcript_1/1_Conf_1.000 | 274  | 0  |          |                |    |         |     |     |                                                                                 |
| Locus_16407_Transcript_1/1_Conf_1.000 | 302  | 0  |          |                |    |         |     |     |                                                                                 |
| Locus_16408_Transcript_1/1_Conf_1.000 | 290  | 20 | 1.95E-29 | XP_001902375.1 | 80 | 132.109 | 95  | 76  | Protein kinase domain containing protein                                        |
| Locus_16409_Transcript_1/1_Conf_1.000 | 653  | 0  |          |                |    |         |     |     |                                                                                 |
| Locus_1641_Transcript_1/1_Conf_1.000  | 1954 | 20 | 0        | XP_002642110.1 | 94 | 876.315 | 538 | 509 | C. briggsae CBR-CCT-5 protein                                                   |
| Locus_16410_Transcript_1/1_Conf_1.000 | 291  | 0  |          |                |    |         |     |     |                                                                                 |
| Locus_16411_Transcript_1/1_Conf_1.000 | 269  | 0  |          |                |    |         |     |     |                                                                                 |
| Locus_16412_Transcript_1/1_Conf_1.000 | 245  | 4  | 1.85E-16 | NP_509518.1    | 77 | 88.9669 | 70  | 54  | hypothetical protein C24A3.2                                                    |
| Locus_16413_Transcript_1/1_Conf_1.000 | 340  | 20 | 2.99E-59 | ACJ65168.1     | 99 | 231.106 | 113 | 112 | Uncoordinated protein 68, isoform b, partially confirmed by transcript evidence |
| Locus_16414_Transcript_1/1_Conf_1.000 | 617  | 3  | 2.00E-40 | EFO25429.1     | 58 | 169.474 | 206 | 120 | hypothetical protein LOAG_03053                                                 |
| Locus_16415_Transcript_1/1_Conf_1.000 | 467  | 20 | 5.61E-45 | NP_491182.2    | 75 | 183.726 | 160 | 120 | LiPid Depleted family member (lpd-3)                                            |
| Locus_16416_Transcript_1/1_Conf_1.000 | 236  | 9  | 1.53E-10 | NP_493057.1    | 70 | 69.3218 | 79  | 56  | RNA-dependent RNA polymerase Family member (rrf-2)                              |
| Locus_16417_Transcript_1/1_Conf_1.000 | 538  | 6  | 1.15E-39 | XP_002647538.1 | 71 | 166.392 | 130 | 93  | Hypothetical protein CBG06620                                                   |
| Locus_16418_Transcript_1/1_Conf_1.000 | 155  | 0  |          |                |    |         |     |     |                                                                                 |
| Locus_16419_Transcript_1/1_Conf_1.000 | 227  | 0  |          |                |    |         |     |     |                                                                                 |

|                                       |     |    |          |                |    |         |     |     |                                                                         |
|---------------------------------------|-----|----|----------|----------------|----|---------|-----|-----|-------------------------------------------------------------------------|
| Locus_1642_Transcript_1/1_Conf_1.000  | 454 | 20 | 4.82E-57 | XP_002647797.1 | 90 | 223.787 | 125 | 113 | Hypothetical protein CBG23568                                           |
| Locus_16420_Transcript_1/1_Conf_1.000 | 222 | 0  |          |                |    |         |     |     |                                                                         |
| Locus_16421_Transcript_1/1_Conf_1.000 | 268 | 0  |          |                |    |         |     |     |                                                                         |
| Locus_16422_Transcript_1/1_Conf_1.000 | 356 | 3  | 4.45E-10 | NP_508551.1    | 64 | 67.781  | 104 | 67  | hypothetical protein F28B4.3                                            |
| Locus_16423_Transcript_1/1_Conf_1.000 | 389 | 20 | 7.84E-34 | XP_002828455.1 | 89 | 136.346 | 76  | 68  | PREDICTED: LOW QUALITY PROTEIN: ornithine decarboxylase antizyme 1-like |
| Locus_16424_Transcript_1/1_Conf_1.000 | 241 | 0  |          |                |    |         |     |     |                                                                         |
| Locus_16425_Transcript_1/1_Conf_1.000 | 387 | 0  |          |                |    |         |     |     |                                                                         |
| Locus_16426_Transcript_1/1_Conf_1.000 | 458 | 20 | 2.83E-41 | EFO23504.1     | 77 | 171.4   | 157 | 121 | TK protein kinase                                                       |
| Locus_16427_Transcript_1/1_Conf_1.000 | 220 | 0  |          |                |    |         |     |     |                                                                         |
| Locus_16428_Transcript_1/1_Conf_1.000 | 230 | 1  | 4.81E-04 | XP_002898487.1 | 66 | 47.7506 | 53  | 35  | microtubule -associated protein EB1                                     |
| Locus_16429_Transcript_1/1_Conf_1.000 | 222 | 0  |          |                |    |         |     |     |                                                                         |
| Locus_1643_Transcript_1/1_Conf_1.000  | 629 | 5  | 2.81E-21 | NP_001022775.1 | 88 | 105.916 | 85  | 75  | hypothetical protein T20G5.14                                           |
| Locus_16430_Transcript_1/2_Conf_1.000 | 792 | 0  |          |                |    |         |     |     |                                                                         |
| Locus_16430_Transcript_2/2_Conf_1.000 | 299 | 0  |          |                |    |         |     |     |                                                                         |
| Locus_16431_Transcript_1/1_Conf_1.000 | 180 | 0  |          |                |    |         |     |     |                                                                         |
| Locus_16432_Transcript_1/1_Conf_1.000 | 563 | 20 | 2.55E-35 | XP_002426892.1 | 60 | 152.14  | 193 | 116 | myst histone acetyltransferase, putative                                |
| Locus_16433_Transcript_1/1_Conf_1.000 | 275 | 20 | 3.85E-30 | XP_002646095.1 | 83 | 134.42  | 90  | 75  | C. briggsae CBR-HMR-1 protein                                           |
| Locus_16434_Transcript_1/1_Conf_1.000 | 393 | 20 | 1.40E-11 | P48460.4       | 70 | 72.7886 | 64  | 45  | Putative serine/threonine-protein phosphatase C27B7.6                   |
| Locus_16435_Transcript_1/1_Conf_1.000 | 240 | 0  |          |                |    |         |     |     |                                                                         |
| Locus_16436_Transcript_1/1_Conf_1.000 | 550 | 0  |          |                |    |         |     |     |                                                                         |
| Locus_16437_Transcript_1/1_Conf_1.000 | 161 | 0  |          |                |    |         |     |     |                                                                         |

|                                       |      |    |          |                |    |         |     |     |                                                                      |
|---------------------------------------|------|----|----------|----------------|----|---------|-----|-----|----------------------------------------------------------------------|
| Locus_16438_Transcript_1/2_Conf_1.000 | 1275 | 20 | 1.68E-36 | EFO20862.1     | 50 | 158.303 | 289 | 147 | zinc finger protein                                                  |
| Locus_16438_Transcript_2/2_Conf_1.000 | 1268 | 20 | 5.72E-37 | EFO20862.1     | 46 | 159.844 | 365 | 169 | zinc finger protein                                                  |
| Locus_16439_Transcript_1/1_Conf_1.000 | 309  | 20 | 1.27E-33 | NP_497786.2    | 89 | 145.976 | 100 | 89  | MethylMalonylCoA Mutase homolog family member (mmcm-1)               |
| Locus_1644_Transcript_1/3_Conf_0.556  | 972  | 20 | 1.18E-86 | XP_002644841.1 | 74 | 324.324 | 240 | 178 | C. briggsae CBR-HSP-43 protein                                       |
| Locus_1644_Transcript_3/3_Conf_0.444  | 941  | 20 | 1.12E-86 | XP_002644841.1 | 74 | 324.324 | 240 | 178 | C. briggsae CBR-HSP-43 protein                                       |
| Locus_16440_Transcript_1/1_Conf_1.000 | 176  | 0  |          |                |    |         |     |     |                                                                      |
| Locus_16441_Transcript_1/1_Conf_1.000 | 312  | 0  |          |                |    |         |     |     |                                                                      |
| Locus_16442_Transcript_1/1_Conf_1.000 | 516  | 0  |          |                |    |         |     |     |                                                                      |
| Locus_16443_Transcript_1/1_Conf_1.000 | 476  | 0  |          |                |    |         |     |     |                                                                      |
| Locus_16444_Transcript_1/2_Conf_1.000 | 603  | 5  | 1.04E-38 | XP_001895905.1 | 64 | 163.696 | 201 | 130 | Fanconi anemia complementation group D2 protein, isoform 2, putative |
| Locus_16444_Transcript_2/2_Conf_1.000 | 399  | 5  | 7.37E-21 | EFO26102.1     | 64 | 103.605 | 113 | 73  | hypothetical protein LOAG_02385                                      |

|                                       |     |    |          |                |    |         |     |     |                               |
|---------------------------------------|-----|----|----------|----------------|----|---------|-----|-----|-------------------------------|
| Locus_16445_Transcript_1/1_Conf_1.000 | 621 | 20 | 3.54E-53 | XP_001891594.1 | 88 | 211.846 | 140 | 124 | MH1 domain containing protein |
| Locus_16446_Transcript_1/1_Conf_1.000 | 352 | 0  |          |                |    |         |     |     |                               |
| Locus_16447_Transcript_1/1_Conf_1.000 | 523 | 20 | 2.52E-65 | XP_002645826.1 | 81 | 251.521 | 174 | 142 | Hypothetical protein CBG07557 |
| Locus_16448_Transcript_1/1_Conf_1.000 | 134 | 20 | 6.17E-12 | NP_493554.1    | 86 | 73.9442 | 44  | 38  | hypothetical protein Y54E5A.6 |
| Locus_16449_Transcript_1/1_Conf_1.000 | 358 | 2  | 2.68E-15 | NP_495433.1    | 67 | 85.1149 | 74  | 50  | hypothetical protein C15F1.2  |
| Locus_1645_Transcript_1/2_Conf_1.000  | 890 | 20 | 2.71E-31 | XP_002630755.1 | 54 | 140.198 | 224 | 122 | C. briggsae CBR-LYS-8 protein |
| Locus_1645_Transcript_2/2_Conf_1.000  | 890 | 20 | 2.71E-31 | XP_002630755.1 | 54 | 140.198 | 224 | 122 | C. briggsae CBR-LYS-8 protein |
| Locus_16450_Transcript_1/1_Conf_1.000 | 232 | 0  |          |                |    |         |     |     |                               |
| Locus_16451_Transcript_1/1_Conf_1.000 | 246 | 0  |          |                |    |         |     |     |                               |
| Locus_16452_Transcript_1/1_Conf_1.000 | 234 | 0  |          |                |    |         |     |     |                               |
| Locus_16453_Transcript_1/1_Conf_1.000 | 135 | 0  |          |                |    |         |     |     |                               |
| Locus_16454_Transcript_1/1_Conf_1.000 | 712 | 0  |          |                |    |         |     |     |                               |
| Locus_16455_Transcript_1/1_Conf_1.000 | 250 | 0  |          |                |    |         |     |     |                               |
| Locus_16456_Transcript_1/1_Conf_1.000 | 799 | 20 | 7.92E-69 | NP_495441.1    | 87 | 264.618 | 178 | 155 | hypothetical protein ZK1127.6 |
| Locus_16457_Transcript_1/1_Conf_1.000 | 138 | 0  |          |                |    |         |     |     |                               |
| Locus_16458_Transcript_1/1_Conf_1.000 | 135 | 0  |          |                |    |         |     |     |                               |
| Locus_16459_Transcript_1/1_Conf_1.000 | 145 | 0  |          |                |    |         |     |     |                               |

|                                       |      |    |           |                |     |         |     |     |                                                       |
|---------------------------------------|------|----|-----------|----------------|-----|---------|-----|-----|-------------------------------------------------------|
| Locus_1646_Transcript_1/1_Conf_1.000  | 1004 | 20 | 3.83E-120 | NP_504638.1    | 86  | 435.647 | 274 | 237 | hypothetical protein T05H4.5                          |
| Locus_16460_Transcript_1/1_Conf_1.000 | 154  | 0  |           |                |     |         |     |     |                                                       |
| Locus_16461_Transcript_1/1_Conf_1.000 | 321  | 0  |           |                |     |         |     |     |                                                       |
| Locus_16462_Transcript_1/1_Conf_1.000 | 840  | 20 | 5.20E-106 | XP_002637794.1 | 84  | 388.267 | 264 | 224 | C. briggsae CBR-PES-9 protein                         |
| Locus_16463_Transcript_1/1_Conf_1.000 | 450  | 3  | 2.32E-59  | XP_002634053.1 | 84  | 231.491 | 150 | 127 | Hypothetical protein CBG01593                         |
| Locus_16464_Transcript_1/1_Conf_1.000 | 1058 | 20 | 3.19E-96  | XP_002639898.1 | 78  | 356.295 | 296 | 233 | Hypothetical protein CBG08220                         |
| Locus_16465_Transcript_1/1_Conf_1.000 | 332  | 0  |           |                |     |         |     |     |                                                       |
| Locus_16466_Transcript_1/1_Conf_1.000 | 172  | 20 | 1.51E-26  | XP_001091804.2 | 100 | 122.479 | 57  | 57  | PREDICTED: hypothetical protein LOC703501             |
| Locus_16467_Transcript_1/1_Conf_1.000 | 474  | 2  | 1.80E-11  | XP_002647749.1 | 72  | 72.4034 | 47  | 34  | C. briggsae CBR-NLP-42 protein                        |
| Locus_16468_Transcript_1/1_Conf_1.000 | 238  | 0  |           |                |     |         |     |     |                                                       |
| Locus_16469_Transcript_1/1_Conf_1.000 | 1098 | 20 | 8.99E-81  | NP_507118.1    | 57  | 305.064 | 365 | 209 | O-ACyltransferase homolog family member (oac-6)       |
| Locus_1647_Transcript_1/2_Conf_1.000  | 882  | 20 | 7.20E-69  | NP_501459.1    | 77  | 265.003 | 195 | 151 | Homolog of Yeast Longevity gene family member (hyl-1) |



|                                       |      |    |           |                |    |         |     |     |                                                                  |
|---------------------------------------|------|----|-----------|----------------|----|---------|-----|-----|------------------------------------------------------------------|
| Locus_1647_Transcript_2/2_Conf_1.000  | 803  | 20 | 1.15E-62  | NP_501459.1    | 89 | 216.083 | 126 | 113 | Homolog of Yeast Longevity gene family member (hyl-1)            |
| Locus_16470_Transcript_1/1_Conf_1.000 | 552  | 20 | 1.16E-08  | XP_001896107.1 | 46 | 63.5438 | 144 | 67  | hypothetical protein Bm1_23250                                   |
| Locus_16471_Transcript_1/1_Conf_1.000 | 215  | 0  |           |                |    |         |     |     |                                                                  |
| Locus_16472_Transcript_1/1_Conf_1.000 | 208  | 2  | 5.75E-26  | XP_002636221.1 | 95 | 120.553 | 68  | 65  | Hypothetical protein CBG12142                                    |
| Locus_16473_Transcript_1/1_Conf_1.000 | 775  | 20 | 1.85E-35  | NP_001040994.1 | 70 | 153.68  | 131 | 92  | WaRThog (hedgehog-like family) family member (wrt-5)             |
| Locus_16474_Transcript_1/1_Conf_1.000 | 193  | 19 | 1.54E-26  | XP_002645128.1 | 92 | 122.479 | 64  | 59  | C. briggsae CBR-NSY-4 protein                                    |
| Locus_16475_Transcript_1/1_Conf_1.000 | 135  | 0  |           |                |    |         |     |     |                                                                  |
| Locus_16476_Transcript_1/1_Conf_1.000 | 865  | 20 | 5.44E-138 | XP_002646763.1 | 90 | 494.582 | 278 | 252 | C. briggsae CBR-GSY-1 protein                                    |
| Locus_16477_Transcript_1/1_Conf_1.000 | 268  | 8  | 2.89E-09  | XP_001895179.1 | 88 | 65.0846 | 35  | 31  | Suppressor of forked protein                                     |
| Locus_16478_Transcript_1/1_Conf_1.000 | 664  | 0  |           |                |    |         |     |     |                                                                  |
| Locus_16479_Transcript_1/1_Conf_1.000 | 181  | 0  |           |                |    |         |     |     |                                                                  |
| Locus_1648_Transcript_1/1_Conf_1.000  | 1218 | 20 | 1.05E-72  | NP_499022.1    | 61 | 278.485 | 357 | 220 | hypothetical protein ZK512.5                                     |
| Locus_16480_Transcript_1/1_Conf_1.000 | 412  | 20 | 3.94E-51  | NP_499895.2    | 86 | 204.142 | 137 | 119 | hypothetical protein T21D12.9                                    |
| Locus_16481_Transcript_1/1_Conf_1.000 | 301  | 20 | 2.11E-36  | XP_001895201.1 | 89 | 155.221 | 99  | 89  | protein phosphatase 1 regulatory inhibitor subunit 16A, putative |
| Locus_16482_Transcript_1/1_Conf_1.000 | 308  | 3  | 1.67E-09  | XP_001896335.1 | 50 | 65.855  | 108 | 55  | helix-turn-helix, Psq domain containing protein                  |
| Locus_16483_Transcript_1/1_Conf_1.000 | 189  | 20 | 6.71E-22  | XP_002630112.1 | 88 | 107.071 | 63  | 56  | Hypothetical protein CBG00513                                    |

|                                       |      |    |          |                |    |         |     |     |                                                                            |
|---------------------------------------|------|----|----------|----------------|----|---------|-----|-----|----------------------------------------------------------------------------|
| Locus_16484_Transcript_1/1_Conf_1.000 | 334  | 20 | 6.57E-22 | NP_001021889.1 | 67 | 107.071 | 102 | 69  | hypothetical protein B0252.3                                               |
| Locus_16485_Transcript_1/1_Conf_1.000 | 167  | 20 | 2.70E-07 | XP_002648412.1 | 66 | 58.5362 | 53  | 35  | C. briggsae CBR-PQE-1 protein                                              |
| Locus_16486_Transcript_1/1_Conf_1.000 | 314  | 0  |          |                |    |         |     |     |                                                                            |
| Locus_16487_Transcript_1/1_Conf_1.000 | 516  | 1  | 2.37E-04 | NP_506662.1    | 43 | 48.9062 | 142 | 62  | hypothetical protein ZC412.3                                               |
| Locus_16488_Transcript_1/1_Conf_1.000 | 537  | 0  |          |                |    |         |     |     |                                                                            |
| Locus_16489_Transcript_1/1_Conf_1.000 | 626  | 0  |          |                |    |         |     |     |                                                                            |
| Locus_1649_Transcript_1/1_Conf_1.000  | 2463 | 20 | 3.08E-17 | XP_509666.2    | 37 | 95.5153 | 498 | 189 | PREDICTED: similar to KIAA0853 protein                                     |
| Locus_16490_Transcript_1/1_Conf_1.000 | 310  | 2  | 4.53E-15 | NP_502613.2    | 72 | 84.3445 | 93  | 67  | QUInine non-avoider family member (qui-1)                                  |
| Locus_16491_Transcript_1/1_Conf_1.000 | 362  | 20 | 4.09E-40 | XP_001902741.1 | 75 | 167.548 | 120 | 90  | DNA topoisomerase III                                                      |
| Locus_16492_Transcript_1/1_Conf_1.000 | 205  | 0  |          |                |    |         |     |     |                                                                            |
| Locus_16493_Transcript_1/1_Conf_1.000 | 246  | 0  |          |                |    |         |     |     |                                                                            |
| Locus_16494_Transcript_1/1_Conf_1.000 | 398  | 5  | 5.86E-18 | NP_494916.1    | 65 | 93.9745 | 133 | 87  | SHC (Src Homology domain C-terminal) adaptor homolog family member (shc-2) |
| Locus_16495_Transcript_1/1_Conf_1.000 | 325  | 0  |          |                |    |         |     |     |                                                                            |
| Locus_16496_Transcript_1/1_Conf_1.000 | 631  | 20 | 4.68E-32 | NP_503727.1    | 52 | 141.739 | 198 | 104 | hypothetical protein W02G9.4                                               |
| Locus_16497_Transcript_1/1_Conf_1.000 | 232  | 0  |          |                |    |         |     |     |                                                                            |
| Locus_16498_Transcript_1/1_Conf_1.000 | 300  | 20 | 2.19E-25 | O96650.1       | 82 | 118.627 | 87  | 72  | Thymidylate synthase                                                       |

|                                       |      |    |          |                |    |         |     |     |                                                                        |
|---------------------------------------|------|----|----------|----------------|----|---------|-----|-----|------------------------------------------------------------------------|
| Locus_16499_Transcript_1/1_Conf_1.000 | 518  | 20 | 1.05E-52 | NP_509229.1    | 75 | 209.534 | 174 | 132 | Suppressor of activated let-60 Ras family member (sur-5)               |
| Locus_165_Transcript_1/1_Conf_1.000   | 3162 | 20 | 0        | NP_496136.1    | 81 | 1140.56 | 915 | 743 | hypothetical protein C08H9.2                                           |
| Locus_1650_Transcript_1/1_Conf_1.000  | 845  | 20 | 3.08E-90 | NP_497876.2    | 78 | 335.88  | 277 | 218 | Heparan Sulfate-glucuronic acid-5-Epimerase family member (hse-5)      |
| Locus_16500_Transcript_1/1_Conf_1.000 | 330  | 0  |          |                |    |         |     |     |                                                                        |
| Locus_16501_Transcript_1/1_Conf_1.000 | 963  | 20 | 3.78E-45 | CAA84693.3     | 56 | 186.422 | 312 | 175 | C. elegans protein D2045.2, partially confirmed by transcript evidence |
| Locus_16502_Transcript_1/1_Conf_1.000 | 442  | 0  |          |                |    |         |     |     |                                                                        |
| Locus_16503_Transcript_1/1_Conf_1.000 | 307  | 0  |          |                |    |         |     |     |                                                                        |
| Locus_16504_Transcript_1/1_Conf_1.000 | 392  | 8  | 9.44E-13 | NP_001076703.1 | 68 | 76.6406 | 117 | 80  | hypothetical protein T11G6.2                                           |
| Locus_16505_Transcript_1/1_Conf_1.000 | 284  | 0  |          |                |    |         |     |     |                                                                        |
| Locus_16506_Transcript_1/1_Conf_1.000 | 753  | 20 | 5.60E-42 | XP_002645124.1 | 66 | 175.252 | 162 | 107 | Hypothetical protein CBG16818                                          |
| Locus_16507_Transcript_1/1_Conf_1.000 | 273  | 0  |          |                |    |         |     |     |                                                                        |
| Locus_16508_Transcript_1/1_Conf_1.000 | 219  | 1  | 1.56E-10 | EFO25846.1     | 69 | 69.3218 | 71  | 49  | hypothetical protein LOAG_02637                                        |
| Locus_16509_Transcript_1/1_Conf_1.000 | 158  | 0  |          |                |    |         |     |     |                                                                        |

|                                       |      |    |           |                |    |         |     |     |                                                                                          |
|---------------------------------------|------|----|-----------|----------------|----|---------|-----|-----|------------------------------------------------------------------------------------------|
| Locus_1651_Transcript_1/2_Conf_1.000  | 544  | 0  |           |                |    |         |     |     |                                                                                          |
| Locus_1651_Transcript_2/2_Conf_1.000  | 550  | 0  |           |                |    |         |     |     |                                                                                          |
| Locus_16510_Transcript_1/1_Conf_1.000 | 241  | 20 | 6.59E-22  | XP_002644770.1 | 84 | 107.071 | 78  | 66  | C. briggsae CBR-ACS-17 protein                                                           |
| Locus_16511_Transcript_1/1_Conf_1.000 | 748  | 20 | 2.33E-64  | AAK68292.3     | 70 | 249.595 | 261 | 184 | U28943_4Clc-type chloride channel protein 3, isoform b, confirmed by transcript evidence |
| Locus_16512_Transcript_1/1_Conf_1.000 | 218  | 0  |           |                |    |         |     |     |                                                                                          |
| Locus_16513_Transcript_1/1_Conf_1.000 | 255  | 20 | 3.22E-24  | NP_494384.2    | 75 | 114.775 | 85  | 64  | PaTChed family member (ptc-3)                                                            |
| Locus_16514_Transcript_1/1_Conf_1.000 | 450  | 20 | 1.42E-32  | EFO16233.1     | 67 | 142.51  | 140 | 94  | variant SH3 domain-containing protein                                                    |
| Locus_16515_Transcript_1/1_Conf_1.000 | 273  | 20 | 6.56E-30  | XP_002753198.1 | 96 | 133.65  | 87  | 84  | PREDICTED: poly(rC)-binding protein 2-like isoform 2                                     |
| Locus_16516_Transcript_1/1_Conf_1.000 | 148  | 0  |           |                |    |         |     |     |                                                                                          |
| Locus_16517_Transcript_1/1_Conf_1.000 | 803  | 0  |           |                |    |         |     |     |                                                                                          |
| Locus_16518_Transcript_1/1_Conf_1.000 | 288  | 0  |           |                |    |         |     |     |                                                                                          |
| Locus_16519_Transcript_1/1_Conf_1.000 | 540  | 20 | 6.20E-65  | XP_002640715.1 | 83 | 250.366 | 178 | 149 | C. briggsae CBR-VPS-28 protein                                                           |
| Locus_1652_Transcript_1/1_Conf_1.000  | 1166 | 20 | 2.22E-133 | XP_002633423.1 | 77 | 479.945 | 335 | 260 | C. briggsae CBR-FAT-6 protein                                                            |
| Locus_16520_Transcript_1/1_Conf_1.000 | 906  | 20 | 5.97E-82  | EFO25806.1     | 74 | 308.531 | 299 | 223 | hypothetical protein LOAG_02677                                                          |
| Locus_16521_Transcript_1/1_Conf_1.000 | 597  | 0  |           |                |    |         |     |     |                                                                                          |
| Locus_16522_Transcript_1/1_Conf_1.000 | 279  | 0  |           |                |    |         |     |     |                                                                                          |

|                                       |      |    |          |                |     |         |     |     |                                                                                                    |
|---------------------------------------|------|----|----------|----------------|-----|---------|-----|-----|----------------------------------------------------------------------------------------------------|
| Locus_16523_Transcript_1/1_Conf_1.000 | 411  | 5  | 4.09E-40 | NP_506132.1    | 72  | 167.548 | 123 | 89  | hypothetical protein W04D2.4                                                                       |
| Locus_16524_Transcript_1/1_Conf_1.000 | 138  | 0  |          |                |     |         |     |     |                                                                                                    |
| Locus_16525_Transcript_1/1_Conf_1.000 | 347  | 20 | 4.59E-55 | EFO25295.1     | 95  | 217.238 | 115 | 110 | STE/STE20/KHS protein kinase                                                                       |
| Locus_16526_Transcript_1/1_Conf_1.000 | 801  | 20 | 5.24E-28 | XP_001900507.1 | 49  | 129.028 | 241 | 120 | Protein set-2.                                                                                     |
| Locus_16527_Transcript_1/1_Conf_1.000 | 261  | 18 | 1.39E-11 | AAS91567.1     | 82  | 72.7886 | 45  | 37  | transformer-1                                                                                      |
| Locus_16528_Transcript_1/1_Conf_1.000 | 148  | 2  | 3.36E-05 | EFO19039.1     | 84  | 51.6026 | 46  | 39  | Tln1 protein                                                                                       |
| Locus_16529_Transcript_1/1_Conf_1.000 | 696  | 20 | 1.67E-26 | NP_497348.3    | 78  | 123.635 | 94  | 74  | hypothetical protein Y119D3B.12                                                                    |
| Locus_1653_Transcript_1/1_Conf_1.000  | 1106 | 20 | 4.52E-64 | CAZ65529.1     | 68  | 249.595 | 317 | 216 | C. elegans protein T28C6.7b, partially confirmed by transcript evidence                            |
| Locus_16530_Transcript_1/1_Conf_1.000 | 482  | 8  | 5.65E-58 | XP_002637142.1 | 88  | 226.868 | 137 | 121 | Hypothetical protein CBG09644                                                                      |
| Locus_16531_Transcript_1/1_Conf_1.000 | 626  | 20 | 3.82E-71 | NP_491354.1    | 78  | 271.552 | 188 | 148 | AcetylCholine Receptor family member (acr-6)                                                       |
| Locus_16532_Transcript_1/2_Conf_1.000 | 448  | 2  | 4.18E-08 | XP_002631722.1 | 49  | 61.2326 | 145 | 72  | C. briggsae CBR-SINH-1 protein                                                                     |
| Locus_16532_Transcript_2/2_Conf_1.000 | 412  | 1  | 6.16E-04 | XP_002631722.1 | 54  | 47.3654 | 97  | 53  | C. briggsae CBR-SINH-1 protein                                                                     |
| Locus_16533_Transcript_1/1_Conf_1.000 | 377  | 0  |          |                |     |         |     |     |                                                                                                    |
| Locus_16534_Transcript_1/1_Conf_1.000 | 334  | 20 | 3.95E-51 | XP_002758725.1 | 100 | 204.142 | 107 | 107 | PREDICTED: dolichyl-diphosphooligosaccharide--protein glycosyltransferase subunit 1-like isoform 2 |
| Locus_16535_Transcript_1/1_Conf_1.000 | 327  | 0  |          |                |     |         |     |     |                                                                                                    |
| Locus_16536_Transcript_1/1_Conf_1.000 | 168  | 0  |          |                |     |         |     |     |                                                                                                    |
| Locus_16537_Transcript_1/1_Conf_1.000 | 148  | 2  | 8.26E-12 | NP_001022051.1 | 80  | 73.559  | 47  | 38  | SREBP Cleavage activating Protein (SCAP) homolog family member (scp-1)                             |

|                                       |     |    |          |                |    |         |     |     |                                                   |
|---------------------------------------|-----|----|----------|----------------|----|---------|-----|-----|---------------------------------------------------|
| Locus_16538_Transcript_1/1_Conf_1.000 | 246 | 2  | 2.50E-05 | XP_002634825.1 | 63 | 51.9878 | 61  | 39  | Hypothetical protein CBG13933                     |
| Locus_16539_Transcript_1/1_Conf_1.000 | 262 | 0  |          |                |    |         |     |     |                                                   |
| Locus_1654_Transcript_1/1_Conf_1.000  | 262 | 0  |          |                |    |         |     |     |                                                   |
| Locus_16540_Transcript_1/1_Conf_1.000 | 177 | 0  |          |                |    |         |     |     |                                                   |
| Locus_16541_Transcript_1/1_Conf_1.000 | 539 | 20 | 2.03E-52 | NP_506007.1    | 83 | 208.764 | 143 | 119 | CYclin L family member (cyl-1)                    |
| Locus_16542_Transcript_1/1_Conf_1.000 | 341 | 6  | 7.22E-13 | EFO19489.1     | 56 | 77.0258 | 113 | 64  | IQ calmodulin-binding domain-containing protein   |
| Locus_16543_Transcript_1/1_Conf_1.000 | 464 | 11 | 1.75E-38 | NP_001122650.1 | 67 | 162.155 | 159 | 107 | PaTChed family member (ptc-3)                     |
| Locus_16544_Transcript_1/1_Conf_1.000 | 146 | 2  | 2.50E-08 | CAD19995.2     | 82 | 62.003  | 39  | 32  | metalloprotease III                               |
| Locus_16545_Transcript_1/1_Conf_1.000 | 278 | 0  |          |                |    |         |     |     |                                                   |
| Locus_16546_Transcript_1/1_Conf_1.000 | 140 | 0  |          |                |    |         |     |     |                                                   |
| Locus_16547_Transcript_1/1_Conf_1.000 | 136 | 4  | 5.04E-06 | XP_001895407.1 | 79 | 54.299  | 43  | 34  | Phospholipase D. Active site motif family protein |
| Locus_16548_Transcript_1/1_Conf_1.000 | 225 | 4  | 4.66E-07 | NP_495463.2    | 61 | 57.7658 | 73  | 45  | hypothetical protein T02G5.2                      |
| Locus_16549_Transcript_1/1_Conf_1.000 | 283 | 0  |          |                |    |         |     |     |                                                   |
| Locus_1655_Transcript_1/1_Conf_1.000  | 248 | 0  |          |                |    |         |     |     |                                                   |
| Locus_16550_Transcript_1/1_Conf_1.000 | 343 | 0  |          |                |    |         |     |     |                                                   |
| Locus_16551_Transcript_1/1_Conf_1.000 | 247 | 3  | 2.84E-17 | CAO72177.1     | 69 | 91.6633 | 83  | 58  | hexosaminidase                                    |
| Locus_16552_Transcript_1/1_Conf_1.000 | 273 | 0  |          |                |    |         |     |     |                                                   |
| Locus_16553_Transcript_1/1_Conf_1.000 | 243 | 4  | 1.57E-07 | EFO27452.1     | 77 | 59.3066 | 81  | 63  | hypothetical protein LOAG_01023                   |
| Locus_16554_Transcript_1/1_Conf_1.000 | 348 | 20 | 2.68E-55 | NP_740906.1    | 98 | 218.009 | 115 | 113 | hypothetical protein F26E4.7                      |
| Locus_16555_Transcript_1/2_Conf_1.000 | 383 | 0  |          |                |    |         |     |     |                                                   |
| Locus_16555_Transcript_2/2_Conf_1.000 | 393 | 0  |          |                |    |         |     |     |                                                   |
| Locus_16556_Transcript_1/1_Conf_1.000 | 187 | 2  | 1.27E-12 | NP_507767.2    | 88 | 76.2554 | 60  | 53  | hypothetical protein C14B4.2                      |

|                                       |     |    |          |                |     |         |     |     |                                      |
|---------------------------------------|-----|----|----------|----------------|-----|---------|-----|-----|--------------------------------------|
| Locus_16557_Transcript_1/1_Conf_1.000 | 213 | 20 | 2.75E-20 | NP_491664.1    | 81  | 101.679 | 70  | 57  | UNCoordinated family member (unc-40) |
| Locus_16558_Transcript_1/1_Conf_1.000 | 489 | 0  |          |                |     |         |     |     |                                      |
| Locus_16559_Transcript_1/1_Conf_1.000 | 396 | 0  |          |                |     |         |     |     |                                      |
| Locus_1656_Transcript_1/1_Conf_1.000  | 488 | 0  |          |                |     |         |     |     |                                      |
| Locus_16560_Transcript_1/1_Conf_1.000 | 364 | 0  |          |                |     |         |     |     |                                      |
| Locus_16561_Transcript_1/1_Conf_1.000 | 230 | 0  |          |                |     |         |     |     |                                      |
| Locus_16562_Transcript_1/1_Conf_1.000 | 131 | 0  |          |                |     |         |     |     |                                      |
| Locus_16563_Transcript_1/1_Conf_1.000 | 238 | 20 | 5.06E-22 | P10253.3       | 100 | 107.457 | 52  | 52  | Lysosomal alpha-glucosidase          |
| Locus_16564_Transcript_1/1_Conf_1.000 | 190 | 0  |          |                |     |         |     |     |                                      |
| Locus_16565_Transcript_1/1_Conf_1.000 | 626 | 20 | 2.35E-20 | XP_002636128.1 | 79  | 102.834 | 88  | 70  | Hypothetical protein CBG01378        |
| Locus_16566_Transcript_1/1_Conf_1.000 | 792 | 20 | 7.54E-72 | XP_002637669.1 | 76  | 274.633 | 208 | 159 | Hypothetical protein CBG19425        |
| Locus_16567_Transcript_1/1_Conf_1.000 | 233 | 0  |          |                |     |         |     |     |                                      |

|                                       |     |    |          |                |     |         |     |     |                                           |
|---------------------------------------|-----|----|----------|----------------|-----|---------|-----|-----|-------------------------------------------|
| Locus_16568_Transcript_1/1_Conf_1.000 | 486 | 20 | 2.00E-26 | XP_002639142.1 | 55  | 122.094 | 168 | 94  | Hypothetical protein CBG14966             |
| Locus_16569_Transcript_1/1_Conf_1.000 | 267 | 0  |          |                |     |         |     |     |                                           |
| Locus_1657_Transcript_1/1_Conf_1.000  | 261 | 0  |          |                |     |         |     |     |                                           |
| Locus_16570_Transcript_1/1_Conf_1.000 | 385 | 20 | 5.91E-47 | NP_505312.1    | 85  | 190.274 | 128 | 110 | hypothetical protein T19A5.1              |
| Locus_16571_Transcript_1/1_Conf_1.000 | 198 | 0  |          |                |     |         |     |     |                                           |
| Locus_16572_Transcript_1/1_Conf_1.000 | 568 | 20 | 3.24E-25 | EFO22800.1     | 54  | 118.627 | 182 | 100 | hypothetical protein LOAG_05685           |
| Locus_16573_Transcript_1/1_Conf_1.000 | 170 | 0  |          |                |     |         |     |     |                                           |
| Locus_16574_Transcript_1/1_Conf_1.000 | 158 | 0  |          |                |     |         |     |     |                                           |
| Locus_16575_Transcript_1/1_Conf_1.000 | 192 | 0  |          |                |     |         |     |     |                                           |
| Locus_16576_Transcript_1/1_Conf_1.000 | 457 | 0  |          |                |     |         |     |     |                                           |
| Locus_16577_Transcript_1/1_Conf_1.000 | 615 | 2  | 2.46E-06 | XP_001899613.1 | 62  | 56.225  | 70  | 44  | hypothetical protein Bm1_40770            |
| Locus_16578_Transcript_1/1_Conf_1.000 | 182 | 0  |          |                |     |         |     |     |                                           |
| Locus_16579_Transcript_1/1_Conf_1.000 | 453 | 20 | 6.50E-62 | AAH62437.1     | 100 | 239.965 | 115 | 115 | Cytochrome c oxidase subunit IV isoform 1 |
| Locus_1658_Transcript_1/1_Conf_1.000  | 172 | 0  |          |                |     |         |     |     |                                           |
| Locus_16580_Transcript_1/1_Conf_1.000 | 282 | 0  |          |                |     |         |     |     |                                           |
| Locus_16581_Transcript_1/1_Conf_1.000 | 166 | 0  |          |                |     |         |     |     |                                           |
| Locus_16582_Transcript_1/1_Conf_1.000 | 359 | 20 | 2.50E-21 | NP_491427.1    | 75  | 105.145 | 99  | 75  | hypothetical protein W09C3.4              |
| Locus_16583_Transcript_1/1_Conf_1.000 | 532 | 20 | 8.35E-67 | NP_502120.1    | 80  | 256.529 | 177 | 142 | hypothetical protein B0035.16             |
| Locus_16584_Transcript_1/1_Conf_1.000 | 454 | 10 | 9.81E-26 | XP_002638736.1 | 66  | 119.783 | 130 | 87  | C. briggsae CBR-EGO-1 protein             |
| Locus_16585_Transcript_1/1_Conf_1.000 | 502 | 20 | 5.47E-32 | EFO21215.1     | 64  | 140.584 | 157 | 101 | AMP-binding enzyme family protein         |



|                                       |      |    |          |                |     |         |     |     |                                                                               |
|---------------------------------------|------|----|----------|----------------|-----|---------|-----|-----|-------------------------------------------------------------------------------|
| Locus_16586_Transcript_1/1_Conf_1.000 | 168  | 20 | 9.83E-26 | XP_002807155.1 | 100 | 119.783 | 55  | 55  | PREDICTED: LOW QUALITY PROTEIN: poly(rC)-binding protein 2-like               |
| Locus_16587_Transcript_1/1_Conf_1.000 | 177  | 20 | 3.03E-27 | XP_002760341.1 | 100 | 124.79  | 58  | 58  | PREDICTED: glutamine synthetase                                               |
| Locus_16588_Transcript_1/1_Conf_1.000 | 443  | 0  |          |                |     |         |     |     |                                                                               |
| Locus_16589_Transcript_1/1_Conf_1.000 | 293  | 20 | 1.87E-40 | NP_491513.2    | 93  | 168.703 | 96  | 90  | Formin HOMology Domain family member (fhod-1)                                 |
| Locus_1659_Transcript_1/1_Conf_1.000  | 296  | 0  |          |                |     |         |     |     |                                                                               |
| Locus_16590_Transcript_1/1_Conf_1.000 | 277  | 0  |          |                |     |         |     |     |                                                                               |
| Locus_16591_Transcript_1/1_Conf_1.000 | 216  | 4  | 2.65E-15 | XP_002633968.1 | 83  | 85.1149 | 56  | 47  | C. briggsae CBR-MCA-1 protein                                                 |
| Locus_16592_Transcript_1/1_Conf_1.000 | 154  | 0  |          |                |     |         |     |     |                                                                               |
| Locus_16593_Transcript_1/1_Conf_1.000 | 546  | 20 | 7.66E-42 | XP_001190458.1 | 69  | 173.711 | 178 | 123 | PREDICTED: similar to ATP-binding cassette, sub-family C (CFTR/MRP), member 4 |
| Locus_16594_Transcript_1/1_Conf_1.000 | 134  | 0  |          |                |     |         |     |     |                                                                               |
| Locus_16595_Transcript_1/1_Conf_1.000 | 249  | 0  |          |                |     |         |     |     |                                                                               |
| Locus_16596_Transcript_1/1_Conf_1.000 | 220  | 0  |          |                |     |         |     |     |                                                                               |
| Locus_16597_Transcript_1/1_Conf_1.000 | 267  | 20 | 2.27E-30 | NP_740900.1    | 84  | 135.191 | 88  | 74  | hypothetical protein T08G11.1                                                 |
| Locus_16598_Transcript_1/1_Conf_1.000 | 217  | 0  |          |                |     |         |     |     |                                                                               |
| Locus_16599_Transcript_1/1_Conf_1.000 | 226  | 0  |          |                |     |         |     |     |                                                                               |
| Locus_166_Transcript_1/1_Conf_1.000   | 1411 | 20 | 4.24E-92 | XP_002645826.1 | 58  | 343.199 | 425 | 250 | Hypothetical protein CBG07557                                                 |
| Locus_1660_Transcript_1/3_Conf_0.400  | 1995 | 20 | 0        | XP_002638688.1 | 83  | 749.969 | 514 | 431 | Hypothetical protein CBG11883                                                 |

|                                       |      |    |           |                |    |         |     |     |                                                                      |
|---------------------------------------|------|----|-----------|----------------|----|---------|-----|-----|----------------------------------------------------------------------|
| Locus_1660_Transcript_2/3_Conf_0.600  | 2103 | 20 | 0         | XP_002638688.1 | 83 | 749.969 | 514 | 431 | Hypothetical protein CBG11883                                        |
| Locus_1660_Transcript_3/3_Conf_0.400  | 1696 | 20 | 5.39E-116 | BAI79333.1     | 62 | 422.935 | 548 | 343 | mitochondrial elongation factor G2                                   |
| Locus_16600_Transcript_1/1_Conf_1.000 | 142  | 2  | 5.35E-08  | XP_002638375.1 | 85 | 60.8474 | 34  | 29  | Hypothetical protein CBG18580                                        |
| Locus_16601_Transcript_1/1_Conf_1.000 | 549  | 0  |           |                |    |         |     |     |                                                                      |
| Locus_16602_Transcript_1/1_Conf_1.000 | 263  | 0  |           |                |    |         |     |     |                                                                      |
| Locus_16603_Transcript_1/1_Conf_1.000 | 294  | 20 | 5.83E-18  | EFN72462.1     | 82 | 93.9745 | 73  | 60  | Copper homeostasis protein cutC-like protein                         |
| Locus_16604_Transcript_1/2_Conf_1.000 | 825  | 4  | 2.99E-50  | XP_002631532.1 | 78 | 202.986 | 193 | 152 | Hypothetical protein CBG20698                                        |
| Locus_16604_Transcript_2/2_Conf_1.000 | 825  | 4  | 6.02E-51  | XP_002631532.1 | 79 | 205.297 | 193 | 153 | Hypothetical protein CBG20698                                        |
| Locus_16605_Transcript_1/2_Conf_1.000 | 528  | 0  |           |                |    |         |     |     |                                                                      |
| Locus_16605_Transcript_2/2_Conf_1.000 | 542  | 0  |           |                |    |         |     |     |                                                                      |
| Locus_16606_Transcript_1/1_Conf_1.000 | 687  | 20 | 6.75E-41  | NP_502212.1    | 60 | 171.4   | 225 | 137 | hypothetical protein ZK792.5                                         |
| Locus_16607_Transcript_1/1_Conf_1.000 | 450  | 20 | 4.01E-19  | NP_495338.1    | 56 | 97.8265 | 151 | 85  | hypothetical protein C56C10.9                                        |
| Locus_16608_Transcript_1/1_Conf_1.000 | 253  | 0  |           |                |    |         |     |     |                                                                      |
| Locus_16609_Transcript_1/2_Conf_1.000 | 637  | 0  |           |                |    |         |     |     |                                                                      |
| Locus_16609_Transcript_2/2_Conf_1.000 | 637  | 0  |           |                |    |         |     |     |                                                                      |
| Locus_1661_Transcript_1/1_Conf_1.000  | 286  | 0  |           |                |    |         |     |     |                                                                      |
| Locus_16610_Transcript_1/1_Conf_1.000 | 286  | 0  |           |                |    |         |     |     |                                                                      |
| Locus_16611_Transcript_1/1_Conf_1.000 | 285  | 0  |           |                |    |         |     |     |                                                                      |
| Locus_16612_Transcript_1/1_Conf_1.000 | 388  | 20 | 3.24E-37  | NP_490840.2    | 76 | 157.918 | 130 | 99  | DAP (Death-Associated Protein) Kinase homolog family member (dapk-1) |
| Locus_16613_Transcript_1/1_Conf_1.000 | 361  | 20 | 1.98E-18  | XP_002647178.1 | 63 | 95.5153 | 119 | 75  | Hypothetical protein CBG22337                                        |

|                                       |     |    |          |                |     |         |     |     |                                                            |
|---------------------------------------|-----|----|----------|----------------|-----|---------|-----|-----|------------------------------------------------------------|
| Locus_16614_Transcript_1/1_Conf_1.000 | 382 | 20 | 2.19E-33 | NP_741467.1    | 81  | 145.206 | 94  | 77  | hypothetical protein C09G4.2                               |
| Locus_16615_Transcript_1/1_Conf_1.000 | 368 | 20 | 4.81E-33 | EFO27702.1     | 79  | 144.05  | 124 | 98  | roadblock/LC7 domain-containing protein                    |
| Locus_16616_Transcript_1/1_Conf_1.000 | 142 | 0  |          |                |     |         |     |     |                                                            |
| Locus_16617_Transcript_1/1_Conf_1.000 | 314 | 20 | 2.63E-50 | XP_002927596.1 | 100 | 201.445 | 96  | 96  | PREDICTED: myosin regulatory light polypeptide 9-like      |
| Locus_16618_Transcript_1/1_Conf_1.000 | 322 | 0  |          |                |     |         |     |     |                                                            |
| Locus_16619_Transcript_1/1_Conf_1.000 | 133 | 0  |          |                |     |         |     |     |                                                            |
| Locus_1662_Transcript_1/1_Conf_1.000  | 701 | 20 | 3.48E-48 | XP_002632763.1 | 85  | 195.667 | 140 | 119 | Hypothetical protein CBG11654                              |
| Locus_16620_Transcript_1/1_Conf_1.000 | 396 | 0  |          |                |     |         |     |     |                                                            |
| Locus_16621_Transcript_1/1_Conf_1.000 | 381 | 4  | 3.74E-25 | NP_496802.2    | 63  | 117.857 | 128 | 81  | BTAF (TBP-associated factor) homolog family member (btf-1) |
| Locus_16622_Transcript_1/1_Conf_1.000 | 441 | 20 | 4.45E-50 | EFO26644.1     | 78  | 200.675 | 143 | 112 | hypothetical protein LOAG_01839                            |
| Locus_16623_Transcript_1/1_Conf_1.000 | 821 | 1  | 9.29E-04 | XP_002635323.1 | 45  | 48.521  | 231 | 104 | Hypothetical protein CBG01490                              |

|                                       |      |    |          |                |    |         |     |     |                                                             |
|---------------------------------------|------|----|----------|----------------|----|---------|-----|-----|-------------------------------------------------------------|
| Locus_16624_Transcript_1/1_Conf_1.000 | 144  | 20 | 1.20E-10 | XP_002601536.1 | 80 | 69.707  | 42  | 34  | hypothetical protein BRAFLDRAFT_230606                      |
| Locus_16625_Transcript_1/1_Conf_1.000 | 423  | 3  | 1.76E-06 | EFO22932.1     | 47 | 55.8398 | 120 | 57  | hypothetical protein LOAG_05551                             |
| Locus_16626_Transcript_1/1_Conf_1.000 | 431  | 9  | 5.78E-18 | A8X9H4.2       | 56 | 93.9745 | 120 | 68  | Chondroitin proteoglycan 4                                  |
| Locus_16627_Transcript_1/1_Conf_1.000 | 156  | 0  |          |                |    |         |     |     |                                                             |
| Locus_16628_Transcript_1/1_Conf_1.000 | 164  | 0  |          |                |    |         |     |     |                                                             |
| Locus_16629_Transcript_1/1_Conf_1.000 | 145  | 0  |          |                |    |         |     |     |                                                             |
| Locus_1663_Transcript_1/1_Conf_1.000  | 2720 | 20 | 0        | XP_002645952.1 | 96 | 1395.56 | 758 | 733 | C. briggsae CBR-DYN-1 protein                               |
| Locus_16630_Transcript_1/1_Conf_1.000 | 659  | 20 | 1.27E-78 | NP_508515.2    | 79 | 296.59  | 214 | 170 | AQuaPorin or aquaglyceroporin related family member (aqp-7) |
| Locus_16631_Transcript_1/1_Conf_1.000 | 145  | 0  |          |                |    |         |     |     |                                                             |
| Locus_16632_Transcript_1/1_Conf_1.000 | 519  | 5  | 2.68E-11 | NP_503141.1    | 63 | 72.0182 | 101 | 64  | hypothetical protein W03F9.10                               |

|                                       |      |    |           |                |    |         |     |     |                                 |
|---------------------------------------|------|----|-----------|----------------|----|---------|-----|-----|---------------------------------|
| Locus_16633_Transcript_1/1_Conf_1.000 | 638  | 20 | 2.86E-85  | NP_501266.1    | 89 | 318.546 | 201 | 180 | hypothetical protein C50F7.4    |
| Locus_16634_Transcript_1/1_Conf_1.000 | 226  | 0  |           |                |    |         |     |     |                                 |
| Locus_16635_Transcript_1/1_Conf_1.000 | 1290 | 6  | 2.91E-52  | XP_002631435.1 | 64 | 210.69  | 223 | 143 | Hypothetical protein CBG03297   |
| Locus_16636_Transcript_1/1_Conf_1.000 | 535  | 0  |           |                |    |         |     |     |                                 |
| Locus_16637_Transcript_1/1_Conf_1.000 | 245  | 0  |           |                |    |         |     |     |                                 |
| Locus_16638_Transcript_1/1_Conf_1.000 | 315  | 0  |           |                |    |         |     |     |                                 |
| Locus_16639_Transcript_1/1_Conf_1.000 | 141  | 18 | 2.94E-06  | EFO23788.1     | 76 | 55.0694 | 42  | 32  | hypothetical protein LOAG_04700 |
| Locus_1664_Transcript_1/7_Conf_0.167  | 335  | 0  |           |                |    |         |     |     |                                 |
| Locus_1664_Transcript_2/7_Conf_0.667  | 1320 | 20 | 8.55E-132 | NP_501877.2    | 80 | 474.937 | 362 | 290 | hypothetical protein F01G10.7   |
| Locus_1664_Transcript_3/7_Conf_0.667  | 1333 | 20 | 1.93E-131 | NP_501877.2    | 80 | 473.781 | 362 | 290 | hypothetical protein F01G10.7   |
| Locus_1664_Transcript_4/7_Conf_0.556  | 1048 | 20 | 1.11E-125 | NP_501877.2    | 79 | 454.136 | 353 | 282 | hypothetical protein F01G10.7   |
| Locus_1664_Transcript_5/7_Conf_0.556  | 1333 | 20 | 2.98E-132 | NP_501877.2    | 80 | 476.478 | 362 | 290 | hypothetical protein F01G10.7   |

|                                       |      |    |           |                |    |         |     |     |                                                                         |
|---------------------------------------|------|----|-----------|----------------|----|---------|-----|-----|-------------------------------------------------------------------------|
| Locus_1664_Transcript_6/7_Conf_0.611  | 1333 | 20 | 1.02E-132 | NP_501877.2    | 80 | 478.019 | 362 | 291 | hypothetical protein F01G10.7                                           |
| Locus_1664_Transcript_7/7_Conf_0.667  | 1333 | 20 | 8.67E-132 | NP_501877.2    | 80 | 474.937 | 362 | 290 | hypothetical protein F01G10.7                                           |
| Locus_16640_Transcript_1/1_Conf_1.000 | 475  | 20 | 4.07E-64  | XP_002633392.1 | 85 | 247.284 | 158 | 135 | C. briggsae CBR-WHT-2 protein                                           |
| Locus_16641_Transcript_1/1_Conf_1.000 | 245  | 0  |           |                |    |         |     |     |                                                                         |
| Locus_16642_Transcript_1/1_Conf_1.000 | 617  | 2  | 1.99E-56  | NP_001024385.1 | 77 | 222.631 | 192 | 148 | hypothetical protein C09F12.3                                           |
| Locus_16643_Transcript_1/1_Conf_1.000 | 345  | 20 | 1.18E-18  | NP_740939.1    | 81 | 96.2857 | 72  | 59  | hypothetical protein Y105E8A.11                                         |
| Locus_16644_Transcript_1/1_Conf_1.000 | 270  | 2  | 2.69E-07  | XP_002646257.1 | 58 | 58.5362 | 91  | 53  | Hypothetical protein CBG11961                                           |
| Locus_16645_Transcript_1/2_Conf_1.000 | 368  | 1  | 5.00E-14  | CAR63617.1     | 79 | 80.8777 | 64  | 51  | hypothetical protein                                                    |
| Locus_16645_Transcript_2/2_Conf_1.000 | 368  | 1  | 5.00E-14  | CAR63617.1     | 79 | 80.8777 | 64  | 51  | hypothetical protein                                                    |
| Locus_16646_Transcript_1/1_Conf_1.000 | 507  | 20 | 5.06E-12  | EFO27069.1     | 65 | 74.3294 | 70  | 46  | Ulp1 protease                                                           |
| Locus_16647_Transcript_1/1_Conf_1.000 | 216  | 20 | 5.34E-16  | XP_002639908.1 | 72 | 87.4261 | 66  | 48  | Hypothetical protein CBG08236                                           |
| Locus_16648_Transcript_1/1_Conf_1.000 | 484  | 20 | 5.81E-50  | NP_001129769.1 | 76 | 200.29  | 156 | 120 | DAP (Death Associated Protein kinase) Like Kinase family member (dlk-1) |

|                                       |      |    |          |                |    |         |     |     |                                            |
|---------------------------------------|------|----|----------|----------------|----|---------|-----|-----|--------------------------------------------|
| Locus_16649_Transcript_1/1_Conf_1.000 | 550  | 20 | 8.09E-31 | XP_001897975.1 | 59 | 137.117 | 176 | 104 | SOH1 family protein                        |
| Locus_1665_Transcript_1/1_Conf_1.000  | 545  | 4  | 2.10E-68 | XP_002631447.1 | 86 | 261.922 | 160 | 139 | Hypothetical protein CBG03309              |
| Locus_16650_Transcript_1/1_Conf_1.000 | 271  | 0  |          |                |    |         |     |     |                                            |
| Locus_16651_Transcript_1/1_Conf_1.000 | 1146 | 20 | 1.43E-52 | NP_509671.3    | 59 | 211.46  | 300 | 178 | hypothetical protein ZC506.1               |
| Locus_16652_Transcript_1/1_Conf_1.000 | 329  | 4  | 1.79E-43 | NP_001022254.1 | 88 | 178.718 | 104 | 92  | hypothetical protein M05D6.9               |
| Locus_16653_Transcript_1/1_Conf_1.000 | 246  | 20 | 1.23E-28 | XP_002634963.1 | 89 | 129.413 | 73  | 65  | C. briggsae CBR-DIS-3 protein              |
| Locus_16654_Transcript_1/1_Conf_1.000 | 445  | 0  |          |                |    |         |     |     |                                            |
| Locus_16655_Transcript_1/1_Conf_1.000 | 647  | 20 | 6.70E-45 | XP_002661818.1 | 64 | 184.496 | 212 | 137 | PREDICTED: Gap-Pol polyprotein-like        |
| Locus_16656_Transcript_1/1_Conf_1.000 | 491  | 0  |          |                |    |         |     |     |                                            |
| Locus_16657_Transcript_1/1_Conf_1.000 | 269  | 20 | 4.02E-19 | XP_002636816.1 | 61 | 97.8265 | 86  | 53  | Hypothetical protein CBG09260              |
| Locus_16658_Transcript_1/1_Conf_1.000 | 213  | 0  |          |                |    |         |     |     |                                            |
| Locus_16659_Transcript_1/1_Conf_1.000 | 142  | 0  |          |                |    |         |     |     |                                            |
| Locus_1666_Transcript_1/1_Conf_1.000  | 280  | 20 | 1.56E-15 | XP_002634963.1 | 64 | 85.8853 | 93  | 60  | C. briggsae CBR-DIS-3 protein              |
| Locus_16660_Transcript_1/1_Conf_1.000 | 372  | 20 | 7.39E-21 | NP_509237.1    | 69 | 103.605 | 102 | 71  | SaPosin-like Protein family member (spp-4) |
| Locus_16661_Transcript_1/1_Conf_1.000 | 270  | 0  |          |                |    |         |     |     |                                            |
| Locus_16662_Transcript_1/1_Conf_1.000 | 301  | 0  |          |                |    |         |     |     |                                            |
| Locus_16663_Transcript_1/1_Conf_1.000 | 162  | 0  |          |                |    |         |     |     |                                            |
| Locus_16664_Transcript_1/1_Conf_1.000 | 155  | 2  | 8.79E-06 | EFO27087.1     | 74 | 53.5286 | 51  | 38  | hypothetical protein LOAG_01392            |
| Locus_16665_Transcript_1/1_Conf_1.000 | 139  | 6  | 3.36E-10 | NP_498641.1    | 83 | 68.1662 | 42  | 35  | hypothetical protein H14A12.3              |
| Locus_16666_Transcript_1/1_Conf_1.000 | 175  | 0  |          |                |    |         |     |     |                                            |

|                                       |      |    |           |                |     |         |     |     |                                                              |
|---------------------------------------|------|----|-----------|----------------|-----|---------|-----|-----|--------------------------------------------------------------|
| Locus_16667_Transcript_1/1_Conf_1.000 | 504  | 20 | 8.23E-92  | 2107           | 100 | 339.347 | 159 | 159 | Human Complement Component C3b                               |
| Locus_16668_Transcript_1/1_Conf_1.000 | 575  | 20 | 9.63E-65  | NP_504498.2    | 76  | 249.98  | 193 | 148 | hypothetical protein F25B4.7                                 |
| Locus_16669_Transcript_1/1_Conf_1.000 | 152  | 20 | 6.29E-20  | NP_871645.1    | 98  | 100.523 | 50  | 49  | hypothetical protein C28H8.11                                |
| Locus_1667_Transcript_1/1_Conf_1.000  | 1874 | 20 | 3.31E-154 | XP_002643742.1 | 70  | 550.051 | 582 | 409 | Hypothetical protein CBG01937                                |
| Locus_16670_Transcript_1/1_Conf_1.000 | 575  | 0  |           |                |     |         |     |     |                                                              |
| Locus_16671_Transcript_1/1_Conf_1.000 | 590  | 5  | 1.30E-27  | CAB04569.3     | 60  | 126.716 | 182 | 110 | C. elegans protein K05C4.5, confirmed by transcript evidence |
| Locus_16672_Transcript_1/1_Conf_1.000 | 560  | 20 | 1.73E-52  | NP_490726.1    | 77  | 209.149 | 179 | 139 | hypothetical protein R119.3                                  |



|                                       |      |    |           |                |    |         |     |     |                                                                       |
|---------------------------------------|------|----|-----------|----------------|----|---------|-----|-----|-----------------------------------------------------------------------|
| Locus_16673_Transcript_1/1_Conf_1.000 | 260  | 0  |           |                |    |         |     |     |                                                                       |
| Locus_16674_Transcript_1/1_Conf_1.000 | 426  | 20 | 3.37E-50  | XP_001897105.1 | 81 | 201.06  | 133 | 109 | protein phosphatase 2A, regulatory subunit B'                         |
| Locus_16675_Transcript_1/1_Conf_1.000 | 140  | 6  | 2.49E-05  | EFO25333.1     | 62 | 51.9878 | 48  | 30  | hypothetical protein LOAG_03154                                       |
| Locus_16676_Transcript_1/1_Conf_1.000 | 409  | 0  |           |                |    |         |     |     |                                                                       |
| Locus_16677_Transcript_1/1_Conf_1.000 | 221  | 13 | 5.91E-18  | ACV31107.1     | 85 | 93.9745 | 67  | 57  | Hypothetical protein F22D3.2b                                         |
| Locus_16678_Transcript_1/2_Conf_1.000 | 546  | 20 | 1.35E-46  | EFO28378.1     | 78 | 189.504 | 137 | 107 | mediator complex subunit 31                                           |
| Locus_16678_Transcript_2/2_Conf_1.000 | 545  | 20 | 1.01E-46  | EFO28378.1     | 78 | 189.889 | 137 | 107 | mediator complex subunit 31                                           |
| Locus_16679_Transcript_1/1_Conf_1.000 | 923  | 10 | 1.19E-101 | EFO20752.1     | 75 | 374.015 | 292 | 219 | AMOP domain-containing protein                                        |
| Locus_1668_Transcript_1/2_Conf_1.000  | 1303 | 20 | 9.77E-64  | NP_492076.1    | 68 | 248.825 | 302 | 207 | hypothetical protein F52A8.6                                          |
| Locus_1668_Transcript_2/2_Conf_1.000  | 1116 | 20 | 5.62E-62  | NP_001040668.1 | 81 | 242.662 | 200 | 163 | hypothetical protein F52A8.6                                          |
| Locus_16680_Transcript_1/1_Conf_1.000 | 230  | 20 | 9.29E-32  | NP_502751.1    | 89 | 139.813 | 76  | 68  | TRAnSformer : XX animals transformed into males family member (tra-3) |
| Locus_16681_Transcript_1/1_Conf_1.000 | 650  | 0  |           |                |    |         |     |     |                                                                       |

|                                       |      |    |          |                |     |         |     |     |                                                                                                     |
|---------------------------------------|------|----|----------|----------------|-----|---------|-----|-----|-----------------------------------------------------------------------------------------------------|
| Locus_16682_Transcript_1/1_Conf_1.000 | 197  | 0  |          |                |     |         |     |     |                                                                                                     |
| Locus_16683_Transcript_1/1_Conf_1.000 | 275  | 20 | 8.53E-46 | XP_002834824.1 | 100 | 186.422 | 91  | 91  | PREDICTED: LOW QUALITY PROTEIN:<br>guanine nucleotide-binding protein subunit<br>beta-2-like 1-like |
| Locus_16684_Transcript_1/1_Conf_1.000 | 284  | 20 | 9.72E-29 | EFO16325.1     | 69  | 129.798 | 100 | 69  | hypothetical protein LOAG_12180                                                                     |
| Locus_16685_Transcript_1/1_Conf_1.000 | 507  | 20 | 3.05E-33 | EFO21515.1     | 64  | 144.821 | 170 | 109 | guanylate kinase                                                                                    |
| Locus_16686_Transcript_1/1_Conf_1.000 | 206  | 2  | 1.29E-09 | NP_495911.3    | 63  | 66.2402 | 66  | 42  | hypothetical protein C18E9.5                                                                        |
| Locus_16687_Transcript_1/1_Conf_1.000 | 286  | 0  |          |                |     |         |     |     |                                                                                                     |
| Locus_16688_Transcript_1/1_Conf_1.000 | 1233 | 20 | 9.46E-37 | XP_001892593.1 | 54  | 159.073 | 340 | 185 | KH domain containing protein                                                                        |
| Locus_16689_Transcript_1/1_Conf_1.000 | 429  | 0  |          |                |     |         |     |     |                                                                                                     |
| Locus_1669_Transcript_1/2_Conf_1.000  | 1412 | 20 | 9.12E-95 | NP_497100.1    | 63  | 352.058 | 419 | 264 | human Activating Signal Cointegrator<br>homolog family member (asc-1)                               |
| Locus_1669_Transcript_2/2_Conf_1.000  | 1412 | 20 | 9.12E-95 | NP_497100.1    | 63  | 352.058 | 419 | 264 | human Activating Signal Cointegrator<br>homolog family member (asc-1)                               |
| Locus_16690_Transcript_1/1_Conf_1.000 | 210  | 20 | 2.85E-17 | XP_002645317.1 | 75  | 91.6633 | 69  | 52  | C. briggsae CBR-TRK-1 protein                                                                       |
| Locus_16691_Transcript_1/1_Conf_1.000 | 346  | 20 | 4.31E-45 | CAR63665.1     | 92  | 184.111 | 98  | 91  | hypothetical protein                                                                                |
| Locus_16692_Transcript_1/1_Conf_1.000 | 132  | 20 | 2.87E-09 | A8XJL7.2       | 88  | 65.0846 | 43  | 38  | Serine/threonine-protein kinase sax-1                                                               |
| Locus_16693_Transcript_1/1_Conf_1.000 | 181  | 0  |          |                |     |         |     |     |                                                                                                     |
| Locus_16694_Transcript_1/1_Conf_1.000 | 375  | 0  |          |                |     |         |     |     |                                                                                                     |
| Locus_16695_Transcript_1/1_Conf_1.000 | 568  | 20 | 5.69E-38 | EFO25439.1     | 70  | 160.999 | 161 | 113 | srpr protein                                                                                        |
| Locus_16696_Transcript_1/1_Conf_1.000 | 246  | 0  |          |                |     |         |     |     |                                                                                                     |
| Locus_16697_Transcript_1/1_Conf_1.000 | 291  | 0  |          |                |     |         |     |     |                                                                                                     |
| Locus_16698_Transcript_1/1_Conf_1.000 | 280  | 0  |          |                |     |         |     |     |                                                                                                     |

|                                       |     |    |          |                |     |         |     |    |                                                                         |
|---------------------------------------|-----|----|----------|----------------|-----|---------|-----|----|-------------------------------------------------------------------------|
| Locus_16699_Transcript_1/1_Conf_1.000 | 301 | 20 | 3.99E-35 | EFO21757.1     | 85  | 150.984 | 99  | 85 | hypothetical protein LOAG_06731                                         |
| Locus_167_Transcript_1/1_Conf_1.000   | 243 | 0  |          |                |     |         |     |    |                                                                         |
| Locus_1670_Transcript_1/1_Conf_1.000  | 195 | 13 | 2.15E-12 | NP_493741.1    | 71  | 75.485  | 59  | 42 | hypothetical protein W10D9.5                                            |
| Locus_16700_Transcript_1/1_Conf_1.000 | 235 | 0  |          |                |     |         |     |    |                                                                         |
| Locus_16701_Transcript_1/1_Conf_1.000 | 146 | 20 | 6.35E-12 | NP_510249.2    | 91  | 73.9442 | 36  | 33 | TREhalase family member (tre-4)                                         |
| Locus_16702_Transcript_1/1_Conf_1.000 | 255 | 0  |          |                |     |         |     |    |                                                                         |
| Locus_16703_Transcript_1/2_Conf_1.000 | 264 | 0  |          |                |     |         |     |    |                                                                         |
| Locus_16703_Transcript_2/2_Conf_1.000 | 131 | 0  |          |                |     |         |     |    |                                                                         |
| Locus_16704_Transcript_1/1_Conf_1.000 | 220 | 20 | 3.12E-35 | ACC44768.1     | 100 | 151.369 | 72  | 72 | APA-2                                                                   |
| Locus_16705_Transcript_1/1_Conf_1.000 | 343 | 3  | 1.55E-10 | NP_001021445.1 | 60  | 69.3218 | 106 | 64 | DAP (Death Associated Protein kinase) Like Kinase family member (dlk-1) |
| Locus_16706_Transcript_1/1_Conf_1.000 | 284 | 0  |          |                |     |         |     |    |                                                                         |
| Locus_16707_Transcript_1/1_Conf_1.000 | 197 | 0  |          |                |     |         |     |    |                                                                         |
| Locus_16708_Transcript_1/1_Conf_1.000 | 330 | 20 | 1.16E-34 | NP_496959.1    | 89  | 149.443 | 107 | 96 | EATing: abnormal pharyngeal pumping family member (eat-2)               |

|                                       |     |    |          |                |    |         |     |     |                                                                         |
|---------------------------------------|-----|----|----------|----------------|----|---------|-----|-----|-------------------------------------------------------------------------|
| Locus_16709_Transcript_1/1_Conf_1.000 | 533 | 6  | 7.18E-10 | NP_001021054.1 | 50 | 67.3958 | 174 | 87  | Suppressor with Morphological effect on Genitalia family member (smg-1) |
| Locus_1671_Transcript_1/1_Conf_1.000  | 215 | 1  | 1.24E-04 | XP_002405836.1 | 64 | 49.6766 | 34  | 22  | conserved hypothetical protein                                          |
| Locus_16710_Transcript_1/1_Conf_1.000 | 148 | 0  |          |                |    |         |     |     |                                                                         |
| Locus_16711_Transcript_1/1_Conf_1.000 | 727 | 2  | 5.20E-66 | XP_002639917.1 | 73 | 254.988 | 241 | 176 | C. briggsae CBR-SMGL-1 protein                                          |
| Locus_16712_Transcript_1/1_Conf_1.000 | 160 | 5  | 2.80E-12 | EFO19924.1     | 79 | 75.0998 | 53  | 42  | hypothetical protein LOAG_08567                                         |
| Locus_16713_Transcript_1/1_Conf_1.000 | 303 | 0  |          |                |    |         |     |     |                                                                         |
| Locus_16714_Transcript_1/1_Conf_1.000 | 151 | 0  |          |                |    |         |     |     |                                                                         |
| Locus_16715_Transcript_1/1_Conf_1.000 | 354 | 0  |          |                |    |         |     |     |                                                                         |
| Locus_16716_Transcript_1/1_Conf_1.000 | 337 | 20 | 1.45E-37 | NP_492905.1    | 97 | 159.073 | 88  | 86  | hypothetical protein H25P06.1                                           |
| Locus_16717_Transcript_1/1_Conf_1.000 | 302 | 20 | 1.57E-31 | XP_001152859.1 | 98 | 139.043 | 67  | 66  | PREDICTED: hypothetical protein                                         |
| Locus_16718_Transcript_1/1_Conf_1.000 | 495 | 0  |          |                |    |         |     |     |                                                                         |
| Locus_16719_Transcript_1/1_Conf_1.000 | 147 | 20 | 5.92E-10 | XP_001896664.1 | 81 | 67.3958 | 48  | 39  | Protein kinase domain containing protein                                |
| Locus_1672_Transcript_1/1_Conf_1.000  | 490 | 0  |          |                |    |         |     |     |                                                                         |
| Locus_16720_Transcript_1/1_Conf_1.000 | 134 | 0  |          |                |    |         |     |     |                                                                         |
| Locus_16721_Transcript_1/1_Conf_1.000 | 396 | 20 | 1.82E-27 | EFO21962.1     | 58 | 125.561 | 130 | 76  | TK/EGFR protein kinase                                                  |
| Locus_16722_Transcript_1/1_Conf_1.000 | 174 | 0  |          |                |    |         |     |     |                                                                         |
| Locus_16723_Transcript_1/1_Conf_1.000 | 396 | 20 | 3.18E-56 | AAA36105.1     | 97 | 221.09  | 106 | 103 | gamma-interferon-inducible protein precursor                            |
| Locus_16724_Transcript_1/1_Conf_1.000 | 137 | 0  |          |                |    |         |     |     |                                                                         |
| Locus_16725_Transcript_1/1_Conf_1.000 | 166 | 0  |          |                |    |         |     |     |                                                                         |
| Locus_16726_Transcript_1/1_Conf_1.000 | 384 | 20 | 3.84E-38 | NP_507509.3    | 79 | 160.999 | 126 | 100 | hypothetical protein C06H5.6                                            |
| Locus_16727_Transcript_1/1_Conf_1.000 | 482 | 0  |          |                |    |         |     |     |                                                                         |
| Locus_16728_Transcript_1/1_Conf_1.000 | 235 | 4  | 1.64E-12 | NP_872065.1    | 82 | 75.8702 | 45  | 37  | hypothetical protein F35C11.7                                           |

|                                       |      |    |          |                |     |         |     |     |                                                             |
|---------------------------------------|------|----|----------|----------------|-----|---------|-----|-----|-------------------------------------------------------------|
| Locus_16729_Transcript_1/1_Conf_1.000 | 495  | 20 | 2.50E-21 | NP_493658.2    | 70  | 105.145 | 131 | 93  | hypothetical protein C50D2.8                                |
| Locus_1673_Transcript_1/1_Conf_1.000  | 907  | 0  |          |                |     |         |     |     |                                                             |
| Locus_16730_Transcript_1/1_Conf_1.000 | 690  | 0  |          |                |     |         |     |     |                                                             |
| Locus_16731_Transcript_1/1_Conf_1.000 | 178  | 0  |          |                |     |         |     |     |                                                             |
| Locus_16732_Transcript_1/1_Conf_1.000 | 460  | 20 | 6.55E-06 | XP_392160.2    | 48  | 53.9138 | 134 | 65  | PREDICTED: similar to ubiquitin specific protease 3         |
| Locus_16733_Transcript_1/1_Conf_1.000 | 341  | 20 | 3.00E-51 | XP_001509789.1 | 100 | 204.527 | 112 | 112 | PREDICTED: hypothetical protein, partial                    |
| Locus_16734_Transcript_1/1_Conf_1.000 | 237  | 0  |          |                |     |         |     |     |                                                             |
| Locus_16735_Transcript_1/1_Conf_1.000 | 262  | 4  | 1.44E-16 | NP_001122565.1 | 60  | 89.3521 | 107 | 65  | Variable ABnormal morphology family member (vab-10)         |
| Locus_16736_Transcript_1/2_Conf_1.000 | 619  | 3  | 2.17E-26 | NP_491462.2    | 71  | 122.865 | 92  | 66  | C-type LECTin family member (clec-90)                       |
| Locus_16736_Transcript_2/2_Conf_1.000 | 619  | 3  | 4.84E-26 | NP_491462.2    | 71  | 121.709 | 92  | 66  | C-type LECTin family member (clec-90)                       |
| Locus_16737_Transcript_1/1_Conf_1.000 | 309  | 0  |          |                |     |         |     |     |                                                             |
| Locus_16738_Transcript_1/1_Conf_1.000 | 332  | 0  |          |                |     |         |     |     |                                                             |
| Locus_16739_Transcript_1/1_Conf_1.000 | 1007 | 3  | 1.19E-28 | NP_492325.2    | 49  | 131.724 | 308 | 153 | hypothetical protein R05D11.6                               |
| Locus_1674_Transcript_1/1_Conf_1.000  | 843  | 0  |          |                |     |         |     |     |                                                             |
| Locus_16740_Transcript_1/1_Conf_1.000 | 177  | 2  | 1.16E-10 | NP_495620.1    | 75  | 69.707  | 58  | 44  | hypothetical protein B0495.9                                |
| Locus_16741_Transcript_1/1_Conf_1.000 | 152  | 0  |          |                |     |         |     |     |                                                             |
| Locus_16742_Transcript_1/1_Conf_1.000 | 250  | 0  |          |                |     |         |     |     |                                                             |
| Locus_16743_Transcript_1/1_Conf_1.000 | 168  | 0  |          |                |     |         |     |     |                                                             |
| Locus_16744_Transcript_1/1_Conf_1.000 | 322  | 20 | 1.30E-25 | XP_001894170.1 | 66  | 119.398 | 106 | 70  | Ribonucleases P/MRP protein subunit POP1 containing protein |
| Locus_16745_Transcript_1/1_Conf_1.000 | 174  | 0  |          |                |     |         |     |     |                                                             |

|                                       |      |    |           |                |     |         |     |     |                                                                                            |
|---------------------------------------|------|----|-----------|----------------|-----|---------|-----|-----|--------------------------------------------------------------------------------------------|
| Locus_16746_Transcript_1/1_Conf_1.000 | 258  | 20 | 8.70E-38  | XP_001898882.1 | 92  | 159.844 | 85  | 79  | casein kinase 1, delta                                                                     |
| Locus_16747_Transcript_1/1_Conf_1.000 | 1057 | 20 | 2.17E-153 | XP_001901272.1 | 91  | 546.199 | 352 | 322 | DEAD                                                                                       |
| Locus_16748_Transcript_1/1_Conf_1.000 | 240  | 20 | 7.82E-07  | EFN81401.1     | 65  | 56.9954 | 61  | 40  | Putative AC transposase                                                                    |
| Locus_16749_Transcript_1/1_Conf_1.000 | 264  | 0  |           |                |     |         |     |     |                                                                                            |
| Locus_1675_Transcript_1/1_Conf_1.000  | 230  | 1  | 1.49E-05  | ACV86995.1     | 74  | 52.7582 | 39  | 29  | gut-associated larval antigen-1                                                            |
| Locus_16750_Transcript_1/1_Conf_1.000 | 191  | 0  |           |                |     |         |     |     |                                                                                            |
| Locus_16751_Transcript_1/1_Conf_1.000 | 293  | 0  |           |                |     |         |     |     |                                                                                            |
| Locus_16752_Transcript_1/1_Conf_1.000 | 145  | 0  |           |                |     |         |     |     |                                                                                            |
| Locus_16753_Transcript_1/1_Conf_1.000 | 364  | 20 | 1.15E-26  | NP_506077.1    | 70  | 122.865 | 121 | 85  | hypothetical protein F55C5.2                                                               |
| Locus_16754_Transcript_1/1_Conf_1.000 | 192  | 0  |           |                |     |         |     |     |                                                                                            |
| Locus_16755_Transcript_1/1_Conf_1.000 | 150  | 0  |           |                |     |         |     |     |                                                                                            |
| Locus_16756_Transcript_1/1_Conf_1.000 | 518  | 3  | 6.24E-05  | ZP_07577412.1  | 48  | 50.8322 | 131 | 64  | chromosome segregation protein SMC                                                         |
| Locus_16757_Transcript_1/1_Conf_1.000 | 138  | 20 | 1.36E-19  | XP_002812342.1 | 100 | 99.3673 | 45  | 45  | PREDICTED: ornithine decarboxylase-like                                                    |
| Locus_16758_Transcript_1/1_Conf_1.000 | 173  | 0  |           |                |     |         |     |     |                                                                                            |
| Locus_16759_Transcript_1/1_Conf_1.000 | 1278 | 20 | 2.29E-17  | NP_492467.1    | 55  | 94.7449 | 219 | 122 | mammalian ASPM (Abnormal SPindles and primary Microcephaly) homolog family member (aspm-1) |
| Locus_1676_Transcript_1/1_Conf_1.000  | 1539 | 20 | 0         | NP_491363.1    | 88  | 835.869 | 513 | 455 | Dynein Heavy Chain family member (dhc-1)                                                   |
| Locus_16760_Transcript_1/1_Conf_1.000 | 174  | 0  |           |                |     |         |     |     |                                                                                            |

|                                       |      |    |           |                |     |         |     |     |                                                                                                                                   |
|---------------------------------------|------|----|-----------|----------------|-----|---------|-----|-----|-----------------------------------------------------------------------------------------------------------------------------------|
| Locus_16761_Transcript_1/1_Conf_1.000 | 704  | 20 | 2.18E-82  | XP_002645723.1 | 81  | 309.301 | 222 | 180 | C. briggsae CBR-GCK-4 protein                                                                                                     |
| Locus_16762_Transcript_1/1_Conf_1.000 | 300  | 6  | 1.37E-27  | XP_541499.2    | 89  | 125.946 | 75  | 67  | PREDICTED: similar to Orphan sodium- and chloride-dependent neurotransmitter transporter NTT5 (Solute carrier family 6 member 16) |
| Locus_16763_Transcript_1/1_Conf_1.000 | 188  | 0  |           |                |     |         |     |     |                                                                                                                                   |
| Locus_16764_Transcript_1/1_Conf_1.000 | 226  | 4  | 2.92E-09  | XP_001899164.1 | 67  | 65.0846 | 62  | 42  | Leucine Rich Repeat family protein                                                                                                |
| Locus_16765_Transcript_1/1_Conf_1.000 | 311  | 0  |           |                |     |         |     |     |                                                                                                                                   |
| Locus_16766_Transcript_1/1_Conf_1.000 | 1066 | 20 | 1.13E-149 | XP_002641970.1 | 87  | 533.872 | 354 | 309 | Hypothetical protein CBG16677                                                                                                     |
| Locus_16767_Transcript_1/1_Conf_1.000 | 465  | 20 | 2.62E-18  | EFO24621.1     | 66  | 95.1301 | 101 | 67  | DNA repair protein Rad4 containing protein                                                                                        |
| Locus_16768_Transcript_1/1_Conf_1.000 | 540  | 20 | 2.30E-27  | XP_002633766.1 | 70  | 125.561 | 151 | 106 | Hypothetical protein CBG03455                                                                                                     |
| Locus_16769_Transcript_1/1_Conf_1.000 | 263  | 2  | 1.49E-05  | EFO27866.1     | 52  | 52.7582 | 89  | 47  | GTPase activating protein and VPS9 domains 1                                                                                      |
| Locus_1677_Transcript_1/1_Conf_1.000  | 935  | 0  |           |                |     |         |     |     |                                                                                                                                   |
| Locus_16770_Transcript_1/1_Conf_1.000 | 145  | 20 | 6.33E-20  | XP_522295.2    | 100 | 100.523 | 48  | 48  | PREDICTED: T-cell, immune regulator 1                                                                                             |
| Locus_16771_Transcript_1/1_Conf_1.000 | 2206 | 11 | 2.15E-06  | EDV09471.1     | 33  | 59.3066 | 520 | 173 | conserved hypothetical protein                                                                                                    |
| Locus_16772_Transcript_1/1_Conf_1.000 | 165  | 0  |           |                |     |         |     |     |                                                                                                                                   |
| Locus_16773_Transcript_1/1_Conf_1.000 | 971  | 0  |           |                |     |         |     |     |                                                                                                                                   |
| Locus_16774_Transcript_1/1_Conf_1.000 | 463  | 0  |           |                |     |         |     |     |                                                                                                                                   |

|                                       |     |    |          |                |     |         |     |    |                                                       |
|---------------------------------------|-----|----|----------|----------------|-----|---------|-----|----|-------------------------------------------------------|
| Locus_16775_Transcript_1/1_Conf_1.000 | 197 | 20 | 3.30E-29 | CAG33263.1     | 100 | 131.339 | 65  | 65 | PSMB10                                                |
| Locus_16776_Transcript_1/1_Conf_1.000 | 400 | 0  |          |                |     |         |     |    |                                                       |
| Locus_16777_Transcript_1/1_Conf_1.000 | 147 | 20 | 3.96E-14 | NP_495614.3    | 87  | 81.2629 | 49  | 43 | Na/H exchanger family member (nhx-2)                  |
| Locus_16778_Transcript_1/1_Conf_1.000 | 286 | 0  |          |                |     |         |     |    |                                                       |
| Locus_16779_Transcript_1/1_Conf_1.000 | 368 | 0  |          |                |     |         |     |    |                                                       |
| Locus_1678_Transcript_1/1_Conf_1.000  | 372 | 20 | 8.73E-22 | XP_001901465.1 | 65  | 106.686 | 123 | 80 | steroid hormone receptor                              |
| Locus_16780_Transcript_1/1_Conf_1.000 | 160 | 0  |          |                |     |         |     |    |                                                       |
| Locus_16781_Transcript_1/1_Conf_1.000 | 309 | 1  | 2.76E-04 | XP_001648563.1 | 58  | 48.521  | 72  | 42 | bone morphogenetic protein receptor type II, putative |
| Locus_16782_Transcript_1/1_Conf_1.000 | 353 | 2  | 1.34E-06 | XP_001894613.1 | 53  | 56.225  | 95  | 51 | hypothetical protein                                  |
| Locus_16783_Transcript_1/1_Conf_1.000 | 456 | 0  |          |                |     |         |     |    |                                                       |
| Locus_16784_Transcript_1/1_Conf_1.000 | 478 | 0  |          |                |     |         |     |    |                                                       |
| Locus_16785_Transcript_1/1_Conf_1.000 | 232 | 0  |          |                |     |         |     |    |                                                       |
| Locus_16786_Transcript_1/1_Conf_1.000 | 196 | 0  |          |                |     |         |     |    |                                                       |
| Locus_16787_Transcript_1/1_Conf_1.000 | 339 | 0  |          |                |     |         |     |    |                                                       |



|                                       |      |    |          |                |    |         |     |    |                                                                         |
|---------------------------------------|------|----|----------|----------------|----|---------|-----|----|-------------------------------------------------------------------------|
| Locus_16788_Transcript_1/1_Conf_1.000 | 717  | 20 | 2.08E-19 | NP_001024724.2 | 49 | 100.138 | 202 | 99 | EGg Laying defective family member (egl-15)                             |
| Locus_16789_Transcript_1/1_Conf_1.000 | 407  | 0  |          |                |    |         |     |    |                                                                         |
| Locus_1679_Transcript_1/2_Conf_1.000  | 1523 | 0  |          |                |    |         |     |    |                                                                         |
| Locus_1679_Transcript_2/2_Conf_1.000  | 1286 | 0  |          |                |    |         |     |    |                                                                         |
| Locus_16790_Transcript_1/1_Conf_1.000 | 295  | 20 | 2.71E-15 | CBA11612.1     | 53 | 85.1149 | 104 | 56 | C. elegans protein F54F3.1b, partially confirmed by transcript evidence |
| Locus_16791_Transcript_1/1_Conf_1.000 | 305  | 2  | 9.16E-32 | NP_499205.1    | 73 | 139.813 | 101 | 74 | hypothetical protein K03H1.5                                            |

|                                       |      |    |           |                |     |         |     |     |                                                                |
|---------------------------------------|------|----|-----------|----------------|-----|---------|-----|-----|----------------------------------------------------------------|
| Locus_16792_Transcript_1/1_Conf_1.000 | 256  | 0  |           |                |     |         |     |     |                                                                |
| Locus_16793_Transcript_1/1_Conf_1.000 | 156  | 20 | 1.40E-11  | CBL43465.1     | 88  | 72.7886 | 51  | 45  | C. elegans protein Y55D9A.1d, confirmed by transcript evidence |
| Locus_16794_Transcript_1/1_Conf_1.000 | 333  | 0  |           |                |     |         |     |     |                                                                |
| Locus_16795_Transcript_1/1_Conf_1.000 | 228  | 11 | 1.11E-08  | NP_001024812.1 | 76  | 63.1586 | 38  | 29  | hypothetical protein M163.8                                    |
| Locus_16796_Transcript_1/1_Conf_1.000 | 369  | 20 | 8.72E-38  | NP_741200.1    | 78  | 159.844 | 123 | 97  | Displaced Gonad family member (dig-1)                          |
| Locus_16797_Transcript_1/1_Conf_1.000 | 188  | 20 | 1.40E-27  | XP_002945331.1 | 100 | 125.946 | 62  | 62  | PREDICTED: heat shock cognate 71 kDa protein-like, partial     |
| Locus_16798_Transcript_1/1_Conf_1.000 | 175  | 0  |           |                |     |         |     |     |                                                                |
| Locus_16799_Transcript_1/1_Conf_1.000 | 311  | 20 | 4.36E-34  | XP_001897050.1 | 80  | 147.517 | 103 | 83  | Endonuclease III-like protein 1                                |
| Locus_168_Transcript_1/3_Conf_0.273   | 427  | 0  |           |                |     |         |     |     |                                                                |
| Locus_168_Transcript_2/3_Conf_0.364   | 569  | 0  |           |                |     |         |     |     |                                                                |
| Locus_168_Transcript_3/3_Conf_0.818   | 764  | 7  | 8.08E-12  | XP_001895031.1 | 71  | 75.0998 | 57  | 41  | hypothetical protein Bm1_17870                                 |
| Locus_1680_Transcript_1/1_Conf_1.000  | 1281 | 20 | 5.50E-120 | XP_002646302.1 | 68  | 435.647 | 416 | 284 | Hypothetical protein CBG12009                                  |
| Locus_16800_Transcript_1/1_Conf_1.000 | 283  | 0  |           |                |     |         |     |     |                                                                |
| Locus_16801_Transcript_1/1_Conf_1.000 | 144  | 0  |           |                |     |         |     |     |                                                                |
| Locus_16802_Transcript_1/1_Conf_1.000 | 420  | 20 | 3.21E-16  | ADI61822.1     | 58  | 88.1965 | 92  | 54  | endonuclease-reverse transcriptase                             |
| Locus_16803_Transcript_1/1_Conf_1.000 | 252  | 0  |           |                |     |         |     |     |                                                                |
| Locus_16804_Transcript_1/1_Conf_1.000 | 267  | 20 | 2.96E-38  | XP_002632657.1 | 90  | 161.384 | 86  | 78  | C. briggsae CBR-TRA-3 protein                                  |
| Locus_16805_Transcript_1/1_Conf_1.000 | 322  | 20 | 1.26E-12  | EFO18611.1     | 71  | 76.2554 | 71  | 51  | hypothetical protein LOAG_09883                                |
| Locus_16806_Transcript_1/1_Conf_1.000 | 156  | 0  |           |                |     |         |     |     |                                                                |
| Locus_16807_Transcript_1/1_Conf_1.000 | 184  | 1  | 6.35E-04  | XP_002636985.1 | 61  | 47.3654 | 52  | 32  | Hypothetical protein CBG09473                                  |
| Locus_16808_Transcript_1/1_Conf_1.000 | 555  | 5  | 2.69E-45  | XP_002645672.1 | 71  | 185.267 | 184 | 132 | Hypothetical protein CBG07319                                  |
| Locus_16809_Transcript_1/1_Conf_1.000 | 310  | 0  |           |                |     |         |     |     |                                                                |
| Locus_1681_Transcript_1/1_Conf_1.000  | 140  | 2  | 7.75E-07  | XP_002630428.1 | 75  | 56.9954 | 41  | 31  | Hypothetical protein CBG11154                                  |

|                                       |      |    |          |                |    |         |     |     |                                             |
|---------------------------------------|------|----|----------|----------------|----|---------|-----|-----|---------------------------------------------|
| Locus_16810_Transcript_1/1_Conf_1.000 | 301  | 2  | 9.58E-05 | NP_498634.1    | 51 | 50.0618 | 97  | 50  | hypothetical protein T20B12.3               |
| Locus_16811_Transcript_1/1_Conf_1.000 | 129  | 0  |          |                |    |         |     |     |                                             |
| Locus_16812_Transcript_1/1_Conf_1.000 | 851  | 5  | 2.07E-17 | XP_001893623.1 | 48 | 93.9745 | 283 | 137 | hypothetical protein Bm1_10755              |
| Locus_16813_Transcript_1/1_Conf_1.000 | 363  | 0  |          |                |    |         |     |     |                                             |
| Locus_16814_Transcript_1/1_Conf_1.000 | 655  | 19 | 1.01E-27 | NP_495774.1    | 51 | 127.487 | 199 | 103 | hypothetical protein F14E5.4                |
| Locus_16815_Transcript_1/1_Conf_1.000 | 249  | 20 | 1.45E-29 | AAV40104.1     | 89 | 132.494 | 82  | 73  | immunoglobulin mu heavy chain               |
| Locus_16816_Transcript_1/1_Conf_1.000 | 136  | 0  |          |                |    |         |     |     |                                             |
| Locus_16817_Transcript_1/1_Conf_1.000 | 166  | 0  |          |                |    |         |     |     |                                             |
| Locus_16818_Transcript_1/1_Conf_1.000 | 171  | 19 | 1.29E-09 | NP_504227.3    | 82 | 66.2402 | 40  | 33  | hypothetical protein Y47D7A.14              |
| Locus_16819_Transcript_1/1_Conf_1.000 | 173  | 20 | 3.61E-20 | NP_498777.2    | 92 | 101.293 | 57  | 53  | hypothetical protein C14B9.8                |
| Locus_1682_Transcript_1/1_Conf_1.000  | 1194 | 3  | 4.08E-05 | XP_001953944.1 | 37 | 53.9138 | 312 | 118 | GF18021                                     |
| Locus_16820_Transcript_1/1_Conf_1.000 | 404  | 6  | 3.91E-06 | XP_002639968.1 | 51 | 54.6842 | 106 | 55  | Hypothetical protein CBG10792               |
| Locus_16821_Transcript_1/1_Conf_1.000 | 235  | 0  |          |                |    |         |     |     |                                             |
| Locus_16822_Transcript_1/1_Conf_1.000 | 407  | 2  | 1.02E-06 | NP_505659.1    | 59 | 56.6102 | 54  | 32  | hypothetical protein K07C5.3                |
| Locus_16823_Transcript_1/1_Conf_1.000 | 272  | 0  |          |                |    |         |     |     |                                             |
| Locus_16824_Transcript_1/1_Conf_1.000 | 591  | 4  | 4.14E-13 | EFO18237.1     | 51 | 78.5666 | 198 | 101 | hypothetical protein LOAG_10257             |
| Locus_16825_Transcript_1/1_Conf_1.000 | 301  | 0  |          |                |    |         |     |     |                                             |
| Locus_16826_Transcript_1/1_Conf_1.000 | 188  | 20 | 2.40E-11 | ZP_04173150.1  | 65 | 72.0182 | 60  | 39  | LPXTG-motif cell wall anchor domain protein |
| Locus_16827_Transcript_1/1_Conf_1.000 | 310  | 0  |          |                |    |         |     |     |                                             |
| Locus_16828_Transcript_1/1_Conf_1.000 | 642  | 0  |          |                |    |         |     |     |                                             |
| Locus_16829_Transcript_1/1_Conf_1.000 | 501  | 3  | 2.24E-09 | NP_490949.3    | 79 | 65.4698 | 54  | 43  | ABC Transporter family member (abt-2)       |

|                                       |     |    |          |                |     |         |     |     |                                                                |
|---------------------------------------|-----|----|----------|----------------|-----|---------|-----|-----|----------------------------------------------------------------|
| Locus_1683_Transcript_1/1_Conf_1.000  | 642 | 20 | 5.27E-26 | NP_499343.2    | 80  | 121.709 | 88  | 71  | hypothetical protein Y39A1A.8                                  |
| Locus_16830_Transcript_1/1_Conf_1.000 | 371 | 1  | 6.44E-49 | AAG23172.1     | 100 | 196.823 | 103 | 103 | AF269289_1unknown                                              |
| Locus_16831_Transcript_1/1_Conf_1.000 | 381 | 20 | 1.11E-69 | BAG58223.1     | 100 | 265.774 | 126 | 126 | unnamed protein product                                        |
| Locus_16832_Transcript_1/2_Conf_1.000 | 327 | 0  |          |                |     |         |     |     |                                                                |
| Locus_16832_Transcript_2/2_Conf_1.000 | 281 | 0  |          |                |     |         |     |     |                                                                |
| Locus_16833_Transcript_1/1_Conf_1.000 | 567 | 2  | 5.74E-06 | EFO22036.1     | 45  | 54.6842 | 140 | 64  | hypothetical protein LOAG_06451                                |
| Locus_16834_Transcript_1/1_Conf_1.000 | 154 | 0  |          |                |     |         |     |     |                                                                |
| Locus_16835_Transcript_1/1_Conf_1.000 | 237 | 0  |          |                |     |         |     |     |                                                                |
| Locus_16836_Transcript_1/1_Conf_1.000 | 272 | 0  |          |                |     |         |     |     |                                                                |
| Locus_16837_Transcript_1/1_Conf_1.000 | 174 | 0  |          |                |     |         |     |     |                                                                |
| Locus_16838_Transcript_1/1_Conf_1.000 | 318 | 20 | 1.22E-23 | NP_001122601.1 | 79  | 112.849 | 92  | 73  | Multiple PDZ domain protein family member (mpz-1)              |
| Locus_16839_Transcript_1/1_Conf_1.000 | 165 | 20 | 6.00E-15 | CBL43465.1     | 90  | 83.9593 | 54  | 49  | C. elegans protein Y55D9A.1d, confirmed by transcript evidence |
| Locus_1684_Transcript_1/1_Conf_1.000  | 482 | 0  |          |                |     |         |     |     |                                                                |

|                                       |     |    |           |                |    |         |     |     |                                                                              |
|---------------------------------------|-----|----|-----------|----------------|----|---------|-----|-----|------------------------------------------------------------------------------|
| Locus_16840_Transcript_1/1_Conf_1.000 | 270 | 5  | 1.09E-08  | XP_002630534.1 | 62 | 63.1586 | 82  | 51  | Hypothetical protein CBG12974                                                |
| Locus_16841_Transcript_1/1_Conf_1.000 | 246 | 0  |           |                |    |         |     |     |                                                                              |
| Locus_16842_Transcript_1/1_Conf_1.000 | 242 | 0  |           |                |    |         |     |     |                                                                              |
| Locus_16843_Transcript_1/1_Conf_1.000 | 668 | 20 | 8.94E-80  | NP_490949.3    | 84 | 300.442 | 216 | 182 | ABC Transporter family member (abt-2)                                        |
| Locus_16844_Transcript_1/2_Conf_1.000 | 791 | 20 | 2.44E-101 | NP_491572.2    | 92 | 227.254 | 128 | 118 | AdaPtin, Mu/medium chain (clathrin associated complex) family member (apm-1) |
| Locus_16844_Transcript_2/2_Conf_1.000 | 763 | 20 | 3.30E-106 | NP_491572.2    | 92 | 388.652 | 227 | 210 | AdaPtin, Mu/medium chain (clathrin associated complex) family member (apm-1) |
| Locus_16845_Transcript_1/1_Conf_1.000 | 128 | 0  |           |                |    |         |     |     |                                                                              |
| Locus_16846_Transcript_1/1_Conf_1.000 | 372 | 20 | 2.69E-47  | NP_001122835.1 | 90 | 191.43  | 124 | 112 | UNCoordinated family member (unc-22)                                         |
| Locus_16847_Transcript_1/1_Conf_1.000 | 136 | 0  |           |                |    |         |     |     |                                                                              |
| Locus_16848_Transcript_1/1_Conf_1.000 | 281 | 0  |           |                |    |         |     |     |                                                                              |
| Locus_16849_Transcript_1/1_Conf_1.000 | 398 | 20 | 5.85E-26  | NP_505052.2    | 69 | 120.553 | 114 | 79  | hypothetical protein F26D11.1                                                |
| Locus_1685_Transcript_1/1_Conf_1.000  | 239 | 0  |           |                |    |         |     |     |                                                                              |
| Locus_16850_Transcript_1/1_Conf_1.000 | 405 | 11 | 4.43E-18  | NP_499495.1    | 66 | 94.3597 | 124 | 82  | hypothetical protein Y66D12A.7                                               |
| Locus_16851_Transcript_1/1_Conf_1.000 | 180 | 0  |           |                |    |         |     |     |                                                                              |
| Locus_16852_Transcript_1/1_Conf_1.000 | 228 | 2  | 1.03E-06  | XP_002639895.1 | 74 | 56.6102 | 47  | 35  | Hypothetical protein CBG08217                                                |

|                                       |     |    |           |             |     |         |     |     |                                                    |
|---------------------------------------|-----|----|-----------|-------------|-----|---------|-----|-----|----------------------------------------------------|
| Locus_16853_Transcript_1/1_Conf_1.000 | 330 | 20 | 3.36E-42  | NP_508504.2 | 87  | 174.481 | 113 | 99  | Non-muscle MYosin family member (nmy-1)            |
| Locus_16854_Transcript_1/1_Conf_1.000 | 668 | 20 | 1.78E-128 | CAI40836.1  | 100 | 462.225 | 222 | 222 | prosaposin                                         |
| Locus_16855_Transcript_1/1_Conf_1.000 | 132 | 0  |           |             |     |         |     |     |                                                    |
| Locus_16856_Transcript_1/1_Conf_1.000 | 311 | 0  |           |             |     |         |     |     |                                                    |
| Locus_16857_Transcript_1/1_Conf_1.000 | 356 | 20 | 5.07E-22  | NP_496542.1 | 64  | 107.457 | 117 | 76  | hypothetical protein ZK930.1                       |
| Locus_16858_Transcript_1/1_Conf_1.000 | 176 | 0  |           |             |     |         |     |     |                                                    |
| Locus_16859_Transcript_1/1_Conf_1.000 | 734 | 20 | 1.01E-32  | NP_503501.1 | 85  | 144.436 | 99  | 85  | DeHydrogenases, Short chain family member (dhs-13) |
| Locus_16860_Transcript_1/1_Conf_1.000 | 572 | 0  |           |             |     |         |     |     |                                                    |
| Locus_16860_Transcript_1/1_Conf_1.000 | 267 | 20 | 2.14E-12  | EFN74509.1  | 61  | 75.485  | 83  | 51  | hypothetical protein EAG_13603                     |

|                                       |      |    |          |                |     |         |     |     |                                                               |
|---------------------------------------|------|----|----------|----------------|-----|---------|-----|-----|---------------------------------------------------------------|
| Locus_16861_Transcript_1/1_Conf_1.000 | 354  | 20 | 3.16E-40 | NP_493945.1    | 83  | 167.933 | 116 | 97  | hypothetical protein Y57G7A.10                                |
| Locus_16862_Transcript_1/1_Conf_1.000 | 145  | 0  |          |                |     |         |     |     |                                                               |
| Locus_16863_Transcript_1/1_Conf_1.000 | 290  | 0  |          |                |     |         |     |     |                                                               |
| Locus_16864_Transcript_1/1_Conf_1.000 | 233  | 0  |          |                |     |         |     |     |                                                               |
| Locus_16865_Transcript_1/1_Conf_1.000 | 137  | 0  |          |                |     |         |     |     |                                                               |
| Locus_16866_Transcript_1/1_Conf_1.000 | 677  | 4  | 1.15E-13 | XP_001897722.1 | 50  | 80.8777 | 153 | 78  | hypothetical protein Bm1_31385                                |
| Locus_16867_Transcript_1/1_Conf_1.000 | 143  | 1  | 7.98E-12 | AAK21295.1     | 100 | 73.559  | 35  | 35  | NM-4                                                          |
| Locus_16868_Transcript_1/1_Conf_1.000 | 392  | 0  |          |                |     |         |     |     |                                                               |
| Locus_16869_Transcript_1/1_Conf_1.000 | 426  | 0  |          |                |     |         |     |     |                                                               |
| Locus_1687_Transcript_1/1_Conf_1.000  | 173  | 0  |          |                |     |         |     |     |                                                               |
| Locus_16870_Transcript_1/1_Conf_1.000 | 207  | 0  |          |                |     |         |     |     |                                                               |
| Locus_16871_Transcript_1/1_Conf_1.000 | 828  | 20 | 4.30E-89 | XP_002645934.1 | 76  | 332.028 | 277 | 212 | Hypothetical protein CBG07699                                 |
| Locus_16872_Transcript_1/1_Conf_1.000 | 425  | 20 | 8.91E-51 | XP_002633498.1 | 89  | 202.986 | 126 | 113 | Hypothetical protein CBG06270                                 |
| Locus_16873_Transcript_1/1_Conf_1.000 | 244  | 0  |          |                |     |         |     |     |                                                               |
| Locus_16874_Transcript_1/1_Conf_1.000 | 1032 | 9  | 9.19E-32 | NP_001023892.1 | 50  | 142.124 | 258 | 130 | HIF (hypoxia inducible factor) homolog family member (hif-1)  |
| Locus_16875_Transcript_1/1_Conf_1.000 | 1322 | 20 | 1.40E-49 | EFO24754.1     | 56  | 201.83  | 334 | 190 | hypothetical protein LOAG_03725                               |
| Locus_16876_Transcript_1/2_Conf_1.000 | 406  | 20 | 3.86E-38 | CBK19479.1     | 88  | 160.999 | 96  | 85  | C. elegans protein W08D2.5b, confirmed by transcript evidence |
| Locus_16876_Transcript_2/2_Conf_1.000 | 360  | 20 | 3.83E-38 | CBK19479.1     | 88  | 160.999 | 96  | 85  | C. elegans protein W08D2.5b, confirmed by transcript evidence |
| Locus_16877_Transcript_1/1_Conf_1.000 | 201  | 0  |          |                |     |         |     |     |                                                               |
| Locus_16878_Transcript_1/1_Conf_1.000 | 154  | 0  |          |                |     |         |     |     |                                                               |
| Locus_16879_Transcript_1/1_Conf_1.000 | 332  | 20 | 7.52E-26 | XP_002629741.1 | 78  | 120.168 | 71  | 56  | Hypothetical protein CBG00975                                 |
| Locus_1688_Transcript_1/2_Conf_1.000  | 690  | 0  |          |                |     |         |     |     |                                                               |
| Locus_1688_Transcript_2/2_Conf_1.000  | 684  | 0  |          |                |     |         |     |     |                                                               |

|                                       |      |    |          |                |    |         |     |     |                                                 |
|---------------------------------------|------|----|----------|----------------|----|---------|-----|-----|-------------------------------------------------|
| Locus_16880_Transcript_1/3_Conf_0.600 | 412  | 3  | 2.50E-13 | XP_002647980.1 | 75 | 78.5666 | 60  | 45  | C. briggsae CBR-PUS-1 protein                   |
| Locus_16880_Transcript_2/3_Conf_0.400 | 433  | 3  | 2.50E-13 | XP_002647980.1 | 75 | 78.5666 | 60  | 45  | C. briggsae CBR-PUS-1 protein                   |
| Locus_16880_Transcript_3/3_Conf_0.600 | 503  | 3  | 2.55E-13 | XP_002647980.1 | 75 | 78.5666 | 60  | 45  | C. briggsae CBR-PUS-1 protein                   |
| Locus_16881_Transcript_1/1_Conf_1.000 | 285  | 20 | 8.49E-25 | ACO14988.1     | 86 | 116.701 | 69  | 60  | Transcription elongation factor B polypeptide 1 |
| Locus_16882_Transcript_1/1_Conf_1.000 | 577  | 20 | 5.40E-47 | NP_495087.1    | 70 | 191.045 | 171 | 121 | hypothetical protein C17G10.2                   |
| Locus_16883_Transcript_1/1_Conf_1.000 | 220  | 6  | 4.84E-12 | NP_492113.2    | 75 | 74.3294 | 54  | 41  | CHitin Synthase family member (chs-1)           |
| Locus_16884_Transcript_1/1_Conf_1.000 | 527  | 3  | 4.94E-08 | XP_001900523.1 | 53 | 61.2326 | 104 | 56  | RWD domain containing protein                   |
| Locus_16885_Transcript_1/1_Conf_1.000 | 498  | 20 | 1.04E-35 | NP_501024.1    | 69 | 152.91  | 168 | 116 | hypothetical protein C01B10.8                   |
| Locus_16886_Transcript_1/1_Conf_1.000 | 622  | 4  | 1.90E-14 | XP_001893304.1 | 66 | 83.1889 | 99  | 66  | hypothetical protein                            |
| Locus_16887_Transcript_1/1_Conf_1.000 | 417  | 3  | 2.56E-13 | XP_002639547.1 | 57 | 78.5666 | 142 | 82  | Hypothetical protein CBG04176                   |
| Locus_16888_Transcript_1/1_Conf_1.000 | 980  | 20 | 7.08E-39 | XP_001900253.1 | 63 | 165.622 | 218 | 138 | hypothetical protein Bm1_43955                  |
| Locus_16889_Transcript_1/1_Conf_1.000 | 233  | 0  |          |                |    |         |     |     |                                                 |
| Locus_1689_Transcript_1/1_Conf_1.000  | 1518 | 20 | 0        | XP_002642074.1 | 85 | 679.863 | 455 | 389 | Hypothetical protein CBG18013                   |
| Locus_16890_Transcript_1/1_Conf_1.000 | 649  | 20 | 1.97E-44 | XP_001891895.1 | 64 | 182.956 | 190 | 123 | metallo-beta-lactamase superfamily protein      |
| Locus_16891_Transcript_1/1_Conf_1.000 | 665  | 0  |          |                |    |         |     |     |                                                 |
| Locus_16892_Transcript_1/1_Conf_1.000 | 159  | 0  |          |                |    |         |     |     |                                                 |
| Locus_16893_Transcript_1/1_Conf_1.000 | 246  | 2  | 6.57E-06 | NP_001076772.1 | 75 | 53.9138 | 45  | 34  | GEX Interacting protein family member (gei-3)   |
| Locus_16894_Transcript_1/1_Conf_1.000 | 178  | 0  |          |                |    |         |     |     |                                                 |



|                                       |      |    |          |             |    |         |     |     |                                    |
|---------------------------------------|------|----|----------|-------------|----|---------|-----|-----|------------------------------------|
| Locus_16895_Transcript_1/1_Conf_1.000 | 244  | 0  |          |             |    |         |     |     |                                    |
| Locus_16896_Transcript_1/1_Conf_1.000 | 1169 | 20 | 0        | ACT34056.1  | 91 | 648.277 | 389 | 356 | glutamate dehydrogenase            |
| Locus_16897_Transcript_1/1_Conf_1.000 | 182  | 0  |          |             |    |         |     |     |                                    |
| Locus_16898_Transcript_1/1_Conf_1.000 | 300  | 20 | 4.27E-29 | ACI49079.1  | 89 | 130.954 | 84  | 75  | hypothetical protein Cbre_JD11.003 |
| Locus_16899_Transcript_1/1_Conf_1.000 | 761  | 8  | 6.79E-11 | NP_494977.1 | 66 | 72.0182 | 68  | 45  | hypothetical protein C34F11.1      |
| Locus_169_Transcript_1/2_Conf_1.000   | 749  | 20 | 1.78E-64 | CAD20464.1  | 91 | 249.98  | 177 | 162 | putative ES protein F7             |
| Locus_169_Transcript_2/2_Conf_1.000   | 579  | 20 | 4.64E-46 | CAD20464.1  | 92 | 187.963 | 139 | 128 | putative ES protein F7             |

|                                       |      |    |           |                |    |         |     |     |                                                                        |
|---------------------------------------|------|----|-----------|----------------|----|---------|-----|-----|------------------------------------------------------------------------|
| Locus_1690_Transcript_1/1_Conf_1.000  | 1454 | 20 | 0         | XP_001895390.1 | 96 | 643.269 | 330 | 317 | Serine/threonine protein phosphatase F56C9.1 in chromosomell, putative |
| Locus_16900_Transcript_1/1_Conf_1.000 | 267  | 2  | 1.25E-12  | NP_001021809.1 | 63 | 76.2554 | 88  | 56  | Branching AbnorMal family member (bam-2)                               |
| Locus_16901_Transcript_1/1_Conf_1.000 | 378  | 0  |           |                |    |         |     |     |                                                                        |
| Locus_16902_Transcript_1/1_Conf_1.000 | 980  | 20 | 5.89E-102 | EFO18398.1     | 74 | 375.17  | 313 | 233 | Prp18 domain-containing protein                                        |
| Locus_16903_Transcript_1/1_Conf_1.000 | 515  | 20 | 6.62E-68  | NP_001023148.1 | 84 | 259.996 | 173 | 146 | ForKHead transcription factor family member (fkh-7)                    |
| Locus_16904_Transcript_1/1_Conf_1.000 | 474  | 0  |           |                |    |         |     |     |                                                                        |
| Locus_16905_Transcript_1/1_Conf_1.000 | 1429 | 20 | 1.74E-55  |                | 57 | 192.971 | 277 | 158 | hypothetical protein F13H8.5 - Caenorhabditis elegans                  |
| Locus_16906_Transcript_1/1_Conf_1.000 | 140  | 0  |           |                |    |         |     |     |                                                                        |
| Locus_16907_Transcript_1/1_Conf_1.000 | 230  | 20 | 5.64E-29  | XP_002637520.1 | 86 | 130.568 | 76  | 66  | Hypothetical protein CBG19243                                          |
| Locus_16908_Transcript_1/1_Conf_1.000 | 220  | 1  | 1.51E-05  | XP_002639022.1 | 48 | 52.7582 | 74  | 36  | Hypothetical protein CBG22271                                          |
| Locus_16909_Transcript_1/1_Conf_1.000 | 171  | 0  |           |                |    |         |     |     |                                                                        |
| Locus_1691_Transcript_1/2_Conf_1.000  | 1782 | 20 | 0         | NP_497043.2    | 73 | 662.144 | 596 | 436 | Amino acid Transporter GlycoProtein subunit family member (atgp-2)     |
| Locus_1691_Transcript_2/2_Conf_1.000  | 2014 | 20 | 0         | NP_497043.2    | 72 | 739.184 | 661 | 482 | Amino acid Transporter GlycoProtein subunit family member (atgp-2)     |

|                                       |     |    |          |                |     |         |    |    |                                                                                     |
|---------------------------------------|-----|----|----------|----------------|-----|---------|----|----|-------------------------------------------------------------------------------------|
| Locus_16910_Transcript_1/1_Conf_1.000 | 255 | 20 | 1.22E-23 | XP_001901338.1 | 78  | 112.849 | 84 | 66 | Bloom's syndrome protein homolog                                                    |
| Locus_16911_Transcript_1/1_Conf_1.000 | 130 | 20 | 5.41E-16 | XP_002747286.1 | 100 | 87.4261 | 42 | 42 | PREDICTED: endoplasmic reticulum-Golgi intermediate compartment protein 3 isoform 2 |
| Locus_16912_Transcript_1/2_Conf_1.000 | 249 | 0  |          |                |     |         |    |    |                                                                                     |
| Locus_16912_Transcript_2/2_Conf_1.000 | 249 | 0  |          |                |     |         |    |    |                                                                                     |
| Locus_16913_Transcript_1/1_Conf_1.000 | 398 | 20 | 7.94E-07 | NP_001021756.1 | 55  | 56.9954 | 79 | 44 | UDP-GlucuronosylTransferase family member (ugt-31)                                  |
| Locus_16914_Transcript_1/1_Conf_1.000 | 165 | 0  |          |                |     |         |    |    |                                                                                     |
| Locus_16915_Transcript_1/1_Conf_1.000 | 479 | 0  |          |                |     |         |    |    |                                                                                     |
| Locus_16916_Transcript_1/1_Conf_1.000 | 326 | 20 | 3.52E-23 | XP_002630450.1 | 73  | 111.309 | 87 | 64 | C. briggsae CBR-ASM-1 protein                                                       |
| Locus_16917_Transcript_1/1_Conf_1.000 | 222 | 4  | 2.47E-16 | XP_002642663.1 | 76  | 88.5817 | 73 | 56 | C. briggsae CBR-NCL-1 protein                                                       |
| Locus_16918_Transcript_1/1_Conf_1.000 | 502 | 0  |          |                |     |         |    |    |                                                                                     |
| Locus_16919_Transcript_1/1_Conf_1.000 | 175 | 0  |          |                |     |         |    |    |                                                                                     |

|                                       |      |    |          |                |     |         |     |     |                                                   |
|---------------------------------------|------|----|----------|----------------|-----|---------|-----|-----|---------------------------------------------------|
| Locus_1692_Transcript_1/1_Conf_1.000  | 975  | 20 | 5.35E-71 | NP_001022317.1 | 72  | 272.322 | 329 | 238 | abnormal cell MIGration family member (mig-5)     |
| Locus_16920_Transcript_1/1_Conf_1.000 | 174  | 20 | 7.52E-10 | XP_002640523.1 | 77  | 67.0106 | 45  | 35  | Hypothetical protein CBG18685                     |
| Locus_16921_Transcript_1/1_Conf_1.000 | 143  | 20 | 1.11E-13 | EAW56733.1     | 92  | 79.7221 | 40  | 37  | similar to zinc finger protein 569, isoform CRA_a |
| Locus_16922_Transcript_1/1_Conf_1.000 | 133  | 0  |          |                |     |         |     |     |                                                   |
| Locus_16923_Transcript_1/1_Conf_1.000 | 184  | 0  |          |                |     |         |     |     |                                                   |
| Locus_16924_Transcript_1/1_Conf_1.000 | 426  | 0  |          |                |     |         |     |     |                                                   |
| Locus_16925_Transcript_1/1_Conf_1.000 | 236  | 1  | 5.42E-24 | XP_002343485.1 | 100 | 114.005 | 48  | 48  | PREDICTED: hypothetical protein XP_002343485      |
| Locus_16926_Transcript_1/1_Conf_1.000 | 296  | 0  |          |                |     |         |     |     |                                                   |
| Locus_16927_Transcript_1/1_Conf_1.000 | 398  | 2  | 1.60E-15 | NP_492266.2    | 56  | 85.8853 | 117 | 66  | hypothetical protein C34B7.2                      |
| Locus_16928_Transcript_1/1_Conf_1.000 | 295  | 4  | 5.11E-14 | XP_002637429.1 | 65  | 80.8777 | 95  | 62  | Hypothetical protein CBG19140                     |
| Locus_16929_Transcript_1/1_Conf_1.000 | 405  | 2  | 7.84E-07 | EFO23509.1     | 64  | 56.9954 | 71  | 46  | STAT protein                                      |
| Locus_1693_Transcript_1/1_Conf_1.000  | 2313 | 20 | 1.67E-41 | XP_001657404.1 | 56  | 176.022 | 266 | 151 | ubiquitin-conjugating enzyme E2-230k              |
| Locus_16930_Transcript_1/1_Conf_1.000 | 1595 | 20 | 1.68E-39 | XP_002647371.1 | 56  | 168.703 | 294 | 166 | Hypothetical protein CBG06428                     |
| Locus_16931_Transcript_1/1_Conf_1.000 | 144  | 0  |          |                |     |         |     |     |                                                   |

|                                       |     |    |          |                |    |         |     |     |                                                                                   |
|---------------------------------------|-----|----|----------|----------------|----|---------|-----|-----|-----------------------------------------------------------------------------------|
| Locus_16932_Transcript_1/1_Conf_1.000 | 435 | 20 | 3.33E-50 | NP_507912.2    | 77 | 201.06  | 146 | 113 | MolTing defective family member (mlt-4)                                           |
| Locus_16933_Transcript_1/1_Conf_1.000 | 287 | 3  | 1.40E-19 | NP_491915.2    | 80 | 99.3673 | 78  | 63  | hypothetical protein ZC581.9                                                      |
| Locus_16934_Transcript_1/1_Conf_1.000 | 265 | 0  |          |                |    |         |     |     |                                                                                   |
| Locus_16935_Transcript_1/2_Conf_1.000 | 625 | 20 | 3.98E-36 | NP_491579.1    | 62 | 155.221 | 205 | 128 | hypothetical protein F55A12.1                                                     |
| Locus_16935_Transcript_2/2_Conf_1.000 | 625 | 20 | 3.98E-36 | NP_491579.1    | 62 | 155.221 | 205 | 128 | hypothetical protein F55A12.1                                                     |
| Locus_16936_Transcript_1/1_Conf_1.000 | 324 | 0  |          |                |    |         |     |     |                                                                                   |
| Locus_16937_Transcript_1/1_Conf_1.000 | 419 | 20 | 1.94E-45 | NP_495666.3    | 79 | 185.267 | 138 | 110 | Temporarily Assigned Gene name family member (tag-341)                            |
| Locus_16938_Transcript_1/1_Conf_1.000 | 665 | 20 | 2.05E-52 | NP_497324.3    | 68 | 209.534 | 209 | 143 | hypothetical protein BE0003N10.1                                                  |
| Locus_16939_Transcript_1/1_Conf_1.000 | 268 | 0  |          |                |    |         |     |     |                                                                                   |
| Locus_1694_Transcript_1/1_Conf_1.000  | 156 | 0  |          |                |    |         |     |     |                                                                                   |
| Locus_16940_Transcript_1/1_Conf_1.000 | 468 | 20 | 9.24E-32 | NP_491891.1    | 64 | 139.813 | 155 | 100 | XPG (Xeroderma Pigmentosum group G) DNA repair gene homolog family member (xpg-1) |
| Locus_16941_Transcript_1/1_Conf_1.000 | 416 | 17 | 3.84E-06 | XP_002629756.1 | 65 | 54.6842 | 55  | 36  | Hypothetical protein CBG00991                                                     |
| Locus_16942_Transcript_1/1_Conf_1.000 | 426 | 20 | 2.42E-48 | CAX65056.1     | 83 | 194.897 | 140 | 117 | C. elegans protein F25C8.3d, partially confirmed by transcript evidence           |
| Locus_16943_Transcript_1/1_Conf_1.000 | 164 | 0  |          |                |    |         |     |     |                                                                                   |
| Locus_16944_Transcript_1/1_Conf_1.000 | 267 | 19 | 5.10E-06 | CAR63735.1     | 66 | 54.299  | 36  | 24  | hypothetical protein                                                              |
| Locus_16945_Transcript_1/1_Conf_1.000 | 951 | 0  |          |                |    |         |     |     |                                                                                   |
| Locus_16946_Transcript_1/1_Conf_1.000 | 183 | 0  |          |                |    |         |     |     |                                                                                   |
| Locus_16947_Transcript_1/1_Conf_1.000 | 338 | 20 | 1.89E-45 | NP_501399.1    | 91 | 185.267 | 111 | 102 | Vacuolar H ATPase family member (vha-5)                                           |
| Locus_16948_Transcript_1/1_Conf_1.000 | 185 | 0  |          |                |    |         |     |     |                                                                                   |
| Locus_16949_Transcript_1/1_Conf_1.000 | 239 | 0  |          |                |    |         |     |     |                                                                                   |
| Locus_1695_Transcript_1/1_Conf_1.000  | 403 | 0  |          |                |    |         |     |     |                                                                                   |

|                                       |     |    |          |                |    |         |     |     |                                                |
|---------------------------------------|-----|----|----------|----------------|----|---------|-----|-----|------------------------------------------------|
| Locus_16950_Transcript_1/1_Conf_1.000 | 536 | 20 | 1.51E-76 | AAF66614.1     | 87 | 288.886 | 177 | 155 | AF142441_1H+/oligopeptide symporter OPT-3      |
| Locus_16951_Transcript_1/1_Conf_1.000 | 725 | 13 | 2.75E-43 | NP_001040915.1 | 62 | 179.489 | 236 | 147 | hypothetical protein C27D8.3                   |
| Locus_16952_Transcript_1/1_Conf_1.000 | 417 | 0  |          |                |    |         |     |     |                                                |
| Locus_16953_Transcript_1/1_Conf_1.000 | 157 | 0  |          |                |    |         |     |     |                                                |
| Locus_16954_Transcript_1/1_Conf_1.000 | 273 | 0  |          |                |    |         |     |     |                                                |
| Locus_16955_Transcript_1/1_Conf_1.000 | 228 | 0  |          |                |    |         |     |     |                                                |
| Locus_16956_Transcript_1/1_Conf_1.000 | 359 | 0  |          |                |    |         |     |     |                                                |
| Locus_16957_Transcript_1/1_Conf_1.000 | 230 | 20 | 4.80E-12 | XP_002642125.1 | 68 | 74.3294 | 76  | 52  | Hypothetical protein CBG18072                  |
| Locus_16958_Transcript_1/1_Conf_1.000 | 434 | 14 | 8.33E-09 | NP_510664.1    | 78 | 63.5438 | 144 | 113 | LEThal family member (let-2)                   |
| Locus_16959_Transcript_1/1_Conf_1.000 | 317 | 0  |          |                |    |         |     |     |                                                |
| Locus_1696_Transcript_1/1_Conf_1.000  | 661 | 20 | 3.44E-68 | NP_509342.1    | 90 | 261.922 | 154 | 140 | SEx Muscle abnormal family member (sem-5)      |
| Locus_16960_Transcript_1/3_Conf_0.667 | 641 | 0  |          |                |    |         |     |     |                                                |
| Locus_16960_Transcript_2/3_Conf_0.667 | 681 | 0  |          |                |    |         |     |     |                                                |
| Locus_16960_Transcript_3/3_Conf_0.667 | 681 | 0  |          |                |    |         |     |     |                                                |
| Locus_16961_Transcript_1/1_Conf_1.000 | 353 | 0  |          |                |    |         |     |     |                                                |
| Locus_16962_Transcript_1/1_Conf_1.000 | 203 | 0  |          |                |    |         |     |     |                                                |
| Locus_16963_Transcript_1/1_Conf_1.000 | 135 | 0  |          |                |    |         |     |     |                                                |
| Locus_16964_Transcript_1/1_Conf_1.000 | 306 | 0  |          |                |    |         |     |     |                                                |
| Locus_16965_Transcript_1/1_Conf_1.000 | 128 | 20 | 2.21E-09 | ABU48855.1     | 78 | 65.4698 | 42  | 33  | heparan sulfate 3-O sulfotransferase isoform a |
| Locus_16966_Transcript_1/1_Conf_1.000 | 144 | 0  |          |                |    |         |     |     |                                                |
| Locus_16967_Transcript_1/1_Conf_1.000 | 169 | 0  |          |                |    |         |     |     |                                                |
| Locus_16968_Transcript_1/1_Conf_1.000 | 618 | 20 | 1.24E-13 | AAG24090.4     | 46 | 80.4925 | 187 | 87  | Hypothetical protein F31F4.11                  |
| Locus_16969_Transcript_1/1_Conf_1.000 | 627 | 0  |          |                |    |         |     |     |                                                |
| Locus_1697_Transcript_1/2_Conf_1.000  | 538 | 1  | 9.22E-05 | XP_001899906.1 | 56 | 50.447  | 66  | 37  | MOZ/SAS family protein                         |

|                                       |     |    |          |                |     |         |     |     |                                                                         |
|---------------------------------------|-----|----|----------|----------------|-----|---------|-----|-----|-------------------------------------------------------------------------|
| Locus_1697_Transcript_2/2_Conf_1.000  | 998 | 20 | 3.77E-19 | XP_002639480.1 | 50  | 100.138 | 150 | 76  | Hypothetical protein CBG04078                                           |
| Locus_16970_Transcript_1/1_Conf_1.000 | 234 | 0  |          |                |     |         |     |     |                                                                         |
| Locus_16971_Transcript_1/1_Conf_1.000 | 271 | 20 | 4.25E-45 | XP_002810085.1 | 100 | 184.111 | 89  | 89  | PREDICTED: lamin-A/C-like                                               |
| Locus_16972_Transcript_1/1_Conf_1.000 | 631 | 7  | 3.73E-05 | EER44235.1     | 49  | 52.373  | 134 | 66  | calmodulin-binding coil-coil protein                                    |
| Locus_16973_Transcript_1/1_Conf_1.000 | 221 | 20 | 1.15E-29 | CAZ39159.1     | 94  | 132.88  | 72  | 68  | C. elegans protein C01C7.1b, partially confirmed by transcript evidence |
| Locus_16974_Transcript_1/1_Conf_1.000 | 638 | 3  | 1.63E-64 | XP_002634053.1 | 77  | 249.595 | 212 | 165 | Hypothetical protein CBG01593                                           |

|                                       |     |    |          |                |     |         |     |     |                                     |
|---------------------------------------|-----|----|----------|----------------|-----|---------|-----|-----|-------------------------------------|
| Locus_16975_Transcript_1/1_Conf_1.000 | 755 | 20 | 3.70E-86 | ADK47995.1     | 100 | 322.013 | 158 | 158 | c-myc promoter-binding protein 1    |
| Locus_16976_Transcript_1/1_Conf_1.000 | 156 | 0  |          |                |     |         |     |     |                                     |
| Locus_16977_Transcript_1/1_Conf_1.000 | 620 | 20 | 8.43E-71 | XP_002632331.1 | 83  | 270.396 | 200 | 166 | C. briggsae CBR-ROM-4 protein       |
| Locus_16978_Transcript_1/1_Conf_1.000 | 165 | 0  |          |                |     |         |     |     |                                     |
| Locus_16979_Transcript_1/1_Conf_1.000 | 374 | 2  | 7.65E-18 | NP_498388.1    | 66  | 93.5893 | 83  | 55  | hypothetical protein C56G2.3        |
| Locus_1698_Transcript_1/1_Conf_1.000  | 341 | 0  |          |                |     |         |     |     |                                     |
| Locus_16980_Transcript_1/1_Conf_1.000 | 733 | 20 | 1.27E-43 | XP_002641461.1 | 77  | 180.644 | 157 | 121 | C. briggsae CBR-WAH-1 protein       |
| Locus_16981_Transcript_1/1_Conf_1.000 | 203 | 1  | 3.47E-11 | AAC06295.1     | 84  | 60.8474 | 45  | 38  | hypothetical protein jmo23          |
| Locus_16982_Transcript_1/1_Conf_1.000 | 248 | 0  |          |                |     |         |     |     |                                     |
| Locus_16983_Transcript_1/1_Conf_1.000 | 253 | 0  |          |                |     |         |     |     |                                     |
| Locus_16984_Transcript_1/1_Conf_1.000 | 601 | 7  | 9.59E-29 | ACY39994.1     | 58  | 130.568 | 202 | 118 | C. elegans FLN-2 protein, isoform d |
| Locus_16985_Transcript_1/1_Conf_1.000 | 859 | 20 | 1.10E-90 | NP_496170.1    | 89  | 337.421 | 191 | 170 | LEThal family member (let-268)      |
| Locus_16986_Transcript_1/1_Conf_1.000 | 696 | 20 | 5.15E-44 | NP_001040927.1 | 65  | 181.8   | 217 | 143 | hypothetical protein C47A4.2        |
| Locus_16987_Transcript_1/1_Conf_1.000 | 180 | 0  |          |                |     |         |     |     |                                     |
| Locus_16988_Transcript_1/1_Conf_1.000 | 547 | 0  |          |                |     |         |     |     |                                     |
| Locus_16989_Transcript_1/1_Conf_1.000 | 373 | 20 | 7.32E-53 | NP_501979.3    | 89  | 209.92  | 124 | 111 | hypothetical protein R102.4         |



|                                       |      |    |          |                |    |         |     |     |                                                                   |
|---------------------------------------|------|----|----------|----------------|----|---------|-----|-----|-------------------------------------------------------------------|
| Locus_16990_Transcript_1/1_Conf_1.000 | 1480 | 20 | 0        | XP_002636638.1 | 97 | 818.92  | 435 | 423 | C. briggsae CBR-RPT-1 protein                                     |
| Locus_16991_Transcript_1/1_Conf_1.000 | 460  | 0  |          |                |    |         |     |     |                                                                   |
| Locus_16992_Transcript_1/1_Conf_1.000 | 605  | 2  | 4.84E-20 | NP_496323.1    | 51 | 101.679 | 158 | 82  | SET (trithorax/polycomb) domain containing family member (set-14) |
| Locus_16993_Transcript_1/1_Conf_1.000 | 240  | 0  |          |                |    |         |     |     |                                                                   |
| Locus_16994_Transcript_1/1_Conf_1.000 | 447  | 20 | 7.09E-24 | NP_001022170.1 | 72 | 113.62  | 95  | 69  | UNCoordinated family member (unc-53)                              |
| Locus_16995_Transcript_1/1_Conf_1.000 | 164  | 6  | 6.67E-06 | XP_002643836.1 | 67 | 53.9138 | 55  | 37  | Hypothetical protein CBG02060                                     |
| Locus_16996_Transcript_1/1_Conf_1.000 | 355  | 20 | 9.28E-08 | XP_002158963.1 | 50 | 60.077  | 91  | 46  | PREDICTED: similar to Rps2e protein                               |

|                                       |      |    |           |                |     |         |     |     |                                                                     |
|---------------------------------------|------|----|-----------|----------------|-----|---------|-----|-----|---------------------------------------------------------------------|
| Locus_16996_Transcript_1/1_Conf_1.000 | 246  | 20 | 3.45E-39  | AAP88768.1     | 100 | 164.466 | 78  | 78  | cytochrome c oxidase subunit VIIb                                   |
| Locus_16997_Transcript_1/1_Conf_1.000 | 279  | 0  |           |                |     |         |     |     |                                                                     |
| Locus_16998_Transcript_1/1_Conf_1.000 | 271  | 0  |           |                |     |         |     |     |                                                                     |
| Locus_16999_Transcript_1/1_Conf_1.000 | 296  | 0  |           |                |     |         |     |     |                                                                     |
| Locus_17_Transcript_17/30_Conf_1.000  | 270  | 20 | 3.60E-44  | ACR36970.1     | 96  | 181.03  | 89  | 86  | unknown                                                             |
| Locus_17_Transcript_18/30_Conf_1.000  | 263  | 1  | 9.35E-08  | XP_002467304.1 | 77  | 60.077  | 44  | 34  | hypothetical protein<br>SORBIDRAFT_01g024221                        |
| Locus_17_Transcript_19/30_Conf_1.000  | 263  | 1  | 3.21E-08  | XP_002467304.1 | 75  | 61.6178 | 48  | 36  | hypothetical protein<br>SORBIDRAFT_01g024221                        |
| Locus_17_Transcript_20/30_Conf_1.000  | 270  | 20 | 3.60E-44  | ACR36970.1     | 96  | 181.03  | 89  | 86  | unknown                                                             |
| Locus_17_Transcript_21/30_Conf_0.019  | 363  | 11 | 2.48E-29  | BAB33421.1     | 92  | 131.724 | 68  | 63  | putative senescence-associated protein                              |
| Locus_17_Transcript_22/30_Conf_0.287  | 1283 | 20 | 1.46E-80  | BAB33421.1     | 71  | 304.679 | 260 | 185 | putative senescence-associated protein                              |
| Locus_17_Transcript_23/30_Conf_0.065  | 426  | 13 | 1.61E-12  | XP_002638702.1 | 63  | 60.8474 | 61  | 39  | Hypothetical protein CBG11901                                       |
| Locus_17_Transcript_24/30_Conf_0.315  | 1384 | 20 | 1.07E-63  | XP_001028745.1 | 67  | 248.825 | 246 | 167 | hypothetical protein THERM_02141640                                 |
| Locus_17_Transcript_25/30_Conf_0.361  | 1485 | 20 | 4.31E-58  | XP_001028745.1 | 67  | 230.335 | 224 | 152 | hypothetical protein THERM_02141640                                 |
| Locus_17_Transcript_26/30_Conf_0.361  | 1527 | 20 | 7.64E-58  | XP_001028745.1 | 67  | 229.565 | 222 | 150 | hypothetical protein THERM_02141640                                 |
| Locus_17_Transcript_27/30_Conf_0.296  | 1059 | 20 | 2.65E-58  | XP_001028745.1 | 67  | 230.335 | 224 | 152 | hypothetical protein THERM_02141640                                 |
| Locus_17_Transcript_28/30_Conf_0.056  | 300  | 1  | 1.54E-12  | XP_002638702.1 | 63  | 60.8474 | 61  | 39  | Hypothetical protein CBG11901                                       |
| Locus_17_Transcript_29/30_Conf_0.343  | 1387 | 20 | 3.94E-58  | XP_001028745.1 | 67  | 230.335 | 224 | 152 | hypothetical protein THERM_02141640                                 |
| Locus_17_Transcript_30/30_Conf_0.565  | 2123 | 20 | 6.76E-58  | XP_001028745.1 | 67  | 230.335 | 224 | 152 | hypothetical protein THERM_02141640                                 |
| Locus_170_Transcript_1/1_Conf_1.000   | 530  | 9  | 1.03E-69  | AAR25200.1     | 90  | 266.159 | 162 | 147 | surface-associated antigen 1                                        |
| Locus_1700_Transcript_1/3_Conf_0.600  | 1828 | 20 | 2.03E-124 | NP_741191.1    | 78  | 451.055 | 346 | 270 | hypothetical protein C56G2.1                                        |
| Locus_1700_Transcript_2/3_Conf_0.600  | 2035 | 20 | 1.03E-132 | NP_741190.1    | 70  | 478.789 | 430 | 305 | hypothetical protein C56G2.1                                        |
| Locus_1700_Transcript_3/3_Conf_0.600  | 1832 | 20 | 2.03E-124 | NP_741191.1    | 78  | 451.055 | 346 | 270 | hypothetical protein C56G2.1                                        |
| Locus_17000_Transcript_1/1_Conf_1.000 | 404  | 20 | 2.13E-20  | ACI48997.1     | 62  | 102.064 | 136 | 85  | hypothetical protein Cbre_JD01.004                                  |
| Locus_17001_Transcript_1/1_Conf_1.000 | 175  | 0  |           |                |     |         |     |     |                                                                     |
| Locus_17002_Transcript_1/1_Conf_1.000 | 589  | 20 | 2.08E-25  | NP_499759.1    | 75  | 119.398 | 109 | 82  | DNAI domain (prokaryotic heat shock protein) family member (dnj-17) |

|                                       |     |    |           |                |    |         |     |     |                                                                                                           |
|---------------------------------------|-----|----|-----------|----------------|----|---------|-----|-----|-----------------------------------------------------------------------------------------------------------|
| Locus_17003_Transcript_1/1_Conf_1.000 | 681 | 20 | 3.67E-116 | NP_492127.1    | 93 | 421.394 | 226 | 211 | Low-density lipoprotein Receptor Related family member (Irp-1)                                            |
| Locus_17004_Transcript_1/1_Conf_1.000 | 214 | 0  |           |                |    |         |     |     |                                                                                                           |
| Locus_17005_Transcript_1/1_Conf_1.000 | 622 | 20 | 1.15E-19  | NP_001040945.1 | 54 | 100.523 | 200 | 108 | human HnRNP A1 homolog family member (hrp-1)                                                              |
| Locus_17006_Transcript_1/1_Conf_1.000 | 208 | 0  |           |                |    |         |     |     |                                                                                                           |
| Locus_17007_Transcript_1/1_Conf_1.000 | 345 | 0  |           |                |    |         |     |     |                                                                                                           |
| Locus_17008_Transcript_1/1_Conf_1.000 | 241 | 0  |           |                |    |         |     |     |                                                                                                           |
| Locus_17009_Transcript_1/1_Conf_1.000 | 415 | 20 | 4.54E-07  | XP_002189413.1 | 59 | 57.7658 | 62  | 37  | PREDICTED: putative U5 snRNP-specific 40 kDa protein, partial                                             |
| Locus_1701_Transcript_1/1_Conf_1.000  | 502 | 0  |           |                |    |         |     |     |                                                                                                           |
| Locus_17010_Transcript_1/1_Conf_1.000 | 674 | 0  |           |                |    |         |     |     |                                                                                                           |
| Locus_17011_Transcript_1/1_Conf_1.000 | 245 | 4  | 2.68E-07  | NP_495342.2    | 61 | 58.5362 | 81  | 50  | related to yeast Vacuolar Protein Sorting factor family member (vps-33.2)                                 |
| Locus_17012_Transcript_1/2_Conf_1.000 | 396 | 0  |           |                |    |         |     |     |                                                                                                           |
| Locus_17012_Transcript_2/2_Conf_1.000 | 481 | 0  |           |                |    |         |     |     |                                                                                                           |
| Locus_17013_Transcript_1/2_Conf_1.000 | 733 | 20 | 3.06E-114 | XP_862070.1    | 99 | 415.231 | 202 | 201 | PREDICTED: similar to Tubulin alpha-6 chain (Alpha-tubulin 6) (Alpha-tubulin isotype M-alpha-6) isoform 6 |
| Locus_17013_Transcript_2/2_Conf_1.000 | 835 | 20 | 3.92E-114 | XP_862070.1    | 99 | 415.231 | 202 | 201 | PREDICTED: similar to Tubulin alpha-6 chain (Alpha-tubulin 6) (Alpha-tubulin isotype M-alpha-6) isoform 6 |
| Locus_17014_Transcript_1/1_Conf_1.000 | 316 | 0  |           |                |    |         |     |     |                                                                                                           |

|                                       |      |    |          |                |     |         |     |    |                                                                 |
|---------------------------------------|------|----|----------|----------------|-----|---------|-----|----|-----------------------------------------------------------------|
| Locus_17015_Transcript_1/1_Conf_1.000 | 287  | 20 | 3.57E-23 | EFO16535.1     | 76  | 111.309 | 94  | 72 | hypothetical protein LOAG_11971                                 |
| Locus_17016_Transcript_1/1_Conf_1.000 | 451  | 0  |          |                |     |         |     |    |                                                                 |
| Locus_17017_Transcript_1/1_Conf_1.000 | 415  | 0  |          |                |     |         |     |    |                                                                 |
| Locus_17018_Transcript_1/1_Conf_1.000 | 320  | 0  |          |                |     |         |     |    |                                                                 |
| Locus_17019_Transcript_1/1_Conf_1.000 | 276  | 0  |          |                |     |         |     |    |                                                                 |
| Locus_1702_Transcript_1/1_Conf_1.000  | 1029 | 0  |          |                |     |         |     |    |                                                                 |
| Locus_17020_Transcript_1/1_Conf_1.000 | 171  | 0  |          |                |     |         |     |    |                                                                 |
| Locus_17021_Transcript_1/1_Conf_1.000 | 239  | 2  | 2.79E-04 | NP_492616.1    | 52  | 48.521  | 82  | 43 | Nematode ASTacin protease family member (nas-5)                 |
| Locus_17022_Transcript_1/1_Conf_1.000 | 279  | 20 | 9.05E-48 | XP_002763564.1 | 100 | 192.971 | 92  | 92 | PREDICTED: transmembrane emp24 domain-containing protein 9-like |
| Locus_17023_Transcript_1/1_Conf_1.000 | 470  | 20 | 1.03E-14 | EFO28126.1     | 60  | 83.1889 | 135 | 82 | hypothetical protein LOAG_00360                                 |
| Locus_17024_Transcript_1/1_Conf_1.000 | 311  | 20 | 5.17E-19 | NP_740774.1    | 81  | 97.4413 | 77  | 63 | hypothetical protein Y48G1A.4                                   |
| Locus_17025_Transcript_1/1_Conf_1.000 | 362  | 20 | 1.24E-20 | ACI49149.1     | 63  | 102.834 | 121 | 77 | hypothetical protein Cbre_JD20.004                              |
| Locus_17026_Transcript_1/1_Conf_1.000 | 213  | 0  |          |                |     |         |     |    |                                                                 |
| Locus_17027_Transcript_1/1_Conf_1.000 | 455  | 20 | 3.27E-21 | XP_002199753.1 | 57  | 104.76  | 119 | 69 | PREDICTED: similar to FLJ14007                                  |
| Locus_17028_Transcript_1/1_Conf_1.000 | 177  | 11 | 7.73E-15 | XP_001901295.1 | 80  | 83.5741 | 56  | 45 | Nematode astacin protease protein 30                            |
| Locus_17029_Transcript_1/2_Conf_1.000 | 752  | 0  |          |                |     |         |     |    |                                                                 |

|                                       |     |    |          |                |     |         |     |     |                                                                                        |
|---------------------------------------|-----|----|----------|----------------|-----|---------|-----|-----|----------------------------------------------------------------------------------------|
| Locus_17029_Transcript_2/2_Conf_1.000 | 752 | 0  |          |                |     |         |     |     |                                                                                        |
| Locus_1703_Transcript_1/1_Conf_1.000  | 468 | 20 | 1.62E-60 | XP_002645153.1 | 91  | 235.343 | 156 | 143 | C. briggsae CBR-SFXN-2 protein                                                         |
| Locus_17030_Transcript_1/1_Conf_1.000 | 387 | 20 | 2.66E-23 | NP_491806.2    | 78  | 111.694 | 89  | 70  | LiPid Depleted family member (lpd-2)                                                   |
| Locus_17031_Transcript_1/1_Conf_1.000 | 146 | 1  | 8.31E-04 | XP_001893741.1 | 63  | 46.9802 | 49  | 31  | LIM domain containing protein                                                          |
| Locus_17032_Transcript_1/1_Conf_1.000 | 552 | 0  |          |                |     |         |     |     |                                                                                        |
| Locus_17033_Transcript_1/1_Conf_1.000 | 148 | 20 | 6.33E-12 | XP_002823973.1 | 100 | 73.9442 | 34  | 34  | PREDICTED: ADP-ribosylation factor-like protein 6-interacting protein 4-like isoform 5 |
| Locus_17034_Transcript_1/1_Conf_1.000 | 150 | 0  |          |                |     |         |     |     |                                                                                        |
| Locus_17035_Transcript_1/1_Conf_1.000 | 584 | 20 | 1.53E-20 | NP_491574.1    | 64  | 103.219 | 135 | 87  | hypothetical protein F55A12.8                                                          |
| Locus_17036_Transcript_1/1_Conf_1.000 | 158 | 20 | 3.92E-22 | BAF83756.1     | 100 | 107.842 | 52  | 52  | unnamed protein product                                                                |
| Locus_17037_Transcript_1/1_Conf_1.000 | 158 | 0  |          |                |     |         |     |     |                                                                                        |
| Locus_17038_Transcript_1/1_Conf_1.000 | 267 | 20 | 1.06E-11 | XP_002641218.1 | 64  | 73.1738 | 77  | 50  | Hypothetical protein CBG09082                                                          |
| Locus_17039_Transcript_1/1_Conf_1.000 | 330 | 20 | 2.66E-47 | NP_001122450.1 | 90  | 191.43  | 110 | 100 | hypothetical protein F10G8.8                                                           |
| Locus_1704_Transcript_1/1_Conf_1.000  | 555 | 2  | 3.53E-29 | NP_001022723.2 | 59  | 131.724 | 156 | 93  | TENeurin family member (ten-1)                                                         |
| Locus_17040_Transcript_1/1_Conf_1.000 | 406 | 20 | 4.26E-37 | EFO28414.1     | 71  | 157.532 | 133 | 95  | hypothetical protein LOAG_00060                                                        |
| Locus_17041_Transcript_1/1_Conf_1.000 | 256 | 3  | 1.11E-24 | AAC39119.1     | 73  | 116.316 | 78  | 57  | low-affinity peptide transporter                                                       |
| Locus_17042_Transcript_1/1_Conf_1.000 | 166 | 0  |          |                |     |         |     |     |                                                                                        |
| Locus_17043_Transcript_1/1_Conf_1.000 | 443 | 0  |          |                |     |         |     |     |                                                                                        |

|                                       |      |    |          |                |     |         |     |     |                                                                   |
|---------------------------------------|------|----|----------|----------------|-----|---------|-----|-----|-------------------------------------------------------------------|
| Locus_17044_Transcript_1/1_Conf_1.000 | 308  | 20 | 3.70E-41 | XP_002630183.1 | 91  | 171.014 | 102 | 93  | C. briggsae CBR-FLI-1 protein                                     |
| Locus_17045_Transcript_1/2_Conf_1.000 | 594  | 0  |          |                |     |         |     |     |                                                                   |
| Locus_17045_Transcript_2/2_Conf_1.000 | 594  | 0  |          |                |     |         |     |     |                                                                   |
| Locus_17046_Transcript_1/1_Conf_1.000 | 486  | 20 | 1.13E-45 | CAA30855.1     | 91  | 186.037 | 137 | 125 | myosin heavy chain 2                                              |
| Locus_17047_Transcript_1/1_Conf_1.000 | 235  | 0  |          |                |     |         |     |     |                                                                   |
| Locus_17048_Transcript_1/1_Conf_1.000 | 176  | 0  |          |                |     |         |     |     |                                                                   |
| Locus_17049_Transcript_1/2_Conf_1.000 | 464  | 2  | 3.69E-04 | NP_495257.3    | 46  | 48.1358 | 111 | 52  | Biotin Protein Ligase family member (bpl-1)                       |
| Locus_17049_Transcript_2/2_Conf_1.000 | 464  | 2  | 3.69E-04 | NP_495257.3    | 46  | 48.1358 | 111 | 52  | Biotin Protein Ligase family member (bpl-1)                       |
| Locus_1705_Transcript_1/1_Conf_1.000  | 496  | 0  |          |                |     |         |     |     |                                                                   |
| Locus_17050_Transcript_1/1_Conf_1.000 | 354  | 20 | 7.32E-21 | XP_002634722.1 | 67  | 103.605 | 101 | 68  | Hypothetical protein CBG24065                                     |
| Locus_17051_Transcript_1/1_Conf_1.000 | 132  | 20 | 1.98E-18 | NP_001087890.2 | 100 | 95.5153 | 43  | 43  | LIM domain only 4, gene 1                                         |
| Locus_17052_Transcript_1/1_Conf_1.000 | 401  | 20 | 9.21E-56 | XP_002645894.1 | 90  | 219.55  | 133 | 121 | Hypothetical protein CBG07647                                     |
| Locus_17053_Transcript_1/1_Conf_1.000 | 351  | 20 | 4.93E-17 | NP_496909.1    | 67  | 90.8929 | 101 | 68  | ING (mammalian INhibitor of Growth) homolog family member (ing-3) |
| Locus_17054_Transcript_1/1_Conf_1.000 | 1012 | 20 | 6.94E-77 | XP_002637110.1 | 76  | 291.967 | 257 | 197 | Hypothetical protein CBG09610                                     |
| Locus_17055_Transcript_1/1_Conf_1.000 | 175  | 0  |          |                |     |         |     |     |                                                                   |
| Locus_17056_Transcript_1/1_Conf_1.000 | 224  | 0  |          |                |     |         |     |     |                                                                   |
| Locus_17057_Transcript_1/1_Conf_1.000 | 404  | 0  |          |                |     |         |     |     |                                                                   |
| Locus_17058_Transcript_1/1_Conf_1.000 | 502  | 20 | 4.51E-10 | XP_975003.1    | 49  | 67.781  | 163 | 80  | PREDICTED: similar to CG31751 CG31751-PA                          |
| Locus_17059_Transcript_1/1_Conf_1.000 | 233  | 0  |          |                |     |         |     |     |                                                                   |

|                                       |      |    |           |                |    |         |     |     |                                                                         |
|---------------------------------------|------|----|-----------|----------------|----|---------|-----|-----|-------------------------------------------------------------------------|
| Locus_1706_Transcript_1/2_Conf_1.000  | 1467 | 20 | 1.87E-122 | XP_002633783.1 | 72 | 444.121 | 425 | 309 | Hypothetical protein CBG03474                                           |
| Locus_1706_Transcript_2/2_Conf_1.000  | 1453 | 20 | 2.96E-115 | XP_002633783.1 | 69 | 330.102 | 347 | 242 | Hypothetical protein CBG03474                                           |
| Locus_17060_Transcript_1/1_Conf_1.000 | 430  | 3  | 1.93E-05  | XP_002644943.1 | 44 | 52.373  | 142 | 63  | Hypothetical protein CBG10898                                           |
| Locus_17061_Transcript_1/1_Conf_1.000 | 849  | 4  | 3.20E-10  | NP_493646.1    | 56 | 70.0922 | 144 | 82  | hypothetical protein F23F1.9                                            |
| Locus_17062_Transcript_1/1_Conf_1.000 | 243  | 20 | 1.01E-22  | NP_501127.2    | 96 | 109.768 | 57  | 55  | RNA Polymerase, Class III (C) family member (rpc-1)                     |
| Locus_17063_Transcript_1/1_Conf_1.000 | 524  | 13 | 3.52E-67  | XP_002640548.1 | 93 | 257.684 | 174 | 163 | Hypothetical protein CBG15812                                           |
| Locus_17064_Transcript_1/1_Conf_1.000 | 230  | 20 | 6.05E-15  | XP_002647188.1 | 79 | 83.9593 | 59  | 47  | Hypothetical protein CBG22355                                           |
| Locus_17065_Transcript_1/1_Conf_1.000 | 665  | 4  | 5.10E-19  | NP_001040707.1 | 60 | 98.5969 | 211 | 128 | CDT (S. pombe CDC10 Dependent Transcript) homolog family member (cdt-1) |
| Locus_17066_Transcript_1/1_Conf_1.000 | 367  | 0  |           |                |    |         |     |     |                                                                         |
| Locus_17067_Transcript_1/1_Conf_1.000 | 432  | 0  |           |                |    |         |     |     |                                                                         |
| Locus_17068_Transcript_1/1_Conf_1.000 | 183  | 20 | 6.34E-12  | XP_002634144.1 | 76 | 73.9442 | 60  | 46  | Hypothetical protein CBG01705                                           |
| Locus_17069_Transcript_1/1_Conf_1.000 | 193  | 0  |           |                |    |         |     |     |                                                                         |

|                                       |     |    |          |                |    |         |     |     |                                                     |
|---------------------------------------|-----|----|----------|----------------|----|---------|-----|-----|-----------------------------------------------------|
| Locus_1707_Transcript_1/1_Conf_1.000  | 415 | 20 | 3.44E-39 | NP_499099.1    | 74 | 164.466 | 136 | 101 | hypothetical protein ZK1098.7                       |
| Locus_17070_Transcript_1/1_Conf_1.000 | 149 | 0  |          |                |    |         |     |     |                                                     |
| Locus_17071_Transcript_1/1_Conf_1.000 | 339 | 2  | 1.61E-04 | EFO20756.1     | 49 | 49.2914 | 104 | 51  | nucleolar RNA-associated protein alpha              |
| Locus_17072_Transcript_1/1_Conf_1.000 | 179 | 20 | 2.11E-12 | XP_002637265.1 | 76 | 75.485  | 59  | 45  | C. briggsae CBR-CPT-6 protein                       |
| Locus_17073_Transcript_1/1_Conf_1.000 | 255 | 0  |          |                |    |         |     |     |                                                     |
| Locus_17074_Transcript_1/1_Conf_1.000 | 252 | 4  | 6.33E-12 | NP_509145.2    | 68 | 73.9442 | 76  | 52  | AuTophagy (yeast Atg homolog) family member (atg-2) |
| Locus_17075_Transcript_1/1_Conf_1.000 | 370 | 0  |          |                |    |         |     |     |                                                     |
| Locus_17076_Transcript_1/1_Conf_1.000 | 302 | 20 | 6.83E-19 | XP_002640837.1 | 78 | 97.0561 | 64  | 50  | Hypothetical protein CBG15725                       |
| Locus_17077_Transcript_1/1_Conf_1.000 | 268 | 20 | 8.06E-36 | XP_001891652.1 | 97 | 153.295 | 79  | 77  | myosin heavy chain, nonmuscle type 1                |
| Locus_17078_Transcript_1/1_Conf_1.000 | 321 | 0  |          |                |    |         |     |     |                                                     |
| Locus_17079_Transcript_1/1_Conf_1.000 | 157 | 4  | 1.49E-13 | EFO21662.1     | 82 | 79.337  | 51  | 42  | hypothetical protein LOAG_06825                     |
| Locus_1708_Transcript_1/1_Conf_1.000  | 460 | 0  |          |                |    |         |     |     |                                                     |
| Locus_17080_Transcript_1/1_Conf_1.000 | 306 | 20 | 2.48E-37 | NP_497182.2    | 88 | 158.303 | 101 | 89  | hypothetical protein Y50D7A.2                       |
| Locus_17081_Transcript_1/1_Conf_1.000 | 188 | 0  |          |                |    |         |     |     |                                                     |
| Locus_17082_Transcript_1/1_Conf_1.000 | 317 | 4  | 1.11E-24 | XP_002644860.1 | 71 | 116.316 | 113 | 81  | Hypothetical protein CBG05033                       |
| Locus_17083_Transcript_1/1_Conf_1.000 | 168 | 0  |          |                |    |         |     |     |                                                     |
| Locus_17084_Transcript_1/1_Conf_1.000 | 736 | 20 | 3.75E-27 | EFO22480.1     | 54 | 125.946 | 235 | 127 | BSD domain-containing protein                       |
| Locus_17085_Transcript_1/1_Conf_1.000 | 256 | 0  |          |                |    |         |     |     |                                                     |
| Locus_17086_Transcript_1/1_Conf_1.000 | 147 | 0  |          |                |    |         |     |     |                                                     |
| Locus_17087_Transcript_1/1_Conf_1.000 | 149 | 0  |          |                |    |         |     |     |                                                     |
| Locus_17088_Transcript_1/1_Conf_1.000 | 294 | 0  |          |                |    |         |     |     |                                                     |
| Locus_17089_Transcript_1/1_Conf_1.000 | 286 | 0  |          |                |    |         |     |     |                                                     |
| Locus_1709_Transcript_1/1_Conf_1.000  | 824 | 0  |          |                |    |         |     |     |                                                     |
| Locus_17090_Transcript_1/1_Conf_1.000 | 485 | 0  |          |                |    |         |     |     |                                                     |
| Locus_17091_Transcript_1/1_Conf_1.000 | 207 | 0  |          |                |    |         |     |     |                                                     |
| Locus_17092_Transcript_1/1_Conf_1.000 | 214 | 0  |          |                |    |         |     |     |                                                     |
| Locus_17093_Transcript_1/1_Conf_1.000 | 244 | 8  | 8.85E-27 | XP_002636220.1 | 79 | 123.25  | 73  | 58  | Hypothetical protein CBG12141                       |
| Locus_17094_Transcript_1/1_Conf_1.000 | 243 | 0  |          |                |    |         |     |     |                                                     |
| Locus_17095_Transcript_1/1_Conf_1.000 | 195 | 0  |          |                |    |         |     |     |                                                     |
| Locus_17096_Transcript_1/1_Conf_1.000 | 327 | 0  |          |                |    |         |     |     |                                                     |
| Locus_17097_Transcript_1/1_Conf_1.000 | 155 | 0  |          |                |    |         |     |     |                                                     |



|                                       |      |    |           |                |    |         |     |     |                                                                        |
|---------------------------------------|------|----|-----------|----------------|----|---------|-----|-----|------------------------------------------------------------------------|
| Locus_17098_Transcript_1/4_Conf_0.333 | 587  | 20 | 2.99E-64  | XP_001892307.1 | 77 | 248.44  | 191 | 148 | ATP-dependent DNA helicase, RecQ family protein                        |
| Locus_17098_Transcript_2/4_Conf_0.444 | 1113 | 20 | 7.48E-99  | XP_002642560.1 | 72 | 365.155 | 315 | 227 | C. briggsae CBR-RCQ-5 protein                                          |
| Locus_17098_Transcript_3/4_Conf_0.444 | 1113 | 20 | 7.48E-99  | XP_002642560.1 | 72 | 365.155 | 315 | 227 | C. briggsae CBR-RCQ-5 protein                                          |
| Locus_17098_Transcript_4/4_Conf_0.333 | 587  | 20 | 2.99E-64  | XP_001892307.1 | 77 | 248.44  | 191 | 148 | ATP-dependent DNA helicase, RecQ family protein                        |
| Locus_17099_Transcript_1/1_Conf_1.000 | 941  | 20 | 6.97E-113 | XP_002641585.1 | 81 | 411.379 | 302 | 245 | Hypothetical protein CBG09887                                          |
| Locus_171_Transcript_1/1_Conf_1.000   | 677  | 20 | 3.67E-36  | XP_001896629.1 | 57 | 155.606 | 229 | 131 | U-box domain containing protein                                        |
| Locus_1710_Transcript_1/1_Conf_1.000  | 271  | 20 | 8.37E-09  | XP_001899631.1 | 57 | 63.5438 | 90  | 52  | WD-repeat protein 26                                                   |
| Locus_17100_Transcript_1/1_Conf_1.000 | 157  | 0  |           |                |    |         |     |     |                                                                        |
| Locus_17101_Transcript_1/1_Conf_1.000 | 515  | 20 | 2.54E-35  | NP_001021671.2 | 68 | 151.754 | 168 | 115 | hypothetical protein W09G3.7                                           |
| Locus_17102_Transcript_1/1_Conf_1.000 | 517  | 20 | 1.39E-12  | XP_002049622.1 | 47 | 76.2554 | 166 | 79  | GJ21697                                                                |
| Locus_17103_Transcript_1/1_Conf_1.000 | 280  | 0  |           |                |    |         |     |     |                                                                        |
| Locus_17104_Transcript_1/1_Conf_1.000 | 777  | 20 | 3.48E-66  | CBL87054.2     | 69 | 255.758 | 262 | 181 | C. elegans protein F54E4.1, partially confirmed by transcript evidence |
| Locus_17105_Transcript_1/1_Conf_1.000 | 232  | 0  |           |                |    |         |     |     |                                                                        |

|                                       |      |    |           |                |    |         |     |     |                                                                                                  |
|---------------------------------------|------|----|-----------|----------------|----|---------|-----|-----|--------------------------------------------------------------------------------------------------|
| Locus_17106_Transcript_1/1_Conf_1.000 | 714  | 20 | 1.83E-76  | XP_001893036.1 | 83 | 289.656 | 210 | 176 | SMC family, C-terminal domain containing protein                                                 |
| Locus_17107_Transcript_1/1_Conf_1.000 | 287  | 20 | 1.66E-20  | ADI61822.1     | 67 | 102.449 | 90  | 61  | endonuclease-reverse transcriptase                                                               |
| Locus_17108_Transcript_1/1_Conf_1.000 | 280  | 4  | 1.84E-08  | XP_001895740.1 | 68 | 62.3882 | 73  | 50  | hypothetical protein Bm1_21430                                                                   |
| Locus_17109_Transcript_1/1_Conf_1.000 | 465  | 20 | 2.62E-26  | XP_001149667.1 | 72 | 121.709 | 115 | 83  | PREDICTED: transcription factor AP-2 beta (activating enhancer binding protein 2 beta) isoform 1 |
| Locus_17111_Transcript_1/1_Conf_1.000 | 878  | 20 | 5.15E-144 | EFO23330.1     | 94 | 514.612 | 287 | 270 | GTP-binding regulatory protein alpha chain                                                       |
| Locus_17110_Transcript_1/1_Conf_1.000 | 536  | 1  | 5.86E-04  | NP_001022760.1 | 62 | 47.7506 | 54  | 34  | hypothetical protein T16G12.9                                                                    |
| Locus_17111_Transcript_1/1_Conf_1.000 | 680  | 20 | 3.02E-62  | XP_002630829.1 | 76 | 242.276 | 227 | 174 | C. briggsae CBR-VPS-35 protein                                                                   |
| Locus_17112_Transcript_1/2_Conf_1.000 | 347  | 0  |           |                |    |         |     |     |                                                                                                  |
| Locus_17112_Transcript_2/2_Conf_1.000 | 345  | 0  |           |                |    |         |     |     |                                                                                                  |
| Locus_17113_Transcript_1/1_Conf_1.000 | 157  | 20 | 2.09E-07  | XP_002157644.1 | 78 | 58.9214 | 51  | 40  | PREDICTED: similar to predicted protein, partial                                                 |
| Locus_17114_Transcript_1/1_Conf_1.000 | 239  | 3  | 1.17E-10  | NP_491138.2    | 63 | 69.707  | 79  | 50  | SULfate Permease family member (sulp-6)                                                          |
| Locus_17115_Transcript_1/1_Conf_1.000 | 1047 | 20 | 9.30E-40  | NP_001022032.1 | 54 | 168.703 | 333 | 181 | TRRAP-like (transcription/transformation domain-associated protein) family member (trr-1)        |
| Locus_17116_Transcript_1/1_Conf_1.000 | 143  | 3  | 1.61E-04  | XP_002631235.1 | 66 | 49.2914 | 54  | 36  | C. briggsae CBR-PTB-1 protein                                                                    |
| Locus_17117_Transcript_1/1_Conf_1.000 | 157  | 0  |           |                |    |         |     |     |                                                                                                  |

|                                       |      |    |          |                |     |         |     |     |                                                             |
|---------------------------------------|------|----|----------|----------------|-----|---------|-----|-----|-------------------------------------------------------------|
| Locus_17118_Transcript_1/1_Conf_1.000 | 206  | 20 | 7.78E-31 | XP_002762172.1 | 100 | 136.732 | 68  | 68  | PREDICTED: 26S protease regulatory subunit 6B               |
| Locus_17119_Transcript_1/1_Conf_1.000 | 1297 | 13 | 1.05E-25 | XP_001895099.1 | 47  | 122.479 | 350 | 165 | hypothetical protein Bm1_18210                              |
| Locus_1712_Transcript_1/1_Conf_1.000  | 1375 | 20 | 1.69E-61 | EFO21998.1     | 50  | 241.506 | 385 | 194 | RWD domain-containing protein                               |
| Locus_17120_Transcript_1/1_Conf_1.000 | 350  | 9  | 9.26E-40 | XP_002635876.1 | 80  | 166.392 | 116 | 93  | C. briggsae CBR-PTR-16 protein                              |
| Locus_17121_Transcript_1/1_Conf_1.000 | 279  | 4  | 1.90E-29 | XP_002642450.1 | 79  | 132.109 | 92  | 73  | Hypothetical protein CBG06858                               |
| Locus_17122_Transcript_1/1_Conf_1.000 | 391  | 20 | 5.92E-15 | ADI61811.1     | 58  | 83.9593 | 111 | 65  | endonuclease-reverse transcriptase                          |
| Locus_17123_Transcript_1/1_Conf_1.000 | 577  | 20 | 1.06E-18 | NP_495324.2    | 80  | 97.0561 | 63  | 51  | human WRN (Werner's syndrome) related family member (wrn-1) |
| Locus_17124_Transcript_1/1_Conf_1.000 | 530  | 20 | 4.20E-63 | NP_496444.1    | 78  | 244.202 | 175 | 138 | Alanyl tRNA Synthetase family member (ars-1)                |
| Locus_17125_Transcript_1/1_Conf_1.000 | 223  | 0  |          |                |     |         |     |     |                                                             |
| Locus_17126_Transcript_1/1_Conf_1.000 | 961  | 0  |          |                |     |         |     |     |                                                             |
| Locus_17127_Transcript_1/1_Conf_1.000 | 461  | 0  |          |                |     |         |     |     |                                                             |
| Locus_17128_Transcript_1/1_Conf_1.000 | 476  | 0  |          |                |     |         |     |     |                                                             |
| Locus_17129_Transcript_1/1_Conf_1.000 | 360  | 0  |          |                |     |         |     |     |                                                             |

|                                       |      |    |          |                |    |         |     |     |                                  |
|---------------------------------------|------|----|----------|----------------|----|---------|-----|-----|----------------------------------|
| Locus_1713_Transcript_1/1_Conf_1.000  | 2758 | 20 | 0        | XP_002646632.1 | 84 | 1382.47 | 926 | 783 | C. briggsae CBR-UNC-52 protein   |
| Locus_17130_Transcript_1/1_Conf_1.000 | 200  | 20 | 2.89E-17 | XP_002636925.1 | 83 | 91.6633 | 68  | 57  | C. briggsae CBR-RHR-1 protein    |
| Locus_17131_Transcript_1/1_Conf_1.000 | 198  | 0  |          |                |    |         |     |     |                                  |
| Locus_17132_Transcript_1/1_Conf_1.000 | 503  | 4  | 3.44E-18 | XP_002630955.1 | 59 | 94.7449 | 166 | 98  | C. briggsae CBR-WRN-1 protein    |
| Locus_17133_Transcript_1/3_Conf_0.333 | 483  | 2  | 4.66E-07 | AAO63576.1     | 40 | 57.7658 | 154 | 62  | secreted protein 4 precursor     |
| Locus_17133_Transcript_2/3_Conf_0.667 | 687  | 4  | 1.29E-07 | ABB53347.1     | 41 | 60.8474 | 214 | 89  | secreted protein 5 precursor     |
| Locus_17133_Transcript_3/3_Conf_0.500 | 175  | 0  |          |                |    |         |     |     |                                  |
| Locus_17134_Transcript_1/1_Conf_1.000 | 162  | 0  |          |                |    |         |     |     |                                  |
| Locus_17135_Transcript_1/1_Conf_1.000 | 196  | 5  | 3.54E-15 | XP_002638527.1 | 76 | 84.7297 | 65  | 50  | C. briggsae CBR-UNC-80 protein   |
| Locus_17136_Transcript_1/1_Conf_1.000 | 255  | 2  | 1.04E-06 | XP_002643159.1 | 63 | 56.6102 | 65  | 41  | C. briggsae CBR-VPS-33.1 protein |
| Locus_17137_Transcript_1/2_Conf_1.000 | 260  | 8  | 2.90E-25 | EFO25373.1     | 76 | 118.242 | 89  | 68  | laterally symmetric protein 2    |
| Locus_17137_Transcript_2/2_Conf_1.000 | 270  | 8  | 3.06E-27 | EFO25373.1     | 77 | 124.79  | 92  | 71  | laterally symmetric protein 2    |
| Locus_17138_Transcript_1/1_Conf_1.000 | 382  | 8  | 3.87E-22 | EFO20275.1     | 64 | 107.842 | 126 | 81  | hypothetical protein LOAG_08213  |

|                                       |      |    |          |                |    |         |     |     |                                     |
|---------------------------------------|------|----|----------|----------------|----|---------|-----|-----|-------------------------------------|
| Locus_17139_Transcript_1/1_Conf_1.000 | 1633 | 20 | 1.05E-60 | XP_001893645.1 | 67 | 239.195 | 238 | 161 | MGC79624 protein                    |
| Locus_1714_Transcript_1/1_Conf_1.000  | 1104 | 20 | 1.32E-63 | NP_496151.1    | 74 | 248.054 | 213 | 158 | hypothetical protein R53.2          |
| Locus_17140_Transcript_1/1_Conf_1.000 | 640  | 0  |          |                |    |         |     |     |                                     |
| Locus_17141_Transcript_1/1_Conf_1.000 | 278  | 0  |          |                |    |         |     |     |                                     |
| Locus_17142_Transcript_1/1_Conf_1.000 | 400  | 20 | 1.34E-22 | XP_002641332.1 | 60 | 109.383 | 138 | 84  | Hypothetical protein CBG13180       |
| Locus_17143_Transcript_1/1_Conf_1.000 | 821  |    |          |                |    |         |     |     |                                     |
| Locus_17144_Transcript_1/1_Conf_1.000 | 297  | 2  | 8.40E-09 | XP_002636395.1 | 53 | 63.5438 | 97  | 52  | Hypothetical protein CBG08700       |
| Locus_17145_Transcript_1/1_Conf_1.000 | 413  | 20 | 1.57E-07 | EFN69864.1     | 56 | 59.3066 | 89  | 50  | Serine/threonine-protein kinase grp |
| Locus_17146_Transcript_1/1_Conf_1.000 | 402  | 1  | 2.80E-04 | NP_508445.1    | 76 | 48.521  | 34  | 26  | hypothetical protein T07D1.3        |
| Locus_17147_Transcript_1/1_Conf_1.000 | 162  | 0  |          |                |    |         |     |     |                                     |
| Locus_17148_Transcript_1/1_Conf_1.000 | 143  | 0  |          |                |    |         |     |     |                                     |
| Locus_17149_Transcript_1/1_Conf_1.000 | 219  | 4  | 4.10E-11 | NP_495673.2    | 94 | 71.2478 | 36  | 34  | hypothetical protein DH11.4         |

|                                       |     |    |           |                |    |         |     |     |                                                               |
|---------------------------------------|-----|----|-----------|----------------|----|---------|-----|-----|---------------------------------------------------------------|
| Locus_1715_Transcript_1/1_Conf_1.000  | 936 | 20 | 2.38E-113 | NP_505736.2    | 77 | 412.92  | 311 | 242 | yeast MRE recombination/repair homolog family member (mre-11) |
| Locus_17150_Transcript_1/1_Conf_1.000 | 379 | 0  |           |                |    |         |     |     |                                                               |
| Locus_17151_Transcript_1/1_Conf_1.000 | 390 | 3  | 1.18E-39  | NP_001021158.1 | 86 | 166.007 | 104 | 90  | UDP-GlucuronosylTransferase family member (ugt-60)            |
| Locus_17152_Transcript_1/1_Conf_1.000 | 188 | 0  |           |                |    |         |     |     |                                                               |
| Locus_17153_Transcript_1/1_Conf_1.000 | 249 | 20 | 1.19E-15  | NP_495614.3    | 84 | 86.2705 | 58  | 49  | Na/H eXchanger family member (nhx-2)                          |
| Locus_17154_Transcript_1/1_Conf_1.000 | 822 | 20 | 2.12E-64  | EFO21353.1     | 70 | 249.98  | 269 | 190 | oxidoreductase                                                |
| Locus_17155_Transcript_1/1_Conf_1.000 | 250 | 0  |           |                |    |         |     |     |                                                               |
| Locus_17156_Transcript_1/1_Conf_1.000 | 406 | 20 | 1.28E-33  | NP_503029.2    | 80 | 145.976 | 117 | 94  | hypothetical protein Y116A8C.27                               |
| Locus_17157_Transcript_1/1_Conf_1.000 | 133 | 0  |           |                |    |         |     |     |                                                               |

|                                       |     |    |          |                |    |         |     |     |                                       |
|---------------------------------------|-----|----|----------|----------------|----|---------|-----|-----|---------------------------------------|
| Locus_17158_Transcript_1/1_Conf_1.000 | 331 | 20 | 9.83E-26 | XP_002634557.1 | 87 | 119.783 | 95  | 83  | C. briggsae CBR-TAX-6 protein         |
| Locus_17159_Transcript_1/1_Conf_1.000 | 260 | 0  |          |                |    |         |     |     |                                       |
| Locus_1716_Transcript_1/1_Conf_1.000  | 931 | 20 | 2.18E-42 | XP_001897236.1 | 62 | 177.178 | 200 | 124 | Zinc finger, C2H2 type family protein |
| Locus_17160_Transcript_1/1_Conf_1.000 | 351 | 2  | 2.43E-32 | NP_506678.2    | 74 | 141.739 | 116 | 86  | hypothetical protein W09D12.1         |
| Locus_17161_Transcript_1/1_Conf_1.000 | 276 | 2  | 2.26E-06 | XP_002639005.1 | 49 | 55.4546 | 91  | 45  | Hypothetical protein CBG22251         |
| Locus_17162_Transcript_1/1_Conf_1.000 | 349 | 0  |          |                |    |         |     |     |                                       |
| Locus_17163_Transcript_1/1_Conf_1.000 | 126 | 0  |          |                |    |         |     |     |                                       |
| Locus_17164_Transcript_1/2_Conf_1.000 | 596 | 20 | 2.79E-41 | NP_499333.1    | 63 | 172.17  | 198 | 126 | hypothetical protein Y45F3A.9         |
| Locus_17164_Transcript_2/2_Conf_1.000 | 406 | 20 | 1.52E-26 | NP_499333.1    | 65 | 122.479 | 135 | 89  | hypothetical protein Y45F3A.9         |

|                                       |     |    |          |                |     |         |     |     |                                             |
|---------------------------------------|-----|----|----------|----------------|-----|---------|-----|-----|---------------------------------------------|
| Locus_17165_Transcript_1/1_Conf_1.000 | 211 | 20 | 1.15E-34 | XP_002928912.1 | 100 | 149.443 | 70  | 70  | PREDICTED: tubulin beta chain-like          |
| Locus_17166_Transcript_1/1_Conf_1.000 | 158 | 0  |          |                |     |         |     |     |                                             |
| Locus_17167_Transcript_1/1_Conf_1.000 | 381 | 0  |          |                |     |         |     |     |                                             |
| Locus_17168_Transcript_1/1_Conf_1.000 | 272 | 4  | 4.59E-07 | XP_001894916.1 | 55  | 57.7658 | 70  | 39  | Zinc finger, C2H2 type family protein       |
| Locus_17169_Transcript_1/1_Conf_1.000 | 148 | 0  |          |                |     |         |     |     |                                             |
| Locus_1717_Transcript_1/1_Conf_1.000  | 545 | 20 | 8.81E-67 | NP_496402.1    | 82  | 256.529 | 175 | 144 | hypothetical protein T06D8.5                |
| Locus_17170_Transcript_1/1_Conf_1.000 | 128 | 20 | 1.43E-16 | NP_001024858.2 | 95  | 89.3521 | 42  | 40  | Sensory AXon guidance family member (sax-1) |
| Locus_17171_Transcript_1/2_Conf_1.000 | 313 | 20 | 4.66E-31 | NP_500367.1    | 76  | 137.502 | 104 | 80  | hypothetical protein M57.2                  |



|                                       |     |    |          |                |    |         |     |     |                                                                           |
|---------------------------------------|-----|----|----------|----------------|----|---------|-----|-----|---------------------------------------------------------------------------|
| Locus_17171_Transcript_2/2_Conf_1.000 | 329 | 20 | 1.86E-32 | NP_500367.1    | 76 | 142.124 | 110 | 84  | hypothetical protein M57.2                                                |
| Locus_17172_Transcript_1/1_Conf_1.000 | 448 | 20 | 9.83E-50 | NP_499387.1    | 74 | 199.519 | 149 | 111 | hypothetical protein R17.3                                                |
| Locus_17173_Transcript_1/1_Conf_1.000 | 216 | 20 | 1.71E-22 | NP_498418.2    | 88 | 108.997 | 69  | 61  | hypothetical protein T26A5.5                                              |
| Locus_17174_Transcript_1/1_Conf_1.000 | 525 | 20 | 4.04E-10 | NP_001022699.1 | 52 | 68.1662 | 186 | 98  | Ring Finger Protein, UBC associated family member (rfp-1)                 |
| Locus_17175_Transcript_1/1_Conf_1.000 | 204 | 0  |          |                |    |         |     |     |                                                                           |
| Locus_17176_Transcript_1/1_Conf_1.000 | 522 | 20 | 4.22E-12 | XP_001273939.1 | 48 | 74.7146 | 166 | 81  | sulfur metabolism regulator SkpA, putative                                |
| Locus_17177_Transcript_1/1_Conf_1.000 | 460 | 20 | 3.34E-26 | XP_002632532.1 | 88 | 121.324 | 104 | 92  | C. briggsae CBR-DPY-4 protein                                             |
| Locus_17178_Transcript_1/1_Conf_1.000 | 516 | 20 | 1.16E-67 | NP_498121.1    | 82 | 259.225 | 168 | 138 | yeast HAP (HydroxylAminoPurine sensitivity) related family member (hap-1) |
| Locus_17179_Transcript_1/1_Conf_1.000 | 553 | 0  |          |                |    |         |     |     |                                                                           |
| Locus_1718_Transcript_1/2_Conf_1.000  | 867 | 20 | 5.97E-68 | XP_001898186.1 | 75 | 261.922 | 188 | 142 | AMME syndrome candidate gene 1 protein homolog                            |
| Locus_1718_Transcript_2/2_Conf_1.000  | 312 | 0  |          |                |    |         |     |     |                                                                           |
| Locus_17180_Transcript_1/1_Conf_1.000 | 541 | 0  |          |                |    |         |     |     |                                                                           |
| Locus_17181_Transcript_1/1_Conf_1.000 | 206 | 1  | 4.75E-04 | XP_002631426.1 | 63 | 47.7506 | 49  | 31  | Hypothetical protein CBG03282                                             |

|                                       |     |    |          |                |    |         |     |     |                                                                   |
|---------------------------------------|-----|----|----------|----------------|----|---------|-----|-----|-------------------------------------------------------------------|
| Locus_17182_Transcript_1/1_Conf_1.000 | 168 | 20 | 2.13E-12 | NP_001021239.1 | 74 | 75.485  | 54  | 40  | Endo-b-N-acetylGlucosaminidase family member (eng-1)              |
| Locus_17183_Transcript_1/1_Conf_1.000 | 360 | 0  |          |                |    |         |     |     |                                                                   |
| Locus_17184_Transcript_1/1_Conf_1.000 | 999 | 20 | 4.77E-30 | XP_002636702.1 | 52 | 136.346 | 333 | 175 | C. briggsae CBR-RAD-50 protein                                    |
| Locus_17185_Transcript_1/1_Conf_1.000 | 129 | 0  |          |                |    |         |     |     |                                                                   |
| Locus_17186_Transcript_1/1_Conf_1.000 | 197 | 0  |          |                |    |         |     |     |                                                                   |
| Locus_17187_Transcript_1/1_Conf_1.000 | 405 | 0  |          |                |    |         |     |     |                                                                   |
| Locus_17188_Transcript_1/1_Conf_1.000 | 368 | 20 | 6.04E-52 | XP_860709.1    | 93 | 206.838 | 118 | 110 | PREDICTED: hypothetical protein XP_855616 isoform 2               |
| Locus_17189_Transcript_1/1_Conf_1.000 | 430 | 20 | 2.27E-22 | XP_002635357.1 | 72 | 108.612 | 92  | 67  | C. briggsae CBR-CLN-3.3 protein                                   |
| Locus_1719_Transcript_1/1_Conf_1.000  | 722 | 20 | 5.92E-14 | EFO20048.1     | 51 | 82.0333 | 201 | 103 | hypothetical protein LOAG_08441                                   |
| Locus_17190_Transcript_1/1_Conf_1.000 | 135 | 0  |          |                |    |         |     |     |                                                                   |
| Locus_17191_Transcript_1/1_Conf_1.000 | 212 | 1  | 1.67E-09 | EDL85946.1     | 71 | 65.855  | 53  | 38  | rCG37353, isoform CRA_a                                           |
| Locus_17192_Transcript_1/1_Conf_1.000 | 250 | 0  |          |                |    |         |     |     |                                                                   |
| Locus_17193_Transcript_1/1_Conf_1.000 | 309 | 0  |          |                |    |         |     |     |                                                                   |
| Locus_17194_Transcript_1/1_Conf_1.000 | 146 | 0  |          |                |    |         |     |     |                                                                   |
| Locus_17195_Transcript_1/1_Conf_1.000 | 659 | 20 | 1.32E-51 | NP_498494.2    | 65 | 206.838 | 221 | 145 | Central Region Assembly in meiosis abnormal family member (cra-1) |
| Locus_17196_Transcript_1/1_Conf_1.000 | 353 | 0  |          |                |    |         |     |     |                                                                   |

|                                       |      |    |          |                |    |         |     |     |                                                                |
|---------------------------------------|------|----|----------|----------------|----|---------|-----|-----|----------------------------------------------------------------|
| Locus_17197_Transcript_1/1_Conf_1.000 | 510  | 20 | 1.27E-47 | NP_505616.2    | 85 | 192.586 | 132 | 113 | CULLin family member (cul-5)                                   |
| Locus_17198_Transcript_1/1_Conf_1.000 | 419  | 0  |          |                |    |         |     |     |                                                                |
| Locus_17199_Transcript_1/1_Conf_1.000 | 647  | 0  |          |                |    |         |     |     |                                                                |
| Locus_172_Transcript_1/1_Conf_1.000   | 1053 | 5  | 5.84E-66 | NP_497742.2    | 56 | 255.758 | 316 | 177 | hypothetical protein C46F11.5                                  |
| Locus_1720_Transcript_1/1_Conf_1.000  | 1258 | 20 | 5.42E-72 | NP_496786.2    | 61 | 276.174 | 351 | 217 | hypothetical protein F29C12.3                                  |
| Locus_17200_Transcript_1/1_Conf_1.000 | 146  | 0  |          |                |    |         |     |     |                                                                |
| Locus_17201_Transcript_1/1_Conf_1.000 | 351  | 0  |          |                |    |         |     |     |                                                                |
| Locus_17202_Transcript_1/1_Conf_1.000 | 158  | 1  | 4.81E-04 | NP_505683.1    | 70 | 47.7506 | 41  | 29  | Poly-A Polymerase family member (pap-1)                        |
| Locus_17203_Transcript_1/1_Conf_1.000 | 794  | 20 | 4.67E-70 | XP_002629667.1 | 73 | 163.31  | 140 | 103 | C. briggsae CBR-TAG-165 protein                                |
| Locus_17204_Transcript_1/1_Conf_1.000 | 640  | 20 | 3.59E-43 | AAO39166.1     | 92 | 178.718 | 98  | 91  | nuclear receptor NHR-1                                         |
| Locus_17205_Transcript_1/1_Conf_1.000 | 155  | 20 | 2.82E-12 | XP_001895196.1 | 95 | 75.0998 | 47  | 45  | Nematode cuticle collagen N-terminal domain containing protein |

|                                       |      |    |          |                |     |         |     |     |                                                  |
|---------------------------------------|------|----|----------|----------------|-----|---------|-----|-----|--------------------------------------------------|
| Locus_17206_Transcript_1/1_Conf_1.000 | 590  | 20 | 4.02E-61 | BAG65301.1     | 100 | 238.039 | 106 | 106 | unnamed protein product                          |
| Locus_17207_Transcript_1/1_Conf_1.000 | 232  | 0  |          |                |     |         |     |     |                                                  |
| Locus_17208_Transcript_1/1_Conf_1.000 | 258  | 0  |          |                |     |         |     |     |                                                  |
| Locus_17209_Transcript_1/1_Conf_1.000 | 415  | 2  | 5.55E-05 | XP_002634505.1 | 62  | 50.8322 | 72  | 45  | Hypothetical protein CBG08295                    |
| Locus_1721_Transcript_1/1_Conf_1.000  | 819  | 20 | 1.12E-41 | AAK31453.4     | 64  | 174.481 | 209 | 135 | Hypothetical protein C25H3.8                     |
| Locus_17210_Transcript_1/1_Conf_1.000 | 235  | 0  |          |                |     |         |     |     |                                                  |
| Locus_17211_Transcript_1/1_Conf_1.000 | 354  | 20 | 6.19E-20 | AAN34967.1     | 69  | 100.523 | 98  | 68  | thioredoxin 2                                    |
| Locus_17212_Transcript_1/1_Conf_1.000 | 275  | 0  |          |                |     |         |     |     |                                                  |
| Locus_17213_Transcript_1/2_Conf_1.000 | 1049 | 2  | 2.56E-05 | XP_843163.1    | 36  | 54.299  | 302 | 109 | proteophosphoglycan 5                            |
| Locus_17213_Transcript_2/2_Conf_1.000 | 1049 | 2  | 2.56E-05 | XP_843163.1    | 36  | 54.299  | 302 | 109 | proteophosphoglycan 5                            |
| Locus_17214_Transcript_1/1_Conf_1.000 | 200  | 2  | 1.26E-04 | NP_492157.2    | 56  | 49.6766 | 53  | 30  | hypothetical protein D2005.6                     |
| Locus_17215_Transcript_1/1_Conf_1.000 | 559  | 4  | 2.52E-27 | XP_002640034.1 | 61  | 125.561 | 180 | 111 | C. briggsae CBR-EDC-3 protein                    |
| Locus_17216_Transcript_1/1_Conf_1.000 | 567  | 12 | 1.03E-71 | NP_496205.2    | 83  | 273.092 | 188 | 157 | PhosphoLipase C family member (plc-3)            |
| Locus_17217_Transcript_1/1_Conf_1.000 | 249  | 20 | 1.00E-30 | NP_508993.2    | 91  | 136.346 | 82  | 75  | fatty Acid CoA Synthetase family member (acs-17) |

|                                       |      |    |           |                |    |         |     |     |                                                           |
|---------------------------------------|------|----|-----------|----------------|----|---------|-----|-----|-----------------------------------------------------------|
| Locus_17218_Transcript_1/1_Conf_1.000 | 187  | 4  | 1.61E-15  | XP_002629798.1 | 83 | 85.8853 | 62  | 52  | Hypothetical protein CBG01041                             |
| Locus_17219_Transcript_1/1_Conf_1.000 | 193  | 0  |           |                |    |         |     |     |                                                           |
| Locus_1722_Transcript_1/2_Conf_1.000  | 1358 | 20 | 1.03E-79  | EFO27010.1     | 79 | 301.982 | 215 | 170 | uracil-DNA glycosylase                                    |
| Locus_1722_Transcript_2/2_Conf_1.000  | 1148 | 20 | 8.07E-80  | EFO27010.1     | 79 | 301.982 | 215 | 170 | uracil-DNA glycosylase                                    |
| Locus_17220_Transcript_1/1_Conf_1.000 | 134  | 0  |           |                |    |         |     |     |                                                           |
| Locus_17221_Transcript_1/1_Conf_1.000 | 505  | 20 | 2.98E-25  | EFO28229.1     | 83 | 118.242 | 72  | 60  | hypothetical protein LOAG_00257                           |
| Locus_17222_Transcript_1/1_Conf_1.000 | 339  | 0  |           |                |    |         |     |     |                                                           |
| Locus_17223_Transcript_1/1_Conf_1.000 | 154  | 6  | 3.81E-09  | NP_509110.1    | 94 | 64.6994 | 36  | 34  | TransThyretin-Related family domain family member (ttr-6) |
| Locus_17224_Transcript_1/1_Conf_1.000 | 172  | 0  |           |                |    |         |     |     |                                                           |
| Locus_17225_Transcript_1/1_Conf_1.000 | 313  | 20 | 4.36E-29  | XP_002640716.1 | 75 | 130.954 | 104 | 78  | Hypothetical protein CBG19783                             |
| Locus_17226_Transcript_1/1_Conf_1.000 | 460  | 20 | 2.29E-59  | NP_001022488.1 | 85 | 231.491 | 127 | 109 | UNCoordinated family member (unc-52)                      |
| Locus_17227_Transcript_1/1_Conf_1.000 | 172  | 0  |           |                |    |         |     |     |                                                           |
| Locus_17228_Transcript_1/1_Conf_1.000 | 188  | 0  |           |                |    |         |     |     |                                                           |
| Locus_17229_Transcript_1/1_Conf_1.000 | 303  | 20 | 1.20E-23  | XP_002636715.1 | 76 | 112.849 | 97  | 74  | Hypothetical protein CBG23434                             |
| Locus_1723_Transcript_1/1_Conf_1.000  | 1662 | 20 | 2.87E-122 | NP_500364.2    | 72 | 443.736 | 424 | 307 | Tumor Susceptibility Gene homolog family member (tsg-101) |
| Locus_17230_Transcript_1/1_Conf_1.000 | 299  | 20 | 4.90E-25  | NP_496829.1    | 73 | 117.472 | 94  | 69  | hypothetical protein Y48E1C.2                             |

|                                       |      |    |           |                |     |         |     |     |                                                                         |
|---------------------------------------|------|----|-----------|----------------|-----|---------|-----|-----|-------------------------------------------------------------------------|
| Locus_17231_Transcript_1/1_Conf_1.000 | 163  | 20 | 1.02E-22  | XP_002925888.1 | 100 | 109.768 | 54  | 54  | PREDICTED: eukaryotic translation initiation factor 3 subunit K-like    |
| Locus_17232_Transcript_1/1_Conf_1.000 | 628  | 20 | 1.91E-94  | NP_505734.2    | 93  | 348.977 | 193 | 181 | Protein PHosphatase family member (pph-1)                               |
| Locus_17233_Transcript_1/1_Conf_1.000 | 197  | 0  |           |                |     |         |     |     |                                                                         |
| Locus_17234_Transcript_1/1_Conf_1.000 | 309  | 20 | 2.55E-42  | CAX65056.1     | 91  | 174.866 | 102 | 93  | C. elegans protein F25C8.3d, partially confirmed by transcript evidence |
| Locus_17235_Transcript_1/1_Conf_1.000 | 149  | 0  |           |                |     |         |     |     |                                                                         |
| Locus_17236_Transcript_1/1_Conf_1.000 | 229  | 0  |           |                |     |         |     |     |                                                                         |
| Locus_17237_Transcript_1/1_Conf_1.000 | 1166 | 20 | 1.00E-101 | XP_001898107.1 | 67  | 374.785 | 378 | 257 | PDZ-domain protein scribble                                             |
| Locus_17238_Transcript_1/1_Conf_1.000 | 349  | 0  |           |                |     |         |     |     |                                                                         |
| Locus_17239_Transcript_1/1_Conf_1.000 | 375  | 0  |           |                |     |         |     |     |                                                                         |

|                                       |      |    |           |                |    |         |     |     |                                                     |
|---------------------------------------|------|----|-----------|----------------|----|---------|-----|-----|-----------------------------------------------------|
| Locus_1724_Transcript_1/1_Conf_1.000  | 3328 | 20 | 0         | XP_002640935.1 | 73 | 919.842 | 830 | 607 | C. briggsae CBR-SSL-1 protein                       |
| Locus_17240_Transcript_1/1_Conf_1.000 | 167  | 0  |           |                |    |         |     |     |                                                     |
| Locus_17241_Transcript_1/1_Conf_1.000 | 154  | 14 | 2.23E-17  | XP_002642067.1 | 92 | 92.0485 | 51  | 47  | Hypothetical protein CBG18006                       |
| Locus_17242_Transcript_1/1_Conf_1.000 | 451  | 0  |           |                |    |         |     |     |                                                     |
| Locus_17243_Transcript_1/1_Conf_1.000 | 322  | 7  | 6.25E-12  | XP_002630536.1 | 57 | 73.9442 | 107 | 62  | Hypothetical protein CBG12976                       |
| Locus_17244_Transcript_1/1_Conf_1.000 | 1201 | 20 | 4.64E-49  | NP_491336.2    | 62 | 199.904 | 240 | 151 | NuDiX family member (ndx-7)                         |
| Locus_17245_Transcript_1/1_Conf_1.000 | 431  | 0  |           |                |    |         |     |     |                                                     |
| Locus_17246_Transcript_1/1_Conf_1.000 | 262  | 0  |           |                |    |         |     |     |                                                     |
| Locus_17247_Transcript_1/1_Conf_1.000 | 224  | 20 | 3.45E-18  | NP_491222.2    | 74 | 94.7449 | 74  | 55  | hypothetical protein C32E8.9                        |
| Locus_17248_Transcript_1/1_Conf_1.000 | 506  | 2  | 2.89E-12  | NP_509145.2    | 53 | 75.0998 | 129 | 69  | AuTophagy (yeast Atg homolog) family member (atg-2) |
| Locus_17249_Transcript_1/1_Conf_1.000 | 460  | 0  |           |                |    |         |     |     |                                                     |
| Locus_1725_Transcript_1/2_Conf_1.000  | 2486 | 20 | 3.22E-139 | XP_002639606.1 | 60 | 500.745 | 690 | 414 | C. briggsae CBR-FRM-4 protein                       |

|                                       |      |    |           |                |     |         |     |     |                                                                     |
|---------------------------------------|------|----|-----------|----------------|-----|---------|-----|-----|---------------------------------------------------------------------|
| Locus_1725_Transcript_2/2_Conf_1.000  | 2435 | 20 | 3.25E-136 | XP_002639606.1 | 61  | 490.73  | 667 | 410 | C. briggsae CBR-FRM-4 protein                                       |
| Locus_17250_Transcript_1/1_Conf_1.000 | 477  | 0  |           |                |     |         |     |     |                                                                     |
| Locus_17251_Transcript_1/1_Conf_1.000 | 332  | 3  | 7.82E-07  | NP_495954.1    | 62  | 56.9954 | 102 | 64  | Regulator of Hypoxia-inducible factor (hif-1) family member (rhy-1) |
| Locus_17252_Transcript_1/1_Conf_1.000 | 495  | 20 | 1.36E-35  | NP_505508.1    | 74  | 152.525 | 136 | 101 | hypothetical protein F40F9.6                                        |
| Locus_17253_Transcript_1/1_Conf_1.000 | 443  | 20 | 1.71E-17  | NP_509794.2    | 100 | 92.4337 | 45  | 45  | honeybee MBlk-1 Related factor family member (mbr-1)                |
| Locus_17254_Transcript_1/1_Conf_1.000 | 320  | 2  | 1.11E-08  | XP_002633778.1 | 60  | 63.1586 | 96  | 58  | Hypothetical protein CBG03469                                       |
| Locus_17255_Transcript_1/1_Conf_1.000 | 465  | 5  | 1.18E-10  | XP_001900440.1 | 63  | 69.707  | 87  | 55  | hypothetical protein Bm1_44890                                      |
| Locus_17256_Transcript_1/1_Conf_1.000 | 164  | 3  | 2.29E-14  | NP_493603.1    | 86  | 82.0333 | 52  | 45  | PaTched Related family member (ptr-23)                              |
| Locus_17257_Transcript_1/1_Conf_1.000 | 716  | 0  |           |                |     |         |     |     |                                                                     |
| Locus_17258_Transcript_1/1_Conf_1.000 | 169  | 6  | 4.00E-19  | XP_001899075.1 | 92  | 97.8265 | 55  | 51  | hypothetical protein Bm1_38110                                      |
| Locus_17259_Transcript_1/1_Conf_1.000 | 418  | 20 | 3.67E-36  | NP_740853.2    | 77  | 154.451 | 122 | 95  | TOMosyn synaptic protein family member (tom-1)                      |
| Locus_1726_Transcript_1/1_Conf_1.000  | 1901 | 20 | 0         | NP_508550.1    | 87  | 830.091 | 544 | 476 | Ral GDS-Like family member (rgl-1)                                  |



|                                       |     |    |          |                |     |         |     |     |                                                              |
|---------------------------------------|-----|----|----------|----------------|-----|---------|-----|-----|--------------------------------------------------------------|
| Locus_17260_Transcript_1/1_Conf_1.000 | 217 | 0  |          |                |     |         |     |     |                                                              |
| Locus_17261_Transcript_1/1_Conf_1.000 | 476 | 20 | 1.42E-16 | XP_002641832.1 | 55  | 89.3521 | 158 | 88  | Hypothetical protein CBG16501                                |
| Locus_17262_Transcript_1/1_Conf_1.000 | 308 | 20 | 4.37E-42 | EFN83153.1     | 100 | 174.096 | 90  | 90  | Histone H3.3                                                 |
| Locus_17263_Transcript_1/1_Conf_1.000 | 203 | 20 | 1.47E-29 | XP_002762066.1 | 100 | 132.494 | 64  | 64  | PREDICTED: transmembrane protein 147-like                    |
| Locus_17264_Transcript_1/1_Conf_1.000 | 374 | 20 | 2.44E-48 | XP_002642870.1 | 88  | 194.897 | 120 | 106 | Hypothetical protein CBG15140                                |
| Locus_17265_Transcript_1/1_Conf_1.000 | 161 | 20 | 1.39E-11 | NP_886553.3    | 100 | 72.7886 | 34  | 34  | eukaryotic translation initiation factor 4 gamma 1 isoform 1 |
| Locus_17266_Transcript_1/2_Conf_1.000 | 384 | 0  |          |                |     |         |     |     |                                                              |
| Locus_17266_Transcript_2/2_Conf_1.000 | 380 | 0  |          |                |     |         |     |     |                                                              |
| Locus_17267_Transcript_1/1_Conf_1.000 | 305 | 1  | 6.19E-04 | XP_002637243.1 | 64  | 47.3654 | 59  | 38  | Hypothetical protein CBG18919                                |
| Locus_17268_Transcript_1/1_Conf_1.000 | 220 | 0  |          |                |     |         |     |     |                                                              |
| Locus_17269_Transcript_1/1_Conf_1.000 | 130 | 0  |          |                |     |         |     |     |                                                              |
| Locus_1727_Transcript_1/1_Conf_1.000  | 761 | 20 | 2.48E-37 | XP_002631715.1 | 63  | 159.844 | 181 | 115 | Hypothetical protein CBG20916                                |
| Locus_17270_Transcript_1/1_Conf_1.000 | 233 | 0  |          |                |     |         |     |     |                                                              |
| Locus_17271_Transcript_1/1_Conf_1.000 | 372 | 20 | 1.75E-30 | AAN11401.1     | 68  | 135.576 | 122 | 84  | metalloprotease 1 precursor                                  |

|                                       |     |    |          |                |     |         |    |    |                                             |
|---------------------------------------|-----|----|----------|----------------|-----|---------|----|----|---------------------------------------------|
| Locus_17272_Transcript_1/1_Conf_1.000 | 238 | 20 | 2.34E-35 | XP_002634104.1 | 100 | 151.754 | 78 | 78 | Hypothetical protein CBG01656               |
| Locus_17273_Transcript_1/1_Conf_1.000 | 293 | 3  | 6.28E-04 | ZP_04116816.1  | 59  | 47.3654 | 54 | 32 | Collagen triple helix repeat domain protein |
| Locus_17274_Transcript_1/1_Conf_1.000 | 207 | 20 | 1.08E-24 | NP_612634.3    | 100 | 116.316 | 57 | 57 | synaptotagmin-8                             |
| Locus_17275_Transcript_1/1_Conf_1.000 | 154 | 4  | 4.22E-08 | EFO20018.1     | 68  | 61.2326 | 50 | 34 | negative elongation factor C/D              |
| Locus_17276_Transcript_1/1_Conf_1.000 | 241 | 20 | 7.26E-29 | XP_002637169.1 | 93  | 130.183 | 77 | 72 | C. briggsae CBR-MRE-11 protein              |

|                                       |     |    |          |                |     |         |     |     |                                             |
|---------------------------------------|-----|----|----------|----------------|-----|---------|-----|-----|---------------------------------------------|
| Locus_17277_Transcript_1/1_Conf_1.000 | 604 | 20 | 8.40E-73 | XP_002646357.1 | 80  | 276.944 | 186 | 149 | Hypothetical protein CBG12071               |
| Locus_17278_Transcript_1/1_Conf_1.000 | 225 | 20 | 1.07E-27 | NP_502964.2    | 87  | 126.331 | 74  | 65  | hypothetical protein Y51H4A.7               |
| Locus_17279_Transcript_1/1_Conf_1.000 | 285 | 1  | 2.84E-04 | XP_002638582.1 | 58  | 48.521  | 79  | 46  | Hypothetical protein CBG05629               |
| Locus_1728_Transcript_1/1_Conf_1.000  | 230 | 2  | 5.85E-18 | AAQ18782.1     | 94  | 93.9745 | 51  | 48  | GATA transcription factor                   |
| Locus_17280_Transcript_1/1_Conf_1.000 | 186 | 0  |          |                |     |         |     |     |                                             |
| Locus_17281_Transcript_1/1_Conf_1.000 | 130 | 0  |          |                |     |         |     |     |                                             |
| Locus_17282_Transcript_1/1_Conf_1.000 | 547 | 0  |          |                |     |         |     |     |                                             |
| Locus_17283_Transcript_1/1_Conf_1.000 | 714 | 20 | 3.81E-90 | NP_501853.1    | 87  | 335.109 | 248 | 216 | TetraSPanin family member (tsp-12)          |
| Locus_17284_Transcript_1/1_Conf_1.000 | 309 | 6  | 3.58E-28 | XP_002633574.1 | 71  | 127.872 | 103 | 74  | Hypothetical protein CBG05448               |
| Locus_17285_Transcript_1/1_Conf_1.000 | 348 | 20 | 5.09E-30 | NP_495375.3    | 84  | 134.035 | 94  | 79  | hypothetical protein T14B4.1                |
| Locus_17286_Transcript_1/1_Conf_1.000 | 429 | 2  | 2.69E-07 | NP_493320.1    | 50  | 58.5362 | 102 | 51  | hypothetical protein ZK1053.2               |
| Locus_17287_Transcript_1/1_Conf_1.000 | 400 | 0  |          |                |     |         |     |     |                                             |
| Locus_17288_Transcript_1/1_Conf_1.000 | 480 | 0  |          |                |     |         |     |     |                                             |
| Locus_17289_Transcript_1/1_Conf_1.000 | 169 | 20 | 1.28E-25 | XP_002801133.1 | 100 | 119.398 | 55  | 55  | PREDICTED: lysosomal alpha-mannosidase-like |
| Locus_1729_Transcript_1/1_Conf_1.000  | 428 | 0  |          |                |     |         |     |     |                                             |
| Locus_17290_Transcript_1/1_Conf_1.000 | 141 | 1  | 3.59E-04 | XP_002634634.1 | 63  | 48.1358 | 44  | 28  | Hypothetical protein CBG18497               |
| Locus_17291_Transcript_1/1_Conf_1.000 | 217 | 0  |          |                |     |         |     |     |                                             |
| Locus_17292_Transcript_1/1_Conf_1.000 | 548 | 20 | 6.44E-65 | EFO19031.1     | 83  | 250.366 | 176 | 147 | hypothetical protein LOAG_09464             |
| Locus_17293_Transcript_1/1_Conf_1.000 | 214 | 0  |          |                |     |         |     |     |                                             |
| Locus_17294_Transcript_1/1_Conf_1.000 | 294 | 20 | 4.43E-42 | EFO26082.1     | 91  | 174.096 | 98  | 90  | hypothetical protein LOAG_02394             |
| Locus_17295_Transcript_1/1_Conf_1.000 | 311 | 20 | 1.01E-22 | NP_491887.1    | 70  | 109.768 | 98  | 69  | hypothetical protein F57B10.8               |
| Locus_17296_Transcript_1/1_Conf_1.000 | 152 | 0  |          |                |     |         |     |     |                                             |

|                                       |      |    |          |                |     |         |     |     |                                                                      |
|---------------------------------------|------|----|----------|----------------|-----|---------|-----|-----|----------------------------------------------------------------------|
| Locus_17297_Transcript_1/1_Conf_1.000 | 159  | 20 | 4.17E-24 | XP_002816748.1 | 100 | 114.39  | 53  | 53  | PREDICTED: LOW QUALITY PROTEIN: large proline-rich protein BAT2-like |
| Locus_17298_Transcript_1/1_Conf_1.000 | 362  | 0  |          |                |     |         |     |     |                                                                      |
| Locus_17299_Transcript_1/1_Conf_1.000 | 238  | 0  |          |                |     |         |     |     |                                                                      |
| Locus_173_Transcript_1/2_Conf_1.000   | 2157 | 7  | 3.84E-08 | XP_002632964.1 | 40  | 65.0846 | 151 | 61  | Hypothetical protein CBG21722                                        |
| Locus_173_Transcript_2/2_Conf_1.000   | 1791 | 4  | 2.04E-12 | XP_002632964.1 | 35  | 78.9518 | 261 | 92  | Hypothetical protein CBG21722                                        |
| Locus_1730_Transcript_1/1_Conf_1.000  | 1908 | 20 | 0        | XP_002629713.1 | 83  | 681.404 | 564 | 473 | Hypothetical protein CBG00943                                        |
| Locus_17300_Transcript_1/2_Conf_1.000 | 1008 | 20 | 1.53E-84 | XP_002633358.1 | 76  | 317.39  | 244 | 187 | C. briggsae CBR-ACL-3 protein                                        |

|                                       |      |    |          |                |    |         |     |     |                                 |
|---------------------------------------|------|----|----------|----------------|----|---------|-----|-----|---------------------------------|
| Locus_17300_Transcript_2/2_Conf_1.000 | 1005 | 20 | 1.53E-84 | XP_002633358.1 | 76 | 317.39  | 244 | 187 | C. briggsae CBR-ACL-3 protein   |
| Locus_17301_Transcript_1/1_Conf_1.000 | 258  | 0  |          |                |    |         |     |     |                                 |
| Locus_17302_Transcript_1/1_Conf_1.000 | 153  | 0  |          |                |    |         |     |     |                                 |
| Locus_17303_Transcript_1/1_Conf_1.000 | 397  | 20 | 7.62E-34 | EFO23539.1     | 74 | 146.747 | 131 | 97  | hypothetical protein LOAG_04946 |
| Locus_17304_Transcript_1/1_Conf_1.000 | 332  | 20 | 2.75E-44 | XP_001896744.1 | 83 | 181.415 | 110 | 92  | Trehalase family protein        |
| Locus_17305_Transcript_1/1_Conf_1.000 | 153  | 0  |          |                |    |         |     |     |                                 |
| Locus_17306_Transcript_1/1_Conf_1.000 | 447  | 8  | 1.09E-48 | XP_002644403.1 | 84 | 196.052 | 148 | 125 | Hypothetical protein CBG14248   |
| Locus_17307_Transcript_1/1_Conf_1.000 | 375  | 4  | 9.59E-29 | NP_491019.1    | 67 | 129.798 | 124 | 84  | hypothetical protein F40E3.5    |
| Locus_17308_Transcript_1/1_Conf_1.000 | 543  | 0  |          |                |    |         |     |     |                                 |
| Locus_17309_Transcript_1/1_Conf_1.000 | 150  | 20 | 7.98E-07 | XP_002640915.1 | 71 | 56.9954 | 49  | 35  | Hypothetical protein CBG00476   |
| Locus_1731_Transcript_1/1_Conf_1.000  | 1129 | 20 | 1.57E-35 | XP_002640023.1 | 65 | 154.836 | 206 | 135 | Hypothetical protein CBG12495   |
| Locus_17310_Transcript_1/1_Conf_1.000 | 171  | 20 | 1.52E-18 | XP_002643095.1 | 85 | 95.9005 | 56  | 48  | C. briggsae CBR-GLY-11 protein  |

|                                       |      |    |           |                |     |         |     |     |                                                                           |
|---------------------------------------|------|----|-----------|----------------|-----|---------|-----|-----|---------------------------------------------------------------------------|
| Locus_17311_Transcript_1/1_Conf_1.000 | 190  | 20 | 1.83E-19  | BAF83766.1     | 100 | 98.9821 | 60  | 60  | unnamed protein product                                                   |
| Locus_17312_Transcript_1/1_Conf_1.000 | 414  | 20 | 5.89E-31  | XP_002647605.1 | 75  | 137.117 | 105 | 79  | Hypothetical protein CBG06696                                             |
| Locus_17313_Transcript_1/1_Conf_1.000 | 469  | 20 | 8.67E-22  | XP_002640707.1 | 68  | 106.686 | 112 | 77  | Hypothetical protein CBG19773                                             |
| Locus_17314_Transcript_1/1_Conf_1.000 | 265  | 4  | 1.10E-16  | CBI63237.1     | 63  | 89.7373 | 104 | 66  | C. elegans protein Y111B2A.4a, partially confirmed by transcript evidence |
| Locus_17315_Transcript_1/1_Conf_1.000 | 287  | 20 | 4.51E-18  | EFO23906.1     | 69  | 94.3597 | 85  | 59  | hypothetical protein LOAG_04576                                           |
| Locus_17316_Transcript_1/1_Conf_1.000 | 437  | 2  | 3.49E-07  | XP_002636583.1 | 51  | 58.151  | 146 | 75  | Hypothetical protein CBG23277                                             |
| Locus_17317_Transcript_1/1_Conf_1.000 | 160  | 0  |           |                |     |         |     |     |                                                                           |
| Locus_17318_Transcript_1/1_Conf_1.000 | 245  | 0  |           |                |     |         |     |     |                                                                           |
| Locus_17319_Transcript_1/1_Conf_1.000 | 199  | 0  |           |                |     |         |     |     |                                                                           |
| Locus_1732_Transcript_1/1_Conf_1.000  | 2295 | 20 | 5.32E-165 | NP_501339.2    | 60  | 586.26  | 740 | 447 | neuRonal IGCAM family member (rig-4)                                      |
| Locus_17320_Transcript_1/1_Conf_1.000 | 383  | 0  |           |                |     |         |     |     |                                                                           |
| Locus_17321_Transcript_1/1_Conf_1.000 | 400  | 0  |           |                |     |         |     |     |                                                                           |
| Locus_17322_Transcript_1/1_Conf_1.000 | 160  | 10 | 1.35E-06  | XP_001902385.1 | 72  | 56.225  | 48  | 35  | Patched family protein                                                    |
| Locus_17323_Transcript_1/1_Conf_1.000 | 153  | 0  |           |                |     |         |     |     |                                                                           |
| Locus_17324_Transcript_1/1_Conf_1.000 | 345  | 20 | 1.22E-23  | NP_502129.1    | 85  | 112.849 | 70  | 60  | hypothetical protein B0035.5                                              |
| Locus_17325_Transcript_1/1_Conf_1.000 | 137  | 0  |           |                |     |         |     |     |                                                                           |
| Locus_17326_Transcript_1/1_Conf_1.000 | 656  | 20 | 1.04E-40  | EFO23575.1     | 89  | 170.629 | 104 | 93  | proteasome regulatory particle                                            |
| Locus_17327_Transcript_1/1_Conf_1.000 | 307  | 0  |           |                |     |         |     |     |                                                                           |

|                                       |     |    |          |                |    |         |     |     |                                         |
|---------------------------------------|-----|----|----------|----------------|----|---------|-----|-----|-----------------------------------------|
| Locus_17328_Transcript_1/1_Conf_1.000 | 291 | 5  | 3.01E-06 | AAX47336.1     | 65 | 55.0694 | 52  | 34  | beta-catenin                            |
| Locus_17329_Transcript_1/1_Conf_1.000 | 294 | 0  |          |                |    |         |     |     |                                         |
| Locus_1733_Transcript_1/1_Conf_1.000  | 406 | 0  |          |                |    |         |     |     |                                         |
| Locus_17330_Transcript_1/1_Conf_1.000 | 155 |    |          |                |    |         |     |     |                                         |
| Locus_17331_Transcript_1/1_Conf_1.000 | 281 | 20 | 1.19E-15 | EFO20952.1     | 70 | 86.2705 | 68  | 48  | endonuclease/Exonuclease/phosphatase    |
| Locus_17332_Transcript_1/2_Conf_1.000 | 435 | 0  |          |                |    |         |     |     |                                         |
| Locus_17332_Transcript_2/2_Conf_1.000 | 444 | 0  |          |                |    |         |     |     |                                         |
| Locus_17333_Transcript_1/1_Conf_1.000 | 251 | 20 | 2.31E-27 | CAR63587.1     | 87 | 125.176 | 79  | 69  | putative BOLA-like family protein       |
| Locus_17334_Transcript_1/1_Conf_1.000 | 480 | 20 | 3.67E-49 | XP_002634049.1 | 75 | 197.593 | 158 | 120 | Hypothetical protein CBG01588           |
| Locus_17335_Transcript_1/1_Conf_1.000 | 199 | 20 | 2.07E-07 | ACI49169.1     | 65 | 58.9214 | 64  | 42  | hypothetical protein Csp3_JD01.001      |
| Locus_17336_Transcript_1/1_Conf_1.000 | 185 | 0  |          |                |    |         |     |     |                                         |
| Locus_17337_Transcript_1/1_Conf_1.000 | 441 | 0  |          |                |    |         |     |     |                                         |
| Locus_17338_Transcript_1/1_Conf_1.000 | 538 | 20 | 1.56E-28 | EFO23663.1     | 60 | 129.413 | 181 | 110 | myosin xviii                            |
| Locus_17339_Transcript_1/1_Conf_1.000 | 245 | 0  |          |                |    |         |     |     |                                         |
| Locus_1734_Transcript_1/2_Conf_1.000  | 262 | 0  |          |                |    |         |     |     |                                         |
| Locus_1734_Transcript_2/2_Conf_1.000  | 181 | 0  |          |                |    |         |     |     |                                         |
| Locus_17340_Transcript_1/1_Conf_1.000 | 155 | 0  |          |                |    |         |     |     |                                         |
| Locus_17341_Transcript_1/1_Conf_1.000 | 175 | 20 | 3.73E-09 | XP_002633845.1 | 77 | 64.6994 | 48  | 37  | C. briggsae CBR-BEC-1 protein           |
| Locus_17342_Transcript_1/1_Conf_1.000 | 749 | 20 | 2.92E-91 | XP_002630786.1 | 85 | 338.961 | 227 | 195 | Hypothetical protein CBG02483           |
| Locus_17343_Transcript_1/1_Conf_1.000 | 258 | 20 | 2.63E-18 | BAD88409.1     | 66 | 95.1301 | 87  | 58  | multidrug resistance-associated protein |

|                                       |      |    |           |                |     |         |     |     |                                                                        |
|---------------------------------------|------|----|-----------|----------------|-----|---------|-----|-----|------------------------------------------------------------------------|
| Locus_17344_Transcript_1/1_Conf_1.000 | 387  | 20 | 7.76E-15  | XP_001626861.1 | 67  | 83.5741 | 84  | 57  | predicted protein                                                      |
| Locus_17345_Transcript_1/1_Conf_1.000 | 337  | 20 | 3.71E-25  | CBA11992.1     | 70  | 117.857 | 111 | 78  | endonuclease-reverse transcriptase HmRTE-e01                           |
| Locus_17346_Transcript_1/1_Conf_1.000 | 859  | 20 | 3.05E-125 | XP_002643856.1 | 90  | 452.21  | 286 | 260 | C. briggsae CBR-AAT-3 protein                                          |
| Locus_17347_Transcript_1/1_Conf_1.000 | 145  | 1  | 1.56E-18  | EAW60095.1     | 100 | 95.9005 | 44  | 44  | hCG2041804                                                             |
| Locus_17348_Transcript_1/1_Conf_1.000 | 306  | 0  |           |                |     |         |     |     |                                                                        |
| Locus_17349_Transcript_1/1_Conf_1.000 | 189  | 2  | 1.00E-09  | XP_002635377.1 | 91  | 66.6254 | 34  | 31  | Hypothetical protein CBG00768                                          |
| Locus_1735_Transcript_1/3_Conf_0.400  | 1343 | 20 | 0         | NP_492790.1    | 84  | 675.241 | 448 | 377 | hypothetical protein B0511.12                                          |
| Locus_1735_Transcript_2/3_Conf_0.400  | 606  | 20 | 8.07E-31  | XP_002640257.1 | 74  | 137.502 | 109 | 81  | Hypothetical protein CBG12782                                          |
| Locus_1735_Transcript_3/3_Conf_0.600  | 2986 | 20 | 0         | NP_492790.1    | 74  | 1149.04 | 994 | 736 | hypothetical protein B0511.12                                          |
| Locus_17350_Transcript_1/1_Conf_1.000 | 185  | 0  |           |                |     |         |     |     |                                                                        |
| Locus_17351_Transcript_1/1_Conf_1.000 | 303  | 20 | 1.37E-27  | NP_492590.1    | 69  | 125.946 | 101 | 70  | hypothetical protein K02A11.3                                          |
| Locus_17352_Transcript_1/1_Conf_1.000 | 479  | 20 | 2.09E-44  | XP_002640631.1 | 73  | 181.8   | 165 | 121 | Hypothetical protein CBG08749                                          |
| Locus_17353_Transcript_1/1_Conf_1.000 | 252  | 20 | 1.45E-16  | NP_496282.2    | 69  | 89.3521 | 83  | 58  | hypothetical protein C14A4.3                                           |
| Locus_17354_Transcript_1/1_Conf_1.000 | 251  | 0  |           |                |     |         |     |     |                                                                        |
| Locus_17355_Transcript_1/1_Conf_1.000 | 739  | 20 | 1.38E-45  | EFO17241.1     | 58  | 187.193 | 234 | 138 | hypothetical protein LOAG_11260                                        |
| Locus_17356_Transcript_1/1_Conf_1.000 | 518  | 7  | 1.74E-31  | XP_002647546.1 | 58  | 139.043 | 171 | 100 | C. briggsae CBR-PME-5 protein                                          |
| Locus_17357_Transcript_1/1_Conf_1.000 | 586  | 0  |           |                |     |         |     |     |                                                                        |
| Locus_17358_Transcript_1/1_Conf_1.000 | 535  | 7  | 4.18E-18  | CAA84693.3     | 55  | 94.7449 | 177 | 98  | C. elegans protein D2045.2, partially confirmed by transcript evidence |
| Locus_17359_Transcript_1/1_Conf_1.000 | 513  | 0  |           |                |     |         |     |     |                                                                        |



|                                       |     |    |          |                |    |         |     |     |                                          |
|---------------------------------------|-----|----|----------|----------------|----|---------|-----|-----|------------------------------------------|
| Locus_1736_Transcript_1/1_Conf_1.000  | 774 | 20 | 1.67E-36 | EFO16781.1     | 55 | 157.147 | 252 | 140 | bone morphogenic protein 6               |
| Locus_17360_Transcript_1/1_Conf_1.000 | 187 | 1  | 9.76E-05 | ABD39382.1     | 75 | 50.0618 | 61  | 46  | putative galectin protein 140            |
| Locus_17361_Transcript_1/1_Conf_1.000 | 282 | 0  |          |                |    |         |     |     |                                          |
| Locus_17362_Transcript_1/1_Conf_1.000 | 168 | 0  |          |                |    |         |     |     |                                          |
| Locus_17363_Transcript_1/1_Conf_1.000 | 173 | 0  |          |                |    |         |     |     |                                          |
| Locus_17364_Transcript_1/1_Conf_1.000 | 224 | 0  |          |                |    |         |     |     |                                          |
| Locus_17365_Transcript_1/1_Conf_1.000 | 279 | 20 | 2.48E-29 | XP_002646489.1 | 86 | 131.724 | 97  | 84  | Hypothetical protein CBG19471            |
| Locus_17366_Transcript_1/1_Conf_1.000 | 390 | 20 | 5.54E-13 | NP_001022669.1 | 72 | 77.411  | 74  | 54  | hypothetical protein K08E3.10            |
| Locus_17367_Transcript_1/1_Conf_1.000 | 486 | 0  |          |                |    |         |     |     |                                          |
| Locus_17368_Transcript_1/1_Conf_1.000 | 441 | 20 | 3.41E-42 | NP_508216.1    | 78 | 174.481 | 146 | 115 | Sorting NeXin family member (snx-1)      |
| Locus_17369_Transcript_1/1_Conf_1.000 | 274 | 20 | 2.18E-25 | XP_002634480.1 | 73 | 118.627 | 90  | 66  | Hypothetical protein CBG10739            |
| Locus_1737_Transcript_1/5_Conf_0.333  | 911 | 20 | 2.81E-51 | CAT00091.1     | 99 | 198.749 | 104 | 103 | translationally controlled tumor protein |
| Locus_1737_Transcript_2/5_Conf_0.167  | 658 | 0  |          |                |    |         |     |     |                                          |

|                                       |      |    |           |                |     |         |     |     |                                          |
|---------------------------------------|------|----|-----------|----------------|-----|---------|-----|-----|------------------------------------------|
| Locus_1737_Transcript_3/5_Conf_0.417  | 859  | 20 | 4.31E-87  | CAT00091.1     | 98  | 325.479 | 181 | 178 | translationally controlled tumor protein |
| Locus_1737_Transcript_4/5_Conf_0.500  | 1311 | 20 | 8.29E-87  | CAT00091.1     | 98  | 325.479 | 181 | 178 | translationally controlled tumor protein |
| Locus_1737_Transcript_5/5_Conf_0.333  | 875  | 20 | 7.75E-132 | XP_002639809.1 | 97  | 474.167 | 264 | 257 | C. briggsae CBR-RPA-0 protein            |
| Locus_17370_Transcript_1/1_Conf_1.000 | 750  | 5  | 7.55E-63  | NP_495112.1    | 69  | 244.588 | 263 | 182 | hypothetical protein C25H3.11            |
| Locus_17371_Transcript_1/1_Conf_1.000 | 193  | 0  |           |                |     |         |     |     |                                          |
| Locus_17372_Transcript_1/1_Conf_1.000 | 135  | 0  |           |                |     |         |     |     |                                          |
| Locus_17373_Transcript_1/1_Conf_1.000 | 315  | 15 | 2.73E-15  | XP_002646997.1 | 60  | 85.1149 | 104 | 63  | Hypothetical protein CBG22453            |
| Locus_17374_Transcript_1/1_Conf_1.000 | 527  | 20 | 4.80E-104 | XP_001101364.2 | 100 | 380.178 | 175 | 175 | PREDICTED: SPARC                         |
| Locus_17375_Transcript_1/1_Conf_1.000 | 221  | 0  |           |                |     |         |     |     |                                          |
| Locus_17376_Transcript_1/2_Conf_1.000 | 890  | 20 | 2.35E-67  | XP_002633534.1 | 82  | 259.996 | 223 | 183 | Hypothetical protein CBG05401            |
| Locus_17376_Transcript_2/2_Conf_1.000 | 890  | 20 | 2.35E-67  | XP_002633534.1 | 82  | 259.996 | 223 | 183 | Hypothetical protein CBG05401            |
| Locus_17377_Transcript_1/1_Conf_1.000 | 293  | 20 | 6.23E-28  | XP_002630862.1 | 77  | 127.102 | 98  | 76  | C. briggsae CBR-RRT-2 protein            |
| Locus_17378_Transcript_1/1_Conf_1.000 | 486  | 20 | 1.87E-32  | NP_499394.2    | 68  | 142.124 | 159 | 109 | hypothetical protein C44B9.1             |

|                                       |      |    |          |                |    |         |     |     |                                                    |
|---------------------------------------|------|----|----------|----------------|----|---------|-----|-----|----------------------------------------------------|
| Locus_17379_Transcript_1/1_Conf_1.000 | 213  | 20 | 4.10E-16 | NP_504274.2    | 77 | 87.8113 | 70  | 54  | UDP-GlucuronosylTransferase family member (ugt-61) |
| Locus_17378_Transcript_1/1_Conf_1.000 | 1269 | 20 | 0        | XP_002638687.1 | 96 | 796.964 | 422 | 409 | Hypothetical protein CBG11882                      |
| Locus_17380_Transcript_1/1_Conf_1.000 | 1266 | 20 | 5.97E-10 | XP_001602928.1 | 45 | 70.0922 | 328 | 148 | PREDICTED: similar to GA21383-PA                   |
| Locus_17381_Transcript_1/1_Conf_1.000 | 243  | 0  |          |                |    |         |     |     |                                                    |
| Locus_17382_Transcript_1/1_Conf_1.000 | 374  | 8  | 3.80E-09 | XP_002631036.1 | 55 | 64.6994 | 114 | 63  | Hypothetical protein CBG02793                      |
| Locus_17383_Transcript_1/1_Conf_1.000 | 356  | 0  |          |                |    |         |     |     |                                                    |
| Locus_17384_Transcript_1/1_Conf_1.000 | 483  | 20 | 5.85E-26 | EFO25878.1     | 70 | 120.553 | 140 | 98  | RDD family protein                                 |
| Locus_17385_Transcript_1/1_Conf_1.000 | 155  | 0  |          |                |    |         |     |     |                                                    |
| Locus_17386_Transcript_1/1_Conf_1.000 | 356  | 0  |          |                |    |         |     |     |                                                    |
| Locus_17387_Transcript_1/1_Conf_1.000 | 226  |    |          |                |    |         |     |     |                                                    |
| Locus_17388_Transcript_1/2_Conf_1.000 | 631  | 0  |          |                |    |         |     |     |                                                    |
| Locus_17388_Transcript_2/2_Conf_1.000 | 617  | 0  |          |                |    |         |     |     |                                                    |
| Locus_17389_Transcript_1/1_Conf_1.000 | 178  | 0  |          |                |    |         |     |     |                                                    |
| Locus_1739_Transcript_1/1_Conf_1.000  | 586  | 20 | 5.84E-52 | NP_501020.2    | 93 | 207.608 | 115 | 107 | hypothetical protein C01B10.3                      |
| Locus_17390_Transcript_1/1_Conf_1.000 | 222  | 0  |          |                |    |         |     |     |                                                    |
| Locus_17391_Transcript_1/1_Conf_1.000 | 184  | 0  |          |                |    |         |     |     |                                                    |
| Locus_17392_Transcript_1/1_Conf_1.000 | 302  | 2  | 1.02E-06 | XP_002645841.1 | 64 | 56.6102 | 62  | 40  | Hypothetical protein CBG07574                      |

|                                       |      |    |           |                |    |         |     |     |                                                                                 |
|---------------------------------------|------|----|-----------|----------------|----|---------|-----|-----|---------------------------------------------------------------------------------|
| Locus_17393_Transcript_1/1_Conf_1.000 | 464  | 20 | 1.26E-69  | A8X3A7.2       | 89 | 259.225 | 142 | 127 | Integrin alpha pat-2                                                            |
| Locus_17394_Transcript_1/1_Conf_1.000 | 908  | 20 | 2.75E-111 | XP_002631326.1 | 74 | 405.986 | 303 | 227 | C. briggsae CBR-FUT-1 protein                                                   |
| Locus_17395_Transcript_1/1_Conf_1.000 | 416  | 6  | 3.22E-37  | Q20548.2       | 76 | 157.918 | 138 | 106 | Probable RING finger protein 207 homolog                                        |
| Locus_17396_Transcript_1/1_Conf_1.000 | 791  | 1  | 3.66E-10  | EFO16945.1     | 46 | 69.707  | 215 | 101 | hypothetical protein LOAG_11558                                                 |
| Locus_17397_Transcript_1/1_Conf_1.000 | 452  | 20 | 9.12E-64  | NP_492483.1    | 85 | 246.128 | 150 | 128 | hypothetical protein F26H9.5                                                    |
| Locus_17398_Transcript_1/1_Conf_1.000 | 594  | 0  |           |                |    |         |     |     |                                                                                 |
| Locus_17399_Transcript_1/1_Conf_1.000 | 333  | 4  | 8.33E-09  | NP_496398.2    | 66 | 63.5438 | 65  | 43  | hypothetical protein T06D8.1                                                    |
| Locus_174_Transcript_1/8_Conf_0.600   | 1809 | 20 | 7.07E-29  | XP_002631180.1 | 56 | 133.65  | 253 | 142 | C. briggsae CBR-NASP-1 protein                                                  |
| Locus_174_Transcript_2/8_Conf_0.560   | 1797 | 20 | 7.00E-29  | XP_002631180.1 | 56 | 133.65  | 253 | 142 | C. briggsae CBR-NASP-1 protein                                                  |
| Locus_174_Transcript_3/8_Conf_0.400   | 935  | 17 | 6.01E-08  | NP_506298.1    | 58 | 62.7734 | 95  | 56  | NASP (human Nuclear Autoantigenic Sperm Protein) homolog family member (nasp-2) |
| Locus_174_Transcript_4/8_Conf_0.560   | 1809 | 20 | 1.21E-28  | XP_002631180.1 | 55 | 132.88  | 253 | 141 | C. briggsae CBR-NASP-1 protein                                                  |
| Locus_174_Transcript_5/8_Conf_0.560   | 1816 | 20 | 7.10E-29  | XP_002631180.1 | 56 | 133.65  | 253 | 142 | C. briggsae CBR-NASP-1 protein                                                  |
| Locus_174_Transcript_6/8_Conf_0.360   | 935  | 17 | 6.01E-08  | NP_506298.1    | 58 | 62.7734 | 95  | 56  | NASP (human Nuclear Autoantigenic Sperm Protein) homolog family member (nasp-2) |

|                                       |      |    |          |                |    |         |     |     |                                                                                 |
|---------------------------------------|------|----|----------|----------------|----|---------|-----|-----|---------------------------------------------------------------------------------|
| Locus_174_Transcript_7/8_Conf_0.200   | 445  | 20 | 7.64E-10 | NP_506298.1    | 60 | 67.0106 | 98  | 59  | NASP (human Nuclear Autoantigenic Sperm Protein) homolog family member (nasp-2) |
| Locus_174_Transcript_8/8_Conf_0.560   | 1809 | 20 | 7.07E-29 | XP_002631180.1 | 56 | 133.65  | 253 | 142 | C. briggsae CBR-NASP-1 protein                                                  |
| Locus_1740_Transcript_1/1_Conf_1.000  | 759  | 20 | 9.04E-56 | XP_002637954.1 | 68 | 221.09  | 238 | 164 | Hypothetical protein CBG04771                                                   |
| Locus_17400_Transcript_1/1_Conf_1.000 | 262  | 20 | 5.26E-35 | ACJ65168.1     | 94 | 150.599 | 87  | 82  | Uncoordinated protein 68, isoform b, partially confirmed by transcript evidence |
| Locus_17401_Transcript_1/1_Conf_1.000 | 244  | 2  | 9.83E-10 | XP_002642848.1 | 72 | 66.6254 | 76  | 55  | Hypothetical protein CBG15114                                                   |
| Locus_17402_Transcript_1/1_Conf_1.000 | 220  | 20 | 3.03E-22 | XP_002648832.1 | 82 | 108.227 | 73  | 60  | Hypothetical protein CBG16947                                                   |

|                                       |      |    |           |                |    |         |     |     |                                               |
|---------------------------------------|------|----|-----------|----------------|----|---------|-----|-----|-----------------------------------------------|
| Locus_17403_Transcript_1/1_Conf_1.000 | 281  | 20 | 6.73E-35  | NP_495838.2    | 84 | 150.214 | 93  | 79  | PYrimidine biosynthesis family member (pyr-1) |
| Locus_17404_Transcript_1/1_Conf_1.000 | 935  | 20 | 2.62E-112 | XP_002646922.1 | 78 | 409.453 | 311 | 245 | Hypothetical protein CBG19625                 |
| Locus_17405_Transcript_1/1_Conf_1.000 | 345  | 20 | 7.12E-40  | NP_497319.1    | 85 | 166.777 | 114 | 97  | hypothetical protein Y46E12BL.2               |
| Locus_17406_Transcript_1/1_Conf_1.000 | 920  | 20 | 3.39E-40  | XP_002633792.1 | 89 | 169.859 | 86  | 77  | Hypothetical protein CBG03484                 |
| Locus_17407_Transcript_1/1_Conf_1.000 | 151  | 0  |           |                |    |         |     |     |                                               |
| Locus_17408_Transcript_1/1_Conf_1.000 | 167  | 20 | 7.59E-10  | EFN89993.1     | 67 | 67.0106 | 53  | 36  | Probable cytochrome P450 6a13                 |
| Locus_17409_Transcript_1/1_Conf_1.000 | 446  | 2  | 1.03E-22  | XP_002631708.1 | 82 | 109.768 | 87  | 72  | Hypothetical protein CBG20908                 |
| Locus_1741_Transcript_1/1_Conf_1.000  | 1858 | 20 | 0         | XP_002630288.1 | 92 | 828.55  | 547 | 507 | C. briggsae CBR-CCT-1 protein                 |
| Locus_17410_Transcript_1/1_Conf_1.000 | 239  | 0  |           |                |    |         |     |     |                                               |

|                                       |     |    |          |                |    |         |     |     |                                                                          |
|---------------------------------------|-----|----|----------|----------------|----|---------|-----|-----|--------------------------------------------------------------------------|
| Locus_17411_Transcript_1/1_Conf_1.000 | 227 | 5  | 5.70E-05 | NP_001021268.1 | 72 | 50.8322 | 40  | 29  | UNCoordinated family member (unc-44)                                     |
| Locus_17412_Transcript_1/1_Conf_1.000 | 423 | 20 | 1.58E-23 | NP_001041046.1 | 61 | 112.464 | 120 | 74  | hypothetical protein Y57G11C.22                                          |
| Locus_17413_Transcript_1/1_Conf_1.000 | 130 | 0  |          |                |    |         |     |     |                                                                          |
| Locus_17414_Transcript_1/1_Conf_1.000 | 437 | 0  |          |                |    |         |     |     |                                                                          |
| Locus_17415_Transcript_1/1_Conf_1.000 | 221 | 0  |          |                |    |         |     |     |                                                                          |
| Locus_17416_Transcript_1/1_Conf_1.000 | 393 | 9  | 1.19E-18 | CAB60377.4     | 59 | 96.2857 | 134 | 80  | C. elegans protein Y46G5A.29, partially confirmed by transcript evidence |
| Locus_17417_Transcript_1/1_Conf_1.000 | 529 | 0  |          |                |    |         |     |     |                                                                          |
| Locus_17418_Transcript_1/1_Conf_1.000 | 205 | 0  |          |                |    |         |     |     |                                                                          |
| Locus_17419_Transcript_1/1_Conf_1.000 | 446 | 20 | 1.16E-58 | XP_002642359.1 | 85 | 229.18  | 148 | 127 | Hypothetical protein CBG18356                                            |
| Locus_1742_Transcript_1/1_Conf_1.000  | 452 | 1  | 2.79E-04 | XP_002648823.1 | 42 | 48.521  | 85  | 36  | Hypothetical protein CBG16936                                            |
| Locus_17420_Transcript_1/1_Conf_1.000 | 205 | 0  |          |                |    |         |     |     |                                                                          |
| Locus_17421_Transcript_1/1_Conf_1.000 | 206 | 2  | 1.25E-04 | EFO26312.1     | 65 | 49.6766 | 41  | 27  | hypothetical protein LOAG_02167                                          |
| Locus_17422_Transcript_1/1_Conf_1.000 | 149 | 20 | 7.98E-15 | NP_001129924.1 | 81 | 83.5741 | 49  | 40  | SLOWpoke potassium channel family member (slo-2)                         |
| Locus_17423_Transcript_1/1_Conf_1.000 | 269 | 0  |          |                |    |         |     |     |                                                                          |

|                                       |      |    |          |                |     |         |     |     |                                                        |
|---------------------------------------|------|----|----------|----------------|-----|---------|-----|-----|--------------------------------------------------------|
| Locus_17424_Transcript_1/1_Conf_1.000 | 146  | 20 | 3.71E-20 | XP_002832350.1 | 100 | 101.293 | 48  | 48  | PREDICTED: LOW QUALITY PROTEIN: filamin-A-like         |
| Locus_17425_Transcript_1/1_Conf_1.000 | 411  | 13 | 3.23E-45 | XP_002639996.1 | 78  | 184.496 | 136 | 107 | Hypothetical protein CBG10826                          |
| Locus_17426_Transcript_1/1_Conf_1.000 | 345  | 20 | 5.28E-35 | NP_001023496.1 | 75  | 150.599 | 114 | 86  | L1 CAM Adhesion molecule homolog family member (lad-2) |
| Locus_17427_Transcript_1/1_Conf_1.000 | 649  | 4  | 1.99E-12 | XP_002640451.1 | 68  | 76.6406 | 63  | 43  | Hypothetical protein CBG08508                          |
| Locus_17428_Transcript_1/1_Conf_1.000 | 274  | 0  |          |                |     |         |     |     |                                                        |
| Locus_17429_Transcript_1/2_Conf_1.000 | 322  | 0  |          |                |     |         |     |     |                                                        |
| Locus_17429_Transcript_2/2_Conf_1.000 | 349  | 0  |          |                |     |         |     |     |                                                        |
| Locus_1743_Transcript_1/1_Conf_1.000  | 1269 | 5  | 3.85E-33 | NP_740830.2    | 55  | 147.132 | 246 | 137 | hypothetical protein Y47G6A.29                         |
| Locus_17430_Transcript_1/1_Conf_1.000 | 219  | 20 | 5.70E-29 | XP_002638487.1 | 95  | 130.568 | 73  | 70  | Hypothetical protein CBG12917                          |



|                                       |      |    |           |                |    |         |     |     |                                              |
|---------------------------------------|------|----|-----------|----------------|----|---------|-----|-----|----------------------------------------------|
| Locus_17431_Transcript_1/1_Conf_1.000 | 143  | 20 | 5.34E-16  | NP_501984.1    | 93 | 87.4261 | 47  | 44  | Na/Ca eXchangers family member (ncx-3)       |
| Locus_17432_Transcript_1/1_Conf_1.000 | 193  | 20 | 5.30E-19  | XP_002405101.1 | 87 | 97.4413 | 62  | 54  | protein 4.1G, putative                       |
| Locus_17433_Transcript_1/1_Conf_1.000 | 814  | 20 | 2.23E-42  | NP_740987.2    | 55 | 176.792 | 268 | 149 | hypothetical protein C27D6.4                 |
| Locus_17434_Transcript_1/1_Conf_1.000 | 216  | 0  |           |                |    |         |     |     |                                              |
| Locus_17435_Transcript_1/1_Conf_1.000 | 613  | 0  |           |                |    |         |     |     |                                              |
| Locus_17436_Transcript_1/1_Conf_1.000 | 390  | 4  | 1.04E-35  | NP_504440.2    | 65 | 152.91  | 147 | 97  | hypothetical protein F08F3.1                 |
| Locus_17437_Transcript_1/1_Conf_1.000 | 142  | 0  |           |                |    |         |     |     |                                              |
| Locus_17438_Transcript_1/1_Conf_1.000 | 130  | 0  |           |                |    |         |     |     |                                              |
| Locus_17439_Transcript_1/1_Conf_1.000 | 176  | 0  |           |                |    |         |     |     |                                              |
| Locus_1744_Transcript_1/1_Conf_1.000  | 1178 | 20 | 3.00E-61  | EFO16596.1     | 65 | 240.35  | 279 | 183 | hypothetical protein LOAG_11909              |
| Locus_17440_Transcript_1/1_Conf_1.000 | 1197 | 20 | 6.74E-133 | XP_002637705.1 | 86 | 478.404 | 312 | 271 | Hypothetical protein CBG11570                |
| Locus_17441_Transcript_1/1_Conf_1.000 | 196  | 20 | 1.21E-23  | XP_002828959.1 | 93 | 112.849 | 62  | 58  | PREDICTED: hypothetical protein LOC100434366 |
| Locus_17442_Transcript_1/1_Conf_1.000 | 967  | 20 | 7.93E-152 | XP_001900845.1 | 92 | 540.806 | 322 | 297 | Beta-centractin                              |

|                                       |     |    |          |                |     |         |     |     |                                                                                                              |
|---------------------------------------|-----|----|----------|----------------|-----|---------|-----|-----|--------------------------------------------------------------------------------------------------------------|
| Locus_17443_Transcript_1/1_Conf_1.000 | 150 | 20 | 3.57E-15 | XP_002821493.1 | 100 | 84.7297 | 39  | 39  | PREDICTED: LOW QUALITY PROTEIN:<br>serine/threonine-protein phosphatase PP1-<br>alpha catalytic subunit-like |
| Locus_17444_Transcript_1/1_Conf_1.000 | 195 | 0  |          |                |     |         |     |     |                                                                                                              |
| Locus_17445_Transcript_1/1_Conf_1.000 | 404 | 20 | 3.19E-16 | EFO22662.1     | 68  | 88.1965 | 82  | 56  | exostosin family protein                                                                                     |
| Locus_17446_Transcript_1/1_Conf_1.000 | 154 | 4  | 1.83E-11 | XP_002646726.1 | 74  | 72.4034 | 50  | 37  | Hypothetical protein CBG13109                                                                                |
| Locus_17447_Transcript_1/1_Conf_1.000 | 133 | 20 | 2.77E-12 | NP_001040856.1 | 90  | 75.0998 | 43  | 39  | PAPS (adenosine 3'-phosphate 5'-<br>phosphosulfate) Transporter family<br>member (pst-2)                     |
| Locus_17448_Transcript_1/1_Conf_1.000 | 189 | 0  |          |                |     |         |     |     |                                                                                                              |
| Locus_17449_Transcript_1/1_Conf_1.000 | 595 | 0  |          |                |     |         |     |     |                                                                                                              |
| Locus_1745_Transcript_1/1_Conf_1.000  | 371 | 0  |          |                |     |         |     |     |                                                                                                              |
| Locus_17450_Transcript_1/1_Conf_1.000 | 602 | 3  | 6.17E-52 | XP_002643880.1 | 67  | 207.608 | 200 | 134 | Hypothetical protein CBG02118                                                                                |
| Locus_17451_Transcript_1/1_Conf_1.000 | 893 | 0  |          |                |     |         |     |     |                                                                                                              |
| Locus_17452_Transcript_1/1_Conf_1.000 | 455 | 0  |          |                |     |         |     |     |                                                                                                              |
| Locus_17453_Transcript_1/1_Conf_1.000 | 168 | 0  |          |                |     |         |     |     |                                                                                                              |
| Locus_17454_Transcript_1/1_Conf_1.000 | 531 | 1  | 3.21E-26 | CAR63592.1     | 65  | 121.709 | 141 | 93  | hypothetical protein                                                                                         |
| Locus_17455_Transcript_1/1_Conf_1.000 | 367 | 20 | 4.34E-42 | XP_002630208.1 | 83  | 174.096 | 117 | 98  | C. briggsae CBR-LACT-4 protein                                                                               |
| Locus_17456_Transcript_1/1_Conf_1.000 | 195 | 6  | 7.37E-21 | NP_001021988.1 | 79  | 103.605 | 63  | 50  | Epithelial Fusion Failure family member (eff-<br>1)                                                          |
| Locus_17457_Transcript_1/1_Conf_1.000 | 230 | 0  |          |                |     |         |     |     |                                                                                                              |
| Locus_17458_Transcript_1/1_Conf_1.000 | 217 | 4  | 1.04E-27 | NP_492127.1    | 93  | 126.331 | 72  | 67  | Low-density lipoprotein Receptor Related<br>family member (lrp-1)                                            |
| Locus_17459_Transcript_1/1_Conf_1.000 | 128 | 2  | 2.98E-06 | AAV28323.2     | 70  | 55.0694 | 40  | 28  | Hypothetical protein T15B7.1                                                                                 |
| Locus_1746_Transcript_1/1_Conf_1.000  | 488 | 1  | 8.18E-04 | NP_001024088.1 | 46  | 46.9802 | 116 | 54  | hypothetical protein T01C3.11                                                                                |

|                                       |      |    |          |                |    |         |     |     |                                        |
|---------------------------------------|------|----|----------|----------------|----|---------|-----|-----|----------------------------------------|
| Locus_17460_Transcript_1/1_Conf_1.000 | 769  | 20 | 2.62E-42 | XP_002639655.1 | 80 | 176.407 | 118 | 95  | Hypothetical protein CBG12371          |
| Locus_17461_Transcript_1/1_Conf_1.000 | 203  | 15 | 3.08E-19 | XP_002641899.1 | 79 | 98.2117 | 68  | 54  | C. briggsae CBR-NHR-10 protein         |
| Locus_17462_Transcript_1/1_Conf_1.000 | 209  | 20 | 5.78E-10 | NP_497641.2    | 67 | 67.3958 | 68  | 46  | CaDHerin family member (cdh-1)         |
| Locus_17463_Transcript_1/1_Conf_1.000 | 134  | 20 | 7.29E-13 | NP_495437.2    | 90 | 77.0258 | 44  | 40  | hypothetical protein C52E12.4          |
| Locus_17464_Transcript_1/1_Conf_1.000 | 290  | 20 | 1.26E-20 | XP_002645050.1 | 79 | 102.834 | 96  | 76  | Hypothetical protein CBG16703          |
| Locus_17465_Transcript_1/1_Conf_1.000 | 199  | 4  | 7.87E-15 | XP_002644812.1 | 72 | 83.5741 | 65  | 47  | Hypothetical protein CBG14830          |
| Locus_17466_Transcript_1/1_Conf_1.000 | 1242 | 20 | 4.24E-85 | XP_002640804.1 | 88 | 319.701 | 197 | 174 | C. briggsae CBR-RAL-1 protein          |
| Locus_17467_Transcript_1/1_Conf_1.000 | 499  | 20 | 6.32E-25 | XP_002631305.1 | 74 | 117.087 | 108 | 80  | C. briggsae CBR-DNA-2 protein          |
| Locus_17468_Transcript_1/2_Conf_1.000 | 367  | 20 | 1.35E-35 | CAA72915.1     | 79 | 152.525 | 116 | 92  | serine protease inhibitor-like protein |

|                                       |      |    |           |                |    |         |     |     |                                                            |
|---------------------------------------|------|----|-----------|----------------|----|---------|-----|-----|------------------------------------------------------------|
| Locus_17468_Transcript_2/2_Conf_1.000 | 366  | 20 | 8.76E-35  | CAA72915.1     | 79 | 149.828 | 116 | 92  | serine protease inhibitor-like protein                     |
| Locus_17469_Transcript_1/1_Conf_1.000 | 247  | 0  |           |                |    |         |     |     |                                                            |
| Locus_1747_Transcript_1/1_Conf_1.000  | 1175 | 20 | 1.04E-122 | XP_002637936.1 | 80 | 444.506 | 333 | 267 | Hypothetical protein CBG04748                              |
| Locus_17470_Transcript_1/1_Conf_1.000 | 192  | 0  |           |                |    |         |     |     |                                                            |
| Locus_17471_Transcript_1/1_Conf_1.000 | 249  | 5  | 8.26E-09  |                | 66 | 63.5438 | 63  | 42  | myoblast city protein homolog                              |
| Locus_17472_Transcript_1/1_Conf_1.000 | 339  | 0  |           |                |    |         |     |     |                                                            |
| Locus_17473_Transcript_1/1_Conf_1.000 | 283  | 20 | 7.69E-34  | NP_500460.1    | 80 | 146.747 | 93  | 75  | hypothetical protein W02C12.1                              |
| Locus_17474_Transcript_1/1_Conf_1.000 | 177  | 0  |           |                |    |         |     |     |                                                            |
| Locus_17475_Transcript_1/1_Conf_1.000 | 281  | 2  | 1.97E-10  | XP_002632596.1 | 64 | 68.9366 | 64  | 41  | Hypothetical protein CBG23720                              |
| Locus_17476_Transcript_1/1_Conf_1.000 | 361  | 20 | 1.72E-30  | NP_498089.2    | 76 | 135.576 | 115 | 88  | hypothetical protein Y54H5A.2                              |
| Locus_17477_Transcript_1/1_Conf_1.000 | 756  | 20 | 4.13E-85  | NP_509008.2    | 80 | 318.546 | 230 | 186 | Inositol Polyphosphate 5-Phosphatase family member (ipp-5) |
| Locus_17478_Transcript_1/1_Conf_1.000 | 149  | 20 | 1.90E-16  | NP_509898.1    | 91 | 88.9669 | 49  | 45  | ACOnitase family member (aco-1)                            |
| Locus_17479_Transcript_1/1_Conf_1.000 | 178  | 0  |           |                |    |         |     |     |                                                            |
| Locus_1748_Transcript_1/1_Conf_1.000  | 1113 | 20 | 2.16E-05  | XP_001897183.1 | 64 | 54.6842 | 62  | 40  | HMG box family protein                                     |
| Locus_17480_Transcript_1/1_Conf_1.000 | 407  | 3  | 2.28E-06  | NP_001123076.1 | 48 | 55.4546 | 129 | 62  | hypothetical protein ZC455.1                               |
| Locus_17481_Transcript_1/1_Conf_1.000 | 132  | 0  |           |                |    |         |     |     |                                                            |
| Locus_17482_Transcript_1/1_Conf_1.000 | 260  | 0  |           |                |    |         |     |     |                                                            |
| Locus_17483_Transcript_1/1_Conf_1.000 | 320  | 0  |           |                |    |         |     |     |                                                            |
| Locus_17484_Transcript_1/1_Conf_1.000 | 452  | 6  | 1.48E-05  | AAA74035.1     | 58 | 52.7582 | 70  | 41  | CV-FLP-1A                                                  |

|                                       |      |    |          |                |    |         |     |     |                                                       |
|---------------------------------------|------|----|----------|----------------|----|---------|-----|-----|-------------------------------------------------------|
| Locus_17485_Transcript_1/1_Conf_1.000 | 429  | 20 | 4.67E-60 | NP_493778.1    | 85 | 233.802 | 142 | 121 | hypothetical protein K07E8.7                          |
| Locus_17486_Transcript_1/1_Conf_1.000 | 361  | 20 | 1.41E-24 | NP_001033391.1 | 64 | 115.931 | 125 | 81  | GLutaRedoXin family member (glrx-22)                  |
| Locus_17487_Transcript_1/1_Conf_1.000 | 514  | 20 | 2.90E-39 | XP_002647238.1 | 71 | 164.851 | 171 | 123 | Hypothetical protein CBG24582                         |
| Locus_17488_Transcript_1/1_Conf_1.000 | 144  | 0  |          |                |    |         |     |     |                                                       |
| Locus_17489_Transcript_1/1_Conf_1.000 | 188  | 0  |          |                |    |         |     |     |                                                       |
| Locus_1749_Transcript_1/2_Conf_1.000  | 1200 | 20 | 3.19E-74 | XP_001894031.1 | 64 | 283.493 | 318 | 205 | Protein kinase domain containing protein              |
| Locus_1749_Transcript_2/2_Conf_1.000  | 1200 | 20 | 3.19E-74 | XP_001894031.1 | 64 | 283.493 | 318 | 205 | Protein kinase domain containing protein              |
| Locus_17490_Transcript_1/1_Conf_1.000 | 664  | 0  |          |                |    |         |     |     |                                                       |
| Locus_17491_Transcript_1/1_Conf_1.000 | 189  | 0  |          |                |    |         |     |     |                                                       |
| Locus_17492_Transcript_1/1_Conf_1.000 | 448  | 20 | 2.60E-26 | A8XZU0.2       | 63 | 121.709 | 147 | 93  | Probable cytosolic Fe-S cluster assembly factor oxy-4 |
| Locus_17493_Transcript_1/1_Conf_1.000 | 179  | 1  | 3.60E-04 | NP_496205.2    | 61 | 48.1358 | 54  | 33  | PhosphoLipase C family member (plc-3)                 |
| Locus_17494_Transcript_1/1_Conf_1.000 | 395  | 20 | 3.01E-22 | NP_741496.2    | 71 | 108.227 | 97  | 69  | hypothetical protein Y10G11A.1                        |
| Locus_17495_Transcript_1/1_Conf_1.000 | 396  | 6  | 4.34E-21 | XP_002634643.1 | 61 | 104.375 | 129 | 79  | C. briggsae CBR-GEI-9 protein                         |
| Locus_17496_Transcript_1/1_Conf_1.000 | 308  | 0  |          |                |    |         |     |     |                                                       |
| Locus_17497_Transcript_1/1_Conf_1.000 | 286  | 20 | 9.43E-08 | AAI24420.1     | 58 | 60.077  | 79  | 46  | Dgcr8 protein                                         |
| Locus_17498_Transcript_1/1_Conf_1.000 | 789  | 20 | 5.98E-37 | NP_505460.1    | 67 | 158.688 | 161 | 109 | hypothetical protein C50F4.12                         |
| Locus_17499_Transcript_1/1_Conf_1.000 | 427  | 3  | 1.74E-38 | XP_002645893.1 | 76 | 162.155 | 142 | 108 | Hypothetical protein CBG07646                         |

|                                       |      |    |          |                |    |         |     |     |                                                                         |
|---------------------------------------|------|----|----------|----------------|----|---------|-----|-----|-------------------------------------------------------------------------|
| Locus_175_Transcript_1/2_Conf_1.000   | 2404 | 20 | 4.16E-51 | XP_002642145.1 | 41 | 207.994 | 898 | 370 | C. briggsae CBR-EVL-14 protein                                          |
| Locus_175_Transcript_2/2_Conf_1.000   | 2404 | 20 | 2.70E-50 | XP_002642145.1 | 41 | 205.297 | 898 | 369 | C. briggsae CBR-EVL-14 protein                                          |
| Locus_1750_Transcript_1/1_Conf_1.000  | 1086 | 20 | 7.74E-77 | NP_498713.3    | 71 | 291.967 | 271 | 195 | hypothetical protein ZK688.9                                            |
| Locus_17500_Transcript_1/1_Conf_1.000 | 137  | 0  |          |                |    |         |     |     |                                                                         |
| Locus_17501_Transcript_1/1_Conf_1.000 | 395  | 20 | 1.60E-23 | EFO22018.1     | 82 | 112.464 | 74  | 61  | hypothetical protein LOAG_06465                                         |
| Locus_17502_Transcript_1/1_Conf_1.000 | 422  | 4  | 1.40E-11 | XP_002632757.1 | 66 | 72.7886 | 72  | 48  | C. briggsae CBR-EOR-1 protein                                           |
| Locus_17503_Transcript_1/1_Conf_1.000 | 647  | 20 | 4.46E-65 | XP_002646632.1 | 74 | 251.521 | 216 | 160 | C. briggsae CBR-UNC-52 protein                                          |
| Locus_17504_Transcript_1/1_Conf_1.000 | 238  | 0  |          |                |    |         |     |     |                                                                         |
| Locus_17505_Transcript_1/1_Conf_1.000 | 194  | 0  |          |                |    |         |     |     |                                                                         |
| Locus_17506_Transcript_1/1_Conf_1.000 | 306  | 0  |          |                |    |         |     |     |                                                                         |
| Locus_17507_Transcript_1/1_Conf_1.000 | 178  | 2  | 3.48E-07 | NP_504750.2    | 81 | 58.151  | 58  | 47  | hypothetical protein K11C4.2                                            |
| Locus_17508_Transcript_1/1_Conf_1.000 | 236  | 0  |          |                |    |         |     |     |                                                                         |
| Locus_17509_Transcript_1/1_Conf_1.000 | 176  | 0  |          |                |    |         |     |     |                                                                         |
| Locus_1751_Transcript_1/1_Conf_1.000  | 1317 | 7  | 5.52E-22 | CAB07693.3     | 65 | 110.153 | 119 | 78  | C. elegans protein Y48E1B.7, partially confirmed by transcript evidence |
| Locus_17510_Transcript_1/1_Conf_1.000 | 315  | 4  | 7.93E-23 | NP_505399.1    | 71 | 110.153 | 104 | 74  | hypothetical protein ZK682.2                                            |
| Locus_17511_Transcript_1/1_Conf_1.000 | 163  | 0  |          |                |    |         |     |     |                                                                         |
| Locus_17512_Transcript_1/1_Conf_1.000 | 256  | 20 | 9.10E-11 | XP_001122011.1 | 57 | 70.0922 | 89  | 51  | PREDICTED: similar to easter CG4920-PA                                  |
| Locus_17513_Transcript_1/1_Conf_1.000 | 248  | 0  |          |                |    |         |     |     |                                                                         |
| Locus_17514_Transcript_1/1_Conf_1.000 | 191  | 0  |          |                |    |         |     |     |                                                                         |
| Locus_17515_Transcript_1/1_Conf_1.000 | 397  | 0  |          |                |    |         |     |     |                                                                         |
| Locus_17516_Transcript_1/1_Conf_1.000 | 250  | 0  |          |                |    |         |     |     |                                                                         |
| Locus_17517_Transcript_1/1_Conf_1.000 | 357  | 20 | 1.28E-25 | XP_002630721.1 | 66 | 119.398 | 133 | 88  | C. briggsae CBR-CLR-1 protein                                           |
| Locus_17518_Transcript_1/1_Conf_1.000 | 480  | 0  |          |                |    |         |     |     |                                                                         |

|                                       |      |    |          |                |    |         |     |     |                                                                         |
|---------------------------------------|------|----|----------|----------------|----|---------|-----|-----|-------------------------------------------------------------------------|
| Locus_17519_Transcript_1/1_Conf_1.000 | 1301 | 2  | 6.61E-20 | NP_505209.2    | 48 | 103.219 | 428 | 206 | hypothetical protein F25G6.9                                            |
| Locus_1752_Transcript_1/1_Conf_1.000  | 761  | 20 | 1.87E-93 | CBW44400.1     | 74 | 346.28  | 280 | 208 | C. elegans protein Y59A8B.22a, confirmed by transcript evidence         |
| Locus_17520_Transcript_1/1_Conf_1.000 | 301  |    |          |                |    |         |     |     |                                                                         |
| Locus_17521_Transcript_1/1_Conf_1.000 | 394  | 0  |          |                |    |         |     |     |                                                                         |
| Locus_17522_Transcript_1/1_Conf_1.000 | 265  | 0  |          |                |    |         |     |     |                                                                         |
| Locus_17523_Transcript_1/1_Conf_1.000 | 131  | 0  |          |                |    |         |     |     |                                                                         |
| Locus_17524_Transcript_1/1_Conf_1.000 | 336  | 0  |          |                |    |         |     |     |                                                                         |
| Locus_17525_Transcript_1/1_Conf_1.000 | 518  | 3  | 1.39E-04 | EEQ88268.1     | 42 | 49.6766 | 155 | 66  | hypothetical protein BDCG_03388                                         |
| Locus_17526_Transcript_1/1_Conf_1.000 | 1007 | 20 | 3.31E-63 | EFO15384.1     | 68 | 246.514 | 240 | 165 | hypothetical protein LOAG_13128                                         |
| Locus_17527_Transcript_1/1_Conf_1.000 | 169  | 3  | 4.58E-15 | NP_001033381.1 | 84 | 84.3445 | 52  | 44  | hypothetical protein Y71H2AM.15                                         |
| Locus_17528_Transcript_1/1_Conf_1.000 | 293  | 1  | 8.20E-04 | NP_509315.1    | 72 | 46.9802 | 37  | 27  | hypothetical protein ZK154.4                                            |
| Locus_17529_Transcript_1/1_Conf_1.000 | 538  | 20 | 1.79E-16 | NP_001022401.1 | 70 | 89.3521 | 98  | 69  | Polarity and Osmotic sensitivity Defect family member (pod-2)           |
| Locus_1753_Transcript_1/1_Conf_1.000  | 288  | 6  | 4.36E-05 | XP_002433635.1 | 68 | 51.2174 | 45  | 31  | protein tyrosine phosphatase, putative                                  |
| Locus_17530_Transcript_1/1_Conf_1.000 | 563  | 0  |          |                |    |         |     |     |                                                                         |
| Locus_17531_Transcript_1/1_Conf_1.000 | 354  | 20 | 1.52E-26 | XP_002631704.1 | 73 | 122.479 | 101 | 74  | Hypothetical protein CBG20903                                           |
| Locus_17532_Transcript_1/1_Conf_1.000 | 179  | 5  | 1.23E-20 | EFO22429.1     | 93 | 102.834 | 59  | 55  | hypothetical protein LOAG_06054                                         |
| Locus_17533_Transcript_1/1_Conf_1.000 | 480  | 0  |          |                |    |         |     |     |                                                                         |
| Locus_17534_Transcript_1/1_Conf_1.000 | 403  | 3  | 8.71E-06 | ACI49231.1     | 66 | 53.5286 | 50  | 33  | hypothetical protein Csp3_JD05.016                                      |
| Locus_17535_Transcript_1/1_Conf_1.000 | 829  | 20 | 9.66E-57 | CAA91288.2     | 60 | 224.557 | 255 | 155 | C. elegans protein K08F8.5b, partially confirmed by transcript evidence |

|                                       |      |    |          |                |    |         |     |     |                                                                         |
|---------------------------------------|------|----|----------|----------------|----|---------|-----|-----|-------------------------------------------------------------------------|
| Locus_17536_Transcript_1/1_Conf_1.000 | 266  | 20 | 1.29E-25 | NP_502170.3    | 75 | 119.398 | 86  | 65  | TWiK family of potassium channels family member (twk-25)                |
| Locus_17537_Transcript_1/1_Conf_1.000 | 331  | 0  |          |                |    |         |     |     |                                                                         |
| Locus_17538_Transcript_1/1_Conf_1.000 | 143  | 0  |          |                |    |         |     |     |                                                                         |
| Locus_17539_Transcript_1/1_Conf_1.000 | 250  | 20 | 1.65E-41 | CAV31771.1     | 96 | 172.17  | 83  | 80  | C. elegans protein F25D7.3b, partially confirmed by transcript evidence |
| Locus_1754_Transcript_1/2_Conf_1.000  | 2556 | 20 | 0        | NP_740776.1    | 87 | 1202.96 | 713 | 627 | WW domain Protein (E3 ubiquitin ligase) family member (wwp-1)           |
| Locus_1754_Transcript_2/2_Conf_1.000  | 2589 | 20 | 0        | NP_740776.1    | 84 | 1228.39 | 800 | 677 | WW domain Protein (E3 ubiquitin ligase) family member (wwp-1)           |
| Locus_17540_Transcript_1/1_Conf_1.000 | 270  | 0  |          |                |    |         |     |     |                                                                         |
| Locus_17541_Transcript_1/1_Conf_1.000 | 427  | 0  |          |                |    |         |     |     |                                                                         |
| Locus_17542_Transcript_1/1_Conf_1.000 | 768  | 5  | 2.12E-76 | CAR63603.1     | 95 | 289.656 | 169 | 161 | putative somatostatin receptor                                          |
| Locus_17543_Transcript_1/1_Conf_1.000 | 163  | 0  |          |                |    |         |     |     |                                                                         |
| Locus_17544_Transcript_1/1_Conf_1.000 | 134  | 20 | 2.77E-12 | NP_741757.1    | 92 | 75.0998 | 42  | 39  | Endophilin-Related Protein family member (erp-1)                        |
| Locus_17545_Transcript_1/1_Conf_1.000 | 324  | 0  |          |                |    |         |     |     |                                                                         |
| Locus_17546_Transcript_1/1_Conf_1.000 | 392  | 20 | 1.55E-23 | XP_002637289.1 | 75 | 112.464 | 89  | 67  | Hypothetical protein CBG18976                                           |
| Locus_17547_Transcript_1/1_Conf_1.000 | 165  | 0  |          |                |    |         |     |     |                                                                         |
| Locus_17548_Transcript_1/1_Conf_1.000 | 308  | 20 | 1.96E-34 | NP_491390.2    | 85 | 148.673 | 100 | 85  | hypothetical protein D1007.15                                           |



|                                       |      |    |           |                |     |         |     |     |                                                                            |
|---------------------------------------|------|----|-----------|----------------|-----|---------|-----|-----|----------------------------------------------------------------------------|
| Locus_17549_Transcript_1/1_Conf_1.000 | 493  | 20 | 1.55E-71  | XP_002642701.1 | 92  | 271.937 | 162 | 150 | C. briggsae CBR-GLY-3 protein                                              |
| Locus_1755_Transcript_1/1_Conf_1.000  | 1189 | 20 | 4.53E-81  | NP_495808.2    | 85  | 306.22  | 200 | 171 | STCH (truncated HSP) family member (stc-1)                                 |
| Locus_17550_Transcript_1/1_Conf_1.000 | 630  | 6  | 1.45E-49  | NP_001021494.1 | 69  | 199.904 | 196 | 136 | hypothetical protein F55A12.2                                              |
| Locus_17551_Transcript_1/1_Conf_1.000 | 228  | 0  |           |                |     |         |     |     |                                                                            |
| Locus_17552_Transcript_1/1_Conf_1.000 | 241  | 15 | 2.19E-17  | NP_001122650.1 | 69  | 92.0485 | 79  | 55  | PaTChed family member (ptc-3)                                              |
| Locus_17553_Transcript_1/1_Conf_1.000 | 432  | 20 | 3.05E-27  | NP_001041274.2 | 69  | 124.79  | 134 | 93  | hypothetical protein K11G12.6                                              |
| Locus_17554_Transcript_1/1_Conf_1.000 | 184  | 20 | 2.83E-28  | ABW22635.1     | 100 | 128.257 | 61  | 61  | GABA receptor subunit                                                      |
| Locus_17555_Transcript_1/1_Conf_1.000 | 155  | 0  |           |                |     |         |     |     |                                                                            |
| Locus_17556_Transcript_1/1_Conf_1.000 | 308  | 0  |           |                |     |         |     |     |                                                                            |
| Locus_17557_Transcript_1/1_Conf_1.000 | 193  | 0  |           |                |     |         |     |     |                                                                            |
| Locus_17558_Transcript_1/1_Conf_1.000 | 371  | 0  |           |                |     |         |     |     |                                                                            |
| Locus_17559_Transcript_1/1_Conf_1.000 | 345  | 4  | 6.94E-11  | NP_001122607.1 | 65  | 70.4774 | 79  | 52  | NURF (nucleosome remodeling factor) complex homolog family member (nurf-1) |
| Locus_1756_Transcript_1/1_Conf_1.000  | 1250 | 20 | 9.00E-160 | NP_493742.1    | 78  | 567.77  | 447 | 350 | NucleOLar protein family member (nol-1)                                    |

|                                       |      |    |          |                |    |         |     |     |                                                                         |
|---------------------------------------|------|----|----------|----------------|----|---------|-----|-----|-------------------------------------------------------------------------|
| Locus_17560_Transcript_1/1_Conf_1.000 | 267  | 2  | 3.77E-09 | NP_491354.1    | 61 | 64.6994 | 97  | 60  | AcetylCholine Receptor family member (acr-6)                            |
| Locus_17561_Transcript_1/1_Conf_1.000 | 414  | 13 | 1.27E-25 | CAA21686.2     | 67 | 119.398 | 135 | 91  | C. elegans protein Y54E2A.4, partially confirmed by transcript evidence |
| Locus_17562_Transcript_1/1_Conf_1.000 | 173  | 0  |          |                |    |         |     |     |                                                                         |
| Locus_17563_Transcript_1/1_Conf_1.000 | 156  | 0  |          |                |    |         |     |     |                                                                         |
| Locus_17564_Transcript_1/1_Conf_1.000 | 157  | 2  | 6.71E-06 | NP_498385.2    | 64 | 53.9138 | 51  | 33  | hypothetical protein C56G2.4                                            |
| Locus_17565_Transcript_1/1_Conf_1.000 | 444  | 20 | 2.87E-49 | XP_002643809.1 | 78 | 197.978 | 147 | 115 | Hypothetical protein CBG02021                                           |
| Locus_17566_Transcript_1/1_Conf_1.000 | 220  | 5  | 3.03E-14 | NP_510542.2    | 72 | 81.6481 | 66  | 48  | Temporarily Assigned Gene name family member (tag-97)                   |
| Locus_17567_Transcript_1/1_Conf_1.000 | 291  | 5  | 3.56E-07 | XP_001895488.1 | 59 | 58.151  | 92  | 55  | hypothetical protein                                                    |
| Locus_17568_Transcript_1/1_Conf_1.000 | 584  | 0  |          |                |    |         |     |     |                                                                         |
| Locus_17569_Transcript_1/1_Conf_1.000 | 326  | 0  |          |                |    |         |     |     |                                                                         |
| Locus_1757_Transcript_1/6_Conf_0.167  | 656  | 20 | 1.19E-36 | AAV28323.2     | 58 | 157.147 | 173 | 102 | Hypothetical protein T15B7.1                                            |
| Locus_1757_Transcript_2/6_Conf_0.500  | 2537 | 20 | 0        | NP_497786.2    | 91 | 1217.99 | 729 | 670 | MethylMalonylCoA Mutase homolog family member (mmcm-1)                  |
| Locus_1757_Transcript_3/6_Conf_0.583  | 2181 | 20 | 0        | XP_002647077.1 | 92 | 905.205 | 521 | 480 | C. briggsae CBR-MMCM-1 protein                                          |
| Locus_1757_Transcript_4/6_Conf_0.417  | 2523 | 20 | 0        | NP_497786.2    | 91 | 1223.38 | 748 | 682 | MethylMalonylCoA Mutase homolog family member (mmcm-1)                  |
| Locus_1757_Transcript_5/6_Conf_0.583  | 3076 | 20 | 0        | NP_497786.2    | 91 | 1215.68 | 729 | 669 | MethylMalonylCoA Mutase homolog family member (mmcm-1)                  |
| Locus_1757_Transcript_6/6_Conf_0.583  | 3076 | 20 | 0        | NP_497786.2    | 91 | 1217.99 | 729 | 670 | MethylMalonylCoA Mutase homolog family member (mmcm-1)                  |

|                                       |     |    |          |                |    |         |     |     |                               |
|---------------------------------------|-----|----|----------|----------------|----|---------|-----|-----|-------------------------------|
| Locus_17570_Transcript_1/1_Conf_1.000 | 496 | 20 | 1.66E-41 | NP_741237.1    | 89 | 172.17  | 105 | 94  | CaLPain family member (clp-1) |
| Locus_17571_Transcript_1/1_Conf_1.000 | 212 | 0  |          |                |    |         |     |     |                               |
| Locus_17572_Transcript_1/1_Conf_1.000 | 420 | 20 | 2.15E-20 | XP_002640915.1 | 69 | 102.064 | 103 | 72  | Hypothetical protein CBG00476 |
| Locus_17573_Transcript_1/1_Conf_1.000 | 243 | 0  |          |                |    |         |     |     |                               |
| Locus_17574_Transcript_1/1_Conf_1.000 | 165 | 20 | 6.86E-11 | NP_510625.2    | 80 | 70.4774 | 50  | 40  | hypothetical protein T27A8.1  |
| Locus_17575_Transcript_1/1_Conf_1.000 | 214 | 0  |          |                |    |         |     |     |                               |
| Locus_17576_Transcript_1/1_Conf_1.000 | 149 | 0  |          |                |    |         |     |     |                               |
| Locus_17577_Transcript_1/1_Conf_1.000 | 212 | 0  |          |                |    |         |     |     |                               |
| Locus_17578_Transcript_1/1_Conf_1.000 | 543 | 0  |          |                |    |         |     |     |                               |
| Locus_17579_Transcript_1/1_Conf_1.000 | 313 | 0  |          |                |    |         |     |     |                               |
| Locus_1758_Transcript_1/1_Conf_1.000  | 616 | 20 | 1.25E-50 | EFO16392.1     | 86 | 203.371 | 123 | 107 | VCP protein                   |
| Locus_17580_Transcript_1/1_Conf_1.000 | 197 | 20 | 2.81E-12 | EFO28029.1     | 95 | 75.0998 | 43  | 41  | AP-1 complex subunit mu-1     |
| Locus_17581_Transcript_1/1_Conf_1.000 | 169 | 20 | 1.85E-24 | ABS45067.1     | 96 | 115.546 | 56  | 54  | latrophilin-like protein 2    |
| Locus_17582_Transcript_1/1_Conf_1.000 | 171 | 3  | 1.73E-14 | NP_498952.1    | 76 | 82.4185 | 56  | 43  | hypothetical protein F44E2.4  |

|                                       |      |    |           |                |     |         |     |     |                                                                |
|---------------------------------------|------|----|-----------|----------------|-----|---------|-----|-----|----------------------------------------------------------------|
| Locus_17583_Transcript_1/1_Conf_1.000 | 191  | 20 | 8.74E-30  | ADK36640.1     | 100 | 133.265 | 63  | 63  | L-lactate dehydrogenase B chain                                |
| Locus_17584_Transcript_1/1_Conf_1.000 | 429  | 20 | 2.66E-47  | CAQ48388.2     | 86  | 191.43  | 143 | 123 | C. elegans protein C26H9A.1b, confirmed by transcript evidence |
| Locus_17585_Transcript_1/1_Conf_1.000 | 196  | 0  |           |                |     |         |     |     |                                                                |
| Locus_17586_Transcript_1/1_Conf_1.000 | 281  | 20 | 3.84E-14  | NP_494219.3    | 59  | 81.2629 | 114 | 68  | hypothetical protein F54A3.2                                   |
| Locus_17587_Transcript_1/1_Conf_1.000 | 933  | 20 | 1.61E-69  | XP_002631319.1 | 64  | 267.314 | 328 | 213 | Hypothetical protein CBG03141                                  |
| Locus_17588_Transcript_1/1_Conf_1.000 | 1091 | 20 | 8.47E-124 | XP_002632173.1 | 88  | 447.973 | 296 | 262 | Hypothetical protein CBG07032                                  |
| Locus_17589_Transcript_1/1_Conf_1.000 | 292  | 0  |           |                |     |         |     |     |                                                                |
| Locus_1759_Transcript_1/3_Conf_0.400  | 362  | 20 | 8.27E-33  | NP_498590.4    | 87  | 143.28  | 105 | 92  | hypothetical protein R151.6                                    |
| Locus_1759_Transcript_2/3_Conf_0.600  | 573  | 20 | 1.27E-32  | NP_498590.4    | 87  | 143.28  | 105 | 92  | hypothetical protein R151.6                                    |
| Locus_1759_Transcript_3/3_Conf_0.600  | 802  | 20 | 2.68E-32  | NP_498590.4    | 87  | 143.28  | 105 | 92  | hypothetical protein R151.6                                    |
| Locus_17590_Transcript_1/1_Conf_1.000 | 184  | 0  |           |                |     |         |     |     |                                                                |
| Locus_17591_Transcript_1/1_Conf_1.000 | 316  | 0  |           |                |     |         |     |     |                                                                |

|                                       |      |    |           |                |    |         |     |     |                                 |
|---------------------------------------|------|----|-----------|----------------|----|---------|-----|-----|---------------------------------|
| Locus_17592_Transcript_1/1_Conf_1.000 | 137  | 0  |           |                |    |         |     |     |                                 |
| Locus_17593_Transcript_1/1_Conf_1.000 | 353  | 0  |           |                |    |         |     |     |                                 |
| Locus_17594_Transcript_1/1_Conf_1.000 | 255  | 0  |           |                |    |         |     |     |                                 |
| Locus_17595_Transcript_1/1_Conf_1.000 | 147  | 0  |           |                |    |         |     |     |                                 |
| Locus_17596_Transcript_1/1_Conf_1.000 | 156  | 0  |           |                |    |         |     |     |                                 |
| Locus_17597_Transcript_1/1_Conf_1.000 | 325  | 20 | 3.42E-10  | XP_001636049.1 | 64 | 68.1662 | 98  | 63  | predicted protein               |
| Locus_17598_Transcript_1/1_Conf_1.000 | 142  | 20 | 5.35E-08  | YP_001328864.1 | 80 | 60.8474 | 46  | 37  | tRNA modification GTPase TrmE   |
| Locus_17599_Transcript_1/1_Conf_1.000 | 132  | 20 | 2.12E-12  | XP_002641552.1 | 86 | 75.485  | 44  | 38  | C. briggsae CBR-RBC-2 protein   |
| Locus_176_Transcript_1/1_Conf_1.000   | 1563 | 20 | 1.49E-141 | XP_002642495.1 | 75 | 507.679 | 460 | 345 | C. briggsae CBR-MIG-22 protein  |
| Locus_1760_Transcript_1/1_Conf_1.000  | 1196 | 20 | 2.70E-49  | EFO26991.1     | 60 | 200.675 | 261 | 159 | hypothetical protein LOAG_01487 |
| Locus_17600_Transcript_1/1_Conf_1.000 | 151  | 0  |           |                |    |         |     |     |                                 |
| Locus_17601_Transcript_1/1_Conf_1.000 | 267  | 2  | 3.40E-18  | NP_492624.2    | 82 | 94.7449 | 69  | 57  | hypothetical protein F52F12.7   |
| Locus_17602_Transcript_1/1_Conf_1.000 | 245  | 2  | 1.79E-11  | XP_002641411.1 | 65 | 72.4034 | 83  | 54  | Hypothetical protein CBG13276   |
| Locus_17603_Transcript_1/1_Conf_1.000 | 990  | 20 | 3.49E-25  | NP_508831.3    | 56 | 120.168 | 168 | 95  | hypothetical protein T07F12.2   |
| Locus_17604_Transcript_1/1_Conf_1.000 | 212  | 0  |           |                |    |         |     |     |                                 |
| Locus_17605_Transcript_1/1_Conf_1.000 | 222  | 0  |           |                |    |         |     |     |                                 |

|                                       |      |    |          |                |    |         |     |     |                                                                         |
|---------------------------------------|------|----|----------|----------------|----|---------|-----|-----|-------------------------------------------------------------------------|
| Locus_17606_Transcript_1/1_Conf_1.000 | 150  | 6  | 4.37E-13 | NP_001033327.1 | 84 | 77.7962 | 45  | 38  | CAN cell Migration defective family member (cam-1)                      |
| Locus_17607_Transcript_1/1_Conf_1.000 | 489  | 20 | 4.61E-07 | NP_492328.1    | 51 | 57.7658 | 122 | 63  | yeast Enhancer of DeCapping homolog family member (edc-3)               |
| Locus_17608_Transcript_1/1_Conf_1.000 | 400  | 20 | 1.47E-61 | NP_506145.1    | 94 | 238.81  | 131 | 124 | hypothetical protein E02A10.1                                           |
| Locus_17609_Transcript_1/1_Conf_1.000 | 245  | 0  |          |                |    |         |     |     |                                                                         |
| Locus_1761_Transcript_1/1_Conf_1.000  | 781  | 0  |          |                |    |         |     |     |                                                                         |
| Locus_17610_Transcript_1/1_Conf_1.000 | 292  | 0  |          |                |    |         |     |     |                                                                         |
| Locus_17611_Transcript_1/1_Conf_1.000 | 286  | 0  |          |                |    |         |     |     |                                                                         |
| Locus_17612_Transcript_1/1_Conf_1.000 | 558  |    |          |                |    |         |     |     |                                                                         |
| Locus_17613_Transcript_1/1_Conf_1.000 | 340  | 20 | 2.74E-20 | CAA91288.2     | 62 | 101.679 | 101 | 63  | C. elegans protein K08F8.5b, partially confirmed by transcript evidence |
| Locus_17614_Transcript_1/1_Conf_1.000 | 265  | 1  | 6.24E-12 | CAR63599.1     | 69 | 73.9442 | 65  | 45  | hypothetical protein                                                    |
| Locus_17615_Transcript_1/1_Conf_1.000 | 132  | 0  |          |                |    |         |     |     |                                                                         |
| Locus_17616_Transcript_1/1_Conf_1.000 | 178  | 0  |          |                |    |         |     |     |                                                                         |
| Locus_17617_Transcript_1/1_Conf_1.000 | 278  | 0  |          |                |    |         |     |     |                                                                         |
| Locus_17618_Transcript_1/1_Conf_1.000 | 184  | 0  |          |                |    |         |     |     |                                                                         |
| Locus_17619_Transcript_1/1_Conf_1.000 | 467  | 1  | 8.46E-09 | XP_002635121.1 | 42 | 63.5438 | 173 | 74  | Hypothetical protein CBG11345                                           |
| Locus_1762_Transcript_1/4_Conf_0.700  | 1967 | 1  | 2.36E-09 | XP_002640249.1 | 35 | 68.9366 | 403 | 145 | C. briggsae CBR-PQN-20 protein                                          |
| Locus_1762_Transcript_2/4_Conf_0.700  | 1943 | 1  | 2.33E-09 | XP_002640249.1 | 35 | 68.9366 | 403 | 145 | C. briggsae CBR-PQN-20 protein                                          |
| Locus_1762_Transcript_3/4_Conf_0.700  | 1943 | 1  | 2.33E-09 | XP_002640249.1 | 35 | 68.9366 | 403 | 145 | C. briggsae CBR-PQN-20 protein                                          |
| Locus_1762_Transcript_4/4_Conf_0.700  | 1943 | 1  | 2.33E-09 | XP_002640249.1 | 35 | 68.9366 | 403 | 145 | C. briggsae CBR-PQN-20 protein                                          |
| Locus_17620_Transcript_1/1_Conf_1.000 | 528  | 20 | 7.43E-52 | AAN61521.1     | 70 | 206.838 | 175 | 124 | 301kDa_2 protein                                                        |

|                                       |     |    |          |                |     |         |     |    |                                                |
|---------------------------------------|-----|----|----------|----------------|-----|---------|-----|----|------------------------------------------------|
| Locus_17621_Transcript_1/1_Conf_1.000 | 140 | 20 | 8.83E-19 | XP_002832350.1 | 100 | 96.6709 | 46  | 46 | PREDICTED: LOW QUALITY PROTEIN: filamin-A-like |
| Locus_17622_Transcript_1/1_Conf_1.000 | 336 | 20 | 2.92E-38 | NP_494753.3    | 87  | 161.384 | 97  | 85 | hypothetical protein C01F1.6                   |
| Locus_17623_Transcript_1/1_Conf_1.000 | 216 | 0  |          |                |     |         |     |    |                                                |
| Locus_17624_Transcript_1/1_Conf_1.000 | 415 | 20 | 8.78E-35 | AAN11401.1     | 71  | 149.828 | 127 | 91 | metalloprotease 1 precursor                    |
| Locus_17625_Transcript_1/1_Conf_1.000 | 474 | 20 | 2.41E-32 | XP_002634336.1 | 64  | 141.739 | 154 | 99 | C. briggsae CBR-KLP-10 protein                 |
| Locus_17626_Transcript_1/1_Conf_1.000 | 168 | 2  | 4.01E-11 | XP_002636973.1 | 72  | 71.2478 | 55  | 40 | Hypothetical protein CBG09454                  |

|                                       |     |    |          |                |    |         |     |     |                                                                   |
|---------------------------------------|-----|----|----------|----------------|----|---------|-----|-----|-------------------------------------------------------------------|
| Locus_17627_Transcript_1/1_Conf_1.000 | 298 | 20 | 2.06E-31 | EFO21606.1     | 81 | 138.658 | 99  | 81  | PDZ-domain-containing protein scribble                            |
| Locus_17628_Transcript_1/1_Conf_1.000 | 345 | 0  |          |                |    |         |     |     |                                                                   |
| Locus_17629_Transcript_1/1_Conf_1.000 | 153 | 0  |          |                |    |         |     |     |                                                                   |
| Locus_1763_Transcript_1/1_Conf_1.000  | 844 | 4  | 1.37E-21 | NP_508166.1    | 49 | 107.842 | 259 | 129 | ImmunoGlobulin-like Cell adhesion Molecule family member (igcm-1) |
| Locus_17630_Transcript_1/1_Conf_1.000 | 400 | 20 | 1.21E-23 | XP_002637712.1 | 63 | 112.849 | 133 | 84  | C. briggsae CBR-RAP-2 protein                                     |
| Locus_17631_Transcript_1/1_Conf_1.000 | 154 | 0  |          |                |    |         |     |     |                                                                   |
| Locus_17632_Transcript_1/1_Conf_1.000 | 301 | 20 | 7.06E-24 | NP_001122600.1 | 84 | 113.62  | 76  | 64  | Multiple PDZ domain protein family member (mpz-1)                 |
| Locus_17633_Transcript_1/1_Conf_1.000 | 655 | 0  |          |                |    |         |     |     |                                                                   |
| Locus_17634_Transcript_1/1_Conf_1.000 | 241 | 20 | 4.42E-18 | NP_499704.1    | 73 | 94.3597 | 80  | 59  | CYtochrome P450 family member (cyp-13A11)                         |
| Locus_17635_Transcript_1/1_Conf_1.000 | 262 | 0  |          |                |    |         |     |     |                                                                   |



|                                       |      |    |          |                |     |         |     |     |                                                                         |
|---------------------------------------|------|----|----------|----------------|-----|---------|-----|-----|-------------------------------------------------------------------------|
| Locus_17636_Transcript_1/1_Conf_1.000 | 275  | 20 | 4.86E-33 | NP_492476.1    | 85  | 144.05  | 91  | 78  | hypothetical protein F14B4.3                                            |
| Locus_17637_Transcript_1/1_Conf_1.000 | 141  | 0  |          |                |     |         |     |     |                                                                         |
| Locus_17638_Transcript_1/1_Conf_1.000 | 150  | 0  |          |                |     |         |     |     |                                                                         |
| Locus_17639_Transcript_1/1_Conf_1.000 | 454  | 4  | 2.59E-18 | EFO26050.1     | 59  | 95.1301 | 131 | 78  | PEK/PEK protein kinase                                                  |
| Locus_1764_Transcript_1/1_Conf_1.000  | 1018 | 20 | 3.49E-60 | XP_002642911.1 | 66  | 236.498 | 317 | 211 | Hypothetical protein CBG15186                                           |
| Locus_17640_Transcript_1/1_Conf_1.000 | 189  | 20 | 2.46E-24 | XP_001896329.1 | 96  | 115.161 | 62  | 60  | calcium ATPase                                                          |
| Locus_17641_Transcript_1/1_Conf_1.000 | 172  | 20 | 2.27E-14 | P00736.2       | 100 | 82.0333 | 36  | 36  | Complement C1r subcomponent                                             |
| Locus_17642_Transcript_1/1_Conf_1.000 | 681  | 6  | 1.26E-15 | CAN99691.2     | 49  | 87.4261 | 206 | 101 | C. elegans protein F54B3.1b, partially confirmed by transcript evidence |
| Locus_17643_Transcript_1/1_Conf_1.000 | 193  | 2  | 7.18E-08 | NP_495415.2    | 72  | 60.4622 | 44  | 32  | Acid SphingoMyelinase family member (asm-1)                             |
| Locus_17644_Transcript_1/1_Conf_1.000 | 324  | 20 | 4.44E-26 | XP_002639976.1 | 73  | 120.939 | 109 | 80  | C. briggsae CBR-KIN-32 protein                                          |
| Locus_17645_Transcript_1/1_Conf_1.000 | 150  | 3  | 3.02E-14 | CAA86821.1     | 87  | 81.6481 | 49  | 43  | excretory/secretory antigen                                             |
| Locus_17646_Transcript_1/1_Conf_1.000 | 129  | 8  | 8.63E-14 | NP_001020988.1 | 93  | 80.1073 | 43  | 40  | UNCoordinated family member (unc-89)                                    |
| Locus_17647_Transcript_1/1_Conf_1.000 | 163  | 4  | 2.71E-07 | XP_002640991.1 | 84  | 58.5362 | 53  | 45  | Hypothetical protein CBG11740                                           |
| Locus_17648_Transcript_1/1_Conf_1.000 | 153  | 0  |          |                |     |         |     |     |                                                                         |
| Locus_17649_Transcript_1/1_Conf_1.000 | 229  | 0  |          |                |     |         |     |     |                                                                         |
| Locus_1765_Transcript_1/1_Conf_1.000  | 375  | 20 | 2.89E-17 | NP_001094784.1 | 100 | 91.6633 | 65  | 65  | transmembrane protein 176B isoform b                                    |
| Locus_17650_Transcript_1/1_Conf_1.000 | 239  | 0  |          |                |     |         |     |     |                                                                         |
| Locus_17651_Transcript_1/1_Conf_1.000 | 423  | 7  | 6.24E-12 | EFO21962.1     | 63  | 73.9442 | 91  | 58  | TK/EGFR protein kinase                                                  |

|                                       |      |    |          |                |     |         |     |     |                                                     |
|---------------------------------------|------|----|----------|----------------|-----|---------|-----|-----|-----------------------------------------------------|
| Locus_17652_Transcript_1/1_Conf_1.000 | 159  | 20 | 1.14E-21 | XP_001118006.2 | 100 | 106.301 | 52  | 52  | PREDICTED: elongation factor 2                      |
| Locus_17653_Transcript_1/1_Conf_1.000 | 520  | 3  | 1.19E-51 | NP_501400.1    | 90  | 206.068 | 174 | 158 | hypothetical protein F35H10.10                      |
| Locus_17654_Transcript_1/1_Conf_1.000 | 131  | 0  |          |                |     |         |     |     |                                                     |
| Locus_17655_Transcript_1/1_Conf_1.000 | 391  | 0  |          |                |     |         |     |     |                                                     |
| Locus_17656_Transcript_1/1_Conf_1.000 | 373  | 20 | 3.65E-36 | XP_002634229.1 | 77  | 154.451 | 123 | 95  | C. briggsae CBR-UNC-26 protein                      |
| Locus_17657_Transcript_1/1_Conf_1.000 | 720  | 20 | 1.25E-88 | XP_002636978.1 | 88  | 330.102 | 238 | 211 | Hypothetical protein CBG09461                       |
| Locus_17658_Transcript_1/1_Conf_1.000 | 361  | 0  |          |                |     |         |     |     |                                                     |
| Locus_17659_Transcript_1/1_Conf_1.000 | 830  | 20 | 1.30E-61 | XP_002631397.1 | 70  | 240.736 | 249 | 176 | C. briggsae CBR-DEP-1 protein                       |
| Locus_1766_Transcript_1/1_Conf_1.000  | 435  | 2  | 1.84E-24 | NP_499357.2    | 73  | 115.546 | 94  | 69  | hypothetical protein Y39A1A.20                      |
| Locus_17660_Transcript_1/1_Conf_1.000 | 427  | 0  |          |                |     |         |     |     |                                                     |
| Locus_17661_Transcript_1/1_Conf_1.000 | 140  | 0  |          |                |     |         |     |     |                                                     |
| Locus_17662_Transcript_1/1_Conf_1.000 | 220  | 0  |          |                |     |         |     |     |                                                     |
| Locus_17663_Transcript_1/1_Conf_1.000 | 321  | 0  |          |                |     |         |     |     |                                                     |
| Locus_17664_Transcript_1/1_Conf_1.000 | 778  | 20 | 1.32E-73 | XP_002647977.1 | 69  | 280.411 | 265 | 183 | Hypothetical protein CBG23894                       |
| Locus_17665_Transcript_1/1_Conf_1.000 | 596  | 20 | 2.85E-86 | XP_002641537.1 | 92  | 321.627 | 182 | 169 | Hypothetical protein CBG09836                       |
| Locus_17666_Transcript_1/1_Conf_1.000 | 1766 | 1  | 3.42E-04 | YP_003834.1    | 57  | 51.6026 | 88  | 51  | unknown                                             |
| Locus_17667_Transcript_1/1_Conf_1.000 | 191  | 1  | 8.78E-14 | NP_494276.2    | 78  | 80.1073 | 64  | 50  | Variable ABnormal morphology family member (vab-19) |

|                                       |      |    |          |                |    |         |     |     |                                                      |
|---------------------------------------|------|----|----------|----------------|----|---------|-----|-----|------------------------------------------------------|
| Locus_17668_Transcript_1/1_Conf_1.000 | 293  | 11 | 8.43E-25 | EFO27980.1     | 76 | 116.701 | 97  | 74  | hypothetical protein LOAG_00505                      |
| Locus_17669_Transcript_1/1_Conf_1.000 | 209  | 20 | 2.12E-20 | XP_002630579.1 | 91 | 102.064 | 69  | 63  | C. briggsae CBR-NHX-2 protein                        |
| Locus_1767_Transcript_1/2_Conf_1.000  | 1257 | 20 | 1.88E-40 | XP_001366252.1 | 64 | 171.4   | 207 | 134 | PREDICTED: similar to Ubiquitin specific peptidase 3 |
| Locus_1767_Transcript_2/2_Conf_1.000  | 1018 | 20 | 8.62E-51 | XP_002110506.1 | 62 | 205.297 | 258 | 161 | hypothetical protein TRIADDRAFT_22897                |
| Locus_17670_Transcript_1/1_Conf_1.000 | 214  | 0  |          |                |    |         |     |     |                                                      |
| Locus_17671_Transcript_1/1_Conf_1.000 | 260  | 0  |          |                |    |         |     |     |                                                      |
| Locus_17672_Transcript_1/2_Conf_1.000 | 565  | 20 | 9.83E-51 | EFO22315.1     | 75 | 203.371 | 176 | 133 | hypothetical protein LOAG_06169                      |
| Locus_17672_Transcript_2/2_Conf_1.000 | 402  | 20 | 1.99E-34 | XP_002639921.1 | 71 | 148.673 | 131 | 94  | Hypothetical protein CBG08253                        |
| Locus_17673_Transcript_1/1_Conf_1.000 | 438  | 0  |          |                |    |         |     |     |                                                      |
| Locus_17674_Transcript_1/1_Conf_1.000 | 333  | 20 | 3.24E-45 | EFO17249.1     | 92 | 184.496 | 106 | 98  | RNA polymerase II                                    |

|                                        |      |    |           |                |     |         |     |     |                                                    |
|----------------------------------------|------|----|-----------|----------------|-----|---------|-----|-----|----------------------------------------------------|
| Locus_17675_Transcript_1/1_Conf_1.000  | 604  | 20 | 8.31E-113 | XP_002639744.1 | 91  | 409.838 | 199 | 183 | C. briggsae CBR-LAM-3 protein                      |
| Locus_17676_Transcript_1/1_Conf_1.000  | 742  | 20 | 5.57E-103 | NP_491257.1    | 88  | 377.867 | 241 | 214 | FK506-Binding protein family member (fkb-5)        |
| Locus_17677_Transcript_1/1_Conf_1.000  | 177  | 20 | 1.19E-23  | AAC27893.1     | 93  | 112.849 | 58  | 54  | ornithine decarboxylase                            |
| Locus_17678_Transcript_1/1_Conf_1.000  | 170  | 20 | 3.74E-25  | XP_002922306.1 | 100 | 117.857 | 56  | 56  | PREDICTED: triosephosphate isomerase-like, partial |
| Locus_17679_Transcript_1/1_Conf_1.000  | 461  | 20 | 1.19E-15  | XP_869306.2    | 73  | 86.2705 | 76  | 56  | PREDICTED: hypothetical protein isoform 1          |
| Locus_1768_Transcript_10/12_Conf_0.588 | 1767 | 20 | 3.07E-154 | XP_001897032.1 | 99  | 550.051 | 288 | 286 | polyubiquitin precursor                            |
| Locus_1768_Transcript_11/12_Conf_0.559 | 1767 | 20 | 3.07E-154 | XP_001897032.1 | 99  | 550.051 | 288 | 286 | polyubiquitin precursor                            |
| Locus_1768_Transcript_12/12_Conf_0.588 | 1767 | 20 | 3.07E-154 | XP_001897032.1 | 99  | 550.051 | 288 | 286 | polyubiquitin precursor                            |

|                                       |      |    |           |                |     |         |     |     |                               |
|---------------------------------------|------|----|-----------|----------------|-----|---------|-----|-----|-------------------------------|
| Locus_1768_Transcript_3/12_Conf_0.353 | 957  | 20 | 1.29E-154 | XP_001897032.1 | 99  | 550.051 | 288 | 286 | polyubiquitin precursor       |
| Locus_1768_Transcript_4/12_Conf_0.324 | 915  | 20 | 3.86E-153 | XP_001897032.1 | 99  | 545.043 | 285 | 283 | polyubiquitin precursor       |
| Locus_1768_Transcript_5/12_Conf_0.471 | 1298 | 20 | 3.73E-140 | XP_001897032.1 | 99  | 502.671 | 264 | 262 | polyubiquitin precursor       |
| Locus_1768_Transcript_6/12_Conf_0.500 | 1343 | 20 | 2.14E-154 | XP_001897032.1 | 99  | 550.051 | 288 | 286 | polyubiquitin precursor       |
| Locus_1768_Transcript_7/12_Conf_0.500 | 1343 | 20 | 3.92E-140 | XP_001897032.1 | 99  | 502.671 | 264 | 262 | polyubiquitin precursor       |
| Locus_1768_Transcript_8/12_Conf_0.235 | 818  | 20 | 2.50E-134 | XP_001897032.1 | 99  | 482.256 | 253 | 251 | polyubiquitin precursor       |
| Locus_1768_Transcript_9/12_Conf_0.088 | 349  | 20 | 1.29E-57  | EFO21508.1     | 100 | 225.713 | 116 | 116 | ubiquitin C II                |
| Locus_17680_Transcript_1/1_Conf_1.000 | 298  | 20 | 2.06E-23  | XP_002633309.1 | 76  | 112.079 | 98  | 75  | Hypothetical protein CBG06044 |
| Locus_17681_Transcript_1/1_Conf_1.000 | 241  | 0  |           |                |     |         |     |     |                               |

|                                       |     |    |           |                |    |         |     |     |                                           |
|---------------------------------------|-----|----|-----------|----------------|----|---------|-----|-----|-------------------------------------------|
| Locus_17682_Transcript_1/1_Conf_1.000 | 371 | 20 | 7.20E-08  | XP_002818294.1 | 98 | 60.4622 | 75  | 74  | PREDICTED: collagen alpha-2(I) chain-like |
| Locus_17683_Transcript_1/1_Conf_1.000 | 887 | 4  | 2.13E-36  | XP_001901821.1 | 52 | 157.147 | 310 | 163 | hypothetical protein Bm1_51765            |
| Locus_17684_Transcript_1/2_Conf_1.000 | 526 | 2  | 9.18E-55  | XP_002633375.1 | 71 | 216.468 | 172 | 123 | Hypothetical protein CBG06123             |
| Locus_17684_Transcript_2/2_Conf_1.000 | 357 | 2  | 1.46E-37  | XP_002633375.1 | 74 | 159.073 | 116 | 86  | Hypothetical protein CBG06123             |
| Locus_17685_Transcript_1/1_Conf_1.000 | 214 | 20 | 1.41E-24  | XP_002631304.1 | 91 | 115.931 | 71  | 65  | Hypothetical protein CBG03118             |
| Locus_17686_Transcript_1/1_Conf_1.000 | 615 | 0  |           |                |    |         |     |     |                                           |
| Locus_17687_Transcript_1/1_Conf_1.000 | 249 | 1  | 1.19E-15  | AAT07449.1     | 78 | 86.2705 | 61  | 48  | putative protein                          |
| Locus_17688_Transcript_1/1_Conf_1.000 | 396 | 0  |           |                |    |         |     |     |                                           |
| Locus_17689_Transcript_1/1_Conf_1.000 | 313 | 20 | 3.45E-26  | XP_002637058.1 | 74 | 121.324 | 104 | 77  | C. briggsae CBR-TTR-19 protein            |
| Locus_1769_Transcript_1/2_Conf_1.000  | 231 | 0  |           |                |    |         |     |     |                                           |
| Locus_1769_Transcript_2/2_Conf_1.000  | 257 | 0  |           |                |    |         |     |     |                                           |
| Locus_17690_Transcript_1/1_Conf_1.000 | 223 | 0  |           |                |    |         |     |     |                                           |
| Locus_17691_Transcript_1/2_Conf_1.000 | 249 | 0  |           |                |    |         |     |     |                                           |
| Locus_17691_Transcript_2/2_Conf_1.000 | 250 | 0  |           |                |    |         |     |     |                                           |
| Locus_17692_Transcript_1/1_Conf_1.000 | 550 | 20 | 2.19E-44  | XP_002637648.1 | 64 | 182.185 | 182 | 118 | C. briggsae CBR-FSHR-1 protein            |
| Locus_17693_Transcript_1/1_Conf_1.000 | 156 | 0  |           |                |    |         |     |     |                                           |
| Locus_17694_Transcript_1/1_Conf_1.000 | 832 | 20 | 8.14E-96  | XP_002634173.1 | 79 | 354.369 | 275 | 219 | C. briggsae CBR-HOE-1 protein             |
| Locus_17695_Transcript_1/1_Conf_1.000 | 853 | 20 | 1.40E-130 | NP_497814.3    | 88 | 469.929 | 281 | 250 | UNCoordinated family member (unc-79)      |
| Locus_17696_Transcript_1/1_Conf_1.000 | 291 | 2  | 4.06E-11  | EFO26621.1     | 51 | 71.2478 | 96  | 49  | AIDA-1b                                   |
| Locus_17697_Transcript_1/1_Conf_1.000 | 159 | 20 | 3.55E-07  | XP_002414302.1 | 82 | 58.151  | 40  | 33  | multidrug resistance protein, putative    |
| Locus_17698_Transcript_1/1_Conf_1.000 | 137 | 0  |           |                |    |         |     |     |                                           |

|                                       |      |    |           |                |     |         |      |     |                                                            |
|---------------------------------------|------|----|-----------|----------------|-----|---------|------|-----|------------------------------------------------------------|
| Locus_17699_Transcript_1/1_Conf_1.000 | 965  | 20 | 3.60E-96  | NP_001021501.1 | 77  | 355.91  | 292  | 227 | UNCoordinated family member (unc-73)                       |
| Locus_177_Transcript_1/1_Conf_1.000   | 1587 | 20 | 4.84E-180 | NP_506706.1    | 80  | 635.565 | 490  | 394 | yeast MCM (licensing factor) related family member (mcm-3) |
| Locus_1770_Transcript_1/1_Conf_1.000  | 3320 | 20 | 0         | NP_494782.1    | 64  | 870.537 | 1102 | 716 | hypothetical protein ZK430.1                               |
| Locus_17700_Transcript_1/1_Conf_1.000 | 189  | 0  |           |                |     |         |      |     |                                                            |
| Locus_17701_Transcript_1/1_Conf_1.000 | 189  | 20 | 2.38E-27  | XP_002638537.1 | 96  | 125.176 | 62   | 60  | Hypothetical protein CBG05572                              |
| Locus_17702_Transcript_1/1_Conf_1.000 | 408  | 1  | 2.51E-05  | XP_002639683.1 | 71  | 51.9878 | 38   | 27  | C. briggsae CBR-GEI-11 protein                             |
| Locus_17703_Transcript_1/1_Conf_1.000 | 329  | 0  |           |                |     |         |      |     |                                                            |
| Locus_17704_Transcript_1/1_Conf_1.000 | 377  | 9  | 6.20E-36  | XP_002638473.1 | 80  | 153.68  | 124  | 100 | Hypothetical protein CBG12901                              |
| Locus_17705_Transcript_1/1_Conf_1.000 | 562  | 3  | 6.32E-18  | NP_510840.2    | 74  | 94.3597 | 79   | 59  | hypothetical protein F31A3.5                               |
| Locus_17706_Transcript_1/1_Conf_1.000 | 237  | 0  |           |                |     |         |      |     |                                                            |
| Locus_17707_Transcript_1/1_Conf_1.000 | 426  | 0  |           |                |     |         |      |     |                                                            |
| Locus_17708_Transcript_1/1_Conf_1.000 | 172  | 20 | 1.16E-26  | XP_002834627.1 | 100 | 122.865 | 57   | 57  | PREDICTED: collagen alpha-2(VI) chain-like, partial        |
| Locus_17709_Transcript_1/1_Conf_1.000 | 661  | 20 | 1.06E-101 | XP_002647328.1 | 91  | 373.244 | 219  | 200 | C. briggsae CBR-EGL-8 protein                              |

|                                       |     |    |           |                |    |         |     |     |                                                     |
|---------------------------------------|-----|----|-----------|----------------|----|---------|-----|-----|-----------------------------------------------------|
| Locus_1771_Transcript_1/1_Conf_1.000  | 329 | 0  |           |                |    |         |     |     |                                                     |
| Locus_17710_Transcript_1/2_Conf_1.000 | 356 | 20 | 1.58E-15  | ADD13547.1     | 77 | 85.8853 | 67  | 52  | Inositol triphosphate receptor protein 1, isoform h |
| Locus_17710_Transcript_2/2_Conf_1.000 | 250 | 0  |           |                |    |         |     |     |                                                     |
| Locus_17711_Transcript_1/1_Conf_1.000 | 151 | 3  | 3.83E-09  | XP_002637315.1 | 84 | 64.6994 | 50  | 42  | Hypothetical protein CBG19004                       |
| Locus_17712_Transcript_1/2_Conf_1.000 | 553 | 2  | 1.57E-05  | XP_002642641.1 | 46 | 53.1434 | 158 | 74  | C. briggsae CBR-LIN-13 protein                      |
| Locus_17712_Transcript_2/2_Conf_1.000 | 547 | 2  | 1.51E-05  | XP_002642641.1 | 46 | 53.1434 | 158 | 74  | C. briggsae CBR-LIN-13 protein                      |
| Locus_17713_Transcript_1/1_Conf_1.000 | 204 | 20 | 5.41E-16  | ZP_03131362.1  | 91 | 87.4261 | 46  | 42  | protein of unknown function DUF255                  |
| Locus_17714_Transcript_1/1_Conf_1.000 | 771 | 20 | 1.25E-100 | XP_002631092.1 | 83 | 370.163 | 253 | 210 | Hypothetical protein CBG02865                       |
| Locus_17715_Transcript_1/1_Conf_1.000 | 223 | 0  |           |                |    |         |     |     |                                                     |
| Locus_17716_Transcript_1/1_Conf_1.000 | 510 | 20 | 1.54E-77  | XP_001897606.1 | 89 | 291.967 | 169 | 151 | Adaptin or adaptin-related protein protein 7        |
| Locus_17717_Transcript_1/1_Conf_1.000 | 200 | 0  |           |                |    |         |     |     |                                                     |



|                                       |      |    |           |                |     |         |     |     |                                                                         |
|---------------------------------------|------|----|-----------|----------------|-----|---------|-----|-----|-------------------------------------------------------------------------|
| Locus_17718_Transcript_1/1_Conf_1.000 | 159  | 0  |           |                |     |         |     |     |                                                                         |
| Locus_17719_Transcript_1/1_Conf_1.000 | 269  | 16 | 2.88E-17  | XP_002634836.1 | 65  | 91.6633 | 89  | 58  | C. briggsae CBR-JTR-1 protein                                           |
| Locus_1772_Transcript_1/1_Conf_1.000  | 1975 | 20 | 1.59E-138 | XP_002643974.1 | 71  | 498.049 | 481 | 344 | Hypothetical protein CBG17350                                           |
| Locus_17720_Transcript_1/1_Conf_1.000 | 246  | 20 | 5.00E-30  | EFO23722.1     | 92  | 134.035 | 81  | 75  | hypothetical protein LOAG_04763                                         |
| Locus_17721_Transcript_1/1_Conf_1.000 | 442  | 20 | 2.20E-65  | XP_002643286.1 | 84  | 251.521 | 146 | 124 | Hypothetical protein CBG08162                                           |
| Locus_17722_Transcript_1/1_Conf_1.000 | 319  | 0  |           |                |     |         |     |     |                                                                         |
| Locus_17723_Transcript_1/1_Conf_1.000 | 186  | 0  |           |                |     |         |     |     |                                                                         |
| Locus_17724_Transcript_1/1_Conf_1.000 | 234  | 20 | 2.68E-39  | ACZ64268.1     | 93  | 164.851 | 77  | 72  | astacin metalloprotease a                                               |
| Locus_17725_Transcript_1/1_Conf_1.000 | 280  | 0  |           |                |     |         |     |     |                                                                         |
| Locus_17726_Transcript_1/1_Conf_1.000 | 423  | 4  | 4.92E-25  | NP_501044.1    | 81  | 117.472 | 69  | 56  | hypothetical protein C17H12.11                                          |
| Locus_17727_Transcript_1/1_Conf_1.000 | 167  | 0  |           |                |     |         |     |     |                                                                         |
| Locus_17728_Transcript_1/1_Conf_1.000 | 1300 | 5  | 6.73E-73  | XP_001901141.1 | 57  | 279.256 | 375 | 216 | hypothetical protein Bm1_48395                                          |
| Locus_17729_Transcript_1/1_Conf_1.000 | 492  | 20 | 1.20E-23  | AAK31527.3     | 67  | 112.849 | 139 | 94  | Neuronal symmetry protein 1, partially confirmed by transcript evidence |
| Locus_1773_Transcript_1/1_Conf_1.000  | 771  | 20 | 5.51E-40  | NP_001122441.1 | 60  | 168.703 | 230 | 138 | hypothetical protein F02E9.10                                           |
| Locus_17730_Transcript_1/1_Conf_1.000 | 540  | 20 | 2.16E-17  | XP_002631113.1 | 55  | 92.4337 | 158 | 88  | C. briggsae CBR-ARS-1 protein                                           |
| Locus_17731_Transcript_1/1_Conf_1.000 | 330  | 5  | 1.86E-16  | NP_001122928.1 | 90  | 88.9669 | 54  | 49  | hypothetical protein F23H12.3                                           |
| Locus_17732_Transcript_1/1_Conf_1.000 | 153  | 0  |           |                |     |         |     |     |                                                                         |
| Locus_17733_Transcript_1/1_Conf_1.000 | 216  | 0  |           |                |     |         |     |     |                                                                         |
| Locus_17734_Transcript_1/1_Conf_1.000 | 272  | 20 | 4.01E-19  | XP_001897385.1 | 70  | 97.8265 | 91  | 64  | hypothetical protein Bm1_29715                                          |
| Locus_17735_Transcript_1/1_Conf_1.000 | 160  | 1  | 4.79E-04  | XP_001893275.1 | 70  | 47.7506 | 48  | 34  | LMBR1-like conserved region family protein                              |
| Locus_17736_Transcript_1/1_Conf_1.000 | 258  | 0  |           |                |     |         |     |     |                                                                         |
| Locus_17737_Transcript_1/1_Conf_1.000 | 359  | 0  |           |                |     |         |     |     |                                                                         |
| Locus_17738_Transcript_1/1_Conf_1.000 | 374  | 0  |           |                |     |         |     |     |                                                                         |
| Locus_17739_Transcript_1/1_Conf_1.000 | 145  | 0  |           |                |     |         |     |     |                                                                         |
| Locus_1774_Transcript_1/1_Conf_1.000  | 988  | 20 | 3.94E-45  | ADN00783.1     | 100 | 186.422 | 96  | 96  | collagen protein                                                        |

|                                       |      |    |           |                |    |         |     |     |                                                                               |
|---------------------------------------|------|----|-----------|----------------|----|---------|-----|-----|-------------------------------------------------------------------------------|
| Locus_17740_Transcript_1/1_Conf_1.000 | 506  | 20 | 3.40E-29  | NP_492763.1    | 62 | 131.339 | 136 | 85  | hypothetical protein F25H2.7                                                  |
| Locus_17741_Transcript_1/1_Conf_1.000 | 447  | 20 | 3.09E-11  | XP_002600120.1 | 54 | 71.633  | 147 | 80  | hypothetical protein BRAFLDRAFT_118238                                        |
| Locus_17742_Transcript_1/1_Conf_1.000 | 194  | 0  |           |                |    |         |     |     |                                                                               |
| Locus_17743_Transcript_1/1_Conf_1.000 | 254  | 20 | 4.37E-21  | NP_001129835.1 | 96 | 104.375 | 78  | 75  | Novel Channel type/putative Nematode<br>CALcium channel family member (nca-2) |
| Locus_17744_Transcript_1/1_Conf_1.000 | 234  | 0  |           |                |    |         |     |     |                                                                               |
| Locus_17745_Transcript_1/1_Conf_1.000 | 150  | 0  |           |                |    |         |     |     |                                                                               |
| Locus_17746_Transcript_1/1_Conf_1.000 | 381  |    |           |                |    |         |     |     |                                                                               |
| Locus_17747_Transcript_1/1_Conf_1.000 | 256  | 20 | 1.83E-19  | NP_001024053.1 | 86 | 98.9821 | 60  | 52  | UNCoordinated family member (unc-70)                                          |
| Locus_17748_Transcript_1/1_Conf_1.000 | 310  | 20 | 4.54E-07  | YP_001701724.1 | 51 | 57.7658 | 101 | 52  | hypothetical protein MAB_0978                                                 |
| Locus_17749_Transcript_1/1_Conf_1.000 | 220  | 0  |           |                |    |         |     |     |                                                                               |
| Locus_1775_Transcript_1/1_Conf_1.000  | 1334 | 20 | 1.49E-115 | XP_002641312.1 | 85 | 421.009 | 288 | 245 | C. briggsae CBR-UNC-50 protein                                                |
| Locus_17750_Transcript_1/1_Conf_1.000 | 343  | 0  |           |                |    |         |     |     |                                                                               |
| Locus_17751_Transcript_1/1_Conf_1.000 | 180  | 0  |           |                |    |         |     |     |                                                                               |

|                                       |     |    |          |                |     |         |     |     |                                                            |
|---------------------------------------|-----|----|----------|----------------|-----|---------|-----|-----|------------------------------------------------------------|
| Locus_17752_Transcript_1/1_Conf_1.000 | 331 | 20 | 1.02E-14 | AAC28140.1     | 59  | 59.6918 | 69  | 41  | mariner transposase                                        |
| Locus_17753_Transcript_1/1_Conf_1.000 | 307 | 2  | 6.59E-06 | NP_499757.2    | 71  | 53.9138 | 38  | 27  | hypothetical protein T03F6.4                               |
| Locus_17754_Transcript_1/1_Conf_1.000 | 194 | 0  |          |                |     |         |     |     |                                                            |
| Locus_17755_Transcript_1/1_Conf_1.000 | 301 | 0  |          |                |     |         |     |     |                                                            |
| Locus_17756_Transcript_1/1_Conf_1.000 | 219 | 2  | 5.16E-22 | NP_001024385.1 | 85  | 107.457 | 68  | 58  | hypothetical protein C09F12.3                              |
| Locus_17757_Transcript_1/1_Conf_1.000 | 576 | 0  |          |                |     |         |     |     |                                                            |
| Locus_17758_Transcript_1/1_Conf_1.000 | 369 | 20 | 3.56E-23 | XP_002634520.1 | 66  | 111.309 | 99  | 66  | Hypothetical protein CBG08313                              |
| Locus_17759_Transcript_1/1_Conf_1.000 | 270 | 0  |          |                |     |         |     |     |                                                            |
| Locus_1776_Transcript_1/1_Conf_1.000  | 532 | 1  | 5.89E-04 | NP_999656.1    | 61  | 47.7506 | 65  | 40  | kinesin-like protein KIF15                                 |
| Locus_17760_Transcript_1/1_Conf_1.000 | 449 | 5  | 7.12E-08 | ABB53347.1     | 52  | 60.4622 | 97  | 51  | secreted protein 5 precursor                               |
| Locus_17761_Transcript_1/1_Conf_1.000 | 249 | 0  |          |                |     |         |     |     |                                                            |
| Locus_17762_Transcript_1/1_Conf_1.000 | 402 | 20 | 3.99E-51 | XP_002914026.1 | 100 | 204.142 | 117 | 117 | PREDICTED: polyadenylate-binding protein 1-like            |
| Locus_17763_Transcript_1/1_Conf_1.000 | 287 | 0  |          |                |     |         |     |     |                                                            |
| Locus_17764_Transcript_1/1_Conf_1.000 | 441 | 20 | 2.53E-37 | NP_505424.2    | 82  | 158.303 | 102 | 84  | TransThyretin-Related family domain family member (ttr-40) |
| Locus_17765_Transcript_1/1_Conf_1.000 | 239 | 2  | 8.67E-06 | ADM53755.1     | 55  | 53.5286 | 74  | 41  | Hypothetical protein ZK1127.13                             |

|                                       |      |    |           |                |     |         |     |     |                                                             |
|---------------------------------------|------|----|-----------|----------------|-----|---------|-----|-----|-------------------------------------------------------------|
| Locus_17766_Transcript_1/1_Conf_1.000 | 550  | 20 | 2.50E-48  | ACD47109.1     | 93  | 195.282 | 126 | 118 | profilin                                                    |
| Locus_17767_Transcript_1/2_Conf_1.000 | 415  | 20 | 7.41E-42  | ACK57928.1     | 78  | 173.326 | 133 | 105 | microsomal aminopeptidase H11                               |
| Locus_17767_Transcript_2/2_Conf_1.000 | 546  | 20 | 1.81E-59  | AAV68383.1     | 81  | 232.261 | 181 | 148 | antigen h11                                                 |
| Locus_17768_Transcript_1/1_Conf_1.000 | 307  | 20 | 4.36E-50  | XP_002825166.1 | 100 | 200.675 | 100 | 100 | PREDICTED: cytoplasmic dynein 1 heavy chain 1-like, partial |
| Locus_17769_Transcript_1/1_Conf_1.000 | 175  | 0  |           |                |     |         |     |     |                                                             |
| Locus_1777_Transcript_1/2_Conf_1.000  | 1187 | 20 | 2.61E-121 | NP_497799.1    | 94  | 439.884 | 242 | 228 | MuSashI (fly neural) family member (msi-1)                  |
| Locus_1777_Transcript_2/2_Conf_1.000  | 1188 | 20 | 2.62E-121 | NP_497799.1    | 94  | 439.884 | 242 | 228 | MuSashI (fly neural) family member (msi-1)                  |
| Locus_17770_Transcript_1/1_Conf_1.000 | 141  | 0  |           |                |     |         |     |     |                                                             |
| Locus_17771_Transcript_1/1_Conf_1.000 | 712  | 0  |           |                |     |         |     |     |                                                             |
| Locus_17772_Transcript_1/1_Conf_1.000 | 633  | 3  | 2.99E-10  | XP_002637670.1 | 65  | 69.3218 | 67  | 44  | C. briggsae CBR-RDE-1 protein                               |
| Locus_17773_Transcript_1/1_Conf_1.000 | 1214 | 4  | 1.10E-106 | NP_501362.2    | 76  | 391.349 | 357 | 272 | hypothetical protein F42G8.5                                |

|                                       |     |    |          |                |    |         |     |     |                                                          |
|---------------------------------------|-----|----|----------|----------------|----|---------|-----|-----|----------------------------------------------------------|
| Locus_17774_Transcript_1/1_Conf_1.000 | 213 | 3  | 1.56E-07 | NP_491050.3    | 56 | 59.3066 | 74  | 42  | InTestinal Neurexin-like family member (itx-1)           |
| Locus_17775_Transcript_1/1_Conf_1.000 | 159 | 0  |          |                |    |         |     |     |                                                          |
| Locus_17776_Transcript_1/1_Conf_1.000 | 188 | 20 | 8.21E-28 | NP_496814.1    | 98 | 126.716 | 62  | 61  | Member of AAA family binding CED-4 family member (mac-1) |
| Locus_17777_Transcript_1/1_Conf_1.000 | 621 | 20 | 3.77E-63 | XP_002644784.1 | 73 | 244.973 | 194 | 142 | Hypothetical protein CBG14799                            |
| Locus_17778_Transcript_1/1_Conf_1.000 | 445 | 1  | 8.19E-04 | XP_002635917.1 | 56 | 46.9802 | 69  | 39  | Hypothetical protein CBG01142                            |
| Locus_17779_Transcript_1/1_Conf_1.000 | 391 | 0  |          |                |    |         |     |     |                                                          |
| Locus_1778_Transcript_1/1_Conf_1.000  | 524 | 20 | 2.62E-38 | EFO22634.1     | 91 | 161.77  | 95  | 87  | fibronectin type III domain-containing protein           |
| Locus_17780_Transcript_1/1_Conf_1.000 | 205 | 0  |          |                |    |         |     |     |                                                          |
| Locus_17781_Transcript_1/1_Conf_1.000 | 173 | 0  |          |                |    |         |     |     |                                                          |
| Locus_17782_Transcript_1/1_Conf_1.000 | 924 | 14 | 2.38E-33 | NP_500590.2    | 53 | 147.132 | 291 | 155 | hypothetical protein F28E10.4                            |
| Locus_17783_Transcript_1/1_Conf_1.000 | 636 | 20 | 3.75E-77 | NP_490992.2    | 79 | 291.582 | 211 | 168 | hypothetical protein Y23H5B.4                            |
| Locus_17784_Transcript_1/1_Conf_1.000 | 691 | 20 | 4.08E-86 | XP_002644575.1 | 85 | 321.627 | 204 | 175 | Hypothetical protein CBG14518                            |
| Locus_17785_Transcript_1/1_Conf_1.000 | 483 | 20 | 5.10E-38 | XP_001896380.1 | 76 | 160.614 | 164 | 125 | XAP5 protein                                             |
| Locus_17786_Transcript_1/1_Conf_1.000 | 200 | 0  |          |                |    |         |     |     |                                                          |
| Locus_17787_Transcript_1/1_Conf_1.000 | 308 | 0  |          |                |    |         |     |     |                                                          |
| Locus_17788_Transcript_1/1_Conf_1.000 | 277 | 4  | 1.37E-11 | XP_001900186.1 | 62 | 72.7886 | 94  | 59  | hypothetical protein                                     |
| Locus_17789_Transcript_1/1_Conf_1.000 | 238 | 0  |          |                |    |         |     |     |                                                          |
| Locus_1779_Transcript_1/1_Conf_1.000  | 274 | 4  | 8.91E-11 | NP_492777.1    | 70 | 70.0922 | 71  | 50  | hypothetical protein C43H8.2                             |
| Locus_17790_Transcript_1/1_Conf_1.000 | 166 | 0  |          |                |    |         |     |     |                                                          |
| Locus_17791_Transcript_1/1_Conf_1.000 | 444 | 20 | 1.17E-26 | XP_002640105.1 | 63 | 122.865 | 149 | 95  | C. briggsae CBR-MUT-2 protein                            |
| Locus_17792_Transcript_1/1_Conf_1.000 | 340 | 20 | 2.91E-38 | NP_497918.1    | 81 | 161.384 | 112 | 91  | UDP-GlucuronosylTransferase family member (ugt-62)       |
| Locus_17793_Transcript_1/1_Conf_1.000 | 488 | 20 | 4.44E-42 | NP_502445.1    | 71 | 174.096 | 160 | 114 | hypothetical protein M02B1.3                             |

|                                       |      |    |          |                |    |         |     |     |                                     |
|---------------------------------------|------|----|----------|----------------|----|---------|-----|-----|-------------------------------------|
| Locus_17794_Transcript_1/1_Conf_1.000 | 310  | 20 | 3.80E-46 | XP_002643972.1 | 95 | 187.578 | 103 | 98  | C. briggsae CBR-SLO-2 protein       |
| Locus_17795_Transcript_1/1_Conf_1.000 | 178  | 20 | 5.53E-21 | NP_502367.2    | 89 | 103.99  | 59  | 53  | hypothetical protein F28D1.9        |
| Locus_17796_Transcript_1/1_Conf_1.000 | 213  | 1  | 5.03E-06 | NP_505001.1    | 64 | 54.299  | 64  | 41  | hypothetical protein T05B11.1       |
| Locus_17797_Transcript_1/1_Conf_1.000 | 469  | 20 | 9.28E-16 | XP_002129449.1 | 50 | 86.6557 | 160 | 80  | PREDICTED: hypothetical protein     |
| Locus_17798_Transcript_1/1_Conf_1.000 | 399  | 20 | 1.02E-46 | NP_497261.2    | 88 | 189.504 | 114 | 101 | SyNapTotagmin family member (snt-2) |
| Locus_17799_Transcript_1/1_Conf_1.000 | 289  | 9  | 2.82E-12 | EFO27735.1     | 58 | 75.0998 | 97  | 57  | leucine Rich Repeat family protein  |
| Locus_178_Transcript_1/2_Conf_1.000   | 1557 | 20 | 0        | NP_491955.1    | 94 | 790.801 | 437 | 414 | hypothetical protein K02F2.2        |

|                                       |      |    |          |                |     |         |     |     |                                                            |
|---------------------------------------|------|----|----------|----------------|-----|---------|-----|-----|------------------------------------------------------------|
| Locus_178_Transcript_2/2_Conf_1.000   | 1557 | 20 | 0        | NP_491955.1    | 94  | 790.801 | 437 | 414 | hypothetical protein K02F2.2                               |
| Locus_1780_Transcript_1/1_Conf_1.000  | 1590 | 20 | 3.63E-26 | XP_002130953.1 | 44  | 124.405 | 547 | 241 | PREDICTED: similar to chromosome 10 open reading frame 119 |
| Locus_17800_Transcript_1/1_Conf_1.000 | 240  | 0  |          |                |     |         |     |     |                                                            |
| Locus_17801_Transcript_1/1_Conf_1.000 | 247  | 9  | 3.25E-21 | NP_871810.1    | 92  | 104.76  | 56  | 52  | HAIF transporter (PGP related) family member (haf-9)       |
| Locus_17802_Transcript_1/1_Conf_1.000 | 170  | 0  |          |                |     |         |     |     |                                                            |
| Locus_17803_Transcript_1/1_Conf_1.000 | 419  | 14 | 1.45E-16 | NP_510686.4    | 61  | 89.3521 | 112 | 69  | hypothetical protein F59C12.3                              |
| Locus_17804_Transcript_1/1_Conf_1.000 | 341  | 20 | 4.32E-58 | XP_002760341.1 | 100 | 227.254 | 110 | 110 | PREDICTED: glutamine synthetase                            |
| Locus_17805_Transcript_1/1_Conf_1.000 | 353  | 5  | 8.68E-22 | XP_002631039.1 | 73  | 106.686 | 82  | 60  | Hypothetical protein CBG02799                              |
| Locus_17806_Transcript_1/2_Conf_1.000 | 334  | 20 | 5.19E-27 | AAN11401.1     | 69  | 124.02  | 108 | 75  | metalloprotease 1 precursor                                |
| Locus_17806_Transcript_2/2_Conf_1.000 | 352  | 20 | 1.25E-28 | AAN11401.1     | 68  | 129.413 | 114 | 78  | metalloprotease 1 precursor                                |
| Locus_17807_Transcript_1/1_Conf_1.000 | 691  | 0  |          |                |     |         |     |     |                                                            |
| Locus_17808_Transcript_1/1_Conf_1.000 | 912  | 2  | 1.97E-32 | CAR63629.1     | 57  | 144.05  | 259 | 150 | hypothetical protein                                       |
| Locus_17809_Transcript_1/1_Conf_1.000 | 426  | 20 | 2.87E-25 | NP_872207.1    | 61  | 118.242 | 150 | 92  | hypothetical protein Y69H2.14                              |
| Locus_1781_Transcript_1/1_Conf_1.000  | 230  | 0  |          |                |     |         |     |     |                                                            |

|                                       |      |    |          |                |     |         |     |     |                                                                     |
|---------------------------------------|------|----|----------|----------------|-----|---------|-----|-----|---------------------------------------------------------------------|
| Locus_17810_Transcript_1/1_Conf_1.000 | 323  | 20 | 1.29E-41 | EFO20030.1     | 89  | 172.555 | 107 | 96  | toll and interleukin 1 receptor domain-containing protein isoform f |
| Locus_17811_Transcript_1/2_Conf_1.000 | 327  | 20 | 5.23E-27 | XP_002640811.1 | 71  | 124.02  | 108 | 77  | Hypothetical protein CBG15695                                       |
| Locus_17811_Transcript_2/2_Conf_1.000 | 327  | 20 | 5.23E-27 | XP_002640811.1 | 71  | 124.02  | 108 | 77  | Hypothetical protein CBG15695                                       |
| Locus_17812_Transcript_1/1_Conf_1.000 | 137  | 0  |          |                |     |         |     |     |                                                                     |
| Locus_17813_Transcript_1/1_Conf_1.000 | 162  | 0  |          |                |     |         |     |     |                                                                     |
| Locus_17814_Transcript_1/1_Conf_1.000 | 224  | 0  |          |                |     |         |     |     |                                                                     |
| Locus_17815_Transcript_1/1_Conf_1.000 | 318  | 0  |          |                |     |         |     |     |                                                                     |
| Locus_17816_Transcript_1/1_Conf_1.000 | 527  | 0  |          |                |     |         |     |     |                                                                     |
| Locus_17817_Transcript_1/1_Conf_1.000 | 304  | 0  |          |                |     |         |     |     |                                                                     |
| Locus_17818_Transcript_1/1_Conf_1.000 | 238  | 0  |          |                |     |         |     |     |                                                                     |
| Locus_17819_Transcript_1/1_Conf_1.000 | 239  | 0  |          |                |     |         |     |     |                                                                     |
| Locus_1782_Transcript_1/1_Conf_1.000  | 404  | 20 | 1.15E-74 | AAH86899.1     | 100 | 282.337 | 133 | 133 | Ribosomal protein S8                                                |
| Locus_17820_Transcript_1/1_Conf_1.000 | 352  | 20 | 2.61E-26 | NP_502060.1    | 73  | 121.709 | 108 | 79  | TransThyretin-Related family domain family member (ttr-16)          |
| Locus_17821_Transcript_1/1_Conf_1.000 | 376  | 0  |          |                |     |         |     |     |                                                                     |
| Locus_17822_Transcript_1/1_Conf_1.000 | 402  | 20 | 8.04E-52 | NP_510711.2    | 86  | 206.453 | 135 | 117 | AMP-Activated Kinase family member (aak-2)                          |
| Locus_17823_Transcript_1/1_Conf_1.000 | 265  | 0  |          |                |     |         |     |     |                                                                     |
| Locus_17824_Transcript_1/1_Conf_1.000 | 142  | 0  |          |                |     |         |     |     |                                                                     |
| Locus_17825_Transcript_1/1_Conf_1.000 | 191  | 0  |          |                |     |         |     |     |                                                                     |
| Locus_17826_Transcript_1/1_Conf_1.000 | 755  | 4  | 1.18E-15 | NP_509620.2    | 48  | 87.8113 | 175 | 84  | hypothetical protein C11E4.6                                        |
| Locus_17827_Transcript_1/1_Conf_1.000 | 412  | 1  | 2.66E-23 | NP_502795.2    | 72  | 111.694 | 90  | 65  | Homolog of Hedgehog AcylTransferase family member (hhat-2)          |
| Locus_17828_Transcript_1/1_Conf_1.000 | 181  | 0  |          |                |     |         |     |     |                                                                     |
| Locus_17829_Transcript_1/1_Conf_1.000 | 361  | 20 | 2.19E-09 | EFN83858.1     | 75  | 65.4698 | 52  | 39  | Histone-lysine N-methyltransferase SETMAR                           |
| Locus_1783_Transcript_1/1_Conf_1.000  | 1706 | 20 | 0        | NP_001022078.1 | 91  | 894.419 | 524 | 479 | ALdehyde deHydrogenase family member (alh-8)                        |
| Locus_17830_Transcript_1/1_Conf_1.000 | 559  | 20 | 3.87E-36 | EFO24024.1     | 97  | 154.836 | 81  | 79  | CMGC/DYRK/HIPK protein kinase                                       |
| Locus_17831_Transcript_1/1_Conf_1.000 | 202  | 0  |          |                |     |         |     |     |                                                                     |



|                                       |     |    |          |                |     |         |     |     |                                   |
|---------------------------------------|-----|----|----------|----------------|-----|---------|-----|-----|-----------------------------------|
| Locus_17832_Transcript_1/1_Conf_1.000 | 171 | 20 | 6.58E-22 | XP_002823622.1 | 100 | 107.071 | 48  | 48  | PREDICTED: decorin-like isoform 1 |
| Locus_17833_Transcript_1/1_Conf_1.000 | 171 | 0  |          |                |     |         |     |     |                                   |
| Locus_17834_Transcript_1/1_Conf_1.000 | 144 | 20 | 1.46E-08 | BAA95178.1     | 71  | 62.7734 | 49  | 35  | hgPTR2Ab                          |
| Locus_17835_Transcript_1/1_Conf_1.000 | 547 | 20 | 3.21E-48 | NP_490889.1    | 82  | 194.897 | 140 | 115 | hypothetical protein Y71G12B.10   |
| Locus_17836_Transcript_1/1_Conf_1.000 | 156 | 0  |          |                |     |         |     |     |                                   |
| Locus_17837_Transcript_1/1_Conf_1.000 | 155 | 2  | 1.89E-08 | NP_495090.1    | 82  | 62.3882 | 50  | 41  | hypothetical protein C17G10.7     |
| Locus_17838_Transcript_1/1_Conf_1.000 | 466 | 20 | 4.04E-27 | NP_001021801.1 | 87  | 124.405 | 74  | 65  | hypothetical protein Y6B3B.5      |

|                                       |      |    |           |                |     |         |     |     |                                                                                       |
|---------------------------------------|------|----|-----------|----------------|-----|---------|-----|-----|---------------------------------------------------------------------------------------|
| Locus_17839_Transcript_1/1_Conf_1.000 | 1289 | 20 | 2.39E-147 | NP_740931.2    | 79  | 526.554 | 433 | 345 | hypothetical protein Y105E8A.3                                                        |
| Locus_1784_Transcript_1/1_Conf_1.000  | 2433 | 20 | 0         | XP_002647083.1 | 86  | 1048.88 | 678 | 584 | Hypothetical protein CBG03613                                                         |
| Locus_17840_Transcript_1/1_Conf_1.000 | 158  | 0  |           |                |     |         |     |     |                                                                                       |
| Locus_17841_Transcript_1/1_Conf_1.000 | 342  | 20 | 1.07E-19  | XP_001649524.1 | 70  | 99.7525 | 103 | 73  | multiple ankyrin repeats single kh domain protein                                     |
| Locus_17842_Transcript_1/1_Conf_1.000 | 670  | 20 | 5.32E-64  | NP_001041144.1 | 83  | 248.054 | 171 | 143 | hypothetical protein H27A22.1                                                         |
| Locus_17843_Transcript_1/1_Conf_1.000 | 383  | 20 | 1.97E-42  | NP_492423.2    | 81  | 175.252 | 127 | 103 | FCP1 (yeast TFIIIF-interacting CTD phosphatase subunit) homolog family member (fcp-1) |
| Locus_17844_Transcript_1/1_Conf_1.000 | 199  | 20 | 1.26E-12  | NP_008817.1    | 100 | 76.2554 | 38  | 38  | ATP synthase subunit epsilon, mitochondrial                                           |
| Locus_17845_Transcript_1/1_Conf_1.000 | 502  | 20 | 1.71E-09  | XP_001635605.1 | 55  | 65.855  | 108 | 60  | predicted protein                                                                     |
| Locus_17846_Transcript_1/1_Conf_1.000 | 152  | 0  |           |                |     |         |     |     |                                                                                       |

|                                       |     |    |           |                |     |         |     |     |                                                               |
|---------------------------------------|-----|----|-----------|----------------|-----|---------|-----|-----|---------------------------------------------------------------|
| Locus_17847_Transcript_1/1_Conf_1.000 | 258 | 20 | 2.23E-17  | EAW98190.1     | 100 | 92.0485 | 38  | 38  | cytochrome c oxidase subunit VIa polypeptide 1, isoform CRA_a |
| Locus_17848_Transcript_1/1_Conf_1.000 | 351 | 20 | 1.05E-43  | XP_002640379.1 | 87  | 179.489 | 116 | 102 | C. briggsae CBR-OPT-3 protein                                 |
| Locus_17849_Transcript_1/1_Conf_1.000 | 277 | 0  |           |                |     |         |     |     |                                                               |
| Locus_1785_Transcript_1/1_Conf_1.000  | 162 | 2  | 1.34E-06  | NP_500107.1    | 70  | 56.225  | 54  | 38  | hypothetical protein Y41D4B.11                                |
| Locus_17850_Transcript_1/1_Conf_1.000 | 785 | 20 | 1.28E-124 | CBW48341.1     | 91  | 449.899 | 261 | 239 | Hypothetical protein C27H6.1c                                 |
| Locus_17851_Transcript_1/1_Conf_1.000 | 329 | 20 | 2.77E-28  | XP_002640543.1 | 77  | 128.257 | 94  | 73  | C. briggsae CBR-SCRM-1 protein                                |
| Locus_17852_Transcript_1/1_Conf_1.000 | 683 | 20 | 5.81E-29  | NP_501200.1    | 53  | 131.724 | 226 | 121 | ROD (Drosophila RoughDeal) homolog family member (rod-1)      |
| Locus_17853_Transcript_1/1_Conf_1.000 | 542 | 5  | 3.01E-19  | Q9NA80.3       | 54  | 98.5969 | 186 | 101 | Stress-activated map kinase-interacting protein 1 homolog     |
| Locus_17854_Transcript_1/1_Conf_1.000 | 329 | 20 | 3.51E-23  | NP_001041035.1 | 70  | 111.309 | 90  | 63  | Temporarily Assigned Gene name family member (tag-208)        |
| Locus_17855_Transcript_1/1_Conf_1.000 | 310 | 0  |           |                |     |         |     |     |                                                               |
| Locus_17856_Transcript_1/1_Conf_1.000 | 317 | 4  | 5.32E-19  | NP_492775.2    | 65  | 97.4413 | 105 | 69  | LAMinin related. See also lmb- family member (lam-3)          |
| Locus_17857_Transcript_1/1_Conf_1.000 | 562 | 20 | 2.75E-13  | EFO20139.1     | 88  | 78.9518 | 42  | 37  | peripheral plasma membrane protein CASK                       |
| Locus_17858_Transcript_1/1_Conf_1.000 | 646 | 4  | 4.05E-58  | CAR63536.1     | 71  | 228.409 | 185 | 132 | hypothetical protein                                          |
| Locus_17859_Transcript_1/1_Conf_1.000 | 241 | 20 | 2.86E-17  | EFO20687.1     | 83  | 91.6633 | 60  | 50  | hypothetical protein LOAG_07803                               |
| Locus_1786_Transcript_1/2_Conf_1.000  | 507 | 20 | 1.20E-13  | EFO25573.1     | 62  | 79.7221 | 150 | 94  | RING finger protein 20                                        |
| Locus_1786_Transcript_2/2_Conf_1.000  | 507 | 20 | 1.20E-13  | EFO25573.1     | 62  | 79.7221 | 150 | 94  | RING finger protein 20                                        |
| Locus_17860_Transcript_1/1_Conf_1.000 | 178 | 5  | 1.37E-11  | NP_510744.1    | 75  | 72.7886 | 60  | 45  | hypothetical protein F52G3.1                                  |

|                                       |      |    |          |                |    |         |     |     |                                                                          |
|---------------------------------------|------|----|----------|----------------|----|---------|-----|-----|--------------------------------------------------------------------------|
| Locus_17861_Transcript_1/1_Conf_1.000 | 284  | 16 | 2.11E-07 | XP_002643990.1 | 54 | 58.9214 | 95  | 52  | C. briggsae CBR-VHL-1 protein                                            |
| Locus_17862_Transcript_1/1_Conf_1.000 | 168  | 0  |          |                |    |         |     |     |                                                                          |
| Locus_17863_Transcript_1/1_Conf_1.000 | 242  | 2  | 3.62E-12 | NP_490776.2    | 75 | 74.7146 | 58  | 44  | hypothetical protein Y18H1A.9                                            |
| Locus_17864_Transcript_1/1_Conf_1.000 | 435  | 20 | 2.22E-70 | XP_002631669.1 | 95 | 268.085 | 144 | 137 | C. briggsae CBR-MOG-4 protein                                            |
| Locus_17865_Transcript_1/1_Conf_1.000 | 155  | 0  |          |                |    |         |     |     |                                                                          |
| Locus_17866_Transcript_1/1_Conf_1.000 | 153  | 0  |          |                |    |         |     |     |                                                                          |
| Locus_17867_Transcript_1/1_Conf_1.000 | 303  | 0  |          |                |    |         |     |     |                                                                          |
| Locus_17868_Transcript_1/1_Conf_1.000 | 671  | 0  |          |                |    |         |     |     |                                                                          |
| Locus_17869_Transcript_1/1_Conf_1.000 | 273  | 2  | 5.05E-14 | NP_502337.1    | 95 | 80.8777 | 42  | 40  | hypothetical protein C42C1.10                                            |
| Locus_1787_Transcript_1/1_Conf_1.000  | 1162 | 20 | 5.07E-29 | XP_001898268.1 | 53 | 133.265 | 214 | 114 | Eukaryotic-type carbonic anhydrase family protein                        |
| Locus_17870_Transcript_1/1_Conf_1.000 | 444  | 20 | 8.97E-35 | XP_001902632.1 | 80 | 149.828 | 130 | 104 | Arid4a protein                                                           |
| Locus_17871_Transcript_1/1_Conf_1.000 | 365  | 0  |          |                |    |         |     |     |                                                                          |
| Locus_17872_Transcript_1/1_Conf_1.000 | 260  | 0  |          |                |    |         |     |     |                                                                          |
| Locus_17873_Transcript_1/1_Conf_1.000 | 160  | 0  |          |                |    |         |     |     |                                                                          |
| Locus_17874_Transcript_1/1_Conf_1.000 | 253  | 0  |          |                |    |         |     |     |                                                                          |
| Locus_17875_Transcript_1/1_Conf_1.000 | 342  | 20 | 4.98E-17 | XP_002640122.1 | 75 | 90.8929 | 100 | 75  | C. briggsae CBR-NCBP-1 protein                                           |
| Locus_17876_Transcript_1/1_Conf_1.000 | 1007 | 20 | 5.07E-88 | CAA16382.5     | 63 | 328.946 | 360 | 228 | C. elegans protein Y45F10D.7, partially confirmed by transcript evidence |
| Locus_17877_Transcript_1/1_Conf_1.000 | 265  | 0  |          |                |    |         |     |     |                                                                          |

|                                       |     |    |           |                |     |         |     |     |                                                     |
|---------------------------------------|-----|----|-----------|----------------|-----|---------|-----|-----|-----------------------------------------------------|
| Locus_17878_Transcript_1/1_Conf_1.000 | 201 | 20 | 1.63E-20  | XP_002834351.1 | 100 | 102.449 | 43  | 43  | PREDICTED: hypothetical protein<br>LOC100438152     |
| Locus_17879_Transcript_1/2_Conf_1.000 | 521 | 0  |           |                |     |         |     |     |                                                     |
| Locus_17879_Transcript_2/2_Conf_1.000 | 521 | 0  |           |                |     |         |     |     |                                                     |
| Locus_1788_Transcript_1/1_Conf_1.000  | 962 | 20 | 2.24E-106 | EFO22691.1     | 83  | 389.808 | 291 | 244 | hypothetical protein LOAG_05796                     |
| Locus_17880_Transcript_1/1_Conf_1.000 | 494 | 4  | 2.75E-44  | CAR63586.1     | 90  | 181.415 | 102 | 92  | hypothetical protein                                |
| Locus_17881_Transcript_1/1_Conf_1.000 | 702 | 4  | 3.20E-33  | XP_002645822.1 | 56  | 145.976 | 235 | 133 | Hypothetical protein CBG07553                       |
| Locus_17882_Transcript_1/1_Conf_1.000 | 247 | 0  |           |                |     |         |     |     |                                                     |
| Locus_17883_Transcript_1/1_Conf_1.000 | 433 | 20 | 4.85E-33  | XP_002639673.1 | 76  | 144.05  | 145 | 111 | Hypothetical protein CBG12391                       |
| Locus_17884_Transcript_1/1_Conf_1.000 | 316 | 20 | 7.63E-42  | NP_501792.2    | 89  | 173.326 | 99  | 89  | abnormal GONad development family<br>member (gon-1) |

|                                       |     |    |          |                |    |         |     |     |                                                                         |
|---------------------------------------|-----|----|----------|----------------|----|---------|-----|-----|-------------------------------------------------------------------------|
| Locus_17885_Transcript_1/1_Conf_1.000 | 431 | 20 | 1.68E-25 | XP_001901813.1 | 64 | 119.013 | 117 | 75  | rad50 family protein                                                    |
| Locus_17886_Transcript_1/1_Conf_1.000 | 226 | 20 | 1.70E-33 | NP_001021324.1 | 97 | 145.591 | 74  | 72  | hypothetical protein C10G6.1                                            |
| Locus_17887_Transcript_1/1_Conf_1.000 | 402 | 0  |          |                |    |         |     |     |                                                                         |
| Locus_17888_Transcript_1/1_Conf_1.000 | 291 | 20 | 2.61E-34 | XP_001895873.1 | 80 | 148.288 | 96  | 77  | hypothetical protein                                                    |
| Locus_17889_Transcript_1/1_Conf_1.000 | 471 | 3  | 2.05E-31 | NP_741656.2    | 63 | 138.658 | 156 | 99  | hypothetical protein Y39B6A.41                                          |
| Locus_1789_Transcript_1/1_Conf_1.000  | 468 | 20 | 2.44E-24 | XP_002631600.1 | 58 | 115.161 | 153 | 89  | Hypothetical protein CBG20781                                           |
| Locus_17890_Transcript_1/1_Conf_1.000 | 204 | 2  | 4.59E-07 | XP_002634011.1 | 60 | 57.7658 | 65  | 39  | Hypothetical protein CBG01544                                           |
| Locus_17891_Transcript_1/1_Conf_1.000 | 274 | 5  | 1.98E-26 | NP_001024333.1 | 81 | 122.094 | 87  | 71  | Olfactory LeaRNing defective family member (olrn-1)                     |
| Locus_17892_Transcript_1/1_Conf_1.000 | 300 | 0  |          |                |    |         |     |     |                                                                         |
| Locus_17893_Transcript_1/1_Conf_1.000 | 253 | 0  |          |                |    |         |     |     |                                                                         |
| Locus_17894_Transcript_1/2_Conf_1.000 | 323 | 0  |          |                |    |         |     |     |                                                                         |
| Locus_17894_Transcript_2/2_Conf_1.000 | 204 | 0  |          |                |    |         |     |     |                                                                         |
| Locus_17895_Transcript_1/1_Conf_1.000 | 302 | 0  |          |                |    |         |     |     |                                                                         |
| Locus_17896_Transcript_1/1_Conf_1.000 | 706 | 20 | 3.62E-45 | CAA21636.3     | 91 | 185.652 | 124 | 113 | C. elegans protein Y38F1A.3, partially confirmed by transcript evidence |
| Locus_17897_Transcript_1/1_Conf_1.000 | 216 | 0  |          |                |    |         |     |     |                                                                         |
| Locus_17898_Transcript_1/1_Conf_1.000 | 360 | 0  |          |                |    |         |     |     |                                                                         |
| Locus_17899_Transcript_1/1_Conf_1.000 | 319 | 20 | 2.30E-22 | NP_492340.1    | 69 | 108.612 | 94  | 65  | hypothetical protein F43G9.10                                           |

|                                      |     |    |          |            |    |         |     |    |                                       |
|--------------------------------------|-----|----|----------|------------|----|---------|-----|----|---------------------------------------|
| Locus_179_Transcript_1/2_Conf_1.000  | 421 | 20 | 1.06E-43 | Q07160.1   | 81 | 179.489 | 119 | 97 | Heat shock protein homolog            |
| Locus_179_Transcript_2/2_Conf_1.000  | 182 | 20 | 1.90E-24 | CAG25499.1 | 95 | 115.546 | 60  | 57 | heat shock protein 20                 |
| Locus_1790_Transcript_1/6_Conf_0.350 | 442 | 20 | 2.01E-18 | AAD51334.1 | 70 | 95.5153 | 74  | 52 | Kunitz type serine protease inhibitor |
| Locus_1790_Transcript_2/6_Conf_0.350 | 400 | 20 | 2.01E-18 | AAD51334.1 | 70 | 95.5153 | 74  | 52 | Kunitz type serine protease inhibitor |
| Locus_1790_Transcript_3/6_Conf_0.200 | 676 | 20 | 4.51E-18 | AAD51334.1 | 70 | 95.5153 | 74  | 52 | Kunitz type serine protease inhibitor |
| Locus_1790_Transcript_4/6_Conf_0.200 | 676 | 20 | 4.51E-18 | AAD51334.1 | 70 | 95.5153 | 74  | 52 | Kunitz type serine protease inhibitor |
| Locus_1790_Transcript_5/6_Conf_0.400 | 556 | 20 | 2.80E-18 | AAD51334.1 | 70 | 95.5153 | 74  | 52 | Kunitz type serine protease inhibitor |

|                                       |     |    |           |                |    |         |     |     |                                                      |
|---------------------------------------|-----|----|-----------|----------------|----|---------|-----|-----|------------------------------------------------------|
| Locus_1790_Transcript_6/6_Conf_0.400  | 556 | 20 | 2.80E-18  | AAD51334.1     | 70 | 95.5153 | 74  | 52  | Kunitz type serine protease inhibitor                |
| Locus_17900_Transcript_1/1_Conf_1.000 | 566 | 2  | 4.77E-13  | XP_002640628.1 | 73 | 78.1814 | 57  | 42  | C. briggsae CBR-EAT-18 protein                       |
| Locus_17901_Transcript_1/1_Conf_1.000 | 157 | 1  | 3.33E-05  | XP_002637780.1 | 68 | 51.6026 | 50  | 34  | Hypothetical protein CBG04563                        |
| Locus_17902_Transcript_1/1_Conf_1.000 | 368 | 14 | 4.09E-16  | XP_002415665.1 | 61 | 87.8113 | 118 | 72  | conserved hypothetical protein                       |
| Locus_17903_Transcript_1/1_Conf_1.000 | 370 | 5  | 3.68E-20  | NP_492775.2    | 75 | 101.293 | 84  | 63  | LAMinin related. See also lmb- family member (lam-3) |
| Locus_17904_Transcript_1/1_Conf_1.000 | 832 | 20 | 2.92E-69  | XP_002632892.1 | 70 | 266.159 | 297 | 208 | Hypothetical protein CBG15100                        |
| Locus_17905_Transcript_1/1_Conf_1.000 | 169 | 20 | 1.16E-18  | XP_002743627.1 | 87 | 96.2857 | 56  | 49  | PREDICTED: hypothetical protein LOC100405423         |
| Locus_17906_Transcript_1/1_Conf_1.000 | 310 | 1  | 1.91E-05  | EFO26102.1     | 46 | 52.373  | 101 | 47  | hypothetical protein LOAG_02385                      |
| Locus_17907_Transcript_1/1_Conf_1.000 | 274 | 0  |           |                |    |         |     |     |                                                      |
| Locus_17908_Transcript_1/1_Conf_1.000 | 565 | 20 | 2.36E-28  | XP_002642471.1 | 67 | 129.028 | 136 | 92  | Hypothetical protein CBG06887                        |
| Locus_17909_Transcript_1/1_Conf_1.000 | 135 | 0  |           |                |    |         |     |     |                                                      |
| Locus_1791_Transcript_1/1_Conf_1.000  | 290 | 20 | 2.39E-11  | NP_001122454.1 | 77 | 72.0182 | 48  | 37  | abnormal ThermoTaxis family member (ttx-7)           |
| Locus_17910_Transcript_1/1_Conf_1.000 | 935 | 20 | 4.02E-129 | XP_002634971.1 | 89 | 465.307 | 284 | 255 | Hypothetical protein CBG13507                        |
| Locus_17911_Transcript_1/1_Conf_1.000 | 229 | 0  |           |                |    |         |     |     |                                                      |
| Locus_17912_Transcript_1/1_Conf_1.000 | 214 | 0  |           |                |    |         |     |     |                                                      |
| Locus_17913_Transcript_1/1_Conf_1.000 | 597 | 0  |           |                |    |         |     |     |                                                      |
| Locus_17914_Transcript_1/4_Conf_0.625 | 490 | 0  |           |                |    |         |     |     |                                                      |
| Locus_17914_Transcript_2/4_Conf_0.625 | 490 | 0  |           |                |    |         |     |     |                                                      |
| Locus_17914_Transcript_3/4_Conf_0.625 | 497 | 0  |           |                |    |         |     |     |                                                      |
| Locus_17914_Transcript_4/4_Conf_0.625 | 497 | 0  |           |                |    |         |     |     |                                                      |



|                                       |      |    |          |                |    |         |     |     |                                                                    |
|---------------------------------------|------|----|----------|----------------|----|---------|-----|-----|--------------------------------------------------------------------|
| Locus_17915_Transcript_1/1_Conf_1.000 | 377  | 3  | 2.54E-05 | EFO27305.1     | 45 | 51.9878 | 127 | 58  | hypothetical protein LOAG_01169                                    |
| Locus_17916_Transcript_1/1_Conf_1.000 | 899  | 20 | 6.13E-39 | ABD39382.1     | 86 | 165.622 | 133 | 115 | putative galectin protein 140                                      |
| Locus_17917_Transcript_1/1_Conf_1.000 | 242  | 0  |          |                |    |         |     |     |                                                                    |
| Locus_17918_Transcript_1/1_Conf_1.000 | 559  | 20 | 1.23E-74 | XP_002630326.1 | 84 | 282.722 | 186 | 158 | Hypothetical protein CBG04253                                      |
| Locus_17919_Transcript_1/1_Conf_1.000 | 252  | 20 | 1.97E-13 | XP_002634749.1 | 67 | 78.9518 | 81  | 55  | Hypothetical protein CBG21079                                      |
| Locus_1792_Transcript_1/1_Conf_1.000  | 1361 | 5  | 6.18E-16 | XP_001896257.1 | 51 | 90.1225 | 193 | 100 | hypothetical protein Bm1_24000                                     |
| Locus_17920_Transcript_1/1_Conf_1.000 | 143  | 0  |          |                |    |         |     |     |                                                                    |
| Locus_17921_Transcript_1/1_Conf_1.000 | 159  | 3  | 7.90E-07 | XP_002637600.1 | 77 | 56.9954 | 53  | 41  | C. briggsae CBR-SULP-8 protein                                     |
| Locus_17922_Transcript_1/1_Conf_1.000 | 145  | 1  | 1.67E-04 | XP_001897983.1 | 68 | 49.2914 | 48  | 33  | RIKEN cDNA 2700097O09                                              |
| Locus_17923_Transcript_1/1_Conf_1.000 | 358  | 0  |          |                |    |         |     |     |                                                                    |
| Locus_17924_Transcript_1/1_Conf_1.000 | 183  | 0  |          |                |    |         |     |     |                                                                    |
| Locus_17925_Transcript_1/1_Conf_1.000 | 136  | 0  |          |                |    |         |     |     |                                                                    |
| Locus_17926_Transcript_1/1_Conf_1.000 | 142  | 0  |          |                |    |         |     |     |                                                                    |
| Locus_17927_Transcript_1/1_Conf_1.000 | 156  | 2  | 3.68E-04 | XP_001512989.1 | 57 | 48.1358 | 52  | 30  | PREDICTED: similar to protocadherin 19                             |
| Locus_17928_Transcript_1/1_Conf_1.000 | 775  | 20 | 1.78E-54 | EFO21392.1     | 69 | 216.853 | 230 | 159 | hypothetical protein LOAG_07098                                    |
| Locus_17929_Transcript_1/2_Conf_1.000 | 332  | 20 | 1.09E-16 | EFO13838.1     | 90 | 89.7373 | 64  | 58  | hypothetical protein LOAG_14688                                    |
| Locus_17929_Transcript_2/2_Conf_1.000 | 332  | 20 | 1.09E-16 | EFO13838.1     | 90 | 89.7373 | 64  | 58  | hypothetical protein LOAG_14688                                    |
| Locus_1793_Transcript_1/1_Conf_1.000  | 341  | 0  |          |                |    |         |     |     |                                                                    |
| Locus_17930_Transcript_1/1_Conf_1.000 | 150  | 18 | 2.74E-15 | NP_502587.2    | 89 | 85.1149 | 49  | 44  | Pelle/IL-1 receptor associated Kinase (IRAK) family member (pik-1) |
| Locus_17931_Transcript_1/1_Conf_1.000 | 505  | 15 | 3.77E-20 | EFO23262.1     | 60 | 101.293 | 116 | 70  | hypothetical protein LOAG_05225                                    |

|                                       |      |    |          |                |    |         |     |     |                                                                                                    |
|---------------------------------------|------|----|----------|----------------|----|---------|-----|-----|----------------------------------------------------------------------------------------------------|
| Locus_17932_Transcript_1/1_Conf_1.000 | 282  | 0  |          |                |    |         |     |     |                                                                                                    |
| Locus_17933_Transcript_1/1_Conf_1.000 | 445  | 20 | 2.18E-73 | XP_002638687.1 | 92 | 278.1   | 148 | 137 | Hypothetical protein CBG11882                                                                      |
| Locus_17934_Transcript_1/1_Conf_1.000 | 429  | 20 | 4.37E-66 | NP_001040875.1 | 91 | 253.832 | 143 | 131 | hypothetical protein T23G5.2                                                                       |
| Locus_17935_Transcript_1/1_Conf_1.000 | 134  | 0  |          |                |    |         |     |     |                                                                                                    |
| Locus_17936_Transcript_1/1_Conf_1.000 | 263  | 1  | 5.12E-14 | XP_001166450.1 | 84 | 80.8777 | 66  | 56  | PREDICTED: hypothetical protein                                                                    |
| Locus_17937_Transcript_1/1_Conf_1.000 | 276  | 0  |          |                |    |         |     |     |                                                                                                    |
| Locus_17938_Transcript_1/1_Conf_1.000 | 148  | 0  |          |                |    |         |     |     |                                                                                                    |
| Locus_17939_Transcript_1/1_Conf_1.000 | 260  | 5  | 6.71E-14 | CAA84706.3     | 63 | 80.4925 | 87  | 55  | C. elegans protein C38H2.1, partially confirmed by transcript evidence                             |
| Locus_1794_Transcript_1/1_Conf_1.000  | 1468 | 20 | 4.89E-22 | AAN05752.1     | 64 | 110.538 | 128 | 83  | heat shock protein 20                                                                              |
| Locus_17940_Transcript_1/1_Conf_1.000 | 591  | 0  |          |                |    |         |     |     |                                                                                                    |
| Locus_17941_Transcript_1/1_Conf_1.000 | 470  | 0  |          |                |    |         |     |     |                                                                                                    |
| Locus_17942_Transcript_1/1_Conf_1.000 | 158  | 0  |          |                |    |         |     |     |                                                                                                    |
| Locus_17943_Transcript_1/1_Conf_1.000 | 259  | 20 | 4.04E-35 | AAB37835.2     | 94 | 150.984 | 86  | 81  | Dnaj domain (prokaryotic heat shock protein) protein 9, partially confirmed by transcript evidence |
| Locus_17944_Transcript_1/1_Conf_1.000 | 665  | 20 | 3.18E-37 | XP_002639077.1 | 59 | 159.073 | 208 | 124 | Hypothetical protein CBG14895                                                                      |
| Locus_17945_Transcript_1/1_Conf_1.000 | 316  | 3  | 1.40E-27 | NP_507767.2    | 79 | 125.946 | 107 | 85  | hypothetical protein C14B4.2                                                                       |
| Locus_17946_Transcript_1/1_Conf_1.000 | 374  | 20 | 5.46E-32 | NP_001076652.1 | 94 | 140.584 | 74  | 70  | NOT-Like (yeast CCR4/NOT complex component) family member (ntl-3)                                  |
| Locus_17947_Transcript_1/1_Conf_1.000 | 276  | 5  | 1.79E-11 | XP_002630778.1 | 79 | 72.4034 | 44  | 35  | Hypothetical protein CBG02473                                                                      |
| Locus_17948_Transcript_1/1_Conf_1.000 | 200  | 0  |          |                |    |         |     |     |                                                                                                    |
| Locus_17949_Transcript_1/1_Conf_1.000 | 128  | 0  |          |                |    |         |     |     |                                                                                                    |
| Locus_1795_Transcript_1/1_Conf_1.000  | 799  | 20 | 6.53E-47 | EFO24294.1     | 62 | 191.815 | 253 | 157 | hypothetical protein LOAG_04191                                                                    |
| Locus_17950_Transcript_1/1_Conf_1.000 | 283  | 0  |          |                |    |         |     |     |                                                                                                    |
| Locus_17951_Transcript_1/1_Conf_1.000 | 636  | 0  |          |                |    |         |     |     |                                                                                                    |

|                                       |      |    |          |                |    |         |     |     |                                                            |
|---------------------------------------|------|----|----------|----------------|----|---------|-----|-----|------------------------------------------------------------|
| Locus_17952_Transcript_1/1_Conf_1.000 | 456  | 20 | 5.51E-45 | NP_491087.1    | 85 | 183.726 | 151 | 129 | MAP kinase kinase or Erk Kinase family member (mek-2)      |
| Locus_17953_Transcript_1/1_Conf_1.000 | 351  | 20 | 3.39E-42 | NP_491246.4    | 80 | 174.481 | 113 | 91  | COenzyme Q (ubiquinone) biosynthesis family member (coq-4) |
| Locus_17954_Transcript_1/1_Conf_1.000 | 599  | 20 | 2.71E-84 | XP_002643253.1 | 87 | 315.079 | 199 | 175 | C. briggsae CBR-AEX-3 protein                              |
| Locus_17955_Transcript_1/1_Conf_1.000 | 147  | 0  |          |                |    |         |     |     |                                                            |
| Locus_17956_Transcript_1/1_Conf_1.000 | 237  | 20 | 3.63E-12 | NP_493027.1    | 71 | 74.7146 | 82  | 59  | hypothetical protein R06C1.2                               |
| Locus_17957_Transcript_1/1_Conf_1.000 | 138  | 0  |          |                |    |         |     |     |                                                            |
| Locus_17958_Transcript_1/1_Conf_1.000 | 192  | 0  |          |                |    |         |     |     |                                                            |
| Locus_17959_Transcript_1/1_Conf_1.000 | 143  | 0  |          |                |    |         |     |     |                                                            |
| Locus_1796_Transcript_1/2_Conf_1.000  | 2501 | 20 | 0        | XP_002642411.1 | 73 | 819.305 | 754 | 553 | C. briggsae CBR-INA-1 protein                              |

|                                       |      |    |          |                |    |         |     |     |                                                                                                                                               |
|---------------------------------------|------|----|----------|----------------|----|---------|-----|-----|-----------------------------------------------------------------------------------------------------------------------------------------------|
| Locus_1796_Transcript_2/2_Conf_1.000  | 2501 | 20 | 0        | XP_002642411.1 | 73 | 819.305 | 754 | 553 | C. briggsae CBR-INA-1 protein                                                                                                                 |
| Locus_17960_Transcript_1/1_Conf_1.000 | 309  | 20 | 9.16E-08 | XP_002129690.1 | 49 | 60.077  | 73  | 36  | PREDICTED: similar to C-type lectin domain family 4 member F (C-type lectin superfamily member 13) (C-type lectin 13) (Kupffer cell receptor) |
| Locus_17961_Transcript_1/1_Conf_1.000 | 343  | 0  |          |                |    |         |     |     |                                                                                                                                               |
| Locus_17962_Transcript_1/1_Conf_1.000 | 230  | 3  | 1.03E-14 | XP_002638987.1 | 73 | 83.1889 | 76  | 56  | Hypothetical protein CBG22233                                                                                                                 |
| Locus_17963_Transcript_1/1_Conf_1.000 | 274  | 20 | 7.47E-42 | XP_002641621.1 | 90 | 173.326 | 91  | 82  | Hypothetical protein CBG09941                                                                                                                 |
| Locus_17964_Transcript_1/1_Conf_1.000 | 249  | 0  |          |                |    |         |     |     |                                                                                                                                               |
| Locus_17965_Transcript_1/1_Conf_1.000 | 271  | 0  |          |                |    |         |     |     |                                                                                                                                               |
| Locus_17966_Transcript_1/1_Conf_1.000 | 259  | 20 | 8.45E-25 | XP_002647748.1 | 80 | 116.701 | 86  | 69  | C. briggsae CBR-WRS-1 protein                                                                                                                 |
| Locus_17967_Transcript_1/1_Conf_1.000 | 678  | 20 | 4.12E-27 | NP_492329.1    | 62 | 125.561 | 142 | 89  | hypothetical protein F43G9.13                                                                                                                 |
| Locus_17968_Transcript_1/1_Conf_1.000 | 179  | 20 | 9.76E-18 | XP_002633968.1 | 87 | 93.2041 | 57  | 50  | C. briggsae CBR-MCA-1 protein                                                                                                                 |
| Locus_17969_Transcript_1/1_Conf_1.000 | 146  | 20 | 8.86E-14 | EFO20394.1     | 87 | 80.1073 | 48  | 42  | hypothetical protein LOAG_08094                                                                                                               |
| Locus_1797_Transcript_1/1_Conf_1.000  | 986  | 20 | 2.35E-82 | XP_002636883.1 | 73 | 310.071 | 275 | 202 | Hypothetical protein CBG09344                                                                                                                 |
| Locus_17970_Transcript_1/1_Conf_1.000 | 460  | 0  |          |                |    |         |     |     |                                                                                                                                               |
| Locus_17971_Transcript_1/1_Conf_1.000 | 135  | 0  |          |                |    |         |     |     |                                                                                                                                               |

|                                       |     |    |          |                |     |         |     |    |                                 |
|---------------------------------------|-----|----|----------|----------------|-----|---------|-----|----|---------------------------------|
| Locus_17972_Transcript_1/1_Conf_1.000 | 318 | 6  | 5.10E-38 | XP_002636221.1 | 80  | 160.614 | 106 | 85 | Hypothetical protein CBG12142   |
| Locus_17973_Transcript_1/1_Conf_1.000 | 249 | 7  | 2.10E-20 | EFO19192.1     | 74  | 102.064 | 83  | 62 | MYND finger family protein      |
| Locus_17974_Transcript_1/1_Conf_1.000 | 231 | 0  |          |                |     |         |     |    |                                 |
| Locus_17975_Transcript_1/1_Conf_1.000 | 157 | 0  |          |                |     |         |     |    |                                 |
| Locus_17976_Transcript_1/1_Conf_1.000 | 367 | 20 | 1.84E-16 | NP_490726.1    | 76  | 88.9669 | 69  | 53 | hypothetical protein R119.3     |
| Locus_17977_Transcript_1/1_Conf_1.000 | 150 | 20 | 6.29E-20 | P01023.3       | 100 | 100.523 | 49  | 49 | Alpha-2-macroglobulin           |
| Locus_17978_Transcript_1/1_Conf_1.000 | 171 | 1  | 4.28E-05 | EFO22577.1     | 69  | 51.2174 | 55  | 38 | hypothetical protein LOAG_05911 |
| Locus_17979_Transcript_1/1_Conf_1.000 | 245 | 20 | 2.11E-28 | XP_001897997.1 | 89  | 128.642 | 79  | 71 | anion exchange protein          |

|                                      |      |    |          |            |    |         |     |     |                 |
|--------------------------------------|------|----|----------|------------|----|---------|-----|-----|-----------------|
| Locus_1798_Transcript_1/3_Conf_0.750 | 1313 | 20 | 2.79E-42 | ADK91433.1 | 68 | 177.563 | 173 | 118 | c-type lectin 1 |
| Locus_1798_Transcript_2/3_Conf_0.750 | 1469 | 20 | 4.26E-42 | ADK91433.1 | 68 | 177.178 | 173 | 119 | c-type lectin 1 |

|                                       |      |    |          |                |    |         |     |     |                                                          |
|---------------------------------------|------|----|----------|----------------|----|---------|-----|-----|----------------------------------------------------------|
| Locus_1798_Transcript_3/3_Conf_0.750  | 1469 | 20 | 1.12E-42 | ADK91433.1     | 68 | 179.104 | 173 | 119 | c-type lectin 1                                          |
| Locus_17980_Transcript_1/1_Conf_1.000 | 180  | 0  |          |                |    |         |     |     |                                                          |
| Locus_17981_Transcript_1/1_Conf_1.000 | 243  | 1  | 9.52E-05 | XP_001895050.1 | 57 | 50.0618 | 54  | 31  | hypothetical protein Bm1_17960                           |
| Locus_17982_Transcript_1/1_Conf_1.000 | 250  | 3  | 6.13E-04 | XP_002634125.1 | 58 | 47.3654 | 62  | 36  | C. briggsae CBR-MSH-5 protein                            |
| Locus_17983_Transcript_1/1_Conf_1.000 | 460  | 0  |          |                |    |         |     |     |                                                          |
| Locus_17984_Transcript_1/1_Conf_1.000 | 185  | 4  | 4.24E-16 | XP_002633677.1 | 80 | 87.8113 | 60  | 48  | C. briggsae CBR-LAD-2 protein                            |
| Locus_17985_Transcript_1/1_Conf_1.000 | 426  | 20 | 1.75E-14 | ACN62126.1     | 54 | 82.4185 | 142 | 78  | tryptophan decarboxylase                                 |
| Locus_17986_Transcript_1/1_Conf_1.000 | 156  | 20 | 1.10E-16 | XP_002635876.1 | 94 | 89.7373 | 51  | 48  | C. briggsae CBR-PTR-16 protein                           |
| Locus_17987_Transcript_1/1_Conf_1.000 | 143  | 0  |          |                |    |         |     |     |                                                          |
| Locus_17988_Transcript_1/1_Conf_1.000 | 377  | 20 | 1.94E-21 | NP_497480.2    | 65 | 105.531 | 127 | 83  | POLH (DNA polymerase eta) homolog family member (polh-1) |

|                                       |      |    |           |                |     |         |     |     |                                                                                                  |
|---------------------------------------|------|----|-----------|----------------|-----|---------|-----|-----|--------------------------------------------------------------------------------------------------|
| Locus_17989_Transcript_1/1_Conf_1.000 | 374  | 20 | 3.41E-42  | NP_001123000.1 | 77  | 174.481 | 124 | 96  | hypothetical protein T05C3.6                                                                     |
| Locus_1799_Transcript_1/1_Conf_1.000  | 489  | 20 | 1.92E-45  | XP_001901624.1 | 73  | 185.267 | 148 | 109 | valyl-tRNA synthetase family protein                                                             |
| Locus_17990_Transcript_1/1_Conf_1.000 | 263  | 0  |           |                |     |         |     |     |                                                                                                  |
| Locus_17991_Transcript_1/1_Conf_1.000 | 270  | 20 | 1.74E-14  | XP_002131575.1 | 68  | 82.4185 | 88  | 60  | PREDICTED: mitogen-activated protein kinase kinase                                               |
| Locus_17992_Transcript_1/1_Conf_1.000 | 242  | 0  |           |                |     |         |     |     |                                                                                                  |
| Locus_17993_Transcript_1/1_Conf_1.000 | 360  | 5  | 7.28E-13  | ADI24623.1     | 54  | 77.0258 | 113 | 62  | Copine domain protein, atypical protein 2, isoform c, partially confirmed by transcript evidence |
| Locus_17994_Transcript_1/1_Conf_1.000 | 324  | 0  |           |                |     |         |     |     |                                                                                                  |
| Locus_17995_Transcript_1/1_Conf_1.000 | 327  | 0  |           |                |     |         |     |     |                                                                                                  |
| Locus_17996_Transcript_1/1_Conf_1.000 | 671  | 0  |           |                |     |         |     |     |                                                                                                  |
| Locus_17997_Transcript_1/1_Conf_1.000 | 251  | 0  |           |                |     |         |     |     |                                                                                                  |
| Locus_17998_Transcript_1/1_Conf_1.000 | 478  | 2  | 5.38E-08  | XP_002631107.1 | 50  | 60.8474 | 122 | 62  | Hypothetical protein CBG02882                                                                    |
| Locus_17999_Transcript_1/1_Conf_1.000 | 180  | 20 | 1.41E-27  | XP_002922896.1 | 100 | 125.946 | 60  | 60  | PREDICTED: macrophage-capping protein-like                                                       |
| Locus_18_Transcript_1/1_Conf_1.000    | 1840 | 20 | 0         | NP_492114.2    | 87  | 783.482 | 513 | 450 | hypothetical protein T25G3.3                                                                     |
| Locus_180_Transcript_1/6_Conf_0.111   | 1363 | 20 | 3.42E-115 | XP_002640295.1 | 90  | 419.853 | 252 | 228 | Hypothetical protein CBG12821                                                                    |



|                                       |      |    |           |                |    |         |     |     |                               |
|---------------------------------------|------|----|-----------|----------------|----|---------|-----|-----|-------------------------------|
| Locus_180_Transcript_2/6_Conf_0.111   | 1363 | 20 | 3.42E-115 | XP_002640295.1 | 90 | 419.853 | 252 | 228 | Hypothetical protein CBG12821 |
| Locus_180_Transcript_3/6_Conf_0.278   | 738  | 12 | 5.45E-26  | CAJ45481.1     | 68 | 122.094 | 122 | 84  | legumain                      |
| Locus_180_Transcript_4/6_Conf_0.278   | 780  | 8  | 6.70E-25  | CAJ45481.1     | 67 | 118.627 | 122 | 82  | legumain                      |
| Locus_180_Transcript_5/6_Conf_0.389   | 2216 | 20 | 1.60E-134 | CAJ45481.1     | 72 | 484.952 | 404 | 294 | legumain                      |
| Locus_180_Transcript_6/6_Conf_0.389   | 2174 | 20 | 1.41E-135 | CAJ45481.1     | 73 | 488.419 | 404 | 296 | legumain                      |
| Locus_1800_Transcript_1/1_Conf_1.000  | 424  | 5  | 8.44E-09  | XP_002631731.1 | 94 | 63.5438 | 52  | 49  | Hypothetical protein CBG20933 |
| Locus_18000_Transcript_1/1_Conf_1.000 | 589  | 20 | 8.19E-22  | NP_491362.1    | 55 | 107.457 | 187 | 104 | hypothetical protein ZK973.1  |
| Locus_18001_Transcript_1/1_Conf_1.000 | 414  | 20 | 2.23E-38  | NP_497589.3    | 81 | 161.77  | 138 | 113 | hypothetical protein Y71H2B.5 |

|                                       |      |    |          |                |    |         |     |     |                                                                   |
|---------------------------------------|------|----|----------|----------------|----|---------|-----|-----|-------------------------------------------------------------------|
| Locus_18002_Transcript_1/1_Conf_1.000 | 303  | 20 | 6.16E-20 | XP_001899247.1 | 81 | 100.523 | 100 | 81  | Probable nucleolar GTP-binding protein 1.                         |
| Locus_18003_Transcript_1/1_Conf_1.000 | 128  | 0  |          |                |    |         |     |     |                                                                   |
| Locus_18004_Transcript_1/1_Conf_1.000 | 153  | 7  | 5.32E-11 | XP_001897512.1 | 87 | 70.8626 | 41  | 36  | Patched family protein                                            |
| Locus_18005_Transcript_1/2_Conf_1.000 | 400  | 3  | 7.91E-07 | CBX25202.1     | 46 | 56.9954 | 110 | 51  | Hypothetical protein Y17G7B.23a                                   |
| Locus_18005_Transcript_2/2_Conf_1.000 | 400  | 3  | 7.91E-07 | CBX25202.1     | 46 | 56.9954 | 110 | 51  | Hypothetical protein Y17G7B.23a                                   |
| Locus_18006_Transcript_1/1_Conf_1.000 | 135  | 4  | 4.26E-13 | XP_002637318.1 | 82 | 77.7962 | 45  | 37  | Hypothetical protein CBG19009                                     |
| Locus_18007_Transcript_1/1_Conf_1.000 | 596  | 20 | 7.36E-34 | XP_002640693.1 | 58 | 147.517 | 204 | 119 | Hypothetical protein CBG19758                                     |
| Locus_18008_Transcript_1/1_Conf_1.000 | 377  | 20 | 5.24E-43 | XP_002646355.1 | 88 | 177.178 | 109 | 96  | Hypothetical protein CBG12069                                     |
| Locus_18009_Transcript_1/1_Conf_1.000 | 441  | 6  | 1.60E-15 | NP_497868.1    | 56 | 85.8853 | 138 | 78  | Temporarily Assigned Gene name family member (tag-131)            |
| Locus_1801_Transcript_1/1_Conf_1.000  | 700  | 20 | 2.76E-45 | EFO22561.1     | 73 | 186.037 | 169 | 124 | hypothetical protein LOAG_05921                                   |
| Locus_18010_Transcript_1/1_Conf_1.000 | 621  | 20 | 1.17E-64 | NP_495666.3    | 80 | 249.98  | 212 | 170 | Temporarily Assigned Gene name family member (tag-341)            |
| Locus_18011_Transcript_1/1_Conf_1.000 | 441  | 0  |          |                |    |         |     |     |                                                                   |
| Locus_18012_Transcript_1/1_Conf_1.000 | 1068 | 5  | 1.65E-15 | NP_001022123.1 | 46 | 88.1965 | 273 | 126 | hypothetical protein F28C6.4                                      |
| Locus_18013_Transcript_1/1_Conf_1.000 | 169  | 20 | 6.17E-20 | XP_002641994.1 | 96 | 100.523 | 56  | 54  | Hypothetical protein CBG09217                                     |
| Locus_18014_Transcript_1/1_Conf_1.000 | 151  | 2  | 3.35E-05 | NP_508866.1    | 75 | 51.6026 | 53  | 40  | Unidentified Vitellogenin-linked Transcript family member (uvt-3) |
| Locus_18015_Transcript_1/1_Conf_1.000 | 226  | 0  |          |                |    |         |     |     |                                                                   |

|                                       |     |    |          |                |    |         |     |     |                               |
|---------------------------------------|-----|----|----------|----------------|----|---------|-----|-----|-------------------------------|
| Locus_18016_Transcript_1/1_Conf_1.000 | 632 | 20 | 2.95E-10 | BAF47075.1     | 53 | 69.3218 | 136 | 73  | AP2 homolog                   |
| Locus_18017_Transcript_1/1_Conf_1.000 | 469 | 20 | 1.09E-40 | EFO20767.1     | 73 | 169.474 | 156 | 114 | Smad1                         |
| Locus_18018_Transcript_1/1_Conf_1.000 | 285 | 0  |          |                |    |         |     |     |                               |
| Locus_18019_Transcript_1/1_Conf_1.000 | 662 | 5  | 7.05E-13 | XP_002639135.1 | 50 | 78.1814 | 216 | 109 | C. briggsae CBR-SEP-1 protein |
| Locus_1802_Transcript_1/1_Conf_1.000  | 145 | 0  |          |                |    |         |     |     |                               |

|                                       |      |    |          |                |     |         |     |     |                                                                       |
|---------------------------------------|------|----|----------|----------------|-----|---------|-----|-----|-----------------------------------------------------------------------|
| Locus_18020_Transcript_1/1_Conf_1.000 | 205  | 20 | 4.42E-26 | XP_002832350.1 | 100 | 120.939 | 68  | 68  | PREDICTED: LOW QUALITY PROTEIN: filamin-A-like                        |
| Locus_18021_Transcript_1/1_Conf_1.000 | 412  | 20 | 8.25E-33 | NP_505116.1    | 66  | 143.28  | 137 | 91  | hypothetical protein K07C11.7                                         |
| Locus_18022_Transcript_1/1_Conf_1.000 | 269  | 20 | 1.95E-16 | NP_001122749.1 | 70  | 83.1889 | 80  | 56  | hypothetical protein ZK643.3                                          |
| Locus_18023_Transcript_1/1_Conf_1.000 | 176  | 2  | 1.28E-09 | XP_002637557.1 | 75  | 66.2402 | 56  | 42  | Hypothetical protein CBG19289                                         |
| Locus_18024_Transcript_1/1_Conf_1.000 | 168  | 20 | 7.08E-08 | XP_002643075.1 | 79  | 60.4622 | 44  | 35  | Hypothetical protein CBG22995                                         |
| Locus_18025_Transcript_1/1_Conf_1.000 | 231  | 0  |          |                |     |         |     |     |                                                                       |
| Locus_18026_Transcript_1/1_Conf_1.000 | 222  | 20 | 3.01E-30 | BAE90469.1     | 90  | 134.806 | 72  | 65  | unnamed protein product                                               |
| Locus_18027_Transcript_1/1_Conf_1.000 | 1774 | 20 | 0        | NP_508475.2    | 79  | 697.582 | 587 | 468 | Inner Membrane of MiTochondria protein homolog family member (immt-1) |
| Locus_18028_Transcript_1/1_Conf_1.000 | 378  | 0  |          |                |     |         |     |     |                                                                       |
| Locus_18029_Transcript_1/1_Conf_1.000 | 177  | 7  | 1.97E-10 | AAN61521.1     | 70  | 68.9366 | 58  | 41  | 301KDa_2 protein                                                      |
| Locus_1803_Transcript_1/1_Conf_1.000  | 922  | 20 | 9.02E-25 | XP_002639695.1 | 72  | 118.627 | 108 | 78  | C. briggsae CBR-FCP-1 protein                                         |
| Locus_18030_Transcript_1/1_Conf_1.000 | 130  | 0  |          |                |     |         |     |     |                                                                       |
| Locus_18031_Transcript_1/1_Conf_1.000 | 135  | 0  |          |                |     |         |     |     |                                                                       |
| Locus_18032_Transcript_1/1_Conf_1.000 | 131  | 0  |          |                |     |         |     |     |                                                                       |
| Locus_18033_Transcript_1/1_Conf_1.000 | 265  | 0  |          |                |     |         |     |     |                                                                       |
| Locus_18034_Transcript_1/1_Conf_1.000 | 384  | 0  |          |                |     |         |     |     |                                                                       |
| Locus_18035_Transcript_1/1_Conf_1.000 | 185  | 0  |          |                |     |         |     |     |                                                                       |
| Locus_18036_Transcript_1/1_Conf_1.000 | 259  | 0  |          |                |     |         |     |     |                                                                       |

|                                       |      |    |          |                |    |         |     |     |                                                                 |
|---------------------------------------|------|----|----------|----------------|----|---------|-----|-----|-----------------------------------------------------------------|
| Locus_18037_Transcript_1/1_Conf_1.000 | 168  | 0  |          |                |    |         |     |     |                                                                 |
| Locus_18038_Transcript_1/1_Conf_1.000 | 276  | 0  |          |                |    |         |     |     |                                                                 |
| Locus_18039_Transcript_1/1_Conf_1.000 | 432  | 2  | 2.27E-06 | NP_495102.1    | 59 | 55.4546 | 74  | 44  | hypothetical protein F59E12.11                                  |
| Locus_1804_Transcript_1/6_Conf_0.762  | 1122 | 0  |          |                |    |         |     |     |                                                                 |
| Locus_1804_Transcript_2/6_Conf_0.762  | 1119 | 0  |          |                |    |         |     |     |                                                                 |
| Locus_1804_Transcript_3/6_Conf_0.762  | 1140 | 0  |          |                |    |         |     |     |                                                                 |
| Locus_1804_Transcript_4/6_Conf_0.762  | 1161 | 0  |          |                |    |         |     |     |                                                                 |
| Locus_1804_Transcript_5/6_Conf_0.762  | 1119 | 0  |          |                |    |         |     |     |                                                                 |
| Locus_1804_Transcript_6/6_Conf_0.762  | 1128 | 0  |          |                |    |         |     |     |                                                                 |
| Locus_18040_Transcript_1/1_Conf_1.000 | 369  | 0  |          |                |    |         |     |     |                                                                 |
| Locus_18041_Transcript_1/1_Conf_1.000 | 243  | 0  |          |                |    |         |     |     |                                                                 |
| Locus_18042_Transcript_1/1_Conf_1.000 | 256  | 0  |          |                |    |         |     |     |                                                                 |
| Locus_18043_Transcript_1/1_Conf_1.000 | 368  | 20 | 4.82E-25 | 3N9L           | 66 | 117.472 | 117 | 78  | Cekdm7a From C.Elegans                                          |
| Locus_18044_Transcript_1/1_Conf_1.000 | 285  | 0  |          |                |    |         |     |     |                                                                 |
| Locus_18045_Transcript_1/1_Conf_1.000 | 549  | 20 | 2.42E-51 | NP_492132.1    | 73 | 205.297 | 178 | 131 | Enhancer of Glp-One (glp-1) family member (ego-1)               |
| Locus_18046_Transcript_1/1_Conf_1.000 | 424  | 20 | 1.43E-40 | XP_002634303.1 | 76 | 169.088 | 141 | 108 | C. briggsae CBR-NCX-3 protein                                   |
| Locus_18047_Transcript_1/1_Conf_1.000 | 548  | 20 | 1.87E-64 | NP_493426.2    | 87 | 248.825 | 183 | 160 | TAF (TBP-associated transcription factor) family member (taf-1) |
| Locus_18048_Transcript_1/1_Conf_1.000 | 818  | 20 | 1.36E-39 | CBW48397.1     | 72 | 167.548 | 157 | 114 | Hypothetical protein F54C8.7e                                   |
| Locus_18049_Transcript_1/1_Conf_1.000 | 702  | 20 | 2.98E-47 | XP_002640651.1 | 65 | 192.586 | 231 | 152 | Hypothetical protein CBG19709                                   |

|                                       |      |    |          |                |    |         |     |     |                                         |
|---------------------------------------|------|----|----------|----------------|----|---------|-----|-----|-----------------------------------------|
| Locus_1805_Transcript_1/1_Conf_1.000  | 1075 | 20 | 1.21E-90 | EFO19288.1     | 96 | 337.806 | 179 | 173 | RAB14 protein                           |
| Locus_18050_Transcript_1/1_Conf_1.000 | 451  | 4  | 3.07E-19 | XP_002634268.1 | 55 | 98.2117 | 148 | 82  | Hypothetical protein CBG01840           |
| Locus_18051_Transcript_1/1_Conf_1.000 | 551  | 20 | 2.29E-17 | XP_002123175.1 | 69 | 92.4337 | 92  | 64  | PREDICTED: similar to predicted protein |
| Locus_18052_Transcript_1/1_Conf_1.000 | 244  | 0  |          |                |    |         |     |     |                                         |
| Locus_18053_Transcript_1/1_Conf_1.000 | 488  | 0  |          |                |    |         |     |     |                                         |
| Locus_18054_Transcript_1/1_Conf_1.000 | 265  | 0  |          |                |    |         |     |     |                                         |
| Locus_18055_Transcript_1/1_Conf_1.000 | 285  | 0  |          |                |    |         |     |     |                                         |
| Locus_18056_Transcript_1/2_Conf_1.000 | 457  | 20 | 1.33E-06 | EFA09420.1     | 50 | 56.225  | 120 | 60  | hypothetical protein TcasGA2_TC005222   |

|                                       |     |    |          |                |     |         |     |     |                                                                         |
|---------------------------------------|-----|----|----------|----------------|-----|---------|-----|-----|-------------------------------------------------------------------------|
| Locus_18056_Transcript_2/2_Conf_1.000 | 457 | 20 | 1.33E-06 | EFA09420.1     | 50  | 56.225  | 120 | 60  | hypothetical protein TcasGA2_TC005222                                   |
| Locus_18057_Transcript_1/1_Conf_1.000 | 347 | 20 | 3.54E-31 | XP_001900176.1 | 89  | 137.887 | 82  | 73  | LIM domain containing protein                                           |
| Locus_18058_Transcript_1/1_Conf_1.000 | 182 | 0  |          |                |     |         |     |     |                                                                         |
| Locus_18059_Transcript_1/1_Conf_1.000 | 287 | 20 | 2.09E-23 | NP_498250.3    | 74  | 112.079 | 95  | 71  | POLQ (DNA polymerase theta) homolog family member (polq-1)              |
| Locus_1806_Transcript_1/1_Conf_1.000  | 896 | 0  |          |                |     |         |     |     |                                                                         |
| Locus_18060_Transcript_1/1_Conf_1.000 | 153 | 18 | 1.50E-05 | CBL43432.1     | 68  | 52.7582 | 47  | 32  | C. elegans protein F01D4.1b, partially confirmed by transcript evidence |
| Locus_18061_Transcript_1/1_Conf_1.000 | 610 | 2  | 1.71E-12 | NP_506085.2    | 45  | 76.6406 | 217 | 99  | FERM domain (protein4.1-ezrin-radixin-moesin) family member (frm-7)     |
| Locus_18062_Transcript_1/1_Conf_1.000 | 220 | 20 | 2.92E-33 | XP_519230.2    | 100 | 144.821 | 72  | 72  | PREDICTED: actin related protein 2/3 complex subunit 1B                 |
| Locus_18063_Transcript_1/1_Conf_1.000 | 525 | 20 | 1.47E-44 | XP_002638481.1 | 70  | 182.57  | 175 | 123 | Hypothetical protein CBG12909                                           |
| Locus_18064_Transcript_1/1_Conf_1.000 | 306 | 0  |          |                |     |         |     |     |                                                                         |
| Locus_18065_Transcript_1/1_Conf_1.000 | 227 | 4  | 1.07E-11 | NP_492746.2    | 94  | 73.1738 | 38  | 36  | Temporarily Assigned Gene name family member (tag-68)                   |
| Locus_18066_Transcript_1/1_Conf_1.000 | 289 | 0  |          |                |     |         |     |     |                                                                         |
| Locus_18067_Transcript_1/1_Conf_1.000 | 732 | 0  |          |                |     |         |     |     |                                                                         |
| Locus_18068_Transcript_1/1_Conf_1.000 | 288 | 1  | 4.50E-10 | NP_490992.2    | 79  | 67.781  | 48  | 38  | hypothetical protein Y23H5B.4                                           |
| Locus_18069_Transcript_1/1_Conf_1.000 | 246 | 0  |          |                |     |         |     |     |                                                                         |

|                                       |      |    |          |                |    |         |     |     |                                                |
|---------------------------------------|------|----|----------|----------------|----|---------|-----|-----|------------------------------------------------|
| Locus_1807_Transcript_1/1_Conf_1.000  | 1724 | 20 | 0        | XP_002634023.1 | 77 | 666.381 | 563 | 434 | Hypothetical protein CBG01556                  |
| Locus_18070_Transcript_1/2_Conf_1.000 | 760  | 20 | 6.47E-62 | NP_495796.1    | 74 | 241.506 | 225 | 168 | RNase H family member (rnh-2)                  |
| Locus_18070_Transcript_2/2_Conf_1.000 | 760  | 20 | 4.95E-62 | NP_495796.1    | 74 | 241.891 | 225 | 168 | RNase H family member (rnh-2)                  |
| Locus_18071_Transcript_1/1_Conf_1.000 | 335  | 0  |          |                |    |         |     |     |                                                |
| Locus_18072_Transcript_1/1_Conf_1.000 | 174  | 20 | 1.85E-08 | XP_002761583.1 | 93 | 62.3882 | 46  | 43  | PREDICTED: 40S ribosomal protein S15-like      |
| Locus_18073_Transcript_1/1_Conf_1.000 | 167  | 0  |          |                |    |         |     |     |                                                |
| Locus_18074_Transcript_1/1_Conf_1.000 | 320  | 2  | 1.26E-12 | XP_002642676.1 | 57 | 76.2554 | 105 | 60  | Hypothetical protein CBG12260                  |
| Locus_18075_Transcript_1/1_Conf_1.000 | 144  | 20 | 9.16E-11 | AAL11454.1     | 88 | 70.0922 | 36  | 32  | Skp1                                           |
| Locus_18076_Transcript_1/1_Conf_1.000 | 165  | 0  |          |                |    |         |     |     |                                                |
| Locus_18077_Transcript_1/1_Conf_1.000 | 320  | 20 | 1.64E-28 | XP_001894370.1 | 69 | 129.028 | 105 | 73  | Immunoglobulin I-set domain containing protein |
| Locus_18078_Transcript_1/1_Conf_1.000 | 208  | 0  |          |                |    |         |     |     |                                                |



|                                       |      |    |          |                |     |         |     |     |                                                                 |
|---------------------------------------|------|----|----------|----------------|-----|---------|-----|-----|-----------------------------------------------------------------|
| Locus_18079_Transcript_1/1_Conf_1.000 | 178  | 20 | 4.39E-10 | XP_002831205.1 | 100 | 67.781  | 34  | 34  | PREDICTED: cyclic AMP-dependent transcription factor ATF-4-like |
| Locus_1808_Transcript_1/1_Conf_1.000  | 598  | 20 | 2.75E-20 | XP_002638769.1 | 56  | 102.449 | 180 | 101 | Hypothetical protein CBG05113                                   |
| Locus_18080_Transcript_1/2_Conf_1.000 | 273  | 0  |          |                |     |         |     |     |                                                                 |
| Locus_18080_Transcript_2/2_Conf_1.000 | 252  | 0  |          |                |     |         |     |     |                                                                 |
| Locus_18081_Transcript_1/1_Conf_1.000 | 389  | 20 | 3.56E-52 | XP_002648958.1 | 82  | 207.608 | 127 | 105 | Hypothetical protein CBG21275                                   |
| Locus_18082_Transcript_1/1_Conf_1.000 | 164  | 0  |          |                |     |         |     |     |                                                                 |
| Locus_18083_Transcript_1/1_Conf_1.000 | 310  | 0  |          |                |     |         |     |     |                                                                 |
| Locus_18084_Transcript_1/1_Conf_1.000 | 246  | 0  |          |                |     |         |     |     |                                                                 |
| Locus_18085_Transcript_1/1_Conf_1.000 | 156  | 0  |          |                |     |         |     |     |                                                                 |
| Locus_18086_Transcript_1/1_Conf_1.000 | 277  | 4  | 1.79E-19 | NP_509455.3    | 73  | 98.9821 | 75  | 55  | hypothetical protein F18E9.3                                    |
| Locus_18087_Transcript_1/1_Conf_1.000 | 297  | 20 | 1.57E-39 | XP_002639744.1 | 87  | 165.622 | 86  | 75  | C. briggsae CBR-LAM-3 protein                                   |
| Locus_18088_Transcript_1/1_Conf_1.000 | 146  | 0  |          |                |     |         |     |     |                                                                 |
| Locus_18089_Transcript_1/1_Conf_1.000 | 839  | 20 | 1.01E-93 | XP_002634766.1 | 73  | 347.436 | 286 | 209 | Hypothetical protein CBG05362                                   |
| Locus_1809_Transcript_1/1_Conf_1.000  | 459  | 20 | 5.31E-40 | XP_001898512.1 | 84  | 167.162 | 105 | 89  | Protein kinase domain containing protein                        |
| Locus_18090_Transcript_1/1_Conf_1.000 | 187  | 0  |          |                |     |         |     |     |                                                                 |
| Locus_18091_Transcript_1/1_Conf_1.000 | 321  | 0  |          |                |     |         |     |     |                                                                 |
| Locus_18092_Transcript_1/1_Conf_1.000 | 1377 | 0  |          |                |     |         |     |     |                                                                 |
| Locus_18093_Transcript_1/2_Conf_1.000 | 732  | 20 | 8.83E-29 | XP_968473.1    | 58  | 131.339 | 179 | 104 | PREDICTED: similar to CG10343 CG10343-PA                        |
| Locus_18093_Transcript_2/2_Conf_1.000 | 720  | 20 | 8.51E-29 | XP_968473.1    | 58  | 131.339 | 179 | 104 | PREDICTED: similar to CG10343 CG10343-PA                        |
| Locus_18094_Transcript_1/1_Conf_1.000 | 237  | 20 | 3.51E-15 | XP_002636807.1 | 74  | 84.7297 | 71  | 53  | Hypothetical protein CBG09249                                   |
| Locus_18095_Transcript_1/1_Conf_1.000 | 495  | 1  | 7.05E-08 | NP_491118.2    | 46  | 60.4622 | 132 | 62  | hypothetical protein Y54E10A.11                                 |
| Locus_18096_Transcript_1/1_Conf_1.000 | 141  | 20 | 6.11E-12 | XP_001998550.1 | 79  | 73.9442 | 44  | 35  | GI23574                                                         |

|                                       |     |    |          |                |    |         |     |     |                                                                     |
|---------------------------------------|-----|----|----------|----------------|----|---------|-----|-----|---------------------------------------------------------------------|
| Locus_18097_Transcript_1/1_Conf_1.000 | 316 | 20 | 9.02E-43 | XP_002638878.1 | 90 | 176.407 | 105 | 95  | C. briggsae CBR-CSN-2 protein                                       |
| Locus_18098_Transcript_1/1_Conf_1.000 | 521 | 0  |          |                |    |         |     |     |                                                                     |
| Locus_18099_Transcript_1/1_Conf_1.000 | 289 | 0  |          |                |    |         |     |     |                                                                     |
| Locus_181_Transcript_1/1_Conf_1.000   | 513 | 20 | 3.01E-20 | NP_500698.1    | 79 | 101.679 | 81  | 64  | Sperm-Specific family, class Q family member (ssq-2)                |
| Locus_1810_Transcript_1/1_Conf_1.000  | 305 | 15 | 2.18E-33 | NP_498273.1    | 85 | 145.206 | 90  | 77  | hypothetical protein F01F1.2                                        |
| Locus_18100_Transcript_1/1_Conf_1.000 | 234 | 0  |          |                |    |         |     |     |                                                                     |
| Locus_18101_Transcript_1/1_Conf_1.000 | 290 | 0  |          |                |    |         |     |     |                                                                     |
| Locus_18102_Transcript_1/1_Conf_1.000 | 269 | 20 | 3.90E-06 | XP_002739735.1 | 49 | 54.6842 | 89  | 44  | PREDICTED: UDP-Gal:betaGlcNAc beta 1,3-galactosyltransferase 1-like |
| Locus_18103_Transcript_1/1_Conf_1.000 | 249 | 20 | 6.30E-25 | EFO27053.1     | 79 | 117.087 | 82  | 65  | glutaminase                                                         |
| Locus_18104_Transcript_1/1_Conf_1.000 | 502 | 3  | 7.81E-71 | CAR63658.1     | 83 | 269.626 | 165 | 138 | hypothetical protein                                                |
| Locus_18105_Transcript_1/1_Conf_1.000 | 265 | 4  | 2.29E-14 | NP_492775.2    | 75 | 82.0333 | 69  | 52  | LAMinin related. See also lmb- family member (lam-3)                |
| Locus_18106_Transcript_1/1_Conf_1.000 | 548 | 8  | 1.00E-33 | NP_500822.2    | 57 | 146.747 | 194 | 112 | UNCoordinated family member (unc-5)                                 |
| Locus_18107_Transcript_1/1_Conf_1.000 | 547 | 20 | 1.50E-21 | NP_741042.1    | 98 | 106.301 | 53  | 52  | human PTB (hnRNP) homolog family member (ptb-1)                     |
| Locus_18108_Transcript_1/1_Conf_1.000 | 203 | 0  |          |                |    |         |     |     |                                                                     |
| Locus_18109_Transcript_1/1_Conf_1.000 | 229 | 20 | 9.34E-16 | NP_001041296.1 | 80 | 86.6557 | 47  | 38  | COLlagen family member (col-181)                                    |

|                                       |      |    |          |                |    |         |     |     |                                                            |
|---------------------------------------|------|----|----------|----------------|----|---------|-----|-----|------------------------------------------------------------|
| Locus_1811_Transcript_1/1_Conf_1.000  | 1312 | 20 | 6.88E-41 | NP_491745.1    | 45 | 172.94  | 452 | 206 | hypothetical protein C27A12.2                              |
| Locus_18110_Transcript_1/1_Conf_1.000 | 230  | 4  | 4.20E-08 | EFO25668.1     | 64 | 61.2326 | 71  | 46  | hypothetical protein LOAG_02820                            |
| Locus_18111_Transcript_1/1_Conf_1.000 | 252  | 20 | 6.55E-09 | NP_499664.2    | 60 | 63.929  | 83  | 50  | hypothetical protein BE10.2                                |
| Locus_18112_Transcript_1/1_Conf_1.000 | 203  | 0  |          |                |    |         |     |     |                                                            |
| Locus_18113_Transcript_1/1_Conf_1.000 | 555  | 0  |          |                |    |         |     |     |                                                            |
| Locus_18114_Transcript_1/1_Conf_1.000 | 158  | 0  |          |                |    |         |     |     |                                                            |
| Locus_18115_Transcript_1/1_Conf_1.000 | 194  | 0  |          |                |    |         |     |     |                                                            |
| Locus_18116_Transcript_1/1_Conf_1.000 | 401  | 20 | 6.89E-19 | EFO28349.1     | 60 | 97.0561 | 105 | 63  | major sperm protein                                        |
| Locus_18117_Transcript_1/1_Conf_1.000 | 184  | 20 | 1.36E-14 | NP_499749.1    | 87 | 82.8037 | 55  | 48  | Aspergillus NUclear Division related family member (nud-1) |
| Locus_18118_Transcript_1/1_Conf_1.000 | 453  | 20 | 7.48E-42 | XP_002640831.1 | 81 | 173.326 | 137 | 111 | Hypothetical protein CBG15718                              |
| Locus_18119_Transcript_1/1_Conf_1.000 | 231  | 7  | 8.71E-14 | XP_002630536.1 | 71 | 80.1073 | 70  | 50  | Hypothetical protein CBG12976                              |
| Locus_1812_Transcript_1/1_Conf_1.000  | 161  | 0  |          |                |    |         |     |     |                                                            |
| Locus_18120_Transcript_1/1_Conf_1.000 | 1040 | 17 | 5.98E-15 | NP_499886.1    | 49 | 86.2705 | 135 | 67  | hypothetical protein R02D3.7                               |

|                                       |      |    |          |                |    |         |     |     |                                                                    |
|---------------------------------------|------|----|----------|----------------|----|---------|-----|-----|--------------------------------------------------------------------|
| Locus_18121_Transcript_1/1_Conf_1.000 | 758  | 20 | 2.03E-07 | XP_002735551.1 | 44 | 60.4622 | 249 | 111 | PREDICTED: janus kinase and microtubule interacting protein 1-like |
| Locus_18122_Transcript_1/1_Conf_1.000 | 243  | 0  |          |                |    |         |     |     |                                                                    |
| Locus_18123_Transcript_1/2_Conf_1.000 | 404  | 11 | 3.04E-67 | ACZ64266.1     | 91 | 257.684 | 134 | 122 | serine protease inhibitor                                          |
| Locus_18123_Transcript_2/2_Conf_1.000 | 404  | 11 | 3.04E-67 | ACZ64266.1     | 91 | 257.684 | 134 | 122 | serine protease inhibitor                                          |
| Locus_18124_Transcript_1/1_Conf_1.000 | 171  | 0  |          |                |    |         |     |     |                                                                    |
| Locus_18125_Transcript_1/1_Conf_1.000 | 216  | 0  |          |                |    |         |     |     |                                                                    |
| Locus_18126_Transcript_1/1_Conf_1.000 | 131  | 0  |          |                |    |         |     |     |                                                                    |
| Locus_18127_Transcript_1/1_Conf_1.000 | 372  | 2  | 3.92E-22 | NP_501557.2    | 79 | 107.842 | 82  | 65  | hypothetical protein C53B4.3                                       |
| Locus_18128_Transcript_1/1_Conf_1.000 | 144  | 0  |          |                |    |         |     |     |                                                                    |
| Locus_18129_Transcript_1/1_Conf_1.000 | 136  | 0  |          |                |    |         |     |     |                                                                    |
| Locus_1813_Transcript_1/1_Conf_1.000  | 1352 | 0  |          |                |    |         |     |     |                                                                    |
| Locus_18130_Transcript_1/1_Conf_1.000 | 168  | 0  |          |                |    |         |     |     |                                                                    |
| Locus_18131_Transcript_1/2_Conf_0.333 | 152  | 0  |          |                |    |         |     |     |                                                                    |
| Locus_18131_Transcript_2/2_Conf_0.667 | 151  | 0  |          |                |    |         |     |     |                                                                    |
| Locus_18132_Transcript_1/1_Conf_1.000 | 191  | 20 | 3.33E-21 | YP_002725716.1 | 88 | 104.76  | 63  | 56  | NADH dehydrogenase subunit 1                                       |
| Locus_18133_Transcript_1/1_Conf_1.000 | 271  | 0  |          |                |    |         |     |     |                                                                    |
| Locus_18134_Transcript_1/1_Conf_1.000 | 282  | 0  |          |                |    |         |     |     |                                                                    |
| Locus_18135_Transcript_1/1_Conf_1.000 | 232  | 0  |          |                |    |         |     |     |                                                                    |
| Locus_18136_Transcript_1/1_Conf_1.000 | 375  | 0  |          |                |    |         |     |     |                                                                    |
| Locus_18137_Transcript_1/1_Conf_1.000 | 351  | 0  |          |                |    |         |     |     |                                                                    |

|                                       |      |    |          |                |    |         |     |     |                                                                          |
|---------------------------------------|------|----|----------|----------------|----|---------|-----|-----|--------------------------------------------------------------------------|
| Locus_18138_Transcript_1/1_Conf_1.000 | 218  | 20 | 2.65E-15 | XP_002635166.1 | 72 | 85.1149 | 72  | 52  | Hypothetical protein CBG11402                                            |
| Locus_18139_Transcript_1/1_Conf_1.000 | 162  | 0  |          |                |    |         |     |     |                                                                          |
| Locus_1814_Transcript_1/1_Conf_1.000  | 635  | 20 | 2.93E-74 | NP_492761.1    | 92 | 281.952 | 153 | 141 | hypothetical protein F25H2.5                                             |
| Locus_18140_Transcript_1/1_Conf_1.000 | 153  | 5  | 7.67E-18 | XP_002634716.1 | 91 | 93.5893 | 49  | 45  | C. briggsae CBR-EXC-5 protein                                            |
| Locus_18141_Transcript_1/1_Conf_1.000 | 1032 | 20 | 8.76E-83 | AAX34423.1     | 67 | 311.612 | 336 | 228 | anion transporter SULP-5                                                 |
| Locus_18142_Transcript_1/1_Conf_1.000 | 211  | 20 | 6.14E-20 | XP_002645743.1 | 80 | 100.523 | 70  | 56  | C. briggsae CBR-UNC-84 protein                                           |
| Locus_18143_Transcript_1/1_Conf_1.000 | 140  | 0  |          |                |    |         |     |     |                                                                          |
| Locus_18144_Transcript_1/1_Conf_1.000 | 505  | 20 | 2.34E-62 | NP_509572.1    | 84 | 241.506 | 156 | 132 | AdaPtin, Alpha chain (clathrin associated complex) family member (apa-2) |
| Locus_18145_Transcript_1/1_Conf_1.000 | 146  | 0  |          |                |    |         |     |     |                                                                          |

|                                       |      |    |          |                |     |         |     |     |                                                                         |
|---------------------------------------|------|----|----------|----------------|-----|---------|-----|-----|-------------------------------------------------------------------------|
| Locus_18146_Transcript_1/1_Conf_1.000 | 363  | 20 | 4.21E-45 | NP_507972.1    | 84  | 184.111 | 122 | 103 | hypothetical protein F26F2.7                                            |
| Locus_18147_Transcript_1/1_Conf_1.000 | 721  | 20 | 3.18E-92 | CBL43435.1     | 89  | 342.043 | 212 | 189 | C. elegans protein F32F2.1e, partially confirmed by transcript evidence |
| Locus_18148_Transcript_1/1_Conf_1.000 | 494  | 20 | 2.05E-31 | XP_002639518.1 | 61  | 138.658 | 153 | 94  | Hypothetical protein CBG04124                                           |
| Locus_18149_Transcript_1/1_Conf_1.000 | 147  | 2  | 3.84E-09 | NP_505266.1    | 80  | 64.6994 | 47  | 38  | hypothetical protein C01B7.5                                            |
| Locus_1815_Transcript_1/1_Conf_1.000  | 1411 | 20 | 4.72E-67 | XP_002630353.1 | 67  | 259.996 | 267 | 179 | Hypothetical protein CBG04283                                           |
| Locus_18150_Transcript_1/1_Conf_1.000 | 673  | 0  |          |                |     |         |     |     |                                                                         |
| Locus_18151_Transcript_1/1_Conf_1.000 | 217  | 0  |          |                |     |         |     |     |                                                                         |
| Locus_18152_Transcript_1/1_Conf_1.000 | 437  | 0  |          |                |     |         |     |     |                                                                         |
| Locus_18153_Transcript_1/1_Conf_1.000 | 145  | 0  |          |                |     |         |     |     |                                                                         |
| Locus_18154_Transcript_1/1_Conf_1.000 | 171  | 2  | 2.12E-12 | XP_002342418.1 | 100 | 75.485  | 50  | 50  | PREDICTED: hypothetical protein XP_002342418                            |
| Locus_18155_Transcript_1/1_Conf_1.000 | 395  | 20 | 7.63E-42 | EFO26003.1     | 72  | 173.326 | 132 | 96  | SPRY domain-containing protein                                          |
| Locus_18156_Transcript_1/1_Conf_1.000 | 566  | 20 | 5.94E-64 | NP_505071.1    | 77  | 247.284 | 188 | 145 | hypothetical protein ZC513.5                                            |
| Locus_18157_Transcript_1/1_Conf_1.000 | 860  | 20 | 1.77E-40 | XP_002639601.1 | 66  | 170.629 | 247 | 165 | Hypothetical protein CBG12310                                           |
| Locus_18158_Transcript_1/1_Conf_1.000 | 227  | 0  |          |                |     |         |     |     |                                                                         |
| Locus_18159_Transcript_1/1_Conf_1.000 | 176  | 0  |          |                |     |         |     |     |                                                                         |
| Locus_1816_Transcript_1/1_Conf_1.000  | 1544 | 20 | 1.64E-92 | EFO22955.1     | 58  | 344.739 | 470 | 273 | MIZ zinc finger family protein                                          |
| Locus_18160_Transcript_1/1_Conf_1.000 | 420  | 20 | 4.16E-48 | XP_001900297.1 | 82  | 194.126 | 138 | 114 | Importin-beta N-terminal domain containing protein                      |

|                                       |     |    |          |                |    |         |     |     |                                                                 |
|---------------------------------------|-----|----|----------|----------------|----|---------|-----|-----|-----------------------------------------------------------------|
| Locus_18161_Transcript_1/1_Conf_1.000 | 610 | 20 | 6.65E-57 | AAC35506.1     | 81 | 224.172 | 158 | 129 | putative actin-binding protein UNC-115                          |
| Locus_18162_Transcript_1/1_Conf_1.000 | 301 | 0  |          |                |    |         |     |     |                                                                 |
| Locus_18163_Transcript_1/1_Conf_1.000 | 201 | 0  |          |                |    |         |     |     |                                                                 |
| Locus_18164_Transcript_1/1_Conf_1.000 | 347 | 2  | 4.50E-10 | XP_002636871.1 | 55 | 67.781  | 96  | 53  | Hypothetical protein CBG09330                                   |
| Locus_18165_Transcript_1/1_Conf_1.000 | 255 | 3  | 4.52E-10 | XP_002633836.1 | 75 | 67.781  | 83  | 63  | Hypothetical protein CBG19874                                   |
| Locus_18166_Transcript_1/1_Conf_1.000 | 427 | 0  |          |                |    |         |     |     |                                                                 |
| Locus_18167_Transcript_1/1_Conf_1.000 | 167 | 0  |          |                |    |         |     |     |                                                                 |
| Locus_18168_Transcript_1/1_Conf_1.000 | 341 | 7  | 9.71E-26 | CAX65089.1     | 78 | 119.783 | 91  | 71  | C. elegans protein Y54G11A.17, confirmed by transcript evidence |
| Locus_18169_Transcript_1/1_Conf_1.000 | 184 | 0  |          |                |    |         |     |     |                                                                 |
| Locus_1817_Transcript_1/2_Conf_1.000  | 475 | 0  |          |                |    |         |     |     |                                                                 |
| Locus_1817_Transcript_2/2_Conf_1.000  | 478 | 0  |          |                |    |         |     |     |                                                                 |
| Locus_18170_Transcript_1/1_Conf_1.000 | 299 | 20 | 9.23E-32 | NP_502747.1    | 78 | 139.813 | 99  | 78  | hypothetical protein F55B11.1                                   |
| Locus_18171_Transcript_1/1_Conf_1.000 | 961 | 20 | 1.79E-71 | XP_002638881.1 | 64 | 273.863 | 319 | 205 | C. briggsae CBR-VPS-34 protein                                  |
| Locus_18172_Transcript_1/1_Conf_1.000 | 150 | 0  |          |                |    |         |     |     |                                                                 |
| Locus_18173_Transcript_1/1_Conf_1.000 | 413 | 20 | 7.67E-55 | AAT76298.1     | 94 | 216.468 | 115 | 109 | FMRFamide-related peptide FLP-18 precursor                      |
| Locus_18174_Transcript_1/1_Conf_1.000 | 169 | 0  |          |                |    |         |     |     |                                                                 |
| Locus_18175_Transcript_1/1_Conf_1.000 | 336 | 20 | 2.03E-31 | NP_496483.1    | 79 | 138.658 | 110 | 87  | hypothetical protein F07A11.5                                   |
| Locus_18176_Transcript_1/1_Conf_1.000 | 144 | 0  |          |                |    |         |     |     |                                                                 |
| Locus_18177_Transcript_1/1_Conf_1.000 | 186 | 20 | 2.17E-12 | XP_002635781.1 | 78 | 75.485  | 61  | 48  | Hypothetical protein CBG10437                                   |
| Locus_18178_Transcript_1/1_Conf_1.000 | 190 | 0  |          |                |    |         |     |     |                                                                 |

|                                       |      |    |          |                |    |         |      |     |                                     |
|---------------------------------------|------|----|----------|----------------|----|---------|------|-----|-------------------------------------|
| Locus_18179_Transcript_1/1_Conf_1.000 | 289  | 20 | 9.08E-11 | XP_001898051.1 | 61 | 70.0922 | 94   | 58  | Ran-binding protein 7               |
| Locus_1818_Transcript_1/1_Conf_1.000  | 3002 | 20 | 0        | AAO85274.1     | 86 | 983.4   | 658  | 570 | chondroitin disaccharide polymerase |
| Locus_18180_Transcript_1/1_Conf_1.000 | 192  | 0  |          |                |    |         |      |     |                                     |
| Locus_18181_Transcript_1/1_Conf_1.000 | 128  | 2  | 1.13E-05 | NP_498470.1    | 76 | 53.1434 | 42   | 32  | hypothetical protein F37A4.5        |
| Locus_18182_Transcript_1/1_Conf_1.000 | 314  | 0  |          |                |    |         |      |     |                                     |
| Locus_18183_Transcript_1/1_Conf_1.000 | 157  | 0  |          |                |    |         |      |     |                                     |
| Locus_18184_Transcript_1/1_Conf_1.000 | 340  | 0  |          |                |    |         |      |     |                                     |
| Locus_18185_Transcript_1/1_Conf_1.000 | 152  | 0  |          |                |    |         |      |     |                                     |
| Locus_18186_Transcript_1/1_Conf_1.000 | 278  | 0  |          |                |    |         |      |     |                                     |
| Locus_18187_Transcript_1/1_Conf_1.000 | 460  | 2  | 5.73E-10 | XP_002642255.1 | 71 | 67.3958 | 56   | 40  | C. briggsae CBR-FLP-15 protein      |
| Locus_18188_Transcript_1/1_Conf_1.000 | 132  | 0  |          |                |    |         |      |     |                                     |
| Locus_18189_Transcript_1/1_Conf_1.000 | 428  | 20 | 5.06E-30 | NP_506393.1    | 66 | 134.035 | 145  | 96  | hypothetical protein T01D3.5        |
| Locus_1819_Transcript_1/1_Conf_1.000  | 3580 | 20 | 0        | NP_508280.1    | 87 | 1718.75 | 1112 | 972 | hypothetical protein D1005.1        |
| Locus_18190_Transcript_1/1_Conf_1.000 | 155  | 0  |          |                |    |         |      |     |                                     |
| Locus_18191_Transcript_1/1_Conf_1.000 | 157  | 0  |          |                |    |         |      |     |                                     |
| Locus_18192_Transcript_1/1_Conf_1.000 | 336  | 0  |          |                |    |         |      |     |                                     |



|                                       |     |    |          |                |     |         |     |     |                                                               |
|---------------------------------------|-----|----|----------|----------------|-----|---------|-----|-----|---------------------------------------------------------------|
| Locus_18193_Transcript_1/1_Conf_1.000 | 251 | 20 | 1.90E-13 | XP_002635372.1 | 84  | 78.9518 | 52  | 44  | C. briggsae CBR-RPM-1 protein                                 |
| Locus_18194_Transcript_1/1_Conf_1.000 | 229 | 4  | 3.93E-06 | EFO14601.1     | 72  | 54.6842 | 47  | 34  | hypothetical protein LOAG_13915                               |
| Locus_18195_Transcript_1/1_Conf_1.000 | 151 | 0  |          |                |     |         |     |     |                                                               |
| Locus_18196_Transcript_1/1_Conf_1.000 | 232 | 7  | 7.61E-18 | CAX65068.1     | 73  | 93.5893 | 76  | 56  | C. elegans protein K08C7.3d, confirmed by transcript evidence |
| Locus_18197_Transcript_1/1_Conf_1.000 | 246 | 4  | 8.82E-27 | XP_002647365.1 | 85  | 123.25  | 82  | 70  | C. briggsae CBR-SNT-5 protein                                 |
| Locus_18198_Transcript_1/1_Conf_1.000 | 722 | 1  | 3.72E-08 | NP_494776.2    | 54  | 62.7734 | 113 | 62  | hypothetical protein B0286.1                                  |
| Locus_18199_Transcript_1/1_Conf_1.000 | 308 | 0  |          |                |     |         |     |     |                                                               |
| Locus_182_Transcript_1/1_Conf_1.000   | 498 | 20 | 1.25E-73 | XP_002634875.1 | 88  | 278.87  | 166 | 147 | Hypothetical protein CBG10541                                 |
| Locus_1820_Transcript_1/1_Conf_1.000  | 603 | 20 | 3.10E-59 | NP_492480.1    | 76  | 231.876 | 195 | 149 | hypothetical protein F26H9.4                                  |
| Locus_18200_Transcript_1/1_Conf_1.000 | 314 | 1  | 1.28E-04 | XP_002642931.1 | 60  | 49.6766 | 70  | 42  | C. briggsae CBR-ALH-11 protein                                |
| Locus_18201_Transcript_1/1_Conf_1.000 | 201 | 20 | 5.42E-24 | NP_004533.1    | 100 | 114.005 | 50  | 50  | NADH dehydrogenase ubiquinone 1 alpha subcomplex subunit 3    |
| Locus_18202_Transcript_1/1_Conf_1.000 | 162 | 0  |          |                |     |         |     |     |                                                               |

|                                       |      |    |          |                |    |         |     |     |                                                                     |
|---------------------------------------|------|----|----------|----------------|----|---------|-----|-----|---------------------------------------------------------------------|
| Locus_18203_Transcript_1/1_Conf_1.000 | 243  | 20 | 1.41E-32 | NP_001023645.1 | 92 | 142.51  | 80  | 74  | AKT kinase family member (akt-1)                                    |
| Locus_18204_Transcript_1/1_Conf_1.000 | 488  | 20 | 1.81E-43 | XP_001896664.1 | 75 | 178.718 | 162 | 122 | Protein kinase domain containing protein                            |
| Locus_18205_Transcript_1/1_Conf_1.000 | 272  | 0  |          |                |    |         |     |     |                                                                     |
| Locus_18206_Transcript_1/1_Conf_1.000 | 164  | 0  |          |                |    |         |     |     |                                                                     |
| Locus_18207_Transcript_1/1_Conf_1.000 | 853  | 20 | 6.05E-25 | NP_510852.1    | 62 | 119.013 | 156 | 97  | hypothetical protein T23E7.2                                        |
| Locus_18208_Transcript_1/1_Conf_1.000 | 1381 | 0  |          |                |    |         |     |     |                                                                     |
| Locus_18209_Transcript_1/1_Conf_1.000 | 148  | 0  |          |                |    |         |     |     |                                                                     |
| Locus_1821_Transcript_1/1_Conf_1.000  | 1478 | 9  | 1.05E-48 | NP_493601.2    | 46 | 199.134 | 515 | 238 | FERM domain (protein4.1-ezrin-radixin-moesin) family member (frm-1) |
| Locus_18210_Transcript_1/1_Conf_1.000 | 237  | 20 | 7.82E-15 | NP_491437.1    | 69 | 83.5741 | 79  | 55  | UDP-GlucuronosylTransferase family member (ugt-28)                  |
| Locus_18211_Transcript_1/1_Conf_1.000 | 136  | 0  |          |                |    |         |     |     |                                                                     |
| Locus_18212_Transcript_1/1_Conf_1.000 | 420  | 20 | 6.47E-17 | AAD13339.1     | 50 | 90.5077 | 126 | 63  | ancylostoma-secreted protein 1 precursor                            |
| Locus_18213_Transcript_1/1_Conf_1.000 | 483  | 20 | 9.27E-48 | XP_001897051.1 | 73 | 192.971 | 160 | 118 | RNA polymerase Rpb1, domain 1 family protein                        |
| Locus_18214_Transcript_1/1_Conf_1.000 | 184  | 0  |          |                |    |         |     |     |                                                                     |
| Locus_18215_Transcript_1/1_Conf_1.000 | 135  | 0  |          |                |    |         |     |     |                                                                     |
| Locus_18216_Transcript_1/1_Conf_1.000 | 144  | 0  |          |                |    |         |     |     |                                                                     |

|                                       |     |    |          |                |     |         |     |     |                                                     |
|---------------------------------------|-----|----|----------|----------------|-----|---------|-----|-----|-----------------------------------------------------|
| Locus_18217_Transcript_1/1_Conf_1.000 | 425 | 20 | 2.85E-65 | NP_502218.1    | 96  | 251.136 | 141 | 136 | hypothetical protein T22B3.2                        |
| Locus_18218_Transcript_1/1_Conf_1.000 | 377 | 20 | 2.98E-30 | XP_002641557.1 | 79  | 134.806 | 93  | 74  | C. briggsae CBR-PRK-2 protein                       |
| Locus_18219_Transcript_1/1_Conf_1.000 | 503 | 20 | 5.41E-72 | XP_002646621.1 | 89  | 273.478 | 160 | 143 | Hypothetical protein CBG20508                       |
| Locus_1822_Transcript_1/1_Conf_1.000  | 777 | 20 | 5.22E-54 | XP_001896728.1 | 71  | 215.312 | 224 | 160 | Rhomboid family protein                             |
| Locus_18220_Transcript_1/1_Conf_1.000 | 228 | 0  |          |                |     |         |     |     |                                                     |
| Locus_18221_Transcript_1/1_Conf_1.000 | 191 | 0  |          |                |     |         |     |     |                                                     |
| Locus_18222_Transcript_1/1_Conf_1.000 | 435 | 3  | 3.15E-16 | XP_002634303.1 | 62  | 88.1965 | 135 | 85  | C. briggsae CBR-NCX-3 protein                       |
| Locus_18223_Transcript_1/1_Conf_1.000 | 166 | 0  |          |                |     |         |     |     |                                                     |
| Locus_18224_Transcript_1/1_Conf_1.000 | 323 | 20 | 1.94E-21 | XP_002633194.1 | 71  | 105.531 | 100 | 71  | Hypothetical protein CBG05911                       |
| Locus_18225_Transcript_1/1_Conf_1.000 | 165 | 20 | 2.69E-15 | NP_506520.1    | 82  | 85.1149 | 52  | 43  | hypothetical protein T16A9.4                        |
| Locus_18226_Transcript_1/1_Conf_1.000 | 158 | 20 | 1.88E-24 | XP_002930821.1 | 100 | 115.546 | 52  | 52  | PREDICTED: splicing factor U2AF 35 kDa subunit-like |
| Locus_18227_Transcript_1/1_Conf_1.000 | 234 | 0  |          |                |     |         |     |     |                                                     |
| Locus_18228_Transcript_1/2_Conf_1.000 | 835 | 20 | 1.12E-68 | XP_783119.1    | 74  | 264.233 | 281 | 208 | PREDICTED: similar to mFLJ00229 protein             |

|                                       |     |    |          |                |    |         |     |     |                                                                         |
|---------------------------------------|-----|----|----------|----------------|----|---------|-----|-----|-------------------------------------------------------------------------|
| Locus_18228_Transcript_2/2_Conf_1.000 | 835 | 20 | 1.12E-68 | XP_783119.1    | 74 | 264.233 | 281 | 208 | PREDICTED: similar to mFLJ00229 protein                                 |
| Locus_18229_Transcript_1/1_Conf_1.000 | 386 | 0  |          |                |    |         |     |     |                                                                         |
| Locus_1823_Transcript_1/1_Conf_1.000  | 593 | 4  | 6.35E-30 | XP_002640094.1 | 60 | 134.42  | 180 | 108 | Hypothetical protein CBG12581                                           |
| Locus_18230_Transcript_1/1_Conf_1.000 | 203 | 0  |          |                |    |         |     |     |                                                                         |
| Locus_18231_Transcript_1/1_Conf_1.000 | 288 | 0  |          |                |    |         |     |     |                                                                         |
| Locus_18232_Transcript_1/1_Conf_1.000 | 268 | 20 | 5.99E-23 | NP_502118.4    | 71 | 110.538 | 89  | 64  | Gon-Two Like (TRP subfamily) family member (gtl-2)                      |
| Locus_18233_Transcript_1/1_Conf_1.000 | 418 | 0  |          |                |    |         |     |     |                                                                         |
| Locus_18234_Transcript_1/1_Conf_1.000 | 233 | 20 | 7.09E-32 | CBA11613.1     | 93 | 140.198 | 77  | 72  | C. elegans protein F54F3.1c, partially confirmed by transcript evidence |
| Locus_18235_Transcript_1/1_Conf_1.000 | 380 | 5  | 2.34E-51 | NP_001123175.1 | 87 | 204.912 | 120 | 105 | ImmunoGlobulin-like Cell adhesion Molecule family member (igcm-3)       |
| Locus_18236_Transcript_1/1_Conf_1.000 | 324 | 4  | 9.29E-16 | EFO17810.1     | 71 | 86.6557 | 108 | 77  | hypothetical protein LOAG_10687                                         |
| Locus_18237_Transcript_1/1_Conf_1.000 | 146 | 2  | 1.67E-04 | AAC31568.1     | 60 | 49.2914 | 48  | 29  | putative zinc metallopeptidase                                          |
| Locus_18238_Transcript_1/1_Conf_1.000 | 492 | 20 | 3.72E-41 | NP_494918.2    | 66 | 171.014 | 168 | 111 | hypothetical protein T27F7.3                                            |
| Locus_18239_Transcript_1/1_Conf_1.000 | 203 | 20 | 9.87E-26 | EDL12480.1     | 96 | 119.783 | 63  | 61  | eukaryotic translation initiation factor 5A, isoform CRA_d              |
| Locus_1824_Transcript_1/2_Conf_1.000  | 343 | 0  |          |                |    |         |     |     |                                                                         |

|                                       |     |    |          |                |     |         |     |     |                                |
|---------------------------------------|-----|----|----------|----------------|-----|---------|-----|-----|--------------------------------|
| Locus_1824_Transcript_2/2_Conf_1.000  | 341 | 0  |          |                |     |         |     |     |                                |
| Locus_18240_Transcript_1/1_Conf_1.000 | 734 | 5  | 1.32E-24 | NP_505973.1    | 46  | 117.472 | 263 | 123 | hypothetical protein F55A11.7  |
| Locus_18241_Transcript_1/1_Conf_1.000 | 199 | 0  |          |                |     |         |     |     |                                |
| Locus_18242_Transcript_1/1_Conf_1.000 | 339 | 20 | 1.27E-17 | XP_002632168.1 | 66  | 92.8189 | 112 | 74  | C. briggsae CBR-PQN-85 protein |
| Locus_18243_Transcript_1/1_Conf_1.000 | 171 | 20 | 3.17E-08 | XP_002633325.1 | 94  | 61.6178 | 35  | 33  | Hypothetical protein CBG06062  |
| Locus_18244_Transcript_1/1_Conf_1.000 | 312 | 0  |          |                |     |         |     |     |                                |
| Locus_18245_Transcript_1/1_Conf_1.000 | 136 | 0  |          |                |     |         |     |     |                                |
| Locus_18246_Transcript_1/1_Conf_1.000 | 480 | 5  | 7.00E-08 | EFO27664.1     | 42  | 60.4622 | 137 | 58  | BUB protein kinase             |
| Locus_18247_Transcript_1/1_Conf_1.000 | 323 | 3  | 2.71E-23 | NP_507767.2    | 71  | 111.694 | 105 | 75  | hypothetical protein C14B4.2   |
| Locus_18248_Transcript_1/1_Conf_1.000 | 176 | 20 | 3.16E-08 | EFO19751.1     | 79  | 61.6178 | 48  | 38  | prefoldin subunit 4            |
| Locus_18249_Transcript_1/1_Conf_1.000 | 275 | 1  | 1.25E-04 | XP_001901066.1 | 72  | 49.6766 | 40  | 29  | Alpha-catulin                  |
| Locus_1825_Transcript_1/1_Conf_1.000  | 393 | 20 | 5.47E-40 | ADD10740.1     | 100 | 167.162 | 81  | 81  | ribosomal protein S26          |

|                                       |     |    |          |                |    |         |     |     |                                                                |  |
|---------------------------------------|-----|----|----------|----------------|----|---------|-----|-----|----------------------------------------------------------------|--|
| Locus_18250_Transcript_1/1_Conf_1.000 | 137 | 0  |          |                |    |         |     |     |                                                                |  |
| Locus_18251_Transcript_1/1_Conf_1.000 | 102 | 0  |          |                |    |         |     |     |                                                                |  |
| Locus_18252_Transcript_1/1_Conf_1.000 | 455 | 20 | 1.16E-34 | XP_001950864.1 | 72 | 149.443 | 152 | 110 | PREDICTED: similar to werner syndrome helicase                 |  |
| Locus_18253_Transcript_1/1_Conf_1.000 | 632 | 2  | 1.98E-06 | NP_506680.1    | 86 | 56.6102 | 37  | 32  | Histone H1 Like family member (hil-1)                          |  |
| Locus_18254_Transcript_1/1_Conf_1.000 | 391 | 2  | 2.25E-06 | XP_002641416.1 | 53 | 55.4546 | 92  | 49  | C. briggsae CBR-SBP-1 protein                                  |  |
| Locus_18255_Transcript_1/1_Conf_1.000 | 305 | 20 | 2.48E-45 | NP_509268.1    | 93 | 184.882 | 101 | 94  | hypothetical protein F48E3.3                                   |  |
| Locus_18256_Transcript_1/1_Conf_1.000 | 174 | 0  |          |                |    |         |     |     |                                                                |  |
| Locus_18257_Transcript_1/1_Conf_1.000 | 211 | 0  |          |                |    |         |     |     |                                                                |  |
| Locus_18258_Transcript_1/1_Conf_1.000 | 421 | 20 | 1.10E-40 | NP_491776.1    | 85 | 169.474 | 119 | 102 | hypothetical protein T09B4.7                                   |  |
| Locus_18259_Transcript_1/1_Conf_1.000 | 692 | 20 | 2.68E-45 | NP_500997.1    | 64 | 186.037 | 234 | 150 | hypothetical protein C01G5.8                                   |  |
| Locus_1826_Transcript_1/1_Conf_1.000  | 366 | 20 | 3.10E-48 | CAA21573.2     | 96 | 194.512 | 106 | 102 | C. elegans protein Y106G6H.3, confirmed by transcript evidence |  |
| Locus_18260_Transcript_1/1_Conf_1.000 | 318 | 0  |          |                |    |         |     |     |                                                                |  |
| Locus_18261_Transcript_1/1_Conf_1.000 | 612 | 20 | 2.74E-50 | XP_001891673.1 | 69 | 202.216 | 207 | 143 | hypothetical protein Bm1_00760                                 |  |
| Locus_18262_Transcript_1/1_Conf_1.000 | 514 | 2  | 3.24E-06 | NP_001021459.2 | 46 | 55.0694 | 135 | 63  | hypothetical protein F36H2.3                                   |  |
| Locus_18263_Transcript_1/1_Conf_1.000 | 616 | 0  |          |                |    |         |     |     |                                                                |  |
| Locus_18264_Transcript_1/1_Conf_1.000 | 177 | 0  |          |                |    |         |     |     |                                                                |  |
| Locus_18265_Transcript_1/1_Conf_1.000 | 206 | 20 | 7.28E-29 | EFO28029.1     | 95 | 130.183 | 68  | 65  | AP-1 complex subunit mu-1                                      |  |
| Locus_18266_Transcript_1/1_Conf_1.000 | 293 | 20 | 2.54E-21 | NP_497959.1    | 78 | 105.145 | 95  | 75  | hypothetical protein T04A8.6                                   |  |
| Locus_18267_Transcript_1/1_Conf_1.000 | 189 | 0  |          |                |    |         |     |     |                                                                |  |
| Locus_18268_Transcript_1/1_Conf_1.000 | 299 | 0  |          |                |    |         |     |     |                                                                |  |
| Locus_18269_Transcript_1/1_Conf_1.000 | 694 | 20 | 3.75E-71 | A8XYX2.2       | 74 | 271.937 | 223 | 166 | Cap-specific mRNA (nucleoside-2'-O-)-methyltransferase 1A      |  |

|                                       |      |    |          |                |    |         |     |     |                                                                |
|---------------------------------------|------|----|----------|----------------|----|---------|-----|-----|----------------------------------------------------------------|
| Locus_1827_Transcript_1/1_Conf_1.000  | 1883 | 20 | 0        | NP_499065.1    | 83 | 726.087 | 483 | 404 | hypothetical protein C38C10.2                                  |
| Locus_18270_Transcript_1/1_Conf_1.000 | 176  | 0  |          |                |    |         |     |     |                                                                |
| Locus_18271_Transcript_1/1_Conf_1.000 | 1567 | 10 | 2.31E-25 | XP_002632478.1 | 51 | 121.709 | 267 | 137 | Hypothetical protein CBG13713                                  |
| Locus_18272_Transcript_1/1_Conf_1.000 | 316  | 0  |          |                |    |         |     |     |                                                                |
| Locus_18273_Transcript_1/1_Conf_1.000 | 397  | 0  |          |                |    |         |     |     |                                                                |
| Locus_18274_Transcript_1/1_Conf_1.000 | 379  | 4  | 6.65E-14 | NP_498113.1    | 73 | 80.4925 | 64  | 47  | hypothetical protein C34E10.11                                 |
| Locus_18275_Transcript_1/1_Conf_1.000 | 162  | 20 | 8.99E-11 | XP_002634244.1 | 98 | 70.0922 | 54  | 53  | C. briggsae CBR-LEV-1 protein                                  |
| Locus_18276_Transcript_1/1_Conf_1.000 | 219  | 20 | 8.21E-36 | CAR63550.1     | 97 | 153.295 | 72  | 70  | putative Mediator of RNA polymerase II transcription subunit 6 |
| Locus_18277_Transcript_1/1_Conf_1.000 | 296  | 20 | 4.63E-07 | EFO20608.1     | 66 | 57.7658 | 72  | 48  | ran-binding protein 7                                          |

|                                       |      |    |           |                |    |         |     |     |                                                    |
|---------------------------------------|------|----|-----------|----------------|----|---------|-----|-----|----------------------------------------------------|
| Locus_18278_Transcript_1/1_Conf_1.000 | 201  | 20 | 3.39E-26  | XP_002633097.1 | 95 | 121.324 | 66  | 63  | C. briggsae CBR-RPC-1 protein                      |
| Locus_18279_Transcript_1/1_Conf_1.000 | 302  | 0  |           |                |    |         |     |     |                                                    |
| Locus_1828_Transcript_1/1_Conf_1.000  | 1144 | 20 | 8.91E-71  | NP_491332.1    | 66 | 271.937 | 355 | 237 | NeurABin family member (nab-1)                     |
| Locus_18280_Transcript_1/1_Conf_1.000 | 297  | 0  |           |                |    |         |     |     |                                                    |
| Locus_18281_Transcript_1/1_Conf_1.000 | 241  | 5  | 1.74E-06  | XP_001900528.1 | 71 | 55.8398 | 60  | 43  | GRIP domain containing protein                     |
| Locus_18282_Transcript_1/1_Conf_1.000 | 208  | 1  | 1.16E-10  | NP_492417.2    | 72 | 69.707  | 54  | 39  | Fatty Acid SyNthase family member (fasn-1)         |
| Locus_18283_Transcript_1/1_Conf_1.000 | 318  | 20 | 2.99E-38  | XP_002632600.1 | 87 | 161.384 | 105 | 92  | Hypothetical protein CBG21499                      |
| Locus_18284_Transcript_1/1_Conf_1.000 | 129  | 0  |           |                |    |         |     |     |                                                    |
| Locus_18285_Transcript_1/1_Conf_1.000 | 144  | 20 | 1.37E-14  | XP_625155.1    | 82 | 82.8037 | 47  | 39  | PREDICTED: similar to WD repeat domain 19, partial |
| Locus_18286_Transcript_1/2_Conf_1.000 | 868  | 20 | 3.63E-57  | XP_002645108.1 | 76 | 226.098 | 165 | 126 | Hypothetical protein CBG16797                      |
| Locus_18286_Transcript_2/2_Conf_1.000 | 725  | 20 | 2.56E-57  | XP_002645108.1 | 76 | 226.098 | 165 | 126 | Hypothetical protein CBG16797                      |
| Locus_18287_Transcript_1/1_Conf_1.000 | 141  | 0  |           |                |    |         |     |     |                                                    |
| Locus_18288_Transcript_1/1_Conf_1.000 | 171  | 0  |           |                |    |         |     |     |                                                    |
| Locus_18289_Transcript_1/1_Conf_1.000 | 243  | 0  |           |                |    |         |     |     |                                                    |
| Locus_1829_Transcript_1/1_Conf_1.000  | 244  | 20 | 3.85E-14  | NP_001033569.1 | 66 | 81.2629 | 81  | 54  | SULfate Permease family member (sulp-7)            |
| Locus_18290_Transcript_1/1_Conf_1.000 | 402  | 2  | 8.41E-09  | EFO20920.1     | 52 | 63.5438 | 113 | 59  | hypothetical protein LOAG_07566                    |
| Locus_18291_Transcript_1/1_Conf_1.000 | 993  | 20 | 1.49E-108 | XP_002634112.1 | 76 | 397.127 | 317 | 244 | C. briggsae CBR-COGC-8 protein                     |
| Locus_18292_Transcript_1/1_Conf_1.000 | 609  | 20 | 6.90E-46  | XP_002646253.1 | 66 | 187.578 | 201 | 133 | C. briggsae CBR-PRG-1 protein                      |
| Locus_18293_Transcript_1/1_Conf_1.000 | 345  | 0  |           |                |    |         |     |     |                                                    |
| Locus_18294_Transcript_1/1_Conf_1.000 | 394  | 0  |           |                |    |         |     |     |                                                    |
| Locus_18295_Transcript_1/1_Conf_1.000 | 154  | 0  |           |                |    |         |     |     |                                                    |
| Locus_18296_Transcript_1/1_Conf_1.000 | 189  | 0  |           |                |    |         |     |     |                                                    |
| Locus_18297_Transcript_1/1_Conf_1.000 | 460  | 20 | 9.35E-45  | XP_002635106.1 | 78 | 182.956 | 136 | 107 | C. briggsae CBR-TAG-225 protein                    |
| Locus_18298_Transcript_1/1_Conf_1.000 | 252  | 20 | 3.82E-25  | EFO16377.1     | 76 | 117.857 | 82  | 63  | hypothetical protein LOAG_12131                    |
| Locus_18299_Transcript_1/1_Conf_1.000 | 266  | 0  |           |                |    |         |     |     |                                                    |



|                                       |      |    |          |                |    |         |     |     |                                                       |
|---------------------------------------|------|----|----------|----------------|----|---------|-----|-----|-------------------------------------------------------|
| Locus_183_Transcript_1/1_Conf_1.000   | 441  | 20 | 1.18E-26 |                | 70 | 122.865 | 148 | 104 | hypothetical protein C52B9.7 - Caenorhabditis elegans |
| Locus_1830_Transcript_1/1_Conf_1.000  | 1067 | 4  | 2.00E-29 | NP_491642.2    | 52 | 134.42  | 235 | 123 | hypothetical protein F46F11.9                         |
| Locus_18300_Transcript_1/1_Conf_1.000 | 337  | 20 | 6.54E-22 | AAG15121.1     | 66 | 107.071 | 108 | 72  | nuclear receptor NHR-22                               |
| Locus_18301_Transcript_1/1_Conf_1.000 | 201  | 0  |          |                |    |         |     |     |                                                       |
| Locus_18302_Transcript_1/1_Conf_1.000 | 389  | 0  |          |                |    |         |     |     |                                                       |
| Locus_18303_Transcript_1/1_Conf_1.000 | 603  | 20 | 8.76E-46 | XP_002644506.1 | 61 | 187.193 | 200 | 122 | Hypothetical protein CBG14396                         |
| Locus_18304_Transcript_1/1_Conf_1.000 | 163  | 0  |          |                |    |         |     |     |                                                       |
| Locus_18305_Transcript_1/1_Conf_1.000 | 219  | 0  |          |                |    |         |     |     |                                                       |
| Locus_18306_Transcript_1/1_Conf_1.000 | 705  | 20 | 1.43E-33 | XP_002639559.1 | 78 | 147.132 | 114 | 90  | C. briggsae CBR-MEK-2 protein                         |
| Locus_18307_Transcript_1/1_Conf_1.000 | 263  | 0  |          |                |    |         |     |     |                                                       |
| Locus_18308_Transcript_1/1_Conf_1.000 | 692  | 8  | 2.07E-13 | XP_002636857.1 | 51 | 80.1073 | 201 | 103 | Hypothetical protein CBG09313                         |
| Locus_18309_Transcript_1/1_Conf_1.000 | 283  | 0  |          |                |    |         |     |     |                                                       |
| Locus_1831_Transcript_1/1_Conf_1.000  | 664  | 0  |          |                |    |         |     |     |                                                       |
| Locus_18310_Transcript_1/1_Conf_1.000 | 239  | 3  | 6.01E-07 | NP_741458.2    | 61 | 57.3806 | 60  | 37  | P38 Map Kinase family member (pmk-2)                  |
| Locus_18311_Transcript_1/1_Conf_1.000 | 290  | 0  |          |                |    |         |     |     |                                                       |
| Locus_18312_Transcript_1/1_Conf_1.000 | 365  | 20 | 8.86E-11 | XP_002611624.1 | 63 | 70.0922 | 76  | 48  | hypothetical protein BRAFLDRAFT_117138                |
| Locus_18313_Transcript_1/1_Conf_1.000 | 427  | 20 | 1.91E-61 | AAK62032.1     | 85 | 238.424 | 141 | 121 | metalloprotease 1 precursor                           |

|                                       |      |    |          |                |    |         |     |     |                                                        |
|---------------------------------------|------|----|----------|----------------|----|---------|-----|-----|--------------------------------------------------------|
| Locus_18314_Transcript_1/1_Conf_1.000 | 339  | 20 | 8.55E-06 | YP_001805161.1 | 59 | 53.5286 | 84  | 50  | hypothetical protein cce_3747                          |
| Locus_18315_Transcript_1/1_Conf_1.000 | 447  | 20 | 2.14E-12 | NP_495978.1    | 72 | 75.485  | 68  | 49  | Temporarily Assigned Gene name family member (tag-165) |
| Locus_18316_Transcript_1/1_Conf_1.000 | 669  | 20 | 7.45E-58 | NP_502862.1    | 73 | 227.639 | 197 | 144 | hypothetical protein Y73F8A.26                         |
| Locus_18317_Transcript_1/2_Conf_1.000 | 431  | 20 | 8.58E-38 | NP_505382.2    | 69 | 159.844 | 143 | 99  | hypothetical protein C24B5.4                           |
| Locus_18317_Transcript_2/2_Conf_1.000 | 431  | 20 | 1.01E-38 | XP_002637502.1 | 68 | 162.925 | 143 | 98  | Hypothetical protein CBG19223                          |
| Locus_18318_Transcript_1/1_Conf_1.000 | 319  | 20 | 4.96E-17 | NP_497641.2    | 67 | 90.8929 | 92  | 62  | CaDHerin family member (cdh-1)                         |
| Locus_18319_Transcript_1/1_Conf_1.000 | 247  | 0  |          |                |    |         |     |     |                                                        |
| Locus_1832_Transcript_1/1_Conf_1.000  | 225  | 1  | 5.70E-05 | XP_002156800.1 | 71 | 50.8322 | 38  | 27  | PREDICTED: similar to tyrosyl-DNA phodphodiesterase 1  |
| Locus_18320_Transcript_1/1_Conf_1.000 | 231  | 0  |          |                |    |         |     |     |                                                        |
| Locus_18321_Transcript_1/1_Conf_1.000 | 1602 | 7  | 3.02E-12 | XP_002640169.1 | 35 | 78.1814 | 452 | 162 | Hypothetical protein CBG12671                          |

|                                       |      |    |          |                |     |         |     |     |                                                                            |
|---------------------------------------|------|----|----------|----------------|-----|---------|-----|-----|----------------------------------------------------------------------------|
| Locus_18322_Transcript_1/1_Conf_1.000 | 197  | 20 | 2.45E-16 | XP_002631921.1 | 97  | 88.5817 | 46  | 45  | Hypothetical protein CBG07909                                              |
| Locus_18323_Transcript_1/1_Conf_1.000 | 378  | 20 | 1.16E-42 | NP_001022488.1 | 92  | 176.022 | 103 | 95  | UNCoordinated family member (unc-52)                                       |
| Locus_18324_Transcript_1/1_Conf_1.000 | 146  | 0  |          |                |     |         |     |     |                                                                            |
| Locus_18325_Transcript_1/1_Conf_1.000 | 255  | 0  |          |                |     |         |     |     |                                                                            |
| Locus_18326_Transcript_1/1_Conf_1.000 | 139  | 2  | 9.48E-05 | CAD20812.1     | 63  | 50.0618 | 44  | 28  | SXC2 protein                                                               |
| Locus_18327_Transcript_1/1_Conf_1.000 | 400  | 20 | 2.01E-18 | XP_001900715.1 | 67  | 95.5153 | 121 | 82  | hypothetical protein                                                       |
| Locus_18328_Transcript_1/1_Conf_1.000 | 174  | 20 | 8.56E-22 | XP_002919926.1 | 100 | 106.686 | 50  | 50  | PREDICTED: hypothetical protein<br>LOC100478075                            |
| Locus_18329_Transcript_1/1_Conf_1.000 | 128  | 0  |          |                |     |         |     |     |                                                                            |
| Locus_1833_Transcript_1/1_Conf_1.000  | 1541 | 4  | 6.63E-09 | NP_491929.1    | 41  | 67.0106 | 275 | 115 | Suppressor with Morphological effect on<br>Genitalia family member (smg-5) |
| Locus_18330_Transcript_1/1_Conf_1.000 | 380  | 20 | 5.59E-37 | XP_002629723.1 | 78  | 157.147 | 118 | 93  | C. briggsae CBR-UGT-58 protein                                             |
| Locus_18331_Transcript_1/1_Conf_1.000 | 195  | 8  | 1.44E-08 | NP_492568.1    | 72  | 62.7734 | 50  | 36  | Nuclear Pore complex Protein family<br>member (npp-14)                     |
| Locus_18332_Transcript_1/1_Conf_1.000 | 330  | 20 | 2.84E-49 | P01023.3       | 100 | 197.978 | 99  | 99  | Alpha-2-macroglobulin                                                      |
| Locus_18333_Transcript_1/1_Conf_1.000 | 334  | 0  |          |                |     |         |     |     |                                                                            |
| Locus_18334_Transcript_1/1_Conf_1.000 | 794  | 0  |          |                |     |         |     |     |                                                                            |
| Locus_18335_Transcript_1/1_Conf_1.000 | 155  | 0  |          |                |     |         |     |     |                                                                            |
| Locus_18336_Transcript_1/1_Conf_1.000 | 241  | 20 | 3.60E-36 | BAI46776.1     | 100 | 154.451 | 80  | 80  | keratin 8                                                                  |
| Locus_18337_Transcript_1/1_Conf_1.000 | 590  | 0  |          |                |     |         |     |     |                                                                            |

|                                       |      |    |          |                |     |         |     |     |                                                   |
|---------------------------------------|------|----|----------|----------------|-----|---------|-----|-----|---------------------------------------------------|
| Locus_18338_Transcript_1/1_Conf_1.000 | 436  | 20 | 6.97E-32 | NP_500551.2    | 64  | 140.198 | 148 | 96  | hypothetical protein F55F10.1                     |
| Locus_18339_Transcript_1/1_Conf_1.000 | 228  | 20 | 1.18E-10 | NP_500215.2    | 63  | 69.707  | 71  | 45  | hypothetical protein Y69A2AR.17                   |
| Locus_1834_Transcript_1/1_Conf_1.000  | 254  | 0  |          |                |     |         |     |     |                                                   |
| Locus_18340_Transcript_1/1_Conf_1.000 | 208  | 1  | 1.98E-18 | XP_001142623.1 | 100 | 95.5153 | 43  | 43  | PREDICTED: similar to lysyl hydroxylase isoform 5 |
| Locus_18341_Transcript_1/1_Conf_1.000 | 271  | 0  |          |                |     |         |     |     |                                                   |
| Locus_18342_Transcript_1/1_Conf_1.000 | 167  | 0  |          |                |     |         |     |     |                                                   |
| Locus_18343_Transcript_1/1_Conf_1.000 | 229  | 0  |          |                |     |         |     |     |                                                   |
| Locus_18344_Transcript_1/1_Conf_1.000 | 155  | 0  |          |                |     |         |     |     |                                                   |
| Locus_18345_Transcript_1/1_Conf_1.000 | 250  | 0  |          |                |     |         |     |     |                                                   |
| Locus_18346_Transcript_1/1_Conf_1.000 | 237  | 0  |          |                |     |         |     |     |                                                   |
| Locus_18347_Transcript_1/1_Conf_1.000 | 328  | 0  |          |                |     |         |     |     |                                                   |
| Locus_18348_Transcript_1/1_Conf_1.000 | 354  | 0  |          |                |     |         |     |     |                                                   |
| Locus_18349_Transcript_1/1_Conf_1.000 | 260  | 0  |          |                |     |         |     |     |                                                   |
| Locus_1835_Transcript_1/3_Conf_0.714  | 1177 | 20 | 7.73E-25 | XP_001892966.1 | 64  | 119.398 | 155 | 100 | KH domain containing protein                      |
| Locus_1835_Transcript_2/3_Conf_0.714  | 1342 | 20 | 2.08E-24 | XP_001892966.1 | 69  | 118.242 | 135 | 94  | KH domain containing protein                      |

|                                       |      |    |          |                |    |         |     |     |                                                             |
|---------------------------------------|------|----|----------|----------------|----|---------|-----|-----|-------------------------------------------------------------|
| Locus_1835_Transcript_3/3_Conf_0.714  | 1336 | 20 | 9.28E-25 | XP_001892966.1 | 64 | 119.398 | 155 | 100 | KH domain containing protein                                |
| Locus_18350_Transcript_1/1_Conf_1.000 | 171  | 20 | 6.35E-25 | XP_002801692.1 | 98 | 117.087 | 56  | 55  | PREDICTED: hypothetical protein LOC100430805                |
| Locus_18351_Transcript_1/1_Conf_1.000 | 268  | 20 | 2.61E-18 | NP_507972.1    | 63 | 95.1301 | 93  | 59  | hypothetical protein F26F2.7                                |
| Locus_18352_Transcript_1/1_Conf_1.000 | 134  | 0  |          |                |    |         |     |     |                                                             |
| Locus_18353_Transcript_1/1_Conf_1.000 | 249  | 20 | 2.16E-33 | XP_002630855.1 | 92 | 145.206 | 83  | 77  | Hypothetical protein CBG02570                               |
| Locus_18354_Transcript_1/1_Conf_1.000 | 693  | 20 | 9.47E-99 | BAA08309.1     | 91 | 363.614 | 231 | 212 | ryanodine receptor                                          |
| Locus_18355_Transcript_1/1_Conf_1.000 | 163  | 20 | 1.03E-14 | NP_508515.2    | 87 | 83.1889 | 47  | 41  | AQuaPorin or aquaglyceroporin related family member (aqp-7) |
| Locus_18356_Transcript_1/1_Conf_1.000 | 375  | 20 | 1.06E-35 | XP_001899245.1 | 98 | 152.91  | 76  | 75  | Dumpy : shorter than wild-type protein 23, isoform b        |
| Locus_18357_Transcript_1/1_Conf_1.000 | 158  | 0  |          |                |    |         |     |     |                                                             |
| Locus_18358_Transcript_1/1_Conf_1.000 | 272  | 0  |          |                |    |         |     |     |                                                             |

|                                       |      |    |           |                |    |         |     |     |                                                                        |
|---------------------------------------|------|----|-----------|----------------|----|---------|-----|-----|------------------------------------------------------------------------|
| Locus_18359_Transcript_1/1_Conf_1.000 | 238  | 20 | 7.04E-32  | XP_002189607.1 | 93 | 140.198 | 78  | 73  | PREDICTED: similar to cytochrome b5 reductase 3                        |
| Locus_1836_Transcript_1/1_Conf_1.000  | 950  | 20 | 2.40E-52  | EFO25070.1     | 61 | 210.305 | 281 | 172 | protein-L-isoaspartate O-methyltransferase domain-containing protein 2 |
| Locus_18360_Transcript_1/1_Conf_1.000 | 523  | 7  | 7.33E-65  | ABO36652.1     | 84 | 249.98  | 177 | 149 | latrophilin-like protein 2                                             |
| Locus_18361_Transcript_1/2_Conf_1.000 | 442  | 4  | 2.23E-09  | XP_002631099.1 | 59 | 65.4698 | 82  | 49  | C. briggsae CBR-OOC-3 protein                                          |
| Locus_18361_Transcript_2/2_Conf_1.000 | 442  | 4  | 2.92E-09  | XP_002631099.1 | 59 | 65.0846 | 82  | 49  | C. briggsae CBR-OOC-3 protein                                          |
| Locus_18362_Transcript_1/1_Conf_1.000 | 169  | 0  |           |                |    |         |     |     |                                                                        |
| Locus_18363_Transcript_1/1_Conf_1.000 | 157  | 0  |           |                |    |         |     |     |                                                                        |
| Locus_18364_Transcript_1/1_Conf_1.000 | 284  | 0  |           |                |    |         |     |     |                                                                        |
| Locus_18365_Transcript_1/1_Conf_1.000 | 348  | 20 | 8.13E-28  | XP_002633875.1 | 66 | 126.716 | 113 | 75  | C. briggsae CBR-FEM-1 protein                                          |
| Locus_18366_Transcript_1/1_Conf_1.000 | 204  | 0  |           |                |    |         |     |     |                                                                        |
| Locus_18367_Transcript_1/1_Conf_1.000 | 632  | 20 | 1.45E-49  | NP_001021522.1 | 74 | 199.904 | 161 | 120 | hypothetical protein F59C6.12                                          |
| Locus_18368_Transcript_1/1_Conf_1.000 | 534  | 5  | 6.05E-09  | NP_505360.3    | 49 | 64.3142 | 177 | 87  | hypothetical protein F21C10.9                                          |
| Locus_18369_Transcript_1/1_Conf_1.000 | 188  | 5  | 1.04E-06  | NP_496976.2    | 59 | 56.6102 | 62  | 37  | hypothetical protein Y54G11A.7                                         |
| Locus_1837_Transcript_1/2_Conf_1.000  | 2063 | 20 | 1.46E-158 | NP_505864.1    | 72 | 564.688 | 475 | 344 | GLYcosylation related family member (gly-20)                           |
| Locus_1837_Transcript_2/2_Conf_1.000  | 2063 | 20 | 1.46E-158 | NP_505864.1    | 72 | 564.688 | 475 | 344 | GLYcosylation related family member (gly-20)                           |

|                                       |     |    |          |                |     |         |     |     |                                                     |
|---------------------------------------|-----|----|----------|----------------|-----|---------|-----|-----|-----------------------------------------------------|
| Locus_18370_Transcript_1/1_Conf_1.000 | 406 | 20 | 3.70E-65 | NP_495706.2    | 92  | 250.751 | 135 | 125 | hypothetical protein F10B5.8                        |
| Locus_18371_Transcript_1/1_Conf_1.000 | 276 | 11 | 8.01E-20 | ADD13547.1     | 78  | 100.138 | 93  | 73  | Inositol triphosphate receptor protein 1, isoform h |
| Locus_18372_Transcript_1/1_Conf_1.000 | 484 | 20 | 7.85E-47 | NP_502633.1    | 74  | 189.889 | 155 | 115 | UDP-GlucuronosylTransferase family member (ugt-22)  |
| Locus_18373_Transcript_1/1_Conf_1.000 | 154 | 20 | 6.70E-22 | DAA31575.1     | 100 | 107.071 | 51  | 51  | cold shock domain containing E1, RNA-binding        |
| Locus_18374_Transcript_1/1_Conf_1.000 | 396 | 0  |          |                |     |         |     |     |                                                     |
| Locus_18375_Transcript_1/1_Conf_1.000 | 234 | 20 | 1.21E-15 | EFO20381.1     | 70  | 86.2705 | 74  | 52  | ZIP Zinc transporter                                |
| Locus_18376_Transcript_1/1_Conf_1.000 | 169 | 2  | 1.43E-08 | NP_494782.1    | 76  | 62.7734 | 52  | 40  | hypothetical protein ZK430.1                        |
| Locus_18377_Transcript_1/1_Conf_1.000 | 151 | 0  |          |                |     |         |     |     |                                                     |
| Locus_18378_Transcript_1/1_Conf_1.000 | 137 | 0  |          |                |     |         |     |     |                                                     |
| Locus_18379_Transcript_1/1_Conf_1.000 | 242 | 20 | 5.56E-29 | XP_002640509.1 | 92  | 130.568 | 79  | 73  | C. briggsae CBR-RGA-2 protein                       |
| Locus_1838_Transcript_1/1_Conf_1.000  | 490 | 20 | 7.83E-23 | XP_002643840.1 | 77  | 110.153 | 105 | 81  | Hypothetical protein CBG02064                       |
| Locus_18380_Transcript_1/2_Conf_1.000 | 329 | 0  |          |                |     |         |     |     |                                                     |
| Locus_18380_Transcript_2/2_Conf_1.000 | 345 | 0  |          |                |     |         |     |     |                                                     |
| Locus_18381_Transcript_1/1_Conf_1.000 | 189 | 0  |          |                |     |         |     |     |                                                     |
| Locus_18382_Transcript_1/1_Conf_1.000 | 491 | 20 | 9.51E-45 | NP_508165.2    | 72  | 182.956 | 160 | 116 | hypothetical protein F39H12.3                       |
| Locus_18383_Transcript_1/1_Conf_1.000 | 316 | 20 | 2.22E-49 | XP_001166832.1 | 100 | 198.364 | 98  | 98  | PREDICTED: similar to interferon-gamma isoform 2    |
| Locus_18384_Transcript_1/1_Conf_1.000 | 375 | 1  | 1.30E-09 | EFO24319.1     | 63  | 66.2402 | 74  | 47  | hypothetical protein LOAG_04165                     |

|                                       |     |    |           |                |    |         |     |     |                                                                                  |
|---------------------------------------|-----|----|-----------|----------------|----|---------|-----|-----|----------------------------------------------------------------------------------|
| Locus_18385_Transcript_1/1_Conf_1.000 | 425 | 20 | 5.07E-38  | XP_002633709.1 | 71 | 160.614 | 138 | 98  | Hypothetical protein CBG03392                                                    |
| Locus_18386_Transcript_1/1_Conf_1.000 | 313 | 0  |           |                |    |         |     |     |                                                                                  |
| Locus_18387_Transcript_1/1_Conf_1.000 | 149 | 0  |           |                |    |         |     |     |                                                                                  |
| Locus_18388_Transcript_1/1_Conf_1.000 | 491 | 0  |           |                |    |         |     |     |                                                                                  |
| Locus_18389_Transcript_1/1_Conf_1.000 | 194 | 0  |           |                |    |         |     |     |                                                                                  |
| Locus_1839_Transcript_1/1_Conf_1.000  | 791 | 20 | 1.50E-80  | NP_001122411.1 | 82 | 303.523 | 234 | 194 | SCP(Small C-terminal domain Phosphatase)-Like phosphatase family member (scpl-1) |
| Locus_18390_Transcript_1/1_Conf_1.000 | 320 | 0  |           |                |    |         |     |     |                                                                                  |
| Locus_18391_Transcript_1/1_Conf_1.000 | 708 | 20 | 7.46E-123 | NP_501709.2    | 97 | 443.736 | 235 | 230 | Membrane Calcium ATPase family member (mca-1)                                    |
| Locus_18392_Transcript_1/1_Conf_1.000 | 206 | 0  |           |                |    |         |     |     |                                                                                  |
| Locus_18393_Transcript_1/1_Conf_1.000 | 548 | 8  | 6.68E-54  | NP_499047.1    | 96 | 213.772 | 105 | 101 | FOrn-homology and Zinc finger domains family member (fozi-1)                     |
| Locus_18394_Transcript_1/1_Conf_1.000 | 214 | 20 | 8.25E-25  | NP_510672.2    | 88 | 116.701 | 71  | 63  | Nematode AStacin protease family member (nas-39)                                 |
| Locus_18395_Transcript_1/1_Conf_1.000 | 128 | 0  |           |                |    |         |     |     |                                                                                  |
| Locus_18396_Transcript_1/1_Conf_1.000 | 139 | 0  |           |                |    |         |     |     |                                                                                  |
| Locus_18397_Transcript_1/1_Conf_1.000 | 252 | 6  | 3.04E-06  | XP_002634634.1 | 54 | 55.0694 | 70  | 38  | Hypothetical protein CBG18497                                                    |
| Locus_18398_Transcript_1/1_Conf_1.000 | 265 | 4  | 4.94E-09  | XP_002639468.1 | 80 | 64.3142 | 46  | 37  | Hypothetical protein CBG04063                                                    |
| Locus_18399_Transcript_1/1_Conf_1.000 | 148 | 20 | 7.99E-15  | NP_498248.2    | 91 | 83.5741 | 47  | 43  | hypothetical protein Y37B11A.2                                                   |



|                                       |      |    |          |                |    |         |     |     |                                                            |
|---------------------------------------|------|----|----------|----------------|----|---------|-----|-----|------------------------------------------------------------|
| Locus_184_Transcript_1/2_Conf_1.000   | 2838 | 20 | 0        | NP_500815.2    | 55 | 671.774 | 916 | 506 | Receptor Mediated Endocytosis family member (rme-2)        |
| Locus_184_Transcript_2/2_Conf_1.000   | 2784 | 20 | 0        | NP_500815.2    | 54 | 676.781 | 924 | 508 | Receptor Mediated Endocytosis family member (rme-2)        |
| Locus_1840_Transcript_1/1_Conf_1.000  | 1042 | 20 | 1.55E-79 | XP_002646388.1 | 81 | 300.827 | 243 | 198 | Hypothetical protein CBG15355                              |
| Locus_18400_Transcript_1/1_Conf_1.000 | 236  | 0  |          |                |    |         |     |     |                                                            |
| Locus_18401_Transcript_1/1_Conf_1.000 | 236  | 20 | 2.53E-13 | NP_506352.1    | 61 | 78.5666 | 77  | 47  | TransThyretin-Related family domain family member (ttr-44) |
| Locus_18402_Transcript_1/1_Conf_1.000 | 387  | 0  |          |                |    |         |     |     |                                                            |
| Locus_18403_Transcript_1/1_Conf_1.000 | 133  | 17 | 1.02E-06 | NP_001024294.1 | 79 | 56.6102 | 44  | 35  | hypothetical protein Y97E10AR.2                            |
| Locus_18404_Transcript_1/1_Conf_1.000 | 215  | 0  |          |                |    |         |     |     |                                                            |
| Locus_18405_Transcript_1/3_Conf_0.625 | 370  | 0  |          |                |    |         |     |     |                                                            |
| Locus_18405_Transcript_2/3_Conf_0.250 | 547  | 4  | 3.04E-06 | XP_392462.3    | 58 | 55.4546 | 129 | 76  | PREDICTED: similar to Stretchin-Mlck CG18255-PA, isoform A |
| Locus_18405_Transcript_3/3_Conf_0.625 | 502  | 20 | 1.45E-08 | XP_392462.3    | 54 | 62.7734 | 164 | 90  | PREDICTED: similar to Stretchin-Mlck CG18255-PA, isoform A |
| Locus_18406_Transcript_1/1_Conf_1.000 | 142  | 1  | 1.61E-04 | AAO63576.1     | 67 | 49.2914 | 46  | 31  | secreted protein 4 precursor                               |
| Locus_18407_Transcript_1/1_Conf_1.000 | 343  | 0  |          |                |    |         |     |     |                                                            |
| Locus_18408_Transcript_1/1_Conf_1.000 | 435  | 5  | 8.24E-33 | NP_501257.1    | 90 | 143.28  | 99  | 90  | hypothetical protein F33D4.5                               |

|                                       |      |    |           |                |     |         |     |     |                                                                          |
|---------------------------------------|------|----|-----------|----------------|-----|---------|-----|-----|--------------------------------------------------------------------------|
| Locus_18409_Transcript_1/1_Conf_1.000 | 327  | 4  | 8.94E-19  | NP_492524.2    | 72  | 96.6709 | 79  | 57  | hypothetical protein F30A10.10                                           |
| Locus_1841_Transcript_1/1_Conf_1.000  | 909  | 20 | 3.90E-73  | AAV38629.1     | 100 | 279.256 | 138 | 138 | cellular retinoic acid binding protein 2                                 |
| Locus_18410_Transcript_1/1_Conf_1.000 | 203  | 0  |           |                |     |         |     |     |                                                                          |
| Locus_18411_Transcript_1/1_Conf_1.000 | 393  | 0  |           |                |     |         |     |     |                                                                          |
| Locus_18412_Transcript_1/1_Conf_1.000 | 130  | 20 | 1.57E-15  | XP_575592.2    | 100 | 85.8853 | 43  | 43  | PREDICTED: poly(rC) binding protein 1-like                               |
| Locus_18413_Transcript_1/1_Conf_1.000 | 360  | 3  | 8.61E-06  | CBW44362.1     | 51  | 53.5286 | 129 | 67  | C. elegans protein C33A11.4b, partially confirmed by transcript evidence |
| Locus_18414_Transcript_1/1_Conf_1.000 | 257  | 0  |           |                |     |         |     |     |                                                                          |
| Locus_18415_Transcript_1/1_Conf_1.000 | 230  | 0  |           |                |     |         |     |     |                                                                          |
| Locus_18416_Transcript_1/1_Conf_1.000 | 376  | 3  | 4.45E-34  | NP_499680.1    | 83  | 147.517 | 98  | 82  | UNCoordinated family member (unc-71)                                     |
| Locus_18417_Transcript_1/1_Conf_1.000 | 638  | 0  |           |                |     |         |     |     |                                                                          |
| Locus_18418_Transcript_1/1_Conf_1.000 | 511  | 20 | 3.23E-43  | XP_001901812.1 | 66  | 177.948 | 177 | 118 | RNase3 domain containing protein                                         |
| Locus_18419_Transcript_1/1_Conf_1.000 | 712  | 8  | 2.86E-05  | XP_002169885.1 | 42  | 53.1434 | 202 | 85  | PREDICTED: similar to cytosolic beta-N-acetylglucosaminidase             |
| Locus_1842_Transcript_1/2_Conf_1.000  | 1016 | 20 | 7.76E-52  | NP_491159.2    | 72  | 208.764 | 172 | 125 | hypothetical protein K03E5.1                                             |
| Locus_1842_Transcript_2/2_Conf_1.000  | 1553 | 20 | 8.45E-105 | NP_491159.2    | 72  | 385.571 | 320 | 231 | hypothetical protein K03E5.1                                             |

|                                       |      |    |          |                |    |         |     |     |                                                                          |
|---------------------------------------|------|----|----------|----------------|----|---------|-----|-----|--------------------------------------------------------------------------|
| Locus_18420_Transcript_1/1_Conf_1.000 | 344  | 20 | 2.89E-49 | EFO18549.1     | 82 | 197.978 | 113 | 93  | hypothetical protein LOAG_09946                                          |
| Locus_18421_Transcript_1/1_Conf_1.000 | 473  | 0  |          |                |    |         |     |     |                                                                          |
| Locus_18422_Transcript_1/1_Conf_1.000 | 616  | 20 | 1.03E-36 | EFO23679.1     | 73 | 157.147 | 186 | 137 | hypothetical protein LOAG_04806                                          |
| Locus_18423_Transcript_1/1_Conf_1.000 | 764  |    |          |                |    |         |     |     |                                                                          |
| Locus_18424_Transcript_1/1_Conf_1.000 | 305  | 6  | 7.01E-32 | NP_500982.2    | 83 | 140.198 | 95  | 79  | hypothetical protein Y73B6BL.24                                          |
| Locus_18425_Transcript_1/1_Conf_1.000 | 298  | 0  |          |                |    |         |     |     |                                                                          |
| Locus_18426_Transcript_1/1_Conf_1.000 | 693  | 20 | 2.00E-48 | XP_002631178.1 | 60 | 196.438 | 246 | 149 | C. briggsae CBR-MAT-2 protein                                            |
| Locus_18427_Transcript_1/1_Conf_1.000 | 254  | 0  |          |                |    |         |     |     |                                                                          |
| Locus_18428_Transcript_1/1_Conf_1.000 | 1002 | 20 | 1.47E-71 | CAA22108.2     | 64 | 274.248 | 335 | 217 | C. elegans protein Y75B8A.24, partially confirmed by transcript evidence |
| Locus_18429_Transcript_1/1_Conf_1.000 | 409  | 2  | 1.33E-06 | XP_002632194.1 | 61 | 56.225  | 70  | 43  | Hypothetical protein CBG07060                                            |
| Locus_1843_Transcript_1/1_Conf_1.000  | 159  | 0  |          |                |    |         |     |     |                                                                          |
| Locus_18430_Transcript_1/1_Conf_1.000 | 375  | 2  | 1.76E-06 | NP_497334.1    | 50 | 55.8398 | 114 | 57  | INverted Formin/formin Three-related family member (inft-1)              |
| Locus_18431_Transcript_1/1_Conf_1.000 | 387  | 0  |          |                |    |         |     |     |                                                                          |
| Locus_18432_Transcript_1/1_Conf_1.000 | 148  | 0  |          |                |    |         |     |     |                                                                          |
| Locus_18433_Transcript_1/1_Conf_1.000 | 233  | 0  |          |                |    |         |     |     |                                                                          |
| Locus_18434_Transcript_1/1_Conf_1.000 | 211  | 2  | 2.77E-04 | XP_001892872.1 | 53 | 48.521  | 62  | 33  | hypothetical protein Bm1_07015                                           |
| Locus_18435_Transcript_1/1_Conf_1.000 | 444  | 20 | 1.33E-54 | NP_495436.1    | 88 | 215.698 | 144 | 127 | SQuashed Vulva family member (sqv-7)                                     |
| Locus_18436_Transcript_1/1_Conf_1.000 | 132  | 0  |          |                |    |         |     |     |                                                                          |

|                                       |      |    |          |                |     |         |     |     |                                                 |
|---------------------------------------|------|----|----------|----------------|-----|---------|-----|-----|-------------------------------------------------|
| Locus_18437_Transcript_1/1_Conf_1.000 | 342  | 20 | 5.13E-30 | AAP36875.1     | 100 | 134.035 | 83  | 83  | Homo sapiens apolipoprotein C-I                 |
| Locus_18438_Transcript_1/1_Conf_1.000 | 439  | 0  |          |                |     |         |     |     |                                                 |
| Locus_18439_Transcript_1/1_Conf_1.000 | 432  | 6  | 1.62E-12 |                | 53  | 75.8702 | 142 | 76  | hypothetical protein T28B8.4                    |
| Locus_1844_Transcript_1/1_Conf_1.000  | 530  | 6  | 1.88E-63 | ABS50363.1     | 90  | 245.358 | 175 | 159 | LIM domain protein variant                      |
| Locus_18440_Transcript_1/1_Conf_1.000 | 211  | 3  | 8.31E-09 | XP_001901164.1 | 63  | 63.5438 | 69  | 44  | hypothetical protein Bm1_48510                  |
| Locus_18441_Transcript_1/1_Conf_1.000 | 158  | 0  |          |                |     |         |     |     |                                                 |
| Locus_18442_Transcript_1/1_Conf_1.000 | 177  | 0  |          |                |     |         |     |     |                                                 |
| Locus_18443_Transcript_1/1_Conf_1.000 | 167  | 0  |          |                |     |         |     |     |                                                 |
| Locus_18444_Transcript_1/1_Conf_1.000 | 493  | 0  |          |                |     |         |     |     |                                                 |
| Locus_18445_Transcript_1/1_Conf_1.000 | 196  | 20 | 1.82E-19 | EFO20545.1     | 94  | 98.9821 | 52  | 49  | beta-centractin                                 |
| Locus_18446_Transcript_1/1_Conf_1.000 | 288  | 20 | 1.34E-38 | XP_002640011.1 | 90  | 162.54  | 95  | 86  | Hypothetical protein CBG12481                   |
| Locus_18447_Transcript_1/1_Conf_1.000 | 237  | 0  |          |                |     |         |     |     |                                                 |
| Locus_18448_Transcript_1/1_Conf_1.000 | 288  | 20 | 4.06E-27 | XP_002646691.1 | 85  | 124.405 | 87  | 74  | Hypothetical protein CBG13068                   |
| Locus_18449_Transcript_1/1_Conf_1.000 | 155  | 0  |          |                |     |         |     |     |                                                 |
| Locus_1845_Transcript_1/1_Conf_1.000  | 1282 | 20 | 1.08E-99 | NP_499274.3    | 67  | 368.237 | 386 | 259 | Connector/eNhancer of KSR family member (cnk-1) |
| Locus_18450_Transcript_1/1_Conf_1.000 | 272  | 5  | 6.38E-25 | NP_504292.2    | 84  | 117.087 | 88  | 74  | hypothetical protein C37H5.5                    |
| Locus_18451_Transcript_1/1_Conf_1.000 | 298  | 4  | 7.34E-13 | XP_002631639.1 | 67  | 77.0258 | 58  | 39  | Hypothetical protein CBG20828                   |
| Locus_18452_Transcript_1/1_Conf_1.000 | 136  | 20 | 1.73E-06 | XP_786652.1    | 77  | 55.8398 | 44  | 34  | PREDICTED: similar to ENSANGP00000028235        |
| Locus_18453_Transcript_1/1_Conf_1.000 | 147  | 0  |          |                |     |         |     |     |                                                 |

|                                       |      |    |           |                |     |         |     |     |                                                                         |  |
|---------------------------------------|------|----|-----------|----------------|-----|---------|-----|-----|-------------------------------------------------------------------------|--|
| Locus_18454_Transcript_1/1_Conf_1.000 | 345  | 0  |           |                |     |         |     |     |                                                                         |  |
| Locus_18455_Transcript_1/1_Conf_1.000 | 584  | 2  | 7.58E-20  | EFO20351.1     | 56  | 100.908 | 179 | 102 | phosphatidylinositol 3                                                  |  |
| Locus_18456_Transcript_1/1_Conf_1.000 | 800  | 20 | 9.75E-43  | NP_498636.2    | 66  | 177.948 | 248 | 165 | hypothetical protein T20B12.1                                           |  |
| Locus_18457_Transcript_1/1_Conf_1.000 | 245  | 0  |           |                |     |         |     |     |                                                                         |  |
| Locus_18458_Transcript_1/1_Conf_1.000 | 143  | 20 | 1.19E-07  | NP_491930.1    | 77  | 59.6918 | 48  | 37  | DiHydroOrotate Dehydrogenas family member (dhod-1)                      |  |
| Locus_18459_Transcript_1/1_Conf_1.000 | 328  | 20 | 1.34E-14  | NP_498936.1    | 95  | 82.8037 | 42  | 40  | hypothetical protein K02D10.1                                           |  |
| Locus_1846_Transcript_1/1_Conf_1.000  | 1645 | 20 | 3.33E-139 | NP_508777.1    | 73  | 499.975 | 438 | 324 | hypothetical protein C07A12.7                                           |  |
| Locus_18460_Transcript_1/1_Conf_1.000 | 149  | 0  |           |                |     |         |     |     |                                                                         |  |
| Locus_18461_Transcript_1/1_Conf_1.000 | 283  | 2  | 4.25E-08  | NP_001022400.1 | 56  | 61.2326 | 81  | 46  | Polarity and Osmotic sensitivity Defect family member (pod-2)           |  |
| Locus_18462_Transcript_1/1_Conf_1.000 | 397  | 20 | 8.98E-43  | XP_002636807.1 | 76  | 176.407 | 131 | 100 | Hypothetical protein CBG09249                                           |  |
| Locus_18463_Transcript_1/1_Conf_1.000 | 306  | 0  |           |                |     |         |     |     |                                                                         |  |
| Locus_18464_Transcript_1/1_Conf_1.000 | 434  | 20 | 2.50E-13  | CAR63705.1     | 100 | 78.5666 | 38  | 38  | putative CREB Homolog family member                                     |  |
| Locus_18465_Transcript_1/1_Conf_1.000 | 551  | 20 | 3.07E-38  | XP_002631239.1 | 71  | 161.77  | 179 | 128 | C. briggsae CBR-LACT-3 protein                                          |  |
| Locus_18466_Transcript_1/1_Conf_1.000 | 200  | 4  | 3.31E-05  | CBL87058.1     | 57  | 51.6026 | 61  | 35  | C. elegans protein T23F1.7c, partially confirmed by transcript evidence |  |
| Locus_18467_Transcript_1/1_Conf_1.000 | 155  | 0  |           |                |     |         |     |     |                                                                         |  |

|                                        |      |    |           |            |    |         |     |     |                                                         |
|----------------------------------------|------|----|-----------|------------|----|---------|-----|-----|---------------------------------------------------------|
| Locus_18468_Transcript_1/1_Conf_1.000  | 576  | 20 | 4.26E-60  | CAA72916.2 | 77 | 234.572 | 188 | 145 | serine protease inhibitor-like protein                  |
| Locus_18469_Transcript_1/1_Conf_1.000  | 162  | 20 | 7.61E-10  | EFO26418.1 | 78 | 67.0106 | 50  | 39  | hypothetical protein LOAG_02063                         |
| Locus_1847_Transcript_10/11_Conf_0.481 | 1586 | 20 | 0         | BAG64279.1 | 94 | 862.448 | 480 | 453 | unnamed protein product                                 |
| Locus_1847_Transcript_11/11_Conf_0.556 | 1275 | 20 | 0         | BAG62883.1 | 97 | 729.169 | 381 | 373 | unnamed protein product                                 |
| Locus_1847_Transcript_2/11_Conf_0.444  | 1251 | 20 | 0         | AAB21181.1 | 97 | 701.049 | 372 | 364 | immunoglobulin heavy chain                              |
| Locus_1847_Transcript_3/11_Conf_0.296  | 521  | 20 | 4.05E-76  | AAO17822.1 | 91 | 287.345 | 173 | 159 | anti-rabies SOJB immunoglobulin heavy chain             |
| Locus_1847_Transcript_4/11_Conf_0.259  | 801  | 20 | 4.02E-129 | ACN59874.1 | 99 | 464.922 | 222 | 221 | chimeric anti-human type VII collagen immunoglobulin G1 |
| Locus_1847_Transcript_5/11_Conf_0.556  | 1297 | 20 | 0         | BAG62883.1 | 97 | 729.169 | 381 | 373 | unnamed protein product                                 |
| Locus_1847_Transcript_6/11_Conf_0.074  | 355  | 20 | 6.33E-57  | ABI74358.1 | 91 | 223.402 | 121 | 111 | immunoglobulin heavy chain variable region              |
| Locus_1847_Transcript_7/11_Conf_0.074  | 316  | 20 | 3.20E-48  | AAM75843.1 | 91 | 194.512 | 109 | 100 | immunoglobulin heavy chain variable region              |

|                                       |      |    |           |                |     |         |     |     |                                                                   |
|---------------------------------------|------|----|-----------|----------------|-----|---------|-----|-----|-------------------------------------------------------------------|
| Locus_1847_Transcript_8/11_Conf_0.481 | 1266 | 20 | 0         | BAG62883.1     | 95  | 691.804 | 381 | 362 | unnamed protein product                                           |
| Locus_1847_Transcript_9/11_Conf_0.481 | 1263 | 20 | 0         | BAG62883.1     | 92  | 649.432 | 381 | 353 | unnamed protein product                                           |
| Locus_18470_Transcript_1/1_Conf_1.000 | 170  | 0  |           |                |     |         |     |     |                                                                   |
| Locus_18471_Transcript_1/1_Conf_1.000 | 306  | 0  |           |                |     |         |     |     |                                                                   |
| Locus_18472_Transcript_1/1_Conf_1.000 | 600  | 18 | 2.71E-07  | XP_002631917.1 | 82  | 59.3066 | 46  | 38  | Hypothetical protein CBG07905                                     |
| Locus_18473_Transcript_1/1_Conf_1.000 | 312  | 0  |           |                |     |         |     |     |                                                                   |
| Locus_18474_Transcript_1/1_Conf_1.000 | 268  | 2  | 1.64E-04  | NP_491537.1    | 55  | 49.2914 | 76  | 42  | HoloCentric chromosome binding Protein family member (hcp-6)      |
| Locus_18475_Transcript_1/1_Conf_1.000 | 189  | 0  |           |                |     |         |     |     |                                                                   |
| Locus_18476_Transcript_1/1_Conf_1.000 | 227  | 0  |           |                |     |         |     |     |                                                                   |
| Locus_18477_Transcript_1/1_Conf_1.000 | 1197 | 20 | 1.96E-124 | NP_001129829.1 | 74  | 450.284 | 367 | 275 | hypothetical protein Y46G5A.19                                    |
| Locus_18478_Transcript_1/1_Conf_1.000 | 146  | 0  |           |                |     |         |     |     |                                                                   |
| Locus_18479_Transcript_1/1_Conf_1.000 | 431  | 0  |           |                |     |         |     |     |                                                                   |
| Locus_1848_Transcript_1/1_Conf_1.000  | 1393 | 20 | 1.12E-121 | NP_490872.1    | 70  | 441.425 | 393 | 277 | BT (Bacillus thuringiensis) toxin REsistant family member (bre-4) |
| Locus_18480_Transcript_1/1_Conf_1.000 | 350  | 20 | 6.87E-35  | BAD88409.1     | 81  | 150.214 | 116 | 94  | multidrug resistance-associated protein                           |
| Locus_18481_Transcript_1/1_Conf_1.000 | 159  | 20 | 7.12E-24  | XP_001113553.2 | 100 | 113.62  | 52  | 52  | PREDICTED: complement factor B isoform 1                          |
| Locus_18482_Transcript_1/1_Conf_1.000 | 410  | 1  | 9.20E-16  | CAR63626.1     | 67  | 86.6557 | 77  | 52  | hypothetical protein                                              |
| Locus_18483_Transcript_1/1_Conf_1.000 | 1244 | 20 | 1.74E-163 | NP_001122531.1 | 80  | 580.096 | 415 | 334 | hypothetical protein Y105E8A.23                                   |

|                                       |     |    |          |                |    |         |     |     |                                                     |
|---------------------------------------|-----|----|----------|----------------|----|---------|-----|-----|-----------------------------------------------------|
| Locus_18484_Transcript_1/1_Conf_1.000 | 153 | 1  | 6.30E-04 | XP_002634303.1 | 71 | 47.3654 | 52  | 37  | C. briggsae CBR-NCX-3 protein                       |
| Locus_18485_Transcript_1/1_Conf_1.000 | 470 | 20 | 2.68E-39 | NP_499652.1    | 76 | 164.851 | 131 | 100 | hypothetical protein Y111B2A.20                     |
| Locus_18486_Transcript_1/1_Conf_1.000 | 271 | 3  | 1.58E-07 | XP_002640845.1 | 55 | 59.3066 | 80  | 44  | C. briggsae CBR-CDH-1 protein                       |
| Locus_18487_Transcript_1/1_Conf_1.000 | 128 | 0  |          |                |    |         |     |     |                                                     |
| Locus_18488_Transcript_1/1_Conf_1.000 | 422 | 0  |          |                |    |         |     |     |                                                     |
| Locus_18489_Transcript_1/1_Conf_1.000 | 234 | 20 | 2.88E-25 | NP_494775.1    | 86 | 118.242 | 67  | 58  | ForkHead transcription factor family member (fkh-6) |
| Locus_1849_Transcript_1/1_Conf_1.000  | 273 | 20 | 3.48E-31 | XP_002412610.1 | 80 | 137.887 | 90  | 72  | sorbitol dehydrogenase, putative                    |



|                                       |     |    |          |                |    |         |     |     |                                                                      |
|---------------------------------------|-----|----|----------|----------------|----|---------|-----|-----|----------------------------------------------------------------------|
| Locus_18490_Transcript_1/1_Conf_1.000 | 342 | 20 | 4.49E-34 | XP_002641355.1 | 78 | 147.517 | 114 | 89  | C. briggsae CBR-GLY-9 protein                                        |
| Locus_18491_Transcript_1/1_Conf_1.000 | 491 | 20 | 2.25E-70 | NP_496487.1    | 85 | 268.085 | 163 | 139 | hypothetical protein ZK20.4                                          |
| Locus_18492_Transcript_1/1_Conf_1.000 | 195 | 0  |          |                |    |         |     |     |                                                                      |
| Locus_18493_Transcript_1/1_Conf_1.000 | 317 | 7  | 2.82E-20 | XP_002633023.1 | 78 | 101.679 | 74  | 58  | Hypothetical protein CBG21797                                        |
| Locus_18494_Transcript_1/2_Conf_1.000 | 416 | 0  |          |                |    |         |     |     |                                                                      |
| Locus_18494_Transcript_2/2_Conf_1.000 | 412 | 0  |          |                |    |         |     |     |                                                                      |
| Locus_18495_Transcript_1/1_Conf_1.000 | 243 | 0  |          |                |    |         |     |     |                                                                      |
| Locus_18496_Transcript_1/1_Conf_1.000 | 402 | 9  | 5.63E-13 | NP_509538.1    | 75 | 77.411  | 66  | 50  | Apical Junction Molecule family member (ajm-1)                       |
| Locus_18497_Transcript_1/1_Conf_1.000 | 254 | 0  |          |                |    |         |     |     |                                                                      |
| Locus_18498_Transcript_1/1_Conf_1.000 | 334 | 20 | 5.35E-40 | XP_001894893.1 | 82 | 167.162 | 111 | 92  | MiaB-like tRNA modifying enzyme, archaeal-type family protein        |
| Locus_18499_Transcript_1/1_Conf_1.000 | 171 | 0  |          |                |    |         |     |     |                                                                      |
| Locus_185_Transcript_1/1_Conf_1.000   | 326 | 20 | 1.30E-17 | XP_002645122.1 | 82 | 92.8189 | 74  | 61  | Hypothetical protein CBG16816                                        |
| Locus_1850_Transcript_1/1_Conf_1.000  | 773 | 20 | 6.28E-52 | NP_505642.1    | 59 | 208.379 | 250 | 148 | LYSozyme family member (lys-1)                                       |
| Locus_18500_Transcript_1/1_Conf_1.000 | 204 | 0  |          |                |    |         |     |     |                                                                      |
| Locus_18501_Transcript_1/1_Conf_1.000 | 367 | 0  |          |                |    |         |     |     |                                                                      |
| Locus_18502_Transcript_1/1_Conf_1.000 | 452 | 20 | 7.75E-47 | XP_002631100.1 | 85 | 189.889 | 124 | 106 | Hypothetical protein CBG02874                                        |
| Locus_18503_Transcript_1/1_Conf_1.000 | 229 | 0  |          |                |    |         |     |     |                                                                      |
| Locus_18504_Transcript_1/1_Conf_1.000 | 442 | 18 | 5.46E-32 | NP_001023978.1 | 85 | 140.584 | 101 | 86  | hypothetical protein F55C10.5                                        |
| Locus_18505_Transcript_1/1_Conf_1.000 | 640 | 8  | 3.10E-87 | NP_509030.2    | 95 | 325.094 | 169 | 161 | hypothetical protein Y72A10A.1                                       |
| Locus_18506_Transcript_1/1_Conf_1.000 | 203 | 3  | 4.60E-15 | NP_001022279.1 | 88 | 84.3445 | 67  | 59  | Serpentine Receptor, class AB (class A-like) family member (srab-14) |

|                                       |      |    |           |                |    |         |     |     |                                                                         |
|---------------------------------------|------|----|-----------|----------------|----|---------|-----|-----|-------------------------------------------------------------------------|
| Locus_18507_Transcript_1/1_Conf_1.000 | 467  | 20 | 1.70E-17  | XP_002629686.1 | 61 | 92.4337 | 129 | 79  | Hypothetical protein CBG00906                                           |
| Locus_18508_Transcript_1/1_Conf_1.000 | 783  | 20 | 1.18E-45  | NP_506271.1    | 56 | 187.578 | 265 | 151 | C-type LECTin family member (clec-41)                                   |
| Locus_18509_Transcript_1/1_Conf_1.000 | 234  | 0  |           |                |    |         |     |     |                                                                         |
| Locus_1851_Transcript_1/1_Conf_1.000  | 2707 | 20 | 2.62E-166 | XP_002639375.1 | 59 | 590.882 | 908 | 543 | C. briggsae CBR-LET-502 protein                                         |
| Locus_18510_Transcript_1/1_Conf_1.000 | 659  | 6  | 8.94E-16  | EFO27431.1     | 48 | 87.8113 | 235 | 115 | hypothetical protein LOAG_01051                                         |
| Locus_18511_Transcript_1/1_Conf_1.000 | 506  | 20 | 2.75E-79  | XP_002634766.1 | 87 | 297.745 | 170 | 149 | Hypothetical protein CBG05362                                           |
| Locus_18512_Transcript_1/1_Conf_1.000 | 148  | 0  |           |                |    |         |     |     |                                                                         |
| Locus_18513_Transcript_1/1_Conf_1.000 | 275  | 0  |           |                |    |         |     |     |                                                                         |
| Locus_18514_Transcript_1/1_Conf_1.000 | 165  | 20 | 8.39E-09  | EFO16065.1     | 70 | 63.5438 | 51  | 36  | asparagine synthase                                                     |
| Locus_18515_Transcript_1/1_Conf_1.000 | 765  | 20 | 3.01E-115 | AAK31527.3     | 90 | 418.698 | 237 | 214 | Neuronal symmetry protein 1, partially confirmed by transcript evidence |
| Locus_18516_Transcript_1/1_Conf_1.000 | 370  | 20 | 1.64E-52  | NP_741809.1    | 87 | 208.764 | 123 | 108 | Beta Carbonic Anhydrase family member (bca-1)                           |
| Locus_18517_Transcript_1/1_Conf_1.000 | 253  | 0  |           |                |    |         |     |     |                                                                         |
| Locus_18518_Transcript_1/1_Conf_1.000 | 171  | 20 | 1.73E-22  | XP_002634622.1 | 94 | 108.997 | 57  | 54  | Hypothetical protein CBG18478                                           |
| Locus_18519_Transcript_1/1_Conf_1.000 | 172  | 0  |           |                |    |         |     |     |                                                                         |
| Locus_1852_Transcript_1/1_Conf_1.000  | 1393 | 20 | 0         | NP_501804.1    | 88 | 647.121 | 395 | 350 | Seryl tRNA Synthetase family member (srs-2)                             |

|                                       |      |    |          |                |     |         |     |     |                                                                         |
|---------------------------------------|------|----|----------|----------------|-----|---------|-----|-----|-------------------------------------------------------------------------|
| Locus_18520_Transcript_1/1_Conf_1.000 | 203  | 20 | 2.36E-11 | BAD92295.1     | 100 | 72.0182 | 52  | 52  | HLA-DPA1 protein variant                                                |
| Locus_18521_Transcript_1/1_Conf_1.000 | 344  | 20 | 4.34E-37 | NP_495793.2    | 78  | 157.532 | 113 | 89  | Gamma Butyrobetaine Hydroxylase family member (gbh-2)                   |
| Locus_18522_Transcript_1/1_Conf_1.000 | 275  | 20 | 3.05E-27 | CAB05601.2     | 94  | 124.79  | 71  | 67  | C. elegans protein R11A5.1b, partially confirmed by transcript evidence |
| Locus_18523_Transcript_1/1_Conf_1.000 | 269  | 20 | 5.60E-29 | AAK62032.1     | 78  | 130.568 | 89  | 70  | metalloprotease 1 precursor                                             |
| Locus_18524_Transcript_1/1_Conf_1.000 | 255  | 20 | 3.01E-30 | NP_741217.1    | 90  | 134.806 | 84  | 76  | EXOSome (multiexonuclease complex) component family member (exos-9)     |
| Locus_18525_Transcript_1/1_Conf_1.000 | 452  | 20 | 1.21E-07 | 1NOR           | 48  | 59.6918 | 126 | 61  | Designed Ankyrin Repeat Protein With Four Identical Consensus Repeats   |
| Locus_18526_Transcript_1/1_Conf_1.000 | 228  | 0  |          |                |     |         |     |     |                                                                         |
| Locus_18527_Transcript_1/1_Conf_1.000 | 225  | 0  |          |                |     |         |     |     |                                                                         |
| Locus_18528_Transcript_1/1_Conf_1.000 | 294  | 0  |          |                |     |         |     |     |                                                                         |
| Locus_18529_Transcript_1/1_Conf_1.000 | 525  | 20 | 2.06E-22 | XP_001898275.1 | 51  | 108.997 | 199 | 102 | GRIP domain containing protein                                          |
| Locus_1853_Transcript_1/1_Conf_1.000  | 1125 | 20 | 1.04E-63 | XP_001897956.1 | 62  | 248.44  | 311 | 195 | UBA/TS-N domain containing protein                                      |

|                                       |     |    |          |                |     |         |     |     |                                                                         |
|---------------------------------------|-----|----|----------|----------------|-----|---------|-----|-----|-------------------------------------------------------------------------|
| Locus_18530_Transcript_1/1_Conf_1.000 | 743 | 20 | 1.92E-87 | NP_001021798.2 | 80  | 326.25  | 245 | 198 | Arf-1 Guanine nucleotide Exchange Factor homolog family member (agef-1) |
| Locus_18531_Transcript_1/1_Conf_1.000 | 344 | 0  |          |                |     |         |     |     |                                                                         |
| Locus_18532_Transcript_1/1_Conf_1.000 | 695 | 4  | 7.66E-24 | XP_002641244.1 | 53  | 114.775 | 222 | 119 | Hypothetical protein CBG09112                                           |
| Locus_18533_Transcript_1/1_Conf_1.000 | 469 | 2  | 9.63E-05 | XP_002643723.1 | 62  | 50.0618 | 64  | 40  | Hypothetical protein CBG01914                                           |
| Locus_18534_Transcript_1/1_Conf_1.000 | 321 | 20 | 7.12E-24 | NP_499704.1    | 66  | 113.62  | 105 | 70  | Cytochrome P450 family member (cyp-13A11)                               |
| Locus_18535_Transcript_1/1_Conf_1.000 | 223 | 0  |          |                |     |         |     |     |                                                                         |
| Locus_18536_Transcript_1/1_Conf_1.000 | 889 | 20 | 2.55E-13 | AAD31839.1     | 46  | 80.4925 | 171 | 80  | AF132291_1ancylostoma-secreted protein 1 precursor                      |
| Locus_18537_Transcript_1/1_Conf_1.000 | 431 | 0  |          |                |     |         |     |     |                                                                         |
| Locus_18538_Transcript_1/1_Conf_1.000 | 403 | 20 | 1.62E-52 | AAS99337.1     | 100 | 208.764 | 103 | 103 | putative calmodulin isoform a                                           |
| Locus_18539_Transcript_1/1_Conf_1.000 | 254 | 20 | 4.22E-24 | CAM25761.1     | 100 | 114.39  | 72  | 72  | major histocompatibility complex, class II, DP alpha 1                  |
| Locus_1854_Transcript_1/1_Conf_1.000  | 764 | 0  |          |                |     |         |     |     |                                                                         |
| Locus_18540_Transcript_1/1_Conf_1.000 | 292 | 20 | 3.79E-17 | EFO14797.1     | 80  | 91.2781 | 67  | 54  | hypothetical protein LOAG_13718                                         |
| Locus_18541_Transcript_1/1_Conf_1.000 | 346 | 0  |          |                |     |         |     |     |                                                                         |
| Locus_18542_Transcript_1/1_Conf_1.000 | 169 | 20 | 2.87E-17 | NP_001022911.1 | 92  | 91.6633 | 56  | 52  | HELicase family member (hel-308)                                        |
| Locus_18543_Transcript_1/1_Conf_1.000 | 262 | 20 | 3.00E-22 | NP_499515.1    | 77  | 108.227 | 87  | 67  | hypothetical protein Y41C4A.8                                           |

|                                       |     |    |          |            |    |         |     |     |                                 |
|---------------------------------------|-----|----|----------|------------|----|---------|-----|-----|---------------------------------|
| Locus_18544_Transcript_1/2_Conf_1.000 | 450 | 20 | 1.78E-51 | EFO23808.1 | 78 | 205.297 | 151 | 118 | hypothetical protein LOAG_04674 |
| Locus_18544_Transcript_2/2_Conf_1.000 | 450 | 20 | 1.78E-51 | EFO23808.1 | 78 | 205.297 | 151 | 118 | hypothetical protein LOAG_04674 |
| Locus_18545_Transcript_1/1_Conf_1.000 | 141 | 20 | 5.00E-14 | EFO26621.1 | 91 | 80.8777 | 45  | 41  | AIDA-1b                         |

|                                       |      |    |          |                |     |         |     |     |                                                                         |
|---------------------------------------|------|----|----------|----------------|-----|---------|-----|-----|-------------------------------------------------------------------------|
| Locus_18546_Transcript_1/1_Conf_1.000 | 205  | 17 | 4.01E-11 | CAA93884.2     | 64  | 71.2478 | 68  | 44  | C. elegans protein ZK1067.2, partially confirmed by transcript evidence |
| Locus_18547_Transcript_1/1_Conf_1.000 | 179  | 0  |          |                |     |         |     |     |                                                                         |
| Locus_18548_Transcript_1/1_Conf_1.000 | 213  | 0  |          |                |     |         |     |     |                                                                         |
| Locus_18549_Transcript_1/1_Conf_1.000 | 256  | 0  |          |                |     |         |     |     |                                                                         |
| Locus_1855_Transcript_1/2_Conf_1.000  | 1479 | 1  | 1.00E-06 | XP_002631725.1 | 42  | 59.6918 | 194 | 83  | Hypothetical protein CBG20927                                           |
| Locus_1855_Transcript_2/2_Conf_1.000  | 1479 | 1  | 1.00E-06 | XP_002631725.1 | 42  | 59.6918 | 194 | 83  | Hypothetical protein CBG20927                                           |
| Locus_18550_Transcript_1/1_Conf_1.000 | 286  | 20 | 9.38E-24 | NP_498534.2    | 84  | 113.235 | 70  | 59  | ectopic membrane RuFFles in embryo family member (rfi-1)                |
| Locus_18551_Transcript_1/1_Conf_1.000 | 254  | 1  | 3.72E-04 | XP_002649031.1 | 64  | 48.1358 | 64  | 41  | Hypothetical protein CBG21486                                           |
| Locus_18552_Transcript_1/2_Conf_1.000 | 242  | 0  |          |                |     |         |     |     |                                                                         |
| Locus_18552_Transcript_2/2_Conf_1.000 | 242  | 0  |          |                |     |         |     |     |                                                                         |
| Locus_18553_Transcript_1/1_Conf_1.000 | 148  | 0  |          |                |     |         |     |     |                                                                         |
| Locus_18554_Transcript_1/1_Conf_1.000 | 347  | 20 | 6.93E-19 | NP_491099.1    | 83  | 97.0561 | 68  | 57  | ARp2/3 complex component family member (arx-7)                          |
| Locus_18555_Transcript_1/1_Conf_1.000 | 360  | 20 | 5.55E-29 | EFO20693.1     | 71  | 130.568 | 119 | 85  | hypothetical protein LOAG_07794                                         |
| Locus_18556_Transcript_1/1_Conf_1.000 | 327  | 20 | 3.05E-43 | XP_002798643.1 | 100 | 177.948 | 108 | 108 | PREDICTED: keratin, type II cytoskeletal 8 isoform 3                    |
| Locus_18557_Transcript_1/1_Conf_1.000 | 418  | 20 | 7.82E-71 | XP_002646356.1 | 96  | 269.626 | 139 | 134 | Hypothetical protein CBG12070                                           |
| Locus_18558_Transcript_1/1_Conf_1.000 | 131  | 20 | 1.86E-16 | XP_002640864.1 | 100 | 88.9669 | 43  | 43  | C. briggsae CBR-UNC-25 protein                                          |

|                                       |      |    |          |                |    |         |     |     |                                                |  |
|---------------------------------------|------|----|----------|----------------|----|---------|-----|-----|------------------------------------------------|--|
| Locus_18559_Transcript_1/1_Conf_1.000 | 160  | 0  |          |                |    |         |     |     |                                                |  |
| Locus_1856_Transcript_1/3_Conf_0.714  | 2144 | 20 | 0        | XP_002639673.1 | 82 | 907.131 | 699 | 580 | Hypothetical protein CBG12391                  |  |
| Locus_1856_Transcript_2/3_Conf_0.714  | 2144 | 20 | 0        | XP_002639673.1 | 82 | 907.131 | 699 | 580 | Hypothetical protein CBG12391                  |  |
| Locus_1856_Transcript_3/3_Conf_0.714  | 2144 | 20 | 0        | XP_002639673.1 | 82 | 907.131 | 699 | 580 | Hypothetical protein CBG12391                  |  |
| Locus_18560_Transcript_1/1_Conf_1.000 | 361  | 0  |          |                |    |         |     |     |                                                |  |
| Locus_18561_Transcript_1/1_Conf_1.000 | 811  |    |          |                |    |         |     |     |                                                |  |
| Locus_18562_Transcript_1/1_Conf_1.000 | 313  | 20 | 4.68E-15 | AAD51334.1     | 66 | 84.3445 | 80  | 53  | Kunitz type serine protease inhibitor          |  |
| Locus_18563_Transcript_1/1_Conf_1.000 | 457  | 0  |          |                |    |         |     |     |                                                |  |
| Locus_18564_Transcript_1/1_Conf_1.000 | 139  | 2  | 8.57E-06 | XP_002632655.1 | 78 | 53.5286 | 38  | 30  | Hypothetical protein CBG21578                  |  |
| Locus_18565_Transcript_1/1_Conf_1.000 | 471  | 2  | 5.07E-14 | NP_499928.1    | 51 | 80.8777 | 127 | 66  | hypothetical protein Y66H1A.5                  |  |
| Locus_18566_Transcript_1/1_Conf_1.000 | 273  | 0  |          |                |    |         |     |     |                                                |  |
| Locus_18567_Transcript_1/1_Conf_1.000 | 193  | 2  | 3.11E-11 | XP_002631732.1 | 65 | 71.633  | 64  | 42  | Hypothetical protein CBG20934                  |  |
| Locus_18568_Transcript_1/1_Conf_1.000 | 219  | 5  | 1.55E-26 | XP_002641766.1 | 88 | 122.479 | 71  | 63  | Hypothetical protein CBG10108                  |  |
| Locus_18569_Transcript_1/1_Conf_1.000 | 266  | 0  |          |                |    |         |     |     |                                                |  |
| Locus_1857_Transcript_1/1_Conf_1.000  | 306  | 20 | 1.85E-16 | NP_498551.3    | 63 | 88.9669 | 86  | 55  | Chondroitin ProteoGlycan family member (cpg-2) |  |
| Locus_18570_Transcript_1/1_Conf_1.000 | 302  | 20 | 2.12E-20 | XP_002635231.1 | 69 | 102.064 | 98  | 68  | Hypothetical protein CBG11474                  |  |
| Locus_18571_Transcript_1/1_Conf_1.000 | 210  | 10 | 1.73E-22 | NP_001129927.1 | 90 | 108.997 | 66  | 60  | PhosphoLipase C family member (plc-1)          |  |
| Locus_18572_Transcript_1/1_Conf_1.000 | 460  | 2  | 2.11E-04 | NP_497502.2    | 50 | 48.9062 | 118 | 59  | hypothetical protein Y48G9A.11                 |  |
| Locus_18573_Transcript_1/1_Conf_1.000 | 296  | 20 | 1.30E-25 | NP_490949.3    | 75 | 119.398 | 94  | 71  | ABC Transporter family member (abt-2)          |  |
| Locus_18574_Transcript_1/1_Conf_1.000 | 257  | 0  |          |                |    |         |     |     |                                                |  |
| Locus_18575_Transcript_1/1_Conf_1.000 | 193  | 0  |          |                |    |         |     |     |                                                |  |

|                                       |      |    |           |                |    |         |     |     |                                                                         |
|---------------------------------------|------|----|-----------|----------------|----|---------|-----|-----|-------------------------------------------------------------------------|
| Locus_18576_Transcript_1/1_Conf_1.000 | 989  | 20 | 1.40E-50  | NP_503359.2    | 54 | 204.527 | 333 | 183 | SQuashed Vulva family member (sqv-6)                                    |
| Locus_18577_Transcript_1/1_Conf_1.000 | 244  | 0  |           |                |    |         |     |     |                                                                         |
| Locus_18578_Transcript_1/1_Conf_1.000 | 234  | 0  |           |                |    |         |     |     |                                                                         |
| Locus_18579_Transcript_1/1_Conf_1.000 | 752  | 0  |           |                |    |         |     |     |                                                                         |
| Locus_1858_Transcript_1/1_Conf_1.000  | 1420 | 20 | 3.88E-85  | NP_496416.1    | 58 | 320.087 | 488 | 285 | hypothetical protein T24F1.2                                            |
| Locus_18580_Transcript_1/1_Conf_1.000 | 172  | 9  | 1.79E-19  | CAA21636.3     | 94 | 98.9821 | 57  | 54  | C. elegans protein Y38F1A.3, partially confirmed by transcript evidence |
| Locus_18581_Transcript_1/1_Conf_1.000 | 294  | 20 | 3.18E-32  | NP_499664.2    | 79 | 141.354 | 96  | 76  | hypothetical protein BE10.2                                             |
| Locus_18582_Transcript_1/1_Conf_1.000 | 173  | 20 | 2.87E-09  | NP_494824.1    | 75 | 65.0846 | 57  | 43  | hypothetical protein T05A7.6                                            |
| Locus_18583_Transcript_1/2_Conf_1.000 | 660  | 20 | 8.05E-17  | NP_498219.1    | 58 | 91.2781 | 113 | 66  | hypothetical protein F54E7.9                                            |
| Locus_18583_Transcript_2/2_Conf_1.000 | 660  | 20 | 3.49E-20  | NP_498219.1    | 58 | 102.449 | 113 | 66  | hypothetical protein F54E7.9                                            |
| Locus_18584_Transcript_1/1_Conf_1.000 | 341  | 20 | 6.96E-24  | XP_002636068.1 | 72 | 113.62  | 98  | 71  | Hypothetical protein CBG01308                                           |
| Locus_18585_Transcript_1/1_Conf_1.000 | 537  | 0  |           |                |    |         |     |     |                                                                         |
| Locus_18586_Transcript_1/1_Conf_1.000 | 298  | 20 | 2.14E-12  | AAM22023.2     | 75 | 75.485  | 60  | 45  | L15188_2Hypothetical protein C14B9.10                                   |
| Locus_18587_Transcript_1/1_Conf_1.000 | 1050 | 20 | 1.16E-114 | XP_002645256.1 | 83 | 417.542 | 294 | 245 | Hypothetical protein CBG00135                                           |
| Locus_18588_Transcript_1/1_Conf_1.000 | 135  | 4  | 8.88E-11  | XP_002643942.1 | 84 | 70.0922 | 45  | 38  | C. briggsae CBR-LEV-8 protein                                           |
| Locus_18589_Transcript_1/1_Conf_1.000 | 224  | 0  |           |                |    |         |     |     |                                                                         |



|                                       |      |    |          |                |     |         |     |     |                                                                                 |
|---------------------------------------|------|----|----------|----------------|-----|---------|-----|-----|---------------------------------------------------------------------------------|
| Locus_1859_Transcript_1/1_Conf_1.000  | 1479 | 20 | 0        | XP_002644843.1 | 90  | 682.559 | 409 | 369 | Hypothetical protein CBG05011                                                   |
| Locus_18590_Transcript_1/5_Conf_0.400 | 203  | 0  |          |                |     |         |     |     |                                                                                 |
| Locus_18590_Transcript_2/5_Conf_0.400 | 254  | 0  |          |                |     |         |     |     |                                                                                 |
| Locus_18590_Transcript_4/5_Conf_0.600 | 380  | 0  |          |                |     |         |     |     |                                                                                 |
| Locus_18590_Transcript_5/5_Conf_0.467 | 245  | 0  |          |                |     |         |     |     |                                                                                 |
| Locus_18591_Transcript_1/1_Conf_1.000 | 132  | 0  |          |                |     |         |     |     |                                                                                 |
| Locus_18592_Transcript_1/1_Conf_1.000 | 557  | 20 | 6.46E-15 | XP_001989392.1 | 55  | 84.3445 | 126 | 70  | GH11701                                                                         |
| Locus_18593_Transcript_1/1_Conf_1.000 | 361  | 20 | 4.28E-05 | NP_741539.2    | 50  | 51.2174 | 120 | 60  | hypothetical protein C18C4.5                                                    |
| Locus_18594_Transcript_1/1_Conf_1.000 | 182  | 2  | 5.04E-09 | AAM45145.1     | 86  | 64.3142 | 43  | 37  | AF278680_1L3B25                                                                 |
| Locus_18595_Transcript_1/1_Conf_1.000 | 141  | 3  | 6.76E-11 | NP_510494.2    | 84  | 70.4774 | 44  | 37  | hypothetical protein C18B12.6                                                   |
| Locus_18596_Transcript_1/1_Conf_1.000 | 232  | 0  |          |                |     |         |     |     |                                                                                 |
| Locus_18597_Transcript_1/1_Conf_1.000 | 130  | 20 | 8.34E-17 | XP_001114147.2 | 100 | 90.1225 | 43  | 43  | PREDICTED: uncharacterized protein C1orf43-like isoform 3                       |
| Locus_18598_Transcript_1/1_Conf_1.000 | 319  | 20 | 4.34E-21 | NP_001022673.1 | 74  | 104.375 | 105 | 78  | NADC (Na <sup>+</sup> -coupled dicarboxylate transporter) family member (nac-3) |
| Locus_18599_Transcript_1/1_Conf_1.000 | 229  | 0  |          |                |     |         |     |     |                                                                                 |
| Locus_186_Transcript_1/3_Conf_0.500   | 738  | 0  |          |                |     |         |     |     |                                                                                 |
| Locus_186_Transcript_2/3_Conf_0.600   | 930  | 0  |          |                |     |         |     |     |                                                                                 |
| Locus_186_Transcript_3/3_Conf_0.700   | 806  | 0  |          |                |     |         |     |     |                                                                                 |

|                                       |     |    |          |                |     |         |     |     |                                               |
|---------------------------------------|-----|----|----------|----------------|-----|---------|-----|-----|-----------------------------------------------|
| Locus_1860_Transcript_1/1_Conf_1.000  | 647 | 20 | 4.35E-36 | XP_001899156.1 | 75  | 155.221 | 150 | 113 | Nuclear hormone receptor family member nhr-41 |
| Locus_18600_Transcript_1/1_Conf_1.000 | 222 | 0  |          |                |     |         |     |     |                                               |
| Locus_18601_Transcript_1/1_Conf_1.000 | 278 | 2  | 4.27E-05 | XP_002642236.1 | 60  | 51.2174 | 68  | 41  | Hypothetical protein CBG18218                 |
| Locus_18602_Transcript_1/1_Conf_1.000 | 196 | 0  |          |                |     |         |     |     |                                               |
| Locus_18603_Transcript_1/1_Conf_1.000 | 213 | 20 | 1.90E-29 | NP_493755.1    | 97  | 132.109 | 70  | 68  | MolTing defective family member (mlt-10)      |
| Locus_18604_Transcript_1/1_Conf_1.000 | 157 | 20 | 1.26E-12 | EAW97458.1     | 100 | 76.2554 | 36  | 36  | decorin, isoform CRA_g                        |
| Locus_18605_Transcript_1/2_Conf_1.000 | 444 | 0  |          |                |     |         |     |     |                                               |
| Locus_18605_Transcript_2/2_Conf_1.000 | 444 | 0  |          |                |     |         |     |     |                                               |
| Locus_18606_Transcript_1/1_Conf_1.000 | 158 | 1  | 1.27E-04 | XP_002632108.1 | 78  | 49.6766 | 52  | 41  | C. briggsae CBR-PTR-3 protein                 |
| Locus_18607_Transcript_1/1_Conf_1.000 | 387 | 20 | 1.27E-33 | XP_002630605.1 | 89  | 145.976 | 122 | 109 | Hypothetical protein CBG02267                 |
| Locus_18608_Transcript_1/1_Conf_1.000 | 169 | 0  |          |                |     |         |     |     |                                               |
| Locus_18609_Transcript_1/1_Conf_1.000 | 247 | 0  |          |                |     |         |     |     |                                               |

|                                       |      |    |           |                |    |         |     |     |                                        |
|---------------------------------------|------|----|-----------|----------------|----|---------|-----|-----|----------------------------------------|
| Locus_1861_Transcript_1/1_Conf_1.000  | 450  | 20 | 4.69E-52  | EFO22655.1     | 79 | 207.223 | 134 | 106 | hypothetical protein LOAG_05826        |
| Locus_18610_Transcript_1/1_Conf_1.000 | 1013 | 20 | 1.75E-112 | NP_505849.2    | 79 | 410.223 | 297 | 236 | hypothetical protein T19B10.3          |
| Locus_18611_Transcript_1/1_Conf_1.000 | 165  | 0  |           |                |    |         |     |     |                                        |
| Locus_18612_Transcript_1/1_Conf_1.000 | 224  | 20 | 2.64E-18  | XP_002639616.1 | 86 | 95.1301 | 60  | 52  | C. briggsae CBR-APM-1 protein          |
| Locus_18613_Transcript_1/1_Conf_1.000 | 466  | 5  | 3.19E-32  | XP_002634225.1 | 66 | 141.354 | 150 | 99  | Hypothetical protein CBG01795          |
| Locus_18614_Transcript_1/1_Conf_1.000 | 172  | 0  |           |                |    |         |     |     |                                        |
| Locus_18615_Transcript_1/1_Conf_1.000 | 182  | 0  |           |                |    |         |     |     |                                        |
| Locus_18616_Transcript_1/1_Conf_1.000 | 443  | 5  | 9.39E-08  | NP_510705.1    | 80 | 60.077  | 40  | 32  | hypothetical protein C10E2.6           |
| Locus_18617_Transcript_1/1_Conf_1.000 | 702  | 20 | 2.95E-79  | NP_001023875.1 | 93 | 298.901 | 175 | 163 | hypothetical protein F32D8.14          |
| Locus_18618_Transcript_1/2_Conf_1.000 | 405  | 0  |           |                |    |         |     |     |                                        |
| Locus_18618_Transcript_2/2_Conf_1.000 | 428  | 0  |           |                |    |         |     |     |                                        |
| Locus_18619_Transcript_1/1_Conf_1.000 | 340  | 20 | 1.96E-18  | XP_002631544.1 | 54 | 95.5153 | 109 | 59  | Hypothetical protein CBG20713          |
| Locus_1862_Transcript_1/1_Conf_1.000  | 650  | 20 | 1.74E-16  | XP_002608187.1 | 55 | 90.1225 | 157 | 87  | hypothetical protein BRAFLDRAFT_125861 |
| Locus_18620_Transcript_1/1_Conf_1.000 | 239  | 0  |           |                |    |         |     |     |                                        |
| Locus_18621_Transcript_1/1_Conf_1.000 | 136  | 0  |           |                |    |         |     |     |                                        |
| Locus_18622_Transcript_1/1_Conf_1.000 | 273  | 0  |           |                |    |         |     |     |                                        |
| Locus_18623_Transcript_1/1_Conf_1.000 | 146  | 0  |           |                |    |         |     |     |                                        |
| Locus_18624_Transcript_1/1_Conf_1.000 | 274  | 20 | 5.20E-27  | NP_499949.2    | 90 | 124.02  | 90  | 81  | Gut on EXterior family member (gex-2)  |

|                                       |      |    |          |                |    |         |     |     |                                                                   |
|---------------------------------------|------|----|----------|----------------|----|---------|-----|-----|-------------------------------------------------------------------|
| Locus_18625_Transcript_1/1_Conf_1.000 | 224  | 0  |          |                |    |         |     |     |                                                                   |
| Locus_18626_Transcript_1/1_Conf_1.000 | 138  | 4  | 5.02E-14 | NP_492772.1    | 93 | 80.8777 | 45  | 42  | SET (trithorax/polycomb) domain containing family member (set-18) |
| Locus_18627_Transcript_1/1_Conf_1.000 | 369  | 20 | 2.08E-39 | NP_499603.1    | 83 | 165.236 | 115 | 96  | Protein PHosphatase family member (pph-4.1)                       |
| Locus_18628_Transcript_1/1_Conf_1.000 | 464  | 20 | 1.64E-44 | NP_496483.1    | 73 | 182.185 | 154 | 113 | hypothetical protein F07A11.5                                     |
| Locus_18629_Transcript_1/1_Conf_1.000 | 189  | 0  |          |                |    |         |     |     |                                                                   |
| Locus_1863_Transcript_1/1_Conf_1.000  | 1423 | 20 | 2.56E-36 | XP_001891682.1 | 50 | 157.918 | 392 | 198 | MRG family protein                                                |
| Locus_18630_Transcript_1/1_Conf_1.000 | 143  | 0  |          |                |    |         |     |     |                                                                   |
| Locus_18631_Transcript_1/1_Conf_1.000 | 330  | 20 | 1.25E-12 | EFA06146.1     | 59 | 76.2554 | 96  | 57  | hypothetical protein TcasGA2_TC008990                             |
| Locus_18632_Transcript_1/1_Conf_1.000 | 319  | 2  | 2.81E-20 | NP_001024902.1 | 68 | 101.679 | 95  | 65  | hypothetical protein T10B10.4                                     |
| Locus_18633_Transcript_1/1_Conf_1.000 | 529  | 20 | 1.00E-48 | NP_492169.2    | 72 | 196.438 | 161 | 117 | TAF (TBP-associated transcription factor) family member (taf-5)   |
| Locus_18634_Transcript_1/1_Conf_1.000 | 244  | 0  |          |                |    |         |     |     |                                                                   |
| Locus_18635_Transcript_1/1_Conf_1.000 | 144  | 20 | 1.12E-16 | NP_492775.2    | 85 | 89.7373 | 47  | 40  | LAMinin related. See also lmb- family member (lam-3)              |
| Locus_18636_Transcript_1/1_Conf_1.000 | 136  | 0  |          |                |    |         |     |     |                                                                   |
| Locus_18637_Transcript_1/1_Conf_1.000 | 130  | 0  |          |                |    |         |     |     |                                                                   |
| Locus_18638_Transcript_1/1_Conf_1.000 | 134  | 0  |          |                |    |         |     |     |                                                                   |
| Locus_18639_Transcript_1/1_Conf_1.000 | 227  | 0  |          |                |    |         |     |     |                                                                   |

|                                       |      |    |          |                |    |         |     |     |                                            |
|---------------------------------------|------|----|----------|----------------|----|---------|-----|-----|--------------------------------------------|
| Locus_1864_Transcript_1/1_Conf_1.000  | 1321 | 20 | 8.83E-20 | XP_002639715.1 | 61 | 102.834 | 129 | 79  | Hypothetical protein CBG12437              |
| Locus_18640_Transcript_1/1_Conf_1.000 | 304  | 20 | 1.37E-35 | NP_510447.1    | 87 | 152.525 | 100 | 87  | hypothetical protein C05G5.1               |
| Locus_18641_Transcript_1/1_Conf_1.000 | 318  | 7  | 3.53E-39 | XP_002645055.1 | 80 | 164.466 | 106 | 85  | Hypothetical protein CBG16715              |
| Locus_18642_Transcript_1/1_Conf_1.000 | 130  | 0  |          |                |    |         |     |     |                                            |
| Locus_18643_Transcript_1/1_Conf_1.000 | 341  | 20 | 2.09E-36 | NP_506047.5    | 79 | 155.221 | 113 | 90  | abnormal CHEmotaxis family member (che-11) |
| Locus_18644_Transcript_1/1_Conf_1.000 | 171  | 0  |          |                |    |         |     |     |                                            |
| Locus_18645_Transcript_1/1_Conf_1.000 | 427  | 0  |          |                |    |         |     |     |                                            |
| Locus_18646_Transcript_1/1_Conf_1.000 | 874  | 0  |          |                |    |         |     |     |                                            |
| Locus_18647_Transcript_1/1_Conf_1.000 | 473  | 20 | 1.12E-37 | EFO25106.1     | 66 | 159.458 | 156 | 104 | hypothetical protein LOAG_03373            |
| Locus_18648_Transcript_1/1_Conf_1.000 | 123  | 0  |          |                |    |         |     |     |                                            |
| Locus_18649_Transcript_1/1_Conf_1.000 | 233  | 0  |          |                |    |         |     |     |                                            |
| Locus_1865_Transcript_1/2_Conf_0.500  | 1726 | 20 | 1.21E-38 | CAR63549.1     | 86 | 166.007 | 99  | 86  | hypothetical protein                       |
| Locus_1865_Transcript_2/2_Conf_0.750  | 2307 | 20 | 6.91E-88 | CAR63549.1     | 80 | 330.102 | 231 | 185 | hypothetical protein                       |
| Locus_18650_Transcript_1/1_Conf_1.000 | 162  | 0  |          |                |    |         |     |     |                                            |
| Locus_18651_Transcript_1/1_Conf_1.000 | 143  | 0  |          |                |    |         |     |     |                                            |
| Locus_18652_Transcript_1/1_Conf_1.000 | 492  | 20 | 4.40E-42 | NP_495617.1    | 73 | 174.096 | 156 | 114 | hypothetical protein B0495.2               |
| Locus_18653_Transcript_1/1_Conf_1.000 | 244  | 0  |          |                |    |         |     |     |                                            |
| Locus_18654_Transcript_1/1_Conf_1.000 | 342  | 2  | 4.98E-17 | XP_002633839.1 | 61 | 90.8929 | 106 | 65  | Hypothetical protein CBG19878              |
| Locus_18655_Transcript_1/1_Conf_1.000 | 930  | 20 | 3.13E-49 | EFO16234.1     | 60 | 199.904 | 303 | 183 | pold2-prov protein                         |
| Locus_18656_Transcript_1/1_Conf_1.000 | 252  | 20 | 2.74E-15 | AAV88076.1     | 69 | 85.1149 | 78  | 54  | putative retrotransposon polyprotein       |
| Locus_18657_Transcript_1/1_Conf_1.000 | 258  | 1  | 1.15E-05 | XP_002646401.1 | 59 | 53.1434 | 86  | 51  | C. briggsae CBR-DYS-1 protein              |
| Locus_18658_Transcript_1/1_Conf_1.000 | 206  | 4  | 3.64E-04 | XP_002636748.1 | 73 | 48.1358 | 46  | 34  | Hypothetical protein CBG23475              |
| Locus_18659_Transcript_1/1_Conf_1.000 | 142  | 0  |          |                |    |         |     |     |                                            |

|                                       |      |    |          |                |    |         |     |     |                                                                           |
|---------------------------------------|------|----|----------|----------------|----|---------|-----|-----|---------------------------------------------------------------------------|
| Locus_1866_Transcript_1/2_Conf_1.000  | 1271 | 3  | 1.25E-07 | AAO33571.1     | 50 | 62.3882 | 109 | 55  | Thr-Ser protein                                                           |
| Locus_1866_Transcript_2/2_Conf_1.000  | 1208 | 3  | 1.17E-07 | AAO33571.1     | 50 | 62.3882 | 109 | 55  | Thr-Ser protein                                                           |
| Locus_18660_Transcript_1/1_Conf_1.000 | 360  | 20 | 1.20E-15 | NP_491604.3    | 56 | 86.2705 | 119 | 67  | hypothetical protein T05E8.3                                              |
| Locus_18661_Transcript_1/1_Conf_1.000 | 425  | 0  |          |                |    |         |     |     |                                                                           |
| Locus_18662_Transcript_1/1_Conf_1.000 | 190  | 20 | 9.36E-24 | CAB55030.2     | 91 | 113.235 | 61  | 56  | C. elegans protein Y57A10A.10, partially confirmed by transcript evidence |
| Locus_18663_Transcript_1/1_Conf_1.000 | 254  | 0  |          |                |    |         |     |     |                                                                           |
| Locus_18664_Transcript_1/1_Conf_1.000 | 522  | 4  | 5.33E-15 | NP_001041216.1 | 59 | 84.3445 | 104 | 62  | hypothetical protein C05D9.9                                              |
| Locus_18665_Transcript_1/1_Conf_1.000 | 129  | 0  |          |                |    |         |     |     |                                                                           |
| Locus_18666_Transcript_1/1_Conf_1.000 | 219  | 0  |          |                |    |         |     |     |                                                                           |
| Locus_18667_Transcript_1/1_Conf_1.000 | 571  | 5  | 5.95E-59 | NP_001122951.1 | 85 | 230.72  | 157 | 135 | Rod-like lethal, DYE-filling defective family member (rdy-2)              |
| Locus_18668_Transcript_1/1_Conf_1.000 | 146  | 0  |          |                |    |         |     |     |                                                                           |
| Locus_18669_Transcript_1/1_Conf_1.000 | 479  | 20 | 5.51E-45 | XP_002637016.1 | 75 | 183.726 | 141 | 107 | C. briggsae CBR-TTR-27 protein                                            |
| Locus_1867_Transcript_1/2_Conf_1.000  | 304  | 2  | 2.05E-07 | XP_002645104.1 | 58 | 58.9214 | 55  | 32  | Hypothetical protein CBG16791                                             |
| Locus_1867_Transcript_2/2_Conf_1.000  | 482  | 2  | 2.03E-15 | XP_002645104.1 | 67 | 85.5001 | 100 | 67  | Hypothetical protein CBG16791                                             |
| Locus_18670_Transcript_1/1_Conf_1.000 | 487  | 5  | 3.66E-12 | NP_741607.1    | 51 | 74.7146 | 140 | 72  | hypothetical protein T07C12.12                                            |
| Locus_18671_Transcript_1/1_Conf_1.000 | 155  | 11 | 3.56E-15 | XP_002631133.1 | 84 | 84.7297 | 50  | 42  | C. briggsae CBR-CLH-2 protein                                             |
| Locus_18672_Transcript_1/1_Conf_1.000 | 217  | 0  |          |                |    |         |     |     |                                                                           |
| Locus_18673_Transcript_1/1_Conf_1.000 | 160  | 0  |          |                |    |         |     |     |                                                                           |
| Locus_18674_Transcript_1/1_Conf_1.000 | 488  | 1  | 6.26E-04 | XP_001551642.1 | 47 | 47.3654 | 109 | 52  | predicted protein                                                         |
| Locus_18675_Transcript_1/1_Conf_1.000 | 129  | 4  | 2.28E-06 | NP_506824.1    | 76 | 55.4546 | 39  | 30  | hypothetical protein T06E6.1                                              |
| Locus_18676_Transcript_1/1_Conf_1.000 | 312  | 20 | 3.68E-36 | XP_002634196.1 | 87 | 154.451 | 99  | 87  | Hypothetical protein CBG01765                                             |
| Locus_18677_Transcript_1/1_Conf_1.000 | 416  | 20 | 7.38E-58 | XP_002641543.1 | 85 | 226.483 | 138 | 118 | Hypothetical protein CBG09842                                             |
| Locus_18678_Transcript_1/1_Conf_1.000 | 231  | 0  |          |                |    |         |     |     |                                                                           |
| Locus_18679_Transcript_1/1_Conf_1.000 | 549  | 0  |          |                |    |         |     |     |                                                                           |

|                                       |      |    |          |                |    |         |     |     |                                                               |
|---------------------------------------|------|----|----------|----------------|----|---------|-----|-----|---------------------------------------------------------------|
| Locus_1868_Transcript_1/2_Conf_1.000  | 1785 | 20 | 4.00E-85 | CAC42336.2     | 65 | 320.472 | 360 | 234 | C. elegans protein T06E6.2b, confirmed by transcript evidence |
| Locus_1868_Transcript_2/2_Conf_1.000  | 1785 | 20 | 4.01E-85 | CAC42336.2     | 65 | 320.472 | 360 | 234 | C. elegans protein T06E6.2b, confirmed by transcript evidence |
| Locus_18680_Transcript_1/1_Conf_1.000 | 476  | 0  |          |                |    |         |     |     |                                                               |
| Locus_18681_Transcript_1/1_Conf_1.000 | 235  | 2  | 2.98E-22 | XP_002632209.1 | 91 | 108.227 | 61  | 56  | Hypothetical protein CBG07076                                 |
| Locus_18682_Transcript_1/1_Conf_1.000 | 1030 | 20 | 1.48E-90 | NP_505918.2    | 72 | 337.421 | 309 | 224 | Tubulin Tyrosine Ligase Like family member (ttlI-5)           |
| Locus_18683_Transcript_1/1_Conf_1.000 | 463  | 3  | 1.19E-10 | EFO18993.1     | 63 | 69.707  | 103 | 65  | hypothetical protein LOAG_09502                               |
| Locus_18684_Transcript_1/1_Conf_1.000 | 241  | 20 | 1.79E-27 | XP_001901477.1 | 85 | 125.561 | 78  | 67  | Homeobox domain containing protein                            |
| Locus_18685_Transcript_1/1_Conf_1.000 | 226  | 0  |          |                |    |         |     |     |                                                               |
| Locus_18686_Transcript_1/1_Conf_1.000 | 257  | 0  |          |                |    |         |     |     |                                                               |
| Locus_18687_Transcript_1/1_Conf_1.000 | 277  | 0  |          |                |    |         |     |     |                                                               |
| Locus_18688_Transcript_1/1_Conf_1.000 | 166  | 20 | 1.25E-20 | EFO23546.1     | 98 | 102.834 | 52  | 51  | PDZ domain-containing protein                                 |
| Locus_18689_Transcript_1/1_Conf_1.000 | 321  | 0  |          |                |    |         |     |     |                                                               |
| Locus_1869_Transcript_1/2_Conf_1.000  | 1835 | 20 | 2.71E-52 | AAC72298.1     | 51 | 211.46  | 479 | 245 | reverse transcriptase                                         |
| Locus_1869_Transcript_2/2_Conf_1.000  | 292  | 1  | 7.69E-11 | ZP_06734949.1  | 88 | 63.929  | 54  | 48  | hypothetical protein NEIELOOT_01783                           |
| Locus_18690_Transcript_1/1_Conf_1.000 | 168  | 0  |          |                |    |         |     |     |                                                               |
| Locus_18691_Transcript_1/1_Conf_1.000 | 499  | 20 | 1.78E-19 | EFN65839.1     | 57 | 98.9821 | 149 | 85  | Craniofacial development protein 2                            |
| Locus_18692_Transcript_1/1_Conf_1.000 | 341  | 0  |          |                |    |         |     |     |                                                               |
| Locus_18693_Transcript_1/1_Conf_1.000 | 172  | 0  |          |                |    |         |     |     |                                                               |

|                                       |      |    |          |                |    |         |     |     |                                                                                   |
|---------------------------------------|------|----|----------|----------------|----|---------|-----|-----|-----------------------------------------------------------------------------------|
| Locus_18694_Transcript_1/1_Conf_1.000 | 137  | 20 | 1.01E-14 | BAB33325.1     | 82 | 83.1889 | 45  | 37  | KIAA1655 protein                                                                  |
| Locus_18695_Transcript_1/1_Conf_1.000 | 201  | 2  | 9.61E-05 | XP_002630279.1 | 61 | 50.0618 | 62  | 38  | Hypothetical protein CBG00710                                                     |
| Locus_18696_Transcript_1/1_Conf_1.000 | 547  | 20 | 3.56E-39 | XP_001902364.1 | 65 | 164.851 | 182 | 120 | Myotubularin-related family protein                                               |
| Locus_18697_Transcript_1/1_Conf_1.000 | 446  | 20 | 1.75E-30 | XP_002631488.1 | 63 | 135.576 | 152 | 97  | C. briggsae CBR-PTR-8 protein                                                     |
| Locus_18698_Transcript_1/1_Conf_1.000 | 174  | 0  |          |                |    |         |     |     |                                                                                   |
| Locus_18699_Transcript_1/1_Conf_1.000 | 262  | 0  |          |                |    |         |     |     |                                                                                   |
| Locus_187_Transcript_1/1_Conf_1.000   | 1760 | 20 | 1.83E-66 | XP_002638761.1 | 86 | 258.455 | 207 | 180 | C. briggsae CBR-MEX-3 protein                                                     |
| Locus_1870_Transcript_1/1_Conf_1.000  | 289  | 20 | 1.44E-32 | NP_741546.3    | 86 | 142.51  | 94  | 81  | PAPS (adenosine 3'-phosphate 5'-phosphosulfate) Transporter family member (pst-1) |
| Locus_18700_Transcript_1/1_Conf_1.000 | 256  | 9  | 4.51E-18 | NP_498134.1    | 72 | 94.3597 | 83  | 60  | hypothetical protein F52C9.7                                                      |



|                                       |      |    |          |                |     |         |     |     |                                                                                      |
|---------------------------------------|------|----|----------|----------------|-----|---------|-----|-----|--------------------------------------------------------------------------------------|
| Locus_18701_Transcript_1/1_Conf_1.000 | 197  | 20 | 1.17E-34 | 3MQL           | 100 | 149.443 | 65  | 65  | CrystalStructure OfThe Fibronectin 6fni1-2fni17fni Fragment                          |
| Locus_18702_Transcript_1/1_Conf_1.000 | 215  | 0  |          |                |     |         |     |     |                                                                                      |
| Locus_18703_Transcript_1/1_Conf_1.000 | 129  | 0  |          |                |     |         |     |     |                                                                                      |
| Locus_18704_Transcript_1/1_Conf_1.000 | 604  | 20 | 1.41E-11 | NP_001121593.1 | 47  | 73.559  | 184 | 87  | sinc finger protein Ci-ZF(C2H2)-148                                                  |
| Locus_18705_Transcript_1/1_Conf_1.000 | 410  | 20 | 1.05E-27 | XP_002635372.1 | 66  | 126.331 | 137 | 91  | C. briggsae CBR-RPM-1 protein                                                        |
| Locus_18706_Transcript_1/1_Conf_1.000 | 539  | 0  |          |                |     |         |     |     |                                                                                      |
| Locus_18707_Transcript_1/1_Conf_1.000 | 619  | 20 | 4.07E-49 | AAF98588.2     | 67  | 198.364 | 167 | 112 | Trehalase protein 2, confirmed by transcript evidence                                |
| Locus_18708_Transcript_1/1_Conf_1.000 | 217  | 20 | 2.93E-14 | XP_002640651.1 | 83  | 81.6481 | 60  | 50  | Hypothetical protein CBG19709                                                        |
| Locus_18709_Transcript_1/1_Conf_1.000 | 374  | 0  |          |                |     |         |     |     |                                                                                      |
| Locus_1871_Transcript_1/1_Conf_1.000  | 1713 | 20 | 0        | NP_510705.1    | 78  | 666.766 | 563 | 441 | hypothetical protein C10E2.6                                                         |
| Locus_18710_Transcript_1/1_Conf_1.000 | 415  | 20 | 7.16E-45 | XP_002633760.1 | 82  | 183.341 | 121 | 100 | C. briggsae CBR-GON-1 protein                                                        |
| Locus_18711_Transcript_1/1_Conf_1.000 | 326  | 4  | 2.06E-31 | XP_002640784.1 | 76  | 138.658 | 101 | 77  | Hypothetical protein CBG15659                                                        |
| Locus_18712_Transcript_1/1_Conf_1.000 | 191  | 20 | 2.02E-18 | NP_504228.2    | 88  | 95.5153 | 53  | 47  | human GoNadotropin-Releasing hormone Receptor (GnRHR) related family member (gnrr-5) |

|                                       |     |    |          |                |     |         |     |     |                                                                        |
|---------------------------------------|-----|----|----------|----------------|-----|---------|-----|-----|------------------------------------------------------------------------|
| Locus_18713_Transcript_1/1_Conf_1.000 | 923 | 20 | 1.15E-96 | XP_002641314.1 | 78  | 357.451 | 292 | 230 | Hypothetical protein CBG24614                                          |
| Locus_18714_Transcript_1/1_Conf_1.000 | 154 | 0  |          |                |     |         |     |     |                                                                        |
| Locus_18715_Transcript_1/1_Conf_1.000 | 139 | 0  |          |                |     |         |     |     |                                                                        |
| Locus_18716_Transcript_1/1_Conf_1.000 | 218 | 0  |          |                |     |         |     |     |                                                                        |
| Locus_18717_Transcript_1/1_Conf_1.000 | 317 | 20 | 2.47E-24 | NP_509760.2    | 73  | 115.161 | 105 | 77  | Temporarily Assigned Gene name family member (tag-289)                 |
| Locus_18718_Transcript_1/1_Conf_1.000 | 148 | 2  | 1.37E-06 | XP_002640681.1 | 70  | 56.225  | 48  | 34  | Hypothetical protein CBG19743                                          |
| Locus_18719_Transcript_1/1_Conf_1.000 | 134 | 1  | 1.52E-10 | EAW50568.1     | 100 | 69.3218 | 44  | 44  | hCG1990620                                                             |
| Locus_1872_Transcript_1/1_Conf_1.000  | 795 | 20 | 3.24E-22 | XP_001900476.1 | 70  | 109.768 | 104 | 73  | DNA / pantothenate metabolism flavoprotein                             |
| Locus_18720_Transcript_1/1_Conf_1.000 | 184 | 5  | 4.68E-23 | CAB04449.3     | 90  | 110.923 | 61  | 55  | C. elegans protein F53A2.1, partially confirmed by transcript evidence |
| Locus_18721_Transcript_1/1_Conf_1.000 | 177 | 0  |          |                |     |         |     |     |                                                                        |
| Locus_18722_Transcript_1/1_Conf_1.000 | 249 | 2  | 1.51E-10 | XP_001892617.1 | 62  | 69.3218 | 81  | 51  | Protein kinase domain containing protein                               |
| Locus_18723_Transcript_1/1_Conf_1.000 | 766 | 9  | 2.80E-12 | NP_499886.1    | 46  | 76.6406 | 187 | 87  | hypothetical protein R02D3.7                                           |
| Locus_18724_Transcript_1/1_Conf_1.000 | 154 | 20 | 1.65E-20 | XP_002799187.1 | 100 | 102.449 | 51  | 51  | PREDICTED: protein disulfide-isomerase A6 isoform 2                    |
| Locus_18725_Transcript_1/1_Conf_1.000 | 214 | 20 | 7.72E-23 | XP_001891673.1 | 87  | 110.153 | 71  | 62  | hypothetical protein Bm1_00760                                         |
| Locus_18726_Transcript_1/1_Conf_1.000 | 158 | 0  |          |                |     |         |     |     |                                                                        |

|                                       |      |    |          |                |    |         |     |     |                                                                  |
|---------------------------------------|------|----|----------|----------------|----|---------|-----|-----|------------------------------------------------------------------|
| Locus_18727_Transcript_1/1_Conf_1.000 | 230  | 2  | 2.82E-04 | XP_002641697.1 | 66 | 48.521  | 42  | 28  | C. briggsae CBR-PRI-1 protein                                    |
| Locus_18728_Transcript_1/1_Conf_1.000 | 149  | 0  |          |                |    |         |     |     |                                                                  |
| Locus_18729_Transcript_1/1_Conf_1.000 | 379  | 0  |          |                |    |         |     |     |                                                                  |
| Locus_1873_Transcript_1/2_Conf_1.000  | 1373 | 0  |          |                |    |         |     |     |                                                                  |
| Locus_1873_Transcript_2/2_Conf_1.000  | 1385 | 0  |          |                |    |         |     |     |                                                                  |
| Locus_18730_Transcript_1/1_Conf_1.000 | 176  | 0  |          |                |    |         |     |     |                                                                  |
| Locus_18731_Transcript_1/1_Conf_1.000 | 488  | 0  |          |                |    |         |     |     |                                                                  |
| Locus_18732_Transcript_1/1_Conf_1.000 | 281  | 0  |          |                |    |         |     |     |                                                                  |
| Locus_18733_Transcript_1/1_Conf_1.000 | 296  | 3  | 6.20E-36 | CAR63525.1     | 84 | 153.68  | 98  | 83  | hypothetical protein                                             |
| Locus_18734_Transcript_1/1_Conf_1.000 | 1167 | 20 | 2.35E-58 | NP_498041.1    | 57 | 230.72  | 313 | 181 | SET (trithorax/polycomb) domain containing family member (set-2) |
| Locus_18735_Transcript_1/1_Conf_1.000 | 298  | 20 | 5.95E-47 | NP_509871.2    | 92 | 190.274 | 98  | 91  | Heparan SulphoTransferase family member (hst-2)                  |
| Locus_18736_Transcript_1/1_Conf_1.000 | 508  | 0  |          |                |    |         |     |     |                                                                  |
| Locus_18737_Transcript_1/1_Conf_1.000 | 208  | 20 | 1.47E-21 | AAB65324.3     | 83 | 105.916 | 65  | 54  | Hypothetical protein F40A3.5                                     |
| Locus_18738_Transcript_1/1_Conf_1.000 | 305  | 20 | 3.86E-22 | XP_002635372.1 | 67 | 107.842 | 106 | 72  | C. briggsae CBR-RPM-1 protein                                    |
| Locus_18739_Transcript_1/1_Conf_1.000 | 393  | 20 | 8.19E-28 | NP_001040743.1 | 68 | 126.716 | 130 | 89  | hypothetical protein C17C3.1                                     |
| Locus_1874_Transcript_1/1_Conf_1.000  | 985  | 3  | 2.65E-17 | NP_001122695.1 | 44 | 93.9745 | 327 | 146 | hypothetical protein F34D10.9                                    |
| Locus_18740_Transcript_1/1_Conf_1.000 | 172  | 20 | 2.95E-22 | NP_503409.1    | 92 | 108.227 | 57  | 53  | SyNapTotagmin family member (snt-5)                              |

|                                       |      |    |           |                |    |         |     |     |                                              |
|---------------------------------------|------|----|-----------|----------------|----|---------|-----|-----|----------------------------------------------|
| Locus_18741_Transcript_1/1_Conf_1.000 | 302  | 20 | 1.33E-30  | NP_001021871.1 | 77 | 135.961 | 105 | 81  | UNCoordinated family member (unc-13)         |
| Locus_18742_Transcript_1/1_Conf_1.000 | 547  | 20 | 3.95E-22  | NP_501018.1    | 62 | 108.227 | 130 | 81  | Dicer Related Helicase family member (drh-1) |
| Locus_18743_Transcript_1/1_Conf_1.000 | 305  | 3  | 4.58E-07  | NP_505360.3    | 54 | 57.7658 | 102 | 56  | hypothetical protein F21C10.9                |
| Locus_18744_Transcript_1/1_Conf_1.000 | 518  | 0  |           |                |    |         |     |     |                                              |
| Locus_18745_Transcript_1/1_Conf_1.000 | 226  | 0  |           |                |    |         |     |     |                                              |
| Locus_18746_Transcript_1/1_Conf_1.000 | 363  | 0  |           |                |    |         |     |     |                                              |
| Locus_18747_Transcript_1/1_Conf_1.000 | 242  | 20 | 6.15E-28  | NP_498711.1    | 85 | 127.102 | 80  | 68  | TYRosinase family member (tyr-1)             |
| Locus_18748_Transcript_1/1_Conf_1.000 | 374  | 0  |           |                |    |         |     |     |                                              |
| Locus_18749_Transcript_1/1_Conf_1.000 | 462  | 20 | 3.67E-28  | NP_491439.1    | 68 | 127.872 | 135 | 92  | hypothetical protein C10H11.8                |
| Locus_1875_Transcript_1/1_Conf_1.000  | 1225 | 20 | 6.90E-165 | AAK28335.1     | 88 | 584.719 | 365 | 324 | glycogen synthase                            |
| Locus_18750_Transcript_1/1_Conf_1.000 | 164  | 0  |           |                |    |         |     |     |                                              |
| Locus_18751_Transcript_1/1_Conf_1.000 | 194  | 0  |           |                |    |         |     |     |                                              |
| Locus_18752_Transcript_1/1_Conf_1.000 | 268  | 7  | 6.66E-06  | XP_002644661.1 | 55 | 53.9138 | 88  | 49  | Hypothetical protein CBG14642                |
| Locus_18753_Transcript_1/1_Conf_1.000 | 174  | 0  |           |                |    |         |     |     |                                              |
| Locus_18754_Transcript_1/1_Conf_1.000 | 155  | 20 | 4.50E-18  | CBI70492.1     | 98 | 94.3597 | 51  | 50  | vacuolar ATPase a subunit                    |
| Locus_18755_Transcript_1/1_Conf_1.000 | 336  | 0  |           |                |    |         |     |     |                                              |

|                                       |      |    |          |                |    |         |     |     |                                                                                 |
|---------------------------------------|------|----|----------|----------------|----|---------|-----|-----|---------------------------------------------------------------------------------|
| Locus_18756_Transcript_1/1_Conf_1.000 | 497  | 20 | 2.73E-60 | NP_001122508.1 | 85 | 234.572 | 165 | 141 | DeHydrogenases, Short chain family member (dhs-3)                               |
| Locus_18757_Transcript_1/1_Conf_1.000 | 692  | 20 | 2.17E-79 | XP_002633915.1 | 74 | 299.286 | 225 | 167 | Hypothetical protein CBG19981                                                   |
| Locus_18758_Transcript_1/1_Conf_1.000 | 207  | 2  | 6.39E-09 | XP_002645082.1 | 83 | 63.929  | 48  | 40  | C. briggsae CBR-DHS-29 protein                                                  |
| Locus_18759_Transcript_1/1_Conf_1.000 | 290  | 2  | 8.23E-04 | NP_001122656.1 | 58 | 46.9802 | 96  | 56  | hypothetical protein Y46G5A.18                                                  |
| Locus_1876_Transcript_1/1_Conf_1.000  | 323  | 0  |          |                |    |         |     |     |                                                                                 |
| Locus_18760_Transcript_1/1_Conf_1.000 | 200  | 16 | 1.48E-13 | NP_490834.1    | 75 | 79.337  | 65  | 49  | hypothetical protein Y48G8AL.1                                                  |
| Locus_18761_Transcript_1/1_Conf_1.000 | 595  | 4  | 1.54E-23 | XP_002639320.1 | 60 | 113.235 | 136 | 82  | C. briggsae CBR-DCT-9 protein                                                   |
| Locus_18762_Transcript_1/1_Conf_1.000 | 270  | 0  |          |                |    |         |     |     |                                                                                 |
| Locus_18763_Transcript_1/1_Conf_1.000 | 1067 | 20 | 0        | ACJ65168.1     | 94 | 653.284 | 354 | 336 | Uncoordinated protein 68, isoform b, partially confirmed by transcript evidence |
| Locus_18764_Transcript_1/1_Conf_1.000 | 400  | 20 | 9.96E-18 | XP_002640827.1 | 70 | 93.2041 | 93  | 66  | Hypothetical protein CBG15714                                                   |
| Locus_18765_Transcript_1/1_Conf_1.000 | 224  | 0  |          |                |    |         |     |     |                                                                                 |
| Locus_18766_Transcript_1/1_Conf_1.000 | 301  | 9  | 1.92E-21 | NP_492082.2    | 69 | 105.531 | 100 | 69  | hypothetical protein F07A5.4                                                    |
| Locus_18767_Transcript_1/1_Conf_1.000 | 288  | 0  |          |                |    |         |     |     |                                                                                 |
| Locus_18768_Transcript_1/1_Conf_1.000 | 157  | 0  |          |                |    |         |     |     |                                                                                 |
| Locus_18769_Transcript_1/1_Conf_1.000 | 169  | 0  |          |                |    |         |     |     |                                                                                 |
| Locus_1877_Transcript_1/1_Conf_1.000  | 1054 | 20 | 4.77E-76 | NP_501805.1    | 68 | 289.271 | 321 | 221 | hypothetical protein F44D12.1                                                   |
| Locus_18770_Transcript_1/1_Conf_1.000 | 318  | 0  |          |                |    |         |     |     |                                                                                 |
| Locus_18771_Transcript_1/1_Conf_1.000 | 157  | 0  |          |                |    |         |     |     |                                                                                 |
| Locus_18772_Transcript_1/1_Conf_1.000 | 185  | 0  |          |                |    |         |     |     |                                                                                 |

|                                       |     |    |           |                |    |         |     |     |                                                                            |
|---------------------------------------|-----|----|-----------|----------------|----|---------|-----|-----|----------------------------------------------------------------------------|
| Locus_18773_Transcript_1/1_Conf_1.000 | 903 | 20 | 1.04E-102 | XP_002640962.1 | 75 | 377.481 | 294 | 222 | Hypothetical protein CBG11705                                              |
| Locus_18774_Transcript_1/1_Conf_1.000 | 128 | 4  | 7.35E-05  | ABI52804.1     | 76 | 50.447  | 38  | 29  | mitochondrial associated endoribonuclease MAR1-isochorismatase superfamily |
| Locus_18775_Transcript_1/1_Conf_1.000 | 246 | 2  | 4.26E-05  | XP_002631065.1 | 75 | 51.2174 | 69  | 52  | C. briggsae CBR-SFXN-1.4 protein                                           |
| Locus_18776_Transcript_1/1_Conf_1.000 | 581 | 0  |           |                |    |         |     |     |                                                                            |
| Locus_18777_Transcript_1/1_Conf_1.000 | 204 | 1  | 8.11E-04  | XP_002634811.1 | 52 | 46.9802 | 55  | 29  | Hypothetical protein CBG13916                                              |
| Locus_18778_Transcript_1/1_Conf_1.000 | 155 | 13 | 2.02E-10  | AAS47831.1     | 78 | 68.9366 | 46  | 36  | metalloprotease IV                                                         |
| Locus_18779_Transcript_1/1_Conf_1.000 | 315 | 0  |           |                |    |         |     |     |                                                                            |
| Locus_1878_Transcript_1/2_Conf_1.000  | 401 | 20 | 5.24E-43  | XP_002637058.1 | 80 | 177.178 | 128 | 103 | C. briggsae CBR-TTR-19 protein                                             |
| Locus_1878_Transcript_2/2_Conf_1.000  | 469 | 20 | 8.05E-44  | XP_002637058.1 | 80 | 179.874 | 130 | 105 | C. briggsae CBR-TTR-19 protein                                             |
| Locus_18780_Transcript_1/1_Conf_1.000 | 294 | 20 | 1.30E-17  | XP_002642870.1 | 66 | 92.8189 | 78  | 52  | Hypothetical protein CBG15140                                              |
| Locus_18781_Transcript_1/1_Conf_1.000 | 144 | 0  |           |                |    |         |     |     |                                                                            |
| Locus_18782_Transcript_1/1_Conf_1.000 | 306 | 0  |           |                |    |         |     |     |                                                                            |
| Locus_18783_Transcript_1/1_Conf_1.000 | 169 | 20 | 1.09E-16  | NP_510342.1    | 80 | 89.7373 | 56  | 45  | hypothetical protein C33G3.4                                               |
| Locus_18784_Transcript_1/1_Conf_1.000 | 509 | 20 | 7.77E-29  | XP_002629716.1 | 59 | 130.183 | 170 | 101 | Hypothetical protein CBG00946                                              |
| Locus_18785_Transcript_1/1_Conf_1.000 | 566 | 20 | 8.95E-28  | POC5E7.1       | 55 | 127.102 | 195 | 109 | Phosphatidylinositol 3-kinase age-1                                        |

|                                       |     |    |          |                |     |         |     |     |                                                                                                                   |
|---------------------------------------|-----|----|----------|----------------|-----|---------|-----|-----|-------------------------------------------------------------------------------------------------------------------|
| Locus_18786_Transcript_1/1_Conf_1.000 | 373 | 20 | 1.77E-06 | XP_001661184.1 | 73  | 55.8398 | 41  | 30  | beta-1,3-n-acetylglucosaminyltransferase radical fringe (o-fucosylpeptide 3-beta-n-acetylglucosaminyltransferase) |
| Locus_18787_Transcript_1/1_Conf_1.000 | 180 | 20 | 5.37E-19 | ACJ65168.1     | 100 | 97.4413 | 59  | 59  | Uncoordinated protein 68, isoform b, partially confirmed by transcript evidence                                   |
| Locus_18788_Transcript_1/1_Conf_1.000 | 133 | 20 | 2.19E-17 | EFO20074.1     | 97  | 92.0485 | 43  | 42  | KIN protein                                                                                                       |
| Locus_18789_Transcript_1/1_Conf_1.000 | 457 | 3  | 3.03E-35 | NP_496398.2    | 71  | 151.369 | 133 | 95  | hypothetical protein T06D8.1                                                                                      |
| Locus_1879_Transcript_1/1_Conf_1.000  | 946 | 6  | 2.09E-56 | XP_002636983.1 | 68  | 223.787 | 257 | 176 | C. briggsae CBR-PQN-22 protein                                                                                    |
| Locus_18790_Transcript_1/1_Conf_1.000 | 245 | 0  |          |                |     |         |     |     |                                                                                                                   |
| Locus_18791_Transcript_1/1_Conf_1.000 | 610 | 20 | 1.50E-24 | XP_001900249.1 | 67  | 116.701 | 127 | 86  | Ctr copper transporter family protein                                                                             |
| Locus_18792_Transcript_1/1_Conf_1.000 | 223 | 0  |          |                |     |         |     |     |                                                                                                                   |
| Locus_18793_Transcript_1/1_Conf_1.000 | 297 | 4  | 6.01E-15 | EFO26610.1     | 68  | 83.9593 | 77  | 53  | hypothetical protein LOAG_01866                                                                                   |

|                                       |     |    |          |                |     |         |     |     |                                                                         |
|---------------------------------------|-----|----|----------|----------------|-----|---------|-----|-----|-------------------------------------------------------------------------|
| Locus_18794_Transcript_1/1_Conf_1.000 | 369 | 20 | 6.91E-35 | 3O47           | 100 | 150.214 | 72  | 72  | CrystalStructure Of Arfgap1-Arf1 Fusion Protein                         |
| Locus_18795_Transcript_1/1_Conf_1.000 | 130 | 0  |          |                |     |         |     |     |                                                                         |
| Locus_18796_Transcript_1/1_Conf_1.000 | 546 | 0  |          |                |     |         |     |     |                                                                         |
| Locus_18797_Transcript_1/1_Conf_1.000 | 181 | 20 | 7.75E-18 | AAD00776.1     | 88  | 93.5893 | 53  | 47  | 2,5 dihydroxyphenylacetate oxidase                                      |
| Locus_18798_Transcript_1/1_Conf_1.000 | 724 | 7  | 4.09E-55 | CBA11611.1     | 74  | 218.779 | 246 | 184 | C. elegans protein F53B7.2b, partially confirmed by transcript evidence |
| Locus_18799_Transcript_1/1_Conf_1.000 | 245 | 20 | 9.14E-32 | EFO18852.1     | 93  | 139.813 | 81  | 76  | RNA polymerase III 128kD subunit-PA                                     |
| Locus_188_Transcript_1/1_Conf_1.000   | 311 | 0  |          |                |     |         |     |     |                                                                         |
| Locus_1880_Transcript_1/1_Conf_1.000  | 519 | 0  |          |                |     |         |     |     |                                                                         |
| Locus_18800_Transcript_1/1_Conf_1.000 | 314 | 4  | 3.14E-11 | EFO28277.1     | 69  | 71.633  | 59  | 41  | piwi domain-containing protein                                          |
| Locus_18801_Transcript_1/1_Conf_1.000 | 273 | 20 | 7.29E-13 | XP_002647311.1 | 72  | 77.0258 | 75  | 54  | Hypothetical protein CBG06352                                           |
| Locus_18802_Transcript_1/1_Conf_1.000 | 128 | 0  |          |                |     |         |     |     |                                                                         |
| Locus_18803_Transcript_1/1_Conf_1.000 | 205 | 0  |          |                |     |         |     |     |                                                                         |
| Locus_18804_Transcript_1/1_Conf_1.000 | 129 | 6  | 2.43E-08 | NP_001076639.1 | 97  | 62.003  | 39  | 38  | TWiK family of potassium channels family member (twk-39)                |



|                                       |     |    |          |                |     |         |     |     |                                                                         |
|---------------------------------------|-----|----|----------|----------------|-----|---------|-----|-----|-------------------------------------------------------------------------|
| Locus_18805_Transcript_1/1_Conf_1.000 | 199 | 6  | 3.00E-06 | NP_508151.1    | 62  | 55.0694 | 62  | 39  | Intracellular LECTin family member (ile-2)                              |
| Locus_18806_Transcript_1/1_Conf_1.000 | 412 | 0  |          |                |     |         |     |     |                                                                         |
| Locus_18807_Transcript_1/1_Conf_1.000 | 843 | 4  | 1.01E-24 | NP_001040707.1 | 59  | 118.242 | 197 | 118 | CDT (S. pombe CDC10 Dependent Transcript) homolog family member (cdt-1) |
| Locus_18808_Transcript_1/1_Conf_1.000 | 222 | 20 | 1.54E-34 | 3078           | 100 | 149.058 | 73  | 73  | TheStructure Of Ca2+ Sensor (Case-12)                                   |
| Locus_18809_Transcript_1/1_Conf_1.000 | 222 | 5  | 9.11E-11 | XP_002641407.1 | 65  | 70.0922 | 69  | 45  | C. briggsae CBR-SUCH-1 protein                                          |
| Locus_1881_Transcript_1/2_Conf_0.750  | 133 | 0  |          |                |     |         |     |     |                                                                         |
| Locus_1881_Transcript_2/2_Conf_0.958  | 166 | 5  | 1.13E-05 | XP_001348421.2 | 67  | 53.1434 | 55  | 37  | conserved Plasmodium protein, unknown function                          |
| Locus_18810_Transcript_1/1_Conf_1.000 | 155 | 0  |          |                |     |         |     |     |                                                                         |
| Locus_18811_Transcript_1/1_Conf_1.000 | 361 | 20 | 1.78E-27 | NP_502580.2    | 85  | 125.561 | 92  | 79  | hypothetical protein Y62E10A.13                                         |
| Locus_18812_Transcript_1/1_Conf_1.000 | 323 | 0  |          |                |     |         |     |     |                                                                         |
| Locus_18813_Transcript_1/1_Conf_1.000 | 365 | 20 | 1.76E-59 | ABD77505.1     | 98  | 231.876 | 120 | 118 | 60S ribosomal protein L34-like protein                                  |
| Locus_18814_Transcript_1/1_Conf_1.000 | 327 | 0  |          |                |     |         |     |     |                                                                         |

|                                       |      |    |           |                |     |         |     |     |                                                       |
|---------------------------------------|------|----|-----------|----------------|-----|---------|-----|-----|-------------------------------------------------------|
| Locus_18815_Transcript_1/1_Conf_1.000 | 375  | 0  |           |                |     |         |     |     |                                                       |
| Locus_18816_Transcript_1/1_Conf_1.000 | 300  | 0  |           |                |     |         |     |     |                                                       |
| Locus_18817_Transcript_1/1_Conf_1.000 | 472  | 20 | 4.40E-42  | NP_497903.1    | 82  | 174.096 | 128 | 105 | anNEXin family member (nex-3)                         |
| Locus_18818_Transcript_1/1_Conf_1.000 | 168  | 0  |           |                |     |         |     |     |                                                       |
| Locus_18819_Transcript_1/1_Conf_1.000 | 140  | 0  |           |                |     |         |     |     |                                                       |
| Locus_1882_Transcript_1/1_Conf_1.000  | 250  | 0  |           |                |     |         |     |     |                                                       |
| Locus_18820_Transcript_1/1_Conf_1.000 | 164  | 0  |           |                |     |         |     |     |                                                       |
| Locus_18821_Transcript_1/1_Conf_1.000 | 210  | 0  |           |                |     |         |     |     |                                                       |
| Locus_18822_Transcript_1/1_Conf_1.000 | 230  | 8  | 2.63E-10  | NP_502123.1    | 71  | 68.5514 | 60  | 43  | hypothetical protein B0035.13                         |
| Locus_18823_Transcript_1/1_Conf_1.000 | 135  | 0  |           |                |     |         |     |     |                                                       |
| Locus_18824_Transcript_1/1_Conf_1.000 | 178  | 0  |           |                |     |         |     |     |                                                       |
| Locus_18825_Transcript_1/1_Conf_1.000 | 140  | 0  |           |                |     |         |     |     |                                                       |
| Locus_18826_Transcript_1/1_Conf_1.000 | 189  | 20 | 3.68E-20  | 3ICH           | 100 | 101.293 | 63  | 63  | CrystalStructure Of Cyclophilin B At 1.2 A Resolution |
| Locus_18827_Transcript_1/1_Conf_1.000 | 143  | 3  | 8.00E-04  | AAB42328.2     | 81  | 46.9802 | 38  | 31  | Hypothetical protein C32E8.11                         |
| Locus_18828_Transcript_1/1_Conf_1.000 | 768  | 4  | 3.70E-04  | XP_002099137.1 | 41  | 49.6766 | 181 | 75  | GE23539                                               |
| Locus_18829_Transcript_1/1_Conf_1.000 | 378  | 20 | 7.05E-40  | XP_002642051.1 | 74  | 166.777 | 126 | 94  | Hypothetical protein CBG17988                         |
| Locus_1883_Transcript_1/2_Conf_1.000  | 2056 | 20 | 3.03E-156 | NP_501180.1    | 70  | 556.984 | 531 | 375 | hypothetical protein C48A7.2                          |

|                                       |      |    |           |                |    |         |     |     |                                                  |
|---------------------------------------|------|----|-----------|----------------|----|---------|-----|-----|--------------------------------------------------|
| Locus_1883_Transcript_2/2_Conf_1.000  | 1981 | 20 | 1.93E-160 | NP_501180.1    | 74 | 570.852 | 506 | 375 | hypothetical protein C48A7.2                     |
| Locus_18830_Transcript_1/1_Conf_1.000 | 154  | 0  |           |                |    |         |     |     |                                                  |
| Locus_18831_Transcript_1/1_Conf_1.000 | 168  | 0  |           |                |    |         |     |     |                                                  |
| Locus_18832_Transcript_1/1_Conf_1.000 | 334  | 0  |           |                |    |         |     |     |                                                  |
| Locus_18833_Transcript_1/1_Conf_1.000 | 258  | 0  |           |                |    |         |     |     |                                                  |
| Locus_18834_Transcript_1/1_Conf_1.000 | 180  | 0  |           |                |    |         |     |     |                                                  |
| Locus_18835_Transcript_1/1_Conf_1.000 | 627  | 0  |           |                |    |         |     |     |                                                  |
| Locus_18836_Transcript_1/1_Conf_1.000 | 190  | 0  |           |                |    |         |     |     |                                                  |
| Locus_18837_Transcript_1/2_Conf_1.000 | 370  | 0  |           |                |    |         |     |     |                                                  |
| Locus_18837_Transcript_2/2_Conf_1.000 | 369  | 0  |           |                |    |         |     |     |                                                  |
| Locus_18838_Transcript_1/1_Conf_1.000 | 167  | 0  |           |                |    |         |     |     |                                                  |
| Locus_18839_Transcript_1/1_Conf_1.000 | 423  | 0  |           |                |    |         |     |     |                                                  |
| Locus_1884_Transcript_1/1_Conf_1.000  | 1248 | 20 | 1.37E-83  | XP_002634010.1 | 57 | 314.694 | 433 | 248 | C. briggsae CBR-RABS-5 protein                   |
| Locus_18840_Transcript_1/1_Conf_1.000 | 176  | 0  |           |                |    |         |     |     |                                                  |
| Locus_18841_Transcript_1/1_Conf_1.000 | 577  | 20 | 1.04E-74  | NP_491574.1    | 85 | 283.108 | 195 | 167 | hypothetical protein F55A12.8                    |
| Locus_18842_Transcript_1/1_Conf_1.000 | 432  | 6  | 4.28E-05  | AAD13339.1     | 52 | 51.2174 | 76  | 40  | ancylostoma-secreted protein 1 precursor         |
| Locus_18843_Transcript_1/1_Conf_1.000 | 261  | 6  | 1.60E-07  | XP_002630534.1 | 69 | 59.3066 | 66  | 46  | Hypothetical protein CBG12974                    |
| Locus_18844_Transcript_1/1_Conf_1.000 | 146  | 20 | 1.08E-11  | NP_500458.1    | 81 | 73.1738 | 48  | 39  | hypothetical protein F47C12.1                    |
| Locus_18845_Transcript_1/1_Conf_1.000 | 625  | 2  | 1.33E-15  | XP_001892397.1 | 49 | 87.0409 | 187 | 93  | hypothetical protein Bm1_04595                   |
| Locus_18846_Transcript_1/1_Conf_1.000 | 210  | 0  |           |                |    |         |     |     |                                                  |
| Locus_18847_Transcript_1/1_Conf_1.000 | 129  | 0  |           |                |    |         |     |     |                                                  |
| Locus_18848_Transcript_1/1_Conf_1.000 | 128  | 0  |           |                |    |         |     |     |                                                  |
| Locus_18849_Transcript_1/1_Conf_1.000 | 148  | 20 | 1.41E-11  | NP_502513.1    | 93 | 72.7886 | 43  | 40  | hypothetical protein C39E9.10                    |
| Locus_1885_Transcript_1/1_Conf_1.000  | 626  | 20 | 3.49E-32  | XP_001895135.1 | 62 | 142.124 | 180 | 112 | replication factor A 73 kDa subunit              |
| Locus_18850_Transcript_1/1_Conf_1.000 | 130  | 0  |           |                |    |         |     |     |                                                  |
| Locus_18851_Transcript_1/1_Conf_1.000 | 419  | 20 | 4.17E-56  | XP_001894250.1 | 87 | 220.705 | 139 | 122 | Low-density lipoprotein receptor-related protein |
| Locus_18852_Transcript_1/1_Conf_1.000 | 305  | 4  | 2.05E-23  | NP_001021638.1 | 71 | 112.079 | 101 | 72  | hypothetical protein T23G11.6                    |
| Locus_18853_Transcript_1/1_Conf_1.000 | 353  | 0  |           |                |    |         |     |     |                                                  |

|                                       |      |    |           |                |    |         |     |     |                                                                         |
|---------------------------------------|------|----|-----------|----------------|----|---------|-----|-----|-------------------------------------------------------------------------|
| Locus_18854_Transcript_1/1_Conf_1.000 | 128  | 16 | 3.52E-07  | NP_501934.3    | 69 | 58.151  | 42  | 29  | hypothetical protein F01D4.3                                            |
| Locus_18855_Transcript_1/1_Conf_1.000 | 640  | 20 | 1.09E-108 | NP_491193.2    | 98 | 396.356 | 215 | 211 | Calcium Channel, Beta subunit family member (ccb-1)                     |
| Locus_18856_Transcript_1/1_Conf_1.000 | 451  | 20 | 2.59E-26  | NP_501549.1    | 98 | 121.709 | 65  | 64  | RAP homolog (vertebrate Rap GTPase family) family member (rap-1)        |
| Locus_18857_Transcript_1/1_Conf_1.000 | 212  | 10 | 1.33E-06  | CAN86632.2     | 63 | 56.225  | 69  | 44  | C. elegans protein Y48C3A.18b, confirmed by transcript evidence         |
| Locus_18858_Transcript_1/1_Conf_1.000 | 437  | 0  |           |                |    |         |     |     |                                                                         |
| Locus_18859_Transcript_1/1_Conf_1.000 | 338  | 20 | 4.49E-55  | AAL06640.1     | 95 | 217.238 | 112 | 107 | serine-threonine protein kinase                                         |
| Locus_1886_Transcript_1/1_Conf_1.000  | 1882 | 20 | 0         | XP_002647048.1 | 89 | 956.822 | 596 | 534 | Hypothetical protein CBG03566                                           |
| Locus_18860_Transcript_1/1_Conf_1.000 | 196  | 4  | 2.72E-07  | NP_001021444.1 | 59 | 58.5362 | 59  | 35  | DAP (Death Associated Protein kinase) Like Kinase family member (dlk-1) |
| Locus_18861_Transcript_1/1_Conf_1.000 | 255  | 5  | 5.89E-18  | NP_510539.1    | 80 | 93.9745 | 62  | 50  | hypothetical protein Y15E3A.4                                           |
| Locus_18862_Transcript_1/1_Conf_1.000 | 172  | 0  |           |                |    |         |     |     |                                                                         |
| Locus_18863_Transcript_1/1_Conf_1.000 | 349  | 0  |           |                |    |         |     |     |                                                                         |

|                                       |     |    |          |                |    |         |     |     |                                                                                          |
|---------------------------------------|-----|----|----------|----------------|----|---------|-----|-----|------------------------------------------------------------------------------------------|
| Locus_18864_Transcript_1/1_Conf_1.000 | 803 | 20 | 9.24E-25 | XP_421314.2    | 51 | 118.242 | 230 | 118 | PREDICTED: hypothetical protein                                                          |
| Locus_18865_Transcript_1/1_Conf_1.000 | 209 | 0  |          |                |    |         |     |     |                                                                                          |
| Locus_18866_Transcript_1/2_Conf_1.000 | 261 | 0  |          |                |    |         |     |     |                                                                                          |
| Locus_18866_Transcript_2/2_Conf_1.000 | 520 | 0  |          |                |    |         |     |     |                                                                                          |
| Locus_18867_Transcript_1/1_Conf_1.000 | 390 | 0  |          |                |    |         |     |     |                                                                                          |
| Locus_18868_Transcript_1/1_Conf_1.000 | 271 | 0  |          |                |    |         |     |     |                                                                                          |
| Locus_18869_Transcript_1/1_Conf_1.000 | 217 | 0  |          |                |    |         |     |     |                                                                                          |
| Locus_1887_Transcript_1/1_Conf_1.000  | 553 | 20 | 5.48E-59 | XP_002632482.1 | 82 | 230.72  | 160 | 132 | Hypothetical protein CBG13717                                                            |
| Locus_18870_Transcript_1/1_Conf_1.000 | 442 | 20 | 2.29E-38 | XP_002630861.1 | 73 | 161.77  | 139 | 102 | Hypothetical protein CBG02576                                                            |
| Locus_18871_Transcript_1/1_Conf_1.000 | 141 | 0  |          |                |    |         |     |     |                                                                                          |
| Locus_18872_Transcript_1/1_Conf_1.000 | 265 | 6  | 8.15E-12 | XP_001899774.1 | 76 | 73.559  | 71  | 54  | Guanine nucleotide exchange factor for Ras-like GTPases; N-terminal motif family protein |
| Locus_18873_Transcript_1/1_Conf_1.000 | 198 | 0  |          |                |    |         |     |     |                                                                                          |
| Locus_18874_Transcript_1/1_Conf_1.000 | 178 | 0  |          |                |    |         |     |     |                                                                                          |
| Locus_18875_Transcript_1/1_Conf_1.000 | 163 | 4  | 7.61E-10 | NP_499922.1    | 75 | 67.0106 | 53  | 40  | Kinase, GLH-Binding family member (kgb-1)                                                |
| Locus_18876_Transcript_1/1_Conf_1.000 | 450 | 20 | 1.33E-38 | NP_495410.4    | 75 | 162.54  | 149 | 112 | hypothetical protein C44B7.11                                                            |
| Locus_18877_Transcript_1/1_Conf_1.000 | 206 | 0  |          |                |    |         |     |     |                                                                                          |
| Locus_18878_Transcript_1/1_Conf_1.000 | 253 | 20 | 3.96E-14 | ACI49197.1     | 61 | 81.2629 | 80  | 49  | hypothetical protein Csp3_JD03.006                                                       |
| Locus_18879_Transcript_1/1_Conf_1.000 | 180 | 0  |          |                |    |         |     |     |                                                                                          |
| Locus_1888_Transcript_1/3_Conf_0.667  | 522 | 0  |          |                |    |         |     |     |                                                                                          |
| Locus_1888_Transcript_2/3_Conf_0.667  | 493 | 0  |          |                |    |         |     |     |                                                                                          |
| Locus_1888_Transcript_3/3_Conf_0.667  | 514 | 0  |          |                |    |         |     |     |                                                                                          |
| Locus_18880_Transcript_1/1_Conf_1.000 | 361 | 2  | 3.27E-05 | XP_001898007.1 | 69 | 51.6026 | 53  | 37  | Origin recognition complex subunit 5                                                     |
| Locus_18881_Transcript_1/1_Conf_1.000 | 391 | 20 | 8.52E-22 | XP_001898421.1 | 63 | 106.686 | 132 | 84  | NG,NG-dimethylarginine dimethylaminohydrolase 1                                          |
| Locus_18882_Transcript_1/1_Conf_1.000 | 208 | 0  |          |                |    |         |     |     |                                                                                          |
| Locus_18883_Transcript_1/1_Conf_1.000 | 143 | 0  |          |                |    |         |     |     |                                                                                          |
| Locus_18884_Transcript_1/1_Conf_1.000 | 228 | 20 | 6.66E-30 | XP_001154014.1 | 97 | 133.65  | 69  | 67  | PREDICTED: similar to COX4I1 protein isoform 1                                           |
| Locus_18885_Transcript_1/1_Conf_1.000 | 446 | 2  | 6.25E-12 | XP_002640218.1 | 59 | 73.9442 | 98  | 58  | C. briggsae CBR-ZTF-4 protein                                                            |

|                                       |      |    |           |                |     |         |     |     |                                                            |
|---------------------------------------|------|----|-----------|----------------|-----|---------|-----|-----|------------------------------------------------------------|
| Locus_18886_Transcript_1/1_Conf_1.000 | 134  | 0  |           |                |     |         |     |     |                                                            |
| Locus_18887_Transcript_1/1_Conf_1.000 | 206  | 0  |           |                |     |         |     |     |                                                            |
| Locus_18888_Transcript_1/1_Conf_1.000 | 151  | 0  |           |                |     |         |     |     |                                                            |
| Locus_18889_Transcript_1/1_Conf_1.000 | 283  | 20 | 5.71E-21  | XP_002647214.1 | 71  | 103.99  | 94  | 67  | Hypothetical protein CBG22398                              |
| Locus_1889_Transcript_1/2_Conf_1.000  | 1149 | 20 | 3.44E-163 | XP_002643004.1 | 91  | 578.941 | 359 | 329 | Hypothetical protein CBG24278                              |
| Locus_1889_Transcript_2/2_Conf_1.000  | 1149 | 20 | 1.70E-162 | XP_002643004.1 | 91  | 576.63  | 359 | 328 | Hypothetical protein CBG24278                              |
| Locus_18890_Transcript_1/1_Conf_1.000 | 416  | 20 | 1.27E-25  | XP_002631207.1 | 74  | 119.398 | 123 | 92  | Hypothetical protein CBG03003                              |
| Locus_18891_Transcript_1/1_Conf_1.000 | 164  | 5  | 3.19E-16  | NP_496398.2    | 77  | 88.1965 | 54  | 42  | hypothetical protein T06D8.1                               |
| Locus_18892_Transcript_1/1_Conf_1.000 | 194  | 0  |           |                |     |         |     |     |                                                            |
| Locus_18893_Transcript_1/1_Conf_1.000 | 207  | 1  | 5.38E-24  | AAQ15253.1     | 100 | 114.005 | 68  | 68  | AF370417_1PP13850                                          |
| Locus_18894_Transcript_1/1_Conf_1.000 | 275  | 0  |           |                |     |         |     |     |                                                            |
| Locus_18895_Transcript_1/1_Conf_1.000 | 146  | 0  |           |                |     |         |     |     |                                                            |
| Locus_18896_Transcript_1/1_Conf_1.000 | 395  | 5  | 1.23E-07  | ABB53347.1     | 53  | 59.6918 | 86  | 46  | secreted protein 5 precursor                               |
| Locus_18897_Transcript_1/1_Conf_1.000 | 264  | 0  |           |                |     |         |     |     |                                                            |
| Locus_18898_Transcript_1/1_Conf_1.000 | 785  | 20 | 1.97E-16  | NP_494956.1    | 49  | 90.5077 | 256 | 127 | Serpentine Receptor, class B (beta) family member (srb-16) |
| Locus_18899_Transcript_1/1_Conf_1.000 | 192  | 20 | 4.19E-24  | NP_001122009.1 | 85  | 114.39  | 63  | 54  | host cell factor C1b                                       |
| Locus_189_Transcript_1/3_Conf_0.750   | 1516 | 20 | 1.56E-95  | XP_002636254.1 | 58  | 354.755 | 462 | 272 | C. briggsae CBR-EGG-1 protein                              |
| Locus_189_Transcript_2/3_Conf_0.750   | 1748 | 20 | 1.86E-95  | XP_002636254.1 | 58  | 354.755 | 462 | 272 | C. briggsae CBR-EGG-1 protein                              |
| Locus_189_Transcript_3/3_Conf_0.750   | 1516 | 20 | 1.56E-95  | XP_002636254.1 | 58  | 354.755 | 462 | 272 | C. briggsae CBR-EGG-1 protein                              |
| Locus_1890_Transcript_1/1_Conf_1.000  | 1332 | 20 | 2.26E-156 | XP_002643220.1 | 84  | 556.599 | 405 | 343 | C. briggsae CBR-ARR-1 protein                              |

|                                       |     |    |          |                |    |         |     |     |                                                                            |
|---------------------------------------|-----|----|----------|----------------|----|---------|-----|-----|----------------------------------------------------------------------------|
| Locus_18900_Transcript_1/1_Conf_1.000 | 290 | 20 | 3.66E-36 | NP_509087.1    | 84 | 154.451 | 97  | 82  | OligoPeptide Transporter family member (opt-2)                             |
| Locus_18901_Transcript_1/1_Conf_1.000 | 256 | 0  |          |                |    |         |     |     |                                                                            |
| Locus_18902_Transcript_1/1_Conf_1.000 | 477 | 20 | 4.23E-37 | NP_495010.2    | 76 | 157.532 | 151 | 115 | hypothetical protein F09E5.2                                               |
| Locus_18903_Transcript_1/1_Conf_1.000 | 175 | 0  |          |                |    |         |     |     |                                                                            |
| Locus_18904_Transcript_1/1_Conf_1.000 | 311 | 20 | 4.68E-20 | XP_002630767.1 | 78 | 100.908 | 83  | 65  | C. briggsae CBR-ZYG-1 protein                                              |
| Locus_18905_Transcript_1/1_Conf_1.000 | 296 | 16 | 1.75E-14 |                | 60 | 82.4185 | 92  | 56  | hypothetical protein Y105C5B.d                                             |
| Locus_18906_Transcript_1/1_Conf_1.000 | 456 | 0  |          |                |    |         |     |     |                                                                            |
| Locus_18907_Transcript_1/1_Conf_1.000 | 255 | 0  |          |                |    |         |     |     |                                                                            |
| Locus_18908_Transcript_1/2_Conf_1.000 | 966 | 0  |          |                |    |         |     |     |                                                                            |
| Locus_18908_Transcript_2/2_Conf_1.000 | 966 | 0  |          |                |    |         |     |     |                                                                            |
| Locus_18909_Transcript_1/1_Conf_1.000 | 259 | 1  | 8.22E-04 | AAZ67106.1     | 68 | 46.9802 | 47  | 32  | transposase                                                                |
| Locus_1891_Transcript_1/2_Conf_1.000  | 741 | 0  |          |                |    |         |     |     |                                                                            |
| Locus_1891_Transcript_2/2_Conf_1.000  | 664 | 0  |          |                |    |         |     |     |                                                                            |
| Locus_18910_Transcript_1/1_Conf_1.000 | 521 | 20 | 3.94E-63 | NP_493371.1    | 81 | 244.202 | 170 | 139 | hypothetical protein Y48G10A.1                                             |
| Locus_18911_Transcript_1/1_Conf_1.000 | 208 | 0  |          |                |    |         |     |     |                                                                            |
| Locus_18912_Transcript_1/1_Conf_1.000 | 535 | 0  |          |                |    |         |     |     |                                                                            |
| Locus_18913_Transcript_1/1_Conf_1.000 | 289 | 0  |          |                |    |         |     |     |                                                                            |
| Locus_18914_Transcript_1/1_Conf_1.000 | 738 | 20 | 2.68E-57 | XP_001473804.1 | 71 | 226.098 | 199 | 142 | PREDICTED: similar to B cell antigen receptor Ig beta associated protein 1 |
| Locus_18915_Transcript_1/1_Conf_1.000 | 162 | 0  |          |                |    |         |     |     |                                                                            |
| Locus_18916_Transcript_1/1_Conf_1.000 | 180 | 20 | 1.98E-13 | Q8MNV0.2       | 74 | 78.9518 | 59  | 44  | Probable spastin homolog spas-1                                            |

|                                       |      |    |          |                |     |         |     |     |                                              |
|---------------------------------------|------|----|----------|----------------|-----|---------|-----|-----|----------------------------------------------|
| Locus_18917_Transcript_1/1_Conf_1.000 | 272  | 20 | 4.11E-48 | XP_002804983.1 | 100 | 194.126 | 90  | 90  | PREDICTED: isocitrate dehydrogenase          |
| Locus_18918_Transcript_1/1_Conf_1.000 | 192  | 5  | 3.33E-05 | EFO24938.1     | 62  | 51.6026 | 61  | 38  | hypothetical protein LOAG_03545              |
| Locus_18919_Transcript_1/1_Conf_1.000 | 1537 | 20 | 0        | NP_495285.1    | 83  | 665.611 | 456 | 381 | abnormal cell LINeage family member (lin-23) |



|                                       |      |    |          |                |    |         |     |     |                                                    |
|---------------------------------------|------|----|----------|----------------|----|---------|-----|-----|----------------------------------------------------|
| Locus_1892_Transcript_1/1_Conf_1.000  | 1204 | 20 | 3.45E-52 | AAC47238.1     | 63 | 210.305 | 323 | 204 | non-muscle myosin heavy chain II                   |
| Locus_18920_Transcript_1/1_Conf_1.000 | 313  | 0  |          |                |    |         |     |     |                                                    |
| Locus_18921_Transcript_1/1_Conf_1.000 | 131  | 3  | 1.86E-08 | XP_002809210.1 | 80 | 62.3882 | 35  | 28  | PREDICTED: myosin regulatory light chain 12B-like  |
| Locus_18922_Transcript_1/1_Conf_1.000 | 474  | 3  | 3.63E-04 | XP_001202730.1 | 51 | 48.1358 | 107 | 55  | PREDICTED: similar to zinc finger protein, partial |
| Locus_18923_Transcript_1/1_Conf_1.000 | 221  | 0  |          |                |    |         |     |     |                                                    |
| Locus_18924_Transcript_1/1_Conf_1.000 | 193  | 0  |          |                |    |         |     |     |                                                    |
| Locus_18925_Transcript_1/1_Conf_1.000 | 222  | 0  |          |                |    |         |     |     |                                                    |
| Locus_18926_Transcript_1/1_Conf_1.000 | 541  | 20 | 9.05E-24 | NP_500084.2    | 83 | 113.62  | 79  | 66  | hypothetical protein Y77E11A.2                     |
| Locus_18927_Transcript_1/1_Conf_1.000 | 303  | 0  |          |                |    |         |     |     |                                                    |
| Locus_18928_Transcript_1/1_Conf_1.000 | 356  | 0  |          |                |    |         |     |     |                                                    |
| Locus_18929_Transcript_1/1_Conf_1.000 | 447  | 2  | 1.22E-07 | EFO20888.1     | 79 | 59.6918 | 44  | 35  | hypothetical protein LOAG_07599                    |
| Locus_1893_Transcript_1/1_Conf_1.000  | 308  | 0  |          |                |    |         |     |     |                                                    |
| Locus_18930_Transcript_1/1_Conf_1.000 | 438  | 0  |          |                |    |         |     |     |                                                    |
| Locus_18931_Transcript_1/1_Conf_1.000 | 129  | 0  |          |                |    |         |     |     |                                                    |
| Locus_18932_Transcript_1/1_Conf_1.000 | 274  | 0  |          |                |    |         |     |     |                                                    |
| Locus_18933_Transcript_1/1_Conf_1.000 | 787  | 20 | 2.90E-92 | NP_492031.1    | 82 | 342.428 | 263 | 217 | hypothetical protein M05B5.6                       |
| Locus_18934_Transcript_1/1_Conf_1.000 | 280  | 0  |          |                |    |         |     |     |                                                    |

|                                       |      |    |          |                |    |         |     |     |                                 |
|---------------------------------------|------|----|----------|----------------|----|---------|-----|-----|---------------------------------|
| Locus_18935_Transcript_1/1_Conf_1.000 | 252  | 20 | 4.23E-16 | CAA06162.1     | 82 | 87.8113 | 62  | 51  | CB-CYP-4                        |
| Locus_18936_Transcript_1/1_Conf_1.000 | 136  | 0  |          |                |    |         |     |     |                                 |
| Locus_18937_Transcript_1/1_Conf_1.000 | 183  | 0  |          |                |    |         |     |     |                                 |
| Locus_18938_Transcript_1/1_Conf_1.000 | 205  | 5  | 1.92E-21 | NP_506678.2    | 85 | 105.531 | 67  | 57  | hypothetical protein W09D12.1   |
| Locus_18939_Transcript_1/1_Conf_1.000 | 135  | 0  |          |                |    |         |     |     |                                 |
| Locus_1894_Transcript_1/1_Conf_1.000  | 1168 | 20 | 2.41E-95 | NP_508455.2    | 93 | 353.599 | 197 | 184 | hypothetical protein K02E10.1   |
| Locus_18940_Transcript_1/1_Conf_1.000 | 254  | 9  | 6.98E-19 | NP_493701.1    | 78 | 97.0561 | 60  | 47  | hypothetical protein K01A2.5    |
| Locus_18941_Transcript_1/1_Conf_1.000 | 204  | 0  |          |                |    |         |     |     |                                 |
| Locus_18942_Transcript_1/1_Conf_1.000 | 1232 | 20 | 9.30E-85 | ABU49430.1     | 67 | 318.546 | 376 | 254 | PRO-2                           |
| Locus_18943_Transcript_1/1_Conf_1.000 | 201  | 7  | 4.76E-12 | EFO19031.1     | 87 | 74.3294 | 49  | 43  | hypothetical protein LOAG_09464 |
| Locus_18944_Transcript_1/1_Conf_1.000 | 578  | 20 | 2.51E-44 | XP_002644494.1 | 67 | 182.185 | 196 | 133 | Hypothetical protein CBG14382   |
| Locus_18945_Transcript_1/1_Conf_1.000 | 690  | 20 | 3.88E-36 | XP_002646140.1 | 76 | 155.606 | 121 | 92  | Hypothetical protein CBG08020   |
| Locus_18946_Transcript_1/1_Conf_1.000 | 329  | 5  | 2.50E-37 | NP_493560.1    | 84 | 158.303 | 111 | 94  | hypothetical protein K05C4.11   |
| Locus_18947_Transcript_1/1_Conf_1.000 | 272  | 6  | 2.43E-16 | NP_494828.1    | 75 | 88.5817 | 72  | 54  | hypothetical protein T05A7.1    |
| Locus_18948_Transcript_1/1_Conf_1.000 | 280  | 20 | 1.19E-15 | NP_001123161.1 | 58 | 86.2705 | 87  | 51  | hypothetical protein K03A11.6   |

|                                       |     |    |           |                |    |         |     |     |                                                                         |
|---------------------------------------|-----|----|-----------|----------------|----|---------|-----|-----|-------------------------------------------------------------------------|
| Locus_18949_Transcript_1/1_Conf_1.000 | 331 | 20 | 2.33E-35  | XP_002641709.1 | 80 | 151.754 | 110 | 88  | C. briggsae CBR-CED-7 protein                                           |
| Locus_1895_Transcript_1/1_Conf_1.000  | 623 | 20 | 3.37E-104 | AAR07614.1     | 98 | 381.333 | 191 | 189 | UNC-18                                                                  |
| Locus_18950_Transcript_1/1_Conf_1.000 | 304 | 20 | 7.01E-32  | NP_509110.1    | 89 | 140.198 | 76  | 68  | TransThyretin-Related family domain family member (ttr-6)               |
| Locus_18951_Transcript_1/1_Conf_1.000 | 230 | 17 | 1.77E-06  | NP_001122780.1 | 56 | 55.8398 | 75  | 42  | hypothetical protein F41H10.6                                           |
| Locus_18952_Transcript_1/1_Conf_1.000 | 399 | 0  |           |                |    |         |     |     |                                                                         |
| Locus_18953_Transcript_1/1_Conf_1.000 | 155 | 0  |           |                |    |         |     |     |                                                                         |
| Locus_18954_Transcript_1/1_Conf_1.000 | 217 | 8  | 1.04E-27  | CAR81372.1     | 91 | 126.331 | 70  | 64  | C. elegans protein F57B7.2b, partially confirmed by transcript evidence |
| Locus_18955_Transcript_1/1_Conf_1.000 | 258 | 20 | 5.11E-30  | NP_872081.1    | 88 | 134.035 | 84  | 74  | Acyl CoA DeHydrogenase family member (acdh-13)                          |
| Locus_18956_Transcript_1/1_Conf_1.000 | 134 | 15 | 1.47E-13  | NP_500715.1    | 88 | 79.337  | 43  | 38  | hypothetical protein R13H9.5                                            |
| Locus_18957_Transcript_1/1_Conf_1.000 | 549 | 20 | 3.76E-28  | NP_501123.1    | 74 | 128.257 | 152 | 113 | COLLagen family member (col-113)                                        |

|                                       |     |    |          |                |     |         |     |     |                                                                   |
|---------------------------------------|-----|----|----------|----------------|-----|---------|-----|-----|-------------------------------------------------------------------|
| Locus_18958_Transcript_1/1_Conf_1.000 | 153 | 20 | 1.15E-13 | NP_001122771.1 | 80  | 79.7221 | 50  | 40  | hypothetical protein F13H10.4                                     |
| Locus_18959_Transcript_1/1_Conf_1.000 | 146 | 0  |          |                |     |         |     |     |                                                                   |
| Locus_1896_Transcript_1/1_Conf_1.000  | 793 | 20 | 3.27E-75 | NP_507513.2    | 70  | 285.804 | 272 | 193 | hypothetical protein E01B7.1                                      |
| Locus_18960_Transcript_1/1_Conf_1.000 | 742 | 20 | 6.47E-43 | NP_497604.2    | 59  | 178.333 | 254 | 150 | SET (trithorax/polycomb) domain containing family member (set-27) |
| Locus_18961_Transcript_1/1_Conf_1.000 | 211 | 0  |          |                |     |         |     |     |                                                                   |
| Locus_18962_Transcript_1/1_Conf_1.000 | 158 | 0  |          |                |     |         |     |     |                                                                   |
| Locus_18963_Transcript_1/1_Conf_1.000 | 329 | 20 | 6.19E-20 | XP_002633531.1 | 76  | 100.523 | 98  | 75  | Hypothetical protein CBG05398                                     |
| Locus_18964_Transcript_1/1_Conf_1.000 | 251 | 0  |          |                |     |         |     |     |                                                                   |
| Locus_18965_Transcript_1/1_Conf_1.000 | 173 | 0  |          |                |     |         |     |     |                                                                   |
| Locus_18966_Transcript_1/1_Conf_1.000 | 384 | 6  | 3.36E-34 | ABH10656.1     | 92  | 147.902 | 83  | 77  | FMRFamide-related peptide FLP-11 precursor                        |
| Locus_18967_Transcript_1/1_Conf_1.000 | 158 | 20 | 7.66E-10 | XP_002633316.1 | 75  | 67.0106 | 52  | 39  | C. briggsae CBR-GTL-2 protein                                     |
| Locus_18968_Transcript_1/1_Conf_1.000 | 159 | 0  |          |                |     |         |     |     |                                                                   |
| Locus_18969_Transcript_1/1_Conf_1.000 | 187 | 0  |          |                |     |         |     |     |                                                                   |
| Locus_1897_Transcript_1/1_Conf_1.000  | 428 | 0  |          |                |     |         |     |     |                                                                   |
| Locus_18970_Transcript_1/1_Conf_1.000 | 480 | 20 | 3.92E-51 | NP_497319.1    | 78  | 204.142 | 157 | 124 | hypothetical protein Y46E12BL.2                                   |
| Locus_18971_Transcript_1/1_Conf_1.000 | 310 | 0  |          |                |     |         |     |     |                                                                   |
| Locus_18972_Transcript_1/1_Conf_1.000 | 460 | 20 | 1.88E-61 | XP_002753304.1 | 100 | 238.424 | 153 | 153 | PREDICTED: 60S ribosomal protein L4-like                          |

|                                       |      |    |           |             |     |         |     |     |                               |
|---------------------------------------|------|----|-----------|-------------|-----|---------|-----|-----|-------------------------------|
| Locus_18973_Transcript_1/1_Conf_1.000 | 368  | 20 | 1.07E-32  | ADK09905.1  | 100 | 142.895 | 122 | 122 | non-muscle myosin IIA         |
| Locus_18974_Transcript_1/1_Conf_1.000 | 289  | 0  |           |             |     |         |     |     |                               |
| Locus_18975_Transcript_1/1_Conf_1.000 | 217  | 0  |           |             |     |         |     |     |                               |
| Locus_18976_Transcript_1/1_Conf_1.000 | 198  | 0  |           |             |     |         |     |     |                               |
| Locus_18977_Transcript_1/1_Conf_1.000 | 258  | 20 | 7.14E-32  | NP_504498.2 | 91  | 140.198 | 81  | 74  | hypothetical protein F25B4.7  |
| Locus_18978_Transcript_1/1_Conf_1.000 | 226  | 0  |           |             |     |         |     |     |                               |
| Locus_18979_Transcript_1/1_Conf_1.000 | 526  | 20 | 3.13E-79  | NP_493549.1 | 84  | 297.745 | 175 | 148 | hypothetical protein Y54E5A.1 |
| Locus_1898_Transcript_1/1_Conf_1.000  | 1979 | 20 | 2.90E-140 | NP_493982.1 | 75  | 503.827 | 436 | 327 | hypothetical protein H17B01.1 |
| Locus_18980_Transcript_1/1_Conf_1.000 | 132  | 0  |           |             |     |         |     |     |                               |
| Locus_18981_Transcript_1/1_Conf_1.000 | 157  | 0  |           |             |     |         |     |     |                               |
| Locus_18982_Transcript_1/1_Conf_1.000 | 273  | 0  |           |             |     |         |     |     |                               |

|                                       |      |    |          |                |    |         |     |     |                                       |
|---------------------------------------|------|----|----------|----------------|----|---------|-----|-----|---------------------------------------|
| Locus_18983_Transcript_1/1_Conf_1.000 | 382  | 20 | 3.35E-66 | XP_002630298.1 | 96 | 254.218 | 127 | 123 | C. briggsae CBR-LTD-1 protein         |
| Locus_18984_Transcript_1/1_Conf_1.000 | 153  | 0  |          |                |    |         |     |     |                                       |
| Locus_18985_Transcript_1/1_Conf_1.000 | 233  | 0  |          |                |    |         |     |     |                                       |
| Locus_18986_Transcript_1/1_Conf_1.000 | 238  | 2  | 1.02E-06 | NP_506256.3    | 57 | 56.6102 | 77  | 44  | CaDHerin family member (cdh-6)        |
| Locus_18987_Transcript_1/1_Conf_1.000 | 129  | 0  |          |                |    |         |     |     |                                       |
| Locus_18988_Transcript_1/1_Conf_1.000 | 231  | 0  |          |                |    |         |     |     |                                       |
| Locus_18989_Transcript_1/1_Conf_1.000 | 136  | 20 | 5.56E-13 | NP_501214.1    | 95 | 77.411  | 40  | 38  | hypothetical protein R05G6.4          |
| Locus_1899_Transcript_1/1_Conf_1.000  | 292  | 0  |          |                |    |         |     |     |                                       |
| Locus_18990_Transcript_1/1_Conf_1.000 | 453  | 20 | 1.46E-37 | NP_508493.1    | 70 | 159.073 | 151 | 106 | protein KINase family member (kin-29) |
| Locus_18991_Transcript_1/1_Conf_1.000 | 268  | 0  |          |                |    |         |     |     |                                       |
| Locus_18992_Transcript_1/1_Conf_1.000 | 311  | 0  |          |                |    |         |     |     |                                       |
| Locus_18993_Transcript_1/1_Conf_1.000 | 137  | 0  |          |                |    |         |     |     |                                       |
| Locus_18994_Transcript_1/1_Conf_1.000 | 196  | 0  |          |                |    |         |     |     |                                       |
| Locus_18995_Transcript_1/1_Conf_1.000 | 141  | 0  |          |                |    |         |     |     |                                       |
| Locus_18996_Transcript_1/1_Conf_1.000 | 371  | 7  | 3.23E-16 | XP_002646731.1 | 56 | 88.1965 | 127 | 72  | C. briggsae CBR-ADA-2 protein         |
| Locus_18997_Transcript_1/1_Conf_1.000 | 365  | 0  |          |                |    |         |     |     |                                       |
| Locus_18998_Transcript_1/1_Conf_1.000 | 252  | 0  |          |                |    |         |     |     |                                       |
| Locus_18999_Transcript_1/1_Conf_1.000 | 139  | 0  |          |                |    |         |     |     |                                       |
| Locus_19_Transcript_1/1_Conf_1.000    | 1371 | 20 | 0        | NP_498775.2    | 85 | 668.692 | 442 | 377 | hypothetical protein C14B9.2          |
| Locus_190_Transcript_1/1_Conf_1.000   | 356  | 0  |          |                |    |         |     |     |                                       |
| Locus_1900_Transcript_1/6_Conf_0.467  | 1098 | 20 | 1.17E-88 | CBW38507.1     | 75 | 331.257 | 283 | 213 | calcium-activated apyrase             |
| Locus_1900_Transcript_2/6_Conf_0.600  | 1098 | 20 | 2.79E-90 | CBW38507.1     | 75 | 336.65  | 283 | 215 | calcium-activated apyrase             |

|                                       |      |    |          |                |     |         |     |     |                                                         |
|---------------------------------------|------|----|----------|----------------|-----|---------|-----|-----|---------------------------------------------------------|
| Locus_1900_Transcript_3/6_Conf_0.600  | 908  | 20 | 1.73E-89 | CBW38507.1     | 75  | 333.569 | 283 | 213 | calcium-activated apyrase                               |
| Locus_1900_Transcript_4/6_Conf_0.667  | 1098 | 20 | 2.36E-89 | CBW38507.1     | 75  | 333.569 | 283 | 214 | calcium-activated apyrase                               |
| Locus_1900_Transcript_5/6_Conf_0.467  | 1098 | 20 | 8.96E-89 | CBW38507.1     | 75  | 331.643 | 283 | 213 | calcium-activated apyrase                               |
| Locus_1900_Transcript_6/6_Conf_0.667  | 1098 | 20 | 2.36E-89 | CBW38507.1     | 75  | 333.569 | 283 | 214 | calcium-activated apyrase                               |
| Locus_19000_Transcript_1/1_Conf_1.000 | 165  | 20 | 1.34E-14 | XP_002758248.1 | 100 | 82.8037 | 38  | 38  | PREDICTED: calcium-regulated heat stable protein 1-like |
| Locus_19001_Transcript_1/1_Conf_1.000 | 450  | 20 | 1.29E-25 | XP_002638288.1 | 60  | 119.398 | 149 | 90  | Hypothetical protein CBG22835                           |
| Locus_19002_Transcript_1/1_Conf_1.000 | 141  | 0  |          |                |     |         |     |     |                                                         |
| Locus_19003_Transcript_1/1_Conf_1.000 | 409  | 4  | 1.36E-43 | XP_002638941.1 | 87  | 179.104 | 135 | 118 | Hypothetical protein CBG22168                           |
| Locus_19004_Transcript_1/1_Conf_1.000 | 602  | 0  |          |                |     |         |     |     |                                                         |
| Locus_19005_Transcript_1/1_Conf_1.000 | 283  | 20 | 3.96E-22 | XP_002639142.1 | 77  | 107.842 | 94  | 73  | Hypothetical protein CBG14966                           |
| Locus_19006_Transcript_1/1_Conf_1.000 | 158  | 20 | 1.59E-15 | XP_002632333.1 | 94  | 85.8853 | 52  | 49  | Hypothetical protein CBG00341                           |

|                                       |      |    |          |                |    |         |     |     |                                                                                 |
|---------------------------------------|------|----|----------|----------------|----|---------|-----|-----|---------------------------------------------------------------------------------|
| Locus_19007_Transcript_1/1_Conf_1.000 | 183  | 18 | 3.37E-05 | YP_001854253.1 | 77 | 51.6026 | 35  | 27  | heat shock protein DnaJ family protein                                          |
| Locus_19008_Transcript_1/1_Conf_1.000 | 163  | 20 | 1.69E-17 | NP_495675.1    | 85 | 92.4337 | 54  | 46  | hypothetical protein DH11.1                                                     |
| Locus_19009_Transcript_1/1_Conf_1.000 | 168  | 0  |          |                |    |         |     |     |                                                                                 |
| Locus_1901_Transcript_1/1_Conf_1.000  | 1440 | 20 | 0        | XP_002647082.1 | 94 | 657.522 | 375 | 355 | C. briggsae CBR-RPL-3 protein                                                   |
| Locus_19010_Transcript_1/1_Conf_1.000 | 742  | 20 | 1.59E-41 | XP_001892576.1 | 84 | 173.711 | 125 | 105 | Voltage-gated calcium channel, T-type, alpha subunit. C. elegans cca-1 ortholog |
| Locus_19011_Transcript_1/1_Conf_1.000 | 177  | 20 | 5.34E-24 | NP_001021973.1 | 98 | 114.005 | 58  | 57  | RAB family member (rab-3)                                                       |



|                                       |      |    |          |                |    |         |     |     |                                                  |
|---------------------------------------|------|----|----------|----------------|----|---------|-----|-----|--------------------------------------------------|
| Locus_19012_Transcript_1/1_Conf_1.000 | 477  | 20 | 1.35E-51 | EFO24598.1     | 81 | 205.682 | 144 | 117 | hypothetical protein LOAG_03887                  |
| Locus_19013_Transcript_1/1_Conf_1.000 | 169  | 20 | 1.09E-16 | XP_002642806.1 | 91 | 89.7373 | 48  | 44  | C. briggsae CBR-CDK-5 protein                    |
| Locus_19014_Transcript_1/1_Conf_1.000 | 333  | 2  | 1.61E-28 | NP_492185.2    | 78 | 129.028 | 97  | 76  | SMG-associated and Lethal family member (smgl-1) |
| Locus_19015_Transcript_1/1_Conf_1.000 | 170  | 0  |          |                |    |         |     |     |                                                  |
| Locus_19016_Transcript_1/1_Conf_1.000 | 453  | 20 | 5.00E-46 | XP_002640189.1 | 72 | 187.193 | 148 | 107 | Hypothetical protein CBG12692                    |
| Locus_19017_Transcript_1/3_Conf_0.600 | 1013 | 0  |          |                |    |         |     |     |                                                  |
| Locus_19017_Transcript_2/3_Conf_0.600 | 455  | 0  |          |                |    |         |     |     |                                                  |
| Locus_19017_Transcript_3/3_Conf_0.600 | 1037 | 0  |          |                |    |         |     |     |                                                  |
| Locus_19018_Transcript_1/1_Conf_1.000 | 335  | 11 | 1.73E-22 | EFO13548.1     | 73 | 108.997 | 98  | 72  | hypothetical protein LOAG_14980                  |
| Locus_19019_Transcript_1/1_Conf_1.000 | 362  | 3  | 1.08E-32 | XP_001892606.1 | 83 | 142.895 | 108 | 90  | hypothetical protein Bm1_05665                   |
| Locus_1902_Transcript_1/3_Conf_0.714  | 1454 | 20 | 1.45E-26 | NP_498156.1    | 51 | 125.561 | 235 | 122 | hypothetical protein W03A5.4                     |

|                                       |      |    |           |                |    |         |     |     |                                                                                             |
|---------------------------------------|------|----|-----------|----------------|----|---------|-----|-----|---------------------------------------------------------------------------------------------|
| Locus_1902_Transcript_2/3_Conf_0.714  | 1475 | 20 | 8.67E-27  | XP_002641265.1 | 50 | 126.331 | 251 | 128 | Hypothetical protein CBG05177                                                               |
| Locus_1902_Transcript_3/3_Conf_0.714  | 1448 | 20 | 1.44E-26  | NP_498156.1    | 51 | 125.561 | 235 | 122 | hypothetical protein W03A5.4                                                                |
| Locus_19020_Transcript_1/1_Conf_1.000 | 141  | 0  |           |                |    |         |     |     |                                                                                             |
| Locus_19021_Transcript_1/1_Conf_1.000 | 325  | 0  |           |                |    |         |     |     |                                                                                             |
| Locus_19022_Transcript_1/1_Conf_1.000 | 255  | 20 | 4.67E-07  | ACX53644.1     | 55 | 57.7658 | 79  | 44  | polyprotein                                                                                 |
| Locus_19023_Transcript_1/1_Conf_1.000 | 243  | 0  |           |                |    |         |     |     |                                                                                             |
| Locus_19024_Transcript_1/1_Conf_1.000 | 1185 | 20 | 7.73E-65  | EFO16078.1     | 63 | 252.292 | 349 | 220 | hypothetical protein LOAG_12430                                                             |
| Locus_19025_Transcript_1/1_Conf_1.000 | 427  | 2  | 4.01E-27  | XP_002636178.1 | 81 | 124.405 | 92  | 75  | Hypothetical protein CBG01435                                                               |
| Locus_19026_Transcript_1/1_Conf_1.000 | 224  | 0  |           |                |    |         |     |     |                                                                                             |
| Locus_19027_Transcript_1/1_Conf_1.000 | 639  | 4  | 2.19E-16  | XP_002632958.1 | 74 | 89.7373 | 74  | 55  | Hypothetical protein CBG21714                                                               |
| Locus_19028_Transcript_1/1_Conf_1.000 | 419  | 0  |           |                |    |         |     |     |                                                                                             |
| Locus_19029_Transcript_1/1_Conf_1.000 | 513  | 20 | 1.49E-35  | XP_002631317.1 | 77 | 152.525 | 112 | 87  | Hypothetical protein CBG03139                                                               |
| Locus_1903_Transcript_1/1_Conf_1.000  | 1542 | 20 | 5.35E-160 | XP_002630721.1 | 69 | 568.926 | 533 | 373 | C. briggsae CBR-CLR-1 protein                                                               |
| Locus_19030_Transcript_1/1_Conf_1.000 | 302  | 0  |           |                |    |         |     |     |                                                                                             |
| Locus_19031_Transcript_1/1_Conf_1.000 | 314  | 20 | 1.96E-21  | XP_394116.3    | 68 | 105.531 | 104 | 71  | PREDICTED: similar to Aromatic-L-amino-acid decarboxylase (AADC) (DOPA decarboxylase) (DDC) |
| Locus_19032_Transcript_1/1_Conf_1.000 | 212  | 0  |           |                |    |         |     |     |                                                                                             |
| Locus_19033_Transcript_1/1_Conf_1.000 | 355  | 1  | 8.13E-04  | XP_001897852.1 | 45 | 46.9802 | 126 | 57  | notch-like transmembrane receptor                                                           |
| Locus_19034_Transcript_1/1_Conf_1.000 | 153  | 9  | 7.19E-08  | XP_002646475.1 | 72 | 60.4622 | 50  | 36  | Hypothetical protein CBG19448                                                               |
| Locus_19035_Transcript_1/1_Conf_1.000 | 188  | 0  |           |                |    |         |     |     |                                                                                             |
| Locus_19036_Transcript_1/1_Conf_1.000 | 311  | 20 | 2.84E-17  | NP_508551.1    | 59 | 91.6633 | 107 | 64  | hypothetical protein F28B4.3                                                                |

|                                       |     |    |          |                |     |         |     |     |                                                                               |
|---------------------------------------|-----|----|----------|----------------|-----|---------|-----|-----|-------------------------------------------------------------------------------|
| Locus_19037_Transcript_1/1_Conf_1.000 | 176 | 19 | 6.57E-14 | XP_002811165.1 | 100 | 80.4925 | 38  | 38  | PREDICTED: MARCKS-related protein-like                                        |
| Locus_19038_Transcript_1/1_Conf_1.000 | 368 | 20 | 2.81E-41 | XP_002638487.1 | 91  | 171.4   | 121 | 111 | Hypothetical protein CBG12917                                                 |
| Locus_19039_Transcript_1/1_Conf_1.000 | 330 | 3  | 3.27E-21 | NP_497897.1    | 82  | 104.76  | 91  | 75  | PDCD (mammalian Programmed Cell Death protein) homolog family member (pdcd-2) |
| Locus_1904_Transcript_1/1_Conf_1.000  | 806 | 20 | 4.33E-14 | NP_507645.2    | 38  | 82.8037 | 248 | 96  | hypothetical protein Y69H2.3                                                  |
| Locus_19040_Transcript_1/1_Conf_1.000 | 212 | 2  | 1.73E-06 | XP_002637606.1 | 65  | 55.8398 | 52  | 34  | Hypothetical protein CBG19344                                                 |
| Locus_19041_Transcript_1/1_Conf_1.000 | 511 | 20 | 1.84E-30 | NP_498290.1    | 74  | 135.576 | 135 | 100 | hypothetical protein F25B5.5                                                  |
| Locus_19042_Transcript_1/1_Conf_1.000 | 496 | 5  | 2.25E-38 | NP_001022759.1 | 78  | 161.77  | 126 | 99  | hypothetical protein T12D8.9                                                  |
| Locus_19043_Transcript_1/1_Conf_1.000 | 240 | 20 | 5.93E-39 | XP_001084827.2 | 100 | 163.696 | 80  | 80  | PREDICTED: serpin H1                                                          |
| Locus_19044_Transcript_1/1_Conf_1.000 | 318 | 20 | 4.04E-35 | NP_498808.2    | 96  | 150.984 | 75  | 72  | hypothetical protein C02F5.3                                                  |

|                                       |     |    |          |                |    |         |     |     |                                                                              |
|---------------------------------------|-----|----|----------|----------------|----|---------|-----|-----|------------------------------------------------------------------------------|
| Locus_19045_Transcript_1/1_Conf_1.000 | 464 | 20 | 1.00E-17 | XP_002648990.1 | 77 | 93.2041 | 72  | 56  | Hypothetical protein CBG21322                                                |
| Locus_19046_Transcript_1/1_Conf_1.000 | 276 | 20 | 5.93E-23 | EFO22951.1     | 73 | 110.538 | 91  | 67  | hypothetical protein LOAG_05534                                              |
| Locus_19047_Transcript_1/1_Conf_1.000 | 338 | 13 | 1.36E-35 | CBK19475.1     | 86 | 152.525 | 106 | 92  | C. elegans protein T12G3.2e, confirmed by transcript evidence                |
| Locus_19048_Transcript_1/1_Conf_1.000 | 250 | 0  |          |                |    |         |     |     |                                                                              |
| Locus_19049_Transcript_1/1_Conf_1.000 | 203 | 0  |          |                |    |         |     |     |                                                                              |
| Locus_1905_Transcript_1/1_Conf_1.000  | 495 | 0  |          |                |    |         |     |     |                                                                              |
| Locus_19050_Transcript_1/1_Conf_1.000 | 540 | 20 | 1.98E-87 | NP_508184.2    | 92 | 325.094 | 180 | 166 | AdaPtin, Mu/medium chain (clathrin associated complex) family member (apm-3) |
| Locus_19051_Transcript_1/1_Conf_1.000 | 323 | 20 | 4.48E-10 | ABG23688.1     | 53 | 67.781  | 106 | 57  | RNA-dependent RNA polymerase                                                 |
| Locus_19052_Transcript_1/1_Conf_1.000 | 890 | 20 | 7.51E-82 | NP_492524.2    | 71 | 308.145 | 297 | 211 | hypothetical protein F30A10.10                                               |
| Locus_19053_Transcript_1/1_Conf_1.000 | 435 | 4  | 3.02E-43 | NP_503059.2    | 85 | 177.948 | 111 | 95  | hypothetical protein ZK550.3                                                 |
| Locus_19054_Transcript_1/2_Conf_1.000 | 375 | 0  |          |                |    |         |     |     |                                                                              |
| Locus_19054_Transcript_2/2_Conf_1.000 | 296 | 0  |          |                |    |         |     |     |                                                                              |
| Locus_19055_Transcript_1/1_Conf_1.000 | 162 | 6  | 1.58E-23 | XP_530140.2    | 96 | 112.464 | 54  | 52  | PREDICTED: hypothetical protein                                              |
| Locus_19056_Transcript_1/1_Conf_1.000 | 483 | 0  |          |                |    |         |     |     |                                                                              |
| Locus_19057_Transcript_1/1_Conf_1.000 | 317 | 20 | 4.97E-25 | NP_497482.1    | 78 | 117.472 | 89  | 70  | hypothetical protein F53A3.7                                                 |
| Locus_19058_Transcript_1/1_Conf_1.000 | 171 | 0  |          |                |    |         |     |     |                                                                              |
| Locus_19059_Transcript_1/1_Conf_1.000 | 230 | 0  |          |                |    |         |     |     |                                                                              |
| Locus_1906_Transcript_1/1_Conf_1.000  | 712 | 20 | 2.23E-66 | EFO22922.1     | 91 | 256.144 | 147 | 135 | eukaryotic translation initiation factor 2 subunit 2                         |
| Locus_19060_Transcript_1/1_Conf_1.000 | 317 | 20 | 2.73E-15 | EFO22683.1     | 68 | 85.1149 | 82  | 56  | STE/STE11/MEKK2 protein kinase                                               |
| Locus_19061_Transcript_1/1_Conf_1.000 | 136 | 0  |          |                |    |         |     |     |                                                                              |
| Locus_19062_Transcript_1/1_Conf_1.000 | 727 | 20 | 2.59E-49 | NP_507155.1    | 57 | 199.519 | 224 | 129 | hypothetical protein F26D2.13                                                |
| Locus_19063_Transcript_1/1_Conf_1.000 | 197 | 0  |          |                |    |         |     |     |                                                                              |

|                                       |     |    |          |                |    |         |     |     |                                                     |
|---------------------------------------|-----|----|----------|----------------|----|---------|-----|-----|-----------------------------------------------------|
| Locus_19064_Transcript_1/1_Conf_1.000 | 275 | 20 | 5.04E-22 | NP_491855.1    | 84 | 107.457 | 66  | 56  | Nuclear Pore complex Protein family member (npp-12) |
| Locus_19065_Transcript_1/1_Conf_1.000 | 717 | 20 | 5.02E-90 | XP_002643890.1 | 81 | 334.724 | 243 | 198 | Hypothetical protein CBG02142                       |
| Locus_19066_Transcript_1/1_Conf_1.000 | 273 | 20 | 3.38E-18 | XP_002642446.1 | 74 | 94.7449 | 86  | 64  | Hypothetical protein CBG06851                       |
| Locus_19067_Transcript_1/1_Conf_1.000 | 260 | 0  |          |                |    |         |     |     |                                                     |
| Locus_19068_Transcript_1/1_Conf_1.000 | 149 | 0  |          |                |    |         |     |     |                                                     |
| Locus_19069_Transcript_1/1_Conf_1.000 | 141 | 0  |          |                |    |         |     |     |                                                     |
| Locus_1907_Transcript_1/5_Conf_0.308  | 747 | 20 | 6.15E-49 | XP_001892438.1 | 82 | 198.364 | 137 | 113 | 60S ribosomal protein L23a                          |
| Locus_1907_Transcript_2/5_Conf_0.538  | 751 | 20 | 6.20E-49 | XP_001892438.1 | 82 | 198.364 | 137 | 113 | 60S ribosomal protein L23a                          |
| Locus_1907_Transcript_3/5_Conf_0.462  | 751 | 20 | 6.20E-49 | XP_001892438.1 | 82 | 198.364 | 137 | 113 | 60S ribosomal protein L23a                          |

|                                       |     |    |          |                |     |         |     |     |                                 |
|---------------------------------------|-----|----|----------|----------------|-----|---------|-----|-----|---------------------------------|
| Locus_1907_Transcript_4/5_Conf_0.462  | 747 | 20 | 6.15E-49 | XP_001892438.1 | 82  | 198.364 | 137 | 113 | 60S ribosomal protein L23a      |
| Locus_1907_Transcript_5/5_Conf_0.308  | 543 | 20 | 2.85E-49 | XP_001892438.1 | 82  | 198.364 | 137 | 113 | 60S ribosomal protein L23a      |
| Locus_19070_Transcript_1/1_Conf_1.000 | 278 | 20 | 1.19E-47 | EFO25348.1     | 100 | 192.586 | 92  | 92  | rab family protein 3            |
| Locus_19071_Transcript_1/1_Conf_1.000 | 308 | 0  |          |                |     |         |     |     |                                 |
| Locus_19072_Transcript_1/1_Conf_1.000 | 144 | 6  | 7.26E-08 | XP_002639125.1 | 78  | 60.4622 | 47  | 37  | C. briggsae CBR-FER-1 protein   |
| Locus_19073_Transcript_1/1_Conf_1.000 | 653 | 20 | 2.08E-17 | XP_001894228.1 | 61  | 93.2041 | 180 | 110 | hypothetical protein            |
| Locus_19074_Transcript_1/1_Conf_1.000 | 632 | 0  |          |                |     |         |     |     |                                 |
| Locus_19075_Transcript_1/1_Conf_1.000 | 492 | 20 | 1.61E-52 | NP_001021681.1 | 73  | 208.764 | 172 | 126 | hypothetical protein Y105E8A.10 |
| Locus_19076_Transcript_1/1_Conf_1.000 | 238 | 8  | 1.74E-30 | XP_002638768.1 | 90  | 135.576 | 76  | 69  | Hypothetical protein CBG05111   |
| Locus_19077_Transcript_1/1_Conf_1.000 | 188 | 0  |          |                |     |         |     |     |                                 |
| Locus_19078_Transcript_1/1_Conf_1.000 | 151 | 0  |          |                |     |         |     |     |                                 |
| Locus_19079_Transcript_1/1_Conf_1.000 | 294 | 20 | 1.75E-30 | XP_002648619.1 | 78  | 135.576 | 98  | 77  | Hypothetical protein CBG24962   |

|                                       |      |    |           |                |     |         |     |     |                                                            |
|---------------------------------------|------|----|-----------|----------------|-----|---------|-----|-----|------------------------------------------------------------|
| Locus_1908_Transcript_1/2_Conf_1.000  | 1127 | 20 | 5.63E-102 | AAM82155.1     | 69  | 375.555 | 324 | 224 | cysteine proteinase                                        |
| Locus_1908_Transcript_2/2_Conf_1.000  | 928  | 20 | 1.76E-60  | AAM82155.1     | 67  | 237.269 | 209 | 141 | cysteine proteinase                                        |
| Locus_19080_Transcript_1/1_Conf_1.000 | 256  | 0  |           |                |     |         |     |     |                                                            |
| Locus_19081_Transcript_1/1_Conf_1.000 | 134  | 0  |           |                |     |         |     |     |                                                            |
| Locus_19082_Transcript_1/1_Conf_1.000 | 960  | 7  | 5.85E-14  | XP_002640822.1 | 41  | 82.8037 | 286 | 119 | Hypothetical protein CBG15709                              |
| Locus_19083_Transcript_1/1_Conf_1.000 | 429  | 5  | 2.60E-10  | XP_002639923.1 | 85  | 68.5514 | 42  | 36  | C. briggsae CBR-JPH-1 protein                              |
| Locus_19084_Transcript_1/1_Conf_1.000 | 230  | 0  |           |                |     |         |     |     |                                                            |
| Locus_19085_Transcript_1/1_Conf_1.000 | 337  | 0  |           |                |     |         |     |     |                                                            |
| Locus_19086_Transcript_1/1_Conf_1.000 | 193  | 20 | 4.96E-17  | EAW84750.1     | 100 | 90.8929 | 63  | 63  | coatomer protein complex, subunit epsilon, isoform CRA_c   |
| Locus_19087_Transcript_1/1_Conf_1.000 | 200  | 20 | 4.60E-23  | XP_001900213.1 | 90  | 110.923 | 66  | 60  | Hypothetical oxidoreductase F56D1.5                        |
| Locus_19088_Transcript_1/1_Conf_1.000 | 235  | 1  | 2.07E-07  | EFO24426.1     | 62  | 58.9214 | 67  | 42  | hypothetical protein LOAG_04062                            |
| Locus_19089_Transcript_1/1_Conf_1.000 | 137  | 0  |           |                |     |         |     |     |                                                            |
| Locus_1909_Transcript_1/1_Conf_1.000  | 317  | 4  | 1.11E-24  | XP_002638813.1 | 71  | 116.316 | 106 | 76  | C. briggsae CBR-ATM-1 protein                              |
| Locus_19090_Transcript_1/1_Conf_1.000 | 175  | 0  |           |                |     |         |     |     |                                                            |
| Locus_19091_Transcript_1/1_Conf_1.000 | 209  | 0  |           |                |     |         |     |     |                                                            |
| Locus_19092_Transcript_1/1_Conf_1.000 | 183  | 20 | 3.57E-31  | EAW65357.1     | 100 | 137.887 | 60  | 60  | filamin B, beta (actin binding protein 278), isoform CRA_e |
| Locus_19093_Transcript_1/1_Conf_1.000 | 525  | 20 | 4.70E-59  | NP_496910.1    | 78  | 230.72  | 174 | 137 | Histone DeAcetylase family member (hda-6)                  |

|                                       |      |    |          |                |    |         |     |     |                                        |
|---------------------------------------|------|----|----------|----------------|----|---------|-----|-----|----------------------------------------|
| Locus_19094_Transcript_1/1_Conf_1.000 | 275  | 20 | 1.52E-18 | XP_786833.2    | 83 | 95.9005 | 68  | 57  | PREDICTED: similar to MGC89020 protein |
| Locus_19095_Transcript_1/1_Conf_1.000 | 641  | 4  | 4.52E-54 | NP_510177.1    | 69 | 214.927 | 213 | 148 | hypothetical protein F17H10.1          |
| Locus_19096_Transcript_1/1_Conf_1.000 | 1051 | 20 | 1.37E-91 | XP_002633254.1 | 78 | 340.887 | 275 | 217 | C. briggsae CBR-NDX-9 protein          |
| Locus_19097_Transcript_1/1_Conf_1.000 | 137  | 0  |          |                |    |         |     |     |                                        |
| Locus_19098_Transcript_1/1_Conf_1.000 | 902  | 20 | 4.41E-45 | EFO20748.1     | 58 | 186.037 | 269 | 157 | MBOAT family protein                   |
| Locus_19099_Transcript_1/1_Conf_1.000 | 378  | 20 | 8.92E-35 | XP_002640827.1 | 78 | 149.828 | 126 | 99  | Hypothetical protein CBG15714          |
| Locus_191_Transcript_1/1_Conf_1.000   | 1799 | 20 | 1.91E-26 | AAO63577.1     | 48 | 125.561 | 266 | 129 | secreted protein 5 precursor           |
| Locus_1910_Transcript_1/3_Conf_0.286  | 308  | 15 | 2.67E-07 | EFO20587.1     | 54 | 58.5362 | 96  | 52  | groucho protein GRG1-S                 |
| Locus_1910_Transcript_2/3_Conf_0.714  | 1611 | 6  | 2.49E-06 | EFO20587.1     | 54 | 58.5362 | 96  | 52  | groucho protein GRG1-S                 |
| Locus_1910_Transcript_3/3_Conf_0.714  | 1611 | 6  | 2.49E-06 | EFO20587.1     | 54 | 58.5362 | 96  | 52  | groucho protein GRG1-S                 |



|                                       |     |    |          |                |    |         |     |    |                                                                         |
|---------------------------------------|-----|----|----------|----------------|----|---------|-----|----|-------------------------------------------------------------------------|
| Locus_19100_Transcript_1/1_Conf_1.000 | 207 | 20 | 1.05E-19 | NP_510290.1    | 80 | 99.7525 | 68  | 55 | Germinal Center Kinase family member (gck-4)                            |
| Locus_19101_Transcript_1/1_Conf_1.000 | 153 | 0  |          |                |    |         |     |    |                                                                         |
| Locus_19102_Transcript_1/1_Conf_1.000 | 131 | 0  |          |                |    |         |     |    |                                                                         |
| Locus_19103_Transcript_1/1_Conf_1.000 | 271 | 0  |          |                |    |         |     |    |                                                                         |
| Locus_19104_Transcript_1/1_Conf_1.000 | 144 | 0  |          |                |    |         |     |    |                                                                         |
| Locus_19105_Transcript_1/1_Conf_1.000 | 379 | 20 | 4.29E-29 | NP_506019.2    | 81 | 130.954 | 90  | 73 | aspartyl(D) tRNA Synthetase family member (drs-2)                       |
| Locus_19106_Transcript_1/1_Conf_1.000 | 210 | 0  |          |                |    |         |     |    |                                                                         |
| Locus_19107_Transcript_1/1_Conf_1.000 | 232 | 0  |          |                |    |         |     |    |                                                                         |
| Locus_19108_Transcript_1/1_Conf_1.000 | 213 | 2  | 1.73E-06 | XP_002631789.1 | 60 | 55.8398 | 73  | 44 | Hypothetical protein CBG21003                                           |
| Locus_19109_Transcript_1/1_Conf_1.000 | 255 | 4  | 3.22E-24 | XP_001898469.1 | 93 | 114.775 | 59  | 55 | Zinc knuckle family protein                                             |
| Locus_1911_Transcript_1/1_Conf_1.000  | 261 | 20 | 7.92E-07 | XP_001495113.2 | 52 | 56.9954 | 85  | 45 | PREDICTED: BUB1 budding uninhibited by benzimidazoles 1 homolog (yeast) |
| Locus_19110_Transcript_1/1_Conf_1.000 | 321 | 15 | 7.39E-13 | CAA73142.1     | 67 | 77.0258 | 100 | 67 | VPS34 homologue                                                         |

|                                       |      |    |           |                |    |         |     |     |                                                                   |
|---------------------------------------|------|----|-----------|----------------|----|---------|-----|-----|-------------------------------------------------------------------|
| Locus_19111_Transcript_1/1_Conf_1.000 | 387  | 10 | 6.54E-30  | Q93890.5       | 82 | 133.65  | 103 | 85  | UDP-galactose/UDP-N-acetylglucosamine transporter srf-3           |
| Locus_19112_Transcript_1/1_Conf_1.000 | 379  | 2  | 2.14E-04  | EFO63420.1     | 47 | 48.9062 | 117 | 56  | Hypothetical protein GLP15_3736                                   |
| Locus_19113_Transcript_1/1_Conf_1.000 | 285  | 0  |           |                |    |         |     |     |                                                                   |
| Locus_19114_Transcript_1/1_Conf_1.000 | 697  | 20 | 7.13E-78  | XP_002634797.1 | 88 | 294.278 | 230 | 203 | Hypothetical protein CBG13900                                     |
| Locus_19115_Transcript_1/1_Conf_1.000 | 201  | 0  |           |                |    |         |     |     |                                                                   |
| Locus_19116_Transcript_1/1_Conf_1.000 | 322  | 0  |           |                |    |         |     |     |                                                                   |
| Locus_19117_Transcript_1/1_Conf_1.000 | 395  | 0  |           |                |    |         |     |     |                                                                   |
| Locus_19118_Transcript_1/1_Conf_1.000 | 158  | 0  |           |                |    |         |     |     |                                                                   |
| Locus_19119_Transcript_1/1_Conf_1.000 | 229  | 0  |           |                |    |         |     |     |                                                                   |
| Locus_1912_Transcript_1/2_Conf_1.000  | 416  | 3  | 2.94E-06  | NP_740842.1    | 62 | 55.0694 | 77  | 48  | protein KINase family member (kin-32)                             |
| Locus_1912_Transcript_2/2_Conf_1.000  | 1501 | 20 | 2.53E-106 | NP_740842.1    | 64 | 390.578 | 470 | 303 | protein KINase family member (kin-32)                             |
| Locus_19120_Transcript_1/1_Conf_1.000 | 329  | 20 | 2.98E-14  | XP_002642974.1 | 79 | 81.6481 | 58  | 46  | Hypothetical protein CBG15258                                     |
| Locus_19121_Transcript_1/1_Conf_1.000 | 297  | 0  |           |                |    |         |     |     |                                                                   |
| Locus_19122_Transcript_1/1_Conf_1.000 | 214  | 0  |           |                |    |         |     |     |                                                                   |
| Locus_19123_Transcript_1/1_Conf_1.000 | 387  | 0  |           |                |    |         |     |     |                                                                   |
| Locus_19124_Transcript_1/1_Conf_1.000 | 366  | 0  |           |                |    |         |     |     |                                                                   |
| Locus_19125_Transcript_1/1_Conf_1.000 | 466  | 20 | 8.99E-27  | NP_508866.1    | 54 | 123.25  | 153 | 83  | Unidentified Vitellogenin-linked Transcript family member (uvt-3) |

|                                       |     |    |          |                |    |         |     |     |                                 |
|---------------------------------------|-----|----|----------|----------------|----|---------|-----|-----|---------------------------------|
| Locus_19126_Transcript_1/1_Conf_1.000 | 236 | 20 | 2.20E-33 | XP_002639036.1 | 96 | 145.206 | 78  | 75  | C. briggsae CBR-DYB-1 protein   |
| Locus_19127_Transcript_1/1_Conf_1.000 | 292 | 1  | 7.66E-10 | EFO25846.1     | 54 | 67.0106 | 96  | 52  | hypothetical protein LOAG_02637 |
| Locus_19128_Transcript_1/1_Conf_1.000 | 895 | 2  | 4.10E-27 | XP_002640906.1 | 78 | 126.331 | 84  | 66  | Hypothetical protein CBG00463   |
| Locus_19129_Transcript_1/1_Conf_1.000 | 422 | 20 | 8.77E-06 | ABK42176.1     | 53 | 53.5286 | 98  | 52  | Chk2                            |
| Locus_1913_Transcript_1/2_Conf_1.000  | 590 | 0  |          |                |    |         |     |     |                                 |
| Locus_1913_Transcript_2/2_Conf_1.000  | 379 | 0  |          |                |    |         |     |     |                                 |
| Locus_19130_Transcript_1/1_Conf_1.000 | 433 | 4  | 2.58E-18 | NP_497051.1    | 76 | 95.1301 | 72  | 55  | hypothetical protein K02B7.3    |
| Locus_19131_Transcript_1/1_Conf_1.000 | 339 | 0  |          |                |    |         |     |     |                                 |
| Locus_19132_Transcript_1/1_Conf_1.000 | 186 | 2  | 7.48E-05 | XP_002639088.1 | 72 | 50.447  | 40  | 29  | C. briggsae CBR-TAG-83 protein  |
| Locus_19133_Transcript_1/1_Conf_1.000 | 244 | 0  |          |                |    |         |     |     |                                 |
| Locus_19134_Transcript_1/1_Conf_1.000 | 324 | 3  | 3.78E-09 | XP_002633677.1 | 76 | 64.6994 | 65  | 50  | C. briggsae CBR-LAD-2 protein   |
| Locus_19135_Transcript_1/1_Conf_1.000 | 135 | 0  |          |                |    |         |     |     |                                 |
| Locus_19136_Transcript_1/1_Conf_1.000 | 219 | 0  |          |                |    |         |     |     |                                 |
| Locus_19137_Transcript_1/1_Conf_1.000 | 532 | 0  |          |                |    |         |     |     |                                 |
| Locus_19138_Transcript_1/1_Conf_1.000 | 533 | 4  | 3.40E-52 | NP_499313.2    | 80 | 207.994 | 177 | 142 | hypothetical protein F43D9.1    |

|                                       |     |    |          |                |    |         |     |    |                                                                             |
|---------------------------------------|-----|----|----------|----------------|----|---------|-----|----|-----------------------------------------------------------------------------|
| Locus_19139_Transcript_1/1_Conf_1.000 | 367 | 20 | 4.99E-22 | XP_002637375.1 | 60 | 107.457 | 120 | 72 | C. briggsae CBR-MYS-1 protein                                               |
| Locus_1914_Transcript_1/1_Conf_1.000  | 494 | 0  |          |                |    |         |     |    |                                                                             |
| Locus_19140_Transcript_1/1_Conf_1.000 | 149 | 0  |          |                |    |         |     |    |                                                                             |
| Locus_19141_Transcript_1/1_Conf_1.000 | 420 | 20 | 3.91E-30 | NP_001033350.1 | 68 | 134.42  | 132 | 90 | hypothetical protein C23G10.7                                               |
| Locus_19142_Transcript_1/1_Conf_1.000 | 151 | 0  |          |                |    |         |     |    |                                                                             |
| Locus_19143_Transcript_1/1_Conf_1.000 | 528 | 2  | 1.24E-06 | XP_001901497.1 | 53 | 56.6102 | 104 | 56 | Zinc finger, C2H2 type family protein                                       |
| Locus_19144_Transcript_1/1_Conf_1.000 | 407 | 2  | 3.75E-17 | EFO18996.1     | 60 | 91.2781 | 126 | 76 | hypothetical protein LOAG_09500                                             |
| Locus_19145_Transcript_1/1_Conf_1.000 | 243 | 0  |          |                |    |         |     |    |                                                                             |
| Locus_19146_Transcript_1/1_Conf_1.000 | 209 | 4  | 6.61E-06 | NP_001129925.1 | 85 | 53.9138 | 35  | 30 | High Incidence of Males (increased X chromosome loss) family member (him-4) |
| Locus_19147_Transcript_1/1_Conf_1.000 | 211 | 0  |          |                |    |         |     |    |                                                                             |
| Locus_19148_Transcript_1/1_Conf_1.000 | 218 | 20 | 6.96E-24 | EFO28414.1     | 86 | 113.62  | 72  | 62 | hypothetical protein LOAG_00060                                             |
| Locus_19149_Transcript_1/1_Conf_1.000 | 434 | 0  |          |                |    |         |     |    |                                                                             |

|                                       |      |    |           |                |     |         |     |     |                                                                          |
|---------------------------------------|------|----|-----------|----------------|-----|---------|-----|-----|--------------------------------------------------------------------------|
| Locus_1915_Transcript_1/1_Conf_1.000  | 244  | 20 | 2.75E-28  | CAV31817.1     | 87  | 128.257 | 79  | 69  | C. elegans protein Y54G9A.3b, partially confirmed by transcript evidence |
| Locus_19150_Transcript_1/1_Conf_1.000 | 196  | 20 | 1.70E-17  | XP_002719350.1 | 100 | 92.4337 | 48  | 48  | PREDICTED: prohibitin                                                    |
| Locus_19151_Transcript_1/1_Conf_1.000 | 201  | 0  |           |                |     |         |     |     |                                                                          |
| Locus_19152_Transcript_1/1_Conf_1.000 | 151  | 2  | 1.90E-08  | NP_492763.1    | 69  | 62.3882 | 49  | 34  | hypothetical protein F25H2.7                                             |
| Locus_19153_Transcript_1/1_Conf_1.000 | 129  | 0  |           |                |     |         |     |     |                                                                          |
| Locus_19154_Transcript_1/2_Conf_1.000 | 1470 | 20 | 6.22E-126 | NP_508552.1    | 62  | 455.677 | 501 | 314 | hypothetical protein F40F4.6                                             |
| Locus_19154_Transcript_2/2_Conf_1.000 | 1470 | 20 | 3.65E-126 | NP_508552.1    | 62  | 456.447 | 501 | 314 | hypothetical protein F40F4.6                                             |
| Locus_19155_Transcript_1/1_Conf_1.000 | 446  | 20 | 6.84E-51  | XP_002638900.1 | 87  | 203.371 | 148 | 129 | Hypothetical protein CBG22126                                            |

|                                       |      |    |          |                |    |         |     |     |                                                                         |
|---------------------------------------|------|----|----------|----------------|----|---------|-----|-----|-------------------------------------------------------------------------|
| Locus_19156_Transcript_1/1_Conf_1.000 | 219  | 20 | 1.72E-25 | XP_002645154.1 | 86 | 119.013 | 69  | 60  | C. briggsae CBR-SEM-5 protein                                           |
| Locus_19157_Transcript_1/1_Conf_1.000 | 820  | 20 | 2.46E-97 | NP_509408.1    | 74 | 359.377 | 275 | 205 | hypothetical protein R09F10.1                                           |
| Locus_19158_Transcript_1/1_Conf_1.000 | 217  | 0  |          |                |    |         |     |     |                                                                         |
| Locus_19159_Transcript_1/2_Conf_1.000 | 403  | 1  | 6.24E-04 | NP_505787.1    | 52 | 47.3654 | 103 | 54  | hypothetical protein F58B4.4                                            |
| Locus_19159_Transcript_2/2_Conf_1.000 | 403  | 0  |          |                |    |         |     |     |                                                                         |
| Locus_1916_Transcript_1/1_Conf_1.000  | 2977 | 20 | 0        | XP_002630360.1 | 84 | 1172.53 | 880 | 743 | C. briggsae CBR-TSN-1 protein                                           |
| Locus_19160_Transcript_1/1_Conf_1.000 | 355  | 0  |          |                |    |         |     |     |                                                                         |
| Locus_19161_Transcript_1/1_Conf_1.000 | 151  | 0  |          |                |    |         |     |     |                                                                         |
| Locus_19162_Transcript_1/1_Conf_1.000 | 153  | 0  |          |                |    |         |     |     |                                                                         |
| Locus_19163_Transcript_1/1_Conf_1.000 | 397  | 20 | 4.03E-43 | NP_506047.5    | 83 | 177.563 | 132 | 110 | abnormal CHEmotaxis family member (che-11)                              |
| Locus_19164_Transcript_1/1_Conf_1.000 | 340  | 4  | 9.74E-18 | XP_002636415.1 | 84 | 93.2041 | 113 | 96  | Hypothetical protein CBG23068                                           |
| Locus_19165_Transcript_1/1_Conf_1.000 | 371  | 20 | 2.22E-41 | CAX65065.1     | 85 | 171.785 | 111 | 95  | C. elegans protein K01A6.2c, partially confirmed by transcript evidence |
| Locus_19166_Transcript_1/1_Conf_1.000 | 640  | 20 | 4.49E-78 | ADD13547.1     | 80 | 294.664 | 222 | 179 | Inositol triphosphate receptor protein 1, isoform h                     |

|                                       |      |    |           |                |    |         |     |     |                                                                   |
|---------------------------------------|------|----|-----------|----------------|----|---------|-----|-----|-------------------------------------------------------------------|
| Locus_19167_Transcript_1/1_Conf_1.000 | 213  | 2  | 1.01E-14  | XP_002632364.1 | 83 | 83.1889 | 53  | 44  | Hypothetical protein CBG00382                                     |
| Locus_19168_Transcript_1/1_Conf_1.000 | 348  | 3  | 1.03E-22  | XP_002647656.1 | 62 | 109.768 | 117 | 73  | Hypothetical protein CBG06763                                     |
| Locus_19169_Transcript_1/1_Conf_1.000 | 251  | 0  |           |                |    |         |     |     |                                                                   |
| Locus_1917_Transcript_1/1_Conf_1.000  | 2068 | 20 | 0         | XP_002637841.1 | 96 | 1114.37 | 603 | 581 | C. briggsae CBR-VHA-13 protein                                    |
| Locus_19170_Transcript_1/1_Conf_1.000 | 242  | 0  |           |                |    |         |     |     |                                                                   |
| Locus_19171_Transcript_1/1_Conf_1.000 | 791  | 20 | 1.54E-117 | NP_493910.2    | 87 | 426.402 | 263 | 230 | Sodium:Neurotransmitter symporter Family family member (snf-3)    |
| Locus_19172_Transcript_1/1_Conf_1.000 | 213  | 0  |           |                |    |         |     |     |                                                                   |
| Locus_19173_Transcript_1/1_Conf_1.000 | 266  | 3  | 9.32E-08  | XP_002636556.1 | 67 | 60.077  | 58  | 39  | Hypothetical protein CBG23246                                     |
| Locus_19174_Transcript_1/1_Conf_1.000 | 311  | 0  |           |                |    |         |     |     |                                                                   |
| Locus_19175_Transcript_1/1_Conf_1.000 | 174  | 0  |           |                |    |         |     |     |                                                                   |
| Locus_19176_Transcript_1/1_Conf_1.000 | 217  | 0  |           |                |    |         |     |     |                                                                   |
| Locus_19177_Transcript_1/2_Conf_1.000 | 596  | 4  | 1.49E-18  | NP_490990.2    | 65 | 96.6709 | 155 | 102 | hypothetical protein Y23H5B.5                                     |
| Locus_19177_Transcript_2/2_Conf_1.000 | 437  | 3  | 1.28E-09  | NP_490990.2    | 64 | 66.2402 | 85  | 55  | hypothetical protein Y23H5B.5                                     |
| Locus_19178_Transcript_1/1_Conf_1.000 | 295  | 20 | 6.88E-19  | XP_001895786.1 | 85 | 97.0561 | 61  | 52  | Fringe-like family protein                                        |
| Locus_19179_Transcript_1/1_Conf_1.000 | 182  | 20 | 9.81E-13  | NP_493967.1    | 83 | 76.6406 | 55  | 46  | Conserved Oligomeric Golgi (COG) Component family member (cogc-4) |
| Locus_1918_Transcript_1/1_Conf_1.000  | 2006 | 20 | 0         | NP_001022876.1 | 73 | 734.947 | 587 | 429 | GLYcosylation related family member (gly-9)                       |
| Locus_19180_Transcript_1/1_Conf_1.000 | 298  | 0  |           |                |    |         |     |     |                                                                   |
| Locus_19181_Transcript_1/1_Conf_1.000 | 364  | 0  |           |                |    |         |     |     |                                                                   |
| Locus_19182_Transcript_1/1_Conf_1.000 | 341  | 0  |           |                |    |         |     |     |                                                                   |
| Locus_19183_Transcript_1/1_Conf_1.000 | 158  | 0  |           |                |    |         |     |     |                                                                   |
| Locus_19184_Transcript_1/1_Conf_1.000 | 192  | 2  | 1.35E-06  | XP_002643956.1 | 57 | 56.225  | 61  | 35  | Hypothetical protein CBG17315                                     |
| Locus_19185_Transcript_1/1_Conf_1.000 | 168  | 0  |           |                |    |         |     |     |                                                                   |

|                                       |      |    |          |                |    |         |     |     |                                                                                             |
|---------------------------------------|------|----|----------|----------------|----|---------|-----|-----|---------------------------------------------------------------------------------------------|
| Locus_19186_Transcript_1/1_Conf_1.000 | 135  | 10 | 1.91E-13 | XP_002637401.1 | 95 | 78.9518 | 43  | 41  | C. briggsae CBR-FKB-3 protein                                                               |
| Locus_19187_Transcript_1/1_Conf_1.000 | 650  | 20 | 6.26E-91 | NP_510336.2    | 85 | 337.421 | 215 | 184 | TBC (Tre-2/Bub2/Cdc16) domain family member (tbc-19)                                        |
| Locus_19188_Transcript_1/1_Conf_1.000 | 565  | 20 | 2.49E-62 | XP_002634543.1 | 76 | 241.891 | 188 | 143 | C. briggsae CBR-CED-5 protein                                                               |
| Locus_19189_Transcript_1/1_Conf_1.000 | 134  | 0  |          |                |    |         |     |     |                                                                                             |
| Locus_1919_Transcript_1/1_Conf_1.000  | 1198 | 20 | 1.57E-97 | XP_001901770.1 | 85 | 360.918 | 220 | 189 | translation initiation factor 4E                                                            |
| Locus_19190_Transcript_1/1_Conf_1.000 | 228  | 0  |          |                |    |         |     |     |                                                                                             |
| Locus_19191_Transcript_1/1_Conf_1.000 | 380  | 20 | 2.98E-22 | NP_497538.1    | 63 | 108.227 | 130 | 82  | hypothetical protein Y54F10BM.13                                                            |
| Locus_19192_Transcript_1/1_Conf_1.000 | 227  | 0  |          |                |    |         |     |     |                                                                                             |
| Locus_19193_Transcript_1/1_Conf_1.000 | 361  | 2  | 9.14E-32 | XP_001899472.1 | 70 | 139.813 | 128 | 90  | Patatin-like phospholipase family protein                                                   |
| Locus_19194_Transcript_1/1_Conf_1.000 | 387  | 20 | 3.32E-66 | XP_002630534.1 | 97 | 254.218 | 128 | 125 | Hypothetical protein CBG12974                                                               |
| Locus_19195_Transcript_1/1_Conf_1.000 | 358  | 20 | 8.04E-28 | NP_507683.2    | 83 | 126.716 | 80  | 67  | tryptophanyl (W) tRNA Synthetase family member (wrs-1)                                      |
| Locus_19196_Transcript_1/1_Conf_1.000 | 260  | 0  |          |                |    |         |     |     |                                                                                             |
| Locus_19197_Transcript_1/1_Conf_1.000 | 179  | 0  |          |                |    |         |     |     |                                                                                             |
| Locus_19198_Transcript_1/1_Conf_1.000 | 426  | 20 | 8.96E-19 | XP_394116.3    | 65 | 96.6709 | 113 | 74  | PREDICTED: similar to Aromatic-L-amino-acid decarboxylase (AADC) (DOPA decarboxylase) (DDC) |
| Locus_19199_Transcript_1/1_Conf_1.000 | 153  | 20 | 2.55E-13 | NP_510672.2    | 90 | 78.5666 | 50  | 45  | Nematode ASTacin protease family member (nas-39)                                            |
| Locus_192_Transcript_1/1_Conf_1.000   | 1244 | 20 | 2.85E-73 | NP_494789.1    | 60 | 280.411 | 379 | 228 | hypothetical protein W06B4.2                                                                |
| Locus_1920_Transcript_1/1_Conf_1.000  | 559  | 4  | 1.69E-23 | XP_001899166.1 | 68 | 112.849 | 106 | 73  | GTP-ase activating protein for Arf containing protein                                       |
| Locus_19200_Transcript_1/1_Conf_1.000 | 133  | 0  |          |                |    |         |     |     |                                                                                             |



|                                       |     |    |          |                |    |         |     |     |                                                         |
|---------------------------------------|-----|----|----------|----------------|----|---------|-----|-----|---------------------------------------------------------|
| Locus_19201_Transcript_1/1_Conf_1.000 | 237 | 6  | 1.75E-06 | XP_002644145.1 | 71 | 55.8398 | 53  | 38  | C. briggsae CBR-DAF-12 protein                          |
| Locus_19202_Transcript_1/1_Conf_1.000 | 303 | 4  | 2.87E-09 | XP_002641939.1 | 60 | 65.0846 | 95  | 57  | C. briggsae CBR-MIG-10 protein                          |
| Locus_19203_Transcript_1/1_Conf_1.000 | 321 | 0  |          |                |    |         |     |     |                                                         |
| Locus_19204_Transcript_1/1_Conf_1.000 | 182 | 0  |          |                |    |         |     |     |                                                         |
| Locus_19205_Transcript_1/1_Conf_1.000 | 692 | 0  |          |                |    |         |     |     |                                                         |
| Locus_19206_Transcript_1/1_Conf_1.000 | 822 | 20 | 4.73E-56 | XP_001902208.1 | 71 | 222.246 | 177 | 127 | TM2 domain containing protein                           |
| Locus_19207_Transcript_1/1_Conf_1.000 | 167 | 0  |          |                |    |         |     |     |                                                         |
| Locus_19208_Transcript_1/1_Conf_1.000 | 142 | 0  |          |                |    |         |     |     |                                                         |
| Locus_19209_Transcript_1/1_Conf_1.000 | 188 | 20 | 1.96E-21 | XP_002113675.1 | 93 | 105.531 | 62  | 58  | hypothetical protein TRIADDRAFT_50388                   |
| Locus_1921_Transcript_1/2_Conf_1.000  | 672 | 20 | 4.54E-79 | NP_502655.1    | 87 | 298.13  | 187 | 164 | Ribosomal Protein, Large subunit family member (rpl-18) |
| Locus_1921_Transcript_2/2_Conf_1.000  | 672 | 20 | 1.01E-78 | NP_502655.1    | 87 | 296.975 | 187 | 164 | Ribosomal Protein, Large subunit family member (rpl-18) |
| Locus_19210_Transcript_1/1_Conf_1.000 | 234 | 0  |          |                |    |         |     |     |                                                         |
| Locus_19211_Transcript_1/1_Conf_1.000 | 387 | 20 | 3.36E-26 | NP_502803.3    | 95 | 121.324 | 63  | 60  | EPS (human endocytosis) related family member (eps-8)   |
| Locus_19212_Transcript_1/1_Conf_1.000 | 298 | 3  | 3.90E-06 | XP_002643075.1 | 60 | 54.6842 | 65  | 39  | Hypothetical protein CBG22995                           |
| Locus_19213_Transcript_1/1_Conf_1.000 | 694 | 19 | 2.30E-36 | EFO26231.1     | 67 | 156.377 | 165 | 111 | hypothetical protein LOAG_02257                         |

|                                       |      |    |          |                |     |         |     |     |                                                                |
|---------------------------------------|------|----|----------|----------------|-----|---------|-----|-----|----------------------------------------------------------------|
| Locus_19214_Transcript_1/1_Conf_1.000 | 422  | 20 | 2.89E-33 | XP_002645074.1 | 65  | 144.821 | 138 | 91  | Hypothetical protein CBG16737                                  |
| Locus_19215_Transcript_1/1_Conf_1.000 | 227  | 20 | 3.68E-12 | CAR63556.1     | 68  | 74.7146 | 64  | 44  | putative Lin-5 (Five) Interacting protein                      |
| Locus_19216_Transcript_1/1_Conf_1.000 | 214  | 20 | 3.59E-12 | XP_002633609.1 | 71  | 74.7146 | 69  | 49  | Hypothetical protein CBG05491                                  |
| Locus_19217_Transcript_1/1_Conf_1.000 | 216  | 20 | 4.84E-09 | XP_002594167.1 | 59  | 64.3142 | 66  | 39  | hypothetical protein BRAFLDRAFT_195549                         |
| Locus_19218_Transcript_1/1_Conf_1.000 | 194  | 3  | 7.90E-23 | NP_492730.2    | 90  | 110.153 | 64  | 58  | hypothetical protein Y106G6H.5                                 |
| Locus_19219_Transcript_1/1_Conf_1.000 | 227  | 20 | 1.22E-31 | NP_499205.1    | 94  | 139.428 | 75  | 71  | hypothetical protein K03H1.5                                   |
| Locus_1922_Transcript_1/1_Conf_1.000  | 1067 | 20 | 2.66E-82 | XP_001895586.1 | 63  | 310.071 | 377 | 238 | N terminus of Rad21 / Rec8 like protein                        |
| Locus_19220_Transcript_1/1_Conf_1.000 | 183  | 20 | 3.57E-31 | BAG60662.1     | 100 | 137.887 | 60  | 60  | unnamed protein product                                        |
| Locus_19221_Transcript_1/1_Conf_1.000 | 709  | 20 | 5.90E-11 | ABB53347.1     | 45  | 72.0182 | 170 | 78  | secreted protein 5 precursor                                   |
| Locus_19222_Transcript_1/1_Conf_1.000 | 282  | 0  |          |                |     |         |     |     |                                                                |
| Locus_19223_Transcript_1/1_Conf_1.000 | 317  | 20 | 3.33E-29 | NP_497990.1    | 76  | 131.339 | 106 | 81  | hypothetical protein C38D4.9                                   |
| Locus_19224_Transcript_1/1_Conf_1.000 | 497  | 0  |          |                |     |         |     |     |                                                                |
| Locus_19225_Transcript_1/1_Conf_1.000 | 148  | 17 | 1.01E-09 | XP_002638772.1 | 81  | 66.6254 | 48  | 39  | C. briggsae CBR-PTR-21 protein                                 |
| Locus_19226_Transcript_1/1_Conf_1.000 | 310  | 20 | 3.72E-09 | XP_002631206.1 | 90  | 64.6994 | 41  | 37  | Hypothetical protein CBG03002                                  |
| Locus_19227_Transcript_1/1_Conf_1.000 | 150  | 0  |          |                |     |         |     |     |                                                                |
| Locus_19228_Transcript_1/1_Conf_1.000 | 222  | 20 | 4.50E-26 | NP_492127.1    | 87  | 120.939 | 74  | 65  | Low-density lipoprotein Receptor Related family member (Irp-1) |
| Locus_19229_Transcript_1/1_Conf_1.000 | 215  | 2  | 3.47E-15 | NP_495787.1    | 74  | 84.7297 | 70  | 52  | hypothetical protein M05D6.2                                   |
| Locus_1923_Transcript_1/3_Conf_0.400  | 790  | 0  |          |                |     |         |     |     |                                                                |

|                                       |      |    |          |                |    |         |     |     |                                                                        |
|---------------------------------------|------|----|----------|----------------|----|---------|-----|-----|------------------------------------------------------------------------|
| Locus_1923_Transcript_2/3_Conf_0.600  | 2129 | 20 | 9.49E-52 | EFO20470.1     | 64 | 209.92  | 300 | 192 | hypothetical protein LOAG_08019                                        |
| Locus_1923_Transcript_3/3_Conf_0.400  | 1559 | 20 | 8.29E-76 | EFO20470.1     | 65 | 289.271 | 375 | 245 | hypothetical protein LOAG_08019                                        |
| Locus_19230_Transcript_1/1_Conf_1.000 | 186  | 0  |          |                |    |         |     |     |                                                                        |
| Locus_19231_Transcript_1/1_Conf_1.000 | 143  | 20 | 2.83E-17 | ABW80082.1     | 95 | 91.6633 | 47  | 45  | immunoglobulin heavy chain variable region                             |
| Locus_19232_Transcript_1/1_Conf_1.000 | 187  | 0  |          |                |    |         |     |     |                                                                        |
| Locus_19233_Transcript_1/1_Conf_1.000 | 213  | 0  |          |                |    |         |     |     |                                                                        |
| Locus_19234_Transcript_1/1_Conf_1.000 | 181  | 0  |          |                |    |         |     |     |                                                                        |
| Locus_19235_Transcript_1/1_Conf_1.000 | 200  | 0  |          |                |    |         |     |     |                                                                        |
| Locus_19236_Transcript_1/1_Conf_1.000 | 140  | 20 | 4.11E-08 | XP_002644355.1 | 78 | 61.2326 | 46  | 36  | C. briggsae CBR-DDR-2 protein                                          |
| Locus_19237_Transcript_1/1_Conf_1.000 | 157  | 0  |          |                |    |         |     |     |                                                                        |
| Locus_19238_Transcript_1/1_Conf_1.000 | 229  | 0  |          |                |    |         |     |     |                                                                        |
| Locus_19239_Transcript_1/1_Conf_1.000 | 164  | 0  |          |                |    |         |     |     |                                                                        |
| Locus_1924_Transcript_1/1_Conf_1.000  | 280  | 20 | 4.51E-31 | NP_502553.2    | 93 | 137.502 | 83  | 78  | Cleavage and Polyadenylation Specificity Factor family member (cpsf-3) |
| Locus_19240_Transcript_1/1_Conf_1.000 | 254  | 0  |          |                |    |         |     |     |                                                                        |

|                                       |     |    |          |                |     |         |    |    |                                                      |
|---------------------------------------|-----|----|----------|----------------|-----|---------|----|----|------------------------------------------------------|
| Locus_19241_Transcript_1/2_Conf_1.000 | 315 | 20 | 1.49E-37 | XP_001175663.1 | 100 | 159.073 | 79 | 79 | PREDICTED: similar to H4 histone protein             |
| Locus_19241_Transcript_2/2_Conf_1.000 | 378 | 20 | 1.20E-39 | XP_001175663.1 | 100 | 166.007 | 83 | 83 | PREDICTED: similar to H4 histone protein             |
| Locus_19242_Transcript_1/1_Conf_1.000 | 153 | 0  |          |                |     |         |    |    |                                                      |
| Locus_19243_Transcript_1/1_Conf_1.000 | 284 | 20 | 1.23E-31 | XP_513264.2    | 100 | 139.428 | 94 | 94 | PREDICTED: similar to KIAA0085                       |
| Locus_19244_Transcript_1/1_Conf_1.000 | 190 | 2  | 2.17E-04 | XP_002634109.1 | 62  | 48.9062 | 64 | 40 | C. briggsae CBR-CSN-3 protein                        |
| Locus_19245_Transcript_1/1_Conf_1.000 | 156 | 0  |          |                |     |         |    |    |                                                      |
| Locus_19246_Transcript_1/1_Conf_1.000 | 218 | 0  |          |                |     |         |    |    |                                                      |
| Locus_19247_Transcript_1/1_Conf_1.000 | 322 | 2  | 3.31E-21 | NP_499330.2    | 80  | 104.76  | 63 | 51 | hypothetical protein Y45F3A.4                        |
| Locus_19248_Transcript_1/1_Conf_1.000 | 423 | 0  |          |                |     |         |    |    |                                                      |
| Locus_19249_Transcript_1/1_Conf_1.000 | 213 | 20 | 7.44E-34 | 3GQY           | 100 | 146.747 | 70 | 70 | Activator-BoundStructure Of Human Pyruvate Kinase M2 |

|                                       |     |    |          |                |    |         |    |    |                                       |
|---------------------------------------|-----|----|----------|----------------|----|---------|----|----|---------------------------------------|
| Locus_1925_Transcript_1/1_Conf_1.000  | 243 | 4  | 1.47E-05 | NP_872245.2    | 65 | 52.7582 | 58 | 38 | protein KINase family member (kin-25) |
| Locus_19250_Transcript_1/1_Conf_1.000 | 164 | 20 | 2.14E-12 | CAA30855.1     | 97 | 75.485  | 41 | 40 | myosin heavy chain 2                  |
| Locus_19251_Transcript_1/1_Conf_1.000 | 200 | 0  |          |                |    |         |    |    |                                       |
| Locus_19252_Transcript_1/1_Conf_1.000 | 273 | 20 | 1.16E-26 | NP_510130.2    | 82 | 122.865 | 90 | 74 | hypothetical protein F22E10.5         |
| Locus_19253_Transcript_1/1_Conf_1.000 | 214 | 0  |          |                |    |         |    |    |                                       |
| Locus_19254_Transcript_1/1_Conf_1.000 | 292 | 6  | 8.16E-20 | XP_001896152.1 | 73 | 100.138 | 73 | 54 | hypothetical protein Bm1_23475        |
| Locus_19255_Transcript_1/1_Conf_1.000 | 769 | 0  |          |                |    |         |    |    |                                       |
| Locus_19256_Transcript_1/1_Conf_1.000 | 231 | 20 | 2.01E-10 | XP_002639913.1 | 70 | 68.9366 | 60 | 42 | Hypothetical protein CBG08243         |
| Locus_19257_Transcript_1/1_Conf_1.000 | 141 | 0  |          |                |    |         |    |    |                                       |

|                                       |      |    |          |                |     |         |     |     |                                            |
|---------------------------------------|------|----|----------|----------------|-----|---------|-----|-----|--------------------------------------------|
| Locus_19258_Transcript_1/1_Conf_1.000 | 265  | 20 | 1.30E-17 | XP_001096144.2 | 100 | 92.8189 | 42  | 42  | PREDICTED: hypothetical protein LOC707717  |
| Locus_19259_Transcript_1/1_Conf_1.000 | 492  | 0  |          |                |     |         |     |     |                                            |
| Locus_1926_Transcript_1/2_Conf_1.000  | 2083 | 20 | 0        | NP_001122877.1 | 82  | 909.442 | 642 | 531 | hypothetical protein C39F7.2               |
| Locus_1926_Transcript_2/2_Conf_1.000  | 2083 | 20 | 0        | NP_001122877.1 | 82  | 909.442 | 642 | 531 | hypothetical protein C39F7.2               |
| Locus_19260_Transcript_1/1_Conf_1.000 | 206  | 0  |          |                |     |         |     |     |                                            |
| Locus_19261_Transcript_1/1_Conf_1.000 | 162  | 20 | 8.13E-12 | NP_506047.5    | 79  | 73.559  | 53  | 42  | abnormal CHEmotaxis family member (che-11) |
| Locus_19262_Transcript_1/1_Conf_1.000 | 138  | 0  |          |                |     |         |     |     |                                            |

|                                       |     |    |          |                |    |         |     |     |                                                                          |
|---------------------------------------|-----|----|----------|----------------|----|---------|-----|-----|--------------------------------------------------------------------------|
| Locus_19263_Transcript_1/1_Conf_1.000 | 213 | 20 | 5.52E-29 | NP_001040912.1 | 94 | 130.568 | 70  | 66  | hypothetical protein C08F8.2                                             |
| Locus_19264_Transcript_1/1_Conf_1.000 | 261 | 1  | 1.54E-10 | NP_503410.3    | 62 | 69.3218 | 74  | 46  | hypothetical protein R12A1.3                                             |
| Locus_19265_Transcript_1/1_Conf_1.000 | 328 | 10 | 1.16E-34 | NP_509899.3    | 77 | 149.443 | 110 | 85  | Organic Cation Transporter family member (oct-2)                         |
| Locus_19266_Transcript_1/1_Conf_1.000 | 525 | 0  |          |                |    |         |     |     |                                                                          |
| Locus_19267_Transcript_1/1_Conf_1.000 | 289 | 20 | 5.65E-37 | NP_509002.2    | 82 | 157.147 | 96  | 79  | INneXin family member (inx-3)                                            |
| Locus_19268_Transcript_1/1_Conf_1.000 | 353 | 0  |          |                |    |         |     |     |                                                                          |
| Locus_19269_Transcript_1/1_Conf_1.000 | 287 | 20 | 1.40E-19 | XP_002647861.1 | 72 | 99.3673 | 95  | 69  | Hypothetical protein CBG23659                                            |
| Locus_1927_Transcript_1/1_Conf_1.000  | 832 | 13 | 1.40E-71 | CBL43423.1     | 69 | 273.863 | 275 | 190 | C. elegans protein C53A5.13b, partially confirmed by transcript evidence |
| Locus_19270_Transcript_1/1_Conf_1.000 | 432 | 0  |          |                |    |         |     |     |                                                                          |
| Locus_19271_Transcript_1/1_Conf_1.000 | 578 | 20 | 3.83E-77 | NP_001022641.1 | 83 | 291.197 | 192 | 161 | LEThal family member (let-805)                                           |
| Locus_19272_Transcript_1/1_Conf_1.000 | 712 | 4  | 1.11E-57 | XP_002645171.1 | 65 | 227.254 | 240 | 156 | Hypothetical protein CBG16891                                            |
| Locus_19273_Transcript_1/1_Conf_1.000 | 134 | 5  | 3.74E-09 | XP_002630796.1 | 86 | 64.6994 | 38  | 33  | Hypothetical protein CBG02494                                            |
| Locus_19274_Transcript_1/1_Conf_1.000 | 958 | 20 | 1.52E-46 | XP_002641058.1 | 61 | 191.045 | 320 | 196 | Hypothetical protein CBG22469                                            |
| Locus_19275_Transcript_1/1_Conf_1.000 | 139 | 0  |          |                |    |         |     |     |                                                                          |
| Locus_19276_Transcript_1/1_Conf_1.000 | 128 | 0  |          |                |    |         |     |     |                                                                          |
| Locus_19277_Transcript_1/1_Conf_1.000 | 133 | 0  |          |                |    |         |     |     |                                                                          |
| Locus_19278_Transcript_1/1_Conf_1.000 | 365 | 0  |          |                |    |         |     |     |                                                                          |
| Locus_19279_Transcript_1/1_Conf_1.000 | 470 | 20 | 1.99E-34 | ACI49192.1     | 69 | 148.673 | 160 | 111 | hypothetical protein Csp3_JD03.001                                       |
| Locus_1928_Transcript_1/1_Conf_1.000  | 818 | 20 | 4.25E-25 | XP_001897581.1 | 53 | 119.398 | 279 | 150 | hypothetical protein Bm1_30710                                           |

|                                       |      |    |           |                |     |         |     |     |                                                 |
|---------------------------------------|------|----|-----------|----------------|-----|---------|-----|-----|-------------------------------------------------|
| Locus_19280_Transcript_1/1_Conf_1.000 | 139  | 3  | 5.03E-06  | XP_002647772.1 | 83  | 54.299  | 36  | 30  | Hypothetical protein CBG20529                   |
| Locus_19281_Transcript_1/1_Conf_1.000 | 128  | 0  |           |                |     |         |     |     |                                                 |
| Locus_19282_Transcript_1/1_Conf_1.000 | 259  | 20 | 7.61E-42  | XP_002920355.1 | 100 | 173.326 | 85  | 85  | PREDICTED: proteasome subunit alpha type-7-like |
| Locus_19283_Transcript_1/1_Conf_1.000 | 372  | 11 | 1.49E-29  | AAK31453.4     | 71  | 132.494 | 123 | 88  | Hypothetical protein C25H3.8                    |
| Locus_19284_Transcript_1/1_Conf_1.000 | 372  | 20 | 9.06E-11  | XP_001032930.1 | 70  | 70.0922 | 51  | 36  | DHHC zinc finger domain containing protein      |
| Locus_19285_Transcript_1/1_Conf_1.000 | 192  | 0  |           |                |     |         |     |     |                                                 |
| Locus_19286_Transcript_1/1_Conf_1.000 | 237  | 0  |           |                |     |         |     |     |                                                 |
| Locus_19287_Transcript_1/1_Conf_1.000 | 182  | 0  |           |                |     |         |     |     |                                                 |
| Locus_19288_Transcript_1/1_Conf_1.000 | 158  | 0  |           |                |     |         |     |     |                                                 |
| Locus_19289_Transcript_1/1_Conf_1.000 | 216  | 0  |           |                |     |         |     |     |                                                 |
| Locus_1929_Transcript_1/1_Conf_1.000  | 491  | 20 | 1.16E-58  | XP_002639025.1 | 83  | 229.18  | 150 | 125 | C. briggsae CBR-RPS-10 protein                  |
| Locus_19290_Transcript_1/1_Conf_1.000 | 266  | 0  |           |                |     |         |     |     |                                                 |
| Locus_19291_Transcript_1/1_Conf_1.000 | 332  | 0  |           |                |     |         |     |     |                                                 |
| Locus_19292_Transcript_1/1_Conf_1.000 | 223  | 0  |           |                |     |         |     |     |                                                 |
| Locus_19293_Transcript_1/1_Conf_1.000 | 216  | 0  |           |                |     |         |     |     |                                                 |
| Locus_19294_Transcript_1/1_Conf_1.000 | 842  | 0  |           |                |     |         |     |     |                                                 |
| Locus_19295_Transcript_1/1_Conf_1.000 | 525  | 20 | 3.48E-62  | NP_001022870.1 | 79  | 241.121 | 169 | 134 | hypothetical protein Y43F4A.1                   |
| Locus_19296_Transcript_1/1_Conf_1.000 | 132  | 0  |           |                |     |         |     |     |                                                 |
| Locus_19297_Transcript_1/1_Conf_1.000 | 259  | 3  | 3.93E-22  | XP_002642486.1 | 83  | 107.842 | 86  | 72  | Hypothetical protein CBG06905                   |
| Locus_19298_Transcript_1/1_Conf_1.000 | 752  | 20 | 1.81E-32  | EFO22295.1     | 88  | 143.665 | 123 | 109 | hypothetical protein LOAG_06193                 |
| Locus_19299_Transcript_1/1_Conf_1.000 | 220  | 0  |           |                |     |         |     |     |                                                 |
| Locus_193_Transcript_1/2_Conf_1.000   | 1078 | 20 | 1.95E-64  | CAR63652.1     | 95  | 250.751 | 135 | 129 | hypothetical protein                            |
| Locus_193_Transcript_2/2_Conf_1.000   | 2045 | 20 | 5.69E-139 | NP_497804.2    | 69  | 499.59  | 441 | 306 | PleXin Domain containing family member (pxd-1)  |



|                                       |      |    |          |                |    |         |     |     |                                                                                 |
|---------------------------------------|------|----|----------|----------------|----|---------|-----|-----|---------------------------------------------------------------------------------|
| Locus_1930_Transcript_1/1_Conf_1.000  | 572  | 20 | 1.69E-21 | NP_492370.1    | 96 | 106.301 | 56  | 54  | Transport to INner mitochondrial membrane (yeast TIM) family member (tin-13)    |
| Locus_19300_Transcript_1/1_Conf_1.000 | 155  | 0  |          |                |    |         |     |     |                                                                                 |
| Locus_19301_Transcript_1/1_Conf_1.000 | 411  | 0  |          |                |    |         |     |     |                                                                                 |
| Locus_19302_Transcript_1/1_Conf_1.000 | 722  | 20 | 1.50E-33 | NP_510576.2    | 57 | 147.132 | 242 | 139 | hypothetical protein K09E9.1                                                    |
| Locus_19303_Transcript_1/1_Conf_1.000 | 227  | 0  |          |                |    |         |     |     |                                                                                 |
| Locus_19304_Transcript_1/1_Conf_1.000 | 209  | 20 | 3.99E-19 | NP_497420.1    | 89 | 97.8265 | 69  | 62  | hypothetical protein Y67D2.6                                                    |
| Locus_19305_Transcript_1/1_Conf_1.000 | 150  | 0  |          |                |    |         |     |     |                                                                                 |
| Locus_19306_Transcript_1/1_Conf_1.000 | 332  | 20 | 4.25E-37 | XP_001899111.1 | 88 | 157.532 | 96  | 85  | Mitochondrial carrier protein                                                   |
| Locus_19307_Transcript_1/1_Conf_1.000 | 377  | 20 | 4.01E-43 | XP_002636973.1 | 76 | 177.563 | 125 | 95  | Hypothetical protein CBG09454                                                   |
| Locus_19308_Transcript_1/2_Conf_1.000 | 884  | 20 | 8.20E-81 | CAA22108.2     | 74 | 304.679 | 295 | 219 | C. elegans protein Y75B8A.24, partially confirmed by transcript evidence        |
| Locus_19308_Transcript_2/2_Conf_1.000 | 578  | 20 | 7.26E-60 | CAA22108.2     | 74 | 233.802 | 204 | 152 | C. elegans protein Y75B8A.24, partially confirmed by transcript evidence        |
| Locus_19309_Transcript_1/1_Conf_1.000 | 355  | 20 | 1.51E-50 | AAF59456.4     | 91 | 202.216 | 118 | 108 | Smg-associated and lethal protein 2, partially confirmed by transcript evidence |
| Locus_1931_Transcript_1/1_Conf_1.000  | 1692 | 20 | 6.40E-93 | ACV31107.1     | 66 | 346.28  | 413 | 273 | Hypothetical protein F22D3.2b                                                   |
| Locus_19310_Transcript_1/1_Conf_1.000 | 334  | 20 | 1.37E-11 | NP_505133.1    | 58 | 72.7886 | 80  | 47  | ASpartyl Protease family member (asp-6)                                         |
| Locus_19311_Transcript_1/1_Conf_1.000 | 281  | 0  |          |                |    |         |     |     |                                                                                 |

|                                       |     |    |          |                |     |         |     |     |                                                                                                     |
|---------------------------------------|-----|----|----------|----------------|-----|---------|-----|-----|-----------------------------------------------------------------------------------------------------|
| Locus_19312_Transcript_1/2_Conf_1.000 | 588 | 20 | 4.20E-26 | XP_002640523.1 | 83  | 121.709 | 80  | 67  | Hypothetical protein CBG18685                                                                       |
| Locus_19312_Transcript_2/2_Conf_1.000 | 588 | 20 | 4.20E-26 | XP_002640523.1 | 83  | 121.709 | 80  | 67  | Hypothetical protein CBG18685                                                                       |
| Locus_19313_Transcript_1/1_Conf_1.000 | 290 | 0  |          |                |     |         |     |     |                                                                                                     |
| Locus_19314_Transcript_1/1_Conf_1.000 | 353 | 20 | 2.27E-38 | XP_002632772.1 | 83  | 161.77  | 117 | 98  | C. briggsae CBR-TAT-2 protein                                                                       |
| Locus_19315_Transcript_1/1_Conf_1.000 | 157 | 0  |          |                |     |         |     |     |                                                                                                     |
| Locus_19316_Transcript_1/1_Conf_1.000 | 212 | 20 | 5.19E-19 | NP_504373.2    | 72  | 97.4413 | 70  | 51  | hypothetical protein F14F9.5                                                                        |
| Locus_19317_Transcript_1/1_Conf_1.000 | 191 | 20 | 1.60E-23 | ACJ65180.1     | 90  | 112.464 | 63  | 57  | Gaba b receptor subunit protein 2, confirmed by transcript evidence                                 |
| Locus_19318_Transcript_1/1_Conf_1.000 | 278 | 0  |          |                |     |         |     |     |                                                                                                     |
| Locus_19319_Transcript_1/1_Conf_1.000 | 211 | 0  |          |                |     |         |     |     |                                                                                                     |
| Locus_1932_Transcript_1/1_Conf_1.000  | 543 | 20 | 7.93E-84 | BAG52420.1     | 100 | 313.153 | 180 | 180 | unnamed protein product                                                                             |
| Locus_19320_Transcript_1/1_Conf_1.000 | 423 | 0  |          |                |     |         |     |     |                                                                                                     |
| Locus_19321_Transcript_1/1_Conf_1.000 | 178 | 0  |          |                |     |         |     |     |                                                                                                     |
| Locus_19322_Transcript_1/1_Conf_1.000 | 152 | 0  |          |                |     |         |     |     |                                                                                                     |
| Locus_19323_Transcript_1/1_Conf_1.000 | 138 | 3  | 4.71E-04 | CAX12927.1     | 68  | 47.7506 | 45  | 31  | novel protein similar to human major facilitator superfamily domain containing 5 (MFSD5, zgc:91807) |
| Locus_19324_Transcript_1/1_Conf_1.000 | 131 | 0  |          |                |     |         |     |     |                                                                                                     |
| Locus_19325_Transcript_1/1_Conf_1.000 | 184 | 20 | 1.78E-14 | XP_002630326.1 | 75  | 82.4185 | 58  | 44  | Hypothetical protein CBG04253                                                                       |
| Locus_19326_Transcript_1/1_Conf_1.000 | 150 | 0  |          |                |     |         |     |     |                                                                                                     |

|                                       |      |    |          |                |     |         |     |     |                                                                |
|---------------------------------------|------|----|----------|----------------|-----|---------|-----|-----|----------------------------------------------------------------|
| Locus_19327_Transcript_1/1_Conf_1.000 | 614  | 20 | 6.55E-44 | XP_002648449.1 | 63  | 181.03  | 204 | 129 | Hypothetical protein CBG24724                                  |
| Locus_19328_Transcript_1/1_Conf_1.000 | 165  | 20 | 3.28E-21 | XP_002927427.1 | 100 | 104.76  | 53  | 53  | PREDICTED: transcription elongation factor SPT5-like isoform 2 |
| Locus_19329_Transcript_1/1_Conf_1.000 | 484  | 4  | 1.69E-41 | AAQ11020.1     | 69  | 172.17  | 172 | 120 | mesocentin                                                     |
| Locus_1933_Transcript_1/1_Conf_1.000  | 2006 | 20 | 0        | XP_002646154.1 | 82  | 826.624 | 627 | 516 | C. briggsae CBR-CYN-15 protein                                 |
| Locus_19330_Transcript_1/1_Conf_1.000 | 222  | 20 | 3.56E-23 | NP_508805.3    | 94  | 111.309 | 53  | 50  | hypothetical protein K02G10.1                                  |
| Locus_19331_Transcript_1/1_Conf_1.000 | 423  |    |          |                |     |         |     |     |                                                                |
| Locus_19332_Transcript_1/1_Conf_1.000 | 130  | 20 | 4.15E-08 | XP_002600688.1 | 88  | 61.2326 | 34  | 30  | hypothetical protein BRAFLDRAFT_118551                         |
| Locus_19333_Transcript_1/1_Conf_1.000 | 447  | 20 | 7.86E-15 | NP_505516.1    | 55  | 83.5741 | 129 | 71  | hypothetical protein F58E6.5                                   |
| Locus_19334_Transcript_1/1_Conf_1.000 | 357  | 0  |          |                |     |         |     |     |                                                                |
| Locus_19335_Transcript_1/1_Conf_1.000 | 254  | 20 | 8.51E-25 | XP_002645934.1 | 83  | 116.701 | 83  | 69  | Hypothetical protein CBG07699                                  |
| Locus_19336_Transcript_1/1_Conf_1.000 | 397  | 20 | 1.64E-44 | NP_492590.1    | 83  | 182.185 | 123 | 103 | hypothetical protein K02A11.3                                  |

|                                       |      |    |          |                |     |         |     |     |                                                                     |
|---------------------------------------|------|----|----------|----------------|-----|---------|-----|-----|---------------------------------------------------------------------|
| Locus_19337_Transcript_1/1_Conf_1.000 | 130  | 1  | 7.55E-18 | XP_001171837.1 | 95  | 93.5893 | 43  | 41  | PREDICTED: DnaJ (Hsp40) homolog, subfamily B, member 1 isoform 1    |
| Locus_19338_Transcript_1/1_Conf_1.000 | 637  | 2  | 9.67E-33 | NP_509416.2    | 72  | 144.05  | 178 | 129 | hypothetical protein F55E10.7                                       |
| Locus_19339_Transcript_1/1_Conf_1.000 | 291  | 20 | 7.57E-50 | XP_002928507.1 | 100 | 199.904 | 97  | 97  | PREDICTED: elongation factor 2-like                                 |
| Locus_1934_Transcript_1/1_Conf_1.000  | 650  | 0  |          |                |     |         |     |     |                                                                     |
| Locus_19340_Transcript_1/1_Conf_1.000 | 618  | 20 | 7.42E-51 | NP_505595.2    | 68  | 204.142 | 203 | 139 | UDP-GlucuronosylTransferase family member (ugt-47)                  |
| Locus_19341_Transcript_1/1_Conf_1.000 | 205  | 0  |          |                |     |         |     |     |                                                                     |
| Locus_19342_Transcript_1/1_Conf_1.000 | 740  | 20 | 4.14E-58 | NP_492244.1    | 66  | 228.794 | 226 | 150 | hypothetical protein ZK265.3                                        |
| Locus_19343_Transcript_1/1_Conf_1.000 | 213  | 0  |          |                |     |         |     |     |                                                                     |
| Locus_19344_Transcript_1/1_Conf_1.000 | 310  | 0  |          |                |     |         |     |     |                                                                     |
| Locus_19345_Transcript_1/1_Conf_1.000 | 1214 | 20 | 2.23E-99 | EFO22512.1     | 66  | 367.081 | 415 | 274 | hypothetical protein LOAG_05973                                     |
| Locus_19346_Transcript_1/1_Conf_1.000 | 439  | 0  |          |                |     |         |     |     |                                                                     |
| Locus_19347_Transcript_1/1_Conf_1.000 | 280  | 0  |          |                |     |         |     |     |                                                                     |
| Locus_19348_Transcript_1/1_Conf_1.000 | 218  | 3  | 4.24E-05 | NP_500978.1    | 62  | 51.2174 | 56  | 35  | EXOSome (multiexonuclease complex) component family member (exos-2) |
| Locus_19349_Transcript_1/1_Conf_1.000 | 194  | 0  |          |                |     |         |     |     |                                                                     |
| Locus_1935_Transcript_1/4_Conf_0.556  | 1543 | 2  | 1.02E-09 | XP_001902753.1 | 54  | 69.707  | 126 | 69  | RhoGAP domain containing protein                                    |
| Locus_1935_Transcript_2/4_Conf_0.444  | 1429 | 2  | 7.05E-10 | XP_001902753.1 | 50  | 70.0922 | 161 | 81  | RhoGAP domain containing protein                                    |
| Locus_1935_Transcript_3/4_Conf_0.333  | 1480 | 2  | 7.41E-10 | XP_001902753.1 | 50  | 70.0922 | 161 | 81  | RhoGAP domain containing protein                                    |
| Locus_1935_Transcript_4/4_Conf_0.556  | 1594 | 2  | 8.15E-10 | XP_001902753.1 | 50  | 70.0922 | 161 | 81  | RhoGAP domain containing protein                                    |
| Locus_19350_Transcript_1/1_Conf_1.000 | 335  | 0  |          |                |     |         |     |     |                                                                     |
| Locus_19351_Transcript_1/1_Conf_1.000 | 494  | 20 | 1.01E-38 | EFO17779.1     | 66  | 162.925 | 159 | 105 | hypothetical protein LOAG_10719                                     |
| Locus_19352_Transcript_1/1_Conf_1.000 | 142  | 0  |          |                |     |         |     |     |                                                                     |
| Locus_19353_Transcript_1/1_Conf_1.000 | 234  | 1  | 1.17E-10 | NP_001129775.1 | 79  | 69.707  | 54  | 43  | GLOBin family member (glb-18)                                       |
| Locus_19354_Transcript_1/1_Conf_1.000 | 208  | 0  |          |                |     |         |     |     |                                                                     |

|                                       |      |    |          |                |    |         |     |     |                                                                         |
|---------------------------------------|------|----|----------|----------------|----|---------|-----|-----|-------------------------------------------------------------------------|
| Locus_19355_Transcript_1/1_Conf_1.000 | 158  | 20 | 8.17E-20 | XP_002647071.1 | 90 | 100.138 | 52  | 47  | C. briggsae CBR-NIT-1 protein                                           |
| Locus_19356_Transcript_1/1_Conf_1.000 | 141  | 0  |          |                |    |         |     |     |                                                                         |
| Locus_19357_Transcript_1/1_Conf_1.000 | 452  | 20 | 9.22E-24 | NP_001041088.1 | 60 | 113.235 | 146 | 89  | hypothetical protein C27A7.3                                            |
| Locus_19358_Transcript_1/1_Conf_1.000 | 669  | 0  |          |                |    |         |     |     |                                                                         |
| Locus_19359_Transcript_1/1_Conf_1.000 | 488  | 17 | 7.38E-13 | XP_001898480.1 | 62 | 77.0258 | 122 | 76  | integrin cytoplasmic domain-associated protein 1, isoform 1, putative   |
| Locus_1936_Transcript_1/4_Conf_0.444  | 473  | 20 | 4.39E-50 | EFO20496.1     | 72 | 200.675 | 157 | 114 | hypothetical protein LOAG_07994                                         |
| Locus_1936_Transcript_2/4_Conf_0.667  | 1144 | 20 | 3.60E-88 | EFO20496.1     | 56 | 329.717 | 432 | 245 | hypothetical protein LOAG_07994                                         |
| Locus_1936_Transcript_3/4_Conf_0.222  | 498  | 8  | 2.25E-14 | XP_001893982.1 | 47 | 82.0333 | 190 | 91  | Mitotic control protein dis3                                            |
| Locus_1936_Transcript_4/4_Conf_0.444  | 473  | 20 | 7.49E-50 | EFO20496.1     | 72 | 199.904 | 157 | 114 | hypothetical protein LOAG_07994                                         |
| Locus_19360_Transcript_1/1_Conf_1.000 | 172  | 5  | 2.19E-09 | CBL43415.1     | 68 | 65.4698 | 54  | 37  | C. elegans protein C32C4.2b, partially confirmed by transcript evidence |
| Locus_19361_Transcript_1/1_Conf_1.000 | 1228 | 20 | 5.24E-96 | NP_001022767.1 | 72 | 355.91  | 345 | 251 | protein KINase family member (kin-18)                                   |
| Locus_19362_Transcript_1/1_Conf_1.000 | 274  | 0  |          |                |    |         |     |     |                                                                         |

|                                       |     |    |          |                |    |         |     |     |                                                      |
|---------------------------------------|-----|----|----------|----------------|----|---------|-----|-----|------------------------------------------------------|
| Locus_19363_Transcript_1/1_Conf_1.000 | 505 | 20 | 1.58E-26 | NP_495701.2    | 75 | 122.479 | 97  | 73  | IRE1 kinase related family member (ire-1)            |
| Locus_19364_Transcript_1/1_Conf_1.000 | 267 | 20 | 8.65E-22 | XP_001742234.1 | 74 | 106.686 | 89  | 66  | hypothetical protein                                 |
| Locus_19365_Transcript_1/1_Conf_1.000 | 255 | 0  |          |                |    |         |     |     |                                                      |
| Locus_19366_Transcript_1/1_Conf_1.000 | 495 | 20 | 5.52E-45 | EFO23518.1     | 72 | 183.726 | 160 | 116 | serine/threonine protein kinase                      |
| Locus_19367_Transcript_1/1_Conf_1.000 | 465 | 2  | 1.03E-06 | XP_001900574.1 | 47 | 56.6102 | 121 | 58  | hypothetical protein Bm1_45555                       |
| Locus_19368_Transcript_1/1_Conf_1.000 | 168 | 3  | 1.43E-08 | NP_496184.2    | 79 | 62.7734 | 49  | 39  | Location Of Vulva defective family member (lov-1)    |
| Locus_19369_Transcript_1/1_Conf_1.000 | 133 | 20 | 1.24E-12 | NP_504553.1    | 95 | 76.2554 | 42  | 40  | Adenylyl CYclase family member (acy-2)               |
| Locus_1937_Transcript_1/1_Conf_1.000  | 565 | 0  |          |                |    |         |     |     |                                                      |
| Locus_19370_Transcript_1/1_Conf_1.000 | 182 | 0  |          |                |    |         |     |     |                                                      |
| Locus_19371_Transcript_1/1_Conf_1.000 | 145 | 0  |          |                |    |         |     |     |                                                      |
| Locus_19372_Transcript_1/1_Conf_1.000 | 218 | 0  |          |                |    |         |     |     |                                                      |
| Locus_19373_Transcript_1/1_Conf_1.000 | 201 | 3  | 5.42E-24 | XP_002641473.1 | 88 | 114.005 | 67  | 59  | Hypothetical protein CBG09762                        |
| Locus_19374_Transcript_1/1_Conf_1.000 | 141 | 0  |          |                |    |         |     |     |                                                      |
| Locus_19375_Transcript_1/1_Conf_1.000 | 490 | 4  | 8.03E-52 | NP_871810.1    | 80 | 206.453 | 164 | 132 | HAIF transporter (PGP related) family member (haf-9) |

|                                       |     |    |           |                |    |         |     |     |                                        |
|---------------------------------------|-----|----|-----------|----------------|----|---------|-----|-----|----------------------------------------|
| Locus_19376_Transcript_1/1_Conf_1.000 | 382 | 20 | 6.56E-46  | XP_002647328.1 | 88 | 186.808 | 106 | 94  | C. briggsae CBR-EGL-8 protein          |
| Locus_19377_Transcript_1/1_Conf_1.000 | 250 | 0  |           |                |    |         |     |     |                                        |
| Locus_19378_Transcript_1/1_Conf_1.000 | 535 | 20 | 8.04E-62  | NP_492067.1    | 85 | 239.965 | 148 | 127 | hypothetical protein F13G3.11          |
| Locus_19379_Transcript_1/1_Conf_1.000 | 595 | 20 | 2.21E-38  | EFO23010.1     | 65 | 162.54  | 167 | 109 | hypothetical protein LOAG_05474        |
| Locus_1938_Transcript_1/10_Conf_0.208 | 750 | 20 | 2.47E-114 | XP_002594632.1 | 93 | 415.616 | 242 | 227 | hypothetical protein BRAFLDRAFT_217516 |

|                                        |      |    |           |                |    |         |     |     |                                        |
|----------------------------------------|------|----|-----------|----------------|----|---------|-----|-----|----------------------------------------|
| Locus_1938_Transcript_10/10_Conf_0.333 | 1691 | 20 | 0         | XP_002594632.1 | 84 | 669.848 | 458 | 386 | hypothetical protein BRAFLDRAFT_217516 |
| Locus_1938_Transcript_2/10_Conf_0.208  | 792  | 20 | 6.09E-114 | XP_002594632.1 | 93 | 414.461 | 244 | 228 | hypothetical protein BRAFLDRAFT_217516 |



|                                       |      |    |   |                |    |         |     |     |                                        |
|---------------------------------------|------|----|---|----------------|----|---------|-----|-----|----------------------------------------|
| Locus_1938_Transcript_3/10_Conf_0.250 | 1175 | 20 | 0 | XP_002594632.1 | 91 | 647.121 | 384 | 352 | hypothetical protein BRAFLDRAFT_217516 |
| Locus_1938_Transcript_4/10_Conf_0.250 | 1175 | 20 | 0 | XP_002594632.1 | 91 | 649.818 | 384 | 352 | hypothetical protein BRAFLDRAFT_217516 |

|                                       |      |    |   |                |    |         |     |     |                                        |
|---------------------------------------|------|----|---|----------------|----|---------|-----|-----|----------------------------------------|
| Locus_1938_Transcript_5/10_Conf_0.333 | 1703 | 20 | 0 | XP_002594632.1 | 83 | 664.07  | 462 | 386 | hypothetical protein BRAFLDRAFT_217516 |
| Locus_1938_Transcript_6/10_Conf_0.333 | 1703 | 20 | 0 | XP_002594632.1 | 83 | 661.374 | 462 | 386 | hypothetical protein BRAFLDRAFT_217516 |

|                                       |      |    |   |                |    |         |     |     |                                        |
|---------------------------------------|------|----|---|----------------|----|---------|-----|-----|----------------------------------------|
| Locus_1938_Transcript_7/10_Conf_0.333 | 1691 | 20 | 0 | XP_002594632.1 | 84 | 667.152 | 458 | 386 | hypothetical protein BRAFLDRAFT_217516 |
| Locus_1938_Transcript_8/10_Conf_0.333 | 1691 | 20 | 0 | XP_002594632.1 | 84 | 669.848 | 458 | 386 | hypothetical protein BRAFLDRAFT_217516 |

|                                       |      |    |          |                |    |         |     |     |                                                |
|---------------------------------------|------|----|----------|----------------|----|---------|-----|-----|------------------------------------------------|
| Locus_1938_Transcript_9/10_Conf_0.333 | 1691 | 20 | 0        | XP_002594632.1 | 84 | 667.152 | 458 | 386 | hypothetical protein BRAFLDRAFT_217516         |
| Locus_19380_Transcript_1/1_Conf_1.000 | 139  | 0  |          |                |    |         |     |     |                                                |
| Locus_19381_Transcript_1/1_Conf_1.000 | 530  | 20 | 4.96E-64 | XP_002633755.1 | 81 | 247.284 | 172 | 140 | Hypothetical protein CBG03442                  |
| Locus_19382_Transcript_1/3_Conf_0.600 | 928  | 20 | 6.94E-49 | XP_002633289.1 | 61 | 198.749 | 302 | 185 | Hypothetical protein CBG06018                  |
| Locus_19382_Transcript_2/3_Conf_0.600 | 911  | 20 | 2.73E-42 | XP_002633289.1 | 60 | 176.792 | 280 | 170 | Hypothetical protein CBG06018                  |
| Locus_19382_Transcript_3/3_Conf_0.600 | 910  | 20 | 1.22E-42 | XP_002633289.1 | 60 | 177.948 | 283 | 171 | Hypothetical protein CBG06018                  |
| Locus_19383_Transcript_1/1_Conf_1.000 | 721  | 20 | 1.04E-18 | EFO20401.1     | 59 | 97.8265 | 155 | 92  | sex-determining protein fem-1                  |
| Locus_19384_Transcript_1/1_Conf_1.000 | 173  | 20 | 1.98E-10 | XP_001900530.1 | 75 | 68.9366 | 57  | 43  | manba-prov protein                             |
| Locus_19385_Transcript_1/1_Conf_1.000 | 377  | 0  |          |                |    |         |     |     |                                                |
| Locus_19386_Transcript_1/1_Conf_1.000 | 418  | 20 | 5.26E-59 | AAM82167.1     | 89 | 230.335 | 138 | 123 | gamma-butyrobetaine,2-oxoglutarate dioxygenase |
| Locus_19387_Transcript_1/1_Conf_1.000 | 1034 | 2  | 5.40E-24 | XP_001897079.1 | 46 | 116.316 | 372 | 172 | Protein kinase domain containing protein       |

|                                       |     |    |          |                |    |         |     |     |                                                           |
|---------------------------------------|-----|----|----------|----------------|----|---------|-----|-----|-----------------------------------------------------------|
| Locus_19388_Transcript_1/1_Conf_1.000 | 956 | 20 | 1.49E-78 | NP_501489.2    | 68 | 297.36  | 311 | 212 | hypothetical protein F08B4.5                              |
| Locus_19389_Transcript_1/1_Conf_1.000 | 280 | 5  | 2.76E-04 | NP_741176.2    | 56 | 48.521  | 95  | 54  | hypothetical protein C23G10.7                             |
| Locus_1939_Transcript_1/1_Conf_1.000  | 430 | 20 | 1.09E-16 | CAR63597.1     | 70 | 89.7373 | 80  | 56  | hypothetical protein                                      |
| Locus_19390_Transcript_1/1_Conf_1.000 | 786 | 6  | 1.99E-16 | NP_492861.1    | 68 | 90.5077 | 93  | 64  | hypothetical protein Y52B11A.10                           |
| Locus_19391_Transcript_1/2_Conf_0.500 | 395 | 0  |          |                |    |         |     |     |                                                           |
| Locus_19391_Transcript_2/2_Conf_0.750 | 116 | 0  |          |                |    |         |     |     |                                                           |
| Locus_19392_Transcript_1/1_Conf_1.000 | 230 | 0  |          |                |    |         |     |     |                                                           |
| Locus_19393_Transcript_1/1_Conf_1.000 | 359 | 8  | 8.61E-22 |                | 50 | 106.686 | 155 | 78  | hypothetical protein H19M22.2 -<br>Caenorhabditis elegans |
| Locus_19394_Transcript_1/1_Conf_1.000 | 542 | 0  |          |                |    |         |     |     |                                                           |
| Locus_19395_Transcript_1/1_Conf_1.000 | 153 | 0  |          |                |    |         |     |     |                                                           |
| Locus_19396_Transcript_1/1_Conf_1.000 | 133 | 0  |          |                |    |         |     |     |                                                           |
| Locus_19397_Transcript_1/1_Conf_1.000 | 158 | 20 | 3.21E-16 | XP_001897126.1 | 94 | 88.1965 | 51  | 48  | DnaJ domain containing protein                            |
| Locus_19398_Transcript_1/1_Conf_1.000 | 181 | 0  |          |                |    |         |     |     |                                                           |
| Locus_19399_Transcript_1/1_Conf_1.000 | 428 | 6  | 5.10E-06 | EFO23325.1     | 50 | 54.299  | 97  | 49  | hypothetical protein LOAG_05163                           |
| Locus_194_Transcript_1/1_Conf_1.000   | 754 | 20 | 5.76E-55 | CAR63677.1     | 89 | 218.394 | 124 | 111 | putative SPERmatogenesis family member                    |
| Locus_1940_Transcript_1/1_Conf_1.000  | 258 | 0  |          |                |    |         |     |     |                                                           |
| Locus_19400_Transcript_1/1_Conf_1.000 | 153 | 0  |          |                |    |         |     |     |                                                           |

|                                       |      |    |          |                |    |         |     |     |                                                                 |
|---------------------------------------|------|----|----------|----------------|----|---------|-----|-----|-----------------------------------------------------------------|
| Locus_19401_Transcript_1/1_Conf_1.000 | 571  | 20 | 3.05E-55 | XP_002640062.1 | 81 | 218.394 | 161 | 131 | C. briggsae CBR-UNC-120 protein                                 |
| Locus_19402_Transcript_1/1_Conf_1.000 | 345  | 0  |          |                |    |         |     |     |                                                                 |
| Locus_19403_Transcript_1/1_Conf_1.000 | 357  | 3  | 1.38E-11 | XP_002647203.1 | 72 | 72.7886 | 66  | 48  | Hypothetical protein CBG22379                                   |
| Locus_19404_Transcript_1/1_Conf_1.000 | 498  | 2  | 1.08E-16 | NP_497632.1    | 64 | 89.7373 | 159 | 102 | Kruppel-Like Factor (zinc finger protein) family member (klf-1) |
| Locus_19405_Transcript_1/1_Conf_1.000 | 447  | 10 | 1.29E-33 | XP_002639456.1 | 69 | 145.976 | 152 | 106 | Hypothetical protein CBG04051                                   |
| Locus_19406_Transcript_1/1_Conf_1.000 | 263  | 0  |          |                |    |         |     |     |                                                                 |
| Locus_19407_Transcript_1/1_Conf_1.000 | 140  | 0  |          |                |    |         |     |     |                                                                 |
| Locus_19408_Transcript_1/1_Conf_1.000 | 144  | 0  |          |                |    |         |     |     |                                                                 |
| Locus_19409_Transcript_1/1_Conf_1.000 | 843  | 20 | 1.53E-97 | CAA94853.5     | 79 | 360.147 | 266 | 211 | C. elegans protein ZK856.5, confirmed by transcript evidence    |
| Locus_1941_Transcript_1/2_Conf_1.000  | 3143 | 1  | 7.96E-05 | XP_001902928.1 | 49 | 54.6842 | 137 | 68  | hypothetical protein Bm1_57350                                  |
| Locus_1941_Transcript_2/2_Conf_1.000  | 3120 | 1  | 7.89E-05 | XP_001902928.1 | 49 | 54.6842 | 137 | 68  | hypothetical protein Bm1_57350                                  |
| Locus_19410_Transcript_1/1_Conf_1.000 | 249  | 0  |          |                |    |         |     |     |                                                                 |
| Locus_19411_Transcript_1/1_Conf_1.000 | 190  | 1  | 4.83E-04 | XP_002646300.1 | 67 | 47.7506 | 49  | 33  | Hypothetical protein CBG12007                                   |
| Locus_19412_Transcript_1/1_Conf_1.000 | 362  | 20 | 1.50E-42 | XP_001901345.1 | 84 | 175.637 | 120 | 101 | Beta-tubulin cofactor D family protein                          |

|                                       |     |    |          |                |    |         |     |     |                                                                         |
|---------------------------------------|-----|----|----------|----------------|----|---------|-----|-----|-------------------------------------------------------------------------|
| Locus_19413_Transcript_1/1_Conf_1.000 | 453 | 20 | 3.86E-22 | NP_495283.2    | 57 | 107.842 | 139 | 80  | C-type LECTin family member (clec-88)                                   |
| Locus_19414_Transcript_1/1_Conf_1.000 | 385 | 0  |          |                |    |         |     |     |                                                                         |
| Locus_19415_Transcript_1/1_Conf_1.000 | 206 | 0  |          |                |    |         |     |     |                                                                         |
| Locus_19416_Transcript_1/1_Conf_1.000 | 671 | 20 | 3.96E-51 | NP_505312.1    | 70 | 205.297 | 205 | 144 | hypothetical protein T19A5.1                                            |
| Locus_19417_Transcript_1/1_Conf_1.000 | 282 | 20 | 4.37E-21 | XP_002642049.1 | 71 | 104.375 | 82  | 59  | Hypothetical protein CBG17986                                           |
| Locus_19418_Transcript_1/1_Conf_1.000 | 458 | 20 | 5.28E-72 | XP_002638687.1 | 90 | 273.478 | 152 | 138 | Hypothetical protein CBG11882                                           |
| Locus_19419_Transcript_1/1_Conf_1.000 | 499 | 20 | 1.09E-85 | XP_002644182.1 | 95 | 318.931 | 166 | 158 | C. briggsae CBR-UNC-115 protein                                         |
| Locus_1942_Transcript_1/1_Conf_1.000  | 667 | 20 | 1.15E-26 | ACM08416.1     | 65 | 124.02  | 103 | 67  | Lipopolysaccharide-induced tumor necrosis factor-alpha factor homolog   |
| Locus_19420_Transcript_1/1_Conf_1.000 | 299 | 17 | 3.64E-20 | EFO24930.1     | 66 | 101.293 | 106 | 70  | hypothetical protein LOAG_03557                                         |
| Locus_19421_Transcript_1/1_Conf_1.000 | 252 | 2  | 4.23E-16 | XP_002630540.1 | 86 | 87.8113 | 66  | 57  | Hypothetical protein CBG12981                                           |
| Locus_19422_Transcript_1/1_Conf_1.000 | 174 | 20 | 3.48E-23 | NP_498516.2    | 92 | 111.309 | 57  | 53  | LEThal family member (let-711)                                          |
| Locus_19423_Transcript_1/1_Conf_1.000 | 455 | 20 | 2.09E-68 | NP_741692.1    | 88 | 261.536 | 151 | 133 | TetraSpanin family member (tsp-13)                                      |
| Locus_19424_Transcript_1/1_Conf_1.000 | 280 | 8  | 3.97E-11 | XP_001894571.1 | 70 | 71.2478 | 62  | 44  | UBX domain containing protein                                           |
| Locus_19425_Transcript_1/1_Conf_1.000 | 263 | 0  |          |                |    |         |     |     |                                                                         |
| Locus_19426_Transcript_1/1_Conf_1.000 | 151 | 1  | 2.57E-05 | XP_002647048.1 | 70 | 51.9878 | 51  | 36  | Hypothetical protein CBG03566                                           |
| Locus_19427_Transcript_1/1_Conf_1.000 | 168 | 0  |          |                |    |         |     |     |                                                                         |
| Locus_19428_Transcript_1/1_Conf_1.000 | 500 | 0  |          |                |    |         |     |     |                                                                         |
| Locus_19429_Transcript_1/1_Conf_1.000 | 332 | 4  | 4.26E-29 | NP_496755.1    | 74 | 130.954 | 110 | 82  | DAF-16/FOXO Controlled, germline Tumor affecting family member (dct-18) |
| Locus_1943_Transcript_1/1_Conf_1.000  | 142 | 0  |          |                |    |         |     |     |                                                                         |
| Locus_19430_Transcript_1/1_Conf_1.000 | 762 | 20 | 3.15E-40 | XP_795502.1    | 57 | 169.474 | 217 | 124 | PREDICTED: similar to ENSANGP00000010363                                |
| Locus_19431_Transcript_1/1_Conf_1.000 | 171 | 0  |          |                |    |         |     |     |                                                                         |
| Locus_19432_Transcript_1/1_Conf_1.000 | 383 | 20 | 7.01E-48 | XP_002647751.1 | 84 | 193.356 | 126 | 106 | C. briggsae CBR-CYP-42A1 protein                                        |
| Locus_19433_Transcript_1/1_Conf_1.000 | 170 | 0  |          |                |    |         |     |     |                                                                         |
| Locus_19434_Transcript_1/1_Conf_1.000 | 294 | 20 | 1.74E-38 | NP_505616.2    | 91 | 162.155 | 97  | 89  | CULLin family member (cul-5)                                            |

|                                       |      |    |          |                |    |         |     |     |                                                       |
|---------------------------------------|------|----|----------|----------------|----|---------|-----|-----|-------------------------------------------------------|
| Locus_19435_Transcript_1/1_Conf_1.000 | 165  | 0  |          |                |    |         |     |     |                                                       |
| Locus_19436_Transcript_1/1_Conf_1.000 | 514  | 20 | 3.66E-42 | NP_496592.1    | 82 | 174.481 | 120 | 99  | hypothetical protein Y57A10A.15                       |
| Locus_19437_Transcript_1/1_Conf_1.000 | 137  | 1  | 3.61E-04 | NP_504648.1    | 71 | 48.1358 | 45  | 32  | Carnitine Palmitoyl Transferase family member (cpt-6) |
| Locus_19438_Transcript_1/1_Conf_1.000 | 146  | 0  |          |                |    |         |     |     |                                                       |
| Locus_19439_Transcript_1/1_Conf_1.000 | 213  | 20 | 1.67E-17 | P30646.4       | 75 | 92.4337 | 70  | 53  | Uncharacterized sugar kinase R08D7.7                  |
| Locus_1944_Transcript_1/1_Conf_1.000  | 1698 | 20 | 0        | XP_002632610.1 | 93 | 766.918 | 444 | 414 | C. briggsae CBR-GDI-1 protein                         |
| Locus_19440_Transcript_1/1_Conf_1.000 | 253  | 0  |          |                |    |         |     |     |                                                       |
| Locus_19441_Transcript_1/1_Conf_1.000 | 201  | 20 | 2.97E-22 | NP_498931.2    | 84 | 108.227 | 65  | 55  | SMALL family member (sma-2)                           |
| Locus_19442_Transcript_1/1_Conf_1.000 | 327  | 6  | 3.64E-12 | XP_002629686.1 | 65 | 74.7146 | 82  | 54  | Hypothetical protein CBG00906                         |
| Locus_19443_Transcript_1/1_Conf_1.000 | 338  | 20 | 1.19E-39 | XP_002636314.1 | 89 | 166.007 | 111 | 99  | Hypothetical protein CBG08607                         |
| Locus_19444_Transcript_1/1_Conf_1.000 | 235  | 0  |          |                |    |         |     |     |                                                       |
| Locus_19445_Transcript_1/1_Conf_1.000 | 795  | 20 | 5.27E-65 | NP_501024.1    | 67 | 251.906 | 264 | 179 | hypothetical protein C01B10.8                         |
| Locus_19446_Transcript_1/1_Conf_1.000 | 233  | 20 | 3.19E-24 | XP_002643253.1 | 96 | 114.775 | 59  | 57  | C. briggsae CBR-AEX-3 protein                         |



|                                       |      |    |           |                |     |         |     |     |                                                                     |
|---------------------------------------|------|----|-----------|----------------|-----|---------|-----|-----|---------------------------------------------------------------------|
| Locus_19447_Transcript_1/1_Conf_1.000 | 385  | 20 | 9.76E-42  | NP_508178.2    | 79  | 172.94  | 128 | 102 | TBC (Tre-2/Bub2/Cdc16) domain family member (tbc-11)                |
| Locus_19448_Transcript_1/1_Conf_1.000 | 256  | 0  |           |                |     |         |     |     |                                                                     |
| Locus_19449_Transcript_1/1_Conf_1.000 | 1002 | 20 | 4.00E-85  | NP_505523.1    | 71  | 319.316 | 308 | 219 | hypothetical protein F46B6.4                                        |
| Locus_1945_Transcript_1/2_Conf_1.000  | 1387 | 20 | 1.11E-36  | NP_508806.1    | 73  | 159.073 | 187 | 137 | DNaJ domain (prokaryotic heat shock protein) family member (dnj-14) |
| Locus_1945_Transcript_2/2_Conf_1.000  | 1388 | 20 | 1.11E-36  | NP_508806.1    | 73  | 159.073 | 187 | 137 | DNaJ domain (prokaryotic heat shock protein) family member (dnj-14) |
| Locus_19450_Transcript_1/1_Conf_1.000 | 423  | 20 | 2.27E-54  | EFO24223.1     | 90  | 214.927 | 130 | 117 | hypothetical protein LOAG_04263                                     |
| Locus_19451_Transcript_1/1_Conf_1.000 | 147  | 6  | 3.04E-06  | NP_741010.1    | 78  | 55.0694 | 38  | 30  | hypothetical protein C56C10.7                                       |
| Locus_19452_Transcript_1/2_Conf_1.000 | 257  | 0  |           |                |     |         |     |     |                                                                     |
| Locus_19452_Transcript_2/2_Conf_1.000 | 257  | 0  |           |                |     |         |     |     |                                                                     |
| Locus_19453_Transcript_1/1_Conf_1.000 | 142  | 20 | 2.10E-12  | XP_002433850.1 | 85  | 75.485  | 47  | 40  | conserved hypothetical protein                                      |
| Locus_19454_Transcript_1/1_Conf_1.000 | 188  | 7  | 9.08E-27  | XP_002640720.1 | 100 | 123.25  | 62  | 62  | C. briggsae CBR-TAG-301 protein                                     |
| Locus_19455_Transcript_1/1_Conf_1.000 | 804  | 20 | 5.82E-35  | NP_508178.2    | 68  | 152.14  | 166 | 114 | TBC (Tre-2/Bub2/Cdc16) domain family member (tbc-11)                |
| Locus_19457_Transcript_1/1_Conf_1.000 | 437  | 0  |           |                |     |         |     |     |                                                                     |
| Locus_19458_Transcript_1/1_Conf_1.000 | 271  | 0  |           |                |     |         |     |     |                                                                     |
| Locus_19459_Transcript_1/1_Conf_1.000 | 362  | 0  |           |                |     |         |     |     |                                                                     |
| Locus_1946_Transcript_1/1_Conf_1.000  | 1208 | 20 | 1.24E-134 | XP_002641737.1 | 78  | 484.182 | 362 | 284 | C. briggsae CBR-DRS-1 protein                                       |
| Locus_19460_Transcript_1/1_Conf_1.000 | 172  | 0  |           |                |     |         |     |     |                                                                     |
| Locus_19461_Transcript_1/1_Conf_1.000 | 725  | 0  |           |                |     |         |     |     |                                                                     |
| Locus_19462_Transcript_1/1_Conf_1.000 | 148  | 20 | 2.65E-18  | NP_498711.1    | 85  | 95.1301 | 49  | 42  | TYRosinase family member (tyr-1)                                    |
| Locus_19463_Transcript_1/1_Conf_1.000 | 213  | 2  | 4.11E-08  | NP_492278.2    | 71  | 61.2326 | 70  | 50  | hypothetical protein T19A6.4                                        |
| Locus_19464_Transcript_1/1_Conf_1.000 | 235  | 0  |           |                |     |         |     |     |                                                                     |
| Locus_19465_Transcript_1/1_Conf_1.000 | 172  | 0  |           |                |     |         |     |     |                                                                     |
| Locus_19466_Transcript_1/1_Conf_1.000 | 217  | 3  | 2.24E-14  | XP_002634811.1 | 50  | 82.0333 | 112 | 57  | Hypothetical protein CBG13916                                       |
| Locus_19467_Transcript_1/1_Conf_1.000 | 248  | 0  |           |                |     |         |     |     |                                                                     |
| Locus_19468_Transcript_1/1_Conf_1.000 | 211  | 20 | 8.88E-11  | EFO22061.1     | 61  | 70.0922 | 65  | 40  | hypothetical protein LOAG_06422                                     |
| Locus_19469_Transcript_1/1_Conf_1.000 | 194  | 2  | 4.35E-05  | XP_001902022.1 | 56  | 51.2174 | 67  | 38  | hypothetical protein Bm1_52770                                      |

|                                       |      |    |           |                |     |         |     |     |                                                 |
|---------------------------------------|------|----|-----------|----------------|-----|---------|-----|-----|-------------------------------------------------|
| Locus_1947_Transcript_1/1_Conf_1.000  | 1371 | 2  | 2.76E-80  | XP_002634154.1 | 64  | 303.908 | 395 | 256 | Hypothetical protein CBG01718                   |
| Locus_19470_Transcript_1/1_Conf_1.000 | 185  | 0  |           |                |     |         |     |     |                                                 |
| Locus_19471_Transcript_1/1_Conf_1.000 | 540  | 20 | 3.41E-55  | NP_498671.2    | 82  | 218.009 | 179 | 147 | Uridine PhosPhorylase family member (upp-1)     |
| Locus_19472_Transcript_1/1_Conf_1.000 | 144  | 20 | 3.48E-10  | XP_002639439.1 | 78  | 68.1662 | 47  | 37  | Hypothetical protein CBG04032                   |
| Locus_19473_Transcript_1/1_Conf_1.000 | 207  | 0  |           |                |     |         |     |     |                                                 |
| Locus_19474_Transcript_1/1_Conf_1.000 | 138  | 20 | 1.67E-17  | XP_002812491.1 | 100 | 92.4337 | 45  | 45  | PREDICTED: c-X-C chemokine receptor type 4-like |
| Locus_19475_Transcript_1/1_Conf_1.000 | 299  | 0  |           |                |     |         |     |     |                                                 |
| Locus_19476_Transcript_1/1_Conf_1.000 | 319  | 0  |           |                |     |         |     |     |                                                 |
| Locus_19477_Transcript_1/1_Conf_1.000 | 1371 | 0  |           |                |     |         |     |     |                                                 |
| Locus_19478_Transcript_1/1_Conf_1.000 | 424  | 20 | 5.26E-27  | EFO24868.1     | 62  | 124.02  | 141 | 88  | hypothetical protein LOAG_03617                 |
| Locus_19479_Transcript_1/1_Conf_1.000 | 235  | 4  | 5.44E-16  | XP_002630800.1 | 90  | 87.4261 | 53  | 48  | Hypothetical protein CBG02500                   |
| Locus_1948_Transcript_1/1_Conf_1.000  | 1671 | 20 | 3.76E-138 | NP_001122655.1 | 64  | 496.508 | 566 | 367 | Motor AXon guidance family member (max-2)       |

|                                       |     |    |          |                |     |         |     |     |                                                     |
|---------------------------------------|-----|----|----------|----------------|-----|---------|-----|-----|-----------------------------------------------------|
| Locus_19480_Transcript_1/1_Conf_1.000 | 220 | 20 | 3.94E-38 | XP_002831505.1 | 100 | 160.999 | 72  | 72  | PREDICTED: diamine acetyltransferase 1-like         |
| Locus_19481_Transcript_1/1_Conf_1.000 | 360 | 0  |          |                |     |         |     |     |                                                     |
| Locus_19482_Transcript_1/1_Conf_1.000 | 139 | 0  |          |                |     |         |     |     |                                                     |
| Locus_19483_Transcript_1/1_Conf_1.000 | 291 | 20 | 6.04E-23 | XP_002645698.1 | 75  | 110.538 | 96  | 72  | Hypothetical protein CBG07358                       |
| Locus_19484_Transcript_1/1_Conf_1.000 | 853 | 20 | 2.43E-66 | NP_503353.2    | 68  | 256.529 | 264 | 180 | hypothetical protein H24K24.4                       |
| Locus_19485_Transcript_1/1_Conf_1.000 | 133 | 4  | 4.14E-08 | ABN08628.1     | 72  | 61.2326 | 43  | 31  | RNA-directed DNA polymerase (Reverse transcriptase) |
| Locus_19486_Transcript_1/1_Conf_1.000 | 639 | 0  |          |                |     |         |     |     |                                                     |
| Locus_19487_Transcript_1/1_Conf_1.000 | 256 | 0  |          |                |     |         |     |     |                                                     |
| Locus_19488_Transcript_1/1_Conf_1.000 | 278 | 20 | 5.18E-27 | EFO19307.1     | 87  | 124.02  | 93  | 81  | hypothetical protein LOAG_09187                     |
| Locus_19489_Transcript_1/1_Conf_1.000 | 632 | 20 | 1.75E-79 | XP_002640158.1 | 95  | 299.286 | 165 | 157 | C. briggsae CBR-TRE-1 protein                       |
| Locus_1949_Transcript_1/1_Conf_1.000  | 398 | 4  | 2.23E-17 | XP_001892578.1 | 57  | 92.0485 | 134 | 77  | hypothetical protein Bm1_05520                      |
| Locus_19490_Transcript_1/1_Conf_1.000 | 156 | 3  | 2.38E-11 | AAF66614.1     | 76  | 72.0182 | 52  | 40  | AF142441_1H+/oligopeptide symporter OPT-3           |

|                                       |     |    |          |                |     |         |     |     |                                |
|---------------------------------------|-----|----|----------|----------------|-----|---------|-----|-----|--------------------------------|
| Locus_19491_Transcript_1/1_Conf_1.000 | 139 | 20 | 2.75E-20 | BAH13895.1     | 100 | 101.679 | 46  | 46  | unnamed protein product        |
| Locus_19492_Transcript_1/1_Conf_1.000 | 248 | 0  |          |                |     |         |     |     |                                |
| Locus_19493_Transcript_1/1_Conf_1.000 | 308 | 5  | 7.99E-28 | XP_001894154.1 | 75  | 126.716 | 101 | 76  | hypothetical protein Bm1_13445 |
| Locus_19494_Transcript_1/1_Conf_1.000 | 393 | 2  | 2.10E-07 | XP_001895343.1 | 52  | 58.9214 | 106 | 56  | hypothetical protein Bm1_19440 |
| Locus_19495_Transcript_1/1_Conf_1.000 | 288 | 2  | 2.83E-04 | NP_505787.1    | 61  | 48.521  | 77  | 47  | hypothetical protein F58B4.4   |
| Locus_19496_Transcript_1/1_Conf_1.000 | 165 | 0  |          |                |     |         |     |     |                                |
| Locus_19497_Transcript_1/1_Conf_1.000 | 620 | 0  |          |                |     |         |     |     |                                |
| Locus_19498_Transcript_1/1_Conf_1.000 | 305 | 0  |          |                |     |         |     |     |                                |
| Locus_19499_Transcript_1/1_Conf_1.000 | 495 | 20 | 1.72E-38 | XP_002642587.1 | 74  | 162.155 | 150 | 111 | Hypothetical protein CBG09137  |
| Locus_195_Transcript_1/1_Conf_1.000   | 942 |    |          |                |     |         |     |     |                                |

|                                       |      |    |          |                |    |         |     |     |                                                       |
|---------------------------------------|------|----|----------|----------------|----|---------|-----|-----|-------------------------------------------------------|
| Locus_1950_Transcript_1/1_Conf_1.000  | 415  | 20 | 3.35E-18 | NP_492436.1    | 56 | 94.7449 | 119 | 67  | hypothetical protein W06D4.4                          |
| Locus_19500_Transcript_1/1_Conf_1.000 | 138  | 0  |          |                |    |         |     |     |                                                       |
| Locus_19501_Transcript_1/1_Conf_1.000 | 433  | 20 | 1.32E-30 | NP_498582.1    | 79 | 135.961 | 130 | 103 | PreFoldin (molecular chaperone) family member (pfd-5) |
| Locus_19502_Transcript_1/1_Conf_1.000 | 386  | 8  | 1.20E-07 | NP_492045.1    | 53 | 59.6918 | 128 | 68  | hypothetical protein R06C7.1                          |
| Locus_19503_Transcript_1/1_Conf_1.000 | 132  | 0  |          |                |    |         |     |     |                                                       |
| Locus_19504_Transcript_1/1_Conf_1.000 | 154  | 0  |          |                |    |         |     |     |                                                       |
| Locus_19505_Transcript_1/1_Conf_1.000 | 1039 | 20 | 4.39E-50 | XP_002638395.1 | 59 | 202.986 | 284 | 170 | Hypothetical protein CBG18604                         |

|                                       |      |    |           |                |    |         |     |     |                                                 |
|---------------------------------------|------|----|-----------|----------------|----|---------|-----|-----|-------------------------------------------------|
| Locus_19506_Transcript_1/1_Conf_1.000 | 341  | 20 | 1.45E-37  | NP_506256.3    | 82 | 159.073 | 113 | 93  | CaDHerin family member (cdh-6)                  |
| Locus_19507_Transcript_1/1_Conf_1.000 | 953  | 20 | 1.82E-68  | XP_002642783.1 | 70 | 263.848 | 273 | 193 | C. briggsae CBR-GRO-1 protein                   |
| Locus_19508_Transcript_1/1_Conf_1.000 | 154  | 0  |           |                |    |         |     |     |                                                 |
| Locus_19509_Transcript_1/1_Conf_1.000 | 205  | 0  |           |                |    |         |     |     |                                                 |
| Locus_1951_Transcript_1/1_Conf_1.000  | 1290 | 20 | 1.52E-101 | XP_002630594.1 | 68 | 374.4   | 400 | 275 | C. briggsae CBR-AKA-1 protein                   |
| Locus_19510_Transcript_1/1_Conf_1.000 | 273  | 20 | 5.53E-45  | NP_001021681.1 | 94 | 183.726 | 90  | 85  | hypothetical protein Y105E8A.10                 |
| Locus_19511_Transcript_1/1_Conf_1.000 | 473  | 0  |           |                |    |         |     |     |                                                 |
| Locus_19512_Transcript_1/1_Conf_1.000 | 352  | 0  |           |                |    |         |     |     |                                                 |
| Locus_19513_Transcript_1/1_Conf_1.000 | 260  | 20 | 2.81E-28  | XP_002412610.1 | 82 | 128.257 | 84  | 69  | sorbitol dehydrogenase, putative                |
| Locus_19514_Transcript_1/1_Conf_1.000 | 236  | 20 | 4.75E-20  | NP_001023038.1 | 87 | 100.908 | 56  | 49  | EXCreatory canal abnormal family member (exc-5) |
| Locus_19515_Transcript_1/1_Conf_1.000 | 737  | 20 | 1.61E-70  | NP_498895.1    | 77 | 270.011 | 245 | 191 | RNA HelicAse family member (rha-2)              |
| Locus_19516_Transcript_1/1_Conf_1.000 | 277  | 5  | 5.37E-16  | EFO21774.1     | 87 | 87.4261 | 55  | 48  | hypothetical protein LOAG_06715                 |

|                                       |      |    |           |                |     |         |     |     |                                        |
|---------------------------------------|------|----|-----------|----------------|-----|---------|-----|-----|----------------------------------------|
| Locus_19517_Transcript_1/1_Conf_1.000 | 241  | 0  |           |                |     |         |     |     |                                        |
| Locus_19518_Transcript_1/1_Conf_1.000 | 142  | 0  |           |                |     |         |     |     |                                        |
| Locus_19519_Transcript_1/1_Conf_1.000 | 238  | 0  |           |                |     |         |     |     |                                        |
| Locus_1952_Transcript_1/1_Conf_1.000  | 1130 | 20 | 2.88E-122 | NP_502383.1    | 83  | 442.965 | 284 | 238 | hypothetical protein C25G4.11          |
| Locus_19520_Transcript_1/1_Conf_1.000 | 217  | 11 | 8.80E-19  | XP_002640798.1 | 81  | 96.6709 | 71  | 58  | C. briggsae CBR-NHR-121 protein        |
| Locus_19521_Transcript_1/1_Conf_1.000 | 259  | 14 | 1.77E-14  | XP_002635781.1 | 68  | 82.4185 | 88  | 60  | Hypothetical protein CBG10437          |
| Locus_19522_Transcript_1/1_Conf_1.000 | 180  | 0  |           |                |     |         |     |     |                                        |
| Locus_19523_Transcript_1/1_Conf_1.000 | 369  | 0  |           |                |     |         |     |     |                                        |
| Locus_19524_Transcript_1/1_Conf_1.000 | 421  | 20 | 3.78E-33  | XP_002637497.1 | 69  | 144.436 | 137 | 95  | Hypothetical protein CBG19218          |
| Locus_19525_Transcript_1/1_Conf_1.000 | 335  | 4  | 2.51E-05  | NP_740989.1    | 56  | 51.9878 | 76  | 43  | hypothetical protein F07F6.8           |
| Locus_19526_Transcript_1/1_Conf_1.000 | 319  | 20 | 9.91E-50  | XP_002631126.1 | 97  | 199.519 | 106 | 103 | C. briggsae CBR-SHN-1 protein          |
| Locus_19527_Transcript_1/1_Conf_1.000 | 233  | 2  | 6.89E-19  | NP_497911.1    | 72  | 97.0561 | 79  | 57  | INSulin related family member (ins-17) |
| Locus_19528_Transcript_1/1_Conf_1.000 | 377  | 4  | 1.17E-26  | NP_509961.1    | 80  | 122.865 | 100 | 80  | hypothetical protein C44C10.9          |
| Locus_19529_Transcript_1/1_Conf_1.000 | 295  | 20 | 6.44E-17  | XP_002631513.1 | 64  | 90.5077 | 99  | 64  | C. briggsae CBR-HDA-6 protein          |
| Locus_1953_Transcript_1/1_Conf_1.000  | 554  | 0  |           |                |     |         |     |     |                                        |
| Locus_19530_Transcript_1/1_Conf_1.000 | 355  | 0  |           |                |     |         |     |     |                                        |
| Locus_19531_Transcript_1/1_Conf_1.000 | 606  | 20 | 5.80E-21  | XP_002637610.1 | 61  | 104.76  | 142 | 87  | C. briggsae CBR-TAG-120 protein        |
| Locus_19532_Transcript_1/1_Conf_1.000 | 294  | 0  |           |                |     |         |     |     |                                        |
| Locus_19533_Transcript_1/1_Conf_1.000 | 234  | 1  | 2.52E-21  | CAA26321.1     | 100 | 105.145 | 48  | 48  | unnamed protein product                |
| Locus_19534_Transcript_1/1_Conf_1.000 | 205  | 5  | 7.83E-07  | XP_002644215.1 | 77  | 56.9954 | 44  | 34  | C. briggsae CBR-ACL-5 protein          |

|                                       |      |    |          |                |    |         |     |     |                                                                         |
|---------------------------------------|------|----|----------|----------------|----|---------|-----|-----|-------------------------------------------------------------------------|
| Locus_19535_Transcript_1/1_Conf_1.000 | 134  | 0  |          |                |    |         |     |     |                                                                         |
| Locus_19536_Transcript_1/1_Conf_1.000 | 320  | 2  | 8.78E-06 | NP_510289.1    | 50 | 53.5286 | 67  | 34  | hypothetical protein C04A11.2                                           |
| Locus_19537_Transcript_1/1_Conf_1.000 | 406  | 2  | 8.67E-06 | XP_001152656.1 | 49 | 53.5286 | 77  | 38  | PREDICTED: similar to P antigen family, member 2B                       |
| Locus_19538_Transcript_1/1_Conf_1.000 | 262  | 0  |          |                |    |         |     |     |                                                                         |
| Locus_19539_Transcript_1/1_Conf_1.000 | 362  | 20 | 1.15E-34 | NP_497034.1    | 74 | 149.443 | 119 | 89  | hypothetical protein C01G12.8                                           |
| Locus_1954_Transcript_1/2_Conf_1.000  | 425  | 0  |          |                |    |         |     |     |                                                                         |
| Locus_1954_Transcript_2/2_Conf_1.000  | 1076 | 20 | 1.83E-38 | XP_002631192.1 | 87 | 164.466 | 98  | 86  | C. briggsae CBR-CEY-1 protein                                           |
| Locus_19540_Transcript_1/1_Conf_1.000 | 294  | 6  | 3.32E-05 | CBM41222.1     | 50 | 51.6026 | 69  | 35  | C. elegans protein T10G3.3b, partially confirmed by transcript evidence |
| Locus_19541_Transcript_1/1_Conf_1.000 | 327  | 0  |          |                |    |         |     |     |                                                                         |
| Locus_19542_Transcript_1/1_Conf_1.000 | 132  | 0  |          |                |    |         |     |     |                                                                         |
| Locus_19543_Transcript_1/1_Conf_1.000 | 508  | 20 | 6.96E-62 | XP_002631239.1 | 81 | 239.965 | 164 | 133 | C. briggsae CBR-LACT-3 protein                                          |
| Locus_19544_Transcript_1/1_Conf_1.000 | 291  | 20 | 2.28E-38 | XP_002634996.1 | 91 | 161.77  | 95  | 87  | C. briggsae CBR-KGB-1 protein                                           |
| Locus_19545_Transcript_1/2_Conf_1.000 | 454  | 0  |          |                |    |         |     |     |                                                                         |
| Locus_19545_Transcript_2/2_Conf_1.000 | 406  | 0  |          |                |    |         |     |     |                                                                         |
| Locus_19546_Transcript_1/1_Conf_1.000 | 242  | 0  |          |                |    |         |     |     |                                                                         |
| Locus_19547_Transcript_1/1_Conf_1.000 | 129  | 0  |          |                |    |         |     |     |                                                                         |
| Locus_19548_Transcript_1/1_Conf_1.000 | 162  | 0  |          |                |    |         |     |     |                                                                         |
| Locus_19549_Transcript_1/1_Conf_1.000 | 223  | 0  |          |                |    |         |     |     |                                                                         |
| Locus_1955_Transcript_1/1_Conf_1.000  | 380  | 0  |          |                |    |         |     |     |                                                                         |
| Locus_19550_Transcript_1/1_Conf_1.000 | 187  | 0  |          |                |    |         |     |     |                                                                         |
| Locus_19551_Transcript_1/1_Conf_1.000 | 359  | 0  |          |                |    |         |     |     |                                                                         |
| Locus_19552_Transcript_1/1_Conf_1.000 | 158  | 0  |          |                |    |         |     |     |                                                                         |
| Locus_19553_Transcript_1/1_Conf_1.000 | 566  | 4  | 3.30E-14 | EFO21208.1     | 75 | 82.0333 | 69  | 52  | hypothetical protein LOAG_07284                                         |
| Locus_19554_Transcript_1/1_Conf_1.000 | 1027 | 7  | 7.43E-42 | XP_002636786.1 | 63 | 175.637 | 176 | 112 | Hypothetical protein CBG23525                                           |
| Locus_19555_Transcript_1/1_Conf_1.000 | 494  | 20 | 8.25E-57 | NP_506862.2    | 78 | 223.016 | 155 | 121 | hypothetical protein F21A3.3                                            |



|                                       |      |    |          |                |     |         |     |     |                                       |
|---------------------------------------|------|----|----------|----------------|-----|---------|-----|-----|---------------------------------------|
| Locus_19556_Transcript_1/1_Conf_1.000 | 130  | 6  | 1.58E-07 | XP_002633573.1 | 74  | 59.3066 | 43  | 32  | Hypothetical protein CBG05447         |
| Locus_19557_Transcript_1/1_Conf_1.000 | 226  | 0  |          |                |     |         |     |     |                                       |
| Locus_19558_Transcript_1/1_Conf_1.000 | 347  | 20 | 6.07E-15 | EFA13656.1     | 60  | 83.9593 | 91  | 55  | hypothetical protein TcasGA2_TC016129 |
| Locus_19559_Transcript_1/1_Conf_1.000 | 222  | 0  |          |                |     |         |     |     |                                       |
| Locus_1956_Transcript_1/1_Conf_1.000  | 1180 | 20 | 2.71E-78 | NP_503386.1    | 100 | 296.975 | 149 | 149 | CalModulin family member (cmd-1)      |
| Locus_19560_Transcript_1/1_Conf_1.000 | 490  | 20 | 9.23E-32 | XP_002635570.1 | 67  | 139.813 | 122 | 82  | Hypothetical protein CBG20553         |
| Locus_19561_Transcript_1/1_Conf_1.000 | 133  | 0  |          |                |     |         |     |     |                                       |
| Locus_19562_Transcript_1/1_Conf_1.000 | 258  | 0  |          |                |     |         |     |     |                                       |
| Locus_19563_Transcript_1/2_Conf_1.000 | 369  | 0  |          |                |     |         |     |     |                                       |
| Locus_19563_Transcript_2/2_Conf_1.000 | 811  | 0  |          |                |     |         |     |     |                                       |
| Locus_19564_Transcript_1/1_Conf_1.000 | 200  | 4  | 2.80E-04 | EFO16977.1     | 60  | 48.521  | 58  | 35  | protein-tyrosine phosphatase          |

|                                       |     |    |          |                |    |         |     |     |                                                                      |
|---------------------------------------|-----|----|----------|----------------|----|---------|-----|-----|----------------------------------------------------------------------|
| Locus_19565_Transcript_1/1_Conf_1.000 | 245 | 0  |          |                |    |         |     |     |                                                                      |
| Locus_19566_Transcript_1/1_Conf_1.000 | 227 | 20 | 3.80E-25 | NP_491658.2    | 87 | 117.857 | 73  | 64  | PaTched Related family member (ptr-10)                               |
| Locus_19567_Transcript_1/1_Conf_1.000 | 130 | 0  |          |                |    |         |     |     |                                                                      |
| Locus_19568_Transcript_1/1_Conf_1.000 | 354 | 20 | 1.57E-23 | XP_002646774.1 | 74 | 112.464 | 116 | 86  | Hypothetical protein CBG18418                                        |
| Locus_19569_Transcript_1/1_Conf_1.000 | 319 | 20 | 1.26E-36 | NP_509884.1    | 84 | 155.992 | 105 | 89  | hypothetical protein F38B2.4                                         |
| Locus_1957_Transcript_1/1_Conf_1.000  | 464 | 20 | 1.80E-59 | NP_741743.1    | 84 | 231.876 | 152 | 129 | Propionyl Coenzyme A Carboxylase Beta subunit family member (pccb-1) |
| Locus_19570_Transcript_1/1_Conf_1.000 | 139 | 0  |          |                |    |         |     |     |                                                                      |
| Locus_19571_Transcript_1/1_Conf_1.000 | 142 | 0  |          |                |    |         |     |     |                                                                      |
| Locus_19572_Transcript_1/1_Conf_1.000 | 158 | 0  |          |                |    |         |     |     |                                                                      |
| Locus_19573_Transcript_1/1_Conf_1.000 | 144 | 0  |          |                |    |         |     |     |                                                                      |
| Locus_19574_Transcript_1/1_Conf_1.000 | 702 | 20 | 1.17E-59 | EFO26681.1     | 72 | 233.802 | 199 | 145 | glycosyl transferase                                                 |
| Locus_19575_Transcript_1/1_Conf_1.000 | 417 | 20 | 3.42E-42 | NP_495445.2    | 86 | 174.481 | 111 | 96  | hypothetical protein ZK1127.5                                        |
| Locus_19576_Transcript_1/1_Conf_1.000 | 148 | 0  |          |                |    |         |     |     |                                                                      |
| Locus_19577_Transcript_1/1_Conf_1.000 | 195 | 0  |          |                |    |         |     |     |                                                                      |
| Locus_19578_Transcript_1/1_Conf_1.000 | 313 | 1  | 1.01E-09 | EDL06708.1     | 71 | 66.6254 | 56  | 40  | mCG51545                                                             |
| Locus_19579_Transcript_1/1_Conf_1.000 | 219 | 0  |          |                |    |         |     |     |                                                                      |
| Locus_1958_Transcript_1/1_Conf_1.000  | 961 | 20 | 1.47E-65 | NP_001129880.1 | 61 | 254.218 | 299 | 185 | Nuclear eXport Factor family member (nxf-1)                          |
| Locus_19580_Transcript_1/1_Conf_1.000 | 321 | 20 | 1.21E-23 | XP_002636926.1 | 84 | 112.849 | 83  | 70  | Hypothetical protein CBG09393                                        |

|                                       |      |    |          |                |     |         |     |     |                                                       |
|---------------------------------------|------|----|----------|----------------|-----|---------|-----|-----|-------------------------------------------------------|
| Locus_19581_Transcript_1/1_Conf_1.000 | 253  | 20 | 3.94E-30 | XP_001110023.2 | 100 | 134.42  | 82  | 82  | PREDICTED: sentrin-specific protease 3-like isoform 3 |
| Locus_19582_Transcript_1/1_Conf_1.000 | 492  | 2  | 1.38E-11 | XP_001900176.1 | 50  | 72.7886 | 199 | 101 | LIM domain containing protein                         |
| Locus_19583_Transcript_1/1_Conf_1.000 | 328  | 20 | 3.76E-17 | EFN66847.1     | 60  | 91.2781 | 111 | 67  | hypothetical protein EAG_08499                        |
| Locus_19584_Transcript_1/1_Conf_1.000 | 324  | 20 | 8.42E-09 | XP_001960086.1 | 55  | 63.5438 | 98  | 54  | GF13190                                               |
| Locus_19585_Transcript_1/1_Conf_1.000 | 259  | 0  |          |                |     |         |     |     |                                                       |
| Locus_19586_Transcript_1/1_Conf_1.000 | 429  | 0  |          |                |     |         |     |     |                                                       |
| Locus_19587_Transcript_1/1_Conf_1.000 | 819  | 20 | 2.02E-83 | XP_002643051.1 | 71  | 313.153 | 263 | 189 | C. briggsae CBR-DPF-6 protein                         |
| Locus_19588_Transcript_1/1_Conf_1.000 | 247  | 7  | 3.46E-31 | XP_002633317.1 | 85  | 137.887 | 82  | 70  | Hypothetical protein CBG06054                         |
| Locus_19589_Transcript_1/1_Conf_1.000 | 480  | 20 | 6.47E-46 | NP_510258.2    | 68  | 186.808 | 158 | 108 | hypothetical protein F18H3.1                          |
| Locus_1959_Transcript_1/2_Conf_1.000  | 1056 | 20 | 1.69E-97 | XP_002630503.1 | 81  | 360.533 | 291 | 238 | Hypothetical protein CBG24740                         |
| Locus_1959_Transcript_2/2_Conf_1.000  | 1056 | 20 | 1.69E-97 | XP_002630503.1 | 81  | 360.533 | 291 | 238 | Hypothetical protein CBG24740                         |
| Locus_19590_Transcript_1/1_Conf_1.000 | 153  | 0  |          |                |     |         |     |     |                                                       |

|                                       |      |    |          |                |    |         |     |     |                                                     |
|---------------------------------------|------|----|----------|----------------|----|---------|-----|-----|-----------------------------------------------------|
| Locus_19591_Transcript_1/1_Conf_1.000 | 151  | 5  | 4.68E-07 | NP_500822.2    | 70 | 57.7658 | 48  | 34  | UNCoordinated family member (unc-5)                 |
| Locus_19592_Transcript_1/1_Conf_1.000 | 132  | 0  |          |                |    |         |     |     |                                                     |
| Locus_19593_Transcript_1/1_Conf_1.000 | 246  | 12 | 3.58E-28 | XP_002633158.1 | 95 | 127.872 | 82  | 78  | C. briggsae CBR-UNC-82 protein                      |
| Locus_19594_Transcript_1/1_Conf_1.000 | 214  | 20 | 9.44E-21 | XP_002644316.1 | 88 | 103.219 | 71  | 63  | C. briggsae CBR-TAG-312 protein                     |
| Locus_19595_Transcript_1/1_Conf_1.000 | 139  | 2  | 3.97E-11 | NP_506168.2    | 91 | 71.2478 | 45  | 41  | hypothetical protein K10C8.2                        |
| Locus_19596_Transcript_1/1_Conf_1.000 | 263  | 20 | 1.26E-28 | BAE38513.1     | 98 | 129.413 | 66  | 65  | unnamed protein product                             |
| Locus_19597_Transcript_1/1_Conf_1.000 | 238  | 0  |          |                |    |         |     |     |                                                     |
| Locus_19598_Transcript_1/1_Conf_1.000 | 333  | 18 | 3.38E-10 | XP_002637287.1 | 49 | 68.1662 | 117 | 58  | Hypothetical protein CBG18974                       |
| Locus_19599_Transcript_1/1_Conf_1.000 | 291  | 2  | 1.59E-23 | NP_508764.2    | 73 | 112.464 | 111 | 82  | hypothetical protein F15A8.7                        |
| Locus_196_Transcript_1/1_Conf_1.000   | 597  | 4  | 5.39E-08 | XP_002641461.1 | 44 | 61.6178 | 179 | 79  | C. briggsae CBR-WAH-1 protein                       |
| Locus_1960_Transcript_1/4_Conf_0.222  | 253  | 0  |          |                |    |         |     |     |                                                     |
| Locus_1960_Transcript_2/4_Conf_0.667  | 1220 | 8  | 8.46E-14 | XP_002630572.1 | 44 | 82.8037 | 216 | 97  | Hypothetical protein CBG13025                       |
| Locus_1960_Transcript_3/4_Conf_0.444  | 1126 | 9  | 7.54E-14 | XP_002630572.1 | 44 | 82.8037 | 216 | 97  | Hypothetical protein CBG13025                       |
| Locus_1960_Transcript_4/4_Conf_0.667  | 1130 | 9  | 7.57E-14 | XP_002630572.1 | 44 | 82.8037 | 216 | 97  | Hypothetical protein CBG13025                       |
| Locus_19600_Transcript_1/1_Conf_1.000 | 128  | 0  |          |                |    |         |     |     |                                                     |
| Locus_19601_Transcript_1/1_Conf_1.000 | 651  | 20 | 4.12E-74 | NP_510485.2    | 81 | 281.567 | 196 | 160 | TBC (Tre-2/Bub2/Cdc16) domain family member (tbc-1) |
| Locus_19602_Transcript_1/1_Conf_1.000 | 161  | 0  |          |                |    |         |     |     |                                                     |
| Locus_19603_Transcript_1/1_Conf_1.000 | 741  | 0  |          |                |    |         |     |     |                                                     |
| Locus_19604_Transcript_1/1_Conf_1.000 | 134  | 0  |          |                |    |         |     |     |                                                     |
| Locus_19605_Transcript_1/1_Conf_1.000 | 181  | 0  |          |                |    |         |     |     |                                                     |
| Locus_19606_Transcript_1/1_Conf_1.000 | 294  | 20 | 1.34E-30 | XP_002648619.1 | 78 | 135.961 | 98  | 77  | Hypothetical protein CBG24962                       |

|                                       |      |    |          |                |     |         |     |     |                                                                             |
|---------------------------------------|------|----|----------|----------------|-----|---------|-----|-----|-----------------------------------------------------------------------------|
| Locus_19607_Transcript_1/1_Conf_1.000 | 484  | 14 | 4.95E-25 | NP_492859.1    | 59  | 117.472 | 128 | 76  | hypothetical protein Y52B11A.8                                              |
| Locus_19608_Transcript_1/1_Conf_1.000 | 602  | 20 | 1.02E-62 | NP_500647.2    | 83  | 243.432 | 156 | 131 | Dipeptidyl Peptidase Four (IV) family member (dpf-5)                        |
| Locus_19609_Transcript_1/1_Conf_1.000 | 194  | 7  | 5.86E-18 | NP_001021449.1 | 77  | 93.9745 | 62  | 48  | hypothetical protein F35C12.3                                               |
| Locus_1961_Transcript_1/1_Conf_1.000  | 2263 | 20 | 0        | NP_506192.1    | 82  | 798.89  | 621 | 512 | ABC transporter, class F family member (abcf-1)                             |
| Locus_19610_Transcript_1/1_Conf_1.000 | 134  | 0  |          |                |     |         |     |     |                                                                             |
| Locus_19611_Transcript_1/1_Conf_1.000 | 417  | 20 | 2.72E-23 | AAK29933.3     | 81  | 111.694 | 83  | 68  | Rab connectin related protein 2, partially confirmed by transcript evidence |
| Locus_19612_Transcript_1/1_Conf_1.000 | 370  | 0  |          |                |     |         |     |     |                                                                             |
| Locus_19613_Transcript_1/1_Conf_1.000 | 230  | 20 | 1.21E-39 | ADN38247.1     | 100 | 166.007 | 76  | 76  | MHC class I antigen                                                         |
| Locus_19614_Transcript_1/1_Conf_1.000 | 142  | 0  |          |                |     |         |     |     |                                                                             |
| Locus_19615_Transcript_1/1_Conf_1.000 | 418  | 4  | 2.31E-22 | NP_508552.1    | 57  | 108.612 | 142 | 81  | hypothetical protein F40F4.6                                                |
| Locus_19616_Transcript_1/1_Conf_1.000 | 261  | 0  |          |                |     |         |     |     |                                                                             |
| Locus_19617_Transcript_1/1_Conf_1.000 | 777  | 9  | 3.41E-29 | EFO22071.1     | 56  | 132.88  | 212 | 120 | hypothetical protein LOAG_06415                                             |
| Locus_19618_Transcript_1/1_Conf_1.000 | 139  | 0  |          |                |     |         |     |     |                                                                             |
| Locus_19619_Transcript_1/1_Conf_1.000 | 128  | 0  |          |                |     |         |     |     |                                                                             |
| Locus_1962_Transcript_1/1_Conf_1.000  | 378  | 20 | 7.28E-45 | XP_002634052.1 | 87  | 183.341 | 124 | 108 | C. briggsae CBR-VHA-5 protein                                               |
| Locus_19620_Transcript_1/1_Conf_1.000 | 184  | 0  |          |                |     |         |     |     |                                                                             |
| Locus_19621_Transcript_1/1_Conf_1.000 | 136  | 2  | 1.47E-05 | NP_505920.1    | 74  | 52.7582 | 43  | 32  | hypothetical protein C55A6.6                                                |
| Locus_19622_Transcript_1/1_Conf_1.000 | 563  | 20 | 1.04E-20 | XP_001898035.1 | 53  | 103.605 | 156 | 84  | hypothetical protein Bm1_32955                                              |

|                                       |     |    |          |                |     |         |     |     |                                                                                 |
|---------------------------------------|-----|----|----------|----------------|-----|---------|-----|-----|---------------------------------------------------------------------------------|
| Locus_19623_Transcript_1/1_Conf_1.000 | 135 | 20 | 3.49E-07 | EFO27090.1     | 82  | 58.151  | 35  | 29  | WD repeats and SOF1 domain-containing protein                                   |
| Locus_19624_Transcript_1/1_Conf_1.000 | 791 | 20 | 7.07E-38 | XP_002631305.1 | 59  | 161.77  | 219 | 131 | C. briggsae CBR-DNA-2 protein                                                   |
| Locus_19625_Transcript_1/1_Conf_1.000 | 320 | 20 | 1.34E-46 | ACJ65168.1     | 93  | 189.119 | 106 | 99  | Uncoordinated protein 68, isoform b, partially confirmed by transcript evidence |
| Locus_19626_Transcript_1/1_Conf_1.000 | 301 | 0  |          |                |     |         |     |     |                                                                                 |
| Locus_19627_Transcript_1/1_Conf_1.000 | 167 | 11 | 6.63E-14 | NP_497035.3    | 83  | 80.4925 | 55  | 46  | Trehalose 6-Phosphate Synthase family member (tps-2)                            |
| Locus_19628_Transcript_1/1_Conf_1.000 | 281 | 0  |          |                |     |         |     |     |                                                                                 |
| Locus_19629_Transcript_1/1_Conf_1.000 | 245 | 0  |          |                |     |         |     |     |                                                                                 |
| Locus_1963_Transcript_1/1_Conf_1.000  | 474 | 3  | 2.58E-26 | CAA85490.2     | 62  | 121.709 | 146 | 91  | C. elegans protein C14B1.9, confirmed by transcript evidence                    |
| Locus_19630_Transcript_1/1_Conf_1.000 | 153 | 0  |          |                |     |         |     |     |                                                                                 |
| Locus_19631_Transcript_1/1_Conf_1.000 | 141 | 0  |          |                |     |         |     |     |                                                                                 |
| Locus_19632_Transcript_1/1_Conf_1.000 | 160 | 0  |          |                |     |         |     |     |                                                                                 |
| Locus_19633_Transcript_1/1_Conf_1.000 | 142 | 3  | 3.96E-11 | NP_505399.1    | 86  | 71.2478 | 44  | 38  | hypothetical protein ZK682.2                                                    |
| Locus_19634_Transcript_1/1_Conf_1.000 | 372 | 0  |          |                |     |         |     |     |                                                                                 |
| Locus_19635_Transcript_1/1_Conf_1.000 | 410 | 20 | 2.43E-08 | XP_001198782.1 | 65  | 62.003  | 58  | 38  | PREDICTED: similar to ENSANGP00000010363                                        |
| Locus_19636_Transcript_1/1_Conf_1.000 | 154 | 2  | 2.73E-07 | XP_002646320.1 | 64  | 58.5362 | 51  | 33  | C. briggsae CBR-SMP-2 protein                                                   |
| Locus_19637_Transcript_1/1_Conf_1.000 | 312 | 2  | 1.16E-05 | XP_002646277.1 | 67  | 53.1434 | 43  | 29  | Hypothetical protein CBG11982                                                   |
| Locus_19638_Transcript_1/1_Conf_1.000 | 131 | 0  |          |                |     |         |     |     |                                                                                 |
| Locus_19639_Transcript_1/1_Conf_1.000 | 188 | 20 | 1.04E-22 | XP_002194320.1 | 100 | 109.768 | 51  | 51  | PREDICTED: putative eukaryotic translation initiation factor 1 variant 1        |

|                                       |     |    |          |                |    |         |     |     |                                                                     |
|---------------------------------------|-----|----|----------|----------------|----|---------|-----|-----|---------------------------------------------------------------------|
| Locus_1964_Transcript_1/1_Conf_1.000  | 410 | 5  | 9.83E-18 | XP_002640436.1 | 61 | 93.2041 | 127 | 78  | Hypothetical protein CBG08488                                       |
| Locus_19640_Transcript_1/1_Conf_1.000 | 225 | 20 | 2.02E-18 | EFO25092.1     | 78 | 95.5153 | 73  | 57  | hypothetical protein LOAG_03389                                     |
| Locus_19641_Transcript_1/1_Conf_1.000 | 363 | 20 | 1.27E-33 | XP_002647703.1 | 89 | 145.976 | 86  | 77  | Hypothetical protein CBG17892                                       |
| Locus_19642_Transcript_1/1_Conf_1.000 | 140 | 0  |          |                |    |         |     |     |                                                                     |
| Locus_19643_Transcript_1/1_Conf_1.000 | 188 | 20 | 1.32E-09 | EFO20907.1     | 74 | 66.2402 | 50  | 37  | MH2 domain-containing protein                                       |
| Locus_19644_Transcript_1/1_Conf_1.000 | 200 | 20 | 2.37E-11 | XP_001901231.1 | 78 | 72.0182 | 60  | 47  | cation channel family protein                                       |
| Locus_19645_Transcript_1/1_Conf_1.000 | 279 | 20 | 5.31E-48 | NP_502119.2    | 94 | 193.741 | 92  | 87  | hypothetical protein F54D1.6                                        |
| Locus_19646_Transcript_1/1_Conf_1.000 | 136 | 0  |          |                |    |         |     |     |                                                                     |
| Locus_19647_Transcript_1/1_Conf_1.000 | 321 | 0  |          |                |    |         |     |     |                                                                     |
| Locus_19648_Transcript_1/1_Conf_1.000 | 545 | 20 | 2.10E-60 | NP_495125.1    | 80 | 235.343 | 181 | 146 | hypothetical protein C18A3.3                                        |
| Locus_19649_Transcript_1/1_Conf_1.000 | 157 | 0  |          |                |    |         |     |     |                                                                     |
| Locus_1965_Transcript_1/2_Conf_1.000  | 769 | 7  | 2.89E-49 | NP_497909.1    | 64 | 199.519 | 208 | 134 | Prion-like-(Q/N-rich)-domain-bearing protein family member (pqn-45) |

|                                       |     |    |          |                |    |         |     |     |                                                                     |
|---------------------------------------|-----|----|----------|----------------|----|---------|-----|-----|---------------------------------------------------------------------|
| Locus_1965_Transcript_2/2_Conf_1.000  | 781 | 8  | 6.02E-50 | NP_497909.1    | 64 | 201.83  | 211 | 136 | Prion-like-(Q/N-rich)-domain-bearing protein family member (pqn-45) |
| Locus_19650_Transcript_1/1_Conf_1.000 | 409 | 20 | 5.40E-16 | NP_509229.1    | 58 | 87.4261 | 106 | 62  | SUppressor of activated let-60 Ras family member (sur-5)            |
| Locus_19651_Transcript_1/1_Conf_1.000 | 272 | 20 | 3.38E-26 | CBW48351.1     | 80 | 121.324 | 86  | 69  | Hypothetical protein C56A3.7c                                       |
| Locus_19652_Transcript_1/1_Conf_1.000 | 235 | 0  |          |                |    |         |     |     |                                                                     |
| Locus_19653_Transcript_1/1_Conf_1.000 | 209 | 0  |          |                |    |         |     |     |                                                                     |
| Locus_19654_Transcript_1/1_Conf_1.000 | 158 | 0  |          |                |    |         |     |     |                                                                     |
| Locus_19655_Transcript_1/1_Conf_1.000 | 190 | 20 | 1.18E-18 | EFO24000.1     | 87 | 96.2857 | 63  | 55  | hypothetical protein LOAG_04486                                     |
| Locus_19656_Transcript_1/1_Conf_1.000 | 380 | 0  |          |                |    |         |     |     |                                                                     |
| Locus_19657_Transcript_1/1_Conf_1.000 | 314 | 4  | 8.83E-14 | NP_505776.1    | 89 | 80.1073 | 47  | 42  | hypothetical protein F32D8.5                                        |
| Locus_19658_Transcript_1/1_Conf_1.000 | 304 | 2  | 7.31E-05 | NP_499025.1    | 81 | 50.447  | 44  | 36  | hypothetical protein ZK512.2                                        |
| Locus_19659_Transcript_1/1_Conf_1.000 | 434 | 20 | 7.25E-29 | XP_001898123.1 | 70 | 130.183 | 145 | 102 | hypothetical protein Bm1_33390                                      |



|                                       |     |    |           |                |    |         |     |     |                                 |
|---------------------------------------|-----|----|-----------|----------------|----|---------|-----|-----|---------------------------------|
| Locus_1966_Transcript_1/1_Conf_1.000  | 988 | 20 | 7.53E-113 | XP_002633752.1 | 83 | 411.379 | 261 | 219 | C. briggsae CBR-PYP-1 protein   |
| Locus_19660_Transcript_1/1_Conf_1.000 | 394 | 0  |           |                |    |         |     |     |                                 |
| Locus_19661_Transcript_1/1_Conf_1.000 | 604 | 20 | 6.94E-43  | NP_495318.2    | 72 | 177.563 | 186 | 135 | hypothetical protein C56E6.2    |
| Locus_19662_Transcript_1/1_Conf_1.000 | 198 | 0  |           |                |    |         |     |     |                                 |
| Locus_19663_Transcript_1/1_Conf_1.000 | 422 | 5  | 1.22E-23  |                | 63 | 112.849 | 141 | 90  | myoblast city protein homolog   |
| Locus_19664_Transcript_1/1_Conf_1.000 | 194 | 0  |           |                |    |         |     |     |                                 |
| Locus_19665_Transcript_1/1_Conf_1.000 | 284 | 20 | 6.73E-30  | ABC69943.1     | 76 | 133.65  | 94  | 72  | STIP                            |
| Locus_19666_Transcript_1/1_Conf_1.000 | 166 | 20 | 4.59E-15  | XP_002632772.1 | 93 | 84.3445 | 47  | 44  | C. briggsae CBR-TAT-2 protein   |
| Locus_19667_Transcript_1/1_Conf_1.000 | 156 | 1  | 4.35E-05  | EFO17124.1     | 59 | 51.2174 | 49  | 29  | hypothetical protein LOAG_11376 |
| Locus_19668_Transcript_1/1_Conf_1.000 | 200 | 0  |           |                |    |         |     |     |                                 |
| Locus_19669_Transcript_1/1_Conf_1.000 | 674 | 20 | 8.89E-59  | XP_002642250.1 | 67 | 230.72  | 228 | 155 | Hypothetical protein CBG18235   |

|                                       |      |    |           |                |    |         |     |     |                                                                                 |
|---------------------------------------|------|----|-----------|----------------|----|---------|-----|-----|---------------------------------------------------------------------------------|
| Locus_1967_Transcript_1/1_Conf_1.000  | 821  | 20 | 1.25E-133 | XP_002646763.1 | 90 | 479.945 | 273 | 246 | C. briggsae CBR-GSY-1 protein                                                   |
| Locus_19670_Transcript_1/1_Conf_1.000 | 573  | 4  | 2.31E-34  | XP_002644385.1 | 56 | 149.058 | 187 | 106 | Hypothetical protein CBG14225                                                   |
| Locus_19671_Transcript_1/1_Conf_1.000 | 420  | 0  |           |                |    |         |     |     |                                                                                 |
| Locus_19672_Transcript_1/1_Conf_1.000 | 449  | 0  |           |                |    |         |     |     |                                                                                 |
| Locus_19673_Transcript_1/1_Conf_1.000 | 309  | 20 | 2.85E-09  | XP_002130995.1 | 87 | 65.0846 | 40  | 35  | PREDICTED: transcription factor protein                                         |
| Locus_19674_Transcript_1/2_Conf_1.000 | 307  | 20 | 2.85E-17  | XP_002634069.1 | 65 | 91.6633 | 98  | 64  | Hypothetical protein CBG01611                                                   |
| Locus_19674_Transcript_2/2_Conf_1.000 | 307  | 20 | 7.50E-18  | XP_002634069.1 | 65 | 93.5893 | 98  | 64  | Hypothetical protein CBG01611                                                   |
| Locus_19675_Transcript_1/1_Conf_1.000 | 629  | 20 | 3.05E-84  | ACJ65168.1     | 87 | 315.079 | 208 | 182 | Uncoordinated protein 68, isoform b, partially confirmed by transcript evidence |
| Locus_19676_Transcript_1/1_Conf_1.000 | 173  | 0  |           |                |    |         |     |     |                                                                                 |
| Locus_19677_Transcript_1/1_Conf_1.000 | 517  | 20 | 2.43E-33  | XP_001892323.1 | 80 | 145.206 | 109 | 88  | Histone deacetylase family protein                                              |
| Locus_19678_Transcript_1/1_Conf_1.000 | 259  | 0  |           |                |    |         |     |     |                                                                                 |
| Locus_19679_Transcript_1/1_Conf_1.000 | 138  | 0  |           |                |    |         |     |     |                                                                                 |
| Locus_1968_Transcript_1/1_Conf_1.000  | 1263 | 20 | 7.66E-58  | XP_002631476.1 | 62 | 229.18  | 295 | 183 | Hypothetical protein CBG20630                                                   |
| Locus_19680_Transcript_1/1_Conf_1.000 | 322  | 20 | 1.69E-41  | NP_506927.2    | 91 | 172.17  | 106 | 97  | HAIF transporter (PGP related) family member (haf-3)                            |
| Locus_19681_Transcript_1/1_Conf_1.000 | 670  | 1  | 2.27E-06  | CAR63599.1     | 41 | 56.6102 | 169 | 70  | hypothetical protein                                                            |
| Locus_19682_Transcript_1/1_Conf_1.000 | 258  | 4  | 6.71E-14  | XP_002630479.1 | 78 | 80.4925 | 60  | 47  | Hypothetical protein CBG11215                                                   |
| Locus_19683_Transcript_1/1_Conf_1.000 | 466  | 20 | 2.43E-48  | NP_500129.1    | 77 | 194.897 | 152 | 118 | hypothetical protein Y41D4A.6                                                   |
| Locus_19684_Transcript_1/1_Conf_1.000 | 521  | 12 | 4.56E-19  | EFO16455.1     | 57 | 97.8265 | 156 | 89  | hypothetical protein LOAG_12053                                                 |

|                                       |      |    |           |                |    |         |     |     |                                                                        |
|---------------------------------------|------|----|-----------|----------------|----|---------|-----|-----|------------------------------------------------------------------------|
| Locus_19685_Transcript_1/1_Conf_1.000 | 379  | 20 | 6.41E-25  | XP_002642701.1 | 65 | 117.087 | 127 | 83  | C. briggsae CBR-GLY-3 protein                                          |
| Locus_19686_Transcript_1/1_Conf_1.000 | 294  | 8  | 5.11E-14  | XP_002633220.1 | 84 | 80.8777 | 64  | 54  | C. briggsae CBR-FLP-13 protein                                         |
| Locus_19687_Transcript_1/1_Conf_1.000 | 283  | 0  |           |                |    |         |     |     |                                                                        |
| Locus_19688_Transcript_1/1_Conf_1.000 | 173  | 0  |           |                |    |         |     |     |                                                                        |
| Locus_19689_Transcript_1/1_Conf_1.000 | 253  | 5  | 1.72E-09  | EFO26102.1     | 63 | 65.855  | 82  | 52  | hypothetical protein LOAG_02385                                        |
| Locus_1969_Transcript_1/1_Conf_1.000  | 591  | 0  |           |                |    |         |     |     |                                                                        |
| Locus_19690_Transcript_1/1_Conf_1.000 | 595  | 20 | 2.78E-49  | XP_002634817.1 | 71 | 198.749 | 184 | 131 | C. briggsae CBR-CLP-7 protein                                          |
| Locus_19691_Transcript_1/1_Conf_1.000 | 316  | 0  |           |                |    |         |     |     |                                                                        |
| Locus_19692_Transcript_1/1_Conf_1.000 | 408  | 0  |           |                |    |         |     |     |                                                                        |
| Locus_19693_Transcript_1/1_Conf_1.000 | 608  | 0  |           |                |    |         |     |     |                                                                        |
| Locus_19694_Transcript_1/1_Conf_1.000 | 255  | 0  |           |                |    |         |     |     |                                                                        |
| Locus_19695_Transcript_1/1_Conf_1.000 | 227  | 4  | 1.83E-11  | NP_501363.1    | 70 | 72.4034 | 61  | 43  | P38 Map Kinase family member (pmk-3)                                   |
| Locus_19696_Transcript_1/1_Conf_1.000 | 139  | 0  |           |                |    |         |     |     |                                                                        |
| Locus_19697_Transcript_1/1_Conf_1.000 | 146  | 20 | 2.18E-12  | XP_002641621.1 | 75 | 75.485  | 48  | 36  | Hypothetical protein CBG09941                                          |
| Locus_19698_Transcript_1/1_Conf_1.000 | 529  | 2  | 7.02E-18  | NP_001022051.1 | 56 | 93.9745 | 126 | 71  | SREBP Cleavage activating Protein (SCAP) homolog family member (scp-1) |
| Locus_19699_Transcript_1/1_Conf_1.000 | 315  | 0  |           |                |    |         |     |     |                                                                        |
| Locus_197_Transcript_1/1_Conf_1.000   | 1044 | 20 | 5.64E-138 | NP_001023493.1 | 84 | 494.967 | 327 | 277 | hypothetical protein Y54G2A.2                                          |
| Locus_1970_Transcript_1/1_Conf_1.000  | 673  | 0  |           |                |    |         |     |     |                                                                        |
| Locus_19700_Transcript_1/1_Conf_1.000 | 161  | 3  | 5.47E-08  | NP_501376.2    | 71 | 60.8474 | 53  | 38  | hypothetical protein C07G1.2                                           |
| Locus_19701_Transcript_1/1_Conf_1.000 | 930  | 0  |           |                |    |         |     |     |                                                                        |
| Locus_19702_Transcript_1/2_Conf_1.000 | 338  | 4  | 5.93E-15  | NP_493617.2    | 92 | 83.9593 | 50  | 46  | hypothetical protein F33H2.6                                           |
| Locus_19702_Transcript_2/2_Conf_1.000 | 338  | 4  | 5.93E-15  | NP_493617.2    | 92 | 83.9593 | 50  | 46  | hypothetical protein F33H2.6                                           |
| Locus_19703_Transcript_1/1_Conf_1.000 | 817  | 20 | 2.09E-56  | XP_001897058.1 | 81 | 223.402 | 182 | 149 | SH3 domain-binding protein 5                                           |
| Locus_19704_Transcript_1/1_Conf_1.000 | 282  | 0  |           |                |    |         |     |     |                                                                        |
| Locus_19705_Transcript_1/1_Conf_1.000 | 338  | 0  |           |                |    |         |     |     |                                                                        |

|                                       |     |    |           |                |    |         |     |     |                                                        |
|---------------------------------------|-----|----|-----------|----------------|----|---------|-----|-----|--------------------------------------------------------|
| Locus_19706_Transcript_1/1_Conf_1.000 | 565 | 20 | 7.32E-30  | EAW75449.1     | 98 | 134.035 | 59  | 58  | cathepsin Z, isoform CRA_b                             |
| Locus_19707_Transcript_1/1_Conf_1.000 | 351 | 20 | 5.46E-08  | XP_001892050.1 | 56 | 60.8474 | 91  | 51  | hypothetical protein Bm1_02740                         |
| Locus_19708_Transcript_1/1_Conf_1.000 | 266 | 0  |           |                |    |         |     |     |                                                        |
| Locus_19709_Transcript_1/1_Conf_1.000 | 285 | 0  |           |                |    |         |     |     |                                                        |
| Locus_1971_Transcript_1/1_Conf_1.000  | 734 | 20 | 1.79E-05  | XP_002646359.1 | 47 | 53.9138 | 118 | 56  | Hypothetical protein CBG12076                          |
| Locus_19710_Transcript_1/1_Conf_1.000 | 411 | 20 | 3.21E-69  | AAC38987.1     | 97 | 264.233 | 136 | 133 | P-glycoprotein                                         |
| Locus_19711_Transcript_1/1_Conf_1.000 | 485 | 20 | 3.52E-55  | NP_505451.1    | 80 | 217.624 | 161 | 129 | hypothetical protein F11A3.1                           |
| Locus_19712_Transcript_1/1_Conf_1.000 | 252 | 12 | 1.66E-20  | XP_002639310.1 | 82 | 102.449 | 68  | 56  | Hypothetical protein CBG03881                          |
| Locus_19713_Transcript_1/1_Conf_1.000 | 425 | 1  | 3.00E-06  | EFO20252.1     | 50 | 55.0694 | 132 | 67  | hypothetical protein LOAG_08240                        |
| Locus_19714_Transcript_1/1_Conf_1.000 | 173 | 0  |           |                |    |         |     |     |                                                        |
| Locus_19715_Transcript_1/1_Conf_1.000 | 264 | 0  |           |                |    |         |     |     |                                                        |
| Locus_19716_Transcript_1/1_Conf_1.000 | 298 | 13 | 1.93E-13  | XP_001901002.1 | 59 | 78.9518 | 99  | 59  | WD40 associated region in TFIID subunit family protein |
| Locus_19717_Transcript_1/1_Conf_1.000 | 899 | 20 | 1.99E-122 | NP_001041015.1 | 92 | 442.965 | 257 | 238 | hypothetical protein Y116A8C.28                        |

|                                       |      |    |           |                |     |         |     |     |                                                                                                             |
|---------------------------------------|------|----|-----------|----------------|-----|---------|-----|-----|-------------------------------------------------------------------------------------------------------------|
| Locus_19718_Transcript_1/1_Conf_1.000 | 603  | 20 | 1.11E-48  | NP_741839.2    | 50  | 196.823 | 242 | 123 | hypothetical protein F48E3.8                                                                                |
| Locus_19719_Transcript_1/1_Conf_1.000 | 145  | 0  |           |                |     |         |     |     |                                                                                                             |
| Locus_1972_Transcript_1/1_Conf_1.000  | 1429 | 20 | 6.15E-139 | NP_694762.1    | 73  | 498.819 | 476 | 350 | 5-oxoprolinase                                                                                              |
| Locus_19720_Transcript_1/1_Conf_1.000 | 232  | 20 | 4.59E-39  | ACX42645.1     | 100 | 164.081 | 76  | 76  | MHC class I antigen                                                                                         |
| Locus_19721_Transcript_1/1_Conf_1.000 | 151  | 20 | 4.37E-13  | XP_002635372.1 | 83  | 77.7962 | 42  | 35  | C. briggsae CBR-RPM-1 protein                                                                               |
| Locus_19722_Transcript_1/1_Conf_1.000 | 212  | 0  |           |                |     |         |     |     |                                                                                                             |
| Locus_19723_Transcript_1/1_Conf_1.000 | 198  | 20 | 3.53E-15  | CBX25138.1     | 78  | 84.7297 | 64  | 50  | Hypothetical protein C25A1.7a                                                                               |
| Locus_19724_Transcript_1/1_Conf_1.000 | 137  | 0  |           |                |     |         |     |     |                                                                                                             |
| Locus_19725_Transcript_1/1_Conf_1.000 | 1016 | 20 | 7.30E-34  | AAK84527.3     | 87  | 149.058 | 87  | 76  | U40420_8Prion-like-(q/n-rich)-domain-bearing protein protein 37, partially confirmed by transcript evidence |
| Locus_19726_Transcript_1/1_Conf_1.000 | 130  | 0  |           |                |     |         |     |     |                                                                                                             |
| Locus_19727_Transcript_1/1_Conf_1.000 | 140  | 0  |           |                |     |         |     |     |                                                                                                             |
| Locus_19728_Transcript_1/1_Conf_1.000 | 1082 | 0  |           |                |     |         |     |     |                                                                                                             |
| Locus_19729_Transcript_1/1_Conf_1.000 | 207  | 0  |           |                |     |         |     |     |                                                                                                             |
| Locus_1973_Transcript_1/1_Conf_1.000  | 339  | 7  | 2.49E-05  | EFO20860.1     | 42  | 51.9878 | 92  | 39  | hypothetical protein LOAG_07630                                                                             |
| Locus_19730_Transcript_1/1_Conf_1.000 | 227  | 20 | 1.82E-19  | NP_495578.2    | 82  | 98.9821 | 63  | 52  | hypothetical protein ZK1290.5                                                                               |
| Locus_19731_Transcript_1/1_Conf_1.000 | 206  | 0  |           |                |     |         |     |     |                                                                                                             |
| Locus_19732_Transcript_1/1_Conf_1.000 | 270  | 20 | 7.28E-29  | NP_504415.2    | 92  | 130.183 | 68  | 63  | Na/Ca eXchangers family member (ncx-2)                                                                      |
| Locus_19733_Transcript_1/1_Conf_1.000 | 359  | 5  | 4.28E-13  | XP_002644294.1 | 74  | 77.7962 | 63  | 47  | C. briggsae CBR-DPY-3 protein                                                                               |
| Locus_19734_Transcript_1/1_Conf_1.000 | 195  | 20 | 1.75E-30  | XP_002832361.1 | 100 | 135.576 | 64  | 64  | PREDICTED: plexin-A3-like                                                                                   |

|                                       |      |    |          |                |    |         |     |     |                                                               |
|---------------------------------------|------|----|----------|----------------|----|---------|-----|-----|---------------------------------------------------------------|
| Locus_19735_Transcript_1/1_Conf_1.000 | 249  | 3  | 4.38E-10 | NP_493741.1    | 94 | 67.781  | 38  | 36  | hypothetical protein W10D9.5                                  |
| Locus_19736_Transcript_1/1_Conf_1.000 | 272  | 1  | 2.79E-04 | NP_496062.3    | 68 | 48.521  | 50  | 34  | Temporarily Assigned Gene name family member (tag-124)        |
| Locus_19737_Transcript_1/1_Conf_1.000 | 236  | 2  | 7.09E-24 | NP_500395.2    | 73 | 113.62  | 78  | 57  | hypothetical protein Y37E11AL.6                               |
| Locus_19738_Transcript_1/1_Conf_1.000 | 343  | 3  | 8.18E-36 | NP_501400.1    | 86 | 153.295 | 115 | 100 | hypothetical protein F35H10.10                                |
| Locus_19739_Transcript_1/1_Conf_1.000 | 137  | 0  |          |                |    |         |     |     |                                                               |
| Locus_1974_Transcript_1/1_Conf_1.000  | 1706 | 20 | 0        | AAK17768.1     | 96 | 803.127 | 516 | 500 | cytochrome c oxidase subunit I                                |
| Locus_19740_Transcript_1/1_Conf_1.000 | 372  | 0  |          |                |    |         |     |     |                                                               |
| Locus_19741_Transcript_1/1_Conf_1.000 | 346  | 0  |          |                |    |         |     |     |                                                               |
| Locus_19742_Transcript_1/1_Conf_1.000 | 199  | 0  |          |                |    |         |     |     |                                                               |
| Locus_19743_Transcript_1/1_Conf_1.000 | 516  | 20 | 5.01E-71 | CBL43419.1     | 92 | 270.396 | 153 | 141 | C. elegans protein C47E8.4b, confirmed by transcript evidence |
| Locus_19744_Transcript_1/1_Conf_1.000 | 136  | 0  |          |                |    |         |     |     |                                                               |
| Locus_19745_Transcript_1/1_Conf_1.000 | 178  | 20 | 4.10E-16 | NP_509760.2    | 87 | 87.8113 | 56  | 49  | Temporarily Assigned Gene name family member (tag-289)        |
| Locus_19746_Transcript_1/1_Conf_1.000 | 548  | 20 | 7.68E-34 | XP_002629803.1 | 62 | 147.132 | 185 | 115 | Hypothetical protein CBG01047                                 |
| Locus_19747_Transcript_1/1_Conf_1.000 | 414  | 9  | 1.01E-22 | NP_509029.1    | 65 | 109.768 | 103 | 67  | hypothetical protein C15H9.9                                  |

|                                       |      |    |          |                |     |         |     |     |                                                      |
|---------------------------------------|------|----|----------|----------------|-----|---------|-----|-----|------------------------------------------------------|
| Locus_19748_Transcript_1/1_Conf_1.000 | 419  | 0  |          |                |     |         |     |     |                                                      |
| Locus_19749_Transcript_1/1_Conf_1.000 | 297  | 20 | 7.08E-24 | XP_002630866.1 | 82  | 113.62  | 79  | 65  | C. briggsae CBR-HST-3.1 protein                      |
| Locus_1975_Transcript_1/1_Conf_1.000  | 1557 | 20 | 0        | NP_499778.1    | 88  | 767.303 | 521 | 460 | CU (copper) ATPase family member (cua-1)             |
| Locus_19750_Transcript_1/1_Conf_1.000 | 527  | 6  | 1.02E-21 | NP_001023604.1 | 88  | 106.686 | 75  | 66  | hypothetical protein ZC477.3                         |
| Locus_19751_Transcript_1/1_Conf_1.000 | 226  | 3  | 1.00E-09 | CAR64255.1     | 93  | 66.6254 | 48  | 45  | protein RIO1 kinase                                  |
| Locus_19752_Transcript_1/1_Conf_1.000 | 261  | 0  |          |                |     |         |     |     |                                                      |
| Locus_19753_Transcript_1/1_Conf_1.000 | 142  | 20 | 7.96E-20 | DAA21858.1     | 100 | 100.138 | 47  | 47  | eukaryotic translation initiation factor 3 subunit M |
| Locus_19754_Transcript_1/1_Conf_1.000 | 411  | 0  |          |                |     |         |     |     |                                                      |
| Locus_19755_Transcript_1/1_Conf_1.000 | 139  | 0  |          |                |     |         |     |     |                                                      |
| Locus_19756_Transcript_1/1_Conf_1.000 | 212  | 0  |          |                |     |         |     |     |                                                      |
| Locus_19757_Transcript_1/1_Conf_1.000 | 270  | 0  |          |                |     |         |     |     |                                                      |

|                                       |      |    |          |                |     |         |     |     |                                                                     |
|---------------------------------------|------|----|----------|----------------|-----|---------|-----|-----|---------------------------------------------------------------------|
| Locus_19758_Transcript_1/1_Conf_1.000 | 182  | 20 | 1.51E-29 | BAG65408.1     | 100 | 132.494 | 60  | 60  | unnamed protein product                                             |
| Locus_19759_Transcript_1/1_Conf_1.000 | 303  | 20 | 1.42E-16 | XP_002642179.1 | 62  | 89.3521 | 99  | 62  | C. briggsae CBR-CUTC-1 protein                                      |
| Locus_1976_Transcript_1/3_Conf_0.500  | 2042 | 20 | 7.90E-40 | NP_495036.3    | 69  | 170.244 | 172 | 120 | human DAZ (Deleted in Azoospermia)<br>homolog family member (daz-1) |
| Locus_1976_Transcript_2/3_Conf_0.667  | 1754 | 20 | 6.53E-40 | NP_495036.3    | 69  | 170.244 | 172 | 120 | human DAZ (Deleted in Azoospermia)<br>homolog family member (daz-1) |
| Locus_1976_Transcript_3/3_Conf_0.667  | 1766 | 20 | 6.59E-40 | NP_495036.3    | 69  | 170.244 | 172 | 120 | human DAZ (Deleted in Azoospermia)<br>homolog family member (daz-1) |
| Locus_19760_Transcript_1/1_Conf_1.000 | 167  | 0  |          |                |     |         |     |     |                                                                     |
| Locus_19761_Transcript_1/1_Conf_1.000 | 189  | 2  | 3.69E-12 | XP_002634423.1 | 84  | 74.7146 | 59  | 50  | C. briggsae CBR-PTR-14 protein                                      |
| Locus_19762_Transcript_1/1_Conf_1.000 | 175  | 0  |          |                |     |         |     |     |                                                                     |
| Locus_19763_Transcript_1/1_Conf_1.000 | 129  | 0  |          |                |     |         |     |     |                                                                     |
| Locus_19764_Transcript_1/1_Conf_1.000 | 238  | 0  |          |                |     |         |     |     |                                                                     |
| Locus_19765_Transcript_1/1_Conf_1.000 | 356  | 0  |          |                |     |         |     |     |                                                                     |
| Locus_19766_Transcript_1/1_Conf_1.000 | 542  | 20 | 6.07E-20 | XP_002637670.1 | 55  | 100.908 | 161 | 89  | C. briggsae CBR-RDE-1 protein                                       |
| Locus_19767_Transcript_1/1_Conf_1.000 | 258  | 20 | 8.13E-44 | XP_002810702.1 | 100 | 179.874 | 79  | 79  | PREDICTED: protein CYR61-like isoform 3                             |
| Locus_19768_Transcript_1/1_Conf_1.000 | 471  | 0  |          |                |     |         |     |     |                                                                     |
| Locus_19769_Transcript_1/1_Conf_1.000 | 141  | 0  |          |                |     |         |     |     |                                                                     |
| Locus_1977_Transcript_1/1_Conf_1.000  | 449  | 0  |          |                |     |         |     |     |                                                                     |



|                                       |      |    |           |                |    |         |     |     |                                                                         |
|---------------------------------------|------|----|-----------|----------------|----|---------|-----|-----|-------------------------------------------------------------------------|
| Locus_19770_Transcript_1/1_Conf_1.000 | 382  | 20 | 1.37E-27  | NP_001021054.1 | 70 | 125.946 | 120 | 85  | Suppressor with Morphological effect on Genitalia family member (smg-1) |
| Locus_19771_Transcript_1/1_Conf_1.000 | 146  | 0  |           |                |    |         |     |     |                                                                         |
| Locus_19772_Transcript_1/1_Conf_1.000 | 164  | 20 | 1.14E-13  | XP_002647593.1 | 93 | 79.7221 | 45  | 42  | C. briggsae CBR-TTR-44 protein                                          |
| Locus_19773_Transcript_1/1_Conf_1.000 | 260  | 0  |           |                |    |         |     |     |                                                                         |
| Locus_19774_Transcript_1/1_Conf_1.000 | 174  | 0  |           |                |    |         |     |     |                                                                         |
| Locus_19775_Transcript_1/1_Conf_1.000 | 465  | 20 | 6.79E-75  | A8XJL7.2       | 90 | 283.108 | 154 | 140 | Serine/threonine-protein kinase sax-1                                   |
| Locus_19776_Transcript_1/1_Conf_1.000 | 332  | 20 | 1.72E-54  | NP_498645.1    | 93 | 215.312 | 110 | 103 | MUScle Positioning family member (mup-4)                                |
| Locus_19777_Transcript_1/1_Conf_1.000 | 173  | 0  |           |                |    |         |     |     |                                                                         |
| Locus_19778_Transcript_1/1_Conf_1.000 | 186  | 0  |           |                |    |         |     |     |                                                                         |
| Locus_19779_Transcript_1/1_Conf_1.000 | 646  | 20 | 1.30E-64  | AAK62032.1     | 69 | 249.98  | 209 | 145 | metalloprotease 1 precursor                                             |
| Locus_1978_Transcript_1/2_Conf_1.000  | 1440 | 20 | 7.17E-111 | NP_498930.1    | 75 | 405.601 | 345 | 260 | UDP-Galactose Transporter Protein family member (ugtp-1)                |
| Locus_1978_Transcript_2/2_Conf_1.000  | 1440 | 20 | 7.17E-111 | NP_498930.1    | 75 | 405.601 | 345 | 260 | UDP-Galactose Transporter Protein family member (ugtp-1)                |
| Locus_19780_Transcript_1/1_Conf_1.000 | 181  | 5  | 1.47E-08  | XP_002641239.1 | 73 | 62.7734 | 56  | 41  | Hypothetical protein CBG09106                                           |
| Locus_19781_Transcript_1/1_Conf_1.000 | 233  | 20 | 5.83E-18  | Q17678.6       | 80 | 93.9745 | 71  | 57  | UPF0632 protein C05G5.5                                                 |
| Locus_19782_Transcript_1/1_Conf_1.000 | 210  | 20 | 1.57E-07  | NP_500129.1    | 75 | 59.3066 | 45  | 34  | hypothetical protein Y41D4A.6                                           |
| Locus_19783_Transcript_1/1_Conf_1.000 | 357  | 3  | 9.87E-10  | XP_002642316.1 | 59 | 66.6254 | 88  | 52  | Hypothetical protein CBG18309                                           |
| Locus_19784_Transcript_1/1_Conf_1.000 | 236  | 0  |           |                |    |         |     |     |                                                                         |
| Locus_19785_Transcript_1/1_Conf_1.000 | 465  | 0  |           |                |    |         |     |     |                                                                         |
| Locus_19786_Transcript_1/1_Conf_1.000 | 159  | 0  |           |                |    |         |     |     |                                                                         |
| Locus_19787_Transcript_1/1_Conf_1.000 | 233  | 0  |           |                |    |         |     |     |                                                                         |
| Locus_19788_Transcript_1/1_Conf_1.000 | 380  | 6  | 2.36E-11  | NP_001021785.2 | 53 | 72.0182 | 108 | 58  | hypothetical protein Y52B11A.3                                          |
| Locus_19789_Transcript_1/1_Conf_1.000 | 817  | 20 | 7.22E-41  | XP_002629747.1 | 58 | 171.785 | 259 | 151 | Hypothetical protein CBG00981                                           |
| Locus_1979_Transcript_1/1_Conf_1.000  | 568  | 0  |           |                |    |         |     |     |                                                                         |
| Locus_19790_Transcript_1/1_Conf_1.000 | 420  | 1  | 1.76E-14  | ABV03827.1     | 84 | 82.4185 | 51  | 43  | hypothetical protein                                                    |

|                                       |      |    |           |                |    |         |     |     |                                                                  |
|---------------------------------------|------|----|-----------|----------------|----|---------|-----|-----|------------------------------------------------------------------|
| Locus_19791_Transcript_1/1_Conf_1.000 | 414  | 0  |           |                |    |         |     |     |                                                                  |
| Locus_19792_Transcript_1/1_Conf_1.000 | 401  | 20 | 4.60E-31  | NP_496981.2    | 86 | 137.502 | 115 | 99  | hypothetical protein Y54G11A.9                                   |
| Locus_19793_Transcript_1/1_Conf_1.000 | 308  | 2  | 3.59E-28  | NP_495419.1    | 78 | 127.872 | 100 | 78  | hypothetical protein B0252.1                                     |
| Locus_19794_Transcript_1/1_Conf_1.000 | 283  | 4  | 3.98E-06  | NP_501765.1    | 60 | 54.6842 | 73  | 44  | hypothetical protein K07F5.7                                     |
| Locus_19795_Transcript_1/1_Conf_1.000 | 176  | 0  |           |                |    |         |     |     |                                                                  |
| Locus_19796_Transcript_1/1_Conf_1.000 | 159  | 0  |           |                |    |         |     |     |                                                                  |
| Locus_19797_Transcript_1/1_Conf_1.000 | 236  | 5  | 5.81E-18  | XP_002644134.1 | 74 | 93.9745 | 78  | 58  | C. briggsae CBR-SYD-2 protein                                    |
| Locus_19798_Transcript_1/1_Conf_1.000 | 163  | 0  |           |                |    |         |     |     |                                                                  |
| Locus_19799_Transcript_1/1_Conf_1.000 | 367  | 20 | 1.47E-25  | NP_493353.3    | 92 | 86.6557 | 41  | 38  | Specificity Protein) Transcription Factor family member (sptf-3) |
| Locus_198_Transcript_1/1_Conf_1.000   | 1850 | 20 | 0         | XP_002640154.1 | 85 | 803.127 | 514 | 441 | Hypothetical protein CBG12654                                    |
| Locus_1980_Transcript_1/1_Conf_1.000  | 513  | 0  |           |                |    |         |     |     |                                                                  |
| Locus_19800_Transcript_1/1_Conf_1.000 | 777  | 20 | 6.42E-28  | XP_001896097.1 | 58 | 128.642 | 229 | 133 | Nsp1-like C-terminal region family protein                       |
| Locus_19801_Transcript_1/1_Conf_1.000 | 276  | 10 | 4.11E-24  | XP_002637177.1 | 76 | 114.39  | 94  | 72  | Hypothetical protein CBG09695                                    |
| Locus_19802_Transcript_1/1_Conf_1.000 | 280  | 0  |           |                |    |         |     |     |                                                                  |
| Locus_19803_Transcript_1/1_Conf_1.000 | 223  | 20 | 3.82E-17  | EFO14895.1     | 75 | 91.2781 | 73  | 55  | CMGC/CDK/CDK9 protein kinase                                     |
| Locus_19804_Transcript_1/1_Conf_1.000 | 1239 | 20 | 1.25E-145 | NP_495680.1    | 76 | 520.776 | 419 | 319 | Nose Resistant to Fluoxetine family member (nrf-6)               |
| Locus_19805_Transcript_1/1_Conf_1.000 | 280  | 20 | 5.18E-19  | XP_002645153.1 | 79 | 97.4413 | 69  | 55  | C. briggsae CBR-SFXN-2 protein                                   |
| Locus_19806_Transcript_1/1_Conf_1.000 | 446  | 13 | 8.34E-57  | NP_503543.1    | 85 | 223.016 | 149 | 128 | hypothetical protein T08B1.1                                     |

|                                       |      |    |           |                |     |         |     |     |                                                              |
|---------------------------------------|------|----|-----------|----------------|-----|---------|-----|-----|--------------------------------------------------------------|
| Locus_19807_Transcript_1/1_Conf_1.000 | 276  | 20 | 1.61E-20  | XP_001893670.1 | 75  | 102.449 | 92  | 69  | Conserved oligomeric Golgi complex component 6               |
| Locus_19808_Transcript_1/1_Conf_1.000 | 184  | 0  |           |                |     |         |     |     |                                                              |
| Locus_19809_Transcript_1/1_Conf_1.000 | 182  | 0  |           |                |     |         |     |     |                                                              |
| Locus_1981_Transcript_1/1_Conf_1.000  | 1694 | 20 | 3.60E-120 | XP_002639089.1 | 89  | 436.802 | 269 | 241 | C. briggsae CBR-TAG-163 protein                              |
| Locus_19810_Transcript_1/1_Conf_1.000 | 276  | 0  |           |                |     |         |     |     |                                                              |
| Locus_19811_Transcript_1/1_Conf_1.000 | 263  | 0  |           |                |     |         |     |     |                                                              |
| Locus_19812_Transcript_1/1_Conf_1.000 | 325  | 20 | 1.69E-25  | XP_970656.1    | 71  | 119.013 | 108 | 77  | PREDICTED: similar to Histone deacetylase 11 (HD11)          |
| Locus_19813_Transcript_1/1_Conf_1.000 | 773  | 20 | 1.22E-47  | EFO28238.1     | 82  | 194.126 | 141 | 117 | rho GDP-dissociation inhibitor 2                             |
| Locus_19814_Transcript_1/1_Conf_1.000 | 800  | 13 | 1.24E-13  | NP_504836.1    | 47  | 81.2629 | 254 | 120 | GEX Interacting protein family member (gei-6)                |
| Locus_19815_Transcript_1/1_Conf_1.000 | 190  | 20 | 4.98E-17  | AAI43755.1     | 100 | 90.8929 | 63  | 63  | FN1 protein                                                  |
| Locus_19816_Transcript_1/1_Conf_1.000 | 501  | 20 | 3.42E-42  | XP_002630693.1 | 75  | 174.481 | 157 | 118 | C. briggsae CBR-SRG-69 protein                               |
| Locus_19817_Transcript_1/1_Conf_1.000 | 325  | 20 | 7.79E-47  | ADN00780.1     | 89  | 189.889 | 107 | 96  | class 3 lipase protein                                       |
| Locus_19818_Transcript_1/1_Conf_1.000 | 462  | 8  | 4.64E-23  | CAR81373.1     | 66  | 110.923 | 153 | 102 | C. elegans protein F58H1.8, confirmed by transcript evidence |
| Locus_19819_Transcript_1/1_Conf_1.000 | 564  | 11 | 2.70E-16  | XP_002635081.1 | 50  | 88.9669 | 178 | 90  | Hypothetical protein CBG11298                                |
| Locus_1982_Transcript_1/1_Conf_1.000  | 956  | 6  | 5.94E-35  | NP_001040920.1 | 54  | 152.525 | 217 | 119 | hypothetical protein C35B1.2                                 |
| Locus_19820_Transcript_1/1_Conf_1.000 | 202  | 0  |           |                |     |         |     |     |                                                              |
| Locus_19821_Transcript_1/1_Conf_1.000 | 336  | 0  |           |                |     |         |     |     |                                                              |

|                                       |      |    |           |                |    |         |     |     |                                                                                         |
|---------------------------------------|------|----|-----------|----------------|----|---------|-----|-----|-----------------------------------------------------------------------------------------|
| Locus_19822_Transcript_1/1_Conf_1.000 | 501  | 4  | 1.59E-39  | NP_871808.3    | 62 | 165.622 | 192 | 120 | hypothetical protein ZC123.4                                                            |
| Locus_19823_Transcript_1/1_Conf_1.000 | 211  | 0  |           |                |    |         |     |     |                                                                                         |
| Locus_19824_Transcript_1/1_Conf_1.000 | 176  | 0  |           |                |    |         |     |     |                                                                                         |
| Locus_19825_Transcript_1/1_Conf_1.000 | 147  | 0  |           |                |    |         |     |     |                                                                                         |
| Locus_19826_Transcript_1/1_Conf_1.000 | 237  | 6  | 2.60E-18  | NP_001022476.1 | 69 | 95.1301 | 86  | 60  | Daf-16-Dependent Longevity (WT but not daf-16 lifespan increased) family member (ddl-3) |
| Locus_19827_Transcript_1/1_Conf_1.000 | 220  | 1  | 4.86E-04  | EFO20896.1     | 67 | 47.7506 | 53  | 36  | hypothetical protein LOAG_07593                                                         |
| Locus_19828_Transcript_1/1_Conf_1.000 | 208  | 0  |           |                |    |         |     |     |                                                                                         |
| Locus_19829_Transcript_1/1_Conf_1.000 | 287  | 0  |           |                |    |         |     |     |                                                                                         |
| Locus_1983_Transcript_1/1_Conf_1.000  | 1354 | 20 | 4.22E-158 | XP_002630362.1 | 86 | 562.377 | 406 | 352 | C. briggsae CBR-RPN-5 protein                                                           |
| Locus_19830_Transcript_1/1_Conf_1.000 | 134  | 20 | 1.98E-10  | CAG09075.1     | 81 | 68.9366 | 44  | 36  | unnamed protein product                                                                 |
| Locus_19831_Transcript_1/1_Conf_1.000 | 291  | 0  |           |                |    |         |     |     |                                                                                         |
| Locus_19832_Transcript_1/1_Conf_1.000 | 284  | 20 | 1.36E-30  | Q22141.2       | 81 | 135.961 | 91  | 74  | Post-GPI attachment to proteins factor 2                                                |
| Locus_19833_Transcript_1/1_Conf_1.000 | 346  | 0  |           |                |    |         |     |     |                                                                                         |
| Locus_19834_Transcript_1/1_Conf_1.000 | 201  | 0  |           |                |    |         |     |     |                                                                                         |
| Locus_19835_Transcript_1/1_Conf_1.000 | 139  | 2  | 4.26E-05  | NP_499273.3    | 77 | 51.2174 | 36  | 28  | hypothetical protein R01H10.7                                                           |
| Locus_19836_Transcript_1/1_Conf_1.000 | 150  | 0  |           |                |    |         |     |     |                                                                                         |
| Locus_19837_Transcript_1/1_Conf_1.000 | 274  | 1  | 2.78E-04  | XP_002640131.1 | 60 | 48.521  | 84  | 51  | Hypothetical protein CBG12630                                                           |
| Locus_19838_Transcript_1/1_Conf_1.000 | 321  | 1  | 4.80E-04  | NP_495712.1    | 57 | 47.7506 | 66  | 38  | abnormal EMBroygenesis family member (emb-27)                                           |
| Locus_19839_Transcript_1/1_Conf_1.000 | 139  | 7  | 8.57E-06  | XP_002646356.1 | 69 | 53.5286 | 46  | 32  | Hypothetical protein CBG12070                                                           |
| Locus_1984_Transcript_1/1_Conf_1.000  | 772  | 20 | 2.58E-13  | NP_501245.1    | 57 | 80.1073 | 155 | 89  | HMG family member (hmg-5)                                                               |
| Locus_19840_Transcript_1/1_Conf_1.000 | 276  | 0  |           |                |    |         |     |     |                                                                                         |

|                                       |      |    |          |                |     |         |     |     |                                          |
|---------------------------------------|------|----|----------|----------------|-----|---------|-----|-----|------------------------------------------|
| Locus_19841_Transcript_1/1_Conf_1.000 | 498  | 20 | 1.89E-37 | CAA10033.1     | 66  | 158.688 | 163 | 108 | DYS-1 protein                            |
| Locus_19842_Transcript_1/1_Conf_1.000 | 170  | 1  | 3.64E-04 | XP_002642935.1 | 68  | 48.1358 | 54  | 37  | C. briggsae CBR-NSH-1 protein            |
| Locus_19843_Transcript_1/1_Conf_1.000 | 294  | 0  |          |                |     |         |     |     |                                          |
| Locus_19844_Transcript_1/1_Conf_1.000 | 431  | 20 | 9.88E-10 | ABG23688.1     | 50  | 66.6254 | 150 | 76  | RNA-dependent RNA polymerase             |
| Locus_19845_Transcript_1/1_Conf_1.000 | 260  | 0  |          |                |     |         |     |     |                                          |
| Locus_19846_Transcript_1/1_Conf_1.000 | 222  | 4  | 1.11E-24 | XP_001902169.1 | 89  | 116.316 | 73  | 65  | myotactin form B                         |
| Locus_19847_Transcript_1/1_Conf_1.000 | 289  | 20 | 2.99E-46 | AAV56742.1     | 96  | 187.963 | 96  | 93  | casein kinase I delta isoform            |
| Locus_19848_Transcript_1/1_Conf_1.000 | 135  | 1  | 6.15E-12 | EDL23991.1     | 89  | 73.9442 | 38  | 34  | transmembrane protein 147, isoform CRA_a |
| Locus_19849_Transcript_1/1_Conf_1.000 | 161  | 0  |          |                |     |         |     |     |                                          |
| Locus_1985_Transcript_1/1_Conf_1.000  | 1235 | 20 | 3.49E-23 | XP_001897562.1 | 55  | 114.005 | 181 | 101 | TSC-22/dip/bun family protein            |
| Locus_19850_Transcript_1/1_Conf_1.000 | 135  | 6  | 2.67E-15 | AAA18259.1     | 90  | 85.1149 | 44  | 40  | protein kinase C                         |
| Locus_19851_Transcript_1/1_Conf_1.000 | 168  | 20 | 1.85E-24 | XP_002816715.1 | 100 | 115.546 | 53  | 53  | PREDICTED: complement C4-B isoform 2     |

|                                       |      |    |          |                |    |         |     |     |                                                                                              |
|---------------------------------------|------|----|----------|----------------|----|---------|-----|-----|----------------------------------------------------------------------------------------------|
| Locus_19852_Transcript_1/1_Conf_1.000 | 386  | 20 | 2.51E-13 | XP_002636676.1 | 54 | 78.5666 | 114 | 62  | Hypothetical protein CBG23390                                                                |
| Locus_19853_Transcript_1/1_Conf_1.000 | 129  | 0  |          |                |    |         |     |     |                                                                                              |
| Locus_19854_Transcript_1/1_Conf_1.000 | 298  | 20 | 1.16E-50 | 2BDW           | 98 | 202.601 | 98  | 97  | CrystalStructure OfThe Auto-Inhibited Kinase Domain Of CalciumCALMODULIN ACTIVATED KINASE II |
| Locus_19855_Transcript_1/1_Conf_1.000 | 185  | 0  |          |                |    |         |     |     |                                                                                              |
| Locus_19856_Transcript_1/1_Conf_1.000 | 145  | 4  | 8.58E-09 | EFO19864.1     | 72 | 63.5438 | 47  | 34  | hypothetical protein LOAG_08632                                                              |
| Locus_19857_Transcript_1/1_Conf_1.000 | 415  | 0  |          |                |    |         |     |     |                                                                                              |
| Locus_19858_Transcript_1/1_Conf_1.000 | 391  | 0  |          |                |    |         |     |     |                                                                                              |
| Locus_19859_Transcript_1/1_Conf_1.000 | 164  | 0  |          |                |    |         |     |     |                                                                                              |
| Locus_1986_Transcript_1/1_Conf_1.000  | 1046 | 20 | 2.53E-21 | NP_496326.1    | 48 | 107.457 | 221 | 108 | hypothetical protein R06F6.6                                                                 |
| Locus_19860_Transcript_1/1_Conf_1.000 | 309  | 0  |          |                |    |         |     |     |                                                                                              |

|                                       |     |    |          |                |    |         |     |     |                                                               |
|---------------------------------------|-----|----|----------|----------------|----|---------|-----|-----|---------------------------------------------------------------|
| Locus_19861_Transcript_1/1_Conf_1.000 | 645 | 20 | 9.10E-26 | XP_001627842.1 | 69 | 120.939 | 117 | 81  | predicted protein                                             |
| Locus_19862_Transcript_1/1_Conf_1.000 | 154 | 0  |          |                |    |         |     |     |                                                               |
| Locus_19863_Transcript_1/1_Conf_1.000 | 226 | 0  |          |                |    |         |     |     |                                                               |
| Locus_19864_Transcript_1/1_Conf_1.000 | 366 | 0  |          |                |    |         |     |     |                                                               |
| Locus_19865_Transcript_1/1_Conf_1.000 | 238 | 20 | 3.62E-28 | CAA30855.1     | 90 | 127.872 | 76  | 69  | myosin heavy chain 2                                          |
| Locus_19866_Transcript_1/1_Conf_1.000 | 371 | 3  | 1.77E-22 | XP_002639247.1 | 73 | 108.997 | 101 | 74  | Hypothetical protein CBG03806                                 |
| Locus_19867_Transcript_1/1_Conf_1.000 | 258 | 0  |          |                |    |         |     |     |                                                               |
| Locus_19868_Transcript_1/1_Conf_1.000 | 230 | 0  |          |                |    |         |     |     |                                                               |
| Locus_19869_Transcript_1/1_Conf_1.000 | 177 | 6  | 3.97E-11 | XP_002640845.1 | 74 | 71.2478 | 58  | 43  | C. briggsae CBR-CDH-1 protein                                 |
| Locus_1987_Transcript_1/1_Conf_1.000  | 672 | 20 | 5.80E-34 | CAA21654.2     | 67 | 148.288 | 177 | 120 | C. elegans protein Y48A6C.4, confirmed by transcript evidence |
| Locus_19870_Transcript_1/1_Conf_1.000 | 275 | 0  |          |                |    |         |     |     |                                                               |
| Locus_19871_Transcript_1/1_Conf_1.000 | 211 | 20 | 1.12E-21 | NP_001090349.1 | 81 | 106.301 | 70  | 57  | sideroflexin 1                                                |
| Locus_19872_Transcript_1/1_Conf_1.000 | 306 | 0  |          |                |    |         |     |     |                                                               |

|                                       |     |    |          |                |     |         |     |     |                                                                         |
|---------------------------------------|-----|----|----------|----------------|-----|---------|-----|-----|-------------------------------------------------------------------------|
| Locus_19873_Transcript_1/1_Conf_1.000 | 138 | 0  |          |                |     |         |     |     |                                                                         |
| Locus_19874_Transcript_1/1_Conf_1.000 | 153 | 5  | 2.09E-07 | CAH04706.3     | 74  | 58.9214 | 47  | 35  | C. elegans protein K04H4.2c, partially confirmed by transcript evidence |
| Locus_19875_Transcript_1/1_Conf_1.000 | 378 | 0  |          |                |     |         |     |     |                                                                         |
| Locus_19876_Transcript_1/1_Conf_1.000 | 243 | 0  |          |                |     |         |     |     |                                                                         |
| Locus_19877_Transcript_1/1_Conf_1.000 | 527 | 20 | 6.37E-48 | XP_002633219.1 | 71  | 193.741 | 178 | 127 | C. briggsae CBR-ITR-1 protein                                           |
| Locus_19878_Transcript_1/1_Conf_1.000 | 149 | 0  |          |                |     |         |     |     |                                                                         |
| Locus_19879_Transcript_1/1_Conf_1.000 | 430 | 20 | 1.78E-59 | ADL62853.1     | 86  | 231.876 | 140 | 121 | thioredoxin reductase 2                                                 |
| Locus_1988_Transcript_1/1_Conf_1.000  | 893 | 20 | 4.50E-26 | EFO21777.1     | 100 | 122.865 | 53  | 53  | zinc finger protein                                                     |
| Locus_19880_Transcript_1/1_Conf_1.000 | 268 | 20 | 1.69E-17 | NP_501552.1    | 81  | 92.4337 | 91  | 74  | hypothetical protein D1046.3                                            |
| Locus_19881_Transcript_1/1_Conf_1.000 | 239 | 0  |          |                |     |         |     |     |                                                                         |
| Locus_19882_Transcript_1/1_Conf_1.000 | 303 | 20 | 1.68E-17 | NP_491872.1    | 56  | 92.4337 | 103 | 58  | hypothetical protein C55B7.3                                            |
| Locus_19883_Transcript_1/1_Conf_1.000 | 224 | 0  |          |                |     |         |     |     |                                                                         |
| Locus_19884_Transcript_1/1_Conf_1.000 | 129 | 0  |          |                |     |         |     |     |                                                                         |
| Locus_19885_Transcript_1/1_Conf_1.000 | 167 | 4  | 1.80E-19 | XP_002639744.1 | 85  | 98.9821 | 54  | 46  | C. briggsae CBR-LAM-3 protein                                           |
| Locus_19886_Transcript_1/1_Conf_1.000 | 276 | 0  |          |                |     |         |     |     |                                                                         |
| Locus_19887_Transcript_1/1_Conf_1.000 | 390 | 20 | 7.41E-42 | NP_496968.1    | 86  | 173.326 | 109 | 94  | hypothetical protein Y48B6A.12                                          |
| Locus_19888_Transcript_1/1_Conf_1.000 | 245 | 0  |          |                |     |         |     |     |                                                                         |
| Locus_19889_Transcript_1/1_Conf_1.000 | 330 | 0  |          |                |     |         |     |     |                                                                         |
| Locus_1989_Transcript_1/1_Conf_1.000  | 821 | 20 | 1.99E-22 | XP_001894821.1 | 67  | 110.538 | 100 | 67  | MGC80968 protein                                                        |
| Locus_19890_Transcript_1/1_Conf_1.000 | 302 | 0  |          |                |     |         |     |     |                                                                         |
| Locus_19891_Transcript_1/1_Conf_1.000 | 250 | 20 | 6.30E-25 | NP_776251.1    | 100 | 117.087 | 83  | 83  | keratinocyte-associated protein 2                                       |



|                                       |      |    |           |                |    |         |     |     |                                                                        |
|---------------------------------------|------|----|-----------|----------------|----|---------|-----|-----|------------------------------------------------------------------------|
| Locus_19892_Transcript_1/1_Conf_1.000 | 353  | 20 | 6.01E-23  | XP_002648880.1 | 69 | 110.538 | 101 | 70  | C. briggsae CBR-CYP-33A1 protein                                       |
| Locus_19893_Transcript_1/1_Conf_1.000 | 355  | 4  | 4.42E-34  | NP_001033358.2 | 73 | 147.517 | 118 | 87  | DAF-16/FOXO Controlled, germline Tumor affecting family member (dct-6) |
| Locus_19894_Transcript_1/1_Conf_1.000 | 812  | 20 | 3.69E-122 | XP_002646641.1 | 87 | 441.81  | 270 | 235 | Hypothetical protein CBG11073                                          |
| Locus_19895_Transcript_1/1_Conf_1.000 | 140  | 0  |           |                |    |         |     |     |                                                                        |
| Locus_19896_Transcript_1/1_Conf_1.000 | 244  | 0  |           |                |    |         |     |     |                                                                        |
| Locus_19897_Transcript_1/1_Conf_1.000 | 357  | 0  |           |                |    |         |     |     |                                                                        |
| Locus_19898_Transcript_1/1_Conf_1.000 | 166  | 0  |           |                |    |         |     |     |                                                                        |
| Locus_19899_Transcript_1/1_Conf_1.000 | 400  | 20 | 2.58E-66  | NP_501549.1    | 99 | 254.603 | 130 | 129 | RAP homolog (vertebrate Rap GTPase family) family member (rap-1)       |
| Locus_199_Transcript_1/2_Conf_1.000   | 814  | 0  |           |                |    |         |     |     |                                                                        |
| Locus_199_Transcript_2/2_Conf_1.000   | 813  | 0  |           |                |    |         |     |     |                                                                        |
| Locus_1990_Transcript_1/1_Conf_1.000  | 2284 | 20 | 1.31E-139 | XP_001901168.1 | 72 | 501.901 | 470 | 342 | Groucho/TLE N-terminal Q-rich domain containing protein                |
| Locus_19900_Transcript_1/1_Conf_1.000 | 141  | 0  |           |                |    |         |     |     |                                                                        |
| Locus_19901_Transcript_1/1_Conf_1.000 | 254  | 0  |           |                |    |         |     |     |                                                                        |
| Locus_19902_Transcript_1/1_Conf_1.000 | 219  | 0  |           |                |    |         |     |     |                                                                        |
| Locus_19903_Transcript_1/1_Conf_1.000 | 560  | 0  |           |                |    |         |     |     |                                                                        |
| Locus_19904_Transcript_1/1_Conf_1.000 | 350  | 20 | 1.87E-32  | NP_490888.1    | 76 | 142.124 | 116 | 89  | Mitochondrial Processing Peptidase Alpha family member (mppa-1)        |
| Locus_19905_Transcript_1/1_Conf_1.000 | 293  | 20 | 2.00E-34  | NP_502428.1    | 83 | 148.673 | 97  | 81  | hypothetical protein C27D8.1                                           |
| Locus_19906_Transcript_1/1_Conf_1.000 | 427  | 0  |           |                |    |         |     |     |                                                                        |

|                                       |      |    |          |                 |     |         |     |     |                                                                                  |
|---------------------------------------|------|----|----------|-----------------|-----|---------|-----|-----|----------------------------------------------------------------------------------|
| Locus_19907_Transcript_1/1_Conf_1.000 | 471  | 20 | 3.03E-59 | NP_001040658.2  | 95  | 231.106 | 129 | 123 | High Incidence of Males (increased X chromosome loss) family member (him-1)      |
| Locus_19908_Transcript_1/1_Conf_1.000 | 219  | 20 | 5.88E-34 | XP_0011110023.2 | 100 | 147.132 | 73  | 73  | PREDICTED: sentrin-specific protease 3-like isoform 3                            |
| Locus_19909_Transcript_1/1_Conf_1.000 | 139  | 0  |          |                 |     |         |     |     |                                                                                  |
| Locus_1991_Transcript_1/1_Conf_1.000  | 1973 | 20 | 0        | NP_001022469.1  | 84  | 809.29  | 541 | 456 | Eukaryotic Initiation Factor family member (eif-3.B)                             |
| Locus_19910_Transcript_1/1_Conf_1.000 | 205  | 20 | 6.60E-22 | NP_501860.1     | 88  | 107.071 | 68  | 60  | Mitochondrial Sorting of Proteins (yeast MSP) in Nematode family member (mspn-1) |
| Locus_19911_Transcript_1/1_Conf_1.000 | 281  | 20 | 3.59E-12 | XP_002631607.1  | 94  | 74.7146 | 39  | 37  | Hypothetical protein CBG20788                                                    |

|                                       |      |    |          |                |     |         |     |     |                                                                                                              |
|---------------------------------------|------|----|----------|----------------|-----|---------|-----|-----|--------------------------------------------------------------------------------------------------------------|
| Locus_19912_Transcript_1/1_Conf_1.000 | 189  | 7  | 4.66E-15 | XP_002630336.1 | 77  | 84.3445 | 62  | 48  | Hypothetical protein CBG04265                                                                                |
| Locus_19913_Transcript_1/1_Conf_1.000 | 262  | 0  |          |                |     |         |     |     |                                                                                                              |
| Locus_19914_Transcript_1/1_Conf_1.000 | 377  | 0  |          |                |     |         |     |     |                                                                                                              |
| Locus_19915_Transcript_1/1_Conf_1.000 | 136  | 10 | 1.33E-06 | NP_001183823.1 | 70  | 56.225  | 41  | 29  | hypothetical protein LOC100502416                                                                            |
| Locus_19916_Transcript_1/1_Conf_1.000 | 222  | 20 | 5.66E-37 | NP_001122684.1 | 100 | 157.147 | 74  | 74  | UNCoordinated family member (unc-103)                                                                        |
| Locus_19917_Transcript_1/1_Conf_1.000 | 400  | 4  | 3.42E-18 | XP_001892604.1 | 62  | 94.7449 | 135 | 85  | Phosphatidylinositol 3- and 4-kinase family protein                                                          |
| Locus_19918_Transcript_1/1_Conf_1.000 | 306  | 0  |          |                |     |         |     |     |                                                                                                              |
| Locus_19919_Transcript_1/1_Conf_1.000 | 240  | 0  |          |                |     |         |     |     |                                                                                                              |
| Locus_1992_Transcript_1/1_Conf_1.000  | 2187 | 20 | 9.98E-89 | NP_740833.1    | 58  | 332.798 | 472 | 276 | hypothetical protein F53F10.2                                                                                |
| Locus_19920_Transcript_1/1_Conf_1.000 | 342  | 20 | 9.33E-40 | NP_501928.1    | 83  | 166.392 | 114 | 95  | hypothetical protein F13B12.4                                                                                |
| Locus_19921_Transcript_1/1_Conf_1.000 | 288  | 0  |          |                |     |         |     |     |                                                                                                              |
| Locus_19922_Transcript_1/1_Conf_1.000 | 259  | 0  |          |                |     |         |     |     |                                                                                                              |
| Locus_19923_Transcript_1/1_Conf_1.000 | 423  | 20 | 2.26E-70 | XP_001142154.1 | 98  | 268.085 | 136 | 134 | PREDICTED: similar to Thioredoxin (ATL-derived factor) (ADF) (Surface-associated sulphhydryl protein) (SASP) |
| Locus_19924_Transcript_1/2_Conf_1.000 | 477  | 0  |          |                |     |         |     |     |                                                                                                              |
| Locus_19924_Transcript_2/2_Conf_1.000 | 439  | 0  |          |                |     |         |     |     |                                                                                                              |
| Locus_19925_Transcript_1/1_Conf_1.000 | 298  | 0  |          |                |     |         |     |     |                                                                                                              |
| Locus_19926_Transcript_1/1_Conf_1.000 | 221  | 0  |          |                |     |         |     |     |                                                                                                              |
| Locus_19927_Transcript_1/1_Conf_1.000 | 575  | 5  | 4.24E-20 | NP_001021744.1 | 68  | 101.679 | 103 | 71  | abnormal cell MIGration family member (mig-1)                                                                |

|                                       |     |    |          |                |     |         |     |     |                                                                      |
|---------------------------------------|-----|----|----------|----------------|-----|---------|-----|-----|----------------------------------------------------------------------|
| Locus_19928_Transcript_1/1_Conf_1.000 | 210 | 19 | 1.01E-30 | NP_506637.1    | 98  | 136.346 | 68  | 67  | One IG domain family member (oig-3)                                  |
| Locus_19929_Transcript_1/1_Conf_1.000 | 291 | 20 | 6.22E-36 | EAW47423.1     | 100 | 153.68  | 78  | 78  | proteasome (prosome, macropain) subunit, beta type, 1, isoform CRA_d |
| Locus_1993_Transcript_1/1_Conf_1.000  | 434 | 0  |          |                |     |         |     |     |                                                                      |
| Locus_19930_Transcript_1/1_Conf_1.000 | 245 | 0  |          |                |     |         |     |     |                                                                      |
| Locus_19931_Transcript_1/1_Conf_1.000 | 559 | 0  |          |                |     |         |     |     |                                                                      |
| Locus_19932_Transcript_1/1_Conf_1.000 | 477 | 8  | 2.04E-15 | EFO24135.1     | 72  | 85.5001 | 80  | 58  | hypothetical protein LOAG_04354                                      |
| Locus_19933_Transcript_1/1_Conf_1.000 | 318 | 2  | 4.66E-07 | NP_494276.2    | 63  | 57.7658 | 98  | 62  | Variable ABnormal morphology family member (vab-19)                  |
| Locus_19934_Transcript_1/1_Conf_1.000 | 690 | 20 | 1.83E-94 | XP_001895028.1 | 88  | 349.362 | 226 | 199 | cytoplasmic polyadenylation element binding protein 4                |
| Locus_19935_Transcript_1/1_Conf_1.000 | 234 | 0  |          |                |     |         |     |     |                                                                      |
| Locus_19936_Transcript_1/2_Conf_1.000 | 901 | 20 | 4.28E-32 | XP_002640503.1 | 61  | 142.895 | 282 | 174 | Hypothetical protein CBG13642                                        |
| Locus_19936_Transcript_2/2_Conf_1.000 | 910 | 20 | 4.36E-32 | XP_002640503.1 | 61  | 142.895 | 282 | 174 | Hypothetical protein CBG13642                                        |
| Locus_19937_Transcript_1/1_Conf_1.000 | 324 | 0  |          |                |     |         |     |     |                                                                      |
| Locus_19938_Transcript_1/1_Conf_1.000 | 217 | 0  |          |                |     |         |     |     |                                                                      |
| Locus_19939_Transcript_1/1_Conf_1.000 | 317 | 20 | 1.35E-30 | XP_001899898.1 | 89  | 135.961 | 104 | 93  | LMBR1-like conserved region family protein                           |
| Locus_1994_Transcript_1/1_Conf_1.000  | 645 | 20 | 4.58E-86 | NP_741348.2    | 88  | 321.242 | 214 | 190 | hypothetical protein Y94H6A.5                                        |

|                                       |     |    |          |                |     |         |     |     |                                                         |
|---------------------------------------|-----|----|----------|----------------|-----|---------|-----|-----|---------------------------------------------------------|
| Locus_19940_Transcript_1/1_Conf_1.000 | 285 | 20 | 4.34E-37 | NP_496968.1    | 92  | 157.532 | 92  | 85  | hypothetical protein Y48B6A.12                          |
| Locus_19941_Transcript_1/1_Conf_1.000 | 150 | 0  |          |                |     |         |     |     |                                                         |
| Locus_19942_Transcript_1/1_Conf_1.000 | 129 | 2  | 5.42E-08 | XP_001899872.1 | 78  | 60.8474 | 41  | 32  | Protein-tyrosine phosphatase containing protein         |
| Locus_19943_Transcript_1/1_Conf_1.000 | 538 | 20 | 4.88E-14 | NP_001021851.2 | 79  | 81.2629 | 54  | 43  | hypothetical protein ZC434.9                            |
| Locus_19944_Transcript_1/1_Conf_1.000 | 133 | 0  |          |                |     |         |     |     |                                                         |
| Locus_19945_Transcript_1/1_Conf_1.000 | 129 | 0  |          |                |     |         |     |     |                                                         |
| Locus_19946_Transcript_1/1_Conf_1.000 | 180 | 0  |          |                |     |         |     |     |                                                         |
| Locus_19947_Transcript_1/1_Conf_1.000 | 305 | 12 | 9.52E-13 | NP_004490.2    | 100 | 76.6406 | 78  | 78  | heterogeneous nuclear ribonucleoprotein A/B isoform b   |
| Locus_19948_Transcript_1/1_Conf_1.000 | 371 | 11 | 1.60E-07 | ABB53347.1     | 44  | 59.3066 | 121 | 54  | secreted protein 5 precursor                            |
| Locus_19949_Transcript_1/1_Conf_1.000 | 291 | 0  |          |                |     |         |     |     |                                                         |
| Locus_1995_Transcript_1/2_Conf_1.000  | 518 | 20 | 1.74E-39 | NP_492576.1    | 89  | 165.622 | 120 | 107 | Ribosomal Protein, Large subunit family member (rpl-14) |
| Locus_1995_Transcript_2/2_Conf_1.000  | 218 | 20 | 1.83E-16 | XP_002639221.1 | 87  | 88.9669 | 55  | 48  | C. briggsae CBR-RPL-14 protein                          |
| Locus_19950_Transcript_1/1_Conf_1.000 | 219 | 0  |          |                |     |         |     |     |                                                         |
| Locus_19951_Transcript_1/1_Conf_1.000 | 201 | 0  |          |                |     |         |     |     |                                                         |

|                                       |      |    |          |                |    |         |     |     |                                                                         |
|---------------------------------------|------|----|----------|----------------|----|---------|-----|-----|-------------------------------------------------------------------------|
| Locus_19952_Transcript_1/1_Conf_1.000 | 325  | 20 | 2.87E-33 | AAD09564.1     | 86 | 144.821 | 104 | 90  | cyclophilin                                                             |
| Locus_19953_Transcript_1/1_Conf_1.000 | 188  | 0  |          |                |    |         |     |     |                                                                         |
| Locus_19954_Transcript_1/1_Conf_1.000 | 136  | 0  |          |                |    |         |     |     |                                                                         |
| Locus_19955_Transcript_1/1_Conf_1.000 | 369  | 11 | 5.82E-50 | CBI63216.1     | 91 | 200.29  | 121 | 111 | C. elegans protein F40F8.8b, partially confirmed by transcript evidence |
| Locus_19956_Transcript_1/1_Conf_1.000 | 1163 | 20 | 7.02E-55 | NP_001021782.1 | 66 | 219.164 | 245 | 163 | hypothetical protein Y52B11A.2                                          |
| Locus_19957_Transcript_1/1_Conf_1.000 | 245  | 0  |          |                |    |         |     |     |                                                                         |
| Locus_19958_Transcript_1/1_Conf_1.000 | 849  | 0  |          |                |    |         |     |     |                                                                         |
| Locus_19959_Transcript_1/2_Conf_1.000 | 660  | 20 | 7.40E-79 | XP_002646242.1 | 95 | 297.36  | 162 | 154 | C. briggsae CBR-UNC-13 protein                                          |
| Locus_19959_Transcript_2/2_Conf_1.000 | 383  | 20 | 2.40E-64 | XP_002646242.1 | 96 | 248.054 | 128 | 123 | C. briggsae CBR-UNC-13 protein                                          |
| Locus_1996_Transcript_1/1_Conf_1.000  | 371  | 20 | 2.82E-20 | XP_002643656.1 | 78 | 101.679 | 76  | 60  | Hypothetical protein CBG16408                                           |
| Locus_19960_Transcript_1/1_Conf_1.000 | 230  | 0  |          |                |    |         |     |     |                                                                         |
| Locus_19961_Transcript_1/1_Conf_1.000 | 171  | 20 | 5.05E-14 | XP_002634908.1 | 76 | 80.8777 | 56  | 43  | Hypothetical protein CBG22506                                           |
| Locus_19962_Transcript_1/1_Conf_1.000 | 585  | 20 | 7.91E-41 | NP_495933.1    | 69 | 170.629 | 163 | 114 | hypothetical protein T24B8.2                                            |

|                                       |     |    |           |                |    |         |     |     |                                            |
|---------------------------------------|-----|----|-----------|----------------|----|---------|-----|-----|--------------------------------------------|
| Locus_19963_Transcript_1/1_Conf_1.000 | 261 | 20 | 7.38E-21  | XP_002639570.1 | 87 | 103.605 | 63  | 55  | C. briggsae CBR-ARX-7 protein              |
| Locus_19964_Transcript_1/1_Conf_1.000 | 402 | 0  |           |                |    |         |     |     |                                            |
| Locus_19965_Transcript_1/1_Conf_1.000 | 463 | 20 | 1.03E-22  | NP_496607.1    | 75 | 109.768 | 88  | 66  | hypothetical protein Y57A10A.29            |
| Locus_19966_Transcript_1/1_Conf_1.000 | 485 | 14 | 1.26E-12  | XP_002633316.1 | 55 | 76.2554 | 167 | 92  | C. briggsae CBR-GTL-2 protein              |
| Locus_19967_Transcript_1/1_Conf_1.000 | 460 | 11 | 1.23E-12  | NP_510606.1    | 74 | 76.2554 | 59  | 44  | ACyLtransferase-like family member (acl-1) |
| Locus_19968_Transcript_1/1_Conf_1.000 | 319 | 1  | 2.64E-10  | XP_001141980.1 | 61 | 68.5514 | 67  | 41  | PREDICTED: ephrin A1                       |
| Locus_19969_Transcript_1/1_Conf_1.000 | 745 | 20 | 3.08E-101 | NP_741172.2    | 91 | 372.089 | 220 | 201 | protein KINase family member (kin-18)      |
| Locus_1997_Transcript_1/1_Conf_1.000  | 198 | 13 | 3.19E-24  | ACY39994.1     | 90 | 114.775 | 66  | 60  | C. elegans FLN-2 protein, isoform d        |
| Locus_19970_Transcript_1/1_Conf_1.000 | 182 | 0  |           |                |    |         |     |     |                                            |
| Locus_19971_Transcript_1/1_Conf_1.000 | 297 | 8  | 2.53E-05  | XP_002646337.1 | 44 | 51.9878 | 95  | 42  | Hypothetical protein CBG12050              |
| Locus_19972_Transcript_1/1_Conf_1.000 | 140 | 20 | 3.97E-11  | NP_500586.2    | 82 | 71.2478 | 46  | 38  | hypothetical protein ZK185.2               |
| Locus_19973_Transcript_1/1_Conf_1.000 | 190 | 0  |           |                |    |         |     |     |                                            |
| Locus_19974_Transcript_1/2_Conf_1.000 | 509 | 20 | 2.56E-56  | XP_002632133.1 | 79 | 221.476 | 168 | 134 | Hypothetical protein CBG06989              |
| Locus_19974_Transcript_2/2_Conf_1.000 | 444 | 20 | 4.43E-50  | XP_002632133.1 | 78 | 200.675 | 147 | 116 | Hypothetical protein CBG06989              |

|                                       |      |    |          |                |    |         |     |     |                                                         |
|---------------------------------------|------|----|----------|----------------|----|---------|-----|-----|---------------------------------------------------------|
| Locus_19975_Transcript_1/1_Conf_1.000 | 174  | 1  | 8.05E-04 | XP_001944330.1 | 73 | 46.9802 | 34  | 25  | PREDICTED: similar to CG8213 CG8213-PA                  |
| Locus_19976_Transcript_1/1_Conf_1.000 | 134  | 0  |          |                |    |         |     |     |                                                         |
| Locus_19977_Transcript_1/1_Conf_1.000 | 425  | 20 | 1.59E-07 | NP_733845.1    | 51 | 59.3066 | 110 | 57  | nonstructural polyprotein                               |
| Locus_19978_Transcript_1/1_Conf_1.000 | 469  | 20 | 6.37E-49 | NP_496736.1    | 85 | 196.823 | 121 | 103 | Glycogen Synthase family member (gsy-1)                 |
| Locus_19979_Transcript_1/1_Conf_1.000 | 322  | 6  | 2.55E-05 | BAD94515.1     | 49 | 51.9878 | 67  | 33  | peroxisome proliferator-activated receptor gamma        |
| Locus_1998_Transcript_1/4_Conf_0.375  | 390  | 20 | 3.11E-48 | NP_495823.1    | 91 | 194.512 | 108 | 99  | Ribosomal Protein, Large subunit family member (rpl-26) |
| Locus_1998_Transcript_2/4_Conf_0.375  | 348  | 20 | 2.06E-47 | NP_871965.1    | 93 | 191.815 | 103 | 96  | Ribosomal Protein, Large subunit family member (rpl-26) |
| Locus_1998_Transcript_3/4_Conf_0.375  | 1184 | 20 | 2.24E-64 | XP_002630145.1 | 92 | 250.751 | 139 | 129 | C. briggsae CBR-RPL-26 protein                          |
| Locus_1998_Transcript_4/4_Conf_0.375  | 1184 | 20 | 2.24E-64 | XP_002630145.1 | 92 | 250.751 | 139 | 129 | C. briggsae CBR-RPL-26 protein                          |
| Locus_19980_Transcript_1/1_Conf_1.000 | 140  | 0  |          |                |    |         |     |     |                                                         |
| Locus_19981_Transcript_1/1_Conf_1.000 | 257  | 0  |          |                |    |         |     |     |                                                         |



|                                       |      |    |          |                |    |         |     |     |                                |
|---------------------------------------|------|----|----------|----------------|----|---------|-----|-----|--------------------------------|
| Locus_19982_Transcript_1/1_Conf_1.000 | 147  | 0  |          |                |    |         |     |     |                                |
| Locus_19983_Transcript_1/1_Conf_1.000 | 265  | 0  |          |                |    |         |     |     |                                |
| Locus_19984_Transcript_1/1_Conf_1.000 | 144  | 0  |          |                |    |         |     |     |                                |
| Locus_19985_Transcript_1/1_Conf_1.000 | 143  | 0  |          |                |    |         |     |     |                                |
| Locus_19986_Transcript_1/1_Conf_1.000 | 132  | 2  | 8.34E-09 | NP_502336.1    | 89 | 63.5438 | 39  | 35  | hypothetical protein C42C1.12  |
| Locus_19987_Transcript_1/1_Conf_1.000 | 213  | 20 | 1.08E-16 | EFO20785.1     | 77 | 89.7373 | 67  | 52  | TKL/MLK/HH498 protein kinase   |
| Locus_19988_Transcript_1/1_Conf_1.000 | 272  | 0  |          |                |    |         |     |     |                                |
| Locus_19989_Transcript_1/1_Conf_1.000 | 347  | 0  |          |                |    |         |     |     |                                |
| Locus_1999_Transcript_1/1_Conf_1.000  | 1887 | 20 | 1.43E-96 | XP_001897626.1 | 67 | 358.607 | 353 | 238 | Myosin head containing protein |
| Locus_19990_Transcript_1/1_Conf_1.000 | 479  | 2  | 1.73E-14 | NP_509587.1    | 66 | 82.4185 | 110 | 73  | hypothetical protein ZK899.1   |
| Locus_19991_Transcript_1/1_Conf_1.000 | 162  | 20 | 4.46E-10 | EDM11526.1     | 75 | 67.781  | 53  | 40  | lactamase, beta 2              |
| Locus_19992_Transcript_1/1_Conf_1.000 | 178  | 6  | 1.23E-20 | XP_001896988.1 | 87 | 102.834 | 58  | 51  | UTP--ammonia ligase            |
| Locus_19993_Transcript_1/1_Conf_1.000 | 564  | 20 | 3.38E-51 | NP_498172.3    | 70 | 204.912 | 192 | 136 | hypothetical protein R02F2.2   |
| Locus_19994_Transcript_1/1_Conf_1.000 | 301  | 20 | 8.05E-28 | XP_002639522.1 | 76 | 126.716 | 99  | 76  | Hypothetical protein CBG04128  |
| Locus_19995_Transcript_1/1_Conf_1.000 | 554  | 2  | 5.38E-06 | NP_741780.1    | 57 | 54.6842 | 90  | 52  | hypothetical protein H28G03.2  |
| Locus_19996_Transcript_1/1_Conf_1.000 | 673  | 0  |          |                |    |         |     |     |                                |

|                                       |      |    |           |                |     |         |     |     |                                 |
|---------------------------------------|------|----|-----------|----------------|-----|---------|-----|-----|---------------------------------|
| Locus_19997_Transcript_1/1_Conf_1.000 | 210  | 20 | 5.01E-30  | AAC19161.1     | 98  | 134.035 | 69  | 68  | unknown                         |
| Locus_19998_Transcript_1/1_Conf_1.000 | 206  | 20 | 7.55E-18  | NP_496500.1    | 75  | 93.5893 | 66  | 50  | hypothetical protein VF13D12L.3 |
| Locus_19999_Transcript_1/1_Conf_1.000 | 229  | 0  |           |                |     |         |     |     |                                 |
| Locus_2_Transcript_1/1_Conf_1.000     | 285  | 0  |           |                |     |         |     |     |                                 |
| Locus_20_Transcript_1/1_Conf_1.000    | 535  | 7  | 3.92E-08  | XP_002641747.1 | 63  | 61.6178 | 63  | 40  | Hypothetical protein CBG10086   |
| Locus_200_Transcript_1/1_Conf_1.000   | 730  | 20 | 5.66E-36  | XP_002631322.1 | 58  | 155.221 | 197 | 115 | C. briggsae CBR-TRS-1 protein   |
| Locus_2000_Transcript_1/1_Conf_1.000  | 1265 | 20 | 6.72E-163 | XP_002646193.1 | 80  | 578.17  | 421 | 341 | Hypothetical protein CBG24498   |
| Locus_20000_Transcript_1/1_Conf_1.000 | 271  | 2  | 1.38E-11  | XP_002642828.1 | 68  | 72.7886 | 80  | 55  | Hypothetical protein CBG21226   |
| Locus_20001_Transcript_1/1_Conf_1.000 | 177  | 20 | 2.40E-24  | BAG59482.1     | 100 | 115.161 | 58  | 58  | unnamed protein product         |
| Locus_20002_Transcript_1/1_Conf_1.000 | 184  | 0  |           |                |     |         |     |     |                                 |

|                                       |      |    |           |                |    |         |     |     |                                                      |
|---------------------------------------|------|----|-----------|----------------|----|---------|-----|-----|------------------------------------------------------|
| Locus_20003_Transcript_1/1_Conf_1.000 | 230  | 0  |           |                |    |         |     |     |                                                      |
| Locus_20004_Transcript_1/1_Conf_1.000 | 621  | 20 | 1.22E-45  | XP_002637227.1 | 72 | 186.808 | 147 | 106 | Hypothetical protein CBG18895                        |
| Locus_20005_Transcript_1/1_Conf_1.000 | 452  | 8  | 7.54E-26  | XP_002631168.1 | 76 | 120.168 | 92  | 70  | C. briggsae CBR-PQM-1 protein                        |
| Locus_20006_Transcript_1/1_Conf_1.000 | 240  | 0  |           |                |    |         |     |     |                                                      |
| Locus_20007_Transcript_1/1_Conf_1.000 | 318  | 4  | 1.95E-13  | EFO19864.1     | 64 | 78.9518 | 100 | 64  | hypothetical protein LOAG_08632                      |
| Locus_20008_Transcript_1/1_Conf_1.000 | 293  | 20 | 2.01E-26  | NP_497035.3    | 78 | 122.094 | 97  | 76  | Trehalose 6-Phosphate Synthase family member (tps-2) |
| Locus_20009_Transcript_1/1_Conf_1.000 | 348  | 0  |           |                |    |         |     |     |                                                      |
| Locus_2001_Transcript_1/1_Conf_1.000  | 1103 | 20 | 8.64E-116 | ACI48996.1     | 79 | 421.394 | 333 | 264 | hypothetical protein Cbre_JD01.003                   |
| Locus_20010_Transcript_1/1_Conf_1.000 | 380  | 0  |           |                |    |         |     |     |                                                      |
| Locus_20011_Transcript_1/1_Conf_1.000 | 817  | 0  |           |                |    |         |     |     |                                                      |
| Locus_20012_Transcript_1/1_Conf_1.000 | 385  | 20 | 3.58E-44  | XP_002633893.1 | 79 | 181.03  | 125 | 99  | C. briggsae CBR-ELO-5 protein                        |
| Locus_20013_Transcript_1/1_Conf_1.000 | 248  | 20 | 2.74E-28  | XP_001898240.1 | 84 | 128.257 | 82  | 69  | XPA-binding protein 2                                |
| Locus_20014_Transcript_1/1_Conf_1.000 | 120  | 0  |           |                |    |         |     |     |                                                      |

|                                       |      |    |          |                |     |         |     |     |                                     |
|---------------------------------------|------|----|----------|----------------|-----|---------|-----|-----|-------------------------------------|
| Locus_20015_Transcript_1/1_Conf_1.000 | 258  | 20 | 6.25E-28 | BAG60492.1     | 100 | 127.102 | 59  | 59  | unnamed protein product             |
| Locus_20016_Transcript_1/1_Conf_1.000 | 338  | 20 | 4.53E-23 | NP_504239.2    | 66  | 110.923 | 106 | 71  | hypothetical protein Y61A9LA.8      |
| Locus_20017_Transcript_1/1_Conf_1.000 | 167  | 0  |          |                |     |         |     |     |                                     |
| Locus_20018_Transcript_1/1_Conf_1.000 | 188  | 0  |          |                |     |         |     |     |                                     |
| Locus_20019_Transcript_1/1_Conf_1.000 | 197  | 0  |          |                |     |         |     |     |                                     |
| Locus_2002_Transcript_1/1_Conf_1.000  | 2412 | 20 | 0        | XP_002637276.1 | 91  | 1036.17 | 591 | 543 | Hypothetical protein CBG18959       |
| Locus_20020_Transcript_1/1_Conf_1.000 | 221  | 4  | 2.84E-12 | NP_001076754.1 | 79  | 75.0998 | 73  | 58  | hypothetical protein C14H10.2       |
| Locus_20021_Transcript_1/1_Conf_1.000 | 392  | 20 | 4.64E-44 | NP_504292.2    | 87  | 180.644 | 115 | 101 | hypothetical protein C37H5.5        |
| Locus_20022_Transcript_1/1_Conf_1.000 | 467  | 20 | 2.99E-22 | EFO27494.1     | 61  | 108.227 | 125 | 77  | hypothetical protein LOAG_00986     |
| Locus_20023_Transcript_1/1_Conf_1.000 | 735  | 20 | 1.90E-63 | XP_002646726.1 | 69  | 246.514 | 219 | 153 | Hypothetical protein CBG13109       |
| Locus_20024_Transcript_1/1_Conf_1.000 | 412  | 2  | 1.55E-47 | NP_001122963.1 | 83  | 192.2   | 134 | 112 | hypothetical protein F58E6.1        |
| Locus_20025_Transcript_1/1_Conf_1.000 | 173  | 0  |          |                |     |         |     |     |                                     |
| Locus_20026_Transcript_1/1_Conf_1.000 | 129  | 20 | 1.47E-13 | NP_741632.2    | 97  | 79.337  | 41  | 40  | SMALL family member (sma-1)         |
| Locus_20027_Transcript_1/1_Conf_1.000 | 312  | 20 | 2.84E-12 | NP_956980.1    | 83  | 75.0998 | 54  | 45  | mitochondrial fission protein MTP18 |
| Locus_20028_Transcript_1/1_Conf_1.000 | 209  | 0  |          |                |     |         |     |     |                                     |

|                                       |      |    |          |                |     |         |     |     |                                                           |
|---------------------------------------|------|----|----------|----------------|-----|---------|-----|-----|-----------------------------------------------------------|
| Locus_20029_Transcript_1/1_Conf_1.000 | 163  | 0  |          |                |     |         |     |     |                                                           |
| Locus_2003_Transcript_1/1_Conf_1.000  | 450  | 20 | 4.25E-45 | XP_002641573.1 | 81  | 184.111 | 138 | 112 | C. briggsae CBR-TLL-4 protein                             |
| Locus_20030_Transcript_1/1_Conf_1.000 | 260  | 0  |          |                |     |         |     |     |                                                           |
| Locus_20031_Transcript_1/1_Conf_1.000 | 290  | 1  | 6.30E-04 | XP_002633908.1 | 45  | 47.3654 | 87  | 40  | Hypothetical protein CBG19972                             |
| Locus_20032_Transcript_1/1_Conf_1.000 | 720  | 20 | 9.26E-84 | NP_509174.1    | 83  | 313.923 | 206 | 173 | hypothetical protein C16E9.2                              |
| Locus_20033_Transcript_1/1_Conf_1.000 | 333  | 20 | 1.12E-21 | NP_500647.2    | 65  | 106.301 | 115 | 75  | Dipeptidyl Peptidase Four (IV) family member (dpf-5)      |
| Locus_20034_Transcript_1/1_Conf_1.000 | 258  | 8  | 1.39E-35 | NP_502016.2    | 94  | 152.525 | 85  | 80  | hypothetical protein F13E9.1                              |
| Locus_20035_Transcript_1/1_Conf_1.000 | 390  | 0  |          |                |     |         |     |     |                                                           |
| Locus_20036_Transcript_1/1_Conf_1.000 | 236  | 0  |          |                |     |         |     |     |                                                           |
| Locus_20037_Transcript_1/1_Conf_1.000 | 306  | 0  |          |                |     |         |     |     |                                                           |
| Locus_20038_Transcript_1/1_Conf_1.000 | 214  | 0  |          |                |     |         |     |     |                                                           |
| Locus_20039_Transcript_1/1_Conf_1.000 | 228  | 20 | 5.65E-21 | EFO26545.1     | 77  | 103.99  | 76  | 59  | kelch domain-containing protein family protein            |
| Locus_2004_Transcript_1/1_Conf_1.000  | 1174 | 20 | 1.76E-53 | NP_493375.2    | 69  | 214.542 | 220 | 153 | AuTophagy (yeast Atg homolog) family member (atg-4.1)     |
| Locus_20040_Transcript_1/1_Conf_1.000 | 217  | 1  | 2.75E-04 | YP_001044988.1 | 53  | 48.521  | 56  | 30  | hypothetical protein Rsph17029_3116                       |
| Locus_20041_Transcript_1/1_Conf_1.000 | 464  | 0  |          |                |     |         |     |     |                                                           |
| Locus_20042_Transcript_1/1_Conf_1.000 | 338  | 20 | 1.82E-56 | XP_002747692.1 | 100 | 221.861 | 112 | 112 | PREDICTED: 40S ribosomal protein S7-like                  |
| Locus_20043_Transcript_1/1_Conf_1.000 | 222  | 0  |          |                |     |         |     |     |                                                           |
| Locus_20044_Transcript_1/1_Conf_1.000 | 1103 | 20 | 6.31E-50 | NP_498604.2    | 71  | 202.601 | 180 | 129 | hypothetical protein B0361.7                              |
| Locus_20045_Transcript_1/1_Conf_1.000 | 247  | 4  | 2.49E-13 | XP_002645089.1 | 66  | 78.5666 | 93  | 62  | Hypothetical protein CBG16766                             |
| Locus_20046_Transcript_1/1_Conf_1.000 | 513  | 0  |          |                |     |         |     |     |                                                           |
| Locus_20047_Transcript_1/1_Conf_1.000 | 221  | 20 | 3.81E-33 | NP_506269.1    | 100 | 144.436 | 73  | 73  | EATing: abnormal pharyngeal pumping family member (eat-6) |
| Locus_20048_Transcript_1/1_Conf_1.000 | 134  | 0  |          |                |     |         |     |     |                                                           |
| Locus_20049_Transcript_1/1_Conf_1.000 | 437  | 0  |          |                |     |         |     |     |                                                           |

|                                       |      |    |           |                |    |         |     |     |                                                                     |
|---------------------------------------|------|----|-----------|----------------|----|---------|-----|-----|---------------------------------------------------------------------|
| Locus_2005_Transcript_1/1_Conf_1.000  | 2109 | 20 | 0         | XP_002638594.1 | 89 | 784.252 | 479 | 427 | C. briggsae CBR-GCK-3 protein                                       |
| Locus_20050_Transcript_1/1_Conf_1.000 | 451  | 2  | 5.41E-24  | XP_002643963.1 | 60 | 114.005 | 130 | 79  | Hypothetical protein CBG17334                                       |
| Locus_20051_Transcript_1/1_Conf_1.000 | 240  | 0  |           |                |    |         |     |     |                                                                     |
| Locus_20052_Transcript_1/1_Conf_1.000 | 436  | 3  | 8.56E-14  | XP_002642011.1 | 57 | 80.1073 | 103 | 59  | Hypothetical protein CBG17944                                       |
| Locus_20053_Transcript_1/1_Conf_1.000 | 173  | 0  |           |                |    |         |     |     |                                                                     |
| Locus_20054_Transcript_1/1_Conf_1.000 | 165  | 0  |           |                |    |         |     |     |                                                                     |
| Locus_20055_Transcript_1/1_Conf_1.000 | 299  | 3  | 2.21E-09  | AAO63577.1     | 54 | 65.4698 | 102 | 56  | secreted protein 5 precursor                                        |
| Locus_20056_Transcript_1/1_Conf_1.000 | 241  | 0  |           |                |    |         |     |     |                                                                     |
| Locus_20057_Transcript_1/1_Conf_1.000 | 145  | 3  | 1.85E-11  | NP_498063.1    | 86 | 72.4034 | 46  | 40  | hypothetical protein R144.11                                        |
| Locus_20058_Transcript_1/1_Conf_1.000 | 139  | 0  |           |                |    |         |     |     |                                                                     |
| Locus_20059_Transcript_1/1_Conf_1.000 | 921  | 20 | 5.16E-113 | ACJ65180.1     | 78 | 411.764 | 304 | 239 | Gaba b receptor subunit protein 2, confirmed by transcript evidence |
| Locus_2006_Transcript_1/1_Conf_1.000  | 1118 | 4  | 3.93E-31  | XP_002638907.1 | 69 | 140.198 | 158 | 110 | Hypothetical protein CBG22133                                       |
| Locus_20060_Transcript_1/1_Conf_1.000 | 372  | 20 | 2.70E-39  | NP_509899.3    | 89 | 164.851 | 118 | 106 | Organic Cation Transporter family member (oct-2)                    |
| Locus_20061_Transcript_1/1_Conf_1.000 | 276  | 0  |           |                |    |         |     |     |                                                                     |
| Locus_20062_Transcript_1/1_Conf_1.000 | 151  | 0  |           |                |    |         |     |     |                                                                     |
| Locus_20063_Transcript_1/1_Conf_1.000 | 161  | 0  |           |                |    |         |     |     |                                                                     |
| Locus_20064_Transcript_1/1_Conf_1.000 | 215  | 0  |           |                |    |         |     |     |                                                                     |
| Locus_20065_Transcript_1/1_Conf_1.000 | 302  | 0  |           |                |    |         |     |     |                                                                     |
| Locus_20066_Transcript_1/1_Conf_1.000 | 302  | 4  | 4.15E-16  | XP_002641354.1 | 66 | 87.8113 | 96  | 64  | Hypothetical protein CBG13208                                       |
| Locus_20067_Transcript_1/1_Conf_1.000 | 311  | 0  |           |                |    |         |     |     |                                                                     |
| Locus_20068_Transcript_1/1_Conf_1.000 | 133  | 1  | 2.13E-04  | XP_002634830.1 | 77 | 48.9062 | 44  | 34  | Hypothetical protein CBG13938                                       |
| Locus_20069_Transcript_1/1_Conf_1.000 | 338  | 20 | 3.98E-11  | XP_001898083.1 | 63 | 71.2478 | 79  | 50  | hypothetical protein                                                |
| Locus_2007_Transcript_1/1_Conf_1.000  | 170  | 0  |           |                |    |         |     |     |                                                                     |
| Locus_20070_Transcript_1/1_Conf_1.000 | 230  | 0  |           |                |    |         |     |     |                                                                     |

|                                       |      |    |           |                |     |         |     |     |                                                                         |
|---------------------------------------|------|----|-----------|----------------|-----|---------|-----|-----|-------------------------------------------------------------------------|
| Locus_20071_Transcript_1/1_Conf_1.000 | 466  | 2  | 2.81E-04  | NP_493556.1    | 49  | 48.521  | 97  | 48  | hypothetical protein Y54E5A.8                                           |
| Locus_20072_Transcript_1/1_Conf_1.000 | 147  | 0  |           |                |     |         |     |     |                                                                         |
| Locus_20073_Transcript_1/1_Conf_1.000 | 418  | 13 | 2.48E-08  | CAR97807.1     | 48  | 62.003  | 115 | 56  | C. elegans protein C23H4.4b, partially confirmed by transcript evidence |
| Locus_20074_Transcript_1/1_Conf_1.000 | 304  | 0  |           |                |     |         |     |     |                                                                         |
| Locus_20075_Transcript_1/1_Conf_1.000 | 173  | 0  |           |                |     |         |     |     |                                                                         |
| Locus_20076_Transcript_1/1_Conf_1.000 | 621  | 20 | 3.20E-54  | NP_508866.1    | 73  | 215.312 | 186 | 137 | Unidentified Vitellogenin-linked Transcript family member (uvt-3)       |
| Locus_20077_Transcript_1/1_Conf_1.000 | 380  | 20 | 4.01E-27  | EFO27289.1     | 69  | 124.405 | 123 | 85  | actin family protein                                                    |
| Locus_20078_Transcript_1/1_Conf_1.000 | 203  | 0  |           |                |     |         |     |     |                                                                         |
| Locus_20079_Transcript_1/1_Conf_1.000 | 294  | 6  | 3.20E-16  | NP_495366.2    | 76  | 88.1965 | 72  | 55  | DumPY : shorter than wild-type family member (dpy-10)                   |
| Locus_2008_Transcript_1/1_Conf_1.000  | 2313 | 20 | 9.50E-154 | XP_002631266.1 | 74  | 548.895 | 455 | 340 | C. briggsae CBR-MNK-1 protein                                           |
| Locus_20080_Transcript_1/1_Conf_1.000 | 305  | 0  |           |                |     |         |     |     |                                                                         |
| Locus_20081_Transcript_1/1_Conf_1.000 | 260  | 0  |           |                |     |         |     |     |                                                                         |
| Locus_20082_Transcript_1/1_Conf_1.000 | 559  | 0  |           |                |     |         |     |     |                                                                         |
| Locus_20083_Transcript_1/1_Conf_1.000 | 345  | 1  | 2.15E-28  | BAB93497.1     | 100 | 128.642 | 73  | 73  | OK/SW-CL.24                                                             |
| Locus_20084_Transcript_1/1_Conf_1.000 | 131  | 3  | 3.40E-10  | XP_002632407.1 | 86  | 68.1662 | 43  | 37  | Hypothetical protein CBG00431                                           |
| Locus_20085_Transcript_1/1_Conf_1.000 | 210  | 20 | 2.33E-19  | AAN11401.1     | 74  | 98.5969 | 66  | 49  | metalloprotease 1 precursor                                             |
| Locus_20086_Transcript_1/1_Conf_1.000 | 524  | 0  |           |                |     |         |     |     |                                                                         |
| Locus_20087_Transcript_1/1_Conf_1.000 | 172  | 0  |           |                |     |         |     |     |                                                                         |

|                                       |      |    |           |                |     |         |     |     |                                              |
|---------------------------------------|------|----|-----------|----------------|-----|---------|-----|-----|----------------------------------------------|
| Locus_20088_Transcript_1/1_Conf_1.000 | 143  | 10 | 1.27E-17  | BAD93019.1     | 100 | 92.8189 | 46  | 46  | ubiquitin C variant                          |
| Locus_20089_Transcript_1/1_Conf_1.000 | 144  | 0  |           |                |     |         |     |     |                                              |
| Locus_2009_Transcript_1/1_Conf_1.000  | 884  | 0  |           |                |     |         |     |     |                                              |
| Locus_20090_Transcript_1/1_Conf_1.000 | 336  | 0  |           |                |     |         |     |     |                                              |
| Locus_20091_Transcript_1/1_Conf_1.000 | 133  | 2  | 1.25E-04  | NP_508432.1    | 74  | 49.6766 | 47  | 35  | hypothetical protein F47G3.1                 |
| Locus_20092_Transcript_1/1_Conf_1.000 | 263  | 4  | 6.23E-28  | XP_002637429.1 | 84  | 127.102 | 83  | 70  | Hypothetical protein CBG19140                |
| Locus_20093_Transcript_1/1_Conf_1.000 | 391  | 0  |           |                |     |         |     |     |                                              |
| Locus_20094_Transcript_1/1_Conf_1.000 | 317  | 20 | 7.90E-39  | XP_002631100.1 | 85  | 163.31  | 104 | 89  | Hypothetical protein CBG02874                |
| Locus_20095_Transcript_1/1_Conf_1.000 | 195  | 0  |           |                |     |         |     |     |                                              |
| Locus_20096_Transcript_1/1_Conf_1.000 | 159  | 0  |           |                |     |         |     |     |                                              |
| Locus_20097_Transcript_1/1_Conf_1.000 | 321  | 0  |           |                |     |         |     |     |                                              |
| Locus_20098_Transcript_1/1_Conf_1.000 | 380  | 0  |           |                |     |         |     |     |                                              |
| Locus_20099_Transcript_1/1_Conf_1.000 | 445  | 20 | 4.17E-32  | XP_001897051.1 | 66  | 140.969 | 148 | 99  | RNA polymerase Rpb1, domain 1 family protein |
| Locus_201_Transcript_1/1_Conf_1.000   | 906  | 0  |           |                |     |         |     |     |                                              |
| Locus_2010_Transcript_1/1_Conf_1.000  | 1579 | 20 | 1.77E-166 | NP_501365.1    | 89  | 590.497 | 348 | 313 | P38 Map Kinase family member (pmk-1)         |
| Locus_20100_Transcript_1/1_Conf_1.000 | 545  | 2  | 7.07E-24  | NP_495419.1    | 60  | 114.005 | 160 | 96  | hypothetical protein B0252.1                 |
| Locus_20101_Transcript_1/1_Conf_1.000 | 157  | 0  |           |                |     |         |     |     |                                              |
| Locus_20102_Transcript_1/1_Conf_1.000 | 225  | 0  |           |                |     |         |     |     |                                              |
| Locus_20103_Transcript_1/1_Conf_1.000 | 151  | 0  |           |                |     |         |     |     |                                              |



|                                       |     |    |          |                |     |         |     |     |                                                                   |
|---------------------------------------|-----|----|----------|----------------|-----|---------|-----|-----|-------------------------------------------------------------------|
| Locus_20104_Transcript_1/1_Conf_1.000 | 769 | 20 | 7.77E-95 | NP_505613.1    | 79  | 350.903 | 257 | 204 | hypothetical protein C51E3.6                                      |
| Locus_20105_Transcript_1/1_Conf_1.000 | 354 | 20 | 1.42E-32 | NP_505071.1    | 70  | 142.51  | 118 | 83  | hypothetical protein ZC513.5                                      |
| Locus_20106_Transcript_1/1_Conf_1.000 | 397 | 0  |          |                |     |         |     |     |                                                                   |
| Locus_20107_Transcript_1/1_Conf_1.000 | 297 | 20 | 5.42E-24 | NP_492498.1    | 91  | 114.005 | 70  | 64  | hypothetical protein F16A11.2                                     |
| Locus_20108_Transcript_1/1_Conf_1.000 | 255 | 3  | 2.10E-07 | AAA83446.5     | 70  | 58.9214 | 74  | 52  | Hypothetical protein F44A2.3                                      |
| Locus_20109_Transcript_1/1_Conf_1.000 | 444 | 20 | 1.62E-68 | NP_498777.2    | 92  | 261.922 | 147 | 136 | hypothetical protein C14B9.8                                      |
| Locus_2011_Transcript_1/1_Conf_1.000  | 706 | 20 | 8.35E-42 | XP_002642125.1 | 64  | 174.481 | 251 | 161 | Hypothetical protein CBG18072                                     |
| Locus_20110_Transcript_1/1_Conf_1.000 | 483 | 20 | 3.91E-30 | NP_493165.3    | 60  | 134.42  | 156 | 95  | hypothetical protein T27F6.1                                      |
| Locus_20111_Transcript_1/1_Conf_1.000 | 350 | 0  |          |                |     |         |     |     |                                                                   |
| Locus_20112_Transcript_1/1_Conf_1.000 | 134 | 5  | 3.28E-05 | EFA00585.1     | 70  | 51.6026 | 44  | 31  | hypothetical protein TcasGA2_TC003455                             |
| Locus_20113_Transcript_1/1_Conf_1.000 | 261 | 20 | 8.96E-43 | XP_002811879.1 | 100 | 176.407 | 87  | 87  | PREDICTED: macrophage-capping protein-like isoform 4              |
| Locus_20114_Transcript_1/1_Conf_1.000 | 437 | 0  |          |                |     |         |     |     |                                                                   |
| Locus_20115_Transcript_1/1_Conf_1.000 | 311 | 4  | 1.01E-14 | NP_741925.2    | 81  | 83.1889 | 86  | 70  | DYstrophin-like phenotype and CAPON related family member (dyc-1) |

|                                       |      |    |           |                |    |         |     |     |                                                                                          |
|---------------------------------------|------|----|-----------|----------------|----|---------|-----|-----|------------------------------------------------------------------------------------------|
| Locus_20116_Transcript_1/1_Conf_1.000 | 180  | 20 | 4.86E-20  | AAK68292.3     | 92 | 100.908 | 54  | 50  | U28943_4Clc-type chloride channel protein 3, isoform b, confirmed by transcript evidence |
| Locus_20117_Transcript_1/1_Conf_1.000 | 357  | 9  | 1.20E-15  | XP_002633446.1 | 55 | 86.2705 | 120 | 67  | Hypothetical protein CBG06214                                                            |
| Locus_20118_Transcript_1/1_Conf_1.000 | 290  | 0  |           |                |    |         |     |     |                                                                                          |
| Locus_20119_Transcript_1/1_Conf_1.000 | 248  | 20 | 1.04E-35  | NP_509689.1    | 96 | 152.91  | 82  | 79  | hypothetical protein ZC373.4                                                             |
| Locus_2012_Transcript_1/1_Conf_1.000  | 1101 | 20 | 9.89E-112 | NP_497785.1    | 78 | 407.912 | 301 | 237 | TIR (Toll and Interleukin 1 Receptor) domain protein family member (tir-1)               |
| Locus_20120_Transcript_1/1_Conf_1.000 | 187  | 0  |           |                |    |         |     |     |                                                                                          |
| Locus_20121_Transcript_1/1_Conf_1.000 | 147  | 0  |           |                |    |         |     |     |                                                                                          |
| Locus_20122_Transcript_1/1_Conf_1.000 | 225  | 0  |           |                |    |         |     |     |                                                                                          |
| Locus_20123_Transcript_1/1_Conf_1.000 | 348  | 0  |           |                |    |         |     |     |                                                                                          |
| Locus_20124_Transcript_1/1_Conf_1.000 | 369  | 13 | 1.27E-20  | XP_002641615.1 | 82 | 102.834 | 76  | 63  | Hypothetical protein CBG09935                                                            |
| Locus_20125_Transcript_1/1_Conf_1.000 | 396  | 20 | 1.18E-26  | XP_002631717.1 | 64 | 122.865 | 137 | 88  | Hypothetical protein CBG20918                                                            |
| Locus_20126_Transcript_1/1_Conf_1.000 | 418  | 7  | 4.37E-05  | XP_002125751.1 | 40 | 51.2174 | 136 | 55  | PREDICTED: similar to Thrombospondin type 1 domain containing protein                    |
| Locus_20127_Transcript_1/1_Conf_1.000 | 326  | 20 | 2.20E-33  | NP_001022572.1 | 77 | 145.206 | 108 | 84  | Elongation Factor Kinase family member (efk-1)                                           |
| Locus_20128_Transcript_1/1_Conf_1.000 | 175  | 0  |           |                |    |         |     |     |                                                                                          |
| Locus_20129_Transcript_1/1_Conf_1.000 | 135  | 0  |           |                |    |         |     |     |                                                                                          |
| Locus_2013_Transcript_1/1_Conf_1.000  | 1587 | 20 | 3.17E-139 | NP_001021806.1 | 72 | 499.975 | 494 | 360 | Conserved Oligomeric Golgi (COG) Component family member (cogc-3)                        |
| Locus_20130_Transcript_1/1_Conf_1.000 | 151  | 0  |           |                |    |         |     |     |                                                                                          |
| Locus_20131_Transcript_1/1_Conf_1.000 | 356  | 0  |           |                |    |         |     |     |                                                                                          |
| Locus_20132_Transcript_1/1_Conf_1.000 | 163  | 0  |           |                |    |         |     |     |                                                                                          |
| Locus_20133_Transcript_1/2_Conf_1.000 | 500  | 0  |           |                |    |         |     |     |                                                                                          |
| Locus_20133_Transcript_2/2_Conf_1.000 | 511  | 0  |           |                |    |         |     |     |                                                                                          |
| Locus_20134_Transcript_1/1_Conf_1.000 | 1114 | 20 | 0         | NP_492498.1    | 93 | 664.84  | 369 | 345 | hypothetical protein F16A11.2                                                            |

|                                       |     |    |          |                |     |         |     |     |                                                                     |
|---------------------------------------|-----|----|----------|----------------|-----|---------|-----|-----|---------------------------------------------------------------------|
| Locus_20135_Transcript_1/1_Conf_1.000 | 432 | 20 | 1.61E-36 | NP_001022174.1 | 74  | 155.606 | 147 | 110 | hypothetical protein F45E10.2                                       |
| Locus_20136_Transcript_1/1_Conf_1.000 | 236 | 0  |          |                |     |         |     |     |                                                                     |
| Locus_20137_Transcript_1/1_Conf_1.000 | 482 | 3  | 5.91E-15 | XP_002641730.1 | 75  | 83.9593 | 62  | 47  | Hypothetical protein CBG10069                                       |
| Locus_20138_Transcript_1/1_Conf_1.000 | 654 | 20 | 6.48E-51 | NP_001022694.1 | 69  | 204.527 | 195 | 135 | hypothetical protein M142.8                                         |
| Locus_20139_Transcript_1/1_Conf_1.000 | 158 | 0  |          |                |     |         |     |     |                                                                     |
| Locus_2014_Transcript_1/1_Conf_1.000  | 183 | 0  |          |                |     |         |     |     |                                                                     |
| Locus_20140_Transcript_1/1_Conf_1.000 | 177 | 0  |          |                |     |         |     |     |                                                                     |
| Locus_20141_Transcript_1/1_Conf_1.000 | 175 | 3  | 3.49E-07 | NP_001022619.1 | 71  | 58.151  | 52  | 37  | NorDiHydroGuaiaretic acid resistant family member (ndg-4)           |
| Locus_20142_Transcript_1/1_Conf_1.000 | 166 | 0  |          |                |     |         |     |     |                                                                     |
| Locus_20143_Transcript_1/1_Conf_1.000 | 287 | 0  |          |                |     |         |     |     |                                                                     |
| Locus_20144_Transcript_1/1_Conf_1.000 | 294 | 20 | 6.02E-23 | NP_001024958.1 | 82  | 110.538 | 97  | 80  | hypothetical protein Y34B4A.4                                       |
| Locus_20145_Transcript_1/2_Conf_1.000 | 466 | 0  |          |                |     |         |     |     |                                                                     |
| Locus_20145_Transcript_2/2_Conf_1.000 | 367 | 0  |          |                |     |         |     |     |                                                                     |
| Locus_20146_Transcript_1/1_Conf_1.000 | 205 | 0  |          |                |     |         |     |     |                                                                     |
| Locus_20147_Transcript_1/1_Conf_1.000 | 370 | 0  |          |                |     |         |     |     |                                                                     |
| Locus_20148_Transcript_1/1_Conf_1.000 | 268 | 0  |          |                |     |         |     |     |                                                                     |
| Locus_20149_Transcript_1/1_Conf_1.000 | 223 | 3  | 8.82E-06 | NP_501039.1    | 63  | 53.5286 | 60  | 38  | hypothetical protein C17H12.2                                       |
| Locus_2015_Transcript_1/3_Conf_0.750  | 726 | 0  |          |                |     |         |     |     |                                                                     |
| Locus_2015_Transcript_2/3_Conf_0.750  | 818 | 0  |          |                |     |         |     |     |                                                                     |
| Locus_2015_Transcript_3/3_Conf_0.750  | 797 | 0  |          |                |     |         |     |     |                                                                     |
| Locus_20150_Transcript_1/1_Conf_1.000 | 145 | 2  | 3.04E-14 | XP_002634423.1 | 89  | 81.6481 | 48  | 43  | C. briggsae CBR-PTR-14 protein                                      |
| Locus_20151_Transcript_1/1_Conf_1.000 | 138 | 20 | 6.12E-20 | XP_002816317.1 | 100 | 100.523 | 46  | 46  | PREDICTED: vesicular integral-membrane protein VIP36-like isoform 2 |

|                                       |      |    |          |                |    |         |     |     |                                                    |
|---------------------------------------|------|----|----------|----------------|----|---------|-----|-----|----------------------------------------------------|
| Locus_20152_Transcript_1/1_Conf_1.000 | 249  | 3  | 5.90E-23 | NP_497970.1    | 88 | 110.538 | 68  | 60  | Adenylyl Cyclase family member (acy-1)             |
| Locus_20153_Transcript_1/1_Conf_1.000 | 200  | 20 | 4.76E-20 | NP_496968.1    | 87 | 100.908 | 66  | 58  | hypothetical protein Y48B6A.12                     |
| Locus_20154_Transcript_1/1_Conf_1.000 | 213  | 20 | 3.96E-19 | NP_500412.1    | 82 | 97.8265 | 69  | 57  | Variable ABnormal morphology family member (vab-2) |
| Locus_20155_Transcript_1/1_Conf_1.000 | 371  | 2  | 4.97E-25 | NP_492185.2    | 65 | 117.472 | 126 | 82  | SMG-associated and Lethal family member (smgl-1)   |
| Locus_20156_Transcript_1/2_Conf_1.000 | 360  | 0  |          |                |    |         |     |     |                                                    |
| Locus_20156_Transcript_2/2_Conf_1.000 | 270  | 0  |          |                |    |         |     |     |                                                    |
| Locus_20157_Transcript_1/1_Conf_1.000 | 231  | 1  | 1.44E-08 | XP_002634119.1 | 65 | 62.7734 | 72  | 47  | Hypothetical protein CBG01673                      |
| Locus_20158_Transcript_1/1_Conf_1.000 | 148  | 0  |          |                |    |         |     |     |                                                    |
| Locus_20159_Transcript_1/1_Conf_1.000 | 134  | 0  |          |                |    |         |     |     |                                                    |
| Locus_2016_Transcript_1/1_Conf_1.000  | 1281 | 20 | 1.24E-79 | NP_492371.1    | 74 | 301.597 | 258 | 193 | nuclear LaMiN family member (lmn-1)                |
| Locus_20160_Transcript_1/1_Conf_1.000 | 198  | 20 | 1.58E-23 | NP_001122833.1 | 89 | 112.464 | 65  | 58  | hypothetical protein ZC518.1                       |
| Locus_20161_Transcript_1/1_Conf_1.000 | 229  | 20 | 3.21E-16 | NP_741383.1    | 73 | 88.1965 | 72  | 53  | tYrosinyl tRNA Synthetase family member (yrs-1)    |
| Locus_20162_Transcript_1/1_Conf_1.000 | 211  | 0  |          |                |    |         |     |     |                                                    |
| Locus_20163_Transcript_1/1_Conf_1.000 | 340  | 0  |          |                |    |         |     |     |                                                    |
| Locus_20165_Transcript_1/1_Conf_1.000 | 492  | 20 | 9.51E-29 | XP_002130984.1 | 63 | 129.798 | 145 | 92  | PREDICTED: similar to MGC80593 protein             |
| Locus_20166_Transcript_1/1_Conf_1.000 | 327  | 0  |          |                |    |         |     |     |                                                    |
| Locus_20167_Transcript_1/1_Conf_1.000 | 153  | 0  |          |                |    |         |     |     |                                                    |
| Locus_20168_Transcript_1/1_Conf_1.000 | 275  | 0  |          |                |    |         |     |     |                                                    |
| Locus_20169_Transcript_1/1_Conf_1.000 | 169  | 0  |          |                |    |         |     |     |                                                    |

|                                       |      |    |           |                |    |         |     |     |                                                           |
|---------------------------------------|------|----|-----------|----------------|----|---------|-----|-----|-----------------------------------------------------------|
| Locus_2017_Transcript_1/1_Conf_1.000  | 456  | 20 | 3.70E-33  | XP_002642667.1 | 95 | 144.436 | 73  | 70  | C. briggsae CBR-SNR-5 protein                             |
| Locus_20170_Transcript_1/1_Conf_1.000 | 198  | 0  |           |                |    |         |     |     |                                                           |
| Locus_20171_Transcript_1/1_Conf_1.000 | 185  | 20 | 2.25E-17  | NP_497008.1    | 83 | 92.0485 | 61  | 51  | hypothetical protein K10H10.2                             |
| Locus_20172_Transcript_1/1_Conf_1.000 | 304  | 0  |           |                |    |         |     |     |                                                           |
| Locus_20173_Transcript_1/1_Conf_1.000 | 210  | 0  |           |                |    |         |     |     |                                                           |
| Locus_20174_Transcript_1/1_Conf_1.000 | 272  | 0  |           |                |    |         |     |     |                                                           |
| Locus_20175_Transcript_1/1_Conf_1.000 | 146  | 0  |           |                |    |         |     |     |                                                           |
| Locus_20176_Transcript_1/1_Conf_1.000 | 205  | 20 | 1.20E-23  | NP_740900.1    | 88 | 112.849 | 68  | 60  | hypothetical protein T08G11.1                             |
| Locus_20177_Transcript_1/1_Conf_1.000 | 318  | 0  |           |                |    |         |     |     |                                                           |
| Locus_20178_Transcript_1/1_Conf_1.000 | 140  | 0  |           |                |    |         |     |     |                                                           |
| Locus_20179_Transcript_1/1_Conf_1.000 | 360  | 20 | 3.83E-38  | XP_002642021.1 | 93 | 160.999 | 90  | 84  | C. briggsae CBR-COQ-8 protein                             |
| Locus_2018_Transcript_1/1_Conf_1.000  | 2111 | 20 | 6.94E-172 | XP_001899259.1 | 75 | 608.986 | 504 | 381 | Conserved hypothetical protein                            |
| Locus_20180_Transcript_1/1_Conf_1.000 | 427  | 20 | 1.48E-21  | NP_499961.2    | 60 | 105.916 | 145 | 87  | Nuclear Hormone Receptor family member (nhr-76)           |
| Locus_20181_Transcript_1/1_Conf_1.000 | 236  | 0  |           |                |    |         |     |     |                                                           |
| Locus_20182_Transcript_1/1_Conf_1.000 | 309  | 0  |           |                |    |         |     |     |                                                           |
| Locus_20183_Transcript_1/1_Conf_1.000 | 1127 | 20 | 1.07E-84  | ADI24662.1     | 71 | 318.161 | 322 | 230 | Hypothetical protein Y110A2AL.12a                         |
| Locus_20184_Transcript_1/1_Conf_1.000 | 131  | 0  |           |                |    |         |     |     |                                                           |
| Locus_20185_Transcript_1/1_Conf_1.000 | 137  | 0  |           |                |    |         |     |     |                                                           |
| Locus_20186_Transcript_1/1_Conf_1.000 | 173  | 0  |           |                |    |         |     |     |                                                           |
| Locus_20187_Transcript_1/2_Conf_1.000 | 318  | 20 | 4.15E-56  | A8Y236.2       | 98 | 220.705 | 104 | 102 | Putative polypeptide N-acetylgalactosaminyltransferase 10 |

|                                       |      |    |          |                |    |         |     |     |                                                           |
|---------------------------------------|------|----|----------|----------------|----|---------|-----|-----|-----------------------------------------------------------|
| Locus_20187_Transcript_2/2_Conf_1.000 | 318  | 20 | 4.15E-56 | A8Y236.2       | 98 | 220.705 | 104 | 102 | Putative polypeptide N-acetylgalactosaminyltransferase 10 |
| Locus_20188_Transcript_1/1_Conf_1.000 | 361  | 6  | 1.51E-34 | XP_002632694.1 | 79 | 149.058 | 111 | 88  | Hypothetical protein CBG21625                             |
| Locus_20189_Transcript_1/1_Conf_1.000 | 144  | 0  |          |                |    |         |     |     |                                                           |
| Locus_2019_Transcript_1/3_Conf_0.357  | 144  | 0  |          |                |    |         |     |     |                                                           |
| Locus_2019_Transcript_2/3_Conf_0.429  | 210  | 0  |          |                |    |         |     |     |                                                           |
| Locus_2019_Transcript_3/3_Conf_0.571  | 407  | 2  | 2.79E-04 | CAC17797.1     | 52 | 48.521  | 74  | 39  | SXC1 protein                                              |
| Locus_20190_Transcript_1/1_Conf_1.000 | 189  | 4  | 1.96E-05 | NP_001122780.1 | 73 | 52.373  | 56  | 41  | hypothetical protein F41H10.6                             |
| Locus_20191_Transcript_1/1_Conf_1.000 | 209  | 0  |          |                |    |         |     |     |                                                           |
| Locus_20192_Transcript_1/1_Conf_1.000 | 267  | 0  |          |                |    |         |     |     |                                                           |
| Locus_20193_Transcript_1/1_Conf_1.000 | 164  | 9  | 8.97E-19 | XP_002630203.1 | 92 | 96.6709 | 54  | 50  | Hypothetical protein CBG00613                             |
| Locus_20194_Transcript_1/1_Conf_1.000 | 1183 | 20 | 1.70E-96 | XP_001897426.1 | 76 | 357.451 | 301 | 231 | Rab5 GDP/GTP exchange factor                              |
| Locus_20195_Transcript_1/1_Conf_1.000 | 129  | 0  |          |                |    |         |     |     |                                                           |
| Locus_20196_Transcript_1/2_Conf_1.000 | 187  | 0  |          |                |    |         |     |     |                                                           |
| Locus_20196_Transcript_2/2_Conf_1.000 | 264  | 0  |          |                |    |         |     |     |                                                           |
| Locus_20197_Transcript_1/1_Conf_1.000 | 175  | 0  |          |                |    |         |     |     |                                                           |
| Locus_20198_Transcript_1/1_Conf_1.000 | 215  | 12 | 3.13E-24 | NP_493493.2    | 88 | 114.775 | 70  | 62  | hypothetical protein F09C3.2                              |
| Locus_20199_Transcript_1/1_Conf_1.000 | 142  | 0  |          |                |    |         |     |     |                                                           |
| Locus_202_Transcript_1/1_Conf_1.000   | 227  | 0  |          |                |    |         |     |     |                                                           |
| Locus_2020_Transcript_1/1_Conf_1.000  | 316  | 20 | 5.13E-30 | XP_002642349.1 | 75 | 134.035 | 103 | 78  | Hypothetical protein CBG18346                             |
| Locus_20200_Transcript_1/1_Conf_1.000 | 364  | 0  |          |                |    |         |     |     |                                                           |
| Locus_20201_Transcript_1/1_Conf_1.000 | 135  | 0  |          |                |    |         |     |     |                                                           |
| Locus_20202_Transcript_1/1_Conf_1.000 | 146  | 0  |          |                |    |         |     |     |                                                           |
| Locus_20203_Transcript_1/1_Conf_1.000 | 424  | 0  |          |                |    |         |     |     |                                                           |
| Locus_20204_Transcript_1/1_Conf_1.000 | 142  | 0  |          |                |    |         |     |     |                                                           |
| Locus_20205_Transcript_1/1_Conf_1.000 | 537  | 0  |          |                |    |         |     |     |                                                           |
| Locus_20206_Transcript_1/1_Conf_1.000 | 225  | 20 | 1.31E-17 | NP_510666.1    | 96 | 92.8189 | 50  | 48  | hypothetical protein F01G12.6                             |
| Locus_20207_Transcript_1/1_Conf_1.000 | 627  | 20 | 2.13E-61 | NP_741746.1    | 83 | 239.195 | 171 | 142 | Kinesin-Like Protein family member (klp-4)                |

|                                       |      |    |          |                |    |         |     |     |                                                                 |
|---------------------------------------|------|----|----------|----------------|----|---------|-----|-----|-----------------------------------------------------------------|
| Locus_20208_Transcript_1/1_Conf_1.000 | 210  | 20 | 1.46E-21 | XP_002637044.1 | 84 | 105.916 | 69  | 58  | C. briggsae CBR-CUL-5 protein                                   |
| Locus_20209_Transcript_1/1_Conf_1.000 | 479  | 20 | 3.01E-51 | XP_002630906.1 | 76 | 204.527 | 159 | 121 | Hypothetical protein CBG02630                                   |
| Locus_2021_Transcript_1/1_Conf_1.000  | 141  | 0  |          |                |    |         |     |     |                                                                 |
| Locus_20210_Transcript_1/1_Conf_1.000 | 379  | 20 | 2.43E-32 | XP_002643095.1 | 77 | 141.739 | 127 | 98  | C. briggsae CBR-GLY-11 protein                                  |
| Locus_20211_Transcript_1/1_Conf_1.000 | 250  | 20 | 5.92E-07 | XP_001641433.1 | 57 | 57.3806 | 75  | 43  | predicted protein                                               |
| Locus_20212_Transcript_1/1_Conf_1.000 | 274  | 0  |          |                |    |         |     |     |                                                                 |
| Locus_20213_Transcript_1/1_Conf_1.000 | 221  | 0  |          |                |    |         |     |     |                                                                 |
| Locus_20214_Transcript_1/1_Conf_1.000 | 964  | 20 | 1.05E-71 | XP_002643853.1 | 67 | 274.633 | 331 | 223 | Hypothetical protein CBG02083                                   |
| Locus_20215_Transcript_1/1_Conf_1.000 | 391  | 0  |          |                |    |         |     |     |                                                                 |
| Locus_20216_Transcript_1/1_Conf_1.000 | 141  | 0  |          |                |    |         |     |     |                                                                 |
| Locus_20217_Transcript_1/1_Conf_1.000 | 177  | 4  | 2.26E-06 | EFO14006.1     | 73 | 55.4546 | 49  | 36  | hypothetical protein LOAG_14520                                 |
| Locus_20218_Transcript_1/1_Conf_1.000 | 189  | 0  |          |                |    |         |     |     |                                                                 |
| Locus_20219_Transcript_1/1_Conf_1.000 | 190  | 20 | 2.46E-24 | Q60V90.3       | 95 | 115.161 | 60  | 57  | Bifunctional heparan sulfate N-deacetylase/N-sulfotransferase 1 |
| Locus_2022_Transcript_1/1_Conf_1.000  | 1196 | 20 | 1.74E-72 | NP_499801.1    | 70 | 277.715 | 278 | 197 | hypothetical protein Y76A2B.5                                   |
| Locus_20220_Transcript_1/2_Conf_1.000 | 311  | 0  |          |                |    |         |     |     |                                                                 |
| Locus_20220_Transcript_2/2_Conf_1.000 | 311  | 0  |          |                |    |         |     |     |                                                                 |
| Locus_20221_Transcript_1/1_Conf_1.000 | 197  | 0  |          |                |    |         |     |     |                                                                 |
| Locus_20222_Transcript_1/1_Conf_1.000 | 165  | 1  | 8.13E-04 | NP_505666.2    | 68 | 46.9802 | 51  | 35  | UDP-GlucuronosylTransferase family member (ugt-49)              |
| Locus_20223_Transcript_1/1_Conf_1.000 | 210  | 3  | 7.89E-19 | NP_492219.1    | 86 | 91.2781 | 51  | 44  | hypothetical protein K04G2.9                                    |
| Locus_20224_Transcript_1/1_Conf_1.000 | 146  | 0  |          |                |    |         |     |     |                                                                 |
| Locus_20225_Transcript_1/1_Conf_1.000 | 179  | 20 | 1.85E-08 | XP_002577284.1 | 66 | 62.3882 | 60  | 40  | nuclear factor Y transcription factor subunit B homolog         |

|                                       |     |    |          |                |     |         |     |     |                                 |
|---------------------------------------|-----|----|----------|----------------|-----|---------|-----|-----|---------------------------------|
| Locus_20226_Transcript_1/1_Conf_1.000 | 137 | 7  | 1.01E-14 | XP_002632396.1 | 97  | 83.1889 | 40  | 39  | C. briggsae CBR-UAF-2 protein   |
| Locus_20227_Transcript_1/1_Conf_1.000 | 234 | 6  | 4.17E-08 | NP_001041050.1 | 58  | 61.2326 | 78  | 46  | hypothetical protein Y57G11C.3  |
| Locus_20228_Transcript_1/1_Conf_1.000 | 264 | 19 | 1.18E-10 | XP_002639499.1 | 61  | 69.707  | 85  | 52  | C. briggsae CBR-ITX-1 protein   |
| Locus_20229_Transcript_1/1_Conf_1.000 | 645 | 1  | 8.85E-05 | EFO26655.1     | 42  | 51.2174 | 133 | 57  | hypothetical protein LOAG_01835 |
| Locus_2023_Transcript_1/1_Conf_1.000  | 583 | 0  |          |                |     |         |     |     |                                 |
| Locus_20230_Transcript_1/1_Conf_1.000 | 194 | 0  |          |                |     |         |     |     |                                 |
| Locus_20231_Transcript_1/1_Conf_1.000 | 161 | 0  |          |                |     |         |     |     |                                 |
| Locus_20232_Transcript_1/1_Conf_1.000 | 179 | 0  |          |                |     |         |     |     |                                 |
| Locus_20233_Transcript_1/1_Conf_1.000 | 206 | 20 | 6.41E-09 | XP_001745498.1 | 76  | 63.929  | 56  | 43  | hypothetical protein            |
| Locus_20234_Transcript_1/1_Conf_1.000 | 323 | 0  |          |                |     |         |     |     |                                 |
| Locus_20235_Transcript_1/1_Conf_1.000 | 165 | 0  |          |                |     |         |     |     |                                 |
| Locus_20236_Transcript_1/1_Conf_1.000 | 166 | 20 | 1.93E-21 | XP_002644000.1 | 100 | 105.531 | 55  | 55  | C. briggsae CBR-IFA-1 protein   |
| Locus_20237_Transcript_1/1_Conf_1.000 | 176 | 0  |          |                |     |         |     |     |                                 |
| Locus_20238_Transcript_1/1_Conf_1.000 | 268 | 0  |          |                |     |         |     |     |                                 |
| Locus_20239_Transcript_1/1_Conf_1.000 | 645 | 20 | 2.01E-49 | NP_505419.3    | 70  | 199.519 | 210 | 147 | hypothetical protein K07B1.7    |



|                                       |      |    |           |                |     |         |     |     |                                                    |
|---------------------------------------|------|----|-----------|----------------|-----|---------|-----|-----|----------------------------------------------------|
| Locus_2024_Transcript_1/1_Conf_1.000  | 1841 | 20 | 5.40E-109 | XP_002639032.1 | 57  | 399.823 | 606 | 349 | Hypothetical protein CBG22281                      |
| Locus_20240_Transcript_1/1_Conf_1.000 | 297  | 20 | 5.24E-27  | NP_504827.2    | 84  | 124.02  | 85  | 72  | hypothetical protein F09G2.1                       |
| Locus_20241_Transcript_1/1_Conf_1.000 | 132  | 0  |           |                |     |         |     |     |                                                    |
| Locus_20242_Transcript_1/1_Conf_1.000 | 276  | 20 | 2.85E-17  | AAN61521.1     | 65  | 91.6633 | 92  | 60  | 301KDa_2 protein                                   |
| Locus_20243_Transcript_1/1_Conf_1.000 | 367  | 0  |           |                |     |         |     |     |                                                    |
| Locus_20244_Transcript_1/1_Conf_1.000 | 312  | 0  |           |                |     |         |     |     |                                                    |
| Locus_20245_Transcript_1/1_Conf_1.000 | 370  | 20 | 1.26E-44  | XP_002826560.1 | 100 | 182.57  | 93  | 93  | PREDICTED: protein FAM96B-like                     |
| Locus_20246_Transcript_1/1_Conf_1.000 | 230  | 20 | 5.11E-22  | NP_569731.2    | 100 | 107.457 | 52  | 52  | putative NPIP-like protein KIAA0220-like           |
| Locus_20247_Transcript_1/1_Conf_1.000 | 312  | 0  |           |                |     |         |     |     |                                                    |
| Locus_20248_Transcript_1/1_Conf_1.000 | 257  | 0  |           |                |     |         |     |     |                                                    |
| Locus_20249_Transcript_1/1_Conf_1.000 | 198  | 0  |           |                |     |         |     |     |                                                    |
| Locus_2025_Transcript_1/1_Conf_1.000  | 1513 | 20 | 3.20E-141 | NP_740900.1    | 75  | 506.523 | 507 | 385 | hypothetical protein T08G11.1                      |
| Locus_20250_Transcript_1/1_Conf_1.000 | 251  | 0  |           |                |     |         |     |     |                                                    |
| Locus_20251_Transcript_1/1_Conf_1.000 | 280  | 20 | 1.45E-29  | XP_002634888.1 | 80  | 132.494 | 88  | 71  | Hypothetical protein CBG10559                      |
| Locus_20252_Transcript_1/1_Conf_1.000 | 200  | 20 | 9.62E-13  | XP_001900297.1 | 75  | 76.6406 | 65  | 49  | Importin-beta N-terminal domain containing protein |
| Locus_20253_Transcript_1/1_Conf_1.000 | 228  | 0  |           |                |     |         |     |     |                                                    |
| Locus_20254_Transcript_1/1_Conf_1.000 | 234  | 0  |           |                |     |         |     |     |                                                    |
| Locus_20255_Transcript_1/1_Conf_1.000 | 520  | 4  | 9.14E-36  | XP_002631027.1 | 70  | 153.295 | 172 | 121 | Hypothetical protein CBG02784                      |
| Locus_20256_Transcript_1/1_Conf_1.000 | 156  | 20 | 5.48E-16  | AAV41897.1     | 92  | 87.4261 | 52  | 48  | SAX-2                                              |
| Locus_20257_Transcript_1/1_Conf_1.000 | 187  | 0  |           |                |     |         |     |     |                                                    |
| Locus_20258_Transcript_1/1_Conf_1.000 | 280  | 20 | 8.53E-22  | NP_001041277.1 | 81  | 106.686 | 69  | 56  | hypothetical protein PDB1.1                        |
| Locus_20259_Transcript_1/1_Conf_1.000 | 262  | 0  |           |                |     |         |     |     |                                                    |
| Locus_2026_Transcript_1/1_Conf_1.000  | 567  | 0  |           |                |     |         |     |     |                                                    |
| Locus_20260_Transcript_1/1_Conf_1.000 | 467  | 5  | 3.79E-17  | XP_001892434.1 | 58  | 91.2781 | 111 | 65  | hypothetical protein Bm1_04780                     |
| Locus_20261_Transcript_1/1_Conf_1.000 | 269  | 0  |           |                |     |         |     |     |                                                    |

|                                       |      |    |          |                |     |         |     |     |                                                 |
|---------------------------------------|------|----|----------|----------------|-----|---------|-----|-----|-------------------------------------------------|
| Locus_20262_Transcript_1/1_Conf_1.000 | 602  | 10 | 1.39E-19 | EFO17301.1     | 56  | 100.138 | 192 | 108 | hypothetical protein LOAG_11198                 |
| Locus_20263_Transcript_1/1_Conf_1.000 | 223  | 0  |          |                |     |         |     |     |                                                 |
| Locus_20264_Transcript_1/1_Conf_1.000 | 154  | 5  | 1.95E-13 | EFO27571.1     | 76  | 78.9518 | 51  | 39  | hypothetical protein LOAG_00907                 |
| Locus_20265_Transcript_1/1_Conf_1.000 | 790  | 5  | 2.70E-13 | XP_002640068.1 | 53  | 80.1073 | 163 | 88  | Hypothetical protein CBG12552                   |
| Locus_20266_Transcript_1/1_Conf_1.000 | 143  | 20 | 3.35E-18 | NP_505810.2    | 95  | 94.7449 | 47  | 45  | P21-Activated Kinase family member (pak-2)      |
| Locus_20267_Transcript_1/1_Conf_1.000 | 410  | 3  | 3.39E-10 | NP_741003.1    | 95  | 68.1662 | 41  | 39  | hypothetical protein C18A3.4                    |
| Locus_20268_Transcript_1/1_Conf_1.000 | 220  | 0  |          |                |     |         |     |     |                                                 |
| Locus_20269_Transcript_1/1_Conf_1.000 | 202  | 0  |          |                |     |         |     |     |                                                 |
| Locus_2027_Transcript_1/1_Conf_1.000  | 1071 | 3  | 3.24E-11 | NP_497269.1    | 43  | 73.9442 | 230 | 100 | bZIP transcription factor family member (zip-2) |
| Locus_20270_Transcript_1/1_Conf_1.000 | 275  | 0  |          |                |     |         |     |     |                                                 |
| Locus_20271_Transcript_1/1_Conf_1.000 | 226  | 20 | 2.30E-22 | XP_002640668.1 | 95  | 108.612 | 60  | 57  | C. briggsae CBR-UNC-54 protein                  |
| Locus_20272_Transcript_1/1_Conf_1.000 | 283  | 20 | 1.40E-27 | NP_497791.1    | 83  | 125.946 | 93  | 78  | NITrilase family member (nit-1)                 |
| Locus_20273_Transcript_1/1_Conf_1.000 | 183  | 16 | 5.70E-29 | XP_002342629.1 | 100 | 130.568 | 61  | 61  | PREDICTED: hypothetical protein XP_002342629    |
| Locus_20274_Transcript_1/1_Conf_1.000 | 206  | 0  |          |                |     |         |     |     |                                                 |
| Locus_20275_Transcript_1/1_Conf_1.000 | 129  | 0  |          |                |     |         |     |     |                                                 |
| Locus_20276_Transcript_1/1_Conf_1.000 | 213  | 0  |          |                |     |         |     |     |                                                 |
| Locus_20277_Transcript_1/1_Conf_1.000 | 336  | 4  | 7.25E-13 | ACM46022.1     | 62  | 77.0258 | 102 | 64  | Troponin t protein 3, isoform d                 |
| Locus_20278_Transcript_1/1_Conf_1.000 | 517  | 0  |          |                |     |         |     |     |                                                 |

|                                       |      |    |           |                |    |         |     |     |                                                |
|---------------------------------------|------|----|-----------|----------------|----|---------|-----|-----|------------------------------------------------|
| Locus_20279_Transcript_1/1_Conf_1.000 | 159  | 0  |           |                |    |         |     |     |                                                |
| Locus_2028_Transcript_1/1_Conf_1.000  | 881  | 20 | 3.98E-136 | A8X7H5.2       | 89 | 488.419 | 279 | 250 | Adenylosuccinate synthetase                    |
| Locus_20280_Transcript_1/1_Conf_1.000 | 266  | 1  | 3.92E-06  | XP_002641855.1 | 56 | 54.6842 | 89  | 50  | Hypothetical protein CBG16529                  |
| Locus_20281_Transcript_1/1_Conf_1.000 | 311  | 20 | 9.11E-24  | XP_002640257.1 | 74 | 113.235 | 101 | 75  | Hypothetical protein CBG12782                  |
| Locus_20282_Transcript_1/1_Conf_1.000 | 471  | 20 | 5.96E-31  | NP_001022174.1 | 68 | 137.117 | 129 | 88  | hypothetical protein F45E10.2                  |
| Locus_20283_Transcript_1/1_Conf_1.000 | 610  | 20 | 3.65E-55  | EFO26301.1     | 62 | 218.394 | 235 | 148 | transcriptional enhancer factor TEF-3          |
| Locus_20284_Transcript_1/1_Conf_1.000 | 429  | 20 | 7.76E-39  | XP_002636280.1 | 78 | 163.31  | 128 | 100 | Hypothetical protein CBG08570                  |
| Locus_20285_Transcript_1/1_Conf_1.000 | 294  | 20 | 2.69E-39  | XP_002632893.1 | 88 | 164.851 | 98  | 87  | Hypothetical protein CBG15101                  |
| Locus_20286_Transcript_1/1_Conf_1.000 | 472  | 4  | 2.49E-45  | NP_495471.1    | 78 | 184.882 | 144 | 113 | hypothetical protein F10E7.6                   |
| Locus_20287_Transcript_1/1_Conf_1.000 | 584  | 0  |           |                |    |         |     |     |                                                |
| Locus_20288_Transcript_1/1_Conf_1.000 | 311  | 20 | 7.20E-29  | EFO24438.1     | 78 | 130.183 | 102 | 80  | hypothetical protein LOAG_04046                |
| Locus_20289_Transcript_1/1_Conf_1.000 | 156  | 0  |           |                |    |         |     |     |                                                |
| Locus_2029_Transcript_1/4_Conf_0.250  | 534  | 0  |           |                |    |         |     |     |                                                |
| Locus_2029_Transcript_2/4_Conf_0.250  | 576  | 0  |           |                |    |         |     |     |                                                |
| Locus_2029_Transcript_3/4_Conf_0.375  | 1644 | 20 | 0         | NP_505657.1    | 95 | 692.575 | 394 | 377 | ARp2/3 complex component family member (arx-2) |

|                                       |      |    |           |                |     |         |     |     |                                                             |
|---------------------------------------|------|----|-----------|----------------|-----|---------|-----|-----|-------------------------------------------------------------|
| Locus_2029_Transcript_4/4_Conf_0.375  | 1644 | 20 | 0         | NP_505657.1    | 95  | 694.886 | 394 | 377 | ARp2/3 complex component family member (arx-2)              |
| Locus_20290_Transcript_1/1_Conf_1.000 | 277  | 0  |           |                |     |         |     |     |                                                             |
| Locus_20291_Transcript_1/1_Conf_1.000 | 401  | 2  | 6.91E-11  | NP_495928.2    | 52  | 70.4774 | 136 | 71  | hypothetical protein F37B12.3                               |
| Locus_20292_Transcript_1/1_Conf_1.000 | 222  | 20 | 7.94E-23  | XP_002639618.1 | 80  | 110.153 | 71  | 57  | Hypothetical protein CBG12331                               |
| Locus_20293_Transcript_1/1_Conf_1.000 | 144  | 0  |           |                |     |         |     |     |                                                             |
| Locus_20294_Transcript_1/1_Conf_1.000 | 229  | 20 | 7.38E-21  | XP_002811972.1 | 100 | 103.605 | 51  | 51  | PREDICTED: small nuclear ribonucleoprotein G-like isoform 1 |
| Locus_20295_Transcript_1/1_Conf_1.000 | 373  | 0  |           |                |     |         |     |     |                                                             |
| Locus_20296_Transcript_1/1_Conf_1.000 | 132  | 0  |           |                |     |         |     |     |                                                             |
| Locus_20297_Transcript_1/1_Conf_1.000 | 349  | 20 | 2.07E-23  | EFO20853.1     | 64  | 112.079 | 119 | 77  | aldehyde dehydrogenase 4                                    |
| Locus_20298_Transcript_1/1_Conf_1.000 | 210  | 20 | 6.32E-33  | XP_002800695.1 | 100 | 143.665 | 70  | 70  | PREDICTED: protein disulfide-isomerase-like                 |
| Locus_20299_Transcript_1/1_Conf_1.000 | 243  | 9  | 5.21E-11  | XP_002636805.1 | 72  | 70.8626 | 81  | 59  | C. briggsae CBR-TTN-1 protein                               |
| Locus_203_Transcript_1/1_Conf_1.000   | 557  | 5  | 2.72E-05  | XP_002646659.1 | 49  | 52.373  | 85  | 42  | C. briggsae CBR-NURF-1 protein                              |
| Locus_2030_Transcript_1/3_Conf_0.500  | 736  | 20 | 5.28E-106 | NP_509854.1    | 90  | 387.882 | 230 | 208 | hypothetical protein W04G3.5                                |

|                                       |      |    |           |                |     |         |     |     |                                                                         |
|---------------------------------------|------|----|-----------|----------------|-----|---------|-----|-----|-------------------------------------------------------------------------|
| Locus_2030_Transcript_2/3_Conf_0.667  | 2018 | 20 | 5.24E-137 | NP_509854.1    | 95  | 493.041 | 286 | 273 | hypothetical protein W04G3.5                                            |
| Locus_2030_Transcript_3/3_Conf_0.667  | 1622 | 20 | 4.83E-167 | NP_509854.1    | 94  | 592.423 | 350 | 330 | hypothetical protein W04G3.5                                            |
| Locus_20300_Transcript_1/1_Conf_1.000 | 171  | 0  |           |                |     |         |     |     |                                                                         |
| Locus_20301_Transcript_1/1_Conf_1.000 | 140  | 0  |           |                |     |         |     |     |                                                                         |
| Locus_20302_Transcript_1/1_Conf_1.000 | 288  | 0  |           |                |     |         |     |     |                                                                         |
| Locus_20303_Transcript_1/1_Conf_1.000 | 570  | 4  | 1.92E-41  | NP_741200.1    | 65  | 172.555 | 190 | 124 | Displaced Gonad family member (dig-1)                                   |
| Locus_20304_Transcript_1/1_Conf_1.000 | 250  | 20 | 1.71E-30  | XP_002424532.1 | 89  | 135.576 | 83  | 74  | GTP-binding protein Di-Ras2, putative                                   |
| Locus_20305_Transcript_1/1_Conf_1.000 | 588  | 5  | 1.49E-39  | NP_001024333.1 | 62  | 166.392 | 206 | 128 | Olfactory LeaRNing defective family member (olrn-1)                     |
| Locus_20306_Transcript_1/1_Conf_1.000 | 169  | 0  |           |                |     |         |     |     |                                                                         |
| Locus_20307_Transcript_1/1_Conf_1.000 | 408  | 4  | 6.78E-35  | NP_490772.2    | 77  | 150.214 | 136 | 105 | hypothetical protein Y18H1A.3                                           |
| Locus_20308_Transcript_1/1_Conf_1.000 | 143  | 0  |           |                |     |         |     |     |                                                                         |
| Locus_20309_Transcript_1/1_Conf_1.000 | 400  | 4  | 3.43E-10  | XP_002647225.1 | 52  | 68.1662 | 131 | 69  | Hypothetical protein CBG23815                                           |
| Locus_2031_Transcript_1/2_Conf_1.000  | 1332 | 20 | 1.45E-86  | XP_414473.2    | 69  | 324.709 | 312 | 217 | PREDICTED: similar to multiple ankyrin repeats single KH domain protein |
| Locus_2031_Transcript_2/2_Conf_1.000  | 1332 | 20 | 1.45E-86  | XP_414473.2    | 69  | 324.709 | 312 | 217 | PREDICTED: similar to multiple ankyrin repeats single KH domain protein |
| Locus_20310_Transcript_1/1_Conf_1.000 | 138  | 0  |           |                |     |         |     |     |                                                                         |
| Locus_20311_Transcript_1/1_Conf_1.000 | 377  | 19 | 2.34E-43  | XP_002338056.1 | 100 | 144.821 | 67  | 67  | predicted protein                                                       |
| Locus_20312_Transcript_1/1_Conf_1.000 | 331  | 20 | 3.47E-47  | XP_002637345.1 | 90  | 191.045 | 109 | 99  | C. briggsae CBR-UNC-68 protein                                          |
| Locus_20313_Transcript_1/1_Conf_1.000 | 397  | 0  |           |                |     |         |     |     |                                                                         |
| Locus_20314_Transcript_1/1_Conf_1.000 | 405  | 20 | 9.47E-45  | NP_503758.4    | 79  | 182.956 | 134 | 106 | KETtin (Drosophila actin-binding) homolog family member (ketn-1)        |

|                                       |     |    |          |                |     |         |     |     |                                                                                                               |
|---------------------------------------|-----|----|----------|----------------|-----|---------|-----|-----|---------------------------------------------------------------------------------------------------------------|
| Locus_20315_Transcript_1/1_Conf_1.000 | 137 | 1  | 3.26E-13 | EAW60097.1     | 100 | 78.1814 | 36  | 36  | myosin, heavy polypeptide 9, non-muscle, isoform CRA_b                                                        |
| Locus_20316_Transcript_1/1_Conf_1.000 | 377 | 9  | 6.89E-19 | XP_002638736.1 | 68  | 97.0561 | 97  | 66  | C. briggsae CBR-EGO-1 protein                                                                                 |
| Locus_20317_Transcript_1/1_Conf_1.000 | 231 | 3  | 9.31E-16 | NP_496235.2    | 78  | 86.6557 | 78  | 61  | Zinc finger Transcription Factor family member (ztf-27)                                                       |
| Locus_20318_Transcript_1/1_Conf_1.000 | 487 | 0  |          |                |     |         |     |     |                                                                                                               |
| Locus_20319_Transcript_1/1_Conf_1.000 | 164 | 20 | 4.16E-24 | XP_002917683.1 | 100 | 114.39  | 54  | 54  | PREDICTED: LOW QUALITY PROTEIN: dolichyl-diphosphooligosaccharide--protein glycosyltransferase subunit 1-like |
| Locus_2032_Transcript_1/2_Conf_1.000  | 994 | 20 | 1.80E-21 | XP_002642942.1 | 46  | 107.842 | 283 | 132 | Hypothetical protein CBG15220                                                                                 |
| Locus_2032_Transcript_2/2_Conf_1.000  | 985 | 20 | 1.04E-21 | XP_002642942.1 | 46  | 108.612 | 283 | 131 | Hypothetical protein CBG15220                                                                                 |
| Locus_20320_Transcript_1/1_Conf_1.000 | 404 | 0  |          |                |     |         |     |     |                                                                                                               |
| Locus_20321_Transcript_1/1_Conf_1.000 | 312 | 0  |          |                |     |         |     |     |                                                                                                               |
| Locus_20322_Transcript_1/1_Conf_1.000 | 342 | 0  |          |                |     |         |     |     |                                                                                                               |
| Locus_20323_Transcript_1/1_Conf_1.000 | 406 | 4  | 6.20E-12 | NP_001021074.1 | 54  | 73.9442 | 133 | 73  | Aboc, EXPulsion defective family member (aex-1)                                                               |
| Locus_20324_Transcript_1/1_Conf_1.000 | 312 | 20 | 7.44E-29 | NP_493968.1    | 78  | 130.183 | 103 | 81  | hypothetical protein Y51H7C.9                                                                                 |
| Locus_20325_Transcript_1/1_Conf_1.000 | 164 | 1  | 8.71E-06 | XP_002639187.1 | 73  | 53.5286 | 38  | 28  | Hypothetical protein CBG03729                                                                                 |

|                                       |     |    |          |                |    |         |     |     |                                    |
|---------------------------------------|-----|----|----------|----------------|----|---------|-----|-----|------------------------------------|
| Locus_20326_Transcript_1/1_Conf_1.000 | 404 | 20 | 3.26E-53 | ADL62853.1     | 88 | 211.075 | 134 | 119 | thioredoxin reductase 2            |
| Locus_20327_Transcript_1/1_Conf_1.000 | 189 | 0  |          |                |    |         |     |     |                                    |
| Locus_20328_Transcript_1/1_Conf_1.000 | 313 | 5  | 7.20E-24 | ABS50363.1     | 86 | 113.62  | 94  | 81  | LIM domain protein variant         |
| Locus_20329_Transcript_1/1_Conf_1.000 | 245 | 0  |          |                |    |         |     |     |                                    |
| Locus_20333_Transcript_1/1_Conf_1.000 | 581 | 20 | 6.90E-58 | P51535.1       | 84 | 227.254 | 154 | 130 | Myoglobin                          |
| Locus_20330_Transcript_1/1_Conf_1.000 | 146 | 0  |          |                |    |         |     |     |                                    |
| Locus_20331_Transcript_1/1_Conf_1.000 | 269 | 0  |          |                |    |         |     |     |                                    |
| Locus_20332_Transcript_1/1_Conf_1.000 | 156 | 8  | 4.35E-05 | XP_002634715.1 | 65 | 51.2174 | 47  | 31  | Hypothetical protein CBG24051      |
| Locus_20333_Transcript_1/1_Conf_1.000 | 344 | 0  |          |                |    |         |     |     |                                    |
| Locus_20334_Transcript_1/1_Conf_1.000 | 344 | 20 | 1.55E-26 | XP_002630719.1 | 82 | 122.479 | 80  | 66  | C. briggsae CBR-DHS-5 protein      |
| Locus_20335_Transcript_1/1_Conf_1.000 | 289 | 0  |          |                |    |         |     |     |                                    |
| Locus_20336_Transcript_1/1_Conf_1.000 | 258 | 4  | 9.69E-13 | Q60V67.2       | 81 | 76.6406 | 49  | 40  | Histone-H3-lysine-36 demethylase 1 |
| Locus_20337_Transcript_1/1_Conf_1.000 | 299 | 16 | 2.52E-13 | XP_002632937.1 | 71 | 78.5666 | 64  | 46  | Hypothetical protein CBG21692      |
| Locus_20338_Transcript_1/1_Conf_1.000 | 177 | 0  |          |                |    |         |     |     |                                    |
| Locus_20339_Transcript_1/1_Conf_1.000 | 294 | 20 | 2.52E-29 | ACI49172.1     | 82 | 131.724 | 97  | 80  | hypothetical protein Csp3_JD01.004 |

|                                       |      |    |           |                |    |         |     |     |                                                                           |
|---------------------------------------|------|----|-----------|----------------|----|---------|-----|-----|---------------------------------------------------------------------------|
| Locus_2034_Transcript_1/2_Conf_1.000  | 1859 | 20 | 0         | XP_002631329.1 | 76 | 653.67  | 522 | 401 | Hypothetical protein CBG03152                                             |
| Locus_2034_Transcript_2/2_Conf_1.000  | 1734 | 20 | 2.64E-126 | NP_495860.1    | 78 | 457.218 | 338 | 265 | hypothetical protein K08F8.1                                              |
| Locus_20340_Transcript_1/1_Conf_1.000 | 133  | 0  |           |                |    |         |     |     |                                                                           |
| Locus_20341_Transcript_1/1_Conf_1.000 | 152  | 0  |           |                |    |         |     |     |                                                                           |
| Locus_20342_Transcript_1/1_Conf_1.000 | 438  | 3  | 1.39E-64  | NP_495881.2    | 86 | 248.825 | 145 | 126 | hypothetical protein F46C5.2                                              |
| Locus_20343_Transcript_1/1_Conf_1.000 | 230  | 14 | 5.68E-05  | XP_002577435.1 | 64 | 50.8322 | 64  | 41  | nonsense-mediated mRNA decay protein 1 (rent1)                            |
| Locus_20344_Transcript_1/1_Conf_1.000 | 230  | 20 | 2.80E-28  | XP_002645190.1 | 89 | 128.257 | 75  | 67  | C. briggsae CBR-PPK-3 protein                                             |
| Locus_20345_Transcript_1/1_Conf_1.000 | 232  | 6  | 7.63E-10  | NP_001021653.1 | 59 | 67.0106 | 74  | 44  | FANCI (Fanconi anemia complex component I) homolog family member (fnci-1) |
| Locus_20346_Transcript_1/1_Conf_1.000 | 164  | 0  |           |                |    |         |     |     |                                                                           |
| Locus_20347_Transcript_1/1_Conf_1.000 | 182  | 20 | 2.04E-18  | NP_491138.2    | 90 | 95.5153 | 60  | 54  | SULfate Permease family member (sulp-6)                                   |



|                                       |      |    |           |                |     |         |     |     |                                                                  |
|---------------------------------------|------|----|-----------|----------------|-----|---------|-----|-----|------------------------------------------------------------------|
| Locus_20348_Transcript_1/1_Conf_1.000 | 180  | 20 | 2.66E-26  | XP_002801767.1 | 100 | 121.709 | 60  | 60  | PREDICTED: sodium/potassium-transporting ATPase subunit alpha-1  |
| Locus_20349_Transcript_1/1_Conf_1.000 | 272  | 5  | 1.80E-11  | NP_493664.2    | 62  | 72.4034 | 89  | 56  | hypothetical protein K10B4.3                                     |
| Locus_2035_Transcript_1/1_Conf_1.000  | 1141 | 20 | 3.02E-103 | NP_500218.2    | 76  | 379.793 | 362 | 277 | Sex Peptide Receptor (Drosophila) Related family member (sprr-3) |
| Locus_20350_Transcript_1/1_Conf_1.000 | 151  | 0  |           |                |     |         |     |     |                                                                  |
| Locus_20351_Transcript_1/1_Conf_1.000 | 450  | 0  |           |                |     |         |     |     |                                                                  |
| Locus_20352_Transcript_1/1_Conf_1.000 | 160  | 0  |           |                |     |         |     |     |                                                                  |
| Locus_20353_Transcript_1/1_Conf_1.000 | 242  | 3  | 9.55E-05  | EFO27722.1     | 56  | 50.0618 | 75  | 42  | zinc finger protein                                              |
| Locus_20354_Transcript_1/1_Conf_1.000 | 156  | 0  |           |                |     |         |     |     |                                                                  |
| Locus_20355_Transcript_1/1_Conf_1.000 | 468  | 20 | 1.98E-50  | XP_002632055.1 | 90  | 201.83  | 132 | 120 | C. briggsae CBR-VAB-19 protein                                   |
| Locus_20356_Transcript_1/1_Conf_1.000 | 855  | 20 | 3.94E-24  | P41234.4       | 48  | 116.316 | 321 | 155 | ATP-binding cassette sub-family A member 2                       |

|                                       |      |    |           |                |    |         |     |     |                                                                     |
|---------------------------------------|------|----|-----------|----------------|----|---------|-----|-----|---------------------------------------------------------------------|
| Locus_20357_Transcript_1/1_Conf_1.000 | 543  | 4  | 2.07E-07  | NP_494349.1    | 48 | 59.3066 | 152 | 74  | hypothetical protein F29A7.6                                        |
| Locus_20358_Transcript_1/1_Conf_1.000 | 604  | 20 | 2.49E-08  | XP_415310.2    | 41 | 62.7734 | 197 | 81  | PREDICTED: similar to heavy neurofilament protein                   |
| Locus_20359_Transcript_1/1_Conf_1.000 | 178  | 2  | 2.04E-07  | XP_001894688.1 | 75 | 58.9214 | 41  | 31  | Protein-tyrosine phosphatase containing protein                     |
| Locus_2036_Transcript_1/1_Conf_1.000  | 1530 | 20 | 1.33E-126 | NP_001041105.1 | 74 | 457.988 | 377 | 282 | EGG Laying defective family member (egl-9)                          |
| Locus_20360_Transcript_1/1_Conf_1.000 | 517  | 20 | 9.86E-43  | NP_492839.4    | 74 | 176.407 | 171 | 127 | Leucine-rich repeats, Ras-like domain, Kinase family member (lrk-1) |
| Locus_20361_Transcript_1/1_Conf_1.000 | 420  | 4  | 2.15E-12  | NP_504235.2    | 67 | 75.485  | 83  | 56  | Drosophila SOS homolog family member (sos-1)                        |
| Locus_20362_Transcript_1/1_Conf_1.000 | 265  | 0  |           |                |    |         |     |     |                                                                     |
| Locus_20363_Transcript_1/1_Conf_1.000 | 114  | 0  |           |                |    |         |     |     |                                                                     |
| Locus_20364_Transcript_1/1_Conf_1.000 | 250  | 5  | 6.31E-17  | NP_504166.2    | 73 | 90.5077 | 76  | 56  | hypothetical protein H43I07.2                                       |

|                                       |      |    |          |                |     |         |     |     |                                  |
|---------------------------------------|------|----|----------|----------------|-----|---------|-----|-----|----------------------------------|
| Locus_20365_Transcript_1/1_Conf_1.000 | 233  | 4  | 1.58E-23 | NP_504708.1    | 80  | 112.464 | 80  | 64  | hypothetical protein T25F10.3    |
| Locus_20366_Transcript_1/1_Conf_1.000 | 183  | 0  |          |                |     |         |     |     |                                  |
| Locus_20367_Transcript_1/1_Conf_1.000 | 238  | 0  |          |                |     |         |     |     |                                  |
| Locus_20368_Transcript_1/1_Conf_1.000 | 418  | 0  |          |                |     |         |     |     |                                  |
| Locus_20369_Transcript_1/1_Conf_1.000 | 276  | 20 | 5.37E-16 | XP_002637140.1 | 100 | 87.4261 | 43  | 43  | C. briggsae CBR-CAT-4 protein    |
| Locus_2037_Transcript_1/1_Conf_1.000  | 205  | 20 | 1.57E-15 | NP_495222.2    | 85  | 85.8853 | 67  | 57  | hypothetical protein F21H12.1    |
| Locus_20370_Transcript_1/1_Conf_1.000 | 219  | 0  |          |                |     |         |     |     |                                  |
| Locus_20371_Transcript_1/1_Conf_1.000 | 155  | 0  |          |                |     |         |     |     |                                  |
| Locus_20372_Transcript_1/1_Conf_1.000 | 665  | 0  |          |                |     |         |     |     |                                  |
| Locus_20373_Transcript_1/1_Conf_1.000 | 130  | 20 | 2.59E-18 | BAH14542.1     | 100 | 95.1301 | 43  | 43  | unnamed protein product          |
| Locus_20374_Transcript_1/1_Conf_1.000 | 399  | 3  | 1.76E-06 | XP_002423450.1 | 44  | 55.8398 | 127 | 56  | conserved hypothetical protein   |
| Locus_20375_Transcript_1/1_Conf_1.000 | 303  | 3  | 3.06E-11 | XP_002642310.1 | 80  | 71.633  | 41  | 33  | Hypothetical protein CBG18302    |
| Locus_20376_Transcript_1/1_Conf_1.000 | 558  | 20 | 2.21E-15 | XP_001894167.1 | 53  | 85.8853 | 175 | 93  | Rad9 family protein              |
| Locus_20377_Transcript_1/1_Conf_1.000 | 382  | 20 | 2.94E-54 | XP_002640633.1 | 89  | 214.542 | 125 | 112 | C. briggsae CBR-CATP-1 protein   |
| Locus_20378_Transcript_1/1_Conf_1.000 | 224  | 0  |          |                |     |         |     |     |                                  |
| Locus_20379_Transcript_1/1_Conf_1.000 | 169  | 1  | 1.63E-04 | XP_002632056.1 | 61  | 49.2914 | 54  | 33  | Hypothetical protein CBG20437    |
| Locus_2038_Transcript_1/2_Conf_1.000  | 2132 | 9  | 2.76E-59 | XP_002639052.1 | 50  | 234.958 | 542 | 276 | C. briggsae CBR-PQN-59.2 protein |
| Locus_2038_Transcript_2/2_Conf_1.000  | 2123 | 9  | 2.74E-59 | XP_002639052.1 | 50  | 234.958 | 542 | 276 | C. briggsae CBR-PQN-59.2 protein |
| Locus_20380_Transcript_1/1_Conf_1.000 | 299  | 0  |          |                |     |         |     |     |                                  |
| Locus_20381_Transcript_1/1_Conf_1.000 | 203  | 0  |          |                |     |         |     |     |                                  |
| Locus_20382_Transcript_1/1_Conf_1.000 | 251  | 0  |          |                |     |         |     |     |                                  |

|                                       |      |    |           |                |    |         |     |     |                                                                                 |
|---------------------------------------|------|----|-----------|----------------|----|---------|-----|-----|---------------------------------------------------------------------------------|
| Locus_20383_Transcript_1/1_Conf_1.000 | 1124 | 20 | 4.21E-166 | AAC38987.1     | 89 | 588.571 | 369 | 329 | P-glycoprotein                                                                  |
| Locus_20384_Transcript_1/1_Conf_1.000 | 137  | 0  |           |                |    |         |     |     |                                                                                 |
| Locus_20385_Transcript_1/1_Conf_1.000 | 396  | 20 | 5.10E-38  | ACJ65168.1     | 98 | 160.614 | 75  | 74  | Uncoordinated protein 68, isoform b, partially confirmed by transcript evidence |
| Locus_20386_Transcript_1/1_Conf_1.000 | 242  | 20 | 1.79E-19  | XP_002637220.1 | 76 | 98.9821 | 77  | 59  | Hypothetical protein CBG18886                                                   |
| Locus_20387_Transcript_1/1_Conf_1.000 | 501  | 0  |           |                |    |         |     |     |                                                                                 |
| Locus_20388_Transcript_1/1_Conf_1.000 | 271  | 0  |           |                |    |         |     |     |                                                                                 |
| Locus_20389_Transcript_1/1_Conf_1.000 | 299  | 0  |           |                |    |         |     |     |                                                                                 |
| Locus_2039_Transcript_1/1_Conf_1.000  | 1598 | 20 | 1.38E-166 | NP_500596.2    | 71 | 590.882 | 503 | 362 | hypothetical protein F19C7.4                                                    |
| Locus_20390_Transcript_1/1_Conf_1.000 | 298  | 0  |           |                |    |         |     |     |                                                                                 |
| Locus_20391_Transcript_1/1_Conf_1.000 | 160  | 0  |           |                |    |         |     |     |                                                                                 |
| Locus_20392_Transcript_1/1_Conf_1.000 | 206  | 0  |           |                |    |         |     |     |                                                                                 |
| Locus_20393_Transcript_1/1_Conf_1.000 | 203  | 20 | 7.36E-05  | EFO21349.1     | 70 | 50.447  | 67  | 47  | hypothetical protein LOAG_07141                                                 |
| Locus_20394_Transcript_1/1_Conf_1.000 | 330  | 20 | 1.28E-41  | NP_495662.2    | 90 | 172.555 | 105 | 95  | PaTChed family member (ptc-1)                                                   |

|                                       |      |    |          |                |    |         |     |     |                                                                   |
|---------------------------------------|------|----|----------|----------------|----|---------|-----|-----|-------------------------------------------------------------------|
| Locus_20395_Transcript_1/1_Conf_1.000 | 427  | 20 | 1.43E-24 | XP_002641664.1 | 62 | 115.931 | 143 | 90  | Hypothetical protein CBG09992                                     |
| Locus_20396_Transcript_1/1_Conf_1.000 | 425  | 20 | 1.21E-23 | CAA90256.2     | 79 | 112.849 | 112 | 89  | C. elegans protein F54C9.11, confirmed by transcript evidence     |
| Locus_20397_Transcript_1/1_Conf_1.000 | 154  | 0  |          |                |    |         |     |     |                                                                   |
| Locus_20398_Transcript_1/1_Conf_1.000 | 889  | 4  | 5.31E-11 | NP_499003.1    | 50 | 72.7886 | 184 | 92  | hypothetical protein R107.5                                       |
| Locus_20399_Transcript_1/1_Conf_1.000 | 226  | 0  |          |                |    |         |     |     |                                                                   |
| Locus_204_Transcript_1/1_Conf_1.000   | 3308 | 20 | 4.04E-15 | NP_491244.1    | 37 | 88.9669 | 678 | 252 | HoloCentric chromosome binding Protein family member (hcp-4)      |
| Locus_2040_Transcript_1/1_Conf_1.000  | 1213 | 20 | 2.23E-99 | XP_002635668.1 | 72 | 367.081 | 345 | 249 | Hypothetical protein CBG21865                                     |
| Locus_20400_Transcript_1/1_Conf_1.000 | 566  | 0  |          |                |    |         |     |     |                                                                   |
| Locus_20401_Transcript_1/1_Conf_1.000 | 508  | 0  |          |                |    |         |     |     |                                                                   |
| Locus_20402_Transcript_1/1_Conf_1.000 | 913  | 20 | 1.62E-10 | NP_491784.1    | 45 | 71.2478 | 268 | 123 | hypothetical protein T05E7.3                                      |
| Locus_20403_Transcript_1/1_Conf_1.000 | 285  | 20 | 3.82E-17 | XP_001896129.1 | 68 | 91.2781 | 98  | 67  | Hypothetical 216.3 kDa protein R06F6.8 in chromosome II, putative |
| Locus_20404_Transcript_1/1_Conf_1.000 | 199  | 0  |          |                |    |         |     |     |                                                                   |
| Locus_20405_Transcript_1/1_Conf_1.000 | 189  | 0  |          |                |    |         |     |     |                                                                   |
| Locus_20406_Transcript_1/1_Conf_1.000 | 329  | 0  |          |                |    |         |     |     |                                                                   |
| Locus_20407_Transcript_1/1_Conf_1.000 | 497  | 5  | 3.36E-34 | NP_001023038.1 | 79 | 147.902 | 166 | 132 | EXCretry canal abnormal family member (exc-5)                     |
| Locus_20408_Transcript_1/1_Conf_1.000 | 146  | 3  | 4.71E-07 | NP_498918.3    | 80 | 57.7658 | 40  | 32  | hypothetical protein B0303.7                                      |
| Locus_20409_Transcript_1/1_Conf_1.000 | 227  | 0  |          |                |    |         |     |     |                                                                   |
| Locus_2041_Transcript_1/1_Conf_1.000  | 1385 | 4  | 1.12E-20 | EFO20584.1     | 62 | 105.916 | 127 | 79  | hypothetical protein LOAG_07907                                   |
| Locus_20410_Transcript_1/1_Conf_1.000 | 275  | 0  |          |                |    |         |     |     |                                                                   |
| Locus_20411_Transcript_1/1_Conf_1.000 | 242  | 1  | 9.86E-10 | NP_502377.2    | 72 | 66.6254 | 54  | 39  | hypothetical protein C25G4.3                                      |
| Locus_20412_Transcript_1/1_Conf_1.000 | 306  | 0  |          |                |    |         |     |     |                                                                   |

|                                       |     |    |           |                |     |         |     |     |                                                          |
|---------------------------------------|-----|----|-----------|----------------|-----|---------|-----|-----|----------------------------------------------------------|
| Locus_20413_Transcript_1/1_Conf_1.000 | 153 | 20 | 9.68E-21  | XP_002761135.1 | 100 | 103.219 | 50  | 50  | PREDICTED: proteasome subunit beta type-10-like          |
| Locus_20414_Transcript_1/1_Conf_1.000 | 288 | 20 | 3.11E-27  | NP_001129887.1 | 82  | 124.79  | 91  | 75  | SEC(selenocysteine)-tRNA Synthase family member (secs-1) |
| Locus_20415_Transcript_1/1_Conf_1.000 | 361 | 20 | 1.56E-31  | XP_002633437.1 | 78  | 139.043 | 119 | 93  | C. briggsae CBR-UNC-22 protein                           |
| Locus_20416_Transcript_1/1_Conf_1.000 | 811 | 20 | 8.96E-52  | XP_001892617.1 | 57  | 207.994 | 272 | 156 | Protein kinase domain containing protein                 |
| Locus_20417_Transcript_1/1_Conf_1.000 | 420 | 9  | 6.92E-19  | XP_002634184.1 | 57  | 97.0561 | 138 | 80  | C. briggsae CBR-QUI-1 protein                            |
| Locus_20418_Transcript_1/1_Conf_1.000 | 340 | 20 | 1.01E-14  | AAD31839.1     | 56  | 83.1889 | 97  | 55  | AF132291_1ancylostoma-secreted protein 1 precursor       |
| Locus_20419_Transcript_1/1_Conf_1.000 | 294 | 20 | 1.05E-51  | BAG60276.1     | 100 | 206.068 | 98  | 98  | unnamed protein product                                  |
| Locus_2042_Transcript_1/1_Conf_1.000  | 988 | 20 | 1.12E-116 | NP_497726.2    | 77  | 424.091 | 332 | 256 | hypothetical protein M01F1.7                             |
| Locus_20420_Transcript_1/1_Conf_1.000 | 533 | 0  |           |                |     |         |     |     |                                                          |

|                                       |     |    |          |                |     |         |     |    |                                                                         |
|---------------------------------------|-----|----|----------|----------------|-----|---------|-----|----|-------------------------------------------------------------------------|
| Locus_20421_Transcript_1/1_Conf_1.000 | 419 | 20 | 4.94E-41 | NP_499920.1    | 81  | 170.629 | 119 | 97 | hypothetical protein T07A9.8                                            |
| Locus_20422_Transcript_1/1_Conf_1.000 | 135 | 5  | 2.95E-14 | NP_492521.1    | 95  | 81.6481 | 45  | 43 | SynTropiN family member (stn-1)                                         |
| Locus_20423_Transcript_1/1_Conf_1.000 | 206 | 7  | 1.93E-05 | EFO24901.1     | 61  | 52.373  | 47  | 29 | hypothetical protein LOAG_03581                                         |
| Locus_20424_Transcript_1/1_Conf_1.000 | 162 | 0  |          |                |     |         |     |    |                                                                         |
| Locus_20425_Transcript_1/1_Conf_1.000 | 139 | 20 | 1.19E-15 | XP_002917678.1 | 100 | 86.2705 | 43  | 43 | PREDICTED: protein transport protein Sec61 subunit alpha isoform 1-like |
| Locus_20426_Transcript_1/1_Conf_1.000 | 219 | 8  | 1.19E-10 | XP_002630904.1 | 67  | 69.707  | 65  | 44 | Hypothetical protein CBG02628                                           |
| Locus_20427_Transcript_1/1_Conf_1.000 | 467 | 3  | 9.33E-16 | XP_002641334.1 | 59  | 86.6557 | 126 | 75 | C. briggsae CBR-HMT-1 protein                                           |
| Locus_20428_Transcript_1/1_Conf_1.000 | 305 | 20 | 4.13E-16 | XP_002643868.1 | 71  | 87.8113 | 81  | 58 | Hypothetical protein CBG02104                                           |
| Locus_20429_Transcript_1/1_Conf_1.000 | 307 | 0  |          |                |     |         |     |    |                                                                         |
| Locus_2043_Transcript_1/1_Conf_1.000  | 686 | 0  |          |                |     |         |     |    |                                                                         |
| Locus_20430_Transcript_1/1_Conf_1.000 | 286 | 5  | 1.65E-36 | NP_740906.1    | 90  | 155.606 | 90  | 81 | hypothetical protein F26E4.7                                            |
| Locus_20431_Transcript_1/1_Conf_1.000 | 297 | 0  |          |                |     |         |     |    |                                                                         |
| Locus_20432_Transcript_1/1_Conf_1.000 | 135 | 20 | 3.49E-07 | NP_491634.1    | 82  | 58.151  | 45  | 37 | hypothetical protein M01E11.2                                           |

|                                       |      |    |          |                |    |         |     |     |                                                              |
|---------------------------------------|------|----|----------|----------------|----|---------|-----|-----|--------------------------------------------------------------|
| Locus_20433_Transcript_1/1_Conf_1.000 | 199  | 20 | 2.00E-26 | CAB00098.2     | 92 | 122.094 | 66  | 61  | C. elegans protein F57F5.1, confirmed by transcript evidence |
| Locus_20434_Transcript_1/1_Conf_1.000 | 290  | 20 | 5.87E-18 | NP_001024053.1 | 56 | 93.9745 | 116 | 65  | UNCoordinated family member (unc-70)                         |
| Locus_20435_Transcript_1/1_Conf_1.000 | 197  | 20 | 3.10E-19 | XP_002629656.1 | 89 | 98.2117 | 57  | 51  | Hypothetical protein CBG00863                                |
| Locus_20436_Transcript_1/2_Conf_1.000 | 448  | 20 | 1.57E-47 | XP_002631186.1 | 75 | 192.2   | 150 | 113 | C. briggsae CBR-UNC-53 protein                               |
| Locus_20436_Transcript_2/2_Conf_1.000 | 459  | 20 | 6.92E-48 | XP_002631186.1 | 75 | 193.356 | 153 | 115 | C. briggsae CBR-UNC-53 protein                               |
| Locus_20437_Transcript_1/1_Conf_1.000 | 162  | 2  | 4.18E-08 | NP_505894.2    | 86 | 61.2326 | 37  | 32  | hypothetical protein K03B8.6                                 |
| Locus_20438_Transcript_1/1_Conf_1.000 | 447  | 20 | 9.87E-34 | XP_001898089.1 | 69 | 146.362 | 148 | 103 | uridine monophosphate kinase                                 |
| Locus_20439_Transcript_1/1_Conf_1.000 | 169  | 1  | 6.20E-04 | XP_001896579.1 | 75 | 47.3654 | 53  | 40  | hypothetical protein Bm1_25600                               |
| Locus_2044_Transcript_1/1_Conf_1.000  | 1097 | 20 | 8.97E-73 | XP_002639582.1 | 80 | 278.485 | 225 | 180 | C. briggsae CBR-TRAP-1 protein                               |
| Locus_20440_Transcript_1/1_Conf_1.000 | 232  | 0  |          |                |    |         |     |     |                                                              |
| Locus_20441_Transcript_1/1_Conf_1.000 | 870  | 4  | 1.00E-38 | NP_508466.2    | 68 | 164.851 | 155 | 106 | hypothetical protein H01M10.1                                |
| Locus_20442_Transcript_1/1_Conf_1.000 | 178  | 0  |          |                |    |         |     |     |                                                              |
| Locus_20443_Transcript_1/1_Conf_1.000 | 152  | 0  |          |                |    |         |     |     |                                                              |
| Locus_20444_Transcript_1/1_Conf_1.000 | 225  | 0  |          |                |    |         |     |     |                                                              |
| Locus_20445_Transcript_1/1_Conf_1.000 | 399  | 0  |          |                |    |         |     |     |                                                              |
| Locus_20446_Transcript_1/1_Conf_1.000 | 262  | 0  |          |                |    |         |     |     |                                                              |
| Locus_20447_Transcript_1/1_Conf_1.000 | 363  | 20 | 1.56E-23 | XP_001899525.1 | 65 | 112.464 | 126 | 83  | C-terminal binding protein                                   |



|                                       |      |    |           |                |    |         |     |     |                                                                                  |
|---------------------------------------|------|----|-----------|----------------|----|---------|-----|-----|----------------------------------------------------------------------------------|
| Locus_20448_Transcript_1/1_Conf_1.000 | 790  | 20 | 4.24E-75  | NP_498392.1    | 70 | 285.419 | 265 | 186 | THO Complex (transcription factor/nuclear export) subunit family member (thoc-2) |
| Locus_20449_Transcript_1/1_Conf_1.000 | 252  | 2  | 9.11E-19  | XP_002640627.1 | 74 | 96.6709 | 75  | 56  | C. briggsae CBR-UNC-95 protein                                                   |
| Locus_2045_Transcript_1/2_Conf_1.000  | 2189 | 20 | 4.56E-142 | NP_001024503.1 | 68 | 509.99  | 515 | 355 | hypothetical protein C55B6.1                                                     |
| Locus_2045_Transcript_2/2_Conf_1.000  | 1601 | 20 | 2.23E-132 | NP_001024503.1 | 69 | 477.248 | 470 | 326 | hypothetical protein C55B6.1                                                     |
| Locus_20450_Transcript_1/1_Conf_1.000 | 186  | 0  |           |                |    |         |     |     |                                                                                  |
| Locus_20451_Transcript_1/1_Conf_1.000 | 184  | 0  |           |                |    |         |     |     |                                                                                  |
| Locus_20452_Transcript_1/1_Conf_1.000 | 146  | 0  |           |                |    |         |     |     |                                                                                  |
| Locus_20453_Transcript_1/1_Conf_1.000 | 906  | 20 | 1.24E-79  | NP_001122707.1 | 75 | 300.827 | 247 | 187 | hypothetical protein K02D10.1                                                    |
| Locus_20454_Transcript_1/1_Conf_1.000 | 258  | 0  |           |                |    |         |     |     |                                                                                  |
| Locus_20455_Transcript_1/1_Conf_1.000 | 227  | 0  |           |                |    |         |     |     |                                                                                  |
| Locus_20456_Transcript_1/1_Conf_1.000 | 578  | 4  | 1.39E-10  | NP_001129872.1 | 53 | 70.0922 | 143 | 76  | hypothetical protein T23B5.3                                                     |
| Locus_20457_Transcript_1/1_Conf_1.000 | 487  | 0  |           |                |    |         |     |     |                                                                                  |
| Locus_20458_Transcript_1/1_Conf_1.000 | 400  | 0  |           |                |    |         |     |     |                                                                                  |
| Locus_20459_Transcript_1/1_Conf_1.000 | 155  | 0  |           |                |    |         |     |     |                                                                                  |
| Locus_2046_Transcript_1/2_Conf_1.000  | 648  | 2  | 4.15E-10  | ABB53347.1     | 42 | 68.9366 | 186 | 79  | secreted protein 5 precursor                                                     |
| Locus_2046_Transcript_2/2_Conf_1.000  | 222  | 0  |           |                |    |         |     |     |                                                                                  |
| Locus_20460_Transcript_1/1_Conf_1.000 | 517  | 0  |           |                |    |         |     |     |                                                                                  |
| Locus_20461_Transcript_1/1_Conf_1.000 | 266  | 20 | 1.09E-40  | NP_510020.2    | 88 | 169.474 | 88  | 78  | hypothetical protein W03G11.3                                                    |
| Locus_20462_Transcript_1/1_Conf_1.000 | 173  | 0  |           |                |    |         |     |     |                                                                                  |
| Locus_20463_Transcript_1/1_Conf_1.000 | 177  | 20 | 8.53E-22  | AAV32848.1     | 91 | 106.686 | 59  | 54  | egl-20                                                                           |
| Locus_20464_Transcript_1/1_Conf_1.000 | 251  | 4  | 1.01E-06  | NP_501580.3    | 60 | 56.6102 | 71  | 43  | LiPoate Ligase family member (lpl-1)                                             |
| Locus_20465_Transcript_1/1_Conf_1.000 | 439  | 4  | 1.35E-43  | NP_510514.2    | 76 | 179.104 | 153 | 117 | hypothetical protein R07D5.2                                                     |

|                                       |      |    |          |                |     |         |     |     |                                                                        |
|---------------------------------------|------|----|----------|----------------|-----|---------|-----|-----|------------------------------------------------------------------------|
| Locus_20466_Transcript_1/1_Conf_1.000 | 200  | 20 | 1.14E-13 | XP_002639317.1 | 85  | 79.7221 | 49  | 42  | C. briggsae CBR-ABT-2 protein                                          |
| Locus_20467_Transcript_1/1_Conf_1.000 | 327  | 20 | 3.36E-58 | NP_509585.1    | 100 | 227.639 | 108 | 108 | Tubulin, Beta family member (tbb-4)                                    |
| Locus_20468_Transcript_1/1_Conf_1.000 | 301  | 0  |          |                |     |         |     |     |                                                                        |
| Locus_20469_Transcript_1/1_Conf_1.000 | 159  | 20 | 1.18E-18 | NP_491028.2    | 88  | 96.2857 | 52  | 46  | abnormal cell LINEage family member (lin-17)                           |
| Locus_2047_Transcript_1/1_Conf_1.000  | 1489 | 20 | 0        | XP_002638927.1 | 83  | 650.588 | 498 | 416 | Hypothetical protein CBG22153                                          |
| Locus_20470_Transcript_1/1_Conf_1.000 | 335  | 1  | 6.17E-04 | XP_002638631.1 | 54  | 47.3654 | 97  | 53  | Hypothetical protein CBG05684                                          |
| Locus_20471_Transcript_1/1_Conf_1.000 | 428  | 7  | 7.34E-13 | XP_002641828.1 | 50  | 77.0258 | 155 | 79  | C. briggsae CBR-PRK-1 protein                                          |
| Locus_20472_Transcript_1/1_Conf_1.000 | 163  | 4  | 7.61E-10 | NP_001033357.2 | 82  | 67.0106 | 45  | 37  | DAF-16/FOXO Controlled, germline Tumor affecting family member (dct-6) |
| Locus_20473_Transcript_1/1_Conf_1.000 | 157  | 0  |          |                |     |         |     |     |                                                                        |
| Locus_20474_Transcript_1/1_Conf_1.000 | 153  | 0  |          |                |     |         |     |     |                                                                        |
| Locus_20475_Transcript_1/1_Conf_1.000 | 271  | 20 | 1.74E-22 | XP_002646294.1 | 78  | 108.997 | 89  | 70  | C. briggsae CBR-RIC-19 protein                                         |
| Locus_20476_Transcript_1/1_Conf_1.000 | 225  | 0  |          |                |     |         |     |     |                                                                        |
| Locus_20477_Transcript_1/1_Conf_1.000 | 210  | 0  |          |                |     |         |     |     |                                                                        |

|                                       |     |    |          |                |    |         |     |     |                                                                          |
|---------------------------------------|-----|----|----------|----------------|----|---------|-----|-----|--------------------------------------------------------------------------|
| Locus_20478_Transcript_1/1_Conf_1.000 | 418 | 20 | 5.49E-24 | NP_491115.1    | 64 | 114.005 | 137 | 89  | hypothetical protein Y54E10A.6                                           |
| Locus_20479_Transcript_1/1_Conf_1.000 | 302 | 0  |          |                |    |         |     |     |                                                                          |
| Locus_2048_Transcript_1/1_Conf_1.000  | 903 | 20 | 1.11E-96 | NP_001122845.1 | 87 | 357.451 | 234 | 204 | Protein Phosphatase 2A (Two A) Regulatory subunit family member (pptr-2) |
| Locus_20480_Transcript_1/1_Conf_1.000 | 148 | 0  |          |                |    |         |     |     |                                                                          |
| Locus_20481_Transcript_1/1_Conf_1.000 | 167 | 0  |          |                |    |         |     |     |                                                                          |
| Locus_20482_Transcript_1/1_Conf_1.000 | 162 | 0  |          |                |    |         |     |     |                                                                          |
| Locus_20483_Transcript_1/1_Conf_1.000 | 129 | 0  |          |                |    |         |     |     |                                                                          |
| Locus_20484_Transcript_1/1_Conf_1.000 | 357 | 2  | 1.90E-53 | XP_002647011.1 | 94 | 211.846 | 104 | 98  | Hypothetical protein CBG23797                                            |
| Locus_20485_Transcript_1/1_Conf_1.000 | 345 | 0  |          |                |    |         |     |     |                                                                          |
| Locus_20486_Transcript_1/1_Conf_1.000 | 502 | 20 | 1.13E-77 | XP_002637163.1 | 92 | 292.352 | 167 | 154 | C. briggsae CBR-SQV-4 protein                                            |

|                                       |     |    |           |                |    |         |     |     |                                                                    |
|---------------------------------------|-----|----|-----------|----------------|----|---------|-----|-----|--------------------------------------------------------------------|
| Locus_20487_Transcript_1/1_Conf_1.000 | 141 | 20 | 2.25E-06  | XP_002429811.1 | 76 | 55.4546 | 42  | 32  | class A rhodopsin-like G-protein coupled receptor GPRfsh, putative |
| Locus_20488_Transcript_1/1_Conf_1.000 | 280 | 0  |           |                |    |         |     |     |                                                                    |
| Locus_20489_Transcript_1/1_Conf_1.000 | 167 | 0  |           |                |    |         |     |     |                                                                    |
| Locus_2049_Transcript_1/1_Conf_1.000  | 668 | 20 | 1.51E-111 | XP_002640980.1 | 90 | 405.986 | 221 | 201 | Hypothetical protein CBG11728                                      |
| Locus_20490_Transcript_1/1_Conf_1.000 | 205 | 0  |           |                |    |         |     |     |                                                                    |
| Locus_20491_Transcript_1/1_Conf_1.000 | 207 | 20 | 2.67E-23  | NP_496968.1    | 95 | 111.694 | 67  | 64  | hypothetical protein Y48B6A.12                                     |
| Locus_20492_Transcript_1/1_Conf_1.000 | 163 | 1  | 6.67E-06  | XP_002643614.1 | 72 | 53.9138 | 43  | 31  | C. briggsae CBR-SER-1 protein                                      |
| Locus_20493_Transcript_1/1_Conf_1.000 | 639 | 20 | 1.58E-99  | NP_510361.1    | 89 | 365.925 | 212 | 189 | Synthetic lethal with Mec family member (sym-4)                    |
| Locus_20494_Transcript_1/1_Conf_1.000 | 172 | 0  |           |                |    |         |     |     |                                                                    |
| Locus_20495_Transcript_1/1_Conf_1.000 | 137 | 0  |           |                |    |         |     |     |                                                                    |
| Locus_20496_Transcript_1/1_Conf_1.000 | 294 | 4  | 1.53E-18  | NP_506256.3    | 67 | 95.9005 | 96  | 65  | CaDHerin family member (cdh-6)                                     |
| Locus_20497_Transcript_1/1_Conf_1.000 | 140 | 0  |           |                |    |         |     |     |                                                                    |

|                                       |     |    |          |                |     |         |     |     |                                                          |
|---------------------------------------|-----|----|----------|----------------|-----|---------|-----|-----|----------------------------------------------------------|
| Locus_20498_Transcript_1/1_Conf_1.000 | 396 | 0  |          |                |     |         |     |     |                                                          |
| Locus_20499_Transcript_1/1_Conf_1.000 | 224 | 10 | 4.36E-21 | NP_001129803.1 | 82  | 104.375 | 74  | 61  | Leucyl tRNA Synthetase family member (Irs-2)             |
| Locus_205_Transcript_1/1_Conf_1.000   | 762 | 20 | 4.09E-56 | NP_496817.1    | 74  | 222.246 | 191 | 142 | hypothetical protein Y48C3A.10                           |
| Locus_2050_Transcript_1/1_Conf_1.000  | 320 | 0  |          |                |     |         |     |     |                                                          |
| Locus_20500_Transcript_1/1_Conf_1.000 | 230 | 2  | 3.56E-07 | XP_001893874.1 | 75  | 58.151  | 52  | 39  | Smr domain containing protein                            |
| Locus_20501_Transcript_1/1_Conf_1.000 | 614 | 20 | 4.26E-27 | XP_002643092.1 | 62  | 125.176 | 211 | 132 | Hypothetical protein CBG23016                            |
| Locus_20502_Transcript_1/1_Conf_1.000 | 484 | 20 | 2.04E-87 | P13498.2       | 100 | 324.709 | 157 | 157 | Cytochrome b-245 light chain                             |
| Locus_20503_Transcript_1/1_Conf_1.000 | 237 | 20 | 7.31E-21 | ACI49169.1     | 78  | 103.605 | 76  | 60  | hypothetical protein Csp3_JD01.001                       |
| Locus_20504_Transcript_1/1_Conf_1.000 | 270 | 0  |          |                |     |         |     |     |                                                          |
| Locus_20505_Transcript_1/1_Conf_1.000 | 157 | 0  |          |                |     |         |     |     |                                                          |
| Locus_20506_Transcript_1/1_Conf_1.000 | 211 | 20 | 1.79E-19 | XP_001894872.1 | 79  | 98.9821 | 69  | 55  | hypothetical protein Bm1_17075                           |
| Locus_20507_Transcript_1/1_Conf_1.000 | 194 | 5  | 1.49E-13 | XP_002637665.1 | 77  | 79.337  | 57  | 44  | C. briggsae CBR-APT-10 protein                           |
| Locus_20508_Transcript_1/1_Conf_1.000 | 133 | 5  | 1.98E-10 | XP_001893497.1 | 92  | 68.9366 | 41  | 38  | Viral A-type inclusion protein repeat containing protein |
| Locus_20509_Transcript_1/1_Conf_1.000 | 346 | 6  | 5.13E-22 | CAD11605.1     | 79  | 107.457 | 115 | 91  | metalloprotease                                          |

|                                       |     |    |          |                |    |         |     |     |                                         |
|---------------------------------------|-----|----|----------|----------------|----|---------|-----|-----|-----------------------------------------|
| Locus_2051_Transcript_1/1_Conf_1.000  | 202 | 20 | 6.00E-15 | XP_002637392.1 | 76 | 83.9593 | 67  | 51  | Hypothetical protein CBG19099           |
| Locus_20510_Transcript_1/1_Conf_1.000 | 551 | 20 | 6.85E-30 | XP_001900782.1 | 62 | 134.035 | 144 | 90  | mKIAA2025 protein                       |
| Locus_20511_Transcript_1/1_Conf_1.000 | 421 | 20 | 4.05E-27 | NP_505989.1    | 72 | 124.405 | 140 | 102 | SULfate Permease family member (sulp-4) |
| Locus_20512_Transcript_1/1_Conf_1.000 | 549 | 5  | 3.65E-15 | XP_002633339.1 | 57 | 85.1149 | 110 | 63  | Hypothetical protein CBG06078           |
| Locus_20513_Transcript_1/1_Conf_1.000 | 367 | 20 | 2.17E-17 | XP_002643252.1 | 78 | 92.0485 | 74  | 58  | C. briggsae CBR-TRAP-2 protein          |
| Locus_20514_Transcript_1/1_Conf_1.000 | 148 | 0  |          |                |    |         |     |     |                                         |
| Locus_20515_Transcript_1/1_Conf_1.000 | 792 | 20 | 1.53E-48 | XP_002641022.1 | 86 | 197.208 | 119 | 103 | C. briggsae CBR-GLRX-5 protein          |
| Locus_20516_Transcript_1/1_Conf_1.000 | 432 | 20 | 3.55E-76 | CAM84506.1     | 96 | 287.345 | 143 | 138 | serine/threonine phosphatase            |
| Locus_20517_Transcript_1/1_Conf_1.000 | 203 | 0  |          |                |    |         |     |     |                                         |
| Locus_20518_Transcript_1/1_Conf_1.000 | 269 | 20 | 3.50E-31 | NP_502314.1    | 91 | 137.887 | 73  | 67  | hypothetical protein F35G2.1            |
| Locus_20519_Transcript_1/1_Conf_1.000 | 265 | 20 | 3.64E-28 |                | 83 | 127.872 | 89  | 74  | myoblast city protein homolog           |

|                                       |     |    |          |                |    |         |     |    |                              |
|---------------------------------------|-----|----|----------|----------------|----|---------|-----|----|------------------------------|
| Locus_2052_Transcript_1/2_Conf_1.000  | 716 | 20 | 3.18E-20 | XP_001896583.1 | 87 | 102.834 | 65  | 57 | high mobility group protein  |
| Locus_2052_Transcript_2/2_Conf_1.000  | 470 | 0  |          |                |    |         |     |    |                              |
| Locus_20520_Transcript_1/1_Conf_1.000 | 204 | 20 | 2.28E-06 | XP_002181319.1 | 65 | 55.4546 | 63  | 41 | predicted protein            |
| Locus_20521_Transcript_1/1_Conf_1.000 | 353 | 2  | 9.64E-05 | EFO18076.1     | 64 | 50.0618 | 59  | 38 | DNA-dependent RNA polymerase |
| Locus_20522_Transcript_1/1_Conf_1.000 | 327 | 20 | 4.87E-41 | NP_492476.1    | 91 | 170.629 | 106 | 97 | hypothetical protein F14B4.3 |
| Locus_20523_Transcript_1/1_Conf_1.000 | 219 | 0  |          |                |    |         |     |    |                              |
| Locus_20524_Transcript_1/1_Conf_1.000 | 145 | 0  |          |                |    |         |     |    |                              |
| Locus_20525_Transcript_1/1_Conf_1.000 | 140 | 0  |          |                |    |         |     |    |                              |
| Locus_20526_Transcript_1/1_Conf_1.000 | 135 | 0  |          |                |    |         |     |    |                              |
| Locus_20527_Transcript_1/1_Conf_1.000 | 129 | 0  |          |                |    |         |     |    |                              |

|                                       |      |    |          |                |     |         |     |     |                                                                 |
|---------------------------------------|------|----|----------|----------------|-----|---------|-----|-----|-----------------------------------------------------------------|
| Locus_20528_Transcript_1/1_Conf_1.000 | 414  | 20 | 3.00E-59 | EFO21414.1     | 89  | 231.106 | 137 | 122 | hypothetical protein LOAG_07072                                 |
| Locus_20529_Transcript_1/1_Conf_1.000 | 220  | 0  |          |                |     |         |     |     |                                                                 |
| Locus_2053_Transcript_1/1_Conf_1.000  | 511  | 20 | 2.11E-18 | XP_001893088.1 | 61  | 95.5153 | 112 | 69  | Glutaredoxin family protein                                     |
| Locus_20530_Transcript_1/1_Conf_1.000 | 137  | 20 | 6.57E-14 | NP_492593.2    | 93  | 80.4925 | 45  | 42  | hypothetical protein F26E4.3                                    |
| Locus_20531_Transcript_1/1_Conf_1.000 | 282  | 0  |          |                |     |         |     |     |                                                                 |
| Locus_20532_Transcript_1/1_Conf_1.000 | 415  | 5  | 3.24E-21 | XP_002630781.1 | 62  | 104.76  | 121 | 76  | Hypothetical protein CBG02477                                   |
| Locus_20533_Transcript_1/1_Conf_1.000 | 335  | 0  |          |                |     |         |     |     |                                                                 |
| Locus_20534_Transcript_1/1_Conf_1.000 | 130  | 0  |          |                |     |         |     |     |                                                                 |
| Locus_20535_Transcript_1/1_Conf_1.000 | 165  | 0  |          |                |     |         |     |     |                                                                 |
| Locus_20536_Transcript_1/1_Conf_1.000 | 197  | 20 | 9.30E-24 | XP_001088441.2 | 100 | 113.235 | 55  | 55  | PREDICTED: transcription elongation factor B polypeptide 2-like |
| Locus_20537_Transcript_1/1_Conf_1.000 | 219  | 0  |          |                |     |         |     |     |                                                                 |
| Locus_20538_Transcript_1/1_Conf_1.000 | 504  | 20 | 3.62E-47 | XP_002633316.1 | 75  | 191.045 | 166 | 126 | C. briggsae CBR-GTL-2 protein                                   |
| Locus_20539_Transcript_1/1_Conf_1.000 | 193  | 0  |          |                |     |         |     |     |                                                                 |
| Locus_2054_Transcript_1/1_Conf_1.000  | 1193 | 7  | 1.03E-32 | XP_002638536.1 | 45  | 145.591 | 430 | 197 | C. briggsae CBR-NUM-1 protein                                   |
| Locus_20540_Transcript_1/1_Conf_1.000 | 276  | 0  |          |                |     |         |     |     |                                                                 |
| Locus_20541_Transcript_1/1_Conf_1.000 | 174  | 0  |          |                |     |         |     |     |                                                                 |
| Locus_20542_Transcript_1/1_Conf_1.000 | 350  | 0  |          |                |     |         |     |     |                                                                 |
| Locus_20543_Transcript_1/1_Conf_1.000 | 685  | 9  | 3.45E-21 | XP_002581843.1 | 55  | 105.916 | 161 | 90  | hypothetical protein                                            |



|                                       |      |    |           |                |     |         |     |     |                                       |
|---------------------------------------|------|----|-----------|----------------|-----|---------|-----|-----|---------------------------------------|
| Locus_20544_Transcript_1/1_Conf_1.000 | 291  | 20 | 1.81E-43  | NP_496205.2    | 93  | 178.718 | 96  | 90  | PhosphoLipase C family member (plc-3) |
| Locus_20545_Transcript_1/1_Conf_1.000 | 273  | 20 | 2.18E-25  | XP_002638629.1 | 77  | 118.627 | 88  | 68  | C. briggsae CBR-TWK-33 protein        |
| Locus_20546_Transcript_1/1_Conf_1.000 | 130  | 0  |           |                |     |         |     |     |                                       |
| Locus_20547_Transcript_1/1_Conf_1.000 | 204  | 0  |           |                |     |         |     |     |                                       |
| Locus_20548_Transcript_1/1_Conf_1.000 | 167  | 4  | 1.29E-09  | XP_002641345.1 | 76  | 66.2402 | 55  | 42  | Hypothetical protein CBG13198         |
| Locus_20549_Transcript_1/1_Conf_1.000 | 228  | 1  | 7.15E-16  | BAG59555.1     | 100 | 87.0409 | 38  | 38  | unnamed protein product               |
| Locus_2055_Transcript_1/1_Conf_1.000  | 2231 | 20 | 7.19E-151 | EFO27499.1     | 75  | 539.265 | 473 | 357 | hypothetical protein LOAG_00977       |
| Locus_20550_Transcript_1/1_Conf_1.000 | 158  | 0  |           |                |     |         |     |     |                                       |
| Locus_20551_Transcript_1/1_Conf_1.000 | 225  | 0  |           |                |     |         |     |     |                                       |
| Locus_20552_Transcript_1/1_Conf_1.000 | 271  | 12 | 2.98E-06  | XP_002660579.1 | 54  | 55.0694 | 86  | 47  | PREDICTED: hypothetical protein       |
| Locus_20553_Transcript_1/1_Conf_1.000 | 247  | 1  | 5.03E-06  | NP_495345.1    | 61  | 54.299  | 78  | 48  | hypothetical protein F54H5.3          |
| Locus_20554_Transcript_1/1_Conf_1.000 | 148  | 0  |           |                |     |         |     |     |                                       |

|                                       |      |    |          |                |     |         |     |     |                                                                    |
|---------------------------------------|------|----|----------|----------------|-----|---------|-----|-----|--------------------------------------------------------------------|
| Locus_20555_Transcript_1/1_Conf_1.000 | 346  | 20 | 7.89E-31 | XP_002635068.1 | 78  | 136.732 | 89  | 70  | C. briggsae CBR-MOM-2 protein                                      |
| Locus_20556_Transcript_1/1_Conf_1.000 | 239  | 3  | 2.44E-08 | NP_001129867.1 | 69  | 62.003  | 72  | 50  | hypothetical protein T05E11.2                                      |
| Locus_20557_Transcript_1/1_Conf_1.000 | 373  | 5  | 1.27E-04 | ZP_02210846.1  | 40  | 49.6766 | 100 | 40  | hypothetical protein CLOBAR_00414                                  |
| Locus_20558_Transcript_1/1_Conf_1.000 | 294  | 20 | 3.51E-39 | NP_496448.1    | 87  | 164.466 | 98  | 86  | hypothetical protein W02B12.10                                     |
| Locus_20559_Transcript_1/1_Conf_1.000 | 207  | 2  | 1.13E-05 | XP_001900715.1 | 57  | 53.1434 | 69  | 40  | hypothetical protein                                               |
| Locus_2056_Transcript_1/1_Conf_1.000  | 435  | 17 | 1.97E-10 | XP_001900570.1 | 64  | 68.9366 | 85  | 55  | ThiS family protein                                                |
| Locus_20560_Transcript_1/1_Conf_1.000 | 380  | 2  | 4.44E-26 | NP_496074.2    | 74  | 120.939 | 109 | 81  | hypothetical protein ZK1307.7                                      |
| Locus_20561_Transcript_1/1_Conf_1.000 | 454  | 20 | 1.67E-41 | XP_002642775.1 | 78  | 172.17  | 132 | 104 | C. briggsae CBR-NEX-1 protein                                      |
| Locus_20562_Transcript_1/1_Conf_1.000 | 168  | 0  |          |                |     |         |     |     |                                                                    |
| Locus_20563_Transcript_1/1_Conf_1.000 | 212  | 0  |          |                |     |         |     |     |                                                                    |
| Locus_20564_Transcript_1/1_Conf_1.000 | 222  | 20 | 7.81E-31 | EAW91906.1     | 100 | 87.4261 | 39  | 39  | hCG2008737                                                         |
| Locus_20565_Transcript_1/1_Conf_1.000 | 148  | 0  |          |                |     |         |     |     |                                                                    |
| Locus_20566_Transcript_1/1_Conf_1.000 | 137  | 0  |          |                |     |         |     |     |                                                                    |
| Locus_20567_Transcript_1/1_Conf_1.000 | 582  | 20 | 1.71E-88 | CAR63545.1     | 91  | 328.946 | 196 | 179 | putative Hsp90 protein                                             |
| Locus_20568_Transcript_1/1_Conf_1.000 | 275  | 20 | 6.78E-35 | XP_002644234.1 | 90  | 150.214 | 91  | 82  | C. briggsae CBR-MIG-15 protein                                     |
| Locus_20569_Transcript_1/1_Conf_1.000 | 280  | 0  |          |                |     |         |     |     |                                                                    |
| Locus_2057_Transcript_1/1_Conf_1.000  | 2326 | 20 | 9.20E-56 | NP_001122456.1 | 49  | 223.402 | 500 | 245 | Protein Phosphatase Four Regulatory subunit family member (ppfr-1) |
| Locus_20570_Transcript_1/1_Conf_1.000 | 266  | 20 | 3.08E-27 | XP_002641517.1 | 82  | 124.79  | 88  | 73  | Hypothetical protein CBG09813                                      |
| Locus_20571_Transcript_1/1_Conf_1.000 | 324  | 20 | 4.74E-36 | NP_491855.1    | 84  | 154.066 | 109 | 92  | Nuclear Pore complex Protein family member (npp-12)                |

|                                       |     |    |          |                |    |         |     |     |                                                                                                                                                   |
|---------------------------------------|-----|----|----------|----------------|----|---------|-----|-----|---------------------------------------------------------------------------------------------------------------------------------------------------|
| Locus_20572_Transcript_1/1_Conf_1.000 | 172 | 20 | 6.17E-12 | XP_863776.1    | 83 | 73.9442 | 55  | 46  | PREDICTED: similar to Poly [ADP-ribose] polymerase-1 (PARP-1) (ADPRT) (NAD(+)-ADP-ribosyltransferase-1) (Poly[ADP-ribose] synthetase-1) isoform 2 |
| Locus_20573_Transcript_1/1_Conf_1.000 | 175 | 0  |          |                |    |         |     |     |                                                                                                                                                   |
| Locus_20574_Transcript_1/1_Conf_1.000 | 343 | 0  |          |                |    |         |     |     |                                                                                                                                                   |
| Locus_20575_Transcript_1/1_Conf_1.000 | 149 | 0  |          |                |    |         |     |     |                                                                                                                                                   |
| Locus_20576_Transcript_1/1_Conf_1.000 | 182 | 16 | 2.04E-10 | XP_002631174.1 | 71 | 68.9366 | 60  | 43  | Hypothetical protein CBG02960                                                                                                                     |
| Locus_20577_Transcript_1/1_Conf_1.000 | 362 | 20 | 2.18E-25 | XP_002642982.1 | 66 | 118.627 | 117 | 78  | Hypothetical protein CBG15266                                                                                                                     |
| Locus_20578_Transcript_1/1_Conf_1.000 | 130 | 1  | 6.63E-06 | NP_509023.1    | 88 | 53.9138 | 34  | 30  | hypothetical protein C15H9.7                                                                                                                      |
| Locus_20579_Transcript_1/1_Conf_1.000 | 177 | 5  | 5.74E-10 | NP_492476.1    | 75 | 67.3958 | 58  | 44  | hypothetical protein F14B4.3                                                                                                                      |
| Locus_2058_Transcript_1/1_Conf_1.000  | 879 | 20 | 1.14E-74 | XP_002647128.1 | 95 | 284.263 | 163 | 155 | Hypothetical protein CBG23912                                                                                                                     |
| Locus_20580_Transcript_1/1_Conf_1.000 | 245 | 5  | 3.50E-07 | XP_002636960.1 | 70 | 58.151  | 61  | 43  | Hypothetical protein CBG09439                                                                                                                     |
| Locus_20581_Transcript_1/1_Conf_1.000 | 255 | 0  |          |                |    |         |     |     |                                                                                                                                                   |
| Locus_20582_Transcript_1/1_Conf_1.000 | 211 | 0  |          |                |    |         |     |     |                                                                                                                                                   |
| Locus_20583_Transcript_1/1_Conf_1.000 | 357 | 0  |          |                |    |         |     |     |                                                                                                                                                   |
| Locus_20584_Transcript_1/1_Conf_1.000 | 261 | 20 | 1.88E-08 | EFO16652.1     | 58 | 62.3882 | 68  | 40  | hypothetical protein LOAG_11852                                                                                                                   |
| Locus_20585_Transcript_1/1_Conf_1.000 | 575 | 11 | 1.22E-51 | NP_498645.1    | 86 | 206.453 | 192 | 167 | MUScle Positioning family member (mup-4)                                                                                                          |
| Locus_20586_Transcript_1/1_Conf_1.000 | 160 | 0  |          |                |    |         |     |     |                                                                                                                                                   |
| Locus_20587_Transcript_1/1_Conf_1.000 | 196 | 0  |          |                |    |         |     |     |                                                                                                                                                   |
| Locus_20588_Transcript_1/1_Conf_1.000 | 174 | 0  |          |                |    |         |     |     |                                                                                                                                                   |

|                                       |      |    |          |                |     |         |     |     |                                                               |
|---------------------------------------|------|----|----------|----------------|-----|---------|-----|-----|---------------------------------------------------------------|
| Locus_20589_Transcript_1/1_Conf_1.000 | 270  | 18 | 1.99E-18 | XP_002642615.1 | 59  | 95.5153 | 89  | 53  | C. briggsae CBR-MUP-4 protein                                 |
| Locus_2059_Transcript_1/1_Conf_1.000  | 559  | 5  | 5.82E-08 | NP_001022759.1 | 53  | 61.2326 | 100 | 53  | hypothetical protein T12D8.9                                  |
| Locus_20590_Transcript_1/1_Conf_1.000 | 709  |    |          |                |     |         |     |     |                                                               |
| Locus_20591_Transcript_1/1_Conf_1.000 | 260  | 0  |          |                |     |         |     |     |                                                               |
| Locus_20592_Transcript_1/1_Conf_1.000 | 302  | 0  |          |                |     |         |     |     |                                                               |
| Locus_20593_Transcript_1/1_Conf_1.000 | 178  | 0  |          |                |     |         |     |     |                                                               |
| Locus_20594_Transcript_1/1_Conf_1.000 | 144  | 0  |          |                |     |         |     |     |                                                               |
| Locus_20595_Transcript_1/1_Conf_1.000 | 149  | 0  |          |                |     |         |     |     |                                                               |
| Locus_20596_Transcript_1/1_Conf_1.000 | 698  | 20 | 3.96E-28 | XP_001899546.1 | 54  | 129.028 | 241 | 131 | hypothetical protein                                          |
| Locus_20597_Transcript_1/1_Conf_1.000 | 215  | 3  | 2.58E-10 | XP_002632188.1 | 70  | 68.5514 | 70  | 49  | C. briggsae CBR-SGCB-1 protein                                |
| Locus_20598_Transcript_1/1_Conf_1.000 | 274  | 19 | 2.35E-11 | XP_002648597.1 | 63  | 72.0182 | 90  | 57  | Hypothetical protein CBG24931                                 |
| Locus_20599_Transcript_1/1_Conf_1.000 | 246  | 20 | 5.55E-13 | NP_001041088.1 | 71  | 77.411  | 63  | 45  | hypothetical protein C27A7.3                                  |
| Locus_206_Transcript_1/5_Conf_0.450   | 391  | 14 | 1.61E-12 | XP_002484510.1 | 64  | 75.8702 | 74  | 48  | hypothetical protein TSTA_040370                              |
| Locus_206_Transcript_2/5_Conf_0.400   | 395  | 14 | 1.66E-12 | XP_002484510.1 | 64  | 75.8702 | 74  | 48  | hypothetical protein TSTA_040370                              |
| Locus_206_Transcript_3/5_Conf_0.650   | 446  | 12 | 1.67E-14 | XP_002484510.1 | 64  | 75.8702 | 74  | 48  | hypothetical protein TSTA_040370                              |
| Locus_206_Transcript_5/5_Conf_0.750   | 497  | 15 | 1.65E-14 | XP_002484510.1 | 64  | 75.8702 | 74  | 48  | hypothetical protein TSTA_040370                              |
| Locus_2060_Transcript_1/2_Conf_1.000  | 1414 | 0  |          |                |     |         |     |     |                                                               |
| Locus_2060_Transcript_2/2_Conf_1.000  | 1393 | 0  |          |                |     |         |     |     |                                                               |
| Locus_20600_Transcript_1/1_Conf_1.000 | 278  | 2  | 1.46E-13 | NP_491385.2    | 59  | 79.337  | 89  | 53  | hypothetical protein Y119C1B.9                                |
| Locus_20601_Transcript_1/1_Conf_1.000 | 132  | 0  |          |                |     |         |     |     |                                                               |
| Locus_20602_Transcript_1/1_Conf_1.000 | 308  | 0  |          |                |     |         |     |     |                                                               |
| Locus_20603_Transcript_1/1_Conf_1.000 | 223  | 11 | 7.67E-26 | XP_002634505.1 | 90  | 120.168 | 74  | 67  | Hypothetical protein CBG08295                                 |
| Locus_20604_Transcript_1/1_Conf_1.000 | 180  | 19 | 1.08E-19 | NP_001065270.1 | 100 | 99.7525 | 46  | 46  | NADH dehydrogenase ubiquinone 1 beta subcomplex subunit 7     |
| Locus_20605_Transcript_1/1_Conf_1.000 | 385  | 20 | 2.18E-33 | XP_001893379.1 | 76  | 145.206 | 102 | 78  | Malate/L-lactate dehydrogenase family protein                 |
| Locus_20606_Transcript_1/1_Conf_1.000 | 183  | 20 | 5.35E-19 | AAD48989.1     | 86  | 97.4413 | 59  | 51  | P-glycoprotein                                                |
| Locus_20607_Transcript_1/1_Conf_1.000 | 527  | 0  |          |                |     |         |     |     |                                                               |
| Locus_20608_Transcript_1/1_Conf_1.000 | 1108 | 20 | 1.08E-73 | NP_509318.1    | 62  | 281.567 | 315 | 198 | ADAM (disintegrin plus metalloprotease) family member (adm-4) |
| Locus_20609_Transcript_1/1_Conf_1.000 | 251  | 0  |          |                |     |         |     |     |                                                               |
| Locus_2061_Transcript_1/1_Conf_1.000  | 527  | 1  | 2.53E-04 | NP_001028814.1 | 41  | 48.9062 | 108 | 45  | C4b-binding protein alpha chain precursor                     |

|                                       |      |    |           |                |     |         |     |     |                                                                   |
|---------------------------------------|------|----|-----------|----------------|-----|---------|-----|-----|-------------------------------------------------------------------|
| Locus_20610_Transcript_1/1_Conf_1.000 | 192  | 0  |           |                |     |         |     |     |                                                                   |
| Locus_20611_Transcript_1/1_Conf_1.000 | 372  | 3  | 5.67E-13  | NP_506162.1    | 62  | 77.411  | 97  | 61  | abnormal cell LINeage family member (lin-25)                      |
| Locus_20612_Transcript_1/1_Conf_1.000 | 312  | 20 | 1.36E-30  | CAR63696.1     | 92  | 135.961 | 77  | 71  | putative Uncoordinated protein 23                                 |
| Locus_20613_Transcript_1/1_Conf_1.000 | 532  | 20 | 6.61E-64  | XP_002633391.1 | 83  | 246.899 | 161 | 135 | Hypothetical protein CBG06150                                     |
| Locus_20614_Transcript_1/1_Conf_1.000 | 146  | 0  |           |                |     |         |     |     |                                                                   |
| Locus_20615_Transcript_1/1_Conf_1.000 | 381  | 0  |           |                |     |         |     |     |                                                                   |
| Locus_20616_Transcript_1/1_Conf_1.000 | 287  | 0  |           |                |     |         |     |     |                                                                   |
| Locus_20617_Transcript_1/1_Conf_1.000 | 647  | 20 | 4.81E-35  | XP_002633591.1 | 83  | 151.754 | 129 | 108 | Hypothetical protein CBG05468                                     |
| Locus_20618_Transcript_1/1_Conf_1.000 | 348  | 0  |           |                |     |         |     |     |                                                                   |
| Locus_20619_Transcript_1/1_Conf_1.000 | 228  | 0  |           |                |     |         |     |     |                                                                   |
| Locus_2062_Transcript_1/1_Conf_1.000  | 1630 | 20 | 1.52E-144 | NP_498913.2    | 83  | 517.694 | 403 | 338 | FLI-I (Drosophila flightless) homolog family member (fli-1)       |
| Locus_20620_Transcript_1/1_Conf_1.000 | 159  | 0  |           |                |     |         |     |     |                                                                   |
| Locus_20621_Transcript_1/1_Conf_1.000 | 323  | 3  | 1.95E-05  | XP_001892569.1 | 78  | 52.373  | 38  | 30  | exonuclease family protein                                        |
| Locus_20622_Transcript_1/1_Conf_1.000 | 443  | 3  | 4.66E-07  | NP_501744.1    | 51  | 57.7658 | 100 | 51  | SM Y trans-splicing-associated snRNA family member (sna-2)        |
| Locus_20623_Transcript_1/1_Conf_1.000 | 186  | 20 | 2.09E-23  | XP_002639867.1 | 95  | 112.079 | 62  | 59  | Hypothetical protein CBG12222                                     |
| Locus_20624_Transcript_1/1_Conf_1.000 | 204  | 0  |           |                |     |         |     |     |                                                                   |
| Locus_20625_Transcript_1/1_Conf_1.000 | 605  | 5  | 3.19E-80  | NP_001123175.1 | 82  | 301.597 | 199 | 165 | ImmunoGlobulin-like Cell adhesion Molecule family member (igcm-3) |
| Locus_20626_Transcript_1/1_Conf_1.000 | 144  | 0  |           |                |     |         |     |     |                                                                   |
| Locus_20627_Transcript_1/1_Conf_1.000 | 209  | 0  |           |                |     |         |     |     |                                                                   |
| Locus_20628_Transcript_1/1_Conf_1.000 | 149  | 20 | 1.90E-24  | BAG64777.1     | 100 | 115.546 | 49  | 49  | unnamed protein product                                           |
| Locus_20629_Transcript_1/1_Conf_1.000 | 228  | 0  |           |                |     |         |     |     |                                                                   |
| Locus_2063_Transcript_1/1_Conf_1.000  | 859  | 20 | 1.39E-77  | NP_491892.1    | 84  | 293.893 | 186 | 157 | hypothetical protein F57B10.5                                     |

|                                       |     |    |          |                |     |         |     |     |                                                                                           |
|---------------------------------------|-----|----|----------|----------------|-----|---------|-----|-----|-------------------------------------------------------------------------------------------|
| Locus_20630_Transcript_1/1_Conf_1.000 | 359 | 20 | 4.89E-17 | XP_002633888.1 | 74  | 90.8929 | 66  | 49  | Hypothetical protein CBG19950                                                             |
| Locus_20631_Transcript_1/1_Conf_1.000 | 293 | 20 | 7.64E-18 | EFO13202.1     | 72  | 93.5893 | 93  | 67  | hypothetical protein LOAG_15329                                                           |
| Locus_20632_Transcript_1/1_Conf_1.000 | 202 | 20 | 1.33E-30 | XP_002922306.1 | 100 | 135.961 | 66  | 66  | PREDICTED: triosephosphate isomerase-like, partial                                        |
| Locus_20633_Transcript_1/1_Conf_1.000 | 179 | 0  |          |                |     |         |     |     |                                                                                           |
| Locus_20634_Transcript_1/1_Conf_1.000 | 232 | 0  |          |                |     |         |     |     |                                                                                           |
| Locus_20635_Transcript_1/1_Conf_1.000 | 184 | 20 | 7.23E-16 | EFO27126.1     | 85  | 87.0409 | 61  | 52  | hypothetical protein LOAG_01361                                                           |
| Locus_20636_Transcript_1/1_Conf_1.000 | 207 | 0  |          |                |     |         |     |     |                                                                                           |
| Locus_20637_Transcript_1/1_Conf_1.000 | 396 | 20 | 1.49E-13 | EFO22336.1     | 60  | 79.337  | 86  | 52  | WW domain-containing protein                                                              |
| Locus_20638_Transcript_1/1_Conf_1.000 | 562 | 20 | 1.45E-38 | XP_002641968.1 | 69  | 162.925 | 168 | 117 | Hypothetical protein CBG16675                                                             |
| Locus_20639_Transcript_1/1_Conf_1.000 | 133 | 0  |          |                |     |         |     |     |                                                                                           |
| Locus_2064_Transcript_1/1_Conf_1.000  | 597 | 20 | 1.12E-29 | EFO20527.1     | 55  | 133.65  | 188 | 105 | hypothetical protein LOAG_07962                                                           |
| Locus_20640_Transcript_1/1_Conf_1.000 | 256 | 0  |          |                |     |         |     |     |                                                                                           |
| Locus_20641_Transcript_1/1_Conf_1.000 | 196 | 20 | 5.64E-21 | XP_002639870.1 | 78  | 103.99  | 65  | 51  | C. briggsae CBR-IRS-2 protein                                                             |
| Locus_20642_Transcript_1/1_Conf_1.000 | 155 | 20 | 1.14E-21 | XP_002914618.1 | 100 | 106.301 | 51  | 51  | PREDICTED: LOW QUALITY PROTEIN: eukaryotic translation initiation factor 3 subunit L-like |
| Locus_20643_Transcript_1/1_Conf_1.000 | 195 | 0  |          |                |     |         |     |     |                                                                                           |
| Locus_20644_Transcript_1/1_Conf_1.000 | 143 | 0  |          |                |     |         |     |     |                                                                                           |

|                                       |      |    |          |                |    |         |     |     |                                         |
|---------------------------------------|------|----|----------|----------------|----|---------|-----|-----|-----------------------------------------|
| Locus_20645_Transcript_1/1_Conf_1.000 | 168  | 2  | 3.89E-06 | XP_002639999.1 | 68 | 54.6842 | 45  | 31  | Hypothetical protein CBG10829           |
| Locus_20646_Transcript_1/1_Conf_1.000 | 152  | 0  |          |                |    |         |     |     |                                         |
| Locus_20647_Transcript_1/1_Conf_1.000 | 309  | 0  |          |                |    |         |     |     |                                         |
| Locus_20648_Transcript_1/1_Conf_1.000 | 151  | 0  |          |                |    |         |     |     |                                         |
| Locus_20649_Transcript_1/1_Conf_1.000 | 383  | 0  |          |                |    |         |     |     |                                         |
| Locus_2065_Transcript_1/1_Conf_1.000  | 1585 | 8  | 7.75E-45 | XP_002635375.1 | 75 | 186.422 | 141 | 106 | Hypothetical protein CBG00762           |
| Locus_20650_Transcript_1/1_Conf_1.000 | 261  | 0  |          |                |    |         |     |     |                                         |
| Locus_20651_Transcript_1/1_Conf_1.000 | 753  | 0  |          |                |    |         |     |     |                                         |
| Locus_20652_Transcript_1/1_Conf_1.000 | 330  | 0  |          |                |    |         |     |     |                                         |
| Locus_20653_Transcript_1/1_Conf_1.000 | 283  | 0  |          |                |    |         |     |     |                                         |
| Locus_20654_Transcript_1/1_Conf_1.000 | 246  | 0  |          |                |    |         |     |     |                                         |
| Locus_20655_Transcript_1/1_Conf_1.000 | 302  | 20 | 1.05E-35 | NP_001040798.1 | 87 | 152.91  | 100 | 87  | PhosphoDiEsterase family member (pde-4) |
| Locus_20656_Transcript_1/1_Conf_1.000 | 408  | 0  |          |                |    |         |     |     |                                         |
| Locus_20657_Transcript_1/1_Conf_1.000 | 268  | 20 | 1.24E-36 | NP_491915.2    | 89 | 155.992 | 89  | 80  | hypothetical protein ZC581.9            |
| Locus_20658_Transcript_1/1_Conf_1.000 | 121  | 0  |          |                |    |         |     |     |                                         |
| Locus_20659_Transcript_1/1_Conf_1.000 | 588  | 20 | 4.19E-34 | AAK62032.1     | 61 | 148.288 | 206 | 127 | metalloprotease 1 precursor             |
| Locus_2066_Transcript_1/1_Conf_1.000  | 2578 | 0  |          |                |    |         |     |     |                                         |
| Locus_20660_Transcript_1/1_Conf_1.000 | 151  | 0  |          |                |    |         |     |     |                                         |
| Locus_20661_Transcript_1/1_Conf_1.000 | 471  | 20 | 3.26E-45 | NP_508877.1    | 80 | 184.496 | 124 | 100 | hypothetical protein T03G11.4           |
| Locus_20662_Transcript_1/1_Conf_1.000 | 167  | 0  |          |                |    |         |     |     |                                         |

|                                       |     |    |          |                |    |         |     |     |                                                                         |
|---------------------------------------|-----|----|----------|----------------|----|---------|-----|-----|-------------------------------------------------------------------------|
| Locus_20663_Transcript_1/1_Conf_1.000 | 221 | 6  | 9.78E-05 | XP_001700925.1 | 65 | 50.0618 | 52  | 34  | flagellar associated protein                                            |
| Locus_20664_Transcript_1/1_Conf_1.000 | 204 | 5  | 3.40E-10 | CAA10033.1     | 71 | 68.1662 | 66  | 47  | DYS-1 protein                                                           |
| Locus_20665_Transcript_1/1_Conf_1.000 | 264 | 0  |          |                |    |         |     |     |                                                                         |
| Locus_20666_Transcript_1/1_Conf_1.000 | 150 | 0  |          |                |    |         |     |     |                                                                         |
| Locus_20667_Transcript_1/1_Conf_1.000 | 150 | 0  |          |                |    |         |     |     |                                                                         |
| Locus_20668_Transcript_1/1_Conf_1.000 | 208 | 20 | 7.53E-18 | XP_002629821.1 | 77 | 93.5893 | 67  | 52  | C. briggsae CBR-SQV-8 protein                                           |
| Locus_20669_Transcript_1/1_Conf_1.000 | 154 | 0  |          |                |    |         |     |     |                                                                         |
| Locus_2067_Transcript_1/1_Conf_1.000  | 533 | 0  |          |                |    |         |     |     |                                                                         |
| Locus_20670_Transcript_1/2_Conf_1.000 | 631 | 2  | 1.37E-07 | NP_496506.1    | 60 | 60.4622 | 151 | 91  | hypothetical protein F13D12.8                                           |
| Locus_20670_Transcript_2/2_Conf_1.000 | 367 | 0  |          |                |    |         |     |     |                                                                         |
| Locus_20671_Transcript_1/1_Conf_1.000 | 549 | 20 | 7.98E-79 | CAH04706.3     | 79 | 296.59  | 183 | 146 | C. elegans protein K04H4.2c, partially confirmed by transcript evidence |
| Locus_20672_Transcript_1/1_Conf_1.000 | 629 | 4  | 3.33E-06 | NP_001022632.1 | 48 | 55.8398 | 174 | 85  | Gamma-tubulin Interacting Protein family member (gip-1)                 |



|                                       |      |    |           |                |    |         |     |     |                                                                         |
|---------------------------------------|------|----|-----------|----------------|----|---------|-----|-----|-------------------------------------------------------------------------|
| Locus_20673_Transcript_1/1_Conf_1.000 | 430  | 20 | 9.19E-32  | NP_001021301.1 | 87 | 139.813 | 88  | 77  | hypothetical protein C06A6.4                                            |
| Locus_20674_Transcript_1/1_Conf_1.000 | 150  | 0  |           |                |    |         |     |     |                                                                         |
| Locus_20675_Transcript_1/1_Conf_1.000 | 195  | 0  |           |                |    |         |     |     |                                                                         |
| Locus_20676_Transcript_1/1_Conf_1.000 | 217  | 20 | 2.02E-23  | XP_002632923.1 | 84 | 112.079 | 71  | 60  | C. briggsae CBR-HIM-6 protein                                           |
| Locus_20677_Transcript_1/1_Conf_1.000 | 168  | 0  |           |                |    |         |     |     |                                                                         |
| Locus_20678_Transcript_1/1_Conf_1.000 | 195  | 1  | 6.27E-04  | XP_001512638.1 | 63 | 47.3654 | 60  | 38  | PREDICTED: similar to phospholipase A2 receptor 1                       |
| Locus_20679_Transcript_1/1_Conf_1.000 | 218  | 20 | 2.17E-17  | CAX65056.1     | 74 | 92.0485 | 67  | 50  | C. elegans protein F25C8.3d, partially confirmed by transcript evidence |
| Locus_2068_Transcript_1/1_Conf_1.000  | 1176 | 20 | 1.50E-145 | CAR63540.1     | 85 | 520.39  | 355 | 305 | putative Uncharacterized GTP-binding protein                            |
| Locus_20680_Transcript_1/1_Conf_1.000 | 233  | 20 | 1.21E-23  | NP_497616.1    | 88 | 112.849 | 76  | 67  | hypothetical protein Y71H2AM.6                                          |
| Locus_20681_Transcript_1/1_Conf_1.000 | 284  | 20 | 1.19E-18  | XP_002083879.1 | 67 | 96.2857 | 90  | 61  | GD13963                                                                 |
| Locus_20682_Transcript_1/1_Conf_1.000 | 145  | 20 | 1.51E-13  | NP_493616.1    | 89 | 79.337  | 47  | 42  | hypothetical protein F33H2.5                                            |
| Locus_20683_Transcript_1/1_Conf_1.000 | 131  | 0  |           |                |    |         |     |     |                                                                         |
| Locus_20684_Transcript_1/1_Conf_1.000 | 246  | 0  |           |                |    |         |     |     |                                                                         |
| Locus_20685_Transcript_1/1_Conf_1.000 | 208  | 0  |           |                |    |         |     |     |                                                                         |
| Locus_20686_Transcript_1/1_Conf_1.000 | 669  | 0  |           |                |    |         |     |     |                                                                         |
| Locus_20687_Transcript_1/1_Conf_1.000 | 165  | 0  |           |                |    |         |     |     |                                                                         |
| Locus_20688_Transcript_1/1_Conf_1.000 | 157  | 1  | 3.33E-05  | XP_001895392.1 | 66 | 51.6026 | 51  | 34  | hypothetical protein Bm1_19685                                          |

|                                       |      |    |          |                |     |         |     |    |                                                                                   |
|---------------------------------------|------|----|----------|----------------|-----|---------|-----|----|-----------------------------------------------------------------------------------|
| Locus_20689_Transcript_1/1_Conf_1.000 | 152  | 0  |          |                |     |         |     |    |                                                                                   |
| Locus_2069_Transcript_1/1_Conf_1.000  | 462  | 20 | 2.81E-20 | EFO21743.1     | 68  | 101.679 | 88  | 60 | hypothetical protein LOAG_06744                                                   |
| Locus_20690_Transcript_1/1_Conf_1.000 | 268  | 20 | 6.63E-22 | EFO20564.1     | 76  | 107.071 | 81  | 62 | hypothetical protein LOAG_07924                                                   |
| Locus_20691_Transcript_1/1_Conf_1.000 | 327  | 7  | 2.88E-09 | NP_498217.2    | 82  | 65.0846 | 46  | 38 | abnormal embryonic PARTitioning of cytoplasm family member (par-3)                |
| Locus_20692_Transcript_1/1_Conf_1.000 | 187  | 0  |          |                |     |         |     |    |                                                                                   |
| Locus_20693_Transcript_1/1_Conf_1.000 | 253  | 20 | 2.32E-22 | XP_002630114.1 | 77  | 108.612 | 84  | 65 | C. briggsae CBR-PYR-1 protein                                                     |
| Locus_20694_Transcript_1/1_Conf_1.000 | 1111 | 0  |          |                |     |         |     |    |                                                                                   |
| Locus_20695_Transcript_1/1_Conf_1.000 | 334  | 4  | 4.40E-18 | NP_495032.1    | 68  | 94.3597 | 89  | 61 | hypothetical protein F07F6.1                                                      |
| Locus_20696_Transcript_1/1_Conf_1.000 | 239  | 0  |          |                |     |         |     |    |                                                                                   |
| Locus_20697_Transcript_1/1_Conf_1.000 | 135  | 9  | 1.08E-16 | XP_002811006.1 | 100 | 89.7373 | 45  | 45 | PREDICTED: LOW QUALITY PROTEIN: nuclease-sensitive element-binding protein 1-like |
| Locus_20698_Transcript_1/1_Conf_1.000 | 230  | 0  |          |                |     |         |     |    |                                                                                   |
| Locus_20699_Transcript_1/1_Conf_1.000 | 272  | 0  |          |                |     |         |     |    |                                                                                   |
| Locus_207_Transcript_10/20_Conf_1.000 | 183  | 0  |          |                |     |         |     |    |                                                                                   |
| Locus_207_Transcript_11/20_Conf_0.125 | 786  | 19 | 4.57E-13 | NP_508612.1    | 57  | 79.337  | 157 | 90 | VITellogenin structural genes (yolk protein genes) family member (vit-4)          |
| Locus_207_Transcript_12/20_Conf_0.125 | 786  | 19 | 2.05E-13 | XP_002644391.1 | 56  | 80.4925 | 157 | 88 | C. briggsae CBR-VIT-5 protein                                                     |
| Locus_207_Transcript_13/20_Conf_0.179 | 429  | 14 | 1.20E-15 | NP_508612.1    | 67  | 86.2705 | 91  | 61 | VITellogenin structural genes (yolk protein genes) family member (vit-4)          |
| Locus_207_Transcript_14/20_Conf_0.054 | 151  | 0  |          |                |     |         |     |    |                                                                                   |
| Locus_207_Transcript_15/20_Conf_0.161 | 821  | 14 | 3.17E-28 | NP_508612.1    | 65  | 129.798 | 146 | 96 | VITellogenin structural genes (yolk protein genes) family member (vit-4)          |

|                                       |      |    |          |                |    |         |     |     |                                                                          |
|---------------------------------------|------|----|----------|----------------|----|---------|-----|-----|--------------------------------------------------------------------------|
| Locus_207_Transcript_16/20_Conf_0.161 | 863  | 19 | 1.62E-33 | NP_508612.1    | 67 | 147.517 | 160 | 108 | ViTellogenin structural genes (yolk protein genes) family member (vit-4) |
| Locus_207_Transcript_17/20_Conf_0.196 | 678  | 19 | 3.14E-35 | NP_508612.1    | 63 | 152.525 | 224 | 142 | ViTellogenin structural genes (yolk protein genes) family member (vit-4) |
| Locus_207_Transcript_18/20_Conf_0.107 | 228  | 5  | 7.41E-05 | NP_509305.1    | 53 | 50.447  | 71  | 38  | ViTellogenin structural genes (yolk protein genes) family member (vit-1) |
| Locus_207_Transcript_19/20_Conf_0.107 | 228  | 14 | 1.22E-07 | NP_001123117.1 | 60 | 59.6918 | 73  | 44  | ViTellogenin structural genes (yolk protein genes) family member (vit-2) |
| Locus_207_Transcript_20/20_Conf_0.196 | 636  | 14 | 2.63E-30 | NP_508612.1    | 62 | 135.961 | 210 | 131 | ViTellogenin structural genes (yolk protein genes) family member (vit-4) |
| Locus_207_Transcript_7/20_Conf_1.000  | 183  | 0  |          |                |    |         |     |     |                                                                          |
| Locus_207_Transcript_8/20_Conf_1.000  | 229  | 0  |          |                |    |         |     |     |                                                                          |
| Locus_207_Transcript_9/20_Conf_1.000  | 229  | 0  |          |                |    |         |     |     |                                                                          |
| Locus_2070_Transcript_1/1_Conf_1.000  | 538  | 20 | 2.09E-65 | XP_001894445.1 | 80 | 251.906 | 177 | 143 | amine oxidase, flavin-containing family protein                          |
| Locus_20700_Transcript_1/1_Conf_1.000 | 258  | 0  |          |                |    |         |     |     |                                                                          |
| Locus_20701_Transcript_1/1_Conf_1.000 | 347  | 20 | 1.75E-46 | NP_490776.2    | 93 | 188.734 | 103 | 96  | hypothetical protein Y18H1A.9                                            |
| Locus_20702_Transcript_1/1_Conf_1.000 | 546  | 0  |          |                |    |         |     |     |                                                                          |
| Locus_20703_Transcript_1/1_Conf_1.000 | 364  | 2  | 1.46E-05 | NP_499886.1    | 47 | 52.7582 | 107 | 51  | hypothetical protein R02D3.7                                             |
| Locus_20704_Transcript_1/1_Conf_1.000 | 152  | 0  |          |                |    |         |     |     |                                                                          |
| Locus_20705_Transcript_1/2_Conf_1.000 | 472  | 0  |          |                |    |         |     |     |                                                                          |
| Locus_20705_Transcript_2/2_Conf_1.000 | 479  | 0  |          |                |    |         |     |     |                                                                          |
| Locus_20706_Transcript_1/1_Conf_1.000 | 409  | 20 | 3.14E-40 | NP_495209.1    | 73 | 167.933 | 142 | 104 | hypothetical protein R12C12.1                                            |
| Locus_20707_Transcript_1/1_Conf_1.000 | 275  | 0  |          |                |    |         |     |     |                                                                          |
| Locus_20708_Transcript_1/1_Conf_1.000 | 129  | 0  |          |                |    |         |     |     |                                                                          |
| Locus_20709_Transcript_1/1_Conf_1.000 | 678  | 20 | 4.46E-98 | XP_002640633.1 | 89 | 361.303 | 225 | 201 | C. briggsae CBR-CATP-1 protein                                           |
| Locus_2071_Transcript_1/2_Conf_1.000  | 1110 | 20 | 3.35E-91 | XP_002634069.1 | 67 | 339.732 | 337 | 229 | Hypothetical protein CBG01611                                            |
| Locus_2071_Transcript_2/2_Conf_1.000  | 1103 | 20 | 1.10E-86 | XP_002634069.1 | 70 | 324.709 | 298 | 209 | Hypothetical protein CBG01611                                            |
| Locus_20710_Transcript_1/1_Conf_1.000 | 204  | 20 | 3.87E-22 | XP_002647042.1 | 88 | 107.842 | 61  | 54  | Hypothetical protein CBG03560                                            |
| Locus_20711_Transcript_1/1_Conf_1.000 | 416  | 1  | 8.56E-06 | EFO19153.1     | 57 | 53.5286 | 107 | 61  | hypothetical protein LOAG_09341                                          |
| Locus_20712_Transcript_1/1_Conf_1.000 | 482  | 0  |          |                |    |         |     |     |                                                                          |

|                                       |      |    |           |                |     |         |     |     |                                                                              |
|---------------------------------------|------|----|-----------|----------------|-----|---------|-----|-----|------------------------------------------------------------------------------|
| Locus_20713_Transcript_1/1_Conf_1.000 | 772  | 0  |           |                |     |         |     |     |                                                                              |
| Locus_20714_Transcript_1/1_Conf_1.000 | 187  | 0  |           |                |     |         |     |     |                                                                              |
| Locus_20715_Transcript_1/1_Conf_1.000 | 227  | 0  |           |                |     |         |     |     |                                                                              |
| Locus_20716_Transcript_1/1_Conf_1.000 | 222  | 0  |           |                |     |         |     |     |                                                                              |
| Locus_20717_Transcript_1/1_Conf_1.000 | 333  | 0  |           |                |     |         |     |     |                                                                              |
| Locus_20718_Transcript_1/1_Conf_1.000 | 598  | 0  |           |                |     |         |     |     |                                                                              |
| Locus_20719_Transcript_1/1_Conf_1.000 | 144  | 0  |           |                |     |         |     |     |                                                                              |
| Locus_2072_Transcript_1/1_Conf_1.000  | 1126 | 20 | 1.02E-119 | XP_002643477.1 | 84  | 434.491 | 300 | 252 | Hypothetical protein CBG16139                                                |
| Locus_20720_Transcript_1/1_Conf_1.000 | 788  | 17 | 3.62E-127 | XP_002633468.1 | 93  | 458.373 | 261 | 244 | C. briggsae CBR-LIN-24 protein                                               |
| Locus_20721_Transcript_1/1_Conf_1.000 | 166  | 0  |           |                |     |         |     |     |                                                                              |
| Locus_20722_Transcript_1/1_Conf_1.000 | 439  | 20 | 1.82E-48  | XP_002637101.1 | 75  | 195.282 | 144 | 109 | Hypothetical protein CBG09600                                                |
| Locus_20723_Transcript_1/1_Conf_1.000 | 133  | 0  |           |                |     |         |     |     |                                                                              |
| Locus_20724_Transcript_1/1_Conf_1.000 | 187  | 0  |           |                |     |         |     |     |                                                                              |
| Locus_20725_Transcript_1/1_Conf_1.000 | 231  | 2  | 1.82E-11  | NP_498172.3    | 67  | 72.4034 | 85  | 57  | hypothetical protein R02F2.2                                                 |
| Locus_20726_Transcript_1/1_Conf_1.000 | 196  | 2  | 5.67E-05  | NP_495410.4    | 61  | 50.8322 | 62  | 38  | hypothetical protein C44B7.11                                                |
| Locus_20727_Transcript_1/1_Conf_1.000 | 246  | 20 | 2.24E-38  | NP_497027.1    | 100 | 161.77  | 81  | 81  | Masculinisation Of Germline family member (mog-4)                            |
| Locus_20728_Transcript_1/1_Conf_1.000 | 223  | 0  |           |                |     |         |     |     |                                                                              |
| Locus_20729_Transcript_1/2_Conf_1.000 | 444  | 0  |           |                |     |         |     |     |                                                                              |
| Locus_20729_Transcript_2/2_Conf_1.000 | 327  | 0  |           |                |     |         |     |     |                                                                              |
| Locus_2073_Transcript_1/1_Conf_1.000  | 3304 | 20 | 0         | NP_498468.2    | 89  | 1436.4  | 930 | 836 | yeast ISW (imitation SWI) homolog family member (isw-1)                      |
| Locus_20730_Transcript_1/1_Conf_1.000 | 186  | 0  |           |                |     |         |     |     |                                                                              |
| Locus_20731_Transcript_1/1_Conf_1.000 | 191  | 0  |           |                |     |         |     |     |                                                                              |
| Locus_20732_Transcript_1/1_Conf_1.000 | 340  | 4  | 4.68E-12  | ACI49172.1     | 61  | 74.3294 | 112 | 69  | hypothetical protein Csp3_JD01.004                                           |
| Locus_20733_Transcript_1/2_Conf_1.000 | 386  | 0  |           |                |     |         |     |     |                                                                              |
| Locus_20733_Transcript_2/2_Conf_1.000 | 386  | 0  |           |                |     |         |     |     |                                                                              |
| Locus_20734_Transcript_1/1_Conf_1.000 | 327  | 0  |           |                |     |         |     |     |                                                                              |
| Locus_20735_Transcript_1/1_Conf_1.000 | 565  | 20 | 4.91E-26  | NP_495451.1    | 64  | 121.324 | 129 | 83  | High Incidence of Males (increased X chromosome loss) family member (him-14) |
| Locus_20736_Transcript_1/1_Conf_1.000 | 134  | 0  |           |                |     |         |     |     |                                                                              |
| Locus_20737_Transcript_1/1_Conf_1.000 | 405  | 0  |           |                |     |         |     |     |                                                                              |

|                                       |     |    |          |                |    |         |     |     |                                                           |
|---------------------------------------|-----|----|----------|----------------|----|---------|-----|-----|-----------------------------------------------------------|
| Locus_20738_Transcript_1/1_Conf_1.000 | 134 | 5  | 3.87E-06 | NP_001024204.1 | 74 | 54.6842 | 43  | 32  | TITIN family member (ttn-1)                               |
| Locus_20739_Transcript_1/1_Conf_1.000 | 463 | 20 | 3.19E-48 | EFO22683.1     | 77 | 194.512 | 153 | 119 | STE/STE11/MEKK2 protein kinase                            |
| Locus_2074_Transcript_1/1_Conf_1.000  | 608 | 20 | 3.71E-68 | NP_498858.2    | 91 | 261.536 | 157 | 143 | hypothetical protein ZK353.1                              |
| Locus_20740_Transcript_1/1_Conf_1.000 | 205 | 0  |          |                |    |         |     |     |                                                           |
| Locus_20741_Transcript_1/1_Conf_1.000 | 215 | 0  |          |                |    |         |     |     |                                                           |
| Locus_20742_Transcript_1/1_Conf_1.000 | 189 | 0  |          |                |    |         |     |     |                                                           |
| Locus_20743_Transcript_1/1_Conf_1.000 | 570 | 0  |          |                |    |         |     |     |                                                           |
| Locus_20744_Transcript_1/1_Conf_1.000 | 409 | 20 | 1.19E-47 | EFO19846.1     | 83 | 192.586 | 136 | 114 | cleavage and polyadenylation specificity factor subunit 2 |
| Locus_20745_Transcript_1/1_Conf_1.000 | 419 | 16 | 7.14E-40 | XP_002640063.1 | 90 | 166.777 | 121 | 109 | Hypothetical protein CBG12545                             |
| Locus_20746_Transcript_1/1_Conf_1.000 | 379 | 0  |          |                |    |         |     |     |                                                           |
| Locus_20747_Transcript_1/1_Conf_1.000 | 209 | 0  |          |                |    |         |     |     |                                                           |
| Locus_20748_Transcript_1/1_Conf_1.000 | 298 | 20 | 5.24E-27 | XP_002629701.1 | 84 | 124.02  | 99  | 84  | C. briggsae CBR-SEC-5 protein                             |
| Locus_20749_Transcript_1/1_Conf_1.000 | 248 | 0  |          |                |    |         |     |     |                                                           |
| Locus_2075_Transcript_1/1_Conf_1.000  | 647 | 0  |          |                |    |         |     |     |                                                           |
| Locus_20750_Transcript_1/1_Conf_1.000 | 236 | 0  |          |                |    |         |     |     |                                                           |
| Locus_20751_Transcript_1/1_Conf_1.000 | 521 | 20 | 5.45E-89 | XP_002630203.1 | 94 | 330.102 | 173 | 164 | Hypothetical protein CBG00613                             |
| Locus_20752_Transcript_1/1_Conf_1.000 | 685 | 20 | 2.46E-35 | NP_001023694.1 | 56 | 152.91  | 223 | 125 | UDP-GlucuronosylTransferase family member (ugt-35)        |

|                                       |     |    |          |                |     |         |     |     |                                                                                   |
|---------------------------------------|-----|----|----------|----------------|-----|---------|-----|-----|-----------------------------------------------------------------------------------|
| Locus_20753_Transcript_1/1_Conf_1.000 | 355 | 20 | 5.80E-18 | XP_002643945.1 | 90  | 93.9745 | 60  | 54  | C. briggsae CBR-MIG-2 protein                                                     |
| Locus_20754_Transcript_1/1_Conf_1.000 | 161 | 0  |          |                |     |         |     |     |                                                                                   |
| Locus_20755_Transcript_1/1_Conf_1.000 | 150 | 5  | 4.22E-16 | CAN82657.1     | 100 | 87.8113 | 38  | 38  | hypothetical protein                                                              |
| Locus_20756_Transcript_1/1_Conf_1.000 | 379 | 20 | 3.86E-46 | XP_002632193.1 | 83  | 187.578 | 126 | 105 | Hypothetical protein CBG07059                                                     |
| Locus_20757_Transcript_1/1_Conf_1.000 | 381 | 20 | 9.85E-26 | NP_509122.1    | 78  | 119.783 | 95  | 75  | hypothetical protein F38B6.4                                                      |
| Locus_20758_Transcript_1/1_Conf_1.000 | 209 | 0  |          |                |     |         |     |     |                                                                                   |
| Locus_20759_Transcript_1/1_Conf_1.000 | 345 | 20 | 5.60E-61 | XP_002807879.1 | 100 | 236.884 | 115 | 115 | PREDICTED: LOW QUALITY PROTEIN:<br>heterogeneous nuclear ribonucleoprotein L-like |
| Locus_2076_Transcript_1/1_Conf_1.000  | 530 | 5  | 2.50E-07 | EFO26720.1     | 47  | 58.9214 | 184 | 87  | hypothetical protein LOAG_01771                                                   |
| Locus_20760_Transcript_1/1_Conf_1.000 | 274 | 5  | 5.57E-21 | NP_509311.1    | 70  | 103.99  | 95  | 67  | DEGeneration of certain neurons family member (deg-1)                             |
| Locus_20761_Transcript_1/1_Conf_1.000 | 454 | 5  | 7.53E-18 | EFO21092.1     | 71  | 93.5893 | 80  | 57  | hypothetical protein LOAG_07396                                                   |
| Locus_20762_Transcript_1/1_Conf_1.000 | 970 | 20 | 3.65E-88 | XP_002639255.1 | 69  | 329.331 | 325 | 226 | C. briggsae CBR-OCRL-1 protein                                                    |
| Locus_20763_Transcript_1/1_Conf_1.000 | 181 | 20 | 1.79E-14 | XP_002640378.1 | 85  | 82.4185 | 60  | 51  | Hypothetical protein CBG20286                                                     |

|                                       |      |    |           |                |     |         |     |     |                                                                     |
|---------------------------------------|------|----|-----------|----------------|-----|---------|-----|-----|---------------------------------------------------------------------|
| Locus_20764_Transcript_1/1_Conf_1.000 | 316  | 20 | 8.73E-38  | XP_002644918.1 | 86  | 159.844 | 91  | 79  | C. briggsae CBR-NHR-173 protein                                     |
| Locus_20765_Transcript_1/1_Conf_1.000 | 423  | 4  | 5.65E-13  | NP_493601.2    | 52  | 77.411  | 147 | 77  | FERM domain (protein4.1-ezrin-radixin-moesin) family member (frm-1) |
| Locus_20766_Transcript_1/1_Conf_1.000 | 573  | 20 | 5.48E-52  | AAS78778.1     | 81  | 207.608 | 144 | 117 | thioredoxin                                                         |
| Locus_20767_Transcript_1/1_Conf_1.000 | 179  | 0  |           |                |     |         |     |     |                                                                     |
| Locus_20768_Transcript_1/1_Conf_1.000 | 435  | 4  | 6.14E-12  | XP_001892264.1 | 58  | 73.9442 | 89  | 52  | hypothetical protein Bm1_03880                                      |
| Locus_20769_Transcript_1/1_Conf_1.000 | 244  | 0  |           |                |     |         |     |     |                                                                     |
| Locus_2077_Transcript_1/1_Conf_1.000  | 1141 | 20 | 4.66E-104 | NP_001041026.1 | 81  | 382.489 | 296 | 240 | hypothetical protein Y41E3.7                                        |
| Locus_20770_Transcript_1/1_Conf_1.000 | 149  | 0  |           |                |     |         |     |     |                                                                     |
| Locus_20771_Transcript_1/1_Conf_1.000 | 186  | 0  |           |                |     |         |     |     |                                                                     |
| Locus_20772_Transcript_1/1_Conf_1.000 | 618  | 20 | 2.84E-26  | EFO23582.1     | 54  | 122.479 | 192 | 104 | hypothetical protein LOAG_04900                                     |
| Locus_20773_Transcript_1/1_Conf_1.000 | 187  | 0  |           |                |     |         |     |     |                                                                     |
| Locus_20774_Transcript_1/1_Conf_1.000 | 135  | 0  |           |                |     |         |     |     |                                                                     |
| Locus_20775_Transcript_1/1_Conf_1.000 | 201  | 20 | 2.51E-29  | XP_002726116.1 | 100 | 131.724 | 64  | 64  | PREDICTED: ribosomal protein L8-like                                |
| Locus_20776_Transcript_1/1_Conf_1.000 | 304  | 4  | 4.56E-23  | AAR30497.1     | 78  | 110.923 | 88  | 69  | RhoGEF                                                              |
| Locus_20777_Transcript_1/1_Conf_1.000 | 604  | 20 | 1.83E-27  | EFA05576.1     | 77  | 126.331 | 93  | 72  | hypothetical protein TcasGA2_TC015765                               |
| Locus_20778_Transcript_1/1_Conf_1.000 | 246  | 3  | 4.68E-28  | NP_492219.1    | 86  | 127.487 | 80  | 69  | hypothetical protein K04G2.9                                        |
| Locus_20779_Transcript_1/1_Conf_1.000 | 263  | 3  | 6.06E-07  | XP_002647600.1 | 55  | 57.3806 | 83  | 46  | Hypothetical protein CBG06690                                       |

|                                       |      |    |          |                |    |         |      |     |                                                                         |
|---------------------------------------|------|----|----------|----------------|----|---------|------|-----|-------------------------------------------------------------------------|
| Locus_2078_Transcript_1/1_Conf_1.000  | 3247 | 20 | 0        | XP_002641511.1 | 93 | 1892.09 | 1065 | 998 | C. briggsae CBR-CHC-1 protein                                           |
| Locus_20780_Transcript_1/1_Conf_1.000 | 484  | 0  |          |                |    |         |      |     |                                                                         |
| Locus_20781_Transcript_1/1_Conf_1.000 | 473  | 20 | 2.59E-34 | CAN99691.2     | 70 | 148.288 | 154  | 108 | C. elegans protein F54B3.1b, partially confirmed by transcript evidence |
| Locus_20782_Transcript_1/1_Conf_1.000 | 264  | 20 | 1.14E-13 | EFO26936.1     | 81 | 79.7221 | 58   | 47  | DIX domain-containing protein                                           |
| Locus_20783_Transcript_1/1_Conf_1.000 | 258  | 0  |          |                |    |         |      |     |                                                                         |
| Locus_20784_Transcript_1/1_Conf_1.000 | 238  | 0  |          |                |    |         |      |     |                                                                         |
| Locus_20785_Transcript_1/1_Conf_1.000 | 269  | 0  |          |                |    |         |      |     |                                                                         |
| Locus_20786_Transcript_1/1_Conf_1.000 | 312  | 20 | 9.43E-16 | CAQ48388.2     | 86 | 86.6557 | 58   | 50  | C. elegans protein C26H9A.1b, confirmed by transcript evidence          |
| Locus_20787_Transcript_1/1_Conf_1.000 | 673  | 20 | 2.05E-63 | NP_496845.1    | 70 | 246.128 | 226  | 159 | hypothetical protein Y48E1B.2                                           |
| Locus_20788_Transcript_1/1_Conf_1.000 | 259  | 0  |          |                |    |         |      |     |                                                                         |
| Locus_20789_Transcript_1/1_Conf_1.000 | 193  | 0  |          |                |    |         |      |     |                                                                         |
| Locus_2079_Transcript_1/5_Conf_0.417  | 658  | 20 | 2.34E-40 | NP_491825.2    | 72 | 169.474 | 153  | 111 | hypothetical protein F26B1.2                                            |
| Locus_2079_Transcript_2/5_Conf_0.667  | 843  | 20 | 4.97E-52 | XP_002640100.1 | 71 | 153.68  | 147  | 105 | Hypothetical protein CBG12588                                           |
| Locus_2079_Transcript_3/5_Conf_0.167  | 308  | 11 | 3.26E-13 | NP_871833.1    | 72 | 78.1814 | 72   | 52  | hypothetical protein F26B1.2                                            |
| Locus_2079_Transcript_4/5_Conf_0.250  | 397  | 20 | 4.06E-19 | XP_002640100.1 | 80 | 97.8265 | 78   | 63  | Hypothetical protein CBG12588                                           |



|                                       |     |    |          |                |     |         |     |     |                                                                |
|---------------------------------------|-----|----|----------|----------------|-----|---------|-----|-----|----------------------------------------------------------------|
| Locus_2079_Transcript_5/5_Conf_0.500  | 713 | 20 | 2.74E-40 | NP_491825.2    | 72  | 169.474 | 153 | 111 | hypothetical protein F26B1.2                                   |
| Locus_20790_Transcript_1/1_Conf_1.000 | 252 | 0  |          |                |     |         |     |     |                                                                |
| Locus_20791_Transcript_1/1_Conf_1.000 | 351 | 0  |          |                |     |         |     |     |                                                                |
| Locus_20792_Transcript_1/1_Conf_1.000 | 271 | 12 | 1.52E-26 | ACI49247.1     | 78  | 122.479 | 89  | 70  | hypothetical protein Csp3_JD06.013                             |
| Locus_20793_Transcript_1/1_Conf_1.000 | 675 | 3  | 9.61E-61 | CAR63560.1     | 79  | 237.269 | 188 | 149 | hypothetical protein                                           |
| Locus_20794_Transcript_1/1_Conf_1.000 | 306 | 20 | 7.25E-21 | XP_001629579.1 | 73  | 103.605 | 86  | 63  | predicted protein                                              |
| Locus_20795_Transcript_1/1_Conf_1.000 | 200 | 5  | 1.21E-15 | NP_495375.3    | 74  | 86.2705 | 63  | 47  | hypothetical protein T14B4.1                                   |
| Locus_20796_Transcript_1/1_Conf_1.000 | 186 | 0  |          |                |     |         |     |     |                                                                |
| Locus_20797_Transcript_1/1_Conf_1.000 | 252 | 20 | 1.00E-33 | XP_002640129.1 | 93  | 146.362 | 83  | 78  | C. briggsae CBR-SNT-4 protein                                  |
| Locus_20798_Transcript_1/1_Conf_1.000 | 291 | 3  | 5.14E-06 | NP_001122477.1 | 70  | 54.299  | 50  | 35  | FERTilization defective (abnormal sperm) family member (fer-1) |
| Locus_20799_Transcript_1/1_Conf_1.000 | 139 | 0  |          |                |     |         |     |     |                                                                |
| Locus_208_Transcript_1/1_Conf_1.000   | 455 | 20 | 1.07E-72 | NP_508537.1    | 100 | 275.789 | 151 | 151 | SPeCtrin family member (spc-1)                                 |
| Locus_2080_Transcript_1/1_Conf_1.000  | 697 | 20 | 3.24E-30 | XP_002646089.1 | 73  | 135.961 | 116 | 85  | C. briggsae CBR-RSR-1 protein                                  |
| Locus_20800_Transcript_1/1_Conf_1.000 | 136 | 4  | 5.21E-11 | NP_498923.1    | 84  | 70.8626 | 44  | 37  | hypothetical protein B0303.15                                  |
| Locus_20801_Transcript_1/1_Conf_1.000 | 426 | 3  | 1.09E-32 | XP_002631054.1 | 68  | 142.895 | 150 | 102 | C. briggsae CBR-BTF-1 protein                                  |
| Locus_20802_Transcript_1/1_Conf_1.000 | 416 | 20 | 5.89E-31 | EFO16181.1     | 83  | 137.117 | 101 | 84  | hypothetical protein LOAG_12327                                |
| Locus_20803_Transcript_1/1_Conf_1.000 | 478 | 20 | 2.11E-12 | YP_003357881.1 | 52  | 75.485  | 154 | 81  | DNA repair and recombination protein RadB                      |
| Locus_20804_Transcript_1/1_Conf_1.000 | 744 | 6  | 4.85E-30 | XP_001897043.1 | 54  | 135.576 | 263 | 143 | Dedicator of cytokinesis family protein                        |
| Locus_20805_Transcript_1/1_Conf_1.000 | 279 | 20 | 1.32E-22 | NP_504644.1    | 71  | 109.383 | 89  | 64  | ACyltransferase-like family member (acl-9)                     |

|                                       |     |    |          |                |     |         |     |     |                                                            |
|---------------------------------------|-----|----|----------|----------------|-----|---------|-----|-----|------------------------------------------------------------|
| Locus_20806_Transcript_1/1_Conf_1.000 | 180 | 20 | 1.12E-24 | EFO22809.1     | 96  | 116.316 | 60  | 58  | hypothetical protein LOAG_05677                            |
| Locus_20807_Transcript_1/1_Conf_1.000 | 133 | 0  |          |                |     |         |     |     |                                                            |
| Locus_20808_Transcript_1/1_Conf_1.000 | 394 | 20 | 4.22E-16 | XP_002647917.1 | 61  | 87.8113 | 104 | 64  | Hypothetical protein CBG23791                              |
| Locus_20809_Transcript_1/1_Conf_1.000 | 432 | 20 | 1.08E-24 | NP_497756.2    | 65  | 116.316 | 126 | 82  | hypothetical protein F34D10.2                              |
| Locus_2081_Transcript_1/1_Conf_1.000  | 804 | 0  |          |                |     |         |     |     |                                                            |
| Locus_20810_Transcript_1/1_Conf_1.000 | 166 | 20 | 1.29E-25 | BAG63585.1     | 100 | 119.398 | 55  | 55  | unnamed protein product                                    |
| Locus_20811_Transcript_1/1_Conf_1.000 | 348 | 0  |          |                |     |         |     |     |                                                            |
| Locus_20812_Transcript_1/1_Conf_1.000 | 355 | 0  |          |                |     |         |     |     |                                                            |
| Locus_20813_Transcript_1/1_Conf_1.000 | 218 | 0  |          |                |     |         |     |     |                                                            |
| Locus_20814_Transcript_1/1_Conf_1.000 | 889 | 20 | 8.57E-86 | XP_002638772.1 | 69  | 321.242 | 292 | 203 | C. briggsae CBR-PTR-21 protein                             |
| Locus_20815_Transcript_1/1_Conf_1.000 | 194 | 20 | 1.89E-08 | XP_001902614.1 | 78  | 62.3882 | 46  | 36  | Elongation factor Tu GTP binding domain containing protein |
| Locus_20816_Transcript_1/1_Conf_1.000 | 130 | 9  | 5.79E-10 | EFO27462.1     | 89  | 67.3958 | 37  | 33  | hypothetical protein LOAG_01021                            |
| Locus_20817_Transcript_1/1_Conf_1.000 | 166 | 20 | 3.08E-11 | ACI49172.1     | 70  | 71.633  | 54  | 38  | hypothetical protein Csp3_JD01.004                         |
| Locus_20818_Transcript_1/1_Conf_1.000 | 447 | 0  |          |                |     |         |     |     |                                                            |
| Locus_20819_Transcript_1/1_Conf_1.000 | 276 | 20 | 2.49E-21 | XP_002631303.1 | 92  | 105.145 | 65  | 60  | C. briggsae CBR-CLH-1 protein                              |
| Locus_2082_Transcript_1/2_Conf_1.000  | 831 | 0  |          |                |     |         |     |     |                                                            |

|                                       |      |    |           |                |    |         |     |     |                                 |
|---------------------------------------|------|----|-----------|----------------|----|---------|-----|-----|---------------------------------|
| Locus_2082_Transcript_2/2_Conf_1.000  | 780  | 0  |           |                |    |         |     |     |                                 |
| Locus_20820_Transcript_1/1_Conf_1.000 | 155  | 0  |           |                |    |         |     |     |                                 |
| Locus_20821_Transcript_1/1_Conf_1.000 | 234  | 20 | 2.98E-14  | XP_002633412.1 | 73 | 81.6481 | 73  | 54  | Hypothetical protein CBG06177   |
| Locus_20822_Transcript_1/1_Conf_1.000 | 178  | 0  |           |                |    |         |     |     |                                 |
| Locus_20823_Transcript_1/1_Conf_1.000 | 283  | 20 | 4.83E-28  | EFO28229.1     | 77 | 127.487 | 94  | 73  | hypothetical protein LOAG_00257 |
| Locus_20824_Transcript_1/1_Conf_1.000 | 188  | 2  | 3.94E-30  | BAC11651.1     | 98 | 134.42  | 60  | 59  | unnamed protein product         |
| Locus_20825_Transcript_1/1_Conf_1.000 | 132  | 0  |           |                |    |         |     |     |                                 |
| Locus_20826_Transcript_1/1_Conf_1.000 | 643  | 20 | 4.51E-102 | A8X3A7.2       | 91 | 374.4   | 214 | 196 | Integrin alpha pat-2            |
| Locus_20827_Transcript_1/1_Conf_1.000 | 241  | 20 | 1.57E-23  | XP_002643333.1 | 82 | 112.464 | 68  | 56  | C. briggsae CBR-VAP-1 protein   |
| Locus_20828_Transcript_1/1_Conf_1.000 | 131  | 0  |           |                |    |         |     |     |                                 |
| Locus_20829_Transcript_1/1_Conf_1.000 | 285  | 20 | 2.31E-30  | NP_502582.2    | 81 | 135.191 | 95  | 77  | hypothetical protein Y62E10A.13 |
| Locus_2083_Transcript_1/3_Conf_0.714  | 1199 | 20 | 4.84E-123 | XP_002635314.1 | 77 | 445.662 | 361 | 278 | Hypothetical protein CBG01477   |

|                                       |      |    |           |                |    |         |      |     |                                                            |
|---------------------------------------|------|----|-----------|----------------|----|---------|------|-----|------------------------------------------------------------|
| Locus_2083_Transcript_2/3_Conf_0.571  | 691  | 20 | 5.18E-73  | XP_002635314.1 | 76 | 278.1   | 224  | 172 | Hypothetical protein CBG01477                              |
| Locus_2083_Transcript_3/3_Conf_0.714  | 1199 | 20 | 4.84E-123 | XP_002635314.1 | 77 | 445.662 | 361  | 278 | Hypothetical protein CBG01477                              |
| Locus_20830_Transcript_1/1_Conf_1.000 | 230  | 2  | 1.18E-10  | NP_740794.1    | 67 | 69.707  | 76   | 51  | hypothetical protein Y51F10.10                             |
| Locus_20831_Transcript_1/1_Conf_1.000 | 187  | 0  |           |                |    |         |      |     |                                                            |
| Locus_20832_Transcript_1/1_Conf_1.000 | 407  | 2  | 4.30E-05  | XP_001898007.1 | 67 | 51.2174 | 53   | 36  | Origin recognition complex subunit 5                       |
| Locus_20833_Transcript_1/1_Conf_1.000 | 185  | 0  |           |                |    |         |      |     |                                                            |
| Locus_20834_Transcript_1/1_Conf_1.000 | 366  | 0  |           |                |    |         |      |     |                                                            |
| Locus_20835_Transcript_1/1_Conf_1.000 | 152  | 0  |           |                |    |         |      |     |                                                            |
| Locus_20836_Transcript_1/1_Conf_1.000 | 1263 | 20 | 0         | EFO25412.1     | 95 | 653.67  | 378  | 360 | hypothetical protein LOAG_03069                            |
| Locus_20837_Transcript_1/1_Conf_1.000 | 140  | 20 | 3.59E-12  | NP_502549.2    | 85 | 74.7146 | 47   | 40  | TransThyretin-Related family domain family member (ttr-51) |
| Locus_20838_Transcript_1/1_Conf_1.000 | 323  | 0  |           |                |    |         |      |     |                                                            |
| Locus_20839_Transcript_1/1_Conf_1.000 | 427  | 20 | 5.95E-47  | XP_002644986.1 | 87 | 190.274 | 113  | 99  | C. briggsae CBR-TAG-320 protein                            |
| Locus_2084_Transcript_1/1_Conf_1.000  | 3760 | 20 | 0         | NP_495221.1    | 60 | 741.88  | 1073 | 650 | hypothetical protein F21H12.6                              |
| Locus_20840_Transcript_1/1_Conf_1.000 | 131  | 0  |           |                |    |         |      |     |                                                            |
| Locus_20841_Transcript_1/1_Conf_1.000 | 165  | 0  |           |                |    |         |      |     |                                                            |
| Locus_20842_Transcript_1/1_Conf_1.000 | 294  | 0  |           |                |    |         |      |     |                                                            |

|                                       |     |    |          |                |    |         |     |     |                                                               |
|---------------------------------------|-----|----|----------|----------------|----|---------|-----|-----|---------------------------------------------------------------|
| Locus_20843_Transcript_1/1_Conf_1.000 | 202 | 5  | 1.58E-07 | XP_002637497.1 | 68 | 59.3066 | 54  | 37  | Hypothetical protein CBG19218                                 |
| Locus_20844_Transcript_1/1_Conf_1.000 | 131 | 0  |          |                |    |         |     |     |                                                               |
| Locus_20845_Transcript_1/1_Conf_1.000 | 204 | 4  | 6.39E-17 | XP_002647777.1 | 85 | 90.5077 | 60  | 51  | C. briggsae CBR-TSP-13 protein                                |
| Locus_20846_Transcript_1/1_Conf_1.000 | 455 | 0  |          |                |    |         |     |     |                                                               |
| Locus_20847_Transcript_1/1_Conf_1.000 | 133 | 20 | 1.98E-10 | NP_001129928.1 | 90 | 68.9366 | 43  | 39  | CHoline Transporter-Like family member (cht1-1)               |
| Locus_20848_Transcript_1/1_Conf_1.000 | 166 | 0  |          |                |    |         |     |     |                                                               |
| Locus_20849_Transcript_1/1_Conf_1.000 | 142 | 0  |          |                |    |         |     |     |                                                               |
| Locus_2085_Transcript_1/1_Conf_1.000  | 364 | 20 | 6.08E-44 | NP_496492.1    | 86 | 180.259 | 121 | 105 | hypothetical protein C47D12.2                                 |
| Locus_20850_Transcript_1/1_Conf_1.000 | 268 | 0  |          |                |    |         |     |     |                                                               |
| Locus_20851_Transcript_1/1_Conf_1.000 | 505 | 4  | 5.64E-16 | NP_496906.2    | 55 | 87.4261 | 127 | 70  | hypothetical protein Y51H1A.2                                 |
| Locus_20852_Transcript_1/1_Conf_1.000 | 172 | 20 | 1.12E-21 | NP_498528.1    | 94 | 106.301 | 53  | 50  | Pim (mammalian oncogene) Related Kinase family member (prk-1) |
| Locus_20853_Transcript_1/1_Conf_1.000 | 239 | 2  | 1.69E-09 | EFO24512.1     | 63 | 65.855  | 76  | 48  | hypothetical protein LOAG_03972                               |
| Locus_20854_Transcript_1/1_Conf_1.000 | 346 | 2  | 4.35E-13 | NP_506285.1    | 61 | 77.7962 | 111 | 68  | hypothetical protein F57B1.5                                  |
| Locus_20855_Transcript_1/1_Conf_1.000 | 287 | 0  |          |                |    |         |     |     |                                                               |
| Locus_20856_Transcript_1/1_Conf_1.000 | 144 | 0  |          |                |    |         |     |     |                                                               |
| Locus_20857_Transcript_1/1_Conf_1.000 | 206 | 20 | 3.07E-19 | NP_500987.3    | 85 | 98.2117 | 68  | 58  | hypothetical protein Y73B6BL.1                                |
| Locus_20858_Transcript_1/1_Conf_1.000 | 136 | 0  |          |                |    |         |     |     |                                                               |
| Locus_20859_Transcript_1/1_Conf_1.000 | 173 | 0  |          |                |    |         |     |     |                                                               |
| Locus_2086_Transcript_1/1_Conf_1.000  | 986 | 20 | 2.91E-40 | NP_001171768.1 | 70 | 170.244 | 180 | 126 | hypothetical protein LOC100376325                             |
| Locus_20860_Transcript_1/1_Conf_1.000 | 297 | 5  | 4.28E-37 | XP_002643254.1 | 88 | 157.532 | 98  | 87  | Hypothetical protein CBG08123                                 |
| Locus_20861_Transcript_1/1_Conf_1.000 | 183 | 0  |          |                |    |         |     |     |                                                               |
| Locus_20862_Transcript_1/1_Conf_1.000 | 236 | 2  | 3.41E-10 | XP_002631009.1 | 63 | 68.1662 | 80  | 51  | Hypothetical protein CBG02761                                 |

|                                       |      |    |           |                |    |         |     |     |                                                                                           |
|---------------------------------------|------|----|-----------|----------------|----|---------|-----|-----|-------------------------------------------------------------------------------------------|
| Locus_20863_Transcript_1/1_Conf_1.000 | 412  | 20 | 5.55E-21  | XP_002636677.1 | 60 | 103.99  | 133 | 81  | Hypothetical protein CBG23391                                                             |
| Locus_20864_Transcript_1/1_Conf_1.000 | 240  | 20 | 1.05E-27  | XP_002639713.1 | 88 | 126.331 | 79  | 70  | C. briggsae CBR-RAD-54 protein                                                            |
| Locus_20865_Transcript_1/1_Conf_1.000 | 144  | 0  |           |                |    |         |     |     |                                                                                           |
| Locus_20866_Transcript_1/1_Conf_1.000 | 264  | 0  |           |                |    |         |     |     |                                                                                           |
| Locus_20867_Transcript_1/1_Conf_1.000 | 188  | 0  |           |                |    |         |     |     |                                                                                           |
| Locus_20868_Transcript_1/1_Conf_1.000 | 188  | 0  |           |                |    |         |     |     |                                                                                           |
| Locus_20869_Transcript_1/1_Conf_1.000 | 277  | 2  | 1.85E-16  | XP_002638587.1 | 67 | 88.9669 | 91  | 61  | Hypothetical protein CBG05635                                                             |
| Locus_2087_Transcript_1/1_Conf_1.000  | 1131 | 20 | 2.61E-131 | NP_001021405.1 | 90 | 473.011 | 292 | 263 | asparaginyl tRNA Synthetase family member (nrs-1)                                         |
| Locus_20870_Transcript_1/2_Conf_1.000 | 519  | 20 | 2.26E-18  | NP_001022032.1 | 55 | 95.5153 | 173 | 96  | TRRAP-like (transcription/transformation domain-associated protein) family member (trr-1) |
| Locus_20870_Transcript_2/2_Conf_1.000 | 519  | 20 | 1.01E-18  | EFO19589.1     | 50 | 96.6709 | 170 | 86  | hypothetical protein LOAG_08898                                                           |
| Locus_20871_Transcript_1/1_Conf_1.000 | 151  | 0  |           |                |    |         |     |     |                                                                                           |
| Locus_20872_Transcript_1/1_Conf_1.000 | 249  | 0  |           |                |    |         |     |     |                                                                                           |
| Locus_20873_Transcript_1/1_Conf_1.000 | 214  | 0  |           |                |    |         |     |     |                                                                                           |
| Locus_20874_Transcript_1/1_Conf_1.000 | 572  | 20 | 9.31E-12  | EFO20177.1     | 55 | 73.9442 | 107 | 59  | hypothetical protein LOAG_08313                                                           |
| Locus_20875_Transcript_1/1_Conf_1.000 | 414  | 20 | 1.07E-32  | XP_002645073.1 | 90 | 142.895 | 71  | 64  | C. briggsae CBR-ADT-2 protein                                                             |
| Locus_20876_Transcript_1/1_Conf_1.000 | 154  | 0  |           |                |    |         |     |     |                                                                                           |

|                                       |      |    |          |                |    |         |     |     |                                                                     |
|---------------------------------------|------|----|----------|----------------|----|---------|-----|-----|---------------------------------------------------------------------|
| Locus_20877_Transcript_1/1_Conf_1.000 | 313  | 0  |          |                |    |         |     |     |                                                                     |
| Locus_20878_Transcript_1/1_Conf_1.000 | 154  | 0  |          |                |    |         |     |     |                                                                     |
| Locus_20879_Transcript_1/1_Conf_1.000 | 290  | 6  | 2.15E-28 | XP_002642067.1 | 94 | 128.642 | 67  | 63  | Hypothetical protein CBG18006                                       |
| Locus_2088_Transcript_1/2_Conf_1.000  | 2677 | 20 | 4.73E-35 | XP_684510.2    | 43 | 154.836 | 718 | 313 | PREDICTED: im:7150991                                               |
| Locus_2088_Transcript_2/2_Conf_1.000  | 2317 | 20 | 4.00E-35 | XP_684510.2    | 43 | 154.836 | 718 | 313 | PREDICTED: im:7150991                                               |
| Locus_20880_Transcript_1/1_Conf_1.000 | 284  | 0  |          |                |    |         |     |     |                                                                     |
| Locus_20881_Transcript_1/1_Conf_1.000 | 155  | 20 | 4.81E-12 | XP_001893740.1 | 88 | 74.3294 | 45  | 40  | ATP-dependent helicase DDX1                                         |
| Locus_20882_Transcript_1/1_Conf_1.000 | 280  | 0  |          |                |    |         |     |     |                                                                     |
| Locus_20883_Transcript_1/1_Conf_1.000 | 425  | 5  | 1.59E-07 | EFO27260.1     | 80 | 59.3066 | 41  | 33  | RNA recognition domain-containing protein domain-containing protein |
| Locus_20884_Transcript_1/1_Conf_1.000 | 194  | 20 | 1.35E-22 | P27442.1       | 90 | 109.383 | 64  | 58  | GMP reductase                                                       |
| Locus_20885_Transcript_1/1_Conf_1.000 | 1807 | 20 | 6.28E-86 | NP_495931.2    | 52 | 323.168 | 642 | 336 | hypothetical protein T24B8.7                                        |
| Locus_20886_Transcript_1/1_Conf_1.000 | 333  | 20 | 3.35E-42 | ACY39994.1     | 92 | 174.481 | 95  | 88  | C. elegans FLN-2 protein, isoform d                                 |
| Locus_20887_Transcript_1/1_Conf_1.000 | 241  | 0  |          |                |    |         |     |     |                                                                     |
| Locus_20888_Transcript_1/1_Conf_1.000 | 175  | 5  | 1.51E-10 | EFO21331.1     | 72 | 69.3218 | 58  | 42  | expressed sequence                                                  |
| Locus_20889_Transcript_1/1_Conf_1.000 | 139  | 0  |          |                |    |         |     |     |                                                                     |
| Locus_2089_Transcript_1/4_Conf_0.667  | 842  | 9  | 8.79E-21 | NP_510235.2    | 46 | 105.145 | 281 | 132 | hypothetical protein C29F7.2                                        |
| Locus_2089_Transcript_2/4_Conf_0.222  | 394  | 4  | 1.15E-13 | NP_510234.1    | 54 | 79.7221 | 135 | 73  | hypothetical protein C29F7.1                                        |
| Locus_2089_Transcript_3/4_Conf_0.667  | 860  | 10 | 1.41E-21 | XP_002645614.1 | 49 | 107.842 | 278 | 138 | Hypothetical protein CBG05337                                       |

|                                       |      |    |          |                |     |         |     |     |                                                                        |
|---------------------------------------|------|----|----------|----------------|-----|---------|-----|-----|------------------------------------------------------------------------|
| Locus_2089_Transcript_4/4_Conf_0.667  | 827  | 12 | 1.71E-21 | XP_002645614.1 | 49  | 107.457 | 278 | 138 | Hypothetical protein CBG05337                                          |
| Locus_20890_Transcript_1/1_Conf_1.000 | 293  | 0  |          |                |     |         |     |     |                                                                        |
| Locus_20891_Transcript_1/1_Conf_1.000 | 139  | 1  | 1.12E-05 | EDL24903.1     | 78  | 53.1434 | 37  | 29  | mCG14133                                                               |
| Locus_20892_Transcript_1/1_Conf_1.000 | 198  | 0  |          |                |     |         |     |     |                                                                        |
| Locus_20893_Transcript_1/1_Conf_1.000 | 368  | 0  |          |                |     |         |     |     |                                                                        |
| Locus_20894_Transcript_1/1_Conf_1.000 | 381  | 20 | 5.21E-35 | NP_499648.3    | 71  | 150.599 | 127 | 91  | Elongator complex Protein Component family member (elpc-2)             |
| Locus_20895_Transcript_1/1_Conf_1.000 | 719  | 0  |          |                |     |         |     |     |                                                                        |
| Locus_20896_Transcript_1/1_Conf_1.000 | 251  | 20 | 2.32E-11 | EFO20608.1     | 62  | 72.0182 | 83  | 52  | ran-binding protein 7                                                  |
| Locus_20897_Transcript_1/1_Conf_1.000 | 221  | 0  |          |                |     |         |     |     |                                                                        |
| Locus_20898_Transcript_1/1_Conf_1.000 | 147  | 0  |          |                |     |         |     |     |                                                                        |
| Locus_20899_Transcript_1/1_Conf_1.000 | 213  | 10 | 1.50E-34 | NP_872018.1    | 100 | 149.058 | 70  | 70  | Anion/Bicarbonate TranSporter family member (abts-3)                   |
| Locus_209_Transcript_1/1_Conf_1.000   | 1555 | 20 | 0        | NP_490816.4    | 88  | 669.848 | 432 | 382 | related to yeast Vacuolar Protein Sorting factor family member (vps-4) |



|                                       |     |    |          |                |     |         |     |     |                                                                          |
|---------------------------------------|-----|----|----------|----------------|-----|---------|-----|-----|--------------------------------------------------------------------------|
| Locus_2090_Transcript_1/1_Conf_1.000  | 583 | 5  | 7.81E-33 | NP_509903.1    | 72  | 144.05  | 179 | 129 | TweeTY transmembrane/cell surface protein Homolog family member (ttyh-1) |
| Locus_20900_Transcript_1/1_Conf_1.000 | 141 | 0  |          |                |     |         |     |     |                                                                          |
| Locus_20901_Transcript_1/1_Conf_1.000 | 789 | 0  |          |                |     |         |     |     |                                                                          |
| Locus_20902_Transcript_1/1_Conf_1.000 | 247 | 0  |          |                |     |         |     |     |                                                                          |
| Locus_20903_Transcript_1/1_Conf_1.000 | 181 | 20 | 2.66E-18 | BAG61688.1     | 100 | 95.1301 | 46  | 46  | unnamed protein product                                                  |
| Locus_20904_Transcript_1/1_Conf_1.000 | 422 | 0  |          |                |     |         |     |     |                                                                          |
| Locus_20905_Transcript_1/1_Conf_1.000 | 161 | 0  |          |                |     |         |     |     |                                                                          |
| Locus_20906_Transcript_1/1_Conf_1.000 | 131 | 0  |          |                |     |         |     |     |                                                                          |
| Locus_20907_Transcript_1/1_Conf_1.000 | 173 | 3  | 5.77E-10 | XP_002639131.1 | 72  | 67.3958 | 58  | 42  | Hypothetical protein CBG14951                                            |
| Locus_20908_Transcript_1/1_Conf_1.000 | 458 | 20 | 6.93E-56 | NP_508379.1    | 82  | 219.935 | 151 | 125 | ACyLtransferase-like family member (acl-4)                               |
| Locus_20909_Transcript_1/1_Conf_1.000 | 305 | 0  |          |                |     |         |     |     |                                                                          |
| Locus_2091_Transcript_1/1_Conf_1.000  | 647 | 2  | 1.12E-07 | XP_002634773.1 | 70  | 60.8474 | 57  | 40  | Hypothetical protein CBG13872                                            |
| Locus_20910_Transcript_1/1_Conf_1.000 | 155 | 20 | 6.29E-12 | XP_002637345.1 | 82  | 73.9442 | 47  | 39  | C. briggsae CBR-UNC-68 protein                                           |
| Locus_20911_Transcript_1/1_Conf_1.000 | 505 | 20 | 2.69E-34 | NP_504148.1    | 61  | 148.288 | 138 | 85  | PHaryngeal gland Toxin-related family member (phat-5)                    |
| Locus_20912_Transcript_1/1_Conf_1.000 | 132 | 0  |          |                |     |         |     |     |                                                                          |
| Locus_20913_Transcript_1/1_Conf_1.000 | 205 | 0  |          |                |     |         |     |     |                                                                          |
| Locus_20914_Transcript_1/1_Conf_1.000 | 263 | 8  | 3.32E-13 | XP_002638527.1 | 72  | 78.1814 | 87  | 63  | C. briggsae CBR-UNC-80 protein                                           |
| Locus_20915_Transcript_1/1_Conf_1.000 | 217 | 0  |          |                |     |         |     |     |                                                                          |
| Locus_20916_Transcript_1/1_Conf_1.000 | 136 | 0  |          |                |     |         |     |     |                                                                          |
| Locus_20917_Transcript_1/1_Conf_1.000 | 143 | 0  |          |                |     |         |     |     |                                                                          |
| Locus_20918_Transcript_1/1_Conf_1.000 | 313 | 0  |          |                |     |         |     |     |                                                                          |
| Locus_20919_Transcript_1/1_Conf_1.000 | 136 | 0  |          |                |     |         |     |     |                                                                          |
| Locus_2092_Transcript_1/1_Conf_1.000  | 767 | 20 | 2.28E-30 | XP_002641311.1 | 94  | 136.732 | 94  | 89  | C. briggsae CBR-UNC-69 protein                                           |
| Locus_20920_Transcript_1/1_Conf_1.000 | 168 | 0  |          |                |     |         |     |     |                                                                          |
| Locus_20921_Transcript_1/1_Conf_1.000 | 328 | 0  |          |                |     |         |     |     |                                                                          |
| Locus_20922_Transcript_1/1_Conf_1.000 | 197 | 0  |          |                |     |         |     |     |                                                                          |
| Locus_20923_Transcript_1/1_Conf_1.000 | 374 | 0  |          |                |     |         |     |     |                                                                          |
| Locus_20924_Transcript_1/1_Conf_1.000 | 310 | 0  |          |                |     |         |     |     |                                                                          |

|                                       |      |    |          |                |    |         |     |     |                                                                          |
|---------------------------------------|------|----|----------|----------------|----|---------|-----|-----|--------------------------------------------------------------------------|
| Locus_20925_Transcript_1/1_Conf_1.000 | 372  | 20 | 2.99E-38 | NP_502432.1    | 77 | 161.384 | 124 | 96  | RBD (RNA binding domain) protein family member (rbd-1)                   |
| Locus_20926_Transcript_1/1_Conf_1.000 | 290  | 0  |          |                |    |         |     |     |                                                                          |
| Locus_20927_Transcript_1/1_Conf_1.000 | 269  | 0  |          |                |    |         |     |     |                                                                          |
| Locus_20928_Transcript_1/1_Conf_1.000 | 178  | 0  |          |                |    |         |     |     |                                                                          |
| Locus_20929_Transcript_1/1_Conf_1.000 | 267  | 0  |          |                |    |         |     |     |                                                                          |
| Locus_2093_Transcript_1/2_Conf_1.000  | 1210 | 2  | 2.43E-13 | NP_505850.1    | 88 | 81.2629 | 51  | 45  | Prion-like-(Q/N-rich)-domain-bearing protein family member (pqn-70)      |
| Locus_2093_Transcript_2/2_Conf_1.000  | 1176 | 2  | 2.33E-13 | NP_505850.1    | 88 | 81.2629 | 51  | 45  | Prion-like-(Q/N-rich)-domain-bearing protein family member (pqn-70)      |
| Locus_20930_Transcript_1/1_Conf_1.000 | 566  | 20 | 2.68E-40 | XP_001894156.1 | 69 | 168.703 | 191 | 132 | MutS domain V family protein                                             |
| Locus_20931_Transcript_1/2_Conf_1.000 | 232  | 0  |          |                |    |         |     |     |                                                                          |
| Locus_20931_Transcript_2/2_Conf_1.000 | 231  | 0  |          |                |    |         |     |     |                                                                          |
| Locus_20932_Transcript_1/1_Conf_1.000 | 183  | 0  |          |                |    |         |     |     |                                                                          |
| Locus_20933_Transcript_1/1_Conf_1.000 | 322  | 0  |          |                |    |         |     |     |                                                                          |
| Locus_20934_Transcript_1/1_Conf_1.000 | 147  | 0  |          |                |    |         |     |     |                                                                          |
| Locus_20935_Transcript_1/1_Conf_1.000 | 130  | 2  | 7.33E-05 | XP_001893489.1 | 70 | 50.447  | 41  | 29  | Hepatocellular carcinoma-associated antigen 66                           |
| Locus_20936_Transcript_1/1_Conf_1.000 | 199  | 20 | 3.76E-25 | NP_509205.2    | 93 | 117.857 | 66  | 62  | P-GlycoProtein related family member (pgp-10)                            |
| Locus_20937_Transcript_1/2_Conf_1.000 | 817  | 4  | 2.32E-39 | NP_508552.1    | 62 | 166.777 | 202 | 126 | hypothetical protein F40F4.6                                             |
| Locus_20937_Transcript_2/2_Conf_1.000 | 817  | 4  | 2.32E-39 | NP_508552.1    | 62 | 166.777 | 202 | 126 | hypothetical protein F40F4.6                                             |
| Locus_20938_Transcript_1/1_Conf_1.000 | 229  | 0  |          |                |    |         |     |     |                                                                          |
| Locus_20939_Transcript_1/1_Conf_1.000 | 310  | 0  |          |                |    |         |     |     |                                                                          |
| Locus_2094_Transcript_1/1_Conf_1.000  | 475  | 7  | 3.39E-10 | NP_499022.1    | 46 | 68.1662 | 151 | 70  | hypothetical protein ZK512.5                                             |
| Locus_20940_Transcript_1/1_Conf_1.000 | 164  | 0  |          |                |    |         |     |     |                                                                          |
| Locus_20941_Transcript_1/1_Conf_1.000 | 291  | 0  |          |                |    |         |     |     |                                                                          |
| Locus_20942_Transcript_1/1_Conf_1.000 | 141  | 0  |          |                |    |         |     |     |                                                                          |
| Locus_20943_Transcript_1/1_Conf_1.000 | 395  | 0  |          |                |    |         |     |     |                                                                          |
| Locus_20944_Transcript_1/1_Conf_1.000 | 228  | 20 | 1.44E-16 | CBW44372.1     | 76 | 89.3521 | 72  | 55  | C. elegans protein F21A10.2e, partially confirmed by transcript evidence |

|                                       |     |    |          |                |     |         |     |     |                                                                         |
|---------------------------------------|-----|----|----------|----------------|-----|---------|-----|-----|-------------------------------------------------------------------------|
| Locus_20945_Transcript_1/1_Conf_1.000 | 203 | 20 | 5.99E-23 | XP_002643622.1 | 84  | 110.538 | 66  | 56  | C. briggsae CBR-NAS-39 protein                                          |
| Locus_20946_Transcript_1/1_Conf_1.000 | 202 | 0  |          |                |     |         |     |     |                                                                         |
| Locus_20947_Transcript_1/1_Conf_1.000 | 249 | 0  |          |                |     |         |     |     |                                                                         |
| Locus_20948_Transcript_1/1_Conf_1.000 | 614 | 3  | 3.50E-13 | NP_497273.2    | 53  | 78.9518 | 166 | 89  | Fatty Acid/Retinol binding protein family member (far-8)                |
| Locus_20949_Transcript_1/1_Conf_1.000 | 343 | 2  | 5.85E-42 | AAQ18782.1     | 80  | 173.711 | 115 | 92  | GATA transcription factor                                               |
| Locus_2095_Transcript_1/1_Conf_1.000  | 846 | 20 | 7.51E-36 | NP_506009.1    | 55  | 155.221 | 274 | 152 | hypothetical protein C52E4.7                                            |
| Locus_20950_Transcript_1/1_Conf_1.000 | 387 | 20 | 1.95E-50 | XP_002645256.1 | 84  | 201.83  | 129 | 109 | Hypothetical protein CBG00135                                           |
| Locus_20951_Transcript_1/1_Conf_1.000 | 232 | 0  |          |                |     |         |     |     |                                                                         |
| Locus_20952_Transcript_1/1_Conf_1.000 | 157 | 0  |          |                |     |         |     |     |                                                                         |
| Locus_20953_Transcript_1/1_Conf_1.000 | 150 | 20 | 8.24E-12 | NP_741684.2    | 87  | 73.559  | 48  | 42  | PROximal proliferation in germline family member (pro-3)                |
| Locus_20954_Transcript_1/1_Conf_1.000 | 141 | 10 | 3.58E-12 | CAA92456.3     | 91  | 74.7146 | 47  | 43  | C. elegans protein C53B4.4b, partially confirmed by transcript evidence |
| Locus_20955_Transcript_1/1_Conf_1.000 | 227 | 1  | 2.89E-41 | EAW61183.1     | 100 | 171.4   | 75  | 75  | basigin (Ok blood group), isoform CRA_d                                 |
| Locus_20956_Transcript_1/1_Conf_1.000 | 207 | 0  |          |                |     |         |     |     |                                                                         |

|                                       |     |    |          |                |    |         |     |     |                                                                     |
|---------------------------------------|-----|----|----------|----------------|----|---------|-----|-----|---------------------------------------------------------------------|
| Locus_20957_Transcript_1/1_Conf_1.000 | 214 | 20 | 2.75E-20 | EFO18082.1     | 94 | 101.679 | 70  | 66  | hypothetical protein LOAG_10417                                     |
| Locus_20958_Transcript_1/1_Conf_1.000 | 284 | 0  |          |                |    |         |     |     |                                                                     |
| Locus_20959_Transcript_1/1_Conf_1.000 | 646 | 9  | 2.22E-56 | NP_509677.1    | 70 | 222.631 | 216 | 153 | hypothetical protein F19C6.2                                        |
| Locus_2096_Transcript_1/1_Conf_1.000  | 278 | 0  |          |                |    |         |     |     |                                                                     |
| Locus_20960_Transcript_1/1_Conf_1.000 | 646 | 6  | 1.70E-48 | XP_002636775.1 | 68 | 196.438 | 190 | 131 | Hypothetical protein CBG23509                                       |
| Locus_20961_Transcript_1/1_Conf_1.000 | 188 | 0  |          |                |    |         |     |     |                                                                     |
| Locus_20962_Transcript_1/1_Conf_1.000 | 140 | 0  |          |                |    |         |     |     |                                                                     |
| Locus_20963_Transcript_1/1_Conf_1.000 | 246 | 20 | 1.61E-12 | NP_505977.1    | 73 | 75.8702 | 67  | 49  | Pyruvate Carboxylase family member (pyc-1)                          |
| Locus_20964_Transcript_1/1_Conf_1.000 | 137 | 20 | 4.87E-09 | XP_797921.2    | 90 | 64.3142 | 43  | 39  | PREDICTED: similar to MGC82686 protein                              |
| Locus_20965_Transcript_1/1_Conf_1.000 | 302 | 20 | 3.87E-22 | NP_491200.1    | 72 | 107.842 | 102 | 74  | hypothetical protein D1037.1                                        |
| Locus_20966_Transcript_1/1_Conf_1.000 | 686 | 0  |          |                |    |         |     |     |                                                                     |
| Locus_20967_Transcript_1/1_Conf_1.000 | 191 | 20 | 5.49E-24 | XP_002632893.1 | 95 | 114.005 | 63  | 60  | Hypothetical protein CBG15101                                       |
| Locus_20968_Transcript_1/1_Conf_1.000 | 164 | 4  | 3.65E-12 | ACJ65180.1     | 86 | 74.7146 | 45  | 39  | Gaba b receptor subunit protein 2, confirmed by transcript evidence |

|                                       |      |    |          |             |     |         |     |     |                                                                                 |
|---------------------------------------|------|----|----------|-------------|-----|---------|-----|-----|---------------------------------------------------------------------------------|
| Locus_20969_Transcript_1/1_Conf_1.000 | 357  | 20 | 3.48E-39 | EFO23704.1  | 80  | 164.466 | 117 | 94  | hypothetical protein LOAG_04778                                                 |
| Locus_2097_Transcript_1/1_Conf_1.000  | 2466 | 20 | 0        | NP_492319.2 | 84  | 820.846 | 590 | 497 | RSK-pNinety (RSK-p90 kinase) homolog family member (rskn-1)                     |
| Locus_20970_Transcript_1/1_Conf_1.000 | 479  | 0  |          |             |     |         |     |     |                                                                                 |
| Locus_20971_Transcript_1/1_Conf_1.000 | 191  | 0  |          |             |     |         |     |     |                                                                                 |
| Locus_20972_Transcript_1/1_Conf_1.000 | 161  | 20 | 8.16E-12 | NP_503578.1 | 84  | 73.559  | 45  | 38  | hypothetical protein F22F7.7                                                    |
| Locus_20973_Transcript_1/1_Conf_1.000 | 743  | 20 | 1.13E-63 | ACI49160.1  | 70  | 247.284 | 231 | 162 | hypothetical protein Cbre_JD21.007                                              |
| Locus_20974_Transcript_1/1_Conf_1.000 | 172  | 0  |          |             |     |         |     |     |                                                                                 |
| Locus_20975_Transcript_1/1_Conf_1.000 | 351  | 0  |          |             |     |         |     |     |                                                                                 |
| Locus_20976_Transcript_1/1_Conf_1.000 | 133  | 20 | 8.32E-17 | ACJ65168.1  | 100 | 90.1225 | 44  | 44  | Uncoordinated protein 68, isoform b, partially confirmed by transcript evidence |
| Locus_20977_Transcript_1/1_Conf_1.000 | 242  | 15 | 2.19E-17 | ADI88500.1  | 71  | 92.0485 | 77  | 55  | DRAG-1                                                                          |
| Locus_20978_Transcript_1/1_Conf_1.000 | 153  | 0  |          |             |     |         |     |     |                                                                                 |
| Locus_20979_Transcript_1/1_Conf_1.000 | 130  | 0  |          |             |     |         |     |     |                                                                                 |

|                                       |     |    |          |                |    |         |     |     |                                                                         |
|---------------------------------------|-----|----|----------|----------------|----|---------|-----|-----|-------------------------------------------------------------------------|
| Locus_2098_Transcript_1/1_Conf_1.000  | 564 | 20 | 9.80E-59 | NP_492601.1    | 89 | 229.95  | 133 | 119 | Cytochrome C Oxidase family member (cco-1)                              |
| Locus_20980_Transcript_1/1_Conf_1.000 | 157 | 1  | 1.65E-04 | EFO17639.1     | 68 | 49.2914 | 35  | 24  | hypothetical protein LOAG_10859                                         |
| Locus_20981_Transcript_1/1_Conf_1.000 | 276 | 0  |          |                |    |         |     |     |                                                                         |
| Locus_20982_Transcript_1/1_Conf_1.000 | 179 | 20 | 6.55E-14 | NP_496814.1    | 80 | 80.4925 | 60  | 48  | Member of AAA family binding CED-4 family member (mac-1)                |
| Locus_20983_Transcript_1/1_Conf_1.000 | 562 | 0  |          |                |    |         |     |     |                                                                         |
| Locus_20984_Transcript_1/1_Conf_1.000 | 134 | 20 | 1.47E-13 | NP_510705.1    | 93 | 79.337  | 44  | 41  | hypothetical protein C10E2.6                                            |
| Locus_20985_Transcript_1/1_Conf_1.000 | 685 | 20 | 1.86E-83 | XP_002645520.1 | 85 | 312.768 | 206 | 176 | C. briggsae CBR-NHR-14 protein                                          |
| Locus_20986_Transcript_1/1_Conf_1.000 | 304 | 20 | 1.56E-39 | CAX65056.1     | 92 | 165.622 | 101 | 93  | C. elegans protein F25C8.3d, partially confirmed by transcript evidence |
| Locus_20987_Transcript_1/1_Conf_1.000 | 225 | 0  |          |                |    |         |     |     |                                                                         |

|                                       |     |    |          |                |    |         |     |     |                                                        |
|---------------------------------------|-----|----|----------|----------------|----|---------|-----|-----|--------------------------------------------------------|
| Locus_20988_Transcript_1/1_Conf_1.000 | 281 | 20 | 6.74E-27 | NP_501743.1    | 77 | 123.635 | 92  | 71  | CAVEolin family member (cav-1)                         |
| Locus_20989_Transcript_1/1_Conf_1.000 | 129 | 1  | 4.75E-04 | XP_002937788.1 | 69 | 47.7506 | 39  | 27  | PREDICTED: collagen alpha-6(VI) chain-like, partial    |
| Locus_2099_Transcript_1/2_Conf_1.000  | 861 | 7  | 1.98E-23 | NP_492047.1    | 55 | 114.005 | 139 | 77  | Chondroitin ProteoGlycan family member (cpg-3)         |
| Locus_2099_Transcript_2/2_Conf_1.000  | 716 | 7  | 1.38E-23 | NP_492047.1    | 55 | 114.005 | 139 | 77  | Chondroitin ProteoGlycan family member (cpg-3)         |
| Locus_20990_Transcript_1/1_Conf_1.000 | 319 | 0  |          |                |    |         |     |     |                                                        |
| Locus_20991_Transcript_1/1_Conf_1.000 | 129 | 0  |          |                |    |         |     |     |                                                        |
| Locus_20992_Transcript_1/1_Conf_1.000 | 242 | 0  |          |                |    |         |     |     |                                                        |
| Locus_20993_Transcript_1/1_Conf_1.000 | 128 | 0  |          |                |    |         |     |     |                                                        |
| Locus_20994_Transcript_1/1_Conf_1.000 | 160 | 0  |          |                |    |         |     |     |                                                        |
| Locus_20995_Transcript_1/2_Conf_1.000 | 476 | 0  |          |                |    |         |     |     |                                                        |
| Locus_20995_Transcript_2/2_Conf_1.000 | 464 | 0  |          |                |    |         |     |     |                                                        |
| Locus_20996_Transcript_1/1_Conf_1.000 | 245 | 3  | 2.67E-15 | XP_002643880.1 | 69 | 85.1149 | 83  | 58  | Hypothetical protein CBG02118                          |
| Locus_20997_Transcript_1/1_Conf_1.000 | 511 | 20 | 7.87E-82 | XP_002645216.1 | 94 | 306.22  | 169 | 159 | Hypothetical protein CBG00074                          |
| Locus_20998_Transcript_1/1_Conf_1.000 | 583 | 20 | 1.16E-52 | NP_741293.1    | 69 | 209.92  | 204 | 142 | Enhanced RNAI (RNA interference) family member (eri-1) |

|                                       |      |    |           |                |    |         |      |      |                                    |
|---------------------------------------|------|----|-----------|----------------|----|---------|------|------|------------------------------------|
| Locus_20999_Transcript_1/1_Conf_1.000 | 153  | 20 | 1.40E-11  | EFO25550.1     | 78 | 72.7886 | 50   | 39   | nucleolar protein 10               |
| Locus_21_Transcript_1/1_Conf_1.000    | 1484 | 20 | 5.83E-156 | NP_502269.1    | 96 | 555.444 | 350  | 336  | hypothetical protein ZK829.7       |
| Locus_210_Transcript_1/3_Conf_0.375   | 562  | 8  | 7.13E-62  | ADN00782.1     | 80 | 240.35  | 175  | 141  | parasitic stage specific protein 1 |
| Locus_210_Transcript_2/3_Conf_0.500   | 851  | 20 | 1.47E-39  | XP_002637073.1 | 56 | 167.548 | 207  | 117  | C. briggsae CBR-LYS-1 protein      |
| Locus_210_Transcript_3/3_Conf_0.375   | 696  | 8  | 4.04E-73  | ADN00782.1     | 79 | 278.485 | 204  | 162  | parasitic stage specific protein 1 |
| Locus_2100_Transcript_1/9_Conf_0.692  | 3844 | 20 | 0         | NP_491069.1    | 86 | 1819.67 | 1231 | 1059 | hypothetical protein Y71F9AL.17    |
| Locus_2100_Transcript_2/9_Conf_0.692  | 3844 | 20 | 0         | NP_491069.1    | 86 | 1819.67 | 1231 | 1059 | hypothetical protein Y71F9AL.17    |



|                                      |      |    |   |             |    |         |      |      |                                 |
|--------------------------------------|------|----|---|-------------|----|---------|------|------|---------------------------------|
| Locus_2100_Transcript_3/9_Conf_0.692 | 3844 | 20 | 0 | NP_491069.1 | 86 | 1819.67 | 1231 | 1059 | hypothetical protein Y71F9AL.17 |
| Locus_2100_Transcript_4/9_Conf_0.692 | 3844 | 20 | 0 | NP_491069.1 | 86 | 1819.67 | 1231 | 1059 | hypothetical protein Y71F9AL.17 |
| Locus_2100_Transcript_5/9_Conf_0.692 | 3844 | 20 | 0 | NP_491069.1 | 86 | 1819.67 | 1231 | 1059 | hypothetical protein Y71F9AL.17 |

|                                      |      |    |   |             |    |         |      |      |                                 |
|--------------------------------------|------|----|---|-------------|----|---------|------|------|---------------------------------|
| Locus_2100_Transcript_6/9_Conf_0.692 | 3844 | 20 | 0 | NP_491069.1 | 86 | 1819.67 | 1231 | 1059 | hypothetical protein Y71F9AL.17 |
| Locus_2100_Transcript_7/9_Conf_0.692 | 3844 | 20 | 0 | NP_491069.1 | 86 | 1819.67 | 1231 | 1059 | hypothetical protein Y71F9AL.17 |
| Locus_2100_Transcript_8/9_Conf_0.692 | 3844 | 20 | 0 | NP_491069.1 | 86 | 1819.67 | 1231 | 1059 | hypothetical protein Y71F9AL.17 |

|                                       |      |    |           |                |    |         |      |      |                                                        |
|---------------------------------------|------|----|-----------|----------------|----|---------|------|------|--------------------------------------------------------|
| Locus_2100_Transcript_9/9_Conf_0.692  | 3844 | 20 | 0         | NP_491069.1    | 86 | 1819.67 | 1231 | 1059 | hypothetical protein Y71F9AL.17                        |
| Locus_21000_Transcript_1/1_Conf_1.000 | 577  | 20 | 3.61E-51  | NP_499668.1    | 71 | 204.912 | 184  | 131  | hypothetical protein Y37D8A.2                          |
| Locus_21001_Transcript_1/1_Conf_1.000 | 233  | 0  |           |                |    |         |      |      |                                                        |
| Locus_21002_Transcript_1/1_Conf_1.000 | 175  | 0  |           |                |    |         |      |      |                                                        |
| Locus_21003_Transcript_1/1_Conf_1.000 | 226  | 0  |           |                |    |         |      |      |                                                        |
| Locus_21004_Transcript_1/1_Conf_1.000 | 282  | 4  | 4.24E-16  | NP_500204.2    | 70 | 87.8113 | 94   | 66   | CaDHerin family member (cdh-10)                        |
| Locus_21005_Transcript_1/1_Conf_1.000 | 150  | 0  |           |                |    |         |      |      |                                                        |
| Locus_21006_Transcript_1/1_Conf_1.000 | 329  | 20 | 7.59E-10  | XP_002640649.1 | 60 | 67.0106 | 70   | 42   | Hypothetical protein CBG19707                          |
| Locus_21007_Transcript_1/1_Conf_1.000 | 218  | 0  |           |                |    |         |      |      |                                                        |
| Locus_21008_Transcript_1/1_Conf_1.000 | 489  | 0  |           |                |    |         |      |      |                                                        |
| Locus_21009_Transcript_1/1_Conf_1.000 | 252  | 0  |           |                |    |         |      |      |                                                        |
| Locus_2101_Transcript_1/2_Conf_1.000  | 1582 | 20 | 8.84E-158 | EFO22806.1     | 77 | 561.607 | 441  | 341  | N-myristoyltransferase 2                               |
| Locus_2101_Transcript_2/2_Conf_1.000  | 1582 | 20 | 8.84E-158 | EFO22806.1     | 77 | 561.607 | 441  | 341  | N-myristoyltransferase 2                               |
| Locus_21010_Transcript_1/1_Conf_1.000 | 191  | 0  |           |                |    |         |      |      |                                                        |
| Locus_21011_Transcript_1/1_Conf_1.000 | 515  | 1  | 5.32E-17  | EFO16507.1     | 56 | 90.8929 | 162  | 91   | hypothetical protein LOAG_12000                        |
| Locus_21012_Transcript_1/1_Conf_1.000 | 270  | 20 | 7.27E-37  | NP_497786.2    | 95 | 156.762 | 89   | 85   | MethylMalonylCoA Mutase homolog family member (mmcm-1) |

|                                       |      |    |          |                |     |         |     |     |                                                                                  |  |
|---------------------------------------|------|----|----------|----------------|-----|---------|-----|-----|----------------------------------------------------------------------------------|--|
| Locus_21013_Transcript_1/1_Conf_1.000 | 254  | 0  |          |                |     |         |     |     |                                                                                  |  |
| Locus_21014_Transcript_1/1_Conf_1.000 | 162  | 10 | 1.34E-06 | ZP_06280939.1  | 58  | 56.225  | 53  | 31  | LPXTG-motif cell wall anchor domain protein                                      |  |
| Locus_21015_Transcript_1/1_Conf_1.000 | 241  | 20 | 2.43E-08 | XP_002155142.1 | 75  | 62.003  | 48  | 36  | PREDICTED: similar to ezrin-binding partner PACE-1                               |  |
| Locus_21016_Transcript_1/1_Conf_1.000 | 349  | 2  | 1.26E-20 | NP_506224.1    | 59  | 102.834 | 118 | 70  | hypothetical protein R90.1                                                       |  |
| Locus_21017_Transcript_1/1_Conf_1.000 | 288  | 1  | 1.96E-05 | XP_002642656.1 | 74  | 52.373  | 35  | 26  | Hypothetical protein CBG00040                                                    |  |
| Locus_21018_Transcript_1/1_Conf_1.000 | 236  | 2  | 3.66E-04 | NP_740912.2    | 46  | 48.1358 | 86  | 40  | SCP(Small C-terminal domain Phosphatase)-Like phosphatase family member (scpl-1) |  |
| Locus_21019_Transcript_1/1_Conf_1.000 | 197  | 0  |          |                |     |         |     |     |                                                                                  |  |
| Locus_2102_Transcript_1/1_Conf_1.000  | 1094 | 4  | 6.52E-07 | XP_002631720.1 | 54  | 59.6918 | 120 | 65  | C. briggsae CBR-PQN-87 protein                                                   |  |
| Locus_21020_Transcript_1/1_Conf_1.000 | 292  | 0  |          |                |     |         |     |     |                                                                                  |  |
| Locus_21021_Transcript_1/1_Conf_1.000 | 467  | 4  | 2.78E-52 | NP_492775.2    | 80  | 207.994 | 154 | 124 | LAMinin related. See also lmb- family member (lam-3)                             |  |
| Locus_21022_Transcript_1/1_Conf_1.000 | 331  | 0  |          |                |     |         |     |     |                                                                                  |  |
| Locus_21023_Transcript_1/1_Conf_1.000 | 220  | 0  |          |                |     |         |     |     |                                                                                  |  |
| Locus_21024_Transcript_1/1_Conf_1.000 | 141  | 0  |          |                |     |         |     |     |                                                                                  |  |
| Locus_21025_Transcript_1/1_Conf_1.000 | 134  | 0  |          |                |     |         |     |     |                                                                                  |  |
| Locus_21026_Transcript_1/1_Conf_1.000 | 183  | 0  |          |                |     |         |     |     |                                                                                  |  |
| Locus_21027_Transcript_1/1_Conf_1.000 | 187  | 4  | 4.37E-13 | NP_491022.2    | 83  | 77.7962 | 61  | 51  | hypothetical protein F32B5.7                                                     |  |
| Locus_21028_Transcript_1/1_Conf_1.000 | 159  | 0  |          |                |     |         |     |     |                                                                                  |  |
| Locus_21029_Transcript_1/1_Conf_1.000 | 157  | 20 | 2.08E-23 | ACV89490.1     | 100 | 112.079 | 52  | 52  | MHC class II antigen                                                             |  |
| Locus_2103_Transcript_1/1_Conf_1.000  | 596  | 20 | 4.47E-23 | EFO22749.1     | 61  | 111.694 | 157 | 97  | hypothetical protein LOAG_05738                                                  |  |
| Locus_21030_Transcript_1/1_Conf_1.000 | 246  | 20 | 1.12E-21 | NP_501999.2    | 78  | 106.301 | 80  | 63  | hypothetical protein T25B9.10                                                    |  |
| Locus_21031_Transcript_1/1_Conf_1.000 | 227  | 10 | 3.32E-21 | XP_002644127.1 | 77  | 104.76  | 75  | 58  | C. briggsae CBR-TAG-289 protein                                                  |  |
| Locus_21032_Transcript_1/1_Conf_1.000 | 350  | 0  |          |                |     |         |     |     |                                                                                  |  |
| Locus_21033_Transcript_1/1_Conf_1.000 | 143  | 11 | 5.35E-08 | NP_496800.1    | 71  | 60.8474 | 45  | 32  | hypothetical protein W09H1.5                                                     |  |

|                                       |      |    |          |                |    |         |     |     |                                                                          |
|---------------------------------------|------|----|----------|----------------|----|---------|-----|-----|--------------------------------------------------------------------------|
| Locus_21034_Transcript_1/1_Conf_1.000 | 154  | 20 | 1.00E-17 | NP_491165.2    | 94 | 93.2041 | 50  | 47  | human SPG (spastic paraplegia) family member (spg-7)                     |
| Locus_21035_Transcript_1/1_Conf_1.000 | 500  | 2  | 2.33E-11 | NP_740794.1    | 47 | 72.0182 | 168 | 79  | hypothetical protein Y51F10.10                                           |
| Locus_21036_Transcript_1/1_Conf_1.000 | 481  | 20 | 5.12E-51 | XP_002646593.1 | 89 | 203.756 | 131 | 117 | C. briggsae CBR-PRPF-4 protein                                           |
| Locus_21037_Transcript_1/1_Conf_1.000 | 363  | 0  |          |                |    |         |     |     |                                                                          |
| Locus_21038_Transcript_1/1_Conf_1.000 | 156  | 0  |          |                |    |         |     |     |                                                                          |
| Locus_21039_Transcript_1/1_Conf_1.000 | 154  | 0  |          |                |    |         |     |     |                                                                          |
| Locus_2104_Transcript_1/1_Conf_1.000  | 2329 | 20 | 0        | CAX32485.1     | 68 | 697.582 | 790 | 539 | C. elegans protein T20D3.11b, partially confirmed by transcript evidence |
| Locus_21040_Transcript_1/1_Conf_1.000 | 416  | 20 | 2.75E-12 | XP_001894417.1 | 59 | 75.0998 | 100 | 59  | Nuclear hormone receptor family member nhr-25                            |
| Locus_21041_Transcript_1/1_Conf_1.000 | 197  | 0  |          |                |    |         |     |     |                                                                          |
| Locus_21042_Transcript_1/1_Conf_1.000 | 204  | 20 | 2.78E-12 | XP_002645018.1 | 69 | 75.0998 | 68  | 47  | C. briggsae CBR-SUR-5 protein                                            |
| Locus_21043_Transcript_1/1_Conf_1.000 | 196  | 0  |          |                |    |         |     |     |                                                                          |
| Locus_21044_Transcript_1/1_Conf_1.000 | 263  | 20 | 1.87E-32 | NP_491529.2    | 87 | 142.124 | 87  | 76  | hypothetical protein Y110A7A.6                                           |
| Locus_21045_Transcript_1/1_Conf_1.000 | 129  | 0  |          |                |    |         |     |     |                                                                          |
| Locus_21046_Transcript_1/1_Conf_1.000 | 220  | 2  | 6.90E-06 | XP_001892872.1 | 61 | 50.0618 | 52  | 32  | hypothetical protein Bm1_07015                                           |
| Locus_21047_Transcript_1/1_Conf_1.000 | 447  | 0  |          |                |    |         |     |     |                                                                          |
| Locus_21048_Transcript_1/1_Conf_1.000 | 177  | 20 | 5.72E-18 | NP_493618.1    | 87 | 93.9745 | 56  | 49  | Deletions Of G-rich DNA family member (dog-1)                            |
| Locus_21049_Transcript_1/1_Conf_1.000 | 213  | 4  | 1.61E-28 | NP_495365.1    | 97 | 129.028 | 70  | 68  | RaPsYn family member (rpy-1)                                             |

|                                       |      |    |           |                |    |         |     |     |                                 |
|---------------------------------------|------|----|-----------|----------------|----|---------|-----|-----|---------------------------------|
| Locus_2105_Transcript_1/1_Conf_1.000  | 1036 | 20 | 7.53E-42  | XP_002639656.1 | 58 | 175.637 | 239 | 141 | Hypothetical protein CBG12372   |
| Locus_21050_Transcript_1/1_Conf_1.000 | 192  | 0  |           |                |    |         |     |     |                                 |
| Locus_21051_Transcript_1/1_Conf_1.000 | 272  | 20 | 2.41E-40  | NP_001122445.1 | 96 | 168.318 | 89  | 86  | hypothetical protein F08A10.1   |
| Locus_21052_Transcript_1/1_Conf_1.000 | 222  | 0  |           |                |    |         |     |     |                                 |
| Locus_21053_Transcript_1/1_Conf_1.000 | 210  | 20 | 3.59E-28  | NP_502747.1    | 94 | 127.872 | 69  | 65  | hypothetical protein F55B11.1   |
| Locus_21054_Transcript_1/1_Conf_1.000 | 161  | 0  |           |                |    |         |     |     |                                 |
| Locus_21055_Transcript_1/1_Conf_1.000 | 318  | 0  |           |                |    |         |     |     |                                 |
| Locus_21056_Transcript_1/1_Conf_1.000 | 136  | 0  |           |                |    |         |     |     |                                 |
| Locus_21057_Transcript_1/1_Conf_1.000 | 161  | 2  | 1.03E-14  | EFO27604.1     | 83 | 83.1889 | 53  | 44  | hypothetical protein LOAG_00873 |
| Locus_21058_Transcript_1/1_Conf_1.000 | 375  | 20 | 6.84E-43  | XP_001900176.1 | 77 | 176.792 | 135 | 104 | LIM domain containing protein   |
| Locus_21059_Transcript_1/1_Conf_1.000 | 406  | 20 | 2.26E-46  | ACZ13335.1     | 90 | 188.348 | 133 | 120 | 60S ribosomal protein L5        |
| Locus_2106_Transcript_1/4_Conf_0.667  | 1634 | 20 | 1.57E-173 | XP_002637767.1 | 87 | 613.994 | 400 | 349 | C. briggsae CBR-UNC-61 protein  |
| Locus_2106_Transcript_2/4_Conf_0.667  | 1639 | 20 | 6.61E-172 | XP_002637767.1 | 86 | 608.601 | 407 | 351 | C. briggsae CBR-UNC-61 protein  |

|                                       |      |    |           |                |     |         |     |     |                                                 |
|---------------------------------------|------|----|-----------|----------------|-----|---------|-----|-----|-------------------------------------------------|
| Locus_2106_Transcript_3/4_Conf_0.667  | 1627 | 20 | 6.55E-172 | XP_002637767.1 | 86  | 608.601 | 403 | 349 | C. briggsae CBR-UNC-61 protein                  |
| Locus_2106_Transcript_4/4_Conf_0.667  | 1618 | 20 | 1.55E-173 | XP_002637767.1 | 87  | 613.994 | 400 | 349 | C. briggsae CBR-UNC-61 protein                  |
| Locus_21060_Transcript_1/1_Conf_1.000 | 145  | 0  |           |                |     |         |     |     |                                                 |
| Locus_21061_Transcript_1/1_Conf_1.000 | 402  | 17 | 4.15E-32  | NP_502894.1    | 68  | 140.969 | 122 | 84  | hypothetical protein Y105C5B.5                  |
| Locus_21062_Transcript_1/1_Conf_1.000 | 155  | 0  |           |                |     |         |     |     |                                                 |
| Locus_21063_Transcript_1/1_Conf_1.000 | 450  | 0  |           |                |     |         |     |     |                                                 |
| Locus_21064_Transcript_1/1_Conf_1.000 | 386  | 15 | 8.32E-17  | NP_509219.1    | 55  | 90.1225 | 138 | 76  | hypothetical protein F46H5.4                    |
| Locus_21065_Transcript_1/1_Conf_1.000 | 268  | 2  | 1.06E-11  | XP_002637628.1 | 72  | 73.1738 | 65  | 47  | Hypothetical protein CBG19373                   |
| Locus_21066_Transcript_1/1_Conf_1.000 | 138  | 20 | 1.90E-21  | XP_002800676.1 | 100 | 105.531 | 45  | 45  | PREDICTED: galectin-3-binding protein isoform 3 |
| Locus_21067_Transcript_1/1_Conf_1.000 | 502  | 5  | 1.15E-13  | XP_002636935.1 | 55  | 79.7221 | 145 | 81  | C. briggsae CBR-UIG-1 protein                   |
| Locus_21068_Transcript_1/1_Conf_1.000 | 351  | 20 | 5.62E-21  | XP_002629947.1 | 85  | 103.99  | 71  | 61  | C. briggsae CBR-PFD-2 protein                   |

|                                       |     |    |          |                |    |         |     |     |                                                                         |
|---------------------------------------|-----|----|----------|----------------|----|---------|-----|-----|-------------------------------------------------------------------------|
| Locus_21069_Transcript_1/1_Conf_1.000 | 308 | 20 | 1.90E-29 | EFO24692.1     | 75 | 132.109 | 100 | 75  | protein-tyrosine phosphatase                                            |
| Locus_2107_Transcript_1/1_Conf_1.000  | 751 | 20 | 1.05E-88 | XP_001899666.1 | 82 | 330.487 | 235 | 194 | Putative activator 1 36 kDa subunit                                     |
| Locus_21070_Transcript_1/1_Conf_1.000 | 131 | 4  | 5.60E-13 | NP_501176.1    | 95 | 77.411  | 41  | 39  | hypothetical protein T12B3.3                                            |
| Locus_21071_Transcript_1/2_Conf_1.000 | 297 | 0  |          |                |    |         |     |     |                                                                         |
| Locus_21071_Transcript_2/2_Conf_1.000 | 195 | 0  |          |                |    |         |     |     |                                                                         |
| Locus_21072_Transcript_1/1_Conf_1.000 | 397 | 20 | 4.48E-26 | XP_002643199.1 | 69 | 120.939 | 113 | 79  | C. briggsae CBR-TTR-37 protein                                          |
| Locus_21073_Transcript_1/1_Conf_1.000 | 436 | 0  |          |                |    |         |     |     |                                                                         |
| Locus_21074_Transcript_1/1_Conf_1.000 | 348 | 0  |          |                |    |         |     |     |                                                                         |
| Locus_21075_Transcript_1/1_Conf_1.000 | 440 | 20 | 5.50E-29 | XP_002648469.1 | 73 | 130.568 | 110 | 81  | Hypothetical protein CBG24757                                           |
| Locus_21076_Transcript_1/1_Conf_1.000 | 165 | 20 | 1.69E-17 | CAX65056.1     | 78 | 92.4337 | 66  | 52  | C. elegans protein F25C8.3d, partially confirmed by transcript evidence |
| Locus_21077_Transcript_1/1_Conf_1.000 | 233 | 20 | 1.43E-24 | NP_492944.2    | 87 | 115.931 | 70  | 61  | hypothetical protein F32B4.5                                            |
| Locus_21078_Transcript_1/1_Conf_1.000 | 141 | 5  | 1.84E-08 | XP_002641945.1 | 85 | 62.3882 | 35  | 30  | C. briggsae CBR-TAG-198 protein                                         |
| Locus_21079_Transcript_1/1_Conf_1.000 | 163 | 0  |          |                |    |         |     |     |                                                                         |
| Locus_2108_Transcript_1/1_Conf_1.000  | 328 | 9  | 7.26E-45 | XP_002632886.1 | 89 | 183.341 | 109 | 98  | Hypothetical protein CBG15094                                           |
| Locus_21080_Transcript_1/1_Conf_1.000 | 308 | 20 | 1.02E-06 | NP_001082522.1 | 65 | 56.6102 | 60  | 39  | UTP14, U3 small nucleolar ribonucleoprotein, homolog A                  |



|                                       |      |    |          |                |    |         |      |     |                                                              |
|---------------------------------------|------|----|----------|----------------|----|---------|------|-----|--------------------------------------------------------------|
| Locus_21081_Transcript_1/1_Conf_1.000 | 634  | 20 | 9.42E-81 | XP_002638487.1 | 80 | 303.523 | 211  | 170 | Hypothetical protein CBG12917                                |
| Locus_21082_Transcript_1/1_Conf_1.000 | 275  | 6  | 1.51E-26 | NP_001122724.1 | 86 | 122.479 | 67   | 58  | hypothetical protein Y22D7AL.6                               |
| Locus_21083_Transcript_1/1_Conf_1.000 | 170  | 20 | 9.88E-10 | XP_002642493.1 | 77 | 66.6254 | 58   | 45  | Hypothetical protein CBG06913                                |
| Locus_21084_Transcript_1/1_Conf_1.000 | 418  | 20 | 1.31E-25 | XP_002430986.1 | 56 | 119.398 | 146  | 82  | zinc finger protein DHHC domain containing protein, putative |
| Locus_21085_Transcript_1/1_Conf_1.000 | 522  | 20 | 2.99E-50 | XP_002643964.1 | 71 | 201.445 | 173  | 124 | C. briggsae CBR-HUM-4 protein                                |
| Locus_21086_Transcript_1/1_Conf_1.000 | 224  | 0  |          |                |    |         |      |     |                                                              |
| Locus_21087_Transcript_1/1_Conf_1.000 | 168  | 0  |          |                |    |         |      |     |                                                              |
| Locus_21088_Transcript_1/1_Conf_1.000 | 342  | 0  |          |                |    |         |      |     |                                                              |
| Locus_21089_Transcript_1/1_Conf_1.000 | 209  | 0  |          |                |    |         |      |     |                                                              |
| Locus_2109_Transcript_1/1_Conf_1.000  | 4169 | 20 | 0        | XP_002638675.1 | 61 | 1021.15 | 1304 | 799 | C. briggsae CBR-PBRM-1 protein                               |
| Locus_21090_Transcript_1/1_Conf_1.000 | 441  | 0  |          |                |    |         |      |     |                                                              |
| Locus_21091_Transcript_1/1_Conf_1.000 | 408  | 20 | 2.85E-25 | NP_001022060.1 | 56 | 118.242 | 165  | 94  | CLC-type chloride channel family member (clh-3)              |
| Locus_21092_Transcript_1/1_Conf_1.000 | 280  | 0  |          |                |    |         |      |     |                                                              |
| Locus_21093_Transcript_1/1_Conf_1.000 | 604  | 20 | 2.90E-65 | XP_002629799.1 | 80 | 251.906 | 204  | 165 | Hypothetical protein CBG01042                                |
| Locus_21094_Transcript_1/1_Conf_1.000 | 363  | 4  | 4.85E-17 | XP_001900557.1 | 57 | 90.8929 | 130  | 75  | Bromodomain containing protein                               |
| Locus_21095_Transcript_1/1_Conf_1.000 | 185  | 0  |          |                |    |         |      |     |                                                              |
| Locus_21096_Transcript_1/1_Conf_1.000 | 319  | 0  |          |                |    |         |      |     |                                                              |

|                                       |     |    |          |                |     |         |     |     |                                                                          |
|---------------------------------------|-----|----|----------|----------------|-----|---------|-----|-----|--------------------------------------------------------------------------|
| Locus_21097_Transcript_1/1_Conf_1.000 | 463 | 2  | 1.26E-28 | NP_492185.2    | 69  | 129.413 | 153 | 107 | SMG-associated and Lethal family member (smgl-1)                         |
| Locus_21098_Transcript_1/1_Conf_1.000 | 506 | 0  |          |                |     |         |     |     |                                                                          |
| Locus_21099_Transcript_1/1_Conf_1.000 | 242 | 2  | 3.28E-05 | NP_503409.1    | 71  | 51.6026 | 73  | 52  | SyNapTotagmin family member (snt-5)                                      |
| Locus_211_Transcript_1/5_Conf_0.588   | 459 | 20 | 8.77E-35 | Q94637.1       | 70  | 149.828 | 156 | 110 | Vitellogenin-6                                                           |
| Locus_211_Transcript_2/5_Conf_0.529   | 314 | 20 | 6.74E-22 | Q94637.1       | 72  | 107.071 | 108 | 78  | Vitellogenin-6                                                           |
| Locus_211_Transcript_3/5_Conf_0.353   | 231 | 20 | 3.66E-12 | NP_001023274.1 | 65  | 74.7146 | 78  | 51  | VITellogenin structural genes (yolk protein genes) family member (vit-6) |
| Locus_211_Transcript_4/5_Conf_0.471   | 311 | 20 | 4.23E-21 | Q94637.1       | 71  | 104.375 | 107 | 77  | Vitellogenin-6                                                           |
| Locus_211_Transcript_5/5_Conf_0.765   | 551 | 20 | 8.07E-39 | Q94637.1       | 68  | 163.696 | 188 | 128 | Vitellogenin-6                                                           |
| Locus_2110_Transcript_1/1_Conf_1.000  | 558 | 20 | 3.27E-43 | NP_491843.3    | 88  | 178.333 | 100 | 88  | hypothetical protein ZC328.2                                             |
| Locus_21100_Transcript_1/1_Conf_1.000 | 163 | 1  | 2.60E-26 | AAG23764.1     | 100 | 121.709 | 54  | 54  | AF258561_1PP3686                                                         |
| Locus_21101_Transcript_1/1_Conf_1.000 | 167 | 20 | 5.43E-16 | XP_002640833.1 | 87  | 87.4261 | 55  | 48  | C. briggsae CBR-KLP-20 protein                                           |
| Locus_21102_Transcript_1/1_Conf_1.000 | 297 | 0  |          |                |     |         |     |     |                                                                          |
| Locus_21103_Transcript_1/1_Conf_1.000 | 239 | 20 | 8.34E-25 | CAR63597.1     | 87  | 116.701 | 70  | 61  | hypothetical protein                                                     |
| Locus_21104_Transcript_1/1_Conf_1.000 | 175 | 0  |          |                |     |         |     |     |                                                                          |
| Locus_21105_Transcript_1/1_Conf_1.000 | 365 | 0  |          |                |     |         |     |     |                                                                          |

|                                       |     |    |          |                |     |         |     |     |                                                                 |
|---------------------------------------|-----|----|----------|----------------|-----|---------|-----|-----|-----------------------------------------------------------------|
| Locus_21106_Transcript_1/1_Conf_1.000 | 237 | 0  |          |                |     |         |     |     |                                                                 |
| Locus_21107_Transcript_1/1_Conf_1.000 | 275 | 20 | 5.54E-37 | XP_002646729.1 | 89  | 157.147 | 87  | 78  | C. briggsae CBR-PRX-13 protein                                  |
| Locus_21108_Transcript_1/1_Conf_1.000 | 198 | 0  |          |                |     |         |     |     |                                                                 |
| Locus_21109_Transcript_1/1_Conf_1.000 | 309 | 0  |          |                |     |         |     |     |                                                                 |
| Locus_2111_Transcript_1/2_Conf_1.000  | 301 | 20 | 3.06E-27 | AAT40500.1     | 72  | 124.79  | 94  | 68  | Putative reverse transcriptase, identical                       |
| Locus_2111_Transcript_2/2_Conf_1.000  | 170 | 15 | 6.19E-12 | ABN08556.1     | 81  | 73.9442 | 53  | 43  | Polyprotein, putative                                           |
| Locus_21110_Transcript_1/1_Conf_1.000 | 144 | 1  | 1.67E-04 | NP_510249.2    | 61  | 49.2914 | 47  | 29  | TREhalase family member (tre-4)                                 |
| Locus_21111_Transcript_1/1_Conf_1.000 | 326 | 0  |          |                |     |         |     |     |                                                                 |
| Locus_21112_Transcript_1/1_Conf_1.000 | 276 | 0  |          |                |     |         |     |     |                                                                 |
| Locus_21113_Transcript_1/1_Conf_1.000 | 232 | 0  |          |                |     |         |     |     |                                                                 |
| Locus_21114_Transcript_1/1_Conf_1.000 | 385 | 20 | 1.46E-29 | XP_002646129.1 | 84  | 132.494 | 86  | 73  | Hypothetical protein CBG08008                                   |
| Locus_21115_Transcript_1/1_Conf_1.000 | 353 | 0  |          |                |     |         |     |     |                                                                 |
| Locus_21116_Transcript_1/1_Conf_1.000 | 351 | 3  | 1.44E-08 | XP_002641791.1 | 66  | 62.7734 | 71  | 47  | Hypothetical protein CBG10142                                   |
| Locus_21117_Transcript_1/1_Conf_1.000 | 332 | 20 | 1.45E-61 | XP_002801767.1 | 100 | 238.81  | 110 | 110 | PREDICTED: sodium/potassium-transporting ATPase subunit alpha-1 |
| Locus_21118_Transcript_1/1_Conf_1.000 | 191 | 0  |          |                |     |         |     |     |                                                                 |
| Locus_21119_Transcript_1/1_Conf_1.000 | 229 | 0  |          |                |     |         |     |     |                                                                 |

|                                       |     |    |          |                |     |         |     |     |                                                         |
|---------------------------------------|-----|----|----------|----------------|-----|---------|-----|-----|---------------------------------------------------------|
| Locus_2112_Transcript_1/2_Conf_1.000  | 829 | 20 | 5.35E-23 | EFO19187.1     | 100 | 112.464 | 54  | 54  | ets-domain-containing protein                           |
| Locus_2112_Transcript_2/2_Conf_1.000  | 829 | 20 | 5.35E-23 | EFO19187.1     | 100 | 112.464 | 54  | 54  | ets-domain-containing protein                           |
| Locus_21120_Transcript_1/1_Conf_1.000 | 447 | 20 | 7.80E-39 | XP_002661248.1 | 74  | 163.31  | 147 | 109 | PREDICTED: ATP-binding cassette, sub-family C, member 1 |
| Locus_21121_Transcript_1/1_Conf_1.000 | 254 | 0  |          |                |     |         |     |     |                                                         |
| Locus_21122_Transcript_1/1_Conf_1.000 | 178 | 0  |          |                |     |         |     |     |                                                         |

|                                       |      |    |          |                |    |         |     |     |                                                    |
|---------------------------------------|------|----|----------|----------------|----|---------|-----|-----|----------------------------------------------------|
| Locus_21123_Transcript_1/1_Conf_1.000 | 284  | 20 | 4.53E-18 | XP_001895789.1 | 73 | 94.3597 | 91  | 67  | Timeless protein                                   |
| Locus_21124_Transcript_1/1_Conf_1.000 | 358  | 0  |          |                |    |         |     |     |                                                    |
| Locus_21125_Transcript_1/1_Conf_1.000 | 270  | 20 | 7.52E-34 | XP_002630757.1 | 84 | 146.747 | 90  | 76  | Hypothetical protein CBG02451                      |
| Locus_21126_Transcript_1/1_Conf_1.000 | 148  | 0  |          |                |    |         |     |     |                                                    |
| Locus_21127_Transcript_1/1_Conf_1.000 | 305  | 0  |          |                |    |         |     |     |                                                    |
| Locus_21128_Transcript_1/1_Conf_1.000 | 491  | 20 | 1.02E-46 | NP_506182.2    | 79 | 189.504 | 149 | 118 | DeHydrogenases, Short chain family member (dhs-21) |
| Locus_21129_Transcript_1/1_Conf_1.000 | 259  | 9  | 1.60E-15 | NP_499482.1    | 69 | 85.8853 | 85  | 59  | defective SPEmatogenesis family member (spe-6)     |
| Locus_2113_Transcript_1/2_Conf_1.000  | 1452 | 3  | 4.50E-28 | XP_002630981.1 | 55 | 130.568 | 206 | 114 | Hypothetical protein CBG02720                      |
| Locus_2113_Transcript_2/2_Conf_1.000  | 1454 | 3  | 4.50E-28 | XP_002630981.1 | 55 | 130.568 | 206 | 114 | Hypothetical protein CBG02720                      |
| Locus_21130_Transcript_1/1_Conf_1.000 | 157  | 0  |          |                |    |         |     |     |                                                    |
| Locus_21131_Transcript_1/1_Conf_1.000 | 167  | 0  |          |                |    |         |     |     |                                                    |

|                                       |     |    |          |                |     |         |    |    |                                                       |
|---------------------------------------|-----|----|----------|----------------|-----|---------|----|----|-------------------------------------------------------|
| Locus_21132_Transcript_1/1_Conf_1.000 | 188 | 20 | 5.68E-29 | XP_001109998.2 | 100 | 130.568 | 62 | 62 | PREDICTED: glucose-6-phosphate isomerase              |
| Locus_21133_Transcript_1/1_Conf_1.000 | 264 | 0  |          |                |     |         |    |    |                                                       |
| Locus_21134_Transcript_1/1_Conf_1.000 | 133 | 12 | 3.17E-08 | NP_001041301.1 | 89  | 61.6178 | 37 | 33 | hypothetical protein ZK54.1                           |
| Locus_21135_Transcript_1/1_Conf_1.000 | 139 | 0  |          |                |     |         |    |    |                                                       |
| Locus_21136_Transcript_1/1_Conf_1.000 | 236 | 2  | 2.07E-07 | EFO26611.1     | 65  | 58.9214 | 72 | 47 | hypothetical protein LOAG_01867                       |
| Locus_21137_Transcript_1/1_Conf_1.000 | 219 | 4  | 1.51E-13 | ACI49219.1     | 90  | 79.337  | 42 | 38 | hypothetical protein Csp3_JD05.004                    |
| Locus_21138_Transcript_1/1_Conf_1.000 | 148 | 0  |          |                |     |         |    |    |                                                       |
| Locus_21139_Transcript_1/1_Conf_1.000 | 174 | 0  |          |                |     |         |    |    |                                                       |
| Locus_2114_Transcript_1/1_Conf_1.000  | 351 | 4  | 1.94E-13 | XP_002640867.1 | 73  | 78.9518 | 60 | 44 | Hypothetical protein CBG15758                         |
| Locus_21140_Transcript_1/1_Conf_1.000 | 139 | 0  |          |                |     |         |    |    |                                                       |
| Locus_21141_Transcript_1/1_Conf_1.000 | 195 | 0  |          |                |     |         |    |    |                                                       |
| Locus_21142_Transcript_1/1_Conf_1.000 | 262 | 0  |          |                |     |         |    |    |                                                       |
| Locus_21143_Transcript_1/1_Conf_1.000 | 189 | 0  |          |                |     |         |    |    |                                                       |
| Locus_21144_Transcript_1/1_Conf_1.000 | 192 | 0  |          |                |     |         |    |    |                                                       |
| Locus_21145_Transcript_1/1_Conf_1.000 | 190 | 0  |          |                |     |         |    |    |                                                       |
| Locus_21146_Transcript_1/1_Conf_1.000 | 187 | 20 | 1.15E-29 | EAW90757.1     | 100 | 132.88  | 61 | 61 | microsomal glutathione S-transferase 3, isoform CRA_d |
| Locus_21147_Transcript_1/1_Conf_1.000 | 136 | 20 | 1.67E-09 | XP_002104105.1 | 84  | 65.855  | 44 | 37 | GD18625                                               |
| Locus_21148_Transcript_1/1_Conf_1.000 | 197 | 0  |          |                |     |         |    |    |                                                       |

|                                       |      |    |           |                |     |         |     |     |                                                                   |
|---------------------------------------|------|----|-----------|----------------|-----|---------|-----|-----|-------------------------------------------------------------------|
| Locus_21149_Transcript_1/1_Conf_1.000 | 197  | 0  |           |                |     |         |     |     |                                                                   |
| Locus_2115_Transcript_1/1_Conf_1.000  | 2245 | 20 | 2.00E-100 | NP_501805.1    | 59  | 371.703 | 694 | 413 | hypothetical protein F44D12.1                                     |
| Locus_21150_Transcript_1/1_Conf_1.000 | 271  | 0  |           |                |     |         |     |     |                                                                   |
| Locus_21151_Transcript_1/1_Conf_1.000 | 469  | 1  | 1.25E-12  | NP_500548.1    | 52  | 76.2554 | 162 | 85  | hypothetical protein W03B1.9                                      |
| Locus_21152_Transcript_1/1_Conf_1.000 | 343  | 20 | 5.66E-37  | ACI49016.1     | 83  | 157.147 | 112 | 94  | hypothetical protein Cbre_JD04.001                                |
| Locus_21153_Transcript_1/1_Conf_1.000 | 205  | 0  |           |                |     |         |     |     |                                                                   |
| Locus_21154_Transcript_1/1_Conf_1.000 | 204  | 20 | 2.77E-20  | NP_503846.1    | 82  | 101.679 | 67  | 55  | Cytochrome P450 family member (cyp-33C9)                          |
| Locus_21155_Transcript_1/1_Conf_1.000 | 182  | 0  |           |                |     |         |     |     |                                                                   |
| Locus_21156_Transcript_1/1_Conf_1.000 | 274  | 2  | 8.89E-19  | NP_001024902.1 | 68  | 96.6709 | 90  | 62  | hypothetical protein T10B10.4                                     |
| Locus_21157_Transcript_1/1_Conf_1.000 | 302  | 0  |           |                |     |         |     |     |                                                                   |
| Locus_21158_Transcript_1/1_Conf_1.000 | 505  | 20 | 2.51E-40  | EFO24958.1     | 71  | 168.318 | 151 | 108 | hypothetical protein LOAG_03524                                   |
| Locus_21159_Transcript_1/1_Conf_1.000 | 169  | 0  |           |                |     |         |     |     |                                                                   |
| Locus_2116_Transcript_1/1_Conf_1.000  | 284  | 0  |           |                |     |         |     |     |                                                                   |
| Locus_21160_Transcript_1/1_Conf_1.000 | 193  | 0  |           |                |     |         |     |     |                                                                   |
| Locus_21161_Transcript_1/1_Conf_1.000 | 136  | 3  | 1.98E-10  | NP_491382.1    | 90  | 68.9366 | 44  | 40  | hypothetical protein Y119C1B.5                                    |
| Locus_21162_Transcript_1/1_Conf_1.000 | 323  | 5  | 5.12E-14  | 3N9L           | 60  | 80.8777 | 110 | 66  | Cekdm7a                                                           |
| Locus_21163_Transcript_1/1_Conf_1.000 | 418  | 0  |           |                |     |         |     |     |                                                                   |
| Locus_21164_Transcript_1/1_Conf_1.000 | 128  | 0  |           |                |     |         |     |     |                                                                   |
| Locus_21165_Transcript_1/1_Conf_1.000 | 149  | 0  |           |                |     |         |     |     |                                                                   |
| Locus_21166_Transcript_1/1_Conf_1.000 | 322  | 20 | 1.53E-42  | NP_505019.2    | 81  | 175.637 | 107 | 87  | hypothetical protein C37C3.7                                      |
| Locus_21167_Transcript_1/1_Conf_1.000 | 187  | 0  |           |                |     |         |     |     |                                                                   |
| Locus_21168_Transcript_1/1_Conf_1.000 | 229  | 13 | 1.93E-37  | EAW74622.1     | 100 | 158.688 | 75  | 75  | protein tyrosine phosphatase, receptor type, C-associated protein |
| Locus_21169_Transcript_1/1_Conf_1.000 | 210  | 0  |           |                |     |         |     |     |                                                                   |
| Locus_2117_Transcript_1/1_Conf_1.000  | 503  | 20 | 1.43E-48  | NP_497411.2    | 76  | 195.667 | 170 | 130 | hypothetical protein Y82E9BR.18                                   |
| Locus_21170_Transcript_1/1_Conf_1.000 | 339  | 0  |           |                |     |         |     |     |                                                                   |
| Locus_21171_Transcript_1/1_Conf_1.000 | 288  | 0  |           |                |     |         |     |     |                                                                   |
| Locus_21172_Transcript_1/1_Conf_1.000 | 197  | 5  | 2.38E-11  | NP_001122672.1 | 76  | 72.0182 | 63  | 48  | Regulator of G protein Signaling family member (rgs-5)            |
| Locus_21173_Transcript_1/1_Conf_1.000 | 274  | 5  | 3.87E-06  | XP_002595725.1 | 55  | 54.6842 | 90  | 50  | hypothetical protein BRAFLDRAFT_200329                            |
| Locus_21174_Transcript_1/1_Conf_1.000 | 202  | 0  |           |                |     |         |     |     |                                                                   |
| Locus_21175_Transcript_1/1_Conf_1.000 | 155  | 0  |           |                |     |         |     |     |                                                                   |
| Locus_21176_Transcript_1/1_Conf_1.000 | 140  | 15 | 1.97E-10  | BAH14685.1     | 100 | 68.9366 | 46  | 46  | unnamed protein product                                           |
| Locus_21177_Transcript_1/2_Conf_1.000 | 560  | 11 | 5.15E-89  | XP_001900400.1 | 87  | 330.487 | 187 | 163 | Zinc finger, C2H2 type family protein                             |

|                                       |     |    |          |                |    |         |     |     |                                          |
|---------------------------------------|-----|----|----------|----------------|----|---------|-----|-----|------------------------------------------|
| Locus_21177_Transcript_2/2_Conf_1.000 | 560 | 11 | 5.15E-89 | XP_001900400.1 | 87 | 330.487 | 187 | 163 | Zinc finger, C2H2 type family protein    |
| Locus_21178_Transcript_1/1_Conf_1.000 | 419 | 20 | 6.47E-33 | XP_002640010.1 | 72 | 143.665 | 128 | 93  | Hypothetical protein CBG12480            |
| Locus_21179_Transcript_1/1_Conf_1.000 | 346 | 0  |          |                |    |         |     |     |                                          |
| Locus_2118_Transcript_1/1_Conf_1.000  | 835 | 4  | 2.44E-23 | NP_492051.1    | 49 | 113.62  | 250 | 124 | yeast BUB homolog family member (bub-1)  |
| Locus_21180_Transcript_1/1_Conf_1.000 | 397 | 20 | 6.72E-06 | XP_002871971.1 | 49 | 53.9138 | 91  | 45  | PAZ domain-containing protein            |
| Locus_21181_Transcript_1/1_Conf_1.000 | 210 | 5  | 2.75E-20 | XP_002641791.1 | 85 | 101.679 | 70  | 60  | Hypothetical protein CBG10142            |
| Locus_21182_Transcript_1/1_Conf_1.000 | 136 | 0  |          |                |    |         |     |     |                                          |
| Locus_21183_Transcript_1/1_Conf_1.000 | 260 | 20 | 1.82E-19 | XP_002646198.1 | 69 | 98.9821 | 86  | 60  | Hypothetical protein CBG04359            |
| Locus_21184_Transcript_1/1_Conf_1.000 | 252 | 20 | 4.53E-10 | XP_001897797.1 | 82 | 67.781  | 46  | 38  | Ets-domain containing protein            |
| Locus_21185_Transcript_1/1_Conf_1.000 | 364 | 18 | 9.15E-16 | XP_002647704.1 | 59 | 86.6557 | 108 | 64  | Hypothetical protein CBG17893            |
| Locus_21186_Transcript_1/1_Conf_1.000 | 139 | 0  |          |                |    |         |     |     |                                          |
| Locus_21187_Transcript_1/1_Conf_1.000 | 153 | 2  | 6.51E-09 | XP_002634130.1 | 80 | 63.929  | 45  | 36  | Hypothetical protein CBG01688            |
| Locus_21188_Transcript_1/1_Conf_1.000 | 149 | 0  |          |                |    |         |     |     |                                          |
| Locus_21189_Transcript_1/1_Conf_1.000 | 377 | 20 | 2.62E-10 | XP_002415173.1 | 61 | 68.5514 | 71  | 44  | sentrin/sumo-specific protease, putative |
| Locus_2119_Transcript_1/1_Conf_1.000  | 256 | 20 | 1.27E-20 | EFO17214.1     | 78 | 102.834 | 71  | 56  | DOMON domain-containing protein          |
| Locus_21190_Transcript_1/1_Conf_1.000 | 245 | 0  |          |                |    |         |     |     |                                          |
| Locus_21191_Transcript_1/1_Conf_1.000 | 150 | 0  |          |                |    |         |     |     |                                          |
| Locus_21192_Transcript_1/1_Conf_1.000 | 328 | 20 | 7.05E-32 | NP_505775.3    | 77 | 140.198 | 104 | 81  | hypothetical protein F32D8.4             |
| Locus_21193_Transcript_1/1_Conf_1.000 | 212 | 0  |          |                |    |         |     |     |                                          |
| Locus_21194_Transcript_1/1_Conf_1.000 | 145 | 0  |          |                |    |         |     |     |                                          |
| Locus_21195_Transcript_1/1_Conf_1.000 | 205 | 20 | 5.59E-21 | EFO25626.1     | 96 | 103.99  | 56  | 54  | hypothetical protein LOAG_02863          |
| Locus_21196_Transcript_1/1_Conf_1.000 | 477 |    |          |                |    |         |     |     |                                          |
| Locus_21197_Transcript_1/1_Conf_1.000 | 374 | 20 | 6.47E-17 | XP_001356645.1 | 58 | 90.5077 | 124 | 73  | GA20218                                  |



|                                       |      |    |          |                |    |         |     |     |                                          |
|---------------------------------------|------|----|----------|----------------|----|---------|-----|-----|------------------------------------------|
| Locus_21198_Transcript_1/1_Conf_1.000 | 137  | 0  |          |                |    |         |     |     |                                          |
| Locus_21199_Transcript_1/1_Conf_1.000 | 537  | 0  |          |                |    |         |     |     |                                          |
| Locus_212_Transcript_1/1_Conf_1.000   | 449  | 20 | 3.75E-33 | XP_001900551.1 | 63 | 144.436 | 148 | 94  | Protein kinase domain containing protein |
| Locus_2120_Transcript_1/1_Conf_1.000  | 619  | 20 | 1.54E-64 | NP_001122891.1 | 75 | 249.595 | 213 | 160 | hypothetical protein C53A5.2             |
| Locus_21200_Transcript_1/1_Conf_1.000 | 226  | 20 | 2.47E-16 | XP_001894892.1 | 76 | 88.5817 | 75  | 57  | RhoGAP domain containing protein         |
| Locus_21201_Transcript_1/1_Conf_1.000 | 415  |    |          |                |    |         |     |     |                                          |
| Locus_21202_Transcript_1/1_Conf_1.000 | 232  | 20 | 2.00E-18 | NP_499164.1    | 76 | 95.5153 | 75  | 57  | SQuashed Vulva family member (sqv-3)     |
| Locus_21203_Transcript_1/1_Conf_1.000 | 135  | 0  |          |                |    |         |     |     |                                          |
| Locus_21204_Transcript_1/1_Conf_1.000 | 138  | 0  |          |                |    |         |     |     |                                          |
| Locus_21205_Transcript_1/1_Conf_1.000 | 165  | 20 | 2.28E-14 | EFO21603.1     | 85 | 82.0333 | 55  | 47  | hypothetical protein LOAG_06885          |
| Locus_21206_Transcript_1/1_Conf_1.000 | 130  | 0  |          |                |    |         |     |     |                                          |
| Locus_21207_Transcript_1/1_Conf_1.000 | 165  | 0  |          |                |    |         |     |     |                                          |
| Locus_21208_Transcript_1/1_Conf_1.000 | 618  | 0  |          |                |    |         |     |     |                                          |
| Locus_21209_Transcript_1/1_Conf_1.000 | 492  | 0  |          |                |    |         |     |     |                                          |
| Locus_2121_Transcript_1/1_Conf_1.000  | 1563 | 20 | 4.01E-62 | NP_496095.1    | 63 | 243.817 | 276 | 174 | WEE homolog family member (wee-1.3)      |
| Locus_21210_Transcript_1/1_Conf_1.000 | 356  | 0  |          |                |    |         |     |     |                                          |
| Locus_21211_Transcript_1/1_Conf_1.000 | 338  | 0  |          |                |    |         |     |     |                                          |
| Locus_21212_Transcript_1/1_Conf_1.000 | 131  | 0  |          |                |    |         |     |     |                                          |
| Locus_21213_Transcript_1/1_Conf_1.000 | 171  | 0  |          |                |    |         |     |     |                                          |
| Locus_21214_Transcript_1/1_Conf_1.000 | 162  | 5  | 1.49E-05 | NP_492318.1    | 80 | 52.7582 | 40  | 32  | hypothetical protein T01H8.2             |

|                                       |      |    |           |                |     |         |     |     |                                                 |
|---------------------------------------|------|----|-----------|----------------|-----|---------|-----|-----|-------------------------------------------------|
| Locus_21215_Transcript_1/1_Conf_1.000 | 429  | 20 | 7.53E-26  | XP_001901553.1 | 60  | 120.168 | 146 | 89  | Protein-tyrosine phosphatase containing protein |
| Locus_21216_Transcript_1/1_Conf_1.000 | 199  | 20 | 7.08E-32  | BAG60652.1     | 100 | 140.198 | 66  | 66  | unnamed protein product                         |
| Locus_21217_Transcript_1/1_Conf_1.000 | 350  | 0  |           |                |     |         |     |     |                                                 |
| Locus_21218_Transcript_1/1_Conf_1.000 | 337  | 4  | 1.85E-08  | XP_002641335.1 | 60  | 62.3882 | 88  | 53  | Hypothetical protein CBG13183                   |
| Locus_21219_Transcript_1/1_Conf_1.000 | 204  | 0  |           |                |     |         |     |     |                                                 |
| Locus_21222_Transcript_1/1_Conf_1.000 | 1418 | 20 | 1.26E-144 | NP_494771.1    | 77  | 517.694 | 420 | 325 | hypothetical protein B0286.3                    |
| Locus_21220_Transcript_1/1_Conf_1.000 | 299  | 2  | 2.44E-16  | NP_492118.1    | 68  | 88.5817 | 98  | 67  | hypothetical protein D2030.3                    |
| Locus_21221_Transcript_1/1_Conf_1.000 | 479  | 20 | 3.13E-40  | NP_500629.1    | 86  | 167.933 | 104 | 90  | Cytochrome C family member (cyc-2.1)            |
| Locus_21222_Transcript_1/1_Conf_1.000 | 180  | 0  |           |                |     |         |     |     |                                                 |
| Locus_21223_Transcript_1/1_Conf_1.000 | 359  | 20 | 2.74E-52  | XP_002638749.1 | 92  | 207.994 | 119 | 110 | Hypothetical protein CBG18552                   |
| Locus_21224_Transcript_1/1_Conf_1.000 | 169  | 0  |           |                |     |         |     |     |                                                 |

|                                       |     |    |          |                |    |         |     |     |                                        |
|---------------------------------------|-----|----|----------|----------------|----|---------|-----|-----|----------------------------------------|
| Locus_21225_Transcript_1/1_Conf_1.000 | 237 | 20 | 4.73E-28 | NP_500379.1    | 79 | 127.487 | 78  | 62  | hypothetical protein Y37E11B.5         |
| Locus_21226_Transcript_1/1_Conf_1.000 | 319 | 20 | 1.03E-22 | NP_494841.3    | 69 | 109.768 | 91  | 63  | hypothetical protein F10G7.10          |
| Locus_21227_Transcript_1/1_Conf_1.000 | 221 | 0  |          |                |    |         |     |     |                                        |
| Locus_21228_Transcript_1/1_Conf_1.000 | 201 | 4  | 5.07E-22 | CAR63710.1     | 88 | 107.457 | 67  | 59  | putative C2 domain containing protein  |
| Locus_21229_Transcript_1/1_Conf_1.000 | 172 | 20 | 7.52E-18 | XP_002639780.1 | 85 | 93.5893 | 56  | 48  | Hypothetical protein CBG02227          |
| Locus_2123_Transcript_1/1_Conf_1.000  | 623 | 20 | 1.16E-88 | XP_002639761.1 | 89 | 329.717 | 200 | 179 | C. briggsae CBR-PAB-1 protein          |
| Locus_21230_Transcript_1/1_Conf_1.000 | 391 | 0  |          |                |    |         |     |     |                                        |
| Locus_21231_Transcript_1/1_Conf_1.000 | 405 | 20 | 8.04E-36 | 2055           | 82 | 153.295 | 114 | 94  | Macrophage Migration Inhibitory Factor |
| Locus_21232_Transcript_1/1_Conf_1.000 | 200 | 0  |          |                |    |         |     |     |                                        |

|                                       |     |    |          |                |    |         |     |     |                                                               |
|---------------------------------------|-----|----|----------|----------------|----|---------|-----|-----|---------------------------------------------------------------|
| Locus_21233_Transcript_1/1_Conf_1.000 | 717 | 20 | 6.35E-85 | NP_497203.1    | 81 | 317.775 | 228 | 185 | Metaphase-to-Anaphase Transition defect family member (mat-3) |
| Locus_21234_Transcript_1/1_Conf_1.000 | 311 | 0  |          |                |    |         |     |     |                                                               |
| Locus_21235_Transcript_1/1_Conf_1.000 | 228 | 20 | 2.62E-26 | NP_001022450.1 | 92 | 121.709 | 75  | 69  | hypothetical protein Y48E1A.1                                 |
| Locus_21236_Transcript_1/1_Conf_1.000 | 278 | 0  |          |                |    |         |     |     |                                                               |
| Locus_21237_Transcript_1/1_Conf_1.000 | 266 | 0  |          |                |    |         |     |     |                                                               |
| Locus_21238_Transcript_1/1_Conf_1.000 | 197 | 20 | 5.29E-11 | XP_001894671.1 | 79 | 70.8626 | 59  | 47  | Protein kinase domain containing protein                      |
| Locus_21239_Transcript_1/1_Conf_1.000 | 159 | 0  |          |                |    |         |     |     |                                                               |
| Locus_2124_Transcript_1/1_Conf_1.000  | 187 | 0  |          |                |    |         |     |     |                                                               |
| Locus_21240_Transcript_1/1_Conf_1.000 | 148 | 0  |          |                |    |         |     |     |                                                               |
| Locus_21241_Transcript_1/1_Conf_1.000 | 260 | 0  |          |                |    |         |     |     |                                                               |
| Locus_21242_Transcript_1/1_Conf_1.000 | 239 | 1  | 2.52E-05 | XP_002630993.1 | 63 | 51.9878 | 57  | 36  | Hypothetical protein CBG02738                                 |
| Locus_21243_Transcript_1/1_Conf_1.000 | 163 | 20 | 8.97E-19 | NP_505312.1    | 90 | 96.6709 | 54  | 49  | hypothetical protein T19A5.1                                  |
| Locus_21244_Transcript_1/1_Conf_1.000 | 169 | 20 | 3.63E-12 | NP_741501.1    | 70 | 74.7146 | 55  | 39  | hypothetical protein F11E6.1                                  |
| Locus_21245_Transcript_1/1_Conf_1.000 | 152 | 0  |          |                |    |         |     |     |                                                               |
| Locus_21246_Transcript_1/1_Conf_1.000 | 133 | 0  |          |                |    |         |     |     |                                                               |

|                                       |      |    |          |                |    |         |     |     |                                               |
|---------------------------------------|------|----|----------|----------------|----|---------|-----|-----|-----------------------------------------------|
| Locus_21247_Transcript_1/1_Conf_1.000 | 180  | 0  |          |                |    |         |     |     |                                               |
| Locus_21248_Transcript_1/1_Conf_1.000 | 166  | 0  |          |                |    |         |     |     |                                               |
| Locus_21249_Transcript_1/1_Conf_1.000 | 165  | 0  |          |                |    |         |     |     |                                               |
| Locus_2125_Transcript_1/3_Conf_0.714  | 1468 | 2  | 2.97E-19 | XP_002634618.1 | 41 | 101.293 | 523 | 217 | Hypothetical protein CBG18472                 |
| Locus_2125_Transcript_2/3_Conf_0.714  | 1468 | 2  | 1.13E-18 | NP_501436.1    | 41 | 99.3673 | 526 | 216 | hypothetical protein T26A8.1                  |
| Locus_2125_Transcript_3/3_Conf_0.714  | 1468 | 2  | 1.13E-18 | NP_501436.1    | 41 | 99.3673 | 526 | 216 | hypothetical protein T26A8.1                  |
| Locus_21250_Transcript_1/1_Conf_1.000 | 248  | 17 | 2.67E-07 | XP_517936.2    | 80 | 58.5362 | 40  | 32  | PREDICTED: PHD finger protein 15              |
| Locus_21251_Transcript_1/1_Conf_1.000 | 207  | 0  |          |                |    |         |     |     |                                               |
| Locus_21252_Transcript_1/1_Conf_1.000 | 261  | 0  |          |                |    |         |     |     |                                               |
| Locus_21253_Transcript_1/1_Conf_1.000 | 848  | 20 | 2.50E-31 | AAO63576.1     | 55 | 140.198 | 183 | 101 | secreted protein 4 precursor                  |
| Locus_21254_Transcript_1/1_Conf_1.000 | 393  | 20 | 1.22E-39 | EFO19650.1     | 75 | 166.007 | 129 | 98  | NAK/GAK protein kinase                        |
| Locus_21255_Transcript_1/1_Conf_1.000 | 203  | 0  |          |                |    |         |     |     |                                               |
| Locus_21256_Transcript_1/1_Conf_1.000 | 142  | 0  |          |                |    |         |     |     |                                               |
| Locus_21257_Transcript_1/1_Conf_1.000 | 509  | 0  |          |                |    |         |     |     |                                               |
| Locus_21258_Transcript_1/1_Conf_1.000 | 393  | 20 | 3.30E-53 | XP_002645892.1 | 92 | 211.075 | 118 | 109 | Hypothetical protein CBG07642                 |
| Locus_21259_Transcript_1/1_Conf_1.000 | 237  | 20 | 7.31E-21 | NP_001123159.1 | 74 | 103.605 | 78  | 58  | SYnaptoGenesis abnormal family member (syg-1) |

|                                       |      |    |           |                |     |         |     |     |                                                          |
|---------------------------------------|------|----|-----------|----------------|-----|---------|-----|-----|----------------------------------------------------------|
| Locus_2126_Transcript_1/1_Conf_1.000  | 2907 | 20 | 3.03E-168 | EFO26291.1     | 57  | 597.43  | 911 | 520 | hypothetical protein LOAG_02191                          |
| Locus_21260_Transcript_1/1_Conf_1.000 | 268  | 20 | 1.38E-35  | ACZ64269.1     | 98  | 152.525 | 88  | 87  | astacin metalloprotease b                                |
| Locus_21261_Transcript_1/1_Conf_1.000 | 147  | 0  |           |                |     |         |     |     |                                                          |
| Locus_21262_Transcript_1/1_Conf_1.000 | 253  | 20 | 1.04E-14  | XP_002629772.1 | 63  | 83.1889 | 86  | 55  | Hypothetical protein CBG01012                            |
| Locus_21263_Transcript_1/1_Conf_1.000 | 137  | 0  |           |                |     |         |     |     |                                                          |
| Locus_21264_Transcript_1/1_Conf_1.000 | 144  | 20 | 1.67E-12  | AAF82410.1     | 87  | 75.8702 | 47  | 41  | AF221132_1diacylglycerol acyltransferase                 |
| Locus_21265_Transcript_1/1_Conf_1.000 | 147  | 20 | 3.70E-20  | XP_002809166.1 | 100 | 101.293 | 48  | 48  | PREDICTED: antigen peptide transporter 1-like            |
| Locus_21266_Transcript_1/1_Conf_1.000 | 305  | 3  | 1.86E-08  | NP_497061.1    | 62  | 62.3882 | 66  | 41  | hypothetical protein Y54E2A.5                            |
| Locus_21267_Transcript_1/1_Conf_1.000 | 142  | 20 | 3.70E-17  | NP_497809.1    | 97  | 91.2781 | 47  | 46  | Heavy chain, Unconventional Myosin family member (hum-5) |

|                                       |     |    |          |                |     |         |     |     |                                                         |
|---------------------------------------|-----|----|----------|----------------|-----|---------|-----|-----|---------------------------------------------------------|
| Locus_21268_Transcript_1/1_Conf_1.000 | 244 | 20 | 1.41E-24 | NP_491242.2    | 86  | 115.931 | 80  | 69  | hypothetical protein T03F1.7                            |
| Locus_21269_Transcript_1/1_Conf_1.000 | 176 | 4  | 1.02E-06 | EFO23768.1     | 66  | 56.6102 | 60  | 40  | hypothetical protein LOAG_04713                         |
| Locus_2127_Transcript_1/1_Conf_1.000  | 145 | 0  |          |                |     |         |     |     |                                                         |
| Locus_21270_Transcript_1/1_Conf_1.000 | 301 | 0  |          |                |     |         |     |     |                                                         |
| Locus_21271_Transcript_1/1_Conf_1.000 | 190 | 0  |          |                |     |         |     |     |                                                         |
| Locus_21272_Transcript_1/1_Conf_1.000 | 218 | 20 | 3.57E-20 | NP_001181828.1 | 100 | 101.293 | 44  | 44  | cathepsin B                                             |
| Locus_21273_Transcript_1/1_Conf_1.000 | 132 | 0  |          |                |     |         |     |     |                                                         |
| Locus_21274_Transcript_1/1_Conf_1.000 | 251 | 0  |          |                |     |         |     |     |                                                         |
| Locus_21275_Transcript_1/1_Conf_1.000 | 470 | 20 | 8.28E-65 | NP_500551.2    | 89  | 249.595 | 155 | 138 | hypothetical protein F55F10.1                           |
| Locus_21276_Transcript_1/1_Conf_1.000 | 203 | 20 | 1.17E-18 | NP_509676.1    | 98  | 96.2857 | 67  | 66  | G-protein-coupled Receptor Kinase family member (grk-1) |
| Locus_21277_Transcript_1/1_Conf_1.000 | 814 | 0  |          |                |     |         |     |     |                                                         |

|                                       |      |    |          |                |    |         |     |     |                                                                       |
|---------------------------------------|------|----|----------|----------------|----|---------|-----|-----|-----------------------------------------------------------------------|
| Locus_21278_Transcript_1/1_Conf_1.000 | 161  | 16 | 9.64E-13 | NP_001122528.1 | 78 | 76.6406 | 52  | 41  | Cation transporting ATPase family member (catp-1)                     |
| Locus_21279_Transcript_1/1_Conf_1.000 | 250  | 20 | 4.67E-20 | NP_500531.1    | 82 | 100.908 | 81  | 67  | hypothetical protein F15E6.6                                          |
| Locus_2128_Transcript_1/4_Conf_0.429  | 1076 | 15 | 1.96E-24 | XP_002630067.1 | 89 | 117.857 | 74  | 66  | C. briggsae CBR-IPLA-1 protein                                        |
| Locus_2128_Transcript_2/4_Conf_0.571  | 1204 | 20 | 5.36E-29 | XP_002630067.1 | 77 | 133.265 | 111 | 86  | C. briggsae CBR-IPLA-1 protein                                        |
| Locus_2128_Transcript_3/4_Conf_0.571  | 2720 | 20 | 0        | XP_002630067.1 | 73 | 731.865 | 664 | 490 | C. briggsae CBR-IPLA-1 protein                                        |
| Locus_2128_Transcript_4/4_Conf_0.571  | 2754 | 20 | 0        | XP_002630067.1 | 73 | 731.865 | 664 | 490 | C. briggsae CBR-IPLA-1 protein                                        |
| Locus_21280_Transcript_1/1_Conf_1.000 | 289  | 0  |          |                |    |         |     |     |                                                                       |
| Locus_21281_Transcript_1/1_Conf_1.000 | 330  | 1  | 2.43E-08 | NP_741467.1    | 67 | 62.003  | 59  | 40  | hypothetical protein C09G4.2                                          |
| Locus_21282_Transcript_1/1_Conf_1.000 | 323  | 20 | 2.29E-22 | EFO17955.1     | 73 | 108.612 | 102 | 75  | hypothetical protein LOAG_10542                                       |
| Locus_21283_Transcript_1/1_Conf_1.000 | 216  | 5  | 1.84E-08 | NP_741348.2    | 68 | 62.3882 | 66  | 45  | hypothetical protein Y94H6A.5                                         |
| Locus_21284_Transcript_1/1_Conf_1.000 | 274  | 0  |          |                |    |         |     |     |                                                                       |
| Locus_21285_Transcript_1/1_Conf_1.000 | 166  | 5  | 8.94E-19 | NP_001122868.1 | 92 | 96.6709 | 54  | 50  | GLioTactin (Drosophila neuroligin-like) homolog family member (nrx-1) |
| Locus_21286_Transcript_1/1_Conf_1.000 | 218  | 8  | 1.01E-06 | XP_001900229.1 | 62 | 56.6102 | 67  | 42  | FAT domain containing protein                                         |
| Locus_21287_Transcript_1/1_Conf_1.000 | 208  | 2  | 7.31E-05 | XP_001901751.1 | 61 | 50.447  | 68  | 42  | mKIAA0368 protein                                                     |
| Locus_21288_Transcript_1/1_Conf_1.000 | 232  | 6  | 4.05E-11 | NP_492132.1    | 67 | 71.2478 | 71  | 48  | Enhancer of Glp-One (glp-1) family member (ego-1)                     |
| Locus_21289_Transcript_1/1_Conf_1.000 | 276  | 0  |          |                |    |         |     |     |                                                                       |



|                                       |      |    |          |                |     |         |     |     |                                                                     |
|---------------------------------------|------|----|----------|----------------|-----|---------|-----|-----|---------------------------------------------------------------------|
| Locus_2129_Transcript_1/1_Conf_1.000  | 361  | 20 | 7.93E-60 | XP_001156335.1 | 100 | 233.032 | 113 | 113 | PREDICTED: similar to proliferation associated gene (pag) isoform 1 |
| Locus_21290_Transcript_1/1_Conf_1.000 | 166  | 0  |          |                |     |         |     |     |                                                                     |
| Locus_21291_Transcript_1/1_Conf_1.000 | 291  | 12 | 1.49E-13 | XP_002637289.1 | 69  | 79.337  | 96  | 67  | Hypothetical protein CBG18976                                       |
| Locus_21292_Transcript_1/1_Conf_1.000 | 167  | 0  |          |                |     |         |     |     |                                                                     |
| Locus_21293_Transcript_1/1_Conf_1.000 | 236  | 0  |          |                |     |         |     |     |                                                                     |
| Locus_21294_Transcript_1/1_Conf_1.000 | 283  | 0  |          |                |     |         |     |     |                                                                     |
| Locus_21295_Transcript_1/1_Conf_1.000 | 314  | 20 | 1.00E-33 | XP_002643878.1 | 73  | 146.362 | 102 | 75  | Hypothetical protein CBG02116                                       |
| Locus_21296_Transcript_1/1_Conf_1.000 | 224  | 0  |          |                |     |         |     |     |                                                                     |
| Locus_21297_Transcript_1/1_Conf_1.000 | 457  | 20 | 1.84E-24 | EFO15194.1     | 54  | 115.546 | 175 | 95  | hypothetical protein LOAG_13318                                     |
| Locus_21298_Transcript_1/1_Conf_1.000 | 129  | 2  | 5.98E-15 | NP_491129.1    | 95  | 83.9593 | 42  | 40  | hypothetical protein Y54E10A.16                                     |
| Locus_21299_Transcript_1/1_Conf_1.000 | 230  | 0  |          |                |     |         |     |     |                                                                     |
| Locus_213_Transcript_1/6_Conf_0.727   | 1047 | 20 | 7.12E-40 | XP_002639074.1 | 83  | 169.088 | 114 | 95  | C. briggsae CBR-CEY-2 protein                                       |
| Locus_213_Transcript_2/6_Conf_0.727   | 1047 | 20 | 1.59E-39 | XP_002639074.1 | 85  | 167.933 | 109 | 93  | C. briggsae CBR-CEY-2 protein                                       |
| Locus_213_Transcript_3/6_Conf_0.409   | 1026 | 20 | 1.15E-42 | XP_002639788.1 | 73  | 178.333 | 145 | 107 | Hypothetical protein CBG02238                                       |

|                                       |      |    |          |                |     |         |     |     |                                        |
|---------------------------------------|------|----|----------|----------------|-----|---------|-----|-----|----------------------------------------|
| Locus_213_Transcript_4/6_Conf_0.409   | 1068 | 20 | 5.44E-43 | XP_002639788.1 | 72  | 179.489 | 150 | 109 | Hypothetical protein CBG02238          |
| Locus_213_Transcript_5/6_Conf_0.409   | 1155 | 20 | 6.11E-43 | XP_002639788.1 | 72  | 179.489 | 150 | 109 | Hypothetical protein CBG02238          |
| Locus_213_Transcript_6/6_Conf_0.409   | 1155 | 20 | 1.36E-42 | XP_002639788.1 | 73  | 178.333 | 145 | 107 | Hypothetical protein CBG02238          |
| Locus_2130_Transcript_1/1_Conf_1.000  | 1047 | 20 | 2.01E-26 | XP_002636810.1 | 49  | 124.405 | 247 | 123 | C. briggsae CBR-MUT-14 protein         |
| Locus_21300_Transcript_1/1_Conf_1.000 | 220  | 0  |          |                |     |         |     |     |                                        |
| Locus_21301_Transcript_1/1_Conf_1.000 | 303  | 20 | 1.52E-18 | NP_741664.1    | 82  | 95.9005 | 76  | 63  | hypothetical protein Y39B6A.33         |
| Locus_21302_Transcript_1/1_Conf_1.000 | 381  | 0  |          |                |     |         |     |     |                                        |
| Locus_21303_Transcript_1/1_Conf_1.000 | 443  | 20 | 6.21E-52 | AAN11401.1     | 75  | 206.838 | 147 | 111 | metalloprotease 1 precursor            |
| Locus_21304_Transcript_1/1_Conf_1.000 | 275  | 20 | 1.56E-39 | XP_002811594.1 | 100 | 165.622 | 82  | 82  | PREDICTED: protein DJ-1-like isoform 1 |
| Locus_21305_Transcript_1/1_Conf_1.000 | 230  | 0  |          |                |     |         |     |     |                                        |
| Locus_21306_Transcript_1/1_Conf_1.000 | 336  | 0  |          |                |     |         |     |     |                                        |
| Locus_21307_Transcript_1/1_Conf_1.000 | 558  | 0  |          |                |     |         |     |     |                                        |

|                                       |     |    |           |                |    |         |     |     |                                                                       |
|---------------------------------------|-----|----|-----------|----------------|----|---------|-----|-----|-----------------------------------------------------------------------|
| Locus_21308_Transcript_1/1_Conf_1.000 | 224 | 20 | 7.66E-34  | NP_001040798.1 | 98 | 146.747 | 74  | 73  | PhosphoDiEsterase family member (pde-4)                               |
| Locus_21309_Transcript_1/1_Conf_1.000 | 247 | 6  | 8.29E-09  | XP_001896275.1 | 71 | 63.5438 | 64  | 46  | Ubiquitin carboxyl-terminal hydrolase family protein                  |
| Locus_21311_Transcript_1/1_Conf_1.000 | 723 | 20 | 1.10E-108 | ABS45067.1     | 87 | 396.741 | 239 | 208 | latrophilin-like protein 2                                            |
| Locus_21310_Transcript_1/1_Conf_1.000 | 194 | 20 | 1.65E-12  | XP_002630862.1 | 82 | 75.8702 | 58  | 48  | C. briggsae CBR-RRT-2 protein                                         |
| Locus_21311_Transcript_1/1_Conf_1.000 | 558 | 20 | 3.61E-50  | XP_002631065.1 | 75 | 201.445 | 185 | 140 | C. briggsae CBR-SFXN-1.4 protein                                      |
| Locus_21312_Transcript_1/1_Conf_1.000 | 189 | 3  | 4.08E-11  | NP_490976.1    | 70 | 71.2478 | 62  | 44  | hypothetical protein F23C8.8                                          |
| Locus_21313_Transcript_1/1_Conf_1.000 | 237 | 0  |           |                |    |         |     |     |                                                                       |
| Locus_21314_Transcript_1/1_Conf_1.000 | 280 | 0  |           |                |    |         |     |     |                                                                       |
| Locus_21315_Transcript_1/1_Conf_1.000 | 193 | 20 | 1.65E-20  | XP_001896049.1 | 95 | 102.449 | 63  | 60  | Patched family protein                                                |
| Locus_21316_Transcript_1/1_Conf_1.000 | 132 | 0  |           |                |    |         |     |     |                                                                       |
| Locus_21317_Transcript_1/1_Conf_1.000 | 175 | 0  |           |                |    |         |     |     |                                                                       |
| Locus_21318_Transcript_1/1_Conf_1.000 | 223 | 0  |           |                |    |         |     |     |                                                                       |
| Locus_21319_Transcript_1/1_Conf_1.000 | 230 | 0  |           |                |    |         |     |     |                                                                       |
| Locus_2132_Transcript_1/1_Conf_1.000  | 260 | 20 | 1.70E-33  | EFO18852.1     | 94 | 145.591 | 84  | 79  | RNA polymerase III 128kD subunit-PA                                   |
| Locus_21320_Transcript_1/1_Conf_1.000 | 172 | 0  |           |                |    |         |     |     |                                                                       |
| Locus_21321_Transcript_1/1_Conf_1.000 | 156 | 0  |           |                |    |         |     |     |                                                                       |
| Locus_21322_Transcript_1/1_Conf_1.000 | 207 | 9  | 3.38E-18  | AAX36081.1     | 84 | 94.7449 | 69  | 58  | transforming growth factor beta                                       |
| Locus_21323_Transcript_1/1_Conf_1.000 | 461 | 10 | 1.08E-16  | NP_498049.2    | 77 | 89.7373 | 66  | 51  | FLYWCH zinc finger transcription factor homolog family member (flh-2) |

|                                       |      |    |          |                |     |         |     |     |                                                               |
|---------------------------------------|------|----|----------|----------------|-----|---------|-----|-----|---------------------------------------------------------------|
| Locus_21324_Transcript_1/1_Conf_1.000 | 446  | 20 | 7.86E-31 | ABJ99064.1     | 67  | 136.732 | 145 | 98  | Hypothetical protein W03A3.2                                  |
| Locus_21325_Transcript_1/1_Conf_1.000 | 245  | 0  |          |                |     |         |     |     |                                                               |
| Locus_21326_Transcript_1/1_Conf_1.000 | 197  | 0  |          |                |     |         |     |     |                                                               |
| Locus_21327_Transcript_1/1_Conf_1.000 | 203  | 0  |          |                |     |         |     |     |                                                               |
| Locus_21328_Transcript_1/1_Conf_1.000 | 183  | 20 | 3.83E-17 | XP_002912747.1 | 100 | 91.2781 | 60  | 60  | PREDICTED: tropomyosin alpha-1 chain-like isoform 2           |
| Locus_21329_Transcript_1/1_Conf_1.000 | 158  | 1  | 3.54E-23 | AAQ15254.1     | 100 | 111.309 | 52  | 52  | AF370418_1PP14214                                             |
| Locus_2133_Transcript_1/2_Conf_1.000  | 1256 | 20 | 8.58E-86 | XP_002633413.1 | 81  | 322.013 | 250 | 203 | C. briggsae CBR-ECH-2 protein                                 |
| Locus_2133_Transcript_2/2_Conf_1.000  | 1132 | 20 | 2.92E-90 | XP_002633413.1 | 80  | 336.65  | 266 | 214 | C. briggsae CBR-ECH-2 protein                                 |
| Locus_21330_Transcript_1/1_Conf_1.000 | 281  | 0  |          |                |     |         |     |     |                                                               |
| Locus_21331_Transcript_1/1_Conf_1.000 | 423  | 0  |          |                |     |         |     |     |                                                               |
| Locus_21332_Transcript_1/1_Conf_1.000 | 228  | 19 | 6.23E-28 | NP_505844.2    | 90  | 127.102 | 75  | 68  | hypothetical protein K10D6.2                                  |
| Locus_21333_Transcript_1/1_Conf_1.000 | 244  | 0  |          |                |     |         |     |     |                                                               |
| Locus_21334_Transcript_1/1_Conf_1.000 | 259  | 0  |          |                |     |         |     |     |                                                               |
| Locus_21335_Transcript_1/1_Conf_1.000 | 391  | 20 | 6.12E-12 | NP_492367.1    | 49  | 73.9442 | 139 | 69  | Glycogen Synthase Kinase Alpha subunit family member (gska-3) |
| Locus_21336_Transcript_1/1_Conf_1.000 | 137  | 0  |          |                |     |         |     |     |                                                               |
| Locus_21337_Transcript_1/1_Conf_1.000 | 249  | 3  | 6.10E-20 | NP_493486.2    | 84  | 100.523 | 72  | 61  | hypothetical protein C49A1.10                                 |

|                                       |     |    |          |                |     |         |     |    |                                                                     |
|---------------------------------------|-----|----|----------|----------------|-----|---------|-----|----|---------------------------------------------------------------------|
| Locus_21338_Transcript_1/1_Conf_1.000 | 303 | 0  |          |                |     |         |     |    |                                                                     |
| Locus_21339_Transcript_1/1_Conf_1.000 | 168 | 0  |          |                |     |         |     |    |                                                                     |
| Locus_2134_Transcript_1/1_Conf_1.000  | 524 | 1  | 3.24E-04 | XP_001639273.1 | 42  | 48.521  | 109 | 46 | predicted protein                                                   |
| Locus_21340_Transcript_1/1_Conf_1.000 | 154 | 20 | 1.14E-21 | XP_002745917.1 | 100 | 106.301 | 50  | 50 | PREDICTED: heterogeneous nuclear ribonucleoproteins A2/B1-like      |
| Locus_21341_Transcript_1/2_Conf_1.000 | 299 | 4  | 2.80E-04 | EDL38626.1     | 73  | 48.521  | 49  | 36 | multiple coagulation factor deficiency 2, isoform CRA_b             |
| Locus_21341_Transcript_2/2_Conf_1.000 | 282 | 4  | 2.85E-04 | EDL38626.1     | 73  | 48.521  | 49  | 36 | multiple coagulation factor deficiency 2, isoform CRA_b             |
| Locus_21342_Transcript_1/1_Conf_1.000 | 261 | 0  |          |                |     |         |     |    |                                                                     |
| Locus_21343_Transcript_1/1_Conf_1.000 | 378 | 20 | 1.29E-17 | XP_002634314.1 | 72  | 92.8189 | 74  | 54 | Hypothetical protein CBG17655                                       |
| Locus_21344_Transcript_1/1_Conf_1.000 | 168 | 9  | 1.09E-24 | ACR27076.1     | 100 | 116.316 | 56  | 56 | transforming growth protein 2-like protein                          |
| Locus_21345_Transcript_1/1_Conf_1.000 | 241 | 2  | 4.41E-26 | XP_002634586.1 | 88  | 120.939 | 79  | 70 | Hypothetical protein CBG08397                                       |
| Locus_21346_Transcript_1/1_Conf_1.000 | 154 | 20 | 1.07E-19 | XP_002929569.1 | 100 | 99.7525 | 49  | 49 | PREDICTED: transcription factor BTF3-like                           |
| Locus_21347_Transcript_1/1_Conf_1.000 | 261 | 7  | 1.26E-04 | XP_002413556.1 | 61  | 49.6766 | 60  | 37 | RB13-6 antigen, putative                                            |
| Locus_21348_Transcript_1/1_Conf_1.000 | 194 | 0  |          |                |     |         |     |    |                                                                     |
| Locus_21349_Transcript_1/1_Conf_1.000 | 141 | 17 | 5.16E-19 | XP_002820885.1 | 100 | 97.4413 | 46  | 46 | PREDICTED: DNA damage-inducible transcript 4 protein-like isoform 1 |

|                                       |      |    |          |                |    |         |     |     |                                                            |
|---------------------------------------|------|----|----------|----------------|----|---------|-----|-----|------------------------------------------------------------|
| Locus_2135_Transcript_1/1_Conf_1.000  | 436  | 20 | 5.87E-47 | NP_508413.1    | 98 | 190.274 | 117 | 115 | Ribosomal Protein, Large subunit family member (rpl-11.2)  |
| Locus_21350_Transcript_1/1_Conf_1.000 | 458  | 20 | 5.94E-15 | XP_001896061.1 | 52 | 83.9593 | 146 | 77  | hypothetical protein Bm1_23020                             |
| Locus_21351_Transcript_1/1_Conf_1.000 | 371  | 0  |          |                |    |         |     |     |                                                            |
| Locus_21352_Transcript_1/1_Conf_1.000 | 138  | 0  |          |                |    |         |     |     |                                                            |
| Locus_21353_Transcript_1/1_Conf_1.000 | 194  | 0  |          |                |    |         |     |     |                                                            |
| Locus_21354_Transcript_1/1_Conf_1.000 | 333  | 20 | 5.38E-16 | NP_506227.1    | 54 | 87.4261 | 111 | 61  | TransThyretin-Related family domain family member (ttr-29) |
| Locus_21355_Transcript_1/1_Conf_1.000 | 235  | 20 | 7.07E-32 | XP_002632463.1 | 96 | 140.198 | 78  | 75  | Hypothetical protein CBG13687                              |
| Locus_21356_Transcript_1/1_Conf_1.000 | 130  | 0  |          |                |    |         |     |     |                                                            |
| Locus_21357_Transcript_1/1_Conf_1.000 | 281  | 1  | 3.60E-04 | XP_002630436.1 | 70 | 48.1358 | 41  | 29  | Hypothetical protein CBG11167                              |
| Locus_21358_Transcript_1/1_Conf_1.000 | 225  | 0  |          |                |    |         |     |     |                                                            |
| Locus_21359_Transcript_1/1_Conf_1.000 | 465  | 20 | 3.76E-41 | NP_001024271.1 | 69 | 171.014 | 152 | 105 | CHeckpoint Kinase family member (chk-2)                    |
| Locus_2136_Transcript_1/1_Conf_1.000  | 2284 | 20 | 0        | NP_741567.1    | 84 | 1033.86 | 710 | 601 | eXPORtin (nuclear export receptor) family member (xpo-1)   |
| Locus_21360_Transcript_1/1_Conf_1.000 | 202  | 0  |          |                |    |         |     |     |                                                            |

|                                       |     |    |          |                |    |         |     |     |                                                                |
|---------------------------------------|-----|----|----------|----------------|----|---------|-----|-----|----------------------------------------------------------------|
| Locus_21361_Transcript_1/1_Conf_1.000 | 219 | 10 | 1.37E-06 | XP_001901212.1 | 52 | 56.225  | 61  | 32  | Furin-like cysteine rich region family protein                 |
| Locus_21362_Transcript_1/1_Conf_1.000 | 907 | 20 | 4.00E-78 | CAB16487.2     | 79 | 295.819 | 260 | 206 | C. elegans protein Y53C12A.3, confirmed by transcript evidence |
| Locus_21363_Transcript_1/1_Conf_1.000 | 160 | 0  |          |                |    |         |     |     |                                                                |
| Locus_21364_Transcript_1/1_Conf_1.000 | 294 | 3  | 1.54E-10 | NP_491682.1    | 59 | 69.3218 | 101 | 60  | MTK1/MEKK4 homolog family member (mtk-1)                       |
| Locus_21365_Transcript_1/1_Conf_1.000 | 281 | 20 | 4.83E-25 | XP_002647206.1 | 73 | 117.472 | 91  | 67  | Hypothetical protein CBG22384                                  |
| Locus_21366_Transcript_1/1_Conf_1.000 | 165 | 0  |          |                |    |         |     |     |                                                                |
| Locus_21367_Transcript_1/1_Conf_1.000 | 271 | 0  |          |                |    |         |     |     |                                                                |
| Locus_21368_Transcript_1/1_Conf_1.000 | 186 | 0  |          |                |    |         |     |     |                                                                |
| Locus_21369_Transcript_1/1_Conf_1.000 | 252 | 0  |          |                |    |         |     |     |                                                                |
| Locus_2137_Transcript_1/1_Conf_1.000  | 667 | 20 | 1.55E-31 | XP_001898376.1 | 61 | 140.198 | 215 | 132 | corneal wound healing-related protein                          |
| Locus_21370_Transcript_1/1_Conf_1.000 | 376 | 20 | 4.17E-24 | XP_002640523.1 | 82 | 114.39  | 78  | 64  | Hypothetical protein CBG18685                                  |
| Locus_21371_Transcript_1/1_Conf_1.000 | 165 | 20 | 8.96E-11 | EFO27900.1     | 71 | 70.0922 | 57  | 41  | ATP-dependent DNA helicase                                     |
| Locus_21372_Transcript_1/1_Conf_1.000 | 110 | 0  |          |                |    |         |     |     |                                                                |
| Locus_21373_Transcript_1/1_Conf_1.000 | 351 | 0  |          |                |    |         |     |     |                                                                |
| Locus_21374_Transcript_1/1_Conf_1.000 | 269 | 0  |          |                |    |         |     |     |                                                                |
| Locus_21375_Transcript_1/1_Conf_1.000 | 154 | 0  |          |                |    |         |     |     |                                                                |

|                                       |     |    |           |                |    |         |     |     |                                                            |
|---------------------------------------|-----|----|-----------|----------------|----|---------|-----|-----|------------------------------------------------------------|
| Locus_21376_Transcript_1/1_Conf_1.000 | 186 | 1  | 4.85E-04  | XP_002632226.1 | 66 | 47.7506 | 50  | 33  | Hypothetical protein CBG07097                              |
| Locus_21377_Transcript_1/1_Conf_1.000 | 299 | 0  |           |                |    |         |     |     |                                                            |
| Locus_21378_Transcript_1/1_Conf_1.000 | 252 | 20 | 2.46E-40  | NP_001024999.1 | 97 | 168.318 | 80  | 78  | Nuclear Hormone Receptor family member (nhr-48)            |
| Locus_21379_Transcript_1/1_Conf_1.000 | 333 | 20 | 2.75E-28  | EFO24634.1     | 71 | 128.257 | 110 | 79  | hypothetical protein LOAG_03853                            |
| Locus_2138_Transcript_1/1_Conf_1.000  | 901 | 20 | 3.01E-102 | ACN93881.1     | 88 | 375.941 | 254 | 224 | putative glutamate-cysteine ligase modifier subunit        |
| Locus_21380_Transcript_1/2_Conf_1.000 | 383 | 20 | 1.99E-10  | XP_002637015.1 | 59 | 68.9366 | 87  | 52  | Hypothetical protein CBG09507                              |
| Locus_21380_Transcript_2/2_Conf_1.000 | 407 | 20 | 1.29E-17  | NP_507628.1    | 59 | 92.8189 | 124 | 74  | TransThyretin-Related family domain family member (ttr-24) |
| Locus_21381_Transcript_1/1_Conf_1.000 | 539 | 0  |           |                |    |         |     |     |                                                            |
| Locus_21382_Transcript_1/1_Conf_1.000 | 130 | 0  |           |                |    |         |     |     |                                                            |
| Locus_21383_Transcript_1/1_Conf_1.000 | 283 | 18 | 8.86E-06  | NP_504810.2    | 75 | 53.5286 | 36  | 27  | UDP-GlucuronosylTransferase family member (ugt-40)         |
| Locus_21384_Transcript_1/1_Conf_1.000 | 276 | 0  |           |                |    |         |     |     |                                                            |
| Locus_21385_Transcript_1/1_Conf_1.000 | 313 | 20 | 1.32E-17  | NP_500737.1    | 64 | 92.8189 | 97  | 63  | hypothetical protein W03F8.3                               |
| Locus_21386_Transcript_1/2_Conf_1.000 | 779 | 20 | 2.05E-50  | EFO28439.1     | 62 | 203.371 | 250 | 157 | transcription factor E2F-4                                 |



|                                       |      |    |          |                |    |         |     |     |                                                |
|---------------------------------------|------|----|----------|----------------|----|---------|-----|-----|------------------------------------------------|
| Locus_21386_Transcript_2/2_Conf_1.000 | 764  | 20 | 9.77E-50 | EFO28439.1     | 62 | 201.06  | 249 | 155 | transcription factor E2F-4                     |
| Locus_21387_Transcript_1/1_Conf_1.000 | 238  | 20 | 2.51E-21 | XP_002646431.1 | 81 | 105.145 | 79  | 64  | Hypothetical protein CBG18813                  |
| Locus_21388_Transcript_1/1_Conf_1.000 | 314  | 9  | 1.15E-13 | XP_001895480.1 | 60 | 79.7221 | 100 | 60  | Immunoglobulin I-set domain containing protein |
| Locus_21389_Transcript_1/1_Conf_1.000 | 349  | 8  | 3.67E-12 | NP_001021225.1 | 62 | 74.7146 | 98  | 61  | Cell Death abnormality family member (ced-7)   |
| Locus_2139_Transcript_1/1_Conf_1.000  | 1861 | 0  |          |                |    |         |     |     |                                                |
| Locus_21390_Transcript_1/1_Conf_1.000 | 242  | 20 | 3.37E-26 | XP_002644773.1 | 86 | 121.324 | 67  | 58  | Hypothetical protein CBG14786                  |
| Locus_21391_Transcript_1/1_Conf_1.000 | 381  | 20 | 7.47E-58 | XP_002643489.1 | 94 | 226.483 | 127 | 120 | C. briggsae CBR-APA-2 protein                  |
| Locus_21392_Transcript_1/1_Conf_1.000 | 281  | 20 | 1.05E-11 | XP_002629730.1 | 87 | 73.1738 | 48  | 42  | Hypothetical protein CBG00961                  |
| Locus_21393_Transcript_1/1_Conf_1.000 | 171  | 0  |          |                |    |         |     |     |                                                |
| Locus_21394_Transcript_1/1_Conf_1.000 | 559  | 2  | 7.59E-16 | XP_002643026.1 | 54 | 87.4261 | 192 | 104 | Hypothetical protein CBG22933                  |
| Locus_21395_Transcript_1/1_Conf_1.000 | 283  | 20 | 5.02E-09 | XP_002595424.1 | 55 | 64.3142 | 94  | 52  | hypothetical protein BRAFLDRAFT_69255          |
| Locus_21396_Transcript_1/1_Conf_1.000 | 237  | 0  |          |                |    |         |     |     |                                                |
| Locus_21397_Transcript_1/1_Conf_1.000 | 366  | 0  |          |                |    |         |     |     |                                                |

|                                       |      |    |          |                |    |         |     |     |                                               |
|---------------------------------------|------|----|----------|----------------|----|---------|-----|-----|-----------------------------------------------|
| Locus_21398_Transcript_1/1_Conf_1.000 | 156  | 0  |          |                |    |         |     |     |                                               |
| Locus_21399_Transcript_1/1_Conf_1.000 | 172  | 0  |          |                |    |         |     |     |                                               |
| Locus_214_Transcript_1/1_Conf_1.000   | 793  | 0  |          |                |    |         |     |     |                                               |
| Locus_2140_Transcript_1/1_Conf_1.000  | 1934 | 20 | 1.91E-96 | XP_001900109.1 | 78 | 358.221 | 266 | 210 | SPRY domain-containing SOCS box protein SSB-4 |
| Locus_21400_Transcript_1/1_Conf_1.000 | 366  | 20 | 1.30E-46 | NP_001122650.1 | 90 | 189.119 | 121 | 109 | PaTChed family member (ptc-3)                 |
| Locus_21401_Transcript_1/1_Conf_1.000 | 306  | 20 | 7.74E-23 | XP_002631676.1 | 74 | 110.153 | 100 | 74  | Hypothetical protein CBG20869                 |
| Locus_21402_Transcript_1/1_Conf_1.000 | 363  | 3  | 8.52E-30 | NP_499313.2    | 67 | 133.265 | 119 | 80  | hypothetical protein F43D9.1                  |
| Locus_21403_Transcript_1/1_Conf_1.000 | 380  | 1  | 8.14E-04 | NP_504527.2    | 61 | 46.9802 | 54  | 33  | hypothetical protein F26F12.3                 |
| Locus_21404_Transcript_1/1_Conf_1.000 | 419  | 0  |          |                |    |         |     |     |                                               |
| Locus_21405_Transcript_1/1_Conf_1.000 | 505  | 20 | 2.19E-52 | XP_002635088.1 | 79 | 208.379 | 156 | 124 | C. briggsae CBR-ASP-6 protein                 |
| Locus_21406_Transcript_1/1_Conf_1.000 | 242  | 0  |          |                |    |         |     |     |                                               |
| Locus_21407_Transcript_1/1_Conf_1.000 | 293  | 1  | 1.49E-21 | NP_498957.1    | 72 | 105.916 | 97  | 70  | hypothetical protein F44E2.9                  |
| Locus_21408_Transcript_1/1_Conf_1.000 | 296  | 20 | 5.08E-30 | NP_491653.2    | 85 | 134.035 | 92  | 79  | hypothetical protein F55F8.3                  |
| Locus_21409_Transcript_1/1_Conf_1.000 | 129  | 3  | 1.29E-09 | NP_508449.1    | 79 | 66.2402 | 43  | 34  | hypothetical protein R04B3.3                  |
| Locus_2141_Transcript_1/1_Conf_1.000  | 309  | 0  |          |                |    |         |     |     |                                               |
| Locus_21410_Transcript_1/1_Conf_1.000 | 132  | 0  |          |                |    |         |     |     |                                               |

|                                       |      |    |          |                |    |         |     |     |                                                                                                 |
|---------------------------------------|------|----|----------|----------------|----|---------|-----|-----|-------------------------------------------------------------------------------------------------|
| Locus_21411_Transcript_1/1_Conf_1.000 | 171  | 20 | 6.14E-28 | EAX10909.1     | 98 | 127.102 | 57  | 56  | collagen, type III, alpha 1 (Ehlers-Danlos syndrome type IV, autosomal dominant), isoform CRA_a |
| Locus_21412_Transcript_1/1_Conf_1.000 | 254  | 0  |          |                |    |         |     |     |                                                                                                 |
| Locus_21413_Transcript_1/1_Conf_1.000 | 155  | 0  |          |                |    |         |     |     |                                                                                                 |
| Locus_21414_Transcript_1/1_Conf_1.000 | 422  | 2  | 4.20E-16 | XP_002631299.1 | 67 | 87.8113 | 98  | 66  | Hypothetical protein CBG03113                                                                   |
| Locus_21415_Transcript_1/1_Conf_1.000 | 240  | 0  |          |                |    |         |     |     |                                                                                                 |
| Locus_21416_Transcript_1/1_Conf_1.000 | 339  | 0  |          |                |    |         |     |     |                                                                                                 |
| Locus_21417_Transcript_1/1_Conf_1.000 | 173  | 0  |          |                |    |         |     |     |                                                                                                 |
| Locus_21418_Transcript_1/1_Conf_1.000 | 231  | 0  |          |                |    |         |     |     |                                                                                                 |
| Locus_21419_Transcript_1/1_Conf_1.000 | 143  | 0  |          |                |    |         |     |     |                                                                                                 |
| Locus_2142_Transcript_1/2_Conf_1.000  | 1427 | 20 | 1.15E-52 | AAD13340.1     | 48 | 212.231 | 450 | 218 | ancylostoma secreted protein 1 precursor                                                        |
| Locus_2142_Transcript_2/2_Conf_1.000  | 322  | 1  | 4.80E-04 | AAD13339.1     | 57 | 47.7506 | 83  | 48  | ancylostoma-secreted protein 1 precursor                                                        |
| Locus_21420_Transcript_1/1_Conf_1.000 | 458  | 15 | 1.61E-20 | NP_491122.2    | 59 | 102.449 | 119 | 71  | hypothetical protein Y54E10A.17                                                                 |
| Locus_21421_Transcript_1/1_Conf_1.000 | 243  | 0  |          |                |    |         |     |     |                                                                                                 |
| Locus_21422_Transcript_1/1_Conf_1.000 | 149  | 0  |          |                |    |         |     |     |                                                                                                 |
| Locus_21423_Transcript_1/1_Conf_1.000 | 171  | 7  | 9.85E-10 | NP_501376.2    | 67 | 66.6254 | 55  | 37  | hypothetical protein C07G1.2                                                                    |
| Locus_21424_Transcript_1/1_Conf_1.000 | 191  | 20 | 4.81E-20 | XP_002635377.1 | 82 | 100.908 | 63  | 52  | Hypothetical protein CBG00768                                                                   |
| Locus_21425_Transcript_1/1_Conf_1.000 | 2573 | 20 | 0        | NP_497274.2    | 92 | 1009.59 | 591 | 545 | hypothetical protein K02F3.2                                                                    |

|                                       |      |    |          |                |     |         |     |     |                                                                        |
|---------------------------------------|------|----|----------|----------------|-----|---------|-----|-----|------------------------------------------------------------------------|
| Locus_21426_Transcript_1/1_Conf_1.000 | 135  | 0  |          |                |     |         |     |     |                                                                        |
| Locus_21427_Transcript_1/1_Conf_1.000 | 335  | 2  | 5.57E-13 | XP_002630454.1 | 65  | 77.411  | 86  | 56  | Hypothetical protein CBG11187                                          |
| Locus_21428_Transcript_1/1_Conf_1.000 | 289  | 20 | 7.90E-31 | NP_492594.2    | 83  | 136.732 | 95  | 79  | hypothetical protein F26E4.5                                           |
| Locus_21429_Transcript_1/1_Conf_1.000 | 307  | 7  | 1.32E-14 | NP_001021268.1 | 71  | 82.8037 | 84  | 60  | UNCoordinated family member (unc-44)                                   |
| Locus_2143_Transcript_1/1_Conf_1.000  | 1279 | 20 | 0        | EFO27018.1     | 94  | 720.694 | 408 | 387 | hypothetical protein LOAG_01458                                        |
| Locus_21430_Transcript_1/1_Conf_1.000 | 334  | 20 | 2.34E-11 | AAN05752.1     | 65  | 72.0182 | 107 | 70  | heat shock protein 20                                                  |
| Locus_21431_Transcript_1/1_Conf_1.000 | 407  | 0  |          |                |     |         |     |     |                                                                        |
| Locus_21432_Transcript_1/1_Conf_1.000 | 450  | 0  |          |                |     |         |     |     |                                                                        |
| Locus_21433_Transcript_1/1_Conf_1.000 | 341  | 0  |          |                |     |         |     |     |                                                                        |
| Locus_21434_Transcript_1/1_Conf_1.000 | 344  | 20 | 6.95E-19 | CAO03461.1     | 61  | 97.0561 | 112 | 69  | SET binding factor 1                                                   |
| Locus_21435_Transcript_1/1_Conf_1.000 | 166  | 20 | 3.51E-23 | BAD92403.1     | 100 | 111.309 | 55  | 55  | major histocompatibility complex, class II, DR alpha precursor variant |
| Locus_21436_Transcript_1/1_Conf_1.000 | 148  | 0  |          |                |     |         |     |     |                                                                        |
| Locus_21437_Transcript_1/1_Conf_1.000 | 171  | 7  | 2.05E-07 | NP_001122684.1 | 90  | 58.9214 | 40  | 36  | UNCoordinated family member (unc-103)                                  |
| Locus_21438_Transcript_1/1_Conf_1.000 | 207  | 20 | 2.41E-32 | XP_001899245.1 | 100 | 141.739 | 68  | 68  | Dumpy : shorter than wild-type protein 23, isoform b                   |

|                                       |      |    |          |            |     |         |     |     |                                                       |
|---------------------------------------|------|----|----------|------------|-----|---------|-----|-----|-------------------------------------------------------|
| Locus_21439_Transcript_1/1_Conf_1.000 | 199  | 20 | 4.45E-26 | AAV38526.1 | 100 | 120.939 | 58  | 58  | proteasome (prosome, macropain) subunit, beta type, 3 |
| Locus_2144_Transcript_1/3_Conf_0.714  | 1075 | 20 | 2.36E-86 | EFO18208.1 | 88  | 323.553 | 199 | 177 | hypothetical protein LOAG_10291                       |
| Locus_2144_Transcript_2/3_Conf_0.714  | 1079 | 20 | 2.37E-86 | EFO18208.1 | 88  | 323.553 | 199 | 177 | hypothetical protein LOAG_10291                       |
| Locus_2144_Transcript_3/3_Conf_0.714  | 1081 | 20 | 2.38E-86 | EFO18208.1 | 88  | 323.553 | 199 | 177 | hypothetical protein LOAG_10291                       |
| Locus_21440_Transcript_1/1_Conf_1.000 | 163  | 17 | 8.38E-25 | BAF84240.1 | 100 | 116.701 | 54  | 54  | unnamed protein product                               |

|                                       |     |    |          |                |     |         |     |    |                                          |
|---------------------------------------|-----|----|----------|----------------|-----|---------|-----|----|------------------------------------------|
| Locus_21441_Transcript_1/1_Conf_1.000 | 237 | 15 | 6.00E-07 | XP_002116347.1 | 60  | 57.3806 | 66  | 40 | hypothetical protein TRIADDRAFT_64268    |
| Locus_21442_Transcript_1/1_Conf_1.000 | 135 | 0  |          |                |     |         |     |    |                                          |
| Locus_21443_Transcript_1/1_Conf_1.000 | 138 | 0  |          |                |     |         |     |    |                                          |
| Locus_21444_Transcript_1/1_Conf_1.000 | 185 | 0  |          |                |     |         |     |    |                                          |
| Locus_21445_Transcript_1/1_Conf_1.000 | 314 | 0  |          |                |     |         |     |    |                                          |
| Locus_21446_Transcript_1/1_Conf_1.000 | 189 | 0  |          |                |     |         |     |    |                                          |
| Locus_21447_Transcript_1/1_Conf_1.000 | 355 | 20 | 6.85E-19 | NP_001090394.1 | 64  | 97.0561 | 115 | 74 | putative deoxyribonuclease tatdn3-A      |
| Locus_21448_Transcript_1/1_Conf_1.000 | 140 | 19 | 2.95E-06 | XP_001113618.2 | 100 | 55.0694 | 44  | 44 | PREDICTED: CD82 antigen isoform 2        |
| Locus_21449_Transcript_1/1_Conf_1.000 | 129 | 0  |          |                |     |         |     |    |                                          |
| Locus_2145_Transcript_1/1_Conf_1.000  | 456 | 0  |          |                |     |         |     |    |                                          |
| Locus_21450_Transcript_1/1_Conf_1.000 | 526 | 0  |          |                |     |         |     |    |                                          |
| Locus_21451_Transcript_1/1_Conf_1.000 | 140 | 0  |          |                |     |         |     |    |                                          |
| Locus_21452_Transcript_1/1_Conf_1.000 | 143 | 3  | 3.47E-07 | NP_498645.1    | 66  | 58.151  | 48  | 32 | MUscle Positioning family member (mup-4) |

|                                       |      |    |          |                |    |         |     |     |                                                  |
|---------------------------------------|------|----|----------|----------------|----|---------|-----|-----|--------------------------------------------------|
| Locus_21453_Transcript_1/1_Conf_1.000 | 537  | 20 | 2.38E-69 | XP_001894059.1 | 87 | 265.003 | 177 | 154 | SMC family, C-terminal domain containing protein |
| Locus_21454_Transcript_1/1_Conf_1.000 | 202  | 20 | 1.87E-08 | XP_001011065.1 | 54 | 62.3882 | 66  | 36  | LIM domain containing protein                    |
| Locus_21455_Transcript_1/1_Conf_1.000 | 176  | 5  | 1.37E-11 | NP_001022925.1 | 68 | 72.7886 | 58  | 40  | hypothetical protein Y56A3A.36                   |
| Locus_21456_Transcript_1/1_Conf_1.000 | 176  | 0  |          |                |    |         |     |     |                                                  |
| Locus_21457_Transcript_1/1_Conf_1.000 | 339  | 8  | 3.55E-44 | ABS45067.1     | 87 | 181.03  | 113 | 99  | latrophilin-like protein 2                       |
| Locus_21458_Transcript_1/1_Conf_1.000 | 175  | 0  |          |                |    |         |     |     |                                                  |
| Locus_21459_Transcript_1/1_Conf_1.000 | 326  | 7  | 4.00E-43 | XP_002646632.1 | 92 | 177.563 | 108 | 100 | C. briggsae CBR-UNC-52 protein                   |
| Locus_2146_Transcript_1/1_Conf_1.000  | 1454 | 20 | 1.88E-42 | XP_001895237.1 | 62 | 178.333 | 222 | 139 | hypothetical protein                             |
| Locus_21460_Transcript_1/1_Conf_1.000 | 243  | 0  |          |                |    |         |     |     |                                                  |
| Locus_21461_Transcript_1/1_Conf_1.000 | 230  | 0  |          |                |    |         |     |     |                                                  |
| Locus_21462_Transcript_1/1_Conf_1.000 | 760  | 5  | 8.15E-73 | XP_002645124.1 | 75 | 277.715 | 237 | 179 | Hypothetical protein CBG16818                    |
| Locus_21463_Transcript_1/1_Conf_1.000 | 159  | 0  |          |                |    |         |     |     |                                                  |
| Locus_21464_Transcript_1/1_Conf_1.000 | 257  | 5  | 7.71E-10 | EFO23218.1     | 66 | 67.0106 | 59  | 39  | hypothetical protein LOAG_05263                  |
| Locus_21465_Transcript_1/1_Conf_1.000 | 498  | 0  |          |                |    |         |     |     |                                                  |
| Locus_21466_Transcript_1/1_Conf_1.000 | 323  | 0  |          |                |    |         |     |     |                                                  |
| Locus_21467_Transcript_1/1_Conf_1.000 | 515  | 20 | 2.30E-28 | XP_001899869.1 | 57 | 128.642 | 171 | 99  | hypothetical protein Bm1_42035                   |

|                                       |      |    |          |                |     |         |     |     |                                                |
|---------------------------------------|------|----|----------|----------------|-----|---------|-----|-----|------------------------------------------------|
| Locus_21468_Transcript_1/1_Conf_1.000 | 165  | 2  | 1.25E-04 | NP_509647.1    | 70  | 49.6766 | 51  | 36  | hypothetical protein F47A4.5                   |
| Locus_21469_Transcript_1/1_Conf_1.000 | 133  | 0  |          |                |     |         |     |     |                                                |
| Locus_2147_Transcript_1/2_Conf_1.000  | 417  | 0  |          |                |     |         |     |     |                                                |
| Locus_2147_Transcript_2/2_Conf_1.000  | 413  | 0  |          |                |     |         |     |     |                                                |
| Locus_21470_Transcript_1/1_Conf_1.000 | 188  | 3  | 3.95E-22 | XP_002633497.1 | 95  | 107.842 | 61  | 58  | Hypothetical protein CBG06269                  |
| Locus_21471_Transcript_1/1_Conf_1.000 | 157  | 0  |          |                |     |         |     |     |                                                |
| Locus_21472_Transcript_1/1_Conf_1.000 | 242  | 0  |          |                |     |         |     |     |                                                |
| Locus_21473_Transcript_1/1_Conf_1.000 | 199  | 0  |          |                |     |         |     |     |                                                |
| Locus_21474_Transcript_1/1_Conf_1.000 | 321  | 3  | 1.10E-24 | XP_002635291.1 | 67  | 116.316 | 105 | 71  | Hypothetical protein CBG11538                  |
| Locus_21475_Transcript_1/1_Conf_1.000 | 271  | 0  |          |                |     |         |     |     |                                                |
| Locus_21476_Transcript_1/1_Conf_1.000 | 149  | 2  | 2.57E-05 | NP_491716.1    | 78  | 51.9878 | 41  | 32  | hypothetical protein B0207.7                   |
| Locus_21477_Transcript_1/1_Conf_1.000 | 182  | 0  |          |                |     |         |     |     |                                                |
| Locus_21478_Transcript_1/1_Conf_1.000 | 179  | 0  |          |                |     |         |     |     |                                                |
| Locus_21479_Transcript_1/1_Conf_1.000 | 149  | 0  |          |                |     |         |     |     |                                                |
| Locus_2148_Transcript_1/1_Conf_1.000  | 1485 | 20 | 2.19E-94 | NP_496624.2    | 59  | 350.903 | 471 | 282 | hypothetical protein Y57A10B.1                 |
| Locus_21480_Transcript_1/1_Conf_1.000 | 481  | 20 | 2.55E-34 | XP_001893384.1 | 65  | 148.288 | 160 | 104 | Plasmid Maintenance Protein containing protein |
| Locus_21481_Transcript_1/1_Conf_1.000 | 470  | 0  |          |                |     |         |     |     |                                                |
| Locus_21482_Transcript_1/1_Conf_1.000 | 151  | 0  |          |                |     |         |     |     |                                                |
| Locus_21483_Transcript_1/1_Conf_1.000 | 335  | 20 | 1.08E-32 | NP_502386.1    | 74  | 142.895 | 111 | 83  | hypothetical protein T04A11.2                  |
| Locus_21484_Transcript_1/1_Conf_1.000 | 518  | 20 | 6.17E-45 | XP_002630506.1 | 70  | 183.726 | 167 | 118 | C. briggsae CBR-HIM-14 protein                 |
| Locus_21485_Transcript_1/1_Conf_1.000 | 522  | 0  |          |                |     |         |     |     |                                                |
| Locus_21486_Transcript_1/1_Conf_1.000 | 475  | 2  | 1.47E-21 | NP_502182.2    | 77  | 105.916 | 86  | 67  | hypothetical protein F12F6.1                   |
| Locus_21487_Transcript_1/1_Conf_1.000 | 491  | 0  |          |                |     |         |     |     |                                                |
| Locus_21488_Transcript_1/1_Conf_1.000 | 314  | 1  | 7.70E-26 | AAB02411.1     | 100 | 120.168 | 55  | 55  | CoxII/D-loop DNA fusion protein                |



|                                       |     |    |          |                |     |         |     |     |                                                                |
|---------------------------------------|-----|----|----------|----------------|-----|---------|-----|-----|----------------------------------------------------------------|
| Locus_21489_Transcript_1/1_Conf_1.000 | 133 | 20 | 2.76E-20 | 3MQL           | 100 | 101.679 | 43  | 43  | CrystalStructure OfThe Fibronectin 6fni1-2fni17fni Fragment    |
| Locus_2149_Transcript_1/1_Conf_1.000  | 644 | 7  | 6.66E-21 | CBI83239.1     | 54  | 104.76  | 130 | 71  | C. elegans protein W06F12.2e, confirmed by transcript evidence |
| Locus_21490_Transcript_1/1_Conf_1.000 | 154 | 1  | 1.66E-04 | NP_001076620.1 | 60  | 49.2914 | 45  | 27  | hypothetical protein Y34D9A.8                                  |
| Locus_21491_Transcript_1/1_Conf_1.000 | 242 | 20 | 4.55E-31 | NP_001021650.1 | 90  | 137.502 | 80  | 72  | HaMmeRhead embryonic lethal family member (hmr-1)              |
| Locus_21492_Transcript_1/1_Conf_1.000 | 775 | 0  |          |                |     |         |     |     |                                                                |
| Locus_21493_Transcript_1/1_Conf_1.000 | 297 | 0  |          |                |     |         |     |     |                                                                |
| Locus_21494_Transcript_1/1_Conf_1.000 | 377 | 4  | 5.81E-34 | NP_493078.2    | 73  | 147.132 | 125 | 92  | hypothetical protein R05D7.5                                   |
| Locus_21495_Transcript_1/1_Conf_1.000 | 398 | 0  |          |                |     |         |     |     |                                                                |
| Locus_21496_Transcript_1/1_Conf_1.000 | 194 | 0  |          |                |     |         |     |     |                                                                |
| Locus_21497_Transcript_1/1_Conf_1.000 | 281 | 3  | 2.33E-11 | NP_499961.2    | 65  | 72.0182 | 93  | 61  | Nuclear Hormone Receptor family member (nhr-76)                |
| Locus_21498_Transcript_1/1_Conf_1.000 | 170 | 0  |          |                |     |         |     |     |                                                                |
| Locus_21499_Transcript_1/1_Conf_1.000 | 137 | 0  |          |                |     |         |     |     |                                                                |
| Locus_215_Transcript_1/2_Conf_1.000   | 983 | 16 | 4.01E-58 | CAR63537.1     | 67  | 229.565 | 202 | 137 | putative Lipid Binding Protein                                 |
| Locus_215_Transcript_2/2_Conf_1.000   | 854 | 20 | 1.74E-64 | CAR63537.1     | 86  | 250.366 | 159 | 137 | putative Lipid Binding Protein                                 |
| Locus_2150_Transcript_1/1_Conf_1.000  | 342 | 20 | 5.13E-30 | NP_494366.2    | 78  | 134.035 | 111 | 87  | hypothetical protein F08D12.1                                  |
| Locus_21500_Transcript_1/1_Conf_1.000 | 384 | 0  |          |                |     |         |     |     |                                                                |
| Locus_21501_Transcript_1/1_Conf_1.000 | 137 | 0  |          |                |     |         |     |     |                                                                |
| Locus_21502_Transcript_1/1_Conf_1.000 | 309 | 0  |          |                |     |         |     |     |                                                                |

|                                       |      |    |          |                |    |         |     |     |                                                       |
|---------------------------------------|------|----|----------|----------------|----|---------|-----|-----|-------------------------------------------------------|
| Locus_21503_Transcript_1/1_Conf_1.000 | 328  | 20 | 3.28E-29 | NP_496542.1    | 76 | 131.339 | 108 | 83  | hypothetical protein ZK930.1                          |
| Locus_21504_Transcript_1/1_Conf_1.000 | 189  | 1  | 1.83E-11 | NP_499637.2    | 77 | 72.4034 | 61  | 47  | hypothetical protein Y111B2A.8                        |
| Locus_21505_Transcript_1/1_Conf_1.000 | 621  | 0  |          |                |    |         |     |     |                                                       |
| Locus_21506_Transcript_1/1_Conf_1.000 | 213  | 4  | 3.15E-08 | XP_002636889.1 | 62 | 61.6178 | 67  | 42  | C. briggsae CBR-HEX-2 protein                         |
| Locus_21507_Transcript_1/1_Conf_1.000 | 271  | 0  |          |                |    |         |     |     |                                                       |
| Locus_21508_Transcript_1/1_Conf_1.000 | 128  | 0  |          |                |    |         |     |     |                                                       |
| Locus_21509_Transcript_1/1_Conf_1.000 | 168  | 0  |          |                |    |         |     |     |                                                       |
| Locus_2151_Transcript_1/1_Conf_1.000  | 773  | 20 | 1.75E-86 | XP_002640077.1 | 81 | 323.168 | 253 | 206 | Hypothetical protein CBG12562                         |
| Locus_21510_Transcript_1/1_Conf_1.000 | 444  | 0  |          |                |    |         |     |     |                                                       |
| Locus_21511_Transcript_1/1_Conf_1.000 | 134  | 0  |          |                |    |         |     |     |                                                       |
| Locus_21512_Transcript_1/1_Conf_1.000 | 178  | 0  |          |                |    |         |     |     |                                                       |
| Locus_21513_Transcript_1/1_Conf_1.000 | 129  | 0  |          |                |    |         |     |     |                                                       |
| Locus_21514_Transcript_1/1_Conf_1.000 | 177  | 20 | 5.92E-15 | NP_499784.2    | 84 | 83.9593 | 58  | 49  | KELch-repeat containing protein family member (kel-3) |
| Locus_21515_Transcript_1/1_Conf_1.000 | 201  | 0  |          |                |    |         |     |     |                                                       |
| Locus_21516_Transcript_1/1_Conf_1.000 | 227  | 0  |          |                |    |         |     |     |                                                       |
| Locus_21517_Transcript_1/1_Conf_1.000 | 160  | 0  |          |                |    |         |     |     |                                                       |
| Locus_21518_Transcript_1/1_Conf_1.000 | 137  | 11 | 1.46E-13 | NP_871654.2    | 93 | 79.337  | 45  | 42  | GEX Interacting protein family member (gei-4)         |
| Locus_21519_Transcript_1/1_Conf_1.000 | 315  | 6  | 1.45E-16 | AAV41897.1     | 69 | 89.3521 | 94  | 65  | SAX-2                                                 |
| Locus_2152_Transcript_1/1_Conf_1.000  | 2478 | 20 | 0        | NP_498283.1    | 77 | 983.786 | 817 | 632 | hypothetical protein C28H8.3                          |
| Locus_21520_Transcript_1/1_Conf_1.000 | 209  | 0  |          |                |    |         |     |     |                                                       |
| Locus_21521_Transcript_1/1_Conf_1.000 | 155  | 0  |          |                |    |         |     |     |                                                       |
| Locus_21522_Transcript_1/1_Conf_1.000 | 219  | 0  |          |                |    |         |     |     |                                                       |

|                                       |     |    |          |                |    |         |    |    |                                                                                 |
|---------------------------------------|-----|----|----------|----------------|----|---------|----|----|---------------------------------------------------------------------------------|
| Locus_21523_Transcript_1/1_Conf_1.000 | 138 | 20 | 6.13E-12 | EFO27870.1     | 89 | 73.9442 | 46 | 41 | CMGC/CDK/CDK7 protein kinase                                                    |
| Locus_21524_Transcript_1/1_Conf_1.000 | 306 | 4  | 1.84E-24 | NP_508923.1    | 77 | 115.546 | 98 | 76 | hypothetical protein C41A3.1                                                    |
| Locus_21525_Transcript_1/1_Conf_1.000 | 273 | 20 | 7.79E-15 | XP_001900299.1 | 60 | 83.5741 | 87 | 53 | Protein-tyrosine phosphatase containing protein                                 |
| Locus_21526_Transcript_1/1_Conf_1.000 | 554 | 0  |          |                |    |         |    |    |                                                                                 |
| Locus_21527_Transcript_1/1_Conf_1.000 | 142 | 11 | 7.71E-15 | ACJ65168.1     | 93 | 83.5741 | 44 | 41 | Uncoordinated protein 68, isoform b, partially confirmed by transcript evidence |
| Locus_21528_Transcript_1/1_Conf_1.000 | 131 | 0  |          |                |    |         |    |    |                                                                                 |
| Locus_21529_Transcript_1/1_Conf_1.000 | 180 | 0  |          |                |    |         |    |    |                                                                                 |
| Locus_2153_Transcript_1/1_Conf_1.000  | 443 | 0  |          |                |    |         |    |    |                                                                                 |
| Locus_21530_Transcript_1/1_Conf_1.000 | 356 | 2  | 3.30E-05 | XP_001901347.1 | 55 | 51.6026 | 76 | 42 | DNA excision repair protein ERCC-6                                              |
| Locus_21531_Transcript_1/1_Conf_1.000 | 324 | 0  |          |                |    |         |    |    |                                                                                 |
| Locus_21532_Transcript_1/1_Conf_1.000 | 264 | 0  |          |                |    |         |    |    |                                                                                 |
| Locus_21533_Transcript_1/2_Conf_1.000 | 731 | 0  |          |                |    |         |    |    |                                                                                 |
| Locus_21533_Transcript_2/2_Conf_1.000 | 731 | 0  |          |                |    |         |    |    |                                                                                 |
| Locus_21534_Transcript_1/1_Conf_1.000 | 277 | 2  | 3.27E-05 | EFO19241.1     | 53 | 51.6026 | 88 | 47 | hypothetical protein LOAG_09252                                                 |
| Locus_21535_Transcript_1/1_Conf_1.000 | 173 | 0  |          |                |    |         |    |    |                                                                                 |
| Locus_21536_Transcript_1/1_Conf_1.000 | 223 | 20 | 1.27E-20 | XP_002645688.1 | 83 | 102.834 | 62 | 52 | C. briggsae CBR-ELT-3 protein                                                   |

|                                       |      |    |          |                |     |         |     |     |                                                                   |
|---------------------------------------|------|----|----------|----------------|-----|---------|-----|-----|-------------------------------------------------------------------|
| Locus_21537_Transcript_1/1_Conf_1.000 | 170  | 17 | 1.74E-06 | NP_001165114.1 | 70  | 55.8398 | 54  | 38  | collagen                                                          |
| Locus_21538_Transcript_1/1_Conf_1.000 | 542  | 20 | 4.95E-30 | XP_002636579.1 | 75  | 134.42  | 103 | 78  | Hypothetical protein CBG23273                                     |
| Locus_21539_Transcript_1/1_Conf_1.000 | 152  | 4  | 1.89E-16 | EFO25124.1     | 89  | 88.9669 | 47  | 42  | bromodomain containing protein                                    |
| Locus_2154_Transcript_1/1_Conf_1.000  | 1064 | 20 | 7.66E-98 | NP_494772.1    | 74  | 361.688 | 281 | 209 | NOT-Like (yeast CCR4/NOT complex component) family member (ntl-2) |
| Locus_21540_Transcript_1/1_Conf_1.000 | 411  | 20 | 8.84E-27 | XP_002114490.1 | 65  | 123.25  | 127 | 83  | hypothetical protein TRIADDRAFT_27462                             |
| Locus_21541_Transcript_1/1_Conf_1.000 | 171  | 0  |          |                |     |         |     |     |                                                                   |
| Locus_21542_Transcript_1/1_Conf_1.000 | 645  | 1  | 1.61E-06 | XP_002634576.1 | 60  | 56.9954 | 75  | 45  | C. briggsae CBR-SRB-17 protein                                    |
| Locus_21543_Transcript_1/1_Conf_1.000 | 332  | 1  | 4.15E-08 | XP_002640024.1 | 66  | 61.2326 | 115 | 77  | Hypothetical protein CBG12496                                     |
| Locus_21544_Transcript_1/1_Conf_1.000 | 302  | 20 | 3.86E-30 | NP_500647.2    | 78  | 134.42  | 99  | 78  | Dipeptidyl Peptidase Four (IV) family member (dpf-5)              |
| Locus_21545_Transcript_1/1_Conf_1.000 | 860  | 20 | 9.45E-26 | XP_001893874.1 | 48  | 121.709 | 284 | 139 | Smr domain containing protein                                     |
| Locus_21546_Transcript_1/1_Conf_1.000 | 151  | 20 | 1.27E-20 | XP_001107614.2 | 100 | 102.834 | 49  | 49  | PREDICTED: inorganic pyrophosphatase-like                         |
| Locus_21547_Transcript_1/1_Conf_1.000 | 145  | 0  |          |                |     |         |     |     |                                                                   |
| Locus_21548_Transcript_1/1_Conf_1.000 | 323  | 20 | 7.11E-32 | XP_002630378.1 | 77  | 140.198 | 109 | 84  | Hypothetical protein CBG04317                                     |
| Locus_21549_Transcript_1/1_Conf_1.000 | 143  | 0  |          |                |     |         |     |     |                                                                   |
| Locus_2155_Transcript_1/2_Conf_1.000  | 295  | 0  |          |                |     |         |     |     |                                                                   |
| Locus_2155_Transcript_2/2_Conf_1.000  | 293  | 0  |          |                |     |         |     |     |                                                                   |
| Locus_21550_Transcript_1/1_Conf_1.000 | 258  | 4  | 4.65E-15 | XP_002646447.1 | 69  | 84.3445 | 73  | 51  | Hypothetical protein CBG18852                                     |
| Locus_21551_Transcript_1/1_Conf_1.000 | 151  | 0  |          |                |     |         |     |     |                                                                   |
| Locus_21552_Transcript_1/1_Conf_1.000 | 232  | 0  |          |                |     |         |     |     |                                                                   |

|                                       |      |    |          |                |    |         |     |     |                                                |
|---------------------------------------|------|----|----------|----------------|----|---------|-----|-----|------------------------------------------------|
| Locus_21553_Transcript_1/1_Conf_1.000 | 139  | 0  |          |                |    |         |     |     |                                                |
| Locus_21554_Transcript_1/1_Conf_1.000 | 155  | 6  | 2.17E-04 | XP_002648446.1 | 68 | 48.9062 | 45  | 31  | Hypothetical protein CBG24721                  |
| Locus_21555_Transcript_1/1_Conf_1.000 | 132  | 0  |          |                |    |         |     |     |                                                |
| Locus_21556_Transcript_1/1_Conf_1.000 | 524  | 20 | 7.42E-25 | XP_001894749.1 | 59 | 117.087 | 162 | 97  | galactokinase family protein                   |
| Locus_21557_Transcript_1/1_Conf_1.000 | 187  | 0  |          |                |    |         |     |     |                                                |
| Locus_21558_Transcript_1/1_Conf_1.000 | 590  | 20 | 1.24E-78 | XP_002633788.1 | 83 | 296.204 | 189 | 157 | C. briggsae CBR-FAT-4 protein                  |
| Locus_21559_Transcript_1/1_Conf_1.000 | 231  | 0  |          |                |    |         |     |     |                                                |
| Locus_2156_Transcript_1/2_Conf_1.000  | 1078 | 12 | 6.52E-44 | XP_002640218.1 | 51 | 182.57  | 276 | 142 | C. briggsae CBR-ZTF-4 protein                  |
| Locus_2156_Transcript_2/2_Conf_1.000  | 336  | 0  |          |                |    |         |     |     |                                                |
| Locus_21560_Transcript_1/1_Conf_1.000 | 263  | 0  |          |                |    |         |     |     |                                                |
| Locus_21561_Transcript_1/1_Conf_1.000 | 171  | 0  |          |                |    |         |     |     |                                                |
| Locus_21562_Transcript_1/1_Conf_1.000 | 298  | 0  |          |                |    |         |     |     |                                                |
| Locus_21563_Transcript_1/1_Conf_1.000 | 187  | 20 | 8.79E-22 | XP_001898118.1 | 94 | 106.686 | 59  | 56  | FYVE finger-containing phosphoinositide kinase |
| Locus_21564_Transcript_1/1_Conf_1.000 | 193  | 0  |          |                |    |         |     |     |                                                |
| Locus_21565_Transcript_1/1_Conf_1.000 | 279  | 0  |          |                |    |         |     |     |                                                |
| Locus_21566_Transcript_1/1_Conf_1.000 | 129  | 0  |          |                |    |         |     |     |                                                |
| Locus_21567_Transcript_1/2_Conf_1.000 | 198  | 0  |          |                |    |         |     |     |                                                |
| Locus_21567_Transcript_2/2_Conf_1.000 | 272  | 0  |          |                |    |         |     |     |                                                |
| Locus_21568_Transcript_1/1_Conf_1.000 | 378  | 20 | 8.07E-36 | XP_002642916.1 | 91 | 153.295 | 87  | 80  | C. briggsae CBR-TAG-168 protein                |
| Locus_21569_Transcript_1/1_Conf_1.000 | 489  | 2  | 8.70E-06 | XP_002634144.1 | 64 | 53.5286 | 48  | 31  | Hypothetical protein CBG01705                  |
| Locus_2157_Transcript_1/2_Conf_1.000  | 1640 | 20 | 0        | NP_001021071.1 | 83 | 675.626 | 452 | 378 | hypothetical protein D1007.5                   |
| Locus_2157_Transcript_2/2_Conf_1.000  | 1640 | 20 | 0        | NP_001021071.1 | 83 | 675.626 | 452 | 378 | hypothetical protein D1007.5                   |

|                                       |     |    |          |                |     |         |     |     |                                                           |
|---------------------------------------|-----|----|----------|----------------|-----|---------|-----|-----|-----------------------------------------------------------|
| Locus_21570_Transcript_1/1_Conf_1.000 | 229 | 20 | 2.22E-17 | EFO19956.1     | 77  | 92.0485 | 68  | 53  | hypothetical protein LOAG_08535                           |
| Locus_21571_Transcript_1/1_Conf_1.000 | 497 | 20 | 1.77E-51 | XP_002636314.1 | 81  | 205.297 | 166 | 135 | Hypothetical protein CBG08607                             |
| Locus_21572_Transcript_1/1_Conf_1.000 | 158 | 0  |          |                |     |         |     |     |                                                           |
| Locus_21573_Transcript_1/1_Conf_1.000 | 168 | 0  |          |                |     |         |     |     |                                                           |
| Locus_21574_Transcript_1/1_Conf_1.000 | 149 | 2  | 2.66E-10 | NP_497053.1    | 83  | 68.5514 | 48  | 40  | hypothetical protein C09F9.2                              |
| Locus_21575_Transcript_1/1_Conf_1.000 | 178 | 0  |          |                |     |         |     |     |                                                           |
| Locus_21576_Transcript_1/1_Conf_1.000 | 329 | 0  |          |                |     |         |     |     |                                                           |
| Locus_21577_Transcript_1/1_Conf_1.000 | 318 | 0  |          |                |     |         |     |     |                                                           |
| Locus_21578_Transcript_1/1_Conf_1.000 | 149 | 20 | 8.83E-14 | XP_002920932.1 | 100 | 80.1073 | 35  | 35  | PREDICTED: lipolysis-stimulated lipoprotein receptor-like |
| Locus_21579_Transcript_1/1_Conf_1.000 | 259 | 20 | 3.67E-20 | NP_493023.1    | 80  | 101.293 | 67  | 54  | hypothetical protein R09B3.3                              |
| Locus_2158_Transcript_1/2_Conf_1.000  | 581 | 12 | 9.31E-63 | XP_002637005.1 | 87  | 243.432 | 166 | 146 | Hypothetical protein CBG09497                             |
| Locus_2158_Transcript_2/2_Conf_1.000  | 581 | 12 | 9.31E-63 | XP_002637005.1 | 87  | 243.432 | 166 | 146 | Hypothetical protein CBG09497                             |
| Locus_21580_Transcript_1/1_Conf_1.000 | 132 | 0  |          |                |     |         |     |     |                                                           |
| Locus_21581_Transcript_1/1_Conf_1.000 | 330 | 0  |          |                |     |         |     |     |                                                           |
| Locus_21582_Transcript_1/1_Conf_1.000 | 485 | 20 | 6.91E-27 | NP_491361.1    | 59  | 123.635 | 161 | 96  | hypothetical protein ZK973.11                             |
| Locus_21583_Transcript_1/1_Conf_1.000 | 291 | 20 | 9.04E-11 | XP_970144.1    | 63  | 70.0922 | 96  | 61  | PREDICTED: similar to conserved hypothetical protein      |
| Locus_21584_Transcript_1/1_Conf_1.000 | 426 | 12 | 3.35E-74 | XP_002633317.1 | 95  | 280.796 | 141 | 134 | Hypothetical protein CBG06054                             |

|                                       |      |    |          |                |     |         |     |     |                                                            |
|---------------------------------------|------|----|----------|----------------|-----|---------|-----|-----|------------------------------------------------------------|
| Locus_21585_Transcript_1/1_Conf_1.000 | 184  | 0  |          |                |     |         |     |     |                                                            |
| Locus_21586_Transcript_1/1_Conf_1.000 | 366  | 20 | 5.68E-34 | XP_002639355.1 | 73  | 147.132 | 122 | 90  | Hypothetical protein CBG03934                              |
| Locus_21587_Transcript_1/1_Conf_1.000 | 483  | 0  |          |                |     |         |     |     |                                                            |
| Locus_21588_Transcript_1/1_Conf_1.000 | 130  | 1  | 2.13E-04 | XP_002646581.1 | 77  | 48.9062 | 44  | 34  | Hypothetical protein CBG20463                              |
| Locus_21589_Transcript_1/1_Conf_1.000 | 234  | 20 | 5.97E-39 | BAG58796.1     | 100 | 163.696 | 78  | 78  | unnamed protein product                                    |
| Locus_2159_Transcript_1/1_Conf_1.000  | 1025 | 8  | 3.34E-18 | XP_002637670.1 | 40  | 97.0561 | 360 | 145 | C. briggsae CBR-RDE-1 protein                              |
| Locus_21590_Transcript_1/1_Conf_1.000 | 136  | 2  | 7.52E-10 | NP_495168.1    | 84  | 67.0106 | 45  | 38  | hypothetical protein H41C03.1                              |
| Locus_21591_Transcript_1/1_Conf_1.000 | 197  | 0  |          |                |     |         |     |     |                                                            |
| Locus_21592_Transcript_1/1_Conf_1.000 | 220  | 20 | 7.99E-15 | NP_494994.1    | 75  | 83.5741 | 73  | 55  | hypothetical protein ZK622.1                               |
| Locus_21593_Transcript_1/1_Conf_1.000 | 150  | 0  |          |                |     |         |     |     |                                                            |
| Locus_21594_Transcript_1/1_Conf_1.000 | 190  | 0  |          |                |     |         |     |     |                                                            |
| Locus_21595_Transcript_1/1_Conf_1.000 | 132  | 0  |          |                |     |         |     |     |                                                            |
| Locus_21596_Transcript_1/1_Conf_1.000 | 198  | 1  | 6.25E-04 | XP_001915506.1 | 74  | 47.3654 | 35  | 26  | PREDICTED: similar to alpha-2-glycoprotein 1, zinc-binding |
| Locus_21597_Transcript_1/1_Conf_1.000 | 605  | 20 | 8.23E-72 | NP_503138.1    | 82  | 210.305 | 151 | 125 | hypothetical protein W03F9.1                               |
| Locus_21598_Transcript_1/1_Conf_1.000 | 141  | 20 | 7.96E-20 | BAD96655.1     | 100 | 100.138 | 46  | 46  | transcription factor-like 1 variant                        |
| Locus_21599_Transcript_1/1_Conf_1.000 | 503  | 0  |          |                |     |         |     |     |                                                            |

|                                       |      |    |          |                |    |         |     |     |                                                                                      |
|---------------------------------------|------|----|----------|----------------|----|---------|-----|-----|--------------------------------------------------------------------------------------|
| Locus_216_Transcript_1/1_Conf_1.000   | 891  | 20 | 8.35E-81 | XP_002636473.1 | 80 | 304.679 | 220 | 177 | Hypothetical protein CBG23144                                                        |
| Locus_2160_Transcript_1/1_Conf_1.000  | 569  | 20 | 9.35E-49 | NP_001040840.1 | 75 | 196.823 | 179 | 136 | hypothetical protein C02D5.2                                                         |
| Locus_21600_Transcript_1/1_Conf_1.000 | 192  | 0  |          |                |    |         |     |     |                                                                                      |
| Locus_21601_Transcript_1/1_Conf_1.000 | 504  | 20 | 7.77E-58 | NP_501991.2    | 80 | 226.483 | 153 | 123 | hypothetical protein T25B9.1                                                         |
| Locus_21602_Transcript_1/1_Conf_1.000 | 129  | 0  |          |                |    |         |     |     |                                                                                      |
| Locus_21603_Transcript_1/1_Conf_1.000 | 1342 | 4  | 9.34E-25 | XP_002645538.1 | 71 | 119.398 | 91  | 65  | Hypothetical protein CBG22805                                                        |
| Locus_21604_Transcript_1/1_Conf_1.000 | 130  | 0  |          |                |    |         |     |     |                                                                                      |
| Locus_21605_Transcript_1/1_Conf_1.000 | 803  | 20 | 2.03E-72 | NP_509284.2    | 76 | 276.559 | 190 | 146 | UNCoordinated family member (unc-98)                                                 |
| Locus_21606_Transcript_1/1_Conf_1.000 | 273  | 7  | 2.25E-38 | XP_002633317.1 | 91 | 161.77  | 90  | 82  | Hypothetical protein CBG06054                                                        |
| Locus_21607_Transcript_1/1_Conf_1.000 | 648  | 20 | 4.29E-15 | NP_491348.1    | 88 | 85.5001 | 68  | 60  | SCP(Small C-terminal domain Phosphatase)-<br>Like phosphatase family member (scpl-3) |
| Locus_21608_Transcript_1/1_Conf_1.000 | 241  | 20 | 3.05E-27 | NP_500943.1    | 82 | 124.79  | 76  | 63  | hypothetical protein F58F9.7                                                         |
| Locus_21609_Transcript_1/1_Conf_1.000 | 520  | 20 | 1.31E-58 | XP_002629752.1 | 86 | 229.18  | 145 | 126 | Hypothetical protein CBG00986                                                        |



|                                       |     |    |          |                |     |         |     |    |                                                                                 |
|---------------------------------------|-----|----|----------|----------------|-----|---------|-----|----|---------------------------------------------------------------------------------|
| Locus_2161_Transcript_1/2_Conf_1.000  | 568 | 20 | 6.35E-05 | ZP_01908754.1  | 60  | 51.2174 | 70  | 42 | putative transcriptional regulator                                              |
| Locus_2161_Transcript_2/2_Conf_1.000  | 692 | 20 | 4.31E-11 | XP_002191349.1 | 59  | 72.4034 | 110 | 65 | PREDICTED: hypothetical protein, partial                                        |
| Locus_21610_Transcript_1/1_Conf_1.000 | 322 | 0  |          |                |     |         |     |    |                                                                                 |
| Locus_21611_Transcript_1/1_Conf_1.000 | 363 | 0  |          |                |     |         |     |    |                                                                                 |
| Locus_21612_Transcript_1/1_Conf_1.000 | 188 | 0  |          |                |     |         |     |    |                                                                                 |
| Locus_21613_Transcript_1/1_Conf_1.000 | 130 | 20 | 8.36E-09 | XP_001899525.1 | 80  | 63.5438 | 42  | 34 | C-terminal binding protein                                                      |
| Locus_21614_Transcript_1/1_Conf_1.000 | 180 | 1  | 5.94E-18 | NP_510548.2    | 100 | 93.9745 | 43  | 43 | hypothetical protein F39D8.3                                                    |
| Locus_21615_Transcript_1/1_Conf_1.000 | 284 | 20 | 6.32E-20 | NP_501792.2    | 74  | 100.523 | 93  | 69 | abnormal GONad development family member (gon-1)                                |
| Locus_21616_Transcript_1/1_Conf_1.000 | 156 | 20 | 4.79E-20 | NP_001021901.1 | 98  | 100.908 | 51  | 50 | CLC-type chloride channel family member (clh-2)                                 |
| Locus_21617_Transcript_1/1_Conf_1.000 | 145 | 3  | 1.85E-11 | NP_001021685.1 | 83  | 72.4034 | 48  | 40 | ZO-1 (Zonula Occludens tight junctional protein) Ortholog family member (zoo-1) |
| Locus_21618_Transcript_1/1_Conf_1.000 | 354 | 20 | 1.87E-08 | EFO14379.1     | 80  | 62.3882 | 42  | 34 | hypothetical protein LOAG_14143                                                 |
| Locus_21619_Transcript_1/1_Conf_1.000 | 281 | 2  | 9.78E-10 | NP_001032983.1 | 74  | 66.6254 | 78  | 58 | hypothetical protein W05F2.4                                                    |

|                                       |      |    |          |                |     |         |     |     |                                                     |
|---------------------------------------|------|----|----------|----------------|-----|---------|-----|-----|-----------------------------------------------------|
| Locus_2162_Transcript_1/1_Conf_1.000  | 1136 | 20 | 7.53E-62 | NP_505962.2    | 60  | 242.276 | 336 | 202 | Nuclear Pore complex Protein family member (npp-22) |
| Locus_21620_Transcript_1/1_Conf_1.000 | 168  | 0  |          |                |     |         |     |     |                                                     |
| Locus_21621_Transcript_1/1_Conf_1.000 | 447  | 0  |          |                |     |         |     |     |                                                     |
| Locus_21622_Transcript_1/1_Conf_1.000 | 242  | 20 | 4.00E-19 | EFO22882.1     | 86  | 97.8265 | 61  | 53  | TK/FER protein kinase                               |
| Locus_21623_Transcript_1/1_Conf_1.000 | 144  | 3  | 1.62E-07 | XP_002639976.1 | 83  | 59.3066 | 48  | 40  | C. briggsae CBR-KIN-32 protein                      |
| Locus_21624_Transcript_1/1_Conf_1.000 | 159  | 0  |          |                |     |         |     |     |                                                     |
| Locus_21625_Transcript_1/1_Conf_1.000 | 132  | 0  |          |                |     |         |     |     |                                                     |
| Locus_21626_Transcript_1/1_Conf_1.000 | 241  | 20 | 1.38E-11 | XP_002630247.1 | 72  | 72.7886 | 79  | 57  | Hypothetical protein CBG00666                       |
| Locus_21627_Transcript_1/1_Conf_1.000 | 195  | 0  |          |                |     |         |     |     |                                                     |
| Locus_21628_Transcript_1/1_Conf_1.000 | 291  | 1  | 2.72E-15 | NP_001076618.1 | 73  | 85.1149 | 76  | 56  | hypothetical protein Y110A7A.21                     |
| Locus_21629_Transcript_1/1_Conf_1.000 | 603  | 20 | 5.72E-21 | XP_002632199.1 | 52  | 104.76  | 180 | 95  | C. briggsae CBR-NOL-1 protein                       |
| Locus_2163_Transcript_1/1_Conf_1.000  | 162  | 0  |          |                |     |         |     |     |                                                     |
| Locus_21630_Transcript_1/1_Conf_1.000 | 267  | 20 | 2.36E-19 | XP_002633705.1 | 80  | 98.5969 | 77  | 62  | C. briggsae CBR-ECH-9 protein                       |
| Locus_21631_Transcript_1/1_Conf_1.000 | 157  | 0  |          |                |     |         |     |     |                                                     |
| Locus_21632_Transcript_1/1_Conf_1.000 | 232  | 1  | 4.33E-05 | NP_490917.3    | 45  | 51.2174 | 87  | 40  | hypothetical protein Y20F4.2                        |
| Locus_21633_Transcript_1/1_Conf_1.000 | 141  | 20 | 2.25E-06 | BAG60188.1     | 100 | 55.4546 | 46  | 46  | unnamed protein product                             |
| Locus_21634_Transcript_1/1_Conf_1.000 | 289  | 0  |          |                |     |         |     |     |                                                     |
| Locus_21635_Transcript_1/1_Conf_1.000 | 216  | 0  |          |                |     |         |     |     |                                                     |

|                                       |     |    |          |                |     |         |     |     |                                            |
|---------------------------------------|-----|----|----------|----------------|-----|---------|-----|-----|--------------------------------------------|
| Locus_21636_Transcript_1/1_Conf_1.000 | 392 | 9  | 1.07E-32 | XP_002640798.1 | 75  | 142.895 | 131 | 99  | C. briggsae CBR-NHR-121 protein            |
| Locus_21637_Transcript_1/1_Conf_1.000 | 309 | 0  |          |                |     |         |     |     |                                            |
| Locus_21638_Transcript_1/1_Conf_1.000 | 195 | 20 | 6.44E-25 | XP_002829151.1 | 100 | 117.087 | 53  | 53  | PREDICTED: tubulin-folding cofactor B-like |
| Locus_21639_Transcript_1/1_Conf_1.000 | 206 | 20 | 3.07E-19 | XP_002633255.1 | 82  | 98.2117 | 68  | 56  | Hypothetical protein CBG05980              |
| Locus_2164_Transcript_1/2_Conf_1.000  | 330 | 0  |          |                |     |         |     |     |                                            |
| Locus_2164_Transcript_2/2_Conf_1.000  | 273 | 0  |          |                |     |         |     |     |                                            |
| Locus_21640_Transcript_1/1_Conf_1.000 | 332 | 0  |          |                |     |         |     |     |                                            |
| Locus_21641_Transcript_1/1_Conf_1.000 | 295 | 20 | 3.78E-17 | EFO25770.1     | 100 | 91.2781 | 61  | 61  | hypothetical protein LOAG_02719            |
| Locus_21642_Transcript_1/1_Conf_1.000 | 324 | 3  | 2.80E-04 | XP_002128277.1 | 50  | 48.521  | 77  | 39  | PREDICTED: hypothetical protein            |
| Locus_21643_Transcript_1/1_Conf_1.000 | 322 | 0  |          |                |     |         |     |     |                                            |
| Locus_21644_Transcript_1/1_Conf_1.000 | 153 | 0  |          |                |     |         |     |     |                                            |
| Locus_21645_Transcript_1/1_Conf_1.000 | 162 | 0  |          |                |     |         |     |     |                                            |
| Locus_21646_Transcript_1/1_Conf_1.000 | 305 | 2  | 2.96E-14 | NP_498845.2    | 78  | 81.6481 | 55  | 43  | hypothetical protein R05D3.9               |
| Locus_21647_Transcript_1/1_Conf_1.000 | 408 | 20 | 5.87E-71 | XP_002705104.1 | 100 | 270.011 | 135 | 135 | PREDICTED: ribosomal protein L9-like       |

|                                       |     |    |           |                |    |         |     |     |                                         |
|---------------------------------------|-----|----|-----------|----------------|----|---------|-----|-----|-----------------------------------------|
| Locus_21648_Transcript_1/1_Conf_1.000 | 353 | 20 | 4.62E-07  | XP_001636445.1 | 45 | 57.7658 | 137 | 63  | predicted protein                       |
| Locus_21649_Transcript_1/1_Conf_1.000 | 186 | 20 | 5.15E-22  | XP_002639246.1 | 83 | 107.457 | 62  | 52  | Hypothetical protein CBG03805           |
| Locus_2165_Transcript_1/2_Conf_0.500  | 351 | 20 | 7.31E-37  | NP_501862.1    | 67 | 156.762 | 141 | 95  | GABA TransAminase family member (gta-1) |
| Locus_2165_Transcript_2/2_Conf_0.750  | 891 | 20 | 1.96E-130 | NP_501862.1    | 87 | 469.544 | 286 | 251 | GABA TransAminase family member (gta-1) |
| Locus_21650_Transcript_1/1_Conf_1.000 | 341 | 0  |           |                |    |         |     |     |                                         |
| Locus_21651_Transcript_1/1_Conf_1.000 | 267 | 0  |           |                |    |         |     |     |                                         |
| Locus_21652_Transcript_1/1_Conf_1.000 | 255 | 0  |           |                |    |         |     |     |                                         |
| Locus_21653_Transcript_1/1_Conf_1.000 | 153 | 0  |           |                |    |         |     |     |                                         |
| Locus_21654_Transcript_1/2_Conf_1.000 | 714 | 8  | 1.93E-09  | AAT40504.2     | 50 | 67.0106 | 121 | 61  | Polyprotein, putative                   |
| Locus_21654_Transcript_2/2_Conf_1.000 | 714 | 8  | 1.93E-09  | AAT40504.2     | 50 | 67.0106 | 121 | 61  | Polyprotein, putative                   |
| Locus_21655_Transcript_1/1_Conf_1.000 | 181 | 0  |           |                |    |         |     |     |                                         |

|                                       |      |    |           |                |    |         |     |     |                                 |
|---------------------------------------|------|----|-----------|----------------|----|---------|-----|-----|---------------------------------|
| Locus_21656_Transcript_1/1_Conf_1.000 | 240  | 20 | 7.80E-15  | CAD44516.1     | 73 | 83.5741 | 78  | 57  | VAB-10B protein                 |
| Locus_21657_Transcript_1/1_Conf_1.000 | 149  | 0  |           |                |    |         |     |     |                                 |
| Locus_21658_Transcript_1/1_Conf_1.000 | 579  |    |           |                |    |         |     |     |                                 |
| Locus_21659_Transcript_1/1_Conf_1.000 | 196  | 0  |           |                |    |         |     |     |                                 |
| Locus_2166_Transcript_1/1_Conf_1.000  | 696  | 5  | 7.03E-09  | XP_002639759.1 | 47 | 65.0846 | 93  | 44  | Hypothetical protein CBG02205   |
| Locus_21660_Transcript_1/1_Conf_1.000 | 291  | 0  |           |                |    |         |     |     |                                 |
| Locus_21661_Transcript_1/1_Conf_1.000 | 175  | 0  |           |                |    |         |     |     |                                 |
| Locus_21662_Transcript_1/1_Conf_1.000 | 181  | 0  |           |                |    |         |     |     |                                 |
| Locus_21663_Transcript_1/1_Conf_1.000 | 219  | 20 | 5.36E-11  | XP_002639380.1 | 65 | 70.8626 | 70  | 46  | Hypothetical protein CBG03966   |
| Locus_21664_Transcript_1/1_Conf_1.000 | 1792 | 20 | 1.42E-98  | EFO26157.1     | 59 | 365.155 | 561 | 333 | type III restriction enzyme     |
| Locus_21665_Transcript_1/1_Conf_1.000 | 145  | 0  |           |                |    |         |     |     |                                 |
| Locus_21666_Transcript_1/1_Conf_1.000 | 983  | 20 | 4.08E-119 | XP_002639292.1 | 76 | 432.18  | 338 | 258 | C. briggsae CBR-NHR-62 protein  |
| Locus_21667_Transcript_1/1_Conf_1.000 | 219  | 0  |           |                |    |         |     |     |                                 |
| Locus_21668_Transcript_1/1_Conf_1.000 | 298  | 0  |           |                |    |         |     |     |                                 |
| Locus_21669_Transcript_1/1_Conf_1.000 | 249  | 7  | 1.55E-23  | NP_491915.2    | 83 | 112.464 | 77  | 64  | hypothetical protein ZC581.9    |
| Locus_2167_Transcript_1/1_Conf_1.000  | 1206 | 20 | 8.23E-54  | EFO26832.1     | 70 | 215.698 | 179 | 126 | hypothetical protein LOAG_01653 |

|                                       |     |    |          |                |     |         |     |     |                                                                                |
|---------------------------------------|-----|----|----------|----------------|-----|---------|-----|-----|--------------------------------------------------------------------------------|
| Locus_21670_Transcript_1/1_Conf_1.000 | 142 | 20 | 2.32E-19 | XP_002923631.1 | 100 | 98.5969 | 47  | 47  | PREDICTED: sodium/potassium-transporting ATPase subunit alpha-1-like isoform 2 |
| Locus_21671_Transcript_1/1_Conf_1.000 | 338 | 0  |          |                |     |         |     |     |                                                                                |
| Locus_21672_Transcript_1/1_Conf_1.000 | 297 | 0  |          |                |     |         |     |     |                                                                                |
| Locus_21673_Transcript_1/1_Conf_1.000 | 140 | 0  |          |                |     |         |     |     |                                                                                |
| Locus_21674_Transcript_1/1_Conf_1.000 | 344 | 20 | 7.64E-42 | ACT52846.1     | 84  | 173.326 | 112 | 95  | GMP reductase                                                                  |
| Locus_21675_Transcript_1/1_Conf_1.000 | 180 | 0  |          |                |     |         |     |     |                                                                                |
| Locus_21676_Transcript_1/1_Conf_1.000 | 156 | 2  | 2.63E-10 | NP_492746.2    | 82  | 68.5514 | 50  | 41  | Temporarily Assigned Gene name family member (tag-68)                          |
| Locus_21677_Transcript_1/1_Conf_1.000 | 446 | 0  |          |                |     |         |     |     |                                                                                |
| Locus_21678_Transcript_1/1_Conf_1.000 | 487 | 20 | 6.63E-38 | NP_498761.1    | 68  | 160.229 | 166 | 114 | DiCer Related family member (dcr-1)                                            |
| Locus_21679_Transcript_1/1_Conf_1.000 | 360 | 0  |          |                |     |         |     |     |                                                                                |
| Locus_2168_Transcript_1/1_Conf_1.000  | 155 | 0  |          |                |     |         |     |     |                                                                                |
| Locus_21680_Transcript_1/1_Conf_1.000 | 140 | 7  | 8.01E-12 | XP_002634930.1 | 91  | 73.559  | 46  | 42  | Hypothetical protein CBG22529                                                  |
| Locus_21681_Transcript_1/1_Conf_1.000 | 224 | 0  |          |                |     |         |     |     |                                                                                |
| Locus_21682_Transcript_1/1_Conf_1.000 | 406 | 6  | 1.13E-13 | NP_501855.1    | 61  | 79.7221 | 100 | 61  | TransThyretin-Related family domain family member (ttr-54)                     |

|                                       |      |    |           |                |     |         |     |     |                                                                    |
|---------------------------------------|------|----|-----------|----------------|-----|---------|-----|-----|--------------------------------------------------------------------|
| Locus_21683_Transcript_1/1_Conf_1.000 | 431  | 20 | 6.55E-46  | EFO19591.1     | 92  | 186.808 | 107 | 99  | hypothetical protein LOAG_08901                                    |
| Locus_21684_Transcript_1/1_Conf_1.000 | 138  | 2  | 4.11E-08  | XP_511489.2    | 79  | 61.2326 | 39  | 31  | PREDICTED: similar to isolog of yeast sui1 and rice gos2; putative |
| Locus_21685_Transcript_1/1_Conf_1.000 | 156  | 20 | 3.43E-18  | EFO22882.1     | 92  | 94.7449 | 52  | 48  | TK/FER protein kinase                                              |
| Locus_21686_Transcript_1/1_Conf_1.000 | 195  | 20 | 4.18E-24  | BAJ21087.1     | 100 | 114.39  | 56  | 56  | transcription elongation factor B (SIII), polypeptide 2            |
| Locus_21687_Transcript_1/1_Conf_1.000 | 189  | 0  |           |                |     |         |     |     |                                                                    |
| Locus_21688_Transcript_1/1_Conf_1.000 | 182  | 20 | 9.78E-21  | XP_002639101.1 | 88  | 103.219 | 60  | 53  | Hypothetical protein CBG14920                                      |
| Locus_21689_Transcript_1/1_Conf_1.000 | 370  | 20 | 2.82E-20  | XP_001894671.1 | 66  | 101.679 | 113 | 75  | Protein kinase domain containing protein                           |
| Locus_2169_Transcript_1/1_Conf_1.000  | 2527 | 20 | 0         | XP_002630210.1 | 71  | 853.203 | 829 | 596 | C. briggsae CBR-ZYG-9 protein                                      |
| Locus_21690_Transcript_1/1_Conf_1.000 | 180  | 0  |           |                |     |         |     |     |                                                                    |
| Locus_21691_Transcript_1/1_Conf_1.000 | 693  | 20 | 3.25E-107 | XP_001902629.1 | 87  | 391.734 | 230 | 201 | Zinc finger, C2H2 type family protein                              |

|                                       |     |    |           |                |     |         |     |     |                                    |
|---------------------------------------|-----|----|-----------|----------------|-----|---------|-----|-----|------------------------------------|
| Locus_21692_Transcript_1/1_Conf_1.000 | 145 | 20 | 2.04E-10  | NP_495516.2    | 85  | 68.9366 | 48  | 41  | hypothetical protein F32A5.8       |
| Locus_21693_Transcript_1/1_Conf_1.000 | 139 | 20 | 1.28E-17  | XP_002750292.1 | 100 | 92.8189 | 46  | 46  | PREDICTED: alpha-enolase isoform 1 |
| Locus_21694_Transcript_1/1_Conf_1.000 | 360 | 0  |           |                |     |         |     |     |                                    |
| Locus_21695_Transcript_1/1_Conf_1.000 | 289 | 20 | 8.17E-28  | NP_496501.2    | 77  | 126.716 | 94  | 73  | hypothetical protein F13D12.9      |
| Locus_21696_Transcript_1/1_Conf_1.000 | 128 | 0  |           |                |     |         |     |     |                                    |
| Locus_21697_Transcript_1/1_Conf_1.000 | 173 | 0  |           |                |     |         |     |     |                                    |
| Locus_21698_Transcript_1/1_Conf_1.000 | 403 | 20 | 3.89E-22  | XP_002648413.1 | 76  | 107.842 | 77  | 59  | Hypothetical protein CBG24676      |
| Locus_21699_Transcript_1/1_Conf_1.000 | 174 | 20 | 2.11E-20  | XP_002636607.1 | 90  | 102.064 | 53  | 48  | C. briggsae CBR-DHS-20 protein     |
| Locus_217_Transcript_1/2_Conf_1.000   | 195 | 2  | 1.35E-06  | XP_002425519.1 | 64  | 56.225  | 64  | 41  | conserved hypothetical protein     |
| Locus_217_Transcript_2/2_Conf_1.000   | 223 | 4  | 4.36E-13  | XP_002425519.1 | 68  | 77.7962 | 73  | 50  | conserved hypothetical protein     |
| Locus_2170_Transcript_1/1_Conf_1.000  | 320 | 0  |           |                |     |         |     |     |                                    |
| Locus_21700_Transcript_1/1_Conf_1.000 | 224 | 0  |           |                |     |         |     |     |                                    |
| Locus_21701_Transcript_1/1_Conf_1.000 | 334 | 15 | 9.46E-29  | XP_002638532.1 | 84  | 129.798 | 92  | 78  | Hypothetical protein CBG05566      |
| Locus_21702_Transcript_1/1_Conf_1.000 | 701 | 20 | 6.89E-113 | XP_002638687.1 | 90  | 410.609 | 233 | 212 | Hypothetical protein CBG11882      |
| Locus_21703_Transcript_1/1_Conf_1.000 | 154 | 0  |           |                |     |         |     |     |                                    |
| Locus_21704_Transcript_1/1_Conf_1.000 | 196 | 20 | 1.22E-15  | XP_002630450.1 | 75  | 86.2705 | 64  | 48  | C. briggsae CBR-ASM-1 protein      |
| Locus_21705_Transcript_1/1_Conf_1.000 | 149 | 0  |           |                |     |         |     |     |                                    |



|                                       |     |    |          |                |     |         |     |     |                                                           |
|---------------------------------------|-----|----|----------|----------------|-----|---------|-----|-----|-----------------------------------------------------------|
| Locus_21706_Transcript_1/1_Conf_1.000 | 274 | 0  |          |                |     |         |     |     |                                                           |
| Locus_21707_Transcript_1/1_Conf_1.000 | 314 | 0  |          |                |     |         |     |     |                                                           |
| Locus_21708_Transcript_1/1_Conf_1.000 | 264 | 0  |          |                |     |         |     |     |                                                           |
| Locus_21709_Transcript_1/1_Conf_1.000 | 351 | 20 | 6.04E-07 | ZP_04769408.1  | 49  | 57.3806 | 109 | 54  | gamma-glutamyltransferase                                 |
| Locus_2171_Transcript_1/1_Conf_1.000  | 990 | 20 | 1.12E-31 | XP_002731938.1 | 51  | 141.739 | 281 | 146 | PREDICTED: sestrin 1-like                                 |
| Locus_21710_Transcript_1/1_Conf_1.000 | 132 | 5  | 1.09E-08 | XP_001901288.1 | 80  | 63.1586 | 42  | 34  | hypothetical protein Bm1_49115                            |
| Locus_21711_Transcript_1/1_Conf_1.000 | 217 | 0  |          |                |     |         |     |     |                                                           |
| Locus_21712_Transcript_1/1_Conf_1.000 | 148 | 20 | 8.24E-20 | XP_001099130.2 | 100 | 100.138 | 48  | 48  | PREDICTED: collagen alpha-2(VI) chain-like isoform 3      |
| Locus_21713_Transcript_1/1_Conf_1.000 | 345 | 5  | 1.54E-34 | NP_492157.2    | 79  | 149.058 | 112 | 89  | hypothetical protein D2005.6                              |
| Locus_21714_Transcript_1/1_Conf_1.000 | 377 | 20 | 1.62E-60 | NP_506269.1    | 99  | 235.343 | 125 | 124 | EATIng: abnormal pharyngeal pumping family member (eat-6) |
| Locus_21715_Transcript_1/1_Conf_1.000 | 138 | 0  |          |                |     |         |     |     |                                                           |
| Locus_21716_Transcript_1/1_Conf_1.000 | 172 | 0  |          |                |     |         |     |     |                                                           |
| Locus_21717_Transcript_1/1_Conf_1.000 | 470 | 4  | 2.78E-36 | A8Y3Q1.2       | 81  | 154.836 | 101 | 82  | Putative 28S ribosomal protein S5                         |
| Locus_21718_Transcript_1/1_Conf_1.000 | 207 | 20 | 1.80E-11 | XP_002632023.1 | 65  | 72.4034 | 63  | 41  | Hypothetical protein CBG10312                             |
| Locus_21719_Transcript_1/1_Conf_1.000 | 183 | 0  |          |                |     |         |     |     |                                                           |

|                                       |      |    |          |                |     |         |     |     |                                                                                |
|---------------------------------------|------|----|----------|----------------|-----|---------|-----|-----|--------------------------------------------------------------------------------|
| Locus_2172_Transcript_1/1_Conf_1.000  | 1676 | 20 | 0        | AAX36933.1     | 100 | 877.856 | 432 | 432 | eukaryotic translation elongation factor 1 alpha 1                             |
| Locus_21720_Transcript_1/1_Conf_1.000 | 175  | 0  |          |                |     |         |     |     |                                                                                |
| Locus_21721_Transcript_1/1_Conf_1.000 | 373  | 20 | 4.46E-34 | XP_001898170.1 | 75  | 147.517 | 121 | 91  | Ubiquitin-conjugating enzyme family protein                                    |
| Locus_21722_Transcript_1/1_Conf_1.000 | 178  | 0  |          |                |     |         |     |     |                                                                                |
| Locus_21723_Transcript_1/1_Conf_1.000 | 320  | 4  | 5.86E-18 | NP_495792.1    | 68  | 93.9745 | 95  | 65  | hypothetical protein M05D6.6                                                   |
| Locus_21724_Transcript_1/1_Conf_1.000 | 288  | 0  |          |                |     |         |     |     |                                                                                |
| Locus_21725_Transcript_1/1_Conf_1.000 | 377  | 0  |          |                |     |         |     |     |                                                                                |
| Locus_21726_Transcript_1/1_Conf_1.000 | 201  | 0  |          |                |     |         |     |     |                                                                                |
| Locus_21727_Transcript_1/1_Conf_1.000 | 157  | 20 | 2.15E-20 | XP_002822113.1 | 100 | 102.064 | 51  | 51  | PREDICTED: eukaryotic translation initiation factor 3 subunit F-like isoform 3 |
| Locus_21728_Transcript_1/1_Conf_1.000 | 433  | 20 | 4.24E-37 | NP_502676.3    | 70  | 157.532 | 143 | 101 | hypothetical protein Y37A1A.2                                                  |
| Locus_21729_Transcript_1/1_Conf_1.000 | 523  | 20 | 4.05E-39 | XP_002631431.1 | 75  | 164.466 | 161 | 121 | C. briggsae CBR-TAG-341 protein                                                |
| Locus_2173_Transcript_1/2_Conf_1.000  | 456  | 20 | 2.40E-24 | NP_741102.1    | 84  | 115.161 | 119 | 100 | UBiquitin-Like family member (ubl-1)                                           |
| Locus_2173_Transcript_2/2_Conf_1.000  | 144  | 0  |          |                |     |         |     |     |                                                                                |
| Locus_21730_Transcript_1/1_Conf_1.000 | 239  | 0  |          |                |     |         |     |     |                                                                                |

|                                       |     |    |          |                |    |         |     |     |                                             |
|---------------------------------------|-----|----|----------|----------------|----|---------|-----|-----|---------------------------------------------|
| Locus_21731_Transcript_1/1_Conf_1.000 | 145 | 1  | 1.28E-04 | XP_002638613.1 | 86 | 49.6766 | 43  | 37  | C. briggsae CBR-PGP-9 protein               |
| Locus_21732_Transcript_1/1_Conf_1.000 | 231 | 0  |          |                |    |         |     |     |                                             |
| Locus_21733_Transcript_1/2_Conf_1.000 | 219 | 0  |          |                |    |         |     |     |                                             |
| Locus_21733_Transcript_2/2_Conf_1.000 | 219 | 0  |          |                |    |         |     |     |                                             |
| Locus_21734_Transcript_1/1_Conf_1.000 | 508 | 20 | 2.58E-32 | XP_002640010.1 | 77 | 141.739 | 132 | 102 | Hypothetical protein CBG12480               |
| Locus_21735_Transcript_1/1_Conf_1.000 | 213 | 0  |          |                |    |         |     |     |                                             |
| Locus_21736_Transcript_1/1_Conf_1.000 | 421 | 13 | 5.11E-30 | AAK31453.4     | 64 | 134.035 | 151 | 97  | Hypothetical protein C25H3.8                |
| Locus_21737_Transcript_1/1_Conf_1.000 | 411 | 0  |          |                |    |         |     |     |                                             |
| Locus_21738_Transcript_1/1_Conf_1.000 | 218 | 20 | 3.35E-10 | XP_002647313.1 | 68 | 68.1662 | 66  | 45  | Hypothetical protein CBG06354               |
| Locus_21739_Transcript_1/1_Conf_1.000 | 147 | 20 | 4.68E-15 | NP_500551.2    | 87 | 84.3445 | 49  | 43  | hypothetical protein F55F10.1               |
| Locus_2174_Transcript_1/1_Conf_1.000  | 877 | 20 | 4.01E-88 | XP_002631317.1 | 78 | 328.946 | 233 | 183 | Hypothetical protein CBG03139               |
| Locus_21740_Transcript_1/1_Conf_1.000 | 299 | 20 | 1.16E-34 | XP_002645875.1 | 82 | 149.443 | 99  | 82  | Hypothetical protein CBG07619               |
| Locus_21741_Transcript_1/1_Conf_1.000 | 230 | 3  | 2.38E-11 | NP_494819.3    | 89 | 72.0182 | 47  | 42  | abnormal DYe Filling family member (dyf-14) |
| Locus_21742_Transcript_1/1_Conf_1.000 | 223 | 0  |          |                |    |         |     |     |                                             |
| Locus_21743_Transcript_1/1_Conf_1.000 | 147 | 0  |          |                |    |         |     |     |                                             |
| Locus_21744_Transcript_1/1_Conf_1.000 | 257 | 2  | 6.75E-06 | XP_001898661.1 | 61 | 53.9138 | 71  | 44  | MGC88946 protein                            |
| Locus_21745_Transcript_1/1_Conf_1.000 | 410 | 0  |          |                |    |         |     |     |                                             |

|                                       |     |    |           |                |     |         |     |     |                                                                |
|---------------------------------------|-----|----|-----------|----------------|-----|---------|-----|-----|----------------------------------------------------------------|
| Locus_21746_Transcript_1/1_Conf_1.000 | 128 | 3  | 2.79E-04  | NP_001129839.1 | 66  | 48.521  | 42  | 28  | hypothetical protein R05D3.12                                  |
| Locus_21747_Transcript_1/1_Conf_1.000 | 231 | 0  |           |                |     |         |     |     |                                                                |
| Locus_21748_Transcript_1/1_Conf_1.000 | 420 | 0  |           |                |     |         |     |     |                                                                |
| Locus_21749_Transcript_1/1_Conf_1.000 | 216 | 0  |           |                |     |         |     |     |                                                                |
| Locus_2175_Transcript_1/1_Conf_1.000  | 798 | 20 | 4.59E-109 | ADL62852.1     | 84  | 398.282 | 266 | 225 | thioredoxin reductase 1                                        |
| Locus_21750_Transcript_1/1_Conf_1.000 | 285 | 0  |           |                |     |         |     |     |                                                                |
| Locus_21751_Transcript_1/1_Conf_1.000 | 170 | 0  |           |                |     |         |     |     |                                                                |
| Locus_21752_Transcript_1/1_Conf_1.000 | 249 | 0  |           |                |     |         |     |     |                                                                |
| Locus_21753_Transcript_1/1_Conf_1.000 | 175 | 19 | 7.50E-18  | XP_002811165.1 | 100 | 93.5893 | 57  | 57  | PREDICTED: MARCKS-related protein-like                         |
| Locus_21754_Transcript_1/1_Conf_1.000 | 161 | 0  |           |                |     |         |     |     |                                                                |
| Locus_21755_Transcript_1/1_Conf_1.000 | 149 | 0  |           |                |     |         |     |     |                                                                |
| Locus_21756_Transcript_1/1_Conf_1.000 | 130 | 0  |           |                |     |         |     |     |                                                                |
| Locus_21757_Transcript_1/1_Conf_1.000 | 151 | 0  |           |                |     |         |     |     |                                                                |
| Locus_21758_Transcript_1/1_Conf_1.000 | 233 | 4  | 2.70E-31  | NP_492127.1    | 89  | 138.272 | 77  | 69  | Low-density lipoprotein Receptor Related family member (Irp-1) |
| Locus_21759_Transcript_1/1_Conf_1.000 | 435 | 20 | 1.00E-46  | XP_002632693.1 | 81  | 189.504 | 144 | 117 | Hypothetical protein CBG21624                                  |
| Locus_2176_Transcript_1/1_Conf_1.000  | 650 | 20 | 2.91E-88  | NP_497035.3    | 86  | 328.561 | 216 | 186 | Trehalose 6-Phosphate Synthase family member (tps-2)           |
| Locus_21760_Transcript_1/1_Conf_1.000 | 203 | 0  |           |                |     |         |     |     |                                                                |
| Locus_21761_Transcript_1/1_Conf_1.000 | 195 | 16 | 1.70E-09  | NP_001021671.2 | 75  | 65.855  | 44  | 33  | hypothetical protein W09G3.7                                   |
| Locus_21762_Transcript_1/1_Conf_1.000 | 443 | 0  |           |                |     |         |     |     |                                                                |

|                                       |     |    |          |                |     |         |     |     |                                                                         |
|---------------------------------------|-----|----|----------|----------------|-----|---------|-----|-----|-------------------------------------------------------------------------|
| Locus_21763_Transcript_1/1_Conf_1.000 | 268 | 20 | 8.34E-33 | NP_496251.1    | 96  | 143.28  | 76  | 73  | TropoNin C family member (tnc-2)                                        |
| Locus_21764_Transcript_1/1_Conf_1.000 | 401 | 20 | 2.61E-34 | NP_496813.1    | 77  | 148.288 | 131 | 101 | hypothetical protein Y48C3A.3                                           |
| Locus_21765_Transcript_1/1_Conf_1.000 | 228 | 0  |          |                |     |         |     |     |                                                                         |
| Locus_21766_Transcript_1/1_Conf_1.000 | 408 | 17 | 5.53E-45 | NP_502746.1    | 84  | 183.726 | 133 | 113 | hypothetical protein Y67A10A.9                                          |
| Locus_21767_Transcript_1/1_Conf_1.000 | 271 | 20 | 8.09E-12 | XP_002631859.1 | 60  | 73.559  | 87  | 53  | Hypothetical protein CBG07809                                           |
| Locus_21768_Transcript_1/1_Conf_1.000 | 347 | 20 | 2.64E-10 | XP_969308.1    | 77  | 68.5514 | 49  | 38  | PREDICTED: similar to required for meiotic nuclear division 5 homolog A |
| Locus_21769_Transcript_1/1_Conf_1.000 | 365 | 20 | 8.56E-14 | EFO27901.1     | 64  | 80.1073 | 106 | 68  | hypothetical protein LOAG_00581                                         |
| Locus_2177_Transcript_1/1_Conf_1.000  | 415 | 4  | 4.08E-24 | XP_002629793.1 | 77  | 114.39  | 95  | 74  | Hypothetical protein CBG01035                                           |
| Locus_21770_Transcript_1/1_Conf_1.000 | 129 | 4  | 5.07E-06 | XP_002647771.1 | 85  | 54.299  | 42  | 36  | C. briggsae CBR-PPH-5 protein                                           |
| Locus_21771_Transcript_1/1_Conf_1.000 | 244 | 20 | 4.25E-21 | AAK31453.4     | 83  | 104.375 | 71  | 59  | Hypothetical protein C25H3.8                                            |
| Locus_21772_Transcript_1/1_Conf_1.000 | 135 | 0  |          |                |     |         |     |     |                                                                         |
| Locus_21773_Transcript_1/1_Conf_1.000 | 148 | 20 | 2.40E-19 | XP_001249905.2 | 100 | 98.5969 | 49  | 49  | PREDICTED: endothelial differentiation-related factor 1                 |
| Locus_21774_Transcript_1/1_Conf_1.000 | 353 | 1  | 8.16E-04 | NP_508782.2    | 61  | 46.9802 | 39  | 24  | hypothetical protein C05E11.6                                           |
| Locus_21775_Transcript_1/1_Conf_1.000 | 237 | 0  |          |                |     |         |     |     |                                                                         |
| Locus_21776_Transcript_1/1_Conf_1.000 | 409 | 0  |          |                |     |         |     |     |                                                                         |
| Locus_21777_Transcript_1/1_Conf_1.000 | 146 | 0  |          |                |     |         |     |     |                                                                         |
| Locus_21778_Transcript_1/1_Conf_1.000 | 281 | 0  |          |                |     |         |     |     |                                                                         |
| Locus_21779_Transcript_1/1_Conf_1.000 | 154 | 0  |          |                |     |         |     |     |                                                                         |
| Locus_2178_Transcript_1/1_Conf_1.000  | 899 | 20 | 1.26E-84 | XP_002642931.1 | 69  | 317.39  | 293 | 204 | C. briggsae CBR-ALH-11 protein                                          |

|                                       |      |    |          |                |    |         |      |     |                                                                         |
|---------------------------------------|------|----|----------|----------------|----|---------|------|-----|-------------------------------------------------------------------------|
| Locus_21780_Transcript_1/1_Conf_1.000 | 188  | 2  | 3.96E-06 | NP_508797.3    | 71 | 54.6842 | 52   | 37  | Nuclear Hormone Receptor family member (nhr-45)                         |
| Locus_21781_Transcript_1/3_Conf_0.667 | 456  | 0  |          |                |    |         |      |     |                                                                         |
| Locus_21781_Transcript_2/3_Conf_0.667 | 475  | 0  |          |                |    |         |      |     |                                                                         |
| Locus_21781_Transcript_3/3_Conf_0.667 | 469  | 0  |          |                |    |         |      |     |                                                                         |
| Locus_21782_Transcript_1/1_Conf_1.000 | 145  | 0  |          |                |    |         |      |     |                                                                         |
| Locus_21783_Transcript_1/1_Conf_1.000 | 246  | 1  | 6.15E-04 | NP_001002222.1 | 75 | 47.3654 | 36   | 27  | serine/threonine-protein kinase PAK 4                                   |
| Locus_21784_Transcript_1/1_Conf_1.000 | 151  | 0  |          |                |    |         |      |     |                                                                         |
| Locus_21785_Transcript_1/1_Conf_1.000 | 268  | 0  |          |                |    |         |      |     |                                                                         |
| Locus_21786_Transcript_1/1_Conf_1.000 | 133  | 0  |          |                |    |         |      |     |                                                                         |
| Locus_21787_Transcript_1/1_Conf_1.000 | 201  | 2  | 2.61E-10 | NP_001022224.1 | 76 | 68.5514 | 63   | 48  | hypothetical protein H20J04.9                                           |
| Locus_21788_Transcript_1/1_Conf_1.000 | 295  | 20 | 2.51E-45 | XP_002646290.1 | 90 | 184.882 | 97   | 88  | C. briggsae CBR-INX-13 protein                                          |
| Locus_21789_Transcript_1/1_Conf_1.000 | 140  | 0  |          |                |    |         |      |     |                                                                         |
| Locus_2179_Transcript_1/2_Conf_1.000  | 808  | 20 | 6.61E-79 | NP_502295.1    | 75 | 298.13  | 265  | 200 | yeast MON (monensin-resistant) homolog family member (mon-2)            |
| Locus_2179_Transcript_2/2_Conf_1.000  | 3007 | 20 | 0        | NP_502295.1    | 72 | 1091.64 | 1027 | 743 | yeast MON (monensin-resistant) homolog family member (mon-2)            |
| Locus_21790_Transcript_1/1_Conf_1.000 | 438  | 4  | 9.73E-18 | CAN99691.2     | 53 | 93.2041 | 162  | 87  | C. elegans protein F54B3.1b, partially confirmed by transcript evidence |
| Locus_21791_Transcript_1/2_Conf_1.000 | 426  | 0  |          |                |    |         |      |     |                                                                         |
| Locus_21791_Transcript_2/2_Conf_1.000 | 426  | 0  |          |                |    |         |      |     |                                                                         |
| Locus_21792_Transcript_1/1_Conf_1.000 | 535  | 0  |          |                |    |         |      |     |                                                                         |

|                                       |      |    |           |                |     |         |     |     |                                                                     |
|---------------------------------------|------|----|-----------|----------------|-----|---------|-----|-----|---------------------------------------------------------------------|
| Locus_21793_Transcript_1/1_Conf_1.000 | 179  | 20 | 2.83E-25  | XP_002918048.1 | 100 | 118.242 | 59  | 59  | PREDICTED: signal transducer and activator of transcription 1-like  |
| Locus_21794_Transcript_1/1_Conf_1.000 | 277  | 0  |           |                |     |         |     |     |                                                                     |
| Locus_21795_Transcript_1/1_Conf_1.000 | 294  | 0  |           |                |     |         |     |     |                                                                     |
| Locus_21796_Transcript_1/1_Conf_1.000 | 259  | 20 | 2.82E-12  | NP_495376.1    | 64  | 75.0998 | 77  | 50  | EXOSome (multiexonuclease complex) component family member (exos-8) |
| Locus_21797_Transcript_1/1_Conf_1.000 | 135  | 0  |           |                |     |         |     |     |                                                                     |
| Locus_21798_Transcript_1/1_Conf_1.000 | 265  | 0  |           |                |     |         |     |     |                                                                     |
| Locus_21799_Transcript_1/1_Conf_1.000 | 350  | 0  |           |                |     |         |     |     |                                                                     |
| Locus_218_Transcript_1/2_Conf_1.000   | 3101 | 20 | 1.52E-157 | EFO23451.1     | 66  | 561.992 | 580 | 388 | hypothetical protein LOAG_05033                                     |
| Locus_218_Transcript_2/2_Conf_1.000   | 3101 | 20 | 1.52E-157 | EFO23451.1     | 66  | 561.992 | 580 | 388 | hypothetical protein LOAG_05033                                     |
| Locus_2180_Transcript_1/1_Conf_1.000  | 919  | 0  |           |                |     |         |     |     |                                                                     |
| Locus_21800_Transcript_1/1_Conf_1.000 | 335  | 0  |           |                |     |         |     |     |                                                                     |
| Locus_21801_Transcript_1/1_Conf_1.000 | 258  | 0  |           |                |     |         |     |     |                                                                     |
| Locus_21802_Transcript_1/1_Conf_1.000 | 157  | 1  | 2.55E-05  | NP_497340.2    | 62  | 51.9878 | 50  | 31  | CaDHerin family member (cdh-12)                                     |

|                                       |     |    |          |                |    |         |     |    |                                                           |
|---------------------------------------|-----|----|----------|----------------|----|---------|-----|----|-----------------------------------------------------------|
| Locus_21803_Transcript_1/1_Conf_1.000 | 207 | 20 | 3.26E-29 | XP_002646095.1 | 95 | 131.339 | 68  | 65 | C. briggsae CBR-HMR-1 protein                             |
| Locus_21804_Transcript_1/1_Conf_1.000 | 143 | 0  |          |                |    |         |     |    |                                                           |
| Locus_21805_Transcript_1/1_Conf_1.000 | 366 | 12 | 3.95E-19 | EFO24904.1     | 59 | 97.8265 | 122 | 73 | hypothetical protein LOAG_03584                           |
| Locus_21806_Transcript_1/1_Conf_1.000 | 395 | 3  | 2.56E-13 | EFO20675.1     | 78 | 78.5666 | 66  | 52 | hypothetical protein LOAG_07811                           |
| Locus_21807_Transcript_1/1_Conf_1.000 | 194 | 5  | 2.55E-05 | XP_002648112.1 | 63 | 51.9878 | 52  | 33 | C. briggsae CBR-PQN-83 protein                            |
| Locus_21808_Transcript_1/1_Conf_1.000 | 228 | 0  |          |                |    |         |     |    |                                                           |
| Locus_21809_Transcript_1/1_Conf_1.000 | 202 | 0  |          |                |    |         |     |    |                                                           |
| Locus_2181_Transcript_1/1_Conf_1.000  | 531 | 0  |          |                |    |         |     |    |                                                           |
| Locus_21810_Transcript_1/1_Conf_1.000 | 234 | 0  |          |                |    |         |     |    |                                                           |
| Locus_21811_Transcript_1/1_Conf_1.000 | 157 | 0  |          |                |    |         |     |    |                                                           |
| Locus_21812_Transcript_1/1_Conf_1.000 | 271 | 4  | 8.94E-11 | XP_002642332.1 | 67 | 70.0922 | 61  | 41 | Hypothetical protein CBG18327                             |
| Locus_21813_Transcript_1/1_Conf_1.000 | 220 | 20 | 5.53E-16 | XP_001850222.1 | 78 | 87.4261 | 66  | 52 | phosphatidylethanolamine-binding protein                  |
| Locus_21814_Transcript_1/1_Conf_1.000 | 151 | 0  |          |                |    |         |     |    |                                                           |
| Locus_21815_Transcript_1/1_Conf_1.000 | 128 | 20 | 5.61E-13 | YP_002725704.1 | 97 | 77.411  | 42  | 41 | NADH dehydrogenase subunit 1                              |
| Locus_21816_Transcript_1/1_Conf_1.000 | 407 | 0  |          |                |    |         |     |    |                                                           |
| Locus_21817_Transcript_1/1_Conf_1.000 | 169 | 2  | 7.83E-07 | XP_001899881.1 | 67 | 56.9954 | 55  | 37 | cytochrome P450                                           |
| Locus_21818_Transcript_1/1_Conf_1.000 | 231 | 5  | 1.10E-16 | XP_001900525.1 | 76 | 89.7373 | 75  | 57 | Lung seven transmembrane receptor family protein          |
| Locus_21819_Transcript_1/1_Conf_1.000 | 233 | 6  | 6.24E-12 | NP_500144.2    | 73 | 73.9442 | 71  | 52 | Erythroid-Like Transcription factor family member (elt-6) |
| Locus_2182_Transcript_1/1_Conf_1.000  | 333 | 0  |          |                |    |         |     |    |                                                           |
| Locus_21820_Transcript_1/1_Conf_1.000 | 151 | 20 | 1.60E-15 | XP_002647214.1 | 94 | 85.8853 | 50  | 47 | Hypothetical protein CBG22398                             |
| Locus_21821_Transcript_1/1_Conf_1.000 | 149 | 19 | 1.90E-16 | XP_002633114.1 | 85 | 88.9669 | 49  | 42 | C. briggsae CBR-UNC-8 protein                             |
| Locus_21822_Transcript_1/1_Conf_1.000 | 218 | 7  | 2.40E-08 | XP_002630441.1 | 59 | 62.003  | 72  | 43 | Hypothetical protein CBG11172                             |
| Locus_21823_Transcript_1/1_Conf_1.000 | 239 | 0  |          |                |    |         |     |    |                                                           |



|                                       |     |    |          |                |     |         |     |     |                                                                          |
|---------------------------------------|-----|----|----------|----------------|-----|---------|-----|-----|--------------------------------------------------------------------------|
| Locus_21824_Transcript_1/1_Conf_1.000 | 330 | 20 | 8.26E-49 | CAA21622.4     | 94  | 196.438 | 110 | 104 | C. elegans protein Y43F8C.12, partially confirmed by transcript evidence |
| Locus_21825_Transcript_1/1_Conf_1.000 | 257 | 0  |          |                |     |         |     |     |                                                                          |
| Locus_21826_Transcript_1/1_Conf_1.000 | 290 | 6  | 4.31E-45 | NP_001022641.1 | 95  | 184.111 | 96  | 92  | LEThal family member (let-805)                                           |
| Locus_21827_Transcript_1/1_Conf_1.000 | 154 | 15 | 3.02E-14 | NP_076949.1    | 100 | 81.6481 | 34  | 34  | structure-specific endonuclease subunit SLX1 isoform 1                   |
| Locus_21828_Transcript_1/1_Conf_1.000 | 201 | 0  |          |                |     |         |     |     |                                                                          |
| Locus_21829_Transcript_1/1_Conf_1.000 | 137 | 1  | 1.02E-06 | NP_501709.2    | 77  | 56.6102 | 44  | 34  | Membrane Calcium ATPase family member (mca-1)                            |
| Locus_2183_Transcript_1/1_Conf_1.000  | 339 | 20 | 6.98E-16 | AAD51334.1     | 66  | 87.0409 | 80  | 53  | Kunitz type serine protease inhibitor                                    |
| Locus_21830_Transcript_1/1_Conf_1.000 | 251 | 20 | 3.58E-12 | EFO23283.1     | 71  | 74.7146 | 67  | 48  | hypothetical protein LOAG_05201                                          |
| Locus_21831_Transcript_1/1_Conf_1.000 | 438 | 20 | 1.95E-34 | NP_499155.1    | 65  | 148.673 | 144 | 95  | hypothetical protein T05G5.5                                             |
| Locus_21832_Transcript_1/1_Conf_1.000 | 510 | 20 | 3.94E-49 | CAA97764.2     | 76  | 197.593 | 160 | 122 | C. elegans protein B0564.2, confirmed by transcript evidence             |
| Locus_21833_Transcript_1/1_Conf_1.000 | 249 | 0  |          |                |     |         |     |     |                                                                          |

|                                       |      |    |          |                |    |         |     |     |                                                       |
|---------------------------------------|------|----|----------|----------------|----|---------|-----|-----|-------------------------------------------------------|
| Locus_21834_Transcript_1/1_Conf_1.000 | 208  | 20 | 8.34E-09 | EFO17055.1     | 64 | 63.5438 | 70  | 45  | thiamin pyrophosphokinase                             |
| Locus_21835_Transcript_1/1_Conf_1.000 | 299  | 4  | 5.82E-10 | NP_496134.1    | 58 | 67.3958 | 96  | 56  | hypothetical protein C08H9.1                          |
| Locus_21836_Transcript_1/1_Conf_1.000 | 146  | 0  |          |                |    |         |     |     |                                                       |
| Locus_21837_Transcript_1/1_Conf_1.000 | 169  | 11 | 4.15E-08 | NP_001024812.1 | 75 | 61.2326 | 37  | 28  | hypothetical protein M163.8                           |
| Locus_21838_Transcript_1/1_Conf_1.000 | 184  | 20 | 2.40E-19 | NP_503175.1    | 83 | 98.5969 | 61  | 51  | ABC Transporter family member (abt-4)                 |
| Locus_21839_Transcript_1/1_Conf_1.000 | 339  | 0  |          |                |    |         |     |     |                                                       |
| Locus_2184_Transcript_1/1_Conf_1.000  | 184  | 0  |          |                |    |         |     |     |                                                       |
| Locus_21840_Transcript_1/1_Conf_1.000 | 275  | 0  |          |                |    |         |     |     |                                                       |
| Locus_21841_Transcript_1/1_Conf_1.000 | 180  | 20 | 8.87E-14 | NP_495410.4    | 81 | 80.1073 | 60  | 49  | hypothetical protein C44B7.11                         |
| Locus_21842_Transcript_1/1_Conf_1.000 | 325  | 20 | 1.17E-18 | Q21012.3       | 75 | 96.2857 | 93  | 70  | Enolase-phosphatase E1                                |
| Locus_21843_Transcript_1/1_Conf_1.000 | 259  | 4  | 2.16E-12 | NP_001040741.1 | 54 | 75.485  | 84  | 46  | hypothetical protein C15F1.5                          |
| Locus_21844_Transcript_1/1_Conf_1.000 | 185  | 3  | 7.48E-13 | NP_495697.2    | 94 | 77.0258 | 34  | 32  | Lim and Transglutaminase Domain family member (ltd-1) |
| Locus_21845_Transcript_1/1_Conf_1.000 | 139  | 0  |          |                |    |         |     |     |                                                       |
| Locus_21846_Transcript_1/1_Conf_1.000 | 273  | 0  |          |                |    |         |     |     |                                                       |
| Locus_21847_Transcript_1/1_Conf_1.000 | 170  | 0  |          |                |    |         |     |     |                                                       |
| Locus_21848_Transcript_1/1_Conf_1.000 | 240  | 0  |          |                |    |         |     |     |                                                       |
| Locus_21849_Transcript_1/1_Conf_1.000 | 161  | 0  |          |                |    |         |     |     |                                                       |
| Locus_2185_Transcript_1/4_Conf_0.667  | 2646 | 20 | 0        | NP_499080.3    | 78 | 730.324 | 588 | 462 | SR Protein Kinase family member (spk-1)               |
| Locus_2185_Transcript_2/4_Conf_0.667  | 2736 | 20 | 0        | NP_499080.3    | 76 | 729.169 | 617 | 471 | SR Protein Kinase family member (spk-1)               |

|                                       |      |    |          |                |    |         |     |     |                                          |
|---------------------------------------|------|----|----------|----------------|----|---------|-----|-----|------------------------------------------|
| Locus_2185_Transcript_3/4_Conf_0.667  | 2847 | 20 | 0        | NP_001021134.1 | 73 | 744.577 | 671 | 495 | SR Protein Kinase family member (spk-1)  |
| Locus_2185_Transcript_4/4_Conf_0.667  | 2697 | 20 | 0        | NP_499080.3    | 77 | 731.865 | 604 | 467 | SR Protein Kinase family member (spk-1)  |
| Locus_21850_Transcript_1/1_Conf_1.000 | 139  | 0  |          |                |    |         |     |     |                                          |
| Locus_21851_Transcript_1/1_Conf_1.000 | 138  | 20 | 7.49E-10 | XP_001510147.1 | 80 | 67.0106 | 46  | 37  | PREDICTED: hypothetical protein, partial |
| Locus_21852_Transcript_1/1_Conf_1.000 | 609  | 0  |          |                |    |         |     |     |                                          |
| Locus_21853_Transcript_1/1_Conf_1.000 | 348  | 20 | 1.88E-16 | NP_502195.3    | 72 | 88.9669 | 77  | 56  | hypothetical protein F58B3.4             |
| Locus_21854_Transcript_1/1_Conf_1.000 | 277  | 0  |          |                |    |         |     |     |                                          |
| Locus_21855_Transcript_1/1_Conf_1.000 | 147  | 0  |          |                |    |         |     |     |                                          |
| Locus_21856_Transcript_1/1_Conf_1.000 | 554  | 20 | 6.06E-58 | NP_498895.1    | 75 | 227.254 | 184 | 138 | RNA Helicase family member (rha-2)       |
| Locus_21857_Transcript_1/1_Conf_1.000 | 172  | 0  |          |                |    |         |     |     |                                          |
| Locus_21858_Transcript_1/1_Conf_1.000 | 132  | 0  |          |                |    |         |     |     |                                          |
| Locus_21859_Transcript_1/1_Conf_1.000 | 142  | 0  |          |                |    |         |     |     |                                          |
| Locus_2186_Transcript_1/1_Conf_1.000  | 147  | 0  |          |                |    |         |     |     |                                          |
| Locus_21860_Transcript_1/1_Conf_1.000 | 199  | 0  |          |                |    |         |     |     |                                          |
| Locus_21861_Transcript_1/1_Conf_1.000 | 128  | 0  |          |                |    |         |     |     |                                          |
| Locus_21862_Transcript_1/1_Conf_1.000 | 446  | 0  |          |                |    |         |     |     |                                          |
| Locus_21863_Transcript_1/1_Conf_1.000 | 226  | 1  | 1.27E-04 | EFO19311.1     | 55 | 49.6766 | 67  | 37  | hypothetical protein LOAG_09182          |
| Locus_21864_Transcript_1/1_Conf_1.000 | 361  | 0  |          |                |    |         |     |     |                                          |
| Locus_21865_Transcript_1/1_Conf_1.000 | 243  | 0  |          |                |    |         |     |     |                                          |
| Locus_21866_Transcript_1/1_Conf_1.000 | 180  | 0  |          |                |    |         |     |     |                                          |

|                                       |      |    |           |                |    |         |     |     |                                                                         |
|---------------------------------------|------|----|-----------|----------------|----|---------|-----|-----|-------------------------------------------------------------------------|
| Locus_21867_Transcript_1/1_Conf_1.000 | 406  | 20 | 4.01E-19  | NP_498361.1    | 64 | 97.8265 | 104 | 67  | hypothetical protein T12A2.8                                            |
| Locus_21868_Transcript_1/1_Conf_1.000 | 1355 | 20 | 5.05E-119 | CBK19468.1     | 66 | 432.565 | 463 | 308 | C. elegans protein R11A8.4b, partially confirmed by transcript evidence |
| Locus_21869_Transcript_1/1_Conf_1.000 | 278  | 0  |           |                |    |         |     |     |                                                                         |
| Locus_2187_Transcript_1/1_Conf_1.000  | 1325 | 20 | 1.81E-81  | NP_493544.2    | 68 | 307.76  | 362 | 249 | hypothetical protein Y105E8B.3                                          |
| Locus_21870_Transcript_1/1_Conf_1.000 | 208  | 20 | 8.34E-09  | XP_002644943.1 | 61 | 63.5438 | 67  | 41  | Hypothetical protein CBG10898                                           |
| Locus_21871_Transcript_1/1_Conf_1.000 | 130  | 0  |           |                |    |         |     |     |                                                                         |
| Locus_21872_Transcript_1/1_Conf_1.000 | 188  | 20 | 3.47E-10  | EFO27462.1     | 61 | 68.1662 | 70  | 43  | hypothetical protein LOAG_01021                                         |
| Locus_21873_Transcript_1/1_Conf_1.000 | 218  | 4  | 1.72E-14  | XP_002638865.1 | 80 | 82.4185 | 72  | 58  | Hypothetical protein CBG22082                                           |
| Locus_21874_Transcript_1/1_Conf_1.000 | 655  | 0  |           |                |    |         |     |     |                                                                         |
| Locus_21875_Transcript_1/1_Conf_1.000 | 201  | 16 | 6.21E-12  | NP_501217.2    | 85 | 73.9442 | 67  | 57  | hypothetical protein R05G6.10                                           |
| Locus_21876_Transcript_1/1_Conf_1.000 | 199  | 0  |           |                |    |         |     |     |                                                                         |
| Locus_21877_Transcript_1/1_Conf_1.000 | 255  | 20 | 5.87E-26  | NP_499922.1    | 85 | 120.553 | 76  | 65  | Kinase, GLH-Binding family member (kgb-1)                               |
| Locus_21878_Transcript_1/1_Conf_1.000 | 184  | 0  |           |                |    |         |     |     |                                                                         |
| Locus_21879_Transcript_1/1_Conf_1.000 | 199  | 0  |           |                |    |         |     |     |                                                                         |

|                                       |      |    |           |                |     |         |     |     |                                                                    |
|---------------------------------------|------|----|-----------|----------------|-----|---------|-----|-----|--------------------------------------------------------------------|
| Locus_2188_Transcript_1/3_Conf_0.600  | 566  | 20 | 7.31E-38  | XP_002637185.1 | 68  | 160.614 | 163 | 112 | Hypothetical protein CBG09704                                      |
| Locus_2188_Transcript_2/3_Conf_0.600  | 603  | 20 | 4.65E-39  | XP_002637185.1 | 69  | 164.851 | 163 | 113 | Hypothetical protein CBG09704                                      |
| Locus_2188_Transcript_3/3_Conf_0.600  | 603  | 20 | 8.78E-38  | XP_002637185.1 | 68  | 160.614 | 163 | 112 | Hypothetical protein CBG09704                                      |
| Locus_21880_Transcript_1/1_Conf_1.000 | 166  | 0  |           |                |     |         |     |     |                                                                    |
| Locus_21881_Transcript_1/1_Conf_1.000 | 216  | 0  |           |                |     |         |     |     |                                                                    |
| Locus_21882_Transcript_1/1_Conf_1.000 | 132  | 0  |           |                |     |         |     |     |                                                                    |
| Locus_21883_Transcript_1/1_Conf_1.000 | 171  | 0  |           |                |     |         |     |     |                                                                    |
| Locus_21884_Transcript_1/1_Conf_1.000 | 143  | 0  |           |                |     |         |     |     |                                                                    |
| Locus_21885_Transcript_1/1_Conf_1.000 | 429  | 20 | 1.24E-36  | XP_001901596.1 | 74  | 155.992 | 143 | 106 | oxidoreductase, short chain dehydrogenase/reductase family protein |
| Locus_21886_Transcript_1/1_Conf_1.000 | 214  | 0  |           |                |     |         |     |     |                                                                    |
| Locus_21887_Transcript_1/1_Conf_1.000 | 137  | 0  |           |                |     |         |     |     |                                                                    |
| Locus_21888_Transcript_1/1_Conf_1.000 | 147  | 0  |           |                |     |         |     |     |                                                                    |
| Locus_21889_Transcript_1/1_Conf_1.000 | 228  | 0  |           |                |     |         |     |     |                                                                    |
| Locus_2189_Transcript_1/2_Conf_1.000  | 967  | 20 | 1.17E-70  | Q95PP1.1       | 86  | 271.166 | 227 | 197 | Aspartyl protease inhibitor                                        |
| Locus_2189_Transcript_2/2_Conf_1.000  | 961  | 20 | 1.16E-70  | Q95PP1.1       | 86  | 271.166 | 227 | 197 | Aspartyl protease inhibitor                                        |
| Locus_21890_Transcript_1/1_Conf_1.000 | 167  | 0  |           |                |     |         |     |     |                                                                    |
| Locus_21891_Transcript_1/1_Conf_1.000 | 136  | 0  |           |                |     |         |     |     |                                                                    |
| Locus_21892_Transcript_1/1_Conf_1.000 | 207  | 2  | 1.80E-11  | XP_002633609.1 | 68  | 72.4034 | 67  | 46  | Hypothetical protein CBG05491                                      |
| Locus_21893_Transcript_1/2_Conf_1.000 | 292  | 0  |           |                |     |         |     |     |                                                                    |
| Locus_21893_Transcript_2/2_Conf_1.000 | 291  | 0  |           |                |     |         |     |     |                                                                    |
| Locus_21894_Transcript_1/1_Conf_1.000 | 462  | 20 | 1.18E-26  | XP_002630318.1 | 62  | 122.865 | 115 | 72  | Hypothetical protein CBG04241                                      |
| Locus_21895_Transcript_1/1_Conf_1.000 | 443  | 0  |           |                |     |         |     |     |                                                                    |
| Locus_21896_Transcript_1/1_Conf_1.000 | 150  | 0  |           |                |     |         |     |     |                                                                    |
| Locus_21897_Transcript_1/1_Conf_1.000 | 134  | 0  |           |                |     |         |     |     |                                                                    |
| Locus_21898_Transcript_1/1_Conf_1.000 | 189  | 20 | 8.18E-28  | XP_002750079.1 | 100 | 126.716 | 63  | 63  | PREDICTED: ATP synthase subunit gamma, mitochondrial-like          |
| Locus_21899_Transcript_1/1_Conf_1.000 | 134  | 0  |           |                |     |         |     |     |                                                                    |
| Locus_219_Transcript_1/1_Conf_1.000   | 593  | 20 | 8.20E-70  | XP_002645843.1 | 78  | 266.929 | 201 | 158 | C. briggsae CBR-TAG-53 protein                                     |
| Locus_2190_Transcript_1/2_Conf_1.000  | 1427 | 20 | 3.74E-112 | XP_002639282.1 | 82  | 409.838 | 338 | 279 | C. briggsae CBR-NHR-69 protein                                     |

|                                       |      |    |           |                |    |         |     |     |                                              |
|---------------------------------------|------|----|-----------|----------------|----|---------|-----|-----|----------------------------------------------|
| Locus_2190_Transcript_2/2_Conf_1.000  | 1427 | 20 | 3.74E-112 | XP_002639282.1 | 82 | 409.838 | 338 | 279 | C. briggsae CBR-NHR-69 protein               |
| Locus_21900_Transcript_1/1_Conf_1.000 | 151  | 2  | 3.35E-05  | XP_002641207.1 | 66 | 51.6026 | 50  | 33  | Hypothetical protein CBG09068                |
| Locus_21901_Transcript_1/1_Conf_1.000 | 970  | 20 | 3.70E-40  | EFO23919.1     | 57 | 169.859 | 319 | 185 | hypothetical protein LOAG_04568              |
| Locus_21902_Transcript_1/1_Conf_1.000 | 277  | 20 | 2.50E-13  | AAV99638.1     | 90 | 78.5666 | 51  | 46  | mca-1                                        |
| Locus_21903_Transcript_1/1_Conf_1.000 | 274  | 3  | 2.05E-07  | ABD39381.1     | 72 | 58.9214 | 36  | 26  | putative galectin protein 10                 |
| Locus_21904_Transcript_1/1_Conf_1.000 | 415  | 0  |           |                |    |         |     |     |                                              |
| Locus_21905_Transcript_1/1_Conf_1.000 | 554  | 0  |           |                |    |         |     |     |                                              |
| Locus_21906_Transcript_1/1_Conf_1.000 | 277  | 1  | 8.60E-06  | EFN73640.1     | 85 | 53.5286 | 34  | 29  | Probable phospholipid-transporting ATPase ID |
| Locus_21907_Transcript_1/1_Conf_1.000 | 421  | 5  | 1.75E-30  | ACI49226.1     | 77 | 135.576 | 121 | 94  | hypothetical protein Csp3_JD05.011           |
| Locus_21908_Transcript_1/1_Conf_1.000 | 145  | 20 | 1.67E-12  | EFN69115.1     | 87 | 75.8702 | 47  | 41  | Peroxisome biogenesis factor 1               |
| Locus_21909_Transcript_1/1_Conf_1.000 | 333  | 0  |           |                |    |         |     |     |                                              |
| Locus_2191_Transcript_1/1_Conf_1.000  | 1559 | 20 | 6.02E-143 | XP_002634371.1 | 70 | 512.301 | 521 | 367 | C. briggsae CBR-RIG-4 protein                |
| Locus_21910_Transcript_1/1_Conf_1.000 | 141  | 0  |           |                |    |         |     |     |                                              |
| Locus_21911_Transcript_1/1_Conf_1.000 | 309  | 0  |           |                |    |         |     |     |                                              |
| Locus_21912_Transcript_1/1_Conf_1.000 | 185  | 0  |           |                |    |         |     |     |                                              |
| Locus_21913_Transcript_1/1_Conf_1.000 | 152  | 0  |           |                |    |         |     |     |                                              |
| Locus_21914_Transcript_1/1_Conf_1.000 | 209  | 0  |           |                |    |         |     |     |                                              |
| Locus_21915_Transcript_1/1_Conf_1.000 | 244  | 20 | 1.50E-42  | ADN00778.1     | 97 | 175.637 | 81  | 79  | LON-1 protein                                |
| Locus_21916_Transcript_1/1_Conf_1.000 | 226  | 0  |           |                |    |         |     |     |                                              |

|                                       |     |    |          |                |    |         |     |     |                                                                           |
|---------------------------------------|-----|----|----------|----------------|----|---------|-----|-----|---------------------------------------------------------------------------|
| Locus_21917_Transcript_1/1_Conf_1.000 | 289 | 1  | 1.50E-05 | NP_501999.2    | 48 | 52.7582 | 95  | 46  | hypothetical protein T25B9.10                                             |
| Locus_21918_Transcript_1/1_Conf_1.000 | 294 | 20 | 8.40E-25 | XP_002644815.1 | 82 | 116.701 | 73  | 60  | Hypothetical protein CBG14833                                             |
| Locus_21919_Transcript_1/1_Conf_1.000 | 204 | 5  | 3.52E-07 | NP_507251.2    | 56 | 58.151  | 67  | 38  | Proline Hydroxylase family member (phy-3)                                 |
| Locus_2192_Transcript_1/1_Conf_1.000  | 516 | 20 | 1.29E-42 | NP_493258.1    | 80 | 176.022 | 131 | 105 | ProFiliN family member (pfn-1)                                            |
| Locus_21920_Transcript_1/1_Conf_1.000 | 166 | 20 | 4.45E-10 | NP_498037.2    | 87 | 67.781  | 40  | 35  | yeast ULA (ubiquitin activating) homolog family member (ula-1)            |
| Locus_21921_Transcript_1/1_Conf_1.000 | 161 | 0  |          |                |    |         |     |     |                                                                           |
| Locus_21922_Transcript_1/1_Conf_1.000 | 416 | 0  |          |                |    |         |     |     |                                                                           |
| Locus_21923_Transcript_1/1_Conf_1.000 | 147 | 0  |          |                |    |         |     |     |                                                                           |
| Locus_21924_Transcript_1/1_Conf_1.000 | 372 | 3  | 2.71E-23 | CAC35853.2     | 62 | 111.694 | 124 | 78  | C. elegans protein Y111B2A.24, partially confirmed by transcript evidence |
| Locus_21925_Transcript_1/2_Conf_1.000 | 407 | 3  | 3.40E-10 | NP_491390.2    | 52 | 68.1662 | 103 | 54  | hypothetical protein D1007.15                                             |
| Locus_21925_Transcript_2/2_Conf_1.000 | 407 | 3  | 4.02E-11 | NP_491390.2    | 52 | 71.2478 | 106 | 56  | hypothetical protein D1007.15                                             |
| Locus_21926_Transcript_1/1_Conf_1.000 | 382 | 0  |          |                |    |         |     |     |                                                                           |
| Locus_21927_Transcript_1/1_Conf_1.000 | 188 | 0  |          |                |    |         |     |     |                                                                           |
| Locus_21928_Transcript_1/1_Conf_1.000 | 274 | 20 | 8.04E-20 | XP_001896429.1 | 84 | 100.138 | 89  | 75  | Hypothetical WD-repeat protein F21H12.1 in chromosome II, putative        |
| Locus_21929_Transcript_1/1_Conf_1.000 | 248 | 0  |          |                |    |         |     |     |                                                                           |
| Locus_2193_Transcript_1/1_Conf_1.000  | 511 | 0  |          |                |    |         |     |     |                                                                           |
| Locus_21930_Transcript_1/1_Conf_1.000 | 318 | 20 | 4.48E-26 | NP_491734.1    | 84 | 120.939 | 86  | 73  | UNCoordinated family member (unc-94)                                      |
| Locus_21931_Transcript_1/1_Conf_1.000 | 261 | 0  |          |                |    |         |     |     |                                                                           |
| Locus_21932_Transcript_1/1_Conf_1.000 | 165 | 0  |          |                |    |         |     |     |                                                                           |
| Locus_21933_Transcript_1/1_Conf_1.000 | 238 | 20 | 7.56E-18 | XP_002632693.1 | 73 | 93.5893 | 78  | 57  | Hypothetical protein CBG21624                                             |

|                                       |      |    |          |                |    |         |     |    |                                                 |
|---------------------------------------|------|----|----------|----------------|----|---------|-----|----|-------------------------------------------------|
| Locus_21934_Transcript_1/1_Conf_1.000 | 272  | 20 | 8.09E-12 | XP_002638675.1 | 63 | 73.559  | 83  | 53 | C. briggsae CBR-PBRM-1 protein                  |
| Locus_21935_Transcript_1/1_Conf_1.000 | 259  | 20 | 4.95E-25 | NP_499717.1    | 91 | 117.472 | 67  | 61 | ABC transporter, class E family member (abce-1) |
| Locus_21936_Transcript_1/1_Conf_1.000 | 571  | 4  | 1.94E-09 | XP_002642383.1 | 52 | 66.2402 | 130 | 68 | Hypothetical protein CBG18387                   |
| Locus_21937_Transcript_1/1_Conf_1.000 | 231  | 0  |          |                |    |         |     |    |                                                 |
| Locus_21938_Transcript_1/1_Conf_1.000 | 170  | 0  |          |                |    |         |     |    |                                                 |
| Locus_21939_Transcript_1/1_Conf_1.000 | 240  | 0  |          |                |    |         |     |    |                                                 |
| Locus_2194_Transcript_1/1_Conf_1.000  | 2311 | 0  |          |                |    |         |     |    |                                                 |
| Locus_21940_Transcript_1/1_Conf_1.000 | 363  | 1  | 1.67E-17 | NP_001041053.1 | 68 | 92.4337 | 92  | 63 | hypothetical protein Y62E10A.20                 |
| Locus_21941_Transcript_1/1_Conf_1.000 | 412  | 0  |          |                |    |         |     |    |                                                 |
| Locus_21942_Transcript_1/1_Conf_1.000 | 154  | 0  |          |                |    |         |     |    |                                                 |
| Locus_21943_Transcript_1/1_Conf_1.000 | 194  | 0  |          |                |    |         |     |    |                                                 |
| Locus_21944_Transcript_1/1_Conf_1.000 | 360  | 12 | 3.36E-26 | XP_002639929.1 | 82 | 121.324 | 106 | 87 | Hypothetical protein CBG08265                   |
| Locus_21945_Transcript_1/1_Conf_1.000 | 312  | 20 | 8.78E-30 | ACV73031.1     | 94 | 133.265 | 71  | 67 | AHA-1                                           |



|                                       |      |    |           |                |     |         |     |     |                                                                           |
|---------------------------------------|------|----|-----------|----------------|-----|---------|-----|-----|---------------------------------------------------------------------------|
| Locus_21946_Transcript_1/1_Conf_1.000 | 254  | 15 | 4.09E-19  | XP_001898877.1 | 79  | 97.8265 | 84  | 67  | oxidoreductase, short chain dehydrogenase/reductase family protein        |
| Locus_21947_Transcript_1/1_Conf_1.000 | 206  | 0  |           |                |     |         |     |     |                                                                           |
| Locus_21948_Transcript_1/1_Conf_1.000 | 429  | 20 | 3.18E-08  | EFO25642.1     | 56  | 61.6178 | 85  | 48  | hypothetical protein LOAG_02841                                           |
| Locus_21949_Transcript_1/1_Conf_1.000 | 304  | 0  |           |                |     |         |     |     |                                                                           |
| Locus_2195_Transcript_1/1_Conf_1.000  | 823  | 20 | 1.03E-119 | XP_002636728.1 | 86  | 433.721 | 268 | 231 | C. briggsae CBR-FRM-7 protein                                             |
| Locus_21950_Transcript_1/1_Conf_1.000 | 303  | 0  |           |                |     |         |     |     |                                                                           |
| Locus_21951_Transcript_1/1_Conf_1.000 | 263  | 0  |           |                |     |         |     |     |                                                                           |
| Locus_21952_Transcript_1/1_Conf_1.000 | 311  | 20 | 1.82E-48  | NP_001033411.1 | 96  | 195.282 | 102 | 98  | hypothetical protein F53H1.1                                              |
| Locus_21953_Transcript_1/1_Conf_1.000 | 207  | 0  |           |                |     |         |     |     |                                                                           |
| Locus_21954_Transcript_1/2_Conf_1.000 | 409  | 0  |           |                |     |         |     |     |                                                                           |
| Locus_21954_Transcript_2/2_Conf_1.000 | 409  | 0  |           |                |     |         |     |     |                                                                           |
| Locus_21955_Transcript_1/1_Conf_1.000 | 315  | 20 | 6.97E-11  | NP_491270.2    | 51  | 70.4774 | 101 | 52  | Low-density lipoprotein Receptor Related family member (Irp-2)            |
| Locus_21956_Transcript_1/1_Conf_1.000 | 254  | 0  |           |                |     |         |     |     |                                                                           |
| Locus_21957_Transcript_1/1_Conf_1.000 | 602  | 1  | 2.08E-07  | NP_491543.1    | 51  | 59.6918 | 133 | 68  | FANCM (Fanconi anemia complex component M) homolog family member (fncm-1) |
| Locus_21958_Transcript_1/1_Conf_1.000 | 158  | 1  | 2.16E-04  | XP_001842842.1 | 62  | 48.9062 | 54  | 34  | plasma glutamate carboxypeptidase                                         |
| Locus_21959_Transcript_1/1_Conf_1.000 | 281  | 0  |           |                |     |         |     |     |                                                                           |
| Locus_2196_Transcript_1/2_Conf_1.000  | 1525 | 20 | 1.89E-141 | EFO24230.1     | 67  | 507.294 | 527 | 358 | hypothetical protein LOAG_04252                                           |
| Locus_2196_Transcript_2/2_Conf_1.000  | 1525 | 20 | 1.89E-141 | EFO24230.1     | 67  | 507.294 | 527 | 358 | hypothetical protein LOAG_04252                                           |
| Locus_21960_Transcript_1/1_Conf_1.000 | 137  | 0  |           |                |     |         |     |     |                                                                           |
| Locus_21961_Transcript_1/1_Conf_1.000 | 190  | 1  | 6.48E-25  | XP_002751331.1 | 90  | 117.087 | 62  | 56  | PREDICTED: stathmin-like                                                  |
| Locus_21962_Transcript_1/1_Conf_1.000 | 195  | 2  | 1.03E-06  | XP_002641391.1 | 67  | 56.6102 | 62  | 42  | C. briggsae CBR-GLY-8 protein                                             |
| Locus_21963_Transcript_1/1_Conf_1.000 | 209  | 2  | 3.36E-34  | EAW76268.1     | 100 | 147.902 | 69  | 69  | hCG38498, isoform CRA_b                                                   |
| Locus_21964_Transcript_1/1_Conf_1.000 | 174  | 0  |           |                |     |         |     |     |                                                                           |
| Locus_21965_Transcript_1/1_Conf_1.000 | 137  | 0  |           |                |     |         |     |     |                                                                           |
| Locus_21966_Transcript_1/1_Conf_1.000 | 130  | 0  |           |                |     |         |     |     |                                                                           |
| Locus_21967_Transcript_1/1_Conf_1.000 | 514  | 0  |           |                |     |         |     |     |                                                                           |

|                                       |      |    |           |                |    |         |     |     |                                                                                           |
|---------------------------------------|------|----|-----------|----------------|----|---------|-----|-----|-------------------------------------------------------------------------------------------|
| Locus_21968_Transcript_1/1_Conf_1.000 | 170  | 20 | 8.92E-19  | NP_494991.1    | 89 | 96.6709 | 56  | 50  | Phosphoethanolamine Methyltransferase family member (pmt-1)                               |
| Locus_21969_Transcript_1/1_Conf_1.000 | 176  | 0  |           |                |    |         |     |     |                                                                                           |
| Locus_2197_Transcript_1/1_Conf_1.000  | 1071 | 20 | 7.66E-146 | NP_493279.1    | 85 | 521.161 | 356 | 303 | Suppressor of Mec and Unc defects family member (smu-1)                                   |
| Locus_21970_Transcript_1/1_Conf_1.000 | 289  | 14 | 5.69E-13  | EFO20293.1     | 65 | 77.411  | 89  | 58  | PDZ domain-containing protein                                                             |
| Locus_21971_Transcript_1/1_Conf_1.000 | 197  | 0  |           |                |    |         |     |     |                                                                                           |
| Locus_21972_Transcript_1/1_Conf_1.000 | 392  | 2  | 1.27E-33  | NP_495168.1    | 77 | 145.976 | 117 | 91  | hypothetical protein H41C03.1                                                             |
| Locus_21973_Transcript_1/1_Conf_1.000 | 142  | 3  | 9.13E-08  | NP_497765.2    | 78 | 60.077  | 42  | 33  | Adenylyl Cyclase family member (acy-3)                                                    |
| Locus_21974_Transcript_1/1_Conf_1.000 | 330  | 20 | 1.13E-13  | NP_496307.1    | 60 | 79.7221 | 103 | 62  | hypothetical protein C09G5.2                                                              |
| Locus_21975_Transcript_1/1_Conf_1.000 | 214  | 20 | 4.25E-13  | XP_002634303.1 | 82 | 77.7962 | 62  | 51  | C. briggsae CBR-NCX-3 protein                                                             |
| Locus_21976_Transcript_1/1_Conf_1.000 | 342  | 6  | 6.95E-19  | XP_002631746.1 | 61 | 97.0561 | 111 | 68  | C. briggsae CBR-TAG-280 protein                                                           |
| Locus_21977_Transcript_1/1_Conf_1.000 | 456  | 0  |           |                |    |         |     |     |                                                                                           |
| Locus_21978_Transcript_1/1_Conf_1.000 | 125  | 0  |           |                |    |         |     |     |                                                                                           |
| Locus_21979_Transcript_1/1_Conf_1.000 | 262  | 0  |           |                |    |         |     |     |                                                                                           |
| Locus_2198_Transcript_1/2_Conf_1.000  | 899  | 20 | 6.46E-89  | EFO20496.1     | 73 | 331.643 | 304 | 223 | hypothetical protein LOAG_07994                                                           |
| Locus_2198_Transcript_2/2_Conf_1.000  | 899  | 20 | 6.46E-89  | EFO20496.1     | 73 | 331.643 | 304 | 223 | hypothetical protein LOAG_07994                                                           |
| Locus_21980_Transcript_1/1_Conf_1.000 | 168  | 0  |           |                |    |         |     |     |                                                                                           |
| Locus_21981_Transcript_1/1_Conf_1.000 | 579  | 20 | 2.73E-38  | NP_001022032.1 | 67 | 162.155 | 187 | 126 | TRRAP-like (transcription/transformation domain-associated protein) family member (trr-1) |
| Locus_21982_Transcript_1/1_Conf_1.000 | 129  | 0  |           |                |    |         |     |     |                                                                                           |
| Locus_21983_Transcript_1/1_Conf_1.000 | 132  | 5  | 9.85E-10  | NP_500647.2    | 82 | 66.6254 | 41  | 34  | Dipeptidyl Peptidase Four (IV) family member (dpf-5)                                      |
| Locus_21984_Transcript_1/1_Conf_1.000 | 200  | 4  | 9.31E-08  | XP_001900237.1 | 64 | 60.077  | 64  | 41  | mucosa associated lymphoid tissue lymphoma translocation protein 1, isoform b             |
| Locus_21985_Transcript_1/1_Conf_1.000 | 540  | 0  |           |                |    |         |     |     |                                                                                           |
| Locus_21986_Transcript_1/1_Conf_1.000 | 186  | 1  | 1.67E-04  | XP_002632203.1 | 71 | 49.2914 | 45  | 32  | Hypothetical protein CBG07070                                                             |
| Locus_21987_Transcript_1/1_Conf_1.000 | 499  | 5  | 1.72E-22  | XP_002642061.1 | 55 | 108.997 | 167 | 93  | Hypothetical protein CBG17999                                                             |
| Locus_21988_Transcript_1/1_Conf_1.000 | 389  | 0  |           |                |    |         |     |     |                                                                                           |
| Locus_21989_Transcript_1/1_Conf_1.000 | 143  | 0  |           |                |    |         |     |     |                                                                                           |
| Locus_2199_Transcript_1/6_Conf_0.357  | 409  | 20 | 2.95E-30  | NP_497777.1    | 72 | 134.806 | 124 | 90  | hypothetical protein C36A4.4                                                              |
| Locus_2199_Transcript_2/6_Conf_0.500  | 1473 | 20 | 4.92E-139 | NP_497777.1    | 71 | 499.204 | 454 | 324 | hypothetical protein C36A4.4                                                              |

|                                       |      |    |           |                |    |         |     |     |                                                 |
|---------------------------------------|------|----|-----------|----------------|----|---------|-----|-----|-------------------------------------------------|
| Locus_2199_Transcript_3/6_Conf_0.429  | 1181 | 20 | 2.43E-119 | NP_497777.1    | 74 | 433.335 | 364 | 270 | hypothetical protein C36A4.4                    |
| Locus_2199_Transcript_4/6_Conf_0.500  | 1473 | 20 | 4.16E-138 | NP_497777.1    | 71 | 496.123 | 454 | 323 | hypothetical protein C36A4.4                    |
| Locus_2199_Transcript_5/6_Conf_0.429  | 1188 | 20 | 1.59E-118 | NP_497777.1    | 74 | 430.639 | 360 | 268 | hypothetical protein C36A4.4                    |
| Locus_2199_Transcript_6/6_Conf_0.429  | 1181 | 20 | 5.41E-119 | NP_497777.1    | 74 | 432.18  | 364 | 270 | hypothetical protein C36A4.4                    |
| Locus_21990_Transcript_1/1_Conf_1.000 | 139  | 0  |           |                |    |         |     |     |                                                 |
| Locus_21991_Transcript_1/1_Conf_1.000 | 279  | 0  |           |                |    |         |     |     |                                                 |
| Locus_21992_Transcript_1/1_Conf_1.000 | 361  | 20 | 6.78E-27  | XP_001896664.1 | 69 | 123.635 | 119 | 83  | Protein kinase domain containing protein        |
| Locus_21993_Transcript_1/1_Conf_1.000 | 400  | 0  |           |                |    |         |     |     |                                                 |
| Locus_21994_Transcript_1/1_Conf_1.000 | 252  | 19 | 4.38E-13  | XP_002640231.1 | 75 | 77.7962 | 52  | 39  | Hypothetical protein CBG12746                   |
| Locus_21995_Transcript_1/1_Conf_1.000 | 129  | 0  |           |                |    |         |     |     |                                                 |
| Locus_21996_Transcript_1/1_Conf_1.000 | 176  | 20 | 8.29E-17  | ACI49101.1     | 88 | 90.1225 | 54  | 48  | hypothetical protein Cbre_JD13.003              |
| Locus_21997_Transcript_1/1_Conf_1.000 | 300  | 20 | 2.77E-28  | NP_496066.2    | 90 | 128.257 | 86  | 78  | Nuclear Hormone Receptor family member (nhr-19) |
| Locus_21998_Transcript_1/1_Conf_1.000 | 206  | 0  |           |                |    |         |     |     |                                                 |

|                                       |      |    |           |                |    |         |     |     |                                                |
|---------------------------------------|------|----|-----------|----------------|----|---------|-----|-----|------------------------------------------------|
| Locus_21999_Transcript_1/1_Conf_1.000 | 151  | 5  | 3.96E-06  | ACI49239.1     | 85 | 54.6842 | 35  | 30  | hypothetical protein Csp3_JD06.005             |
| Locus_22_Transcript_1/1_Conf_1.000    | 2388 | 16 | 6.91E-06  | AAH84352.1     | 35 | 57.7658 | 562 | 197 | LOC495149 protein                              |
| Locus_220_Transcript_1/2_Conf_1.000   | 1383 | 20 | 7.76E-123 | CAJ45481.1     | 67 | 445.277 | 424 | 286 | legumain                                       |
| Locus_220_Transcript_2/2_Conf_1.000   | 1059 | 20 | 6.90E-99  | XP_002636781.1 | 69 | 365.155 | 332 | 231 | Hypothetical protein CBG23516                  |
| Locus_2200_Transcript_1/2_Conf_1.000  | 523  | 20 | 3.08E-63  | NP_500191.3    | 86 | 244.588 | 175 | 151 | ParaPleGiN AAA protease family member (ppgn-1) |
| Locus_2200_Transcript_2/2_Conf_1.000  | 523  | 20 | 3.08E-63  | NP_500191.3    | 86 | 244.588 | 175 | 151 | ParaPleGiN AAA protease family member (ppgn-1) |

|                                       |     |    |          |                |     |         |     |    |                                                                           |
|---------------------------------------|-----|----|----------|----------------|-----|---------|-----|----|---------------------------------------------------------------------------|
| Locus_22000_Transcript_1/1_Conf_1.000 | 450 | 1  | 5.25E-11 | CAR63594.1     | 55  | 70.8626 | 127 | 71 | hypothetical protein                                                      |
| Locus_22001_Transcript_1/1_Conf_1.000 | 166 | 0  |          |                |     |         |     |    |                                                                           |
| Locus_22002_Transcript_1/1_Conf_1.000 | 302 | 20 | 6.79E-43 | EFO27430.1     | 95  | 176.792 | 93  | 89 | GTP-binding protein GTR1                                                  |
| Locus_22003_Transcript_1/1_Conf_1.000 | 256 | 3  | 6.97E-11 | AAF82410.1     | 77  | 70.4774 | 53  | 41 | AF221132_1diacylglycerol acyltransferase                                  |
| Locus_22004_Transcript_1/1_Conf_1.000 | 145 | 2  | 9.81E-05 | XP_002635479.1 | 73  | 50.0618 | 45  | 33 | C. briggsae CBR-PMT-2 protein                                             |
| Locus_22005_Transcript_1/1_Conf_1.000 | 132 | 0  |          |                |     |         |     |    |                                                                           |
| Locus_22006_Transcript_1/1_Conf_1.000 | 228 | 14 | 5.14E-06 | EFN62076.1     | 68  | 54.299  | 38  | 26 | hypothetical protein EAG_04210                                            |
| Locus_22007_Transcript_1/1_Conf_1.000 | 325 | 0  |          |                |     |         |     |    |                                                                           |
| Locus_22008_Transcript_1/1_Conf_1.000 | 212 | 0  |          |                |     |         |     |    |                                                                           |
| Locus_22009_Transcript_1/1_Conf_1.000 | 294 | 0  |          |                |     |         |     |    |                                                                           |
| Locus_2201_Transcript_1/1_Conf_1.000  | 275 | 0  |          |                |     |         |     |    |                                                                           |
| Locus_22010_Transcript_1/1_Conf_1.000 | 160 | 20 | 5.10E-22 | XP_002913146.1 | 100 | 107.457 | 53  | 53 | PREDICTED: transmembrane emp24 domain-containing protein 2-like isoform 1 |
| Locus_22011_Transcript_1/1_Conf_1.000 | 340 | 20 | 5.33E-24 | XP_001899060.1 | 66  | 114.005 | 112 | 75 | acetyltransferase, GNAT family protein                                    |
| Locus_22012_Transcript_1/1_Conf_1.000 | 132 | 0  |          |                |     |         |     |    |                                                                           |
| Locus_22013_Transcript_1/1_Conf_1.000 | 151 | 8  | 9.40E-16 | CAB00107.2     | 85  | 86.6557 | 49  | 42 | C. elegans protein F58H1.4, confirmed by transcript evidence              |

|                                       |     |    |          |                |     |         |     |     |                                                                                        |
|---------------------------------------|-----|----|----------|----------------|-----|---------|-----|-----|----------------------------------------------------------------------------------------|
| Locus_22014_Transcript_1/1_Conf_1.000 | 233 | 0  |          |                |     |         |     |     |                                                                                        |
| Locus_22015_Transcript_1/1_Conf_1.000 | 144 | 0  |          |                |     |         |     |     |                                                                                        |
| Locus_22016_Transcript_1/1_Conf_1.000 | 343 | 20 | 3.09E-59 | ABU93237.1     | 97  | 231.106 | 114 | 111 | ligand-gated ion channel subunit                                                       |
| Locus_22017_Transcript_1/1_Conf_1.000 | 138 | 0  |          |                |     |         |     |     |                                                                                        |
| Locus_22018_Transcript_1/1_Conf_1.000 | 373 | 0  |          |                |     |         |     |     |                                                                                        |
| Locus_22019_Transcript_1/1_Conf_1.000 | 197 | 20 | 1.64E-20 | BAG65407.1     | 100 | 102.449 | 50  | 50  | unnamed protein product                                                                |
| Locus_2202_Transcript_1/1_Conf_1.000  | 341 | 0  |          |                |     |         |     |     |                                                                                        |
| Locus_22020_Transcript_1/1_Conf_1.000 | 146 | 0  |          |                |     |         |     |     |                                                                                        |
| Locus_22021_Transcript_1/1_Conf_1.000 | 380 | 20 | 9.93E-10 | NP_495244.1    | 77  | 66.6254 | 48  | 37  | Transbilayer Amphipath Transporters (subfamily IV P-type ATPase) family member (tat-4) |
| Locus_22022_Transcript_1/1_Conf_1.000 | 349 | 20 | 8.67E-38 | AAK62032.1     | 74  | 159.844 | 116 | 86  | metalloprotease 1 precursor                                                            |
| Locus_22023_Transcript_1/1_Conf_1.000 | 217 | 0  |          |                |     |         |     |     |                                                                                        |
| Locus_22024_Transcript_1/1_Conf_1.000 | 206 | 4  | 4.00E-19 | NP_504292.2    | 89  | 97.8265 | 68  | 61  | hypothetical protein C37H5.5                                                           |
| Locus_22025_Transcript_1/1_Conf_1.000 | 160 | 20 | 3.54E-15 | XP_001896329.1 | 90  | 84.7297 | 53  | 48  | calcium ATPase                                                                         |
| Locus_22026_Transcript_1/1_Conf_1.000 | 312 | 7  | 1.96E-21 | NP_001021268.1 | 87  | 105.531 | 78  | 68  | UNCoordinated family member (unc-44)                                                   |

|                                       |     |    |           |                |     |         |     |     |                                                              |
|---------------------------------------|-----|----|-----------|----------------|-----|---------|-----|-----|--------------------------------------------------------------|
| Locus_22027_Transcript_1/1_Conf_1.000 | 234 | 3  | 9.93E-10  | A8X3A7.2       | 85  | 66.6254 | 75  | 64  | Integrin alpha pat-2                                         |
| Locus_22028_Transcript_1/1_Conf_1.000 | 147 | 0  |           |                |     |         |     |     |                                                              |
| Locus_22029_Transcript_1/1_Conf_1.000 | 235 | 20 | 4.44E-26  | NP_498128.1    | 96  | 120.939 | 65  | 63  | Clock (biological timing) abnormality family member (clk-1)  |
| Locus_2203_Transcript_1/1_Conf_1.000  | 854 | 20 | 2.54E-132 | XP_002634111.1 | 94  | 475.707 | 280 | 264 | Hypothetical protein CBG01664                                |
| Locus_22030_Transcript_1/1_Conf_1.000 | 353 | 0  |           |                |     |         |     |     |                                                              |
| Locus_22031_Transcript_1/1_Conf_1.000 | 267 | 20 | 4.72E-44  | XP_002808235.1 | 100 | 180.644 | 88  | 88  | PREDICTED: LOW QUALITY PROTEIN: calpain small subunit 1-like |
| Locus_22032_Transcript_1/1_Conf_1.000 | 144 | 0  |           |                |     |         |     |     |                                                              |
| Locus_22033_Transcript_1/1_Conf_1.000 | 165 | 20 | 1.69E-17  | EFO18251.1     | 87  | 92.4337 | 55  | 48  | hypothetical protein LOAG_10243                              |
| Locus_22034_Transcript_1/1_Conf_1.000 | 164 | 20 | 2.06E-23  | XP_002799431.1 | 100 | 112.079 | 54  | 54  | PREDICTED: pyruvate kinase isozymes M1/M2 isoform 2          |

|                                       |     |    |          |                |    |         |     |     |                                                              |
|---------------------------------------|-----|----|----------|----------------|----|---------|-----|-----|--------------------------------------------------------------|
| Locus_22035_Transcript_1/1_Conf_1.000 | 154 | 20 | 3.81E-17 | EFO24654.1     | 92 | 91.2781 | 51  | 47  | RNA polymerase Rpb1                                          |
| Locus_22036_Transcript_1/1_Conf_1.000 | 176 | 0  |          |                |    |         |     |     |                                                              |
| Locus_22037_Transcript_1/1_Conf_1.000 | 156 | 3  | 4.20E-08 | NP_001022683.1 | 67 | 61.2326 | 55  | 37  | hypothetical protein M01A8.2                                 |
| Locus_22038_Transcript_1/1_Conf_1.000 | 418 | 20 | 5.64E-45 | NP_001023958.1 | 85 | 183.726 | 124 | 106 | Heat Shock Protein family member (hsp-17)                    |
| Locus_22039_Transcript_1/1_Conf_1.000 | 439 | 0  |          |                |    |         |     |     |                                                              |
| Locus_2204_Transcript_1/1_Conf_1.000  | 681 | 20 | 1.42E-59 | EFO25906.1     | 68 | 233.417 | 206 | 142 | steroid hormone receptor                                     |
| Locus_22040_Transcript_1/1_Conf_1.000 | 396 | 4  | 5.87E-10 | EFO16079.1     | 55 | 67.3958 | 129 | 72  | hypothetical protein LOAG_12429                              |
| Locus_22041_Transcript_1/1_Conf_1.000 | 199 | 0  |          |                |    |         |     |     |                                                              |
| Locus_22042_Transcript_1/1_Conf_1.000 | 164 | 20 | 1.58E-23 | NP_498711.1    | 96 | 112.464 | 54  | 52  | TYrosinase family member (tyr-1)                             |
| Locus_22043_Transcript_1/1_Conf_1.000 | 478 | 0  |          |                |    |         |     |     |                                                              |
| Locus_22044_Transcript_1/1_Conf_1.000 | 215 | 0  |          |                |    |         |     |     |                                                              |
| Locus_22045_Transcript_1/1_Conf_1.000 | 145 | 0  |          |                |    |         |     |     |                                                              |
| Locus_22046_Transcript_1/1_Conf_1.000 | 323 | 0  |          |                |    |         |     |     |                                                              |
| Locus_22047_Transcript_1/1_Conf_1.000 | 132 | 2  | 8.63E-06 | NP_491776.1    | 75 | 53.5286 | 44  | 33  | hypothetical protein T09B4.7                                 |
| Locus_22048_Transcript_1/1_Conf_1.000 | 345 | 4  | 2.23E-09 | EFO23701.1     | 55 | 65.4698 | 103 | 57  | TPR Domain containing protein                                |
| Locus_22049_Transcript_1/1_Conf_1.000 | 325 | 1  | 7.41E-16 | CAR63646.1     | 80 | 84.7297 | 46  | 37  | putative Homeobox family member                              |
| Locus_2205_Transcript_1/1_Conf_1.000  | 491 | 5  | 1.58E-23 | CAB04203.2     | 62 | 112.464 | 156 | 98  | C. elegans protein F26H9.2, confirmed by transcript evidence |
| Locus_22050_Transcript_1/1_Conf_1.000 | 172 | 0  |          |                |    |         |     |     |                                                              |
| Locus_22051_Transcript_1/1_Conf_1.000 | 976 | 1  | 9.61E-04 | CBI61474.1     | 45 | 48.9062 | 150 | 68  | unnamed protein product                                      |
| Locus_22052_Transcript_1/1_Conf_1.000 | 142 | 1  | 8.55E-06 | EFO27222.1     | 72 | 53.5286 | 47  | 34  | hypothetical protein LOAG_01266                              |
| Locus_22053_Transcript_1/1_Conf_1.000 | 455 | 20 | 1.56E-39 | XP_001896270.1 | 66 | 165.622 | 149 | 99  | Zinc finger, C2H2 type family protein                        |
| Locus_22054_Transcript_1/1_Conf_1.000 | 298 | 20 | 4.31E-13 | EFO28436.1     | 54 | 77.7962 | 92  | 50  | zinc finger protein                                          |
| Locus_22055_Transcript_1/1_Conf_1.000 | 313 | 0  |          |                |    |         |     |     |                                                              |



|                                       |      |    |          |                |    |         |     |     |                                                |
|---------------------------------------|------|----|----------|----------------|----|---------|-----|-----|------------------------------------------------|
| Locus_22056_Transcript_1/1_Conf_1.000 | 352  | 20 | 1.94E-13 | XP_002637085.1 | 77 | 78.9518 | 58  | 45  | Hypothetical protein CBG09584                  |
| Locus_22057_Transcript_1/1_Conf_1.000 | 505  | 0  |          |                |    |         |     |     |                                                |
| Locus_22058_Transcript_1/1_Conf_1.000 | 139  | 0  |          |                |    |         |     |     |                                                |
| Locus_22059_Transcript_1/1_Conf_1.000 | 164  | 0  |          |                |    |         |     |     |                                                |
| Locus_2206_Transcript_1/1_Conf_1.000  | 345  | 20 | 5.12E-22 | XP_002630467.1 | 86 | 107.457 | 74  | 64  | C. briggsae CBR-UNC-104 protein                |
| Locus_22060_Transcript_1/1_Conf_1.000 | 129  | 0  |          |                |    |         |     |     |                                                |
| Locus_22061_Transcript_1/1_Conf_1.000 | 405  | 0  |          |                |    |         |     |     |                                                |
| Locus_22062_Transcript_1/1_Conf_1.000 | 432  | 20 | 4.84E-41 | NP_504578.1    | 76 | 170.629 | 131 | 100 | hypothetical protein F17A9.4                   |
| Locus_22063_Transcript_1/1_Conf_1.000 | 565  | 0  |          |                |    |         |     |     |                                                |
| Locus_22064_Transcript_1/1_Conf_1.000 | 240  | 0  |          |                |    |         |     |     |                                                |
| Locus_22065_Transcript_1/1_Conf_1.000 | 129  | 0  |          |                |    |         |     |     |                                                |
| Locus_22066_Transcript_1/1_Conf_1.000 | 236  | 3  | 4.58E-31 | NP_500132.3    | 87 | 137.502 | 78  | 68  | hypothetical protein Y41D4A.7                  |
| Locus_22067_Transcript_1/1_Conf_1.000 | 321  | 20 | 3.31E-21 | NP_593736.1    | 70 | 104.76  | 105 | 74  | histone acetyltransferase Mst2                 |
| Locus_22068_Transcript_1/1_Conf_1.000 | 232  | 0  |          |                |    |         |     |     |                                                |
| Locus_22069_Transcript_1/1_Conf_1.000 | 234  | 20 | 8.41E-09 | NP_504512.1    | 71 | 63.5438 | 74  | 53  | hypothetical protein F44E7.2                   |
| Locus_2207_Transcript_1/2_Conf_1.000  | 1526 | 3  | 5.54E-08 | NP_492411.1    | 46 | 63.929  | 167 | 77  | GEX Interacting protein family member (gei-11) |
| Locus_2207_Transcript_2/2_Conf_1.000  | 2627 | 3  | 1.07E-07 | NP_492411.1    | 46 | 63.929  | 167 | 77  | GEX Interacting protein family member (gei-11) |
| Locus_22070_Transcript_1/1_Conf_1.000 | 214  | 20 | 4.09E-24 | XP_002646410.1 | 91 | 114.39  | 67  | 61  | Hypothetical protein CBG18783                  |
| Locus_22071_Transcript_1/1_Conf_1.000 | 481  | 0  |          |                |    |         |     |     |                                                |
| Locus_22072_Transcript_1/1_Conf_1.000 | 146  | 0  |          |                |    |         |     |     |                                                |
| Locus_22073_Transcript_1/1_Conf_1.000 | 623  | 0  |          |                |    |         |     |     |                                                |

|                                       |      |    |          |                |    |         |     |     |                                                               |
|---------------------------------------|------|----|----------|----------------|----|---------|-----|-----|---------------------------------------------------------------|
| Locus_22074_Transcript_1/1_Conf_1.000 | 492  | 0  |          |                |    |         |     |     |                                                               |
| Locus_22075_Transcript_1/1_Conf_1.000 | 210  | 20 | 3.98E-19 | NP_509186.3    | 78 | 97.8265 | 71  | 56  | Carbonic AnHydrase family member (cah-5)                      |
| Locus_22076_Transcript_1/1_Conf_1.000 | 208  | 2  | 1.20E-07 | XP_002642021.1 | 65 | 59.6918 | 69  | 45  | C. briggsae CBR-COQ-8 protein                                 |
| Locus_22077_Transcript_1/1_Conf_1.000 | 264  | 20 | 5.10E-14 | XP_002642804.1 | 72 | 80.8777 | 75  | 54  | Hypothetical protein CBG21200                                 |
| Locus_22078_Transcript_1/1_Conf_1.000 | 341  | 20 | 1.90E-21 | CAB07368.3     | 67 | 105.531 | 113 | 76  | C. elegans protein F22G12.4, confirmed by transcript evidence |
| Locus_22079_Transcript_1/1_Conf_1.000 | 143  | 20 | 6.53E-14 | XP_002640379.1 | 87 | 80.4925 | 47  | 41  | C. briggsae CBR-OPT-3 protein                                 |
| Locus_2208_Transcript_1/2_Conf_1.000  | 4847 | 20 | 0        | NP_001024981.1 | 79 | 1048.88 | 844 | 674 | Lin-5 (Five) Interacting protein family member (lfi-1)        |
| Locus_2208_Transcript_2/2_Conf_1.000  | 4847 | 20 | 0        | NP_001024981.1 | 79 | 1044.65 | 843 | 673 | Lin-5 (Five) Interacting protein family member (lfi-1)        |
| Locus_22080_Transcript_1/1_Conf_1.000 | 302  | 3  | 5.43E-08 | XP_002645016.1 | 62 | 60.8474 | 81  | 51  | Hypothetical protein CBG11012                                 |
| Locus_22081_Transcript_1/1_Conf_1.000 | 307  | 20 | 9.77E-26 | NP_498284.1    | 75 | 119.783 | 93  | 70  | hypothetical protein C28H8.11                                 |
| Locus_22082_Transcript_1/1_Conf_1.000 | 154  | 0  |          |                |    |         |     |     |                                                               |

|                                       |      |    |          |                |    |         |     |     |                                 |
|---------------------------------------|------|----|----------|----------------|----|---------|-----|-----|---------------------------------|
| Locus_22083_Transcript_1/1_Conf_1.000 | 250  | 2  | 1.15E-10 | NP_505353.1    | 94 | 69.707  | 39  | 37  | hypothetical protein T27E4.7    |
| Locus_22084_Transcript_1/1_Conf_1.000 | 346  | 0  |          |                |    |         |     |     |                                 |
| Locus_22085_Transcript_1/1_Conf_1.000 | 432  | 0  |          |                |    |         |     |     |                                 |
| Locus_22086_Transcript_1/1_Conf_1.000 | 319  | 20 | 1.43E-48 | XP_002633294.1 | 95 | 195.667 | 94  | 90  | C. briggsae CBR-NHR-67 protein  |
| Locus_22087_Transcript_1/1_Conf_1.000 | 167  | 20 | 5.07E-22 | NP_500379.1    | 98 | 107.457 | 53  | 52  | hypothetical protein Y37E11B.5  |
| Locus_22088_Transcript_1/1_Conf_1.000 | 142  | 0  |          |                |    |         |     |     |                                 |
| Locus_22089_Transcript_1/1_Conf_1.000 | 362  | 20 | 2.96E-06 | XP_001361765.2 | 43 | 55.0694 | 116 | 51  | GA21047                         |
| Locus_2209_Transcript_1/1_Conf_1.000  | 782  | 20 | 1.64E-55 | XP_002642013.1 | 85 | 220.32  | 185 | 159 | Hypothetical protein CBG17947   |
| Locus_22090_Transcript_1/1_Conf_1.000 | 182  | 20 | 2.84E-28 | XP_002641773.1 | 98 | 128.257 | 60  | 59  | Hypothetical protein CBG10119   |
| Locus_22091_Transcript_1/1_Conf_1.000 | 404  | 2  | 1.70E-09 | NP_496236.1    | 57 | 65.855  | 124 | 71  | hypothetical protein T09F3.2    |
| Locus_22092_Transcript_1/1_Conf_1.000 | 219  | 0  |          |                |    |         |     |     |                                 |
| Locus_22093_Transcript_1/1_Conf_1.000 | 212  | 0  |          |                |    |         |     |     |                                 |
| Locus_22094_Transcript_1/1_Conf_1.000 | 190  | 0  |          |                |    |         |     |     |                                 |
| Locus_22095_Transcript_1/1_Conf_1.000 | 524  | 0  |          |                |    |         |     |     |                                 |
| Locus_22096_Transcript_1/1_Conf_1.000 | 147  | 0  |          |                |    |         |     |     |                                 |
| Locus_22097_Transcript_1/1_Conf_1.000 | 173  | 0  |          |                |    |         |     |     |                                 |
| Locus_22098_Transcript_1/1_Conf_1.000 | 154  | 0  |          |                |    |         |     |     |                                 |
| Locus_22099_Transcript_1/1_Conf_1.000 | 273  | 0  |          |                |    |         |     |     |                                 |
| Locus_221_Transcript_1/3_Conf_0.571   | 588  | 1  | 3.01E-16 | EFO15932.1     | 65 | 88.9669 | 112 | 73  | hypothetical protein LOAG_12576 |
| Locus_221_Transcript_2/3_Conf_0.429   | 588  | 1  | 3.01E-16 | EFO15932.1     | 65 | 88.9669 | 112 | 73  | hypothetical protein LOAG_12576 |
| Locus_221_Transcript_3/3_Conf_0.571   | 2214 | 20 | 1.02E-72 | EFO15932.1     | 67 | 279.641 | 286 | 192 | hypothetical protein LOAG_12576 |
| Locus_2210_Transcript_1/3_Conf_0.400  | 1914 | 20 | 0        | XP_002636622.1 | 83 | 884.019 | 643 | 537 | C. briggsae CBR-SMA-1 protein   |
| Locus_2210_Transcript_2/3_Conf_0.400  | 1905 | 20 | 0        | XP_002636622.1 | 85 | 883.248 | 625 | 532 | C. briggsae CBR-SMA-1 protein   |

|                                       |      |    |          |                |     |         |     |     |                                                                                  |
|---------------------------------------|------|----|----------|----------------|-----|---------|-----|-----|----------------------------------------------------------------------------------|
| Locus_2210_Transcript_3/3_Conf_0.600  | 1954 | 20 | 0        | XP_002636622.1 | 85  | 882.478 | 623 | 531 | C. briggsae CBR-SMA-1 protein                                                    |
| Locus_22100_Transcript_1/1_Conf_1.000 | 319  | 0  |          |                |     |         |     |     |                                                                                  |
| Locus_22101_Transcript_1/1_Conf_1.000 | 167  | 0  |          |                |     |         |     |     |                                                                                  |
| Locus_22102_Transcript_1/1_Conf_1.000 | 169  | 20 | 1.24E-28 | XP_002913159.1 | 100 | 129.413 | 56  | 56  | PREDICTED: serine/threonine-protein phosphatase PP1-gamma catalytic subunit-like |
| Locus_22103_Transcript_1/1_Conf_1.000 | 181  | 0  |          |                |     |         |     |     |                                                                                  |
| Locus_22104_Transcript_1/1_Conf_1.000 | 162  | 0  |          |                |     |         |     |     |                                                                                  |
| Locus_22105_Transcript_1/1_Conf_1.000 | 668  | 20 | 7.73E-07 | XP_001894189.1 | 53  | 58.151  | 149 | 79  | hypothetical protein                                                             |
| Locus_22106_Transcript_1/1_Conf_1.000 | 179  | 0  |          |                |     |         |     |     |                                                                                  |
| Locus_22107_Transcript_1/1_Conf_1.000 | 407  | 5  | 1.74E-14 | NP_492265.1    | 66  | 82.4185 | 77  | 51  | MYST family histone acetyltransferase-like family member (mys-4)                 |
| Locus_22108_Transcript_1/1_Conf_1.000 | 393  | 6  | 1.90E-08 | XP_002645850.1 | 58  | 62.3882 | 73  | 43  | Hypothetical protein CBG07586                                                    |
| Locus_22109_Transcript_1/1_Conf_1.000 | 191  | 0  |          |                |     |         |     |     |                                                                                  |
| Locus_2211_Transcript_1/1_Conf_1.000  | 903  | 5  | 3.79E-12 | NP_496595.1    | 73  | 76.6406 | 67  | 49  | SR protein related family member (rsr-2)                                         |
| Locus_22110_Transcript_1/1_Conf_1.000 | 250  | 0  |          |                |     |         |     |     |                                                                                  |

|                                       |     |    |          |                |    |         |     |     |                                                                                                     |
|---------------------------------------|-----|----|----------|----------------|----|---------|-----|-----|-----------------------------------------------------------------------------------------------------|
| Locus_22111_Transcript_1/1_Conf_1.000 | 441 | 20 | 7.85E-47 | EFO21836.1     | 77 | 189.889 | 146 | 113 | hypothetical protein LOAG_06649                                                                     |
| Locus_22112_Transcript_1/1_Conf_1.000 | 301 | 3  | 2.13E-04 | XP_002646170.1 | 59 | 48.9062 | 72  | 43  | C. briggsae CBR-TAF-5 protein                                                                       |
| Locus_22113_Transcript_1/1_Conf_1.000 | 762 | 20 | 6.82E-27 | XP_002131847.1 | 73 | 125.176 | 127 | 93  | PREDICTED: similar to riboflavin kinase                                                             |
| Locus_22114_Transcript_1/1_Conf_1.000 | 157 | 2  | 2.23E-09 | XP_002634423.1 | 75 | 65.4698 | 52  | 39  | C. briggsae CBR-PTR-14 protein                                                                      |
| Locus_22115_Transcript_1/1_Conf_1.000 | 513 | 20 | 5.99E-69 | NP_741582.2    | 86 | 263.462 | 170 | 147 | hypothetical protein H14N18.4                                                                       |
| Locus_22116_Transcript_1/1_Conf_1.000 | 131 | 0  |          |                |    |         |     |     |                                                                                                     |
| Locus_22117_Transcript_1/1_Conf_1.000 | 305 | 0  |          |                |    |         |     |     |                                                                                                     |
| Locus_22118_Transcript_1/1_Conf_1.000 | 292 | 20 | 3.41E-34 | XP_002629844.1 | 89 | 147.902 | 97  | 87  | C. briggsae CBR-SCP-1 protein                                                                       |
| Locus_22119_Transcript_1/1_Conf_1.000 | 302 | 0  |          |                |    |         |     |     |                                                                                                     |
| Locus_2212_Transcript_1/1_Conf_1.000  | 889 | 20 | 9.52E-69 | NP_493412.2    | 68 | 264.618 | 316 | 218 | hypothetical protein Y37H9A.3                                                                       |
| Locus_22120_Transcript_1/1_Conf_1.000 | 130 | 0  |          |                |    |         |     |     |                                                                                                     |
| Locus_22121_Transcript_1/1_Conf_1.000 | 633 | 20 | 7.79E-43 | NP_504651.1    | 75 | 177.563 | 152 | 114 | MOlybdenum Cofactor biosynthesis family member (moc-2)                                              |
| Locus_22122_Transcript_1/1_Conf_1.000 | 361 | 0  |          |                |    |         |     |     |                                                                                                     |
| Locus_22123_Transcript_1/1_Conf_1.000 | 148 | 0  |          |                |    |         |     |     |                                                                                                     |
| Locus_22124_Transcript_1/1_Conf_1.000 | 197 | 6  | 2.22E-09 | EFO16773.1     | 69 | 65.4698 | 66  | 46  | hypothetical protein LOAG_11731                                                                     |
| Locus_22125_Transcript_1/1_Conf_1.000 | 286 | 0  |          |                |    |         |     |     |                                                                                                     |
| Locus_22126_Transcript_1/1_Conf_1.000 | 614 | 20 | 1.49E-88 | 1LLQ           | 89 | 329.331 | 201 | 180 | CrystalStructure Of Malic Enzyme From Ascaris Suum Complexed With Nicotinamide Adenine Dinucleotide |
| Locus_22127_Transcript_1/1_Conf_1.000 | 262 | 0  |          |                |    |         |     |     |                                                                                                     |
| Locus_22128_Transcript_1/1_Conf_1.000 | 129 | 0  |          |                |    |         |     |     |                                                                                                     |
| Locus_22129_Transcript_1/1_Conf_1.000 | 379 | 9  | 3.19E-16 | XP_002638736.1 | 71 | 88.1965 | 84  | 60  | C. briggsae CBR-EGO-1 protein                                                                       |

|                                       |      |    |          |                |    |         |     |     |                                                                         |
|---------------------------------------|------|----|----------|----------------|----|---------|-----|-----|-------------------------------------------------------------------------|
| Locus_2213_Transcript_1/1_Conf_1.000  | 2658 | 20 | 0        | XP_002645233.1 | 76 | 946.421 | 777 | 597 | C. briggsae CBR-TAG-147 protein                                         |
| Locus_22130_Transcript_1/1_Conf_1.000 | 173  | 20 | 2.59E-10 | YP_001413705.1 | 71 | 68.5514 | 57  | 41  | D-lactate dehydrogenase (cytochrome)                                    |
| Locus_22131_Transcript_1/1_Conf_1.000 | 222  | 20 | 2.64E-18 | NP_497641.2    | 83 | 95.1301 | 68  | 57  | CaDHerin family member (cdh-1)                                          |
| Locus_22132_Transcript_1/1_Conf_1.000 | 288  | 0  |          |                |    |         |     |     |                                                                         |
| Locus_22133_Transcript_1/1_Conf_1.000 | 359  | 1  | 1.68E-17 | EFO25272.1     | 58 | 92.4337 | 116 | 68  | hypothetical protein LOAG_03210                                         |
| Locus_22134_Transcript_1/1_Conf_1.000 | 284  | 0  |          |                |    |         |     |     |                                                                         |
| Locus_22135_Transcript_1/1_Conf_1.000 | 502  | 20 | 1.93E-53 | NP_741714.1    | 80 | 211.846 | 167 | 134 | related to yeast Vacuolar Protein Sorting factor family member (vps-45) |
| Locus_22136_Transcript_1/1_Conf_1.000 | 373  | 0  |          |                |    |         |     |     |                                                                         |
| Locus_22137_Transcript_1/1_Conf_1.000 | 133  | 0  |          |                |    |         |     |     |                                                                         |
| Locus_22138_Transcript_1/1_Conf_1.000 | 165  | 0  |          |                |    |         |     |     |                                                                         |
| Locus_22139_Transcript_1/1_Conf_1.000 | 174  | 17 | 5.04E-06 | XP_002740793.1 | 62 | 54.299  | 54  | 34  | PREDICTED: hypothetical protein                                         |
| Locus_2214_Transcript_1/2_Conf_1.000  | 1072 | 20 | 2.79E-63 | EFO18993.1     | 56 | 246.899 | 362 | 203 | hypothetical protein LOAG_09502                                         |
| Locus_2214_Transcript_2/2_Conf_1.000  | 1033 | 20 | 4.37E-66 | EFO18993.1     | 58 | 256.144 | 349 | 203 | hypothetical protein LOAG_09502                                         |
| Locus_22140_Transcript_1/1_Conf_1.000 | 169  | 2  | 7.31E-13 | NP_491499.1    | 80 | 77.0258 | 56  | 45  | hypothetical protein F54C1.1                                            |
| Locus_22141_Transcript_1/1_Conf_1.000 | 172  | 0  |          |                |    |         |     |     |                                                                         |
| Locus_22142_Transcript_1/1_Conf_1.000 | 157  | 0  |          |                |    |         |     |     |                                                                         |
| Locus_22143_Transcript_1/1_Conf_1.000 | 155  | 0  |          |                |    |         |     |     |                                                                         |
| Locus_22144_Transcript_1/1_Conf_1.000 | 251  | 2  | 8.00E-04 | NP_503880.1    | 58 | 46.9802 | 50  | 29  | hypothetical protein Y73C8B.1                                           |
| Locus_22145_Transcript_1/1_Conf_1.000 | 260  | 0  |          |                |    |         |     |     |                                                                         |
| Locus_22146_Transcript_1/1_Conf_1.000 | 168  | 0  |          |                |    |         |     |     |                                                                         |
| Locus_22147_Transcript_1/1_Conf_1.000 | 276  | 0  |          |                |    |         |     |     |                                                                         |
| Locus_22148_Transcript_1/2_Conf_1.000 | 276  | 4  | 3.05E-11 | NP_495478.1    | 82 | 71.633  | 50  | 41  | hypothetical protein T07F8.4                                            |
| Locus_22148_Transcript_2/2_Conf_1.000 | 270  | 2  | 1.43E-08 | NP_495478.1    | 78 | 62.7734 | 50  | 39  | hypothetical protein T07F8.4                                            |

|                                       |      |    |           |                |     |         |     |     |                                                                         |
|---------------------------------------|------|----|-----------|----------------|-----|---------|-----|-----|-------------------------------------------------------------------------|
| Locus_22149_Transcript_1/1_Conf_1.000 | 291  | 20 | 2.29E-22  | NP_061932.1    | 100 | 108.612 | 51  | 51  | mitochondrial import receptor subunit TOM7 homolog                      |
| Locus_2215_Transcript_1/2_Conf_1.000  | 1365 | 2  | 1.44E-04  | XP_001751006.1 | 30  | 52.373  | 325 | 98  | hypothetical protein                                                    |
| Locus_2215_Transcript_2/2_Conf_1.000  | 1365 | 4  | 7.63E-06  | XP_001751006.1 | 29  | 56.6102 | 325 | 95  | hypothetical protein                                                    |
| Locus_22150_Transcript_1/1_Conf_1.000 | 206  | 4  | 1.74E-14  | NP_496984.1    | 72  | 82.4185 | 68  | 49  | hypothetical protein R06A4.8                                            |
| Locus_22151_Transcript_1/1_Conf_1.000 | 229  | 0  |           |                |     |         |     |     |                                                                         |
| Locus_22152_Transcript_1/1_Conf_1.000 | 319  | 20 | 1.34E-46  | XP_002831374.1 | 99  | 189.119 | 106 | 105 | PREDICTED: ADP/ATP translocase 3-like, partial                          |
| Locus_22153_Transcript_1/1_Conf_1.000 | 410  | 1  | 4.28E-05  | NP_504468.2    | 61  | 51.2174 | 72  | 44  | hypothetical protein C18C4.7                                            |
| Locus_22154_Transcript_1/1_Conf_1.000 | 213  | 2  | 4.54E-15  | XP_002638798.1 | 76  | 84.3445 | 71  | 54  | C. briggsae CBR-PIF-1 protein                                           |
| Locus_22155_Transcript_1/1_Conf_1.000 | 251  | 20 | 1.83E-24  | XP_002643979.1 | 95  | 115.546 | 68  | 65  | C. briggsae CBR-PGP-3 protein                                           |
| Locus_22156_Transcript_1/1_Conf_1.000 | 148  | 15 | 7.24E-08  | XP_002630579.1 | 75  | 60.4622 | 48  | 36  | C. briggsae CBR-NHX-2 protein                                           |
| Locus_22157_Transcript_1/1_Conf_1.000 | 263  | 0  |           |                |     |         |     |     |                                                                         |
| Locus_22158_Transcript_1/1_Conf_1.000 | 248  | 0  |           |                |     |         |     |     |                                                                         |
| Locus_22159_Transcript_1/1_Conf_1.000 | 327  | 20 | 4.43E-26  | NP_502164.1    | 86  | 120.939 | 105 | 91  | WHITe (Drosophila) related ABC transport family member (wht-2)          |
| Locus_2216_Transcript_1/2_Conf_1.000  | 2128 | 20 | 2.68E-147 | NP_505969.1    | 91  | 527.324 | 309 | 284 | HRD (yeast Hmg-coa Reductase Degradation) homolog family member (hrd-1) |

|                                       |      |    |           |                |     |         |     |     |                                                                         |
|---------------------------------------|------|----|-----------|----------------|-----|---------|-----|-----|-------------------------------------------------------------------------|
| Locus_2216_Transcript_2/2_Conf_1.000  | 2053 | 20 | 2.57E-147 | NP_505969.1    | 91  | 527.324 | 309 | 284 | HRD (yeast Hmg-coa Reductase Degradation) homolog family member (hrd-1) |
| Locus_22160_Transcript_1/1_Conf_1.000 | 372  | 2  | 4.35E-05  | NP_506364.2    | 50  | 51.2174 | 122 | 62  | hypothetical protein C50B8.5                                            |
| Locus_22161_Transcript_1/1_Conf_1.000 | 184  | 0  |           |                |     |         |     |     |                                                                         |
| Locus_22162_Transcript_1/1_Conf_1.000 | 151  | 0  |           |                |     |         |     |     |                                                                         |
| Locus_22163_Transcript_1/1_Conf_1.000 | 473  | 20 | 2.26E-46  | XP_001895190.1 | 74  | 188.348 | 157 | 117 | Receptor family ligand binding region containing protein                |
| Locus_22164_Transcript_1/1_Conf_1.000 | 156  | 0  |           |                |     |         |     |     |                                                                         |
| Locus_22165_Transcript_1/1_Conf_1.000 | 225  | 20 | 3.21E-24  | XP_001100810.2 | 100 | 114.775 | 72  | 72  | PREDICTED: 60S ribosomal protein L5-like isoform 3                      |
| Locus_22166_Transcript_1/1_Conf_1.000 | 167  | 0  |           |                |     |         |     |     |                                                                         |
| Locus_22167_Transcript_1/1_Conf_1.000 | 169  | 0  |           |                |     |         |     |     |                                                                         |
| Locus_22168_Transcript_1/1_Conf_1.000 | 300  | 0  |           |                |     |         |     |     |                                                                         |
| Locus_22169_Transcript_1/1_Conf_1.000 | 923  | 20 | 9.69E-11  | XP_001464299.1 | 42  | 72.0182 | 293 | 124 | kinesin K39                                                             |
| Locus_2217_Transcript_1/1_Conf_1.000  | 1332 | 20 | 6.06E-101 | NP_498411.1    | 81  | 372.474 | 281 | 228 | related to yeast Vacuolar Protein Sorting factor family member (vps-16) |
| Locus_22170_Transcript_1/1_Conf_1.000 | 120  | 0  |           |                |     |         |     |     |                                                                         |



|                                       |     |    |          |                |    |         |     |     |                                                            |
|---------------------------------------|-----|----|----------|----------------|----|---------|-----|-----|------------------------------------------------------------|
| Locus_22171_Transcript_1/1_Conf_1.000 | 174 | 20 | 2.33E-19 | XP_002643811.1 | 94 | 98.5969 | 57  | 54  | C. briggsae CBR-NMY-1 protein                              |
| Locus_22172_Transcript_1/1_Conf_1.000 | 246 | 4  | 8.84E-19 | NP_496968.1    | 77 | 96.6709 | 74  | 57  | hypothetical protein Y48B6A.12                             |
| Locus_22173_Transcript_1/1_Conf_1.000 | 134 | 0  |          |                |    |         |     |     |                                                            |
| Locus_22174_Transcript_1/1_Conf_1.000 | 284 | 20 | 1.23E-15 | ABJ99064.1     | 64 | 86.2705 | 96  | 62  | Hypothetical protein W03A3.2                               |
| Locus_22175_Transcript_1/1_Conf_1.000 | 210 | 20 | 2.75E-20 | EFO25043.1     | 86 | 101.679 | 69  | 60  | hypothetical protein LOAG_03439                            |
| Locus_22176_Transcript_1/1_Conf_1.000 | 197 | 20 | 5.83E-26 | XP_002640668.1 | 96 | 120.553 | 65  | 63  | C. briggsae CBR-UNC-54 protein                             |
| Locus_22177_Transcript_1/1_Conf_1.000 | 215 | 2  | 1.91E-05 | XP_002636455.1 | 65 | 52.373  | 47  | 31  | Hypothetical protein CBG23119                              |
| Locus_22178_Transcript_1/1_Conf_1.000 | 574 | 20 | 1.76E-58 | CAR63670.1     | 84 | 229.18  | 152 | 129 | hypothetical protein                                       |
| Locus_22179_Transcript_1/1_Conf_1.000 | 211 | 0  |          |                |    |         |     |     |                                                            |
| Locus_2218_Transcript_1/1_Conf_1.000  | 324 | 0  |          |                |    |         |     |     |                                                            |
| Locus_22180_Transcript_1/1_Conf_1.000 | 177 | 0  |          |                |    |         |     |     |                                                            |
| Locus_22181_Transcript_1/1_Conf_1.000 | 359 | 0  |          |                |    |         |     |     |                                                            |
| Locus_22182_Transcript_1/1_Conf_1.000 | 255 | 0  |          |                |    |         |     |     |                                                            |
| Locus_22183_Transcript_1/1_Conf_1.000 | 374 | 20 | 5.42E-56 | XP_002642222.1 | 90 | 220.32  | 122 | 111 | C. briggsae CBR-FSN-1 protein                              |
| Locus_22184_Transcript_1/1_Conf_1.000 | 345 | 10 | 3.20E-40 | XP_002631802.1 | 84 | 167.933 | 115 | 97  | Hypothetical protein CBG21021                              |
| Locus_22185_Transcript_1/1_Conf_1.000 | 273 | 20 | 2.12E-20 | NP_492278.2    | 69 | 102.064 | 91  | 63  | hypothetical protein T19A6.4                               |
| Locus_22186_Transcript_1/1_Conf_1.000 | 331 | 4  | 2.52E-05 | XP_001204017.1 | 53 | 51.9878 | 111 | 59  | PREDICTED: similar to Pcd6ip protein                       |
| Locus_22187_Transcript_1/1_Conf_1.000 | 552 | 5  | 2.03E-37 | ACM46022.1     | 70 | 159.073 | 150 | 105 | Troponin t protein 3, isoform d                            |
| Locus_22188_Transcript_1/1_Conf_1.000 | 141 | 0  |          |                |    |         |     |     |                                                            |
| Locus_22189_Transcript_1/1_Conf_1.000 | 136 | 0  |          |                |    |         |     |     |                                                            |
| Locus_2219_Transcript_1/1_Conf_1.000  | 242 | 0  |          |                |    |         |     |     |                                                            |
| Locus_22190_Transcript_1/1_Conf_1.000 | 346 | 20 | 2.79E-44 | NP_498014.2    | 86 | 181.415 | 115 | 100 | COenzyme Q (ubiquinone) biosynthesis family member (coq-8) |

|                                       |      |    |           |                |     |         |     |     |                                              |
|---------------------------------------|------|----|-----------|----------------|-----|---------|-----|-----|----------------------------------------------|
| Locus_22191_Transcript_1/1_Conf_1.000 | 379  | 20 | 1.92E-29  | XP_002634543.1 | 71  | 132.109 | 118 | 84  | C. briggsae CBR-CED-5 protein                |
| Locus_22192_Transcript_1/1_Conf_1.000 | 128  | 0  |           |                |     |         |     |     |                                              |
| Locus_22193_Transcript_1/1_Conf_1.000 | 497  | 0  |           |                |     |         |     |     |                                              |
| Locus_22194_Transcript_1/1_Conf_1.000 | 143  | 20 | 4.22E-21  | 3JYH           | 100 | 104.375 | 47  | 47  | Human Dipeptidyl Peptidase Dpp7              |
| Locus_22195_Transcript_1/1_Conf_1.000 | 230  | 7  | 1.14E-05  | B4XT00.1       | 60  | 53.1434 | 71  | 43  | C-type lectin B1                             |
| Locus_22196_Transcript_1/1_Conf_1.000 | 255  | 0  |           |                |     |         |     |     |                                              |
| Locus_22197_Transcript_1/1_Conf_1.000 | 496  | 20 | 3.47E-39  | XP_001899820.1 | 85  | 164.466 | 132 | 113 | Hexokinase family protein                    |
| Locus_22198_Transcript_1/1_Conf_1.000 | 132  | 9  | 2.27E-06  | CBA11992.1     | 80  | 55.4546 | 41  | 33  | endonuclease-reverse transcriptase HmRTE-e01 |
| Locus_22199_Transcript_1/1_Conf_1.000 | 311  | 0  |           |                |     |         |     |     |                                              |
| Locus_222_Transcript_1/3_Conf_0.625   | 1227 | 20 | 1.16E-127 | P54813.2       | 83  | 461.07  | 323 | 270 | Protein YME1 homolog                         |
| Locus_222_Transcript_2/3_Conf_0.750   | 2500 | 20 | 0         | P54813.2       | 86  | 921.383 | 636 | 551 | Protein YME1 homolog                         |
| Locus_222_Transcript_3/3_Conf_0.750   | 2518 | 20 | 0         | P54813.2       | 87  | 935.636 | 636 | 556 | Protein YME1 homolog                         |

|                                       |      |    |          |                |     |         |     |     |                                                                          |
|---------------------------------------|------|----|----------|----------------|-----|---------|-----|-----|--------------------------------------------------------------------------|
| Locus_2220_Transcript_1/1_Conf_1.000  | 2000 | 20 | 0        | NP_498887.2    | 91  | 1072.77 | 628 | 574 | Glutamate Receptor family (AMPA) family member (glr-1)                   |
| Locus_22200_Transcript_1/1_Conf_1.000 | 349  | 0  |          |                |     |         |     |     |                                                                          |
| Locus_22201_Transcript_1/1_Conf_1.000 | 146  | 1  | 6.36E-04 | EFO24319.1     | 64  | 47.3654 | 48  | 31  | hypothetical protein LOAG_04165                                          |
| Locus_22202_Transcript_1/1_Conf_1.000 | 162  | 0  |          |                |     |         |     |     |                                                                          |
| Locus_22203_Transcript_1/1_Conf_1.000 | 291  | 4  | 1.59E-31 | XP_002642450.1 | 83  | 139.043 | 92  | 77  | Hypothetical protein CBG06858                                            |
| Locus_22204_Transcript_1/1_Conf_1.000 | 261  | 20 | 2.01E-18 | NP_740780.1    | 94  | 95.5153 | 71  | 67  | AdaPtin, Small chain (clathrin associated complex) family member (aps-3) |
| Locus_22205_Transcript_1/1_Conf_1.000 | 376  | 0  |          |                |     |         |     |     |                                                                          |
| Locus_22206_Transcript_1/1_Conf_1.000 | 462  | 0  |          |                |     |         |     |     |                                                                          |
| Locus_22207_Transcript_1/1_Conf_1.000 | 163  | 0  |          |                |     |         |     |     |                                                                          |
| Locus_22208_Transcript_1/1_Conf_1.000 | 452  | 20 | 1.85E-32 | XP_002636579.1 | 76  | 142.124 | 103 | 79  | Hypothetical protein CBG23273                                            |
| Locus_22209_Transcript_1/1_Conf_1.000 | 206  | 0  |          |                |     |         |     |     |                                                                          |
| Locus_2221_Transcript_1/1_Conf_1.000  | 864  | 0  |          |                |     |         |     |     |                                                                          |
| Locus_22210_Transcript_1/1_Conf_1.000 | 174  | 20 | 5.93E-23 | BAG11032.1     | 100 | 110.538 | 52  | 52  | FERM, RhoGEF and pleckstrin domain-containing protein 1                  |
| Locus_22211_Transcript_1/1_Conf_1.000 | 152  | 0  |          |                |     |         |     |     |                                                                          |
| Locus_22212_Transcript_1/1_Conf_1.000 | 229  | 0  |          |                |     |         |     |     |                                                                          |

|                                       |      |    |          |                |    |         |     |     |                                                                            |
|---------------------------------------|------|----|----------|----------------|----|---------|-----|-----|----------------------------------------------------------------------------|
| Locus_22213_Transcript_1/1_Conf_1.000 | 206  | 0  |          |                |    |         |     |     |                                                                            |
| Locus_22214_Transcript_1/1_Conf_1.000 | 149  | 0  |          |                |    |         |     |     |                                                                            |
| Locus_22215_Transcript_1/1_Conf_1.000 | 413  | 20 | 9.70E-50 | NP_501127.2    | 85 | 199.519 | 126 | 108 | RNA Polymerase, Class III (C) family member (rpc-1)                        |
| Locus_22216_Transcript_1/1_Conf_1.000 | 317  | 20 | 1.76E-38 | NP_495009.1    | 90 | 162.155 | 96  | 87  | hypothetical protein F09E5.3                                               |
| Locus_22217_Transcript_1/1_Conf_1.000 | 270  | 20 | 4.01E-19 | NP_490706.2    | 64 | 97.8265 | 90  | 58  | hypothetical protein Y48G1BM.1                                             |
| Locus_22218_Transcript_1/1_Conf_1.000 | 219  | 20 | 1.46E-16 | XP_001894229.1 | 84 | 89.3521 | 58  | 49  | Variant SH3 domain containing protein                                      |
| Locus_22219_Transcript_1/1_Conf_1.000 | 159  | 0  |          |                |    |         |     |     |                                                                            |
| Locus_2222_Transcript_1/2_Conf_1.000  | 344  | 4  | 5.15E-14 | XP_002640676.1 | 89 | 80.8777 | 47  | 42  | Hypothetical protein CBG19738                                              |
| Locus_2222_Transcript_2/2_Conf_1.000  | 340  | 2  | 6.53E-14 | XP_002640676.1 | 85 | 80.4925 | 70  | 60  | Hypothetical protein CBG19738                                              |
| Locus_22220_Transcript_1/1_Conf_1.000 | 281  | 1  | 2.04E-07 | NP_502613.2    | 62 | 58.9214 | 91  | 57  | QUInine non-avoider family member (qui-1)                                  |
| Locus_22221_Transcript_1/1_Conf_1.000 | 364  | 0  |          |                |    |         |     |     |                                                                            |
| Locus_22222_Transcript_1/1_Conf_1.000 | 158  | 0  |          |                |    |         |     |     |                                                                            |
| Locus_22223_Transcript_1/1_Conf_1.000 | 229  | 1  | 8.18E-12 | XP_001896987.1 | 63 | 73.559  | 79  | 50  | Zinc finger, C2H2 type family protein                                      |
| Locus_22224_Transcript_1/1_Conf_1.000 | 327  | 1  | 2.98E-14 | NP_508445.1    | 60 | 81.6481 | 82  | 50  | hypothetical protein T07D1.3                                               |
| Locus_22225_Transcript_1/1_Conf_1.000 | 227  | 0  |          |                |    |         |     |     |                                                                            |
| Locus_22226_Transcript_1/1_Conf_1.000 | 175  | 0  |          |                |    |         |     |     |                                                                            |
| Locus_22227_Transcript_1/1_Conf_1.000 | 243  | 0  |          |                |    |         |     |     |                                                                            |
| Locus_22228_Transcript_1/1_Conf_1.000 | 544  | 7  | 2.52E-05 | CAB55122.3     | 56 | 52.373  | 51  | 29  | C. elegans protein Y116A8C.16a, partially confirmed by transcript evidence |
| Locus_22229_Transcript_1/1_Conf_1.000 | 407  | 20 | 1.32E-62 | XP_002642870.1 | 89 | 242.276 | 135 | 121 | Hypothetical protein CBG15140                                              |
| Locus_2223_Transcript_1/1_Conf_1.000  | 2261 | 20 | 0        | NP_496721.2    | 87 | 1045.42 | 664 | 578 | Carnitine Palmitoyl Transferase family member (cpt-1)                      |

|                                       |      |    |          |                |     |         |     |     |                                                         |
|---------------------------------------|------|----|----------|----------------|-----|---------|-----|-----|---------------------------------------------------------|
| Locus_22230_Transcript_1/1_Conf_1.000 | 319  | 20 | 4.94E-33 | NP_504750.2    | 80  | 144.05  | 91  | 73  | hypothetical protein K11C4.2                            |
| Locus_22231_Transcript_1/1_Conf_1.000 | 145  | 20 | 1.97E-21 | BAG60853.1     | 100 | 105.531 | 47  | 47  | unnamed protein product                                 |
| Locus_22232_Transcript_1/1_Conf_1.000 | 329  | 0  |          |                |     |         |     |     |                                                         |
| Locus_22233_Transcript_1/1_Conf_1.000 | 224  | 0  |          |                |     |         |     |     |                                                         |
| Locus_22234_Transcript_1/1_Conf_1.000 | 289  | 20 | 4.19E-32 | NP_491653.2    | 84  | 140.969 | 95  | 80  | hypothetical protein F55F8.3                            |
| Locus_22235_Transcript_1/1_Conf_1.000 | 312  | 0  |          |                |     |         |     |     |                                                         |
| Locus_22236_Transcript_1/1_Conf_1.000 | 422  | 0  |          |                |     |         |     |     |                                                         |
| Locus_22237_Transcript_1/1_Conf_1.000 | 160  | 0  |          |                |     |         |     |     |                                                         |
| Locus_22238_Transcript_1/1_Conf_1.000 | 837  | 20 | 5.54E-92 | XP_002630799.1 | 72  | 341.658 | 285 | 208 | Hypothetical protein CBG02498                           |
| Locus_22239_Transcript_1/1_Conf_1.000 | 435  | 5  | 1.97E-26 | NP_503502.2    | 75  | 122.094 | 86  | 65  | hypothetical protein F36H9.7                            |
| Locus_2224_Transcript_1/2_Conf_1.000  | 2466 | 20 | 2.43E-38 | XP_002640658.1 | 39  | 165.622 | 746 | 298 | Hypothetical protein CBG19716                           |
| Locus_2224_Transcript_2/2_Conf_1.000  | 2403 | 20 | 5.28E-38 | XP_002640658.1 | 39  | 164.466 | 731 | 286 | Hypothetical protein CBG19716                           |
| Locus_22240_Transcript_1/1_Conf_1.000 | 247  | 0  |          |                |     |         |     |     |                                                         |
| Locus_22241_Transcript_1/1_Conf_1.000 | 289  | 20 | 1.23E-07 | NP_001037879.1 | 69  | 59.6918 | 63  | 44  | CTF8, chromosome transmission fidelity factor 8 homolog |
| Locus_22242_Transcript_1/1_Conf_1.000 | 163  | 0  |          |                |     |         |     |     |                                                         |
| Locus_22243_Transcript_1/1_Conf_1.000 | 267  | 20 | 3.89E-14 | NP_505919.3    | 63  | 81.2629 | 86  | 55  | hypothetical protein C55A6.3                            |
| Locus_22244_Transcript_1/1_Conf_1.000 | 140  | 2  | 5.94E-07 | XP_002641999.1 | 78  | 57.3806 | 46  | 36  | C. briggsae CBR-ACY-3 protein                           |
| Locus_22245_Transcript_1/1_Conf_1.000 | 204  | 18 | 4.13E-24 | XP_002641899.1 | 89  | 114.39  | 68  | 61  | C. briggsae CBR-NHR-10 protein                          |
| Locus_22246_Transcript_1/1_Conf_1.000 | 152  | 0  |          |                |     |         |     |     |                                                         |
| Locus_22247_Transcript_1/1_Conf_1.000 | 438  | 0  |          |                |     |         |     |     |                                                         |
| Locus_22248_Transcript_1/1_Conf_1.000 | 164  | 0  |          |                |     |         |     |     |                                                         |
| Locus_22249_Transcript_1/1_Conf_1.000 | 133  | 0  |          |                |     |         |     |     |                                                         |

|                                       |      |    |          |                |     |         |     |     |                                                                      |
|---------------------------------------|------|----|----------|----------------|-----|---------|-----|-----|----------------------------------------------------------------------|
| Locus_2225_Transcript_1/1_Conf_1.000  | 2231 | 20 | 0        | XP_002633925.1 | 88  | 749.584 | 551 | 487 | C. briggsae CBR-SOC-2 protein                                        |
| Locus_22250_Transcript_1/1_Conf_1.000 | 351  | 2  | 6.64E-22 | XP_002638987.1 | 75  | 107.071 | 113 | 85  | Hypothetical protein CBG22233                                        |
| Locus_22251_Transcript_1/1_Conf_1.000 | 959  | 20 | 2.68E-43 | XP_002630256.1 | 53  | 180.259 | 308 | 166 | Hypothetical protein CBG00675                                        |
| Locus_22252_Transcript_1/1_Conf_1.000 | 236  | 0  |          |                |     |         |     |     |                                                                      |
| Locus_22253_Transcript_1/1_Conf_1.000 | 177  | 20 | 7.97E-28 | XP_002811367.1 | 100 | 126.716 | 58  | 58  | PREDICTED: complement C1q subcomponent subunit C-like isoform 1      |
| Locus_22254_Transcript_1/1_Conf_1.000 | 322  | 16 | 7.30E-53 | NP_001129826.1 | 98  | 209.92  | 106 | 104 | hypothetical protein T13H5.1                                         |
| Locus_22255_Transcript_1/1_Conf_1.000 | 131  | 0  |          |                |     |         |     |     |                                                                      |
| Locus_22256_Transcript_1/1_Conf_1.000 | 132  | 20 | 8.89E-19 | XP_002802333.1 | 100 | 96.6709 | 43  | 43  | PREDICTED: eukaryotic translation initiation factor 3 subunit I-like |
| Locus_22257_Transcript_1/1_Conf_1.000 | 143  | 20 | 1.23E-20 | XP_002915235.1 | 100 | 102.834 | 47  | 47  | PREDICTED: spectrin alpha chain, brain-like isoform 2                |
| Locus_22258_Transcript_1/1_Conf_1.000 | 262  | 0  |          |                |     |         |     |     |                                                                      |

|                                       |     |    |          |                |     |         |     |     |                                                 |
|---------------------------------------|-----|----|----------|----------------|-----|---------|-----|-----|-------------------------------------------------|
| Locus_22259_Transcript_1/1_Conf_1.000 | 237 | 20 | 1.57E-39 | ADI78884.1     | 100 | 165.622 | 79  | 79  | plasma membrane citrate carrier                 |
| Locus_2226_Transcript_1/1_Conf_1.000  | 576 | 4  | 5.82E-17 | XP_001899796.1 | 70  | 91.2781 | 82  | 58  | Uncoordinated protein 40                        |
| Locus_22260_Transcript_1/1_Conf_1.000 | 147 | 0  |          |                |     |         |     |     |                                                 |
| Locus_22261_Transcript_1/1_Conf_1.000 | 130 | 0  |          |                |     |         |     |     |                                                 |
| Locus_22262_Transcript_1/1_Conf_1.000 | 273 | 20 | 2.11E-28 | XP_002644906.1 | 92  | 128.642 | 88  | 81  | Hypothetical protein CBG10845                   |
| Locus_22263_Transcript_1/1_Conf_1.000 | 208 | 0  |          |                |     |         |     |     |                                                 |
| Locus_22264_Transcript_1/1_Conf_1.000 | 264 | 0  |          |                |     |         |     |     |                                                 |
| Locus_22265_Transcript_1/1_Conf_1.000 | 210 | 2  | 1.09E-08 | NP_001023357.2 | 67  | 63.1586 | 68  | 46  | hypothetical protein T04C4.1                    |
| Locus_22266_Transcript_1/1_Conf_1.000 | 145 | 0  |          |                |     |         |     |     |                                                 |
| Locus_22267_Transcript_1/1_Conf_1.000 | 295 | 20 | 2.52E-29 | XP_002631704.1 | 80  | 131.724 | 96  | 77  | Hypothetical protein CBG20903                   |
| Locus_22268_Transcript_1/1_Conf_1.000 | 206 | 0  |          |                |     |         |     |     |                                                 |
| Locus_22269_Transcript_1/1_Conf_1.000 | 210 | 0  |          |                |     |         |     |     |                                                 |
| Locus_2227_Transcript_1/1_Conf_1.000  | 188 | 1  | 6.11E-07 | XP_001898414.1 | 85  | 57.3806 | 35  | 30  | collagen col-34                                 |
| Locus_22270_Transcript_1/1_Conf_1.000 | 173 | 20 | 7.79E-15 | XP_002636770.1 | 85  | 83.5741 | 56  | 48  | Hypothetical protein CBG23501                   |
| Locus_22271_Transcript_1/1_Conf_1.000 | 767 | 20 | 1.78E-75 | XP_002630049.1 | 73  | 286.574 | 238 | 176 | C. briggsae CBR-APN-1 protein                   |
| Locus_22272_Transcript_1/1_Conf_1.000 | 382 | 20 | 2.83E-65 | XP_002646694.1 | 95  | 251.136 | 126 | 120 | C. briggsae CBR-SPON-1 protein                  |
| Locus_22273_Transcript_1/1_Conf_1.000 | 204 | 0  |          |                |     |         |     |     |                                                 |
| Locus_22274_Transcript_1/1_Conf_1.000 | 182 | 0  |          |                |     |         |     |     |                                                 |
| Locus_22275_Transcript_1/1_Conf_1.000 | 328 | 0  |          |                |     |         |     |     |                                                 |
| Locus_22276_Transcript_1/1_Conf_1.000 | 278 | 0  |          |                |     |         |     |     |                                                 |
| Locus_22277_Transcript_1/1_Conf_1.000 | 307 | 9  | 5.93E-23 | NP_499482.1    | 78  | 110.538 | 83  | 65  | defective SPERmatogenesis family member (spe-6) |
| Locus_22278_Transcript_1/1_Conf_1.000 | 167 | 0  |          |                |     |         |     |     |                                                 |
| Locus_22279_Transcript_1/1_Conf_1.000 | 464 | 20 | 9.54E-69 | XP_002629875.1 | 90  | 262.692 | 154 | 139 | C. briggsae CBR-LET-75 protein                  |
| Locus_2228_Transcript_1/1_Conf_1.000  | 549 | 0  |          |                |     |         |     |     |                                                 |
| Locus_22280_Transcript_1/1_Conf_1.000 | 247 | 20 | 5.51E-37 | XP_002641343.1 | 96  | 157.147 | 81  | 78  | C. briggsae CBR-DPY-18 protein                  |

|                                       |      |    |          |                |     |         |     |     |                                                                      |
|---------------------------------------|------|----|----------|----------------|-----|---------|-----|-----|----------------------------------------------------------------------|
| Locus_22281_Transcript_1/1_Conf_1.000 | 286  | 20 | 3.93E-30 | NP_501419.2    | 84  | 134.42  | 95  | 80  | hypothetical protein D2096.3                                         |
| Locus_22282_Transcript_1/1_Conf_1.000 | 188  | 0  |          |                |     |         |     |     |                                                                      |
| Locus_22283_Transcript_1/1_Conf_1.000 | 423  | 0  |          |                |     |         |     |     |                                                                      |
| Locus_22284_Transcript_1/1_Conf_1.000 | 160  | 3  | 4.63E-07 | NP_509676.1    | 68  | 57.7658 | 54  | 37  | G-protein-coupled Receptor Kinase family member (grk-1)              |
| Locus_22285_Transcript_1/1_Conf_1.000 | 158  | 0  |          |                |     |         |     |     |                                                                      |
| Locus_22286_Transcript_1/1_Conf_1.000 | 133  | 3  | 1.09E-08 | EFO24958.1     | 79  | 63.1586 | 43  | 34  | hypothetical protein LOAG_03524                                      |
| Locus_22287_Transcript_1/1_Conf_1.000 | 357  | 20 | 1.24E-28 | NP_001021200.1 | 70  | 129.413 | 116 | 82  | tryptophanyl (W) tRNA Synthetase family member (wrs-2)               |
| Locus_22288_Transcript_1/1_Conf_1.000 | 138  | 0  |          |                |     |         |     |     |                                                                      |
| Locus_22289_Transcript_1/1_Conf_1.000 | 287  | 0  |          |                |     |         |     |     |                                                                      |
| Locus_2229_Transcript_1/2_Conf_1.000  | 2011 | 20 | 0        | NP_498777.2    | 84  | 619.772 | 437 | 370 | hypothetical protein C14B9.8                                         |
| Locus_2229_Transcript_2/2_Conf_1.000  | 1987 | 20 | 0        | NP_498777.2    | 84  | 619.772 | 437 | 370 | hypothetical protein C14B9.8                                         |
| Locus_22290_Transcript_1/1_Conf_1.000 | 327  | 0  |          |                |     |         |     |     |                                                                      |
| Locus_22291_Transcript_1/1_Conf_1.000 | 172  | 0  |          |                |     |         |     |     |                                                                      |
| Locus_22292_Transcript_1/1_Conf_1.000 | 337  | 20 | 4.35E-50 | XP_002632347.1 | 92  | 200.675 | 113 | 105 | Hypothetical protein CBG00360                                        |
| Locus_22293_Transcript_1/1_Conf_1.000 | 186  | 20 | 3.81E-25 | NP_509174.1    | 96  | 117.857 | 61  | 59  | hypothetical protein C16E9.2                                         |
| Locus_22294_Transcript_1/1_Conf_1.000 | 321  | 20 | 6.90E-19 | XP_001893826.1 | 66  | 97.0561 | 104 | 69  | Protein-tyrosine phosphatase containing protein                      |
| Locus_22295_Transcript_1/1_Conf_1.000 | 325  | 0  |          |                |     |         |     |     |                                                                      |
| Locus_22296_Transcript_1/1_Conf_1.000 | 235  | 20 | 4.58E-31 | XP_002927413.1 | 100 | 137.502 | 67  | 67  | PREDICTED: eukaryotic translation initiation factor 3 subunit C-like |
| Locus_22297_Transcript_1/1_Conf_1.000 | 188  | 0  |          |                |     |         |     |     |                                                                      |
| Locus_22298_Transcript_1/1_Conf_1.000 | 147  | 0  |          |                |     |         |     |     |                                                                      |
| Locus_22299_Transcript_1/1_Conf_1.000 | 172  | 0  |          |                |     |         |     |     |                                                                      |



|                                       |      |    |          |                |     |         |     |     |                                             |
|---------------------------------------|------|----|----------|----------------|-----|---------|-----|-----|---------------------------------------------|
| Locus_223_Transcript_1/1_Conf_1.000   | 2106 | 20 | 0        | XP_001894294.1 | 87  | 899.427 | 592 | 517 | protein phosphatase PP2A regulatory subunit |
| Locus_2230_Transcript_1/1_Conf_1.000  | 916  | 0  |          |                |     |         |     |     |                                             |
| Locus_22300_Transcript_1/1_Conf_1.000 | 368  | 0  |          |                |     |         |     |     |                                             |
| Locus_22301_Transcript_1/1_Conf_1.000 | 140  | 0  |          |                |     |         |     |     |                                             |
| Locus_22302_Transcript_1/1_Conf_1.000 | 433  | 20 | 6.05E-76 | BAG60350.1     | 100 | 286.574 | 144 | 144 | unnamed protein product                     |
| Locus_22303_Transcript_1/1_Conf_1.000 | 293  | 20 | 1.18E-18 | XP_002632873.1 | 64  | 96.2857 | 97  | 63  | Hypothetical protein CBG15077               |
| Locus_22304_Transcript_1/1_Conf_1.000 | 145  | 0  |          |                |     |         |     |     |                                             |
| Locus_22305_Transcript_1/1_Conf_1.000 | 367  | 0  |          |                |     |         |     |     |                                             |
| Locus_22306_Transcript_1/1_Conf_1.000 | 218  | 8  | 5.70E-18 | NP_501928.1    | 80  | 93.9745 | 71  | 57  | hypothetical protein F13B12.4               |
| Locus_22307_Transcript_1/1_Conf_1.000 | 139  | 0  |          |                |     |         |     |     |                                             |

|                                       |     |    |          |                |    |         |     |     |                                        |
|---------------------------------------|-----|----|----------|----------------|----|---------|-----|-----|----------------------------------------|
| Locus_22308_Transcript_1/1_Conf_1.000 | 381 | 20 | 1.57E-23 | NP_494994.1    | 67 | 112.464 | 129 | 87  | hypothetical protein ZK622.1           |
| Locus_22309_Transcript_1/1_Conf_1.000 | 350 | 1  | 4.06E-11 | EFO24286.1     | 76 | 71.2478 | 50  | 38  | hypothetical protein LOAG_04203        |
| Locus_2231_Transcript_1/1_Conf_1.000  | 563 | 20 | 1.95E-43 | CAR63593.1     | 83 | 179.104 | 110 | 92  | putative PQ loop repeat family protein |
| Locus_22310_Transcript_1/2_Conf_1.000 | 423 | 0  |          |                |    |         |     |     |                                        |
| Locus_22310_Transcript_2/2_Conf_1.000 | 475 | 0  |          |                |    |         |     |     |                                        |
| Locus_22311_Transcript_1/1_Conf_1.000 | 493 | 3  | 1.48E-05 | XP_002633421.1 | 53 | 52.7582 | 94  | 50  | C. briggsae CBR-NHR-43 protein         |
| Locus_22312_Transcript_1/1_Conf_1.000 | 131 | 20 | 4.29E-13 | NP_505370.2    | 97 | 77.7962 | 43  | 42  | hypothetical protein B0222.2           |
| Locus_22313_Transcript_1/1_Conf_1.000 | 637 | 20 | 4.57E-83 | XP_002641813.1 | 95 | 311.227 | 180 | 171 | C. briggsae CBR-INF-1 protein          |
| Locus_22314_Transcript_1/1_Conf_1.000 | 283 | 0  |          |                |    |         |     |     |                                        |
| Locus_22315_Transcript_1/1_Conf_1.000 | 787 | 7  | 2.55E-72 |                | 74 | 276.174 | 255 | 189 | hypothetical protein Y105C5A.r         |
| Locus_22316_Transcript_1/1_Conf_1.000 | 458 | 2  | 6.16E-04 | NP_001024104.1 | 61 | 47.3654 | 59  | 36  | hypothetical protein T05B11.7          |
| Locus_22317_Transcript_1/1_Conf_1.000 | 312 | 0  |          |                |    |         |     |     |                                        |
| Locus_22318_Transcript_1/1_Conf_1.000 | 407 | 0  |          |                |    |         |     |     |                                        |
| Locus_22319_Transcript_1/1_Conf_1.000 | 164 | 5  | 1.70E-09 | NP_495484.1    | 80 | 65.855  | 50  | 40  | hypothetical protein C27H5.2           |

|                                       |     |    |          |                |     |         |     |    |                                                      |
|---------------------------------------|-----|----|----------|----------------|-----|---------|-----|----|------------------------------------------------------|
| Locus_2232_Transcript_1/1_Conf_1.000  | 500 | 20 | 4.85E-17 | NP_500336.1    | 89  | 90.8929 | 57  | 51 | Mitochondrial ATPase Inhibitor family member (mai-2) |
| Locus_22320_Transcript_1/1_Conf_1.000 | 379 | 0  |          |                |     |         |     |    |                                                      |
| Locus_22321_Transcript_1/1_Conf_1.000 | 351 | 0  |          |                |     |         |     |    |                                                      |
| Locus_22322_Transcript_1/1_Conf_1.000 | 305 | 2  | 4.29E-28 | EAW71418.1     | 100 | 92.0485 | 57  | 57 | RNA binding motif protein 8A, isoform CRA_a          |
| Locus_22323_Transcript_1/1_Conf_1.000 | 143 | 0  |          |                |     |         |     |    |                                                      |
| Locus_22324_Transcript_1/1_Conf_1.000 | 290 | 0  |          |                |     |         |     |    |                                                      |
| Locus_22325_Transcript_1/1_Conf_1.000 | 175 | 0  |          |                |     |         |     |    |                                                      |
| Locus_22326_Transcript_1/1_Conf_1.000 | 154 | 0  |          |                |     |         |     |    |                                                      |
| Locus_22327_Transcript_1/1_Conf_1.000 | 347 | 20 | 1.26E-36 | EFO24516.1     | 73  | 155.992 | 115 | 85 | TBL1X protein                                        |
| Locus_22328_Transcript_1/1_Conf_1.000 | 194 | 4  | 1.27E-04 | XP_002639323.1 | 59  | 49.6766 | 67  | 40 | C. briggsae CBR-HUM-7 protein                        |
| Locus_22329_Transcript_1/1_Conf_1.000 | 147 | 0  |          |                |     |         |     |    |                                                      |
| Locus_2233_Transcript_1/1_Conf_1.000  | 256 | 20 | 7.65E-34 | NP_001129862.1 | 90  | 146.747 | 85  | 77 | UNCoordinated family member (unc-26)                 |
| Locus_22330_Transcript_1/1_Conf_1.000 | 269 | 0  |          |                |     |         |     |    |                                                      |

|                                       |      |    |          |                |    |         |     |     |                                                     |
|---------------------------------------|------|----|----------|----------------|----|---------|-----|-----|-----------------------------------------------------|
| Locus_22331_Transcript_1/1_Conf_1.000 | 162  | 0  |          |                |    |         |     |     |                                                     |
| Locus_22332_Transcript_1/1_Conf_1.000 | 417  | 20 | 2.71E-39 | NP_505978.1    | 69 | 164.851 | 138 | 96  | hypothetical protein D2023.4                        |
| Locus_22333_Transcript_1/1_Conf_1.000 | 206  | 11 | 1.33E-14 | ADD13547.1     | 91 | 82.8037 | 68  | 62  | Inositol triphosphate receptor protein 1, isoform h |
| Locus_22334_Transcript_1/1_Conf_1.000 | 393  | 20 | 2.99E-54 | NP_001022450.1 | 89 | 214.542 | 130 | 116 | hypothetical protein Y48E1A.1                       |
| Locus_22335_Transcript_1/1_Conf_1.000 | 260  | 4  | 7.39E-29 | NP_510438.1    | 95 | 130.183 | 67  | 64  | CalSeQuestrin family member (csq-1)                 |
| Locus_22336_Transcript_1/1_Conf_1.000 | 255  | 20 | 4.83E-12 | NP_509417.2    | 71 | 74.3294 | 67  | 48  | hypothetical protein F40B5.2                        |
| Locus_22337_Transcript_1/1_Conf_1.000 | 163  | 0  |          |                |    |         |     |     |                                                     |
| Locus_22338_Transcript_1/1_Conf_1.000 | 261  | 0  |          |                |    |         |     |     |                                                     |
| Locus_22339_Transcript_1/1_Conf_1.000 | 343  | 1  | 1.55E-10 | NP_001041292.1 | 71 | 69.3218 | 59  | 42  | hypothetical protein T23E7.6                        |
| Locus_2234_Transcript_1/1_Conf_1.000  | 2782 | 20 | 0        | XP_002633929.1 | 86 | 1461.82 | 878 | 756 | C. briggsae CBR-LAM-1 protein                       |
| Locus_22340_Transcript_1/1_Conf_1.000 | 243  | 0  |          |                |    |         |     |     |                                                     |
| Locus_22341_Transcript_1/1_Conf_1.000 | 370  | 0  |          |                |    |         |     |     |                                                     |
| Locus_22342_Transcript_1/1_Conf_1.000 | 283  | 20 | 6.78E-06 | ZP_04074401.1  | 64 | 53.9138 | 53  | 34  | hypothetical protein bthur0013_47340                |
| Locus_22343_Transcript_1/1_Conf_1.000 | 131  | 0  |          |                |    |         |     |     |                                                     |
| Locus_22344_Transcript_1/1_Conf_1.000 | 186  | 0  |          |                |    |         |     |     |                                                     |
| Locus_22345_Transcript_1/1_Conf_1.000 | 540  | 2  | 2.74E-04 | NP_001033432.1 | 65 | 48.9062 | 47  | 31  | hypothetical protein T19E7.6                        |
| Locus_22346_Transcript_1/1_Conf_1.000 | 312  | 20 | 2.17E-20 | NP_502560.1    | 67 | 102.064 | 81  | 55  | FATty acid desaturase family member (fat-2)         |
| Locus_22347_Transcript_1/1_Conf_1.000 | 143  | 0  |          |                |    |         |     |     |                                                     |
| Locus_22348_Transcript_1/1_Conf_1.000 | 587  | 0  |          |                |    |         |     |     |                                                     |
| Locus_22349_Transcript_1/1_Conf_1.000 | 203  | 0  |          |                |    |         |     |     |                                                     |
| Locus_2235_Transcript_1/1_Conf_1.000  | 1801 | 20 | 1.11E-58 | ACI32657.1     | 53 | 232.646 | 274 | 147 | Delta protein                                       |
| Locus_22350_Transcript_1/1_Conf_1.000 | 354  | 20 | 1.73E-46 | XP_002638742.1 | 92 | 188.734 | 117 | 108 | C. briggsae CBR-PDE-6 protein                       |
| Locus_22351_Transcript_1/1_Conf_1.000 | 139  | 0  |          |                |    |         |     |     |                                                     |

|                                       |      |    |           |                |    |         |     |     |                                           |
|---------------------------------------|------|----|-----------|----------------|----|---------|-----|-----|-------------------------------------------|
| Locus_22352_Transcript_1/1_Conf_1.000 | 609  | 20 | 2.28E-65  | NP_001021681.1 | 77 | 252.292 | 209 | 162 | hypothetical protein Y105E8A.10           |
| Locus_22353_Transcript_1/1_Conf_1.000 | 346  | 0  |           |                |    |         |     |     |                                           |
| Locus_22354_Transcript_1/1_Conf_1.000 | 206  | 20 | 5.07E-14  | XP_002633760.1 | 68 | 80.8777 | 58  | 40  | C. briggsae CBR-GON-1 protein             |
| Locus_22355_Transcript_1/1_Conf_1.000 | 389  | 0  |           |                |    |         |     |     |                                           |
| Locus_22356_Transcript_1/1_Conf_1.000 | 263  | 20 | 7.15E-16  | CAR63522.1     | 72 | 87.0409 | 86  | 62  | putative heat shock protein               |
| Locus_22357_Transcript_1/1_Conf_1.000 | 181  | 20 | 8.57E-17  | XP_002637669.1 | 88 | 90.1225 | 51  | 45  | Hypothetical protein CBG19425             |
| Locus_22358_Transcript_1/1_Conf_1.000 | 133  | 1  | 6.18E-04  | XP_002637804.1 | 70 | 47.3654 | 37  | 26  | Hypothetical protein CBG04590             |
| Locus_22359_Transcript_1/1_Conf_1.000 | 180  | 1  | 1.68E-04  | NP_499757.2    | 60 | 49.2914 | 51  | 31  | hypothetical protein T03F6.4              |
| Locus_2236_Transcript_1/5_Conf_0.444  | 342  | 0  |           |                |    |         |     |     |                                           |
| Locus_2236_Transcript_2/5_Conf_0.222  | 475  | 0  |           |                |    |         |     |     |                                           |
| Locus_2236_Transcript_3/5_Conf_0.333  | 333  | 0  |           |                |    |         |     |     |                                           |
| Locus_2236_Transcript_4/5_Conf_0.333  | 1724 | 20 | 7.87E-123 | XP_002637706.1 | 77 | 445.662 | 339 | 264 | Hypothetical protein CBG11571             |
| Locus_2236_Transcript_5/5_Conf_0.222  | 342  | 0  |           |                |    |         |     |     |                                           |
| Locus_22360_Transcript_1/1_Conf_1.000 | 199  | 2  | 1.94E-05  | XP_001891532.1 | 62 | 52.373  | 66  | 41  | hypothetical protein Bm1_00020            |
| Locus_22361_Transcript_1/1_Conf_1.000 | 374  | 20 | 2.31E-06  | EFN78575.1     | 57 | 55.4546 | 83  | 48  | Histone-lysine N-methyltransferase SETMAR |
| Locus_22362_Transcript_1/1_Conf_1.000 | 147  | 0  |           |                |    |         |     |     |                                           |
| Locus_22363_Transcript_1/1_Conf_1.000 | 274  | 0  |           |                |    |         |     |     |                                           |
| Locus_22364_Transcript_1/1_Conf_1.000 | 139  | 0  |           |                |    |         |     |     |                                           |
| Locus_22365_Transcript_1/1_Conf_1.000 | 215  | 0  |           |                |    |         |     |     |                                           |
| Locus_22366_Transcript_1/1_Conf_1.000 | 248  | 0  |           |                |    |         |     |     |                                           |

|                                       |     |    |           |                |    |         |     |     |                                                                    |
|---------------------------------------|-----|----|-----------|----------------|----|---------|-----|-----|--------------------------------------------------------------------|
| Locus_22367_Transcript_1/1_Conf_1.000 | 275 | 6  | 2.59E-10  | NP_001033378.1 | 67 | 68.5514 | 73  | 49  | Acyl CoA DeHydrogenase family member (acdh-11)                     |
| Locus_22368_Transcript_1/1_Conf_1.000 | 167 | 0  |           |                |    |         |     |     |                                                                    |
| Locus_22369_Transcript_1/1_Conf_1.000 | 460 | 20 | 3.22E-37  | CAB55118.2     | 73 | 157.918 | 143 | 105 | C. elegans protein Y48C3A.18a, confirmed by transcript evidence    |
| Locus_2237_Transcript_1/1_Conf_1.000  | 399 | 20 | 8.68E-30  | XP_001895262.1 | 90 | 133.265 | 66  | 60  | Hypothetical UPF0222 protein Y54G11A.11 in chromosome II, putative |
| Locus_22370_Transcript_1/1_Conf_1.000 | 145 | 1  | 6.36E-04  | NP_491653.2    | 65 | 47.3654 | 47  | 31  | hypothetical protein F55F8.3                                       |
| Locus_22371_Transcript_1/1_Conf_1.000 | 312 | 0  |           |                |    |         |     |     |                                                                    |
| Locus_22372_Transcript_1/1_Conf_1.000 | 172 | 6  | 5.05E-14  | NP_490755.1    | 87 | 80.8777 | 54  | 47  | Heavy chain, Unconventional Myosin family member (hum-7)           |
| Locus_22373_Transcript_1/1_Conf_1.000 | 467 | 14 | 1.59E-15  | NP_001024064.1 | 53 | 85.8853 | 123 | 66  | hypothetical protein R02C2.7                                       |
| Locus_22374_Transcript_1/1_Conf_1.000 | 165 | 9  | 4.44E-18  | XP_002647278.1 | 87 | 94.3597 | 55  | 48  | C. briggsae CBR-KETN-1 protein                                     |
| Locus_22375_Transcript_1/1_Conf_1.000 | 322 | 0  |           |                |    |         |     |     |                                                                    |
| Locus_22376_Transcript_1/1_Conf_1.000 | 169 | 0  |           |                |    |         |     |     |                                                                    |
| Locus_22377_Transcript_1/1_Conf_1.000 | 198 | 20 | 3.65E-20  | XP_002634787.1 | 80 | 101.293 | 65  | 52  | C. briggsae CBR-NPP-20 protein                                     |
| Locus_22378_Transcript_1/1_Conf_1.000 | 268 | 0  |           |                |    |         |     |     |                                                                    |
| Locus_22379_Transcript_1/1_Conf_1.000 | 172 | 0  |           |                |    |         |     |     |                                                                    |
| Locus_2238_Transcript_1/1_Conf_1.000  | 438 | 6  | 3.45E-23  | XP_002646549.1 | 63 | 111.309 | 144 | 91  | Hypothetical protein CBG20406                                      |
| Locus_22380_Transcript_1/1_Conf_1.000 | 497 | 20 | 6.42E-102 | NP_492020.1    | 99 | 372.859 | 165 | 164 | hypothetical protein K10D3.4                                       |
| Locus_22381_Transcript_1/1_Conf_1.000 | 134 | 0  |           |                |    |         |     |     |                                                                    |
| Locus_22382_Transcript_1/1_Conf_1.000 | 301 | 0  |           |                |    |         |     |     |                                                                    |
| Locus_22383_Transcript_1/1_Conf_1.000 | 256 | 20 | 4.83E-12  | XP_002646299.1 | 63 | 74.3294 | 77  | 49  | Hypothetical protein CBG12006                                      |

|                                       |      |    |          |                |    |         |     |     |                                           |
|---------------------------------------|------|----|----------|----------------|----|---------|-----|-----|-------------------------------------------|
| Locus_22384_Transcript_1/1_Conf_1.000 | 485  | 20 | 1.58E-55 | ACD61693.1     | 81 | 218.779 | 164 | 133 | UDP-galactose transporter-related protein |
| Locus_22385_Transcript_1/1_Conf_1.000 | 205  | 6  | 1.63E-12 | XP_002639055.1 | 71 | 75.8702 | 70  | 50  | C. briggsae CBR-GCY-28 protein            |
| Locus_22386_Transcript_1/1_Conf_1.000 | 129  | 0  |          |                |    |         |     |     |                                           |
| Locus_22387_Transcript_1/1_Conf_1.000 | 236  | 0  |          |                |    |         |     |     |                                           |
| Locus_22388_Transcript_1/1_Conf_1.000 | 177  | 0  |          |                |    |         |     |     |                                           |
| Locus_22389_Transcript_1/1_Conf_1.000 | 450  | 3  | 1.93E-13 | ACH87166.1     | 54 | 78.9518 | 142 | 78  | GLO-3                                     |
| Locus_2239_Transcript_1/1_Conf_1.000  | 898  | 20 | 3.82E-57 | XP_001898424.1 | 68 | 226.098 | 241 | 165 | DEAD/H                                    |
| Locus_22390_Transcript_1/1_Conf_1.000 | 191  | 0  |          |                |    |         |     |     |                                           |
| Locus_22391_Transcript_1/1_Conf_1.000 | 173  | 0  |          |                |    |         |     |     |                                           |
| Locus_22392_Transcript_1/1_Conf_1.000 | 340  | 20 | 6.07E-36 | NP_502129.1    | 84 | 153.68  | 113 | 95  | hypothetical protein B0035.5              |
| Locus_22393_Transcript_1/1_Conf_1.000 | 513  | 1  | 3.58E-05 | XP_002640597.1 | 42 | 51.6026 | 168 | 71  | C. briggsae CBR-DLK-1 protein             |
| Locus_22394_Transcript_1/2_Conf_1.000 | 345  | 0  |          |                |    |         |     |     |                                           |
| Locus_22394_Transcript_2/2_Conf_1.000 | 345  | 0  |          |                |    |         |     |     |                                           |
| Locus_22395_Transcript_1/1_Conf_1.000 | 145  | 0  |          |                |    |         |     |     |                                           |
| Locus_22396_Transcript_1/1_Conf_1.000 | 377  | 0  |          |                |    |         |     |     |                                           |
| Locus_22397_Transcript_1/1_Conf_1.000 | 179  | 0  |          |                |    |         |     |     |                                           |
| Locus_22398_Transcript_1/1_Conf_1.000 | 137  | 0  |          |                |    |         |     |     |                                           |
| Locus_22399_Transcript_1/1_Conf_1.000 | 134  | 0  |          |                |    |         |     |     |                                           |
| Locus_224_Transcript_1/2_Conf_1.000   | 2197 | 20 | 0        | NP_502350.1    | 80 | 701.049 | 543 | 439 | hypothetical protein F19B6.1              |
| Locus_224_Transcript_2/2_Conf_1.000   | 2197 | 20 | 0        | NP_502350.1    | 80 | 701.049 | 543 | 439 | hypothetical protein F19B6.1              |
| Locus_2240_Transcript_1/1_Conf_1.000  | 708  | 0  |          |                |    |         |     |     |                                           |
| Locus_22400_Transcript_1/1_Conf_1.000 | 187  | 0  |          |                |    |         |     |     |                                           |

|                                       |     |    |          |                |     |         |     |     |                                                           |
|---------------------------------------|-----|----|----------|----------------|-----|---------|-----|-----|-----------------------------------------------------------|
| Locus_22401_Transcript_1/1_Conf_1.000 | 133 | 20 | 2.68E-15 | XP_002744859.1 | 100 | 85.1149 | 43  | 43  | PREDICTED: L-lactate dehydrogenase B chain-like isoform 1 |
| Locus_22402_Transcript_1/1_Conf_1.000 | 142 | 0  |          |                |     |         |     |     |                                                           |
| Locus_22403_Transcript_1/1_Conf_1.000 | 188 | 20 | 1.27E-12 | CAO72177.1     | 79  | 76.2554 | 62  | 49  | hexosaminidase                                            |
| Locus_22404_Transcript_1/1_Conf_1.000 | 144 | 0  |          |                |     |         |     |     |                                                           |
| Locus_22405_Transcript_1/1_Conf_1.000 | 164 | 0  |          |                |     |         |     |     |                                                           |
| Locus_22406_Transcript_1/1_Conf_1.000 | 310 | 0  |          |                |     |         |     |     |                                                           |
| Locus_22407_Transcript_1/1_Conf_1.000 | 146 | 3  | 6.15E-07 | XP_002633895.1 | 70  | 57.3806 | 48  | 34  | C. briggsae CBR-SAND-1 protein                            |
| Locus_22408_Transcript_1/1_Conf_1.000 | 265 | 20 | 6.44E-17 | EFO24933.1     | 75  | 90.5077 | 86  | 65  | AGC/PKN protein kinase                                    |
| Locus_22409_Transcript_1/1_Conf_1.000 | 284 | 0  |          |                |     |         |     |     |                                                           |
| Locus_2241_Transcript_1/1_Conf_1.000  | 149 | 0  |          |                |     |         |     |     |                                                           |
| Locus_22410_Transcript_1/1_Conf_1.000 | 296 | 0  |          |                |     |         |     |     |                                                           |
| Locus_22411_Transcript_1/1_Conf_1.000 | 260 | 20 | 6.07E-15 | XP_786956.2    | 64  | 83.9593 | 81  | 52  | PREDICTED: similar to MGC140497 protein                   |
| Locus_22412_Transcript_1/1_Conf_1.000 | 206 | 0  |          |                |     |         |     |     |                                                           |
| Locus_22413_Transcript_1/1_Conf_1.000 | 320 | 2  | 2.82E-12 | XP_001893183.1 | 53  | 75.0998 | 115 | 61  | Zinc finger, C2H2 type family protein                     |
| Locus_22414_Transcript_1/1_Conf_1.000 | 288 | 20 | 5.14E-14 | XP_002635477.1 | 85  | 80.8777 | 48  | 41  | Hypothetical protein CBG08772                             |
| Locus_22415_Transcript_1/1_Conf_1.000 | 130 | 0  |          |                |     |         |     |     |                                                           |
| Locus_22416_Transcript_1/1_Conf_1.000 | 194 | 20 | 6.26E-20 | NP_501657.1    | 84  | 100.523 | 64  | 54  | hypothetical protein F56D5.3                              |
| Locus_22417_Transcript_1/1_Conf_1.000 | 743 | 20 | 6.27E-38 | XP_002637600.1 | 67  | 161.77  | 179 | 120 | C. briggsae CBR-SULP-8 protein                            |
| Locus_22418_Transcript_1/1_Conf_1.000 | 173 | 0  |          |                |     |         |     |     |                                                           |
| Locus_22419_Transcript_1/1_Conf_1.000 | 282 | 0  |          |                |     |         |     |     |                                                           |
| Locus_2242_Transcript_1/1_Conf_1.000  | 881 | 0  |          |                |     |         |     |     |                                                           |
| Locus_22420_Transcript_1/1_Conf_1.000 | 160 | 20 | 3.66E-12 | XP_002641552.1 | 80  | 74.7146 | 51  | 41  | C. briggsae CBR-RBC-2 protein                             |
| Locus_22421_Transcript_1/1_Conf_1.000 | 317 | 3  | 1.77E-14 | NP_492775.2    | 62  | 82.4185 | 108 | 67  | LAMinin related. See also lmb- family member (lam-3)      |
| Locus_22422_Transcript_1/1_Conf_1.000 | 251 | 0  |          |                |     |         |     |     |                                                           |
| Locus_22423_Transcript_1/1_Conf_1.000 | 212 | 0  |          |                |     |         |     |     |                                                           |
| Locus_22424_Transcript_1/1_Conf_1.000 | 236 | 20 | 3.77E-17 | EFO15057.1     | 66  | 91.2781 | 77  | 51  | DNA polymerase epsilon catalytic subunit                  |
| Locus_22425_Transcript_1/1_Conf_1.000 | 264 | 0  |          |                |     |         |     |     |                                                           |



|                                       |      |    |          |                |     |         |     |     |                                             |
|---------------------------------------|------|----|----------|----------------|-----|---------|-----|-----|---------------------------------------------|
| Locus_22426_Transcript_1/1_Conf_1.000 | 252  | 0  |          |                |     |         |     |     |                                             |
| Locus_22427_Transcript_1/1_Conf_1.000 | 153  | 0  |          |                |     |         |     |     |                                             |
| Locus_22428_Transcript_1/1_Conf_1.000 | 179  | 0  |          |                |     |         |     |     |                                             |
| Locus_22429_Transcript_1/1_Conf_1.000 | 312  | 0  |          |                |     |         |     |     |                                             |
| Locus_2243_Transcript_1/4_Conf_0.154  | 715  | 8  | 6.01E-11 | NP_741488.1    | 40  | 72.0182 | 227 | 93  | abnormal cell LiNeage family member (lin-3) |
| Locus_2243_Transcript_2/4_Conf_0.692  | 1505 | 9  | 3.75E-17 | NP_741489.1    | 45  | 94.3597 | 246 | 111 | abnormal cell LiNeage family member (lin-3) |
| Locus_2243_Transcript_3/4_Conf_0.769  | 1505 | 9  | 3.75E-17 | NP_741489.1    | 45  | 94.3597 | 246 | 111 | abnormal cell LiNeage family member (lin-3) |
| Locus_2243_Transcript_4/4_Conf_0.692  | 1505 | 9  | 3.75E-17 | NP_741489.1    | 45  | 94.3597 | 246 | 111 | abnormal cell LiNeage family member (lin-3) |
| Locus_22430_Transcript_1/1_Conf_1.000 | 218  | 20 | 8.76E-35 | XP_002917081.1 | 100 | 149.828 | 72  | 72  | PREDICTED: alpha-actinin-1-like             |
| Locus_22431_Transcript_1/1_Conf_1.000 | 182  | 0  |          |                |     |         |     |     |                                             |
| Locus_22432_Transcript_1/1_Conf_1.000 | 312  | 20 | 2.47E-32 | NP_001040998.1 | 83  | 141.739 | 103 | 86  | hypothetical protein W07G9.2                |
| Locus_22433_Transcript_1/1_Conf_1.000 | 192  | 0  |          |                |     |         |     |     |                                             |
| Locus_22434_Transcript_1/1_Conf_1.000 | 512  | 20 | 1.85E-14 | EFO23916.1     | 55  | 82.4185 | 177 | 98  | transcription accessory protein             |
| Locus_22435_Transcript_1/1_Conf_1.000 | 267  | 0  |          |                |     |         |     |     |                                             |
| Locus_22436_Transcript_1/1_Conf_1.000 | 328  | 0  |          |                |     |         |     |     |                                             |
| Locus_22437_Transcript_1/1_Conf_1.000 | 463  | 0  |          |                |     |         |     |     |                                             |
| Locus_22438_Transcript_1/1_Conf_1.000 | 129  | 0  |          |                |     |         |     |     |                                             |
| Locus_22439_Transcript_1/1_Conf_1.000 | 135  | 0  |          |                |     |         |     |     |                                             |
| Locus_2244_Transcript_1/1_Conf_1.000  | 443  | 20 | 1.88E-32 | NP_871953.1    | 86  | 142.124 | 90  | 78  | hypothetical protein T05H10.6               |
| Locus_22440_Transcript_1/1_Conf_1.000 | 163  | 7  | 8.12E-20 | XP_002644337.1 | 98  | 100.138 | 52  | 51  | C. briggsae CBR-KLP-4 protein               |
| Locus_22441_Transcript_1/1_Conf_1.000 | 185  | 20 | 2.03E-26 | AAH05159.2     | 100 | 122.094 | 61  | 61  | COL6A1 protein                              |

|                                       |     |    |          |                |    |         |     |     |                                                       |
|---------------------------------------|-----|----|----------|----------------|----|---------|-----|-----|-------------------------------------------------------|
| Locus_22442_Transcript_1/1_Conf_1.000 | 319 | 0  |          |                |    |         |     |     |                                                       |
| Locus_22443_Transcript_1/1_Conf_1.000 | 145 | 0  |          |                |    |         |     |     |                                                       |
| Locus_22444_Transcript_1/1_Conf_1.000 | 141 | 0  |          |                |    |         |     |     |                                                       |
| Locus_22445_Transcript_1/1_Conf_1.000 | 249 | 0  |          |                |    |         |     |     |                                                       |
| Locus_22446_Transcript_1/1_Conf_1.000 | 241 | 20 | 3.61E-28 | XP_002632693.1 | 83 | 127.872 | 80  | 67  | Hypothetical protein CBG21624                         |
| Locus_22447_Transcript_1/1_Conf_1.000 | 308 | 0  |          |                |    |         |     |     |                                                       |
| Locus_22448_Transcript_1/1_Conf_1.000 | 893 | 20 | 1.29E-89 | NP_001040689.1 | 71 | 333.954 | 301 | 216 | Prolyl tRNA Synthetase family member (prs-2)          |
| Locus_22449_Transcript_1/1_Conf_1.000 | 218 | 0  |          |                |    |         |     |     |                                                       |
| Locus_2245_Transcript_1/1_Conf_1.000  | 480 | 20 | 4.76E-73 | XP_002756083.1 | 99 | 276.944 | 159 | 158 | PREDICTED: fructose-bisphosphate aldolase A isoform 1 |
| Locus_22450_Transcript_1/1_Conf_1.000 | 203 | 0  |          |                |    |         |     |     |                                                       |
| Locus_22451_Transcript_1/1_Conf_1.000 | 130 | 0  |          |                |    |         |     |     |                                                       |
| Locus_22452_Transcript_1/1_Conf_1.000 | 221 | 0  |          |                |    |         |     |     |                                                       |
| Locus_22453_Transcript_1/1_Conf_1.000 | 139 | 0  |          |                |    |         |     |     |                                                       |
| Locus_22454_Transcript_1/1_Conf_1.000 | 197 | 20 | 2.71E-15 | XP_002635154.1 | 77 | 85.1149 | 62  | 48  | C. briggsae CBR-VRS-1 protein                         |
| Locus_22455_Transcript_1/1_Conf_1.000 | 229 | 0  |          |                |    |         |     |     |                                                       |
| Locus_22456_Transcript_1/1_Conf_1.000 | 202 | 0  |          |                |    |         |     |     |                                                       |
| Locus_22457_Transcript_1/1_Conf_1.000 | 414 | 2  | 4.10E-16 | NP_510476.2    | 75 | 87.8113 | 68  | 51  | hypothetical protein Y70D2A.1                         |
| Locus_22458_Transcript_1/1_Conf_1.000 | 173 | 0  |          |                |    |         |     |     |                                                       |
| Locus_22459_Transcript_1/1_Conf_1.000 | 425 | 0  |          |                |    |         |     |     |                                                       |
| Locus_2246_Transcript_1/1_Conf_1.000  | 221 | 0  |          |                |    |         |     |     |                                                       |

|                                       |     |    |          |                |    |         |     |     |                                                                                 |
|---------------------------------------|-----|----|----------|----------------|----|---------|-----|-----|---------------------------------------------------------------------------------|
| Locus_22460_Transcript_1/1_Conf_1.000 | 319 | 1  | 5.15E-06 | NP_492051.1    | 54 | 54.299  | 105 | 57  | yeast BUB homolog family member (bub-1)                                         |
| Locus_22461_Transcript_1/1_Conf_1.000 | 141 | 0  |          |                |    |         |     |     |                                                                                 |
| Locus_22462_Transcript_1/1_Conf_1.000 | 145 | 20 | 2.26E-09 | EFO26209.1     | 83 | 65.4698 | 43  | 36  | hypothetical protein LOAG_02281                                                 |
| Locus_22463_Transcript_1/1_Conf_1.000 | 486 | 20 | 2.00E-34 | XP_002641244.1 | 66 | 148.673 | 156 | 103 | Hypothetical protein CBG09112                                                   |
| Locus_22464_Transcript_1/1_Conf_1.000 | 268 | 0  |          |                |    |         |     |     |                                                                                 |
| Locus_22465_Transcript_1/1_Conf_1.000 | 204 | 3  | 5.08E-06 | AAZ82850.2     | 67 | 54.299  | 62  | 42  | Hypothetical protein C01B10.11                                                  |
| Locus_22466_Transcript_1/1_Conf_1.000 | 271 | 0  |          |                |    |         |     |     |                                                                                 |
| Locus_22467_Transcript_1/2_Conf_1.000 | 256 | 0  |          |                |    |         |     |     |                                                                                 |
| Locus_22467_Transcript_2/2_Conf_1.000 | 256 | 0  |          |                |    |         |     |     |                                                                                 |
| Locus_22468_Transcript_1/1_Conf_1.000 | 270 | 0  |          |                |    |         |     |     |                                                                                 |
| Locus_22469_Transcript_1/1_Conf_1.000 | 187 | 1  | 1.46E-08 | EFO26588.1     | 70 | 62.7734 | 62  | 44  | hypothetical protein LOAG_01892                                                 |
| Locus_2247_Transcript_1/1_Conf_1.000  | 500 | 20 | 1.94E-74 | XP_001135183.1 | 99 | 281.567 | 138 | 137 | PREDICTED: similar to ubiquitin A-52 residue ribosomal protein fusion product 1 |
| Locus_22470_Transcript_1/1_Conf_1.000 | 271 | 0  |          |                |    |         |     |     |                                                                                 |
| Locus_22471_Transcript_1/1_Conf_1.000 | 228 | 0  |          |                |    |         |     |     |                                                                                 |
| Locus_22472_Transcript_1/1_Conf_1.000 | 321 | 0  |          |                |    |         |     |     |                                                                                 |
| Locus_22473_Transcript_1/1_Conf_1.000 | 233 | 0  |          |                |    |         |     |     |                                                                                 |
| Locus_22474_Transcript_1/1_Conf_1.000 | 483 | 0  |          |                |    |         |     |     |                                                                                 |
| Locus_22475_Transcript_1/1_Conf_1.000 | 138 | 1  | 2.76E-04 | NP_493647.1    | 70 | 48.521  | 44  | 31  | hypothetical protein C23H3.5                                                    |
| Locus_22476_Transcript_1/1_Conf_1.000 | 295 | 0  |          |                |    |         |     |     |                                                                                 |

|                                       |      |    |           |                |     |         |     |     |                                                                                      |
|---------------------------------------|------|----|-----------|----------------|-----|---------|-----|-----|--------------------------------------------------------------------------------------|
| Locus_22477_Transcript_1/1_Conf_1.000 | 703  | 2  | 6.07E-08  | XP_001898083.1 | 50  | 62.003  | 173 | 87  | hypothetical protein                                                                 |
| Locus_22478_Transcript_1/1_Conf_1.000 | 182  | 2  | 4.41E-05  | XP_001897754.1 | 58  | 51.2174 | 62  | 36  | Poly                                                                                 |
| Locus_22479_Transcript_1/1_Conf_1.000 | 260  | 0  |           |                |     |         |     |     |                                                                                      |
| Locus_2248_Transcript_1/1_Conf_1.000  | 1524 | 20 | 1.32E-110 | NP_495161.1    | 86  | 404.831 | 280 | 241 | FZO (Fzo mitochondrial fusion protein) related family member (fzo-1)                 |
| Locus_22480_Transcript_1/1_Conf_1.000 | 189  | 0  |           |                |     |         |     |     |                                                                                      |
| Locus_22481_Transcript_1/1_Conf_1.000 | 222  | 9  | 1.36E-06  | XP_002648400.1 | 62  | 56.225  | 62  | 39  | C. briggsae CBR-DPF-1 protein                                                        |
| Locus_22482_Transcript_1/1_Conf_1.000 | 137  | 0  |           |                |     |         |     |     |                                                                                      |
| Locus_22483_Transcript_1/1_Conf_1.000 | 416  | 0  |           |                |     |         |     |     |                                                                                      |
| Locus_22484_Transcript_1/1_Conf_1.000 | 203  | 2  | 5.63E-05  | XP_002646533.1 | 64  | 50.8322 | 48  | 31  | C. briggsae CBR-SPTF-3 protein                                                       |
| Locus_22485_Transcript_1/1_Conf_1.000 | 284  | 20 | 5.87E-48  | NP_001034936.1 | 100 | 127.487 | 57  | 57  | phospholipid hydroperoxide glutathione peroxidase, mitochondrial isoform B precursor |
| Locus_22486_Transcript_1/1_Conf_1.000 | 199  | 0  |           |                |     |         |     |     |                                                                                      |
| Locus_22487_Transcript_1/1_Conf_1.000 | 487  | 5  | 7.64E-10  | XP_002647866.1 | 55  | 67.0106 | 93  | 52  | C. briggsae CBR-PRS-2 protein                                                        |
| Locus_22488_Transcript_1/1_Conf_1.000 | 255  | 2  | 4.67E-07  | XP_001900629.1 | 63  | 57.7658 | 73  | 46  | hypothetical protein Bm1_45825                                                       |
| Locus_22489_Transcript_1/1_Conf_1.000 | 185  | 0  |           |                |     |         |     |     |                                                                                      |
| Locus_2249_Transcript_1/1_Conf_1.000  | 746  | 20 | 4.30E-103 | NP_500125.1    | 94  | 378.252 | 219 | 207 | Proteasome Beta Subunit family member (pbs-1)                                        |

|                                       |     |    |           |                |     |         |     |     |                                                                        |
|---------------------------------------|-----|----|-----------|----------------|-----|---------|-----|-----|------------------------------------------------------------------------|
| Locus_22490_Transcript_1/1_Conf_1.000 | 282 | 20 | 2.04E-10  | NP_502532.1    | 55  | 68.9366 | 79  | 44  | SCP-Like extracellular protein family member (scl-14)                  |
| Locus_22491_Transcript_1/1_Conf_1.000 | 545 | 0  |           |                |     |         |     |     |                                                                        |
| Locus_22492_Transcript_1/1_Conf_1.000 | 433 | 20 | 1.31E-62  | NP_505810.2    | 91  | 242.276 | 143 | 131 | P21-Activated Kinase family member (pak-2)                             |
| Locus_22493_Transcript_1/1_Conf_1.000 | 138 | 0  |           |                |     |         |     |     |                                                                        |
| Locus_22494_Transcript_1/1_Conf_1.000 | 216 | 20 | 1.35E-35  | XP_001164037.1 | 100 | 152.525 | 71  | 71  | PREDICTED: similar to macrophage inflammatory protein 3 beta isoform 1 |
| Locus_22495_Transcript_1/1_Conf_1.000 | 323 | 2  | 3.55E-07  | NP_502859.2    | 62  | 58.151  | 69  | 43  | hypothetical protein Y73F8A.24                                         |
| Locus_22496_Transcript_1/1_Conf_1.000 | 206 | 5  | 9.25E-08  | NP_505281.1    | 59  | 60.077  | 62  | 37  | hypothetical protein F07B7.12                                          |
| Locus_22497_Transcript_1/1_Conf_1.000 | 147 | 0  |           |                |     |         |     |     |                                                                        |
| Locus_22498_Transcript_1/1_Conf_1.000 | 234 | 0  |           |                |     |         |     |     |                                                                        |
| Locus_22499_Transcript_1/1_Conf_1.000 | 193 | 0  |           |                |     |         |     |     |                                                                        |
| Locus_225_Transcript_1/1_Conf_1.000   | 651 | 8  | 2.47E-111 | NP_510149.1    | 93  | 405.216 | 216 | 203 | hypothetical protein C34E7.4                                           |
| Locus_2250_Transcript_1/1_Conf_1.000  | 480 | 0  |           |                |     |         |     |     |                                                                        |
| Locus_22500_Transcript_1/1_Conf_1.000 | 197 | 0  |           |                |     |         |     |     |                                                                        |
| Locus_22501_Transcript_1/1_Conf_1.000 | 198 | 5  | 8.40E-17  | NP_499157.2    | 84  | 90.1225 | 65  | 55  | hypothetical protein T05G5.8                                           |
| Locus_22502_Transcript_1/1_Conf_1.000 | 129 | 0  |           |                |     |         |     |     |                                                                        |
| Locus_22503_Transcript_1/1_Conf_1.000 | 363 | 5  | 1.91E-05  | XP_001945045.1 | 50  | 52.373  | 89  | 45  | PREDICTED: similar to conserved hypothetical protein                   |
| Locus_22504_Transcript_1/1_Conf_1.000 | 236 | 0  |           |                |     |         |     |     |                                                                        |
| Locus_22505_Transcript_1/1_Conf_1.000 | 184 | 0  |           |                |     |         |     |     |                                                                        |

|                                       |     |    |          |                |     |         |     |    |                                                          |
|---------------------------------------|-----|----|----------|----------------|-----|---------|-----|----|----------------------------------------------------------|
| Locus_22506_Transcript_1/1_Conf_1.000 | 135 | 20 | 1.73E-14 | NP_496037.1    | 93  | 82.4185 | 44  | 41 | Guanylyl Cyclase family member (gcy-3)                   |
| Locus_22507_Transcript_1/1_Conf_1.000 | 164 | 0  |          |                |     |         |     |    |                                                          |
| Locus_22508_Transcript_1/1_Conf_1.000 | 148 | 20 | 1.01E-09 | NP_001122772.1 | 77  | 66.6254 | 45  | 35 | Poly(ADP-ribose) Metabolism Enzyme family member (pme-3) |
| Locus_22509_Transcript_1/1_Conf_1.000 | 434 | 5  | 1.13E-05 | NP_001021813.1 | 55  | 53.1434 | 89  | 49 | abnormal cell LiNeage family member (lin-17)             |
| Locus_2251_Transcript_1/1_Conf_1.000  | 259 | 0  |          |                |     |         |     |    |                                                          |
| Locus_22510_Transcript_1/1_Conf_1.000 | 410 | 20 | 2.95E-22 | P34569.4       | 69  | 108.227 | 94  | 65 | Kelch repeat-containing protein kel-10                   |
| Locus_22511_Transcript_1/1_Conf_1.000 | 185 | 20 | 3.70E-28 | XP_002931439.1 | 100 | 127.872 | 61  | 61 | PREDICTED: heat shock 70 kDa protein 1A/1B-like, partial |
| Locus_22512_Transcript_1/1_Conf_1.000 | 240 | 0  |          |                |     |         |     |    |                                                          |
| Locus_22513_Transcript_1/1_Conf_1.000 | 141 | 0  |          |                |     |         |     |    |                                                          |
| Locus_22514_Transcript_1/1_Conf_1.000 | 140 | 0  |          |                |     |         |     |    |                                                          |
| Locus_22515_Transcript_1/1_Conf_1.000 | 249 | 0  |          |                |     |         |     |    |                                                          |
| Locus_22516_Transcript_1/1_Conf_1.000 | 128 | 0  |          |                |     |         |     |    |                                                          |
| Locus_22517_Transcript_1/1_Conf_1.000 | 185 | 0  |          |                |     |         |     |    |                                                          |
| Locus_22518_Transcript_1/1_Conf_1.000 | 408 | 10 | 1.41E-32 | XP_002645844.1 | 75  | 142.51  | 131 | 99 | C. briggsae CBR-TSP-8 protein                            |
| Locus_22519_Transcript_1/1_Conf_1.000 | 363 | 1  | 2.11E-04 | XP_002643891.1 | 49  | 48.9062 | 102 | 50 | Hypothetical protein CBG02143                            |

|                                       |     |    |          |                |    |         |     |     |                                                          |
|---------------------------------------|-----|----|----------|----------------|----|---------|-----|-----|----------------------------------------------------------|
| Locus_2252_Transcript_1/1_Conf_1.000  | 444 | 20 | 9.19E-64 | EFO27339.1     | 90 | 246.128 | 148 | 134 | dynein heavy chain protein 1                             |
| Locus_22520_Transcript_1/1_Conf_1.000 | 184 | 3  | 3.71E-12 | NP_491803.1    | 87 | 74.7146 | 48  | 42  | SaPosin-like Protein family member (spp-15)              |
| Locus_22521_Transcript_1/1_Conf_1.000 | 284 | 2  | 8.27E-12 | NP_001023948.1 | 62 | 73.559  | 70  | 44  | hypothetical protein F48F5.6                             |
| Locus_22522_Transcript_1/1_Conf_1.000 | 413 | 3  | 1.05E-11 | XP_002638813.1 | 61 | 73.1738 | 98  | 60  | C. briggsae CBR-ATM-1 protein                            |
| Locus_22523_Transcript_1/1_Conf_1.000 | 150 | 20 | 2.02E-18 | CAC43204.1     | 96 | 95.5153 | 50  | 48  | immunoglobulin heavy chain variable region               |
| Locus_22524_Transcript_1/1_Conf_1.000 | 176 | 20 | 1.42E-08 | XP_002633529.1 | 70 | 62.7734 | 54  | 38  | Hypothetical protein CBG05395                            |
| Locus_22525_Transcript_1/1_Conf_1.000 | 159 | 0  |          |                |    |         |     |     |                                                          |
| Locus_22526_Transcript_1/1_Conf_1.000 | 186 | 0  |          |                |    |         |     |     |                                                          |
| Locus_22527_Transcript_1/1_Conf_1.000 | 128 | 6  | 1.21E-07 | EFO13288.1     | 80 | 59.6918 | 41  | 33  | hypothetical protein LOAG_15242                          |
| Locus_22528_Transcript_1/1_Conf_1.000 | 208 | 20 | 1.24E-20 | NP_496814.1    | 82 | 102.834 | 70  | 58  | Member of AAA family binding CED-4 family member (mac-1) |
| Locus_22529_Transcript_1/1_Conf_1.000 | 293 | 0  |          |                |    |         |     |     |                                                          |
| Locus_2253_Transcript_1/2_Conf_1.000  | 924 | 20 | 4.14E-86 | NP_498620.1    | 84 | 322.398 | 227 | 191 | hypothetical protein F08F8.7                             |
| Locus_2253_Transcript_2/2_Conf_1.000  | 904 | 20 | 3.97E-86 | NP_498620.1    | 84 | 322.398 | 227 | 191 | hypothetical protein F08F8.7                             |
| Locus_22530_Transcript_1/1_Conf_1.000 | 518 | 4  | 3.75E-42 | XP_001898170.1 | 73 | 174.481 | 172 | 126 | Ubiquitin-conjugating enzyme family protein              |
| Locus_22531_Transcript_1/1_Conf_1.000 | 313 | 0  |          |                |    |         |     |     |                                                          |
| Locus_22532_Transcript_1/1_Conf_1.000 | 567 | 20 | 7.96E-32 | XP_002634048.1 | 59 | 140.584 | 197 | 118 | Hypothetical protein CBG01587                            |

|                                       |     |    |          |                |     |         |     |     |                                                                             |
|---------------------------------------|-----|----|----------|----------------|-----|---------|-----|-----|-----------------------------------------------------------------------------|
| Locus_22533_Transcript_1/1_Conf_1.000 | 174 | 20 | 1.36E-27 | XP_614269.5    | 100 | 125.946 | 58  | 58  | PREDICTED: filamin A, alpha                                                 |
| Locus_22534_Transcript_1/1_Conf_1.000 | 158 | 0  |          |                |     |         |     |     |                                                                             |
| Locus_22535_Transcript_1/1_Conf_1.000 | 222 | 3  | 1.23E-07 | NP_502249.3    | 64  | 59.6918 | 73  | 47  | TRPA cation channel homolog family member (trpa-1)                          |
| Locus_22536_Transcript_1/1_Conf_1.000 | 337 | 0  |          |                |     |         |     |     |                                                                             |
| Locus_22537_Transcript_1/1_Conf_1.000 | 466 | 20 | 2.07E-23 | NP_001086849.1 | 66  | 112.079 | 154 | 102 | dolichyl pyrophosphate Man9GlcNAc2 alpha-1,3-glucosyltransferase            |
| Locus_22538_Transcript_1/1_Conf_1.000 | 136 | 0  |          |                |     |         |     |     |                                                                             |
| Locus_22539_Transcript_1/1_Conf_1.000 | 303 | 0  |          |                |     |         |     |     |                                                                             |
| Locus_2254_Transcript_1/1_Conf_1.000  | 714 | 9  | 7.10E-12 | EFO26833.1     | 56  | 75.0998 | 117 | 66  | hypothetical protein LOAG_01654                                             |
| Locus_22540_Transcript_1/1_Conf_1.000 | 197 | 0  |          |                |     |         |     |     |                                                                             |
| Locus_22541_Transcript_1/1_Conf_1.000 | 255 | 0  |          |                |     |         |     |     |                                                                             |
| Locus_22542_Transcript_1/1_Conf_1.000 | 567 | 0  |          |                |     |         |     |     |                                                                             |
| Locus_22543_Transcript_1/1_Conf_1.000 | 359 | 5  | 4.71E-28 | XP_002645442.1 | 72  | 127.487 | 115 | 83  | C. briggsae CBR-TAG-241 protein                                             |
| Locus_22544_Transcript_1/1_Conf_1.000 | 145 | 0  |          |                |     |         |     |     |                                                                             |
| Locus_22545_Transcript_1/1_Conf_1.000 | 437 | 20 | 9.36E-53 | XP_002639554.1 | 83  | 209.534 | 148 | 123 | Hypothetical protein CBG04185                                               |
| Locus_22546_Transcript_1/1_Conf_1.000 | 442 | 0  |          |                |     |         |     |     |                                                                             |
| Locus_22547_Transcript_1/1_Conf_1.000 | 147 | 0  |          |                |     |         |     |     |                                                                             |
| Locus_22548_Transcript_1/1_Conf_1.000 | 162 | 20 | 5.26E-19 | XP_002637506.1 | 86  | 97.4413 | 53  | 46  | C. briggsae CBR-INX-10 protein                                              |
| Locus_22549_Transcript_1/1_Conf_1.000 | 275 | 1  | 2.97E-06 | NP_502390.2    | 52  | 55.0694 | 85  | 45  | High Incidence of Males (increased X chromosome loss) family member (him-6) |



|                                       |      |    |           |                |    |         |     |     |                                                                |
|---------------------------------------|------|----|-----------|----------------|----|---------|-----|-----|----------------------------------------------------------------|
| Locus_2255_Transcript_1/1_Conf_1.000  | 1317 | 20 | 4.49E-157 | NP_499188.2    | 89 | 558.91  | 346 | 309 | Glycerol-3-Phosphate DeHydrogenase family member (gpdh-2)      |
| Locus_22550_Transcript_1/1_Conf_1.000 | 208  | 3  | 1.25E-04  | NP_491050.3    | 58 | 49.6766 | 73  | 43  | InTestinal Neurexin-like family member (itx-1)                 |
| Locus_22551_Transcript_1/1_Conf_1.000 | 168  | 20 | 3.75E-17  | NP_497990.1    | 83 | 91.2781 | 56  | 47  | hypothetical protein C38D4.9                                   |
| Locus_22552_Transcript_1/1_Conf_1.000 | 149  | 0  |           |                |    |         |     |     |                                                                |
| Locus_22553_Transcript_1/1_Conf_1.000 | 129  | 0  |           |                |    |         |     |     |                                                                |
| Locus_22554_Transcript_1/1_Conf_1.000 | 163  | 0  |           |                |    |         |     |     |                                                                |
| Locus_22555_Transcript_1/1_Conf_1.000 | 280  | 6  | 9.14E-16  | XP_002640853.1 | 62 | 86.6557 | 88  | 55  | Hypothetical protein CBG15741                                  |
| Locus_22556_Transcript_1/1_Conf_1.000 | 188  | 3  | 6.53E-09  | NP_741241.1    | 66 | 63.929  | 60  | 40  | Dipeptidyl Peptidase Four (IV) family member (dpf-6)           |
| Locus_22557_Transcript_1/1_Conf_1.000 | 355  | 17 | 6.63E-14  | EFO22315.1     | 60 | 80.4925 | 105 | 64  | hypothetical protein LOAG_06169                                |
| Locus_22558_Transcript_1/1_Conf_1.000 | 145  | 0  |           |                |    |         |     |     |                                                                |
| Locus_22559_Transcript_1/1_Conf_1.000 | 269  | 1  | 1.48E-05  | ACI49192.1     | 59 | 52.7582 | 81  | 48  | hypothetical protein Csp3_JD03.001                             |
| Locus_2256_Transcript_1/2_Conf_1.000  | 893  | 11 | 3.83E-09  | XP_002733735.1 | 47 | 66.6254 | 138 | 65  | PREDICTED: receptor for egg jelly 6-like                       |
| Locus_2256_Transcript_2/2_Conf_1.000  | 902  | 12 | 7.86E-10  | NP_001021459.2 | 40 | 68.9366 | 188 | 76  | hypothetical protein F36H2.3                                   |
| Locus_22560_Transcript_1/1_Conf_1.000 | 283  | 20 | 1.88E-48  | NP_492127.1    | 92 | 195.282 | 94  | 87  | Low-density lipoprotein Receptor Related family member (lrp-1) |
| Locus_22561_Transcript_1/1_Conf_1.000 | 167  | 0  |           |                |    |         |     |     |                                                                |
| Locus_22562_Transcript_1/1_Conf_1.000 | 258  | 0  |           |                |    |         |     |     |                                                                |
| Locus_22563_Transcript_1/1_Conf_1.000 | 149  | 4  | 6.78E-06  | XP_001894015.1 | 68 | 53.9138 | 47  | 32  | hypothetical protein Bm1_12730                                 |
| Locus_22564_Transcript_1/1_Conf_1.000 | 288  | 0  |           |                |    |         |     |     |                                                                |
| Locus_22565_Transcript_1/1_Conf_1.000 | 150  | 0  |           |                |    |         |     |     |                                                                |
| Locus_22566_Transcript_1/1_Conf_1.000 | 191  | 1  | 1.36E-06  | XP_002643591.1 | 76 | 56.225  | 63  | 48  | Hypothetical protein CBG16316                                  |
| Locus_22567_Transcript_1/1_Conf_1.000 | 183  | 20 | 3.84E-09  | NP_001023008.1 | 66 | 64.6994 | 57  | 38  | CULLin family member (cul-2)                                   |

|                                       |      |    |          |                |     |         |     |     |                                                                                  |
|---------------------------------------|------|----|----------|----------------|-----|---------|-----|-----|----------------------------------------------------------------------------------|
| Locus_22568_Transcript_1/1_Conf_1.000 | 401  | 20 | 2.19E-57 | NP_001022438.1 | 96  | 224.942 | 127 | 122 | Ligand-Gated ion Channel family member (lgc-35)                                  |
| Locus_22569_Transcript_1/1_Conf_1.000 | 164  | 0  |          |                |     |         |     |     |                                                                                  |
| Locus_2257_Transcript_1/1_Conf_1.000  | 1700 | 20 | 5.45E-84 | CAD44516.1     | 59  | 316.62  | 564 | 334 | VAB-10B protein                                                                  |
| Locus_22570_Transcript_1/1_Conf_1.000 | 276  | 0  |          |                |     |         |     |     |                                                                                  |
| Locus_22571_Transcript_1/1_Conf_1.000 | 276  | 0  |          |                |     |         |     |     |                                                                                  |
| Locus_22572_Transcript_1/1_Conf_1.000 | 332  | 0  |          |                |     |         |     |     |                                                                                  |
| Locus_22573_Transcript_1/1_Conf_1.000 | 430  | 4  | 4.71E-36 | NP_505948.2    | 72  | 154.066 | 143 | 104 | hypothetical protein T27F2.2                                                     |
| Locus_22574_Transcript_1/1_Conf_1.000 | 271  | 0  |          |                |     |         |     |     |                                                                                  |
| Locus_22575_Transcript_1/1_Conf_1.000 | 349  | 0  |          |                |     |         |     |     |                                                                                  |
| Locus_22576_Transcript_1/1_Conf_1.000 | 185  | 20 | 8.52E-25 | XP_002641621.1 | 90  | 116.701 | 61  | 55  | Hypothetical protein CBG09941                                                    |
| Locus_22577_Transcript_1/1_Conf_1.000 | 219  | 0  |          |                |     |         |     |     |                                                                                  |
| Locus_22578_Transcript_1/1_Conf_1.000 | 369  | 20 | 2.46E-24 | NP_495529.1    | 73  | 115.161 | 91  | 67  | SCP(Small C-terminal domain Phosphatase)-Like phosphatase family member (scpl-2) |
| Locus_22579_Transcript_1/1_Conf_1.000 | 611  | 20 | 2.05E-82 | NP_497814.3    | 89  | 308.916 | 203 | 181 | UNCoordinated family member (unc-79)                                             |
| Locus_2258_Transcript_1/2_Conf_1.000  | 685  | 20 | 4.77E-55 | ACX55058.1     | 92  | 218.394 | 127 | 117 | glutathione peroxidase                                                           |
| Locus_2258_Transcript_2/2_Conf_1.000  | 679  | 20 | 1.45E-56 | ACX55058.1     | 93  | 223.402 | 125 | 117 | glutathione peroxidase                                                           |
| Locus_22580_Transcript_1/1_Conf_1.000 | 161  | 20 | 1.87E-24 | EFO18724.1     | 98  | 115.546 | 53  | 52  | voltage and ligand gated potassium channel                                       |
| Locus_22581_Transcript_1/1_Conf_1.000 | 271  | 0  |          |                |     |         |     |     |                                                                                  |
| Locus_22582_Transcript_1/1_Conf_1.000 | 146  | 0  |          |                |     |         |     |     |                                                                                  |
| Locus_22583_Transcript_1/1_Conf_1.000 | 230  | 20 | 1.53E-34 | XP_002710954.1 | 100 | 149.058 | 72  | 72  | PREDICTED: small nuclear ribonucleoprotein polypeptide B/B-like                  |
| Locus_22584_Transcript_1/1_Conf_1.000 | 221  | 0  |          |                |     |         |     |     |                                                                                  |
| Locus_22585_Transcript_1/1_Conf_1.000 | 283  | 0  |          |                |     |         |     |     |                                                                                  |
| Locus_22586_Transcript_1/1_Conf_1.000 | 149  | 4  | 1.41E-11 | XP_002644189.1 | 85  | 72.7886 | 49  | 42  | Hypothetical protein CBG17172                                                    |

|                                       |      |    |          |                |     |         |     |     |                                                                   |
|---------------------------------------|------|----|----------|----------------|-----|---------|-----|-----|-------------------------------------------------------------------|
| Locus_22587_Transcript_1/1_Conf_1.000 | 287  | 11 | 1.66E-12 | EFO24938.1     | 78  | 75.8702 | 87  | 68  | hypothetical protein LOAG_03545                                   |
| Locus_22588_Transcript_1/1_Conf_1.000 | 313  | 20 | 1.07E-35 | NP_495634.1    | 84  | 152.91  | 104 | 88  | hypothetical protein C06A8.6                                      |
| Locus_22589_Transcript_1/1_Conf_1.000 | 293  | 20 | 3.65E-36 | CAN70790.1     | 97  | 154.451 | 80  | 78  | hypothetical protein                                              |
| Locus_2259_Transcript_1/1_Conf_1.000  | 1021 | 0  |          |                |     |         |     |     |                                                                   |
| Locus_22590_Transcript_1/1_Conf_1.000 | 175  | 6  | 2.50E-13 | EAW66059.1     | 100 | 78.5666 | 47  | 47  | neural precursor cell expressed, developmentally down-regulated 8 |
| Locus_22591_Transcript_1/1_Conf_1.000 | 166  | 0  |          |                |     |         |     |     |                                                                   |
| Locus_22592_Transcript_1/1_Conf_1.000 | 342  | 0  |          |                |     |         |     |     |                                                                   |
| Locus_22593_Transcript_1/1_Conf_1.000 | 246  | 20 | 1.78E-27 | NP_502312.2    | 86  | 125.561 | 81  | 70  | Neurexin Like receptor family member (nlr-1)                      |
| Locus_22594_Transcript_1/1_Conf_1.000 | 179  | 0  |          |                |     |         |     |     |                                                                   |
| Locus_22595_Transcript_1/1_Conf_1.000 | 138  | 0  |          |                |     |         |     |     |                                                                   |
| Locus_22596_Transcript_1/1_Conf_1.000 | 215  | 0  |          |                |     |         |     |     |                                                                   |
| Locus_22597_Transcript_1/1_Conf_1.000 | 284  | 4  | 1.16E-05 | EFO13647.1     | 59  | 53.1434 | 67  | 40  | hypothetical protein LOAG_14881                                   |
| Locus_22598_Transcript_1/1_Conf_1.000 | 448  | 8  | 2.27E-38 | XP_002636678.1 | 75  | 161.77  | 145 | 109 | C. briggsae CBR-CHE-11 protein                                    |
| Locus_22599_Transcript_1/1_Conf_1.000 | 131  | 20 | 5.24E-11 | AAF82410.1     | 88  | 70.8626 | 43  | 38  | AF221132_1diacylglycerol acyltransferase                          |
| Locus_226_Transcript_1/1_Conf_1.000   | 379  | 0  |          |                |     |         |     |     |                                                                   |
| Locus_2260_Transcript_1/2_Conf_1.000  | 609  | 20 | 7.94E-18 | EFO17801.1     | 100 | 94.3597 | 47  | 47  | hypothetical protein LOAG_10696                                   |
| Locus_2260_Transcript_2/2_Conf_1.000  | 609  | 20 | 1.77E-17 | EFO17801.1     | 97  | 93.2041 | 47  | 46  | hypothetical protein LOAG_10696                                   |

|                                       |     |    |          |                |     |         |     |     |                                                                            |
|---------------------------------------|-----|----|----------|----------------|-----|---------|-----|-----|----------------------------------------------------------------------------|
| Locus_22600_Transcript_1/1_Conf_1.000 | 137 | 19 | 6.35E-17 | XP_002647760.1 | 97  | 90.5077 | 45  | 44  | Hypothetical protein CBG20513                                              |
| Locus_22601_Transcript_1/1_Conf_1.000 | 228 | 0  |          |                |     |         |     |     |                                                                            |
| Locus_22602_Transcript_1/1_Conf_1.000 | 238 | 0  |          |                |     |         |     |     |                                                                            |
| Locus_22603_Transcript_1/1_Conf_1.000 | 152 | 1  | 2.17E-04 | XP_001896667.1 | 63  | 48.9062 | 46  | 29  | Zinc finger, C2H2 type family protein                                      |
| Locus_22604_Transcript_1/1_Conf_1.000 | 145 | 20 | 2.04E-10 | EFO20586.1     | 80  | 68.9366 | 47  | 38  | anion exchange protein                                                     |
| Locus_22605_Transcript_1/1_Conf_1.000 | 145 | 9  | 5.56E-08 | NP_001020988.1 | 71  | 60.8474 | 45  | 32  | UNCoordinated family member (unc-89)                                       |
| Locus_22606_Transcript_1/1_Conf_1.000 | 184 | 0  |          |                |     |         |     |     |                                                                            |
| Locus_22607_Transcript_1/1_Conf_1.000 | 248 | 0  |          |                |     |         |     |     |                                                                            |
| Locus_22608_Transcript_1/1_Conf_1.000 | 202 | 0  |          |                |     |         |     |     |                                                                            |
| Locus_22609_Transcript_1/1_Conf_1.000 | 138 | 0  |          |                |     |         |     |     |                                                                            |
| Locus_2261_Transcript_1/1_Conf_1.000  | 444 | 20 | 3.52E-39 | P27613.1       | 81  | 164.466 | 125 | 102 | Globin-like host-protective antigen                                        |
| Locus_22610_Transcript_1/1_Conf_1.000 | 301 | 2  | 7.09E-08 | NP_499962.2    | 63  | 60.4622 | 88  | 56  | hypothetical protein K11H12.9                                              |
| Locus_22611_Transcript_1/1_Conf_1.000 | 164 | 20 | 1.87E-16 | NP_506256.3    | 88  | 88.9669 | 54  | 48  | CaDHerin family member (cdh-6)                                             |
| Locus_22612_Transcript_1/1_Conf_1.000 | 249 | 2  | 2.94E-06 | EFO23679.1     | 61  | 55.0694 | 94  | 58  | hypothetical protein LOAG_04806                                            |
| Locus_22613_Transcript_1/1_Conf_1.000 | 235 | 20 | 2.96E-38 | BAG51482.1     | 100 | 161.384 | 78  | 78  | unnamed protein product                                                    |
| Locus_22614_Transcript_1/1_Conf_1.000 | 142 | 0  |          |                |     |         |     |     |                                                                            |
| Locus_22615_Transcript_1/1_Conf_1.000 | 468 | 20 | 5.05E-46 | NP_508419.1    | 76  | 187.193 | 139 | 107 | hypothetical protein T10H10.2                                              |
| Locus_22616_Transcript_1/1_Conf_1.000 | 158 | 0  |          |                |     |         |     |     |                                                                            |
| Locus_22617_Transcript_1/1_Conf_1.000 | 189 | 20 | 1.44E-24 | NP_001024984.1 | 89  | 115.931 | 59  | 53  | DVE (Defective proVentriculus in Drosophila) homolog family member (dve-1) |
| Locus_22618_Transcript_1/1_Conf_1.000 | 349 | 20 | 2.53E-29 | NP_510434.2    | 82  | 131.724 | 76  | 63  | hypothetical protein F54E4.4                                               |
| Locus_22619_Transcript_1/1_Conf_1.000 | 156 | 0  |          |                |     |         |     |     |                                                                            |

|                                       |      |    |          |                |     |         |      |     |                                                                      |
|---------------------------------------|------|----|----------|----------------|-----|---------|------|-----|----------------------------------------------------------------------|
| Locus_2262_Transcript_1/1_Conf_1.000  | 3456 | 20 | 0        | XP_001895813.1 | 61  | 806.594 | 1073 | 659 | F/Y-rich N-terminus family protein                                   |
| Locus_22620_Transcript_1/1_Conf_1.000 | 163  | 0  |          |                |     |         |      |     |                                                                      |
| Locus_22621_Transcript_1/1_Conf_1.000 | 328  | 0  |          |                |     |         |      |     |                                                                      |
| Locus_22622_Transcript_1/1_Conf_1.000 | 320  | 20 | 1.31E-17 | NP_505966.1    | 82  | 92.8189 | 69   | 57  | hypothetical protein T04F3.4                                         |
| Locus_22623_Transcript_1/1_Conf_1.000 | 440  | 0  |          |                |     |         |      |     |                                                                      |
| Locus_22624_Transcript_1/1_Conf_1.000 | 167  | 0  |          |                |     |         |      |     |                                                                      |
| Locus_22625_Transcript_1/1_Conf_1.000 | 211  | 20 | 2.75E-28 | XP_002831615.1 | 100 | 128.257 | 64   | 64  | PREDICTED: LOW QUALITY PROTEIN: cell division protein kinase 16-like |
| Locus_22626_Transcript_1/1_Conf_1.000 | 401  | 0  |          |                |     |         |      |     |                                                                      |
| Locus_22627_Transcript_1/1_Conf_1.000 | 252  | 0  |          |                |     |         |      |     |                                                                      |
| Locus_22628_Transcript_1/1_Conf_1.000 | 195  | 0  |          |                |     |         |      |     |                                                                      |
| Locus_22629_Transcript_1/1_Conf_1.000 | 141  | 20 | 2.17E-17 | XP_001110023.2 | 100 | 92.0485 | 46   | 46  | PREDICTED: sentrin-specific protease 3-like isoform 3                |
| Locus_2263_Transcript_1/1_Conf_1.000  | 219  | 0  |          |                |     |         |      |     |                                                                      |
| Locus_22630_Transcript_1/1_Conf_1.000 | 172  | 3  | 8.63E-06 | NP_001122749.1 | 66  | 53.5286 | 57   | 38  | hypothetical protein ZK643.3                                         |
| Locus_22631_Transcript_1/1_Conf_1.000 | 196  | 20 | 2.45E-16 | XP_426592.2    | 95  | 88.5817 | 42   | 40  | PREDICTED: hypothetical protein                                      |
| Locus_22632_Transcript_1/1_Conf_1.000 | 334  | 4  | 2.05E-07 | XP_002642528.1 | 69  | 58.9214 | 66   | 46  | Hypothetical protein CBG20151                                        |
| Locus_22633_Transcript_1/1_Conf_1.000 | 316  | 20 | 2.23E-25 | NP_510713.1    | 72  | 118.627 | 113  | 82  | Cyclase ASSociated protein Homolog family member (cas-1)             |
| Locus_22634_Transcript_1/1_Conf_1.000 | 406  | 5  | 1.01E-46 | ACY39996.1     | 83  | 189.504 | 133  | 111 | Hypothetical protein C30F12.5a                                       |
| Locus_22635_Transcript_1/1_Conf_1.000 | 178  | 0  |          |                |     |         |      |     |                                                                      |
| Locus_22636_Transcript_1/1_Conf_1.000 | 229  | 0  |          |                |     |         |      |     |                                                                      |
| Locus_22637_Transcript_1/1_Conf_1.000 | 184  | 0  |          |                |     |         |      |     |                                                                      |
| Locus_22638_Transcript_1/1_Conf_1.000 | 155  | 0  |          |                |     |         |      |     |                                                                      |
| Locus_22639_Transcript_1/1_Conf_1.000 | 137  | 0  |          |                |     |         |      |     |                                                                      |
| Locus_2264_Transcript_1/1_Conf_1.000  | 462  | 0  |          |                |     |         |      |     |                                                                      |
| Locus_22640_Transcript_1/1_Conf_1.000 | 135  | 0  |          |                |     |         |      |     |                                                                      |
| Locus_22641_Transcript_1/1_Conf_1.000 | 168  | 0  |          |                |     |         |      |     |                                                                      |

|                                       |      |    |          |                |    |         |     |     |                                                 |
|---------------------------------------|------|----|----------|----------------|----|---------|-----|-----|-------------------------------------------------|
| Locus_22642_Transcript_1/1_Conf_1.000 | 207  | 0  |          |                |    |         |     |     |                                                 |
| Locus_22643_Transcript_1/1_Conf_1.000 | 387  | 0  |          |                |    |         |     |     |                                                 |
| Locus_22644_Transcript_1/1_Conf_1.000 | 275  | 20 | 9.22E-08 | XP_002585751.1 | 57 | 60.077  | 80  | 46  | hypothetical protein BRAFLDRAFT_111201          |
| Locus_22645_Transcript_1/1_Conf_1.000 | 145  | 0  |          |                |    |         |     |     |                                                 |
| Locus_22646_Transcript_1/1_Conf_1.000 | 408  | 0  |          |                |    |         |     |     |                                                 |
| Locus_22647_Transcript_1/1_Conf_1.000 | 196  | 2  | 3.93E-06 | XP_001895789.1 | 66 | 54.6842 | 65  | 43  | Timeless protein                                |
| Locus_22648_Transcript_1/1_Conf_1.000 | 365  | 5  | 1.61E-28 | XP_002638930.1 | 87 | 129.028 | 121 | 106 | C. briggsae CBR-CPX-1 protein                   |
| Locus_22649_Transcript_1/1_Conf_1.000 | 132  | 0  |          |                |    |         |     |     |                                                 |
| Locus_2265_Transcript_1/1_Conf_1.000  | 1188 | 20 | 3.15E-66 | XP_002429272.1 | 55 | 256.914 | 353 | 197 | G-protein signaling modulator, putative         |
| Locus_22650_Transcript_1/1_Conf_1.000 | 202  | 0  |          |                |    |         |     |     |                                                 |
| Locus_22651_Transcript_1/1_Conf_1.000 | 187  | 0  |          |                |    |         |     |     |                                                 |
| Locus_22652_Transcript_1/1_Conf_1.000 | 136  | 2  | 1.98E-10 | NP_502231.1    | 81 | 68.9366 | 44  | 36  | LiPocalin-Related protein family member (lpr-2) |
| Locus_22653_Transcript_1/1_Conf_1.000 | 176  | 0  |          |                |    |         |     |     |                                                 |
| Locus_22654_Transcript_1/1_Conf_1.000 | 544  | 20 | 2.17E-65 | NP_500551.2    | 86 | 251.906 | 172 | 148 | hypothetical protein F55F10.1                   |
| Locus_22655_Transcript_1/1_Conf_1.000 | 134  | 0  |          |                |    |         |     |     |                                                 |
| Locus_22656_Transcript_1/1_Conf_1.000 | 312  | 20 | 3.23E-32 | EFO15665.1     | 85 | 141.354 | 89  | 76  | hypothetical protein LOAG_12844                 |
| Locus_22657_Transcript_1/1_Conf_1.000 | 251  | 0  |          |                |    |         |     |     |                                                 |
| Locus_22658_Transcript_1/1_Conf_1.000 | 166  | 20 | 3.88E-22 | XP_002630655.1 | 96 | 107.842 | 55  | 53  | C. briggsae CBR-MPK-2 protein                   |
| Locus_22659_Transcript_1/1_Conf_1.000 | 173  | 0  |          |                |    |         |     |     |                                                 |
| Locus_2266_Transcript_1/1_Conf_1.000  | 2199 | 20 | 0        | EFO25169.1     | 84 | 907.131 | 625 | 526 | trehalose 6-phosphate synthase 1                |
| Locus_22660_Transcript_1/1_Conf_1.000 | 160  | 20 | 6.04E-15 | XP_002630143.1 | 88 | 83.9593 | 50  | 44  | Hypothetical protein CBG00545                   |
| Locus_22661_Transcript_1/1_Conf_1.000 | 206  | 2  | 3.52E-07 | XP_001895139.1 | 63 | 58.151  | 65  | 41  | MGC84124 protein                                |
| Locus_22662_Transcript_1/1_Conf_1.000 | 285  | 0  |          |                |    |         |     |     |                                                 |

|                                       |     |    |          |                |    |         |     |     |                                                          |
|---------------------------------------|-----|----|----------|----------------|----|---------|-----|-----|----------------------------------------------------------|
| Locus_22663_Transcript_1/1_Conf_1.000 | 252 | 20 | 1.50E-29 | CBW48349.1     | 85 | 132.494 | 84  | 72  | Hypothetical protein C52E4.5b                            |
| Locus_22664_Transcript_1/1_Conf_1.000 | 175 | 0  |          |                |    |         |     |     |                                                          |
| Locus_22665_Transcript_1/1_Conf_1.000 | 144 | 20 | 3.98E-14 | NP_490693.2    | 86 | 81.2629 | 46  | 40  | ATM (ataxia telangectasia mutated) family member (atm-1) |
| Locus_22666_Transcript_1/1_Conf_1.000 | 243 | 17 | 1.42E-08 | XP_002634032.1 | 55 | 62.7734 | 85  | 47  | Hypothetical protein CBG01569                            |
| Locus_22667_Transcript_1/1_Conf_1.000 | 184 | 0  |          |                |    |         |     |     |                                                          |
| Locus_22668_Transcript_1/1_Conf_1.000 | 542 | 20 | 1.10E-53 | Q60QP4.2       | 80 | 213.001 | 150 | 120 | UPF0359 membrane protein CBG21730                        |
| Locus_22669_Transcript_1/1_Conf_1.000 | 226 | 0  |          |                |    |         |     |     |                                                          |
| Locus_2267_Transcript_1/1_Conf_1.000  | 546 | 0  |          |                |    |         |     |     |                                                          |
| Locus_22670_Transcript_1/1_Conf_1.000 | 313 | 0  |          |                |    |         |     |     |                                                          |
| Locus_22671_Transcript_1/1_Conf_1.000 | 372 | 2  | 2.30E-14 | NP_498398.1    | 71 | 82.0333 | 125 | 89  | LEThal family member (let-716)                           |
| Locus_22672_Transcript_1/1_Conf_1.000 | 155 | 20 | 1.31E-09 | XP_002633495.1 | 74 | 66.2402 | 51  | 38  | Hypothetical protein CBG06267                            |
| Locus_22673_Transcript_1/1_Conf_1.000 | 328 | 0  |          |                |    |         |     |     |                                                          |
| Locus_22674_Transcript_1/1_Conf_1.000 | 315 | 0  |          |                |    |         |     |     |                                                          |
| Locus_22675_Transcript_1/1_Conf_1.000 | 158 | 0  |          |                |    |         |     |     |                                                          |
| Locus_22676_Transcript_1/1_Conf_1.000 | 390 | 0  |          |                |    |         |     |     |                                                          |

|                                       |      |    |          |                |    |         |     |     |                                                                        |
|---------------------------------------|------|----|----------|----------------|----|---------|-----|-----|------------------------------------------------------------------------|
| Locus_22677_Transcript_1/1_Conf_1.000 | 218  | 20 | 8.80E-19 | NP_508493.1    | 81 | 96.6709 | 64  | 52  | protein KINase family member (kin-29)                                  |
| Locus_22678_Transcript_1/1_Conf_1.000 | 313  | 0  |          |                |    |         |     |     |                                                                        |
| Locus_22679_Transcript_1/1_Conf_1.000 | 242  | 0  |          |                |    |         |     |     |                                                                        |
| Locus_2268_Transcript_1/1_Conf_1.000  | 809  | 2  | 1.11E-17 | NP_509937.1    | 64 | 94.7449 | 156 | 100 | hypothetical protein F52D10.2                                          |
| Locus_22680_Transcript_1/1_Conf_1.000 | 313  | 0  |          |                |    |         |     |     |                                                                        |
| Locus_22681_Transcript_1/1_Conf_1.000 | 134  | 0  |          |                |    |         |     |     |                                                                        |
| Locus_22682_Transcript_1/1_Conf_1.000 | 379  | 20 | 2.88E-25 | XP_001901557.1 | 66 | 118.242 | 113 | 75  | Protein kinase domain containing protein                               |
| Locus_22683_Transcript_1/1_Conf_1.000 | 192  | 3  | 2.01E-18 | XP_002633133.1 | 77 | 95.5153 | 68  | 53  | C. briggsae CBR-GRL-4 protein                                          |
| Locus_22684_Transcript_1/2_Conf_1.000 | 542  | 2  | 2.48E-05 | NP_001122966.1 | 50 | 52.373  | 124 | 63  | hypothetical protein F59A1.11                                          |
| Locus_22684_Transcript_2/2_Conf_1.000 | 651  | 4  | 6.07E-09 | NP_001122966.1 | 52 | 65.0846 | 153 | 80  | hypothetical protein F59A1.11                                          |
| Locus_22685_Transcript_1/1_Conf_1.000 | 280  | 0  |          |                |    |         |     |     |                                                                        |
| Locus_22686_Transcript_1/1_Conf_1.000 | 331  | 20 | 2.27E-14 | EFO16615.1     | 68 | 82.0333 | 83  | 57  | hypothetical protein LOAG_11891                                        |
| Locus_22687_Transcript_1/1_Conf_1.000 | 353  | 0  |          |                |    |         |     |     |                                                                        |
| Locus_22688_Transcript_1/1_Conf_1.000 | 136  | 0  |          |                |    |         |     |     |                                                                        |
| Locus_22689_Transcript_1/1_Conf_1.000 | 157  | 0  |          |                |    |         |     |     |                                                                        |
| Locus_2269_Transcript_1/1_Conf_1.000  | 1064 | 20 | 1.38E-38 | CAA86058.2     | 52 | 164.851 | 210 | 111 | C. elegans protein B0393.5, partially confirmed by transcript evidence |
| Locus_22690_Transcript_1/1_Conf_1.000 | 128  | 5  | 5.09E-06 | NP_001021995.1 | 76 | 54.299  | 42  | 32  | hypothetical protein C27D6.11                                          |
| Locus_22691_Transcript_1/1_Conf_1.000 | 129  | 20 | 9.55E-13 | A8WRV1.2       | 83 | 76.6406 | 42  | 35  | Serine/threonine-protein kinase kin-29                                 |
| Locus_22692_Transcript_1/1_Conf_1.000 | 323  | 20 | 5.99E-47 | CAR97828.1     | 88 | 190.274 | 106 | 94  | C. elegans protein F44G4.8b, confirmed by transcript evidence          |



|                                       |      |    |          |                |    |         |     |     |                                                                                 |
|---------------------------------------|------|----|----------|----------------|----|---------|-----|-----|---------------------------------------------------------------------------------|
| Locus_22693_Transcript_1/1_Conf_1.000 | 207  | 0  |          |                |    |         |     |     |                                                                                 |
| Locus_22694_Transcript_1/1_Conf_1.000 | 182  | 0  |          |                |    |         |     |     |                                                                                 |
| Locus_22695_Transcript_1/1_Conf_1.000 | 241  | 0  |          |                |    |         |     |     |                                                                                 |
| Locus_22696_Transcript_1/1_Conf_1.000 | 162  | 0  |          |                |    |         |     |     |                                                                                 |
| Locus_22697_Transcript_1/1_Conf_1.000 | 269  | 0  |          |                |    |         |     |     |                                                                                 |
| Locus_22698_Transcript_1/1_Conf_1.000 | 299  | 0  |          |                |    |         |     |     |                                                                                 |
| Locus_22699_Transcript_1/1_Conf_1.000 | 437  | 20 | 2.17E-33 | NP_490828.3    | 73 | 145.206 | 123 | 91  | HAIF transporter (PGP related) family member (haf-6)                            |
| Locus_227_Transcript_1/4_Conf_0.500   | 2580 | 20 | 0        | NP_500329.1    | 74 | 724.931 | 707 | 528 | mammalian ELKS/CAST/ERC/Rab6 interacting protein homolog family member (elks-1) |
| Locus_227_Transcript_2/4_Conf_0.400   | 842  | 3  | 3.13E-10 | XP_002634742.1 | 63 | 70.0922 | 79  | 50  | C. briggsae CBR-ELKS-1 protein                                                  |
| Locus_227_Transcript_3/4_Conf_0.700   | 3093 | 20 | 0        | NP_500329.1    | 69 | 750.355 | 819 | 573 | mammalian ELKS/CAST/ERC/Rab6 interacting protein homolog family member (elks-1) |
| Locus_227_Transcript_4/4_Conf_0.700   | 3093 | 20 | 0        | NP_500329.1    | 69 | 750.355 | 819 | 573 | mammalian ELKS/CAST/ERC/Rab6 interacting protein homolog family member (elks-1) |
| Locus_2270_Transcript_1/1_Conf_1.000  | 1071 | 0  |          |                |    |         |     |     |                                                                                 |
| Locus_22700_Transcript_1/1_Conf_1.000 | 320  | 1  | 5.65E-29 | CAR63539.1     | 77 | 130.568 | 102 | 79  | hypothetical protein                                                            |
| Locus_22701_Transcript_1/1_Conf_1.000 | 344  | 0  |          |                |    |         |     |     |                                                                                 |
| Locus_22702_Transcript_1/1_Conf_1.000 | 342  | 20 | 9.73E-13 | XP_002647591.1 | 51 | 76.6406 | 95  | 49  | Hypothetical protein CBG06679                                                   |
| Locus_22703_Transcript_1/1_Conf_1.000 | 154  | 0  |          |                |    |         |     |     |                                                                                 |
| Locus_22704_Transcript_1/1_Conf_1.000 | 312  | 3  | 2.25E-09 | NP_741925.2    | 62 | 65.4698 | 100 | 62  | DYstrophin-like phenotype and CAPON related family member (dyc-1)               |
| Locus_22705_Transcript_1/1_Conf_1.000 | 132  | 0  |          |                |    |         |     |     |                                                                                 |
| Locus_22706_Transcript_1/1_Conf_1.000 | 261  | 20 | 8.75E-06 | NP_001087602.1 | 58 | 53.5286 | 67  | 39  | zinc finger, MIZ-type containing 2                                              |
| Locus_22707_Transcript_1/1_Conf_1.000 | 237  | 20 | 1.74E-14 | NP_741251.1    | 68 | 82.4185 | 76  | 52  | hypothetical protein C02F5.6                                                    |
| Locus_22708_Transcript_1/1_Conf_1.000 | 270  | 3  | 1.63E-04 | XP_001194422.1 | 52 | 49.2914 | 72  | 38  | PREDICTED: similar to contactin associated protein                              |
| Locus_22709_Transcript_1/1_Conf_1.000 | 182  | 0  |          |                |    |         |     |     |                                                                                 |
| Locus_2271_Transcript_1/1_Conf_1.000  | 819  | 20 | 6.76E-63 | NP_001129866.1 | 71 | 244.973 | 212 | 152 | Kinesin-Like Protein family member (klp-12)                                     |

|                                       |     |    |          |                |    |         |     |    |                                        |
|---------------------------------------|-----|----|----------|----------------|----|---------|-----|----|----------------------------------------|
| Locus_22710_Transcript_1/1_Conf_1.000 | 431 | 20 | 2.98E-06 | EFN51338.1     | 82 | 55.0694 | 39  | 32 | hypothetical protein CHLNCDRAFT_141133 |
| Locus_22711_Transcript_1/1_Conf_1.000 | 156 | 0  |          |                |    |         |     |    |                                        |
| Locus_22712_Transcript_1/1_Conf_1.000 | 423 | 14 | 4.17E-24 | CAR63608.1     | 72 | 114.39  | 74  | 54 | hypothetical protein                   |
| Locus_22713_Transcript_1/1_Conf_1.000 | 387 | 0  |          |                |    |         |     |    |                                        |
| Locus_22714_Transcript_1/1_Conf_1.000 | 373 | 20 | 2.22E-25 | XP_518438.2    | 66 | 118.627 | 123 | 82 | PREDICTED: copine V isoform 3          |
| Locus_22715_Transcript_1/1_Conf_1.000 | 309 | 20 | 4.25E-05 | XP_002108615.1 | 48 | 51.2174 | 72  | 35 | hypothetical protein TRIADDRAFT_19102  |
| Locus_22716_Transcript_1/1_Conf_1.000 | 161 | 0  |          |                |    |         |     |    |                                        |
| Locus_22717_Transcript_1/1_Conf_1.000 | 225 | 20 | 2.15E-28 | EFO21576.1     | 86 | 128.642 | 74  | 64 | hypothetical protein LOAG_06912        |
| Locus_22718_Transcript_1/1_Conf_1.000 | 314 | 3  | 1.77E-22 | NP_508833.1    | 86 | 108.997 | 67  | 58 | hypothetical protein T07F12.4          |
| Locus_22719_Transcript_1/1_Conf_1.000 | 180 | 0  |          |                |    |         |     |    |                                        |
| Locus_2272_Transcript_1/2_Conf_1.000  | 734 | 20 | 5.56E-15 | ABH88210.1     | 65 | 85.5001 | 103 | 67 | sapoin-like protein 1                  |
| Locus_2272_Transcript_2/2_Conf_1.000  | 739 | 20 | 5.66E-15 | ABH88210.1     | 65 | 85.5001 | 103 | 67 | sapoin-like protein 1                  |
| Locus_22720_Transcript_1/1_Conf_1.000 | 554 | 20 | 1.01E-28 | XP_002630751.1 | 63 | 130.183 | 133 | 85 | Hypothetical protein CBG02443          |

|                                       |      |    |          |                |     |         |     |     |                                                            |
|---------------------------------------|------|----|----------|----------------|-----|---------|-----|-----|------------------------------------------------------------|
| Locus_22721_Transcript_1/1_Conf_1.000 | 270  | 20 | 1.84E-48 | XP_002803216.1 | 100 | 195.282 | 89  | 89  | PREDICTED: amyloid beta A4 protein-like, partial           |
| Locus_22722_Transcript_1/1_Conf_1.000 | 361  | 20 | 8.87E-19 | XP_001900618.1 | 63  | 96.6709 | 117 | 74  | Leucine Rich Repeat family protein                         |
| Locus_22723_Transcript_1/1_Conf_1.000 | 177  | 20 | 2.25E-14 | CAR63659.1     | 82  | 82.0333 | 57  | 47  | putative Collagen protein 20                               |
| Locus_22724_Transcript_1/1_Conf_1.000 | 242  | 0  |          |                |     |         |     |     |                                                            |
| Locus_22725_Transcript_1/1_Conf_1.000 | 521  | 0  |          |                |     |         |     |     |                                                            |
| Locus_22726_Transcript_1/1_Conf_1.000 | 165  | 0  |          |                |     |         |     |     |                                                            |
| Locus_22727_Transcript_1/1_Conf_1.000 | 177  | 0  |          |                |     |         |     |     |                                                            |
| Locus_22728_Transcript_1/1_Conf_1.000 | 242  | 6  | 3.88E-06 | XP_002630353.1 | 61  | 54.6842 | 57  | 35  | Hypothetical protein CBG04283                              |
| Locus_22729_Transcript_1/1_Conf_1.000 | 718  | 3  | 1.75E-34 | NP_498060.2    | 57  | 150.214 | 244 | 140 | hypothetical protein R144.5                                |
| Locus_2273_Transcript_1/1_Conf_1.000  | 1338 | 20 | 9.65E-14 | XP_002664350.1 | 69  | 82.8037 | 59  | 41  | PREDICTED: hypothetical protein LOC322903                  |
| Locus_22730_Transcript_1/1_Conf_1.000 | 128  | 20 | 2.88E-09 | NP_001024131.1 | 76  | 65.0846 | 42  | 32  | Peroxisomal Membrane Protein related family member (pmp-5) |
| Locus_22731_Transcript_1/1_Conf_1.000 | 128  | 0  |          |                |     |         |     |     |                                                            |

|                                       |      |    |          |                |     |         |     |     |                                                     |
|---------------------------------------|------|----|----------|----------------|-----|---------|-----|-----|-----------------------------------------------------|
| Locus_22732_Transcript_1/1_Conf_1.000 | 148  | 20 | 7.72E-18 | XP_002823344.1 | 100 | 93.5893 | 49  | 49  | PREDICTED: keratin, type I cytoskeletal 18-like     |
| Locus_22733_Transcript_1/1_Conf_1.000 | 228  | 20 | 9.32E-24 | AAQ06435.1     | 96  | 113.235 | 76  | 73  | ABC6 protein                                        |
| Locus_22734_Transcript_1/1_Conf_1.000 | 157  | 0  |          |                |     |         |     |     |                                                     |
| Locus_22735_Transcript_1/1_Conf_1.000 | 203  | 2  | 3.90E-06 | EFO23663.1     | 61  | 54.6842 | 68  | 42  | myosin xviii                                        |
| Locus_22736_Transcript_1/1_Conf_1.000 | 194  | 0  |          |                |     |         |     |     |                                                     |
| Locus_22737_Transcript_1/2_Conf_1.000 | 303  | 20 | 6.58E-22 | XP_002632609.1 | 72  | 107.071 | 100 | 72  | C. briggsae CBR-COQ-3 protein                       |
| Locus_22737_Transcript_2/2_Conf_1.000 | 309  | 20 | 2.10E-20 | XP_002632609.1 | 70  | 102.064 | 102 | 72  | C. briggsae CBR-COQ-3 protein                       |
| Locus_22738_Transcript_1/1_Conf_1.000 | 640  | 20 | 2.11E-27 | NP_509145.2    | 68  | 126.331 | 104 | 71  | AuTophagy (yeast Atg homolog) family member (atg-2) |
| Locus_22739_Transcript_1/1_Conf_1.000 | 504  | 20 | 3.49E-58 | XP_001894372.1 | 75  | 227.639 | 180 | 136 | Immunoglobulin I-set domain containing protein      |
| Locus_2274_Transcript_1/1_Conf_1.000  | 1028 | 20 | 4.97E-46 | XP_001893845.1 | 57  | 189.504 | 303 | 173 | Mov34/MPN/PAD-1 family protein                      |
| Locus_22740_Transcript_1/1_Conf_1.000 | 220  | 0  |          |                |     |         |     |     |                                                     |
| Locus_22741_Transcript_1/1_Conf_1.000 | 368  | 0  |          |                |     |         |     |     |                                                     |
| Locus_22742_Transcript_1/1_Conf_1.000 | 135  | 0  |          |                |     |         |     |     |                                                     |
| Locus_22743_Transcript_1/1_Conf_1.000 | 525  | 20 | 2.48E-76 | XP_002644087.1 | 90  | 288.115 | 173 | 157 | Hypothetical protein CBG17560                       |
| Locus_22744_Transcript_1/1_Conf_1.000 | 172  | 0  |          |                |     |         |     |     |                                                     |

|                                       |     |    |          |                |     |         |     |     |                                              |
|---------------------------------------|-----|----|----------|----------------|-----|---------|-----|-----|----------------------------------------------|
| Locus_22745_Transcript_1/1_Conf_1.000 | 330 | 20 | 6.61E-14 | XP_002643183.1 | 60  | 80.4925 | 98  | 59  | Hypothetical protein CBG24152                |
| Locus_22746_Transcript_1/1_Conf_1.000 | 168 | 0  |          |                |     |         |     |     |                                              |
| Locus_22747_Transcript_1/1_Conf_1.000 | 381 | 20 | 3.74E-25 | XP_002639036.1 | 75  | 117.857 | 122 | 92  | C. briggsae CBR-DYB-1 protein                |
| Locus_22748_Transcript_1/1_Conf_1.000 | 178 | 0  |          |                |     |         |     |     |                                              |
| Locus_22749_Transcript_1/1_Conf_1.000 | 138 | 0  |          |                |     |         |     |     |                                              |
| Locus_2275_Transcript_1/2_Conf_1.000  | 566 | 6  | 4.17E-17 | XP_002633345.1 | 52  | 91.6633 | 163 | 86  | Hypothetical protein CBG06087                |
| Locus_2275_Transcript_2/2_Conf_1.000  | 560 | 6  | 2.36E-17 | XP_002633345.1 | 53  | 92.4337 | 161 | 86  | Hypothetical protein CBG06087                |
| Locus_22750_Transcript_1/1_Conf_1.000 | 137 | 0  |          |                |     |         |     |     |                                              |
| Locus_22751_Transcript_1/1_Conf_1.000 | 355 | 20 | 4.44E-18 | EFO24692.1     | 65  | 94.3597 | 120 | 79  | protein-tyrosine phosphatase                 |
| Locus_22752_Transcript_1/1_Conf_1.000 | 139 | 1  | 2.75E-12 | NP_001122963.1 | 86  | 75.0998 | 46  | 40  | hypothetical protein F58E6.1                 |
| Locus_22753_Transcript_1/1_Conf_1.000 | 216 | 0  |          |                |     |         |     |     |                                              |
| Locus_22754_Transcript_1/1_Conf_1.000 | 448 | 0  |          |                |     |         |     |     |                                              |
| Locus_22755_Transcript_1/1_Conf_1.000 | 148 | 0  |          |                |     |         |     |     |                                              |
| Locus_22756_Transcript_1/1_Conf_1.000 | 196 | 0  |          |                |     |         |     |     |                                              |
| Locus_22757_Transcript_1/1_Conf_1.000 | 198 | 0  |          |                |     |         |     |     |                                              |
| Locus_22758_Transcript_1/1_Conf_1.000 | 245 | 0  |          |                |     |         |     |     |                                              |
| Locus_22759_Transcript_1/1_Conf_1.000 | 207 | 20 | 8.57E-30 | XP_002818459.1 | 100 | 133.265 | 67  | 67  | PREDICTED: hypothetical protein LOC100441808 |
| Locus_2276_Transcript_1/4_Conf_0.500  | 854 | 20 | 1.64E-38 | AAG36874.1     | 76  | 164.081 | 178 | 136 | AF242767_1SF2                                |
| Locus_2276_Transcript_3/4_Conf_0.375  | 566 | 9  | 7.36E-14 | AAG36874.1     | 69  | 80.8777 | 134 | 93  | AF242767_1SF2                                |

|                                       |      |    |           |                |     |         |     |     |                                        |
|---------------------------------------|------|----|-----------|----------------|-----|---------|-----|-----|----------------------------------------|
| Locus_2276_Transcript_4/4_Conf_0.500  | 970  | 20 | 2.03E-38  | AAG36874.1     | 76  | 164.081 | 178 | 136 | AF242767_1SF2                          |
| Locus_22760_Transcript_1/1_Conf_1.000 | 180  | 0  |           |                |     |         |     |     |                                        |
| Locus_22761_Transcript_1/1_Conf_1.000 | 188  | 2  | 2.18E-04  | NP_500597.1    | 62  | 48.9062 | 35  | 22  | hypothetical protein F19C7.1           |
| Locus_22762_Transcript_1/1_Conf_1.000 | 165  | 0  |           |                |     |         |     |     |                                        |
| Locus_22763_Transcript_1/1_Conf_1.000 | 319  | 20 | 2.72E-15  | XP_002641345.1 | 63  | 85.1149 | 103 | 65  | Hypothetical protein CBG13198          |
| Locus_22764_Transcript_1/1_Conf_1.000 | 179  | 1  | 1.46E-05  | AAG43143.1     | 100 | 52.7582 | 53  | 53  | AF061732_1My029 protein                |
| Locus_22765_Transcript_1/1_Conf_1.000 | 179  | 1  | 2.76E-04  | XP_001895772.1 | 59  | 48.521  | 57  | 34  | hypothetical protein Bm1_21590         |
| Locus_22766_Transcript_1/1_Conf_1.000 | 166  | 0  |           |                |     |         |     |     |                                        |
| Locus_22767_Transcript_1/1_Conf_1.000 | 686  | 20 | 4.64E-34  | NP_495011.1    | 87  | 148.673 | 90  | 79  | Protein Kinase C family member (pkc-3) |
| Locus_22768_Transcript_1/1_Conf_1.000 | 423  | 1  | 1.54E-10  | EFO21344.1     | 56  | 69.3218 | 91  | 51  | hypothetical protein LOAG_07145        |
| Locus_22769_Transcript_1/1_Conf_1.000 | 210  | 0  |           |                |     |         |     |     |                                        |
| Locus_2277_Transcript_1/1_Conf_1.000  | 1707 | 20 | 9.80E-158 | XP_002640778.1 | 74  | 561.607 | 491 | 365 | C. briggsae CBR-FRL-1 protein          |

|                                       |     |    |          |                |    |         |     |     |                                                               |
|---------------------------------------|-----|----|----------|----------------|----|---------|-----|-----|---------------------------------------------------------------|
| Locus_22770_Transcript_1/1_Conf_1.000 | 361 | 20 | 1.45E-45 | EFO25590.1     | 84 | 185.652 | 120 | 101 | hypothetical protein LOAG_02898                               |
| Locus_22771_Transcript_1/1_Conf_1.000 | 147 | 0  |          |                |    |         |     |     |                                                               |
| Locus_22772_Transcript_1/1_Conf_1.000 | 232 | 0  |          |                |    |         |     |     |                                                               |
| Locus_22773_Transcript_1/1_Conf_1.000 | 353 | 0  |          |                |    |         |     |     |                                                               |
| Locus_22774_Transcript_1/1_Conf_1.000 | 298 | 20 | 2.06E-23 | XP_002427603.1 | 84 | 112.079 | 88  | 74  | mitochondrial 2-oxoglutarate/malate carrier protein, putative |
| Locus_22775_Transcript_1/1_Conf_1.000 | 311 | 20 | 2.66E-07 | XP_001897863.1 | 76 | 58.5362 | 56  | 43  | rab6                                                          |
| Locus_22776_Transcript_1/1_Conf_1.000 | 403 | 3  | 2.60E-26 | NP_500870.2    | 80 | 121.709 | 112 | 90  | hypothetical protein C06E7.2                                  |
| Locus_22777_Transcript_1/1_Conf_1.000 | 280 | 0  |          |                |    |         |     |     |                                                               |
| Locus_22778_Transcript_1/1_Conf_1.000 | 325 | 0  |          |                |    |         |     |     |                                                               |
| Locus_22779_Transcript_1/1_Conf_1.000 | 153 | 20 | 9.37E-16 | EFO27858.1     | 90 | 86.6557 | 50  | 45  | hypothetical protein LOAG_00620                               |
| Locus_2278_Transcript_1/1_Conf_1.000  | 587 | 0  |          |                |    |         |     |     |                                                               |
| Locus_22780_Transcript_1/1_Conf_1.000 | 179 | 0  |          |                |    |         |     |     |                                                               |
| Locus_22781_Transcript_1/1_Conf_1.000 | 583 | 20 | 1.20E-33 | NP_500530.1    | 61 | 146.747 | 191 | 118 | Nuclear Hormone Receptor family member (nhr-78)               |
| Locus_22782_Transcript_1/1_Conf_1.000 | 170 | 3  | 3.29E-05 | AAA82423.2     | 62 | 51.6026 | 58  | 36  | Hypothetical protein F10E7.9                                  |
| Locus_22783_Transcript_1/1_Conf_1.000 | 180 | 0  |          |                |    |         |     |     |                                                               |

|                                       |      |    |           |                |     |         |     |     |                                                                           |
|---------------------------------------|------|----|-----------|----------------|-----|---------|-----|-----|---------------------------------------------------------------------------|
| Locus_22784_Transcript_1/1_Conf_1.000 | 131  | 0  |           |                |     |         |     |     |                                                                           |
| Locus_22785_Transcript_1/1_Conf_1.000 | 228  | 20 | 6.68E-22  | NP_497205.1    | 89  | 107.071 | 75  | 67  | UNCoordinated family member (unc-45)                                      |
| Locus_22786_Transcript_1/1_Conf_1.000 | 404  | 20 | 3.76E-25  | XP_002639857.1 | 68  | 117.857 | 134 | 92  | Hypothetical protein CBG12210                                             |
| Locus_22787_Transcript_1/1_Conf_1.000 | 203  | 0  |           |                |     |         |     |     |                                                                           |
| Locus_22788_Transcript_1/2_Conf_1.000 | 320  | 0  |           |                |     |         |     |     |                                                                           |
| Locus_22788_Transcript_2/2_Conf_1.000 | 294  | 0  |           |                |     |         |     |     |                                                                           |
| Locus_22789_Transcript_1/1_Conf_1.000 | 302  | 0  |           |                |     |         |     |     |                                                                           |
| Locus_2279_Transcript_1/1_Conf_1.000  | 1312 | 20 | 1.47E-176 | XP_002639838.1 | 87  | 623.624 | 401 | 351 | Hypothetical protein CBG12186                                             |
| Locus_22790_Transcript_1/1_Conf_1.000 | 141  | 0  |           |                |     |         |     |     |                                                                           |
| Locus_22791_Transcript_1/1_Conf_1.000 | 134  | 0  |           |                |     |         |     |     |                                                                           |
| Locus_22792_Transcript_1/1_Conf_1.000 | 240  | 20 | 6.15E-28  | NP_001122569.1 | 86  | 127.102 | 81  | 70  | hypothetical protein ZK849.2                                              |
| Locus_22793_Transcript_1/1_Conf_1.000 | 304  | 20 | 3.58E-52  | EAW85022.1     | 100 | 207.608 | 100 | 100 | px19-like protein, isoform CRA_b                                          |
| Locus_22794_Transcript_1/1_Conf_1.000 | 326  | 0  |           |                |     |         |     |     |                                                                           |
| Locus_22795_Transcript_1/1_Conf_1.000 | 188  | 5  | 5.18E-06  | CBK19511.1     | 68  | 54.299  | 47  | 32  | C. elegans protein Y67H2A.10b, partially confirmed by transcript evidence |
| Locus_22796_Transcript_1/1_Conf_1.000 | 289  | 0  |           |                |     |         |     |     |                                                                           |
| Locus_22797_Transcript_1/1_Conf_1.000 | 182  | 5  | 5.04E-09  | CAE47474.2     | 72  | 64.3142 | 54  | 39  | C. elegans protein Y79H2A.3b, partially confirmed by transcript evidence  |
| Locus_22798_Transcript_1/1_Conf_1.000 | 423  | 20 | 7.86E-23  | XP_002630155.1 | 58  | 110.153 | 154 | 90  | Hypothetical protein CBG00558                                             |
| Locus_22799_Transcript_1/1_Conf_1.000 | 256  | 3  | 5.68E-29  | NP_493358.1    | 90  | 130.568 | 83  | 75  | hypothetical protein C01A2.2                                              |
| Locus_228_Transcript_1/1_Conf_1.000   | 1269 | 20 | 3.77E-105 | ACO15793.1     | 85  | 386.341 | 253 | 217 | Hypothetical protein Y71G12B.23a                                          |
| Locus_2280_Transcript_1/1_Conf_1.000  | 1611 | 20 | 2.29E-177 | XP_002633188.1 | 78  | 626.706 | 449 | 354 | C. briggsae CBR-PAM-1 protein                                             |
| Locus_22800_Transcript_1/1_Conf_1.000 | 194  | 0  |           |                |     |         |     |     |                                                                           |
| Locus_22801_Transcript_1/1_Conf_1.000 | 172  | 20 | 1.20E-23  | AAW29117.1     | 96  | 112.849 | 57  | 55  | AF1 non-allergic IgE heavy chain VH3-30-3                                 |



|                                       |      |    |          |                |    |         |     |     |                                                                    |
|---------------------------------------|------|----|----------|----------------|----|---------|-----|-----|--------------------------------------------------------------------|
| Locus_22802_Transcript_1/1_Conf_1.000 | 364  | 20 | 1.08E-16 | NP_506711.1    | 58 | 89.7373 | 127 | 74  | DNaJ domain (prokaryotic heat shock protein) family member (dnj-3) |
| Locus_22803_Transcript_1/1_Conf_1.000 | 297  | 20 | 1.17E-18 | EFO22690.1     | 80 | 96.2857 | 62  | 50  | 4-hydroxybenzoate polyprenyl transferase                           |
| Locus_22804_Transcript_1/1_Conf_1.000 | 140  | 0  |          |                |    |         |     |     |                                                                    |
| Locus_22805_Transcript_1/1_Conf_1.000 | 409  | 0  |          |                |    |         |     |     |                                                                    |
| Locus_22806_Transcript_1/1_Conf_1.000 | 355  | 4  | 1.25E-04 | ACP31595.1     | 62 | 49.6766 | 72  | 45  | Hypothetical protein Y32H12A.2b                                    |
| Locus_22807_Transcript_1/1_Conf_1.000 | 175  | 0  |          |                |    |         |     |     |                                                                    |
| Locus_22808_Transcript_1/1_Conf_1.000 | 317  | 0  |          |                |    |         |     |     |                                                                    |
| Locus_22809_Transcript_1/1_Conf_1.000 | 187  | 0  |          |                |    |         |     |     |                                                                    |
| Locus_2281_Transcript_1/1_Conf_1.000  | 2804 | 20 | 0        | XP_002644134.1 | 81 | 1070.84 | 835 | 684 | C. briggsae CBR-SYD-2 protein                                      |
| Locus_22810_Transcript_1/1_Conf_1.000 | 190  | 0  |          |                |    |         |     |     |                                                                    |
| Locus_22811_Transcript_1/1_Conf_1.000 | 261  | 2  | 5.48E-08 | NP_505736.2    | 75 | 60.8474 | 48  | 36  | yeast MRE recombination/repair homolog family member (mre-11)      |
| Locus_22812_Transcript_1/1_Conf_1.000 | 168  | 0  |          |                |    |         |     |     |                                                                    |
| Locus_22813_Transcript_1/1_Conf_1.000 | 354  | 11 | 1.48E-13 | EFO21218.1     | 97 | 79.337  | 40  | 39  | CAMK/CAMKL/NUAK protein kinase                                     |
| Locus_22814_Transcript_1/1_Conf_1.000 | 195  | 0  |          |                |    |         |     |     |                                                                    |
| Locus_22815_Transcript_1/1_Conf_1.000 | 146  | 0  |          |                |    |         |     |     |                                                                    |
| Locus_22816_Transcript_1/1_Conf_1.000 | 183  | 0  |          |                |    |         |     |     |                                                                    |
| Locus_22817_Transcript_1/1_Conf_1.000 | 377  | 20 | 3.55E-07 | XP_700974.4    | 60 | 58.151  | 65  | 39  | PREDICTED: transmembrane protein 67                                |
| Locus_22818_Transcript_1/1_Conf_1.000 | 134  | 0  |          |                |    |         |     |     |                                                                    |
| Locus_22819_Transcript_1/1_Conf_1.000 | 350  | 0  |          |                |    |         |     |     |                                                                    |

|                                       |     |    |          |                |     |         |     |     |                                                                                 |
|---------------------------------------|-----|----|----------|----------------|-----|---------|-----|-----|---------------------------------------------------------------------------------|
| Locus_2282_Transcript_1/1_Conf_1.000  | 278 | 20 | 1.90E-37 | ABC40752.1     | 94  | 158.688 | 88  | 83  | myosin heavy chain                                                              |
| Locus_22820_Transcript_1/1_Conf_1.000 | 434 | 20 | 1.27E-49 | AAH13586.2     | 100 | 199.134 | 108 | 108 | PRKCSH protein                                                                  |
| Locus_22821_Transcript_1/1_Conf_1.000 | 130 | 4  | 1.43E-08 | NP_490840.2    | 87  | 62.7734 | 41  | 36  | DAP (Death-Associated Protein) Kinase homolog family member (dapk-1)            |
| Locus_22822_Transcript_1/1_Conf_1.000 | 180 | 0  |          |                |     |         |     |     |                                                                                 |
| Locus_22823_Transcript_1/1_Conf_1.000 | 364 | 0  |          |                |     |         |     |     |                                                                                 |
| Locus_22824_Transcript_1/1_Conf_1.000 | 246 | 8  | 6.32E-25 | XP_002634052.1 | 87  | 117.087 | 82  | 72  | C. briggsae CBR-VHA-5 protein                                                   |
| Locus_22825_Transcript_1/1_Conf_1.000 | 176 | 0  |          |                |     |         |     |     |                                                                                 |
| Locus_22826_Transcript_1/1_Conf_1.000 | 129 | 0  |          |                |     |         |     |     |                                                                                 |
| Locus_22827_Transcript_1/1_Conf_1.000 | 346 | 20 | 4.78E-36 | NP_001022673.1 | 85  | 154.066 | 111 | 95  | NADC (Na <sup>+</sup> -coupled dicarboxylate transporter) family member (nac-3) |
| Locus_22828_Transcript_1/1_Conf_1.000 | 259 | 20 | 3.66E-36 | XP_002632226.1 | 90  | 154.451 | 85  | 77  | Hypothetical protein CBG07097                                                   |
| Locus_22829_Transcript_1/1_Conf_1.000 | 295 | 20 | 1.53E-34 | ADL62853.1     | 84  | 149.058 | 98  | 83  | thioredoxin reductase 2                                                         |

|                                       |      |    |           |                |    |         |     |     |                                     |
|---------------------------------------|------|----|-----------|----------------|----|---------|-----|-----|-------------------------------------|
| Locus_2283_Transcript_1/1_Conf_1.000  | 241  | 20 | 1.56E-31  | XP_002636221.1 | 88 | 139.043 | 80  | 71  | Hypothetical protein CBG12142       |
| Locus_22830_Transcript_1/1_Conf_1.000 | 309  | 20 | 1.19E-23  | NP_500418.1    | 70 | 112.849 | 96  | 68  | hypothetical protein M02B7.2        |
| Locus_22831_Transcript_1/1_Conf_1.000 | 219  | 0  |           |                |    |         |     |     |                                     |
| Locus_22832_Transcript_1/1_Conf_1.000 | 224  | 20 | 8.48E-25  | NP_001022123.1 | 86 | 116.701 | 76  | 66  | hypothetical protein F28C6.4        |
| Locus_22833_Transcript_1/1_Conf_1.000 | 205  | 0  |           |                |    |         |     |     |                                     |
| Locus_22834_Transcript_1/1_Conf_1.000 | 1423 | 20 | 1.44E-164 | XP_002636960.1 | 82 | 583.948 | 439 | 362 | Hypothetical protein CBG09439       |
| Locus_22835_Transcript_1/1_Conf_1.000 | 141  | 0  |           |                |    |         |     |     |                                     |
| Locus_22836_Transcript_1/1_Conf_1.000 | 199  | 0  |           |                |    |         |     |     |                                     |
| Locus_22837_Transcript_1/1_Conf_1.000 | 232  | 0  |           |                |    |         |     |     |                                     |
| Locus_22838_Transcript_1/1_Conf_1.000 | 154  | 0  |           |                |    |         |     |     |                                     |
| Locus_22839_Transcript_1/1_Conf_1.000 | 417  | 0  |           |                |    |         |     |     |                                     |
| Locus_2284_Transcript_1/2_Conf_0.500  | 3023 | 20 | 0         | XP_002635006.1 | 86 | 1407.89 | 935 | 811 | Hypothetical protein CBG13546       |
| Locus_2284_Transcript_2/2_Conf_0.500  | 925  | 20 | 2.42E-102 | XP_001900408.1 | 98 | 376.326 | 194 | 192 | GTP-binding nuclear protein RAN/TC4 |

|                                       |     |    |          |                |     |         |     |     |                                           |
|---------------------------------------|-----|----|----------|----------------|-----|---------|-----|-----|-------------------------------------------|
| Locus_22840_Transcript_1/1_Conf_1.000 | 263 | 20 | 2.70E-39 | XP_002633776.1 | 89  | 164.851 | 87  | 78  | C. briggsae CBR-NHR-4 protein             |
| Locus_22841_Transcript_1/1_Conf_1.000 | 280 | 0  |          |                |     |         |     |     |                                           |
| Locus_22842_Transcript_1/1_Conf_1.000 | 257 | 0  |          |                |     |         |     |     |                                           |
| Locus_22843_Transcript_1/1_Conf_1.000 | 201 | 0  |          |                |     |         |     |     |                                           |
| Locus_22844_Transcript_1/1_Conf_1.000 | 246 | 20 | 3.46E-31 | XP_001093980.2 | 100 | 137.887 | 60  | 60  | PREDICTED: hypothetical protein LOC705622 |
| Locus_22845_Transcript_1/1_Conf_1.000 | 282 | 1  | 9.79E-05 | EFO22051.1     | 58  | 50.0618 | 78  | 46  | hypothetical protein LOAG_06433           |
| Locus_22846_Transcript_1/1_Conf_1.000 | 140 | 4  | 2.41E-08 | XP_001901959.1 | 79  | 62.003  | 39  | 31  | hypothetical protein                      |
| Locus_22847_Transcript_1/1_Conf_1.000 | 324 | 0  |          |                |     |         |     |     |                                           |
| Locus_22848_Transcript_1/1_Conf_1.000 | 160 | 20 | 2.70E-23 | XP_002810196.1 | 100 | 111.694 | 53  | 53  | PREDICTED: protein S100-A4-like isoform 2 |
| Locus_22849_Transcript_1/1_Conf_1.000 | 281 | 0  |          |                |     |         |     |     |                                           |
| Locus_2285_Transcript_1/1_Conf_1.000  | 212 | 0  |          |                |     |         |     |     |                                           |
| Locus_22850_Transcript_1/1_Conf_1.000 | 653 | 7  | 2.62E-28 | NP_498592.1    | 55  | 129.413 | 216 | 119 | hypothetical protein R151.8               |
| Locus_22851_Transcript_1/1_Conf_1.000 | 187 | 0  |          |                |     |         |     |     |                                           |
| Locus_22852_Transcript_1/1_Conf_1.000 | 275 | 0  |          |                |     |         |     |     |                                           |
| Locus_22853_Transcript_1/1_Conf_1.000 | 338 | 0  |          |                |     |         |     |     |                                           |
| Locus_22854_Transcript_1/1_Conf_1.000 | 133 | 0  |          |                |     |         |     |     |                                           |
| Locus_22855_Transcript_1/1_Conf_1.000 | 204 | 0  |          |                |     |         |     |     |                                           |
| Locus_22856_Transcript_1/1_Conf_1.000 | 138 | 0  |          |                |     |         |     |     |                                           |
| Locus_22857_Transcript_1/1_Conf_1.000 | 235 | 0  |          |                |     |         |     |     |                                           |
| Locus_22858_Transcript_1/1_Conf_1.000 | 523 | 20 | 8.72E-42 | AAO18224.1     | 95  | 173.326 | 92  | 88  | FMRFamide-like prepropeptide              |

|                                       |      |    |          |                |     |         |     |     |                                                                                          |
|---------------------------------------|------|----|----------|----------------|-----|---------|-----|-----|------------------------------------------------------------------------------------------|
| Locus_22859_Transcript_1/1_Conf_1.000 | 388  | 20 | 1.14E-58 | XP_002637345.1 | 92  | 229.18  | 128 | 118 | C. briggsae CBR-UNC-68 protein                                                           |
| Locus_2286_Transcript_1/1_Conf_1.000  | 660  | 4  | 7.26E-26 | NP_501779.1    | 52  | 121.324 | 198 | 103 | hypothetical protein F32B6.4                                                             |
| Locus_22860_Transcript_1/1_Conf_1.000 | 199  | 0  |          |                |     |         |     |     |                                                                                          |
| Locus_22861_Transcript_1/1_Conf_1.000 | 610  | 0  |          |                |     |         |     |     |                                                                                          |
| Locus_22862_Transcript_1/1_Conf_1.000 | 297  | 0  |          |                |     |         |     |     |                                                                                          |
| Locus_22863_Transcript_1/1_Conf_1.000 | 209  | 20 | 6.58E-22 | XP_001899774.1 | 88  | 107.071 | 68  | 60  | Guanine nucleotide exchange factor for Ras-like GTPases; N-terminal motif family protein |
| Locus_22864_Transcript_1/1_Conf_1.000 | 360  | 20 | 4.23E-45 | NP_490690.1    | 86  | 184.111 | 104 | 90  | hypothetical protein F56C11.3                                                            |
| Locus_22865_Transcript_1/1_Conf_1.000 | 161  | 0  |          |                |     |         |     |     |                                                                                          |
| Locus_22866_Transcript_1/1_Conf_1.000 | 182  | 9  | 3.05E-14 | NP_001020988.1 | 79  | 81.6481 | 62  | 49  | UNCoordinated family member (unc-89)                                                     |
| Locus_22867_Transcript_1/1_Conf_1.000 | 241  | 0  |          |                |     |         |     |     |                                                                                          |
| Locus_22868_Transcript_1/1_Conf_1.000 | 339  | 2  | 1.15E-10 | NP_500240.1    | 91  | 69.707  | 36  | 33  | hypothetical protein Y69A2AR.31                                                          |
| Locus_22869_Transcript_1/1_Conf_1.000 | 278  | 8  | 9.15E-24 | XP_002639434.1 | 79  | 113.235 | 91  | 72  | Hypothetical protein CBG04027                                                            |
| Locus_2287_Transcript_1/4_Conf_0.625  | 1135 | 20 | 2.06E-43 | NP_506352.1    | 82  | 181.03  | 137 | 113 | TransThyretin-Related family domain family member (ttr-44)                               |
| Locus_2287_Transcript_2/4_Conf_0.625  | 1094 | 20 | 1.94E-43 | NP_506352.1    | 82  | 181.03  | 137 | 113 | TransThyretin-Related family domain family member (ttr-44)                               |
| Locus_2287_Transcript_3/4_Conf_0.375  | 532  | 20 | 2.21E-51 | EFO24957.1     | 84  | 205.297 | 122 | 103 | hypothetical protein LOAG_03532                                                          |
| Locus_2287_Transcript_4/4_Conf_0.625  | 1135 | 20 | 2.06E-43 | NP_506352.1    | 82  | 181.03  | 137 | 113 | TransThyretin-Related family domain family member (ttr-44)                               |
| Locus_22870_Transcript_1/1_Conf_1.000 | 173  | 20 | 5.20E-27 | XP_002825204.1 | 100 | 124.02  | 57  | 57  | PREDICTED: apoptosis regulatory protein Siva-like                                        |
| Locus_22871_Transcript_1/1_Conf_1.000 | 191  | 0  |          |                |     |         |     |     |                                                                                          |

|                                       |      |    |          |                |     |         |     |     |                                                       |
|---------------------------------------|------|----|----------|----------------|-----|---------|-----|-----|-------------------------------------------------------|
| Locus_22872_Transcript_1/1_Conf_1.000 | 161  | 20 | 7.87E-23 | NP_001024865.1 | 100 | 110.153 | 53  | 53  | DumPY : shorter than wild-type family member (dpy-23) |
| Locus_22873_Transcript_1/1_Conf_1.000 | 217  | 7  | 9.13E-08 | NP_502367.2    | 69  | 60.077  | 59  | 41  | hypothetical protein F28D1.9                          |
| Locus_22874_Transcript_1/1_Conf_1.000 | 191  | 0  |          |                |     |         |     |     |                                                       |
| Locus_22875_Transcript_1/1_Conf_1.000 | 136  | 0  |          |                |     |         |     |     |                                                       |
| Locus_22876_Transcript_1/1_Conf_1.000 | 188  | 5  | 7.99E-07 | NP_504937.3    | 57  | 56.9954 | 56  | 32  | hypothetical protein C54F6.6                          |
| Locus_22877_Transcript_1/1_Conf_1.000 | 305  | 20 | 1.57E-23 | ABD75715.1     | 95  | 112.464 | 80  | 76  | vacuolar protein sorting factor                       |
| Locus_22878_Transcript_1/1_Conf_1.000 | 142  | 0  |          |                |     |         |     |     |                                                       |
| Locus_22879_Transcript_1/1_Conf_1.000 | 242  | 20 | 6.60E-14 | CAA96571.1     | 74  | 80.4925 | 79  | 59  | parasite pepsinogen                                   |
| Locus_2288_Transcript_1/1_Conf_1.000  | 1890 | 20 | 0        | NP_499949.2    | 82  | 783.097 | 558 | 459 | Gut on EXterior family member (gex-2)                 |
| Locus_22880_Transcript_1/1_Conf_1.000 | 324  | 0  |          |                |     |         |     |     |                                                       |
| Locus_22881_Transcript_1/1_Conf_1.000 | 159  | 0  |          |                |     |         |     |     |                                                       |
| Locus_22882_Transcript_1/1_Conf_1.000 | 265  | 20 | 4.32E-13 | NP_001024930.1 | 68  | 77.7962 | 79  | 54  | Choline Kinase C family member (ckc-1)                |
| Locus_22883_Transcript_1/1_Conf_1.000 | 152  | 0  |          |                |     |         |     |     |                                                       |
| Locus_22884_Transcript_1/1_Conf_1.000 | 230  | 20 | 2.45E-24 | NP_872193.1    | 80  | 115.161 | 76  | 61  | hypothetical protein K07C11.7                         |
| Locus_22885_Transcript_1/1_Conf_1.000 | 161  | 0  |          |                |     |         |     |     |                                                       |
| Locus_22886_Transcript_1/1_Conf_1.000 | 364  | 20 | 9.15E-16 | NP_508641.2    | 82  | 86.6557 | 73  | 60  | Temporarily Assigned Gene name family member (tag-81) |
| Locus_22887_Transcript_1/1_Conf_1.000 | 243  | 0  |          |                |     |         |     |     |                                                       |
| Locus_22888_Transcript_1/1_Conf_1.000 | 172  | 0  |          |                |     |         |     |     |                                                       |
| Locus_22889_Transcript_1/1_Conf_1.000 | 217  | 0  |          |                |     |         |     |     |                                                       |

|                                      |      |    |   |            |    |         |     |     |                                   |
|--------------------------------------|------|----|---|------------|----|---------|-----|-----|-----------------------------------|
| Locus_2289_Transcript_1/4_Conf_0.700 | 2494 | 20 | 0 | EFO23774.1 | 80 | 902.123 | 740 | 594 | replication licensing factor MCM7 |
| Locus_2289_Transcript_2/4_Conf_0.700 | 2494 | 20 | 0 | EFO23774.1 | 80 | 902.123 | 740 | 594 | replication licensing factor MCM7 |

|                                       |      |    |          |                |     |         |     |     |                                                    |
|---------------------------------------|------|----|----------|----------------|-----|---------|-----|-----|----------------------------------------------------|
| Locus_2289_Transcript_3/4_Conf_0.700  | 2494 | 20 | 0        | EFO23774.1     | 80  | 901.353 | 740 | 593 | replication licensing factor MCM7                  |
| Locus_2289_Transcript_4/4_Conf_0.700  | 2494 | 20 | 0        | EFO23774.1     | 80  | 902.123 | 740 | 594 | replication licensing factor MCM7                  |
| Locus_22890_Transcript_1/1_Conf_1.000 | 431  | 0  |          |                |     |         |     |     |                                                    |
| Locus_22891_Transcript_1/1_Conf_1.000 | 145  | 1  | 6.78E-14 | NP_001021158.1 | 83  | 80.4925 | 48  | 40  | UDP-GlucuronosylTransferase family member (ugt-60) |
| Locus_22892_Transcript_1/1_Conf_1.000 | 499  | 0  |          |                |     |         |     |     |                                                    |
| Locus_22893_Transcript_1/1_Conf_1.000 | 206  | 0  |          |                |     |         |     |     |                                                    |
| Locus_22894_Transcript_1/1_Conf_1.000 | 151  | 0  |          |                |     |         |     |     |                                                    |
| Locus_22895_Transcript_1/1_Conf_1.000 | 203  | 0  |          |                |     |         |     |     |                                                    |
| Locus_22896_Transcript_1/1_Conf_1.000 | 248  | 0  |          |                |     |         |     |     |                                                    |
| Locus_22897_Transcript_1/1_Conf_1.000 | 137  | 11 | 4.40E-18 | CAH73152.1     | 100 | 94.3597 | 45  | 45  | golgi membrane protein 1                           |
| Locus_22898_Transcript_1/1_Conf_1.000 | 339  | 0  |          |                |     |         |     |     |                                                    |
| Locus_22899_Transcript_1/1_Conf_1.000 | 354  | 10 | 1.25E-12 | XP_001895198.1 | 57  | 76.2554 | 111 | 64  | PAZ domain containing protein                      |



|                                       |      |    |          |                |     |         |     |     |                                                                                    |
|---------------------------------------|------|----|----------|----------------|-----|---------|-----|-----|------------------------------------------------------------------------------------|
| Locus_229_Transcript_1/1_Conf_1.000   | 1740 | 20 | 0        | XP_002642779.1 | 94  | 870.922 | 511 | 482 | C. briggsae CBR-ATP-2 protein                                                      |
| Locus_2290_Transcript_1/1_Conf_1.000  | 613  | 20 | 2.94E-44 | ACD88894.1     | 73  | 182.185 | 138 | 102 | transthyretin-like protein                                                         |
| Locus_22900_Transcript_1/1_Conf_1.000 | 148  | 20 | 7.73E-10 | NP_001122772.1 | 77  | 67.0106 | 45  | 35  | Poly(ADP-ribose) Metabolism Enzyme family member (pme-3)                           |
| Locus_22901_Transcript_1/1_Conf_1.000 | 182  | 0  |          |                |     |         |     |     |                                                                                    |
| Locus_22902_Transcript_1/1_Conf_1.000 | 257  | 20 | 6.97E-11 | NP_494994.1    | 70  | 70.4774 | 60  | 42  | hypothetical protein ZK622.1                                                       |
| Locus_22903_Transcript_1/1_Conf_1.000 | 190  | 2  | 7.20E-08 | NP_498149.1    | 69  | 60.4622 | 63  | 44  | hypothetical protein Y32H12A.6                                                     |
| Locus_22904_Transcript_1/1_Conf_1.000 | 420  | 0  |          |                |     |         |     |     |                                                                                    |
| Locus_22905_Transcript_1/1_Conf_1.000 | 150  | 0  |          |                |     |         |     |     |                                                                                    |
| Locus_22906_Transcript_1/1_Conf_1.000 | 306  | 20 | 4.23E-37 | 1UH6           | 98  | 157.532 | 75  | 74  | SolutionStructure OfThe Murine Ubiquitin-Like 5 Protein From Riken Cdna 0610031k06 |
| Locus_22907_Transcript_1/1_Conf_1.000 | 243  | 0  |          |                |     |         |     |     |                                                                                    |
| Locus_22908_Transcript_1/1_Conf_1.000 | 147  | 16 | 1.08E-19 | XP_002831355.1 | 100 | 99.7525 | 48  | 48  | PREDICTED: kelch domain-containing protein 7B-like                                 |
| Locus_22909_Transcript_1/1_Conf_1.000 | 360  | 20 | 2.12E-12 | XP_002402660.1 | 59  | 75.485  | 77  | 46  | engulfment and cell motility, putative                                             |
| Locus_2291_Transcript_1/1_Conf_1.000  | 620  | 19 | 1.93E-83 | XP_002646662.1 | 84  | 312.383 | 206 | 174 | C. briggsae CBR-DDL-3 protein                                                      |

|                                       |     |    |          |                |    |         |    |    |                                           |
|---------------------------------------|-----|----|----------|----------------|----|---------|----|----|-------------------------------------------|
| Locus_22910_Transcript_1/1_Conf_1.000 | 182 | 20 | 3.05E-14 | XP_001901250.1 | 83 | 81.6481 | 56 | 47 | MGC80217 protein                          |
| Locus_22911_Transcript_1/1_Conf_1.000 | 170 | 0  |          |                |    |         |    |    |                                           |
| Locus_22912_Transcript_1/1_Conf_1.000 | 233 | 20 | 4.78E-12 | AAC39118.1     | 72 | 74.3294 | 74 | 54 | high-affinity peptide transporter         |
| Locus_22913_Transcript_1/1_Conf_1.000 | 132 | 0  |          |                |    |         |    |    |                                           |
| Locus_22914_Transcript_1/1_Conf_1.000 | 292 | 20 | 4.47E-26 | NP_498248.2    | 82 | 120.939 | 89 | 73 | hypothetical protein Y37B11A.2            |
| Locus_22915_Transcript_1/1_Conf_1.000 | 231 | 14 | 8.40E-25 | AAZ42352.1     | 76 | 116.701 | 76 | 58 | degeneration of certain neurons protein 1 |
| Locus_22916_Transcript_1/1_Conf_1.000 | 214 | 0  |          |                |    |         |    |    |                                           |
| Locus_22917_Transcript_1/1_Conf_1.000 | 264 | 20 | 3.64E-28 | NP_502011.1    | 81 | 127.872 | 83 | 68 | hypothetical protein T11G6.3              |
| Locus_22918_Transcript_1/1_Conf_1.000 | 133 | 0  |          |                |    |         |    |    |                                           |
| Locus_22919_Transcript_1/1_Conf_1.000 | 230 | 3  | 2.55E-05 | NP_001022134.1 | 60 | 51.9878 | 64 | 39 | hypothetical protein F32A5.1              |
| Locus_2292_Transcript_1/1_Conf_1.000  | 319 | 0  |          |                |    |         |    |    |                                           |
| Locus_22920_Transcript_1/1_Conf_1.000 | 151 | 0  |          |                |    |         |    |    |                                           |
| Locus_22921_Transcript_1/1_Conf_1.000 | 199 | 20 | 5.26E-19 | XP_002636781.1 | 83 | 97.4413 | 66 | 55 | Hypothetical protein CBG23516             |
| Locus_22922_Transcript_1/1_Conf_1.000 | 140 | 0  |          |                |    |         |    |    |                                           |
| Locus_22923_Transcript_1/1_Conf_1.000 | 132 | 0  |          |                |    |         |    |    |                                           |
| Locus_22924_Transcript_1/1_Conf_1.000 | 148 | 0  |          |                |    |         |    |    |                                           |

|                                       |      |    |           |                |     |         |     |     |                                                 |
|---------------------------------------|------|----|-----------|----------------|-----|---------|-----|-----|-------------------------------------------------|
| Locus_22925_Transcript_1/1_Conf_1.000 | 130  | 20 | 3.39E-18  | XP_002914592.1 | 100 | 94.7449 | 43  | 43  | PREDICTED: casein kinase I isoform epsilon-like |
| Locus_22926_Transcript_1/1_Conf_1.000 | 157  | 0  |           |                |     |         |     |     |                                                 |
| Locus_22927_Transcript_1/1_Conf_1.000 | 224  | 0  |           |                |     |         |     |     |                                                 |
| Locus_22928_Transcript_1/1_Conf_1.000 | 147  | 0  |           |                |     |         |     |     |                                                 |
| Locus_22929_Transcript_1/1_Conf_1.000 | 138  | 0  |           |                |     |         |     |     |                                                 |
| Locus_2293_Transcript_1/1_Conf_1.000  | 1402 | 20 | 1.20E-163 | XP_002633437.1 | 77  | 580.867 | 470 | 364 | C. briggsae CBR-UNC-22 protein                  |
| Locus_22930_Transcript_1/1_Conf_1.000 | 138  | 0  |           |                |     |         |     |     |                                                 |
| Locus_22931_Transcript_1/1_Conf_1.000 | 173  | 0  |           |                |     |         |     |     |                                                 |
| Locus_22932_Transcript_1/1_Conf_1.000 | 225  | 3  | 3.94E-14  | NP_496398.2    | 76  | 81.2629 | 55  | 42  | hypothetical protein T06D8.1                    |
| Locus_22933_Transcript_1/1_Conf_1.000 | 330  | 0  |           |                |     |         |     |     |                                                 |
| Locus_22934_Transcript_1/1_Conf_1.000 | 266  | 2  | 9.96E-10  | NP_741424.1    | 86  | 66.6254 | 38  | 33  | hypothetical protein Y73B6BL.35                 |
| Locus_22935_Transcript_1/1_Conf_1.000 | 218  | 2  | 1.15E-10  | NP_505963.3    | 70  | 69.707  | 61  | 43  | hypothetical protein T04F3.1                    |
| Locus_22936_Transcript_1/1_Conf_1.000 | 262  | 0  |           |                |     |         |     |     |                                                 |
| Locus_22937_Transcript_1/1_Conf_1.000 | 292  | 2  | 2.31E-06  | XP_002645672.1 | 53  | 55.4546 | 102 | 55  | Hypothetical protein CBG07319                   |
| Locus_22938_Transcript_1/1_Conf_1.000 | 185  | 0  |           |                |     |         |     |     |                                                 |
| Locus_22939_Transcript_1/1_Conf_1.000 | 131  | 0  |           |                |     |         |     |     |                                                 |
| Locus_2294_Transcript_1/1_Conf_1.000  | 195  | 20 | 5.11E-14  | XP_002633575.1 | 79  | 80.8777 | 62  | 49  | C. briggsae CBR-EXOS-2 protein                  |
| Locus_22940_Transcript_1/1_Conf_1.000 | 284  | 20 | 3.14E-11  | XP_002630279.1 | 58  | 71.633  | 72  | 42  | Hypothetical protein CBG00710                   |
| Locus_22941_Transcript_1/1_Conf_1.000 | 358  | 20 | 6.80E-27  | XP_002638874.1 | 87  | 123.635 | 100 | 87  | Hypothetical protein CBG22093                   |
| Locus_22942_Transcript_1/1_Conf_1.000 | 207  | 0  |           |                |     |         |     |     |                                                 |
| Locus_22943_Transcript_1/1_Conf_1.000 | 241  | 0  |           |                |     |         |     |     |                                                 |
| Locus_22944_Transcript_1/1_Conf_1.000 | 432  | 5  | 2.42E-08  | XP_001897081.1 | 62  | 62.003  | 94  | 59  | hypothetical protein                            |
| Locus_22945_Transcript_1/1_Conf_1.000 | 416  | 20 | 1.22E-60  | XP_002638579.1 | 88  | 235.728 | 137 | 121 | Hypothetical protein CBG05625                   |
| Locus_22946_Transcript_1/1_Conf_1.000 | 159  | 0  |           |                |     |         |     |     |                                                 |
| Locus_22947_Transcript_1/1_Conf_1.000 | 324  | 20 | 4.43E-34  | XP_002639978.1 | 85  | 147.517 | 107 | 91  | C. briggsae CBR-FHOD-1 protein                  |

|                                       |      |    |          |                |    |         |     |     |                                                                            |
|---------------------------------------|------|----|----------|----------------|----|---------|-----|-----|----------------------------------------------------------------------------|
| Locus_22948_Transcript_1/1_Conf_1.000 | 192  | 20 | 4.95E-25 | NP_502317.1    | 95 | 117.472 | 60  | 57  | Proline HYdroxylase family member (phy-2)                                  |
| Locus_22949_Transcript_1/1_Conf_1.000 | 309  | 20 | 9.13E-16 | NP_493574.2    | 71 | 86.6557 | 67  | 48  | hypothetical protein F39B2.5                                               |
| Locus_2295_Transcript_1/1_Conf_1.000  | 1397 | 20 | 1.24E-19 | NP_001012918.1 | 45 | 102.449 | 328 | 148 | G2/M phase-specific E3 ubiquitin-protein ligase                            |
| Locus_22950_Transcript_1/1_Conf_1.000 | 183  | 20 | 1.27E-20 | XP_002637401.1 | 88 | 102.834 | 59  | 52  | C. briggsae CBR-FKB-3 protein                                              |
| Locus_22951_Transcript_1/1_Conf_1.000 | 289  | 20 | 3.80E-25 | XP_002648446.1 | 72 | 117.857 | 92  | 67  | Hypothetical protein CBG24721                                              |
| Locus_22952_Transcript_1/1_Conf_1.000 | 277  | 5  | 1.12E-21 | XP_002629678.1 | 81 | 106.301 | 83  | 68  | Hypothetical protein CBG00897                                              |
| Locus_22953_Transcript_1/1_Conf_1.000 | 204  | 0  |          |                |    |         |     |     |                                                                            |
| Locus_22954_Transcript_1/1_Conf_1.000 | 231  | 0  |          |                |    |         |     |     |                                                                            |
| Locus_22955_Transcript_1/1_Conf_1.000 | 283  | 0  |          |                |    |         |     |     |                                                                            |
| Locus_22956_Transcript_1/1_Conf_1.000 | 199  | 20 | 1.03E-14 | NP_505237.1    | 71 | 83.1889 | 66  | 47  | human CLN (neuronal ceroid lipofuscinosis) related family member (cln-3.3) |
| Locus_22957_Transcript_1/1_Conf_1.000 | 508  | 20 | 2.13E-10 | AAD13339.1     | 45 | 68.9366 | 167 | 76  | ancylostoma-secreted protein 1 precursor                                   |

|                                       |      |    |          |                |    |         |     |     |                                                    |
|---------------------------------------|------|----|----------|----------------|----|---------|-----|-----|----------------------------------------------------|
| Locus_22958_Transcript_1/1_Conf_1.000 | 199  | 20 | 3.19E-24 | XP_002634309.1 | 89 | 114.775 | 65  | 58  | Hypothetical protein CBG17650                      |
| Locus_22959_Transcript_1/1_Conf_1.000 | 142  | 0  |          |                |    |         |     |     |                                                    |
| Locus_2296_Transcript_1/1_Conf_1.000  | 788  | 20 | 1.26E-79 | NP_506570.1    | 73 | 300.442 | 250 | 183 | Dehydrogenases, Short chain family member (dhs-22) |
| Locus_22960_Transcript_1/1_Conf_1.000 | 298  | 20 | 1.14E-05 | XP_001523646.1 | 60 | 53.1434 | 78  | 47  | conserved hypothetical protein                     |
| Locus_22961_Transcript_1/1_Conf_1.000 | 137  | 0  |          |                |    |         |     |     |                                                    |
| Locus_22962_Transcript_1/1_Conf_1.000 | 150  | 0  |          |                |    |         |     |     |                                                    |
| Locus_22963_Transcript_1/1_Conf_1.000 | 135  | 0  |          |                |    |         |     |     |                                                    |
| Locus_22964_Transcript_1/1_Conf_1.000 | 157  | 0  |          |                |    |         |     |     |                                                    |
| Locus_22965_Transcript_1/1_Conf_1.000 | 129  | 0  |          |                |    |         |     |     |                                                    |
| Locus_22966_Transcript_1/1_Conf_1.000 | 245  | 0  |          |                |    |         |     |     |                                                    |
| Locus_22967_Transcript_1/1_Conf_1.000 | 142  | 20 | 1.45E-13 | XP_002631429.1 | 85 | 79.337  | 47  | 40  | Hypothetical protein CBG03286                      |
| Locus_22968_Transcript_1/1_Conf_1.000 | 383  | 6  | 9.89E-10 | NP_510686.4    | 63 | 66.6254 | 116 | 74  | hypothetical protein F59C12.3                      |
| Locus_22969_Transcript_1/1_Conf_1.000 | 244  | 0  |          |                |    |         |     |     |                                                    |
| Locus_2297_Transcript_1/6_Conf_0.556  | 1657 | 20 | 3.85E-18 | EEE52502.1     | 34 | 97.8265 | 374 | 129 | hypothetical protein OsJ_34704                     |
| Locus_2297_Transcript_2/6_Conf_0.389  | 1133 | 20 | 1.34E-18 | EEE52502.1     | 35 | 98.5969 | 370 | 130 | hypothetical protein OsJ_34704                     |
| Locus_2297_Transcript_3/6_Conf_0.167  | 445  | 0  |          |                |    |         |     |     |                                                    |
| Locus_2297_Transcript_4/6_Conf_0.333  | 922  | 20 | 8.18E-18 | YP_068003.1    | 36 | 95.5153 | 355 | 130 | LF3                                                |
| Locus_2297_Transcript_5/6_Conf_0.500  | 2112 | 20 | 2.11E-19 | XP_001427121.1 | 39 | 102.449 | 415 | 164 | hypothetical protein                               |
| Locus_2297_Transcript_6/6_Conf_0.556  | 1675 | 20 | 3.91E-18 | EEE52502.1     | 34 | 97.8265 | 374 | 129 | hypothetical protein OsJ_34704                     |
| Locus_22970_Transcript_1/1_Conf_1.000 | 343  | 0  |          |                |    |         |     |     |                                                    |

|                                       |     |    |          |                |    |         |     |    |                                                                        |
|---------------------------------------|-----|----|----------|----------------|----|---------|-----|----|------------------------------------------------------------------------|
| Locus_22971_Transcript_1/1_Conf_1.000 | 279 | 0  |          |                |    |         |     |    |                                                                        |
| Locus_22972_Transcript_1/1_Conf_1.000 | 134 | 20 | 4.27E-13 | CBL87054.2     | 97 | 77.7962 | 44  | 43 | C. elegans protein F54E4.1, partially confirmed by transcript evidence |
| Locus_22973_Transcript_1/1_Conf_1.000 | 305 | 20 | 7.24E-37 | XP_002640083.1 | 89 | 156.762 | 101 | 90 | C. briggsae CBR-FRK-1 protein                                          |
| Locus_22974_Transcript_1/1_Conf_1.000 | 254 | 20 | 2.09E-31 | XP_396338.2    | 98 | 138.658 | 84  | 83 | PREDICTED: similar to Tubulin alpha-1 chain                            |
| Locus_22975_Transcript_1/1_Conf_1.000 | 228 | 2  | 2.16E-04 | NP_001041050.1 | 65 | 48.9062 | 55  | 36 | hypothetical protein Y57G11C.3                                         |
| Locus_22976_Transcript_1/1_Conf_1.000 | 187 | 0  |          |                |    |         |     |    |                                                                        |
| Locus_22977_Transcript_1/1_Conf_1.000 | 130 | 0  |          |                |    |         |     |    |                                                                        |
| Locus_22978_Transcript_1/1_Conf_1.000 | 473 | 0  |          |                |    |         |     |    |                                                                        |
| Locus_22979_Transcript_1/1_Conf_1.000 | 199 | 0  |          |                |    |         |     |    |                                                                        |
| Locus_2298_Transcript_1/1_Conf_1.000  | 708 | 20 | 6.93E-28 | NP_492608.2    | 74 | 128.257 | 119 | 89 | 2 (Zwei) IG-domain protein family member (zig-1)                       |
| Locus_22980_Transcript_1/1_Conf_1.000 | 137 | 0  |          |                |    |         |     |    |                                                                        |
| Locus_22981_Transcript_1/1_Conf_1.000 | 229 | 0  |          |                |    |         |     |    |                                                                        |
| Locus_22982_Transcript_1/1_Conf_1.000 | 130 | 1  | 5.79E-10 | NP_506678.2    | 80 | 67.3958 | 41  | 33 | hypothetical protein W09D12.1                                          |
| Locus_22983_Transcript_1/1_Conf_1.000 | 161 | 11 | 1.18E-18 | NP_491003.2    | 94 | 96.2857 | 53  | 50 | Amino Acid Transporter family member (aat-5)                           |

|                                       |      |    |          |                |    |         |     |     |                                                          |
|---------------------------------------|------|----|----------|----------------|----|---------|-----|-----|----------------------------------------------------------|
| Locus_22984_Transcript_1/1_Conf_1.000 | 179  | 2  | 4.39E-10 | NP_492730.2    | 79 | 67.781  | 49  | 39  | hypothetical protein Y106G6H.5                           |
| Locus_22985_Transcript_1/1_Conf_1.000 | 269  | 20 | 3.64E-20 | NP_001024342.1 | 84 | 101.293 | 76  | 64  | Aboc, EXPulsion defective family member (aex-3)          |
| Locus_22986_Transcript_1/1_Conf_1.000 | 181  | 0  |          |                |    |         |     |     |                                                          |
| Locus_22987_Transcript_1/1_Conf_1.000 | 148  | 17 | 1.72E-09 | A8X3A7.2       | 78 | 65.855  | 50  | 39  | Integrin alpha pat-2                                     |
| Locus_22988_Transcript_1/1_Conf_1.000 | 128  | 0  |          |                |    |         |     |     |                                                          |
| Locus_22989_Transcript_1/1_Conf_1.000 | 321  | 0  |          |                |    |         |     |     |                                                          |
| Locus_2299_Transcript_1/1_Conf_1.000  | 1902 | 20 | 4.54E-58 | XP_001899184.1 | 75 | 230.72  | 208 | 158 | SWIM zinc finger family protein                          |
| Locus_22990_Transcript_1/1_Conf_1.000 | 217  | 6  | 1.23E-12 | NP_001021463.1 | 65 | 76.2554 | 69  | 45  | SUppressor of activated let-60 Ras family member (sur-2) |
| Locus_22991_Transcript_1/1_Conf_1.000 | 269  | 0  |          |                |    |         |     |     |                                                          |
| Locus_22992_Transcript_1/1_Conf_1.000 | 297  | 4  | 3.28E-29 | XP_002644323.1 | 81 | 131.339 | 93  | 76  | C. briggsae CBR-SEC-3 protein                            |
| Locus_22993_Transcript_1/1_Conf_1.000 | 357  | 20 | 8.04E-28 | XP_002631304.1 | 81 | 126.716 | 85  | 69  | Hypothetical protein CBG03118                            |
| Locus_22994_Transcript_1/1_Conf_1.000 | 184  | 0  |          |                |    |         |     |     |                                                          |
| Locus_22995_Transcript_1/1_Conf_1.000 | 196  | 0  |          |                |    |         |     |     |                                                          |
| Locus_22996_Transcript_1/1_Conf_1.000 | 440  | 20 | 7.35E-66 | XP_002637345.1 | 89 | 253.062 | 146 | 130 | C. briggsae CBR-UNC-68 protein                           |
| Locus_22997_Transcript_1/1_Conf_1.000 | 137  | 0  |          |                |    |         |     |     |                                                          |
| Locus_22998_Transcript_1/1_Conf_1.000 | 252  | 0  |          |                |    |         |     |     |                                                          |
| Locus_22999_Transcript_1/1_Conf_1.000 | 468  | 20 | 1.17E-18 | EFO22869.1     | 81 | 96.2857 | 92  | 75  | hypothetical protein LOAG_05613                          |

|                                       |      |    |          |                |    |         |      |      |                                 |
|---------------------------------------|------|----|----------|----------------|----|---------|------|------|---------------------------------|
| Locus_23_Transcript_1/1_Conf_1.000    | 1555 | 20 | 0        | XP_002645954.1 | 92 | 862.833 | 482  | 446  | C. briggsae CBR-GAS-1 protein   |
| Locus_230_Transcript_1/1_Conf_1.000   | 1380 | 16 | 2.66E-14 | XP_001901969.1 | 49 | 84.7297 | 216  | 106  | hypothetical protein            |
| Locus_2300_Transcript_1/1_Conf_1.000  | 1112 | 20 | 7.98E-93 | EFO19759.1     | 67 | 345.125 | 354  | 240  | hypothetical protein LOAG_08726 |
| Locus_23000_Transcript_1/1_Conf_1.000 | 388  | 0  |          |                |    |         |      |      |                                 |
| Locus_23001_Transcript_1/1_Conf_1.000 | 177  | 0  |          |                |    |         |      |      |                                 |
| Locus_23002_Transcript_1/1_Conf_1.000 | 262  | 20 | 5.66E-13 | XP_002631622.1 | 62 | 77.411  | 87   | 54   | Hypothetical protein CBG20808   |
| Locus_23003_Transcript_1/1_Conf_1.000 | 136  | 0  |          |                |    |         |      |      |                                 |
| Locus_23004_Transcript_1/1_Conf_1.000 | 308  | 20 | 1.04E-35 | XP_002629821.1 | 84 | 152.91  | 101  | 85   | C. briggsae CBR-SQV-8 protein   |
| Locus_23005_Transcript_1/1_Conf_1.000 | 266  | 0  |          |                |    |         |      |      |                                 |
| Locus_23006_Transcript_1/1_Conf_1.000 | 432  | 20 | 7.73E-39 | EFO17002.1     | 80 | 163.31  | 122  | 98   | rab5-interacting protein        |
| Locus_23007_Transcript_1/1_Conf_1.000 | 374  | 5  | 4.61E-39 | NP_001123075.1 | 86 | 164.081 | 123  | 106  | hypothetical protein ZC455.1    |
| Locus_23008_Transcript_1/1_Conf_1.000 | 351  | 0  |          |                |    |         |      |      |                                 |
| Locus_23009_Transcript_1/1_Conf_1.000 | 167  | 20 | 4.30E-13 | XP_002635372.1 | 86 | 77.7962 | 51   | 44   | C. briggsae CBR-RPM-1 protein   |
| Locus_2301_Transcript_1/1_Conf_1.000  | 3724 | 20 | 0        | NP_497506.3    | 85 | 1672.14 | 1246 | 1066 | hypothetical protein Y48G9A.3   |
| Locus_23010_Transcript_1/1_Conf_1.000 | 182  | 11 | 9.48E-16 | XP_002648958.1 | 77 | 86.6557 | 61   | 47   | Hypothetical protein CBG21275   |
| Locus_23011_Transcript_1/1_Conf_1.000 | 175  | 0  |          |                |    |         |      |      |                                 |



|                                       |      |    |           |                |    |         |     |     |                                                        |
|---------------------------------------|------|----|-----------|----------------|----|---------|-----|-----|--------------------------------------------------------|
| Locus_23012_Transcript_1/1_Conf_1.000 | 185  | 0  |           |                |    |         |     |     |                                                        |
| Locus_23013_Transcript_1/1_Conf_1.000 | 152  | 0  |           |                |    |         |     |     |                                                        |
| Locus_23014_Transcript_1/1_Conf_1.000 | 208  | 1  | 1.25E-04  | NP_497103.1    | 62 | 49.6766 | 61  | 38  | hypothetical protein Y53F4B.18                         |
| Locus_23015_Transcript_1/1_Conf_1.000 | 146  | 6  | 8.86E-14  | NP_495550.1    | 82 | 80.1073 | 51  | 42  | BTB and MATH domain containing family member (bath-44) |
| Locus_23016_Transcript_1/1_Conf_1.000 | 156  | 0  |           |                |    |         |     |     |                                                        |
| Locus_23017_Transcript_1/1_Conf_1.000 | 222  | 4  | 9.73E-13  | EFO20262.1     | 88 | 76.6406 | 53  | 47  | zinc finger protein                                    |
| Locus_23018_Transcript_1/1_Conf_1.000 | 145  | 20 | 2.66E-18  | XP_001369724.1 | 93 | 95.1301 | 46  | 43  | PREDICTED: similar to LOC539180 protein                |
| Locus_23019_Transcript_1/1_Conf_1.000 | 299  | 0  |           |                |    |         |     |     |                                                        |
| Locus_2302_Transcript_1/1_Conf_1.000  | 2013 | 20 | 6.32E-175 | NP_505638.1    | 69 | 619.002 | 593 | 413 | RO (Ro) ribonucleoProtein family member (rop-1)        |
| Locus_23020_Transcript_1/1_Conf_1.000 | 283  | 0  |           |                |    |         |     |     |                                                        |
| Locus_23021_Transcript_1/1_Conf_1.000 | 204  | 0  |           |                |    |         |     |     |                                                        |
| Locus_23022_Transcript_1/1_Conf_1.000 | 169  | 0  |           |                |    |         |     |     |                                                        |
| Locus_23023_Transcript_1/1_Conf_1.000 | 243  | 12 | 4.57E-07  | EFO17581.1     | 76 | 57.7658 | 63  | 48  | bestrophin family protein                              |
| Locus_23024_Transcript_1/1_Conf_1.000 | 537  | 5  | 2.84E-38  | XP_002647112.1 | 73 | 161.77  | 146 | 107 | C. briggsae CBR-FRM-8 protein                          |
| Locus_23025_Transcript_1/1_Conf_1.000 | 780  | 1  | 2.64E-21  | EFO16834.1     | 64 | 106.686 | 136 | 88  | hypothetical protein LOAG_11670                        |
| Locus_23026_Transcript_1/1_Conf_1.000 | 267  | 8  | 1.09E-24  | NP_001022643.1 | 76 | 116.316 | 88  | 67  | LEThal family member (let-805)                         |

|                                       |     |    |          |                |    |         |     |     |                                            |
|---------------------------------------|-----|----|----------|----------------|----|---------|-----|-----|--------------------------------------------|
| Locus_23027_Transcript_1/1_Conf_1.000 | 284 | 20 | 9.42E-24 | XP_002634423.1 | 79 | 113.235 | 88  | 70  | C. briggsae CBR-PTR-14 protein             |
| Locus_23028_Transcript_1/2_Conf_1.000 | 384 | 20 | 3.74E-09 | ZP_05656155.1  | 47 | 64.6994 | 87  | 41  | predicted protein                          |
| Locus_23028_Transcript_2/2_Conf_1.000 | 293 | 20 | 3.80E-09 | ZP_05656155.1  | 47 | 64.6994 | 87  | 41  | predicted protein                          |
| Locus_23029_Transcript_1/1_Conf_1.000 | 280 | 0  |          |                |    |         |     |     |                                            |
| Locus_2303_Transcript_1/1_Conf_1.000  | 552 | 0  |          |                |    |         |     |     |                                            |
| Locus_23030_Transcript_1/1_Conf_1.000 | 385 | 20 | 1.31E-54 | CAR63666.1     | 90 | 215.698 | 128 | 116 | putative Zinc finger C-x8-C-x5-C-x3-H type |
| Locus_23031_Transcript_1/1_Conf_1.000 | 166 | 3  | 1.06E-11 | CAR63674.1     | 85 | 73.1738 | 54  | 46  | putative PeRoXisome assembly factor        |
| Locus_23032_Transcript_1/1_Conf_1.000 | 198 | 20 | 6.23E-12 | XP_002645757.1 | 88 | 73.9442 | 44  | 39  | Hypothetical protein CBG07432              |
| Locus_23033_Transcript_1/1_Conf_1.000 | 253 | 0  |          |                |    |         |     |     |                                            |
| Locus_23034_Transcript_1/1_Conf_1.000 | 188 | 1  | 8.25E-12 | CAJ45481.1     | 76 | 73.559  | 60  | 46  | legumain                                   |
| Locus_23035_Transcript_1/1_Conf_1.000 | 218 | 0  |          |                |    |         |     |     |                                            |
| Locus_23036_Transcript_1/1_Conf_1.000 | 235 | 0  |          |                |    |         |     |     |                                            |
| Locus_23037_Transcript_1/1_Conf_1.000 | 312 | 1  | 5.73E-05 | XP_002642902.1 | 45 | 50.8322 | 105 | 48  | Hypothetical protein CBG15176              |
| Locus_23038_Transcript_1/1_Conf_1.000 | 144 | 20 | 1.01E-17 | EFO25442.1     | 95 | 93.2041 | 48  | 46  | TWK-7 protein                              |

|                                       |      |    |           |                |     |         |     |     |                                    |
|---------------------------------------|------|----|-----------|----------------|-----|---------|-----|-----|------------------------------------|
| Locus_23039_Transcript_1/1_Conf_1.000 | 145  | 4  | 1.46E-08  | XP_002640845.1 | 76  | 62.7734 | 46  | 35  | C. briggsae CBR-CDH-1 protein      |
| Locus_2304_Transcript_1/1_Conf_1.000  | 284  | 0  |           |                |     |         |     |     |                                    |
| Locus_23040_Transcript_1/1_Conf_1.000 | 141  | 0  |           |                |     |         |     |     |                                    |
| Locus_23041_Transcript_1/1_Conf_1.000 | 224  | 20 | 2.31E-22  | NP_498057.1    | 89  | 108.612 | 67  | 60  | hypothetical protein C27F2.10      |
| Locus_23042_Transcript_1/1_Conf_1.000 | 221  | 0  |           |                |     |         |     |     |                                    |
| Locus_23043_Transcript_1/1_Conf_1.000 | 254  | 0  |           |                |     |         |     |     |                                    |
| Locus_23044_Transcript_1/2_Conf_1.000 | 271  | 0  |           |                |     |         |     |     |                                    |
| Locus_23044_Transcript_2/2_Conf_1.000 | 424  | 0  |           |                |     |         |     |     |                                    |
| Locus_23045_Transcript_1/1_Conf_1.000 | 146  | 0  |           |                |     |         |     |     |                                    |
| Locus_23046_Transcript_1/1_Conf_1.000 | 256  | 9  | 7.20E-16  | NP_499308.1    | 70  | 87.0409 | 77  | 54  | hypothetical protein D2045.5       |
| Locus_23047_Transcript_1/1_Conf_1.000 | 181  | 2  | 7.53E-05  | XP_002631385.1 | 61  | 50.447  | 57  | 35  | Hypothetical protein CBG03227      |
| Locus_23048_Transcript_1/1_Conf_1.000 | 203  | 0  |           |                |     |         |     |     |                                    |
| Locus_23049_Transcript_1/1_Conf_1.000 | 162  | 0  |           |                |     |         |     |     |                                    |
| Locus_2305_Transcript_1/1_Conf_1.000  | 1074 | 4  | 3.48E-122 | XP_002631137.1 | 75  | 442.58  | 328 | 248 | Hypothetical protein CBG02921      |
| Locus_23050_Transcript_1/1_Conf_1.000 | 312  | 20 | 7.64E-50  | NP_505708.2    | 94  | 199.904 | 102 | 96  | hypothetical protein F32G8.4       |
| Locus_23051_Transcript_1/1_Conf_1.000 | 141  | 0  |           |                |     |         |     |     |                                    |
| Locus_23052_Transcript_1/1_Conf_1.000 | 163  | 0  |           |                |     |         |     |     |                                    |
| Locus_23053_Transcript_1/1_Conf_1.000 | 395  | 0  |           |                |     |         |     |     |                                    |
| Locus_23054_Transcript_1/1_Conf_1.000 | 133  | 0  |           |                |     |         |     |     |                                    |
| Locus_23055_Transcript_1/1_Conf_1.000 | 181  | 0  |           |                |     |         |     |     |                                    |
| Locus_23056_Transcript_1/1_Conf_1.000 | 135  | 4  | 2.85E-17  | ABU93237.1     | 100 | 91.6633 | 44  | 44  | ligand-gated ion channel subunit   |
| Locus_23057_Transcript_1/1_Conf_1.000 | 253  | 2  | 4.83E-20  | XP_002719154.1 | 73  | 100.908 | 83  | 61  | PREDICTED: alpha 1 type I collagen |
| Locus_23058_Transcript_1/1_Conf_1.000 | 132  | 0  |           |                |     |         |     |     |                                    |
| Locus_23059_Transcript_1/1_Conf_1.000 | 185  | 20 | 5.52E-24  | XP_001640743.1 | 95  | 114.005 | 60  | 57  | predicted protein                  |

|                                       |      |    |          |                |    |         |     |     |                                                                     |
|---------------------------------------|------|----|----------|----------------|----|---------|-----|-----|---------------------------------------------------------------------|
| Locus_2306_Transcript_1/2_Conf_1.000  | 1217 | 20 | 4.42E-55 | XP_002633667.1 | 67 | 219.935 | 230 | 156 | Hypothetical protein CBG03342                                       |
| Locus_2306_Transcript_2/2_Conf_1.000  | 2247 | 20 | 0        | O18023.4       | 72 | 824.313 | 761 | 548 | Ig-like and fibronectin type-III domain-containing protein C25G4.10 |
| Locus_23060_Transcript_1/1_Conf_1.000 | 180  | 1  | 1.05E-06 | XP_001083984.1 | 75 | 56.6102 | 45  | 34  | PREDICTED: hypothetical protein LOC695354                           |
| Locus_23061_Transcript_1/1_Conf_1.000 | 298  | 20 | 9.18E-48 | XP_001901913.1 | 95 | 192.971 | 97  | 93  | F-box only protein 11                                               |
| Locus_23062_Transcript_1/1_Conf_1.000 | 165  | 0  |          |                |    |         |     |     |                                                                     |
| Locus_23063_Transcript_1/1_Conf_1.000 | 215  | 20 | 1.85E-08 | XP_002742403.1 | 72 | 62.3882 | 68  | 49  | PREDICTED: TIP30-like                                               |
| Locus_23064_Transcript_1/1_Conf_1.000 | 256  | 0  |          |                |    |         |     |     |                                                                     |
| Locus_23065_Transcript_1/1_Conf_1.000 | 179  | 4  | 1.08E-08 | XP_001892742.1 | 83 | 63.1586 | 56  | 47  | hypothetical protein                                                |
| Locus_23066_Transcript_1/1_Conf_1.000 | 468  | 20 | 1.51E-58 | XP_002633219.1 | 84 | 228.794 | 152 | 128 | C. briggsae CBR-ITR-1 protein                                       |
| Locus_23067_Transcript_1/1_Conf_1.000 | 184  | 17 | 7.25E-08 | NP_998128.1    | 94 | 60.4622 | 34  | 32  | disco-interacting protein 2 homolog B                               |
| Locus_23068_Transcript_1/1_Conf_1.000 | 137  | 0  |          |                |    |         |     |     |                                                                     |
| Locus_23069_Transcript_1/1_Conf_1.000 | 325  | 20 | 7.56E-34 | XP_002645153.1 | 84 | 146.747 | 99  | 84  | C. briggsae CBR-SFXN-2 protein                                      |
| Locus_2307_Transcript_1/2_Conf_1.000  | 2933 | 20 | 2.70E-23 | EFO22438.1     | 54 | 115.931 | 206 | 112 | R3H domain-containing protein                                       |

|                                       |      |    |          |                |     |         |     |     |                                                       |
|---------------------------------------|------|----|----------|----------------|-----|---------|-----|-----|-------------------------------------------------------|
| Locus_2307_Transcript_2/2_Conf_1.000  | 2933 | 20 | 6.01E-23 | XP_001900693.1 | 44  | 114.775 | 327 | 147 | R3H domain containing protein                         |
| Locus_23070_Transcript_1/1_Conf_1.000 | 297  | 0  |          |                |     |         |     |     |                                                       |
| Locus_23071_Transcript_1/1_Conf_1.000 | 240  | 0  |          |                |     |         |     |     |                                                       |
| Locus_23072_Transcript_1/1_Conf_1.000 | 165  | 0  |          |                |     |         |     |     |                                                       |
| Locus_23073_Transcript_1/1_Conf_1.000 | 247  | 0  |          |                |     |         |     |     |                                                       |
| Locus_23074_Transcript_1/1_Conf_1.000 | 156  | 11 | 2.81E-12 | XP_002633999.1 | 90  | 75.0998 | 43  | 39  | C. briggsae CBR-TNI-4 protein                         |
| Locus_23075_Transcript_1/1_Conf_1.000 | 358  | 20 | 1.01E-30 | XP_001899166.1 | 74  | 136.346 | 116 | 86  | GTP-ase activating protein for Arf containing protein |
| Locus_23076_Transcript_1/1_Conf_1.000 | 143  | 0  |          |                |     |         |     |     |                                                       |
| Locus_23077_Transcript_1/1_Conf_1.000 | 138  | 0  |          |                |     |         |     |     |                                                       |
| Locus_23078_Transcript_1/1_Conf_1.000 | 298  | 4  | 6.64E-14 | XP_002638288.1 | 61  | 80.4925 | 89  | 55  | Hypothetical protein CBG22835                         |
| Locus_23079_Transcript_1/1_Conf_1.000 | 184  | 0  |          |                |     |         |     |     |                                                       |
| Locus_2308_Transcript_1/1_Conf_1.000  | 1637 | 20 | 0        | P50719.1       | 100 | 843.188 | 440 | 440 | Tubulin alpha chain                                   |
| Locus_23080_Transcript_1/1_Conf_1.000 | 339  | 20 | 3.47E-07 | BAC36271.1     | 51  | 58.151  | 104 | 54  | unnamed protein product                               |
| Locus_23081_Transcript_1/1_Conf_1.000 | 224  | 0  |          |                |     |         |     |     |                                                       |
| Locus_23082_Transcript_1/1_Conf_1.000 | 137  | 0  |          |                |     |         |     |     |                                                       |
| Locus_23083_Transcript_1/1_Conf_1.000 | 286  | 0  |          |                |     |         |     |     |                                                       |
| Locus_23084_Transcript_1/1_Conf_1.000 | 213  | 0  |          |                |     |         |     |     |                                                       |
| Locus_23085_Transcript_1/1_Conf_1.000 | 145  | 19 | 8.29E-12 | XP_002640829.1 | 91  | 73.559  | 48  | 44  | C. briggsae CBR-ADS-1 protein                         |
| Locus_23086_Transcript_1/1_Conf_1.000 | 415  | 0  |          |                |     |         |     |     |                                                       |

|                                       |     |    |          |                |    |         |     |     |                                                                           |
|---------------------------------------|-----|----|----------|----------------|----|---------|-----|-----|---------------------------------------------------------------------------|
| Locus_23087_Transcript_1/1_Conf_1.000 | 181 | 2  | 4.41E-05 | NP_502795.2    | 68 | 51.2174 | 51  | 35  | Homolog of Hedgehog AcylTransferase family member (hhat-2)                |
| Locus_23088_Transcript_1/1_Conf_1.000 | 251 | 1  | 3.84E-06 | XP_001897820.1 | 61 | 54.6842 | 81  | 50  | hypothetical protein Bm1_31875                                            |
| Locus_23089_Transcript_1/1_Conf_1.000 | 193 | 8  | 1.14E-13 | EFO12672.1     | 79 | 79.7221 | 64  | 51  | hypothetical protein LOAG_15862                                           |
| Locus_2309_Transcript_1/1_Conf_1.000  | 762 | 20 | 3.25E-45 | NP_499537.2    | 61 | 186.037 | 267 | 164 | hypothetical protein Y56A3A.2                                             |
| Locus_23090_Transcript_1/1_Conf_1.000 | 165 | 0  |          |                |    |         |     |     |                                                                           |
| Locus_23091_Transcript_1/1_Conf_1.000 | 187 | 0  |          |                |    |         |     |     |                                                                           |
| Locus_23092_Transcript_1/1_Conf_1.000 | 232 | 0  |          |                |    |         |     |     |                                                                           |
| Locus_23093_Transcript_1/1_Conf_1.000 | 132 | 3  | 7.06E-08 | NP_508964.2    | 75 | 60.4622 | 45  | 34  | Regulator of G protein Signaling family member (rgs-6)                    |
| Locus_23094_Transcript_1/1_Conf_1.000 | 172 | 2  | 3.28E-05 | XP_002630912.1 | 63 | 51.6026 | 57  | 36  | Hypothetical protein CBG02636                                             |
| Locus_23095_Transcript_1/1_Conf_1.000 | 544 | 4  | 5.25E-11 | NP_001021653.1 | 45 | 71.2478 | 191 | 87  | FANCI (Fanconi anemia complex component I) homolog family member (fnci-1) |
| Locus_23096_Transcript_1/1_Conf_1.000 | 168 | 0  |          |                |    |         |     |     |                                                                           |
| Locus_23097_Transcript_1/1_Conf_1.000 | 322 | 20 | 1.14E-21 | XP_001899134.1 | 73 | 106.301 | 102 | 75  | hypothetical protein Bm1_38405                                            |
| Locus_23098_Transcript_1/1_Conf_1.000 | 228 | 2  | 7.64E-18 | XP_002632364.1 | 93 | 93.5893 | 75  | 70  | Hypothetical protein CBG00382                                             |
| Locus_23099_Transcript_1/1_Conf_1.000 | 129 | 0  |          |                |    |         |     |     |                                                                           |
| Locus_231_Transcript_1/2_Conf_1.000   | 536 | 20 | 1.87E-34 | XP_002698333.1 | 90 | 149.058 | 103 | 93  | PREDICTED: hypothetical protein                                           |
| Locus_231_Transcript_2/2_Conf_1.000   | 497 | 20 | 1.05E-27 | XP_002698333.1 | 89 | 126.331 | 92  | 82  | PREDICTED: hypothetical protein                                           |

|                                       |     |    |          |                |    |         |     |     |                                                                             |
|---------------------------------------|-----|----|----------|----------------|----|---------|-----|-----|-----------------------------------------------------------------------------|
| Locus_2310_Transcript_1/4_Conf_0.429  | 194 | 4  | 2.82E-04 | XP_002641892.1 | 62 | 48.521  | 50  | 31  | Hypothetical protein CBG16586                                               |
| Locus_2310_Transcript_2/4_Conf_0.571  | 297 | 4  | 2.61E-10 | XP_002641892.1 | 60 | 68.5514 | 76  | 46  | Hypothetical protein CBG16586                                               |
| Locus_2310_Transcript_3/4_Conf_0.571  | 238 | 4  | 1.34E-06 | NP_001021172.1 | 69 | 56.225  | 46  | 32  | PDF Receptor homolog family member (pdf-1)                                  |
| Locus_2310_Transcript_4/4_Conf_0.571  | 289 | 4  | 2.64E-10 | XP_002641892.1 | 60 | 68.5514 | 76  | 46  | Hypothetical protein CBG16586                                               |
| Locus_23100_Transcript_1/1_Conf_1.000 | 137 | 0  |          |                |    |         |     |     |                                                                             |
| Locus_23101_Transcript_1/1_Conf_1.000 | 237 | 20 | 4.27E-29 | NP_496802.2    | 89 | 130.954 | 79  | 71  | BTAF (TBP-associated factor) homolog family member (btf-1)                  |
| Locus_23102_Transcript_1/1_Conf_1.000 | 135 | 0  |          |                |    |         |     |     |                                                                             |
| Locus_23103_Transcript_1/1_Conf_1.000 | 465 | 5  | 8.17E-12 | XP_002642202.1 | 47 | 73.559  | 123 | 59  | Hypothetical protein CBG18175                                               |
| Locus_23104_Transcript_1/1_Conf_1.000 | 177 | 0  |          |                |    |         |     |     |                                                                             |
| Locus_23105_Transcript_1/1_Conf_1.000 | 204 | 20 | 2.05E-23 | NP_502390.2    | 84 | 112.079 | 66  | 56  | High Incidence of Males (increased X chromosome loss) family member (him-6) |
| Locus_23106_Transcript_1/1_Conf_1.000 | 545 | 20 | 5.94E-47 | NP_001129830.1 | 62 | 190.66  | 182 | 113 | LEThal family member (let-23)                                               |

|                                       |      |    |          |                |     |         |     |     |                                                          |
|---------------------------------------|------|----|----------|----------------|-----|---------|-----|-----|----------------------------------------------------------|
| Locus_23107_Transcript_1/1_Conf_1.000 | 237  | 20 | 2.43E-24 | CAR63538.1     | 79  | 115.161 | 78  | 62  | putative MFP2                                            |
| Locus_23108_Transcript_1/1_Conf_1.000 | 142  | 20 | 6.10E-20 | XP_002828013.1 | 100 | 100.523 | 46  | 46  | PREDICTED: tRNA-dihydrouridine synthase 1-like isoform 2 |
| Locus_23109_Transcript_1/1_Conf_1.000 | 248  | 0  |          |                |     |         |     |     |                                                          |
| Locus_2311_Transcript_1/1_Conf_1.000  | 1074 | 20 | 1.06E-62 | NP_496320.3    | 63  | 244.973 | 337 | 213 | Cell Death Lethal family member (cdl-1)                  |
| Locus_23110_Transcript_1/1_Conf_1.000 | 177  | 1  | 5.56E-05 | XP_002640523.1 | 79  | 50.8322 | 44  | 35  | Hypothetical protein CBG18685                            |
| Locus_23111_Transcript_1/1_Conf_1.000 | 147  | 3  | 1.37E-06 | EFO17834.1     | 76  | 56.225  | 47  | 36  | hypothetical protein LOAG_10662                          |
| Locus_23112_Transcript_1/1_Conf_1.000 | 551  | 0  |          |                |     |         |     |     |                                                          |
| Locus_23113_Transcript_1/1_Conf_1.000 | 140  | 0  |          |                |     |         |     |     |                                                          |
| Locus_23114_Transcript_1/1_Conf_1.000 | 144  | 0  |          |                |     |         |     |     |                                                          |
| Locus_23115_Transcript_1/1_Conf_1.000 | 478  | 20 | 2.03E-39 | XP_002735023.1 | 75  | 165.236 | 157 | 119 | PREDICTED: CG8129-like                                   |
| Locus_23116_Transcript_1/1_Conf_1.000 | 221  | 0  |          |                |     |         |     |     |                                                          |
| Locus_23117_Transcript_1/1_Conf_1.000 | 188  | 0  |          |                |     |         |     |     |                                                          |
| Locus_23118_Transcript_1/1_Conf_1.000 | 200  | 0  |          |                |     |         |     |     |                                                          |
| Locus_23119_Transcript_1/1_Conf_1.000 | 165  | 20 | 9.56E-21 | AAH18938.4     | 100 | 103.219 | 45  | 45  | NSMCE1 protein                                           |
| Locus_2312_Transcript_1/2_Conf_1.000  | 2781 | 20 | 0        | XP_002642644.1 | 85  | 1073.15 | 796 | 678 | C. briggsae CBR-EGL-45 protein                           |
| Locus_2312_Transcript_2/2_Conf_1.000  | 2835 | 20 | 0        | XP_002642644.1 | 85  | 1073.15 | 796 | 678 | C. briggsae CBR-EGL-45 protein                           |
| Locus_23120_Transcript_1/1_Conf_1.000 | 155  | 0  |          |                |     |         |     |     |                                                          |
| Locus_23121_Transcript_1/1_Conf_1.000 | 212  | 0  |          |                |     |         |     |     |                                                          |
| Locus_23122_Transcript_1/1_Conf_1.000 | 189  | 0  |          |                |     |         |     |     |                                                          |



|                                       |      |    |          |                |     |         |     |     |                                                                          |
|---------------------------------------|------|----|----------|----------------|-----|---------|-----|-----|--------------------------------------------------------------------------|
| Locus_23123_Transcript_1/1_Conf_1.000 | 342  | 20 | 2.45E-48 | XP_002637013.1 | 82  | 194.897 | 113 | 93  | C. briggsae CBR-NID-1 protein                                            |
| Locus_23124_Transcript_1/1_Conf_1.000 | 151  | 0  |          |                |     |         |     |     |                                                                          |
| Locus_23125_Transcript_1/1_Conf_1.000 | 369  | 20 | 3.32E-37 | NP_001024306.1 | 78  | 157.918 | 114 | 90  | Poly(ADP-ribose) Metabolism Enzyme family member (pme-5)                 |
| Locus_23126_Transcript_1/1_Conf_1.000 | 375  | 7  | 9.29E-24 | XP_002640437.1 | 68  | 113.235 | 113 | 77  | Hypothetical protein CBG08489                                            |
| Locus_23127_Transcript_1/1_Conf_1.000 | 625  | 20 | 1.72E-63 | NP_001040789.1 | 84  | 246.128 | 178 | 150 | hypothetical protein H20J04.4                                            |
| Locus_23128_Transcript_1/1_Conf_1.000 | 269  | 0  |          |                |     |         |     |     |                                                                          |
| Locus_23129_Transcript_1/1_Conf_1.000 | 225  | 7  | 3.33E-13 | XP_001894370.1 | 69  | 78.1814 | 72  | 50  | Immunoglobulin I-set domain containing protein                           |
| Locus_2313_Transcript_1/1_Conf_1.000  | 551  | 20 | 1.45E-96 | BAE90788.1     | 100 | 355.525 | 183 | 183 | unnamed protein product                                                  |
| Locus_23130_Transcript_1/1_Conf_1.000 | 327  | 8  | 2.34E-43 | ACI49226.1     | 87  | 178.333 | 109 | 95  | hypothetical protein Csp3_JD05.011                                       |
| Locus_23131_Transcript_1/1_Conf_1.000 | 157  | 0  |          |                |     |         |     |     |                                                                          |
| Locus_23132_Transcript_1/1_Conf_1.000 | 498  | 0  |          |                |     |         |     |     |                                                                          |
| Locus_23133_Transcript_1/1_Conf_1.000 | 146  | 0  |          |                |     |         |     |     |                                                                          |
| Locus_23134_Transcript_1/1_Conf_1.000 | 191  | 2  | 3.23E-08 | XP_002634150.1 | 71  | 61.6178 | 39  | 28  | Hypothetical protein CBG01711                                            |
| Locus_23135_Transcript_1/1_Conf_1.000 | 227  | 20 | 4.05E-35 | XP_002828602.1 | 100 | 150.984 | 75  | 75  | PREDICTED: trafficking protein particle complex subunit 5-like isoform 1 |
| Locus_23136_Transcript_1/1_Conf_1.000 | 396  | 20 | 9.02E-27 | NP_493980.1    | 64  | 123.25  | 132 | 85  | hypothetical protein H17B01.4                                            |
| Locus_23137_Transcript_1/1_Conf_1.000 | 291  | 13 | 8.18E-12 | XP_002646276.1 | 63  | 73.559  | 66  | 42  | C. briggsae CBR-ABF-2 protein                                            |
| Locus_23138_Transcript_1/1_Conf_1.000 | 180  | 0  |          |                |     |         |     |     |                                                                          |
| Locus_23139_Transcript_1/1_Conf_1.000 | 169  | 0  |          |                |     |         |     |     |                                                                          |
| Locus_2314_Transcript_1/1_Conf_1.000  | 1573 | 20 | 9.32E-59 | NP_494334.3    | 59  | 232.646 | 255 | 152 | SET (trithorax/polycomb) domain containing family member (set-11)        |
| Locus_23140_Transcript_1/1_Conf_1.000 | 203  | 0  |          |                |     |         |     |     |                                                                          |
| Locus_23141_Transcript_1/1_Conf_1.000 | 181  | 0  |          |                |     |         |     |     |                                                                          |
| Locus_23142_Transcript_1/1_Conf_1.000 | 488  | 1  | 2.22E-09 | XP_001900122.1 | 58  | 65.4698 | 90  | 53  | hypothetical protein Bm1_43305                                           |
| Locus_23143_Transcript_1/1_Conf_1.000 | 187  | 5  | 1.11E-24 | ACD85816.1     | 95  | 116.316 | 61  | 58  | forkhead transcription factor DAF-16                                     |

|                                       |      |    |          |                |    |         |     |     |                                                                                                                                                 |
|---------------------------------------|------|----|----------|----------------|----|---------|-----|-----|-------------------------------------------------------------------------------------------------------------------------------------------------|
| Locus_23144_Transcript_1/1_Conf_1.000 | 157  | 17 | 4.06E-11 | XP_002635426.1 | 92 | 71.2478 | 51  | 47  | Hypothetical protein CBG00823                                                                                                                   |
| Locus_23145_Transcript_1/1_Conf_1.000 | 167  | 0  |          |                |    |         |     |     |                                                                                                                                                 |
| Locus_23146_Transcript_1/1_Conf_1.000 | 175  | 5  | 4.56E-07 | NP_001041091.2 | 67 | 57.7658 | 55  | 37  | Motor Axon guidance family member (max-1)                                                                                                       |
| Locus_23147_Transcript_1/1_Conf_1.000 | 251  | 0  |          |                |    |         |     |     |                                                                                                                                                 |
| Locus_23148_Transcript_1/1_Conf_1.000 | 191  | 20 | 2.81E-28 | XP_002642963.1 | 96 | 128.257 | 63  | 61  | Hypothetical protein CBG15247                                                                                                                   |
| Locus_23149_Transcript_1/1_Conf_1.000 | 152  | 0  |          |                |    |         |     |     |                                                                                                                                                 |
| Locus_2315_Transcript_1/1_Conf_1.000  | 551  | 20 | 6.96E-91 | NP_506055.2    | 95 | 336.65  | 183 | 175 | ELongator complex Protein Component family member (elpc-3)                                                                                      |
| Locus_23150_Transcript_1/1_Conf_1.000 | 169  | 0  |          |                |    |         |     |     |                                                                                                                                                 |
| Locus_23151_Transcript_1/1_Conf_1.000 | 741  | 10 | 7.44E-23 | XP_002633684.1 | 53 | 111.694 | 209 | 112 | C. briggsae CBR-EEL-1 protein                                                                                                                   |
| Locus_23152_Transcript_1/1_Conf_1.000 | 151  | 0  |          |                |    |         |     |     |                                                                                                                                                 |
| Locus_23153_Transcript_1/1_Conf_1.000 | 214  | 0  |          |                |    |         |     |     |                                                                                                                                                 |
| Locus_23154_Transcript_1/1_Conf_1.000 | 344  |    |          |                |    |         |     |     |                                                                                                                                                 |
| Locus_23155_Transcript_1/1_Conf_1.000 | 169  | 0  |          |                |    |         |     |     |                                                                                                                                                 |
| Locus_23156_Transcript_1/1_Conf_1.000 | 173  | 0  |          |                |    |         |     |     |                                                                                                                                                 |
| Locus_23157_Transcript_1/1_Conf_1.000 | 175  | 8  | 7.48E-26 | XP_001893452.1 | 98 | 120.168 | 58  | 57  | basement membrane proteoglycan                                                                                                                  |
| Locus_23158_Transcript_1/1_Conf_1.000 | 202  | 0  |          |                |    |         |     |     |                                                                                                                                                 |
| Locus_23159_Transcript_1/1_Conf_1.000 | 200  | 0  |          |                |    |         |     |     |                                                                                                                                                 |
| Locus_2316_Transcript_1/1_Conf_1.000  | 1085 | 20 | 7.44E-80 | XP_001510286.1 | 59 | 301.982 | 364 | 217 | PREDICTED: similar to Phosphoenolpyruvate carboxykinase, cytosolic [GTP] (Phosphoenolpyruvate carboxylase) (PEPCK-C) [Ornithorhynchus anatinus] |

|                                       |      |    |          |                |     |         |     |     |                                 |
|---------------------------------------|------|----|----------|----------------|-----|---------|-----|-----|---------------------------------|
| Locus_23160_Transcript_1/2_Conf_1.000 | 778  | 20 | 4.44E-37 | NP_491390.2    | 65  | 159.073 | 217 | 142 | hypothetical protein D1007.15   |
| Locus_23160_Transcript_2/2_Conf_1.000 | 778  | 20 | 4.44E-37 | NP_491390.2    | 65  | 159.073 | 217 | 142 | hypothetical protein D1007.15   |
| Locus_23161_Transcript_1/1_Conf_1.000 | 154  | 0  |          |                |     |         |     |     |                                 |
| Locus_23162_Transcript_1/1_Conf_1.000 | 243  | 6  | 9.50E-13 | CBX25138.1     | 69  | 76.6406 | 69  | 48  | Hypothetical protein C25A1.7a   |
| Locus_23163_Transcript_1/1_Conf_1.000 | 181  | 0  |          |                |     |         |     |     |                                 |
| Locus_23164_Transcript_1/1_Conf_1.000 | 318  | 0  |          |                |     |         |     |     |                                 |
| Locus_23165_Transcript_1/1_Conf_1.000 | 277  | 0  |          |                |     |         |     |     |                                 |
| Locus_23166_Transcript_1/1_Conf_1.000 | 185  | 0  |          |                |     |         |     |     |                                 |
| Locus_23167_Transcript_1/1_Conf_1.000 | 212  | 0  |          |                |     |         |     |     |                                 |
| Locus_23168_Transcript_1/1_Conf_1.000 | 448  | 20 | 1.62E-60 | XP_002635876.1 | 89  | 235.343 | 149 | 133 | C. briggsae CBR-PTR-16 protein  |
| Locus_23169_Transcript_1/1_Conf_1.000 | 187  | 3  | 1.97E-05 | EFO13949.1     | 72  | 52.373  | 58  | 42  | hypothetical protein LOAG_14577 |
| Locus_2317_Transcript_1/1_Conf_1.000  | 1249 | 3  | 5.27E-43 | XP_002646302.1 | 49  | 179.874 | 429 | 214 | Hypothetical protein CBG12009   |
| Locus_23170_Transcript_1/1_Conf_1.000 | 176  | 0  |          |                |     |         |     |     |                                 |
| Locus_23171_Transcript_1/1_Conf_1.000 | 160  | 20 | 2.99E-22 | NP_502576.1    | 100 | 108.227 | 53  | 53  | RAB family member (rab-19)      |
| Locus_23172_Transcript_1/1_Conf_1.000 | 220  | 0  |          |                |     |         |     |     |                                 |
| Locus_23173_Transcript_1/1_Conf_1.000 | 298  | 0  |          |                |     |         |     |     |                                 |
| Locus_23174_Transcript_1/1_Conf_1.000 | 227  | 0  |          |                |     |         |     |     |                                 |
| Locus_23175_Transcript_1/1_Conf_1.000 | 141  | 0  |          |                |     |         |     |     |                                 |
| Locus_23176_Transcript_1/1_Conf_1.000 | 173  | 0  |          |                |     |         |     |     |                                 |
| Locus_23177_Transcript_1/1_Conf_1.000 | 131  | 20 | 9.86E-18 | XP_002813192.1 | 100 | 93.2041 | 43  | 43  | PREDICTED: plexin-D1-like       |

|                                       |      |    |          |                |     |         |     |     |                                                              |
|---------------------------------------|------|----|----------|----------------|-----|---------|-----|-----|--------------------------------------------------------------|
| Locus_23178_Transcript_1/1_Conf_1.000 | 299  | 20 | 2.34E-51 | NP_001024972.1 | 100 | 204.912 | 99  | 99  | abnormal cell MIGration family member (mig-15)               |
| Locus_23179_Transcript_1/1_Conf_1.000 | 625  | 20 | 4.85E-50 | XP_002646339.1 | 75  | 201.445 | 174 | 131 | C. briggsae CBR-INX-16 protein                               |
| Locus_2318_Transcript_1/2_Conf_1.000  | 2402 | 20 | 5.84E-29 | AAK18978.3     | 47  | 134.42  | 267 | 128 | Hypothetical protein T20F7.1                                 |
| Locus_2318_Transcript_2/2_Conf_1.000  | 2381 | 20 | 2.87E-28 | AAK18978.3     | 47  | 132.109 | 263 | 126 | Hypothetical protein T20F7.1                                 |
| Locus_23180_Transcript_1/1_Conf_1.000 | 154  | 3  | 2.64E-10 | XP_001900332.1 | 97  | 68.5514 | 34  | 33  | hypothetical protein                                         |
| Locus_23181_Transcript_1/1_Conf_1.000 | 343  | 0  |          |                |     |         |     |     |                                                              |
| Locus_23182_Transcript_1/1_Conf_1.000 | 225  | 0  |          |                |     |         |     |     |                                                              |
| Locus_23183_Transcript_1/1_Conf_1.000 | 791  | 20 | 4.85E-71 | XP_002635154.1 | 74  | 271.937 | 230 | 172 | C. briggsae CBR-VRS-1 protein                                |
| Locus_23184_Transcript_1/1_Conf_1.000 | 179  | 2  | 4.55E-07 | NP_505266.1    | 73  | 57.7658 | 65  | 48  | hypothetical protein C01B7.5                                 |
| Locus_23185_Transcript_1/1_Conf_1.000 | 249  | 6  | 1.27E-17 | AAV41897.1     | 77  | 92.8189 | 70  | 54  | SAX-2                                                        |
| Locus_23186_Transcript_1/1_Conf_1.000 | 250  | 0  |          |                |     |         |     |     |                                                              |
| Locus_23187_Transcript_1/1_Conf_1.000 | 150  | 0  |          |                |     |         |     |     |                                                              |
| Locus_23188_Transcript_1/1_Conf_1.000 | 235  | 0  |          |                |     |         |     |     |                                                              |
| Locus_23189_Transcript_1/1_Conf_1.000 | 299  | 0  |          |                |     |         |     |     |                                                              |
| Locus_2319_Transcript_1/1_Conf_1.000  | 830  | 20 | 5.86E-54 | NP_741763.1    | 62  | 215.312 | 276 | 172 | Homeodomain interacting Protein Kinase family member (hpk-1) |
| Locus_23190_Transcript_1/1_Conf_1.000 | 213  | 0  |          |                |     |         |     |     |                                                              |
| Locus_23191_Transcript_1/1_Conf_1.000 | 207  | 20 | 6.56E-30 | NP_508833.1    | 94  | 133.65  | 68  | 64  | hypothetical protein T07F12.4                                |
| Locus_23192_Transcript_1/1_Conf_1.000 | 214  | 0  |          |                |     |         |     |     |                                                              |
| Locus_23193_Transcript_1/1_Conf_1.000 | 662  | 20 | 1.01E-35 | XP_002639186.1 | 69  | 154.066 | 146 | 102 | C. briggsae CBR-LEM-3 protein                                |

|                                       |      |    |          |                |     |         |     |     |                                               |
|---------------------------------------|------|----|----------|----------------|-----|---------|-----|-----|-----------------------------------------------|
| Locus_23194_Transcript_1/1_Conf_1.000 | 239  | 4  | 1.80E-27 | XP_002638826.1 | 84  | 125.561 | 79  | 67  | Hypothetical protein CBG22031                 |
| Locus_23195_Transcript_1/1_Conf_1.000 | 461  | 0  |          |                |     |         |     |     |                                               |
| Locus_23196_Transcript_1/1_Conf_1.000 | 163  | 20 | 9.28E-16 | NP_501335.1    | 92  | 86.6557 | 53  | 49  | UNCoordinated family member (unc-24)          |
| Locus_23197_Transcript_1/1_Conf_1.000 | 148  | 0  |          |                |     |         |     |     |                                               |
| Locus_23198_Transcript_1/1_Conf_1.000 | 237  | 5  | 2.98E-06 | XP_002637807.1 | 64  | 55.0694 | 71  | 46  | Hypothetical protein CBG04593                 |
| Locus_23199_Transcript_1/1_Conf_1.000 | 130  | 2  | 1.25E-04 | NP_001023038.1 | 77  | 49.6766 | 40  | 31  | EXCretry canal abnormal family member (exc-5) |
| Locus_232_Transcript_1/1_Conf_1.000   | 1047 | 20 | 1.18E-34 | NP_505179.1    | 54  | 151.754 | 251 | 137 | hypothetical protein T23B12.4                 |
| Locus_2320_Transcript_1/1_Conf_1.000  | 1692 | 20 | 8.96E-79 | NP_498203.2    | 57  | 299.286 | 510 | 292 | CELL Death abnormality family member (ced-6)  |
| Locus_23200_Transcript_1/1_Conf_1.000 | 276  | 20 | 3.97E-27 | XP_002638736.1 | 81  | 124.405 | 92  | 75  | C. briggsae CBR-EGO-1 protein                 |
| Locus_23201_Transcript_1/1_Conf_1.000 | 248  | 20 | 1.27E-41 | XP_002823653.1 | 100 | 172.555 | 82  | 82  | PREDICTED: hypothetical protein LOC100451758  |
| Locus_23202_Transcript_1/1_Conf_1.000 | 234  | 0  |          |                |     |         |     |     |                                               |
| Locus_23203_Transcript_1/1_Conf_1.000 | 259  | 0  |          |                |     |         |     |     |                                               |
| Locus_23204_Transcript_1/1_Conf_1.000 | 148  | 5  | 8.85E-06 | NP_493023.1    | 85  | 53.5286 | 34  | 29  | hypothetical protein R09B3.3                  |
| Locus_23205_Transcript_1/1_Conf_1.000 | 195  | 7  | 9.34E-08 | XP_002636803.1 | 68  | 60.077  | 63  | 43  | Hypothetical protein CBG09244                 |
| Locus_23206_Transcript_1/1_Conf_1.000 | 133  | 3  | 2.51E-05 | XP_002639821.1 | 79  | 51.9878 | 39  | 31  | C. briggsae CBR-ERS-2 protein                 |

|                                       |      |    |          |                |     |         |     |     |                                                            |
|---------------------------------------|------|----|----------|----------------|-----|---------|-----|-----|------------------------------------------------------------|
| Locus_23207_Transcript_1/1_Conf_1.000 | 131  | 20 | 4.14E-16 | EFN87947.1     | 100 | 87.8113 | 43  | 43  | 26S protease regulatory subunit 8                          |
| Locus_23208_Transcript_1/1_Conf_1.000 | 138  | 0  |          |                |     |         |     |     |                                                            |
| Locus_23209_Transcript_1/1_Conf_1.000 | 264  | 4  | 1.94E-05 | NP_001023935.1 | 56  | 52.373  | 67  | 38  | hypothetical protein F46B6.5                               |
| Locus_2321_Transcript_1/1_Conf_1.000  | 1394 | 20 | 0        | XP_002643863.1 | 86  | 710.294 | 449 | 390 | C. briggsae CBR-HID-1 protein                              |
| Locus_23210_Transcript_1/1_Conf_1.000 | 310  | 20 | 7.42E-42 | EAW52759.1     | 100 | 173.326 | 82  | 82  | transgelin 2, isoform CRA_a                                |
| Locus_23211_Transcript_1/1_Conf_1.000 | 227  | 5  | 4.98E-09 | CBW48343.1     | 86  | 64.3142 | 38  | 33  | Hypothetical protein C29A12.4d                             |
| Locus_23212_Transcript_1/1_Conf_1.000 | 317  | 1  | 6.32E-04 | EFO26583.1     | 53  | 47.3654 | 98  | 52  | hypothetical protein LOAG_01905                            |
| Locus_23213_Transcript_1/1_Conf_1.000 | 326  | 0  |          |                |     |         |     |     |                                                            |
| Locus_23214_Transcript_1/1_Conf_1.000 | 184  | 0  |          |                |     |         |     |     |                                                            |
| Locus_23215_Transcript_1/1_Conf_1.000 | 383  | 20 | 2.66E-47 | NP_001024720.1 | 88  | 191.43  | 126 | 111 | Na/H exchanger family member (nhx-5)                       |
| Locus_23216_Transcript_1/1_Conf_1.000 | 188  | 0  |          |                |     |         |     |     |                                                            |
| Locus_23217_Transcript_1/1_Conf_1.000 | 288  | 0  |          |                |     |         |     |     |                                                            |
| Locus_23218_Transcript_1/1_Conf_1.000 | 165  | 8  | 2.88E-09 | CAA46190.1     | 80  | 65.0846 | 51  | 41  | P-glycoprotein A                                           |
| Locus_23219_Transcript_1/1_Conf_1.000 | 141  | 1  | 1.72E-06 | EAW50361.1     | 88  | 55.8398 | 44  | 39  | hCG2041296                                                 |
| Locus_2322_Transcript_1/1_Conf_1.000  | 758  | 20 | 1.09E-85 | NP_503105.1    | 80  | 320.472 | 255 | 204 | Peroxisomal Membrane Protein related family member (pmp-4) |
| Locus_23220_Transcript_1/1_Conf_1.000 | 167  | 0  |          |                |     |         |     |     |                                                            |
| Locus_23221_Transcript_1/1_Conf_1.000 | 192  | 2  | 4.81E-04 | XP_002637532.1 | 80  | 47.7506 | 36  | 29  | Hypothetical protein CBG19257                              |
| Locus_23222_Transcript_1/1_Conf_1.000 | 300  | 0  |          |                |     |         |     |     |                                                            |
| Locus_23223_Transcript_1/1_Conf_1.000 | 181  | 0  |          |                |     |         |     |     |                                                            |

|                                       |     |    |          |                |     |         |     |     |                                                                                  |
|---------------------------------------|-----|----|----------|----------------|-----|---------|-----|-----|----------------------------------------------------------------------------------|
| Locus_23224_Transcript_1/1_Conf_1.000 | 346 | 20 | 3.54E-31 | NP_501928.1    | 70  | 137.887 | 116 | 82  | hypothetical protein F13B12.4                                                    |
| Locus_23225_Transcript_1/1_Conf_1.000 | 135 | 0  |          |                |     |         |     |     |                                                                                  |
| Locus_23226_Transcript_1/1_Conf_1.000 | 212 | 3  | 2.41E-16 | XP_002636913.1 | 75  | 88.5817 | 70  | 53  | Hypothetical protein CBG09377                                                    |
| Locus_23227_Transcript_1/1_Conf_1.000 | 199 | 3  | 3.78E-09 | XP_002638395.1 | 67  | 64.6994 | 61  | 41  | Hypothetical protein CBG18604                                                    |
| Locus_23228_Transcript_1/1_Conf_1.000 | 221 | 7  | 2.48E-16 | EFO21619.1     | 76  | 88.5817 | 71  | 54  | DOMON domain-containing protein                                                  |
| Locus_23229_Transcript_1/1_Conf_1.000 | 169 | 20 | 2.19E-25 | XP_002828392.1 | 100 | 118.627 | 55  | 55  | PREDICTED: LOW QUALITY PROTEIN: lipid phosphate phosphohydrolase 2-like, partial |
| Locus_2323_Transcript_1/1_Conf_1.000  | 523 | 0  |          |                |     |         |     |     |                                                                                  |
| Locus_23230_Transcript_1/1_Conf_1.000 | 168 |    |          |                |     |         |     |     |                                                                                  |
| Locus_23231_Transcript_1/1_Conf_1.000 | 168 | 8  | 3.88E-14 | XP_001894372.1 | 78  | 81.2629 | 56  | 44  | Immunoglobulin I-set domain containing protein                                   |
| Locus_23232_Transcript_1/1_Conf_1.000 | 151 | 0  |          |                |     |         |     |     |                                                                                  |
| Locus_23233_Transcript_1/1_Conf_1.000 | 129 | 0  |          |                |     |         |     |     |                                                                                  |
| Locus_23234_Transcript_1/1_Conf_1.000 | 330 | 5  | 2.32E-51 | CAR63666.1     | 94  | 204.912 | 110 | 104 | putative Zinc finger C-x8-C-x5-C-x3-H type                                       |
| Locus_23235_Transcript_1/1_Conf_1.000 | 140 | 0  |          |                |     |         |     |     |                                                                                  |
| Locus_23236_Transcript_1/1_Conf_1.000 | 157 | 2  | 2.15E-12 | XP_002634505.1 | 82  | 75.485  | 52  | 43  | Hypothetical protein CBG08295                                                    |
| Locus_23237_Transcript_1/1_Conf_1.000 | 202 | 0  |          |                |     |         |     |     |                                                                                  |
| Locus_23238_Transcript_1/1_Conf_1.000 | 128 | 20 | 1.06E-11 | NP_502846.2    | 90  | 73.1738 | 42  | 38  | hypothetical protein Y73F8A.11                                                   |
| Locus_23239_Transcript_1/1_Conf_1.000 | 132 | 0  |          |                |     |         |     |     |                                                                                  |
| Locus_2324_Transcript_1/2_Conf_1.000  | 345 | 20 | 1.03E-14 | NP_504416.1    | 68  | 83.1889 | 51  | 35  | hypothetical protein C10G8.4                                                     |
| Locus_2324_Transcript_2/2_Conf_1.000  | 462 | 20 | 1.04E-14 | NP_504416.1    | 68  | 83.1889 | 51  | 35  | hypothetical protein C10G8.4                                                     |
| Locus_23240_Transcript_1/1_Conf_1.000 | 144 | 0  |          |                |     |         |     |     |                                                                                  |
| Locus_23241_Transcript_1/1_Conf_1.000 | 270 | 0  |          |                |     |         |     |     |                                                                                  |
| Locus_23242_Transcript_1/1_Conf_1.000 | 153 | 0  |          |                |     |         |     |     |                                                                                  |
| Locus_23243_Transcript_1/1_Conf_1.000 | 200 | 2  | 1.26E-04 | EFO16396.1     | 60  | 49.6766 | 66  | 40  | hypothetical protein LOAG_12108                                                  |
| Locus_23244_Transcript_1/1_Conf_1.000 | 385 | 20 | 3.94E-59 | CAB55030.2     | 96  | 230.72  | 128 | 123 | C. elegans protein Y57A10A.10, partially confirmed by transcript evidence        |

|                                       |     |    |          |                |     |         |     |     |                                                        |
|---------------------------------------|-----|----|----------|----------------|-----|---------|-----|-----|--------------------------------------------------------|
| Locus_23245_Transcript_1/1_Conf_1.000 | 146 | 20 | 2.33E-22 | BAH13667.1     | 100 | 108.612 | 48  | 48  | unnamed protein product                                |
| Locus_23246_Transcript_1/1_Conf_1.000 | 548 | 6  | 2.31E-30 | EFO19771.1     | 59  | 135.576 | 189 | 113 | hypothetical protein LOAG_08718                        |
| Locus_23247_Transcript_1/1_Conf_1.000 | 319 | 20 | 2.71E-31 | NP_495273.1    | 79  | 138.272 | 106 | 84  | hypothetical protein C32D5.6                           |
| Locus_23248_Transcript_1/1_Conf_1.000 | 186 | 3  | 3.83E-09 | NP_495267.1    | 85  | 64.6994 | 35  | 30  | hypothetical protein C29F5.1                           |
| Locus_23249_Transcript_1/1_Conf_1.000 | 270 | 20 | 3.75E-17 | NP_505501.1    | 68  | 91.2781 | 85  | 58  | Temporarily Assigned Gene name family member (tag-120) |
| Locus_2325_Transcript_1/2_Conf_1.000  | 766 | 20 | 2.04E-63 | NP_741181.1    | 74  | 246.514 | 213 | 158 | hypothetical protein T12A2.15                          |
| Locus_2325_Transcript_2/2_Conf_1.000  | 743 | 20 | 1.93E-63 | NP_741181.1    | 73  | 246.514 | 213 | 157 | hypothetical protein T12A2.15                          |
| Locus_23250_Transcript_1/1_Conf_1.000 | 163 | 0  |          |                |     |         |     |     |                                                        |
| Locus_23251_Transcript_1/1_Conf_1.000 | 337 | 0  |          |                |     |         |     |     |                                                        |
| Locus_23252_Transcript_1/1_Conf_1.000 | 170 | 0  |          |                |     |         |     |     |                                                        |
| Locus_23253_Transcript_1/1_Conf_1.000 | 132 | 0  |          |                |     |         |     |     |                                                        |
| Locus_23254_Transcript_1/1_Conf_1.000 | 317 | 0  |          |                |     |         |     |     |                                                        |
| Locus_23255_Transcript_1/1_Conf_1.000 | 262 | 0  |          |                |     |         |     |     |                                                        |
| Locus_23256_Transcript_1/1_Conf_1.000 | 428 | 20 | 2.29E-06 | XP_002648766.1 | 45  | 55.4546 | 146 | 66  | Hypothetical protein CBG10699                          |
| Locus_23257_Transcript_1/1_Conf_1.000 | 184 | 20 | 5.35E-19 | CAR63646.1     | 98  | 97.4413 | 60  | 59  | putative Homeobox family member                        |
| Locus_23258_Transcript_1/1_Conf_1.000 | 205 | 0  |          |                |     |         |     |     |                                                        |



|                                       |     |    |          |                |     |         |     |    |                                    |
|---------------------------------------|-----|----|----------|----------------|-----|---------|-----|----|------------------------------------|
| Locus_23259_Transcript_1/1_Conf_1.000 | 154 | 0  |          |                |     |         |     |    |                                    |
| Locus_2326_Transcript_1/1_Conf_1.000  | 356 | 20 | 1.06E-19 | ACI49172.1     | 60  | 99.7525 | 121 | 73 | hypothetical protein Csp3_JD01.004 |
| Locus_23260_Transcript_1/1_Conf_1.000 | 138 | 0  |          |                |     |         |     |    |                                    |
| Locus_23261_Transcript_1/1_Conf_1.000 | 137 | 0  |          |                |     |         |     |    |                                    |
| Locus_23262_Transcript_1/1_Conf_1.000 | 474 | 0  |          |                |     |         |     |    |                                    |
| Locus_23263_Transcript_1/1_Conf_1.000 | 489 | 20 | 1.93E-21 | XP_001636445.1 | 49  | 105.531 | 180 | 89 | predicted protein                  |
| Locus_23264_Transcript_1/1_Conf_1.000 | 338 | 20 | 5.35E-24 | EFO26090.1     | 72  | 114.005 | 111 | 80 | hypothetical protein LOAG_02402    |
| Locus_23265_Transcript_1/1_Conf_1.000 | 153 | 0  |          |                |     |         |     |    |                                    |
| Locus_23266_Transcript_1/1_Conf_1.000 | 156 | 0  |          |                |     |         |     |    |                                    |
| Locus_23267_Transcript_1/1_Conf_1.000 | 222 | 20 | 1.77E-14 | NP_506322.1    | 81  | 82.4185 | 55  | 45 | hypothetical protein F53F1.2       |
| Locus_23268_Transcript_1/1_Conf_1.000 | 407 | 20 | 8.61E-30 | XP_002638851.1 | 69  | 133.265 | 136 | 94 | C. briggsae CBR-IMB-5 protein      |
| Locus_23269_Transcript_1/1_Conf_1.000 | 239 | 0  |          |                |     |         |     |    |                                    |
| Locus_2327_Transcript_1/1_Conf_1.000  | 128 | 0  |          |                |     |         |     |    |                                    |
| Locus_23270_Transcript_1/1_Conf_1.000 | 187 | 0  |          |                |     |         |     |    |                                    |
| Locus_23271_Transcript_1/1_Conf_1.000 | 188 | 20 | 3.13E-11 | BAG10454.1     | 100 | 71.633  | 62  | 62 | ribosome-binding protein 1         |
| Locus_23272_Transcript_1/1_Conf_1.000 | 199 | 1  | 3.91E-06 | NP_001022861.1 | 76  | 54.6842 | 43  | 33 | CREB Homolog family member (crh-1) |
| Locus_23273_Transcript_1/1_Conf_1.000 | 140 | 0  |          |                |     |         |     |    |                                    |
| Locus_23274_Transcript_1/1_Conf_1.000 | 135 | 0  |          |                |     |         |     |    |                                    |
| Locus_23275_Transcript_1/1_Conf_1.000 | 265 | 0  |          |                |     |         |     |    |                                    |

|                                       |     |    |          |                |     |         |     |    |                                                                                                      |
|---------------------------------------|-----|----|----------|----------------|-----|---------|-----|----|------------------------------------------------------------------------------------------------------|
| Locus_23276_Transcript_1/1_Conf_1.000 | 133 | 7  | 2.34E-11 | XP_002634396.1 | 86  | 72.0182 | 44  | 38 | Hypothetical protein CBG04396                                                                        |
| Locus_23277_Transcript_1/1_Conf_1.000 | 274 | 5  | 2.77E-12 | EFO24919.1     | 64  | 75.0998 | 90  | 58 | RGC/RGC protein kinase                                                                               |
| Locus_23278_Transcript_1/1_Conf_1.000 | 142 | 0  |          |                |     |         |     |    |                                                                                                      |
| Locus_23279_Transcript_1/1_Conf_1.000 | 143 | 20 | 5.34E-16 | XP_002342425.1 | 100 | 87.4261 | 41  | 41 | PREDICTED: hypothetical protein XP_002342425                                                         |
| Locus_2328_Transcript_1/2_Conf_1.000  | 570 | 0  |          |                |     |         |     |    |                                                                                                      |
| Locus_2328_Transcript_2/2_Conf_1.000  | 438 | 0  |          |                |     |         |     |    |                                                                                                      |
| Locus_23280_Transcript_1/1_Conf_1.000 | 159 | 8  | 6.02E-23 | XP_002632635.1 | 98  | 110.538 | 51  | 50 | C. briggsae CBR-DMD-6 protein                                                                        |
| Locus_23281_Transcript_1/1_Conf_1.000 | 244 | 0  |          |                |     |         |     |    |                                                                                                      |
| Locus_23282_Transcript_1/1_Conf_1.000 | 219 | 0  |          |                |     |         |     |    |                                                                                                      |
| Locus_23283_Transcript_1/1_Conf_1.000 | 221 | 3  | 4.24E-08 | XP_002636414.1 | 61  | 61.2326 | 72  | 44 | Hypothetical protein CBG23067                                                                        |
| Locus_23284_Transcript_1/1_Conf_1.000 | 202 | 0  |          |                |     |         |     |    |                                                                                                      |
| Locus_23285_Transcript_1/1_Conf_1.000 | 492 | 0  |          |                |     |         |     |    |                                                                                                      |
| Locus_23286_Transcript_1/2_Conf_1.000 | 409 | 9  | 1.51E-34 | NP_496430.1    | 90  | 149.058 | 82  | 74 | hypothetical protein C33B4.2                                                                         |
| Locus_23286_Transcript_2/2_Conf_1.000 | 409 | 7  | 5.19E-35 | NP_496430.1    | 91  | 150.599 | 82  | 75 | hypothetical protein C33B4.2                                                                         |
| Locus_23287_Transcript_1/1_Conf_1.000 | 240 | 3  | 2.96E-14 | XP_002634119.1 | 69  | 81.6481 | 79  | 55 | Hypothetical protein CBG01673                                                                        |
| Locus_23288_Transcript_1/1_Conf_1.000 | 164 | 20 | 1.29E-25 | 2DDY           | 100 | 119.398 | 54  | 54 | SolutionStructure Of Matrilysin (Mmp-7) Complexed To Constraint Conformational Sulfonamide Inhibitor |
| Locus_23289_Transcript_1/1_Conf_1.000 | 263 | 20 | 7.39E-13 | XP_001897247.1 | 65  | 77.0258 | 85  | 56 | Strictosidine synthase family protein                                                                |
| Locus_2329_Transcript_1/1_Conf_1.000  | 226 | 4  | 1.76E-22 | XP_002631267.1 | 81  | 108.997 | 75  | 61 | C. briggsae CBR-PRO-1 protein                                                                        |
| Locus_23290_Transcript_1/1_Conf_1.000 | 159 | 0  |          |                |     |         |     |    |                                                                                                      |
| Locus_23291_Transcript_1/1_Conf_1.000 | 193 | 0  |          |                |     |         |     |    |                                                                                                      |
| Locus_23292_Transcript_1/1_Conf_1.000 | 324 | 0  |          |                |     |         |     |    |                                                                                                      |
| Locus_23293_Transcript_1/1_Conf_1.000 | 168 | 7  | 2.13E-04 | XP_002848567.1 | 73  | 48.9062 | 41  | 30 | ADP-ribosylation factor                                                                              |
| Locus_23294_Transcript_1/1_Conf_1.000 | 328 | 1  | 1.09E-16 | AAB32534.1     | 100 | 89.7373 | 39  | 39 | histone H1 transcription factor large subunit 2A                                                     |
| Locus_23295_Transcript_1/1_Conf_1.000 | 212 | 0  |          |                |     |         |     |    |                                                                                                      |
| Locus_23296_Transcript_1/1_Conf_1.000 | 134 | 0  |          |                |     |         |     |    |                                                                                                      |
| Locus_23297_Transcript_1/1_Conf_1.000 | 198 | 0  |          |                |     |         |     |    |                                                                                                      |
| Locus_23298_Transcript_1/1_Conf_1.000 | 130 | 0  |          |                |     |         |     |    |                                                                                                      |
| Locus_23299_Transcript_1/1_Conf_1.000 | 349 | 0  |          |                |     |         |     |    |                                                                                                      |
| Locus_233_Transcript_1/1_Conf_1.000   | 506 | 20 | 8.67E-25 | XP_002644823.1 | 59  | 116.701 | 153 | 91 | C. briggsae CBR-TAG-275 protein                                                                      |
| Locus_2330_Transcript_1/2_Conf_1.000  | 600 | 0  |          |                |     |         |     |    |                                                                                                      |
| Locus_2330_Transcript_2/2_Conf_1.000  | 596 | 0  |          |                |     |         |     |    |                                                                                                      |

|                                       |      |    |           |                |    |         |     |     |                                               |
|---------------------------------------|------|----|-----------|----------------|----|---------|-----|-----|-----------------------------------------------|
| Locus_23300_Transcript_1/1_Conf_1.000 | 176  | 0  |           |                |    |         |     |     |                                               |
| Locus_23301_Transcript_1/1_Conf_1.000 | 329  | 5  | 4.75E-12  | XP_002630535.1 | 57 | 74.3294 | 89  | 51  | C. briggsae CBR-TAG-308 protein               |
| Locus_23302_Transcript_1/1_Conf_1.000 | 199  | 0  |           |                |    |         |     |     |                                               |
| Locus_23303_Transcript_1/1_Conf_1.000 | 287  | 20 | 1.26E-36  | ACI49226.1     | 87 | 155.992 | 95  | 83  | hypothetical protein Csp3_JD05.011            |
| Locus_23304_Transcript_1/1_Conf_1.000 | 405  | 0  |           |                |    |         |     |     |                                               |
| Locus_23305_Transcript_1/1_Conf_1.000 | 286  | 0  |           |                |    |         |     |     |                                               |
| Locus_23306_Transcript_1/1_Conf_1.000 | 150  | 0  |           |                |    |         |     |     |                                               |
| Locus_23307_Transcript_1/1_Conf_1.000 | 240  | 0  |           |                |    |         |     |     |                                               |
| Locus_23308_Transcript_1/1_Conf_1.000 | 255  | 1  | 9.75E-05  | CBH39183.1     | 57 | 50.0618 | 73  | 42  | conserved hypothetical protein, DUF255 family |
| Locus_23309_Transcript_1/1_Conf_1.000 | 194  | 20 | 7.65E-18  | XP_002637256.1 | 77 | 93.5893 | 63  | 49  | Hypothetical protein CBG18935                 |
| Locus_2331_Transcript_1/1_Conf_1.000  | 1737 | 20 | 4.28E-76  | XP_002735266.1 | 50 | 290.426 | 542 | 271 | PREDICTED: lethal giant larvae homolog 1-like |
| Locus_23310_Transcript_1/1_Conf_1.000 | 143  | 0  |           |                |    |         |     |     |                                               |
| Locus_23311_Transcript_1/1_Conf_1.000 | 158  | 0  |           |                |    |         |     |     |                                               |
| Locus_23312_Transcript_1/1_Conf_1.000 | 283  | 0  |           |                |    |         |     |     |                                               |
| Locus_23313_Transcript_1/1_Conf_1.000 | 256  | 4  | 6.06E-31  | XP_002643867.1 | 91 | 137.117 | 83  | 76  | Hypothetical protein CBG02103                 |
| Locus_23314_Transcript_1/1_Conf_1.000 | 221  | 0  |           |                |    |         |     |     |                                               |
| Locus_23315_Transcript_1/1_Conf_1.000 | 181  | 13 | 7.03E-11  | XP_002648535.1 | 77 | 70.4774 | 59  | 46  | Hypothetical protein CBG24833                 |
| Locus_23316_Transcript_1/1_Conf_1.000 | 306  | 20 | 5.01E-30  | NP_497814.3    | 77 | 134.035 | 101 | 78  | UNCoordinated family member (unc-79)          |
| Locus_23317_Transcript_1/1_Conf_1.000 | 380  | 11 | 1.29E-17  | XP_001896168.1 | 62 | 92.8189 | 108 | 68  | SET domain containing protein                 |
| Locus_23318_Transcript_1/1_Conf_1.000 | 164  | 1  | 1.64E-04  | EFO14283.1     | 69 | 49.2914 | 52  | 36  | hypothetical protein LOAG_14239               |
| Locus_23319_Transcript_1/1_Conf_1.000 | 231  | 0  |           |                |    |         |     |     |                                               |
| Locus_2332_Transcript_1/1_Conf_1.000  | 1141 | 20 | 1.29E-154 | XP_002642936.1 | 90 | 550.436 | 341 | 310 | C. briggsae CBR-MDH-1 protein                 |
| Locus_23320_Transcript_1/1_Conf_1.000 | 263  | 0  |           |                |    |         |     |     |                                               |
| Locus_23321_Transcript_1/1_Conf_1.000 | 145  | 0  |           |                |    |         |     |     |                                               |
| Locus_23322_Transcript_1/1_Conf_1.000 | 134  | 0  |           |                |    |         |     |     |                                               |
| Locus_23323_Transcript_1/1_Conf_1.000 | 199  | 20 | 2.88E-25  | NP_496219.1    | 90 | 118.242 | 66  | 60  | Guanylyl CYclase family member (gcy-5)        |
| Locus_23324_Transcript_1/1_Conf_1.000 | 406  | 0  |           |                |    |         |     |     |                                               |

|                                       |      |    |          |                |     |         |     |     |                                                                                |
|---------------------------------------|------|----|----------|----------------|-----|---------|-----|-----|--------------------------------------------------------------------------------|
| Locus_23325_Transcript_1/1_Conf_1.000 | 143  | 1  | 2.25E-06 | NP_001021657.2 | 77  | 55.4546 | 36  | 28  | hypothetical protein W03F11.5                                                  |
| Locus_23326_Transcript_1/1_Conf_1.000 | 255  | 0  |          |                |     |         |     |     |                                                                                |
| Locus_23327_Transcript_1/1_Conf_1.000 | 184  | 0  |          |                |     |         |     |     |                                                                                |
| Locus_23328_Transcript_1/1_Conf_1.000 | 189  | 20 | 7.18E-16 | EFN89112.1     | 82  | 87.0409 | 57  | 47  | F-actin-capping protein subunit alpha                                          |
| Locus_23329_Transcript_1/1_Conf_1.000 | 195  | 0  |          |                |     |         |     |     |                                                                                |
| Locus_2333_Transcript_1/1_Conf_1.000  | 1837 | 20 | 1.64E-65 | XP_002642511.1 | 54  | 255.373 | 430 | 233 | Hypothetical protein CBG06936                                                  |
| Locus_23330_Transcript_1/1_Conf_1.000 | 444  | 0  |          |                |     |         |     |     |                                                                                |
| Locus_23331_Transcript_1/1_Conf_1.000 | 159  | 5  | 4.19E-08 | AAB42328.2     | 70  | 61.2326 | 51  | 36  | Hypothetical protein C32E8.11                                                  |
| Locus_23332_Transcript_1/1_Conf_1.000 | 155  | 0  |          |                |     |         |     |     |                                                                                |
| Locus_23333_Transcript_1/1_Conf_1.000 | 251  | 0  |          |                |     |         |     |     |                                                                                |
| Locus_23334_Transcript_1/1_Conf_1.000 | 129  | 20 | 2.77E-20 | XP_002924566.1 | 100 | 101.679 | 42  | 42  | PREDICTED: LIM domain-containing protein 2-like                                |
| Locus_23335_Transcript_1/1_Conf_1.000 | 147  | 0  |          |                |     |         |     |     |                                                                                |
| Locus_23336_Transcript_1/1_Conf_1.000 | 151  | 0  |          |                |     |         |     |     |                                                                                |
| Locus_23337_Transcript_1/1_Conf_1.000 | 186  | 0  |          |                |     |         |     |     |                                                                                |
| Locus_23338_Transcript_1/1_Conf_1.000 | 208  | 0  |          |                |     |         |     |     |                                                                                |
| Locus_23339_Transcript_1/1_Conf_1.000 | 134  | 20 | 2.86E-17 | XP_002919669.1 | 100 | 91.6633 | 44  | 44  | PREDICTED: n-alpha-acetyltransferase 20, NatB catalytic subunit-like isoform 3 |
| Locus_2334_Transcript_1/1_Conf_1.000  | 323  | 0  |          |                |     |         |     |     |                                                                                |
| Locus_23340_Transcript_1/1_Conf_1.000 | 189  | 20 | 1.40E-11 | CAX65070.1     | 81  | 72.7886 | 53  | 43  | C. elegans protein R74.4b, confirmed by transcript evidence                    |
| Locus_23341_Transcript_1/1_Conf_1.000 | 141  | 20 | 8.24E-17 | NP_510700.3    | 91  | 90.1225 | 47  | 43  | Histone DeAcetylase family member (hda-4)                                      |
| Locus_23342_Transcript_1/1_Conf_1.000 | 133  | 0  |          |                |     |         |     |     |                                                                                |
| Locus_23343_Transcript_1/1_Conf_1.000 | 297  | 20 | 1.58E-23 | XP_002634426.1 | 67  | 112.464 | 98  | 66  | Hypothetical protein CBG04437                                                  |
| Locus_23344_Transcript_1/1_Conf_1.000 | 139  | 0  |          |                |     |         |     |     |                                                                                |

|                                       |      |    |          |                |     |         |     |     |                                                                                     |
|---------------------------------------|------|----|----------|----------------|-----|---------|-----|-----|-------------------------------------------------------------------------------------|
| Locus_23345_Transcript_1/1_Conf_1.000 | 136  | 16 | 6.15E-12 | NP_510520.4    | 91  | 73.9442 | 45  | 41  | Osm-9 and Capsaicin receptor-Related family member (ocr-3)                          |
| Locus_23346_Transcript_1/1_Conf_1.000 | 179  |    |          |                |     |         |     |     |                                                                                     |
| Locus_23347_Transcript_1/1_Conf_1.000 | 160  | 0  |          |                |     |         |     |     |                                                                                     |
| Locus_23348_Transcript_1/1_Conf_1.000 | 140  | 0  |          |                |     |         |     |     |                                                                                     |
| Locus_23349_Transcript_1/1_Conf_1.000 | 305  | 0  |          |                |     |         |     |     |                                                                                     |
| Locus_2335_Transcript_1/1_Conf_1.000  | 1570 | 1  | 2.48E-11 | XP_001902673.1 | 44  | 75.0998 | 396 | 175 | hypothetical protein Bm1_56075                                                      |
| Locus_23350_Transcript_1/1_Conf_1.000 | 236  | 0  |          |                |     |         |     |     |                                                                                     |
| Locus_23351_Transcript_1/1_Conf_1.000 | 128  | 0  |          |                |     |         |     |     |                                                                                     |
| Locus_23352_Transcript_1/1_Conf_1.000 | 933  | 4  | 5.99E-24 | NP_509471.2    | 59  | 115.931 | 233 | 138 | hypothetical protein F53A9.4                                                        |
| Locus_23353_Transcript_1/1_Conf_1.000 | 325  | 20 | 3.75E-41 | NP_508154.2    | 89  | 171.014 | 93  | 83  | Nematode ASTacin protease family member (nas-15)                                    |
| Locus_23354_Transcript_1/1_Conf_1.000 | 255  | 0  |          |                |     |         |     |     |                                                                                     |
| Locus_23355_Transcript_1/1_Conf_1.000 | 148  | 7  | 7.24E-08 | ACJ65168.1     | 77  | 60.4622 | 49  | 38  | Uncoordinated protein 68, isoform b, partially confirmed by transcript evidence     |
| Locus_23356_Transcript_1/1_Conf_1.000 | 157  | 20 | 3.00E-22 | EFO27462.1     | 100 | 108.227 | 52  | 52  | hypothetical protein LOAG_01021                                                     |
| Locus_23357_Transcript_1/1_Conf_1.000 | 187  | 0  |          |                |     |         |     |     |                                                                                     |
| Locus_23358_Transcript_1/1_Conf_1.000 | 129  | 20 | 1.09E-16 | XP_002829423.1 | 100 | 89.7373 | 42  | 42  | PREDICTED: LOW QUALITY PROTEIN: mitochondrial import receptor subunit TOM40 homolog |
| Locus_23359_Transcript_1/1_Conf_1.000 | 363  | 0  |          |                |     |         |     |     |                                                                                     |
| Locus_2336_Transcript_1/2_Conf_1.000  | 139  | 0  |          |                |     |         |     |     |                                                                                     |
| Locus_2336_Transcript_2/2_Conf_1.000  | 132  | 0  |          |                |     |         |     |     |                                                                                     |

|                                       |     |    |          |                |    |         |     |    |                                                        |
|---------------------------------------|-----|----|----------|----------------|----|---------|-----|----|--------------------------------------------------------|
| Locus_23360_Transcript_1/1_Conf_1.000 | 251 | 20 | 3.23E-21 | XP_002640311.1 | 79 | 104.76  | 82  | 65 | C. briggsae CBR-LET-363 protein                        |
| Locus_23361_Transcript_1/1_Conf_1.000 | 131 | 0  |          |                |    |         |     |    |                                                        |
| Locus_23362_Transcript_1/1_Conf_1.000 | 159 | 0  |          |                |    |         |     |    |                                                        |
| Locus_23363_Transcript_1/1_Conf_1.000 | 250 | 0  |          |                |    |         |     |    |                                                        |
| Locus_23364_Transcript_1/1_Conf_1.000 | 259 | 20 | 2.72E-23 | XP_002636068.1 | 76 | 111.694 | 84  | 64 | Hypothetical protein CBG01308                          |
| Locus_23365_Transcript_1/1_Conf_1.000 | 263 | 5  | 5.30E-11 | NP_497641.2    | 72 | 70.8626 | 86  | 62 | CaDHerin family member (cdh-1)                         |
| Locus_23366_Transcript_1/1_Conf_1.000 | 232 | 5  | 3.31E-13 | Q60UZ5.2       | 71 | 78.1814 | 77  | 55 | Mediator of RNA polymerase II transcription subunit 23 |
| Locus_23367_Transcript_1/1_Conf_1.000 | 235 | 0  |          |                |    |         |     |    |                                                        |
| Locus_23368_Transcript_1/1_Conf_1.000 | 214 | 20 | 9.74E-26 | XP_001891908.1 | 98 | 119.783 | 66  | 65 | SNF7 family protein                                    |
| Locus_23369_Transcript_1/1_Conf_1.000 | 172 | 4  | 8.59E-22 | NP_001022641.1 | 91 | 106.686 | 57  | 52 | LEThal family member (let-805)                         |
| Locus_2337_Transcript_1/1_Conf_1.000  | 534 | 20 | 1.58E-41 | XP_002629939.1 | 89 | 172.555 | 103 | 92 | Hypothetical protein CBG03659                          |
| Locus_23370_Transcript_1/1_Conf_1.000 | 178 | 0  |          |                |    |         |     |    |                                                        |

|                                       |      |    |          |                |     |         |     |     |                                                                             |
|---------------------------------------|------|----|----------|----------------|-----|---------|-----|-----|-----------------------------------------------------------------------------|
| Locus_23371_Transcript_1/1_Conf_1.000 | 130  | 0  |          |                |     |         |     |     |                                                                             |
| Locus_23372_Transcript_1/1_Conf_1.000 | 163  | 14 | 4.62E-07 | AAK64493.1     | 67  | 57.7658 | 49  | 33  | AF388311_1C-type lectin CTL-2 precursor                                     |
| Locus_23373_Transcript_1/1_Conf_1.000 | 314  | 2  | 2.56E-21 | ACE63491.1     | 67  | 105.145 | 97  | 65  | GABAB2 receptor subunit                                                     |
| Locus_23374_Transcript_1/1_Conf_1.000 | 306  | 0  |          |                |     |         |     |     |                                                                             |
| Locus_23375_Transcript_1/1_Conf_1.000 | 148  | 0  |          |                |     |         |     |     |                                                                             |
| Locus_23376_Transcript_1/1_Conf_1.000 | 141  | 0  |          |                |     |         |     |     |                                                                             |
| Locus_23377_Transcript_1/1_Conf_1.000 | 156  | 20 | 2.54E-13 | XP_002918275.1 | 100 | 78.5666 | 35  | 35  | PREDICTED: collagen alpha-2(I) chain-like                                   |
| Locus_23378_Transcript_1/1_Conf_1.000 | 176  | 0  |          |                |     |         |     |     |                                                                             |
| Locus_23379_Transcript_1/1_Conf_1.000 | 223  | 0  |          |                |     |         |     |     |                                                                             |
| Locus_2338_Transcript_1/2_Conf_1.000  | 510  | 0  |          |                |     |         |     |     |                                                                             |
| Locus_2338_Transcript_2/2_Conf_1.000  | 510  | 0  |          |                |     |         |     |     |                                                                             |
| Locus_23380_Transcript_1/1_Conf_1.000 | 171  | 2  | 2.43E-08 | XP_002641539.1 | 70  | 62.003  | 54  | 38  | C. briggsae CBR-SET-27 protein                                              |
| Locus_23381_Transcript_1/1_Conf_1.000 | 336  | 0  |          |                |     |         |     |     |                                                                             |
| Locus_23382_Transcript_1/1_Conf_1.000 | 163  | 0  |          |                |     |         |     |     |                                                                             |
| Locus_23383_Transcript_1/1_Conf_1.000 | 156  | 0  |          |                |     |         |     |     |                                                                             |
| Locus_23384_Transcript_1/1_Conf_1.000 | 184  | 20 | 9.42E-24 | XP_002919957.1 | 100 | 113.235 | 53  | 53  | PREDICTED: activated RNA polymerase II transcriptional coactivator p15-like |
| Locus_23385_Transcript_1/1_Conf_1.000 | 149  | 2  | 5.92E-10 | XP_002643350.1 | 77  | 67.3958 | 45  | 35  | Hypothetical protein CBG15947                                               |
| Locus_23386_Transcript_1/1_Conf_1.000 | 243  | 0  |          |                |     |         |     |     |                                                                             |
| Locus_23387_Transcript_1/1_Conf_1.000 | 288  | 0  |          |                |     |         |     |     |                                                                             |
| Locus_23388_Transcript_1/1_Conf_1.000 | 160  | 0  |          |                |     |         |     |     |                                                                             |
| Locus_23389_Transcript_1/1_Conf_1.000 | 318  | 7  | 8.20E-12 | NP_497229.1    | 70  | 73.559  | 93  | 66  | hypothetical protein W06E11.1                                               |
| Locus_2339_Transcript_1/1_Conf_1.000  | 1339 | 20 | 1.14E-22 | EFO18116.1     | 46  | 112.464 | 463 | 215 | api5-prov protein                                                           |
| Locus_23390_Transcript_1/1_Conf_1.000 | 158  | 0  |          |                |     |         |     |     |                                                                             |

|                                       |     |    |          |                |     |         |     |     |                                                                      |
|---------------------------------------|-----|----|----------|----------------|-----|---------|-----|-----|----------------------------------------------------------------------|
| Locus_23391_Transcript_1/1_Conf_1.000 | 147 | 0  |          |                |     |         |     |     |                                                                      |
| Locus_23392_Transcript_1/1_Conf_1.000 | 149 | 0  |          |                |     |         |     |     |                                                                      |
| Locus_23393_Transcript_1/1_Conf_1.000 | 163 | 0  |          |                |     |         |     |     |                                                                      |
| Locus_23394_Transcript_1/1_Conf_1.000 | 160 | 20 | 1.76E-06 | NP_490949.3    | 69  | 55.8398 | 53  | 37  | ABC Transporter family member (abt-2)                                |
| Locus_23395_Transcript_1/1_Conf_1.000 | 262 | 0  |          |                |     |         |     |     |                                                                      |
| Locus_23396_Transcript_1/1_Conf_1.000 | 365 | 9  | 3.13E-32 | AAA83446.5     | 80  | 141.354 | 109 | 88  | Hypothetical protein F44A2.3                                         |
| Locus_23397_Transcript_1/1_Conf_1.000 | 270 | 0  |          |                |     |         |     |     |                                                                      |
| Locus_23398_Transcript_1/1_Conf_1.000 | 152 | 0  |          |                |     |         |     |     |                                                                      |
| Locus_23399_Transcript_1/1_Conf_1.000 | 142 | 20 | 3.03E-19 | XP_002921914.1 | 100 | 98.2117 | 47  | 47  | PREDICTED: eukaryotic translation initiation factor 3 subunit I-like |
| Locus_234_Transcript_1/1_Conf_1.000   | 568 | 20 | 2.80E-61 | NP_506256.3    | 67  | 238.424 | 187 | 126 | CaDHerin family member (cdh-6)                                       |
| Locus_2340_Transcript_1/1_Conf_1.000  | 666 | 6  | 1.21E-60 | NP_492439.1    | 83  | 236.884 | 160 | 133 | hypothetical protein T06D10.1                                        |
| Locus_23400_Transcript_1/1_Conf_1.000 | 140 | 0  |          |                |     |         |     |     |                                                                      |
| Locus_23401_Transcript_1/1_Conf_1.000 | 229 | 0  |          |                |     |         |     |     |                                                                      |



|                                       |     |    |          |                |     |         |     |     |                                                                    |
|---------------------------------------|-----|----|----------|----------------|-----|---------|-----|-----|--------------------------------------------------------------------|
| Locus_23402_Transcript_1/1_Conf_1.000 | 410 | 20 | 6.98E-48 | XP_002639323.1 | 78  | 193.356 | 134 | 105 | C. briggsae CBR-HUM-7 protein                                      |
| Locus_23403_Transcript_1/1_Conf_1.000 | 137 | 4  | 3.99E-11 | XP_002646095.1 | 86  | 71.2478 | 45  | 39  | C. briggsae CBR-HMR-1 protein                                      |
| Locus_23404_Transcript_1/1_Conf_1.000 | 183 | 1  | 4.25E-08 | XP_002641351.1 | 73  | 61.2326 | 60  | 44  | C. briggsae CBR-TEG-1 protein                                      |
| Locus_23405_Transcript_1/1_Conf_1.000 | 214 | 0  |          |                |     |         |     |     |                                                                    |
| Locus_23406_Transcript_1/1_Conf_1.000 | 655 | 0  |          |                |     |         |     |     |                                                                    |
| Locus_23407_Transcript_1/1_Conf_1.000 | 319 | 0  |          |                |     |         |     |     |                                                                    |
| Locus_23408_Transcript_1/1_Conf_1.000 | 658 | 0  |          |                |     |         |     |     |                                                                    |
| Locus_23409_Transcript_1/1_Conf_1.000 | 240 | 20 | 4.71E-28 | XP_002632772.1 | 82  | 127.487 | 79  | 65  | C. briggsae CBR-TAT-2 protein                                      |
| Locus_2341_Transcript_1/1_Conf_1.000  | 348 | 0  |          |                |     |         |     |     |                                                                    |
| Locus_23410_Transcript_1/1_Conf_1.000 | 284 | 0  |          |                |     |         |     |     |                                                                    |
| Locus_23411_Transcript_1/1_Conf_1.000 | 147 | 0  |          |                |     |         |     |     |                                                                    |
| Locus_23412_Transcript_1/1_Conf_1.000 | 278 | 9  | 6.31E-41 | NP_001022641.1 | 89  | 170.244 | 92  | 82  | LEThal family member (let-805)                                     |
| Locus_23413_Transcript_1/1_Conf_1.000 | 174 | 20 | 5.74E-18 | AAF36480.1     | 87  | 93.9745 | 56  | 49  | glutathione S-transferase 2                                        |
| Locus_23414_Transcript_1/1_Conf_1.000 | 172 | 20 | 5.38E-24 | XP_002834167.1 | 100 | 114.005 | 56  | 56  | PREDICTED: peptidyl-tRNA hydrolase 2, mitochondrial-like isoform 2 |
| Locus_23415_Transcript_1/1_Conf_1.000 | 240 | 20 | 1.23E-44 | NP_001182611.1 | 100 | 182.57  | 78  | 78  | metalloproteinase inhibitor 3                                      |
| Locus_23416_Transcript_1/1_Conf_1.000 | 338 | 20 | 1.11E-45 | XP_002642615.1 | 81  | 186.037 | 112 | 91  | C. briggsae CBR-MUP-4 protein                                      |

|                                       |      |    |           |                |     |         |     |     |                                                                           |
|---------------------------------------|------|----|-----------|----------------|-----|---------|-----|-----|---------------------------------------------------------------------------|
| Locus_23417_Transcript_1/1_Conf_1.000 | 160  | 0  |           |                |     |         |     |     |                                                                           |
| Locus_23418_Transcript_1/1_Conf_1.000 | 386  | 4  | 8.91E-11  | NP_001021653.1 | 61  | 70.0922 | 126 | 78  | FANCI (Fanconi anemia complex component I) homolog family member (fnci-1) |
| Locus_23419_Transcript_1/1_Conf_1.000 | 683  | 20 | 9.46E-72  | NP_499173.1    | 82  | 273.863 | 206 | 169 | hypothetical protein ZK632.3                                              |
| Locus_2342_Transcript_1/1_Conf_1.000  | 374  | 20 | 9.61E-37  | XP_002643252.1 | 78  | 156.377 | 114 | 89  | C. briggsae CBR-TRAP-2 protein                                            |
| Locus_23420_Transcript_1/1_Conf_1.000 | 137  | 0  |           |                |     |         |     |     |                                                                           |
| Locus_23421_Transcript_1/1_Conf_1.000 | 290  | 3  | 7.18E-16  | XP_002637525.1 | 74  | 87.0409 | 75  | 56  | Hypothetical protein CBG19248                                             |
| Locus_23422_Transcript_1/1_Conf_1.000 | 157  | 0  |           |                |     |         |     |     |                                                                           |
| Locus_23423_Transcript_1/1_Conf_1.000 | 212  | 0  |           |                |     |         |     |     |                                                                           |
| Locus_23424_Transcript_1/1_Conf_1.000 | 172  | 0  |           |                |     |         |     |     |                                                                           |
| Locus_23425_Transcript_1/1_Conf_1.000 | 169  | 20 | 2.51E-13  | NP_001024724.2 | 80  | 78.5666 | 56  | 45  | EGG Laying defective family member (egl-15)                               |
| Locus_23426_Transcript_1/1_Conf_1.000 | 182  | 0  |           |                |     |         |     |     |                                                                           |
| Locus_23427_Transcript_1/1_Conf_1.000 | 151  | 0  |           |                |     |         |     |     |                                                                           |
| Locus_23428_Transcript_1/1_Conf_1.000 | 152  | 0  |           |                |     |         |     |     |                                                                           |
| Locus_23429_Transcript_1/1_Conf_1.000 | 137  | 0  |           |                |     |         |     |     |                                                                           |
| Locus_2343_Transcript_1/2_Conf_1.000  | 1864 | 20 | 6.27E-113 | XP_002630571.1 | 70  | 412.92  | 403 | 285 | Hypothetical protein CBG13024                                             |
| Locus_2343_Transcript_2/2_Conf_1.000  | 1788 | 20 | 5.94E-113 | XP_002630571.1 | 70  | 412.92  | 403 | 285 | Hypothetical protein CBG13024                                             |
| Locus_23430_Transcript_1/1_Conf_1.000 | 187  | 0  |           |                |     |         |     |     |                                                                           |
| Locus_23431_Transcript_1/1_Conf_1.000 | 306  | 3  | 2.50E-05  | XP_002642803.1 | 82  | 51.9878 | 40  | 33  | C. briggsae CBR-TAG-164 protein                                           |
| Locus_23432_Transcript_1/1_Conf_1.000 | 136  | 0  |           |                |     |         |     |     |                                                                           |
| Locus_23433_Transcript_1/1_Conf_1.000 | 255  | 0  |           |                |     |         |     |     |                                                                           |
| Locus_23434_Transcript_1/1_Conf_1.000 | 194  | 20 | 9.66E-21  | CAA86821.1     | 87  | 103.219 | 64  | 56  | excretory/secretory antigen                                               |
| Locus_23435_Transcript_1/1_Conf_1.000 | 261  | 0  |           |                |     |         |     |     |                                                                           |
| Locus_23436_Transcript_1/1_Conf_1.000 | 209  | 20 | 2.18E-25  | XP_002634716.1 | 95  | 118.627 | 69  | 66  | C. briggsae CBR-EXC-5 protein                                             |
| Locus_23437_Transcript_1/1_Conf_1.000 | 261  | 0  |           |                |     |         |     |     |                                                                           |
| Locus_23438_Transcript_1/1_Conf_1.000 | 157  | 20 | 4.63E-23  | NP_001034792.3 | 100 | 110.923 | 52  | 52  | neuroblastoma breakpoint family member 10                                 |
| Locus_23439_Transcript_1/1_Conf_1.000 | 165  | 4  | 7.10E-08  | XP_001893303.1 | 67  | 60.4622 | 53  | 36  | ribosomal RNA adenine dimethylase family protein                          |
| Locus_2344_Transcript_1/2_Conf_1.000  | 1084 | 20 | 3.64E-10  | XP_002641794.1 | 65  | 70.4774 | 61  | 40  | Hypothetical protein CBG10147                                             |
| Locus_2344_Transcript_2/2_Conf_1.000  | 1095 | 20 | 3.71E-10  | XP_002641794.1 | 65  | 70.4774 | 61  | 40  | Hypothetical protein CBG10147                                             |
| Locus_23440_Transcript_1/1_Conf_1.000 | 159  | 20 | 1.35E-14  | XP_002640523.1 | 84  | 82.8037 | 51  | 43  | Hypothetical protein CBG18685                                             |
| Locus_23441_Transcript_1/1_Conf_1.000 | 301  | 0  |           |                |     |         |     |     |                                                                           |

|                                       |      |    |           |                |     |         |      |     |                                                                |
|---------------------------------------|------|----|-----------|----------------|-----|---------|------|-----|----------------------------------------------------------------|
| Locus_23442_Transcript_1/1_Conf_1.000 | 169  | 0  |           |                |     |         |      |     |                                                                |
| Locus_23443_Transcript_1/1_Conf_1.000 | 504  | 20 | 1.32E-65  | NP_490772.2    | 88  | 252.292 | 159  | 141 | hypothetical protein Y18H1A.3                                  |
| Locus_23444_Transcript_1/1_Conf_1.000 | 165  | 20 | 4.02E-11  | XP_002639959.1 | 86  | 71.2478 | 46   | 40  | Hypothetical protein CBG10779                                  |
| Locus_23445_Transcript_1/1_Conf_1.000 | 330  | 0  |           |                |     |         |      |     |                                                                |
| Locus_23446_Transcript_1/1_Conf_1.000 | 274  | 0  |           |                |     |         |      |     |                                                                |
| Locus_23447_Transcript_1/1_Conf_1.000 | 161  | 0  |           |                |     |         |      |     |                                                                |
| Locus_23448_Transcript_1/1_Conf_1.000 | 165  | 20 | 1.38E-19  | NP_004137.2    | 100 | 99.3673 | 42   | 42  | NADH dehydrogenase ubiquinone 1 beta subcomplex subunit 7      |
| Locus_23449_Transcript_1/1_Conf_1.000 | 352  | 0  |           |                |     |         |      |     |                                                                |
| Locus_2345_Transcript_1/1_Conf_1.000  | 1819 | 20 | 0         | NP_001040881.1 | 71  | 650.588 | 582  | 414 | WHiTe (Drosophila) related ABC transport family member (wht-7) |
| Locus_23450_Transcript_1/1_Conf_1.000 | 198  | 2  | 2.70E-15  | NP_001076730.1 | 86  | 85.1149 | 52   | 45  | hypothetical protein Y41E3.22                                  |
| Locus_23451_Transcript_1/1_Conf_1.000 | 139  | 2  | 2.26E-06  | XP_002630900.1 | 79  | 55.4546 | 43   | 34  | Hypothetical protein CBG02622                                  |
| Locus_23452_Transcript_1/1_Conf_1.000 | 202  | 0  |           |                |     |         |      |     |                                                                |
| Locus_23453_Transcript_1/1_Conf_1.000 | 159  | 0  |           |                |     |         |      |     |                                                                |
| Locus_23454_Transcript_1/1_Conf_1.000 | 308  | 0  |           |                |     |         |      |     |                                                                |
| Locus_23455_Transcript_1/1_Conf_1.000 | 221  | 0  |           |                |     |         |      |     |                                                                |
| Locus_23456_Transcript_1/1_Conf_1.000 | 184  | 20 | 8.52E-25  | NP_509350.2    | 90  | 116.701 | 61   | 55  | hypothetical protein C34D10.2                                  |
| Locus_23457_Transcript_1/1_Conf_1.000 | 162  | 0  |           |                |     |         |      |     |                                                                |
| Locus_23458_Transcript_1/1_Conf_1.000 | 134  | 0  |           |                |     |         |      |     |                                                                |
| Locus_23459_Transcript_1/1_Conf_1.000 | 382  | 1  | 4.76E-04  | EFO21065.1     | 50  | 47.7506 | 89   | 45  | hypothetical protein LOAG_07427                                |
| Locus_2346_Transcript_1/2_Conf_1.000  | 4361 | 20 | 7.65E-118 | NP_498678.3    | 42  | 430.639 | 1286 | 548 | abnormal cell LiNeage family member (lin-13)                   |
| Locus_2346_Transcript_2/2_Conf_1.000  | 2584 | 20 | 9.64E-86  | NP_498678.3    | 46  | 323.168 | 703  | 329 | abnormal cell LiNeage family member (lin-13)                   |
| Locus_23460_Transcript_1/1_Conf_1.000 | 132  | 0  |           |                |     |         |      |     |                                                                |
| Locus_23461_Transcript_1/1_Conf_1.000 | 389  | 0  |           |                |     |         |      |     |                                                                |

|                                       |      |    |          |                |    |         |     |     |                                                 |
|---------------------------------------|------|----|----------|----------------|----|---------|-----|-----|-------------------------------------------------|
| Locus_23462_Transcript_1/1_Conf_1.000 | 307  | 20 | 1.91E-13 | NP_001006002.1 | 67 | 78.9518 | 67  | 45  | galactokinase                                   |
| Locus_23463_Transcript_1/1_Conf_1.000 | 332  | 0  |          |                |    |         |     |     |                                                 |
| Locus_23464_Transcript_1/1_Conf_1.000 | 201  | 0  |          |                |    |         |     |     |                                                 |
| Locus_23465_Transcript_1/1_Conf_1.000 | 300  | 6  | 8.07E-20 | AAX48771.1     | 95 | 100.138 | 60  | 57  | FMRF amide-like protein 7                       |
| Locus_23466_Transcript_1/1_Conf_1.000 | 505  | 0  |          |                |    |         |     |     |                                                 |
| Locus_23467_Transcript_1/1_Conf_1.000 | 334  | 20 | 1.98E-10 | XP_001901255.1 | 60 | 68.9366 | 106 | 64  | COMM domain containing 4                        |
| Locus_23468_Transcript_1/1_Conf_1.000 | 320  | 0  |          |                |    |         |     |     |                                                 |
| Locus_23469_Transcript_1/1_Conf_1.000 | 313  | 20 | 6.11E-15 | XP_002633416.1 | 56 | 83.9593 | 125 | 70  | Hypothetical protein CBG06181                   |
| Locus_2347_Transcript_1/1_Conf_1.000  | 2252 | 20 | 0        | NP_502420.2    | 77 | 916.376 | 760 | 591 | hypothetical protein C26H9A.2                   |
| Locus_23470_Transcript_1/1_Conf_1.000 | 263  | 1  | 8.19E-04 | XP_002613981.1 | 45 | 46.9802 | 70  | 32  | hypothetical protein BRAFLDRAFT_118457          |
| Locus_23471_Transcript_1/1_Conf_1.000 | 278  | 7  | 6.53E-43 | XP_002644616.1 | 91 | 170.244 | 87  | 80  | Hypothetical protein CBG14575                   |
| Locus_23472_Transcript_1/1_Conf_1.000 | 412  | 20 | 5.51E-45 | NP_495209.1    | 81 | 183.726 | 138 | 113 | hypothetical protein R12C12.1                   |
| Locus_23473_Transcript_1/1_Conf_1.000 | 235  | 20 | 1.75E-14 | XP_001524562.1 | 72 | 82.4185 | 77  | 56  | 26S proteasome regulatory subunit RPN6          |
| Locus_23474_Transcript_1/1_Conf_1.000 | 158  | 0  |          |                |    |         |     |     |                                                 |
| Locus_23475_Transcript_1/1_Conf_1.000 | 354  | 2  | 4.45E-10 | XP_001899872.1 | 55 | 67.781  | 87  | 48  | Protein-tyrosine phosphatase containing protein |

|                                       |      |    |          |                |     |         |     |     |                                                                            |
|---------------------------------------|------|----|----------|----------------|-----|---------|-----|-----|----------------------------------------------------------------------------|
| Locus_23476_Transcript_1/1_Conf_1.000 | 190  | 20 | 1.35E-30 | XP_002913719.1 | 100 | 135.961 | 63  | 63  | PREDICTED: actin-related protein 2/3 complex subunit 2-like                |
| Locus_23477_Transcript_1/1_Conf_1.000 | 308  | 20 | 8.29E-17 | NP_500127.2    | 60  | 90.1225 | 102 | 62  | hypothetical protein K08D12.2                                              |
| Locus_23478_Transcript_1/1_Conf_1.000 | 232  | 3  | 4.63E-07 | XP_002635372.1 | 68  | 57.7658 | 73  | 50  | C. briggsae CBR-RPM-1 protein                                              |
| Locus_23479_Transcript_1/1_Conf_1.000 | 136  | 0  |          |                |     |         |     |     |                                                                            |
| Locus_2348_Transcript_1/2_Conf_1.000  | 1264 | 20 | 1.03E-62 | XP_002643530.1 | 55  | 245.358 | 400 | 223 | C. briggsae CBR-CAB-1 protein                                              |
| Locus_2348_Transcript_2/2_Conf_1.000  | 1188 | 20 | 2.20E-46 | XP_002643530.1 | 86  | 115.161 | 75  | 65  | C. briggsae CBR-CAB-1 protein                                              |
| Locus_23480_Transcript_1/1_Conf_1.000 | 312  | 0  |          |                |     |         |     |     |                                                                            |
| Locus_23481_Transcript_1/1_Conf_1.000 | 222  | 0  |          |                |     |         |     |     |                                                                            |
| Locus_23482_Transcript_1/1_Conf_1.000 | 576  | 20 | 2.64E-94 | NP_503410.3    | 92  | 348.206 | 176 | 162 | hypothetical protein R12A1.3                                               |
| Locus_23483_Transcript_1/1_Conf_1.000 | 144  | 0  |          |                |     |         |     |     |                                                                            |
| Locus_23484_Transcript_1/1_Conf_1.000 | 181  | 4  | 2.26E-17 | XP_002648388.1 | 84  | 92.0485 | 57  | 48  | Hypothetical protein CBG24638                                              |
| Locus_23485_Transcript_1/1_Conf_1.000 | 284  | 0  |          |                |     |         |     |     |                                                                            |
| Locus_23486_Transcript_1/1_Conf_1.000 | 347  | 20 | 1.10E-48 | XP_001897519.1 | 91  | 196.052 | 115 | 105 | symbol                                                                     |
| Locus_23487_Transcript_1/1_Conf_1.000 | 179  | 0  |          |                |     |         |     |     |                                                                            |
| Locus_23488_Transcript_1/1_Conf_1.000 | 135  | 3  | 5.58E-05 | NP_506407.1    | 73  | 50.8322 | 42  | 31  | hypothetical protein F20G2.2                                               |
| Locus_23489_Transcript_1/1_Conf_1.000 | 147  | 4  | 1.01E-09 | XP_002644860.1 | 86  | 66.6254 | 46  | 40  | Hypothetical protein CBG05033                                              |
| Locus_2349_Transcript_1/1_Conf_1.000  | 432  | 2  | 3.38E-10 | XP_002646300.1 | 66  | 68.1662 | 78  | 52  | Hypothetical protein CBG12007                                              |
| Locus_23490_Transcript_1/1_Conf_1.000 | 477  | 10 | 1.37E-19 | NP_494916.1    | 68  | 99.3673 | 106 | 73  | SHC (Src Homology domain C-terminal) adaptor homolog family member (shc-2) |
| Locus_23491_Transcript_1/1_Conf_1.000 | 237  | 0  |          |                |     |         |     |     |                                                                            |
| Locus_23492_Transcript_1/1_Conf_1.000 | 211  | 0  |          |                |     |         |     |     |                                                                            |
| Locus_23493_Transcript_1/1_Conf_1.000 | 156  | 0  |          |                |     |         |     |     |                                                                            |
| Locus_23494_Transcript_1/1_Conf_1.000 | 394  | 0  |          |                |     |         |     |     |                                                                            |

|                                       |      |    |          |                |    |         |     |     |                                                                      |
|---------------------------------------|------|----|----------|----------------|----|---------|-----|-----|----------------------------------------------------------------------|
| Locus_23495_Transcript_1/1_Conf_1.000 | 567  | 20 | 2.63E-59 | NP_491658.2    | 74 | 231.876 | 190 | 141 | PaTched Related family member (ptr-10)                               |
| Locus_23496_Transcript_1/1_Conf_1.000 | 162  | 20 | 1.03E-14 | XP_002632718.1 | 75 | 83.1889 | 54  | 41  | Hypothetical protein CBG18748                                        |
| Locus_23497_Transcript_1/1_Conf_1.000 | 168  | 0  |          |                |    |         |     |     |                                                                      |
| Locus_23498_Transcript_1/1_Conf_1.000 | 286  | 20 | 3.35E-13 | XP_002642338.1 | 70 | 78.1814 | 81  | 57  | C. briggsae CBR-DHS-11 protein                                       |
| Locus_23499_Transcript_1/2_Conf_1.000 | 175  | 0  |          |                |    |         |     |     |                                                                      |
| Locus_23499_Transcript_2/2_Conf_1.000 | 187  | 0  |          |                |    |         |     |     |                                                                      |
| Locus_235_Transcript_1/1_Conf_1.000   | 1048 | 7  | 4.65E-15 | XP_001892092.1 | 72 | 86.6557 | 94  | 68  | reticulocyte binding-like protein 2b                                 |
| Locus_2350_Transcript_1/1_Conf_1.000  | 258  | 20 | 1.65E-20 | NP_500837.1    | 72 | 102.449 | 85  | 62  | hypothetical protein C39H7.1                                         |
| Locus_23500_Transcript_1/1_Conf_1.000 | 216  | 0  |          |                |    |         |     |     |                                                                      |
| Locus_23501_Transcript_1/1_Conf_1.000 | 319  | 20 | 1.03E-30 | EFO26545.1     | 79 | 136.346 | 105 | 83  | kelch domain-containing protein family protein                       |
| Locus_23502_Transcript_1/1_Conf_1.000 | 143  | 1  | 1.56E-07 | NP_001123118.1 | 80 | 59.3066 | 35  | 28  | hypothetical protein C44C10.9                                        |
| Locus_23503_Transcript_1/1_Conf_1.000 | 158  | 2  | 9.69E-05 | NP_496542.1    | 83 | 50.0618 | 43  | 36  | hypothetical protein ZK930.1                                         |
| Locus_23504_Transcript_1/1_Conf_1.000 | 358  | 0  |          |                |    |         |     |     |                                                                      |
| Locus_23505_Transcript_1/1_Conf_1.000 | 665  | 2  | 1.10E-29 | NP_499472.1    | 67 | 134.035 | 125 | 84  | Sterol regulatory element Binding Protein family member (sbp-1)      |
| Locus_23506_Transcript_1/1_Conf_1.000 | 158  | 20 | 2.54E-21 | XP_002829216.1 | 96 | 105.145 | 52  | 50  | PREDICTED: eukaryotic translation initiation factor 3 subunit K-like |
| Locus_23507_Transcript_1/1_Conf_1.000 | 212  | 0  |          |                |    |         |     |     |                                                                      |
| Locus_23508_Transcript_1/1_Conf_1.000 | 228  | 0  |          |                |    |         |     |     |                                                                      |
| Locus_23509_Transcript_1/1_Conf_1.000 | 145  | 0  |          |                |    |         |     |     |                                                                      |
| Locus_2351_Transcript_1/1_Conf_1.000  | 443  | 20 | 1.81E-43 | EFO27551.1     | 76 | 178.718 | 147 | 112 | hypothetical protein LOAG_00931                                      |
| Locus_23510_Transcript_1/1_Conf_1.000 | 339  | 12 | 4.95E-46 | NP_506408.1    | 85 | 187.193 | 113 | 97  | hypothetical protein F20G2.3                                         |
| Locus_23511_Transcript_1/1_Conf_1.000 | 186  | 0  |          |                |    |         |     |     |                                                                      |
| Locus_23512_Transcript_1/1_Conf_1.000 | 182  | 0  |          |                |    |         |     |     |                                                                      |

|                                       |     |    |          |                |    |         |     |     |                                                       |
|---------------------------------------|-----|----|----------|----------------|----|---------|-----|-----|-------------------------------------------------------|
| Locus_23513_Transcript_1/1_Conf_1.000 | 157 | 6  | 2.46E-08 | NP_001021110.1 | 70 | 62.003  | 51  | 36  | CAISYntenin/Alcadein homolog family member (casy-1)   |
| Locus_23514_Transcript_1/1_Conf_1.000 | 168 | 20 | 5.41E-16 | NP_493642.1    | 92 | 87.4261 | 56  | 52  | hypothetical protein F23F1.6                          |
| Locus_23515_Transcript_1/1_Conf_1.000 | 381 | 20 | 2.86E-25 | XP_002645261.1 | 80 | 118.242 | 86  | 69  | Hypothetical protein CBG00142                         |
| Locus_23516_Transcript_1/1_Conf_1.000 | 163 | 0  |          |                |    |         |     |     |                                                       |
| Locus_23517_Transcript_1/1_Conf_1.000 | 195 | 0  |          |                |    |         |     |     |                                                       |
| Locus_23518_Transcript_1/1_Conf_1.000 | 197 | 0  |          |                |    |         |     |     |                                                       |
| Locus_23519_Transcript_1/1_Conf_1.000 | 163 | 0  |          |                |    |         |     |     |                                                       |
| Locus_2352_Transcript_1/1_Conf_1.000  | 554 | 0  |          |                |    |         |     |     |                                                       |
| Locus_23520_Transcript_1/1_Conf_1.000 | 144 | 3  | 7.26E-08 | EFO24290.1     | 73 | 60.4622 | 46  | 34  | hypothetical protein LOAG_04198                       |
| Locus_23521_Transcript_1/1_Conf_1.000 | 178 | 0  |          |                |    |         |     |     |                                                       |
| Locus_23522_Transcript_1/1_Conf_1.000 | 194 | 2  | 9.37E-08 | XP_002630446.1 | 61 | 60.077  | 60  | 37  | Hypothetical protein CBG11179                         |
| Locus_23523_Transcript_1/1_Conf_1.000 | 205 | 20 | 1.63E-20 | XP_002633097.1 | 79 | 102.449 | 68  | 54  | C. briggsae CBR-RPC-1 protein                         |
| Locus_23524_Transcript_1/1_Conf_1.000 | 164 | 0  |          |                |    |         |     |     |                                                       |
| Locus_23525_Transcript_1/1_Conf_1.000 | 318 | 3  | 3.22E-08 | EFO16242.1     | 53 | 61.6178 | 83  | 44  | hypothetical protein LOAG_12266                       |
| Locus_23526_Transcript_1/1_Conf_1.000 | 180 | 2  | 7.53E-05 | XP_002648586.1 | 52 | 50.447  | 91  | 48  | Hypothetical protein CBG24916                         |
| Locus_23527_Transcript_1/1_Conf_1.000 | 179 | 0  |          |                |    |         |     |     |                                                       |
| Locus_23528_Transcript_1/1_Conf_1.000 | 174 | 0  |          |                |    |         |     |     |                                                       |
| Locus_23529_Transcript_1/1_Conf_1.000 | 141 | 0  |          |                |    |         |     |     |                                                       |
| Locus_2353_Transcript_1/3_Conf_0.600  | 721 | 20 | 8.76E-42 | NP_001041048.1 | 59 | 174.481 | 204 | 122 | EPS (human endocytosis) related family member (eps-8) |
| Locus_2353_Transcript_2/3_Conf_0.400  | 751 | 20 | 7.62E-31 | NP_502803.3    | 53 | 138.272 | 213 | 113 | EPS (human endocytosis) related family member (eps-8) |
| Locus_2353_Transcript_3/3_Conf_0.600  | 698 | 20 | 8.23E-42 | NP_001041048.1 | 59 | 174.481 | 204 | 122 | EPS (human endocytosis) related family member (eps-8) |
| Locus_23530_Transcript_1/1_Conf_1.000 | 277 | 20 | 2.10E-28 | EFO24787.1     | 89 | 128.642 | 83  | 74  | ATP-dependent Clp protease                            |

|                                       |      |    |           |                |     |         |     |     |                                                                                |
|---------------------------------------|------|----|-----------|----------------|-----|---------|-----|-----|--------------------------------------------------------------------------------|
| Locus_23531_Transcript_1/1_Conf_1.000 | 313  | 20 | 4.05E-51  | XP_002822113.1 | 100 | 204.142 | 104 | 104 | PREDICTED: eukaryotic translation initiation factor 3 subunit F-like isoform 3 |
| Locus_23532_Transcript_1/1_Conf_1.000 | 128  | 0  |           |                |     |         |     |     |                                                                                |
| Locus_23533_Transcript_1/1_Conf_1.000 | 255  | 20 | 1.27E-20  | XP_002633417.1 | 84  | 102.834 | 76  | 64  | C. briggsae CBR-TRPA-1 protein                                                 |
| Locus_23534_Transcript_1/1_Conf_1.000 | 208  | 20 | 7.75E-31  | NP_001023038.1 | 98  | 136.732 | 69  | 68  | EXCreatory canal abnormal family member (exc-5)                                |
| Locus_23535_Transcript_1/1_Conf_1.000 | 279  | 20 | 4.49E-47  | XP_002803216.1 | 100 | 190.66  | 93  | 93  | PREDICTED: amyloid beta A4 protein-like, partial                               |
| Locus_23536_Transcript_1/1_Conf_1.000 | 155  | 0  |           |                |     |         |     |     |                                                                                |
| Locus_23537_Transcript_1/1_Conf_1.000 | 1347 | 20 | 4.79E-162 | XP_002641814.1 | 80  | 575.474 | 437 | 351 | C. briggsae CBR-BYN-1 protein                                                  |



|                                       |      |    |           |                |     |         |     |     |                                    |
|---------------------------------------|------|----|-----------|----------------|-----|---------|-----|-----|------------------------------------|
| Locus_23538_Transcript_1/1_Conf_1.000 | 130  | 20 | 4.89E-17  | XP_002931287.1 | 100 | 90.8929 | 43  | 43  | PREDICTED: filamin-A-like, partial |
| Locus_23539_Transcript_1/1_Conf_1.000 | 187  |    |           |                |     |         |     |     |                                    |
| Locus_2354_Transcript_1/2_Conf_1.000  | 1575 | 20 | 1.62E-119 | XP_001898426.1 | 56  | 434.491 | 575 | 325 | Bromodomain containing protein     |
| Locus_2354_Transcript_2/2_Conf_1.000  | 499  | 20 | 5.14E-43  | NP_509770.2    | 76  | 177.178 | 135 | 103 | hypothetical protein F57C7.1       |
| Locus_23540_Transcript_1/1_Conf_1.000 | 174  | 1  | 9.51E-05  | NP_499670.1    | 59  | 50.0618 | 57  | 34  | hypothetical protein Y37D8A.4      |
| Locus_23541_Transcript_1/1_Conf_1.000 | 213  | 0  |           |                |     |         |     |     |                                    |
| Locus_23542_Transcript_1/1_Conf_1.000 | 371  | 0  |           |                |     |         |     |     |                                    |
| Locus_23543_Transcript_1/1_Conf_1.000 | 169  | 20 | 1.92E-21  | NP_001122771.1 | 88  | 105.531 | 53  | 47  | hypothetical protein F13H10.4      |
| Locus_23544_Transcript_1/1_Conf_1.000 | 261  | 0  |           |                |     |         |     |     |                                    |
| Locus_23545_Transcript_1/1_Conf_1.000 | 744  | 4  | 3.36E-31  | EFO25848.1     | 69  | 139.428 | 175 | 122 | zinc finger protein                |
| Locus_23546_Transcript_1/1_Conf_1.000 | 149  | 0  |           |                |     |         |     |     |                                    |
| Locus_23547_Transcript_1/1_Conf_1.000 | 324  | 0  |           |                |     |         |     |     |                                    |
| Locus_23548_Transcript_1/1_Conf_1.000 | 228  | 0  |           |                |     |         |     |     |                                    |
| Locus_23549_Transcript_1/1_Conf_1.000 | 333  | 0  |           |                |     |         |     |     |                                    |

|                                       |      |    |          |                |    |         |     |     |                                                                         |
|---------------------------------------|------|----|----------|----------------|----|---------|-----|-----|-------------------------------------------------------------------------|
| Locus_2355_Transcript_1/1_Conf_1.000  | 348  | 20 | 6.83E-51 | AAZ42325.1     | 98 | 203.371 | 103 | 101 | translation elongation factor 1-alpha                                   |
| Locus_23550_Transcript_1/1_Conf_1.000 | 810  | 20 | 9.95E-35 | NP_501226.2    | 67 | 151.369 | 157 | 106 | hypothetical protein F49E8.1                                            |
| Locus_23551_Transcript_1/1_Conf_1.000 | 366  | 20 | 1.78E-11 | XP_001899513.1 | 67 | 72.4034 | 68  | 46  | AIDA-1b                                                                 |
| Locus_23552_Transcript_1/1_Conf_1.000 | 214  | 1  | 2.76E-04 | XP_002634850.1 | 65 | 48.521  | 60  | 39  | Hypothetical protein CBG13967                                           |
| Locus_23553_Transcript_1/1_Conf_1.000 | 321  | 20 | 1.13E-37 | NP_492438.1    | 87 | 159.458 | 106 | 93  | RADiation sensitivity abnormal/yeast RAD-related family member (rad-54) |
| Locus_23554_Transcript_1/1_Conf_1.000 | 131  | 0  |          |                |    |         |     |     |                                                                         |
| Locus_23555_Transcript_1/1_Conf_1.000 | 146  | 0  |          |                |    |         |     |     |                                                                         |
| Locus_23556_Transcript_1/1_Conf_1.000 | 206  | 0  |          |                |    |         |     |     |                                                                         |
| Locus_23557_Transcript_1/1_Conf_1.000 | 358  | 7  | 1.05E-11 | NP_001021268.1 | 71 | 73.1738 | 115 | 82  | UNCoordinated family member (unc-44)                                    |
| Locus_23558_Transcript_1/1_Conf_1.000 | 181  | 20 | 9.16E-19 | NP_491003.2    | 91 | 96.6709 | 60  | 55  | Amino Acid Transporter family member (aat-5)                            |
| Locus_23559_Transcript_1/1_Conf_1.000 | 249  | 20 | 2.65E-23 | NP_500943.1    | 86 | 111.694 | 65  | 56  | hypothetical protein F58F9.7                                            |
| Locus_2356_Transcript_1/3_Conf_0.714  | 1423 | 20 | 4.21E-47 | NP_001018536.1 | 44 | 193.741 | 421 | 188 | drebrin-like protein                                                    |
| Locus_2356_Transcript_2/3_Conf_0.714  | 1423 | 20 | 7.17E-47 | NP_001018536.1 | 44 | 192.971 | 424 | 190 | drebrin-like protein                                                    |

|                                       |      |    |          |                |     |         |     |     |                                                                    |
|---------------------------------------|------|----|----------|----------------|-----|---------|-----|-----|--------------------------------------------------------------------|
| Locus_2356_Transcript_3/3_Conf_0.714  | 1423 | 20 | 4.21E-47 | NP_001018536.1 | 44  | 193.741 | 421 | 188 | drebrin-like protein                                               |
| Locus_23560_Transcript_1/1_Conf_1.000 | 323  | 4  | 3.50E-55 | XP_002629930.1 | 96  | 217.624 | 105 | 101 | Hypothetical protein CBG21978                                      |
| Locus_23561_Transcript_1/1_Conf_1.000 | 260  | 4  | 3.94E-06 | XP_002641855.1 | 62  | 54.6842 | 66  | 41  | Hypothetical protein CBG16529                                      |
| Locus_23562_Transcript_1/1_Conf_1.000 | 147  | 3  | 4.69E-07 | XP_002639522.1 | 76  | 57.7658 | 43  | 33  | Hypothetical protein CBG04128                                      |
| Locus_23563_Transcript_1/1_Conf_1.000 | 150  | 0  |          |                |     |         |     |     |                                                                    |
| Locus_23564_Transcript_1/1_Conf_1.000 | 243  | 2  | 8.32E-09 | XP_002634329.1 | 79  | 63.5438 | 48  | 38  | C. briggsae CBR-TAG-321 protein                                    |
| Locus_23565_Transcript_1/1_Conf_1.000 | 202  | 0  |          |                |     |         |     |     |                                                                    |
| Locus_23566_Transcript_1/1_Conf_1.000 | 174  | 20 | 9.77E-26 | XP_001115060.2 | 100 | 119.783 | 57  | 57  | PREDICTED: heat shock 70 kDa protein 1A/1B, partial                |
| Locus_23567_Transcript_1/1_Conf_1.000 | 235  | 9  | 7.05E-40 | ADN00778.1     | 97  | 166.777 | 77  | 75  | LON-1 protein                                                      |
| Locus_23568_Transcript_1/1_Conf_1.000 | 412  | 20 | 1.31E-38 | NP_496802.2    | 73  | 162.54  | 133 | 98  | BTAF (TBP-associated factor) homolog family member (btf-1)         |
| Locus_23569_Transcript_1/1_Conf_1.000 | 197  | 0  |          |                |     |         |     |     |                                                                    |
| Locus_2357_Transcript_1/1_Conf_1.000  | 774  | 20 | 2.10E-63 | XP_001895436.1 | 66  | 246.514 | 268 | 177 | Micro-fibrillar-associated protein 1 C-terminus containing protein |
| Locus_23570_Transcript_1/1_Conf_1.000 | 157  | 2  | 1.65E-12 | CBL43426.1     | 84  | 75.8702 | 52  | 44  | C. elegans protein C54E10.2b, confirmed by transcript evidence     |
| Locus_23571_Transcript_1/1_Conf_1.000 | 136  | 20 | 7.52E-10 | XP_002171431.1 | 86  | 67.0106 | 45  | 39  | vacuolar ATP synthase subunit B                                    |
| Locus_23572_Transcript_1/1_Conf_1.000 | 180  | 20 | 8.00E-23 | EFO22245.1     | 96  | 110.153 | 59  | 57  | ubiquitin-conjugating enzyme family protein                        |

|                                       |      |    |           |                |     |         |     |     |                                             |
|---------------------------------------|------|----|-----------|----------------|-----|---------|-----|-----|---------------------------------------------|
| Locus_23573_Transcript_1/1_Conf_1.000 | 241  | 3  | 1.20E-23  | NP_001022992.1 | 80  | 112.849 | 80  | 64  | CYtoKinesis defect family member (cyk-3)    |
| Locus_23574_Transcript_1/1_Conf_1.000 | 156  | 0  |           |                |     |         |     |     |                                             |
| Locus_23575_Transcript_1/1_Conf_1.000 | 190  | 0  |           |                |     |         |     |     |                                             |
| Locus_23576_Transcript_1/1_Conf_1.000 | 166  | 0  |           |                |     |         |     |     |                                             |
| Locus_23577_Transcript_1/1_Conf_1.000 | 212  | 0  |           |                |     |         |     |     |                                             |
| Locus_23578_Transcript_1/1_Conf_1.000 | 229  | 0  |           |                |     |         |     |     |                                             |
| Locus_23579_Transcript_1/1_Conf_1.000 | 129  | 0  |           |                |     |         |     |     |                                             |
| Locus_2358_Transcript_1/1_Conf_1.000  | 1379 | 5  | 1.54E-38  | NP_872024.1    | 63  | 165.236 | 211 | 134 | hypothetical protein F18C5.10               |
| Locus_23580_Transcript_1/1_Conf_1.000 | 439  | 20 | 2.21E-62  | XP_002752629.1 | 100 | 241.506 | 140 | 140 | PREDICTED: CD63 antigen-like isoform 1      |
| Locus_23581_Transcript_1/1_Conf_1.000 | 503  | 0  |           |                |     |         |     |     |                                             |
| Locus_23582_Transcript_1/1_Conf_1.000 | 158  | 0  |           |                |     |         |     |     |                                             |
| Locus_23583_Transcript_1/1_Conf_1.000 | 170  | 13 | 1.42E-24  | BAG65491.1     | 100 | 115.931 | 56  | 56  | unnamed protein product                     |
| Locus_23584_Transcript_1/1_Conf_1.000 | 334  | 20 | 3.47E-39  | NP_491529.2    | 89  | 164.466 | 101 | 90  | hypothetical protein Y110A7A.6              |
| Locus_23585_Transcript_1/1_Conf_1.000 | 164  | 0  |           |                |     |         |     |     |                                             |
| Locus_23586_Transcript_1/1_Conf_1.000 | 204  | 20 | 4.28E-21  | EFO18824.1     | 83  | 104.375 | 66  | 55  | hypothetical protein LOAG_09672             |
| Locus_23587_Transcript_1/1_Conf_1.000 | 210  | 20 | 3.14E-24  | EFO21237.1     | 87  | 114.775 | 66  | 58  | hypothetical protein LOAG_07254             |
| Locus_23588_Transcript_1/1_Conf_1.000 | 196  | 0  |           |                |     |         |     |     |                                             |
| Locus_23589_Transcript_1/1_Conf_1.000 | 233  | 0  |           |                |     |         |     |     |                                             |
| Locus_2359_Transcript_1/2_Conf_1.000  | 1640 | 20 | 1.60E-125 | NP_741885.1    | 77  | 454.521 | 366 | 284 | NUCLEoBindin homolog family member (nucb-1) |

|                                       |      |    |           |                |     |         |     |     |                                                                    |
|---------------------------------------|------|----|-----------|----------------|-----|---------|-----|-----|--------------------------------------------------------------------|
| Locus_2359_Transcript_2/2_Conf_1.000  | 1601 | 20 | 5.69E-120 | XP_002644192.1 | 76  | 436.032 | 375 | 285 | C. briggsae CBR-NUCB-1 protein                                     |
| Locus_23590_Transcript_1/1_Conf_1.000 | 662  | 6  | 1.41E-37  | XP_002638375.1 | 67  | 160.229 | 190 | 128 | Hypothetical protein CBG18580                                      |
| Locus_23591_Transcript_1/1_Conf_1.000 | 318  | 0  |           |                |     |         |     |     |                                                                    |
| Locus_23592_Transcript_1/1_Conf_1.000 | 345  | 0  |           |                |     |         |     |     |                                                                    |
| Locus_23593_Transcript_1/1_Conf_1.000 | 141  | 0  |           |                |     |         |     |     |                                                                    |
| Locus_23594_Transcript_1/1_Conf_1.000 | 329  | 0  |           |                |     |         |     |     |                                                                    |
| Locus_23595_Transcript_1/1_Conf_1.000 | 129  | 20 | 4.89E-17  | XP_002831617.1 | 100 | 90.8929 | 43  | 43  | PREDICTED: serine/threonine-protein kinase A-Raf-like              |
| Locus_23596_Transcript_1/1_Conf_1.000 | 216  | 0  |           |                |     |         |     |     |                                                                    |
| Locus_23597_Transcript_1/1_Conf_1.000 | 237  | 0  |           |                |     |         |     |     |                                                                    |
| Locus_23598_Transcript_1/1_Conf_1.000 | 296  | 0  |           |                |     |         |     |     |                                                                    |
| Locus_23599_Transcript_1/1_Conf_1.000 | 159  | 20 | 1.44E-16  | XP_002639507.1 | 84  | 89.3521 | 52  | 44  | C. briggsae CBR-LIN-17 protein                                     |
| Locus_236_Transcript_1/4_Conf_0.250   | 844  | 20 | 2.94E-16  | EFO27939.1     | 71  | 90.1225 | 85  | 61  | hypothetical protein LOAG_00532                                    |
| Locus_236_Transcript_2/4_Conf_0.500   | 976  | 20 | 3.76E-16  | EFO27939.1     | 71  | 90.1225 | 85  | 61  | hypothetical protein LOAG_00532                                    |
| Locus_236_Transcript_3/4_Conf_0.500   | 1137 | 20 | 4.80E-16  | EFO27939.1     | 71  | 90.1225 | 85  | 61  | hypothetical protein LOAG_00532                                    |
| Locus_236_Transcript_4/4_Conf_0.375   | 1156 | 20 | 5.39E-15  | EFO27939.1     | 75  | 86.6557 | 74  | 56  | hypothetical protein LOAG_00532                                    |
| Locus_2360_Transcript_1/4_Conf_0.444  | 1248 | 20 | 1.59E-156 | NP_503064.2    | 78  | 556.984 | 409 | 323 | Amino acid Transporter GlycoProtein subunit family member (atgp-1) |
| Locus_2360_Transcript_2/4_Conf_0.667  | 1905 | 20 | 0         | NP_503064.2    | 74  | 756.518 | 617 | 461 | Amino acid Transporter GlycoProtein subunit family member (atgp-1) |
| Locus_2360_Transcript_3/4_Conf_0.667  | 1905 | 20 | 0         | NP_503064.2    | 74  | 756.133 | 617 | 461 | Amino acid Transporter GlycoProtein subunit family member (atgp-1) |
| Locus_2360_Transcript_4/4_Conf_0.667  | 1905 | 20 | 0         | NP_503064.2    | 74  | 756.133 | 617 | 461 | Amino acid Transporter GlycoProtein subunit family member (atgp-1) |
| Locus_23600_Transcript_1/1_Conf_1.000 | 150  | 20 | 1.23E-15  | EFO17879.1     | 87  | 86.2705 | 48  | 42  | hypothetical protein LOAG_10616                                    |
| Locus_23601_Transcript_1/1_Conf_1.000 | 189  | 0  |           |                |     |         |     |     |                                                                    |

|                                       |      |    |          |                |     |         |     |     |                                                                          |
|---------------------------------------|------|----|----------|----------------|-----|---------|-----|-----|--------------------------------------------------------------------------|
| Locus_23602_Transcript_1/1_Conf_1.000 | 225  | 20 | 1.39E-27 | XP_002634807.1 | 85  | 125.946 | 74  | 63  | Hypothetical protein CBG13912                                            |
| Locus_23603_Transcript_1/1_Conf_1.000 | 155  | 0  |          |                |     |         |     |     |                                                                          |
| Locus_23604_Transcript_1/1_Conf_1.000 | 241  | 0  |          |                |     |         |     |     |                                                                          |
| Locus_23605_Transcript_1/1_Conf_1.000 | 169  | 0  |          |                |     |         |     |     |                                                                          |
| Locus_23606_Transcript_1/1_Conf_1.000 | 159  | 0  |          |                |     |         |     |     |                                                                          |
| Locus_23607_Transcript_1/1_Conf_1.000 | 187  | 20 | 2.17E-12 | XP_002648059.1 | 78  | 75.485  | 60  | 47  | Hypothetical protein CBG24048                                            |
| Locus_23608_Transcript_1/1_Conf_1.000 | 199  | 20 | 3.19E-16 | EDL39643.1     | 100 | 88.1965 | 55  | 55  | small nuclear ribonucleoprotein E, isoform CRA_a                         |
| Locus_23609_Transcript_1/1_Conf_1.000 | 184  | 0  |          |                |     |         |     |     |                                                                          |
| Locus_2361_Transcript_1/1_Conf_1.000  | 1589 | 20 | 1.49E-96 | XP_002642323.1 | 60  | 358.221 | 526 | 317 | C. briggsae CBR-RIB-2 protein                                            |
| Locus_23610_Transcript_1/1_Conf_1.000 | 321  | 0  |          |                |     |         |     |     |                                                                          |
| Locus_23611_Transcript_1/1_Conf_1.000 | 275  | 20 | 7.03E-24 | XP_002647685.1 | 76  | 113.62  | 91  | 70  | Hypothetical protein CBG17873                                            |
| Locus_23612_Transcript_1/1_Conf_1.000 | 170  | 20 | 1.05E-19 | CAB57891.2     | 91  | 99.7525 | 56  | 51  | C. elegans protein Y47D3A.11, partially confirmed by transcript evidence |
| Locus_23613_Transcript_1/1_Conf_1.000 | 254  | 0  |          |                |     |         |     |     |                                                                          |
| Locus_23614_Transcript_1/1_Conf_1.000 | 230  | 0  |          |                |     |         |     |     |                                                                          |
| Locus_23615_Transcript_1/1_Conf_1.000 | 128  | 0  |          |                |     |         |     |     |                                                                          |
| Locus_23616_Transcript_1/1_Conf_1.000 | 155  | 0  |          |                |     |         |     |     |                                                                          |
| Locus_23617_Transcript_1/1_Conf_1.000 | 131  | 2  | 1.09E-16 | NP_001023062.1 | 100 | 89.7373 | 43  | 43  | Ligand-Gated ion Channel family member (lgc-43)                          |
| Locus_23618_Transcript_1/1_Conf_1.000 | 248  | 12 | 7.02E-08 | EFO19578.1     | 72  | 60.4622 | 72  | 52  | hypothetical protein LOAG_08912                                          |
| Locus_23619_Transcript_1/1_Conf_1.000 | 159  | 0  |          |                |     |         |     |     |                                                                          |
| Locus_2362_Transcript_1/1_Conf_1.000  | 618  | 20 | 4.68E-29 | NP_501149.1    | 57  | 131.724 | 198 | 113 | hypothetical protein D2024.2                                             |
| Locus_23620_Transcript_1/1_Conf_1.000 | 197  | 0  |          |                |     |         |     |     |                                                                          |

|                                       |      |    |          |                |    |         |     |     |                                                                 |
|---------------------------------------|------|----|----------|----------------|----|---------|-----|-----|-----------------------------------------------------------------|
| Locus_23621_Transcript_1/1_Conf_1.000 | 233  | 20 | 1.64E-12 | NP_503528.2    | 82 | 75.8702 | 64  | 53  | SeRPin family member (srp-3)                                    |
| Locus_23622_Transcript_1/1_Conf_1.000 | 174  | 0  |          |                |    |         |     |     |                                                                 |
| Locus_23623_Transcript_1/1_Conf_1.000 | 289  | 13 | 3.44E-18 | NP_001041303.1 | 65 | 94.7449 | 93  | 61  | Trehalose 6-Phosphate Synthase family member (tps-1)            |
| Locus_23624_Transcript_1/1_Conf_1.000 | 131  | 1  | 4.75E-04 | XP_001121351.1 | 79 | 47.7506 | 39  | 31  | PREDICTED: similar to SET domain and mariner transposase fusion |
| Locus_23625_Transcript_1/1_Conf_1.000 | 761  | 20 | 3.10E-72 | NP_500284.2    | 81 | 275.789 | 213 | 174 | Enhancer of Efl-1 mutant phenotype family member (eel-1)        |
| Locus_23626_Transcript_1/2_Conf_1.000 | 390  | 3  | 3.84E-06 | XP_002642918.1 | 57 | 54.6842 | 107 | 61  | Hypothetical protein CBG15194                                   |
| Locus_23626_Transcript_2/2_Conf_1.000 | 417  | 6  | 7.20E-08 | NP_498462.3    | 52 | 60.4622 | 112 | 59  | hypothetical protein C13B9.2                                    |
| Locus_23627_Transcript_1/1_Conf_1.000 | 179  | 0  |          |                |    |         |     |     |                                                                 |
| Locus_23628_Transcript_1/1_Conf_1.000 | 454  | 0  |          |                |    |         |     |     |                                                                 |
| Locus_23629_Transcript_1/1_Conf_1.000 | 143  | 0  |          |                |    |         |     |     |                                                                 |
| Locus_2363_Transcript_1/1_Conf_1.000  | 1280 | 20 | 2.94E-81 | EFO22000.1     | 60 | 306.99  | 392 | 239 | hypothetical protein LOAG_06484                                 |
| Locus_23630_Transcript_1/1_Conf_1.000 | 160  | 0  |          |                |    |         |     |     |                                                                 |
| Locus_23631_Transcript_1/1_Conf_1.000 | 295  | 0  |          |                |    |         |     |     |                                                                 |
| Locus_23632_Transcript_1/1_Conf_1.000 | 147  | 7  | 2.49E-08 | AAN61521.1     | 82 | 62.003  | 47  | 39  | 301KDa_2 protein                                                |
| Locus_23633_Transcript_1/1_Conf_1.000 | 178  | 0  |          |                |    |         |     |     |                                                                 |
| Locus_23634_Transcript_1/2_Conf_1.000 | 668  | 20 | 2.72E-44 | XP_002643134.1 | 67 | 182.57  | 205 | 139 | Hypothetical protein CBG15311                                   |

|                                       |     |    |          |                |     |         |     |     |                                                 |
|---------------------------------------|-----|----|----------|----------------|-----|---------|-----|-----|-------------------------------------------------|
| Locus_23634_Transcript_2/2_Conf_1.000 | 668 | 20 | 2.72E-44 | XP_002643134.1 | 67  | 182.57  | 205 | 139 | Hypothetical protein CBG15311                   |
| Locus_23635_Transcript_1/1_Conf_1.000 | 355 | 20 | 2.51E-21 | CAB40412.1     | 73  | 105.145 | 93  | 68  | hexokinase                                      |
| Locus_23636_Transcript_1/1_Conf_1.000 | 144 | 3  | 4.41E-05 | NP_501448.1    | 68  | 51.2174 | 45  | 31  | hypothetical protein C28C12.4                   |
| Locus_23637_Transcript_1/1_Conf_1.000 | 147 | 0  |          |                |     |         |     |     |                                                 |
| Locus_23638_Transcript_1/1_Conf_1.000 | 211 | 12 | 5.38E-16 | XP_002639999.1 | 82  | 87.4261 | 68  | 56  | Hypothetical protein CBG10829                   |
| Locus_23639_Transcript_1/1_Conf_1.000 | 140 | 20 | 1.08E-08 | XP_002926200.1 | 100 | 63.1586 | 46  | 46  | PREDICTED: l-lactate dehydrogenase A chain-like |
| Locus_2364_Transcript_1/1_Conf_1.000  | 270 | 0  |          |                |     |         |     |     |                                                 |
| Locus_23640_Transcript_1/1_Conf_1.000 | 333 | 0  |          |                |     |         |     |     |                                                 |
| Locus_23641_Transcript_1/1_Conf_1.000 | 206 | 0  |          |                |     |         |     |     |                                                 |
| Locus_23642_Transcript_1/1_Conf_1.000 | 549 | 20 | 3.61E-55 | NP_491390.2    | 74  | 218.009 | 181 | 135 | hypothetical protein D1007.15                   |



|                                       |     |    |          |                |     |         |     |     |                                                           |
|---------------------------------------|-----|----|----------|----------------|-----|---------|-----|-----|-----------------------------------------------------------|
| Locus_23643_Transcript_1/1_Conf_1.000 | 445 | 20 | 5.60E-45 | XP_002634229.1 | 77  | 183.726 | 146 | 113 | C. briggsae CBR-UNC-26 protein                            |
| Locus_23644_Transcript_1/1_Conf_1.000 | 148 | 0  |          |                |     |         |     |     |                                                           |
| Locus_23645_Transcript_1/1_Conf_1.000 | 432 | 2  | 2.77E-12 | XP_002634200.1 | 53  | 75.0998 | 135 | 72  | C. briggsae CBR-NOL-9 protein                             |
| Locus_23646_Transcript_1/1_Conf_1.000 | 134 | 20 | 4.13E-16 | NP_506269.1    | 100 | 87.8113 | 44  | 44  | EATing: abnormal pharyngeal pumping family member (eat-6) |
| Locus_23647_Transcript_1/1_Conf_1.000 | 265 | 0  |          |                |     |         |     |     |                                                           |
| Locus_23648_Transcript_1/1_Conf_1.000 | 208 | 20 | 3.87E-14 | NP_504523.1    | 76  | 81.2629 | 67  | 51  | LEThal family member (let-418)                            |
| Locus_23649_Transcript_1/1_Conf_1.000 | 207 | 0  |          |                |     |         |     |     |                                                           |

|                                       |      |    |           |                |    |         |     |     |                                                                             |
|---------------------------------------|------|----|-----------|----------------|----|---------|-----|-----|-----------------------------------------------------------------------------|
| Locus_2365_Transcript_1/1_Conf_1.000  | 1466 | 20 | 4.23E-167 | CAJ43810.1     | 74 | 592.423 | 483 | 361 | astacin-like metalloprotease                                                |
| Locus_23650_Transcript_1/1_Conf_1.000 | 165  | 0  |           |                |    |         |     |     |                                                                             |
| Locus_23651_Transcript_1/1_Conf_1.000 | 335  | 0  |           |                |    |         |     |     |                                                                             |
| Locus_23652_Transcript_1/1_Conf_1.000 | 219  | 20 | 3.58E-15  | CAB01717.3     | 84 | 84.7297 | 51  | 43  | C. elegans protein C07A4.1, partially confirmed by transcript evidence      |
| Locus_23653_Transcript_1/1_Conf_1.000 | 274  | 0  |           |                |    |         |     |     |                                                                             |
| Locus_23654_Transcript_1/1_Conf_1.000 | 202  | 0  |           |                |    |         |     |     |                                                                             |
| Locus_23655_Transcript_1/1_Conf_1.000 | 138  | 13 | 2.18E-17  | XP_002630534.1 | 97 | 92.0485 | 45  | 44  | Hypothetical protein CBG12974                                               |
| Locus_23656_Transcript_1/1_Conf_1.000 | 340  | 20 | 8.83E-11  | XP_001902350.1 | 56 | 70.0922 | 103 | 58  | Myosin XVIIIa                                                               |
| Locus_23657_Transcript_1/1_Conf_1.000 | 314  | 20 | 2.81E-52  | XP_002346307.1 | 99 | 207.994 | 104 | 103 | PREDICTED: similar to complement component 4B (Childo blood group), partial |
| Locus_23658_Transcript_1/1_Conf_1.000 | 371  | 1  | 4.83E-04  | XP_002641128.1 | 46 | 47.7506 | 130 | 60  | Hypothetical protein CBG08978                                               |
| Locus_23659_Transcript_1/1_Conf_1.000 | 186  | 20 | 1.83E-19  | NP_501991.2    | 83 | 98.9821 | 61  | 51  | hypothetical protein T25B9.1                                                |
| Locus_2366_Transcript_1/2_Conf_1.000  | 2579 | 20 | 0         | XP_001901889.1 | 68 | 675.241 | 712 | 487 | Kelch motif family protein                                                  |
| Locus_2366_Transcript_2/2_Conf_1.000  | 2573 | 20 | 0         | XP_001901889.1 | 68 | 676.011 | 712 | 488 | Kelch motif family protein                                                  |
| Locus_23660_Transcript_1/1_Conf_1.000 | 219  | 0  |           |                |    |         |     |     |                                                                             |
| Locus_23661_Transcript_1/1_Conf_1.000 | 198  | 1  | 4.33E-05  | NP_497340.2    | 55 | 51.2174 | 65  | 36  | CaDHerin family member (cdh-12)                                             |
| Locus_23662_Transcript_1/1_Conf_1.000 | 147  | 0  |           |                |    |         |     |     |                                                                             |
| Locus_23663_Transcript_1/1_Conf_1.000 | 244  | 0  |           |                |    |         |     |     |                                                                             |
| Locus_23664_Transcript_1/1_Conf_1.000 | 359  | 0  |           |                |    |         |     |     |                                                                             |

|                                       |      |    |           |                |     |         |     |     |                                                                             |
|---------------------------------------|------|----|-----------|----------------|-----|---------|-----|-----|-----------------------------------------------------------------------------|
| Locus_23665_Transcript_1/1_Conf_1.000 | 390  | 20 | 2.25E-06  | XP_418071.2    | 48  | 55.4546 | 117 | 57  | PREDICTED: similar to mannose receptor, C type 2                            |
| Locus_23666_Transcript_1/1_Conf_1.000 | 157  | 0  |           |                |     |         |     |     |                                                                             |
| Locus_23667_Transcript_1/1_Conf_1.000 | 240  | 1  | 8.09E-04  | NP_498765.1    | 54  | 46.9802 | 79  | 43  | hypothetical protein K06H7.3                                                |
| Locus_23668_Transcript_1/1_Conf_1.000 | 129  | 0  |           |                |     |         |     |     |                                                                             |
| Locus_23669_Transcript_1/1_Conf_1.000 | 287  | 0  |           |                |     |         |     |     |                                                                             |
| Locus_2367_Transcript_1/3_Conf_0.375  | 1482 | 20 | 2.08E-145 | Q24702.1       | 77  | 520.39  | 417 | 325 | DVA-1 polyprotein                                                           |
| Locus_2367_Transcript_3/3_Conf_0.375  | 226  | 0  |           |                |     |         |     |     |                                                                             |
| Locus_23670_Transcript_1/1_Conf_1.000 | 140  | 1  | 1.01E-06  | NP_502390.2    | 73  | 56.6102 | 46  | 34  | High Incidence of Males (increased X chromosome loss) family member (him-6) |
| Locus_23671_Transcript_1/1_Conf_1.000 | 206  | 20 | 6.18E-20  | BAG63346.1     | 100 | 100.523 | 48  | 48  | unnamed protein product                                                     |
| Locus_23672_Transcript_1/1_Conf_1.000 | 148  | 4  | 8.85E-06  | XP_001901521.1 | 70  | 53.5286 | 47  | 33  | Protein kinase domain containing protein                                    |
| Locus_23673_Transcript_1/1_Conf_1.000 | 166  | 20 | 9.23E-24  | BAG63075.1     | 100 | 113.235 | 55  | 55  | unnamed protein product                                                     |
| Locus_23674_Transcript_1/1_Conf_1.000 | 448  | 20 | 1.74E-30  | NP_502434.1    | 69  | 135.576 | 147 | 102 | hypothetical protein C36H8.1                                                |

|                                       |      |    |          |                |     |         |     |     |                                                                    |
|---------------------------------------|------|----|----------|----------------|-----|---------|-----|-----|--------------------------------------------------------------------|
| Locus_23675_Transcript_1/1_Conf_1.000 | 287  | 20 | 7.68E-26 | XP_002633316.1 | 74  | 120.168 | 99  | 74  | C. briggsae CBR-GTL-2 protein                                      |
| Locus_23676_Transcript_1/1_Conf_1.000 | 630  | 20 | 4.59E-96 | NP_492775.2    | 87  | 354.369 | 213 | 187 | LAMinin related. See also lmb- family member (lam-3)               |
| Locus_23677_Transcript_1/1_Conf_1.000 | 138  | 1  | 6.57E-06 | XP_002635510.1 | 75  | 53.9138 | 44  | 33  | Hypothetical protein CBG08814                                      |
| Locus_23678_Transcript_1/1_Conf_1.000 | 137  | 0  |          |                |     |         |     |     |                                                                    |
| Locus_23679_Transcript_1/1_Conf_1.000 | 278  | 0  |          |                |     |         |     |     |                                                                    |
| Locus_2368_Transcript_1/1_Conf_1.000  | 342  | 20 | 5.67E-29 | EEZ99728.1     | 77  | 130.568 | 89  | 69  | hypothetical protein TcasGA2_TC002495                              |
| Locus_23680_Transcript_1/1_Conf_1.000 | 351  | 0  |          |                |     |         |     |     |                                                                    |
| Locus_23681_Transcript_1/1_Conf_1.000 | 175  | 0  |          |                |     |         |     |     |                                                                    |
| Locus_23682_Transcript_1/1_Conf_1.000 | 332  | 20 | 2.18E-33 | NP_001022190.1 | 85  | 145.206 | 95  | 81  | hypothetical protein F53A10.2                                      |
| Locus_23683_Transcript_1/1_Conf_1.000 | 141  | 0  |          |                |     |         |     |     |                                                                    |
| Locus_23684_Transcript_1/1_Conf_1.000 | 295  | 0  |          |                |     |         |     |     |                                                                    |
| Locus_23685_Transcript_1/1_Conf_1.000 | 244  | 20 | 1.56E-31 | XP_002719808.1 | 100 | 139.043 | 64  | 64  | PREDICTED: actin related protein 2/3 complex subunit 3-like        |
| Locus_23686_Transcript_1/1_Conf_1.000 | 493  | 20 | 1.16E-42 | XP_002642732.1 | 75  | 176.022 | 132 | 100 | C. briggsae CBR-KIN-18 protein                                     |
| Locus_23687_Transcript_1/1_Conf_1.000 | 247  | 20 | 1.51E-18 | XP_001898877.1 | 79  | 95.9005 | 81  | 64  | oxidoreductase, short chain dehydrogenase/reductase family protein |
| Locus_23688_Transcript_1/1_Conf_1.000 | 264  | 0  |          |                |     |         |     |     |                                                                    |
| Locus_23689_Transcript_1/1_Conf_1.000 | 220  | 0  |          |                |     |         |     |     |                                                                    |
| Locus_2369_Transcript_1/2_Conf_1.000  | 1648 | 5  | 2.60E-68 | XP_002638678.1 | 56  | 179.874 | 274 | 156 | Hypothetical protein CBG11870                                      |
| Locus_2369_Transcript_2/2_Conf_1.000  | 1598 | 5  | 8.30E-71 | NP_492101.1    | 57  | 272.707 | 479 | 274 | hypothetical protein T28F4.4                                       |
| Locus_23690_Transcript_1/1_Conf_1.000 | 177  | 0  |          |                |     |         |     |     |                                                                    |
| Locus_23691_Transcript_1/1_Conf_1.000 | 242  | 0  |          |                |     |         |     |     |                                                                    |
| Locus_23692_Transcript_1/1_Conf_1.000 | 203  | 0  |          |                |     |         |     |     |                                                                    |
| Locus_23693_Transcript_1/1_Conf_1.000 | 389  | 0  |          |                |     |         |     |     |                                                                    |

|                                       |     |    |          |                |     |         |    |    |                                                                             |
|---------------------------------------|-----|----|----------|----------------|-----|---------|----|----|-----------------------------------------------------------------------------|
| Locus_23694_Transcript_1/1_Conf_1.000 | 215 | 20 | 5.33E-32 | XP_002807990.1 | 100 | 140.584 | 68 | 68 | PREDICTED: LOW QUALITY PROTEIN: ATP-dependent DNA helicase 2 subunit 1-like |
| Locus_23695_Transcript_1/1_Conf_1.000 | 168 | 0  |          |                |     |         |    |    |                                                                             |
| Locus_23696_Transcript_1/1_Conf_1.000 | 194 | 2  | 1.15E-05 | XP_002644087.1 | 74  | 53.1434 | 39 | 29 | Hypothetical protein CBG17560                                               |
| Locus_23697_Transcript_1/1_Conf_1.000 | 162 | 20 | 1.75E-22 | BAG59422.1     | 100 | 108.997 | 53 | 53 | unnamed protein product                                                     |
| Locus_23698_Transcript_1/1_Conf_1.000 | 276 | 0  |          |                |     |         |    |    |                                                                             |
| Locus_23699_Transcript_1/1_Conf_1.000 | 197 | 20 | 1.21E-23 | NP_506269.1    | 89  | 112.849 | 65 | 58 | EATing: abnormal pharyngeal pumping family member (eat-6)                   |

|                                       |      |    |          |                |     |         |     |     |                                         |
|---------------------------------------|------|----|----------|----------------|-----|---------|-----|-----|-----------------------------------------|
| Locus_237_Transcript_1/1_Conf_1.000   | 1085 | 10 | 6.02E-05 | ZP_04598122.1  | 45  | 53.1434 | 174 | 80  | immunoglobulin A1 protease              |
| Locus_2370_Transcript_1/1_Conf_1.000  | 229  | 7  | 3.22E-08 | EFO22616.1     | 72  | 61.6178 | 59  | 43  | TK/ABL protein kinase                   |
| Locus_23700_Transcript_1/1_Conf_1.000 | 166  | 20 | 7.57E-18 | NP_001040798.1 | 87  | 93.5893 | 55  | 48  | PhosphoDiEsterase family member (pde-4) |
| Locus_23701_Transcript_1/1_Conf_1.000 | 198  | 5  | 2.54E-05 | A8WRJ2.2       | 61  | 51.9878 | 71  | 44  | GTPase-activating protein rrc-1         |
| Locus_23702_Transcript_1/1_Conf_1.000 | 304  | 20 | 1.78E-51 | XP_002928507.1 | 100 | 205.297 | 101 | 101 | PREDICTED: elongation factor 2-like     |
| Locus_23703_Transcript_1/1_Conf_1.000 | 291  | 20 | 1.89E-08 | XP_001641575.1 | 58  | 62.3882 | 70  | 41  | predicted protein                       |
| Locus_23704_Transcript_1/1_Conf_1.000 | 203  | 20 | 1.25E-28 | NP_497796.1    | 95  | 129.413 | 67  | 64  | hypothetical protein F37A8.5            |
| Locus_23705_Transcript_1/1_Conf_1.000 | 246  | 0  |          |                |     |         |     |     |                                         |
| Locus_23706_Transcript_1/1_Conf_1.000 | 215  | 9  | 3.04E-11 | XP_002630557.1 | 71  | 71.633  | 71  | 51  | Hypothetical protein CBG13002           |
| Locus_23707_Transcript_1/1_Conf_1.000 | 137  | 0  |          |                |     |         |     |     |                                         |
| Locus_23708_Transcript_1/1_Conf_1.000 | 174  | 5  | 1.91E-13 | ABU49430.1     | 82  | 78.9518 | 57  | 47  | PRO-2                                   |

|                                       |      |    |           |                |    |         |      |     |                                                                              |
|---------------------------------------|------|----|-----------|----------------|----|---------|------|-----|------------------------------------------------------------------------------|
| Locus_23709_Transcript_1/1_Conf_1.000 | 292  | 6  | 7.64E-18  | ADJ37280.1     | 70 | 93.5893 | 99   | 70  | Hypothetical protein F26G1.2a                                                |
| Locus_2371_Transcript_1/1_Conf_1.000  | 3023 | 20 | 0         | XP_002636622.1 | 79 | 1228.77 | 1002 | 794 | C. briggsae CBR-SMA-1 protein                                                |
| Locus_23710_Transcript_1/1_Conf_1.000 | 138  | 20 | 5.36E-16  | ACT68329.1     | 86 | 87.4261 | 45   | 39  | cysteine proteinase                                                          |
| Locus_23711_Transcript_1/1_Conf_1.000 | 174  | 0  |           |                |    |         |      |     |                                                                              |
| Locus_23712_Transcript_1/1_Conf_1.000 | 229  | 0  |           |                |    |         |      |     |                                                                              |
| Locus_23713_Transcript_1/1_Conf_1.000 | 880  | 20 | 2.13E-105 | NP_001022916.1 | 82 | 386.341 | 292  | 242 | STIM (mammalian STromal Interaction Molecule) homolog family member (stim-1) |
| Locus_23714_Transcript_1/1_Conf_1.000 | 184  | 0  |           |                |    |         |      |     |                                                                              |
| Locus_23715_Transcript_1/1_Conf_1.000 | 144  | 5  | 2.76E-07  | EFO26737.1     | 85 | 58.5362 | 48   | 41  | hypothetical protein LOAG_01753                                              |
| Locus_23716_Transcript_1/1_Conf_1.000 | 161  | 3  | 4.34E-05  | XP_002647546.1 | 71 | 51.2174 | 45   | 32  | C. briggsae CBR-PME-5 protein                                                |
| Locus_23717_Transcript_1/1_Conf_1.000 | 357  | 20 | 8.04E-28  | XP_002637952.1 | 76 | 126.716 | 117  | 90  | Hypothetical protein CBG04769                                                |
| Locus_23718_Transcript_1/1_Conf_1.000 | 197  | 1  | 8.19E-04  | XP_001898052.1 | 62 | 46.9802 | 54   | 34  | Importin-beta N-terminal domain containing protein                           |
| Locus_23719_Transcript_1/1_Conf_1.000 | 142  | 20 | 2.84E-09  | EFO25060.1     | 82 | 65.0846 | 45   | 37  | UDP-glucuronosyl and UDP-glucosyl transferase                                |
| Locus_2372_Transcript_1/1_Conf_1.000  | 253  | 0  |           |                |    |         |      |     |                                                                              |
| Locus_23720_Transcript_1/1_Conf_1.000 | 308  | 20 | 1.27E-33  | XP_002634145.1 | 85 | 145.976 | 101  | 86  | Hypothetical protein CBG01706                                                |
| Locus_23721_Transcript_1/1_Conf_1.000 | 128  | 2  | 7.85E-07  | XP_002634289.1 | 87 | 56.9954 | 41   | 36  | Hypothetical protein CBG17623                                                |
| Locus_23722_Transcript_1/1_Conf_1.000 | 150  | 20 | 1.96E-13  | AAZ82849.1     | 87 | 78.9518 | 49   | 43  | Cam kinase kinase protein 1, isoform b                                       |

|                                       |      |    |           |                |     |         |     |     |                                                                     |
|---------------------------------------|------|----|-----------|----------------|-----|---------|-----|-----|---------------------------------------------------------------------|
| Locus_23723_Transcript_1/1_Conf_1.000 | 266  | 13 | 7.33E-29  | XP_002631169.1 | 92  | 130.183 | 88  | 81  | Hypothetical protein CBG02955                                       |
| Locus_23724_Transcript_1/1_Conf_1.000 | 211  | 5  | 1.33E-06  | XP_001946729.1 | 59  | 56.225  | 61  | 36  | PREDICTED: similar to DNA ligase IV                                 |
| Locus_23725_Transcript_1/1_Conf_1.000 | 244  | 0  |           |                |     |         |     |     |                                                                     |
| Locus_23726_Transcript_1/1_Conf_1.000 | 208  | 0  |           |                |     |         |     |     |                                                                     |
| Locus_23727_Transcript_1/1_Conf_1.000 | 439  | 0  |           |                |     |         |     |     |                                                                     |
| Locus_23728_Transcript_1/1_Conf_1.000 | 213  | 6  | 8.85E-11  | NP_001021303.1 | 76  | 70.0922 | 67  | 51  | Nuclear Hormone Receptor family member (nhr-105)                    |
| Locus_23729_Transcript_1/1_Conf_1.000 | 270  | 20 | 2.33E-51  | XP_540489.1    | 100 | 204.912 | 85  | 85  | PREDICTED: similar to anaphase promoting complex subunit 11 homolog |
| Locus_2373_Transcript_1/1_Conf_1.000  | 2283 | 20 | 2.07E-177 | AAD45354.1     | 91  | 627.476 | 348 | 319 | AF159950_1GSK-3                                                     |



|                                       |      |    |          |                |     |         |     |     |                                                                                                 |
|---------------------------------------|------|----|----------|----------------|-----|---------|-----|-----|-------------------------------------------------------------------------------------------------|
| Locus_23730_Transcript_1/1_Conf_1.000 | 302  | 20 | 1.46E-37 | XP_002639432.1 | 81  | 159.073 | 100 | 81  | C. briggsae CBR-TYR-4 protein                                                                   |
| Locus_23731_Transcript_1/1_Conf_1.000 | 151  | 0  |          |                |     |         |     |     |                                                                                                 |
| Locus_23732_Transcript_1/1_Conf_1.000 | 146  | 0  |          |                |     |         |     |     |                                                                                                 |
| Locus_23733_Transcript_1/1_Conf_1.000 | 189  | 20 | 6.27E-28 | XP_002914618.1 | 100 | 127.102 | 62  | 62  | PREDICTED: LOW QUALITY PROTEIN:<br>eukaryotic translation initiation factor 3<br>subunit L-like |
| Locus_23734_Transcript_1/1_Conf_1.000 | 148  | 0  |          |                |     |         |     |     |                                                                                                 |
| Locus_23735_Transcript_1/1_Conf_1.000 | 159  | 20 | 3.92E-06 | XP_002735062.1 | 60  | 54.6842 | 48  | 29  | PREDICTED: Alk-like, partial                                                                    |
| Locus_23736_Transcript_1/1_Conf_1.000 | 239  | 20 | 2.21E-09 | XP_002639475.1 | 64  | 65.4698 | 75  | 48  | Hypothetical protein CBG04073                                                                   |
| Locus_23737_Transcript_1/1_Conf_1.000 | 645  | 20 | 2.15E-43 | XP_002629985.1 | 79  | 179.489 | 137 | 109 | Hypothetical protein CBG13347                                                                   |
| Locus_23738_Transcript_1/1_Conf_1.000 | 267  | 0  |          |                |     |         |     |     |                                                                                                 |
| Locus_23739_Transcript_1/1_Conf_1.000 | 200  | 0  |          |                |     |         |     |     |                                                                                                 |
| Locus_2374_Transcript_1/3_Conf_0.571  | 477  | 0  |          |                |     |         |     |     |                                                                                                 |
| Locus_2374_Transcript_2/3_Conf_0.571  | 1546 | 20 | 1.18E-82 |                | 63  | 311.997 | 329 | 208 | hypothetical protein Y105C5B.t -<br>Caenorhabditis elegans                                      |
| Locus_2374_Transcript_3/3_Conf_0.714  | 1461 | 20 | 1.10E-82 |                | 63  | 311.997 | 329 | 208 | hypothetical protein Y105C5B.t -<br>Caenorhabditis elegans                                      |
| Locus_23740_Transcript_1/1_Conf_1.000 | 229  | 0  |          |                |     |         |     |     |                                                                                                 |
| Locus_23741_Transcript_1/1_Conf_1.000 | 128  | 0  |          |                |     |         |     |     |                                                                                                 |
| Locus_23742_Transcript_1/1_Conf_1.000 | 214  | 20 | 1.15E-34 | ACJ65168.1     | 100 | 149.443 | 71  | 71  | Uncoordinated protein 68, isoform b,<br>partially confirmed by transcript evidence              |
| Locus_23743_Transcript_1/1_Conf_1.000 | 130  | 0  |          |                |     |         |     |     |                                                                                                 |

|                                       |     |    |          |                |     |         |     |     |                                                               |
|---------------------------------------|-----|----|----------|----------------|-----|---------|-----|-----|---------------------------------------------------------------|
| Locus_23744_Transcript_1/1_Conf_1.000 | 254 | 20 | 9.37E-40 | EFO24654.1     | 96  | 166.392 | 84  | 81  | RNA polymerase Rpb1                                           |
| Locus_23745_Transcript_1/1_Conf_1.000 | 138 | 20 | 1.51E-18 | XP_002924501.1 | 100 | 95.9005 | 45  | 45  | PREDICTED: eukaryotic translation initiation factor 5A-1-like |
| Locus_23746_Transcript_1/1_Conf_1.000 | 615 | 20 | 4.23E-99 | NP_001122963.1 | 94  | 364.385 | 204 | 193 | hypothetical protein F58E6.1                                  |
| Locus_23747_Transcript_1/1_Conf_1.000 | 287 | 5  | 5.33E-19 | NP_001122928.1 | 74  | 97.4413 | 79  | 59  | hypothetical protein F23H12.3                                 |
| Locus_23748_Transcript_1/1_Conf_1.000 | 228 | 20 | 2.70E-31 | XP_002745237.1 | 100 | 138.272 | 68  | 68  | PREDICTED: 40S ribosomal protein S13-like                     |

|                                       |      |    |          |                |     |         |     |     |                                                               |
|---------------------------------------|------|----|----------|----------------|-----|---------|-----|-----|---------------------------------------------------------------|
| Locus_23749_Transcript_1/1_Conf_1.000 | 243  | 0  |          |                |     |         |     |     |                                                               |
| Locus_2375_Transcript_1/1_Conf_1.000  | 2868 | 20 | 0        | XP_001899340.1 | 63  | 783.867 | 990 | 624 | c-MYC promoter-binding protein IRLB                           |
| Locus_23750_Transcript_1/1_Conf_1.000 | 132  | 2  | 1.13E-05 | EFO21756.1     | 70  | 53.1434 | 44  | 31  | PAN domain-containing protein                                 |
| Locus_23751_Transcript_1/1_Conf_1.000 | 182  | 18 | 2.66E-18 | XP_002642115.1 | 82  | 95.1301 | 57  | 47  | C. briggsae CBR-NDG-4 protein                                 |
| Locus_23752_Transcript_1/1_Conf_1.000 | 305  | 20 | 9.16E-32 | XP_002644203.1 | 81  | 139.813 | 101 | 82  | Hypothetical protein CBG17194                                 |
| Locus_23753_Transcript_1/1_Conf_1.000 | 135  | 20 | 1.05E-11 | NP_493662.1    | 90  | 73.1738 | 44  | 40  | hypothetical protein C50D2.2                                  |
| Locus_23754_Transcript_1/1_Conf_1.000 | 138  | 0  |          |                |     |         |     |     |                                                               |
| Locus_23755_Transcript_1/1_Conf_1.000 | 199  | 20 | 9.00E-11 | NP_503517.1    | 66  | 70.0922 | 65  | 43  | hypothetical protein T10B5.7                                  |
| Locus_23756_Transcript_1/1_Conf_1.000 | 161  | 0  |          |                |     |         |     |     |                                                               |
| Locus_23757_Transcript_1/1_Conf_1.000 | 324  | 20 | 1.68E-41 | NP_001122686.1 | 100 | 172.17  | 103 | 103 | UNCoordinated family member (unc-103)                         |
| Locus_23758_Transcript_1/1_Conf_1.000 | 309  | 0  |          |                |     |         |     |     |                                                               |
| Locus_23759_Transcript_1/1_Conf_1.000 | 179  | 2  | 5.94E-07 | NP_508708.2    | 71  | 57.3806 | 45  | 32  | hypothetical protein ZK470.1                                  |
| Locus_2376_Transcript_1/3_Conf_0.600  | 922  | 20 | 1.26E-10 | NP_495957.1    | 77  | 71.633  | 57  | 44  | vertebrate transcription factor DP-Like family member (dpl-1) |
| Locus_2376_Transcript_2/3_Conf_0.400  | 2018 | 20 | 9.73E-75 | XP_001897870.1 | 78  | 286.189 | 235 | 184 | transcription factor DP1                                      |

|                                       |      |    |           |                |    |         |     |     |                                                                                 |
|---------------------------------------|------|----|-----------|----------------|----|---------|-----|-----|---------------------------------------------------------------------------------|
| Locus_2376_Transcript_3/3_Conf_0.400  | 1648 | 20 | 1.83E-137 | XP_001897504.1 | 76 | 494.197 | 413 | 316 | SNF2 family N-terminal domain containing protein                                |
| Locus_23760_Transcript_1/1_Conf_1.000 | 129  | 0  |           |                |    |         |     |     |                                                                                 |
| Locus_23761_Transcript_1/1_Conf_1.000 | 235  | 0  |           |                |    |         |     |     |                                                                                 |
| Locus_23762_Transcript_1/1_Conf_1.000 | 227  | 0  |           |                |    |         |     |     |                                                                                 |
| Locus_23763_Transcript_1/1_Conf_1.000 | 205  | 20 | 3.07E-11  | XP_001381283.1 | 73 | 71.633  | 56  | 41  | PREDICTED: similar to haloacid dehalogenase-like hydrolase domain containing 1A |
| Locus_23764_Transcript_1/1_Conf_1.000 | 277  | 20 | 8.56E-22  | XP_002642776.1 | 79 | 106.686 | 77  | 61  | C. briggsae CBR-WRS-2 protein                                                   |
| Locus_23765_Transcript_1/1_Conf_1.000 | 152  | 0  |           |                |    |         |     |     |                                                                                 |
| Locus_23766_Transcript_1/1_Conf_1.000 | 140  | 4  | 3.26E-05  | XP_002641225.1 | 82 | 51.6026 | 35  | 29  | C. briggsae CBR-SMA-4 protein                                                   |
| Locus_23767_Transcript_1/1_Conf_1.000 | 282  | 0  |           |                |    |         |     |     |                                                                                 |

|                                       |     |    |          |                |     |         |     |     |                                   |
|---------------------------------------|-----|----|----------|----------------|-----|---------|-----|-----|-----------------------------------|
| Locus_23768_Transcript_1/1_Conf_1.000 | 249 | 20 | 4.82E-25 | XP_002633897.1 | 82  | 117.472 | 80  | 66  | Hypothetical protein CBG19959     |
| Locus_23769_Transcript_1/1_Conf_1.000 | 284 | 0  |          |                |     |         |     |     |                                   |
| Locus_2377_Transcript_1/1_Conf_1.000  | 593 | 20 | 1.91E-34 | XP_002637821.1 | 70  | 149.443 | 179 | 126 | Hypothetical protein CBG04610     |
| Locus_23770_Transcript_1/1_Conf_1.000 | 455 | 0  |          |                |     |         |     |     |                                   |
| Locus_23771_Transcript_1/1_Conf_1.000 | 140 | 0  |          |                |     |         |     |     |                                   |
| Locus_23772_Transcript_1/1_Conf_1.000 | 213 | 20 | 4.82E-33 | A8Y3Q1.2       | 100 | 144.05  | 70  | 70  | Putative 28S ribosomal protein S5 |
| Locus_23773_Transcript_1/1_Conf_1.000 | 171 | 0  |          |                |     |         |     |     |                                   |
| Locus_23774_Transcript_1/1_Conf_1.000 | 321 | 18 | 1.75E-22 | EFO19513.1     | 75  | 108.997 | 88  | 66  | hypothetical protein LOAG_08980   |

|                                       |     |    |          |                |    |         |     |     |                                 |
|---------------------------------------|-----|----|----------|----------------|----|---------|-----|-----|---------------------------------|
| Locus_23775_Transcript_1/1_Conf_1.000 | 323 | 20 | 5.64E-21 | NP_741839.2    | 58 | 103.99  | 104 | 61  | hypothetical protein F48E3.8    |
| Locus_23776_Transcript_1/1_Conf_1.000 | 292 | 20 | 9.04E-11 | EFO25944.1     | 56 | 70.0922 | 95  | 54  | hypothetical protein LOAG_02539 |
| Locus_23777_Transcript_1/1_Conf_1.000 | 140 | 0  |          |                |    |         |     |     |                                 |
| Locus_23778_Transcript_1/1_Conf_1.000 | 143 | 2  | 2.11E-04 | NP_490886.2    | 70 | 48.9062 | 48  | 34  | hypothetical protein Y71G12B.11 |
| Locus_23779_Transcript_1/1_Conf_1.000 | 149 | 0  |          |                |    |         |     |     |                                 |
| Locus_2378_Transcript_1/1_Conf_1.000  | 957 | 16 | 5.07E-26 | XP_002639372.1 | 54 | 122.865 | 296 | 160 | C. briggsae CBR-RPA-2 protein   |
| Locus_23780_Transcript_1/1_Conf_1.000 | 207 | 20 | 7.27E-21 | XP_002640853.1 | 77 | 103.605 | 67  | 52  | Hypothetical protein CBG15741   |
| Locus_23781_Transcript_1/1_Conf_1.000 | 258 | 0  |          |                |    |         |     |     |                                 |
| Locus_23782_Transcript_1/1_Conf_1.000 | 161 | 20 | 2.01E-18 | XP_002636919.1 | 88 | 95.5153 | 51  | 45  | Hypothetical protein CBG09383   |
| Locus_23783_Transcript_1/1_Conf_1.000 | 187 | 10 | 1.90E-08 | XP_001901648.1 | 72 | 62.3882 | 61  | 44  | Conserved hypothetical protein  |
| Locus_23784_Transcript_1/1_Conf_1.000 | 274 | 0  |          |                |    |         |     |     |                                 |
| Locus_23785_Transcript_1/1_Conf_1.000 | 171 | 0  |          |                |    |         |     |     |                                 |
| Locus_23786_Transcript_1/1_Conf_1.000 | 198 | 2  | 1.21E-15 | NP_496015.1    | 80 | 86.2705 | 65  | 52  | hypothetical protein M176.5     |
| Locus_23787_Transcript_1/1_Conf_1.000 | 277 | 20 | 2.25E-30 | NP_493616.1    | 85 | 135.191 | 91  | 78  | hypothetical protein F33H2.5    |

|                                       |      |    |           |                |     |         |     |     |                                                                         |
|---------------------------------------|------|----|-----------|----------------|-----|---------|-----|-----|-------------------------------------------------------------------------|
| Locus_23788_Transcript_1/1_Conf_1.000 | 266  | 20 | 3.51E-39  | CAX51641.1     | 92  | 164.466 | 88  | 81  | C. elegans protein F11E6.8b, partially confirmed by transcript evidence |
| Locus_23789_Transcript_1/1_Conf_1.000 | 232  | 0  |           |                |     |         |     |     |                                                                         |
| Locus_2379_Transcript_1/1_Conf_1.000  | 1394 | 20 | 1.05E-119 | NP_491213.1    | 69  | 434.876 | 400 | 277 | INnexin family member (inx-12)                                          |
| Locus_23790_Transcript_1/1_Conf_1.000 | 129  | 0  |           |                |     |         |     |     |                                                                         |
| Locus_23791_Transcript_1/1_Conf_1.000 | 317  | 18 | 4.14E-49  | NP_001002032.1 | 100 | 177.178 | 78  | 78  | hematological and neurological expressed 1 protein isoform 2            |
| Locus_23792_Transcript_1/1_Conf_1.000 | 196  | 0  |           |                |     |         |     |     |                                                                         |
| Locus_23793_Transcript_1/1_Conf_1.000 | 534  | 2  | 7.85E-33  | NP_498567.1    | 70  | 143.665 | 164 | 116 | hypothetical protein K04G7.1                                            |
| Locus_23794_Transcript_1/1_Conf_1.000 | 137  | 0  |           |                |     |         |     |     |                                                                         |
| Locus_23795_Transcript_1/1_Conf_1.000 | 265  | 0  |           |                |     |         |     |     |                                                                         |
| Locus_23796_Transcript_1/1_Conf_1.000 | 186  | 20 | 3.23E-24  | XP_002631133.1 | 96  | 114.775 | 61  | 59  | C. briggsae CBR-CLH-2 protein                                           |
| Locus_23797_Transcript_1/1_Conf_1.000 | 620  | 20 | 4.35E-51  | XP_002637127.1 | 75  | 204.912 | 205 | 154 | Hypothetical protein CBG09629                                           |
| Locus_23798_Transcript_1/1_Conf_1.000 | 131  | 20 | 6.19E-12  | NP_510155.3    | 93  | 73.9442 | 43  | 40  | PIP Kinase family member (ppk-3)                                        |
| Locus_23799_Transcript_1/1_Conf_1.000 | 198  | 0  |           |                |     |         |     |     |                                                                         |
| Locus_238_Transcript_1/1_Conf_1.000   | 608  | 0  |           |                |     |         |     |     |                                                                         |
| Locus_2380_Transcript_1/1_Conf_1.000  | 802  | 0  |           |                |     |         |     |     |                                                                         |
| Locus_23800_Transcript_1/1_Conf_1.000 | 278  | 0  |           |                |     |         |     |     |                                                                         |
| Locus_23801_Transcript_1/1_Conf_1.000 | 446  | 0  |           |                |     |         |     |     |                                                                         |

|                                       |      |    |          |                |     |         |      |     |                                                          |
|---------------------------------------|------|----|----------|----------------|-----|---------|------|-----|----------------------------------------------------------|
| Locus_23802_Transcript_1/1_Conf_1.000 | 154  | 20 | 1.44E-24 | XP_002737593.1 | 100 | 115.931 | 51   | 51  | PREDICTED: protein phosphatase 4, catalytic subunit-like |
| Locus_23803_Transcript_1/1_Conf_1.000 | 201  | 0  |          |                |     |         |      |     |                                                          |
| Locus_23804_Transcript_1/1_Conf_1.000 | 234  | 0  |          |                |     |         |      |     |                                                          |
| Locus_23805_Transcript_1/1_Conf_1.000 | 174  | 0  |          |                |     |         |      |     |                                                          |
| Locus_23806_Transcript_1/1_Conf_1.000 | 347  | 0  |          |                |     |         |      |     |                                                          |
| Locus_23807_Transcript_1/1_Conf_1.000 | 338  | 0  |          |                |     |         |      |     |                                                          |
| Locus_23808_Transcript_1/1_Conf_1.000 | 143  | 0  |          |                |     |         |      |     |                                                          |
| Locus_23809_Transcript_1/1_Conf_1.000 | 237  | 0  |          |                |     |         |      |     |                                                          |
| Locus_2381_Transcript_1/1_Conf_1.000  | 2060 | 20 | 2.81E-77 | Q09275.2       | 67  | 294.664 | 328  | 223 | Putative thiol protease ulp-4                            |
| Locus_23810_Transcript_1/1_Conf_1.000 | 143  | 0  |          |                |     |         |      |     |                                                          |
| Locus_23811_Transcript_1/1_Conf_1.000 | 279  | 4  | 1.11E-21 | NP_501142.1    | 70  | 106.301 | 94   | 66  | GLoBin family member (glb-23)                            |
| Locus_23812_Transcript_1/1_Conf_1.000 | 144  | 0  |          |                |     |         |      |     |                                                          |
| Locus_23813_Transcript_1/1_Conf_1.000 | 288  | 0  |          |                |     |         |      |     |                                                          |
| Locus_23814_Transcript_1/1_Conf_1.000 | 357  | 1  | 5.61E-05 | XP_002641620.1 | 60  | 50.8322 | 53   | 32  | C. briggsae CBR-BUB-1 protein                            |
| Locus_23815_Transcript_1/1_Conf_1.000 | 163  | 0  |          |                |     |         |      |     |                                                          |
| Locus_23816_Transcript_1/1_Conf_1.000 | 134  | 0  |          |                |     |         |      |     |                                                          |
| Locus_23817_Transcript_1/1_Conf_1.000 | 162  | 0  |          |                |     |         |      |     |                                                          |
| Locus_23818_Transcript_1/1_Conf_1.000 | 137  | 0  |          |                |     |         |      |     |                                                          |
| Locus_23819_Transcript_1/1_Conf_1.000 | 218  | 20 | 8.80E-19 | XP_001891673.1 | 86  | 96.6709 | 65   | 56  | hypothetical protein Bm1_00760                           |
| Locus_2382_Transcript_1/3_Conf_0.714  | 4636 | 20 | 0        | XP_002630260.1 | 81  | 1592.4  | 1126 | 913 | Hypothetical protein CBG00683                            |
| Locus_2382_Transcript_2/3_Conf_0.714  | 4612 | 20 | 0        | XP_002630260.1 | 80  | 1583.93 | 1126 | 911 | Hypothetical protein CBG00683                            |
| Locus_2382_Transcript_3/3_Conf_0.714  | 4618 | 20 | 0        | XP_002630260.1 | 81  | 1592.4  | 1126 | 913 | Hypothetical protein CBG00683                            |
| Locus_23820_Transcript_1/1_Conf_1.000 | 292  | 20 | 2.07E-39 | XP_002630350.1 | 87  | 165.236 | 97   | 85  | Hypothetical protein CBG04280                            |
| Locus_23821_Transcript_1/1_Conf_1.000 | 136  | 8  | 1.57E-07 | XP_002639522.1 | 74  | 59.3066 | 43   | 32  | Hypothetical protein CBG04128                            |



|                                       |      |    |           |                |     |         |     |     |                                                                     |
|---------------------------------------|------|----|-----------|----------------|-----|---------|-----|-----|---------------------------------------------------------------------|
| Locus_23822_Transcript_1/1_Conf_1.000 | 206  | 20 | 8.07E-20  | XP_002917175.1 | 100 | 100.138 | 68  | 68  | PREDICTED: proteasome subunit beta type-2-like                      |
| Locus_23823_Transcript_1/1_Conf_1.000 | 208  | 2  | 3.39E-10  | XP_002638587.1 | 78  | 68.1662 | 55  | 43  | Hypothetical protein CBG05635                                       |
| Locus_23824_Transcript_1/1_Conf_1.000 | 208  | 0  |           |                |     |         |     |     |                                                                     |
| Locus_23825_Transcript_1/1_Conf_1.000 | 205  | 0  |           |                |     |         |     |     |                                                                     |
| Locus_23826_Transcript_1/1_Conf_1.000 | 153  | 20 | 3.33E-21  | CAR63641.1     | 100 | 104.76  | 50  | 50  | putative 26S proteasome regulatory chain 4                          |
| Locus_23827_Transcript_1/1_Conf_1.000 | 323  | 0  |           |                |     |         |     |     |                                                                     |
| Locus_23828_Transcript_1/1_Conf_1.000 | 384  | 20 | 1.55E-47  | NP_491030.1    | 91  | 192.2   | 128 | 117 | DNaJ domain (prokaryotic heat shock protein) family member (dnj-30) |
| Locus_23829_Transcript_1/1_Conf_1.000 | 151  | 0  |           |                |     |         |     |     |                                                                     |
| Locus_2383_Transcript_1/3_Conf_0.667  | 1039 | 20 | 1.44E-101 | XP_001902124.1 | 73  | 374.015 | 317 | 233 | sterol carrier protein                                              |
| Locus_2383_Transcript_2/3_Conf_0.667  | 918  | 20 | 7.71E-85  | XP_001902124.1 | 71  | 318.161 | 277 | 197 | sterol carrier protein                                              |

|                                       |      |    |           |                |    |         |     |     |                                                             |
|---------------------------------------|------|----|-----------|----------------|----|---------|-----|-----|-------------------------------------------------------------|
| Locus_2383_Transcript_3/3_Conf_0.667  | 1039 | 20 | 1.10E-101 | XP_001902124.1 | 73 | 374.4   | 317 | 233 | sterol carrier protein                                      |
| Locus_23830_Transcript_1/1_Conf_1.000 | 155  | 0  |           |                |    |         |     |     |                                                             |
| Locus_23831_Transcript_1/1_Conf_1.000 | 234  | 0  |           |                |    |         |     |     |                                                             |
| Locus_23832_Transcript_1/1_Conf_1.000 | 322  | 0  |           |                |    |         |     |     |                                                             |
| Locus_23833_Transcript_1/1_Conf_1.000 | 166  | 0  |           |                |    |         |     |     |                                                             |
| Locus_23834_Transcript_1/1_Conf_1.000 | 178  | 0  |           |                |    |         |     |     |                                                             |
| Locus_23835_Transcript_1/1_Conf_1.000 | 128  | 5  | 4.45E-10  | NP_509586.1    | 92 | 67.781  | 42  | 39  | GOlgi Snap Receptor complex member family member (gosr-2.1) |
| Locus_23836_Transcript_1/1_Conf_1.000 | 179  | 4  | 5.01E-14  | XP_002637214.1 | 75 | 80.8777 | 60  | 45  | Hypothetical protein CBG09740                               |
| Locus_23837_Transcript_1/1_Conf_1.000 | 232  | 20 | 7.58E-34  | NP_741181.1    | 97 | 146.747 | 77  | 75  | hypothetical protein T12A2.15                               |
| Locus_23838_Transcript_1/1_Conf_1.000 | 353  | 20 | 7.29E-45  | NP_490755.1    | 89 | 183.341 | 120 | 107 | Heavy chain, Unconventional Myosin family member (hum-7)    |
| Locus_23839_Transcript_1/1_Conf_1.000 | 145  | 0  |           |                |    |         |     |     |                                                             |
| Locus_2384_Transcript_1/2_Conf_1.000  | 1699 | 20 | 8.68E-90  | XP_001897752.1 | 95 | 335.88  | 182 | 173 | Ubiquitin-conjugating enzyme E2 1                           |

|                                       |     |    |          |             |    |         |     |     |                                                                                                                                                   |
|---------------------------------------|-----|----|----------|-------------|----|---------|-----|-----|---------------------------------------------------------------------------------------------------------------------------------------------------|
| Locus_2384_Transcript_2/2_Conf_1.000  | 511 | 20 | 1.81E-78 | 1Z3D        | 98 | 295.049 | 146 | 144 | ProteinCrystal Growth Improvement Leading ToThe 2.5aCrystallographicStructure Of Ubiquitin-Conjugating Enzyme (Ubc-1) From Caenorhabditis Elegans |
| Locus_23840_Transcript_1/1_Conf_1.000 | 304 | 5  | 2.05E-07 | NP_499641.2 | 53 | 58.9214 | 73  | 39  | hypothetical protein Y111B2A.10                                                                                                                   |
| Locus_23841_Transcript_1/1_Conf_1.000 | 179 | 0  |          |             |    |         |     |     |                                                                                                                                                   |
| Locus_23842_Transcript_1/1_Conf_1.000 | 390 | 13 | 7.25E-05 | XP_652875.1 | 54 | 50.447  | 116 | 63  | hypothetical protein                                                                                                                              |
| Locus_23843_Transcript_1/1_Conf_1.000 | 251 | 0  |          |             |    |         |     |     |                                                                                                                                                   |

|                                       |     |    |          |                |     |         |     |     |                                                                    |
|---------------------------------------|-----|----|----------|----------------|-----|---------|-----|-----|--------------------------------------------------------------------|
| Locus_23844_Transcript_1/1_Conf_1.000 | 162 | 20 | 2.70E-15 | XP_002832350.1 | 100 | 85.1149 | 53  | 53  | PREDICTED: LOW QUALITY PROTEIN: filamin-A-like                     |
| Locus_23845_Transcript_1/1_Conf_1.000 | 363 | 20 | 1.22E-52 | XP_002633950.1 | 85  | 209.149 | 120 | 102 | C. briggsae CBR-FBL-1 protein                                      |
| Locus_23846_Transcript_1/1_Conf_1.000 | 152 | 20 | 2.56E-13 | XP_002703534.1 | 100 | 78.5666 | 50  | 50  | PREDICTED: signal recognition particle receptor subunit alpha-like |
| Locus_23847_Transcript_1/1_Conf_1.000 | 212 | 0  |          |                |     |         |     |     |                                                                    |
| Locus_23848_Transcript_1/1_Conf_1.000 | 386 | 20 | 1.60E-68 | ADF56012.1     | 97  | 261.922 | 128 | 125 | nicotinic acetylcholine receptor non-alpha subunit LEV-1           |
| Locus_23849_Transcript_1/1_Conf_1.000 | 191 | 20 | 8.78E-14 | XP_002642807.1 | 79  | 80.1073 | 63  | 50  | C. briggsae CBR-KEL-3 protein                                      |
| Locus_2385_Transcript_1/1_Conf_1.000  | 913 | 20 | 9.29E-91 | NP_498012.1    | 83  | 337.806 | 263 | 219 | hypothetical protein C35D10.10                                     |
| Locus_23850_Transcript_1/1_Conf_1.000 | 130 | 5  | 3.18E-08 | NP_501599.1    | 80  | 61.6178 | 41  | 33  | Prolyl Carboxy Peptidase like family member (pcp-2)                |
| Locus_23851_Transcript_1/1_Conf_1.000 | 192 | 0  |          |                |     |         |     |     |                                                                    |
| Locus_23852_Transcript_1/1_Conf_1.000 | 212 | 0  |          |                |     |         |     |     |                                                                    |

|                                       |      |    |           |                |     |         |     |     |                                                                     |  |
|---------------------------------------|------|----|-----------|----------------|-----|---------|-----|-----|---------------------------------------------------------------------|--|
| Locus_23853_Transcript_1/1_Conf_1.000 | 141  | 0  |           |                |     |         |     |     |                                                                     |  |
| Locus_23854_Transcript_1/1_Conf_1.000 | 277  | 20 | 1.50E-34  | NP_501127.2    | 89  | 149.058 | 92  | 82  | RNA Polymerase, Class III (C) family member (rpc-1)                 |  |
| Locus_23855_Transcript_1/1_Conf_1.000 | 158  | 0  |           |                |     |         |     |     |                                                                     |  |
| Locus_23856_Transcript_1/1_Conf_1.000 | 143  | 0  |           |                |     |         |     |     |                                                                     |  |
| Locus_23857_Transcript_1/1_Conf_1.000 | 171  | 0  |           |                |     |         |     |     |                                                                     |  |
| Locus_23858_Transcript_1/1_Conf_1.000 | 128  | 18 | 4.02E-11  | NP_494777.1    | 90  | 71.2478 | 42  | 38  | MolTing defective family member (mlt-7)                             |  |
| Locus_23859_Transcript_1/1_Conf_1.000 | 136  | 4  | 2.19E-09  | NP_500615.1    | 81  | 65.4698 | 44  | 36  | hypothetical protein T22B11.2                                       |  |
| Locus_2386_Transcript_1/1_Conf_1.000  | 1394 | 20 | 3.97E-137 | NP_492839.4    | 81  | 347.436 | 271 | 220 | Leucine-rich repeats, Ras-like domain, Kinase family member (lrk-1) |  |
| Locus_23860_Transcript_1/1_Conf_1.000 | 133  | 0  |           |                |     |         |     |     |                                                                     |  |
| Locus_23861_Transcript_1/1_Conf_1.000 | 299  | 2  | 1.34E-06  | XP_001899503.1 | 56  | 56.225  | 107 | 60  | hypothetical protein Bm1_40230                                      |  |
| Locus_23862_Transcript_1/1_Conf_1.000 | 182  | 0  |           |                |     |         |     |     |                                                                     |  |
| Locus_23863_Transcript_1/1_Conf_1.000 | 191  | 0  |           |                |     |         |     |     |                                                                     |  |
| Locus_23864_Transcript_1/1_Conf_1.000 | 356  | 0  |           |                |     |         |     |     |                                                                     |  |
| Locus_23865_Transcript_1/1_Conf_1.000 | 272  | 0  |           |                |     |         |     |     |                                                                     |  |
| Locus_23866_Transcript_1/1_Conf_1.000 | 204  | 0  |           |                |     |         |     |     |                                                                     |  |
| Locus_23867_Transcript_1/1_Conf_1.000 | 274  | 0  |           |                |     |         |     |     |                                                                     |  |
| Locus_23868_Transcript_1/1_Conf_1.000 | 507  | 0  |           |                |     |         |     |     |                                                                     |  |
| Locus_23869_Transcript_1/1_Conf_1.000 | 173  | 0  |           |                |     |         |     |     |                                                                     |  |
| Locus_2387_Transcript_1/3_Conf_0.571  | 792  | 0  |           |                |     |         |     |     |                                                                     |  |
| Locus_2387_Transcript_2/3_Conf_0.714  | 1343 | 0  |           |                |     |         |     |     |                                                                     |  |
| Locus_2387_Transcript_3/3_Conf_0.714  | 1382 | 0  |           |                |     |         |     |     |                                                                     |  |
| Locus_23870_Transcript_1/1_Conf_1.000 | 171  | 0  |           |                |     |         |     |     |                                                                     |  |
| Locus_23871_Transcript_1/1_Conf_1.000 | 165  | 20 | 4.14E-24  | AAH46345.1     | 100 | 114.39  | 55  | 55  | AURKAIP1 protein                                                    |  |

|                                       |      |    |           |                |     |         |     |     |                                                                   |
|---------------------------------------|------|----|-----------|----------------|-----|---------|-----|-----|-------------------------------------------------------------------|
| Locus_23872_Transcript_1/1_Conf_1.000 | 164  | 20 | 1.87E-16  | XP_002929659.1 | 100 | 88.9669 | 43  | 43  | PREDICTED: GTP-binding nuclear protein Ran-like, partial          |
| Locus_23873_Transcript_1/1_Conf_1.000 | 170  | 0  |           |                |     |         |     |     |                                                                   |
| Locus_23874_Transcript_1/1_Conf_1.000 | 389  | 0  |           |                |     |         |     |     |                                                                   |
| Locus_23875_Transcript_1/1_Conf_1.000 | 439  | 0  |           |                |     |         |     |     |                                                                   |
| Locus_23876_Transcript_1/1_Conf_1.000 | 171  | 0  |           |                |     |         |     |     |                                                                   |
| Locus_23877_Transcript_1/1_Conf_1.000 | 277  | 0  |           |                |     |         |     |     |                                                                   |
| Locus_23878_Transcript_1/1_Conf_1.000 | 163  | 20 | 2.99E-14  | NP_509229.1    | 90  | 81.6481 | 51  | 46  | SUppressor of activated let-60 Ras family member (sur-5)          |
| Locus_23879_Transcript_1/1_Conf_1.000 | 174  | 0  |           |                |     |         |     |     |                                                                   |
| Locus_2388_Transcript_1/1_Conf_1.000  | 1053 | 20 | 9.22E-104 | NP_500892.1    | 85  | 381.333 | 287 | 244 | hypothetical protein K02B2.3                                      |
| Locus_23880_Transcript_1/1_Conf_1.000 | 320  | 20 | 3.41E-42  | XP_001891823.1 | 90  | 174.481 | 106 | 96  | 2-amino-3-ketobutyrate coenzyme A ligase, mitochondrial precursor |
| Locus_23881_Transcript_1/1_Conf_1.000 | 159  | 0  |           |                |     |         |     |     |                                                                   |
| Locus_23882_Transcript_1/1_Conf_1.000 | 233  | 0  |           |                |     |         |     |     |                                                                   |
| Locus_23883_Transcript_1/1_Conf_1.000 | 189  | 0  |           |                |     |         |     |     |                                                                   |
| Locus_23884_Transcript_1/1_Conf_1.000 | 196  | 0  |           |                |     |         |     |     |                                                                   |
| Locus_23885_Transcript_1/1_Conf_1.000 | 176  | 0  |           |                |     |         |     |     |                                                                   |
| Locus_23886_Transcript_1/1_Conf_1.000 | 263  | 0  |           |                |     |         |     |     |                                                                   |
| Locus_23887_Transcript_1/1_Conf_1.000 | 138  | 0  |           |                |     |         |     |     |                                                                   |
| Locus_23888_Transcript_1/1_Conf_1.000 | 128  | 6  | 1.48E-05  | EFO20090.1     | 86  | 52.7582 | 37  | 32  | hypothetical protein LOAG_08398                                   |
| Locus_23889_Transcript_1/1_Conf_1.000 | 160  | 0  |           |                |     |         |     |     |                                                                   |

|                                       |     |    |          |                |     |         |     |     |                                                                         |
|---------------------------------------|-----|----|----------|----------------|-----|---------|-----|-----|-------------------------------------------------------------------------|
| Locus_2389_Transcript_1/2_Conf_1.000  | 991 | 20 | 7.28E-15 | EFO27344.1     | 43  | 85.8853 | 314 | 138 | double-stranded RNA binding domain-containing protein family protein    |
| Locus_2389_Transcript_2/2_Conf_1.000  | 995 | 20 | 7.32E-15 | EFO27344.1     | 43  | 85.8853 | 314 | 138 | double-stranded RNA binding domain-containing protein family protein    |
| Locus_23890_Transcript_1/1_Conf_1.000 | 155 | 0  |          |                |     |         |     |     |                                                                         |
| Locus_23891_Transcript_1/1_Conf_1.000 | 192 | 0  |          |                |     |         |     |     |                                                                         |
| Locus_23892_Transcript_1/1_Conf_1.000 | 135 | 0  |          |                |     |         |     |     |                                                                         |
| Locus_23893_Transcript_1/1_Conf_1.000 | 206 | 0  |          |                |     |         |     |     |                                                                         |
| Locus_23894_Transcript_1/1_Conf_1.000 | 192 | 20 | 1.64E-28 | XP_002828455.1 | 100 | 129.028 | 63  | 63  | PREDICTED: LOW QUALITY PROTEIN: ornithine decarboxylase antizyme 1-like |
| Locus_23895_Transcript_1/1_Conf_1.000 | 551 | 20 | 3.09E-14 | NP_507654.1    | 46  | 82.0333 | 169 | 79  | SCP-Like extracellular protein family member (scl-19)                   |
| Locus_23896_Transcript_1/1_Conf_1.000 | 187 | 0  |          |                |     |         |     |     |                                                                         |
| Locus_23897_Transcript_1/1_Conf_1.000 | 392 | 0  |          |                |     |         |     |     |                                                                         |
| Locus_23898_Transcript_1/1_Conf_1.000 | 129 | 0  |          |                |     |         |     |     |                                                                         |

|                                       |     |    |          |                |     |         |     |     |                                                              |
|---------------------------------------|-----|----|----------|----------------|-----|---------|-----|-----|--------------------------------------------------------------|
| Locus_23899_Transcript_1/1_Conf_1.000 | 284 | 20 | 3.02E-30 | CAF97585.1     | 80  | 134.806 | 88  | 71  | unnamed protein product                                      |
| Locus_239_Transcript_1/1_Conf_1.000   | 180 | 0  |          |                |     |         |     |     |                                                              |
| Locus_2390_Transcript_1/1_Conf_1.000  | 498 | 20 | 6.90E-64 | CAG25499.1     | 88  | 246.514 | 144 | 128 | heat shock protein 20                                        |
| Locus_23900_Transcript_1/1_Conf_1.000 | 133 | 1  | 3.63E-04 | XP_002642828.1 | 64  | 48.1358 | 42  | 27  | Hypothetical protein CBG21226                                |
| Locus_23901_Transcript_1/1_Conf_1.000 | 205 | 20 | 5.96E-31 | BAG64784.1     | 100 | 137.117 | 68  | 68  | unnamed protein product                                      |
| Locus_23902_Transcript_1/1_Conf_1.000 | 208 | 20 | 4.11E-32 | XP_002920795.1 | 100 | 140.969 | 59  | 59  | PREDICTED: LOW QUALITY PROTEIN: SPARC-like                   |
| Locus_23903_Transcript_1/1_Conf_1.000 | 227 | 0  |          |                |     |         |     |     |                                                              |
| Locus_23904_Transcript_1/1_Conf_1.000 | 171 | 20 | 1.67E-25 | XP_002810873.1 | 100 | 119.013 | 57  | 57  | PREDICTED: nardilysin-like isoform 2                         |
| Locus_23905_Transcript_1/1_Conf_1.000 | 742 | 0  |          |                |     |         |     |     |                                                              |
| Locus_23906_Transcript_1/1_Conf_1.000 | 370 | 20 | 3.33E-21 | NP_503012.2    | 67  | 104.76  | 102 | 69  | hypothetical protein Y116A8C.13                              |
| Locus_23907_Transcript_1/1_Conf_1.000 | 356 | 0  |          |                |     |         |     |     |                                                              |
| Locus_23908_Transcript_1/1_Conf_1.000 | 164 | 0  |          |                |     |         |     |     |                                                              |
| Locus_23909_Transcript_1/1_Conf_1.000 | 423 | 7  | 2.12E-60 | CAA92681.2     | 89  | 234.958 | 125 | 112 | C. elegans protein K08E4.3, confirmed by transcript evidence |



|                                       |      |    |           |                |    |         |     |     |                                                                                                                           |
|---------------------------------------|------|----|-----------|----------------|----|---------|-----|-----|---------------------------------------------------------------------------------------------------------------------------|
| Locus_2391_Transcript_1/1_Conf_1.000  | 730  | 20 | 2.62E-41  | NP_492270.1    | 58 | 172.94  | 235 | 137 | hypothetical protein F16D3.4                                                                                              |
| Locus_23910_Transcript_1/1_Conf_1.000 | 212  | 0  |           |                |    |         |     |     |                                                                                                                           |
| Locus_23911_Transcript_1/1_Conf_1.000 | 395  | 20 | 1.17E-50  | NP_497814.3    | 84 | 202.601 | 131 | 111 | UNCoordinated family member (unc-79)                                                                                      |
| Locus_23912_Transcript_1/1_Conf_1.000 | 470  | 10 | 5.59E-37  | NP_499042.2    | 71 | 157.147 | 156 | 112 | hypothetical protein T23G5.6                                                                                              |
| Locus_23913_Transcript_1/1_Conf_1.000 | 345  | 2  | 6.28E-12  | NP_494997.1    | 67 | 73.9442 | 76  | 51  | VH1 dual-specificity phosphatase family member (vhp-1)                                                                    |
| Locus_23914_Transcript_1/1_Conf_1.000 | 317  | 2  | 7.95E-15  | NP_001024845.1 | 69 | 83.5741 | 89  | 62  | hypothetical protein R08B4.5                                                                                              |
| Locus_23915_Transcript_1/1_Conf_1.000 | 174  | 6  | 5.56E-13  | XP_523970.2    | 90 | 77.411  | 42  | 38  | PREDICTED: similar to Finkel-Biskis-Reilly murine sarcoma virus (FBR-MuSV) ubiquitously expressed (fox derived) isoform 2 |
| Locus_23916_Transcript_1/1_Conf_1.000 | 183  | 0  |           |                |    |         |     |     |                                                                                                                           |
| Locus_23917_Transcript_1/1_Conf_1.000 | 226  | 3  | 6.47E-25  | NP_740934.2    | 93 | 117.087 | 75  | 70  | UNCoordinated family member (unc-95)                                                                                      |
| Locus_23918_Transcript_1/1_Conf_1.000 | 459  | 20 | 3.84E-06  | XP_002130348.1 | 48 | 54.6842 | 128 | 62  | PREDICTED: similar to protease, serine, 7 (enterokinase)                                                                  |
| Locus_23919_Transcript_1/1_Conf_1.000 | 304  | 11 | 7.55E-10  |                | 54 | 67.0106 | 100 | 54  | hypothetical protein T28B8.4                                                                                              |
| Locus_2392_Transcript_1/1_Conf_1.000  | 2200 | 20 | 2.86E-160 | XP_002641169.1 | 66 | 570.466 | 528 | 353 | C. briggsae CBR-FRM-2 protein                                                                                             |
| Locus_23920_Transcript_1/1_Conf_1.000 | 147  | 0  |           |                |    |         |     |     |                                                                                                                           |
| Locus_23921_Transcript_1/1_Conf_1.000 | 522  | 20 | 9.64E-41  | NP_502553.2    | 79 | 169.859 | 162 | 128 | Cleavage and Polyadenylation Specificity Factor family member (cpsf-3)                                                    |
| Locus_23922_Transcript_1/1_Conf_1.000 | 268  | 0  |           |                |    |         |     |     |                                                                                                                           |
| Locus_23923_Transcript_1/1_Conf_1.000 | 389  | 0  |           |                |    |         |     |     |                                                                                                                           |
| Locus_23924_Transcript_1/1_Conf_1.000 | 235  | 0  |           |                |    |         |     |     |                                                                                                                           |
| Locus_23925_Transcript_1/1_Conf_1.000 | 169  | 0  |           |                |    |         |     |     |                                                                                                                           |
| Locus_23926_Transcript_1/1_Conf_1.000 | 290  | 20 | 1.82E-19  | NP_493592.1    | 68 | 98.9821 | 104 | 71  | hypothetical protein F32A7.4                                                                                              |
| Locus_23927_Transcript_1/1_Conf_1.000 | 418  | 0  |           |                |    |         |     |     |                                                                                                                           |
| Locus_23928_Transcript_1/1_Conf_1.000 | 254  | 0  |           |                |    |         |     |     |                                                                                                                           |

|                                       |      |    |          |                |    |         |     |     |                                                         |
|---------------------------------------|------|----|----------|----------------|----|---------|-----|-----|---------------------------------------------------------|
| Locus_23929_Transcript_1/1_Conf_1.000 | 239  | 20 | 2.35E-27 | AAM11895.1     | 86 | 125.176 | 79  | 68  | high-affinity dicarboxylate transporter INDY3           |
| Locus_23933_Transcript_1/1_Conf_1.000 | 451  | 20 | 1.66E-57 | NP_497721.1    | 87 | 225.328 | 138 | 121 | Ribosomal Protein, Large subunit family member (rpl-16) |
| Locus_23930_Transcript_1/1_Conf_1.000 | 376  | 0  |          |                |    |         |     |     |                                                         |
| Locus_23931_Transcript_1/1_Conf_1.000 | 132  | 0  |          |                |    |         |     |     |                                                         |
| Locus_23932_Transcript_1/1_Conf_1.000 | 226  | 0  |          |                |    |         |     |     |                                                         |
| Locus_23933_Transcript_1/1_Conf_1.000 | 226  | 0  |          |                |    |         |     |     |                                                         |
| Locus_23934_Transcript_1/1_Conf_1.000 | 242  | 0  |          |                |    |         |     |     |                                                         |
| Locus_23935_Transcript_1/1_Conf_1.000 | 152  | 0  |          |                |    |         |     |     |                                                         |
| Locus_23936_Transcript_1/1_Conf_1.000 | 278  | 20 | 3.25E-29 | EFO19658.1     | 82 | 131.339 | 92  | 76  | hypothetical protein LOAG_08833                         |
| Locus_23937_Transcript_1/1_Conf_1.000 | 187  | 0  |          |                |    |         |     |     |                                                         |
| Locus_23938_Transcript_1/1_Conf_1.000 | 320  | 20 | 2.14E-36 | XP_002643176.1 | 87 | 155.221 | 99  | 87  | Hypothetical protein CBG24142                           |
| Locus_23939_Transcript_1/1_Conf_1.000 | 367  | 20 | 4.08E-24 | XP_002646775.1 | 66 | 114.39  | 116 | 77  | Hypothetical protein CBG18419                           |
| Locus_2394_Transcript_1/2_Conf_1.000  | 1214 | 0  |          |                |    |         |     |     |                                                         |
| Locus_2394_Transcript_2/2_Conf_1.000  | 621  | 0  |          |                |    |         |     |     |                                                         |
| Locus_23940_Transcript_1/1_Conf_1.000 | 347  | 20 | 8.43E-33 | XP_002637479.1 | 78 | 143.28  | 112 | 88  | Hypothetical protein CBG19196                           |

|                                       |      |    |           |             |    |         |     |     |                                                         |
|---------------------------------------|------|----|-----------|-------------|----|---------|-----|-----|---------------------------------------------------------|
| Locus_23941_Transcript_1/1_Conf_1.000 | 340  | 19 | 1.04E-19  | NP_497235.2 | 94 | 99.7525 | 57  | 54  | G-protein-coupled Receptor Kinase family member (grk-2) |
| Locus_23942_Transcript_1/1_Conf_1.000 | 154  | 0  |           |             |    |         |     |     |                                                         |
| Locus_23943_Transcript_1/1_Conf_1.000 | 143  | 0  |           |             |    |         |     |     |                                                         |
| Locus_23944_Transcript_1/1_Conf_1.000 | 133  | 0  |           |             |    |         |     |     |                                                         |
| Locus_23945_Transcript_1/1_Conf_1.000 | 332  | 0  |           |             |    |         |     |     |                                                         |
| Locus_23946_Transcript_1/1_Conf_1.000 | 207  | 0  |           |             |    |         |     |     |                                                         |
| Locus_23947_Transcript_1/1_Conf_1.000 | 350  | 0  |           |             |    |         |     |     |                                                         |
| Locus_23948_Transcript_1/1_Conf_1.000 | 155  | 0  |           |             |    |         |     |     |                                                         |
| Locus_23949_Transcript_1/1_Conf_1.000 | 240  | 0  |           |             |    |         |     |     |                                                         |
| Locus_2395_Transcript_1/1_Conf_1.000  | 808  | 20 | 3.70E-122 | NP_492775.2 | 80 | 441.81  | 265 | 213 | LAMinin related. See also lmb- family member (lam-3)    |
| Locus_23950_Transcript_1/1_Conf_1.000 | 136  | 1  | 4.72E-04  | NP_491418.1 | 76 | 47.7506 | 39  | 30  | hypothetical protein B0041.5                            |
| Locus_23951_Transcript_1/1_Conf_1.000 | 154  | 0  |           |             |    |         |     |     |                                                         |
| Locus_23952_Transcript_1/1_Conf_1.000 | 426  | 7  | 5.74E-58  | Q20548.2    | 89 | 226.868 | 141 | 126 | Probable RING finger protein 207 homolog                |
| Locus_23953_Transcript_1/1_Conf_1.000 | 226  | 0  |           |             |    |         |     |     |                                                         |
| Locus_23954_Transcript_1/1_Conf_1.000 | 135  | 0  |           |             |    |         |     |     |                                                         |
| Locus_23955_Transcript_1/1_Conf_1.000 | 217  | 0  |           |             |    |         |     |     |                                                         |
| Locus_23956_Transcript_1/1_Conf_1.000 | 377  | 20 | 1.18E-18  | EFO24235.1  | 60 | 96.2857 | 118 | 71  | hypothetical protein LOAG_04250                         |
| Locus_23957_Transcript_1/1_Conf_1.000 | 189  | 0  |           |             |    |         |     |     |                                                         |
| Locus_23958_Transcript_1/1_Conf_1.000 | 178  | 4  | 8.85E-11  | NP_500790.1 | 82 | 70.0922 | 57  | 47  | hypothetical protein F41H10.4                           |
| Locus_23959_Transcript_1/1_Conf_1.000 | 197  | 0  |           |             |    |         |     |     |                                                         |
| Locus_2396_Transcript_1/1_Conf_1.000  | 1005 | 1  | 7.75E-04  | NP_504247.2 | 38 | 49.2914 | 226 | 87  | hypothetical protein F54D11.2                           |

|                                       |      |    |           |                |    |         |     |     |                                                             |
|---------------------------------------|------|----|-----------|----------------|----|---------|-----|-----|-------------------------------------------------------------|
| Locus_23960_Transcript_1/1_Conf_1.000 | 1207 | 20 | 1.97E-156 | NP_497007.1    | 81 | 556.599 | 403 | 327 | hypothetical protein K10H10.1                               |
| Locus_23961_Transcript_1/1_Conf_1.000 | 239  | 20 | 3.40E-10  | EFO26171.1     | 68 | 68.1662 | 60  | 41  | tyrosyl-DNA phosphodiesterase                               |
| Locus_23962_Transcript_1/1_Conf_1.000 | 455  | 20 | 2.32E-43  | NP_502044.1    | 76 | 178.333 | 150 | 115 | AQuaPorin or aquaglyceroporin related family member (aqp-3) |
| Locus_23963_Transcript_1/1_Conf_1.000 | 147  | 3  | 4.38E-13  | XP_001897744.1 | 91 | 77.7962 | 48  | 44  | ABC transporter family protein                              |
| Locus_23964_Transcript_1/1_Conf_1.000 | 153  | 20 | 1.15E-13  | EAX10112.1     | 82 | 79.7221 | 47  | 39  | hCG2018900                                                  |
| Locus_23965_Transcript_1/1_Conf_1.000 | 208  | 20 | 1.68E-17  | XP_002642043.1 | 73 | 92.4337 | 72  | 53  | C. briggsae CBR-PAL-1 protein                               |
| Locus_23966_Transcript_1/1_Conf_1.000 | 201  | 0  |           |                |    |         |     |     |                                                             |
| Locus_23967_Transcript_1/1_Conf_1.000 | 222  | 0  |           |                |    |         |     |     |                                                             |
| Locus_23968_Transcript_1/1_Conf_1.000 | 313  | 0  |           |                |    |         |     |     |                                                             |
| Locus_23969_Transcript_1/1_Conf_1.000 | 168  | 0  |           |                |    |         |     |     |                                                             |

|                                       |      |    |           |                |     |         |     |     |                                                 |
|---------------------------------------|------|----|-----------|----------------|-----|---------|-----|-----|-------------------------------------------------|
| Locus_2397_Transcript_1/1_Conf_1.000  | 2178 | 20 | 4.59E-102 | EFO15014.1     | 73  | 377.096 | 314 | 230 | CAMK/PIM protein kinase                         |
| Locus_23970_Transcript_1/1_Conf_1.000 | 311  | 4  | 1.23E-28  | NP_500851.2    | 79  | 129.413 | 101 | 80  | hypothetical protein H35B03.1                   |
| Locus_23971_Transcript_1/1_Conf_1.000 | 143  | 0  |           |                |     |         |     |     |                                                 |
| Locus_23972_Transcript_1/1_Conf_1.000 | 192  | 1  | 9.70E-05  | XP_002633562.1 | 63  | 50.0618 | 65  | 41  | Hypothetical protein CBG05433                   |
| Locus_23973_Transcript_1/1_Conf_1.000 | 324  | 0  |           |                |     |         |     |     |                                                 |
| Locus_23974_Transcript_1/1_Conf_1.000 | 368  | 20 | 2.61E-63  | XP_002926784.1 | 100 | 244.588 | 122 | 122 | PREDICTED: heat shock protein HSP 90-alpha-like |
| Locus_23975_Transcript_1/1_Conf_1.000 | 163  | 20 | 3.53E-15  | XP_002631757.1 | 86  | 84.7297 | 53  | 46  | Hypothetical protein CBG20965                   |
| Locus_23976_Transcript_1/1_Conf_1.000 | 390  | 7  | 5.54E-13  | XP_001901143.1 | 70  | 77.411  | 93  | 66  | Protein kinase domain containing protein        |

|                                       |      |    |          |                |    |         |     |     |                                                                  |
|---------------------------------------|------|----|----------|----------------|----|---------|-----|-----|------------------------------------------------------------------|
| Locus_23977_Transcript_1/1_Conf_1.000 | 196  | 20 | 2.46E-08 | XP_001900312.1 | 80 | 62.003  | 66  | 53  | Krr1 family protein                                              |
| Locus_23978_Transcript_1/1_Conf_1.000 | 593  | 12 | 1.08E-45 | XP_002644583.1 | 74 | 186.808 | 150 | 112 | C. briggsae CBR-GLIT-1 protein                                   |
| Locus_23979_Transcript_1/1_Conf_1.000 | 276  | 20 | 5.54E-29 | NP_509689.1    | 84 | 130.568 | 95  | 80  | hypothetical protein ZC373.4                                     |
| Locus_2398_Transcript_1/1_Conf_1.000  | 468  | 5  | 3.91E-06 | AAR03713.1     | 49 | 54.6842 | 103 | 51  | secreted protein 4 precursor                                     |
| Locus_23980_Transcript_1/1_Conf_1.000 | 261  | 20 | 2.46E-16 | XP_002634885.1 | 75 | 88.5817 | 76  | 57  | Hypothetical protein CBG10553                                    |
| Locus_23981_Transcript_1/1_Conf_1.000 | 194  | 9  | 7.16E-16 | NP_503758.4    | 77 | 87.0409 | 63  | 49  | KETtIN (Drosophila actin-binding) homolog family member (ketn-1) |
| Locus_23982_Transcript_1/1_Conf_1.000 | 198  | 20 | 3.91E-06 | YP_779412.1    | 60 | 54.6842 | 64  | 39  | malonyl-CoA synthase                                             |
| Locus_23983_Transcript_1/1_Conf_1.000 | 269  | 20 | 9.25E-24 | EFO16116.1     | 79 | 113.235 | 88  | 70  | hypothetical protein LOAG_12392                                  |
| Locus_23984_Transcript_1/1_Conf_1.000 | 138  | 0  |          |                |    |         |     |     |                                                                  |
| Locus_23985_Transcript_1/1_Conf_1.000 | 755  | 20 | 3.51E-36 | XP_002636125.1 | 52 | 155.992 | 257 | 136 | Hypothetical protein CBG01375                                    |
| Locus_23986_Transcript_1/1_Conf_1.000 | 276  | 0  |          |                |    |         |     |     |                                                                  |
| Locus_23987_Transcript_1/1_Conf_1.000 | 304  | 19 | 6.82E-11 | NP_502296.1    | 58 | 70.4774 | 92  | 54  | hypothetical protein M18.3                                       |
| Locus_23988_Transcript_1/1_Conf_1.000 | 183  | 0  |          |                |    |         |     |     |                                                                  |
| Locus_23989_Transcript_1/1_Conf_1.000 | 229  | 0  |          |                |    |         |     |     |                                                                  |
| Locus_2399_Transcript_1/1_Conf_1.000  | 2816 | 20 | 0        | XP_002644820.1 | 87 | 1172.15 | 864 | 757 | C. briggsae CBR-NNT-1 protein                                    |
| Locus_23990_Transcript_1/1_Conf_1.000 | 186  | 0  |          |                |    |         |     |     |                                                                  |
| Locus_23991_Transcript_1/1_Conf_1.000 | 192  | 0  |          |                |    |         |     |     |                                                                  |
| Locus_23992_Transcript_1/1_Conf_1.000 | 148  | 20 | 3.47E-10 | YP_466652.1    | 83 | 68.1662 | 43  | 36  | L-threonine ammonia-lyase                                        |

|                                       |      |    |          |                |    |         |     |     |                                                      |
|---------------------------------------|------|----|----------|----------------|----|---------|-----|-----|------------------------------------------------------|
| Locus_23993_Transcript_1/1_Conf_1.000 | 132  | 3  | 9.54E-05 |                | 67 | 50.0618 | 43  | 29  | ypothetical protein Y39B6B.h                         |
| Locus_23994_Transcript_1/1_Conf_1.000 | 298  | 4  | 1.06E-27 | XP_002638375.1 | 80 | 126.331 | 97  | 78  | Hypothetical protein CBG18580                        |
| Locus_23995_Transcript_1/1_Conf_1.000 | 145  | 1  | 4.87E-04 | NP_494953.3    | 72 | 47.7506 | 40  | 29  | Nematode ASTacin protease family member (nas-29)     |
| Locus_23996_Transcript_1/1_Conf_1.000 | 497  | 0  |          |                |    |         |     |     |                                                      |
| Locus_23997_Transcript_1/1_Conf_1.000 | 417  | 0  |          |                |    |         |     |     |                                                      |
| Locus_23998_Transcript_1/1_Conf_1.000 | 219  | 0  |          |                |    |         |     |     |                                                      |
| Locus_23999_Transcript_1/1_Conf_1.000 | 186  | 0  |          |                |    |         |     |     |                                                      |
| Locus_24_Transcript_1/1_Conf_1.000    | 315  | 0  |          |                |    |         |     |     |                                                      |
| Locus_240_Transcript_1/1_Conf_1.000   | 2181 | 20 | 0        | NP_496273.1    | 96 | 1174.07 | 702 | 674 | Cell Division Cycle related family member (cdc-48.1) |
| Locus_2400_Transcript_1/1_Conf_1.000  | 506  | 20 | 1.57E-42 | XP_002631189.1 | 90 | 175.637 | 103 | 93  | C. briggsae CBR-SDHD-1 protein                       |
| Locus_24000_Transcript_1/1_Conf_1.000 | 172  | 0  |          |                |    |         |     |     |                                                      |
| Locus_24001_Transcript_1/1_Conf_1.000 | 131  | 0  |          |                |    |         |     |     |                                                      |
| Locus_24002_Transcript_1/1_Conf_1.000 | 161  | 0  |          |                |    |         |     |     |                                                      |
| Locus_24003_Transcript_1/1_Conf_1.000 | 138  | 0  |          |                |    |         |     |     |                                                      |
| Locus_24004_Transcript_1/1_Conf_1.000 | 188  | 0  |          |                |    |         |     |     |                                                      |
| Locus_24005_Transcript_1/1_Conf_1.000 | 164  | 0  |          |                |    |         |     |     |                                                      |
| Locus_24006_Transcript_1/1_Conf_1.000 | 187  | 20 | 1.19E-18 | Q03566.2       | 88 | 96.2857 | 51  | 45  | Probable G-protein coupled receptor tkr-1            |
| Locus_24007_Transcript_1/1_Conf_1.000 | 317  | 20 | 9.68E-29 | XP_002630524.1 | 69 | 129.798 | 105 | 73  | Hypothetical protein CBG12962                        |

|                                       |     |    |          |                |    |         |     |     |                                    |
|---------------------------------------|-----|----|----------|----------------|----|---------|-----|-----|------------------------------------|
| Locus_24008_Transcript_1/1_Conf_1.000 | 183 | 1  | 6.35E-04 | XP_002641413.1 | 65 | 47.3654 | 60  | 39  | Hypothetical protein CBG13279      |
| Locus_24009_Transcript_1/1_Conf_1.000 | 170 | 0  |          |                |    |         |     |     |                                    |
| Locus_2401_Transcript_1/1_Conf_1.000  | 620 | 5  | 7.64E-64 | NP_001123059.1 | 76 | 247.284 | 204 | 156 | hypothetical protein Y61A9LA.11    |
| Locus_24010_Transcript_1/1_Conf_1.000 | 330 | 0  |          |                |    |         |     |     |                                    |
| Locus_24011_Transcript_1/1_Conf_1.000 | 156 | 6  | 3.01E-06 | EFO20752.1     | 73 | 55.0694 | 41  | 30  | AMOP domain-containing protein     |
| Locus_24012_Transcript_1/1_Conf_1.000 | 684 | 20 | 7.13E-51 | XP_001897894.1 | 66 | 204.527 | 247 | 165 | ancient conserved domain protein 4 |
| Locus_24013_Transcript_1/1_Conf_1.000 | 152 | 0  |          |                |    |         |     |     |                                    |
| Locus_24014_Transcript_1/1_Conf_1.000 | 211 | 20 | 1.16E-18 | XP_002640591.1 | 77 | 96.2857 | 68  | 53  | Hypothetical protein CBG15874      |
| Locus_24015_Transcript_1/1_Conf_1.000 | 242 | 20 | 5.19E-35 | EFO28104.1     | 97 | 150.599 | 76  | 74  | hypothetical protein LOAG_00390    |
| Locus_24016_Transcript_1/1_Conf_1.000 | 161 | 0  |          |                |    |         |     |     |                                    |
| Locus_24017_Transcript_1/1_Conf_1.000 | 411 | 2  | 1.79E-11 | NP_497340.2    | 59 | 72.4034 | 139 | 83  | CaDHerin family member (cdh-12)    |
| Locus_24018_Transcript_1/1_Conf_1.000 | 265 | 0  |          |                |    |         |     |     |                                    |
| Locus_24019_Transcript_1/1_Conf_1.000 | 301 | 0  |          |                |    |         |     |     |                                    |
| Locus_2402_Transcript_1/1_Conf_1.000  | 281 | 8  | 3.26E-05 | NP_498849.3    | 57 | 51.6026 | 84  | 48  | hypothetical protein R05D3.1       |
| Locus_24020_Transcript_1/1_Conf_1.000 | 204 | 0  |          |                |    |         |     |     |                                    |
| Locus_24021_Transcript_1/1_Conf_1.000 | 284 | 0  |          |                |    |         |     |     |                                    |



|                                       |      |    |           |                |     |         |     |     |                                                            |
|---------------------------------------|------|----|-----------|----------------|-----|---------|-----|-----|------------------------------------------------------------|
| Locus_24022_Transcript_1/1_Conf_1.000 | 214  | 20 | 1.36E-27  | NP_503175.1    | 92  | 125.946 | 71  | 66  | ABC Transporter family member (abt-4)                      |
| Locus_24023_Transcript_1/1_Conf_1.000 | 193  | 20 | 1.65E-12  | NP_500785.1    | 70  | 75.8702 | 64  | 45  | hypothetical protein Y4C6B.6                               |
| Locus_24024_Transcript_1/1_Conf_1.000 | 210  | 20 | 2.25E-30  | NP_004532.1    | 100 | 135.191 | 62  | 62  | NADH dehydrogenase ubiquinone 1 alpha subcomplex subunit 1 |
| Locus_24025_Transcript_1/1_Conf_1.000 | 250  | 0  |           |                |     |         |     |     |                                                            |
| Locus_24026_Transcript_1/1_Conf_1.000 | 235  | 0  |           |                |     |         |     |     |                                                            |
| Locus_24027_Transcript_1/1_Conf_1.000 | 225  | 20 | 5.12E-30  | BAI49947.1     | 85  | 134.035 | 74  | 63  | GLI family zinc finger protein                             |
| Locus_24028_Transcript_1/1_Conf_1.000 | 344  | 0  |           |                |     |         |     |     |                                                            |
| Locus_24029_Transcript_1/1_Conf_1.000 | 320  | 5  | 5.29E-27  | NP_001024085.2 | 95  | 124.02  | 71  | 68  | hypothetical protein R186.8                                |
| Locus_2403_Transcript_1/1_Conf_1.000  | 1475 | 20 | 1.24E-166 | NP_502560.1    | 82  | 590.882 | 376 | 311 | FATty acid desaturase family member (fat-2)                |
| Locus_24030_Transcript_1/1_Conf_1.000 | 133  | 0  |           |                |     |         |     |     |                                                            |
| Locus_24031_Transcript_1/1_Conf_1.000 | 226  | 2  | 6.49E-17  | XP_002634566.1 | 85  | 90.5077 | 64  | 55  | Hypothetical protein CBG08372                              |
| Locus_24032_Transcript_1/1_Conf_1.000 | 228  | 0  |           |                |     |         |     |     |                                                            |

|                                       |      |    |          |                |     |         |     |     |                                    |
|---------------------------------------|------|----|----------|----------------|-----|---------|-----|-----|------------------------------------|
| Locus_24033_Transcript_1/1_Conf_1.000 | 135  | 2  | 1.73E-06 | NP_504508.1    | 76  | 55.8398 | 47  | 36  | hypothetical protein K09H11.1      |
| Locus_24034_Transcript_1/1_Conf_1.000 | 136  | 0  |          |                |     |         |     |     |                                    |
| Locus_24035_Transcript_1/1_Conf_1.000 | 165  | 0  |          |                |     |         |     |     |                                    |
| Locus_24036_Transcript_1/1_Conf_1.000 | 183  | 2  | 8.82E-22 | NP_001122963.1 | 88  | 106.686 | 60  | 53  | hypothetical protein F58E6.1       |
| Locus_24037_Transcript_1/1_Conf_1.000 | 232  | 20 | 1.48E-37 | BAG62774.1     | 100 | 159.073 | 77  | 77  | unnamed protein product            |
| Locus_24038_Transcript_1/1_Conf_1.000 | 162  | 9  | 1.34E-06 | AAO63576.1     | 66  | 56.225  | 53  | 35  | secreted protein 4 precursor       |
| Locus_24039_Transcript_1/1_Conf_1.000 | 275  | 2  | 1.29E-09 | NP_491915.2    | 81  | 66.2402 | 43  | 35  | hypothetical protein ZC581.9       |
| Locus_2404_Transcript_1/1_Conf_1.000  | 2087 | 20 | 1.81E-39 | XP_002640179.1 | 52  | 169.088 | 411 | 217 | Hypothetical protein CBG12682      |
| Locus_24040_Transcript_1/1_Conf_1.000 | 141  | 0  |          |                |     |         |     |     |                                    |
| Locus_24041_Transcript_1/1_Conf_1.000 | 139  | 0  |          |                |     |         |     |     |                                    |
| Locus_24042_Transcript_1/1_Conf_1.000 | 376  | 20 | 9.93E-26 | NP_871661.1    | 75  | 119.783 | 106 | 80  | hypothetical protein F54C8.7       |
| Locus_24043_Transcript_1/1_Conf_1.000 | 237  | 0  |          |                |     |         |     |     |                                    |
| Locus_24044_Transcript_1/1_Conf_1.000 | 252  | 0  |          |                |     |         |     |     |                                    |
| Locus_24045_Transcript_1/1_Conf_1.000 | 546  | 20 | 1.90E-08 | ADI61829.1     | 76  | 62.7734 | 56  | 43  | endonuclease-reverse transcriptase |
| Locus_24046_Transcript_1/1_Conf_1.000 | 183  | 0  |          |                |     |         |     |     |                                    |
| Locus_24047_Transcript_1/1_Conf_1.000 | 301  | 0  |          |                |     |         |     |     |                                    |
| Locus_24048_Transcript_1/1_Conf_1.000 | 169  | 20 | 2.87E-09 | XP_002648446.1 | 67  | 65.0846 | 53  | 36  | Hypothetical protein CBG24721      |
| Locus_24049_Transcript_1/1_Conf_1.000 | 241  | 2  | 2.35E-11 | NP_494213.2    | 84  | 72.0182 | 51  | 43  | hypothetical protein Y59C2A.1      |
| Locus_2405_Transcript_1/4_Conf_0.600  | 721  | 20 | 2.48E-20 | AAO63578.1     | 46  | 103.219 | 204 | 94  | secreted protein 6 precursor       |

|                                       |      |    |          |                |    |         |     |    |                                                                         |
|---------------------------------------|------|----|----------|----------------|----|---------|-----|----|-------------------------------------------------------------------------|
| Locus_2405_Transcript_2/4_Conf_0.500  | 416  | 20 | 2.48E-13 | NP_502498.1    | 52 | 78.5666 | 99  | 52 | SCP-Like extracellular protein family member (scl-10)                   |
| Locus_2405_Transcript_3/4_Conf_0.600  | 766  | 20 | 4.77E-20 | AAO63578.1     | 45 | 102.449 | 204 | 92 | secreted protein 6 precursor                                            |
| Locus_2405_Transcript_4/4_Conf_0.700  | 766  | 20 | 8.14E-20 | AAO63578.1     | 45 | 101.679 | 204 | 93 | secreted protein 6 precursor                                            |
| Locus_24050_Transcript_1/1_Conf_1.000 | 275  | 1  | 8.08E-04 | ZP_05532439.1  | 50 | 46.9802 | 85  | 43 | hypothetical protein SvirD4_18528                                       |
| Locus_24051_Transcript_1/1_Conf_1.000 | 145  | 5  | 1.91E-08 | CAA10033.1     | 75 | 62.3882 | 48  | 36 | DYS-1 protein                                                           |
| Locus_24052_Transcript_1/1_Conf_1.000 | 176  | 2  | 5.57E-05 | NP_508178.2    | 63 | 50.8322 | 58  | 37 | TBC (Tre-2/Bub2/Cdc16) domain family member (tbc-11)                    |
| Locus_24053_Transcript_1/1_Conf_1.000 | 145  | 0  |          |                |    |         |     |    |                                                                         |
| Locus_24054_Transcript_1/1_Conf_1.000 | 320  | 20 | 3.79E-25 | NP_001022327.2 | 67 | 117.857 | 105 | 71 | CalEXcitin family member (cex-2)                                        |
| Locus_24055_Transcript_1/1_Conf_1.000 | 254  | 20 | 3.83E-17 | XP_002647073.1 | 66 | 91.2781 | 84  | 56 | Hypothetical protein CBG03599                                           |
| Locus_24056_Transcript_1/1_Conf_1.000 | 142  | 0  |          |                |    |         |     |    |                                                                         |
| Locus_24057_Transcript_1/1_Conf_1.000 | 155  | 0  |          |                |    |         |     |    |                                                                         |
| Locus_24058_Transcript_1/1_Conf_1.000 | 184  | 4  | 1.19E-10 | AAK31527.3     | 74 | 69.707  | 58  | 43 | Neuronal symmetry protein 1, partially confirmed by transcript evidence |
| Locus_24059_Transcript_1/1_Conf_1.000 | 226  | 0  |          |                |    |         |     |    |                                                                         |
| Locus_2406_Transcript_1/3_Conf_0.714  | 1282 | 4  | 3.45E-05 | AAH48067.1     | 44 | 54.299  | 201 | 89 | Nolc1l protein                                                          |
| Locus_2406_Transcript_2/3_Conf_0.714  | 1306 | 4  | 1.59E-05 | YP_708893.1    | 43 | 55.4546 | 216 | 93 | hypothetical protein RHA1_ro11088                                       |
| Locus_2406_Transcript_3/3_Conf_0.714  | 1306 | 4  | 4.63E-05 | YP_708893.1    | 42 | 53.9138 | 216 | 92 | hypothetical protein RHA1_ro11088                                       |
| Locus_24060_Transcript_1/1_Conf_1.000 | 160  | 0  |          |                |    |         |     |    |                                                                         |
| Locus_24061_Transcript_1/1_Conf_1.000 | 151  | 0  |          |                |    |         |     |    |                                                                         |
| Locus_24062_Transcript_1/1_Conf_1.000 | 285  | 0  |          |                |    |         |     |    |                                                                         |
| Locus_24063_Transcript_1/1_Conf_1.000 | 263  | 0  |          |                |    |         |     |    |                                                                         |
| Locus_24064_Transcript_1/1_Conf_1.000 | 236  | 20 | 4.31E-13 | XP_002640318.1 | 64 | 77.7962 | 76  | 49 | C. briggsae CBR-CLN-3.2 protein                                         |
| Locus_24065_Transcript_1/1_Conf_1.000 | 190  | 0  |          |                |    |         |     |    |                                                                         |
| Locus_24066_Transcript_1/1_Conf_1.000 | 131  | 0  |          |                |    |         |     |    |                                                                         |
| Locus_24067_Transcript_1/1_Conf_1.000 | 187  | 0  |          |                |    |         |     |    |                                                                         |
| Locus_24068_Transcript_1/1_Conf_1.000 | 176  | 0  |          |                |    |         |     |    |                                                                         |
| Locus_24069_Transcript_1/1_Conf_1.000 | 259  | 0  |          |                |    |         |     |    |                                                                         |
| Locus_2407_Transcript_1/1_Conf_1.000  | 160  | 0  |          |                |    |         |     |    |                                                                         |
| Locus_24070_Transcript_1/1_Conf_1.000 | 285  | 20 | 3.45E-18 | NP_491128.4    | 72 | 94.7449 | 84  | 61 | Conserved Oligomeric Golgi (COG) Component family member (cogc-1)       |
| Locus_24071_Transcript_1/1_Conf_1.000 | 155  | 5  | 8.79E-06 | CAD44090.2     | 80 | 53.5286 | 46  | 37 | C. elegans protein C27H6.4b, confirmed by transcript evidence           |
| Locus_24072_Transcript_1/1_Conf_1.000 | 402  | 0  |          |                |    |         |     |    |                                                                         |

|                                       |      |    |           |                |    |         |     |     |                                                                |
|---------------------------------------|------|----|-----------|----------------|----|---------|-----|-----|----------------------------------------------------------------|
| Locus_24073_Transcript_1/1_Conf_1.000 | 139  | 0  |           |                |    |         |     |     |                                                                |
| Locus_24074_Transcript_1/1_Conf_1.000 | 129  | 0  |           |                |    |         |     |     |                                                                |
| Locus_24075_Transcript_1/1_Conf_1.000 | 308  | 20 | 9.47E-21  | NP_491496.1    | 68 | 103.219 | 103 | 71  | Downstream Of Mes (in same operon) family member (dom-3)       |
| Locus_24076_Transcript_1/1_Conf_1.000 | 132  | 0  |           |                |    |         |     |     |                                                                |
| Locus_24077_Transcript_1/1_Conf_1.000 | 144  | 20 | 2.41E-11  | XP_002639452.1 | 92 | 72.0182 | 42  | 39  | Hypothetical protein CBG04047                                  |
| Locus_24078_Transcript_1/1_Conf_1.000 | 172  | 0  |           |                |    |         |     |     |                                                                |
| Locus_24079_Transcript_1/1_Conf_1.000 | 201  | 0  |           |                |    |         |     |     |                                                                |
| Locus_2408_Transcript_1/1_Conf_1.000  | 160  | 0  |           |                |    |         |     |     |                                                                |
| Locus_24080_Transcript_1/1_Conf_1.000 | 335  | 3  | 1.62E-12  | EFO17724.1     | 55 | 75.8702 | 109 | 61  | hypothetical protein LOAG_10773                                |
| Locus_24081_Transcript_1/1_Conf_1.000 | 234  | 0  |           |                |    |         |     |     |                                                                |
| Locus_24082_Transcript_1/1_Conf_1.000 | 147  | 3  | 1.12E-08  | XP_002642237.1 | 82 | 63.1586 | 40  | 33  | Hypothetical protein CBG18219                                  |
| Locus_24083_Transcript_1/1_Conf_1.000 | 221  | 20 | 7.47E-13  | ACI49160.1     | 67 | 77.0258 | 74  | 50  | hypothetical protein Cbre_JD21.007                             |
| Locus_24084_Transcript_1/1_Conf_1.000 | 375  | 20 | 1.34E-30  | NP_509266.1    | 73 | 135.961 | 125 | 92  | hypothetical protein F48E3.2                                   |
| Locus_24085_Transcript_1/1_Conf_1.000 | 473  | 13 | 3.71E-57  | NP_001040915.1 | 84 | 224.172 | 144 | 121 | hypothetical protein C27D8.3                                   |
| Locus_24086_Transcript_1/1_Conf_1.000 | 194  | 20 | 2.63E-18  | EFO22374.1     | 83 | 95.1301 | 62  | 52  | hypothetical protein LOAG_06111                                |
| Locus_24087_Transcript_1/1_Conf_1.000 | 280  | 0  |           |                |    |         |     |     |                                                                |
| Locus_24088_Transcript_1/1_Conf_1.000 | 179  | 9  | 1.01E-22  | NP_492127.1    | 89 | 109.768 | 59  | 53  | Low-density lipoprotein Receptor Related family member (Irp-1) |
| Locus_24089_Transcript_1/1_Conf_1.000 | 184  | 0  |           |                |    |         |     |     |                                                                |
| Locus_2409_Transcript_1/1_Conf_1.000  | 1275 | 20 | 7.04E-168 | NP_492451.2    | 93 | 594.734 | 333 | 313 | hypothetical protein ZK858.6                                   |
| Locus_24090_Transcript_1/1_Conf_1.000 | 411  | 0  |           |                |    |         |     |     |                                                                |
| Locus_24091_Transcript_1/1_Conf_1.000 | 369  | 5  | 1.71E-17  | AAA97973.2     | 79 | 92.4337 | 78  | 62  | Hypothetical protein F21C10.7                                  |
| Locus_24092_Transcript_1/1_Conf_1.000 | 248  | 0  |           |                |    |         |     |     |                                                                |
| Locus_24093_Transcript_1/1_Conf_1.000 | 372  | 0  |           |                |    |         |     |     |                                                                |
| Locus_24094_Transcript_1/1_Conf_1.000 | 152  | 0  |           |                |    |         |     |     |                                                                |
| Locus_24095_Transcript_1/1_Conf_1.000 | 141  | 0  |           |                |    |         |     |     |                                                                |
| Locus_24096_Transcript_1/1_Conf_1.000 | 139  | 20 | 1.51E-10  | XP_002596899.1 | 78 | 69.3218 | 46  | 36  | hypothetical protein BRAFLDRAFT_76408                          |
| Locus_24097_Transcript_1/1_Conf_1.000 | 190  | 0  |           |                |    |         |     |     |                                                                |

|                                       |      |    |           |                |     |         |     |     |                                                |
|---------------------------------------|------|----|-----------|----------------|-----|---------|-----|-----|------------------------------------------------|
| Locus_24098_Transcript_1/1_Conf_1.000 | 233  | 2  | 4.32E-13  | NP_493385.2    | 85  | 77.7962 | 56  | 48  | hypothetical protein Y87G2A.13                 |
| Locus_24099_Transcript_1/1_Conf_1.000 | 309  | 20 | 5.72E-18  | XP_002636521.1 | 67  | 93.9745 | 96  | 65  | Hypothetical protein CBG23202                  |
| Locus_241_Transcript_1/2_Conf_1.000   | 1101 | 20 | 4.03E-97  | NP_498934.1    | 74  | 359.377 | 303 | 226 | abnormal cell MIGration family member (mig-22) |
| Locus_241_Transcript_2/2_Conf_1.000   | 1053 | 20 | 2.77E-100 | NP_498934.1    | 78  | 369.777 | 287 | 226 | abnormal cell MIGration family member (mig-22) |
| Locus_2410_Transcript_1/1_Conf_1.000  | 311  | 0  |           |                |     |         |     |     |                                                |
| Locus_24100_Transcript_1/1_Conf_1.000 | 136  | 0  |           |                |     |         |     |     |                                                |
| Locus_24101_Transcript_1/1_Conf_1.000 | 136  | 20 | 1.97E-18  | BAD92458.1     | 100 | 95.5153 | 44  | 44  | hypothetical protein FLJ41407 variant          |
| Locus_24102_Transcript_1/1_Conf_1.000 | 150  | 0  |           |                |     |         |     |     |                                                |
| Locus_24103_Transcript_1/1_Conf_1.000 | 384  | 0  |           |                |     |         |     |     |                                                |
| Locus_24104_Transcript_1/1_Conf_1.000 | 201  | 20 | 4.03E-11  | NP_001122921.1 | 66  | 71.2478 | 68  | 45  | hypothetical protein F17C11.12                 |
| Locus_24105_Transcript_1/1_Conf_1.000 | 242  | 0  |           |                |     |         |     |     |                                                |
| Locus_24106_Transcript_1/1_Conf_1.000 | 158  | 0  |           |                |     |         |     |     |                                                |

|                                       |      |    |           |                |     |         |     |     |                                                               |
|---------------------------------------|------|----|-----------|----------------|-----|---------|-----|-----|---------------------------------------------------------------|
| Locus_24107_Transcript_1/1_Conf_1.000 | 191  | 20 | 3.00E-30  | XP_002916731.1 | 100 | 134.806 | 63  | 63  | PREDICTED: u4/U6.U5 tri-snRNP-associated protein 1-like       |
| Locus_24108_Transcript_1/1_Conf_1.000 | 134  | 20 | 6.61E-06  | DAA27257.1     | 95  | 53.9138 | 44  | 42  | SPARC                                                         |
| Locus_24109_Transcript_1/1_Conf_1.000 | 218  | 20 | 2.16E-25  | NP_502044.1    | 86  | 118.627 | 72  | 62  | AQuaPorin or aquaglyceroporin related family member (aqp-3)   |
| Locus_2411_Transcript_1/1_Conf_1.000  | 2614 | 20 | 2.92E-106 | XP_001902470.1 | 55  | 391.349 | 585 | 326 | SET domain containing protein                                 |
| Locus_24110_Transcript_1/1_Conf_1.000 | 254  | 0  |           |                |     |         |     |     |                                                               |
| Locus_24111_Transcript_1/1_Conf_1.000 | 137  | 0  |           |                |     |         |     |     |                                                               |
| Locus_24112_Transcript_1/1_Conf_1.000 | 175  | 20 | 1.84E-24  | NP_497696.2    | 96  | 115.546 | 58  | 56  | Pim (mammalian oncogene) Related Kinase family member (prk-2) |
| Locus_24113_Transcript_1/1_Conf_1.000 | 403  |    |           |                |     |         |     |     |                                                               |
| Locus_24114_Transcript_1/1_Conf_1.000 | 263  | 0  |           |                |     |         |     |     |                                                               |
| Locus_24115_Transcript_1/1_Conf_1.000 | 269  | 0  |           |                |     |         |     |     |                                                               |
| Locus_24116_Transcript_1/1_Conf_1.000 | 135  | 0  |           |                |     |         |     |     |                                                               |
| Locus_24117_Transcript_1/1_Conf_1.000 | 139  | 0  |           |                |     |         |     |     |                                                               |

|                                       |      |    |           |                |     |         |     |     |                                                   |
|---------------------------------------|------|----|-----------|----------------|-----|---------|-----|-----|---------------------------------------------------|
| Locus_24118_Transcript_1/1_Conf_1.000 | 251  | 20 | 2.55E-34  | NP_001001392.1 | 98  | 148.288 | 70  | 69  | CD44 antigen isoform 5 precursor                  |
| Locus_24119_Transcript_1/1_Conf_1.000 | 140  | 1  | 6.15E-04  | XP_002640263.1 | 63  | 47.3654 | 46  | 29  | Hypothetical protein CBG12788                     |
| Locus_2412_Transcript_1/1_Conf_1.000  | 1672 | 20 | 2.59E-163 | AAF63404.1     | 99  | 580.096 | 285 | 283 | AF105967_1galectin                                |
| Locus_24120_Transcript_1/1_Conf_1.000 | 206  | 0  |           |                |     |         |     |     |                                                   |
| Locus_24121_Transcript_1/1_Conf_1.000 | 272  | 0  |           |                |     |         |     |     |                                                   |
| Locus_24122_Transcript_1/1_Conf_1.000 | 388  | 2  | 1.98E-10  | XP_002634119.1 | 56  | 68.9366 | 116 | 65  | Hypothetical protein CBG01673                     |
| Locus_24123_Transcript_1/1_Conf_1.000 | 347  | 20 | 1.10E-24  | EFO26647.1     | 73  | 116.316 | 114 | 84  | FYVE zinc finger family protein                   |
| Locus_24124_Transcript_1/1_Conf_1.000 | 332  | 20 | 2.35E-46  | EAX00616.1     | 100 | 110.538 | 46  | 46  | chromosome 2 open reading frame 28, isoform CRA_b |
| Locus_24125_Transcript_1/1_Conf_1.000 | 364  | 20 | 1.08E-32  | XP_001901809.1 | 70  | 142.895 | 118 | 83  | Serine/threonine protein phosphatase PP1-1        |

|                                       |      |    |          |                |    |         |     |     |                                          |
|---------------------------------------|------|----|----------|----------------|----|---------|-----|-----|------------------------------------------|
| Locus_24126_Transcript_1/1_Conf_1.000 | 296  | 0  |          |                |    |         |     |     |                                          |
| Locus_24127_Transcript_1/1_Conf_1.000 | 294  | 20 | 2.37E-19 | NP_741638.1    | 70 | 98.5969 | 92  | 65  | Cytochrome P450 family member (cyp-35C1) |
| Locus_24128_Transcript_1/1_Conf_1.000 | 492  | 20 | 2.41E-48 | XP_002642154.1 | 76 | 194.897 | 161 | 123 | Hypothetical protein CBG18111            |
| Locus_24129_Transcript_1/1_Conf_1.000 | 144  | 20 | 1.16E-13 | XP_001628405.1 | 93 | 79.7221 | 45  | 42  | predicted protein                        |
| Locus_2413_Transcript_1/1_Conf_1.000  | 1443 | 0  |          |                |    |         |     |     |                                          |
| Locus_24130_Transcript_1/1_Conf_1.000 | 184  | 2  | 9.80E-05 | AAN10061.1     | 71 | 50.0618 | 38  | 27  | Kunitz-like protease inhibitor precursor |
| Locus_24131_Transcript_1/1_Conf_1.000 | 173  | 0  |          |                |    |         |     |     |                                          |
| Locus_24132_Transcript_1/1_Conf_1.000 | 459  | 1  | 2.75E-04 | XP_002647046.1 | 56 | 48.521  | 73  | 41  | Hypothetical protein CBG03564            |
| Locus_24133_Transcript_1/1_Conf_1.000 | 321  | 7  | 4.33E-13 | XP_001901084.1 | 66 | 77.7962 | 77  | 51  | hypothetical protein Bm1_48110           |
| Locus_24134_Transcript_1/1_Conf_1.000 | 174  | 0  |          |                |    |         |     |     |                                          |
| Locus_24135_Transcript_1/1_Conf_1.000 | 218  | 0  |          |                |    |         |     |     |                                          |
| Locus_24136_Transcript_1/1_Conf_1.000 | 140  | 0  |          |                |    |         |     |     |                                          |
| Locus_24137_Transcript_1/1_Conf_1.000 | 128  | 0  |          |                |    |         |     |     |                                          |
| Locus_24138_Transcript_1/1_Conf_1.000 | 236  | 2  | 2.21E-17 | NP_492944.2    | 73 | 92.0485 | 75  | 55  | hypothetical protein F32B4.5             |
| Locus_24139_Transcript_1/1_Conf_1.000 | 244  | 20 | 1.98E-18 | NP_510410.1    | 75 | 95.5153 | 77  | 58  | HIStone family member (his-24)           |
| Locus_2414_Transcript_1/2_Conf_1.000  | 1323 | 20 | 3.46E-40 | XP_002641351.1 | 72 | 170.629 | 148 | 108 | C. briggsae CBR-TEG-1 protein            |
| Locus_2414_Transcript_2/2_Conf_1.000  | 820  | 20 | 1.09E-20 | NP_510410.1    | 73 | 104.76  | 89  | 65  | HIStone family member (his-24)           |



|                                       |     |    |          |                |     |         |     |    |                                                       |
|---------------------------------------|-----|----|----------|----------------|-----|---------|-----|----|-------------------------------------------------------|
| Locus_24140_Transcript_1/1_Conf_1.000 | 141 | 20 | 8.80E-19 | XP_002829265.1 | 100 | 96.6709 | 47  | 47 | PREDICTED: rRNA 2'-O-methyltransferase fibrillar-like |
| Locus_24141_Transcript_1/1_Conf_1.000 | 236 | 0  |          |                |     |         |     |    |                                                       |
| Locus_24142_Transcript_1/1_Conf_1.000 | 174 | 20 | 2.57E-26 | AAA18259.1     | 100 | 121.709 | 57  | 57 | protein kinase C                                      |
| Locus_24143_Transcript_1/1_Conf_1.000 | 328 | 20 | 7.59E-10 | XP_001184423.1 | 51  | 67.0106 | 106 | 55 | PREDICTED: similar to alpha-2-macroglobulin receptor  |
| Locus_24144_Transcript_1/1_Conf_1.000 | 133 | 0  |          |                |     |         |     |    |                                                       |
| Locus_24145_Transcript_1/1_Conf_1.000 | 246 | 20 | 6.78E-11 | XP_001990298.1 | 71  | 70.4774 | 67  | 48 | GH18314                                               |
| Locus_24146_Transcript_1/1_Conf_1.000 | 130 | 0  |          |                |     |         |     |    |                                                       |

|                                       |      |    |           |                |     |         |     |     |                                            |
|---------------------------------------|------|----|-----------|----------------|-----|---------|-----|-----|--------------------------------------------|
| Locus_24147_Transcript_1/1_Conf_1.000 | 379  | 20 | 6.62E-30  | XP_002639618.1 | 72  | 133.65  | 118 | 85  | Hypothetical protein CBG12331              |
| Locus_24148_Transcript_1/1_Conf_1.000 | 151  | 0  |           |                |     |         |     |     |                                            |
| Locus_24149_Transcript_1/1_Conf_1.000 | 339  | 0  |           |                |     |         |     |     |                                            |
| Locus_2415_Transcript_1/1_Conf_1.000  | 1170 | 20 | 0         | XP_002642268.1 | 98  | 711.064 | 375 | 370 | C. briggsae CBR-ACT-5 protein              |
| Locus_24150_Transcript_1/1_Conf_1.000 | 206  | 20 | 1.13E-21  | XP_001099076.2 | 100 | 106.301 | 49  | 49  | PREDICTED: hypothetical protein LOC710457  |
| Locus_24151_Transcript_1/1_Conf_1.000 | 347  | 0  |           |                |     |         |     |     |                                            |
| Locus_24152_Transcript_1/1_Conf_1.000 | 343  | 6  | 3.32E-37  | AAK09440.1     | 93  | 157.918 | 86  | 80  | AF339097_1fasciclin-like precursor protein |
| Locus_24153_Transcript_1/1_Conf_1.000 | 160  | 0  |           |                |     |         |     |     |                                            |
| Locus_24154_Transcript_1/1_Conf_1.000 | 128  | 0  |           |                |     |         |     |     |                                            |
| Locus_24155_Transcript_1/1_Conf_1.000 | 278  | 0  |           |                |     |         |     |     |                                            |
| Locus_24156_Transcript_1/1_Conf_1.000 | 328  | 0  |           |                |     |         |     |     |                                            |
| Locus_24157_Transcript_1/1_Conf_1.000 | 323  | 20 | 1.53E-34  | NP_492266.2    | 84  | 149.058 | 106 | 90  | hypothetical protein C34B7.2               |
| Locus_24158_Transcript_1/1_Conf_1.000 | 237  | 0  |           |                |     |         |     |     |                                            |
| Locus_24159_Transcript_1/1_Conf_1.000 | 200  | 20 | 9.95E-10  | NP_499001.1    | 70  | 66.6254 | 57  | 40  | hypothetical protein R107.2                |
| Locus_2416_Transcript_1/1_Conf_1.000  | 1155 | 20 | 9.92E-102 | NP_492781.2    | 81  | 374.785 | 277 | 226 | hypothetical protein B0511.7               |

|                                       |     |    |          |                |    |         |     |    |                                            |
|---------------------------------------|-----|----|----------|----------------|----|---------|-----|----|--------------------------------------------|
| Locus_24160_Transcript_1/1_Conf_1.000 | 450 | 20 | 6.19E-20 | EFO19584.1     | 51 | 100.523 | 156 | 80 | histone acetyltransferase MYST1            |
| Locus_24161_Transcript_1/1_Conf_1.000 | 153 | 20 | 8.48E-17 | XP_002643253.1 | 94 | 90.1225 | 50  | 47 | C. briggsae CBR-AEX-3 protein              |
| Locus_24162_Transcript_1/1_Conf_1.000 | 407 | 0  |          |                |    |         |     |    |                                            |
| Locus_24163_Transcript_1/1_Conf_1.000 | 314 | 20 | 1.89E-32 | XP_002429721.1 | 75 | 142.124 | 104 | 79 | low-density lipoprotein receptor, putative |

|                                       |     |    |          |                |    |         |     |    |                                        |
|---------------------------------------|-----|----|----------|----------------|----|---------|-----|----|----------------------------------------|
| Locus_24164_Transcript_1/1_Conf_1.000 | 285 | 20 | 3.79E-41 | CAD44516.1     | 93 | 171.014 | 95  | 89 | VAB-10B protein                        |
| Locus_24165_Transcript_1/1_Conf_1.000 | 132 | 0  |          |                |    |         |     |    |                                        |
| Locus_24166_Transcript_1/1_Conf_1.000 | 153 | 0  |          |                |    |         |     |    |                                        |
| Locus_24167_Transcript_1/1_Conf_1.000 | 228 | 0  |          |                |    |         |     |    |                                        |
| Locus_24168_Transcript_1/1_Conf_1.000 | 219 | 0  |          |                |    |         |     |    |                                        |
| Locus_24169_Transcript_1/1_Conf_1.000 | 217 | 18 | 1.04E-19 | XP_002643289.1 | 82 | 99.7525 | 68  | 56 | C. briggsae CBR-DVE-1 protein          |
| Locus_2417_Transcript_1/2_Conf_1.000  | 896 | 0  |          |                |    |         |     |    |                                        |
| Locus_2417_Transcript_2/2_Conf_1.000  | 887 | 0  |          |                |    |         |     |    |                                        |
| Locus_24170_Transcript_1/1_Conf_1.000 | 138 | 0  |          |                |    |         |     |    |                                        |
| Locus_24171_Transcript_1/1_Conf_1.000 | 179 | 0  |          |                |    |         |     |    |                                        |
| Locus_24172_Transcript_1/1_Conf_1.000 | 198 | 0  |          |                |    |         |     |    |                                        |
| Locus_24173_Transcript_1/1_Conf_1.000 | 368 | 2  | 2.10E-12 | XP_002630024.1 | 76 | 75.485  | 51  | 39 | Hypothetical protein CBG13391          |
| Locus_24174_Transcript_1/1_Conf_1.000 | 351 | 0  |          |                |    |         |     |    |                                        |
| Locus_24175_Transcript_1/1_Conf_1.000 | 131 | 0  |          |                |    |         |     |    |                                        |
| Locus_24176_Transcript_1/1_Conf_1.000 | 251 | 20 | 8.49E-30 | XP_002634445.1 | 81 | 133.265 | 83  | 68 | Hypothetical protein CBG04460          |
| Locus_24177_Transcript_1/1_Conf_1.000 | 281 | 0  |          |                |    |         |     |    |                                        |
| Locus_24178_Transcript_1/1_Conf_1.000 | 234 | 20 | 7.83E-23 | XP_002603816.1 | 81 | 110.153 | 76  | 62 | hypothetical protein BRAFLDRAFT_124685 |
| Locus_24179_Transcript_1/1_Conf_1.000 | 331 | 4  | 6.61E-14 | EFO19179.1     | 61 | 80.4925 | 115 | 71 | hypothetical protein LOAG_09315        |
| Locus_2418_Transcript_1/1_Conf_1.000  | 485 | 20 | 2.37E-27 | NP_497641.2    | 60 | 125.176 | 150 | 91 | CaDHerin family member (cdh-1)         |

|                                       |      |    |          |                |     |         |     |     |                                                                             |
|---------------------------------------|------|----|----------|----------------|-----|---------|-----|-----|-----------------------------------------------------------------------------|
| Locus_24180_Transcript_1/1_Conf_1.000 | 359  | 14 | 6.82E-19 | NP_505989.1    | 57  | 97.0561 | 135 | 78  | SULfate Permease family member (sulp-4)                                     |
| Locus_24181_Transcript_1/1_Conf_1.000 | 291  | 0  |          |                |     |         |     |     |                                                                             |
| Locus_24182_Transcript_1/1_Conf_1.000 | 155  | 0  |          |                |     |         |     |     |                                                                             |
| Locus_24183_Transcript_1/1_Conf_1.000 | 203  | 0  |          |                |     |         |     |     |                                                                             |
| Locus_24184_Transcript_1/1_Conf_1.000 | 208  | 0  |          |                |     |         |     |     |                                                                             |
| Locus_24185_Transcript_1/1_Conf_1.000 | 208  | 20 | 7.49E-34 | XP_002809493.1 | 100 | 146.747 | 65  | 65  | PREDICTED: bifunctional aminoacyl-tRNA synthetase                           |
| Locus_24186_Transcript_1/1_Conf_1.000 | 166  | 0  |          |                |     |         |     |     |                                                                             |
| Locus_24187_Transcript_1/1_Conf_1.000 | 306  | 2  | 1.98E-10 | NP_509809.2    | 60  | 68.9366 | 88  | 53  | hypothetical protein C05A9.2                                                |
| Locus_24188_Transcript_1/1_Conf_1.000 | 245  | 0  |          |                |     |         |     |     |                                                                             |
| Locus_24189_Transcript_1/1_Conf_1.000 | 164  | 0  |          |                |     |         |     |     |                                                                             |
| Locus_2419_Transcript_1/1_Conf_1.000  | 1171 | 20 | 3.20E-47 | XP_002645722.1 | 63  | 193.741 | 234 | 149 | C. briggsae CBR-ADM-2 protein                                               |
| Locus_24190_Transcript_1/1_Conf_1.000 | 206  | 0  |          |                |     |         |     |     |                                                                             |
| Locus_24191_Transcript_1/1_Conf_1.000 | 166  | 20 | 3.28E-21 | AAI00854.1     | 100 | 104.76  | 52  | 52  | Cytochrome c oxidase subunit VIIa polypeptide 2 (liver)                     |
| Locus_24192_Transcript_1/1_Conf_1.000 | 154  | 20 | 3.33E-13 | XP_002642408.1 | 84  | 78.1814 | 50  | 42  | C. briggsae CBR-NHL-1 protein                                               |
| Locus_24193_Transcript_1/1_Conf_1.000 | 178  | 0  |          |                |     |         |     |     |                                                                             |
| Locus_24194_Transcript_1/1_Conf_1.000 | 312  | 20 | 3.23E-24 | XP_001901686.1 | 72  | 114.775 | 99  | 72  | Cohesin subunit SA-1                                                        |
| Locus_24195_Transcript_1/1_Conf_1.000 | 279  | 0  |          |                |     |         |     |     |                                                                             |
| Locus_24196_Transcript_1/1_Conf_1.000 | 286  | 0  |          |                |     |         |     |     |                                                                             |
| Locus_24197_Transcript_1/1_Conf_1.000 | 146  | 0  |          |                |     |         |     |     |                                                                             |
| Locus_24198_Transcript_1/1_Conf_1.000 | 432  | 20 | 1.40E-64 | NP_871810.1    | 93  | 248.825 | 143 | 133 | HAIF transporter (PGP related) family member (haf-9)                        |
| Locus_24199_Transcript_1/1_Conf_1.000 | 264  | 20 | 1.81E-27 | NP_495790.1    | 81  | 125.561 | 87  | 71  | beta-LACTamase domain containing family member (lact-4)                     |
| Locus_242_Transcript_1/1_Conf_1.000   | 464  | 20 | 1.48E-37 | NP_001021606.1 | 72  | 159.073 | 131 | 95  | hypothetical protein T03F1.12                                               |
| Locus_2420_Transcript_1/1_Conf_1.000  | 296  | 0  |          |                |     |         |     |     |                                                                             |
| Locus_24200_Transcript_1/1_Conf_1.000 | 144  | 5  | 2.11E-07 | NP_001129925.1 | 74  | 58.9214 | 47  | 35  | High Incidence of Males (increased X chromosome loss) family member (him-4) |

|                                       |     |    |          |                |     |         |     |     |                                                                                |
|---------------------------------------|-----|----|----------|----------------|-----|---------|-----|-----|--------------------------------------------------------------------------------|
| Locus_24201_Transcript_1/1_Conf_1.000 | 240 | 20 | 9.53E-13 | EFO15112.1     | 69  | 76.6406 | 76  | 53  | hypothetical protein LOAG_13403                                                |
| Locus_24202_Transcript_1/1_Conf_1.000 | 131 | 0  |          |                |     |         |     |     |                                                                                |
| Locus_24203_Transcript_1/1_Conf_1.000 | 216 | 0  |          |                |     |         |     |     |                                                                                |
| Locus_24204_Transcript_1/1_Conf_1.000 | 311 | 0  |          |                |     |         |     |     |                                                                                |
| Locus_24205_Transcript_1/1_Conf_1.000 | 150 | 20 | 1.19E-10 | XP_002634930.1 | 82  | 69.707  | 46  | 38  | Hypothetical protein CBG22529                                                  |
| Locus_24206_Transcript_1/1_Conf_1.000 | 138 | 0  |          |                |     |         |     |     |                                                                                |
| Locus_24207_Transcript_1/1_Conf_1.000 | 194 | 4  | 6.32E-14 | XP_002631791.1 | 77  | 68.1662 | 48  | 37  | Hypothetical protein CBG21009                                                  |
| Locus_24208_Transcript_1/1_Conf_1.000 | 168 | 14 | 1.47E-13 | XP_002644186.1 | 85  | 79.337  | 54  | 46  | Hypothetical protein CBG17168                                                  |
| Locus_24209_Transcript_1/1_Conf_1.000 | 522 | 20 | 6.05E-35 | XP_002632055.1 | 61  | 150.599 | 181 | 111 | C. briggsae CBR-VAB-19 protein                                                 |
| Locus_2421_Transcript_1/1_Conf_1.000  | 882 | 20 | 4.08E-72 | XP_001900701.1 | 65  | 275.789 | 286 | 187 | hypothetical protein Bm1_46195                                                 |
| Locus_24210_Transcript_1/1_Conf_1.000 | 265 | 20 | 1.29E-41 | XP_002633950.1 | 87  | 172.555 | 88  | 77  | C. briggsae CBR-FBL-1 protein                                                  |
| Locus_24211_Transcript_1/1_Conf_1.000 | 292 | 0  |          |                |     |         |     |     |                                                                                |
| Locus_24212_Transcript_1/1_Conf_1.000 | 163 | 0  |          |                |     |         |     |     |                                                                                |
| Locus_24213_Transcript_1/1_Conf_1.000 | 137 | 0  |          |                |     |         |     |     |                                                                                |
| Locus_24214_Transcript_1/1_Conf_1.000 | 159 | 20 | 5.64E-21 | XP_002923631.1 | 100 | 103.99  | 52  | 52  | PREDICTED: sodium/potassium-transporting ATPase subunit alpha-1-like isoform 2 |

|                                       |     |    |          |                |     |         |     |    |                                                           |
|---------------------------------------|-----|----|----------|----------------|-----|---------|-----|----|-----------------------------------------------------------|
| Locus_24215_Transcript_1/1_Conf_1.000 | 270 | 10 | 1.21E-15 | EFO20077.1     | 75  | 86.2705 | 72  | 54 | hypothetical protein LOAG_08413                           |
| Locus_24216_Transcript_1/1_Conf_1.000 | 253 | 0  |          |                |     |         |     |    |                                                           |
| Locus_24217_Transcript_1/1_Conf_1.000 | 405 | 1  | 2.70E-07 | YP_002000086.1 | 45  | 58.5362 | 97  | 44 | virulence-associated lipoprotein MIA                      |
| Locus_24218_Transcript_1/1_Conf_1.000 | 184 | 1  | 3.72E-04 | AAO63576.1     | 53  | 48.1358 | 62  | 33 | secreted protein 4 precursor                              |
| Locus_24219_Transcript_1/1_Conf_1.000 | 379 | 4  | 7.85E-15 | XP_002631397.1 | 56  | 83.5741 | 121 | 68 | C. briggsae CBR-DEP-1 protein                             |
| Locus_2422_Transcript_1/1_Conf_1.000  | 360 | 0  |          |                |     |         |     |    |                                                           |
| Locus_24220_Transcript_1/1_Conf_1.000 | 375 | 20 | 4.75E-36 | XP_002635372.1 | 80  | 154.066 | 118 | 95 | C. briggsae CBR-RPM-1 protein                             |
| Locus_24221_Transcript_1/1_Conf_1.000 | 151 | 20 | 3.95E-14 | ADM44660.1     | 82  | 81.2629 | 51  | 42 | immunoglobulin epsilon heavy chain variable region        |
| Locus_24222_Transcript_1/1_Conf_1.000 | 139 | 0  |          |                |     |         |     |    |                                                           |
| Locus_24223_Transcript_1/1_Conf_1.000 | 195 | 20 | 9.94E-26 | NP_495986.3    | 98  | 119.783 | 65  | 64 | EATing: abnormal pharyngeal pumping family member (eat-3) |
| Locus_24224_Transcript_1/1_Conf_1.000 | 136 | 0  |          |                |     |         |     |    |                                                           |
| Locus_24225_Transcript_1/1_Conf_1.000 | 298 | 0  |          |                |     |         |     |    |                                                           |
| Locus_24226_Transcript_1/1_Conf_1.000 | 142 | 20 | 9.41E-21 | XP_001713909.1 | 100 | 103.219 | 46  | 46 | PREDICTED: similar to MHC class II antigen                |
| Locus_24227_Transcript_1/1_Conf_1.000 | 253 | 7  | 5.91E-18 | NP_494897.3    | 66  | 93.9745 | 80  | 53 | hypothetical protein R05F9.12                             |
| Locus_24228_Transcript_1/1_Conf_1.000 | 221 | 0  |          |                |     |         |     |    |                                                           |
| Locus_24229_Transcript_1/1_Conf_1.000 | 244 | 0  |          |                |     |         |     |    |                                                           |

|                                       |      |    |           |                |     |         |     |     |                                                               |
|---------------------------------------|------|----|-----------|----------------|-----|---------|-----|-----|---------------------------------------------------------------|
| Locus_2423_Transcript_1/2_Conf_1.000  | 1601 | 20 | 1.59E-138 | XP_002637274.1 | 81  | 497.664 | 356 | 291 | Hypothetical protein CBG18957                                 |
| Locus_2423_Transcript_2/2_Conf_1.000  | 1541 | 20 | 6.60E-142 | XP_002637274.1 | 86  | 508.834 | 336 | 289 | Hypothetical protein CBG18957                                 |
| Locus_24230_Transcript_1/1_Conf_1.000 | 266  | 20 | 1.53E-18  | EFO24692.1     | 70  | 95.9005 | 86  | 61  | protein-tyrosine phosphatase                                  |
| Locus_24231_Transcript_1/1_Conf_1.000 | 265  | 12 | 5.64E-13  | XP_002640224.1 | 68  | 77.411  | 83  | 57  | C. briggsae CBR-SMG-1 protein                                 |
| Locus_24232_Transcript_1/1_Conf_1.000 | 129  | 0  |           |                |     |         |     |     |                                                               |
| Locus_24233_Transcript_1/1_Conf_1.000 | 132  | 0  |           |                |     |         |     |     |                                                               |
| Locus_24234_Transcript_1/1_Conf_1.000 | 162  | 20 | 1.58E-23  | DAA31575.1     | 100 | 112.464 | 53  | 53  | cold shock domain containing E1, RNA-binding                  |
| Locus_24235_Transcript_1/1_Conf_1.000 | 520  | 0  |           |                |     |         |     |     |                                                               |
| Locus_24236_Transcript_1/1_Conf_1.000 | 221  | 20 | 3.95E-30  | NP_741812.1    | 89  | 134.42  | 73  | 65  | hypothetical protein T07H6.1                                  |
| Locus_24237_Transcript_1/1_Conf_1.000 | 200  | 20 | 2.00E-18  | NP_872022.1    | 80  | 95.5153 | 65  | 52  | CysTiNoSin (lysosomal protein) homolog family member (ctns-1) |
| Locus_24238_Transcript_1/1_Conf_1.000 | 149  | 0  |           |                |     |         |     |     |                                                               |
| Locus_24239_Transcript_1/1_Conf_1.000 | 234  | 0  |           |                |     |         |     |     |                                                               |
| Locus_2424_Transcript_1/2_Conf_1.000  | 1973 | 20 | 3.29E-152 | NP_491664.1    | 61  | 543.502 | 685 | 423 | UNCoordinated family member (unc-40)                          |
| Locus_2424_Transcript_2/2_Conf_1.000  | 1793 | 20 | 3.67E-171 | NP_491664.1    | 69  | 606.29  | 625 | 432 | UNCoordinated family member (unc-40)                          |
| Locus_24240_Transcript_1/1_Conf_1.000 | 313  | 0  |           |                |     |         |     |     |                                                               |
| Locus_24241_Transcript_1/1_Conf_1.000 | 418  | 0  |           |                |     |         |     |     |                                                               |
| Locus_24242_Transcript_1/1_Conf_1.000 | 357  | 3  | 6.18E-12  | NP_001023197.1 | 64  | 73.9442 | 111 | 72  | hypothetical protein F38E11.6                                 |
| Locus_24243_Transcript_1/1_Conf_1.000 | 181  | 2  | 4.12E-11  | XP_001898554.1 | 72  | 71.2478 | 59  | 43  | DOMON domain containing protein                               |



|                                       |     |    |          |                |    |         |    |    |                                                 |
|---------------------------------------|-----|----|----------|----------------|----|---------|----|----|-------------------------------------------------|
| Locus_24244_Transcript_1/1_Conf_1.000 | 150 | 20 | 6.09E-15 | XP_002640668.1 | 97 | 83.9593 | 45 | 44 | C. briggsae CBR-UNC-54 protein                  |
| Locus_24245_Transcript_1/1_Conf_1.000 | 249 | 0  |          |                |    |         |    |    |                                                 |
| Locus_24246_Transcript_1/1_Conf_1.000 | 280 | 0  |          |                |    |         |    |    |                                                 |
| Locus_24247_Transcript_1/1_Conf_1.000 | 212 | 20 | 1.41E-24 | NP_508573.1    | 85 | 115.931 | 70 | 60 | Discoidin Domain Receptor family member (ddr-2) |
| Locus_24248_Transcript_1/1_Conf_1.000 | 220 | 0  |          |                |    |         |    |    |                                                 |
| Locus_24249_Transcript_1/1_Conf_1.000 | 415 | 0  |          |                |    |         |    |    |                                                 |

|                                       |      |    |          |                |    |         |     |     |                                                       |
|---------------------------------------|------|----|----------|----------------|----|---------|-----|-----|-------------------------------------------------------|
| Locus_2425_Transcript_1/1_Conf_1.000  | 1947 | 20 | 0        | NP_490866.4    | 95 | 833.558 | 463 | 442 | SRC oncogene related family member (src-1)            |
| Locus_24250_Transcript_1/1_Conf_1.000 | 412  | 20 | 3.37E-18 | XP_002631639.1 | 62 | 94.7449 | 116 | 73  | Hypothetical protein CBG20828                         |
| Locus_24251_Transcript_1/1_Conf_1.000 | 169  | 0  |          |                |    |         |     |     |                                                       |
| Locus_24252_Transcript_1/1_Conf_1.000 | 165  | 0  |          |                |    |         |     |     |                                                       |
| Locus_24253_Transcript_1/1_Conf_1.000 | 195  | 20 | 2.53E-21 | NP_495697.2    | 90 | 105.145 | 64  | 58  | Lim and Transglutaminase Domain family member (ltd-1) |
| Locus_24254_Transcript_1/1_Conf_1.000 | 246  | 0  |          |                |    |         |     |     |                                                       |
| Locus_24255_Transcript_1/1_Conf_1.000 | 174  | 2  | 9.19E-08 | XP_002646794.1 | 75 | 60.077  | 53  | 40  | C. briggsae CBR-RHGF-2 protein                        |
| Locus_24256_Transcript_1/1_Conf_1.000 | 219  | 0  |          |                |    |         |     |     |                                                       |
| Locus_24257_Transcript_1/1_Conf_1.000 | 131  | 0  |          |                |    |         |     |     |                                                       |
| Locus_24258_Transcript_1/1_Conf_1.000 | 208  | 2  | 4.89E-09 | NP_490719.1    | 69 | 64.3142 | 53  | 37  | hypothetical protein Y48G1A.3                         |
| Locus_24259_Transcript_1/1_Conf_1.000 | 600  | 6  | 1.06E-35 | CAR63655.1     | 94 | 153.68  | 73  | 69  | hypothetical protein                                  |
| Locus_2426_Transcript_1/1_Conf_1.000  | 502  | 20 | 1.71E-09 | EFO21554.1     | 56 | 65.855  | 81  | 46  | hypothetical protein LOAG_06935                       |
| Locus_24260_Transcript_1/1_Conf_1.000 | 297  | 20 | 7.28E-45 | NP_498931.2    | 91 | 183.341 | 101 | 92  | SMALL family member (sma-2)                           |
| Locus_24261_Transcript_1/1_Conf_1.000 | 142  | 0  |          |                |    |         |     |     |                                                       |
| Locus_24262_Transcript_1/1_Conf_1.000 | 204  | 0  |          |                |    |         |     |     |                                                       |
| Locus_24263_Transcript_1/1_Conf_1.000 | 168  | 0  |          |                |    |         |     |     |                                                       |
| Locus_24264_Transcript_1/1_Conf_1.000 | 181  | 0  |          |                |    |         |     |     |                                                       |

|                                       |     |    |          |                |     |         |     |     |                                                                       |
|---------------------------------------|-----|----|----------|----------------|-----|---------|-----|-----|-----------------------------------------------------------------------|
| Locus_24265_Transcript_1/1_Conf_1.000 | 186 | 20 | 4.35E-29 | XP_002831612.1 | 100 | 130.954 | 61  | 61  | PREDICTED: NADH dehydrogenase ubiquinone 1 alpha subcomplex subunit 4 |
| Locus_24266_Transcript_1/1_Conf_1.000 | 278 | 9  | 7.76E-15 | NP_498229.3    | 74  | 83.5741 | 81  | 60  | Regulator of G protein Signaling family member (rgs-5)                |
| Locus_24267_Transcript_1/1_Conf_1.000 | 178 | 0  |          |                |     |         |     |     |                                                                       |
| Locus_24268_Transcript_1/1_Conf_1.000 | 189 | 0  |          |                |     |         |     |     |                                                                       |
| Locus_24269_Transcript_1/1_Conf_1.000 | 160 | 0  |          |                |     |         |     |     |                                                                       |
| Locus_2427_Transcript_1/3_Conf_0.714  | 957 | 20 | 3.62E-32 | EFO20353.1     | 60  | 143.28  | 175 | 106 | hypothetical protein LOAG_08138                                       |
| Locus_2427_Transcript_2/3_Conf_0.429  | 888 | 20 | 9.31E-32 | EFO20353.1     | 62  | 141.739 | 158 | 99  | hypothetical protein LOAG_08138                                       |
| Locus_2427_Transcript_3/3_Conf_0.714  | 888 | 20 | 9.31E-32 | EFO20353.1     | 62  | 141.739 | 158 | 99  | hypothetical protein LOAG_08138                                       |
| Locus_24270_Transcript_1/1_Conf_1.000 | 216 | 20 | 7.73E-07 | BAC54021.1     | 58  | 56.9954 | 58  | 34  | C-type lectin 2                                                       |
| Locus_24271_Transcript_1/1_Conf_1.000 | 150 | 0  |          |                |     |         |     |     |                                                                       |
| Locus_24272_Transcript_1/1_Conf_1.000 | 240 | 20 | 3.28E-13 | XP_002634543.1 | 80  | 78.1814 | 71  | 57  | C. briggsae CBR-CED-5 protein                                         |
| Locus_24273_Transcript_1/1_Conf_1.000 | 156 | 0  |          |                |     |         |     |     |                                                                       |
| Locus_24274_Transcript_1/1_Conf_1.000 | 225 | 4  | 3.68E-12 | EFO20220.1     | 80  | 74.7146 | 56  | 45  | hypothetical protein LOAG_08273                                       |
| Locus_24275_Transcript_1/1_Conf_1.000 | 228 | 9  | 3.21E-16 | NP_001122921.1 | 74  | 88.1965 | 74  | 55  | hypothetical protein F17C11.12                                        |

|                                       |      |    |           |                |     |         |     |     |                                                         |
|---------------------------------------|------|----|-----------|----------------|-----|---------|-----|-----|---------------------------------------------------------|
| Locus_24276_Transcript_1/1_Conf_1.000 | 145  | 20 | 3.48E-10  | NP_496115.1    | 81  | 68.1662 | 48  | 39  | Cytochrome P450 family member (cyp-13A8)                |
| Locus_24277_Transcript_1/1_Conf_1.000 | 357  | 20 | 4.68E-52  | XP_002629849.1 | 94  | 207.223 | 117 | 110 | C. briggsae CBR-RAB-39 protein                          |
| Locus_24278_Transcript_1/1_Conf_1.000 | 213  | 0  |           |                |     |         |     |     |                                                         |
| Locus_24279_Transcript_1/1_Conf_1.000 | 240  | 0  |           |                |     |         |     |     |                                                         |
| Locus_2428_Transcript_1/1_Conf_1.000  | 604  | 20 | 3.13E-27  | NP_492063.1    | 80  | 125.561 | 89  | 72  | DYnein Light chain (Tctex type family member (dylt-1))  |
| Locus_24280_Transcript_1/1_Conf_1.000 | 484  | 20 | 2.45E-40  | NP_495790.1    | 73  | 168.318 | 145 | 107 | beta-LACTamase domain containing family member (lact-4) |
| Locus_24281_Transcript_1/1_Conf_1.000 | 137  | 0  |           |                |     |         |     |     |                                                         |
| Locus_24282_Transcript_1/1_Conf_1.000 | 206  | 2  | 6.19E-12  | XP_002633595.1 | 88  | 73.9442 | 43  | 38  | Hypothetical protein CBG05472                           |
| Locus_24283_Transcript_1/1_Conf_1.000 | 184  | 0  |           |                |     |         |     |     |                                                         |
| Locus_24284_Transcript_1/1_Conf_1.000 | 154  | 0  |           |                |     |         |     |     |                                                         |
| Locus_24285_Transcript_1/1_Conf_1.000 | 143  | 0  |           |                |     |         |     |     |                                                         |
| Locus_24286_Transcript_1/1_Conf_1.000 | 141  | 0  |           |                |     |         |     |     |                                                         |
| Locus_24287_Transcript_1/1_Conf_1.000 | 334  | 11 | 9.48E-21  | NP_496106.2    | 72  | 103.219 | 88  | 64  | hypothetical protein ZK1321.4                           |
| Locus_24288_Transcript_1/1_Conf_1.000 | 198  | 0  |           |                |     |         |     |     |                                                         |
| Locus_24289_Transcript_1/1_Conf_1.000 | 161  | 0  |           |                |     |         |     |     |                                                         |
| Locus_2429_Transcript_1/2_Conf_1.000  | 1332 | 20 | 1.81E-121 | NP_501711.1    | 68  | 440.654 | 445 | 307 | AMPHiphysin homolog family member (amph-1)              |
| Locus_2429_Transcript_2/2_Conf_1.000  | 756  | 20 | 1.71E-22  | XP_002633971.1 | 80  | 110.538 | 73  | 59  | C. briggsae CBR-AMPH-1 protein                          |
| Locus_24290_Transcript_1/1_Conf_1.000 | 179  | 0  |           |                |     |         |     |     |                                                         |
| Locus_24291_Transcript_1/1_Conf_1.000 | 288  | 0  |           |                |     |         |     |     |                                                         |
| Locus_24292_Transcript_1/1_Conf_1.000 | 177  | 20 | 2.10E-20  | NP_741242.1    | 91  | 102.064 | 59  | 54  | Dipeptidyl Peptidase Four (IV) family member (dpf-6)    |
| Locus_24293_Transcript_1/1_Conf_1.000 | 132  | 20 | 1.68E-17  | DAA31575.1     | 100 | 92.4337 | 43  | 43  | cold shock domain containing E1, RNA-binding            |

|                                       |     |    |           |                |     |         |     |     |                                                            |
|---------------------------------------|-----|----|-----------|----------------|-----|---------|-----|-----|------------------------------------------------------------|
| Locus_24294_Transcript_1/1_Conf_1.000 | 259 | 20 | 6.49E-17  | XP_001899548.1 | 66  | 90.5077 | 87  | 58  | Immunoglobulin I-set domain containing protein             |
| Locus_24295_Transcript_1/1_Conf_1.000 | 144 | 0  |           |                |     |         |     |     |                                                            |
| Locus_24296_Transcript_1/1_Conf_1.000 | 302 | 0  |           |                |     |         |     |     |                                                            |
| Locus_24297_Transcript_1/1_Conf_1.000 | 273 | 6  | 4.58E-07  | EFO18390.1     | 54  | 57.7658 | 83  | 45  | hypothetical protein LOAG_10106                            |
| Locus_24298_Transcript_1/1_Conf_1.000 | 135 | 20 | 6.36E-09  | NP_001014338.1 | 79  | 63.929  | 44  | 35  | 3-hydroxyisobutyryl-CoA hydrolase, mitochondrial precursor |
| Locus_24299_Transcript_1/1_Conf_1.000 | 389 | 20 | 2.64E-47  | NP_508711.1    | 83  | 191.43  | 128 | 107 | Vacuolar H ATPase family member (vha-12)                   |
| Locus_243_Transcript_1/2_Conf_1.000   | 330 | 20 | 3.24E-53  | EFO21508.1     | 100 | 211.075 | 109 | 109 | ubiquitin C II                                             |
| Locus_243_Transcript_2/2_Conf_1.000   | 828 | 20 | 3.59E-136 | EFO21508.1     | 100 | 488.419 | 255 | 255 | ubiquitin C II                                             |
| Locus_2430_Transcript_1/1_Conf_1.000  | 497 | 20 | 6.92E-72  | XP_001477246.1 | 100 | 273.092 | 135 | 135 | PREDICTED: similar to ribosomal protein                    |
| Locus_24300_Transcript_1/1_Conf_1.000 | 155 | 0  |           |                |     |         |     |     |                                                            |
| Locus_24301_Transcript_1/1_Conf_1.000 | 163 | 20 | 6.87E-19  | XP_001895981.1 | 94  | 97.0561 | 53  | 50  | probable spectrin beta chain                               |
| Locus_24302_Transcript_1/1_Conf_1.000 | 145 | 0  |           |                |     |         |     |     |                                                            |
| Locus_24303_Transcript_1/1_Conf_1.000 | 161 | 0  |           |                |     |         |     |     |                                                            |

|                                       |      |    |          |                |    |         |     |     |                                           |
|---------------------------------------|------|----|----------|----------------|----|---------|-----|-----|-------------------------------------------|
| Locus_24304_Transcript_1/1_Conf_1.000 | 313  | 20 | 2.10E-15 | XP_002426250.1 | 67 | 85.5001 | 67  | 45  | Ubl carboxyl-terminal hydrolase, putative |
| Locus_24305_Transcript_1/1_Conf_1.000 | 157  | 0  |          |                |    |         |     |     |                                           |
| Locus_24306_Transcript_1/1_Conf_1.000 | 233  | 0  |          |                |    |         |     |     |                                           |
| Locus_24307_Transcript_1/1_Conf_1.000 | 141  | 7  | 7.22E-13 | XP_001899214.1 | 80 | 77.0258 | 46  | 37  | MSP domain protein 2                      |
| Locus_24308_Transcript_1/1_Conf_1.000 | 154  | 0  |          |                |    |         |     |     |                                           |
| Locus_24309_Transcript_1/1_Conf_1.000 | 198  | 0  |          |                |    |         |     |     |                                           |
| Locus_2431_Transcript_1/1_Conf_1.000  | 1226 | 20 | 0        | AAF86584.1     | 95 | 649.047 | 339 | 323 | cathepsin L cysteine protease             |
| Locus_24310_Transcript_1/1_Conf_1.000 | 221  | 0  |          |                |    |         |     |     |                                           |
| Locus_24311_Transcript_1/1_Conf_1.000 | 230  | 0  |          |                |    |         |     |     |                                           |
| Locus_24312_Transcript_1/1_Conf_1.000 | 866  | 17 | 1.17E-15 | NP_001022738.1 | 47 | 88.1965 | 270 | 127 | hypothetical protein R74.8                |
| Locus_24313_Transcript_1/1_Conf_1.000 | 304  | 20 | 3.15E-32 | XP_002647589.1 | 84 | 141.354 | 100 | 84  | Hypothetical protein CBG06677             |
| Locus_24314_Transcript_1/1_Conf_1.000 | 295  | 0  |          |                |    |         |     |     |                                           |
| Locus_24315_Transcript_1/1_Conf_1.000 | 278  | 14 | 1.67E-09 | NP_741839.2    | 52 | 65.855  | 78  | 41  | hypothetical protein F48E3.8              |
| Locus_24316_Transcript_1/1_Conf_1.000 | 442  | 20 | 6.43E-49 | XP_002634964.1 | 77 | 196.823 | 146 | 113 | Hypothetical protein CBG13500             |
| Locus_24317_Transcript_1/1_Conf_1.000 | 146  | 5  | 1.67E-12 | XP_001893342.1 | 87 | 75.8702 | 48  | 42  | chloride channel protein 7                |
| Locus_24318_Transcript_1/1_Conf_1.000 | 361  | 0  |          |                |    |         |     |     |                                           |
| Locus_24319_Transcript_1/1_Conf_1.000 | 219  | 1  | 2.57E-13 | NP_508464.2    | 77 | 78.5666 | 68  | 53  | hypothetical protein F52H2.7              |
| Locus_2432_Transcript_1/2_Conf_1.000  | 590  | 20 | 7.59E-52 | NP_492097.1    | 77 | 207.223 | 164 | 127 | hypothetical protein ZK524.4              |
| Locus_2432_Transcript_2/2_Conf_1.000  | 649  | 20 | 9.77E-52 | NP_492097.1    | 77 | 207.223 | 164 | 127 | hypothetical protein ZK524.4              |
| Locus_24320_Transcript_1/1_Conf_1.000 | 191  | 19 | 2.02E-18 | XP_002642115.1 | 84 | 95.5153 | 57  | 48  | C. briggsae CBR-NDG-4 protein             |

|                                       |     |    |          |                |    |         |     |     |                                                        |
|---------------------------------------|-----|----|----------|----------------|----|---------|-----|-----|--------------------------------------------------------|
| Locus_24321_Transcript_1/1_Conf_1.000 | 189 | 20 | 8.76E-22 | NP_001020988.1 | 87 | 106.686 | 62  | 54  | UNCoordinated family member (unc-89)                   |
| Locus_24322_Transcript_1/1_Conf_1.000 | 169 | 0  |          |                |    |         |     |     |                                                        |
| Locus_24323_Transcript_1/1_Conf_1.000 | 321 | 0  |          |                |    |         |     |     |                                                        |
| Locus_24324_Transcript_1/1_Conf_1.000 | 373 | 1  | 8.21E-04 | NP_509241.1    | 52 | 46.9802 | 124 | 65  | AuTophagy (yeast Atg homolog) family member (atg-11)   |
| Locus_24325_Transcript_1/1_Conf_1.000 | 260 | 0  |          |                |    |         |     |     |                                                        |
| Locus_24326_Transcript_1/1_Conf_1.000 | 311 | 0  |          |                |    |         |     |     |                                                        |
| Locus_24327_Transcript_1/1_Conf_1.000 | 143 | 0  |          |                |    |         |     |     |                                                        |
| Locus_24328_Transcript_1/1_Conf_1.000 | 204 | 1  | 2.69E-15 | XP_861221.1    | 87 | 85.1149 | 48  | 42  | PREDICTED: similar to protein phosphatase 1G isoform 3 |
| Locus_24329_Transcript_1/1_Conf_1.000 | 152 | 0  |          |                |    |         |     |     |                                                        |
| Locus_2433_Transcript_1/1_Conf_1.000  | 842 | 20 | 1.62E-99 | XP_002591721.1 | 78 | 366.696 | 279 | 220 | hypothetical protein BRAFLDRAFT_80816                  |
| Locus_24330_Transcript_1/1_Conf_1.000 | 315 | 11 | 8.81E-06 | NP_001129799.1 | 78 | 53.5286 | 50  | 39  | Nuclear Hormone Receptor family member (nhr-62)        |
| Locus_24331_Transcript_1/1_Conf_1.000 | 178 | 10 | 1.61E-12 | NP_001122601.1 | 69 | 75.8702 | 73  | 51  | Multiple PDZ domain protein family member (mpz-1)      |
| Locus_24332_Transcript_1/1_Conf_1.000 | 192 | 6  | 1.26E-12 | XP_002639323.1 | 75 | 76.2554 | 66  | 50  | C. briggsae CBR-HUM-7 protein                          |

|                                       |     |    |          |                |     |         |     |     |                                                                |
|---------------------------------------|-----|----|----------|----------------|-----|---------|-----|-----|----------------------------------------------------------------|
| Locus_24333_Transcript_1/1_Conf_1.000 | 172 | 20 | 5.57E-21 | EFO16323.1     | 92  | 103.99  | 57  | 53  | CAMK/PSK protein kinase                                        |
| Locus_24334_Transcript_1/1_Conf_1.000 | 145 | 0  |          |                |     |         |     |     |                                                                |
| Locus_24335_Transcript_1/1_Conf_1.000 | 130 | 0  |          |                |     |         |     |     |                                                                |
| Locus_24336_Transcript_1/1_Conf_1.000 | 166 | 20 | 3.07E-19 | NP_001122814.1 | 92  | 98.2117 | 53  | 49  | STAT transcription factor family member (sta-1)                |
| Locus_24337_Transcript_1/1_Conf_1.000 | 178 | 0  |          |                |     |         |     |     |                                                                |
| Locus_24338_Transcript_1/1_Conf_1.000 | 178 | 0  |          |                |     |         |     |     |                                                                |
| Locus_24339_Transcript_1/1_Conf_1.000 | 144 | 0  |          |                |     |         |     |     |                                                                |
| Locus_2434_Transcript_1/1_Conf_1.000  | 469 | 20 | 2.84E-73 | XP_002815481.1 | 98  | 277.715 | 156 | 154 | PREDICTED: 60S ribosomal protein L27a-like                     |
| Locus_24340_Transcript_1/1_Conf_1.000 | 185 | 20 | 1.78E-22 | XP_002641381.1 | 88  | 108.997 | 61  | 54  | Hypothetical protein CBG13238                                  |
| Locus_24341_Transcript_1/1_Conf_1.000 | 134 | 0  |          |                |     |         |     |     |                                                                |
| Locus_24342_Transcript_1/1_Conf_1.000 | 220 | 0  |          |                |     |         |     |     |                                                                |
| Locus_24343_Transcript_1/1_Conf_1.000 | 260 | 0  |          |                |     |         |     |     |                                                                |
| Locus_24344_Transcript_1/1_Conf_1.000 | 344 | 0  |          |                |     |         |     |     |                                                                |
| Locus_24345_Transcript_1/1_Conf_1.000 | 133 | 0  |          |                |     |         |     |     |                                                                |
| Locus_24346_Transcript_1/1_Conf_1.000 | 132 | 20 | 4.88E-17 | XP_002927181.1 | 100 | 90.8929 | 43  | 43  | PREDICTED: LOW QUALITY PROTEIN: Golgi apparatus protein 1-like |
| Locus_24347_Transcript_1/1_Conf_1.000 | 225 | 20 | 1.11E-16 | YP_003885693.1 | 70  | 89.7373 | 75  | 53  | alpha/beta hydrolase fold protein                              |
| Locus_24348_Transcript_1/1_Conf_1.000 | 144 | 0  |          |                |     |         |     |     |                                                                |
| Locus_24349_Transcript_1/1_Conf_1.000 | 216 | 0  |          |                |     |         |     |     |                                                                |
| Locus_2435_Transcript_1/2_Conf_1.000  | 151 | 0  |          |                |     |         |     |     |                                                                |
| Locus_2435_Transcript_2/2_Conf_1.000  | 170 | 1  | 2.69E-07 | P51536.1       | 71  | 58.5362 | 49  | 35  | Globin                                                         |
| Locus_24350_Transcript_1/1_Conf_1.000 | 199 | 5  | 2.44E-24 | NP_001022641.1 | 87  | 115.161 | 66  | 58  | LEThal family member (let-805)                                 |
| Locus_24351_Transcript_1/1_Conf_1.000 | 154 | 0  |          |                |     |         |     |     |                                                                |



|                                       |      |    |          |                |    |         |      |     |                                                        |
|---------------------------------------|------|----|----------|----------------|----|---------|------|-----|--------------------------------------------------------|
| Locus_24352_Transcript_1/1_Conf_1.000 | 137  | 20 | 1.05E-11 | NP_495799.1    | 91 | 73.1738 | 45   | 41  | hypothetical protein T13H5.4                           |
| Locus_24353_Transcript_1/1_Conf_1.000 | 292  | 10 | 3.11E-11 | NP_001023172.1 | 62 | 71.633  | 102  | 64  | Inositol Triphosphate Receptor family member (itr-1)   |
| Locus_24354_Transcript_1/1_Conf_1.000 | 224  |    |          |                |    |         |      |     |                                                        |
| Locus_24355_Transcript_1/1_Conf_1.000 | 505  | 6  | 1.34E-25 | NP_492101.1    | 59 | 119.398 | 144  | 86  | hypothetical protein T28F4.4                           |
| Locus_24356_Transcript_1/1_Conf_1.000 | 171  | 8  | 1.16E-10 | NP_001024200.1 | 83 | 69.707  | 54   | 45  | TITIN family member (ttn-1)                            |
| Locus_24357_Transcript_1/1_Conf_1.000 | 154  | 1  | 2.47E-08 | NP_509760.2    | 68 | 62.003  | 48   | 33  | Temporarily Assigned Gene name family member (tag-289) |
| Locus_24358_Transcript_1/1_Conf_1.000 | 288  | 0  |          |                |    |         |      |     |                                                        |
| Locus_24359_Transcript_1/1_Conf_1.000 | 239  | 20 | 1.17E-10 | NP_492984.1    | 60 | 69.707  | 70   | 42  | O-ACyltransferase homolog family member (oac-19)       |
| Locus_2436_Transcript_1/1_Conf_1.000  | 402  | 0  |          |                |    |         |      |     |                                                        |
| Locus_24360_Transcript_1/1_Conf_1.000 | 288  | 20 | 1.49E-21 | XP_002643681.1 | 77 | 105.916 | 94   | 73  | Hypothetical protein CBG01860                          |
| Locus_24361_Transcript_1/1_Conf_1.000 | 236  | 0  |          |                |    |         |      |     |                                                        |
| Locus_24362_Transcript_1/1_Conf_1.000 | 284  | 0  |          |                |    |         |      |     |                                                        |
| Locus_24363_Transcript_1/1_Conf_1.000 | 135  | 0  |          |                |    |         |      |     |                                                        |
| Locus_24364_Transcript_1/1_Conf_1.000 | 129  | 0  |          |                |    |         |      |     |                                                        |
| Locus_24365_Transcript_1/1_Conf_1.000 | 272  | 0  |          |                |    |         |      |     |                                                        |
| Locus_24366_Transcript_1/1_Conf_1.000 | 361  | 2  | 7.01E-24 | NP_508797.3    | 68 | 113.62  | 116  | 79  | Nuclear Hormone Receptor family member (nhr-45)        |
| Locus_24367_Transcript_1/1_Conf_1.000 | 149  | 0  |          |                |    |         |      |     |                                                        |
| Locus_24368_Transcript_1/1_Conf_1.000 | 236  |    |          |                |    |         |      |     |                                                        |
| Locus_24369_Transcript_1/1_Conf_1.000 | 300  | 0  |          |                |    |         |      |     |                                                        |
| Locus_2437_Transcript_1/1_Conf_1.000  | 4194 | 20 | 0        | EFO20269.1     | 56 | 702.59  | 1020 | 581 | hypothetical protein LOAG_08219                        |
| Locus_24370_Transcript_1/1_Conf_1.000 | 187  | 0  |          |                |    |         |      |     |                                                        |
| Locus_24371_Transcript_1/1_Conf_1.000 | 265  | 0  |          |                |    |         |      |     |                                                        |
| Locus_24372_Transcript_1/1_Conf_1.000 | 252  | 7  | 3.23E-24 | Q09600.2       | 78 | 114.775 | 82   | 64  | Vacuolar protein sorting-associated protein 11 homolog |
| Locus_24373_Transcript_1/1_Conf_1.000 | 423  | 0  |          |                |    |         |      |     |                                                        |
| Locus_24374_Transcript_1/1_Conf_1.000 | 251  | 2  | 1.97E-10 | XP_002640291.1 | 83 | 68.9366 | 49   | 41  | Hypothetical protein CBG12817                          |
| Locus_24375_Transcript_1/1_Conf_1.000 | 164  | 0  |          |                |    |         |      |     |                                                        |

|                                       |     |    |          |                |     |         |     |     |                                                                         |
|---------------------------------------|-----|----|----------|----------------|-----|---------|-----|-----|-------------------------------------------------------------------------|
| Locus_24376_Transcript_1/1_Conf_1.000 | 243 | 20 | 3.59E-28 | ABW80085.1     | 84  | 127.872 | 82  | 69  | immunoglobulin heavy chain variable region                              |
| Locus_24377_Transcript_1/1_Conf_1.000 | 282 | 7  | 5.02E-09 | Q60LV7.3       | 61  | 64.3142 | 86  | 53  | Kinesin-like protein vab-8                                              |
| Locus_24378_Transcript_1/1_Conf_1.000 | 209 | 0  |          |                |     |         |     |     |                                                                         |
| Locus_24379_Transcript_1/1_Conf_1.000 | 221 | 0  |          |                |     |         |     |     |                                                                         |
| Locus_2438_Transcript_1/1_Conf_1.000  | 974 | 20 | 3.92E-82 | XP_002631685.1 | 74  | 309.301 | 255 | 191 | Hypothetical protein CBG20878                                           |
| Locus_24380_Transcript_1/1_Conf_1.000 | 217 | 20 | 3.34E-18 | XP_002629800.1 | 80  | 94.7449 | 56  | 45  | C. briggsae CBR-MAB-3.1 protein                                         |
| Locus_24381_Transcript_1/1_Conf_1.000 | 133 | 0  |          |                |     |         |     |     |                                                                         |
| Locus_24382_Transcript_1/1_Conf_1.000 | 288 | 20 | 3.56E-15 | ADK91433.1     | 60  | 84.7297 | 86  | 52  | c-type lectin 1                                                         |
| Locus_24383_Transcript_1/1_Conf_1.000 | 528 | 20 | 1.12E-23 | EFO20021.1     | 52  | 113.235 | 161 | 84  | hypothetical protein LOAG_08471                                         |
| Locus_24384_Transcript_1/1_Conf_1.000 | 171 | 20 | 5.38E-24 | XP_002825166.1 | 100 | 114.005 | 56  | 56  | PREDICTED: cytoplasmic dynein 1 heavy chain 1-like, partial             |
| Locus_24385_Transcript_1/1_Conf_1.000 | 130 | 0  |          |                |     |         |     |     |                                                                         |
| Locus_24386_Transcript_1/1_Conf_1.000 | 396 | 20 | 2.99E-38 | CAA92456.3     | 85  | 161.384 | 124 | 106 | C. elegans protein C53B4.4b, partially confirmed by transcript evidence |
| Locus_24387_Transcript_1/1_Conf_1.000 | 139 | 20 | 2.94E-14 | XP_002641617.1 | 91  | 81.6481 | 46  | 42  | C. briggsae CBR-MOG-1 protein                                           |
| Locus_24388_Transcript_1/1_Conf_1.000 | 139 | 0  |          |                |     |         |     |     |                                                                         |
| Locus_24389_Transcript_1/1_Conf_1.000 | 137 | 0  |          |                |     |         |     |     |                                                                         |
| Locus_2439_Transcript_1/1_Conf_1.000  | 705 | 0  |          |                |     |         |     |     |                                                                         |

|                                       |      |    |           |                |    |         |     |     |                                         |
|---------------------------------------|------|----|-----------|----------------|----|---------|-----|-----|-----------------------------------------|
| Locus_24390_Transcript_1/1_Conf_1.000 | 195  | 0  |           |                |    |         |     |     |                                         |
| Locus_24391_Transcript_1/1_Conf_1.000 | 266  | 0  |           |                |    |         |     |     |                                         |
| Locus_24392_Transcript_1/1_Conf_1.000 | 343  | 17 | 2.01E-34  | XP_002634184.1 | 78 | 148.673 | 114 | 89  | C. briggsae CBR-QUI-1 protein           |
| Locus_24393_Transcript_1/1_Conf_1.000 | 200  | 0  |           |                |    |         |     |     |                                         |
| Locus_24394_Transcript_1/1_Conf_1.000 | 258  | 0  |           |                |    |         |     |     |                                         |
| Locus_24395_Transcript_1/1_Conf_1.000 | 256  | 0  |           |                |    |         |     |     |                                         |
| Locus_24396_Transcript_1/1_Conf_1.000 | 294  | 0  |           |                |    |         |     |     |                                         |
| Locus_24397_Transcript_1/1_Conf_1.000 | 330  | 20 | 2.05E-15  | XP_002130849.1 | 57 | 85.5001 | 105 | 60  | PREDICTED: similar to predicted protein |
| Locus_24398_Transcript_1/1_Conf_1.000 | 190  | 0  |           |                |    |         |     |     |                                         |
| Locus_24399_Transcript_1/1_Conf_1.000 | 211  | 0  |           |                |    |         |     |     |                                         |
| Locus_244_Transcript_1/3_Conf_0.714   | 1927 | 20 | 1.47E-165 | XP_002631704.1 | 78 | 587.8   | 514 | 402 | Hypothetical protein CBG20903           |
| Locus_244_Transcript_2/3_Conf_0.714   | 1927 | 20 | 1.47E-165 | XP_002631704.1 | 78 | 587.8   | 514 | 402 | Hypothetical protein CBG20903           |
| Locus_244_Transcript_3/3_Conf_0.714   | 1927 | 20 | 1.47E-165 | XP_002631704.1 | 78 | 587.8   | 514 | 402 | Hypothetical protein CBG20903           |
| Locus_2440_Transcript_1/1_Conf_1.000  | 483  | 0  |           |                |    |         |     |     |                                         |
| Locus_24400_Transcript_1/1_Conf_1.000 | 144  | 0  |           |                |    |         |     |     |                                         |
| Locus_24401_Transcript_1/1_Conf_1.000 | 432  | 0  |           |                |    |         |     |     |                                         |
| Locus_24402_Transcript_1/1_Conf_1.000 | 178  | 0  |           |                |    |         |     |     |                                         |
| Locus_24403_Transcript_1/1_Conf_1.000 | 306  | 0  |           |                |    |         |     |     |                                         |
| Locus_24404_Transcript_1/1_Conf_1.000 | 169  | 0  |           |                |    |         |     |     |                                         |
| Locus_24405_Transcript_1/1_Conf_1.000 | 233  | 0  |           |                |    |         |     |     |                                         |
| Locus_24406_Transcript_1/1_Conf_1.000 | 206  | 20 | 4.74E-12  | NP_504354.1    | 79 | 74.3294 | 48  | 38  | hypothetical protein K11D12.9           |
| Locus_24407_Transcript_1/1_Conf_1.000 | 177  | 2  | 1.05E-11  | XP_002634565.1 | 64 | 73.1738 | 64  | 41  | C. briggsae CBR-INS-1 protein           |

|                                       |     |    |          |                |    |         |     |     |                                                                     |
|---------------------------------------|-----|----|----------|----------------|----|---------|-----|-----|---------------------------------------------------------------------|
| Locus_24408_Transcript_1/1_Conf_1.000 | 247 | 20 | 1.32E-22 | EFO19136.1     | 77 | 109.383 | 81  | 63  | TKL/STKR/TYPE1 protein kinase                                       |
| Locus_24409_Transcript_1/1_Conf_1.000 | 131 | 0  |          |                |    |         |     |     |                                                                     |
| Locus_2441_Transcript_1/1_Conf_1.000  | 498 | 0  |          |                |    |         |     |     |                                                                     |
| Locus_24410_Transcript_1/1_Conf_1.000 | 370 | 0  |          |                |    |         |     |     |                                                                     |
| Locus_24411_Transcript_1/1_Conf_1.000 | 130 | 0  |          |                |    |         |     |     |                                                                     |
| Locus_24412_Transcript_1/1_Conf_1.000 | 130 | 20 | 1.09E-08 | NP_494912.1    | 80 | 63.1586 | 42  | 34  | NuDiX family member (ndx-3)                                         |
| Locus_24413_Transcript_1/1_Conf_1.000 | 132 | 0  |          |                |    |         |     |     |                                                                     |
| Locus_24414_Transcript_1/1_Conf_1.000 | 414 | 20 | 3.79E-54 | NP_502964.2    | 89 | 214.157 | 136 | 122 | hypothetical protein Y51H4A.7                                       |
| Locus_24415_Transcript_1/1_Conf_1.000 | 136 | 0  |          |                |    |         |     |     |                                                                     |
| Locus_24416_Transcript_1/1_Conf_1.000 | 164 | 0  |          |                |    |         |     |     |                                                                     |
| Locus_24417_Transcript_1/1_Conf_1.000 | 182 | 5  | 1.42E-11 | NP_509645.1    | 77 | 72.7886 | 49  | 38  | DumPY : shorter than wild-type family member (dpy-22)               |
| Locus_24418_Transcript_1/1_Conf_1.000 | 442 | 3  | 1.04E-14 | XP_002642231.1 | 59 | 83.1889 | 122 | 73  | Hypothetical protein CBG18209                                       |
| Locus_24419_Transcript_1/1_Conf_1.000 | 211 | 0  |          |                |    |         |     |     |                                                                     |
| Locus_2442_Transcript_1/1_Conf_1.000  | 379 | 20 | 1.09E-24 | NP_502571.1    | 80 | 116.316 | 110 | 89  | Ribosomal protein, Large subunit, Acidic (P1) family member (rla-2) |
| Locus_24420_Transcript_1/1_Conf_1.000 | 143 | 0  |          |                |    |         |     |     |                                                                     |

|                                       |     |    |          |                |     |         |     |     |                                                    |
|---------------------------------------|-----|----|----------|----------------|-----|---------|-----|-----|----------------------------------------------------|
| Locus_24421_Transcript_1/1_Conf_1.000 | 201 | 4  | 5.62E-13 | CAR63703.1     | 73  | 77.411  | 56  | 41  | hypothetical protein                               |
| Locus_24422_Transcript_1/1_Conf_1.000 | 373 | 0  |          |                |     |         |     |     |                                                    |
| Locus_24423_Transcript_1/1_Conf_1.000 | 173 | 20 | 1.37E-19 | ADN38247.1     | 100 | 99.3673 | 57  | 57  | MHC class I antigen                                |
| Locus_24424_Transcript_1/1_Conf_1.000 | 276 | 20 | 1.28E-09 | NP_509658.1    | 72  | 66.2402 | 51  | 37  | Multidrug Resistance Protein family member (mrp-4) |
| Locus_24425_Transcript_1/1_Conf_1.000 | 194 | 0  |          |                |     |         |     |     |                                                    |
| Locus_24426_Transcript_1/1_Conf_1.000 | 306 | 0  |          |                |     |         |     |     |                                                    |
| Locus_24427_Transcript_1/1_Conf_1.000 | 133 | 0  |          |                |     |         |     |     |                                                    |
| Locus_24428_Transcript_1/1_Conf_1.000 | 217 | 20 | 4.36E-26 | AAA62207.1     | 89  | 120.939 | 69  | 62  | prolyl 4-hydroxylase alpha subunit                 |
| Locus_24429_Transcript_1/1_Conf_1.000 | 287 | 3  | 2.74E-15 | NP_494848.3    | 70  | 85.1149 | 81  | 57  | fatty Acid CoA Synthetase family member (acs-11)   |
| Locus_2443_Transcript_1/1_Conf_1.000  | 437 | 3  | 3.85E-06 | NP_506662.1    | 51  | 54.6842 | 97  | 50  | hypothetical protein ZC412.3                       |
| Locus_24430_Transcript_1/1_Conf_1.000 | 308 | 4  | 3.05E-19 | XP_002640160.1 | 69  | 98.2117 | 102 | 71  | Hypothetical protein CBG12661                      |
| Locus_24431_Transcript_1/1_Conf_1.000 | 163 | 0  |          |                |     |         |     |     |                                                    |
| Locus_24432_Transcript_1/1_Conf_1.000 | 275 | 12 | 3.60E-28 | XP_002636027.1 | 79  | 127.872 | 88  | 70  | C. briggsae CBR-ABT-4 protein                      |
| Locus_24433_Transcript_1/1_Conf_1.000 | 140 | 0  |          |                |     |         |     |     |                                                    |
| Locus_24434_Transcript_1/1_Conf_1.000 | 180 | 0  |          |                |     |         |     |     |                                                    |
| Locus_24435_Transcript_1/1_Conf_1.000 | 181 | 20 | 1.51E-13 | XP_002633107.1 | 78  | 79.337  | 60  | 47  | Hypothetical protein CBG05798                      |
| Locus_24436_Transcript_1/1_Conf_1.000 | 258 | 20 | 3.67E-20 | NP_001040940.1 | 67  | 101.293 | 84  | 57  | PhosphatidylSerine Receptor family member (psr-1)  |
| Locus_24437_Transcript_1/1_Conf_1.000 | 228 | 0  |          |                |     |         |     |     |                                                    |
| Locus_24438_Transcript_1/1_Conf_1.000 | 293 | 0  |          |                |     |         |     |     |                                                    |
| Locus_24439_Transcript_1/1_Conf_1.000 | 306 | 0  |          |                |     |         |     |     |                                                    |
| Locus_2444_Transcript_1/1_Conf_1.000  | 891 | 5  | 1.19E-26 | XP_002634353.1 | 53  | 124.79  | 247 | 131 | Hypothetical protein CBG17703                      |
| Locus_24440_Transcript_1/1_Conf_1.000 | 128 | 0  |          |                |     |         |     |     |                                                    |
| Locus_24441_Transcript_1/1_Conf_1.000 | 176 | 0  |          |                |     |         |     |     |                                                    |
| Locus_24442_Transcript_1/1_Conf_1.000 | 277 | 0  |          |                |     |         |     |     |                                                    |
| Locus_24443_Transcript_1/1_Conf_1.000 | 185 | 20 | 1.04E-22 | XP_002639077.1 | 83  | 109.768 | 61  | 51  | Hypothetical protein CBG14895                      |

|                                       |      |    |          |                |    |         |     |     |                                                                                                 |
|---------------------------------------|------|----|----------|----------------|----|---------|-----|-----|-------------------------------------------------------------------------------------------------|
| Locus_24444_Transcript_1/1_Conf_1.000 | 463  | 2  | 1.65E-28 | NP_493079.1    | 76 | 129.028 | 143 | 110 | hypothetical protein C15C6.1                                                                    |
| Locus_24445_Transcript_1/1_Conf_1.000 | 164  | 0  |          |                |    |         |     |     |                                                                                                 |
| Locus_24446_Transcript_1/1_Conf_1.000 | 131  | 4  | 1.48E-05 | NP_496976.2    | 72 | 52.7582 | 43  | 31  | hypothetical protein Y54G11A.7                                                                  |
| Locus_24447_Transcript_1/1_Conf_1.000 | 397  | 0  |          |                |    |         |     |     |                                                                                                 |
| Locus_24448_Transcript_1/1_Conf_1.000 | 250  | 0  |          |                |    |         |     |     |                                                                                                 |
| Locus_24449_Transcript_1/1_Conf_1.000 | 135  | 0  |          |                |    |         |     |     |                                                                                                 |
| Locus_2445_Transcript_1/1_Conf_1.000  | 1244 | 20 | 5.89E-95 | XP_002642343.1 | 68 | 352.443 | 434 | 297 | C. briggsae CBR-CNT-2 protein                                                                   |
| Locus_24450_Transcript_1/1_Conf_1.000 | 201  | 0  |          |                |    |         |     |     |                                                                                                 |
| Locus_24451_Transcript_1/1_Conf_1.000 | 184  | 0  |          |                |    |         |     |     |                                                                                                 |
| Locus_24452_Transcript_1/1_Conf_1.000 | 242  | 20 | 3.48E-39 | NP_506014.1    | 97 | 164.466 | 80  | 78  | Protein Kinase C family member (pkc-1)                                                          |
| Locus_24453_Transcript_1/1_Conf_1.000 | 163  | 20 | 1.10E-16 | XP_002646949.1 | 90 | 89.7373 | 52  | 47  | C. briggsae CBR-APD-3 protein                                                                   |
| Locus_24454_Transcript_1/1_Conf_1.000 | 161  | 4  | 6.05E-07 | XP_001897054.1 | 75 | 57.3806 | 41  | 31  | Fes/CIP4 homology domain containing protein                                                     |
| Locus_24455_Transcript_1/1_Conf_1.000 | 212  | 0  |          |                |    |         |     |     |                                                                                                 |
| Locus_24456_Transcript_1/1_Conf_1.000 | 178  | 20 | 2.57E-18 | ADI24637.1     | 84 | 95.1301 | 59  | 50  | Lin-12 and glp-1 x-hybridizing protein 1, isoform a, partially confirmed by transcript evidence |
| Locus_24457_Transcript_1/1_Conf_1.000 | 143  | 0  |          |                |    |         |     |     |                                                                                                 |
| Locus_24458_Transcript_1/1_Conf_1.000 | 146  | 0  |          |                |    |         |     |     |                                                                                                 |
| Locus_24459_Transcript_1/1_Conf_1.000 | 292  | 0  |          |                |    |         |     |     |                                                                                                 |
| Locus_2446_Transcript_1/3_Conf_0.750  | 1744 | 20 | 4.61E-70 | XP_002639919.1 | 61 | 270.396 | 332 | 203 | Hypothetical protein CBG08251                                                                   |
| Locus_2446_Transcript_2/3_Conf_0.750  | 1744 | 20 | 4.61E-70 | XP_002639919.1 | 61 | 270.396 | 332 | 203 | Hypothetical protein CBG08251                                                                   |
| Locus_2446_Transcript_3/3_Conf_0.750  | 1744 | 20 | 4.61E-70 | XP_002639919.1 | 61 | 270.396 | 332 | 203 | Hypothetical protein CBG08251                                                                   |
| Locus_24460_Transcript_1/1_Conf_1.000 | 385  | 0  |          |                |    |         |     |     |                                                                                                 |

|                                       |     |    |          |                |     |         |     |     |                                                                |
|---------------------------------------|-----|----|----------|----------------|-----|---------|-----|-----|----------------------------------------------------------------|
| Locus_24461_Transcript_1/1_Conf_1.000 | 142 | 20 | 4.38E-10 | EFO14895.1     | 82  | 67.781  | 46  | 38  | CMGC/CDK/CDK9 protein kinase                                   |
| Locus_24462_Transcript_1/1_Conf_1.000 | 160 | 0  |          |                |     |         |     |     |                                                                |
| Locus_24463_Transcript_1/1_Conf_1.000 | 187 | 0  |          |                |     |         |     |     |                                                                |
| Locus_24464_Transcript_1/1_Conf_1.000 | 183 | 0  |          |                |     |         |     |     |                                                                |
| Locus_24465_Transcript_1/1_Conf_1.000 | 408 | 0  |          |                |     |         |     |     |                                                                |
| Locus_24466_Transcript_1/1_Conf_1.000 | 206 | 0  |          |                |     |         |     |     |                                                                |
| Locus_24467_Transcript_1/1_Conf_1.000 | 391 | 3  | 6.99E-16 | XP_002649017.1 | 54  | 87.0409 | 132 | 72  | Hypothetical protein CBG21465                                  |
| Locus_24468_Transcript_1/1_Conf_1.000 | 255 | 0  |          |                |     |         |     |     |                                                                |
| Locus_24469_Transcript_1/1_Conf_1.000 | 276 | 0  |          |                |     |         |     |     |                                                                |
| Locus_2447_Transcript_1/1_Conf_1.000  | 346 | 20 | 5.86E-11 | Q6T269.1       | 63  | 64.3142 | 52  | 33  | Bitisilin-3                                                    |
| Locus_24470_Transcript_1/1_Conf_1.000 | 228 | 20 | 7.60E-34 | BAG59376.1     | 100 | 146.747 | 75  | 75  | unnamed protein product                                        |
| Locus_24471_Transcript_1/1_Conf_1.000 | 185 | 3  | 3.03E-22 | CB183238.1     | 93  | 108.227 | 59  | 55  | C. elegans protein W06F12.2d, confirmed by transcript evidence |
| Locus_24472_Transcript_1/1_Conf_1.000 | 183 | 7  | 2.04E-10 | NP_490781.1    | 69  | 68.9366 | 66  | 46  | hypothetical protein ZC123.3                                   |
| Locus_24473_Transcript_1/1_Conf_1.000 | 158 | 0  |          |                |     |         |     |     |                                                                |
| Locus_24474_Transcript_1/1_Conf_1.000 | 156 | 20 | 4.79E-20 | AA999638.1     | 98  | 100.908 | 51  | 50  | mca-1                                                          |
| Locus_24475_Transcript_1/1_Conf_1.000 | 201 | 20 | 4.29E-21 | XP_002643587.1 | 86  | 104.375 | 66  | 57  | Hypothetical protein CBG16309                                  |
| Locus_24476_Transcript_1/1_Conf_1.000 | 231 | 3  | 1.18E-10 | NP_001122838.1 | 65  | 69.707  | 75  | 49  | hypothetical protein B0399.1                                   |
| Locus_24477_Transcript_1/1_Conf_1.000 | 400 | 0  |          |                |     |         |     |     |                                                                |
| Locus_24478_Transcript_1/1_Conf_1.000 | 162 | 0  |          |                |     |         |     |     |                                                                |
| Locus_24479_Transcript_1/1_Conf_1.000 | 172 | 0  |          |                |     |         |     |     |                                                                |
| Locus_2448_Transcript_1/1_Conf_1.000  | 967 | 20 | 8.95E-79 | CAA52188.1     | 77  | 298.13  | 281 | 219 | lamin                                                          |
| Locus_24480_Transcript_1/1_Conf_1.000 | 225 | 0  |          |                |     |         |     |     |                                                                |

|                                       |     |    |          |                |     |         |    |    |                                                                                       |
|---------------------------------------|-----|----|----------|----------------|-----|---------|----|----|---------------------------------------------------------------------------------------|
| Locus_24481_Transcript_1/1_Conf_1.000 | 178 | 0  |          |                |     |         |    |    |                                                                                       |
| Locus_24482_Transcript_1/1_Conf_1.000 | 224 | 17 | 1.96E-21 | NP_001129905.1 | 78  | 105.531 | 74 | 58 | hypothetical protein T03D8.6                                                          |
| Locus_24483_Transcript_1/1_Conf_1.000 | 138 | 20 | 1.91E-13 | XP_002829097.1 | 100 | 78.9518 | 37 | 37 | PREDICTED: GRAM domain-containing protein 1A-like, partial                            |
| Locus_24484_Transcript_1/1_Conf_1.000 | 149 | 20 | 6.55E-09 | XP_001961184.1 | 73  | 63.929  | 49 | 36 | GF13738                                                                               |
| Locus_24485_Transcript_1/1_Conf_1.000 | 346 | 0  |          |                |     |         |    |    |                                                                                       |
| Locus_24486_Transcript_1/1_Conf_1.000 | 301 | 0  |          |                |     |         |    |    |                                                                                       |
| Locus_24487_Transcript_1/1_Conf_1.000 | 183 | 20 | 6.12E-15 | ACY40018.1     | 93  | 83.9593 | 46 | 43 | C. elegans FLN-1 protein, isoform g                                                   |
| Locus_24488_Transcript_1/1_Conf_1.000 | 162 | 20 | 1.93E-21 | NP_510672.2    | 94  | 105.531 | 52 | 49 | Nematode ASTacin protease family member (nas-39)                                      |
| Locus_24489_Transcript_1/1_Conf_1.000 | 143 | 0  |          |                |     |         |    |    |                                                                                       |
| Locus_2449_Transcript_1/1_Conf_1.000  | 210 | 3  | 3.49E-07 | NP_492018.1    | 74  | 58.151  | 47 | 35 | UNCoordinated family member (unc-14)                                                  |
| Locus_24490_Transcript_1/1_Conf_1.000 | 188 | 0  |          |                |     |         |    |    |                                                                                       |
| Locus_24491_Transcript_1/1_Conf_1.000 | 202 | 20 | 1.13E-21 | XP_002644000.1 | 92  | 106.301 | 66 | 61 | C. briggsae CBR-IFA-1 protein                                                         |
| Locus_24492_Transcript_1/1_Conf_1.000 | 133 | 0  |          |                |     |         |    |    |                                                                                       |
| Locus_24493_Transcript_1/1_Conf_1.000 | 217 | 0  |          |                |     |         |    |    |                                                                                       |
| Locus_24494_Transcript_1/1_Conf_1.000 | 218 | 20 | 5.01E-06 | XP_002807830.1 | 55  | 54.299  | 67 | 37 | PREDICTED: LOW QUALITY PROTEIN: SH2 domain-containing adapter protein D-like, partial |
| Locus_24495_Transcript_1/1_Conf_1.000 | 219 | 0  |          |                |     |         |    |    |                                                                                       |
| Locus_24496_Transcript_1/1_Conf_1.000 | 152 | 5  | 1.27E-04 | NP_001024175.1 | 68  | 49.6766 | 48 | 33 | UNCoordinated family member (unc-62)                                                  |
| Locus_24497_Transcript_1/1_Conf_1.000 | 305 | 0  |          |                |     |         |    |    |                                                                                       |
| Locus_24498_Transcript_1/1_Conf_1.000 | 179 | 0  |          |                |     |         |    |    |                                                                                       |



|                                       |      |    |          |                |    |         |     |     |                                                                |
|---------------------------------------|------|----|----------|----------------|----|---------|-----|-----|----------------------------------------------------------------|
| Locus_24499_Transcript_1/1_Conf_1.000 | 186  | 2  | 7.97E-15 | ABU93237.1     | 81 | 83.5741 | 59  | 48  | ligand-gated ion channel subunit                               |
| Locus_245_Transcript_1/1_Conf_1.000   | 638  | 20 | 1.24E-96 | CAR63548.1     | 98 | 356.295 | 188 | 186 | putative Ribosomal Protein                                     |
| Locus_2450_Transcript_1/1_Conf_1.000  | 1068 | 4  | 5.20E-86 | EFO19071.1     | 66 | 322.398 | 358 | 239 | hypothetical protein LOAG_09424                                |
| Locus_24500_Transcript_1/1_Conf_1.000 | 321  | 0  |          |                |    |         |     |     |                                                                |
| Locus_24501_Transcript_1/1_Conf_1.000 | 214  | 0  |          |                |    |         |     |     |                                                                |
| Locus_24502_Transcript_1/1_Conf_1.000 | 293  | 4  | 1.03E-06 | XP_002643707.1 | 52 | 56.6102 | 97  | 51  | Hypothetical protein CBG01897                                  |
| Locus_24503_Transcript_1/1_Conf_1.000 | 226  | 20 | 5.86E-26 | NP_502164.1    | 85 | 120.553 | 74  | 63  | WHiTe (Drosophila) related ABC transport family member (wht-2) |
| Locus_24504_Transcript_1/1_Conf_1.000 | 139  | 0  |          |                |    |         |     |     |                                                                |
| Locus_24505_Transcript_1/1_Conf_1.000 | 208  | 0  |          |                |    |         |     |     |                                                                |
| Locus_24506_Transcript_1/1_Conf_1.000 | 332  | 20 | 7.29E-21 | NP_499580.1    | 72 | 103.605 | 114 | 83  | hypothetical protein Y75B8A.7                                  |
| Locus_24507_Transcript_1/1_Conf_1.000 | 204  | 0  |          |                |    |         |     |     |                                                                |
| Locus_24508_Transcript_1/1_Conf_1.000 | 173  | 0  |          |                |    |         |     |     |                                                                |
| Locus_24509_Transcript_1/1_Conf_1.000 | 343  | 20 | 6.28E-28 | XP_002646550.1 | 88 | 127.102 | 81  | 72  | C. briggsae CBR-PRP-17 protein                                 |
| Locus_2451_Transcript_1/8_Conf_0.150  | 1777 | 20 | 2.94E-88 | NP_505392.2    | 61 | 330.872 | 444 | 271 | Gut granule LOss family member (glo-4)                         |
| Locus_2451_Transcript_2/8_Conf_0.150  | 1819 | 20 | 1.61E-89 | NP_505392.2    | 61 | 335.109 | 445 | 272 | Gut granule LOss family member (glo-4)                         |

|                                       |      |    |          |             |    |         |      |     |                                        |
|---------------------------------------|------|----|----------|-------------|----|---------|------|-----|----------------------------------------|
| Locus_2451_Transcript_3/8_Conf_0.300  | 4245 | 20 | 0        | NP_505392.2 | 62 | 979.163 | 1295 | 805 | Gut granule LOss family member (glo-4) |
| Locus_2451_Transcript_4/8_Conf_0.350  | 4512 | 20 | 0        | NP_505392.2 | 62 | 1038.48 | 1368 | 852 | Gut granule LOss family member (glo-4) |
| Locus_2451_Transcript_5/8_Conf_0.350  | 4512 | 20 | 0        | NP_505392.2 | 62 | 1040.02 | 1368 | 852 | Gut granule LOss family member (glo-4) |
| Locus_2451_Transcript_6/8_Conf_0.350  | 4512 | 20 | 0        | NP_505392.2 | 62 | 1045.42 | 1368 | 854 | Gut granule LOss family member (glo-4) |
| Locus_2451_Transcript_7/8_Conf_0.300  | 4245 | 20 | 0        | NP_505392.2 | 62 | 980.319 | 1295 | 805 | Gut granule LOss family member (glo-4) |
| Locus_2451_Transcript_8/8_Conf_0.350  | 4512 | 20 | 0        | NP_505392.2 | 62 | 1039.64 | 1368 | 852 | Gut granule LOss family member (glo-4) |
| Locus_24510_Transcript_1/1_Conf_1.000 | 253  | 0  |          |             |    |         |      |     |                                        |
| Locus_24511_Transcript_1/1_Conf_1.000 | 187  | 0  |          |             |    |         |      |     |                                        |
| Locus_24512_Transcript_1/1_Conf_1.000 | 155  | 0  |          |             |    |         |      |     |                                        |
| Locus_24513_Transcript_1/1_Conf_1.000 | 304  | 15 | 1.05E-27 | NP_491312.2 | 67 | 126.331 | 99   | 67  | hypothetical protein R12E2.8           |
| Locus_24514_Transcript_1/1_Conf_1.000 | 134  | 0  |          |             |    |         |      |     |                                        |

|                                       |      |    |          |                |    |         |     |     |                                              |
|---------------------------------------|------|----|----------|----------------|----|---------|-----|-----|----------------------------------------------|
| Locus_24515_Transcript_1/1_Conf_1.000 | 205  | 20 | 5.59E-21 | CBI31608.3     | 86 | 103.99  | 66  | 57  | unnamed protein product                      |
| Locus_24516_Transcript_1/1_Conf_1.000 | 393  | 20 | 8.48E-25 | XP_001623156.1 | 76 | 116.701 | 97  | 74  | predicted protein                            |
| Locus_24517_Transcript_1/1_Conf_1.000 | 134  | 2  | 2.13E-04 | NP_504235.2    | 73 | 48.9062 | 46  | 34  | Drosophila SOS homolog family member (sos-1) |
| Locus_24518_Transcript_1/1_Conf_1.000 | 165  | 1  | 8.96E-11 | BAG60969.1     | 90 | 70.0922 | 51  | 46  | unnamed protein product                      |
| Locus_24519_Transcript_1/1_Conf_1.000 | 282  | 0  |          |                |    |         |     |     |                                              |
| Locus_2452_Transcript_1/1_Conf_1.000  | 2027 | 20 | 4.14E-49 | XP_002630773.1 | 58 | 201.06  | 321 | 189 | Hypothetical protein CBG02468                |
| Locus_24520_Transcript_1/1_Conf_1.000 | 153  | 20 | 5.14E-14 | EFO17784.1     | 86 | 80.8777 | 51  | 44  | hypothetical protein LOAG_10715              |
| Locus_24521_Transcript_1/1_Conf_1.000 | 155  | 8  | 1.15E-05 | AAN61521.1     | 62 | 53.1434 | 51  | 32  | 301kDa_2 protein                             |
| Locus_24522_Transcript_1/1_Conf_1.000 | 298  | 0  |          |                |    |         |     |     |                                              |
| Locus_24523_Transcript_1/1_Conf_1.000 | 170  | 1  | 2.78E-04 | XP_001899312.1 | 62 | 48.521  | 50  | 31  | nuclear receptor NHR-67                      |
| Locus_24524_Transcript_1/1_Conf_1.000 | 165  | 0  |          |                |    |         |     |     |                                              |

|                                       |     |    |          |                |     |         |     |     |                                                       |
|---------------------------------------|-----|----|----------|----------------|-----|---------|-----|-----|-------------------------------------------------------|
| Locus_24525_Transcript_1/1_Conf_1.000 | 174 | 20 | 1.37E-11 | NP_001182132.1 | 100 | 72.7886 | 58  | 58  | elongation factor 1-delta isoform 5                   |
| Locus_24526_Transcript_1/1_Conf_1.000 | 228 | 0  |          |                |     |         |     |     |                                                       |
| Locus_24527_Transcript_1/1_Conf_1.000 | 139 | 5  | 2.67E-07 | XP_002637772.1 | 69  | 58.5362 | 42  | 29  | Hypothetical protein CBG04555                         |
| Locus_24528_Transcript_1/1_Conf_1.000 | 162 | 0  |          |                |     |         |     |     |                                                       |
| Locus_24529_Transcript_1/1_Conf_1.000 | 199 | 0  |          |                |     |         |     |     |                                                       |
| Locus_2453_Transcript_1/2_Conf_1.000  | 681 | 20 | 7.21E-88 | XP_002644811.1 | 89  | 327.405 | 209 | 187 | C. briggsae CBR-HSP-3 protein                         |
| Locus_2453_Transcript_2/2_Conf_1.000  | 699 | 20 | 3.33E-91 | XP_002644811.1 | 89  | 338.576 | 215 | 193 | C. briggsae CBR-HSP-3 protein                         |
| Locus_24530_Transcript_1/1_Conf_1.000 | 220 | 0  |          |                |     |         |     |     |                                                       |
| Locus_24531_Transcript_1/1_Conf_1.000 | 199 | 20 | 4.92E-25 | EFO22480.1     | 89  | 117.472 | 65  | 58  | BSD domain-containing protein                         |
| Locus_24532_Transcript_1/1_Conf_1.000 | 129 | 20 | 2.87E-09 | XP_002932324.1 | 88  | 65.0846 | 42  | 37  | PREDICTED: putative ATP-dependent RNA helicase DHX33  |
| Locus_24533_Transcript_1/1_Conf_1.000 | 272 | 0  |          |                |     |         |     |     |                                                       |
| Locus_24534_Transcript_1/1_Conf_1.000 | 163 | 0  |          |                |     |         |     |     |                                                       |
| Locus_24535_Transcript_1/1_Conf_1.000 | 175 | 20 | 2.11E-20 | NP_501972.1    | 84  | 102.064 | 57  | 48  | Flavin-containing MonoOxygenase family member (fmo-2) |
| Locus_24536_Transcript_1/1_Conf_1.000 | 229 | 0  |          |                |     |         |     |     |                                                       |
| Locus_24537_Transcript_1/1_Conf_1.000 | 192 | 0  |          |                |     |         |     |     |                                                       |
| Locus_24538_Transcript_1/1_Conf_1.000 | 310 | 20 | 1.50E-34 | XP_002636957.1 | 82  | 149.058 | 103 | 85  | C. briggsae CBR-EAT-6 protein                         |
| Locus_24539_Transcript_1/1_Conf_1.000 | 486 | 20 | 1.47E-53 | NP_495222.2    | 79  | 212.231 | 162 | 128 | hypothetical protein F21H12.1                         |
| Locus_2454_Transcript_1/1_Conf_1.000  | 502 | 20 | 1.30E-41 | EFO26496.1     | 73  | 172.555 | 171 | 125 | hypothetical protein LOAG_01982                       |

|                                       |      |    |          |                |     |         |     |     |                                                                                                       |
|---------------------------------------|------|----|----------|----------------|-----|---------|-----|-----|-------------------------------------------------------------------------------------------------------|
| Locus_24540_Transcript_1/1_Conf_1.000 | 160  | 2  | 1.49E-05 | XP_002643029.1 | 75  | 52.7582 | 36  | 27  | Hypothetical protein CBG22937                                                                         |
| Locus_24541_Transcript_1/1_Conf_1.000 | 244  | 0  |          |                |     |         |     |     |                                                                                                       |
| Locus_24542_Transcript_1/1_Conf_1.000 | 696  | 17 | 3.83E-31 | XP_002643226.1 | 52  | 139.043 | 232 | 122 | Hypothetical protein CBG08091                                                                         |
| Locus_24543_Transcript_1/1_Conf_1.000 | 284  | 20 | 3.81E-33 | NP_001021871.1 | 87  | 144.436 | 90  | 79  | UNCoordinated family member (unc-13)                                                                  |
| Locus_24544_Transcript_1/1_Conf_1.000 | 141  | 0  |          |                |     |         |     |     |                                                                                                       |
| Locus_24545_Transcript_1/1_Conf_1.000 | 170  | 8  | 1.48E-05 | NP_001040941.1 | 78  | 52.7582 | 47  | 37  | PhosphatidylSerine Receptor family member (psr-1)                                                     |
| Locus_24546_Transcript_1/1_Conf_1.000 | 413  | 20 | 1.70E-62 | EFO20273.1     | 91  | 241.891 | 137 | 125 | RNA-metabolising metallo-beta-lactamase                                                               |
| Locus_24547_Transcript_1/1_Conf_1.000 | 170  | 20 | 8.64E-14 | 2DIZ           | 100 | 80.1073 | 38  | 38  | The SolutionStructure OfThe Third Thioredoxin Domain Of Human Thioredoxin Domain-Containing Protein 5 |
| Locus_24548_Transcript_1/1_Conf_1.000 | 178  | 0  |          |                |     |         |     |     |                                                                                                       |
| Locus_24549_Transcript_1/1_Conf_1.000 | 270  | 20 | 1.20E-31 | CAJ43276.1     | 86  | 139.428 | 90  | 78  | hypothetical protein                                                                                  |
| Locus_2455_Transcript_1/1_Conf_1.000  | 3007 | 20 | 0        | XP_002637229.1 | 74  | 752.666 | 675 | 503 | C. briggsae CBR-TAG-59 protein                                                                        |
| Locus_24550_Transcript_1/1_Conf_1.000 | 239  | 2  | 1.38E-11 | NP_508799.1    | 69  | 72.7886 | 78  | 54  | hypothetical protein F16H11.1                                                                         |
| Locus_24551_Transcript_1/1_Conf_1.000 | 174  | 9  | 7.25E-21 | ADI24623.1     | 100 | 103.605 | 54  | 54  | Copine domain protein, atypical protein 2, isoform c, partially confirmed by transcript evidence      |

|                                       |     |    |          |                |     |         |     |     |                                |
|---------------------------------------|-----|----|----------|----------------|-----|---------|-----|-----|--------------------------------|
| Locus_24552_Transcript_1/1_Conf_1.000 | 199 | 20 | 1.13E-29 | BAH13680.1     | 100 | 132.88  | 66  | 66  | unnamed protein product        |
| Locus_24553_Transcript_1/1_Conf_1.000 | 202 | 4  | 5.26E-11 | NP_501686.2    | 63  | 70.8626 | 65  | 41  | hypothetical protein C33A12.3  |
| Locus_24554_Transcript_1/1_Conf_1.000 | 171 | 0  |          |                |     |         |     |     |                                |
| Locus_24555_Transcript_1/1_Conf_1.000 | 195 | 0  |          |                |     |         |     |     |                                |
| Locus_24556_Transcript_1/1_Conf_1.000 | 208 | 20 | 5.39E-16 | XP_002634584.1 | 79  | 87.4261 | 68  | 54  | Hypothetical protein CBG08395  |
| Locus_24557_Transcript_1/1_Conf_1.000 | 153 | 0  |          |                |     |         |     |     |                                |
| Locus_24558_Transcript_1/1_Conf_1.000 | 156 | 0  |          |                |     |         |     |     |                                |
| Locus_24559_Transcript_1/1_Conf_1.000 | 322 | 20 | 6.02E-31 | AAI16568.1     | 71  | 137.117 | 98  | 70  | Sp5 transcription factor-like  |
| Locus_2456_Transcript_1/1_Conf_1.000  | 195 | 20 | 2.46E-08 | XP_002052742.1 | 61  | 62.003  | 62  | 38  | GJ17725                        |
| Locus_24560_Transcript_1/1_Conf_1.000 | 865 | 20 | 4.14E-45 | EFO20328.1     | 54  | 186.037 | 289 | 158 | cytochrome P450 family protein |

|                                       |      |    |          |                |     |         |     |     |                                                                                      |
|---------------------------------------|------|----|----------|----------------|-----|---------|-----|-----|--------------------------------------------------------------------------------------|
| Locus_24561_Transcript_1/1_Conf_1.000 | 266  | 20 | 3.53E-15 | NP_508145.2    | 72  | 84.7297 | 68  | 49  | Suppressor of Lneage defect family member (sli-1)                                    |
| Locus_24562_Transcript_1/1_Conf_1.000 | 379  | 20 | 5.21E-51 | EAX09478.1     | 100 | 203.756 | 102 | 102 | hCG401289, isoform CRA_d                                                             |
| Locus_24563_Transcript_1/1_Conf_1.000 | 166  | 0  |          |                |     |         |     |     |                                                                                      |
| Locus_24564_Transcript_1/1_Conf_1.000 | 313  | 3  | 5.01E-09 | XP_001893739.1 | 57  | 64.3142 | 82  | 47  | Protein kinase domain containing protein                                             |
| Locus_24565_Transcript_1/1_Conf_1.000 | 268  | 20 | 1.86E-32 | XP_002634119.1 | 89  | 142.124 | 87  | 78  | Hypothetical protein CBG01673                                                        |
| Locus_24566_Transcript_1/1_Conf_1.000 | 270  | 1  | 3.64E-04 | NP_499445.2    | 56  | 48.1358 | 67  | 38  | hypothetical protein Y47D3A.14                                                       |
| Locus_24567_Transcript_1/1_Conf_1.000 | 131  | 0  |          |                |     |         |     |     |                                                                                      |
| Locus_24568_Transcript_1/1_Conf_1.000 | 157  | 0  |          |                |     |         |     |     |                                                                                      |
| Locus_24569_Transcript_1/1_Conf_1.000 | 182  | 0  |          |                |     |         |     |     |                                                                                      |
| Locus_2457_Transcript_1/1_Conf_1.000  | 1156 | 5  | 3.96E-42 | NP_498283.1    | 65  | 176.792 | 206 | 134 | hypothetical protein C28H8.3                                                         |
| Locus_24570_Transcript_1/1_Conf_1.000 | 176  | 20 | 3.15E-16 | NP_001163592.1 | 87  | 88.1965 | 56  | 49  | CG31116, isoform H                                                                   |
| Locus_24571_Transcript_1/1_Conf_1.000 | 305  | 20 | 3.95E-51 | XP_002924108.1 | 100 | 204.142 | 101 | 101 | PREDICTED: LOW QUALITY PROTEIN: transmembrane emp24 domain-containing protein 9-like |
| Locus_24572_Transcript_1/1_Conf_1.000 | 203  | 2  | 2.29E-06 | EFO23663.1     | 61  | 55.4546 | 68  | 42  | myosin xviii                                                                         |
| Locus_24573_Transcript_1/1_Conf_1.000 | 146  | 0  |          |                |     |         |     |     |                                                                                      |
| Locus_24574_Transcript_1/1_Conf_1.000 | 660  | 0  |          |                |     |         |     |     |                                                                                      |

|                                       |     |    |           |                |     |         |     |     |                                                                                                        |
|---------------------------------------|-----|----|-----------|----------------|-----|---------|-----|-----|--------------------------------------------------------------------------------------------------------|
| Locus_24575_Transcript_1/1_Conf_1.000 | 175 | 0  |           |                |     |         |     |     |                                                                                                        |
| Locus_24576_Transcript_1/1_Conf_1.000 | 138 | 0  |           |                |     |         |     |     |                                                                                                        |
| Locus_24577_Transcript_1/1_Conf_1.000 | 484 | 20 | 1.49E-29  | NP_001024342.1 | 77  | 132.494 | 127 | 98  | Aboc, EXPulsion defective family member (aex-3)                                                        |
| Locus_24578_Transcript_1/1_Conf_1.000 | 385 | 20 | 7.04E-16  | AAO63576.1     | 59  | 87.0409 | 106 | 63  | secreted protein 4 precursor                                                                           |
| Locus_24579_Transcript_1/1_Conf_1.000 | 168 | 0  |           |                |     |         |     |     |                                                                                                        |
| Locus_2458_Transcript_1/1_Conf_1.000  | 180 | 4  | 8.28E-20  | NP_493560.1    | 84  | 100.138 | 58  | 49  | hypothetical protein K05C4.11                                                                          |
| Locus_24580_Transcript_1/1_Conf_1.000 | 258 | 0  |           |                |     |         |     |     |                                                                                                        |
| Locus_24581_Transcript_1/1_Conf_1.000 | 954 | 20 | 6.87E-108 | XP_002640180.1 | 92  | 394.815 | 252 | 232 | Hypothetical protein CBG12683                                                                          |
| Locus_24582_Transcript_1/1_Conf_1.000 | 303 | 0  |           |                |     |         |     |     |                                                                                                        |
| Locus_24583_Transcript_1/1_Conf_1.000 | 135 | 0  |           |                |     |         |     |     |                                                                                                        |
| Locus_24584_Transcript_1/1_Conf_1.000 | 256 | 20 | 2.57E-05  | XP_002875012.1 | 52  | 51.9878 | 84  | 44  | RNA recognition motif-containing protein                                                               |
| Locus_24585_Transcript_1/1_Conf_1.000 | 286 | 2  | 5.48E-40  | NP_001022371.1 | 96  | 167.162 | 86  | 83  | hypothetical protein T26C5.5                                                                           |
| Locus_24587_Transcript_1/1_Conf_1.000 | 370 | 4  | 2.37E-43  | XP_002631789.1 | 81  | 178.333 | 122 | 100 | Hypothetical protein CBG21003                                                                          |
| Locus_24588_Transcript_1/1_Conf_1.000 | 128 | 0  |           |                |     |         |     |     |                                                                                                        |
| Locus_24589_Transcript_1/1_Conf_1.000 | 131 | 20 | 7.81E-15  | XP_001894369.1 | 100 | 83.5741 | 43  | 43  | Voltage-gated potassium channel, Shab-family (KCNB, Kv2-like) alpha-subunit. C. elegans exp-2 ortholog |



|                                       |     |    |          |                |    |         |     |     |                                                 |
|---------------------------------------|-----|----|----------|----------------|----|---------|-----|-----|-------------------------------------------------|
| Locus_2459_Transcript_1/1_Conf_1.000  | 570 | 20 | 3.29E-33 | XP_001900388.1 | 83 | 145.206 | 114 | 95  | GTP-binding protein Rheb homolog                |
| Locus_24590_Transcript_1/1_Conf_1.000 | 265 | 0  |          |                |    |         |     |     |                                                 |
| Locus_24591_Transcript_1/1_Conf_1.000 | 257 | 0  |          |                |    |         |     |     |                                                 |
| Locus_24592_Transcript_1/1_Conf_1.000 | 300 | 0  |          |                |    |         |     |     |                                                 |
| Locus_24593_Transcript_1/1_Conf_1.000 | 132 | 0  |          |                |    |         |     |     |                                                 |
| Locus_24594_Transcript_1/1_Conf_1.000 | 138 | 0  |          |                |    |         |     |     |                                                 |
| Locus_24595_Transcript_1/1_Conf_1.000 | 151 | 0  |          |                |    |         |     |     |                                                 |
| Locus_24596_Transcript_1/1_Conf_1.000 | 145 | 17 | 5.56E-08 | NP_504022.2    | 74 | 60.8474 | 47  | 35  | hypothetical protein F59B1.8                    |
| Locus_24597_Transcript_1/1_Conf_1.000 | 132 | 0  |          |                |    |         |     |     |                                                 |
| Locus_24598_Transcript_1/1_Conf_1.000 | 218 | 20 | 4.07E-32 | ABO36652.1     | 97 | 140.969 | 72  | 70  | latrophilin-like protein 2                      |
| Locus_24599_Transcript_1/1_Conf_1.000 | 155 | 0  |          |                |    |         |     |     |                                                 |
| Locus_246_Transcript_1/1_Conf_1.000   | 340 | 0  |          |                |    |         |     |     |                                                 |
| Locus_2460_Transcript_1/1_Conf_1.000  | 812 | 20 | 3.08E-52 | NP_510201.2    | 70 | 209.534 | 238 | 167 | Nuclear Hormone Receptor family member (nhr-32) |
| Locus_24600_Transcript_1/1_Conf_1.000 | 291 | 0  |          |                |    |         |     |     |                                                 |

|                                       |     |    |          |                |     |         |     |     |                                                       |
|---------------------------------------|-----|----|----------|----------------|-----|---------|-----|-----|-------------------------------------------------------|
| Locus_24601_Transcript_1/1_Conf_1.000 | 337 | 20 | 2.17E-25 | XP_001901457.1 | 73  | 118.627 | 109 | 80  | Hypothetical UPF0202 protein F55A12.8 in chromosome I |
| Locus_24602_Transcript_1/1_Conf_1.000 | 357 | 20 | 8.61E-22 | XP_002640146.1 | 66  | 106.686 | 110 | 73  | C. briggsae CBR-GLY-2 protein                         |
| Locus_24603_Transcript_1/1_Conf_1.000 | 257 | 20 | 3.43E-42 | EFO25047.1     | 96  | 174.481 | 85  | 82  | serine/threonine protein phosphatase 5                |
| Locus_24604_Transcript_1/1_Conf_1.000 | 157 | 20 | 2.01E-18 | BAG58382.1     | 100 | 95.5153 | 52  | 52  | unnamed protein product                               |
| Locus_24605_Transcript_1/1_Conf_1.000 | 159 | 0  |          |                |     |         |     |     |                                                       |
| Locus_24606_Transcript_1/1_Conf_1.000 | 158 | 20 | 9.32E-24 | AAP36779.1     | 100 | 113.235 | 52  | 52  | Homo sapiens jumping translocation breakpoint         |
| Locus_24607_Transcript_1/1_Conf_1.000 | 208 | 6  | 3.38E-18 | XP_002645082.1 | 82  | 94.7449 | 68  | 56  | C. briggsae CBR-DHS-29 protein                        |
| Locus_24608_Transcript_1/1_Conf_1.000 | 211 | 18 | 1.25E-10 | XP_002638474.1 | 59  | 47.3654 | 47  | 28  | C. briggsae CBR-TTR-26 protein                        |
| Locus_24609_Transcript_1/1_Conf_1.000 | 306 | 0  |          |                |     |         |     |     |                                                       |
| Locus_2461_Transcript_1/1_Conf_1.000  | 145 | 0  |          |                |     |         |     |     |                                                       |
| Locus_24610_Transcript_1/1_Conf_1.000 | 374 | 4  | 2.63E-18 | XP_002643890.1 | 78  | 95.1301 | 120 | 94  | Hypothetical protein CBG02142                         |
| Locus_24611_Transcript_1/1_Conf_1.000 | 222 | 0  |          |                |     |         |     |     |                                                       |
| Locus_24612_Transcript_1/1_Conf_1.000 | 222 | 0  |          |                |     |         |     |     |                                                       |
| Locus_24613_Transcript_1/1_Conf_1.000 | 150 | 0  |          |                |     |         |     |     |                                                       |
| Locus_24614_Transcript_1/1_Conf_1.000 | 565 | 20 | 2.03E-80 | NP_496205.2    | 87  | 301.982 | 187 | 163 | PhosphoLipase C family member (plc-3)                 |

|                                       |     |    |          |                |     |         |     |    |                                                                    |
|---------------------------------------|-----|----|----------|----------------|-----|---------|-----|----|--------------------------------------------------------------------|
| Locus_24615_Transcript_1/1_Conf_1.000 | 253 | 20 | 4.23E-16 | NP_001020988.1 | 64  | 87.8113 | 84  | 54 | UNCoordinated family member (unc-89)                               |
| Locus_24616_Transcript_1/1_Conf_1.000 | 253 | 20 | 3.35E-13 | XP_002631113.1 | 68  | 78.1814 | 86  | 59 | C. briggsae CBR-ARS-1 protein                                      |
| Locus_24617_Transcript_1/1_Conf_1.000 | 182 | 20 | 2.49E-16 | XP_001893904.1 | 87  | 88.5817 | 55  | 48 | Protein-tyrosine phosphatase containing protein                    |
| Locus_24618_Transcript_1/1_Conf_1.000 | 151 | 0  |          |                |     |         |     |    |                                                                    |
| Locus_24619_Transcript_1/1_Conf_1.000 | 128 | 9  | 3.90E-06 | XP_002748769.1 | 100 | 54.6842 | 42  | 42 | PREDICTED: hematological and neurological expressed 1 protein-like |
| Locus_2462_Transcript_1/1_Conf_1.000  | 171 | 0  |          |                |     |         |     |    |                                                                    |
| Locus_24620_Transcript_1/1_Conf_1.000 | 131 | 20 | 5.07E-06 | AAZ67097.1     | 78  | 54.299  | 42  | 33 | transposase                                                        |
| Locus_24621_Transcript_1/1_Conf_1.000 | 250 | 20 | 3.46E-15 | NP_509351.1    | 66  | 84.7297 | 83  | 55 | hypothetical protein C34D10.1                                      |
| Locus_24622_Transcript_1/1_Conf_1.000 | 385 | 20 | 3.74E-17 | NP_510174.3    | 56  | 91.2781 | 127 | 72 | hypothetical protein R03G8.3                                       |
| Locus_24623_Transcript_1/1_Conf_1.000 | 152 | 0  |          |                |     |         |     |    |                                                                    |
| Locus_24624_Transcript_1/1_Conf_1.000 | 147 | 0  |          |                |     |         |     |    |                                                                    |
| Locus_24625_Transcript_1/1_Conf_1.000 | 346 | 2  | 8.20E-12 | XP_002642236.1 | 64  | 73.559  | 105 | 68 | Hypothetical protein CBG18218                                      |
| Locus_24626_Transcript_1/1_Conf_1.000 | 142 | 0  |          |                |     |         |     |    |                                                                    |
| Locus_24627_Transcript_1/1_Conf_1.000 | 326 | 0  |          |                |     |         |     |    |                                                                    |
| Locus_24628_Transcript_1/1_Conf_1.000 | 226 | 20 | 1.66E-23 | CAI15068.1     | 100 | 74.7146 | 38  | 38 | guanylate kinase 1                                                 |

|                                       |      |    |          |                |    |         |     |     |                                             |
|---------------------------------------|------|----|----------|----------------|----|---------|-----|-----|---------------------------------------------|
| Locus_24629_Transcript_1/1_Conf_1.000 | 525  | 20 | 1.75E-13 | NP_496914.1    | 53 | 79.337  | 189 | 101 | hypothetical protein W02B8.2                |
| Locus_2463_Transcript_1/1_Conf_1.000  | 1421 | 20 | 0        | NP_491134.1    | 87 | 676.781 | 455 | 399 | NucleOLar protein family member (nol-5)     |
| Locus_24630_Transcript_1/1_Conf_1.000 | 341  | 20 | 6.47E-46 | XP_002637940.1 | 89 | 186.808 | 113 | 101 | C. briggsae CBR-CTG-2 protein               |
| Locus_24631_Transcript_1/1_Conf_1.000 | 157  | 0  |          |                |    |         |     |     |                                             |
| Locus_24632_Transcript_1/1_Conf_1.000 | 136  | 0  |          |                |    |         |     |     |                                             |
| Locus_24633_Transcript_1/1_Conf_1.000 | 359  | 5  | 5.37E-40 | NP_741363.1    | 91 | 167.162 | 117 | 107 | hypothetical protein F37C4.4                |
| Locus_24634_Transcript_1/1_Conf_1.000 | 200  | 0  |          |                |    |         |     |     |                                             |
| Locus_24635_Transcript_1/1_Conf_1.000 | 417  | 20 | 4.06E-27 | XP_795502.1    | 62 | 124.405 | 135 | 85  | PREDICTED: similar to<br>ENSANGP00000010363 |
| Locus_24636_Transcript_1/1_Conf_1.000 | 242  | 0  |          |                |    |         |     |     |                                             |
| Locus_24637_Transcript_1/1_Conf_1.000 | 235  | 4  | 7.10E-16 | NP_493170.1    | 79 | 87.0409 | 64  | 51  | hypothetical protein T27F6.7                |
| Locus_24638_Transcript_1/1_Conf_1.000 | 162  | 0  |          |                |    |         |     |     |                                             |
| Locus_24639_Transcript_1/1_Conf_1.000 | 243  | 20 | 1.01E-38 | A8XQD5.2       | 98 | 162.925 | 80  | 79  | Serine/threonine-protein kinase dkf-2       |
| Locus_2464_Transcript_1/1_Conf_1.000  | 174  | 0  |          |                |    |         |     |     |                                             |
| Locus_24640_Transcript_1/1_Conf_1.000 | 231  | 0  |          |                |    |         |     |     |                                             |
| Locus_24641_Transcript_1/1_Conf_1.000 | 160  | 0  |          |                |    |         |     |     |                                             |
| Locus_24642_Transcript_1/1_Conf_1.000 | 194  | 0  |          |                |    |         |     |     |                                             |

|                                       |      |    |          |                |     |         |     |     |                                                    |
|---------------------------------------|------|----|----------|----------------|-----|---------|-----|-----|----------------------------------------------------|
| Locus_24643_Transcript_1/1_Conf_1.000 | 236  | 7  | 3.05E-12 | XP_002631921.1 | 85  | 56.9954 | 34  | 29  | Hypothetical protein CBG07909                      |
| Locus_24644_Transcript_1/1_Conf_1.000 | 389  | 0  |          |                |     |         |     |     |                                                    |
| Locus_24645_Transcript_1/1_Conf_1.000 | 227  | 0  |          |                |     |         |     |     |                                                    |
| Locus_24646_Transcript_1/1_Conf_1.000 | 148  | 20 | 5.01E-09 | XP_002641345.1 | 79  | 64.3142 | 48  | 38  | Hypothetical protein CBG13198                      |
| Locus_24647_Transcript_1/1_Conf_1.000 | 130  | 0  |          |                |     |         |     |     |                                                    |
| Locus_24648_Transcript_1/1_Conf_1.000 | 221  | 0  |          |                |     |         |     |     |                                                    |
| Locus_24649_Transcript_1/1_Conf_1.000 | 287  | 0  |          |                |     |         |     |     |                                                    |
| Locus_2465_Transcript_1/3_Conf_0.286  | 550  | 1  | 4.94E-04 | NP_001022722.1 | 82  | 48.1358 | 40  | 33  | Coelomocyte UPTake defective family member (cup-5) |
| Locus_2465_Transcript_2/3_Conf_0.714  | 2391 | 20 | 0        | NP_001022722.1 | 79  | 597.045 | 452 | 361 | Coelomocyte UPTake defective family member (cup-5) |
| Locus_2465_Transcript_3/3_Conf_0.714  | 2429 | 20 | 0        | NP_001022722.1 | 82  | 823.928 | 587 | 485 | Coelomocyte UPTake defective family member (cup-5) |
| Locus_24650_Transcript_1/1_Conf_1.000 | 286  | 0  |          |                |     |         |     |     |                                                    |
| Locus_24651_Transcript_1/1_Conf_1.000 | 265  | 0  |          |                |     |         |     |     |                                                    |
| Locus_24652_Transcript_1/1_Conf_1.000 | 201  | 2  | 4.92E-09 | XP_002639479.1 | 77  | 64.3142 | 63  | 49  | Hypothetical protein CBG04077                      |
| Locus_24653_Transcript_1/1_Conf_1.000 | 196  | 20 | 2.15E-12 | YP_388711.1    | 76  | 75.485  | 64  | 49  | ATP-dependent protease ATP-binding subunit ClpX    |
| Locus_24654_Transcript_1/1_Conf_1.000 | 710  | 20 | 3.39E-83 | XP_001892306.1 | 77  | 311.997 | 235 | 181 | Ser/Thr protein phosphatase family protein         |
| Locus_24655_Transcript_1/1_Conf_1.000 | 150  | 0  |          |                |     |         |     |     |                                                    |
| Locus_24656_Transcript_1/1_Conf_1.000 | 259  | 1  | 3.68E-12 | XP_001161286.1 | 100 | 74.7146 | 34  | 34  | PREDICTED: hypothetical protein                    |
| Locus_24657_Transcript_1/1_Conf_1.000 | 346  | 20 | 9.96E-34 | NP_498081.2    | 83  | 146.362 | 103 | 86  | ALdehyde deHydrogenase family member (alh-1)       |
| Locus_24658_Transcript_1/1_Conf_1.000 | 278  | 0  |          |                |     |         |     |     |                                                    |
| Locus_24659_Transcript_1/1_Conf_1.000 | 1389 | 20 | 5.06E-98 | XP_001895789.1 | 62  | 362.844 | 473 | 295 | Timeless protein                                   |
| Locus_2466_Transcript_1/2_Conf_1.000  | 1416 | 20 | 5.41E-79 | XP_002634331.1 | 76  | 299.671 | 261 | 200 | C. briggsae CBR-IMP-3 protein                      |
| Locus_2466_Transcript_2/2_Conf_1.000  | 1416 | 20 | 5.41E-79 | XP_002634331.1 | 76  | 299.671 | 261 | 200 | C. briggsae CBR-IMP-3 protein                      |
| Locus_24660_Transcript_1/1_Conf_1.000 | 387  | 0  |          |                |     |         |     |     |                                                    |

|                                       |      |    |          |                |     |         |     |     |                                                            |
|---------------------------------------|------|----|----------|----------------|-----|---------|-----|-----|------------------------------------------------------------|
| Locus_24661_Transcript_1/1_Conf_1.000 | 379  | 0  |          |                |     |         |     |     |                                                            |
| Locus_24662_Transcript_1/1_Conf_1.000 | 300  | 20 | 2.69E-15 | NP_491806.2    | 65  | 85.1149 | 101 | 66  | LiPid Depleted family member (lpd-2)                       |
| Locus_24663_Transcript_1/2_Conf_1.000 | 228  | 0  |          |                |     |         |     |     |                                                            |
| Locus_24663_Transcript_2/2_Conf_1.000 | 236  | 0  |          |                |     |         |     |     |                                                            |
| Locus_24664_Transcript_1/1_Conf_1.000 | 156  | 0  |          |                |     |         |     |     |                                                            |
| Locus_24665_Transcript_1/1_Conf_1.000 | 547  | 20 | 1.90E-16 | XP_002642886.1 | 54  | 89.3521 | 182 | 99  | C. briggsae CBR-INFT-1 protein                             |
| Locus_24666_Transcript_1/1_Conf_1.000 | 275  | 2  | 5.39E-16 | EDL12487.1     | 62  | 87.4261 | 86  | 54  | eukaryotic translation initiation factor 5A, isoform CRA_i |
| Locus_24667_Transcript_1/1_Conf_1.000 | 259  | 0  |          |                |     |         |     |     |                                                            |
| Locus_24668_Transcript_1/1_Conf_1.000 | 131  | 0  |          |                |     |         |     |     |                                                            |
| Locus_24669_Transcript_1/1_Conf_1.000 | 287  | 20 | 1.03E-46 | ABI63362.1     | 100 | 189.504 | 88  | 88  | immunoglobulin J chain                                     |
| Locus_2467_Transcript_1/2_Conf_1.000  | 1601 | 20 | 6.23E-34 | XP_002633700.1 | 53  | 150.214 | 316 | 168 | Hypothetical protein CBG03383                              |
| Locus_2467_Transcript_2/2_Conf_1.000  | 1601 | 20 | 6.23E-34 | XP_002633700.1 | 53  | 150.214 | 316 | 168 | Hypothetical protein CBG03383                              |
| Locus_24670_Transcript_1/1_Conf_1.000 | 248  | 2  | 3.48E-07 | XP_001902364.1 | 64  | 58.151  | 57  | 37  | Myotubularin-related family protein                        |
| Locus_24671_Transcript_1/1_Conf_1.000 | 332  | 0  |          |                |     |         |     |     |                                                            |
| Locus_24672_Transcript_1/1_Conf_1.000 | 239  | 20 | 3.08E-11 | XP_002599652.1 | 65  | 71.633  | 61  | 40  | hypothetical protein BRAFLDRAFT_119367                     |
| Locus_24673_Transcript_1/1_Conf_1.000 | 133  | 0  |          |                |     |         |     |     |                                                            |
| Locus_24674_Transcript_1/1_Conf_1.000 | 142  | 6  | 2.49E-05 | XP_002637217.1 | 67  | 51.9878 | 46  | 31  | Hypothetical protein CBG18883                              |
| Locus_24675_Transcript_1/1_Conf_1.000 | 145  | 0  |          |                |     |         |     |     |                                                            |
| Locus_24676_Transcript_1/1_Conf_1.000 | 175  | 20 | 1.01E-14 | NP_001020992.1 | 82  | 83.1889 | 57  | 47  | hypothetical protein C09D4.1                               |
| Locus_24677_Transcript_1/1_Conf_1.000 | 346  | 0  |          |                |     |         |     |     |                                                            |
| Locus_24678_Transcript_1/1_Conf_1.000 | 146  | 0  |          |                |     |         |     |     |                                                            |
| Locus_24679_Transcript_1/1_Conf_1.000 | 193  | 0  |          |                |     |         |     |     |                                                            |
| Locus_2468_Transcript_1/1_Conf_1.000  | 212  | 8  | 1.73E-14 | EFO23768.1     | 83  | 82.4185 | 48  | 40  | hypothetical protein LOAG_04713                            |

|                                       |     |    |          |                |    |         |    |    |                                |
|---------------------------------------|-----|----|----------|----------------|----|---------|----|----|--------------------------------|
| Locus_24680_Transcript_1/1_Conf_1.000 | 176 | 0  |          |                |    |         |    |    |                                |
| Locus_24681_Transcript_1/1_Conf_1.000 | 176 | 20 | 1.33E-06 | EFN62814.1     | 69 | 56.225  | 56 | 39 | Myosin-2 essential light chain |
| Locus_24682_Transcript_1/1_Conf_1.000 | 132 | 0  |          |                |    |         |    |    |                                |
| Locus_24683_Transcript_1/1_Conf_1.000 | 177 | 0  |          |                |    |         |    |    |                                |
| Locus_24684_Transcript_1/1_Conf_1.000 | 130 | 0  |          |                |    |         |    |    |                                |
| Locus_24685_Transcript_1/1_Conf_1.000 | 427 | 0  |          |                |    |         |    |    |                                |
| Locus_24686_Transcript_1/1_Conf_1.000 | 151 | 0  |          |                |    |         |    |    |                                |
| Locus_24687_Transcript_1/1_Conf_1.000 | 451 | 0  |          |                |    |         |    |    |                                |
| Locus_24688_Transcript_1/1_Conf_1.000 | 136 | 0  |          |                |    |         |    |    |                                |
| Locus_24689_Transcript_1/1_Conf_1.000 | 208 | 0  |          |                |    |         |    |    |                                |
| Locus_2469_Transcript_1/1_Conf_1.000  | 204 | 0  |          |                |    |         |    |    |                                |
| Locus_24690_Transcript_1/1_Conf_1.000 | 154 | 17 | 1.15E-05 | NP_498151.2    | 66 | 53.1434 | 51 | 34 | hypothetical protein Y32H12A.8 |
| Locus_24691_Transcript_1/1_Conf_1.000 | 139 | 0  |          |                |    |         |    |    |                                |
| Locus_24692_Transcript_1/1_Conf_1.000 | 198 | 0  |          |                |    |         |    |    |                                |
| Locus_24693_Transcript_1/1_Conf_1.000 | 144 | 3  | 1.12E-08 | EFO21461.1     | 69 | 63.1586 | 52 | 36 | AGC/NDR protein kinase         |
| Locus_24694_Transcript_1/1_Conf_1.000 | 533 | 0  |          |                |    |         |    |    |                                |
| Locus_24695_Transcript_1/1_Conf_1.000 | 407 | 0  |          |                |    |         |    |    |                                |
| Locus_24696_Transcript_1/1_Conf_1.000 | 130 | 20 | 1.42E-16 | NP_500130.1    | 97 | 89.3521 | 43 | 42 | hypothetical protein Y41D4A.4  |
| Locus_24697_Transcript_1/1_Conf_1.000 | 234 | 20 | 8.09E-28 | XP_001902612.1 | 92 | 126.716 | 77 | 71 | PWI domain containing protein  |

|                                       |      |    |          |                |     |         |     |     |                                              |
|---------------------------------------|------|----|----------|----------------|-----|---------|-----|-----|----------------------------------------------|
| Locus_24698_Transcript_1/1_Conf_1.000 | 329  | 20 | 2.18E-49 | 3FGA           | 100 | 198.364 | 99  | 99  | Structural Basis Of Pp2a And Sgo Interaction |
| Locus_24699_Transcript_1/1_Conf_1.000 | 132  | 20 | 4.42E-10 | XP_002158814.1 | 81  | 67.781  | 43  | 35  | PREDICTED: similar to predicted protein      |
| Locus_247_Transcript_1/3_Conf_0.714   | 2780 | 20 | 3.49E-65 | ACI49190.1     | 58  | 254.988 | 346 | 204 | hypothetical protein Csp3_JD02.018           |
| Locus_247_Transcript_2/3_Conf_0.714   | 2693 | 20 | 2.50E-76 | ACI49190.1     | 63  | 291.967 | 319 | 204 | hypothetical protein Csp3_JD02.018           |
| Locus_247_Transcript_3/3_Conf_0.714   | 2702 | 20 | 1.74E-69 | ACI49190.1     | 63  | 269.24  | 320 | 204 | hypothetical protein Csp3_JD02.018           |
| Locus_2470_Transcript_1/1_Conf_1.000  | 268  | 0  |          |                |     |         |     |     |                                              |
| Locus_24700_Transcript_1/1_Conf_1.000 | 278  | 20 | 3.71E-25 | EFO27066.1     | 82  | 117.857 | 90  | 74  | hypothetical protein LOAG_01421              |
| Locus_24701_Transcript_1/1_Conf_1.000 | 371  | 11 | 4.50E-18 | XP_002629874.1 | 65  | 94.3597 | 102 | 67  | C. briggsae CBR-TWK-1 protein                |
| Locus_24702_Transcript_1/1_Conf_1.000 | 249  | 5  | 1.08E-16 | CBW48341.1     | 63  | 89.7373 | 86  | 55  | Hypothetical protein C27H6.1c                |
| Locus_24703_Transcript_1/1_Conf_1.000 | 131  | 0  |          |                |     |         |     |     |                                              |



|                                       |     |    |          |                |     |         |     |     |                                                     |
|---------------------------------------|-----|----|----------|----------------|-----|---------|-----|-----|-----------------------------------------------------|
| Locus_24704_Transcript_1/1_Conf_1.000 | 151 | 3  | 1.78E-06 | XP_002630904.1 | 72  | 55.8398 | 43  | 31  | Hypothetical protein CBG02628                       |
| Locus_24705_Transcript_1/1_Conf_1.000 | 316 | 20 | 2.37E-51 | NP_491193.2    | 97  | 204.912 | 105 | 102 | Calcium Channel, Beta subunit family member (ccb-1) |
| Locus_24706_Transcript_1/1_Conf_1.000 | 131 | 2  | 8.94E-11 | XP_002645194.1 | 88  | 70.0922 | 43  | 38  | Hypothetical protein CBG16926                       |
| Locus_24707_Transcript_1/1_Conf_1.000 | 167 | 20 | 2.35E-27 | BAG64777.1     | 100 | 125.176 | 55  | 55  | unnamed protein product                             |
| Locus_24708_Transcript_1/1_Conf_1.000 | 166 | 0  |          |                |     |         |     |     |                                                     |
| Locus_24709_Transcript_1/1_Conf_1.000 | 183 | 0  |          |                |     |         |     |     |                                                     |
| Locus_2471_Transcript_1/1_Conf_1.000  | 772 | 20 | 4.76E-84 | Q27666.1       | 96  | 315.079 | 159 | 153 | cytoplasmic superoxide dismutase                    |
| Locus_24710_Transcript_1/1_Conf_1.000 | 166 | 0  |          |                |     |         |     |     |                                                     |
| Locus_24711_Transcript_1/1_Conf_1.000 | 292 | 20 | 7.66E-10 | NP_001074358.1 | 66  | 67.0106 | 75  | 50  | hypothetical protein LOC771987                      |
| Locus_24712_Transcript_1/1_Conf_1.000 | 204 | 0  |          |                |     |         |     |     |                                                     |
| Locus_24713_Transcript_1/1_Conf_1.000 | 153 | 20 | 3.33E-21 | ABI74141.1     | 100 | 104.76  | 51  | 51  | immunoglobulin light chain variable region          |
| Locus_24714_Transcript_1/1_Conf_1.000 | 135 | 0  |          |                |     |         |     |     |                                                     |
| Locus_24715_Transcript_1/1_Conf_1.000 | 138 | 0  |          |                |     |         |     |     |                                                     |
| Locus_24716_Transcript_1/1_Conf_1.000 | 151 | 0  |          |                |     |         |     |     |                                                     |
| Locus_24717_Transcript_1/1_Conf_1.000 | 260 | 0  |          |                |     |         |     |     |                                                     |
| Locus_24718_Transcript_1/1_Conf_1.000 | 229 | 0  |          |                |     |         |     |     |                                                     |

|                                       |     |    |          |                |    |         |     |     |                                |
|---------------------------------------|-----|----|----------|----------------|----|---------|-----|-----|--------------------------------|
| Locus_24719_Transcript_1/1_Conf_1.000 | 154 | 0  |          |                |    |         |     |     |                                |
| Locus_2472_Transcript_1/1_Conf_1.000  | 504 | 20 | 1.06E-38 | XP_002631813.1 | 66 | 162.925 | 167 | 111 | Hypothetical protein CBG21034  |
| Locus_24720_Transcript_1/1_Conf_1.000 | 145 | 0  |          |                |    |         |     |     |                                |
| Locus_24721_Transcript_1/1_Conf_1.000 | 554 | 3  | 7.77E-05 | XP_001902040.1 | 45 | 50.8322 | 127 | 58  | Conserved hypothetical protein |
| Locus_24722_Transcript_1/1_Conf_1.000 | 140 | 0  |          |                |    |         |     |     |                                |
| Locus_24723_Transcript_1/1_Conf_1.000 | 403 | 20 | 1.02E-30 | NP_491275.2    | 62 | 136.346 | 133 | 83  | hypothetical protein F47B3.6   |
| Locus_24724_Transcript_1/1_Conf_1.000 | 142 | 0  |          |                |    |         |     |     |                                |
| Locus_24725_Transcript_1/1_Conf_1.000 | 437 | 20 | 6.29E-41 | NP_491293.1    | 72 | 170.244 | 143 | 104 | hypothetical protein C24G7.4   |
| Locus_24726_Transcript_1/1_Conf_1.000 | 200 | 0  |          |                |    |         |     |     |                                |
| Locus_24727_Transcript_1/1_Conf_1.000 | 206 | 19 | 1.69E-09 | ACI22689.1     | 62 | 65.855  | 67  | 42  | Hypothetical protein F52C12.6  |
| Locus_24728_Transcript_1/1_Conf_1.000 | 210 | 20 | 1.97E-18 | NP_495675.1    | 81 | 95.5153 | 69  | 56  | hypothetical protein DH11.1    |

|                                       |     |    |          |                |     |         |     |     |                                              |
|---------------------------------------|-----|----|----------|----------------|-----|---------|-----|-----|----------------------------------------------|
| Locus_24729_Transcript_1/1_Conf_1.000 | 325 | 20 | 5.57E-53 | XP_002750116.1 | 100 | 210.305 | 108 | 108 | PREDICTED: vimentin-like isoform 2           |
| Locus_2473_Transcript_1/1_Conf_1.000  | 621 | 20 | 5.97E-93 | NP_504721.1    | 95  | 343.969 | 180 | 171 | Germinal Center Kinase family member (gck-2) |
| Locus_24730_Transcript_1/1_Conf_1.000 | 264 | 2  | 1.75E-22 | XP_002640985.1 | 73  | 108.997 | 87  | 64  | C. briggsae CBR-CDH-12 protein               |
| Locus_24731_Transcript_1/1_Conf_1.000 | 323 | 20 | 3.20E-16 | AAN11402.1     | 55  | 88.1965 | 109 | 61  | secreted-protein 1 precursor                 |
| Locus_24732_Transcript_1/1_Conf_1.000 | 145 | 0  |          |                |     |         |     |     |                                              |
| Locus_24733_Transcript_1/1_Conf_1.000 | 205 | 0  |          |                |     |         |     |     |                                              |
| Locus_24734_Transcript_1/1_Conf_1.000 | 262 | 0  |          |                |     |         |     |     |                                              |
| Locus_24735_Transcript_1/1_Conf_1.000 | 205 | 20 | 2.34E-27 | NP_498931.2    | 91  | 125.176 | 68  | 62  | SMALL family member (sma-2)                  |
| Locus_24736_Transcript_1/1_Conf_1.000 | 130 | 0  |          |                |     |         |     |     |                                              |
| Locus_24737_Transcript_1/1_Conf_1.000 | 146 | 20 | 4.54E-18 | AAC18189.1     | 97  | 94.3597 | 48  | 47  | immunoglobulin heavy chain variable region   |
| Locus_24738_Transcript_1/1_Conf_1.000 | 218 | 0  |          |                |     |         |     |     |                                              |
| Locus_24739_Transcript_1/1_Conf_1.000 | 228 | 11 | 3.33E-05 | XP_002401086.1 | 62  | 51.6026 | 64  | 40  | rolling pebbles, putative                    |

|                                       |      |    |           |                |     |         |     |     |                                                       |
|---------------------------------------|------|----|-----------|----------------|-----|---------|-----|-----|-------------------------------------------------------|
| Locus_2474_Transcript_1/1_Conf_1.000  | 1096 | 20 | 6.98E-134 | CAB77052.1     | 95  | 481.485 | 260 | 247 | putative integrin-linked kinase                       |
| Locus_24740_Transcript_1/1_Conf_1.000 | 1017 | 20 | 7.66E-116 | NP_493356.2    | 82  | 421.394 | 288 | 238 | hypothetical protein C01A2.3                          |
| Locus_24741_Transcript_1/1_Conf_1.000 | 154  | 3  | 3.81E-09  | XP_002639439.1 | 74  | 64.6994 | 51  | 38  | Hypothetical protein CBG04032                         |
| Locus_24742_Transcript_1/1_Conf_1.000 | 288  | 0  |           |                |     |         |     |     |                                                       |
| Locus_24743_Transcript_1/1_Conf_1.000 | 130  | 0  |           |                |     |         |     |     |                                                       |
| Locus_24744_Transcript_1/1_Conf_1.000 | 150  | 5  | 1.00E-17  | XP_001893254.1 | 92  | 93.2041 | 50  | 46  | hypothetical protein Bm1_08915                        |
| Locus_24745_Transcript_1/1_Conf_1.000 | 358  | 0  |           |                |     |         |     |     |                                                       |
| Locus_24746_Transcript_1/1_Conf_1.000 | 153  | 0  |           |                |     |         |     |     |                                                       |
| Locus_24747_Transcript_1/1_Conf_1.000 | 154  | 0  |           |                |     |         |     |     |                                                       |
| Locus_24748_Transcript_1/1_Conf_1.000 | 182  | 20 | 9.14E-27  | A8WL06.2       | 100 | 123.25  | 59  | 59  | Homeobox protein unc-62                               |
| Locus_24749_Transcript_1/1_Conf_1.000 | 143  | 20 | 2.24E-14  | NP_001021183.1 | 89  | 82.0333 | 47  | 42  | hypothetical protein C24A1.3                          |
| Locus_2475_Transcript_1/1_Conf_1.000  | 763  | 20 | 8.27E-49  | XP_002631218.1 | 61  | 197.978 | 254 | 157 | Hypothetical protein CBG03015                         |
| Locus_24750_Transcript_1/1_Conf_1.000 | 185  | 20 | 7.47E-21  | XP_002641474.1 | 92  | 103.605 | 56  | 52  | C. briggsae CBR-PTP-1 protein                         |
| Locus_24751_Transcript_1/1_Conf_1.000 | 340  | 20 | 1.45E-29  | NP_501968.2    | 74  | 132.494 | 110 | 82  | Flavin-containing MonoOxygenase family member (fmo-1) |

|                                       |      |    |          |                |     |         |     |     |                                                          |
|---------------------------------------|------|----|----------|----------------|-----|---------|-----|-----|----------------------------------------------------------|
| Locus_24752_Transcript_1/1_Conf_1.000 | 136  | 13 | 5.21E-11 | XP_519221.2    | 100 | 70.8626 | 45  | 45  | PREDICTED: similar to I3 protein                         |
| Locus_24753_Transcript_1/1_Conf_1.000 | 267  | 2  | 2.99E-06 | NP_508991.1    | 75  | 55.0694 | 53  | 40  | hypothetical protein Y23B4A.2                            |
| Locus_24754_Transcript_1/1_Conf_1.000 | 140  | 4  | 3.48E-07 | AAA96224.2     | 74  | 58.151  | 39  | 29  | Hypothetical protein T07H6.4                             |
| Locus_24755_Transcript_1/1_Conf_1.000 | 372  | 20 | 3.65E-36 | NP_492763.1    | 70  | 154.451 | 124 | 88  | hypothetical protein F25H2.7                             |
| Locus_24756_Transcript_1/1_Conf_1.000 | 172  | 0  |          |                |     |         |     |     |                                                          |
| Locus_24757_Transcript_1/1_Conf_1.000 | 227  | 0  |          |                |     |         |     |     |                                                          |
| Locus_24758_Transcript_1/1_Conf_1.000 | 209  | 6  | 1.24E-20 | NP_001024545.1 | 93  | 102.834 | 49  | 46  | hypothetical protein F09E10.7                            |
| Locus_24759_Transcript_1/1_Conf_1.000 | 248  | 0  |          |                |     |         |     |     |                                                          |
| Locus_2476_Transcript_1/2_Conf_1.000  | 2134 | 20 | 0        | NP_001040799.1 | 91  | 1153.27 | 712 | 653 | hypothetical protein T04B8.5                             |
| Locus_2476_Transcript_2/2_Conf_1.000  | 1458 | 20 | 0        | NP_001040799.1 | 92  | 774.622 | 487 | 449 | hypothetical protein T04B8.5                             |
| Locus_24760_Transcript_1/1_Conf_1.000 | 139  | 0  |          |                |     |         |     |     |                                                          |
| Locus_24761_Transcript_1/1_Conf_1.000 | 136  | 0  |          |                |     |         |     |     |                                                          |
| Locus_24762_Transcript_1/1_Conf_1.000 | 131  | 0  |          |                |     |         |     |     |                                                          |
| Locus_24763_Transcript_1/1_Conf_1.000 | 159  | 0  |          |                |     |         |     |     |                                                          |
| Locus_24764_Transcript_1/1_Conf_1.000 | 251  | 20 | 2.73E-36 | XP_002647008.1 | 93  | 154.836 | 86  | 80  | Hypothetical protein CBG23794                            |
| Locus_24765_Transcript_1/1_Conf_1.000 | 136  | 0  |          |                |     |         |     |     |                                                          |
| Locus_24766_Transcript_1/1_Conf_1.000 | 291  | 0  |          |                |     |         |     |     |                                                          |
| Locus_24767_Transcript_1/1_Conf_1.000 | 250  | 20 | 7.21E-21 | XP_002631054.1 | 80  | 103.605 | 82  | 66  | C. briggsae CBR-BTF-1 protein                            |
| Locus_24768_Transcript_1/1_Conf_1.000 | 135  | 0  |          |                |     |         |     |     |                                                          |
| Locus_24769_Transcript_1/1_Conf_1.000 | 146  | 20 | 1.56E-10 | XP_002759913.1 | 100 | 69.3218 | 45  | 45  | PREDICTED: 28S ribosomal protein S21, mitochondrial-like |
| Locus_2477_Transcript_1/1_Conf_1.000  | 471  | 20 | 2.51E-29 | NP_509186.3    | 55  | 131.724 | 161 | 90  | Carbonic AnHydrase family member (cah-5)                 |
| Locus_24770_Transcript_1/1_Conf_1.000 | 175  | 20 | 3.04E-27 | XP_002825949.1 | 100 | 124.79  | 58  | 58  | PREDICTED: DNA-3-methyladenine glycosylase-like, partial |
| Locus_24771_Transcript_1/1_Conf_1.000 | 141  | 0  |          |                |     |         |     |     |                                                          |
| Locus_24772_Transcript_1/1_Conf_1.000 | 237  | 20 | 9.24E-16 | EFO16624.1     | 78  | 86.6557 | 61  | 48  | hypothetical protein LOAG_11880                          |
| Locus_24773_Transcript_1/1_Conf_1.000 | 159  | 0  |          |                |     |         |     |     |                                                          |

|                                       |      |    |           |                |     |         |     |     |                                                                  |
|---------------------------------------|------|----|-----------|----------------|-----|---------|-----|-----|------------------------------------------------------------------|
| Locus_24774_Transcript_1/1_Conf_1.000 | 149  | 20 | 7.73E-10  | XP_002638989.1 | 78  | 67.0106 | 46  | 36  | C. briggsae CBR-RPL-4 protein                                    |
| Locus_24775_Transcript_1/1_Conf_1.000 | 156  | 0  |           |                |     |         |     |     |                                                                  |
| Locus_24776_Transcript_1/1_Conf_1.000 | 239  | 0  |           |                |     |         |     |     |                                                                  |
| Locus_24777_Transcript_1/1_Conf_1.000 | 760  | 11 | 1.73E-06  | XP_002648923.1 | 51  | 57.3806 | 154 | 79  | Hypothetical protein CBG17840                                    |
| Locus_24778_Transcript_1/1_Conf_1.000 | 136  | 0  |           |                |     |         |     |     |                                                                  |
| Locus_24779_Transcript_1/1_Conf_1.000 | 165  | 0  |           |                |     |         |     |     |                                                                  |
| Locus_2478_Transcript_1/2_Conf_1.000  | 4143 | 20 | 9.75E-123 | XP_001891725.1 | 57  | 446.817 | 695 | 400 | hypothetical protein                                             |
| Locus_2478_Transcript_2/2_Conf_1.000  | 4143 | 20 | 7.47E-123 | XP_001891725.1 | 57  | 447.203 | 697 | 401 | hypothetical protein                                             |
| Locus_24780_Transcript_1/1_Conf_1.000 | 145  | 0  |           |                |     |         |     |     |                                                                  |
| Locus_24781_Transcript_1/1_Conf_1.000 | 212  | 0  |           |                |     |         |     |     |                                                                  |
| Locus_24782_Transcript_1/1_Conf_1.000 | 203  | 20 | 3.63E-20  | XP_002632923.1 | 89  | 101.293 | 66  | 59  | C. briggsae CBR-HIM-6 protein                                    |
| Locus_24783_Transcript_1/1_Conf_1.000 | 181  | 0  |           |                |     |         |     |     |                                                                  |
| Locus_24784_Transcript_1/1_Conf_1.000 | 270  | 0  |           |                |     |         |     |     |                                                                  |
| Locus_24785_Transcript_1/1_Conf_1.000 | 279  | 20 | 8.26E-17  | NP_001166985.1 | 100 | 90.1225 | 43  | 43  | TYRO protein tyrosine kinase-binding protein isoform 3 precursor |
| Locus_24786_Transcript_1/1_Conf_1.000 | 158  | 20 | 9.67E-13  | NP_496723.2    | 82  | 76.6406 | 52  | 43  | hypothetical protein Y46G5A.19                                   |
| Locus_24787_Transcript_1/1_Conf_1.000 | 411  | 0  |           |                |     |         |     |     |                                                                  |
| Locus_24788_Transcript_1/1_Conf_1.000 | 723  | 15 | 4.43E-09  | NP_001076729.1 | 45  | 65.855  | 139 | 63  | hypothetical protein Y41E3.19                                    |
| Locus_24789_Transcript_1/1_Conf_1.000 | 297  | 0  |           |                |     |         |     |     |                                                                  |

|                                       |      |    |          |                |    |         |      |     |                                                                                 |
|---------------------------------------|------|----|----------|----------------|----|---------|------|-----|---------------------------------------------------------------------------------|
| Locus_2479_Transcript_1/3_Conf_0.333  | 1313 | 20 | 1.28E-87 | ACY40014.1     | 64 | 328.176 | 344  | 223 | C. elegans FLN-1 protein, isoform a, partially confirmed by transcript evidence |
| Locus_2479_Transcript_2/3_Conf_0.667  | 3520 | 20 | 0        | ACY40014.1     | 61 | 917.146 | 1187 | 730 | C. elegans FLN-1 protein, isoform a, partially confirmed by transcript evidence |
| Locus_2479_Transcript_3/3_Conf_0.667  | 3520 | 20 | 0        | ACY40014.1     | 61 | 915.99  | 1187 | 730 | C. elegans FLN-1 protein, isoform a, partially confirmed by transcript evidence |
| Locus_24790_Transcript_1/1_Conf_1.000 | 319  | 20 | 2.30E-22 | NP_001022192.1 | 77 | 108.612 | 81   | 63  | BCS1 (mitochondrial chaperone) homolog family member (bcs-1)                    |
| Locus_24791_Transcript_1/1_Conf_1.000 | 420  | 0  |          |                |    |         |      |     |                                                                                 |
| Locus_24792_Transcript_1/1_Conf_1.000 | 238  | 4  | 2.88E-09 | NP_001021653.1 | 67 | 65.0846 | 56   | 38  | FANCI (Fanconi anemia complex component I) homolog family member (fnci-1)       |
| Locus_24793_Transcript_1/1_Conf_1.000 | 261  | 20 | 2.53E-29 | XP_002630251.1 | 83 | 131.724 | 86   | 72  | Hypothetical protein CBG00670                                                   |
| Locus_24794_Transcript_1/1_Conf_1.000 | 359  | 0  |          |                |    |         |      |     |                                                                                 |
| Locus_24795_Transcript_1/1_Conf_1.000 | 203  | 0  |          |                |    |         |      |     |                                                                                 |
| Locus_24796_Transcript_1/1_Conf_1.000 | 222  | 0  |          |                |    |         |      |     |                                                                                 |
| Locus_24797_Transcript_1/1_Conf_1.000 | 133  | 0  |          |                |    |         |      |     |                                                                                 |
| Locus_24798_Transcript_1/1_Conf_1.000 | 284  | 0  |          |                |    |         |      |     |                                                                                 |
| Locus_24799_Transcript_1/1_Conf_1.000 | 193  | 20 | 2.91E-17 | NP_505967.1    | 80 | 91.6633 | 62   | 50  | hypothetical protein F55A11.1                                                   |
| Locus_248_Transcript_1/2_Conf_1.000   | 1922 | 20 | 0        | XP_002641003.1 | 86 | 956.822 | 641  | 554 | C. briggsae CBR-TAT-1 protein                                                   |

|                                       |      |    |           |                |     |         |     |     |                                                                          |
|---------------------------------------|------|----|-----------|----------------|-----|---------|-----|-----|--------------------------------------------------------------------------|
| Locus_248_Transcript_2/2_Conf_1.000   | 1922 | 20 | 0         | XP_002641003.1 | 86  | 958.748 | 641 | 554 | C. briggsae CBR-TAT-1 protein                                            |
| Locus_2480_Transcript_1/4_Conf_0.500  | 1152 | 10 | 2.01E-62  | AAM22693.1     | 65  | 244.202 | 398 | 259 | AF504312_1adaptor protein UNC-53                                         |
| Locus_2480_Transcript_2/4_Conf_0.250  | 1513 | 20 | 1.11E-101 | CBB16173.1     | 75  | 375.17  | 490 | 371 | C. elegans protein F45E10.1f, partially confirmed by transcript evidence |
| Locus_2480_Transcript_3/4_Conf_0.625  | 2518 | 20 | 1.72E-164 | NP_741045.1    | 70  | 584.719 | 856 | 606 | UNCoordinated family member (unc-53)                                     |
| Locus_2480_Transcript_4/4_Conf_0.500  | 1164 | 10 | 2.67E-62  | AAM22693.1     | 64  | 243.817 | 402 | 260 | AF504312_1adaptor protein UNC-53                                         |
| Locus_24800_Transcript_1/1_Conf_1.000 | 224  | 0  |           |                |     |         |     |     |                                                                          |
| Locus_24801_Transcript_1/1_Conf_1.000 | 250  | 0  |           |                |     |         |     |     |                                                                          |
| Locus_24802_Transcript_1/1_Conf_1.000 | 168  | 0  |           |                |     |         |     |     |                                                                          |
| Locus_24803_Transcript_1/1_Conf_1.000 | 206  | 0  |           |                |     |         |     |     |                                                                          |
| Locus_24804_Transcript_1/1_Conf_1.000 | 382  | 0  |           |                |     |         |     |     |                                                                          |
| Locus_24805_Transcript_1/1_Conf_1.000 | 149  | 0  |           |                |     |         |     |     |                                                                          |
| Locus_24806_Transcript_1/1_Conf_1.000 | 136  | 0  |           |                |     |         |     |     |                                                                          |
| Locus_24807_Transcript_1/1_Conf_1.000 | 143  | 17 | 2.48E-13  | NP_001022373.1 | 87  | 78.5666 | 47  | 41  | CLC-type chloride channel family member (clh-1)                          |
| Locus_24808_Transcript_1/1_Conf_1.000 | 172  | 0  |           |                |     |         |     |     |                                                                          |
| Locus_24809_Transcript_1/1_Conf_1.000 | 241  | 0  |           |                |     |         |     |     |                                                                          |
| Locus_2481_Transcript_1/1_Conf_1.000  | 367  | 0  |           |                |     |         |     |     |                                                                          |
| Locus_24810_Transcript_1/1_Conf_1.000 | 286  | 20 | 9.67E-37  | XP_002633562.1 | 77  | 156.377 | 93  | 72  | Hypothetical protein CBG05433                                            |
| Locus_24811_Transcript_1/1_Conf_1.000 | 234  | 20 | 4.13E-40  | BAH12664.1     | 100 | 167.548 | 78  | 78  | unnamed protein product                                                  |
| Locus_24812_Transcript_1/1_Conf_1.000 | 180  | 0  |           |                |     |         |     |     |                                                                          |
| Locus_24813_Transcript_1/1_Conf_1.000 | 175  | 2  | 2.50E-05  | XP_002648434.1 | 58  | 51.9878 | 53  | 31  | Hypothetical protein CBG24703                                            |
| Locus_24814_Transcript_1/1_Conf_1.000 | 356  | 0  |           |                |     |         |     |     |                                                                          |



|                                       |     |    |          |                |     |         |     |     |                                                                          |
|---------------------------------------|-----|----|----------|----------------|-----|---------|-----|-----|--------------------------------------------------------------------------|
| Locus_24815_Transcript_1/1_Conf_1.000 | 180 | 20 | 1.19E-26 | XP_001095809.2 | 100 | 122.865 | 60  | 60  | PREDICTED: biogenesis of lysosome-related organelles complex 1 subunit 1 |
| Locus_24816_Transcript_1/1_Conf_1.000 | 134 | 0  |          |                |     |         |     |     |                                                                          |
| Locus_24817_Transcript_1/1_Conf_1.000 | 195 | 2  | 4.64E-07 | NP_505267.1    | 86  | 57.7658 | 61  | 53  | Regulator of Presynaptic Morphology family member (rpm-1)                |
| Locus_24818_Transcript_1/1_Conf_1.000 | 145 | 4  | 3.37E-05 | CAA16382.5     | 73  | 51.6026 | 46  | 34  | C. elegans protein Y45F10D.7, partially confirmed by transcript evidence |
| Locus_24819_Transcript_1/1_Conf_1.000 | 352 | 20 | 3.09E-19 | XP_002641620.1 | 60  | 98.2117 | 110 | 67  | C. briggsae CBR-BUB-1 protein                                            |
| Locus_2482_Transcript_1/1_Conf_1.000  | 572 | 20 | 1.47E-41 | NP_498339.1    | 81  | 172.94  | 131 | 107 | ABC transporter, class F family member (abcf-3)                          |
| Locus_24820_Transcript_1/1_Conf_1.000 | 131 | 20 | 2.20E-09 | ADM47606.1     | 95  | 65.4698 | 43  | 41  | MHC class I antigen                                                      |
| Locus_24821_Transcript_1/1_Conf_1.000 | 301 | 2  | 9.26E-08 | XP_002633755.1 | 63  | 60.077  | 58  | 37  | Hypothetical protein CBG03442                                            |
| Locus_24822_Transcript_1/1_Conf_1.000 | 150 | 0  |          |                |     |         |     |     |                                                                          |
| Locus_24823_Transcript_1/1_Conf_1.000 | 366 | 0  |          |                |     |         |     |     |                                                                          |
| Locus_24824_Transcript_1/1_Conf_1.000 | 293 | 0  |          |                |     |         |     |     |                                                                          |
| Locus_24825_Transcript_1/1_Conf_1.000 | 143 | 0  |          |                |     |         |     |     |                                                                          |
| Locus_24826_Transcript_1/1_Conf_1.000 | 196 | 0  |          |                |     |         |     |     |                                                                          |

|                                       |      |    |          |                |     |         |     |    |                                   |
|---------------------------------------|------|----|----------|----------------|-----|---------|-----|----|-----------------------------------|
| Locus_24827_Transcript_1/1_Conf_1.000 | 142  | 20 | 4.22E-21 | EFN76814.1     | 100 | 104.375 | 47  | 47 | Ras-like GTP-binding protein Rho1 |
| Locus_24828_Transcript_1/1_Conf_1.000 | 254  | 0  |          |                |     |         |     |    |                                   |
| Locus_24829_Transcript_1/1_Conf_1.000 | 147  | 0  |          |                |     |         |     |    |                                   |
| Locus_2483_Transcript_1/2_Conf_1.000  | 1174 | 0  |          |                |     |         |     |    |                                   |
| Locus_2483_Transcript_2/2_Conf_1.000  | 1174 | 0  |          |                |     |         |     |    |                                   |
| Locus_24830_Transcript_1/1_Conf_1.000 | 129  | 0  |          |                |     |         |     |    |                                   |
| Locus_24831_Transcript_1/1_Conf_1.000 | 334  | 0  |          |                |     |         |     |    |                                   |
| Locus_24832_Transcript_1/1_Conf_1.000 | 262  | 20 | 4.77E-28 | XP_002631558.1 | 77  | 127.487 | 92  | 71 | Hypothetical protein CBG20734     |
| Locus_24833_Transcript_1/1_Conf_1.000 | 237  | 0  |          |                |     |         |     |    |                                   |
| Locus_24834_Transcript_1/1_Conf_1.000 | 478  | 20 | 3.04E-19 | XP_001894846.1 | 66  | 98.2117 | 103 | 69 | hypothetical protein              |
| Locus_24835_Transcript_1/1_Conf_1.000 | 193  | 1  | 3.69E-04 | XP_001901807.1 | 60  | 48.1358 | 64  | 39 | F-box domain containing protein   |
| Locus_24836_Transcript_1/1_Conf_1.000 | 163  | 0  |          |                |     |         |     |    |                                   |
| Locus_24837_Transcript_1/1_Conf_1.000 | 184  | 20 | 4.69E-15 | XP_002647686.1 | 80  | 84.3445 | 57  | 46 | Hypothetical protein CBG17874     |

|                                       |      |    |           |                |     |         |     |     |                                                 |
|---------------------------------------|------|----|-----------|----------------|-----|---------|-----|-----|-------------------------------------------------|
| Locus_24838_Transcript_1/1_Conf_1.000 | 198  | 20 | 1.26E-12  | CBJ28140.1     | 72  | 76.2554 | 66  | 48  | hypothetical protein                            |
| Locus_24839_Transcript_1/1_Conf_1.000 | 170  | 0  |           |                |     |         |     |     |                                                 |
| Locus_2484_Transcript_1/1_Conf_1.000  | 1554 | 20 | 2.55E-101 | XP_002641142.1 | 57  | 374.015 | 509 | 293 | Hypothetical protein CBG08994                   |
| Locus_24840_Transcript_1/1_Conf_1.000 | 162  | 0  |           |                |     |         |     |     |                                                 |
| Locus_24841_Transcript_1/1_Conf_1.000 | 169  | 20 | 1.42E-24  | NP_001182041.1 | 100 | 115.931 | 56  | 56  | protein disulfide-isomerase A3                  |
| Locus_24842_Transcript_1/1_Conf_1.000 | 177  | 0  |           |                |     |         |     |     |                                                 |
| Locus_24843_Transcript_1/1_Conf_1.000 | 184  | 0  |           |                |     |         |     |     |                                                 |
| Locus_24844_Transcript_1/1_Conf_1.000 | 228  | 20 | 1.30E-25  | NP_495863.1    | 90  | 119.398 | 75  | 68  | PhenylAlanine Hydroxylase family member (pah-1) |
| Locus_24845_Transcript_1/1_Conf_1.000 | 284  | 7  | 1.56E-10  | EFO24689.1     | 57  | 69.3218 | 90  | 52  | hypothetical protein LOAG_03797                 |
| Locus_24846_Transcript_1/1_Conf_1.000 | 144  | 0  |           |                |     |         |     |     |                                                 |

|                                       |     |    |          |                |     |         |     |    |                                              |
|---------------------------------------|-----|----|----------|----------------|-----|---------|-----|----|----------------------------------------------|
| Locus_24847_Transcript_1/1_Conf_1.000 | 310 | 20 | 7.70E-31 | EFO19136.1     | 83  | 136.732 | 101 | 84 | TKL/STKR/TYPE1 protein kinase                |
| Locus_24848_Transcript_1/1_Conf_1.000 | 174 | 0  |          |                |     |         |     |    |                                              |
| Locus_24849_Transcript_1/1_Conf_1.000 | 360 | 20 | 7.77E-15 | NP_001021785.2 | 56  | 83.5741 | 110 | 62 | hypothetical protein Y52B11A.3               |
| Locus_2485_Transcript_1/1_Conf_1.000  | 304 | 20 | 1.42E-24 | AAI67646.1     | 100 | 115.931 | 88  | 88 | Unknown (protein for MGC:185319)             |
| Locus_24850_Transcript_1/1_Conf_1.000 | 158 | 0  |          |                |     |         |     |    |                                              |
| Locus_24851_Transcript_1/1_Conf_1.000 | 155 | 2  | 5.16E-06 | XP_002639255.1 | 68  | 54.299  | 51  | 35 | C. briggsae CBR-OCRL-1 protein               |
| Locus_24852_Transcript_1/1_Conf_1.000 | 128 | 0  |          |                |     |         |     |    |                                              |
| Locus_24853_Transcript_1/1_Conf_1.000 | 144 | 0  |          |                |     |         |     |    |                                              |
| Locus_24854_Transcript_1/1_Conf_1.000 | 168 | 20 | 2.78E-12 | NP_505810.2    | 78  | 75.0998 | 55  | 43 | P21-Activated Kinase family member (pak-2)   |
| Locus_24855_Transcript_1/1_Conf_1.000 | 398 | 1  | 2.07E-31 | NP_501548.2    | 69  | 138.658 | 131 | 91 | hypothetical protein C27B7.7                 |
| Locus_24856_Transcript_1/1_Conf_1.000 | 184 | 0  |          |                |     |         |     |    |                                              |
| Locus_24857_Transcript_1/1_Conf_1.000 | 206 | 0  |          |                |     |         |     |    |                                              |
| Locus_24858_Transcript_1/1_Conf_1.000 | 149 | 0  |          |                |     |         |     |    |                                              |
| Locus_24859_Transcript_1/1_Conf_1.000 | 138 | 0  |          |                |     |         |     |    |                                              |
| Locus_2486_Transcript_1/1_Conf_1.000  | 816 | 2  | 8.61E-10 | EFO27866.1     | 52  | 68.5514 | 109 | 57 | GTPase activating protein and VPS9 domains 1 |
| Locus_24860_Transcript_1/1_Conf_1.000 | 378 | 8  | 1.99E-34 | NP_492398.1    | 75  | 148.673 | 115 | 87 | hypothetical protein F55H12.4                |
| Locus_24861_Transcript_1/1_Conf_1.000 | 142 | 0  |          |                |     |         |     |    |                                              |

|                                       |     |    |          |                |     |         |     |     |                                                          |
|---------------------------------------|-----|----|----------|----------------|-----|---------|-----|-----|----------------------------------------------------------|
| Locus_24862_Transcript_1/1_Conf_1.000 | 203 | 0  |          |                |     |         |     |     |                                                          |
| Locus_24863_Transcript_1/1_Conf_1.000 | 269 | 0  |          |                |     |         |     |     |                                                          |
| Locus_24864_Transcript_1/1_Conf_1.000 | 140 | 20 | 2.84E-17 | XP_002824717.1 | 100 | 91.6633 | 44  | 44  | PREDICTED: proteasome subunit alpha type-6-like          |
| Locus_24865_Transcript_1/1_Conf_1.000 | 282 | 20 | 5.36E-11 | EFN81965.1     | 73  | 70.8626 | 63  | 46  | Putative methyltransferase KIAA0859-like protein         |
| Locus_24866_Transcript_1/1_Conf_1.000 | 300 | 20 | 5.24E-11 | AAN08883.1     | 60  | 70.8626 | 89  | 54  | MSP-domain protein 5                                     |
| Locus_24867_Transcript_1/1_Conf_1.000 | 191 | 2  | 2.24E-09 | NP_499962.2    | 78  | 65.4698 | 66  | 52  | hypothetical protein K11H12.9                            |
| Locus_24868_Transcript_1/1_Conf_1.000 | 156 | 1  | 6.28E-04 | NP_505689.1    | 65  | 47.3654 | 46  | 30  | hypothetical protein Y32F6B.1                            |
| Locus_24869_Transcript_1/1_Conf_1.000 | 440 | 20 | 1.78E-11 | NP_741839.2    | 48  | 72.4034 | 125 | 60  | hypothetical protein F48E3.8                             |
| Locus_2487_Transcript_1/1_Conf_1.000  | 749 | 20 | 1.36E-64 | NP_741200.1    | 73  | 250.366 | 187 | 137 | Displaced Gonad family member (dig-1)                    |
| Locus_24870_Transcript_1/1_Conf_1.000 | 275 | 20 | 2.77E-12 | XP_002647178.1 | 66  | 75.0998 | 72  | 48  | Hypothetical protein CBG22337                            |
| Locus_24871_Transcript_1/1_Conf_1.000 | 323 | 0  |          |                |     |         |     |     |                                                          |
| Locus_24872_Transcript_1/1_Conf_1.000 | 130 | 8  | 4.15E-08 | XP_002630422.1 | 72  | 61.2326 | 37  | 27  | C. briggsae CBR-AGR-1 protein                            |
| Locus_24873_Transcript_1/1_Conf_1.000 | 172 | 3  | 1.37E-11 | XP_002637786.1 | 94  | 72.7886 | 38  | 36  | Hypothetical protein CBG04571                            |
| Locus_24874_Transcript_1/1_Conf_1.000 | 155 | 4  | 8.75E-22 | NP_497769.3    | 100 | 106.686 | 51  | 51  | TOLLiSH (Tolloid and BMP-1 family) family member (toh-1) |
| Locus_24875_Transcript_1/1_Conf_1.000 | 267 | 0  |          |                |     |         |     |     |                                                          |
| Locus_24876_Transcript_1/1_Conf_1.000 | 695 | 20 | 8.74E-28 | XP_002630011.1 | 71  | 127.872 | 130 | 93  | Hypothetical protein CBG13376                            |
| Locus_24877_Transcript_1/1_Conf_1.000 | 133 | 0  |          |                |     |         |     |     |                                                          |
| Locus_24878_Transcript_1/1_Conf_1.000 | 312 | 20 | 1.45E-16 | EFO23358.1     | 63  | 89.3521 | 101 | 64  | hypothetical protein LOAG_05127                          |
| Locus_24879_Transcript_1/1_Conf_1.000 | 137 | 2  | 3.61E-12 | XP_002633220.1 | 84  | 74.7146 | 45  | 38  | C. briggsae CBR-FLP-13 protein                           |
| Locus_2488_Transcript_1/1_Conf_1.000  | 740 | 20 | 8.08E-54 | NP_496457.1    | 83  | 214.542 | 172 | 143 | hypothetical protein B0334.4                             |

|                                       |     |    |          |                |    |         |     |    |                                  |
|---------------------------------------|-----|----|----------|----------------|----|---------|-----|----|----------------------------------|
| Locus_24880_Transcript_1/1_Conf_1.000 | 165 | 20 | 2.78E-20 | NP_493616.1    | 92 | 101.679 | 54  | 50 | hypothetical protein F33H2.5     |
| Locus_24881_Transcript_1/1_Conf_1.000 | 128 | 0  |          |                |    |         |     |    |                                  |
| Locus_24882_Transcript_1/1_Conf_1.000 | 412 | 0  |          |                |    |         |     |    |                                  |
| Locus_24883_Transcript_1/1_Conf_1.000 | 160 | 0  |          |                |    |         |     |    |                                  |
| Locus_24884_Transcript_1/1_Conf_1.000 | 366 | 3  | 3.84E-06 | NP_001040833.1 | 56 | 54.6842 | 114 | 64 | hypothetical protein ZK669.5     |
| Locus_24885_Transcript_1/1_Conf_1.000 | 282 | 0  |          |                |    |         |     |    |                                  |
| Locus_24886_Transcript_1/1_Conf_1.000 | 162 | 0  |          |                |    |         |     |    |                                  |
| Locus_24887_Transcript_1/1_Conf_1.000 | 172 | 2  | 2.86E-17 | NP_503543.1    | 87 | 91.6633 | 56  | 49 | hypothetical protein T08B1.1     |
| Locus_24888_Transcript_1/1_Conf_1.000 | 201 | 0  |          |                |    |         |     |    |                                  |
| Locus_24889_Transcript_1/1_Conf_1.000 | 265 | 2  | 6.90E-11 | XP_001895635.1 | 73 | 70.4774 | 86  | 63 | hypothetical protein Bm1_20905   |
| Locus_2489_Transcript_1/1_Conf_1.000  | 339 | 20 | 1.60E-36 | NP_505349.1    | 89 | 155.606 | 87  | 78 | hypothetical protein C25E10.12   |
| Locus_24890_Transcript_1/1_Conf_1.000 | 129 | 0  |          |                |    |         |     |    |                                  |
| Locus_24891_Transcript_1/1_Conf_1.000 | 240 | 20 | 8.58E-30 | NP_510155.3    | 82 | 133.265 | 79  | 65 | PIP Kinase family member (ppk-3) |
| Locus_24892_Transcript_1/1_Conf_1.000 | 265 | 4  | 1.64E-12 | NP_001020992.1 | 77 | 75.8702 | 66  | 51 | hypothetical protein C09D4.1     |
| Locus_24893_Transcript_1/1_Conf_1.000 | 132 | 4  | 9.52E-13 | NP_495984.2    | 90 | 76.6406 | 43  | 39 | RAB family member (rab-39)       |
| Locus_24894_Transcript_1/1_Conf_1.000 | 128 | 0  |          |                |    |         |     |    |                                  |

|                                       |     |    |          |                |    |         |     |     |                                                                        |
|---------------------------------------|-----|----|----------|----------------|----|---------|-----|-----|------------------------------------------------------------------------|
| Locus_24895_Transcript_1/1_Conf_1.000 | 174 | 20 | 4.39E-26 | XP_002634414.1 | 94 | 120.939 | 58  | 55  | C. briggsae CBR-EPI-1 protein                                          |
| Locus_24896_Transcript_1/1_Conf_1.000 | 159 | 0  |          |                |    |         |     |     |                                                                        |
| Locus_24897_Transcript_1/1_Conf_1.000 | 146 | 0  |          |                |    |         |     |     |                                                                        |
| Locus_24898_Transcript_1/1_Conf_1.000 | 223 | 0  |          |                |    |         |     |     |                                                                        |
| Locus_24899_Transcript_1/1_Conf_1.000 | 603 | 20 | 6.71E-46 | NP_510155.3    | 64 | 187.578 | 196 | 127 | PIP Kinase family member (ppk-3)                                       |
| Locus_249_Transcript_1/1_Conf_1.000   | 337 | 7  | 3.98E-11 | XP_002644052.1 | 57 | 71.2478 | 82  | 47  | C. briggsae CBR-EGL-15 protein                                         |
| Locus_2490_Transcript_1/1_Conf_1.000  | 808 | 10 | 1.81E-52 | NP_508890.2    | 61 | 210.305 | 223 | 137 | hypothetical protein Y34B4A.6                                          |
| Locus_24900_Transcript_1/1_Conf_1.000 | 138 | 0  |          |                |    |         |     |     |                                                                        |
| Locus_24901_Transcript_1/1_Conf_1.000 | 204 | 0  |          |                |    |         |     |     |                                                                        |
| Locus_24902_Transcript_1/1_Conf_1.000 | 135 | 3  | 3.27E-05 | NP_504660.1    | 63 | 51.6026 | 41  | 26  | hypothetical protein F46E10.11                                         |
| Locus_24903_Transcript_1/1_Conf_1.000 | 316 | 0  |          |                |    |         |     |     |                                                                        |
| Locus_24904_Transcript_1/1_Conf_1.000 | 163 | 3  | 7.37E-05 | CAA84706.3     | 65 | 50.447  | 52  | 34  | C. elegans protein C38H2.1, partially confirmed by transcript evidence |
| Locus_24905_Transcript_1/2_Conf_1.000 | 271 | 0  |          |                |    |         |     |     |                                                                        |
| Locus_24905_Transcript_2/2_Conf_1.000 | 298 | 0  |          |                |    |         |     |     |                                                                        |
| Locus_24906_Transcript_1/1_Conf_1.000 | 287 | 1  | 1.78E-06 | XP_002638498.1 | 70 | 55.8398 | 60  | 42  | Hypothetical protein CBG12930                                          |
| Locus_24907_Transcript_1/1_Conf_1.000 | 171 | 0  |          |                |    |         |     |     |                                                                        |
| Locus_24908_Transcript_1/1_Conf_1.000 | 233 | 20 | 3.29E-29 | EFO18171.1     | 89 | 131.339 | 76  | 68  | hypothetical protein LOAG_10325                                        |
| Locus_24909_Transcript_1/1_Conf_1.000 | 267 | 2  | 1.48E-05 | XP_001892578.1 | 63 | 52.7582 | 79  | 50  | hypothetical protein Bm1_05520                                         |

|                                       |     |    |          |                |    |         |     |    |                                |
|---------------------------------------|-----|----|----------|----------------|----|---------|-----|----|--------------------------------|
| Locus_2491_Transcript_1/1_Conf_1.000  | 760 | 20 | 7.77E-07 | EFN60440.1     | 42 | 58.5362 | 228 | 97 | hypothetical protein EAG_01913 |
| Locus_24910_Transcript_1/1_Conf_1.000 | 136 | 0  |          |                |    |         |     |    |                                |
| Locus_24911_Transcript_1/1_Conf_1.000 | 128 | 0  |          |                |    |         |     |    |                                |
| Locus_24912_Transcript_1/1_Conf_1.000 | 148 | 0  |          |                |    |         |     |    |                                |
| Locus_24913_Transcript_1/1_Conf_1.000 | 163 | 0  |          |                |    |         |     |    |                                |
| Locus_24914_Transcript_1/1_Conf_1.000 | 219 | 4  | 1.55E-26 | XP_002646617.1 | 84 | 122.479 | 72  | 61 | Hypothetical protein CBG20503  |
| Locus_24915_Transcript_1/1_Conf_1.000 | 243 | 0  |          |                |    |         |     |    |                                |
| Locus_24916_Transcript_1/1_Conf_1.000 | 274 | 0  |          |                |    |         |     |    |                                |
| Locus_24917_Transcript_1/1_Conf_1.000 | 234 | 0  |          |                |    |         |     |    |                                |
| Locus_24918_Transcript_1/1_Conf_1.000 | 268 | 20 | 2.52E-13 | EFO23036.1     | 81 | 78.5666 | 54  | 44 | CBP-B                          |



|                                       |     |    |           |                |    |         |     |     |                                 |
|---------------------------------------|-----|----|-----------|----------------|----|---------|-----|-----|---------------------------------|
| Locus_24919_Transcript_1/1_Conf_1.000 | 133 | 17 | 9.54E-05  | XP_002637396.1 | 83 | 50.0618 | 42  | 35  | Hypothetical protein CBG19103   |
| Locus_2492_Transcript_1/1_Conf_1.000  | 934 | 20 | 5.42E-134 | AAW02892.1     | 98 | 481.485 | 250 | 247 | goa-1                           |
| Locus_24920_Transcript_1/1_Conf_1.000 | 155 | 20 | 1.60E-15  | XP_002632893.1 | 86 | 85.8853 | 51  | 44  | Hypothetical protein CBG15101   |
| Locus_24921_Transcript_1/1_Conf_1.000 | 133 | 0  |           |                |    |         |     |     |                                 |
| Locus_24922_Transcript_1/1_Conf_1.000 | 318 | 20 | 1.26E-20  | EFO22577.1     | 61 | 102.834 | 105 | 65  | hypothetical protein LOAG_05911 |
| Locus_24923_Transcript_1/1_Conf_1.000 | 220 | 20 | 2.10E-15  | NP_510249.2    | 70 | 85.5001 | 71  | 50  | TREhalase family member (tre-4) |

|                                       |     |    |          |                |     |         |     |     |                                                    |
|---------------------------------------|-----|----|----------|----------------|-----|---------|-----|-----|----------------------------------------------------|
| Locus_24924_Transcript_1/1_Conf_1.000 | 522 | 20 | 5.67E-33 | NP_490796.2    | 61  | 144.05  | 184 | 113 | abnormal cell MIGration family member (mig-1)      |
| Locus_24925_Transcript_1/1_Conf_1.000 | 276 | 7  | 4.71E-12 | NP_497641.2    | 66  | 74.3294 | 92  | 61  | CaDHerin family member (cdh-1)                     |
| Locus_24926_Transcript_1/1_Conf_1.000 | 171 | 0  |          |                |     |         |     |     |                                                    |
| Locus_24927_Transcript_1/1_Conf_1.000 | 276 | 20 | 2.10E-36 | XP_002921690.1 | 100 | 155.221 | 75  | 75  | PREDICTED: 26S protease regulatory subunit 6A-like |
| Locus_24928_Transcript_1/1_Conf_1.000 | 131 | 13 | 3.75E-09 | EFO15717.1     | 81  | 64.6994 | 43  | 35  | hypothetical protein LOAG_12793                    |
| Locus_24929_Transcript_1/1_Conf_1.000 | 201 | 0  |          |                |     |         |     |     |                                                    |
| Locus_2493_Transcript_1/1_Conf_1.000  | 350 | 0  |          |                |     |         |     |     |                                                    |
| Locus_24930_Transcript_1/1_Conf_1.000 | 126 | 0  |          |                |     |         |     |     |                                                    |
| Locus_24931_Transcript_1/1_Conf_1.000 | 174 | 0  |          |                |     |         |     |     |                                                    |
| Locus_24932_Transcript_1/1_Conf_1.000 | 223 | 4  | 1.77E-22 | NP_001041206.1 | 79  | 108.997 | 74  | 59  | hypothetical protein ZC487.1                       |
| Locus_24933_Transcript_1/1_Conf_1.000 | 130 | 0  |          |                |     |         |     |     |                                                    |
| Locus_24934_Transcript_1/1_Conf_1.000 | 135 | 0  |          |                |     |         |     |     |                                                    |
| Locus_24935_Transcript_1/1_Conf_1.000 | 150 | 0  |          |                |     |         |     |     |                                                    |
| Locus_24936_Transcript_1/1_Conf_1.000 | 301 | 0  |          |                |     |         |     |     |                                                    |
| Locus_24937_Transcript_1/1_Conf_1.000 | 348 | 20 | 1.25E-28 | NP_506047.5    | 75  | 129.413 | 114 | 86  | abnormal CHEmotaxis family member (che-11)         |

|                                       |     |    |          |                |     |         |    |    |                                             |
|---------------------------------------|-----|----|----------|----------------|-----|---------|----|----|---------------------------------------------|
| Locus_24938_Transcript_1/1_Conf_1.000 | 178 | 20 | 3.15E-08 | XP_001237683.2 | 75  | 61.6178 | 52 | 39 | AGAP005567-PA                               |
| Locus_24939_Transcript_1/1_Conf_1.000 | 194 | 0  |          |                |     |         |    |    |                                             |
| Locus_2494_Transcript_1/1_Conf_1.000  | 204 | 4  | 2.98E-06 | EFO23863.1     | 58  | 55.0694 | 70 | 41 | hypothetical protein LOAG_04618             |
| Locus_24940_Transcript_1/1_Conf_1.000 | 174 | 20 | 7.76E-15 | NP_504416.1    | 71  | 83.5741 | 53 | 38 | hypothetical protein C10G8.4                |
| Locus_24941_Transcript_1/1_Conf_1.000 | 169 | 20 | 5.57E-29 | 3K6S           | 100 | 130.568 | 56 | 56 | Structure Of Integrin Alphabeta2 Ectodomain |
| Locus_24942_Transcript_1/1_Conf_1.000 | 173 | 0  |          |                |     |         |    |    |                                             |
| Locus_24943_Transcript_1/1_Conf_1.000 | 159 | 0  |          |                |     |         |    |    |                                             |
| Locus_24944_Transcript_1/1_Conf_1.000 | 185 | 0  |          |                |     |         |    |    |                                             |
| Locus_24945_Transcript_1/1_Conf_1.000 | 267 | 2  | 3.65E-04 | EFO22882.1     | 72  | 48.1358 | 37 | 27 | TK/FER protein kinase                       |
| Locus_24946_Transcript_1/1_Conf_1.000 | 159 | 0  |          |                |     |         |    |    |                                             |
| Locus_24947_Transcript_1/1_Conf_1.000 | 159 | 0  |          |                |     |         |    |    |                                             |

|                                       |      |    |          |                |     |         |     |     |                                                                         |
|---------------------------------------|------|----|----------|----------------|-----|---------|-----|-----|-------------------------------------------------------------------------|
| Locus_24948_Transcript_1/1_Conf_1.000 | 215  | 20 | 2.93E-22 | XP_002130881.1 | 85  | 108.227 | 63  | 54  | PREDICTED: similar to glucosamine-6-phosphate deaminase 1               |
| Locus_24949_Transcript_1/1_Conf_1.000 | 230  | 3  | 8.47E-09 | XP_002632822.1 | 68  | 63.5438 | 70  | 48  | C. briggsae CBR-NHR-97 protein                                          |
| Locus_2495_Transcript_1/3_Conf_0.667  | 2889 | 4  | 9.44E-21 | XP_002639685.1 | 39  | 107.457 | 822 | 328 | C. briggsae CBR-SPD-2 protein                                           |
| Locus_2495_Transcript_2/3_Conf_0.667  | 2934 | 6  | 3.77E-25 | XP_002639685.1 | 40  | 122.094 | 823 | 336 | C. briggsae CBR-SPD-2 protein                                           |
| Locus_2495_Transcript_3/3_Conf_0.667  | 2934 | 6  | 3.77E-25 | XP_002639685.1 | 40  | 122.094 | 823 | 336 | C. briggsae CBR-SPD-2 protein                                           |
| Locus_24950_Transcript_1/1_Conf_1.000 | 128  | 20 | 6.41E-17 | XP_002821745.1 | 100 | 90.5077 | 42  | 42  | PREDICTED: LOW QUALITY PROTEIN: solute carrier family 15 member 3-like  |
| Locus_24951_Transcript_1/1_Conf_1.000 | 153  | 20 | 1.40E-11 | CBK19469.1     | 87  | 72.7886 | 47  | 41  | C. elegans protein T04B2.2b, partially confirmed by transcript evidence |
| Locus_24952_Transcript_1/1_Conf_1.000 | 201  | 4  | 1.34E-06 | XP_002641616.1 | 66  | 56.225  | 66  | 44  | C. briggsae CBR-ALX-1 protein                                           |
| Locus_24953_Transcript_1/1_Conf_1.000 | 129  | 0  |          |                |     |         |     |     |                                                                         |
| Locus_24954_Transcript_1/1_Conf_1.000 | 142  | 0  |          |                |     |         |     |     |                                                                         |
| Locus_24955_Transcript_1/1_Conf_1.000 | 154  | 0  |          |                |     |         |     |     |                                                                         |
| Locus_24956_Transcript_1/1_Conf_1.000 | 187  | 0  |          |                |     |         |     |     |                                                                         |
| Locus_24957_Transcript_1/1_Conf_1.000 | 141  | 0  |          |                |     |         |     |     |                                                                         |
| Locus_24958_Transcript_1/1_Conf_1.000 | 502  | 0  |          |                |     |         |     |     |                                                                         |
| Locus_24959_Transcript_1/1_Conf_1.000 | 264  | 0  |          |                |     |         |     |     |                                                                         |
| Locus_2496_Transcript_1/1_Conf_1.000  | 355  | 0  |          |                |     |         |     |     |                                                                         |
| Locus_24960_Transcript_1/1_Conf_1.000 | 135  | 0  |          |                |     |         |     |     |                                                                         |
| Locus_24961_Transcript_1/1_Conf_1.000 | 129  | 5  | 1.21E-07 | XP_002407980.1 | 81  | 59.6918 | 38  | 31  | conserved hypothetical protein                                          |

|                                       |      |    |          |                |    |         |    |    |                                                           |
|---------------------------------------|------|----|----------|----------------|----|---------|----|----|-----------------------------------------------------------|
| Locus_24962_Transcript_1/1_Conf_1.000 | 188  | 20 | 4.99E-17 | EFO14883.1     | 82 | 90.8929 | 62 | 51 | TK/FER protein kinase                                     |
| Locus_24963_Transcript_1/1_Conf_1.000 | 170  | 0  |          |                |    |         |    |    |                                                           |
| Locus_24964_Transcript_1/1_Conf_1.000 | 226  | 20 | 1.49E-29 | XP_002634978.1 | 95 | 132.494 | 74 | 71 | C. briggsae CBR-PGP-1 protein                             |
| Locus_24965_Transcript_1/1_Conf_1.000 | 230  | 2  | 3.93E-06 | XP_002631113.1 | 59 | 54.6842 | 66 | 39 | C. briggsae CBR-ARS-1 protein                             |
| Locus_24966_Transcript_1/1_Conf_1.000 | 243  | 0  |          |                |    |         |    |    |                                                           |
| Locus_24967_Transcript_1/1_Conf_1.000 | 183  | 1  | 3.05E-06 | XP_002636321.1 | 70 | 55.0694 | 40 | 28 | Hypothetical protein CBG08614                             |
| Locus_24968_Transcript_1/1_Conf_1.000 | 149  | 0  |          |                |    |         |    |    |                                                           |
| Locus_24969_Transcript_1/1_Conf_1.000 | 200  | 0  |          |                |    |         |    |    |                                                           |
| Locus_2497_Transcript_1/1_Conf_1.000  | 1368 | 0  |          |                |    |         |    |    |                                                           |
| Locus_24970_Transcript_1/1_Conf_1.000 | 153  | 0  |          |                |    |         |    |    |                                                           |
| Locus_24971_Transcript_1/1_Conf_1.000 | 235  | 20 | 2.77E-36 | XP_002631558.1 | 98 | 154.836 | 77 | 76 | Hypothetical protein CBG20734                             |
| Locus_24972_Transcript_1/1_Conf_1.000 | 137  | 3  | 3.37E-10 | NP_497769.3    | 84 | 68.1662 | 46 | 39 | TOLLiSH (Tolloid and BMP-1 family) family member (toh-1)  |
| Locus_24973_Transcript_1/1_Conf_1.000 | 149  | 0  |          |                |    |         |    |    |                                                           |
| Locus_24974_Transcript_1/1_Conf_1.000 | 145  | 0  |          |                |    |         |    |    |                                                           |
| Locus_24975_Transcript_1/1_Conf_1.000 | 212  | 17 | 1.02E-06 | EFO17895.1     | 60 | 56.6102 | 55 | 33 | hypothetical protein LOAG_10603                           |
| Locus_24976_Transcript_1/1_Conf_1.000 | 164  | 0  |          |                |    |         |    |    |                                                           |
| Locus_24977_Transcript_1/1_Conf_1.000 | 255  | 0  |          |                |    |         |    |    |                                                           |
| Locus_24978_Transcript_1/1_Conf_1.000 | 274  | 0  |          |                |    |         |    |    |                                                           |
| Locus_24979_Transcript_1/1_Conf_1.000 | 442  | 0  |          |                |    |         |    |    |                                                           |
| Locus_2498_Transcript_1/1_Conf_1.000  | 1173 | 0  |          |                |    |         |    |    |                                                           |
| Locus_24980_Transcript_1/1_Conf_1.000 | 188  | 4  | 1.78E-14 | NP_495713.1    | 78 | 82.4185 | 61 | 48 | RNA-dependent RNA polymerase Family family member (rrf-3) |
| Locus_24981_Transcript_1/1_Conf_1.000 | 165  | 0  |          |                |    |         |    |    |                                                           |

|                                       |      |    |           |                |     |         |     |     |                                                               |
|---------------------------------------|------|----|-----------|----------------|-----|---------|-----|-----|---------------------------------------------------------------|
| Locus_24982_Transcript_1/1_Conf_1.000 | 175  | 20 | 9.15E-24  | EFN84489.1     | 100 | 113.235 | 58  | 58  | Histone H2A.V                                                 |
| Locus_24983_Transcript_1/1_Conf_1.000 | 173  | 0  |           |                |     |         |     |     |                                                               |
| Locus_24984_Transcript_1/1_Conf_1.000 | 212  | 0  |           |                |     |         |     |     |                                                               |
| Locus_24985_Transcript_1/1_Conf_1.000 | 162  | 0  |           |                |     |         |     |     |                                                               |
| Locus_24986_Transcript_1/1_Conf_1.000 | 172  | 0  |           |                |     |         |     |     |                                                               |
| Locus_24987_Transcript_1/1_Conf_1.000 | 182  | 0  |           |                |     |         |     |     |                                                               |
| Locus_24988_Transcript_1/1_Conf_1.000 | 131  | 0  |           |                |     |         |     |     |                                                               |
| Locus_24989_Transcript_1/1_Conf_1.000 | 560  | 20 | 4.71E-50  | CAB07368.3     | 72  | 201.06  | 180 | 130 | C. elegans protein F22G12.4, confirmed by transcript evidence |
| Locus_2499_Transcript_1/1_Conf_1.000  | 144  | 0  |           |                |     |         |     |     |                                                               |
| Locus_24990_Transcript_1/1_Conf_1.000 | 168  | 0  |           |                |     |         |     |     |                                                               |
| Locus_24991_Transcript_1/1_Conf_1.000 | 129  | 0  |           |                |     |         |     |     |                                                               |
| Locus_24992_Transcript_1/1_Conf_1.000 | 161  | 0  |           |                |     |         |     |     |                                                               |
| Locus_24993_Transcript_1/1_Conf_1.000 | 198  | 6  | 3.30E-13  | XP_001894136.1 | 69  | 78.1814 | 65  | 45  | hypothetical protein                                          |
| Locus_24994_Transcript_1/1_Conf_1.000 | 174  | 0  |           |                |     |         |     |     |                                                               |
| Locus_24995_Transcript_1/1_Conf_1.000 | 534  | 4  | 1.82E-13  | NP_497743.1    | 64  | 79.337  | 98  | 63  | hypothetical protein C46F11.4                                 |
| Locus_24996_Transcript_1/1_Conf_1.000 | 467  | 20 | 2.21E-25  | XP_002632990.1 | 66  | 118.627 | 117 | 78  | C. briggsae CBR-NHR-11 protein                                |
| Locus_24997_Transcript_1/1_Conf_1.000 | 268  | 2  | 4.31E-05  | XP_001623877.1 | 72  | 51.2174 | 48  | 35  | predicted protein                                             |
| Locus_24998_Transcript_1/1_Conf_1.000 | 202  | 20 | 2.51E-29  | XP_002644000.1 | 100 | 131.724 | 67  | 67  | C. briggsae CBR-IFA-1 protein                                 |
| Locus_24999_Transcript_1/1_Conf_1.000 | 245  | 10 | 7.74E-31  | AAA64509.3     | 91  | 136.732 | 81  | 74  | Hypothetical protein C09F5.1                                  |
| Locus_25_Transcript_1/1_Conf_1.000    | 4623 | 20 | 9.79E-164 | XP_001900720.1 | 53  | 583.178 | 967 | 518 | Bromodomain containing protein                                |
| Locus_250_Transcript_1/1_Conf_1.000   | 1664 | 20 | 0         | CAJ80808.3     | 83  | 772.311 | 563 | 471 | C. elegans protein F36H1.2b, confirmed by transcript evidence |
| Locus_2500_Transcript_1/1_Conf_1.000  | 430  | 0  |           |                |     |         |     |     |                                                               |
| Locus_25000_Transcript_1/1_Conf_1.000 | 140  | 5  | 2.41E-08  | AAA81106.2     | 81  | 62.003  | 44  | 36  | Hypothetical protein F41G3.5                                  |
| Locus_25001_Transcript_1/1_Conf_1.000 | 133  | 0  |           |                |     |         |     |     |                                                               |
| Locus_25002_Transcript_1/1_Conf_1.000 | 144  | 0  |           |                |     |         |     |     |                                                               |

|                                       |     |    |          |                |    |         |    |    |                                                         |
|---------------------------------------|-----|----|----------|----------------|----|---------|----|----|---------------------------------------------------------|
| Locus_25003_Transcript_1/1_Conf_1.000 | 144 | 20 | 1.97E-13 | NP_500460.1    | 72 | 78.9518 | 47 | 34 | hypothetical protein W02C12.1                           |
| Locus_25004_Transcript_1/1_Conf_1.000 | 286 | 2  | 2.84E-04 | XP_001895815.1 | 52 | 48.521  | 76 | 40 | Protein-tyrosine phosphatase containing protein         |
| Locus_25005_Transcript_1/1_Conf_1.000 | 188 | 5  | 2.65E-10 |                | 70 | 68.5514 | 62 | 44 | hypothetical protein F32B4.3a - Caenorhabditis elegans  |
| Locus_25006_Transcript_1/1_Conf_1.000 | 180 | 0  |          |                |    |         |    |    |                                                         |
| Locus_25007_Transcript_1/1_Conf_1.000 | 189 | 0  |          |                |    |         |    |    |                                                         |
| Locus_25008_Transcript_1/1_Conf_1.000 | 358 | 20 | 7.79E-23 | XP_002635009.1 | 69 | 110.153 | 84 | 58 | C. briggsae CBR-ELT-6 protein                           |
| Locus_25009_Transcript_1/1_Conf_1.000 | 314 | 20 | 3.70E-20 | NP_503109.1    | 74 | 101.293 | 87 | 65 | beta-LACTamase domain containing family member (lact-6) |
| Locus_2501_Transcript_1/1_Conf_1.000  | 392 | 0  |          |                |    |         |    |    |                                                         |
| Locus_25010_Transcript_1/1_Conf_1.000 | 178 | 0  |          |                |    |         |    |    |                                                         |
| Locus_25011_Transcript_1/1_Conf_1.000 | 282 | 0  |          |                |    |         |    |    |                                                         |
| Locus_25012_Transcript_1/1_Conf_1.000 | 169 | 10 | 8.66E-06 | NP_001022158.1 | 66 | 53.5286 | 57 | 38 | hypothetical protein F41G3.21                           |
| Locus_25013_Transcript_1/1_Conf_1.000 | 195 | 0  |          |                |    |         |    |    |                                                         |

|                                       |      |    |           |                |     |         |     |     |                                                 |
|---------------------------------------|------|----|-----------|----------------|-----|---------|-----|-----|-------------------------------------------------|
| Locus_25014_Transcript_1/1_Conf_1.000 | 133  | 20 | 3.16E-16  | AAC47238.1     | 95  | 88.1965 | 44  | 42  | non-muscle myosin heavy chain II                |
| Locus_25015_Transcript_1/1_Conf_1.000 | 224  | 0  |           |                |     |         |     |     |                                                 |
| Locus_25016_Transcript_1/1_Conf_1.000 | 222  | 0  |           |                |     |         |     |     |                                                 |
| Locus_25017_Transcript_1/1_Conf_1.000 | 224  | 20 | 3.33E-29  | XP_002642615.1 | 83  | 131.339 | 74  | 62  | C. briggsae CBR-MUP-4 protein                   |
| Locus_25018_Transcript_1/1_Conf_1.000 | 134  | 0  |           |                |     |         |     |     |                                                 |
| Locus_25019_Transcript_1/1_Conf_1.000 | 168  | 20 | 9.83E-26  | XP_001105618.2 | 100 | 119.783 | 56  | 56  | PREDICTED: poly(rC)-binding protein 2 isoform 2 |
| Locus_2502_Transcript_1/2_Conf_1.000  | 2134 | 20 | 2.50E-169 | NP_508849.3    | 67  | 600.512 | 621 | 420 | hypothetical protein ZC8.6                      |
| Locus_2502_Transcript_2/2_Conf_1.000  | 2035 | 20 | 1.86E-174 | NP_508849.3    | 71  | 617.461 | 588 | 420 | hypothetical protein ZC8.6                      |
| Locus_25020_Transcript_1/1_Conf_1.000 | 362  | 2  | 5.72E-34  | XP_002630907.1 | 71  | 147.132 | 119 | 85  | Hypothetical protein CBG02631                   |
| Locus_25021_Transcript_1/1_Conf_1.000 | 138  | 0  |           |                |     |         |     |     |                                                 |
| Locus_25022_Transcript_1/1_Conf_1.000 | 213  | 0  |           |                |     |         |     |     |                                                 |
| Locus_25023_Transcript_1/1_Conf_1.000 | 285  | 20 | 2.46E-40  | BAI81969.1     | 92  | 168.318 | 95  | 88  | FKBP-binding protein fkb-3                      |
| Locus_25024_Transcript_1/1_Conf_1.000 | 132  | 0  |           |                |     |         |     |     |                                                 |



|                                       |     |    |          |                |     |         |     |     |                                                                                                        |
|---------------------------------------|-----|----|----------|----------------|-----|---------|-----|-----|--------------------------------------------------------------------------------------------------------|
| Locus_25025_Transcript_1/1_Conf_1.000 | 239 | 0  |          |                |     |         |     |     |                                                                                                        |
| Locus_25026_Transcript_1/1_Conf_1.000 | 183 | 20 | 2.57E-21 | XP_002643286.1 | 89  | 105.145 | 59  | 53  | Hypothetical protein CBG08162                                                                          |
| Locus_25027_Transcript_1/1_Conf_1.000 | 312 | 0  |          |                |     |         |     |     |                                                                                                        |
| Locus_25028_Transcript_1/1_Conf_1.000 | 436 | 20 | 2.81E-57 | NP_495437.2    | 85  | 224.557 | 145 | 124 | hypothetical protein C52E12.4                                                                          |
| Locus_25029_Transcript_1/1_Conf_1.000 | 217 | 0  |          |                |     |         |     |     |                                                                                                        |
| Locus_2503_Transcript_1/1_Conf_1.000  | 349 | 0  |          |                |     |         |     |     |                                                                                                        |
| Locus_25030_Transcript_1/1_Conf_1.000 | 143 | 0  |          |                |     |         |     |     |                                                                                                        |
| Locus_25031_Transcript_1/1_Conf_1.000 | 138 | 0  |          |                |     |         |     |     |                                                                                                        |
| Locus_25032_Transcript_1/1_Conf_1.000 | 166 | 0  |          |                |     |         |     |     |                                                                                                        |
| Locus_25033_Transcript_1/1_Conf_1.000 | 169 | 0  |          |                |     |         |     |     |                                                                                                        |
| Locus_25034_Transcript_1/1_Conf_1.000 | 245 | 0  |          |                |     |         |     |     |                                                                                                        |
| Locus_25035_Transcript_1/1_Conf_1.000 | 144 | 20 | 1.84E-19 | XP_002914626.1 | 100 | 98.9821 | 47  | 47  | PREDICTED: LOW QUALITY PROTEIN:<br>probable ATP-dependent RNA helicase<br>DDX17-like                   |
| Locus_25036_Transcript_1/1_Conf_1.000 | 161 | 0  |          |                |     |         |     |     |                                                                                                        |
| Locus_25037_Transcript_1/1_Conf_1.000 | 177 | 20 | 1.23E-20 | NP_494711.1    | 89  | 102.834 | 58  | 52  | Prion-like-(Q/N-rich)-domain-bearing<br>protein family member (pqn-48)                                 |
| Locus_25038_Transcript_1/1_Conf_1.000 | 167 | 3  | 1.17E-18 | EFO21620.1     | 87  | 96.2857 | 55  | 48  | hypothetical protein LOAG_06866                                                                        |
| Locus_25039_Transcript_1/1_Conf_1.000 | 205 | 0  |          |                |     |         |     |     |                                                                                                        |
| Locus_2504_Transcript_1/1_Conf_1.000  | 284 | 20 | 3.33E-37 | XP_002642308.1 | 91  | 157.918 | 94  | 86  | C. briggsae CBR-HEX-3 protein                                                                          |
| Locus_25040_Transcript_1/1_Conf_1.000 | 188 | 0  |          |                |     |         |     |     |                                                                                                        |
| Locus_25041_Transcript_1/1_Conf_1.000 | 163 | 0  |          |                |     |         |     |     |                                                                                                        |
| Locus_25042_Transcript_1/1_Conf_1.000 | 133 | 0  |          |                |     |         |     |     |                                                                                                        |
| Locus_25043_Transcript_1/1_Conf_1.000 | 223 | 20 | 4.67E-15 | EFO23870.1     | 72  | 84.3445 | 72  | 52  | hypothetical protein LOAG_04614                                                                        |
| Locus_25044_Transcript_1/1_Conf_1.000 | 138 | 0  |          |                |     |         |     |     |                                                                                                        |
| Locus_25045_Transcript_1/1_Conf_1.000 | 129 | 20 | 2.06E-15 | XP_002643086.1 | 90  | 85.5001 | 43  | 39  | C. briggsae CBR-ALH-1 protein                                                                          |
| Locus_25046_Transcript_1/1_Conf_1.000 | 154 | 2  | 4.36E-05 | NP_001076752.1 | 68  | 51.2174 | 50  | 34  | hypothetical protein ZC15.10                                                                           |
| Locus_25047_Transcript_1/1_Conf_1.000 | 238 | 8  | 1.52E-18 | ADI24623.1     | 94  | 95.9005 | 78  | 74  | Copine domain protein, atypical protein 2,<br>isoform c, partially confirmed by transcript<br>evidence |
| Locus_25048_Transcript_1/1_Conf_1.000 | 314 | 1  | 8.28E-04 | XP_001898965.1 | 64  | 46.9802 | 54  | 35  | Protein kinase domain containing protein                                                               |
| Locus_25049_Transcript_1/1_Conf_1.000 | 133 | 0  |          |                |     |         |     |     |                                                                                                        |

|                                       |      |    |           |                |    |         |     |     |                                                               |
|---------------------------------------|------|----|-----------|----------------|----|---------|-----|-----|---------------------------------------------------------------|
| Locus_2505_Transcript_1/1_Conf_1.000  | 366  | 0  |           |                |    |         |     |     |                                                               |
| Locus_25050_Transcript_1/1_Conf_1.000 | 236  | 0  |           |                |    |         |     |     |                                                               |
| Locus_25051_Transcript_1/1_Conf_1.000 | 175  | 0  |           |                |    |         |     |     |                                                               |
| Locus_25052_Transcript_1/1_Conf_1.000 | 190  | 0  |           |                |    |         |     |     |                                                               |
| Locus_25053_Transcript_1/1_Conf_1.000 | 392  | 0  |           |                |    |         |     |     |                                                               |
| Locus_25054_Transcript_1/1_Conf_1.000 | 272  | 11 | 2.96E-30  | XP_001899066.1 | 90 | 134.806 | 90  | 81  | Clc-like                                                      |
| Locus_25055_Transcript_1/1_Conf_1.000 | 131  | 0  |           |                |    |         |     |     |                                                               |
| Locus_25056_Transcript_1/1_Conf_1.000 | 392  | 20 | 2.47E-37  | CAX65068.1     | 74 | 158.303 | 129 | 96  | C. elegans protein K08C7.3d, confirmed by transcript evidence |
| Locus_25057_Transcript_1/1_Conf_1.000 | 210  | 8  | 1.51E-10  | NP_001040671.1 | 64 | 69.3218 | 71  | 46  | AXin-Like family member (axl-1)                               |
| Locus_25058_Transcript_1/1_Conf_1.000 | 198  | 20 | 2.21E-25  | XP_002638487.1 | 90 | 118.627 | 65  | 59  | Hypothetical protein CBG12917                                 |
| Locus_25059_Transcript_1/1_Conf_1.000 | 263  | 0  |           |                |    |         |     |     |                                                               |
| Locus_2506_Transcript_1/1_Conf_1.000  | 529  | 4  | 7.76E-17  | NP_499212.1    | 56 | 90.5077 | 181 | 103 | Masculinisation Of Germline family member (mog-1)             |
| Locus_25060_Transcript_1/1_Conf_1.000 | 133  | 0  |           |                |    |         |     |     |                                                               |
| Locus_25061_Transcript_1/1_Conf_1.000 | 154  | 0  |           |                |    |         |     |     |                                                               |
| Locus_25062_Transcript_1/1_Conf_1.000 | 312  | 0  |           |                |    |         |     |     |                                                               |
| Locus_25063_Transcript_1/1_Conf_1.000 | 278  | 20 | 3.72E-17  | XP_002636218.1 | 78 | 91.2781 | 92  | 72  | C. briggsae CBR-TNT-4 protein                                 |
| Locus_25064_Transcript_1/1_Conf_1.000 | 208  | 0  |           |                |    |         |     |     |                                                               |
| Locus_25065_Transcript_1/1_Conf_1.000 | 152  | 0  |           |                |    |         |     |     |                                                               |
| Locus_25066_Transcript_1/1_Conf_1.000 | 278  | 20 | 3.71E-25  | XP_002637122.1 | 71 | 117.857 | 92  | 66  | C. briggsae CBR-UGT-49 protein                                |
| Locus_25067_Transcript_1/1_Conf_1.000 | 147  | 0  |           |                |    |         |     |     |                                                               |
| Locus_25068_Transcript_1/1_Conf_1.000 | 136  | 1  | 6.59E-06  | XP_002719154.1 | 75 | 53.9138 | 44  | 33  | PREDICTED: alpha 1 type I collagen                            |
| Locus_25069_Transcript_1/1_Conf_1.000 | 191  | 0  |           |                |    |         |     |     |                                                               |
| Locus_2507_Transcript_1/1_Conf_1.000  | 1346 | 20 | 2.90E-159 | XP_002642829.1 | 97 | 566.229 | 295 | 289 | Hypothetical protein CBG21228                                 |
| Locus_25070_Transcript_1/1_Conf_1.000 | 198  | 18 | 4.47E-10  | EFO23249.1     | 78 | 67.781  | 52  | 41  | hypothetical protein LOAG_05238                               |
| Locus_25071_Transcript_1/1_Conf_1.000 | 459  | 20 | 1.45E-37  | XP_002648400.1 | 69 | 159.073 | 152 | 105 | C. briggsae CBR-DPF-1 protein                                 |

|                                       |      |    |           |                |     |         |     |     |                                                                                                                                                                      |
|---------------------------------------|------|----|-----------|----------------|-----|---------|-----|-----|----------------------------------------------------------------------------------------------------------------------------------------------------------------------|
| Locus_25072_Transcript_1/1_Conf_1.000 | 350  | 20 | 3.64E-36  | XP_002120354.1 | 80  | 154.451 | 121 | 97  | PREDICTED: similar to Methylglutaconyl-CoA hydratase, mitochondrial precursor (AU-specific RNA-binding enoyl-CoA hydratase) (AU-binding protein/enoyl-CoA hydratase) |
| Locus_25073_Transcript_1/1_Conf_1.000 | 235  | 0  |           |                |     |         |     |     |                                                                                                                                                                      |
| Locus_25074_Transcript_1/1_Conf_1.000 | 149  | 0  |           |                |     |         |     |     |                                                                                                                                                                      |
| Locus_25075_Transcript_1/1_Conf_1.000 | 377  | 5  | 1.59E-07  | A8WRJ2.2       | 61  | 59.3066 | 75  | 46  | GTPase-activating protein rrc-1                                                                                                                                      |
| Locus_25076_Transcript_1/1_Conf_1.000 | 214  | 0  |           |                |     |         |     |     |                                                                                                                                                                      |
| Locus_25077_Transcript_1/1_Conf_1.000 | 136  | 20 | 1.56E-15  | EFO17879.1     | 100 | 85.8853 | 41  | 41  | hypothetical protein LOAG_10616                                                                                                                                      |
| Locus_25078_Transcript_1/1_Conf_1.000 | 230  | 20 | 1.89E-08  | XP_002646359.1 | 63  | 62.3882 | 72  | 46  | Hypothetical protein CBG12076                                                                                                                                        |
| Locus_25079_Transcript_1/1_Conf_1.000 | 150  | 0  |           |                |     |         |     |     |                                                                                                                                                                      |
| Locus_2508_Transcript_1/3_Conf_0.429  | 1197 | 20 | 2.69E-81  | XP_002632934.1 | 68  | 306.99  | 348 | 239 | Hypothetical protein CBG21689                                                                                                                                        |
| Locus_2508_Transcript_2/3_Conf_0.571  | 2020 | 20 | 6.19E-146 | CBH29652.1     | 61  | 522.702 | 707 | 438 | C. elegans protein C10C5.1c, partially confirmed by transcript evidence                                                                                              |
| Locus_2508_Transcript_3/3_Conf_0.714  | 2128 | 20 | 2.43E-148 | CBH29652.1     | 60  | 530.791 | 727 | 442 | C. elegans protein C10C5.1c, partially confirmed by transcript evidence                                                                                              |
| Locus_25080_Transcript_1/1_Conf_1.000 | 163  | 20 | 1.21E-23  | XP_001116282.2 | 100 | 112.849 | 54  | 54  | PREDICTED: plexin-B2                                                                                                                                                 |
| Locus_25081_Transcript_1/1_Conf_1.000 | 198  | 0  |           |                |     |         |     |     |                                                                                                                                                                      |
| Locus_25082_Transcript_1/1_Conf_1.000 | 170  | 0  |           |                |     |         |     |     |                                                                                                                                                                      |
| Locus_25083_Transcript_1/1_Conf_1.000 | 175  | 7  | 4.25E-21  | XP_002647789.1 | 86  | 104.375 | 58  | 50  | Hypothetical protein CBG23555                                                                                                                                        |
| Locus_25084_Transcript_1/1_Conf_1.000 | 223  | 0  |           |                |     |         |     |     |                                                                                                                                                                      |
| Locus_25085_Transcript_1/1_Conf_1.000 | 162  |    |           |                |     |         |     |     |                                                                                                                                                                      |
| Locus_25086_Transcript_1/1_Conf_1.000 | 531  |    |           |                |     |         |     |     |                                                                                                                                                                      |

|                                       |     |    |           |                |    |         |     |     |                                                          |
|---------------------------------------|-----|----|-----------|----------------|----|---------|-----|-----|----------------------------------------------------------|
| Locus_25087_Transcript_1/1_Conf_1.000 | 182 | 20 | 3.15E-19  | NP_497809.1    | 86 | 98.2117 | 60  | 52  | Heavy chain, Unconventional Myosin family member (hum-5) |
| Locus_25088_Transcript_1/1_Conf_1.000 | 208 | 20 | 1.37E-27  | EFO23546.1     | 95 | 125.946 | 67  | 64  | PDZ domain-containing protein                            |
| Locus_25089_Transcript_1/1_Conf_1.000 | 303 | 20 | 3.72E-33  | XP_002641457.1 | 83 | 144.436 | 101 | 84  | C. briggsae CBR-TOP-3 protein                            |
| Locus_2509_Transcript_1/1_Conf_1.000  | 920 | 20 | 5.02E-68  | XP_002639645.1 | 74 | 262.307 | 225 | 168 | C. briggsae CBR-IMP-1 protein                            |
| Locus_25090_Transcript_1/1_Conf_1.000 | 145 | 7  | 6.57E-09  | XP_002641706.1 | 86 | 63.929  | 45  | 39  | C. briggsae CBR-ROM-2 protein                            |
| Locus_25091_Transcript_1/1_Conf_1.000 | 247 | 0  |           |                |    |         |     |     |                                                          |
| Locus_25092_Transcript_1/1_Conf_1.000 | 339 | 0  |           |                |    |         |     |     |                                                          |
| Locus_25093_Transcript_1/1_Conf_1.000 | 326 | 16 | 5.11E-06  | XP_002605049.1 | 51 | 54.299  | 82  | 42  | hypothetical protein BRAFLDRAFT_85195                    |
| Locus_25094_Transcript_1/1_Conf_1.000 | 357 | 0  |           |                |    |         |     |     |                                                          |
| Locus_25095_Transcript_1/1_Conf_1.000 | 164 | 0  |           |                |    |         |     |     |                                                          |
| Locus_25096_Transcript_1/1_Conf_1.000 | 169 | 20 | 1.25E-12  | BAE78960.1     | 80 | 76.2554 | 52  | 42  | aspartate racemase                                       |
| Locus_25097_Transcript_1/1_Conf_1.000 | 151 | 0  |           |                |    |         |     |     |                                                          |
| Locus_25098_Transcript_1/1_Conf_1.000 | 155 | 20 | 2.30E-22  | EFO23668.1     | 96 | 108.612 | 51  | 49  | hypothetical protein LOAG_04821                          |
| Locus_25099_Transcript_1/1_Conf_1.000 | 156 | 0  |           |                |    |         |     |     |                                                          |
| Locus_251_Transcript_1/1_Conf_1.000   | 795 | 20 | 3.65E-66  | XP_002634865.1 | 66 | 255.758 | 256 | 170 | C. briggsae CBR-PLX-1 protein                            |
| Locus_2510_Transcript_1/1_Conf_1.000  | 849 | 20 | 2.55E-100 | AAG29105.1     | 85 | 369.392 | 223 | 190 | AF273705_1zinc metallopeptidase 2 MEP2                   |
| Locus_25100_Transcript_1/1_Conf_1.000 | 144 | 0  |           |                |    |         |     |     |                                                          |

|                                       |      |    |           |                |    |         |     |     |                                                            |
|---------------------------------------|------|----|-----------|----------------|----|---------|-----|-----|------------------------------------------------------------|
| Locus_25101_Transcript_1/1_Conf_1.000 | 190  | 4  | 2.56E-05  | NP_501343.1    | 64 | 51.9878 | 51  | 33  | Elongator complex Protein Component family member (elpc-4) |
| Locus_25102_Transcript_1/1_Conf_1.000 | 169  | 0  |           |                |    |         |     |     |                                                            |
| Locus_25103_Transcript_1/1_Conf_1.000 | 141  | 0  |           |                |    |         |     |     |                                                            |
| Locus_25104_Transcript_1/1_Conf_1.000 | 443  | 20 | 2.30E-22  | NP_503178.1    | 62 | 108.612 | 140 | 88  | AuTophagy (yeast Atg homolog) family member (atg-9)        |
| Locus_25105_Transcript_1/1_Conf_1.000 | 163  | 0  |           |                |    |         |     |     |                                                            |
| Locus_25106_Transcript_1/1_Conf_1.000 | 332  | 20 | 4.39E-42  | EFO17747.1     | 97 | 174.096 | 87  | 85  | STE/STE20/MSN protein kinase                               |
| Locus_25107_Transcript_1/1_Conf_1.000 | 133  | 0  |           |                |    |         |     |     |                                                            |
| Locus_25108_Transcript_1/1_Conf_1.000 | 132  | 0  |           |                |    |         |     |     |                                                            |
| Locus_25109_Transcript_1/1_Conf_1.000 | 257  | 0  |           |                |    |         |     |     |                                                            |
| Locus_2511_Transcript_1/2_Conf_1.000  | 2147 | 20 | 1.15E-121 | NP_001040884.2 | 90 | 442.195 | 349 | 315 | hypothetical protein Y53G8B.4                              |
| Locus_2511_Transcript_2/2_Conf_1.000  | 2214 | 20 | 1.19E-121 | NP_001040884.2 | 90 | 442.195 | 349 | 315 | hypothetical protein Y53G8B.4                              |
| Locus_25110_Transcript_1/1_Conf_1.000 | 164  | 20 | 1.81E-11  | XP_001902281.1 | 73 | 72.4034 | 53  | 39  | Protein-tyrosine phosphatase containing protein            |
| Locus_25111_Transcript_1/1_Conf_1.000 | 210  | 0  |           |                |    |         |     |     |                                                            |
| Locus_25112_Transcript_1/1_Conf_1.000 | 215  | 0  |           |                |    |         |     |     |                                                            |
| Locus_25113_Transcript_1/1_Conf_1.000 | 186  | 0  |           |                |    |         |     |     |                                                            |

|                                       |     |    |          |                |     |         |     |     |                                                          |
|---------------------------------------|-----|----|----------|----------------|-----|---------|-----|-----|----------------------------------------------------------|
| Locus_25114_Transcript_1/1_Conf_1.000 | 275 | 20 | 8.06E-12 | NP_508409.1    | 65  | 73.559  | 89  | 58  | HEXosaminidase family member (hex-1)                     |
| Locus_25115_Transcript_1/1_Conf_1.000 | 136 | 20 | 5.19E-19 | XP_002634414.1 | 93  | 97.4413 | 45  | 42  | C. briggsae CBR-EPI-1 protein                            |
| Locus_25116_Transcript_1/1_Conf_1.000 | 149 | 0  |          |                |     |         |     |     |                                                          |
| Locus_25117_Transcript_1/1_Conf_1.000 | 129 | 0  |          |                |     |         |     |     |                                                          |
| Locus_25118_Transcript_1/1_Conf_1.000 | 132 | 0  |          |                |     |         |     |     |                                                          |
| Locus_25119_Transcript_1/1_Conf_1.000 | 466 | 2  | 2.30E-06 | NP_501321.1    | 58  | 55.4546 | 97  | 57  | hypothetical protein C49H3.3                             |
| Locus_2512_Transcript_1/1_Conf_1.000  | 544 | 20 | 2.95E-46 | XP_001901466.1 | 71  | 188.348 | 184 | 131 | Paired amphipathic helix repeat family protein           |
| Locus_25120_Transcript_1/1_Conf_1.000 | 227 | 0  |          |                |     |         |     |     |                                                          |
| Locus_25121_Transcript_1/1_Conf_1.000 | 161 | 2  | 8.74E-06 | XP_002646257.1 | 71  | 53.5286 | 52  | 37  | Hypothetical protein CBG11961                            |
| Locus_25122_Transcript_1/1_Conf_1.000 | 548 | 20 | 1.04E-22 | XP_001900186.1 | 65  | 110.153 | 145 | 95  | hypothetical protein                                     |
| Locus_25123_Transcript_1/1_Conf_1.000 | 156 | 20 | 1.03E-22 | EFN85419.1     | 100 | 109.768 | 51  | 51  | Serine/threonine-protein phosphatase 4 catalytic subunit |
| Locus_25124_Transcript_1/1_Conf_1.000 | 139 | 0  |          |                |     |         |     |     |                                                          |
| Locus_25125_Transcript_1/1_Conf_1.000 | 154 | 0  |          |                |     |         |     |     |                                                          |
| Locus_25126_Transcript_1/1_Conf_1.000 | 106 | 0  |          |                |     |         |     |     |                                                          |
| Locus_25127_Transcript_1/1_Conf_1.000 | 204 | 0  |          |                |     |         |     |     |                                                          |
| Locus_25128_Transcript_1/1_Conf_1.000 | 138 | 0  |          |                |     |         |     |     |                                                          |

|                                       |     |    |          |                |     |         |     |    |                                                      |
|---------------------------------------|-----|----|----------|----------------|-----|---------|-----|----|------------------------------------------------------|
| Locus_25129_Transcript_1/1_Conf_1.000 | 146 | 20 | 5.93E-18 | NP_001024588.1 | 100 | 93.9745 | 48  | 48 | abnormal cell LINEage family member (lin-2)          |
| Locus_2513_Transcript_1/1_Conf_1.000  | 233 | 0  |          |                |     |         |     |    |                                                      |
| Locus_25130_Transcript_1/1_Conf_1.000 | 333 | 0  |          |                |     |         |     |    |                                                      |
| Locus_25131_Transcript_1/1_Conf_1.000 | 224 | 20 | 3.57E-15 | EFO20785.1     | 89  | 84.7297 | 48  | 43 | TKL/MLK/HH498 protein kinase                         |
| Locus_25132_Transcript_1/1_Conf_1.000 | 173 | 0  |          |                |     |         |     |    |                                                      |
| Locus_25133_Transcript_1/1_Conf_1.000 | 162 | 20 | 4.30E-21 | XP_002759851.1 | 98  | 104.375 | 53  | 52 | PREDICTED: rho-related GTP-binding protein RhoC-like |
| Locus_25134_Transcript_1/1_Conf_1.000 | 151 | 0  |          |                |     |         |     |    |                                                      |
| Locus_25135_Transcript_1/1_Conf_1.000 | 149 | 0  |          |                |     |         |     |    |                                                      |
| Locus_25136_Transcript_1/1_Conf_1.000 | 294 | 0  |          |                |     |         |     |    |                                                      |
| Locus_25137_Transcript_1/1_Conf_1.000 | 261 | 0  |          |                |     |         |     |    |                                                      |
| Locus_25138_Transcript_1/1_Conf_1.000 | 316 | 14 | 1.40E-19 | EFO19841.1     | 69  | 99.3673 | 105 | 73 | hypothetical protein LOAG_08651                      |
| Locus_25139_Transcript_1/1_Conf_1.000 | 260 | 0  |          |                |     |         |     |    |                                                      |
| Locus_2514_Transcript_1/2_Conf_1.000  | 670 | 0  |          |                |     |         |     |    |                                                      |
| Locus_2514_Transcript_2/2_Conf_1.000  | 670 | 0  |          |                |     |         |     |    |                                                      |
| Locus_25140_Transcript_1/1_Conf_1.000 | 155 | 0  |          |                |     |         |     |    |                                                      |

|                                       |      |    |           |                |     |         |     |     |                                      |
|---------------------------------------|------|----|-----------|----------------|-----|---------|-----|-----|--------------------------------------|
| Locus_25141_Transcript_1/1_Conf_1.000 | 156  | 6  | 4.97E-09  | NP_491776.1    | 71  | 64.3142 | 52  | 37  | hypothetical protein T09B4.7         |
| Locus_25142_Transcript_1/1_Conf_1.000 | 297  | 20 | 4.92E-17  | NP_495815.1    | 61  | 90.8929 | 99  | 61  | hypothetical protein F54C9.9         |
| Locus_25143_Transcript_1/1_Conf_1.000 | 137  | 20 | 1.79E-19  | EFO27232.1     | 100 | 98.9821 | 45  | 45  | voltage-gated potassium channel      |
| Locus_25144_Transcript_1/1_Conf_1.000 | 322  | 0  |           |                |     |         |     |     |                                      |
| Locus_25145_Transcript_1/1_Conf_1.000 | 261  | 0  |           |                |     |         |     |     |                                      |
| Locus_25146_Transcript_1/1_Conf_1.000 | 169  | 20 | 1.47E-29  | XP_002805655.1 | 100 | 132.494 | 55  | 55  | PREDICTED: integrin beta-1           |
| Locus_25147_Transcript_1/1_Conf_1.000 | 243  | 20 | 5.19E-27  | NP_001122835.1 | 85  | 124.02  | 80  | 68  | UNCoordinated family member (unc-22) |
| Locus_25148_Transcript_1/1_Conf_1.000 | 157  | 0  |           |                |     |         |     |     |                                      |
| Locus_25149_Transcript_1/1_Conf_1.000 | 365  | 0  |           |                |     |         |     |     |                                      |
| Locus_2515_Transcript_1/1_Conf_1.000  | 1649 | 20 | 5.30E-153 | XP_002643132.1 | 67  | 545.814 | 517 | 348 | C. briggsae CBR-POD-1 protein        |
| Locus_25150_Transcript_1/1_Conf_1.000 | 354  | 2  | 8.09E-20  | XP_002648027.1 | 73  | 100.138 | 112 | 82  | Hypothetical protein CBG23996        |
| Locus_25151_Transcript_1/1_Conf_1.000 | 132  | 4  | 3.28E-05  | NP_741744.2    | 74  | 51.6026 | 43  | 32  | hypothetical protein C15C7.7         |
| Locus_25152_Transcript_1/1_Conf_1.000 | 168  | 2  | 5.42E-08  | XP_002644454.1 | 75  | 60.8474 | 56  | 42  | Hypothetical protein CBG14320        |



|                                       |      |    |           |                |    |         |     |     |                                                                                 |
|---------------------------------------|------|----|-----------|----------------|----|---------|-----|-----|---------------------------------------------------------------------------------|
| Locus_25153_Transcript_1/1_Conf_1.000 | 250  | 0  |           |                |    |         |     |     |                                                                                 |
| Locus_25154_Transcript_1/1_Conf_1.000 | 169  | 0  |           |                |    |         |     |     |                                                                                 |
| Locus_25155_Transcript_1/1_Conf_1.000 | 321  | 3  | 2.91E-09  | XP_002637263.1 | 58 | 65.0846 | 113 | 66  | Hypothetical protein CBG18943                                                   |
| Locus_25156_Transcript_1/1_Conf_1.000 | 326  |    |           |                |    |         |     |     |                                                                                 |
| Locus_25157_Transcript_1/1_Conf_1.000 | 121  | 3  | 1.35E-06  | XP_002639673.1 | 84 | 56.225  | 39  | 33  | Hypothetical protein CBG12391                                                   |
| Locus_25158_Transcript_1/1_Conf_1.000 | 199  | 6  | 4.77E-12  | NP_001022673.1 | 86 | 74.3294 | 66  | 57  | NADC (Na <sup>+</sup> -coupled dicarboxylate transporter) family member (nac-3) |
| Locus_25159_Transcript_1/1_Conf_1.000 | 144  | 0  |           |                |    |         |     |     |                                                                                 |
| Locus_2516_Transcript_1/1_Conf_1.000  | 316  | 7  | 1.03E-46  | CAB04449.3     | 91 | 189.504 | 105 | 96  | C. elegans protein F53A2.1, partially confirmed by transcript evidence          |
| Locus_25160_Transcript_1/1_Conf_1.000 | 153  | 0  |           |                |    |         |     |     |                                                                                 |
| Locus_25161_Transcript_1/1_Conf_1.000 | 263  | 20 | 1.75E-38  | NP_497733.1    | 89 | 162.155 | 87  | 78  | Protein Tyrosine Phosphatase family member (ptp-1)                              |
| Locus_25162_Transcript_1/1_Conf_1.000 | 168  | 20 | 8.06E-20  | CAC10528.1     | 94 | 100.138 | 55  | 52  | putative inositol 1,4,5-trisphosphate receptor                                  |
| Locus_25163_Transcript_1/1_Conf_1.000 | 128  | 17 | 7.85E-07  | NP_502225.1    | 80 | 56.9954 | 40  | 32  | Gon-2 Extragenic Modifier family member (gem-4)                                 |
| Locus_25164_Transcript_1/1_Conf_1.000 | 140  | 0  |           |                |    |         |     |     |                                                                                 |
| Locus_25165_Transcript_1/1_Conf_1.000 | 219  | 5  | 1.72E-17  | EFO21092.1     | 72 | 92.4337 | 72  | 52  | hypothetical protein LOAG_07396                                                 |
| Locus_25166_Transcript_1/1_Conf_1.000 | 357  | 4  | 1.12E-29  | XP_002641257.1 | 67 | 132.88  | 118 | 80  | Hypothetical protein CBG05168                                                   |
| Locus_25167_Transcript_1/1_Conf_1.000 | 217  | 20 | 3.58E-12  | XP_001898472.1 | 68 | 74.7146 | 64  | 44  | Trehalase family protein                                                        |
| Locus_25168_Transcript_1/1_Conf_1.000 | 470  | 20 | 7.49E-66  | NP_490828.3    | 87 | 253.062 | 156 | 136 | HAIF transporter (PGP related) family member (haf-6)                            |
| Locus_25169_Transcript_1/1_Conf_1.000 | 167  | 20 | 9.26E-16  | NP_498923.1    | 87 | 86.6557 | 54  | 47  | hypothetical protein B0303.15                                                   |
| Locus_2517_Transcript_1/1_Conf_1.000  | 1635 | 20 | 3.40E-160 | NP_740981.1    | 71 | 569.696 | 565 | 406 | hypothetical protein R05F9.1                                                    |

|                                       |     |    |          |                |     |         |     |     |                                                     |
|---------------------------------------|-----|----|----------|----------------|-----|---------|-----|-----|-----------------------------------------------------|
| Locus_25170_Transcript_1/1_Conf_1.000 | 391 | 20 | 2.71E-60 | XP_002819557.1 | 99  | 234.572 | 115 | 114 | PREDICTED: hypothetical protein<br>LOC100461873     |
| Locus_25171_Transcript_1/1_Conf_1.000 | 165 | 4  | 7.55E-26 | XP_002345197.1 | 100 | 120.168 | 54  | 54  | PREDICTED: hypothetical protein<br>XP_002345197     |
| Locus_25172_Transcript_1/1_Conf_1.000 | 238 | 0  |          |                |     |         |     |     |                                                     |
| Locus_25173_Transcript_1/1_Conf_1.000 | 155 | 0  |          |                |     |         |     |     |                                                     |
| Locus_25174_Transcript_1/1_Conf_1.000 | 215 | 2  | 2.25E-14 | NP_741941.1    | 88  | 82.0333 | 54  | 48  | MEChanosensory abnormality family<br>member (mec-5) |
| Locus_25175_Transcript_1/1_Conf_1.000 | 504 | 4  | 3.40E-29 | NP_497751.1    | 75  | 131.339 | 101 | 76  | hypothetical protein C14B1.10                       |
| Locus_25176_Transcript_1/1_Conf_1.000 | 292 | 7  | 4.03E-35 | XP_002630272.1 | 86  | 150.984 | 96  | 83  | C. briggsae CBR-EFF-1 protein                       |
| Locus_25177_Transcript_1/1_Conf_1.000 | 269 | 0  |          |                |     |         |     |     |                                                     |
| Locus_25178_Transcript_1/1_Conf_1.000 | 140 | 18 | 1.01E-14 | XP_002645243.1 | 97  | 83.1889 | 46  | 45  | C. briggsae CBR-MYO-2 protein                       |
| Locus_25179_Transcript_1/1_Conf_1.000 | 186 | 0  |          |                |     |         |     |     |                                                     |

|                                       |      |    |          |                |     |         |     |     |                                                                       |
|---------------------------------------|------|----|----------|----------------|-----|---------|-----|-----|-----------------------------------------------------------------------|
| Locus_2518_Transcript_1/2_Conf_1.000  | 1213 | 20 | 3.12E-85 | NP_001021274.1 | 80  | 320.087 | 232 | 186 | EXOSome (multiexonuclease complex) component family member (exos-4.1) |
| Locus_2518_Transcript_2/2_Conf_1.000  | 1162 | 20 | 2.92E-85 | NP_001021274.1 | 80  | 320.087 | 232 | 186 | EXOSome (multiexonuclease complex) component family member (exos-4.1) |
| Locus_25180_Transcript_1/1_Conf_1.000 | 144  | 0  |          |                |     |         |     |     |                                                                       |
| Locus_25181_Transcript_1/1_Conf_1.000 | 159  | 20 | 1.34E-22 | 3ML6           | 100 | 109.383 | 52  | 52  | A Complex Between Dishevelled2 And Clathrin Adaptor Ap-2              |
| Locus_25182_Transcript_1/1_Conf_1.000 | 148  | 0  |          |                |     |         |     |     |                                                                       |
| Locus_25183_Transcript_1/1_Conf_1.000 | 286  | 20 | 1.23E-07 | XP_002634977.1 | 64  | 59.6918 | 57  | 37  | Hypothetical protein CBG13513                                         |
| Locus_25184_Transcript_1/1_Conf_1.000 | 130  | 0  |          |                |     |         |     |     |                                                                       |
| Locus_25185_Transcript_1/1_Conf_1.000 | 162  | 0  |          |                |     |         |     |     |                                                                       |

|                                       |      |    |           |                |    |         |     |     |                                  |
|---------------------------------------|------|----|-----------|----------------|----|---------|-----|-----|----------------------------------|
| Locus_25186_Transcript_1/1_Conf_1.000 | 149  | 20 | 1.41E-11  | EFO25550.1     | 82 | 72.7886 | 46  | 38  | nucleolar protein 10             |
| Locus_25187_Transcript_1/1_Conf_1.000 | 455  | 6  | 2.12E-20  | XP_001892878.1 | 63 | 102.064 | 110 | 70  | hypothetical protein Bm1_07045   |
| Locus_25188_Transcript_1/1_Conf_1.000 | 278  | 20 | 2.75E-20  | XP_001898597.1 | 75 | 101.679 | 96  | 72  | Steroid receptor seven-up type 2 |
| Locus_25189_Transcript_1/1_Conf_1.000 | 152  | 0  |           |                |    |         |     |     |                                  |
| Locus_2519_Transcript_1/2_Conf_1.000  | 914  | 0  |           |                |    |         |     |     |                                  |
| Locus_2519_Transcript_2/2_Conf_1.000  | 927  | 0  |           |                |    |         |     |     |                                  |
| Locus_25190_Transcript_1/1_Conf_1.000 | 191  | 0  |           |                |    |         |     |     |                                  |
| Locus_25191_Transcript_1/1_Conf_1.000 | 373  | 0  |           |                |    |         |     |     |                                  |
| Locus_25192_Transcript_1/1_Conf_1.000 | 259  | 11 | 1.40E-19  | ADN00780.1     | 89 | 99.3673 | 59  | 53  | class 3 lipase protein           |
| Locus_25193_Transcript_1/1_Conf_1.000 | 343  | 0  |           |                |    |         |     |     |                                  |
| Locus_25194_Transcript_1/1_Conf_1.000 | 185  | 0  |           |                |    |         |     |     |                                  |
| Locus_25195_Transcript_1/1_Conf_1.000 | 139  | 0  |           |                |    |         |     |     |                                  |
| Locus_25196_Transcript_1/1_Conf_1.000 | 270  | 2  | 1.92E-21  | XP_002634505.1 | 71 | 105.531 | 89  | 64  | Hypothetical protein CBG08295    |
| Locus_25197_Transcript_1/1_Conf_1.000 | 376  | 20 | 1.88E-08  | EFO23604.1     | 59 | 62.3882 | 79  | 47  | hypothetical protein LOAG_04880  |
| Locus_25198_Transcript_1/1_Conf_1.000 | 244  | 0  |           |                |    |         |     |     |                                  |
| Locus_25199_Transcript_1/1_Conf_1.000 | 1268 | 20 | 7.93E-180 | AAC47722.1     | 85 | 634.41  | 417 | 358 | Native 66kDa protein             |
| Locus_252_Transcript_1/1_Conf_1.000   | 186  | 0  |           |                |    |         |     |     |                                  |
| Locus_2520_Transcript_1/1_Conf_1.000  | 522  | 3  | 4.52E-06  | EFO28201.1     | 55 | 54.6842 | 85  | 47  | hypothetical protein LOAG_00283  |
| Locus_25200_Transcript_1/1_Conf_1.000 | 211  | 0  |           |                |    |         |     |     |                                  |
| Locus_25201_Transcript_1/1_Conf_1.000 | 226  | 0  |           |                |    |         |     |     |                                  |
| Locus_25202_Transcript_1/1_Conf_1.000 | 245  | 20 | 1.56E-23  | XP_002646299.1 | 78 | 112.464 | 80  | 63  | Hypothetical protein CBG12006    |

|                                       |     |    |          |                |     |         |     |     |                                                                               |
|---------------------------------------|-----|----|----------|----------------|-----|---------|-----|-----|-------------------------------------------------------------------------------|
| Locus_25203_Transcript_1/1_Conf_1.000 | 128 | 20 | 3.76E-17 | EFN84506.1     | 100 | 91.2781 | 42  | 42  | GTP-binding nuclear protein Ran                                               |
| Locus_25204_Transcript_1/1_Conf_1.000 | 655 | 4  | 9.45E-18 | NP_501302.1    | 55  | 94.3597 | 152 | 84  | MVB (yeast MultiVesicular Body sorting factor) related family member (mvb-12) |
| Locus_25205_Transcript_1/1_Conf_1.000 | 219 | 0  |          |                |     |         |     |     |                                                                               |
| Locus_25206_Transcript_1/1_Conf_1.000 | 187 | 2  | 1.23E-07 | NP_497231.1    | 58  | 59.6918 | 68  | 40  | hypothetical protein W06E11.7                                                 |
| Locus_25207_Transcript_1/1_Conf_1.000 | 191 | 0  |          |                |     |         |     |     |                                                                               |
| Locus_25208_Transcript_1/1_Conf_1.000 | 282 | 1  | 1.61E-07 | XP_001898279.1 | 56  | 59.3066 | 86  | 49  | hypothetical protein Bm1_34160                                                |
| Locus_25209_Transcript_1/1_Conf_1.000 | 201 | 0  |          |                |     |         |     |     |                                                                               |
| Locus_2521_Transcript_1/1_Conf_1.000  | 266 | 20 | 1.81E-27 | XP_002639700.1 | 83  | 125.561 | 87  | 73  | Hypothetical protein CBG12421                                                 |
| Locus_25210_Transcript_1/1_Conf_1.000 | 139 | 0  |          |                |     |         |     |     |                                                                               |
| Locus_25211_Transcript_1/1_Conf_1.000 | 237 | 0  |          |                |     |         |     |     |                                                                               |
| Locus_25212_Transcript_1/1_Conf_1.000 | 146 | 17 | 5.56E-08 | CAI42467.1     | 100 | 60.8474 | 44  | 44  | TIMP metalloproteinase inhibitor 1                                            |
| Locus_25213_Transcript_1/1_Conf_1.000 | 242 | 20 | 1.05E-27 | XP_002826795.1 | 100 | 126.331 | 69  | 69  | PREDICTED: protein FAM38A-like, partial                                       |
| Locus_25214_Transcript_1/1_Conf_1.000 | 603 | 0  |          |                |     |         |     |     |                                                                               |
| Locus_25215_Transcript_1/1_Conf_1.000 | 182 | 0  |          |                |     |         |     |     |                                                                               |
| Locus_25216_Transcript_1/1_Conf_1.000 | 381 | 20 | 5.02E-46 | XP_002629656.1 | 83  | 187.193 | 126 | 105 | Hypothetical protein CBG00863                                                 |
| Locus_25217_Transcript_1/1_Conf_1.000 | 405 | 0  |          |                |     |         |     |     |                                                                               |

|                                       |     |    |          |             |     |         |    |    |                                                        |
|---------------------------------------|-----|----|----------|-------------|-----|---------|----|----|--------------------------------------------------------|
| Locus_25218_Transcript_1/1_Conf_1.000 | 203 | 4  | 2.29E-06 | NP_506256.3 | 64  | 55.4546 | 51 | 33 | CaDHerin family member (cdh-6)                         |
| Locus_25219_Transcript_1/1_Conf_1.000 | 140 | 0  |          |             |     |         |    |    |                                                        |
| Locus_2522_Transcript_1/2_Conf_1.000  | 772 | 0  |          |             |     |         |    |    |                                                        |
| Locus_2522_Transcript_2/2_Conf_1.000  | 778 | 0  |          |             |     |         |    |    |                                                        |
| Locus_25220_Transcript_1/1_Conf_1.000 | 129 | 2  | 1.25E-04 | NP_499780.1 | 75  | 49.6766 | 41 | 31 | Temporarily Assigned Gene name family member (tag-164) |
| Locus_25221_Transcript_1/1_Conf_1.000 | 433 | 0  |          |             |     |         |    |    |                                                        |
| Locus_25222_Transcript_1/1_Conf_1.000 | 128 | 20 | 2.28E-14 | ADK09905.1  | 100 | 82.0333 | 42 | 42 | non-muscle myosin IIA                                  |
| Locus_25223_Transcript_1/1_Conf_1.000 | 226 | 0  |          |             |     |         |    |    |                                                        |

|                                       |      |    |           |                |     |         |     |     |                                                                      |
|---------------------------------------|------|----|-----------|----------------|-----|---------|-----|-----|----------------------------------------------------------------------|
| Locus_25224_Transcript_1/1_Conf_1.000 | 228  | 20 | 1.14E-21  | XP_002930443.1 | 78  | 106.301 | 75  | 59  | PREDICTED: dynein light chain 1, cytoplasmic-like                    |
| Locus_25225_Transcript_1/1_Conf_1.000 | 336  | 3  | 4.21E-45  | NP_001022280.1 | 90  | 184.111 | 110 | 99  | Serpentine Receptor, class AB (class A-like) family member (srab-14) |
| Locus_25226_Transcript_1/1_Conf_1.000 | 149  | 0  |           |                |     |         |     |     |                                                                      |
| Locus_25227_Transcript_1/1_Conf_1.000 | 174  | 0  |           |                |     |         |     |     |                                                                      |
| Locus_25228_Transcript_1/1_Conf_1.000 | 146  | 0  |           |                |     |         |     |     |                                                                      |
| Locus_25229_Transcript_1/1_Conf_1.000 | 211  | 20 | 3.37E-18  | XP_002763951.1 | 100 | 94.7449 | 61  | 61  | PREDICTED: NHP2-like protein 1-like                                  |
| Locus_2523_Transcript_1/1_Conf_1.000  | 1244 | 3  | 1.26E-12  | ADI24666.1     | 52  | 78.9518 | 172 | 90  | Hypothetical protein Y59E9AL.36                                      |
| Locus_25230_Transcript_1/1_Conf_1.000 | 389  | 0  |           |                |     |         |     |     |                                                                      |
| Locus_25231_Transcript_1/1_Conf_1.000 | 143  | 0  |           |                |     |         |     |     |                                                                      |
| Locus_25232_Transcript_1/1_Conf_1.000 | 899  | 20 | 1.43E-120 | XP_002638375.1 | 79  | 436.802 | 298 | 238 | Hypothetical protein CBG18580                                        |
| Locus_25233_Transcript_1/1_Conf_1.000 | 242  | 0  |           |                |     |         |     |     |                                                                      |

|                                       |      |    |           |                |    |         |     |     |                                                    |
|---------------------------------------|------|----|-----------|----------------|----|---------|-----|-----|----------------------------------------------------|
| Locus_25234_Transcript_1/1_Conf_1.000 | 175  | 20 | 5.36E-24  | NP_499922.1    | 96 | 114.005 | 58  | 56  | Kinase, GLH-Binding family member (kgb-1)          |
| Locus_25235_Transcript_1/1_Conf_1.000 | 217  | 5  | 4.51E-23  | XP_002638527.1 | 91 | 110.923 | 69  | 63  | C. briggsae CBR-UNC-80 protein                     |
| Locus_25236_Transcript_1/1_Conf_1.000 | 163  | 0  |           |                |    |         |     |     |                                                    |
| Locus_25237_Transcript_1/1_Conf_1.000 | 216  | 0  |           |                |    |         |     |     |                                                    |
| Locus_25238_Transcript_1/1_Conf_1.000 | 149  | 0  |           |                |    |         |     |     |                                                    |
| Locus_25239_Transcript_1/1_Conf_1.000 | 210  | 0  |           |                |    |         |     |     |                                                    |
| Locus_2524_Transcript_1/1_Conf_1.000  | 3186 | 20 | 6.02E-101 | NP_497703.1    | 53 | 374.015 | 744 | 397 | Nuclear Pore complex Protein family member (npp-9) |
| Locus_25240_Transcript_1/1_Conf_1.000 | 153  | 0  |           |                |    |         |     |     |                                                    |
| Locus_25241_Transcript_1/1_Conf_1.000 | 136  | 0  |           |                |    |         |     |     |                                                    |
| Locus_25242_Transcript_1/1_Conf_1.000 | 399  | 0  |           |                |    |         |     |     |                                                    |
| Locus_25243_Transcript_1/1_Conf_1.000 | 258  | 0  |           |                |    |         |     |     |                                                    |
| Locus_25244_Transcript_1/1_Conf_1.000 | 228  | 0  |           |                |    |         |     |     |                                                    |
| Locus_25245_Transcript_1/1_Conf_1.000 | 138  | 0  |           |                |    |         |     |     |                                                    |
| Locus_25246_Transcript_1/1_Conf_1.000 | 169  | 2  | 1.25E-04  | XP_002642995.1 | 52 | 49.6766 | 68  | 36  | Hypothetical protein CBG15282                      |
| Locus_25247_Transcript_1/1_Conf_1.000 | 140  | 0  |           |                |    |         |     |     |                                                    |
| Locus_25248_Transcript_1/1_Conf_1.000 | 133  | 0  |           |                |    |         |     |     |                                                    |
| Locus_25249_Transcript_1/1_Conf_1.000 | 264  | 0  |           |                |    |         |     |     |                                                    |
| Locus_2525_Transcript_1/2_Conf_1.000  | 2931 | 20 | 1.57E-164 | XP_001897294.1 | 63 | 585.104 | 691 | 441 | DZF family protein                                 |
| Locus_2525_Transcript_2/2_Conf_1.000  | 2898 | 20 | 1.55E-164 | XP_001897294.1 | 63 | 585.104 | 691 | 441 | DZF family protein                                 |
| Locus_25250_Transcript_1/1_Conf_1.000 | 299  | 20 | 2.51E-29  | NP_001022438.1 | 82 | 131.724 | 99  | 82  | Ligand-Gated ion Channel family member (lgc-35)    |
| Locus_25251_Transcript_1/1_Conf_1.000 | 143  | 0  |           |                |    |         |     |     |                                                    |
| Locus_25252_Transcript_1/1_Conf_1.000 | 153  | 0  |           |                |    |         |     |     |                                                    |
| Locus_25253_Transcript_1/1_Conf_1.000 | 419  | 0  |           |                |    |         |     |     |                                                    |
| Locus_25254_Transcript_1/1_Conf_1.000 | 161  | 0  |           |                |    |         |     |     |                                                    |
| Locus_25255_Transcript_1/1_Conf_1.000 | 194  | 1  | 1.77E-06  | XP_002629926.1 | 67 | 55.8398 | 62  | 42  | C. briggsae CBR-TAG-149 protein                    |



|                                       |      |    |           |                |    |         |     |     |                                                             |
|---------------------------------------|------|----|-----------|----------------|----|---------|-----|-----|-------------------------------------------------------------|
| Locus_25256_Transcript_1/1_Conf_1.000 | 225  | 20 | 6.47E-25  | XP_002644368.1 | 81 | 117.087 | 74  | 60  | C. briggsae CBR-CHT-1 protein                               |
| Locus_25257_Transcript_1/1_Conf_1.000 | 452  | 0  |           |                |    |         |     |     |                                                             |
| Locus_25258_Transcript_1/1_Conf_1.000 | 134  | 0  |           |                |    |         |     |     |                                                             |
| Locus_25259_Transcript_1/1_Conf_1.000 | 236  | 20 | 4.92E-17  | NP_500737.1    | 77 | 90.8929 | 72  | 56  | hypothetical protein W03F8.3                                |
| Locus_2526_Transcript_1/1_Conf_1.000  | 2791 | 20 | 0         | XP_002644295.1 | 79 | 951.429 | 736 | 582 | Hypothetical protein CBG14081                               |
| Locus_25260_Transcript_1/1_Conf_1.000 | 131  | 0  |           |                |    |         |     |     |                                                             |
| Locus_25261_Transcript_1/1_Conf_1.000 | 281  | 20 | 2.17E-17  | EFO24654.1     | 78 | 92.0485 | 66  | 52  | RNA polymerase Rpb1                                         |
| Locus_25262_Transcript_1/1_Conf_1.000 | 283  | 20 | 5.34E-27  | NP_001021098.1 | 87 | 124.02  | 82  | 72  | hypothetical protein F10G8.9                                |
| Locus_25263_Transcript_1/1_Conf_1.000 | 159  | 0  |           |                |    |         |     |     |                                                             |
| Locus_25264_Transcript_1/1_Conf_1.000 | 387  | 2  | 5.95E-07  | EFO17840.1     | 59 | 57.3806 | 77  | 46  | hypothetical protein LOAG_10658                             |
| Locus_25265_Transcript_1/1_Conf_1.000 | 281  | 20 | 5.18E-19  | NP_001023531.1 | 70 | 97.4413 | 93  | 66  | Pyrazinamidase and Nicotinamidase family member (pnc-2)     |
| Locus_25266_Transcript_1/1_Conf_1.000 | 421  | 0  |           |                |    |         |     |     |                                                             |
| Locus_25267_Transcript_1/1_Conf_1.000 | 277  | 0  |           |                |    |         |     |     |                                                             |
| Locus_25268_Transcript_1/1_Conf_1.000 | 236  | 0  |           |                |    |         |     |     |                                                             |
| Locus_25269_Transcript_1/1_Conf_1.000 | 144  | 0  |           |                |    |         |     |     |                                                             |
| Locus_2527_Transcript_1/2_Conf_1.000  | 1157 | 20 | 3.73E-141 | NP_492635.1    | 72 | 505.753 | 397 | 286 | More Of MS family member (mom-5)                            |
| Locus_2527_Transcript_2/2_Conf_1.000  | 258  | 20 | 3.32E-21  | XP_001901058.1 | 70 | 104.76  | 88  | 62  | Frizzled/Smoothed family membrane region containing protein |
| Locus_25270_Transcript_1/1_Conf_1.000 | 138  | 0  |           |                |    |         |     |     |                                                             |
| Locus_25271_Transcript_1/1_Conf_1.000 | 136  | 10 | 6.57E-14  | NP_492266.2    | 93 | 80.4925 | 45  | 42  | hypothetical protein C34B7.2                                |
| Locus_25272_Transcript_1/1_Conf_1.000 | 241  | 0  |           |                |    |         |     |     |                                                             |
| Locus_25273_Transcript_1/1_Conf_1.000 | 133  | 0  |           |                |    |         |     |     |                                                             |
| Locus_25274_Transcript_1/1_Conf_1.000 | 128  | 20 | 1.06E-11  | NP_505135.1    | 95 | 73.1738 | 41  | 39  | ASpartyl Protease family member (asp-5)                     |
| Locus_25275_Transcript_1/1_Conf_1.000 | 159  | 20 | 4.47E-18  | XP_002644419.1 | 96 | 94.3597 | 52  | 50  | Hypothetical protein CBG14273                               |
| Locus_25276_Transcript_1/1_Conf_1.000 | 202  | 0  |           |                |    |         |     |     |                                                             |
| Locus_25277_Transcript_1/1_Conf_1.000 | 141  | 0  |           |                |    |         |     |     |                                                             |

|                                       |      |    |          |                |    |         |     |     |                                                             |
|---------------------------------------|------|----|----------|----------------|----|---------|-----|-----|-------------------------------------------------------------|
| Locus_25278_Transcript_1/1_Conf_1.000 | 388  | 20 | 3.37E-10 | NP_491657.1    | 63 | 68.1662 | 95  | 60  | hypothetical protein F55F8.7                                |
| Locus_25279_Transcript_1/1_Conf_1.000 | 143  | 0  |          |                |    |         |     |     |                                                             |
| Locus_2528_Transcript_1/2_Conf_1.000  | 1018 | 4  | 2.99E-19 | AAF39779.2     | 48 | 100.523 | 291 | 142 | Hypothetical protein C51G7.4                                |
| Locus_2528_Transcript_2/2_Conf_1.000  | 1015 | 4  | 2.98E-19 | AAF39779.2     | 48 | 100.523 | 291 | 142 | Hypothetical protein C51G7.4                                |
| Locus_25280_Transcript_1/1_Conf_1.000 | 129  | 0  |          |                |    |         |     |     |                                                             |
| Locus_25281_Transcript_1/1_Conf_1.000 | 156  | 1  | 1.27E-04 | XP_002643480.1 | 76 | 49.6766 | 42  | 32  | Hypothetical protein CBG16145                               |
| Locus_25282_Transcript_1/1_Conf_1.000 | 253  | 20 | 3.97E-06 | XP_002642807.1 | 84 | 54.6842 | 51  | 43  | C. briggsae CBR-KEL-3 protein                               |
| Locus_25283_Transcript_1/1_Conf_1.000 | 285  | 20 | 7.93E-31 | XP_001901053.1 | 79 | 136.732 | 93  | 74  | Frizzled/Smoothed family membrane region containing protein |
| Locus_25284_Transcript_1/1_Conf_1.000 | 282  | 0  |          |                |    |         |     |     |                                                             |
| Locus_25285_Transcript_1/1_Conf_1.000 | 162  | 0  |          |                |    |         |     |     |                                                             |
| Locus_25286_Transcript_1/1_Conf_1.000 | 280  | 0  |          |                |    |         |     |     |                                                             |
| Locus_25287_Transcript_1/1_Conf_1.000 | 359  | 20 | 4.88E-25 | EFO27858.1     | 67 | 117.472 | 122 | 82  | hypothetical protein LOAG_00620                             |
| Locus_25288_Transcript_1/1_Conf_1.000 | 338  | 0  |          |                |    |         |     |     |                                                             |
| Locus_25289_Transcript_1/1_Conf_1.000 | 153  | 1  | 3.02E-06 | XP_002635871.1 | 74 | 55.0694 | 51  | 38  | Hypothetical protein CBG01087                               |
| Locus_2529_Transcript_1/1_Conf_1.000  | 688  | 20 | 5.49E-67 | CAA96571.1     | 69 | 258.07  | 221 | 154 | parasite pepsinogen                                         |
| Locus_25290_Transcript_1/1_Conf_1.000 | 330  | 0  |          |                |    |         |     |     |                                                             |
| Locus_25291_Transcript_1/1_Conf_1.000 | 311  | 0  |          |                |    |         |     |     |                                                             |
| Locus_25292_Transcript_1/1_Conf_1.000 | 209  | 0  |          |                |    |         |     |     |                                                             |
| Locus_25293_Transcript_1/1_Conf_1.000 | 136  | 0  |          |                |    |         |     |     |                                                             |
| Locus_25294_Transcript_1/1_Conf_1.000 | 140  | 2  | 7.01E-08 | XP_002633940.1 | 77 | 60.4622 | 40  | 31  | Hypothetical protein CBG20015                               |
| Locus_25295_Transcript_1/1_Conf_1.000 | 233  | 0  |          |                |    |         |     |     |                                                             |
| Locus_25296_Transcript_1/1_Conf_1.000 | 425  | 20 | 1.37E-51 | XP_002647010.1 | 90 | 205.682 | 143 | 129 | C. briggsae CBR-COR-1 protein                               |
| Locus_25297_Transcript_1/1_Conf_1.000 | 128  | 0  |          |                |    |         |     |     |                                                             |
| Locus_25298_Transcript_1/1_Conf_1.000 | 550  | 17 | 2.24E-81 | NP_001022641.1 | 89 | 305.064 | 183 | 163 | LEThal family member (let-805)                              |
| Locus_25299_Transcript_1/1_Conf_1.000 | 186  | 13 | 3.57E-23 | AAC27893.1     | 90 | 111.309 | 61  | 55  | ornithine decarboxylase                                     |
| Locus_253_Transcript_1/1_Conf_1.000   | 472  | 0  |          |                |    |         |     |     |                                                             |

|                                       |      |    |           |                |    |         |     |     |                               |
|---------------------------------------|------|----|-----------|----------------|----|---------|-----|-----|-------------------------------|
| Locus_2530_Transcript_1/7_Conf_0.409  | 1049 | 20 | 6.69E-139 | AAN11401.1     | 77 | 498.049 | 348 | 270 | metalloprotease 1 precursor   |
| Locus_2530_Transcript_2/7_Conf_0.091  | 172  | 11 | 3.27E-13  | AAN11401.1     | 78 | 78.1814 | 56  | 44  | metalloprotease 1 precursor   |
| Locus_2530_Transcript_3/7_Conf_0.409  | 931  | 20 | 1.92E-123 | AAN11401.1     | 78 | 446.432 | 308 | 242 | metalloprotease 1 precursor   |
| Locus_2530_Transcript_4/7_Conf_0.364  | 931  | 20 | 8.63E-124 | AAN11401.1     | 78 | 447.588 | 308 | 242 | metalloprotease 1 precursor   |
| Locus_2530_Transcript_5/7_Conf_0.545  | 1049 | 20 | 1.76E-139 | AAN11401.1     | 77 | 499.975 | 348 | 270 | metalloprotease 1 precursor   |
| Locus_2530_Transcript_6/7_Conf_0.091  | 259  | 12 | 4.96E-17  | AAN11401.1     | 70 | 90.8929 | 78  | 55  | metalloprotease 1 precursor   |
| Locus_2530_Transcript_7/7_Conf_0.409  | 931  | 20 | 8.63E-124 | AAN11401.1     | 78 | 447.588 | 308 | 242 | metalloprotease 1 precursor   |
| Locus_25300_Transcript_1/1_Conf_1.000 | 222  | 20 | 9.73E-13  | XP_002630063.1 | 66 | 76.6406 | 69  | 46  | Hypothetical protein CBG13437 |
| Locus_25301_Transcript_1/1_Conf_1.000 | 131  | 0  |           |                |    |         |     |     |                               |
| Locus_25302_Transcript_1/1_Conf_1.000 | 251  | 0  |           |                |    |         |     |     |                               |
| Locus_25303_Transcript_1/1_Conf_1.000 | 209  | 0  |           |                |    |         |     |     |                               |

|                                       |      |    |           |                |     |         |     |     |                                              |
|---------------------------------------|------|----|-----------|----------------|-----|---------|-----|-----|----------------------------------------------|
| Locus_25304_Transcript_1/1_Conf_1.000 | 174  | 20 | 8.84E-27  | NP_937818.1    | 100 | 123.25  | 57  | 57  | nucleoside diphosphate kinase A isoform a    |
| Locus_25305_Transcript_1/1_Conf_1.000 | 294  | 0  |           |                |     |         |     |     |                                              |
| Locus_25306_Transcript_1/1_Conf_1.000 | 171  | 0  |           |                |     |         |     |     |                                              |
| Locus_25307_Transcript_1/1_Conf_1.000 | 516  | 13 | 2.99E-15  | XP_002632584.1 | 47  | 85.1149 | 144 | 69  | Hypothetical protein CBG13848                |
| Locus_25308_Transcript_1/1_Conf_1.000 | 365  | 0  |           |                |     |         |     |     |                                              |
| Locus_25309_Transcript_1/1_Conf_1.000 | 145  | 0  |           |                |     |         |     |     |                                              |
| Locus_2531_Transcript_1/1_Conf_1.000  | 1130 | 20 | 2.45E-105 | NP_504635.1    | 70  | 386.726 | 352 | 247 | GAstrulation Defective family member (gad-1) |
| Locus_25310_Transcript_1/1_Conf_1.000 | 130  | 7  | 6.19E-12  | ACT34056.1     | 97  | 73.9442 | 42  | 41  | glutamate dehydrogenase                      |
| Locus_25311_Transcript_1/1_Conf_1.000 | 128  | 0  |           |                |     |         |     |     |                                              |
| Locus_25312_Transcript_1/1_Conf_1.000 | 249  | 0  |           |                |     |         |     |     |                                              |
| Locus_25313_Transcript_1/1_Conf_1.000 | 168  | 5  | 1.57E-15  | NP_495951.2    | 85  | 85.8853 | 55  | 47  | hypothetical protein W07A12.4                |
| Locus_25314_Transcript_1/1_Conf_1.000 | 133  | 0  |           |                |     |         |     |     |                                              |
| Locus_25315_Transcript_1/1_Conf_1.000 | 138  | 0  |           |                |     |         |     |     |                                              |
| Locus_25316_Transcript_1/1_Conf_1.000 | 134  | 5  | 2.50E-13  | EFO24258.1     | 93  | 78.5666 | 44  | 41  | DNA-directed RNA polymerase                  |
| Locus_25317_Transcript_1/1_Conf_1.000 | 129  | 0  |           |                |     |         |     |     |                                              |

|                                       |     |    |          |                |     |         |    |    |                                                |
|---------------------------------------|-----|----|----------|----------------|-----|---------|----|----|------------------------------------------------|
| Locus_25318_Transcript_1/1_Conf_1.000 | 169 | 13 | 1.24E-20 | EFO25169.1     | 100 | 102.834 | 55 | 55 | trehalose 6-phosphate synthase 1               |
| Locus_25319_Transcript_1/1_Conf_1.000 | 205 | 0  |          |                |     |         |    |    |                                                |
| Locus_2532_Transcript_1/2_Conf_1.000  | 967 | 0  |          |                |     |         |    |    |                                                |
| Locus_2532_Transcript_2/2_Conf_1.000  | 846 | 0  |          |                |     |         |    |    |                                                |
| Locus_25320_Transcript_1/1_Conf_1.000 | 214 | 1  | 3.60E-04 | AAB47739.1     | 56  | 48.1358 | 74 | 42 | transposase                                    |
| Locus_25321_Transcript_1/1_Conf_1.000 | 287 | 1  | 9.76E-05 | NP_498936.1    | 50  | 50.0618 | 72 | 36 | hypothetical protein K02D10.1                  |
| Locus_25322_Transcript_1/1_Conf_1.000 | 328 | 2  | 2.21E-09 | XP_002635372.1 | 55  | 65.4698 | 99 | 55 | C. briggsae CBR-RPM-1 protein                  |
| Locus_25323_Transcript_1/1_Conf_1.000 | 183 | 0  |          |                |     |         |    |    |                                                |
| Locus_25324_Transcript_1/1_Conf_1.000 | 199 | 20 | 1.13E-29 | NP_001024855.1 | 95  | 132.88  | 66 | 63 | Nuclear Hormone Receptor family member (nhr-1) |
| Locus_25325_Transcript_1/1_Conf_1.000 | 148 | 20 | 2.17E-20 | XP_002751090.1 | 97  | 102.064 | 49 | 48 | PREDICTED: 60S ribosomal protein L21-like      |
| Locus_25326_Transcript_1/1_Conf_1.000 | 174 | 0  |          |                |     |         |    |    |                                                |
| Locus_25327_Transcript_1/1_Conf_1.000 | 130 | 0  |          |                |     |         |    |    |                                                |
| Locus_25328_Transcript_1/2_Conf_1.000 | 191 | 0  |          |                |     |         |    |    |                                                |
| Locus_25328_Transcript_2/2_Conf_1.000 | 301 | 0  |          |                |     |         |    |    |                                                |
| Locus_25329_Transcript_1/1_Conf_1.000 | 293 | 20 | 7.17E-08 | XP_002646105.1 | 61  | 60.4622 | 81 | 50 | Hypothetical protein CBG07981                  |
| Locus_2533_Transcript_1/1_Conf_1.000  | 464 | 2  | 4.07E-11 | XP_002639234.1 | 70  | 71.2478 | 68 | 48 | Hypothetical protein CBG03790                  |
| Locus_25330_Transcript_1/1_Conf_1.000 | 134 | 0  |          |                |     |         |    |    |                                                |
| Locus_25331_Transcript_1/1_Conf_1.000 | 316 | 0  |          |                |     |         |    |    |                                                |
| Locus_25332_Transcript_1/1_Conf_1.000 | 227 | 0  |          |                |     |         |    |    |                                                |
| Locus_25333_Transcript_1/1_Conf_1.000 | 284 | 0  |          |                |     |         |    |    |                                                |
| Locus_25334_Transcript_1/1_Conf_1.000 | 235 | 20 | 2.87E-33 | XP_002630488.1 | 96  | 144.821 | 78 | 75 | C. briggsae CBR-RPY-1 protein                  |
| Locus_25335_Transcript_1/1_Conf_1.000 | 153 | 0  |          |                |     |         |    |    |                                                |
| Locus_25336_Transcript_1/1_Conf_1.000 | 230 | 1  | 8.20E-04 | NP_509643.1    | 65  | 46.9802 | 40 | 26 | hypothetical protein F36G3.2                   |
| Locus_25337_Transcript_1/1_Conf_1.000 | 185 | 0  |          |                |     |         |    |    |                                                |
| Locus_25338_Transcript_1/1_Conf_1.000 | 175 | 0  |          |                |     |         |    |    |                                                |

|                                       |      |    |          |                |     |         |     |     |                                                                                                       |
|---------------------------------------|------|----|----------|----------------|-----|---------|-----|-----|-------------------------------------------------------------------------------------------------------|
| Locus_25339_Transcript_1/1_Conf_1.000 | 230  | 20 | 5.49E-08 | NP_503298.1    | 67  | 60.8474 | 53  | 36  | UDP-GlucuronosylTransferase family member (ugt-29)                                                    |
| Locus_2534_Transcript_1/1_Conf_1.000  | 613  | 0  |          |                |     |         |     |     |                                                                                                       |
| Locus_25340_Transcript_1/1_Conf_1.000 | 164  | 5  | 2.71E-07 | XP_002998319.1 | 77  | 58.5362 | 48  | 37  | copine-like protein                                                                                   |
| Locus_25341_Transcript_1/1_Conf_1.000 | 149  | 0  |          |                |     |         |     |     |                                                                                                       |
| Locus_25342_Transcript_1/1_Conf_1.000 | 137  | 0  |          |                |     |         |     |     |                                                                                                       |
| Locus_25343_Transcript_1/1_Conf_1.000 | 187  | 0  |          |                |     |         |     |     |                                                                                                       |
| Locus_25344_Transcript_1/1_Conf_1.000 | 150  | 0  |          |                |     |         |     |     |                                                                                                       |
| Locus_25345_Transcript_1/1_Conf_1.000 | 216  | 5  | 4.07E-32 | NP_490803.1    | 94  | 140.969 | 71  | 67  | hypothetical protein F54A5.1                                                                          |
| Locus_25346_Transcript_1/1_Conf_1.000 | 212  | 20 | 2.25E-22 | NP_501957.1    | 75  | 108.612 | 70  | 53  | hypothetical protein C43F9.5                                                                          |
| Locus_25347_Transcript_1/1_Conf_1.000 | 170  | 0  |          |                |     |         |     |     |                                                                                                       |
| Locus_25348_Transcript_1/1_Conf_1.000 | 140  | 3  | 3.47E-15 | EFO21620.1     | 82  | 84.7297 | 46  | 38  | hypothetical protein LOAG_06866                                                                       |
| Locus_25349_Transcript_1/1_Conf_1.000 | 546  | 20 | 5.11E-54 | NP_491761.3    | 70  | 214.157 | 184 | 129 | hypothetical protein T27A3.5                                                                          |
| Locus_2535_Transcript_1/1_Conf_1.000  | 2132 | 20 | 0        | XP_002631588.1 | 69  | 706.827 | 656 | 457 | Hypothetical protein CBG20766                                                                         |
| Locus_25350_Transcript_1/1_Conf_1.000 | 272  | 0  |          |                |     |         |     |     |                                                                                                       |
| Locus_25351_Transcript_1/1_Conf_1.000 | 134  | 0  |          |                |     |         |     |     |                                                                                                       |
| Locus_25352_Transcript_1/1_Conf_1.000 | 241  | 20 | 1.85E-32 | NP_496500.1    | 92  | 142.124 | 79  | 73  | hypothetical protein VF13D12L.3                                                                       |
| Locus_25353_Transcript_1/1_Conf_1.000 | 429  | 20 | 3.58E-60 | CAR63575.1     | 87  | 234.187 | 142 | 124 | hypothetical protein                                                                                  |
| Locus_25354_Transcript_1/1_Conf_1.000 | 297  | 0  |          |                |     |         |     |     |                                                                                                       |
| Locus_25355_Transcript_1/1_Conf_1.000 | 452  | 20 | 8.55E-54 | EFO24754.1     | 79  | 213.001 | 150 | 119 | hypothetical protein LOAG_03725                                                                       |
| Locus_25356_Transcript_1/1_Conf_1.000 | 169  | 4  | 8.66E-06 | NP_505743.1    | 71  | 53.5286 | 39  | 28  | hypothetical protein F28H7.3                                                                          |
| Locus_25357_Transcript_1/1_Conf_1.000 | 246  | 0  |          |                |     |         |     |     |                                                                                                       |
| Locus_25358_Transcript_1/1_Conf_1.000 | 186  | 1  | 5.71E-13 | XP_001141034.1 | 100 | 77.411  | 51  | 51  | PREDICTED: hypothetical protein                                                                       |
| Locus_25359_Transcript_1/1_Conf_1.000 | 250  | 20 | 3.67E-49 | EAW82235.1     | 100 | 197.593 | 83  | 83  | eukaryotic translation elongation factor 1 delta (guanine nucleotide exchange protein), isoform CRA_f |

|                                       |      |    |          |                |    |         |     |     |                                                      |
|---------------------------------------|------|----|----------|----------------|----|---------|-----|-----|------------------------------------------------------|
| Locus_2536_Transcript_1/1_Conf_1.000  | 1849 | 20 | 1.49E-82 | XP_001899827.1 | 79 | 311.997 | 253 | 202 | TBP-like factor                                      |
| Locus_25360_Transcript_1/1_Conf_1.000 | 129  | 0  |          |                |    |         |     |     |                                                      |
| Locus_25361_Transcript_1/1_Conf_1.000 | 271  | 0  |          |                |    |         |     |     |                                                      |
| Locus_25362_Transcript_1/1_Conf_1.000 | 245  | 0  |          |                |    |         |     |     |                                                      |
| Locus_25363_Transcript_1/1_Conf_1.000 | 295  | 0  |          |                |    |         |     |     |                                                      |
| Locus_25364_Transcript_1/1_Conf_1.000 | 166  | 0  |          |                |    |         |     |     |                                                      |
| Locus_25365_Transcript_1/1_Conf_1.000 | 145  | 0  |          |                |    |         |     |     |                                                      |
| Locus_25366_Transcript_1/1_Conf_1.000 | 219  | 0  |          |                |    |         |     |     |                                                      |
| Locus_25367_Transcript_1/1_Conf_1.000 | 390  | 0  |          |                |    |         |     |     |                                                      |
| Locus_25368_Transcript_1/1_Conf_1.000 | 217  | 0  |          |                |    |         |     |     |                                                      |
| Locus_25369_Transcript_1/1_Conf_1.000 | 130  | 0  |          |                |    |         |     |     |                                                      |
| Locus_2537_Transcript_1/3_Conf_0.714  | 3098 | 20 | 0        | NP_001076724.1 | 79 | 1119.76 | 872 | 689 | Na-K-Cl Cotransporter homolog family member (nkcc-1) |
| Locus_2537_Transcript_2/3_Conf_0.286  | 859  | 20 | 1.23E-41 | NP_001076724.1 | 85 | 174.481 | 118 | 101 | Na-K-Cl Cotransporter homolog family member (nkcc-1) |
| Locus_2537_Transcript_3/3_Conf_0.714  | 3098 | 20 | 0        | NP_001076724.1 | 79 | 1119.76 | 872 | 689 | Na-K-Cl Cotransporter homolog family member (nkcc-1) |
| Locus_25370_Transcript_1/1_Conf_1.000 | 231  | 20 | 3.64E-28 | NP_492593.2    | 80 | 127.872 | 77  | 62  | hypothetical protein F26E4.3                         |
| Locus_25371_Transcript_1/1_Conf_1.000 | 133  | 0  |          |                |    |         |     |     |                                                      |
| Locus_25372_Transcript_1/1_Conf_1.000 | 143  | 12 | 5.92E-07 | NP_501598.2    | 73 | 57.3806 | 45  | 33  | Prolyl Carboxy Peptidase like family member (pcp-3)  |
| Locus_25373_Transcript_1/1_Conf_1.000 | 151  | 0  |          |                |    |         |     |     |                                                      |
| Locus_25374_Transcript_1/1_Conf_1.000 | 408  | 0  |          |                |    |         |     |     |                                                      |
| Locus_25375_Transcript_1/1_Conf_1.000 | 357  | 20 | 9.11E-56 | NP_001123162.1 | 95 | 219.55  | 118 | 113 | UNCoordinated family member (unc-1)                  |
| Locus_25376_Transcript_1/1_Conf_1.000 | 131  | 1  | 1.63E-04 | CAR63718.1     | 69 | 49.2914 | 42  | 29  | hypothetical protein                                 |
| Locus_25377_Transcript_1/1_Conf_1.000 | 159  | 13 | 8.72E-14 | CBA11992.1     | 87 | 80.1073 | 47  | 41  | endonuclease-reverse transcriptase HmRTE-e01         |
| Locus_25378_Transcript_1/1_Conf_1.000 | 159  | 0  |          |                |    |         |     |     |                                                      |
| Locus_25379_Transcript_1/1_Conf_1.000 | 245  | 3  | 2.41E-24 | XP_002631142.1 | 81 | 115.161 | 81  | 66  | C. briggsae CBR-TAG-180 protein                      |

|                                       |      |    |          |                |     |         |     |     |                                            |
|---------------------------------------|------|----|----------|----------------|-----|---------|-----|-----|--------------------------------------------|
| Locus_2538_Transcript_1/1_Conf_1.000  | 1332 | 20 | 0        | EFO25501.1     | 97  | 706.442 | 393 | 385 | 26S protease regulatory subunit 8          |
| Locus_25380_Transcript_1/1_Conf_1.000 | 242  | 0  |          |                |     |         |     |     |                                            |
| Locus_25381_Transcript_1/1_Conf_1.000 | 134  | 0  |          |                |     |         |     |     |                                            |
| Locus_25382_Transcript_1/1_Conf_1.000 | 242  | 2  | 1.09E-08 | NP_001022338.1 | 59  | 63.1586 | 79  | 47  | hypothetical protein T09F3.5               |
| Locus_25383_Transcript_1/1_Conf_1.000 | 229  | 0  |          |                |     |         |     |     |                                            |
| Locus_25384_Transcript_1/1_Conf_1.000 | 195  | 0  |          |                |     |         |     |     |                                            |
| Locus_25385_Transcript_1/1_Conf_1.000 | 206  | 0  |          |                |     |         |     |     |                                            |
| Locus_25386_Transcript_1/1_Conf_1.000 | 160  | 0  |          |                |     |         |     |     |                                            |
| Locus_25387_Transcript_1/1_Conf_1.000 | 137  | 0  |          |                |     |         |     |     |                                            |
| Locus_25388_Transcript_1/1_Conf_1.000 | 231  | 0  |          |                |     |         |     |     |                                            |
| Locus_25389_Transcript_1/1_Conf_1.000 | 224  | 0  |          |                |     |         |     |     |                                            |
| Locus_2539_Transcript_1/1_Conf_1.000  | 267  | 0  |          |                |     |         |     |     |                                            |
| Locus_25390_Transcript_1/1_Conf_1.000 | 230  | 20 | 1.70E-25 | CAI95512.1     | 86  | 119.013 | 72  | 62  | cytochrome b                               |
| Locus_25391_Transcript_1/1_Conf_1.000 | 194  | 0  |          |                |     |         |     |     |                                            |
| Locus_25392_Transcript_1/1_Conf_1.000 | 115  | 0  |          |                |     |         |     |     |                                            |
| Locus_25393_Transcript_1/1_Conf_1.000 | 193  | 0  |          |                |     |         |     |     |                                            |
| Locus_25394_Transcript_1/1_Conf_1.000 | 134  | 0  |          |                |     |         |     |     |                                            |
| Locus_25395_Transcript_1/1_Conf_1.000 | 305  | 5  | 9.81E-26 | EFO19679.1     | 90  | 119.783 | 102 | 92  | hypothetical protein LOAG_08814            |
| Locus_25396_Transcript_1/1_Conf_1.000 | 144  | 20 | 1.28E-20 | ADM47830.1     | 100 | 102.834 | 48  | 48  | immunoglobulin heavy chain variable region |
| Locus_25397_Transcript_1/1_Conf_1.000 | 147  | 0  |          |                |     |         |     |     |                                            |



|                                       |      |    |          |                |    |         |     |     |                                                                         |
|---------------------------------------|------|----|----------|----------------|----|---------|-----|-----|-------------------------------------------------------------------------|
| Locus_25398_Transcript_1/1_Conf_1.000 | 149  | 0  |          |                |    |         |     |     |                                                                         |
| Locus_25399_Transcript_1/1_Conf_1.000 | 151  | 20 | 2.92E-17 | ABE66949.1     | 92 | 91.6633 | 50  | 46  | immunoglobulin heavy chain variable region                              |
| Locus_254_Transcript_1/1_Conf_1.000   | 666  | 20 | 8.59E-99 | NP_495707.1    | 94 | 363.614 | 188 | 178 | Ribosomal Protein, Large subunit family member (rpl-10)                 |
| Locus_2540_Transcript_1/1_Conf_1.000  | 568  | 20 | 1.10E-65 | NP_496503.1    | 87 | 253.062 | 174 | 152 | Lactate DeHydrogenase family member (ldh-1)                             |
| Locus_25400_Transcript_1/1_Conf_1.000 | 156  | 11 | 2.38E-11 | XP_002636807.1 | 81 | 72.0182 | 53  | 43  | Hypothetical protein CBG09249                                           |
| Locus_25401_Transcript_1/1_Conf_1.000 | 135  | 0  |          |                |    |         |     |     |                                                                         |
| Locus_25402_Transcript_1/1_Conf_1.000 | 166  | 0  |          |                |    |         |     |     |                                                                         |
| Locus_25403_Transcript_1/1_Conf_1.000 | 508  | 0  |          |                |    |         |     |     |                                                                         |
| Locus_25404_Transcript_1/1_Conf_1.000 | 177  | 20 | 9.14E-16 | EFO23663.1     | 83 | 86.6557 | 56  | 47  | myosin xviii                                                            |
| Locus_25405_Transcript_1/1_Conf_1.000 | 160  | 0  |          |                |    |         |     |     |                                                                         |
| Locus_25406_Transcript_1/1_Conf_1.000 | 325  | 5  | 1.39E-11 | CAA88959.2     | 59 | 72.7886 | 114 | 68  | C. elegans protein M03C11.2, partially confirmed by transcript evidence |
| Locus_25407_Transcript_1/1_Conf_1.000 | 170  | 0  |          |                |    |         |     |     |                                                                         |
| Locus_25408_Transcript_1/1_Conf_1.000 | 189  | 20 | 2.23E-25 | XP_002634588.1 | 92 | 118.627 | 63  | 58  | Hypothetical protein CBG08399                                           |
| Locus_25409_Transcript_1/1_Conf_1.000 | 272  | 0  |          |                |    |         |     |     |                                                                         |
| Locus_2541_Transcript_1/2_Conf_1.000  | 1732 | 20 | 6.62E-53 | XP_002647206.1 | 62 | 213.386 | 247 | 155 | Hypothetical protein CBG22384                                           |
| Locus_2541_Transcript_2/2_Conf_1.000  | 966  | 20 | 2.29E-58 | XP_002647206.1 | 62 | 230.335 | 284 | 178 | Hypothetical protein CBG22384                                           |
| Locus_25410_Transcript_1/1_Conf_1.000 | 163  | 0  |          |                |    |         |     |     |                                                                         |
| Locus_25411_Transcript_1/1_Conf_1.000 | 134  | 0  |          |                |    |         |     |     |                                                                         |
| Locus_25412_Transcript_1/1_Conf_1.000 | 359  | 2  | 1.17E-10 | EFO26102.1     | 55 | 69.707  | 119 | 66  | hypothetical protein LOAG_02385                                         |
| Locus_25413_Transcript_1/1_Conf_1.000 | 149  | 0  |          |                |    |         |     |     |                                                                         |

|                                       |      |    |           |                |     |         |     |     |                                                                                  |
|---------------------------------------|------|----|-----------|----------------|-----|---------|-----|-----|----------------------------------------------------------------------------------|
| Locus_25414_Transcript_1/1_Conf_1.000 | 249  | 20 | 1.50E-18  | XP_002631710.1 | 75  | 95.9005 | 77  | 58  | Hypothetical protein CBG20910                                                    |
| Locus_25415_Transcript_1/1_Conf_1.000 | 187  | 20 | 6.95E-27  | XP_002630446.1 | 96  | 123.635 | 62  | 60  | Hypothetical protein CBG11179                                                    |
| Locus_25416_Transcript_1/1_Conf_1.000 | 132  | 0  |           |                |     |         |     |     |                                                                                  |
| Locus_25417_Transcript_1/1_Conf_1.000 | 153  | 20 | 5.48E-24  | XP_002759549.1 | 100 | 114.005 | 50  | 50  | PREDICTED: transmembrane 4 L6 family member 1-like                               |
| Locus_25418_Transcript_1/1_Conf_1.000 | 328  | 20 | 3.62E-28  | XP_002629844.1 | 71  | 127.872 | 103 | 74  | C. briggsae CBR-SCP-1 protein                                                    |
| Locus_25419_Transcript_1/1_Conf_1.000 | 156  | 3  | 6.27E-12  | NP_001022489.1 | 76  | 73.9442 | 51  | 39  | Homolog of Hedgehog AcylTransferase family member (hhat-1)                       |
| Locus_2542_Transcript_1/1_Conf_1.000  | 1472 | 20 | 1.13E-127 | NP_493796.2    | 67  | 461.455 | 499 | 335 | THO Complex (transcription factor/nuclear export) subunit family member (thoc-1) |
| Locus_25420_Transcript_1/1_Conf_1.000 | 211  | 0  |           |                |     |         |     |     |                                                                                  |
| Locus_25421_Transcript_1/1_Conf_1.000 | 146  | 0  |           |                |     |         |     |     |                                                                                  |
| Locus_25422_Transcript_1/1_Conf_1.000 | 258  | 4  | 2.45E-32  | NP_508470.1    | 80  | 141.739 | 86  | 69  | hypothetical protein T03G6.3                                                     |
| Locus_25423_Transcript_1/1_Conf_1.000 | 215  | 20 | 1.56E-15  | NP_001020987.1 | 71  | 85.8853 | 71  | 51  | UNCoordinated family member (unc-89)                                             |
| Locus_25424_Transcript_1/1_Conf_1.000 | 255  | 9  | 2.31E-14  | CAL49442.3     | 72  | 82.0333 | 87  | 63  | C. elegans protein F36H1.2c, partially confirmed by transcript evidence          |
| Locus_25425_Transcript_1/1_Conf_1.000 | 180  | 0  |           |                |     |         |     |     |                                                                                  |
| Locus_25426_Transcript_1/1_Conf_1.000 | 213  | 4  | 2.49E-05  | CBM41222.1     | 64  | 51.9878 | 56  | 36  | C. elegans protein T10G3.3b, partially confirmed by transcript evidence          |
| Locus_25427_Transcript_1/1_Conf_1.000 | 135  | 0  |           |                |     |         |     |     |                                                                                  |
| Locus_25428_Transcript_1/1_Conf_1.000 | 209  | 0  |           |                |     |         |     |     |                                                                                  |
| Locus_25429_Transcript_1/1_Conf_1.000 | 271  | 0  |           |                |     |         |     |     |                                                                                  |
| Locus_2543_Transcript_1/1_Conf_1.000  | 1420 | 20 | 3.54E-171 | XP_001900407.1 | 91  | 605.905 | 367 | 336 | Nucleolar protein K01G5.5                                                        |
| Locus_25430_Transcript_1/1_Conf_1.000 | 209  | 20 | 7.01E-32  | NP_497769.3    | 92  | 140.198 | 69  | 64  | TollisH (Tolloid and BMP-1 family) family member (toh-1)                         |

|                                       |      |    |          |                |    |         |     |    |                                                               |
|---------------------------------------|------|----|----------|----------------|----|---------|-----|----|---------------------------------------------------------------|
| Locus_25431_Transcript_1/1_Conf_1.000 | 145  | 3  | 6.35E-12 | XP_002637017.1 | 88 | 73.9442 | 44  | 39 | Hypothetical protein CBG09510                                 |
| Locus_25432_Transcript_1/1_Conf_1.000 | 180  | 6  | 1.12E-16 | NP_001021110.1 | 86 | 89.7373 | 59  | 51 | CAISyntenin/Alcadein homolog family member (casy-1)           |
| Locus_25433_Transcript_1/1_Conf_1.000 | 171  | 0  |          |                |    |         |     |    |                                                               |
| Locus_25434_Transcript_1/1_Conf_1.000 | 419  | 0  |          |                |    |         |     |    |                                                               |
| Locus_25435_Transcript_1/1_Conf_1.000 | 196  | 0  |          |                |    |         |     |    |                                                               |
| Locus_25436_Transcript_1/1_Conf_1.000 | 211  | 0  |          |                |    |         |     |    |                                                               |
| Locus_25437_Transcript_1/1_Conf_1.000 | 400  | 20 | 3.31E-13 | XP_001902061.1 | 47 | 78.1814 | 154 | 73 | ancient conserved domain protein 2                            |
| Locus_25438_Transcript_1/1_Conf_1.000 | 222  | 2  | 1.19E-10 | NP_495978.1    | 70 | 69.707  | 62  | 44 | Temporarily Assigned Gene name family member (tag-165)        |
| Locus_25439_Transcript_1/1_Conf_1.000 | 165  | 0  |          |                |    |         |     |    |                                                               |
| Locus_2544_Transcript_1/1_Conf_1.000  | 1273 | 20 | 3.89E-09 | XP_001892980.1 | 45 | 67.3958 | 210 | 95 | Kelch motif family protein                                    |
| Locus_25440_Transcript_1/1_Conf_1.000 | 141  | 0  |          |                |    |         |     |    |                                                               |
| Locus_25441_Transcript_1/1_Conf_1.000 | 1035 | 0  |          |                |    |         |     |    |                                                               |
| Locus_25442_Transcript_1/1_Conf_1.000 | 477  | 2  | 4.87E-09 | EFO19385.1     | 60 | 64.3142 | 102 | 62 | hypothetical protein LOAG_09109                               |
| Locus_25443_Transcript_1/1_Conf_1.000 | 261  | 0  |          |                |    |         |     |    |                                                               |
| Locus_25444_Transcript_1/1_Conf_1.000 | 169  | 0  |          |                |    |         |     |    |                                                               |
| Locus_25445_Transcript_1/1_Conf_1.000 | 129  | 20 | 7.31E-13 | XP_002914987.1 | 97 | 77.0258 | 40  | 39 | PREDICTED: mitochondrial import receptor subunit TOM5 homolog |
| Locus_25446_Transcript_1/1_Conf_1.000 | 139  | 0  |          |                |    |         |     |    |                                                               |
| Locus_25447_Transcript_1/1_Conf_1.000 | 311  | 0  |          |                |    |         |     |    |                                                               |
| Locus_25448_Transcript_1/1_Conf_1.000 | 205  | 0  |          |                |    |         |     |    |                                                               |
| Locus_25449_Transcript_1/1_Conf_1.000 | 147  | 0  |          |                |    |         |     |    |                                                               |

|                                       |      |    |          |                |     |         |     |     |                                                                                          |
|---------------------------------------|------|----|----------|----------------|-----|---------|-----|-----|------------------------------------------------------------------------------------------|
| Locus_2545_Transcript_1/1_Conf_1.000  | 1441 | 20 | 2.29E-24 | NP_499947.1    | 44  | 118.242 | 360 | 160 | Eph(F)riN family member (efn-4)                                                          |
| Locus_25450_Transcript_1/1_Conf_1.000 | 392  | 0  |          |                |     |         |     |     |                                                                                          |
| Locus_25451_Transcript_1/1_Conf_1.000 | 446  | 0  |          |                |     |         |     |     |                                                                                          |
| Locus_25452_Transcript_1/1_Conf_1.000 | 203  | 0  |          |                |     |         |     |     |                                                                                          |
| Locus_25453_Transcript_1/1_Conf_1.000 | 233  | 20 | 8.12E-28 | XP_001899774.1 | 87  | 126.716 | 77  | 67  | Guanine nucleotide exchange factor for Ras-like GTPases; N-terminal motif family protein |
| Locus_25454_Transcript_1/1_Conf_1.000 | 291  | 0  |          |                |     |         |     |     |                                                                                          |
| Locus_25455_Transcript_1/1_Conf_1.000 | 359  | 0  |          |                |     |         |     |     |                                                                                          |
| Locus_25456_Transcript_1/1_Conf_1.000 | 261  | 20 | 2.37E-19 | XP_002629783.1 | 77  | 98.5969 | 72  | 56  | Hypothetical protein CBG01025                                                            |
| Locus_25457_Transcript_1/1_Conf_1.000 | 134  | 0  |          |                |     |         |     |     |                                                                                          |
| Locus_25458_Transcript_1/1_Conf_1.000 | 143  | 20 | 2.10E-20 | BAG51482.1     | 100 | 102.064 | 47  | 47  | unnamed protein product                                                                  |
| Locus_25459_Transcript_1/1_Conf_1.000 | 335  | 20 | 6.33E-33 | NP_001024306.1 | 75  | 143.665 | 112 | 85  | Poly(ADP-ribose) Metabolism Enzyme family member (pme-5)                                 |

|                                       |      |    |           |                |    |         |     |     |                                                        |
|---------------------------------------|------|----|-----------|----------------|----|---------|-----|-----|--------------------------------------------------------|
| Locus_2546_Transcript_1/2_Conf_1.000  | 3052 | 20 | 3.46E-138 | EFO26461.1     | 82 | 497.664 | 331 | 274 | brahma associated protein                              |
| Locus_2546_Transcript_2/2_Conf_1.000  | 1613 | 20 | 1.76E-177 | NP_499250.1    | 81 | 627.091 | 459 | 375 | Temporarily Assigned Gene name family member (tag-246) |
| Locus_25460_Transcript_1/1_Conf_1.000 | 296  | 0  |           |                |    |         |     |     |                                                        |
| Locus_25461_Transcript_1/1_Conf_1.000 | 250  | 0  |           |                |    |         |     |     |                                                        |
| Locus_25462_Transcript_1/1_Conf_1.000 | 283  | 0  |           |                |    |         |     |     |                                                        |
| Locus_25463_Transcript_1/1_Conf_1.000 | 345  | 0  |           |                |    |         |     |     |                                                        |
| Locus_25464_Transcript_1/1_Conf_1.000 | 200  | 0  |           |                |    |         |     |     |                                                        |
| Locus_25465_Transcript_1/1_Conf_1.000 | 140  | 20 | 1.72E-14  | NP_001021183.1 | 93 | 82.4185 | 45  | 42  | hypothetical protein C24A1.3                           |
| Locus_25466_Transcript_1/1_Conf_1.000 | 555  | 10 | 2.88E-31  | XP_002647560.1 | 60 | 138.658 | 184 | 111 | Hypothetical protein CBG06646                          |
| Locus_25467_Transcript_1/1_Conf_1.000 | 129  | 5  | 5.99E-07  | XP_002635249.1 | 77 | 57.3806 | 40  | 31  | Hypothetical protein CBG11493                          |
| Locus_25468_Transcript_1/1_Conf_1.000 | 372  | 0  |           |                |    |         |     |     |                                                        |
| Locus_25469_Transcript_1/1_Conf_1.000 | 144  | 20 | 5.03E-09  | XP_001441628.1 | 80 | 64.3142 | 46  | 37  | hypothetical protein                                   |
| Locus_2547_Transcript_1/1_Conf_1.000  | 187  | 0  |           |                |    |         |     |     |                                                        |

|                                       |      |    |           |                |    |         |     |     |                                                  |
|---------------------------------------|------|----|-----------|----------------|----|---------|-----|-----|--------------------------------------------------|
| Locus_25470_Transcript_1/1_Conf_1.000 | 1235 | 20 | 1.56E-156 | NP_506599.1    | 91 | 556.984 | 316 | 289 | Histone DeAcetylase family member (hda-1)        |
| Locus_25471_Transcript_1/1_Conf_1.000 | 129  | 0  |           |                |    |         |     |     |                                                  |
| Locus_25472_Transcript_1/1_Conf_1.000 | 157  | 0  |           |                |    |         |     |     |                                                  |
| Locus_25473_Transcript_1/1_Conf_1.000 | 168  | 0  |           |                |    |         |     |     |                                                  |
| Locus_25474_Transcript_1/1_Conf_1.000 | 236  | 20 | 5.07E-30  | NP_504697.2    | 91 | 134.035 | 78  | 71  | hypothetical protein W02F12.2                    |
| Locus_25475_Transcript_1/1_Conf_1.000 | 155  | 5  | 1.50E-13  | ACI49151.1     | 94 | 79.337  | 39  | 37  | hypothetical protein Cbre_JD20.006               |
| Locus_25476_Transcript_1/1_Conf_1.000 | 417  | 20 | 6.62E-70  | XP_001894250.1 | 91 | 266.544 | 138 | 126 | Low-density lipoprotein receptor-related protein |
| Locus_25477_Transcript_1/1_Conf_1.000 | 141  | 0  |           |                |    |         |     |     |                                                  |

|                                       |      |    |           |                |    |         |     |     |                                                                                 |
|---------------------------------------|------|----|-----------|----------------|----|---------|-----|-----|---------------------------------------------------------------------------------|
| Locus_25478_Transcript_1/1_Conf_1.000 | 378  | 20 | 2.69E-31  | CAX65068.1     | 76 | 138.272 | 126 | 97  | C. elegans protein K08C7.3d, confirmed by transcript evidence                   |
| Locus_25479_Transcript_1/1_Conf_1.000 | 204  | 0  |           |                |    |         |     |     |                                                                                 |
| Locus_2548_Transcript_1/1_Conf_1.000  | 2240 | 20 | 4.11E-138 | NP_501455.1    | 62 | 496.893 | 635 | 397 | Temporarily Assigned Gene name family member (tag-77)                           |
| Locus_25480_Transcript_1/1_Conf_1.000 | 205  | 0  |           |                |    |         |     |     |                                                                                 |
| Locus_25481_Transcript_1/1_Conf_1.000 | 164  | 7  | 4.17E-16  | ACJ65168.1     | 85 | 87.8113 | 57  | 49  | Uncoordinated protein 68, isoform b, partially confirmed by transcript evidence |
| Locus_25482_Transcript_1/1_Conf_1.000 | 386  | 6  | 9.50E-21  | NP_502119.2    | 54 | 103.219 | 151 | 82  | hypothetical protein F54D1.6                                                    |
| Locus_25483_Transcript_1/1_Conf_1.000 | 178  | 0  |           |                |    |         |     |     |                                                                                 |
| Locus_25484_Transcript_1/1_Conf_1.000 | 201  | 0  |           |                |    |         |     |     |                                                                                 |
| Locus_25485_Transcript_1/1_Conf_1.000 | 134  | 0  |           |                |    |         |     |     |                                                                                 |
| Locus_25486_Transcript_1/2_Conf_1.000 | 705  | 20 | 2.07E-24  | A8WQT4.2       | 89 | 116.701 | 96  | 86  | Calcium uptake protein 1 homolog                                                |
| Locus_25486_Transcript_2/2_Conf_1.000 | 701  | 20 | 2.06E-24  | A8WQT4.2       | 89 | 116.701 | 96  | 86  | Calcium uptake protein 1 homolog                                                |
| Locus_25487_Transcript_1/1_Conf_1.000 | 374  | 5  | 4.96E-17  | NP_001129770.1 | 65 | 90.8929 | 120 | 78  | hypothetical protein F33H2.8                                                    |
| Locus_25488_Transcript_1/1_Conf_1.000 | 269  | 20 | 1.05E-43  | XP_002821429.1 | 96 | 179.489 | 89  | 86  | PREDICTED: CD81 antigen-like                                                    |
| Locus_25489_Transcript_1/1_Conf_1.000 | 180  | 0  |           |                |    |         |     |     |                                                                                 |
| Locus_2549_Transcript_1/1_Conf_1.000  | 1299 | 4  | 1.67E-39  | XP_002634600.1 | 52 | 168.318 | 353 | 184 | Hypothetical protein CBG08415                                                   |
| Locus_25490_Transcript_1/1_Conf_1.000 | 231  | 0  |           |                |    |         |     |     |                                                                                 |
| Locus_25491_Transcript_1/1_Conf_1.000 | 287  | 20 | 2.31E-30  | XP_001901457.1 | 87 | 135.191 | 94  | 82  | Hypothetical UPF0202 protein F55A12.8 in chromosome I                           |
| Locus_25492_Transcript_1/1_Conf_1.000 | 420  | 0  |           |                |    |         |     |     |                                                                                 |
| Locus_25493_Transcript_1/1_Conf_1.000 | 148  | 0  |           |                |    |         |     |     |                                                                                 |
| Locus_25494_Transcript_1/1_Conf_1.000 | 217  | 0  |           |                |    |         |     |     |                                                                                 |

|                                       |      |    |           |                |     |         |     |     |                                                                                           |
|---------------------------------------|------|----|-----------|----------------|-----|---------|-----|-----|-------------------------------------------------------------------------------------------|
| Locus_25495_Transcript_1/1_Conf_1.000 | 258  | 15 | 1.65E-12  | XP_001896436.1 | 72  | 75.8702 | 73  | 53  | hypothetical protein Bm1_24880                                                            |
| Locus_25496_Transcript_1/1_Conf_1.000 | 199  | 6  | 2.54E-05  | NP_502296.1    | 53  | 51.9878 | 65  | 35  | hypothetical protein M18.3                                                                |
| Locus_25497_Transcript_1/1_Conf_1.000 | 129  | 0  |           |                |     |         |     |     |                                                                                           |
| Locus_25498_Transcript_1/1_Conf_1.000 | 171  | 3  | 5.96E-15  | NP_001129860.1 | 92  | 83.9593 | 42  | 39  | hypothetical protein H01G02.3                                                             |
| Locus_25499_Transcript_1/1_Conf_1.000 | 278  | 20 | 2.75E-28  | XP_002646518.1 | 81  | 128.257 | 92  | 75  | Hypothetical protein CBG20357                                                             |
| Locus_255_Transcript_1/5_Conf_0.400   | 832  | 20 | 2.08E-75  | XP_002633038.1 | 71  | 286.574 | 260 | 186 | Hypothetical protein CBG05717                                                             |
| Locus_255_Transcript_2/5_Conf_0.533   | 1679 | 20 | 1.13E-150 | NP_501065.2    | 78  | 538.11  | 463 | 362 | hypothetical protein T22D1.4                                                              |
| Locus_255_Transcript_3/5_Conf_0.667   | 2045 | 20 | 2.00E-176 | NP_501065.2    | 75  | 624.009 | 569 | 429 | hypothetical protein T22D1.4                                                              |
| Locus_255_Transcript_4/5_Conf_0.667   | 2051 | 20 | 2.01E-176 | NP_501065.2    | 75  | 624.009 | 569 | 429 | hypothetical protein T22D1.4                                                              |
| Locus_255_Transcript_5/5_Conf_0.667   | 2051 | 20 | 2.01E-176 | NP_501065.2    | 75  | 624.009 | 569 | 429 | hypothetical protein T22D1.4                                                              |
| Locus_2550_Transcript_1/1_Conf_1.000  | 953  | 20 | 6.67E-79  | NP_505112.1    | 72  | 298.516 | 315 | 229 | hypothetical protein F20D6.11                                                             |
| Locus_25500_Transcript_1/1_Conf_1.000 | 169  | 0  |           |                |     |         |     |     |                                                                                           |
| Locus_25501_Transcript_1/1_Conf_1.000 | 195  | 20 | 1.49E-13  | NP_497632.1    | 94  | 79.337  | 37  | 35  | Kruppel-Like Factor (zinc finger protein) family member (klf-1)                           |
| Locus_25502_Transcript_1/1_Conf_1.000 | 190  | 0  |           |                |     |         |     |     |                                                                                           |
| Locus_25503_Transcript_1/1_Conf_1.000 | 171  | 20 | 1.85E-24  | CAQ10285.1     | 100 | 115.546 | 54  | 54  | proteasome (prosome, macropain) subunit, beta type, 8 (large multifunctional peptidase 7) |
| Locus_25504_Transcript_1/1_Conf_1.000 | 237  | 20 | 3.08E-11  | XP_001959417.1 | 67  | 71.633  | 79  | 53  | GF12865                                                                                   |



|                                       |     |    |          |                |     |         |     |     |                                                                                |
|---------------------------------------|-----|----|----------|----------------|-----|---------|-----|-----|--------------------------------------------------------------------------------|
| Locus_25505_Transcript_1/1_Conf_1.000 | 157 | 0  |          |                |     |         |     |     |                                                                                |
| Locus_25506_Transcript_1/1_Conf_1.000 | 176 | 0  |          |                |     |         |     |     |                                                                                |
| Locus_25507_Transcript_1/1_Conf_1.000 | 210 | 0  |          |                |     |         |     |     |                                                                                |
| Locus_25508_Transcript_1/1_Conf_1.000 | 372 | 20 | 1.99E-50 | NP_498645.1    | 91  | 201.83  | 122 | 112 | MUScle Positioning family member (mup-4)                                       |
| Locus_25509_Transcript_1/1_Conf_1.000 | 420 | 0  |          |                |     |         |     |     |                                                                                |
| Locus_2551_Transcript_1/1_Conf_1.000  | 880 | 0  |          |                |     |         |     |     |                                                                                |
| Locus_25510_Transcript_1/1_Conf_1.000 | 215 | 3  | 4.55E-07 | XP_001895050.1 | 55  | 57.7658 | 70  | 39  | hypothetical protein Bm1_17960                                                 |
| Locus_25511_Transcript_1/1_Conf_1.000 | 257 | 20 | 4.64E-31 | XP_001138884.1 | 100 | 137.502 | 64  | 64  | PREDICTED: similar to F1Fo-ATPase synthase f subunit isoform 4                 |
| Locus_25512_Transcript_1/1_Conf_1.000 | 255 | 4  | 1.08E-11 | NP_495713.1    | 68  | 73.1738 | 83  | 57  | RNA-dependent RNA polymerase Family member (rrf-3)                             |
| Locus_25513_Transcript_1/1_Conf_1.000 | 218 | 20 | 1.27E-17 | CAX65068.1     | 76  | 92.8189 | 71  | 54  | C. elegans protein K08C7.3d, confirmed by transcript evidence                  |
| Locus_25514_Transcript_1/1_Conf_1.000 | 144 | 20 | 1.01E-17 | XP_002923631.1 | 100 | 93.2041 | 47  | 47  | PREDICTED: sodium/potassium-transporting ATPase subunit alpha-1-like isoform 2 |
| Locus_25515_Transcript_1/1_Conf_1.000 | 243 | 3  | 2.11E-20 | NP_495801.1    | 74  | 102.064 | 81  | 60  | hypothetical protein T13H5.6                                                   |
| Locus_25516_Transcript_1/1_Conf_1.000 | 297 | 0  |          |                |     |         |     |     |                                                                                |
| Locus_25517_Transcript_1/1_Conf_1.000 | 203 | 0  |          |                |     |         |     |     |                                                                                |
| Locus_25518_Transcript_1/1_Conf_1.000 | 126 | 0  |          |                |     |         |     |     |                                                                                |
| Locus_25519_Transcript_1/1_Conf_1.000 | 153 | 11 | 1.35E-14 | CBW44370.1     | 79  | 82.8037 | 49  | 39  | C. elegans protein F14D7.6c, confirmed by transcript evidence                  |
| Locus_2552_Transcript_1/1_Conf_1.000  | 353 | 0  |          |                |     |         |     |     |                                                                                |
| Locus_25520_Transcript_1/1_Conf_1.000 | 197 | 20 | 3.78E-17 | EFO27545.1     | 77  | 91.2781 | 68  | 53  | hypothetical protein LOAG_00943                                                |
| Locus_25521_Transcript_1/1_Conf_1.000 | 130 | 0  |          |                |     |         |     |     |                                                                                |
| Locus_25522_Transcript_1/1_Conf_1.000 | 137 | 0  |          |                |     |         |     |     |                                                                                |

|                                       |     |    |          |                |     |         |    |    |                                                                      |
|---------------------------------------|-----|----|----------|----------------|-----|---------|----|----|----------------------------------------------------------------------|
| Locus_25523_Transcript_1/1_Conf_1.000 | 132 | 0  |          |                |     |         |    |    |                                                                      |
| Locus_25524_Transcript_1/1_Conf_1.000 | 187 | 9  | 2.65E-10 | CAD44516.1     | 75  | 68.5514 | 61 | 46 | VAB-10B protein                                                      |
| Locus_25525_Transcript_1/1_Conf_1.000 | 185 | 0  |          |                |     |         |    |    |                                                                      |
| Locus_25526_Transcript_1/1_Conf_1.000 | 386 | 20 | 5.21E-19 | ADI61822.1     | 63  | 97.4413 | 93 | 59 | endonuclease-reverse transcriptase                                   |
| Locus_25527_Transcript_1/1_Conf_1.000 | 266 | 0  |          |                |     |         |    |    |                                                                      |
| Locus_25528_Transcript_1/1_Conf_1.000 | 261 | 5  | 2.08E-07 | EFO26811.1     | 62  | 58.9214 | 70 | 44 | hypothetical protein LOAG_01665                                      |
| Locus_25529_Transcript_1/1_Conf_1.000 | 134 | 0  |          |                |     |         |    |    |                                                                      |
| Locus_2553_Transcript_1/1_Conf_1.000  | 409 | 0  |          |                |     |         |    |    |                                                                      |
| Locus_25530_Transcript_1/1_Conf_1.000 | 154 | 0  |          |                |     |         |    |    |                                                                      |
| Locus_25531_Transcript_1/1_Conf_1.000 | 130 | 2  | 1.34E-06 | XP_001900715.1 | 79  | 56.225  | 39 | 31 | hypothetical protein                                                 |
| Locus_25532_Transcript_1/1_Conf_1.000 | 349 | 2  | 3.32E-05 | NP_001021613.1 | 73  | 51.6026 | 41 | 30 | hypothetical protein T06G6.12                                        |
| Locus_25533_Transcript_1/1_Conf_1.000 | 128 | 0  |          |                |     |         |    |    |                                                                      |
| Locus_25534_Transcript_1/1_Conf_1.000 | 163 | 20 | 2.06E-23 | NP_001171941.1 | 100 | 112.079 | 54 | 54 | NADH dehydrogenase ubiquinone 1 alpha subcomplex subunit 2 isoform 2 |
| Locus_25535_Transcript_1/1_Conf_1.000 | 219 | 0  |          |                |     |         |    |    |                                                                      |
| Locus_25536_Transcript_1/1_Conf_1.000 | 188 | 0  |          |                |     |         |    |    |                                                                      |
| Locus_25537_Transcript_1/1_Conf_1.000 | 203 | 20 | 4.92E-09 | EFO24868.1     | 66  | 64.3142 | 68 | 45 | hypothetical protein LOAG_03617                                      |
| Locus_25538_Transcript_1/1_Conf_1.000 | 215 | 0  |          |                |     |         |    |    |                                                                      |
| Locus_25539_Transcript_1/1_Conf_1.000 | 139 | 0  |          |                |     |         |    |    |                                                                      |

|                                       |     |    |          |             |    |         |     |     |                                                  |
|---------------------------------------|-----|----|----------|-------------|----|---------|-----|-----|--------------------------------------------------|
| Locus_2554_Transcript_1/1_Conf_1.000  | 280 | 20 | 7.71E-23 | CAR63555.1  | 80 | 110.153 | 85  | 68  | putative 15 kDa selenoprotein precursor          |
| Locus_25540_Transcript_1/1_Conf_1.000 | 568 | 20 | 8.51E-34 | EFO22877.1  | 80 | 147.132 | 111 | 89  | kelch domain-containing protein family protein   |
| Locus_25541_Transcript_1/1_Conf_1.000 | 198 | 1  | 3.20E-08 | EAW55278.1  | 77 | 61.6178 | 36  | 28  | transmembrane protein 14B, isoform CRA_c         |
| Locus_25542_Transcript_1/1_Conf_1.000 | 285 | 0  |          |             |    |         |     |     |                                                  |
| Locus_25543_Transcript_1/1_Conf_1.000 | 151 | 0  |          |             |    |         |     |     |                                                  |
| Locus_25544_Transcript_1/1_Conf_1.000 | 195 | 0  |          |             |    |         |     |     |                                                  |
| Locus_25545_Transcript_1/1_Conf_1.000 | 377 | 2  | 1.25E-28 | NP_492185.2 | 73 | 129.413 | 119 | 87  | SMG-associated and Lethal family member (smgl-1) |
| Locus_25546_Transcript_1/1_Conf_1.000 | 266 | 0  |          |             |    |         |     |     |                                                  |
| Locus_25547_Transcript_1/1_Conf_1.000 | 153 | 0  |          |             |    |         |     |     |                                                  |
| Locus_25548_Transcript_1/1_Conf_1.000 | 144 | 20 | 2.50E-08 | EFN73236.1  | 82 | 62.003  | 47  | 39  | BTB/POZ domain-containing protein 9              |
| Locus_25549_Transcript_1/1_Conf_1.000 | 149 | 0  |          |             |    |         |     |     |                                                  |
| Locus_2555_Transcript_1/1_Conf_1.000  | 720 | 20 | 6.01E-75 | EFO24268.1  | 77 | 284.648 | 239 | 186 | hypothetical protein LOAG_04219                  |
| Locus_25550_Transcript_1/1_Conf_1.000 | 139 | 0  |          |             |    |         |     |     |                                                  |

|                                       |     |    |          |                |     |         |    |    |                                                       |
|---------------------------------------|-----|----|----------|----------------|-----|---------|----|----|-------------------------------------------------------|
| Locus_25551_Transcript_1/1_Conf_1.000 | 261 | 20 | 2.80E-28 | ADK09905.1     | 100 | 128.257 | 86 | 86 | non-muscle myosin IIA                                 |
| Locus_25552_Transcript_1/1_Conf_1.000 | 257 | 20 | 3.00E-38 | XP_002629730.1 | 95  | 161.384 | 85 | 81 | Hypothetical protein CBG00961                         |
| Locus_25553_Transcript_1/1_Conf_1.000 | 153 | 0  |          |                |     |         |    |    |                                                       |
| Locus_25554_Transcript_1/1_Conf_1.000 | 196 | 2  | 1.88E-08 | NP_502201.2    | 69  | 62.3882 | 63 | 44 | PeRoXisome assembly factor family member (prx-2)      |
| Locus_25555_Transcript_1/1_Conf_1.000 | 299 | 2  | 1.64E-04 | EFO22952.1     | 59  | 49.2914 | 83 | 49 | hypothetical protein LOAG_05535                       |
| Locus_25556_Transcript_1/1_Conf_1.000 | 167 | 3  | 6.42E-09 | EFO26002.1     | 78  | 63.929  | 52 | 41 | bromodomain containing protein                        |
| Locus_25557_Transcript_1/1_Conf_1.000 | 277 | 0  |          |                |     |         |    |    |                                                       |
| Locus_25558_Transcript_1/1_Conf_1.000 | 234 | 20 | 1.99E-34 | NP_497027.1    | 98  | 148.673 | 78 | 77 | Masculinisation Of Germline family member (mog-4)     |
| Locus_25559_Transcript_1/1_Conf_1.000 | 150 | 3  | 1.97E-05 | XP_002641487.1 | 67  | 52.373  | 49 | 33 | Hypothetical protein CBG09778                         |
| Locus_2556_Transcript_1/1_Conf_1.000  | 811 | 0  |          |                |     |         |    |    |                                                       |
| Locus_25560_Transcript_1/1_Conf_1.000 | 204 | 0  |          |                |     |         |    |    |                                                       |
| Locus_25561_Transcript_1/1_Conf_1.000 | 216 | 1  | 6.12E-04 | NP_502067.2    | 63  | 47.3654 | 60 | 38 | BiCaudal C (Drosophila) homolog family member (bcc-1) |
| Locus_25562_Transcript_1/1_Conf_1.000 | 209 | 0  |          |                |     |         |    |    |                                                       |
| Locus_25563_Transcript_1/1_Conf_1.000 | 272 | 4  | 1.17E-10 | NP_506157.3    | 57  | 69.707  | 89 | 51 | hypothetical protein ZC116.3                          |
| Locus_25564_Transcript_1/1_Conf_1.000 | 146 | 0  |          |                |     |         |    |    |                                                       |
| Locus_25565_Transcript_1/1_Conf_1.000 | 333 | 0  |          |                |     |         |    |    |                                                       |
| Locus_25566_Transcript_1/1_Conf_1.000 | 177 | 0  |          |                |     |         |    |    |                                                       |
| Locus_25567_Transcript_1/1_Conf_1.000 | 172 | 7  | 2.05E-15 | XP_001892790.1 | 85  | 85.5001 | 54 | 46 | SH2 domain containing protein                         |
| Locus_25568_Transcript_1/1_Conf_1.000 | 243 | 0  |          |                |     |         |    |    |                                                       |

|                                       |      |    |          |                |    |         |     |     |                                                      |
|---------------------------------------|------|----|----------|----------------|----|---------|-----|-----|------------------------------------------------------|
| Locus_25569_Transcript_1/1_Conf_1.000 | 589  | 2  | 2.28E-64 | XP_002641621.1 | 76 | 248.825 | 198 | 152 | Hypothetical protein CBG09941                        |
| Locus_2557_Transcript_1/1_Conf_1.000  | 1442 | 2  | 3.66E-14 | XP_002636404.1 | 46 | 84.3445 | 273 | 128 | Hypothetical protein CBG23056                        |
| Locus_25570_Transcript_1/1_Conf_1.000 | 198  | 0  |          |                |    |         |     |     |                                                      |
| Locus_25571_Transcript_1/1_Conf_1.000 | 199  | 0  |          |                |    |         |     |     |                                                      |
| Locus_25572_Transcript_1/1_Conf_1.000 | 139  | 5  | 1.20E-07 | XP_002639618.1 | 67 | 59.6918 | 46  | 31  | Hypothetical protein CBG12331                        |
| Locus_25573_Transcript_1/1_Conf_1.000 | 141  | 1  | 4.69E-04 | NP_508435.2    | 69 | 47.7506 | 43  | 30  | hypothetical protein C43H6.7                         |
| Locus_25574_Transcript_1/1_Conf_1.000 | 260  | 0  |          |                |    |         |     |     |                                                      |
| Locus_25575_Transcript_1/1_Conf_1.000 | 134  | 20 | 1.47E-13 | XP_002648986.1 | 93 | 79.337  | 44  | 41  | C. briggsae CBR-SAX-2 protein                        |
| Locus_25576_Transcript_1/1_Conf_1.000 | 167  | 0  |          |                |    |         |     |     |                                                      |
| Locus_25577_Transcript_1/1_Conf_1.000 | 170  | 0  |          |                |    |         |     |     |                                                      |
| Locus_25578_Transcript_1/1_Conf_1.000 | 168  | 20 | 1.57E-15 | NP_001076764.1 | 95 | 85.8853 | 44  | 42  | Intermediate Filament, A family member (ifa-1)       |
| Locus_25579_Transcript_1/1_Conf_1.000 | 136  | 0  |          |                |    |         |     |     |                                                      |
| Locus_2558_Transcript_1/1_Conf_1.000  | 1141 | 20 | 3.16E-60 | EFO28288.1     | 59 | 236.884 | 347 | 207 | hypothetical protein LOAG_00181                      |
| Locus_25580_Transcript_1/1_Conf_1.000 | 139  | 0  |          |                |    |         |     |     |                                                      |
| Locus_25581_Transcript_1/1_Conf_1.000 | 137  | 0  |          |                |    |         |     |     |                                                      |
| Locus_25582_Transcript_1/1_Conf_1.000 | 142  | 0  |          |                |    |         |     |     |                                                      |
| Locus_25583_Transcript_1/1_Conf_1.000 | 158  | 0  |          |                |    |         |     |     |                                                      |
| Locus_25584_Transcript_1/1_Conf_1.000 | 506  | 0  |          |                |    |         |     |     |                                                      |
| Locus_25585_Transcript_1/1_Conf_1.000 | 181  | 3  | 3.38E-05 | NP_499313.2    | 65 | 51.6026 | 60  | 39  | hypothetical protein F43D9.1                         |
| Locus_25586_Transcript_1/1_Conf_1.000 | 142  | 3  | 1.08E-08 | XP_002633114.1 | 74 | 63.1586 | 47  | 35  | C. briggsae CBR-UNC-8 protein                        |
| Locus_25587_Transcript_1/1_Conf_1.000 | 134  | 0  |          |                |    |         |     |     |                                                      |
| Locus_25588_Transcript_1/1_Conf_1.000 | 133  | 0  |          |                |    |         |     |     |                                                      |
| Locus_25589_Transcript_1/1_Conf_1.000 | 190  | 0  |          |                |    |         |     |     |                                                      |
| Locus_2559_Transcript_1/8_Conf_0.200  | 259  | 20 | 1.72E-30 | CAA51334.1     | 98 | 130.568 | 66  | 65  | Immunoglobulin kappa light chain variable region L16 |

|                                       |     |    |           |                |    |         |     |     |                                                  |
|---------------------------------------|-----|----|-----------|----------------|----|---------|-----|-----|--------------------------------------------------|
| Locus_2559_Transcript_2/8_Conf_0.100  | 211 | 20 | 9.13E-32  | ACJ71716.1     | 98 | 139.813 | 70  | 69  | immunoglobulin kappa light chain variable region |
| Locus_2559_Transcript_3/8_Conf_0.300  | 889 | 20 | 9.12E-104 | BAF64543.1     | 98 | 380.948 | 210 | 207 | immunoglobulin light chain                       |
| Locus_2559_Transcript_4/8_Conf_0.150  | 306 | 20 | 7.21E-37  | AAA16949.1     | 96 | 156.762 | 82  | 79  | immunoglobulin kappa chain                       |
| Locus_2559_Transcript_5/8_Conf_0.100  | 384 | 20 | 1.65E-65  | CAA51135.1     | 98 | 251.906 | 127 | 125 | Ig kappa light chain (VJC)                       |
| Locus_2559_Transcript_6/8_Conf_0.250  | 383 | 20 | 4.16E-52  | CAA29935.1     | 99 | 204.527 | 105 | 104 | unnamed protein product                          |
| Locus_2559_Transcript_7/8_Conf_0.100  | 483 | 20 | 2.86E-73  | AAA72132.1     | 96 | 277.715 | 144 | 139 | immunoglobulin kappa chain variable region       |
| Locus_2559_Transcript_8/8_Conf_0.450  | 892 | 20 | 1.05E-107 | BAC01759.1     | 99 | 394.045 | 210 | 209 | immunoglobulin kappa light chain VLJ region      |
| Locus_25590_Transcript_1/1_Conf_1.000 | 246 | 5  | 2.04E-15  | ACI49128.1     | 86 | 85.5001 | 51  | 44  | hypothetical protein Cbre_JD15.003               |
| Locus_25591_Transcript_1/1_Conf_1.000 | 144 | 0  |           |                |    |         |     |     |                                                  |
| Locus_25592_Transcript_1/1_Conf_1.000 | 140 | 0  |           |                |    |         |     |     |                                                  |
| Locus_25593_Transcript_1/1_Conf_1.000 | 165 | 0  |           |                |    |         |     |     |                                                  |
| Locus_25594_Transcript_1/1_Conf_1.000 | 344 | 20 | 8.23E-12  | ACC44276.1     | 66 | 73.559  | 112 | 75  | SLO-2                                            |
| Locus_25595_Transcript_1/1_Conf_1.000 | 226 | 0  |           |                |    |         |     |     |                                                  |
| Locus_25596_Transcript_1/1_Conf_1.000 | 174 | 0  |           |                |    |         |     |     |                                                  |
| Locus_25597_Transcript_1/1_Conf_1.000 | 175 | 0  |           |                |    |         |     |     |                                                  |
| Locus_25598_Transcript_1/1_Conf_1.000 | 186 | 0  |           |                |    |         |     |     |                                                  |
| Locus_25599_Transcript_1/1_Conf_1.000 | 309 | 20 | 6.10E-28  | XP_001893904.1 | 73 | 127.102 | 101 | 74  | Protein-tyrosine phosphatase containing protein  |
| Locus_256_Transcript_1/1_Conf_1.000   | 274 | 20 | 2.95E-22  | XP_002633330.1 | 79 | 108.227 | 81  | 64  | C. briggsae CBR-DNJ-2 protein                    |

|                                       |      |    |          |                |     |         |     |     |                                                               |
|---------------------------------------|------|----|----------|----------------|-----|---------|-----|-----|---------------------------------------------------------------|
| Locus_2560_Transcript_1/1_Conf_1.000  | 404  | 20 | 5.75E-21 | NP_495537.1    | 86  | 103.99  | 75  | 65  | HAIF transporter (PGP related) family member (haf-2)          |
| Locus_25600_Transcript_1/1_Conf_1.000 | 357  | 0  |          |                |     |         |     |     |                                                               |
| Locus_25601_Transcript_1/1_Conf_1.000 | 163  | 0  |          |                |     |         |     |     |                                                               |
| Locus_25602_Transcript_1/1_Conf_1.000 | 123  | 0  |          |                |     |         |     |     |                                                               |
| Locus_25603_Transcript_1/1_Conf_1.000 | 198  | 2  | 5.11E-06 | XP_002642154.1 | 74  | 54.299  | 66  | 49  | Hypothetical protein CBG18111                                 |
| Locus_25604_Transcript_1/1_Conf_1.000 | 132  | 20 | 4.58E-07 | NP_497182.2    | 73  | 57.7658 | 42  | 31  | hypothetical protein Y50D7A.2                                 |
| Locus_25605_Transcript_1/1_Conf_1.000 | 184  | 0  |          |                |     |         |     |     |                                                               |
| Locus_25606_Transcript_1/1_Conf_1.000 | 134  | 20 | 2.05E-15 | NP_114107.1    | 100 | 85.5001 | 42  | 42  | 28S ribosomal protein S21, mitochondrial                      |
| Locus_25607_Transcript_1/1_Conf_1.000 | 321  | 12 | 9.28E-32 | XP_002642296.1 | 87  | 139.813 | 107 | 94  | Hypothetical protein CBG18288                                 |
| Locus_25608_Transcript_1/1_Conf_1.000 | 147  | 0  |          |                |     |         |     |     |                                                               |
| Locus_25609_Transcript_1/1_Conf_1.000 | 169  | 0  |          |                |     |         |     |     |                                                               |
| Locus_2561_Transcript_1/1_Conf_1.000  | 215  | 20 | 2.25E-06 | EFO23536.1     | 56  | 55.4546 | 71  | 40  | hypothetical protein LOAG_04951                               |
| Locus_25610_Transcript_1/1_Conf_1.000 | 175  | 0  |          |                |     |         |     |     |                                                               |
| Locus_25611_Transcript_1/1_Conf_1.000 | 161  | 0  |          |                |     |         |     |     |                                                               |
| Locus_25612_Transcript_1/1_Conf_1.000 | 159  | 0  |          |                |     |         |     |     |                                                               |
| Locus_25613_Transcript_1/1_Conf_1.000 | 345  | 3  | 5.30E-19 | XP_002631142.1 | 59  | 97.4413 | 118 | 70  | C. briggsae CBR-TAG-180 protein                               |
| Locus_25614_Transcript_1/1_Conf_1.000 | 132  | 4  | 4.42E-10 | XP_002639744.1 | 74  | 67.781  | 43  | 32  | C. briggsae CBR-LAM-3 protein                                 |
| Locus_25615_Transcript_1/1_Conf_1.000 | 198  | 2  | 1.49E-05 | EFO20174.1     | 67  | 52.7582 | 43  | 29  | hypothetical protein LOAG_08316                               |
| Locus_25616_Transcript_1/1_Conf_1.000 | 170  | 0  |          |                |     |         |     |     |                                                               |
| Locus_25617_Transcript_1/1_Conf_1.000 | 188  | 2  | 3.36E-05 | ACO15789.1     | 63  | 51.6026 | 63  | 40  | Hypothetical protein Y55F3BL.4                                |
| Locus_25618_Transcript_1/1_Conf_1.000 | 228  | 0  |          |                |     |         |     |     |                                                               |
| Locus_25619_Transcript_1/1_Conf_1.000 | 156  | 2  | 2.55E-05 | NP_501669.1    | 68  | 51.9878 | 50  | 34  | CyPIN (guanine aminohydrolase) homolog family member (cpin-1) |
| Locus_2562_Transcript_1/1_Conf_1.000  | 2136 | 20 | 0        | NP_491363.1    | 87  | 1036.94 | 698 | 608 | Dynein Heavy Chain family member (dhc-1)                      |
| Locus_25620_Transcript_1/1_Conf_1.000 | 154  | 0  |          |                |     |         |     |     |                                                               |
| Locus_25621_Transcript_1/1_Conf_1.000 | 254  | 4  | 8.83E-14 | XP_002633836.1 | 68  | 80.1073 | 74  | 51  | Hypothetical protein CBG19874                                 |
| Locus_25622_Transcript_1/1_Conf_1.000 | 349  | 0  |          |                |     |         |     |     |                                                               |

|                                       |     |    |          |                |     |         |     |    |                                                                                                                   |
|---------------------------------------|-----|----|----------|----------------|-----|---------|-----|----|-------------------------------------------------------------------------------------------------------------------|
| Locus_25623_Transcript_1/1_Conf_1.000 | 147 | 20 | 1.04E-22 | XP_001146702.1 | 100 | 109.768 | 48  | 48 | PREDICTED: similar to Cystatin C precursor (Neuroendocrine basic polypeptide) (Gamma-trace) (Post-gamma-globulin) |
| Locus_25624_Transcript_1/1_Conf_1.000 | 316 | 20 | 1.39E-35 | XP_002648005.1 | 81  | 152.525 | 102 | 83 | C. briggsae CBR-PQN-48 protein                                                                                    |
| Locus_25625_Transcript_1/1_Conf_1.000 | 168 | 0  |          |                |     |         |     |    |                                                                                                                   |
| Locus_25626_Transcript_1/1_Conf_1.000 | 284 | 2  | 3.37E-05 | XP_002634820.1 | 64  | 51.6026 | 67  | 43 | Hypothetical protein CBG13928                                                                                     |
| Locus_25627_Transcript_1/1_Conf_1.000 | 210 | 0  |          |                |     |         |     |    |                                                                                                                   |
| Locus_25628_Transcript_1/1_Conf_1.000 | 257 | 20 | 8.50E-17 | XP_002633353.1 | 68  | 90.1225 | 83  | 57 | Hypothetical protein CBG06097                                                                                     |
| Locus_25629_Transcript_1/1_Conf_1.000 | 224 | 20 | 6.74E-14 | NP_490693.2    | 66  | 80.4925 | 74  | 49 | ATM (ataxia telangectasia mutated) family member (atm-1)                                                          |
| Locus_2563_Transcript_1/1_Conf_1.000  | 641 | 8  | 4.73E-11 | ACI49177.1     | 81  | 72.0182 | 71  | 58 | hypothetical protein Csp3_JD02.005                                                                                |
| Locus_25630_Transcript_1/1_Conf_1.000 | 336 | 20 | 3.70E-33 | NP_001122445.1 | 78  | 144.436 | 110 | 86 | hypothetical protein F08A10.1                                                                                     |
| Locus_25631_Transcript_1/1_Conf_1.000 | 169 | 0  |          |                |     |         |     |    |                                                                                                                   |
| Locus_25632_Transcript_1/1_Conf_1.000 | 218 | 0  |          |                |     |         |     |    |                                                                                                                   |
| Locus_25633_Transcript_1/1_Conf_1.000 | 272 | 0  |          |                |     |         |     |    |                                                                                                                   |
| Locus_25634_Transcript_1/1_Conf_1.000 | 162 | 1  | 9.63E-05 | NP_497480.2    | 77  | 50.0618 | 36  | 28 | POLH (DNA polymerase eta) homolog family member (polh-1)                                                          |
| Locus_25635_Transcript_1/1_Conf_1.000 | 221 | 0  |          |                |     |         |     |    |                                                                                                                   |
| Locus_25636_Transcript_1/1_Conf_1.000 | 147 | 0  |          |                |     |         |     |    |                                                                                                                   |
| Locus_25637_Transcript_1/1_Conf_1.000 | 198 | 0  |          |                |     |         |     |    |                                                                                                                   |



|                                       |      |    |          |                |     |         |     |     |                                                |
|---------------------------------------|------|----|----------|----------------|-----|---------|-----|-----|------------------------------------------------|
| Locus_25638_Transcript_1/1_Conf_1.000 | 380  | 20 | 5.97E-39 | AAF99087.1     | 80  | 163.696 | 125 | 100 | AF149288_1KRP85                                |
| Locus_25639_Transcript_1/1_Conf_1.000 | 263  | 0  |          |                |     |         |     |     |                                                |
| Locus_2564_Transcript_1/1_Conf_1.000  | 1333 | 20 | 1.15E-83 | XP_002636916.1 | 62  | 315.079 | 361 | 227 | C. briggsae CBR-NHR-47 protein                 |
| Locus_25640_Transcript_1/1_Conf_1.000 | 143  | 0  |          |                |     |         |     |     |                                                |
| Locus_25641_Transcript_1/1_Conf_1.000 | 194  | 0  |          |                |     |         |     |     |                                                |
| Locus_25642_Transcript_1/1_Conf_1.000 | 212  | 20 | 3.97E-27 | XP_002750805.1 | 100 | 124.405 | 58  | 58  | PREDICTED: peroxiredoxin-1-like                |
| Locus_25643_Transcript_1/1_Conf_1.000 | 305  | 20 | 2.10E-44 | AAM82167.1     | 91  | 181.8   | 101 | 92  | gamma-butyrobetaine,2-oxoglutarate dioxygenase |
| Locus_25644_Transcript_1/1_Conf_1.000 | 129  | 20 | 5.41E-16 | NP_001021172.1 | 100 | 87.4261 | 43  | 43  | PDF Receptor homolog family member (pdfr-1)    |
| Locus_25645_Transcript_1/1_Conf_1.000 | 222  | 0  |          |                |     |         |     |     |                                                |
| Locus_25646_Transcript_1/1_Conf_1.000 | 148  | 0  |          |                |     |         |     |     |                                                |
| Locus_25647_Transcript_1/1_Conf_1.000 | 369  | 0  |          |                |     |         |     |     |                                                |
| Locus_25648_Transcript_1/1_Conf_1.000 | 164  | 0  |          |                |     |         |     |     |                                                |
| Locus_25649_Transcript_1/1_Conf_1.000 | 130  | 0  |          |                |     |         |     |     |                                                |
| Locus_2565_Transcript_1/1_Conf_1.000  | 335  | 0  |          |                |     |         |     |     |                                                |

|                                       |      |    |          |                |     |         |     |     |                                                        |
|---------------------------------------|------|----|----------|----------------|-----|---------|-----|-----|--------------------------------------------------------|
| Locus_25650_Transcript_1/1_Conf_1.000 | 147  | 20 | 3.24E-16 | NP_001020988.1 | 89  | 88.1965 | 48  | 43  | UNCoordinated family member (unc-89)                   |
| Locus_25651_Transcript_1/1_Conf_1.000 | 253  | 0  |          |                |     |         |     |     |                                                        |
| Locus_25652_Transcript_1/1_Conf_1.000 | 304  | 4  | 4.28E-05 | NP_498124.2    | 54  | 51.2174 | 74  | 40  | Zinc finger Transcription Factor family member (ztf-8) |
| Locus_25653_Transcript_1/1_Conf_1.000 | 194  | 0  |          |                |     |         |     |     |                                                        |
| Locus_25654_Transcript_1/1_Conf_1.000 | 204  | 20 | 1.02E-22 | XP_002912987.1 | 100 | 109.768 | 54  | 54  | PREDICTED: protein disulfide-isomerase-like            |
| Locus_25655_Transcript_1/1_Conf_1.000 | 356  | 0  |          |                |     |         |     |     |                                                        |
| Locus_25656_Transcript_1/1_Conf_1.000 | 544  | 20 | 1.85E-48 | NP_001024728.1 | 72  | 195.667 | 183 | 132 | SERotonin/octopamine receptor family member (ser-1)    |
| Locus_25657_Transcript_1/1_Conf_1.000 | 171  | 0  |          |                |     |         |     |     |                                                        |
| Locus_25658_Transcript_1/1_Conf_1.000 | 286  | 3  | 1.11E-32 | NP_001022363.1 | 85  | 142.895 | 95  | 81  | Temporarily Assigned Gene name family member (tag-180) |
| Locus_25659_Transcript_1/1_Conf_1.000 | 359  | 16 | 1.25E-12 | XP_002629787.1 | 68  | 76.2554 | 95  | 65  | Hypothetical protein CBG01029                          |
| Locus_2566_Transcript_1/3_Conf_0.750  | 2466 | 20 | 0        | XP_002633285.1 | 88  | 1071.61 | 731 | 650 | Hypothetical protein CBG06014                          |

|                                       |      |    |          |                |    |         |     |     |                                           |
|---------------------------------------|------|----|----------|----------------|----|---------|-----|-----|-------------------------------------------|
| Locus_2566_Transcript_2/3_Conf_0.750  | 2466 | 20 | 0        | XP_002633285.1 | 88 | 1071.61 | 731 | 650 | Hypothetical protein CBG06014             |
| Locus_2566_Transcript_3/3_Conf_0.750  | 2466 | 20 | 0        | XP_002633285.1 | 88 | 1071.61 | 731 | 650 | Hypothetical protein CBG06014             |
| Locus_25660_Transcript_1/1_Conf_1.000 | 135  | 20 | 3.15E-16 | NP_499865.1    | 97 | 88.1965 | 44  | 43  | hypothetical protein F29C4.6              |
| Locus_25661_Transcript_1/1_Conf_1.000 | 238  | 0  |          |                |    |         |     |     |                                           |
| Locus_25662_Transcript_1/1_Conf_1.000 | 207  | 2  | 3.06E-11 | EFO25474.1     | 68 | 71.633  | 66  | 45  | acyltransferase                           |
| Locus_25663_Transcript_1/1_Conf_1.000 | 163  | 0  |          |                |    |         |     |     |                                           |
| Locus_25664_Transcript_1/1_Conf_1.000 | 163  | 4  | 2.71E-07 | NP_502613.2    | 68 | 58.5362 | 51  | 35  | QUInine non-avoider family member (qui-1) |
| Locus_25665_Transcript_1/1_Conf_1.000 | 147  | 0  |          |                |    |         |     |     |                                           |
| Locus_25666_Transcript_1/1_Conf_1.000 | 222  | 0  |          |                |    |         |     |     |                                           |
| Locus_25667_Transcript_1/1_Conf_1.000 | 137  | 1  | 2.50E-05 | NP_495884.2    | 78 | 51.9878 | 41  | 32  | hypothetical protein F46C5.6              |
| Locus_25668_Transcript_1/1_Conf_1.000 | 179  | 0  |          |                |    |         |     |     |                                           |
| Locus_25669_Transcript_1/1_Conf_1.000 | 367  | 1  | 3.84E-06 | XP_002641244.1 | 53 | 54.6842 | 121 | 65  | Hypothetical protein CBG09112             |

|                                       |     |    |           |                |     |         |     |     |                                                                              |
|---------------------------------------|-----|----|-----------|----------------|-----|---------|-----|-----|------------------------------------------------------------------------------|
| Locus_2567_Transcript_1/1_Conf_1.000  | 810 | 20 | 1.11E-126 | XP_002646709.1 | 91  | 456.833 | 269 | 246 | Hypothetical protein CBG13088                                                |
| Locus_25670_Transcript_1/1_Conf_1.000 | 220 | 2  | 7.00E-11  | XP_002644637.1 | 85  | 70.4774 | 49  | 42  | C. briggsae CBR-ACN-1 protein                                                |
| Locus_25671_Transcript_1/1_Conf_1.000 | 137 | 20 | 2.58E-18  | XP_002824940.1 | 100 | 95.1301 | 44  | 44  | PREDICTED: alpha-actinin-1-like                                              |
| Locus_25672_Transcript_1/1_Conf_1.000 | 263 | 0  |           |                |     |         |     |     |                                                                              |
| Locus_25673_Transcript_1/1_Conf_1.000 | 212 | 0  |           |                |     |         |     |     |                                                                              |
| Locus_25674_Transcript_1/1_Conf_1.000 | 170 | 0  |           |                |     |         |     |     |                                                                              |
| Locus_25675_Transcript_1/1_Conf_1.000 | 384 | 5  | 4.56E-23  | CAR63715.1     | 98  | 110.923 | 55  | 54  | putative NHL (ring finger b-box coiled coil) domain containing family member |
| Locus_25676_Transcript_1/1_Conf_1.000 | 266 | 2  | 9.65E-05  | Q6E3C7.1       | 50  | 50.0618 | 59  | 30  | Cytoplasmic polyadenylation element-binding protein 1                        |
| Locus_25677_Transcript_1/1_Conf_1.000 | 132 | 0  |           |                |     |         |     |     |                                                                              |
| Locus_25678_Transcript_1/1_Conf_1.000 | 138 | 0  |           |                |     |         |     |     |                                                                              |
| Locus_25679_Transcript_1/1_Conf_1.000 | 273 | 0  |           |                |     |         |     |     |                                                                              |
| Locus_2568_Transcript_1/1_Conf_1.000  | 576 | 20 | 1.23E-67  | XP_001900416.1 | 78  | 259.61  | 187 | 147 | DNA primase, eukaryotic-type, small subunit family protein                   |

|                                       |     |    |          |                |    |         |     |    |                                                                         |
|---------------------------------------|-----|----|----------|----------------|----|---------|-----|----|-------------------------------------------------------------------------|
| Locus_25680_Transcript_1/1_Conf_1.000 | 253 | 20 | 2.73E-31 | EFO21762.1     | 96 | 138.272 | 63  | 61 | hypothetical protein LOAG_06724                                         |
| Locus_25681_Transcript_1/1_Conf_1.000 | 145 | 0  |          |                |    |         |     |    |                                                                         |
| Locus_25682_Transcript_1/1_Conf_1.000 | 170 | 0  |          |                |    |         |     |    |                                                                         |
| Locus_25683_Transcript_1/1_Conf_1.000 | 152 | 0  |          |                |    |         |     |    |                                                                         |
| Locus_25684_Transcript_1/1_Conf_1.000 | 134 | 0  |          |                |    |         |     |    |                                                                         |
| Locus_25685_Transcript_1/1_Conf_1.000 | 143 | 0  |          |                |    |         |     |    |                                                                         |
| Locus_25686_Transcript_1/1_Conf_1.000 | 132 | 1  | 5.77E-10 | ADD49663.1     | 88 | 67.3958 | 43  | 38 | ecdysone receptor isoform +9.1_B                                        |
| Locus_25687_Transcript_1/1_Conf_1.000 | 284 | 18 | 3.94E-38 | NP_503107.2    | 89 | 160.999 | 94  | 84 | hypothetical protein T02D1.6                                            |
| Locus_25688_Transcript_1/1_Conf_1.000 | 305 | 20 | 5.38E-24 | XP_002640523.1 | 81 | 114.005 | 81  | 66 | Hypothetical protein CBG18685                                           |
| Locus_25689_Transcript_1/1_Conf_1.000 | 331 | 2  | 5.98E-15 | EFO16157.1     | 63 | 83.9593 | 112 | 71 | ribonuclease P/MRP protein subunit POP1 containing protein              |
| Locus_2569_Transcript_1/1_Conf_1.000  | 132 | 0  |          |                |    |         |     |    |                                                                         |
| Locus_25690_Transcript_1/1_Conf_1.000 | 155 | 4  | 3.69E-12 | XP_002641218.1 | 78 | 74.7146 | 50  | 39 | Hypothetical protein CBG09082                                           |
| Locus_25691_Transcript_1/1_Conf_1.000 | 151 | 0  |          |                |    |         |     |    |                                                                         |
| Locus_25692_Transcript_1/1_Conf_1.000 | 206 | 4  | 3.76E-09 | XP_001900733.1 | 61 | 64.6994 | 70  | 43 | hypothetical protein Bm1_46355                                          |
| Locus_25693_Transcript_1/1_Conf_1.000 | 230 | 0  |          |                |    |         |     |    |                                                                         |
| Locus_25694_Transcript_1/1_Conf_1.000 | 307 | 0  |          |                |    |         |     |    |                                                                         |
| Locus_25695_Transcript_1/1_Conf_1.000 | 130 | 0  |          |                |    |         |     |    |                                                                         |
| Locus_25696_Transcript_1/1_Conf_1.000 | 133 | 0  |          |                |    |         |     |    |                                                                         |
| Locus_25697_Transcript_1/1_Conf_1.000 | 213 | 4  | 2.49E-05 | CBM41222.1     | 64 | 51.9878 | 56  | 36 | C. elegans protein T10G3.3b, partially confirmed by transcript evidence |
| Locus_25698_Transcript_1/1_Conf_1.000 | 189 | 0  |          |                |    |         |     |    |                                                                         |
| Locus_25699_Transcript_1/1_Conf_1.000 | 614 | 0  |          |                |    |         |     |    |                                                                         |
| Locus_257_Transcript_1/1_Conf_1.000   | 304 | 2  | 3.61E-20 | XP_002639243.1 | 75 | 101.293 | 84  | 63 | Hypothetical protein CBG03801                                           |
| Locus_2570_Transcript_1/1_Conf_1.000  | 320 | 0  |          |                |    |         |     |    |                                                                         |
| Locus_25700_Transcript_1/1_Conf_1.000 | 276 | 0  |          |                |    |         |     |    |                                                                         |
| Locus_25701_Transcript_1/1_Conf_1.000 | 132 | 20 | 5.05E-14 | XP_002634119.1 | 97 | 80.8777 | 44  | 43 | Hypothetical protein CBG01673                                           |

|                                       |      |    |           |                |     |         |     |     |                                                                        |
|---------------------------------------|------|----|-----------|----------------|-----|---------|-----|-----|------------------------------------------------------------------------|
| Locus_25702_Transcript_1/1_Conf_1.000 | 496  | 20 | 6.57E-22  | CAA84693.3     | 59  | 107.071 | 166 | 99  | C. elegans protein D2045.2, partially confirmed by transcript evidence |
| Locus_25703_Transcript_1/1_Conf_1.000 | 160  | 0  |           |                |     |         |     |     |                                                                        |
| Locus_25704_Transcript_1/1_Conf_1.000 | 131  | 0  |           |                |     |         |     |     |                                                                        |
| Locus_25705_Transcript_1/1_Conf_1.000 | 212  | 0  |           |                |     |         |     |     |                                                                        |
| Locus_25706_Transcript_1/1_Conf_1.000 | 145  | 0  |           |                |     |         |     |     |                                                                        |
| Locus_25707_Transcript_1/1_Conf_1.000 | 136  | 0  |           |                |     |         |     |     |                                                                        |
| Locus_25708_Transcript_1/1_Conf_1.000 | 135  | 9  | 1.12E-05  | XP_002826360.1 | 100 | 53.1434 | 44  | 44  | PREDICTED: transmembrane protein 219-like                              |
| Locus_25709_Transcript_1/1_Conf_1.000 | 296  | 0  |           |                |     |         |     |     |                                                                        |
| Locus_2571_Transcript_1/1_Conf_1.000  | 735  | 1  | 3.30E-07  | NP_490789.3    | 42  | 59.6918 | 191 | 81  | hypothetical protein Y95B8A.11                                         |
| Locus_25710_Transcript_1/1_Conf_1.000 | 284  | 2  | 2.51E-06  | XP_002631327.1 | 72  | 53.5286 | 48  | 35  | Hypothetical protein CBG03149                                          |
| Locus_25711_Transcript_1/1_Conf_1.000 | 141  | 2  | 5.35E-08  | XP_002631501.1 | 73  | 60.8474 | 45  | 33  | Hypothetical protein CBG20665                                          |
| Locus_25712_Transcript_1/1_Conf_1.000 | 149  | 0  |           |                |     |         |     |     |                                                                        |
| Locus_25713_Transcript_1/1_Conf_1.000 | 171  | 20 | 7.29E-13  | AAB62695.1     | 78  | 77.0258 | 57  | 45  | P-type ATPase                                                          |
| Locus_25714_Transcript_1/1_Conf_1.000 | 450  | 0  |           |                |     |         |     |     |                                                                        |
| Locus_25715_Transcript_1/1_Conf_1.000 | 203  | 0  |           |                |     |         |     |     |                                                                        |
| Locus_25716_Transcript_1/1_Conf_1.000 | 151  | 0  |           |                |     |         |     |     |                                                                        |
| Locus_25717_Transcript_1/1_Conf_1.000 | 258  | 0  |           |                |     |         |     |     |                                                                        |
| Locus_25718_Transcript_1/1_Conf_1.000 | 150  | 5  | 1.00E-17  | NP_001024333.1 | 97  | 93.2041 | 49  | 48  | Olfactory LearNing defective family member (olrn-1)                    |
| Locus_25719_Transcript_1/1_Conf_1.000 | 288  | 2  | 1.04E-14  | XP_002646895.1 | 60  | 83.1889 | 107 | 65  | Hypothetical protein CBG19593                                          |
| Locus_2572_Transcript_1/4_Conf_0.556  | 914  | 20 | 5.04E-129 | XP_002646784.1 | 87  | 464.922 | 300 | 261 | Hypothetical protein CBG18435                                          |
| Locus_2572_Transcript_2/4_Conf_0.667  | 1253 | 20 | 9.11E-128 | XP_002646784.1 | 92  | 461.455 | 264 | 243 | Hypothetical protein CBG18435                                          |
| Locus_2572_Transcript_3/4_Conf_0.556  | 1253 | 20 | 9.11E-128 | XP_002646784.1 | 92  | 461.455 | 264 | 243 | Hypothetical protein CBG18435                                          |
| Locus_2572_Transcript_4/4_Conf_0.667  | 1253 | 20 | 9.11E-128 | XP_002646784.1 | 92  | 461.455 | 264 | 243 | Hypothetical protein CBG18435                                          |
| Locus_25720_Transcript_1/1_Conf_1.000 | 270  | 20 | 8.35E-17  | NP_001022450.1 | 65  | 90.1225 | 89  | 58  | hypothetical protein Y48E1A.1                                          |
| Locus_25721_Transcript_1/1_Conf_1.000 | 219  | 0  |           |                |     |         |     |     |                                                                        |
| Locus_25722_Transcript_1/1_Conf_1.000 | 166  | 9  | 4.30E-13  | NP_492132.1    | 76  | 77.7962 | 55  | 42  | Enhancer of Glp-One (glp-1) family member (ego-1)                      |
| Locus_25723_Transcript_1/1_Conf_1.000 | 189  | 5  | 1.45E-08  | XP_002631434.1 | 65  | 62.7734 | 60  | 39  | Hypothetical protein CBG03294                                          |
| Locus_25724_Transcript_1/1_Conf_1.000 | 148  | 3  | 6.55E-09  | NP_505978.1    | 76  | 63.929  | 47  | 36  | hypothetical protein D2023.4                                           |

|                                       |      |    |           |                |    |         |     |     |                                                                    |
|---------------------------------------|------|----|-----------|----------------|----|---------|-----|-----|--------------------------------------------------------------------|
| Locus_25725_Transcript_1/1_Conf_1.000 | 140  | 0  |           |                |    |         |     |     |                                                                    |
| Locus_25726_Transcript_1/1_Conf_1.000 | 236  | 20 | 4.58E-31  | EFO15620.1     | 96 | 137.502 | 77  | 74  | hypothetical protein LOAG_12889                                    |
| Locus_25727_Transcript_1/1_Conf_1.000 | 649  | 4  | 8.08E-14  | NP_498323.2    | 53 | 81.2629 | 210 | 113 | hypothetical protein C05D10.4                                      |
| Locus_25728_Transcript_1/1_Conf_1.000 | 152  | 20 | 1.77E-14  | XP_002645100.1 | 74 | 82.4185 | 50  | 37  | C. briggsae CBR-DEG-1 protein                                      |
| Locus_25729_Transcript_1/1_Conf_1.000 | 188  | 3  | 5.53E-08  | XP_002642594.1 | 75 | 60.8474 | 52  | 39  | Hypothetical protein CBG09147                                      |
| Locus_2573_Transcript_1/1_Conf_1.000  | 1094 | 20 | 3.43E-149 | NP_001024806.1 | 96 | 532.332 | 269 | 260 | CALUmenin (calcium-binding protein) homolog family member (calu-1) |
| Locus_25730_Transcript_1/1_Conf_1.000 | 203  | 1  | 2.79E-04  | XP_001897289.1 | 52 | 48.521  | 63  | 33  | Regulator of G protein signaling domain containing protein         |
| Locus_25731_Transcript_1/1_Conf_1.000 | 246  | 2  | 8.00E-20  | XP_002647842.1 | 82 | 100.138 | 82  | 68  | C. briggsae CBR-ACC-1 protein                                      |
| Locus_25732_Transcript_1/1_Conf_1.000 | 387  | 5  | 2.92E-46  | XP_002643956.1 | 80 | 187.963 | 127 | 102 | Hypothetical protein CBG17315                                      |
| Locus_25733_Transcript_1/1_Conf_1.000 | 146  | 0  |           |                |    |         |     |     |                                                                    |
| Locus_25734_Transcript_1/1_Conf_1.000 | 139  | 0  |           |                |    |         |     |     |                                                                    |
| Locus_25735_Transcript_1/1_Conf_1.000 | 312  | 4  | 1.08E-11  | XP_002637547.1 | 65 | 73.1738 | 92  | 60  | Hypothetical protein CBG19279                                      |
| Locus_25736_Transcript_1/1_Conf_1.000 | 218  | 20 | 1.01E-14  | EFO22696.1     | 88 | 83.1889 | 72  | 64  | hypothetical protein LOAG_05790                                    |
| Locus_25737_Transcript_1/1_Conf_1.000 | 279  | 4  | 6.31E-25  | XP_002631133.1 | 91 | 117.087 | 81  | 74  | C. briggsae CBR-CLH-2 protein                                      |
| Locus_25738_Transcript_1/1_Conf_1.000 | 367  | 0  |           |                |    |         |     |     |                                                                    |
| Locus_25739_Transcript_1/1_Conf_1.000 | 133  | 0  |           |                |    |         |     |     |                                                                    |

|                                       |      |    |           |                |     |         |     |     |                                                                                            |
|---------------------------------------|------|----|-----------|----------------|-----|---------|-----|-----|--------------------------------------------------------------------------------------------|
| Locus_2574_Transcript_1/1_Conf_1.000  | 1106 | 20 | 1.35E-84  | XP_002630638.1 | 68  | 317.775 | 274 | 189 | C. briggsae CBR-TRY-1 protein                                                              |
| Locus_25740_Transcript_1/1_Conf_1.000 | 160  | 0  |           |                |     |         |     |     |                                                                                            |
| Locus_25742_Transcript_1/1_Conf_1.000 | 217  | 20 | 1.36E-19  | XP_002637203.1 | 77  | 99.3673 | 72  | 56  | Hypothetical protein CBG09729                                                              |
| Locus_25743_Transcript_1/1_Conf_1.000 | 154  | 0  |           |                |     |         |     |     |                                                                                            |
| Locus_25744_Transcript_1/1_Conf_1.000 | 134  | 0  |           |                |     |         |     |     |                                                                                            |
| Locus_25745_Transcript_1/1_Conf_1.000 | 236  | 9  | 3.20E-08  | XP_002633427.1 | 61  | 61.6178 | 80  | 49  | C. briggsae CBR-NHX-9 protein                                                              |
| Locus_25746_Transcript_1/1_Conf_1.000 | 137  | 0  |           |                |     |         |     |     |                                                                                            |
| Locus_25747_Transcript_1/1_Conf_1.000 | 281  | 20 | 8.53E-22  | XP_002646299.1 | 73  | 106.686 | 91  | 67  | Hypothetical protein CBG12006                                                              |
| Locus_25748_Transcript_1/1_Conf_1.000 | 177  | 0  |           |                |     |         |     |     |                                                                                            |
| Locus_25749_Transcript_1/1_Conf_1.000 | 166  | 0  |           |                |     |         |     |     |                                                                                            |
| Locus_2575_Transcript_1/1_Conf_1.000  | 1930 | 20 | 7.91E-135 | XP_002641309.1 | 86  | 485.723 | 323 | 281 | C. briggsae CBR-NEX-2 protein                                                              |
| Locus_25750_Transcript_1/1_Conf_1.000 | 302  | 20 | 4.86E-41  | NP_491529.2    | 97  | 170.629 | 100 | 97  | hypothetical protein Y110A7A.6                                                             |
| Locus_25751_Transcript_1/1_Conf_1.000 | 175  | 0  |           |                |     |         |     |     |                                                                                            |
| Locus_25752_Transcript_1/1_Conf_1.000 | 155  | 0  |           |                |     |         |     |     |                                                                                            |
| Locus_25753_Transcript_1/1_Conf_1.000 | 258  | 0  |           |                |     |         |     |     |                                                                                            |
| Locus_25754_Transcript_1/1_Conf_1.000 | 132  | 0  |           |                |     |         |     |     |                                                                                            |
| Locus_25755_Transcript_1/1_Conf_1.000 | 141  | 20 | 3.03E-19  | BAH14701.1     | 100 | 98.2117 | 45  | 45  | unnamed protein product                                                                    |
| Locus_25756_Transcript_1/1_Conf_1.000 | 561  | 0  |           |                |     |         |     |     |                                                                                            |
| Locus_25757_Transcript_1/1_Conf_1.000 | 192  | 20 | 1.18E-10  | XP_392546.3    | 77  | 69.707  | 53  | 41  | PREDICTED: similar to Pantothenate kinase 4 (Pantothenic acid kinase 4) (hPanK4) isoform 1 |
| Locus_25758_Transcript_1/1_Conf_1.000 | 136  | 0  |           |                |     |         |     |     |                                                                                            |



|                                       |      |    |           |                |    |         |     |     |                                                                             |
|---------------------------------------|------|----|-----------|----------------|----|---------|-----|-----|-----------------------------------------------------------------------------|
| Locus_25759_Transcript_1/1_Conf_1.000 | 200  | 3  | 4.32E-13  | NP_001024442.1 | 72 | 77.7962 | 62  | 45  | hypothetical protein C35B8.3                                                |
| Locus_2576_Transcript_1/1_Conf_1.000  | 565  | 20 | 1.74E-47  | NP_741553.1    | 76 | 192.586 | 154 | 118 | Aldehyde deHydrogenase family member (alh-4)                                |
| Locus_25760_Transcript_1/1_Conf_1.000 | 242  | 0  |           |                |    |         |     |     |                                                                             |
| Locus_25761_Transcript_1/1_Conf_1.000 | 159  | 0  |           |                |    |         |     |     |                                                                             |
| Locus_25762_Transcript_1/1_Conf_1.000 | 151  | 0  |           |                |    |         |     |     |                                                                             |
| Locus_25763_Transcript_1/1_Conf_1.000 | 210  | 0  |           |                |    |         |     |     |                                                                             |
| Locus_25764_Transcript_1/1_Conf_1.000 | 135  | 0  |           |                |    |         |     |     |                                                                             |
| Locus_25765_Transcript_1/1_Conf_1.000 | 233  | 0  |           |                |    |         |     |     |                                                                             |
| Locus_25766_Transcript_1/1_Conf_1.000 | 270  | 0  |           |                |    |         |     |     |                                                                             |
| Locus_25767_Transcript_1/1_Conf_1.000 | 179  | 0  |           |                |    |         |     |     |                                                                             |
| Locus_25768_Transcript_1/1_Conf_1.000 | 220  | 0  |           |                |    |         |     |     |                                                                             |
| Locus_25769_Transcript_1/1_Conf_1.000 | 310  | 0  |           |                |    |         |     |     |                                                                             |
| Locus_2577_Transcript_1/2_Conf_1.000  | 1647 | 20 | 1.15E-123 | NP_508463.1    | 64 | 448.358 | 507 | 326 | hypothetical protein F52H2.6                                                |
| Locus_2577_Transcript_2/2_Conf_1.000  | 1301 | 20 | 1.26E-103 | NP_508463.1    | 64 | 381.333 | 433 | 280 | hypothetical protein F52H2.6                                                |
| Locus_25770_Transcript_1/1_Conf_1.000 | 171  | 0  |           |                |    |         |     |     |                                                                             |
| Locus_25771_Transcript_1/1_Conf_1.000 | 134  | 0  |           |                |    |         |     |     |                                                                             |
| Locus_25772_Transcript_1/1_Conf_1.000 | 150  | 0  |           |                |    |         |     |     |                                                                             |
| Locus_25773_Transcript_1/1_Conf_1.000 | 165  | 0  |           |                |    |         |     |     |                                                                             |
| Locus_25774_Transcript_1/1_Conf_1.000 | 554  | 13 | 4.25E-11  | XP_002631536.1 | 41 | 71.633  | 173 | 72  | Hypothetical protein CBG20702                                               |
| Locus_25775_Transcript_1/1_Conf_1.000 | 190  | 0  |           |                |    |         |     |     |                                                                             |
| Locus_25776_Transcript_1/1_Conf_1.000 | 221  | 0  |           |                |    |         |     |     |                                                                             |
| Locus_25777_Transcript_1/1_Conf_1.000 | 169  | 0  |           |                |    |         |     |     |                                                                             |
| Locus_25778_Transcript_1/1_Conf_1.000 | 148  | 0  |           |                |    |         |     |     |                                                                             |
| Locus_25779_Transcript_1/1_Conf_1.000 | 239  | 2  | 2.79E-04  | XP_002648604.1 | 58 | 48.521  | 62  | 36  | Hypothetical protein CBG24940                                               |
| Locus_2578_Transcript_1/3_Conf_0.667  | 388  | 0  |           |                |    |         |     |     |                                                                             |
| Locus_2578_Transcript_2/3_Conf_0.333  | 377  | 0  |           |                |    |         |     |     |                                                                             |
| Locus_2578_Transcript_3/3_Conf_0.667  | 377  | 0  |           |                |    |         |     |     |                                                                             |
| Locus_25780_Transcript_1/1_Conf_1.000 | 314  | 12 | 2.56E-21  | ACD02409.2     | 61 | 105.145 | 106 | 65  | Delta and osm-11-like protein 3, partially confirmed by transcript evidence |

|                                       |      |    |           |                |     |         |     |     |                                                        |
|---------------------------------------|------|----|-----------|----------------|-----|---------|-----|-----|--------------------------------------------------------|
| Locus_25781_Transcript_1/1_Conf_1.000 | 130  | 20 | 1.16E-18  | XP_002761817.1 | 100 | 96.2857 | 43  | 43  | PREDICTED: lysosomal alpha-mannosidase isoform 2       |
| Locus_25782_Transcript_1/1_Conf_1.000 | 202  | 0  |           |                |     |         |     |     |                                                        |
| Locus_25783_Transcript_1/1_Conf_1.000 | 139  | 0  |           |                |     |         |     |     |                                                        |
| Locus_25784_Transcript_1/1_Conf_1.000 | 298  | 0  |           |                |     |         |     |     |                                                        |
| Locus_25785_Transcript_1/1_Conf_1.000 | 407  | 20 | 2.88E-09  | XP_002112951.1 | 52  | 65.0846 | 128 | 67  | hypothetical protein TRIADDRAFT_25152                  |
| Locus_25786_Transcript_1/1_Conf_1.000 | 242  | 13 | 3.39E-10  | NP_505389.3    | 63  | 68.1662 | 74  | 47  | GrounDhog (hedgehog-like family) family member (grd-6) |
| Locus_25787_Transcript_1/1_Conf_1.000 | 248  | 0  |           |                |     |         |     |     |                                                        |
| Locus_25788_Transcript_1/1_Conf_1.000 | 131  | 1  | 4.30E-05  | CBJ28140.1     | 72  | 51.2174 | 37  | 27  | hypothetical protein                                   |
| Locus_25789_Transcript_1/1_Conf_1.000 | 202  | 0  |           |                |     |         |     |     |                                                        |
| Locus_2579_Transcript_1/1_Conf_1.000  | 296  | 3  | 9.62E-13  | ACO15779.1     | 70  | 76.6406 | 68  | 48  | Neuronal symmetry protein 7, isoform b                 |
| Locus_25790_Transcript_1/1_Conf_1.000 | 139  | 0  |           |                |     |         |     |     |                                                        |
| Locus_25791_Transcript_1/1_Conf_1.000 | 142  | 0  |           |                |     |         |     |     |                                                        |
| Locus_25792_Transcript_1/1_Conf_1.000 | 253  | 20 | 8.26E-12  | XP_002629983.1 | 73  | 73.559  | 82  | 60  | Hypothetical protein CBG13345                          |
| Locus_25793_Transcript_1/1_Conf_1.000 | 144  | 0  |           |                |     |         |     |     |                                                        |
| Locus_25794_Transcript_1/1_Conf_1.000 | 173  | 0  |           |                |     |         |     |     |                                                        |
| Locus_25795_Transcript_1/1_Conf_1.000 | 130  | 0  |           |                |     |         |     |     |                                                        |
| Locus_25796_Transcript_1/1_Conf_1.000 | 139  | 20 | 2.41E-08  | XP_002641457.1 | 82  | 62.003  | 46  | 38  | C. briggsae CBR-TOP-3 protein                          |
| Locus_25797_Transcript_1/1_Conf_1.000 | 152  | 0  |           |                |     |         |     |     |                                                        |
| Locus_25798_Transcript_1/1_Conf_1.000 | 447  | 2  | 5.65E-05  | XP_001603548.1 | 61  | 50.8322 | 86  | 53  | PREDICTED: similar to ENSANGP00000010363               |
| Locus_25799_Transcript_1/1_Conf_1.000 | 197  | 0  |           |                |     |         |     |     |                                                        |
| Locus_258_Transcript_1/1_Conf_1.000   | 1339 | 20 | 2.15E-130 | XP_002634773.1 | 75  | 470.315 | 416 | 315 | Hypothetical protein CBG13872                          |
| Locus_2580_Transcript_1/1_Conf_1.000  | 516  | 20 | 2.26E-55  | XP_002647771.1 | 83  | 218.394 | 156 | 130 | C. briggsae CBR-PPH-5 protein                          |
| Locus_25800_Transcript_1/1_Conf_1.000 | 157  | 0  |           |                |     |         |     |     |                                                        |
| Locus_25801_Transcript_1/1_Conf_1.000 | 163  | 2  | 1.88E-08  | NP_500240.1    | 69  | 62.3882 | 52  | 36  | hypothetical protein Y69A2AR.31                        |

|                                       |     |    |          |                |     |         |     |     |                                                                |
|---------------------------------------|-----|----|----------|----------------|-----|---------|-----|-----|----------------------------------------------------------------|
| Locus_25802_Transcript_1/1_Conf_1.000 | 142 | 0  |          |                |     |         |     |     |                                                                |
| Locus_25803_Transcript_1/1_Conf_1.000 | 185 | 0  |          |                |     |         |     |     |                                                                |
| Locus_25804_Transcript_1/1_Conf_1.000 | 168 | 5  | 2.27E-22 | NP_492127.1    | 96  | 108.612 | 55  | 53  | Low-density lipoprotein Receptor Related family member (Irp-1) |
| Locus_25805_Transcript_1/1_Conf_1.000 | 205 | 18 | 1.09E-08 | NP_498071.1    | 84  | 63.1586 | 44  | 37  | hypothetical protein C45G9.7                                   |
| Locus_25806_Transcript_1/1_Conf_1.000 | 163 | 3  | 3.66E-04 | NP_001033381.1 | 60  | 48.1358 | 53  | 32  | hypothetical protein Y71H2AM.15                                |
| Locus_25807_Transcript_1/1_Conf_1.000 | 228 | 0  |          |                |     |         |     |     |                                                                |
| Locus_25808_Transcript_1/1_Conf_1.000 | 155 | 0  |          |                |     |         |     |     |                                                                |
| Locus_25809_Transcript_1/1_Conf_1.000 | 146 | 0  |          |                |     |         |     |     |                                                                |
| Locus_2581_Transcript_1/1_Conf_1.000  | 627 | 20 | 2.98E-47 | NP_001022969.1 | 87  | 192.2   | 148 | 129 | U2AF splicing factor family member (uaf-1)                     |
| Locus_25810_Transcript_1/1_Conf_1.000 | 189 | 20 | 1.31E-09 | EFO18137.1     | 71  | 66.2402 | 46  | 33  | zinc finger protein                                            |
| Locus_25811_Transcript_1/1_Conf_1.000 | 191 | 0  |          |                |     |         |     |     |                                                                |
| Locus_25812_Transcript_1/1_Conf_1.000 | 253 | 8  | 2.11E-07 | EFO20293.1     | 65  | 58.9214 | 84  | 55  | PDZ domain-containing protein                                  |
| Locus_25813_Transcript_1/1_Conf_1.000 | 142 | 0  |          |                |     |         |     |     |                                                                |
| Locus_25814_Transcript_1/1_Conf_1.000 | 180 | 2  | 1.52E-05 | NP_497609.1    | 64  | 52.7582 | 54  | 35  | hypothetical protein Y71H2AM.13                                |
| Locus_25815_Transcript_1/1_Conf_1.000 | 154 | 0  |          |                |     |         |     |     |                                                                |
| Locus_25816_Transcript_1/1_Conf_1.000 | 152 | 0  |          |                |     |         |     |     |                                                                |
| Locus_25817_Transcript_1/1_Conf_1.000 | 149 | 0  |          |                |     |         |     |     |                                                                |
| Locus_25818_Transcript_1/1_Conf_1.000 | 143 | 0  |          |                |     |         |     |     |                                                                |
| Locus_25819_Transcript_1/1_Conf_1.000 | 131 | 0  |          |                |     |         |     |     |                                                                |
| Locus_2582_Transcript_1/1_Conf_1.000  | 440 | 20 | 2.46E-45 | ABK80760.1     | 100 | 184.882 | 91  | 91  | 60S ribosomal protein L37a                                     |
| Locus_25820_Transcript_1/1_Conf_1.000 | 622 | 20 | 8.68E-68 | XP_002640264.1 | 72  | 260.381 | 206 | 150 | Hypothetical protein CBG12789                                  |
| Locus_25821_Transcript_1/1_Conf_1.000 | 153 | 0  |          |                |     |         |     |     |                                                                |
| Locus_25822_Transcript_1/1_Conf_1.000 | 129 | 0  |          |                |     |         |     |     |                                                                |

|                                       |     |    |          |                |     |         |     |     |                                                          |
|---------------------------------------|-----|----|----------|----------------|-----|---------|-----|-----|----------------------------------------------------------|
| Locus_25823_Transcript_1/1_Conf_1.000 | 370 | 19 | 3.45E-18 | EFO26611.1     | 61  | 94.7449 | 124 | 76  | hypothetical protein LOAG_01867                          |
| Locus_25824_Transcript_1/1_Conf_1.000 | 175 | 3  | 1.33E-06 | XP_002642918.1 | 68  | 56.225  | 58  | 40  | Hypothetical protein CBG15194                            |
| Locus_25825_Transcript_1/1_Conf_1.000 | 167 | 2  | 7.84E-15 | XP_002646694.1 | 87  | 83.5741 | 55  | 48  | C. briggsae CBR-SPON-1 protein                           |
| Locus_25826_Transcript_1/1_Conf_1.000 | 227 | 2  | 1.15E-05 | XP_002631363.1 | 81  | 53.1434 | 37  | 30  | Hypothetical protein CBG03199                            |
| Locus_25827_Transcript_1/1_Conf_1.000 | 270 | 4  | 1.86E-16 | NP_001022058.1 | 85  | 88.9669 | 55  | 47  | hypothetical protein E02H1.8                             |
| Locus_25828_Transcript_1/1_Conf_1.000 | 222 | 2  | 4.09E-11 | XP_002640985.1 | 66  | 71.2478 | 69  | 46  | C. briggsae CBR-CDH-12 protein                           |
| Locus_25829_Transcript_1/1_Conf_1.000 | 146 | 0  |          |                |     |         |     |     |                                                          |
| Locus_2583_Transcript_1/1_Conf_1.000  | 498 | 20 | 1.40E-40 | XP_001897955.1 | 70  | 169.088 | 165 | 117 | membrin                                                  |
| Locus_25830_Transcript_1/1_Conf_1.000 | 133 | 0  |          |                |     |         |     |     |                                                          |
| Locus_25831_Transcript_1/1_Conf_1.000 | 209 | 4  | 7.81E-07 | XP_002633255.1 | 57  | 56.9954 | 89  | 51  | Hypothetical protein CBG05980                            |
| Locus_25832_Transcript_1/1_Conf_1.000 | 260 | 0  |          |                |     |         |     |     |                                                          |
| Locus_25833_Transcript_1/1_Conf_1.000 | 333 | 0  |          |                |     |         |     |     |                                                          |
| Locus_25834_Transcript_1/1_Conf_1.000 | 216 | 0  |          |                |     |         |     |     |                                                          |
| Locus_25835_Transcript_1/1_Conf_1.000 | 298 | 0  |          |                |     |         |     |     |                                                          |
| Locus_25836_Transcript_1/1_Conf_1.000 | 142 | 0  |          |                |     |         |     |     |                                                          |
| Locus_25837_Transcript_1/1_Conf_1.000 | 185 | 0  |          |                |     |         |     |     |                                                          |
| Locus_25838_Transcript_1/1_Conf_1.000 | 158 | 20 | 2.54E-21 | XP_002927123.1 | 100 | 105.145 | 52  | 52  | PREDICTED: transcription intermediary factor 1-beta-like |
| Locus_25839_Transcript_1/1_Conf_1.000 | 206 | 20 | 2.35E-19 | XP_001893904.1 | 77  | 98.5969 | 68  | 53  | Protein-tyrosine phosphatase containing protein          |
| Locus_2584_Transcript_1/1_Conf_1.000  | 240 | 9  | 2.27E-06 | NP_491127.1    | 78  | 55.4546 | 37  | 29  | hypothetical protein Y54E10A.3                           |
| Locus_25840_Transcript_1/1_Conf_1.000 | 166 | 0  |          |                |     |         |     |     |                                                          |
| Locus_25841_Transcript_1/1_Conf_1.000 | 355 | 12 | 4.73E-28 | CAC39009.1     | 76  | 127.487 | 120 | 92  | membrane aminopeptidase H11-4, isoform 4                 |
| Locus_25842_Transcript_1/1_Conf_1.000 | 164 | 0  |          |                |     |         |     |     |                                                          |

|                                       |      |    |          |                |     |         |     |     |                                                                                    |
|---------------------------------------|------|----|----------|----------------|-----|---------|-----|-----|------------------------------------------------------------------------------------|
| Locus_25843_Transcript_1/1_Conf_1.000 | 343  | 20 | 2.08E-31 | NP_499594.2    | 77  | 138.658 | 114 | 88  | TIMEless (Drosophila/mammal) related family member (tim-1)                         |
| Locus_25844_Transcript_1/1_Conf_1.000 | 135  | 20 | 8.29E-17 | XP_001139169.1 | 97  | 90.1225 | 45  | 44  | PREDICTED: alpha-2-macroglobulin isoform 1                                         |
| Locus_25845_Transcript_1/1_Conf_1.000 | 153  | 0  |          |                |     |         |     |     |                                                                                    |
| Locus_25846_Transcript_1/1_Conf_1.000 | 160  | 0  |          |                |     |         |     |     |                                                                                    |
| Locus_25847_Transcript_1/1_Conf_1.000 | 224  | 0  |          |                |     |         |     |     |                                                                                    |
| Locus_25848_Transcript_1/1_Conf_1.000 | 240  | 0  |          |                |     |         |     |     |                                                                                    |
| Locus_25849_Transcript_1/1_Conf_1.000 | 135  | 0  |          |                |     |         |     |     |                                                                                    |
| Locus_2585_Transcript_1/2_Conf_1.000  | 737  | 20 | 4.38E-60 | XP_002643190.1 | 83  | 235.343 | 170 | 142 | C. briggsae CBR-TSP-9 protein                                                      |
| Locus_2585_Transcript_2/2_Conf_1.000  | 749  | 20 | 3.34E-87 | NP_508232.1    | 84  | 325.479 | 231 | 195 | TetraSPanin family member (tsp-9)                                                  |
| Locus_25850_Transcript_1/1_Conf_1.000 | 323  | 2  | 3.53E-23 | NP_500282.2    | 73  | 111.309 | 91  | 67  | hypothetical protein Y54G2A.29                                                     |
| Locus_25851_Transcript_1/1_Conf_1.000 | 142  | 0  |          |                |     |         |     |     |                                                                                    |
| Locus_25852_Transcript_1/1_Conf_1.000 | 409  | 11 | 3.06E-19 | XP_002632455.1 | 55  | 98.2117 | 122 | 68  | Hypothetical protein CBG13677                                                      |
| Locus_25853_Transcript_1/1_Conf_1.000 | 385  | 0  |          |                |     |         |     |     |                                                                                    |
| Locus_25854_Transcript_1/1_Conf_1.000 | 150  | 0  |          |                |     |         |     |     |                                                                                    |
| Locus_25855_Transcript_1/1_Conf_1.000 | 229  | 2  | 5.68E-05 | XP_002571369.1 | 63  | 50.8322 | 69  | 44  | inhibitor of growth family member 5                                                |
| Locus_25856_Transcript_1/1_Conf_1.000 | 307  | 0  |          |                |     |         |     |     |                                                                                    |
| Locus_25857_Transcript_1/1_Conf_1.000 | 155  | 0  |          |                |     |         |     |     |                                                                                    |
| Locus_25858_Transcript_1/1_Conf_1.000 | 128  | 5  | 1.21E-07 | NP_004537.1    | 100 | 59.6918 | 42  | 42  | NADH dehydrogenase ubiquinone 1 beta subcomplex subunit 2, mitochondrial precursor |
| Locus_25859_Transcript_1/1_Conf_1.000 | 138  | 0  |          |                |     |         |     |     |                                                                                    |
| Locus_2586_Transcript_1/1_Conf_1.000  | 1145 | 20 | 3.84E-98 | XP_001899156.1 | 68  | 362.844 | 373 | 255 | Nuclear hormone receptor family member nhr-41                                      |

|                                       |     |    |          |                |    |         |     |     |                                                             |
|---------------------------------------|-----|----|----------|----------------|----|---------|-----|-----|-------------------------------------------------------------|
| Locus_25860_Transcript_1/1_Conf_1.000 | 242 | 0  |          |                |    |         |     |     |                                                             |
| Locus_25861_Transcript_1/1_Conf_1.000 | 160 | 0  |          |                |    |         |     |     |                                                             |
| Locus_25862_Transcript_1/1_Conf_1.000 | 199 | 0  |          |                |    |         |     |     |                                                             |
| Locus_25863_Transcript_1/1_Conf_1.000 | 209 | 0  |          |                |    |         |     |     |                                                             |
| Locus_25864_Transcript_1/1_Conf_1.000 | 147 | 20 | 5.00E-17 | NP_505445.2    | 93 | 90.8929 | 47  | 44  | Nematode AStacin protease family member (nas-3)             |
| Locus_25865_Transcript_1/1_Conf_1.000 | 141 | 0  |          |                |    |         |     |     |                                                             |
| Locus_25866_Transcript_1/1_Conf_1.000 | 174 | 0  |          |                |    |         |     |     |                                                             |
| Locus_25867_Transcript_1/1_Conf_1.000 | 452 | 20 | 5.54E-53 | NP_499482.1    | 80 | 210.305 | 148 | 119 | defective SPERmatogenesis family member (spe-6)             |
| Locus_25868_Transcript_1/1_Conf_1.000 | 238 | 0  |          |                |    |         |     |     |                                                             |
| Locus_25869_Transcript_1/1_Conf_1.000 | 333 | 0  |          |                |    |         |     |     |                                                             |
| Locus_2587_Transcript_1/2_Conf_1.000  | 928 | 20 | 2.17E-34 | XP_001899299.1 | 61 | 150.599 | 260 | 160 | hypothetical protein Bm1_39225                              |
| Locus_2587_Transcript_2/2_Conf_1.000  | 915 | 20 | 2.12E-34 | XP_001899299.1 | 61 | 150.599 | 260 | 160 | hypothetical protein Bm1_39225                              |
| Locus_25870_Transcript_1/1_Conf_1.000 | 142 | 0  |          |                |    |         |     |     |                                                             |
| Locus_25871_Transcript_1/1_Conf_1.000 | 137 | 0  |          |                |    |         |     |     |                                                             |
| Locus_25872_Transcript_1/1_Conf_1.000 | 284 | 20 | 2.56E-29 | NP_505512.3    | 84 | 131.724 | 94  | 79  | AQuaPorin or aquaglyceroporin related family member (aqp-4) |
| Locus_25873_Transcript_1/1_Conf_1.000 | 561 | 4  | 7.96E-29 | XP_002638567.1 | 60 | 130.568 | 179 | 108 | Hypothetical protein CBG05609                               |
| Locus_25874_Transcript_1/1_Conf_1.000 | 237 | 5  | 3.18E-16 | NP_001021110.1 | 91 | 88.1965 | 49  | 45  | CAISYntenin/Alcadein homolog family member (casy-1)         |
| Locus_25875_Transcript_1/1_Conf_1.000 | 248 | 0  |          |                |    |         |     |     |                                                             |
| Locus_25876_Transcript_1/1_Conf_1.000 | 190 | 0  |          |                |    |         |     |     |                                                             |
| Locus_25877_Transcript_1/1_Conf_1.000 | 217 | 19 | 1.32E-14 | XP_001902377.1 | 68 | 82.8037 | 69  | 47  | Adducin-related protein 1                                   |
| Locus_25878_Transcript_1/1_Conf_1.000 | 217 | 0  |          |                |    |         |     |     |                                                             |
| Locus_25879_Transcript_1/1_Conf_1.000 | 200 | 1  | 1.26E-04 | NP_491362.1    | 62 | 49.6766 | 61  | 38  | hypothetical protein ZK973.1                                |

|                                       |      |    |          |                |     |         |     |     |                                                                         |
|---------------------------------------|------|----|----------|----------------|-----|---------|-----|-----|-------------------------------------------------------------------------|
| Locus_2588_Transcript_1/1_Conf_1.000  | 1099 | 20 | 4.16E-94 | AAC79672.3     | 76  | 349.362 | 299 | 228 | putative cdc2-related kinase                                            |
| Locus_25880_Transcript_1/1_Conf_1.000 | 151  | 0  |          |                |     |         |     |     |                                                                         |
| Locus_25881_Transcript_1/1_Conf_1.000 | 145  | 20 | 2.41E-19 | XP_002818132.1 | 100 | 98.5969 | 46  | 46  | PREDICTED: tRNA methyltransferase 112 homolog                           |
| Locus_25882_Transcript_1/1_Conf_1.000 | 372  | 0  |          |                |     |         |     |     |                                                                         |
| Locus_25883_Transcript_1/1_Conf_1.000 | 143  | 0  |          |                |     |         |     |     |                                                                         |
| Locus_25884_Transcript_1/1_Conf_1.000 | 237  | 0  |          |                |     |         |     |     |                                                                         |
| Locus_25885_Transcript_1/1_Conf_1.000 | 182  | 0  |          |                |     |         |     |     |                                                                         |
| Locus_25886_Transcript_1/1_Conf_1.000 | 218  | 0  |          |                |     |         |     |     |                                                                         |
| Locus_25887_Transcript_1/1_Conf_1.000 | 182  | 0  |          |                |     |         |     |     |                                                                         |
| Locus_25888_Transcript_1/1_Conf_1.000 | 130  | 0  |          |                |     |         |     |     |                                                                         |
| Locus_25889_Transcript_1/1_Conf_1.000 | 209  | 0  |          |                |     |         |     |     |                                                                         |
| Locus_2589_Transcript_1/1_Conf_1.000  | 147  | 0  |          |                |     |         |     |     |                                                                         |
| Locus_25890_Transcript_1/1_Conf_1.000 | 216  | 0  |          |                |     |         |     |     |                                                                         |
| Locus_25891_Transcript_1/1_Conf_1.000 | 168  | 0  |          |                |     |         |     |     |                                                                         |
| Locus_25892_Transcript_1/1_Conf_1.000 | 236  | 20 | 4.91E-25 | XP_002634260.1 | 77  | 117.472 | 76  | 59  | Hypothetical protein CBG01831                                           |
| Locus_25893_Transcript_1/1_Conf_1.000 | 177  | 0  |          |                |     |         |     |     |                                                                         |
| Locus_25894_Transcript_1/1_Conf_1.000 | 264  | 0  |          |                |     |         |     |     |                                                                         |
| Locus_25895_Transcript_1/1_Conf_1.000 | 243  | 20 | 8.28E-25 | NP_741684.2    | 89  | 116.701 | 73  | 65  | PROximal proliferation in germline family member (pro-3)                |
| Locus_25896_Transcript_1/1_Conf_1.000 | 192  | 0  |          |                |     |         |     |     |                                                                         |
| Locus_25897_Transcript_1/1_Conf_1.000 | 255  | 0  |          |                |     |         |     |     |                                                                         |
| Locus_25898_Transcript_1/1_Conf_1.000 | 166  | 0  |          |                |     |         |     |     |                                                                         |
| Locus_25899_Transcript_1/1_Conf_1.000 | 180  | 0  |          |                |     |         |     |     |                                                                         |
| Locus_259_Transcript_1/2_Conf_1.000   | 1451 | 20 | 1.73E-96 | XP_002631411.1 | 76  | 357.836 | 303 | 232 | Hypothetical protein CBG03263                                           |
| Locus_259_Transcript_2/2_Conf_1.000   | 619  | 20 | 1.44E-70 | P51535.1       | 90  | 269.626 | 153 | 138 | Myoglobin                                                               |
| Locus_2590_Transcript_1/1_Conf_1.000  | 266  | 0  |          |                |     |         |     |     |                                                                         |
| Locus_25900_Transcript_1/1_Conf_1.000 | 143  | 0  |          |                |     |         |     |     |                                                                         |
| Locus_25901_Transcript_1/1_Conf_1.000 | 201  | 4  | 4.60E-15 | Q20548.2       | 75  | 84.3445 | 66  | 50  | Probable RING finger protein 207 homolog                                |
| Locus_25902_Transcript_1/1_Conf_1.000 | 148  | 0  |          |                |     |         |     |     |                                                                         |
| Locus_25903_Transcript_1/1_Conf_1.000 | 206  | 3  | 1.99E-10 | CAH04706.3     | 63  | 68.9366 | 66  | 42  | C. elegans protein K04H4.2c, partially confirmed by transcript evidence |
| Locus_25904_Transcript_1/1_Conf_1.000 | 141  | 0  |          |                |     |         |     |     |                                                                         |

|                                       |      |    |           |                |     |         |     |     |                                                                         |
|---------------------------------------|------|----|-----------|----------------|-----|---------|-----|-----|-------------------------------------------------------------------------|
| Locus_25905_Transcript_1/1_Conf_1.000 | 152  | 0  |           |                |     |         |     |     |                                                                         |
| Locus_25906_Transcript_1/1_Conf_1.000 | 251  | 0  |           |                |     |         |     |     |                                                                         |
| Locus_25907_Transcript_1/1_Conf_1.000 | 467  | 0  |           |                |     |         |     |     |                                                                         |
| Locus_25908_Transcript_1/1_Conf_1.000 | 276  | 20 | 1.23E-36  | NP_507688.2    | 85  | 155.992 | 92  | 79  | Cytochrome P450 family member (cyp-42A1)                                |
| Locus_25909_Transcript_1/1_Conf_1.000 | 138  | 20 | 6.13E-12  | NP_001038776.1 | 84  | 73.9442 | 46  | 39  | alpha-1,6-mannosylglycoprotein 6-beta-N-acetylglucosaminyltransferase A |
| Locus_2591_Transcript_1/1_Conf_1.000  | 1908 | 20 | 3.88E-150 | NP_492762.1    | 65  | 536.569 | 586 | 386 | hypothetical protein F25H2.6                                            |
| Locus_25910_Transcript_1/1_Conf_1.000 | 147  | 0  |           |                |     |         |     |     |                                                                         |
| Locus_25911_Transcript_1/1_Conf_1.000 | 153  | 0  |           |                |     |         |     |     |                                                                         |
| Locus_25912_Transcript_1/1_Conf_1.000 | 396  | 6  | 1.77E-06  | XP_002577829.1 | 50  | 55.8398 | 79  | 40  | hypothetical protein                                                    |
| Locus_25913_Transcript_1/1_Conf_1.000 | 128  | 0  |           |                |     |         |     |     |                                                                         |
| Locus_25914_Transcript_1/1_Conf_1.000 | 152  | 0  |           |                |     |         |     |     |                                                                         |
| Locus_25915_Transcript_1/1_Conf_1.000 | 137  | 20 | 2.19E-09  | XP_002629772.1 | 79  | 65.4698 | 44  | 35  | Hypothetical protein CBG01012                                           |
| Locus_25916_Transcript_1/1_Conf_1.000 | 129  | 20 | 4.14E-16  | 3IYG           | 100 | 87.8113 | 43  | 43  | Ca Model Of Bovine TricCCT DERIVED FROM A 4.0 ANGSTROM Cryo-Em Map      |
| Locus_25917_Transcript_1/1_Conf_1.000 | 189  | 1  | 6.96E-11  | NP_506678.2    | 72  | 70.4774 | 58  | 42  | hypothetical protein W09D12.1                                           |
| Locus_25918_Transcript_1/1_Conf_1.000 | 321  | 20 | 6.21E-36  | ACI49180.1     | 82  | 153.68  | 98  | 81  | hypothetical protein Csp3_JD02.008                                      |
| Locus_25919_Transcript_1/1_Conf_1.000 | 156  | 0  |           |                |     |         |     |     |                                                                         |
| Locus_2592_Transcript_1/1_Conf_1.000  | 1021 | 11 | 2.97E-59  | AAD32265.1     | 71  | 233.417 | 220 | 157 | AF133832_1NIP3                                                          |
| Locus_25920_Transcript_1/1_Conf_1.000 | 192  | 4  | 4.35E-05  | EFO16147.1     | 62  | 51.2174 | 62  | 39  | major facilitator superfamily transporter                               |
| Locus_25921_Transcript_1/1_Conf_1.000 | 140  | 0  |           |                |     |         |     |     |                                                                         |
| Locus_25922_Transcript_1/1_Conf_1.000 | 141  | 0  |           |                |     |         |     |     |                                                                         |



|                                       |      |    |          |                |     |         |     |     |                                                           |
|---------------------------------------|------|----|----------|----------------|-----|---------|-----|-----|-----------------------------------------------------------|
| Locus_25923_Transcript_1/1_Conf_1.000 | 140  | 2  | 1.28E-09 | NP_496764.1    | 80  | 66.2402 | 46  | 37  | hypothetical protein Y38F1A.6                             |
| Locus_25924_Transcript_1/1_Conf_1.000 | 220  | 17 | 4.69E-07 | XP_520983.2    | 100 | 57.7658 | 73  | 73  | PREDICTED: similar to elongation factor-1-beta            |
| Locus_25925_Transcript_1/1_Conf_1.000 | 259  | 20 | 3.20E-32 | XP_002631100.1 | 82  | 141.354 | 86  | 71  | Hypothetical protein CBG02874                             |
| Locus_25926_Transcript_1/1_Conf_1.000 | 183  | 0  |          |                |     |         |     |     |                                                           |
| Locus_25927_Transcript_1/1_Conf_1.000 | 217  | 15 | 9.09E-24 | XP_001896231.1 | 86  | 113.235 | 68  | 59  | SEC14-like protein 4                                      |
| Locus_25928_Transcript_1/1_Conf_1.000 | 178  | 0  |          |                |     |         |     |     |                                                           |
| Locus_25929_Transcript_1/1_Conf_1.000 | 243  | 0  |          |                |     |         |     |     |                                                           |
| Locus_2593_Transcript_1/1_Conf_1.000  | 2047 | 20 | 0        | NP_501914.1    | 82  | 898.656 | 626 | 515 | Isoleucyl tRNA Synthetase family member (irs-1)           |
| Locus_25930_Transcript_1/1_Conf_1.000 | 620  | 0  |          |                |     |         |     |     |                                                           |
| Locus_25931_Transcript_1/1_Conf_1.000 | 332  | 0  |          |                |     |         |     |     |                                                           |
| Locus_25932_Transcript_1/1_Conf_1.000 | 145  | 0  |          |                |     |         |     |     |                                                           |
| Locus_25933_Transcript_1/1_Conf_1.000 | 167  | 2  | 1.13E-05 | NP_496725.2    | 64  | 53.1434 | 54  | 35  | ACyltransferase-like family member (acl-7)                |
| Locus_25934_Transcript_1/1_Conf_1.000 | 197  | 0  |          |                |     |         |     |     |                                                           |
| Locus_25935_Transcript_1/1_Conf_1.000 | 162  | 0  |          |                |     |         |     |     |                                                           |
| Locus_25936_Transcript_1/1_Conf_1.000 | 493  | 4  | 1.37E-27 | NP_001022619.1 | 60  | 125.946 | 166 | 100 | NorDiHydroGuaiaretic acid resistant family member (ndg-4) |
| Locus_25937_Transcript_1/1_Conf_1.000 | 244  | 9  | 2.57E-34 | NP_741755.1    | 92  | 148.288 | 81  | 75  | hypothetical protein C01C4.3                              |
| Locus_25938_Transcript_1/1_Conf_1.000 | 181  | 0  |          |                |     |         |     |     |                                                           |
| Locus_25939_Transcript_1/1_Conf_1.000 | 142  | 0  |          |                |     |         |     |     |                                                           |
| Locus_2594_Transcript_1/1_Conf_1.000  | 664  | 20 | 3.59E-81 | XP_002646512.1 | 89  | 305.064 | 221 | 198 | C. briggsae CBR-TOP-1 protein                             |

|                                       |      |    |          |                |     |         |     |     |                                                                                       |
|---------------------------------------|------|----|----------|----------------|-----|---------|-----|-----|---------------------------------------------------------------------------------------|
| Locus_25940_Transcript_1/1_Conf_1.000 | 155  | 0  |          |                |     |         |     |     |                                                                                       |
| Locus_25941_Transcript_1/1_Conf_1.000 | 235  | 20 | 1.34E-14 | NP_001122528.1 | 65  | 82.8037 | 70  | 46  | Cation transporting ATPase family member (catp-1)                                     |
| Locus_25942_Transcript_1/1_Conf_1.000 | 393  | 2  | 5.90E-10 | XP_002643618.1 | 62  | 67.3958 | 100 | 62  | Hypothetical protein CBG16356                                                         |
| Locus_25943_Transcript_1/1_Conf_1.000 | 239  | 0  |          |                |     |         |     |     |                                                                                       |
| Locus_25944_Transcript_1/1_Conf_1.000 | 401  | 20 | 4.86E-73 | XP_002762104.1 | 100 | 276.944 | 125 | 125 | PREDICTED: DNA-directed RNA polymerase II subunit RPB9-like                           |
| Locus_25945_Transcript_1/1_Conf_1.000 | 184  | 0  |          |                |     |         |     |     |                                                                                       |
| Locus_25946_Transcript_1/1_Conf_1.000 | 194  | 20 | 1.22E-07 | XP_533290.2    | 80  | 59.6918 | 57  | 46  | PREDICTED: similar to Heat shock cognate 71 kDa protein (Heat shock 70 kDa protein 8) |
| Locus_25947_Transcript_1/1_Conf_1.000 | 139  | 20 | 1.97E-18 | XP_002819230.1 | 100 | 95.5153 | 45  | 45  | PREDICTED: transcription elongation factor B polypeptide 1-like                       |
| Locus_25948_Transcript_1/1_Conf_1.000 | 245  | 0  |          |                |     |         |     |     |                                                                                       |
| Locus_25949_Transcript_1/1_Conf_1.000 | 246  | 2  | 1.12E-05 | NP_498014.2    | 67  | 53.1434 | 53  | 36  | COenzyme Q (ubiquinone) biosynthesis family member (coq-8)                            |
| Locus_2595_Transcript_1/3_Conf_0.667  | 1170 | 20 | 5.26E-58 | NP_492860.1    | 78  | 229.565 | 201 | 157 | hypothetical protein Y52B11A.9                                                        |

|                                       |      |    |          |                |    |         |     |     |                                              |
|---------------------------------------|------|----|----------|----------------|----|---------|-----|-----|----------------------------------------------|
| Locus_2595_Transcript_2/3_Conf_0.667  | 1170 | 20 | 5.26E-58 | NP_492860.1    | 78 | 229.565 | 201 | 157 | hypothetical protein Y52B11A.9               |
| Locus_2595_Transcript_3/3_Conf_0.667  | 1170 | 20 | 5.26E-58 | NP_492860.1    | 78 | 229.565 | 201 | 157 | hypothetical protein Y52B11A.9               |
| Locus_25950_Transcript_1/1_Conf_1.000 | 144  | 0  |          |                |    |         |     |     |                                              |
| Locus_25951_Transcript_1/1_Conf_1.000 | 161  | 0  |          |                |    |         |     |     |                                              |
| Locus_25952_Transcript_1/1_Conf_1.000 | 135  | 0  |          |                |    |         |     |     |                                              |
| Locus_25953_Transcript_1/1_Conf_1.000 | 274  | 6  | 4.28E-05 | XP_313869.4    | 71 | 51.2174 | 39  | 28  | AGAP004566-PA                                |
| Locus_25954_Transcript_1/1_Conf_1.000 | 584  |    |          |                |    |         |     |     |                                              |
| Locus_25955_Transcript_1/1_Conf_1.000 | 129  | 0  |          |                |    |         |     |     |                                              |
| Locus_25956_Transcript_1/1_Conf_1.000 | 151  | 0  |          |                |    |         |     |     |                                              |
| Locus_25957_Transcript_1/1_Conf_1.000 | 184  | 0  |          |                |    |         |     |     |                                              |
| Locus_25958_Transcript_1/1_Conf_1.000 | 181  | 0  |          |                |    |         |     |     |                                              |
| Locus_25959_Transcript_1/1_Conf_1.000 | 163  | 4  | 2.71E-07 | EFO28302.1     | 78 | 58.5362 | 51  | 40  | hypothetical protein LOAG_00195              |
| Locus_2596_Transcript_1/1_Conf_1.000  | 1084 | 2  | 1.25E-10 | XP_002630692.1 | 52 | 72.0182 | 143 | 75  | Hypothetical protein CBG02374                |
| Locus_25960_Transcript_1/1_Conf_1.000 | 388  | 20 | 5.17E-35 | XP_002914611.1 | 71 | 150.599 | 121 | 87  | PREDICTED: cytohesin-4-like                  |
| Locus_25961_Transcript_1/1_Conf_1.000 | 377  | 20 | 2.67E-63 | XP_002641621.1 | 93 | 244.588 | 125 | 117 | Hypothetical protein CBG09941                |
| Locus_25962_Transcript_1/1_Conf_1.000 | 183  | 0  |          |                |    |         |     |     |                                              |
| Locus_25963_Transcript_1/1_Conf_1.000 | 231  | 0  |          |                |    |         |     |     |                                              |
| Locus_25964_Transcript_1/1_Conf_1.000 | 169  | 1  | 2.43E-08 | NP_500905.2    | 67 | 62.003  | 55  | 37  | hypothetical protein C46G7.1                 |
| Locus_25965_Transcript_1/1_Conf_1.000 | 153  | 1  | 2.86E-14 | XP_002826351.1 | 91 | 75.485  | 36  | 33  | PREDICTED: hypothetical protein LOC100437226 |

|                                       |      |    |          |                |     |         |     |     |                                                     |
|---------------------------------------|------|----|----------|----------------|-----|---------|-----|-----|-----------------------------------------------------|
| Locus_25966_Transcript_1/1_Conf_1.000 | 133  | 5  | 5.06E-06 | NP_501743.1    | 67  | 54.299  | 43  | 29  | CAVeolin family member (cav-1)                      |
| Locus_25967_Transcript_1/1_Conf_1.000 | 175  | 6  | 4.27E-05 | XP_002405738.1 | 65  | 51.2174 | 43  | 28  | hexosaminidase domain-containing protein, putative  |
| Locus_25968_Transcript_1/1_Conf_1.000 | 179  | 20 | 4.84E-17 | NP_493694.2    | 83  | 90.8929 | 59  | 49  | Mitochondrial Solute Carrier family member (misc-1) |
| Locus_25969_Transcript_1/1_Conf_1.000 | 174  | 0  |          |                |     |         |     |     |                                                     |
| Locus_2597_Transcript_1/2_Conf_1.000  | 1277 | 3  | 2.88E-28 | XP_002630689.1 | 45  | 130.954 | 378 | 172 | Hypothetical protein CBG02369                       |
| Locus_2597_Transcript_2/2_Conf_1.000  | 620  | 3  | 1.51E-19 |                | 48  | 100.138 | 223 | 109 | hypothetical protein F08B1.2                        |
| Locus_25970_Transcript_1/1_Conf_1.000 | 320  | 3  | 3.43E-26 | XP_002639499.1 | 73  | 121.324 | 97  | 71  | C. briggsae CBR-ITX-1 protein                       |
| Locus_25971_Transcript_1/1_Conf_1.000 | 209  | 0  |          |                |     |         |     |     |                                                     |
| Locus_25972_Transcript_1/1_Conf_1.000 | 158  | 0  |          |                |     |         |     |     |                                                     |
| Locus_25973_Transcript_1/1_Conf_1.000 | 151  | 4  | 1.11E-16 | NP_495365.1    | 93  | 89.7373 | 47  | 44  | RaPsYn family member (rpy-1)                        |
| Locus_25974_Transcript_1/1_Conf_1.000 | 1667 | 20 | 0        | XP_002644337.1 | 79  | 661.374 | 512 | 407 | C. briggsae CBR-KLP-4 protein                       |
| Locus_25975_Transcript_1/1_Conf_1.000 | 240  | 0  |          |                |     |         |     |     |                                                     |
| Locus_25976_Transcript_1/1_Conf_1.000 | 173  | 20 | 4.87E-25 | ACH45822.1     | 100 | 117.472 | 57  | 57  | putative nef1 variant 1                             |
| Locus_25977_Transcript_1/1_Conf_1.000 | 167  | 0  |          |                |     |         |     |     |                                                     |

|                                       |      |    |           |                |     |         |     |     |                                         |
|---------------------------------------|------|----|-----------|----------------|-----|---------|-----|-----|-----------------------------------------|
| Locus_25978_Transcript_1/1_Conf_1.000 | 164  | 20 | 3.76E-25  | XP_002760341.1 | 100 | 117.857 | 54  | 54  | PREDICTED: glutamine synthetase         |
| Locus_25979_Transcript_1/1_Conf_1.000 | 157  | 0  |           |                |     |         |     |     |                                         |
| Locus_2598_Transcript_1/1_Conf_1.000  | 1320 | 20 | 1.52E-104 | AAC98796.1     | 88  | 384.415 | 234 | 208 | dolichol monophosphate mannose synthase |
| Locus_25980_Transcript_1/1_Conf_1.000 | 161  | 20 | 3.79E-09  | XP_002630623.1 | 71  | 64.6994 | 56  | 40  | C. briggsae CBR-NDX-3 protein           |
| Locus_25981_Transcript_1/1_Conf_1.000 | 247  | 0  |           |                |     |         |     |     |                                         |
| Locus_25982_Transcript_1/1_Conf_1.000 | 152  | 20 | 2.40E-11  | EFO26471.1     | 75  | 72.0182 | 49  | 37  | hypothetical protein LOAG_02007         |
| Locus_25983_Transcript_1/1_Conf_1.000 | 130  | 0  |           |                |     |         |     |     |                                         |
| Locus_25984_Transcript_1/1_Conf_1.000 | 175  | 0  |           |                |     |         |     |     |                                         |
| Locus_25985_Transcript_1/1_Conf_1.000 | 240  | 0  |           |                |     |         |     |     |                                         |
| Locus_25986_Transcript_1/1_Conf_1.000 | 268  | 20 | 3.52E-15  | XP_002633325.1 | 59  | 84.7297 | 94  | 56  | Hypothetical protein CBG06062           |
| Locus_25987_Transcript_1/1_Conf_1.000 | 175  | 0  |           |                |     |         |     |     |                                         |
| Locus_25988_Transcript_1/1_Conf_1.000 | 181  | 20 | 1.41E-19  | XP_002630203.1 | 86  | 99.3673 | 60  | 52  | Hypothetical protein CBG060613          |
| Locus_25989_Transcript_1/1_Conf_1.000 | 170  | 0  |           |                |     |         |     |     |                                         |
| Locus_2599_Transcript_1/1_Conf_1.000  | 1009 | 20 | 2.22E-83  | EFO26496.1     | 67  | 313.538 | 336 | 226 | hypothetical protein LOAG_01982         |
| Locus_25990_Transcript_1/1_Conf_1.000 | 156  | 0  |           |                |     |         |     |     |                                         |
| Locus_25991_Transcript_1/1_Conf_1.000 | 147  | 0  |           |                |     |         |     |     |                                         |

|                                       |      |    |          |                |     |         |     |     |                                                          |
|---------------------------------------|------|----|----------|----------------|-----|---------|-----|-----|----------------------------------------------------------|
| Locus_25992_Transcript_1/1_Conf_1.000 | 166  | 1  | 1.25E-04 | XP_002641244.1 | 66  | 49.6766 | 48  | 32  | Hypothetical protein CBG09112                            |
| Locus_25993_Transcript_1/1_Conf_1.000 | 129  | 0  |          |                |     |         |     |     |                                                          |
| Locus_25994_Transcript_1/1_Conf_1.000 | 129  | 1  | 3.64E-04 | XP_002642305.1 | 77  | 48.1358 | 36  | 28  | Hypothetical protein CBG18297                            |
| Locus_25995_Transcript_1/1_Conf_1.000 | 259  | 20 | 1.14E-29 | NP_001023792.1 | 98  | 132.88  | 85  | 84  | EXPulsion defective (defecation) family member (exp-2)   |
| Locus_25996_Transcript_1/1_Conf_1.000 | 346  | 4  | 7.94E-07 | XP_002638551.1 | 74  | 56.9954 | 43  | 32  | Hypothetical protein CBG05587                            |
| Locus_25997_Transcript_1/1_Conf_1.000 | 284  | 20 | 8.46E-49 | BAG65408.1     | 100 | 196.438 | 94  | 94  | unnamed protein product                                  |
| Locus_25998_Transcript_1/1_Conf_1.000 | 159  | 0  |          |                |     |         |     |     |                                                          |
| Locus_25999_Transcript_1/1_Conf_1.000 | 288  | 20 | 2.02E-10 | XP_002630318.1 | 73  | 68.9366 | 63  | 46  | Hypothetical protein CBG04241                            |
| Locus_26_Transcript_1/3_Conf_0.636    | 314  | 0  |          |                |     |         |     |     |                                                          |
| Locus_26_Transcript_3/3_Conf_0.727    | 279  | 0  |          |                |     |         |     |     |                                                          |
| Locus_260_Transcript_1/2_Conf_1.000   | 1541 | 20 | 9.44E-56 | NP_501053.2    | 63  | 222.631 | 305 | 194 | Lateral-signal-Induced Phosphatase family member (lip-1) |
| Locus_260_Transcript_2/2_Conf_1.000   | 1502 | 20 | 1.19E-55 | NP_501053.2    | 63  | 222.246 | 304 | 193 | Lateral-signal-Induced Phosphatase family member (lip-1) |
| Locus_2600_Transcript_1/1_Conf_1.000  | 373  | 4  | 1.95E-13 | XP_002643098.1 | 76  | 78.9518 | 59  | 45  | Hypothetical protein CBG23022                            |
| Locus_26000_Transcript_1/1_Conf_1.000 | 180  | 0  |          |                |     |         |     |     |                                                          |
| Locus_26001_Transcript_1/1_Conf_1.000 | 193  | 0  |          |                |     |         |     |     |                                                          |
| Locus_26002_Transcript_1/1_Conf_1.000 | 154  | 0  |          |                |     |         |     |     |                                                          |

|                                       |      |    |          |                |     |         |     |     |                                                                      |
|---------------------------------------|------|----|----------|----------------|-----|---------|-----|-----|----------------------------------------------------------------------|
| Locus_26003_Transcript_1/1_Conf_1.000 | 219  | 0  |          |                |     |         |     |     |                                                                      |
| Locus_26004_Transcript_1/1_Conf_1.000 | 168  | 20 | 1.42E-16 | NP_491363.1    | 89  | 89.3521 | 55  | 49  | Dynein Heavy Chain family member (dhc-1)                             |
| Locus_26005_Transcript_1/1_Conf_1.000 | 148  | 0  |          |                |     |         |     |     |                                                                      |
| Locus_26006_Transcript_1/1_Conf_1.000 | 178  | 0  |          |                |     |         |     |     |                                                                      |
| Locus_26007_Transcript_1/1_Conf_1.000 | 231  | 6  | 4.95E-09 | XP_002637804.1 | 64  | 64.3142 | 76  | 49  | Hypothetical protein CBG04590                                        |
| Locus_26008_Transcript_1/1_Conf_1.000 | 142  | 0  |          |                |     |         |     |     |                                                                      |
| Locus_26009_Transcript_1/1_Conf_1.000 | 267  | 20 | 1.21E-23 | XP_002647993.1 | 92  | 112.849 | 82  | 76  | C. briggsae CBR-ACR-6 protein                                        |
| Locus_2601_Transcript_1/1_Conf_1.000  | 1438 | 6  | 1.67E-67 | NP_491128.4    | 56  | 261.536 | 478 | 272 | Conserved Oligomeric Golgi (COG) Component family member (cogc-1)    |
| Locus_26010_Transcript_1/1_Conf_1.000 | 135  | 20 | 2.33E-19 | XP_002927413.1 | 100 | 98.5969 | 44  | 44  | PREDICTED: eukaryotic translation initiation factor 3 subunit C-like |
| Locus_26011_Transcript_1/1_Conf_1.000 | 270  | 1  | 5.05E-22 | NP_001023862.1 | 72  | 107.457 | 86  | 62  | hypothetical protein F26F2.8                                         |
| Locus_26012_Transcript_1/1_Conf_1.000 | 129  | 0  |          |                |     |         |     |     |                                                                      |
| Locus_26013_Transcript_1/1_Conf_1.000 | 166  | 0  |          |                |     |         |     |     |                                                                      |
| Locus_26014_Transcript_1/1_Conf_1.000 | 204  | 0  |          |                |     |         |     |     |                                                                      |
| Locus_26015_Transcript_1/1_Conf_1.000 | 138  | 0  |          |                |     |         |     |     |                                                                      |
| Locus_26016_Transcript_1/1_Conf_1.000 | 248  | 20 | 6.77E-19 |                | 100 | 97.0561 | 73  | 73  | Orn decarboxylase antizyme                                           |
| Locus_26017_Transcript_1/1_Conf_1.000 | 139  | 0  |          |                |     |         |     |     |                                                                      |
| Locus_26018_Transcript_1/1_Conf_1.000 | 178  | 0  |          |                |     |         |     |     |                                                                      |
| Locus_26019_Transcript_1/1_Conf_1.000 | 222  | 5  | 3.33E-29 | ABS45067.1     | 92  | 131.339 | 67  | 62  | latrophilin-like protein 2                                           |
| Locus_2602_Transcript_1/1_Conf_1.000  | 317  | 20 | 4.20E-24 | NP_501767.1    | 74  | 114.39  | 99  | 74  | Sperm-Specific family, class P family member (ssp-10)                |
| Locus_26020_Transcript_1/1_Conf_1.000 | 166  | 0  |          |                |     |         |     |     |                                                                      |

|                                       |      |    |          |                |    |         |     |     |                                                                                      |
|---------------------------------------|------|----|----------|----------------|----|---------|-----|-----|--------------------------------------------------------------------------------------|
| Locus_26021_Transcript_1/1_Conf_1.000 | 140  | 0  |          |                |    |         |     |     |                                                                                      |
| Locus_26022_Transcript_1/1_Conf_1.000 | 128  | 0  |          |                |    |         |     |     |                                                                                      |
| Locus_26023_Transcript_1/1_Conf_1.000 | 147  | 0  |          |                |    |         |     |     |                                                                                      |
| Locus_26024_Transcript_1/1_Conf_1.000 | 173  | 0  |          |                |    |         |     |     |                                                                                      |
| Locus_26025_Transcript_1/1_Conf_1.000 | 222  | 0  |          |                |    |         |     |     |                                                                                      |
| Locus_26026_Transcript_1/1_Conf_1.000 | 405  | 0  |          |                |    |         |     |     |                                                                                      |
| Locus_26027_Transcript_1/1_Conf_1.000 | 461  | 20 | 3.77E-70 | CAJ98743.1     | 92 | 267.314 | 147 | 136 | serine/threonine phosphatase                                                         |
| Locus_26028_Transcript_1/1_Conf_1.000 | 137  | 0  |          |                |    |         |     |     |                                                                                      |
| Locus_26029_Transcript_1/1_Conf_1.000 | 212  | 20 | 4.12E-16 | EFO26456.1     | 76 | 87.8113 | 64  | 49  | hypothetical protein LOAG_02027                                                      |
| Locus_2603_Transcript_1/1_Conf_1.000  | 1909 | 20 | 0        | AAC48152.3     | 85 | 1069.69 | 623 | 534 | Laminin related. see also lmb- protein 2, partially confirmed by transcript evidence |
| Locus_26030_Transcript_1/1_Conf_1.000 | 189  | 0  |          |                |    |         |     |     |                                                                                      |
| Locus_26031_Transcript_1/1_Conf_1.000 | 142  | 0  |          |                |    |         |     |     |                                                                                      |
| Locus_26032_Transcript_1/1_Conf_1.000 | 266  | 0  |          |                |    |         |     |     |                                                                                      |
| Locus_26033_Transcript_1/1_Conf_1.000 | 369  | 0  |          |                |    |         |     |     |                                                                                      |
| Locus_26034_Transcript_1/1_Conf_1.000 | 298  | 0  |          |                |    |         |     |     |                                                                                      |
| Locus_26035_Transcript_1/1_Conf_1.000 | 184  | 4  | 1.23E-15 | EFO19152.1     | 79 | 86.2705 | 59  | 47  | hypothetical protein LOAG_09340                                                      |
| Locus_26036_Transcript_1/1_Conf_1.000 | 308  | 20 | 3.60E-20 | XP_002640994.1 | 69 | 101.293 | 101 | 70  | C. briggsae CBR-POLH-1 protein                                                       |
| Locus_26037_Transcript_1/1_Conf_1.000 | 371  | 4  | 8.81E-06 | XP_002646250.1 | 54 | 53.5286 | 108 | 59  | C. briggsae CBR-AEX-1 protein                                                        |
| Locus_26038_Transcript_1/1_Conf_1.000 | 419  | 3  | 1.45E-16 | NP_492183.2    | 64 | 89.3521 | 91  | 59  | hypothetical protein F55D12.5                                                        |
| Locus_26039_Transcript_1/1_Conf_1.000 | 128  | 0  |          |                |    |         |     |     |                                                                                      |
| Locus_2604_Transcript_1/1_Conf_1.000  | 226  | 0  |          |                |    |         |     |     |                                                                                      |
| Locus_26040_Transcript_1/1_Conf_1.000 | 150  | 0  |          |                |    |         |     |     |                                                                                      |
| Locus_26041_Transcript_1/1_Conf_1.000 | 131  | 0  |          |                |    |         |     |     |                                                                                      |
| Locus_26042_Transcript_1/1_Conf_1.000 | 148  | 0  |          |                |    |         |     |     |                                                                                      |
| Locus_26043_Transcript_1/1_Conf_1.000 | 301  | 0  |          |                |    |         |     |     |                                                                                      |
| Locus_26044_Transcript_1/1_Conf_1.000 | 196  | 17 | 2.07E-23 | XP_002640347.1 | 90 | 112.079 | 65  | 59  | C. briggsae CBR-HAF-9 protein                                                        |
| Locus_26045_Transcript_1/1_Conf_1.000 | 175  | 0  |          |                |    |         |     |     |                                                                                      |
| Locus_26046_Transcript_1/1_Conf_1.000 | 176  | 3  | 8.60E-06 | EFO27601.1     | 64 | 53.5286 | 53  | 34  | hypothetical protein LOAG_00885                                                      |
| Locus_26047_Transcript_1/1_Conf_1.000 | 273  | 1  | 6.61E-06 | EFO15824.1     | 83 | 53.9138 | 36  | 30  | hypothetical protein LOAG_12685                                                      |



|                                       |     |    |           |                |    |         |     |     |                                                                                                                                                               |
|---------------------------------------|-----|----|-----------|----------------|----|---------|-----|-----|---------------------------------------------------------------------------------------------------------------------------------------------------------------|
| Locus_26048_Transcript_1/1_Conf_1.000 | 344 | 20 | 3.81E-25  | NP_498951.1    | 71 | 117.857 | 106 | 76  | hypothetical protein F44E2.10                                                                                                                                 |
| Locus_26049_Transcript_1/1_Conf_1.000 | 129 | 0  |           |                |    |         |     |     |                                                                                                                                                               |
| Locus_2605_Transcript_1/1_Conf_1.000  | 908 | 20 | 6.92E-147 | YP_002725710.1 | 96 | 524.242 | 302 | 291 | cytochrome c oxidase subunit I                                                                                                                                |
| Locus_26050_Transcript_1/1_Conf_1.000 | 345 | 0  |           |                |    |         |     |     |                                                                                                                                                               |
| Locus_26051_Transcript_1/1_Conf_1.000 | 183 | 0  |           |                |    |         |     |     |                                                                                                                                                               |
| Locus_26052_Transcript_1/1_Conf_1.000 | 311 | 0  |           |                |    |         |     |     |                                                                                                                                                               |
| Locus_26053_Transcript_1/1_Conf_1.000 | 226 | 0  |           |                |    |         |     |     |                                                                                                                                                               |
| Locus_26054_Transcript_1/1_Conf_1.000 | 178 | 0  |           |                |    |         |     |     |                                                                                                                                                               |
| Locus_26055_Transcript_1/1_Conf_1.000 | 150 | 0  |           |                |    |         |     |     |                                                                                                                                                               |
| Locus_26056_Transcript_1/1_Conf_1.000 | 316 | 0  |           |                |    |         |     |     |                                                                                                                                                               |
| Locus_26057_Transcript_1/1_Conf_1.000 | 344 | 0  |           |                |    |         |     |     |                                                                                                                                                               |
| Locus_26058_Transcript_1/1_Conf_1.000 | 365 | 20 | 7.99E-20  | NP_491864.2    | 65 | 100.138 | 93  | 61  | hypothetical protein K06A5.8                                                                                                                                  |
| Locus_26059_Transcript_1/1_Conf_1.000 | 132 | 0  |           |                |    |         |     |     |                                                                                                                                                               |
| Locus_2606_Transcript_1/1_Conf_1.000  | 685 | 20 | 2.66E-106 | NP_001022450.1 | 90 | 388.652 | 228 | 207 | hypothetical protein Y48E1A.1                                                                                                                                 |
| Locus_26060_Transcript_1/1_Conf_1.000 | 212 | 0  |           |                |    |         |     |     |                                                                                                                                                               |
| Locus_26061_Transcript_1/1_Conf_1.000 | 154 | 14 | 7.95E-07  | XP_002111941.1 | 72 | 56.9954 | 47  | 34  | expressed hypothetical protein                                                                                                                                |
| Locus_26062_Transcript_1/1_Conf_1.000 | 340 | 0  |           |                |    |         |     |     |                                                                                                                                                               |
| Locus_26063_Transcript_1/1_Conf_1.000 | 215 | 0  |           |                |    |         |     |     |                                                                                                                                                               |
| Locus_26064_Transcript_1/1_Conf_1.000 | 192 | 0  |           |                |    |         |     |     |                                                                                                                                                               |
| Locus_26065_Transcript_1/1_Conf_1.000 | 447 | 7  | 1.59E-07  | XP_001894326.1 | 65 | 59.3066 | 70  | 46  | DEK protein                                                                                                                                                   |
| Locus_26066_Transcript_1/1_Conf_1.000 | 136 | 20 | 2.50E-13  | NP_492053.1    | 91 | 78.5666 | 45  | 41  | LEThal family member (let-75)                                                                                                                                 |
| Locus_26067_Transcript_1/1_Conf_1.000 | 487 | 20 | 1.22E-15  | XP_969725.1    | 77 | 86.2705 | 70  | 54  | PREDICTED: similar to Nuclear transcription factor Y subunit beta (Nuclear transcription factor Y subunit B) (NF-YB) (CAAT-box DNA-binding protein subunit B) |
| Locus_26068_Transcript_1/1_Conf_1.000 | 291 | 0  |           |                |    |         |     |     |                                                                                                                                                               |
| Locus_26069_Transcript_1/1_Conf_1.000 | 423 | 20 | 1.14E-21  |                | 59 | 106.301 | 142 | 84  | hypothetical protein T28B8.4                                                                                                                                  |
| Locus_2607_Transcript_1/1_Conf_1.000  | 619 | 1  | 3.61E-05  | XP_001894276.1 | 63 | 52.373  | 47  | 30  | ShTK domain containing protein                                                                                                                                |
| Locus_26070_Transcript_1/1_Conf_1.000 | 130 | 0  |           |                |    |         |     |     |                                                                                                                                                               |

|                                       |     |    |          |                |     |         |     |     |                                                          |
|---------------------------------------|-----|----|----------|----------------|-----|---------|-----|-----|----------------------------------------------------------|
| Locus_26071_Transcript_1/1_Conf_1.000 | 159 | 20 | 4.32E-21 | XP_002823301.1 | 100 | 104.375 | 52  | 52  | PREDICTED: keratin, type II cytoskeletal 7-like          |
| Locus_26072_Transcript_1/1_Conf_1.000 | 229 | 20 | 1.05E-18 | ACO14409.1     | 76  | 90.1225 | 65  | 50  | Oligoribonuclease, mitochondrial precursor               |
| Locus_26073_Transcript_1/1_Conf_1.000 | 213 | 0  |          |                |     |         |     |     |                                                          |
| Locus_26074_Transcript_1/1_Conf_1.000 | 158 | 11 | 7.64E-18 | ACM46025.1     | 94  | 93.5893 | 50  | 47  | Let-23 fertility effector/regulator protein 2, isoform d |
| Locus_26075_Transcript_1/1_Conf_1.000 | 238 | 0  |          |                |     |         |     |     |                                                          |
| Locus_26076_Transcript_1/1_Conf_1.000 | 130 | 3  | 5.24E-11 | XP_002631617.1 | 79  | 70.8626 | 43  | 34  | Hypothetical protein CBG20802                            |
| Locus_26077_Transcript_1/1_Conf_1.000 | 256 | 0  |          |                |     |         |     |     |                                                          |
| Locus_26078_Transcript_1/1_Conf_1.000 | 142 | 0  |          |                |     |         |     |     |                                                          |
| Locus_26079_Transcript_1/1_Conf_1.000 | 235 | 0  |          |                |     |         |     |     |                                                          |
| Locus_2608_Transcript_1/1_Conf_1.000  | 512 | 20 | 7.02E-14 | XP_001601037.1 | 53  | 80.4925 | 142 | 76  | PREDICTED: similar to n-acetylgalactosaminyltransferase  |
| Locus_26080_Transcript_1/1_Conf_1.000 | 422 | 7  | 1.65E-12 | XP_002640486.1 | 54  | 75.8702 | 142 | 77  | Hypothetical protein CBG13622                            |
| Locus_26081_Transcript_1/1_Conf_1.000 | 188 | 0  |          |                |     |         |     |     |                                                          |
| Locus_26082_Transcript_1/2_Conf_1.000 | 413 | 20 | 6.95E-48 | AAC46543.2     | 81  | 193.356 | 137 | 112 | Hypothetical protein F48E8.6                             |
| Locus_26082_Transcript_2/2_Conf_1.000 | 365 | 20 | 7.43E-42 | AAC46543.2     | 82  | 173.326 | 121 | 100 | Hypothetical protein F48E8.6                             |
| Locus_26083_Transcript_1/1_Conf_1.000 | 217 | 4  | 1.01E-06 | EFO17148.1     | 78  | 56.6102 | 41  | 32  | hypothetical protein LOAG_11354                          |
| Locus_26084_Transcript_1/1_Conf_1.000 | 131 | 0  |          |                |     |         |     |     |                                                          |
| Locus_26085_Transcript_1/1_Conf_1.000 | 161 | 1  | 6.68E-14 | AAM45145.1     | 88  | 80.4925 | 52  | 46  | AF278680_1L3B25                                          |
| Locus_26086_Transcript_1/1_Conf_1.000 | 187 | 4  | 4.38E-05 | XP_002637648.1 | 56  | 51.2174 | 55  | 31  | C. briggsae CBR-FSHR-1 protein                           |
| Locus_26087_Transcript_1/1_Conf_1.000 | 157 | 0  |          |                |     |         |     |     |                                                          |
| Locus_26088_Transcript_1/1_Conf_1.000 | 255 | 2  | 7.45E-13 | XP_002635599.1 | 75  | 77.0258 | 69  | 52  | Hypothetical protein CBG20588                            |
| Locus_26089_Transcript_1/1_Conf_1.000 | 168 | 0  |          |                |     |         |     |     |                                                          |

|                                       |      |    |          |                |     |         |     |     |                                                                         |
|---------------------------------------|------|----|----------|----------------|-----|---------|-----|-----|-------------------------------------------------------------------------|
| Locus_2609_Transcript_1/1_Conf_1.000  | 540  | 20 | 2.13E-65 | XP_002630326.1 | 81  | 251.906 | 181 | 147 | Hypothetical protein CBG04253                                           |
| Locus_26090_Transcript_1/1_Conf_1.000 | 146  | 1  | 8.31E-04 | NP_497771.1    | 68  | 46.9802 | 45  | 31  | DumPY : shorter than wild-type family member (dpy-27)                   |
| Locus_26091_Transcript_1/1_Conf_1.000 | 228  | 0  |          |                |     |         |     |     |                                                                         |
| Locus_26092_Transcript_1/1_Conf_1.000 | 141  | 0  |          |                |     |         |     |     |                                                                         |
| Locus_26093_Transcript_1/1_Conf_1.000 | 171  | 10 | 6.35E-25 | NP_504628.1    | 92  | 117.087 | 55  | 51  | hypothetical protein T05H4.7                                            |
| Locus_26094_Transcript_1/1_Conf_1.000 | 387  | 0  |          |                |     |         |     |     |                                                                         |
| Locus_26095_Transcript_1/1_Conf_1.000 | 174  | 0  |          |                |     |         |     |     |                                                                         |
| Locus_26096_Transcript_1/1_Conf_1.000 | 342  | 0  |          |                |     |         |     |     |                                                                         |
| Locus_26097_Transcript_1/1_Conf_1.000 | 225  | 0  |          |                |     |         |     |     |                                                                         |
| Locus_26098_Transcript_1/1_Conf_1.000 | 207  | 0  |          |                |     |         |     |     |                                                                         |
| Locus_26099_Transcript_1/1_Conf_1.000 | 139  | 0  |          |                |     |         |     |     |                                                                         |
| Locus_261_Transcript_1/1_Conf_1.000   | 1670 | 20 | 0        | CAB07859.3     | 81  | 760.755 | 572 | 465 | C. elegans protein W09D10.2, partially confirmed by transcript evidence |
| Locus_2610_Transcript_1/1_Conf_1.000  | 1003 | 20 | 7.12E-50 | XP_001896958.1 | 69  | 202.216 | 222 | 154 | Uncharacterized protein family UPF0005 containing protein               |
| Locus_26100_Transcript_1/1_Conf_1.000 | 129  | 0  |          |                |     |         |     |     |                                                                         |
| Locus_26101_Transcript_1/1_Conf_1.000 | 357  | 0  |          |                |     |         |     |     |                                                                         |
| Locus_26102_Transcript_1/1_Conf_1.000 | 141  | 0  |          |                |     |         |     |     |                                                                         |
| Locus_26103_Transcript_1/1_Conf_1.000 | 247  | 20 | 5.36E-16 | XP_002646583.1 | 82  | 87.4261 | 57  | 47  | Hypothetical protein CBG20465                                           |
| Locus_26104_Transcript_1/1_Conf_1.000 | 391  | 0  |          |                |     |         |     |     |                                                                         |
| Locus_26105_Transcript_1/1_Conf_1.000 | 217  | 1  | 2.75E-04 | NP_509316.1    | 64  | 48.521  | 42  | 27  | hypothetical protein ZK154.5                                            |
| Locus_26106_Transcript_1/1_Conf_1.000 | 157  | 0  |          |                |     |         |     |     |                                                                         |
| Locus_26107_Transcript_1/1_Conf_1.000 | 233  | 0  |          |                |     |         |     |     |                                                                         |
| Locus_26108_Transcript_1/1_Conf_1.000 | 165  | 0  |          |                |     |         |     |     |                                                                         |
| Locus_26109_Transcript_1/1_Conf_1.000 | 182  | 0  |          |                |     |         |     |     |                                                                         |
| Locus_2611_Transcript_1/1_Conf_1.000  | 193  | 0  |          |                |     |         |     |     |                                                                         |
| Locus_26110_Transcript_1/1_Conf_1.000 | 285  | 4  | 2.39E-19 | EAW74503.1     | 100 | 98.5969 | 42  | 42  | phosphofurin acidic cluster sorting protein 1, isoform CRA_b            |
| Locus_26111_Transcript_1/1_Conf_1.000 | 155  | 0  |          |                |     |         |     |     |                                                                         |
| Locus_26112_Transcript_1/1_Conf_1.000 | 528  | 0  |          |                |     |         |     |     |                                                                         |
| Locus_26113_Transcript_1/1_Conf_1.000 | 175  | 0  |          |                |     |         |     |     |                                                                         |

|                                       |     |    |          |                |     |         |     |     |                                                                                                  |
|---------------------------------------|-----|----|----------|----------------|-----|---------|-----|-----|--------------------------------------------------------------------------------------------------|
| Locus_26114_Transcript_1/1_Conf_1.000 | 138 | 20 | 2.84E-17 | NP_510672.2    | 95  | 91.6633 | 46  | 44  | Nematode AStacin protease family member (nas-39)                                                 |
| Locus_26115_Transcript_1/1_Conf_1.000 | 152 | 1  | 1.66E-04 | CBA11992.1     | 68  | 49.2914 | 48  | 33  | endonuclease-reverse transcriptase HmRTE-e01                                                     |
| Locus_26116_Transcript_1/1_Conf_1.000 | 141 | 0  |          |                |     |         |     |     |                                                                                                  |
| Locus_26117_Transcript_1/1_Conf_1.000 | 207 | 20 | 1.24E-20 | NP_493275.1    | 86  | 102.834 | 73  | 63  | SELB (SELB homolog) translation factor for selenocysteine incorporation family member (selb-1)   |
| Locus_26118_Transcript_1/1_Conf_1.000 | 478 | 20 | 2.03E-39 | XP_001900095.1 | 83  | 165.236 | 142 | 119 | ABC transporter family protein                                                                   |
| Locus_26119_Transcript_1/1_Conf_1.000 | 172 | 0  |          |                |     |         |     |     |                                                                                                  |
| Locus_2612_Transcript_1/1_Conf_1.000  | 491 | 20 | 1.05E-35 | XP_002645442.1 | 78  | 152.91  | 141 | 110 | C. briggsae CBR-TAG-241 protein                                                                  |
| Locus_26120_Transcript_1/1_Conf_1.000 | 241 | 20 | 1.12E-45 | BAG58844.1     | 100 | 186.037 | 80  | 80  | unnamed protein product                                                                          |
| Locus_26121_Transcript_1/1_Conf_1.000 | 157 | 0  |          |                |     |         |     |     |                                                                                                  |
| Locus_26122_Transcript_1/1_Conf_1.000 | 167 | 20 | 1.53E-18 | ADI24623.1     | 85  | 95.9005 | 55  | 47  | Copine domain protein, atypical protein 2, isoform c, partially confirmed by transcript evidence |
| Locus_26123_Transcript_1/1_Conf_1.000 | 243 | 18 | 1.85E-08 | XP_001898275.1 | 53  | 62.3882 | 93  | 50  | GRIP domain containing protein                                                                   |
| Locus_26124_Transcript_1/1_Conf_1.000 | 291 | 0  |          |                |     |         |     |     |                                                                                                  |
| Locus_26125_Transcript_1/1_Conf_1.000 | 526 | 20 | 1.67E-64 | XP_002634423.1 | 85  | 248.825 | 172 | 147 | C. briggsae CBR-PTR-14 protein                                                                   |
| Locus_26126_Transcript_1/1_Conf_1.000 | 152 | 20 | 3.24E-08 | NP_495354.1    | 70  | 61.6178 | 50  | 35  | hypothetical protein T19D12.10                                                                   |

|                                       |     |    |          |                |    |         |     |     |                                           |
|---------------------------------------|-----|----|----------|----------------|----|---------|-----|-----|-------------------------------------------|
| Locus_26127_Transcript_1/1_Conf_1.000 | 138 | 7  | 3.85E-06 | XP_002639419.1 | 76 | 54.6842 | 43  | 33  | Hypothetical protein CBG04011             |
| Locus_26128_Transcript_1/1_Conf_1.000 | 215 | 0  |          |                |    |         |     |     |                                           |
| Locus_26129_Transcript_1/1_Conf_1.000 | 269 | 0  |          |                |    |         |     |     |                                           |
| Locus_2613_Transcript_1/1_Conf_1.000  | 681 | 20 | 2.77E-55 | EFO27544.1     | 64 | 219.164 | 226 | 145 | hypothetical protein LOAG_00942           |
| Locus_26130_Transcript_1/1_Conf_1.000 | 128 | 0  |          |                |    |         |     |     |                                           |
| Locus_26131_Transcript_1/1_Conf_1.000 | 243 | 0  |          |                |    |         |     |     |                                           |
| Locus_26132_Transcript_1/1_Conf_1.000 | 177 | 0  |          |                |    |         |     |     |                                           |
| Locus_26133_Transcript_1/1_Conf_1.000 | 128 | 0  |          |                |    |         |     |     |                                           |
| Locus_26134_Transcript_1/1_Conf_1.000 | 172 | 0  |          |                |    |         |     |     |                                           |
| Locus_26135_Transcript_1/1_Conf_1.000 | 239 | 0  |          |                |    |         |     |     |                                           |
| Locus_26136_Transcript_1/1_Conf_1.000 | 149 | 20 | 3.59E-07 | XP_001898117.1 | 75 | 58.151  | 49  | 37  | FYVE zinc finger family protein           |
| Locus_26137_Transcript_1/1_Conf_1.000 | 463 | 2  | 6.95E-11 | NP_498895.1    | 63 | 70.4774 | 107 | 68  | RNA HelicAse family member (rha-2)        |
| Locus_26138_Transcript_1/1_Conf_1.000 | 188 | 20 | 2.32E-06 | EFN81468.1     | 72 | 55.4546 | 47  | 34  | Histone-lysine N-methyltransferase SETMAR |
| Locus_26139_Transcript_1/1_Conf_1.000 | 152 | 0  |          |                |    |         |     |     |                                           |

|                                       |      |    |          |                |    |         |     |     |                               |
|---------------------------------------|------|----|----------|----------------|----|---------|-----|-----|-------------------------------|
| Locus_2614_Transcript_1/3_Conf_0.333  | 2028 | 20 | 0        | EFO27896.1     | 75 | 726.472 | 595 | 452 | PLK/PLK1 protein kinase       |
| Locus_2614_Transcript_2/3_Conf_0.333  | 184  | 0  |          |                |    |         |     |     |                               |
| Locus_2614_Transcript_3/3_Conf_0.500  | 1986 | 20 | 0        | EFO27896.1     | 75 | 726.472 | 595 | 452 | PLK/PLK1 protein kinase       |
| Locus_26140_Transcript_1/1_Conf_1.000 | 133  | 0  |          |                |    |         |     |     |                               |
| Locus_26141_Transcript_1/1_Conf_1.000 | 172  | 0  |          |                |    |         |     |     |                               |
| Locus_26142_Transcript_1/1_Conf_1.000 | 177  | 9  | 9.76E-18 | XP_002631132.1 | 84 | 93.2041 | 58  | 49  | Hypothetical protein CBG02915 |

|                                       |     |    |          |                |    |         |     |    |                                                               |
|---------------------------------------|-----|----|----------|----------------|----|---------|-----|----|---------------------------------------------------------------|
| Locus_26143_Transcript_1/1_Conf_1.000 | 168 | 20 | 2.59E-18 | EFO17467.1     | 87 | 95.1301 | 54  | 47 | hypothetical protein LOAG_11032                               |
| Locus_26144_Transcript_1/1_Conf_1.000 | 131 | 0  |          |                |    |         |     |    |                                                               |
| Locus_26145_Transcript_1/1_Conf_1.000 | 189 | 0  |          |                |    |         |     |    |                                                               |
| Locus_26146_Transcript_1/1_Conf_1.000 | 150 | 0  |          |                |    |         |     |    |                                                               |
| Locus_26147_Transcript_1/1_Conf_1.000 | 402 | 20 | 3.64E-20 | NP_495206.2    | 76 | 101.293 | 113 | 86 | hypothetical protein R12C12.5                                 |
| Locus_26148_Transcript_1/1_Conf_1.000 | 254 | 0  |          |                |    |         |     |    |                                                               |
| Locus_26149_Transcript_1/1_Conf_1.000 | 161 | 20 | 1.10E-16 | NP_494491.3    | 92 | 89.7373 | 53  | 49 | Guanylyl Cyclase family member (gcy-19)                       |
| Locus_2615_Transcript_1/1_Conf_1.000  | 735 | 20 | 4.73E-30 | XP_001897810.1 | 67 | 135.576 | 143 | 97 | dehydrogenases, short chain protein 9                         |
| Locus_26150_Transcript_1/1_Conf_1.000 | 308 | 0  |          |                |    |         |     |    |                                                               |
| Locus_26151_Transcript_1/1_Conf_1.000 | 132 | 0  |          |                |    |         |     |    |                                                               |
| Locus_26152_Transcript_1/1_Conf_1.000 | 147 | 0  |          |                |    |         |     |    |                                                               |
| Locus_26153_Transcript_1/1_Conf_1.000 | 229 | 0  |          |                |    |         |     |    |                                                               |
| Locus_26154_Transcript_1/1_Conf_1.000 | 254 | 0  |          |                |    |         |     |    |                                                               |
| Locus_26155_Transcript_1/1_Conf_1.000 | 141 | 6  | 8.26E-09 | CAX65068.1     | 82 | 63.5438 | 46  | 38 | C. elegans protein K08C7.3d, confirmed by transcript evidence |
| Locus_26156_Transcript_1/1_Conf_1.000 | 238 | 0  |          |                |    |         |     |    |                                                               |

|                                       |      |    |          |                |     |         |     |     |                                                          |
|---------------------------------------|------|----|----------|----------------|-----|---------|-----|-----|----------------------------------------------------------|
| Locus_26157_Transcript_1/1_Conf_1.000 | 167  | 20 | 5.99E-23 | ACZ06864.1     | 100 | 110.538 | 55  | 55  | nucleophosmin                                            |
| Locus_26158_Transcript_1/1_Conf_1.000 | 166  | 0  |          |                |     |         |     |     |                                                          |
| Locus_26159_Transcript_1/1_Conf_1.000 | 1092 | 20 | 1.31E-23 | XP_001894303.1 | 47  | 115.161 | 363 | 173 | hypothetical protein Bm1_14190                           |
| Locus_2616_Transcript_1/2_Conf_1.000  | 2344 | 20 | 1.00E-25 | NP_495784.1    | 43  | 123.635 | 486 | 212 | ZYGote defective: embryonic lethal family member (zyg-9) |
| Locus_2616_Transcript_2/2_Conf_1.000  | 2343 | 20 | 1.00E-25 | NP_495784.1    | 43  | 123.635 | 486 | 212 | ZYGote defective: embryonic lethal family member (zyg-9) |
| Locus_26160_Transcript_1/1_Conf_1.000 | 499  | 20 | 9.40E-37 | XP_002634598.1 | 79  | 156.377 | 133 | 106 | Hypothetical protein CBG08413                            |
| Locus_26161_Transcript_1/1_Conf_1.000 | 235  | 4  | 1.29E-33 | NP_499479.2    | 96  | 145.976 | 78  | 75  | hypothetical protein Y66D12A.24                          |
| Locus_26162_Transcript_1/1_Conf_1.000 | 285  | 1  | 3.03E-14 | CAR63594.1     | 66  | 81.6481 | 84  | 56  | hypothetical protein                                     |
| Locus_26163_Transcript_1/1_Conf_1.000 | 152  | 0  |          |                |     |         |     |     |                                                          |
| Locus_26164_Transcript_1/1_Conf_1.000 | 324  | 0  |          |                |     |         |     |     |                                                          |
| Locus_26165_Transcript_1/1_Conf_1.000 | 214  | 0  |          |                |     |         |     |     |                                                          |
| Locus_26166_Transcript_1/1_Conf_1.000 | 297  | 0  |          |                |     |         |     |     |                                                          |
| Locus_26167_Transcript_1/1_Conf_1.000 | 242  | 0  |          |                |     |         |     |     |                                                          |
| Locus_26168_Transcript_1/1_Conf_1.000 | 139  | 0  |          |                |     |         |     |     |                                                          |
| Locus_26169_Transcript_1/1_Conf_1.000 | 260  | 20 | 3.09E-43 | NP_057578.1    | 100 | 177.948 | 86  | 86  | E3 ubiquitin-protein ligase RNF181                       |



|                                       |      |    |           |                |    |         |     |     |                                                             |
|---------------------------------------|------|----|-----------|----------------|----|---------|-----|-----|-------------------------------------------------------------|
| Locus_2617_Transcript_1/1_Conf_1.000  | 728  | 20 | 3.77E-24  | XP_002648620.1 | 62 | 115.931 | 154 | 97  | Hypothetical protein CBG24963                               |
| Locus_26170_Transcript_1/1_Conf_1.000 | 156  | 0  |           |                |    |         |     |     |                                                             |
| Locus_26171_Transcript_1/1_Conf_1.000 | 148  | 0  |           |                |    |         |     |     |                                                             |
| Locus_26172_Transcript_1/1_Conf_1.000 | 141  | 0  |           |                |    |         |     |     |                                                             |
| Locus_26173_Transcript_1/1_Conf_1.000 | 154  | 0  |           |                |    |         |     |     |                                                             |
| Locus_26174_Transcript_1/1_Conf_1.000 | 350  | 0  |           |                |    |         |     |     |                                                             |
| Locus_26175_Transcript_1/1_Conf_1.000 | 136  | 0  |           |                |    |         |     |     |                                                             |
| Locus_26176_Transcript_1/1_Conf_1.000 | 152  | 0  |           |                |    |         |     |     |                                                             |
| Locus_26177_Transcript_1/1_Conf_1.000 | 314  | 3  | 2.74E-15  | XP_002631142.1 | 64 | 85.1149 | 102 | 66  | C. briggsae CBR-TAG-180 protein                             |
| Locus_26178_Transcript_1/1_Conf_1.000 | 166  | 9  | 1.13E-13  | NP_001021638.1 | 85 | 79.7221 | 54  | 46  | hypothetical protein T23G11.6                               |
| Locus_26179_Transcript_1/1_Conf_1.000 | 159  | 3  | 9.34E-08  | XP_002641147.1 | 78 | 60.077  | 52  | 41  | C. briggsae CBR-RGS-5 protein                               |
| Locus_2618_Transcript_1/2_Conf_1.000  | 886  | 20 | 1.69E-134 | XP_002639887.1 | 92 | 483.026 | 270 | 251 | C. briggsae CBR-RSKN-2 protein                              |
| Locus_2618_Transcript_2/2_Conf_1.000  | 1076 | 20 | 2.91E-161 | NP_001040645.1 | 90 | 572.392 | 333 | 301 | RSK-pNinety (RSK-p90 kinase) homolog family member (rskn-2) |
| Locus_26180_Transcript_1/1_Conf_1.000 | 150  | 0  |           |                |    |         |     |     |                                                             |
| Locus_26181_Transcript_1/1_Conf_1.000 | 182  | 0  |           |                |    |         |     |     |                                                             |

|                                       |     |    |          |                |     |         |     |     |                                                                               |
|---------------------------------------|-----|----|----------|----------------|-----|---------|-----|-----|-------------------------------------------------------------------------------|
| Locus_26182_Transcript_1/1_Conf_1.000 | 211 | 0  |          |                |     |         |     |     |                                                                               |
| Locus_26183_Transcript_1/1_Conf_1.000 | 193 | 2  | 6.08E-07 | AAV28323.2     | 56  | 57.3806 | 60  | 34  | Hypothetical protein T15B7.1                                                  |
| Locus_26184_Transcript_1/1_Conf_1.000 | 137 | 20 | 3.99E-11 | NP_492907.2    | 100 | 71.2478 | 36  | 36  | Cyclin-Dependent Kinase family member (cdk-9)                                 |
| Locus_26185_Transcript_1/1_Conf_1.000 | 555 | 14 | 1.88E-14 | CBW48338.1     | 59  | 82.8037 | 121 | 72  | Hypothetical protein C27A7.1d                                                 |
| Locus_26186_Transcript_1/1_Conf_1.000 | 166 | 0  |          |                |     |         |     |     |                                                                               |
| Locus_26187_Transcript_1/1_Conf_1.000 | 161 | 0  |          |                |     |         |     |     |                                                                               |
| Locus_26188_Transcript_1/1_Conf_1.000 | 153 | 0  |          |                |     |         |     |     |                                                                               |
| Locus_26189_Transcript_1/1_Conf_1.000 | 336 | 2  | 1.85E-08 | XP_002641514.1 | 54  | 62.3882 | 116 | 63  | Hypothetical protein CBG09809                                                 |
| Locus_2619_Transcript_1/1_Conf_1.000  | 696 | 20 | 2.24E-39 | NP_497896.1    | 71  | 166.392 | 146 | 105 | PDCD (mammalian Programmed Cell Death protein) homolog family member (pdcd-2) |
| Locus_26190_Transcript_1/1_Conf_1.000 | 343 | 20 | 2.22E-41 | XP_002629896.1 | 77  | 171.785 | 113 | 88  | Hypothetical protein CBG21934                                                 |
| Locus_26191_Transcript_1/1_Conf_1.000 | 144 | 6  | 1.16E-05 | XP_002603196.1 | 67  | 53.1434 | 43  | 29  | hypothetical protein BRAFLDRAFT_226530                                        |
| Locus_26192_Transcript_1/1_Conf_1.000 | 378 | 20 | 2.67E-47 | NP_498062.2    | 84  | 191.43  | 126 | 106 | hypothetical protein R144.6                                                   |
| Locus_26193_Transcript_1/1_Conf_1.000 | 178 | 0  |          |                |     |         |     |     |                                                                               |
| Locus_26194_Transcript_1/1_Conf_1.000 | 164 | 0  |          |                |     |         |     |     |                                                                               |
| Locus_26195_Transcript_1/1_Conf_1.000 | 215 | 0  |          |                |     |         |     |     |                                                                               |
| Locus_26196_Transcript_1/1_Conf_1.000 | 294 | 2  | 1.59E-07 | NP_509975.1    | 66  | 59.3066 | 98  | 65  | Temporarily Assigned Gene name family member (tag-241)                        |
| Locus_26197_Transcript_1/1_Conf_1.000 | 217 | 0  |          |                |     |         |     |     |                                                                               |

|                                       |      |    |          |                |     |         |     |     |                                                                |
|---------------------------------------|------|----|----------|----------------|-----|---------|-----|-----|----------------------------------------------------------------|
| Locus_26198_Transcript_1/1_Conf_1.000 | 169  | 20 | 1.68E-25 | XP_520842.1    | 100 | 119.013 | 56  | 56  | PREDICTED: interferon, alpha-inducible protein (clone IFI-15K) |
| Locus_26199_Transcript_1/1_Conf_1.000 | 169  | 0  |          |                |     |         |     |     |                                                                |
| Locus_262_Transcript_1/1_Conf_1.000   | 347  | 0  |          |                |     |         |     |     |                                                                |
| Locus_2620_Transcript_1/2_Conf_1.000  | 2085 | 20 | 0        | XP_002648832.1 | 90  | 856.67  | 551 | 497 | Hypothetical protein CBG16947                                  |
| Locus_2620_Transcript_2/2_Conf_1.000  | 2086 | 20 | 0        | XP_002648832.1 | 90  | 857.825 | 551 | 497 | Hypothetical protein CBG16947                                  |
| Locus_26200_Transcript_1/1_Conf_1.000 | 139  | 0  |          |                |     |         |     |     |                                                                |
| Locus_26201_Transcript_1/1_Conf_1.000 | 368  | 0  |          |                |     |         |     |     |                                                                |
| Locus_26202_Transcript_1/1_Conf_1.000 | 134  | 20 | 6.82E-11 | NP_001041125.1 | 92  | 70.4774 | 38  | 35  | hypothetical protein F55C5.11                                  |
| Locus_26203_Transcript_1/1_Conf_1.000 | 159  | 0  |          |                |     |         |     |     |                                                                |
| Locus_26204_Transcript_1/1_Conf_1.000 | 142  | 0  |          |                |     |         |     |     |                                                                |
| Locus_26205_Transcript_1/1_Conf_1.000 | 194  | 0  |          |                |     |         |     |     |                                                                |
| Locus_26206_Transcript_1/1_Conf_1.000 | 135  | 0  |          |                |     |         |     |     |                                                                |
| Locus_26207_Transcript_1/1_Conf_1.000 | 137  | 0  |          |                |     |         |     |     |                                                                |
| Locus_26208_Transcript_1/1_Conf_1.000 | 199  | 0  |          |                |     |         |     |     |                                                                |
| Locus_26209_Transcript_1/1_Conf_1.000 | 142  | 0  |          |                |     |         |     |     |                                                                |
| Locus_2621_Transcript_1/1_Conf_1.000  | 843  | 0  |          |                |     |         |     |     |                                                                |
| Locus_26210_Transcript_1/1_Conf_1.000 | 170  | 0  |          |                |     |         |     |     |                                                                |
| Locus_26211_Transcript_1/1_Conf_1.000 | 276  | 20 | 2.17E-33 | CAR63560.1     | 84  | 145.206 | 91  | 77  | hypothetical protein                                           |
| Locus_26212_Transcript_1/1_Conf_1.000 | 273  | 20 | 3.13E-48 | ADN38247.1     | 100 | 194.512 | 90  | 90  | MHC class I antigen                                            |
| Locus_26213_Transcript_1/1_Conf_1.000 | 155  | 0  |          |                |     |         |     |     |                                                                |

|                                       |      |    |          |                |    |         |     |     |                                                   |
|---------------------------------------|------|----|----------|----------------|----|---------|-----|-----|---------------------------------------------------|
| Locus_26214_Transcript_1/1_Conf_1.000 | 188  | 20 | 2.65E-18 | XP_002632123.1 | 85 | 95.1301 | 62  | 53  | C. briggsae CBR-CWN-1 protein                     |
| Locus_26215_Transcript_1/1_Conf_1.000 | 213  | 0  |          |                |    |         |     |     |                                                   |
| Locus_26216_Transcript_1/1_Conf_1.000 | 334  | 0  |          |                |    |         |     |     |                                                   |
| Locus_26217_Transcript_1/1_Conf_1.000 | 137  | 0  |          |                |    |         |     |     |                                                   |
| Locus_26218_Transcript_1/1_Conf_1.000 | 269  | 0  |          |                |    |         |     |     |                                                   |
| Locus_26219_Transcript_1/1_Conf_1.000 | 133  | 0  |          |                |    |         |     |     |                                                   |
| Locus_2622_Transcript_1/2_Conf_1.000  | 1092 | 20 | 2.52E-67 | XP_001895980.1 | 59 | 260.381 | 367 | 220 | RNA pol II accessory factor, Cdc73 family protein |
| Locus_2622_Transcript_2/2_Conf_1.000  | 1092 | 20 | 2.52E-67 | XP_001895980.1 | 59 | 260.381 | 367 | 220 | RNA pol II accessory factor, Cdc73 family protein |
| Locus_26220_Transcript_1/1_Conf_1.000 | 193  | 20 | 4.63E-23 | XP_001636325.1 | 93 | 110.923 | 63  | 59  | predicted protein                                 |
| Locus_26221_Transcript_1/1_Conf_1.000 | 389  | 20 | 3.13E-32 | XP_001897373.1 | 65 | 141.354 | 135 | 89  | B-box zinc finger family protein                  |
| Locus_26222_Transcript_1/1_Conf_1.000 | 271  | 20 | 1.42E-16 | XP_002641225.1 | 80 | 89.3521 | 62  | 50  | C. briggsae CBR-SMA-4 protein                     |
| Locus_26223_Transcript_1/1_Conf_1.000 | 148  | 0  |          |                |    |         |     |     |                                                   |
| Locus_26224_Transcript_1/1_Conf_1.000 | 249  | 1  | 3.59E-04 | CAD56659.1     | 55 | 48.1358 | 78  | 43  | ancylostoma-secreted protein-like protein         |

|                                       |     |    |          |                |    |         |     |     |                                           |
|---------------------------------------|-----|----|----------|----------------|----|---------|-----|-----|-------------------------------------------|
| Locus_26225_Transcript_1/1_Conf_1.000 | 255 | 11 | 5.52E-08 | NP_492051.1    | 65 | 60.8474 | 70  | 46  | yeast BUB homolog family member (bub-1)   |
| Locus_26226_Transcript_1/1_Conf_1.000 | 398 | 20 | 6.64E-46 | ACQ44114.1     | 82 | 186.808 | 132 | 109 | multidrug resistance-associated protein 2 |
| Locus_26227_Transcript_1/1_Conf_1.000 | 180 | 16 | 2.59E-05 | XP_002631000.1 | 53 | 51.9878 | 64  | 34  | Hypothetical protein CBG02746             |
| Locus_26228_Transcript_1/1_Conf_1.000 | 147 | 0  |          |                |    |         |     |     |                                           |
| Locus_26229_Transcript_1/1_Conf_1.000 | 142 | 0  |          |                |    |         |     |     |                                           |
| Locus_2623_Transcript_1/1_Conf_1.000  | 240 | 0  |          |                |    |         |     |     |                                           |
| Locus_26230_Transcript_1/1_Conf_1.000 | 144 | 0  |          |                |    |         |     |     |                                           |
| Locus_26231_Transcript_1/1_Conf_1.000 | 267 | 20 | 3.50E-31 | XP_002632463.1 | 86 | 137.887 | 88  | 76  | Hypothetical protein CBG13687             |
| Locus_26232_Transcript_1/1_Conf_1.000 | 170 | 0  |          |                |    |         |     |     |                                           |
| Locus_26233_Transcript_1/1_Conf_1.000 | 272 | 7  | 3.07E-11 | NP_001023197.1 | 61 | 71.633  | 86  | 53  | hypothetical protein F38E11.6             |
| Locus_26234_Transcript_1/1_Conf_1.000 | 235 | 0  |          |                |    |         |     |     |                                           |
| Locus_26235_Transcript_1/1_Conf_1.000 | 238 | 0  |          |                |    |         |     |     |                                           |
| Locus_26236_Transcript_1/1_Conf_1.000 | 241 | 0  |          |                |    |         |     |     |                                           |
| Locus_26237_Transcript_1/1_Conf_1.000 | 218 | 12 | 2.55E-26 | AAV41897.1     | 84 | 121.709 | 72  | 61  | SAX-2                                     |
| Locus_26238_Transcript_1/1_Conf_1.000 | 145 | 0  |          |                |    |         |     |     |                                           |
| Locus_26239_Transcript_1/1_Conf_1.000 | 154 | 0  |          |                |    |         |     |     |                                           |
| Locus_2624_Transcript_1/1_Conf_1.000  | 361 | 20 | 2.85E-17 | XP_002639922.1 | 65 | 91.6633 | 92  | 60  | Hypothetical protein CBG08254             |
| Locus_26240_Transcript_1/1_Conf_1.000 | 130 | 0  |          |                |    |         |     |     |                                           |
| Locus_26241_Transcript_1/1_Conf_1.000 | 238 | 2  | 2.52E-05 | EFO27157.1     | 70 | 51.9878 | 50  | 35  | hypothetical protein LOAG_01331           |
| Locus_26242_Transcript_1/1_Conf_1.000 | 149 | 9  | 2.25E-09 | NP_495746.1    | 72 | 65.4698 | 48  | 35  | hypothetical protein K01C8.7              |
| Locus_26243_Transcript_1/1_Conf_1.000 | 225 | 0  |          |                |    |         |     |     |                                           |

|                                       |     |    |           |                |    |         |     |     |                                          |
|---------------------------------------|-----|----|-----------|----------------|----|---------|-----|-----|------------------------------------------|
| Locus_26244_Transcript_1/1_Conf_1.000 | 200 | 20 | 1.39E-19  | NP_491529.2    | 89 | 99.3673 | 64  | 57  | hypothetical protein Y110A7A.6           |
| Locus_26245_Transcript_1/1_Conf_1.000 | 180 | 20 | 6.56E-17  | AAA18259.1     | 93 | 90.5077 | 47  | 44  | protein kinase C                         |
| Locus_26246_Transcript_1/1_Conf_1.000 | 244 | 20 | 1.33E-06  | NP_504102.2    | 62 | 56.225  | 72  | 45  | Cytochrome P450 family member (cyp-34A8) |
| Locus_26247_Transcript_1/1_Conf_1.000 | 141 | 0  |           |                |    |         |     |     |                                          |
| Locus_26248_Transcript_1/1_Conf_1.000 | 138 | 0  |           |                |    |         |     |     |                                          |
| Locus_26249_Transcript_1/1_Conf_1.000 | 284 | 1  | 8.29E-04  | XP_001898167.1 | 66 | 46.9802 | 42  | 28  | hypothetical protein Bm1_33605           |
| Locus_2625_Transcript_1/1_Conf_1.000  | 630 | 20 | 2.87E-106 | NP_496787.1    | 94 | 388.267 | 209 | 197 | hypothetical protein F29C12.4            |
| Locus_26250_Transcript_1/1_Conf_1.000 | 170 | 20 | 6.37E-25  | EDL19700.1     | 98 | 117.087 | 54  | 53  | mCG129661, isoform CRA_d                 |
| Locus_26251_Transcript_1/1_Conf_1.000 | 153 | 0  |           |                |    |         |     |     |                                          |
| Locus_26252_Transcript_1/1_Conf_1.000 | 167 | 0  |           |                |    |         |     |     |                                          |
| Locus_26253_Transcript_1/1_Conf_1.000 | 161 | 0  |           |                |    |         |     |     |                                          |

|                                       |      |    |           |                |    |         |     |     |                                                                          |
|---------------------------------------|------|----|-----------|----------------|----|---------|-----|-----|--------------------------------------------------------------------------|
| Locus_26254_Transcript_1/1_Conf_1.000 | 208  | 20 | 3.87E-06  | XP_002643160.1 | 62 | 54.6842 | 72  | 45  | Hypothetical protein CBG15341                                            |
| Locus_26255_Transcript_1/1_Conf_1.000 | 205  | 20 | 5.42E-08  | XP_001926555.1 | 66 | 60.8474 | 54  | 36  | PREDICTED: similar to protein tyrosine phosphatase, non-receptor type 20 |
| Locus_26256_Transcript_1/1_Conf_1.000 | 157  | 0  |           |                |    |         |     |     |                                                                          |
| Locus_26257_Transcript_1/1_Conf_1.000 | 165  | 0  |           |                |    |         |     |     |                                                                          |
| Locus_26258_Transcript_1/1_Conf_1.000 | 237  | 20 | 2.77E-28  | XP_002634167.1 | 87 | 128.257 | 78  | 68  | Hypothetical protein CBG01734                                            |
| Locus_26259_Transcript_1/1_Conf_1.000 | 265  | 0  |           |                |    |         |     |     |                                                                          |
| Locus_2626_Transcript_1/2_Conf_0.600  | 1533 | 20 | 2.30E-78  | XP_001899238.1 | 57 | 297.745 | 526 | 301 | Low-density lipoprotein receptor repeat class B containing protein       |
| Locus_2626_Transcript_2/2_Conf_0.400  | 1581 | 20 | 1.86E-115 | XP_002640024.1 | 65 | 421.009 | 513 | 337 | Hypothetical protein CBG12496                                            |
| Locus_26260_Transcript_1/1_Conf_1.000 | 166  | 0  |           |                |    |         |     |     |                                                                          |
| Locus_26261_Transcript_1/1_Conf_1.000 | 197  | 20 | 2.01E-18  | XP_002640668.1 | 95 | 95.5153 | 65  | 62  | C. briggsae CBR-UNC-54 protein                                           |
| Locus_26262_Transcript_1/1_Conf_1.000 | 243  | 0  |           |                |    |         |     |     |                                                                          |
| Locus_26263_Transcript_1/1_Conf_1.000 | 280  | 0  |           |                |    |         |     |     |                                                                          |
| Locus_26264_Transcript_1/1_Conf_1.000 | 128  | 0  |           |                |    |         |     |     |                                                                          |
| Locus_26265_Transcript_1/1_Conf_1.000 | 141  | 0  |           |                |    |         |     |     |                                                                          |
| Locus_26266_Transcript_1/1_Conf_1.000 | 185  | 0  |           |                |    |         |     |     |                                                                          |

|                                       |     |    |          |                |     |         |     |     |                                                                        |
|---------------------------------------|-----|----|----------|----------------|-----|---------|-----|-----|------------------------------------------------------------------------|
| Locus_26267_Transcript_1/1_Conf_1.000 | 308 | 20 | 1.12E-13 | XP_002642390.1 | 61  | 79.7221 | 97  | 60  | Hypothetical protein CBG18394                                          |
| Locus_26268_Transcript_1/1_Conf_1.000 | 255 | 9  | 8.18E-36 | NP_496430.1    | 92  | 153.295 | 83  | 77  | hypothetical protein C33B4.2                                           |
| Locus_26269_Transcript_1/1_Conf_1.000 | 146 | 9  | 2.33E-14 | NP_504648.1    | 81  | 82.0333 | 48  | 39  | Carnitine Palmitoyl Transferase family member (cpt-6)                  |
| Locus_2627_Transcript_1/1_Conf_1.000  | 386 | 20 | 1.04E-67 | XP_002640454.1 | 100 | 259.225 | 128 | 128 | C. briggsae CBR-APS-3 protein                                          |
| Locus_26270_Transcript_1/2_Conf_1.000 | 301 | 0  |          |                |     |         |     |     |                                                                        |
| Locus_26270_Transcript_2/2_Conf_1.000 | 346 | 0  |          |                |     |         |     |     |                                                                        |
| Locus_26271_Transcript_1/1_Conf_1.000 | 141 | 0  |          |                |     |         |     |     |                                                                        |
| Locus_26272_Transcript_1/1_Conf_1.000 | 136 | 7  | 1.42E-08 | NP_872018.1    | 84  | 62.7734 | 38  | 32  | Anion/Bicarbonate TranSporter family member (abts-3)                   |
| Locus_26273_Transcript_1/1_Conf_1.000 | 350 | 20 | 1.70E-17 | EFO27552.1     | 56  | 92.4337 | 109 | 62  | G-patch domain-containing protein                                      |
| Locus_26274_Transcript_1/1_Conf_1.000 | 170 | 4  | 1.63E-12 | XP_001140303.1 | 100 | 75.8702 | 46  | 46  | PREDICTED: hypothetical protein                                        |
| Locus_26275_Transcript_1/1_Conf_1.000 | 186 | 15 | 1.45E-16 | XP_002811847.1 | 98  | 89.3521 | 61  | 60  | PREDICTED: midkine-like                                                |
| Locus_26276_Transcript_1/2_Conf_1.000 | 253 | 20 | 1.31E-25 | NP_001023126.1 | 73  | 119.398 | 84  | 62  | Cleavage and Polyadenylation Specificity Factor family member (cpsf-4) |
| Locus_26276_Transcript_2/2_Conf_1.000 | 259 | 20 | 2.22E-25 | NP_001023126.1 | 72  | 118.627 | 86  | 62  | Cleavage and Polyadenylation Specificity Factor family member (cpsf-4) |
| Locus_26277_Transcript_1/1_Conf_1.000 | 384 | 0  |          |                |     |         |     |     |                                                                        |
| Locus_26278_Transcript_1/1_Conf_1.000 | 124 | 0  |          |                |     |         |     |     |                                                                        |
| Locus_26279_Transcript_1/1_Conf_1.000 | 251 | 20 | 9.07E-32 | XP_002644858.1 | 83  | 139.813 | 83  | 69  | Hypothetical protein CBG05031                                          |
| Locus_2628_Transcript_1/2_Conf_1.000  | 430 | 0  |          |                |     |         |     |     |                                                                        |



|                                       |     |    |          |                |     |         |    |    |                                                         |
|---------------------------------------|-----|----|----------|----------------|-----|---------|----|----|---------------------------------------------------------|
| Locus_2628_Transcript_2/2_Conf_1.000  | 436 | 0  |          |                |     |         |    |    |                                                         |
| Locus_26280_Transcript_1/1_Conf_1.000 | 200 | 10 | 5.10E-14 | NP_502380.1    | 86  | 80.8777 | 52 | 45 | hypothetical protein C25G4.6                            |
| Locus_26281_Transcript_1/1_Conf_1.000 | 183 | 3  | 2.66E-10 | XP_002638520.1 | 72  | 68.5514 | 59 | 43 | C. briggsae CBR-LGC-2 protein                           |
| Locus_26282_Transcript_1/1_Conf_1.000 | 303 | 0  |          |                |     |         |    |    |                                                         |
| Locus_26283_Transcript_1/1_Conf_1.000 | 187 | 0  |          |                |     |         |    |    |                                                         |
| Locus_26284_Transcript_1/1_Conf_1.000 | 242 | 2  | 1.80E-11 | XP_002641160.1 | 76  | 72.4034 | 50 | 38 | Hypothetical protein CBG09017                           |
| Locus_26285_Transcript_1/1_Conf_1.000 | 192 | 0  |          |                |     |         |    |    |                                                         |
| Locus_26286_Transcript_1/1_Conf_1.000 | 131 | 6  | 1.33E-14 | BAD93059.1     | 100 | 82.8037 | 43 | 43 | ADP,ATP carrier protein, liver isoform T2 variant       |
| Locus_26287_Transcript_1/1_Conf_1.000 | 268 | 0  |          |                |     |         |    |    |                                                         |
| Locus_26288_Transcript_1/1_Conf_1.000 | 211 | 0  |          |                |     |         |    |    |                                                         |
| Locus_26289_Transcript_1/1_Conf_1.000 | 203 | 19 | 1.53E-10 | AAN34967.1     | 66  | 69.3218 | 66 | 44 | thioredoxin 2                                           |
| Locus_2629_Transcript_1/1_Conf_1.000  | 283 | 2  | 8.27E-12 | XP_002646505.1 | 66  | 73.559  | 81 | 54 | Hypothetical protein CBG20338                           |
| Locus_26290_Transcript_1/1_Conf_1.000 | 200 | 0  |          |                |     |         |    |    |                                                         |
| Locus_26291_Transcript_1/1_Conf_1.000 | 152 | 20 | 1.96E-13 | ZP_02865662.1  | 77  | 78.9518 | 49 | 38 | conserved hypothetical protein                          |
| Locus_26292_Transcript_1/1_Conf_1.000 | 193 | 0  |          |                |     |         |    |    |                                                         |
| Locus_26293_Transcript_1/1_Conf_1.000 | 143 | 0  |          |                |     |         |    |    |                                                         |
| Locus_26294_Transcript_1/1_Conf_1.000 | 181 | 20 | 3.47E-26 | 3O3T           | 100 | 121.324 | 60 | 60 | CrystalStructure Analysis Of M32a Mutant Of Human Clic1 |

|                                       |      |    |          |                |     |         |     |     |                                                         |
|---------------------------------------|------|----|----------|----------------|-----|---------|-----|-----|---------------------------------------------------------|
| Locus_26295_Transcript_1/1_Conf_1.000 | 154  | 20 | 4.80E-20 | XP_002920111.1 | 100 | 100.908 | 51  | 51  | PREDICTED: amyloid beta A4 protein-like isoform 4       |
| Locus_26296_Transcript_1/1_Conf_1.000 | 534  | 0  |          |                |     |         |     |     |                                                         |
| Locus_26297_Transcript_1/1_Conf_1.000 | 319  | 20 | 1.44E-24 | XP_970656.1    | 71  | 115.931 | 106 | 76  | PREDICTED: similar to Histone deacetylase 11 (HD11)     |
| Locus_26298_Transcript_1/1_Conf_1.000 | 146  | 0  |          |                |     |         |     |     |                                                         |
| Locus_26299_Transcript_1/1_Conf_1.000 | 203  | 0  |          |                |     |         |     |     |                                                         |
| Locus_263_Transcript_1/1_Conf_1.000   | 296  | 0  |          |                |     |         |     |     |                                                         |
| Locus_2630_Transcript_1/1_Conf_1.000  | 1463 | 20 | 2.65E-44 | XP_001897852.1 | 54  | 184.496 | 348 | 191 | notch-like transmembrane receptor                       |
| Locus_26300_Transcript_1/1_Conf_1.000 | 130  | 20 | 5.78E-18 | NP_497235.2    | 100 | 93.9745 | 43  | 43  | G-protein-coupled Receptor Kinase family member (grk-2) |
| Locus_26301_Transcript_1/1_Conf_1.000 | 132  | 0  |          |                |     |         |     |     |                                                         |
| Locus_26302_Transcript_1/1_Conf_1.000 | 133  | 0  |          |                |     |         |     |     |                                                         |
| Locus_26303_Transcript_1/1_Conf_1.000 | 230  | 4  | 1.76E-14 | NP_503353.2    | 70  | 82.4185 | 77  | 54  | hypothetical protein H24K24.4                           |
| Locus_26304_Transcript_1/1_Conf_1.000 | 163  | 0  |          |                |     |         |     |     |                                                         |
| Locus_26305_Transcript_1/1_Conf_1.000 | 189  | 20 | 2.39E-19 | NP_001122539.1 | 87  | 98.5969 | 62  | 54  | hypothetical protein Y47G6A.19                          |
| Locus_26306_Transcript_1/1_Conf_1.000 | 470  | 20 | 8.34E-41 | XP_002642877.1 | 74  | 169.859 | 146 | 109 | Hypothetical protein CBG15147                           |
| Locus_26307_Transcript_1/1_Conf_1.000 | 138  | 0  |          |                |     |         |     |     |                                                         |
| Locus_26308_Transcript_1/1_Conf_1.000 | 190  | 1  | 1.15E-05 | AAA68328.2     | 54  | 53.1434 | 62  | 34  | Hypothetical protein F35D2.4                            |

|                                       |     |    |          |                |     |         |     |     |                                                                          |
|---------------------------------------|-----|----|----------|----------------|-----|---------|-----|-----|--------------------------------------------------------------------------|
| Locus_26309_Transcript_1/1_Conf_1.000 | 187 | 0  |          |                |     |         |     |     |                                                                          |
| Locus_2631_Transcript_1/2_Conf_1.000  | 856 | 0  |          |                |     |         |     |     |                                                                          |
| Locus_2631_Transcript_2/2_Conf_1.000  | 436 | 1  | 6.15E-04 | ZP_05975603.1  | 48  | 47.3654 | 121 | 59  | conserved hypothetical protein                                           |
| Locus_26310_Transcript_1/1_Conf_1.000 | 355 | 5  | 1.57E-39 | XP_002642902.1 | 81  | 165.622 | 116 | 94  | Hypothetical protein CBG15176                                            |
| Locus_26311_Transcript_1/1_Conf_1.000 | 164 | 0  |          |                |     |         |     |     |                                                                          |
| Locus_26312_Transcript_1/1_Conf_1.000 | 415 | 0  |          |                |     |         |     |     |                                                                          |
| Locus_26313_Transcript_1/1_Conf_1.000 | 558 | 1  | 1.10E-06 | XP_001895331.1 | 43  | 56.9954 | 158 | 68  | hypothetical protein Bm1_19380                                           |
| Locus_26314_Transcript_1/1_Conf_1.000 | 188 | 3  | 1.31E-17 | NP_504623.1    | 86  | 92.8189 | 60  | 52  | hypothetical protein F13H6.5                                             |
| Locus_26315_Transcript_1/1_Conf_1.000 | 139 | 0  |          |                |     |         |     |     |                                                                          |
| Locus_26316_Transcript_1/1_Conf_1.000 | 129 | 0  |          |                |     |         |     |     |                                                                          |
| Locus_26317_Transcript_1/1_Conf_1.000 | 167 | 0  |          |                |     |         |     |     |                                                                          |
| Locus_26318_Transcript_1/1_Conf_1.000 | 130 | 0  |          |                |     |         |     |     |                                                                          |
| Locus_26319_Transcript_1/1_Conf_1.000 | 146 | 0  |          |                |     |         |     |     |                                                                          |
| Locus_2632_Transcript_1/1_Conf_1.000  | 415 | 4  | 4.84E-17 | XP_002645042.1 | 69  | 90.8929 | 106 | 74  | C. briggsae CBR-ACL-12 protein                                           |
| Locus_26320_Transcript_1/1_Conf_1.000 | 346 | 20 | 5.81E-50 | EFO21680.1     | 92  | 200.29  | 115 | 106 | hypothetical protein LOAG_06808                                          |
| Locus_26321_Transcript_1/1_Conf_1.000 | 190 | 0  |          |                |     |         |     |     |                                                                          |
| Locus_26322_Transcript_1/1_Conf_1.000 | 199 | 6  | 1.64E-12 | NP_491802.1    | 75  | 75.8702 | 66  | 50  | hypothetical protein C48E7.6                                             |
| Locus_26323_Transcript_1/1_Conf_1.000 | 253 | 20 | 2.92E-25 | CAA21622.4     | 81  | 118.242 | 83  | 68  | C. elegans protein Y43F8C.12, partially confirmed by transcript evidence |
| Locus_26324_Transcript_1/1_Conf_1.000 | 182 | 0  |          |                |     |         |     |     |                                                                          |
| Locus_26325_Transcript_1/1_Conf_1.000 | 179 | 11 | 1.23E-12 | AAN11401.1     | 75  | 76.2554 | 57  | 43  | metalloprotease 1 precursor                                              |
| Locus_26326_Transcript_1/1_Conf_1.000 | 181 | 9  | 1.91E-16 | NP_001020988.1 | 82  | 88.9669 | 57  | 47  | UNCoordinated family member (unc-89)                                     |
| Locus_26327_Transcript_1/1_Conf_1.000 | 155 | 12 | 2.09E-07 | XP_001897657.1 | 70  | 58.9214 | 51  | 36  | aminoadipate-semialdehyde dehydrogenase-phosphopantetheinyl transferase  |
| Locus_26328_Transcript_1/1_Conf_1.000 | 412 | 0  |          |                |     |         |     |     |                                                                          |
| Locus_26329_Transcript_1/1_Conf_1.000 | 213 | 0  |          |                |     |         |     |     |                                                                          |
| Locus_2633_Transcript_1/1_Conf_1.000  | 398 | 20 | 5.58E-69 | AAH51205.1     | 100 | 263.462 | 131 | 131 | Rps15a protein                                                           |
| Locus_26330_Transcript_1/1_Conf_1.000 | 253 | 3  | 2.11E-07 | XP_002638396.1 | 59  | 58.9214 | 84  | 50  | Hypothetical protein CBG18605                                            |
| Locus_26331_Transcript_1/1_Conf_1.000 | 144 | 0  |          |                |     |         |     |     |                                                                          |
| Locus_26332_Transcript_1/1_Conf_1.000 | 171 | 0  |          |                |     |         |     |     |                                                                          |

|                                       |     |    |          |                |     |         |     |     |                                       |
|---------------------------------------|-----|----|----------|----------------|-----|---------|-----|-----|---------------------------------------|
| Locus_26333_Transcript_1/1_Conf_1.000 | 150 | 20 | 4.36E-21 | BAD96849.1     | 100 | 104.375 | 49  | 49  | defender against cell death 1 variant |
| Locus_26334_Transcript_1/1_Conf_1.000 | 136 | 0  |          |                |     |         |     |     |                                       |
| Locus_26335_Transcript_1/1_Conf_1.000 | 505 | 20 | 3.09E-14 | XP_783768.2    | 56  | 81.6481 | 161 | 91  | PREDICTED: similar to Sec14l1 protein |
| Locus_26336_Transcript_1/1_Conf_1.000 | 145 | 8  | 2.66E-18 | XP_002637345.1 | 97  | 95.1301 | 48  | 47  | C. briggsae CBR-UNC-68 protein        |
| Locus_26337_Transcript_1/1_Conf_1.000 | 155 | 0  |          |                |     |         |     |     |                                       |
| Locus_26338_Transcript_1/1_Conf_1.000 | 462 | 0  |          |                |     |         |     |     |                                       |
| Locus_26339_Transcript_1/1_Conf_1.000 | 224 | 2  | 4.09E-11 | XP_002637395.1 | 68  | 71.2478 | 72  | 49  | Hypothetical protein CBG19102         |
| Locus_2634_Transcript_1/1_Conf_1.000  | 651 | 20 | 1.52E-60 | EFO21579.1     | 86  | 236.498 | 189 | 164 | RiNg Finger protein family member     |
| Locus_26340_Transcript_1/1_Conf_1.000 | 255 | 14 | 2.82E-20 | XP_002633446.1 | 74  | 101.679 | 87  | 65  | Hypothetical protein CBG06214         |
| Locus_26341_Transcript_1/1_Conf_1.000 | 133 | 0  |          |                |     |         |     |     |                                       |
| Locus_26342_Transcript_1/1_Conf_1.000 | 273 | 0  |          |                |     |         |     |     |                                       |
| Locus_26343_Transcript_1/1_Conf_1.000 | 203 | 1  | 3.65E-04 | NP_001076618.1 | 70  | 48.1358 | 40  | 28  | hypothetical protein Y110A7A.21       |
| Locus_26344_Transcript_1/1_Conf_1.000 | 273 | 0  |          |                |     |         |     |     |                                       |
| Locus_26345_Transcript_1/1_Conf_1.000 | 238 | 0  |          |                |     |         |     |     |                                       |
| Locus_26346_Transcript_1/1_Conf_1.000 | 138 | 0  |          |                |     |         |     |     |                                       |
| Locus_26347_Transcript_1/1_Conf_1.000 | 334 | 0  |          |                |     |         |     |     |                                       |
| Locus_26348_Transcript_1/1_Conf_1.000 | 314 | 0  |          |                |     |         |     |     |                                       |
| Locus_26349_Transcript_1/1_Conf_1.000 | 446 | 20 | 2.00E-26 | XP_001902022.1 | 65  | 122.094 | 148 | 97  | hypothetical protein Bm1_52770        |
| Locus_2635_Transcript_1/1_Conf_1.000  | 670 | 0  |          |                |     |         |     |     |                                       |

|                                       |     |    |          |                |     |         |     |     |                                                                  |
|---------------------------------------|-----|----|----------|----------------|-----|---------|-----|-----|------------------------------------------------------------------|
| Locus_26350_Transcript_1/1_Conf_1.000 | 151 | 20 | 6.09E-15 | XP_510220.2    | 100 | 83.9593 | 50  | 50  | PREDICTED: similar to Ig H-chain (C-D-JH4) precursor             |
| Locus_26351_Transcript_1/1_Conf_1.000 | 149 | 0  |          |                |     |         |     |     |                                                                  |
| Locus_26352_Transcript_1/1_Conf_1.000 | 341 | 20 | 8.26E-09 | EFO21921.1     | 50  | 63.5438 | 108 | 55  | hypothetical protein LOAG_06561                                  |
| Locus_26353_Transcript_1/1_Conf_1.000 | 214 | 2  | 4.39E-10 | XP_002643263.1 | 80  | 67.781  | 71  | 57  | Hypothetical protein CBG08133                                    |
| Locus_26354_Transcript_1/1_Conf_1.000 | 166 | 0  |          |                |     |         |     |     |                                                                  |
| Locus_26355_Transcript_1/1_Conf_1.000 | 169 | 0  |          |                |     |         |     |     |                                                                  |
| Locus_26356_Transcript_1/1_Conf_1.000 | 240 | 20 | 8.92E-11 | XP_002410853.1 | 63  | 70.0922 | 60  | 38  | cysteine-rich secretory protein-buccal gland secretion, putative |
| Locus_26357_Transcript_1/1_Conf_1.000 | 157 | 0  |          |                |     |         |     |     |                                                                  |
| Locus_26358_Transcript_1/1_Conf_1.000 | 182 | 0  |          |                |     |         |     |     |                                                                  |
| Locus_26359_Transcript_1/1_Conf_1.000 | 196 | 0  |          |                |     |         |     |     |                                                                  |
| Locus_2636_Transcript_1/1_Conf_1.000  | 518 | 3  | 2.98E-23 | ADI24662.1     | 65  | 111.694 | 155 | 101 | Hypothetical protein Y110A2AL.12a                                |
| Locus_26360_Transcript_1/1_Conf_1.000 | 186 | 0  |          |                |     |         |     |     |                                                                  |
| Locus_26361_Transcript_1/1_Conf_1.000 | 135 | 0  |          |                |     |         |     |     |                                                                  |
| Locus_26362_Transcript_1/1_Conf_1.000 | 144 | 0  |          |                |     |         |     |     |                                                                  |
| Locus_26363_Transcript_1/1_Conf_1.000 | 228 | 0  |          |                |     |         |     |     |                                                                  |
| Locus_26364_Transcript_1/1_Conf_1.000 | 281 | 0  |          |                |     |         |     |     |                                                                  |
| Locus_26365_Transcript_1/1_Conf_1.000 | 256 | 16 | 5.52E-08 | NP_510810.3    | 66  | 60.8474 | 56  | 37  | PaTched Related family member (ptr-5)                            |
| Locus_26366_Transcript_1/1_Conf_1.000 | 150 | 20 | 1.23E-15 | XP_002636676.1 | 87  | 86.2705 | 49  | 43  | Hypothetical protein CBG23390                                    |
| Locus_26367_Transcript_1/1_Conf_1.000 | 359 | 0  |          |                |     |         |     |     |                                                                  |
| Locus_26368_Transcript_1/1_Conf_1.000 | 227 | 2  | 4.49E-18 | NP_499205.1    | 76  | 94.3597 | 72  | 55  | hypothetical protein K03H1.5                                     |
| Locus_26369_Transcript_1/1_Conf_1.000 | 215 | 0  |          |                |     |         |     |     |                                                                  |
| Locus_2637_Transcript_1/1_Conf_1.000  | 976 | 20 | 2.03E-62 | XP_002631377.1 | 82  | 243.817 | 240 | 197 | Hypothetical protein CBG03219                                    |
| Locus_26370_Transcript_1/1_Conf_1.000 | 131 | 0  |          |                |     |         |     |     |                                                                  |
| Locus_26371_Transcript_1/1_Conf_1.000 | 153 | 0  |          |                |     |         |     |     |                                                                  |
| Locus_26372_Transcript_1/1_Conf_1.000 | 282 | 0  |          |                |     |         |     |     |                                                                  |
| Locus_26373_Transcript_1/1_Conf_1.000 | 154 | 0  |          |                |     |         |     |     |                                                                  |
| Locus_26374_Transcript_1/1_Conf_1.000 | 132 | 0  |          |                |     |         |     |     |                                                                  |
| Locus_26375_Transcript_1/1_Conf_1.000 | 133 | 0  |          |                |     |         |     |     |                                                                  |
| Locus_26376_Transcript_1/1_Conf_1.000 | 271 | 20 | 3.99E-35 | XP_001892290.1 | 76  | 150.984 | 89  | 68  | EGF-like domain containing protein                               |
| Locus_26377_Transcript_1/1_Conf_1.000 | 145 | 0  |          |                |     |         |     |     |                                                                  |

|                                       |     |    |          |                |     |         |     |     |                                           |
|---------------------------------------|-----|----|----------|----------------|-----|---------|-----|-----|-------------------------------------------|
| Locus_26378_Transcript_1/1_Conf_1.000 | 241 | 20 | 1.42E-16 | P41755.1       | 75  | 89.3521 | 81  | 61  | NAD-specific glutamate dehydrogenase      |
| Locus_26379_Transcript_1/1_Conf_1.000 | 187 | 0  |          |                |     |         |     |     |                                           |
| Locus_2638_Transcript_1/1_Conf_1.000  | 255 | 0  |          |                |     |         |     |     |                                           |
| Locus_26380_Transcript_1/1_Conf_1.000 | 162 | 0  |          |                |     |         |     |     |                                           |
| Locus_26381_Transcript_1/1_Conf_1.000 | 130 | 20 | 1.13E-13 | NP_493247.2    | 88  | 79.7221 | 43  | 38  | hypothetical protein Y18D10A.9            |
| Locus_26382_Transcript_1/1_Conf_1.000 | 209 | 20 | 9.81E-26 | EFO23768.1     | 86  | 119.783 | 68  | 59  | hypothetical protein LOAG_04713           |
| Locus_26383_Transcript_1/1_Conf_1.000 | 133 | 0  |          |                |     |         |     |     |                                           |
| Locus_26384_Transcript_1/1_Conf_1.000 | 124 | 0  |          |                |     |         |     |     |                                           |
| Locus_26385_Transcript_1/1_Conf_1.000 | 195 | 0  |          |                |     |         |     |     |                                           |
| Locus_26386_Transcript_1/1_Conf_1.000 | 139 | 20 | 1.12E-13 | XP_001849399.1 | 86  | 79.7221 | 46  | 40  | multidrug resistance protein 2            |
| Locus_26387_Transcript_1/1_Conf_1.000 | 284 | 0  |          |                |     |         |     |     |                                           |
| Locus_26388_Transcript_1/1_Conf_1.000 | 204 | 3  | 2.28E-06 | AAK84608.3     | 81  | 55.4546 | 65  | 53  | AC024790_6Hypothetical protein Y47D7A.14a |
| Locus_26389_Transcript_1/1_Conf_1.000 | 357 | 20 | 1.73E-30 | NP_500803.1    | 73  | 135.576 | 101 | 74  | hypothetical protein ZK616.3              |
| Locus_2639_Transcript_1/1_Conf_1.000  | 846 | 20 | 2.08E-86 | XP_001894717.1 | 76  | 323.168 | 250 | 192 | SPRY domain containing protein            |
| Locus_26390_Transcript_1/1_Conf_1.000 | 162 | 20 | 2.52E-21 | EFO15057.1     | 100 | 105.145 | 53  | 53  | DNA polymerase epsilon catalytic subunit  |
| Locus_26391_Transcript_1/1_Conf_1.000 | 129 | 0  |          |                |     |         |     |     |                                           |

|                                       |     |    |          |                |     |         |     |     |                                                               |
|---------------------------------------|-----|----|----------|----------------|-----|---------|-----|-----|---------------------------------------------------------------|
| Locus_26392_Transcript_1/1_Conf_1.000 | 131 | 0  |          |                |     |         |     |     |                                                               |
| Locus_26393_Transcript_1/1_Conf_1.000 | 268 | 20 | 3.99E-43 | NP_001020988.1 | 97  | 177.563 | 88  | 86  | UNCoordinated family member (unc-89)                          |
| Locus_26394_Transcript_1/1_Conf_1.000 | 159 | 0  |          |                |     |         |     |     |                                                               |
| Locus_26395_Transcript_1/1_Conf_1.000 | 143 | 0  |          |                |     |         |     |     |                                                               |
| Locus_26396_Transcript_1/1_Conf_1.000 | 175 | 3  | 6.36E-09 | NP_741731.1    | 86  | 63.929  | 37  | 32  | SERotonin/octopamine receptor family member (ser-7)           |
| Locus_26397_Transcript_1/1_Conf_1.000 | 129 | 0  |          |                |     |         |     |     |                                                               |
| Locus_26398_Transcript_1/1_Conf_1.000 | 157 | 20 | 3.32E-21 | XP_002828837.1 | 100 | 104.76  | 52  | 52  | PREDICTED: PDZ domain-containing protein GIPC1-like isoform 1 |
| Locus_26399_Transcript_1/1_Conf_1.000 | 171 | 0  |          |                |     |         |     |     |                                                               |
| Locus_264_Transcript_1/1_Conf_1.000   | 628 | 20 | 2.41E-89 | XP_002630255.1 | 93  | 332.028 | 195 | 182 | C. briggsae CBR-CCT-4 protein                                 |
| Locus_2640_Transcript_1/1_Conf_1.000  | 541 | 20 | 5.62E-58 | NP_501688.1    | 84  | 227.254 | 149 | 126 | hypothetical protein C33A12.1                                 |

|                                       |      |    |          |                |     |         |     |     |                                                                                 |
|---------------------------------------|------|----|----------|----------------|-----|---------|-----|-----|---------------------------------------------------------------------------------|
| Locus_26400_Transcript_1/1_Conf_1.000 | 150  | 20 | 1.96E-13 | ABB02455.1     | 93  | 78.9518 | 43  | 40  | anti-anthrax monoclonal antibody A63-6                                          |
| Locus_26401_Transcript_1/1_Conf_1.000 | 153  | 0  |          |                |     |         |     |     |                                                                                 |
| Locus_26402_Transcript_1/1_Conf_1.000 | 152  | 0  |          |                |     |         |     |     |                                                                                 |
| Locus_26403_Transcript_1/1_Conf_1.000 | 139  | 5  | 7.49E-10 | CAA88959.2     | 84  | 67.0106 | 44  | 37  | C. elegans protein M03C11.2, partially confirmed by transcript evidence         |
| Locus_26404_Transcript_1/1_Conf_1.000 | 161  | 1  | 4.79E-04 | NP_493077.1    | 65  | 47.7506 | 52  | 34  | hypothetical protein R05D7.4                                                    |
| Locus_26405_Transcript_1/1_Conf_1.000 | 467  | 0  |          |                |     |         |     |     |                                                                                 |
| Locus_26406_Transcript_1/1_Conf_1.000 | 170  | 0  |          |                |     |         |     |     |                                                                                 |
| Locus_26407_Transcript_1/1_Conf_1.000 | 155  | 20 | 2.73E-07 | XP_002933280.1 | 79  | 58.5362 | 49  | 39  | PREDICTED: protein phosphatase 1L                                               |
| Locus_26408_Transcript_1/1_Conf_1.000 | 283  | 20 | 3.80E-49 | ACJ65168.1     | 100 | 197.593 | 94  | 94  | Uncoordinated protein 68, isoform b, partially confirmed by transcript evidence |
| Locus_26409_Transcript_1/1_Conf_1.000 | 174  | 0  |          |                |     |         |     |     |                                                                                 |
| Locus_2641_Transcript_1/1_Conf_1.000  | 1343 | 20 | 7.05E-73 | XP_001894296.1 | 55  | 279.256 | 459 | 255 | hypothetical protein                                                            |
| Locus_26410_Transcript_1/1_Conf_1.000 | 146  | 4  | 7.76E-10 | NP_505445.2    | 76  | 67.0106 | 46  | 35  | Nematode ASTacin protease family member (nas-3)                                 |
| Locus_26411_Transcript_1/1_Conf_1.000 | 289  | 20 | 4.48E-26 | XP_002634104.1 | 76  | 120.939 | 91  | 70  | Hypothetical protein CBG01656                                                   |
| Locus_26412_Transcript_1/1_Conf_1.000 | 352  | 20 | 1.62E-44 | XP_002637101.1 | 84  | 182.185 | 116 | 98  | Hypothetical protein CBG09600                                                   |
| Locus_26413_Transcript_1/1_Conf_1.000 | 130  | 0  |          |                |     |         |     |     |                                                                                 |
| Locus_26414_Transcript_1/1_Conf_1.000 | 186  | 0  |          |                |     |         |     |     |                                                                                 |
| Locus_26415_Transcript_1/1_Conf_1.000 | 249  | 0  |          |                |     |         |     |     |                                                                                 |
| Locus_26416_Transcript_1/1_Conf_1.000 | 140  | 0  |          |                |     |         |     |     |                                                                                 |
| Locus_26417_Transcript_1/1_Conf_1.000 | 167  | 0  |          |                |     |         |     |     |                                                                                 |
| Locus_26418_Transcript_1/1_Conf_1.000 | 128  | 0  |          |                |     |         |     |     |                                                                                 |



|                                       |      |    |          |                |     |         |     |     |                                                                                     |  |
|---------------------------------------|------|----|----------|----------------|-----|---------|-----|-----|-------------------------------------------------------------------------------------|--|
| Locus_26419_Transcript_1/1_Conf_1.000 | 225  | 0  |          |                |     |         |     |     |                                                                                     |  |
| Locus_2642_Transcript_1/1_Conf_1.000  | 2537 | 20 | 0        | NP_001041024.1 | 70  | 737.643 | 688 | 487 | hypothetical protein Y41E3.1                                                        |  |
| Locus_26420_Transcript_1/1_Conf_1.000 | 155  | 0  |          |                |     |         |     |     |                                                                                     |  |
| Locus_26421_Transcript_1/1_Conf_1.000 | 140  | 3  | 2.49E-05 | NP_492193.2    | 71  | 51.9878 | 45  | 32  | JunctoPHilin family member (jph-1)                                                  |  |
| Locus_26422_Transcript_1/1_Conf_1.000 | 144  | 20 | 3.98E-14 | NP_507487.1    | 89  | 81.2629 | 48  | 43  | P-GlycoProtein related family member (pgp-9)                                        |  |
| Locus_26423_Transcript_1/1_Conf_1.000 | 401  | 20 | 1.34E-30 | XP_002630350.1 | 70  | 135.961 | 137 | 96  | Hypothetical protein CBG04280                                                       |  |
| Locus_26424_Transcript_1/1_Conf_1.000 | 145  | 0  |          |                |     |         |     |     |                                                                                     |  |
| Locus_26425_Transcript_1/1_Conf_1.000 | 208  | 0  |          |                |     |         |     |     |                                                                                     |  |
| Locus_26426_Transcript_1/1_Conf_1.000 | 175  | 0  |          |                |     |         |     |     |                                                                                     |  |
| Locus_26427_Transcript_1/1_Conf_1.000 | 214  | 3  | 5.74E-10 | NP_504373.2    | 65  | 67.3958 | 69  | 45  | hypothetical protein F14F9.5                                                        |  |
| Locus_26428_Transcript_1/1_Conf_1.000 | 135  | 2  | 3.73E-09 | NP_510616.2    | 75  | 64.6994 | 44  | 33  | Multidrug Resistance Protein family member (mrp-3)                                  |  |
| Locus_26429_Transcript_1/1_Conf_1.000 | 379  | 20 | 3.41E-18 | XP_002630819.1 | 59  | 94.7449 | 125 | 74  | Hypothetical protein CBG02521                                                       |  |
| Locus_2643_Transcript_1/1_Conf_1.000  | 569  | 20 | 1.63E-85 | XP_001895824.1 | 92  | 318.931 | 189 | 174 | SH2 domain containing protein                                                       |  |
| Locus_26430_Transcript_1/1_Conf_1.000 | 143  | 0  |          |                |     |         |     |     |                                                                                     |  |
| Locus_26431_Transcript_1/1_Conf_1.000 | 147  | 20 | 3.70E-20 | 3N3G           | 100 | 101.293 | 48  | 48  | 4-(3-Trifluoromethylphenyl)-Pyrimidine-2-Carbonitrile As Cathepsin S Inhibitors: N3 |  |
| Locus_26432_Transcript_1/1_Conf_1.000 | 216  | 0  |          |                |     |         |     |     |                                                                                     |  |
| Locus_26433_Transcript_1/1_Conf_1.000 | 133  | 0  |          |                |     |         |     |     |                                                                                     |  |
| Locus_26434_Transcript_1/1_Conf_1.000 | 333  | 20 | 2.95E-14 | CBL43415.1     | 65  | 81.6481 | 81  | 53  | C. elegans protein C32C4.2b, partially confirmed by transcript evidence             |  |
| Locus_26435_Transcript_1/1_Conf_1.000 | 133  | 0  |          |                |     |         |     |     |                                                                                     |  |
| Locus_26436_Transcript_1/1_Conf_1.000 | 195  | 4  | 1.03E-06 | XP_002634339.1 | 63  | 56.6102 | 65  | 41  | C. briggsae CBR-RIC-3 protein                                                       |  |

|                                       |      |    |          |                |     |         |     |     |                                                                 |
|---------------------------------------|------|----|----------|----------------|-----|---------|-----|-----|-----------------------------------------------------------------|
| Locus_26437_Transcript_1/1_Conf_1.000 | 373  | 20 | 1.02E-46 | XP_002636748.1 | 87  | 189.504 | 124 | 109 | Hypothetical protein CBG23475                                   |
| Locus_26438_Transcript_1/1_Conf_1.000 | 184  | 20 | 3.71E-12 | EFO26419.1     | 70  | 74.7146 | 55  | 39  | hypothetical protein LOAG_02064                                 |
| Locus_26439_Transcript_1/1_Conf_1.000 | 153  | 4  | 9.70E-13 | NP_491050.3    | 87  | 76.6406 | 47  | 41  | InTestinal Neurexin-like family member (itx-1)                  |
| Locus_2644_Transcript_1/1_Conf_1.000  | 1443 | 14 | 1.40E-05 | XP_001478231.1 | 47  | 55.8398 | 193 | 92  | PREDICTED: hypothetical protein                                 |
| Locus_26440_Transcript_1/1_Conf_1.000 | 138  | 20 | 3.96E-19 | XP_002810977.1 | 100 | 97.8265 | 45  | 45  | PREDICTED: v-type proton ATPase 21 kDa proteolipid subunit-like |
| Locus_26441_Transcript_1/1_Conf_1.000 | 318  | 0  |          |                |     |         |     |     |                                                                 |
| Locus_26442_Transcript_1/1_Conf_1.000 | 284  | 20 | 2.47E-40 | XP_002637017.1 | 89  | 168.318 | 94  | 84  | Hypothetical protein CBG09510                                   |
| Locus_26443_Transcript_1/1_Conf_1.000 | 168  | 1  | 4.75E-04 | EFO23545.1     | 64  | 47.7506 | 48  | 31  | hypothetical protein LOAG_04940                                 |
| Locus_26444_Transcript_1/1_Conf_1.000 | 193  | 0  |          |                |     |         |     |     |                                                                 |
| Locus_26445_Transcript_1/1_Conf_1.000 | 176  | 0  |          |                |     |         |     |     |                                                                 |
| Locus_26446_Transcript_1/1_Conf_1.000 | 227  | 4  | 4.81E-12 | XP_002636929.1 | 81  | 74.3294 | 75  | 61  | Hypothetical protein CBG09397                                   |
| Locus_26447_Transcript_1/1_Conf_1.000 | 130  | 20 | 3.17E-16 | NP_500379.1    | 95  | 88.1965 | 43  | 41  | hypothetical protein Y37E11B.5                                  |
| Locus_26448_Transcript_1/1_Conf_1.000 | 144  | 0  |          |                |     |         |     |     |                                                                 |
| Locus_26449_Transcript_1/1_Conf_1.000 | 191  | 0  |          |                |     |         |     |     |                                                                 |
| Locus_2645_Transcript_1/1_Conf_1.000  | 288  | 0  |          |                |     |         |     |     |                                                                 |
| Locus_26450_Transcript_1/1_Conf_1.000 | 167  | 12 | 4.44E-18 | ACI49219.1     | 87  | 94.3597 | 54  | 47  | hypothetical protein Csp3_JD05.004                              |
| Locus_26451_Transcript_1/1_Conf_1.000 | 140  | 0  |          |                |     |         |     |     |                                                                 |
| Locus_26452_Transcript_1/1_Conf_1.000 | 130  | 20 | 6.61E-14 | AAL14108.1     | 93  | 80.4925 | 43  | 40  | GOP-1                                                           |

|                                       |      |    |           |                |    |         |     |     |                                 |
|---------------------------------------|------|----|-----------|----------------|----|---------|-----|-----|---------------------------------|
| Locus_26453_Transcript_1/1_Conf_1.000 | 208  | 20 | 5.05E-14  | ACU83597.1     | 75 | 80.8777 | 66  | 50  | poly-(ADP-ribose) polymerase I  |
| Locus_26454_Transcript_1/1_Conf_1.000 | 137  | 1  | 5.58E-05  | XP_001390210.1 | 75 | 50.8322 | 45  | 34  | hypothetical protein An03g03270 |
| Locus_26455_Transcript_1/1_Conf_1.000 | 370  | 0  |           |                |    |         |     |     |                                 |
| Locus_26456_Transcript_1/1_Conf_1.000 | 191  | 0  |           |                |    |         |     |     |                                 |
| Locus_26457_Transcript_1/1_Conf_1.000 | 279  | 0  |           |                |    |         |     |     |                                 |
| Locus_26458_Transcript_1/1_Conf_1.000 | 146  | 0  |           |                |    |         |     |     |                                 |
| Locus_26459_Transcript_1/1_Conf_1.000 | 143  | 0  |           |                |    |         |     |     |                                 |
| Locus_2646_Transcript_1/1_Conf_1.000  | 1574 | 20 | 1.20E-114 | XP_002642100.1 | 70 | 418.313 | 422 | 298 | Hypothetical protein CBG18041   |
| Locus_26460_Transcript_1/1_Conf_1.000 | 181  | 4  | 3.15E-11  | XP_002637396.1 | 79 | 71.633  | 63  | 50  | Hypothetical protein CBG19103   |
| Locus_26461_Transcript_1/1_Conf_1.000 | 241  | 0  |           |                |    |         |     |     |                                 |
| Locus_26462_Transcript_1/1_Conf_1.000 | 138  | 0  |           |                |    |         |     |     |                                 |
| Locus_26463_Transcript_1/1_Conf_1.000 | 151  | 0  |           |                |    |         |     |     |                                 |
| Locus_26464_Transcript_1/1_Conf_1.000 | 768  |    |           |                |    |         |     |     |                                 |
| Locus_26465_Transcript_1/1_Conf_1.000 | 200  | 12 | 1.76E-06  | NP_498265.1    | 64 | 55.8398 | 56  | 36  | hypothetical protein F01F1.9    |
| Locus_26466_Transcript_1/1_Conf_1.000 | 137  | 0  |           |                |    |         |     |     |                                 |
| Locus_26467_Transcript_1/1_Conf_1.000 | 137  | 0  |           |                |    |         |     |     |                                 |
| Locus_26468_Transcript_1/1_Conf_1.000 | 129  | 0  |           |                |    |         |     |     |                                 |
| Locus_26469_Transcript_1/1_Conf_1.000 | 198  | 0  |           |                |    |         |     |     |                                 |
| Locus_2647_Transcript_1/1_Conf_1.000  | 265  | 8  | 5.46E-08  | XP_002639256.1 | 79 | 60.8474 | 48  | 38  | Hypothetical protein CBG03816   |
| Locus_26470_Transcript_1/1_Conf_1.000 | 346  | 1  | 7.94E-07  | EFO24319.1     | 52 | 56.9954 | 94  | 49  | hypothetical protein LOAG_04165 |
| Locus_26471_Transcript_1/1_Conf_1.000 | 163  | 20 | 1.94E-13  | XP_001900186.1 | 79 | 78.9518 | 53  | 42  | hypothetical protein            |
| Locus_26472_Transcript_1/1_Conf_1.000 | 131  | 2  | 1.02E-06  | XP_002643817.1 | 65 | 56.6102 | 46  | 30  | Hypothetical protein CBG02032   |

|                                       |     |    |          |                |    |         |     |    |                               |
|---------------------------------------|-----|----|----------|----------------|----|---------|-----|----|-------------------------------|
| Locus_26473_Transcript_1/1_Conf_1.000 | 388 | 20 | 3.13E-32 | XP_002642446.1 | 76 | 141.354 | 130 | 99 | Hypothetical protein CBG06851 |
| Locus_26474_Transcript_1/1_Conf_1.000 | 219 | 12 | 3.04E-06 | XP_002629716.1 | 56 | 55.0694 | 74  | 42 | Hypothetical protein CBG00946 |
| Locus_26475_Transcript_1/1_Conf_1.000 | 286 | 0  |          |                |    |         |     |    |                               |
| Locus_26476_Transcript_1/1_Conf_1.000 | 211 | 3  | 2.96E-06 | XP_002637522.1 | 81 | 55.0694 | 71  | 58 | Hypothetical protein CBG19245 |
| Locus_26477_Transcript_1/1_Conf_1.000 | 142 | 0  |          |                |    |         |     |    |                               |
| Locus_26478_Transcript_1/1_Conf_1.000 | 209 | 0  |          |                |    |         |     |    |                               |
| Locus_26479_Transcript_1/1_Conf_1.000 | 151 | 0  |          |                |    |         |     |    |                               |
| Locus_2648_Transcript_1/1_Conf_1.000  | 156 | 2  | 7.93E-07 | NP_498636.2    | 70 | 56.9954 | 51  | 36 | hypothetical protein T20B12.1 |
| Locus_26480_Transcript_1/1_Conf_1.000 | 324 | 6  | 1.69E-25 | XP_002641872.1 | 63 | 119.013 | 122 | 78 | C. briggsae CBR-LIM-8 protein |
| Locus_26481_Transcript_1/1_Conf_1.000 | 256 | 0  |          |                |    |         |     |    |                               |
| Locus_26482_Transcript_1/1_Conf_1.000 | 154 | 0  |          |                |    |         |     |    |                               |
| Locus_26483_Transcript_1/1_Conf_1.000 | 130 | 0  |          |                |    |         |     |    |                               |
| Locus_26484_Transcript_1/1_Conf_1.000 | 389 | 20 | 3.47E-31 | NP_491716.1    | 66 | 137.887 | 124 | 83 | hypothetical protein B0207.7  |
| Locus_26485_Transcript_1/1_Conf_1.000 | 160 | 0  |          |                |    |         |     |    |                               |
| Locus_26486_Transcript_1/1_Conf_1.000 | 159 | 0  |          |                |    |         |     |    |                               |
| Locus_26487_Transcript_1/1_Conf_1.000 | 347 |    |          |                |    |         |     |    |                               |
| Locus_26488_Transcript_1/1_Conf_1.000 | 153 | 20 | 4.07E-19 | YP_003433734.1 | 94 | 97.8265 | 51  | 48 | ATP synthase F0 subunit 6     |
| Locus_26489_Transcript_1/1_Conf_1.000 | 220 | 0  |          |                |    |         |     |    |                               |
| Locus_2649_Transcript_1/1_Conf_1.000  | 310 | 0  |          |                |    |         |     |    |                               |
| Locus_26490_Transcript_1/1_Conf_1.000 | 247 | 20 | 9.44E-21 | XP_002646475.1 | 75 | 103.219 | 82  | 62 | Hypothetical protein CBG19448 |
| Locus_26491_Transcript_1/1_Conf_1.000 | 223 | 0  |          |                |    |         |     |    |                               |
| Locus_26492_Transcript_1/1_Conf_1.000 | 175 | 0  |          |                |    |         |     |    |                               |
| Locus_26493_Transcript_1/1_Conf_1.000 | 375 | 3  | 3.19E-24 | XP_002642192.1 | 63 | 114.775 | 123 | 78 | Hypothetical protein CBG18160 |
| Locus_26494_Transcript_1/1_Conf_1.000 | 206 | 0  |          |                |    |         |     |    |                               |
| Locus_26495_Transcript_1/1_Conf_1.000 | 260 | 20 | 1.49E-21 | NP_502245.1    | 75 | 105.916 | 84  | 63 | hypothetical protein F38H4.5  |
| Locus_26496_Transcript_1/1_Conf_1.000 | 158 | 0  |          |                |    |         |     |    |                               |
| Locus_26497_Transcript_1/1_Conf_1.000 | 134 | 0  |          |                |    |         |     |    |                               |
| Locus_26498_Transcript_1/1_Conf_1.000 | 341 | 0  |          |                |    |         |     |    |                               |
| Locus_26499_Transcript_1/1_Conf_1.000 | 281 | 0  |          |                |    |         |     |    |                               |

|                                       |      |    |           |                |     |         |     |     |                                                                                       |
|---------------------------------------|------|----|-----------|----------------|-----|---------|-----|-----|---------------------------------------------------------------------------------------|
| Locus_265_Transcript_1/1_Conf_1.000   | 1118 | 20 | 1.90E-118 | NP_509362.1    | 85  | 430.254 | 301 | 258 | Dauer or Aging adult Overexpression family member (dao-3)                             |
| Locus_2650_Transcript_1/1_Conf_1.000  | 592  | 20 | 4.52E-52  | NP_001171651.1 | 100 | 207.994 | 102 | 102 | glucose-6-phosphate isomerase isoform 1                                               |
| Locus_26500_Transcript_1/1_Conf_1.000 | 147  | 1  | 4.53E-10  | NP_497796.1    | 86  | 67.781  | 37  | 32  | hypothetical protein F37A8.5                                                          |
| Locus_26501_Transcript_1/1_Conf_1.000 | 297  | 0  |           |                |     |         |     |     |                                                                                       |
| Locus_26502_Transcript_1/1_Conf_1.000 | 237  | 0  |           |                |     |         |     |     |                                                                                       |
| Locus_26503_Transcript_1/1_Conf_1.000 | 134  | 0  |           |                |     |         |     |     |                                                                                       |
| Locus_26504_Transcript_1/1_Conf_1.000 | 159  | 0  |           |                |     |         |     |     |                                                                                       |
| Locus_26505_Transcript_1/1_Conf_1.000 | 186  | 5  | 8.51E-17  | NP_001122868.1 | 85  | 90.1225 | 61  | 52  | GLioTactin (Drosophila neuroligin-like) homolog family member (nrx-1)                 |
| Locus_26506_Transcript_1/1_Conf_1.000 | 170  | 0  |           |                |     |         |     |     |                                                                                       |
| Locus_26507_Transcript_1/1_Conf_1.000 | 132  | 20 | 1.98E-10  | EFO23808.1     | 86  | 68.9366 | 43  | 37  | hypothetical protein LOAG_04674                                                       |
| Locus_26508_Transcript_1/1_Conf_1.000 | 143  | 0  |           |                |     |         |     |     |                                                                                       |
| Locus_26509_Transcript_1/1_Conf_1.000 | 149  | 0  |           |                |     |         |     |     |                                                                                       |
| Locus_2651_Transcript_1/2_Conf_1.000  | 1422 | 20 | 7.72E-25  | XP_002641168.1 | 56  | 119.783 | 167 | 95  | Hypothetical protein CBG09025                                                         |
| Locus_2651_Transcript_2/2_Conf_1.000  | 1251 | 20 | 2.31E-30  | NP_498306.3    | 74  | 137.887 | 110 | 82  | hypothetical protein T04C9.1                                                          |
| Locus_26510_Transcript_1/1_Conf_1.000 | 144  | 0  |           |                |     |         |     |     |                                                                                       |
| Locus_26511_Transcript_1/1_Conf_1.000 | 134  | 17 | 7.04E-16  | XP_521343.2    | 97  | 87.0409 | 44  | 43  | PREDICTED: similar to L antigen family, member 3                                      |
| Locus_26512_Transcript_1/1_Conf_1.000 | 158  | 0  |           |                |     |         |     |     |                                                                                       |
| Locus_26513_Transcript_1/1_Conf_1.000 | 179  | 0  |           |                |     |         |     |     |                                                                                       |
| Locus_26514_Transcript_1/1_Conf_1.000 | 140  | 6  | 1.20E-07  | NP_001129925.1 | 79  | 59.6918 | 44  | 35  | High Incidence of Males (increased X chromosome loss) family member (him-4)           |
| Locus_26515_Transcript_1/1_Conf_1.000 | 168  | 0  |           |                |     |         |     |     |                                                                                       |
| Locus_26516_Transcript_1/1_Conf_1.000 | 213  | 0  |           |                |     |         |     |     |                                                                                       |
| Locus_26517_Transcript_1/1_Conf_1.000 | 219  | 20 | 3.03E-22  | NP_505548.1    | 81  | 108.227 | 69  | 56  | FSHR (mammalian follicle stimulating hormone receptor) homolog family member (fshr-1) |
| Locus_26518_Transcript_1/1_Conf_1.000 | 145  | 0  |           |                |     |         |     |     |                                                                                       |

|                                       |     |    |           |                |    |         |     |     |                                        |
|---------------------------------------|-----|----|-----------|----------------|----|---------|-----|-----|----------------------------------------|
| Locus_26519_Transcript_1/1_Conf_1.000 | 165 | 0  |           |                |    |         |     |     |                                        |
| Locus_2652_Transcript_1/1_Conf_1.000  | 759 | 0  |           |                |    |         |     |     |                                        |
| Locus_26520_Transcript_1/1_Conf_1.000 | 133 | 0  |           |                |    |         |     |     |                                        |
| Locus_26521_Transcript_1/1_Conf_1.000 | 361 | 8  | 2.85E-25  | XP_002640492.1 | 71 | 118.242 | 119 | 85  | Hypothetical protein CBG13628          |
| Locus_26522_Transcript_1/1_Conf_1.000 | 159 | 0  |           |                |    |         |     |     |                                        |
| Locus_26523_Transcript_1/1_Conf_1.000 | 239 | 0  |           |                |    |         |     |     |                                        |
| Locus_26524_Transcript_1/1_Conf_1.000 | 325 | 20 | 1.17E-34  | XP_002636068.1 | 78 | 149.443 | 107 | 84  | Hypothetical protein CBG01308          |
| Locus_26525_Transcript_1/1_Conf_1.000 | 261 | 0  |           |                |    |         |     |     |                                        |
| Locus_26526_Transcript_1/1_Conf_1.000 | 358 | 3  | 5.93E-39  | XP_001900400.1 | 79 | 163.696 | 120 | 95  | Zinc finger, C2H2 type family protein  |
| Locus_26527_Transcript_1/1_Conf_1.000 | 197 | 20 | 6.46E-17  | EFO26573.1     | 79 | 90.5077 | 64  | 51  | O-glycosyl hydrolase family 30 protein |
| Locus_26528_Transcript_1/1_Conf_1.000 | 185 | 0  |           |                |    |         |     |     |                                        |
| Locus_26529_Transcript_1/1_Conf_1.000 | 364 | 0  |           |                |    |         |     |     |                                        |
| Locus_2653_Transcript_1/1_Conf_1.000  | 865 | 20 | 3.79E-115 | XP_002646059.1 | 91 | 418.698 | 289 | 263 | C. briggsae CBR-PMR-1 protein          |
| Locus_26530_Transcript_1/1_Conf_1.000 | 171 | 20 | 5.95E-23  | AAY14814.1     | 96 | 110.538 | 56  | 54  | unknown                                |
| Locus_26531_Transcript_1/1_Conf_1.000 | 181 | 0  |           |                |    |         |     |     |                                        |

|                                       |      |    |           |                |     |         |     |     |                                                 |
|---------------------------------------|------|----|-----------|----------------|-----|---------|-----|-----|-------------------------------------------------|
| Locus_26532_Transcript_1/1_Conf_1.000 | 253  | 20 | 1.27E-12  | EDM01692.1     | 78  | 76.2554 | 56  | 44  | cold shock domain protein A, isoform CRA_a      |
| Locus_26533_Transcript_1/1_Conf_1.000 | 135  | 20 | 1.41E-16  | XP_002916718.1 | 100 | 89.3521 | 44  | 44  | PREDICTED: stress-induced-phosphoprotein 1-like |
| Locus_26534_Transcript_1/1_Conf_1.000 | 133  | 2  | 6.18E-04  | XP_002629723.1 | 80  | 47.3654 | 40  | 32  | C. briggsae CBR-UGT-58 protein                  |
| Locus_26535_Transcript_1/1_Conf_1.000 | 141  | 4  | 1.41E-08  | XP_002637554.1 | 73  | 62.7734 | 46  | 34  | Hypothetical protein CBG19286                   |
| Locus_26536_Transcript_1/1_Conf_1.000 | 188  | 20 | 1.90E-08  | NP_001022736.1 | 71  | 62.3882 | 46  | 33  | hypothetical protein R155.1                     |
| Locus_26537_Transcript_1/1_Conf_1.000 | 184  | 8  | 6.34E-12  | ABC69942.1     | 71  | 73.9442 | 60  | 43  | STIP                                            |
| Locus_26538_Transcript_1/1_Conf_1.000 | 427  | 20 | 4.02E-19  | XP_002637195.1 | 72  | 97.8265 | 87  | 63  | C. briggsae CBR-LIG-1 protein                   |
| Locus_26539_Transcript_1/1_Conf_1.000 | 150  | 2  | 3.24E-08  | XP_002634886.1 | 79  | 61.6178 | 48  | 38  | Hypothetical protein CBG10557                   |
| Locus_2654_Transcript_1/1_Conf_1.000  | 1199 | 20 | 1.10E-159 | XP_002633720.1 | 84  | 567.385 | 376 | 316 | C. briggsae CBR-PPS-1 protein                   |
| Locus_26540_Transcript_1/1_Conf_1.000 | 213  | 0  |           |                |     |         |     |     |                                                 |
| Locus_26541_Transcript_1/1_Conf_1.000 | 140  | 0  |           |                |     |         |     |     |                                                 |
| Locus_26542_Transcript_1/1_Conf_1.000 | 134  | 0  |           |                |     |         |     |     |                                                 |
| Locus_26543_Transcript_1/1_Conf_1.000 | 183  | 0  |           |                |     |         |     |     |                                                 |

|                                       |      |    |           |                |    |         |     |     |                                                                                                              |
|---------------------------------------|------|----|-----------|----------------|----|---------|-----|-----|--------------------------------------------------------------------------------------------------------------|
| Locus_26544_Transcript_1/1_Conf_1.000 | 267  | 1  | 2.99E-06  | NP_508765.1    | 69 | 55.0694 | 56  | 39  | hypothetical protein F25F6.1                                                                                 |
| Locus_26545_Transcript_1/1_Conf_1.000 | 197  | 0  |           |                |    |         |     |     |                                                                                                              |
| Locus_26546_Transcript_1/1_Conf_1.000 | 184  | 0  |           |                |    |         |     |     |                                                                                                              |
| Locus_26547_Transcript_1/1_Conf_1.000 | 325  | 20 | 2.07E-15  | XP_002644902.1 | 62 | 85.5001 | 93  | 58  | Hypothetical protein CBG10839                                                                                |
| Locus_26548_Transcript_1/1_Conf_1.000 | 177  | 0  |           |                |    |         |     |     |                                                                                                              |
| Locus_26549_Transcript_1/1_Conf_1.000 | 148  | 0  |           |                |    |         |     |     |                                                                                                              |
| Locus_2655_Transcript_1/2_Conf_1.000  | 1256 | 20 | 1.02E-70  | NP_001033411.1 | 78 | 271.937 | 277 | 217 | hypothetical protein F53H1.1                                                                                 |
| Locus_2655_Transcript_2/2_Conf_1.000  | 1186 | 20 | 9.43E-71  | NP_001033411.1 | 78 | 271.937 | 277 | 217 | hypothetical protein F53H1.1                                                                                 |
| Locus_26550_Transcript_1/1_Conf_1.000 | 208  | 2  | 3.06E-11  | NP_492839.4    | 73 | 71.633  | 71  | 52  | Leucine-rich repeats, Ras-like domain, Kinase family member (lrk-1)                                          |
| Locus_26551_Transcript_1/1_Conf_1.000 | 140  | 0  |           |                |    |         |     |     |                                                                                                              |
| Locus_26552_Transcript_1/1_Conf_1.000 | 220  | 2  | 1.19E-10  | XP_002642371.1 | 72 | 69.707  | 68  | 49  | Hypothetical protein CBG18375                                                                                |
| Locus_26553_Transcript_1/1_Conf_1.000 | 178  | 0  |           |                |    |         |     |     |                                                                                                              |
| Locus_26554_Transcript_1/1_Conf_1.000 | 165  | 0  |           |                |    |         |     |     |                                                                                                              |
| Locus_26555_Transcript_1/1_Conf_1.000 | 454  | 18 | 2.49E-29  | NP_490848.2    | 62 | 131.724 | 157 | 98  | hypothetical protein Y92H12BR.7                                                                              |
| Locus_26556_Transcript_1/1_Conf_1.000 | 131  | 0  |           |                |    |         |     |     |                                                                                                              |
| Locus_26557_Transcript_1/1_Conf_1.000 | 138  | 0  |           |                |    |         |     |     |                                                                                                              |
| Locus_26558_Transcript_1/1_Conf_1.000 | 367  | 0  |           |                |    |         |     |     |                                                                                                              |
| Locus_26559_Transcript_1/1_Conf_1.000 | 178  | 0  |           |                |    |         |     |     |                                                                                                              |
| Locus_2656_Transcript_1/4_Conf_0.625  | 1790 | 20 | 3.93E-157 | AAO62949.1     | 69 | 559.681 | 551 | 384 | neuronal acetylcholinesterase precursor                                                                      |
| Locus_2656_Transcript_2/4_Conf_0.625  | 1819 | 20 | 5.25E-157 | AAO62949.1     | 69 | 559.296 | 558 | 386 | neuronal acetylcholinesterase precursor                                                                      |
| Locus_2656_Transcript_3/4_Conf_0.625  | 1801 | 20 | 1.23E-158 | AAO62949.1     | 70 | 564.688 | 551 | 386 | neuronal acetylcholinesterase precursor                                                                      |
| Locus_2656_Transcript_4/4_Conf_0.625  | 1801 | 20 | 6.77E-157 | AAO62949.1     | 69 | 558.91  | 551 | 383 | neuronal acetylcholinesterase precursor                                                                      |
| Locus_26560_Transcript_1/1_Conf_1.000 | 244  | 20 | 2.49E-29  | NP_001021650.1 | 85 | 131.724 | 81  | 69  | HaMmeRhead embryonic lethal family member (hmr-1)                                                            |
| Locus_26561_Transcript_1/1_Conf_1.000 | 134  | 1  | 1.57E-07  | XP_853076.1    | 94 | 59.3066 | 34  | 32  | PREDICTED: similar to Actin-related protein 2/3 complex subunit 1B (ARP2/3 complex 41 kDa subunit) (p41-ARC) |



|                                       |     |    |          |                |     |         |     |     |                                      |
|---------------------------------------|-----|----|----------|----------------|-----|---------|-----|-----|--------------------------------------|
| Locus_26562_Transcript_1/1_Conf_1.000 | 145 | 0  |          |                |     |         |     |     |                                      |
| Locus_26563_Transcript_1/1_Conf_1.000 | 259 | 0  |          |                |     |         |     |     |                                      |
| Locus_26564_Transcript_1/1_Conf_1.000 | 294 | 20 | 8.40E-25 | EFO22954.1     | 100 | 116.701 | 57  | 57  | Mef2c protein                        |
| Locus_26565_Transcript_1/1_Conf_1.000 | 178 | 0  |          |                |     |         |     |     |                                      |
| Locus_26566_Transcript_1/1_Conf_1.000 | 130 | 0  |          |                |     |         |     |     |                                      |
| Locus_26567_Transcript_1/1_Conf_1.000 | 179 | 0  |          |                |     |         |     |     |                                      |
| Locus_26568_Transcript_1/1_Conf_1.000 | 216 | 20 | 3.69E-25 | NP_001024175.1 | 90  | 117.857 | 70  | 63  | UNCoordinated family member (unc-62) |
| Locus_26569_Transcript_1/1_Conf_1.000 | 131 | 0  |          |                |     |         |     |     |                                      |
| Locus_2657_Transcript_1/1_Conf_1.000  | 501 | 20 | 3.21E-32 | XP_002644479.1 | 72  | 141.354 | 165 | 119 | C. briggsae CBR-MRP-6 protein        |
| Locus_26570_Transcript_1/1_Conf_1.000 | 155 | 0  |          |                |     |         |     |     |                                      |
| Locus_26571_Transcript_1/1_Conf_1.000 | 129 | 0  |          |                |     |         |     |     |                                      |
| Locus_26572_Transcript_1/1_Conf_1.000 | 383 | 0  |          |                |     |         |     |     |                                      |
| Locus_26573_Transcript_1/1_Conf_1.000 | 355 | 0  |          |                |     |         |     |     |                                      |
| Locus_26574_Transcript_1/1_Conf_1.000 | 161 | 0  |          |                |     |         |     |     |                                      |

|                                       |     |    |          |                |    |         |     |     |                                                 |
|---------------------------------------|-----|----|----------|----------------|----|---------|-----|-----|-------------------------------------------------|
| Locus_26575_Transcript_1/1_Conf_1.000 | 166 | 20 | 1.02E-14 | XP_002640693.1 | 85 | 83.1889 | 54  | 46  | Hypothetical protein CBG19758                   |
| Locus_26576_Transcript_1/1_Conf_1.000 | 181 | 20 | 3.86E-09 | EFO26660.1     | 78 | 64.6994 | 47  | 37  | ELC-1 protein                                   |
| Locus_26577_Transcript_1/1_Conf_1.000 | 171 | 0  |          |                |    |         |     |     |                                                 |
| Locus_26578_Transcript_1/1_Conf_1.000 | 197 | 0  |          |                |    |         |     |     |                                                 |
| Locus_26579_Transcript_1/1_Conf_1.000 | 301 | 0  |          |                |    |         |     |     |                                                 |
| Locus_2658_Transcript_1/2_Conf_1.000  | 551 | 20 | 1.16E-45 | NP_504455.1    | 72 | 186.422 | 179 | 129 | Nuclear Hormone Receptor family member (nhr-47) |
| Locus_2658_Transcript_2/2_Conf_1.000  | 543 | 20 | 1.09E-24 | NP_504455.1    | 88 | 116.701 | 60  | 53  | Nuclear Hormone Receptor family member (nhr-47) |
| Locus_26580_Transcript_1/1_Conf_1.000 | 174 | 0  |          |                |    |         |     |     |                                                 |
| Locus_26581_Transcript_1/1_Conf_1.000 | 135 | 0  |          |                |    |         |     |     |                                                 |
| Locus_26582_Transcript_1/1_Conf_1.000 | 235 | 0  |          |                |    |         |     |     |                                                 |
| Locus_26583_Transcript_1/1_Conf_1.000 | 308 | 0  |          |                |    |         |     |     |                                                 |
| Locus_26584_Transcript_1/1_Conf_1.000 | 147 | 0  |          |                |    |         |     |     |                                                 |
| Locus_26585_Transcript_1/1_Conf_1.000 | 164 | 0  |          |                |    |         |     |     |                                                 |
| Locus_26586_Transcript_1/1_Conf_1.000 | 138 | 0  |          |                |    |         |     |     |                                                 |
| Locus_26587_Transcript_1/1_Conf_1.000 | 149 | 20 | 4.38E-13 | NP_494777.1    | 87 | 77.7962 | 49  | 43  | MoLTing defective family member (mlt-7)         |
| Locus_26588_Transcript_1/1_Conf_1.000 | 764 | 20 | 7.78E-31 | NP_508889.1    | 57 | 138.272 | 184 | 105 | hypothetical protein Y34B4A.7                   |
| Locus_26589_Transcript_1/1_Conf_1.000 | 182 | 0  |          |                |    |         |     |     |                                                 |

|                                       |      |    |           |                |     |         |     |     |                                                      |
|---------------------------------------|------|----|-----------|----------------|-----|---------|-----|-----|------------------------------------------------------|
| Locus_2659_Transcript_1/1_Conf_1.000  | 666  | 20 | 5.40E-93  | XP_001897209.1 | 87  | 344.354 | 220 | 192 | adaptor-related protein complex 2, beta 1 subunit    |
| Locus_26590_Transcript_1/1_Conf_1.000 | 173  | 0  |           |                |     |         |     |     |                                                      |
| Locus_26591_Transcript_1/1_Conf_1.000 | 172  | 20 | 9.80E-26  | 3F8U           | 100 | 119.783 | 57  | 57  | TapasinERP57 HETERODIMER                             |
| Locus_26592_Transcript_1/1_Conf_1.000 | 242  | 5  | 1.24E-20  | NP_001024499.1 | 75  | 102.834 | 77  | 58  | Calcium Channel, Alpha subunit family member (cca-1) |
| Locus_26593_Transcript_1/1_Conf_1.000 | 128  | 0  |           |                |     |         |     |     |                                                      |
| Locus_26594_Transcript_1/1_Conf_1.000 | 265  | 0  |           |                |     |         |     |     |                                                      |
| Locus_26595_Transcript_1/1_Conf_1.000 | 197  | 0  |           |                |     |         |     |     |                                                      |
| Locus_26596_Transcript_1/1_Conf_1.000 | 243  | 20 | 2.33E-19  | XP_002635088.1 | 70  | 98.5969 | 81  | 57  | C. briggsae CBR-ASP-6 protein                        |
| Locus_26597_Transcript_1/1_Conf_1.000 | 207  | 0  |           |                |     |         |     |     |                                                      |
| Locus_26598_Transcript_1/1_Conf_1.000 | 231  | 0  |           |                |     |         |     |     |                                                      |
| Locus_26599_Transcript_1/1_Conf_1.000 | 154  | 0  |           |                |     |         |     |     |                                                      |
| Locus_266_Transcript_1/5_Conf_0.500   | 1644 | 20 | 1.79E-100 | XP_002640720.1 | 53  | 371.318 | 579 | 310 | C. briggsae CBR-TAG-301 protein                      |
| Locus_266_Transcript_2/5_Conf_0.600   | 2140 | 20 | 2.48E-100 | XP_002640720.1 | 53  | 371.318 | 579 | 310 | C. briggsae CBR-TAG-301 protein                      |
| Locus_266_Transcript_3/5_Conf_0.600   | 2136 | 20 | 2.47E-100 | XP_002640720.1 | 53  | 371.318 | 579 | 310 | C. briggsae CBR-TAG-301 protein                      |

|                                       |      |    |           |                |    |         |     |     |                                                                         |
|---------------------------------------|------|----|-----------|----------------|----|---------|-----|-----|-------------------------------------------------------------------------|
| Locus_266_Transcript_4/5_Conf_0.200   | 620  | 20 | 6.30E-34  | XP_002640720.1 | 72 | 147.902 | 127 | 92  | C. briggsae CBR-TAG-301 protein                                         |
| Locus_266_Transcript_5/5_Conf_0.600   | 2140 | 20 | 2.48E-100 | XP_002640720.1 | 53 | 371.318 | 579 | 310 | C. briggsae CBR-TAG-301 protein                                         |
| Locus_2660_Transcript_1/1_Conf_1.000  | 457  | 0  |           |                |    |         |     |     |                                                                         |
| Locus_26600_Transcript_1/1_Conf_1.000 | 157  | 0  |           |                |    |         |     |     |                                                                         |
| Locus_26601_Transcript_1/1_Conf_1.000 | 141  | 0  |           |                |    |         |     |     |                                                                         |
| Locus_26602_Transcript_1/1_Conf_1.000 | 167  | 0  |           |                |    |         |     |     |                                                                         |
| Locus_26603_Transcript_1/1_Conf_1.000 | 139  | 20 | 2.41E-08  | CAR94311.1     | 80 | 62.003  | 45  | 36  | CG3603-PA                                                               |
| Locus_26604_Transcript_1/1_Conf_1.000 | 211  | 20 | 4.71E-12  | XP_002647146.1 | 75 | 74.3294 | 62  | 47  | Hypothetical protein CBG16450                                           |
| Locus_26605_Transcript_1/1_Conf_1.000 | 215  | 20 | 5.90E-31  | CAX51641.1     | 98 | 137.117 | 71  | 70  | C. elegans protein F11E6.8b, partially confirmed by transcript evidence |
| Locus_26606_Transcript_1/1_Conf_1.000 | 157  | 0  |           |                |    |         |     |     |                                                                         |
| Locus_26607_Transcript_1/1_Conf_1.000 | 133  | 0  |           |                |    |         |     |     |                                                                         |
| Locus_26608_Transcript_1/1_Conf_1.000 | 200  | 20 | 9.62E-13  | NP_493608.2    | 85 | 76.6406 | 48  | 41  | hypothetical protein ZK909.3                                            |

|                                       |      |    |          |                |     |         |     |     |                                                                           |
|---------------------------------------|------|----|----------|----------------|-----|---------|-----|-----|---------------------------------------------------------------------------|
| Locus_26609_Transcript_1/1_Conf_1.000 | 208  | 0  |          |                |     |         |     |     |                                                                           |
| Locus_2661_Transcript_1/1_Conf_1.000  | 1657 | 20 | 1.34E-95 | XP_001899995.1 | 91  | 355.14  | 212 | 195 | fizzy-related protein                                                     |
| Locus_26610_Transcript_1/1_Conf_1.000 | 181  | 9  | 1.52E-05 | XP_001197720.1 | 57  | 52.7582 | 57  | 33  | PREDICTED: similar to mannose receptor, C type 1-like 1                   |
| Locus_26611_Transcript_1/1_Conf_1.000 | 208  | 0  |          |                |     |         |     |     |                                                                           |
| Locus_26612_Transcript_1/1_Conf_1.000 | 176  | 2  | 9.19E-08 | NP_496234.3    | 78  | 60.077  | 42  | 33  | hypothetical protein C07E3.6                                              |
| Locus_26613_Transcript_1/1_Conf_1.000 | 222  | 0  |          |                |     |         |     |     |                                                                           |
| Locus_26614_Transcript_1/2_Conf_1.000 | 264  | 20 | 2.22E-09 | XP_002809164.1 | 100 | 65.4698 | 54  | 54  | PREDICTED: HLA class II histocompatibility antigen, DQ alpha 1 chain-like |
| Locus_26614_Transcript_2/2_Conf_1.000 | 290  | 20 | 2.24E-09 | XP_002809164.1 | 100 | 65.4698 | 54  | 54  | PREDICTED: HLA class II histocompatibility antigen, DQ alpha 1 chain-like |
| Locus_26615_Transcript_1/1_Conf_1.000 | 318  | 0  |          |                |     |         |     |     |                                                                           |
| Locus_26616_Transcript_1/1_Conf_1.000 | 220  | 0  |          |                |     |         |     |     |                                                                           |
| Locus_26617_Transcript_1/1_Conf_1.000 | 167  | 0  |          |                |     |         |     |     |                                                                           |
| Locus_26618_Transcript_1/1_Conf_1.000 | 208  | 0  |          |                |     |         |     |     |                                                                           |
| Locus_26619_Transcript_1/1_Conf_1.000 | 282  | 2  | 3.60E-07 | NP_496803.1    | 66  | 58.151  | 66  | 44  | hypothetical protein F15D4.2                                              |
| Locus_2662_Transcript_1/1_Conf_1.000  | 1548 | 20 | 0        | NP_497939.2    | 81  | 761.525 | 516 | 422 | Suppressor/Enhancer of Lin-12 family member (sel-2)                       |
| Locus_26620_Transcript_1/1_Conf_1.000 | 138  | 0  |          |                |     |         |     |     |                                                                           |

|                                       |     |    |          |                |     |         |    |    |                                                                         |
|---------------------------------------|-----|----|----------|----------------|-----|---------|----|----|-------------------------------------------------------------------------|
| Locus_26621_Transcript_1/1_Conf_1.000 | 215 | 20 | 6.52E-30 | NP_492438.1    | 92  | 133.65  | 71 | 66 | RADIation sensitivity abnormal/yeast RAD-related family member (rad-54) |
| Locus_26622_Transcript_1/1_Conf_1.000 | 222 | 0  |          |                |     |         |    |    |                                                                         |
| Locus_26623_Transcript_1/1_Conf_1.000 | 165 | 3  | 5.44E-08 | NP_872190.1    | 69  | 60.8474 | 53 | 37 | hypothetical protein C37C3.12                                           |
| Locus_26624_Transcript_1/1_Conf_1.000 | 232 | 20 | 3.89E-30 | XP_002633760.1 | 82  | 134.42  | 76 | 63 | C. briggsae CBR-GON-1 protein                                           |
| Locus_26625_Transcript_1/1_Conf_1.000 | 133 | 0  |          |                |     |         |    |    |                                                                         |
| Locus_26626_Transcript_1/1_Conf_1.000 | 146 | 20 | 3.98E-14 | Q5RD44.2       | 100 | 81.2629 | 37 | 37 | Anion exchange protein 2                                                |
| Locus_26627_Transcript_1/1_Conf_1.000 | 133 | 0  |          |                |     |         |    |    |                                                                         |
| Locus_26628_Transcript_1/1_Conf_1.000 | 185 | 1  | 8.86E-06 | XP_002645934.1 | 55  | 53.5286 | 58 | 32 | Hypothetical protein CBG07699                                           |
| Locus_26629_Transcript_1/1_Conf_1.000 | 159 | 0  |          |                |     |         |    |    |                                                                         |
| Locus_2663_Transcript_1/1_Conf_1.000  | 693 | 20 | 2.90E-31 | NP_500617.1    | 83  | 139.428 | 87 | 73 | hypothetical protein T22B11.5                                           |

|                                       |     |    |          |                |    |         |     |     |                                        |
|---------------------------------------|-----|----|----------|----------------|----|---------|-----|-----|----------------------------------------|
| Locus_26630_Transcript_1/1_Conf_1.000 | 151 | 20 | 1.66E-12 | XP_001901686.1 | 87 | 75.8702 | 47  | 41  | Cohesin subunit SA-1                   |
| Locus_26631_Transcript_1/1_Conf_1.000 | 259 | 2  | 2.72E-23 | NP_001022254.1 | 74 | 111.694 | 77  | 57  | hypothetical protein M05D6.9           |
| Locus_26632_Transcript_1/1_Conf_1.000 | 395 | 20 | 2.78E-68 | XP_002637927.1 | 97 | 261.151 | 131 | 128 | Hypothetical protein CBG04739          |
| Locus_26633_Transcript_1/1_Conf_1.000 | 141 | 0  |          |                |    |         |     |     |                                        |
| Locus_26634_Transcript_1/1_Conf_1.000 | 163 | 0  |          |                |    |         |     |     |                                        |
| Locus_26635_Transcript_1/1_Conf_1.000 | 191 | 8  | 2.39E-19 | NP_493603.1    | 88 | 98.5969 | 59  | 52  | PaTched Related family member (ptr-23) |
| Locus_26636_Transcript_1/1_Conf_1.000 | 178 | 0  |          |                |    |         |     |     |                                        |

|                                       |     |    |          |                |    |         |     |     |                                                          |
|---------------------------------------|-----|----|----------|----------------|----|---------|-----|-----|----------------------------------------------------------|
| Locus_26637_Transcript_1/1_Conf_1.000 | 184 | 20 | 4.68E-23 | XP_002931287.1 | 98 | 110.923 | 60  | 59  | PREDICTED: filamin-A-like, partial                       |
| Locus_26638_Transcript_1/1_Conf_1.000 | 219 | 20 | 7.24E-08 | EFO19578.1     | 63 | 60.4622 | 72  | 46  | hypothetical protein LOAG_08912                          |
| Locus_26639_Transcript_1/1_Conf_1.000 | 259 | 20 | 1.14E-37 | EFO21255.1     | 94 | 159.458 | 85  | 80  | hypothetical protein LOAG_07233                          |
| Locus_2664_Transcript_1/1_Conf_1.000  | 813 | 20 | 2.61E-75 | NP_496593.1    | 91 | 286.189 | 182 | 167 | hypothetical protein Y57A10A.16                          |
| Locus_26640_Transcript_1/1_Conf_1.000 | 288 | 20 | 8.99E-43 | XP_002753346.1 | 98 | 176.407 | 89  | 88  | PREDICTED: pyruvate kinase isozymes M1/M2-like isoform 1 |
| Locus_26641_Transcript_1/1_Conf_1.000 | 166 | 2  | 7.59E-10 | NP_499157.2    | 84 | 67.0106 | 44  | 37  | hypothetical protein T05G5.8                             |
| Locus_26642_Transcript_1/1_Conf_1.000 | 255 | 20 | 2.24E-09 | XP_002634553.1 | 70 | 65.4698 | 82  | 58  | Hypothetical protein CBG08354                            |
| Locus_26643_Transcript_1/1_Conf_1.000 | 200 | 0  |          |                |    |         |     |     |                                                          |
| Locus_26644_Transcript_1/1_Conf_1.000 | 190 | 0  |          |                |    |         |     |     |                                                          |
| Locus_26645_Transcript_1/1_Conf_1.000 | 334 | 0  |          |                |    |         |     |     |                                                          |
| Locus_26646_Transcript_1/1_Conf_1.000 | 179 | 0  |          |                |    |         |     |     |                                                          |
| Locus_26647_Transcript_1/1_Conf_1.000 | 186 | 0  |          |                |    |         |     |     |                                                          |



|                                       |     |    |          |                |    |         |     |     |                                                           |
|---------------------------------------|-----|----|----------|----------------|----|---------|-----|-----|-----------------------------------------------------------|
| Locus_26648_Transcript_1/1_Conf_1.000 | 289 | 7  | 2.64E-10 | NP_498653.2    | 54 | 68.5514 | 109 | 59  | LIGase family member (lig-4)                              |
| Locus_26649_Transcript_1/1_Conf_1.000 | 186 | 3  | 1.46E-08 | NP_495925.1    | 61 | 62.7734 | 65  | 40  | hypothetical protein F44G4.8                              |
| Locus_2665_Transcript_1/1_Conf_1.000  | 733 | 20 | 2.71E-70 | XP_002644989.1 | 72 | 269.24  | 232 | 168 | Hypothetical protein CBG10971                             |
| Locus_26650_Transcript_1/1_Conf_1.000 | 149 | 0  |          |                |    |         |     |     |                                                           |
| Locus_26651_Transcript_1/1_Conf_1.000 | 237 | 0  |          |                |    |         |     |     |                                                           |
| Locus_26652_Transcript_1/1_Conf_1.000 | 446 | 20 | 5.62E-37 | NP_506406.1    | 74 | 157.147 | 148 | 110 | hypothetical protein F20G2.1                              |
| Locus_26653_Transcript_1/1_Conf_1.000 | 181 | 8  | 5.76E-05 | XP_002585537.1 | 70 | 50.8322 | 60  | 42  | hypothetical protein BRAFLDRAFT_111890                    |
| Locus_26654_Transcript_1/1_Conf_1.000 | 247 | 20 | 7.23E-21 | XP_002631425.1 | 83 | 103.605 | 68  | 57  | Hypothetical protein CBG03281                             |
| Locus_26655_Transcript_1/1_Conf_1.000 | 306 | 0  |          |                |    |         |     |     |                                                           |
| Locus_26656_Transcript_1/1_Conf_1.000 | 173 | 0  |          |                |    |         |     |     |                                                           |
| Locus_26657_Transcript_1/1_Conf_1.000 | 269 | 20 | 2.79E-12 | NP_490693.2    | 55 | 75.0998 | 89  | 49  | ATM (ataxia telangiectasia mutated) family member (atm-1) |
| Locus_26658_Transcript_1/1_Conf_1.000 | 225 | 0  |          |                |    |         |     |     |                                                           |
| Locus_26659_Transcript_1/1_Conf_1.000 | 162 | 0  |          |                |    |         |     |     |                                                           |
| Locus_2666_Transcript_1/1_Conf_1.000  | 323 | 20 | 2.29E-30 | NP_001023663.1 | 79 | 135.191 | 107 | 85  | Kinesin Light Chain family member (klc-2)                 |
| Locus_26660_Transcript_1/1_Conf_1.000 | 236 | 0  |          |                |    |         |     |     |                                                           |
| Locus_26661_Transcript_1/1_Conf_1.000 | 281 | 0  |          |                |    |         |     |     |                                                           |
| Locus_26662_Transcript_1/1_Conf_1.000 | 345 | 4  | 1.14E-13 | NP_509618.1    | 92 | 79.7221 | 40  | 37  | hypothetical protein C11E4.4                              |
| Locus_26663_Transcript_1/1_Conf_1.000 | 154 | 0  |          |                |    |         |     |     |                                                           |
| Locus_26664_Transcript_1/1_Conf_1.000 | 158 | 0  |          |                |    |         |     |     |                                                           |
| Locus_26665_Transcript_1/1_Conf_1.000 | 391 | 0  |          |                |    |         |     |     |                                                           |

|                                       |     |    |          |                |    |         |     |     |                                                          |
|---------------------------------------|-----|----|----------|----------------|----|---------|-----|-----|----------------------------------------------------------|
| Locus_26666_Transcript_1/1_Conf_1.000 | 237 | 0  |          |                |    |         |     |     |                                                          |
| Locus_26667_Transcript_1/1_Conf_1.000 | 144 | 20 | 5.02E-17 | NP_492907.2    | 93 | 90.8929 | 44  | 41  | Cyclin-Dependent Kinase family member (cdk-9)            |
| Locus_26668_Transcript_1/1_Conf_1.000 | 307 | 0  |          |                |    |         |     |     |                                                          |
| Locus_26669_Transcript_1/1_Conf_1.000 | 213 | 0  |          |                |    |         |     |     |                                                          |
| Locus_2667_Transcript_1/1_Conf_1.000  | 325 | 0  |          |                |    |         |     |     |                                                          |
| Locus_26670_Transcript_1/1_Conf_1.000 | 267 | 0  |          |                |    |         |     |     |                                                          |
| Locus_26671_Transcript_1/1_Conf_1.000 | 202 | 0  |          |                |    |         |     |     |                                                          |
| Locus_26672_Transcript_1/1_Conf_1.000 | 141 | 0  |          |                |    |         |     |     |                                                          |
| Locus_26673_Transcript_1/1_Conf_1.000 | 134 | 0  |          |                |    |         |     |     |                                                          |
| Locus_26674_Transcript_1/1_Conf_1.000 | 142 | 3  | 1.01E-14 | AAM82167.1     | 87 | 83.1889 | 47  | 41  | gamma-butyrobetaine,2-oxoglutarate dioxygenase           |
| Locus_26675_Transcript_1/1_Conf_1.000 | 267 | 20 | 8.32E-41 | XP_002644403.1 | 97 | 169.859 | 88  | 86  | Hypothetical protein CBG14248                            |
| Locus_26676_Transcript_1/1_Conf_1.000 | 161 | 1  | 2.54E-05 | EFO23475.1     | 68 | 51.9878 | 51  | 35  | hypothetical protein LOAG_05011                          |
| Locus_26677_Transcript_1/1_Conf_1.000 | 216 | 20 | 1.72E-06 | XP_002641616.1 | 75 | 55.8398 | 48  | 36  | C. briggsae CBR-ALX-1 protein                            |
| Locus_26678_Transcript_1/1_Conf_1.000 | 129 | 4  | 6.84E-11 | XP_002632353.1 | 88 | 70.4774 | 43  | 38  | Hypothetical protein CBG00367                            |
| Locus_26679_Transcript_1/1_Conf_1.000 | 178 | 0  |          |                |    |         |     |     |                                                          |
| Locus_2668_Transcript_1/1_Conf_1.000  | 523 | 20 | 3.54E-43 | NP_491888.2    | 86 | 177.948 | 172 | 149 | hypothetical protein F57B10.9                            |
| Locus_26680_Transcript_1/1_Conf_1.000 | 328 | 1  | 2.14E-04 | EFO17852.1     | 70 | 48.9062 | 37  | 26  | ACL-8 protein                                            |
| Locus_26681_Transcript_1/1_Conf_1.000 | 138 | 2  | 1.37E-11 | NP_491291.3    | 80 | 72.7886 | 47  | 38  | C-type LECTin family member (clec-89)                    |
| Locus_26682_Transcript_1/1_Conf_1.000 | 221 | 3  | 1.05E-06 | NP_501320.2    | 61 | 56.6102 | 73  | 45  | exPOrtin (nuclear export receptor) family member (xpo-3) |
| Locus_26683_Transcript_1/1_Conf_1.000 | 200 | 20 | 4.94E-09 | ADD13547.1     | 79 | 64.3142 | 58  | 46  | Inositol triphosphate receptor protein 1, isoform h      |
| Locus_26684_Transcript_1/1_Conf_1.000 | 132 | 0  |          |                |    |         |     |     |                                                          |
| Locus_26685_Transcript_1/1_Conf_1.000 | 132 | 0  |          |                |    |         |     |     |                                                          |

|                                       |      |    |          |                |     |         |     |     |                                                                     |
|---------------------------------------|------|----|----------|----------------|-----|---------|-----|-----|---------------------------------------------------------------------|
| Locus_26686_Transcript_1/1_Conf_1.000 | 323  | 20 | 1.03E-06 | NP_508806.1    | 55  | 56.6102 | 87  | 48  | DNAJ domain (prokaryotic heat shock protein) family member (dnj-14) |
| Locus_26687_Transcript_1/1_Conf_1.000 | 280  | 20 | 9.14E-16 | XP_002190367.1 | 66  | 86.6557 | 95  | 63  | PREDICTED: similar to ATP-binding cassette transporter              |
| Locus_26688_Transcript_1/1_Conf_1.000 | 165  | 0  |          |                |     |         |     |     |                                                                     |
| Locus_26689_Transcript_1/1_Conf_1.000 | 202  | 0  |          |                |     |         |     |     |                                                                     |
| Locus_2669_Transcript_1/2_Conf_1.000  | 479  | 4  | 1.51E-18 | NP_503408.1    | 65  | 95.9005 | 101 | 66  | hypothetical protein Y75B7AR.1                                      |
| Locus_2669_Transcript_2/2_Conf_1.000  | 479  | 4  | 1.51E-18 | NP_503408.1    | 65  | 95.9005 | 101 | 66  | hypothetical protein Y75B7AR.1                                      |
| Locus_26690_Transcript_1/1_Conf_1.000 | 288  | 20 | 1.44E-24 | NP_496170.1    | 80  | 115.931 | 87  | 70  | LEThal family member (let-268)                                      |
| Locus_26691_Transcript_1/1_Conf_1.000 | 268  | 20 | 1.68E-41 | ADN33424.1     | 100 | 172.17  | 88  | 88  | ACR-17-like protein                                                 |
| Locus_26692_Transcript_1/1_Conf_1.000 | 220  | 0  |          |                |     |         |     |     |                                                                     |
| Locus_26693_Transcript_1/1_Conf_1.000 | 300  | 0  |          |                |     |         |     |     |                                                                     |
| Locus_26694_Transcript_1/1_Conf_1.000 | 190  | 2  | 1.96E-05 | CBA11992.1     | 64  | 52.373  | 45  | 29  | endonuclease-reverse transcriptase HmRTE-e01                        |
| Locus_26695_Transcript_1/1_Conf_1.000 | 171  | 0  |          |                |     |         |     |     |                                                                     |
| Locus_26696_Transcript_1/1_Conf_1.000 | 134  | 0  |          |                |     |         |     |     |                                                                     |
| Locus_26697_Transcript_1/1_Conf_1.000 | 257  | 5  | 5.34E-11 | CBX25206.1     | 77  | 70.8626 | 57  | 44  | Hypothetical protein Y17G7B.6c                                      |
| Locus_26698_Transcript_1/1_Conf_1.000 | 146  | 0  |          |                |     |         |     |     |                                                                     |
| Locus_26699_Transcript_1/1_Conf_1.000 | 175  | 0  |          |                |     |         |     |     |                                                                     |
| Locus_267_Transcript_1/1_Conf_1.000   | 2400 | 20 | 0        | NP_508537.1    | 92  | 1337.01 | 769 | 714 | SPeCtrin family member (spc-1)                                      |
| Locus_2670_Transcript_1/1_Conf_1.000  | 394  | 20 | 5.48E-32 | XP_002646170.1 | 68  | 140.584 | 131 | 90  | C. briggsae CBR-TAF-5 protein                                       |
| Locus_26700_Transcript_1/1_Conf_1.000 | 278  | 3  | 7.04E-08 | NP_001123075.1 | 57  | 60.4622 | 100 | 57  | hypothetical protein ZC455.1                                        |

|                                       |     |    |          |                |     |         |     |     |                                                              |
|---------------------------------------|-----|----|----------|----------------|-----|---------|-----|-----|--------------------------------------------------------------|
| Locus_26701_Transcript_1/1_Conf_1.000 | 190 | 2  | 1.15E-05 | NP_505506.2    | 73  | 53.1434 | 63  | 46  | hypothetical protein F40F9.5                                 |
| Locus_26702_Transcript_1/1_Conf_1.000 | 129 | 0  |          |                |     |         |     |     |                                                              |
| Locus_26703_Transcript_1/1_Conf_1.000 | 149 | 0  |          |                |     |         |     |     |                                                              |
| Locus_26704_Transcript_1/1_Conf_1.000 | 137 | 20 | 1.85E-08 | CBN79579.1     | 83  | 62.3882 | 43  | 36  | conserved unknown protein                                    |
| Locus_26705_Transcript_1/1_Conf_1.000 | 140 | 0  |          |                |     |         |     |     |                                                              |
| Locus_26706_Transcript_1/1_Conf_1.000 | 259 | 0  |          |                |     |         |     |     |                                                              |
| Locus_26707_Transcript_1/1_Conf_1.000 | 350 | 20 | 8.95E-43 | NP_509839.1    | 86  | 176.407 | 115 | 100 | TransThyretin-Related family domain family member (ttr-31)   |
| Locus_26708_Transcript_1/1_Conf_1.000 | 150 | 20 | 2.39E-19 | 3GQY           | 100 | 98.5969 | 49  | 49  | Activator-BoundStructure Of Human Pyruvate Kinase M2         |
| Locus_26709_Transcript_1/1_Conf_1.000 | 167 | 0  |          |                |     |         |     |     |                                                              |
| Locus_2671_Transcript_1/1_Conf_1.000  | 377 | 20 | 8.42E-17 | XP_002632730.1 | 67  | 90.1225 | 84  | 57  | C. briggsae CBR-LST-3 protein                                |
| Locus_26710_Transcript_1/1_Conf_1.000 | 182 | 0  |          |                |     |         |     |     |                                                              |
| Locus_26711_Transcript_1/1_Conf_1.000 | 230 | 20 | 1.17E-34 | NP_509311.1    | 97  | 149.443 | 75  | 73  | DEGeneration of certain neurons family member (deg-1)        |
| Locus_26712_Transcript_1/1_Conf_1.000 | 230 | 20 | 1.93E-37 | DAA27776.1     | 100 | 158.688 | 76  | 76  | amino-terminal enhancer of split                             |
| Locus_26713_Transcript_1/1_Conf_1.000 | 348 | 0  |          |                |     |         |     |     |                                                              |
| Locus_26714_Transcript_1/1_Conf_1.000 | 129 | 0  |          |                |     |         |     |     |                                                              |
| Locus_26715_Transcript_1/1_Conf_1.000 | 189 | 7  | 1.27E-12 | EFO19841.1     | 77  | 76.2554 | 62  | 48  | hypothetical protein LOAG_08651                              |
| Locus_26716_Transcript_1/1_Conf_1.000 | 170 | 0  |          |                |     |         |     |     |                                                              |
| Locus_26717_Transcript_1/1_Conf_1.000 | 163 | 2  | 4.18E-08 | NP_508379.1    | 75  | 61.2326 | 56  | 42  | ACyLtransferase-like family member (acl-4)                   |
| Locus_26718_Transcript_1/1_Conf_1.000 | 134 | 20 | 7.52E-18 | NP_741763.1    | 97  | 93.5893 | 44  | 43  | Homeodomain interacting Protein Kinase family member (hpk-1) |
| Locus_26719_Transcript_1/1_Conf_1.000 | 153 | 2  | 4.36E-05 | NP_001123088.1 | 80  | 51.2174 | 50  | 40  | hypothetical protein B0310.1                                 |

|                                       |      |    |           |                |    |         |     |     |                                                   |
|---------------------------------------|------|----|-----------|----------------|----|---------|-----|-----|---------------------------------------------------|
| Locus_2672_Transcript_1/1_Conf_1.000  | 1215 | 20 | 3.54E-129 | XP_002639872.1 | 84 | 466.077 | 311 | 262 | Hypothetical protein CBG12227                     |
| Locus_26720_Transcript_1/1_Conf_1.000 | 134  | 0  |           |                |    |         |     |     |                                                   |
| Locus_26721_Transcript_1/1_Conf_1.000 | 152  | 0  |           |                |    |         |     |     |                                                   |
| Locus_26722_Transcript_1/1_Conf_1.000 | 140  | 0  |           |                |    |         |     |     |                                                   |
| Locus_26723_Transcript_1/1_Conf_1.000 | 128  | 0  |           |                |    |         |     |     |                                                   |
| Locus_26724_Transcript_1/1_Conf_1.000 | 212  | 17 | 1.16E-18  | XP_002633939.1 | 77 | 96.2857 | 70  | 54  | Hypothetical protein CBG20014                     |
| Locus_26725_Transcript_1/1_Conf_1.000 | 327  | 20 | 4.00E-27  | XP_002631190.1 | 76 | 124.405 | 104 | 80  | Hypothetical protein CBG02979                     |
| Locus_26726_Transcript_1/1_Conf_1.000 | 231  | 0  |           |                |    |         |     |     |                                                   |
| Locus_26727_Transcript_1/1_Conf_1.000 | 232  | 0  |           |                |    |         |     |     |                                                   |
| Locus_26728_Transcript_1/1_Conf_1.000 | 276  | 20 | 1.00E-46  | ADF56009.1     | 98 | 189.504 | 91  | 90  | nicotinic acetylcholine receptor alpha subunit 38 |
| Locus_26729_Transcript_1/1_Conf_1.000 | 145  | 0  |           |                |    |         |     |     |                                                   |
| Locus_2673_Transcript_1/2_Conf_1.000  | 737  | 4  | 1.08E-28  | NP_500404.2    | 60 | 85.1149 | 117 | 71  | hypothetical protein Y37E11AM.2                   |
| Locus_2673_Transcript_2/2_Conf_1.000  | 737  | 4  | 1.08E-28  | NP_500404.2    | 60 | 85.1149 | 117 | 71  | hypothetical protein Y37E11AM.2                   |
| Locus_26730_Transcript_1/1_Conf_1.000 | 195  | 0  |           |                |    |         |     |     |                                                   |
| Locus_26731_Transcript_1/1_Conf_1.000 | 398  | 0  |           |                |    |         |     |     |                                                   |
| Locus_26732_Transcript_1/1_Conf_1.000 | 181  | 0  |           |                |    |         |     |     |                                                   |
| Locus_26733_Transcript_1/1_Conf_1.000 | 244  | 0  |           |                |    |         |     |     |                                                   |

|                                       |      |    |          |                |     |         |    |    |                                                        |
|---------------------------------------|------|----|----------|----------------|-----|---------|----|----|--------------------------------------------------------|
| Locus_26734_Transcript_1/1_Conf_1.000 | 148  | 20 | 3.71E-12 | ADM18967.1     | 100 | 74.7146 | 36 | 36 | glucose regulated protein 78                           |
| Locus_26735_Transcript_1/1_Conf_1.000 | 200  | 2  | 5.11E-06 | NP_490861.3    | 60  | 54.299  | 63 | 38 | hypothetical protein Y92H12A.5                         |
| Locus_26736_Transcript_1/1_Conf_1.000 | 143  | 0  |          |                |     |         |    |    |                                                        |
| Locus_26737_Transcript_1/1_Conf_1.000 | 251  | 5  | 4.09E-16 | NP_492157.2    | 63  | 87.8113 | 92 | 58 | hypothetical protein D2005.6                           |
| Locus_26738_Transcript_1/1_Conf_1.000 | 172  | 20 | 3.38E-18 | NP_001024333.1 | 80  | 94.7449 | 57 | 46 | Olfactory LeaRNing defective family member (olrn-1)    |
| Locus_26739_Transcript_1/1_Conf_1.000 | 196  | 20 | 5.13E-06 | XP_001900094.1 | 60  | 54.299  | 63 | 38 | Voltage gated chloride channel family protein          |
| Locus_2674_Transcript_1/1_Conf_1.000  | 505  | 0  |          |                |     |         |    |    |                                                        |
| Locus_26740_Transcript_1/1_Conf_1.000 | 133  | 0  |          |                |     |         |    |    |                                                        |
| Locus_26741_Transcript_1/1_Conf_1.000 | 132  | 0  |          |                |     |         |    |    |                                                        |
| Locus_26742_Transcript_1/1_Conf_1.000 | 156  | 0  |          |                |     |         |    |    |                                                        |
| Locus_26743_Transcript_1/1_Conf_1.000 | 134  | 0  |          |                |     |         |    |    |                                                        |
| Locus_26744_Transcript_1/1_Conf_1.000 | 149  | 0  |          |                |     |         |    |    |                                                        |
| Locus_26745_Transcript_1/1_Conf_1.000 | 152  | 0  |          |                |     |         |    |    |                                                        |
| Locus_26746_Transcript_1/1_Conf_1.000 | 149  | 0  |          |                |     |         |    |    |                                                        |
| Locus_26747_Transcript_1/1_Conf_1.000 | 306  | 4  | 6.35E-17 | NP_498273.1    | 79  | 90.5077 | 63 | 50 | hypothetical protein F01F1.2                           |
| Locus_26748_Transcript_1/1_Conf_1.000 | 130  | 3  | 3.29E-05 | NP_502249.3    | 80  | 51.6026 | 40 | 32 | TRPA cation channel homolog family member (trpa-1)     |
| Locus_26749_Transcript_1/1_Conf_1.000 | 241  | 0  |          |                |     |         |    |    |                                                        |
| Locus_2675_Transcript_1/2_Conf_1.000  | 1413 | 7  | 7.16E-23 | NP_505497.1    | 74  | 113.235 | 85 | 63 | Zinc finger Transcription Factor family member (ztf-9) |

|                                       |      |    |          |                |    |         |     |     |                                                              |
|---------------------------------------|------|----|----------|----------------|----|---------|-----|-----|--------------------------------------------------------------|
| Locus_2675_Transcript_2/2_Conf_1.000  | 1401 | 7  | 7.07E-23 | NP_505497.1    | 74 | 113.235 | 85  | 63  | Zinc finger Transcription Factor family member (ztf-9)       |
| Locus_26750_Transcript_1/1_Conf_1.000 | 155  | 5  | 3.12E-11 | AAA83446.5     | 85 | 71.633  | 49  | 42  | Hypothetical protein F44A2.3                                 |
| Locus_26751_Transcript_1/1_Conf_1.000 | 229  | 0  |          |                |    |         |     |     |                                                              |
| Locus_26752_Transcript_1/1_Conf_1.000 | 385  |    |          |                |    |         |     |     |                                                              |
| Locus_26753_Transcript_1/1_Conf_1.000 | 153  | 0  |          |                |    |         |     |     |                                                              |
| Locus_26754_Transcript_1/1_Conf_1.000 | 153  | 8  | 1.45E-08 | NP_510664.1    | 75 | 62.7734 | 45  | 34  | LEThal family member (let-2)                                 |
| Locus_26755_Transcript_1/1_Conf_1.000 | 165  | 0  |          |                |    |         |     |     |                                                              |
| Locus_26756_Transcript_1/1_Conf_1.000 | 160  | 0  |          |                |    |         |     |     |                                                              |
| Locus_26757_Transcript_1/1_Conf_1.000 | 245  | 0  |          |                |    |         |     |     |                                                              |
| Locus_26758_Transcript_1/1_Conf_1.000 | 149  | 6  | 1.08E-11 | XP_002644311.1 | 89 | 73.1738 | 46  | 41  | C. briggsae CBR-AQP-7 protein                                |
| Locus_26759_Transcript_1/1_Conf_1.000 | 142  | 0  |          |                |    |         |     |     |                                                              |
| Locus_2676_Transcript_1/1_Conf_1.000  | 1136 | 20 | 5.47E-12 | CAA97782.4     | 51 | 76.6406 | 200 | 103 | C. elegans protein C44B9.5, confirmed by transcript evidence |
| Locus_26760_Transcript_1/1_Conf_1.000 | 151  | 0  |          |                |    |         |     |     |                                                              |
| Locus_26761_Transcript_1/1_Conf_1.000 | 397  | 0  |          |                |    |         |     |     |                                                              |
| Locus_26762_Transcript_1/1_Conf_1.000 | 175  | 2  | 3.61E-04 | AAD13339.1     | 60 | 48.1358 | 53  | 32  | ancylostoma-secreted protein 1 precursor                     |
| Locus_26763_Transcript_1/1_Conf_1.000 | 164  | 0  |          |                |    |         |     |     |                                                              |
| Locus_26764_Transcript_1/1_Conf_1.000 | 521  | 20 | 5.70E-54 | NP_508523.1    | 85 | 213.772 | 173 | 148 | Temporarily Assigned Gene name family member (tag-312)       |
| Locus_26765_Transcript_1/1_Conf_1.000 | 255  | 0  |          |                |    |         |     |     |                                                              |
| Locus_26766_Transcript_1/1_Conf_1.000 | 131  | 0  |          |                |    |         |     |     |                                                              |
| Locus_26767_Transcript_1/1_Conf_1.000 | 176  | 9  | 8.03E-12 | XP_002637952.1 | 88 | 73.559  | 54  | 48  | Hypothetical protein CBG04769                                |
| Locus_26768_Transcript_1/1_Conf_1.000 | 175  | 4  | 7.50E-18 | ABS50363.1     | 91 | 93.5893 | 57  | 52  | LIM domain protein variant                                   |
| Locus_26769_Transcript_1/1_Conf_1.000 | 164  | 0  |          |                |    |         |     |     |                                                              |

|                                       |      |    |          |                |     |         |     |     |                                                                    |
|---------------------------------------|------|----|----------|----------------|-----|---------|-----|-----|--------------------------------------------------------------------|
| Locus_2677_Transcript_1/1_Conf_1.000  | 618  | 9  | 1.01E-07 | NP_501074.1    | 48  | 60.8474 | 95  | 46  | hypothetical protein B0478.3                                       |
| Locus_26770_Transcript_1/1_Conf_1.000 | 170  | 0  |          |                |     |         |     |     |                                                                    |
| Locus_26771_Transcript_1/1_Conf_1.000 | 165  | 4  | 1.69E-09 | NP_510156.2    | 77  | 65.855  | 53  | 41  | hypothetical protein F11C1.4                                       |
| Locus_26772_Transcript_1/1_Conf_1.000 | 181  | 0  |          |                |     |         |     |     |                                                                    |
| Locus_26773_Transcript_1/1_Conf_1.000 | 204  | 20 | 1.74E-14 | NP_491496.1    | 78  | 82.4185 | 57  | 45  | Downstream Of Mes (in same operon) family member (dom-3)           |
| Locus_26774_Transcript_1/1_Conf_1.000 | 134  | 20 | 8.89E-19 | XP_002921250.1 | 100 | 96.6709 | 44  | 44  | PREDICTED: 6-phosphofructokinase type C-like                       |
| Locus_26775_Transcript_1/1_Conf_1.000 | 270  | 4  | 2.35E-11 | XP_002641216.1 | 81  | 72.0182 | 48  | 39  | Hypothetical protein CBG09080                                      |
| Locus_26776_Transcript_1/1_Conf_1.000 | 138  | 0  |          |                |     |         |     |     |                                                                    |
| Locus_26777_Transcript_1/1_Conf_1.000 | 566  | 0  |          |                |     |         |     |     |                                                                    |
| Locus_26778_Transcript_1/1_Conf_1.000 | 174  | 0  |          |                |     |         |     |     |                                                                    |
| Locus_26779_Transcript_1/1_Conf_1.000 | 170  | 20 | 8.08E-12 | XP_002760891.1 | 100 | 73.559  | 38  | 38  | PREDICTED: 40S ribosomal protein S25-like                          |
| Locus_2678_Transcript_1/1_Conf_1.000  | 1405 | 20 | 4.70E-59 | NP_492743.3    | 50  | 233.417 | 472 | 239 | MUS (Drosophila mutagen sensitive) related family member (mus-101) |
| Locus_26780_Transcript_1/1_Conf_1.000 | 190  | 0  |          |                |     |         |     |     |                                                                    |
| Locus_26781_Transcript_1/1_Conf_1.000 | 201  | 0  |          |                |     |         |     |     |                                                                    |
| Locus_26782_Transcript_1/1_Conf_1.000 | 361  | 0  |          |                |     |         |     |     |                                                                    |
| Locus_26783_Transcript_1/1_Conf_1.000 | 206  | 1  | 6.63E-06 | NP_510520.4    | 71  | 53.9138 | 53  | 38  | Osm-9 and Capsaicin receptor-Related family member (ocr-3)         |
| Locus_26784_Transcript_1/1_Conf_1.000 | 306  | 2  | 9.51E-05 | CAD20812.1     | 45  | 50.0618 | 106 | 48  | SXC2 protein                                                       |
| Locus_26785_Transcript_1/1_Conf_1.000 | 188  | 0  |          |                |     |         |     |     |                                                                    |
| Locus_26786_Transcript_1/1_Conf_1.000 | 165  | 0  |          |                |     |         |     |     |                                                                    |
| Locus_26787_Transcript_1/1_Conf_1.000 | 157  | 0  |          |                |     |         |     |     |                                                                    |
| Locus_26788_Transcript_1/1_Conf_1.000 | 197  | 0  |          |                |     |         |     |     |                                                                    |



|                                       |     |    |          |                |     |         |     |     |                                      |
|---------------------------------------|-----|----|----------|----------------|-----|---------|-----|-----|--------------------------------------|
| Locus_26789_Transcript_1/1_Conf_1.000 | 163 | 20 | 5.44E-16 | XP_002639418.1 | 86  | 87.4261 | 53  | 46  | C. briggsae CBR-LIM-7 protein        |
| Locus_2679_Transcript_1/1_Conf_1.000  | 659 | 20 | 1.27E-70 | ADN20761.1     | 98  | 270.011 | 174 | 171 | cytochrome c oxidase subunit II      |
| Locus_26790_Transcript_1/1_Conf_1.000 | 213 | 0  |          |                |     |         |     |     |                                      |
| Locus_26791_Transcript_1/1_Conf_1.000 | 240 | 20 | 4.13E-24 | 1AV5           | 100 | 114.39  | 51  | 51  | Pkci-Substrate Analog                |
| Locus_26792_Transcript_1/1_Conf_1.000 | 231 | 20 | 3.20E-16 | NP_001021871.1 | 88  | 88.1965 | 52  | 46  | UNCoordinated family member (unc-13) |
| Locus_26793_Transcript_1/1_Conf_1.000 | 166 | 0  |          |                |     |         |     |     |                                      |
| Locus_26794_Transcript_1/1_Conf_1.000 | 140 | 0  |          |                |     |         |     |     |                                      |

|                                       |      |    |          |                |     |         |     |     |                                                |
|---------------------------------------|------|----|----------|----------------|-----|---------|-----|-----|------------------------------------------------|
| Locus_26795_Transcript_1/1_Conf_1.000 | 215  | 20 | 5.70E-34 | XP_001135927.1 | 100 | 147.132 | 71  | 71  | PREDICTED: similar to elongation factor-1-beta |
| Locus_26796_Transcript_1/1_Conf_1.000 | 226  | 0  |          |                |     |         |     |     |                                                |
| Locus_26797_Transcript_1/1_Conf_1.000 | 218  | 0  |          |                |     |         |     |     |                                                |
| Locus_26798_Transcript_1/1_Conf_1.000 | 223  | 0  |          |                |     |         |     |     |                                                |
| Locus_26799_Transcript_1/1_Conf_1.000 | 226  | 12 | 2.46E-24 | XP_002638736.1 | 86  | 115.161 | 75  | 65  | C. briggsae CBR-EGO-1 protein                  |
| Locus_268_Transcript_1/1_Conf_1.000   | 1373 | 20 | 4.28E-65 | ADK24111.1     | 59  | 253.447 | 396 | 236 | Hypothetical protein ZK1248.7                  |
| Locus_2680_Transcript_1/1_Conf_1.000  | 598  | 0  |          |                |     |         |     |     |                                                |
| Locus_26800_Transcript_1/1_Conf_1.000 | 147  | 0  |          |                |     |         |     |     |                                                |
| Locus_26801_Transcript_1/1_Conf_1.000 | 179  | 0  |          |                |     |         |     |     |                                                |
| Locus_26802_Transcript_1/1_Conf_1.000 | 335  | 20 | 2.50E-21 | XP_002982216.1 | 65  | 105.145 | 106 | 69  | hypothetical protein SELMODRAFT_421595         |
| Locus_26803_Transcript_1/1_Conf_1.000 | 217  | 0  |          |                |     |         |     |     |                                                |
| Locus_26804_Transcript_1/1_Conf_1.000 | 143  | 20 | 1.51E-10 | XP_002708655.1 | 100 | 69.3218 | 47  | 47  | PREDICTED: tropomyosin 4                       |
| Locus_26805_Transcript_1/1_Conf_1.000 | 452  | 0  |          |                |     |         |     |     |                                                |
| Locus_26806_Transcript_1/1_Conf_1.000 | 384  | 2  | 2.41E-32 | XP_002630907.1 | 81  | 141.739 | 92  | 75  | Hypothetical protein CBG02631                  |
| Locus_26807_Transcript_1/1_Conf_1.000 | 161  | 0  |          |                |     |         |     |     |                                                |
| Locus_26808_Transcript_1/1_Conf_1.000 | 274  | 20 | 9.48E-29 | XP_002636773.1 | 79  | 129.798 | 91  | 72  | C. briggsae CBR-INX-11 protein                 |
| Locus_26809_Transcript_1/1_Conf_1.000 | 338  | 15 | 1.55E-31 | XP_002638625.1 | 75  | 139.043 | 108 | 82  | Hypothetical protein CBG05678                  |
| Locus_2681_Transcript_1/2_Conf_1.000  | 1581 | 20 | 0        | NP_741452.2    | 88  | 768.459 | 519 | 458 | hypothetical protein C55F2.1                   |
| Locus_2681_Transcript_2/2_Conf_1.000  | 1581 | 20 | 0        | NP_741452.2    | 88  | 768.459 | 519 | 458 | hypothetical protein C55F2.1                   |
| Locus_26810_Transcript_1/1_Conf_1.000 | 133  | 19 | 3.49E-15 | XP_002630579.1 | 97  | 84.7297 | 44  | 43  | C. briggsae CBR-NHX-2 protein                  |
| Locus_26811_Transcript_1/1_Conf_1.000 | 163  | 0  |          |                |     |         |     |     |                                                |

|                                       |     |    |          |                |     |         |    |    |                                                   |
|---------------------------------------|-----|----|----------|----------------|-----|---------|----|----|---------------------------------------------------|
| Locus_26812_Transcript_1/1_Conf_1.000 | 289 | 20 | 2.09E-15 | XP_001607227.1 | 62  | 85.5001 | 96 | 60 | PREDICTED: hypothetical protein                   |
| Locus_26813_Transcript_1/1_Conf_1.000 | 143 | 20 | 6.74E-19 | XP_002931287.1 | 100 | 97.0561 | 47 | 47 | PREDICTED: filamin-A-like, partial                |
| Locus_26814_Transcript_1/1_Conf_1.000 | 226 | 2  | 1.26E-28 | NP_499205.1    | 89  | 129.413 | 75 | 67 | hypothetical protein K03H1.5                      |
| Locus_26815_Transcript_1/1_Conf_1.000 | 135 | 10 | 2.19E-09 | XP_002631278.1 | 81  | 65.4698 | 43 | 35 | C. briggsae CBR-PQN-47 protein                    |
| Locus_26816_Transcript_1/1_Conf_1.000 | 221 | 0  |          |                |     |         |    |    |                                                   |
| Locus_26817_Transcript_1/1_Conf_1.000 | 132 | 0  |          |                |     |         |    |    |                                                   |
| Locus_26818_Transcript_1/1_Conf_1.000 | 334 | 20 | 6.12E-36 | XP_002631690.1 | 91  | 153.68  | 85 | 78 | C. briggsae CBR-PDE-3 protein                     |
| Locus_26819_Transcript_1/1_Conf_1.000 | 166 | 10 | 3.07E-19 | NP_001122601.1 | 94  | 98.2117 | 54 | 51 | Multiple PDZ domain protein family member (mpz-1) |

|                                       |      |    |           |                |    |         |     |     |                                                     |
|---------------------------------------|------|----|-----------|----------------|----|---------|-----|-----|-----------------------------------------------------|
| Locus_2682_Transcript_1/1_Conf_1.000  | 473  | 20 | 2.32E-59  | XP_001902067.1 | 95 | 231.491 | 117 | 112 | DNA-directed RNA polymerase II 15.1 kDa polypeptide |
| Locus_26820_Transcript_1/1_Conf_1.000 | 151  | 5  | 7.45E-13  | NP_001021650.1 | 82 | 77.0258 | 50  | 41  | HaMmeRhead embryonic lethal family member (hmr-1)   |
| Locus_26821_Transcript_1/1_Conf_1.000 | 200  | 0  |           |                |    |         |     |     |                                                     |
| Locus_26822_Transcript_1/1_Conf_1.000 | 142  | 0  |           |                |    |         |     |     |                                                     |
| Locus_26823_Transcript_1/1_Conf_1.000 | 146  | 0  |           |                |    |         |     |     |                                                     |
| Locus_26824_Transcript_1/1_Conf_1.000 | 194  | 0  |           |                |    |         |     |     |                                                     |
| Locus_26825_Transcript_1/1_Conf_1.000 | 150  | 0  |           |                |    |         |     |     |                                                     |
| Locus_26826_Transcript_1/1_Conf_1.000 | 174  | 8  | 3.26E-13  | NP_001021991.1 | 76 | 78.1814 | 55  | 42  | hypothetical protein C26D10.6                       |
| Locus_26827_Transcript_1/1_Conf_1.000 | 164  | 2  | 5.46E-08  | NP_499445.2    | 80 | 60.8474 | 36  | 29  | hypothetical protein Y47D3A.14                      |
| Locus_26828_Transcript_1/1_Conf_1.000 | 230  | 20 | 1.59E-15  | XP_002637122.1 | 80 | 85.8853 | 61  | 49  | C. briggsae CBR-UGT-49 protein                      |
| Locus_26829_Transcript_1/1_Conf_1.000 | 202  | 2  | 7.36E-05  | NP_500870.2    | 58 | 50.447  | 67  | 39  | hypothetical protein C06E7.2                        |
| Locus_2683_Transcript_1/1_Conf_1.000  | 1369 | 20 | 1.16E-171 | XP_002630814.1 | 81 | 607.446 | 456 | 372 | C. briggsae CBR-FZO-1 protein                       |
| Locus_26830_Transcript_1/1_Conf_1.000 | 315  | 4  | 7.19E-16  | NP_491962.1    | 82 | 87.0409 | 67  | 55  | hypothetical protein H27M09.1                       |
| Locus_26831_Transcript_1/1_Conf_1.000 | 158  | 0  |           |                |    |         |     |     |                                                     |
| Locus_26832_Transcript_1/1_Conf_1.000 | 166  | 6  | 6.41E-17  | NP_001021110.1 | 96 | 90.5077 | 51  | 49  | CAISYntenin/Alcadein homolog family member (casy-1) |
| Locus_26833_Transcript_1/1_Conf_1.000 | 149  | 0  |           |                |    |         |     |     |                                                     |
| Locus_26834_Transcript_1/1_Conf_1.000 | 128  | 20 | 8.68E-06  | NP_502174.2    | 69 | 53.5286 | 36  | 25  | hypothetical protein M04B2.2                        |
| Locus_26835_Transcript_1/1_Conf_1.000 | 229  | 0  |           |                |    |         |     |     |                                                     |
| Locus_26836_Transcript_1/1_Conf_1.000 | 220  | 2  | 6.13E-07  | XP_002631025.1 | 59 | 57.3806 | 69  | 41  | Hypothetical protein CBG02782                       |
| Locus_26837_Transcript_1/1_Conf_1.000 | 162  | 0  |           |                |    |         |     |     |                                                     |
| Locus_26838_Transcript_1/1_Conf_1.000 | 132  | 0  |           |                |    |         |     |     |                                                     |
| Locus_26839_Transcript_1/1_Conf_1.000 | 191  | 0  |           |                |    |         |     |     |                                                     |
| Locus_2684_Transcript_1/2_Conf_1.000  | 504  | 0  |           |                |    |         |     |     |                                                     |

|                                       |      |    |           |                |     |         |     |     |                                                                                    |
|---------------------------------------|------|----|-----------|----------------|-----|---------|-----|-----|------------------------------------------------------------------------------------|
| Locus_2684_Transcript_2/2_Conf_1.000  | 1824 | 20 | 2.38E-133 | AAN11402.1     | 72  | 480.715 | 400 | 289 | secreted-protein 1 precursor                                                       |
| Locus_26840_Transcript_1/1_Conf_1.000 | 155  | 0  |           |                |     |         |     |     |                                                                                    |
| Locus_26841_Transcript_1/1_Conf_1.000 | 131  | 20 | 6.83E-19  | XP_002923583.1 | 100 | 97.0561 | 43  | 43  | PREDICTED: calponin-2-like                                                         |
| Locus_26842_Transcript_1/1_Conf_1.000 | 160  | 0  |           |                |     |         |     |     |                                                                                    |
| Locus_26843_Transcript_1/1_Conf_1.000 | 132  | 0  |           |                |     |         |     |     |                                                                                    |
| Locus_26844_Transcript_1/1_Conf_1.000 | 132  | 0  |           |                |     |         |     |     |                                                                                    |
| Locus_26845_Transcript_1/1_Conf_1.000 | 138  | 20 | 1.41E-16  | XP_002833724.1 | 100 | 89.3521 | 45  | 45  | PREDICTED: keratin, type II cytoskeletal 5-like                                    |
| Locus_26846_Transcript_1/1_Conf_1.000 | 368  | 0  |           |                |     |         |     |     |                                                                                    |
| Locus_26847_Transcript_1/1_Conf_1.000 | 147  | 0  |           |                |     |         |     |     |                                                                                    |
| Locus_26848_Transcript_1/1_Conf_1.000 | 247  | 0  |           |                |     |         |     |     |                                                                                    |
| Locus_26849_Transcript_1/1_Conf_1.000 | 286  | 0  |           |                |     |         |     |     |                                                                                    |
| Locus_2685_Transcript_1/1_Conf_1.000  | 434  | 20 | 7.48E-34  | NP_508706.2    | 75  | 146.747 | 135 | 102 | NCK (Non-Catalytic region of tyrosine Kinase) adaptor protein family member (nck1) |
| Locus_26850_Transcript_1/1_Conf_1.000 | 152  | 0  |           |                |     |         |     |     |                                                                                    |
| Locus_26851_Transcript_1/1_Conf_1.000 | 329  | 0  |           |                |     |         |     |     |                                                                                    |
| Locus_26852_Transcript_1/1_Conf_1.000 | 234  | 0  |           |                |     |         |     |     |                                                                                    |
| Locus_26853_Transcript_1/1_Conf_1.000 | 195  | 20 | 5.64E-21  | XP_002634571.1 | 100 | 103.99  | 48  | 48  | C. briggsae CBR-GPA-7 protein                                                      |
| Locus_26854_Transcript_1/1_Conf_1.000 | 238  | 12 | 5.80E-10  | NP_499376.1    | 68  | 67.3958 | 79  | 54  | hypothetical protein K01G5.10                                                      |
| Locus_26855_Transcript_1/1_Conf_1.000 | 251  | 20 | 7.41E-42  | EFO21218.1     | 98  | 173.326 | 83  | 82  | CAMK/CAMKL/NUAK protein kinase                                                     |
| Locus_26856_Transcript_1/1_Conf_1.000 | 161  | 0  |           |                |     |         |     |     |                                                                                    |

|                                       |     |    |          |                |    |         |     |     |                                                                            |
|---------------------------------------|-----|----|----------|----------------|----|---------|-----|-----|----------------------------------------------------------------------------|
| Locus_26857_Transcript_1/1_Conf_1.000 | 137 | 0  |          |                |    |         |     |     |                                                                            |
| Locus_26858_Transcript_1/1_Conf_1.000 | 151 | 0  |          |                |    |         |     |     |                                                                            |
| Locus_26859_Transcript_1/1_Conf_1.000 | 165 | 20 | 5.62E-13 | XP_002732167.1 | 82 | 77.411  | 52  | 43  | PREDICTED: hypothetical protein, partial                                   |
| Locus_2686_Transcript_1/1_Conf_1.000  | 381 | 0  |          |                |    |         |     |     |                                                                            |
| Locus_26860_Transcript_1/1_Conf_1.000 | 836 | 20 | 3.45E-86 | NP_495615.2    | 70 | 322.398 | 281 | 197 | hypothetical protein B0495.5                                               |
| Locus_26861_Transcript_1/1_Conf_1.000 | 175 | 6  | 1.85E-08 | XP_002644672.1 | 68 | 62.3882 | 57  | 39  | C. briggsae CBR-VPS-41 protein                                             |
| Locus_26862_Transcript_1/1_Conf_1.000 | 198 | 20 | 4.76E-20 | XP_002629862.1 | 89 | 100.908 | 65  | 58  | Hypothetical protein CBG21896                                              |
| Locus_26863_Transcript_1/1_Conf_1.000 | 230 | 20 | 6.23E-28 | CBK19482.1     | 86 | 127.102 | 76  | 66  | C. elegans protein Y116A8C.13b, partially confirmed by transcript evidence |
| Locus_26864_Transcript_1/1_Conf_1.000 | 213 | 0  |          |                |    |         |     |     |                                                                            |
| Locus_26865_Transcript_1/1_Conf_1.000 | 323 | 0  |          |                |    |         |     |     |                                                                            |
| Locus_26866_Transcript_1/1_Conf_1.000 | 183 | 18 | 2.25E-17 | Q24702.1       | 83 | 92.0485 | 60  | 50  | DVA-1 polyprotein                                                          |
| Locus_26867_Transcript_1/1_Conf_1.000 | 254 | 0  |          |                |    |         |     |     |                                                                            |
| Locus_26868_Transcript_1/1_Conf_1.000 | 197 | 20 | 6.22E-28 | XP_002641359.1 | 98 | 127.102 | 65  | 64  | C. briggsae CBR-RSKS-1 protein                                             |
| Locus_26869_Transcript_1/1_Conf_1.000 | 220 | 0  |          |                |    |         |     |     |                                                                            |

|                                       |      |    |          |                |    |         |     |     |                                             |
|---------------------------------------|------|----|----------|----------------|----|---------|-----|-----|---------------------------------------------|
| Locus_2687_Transcript_1/2_Conf_1.000  | 1302 | 20 | 1.19E-61 | XP_001892903.1 | 68 | 241.891 | 216 | 147 | cytokine inducible SH2-containing protein 5 |
| Locus_2687_Transcript_2/2_Conf_1.000  | 1254 | 20 | 5.60E-61 | XP_001892903.1 | 79 | 239.58  | 168 | 133 | cytokine inducible SH2-containing protein 5 |
| Locus_26870_Transcript_1/1_Conf_1.000 | 157  | 1  | 8.20E-04 | NP_493078.2    | 67 | 46.9802 | 37  | 25  | hypothetical protein R05D7.5                |
| Locus_26871_Transcript_1/1_Conf_1.000 | 159  | 0  |          |                |    |         |     |     |                                             |
| Locus_26872_Transcript_1/1_Conf_1.000 | 131  | 0  |          |                |    |         |     |     |                                             |
| Locus_26873_Transcript_1/1_Conf_1.000 | 183  | 0  |          |                |    |         |     |     |                                             |
| Locus_26874_Transcript_1/1_Conf_1.000 | 202  | 20 | 2.29E-06 | EFO22266.1     | 63 | 55.4546 | 58  | 37  | hypothetical protein LOAG_06220             |
| Locus_26875_Transcript_1/1_Conf_1.000 | 254  | 20 | 1.32E-09 | EFO26172.1     | 75 | 66.2402 | 60  | 45  | Ulp1 protease                               |
| Locus_26876_Transcript_1/1_Conf_1.000 | 164  | 0  |          |                |    |         |     |     |                                             |
| Locus_26877_Transcript_1/1_Conf_1.000 | 207  | 20 | 7.77E-23 | EFO21255.1     | 95 | 110.153 | 68  | 65  | hypothetical protein LOAG_07233             |
| Locus_26878_Transcript_1/1_Conf_1.000 | 145  | 0  |          |                |    |         |     |     |                                             |
| Locus_26879_Transcript_1/1_Conf_1.000 | 222  | 0  |          |                |    |         |     |     |                                             |
| Locus_2688_Transcript_1/1_Conf_1.000  | 530  | 0  |          |                |    |         |     |     |                                             |
| Locus_26880_Transcript_1/1_Conf_1.000 | 157  | 0  |          |                |    |         |     |     |                                             |
| Locus_26881_Transcript_1/1_Conf_1.000 | 271  | 20 | 2.95E-38 | EFO24540.1     | 88 | 161.384 | 90  | 80  | hypothetical protein LOAG_03946             |
| Locus_26882_Transcript_1/1_Conf_1.000 | 378  | 8  | 1.74E-30 | NP_001022643.1 | 69 | 135.576 | 126 | 88  | LEThal family member (let-805)              |
| Locus_26883_Transcript_1/1_Conf_1.000 | 492  | 0  |          |                |    |         |     |     |                                             |
| Locus_26884_Transcript_1/1_Conf_1.000 | 130  | 0  |          |                |    |         |     |     |                                             |
| Locus_26885_Transcript_1/1_Conf_1.000 | 196  | 3  | 7.89E-15 | XP_002642115.1 | 89 | 83.5741 | 56  | 50  | C. briggsae CBR-NDG-4 protein               |
| Locus_26886_Transcript_1/1_Conf_1.000 | 132  | 0  |          |                |    |         |     |     |                                             |
| Locus_26887_Transcript_1/1_Conf_1.000 | 152  | 0  |          |                |    |         |     |     |                                             |
| Locus_26888_Transcript_1/1_Conf_1.000 | 338  | 20 | 3.56E-52 | XP_002631304.1 | 94 | 207.608 | 112 | 106 | Hypothetical protein CBG03118               |

|                                       |      |    |          |                |     |         |     |     |                                                                                       |
|---------------------------------------|------|----|----------|----------------|-----|---------|-----|-----|---------------------------------------------------------------------------------------|
| Locus_26889_Transcript_1/1_Conf_1.000 | 165  | 2  | 9.89E-18 | NP_001122963.1 | 90  | 93.2041 | 54  | 49  | hypothetical protein F58E6.1                                                          |
| Locus_2689_Transcript_1/1_Conf_1.000  | 605  | 20 | 6.87E-75 | CAR63569.1     | 91  | 283.878 | 168 | 153 | putative elongation factor 1-beta/1-delta 1                                           |
| Locus_26890_Transcript_1/1_Conf_1.000 | 129  | 0  |          |                |     |         |     |     |                                                                                       |
| Locus_26891_Transcript_1/1_Conf_1.000 | 188  | 0  |          |                |     |         |     |     |                                                                                       |
| Locus_26892_Transcript_1/1_Conf_1.000 | 205  | 0  |          |                |     |         |     |     |                                                                                       |
| Locus_26893_Transcript_1/1_Conf_1.000 | 204  | 0  |          |                |     |         |     |     |                                                                                       |
| Locus_26894_Transcript_1/1_Conf_1.000 | 179  | 20 | 1.97E-18 | NP_492839.4    | 89  | 95.5153 | 57  | 51  | Leucine-rich repeats, Ras-like domain, Kinase family member (Irk-1)                   |
| Locus_26895_Transcript_1/1_Conf_1.000 | 173  | 0  |          |                |     |         |     |     |                                                                                       |
| Locus_26896_Transcript_1/1_Conf_1.000 | 145  | 20 | 3.72E-12 | XP_002636452.1 | 91  | 74.7146 | 47  | 43  | C. briggsae CBR-FOLT-1 protein                                                        |
| Locus_26897_Transcript_1/1_Conf_1.000 | 165  | 20 | 2.52E-13 | XP_002809331.1 | 100 | 78.5666 | 38  | 38  | PREDICTED: LOW QUALITY PROTEIN: interferon regulatory factor 2-binding protein 2-like |
| Locus_26898_Transcript_1/1_Conf_1.000 | 221  | 0  |          |                |     |         |     |     |                                                                                       |
| Locus_26899_Transcript_1/1_Conf_1.000 | 149  | 0  |          |                |     |         |     |     |                                                                                       |
| Locus_269_Transcript_1/1_Conf_1.000   | 1291 | 0  |          |                |     |         |     |     |                                                                                       |
| Locus_2690_Transcript_1/1_Conf_1.000  | 136  | 3  | 3.27E-05 | NP_510725.1    | 86  | 51.6026 | 36  | 31  | hypothetical protein T20F7.6                                                          |
| Locus_26900_Transcript_1/1_Conf_1.000 | 250  | 0  |          |                |     |         |     |     |                                                                                       |
| Locus_26901_Transcript_1/1_Conf_1.000 | 211  | 0  |          |                |     |         |     |     |                                                                                       |
| Locus_26902_Transcript_1/1_Conf_1.000 | 220  | 2  | 5.74E-05 | XP_002639815.1 | 56  | 50.8322 | 69  | 39  | Hypothetical protein CBG21340                                                         |
| Locus_26903_Transcript_1/1_Conf_1.000 | 207  | 0  |          |                |     |         |     |     |                                                                                       |
| Locus_26904_Transcript_1/1_Conf_1.000 | 144  | 0  |          |                |     |         |     |     |                                                                                       |
| Locus_26905_Transcript_1/1_Conf_1.000 | 145  | 0  |          |                |     |         |     |     |                                                                                       |



|                                       |     |    |          |                |     |         |     |     |                               |
|---------------------------------------|-----|----|----------|----------------|-----|---------|-----|-----|-------------------------------|
| Locus_26906_Transcript_1/1_Conf_1.000 | 257 | 20 | 1.30E-41 | P02751.4       | 100 | 172.555 | 85  | 85  | Fibronectin                   |
| Locus_26907_Transcript_1/1_Conf_1.000 | 139 | 0  |          |                |     |         |     |     |                               |
| Locus_26908_Transcript_1/1_Conf_1.000 | 138 | 0  |          |                |     |         |     |     |                               |
| Locus_26909_Transcript_1/1_Conf_1.000 | 312 | 0  |          |                |     |         |     |     |                               |
| Locus_2691_Transcript_1/1_Conf_1.000  | 716 | 20 | 1.71E-90 | NP_495445.2    | 83  | 336.265 | 238 | 198 | hypothetical protein ZK1127.5 |
| Locus_26910_Transcript_1/1_Conf_1.000 | 148 | 2  | 8.53E-17 | NP_501866.1    | 93  | 90.1225 | 48  | 45  | hypothetical protein C24F3.4  |
| Locus_26911_Transcript_1/1_Conf_1.000 | 179 | 0  |          |                |     |         |     |     |                               |
| Locus_26912_Transcript_1/1_Conf_1.000 | 148 | 0  |          |                |     |         |     |     |                               |
| Locus_26913_Transcript_1/1_Conf_1.000 | 347 | 20 | 4.94E-33 | XP_002642963.1 | 85  | 144.05  | 99  | 85  | Hypothetical protein CBG15247 |
| Locus_26914_Transcript_1/1_Conf_1.000 | 282 | 0  |          |                |     |         |     |     |                               |
| Locus_26915_Transcript_1/1_Conf_1.000 | 283 | 0  |          |                |     |         |     |     |                               |
| Locus_26916_Transcript_1/1_Conf_1.000 | 140 | 0  |          |                |     |         |     |     |                               |
| Locus_26917_Transcript_1/1_Conf_1.000 | 203 | 20 | 4.58E-31 | ABY48069.1     | 100 | 137.502 | 67  | 67  | beta-tubulin                  |
| Locus_26918_Transcript_1/1_Conf_1.000 | 210 | 20 | 1.01E-22 | CAB57358.1     | 85  | 109.768 | 69  | 59  | microsomal aminopeptidase     |

|                                       |     |    |          |                |     |         |     |     |                                                                 |
|---------------------------------------|-----|----|----------|----------------|-----|---------|-----|-----|-----------------------------------------------------------------|
| Locus_26919_Transcript_1/1_Conf_1.000 | 398 | 3  | 4.21E-08 | NP_491118.2    | 72  | 61.2326 | 65  | 47  | hypothetical protein Y54E10A.11                                 |
| Locus_2692_Transcript_1/1_Conf_1.000  | 671 | 20 | 3.48E-31 | XP_002642923.1 | 63  | 139.043 | 168 | 107 | Hypothetical protein CBG15199                                   |
| Locus_26920_Transcript_1/1_Conf_1.000 | 190 | 3  | 6.29E-12 | XP_002632467.1 | 82  | 73.9442 | 50  | 41  | C. briggsae CBR-GNRR-8 protein                                  |
| Locus_26921_Transcript_1/1_Conf_1.000 | 253 | 0  |          |                |     |         |     |     |                                                                 |
| Locus_26922_Transcript_1/1_Conf_1.000 | 133 | 0  |          |                |     |         |     |     |                                                                 |
| Locus_26923_Transcript_1/1_Conf_1.000 | 328 | 20 | 2.12E-36 | AAH17408.1     | 100 | 155.221 | 81  | 81  | Enoyl Coenzyme A hydratase 1, peroxisomal                       |
| Locus_26924_Transcript_1/1_Conf_1.000 | 174 | 3  | 7.78E-07 | XP_002636378.1 | 70  | 56.9954 | 57  | 40  | C. briggsae CBR-UGT-63 protein                                  |
| Locus_26925_Transcript_1/1_Conf_1.000 | 248 | 0  |          |                |     |         |     |     |                                                                 |
| Locus_26926_Transcript_1/1_Conf_1.000 | 130 | 4  | 9.86E-18 | XP_002645998.1 | 97  | 93.2041 | 42  | 41  | Hypothetical protein CBG07786                                   |
| Locus_26927_Transcript_1/1_Conf_1.000 | 161 | 0  |          |                |     |         |     |     |                                                                 |
| Locus_26928_Transcript_1/1_Conf_1.000 | 257 | 2  | 6.05E-39 | XP_002636673.1 | 92  | 163.696 | 83  | 77  | Hypothetical protein CBG23386                                   |
| Locus_26929_Transcript_1/1_Conf_1.000 | 135 | 0  |          |                |     |         |     |     |                                                                 |
| Locus_2693_Transcript_1/1_Conf_1.000  | 329 | 0  |          |                |     |         |     |     |                                                                 |
| Locus_26930_Transcript_1/1_Conf_1.000 | 168 | 10 | 1.47E-13 | NP_499472.1    | 78  | 79.337  | 56  | 44  | Sterol regulatory element Binding Protein family member (sbp-1) |
| Locus_26931_Transcript_1/1_Conf_1.000 | 149 | 20 | 2.56E-21 | XP_002821635.1 | 100 | 105.145 | 49  | 49  | PREDICTED: stress-induced-phosphoprotein 1-like                 |
| Locus_26932_Transcript_1/1_Conf_1.000 | 282 | 0  |          |                |     |         |     |     |                                                                 |

|                                       |     |    |          |                |     |         |    |    |                                                                 |
|---------------------------------------|-----|----|----------|----------------|-----|---------|----|----|-----------------------------------------------------------------|
| Locus_26933_Transcript_1/1_Conf_1.000 | 254 | 20 | 5.34E-19 | NP_497632.1    | 100 | 97.4413 | 44 | 44 | Kruppel-Like Factor (zinc finger protein) family member (klf-1) |
| Locus_26934_Transcript_1/1_Conf_1.000 | 173 | 0  |          |                |     |         |    |    |                                                                 |
| Locus_26935_Transcript_1/1_Conf_1.000 | 303 | 20 | 7.21E-53 | XP_002812714.1 | 100 | 209.92  | 99 | 99 | PREDICTED: collagen alpha-1(III) chain-like isoform 2           |
| Locus_26936_Transcript_1/1_Conf_1.000 | 197 | 8  | 1.44E-16 | NP_001022643.1 | 78  | 89.3521 | 65 | 51 | LEThal family member (let-805)                                  |
| Locus_26937_Transcript_1/1_Conf_1.000 | 267 | 0  |          |                |     |         |    |    |                                                                 |

|                                       |      |    |           |                |     |         |     |     |                                                                 |
|---------------------------------------|------|----|-----------|----------------|-----|---------|-----|-----|-----------------------------------------------------------------|
| Locus_26938_Transcript_1/1_Conf_1.000 | 134  | 3  | 8.34E-09  | NP_001021350.1 | 82  | 63.5438 | 41  | 34  | C-type LECTin family member (clec-225)                          |
| Locus_26939_Transcript_1/1_Conf_1.000 | 197  | 0  |           |                |     |         |     |     |                                                                 |
| Locus_2694_Transcript_1/1_Conf_1.000  | 1688 | 20 | 7.64E-155 | XP_002631800.1 | 80  | 551.977 | 457 | 370 | Hypothetical protein CBG21019                                   |
| Locus_26940_Transcript_1/1_Conf_1.000 | 184  | 0  |           |                |     |         |     |     |                                                                 |
| Locus_26941_Transcript_1/1_Conf_1.000 | 146  | 0  |           |                |     |         |     |     |                                                                 |
| Locus_26942_Transcript_1/1_Conf_1.000 | 138  | 20 | 8.27E-17  | DAA16569.1     | 100 | 90.1225 | 45  | 45  | heat shock protein HSP 90-beta                                  |
| Locus_26943_Transcript_1/1_Conf_1.000 | 173  | 0  |           |                |     |         |     |     |                                                                 |
| Locus_26944_Transcript_1/1_Conf_1.000 | 206  | 0  |           |                |     |         |     |     |                                                                 |
| Locus_26945_Transcript_1/1_Conf_1.000 | 152  | 20 | 2.65E-10  | NP_491761.3    | 78  | 68.5514 | 50  | 39  | hypothetical protein T27A3.5                                    |
| Locus_26946_Transcript_1/1_Conf_1.000 | 173  | 0  |           |                |     |         |     |     |                                                                 |
| Locus_26947_Transcript_1/1_Conf_1.000 | 140  | 20 | 1.32E-22  | XP_002807463.1 | 100 | 109.383 | 46  | 46  | PREDICTED: LOW QUALITY PROTEIN: kinesin-like protein KIF22-like |
| Locus_26948_Transcript_1/1_Conf_1.000 | 378  | 20 | 4.43E-34  | XP_002633255.1 | 79  | 147.517 | 121 | 96  | Hypothetical protein CBG05980                                   |
| Locus_26949_Transcript_1/1_Conf_1.000 | 257  | 0  |           |                |     |         |     |     |                                                                 |

|                                       |      |    |          |                |     |         |     |    |                                  |
|---------------------------------------|------|----|----------|----------------|-----|---------|-----|----|----------------------------------|
| Locus_2695_Transcript_1/1_Conf_1.000  | 396  | 20 | 1.65E-12 | XP_002065721.1 | 61  | 75.8702 | 122 | 75 | GK19967                          |
| Locus_26950_Transcript_1/1_Conf_1.000 | 266  | 0  |          |                |     |         |     |    |                                  |
| Locus_26951_Transcript_1/1_Conf_1.000 | 140  | 3  | 1.20E-07 | XP_002643051.1 | 75  | 59.6918 | 45  | 34 | C. briggsae CBR-DPF-6 protein    |
| Locus_26952_Transcript_1/1_Conf_1.000 | 175  | 0  |          |                |     |         |     |    |                                  |
| Locus_26953_Transcript_1/1_Conf_1.000 | 152  | 0  |          |                |     |         |     |    |                                  |
| Locus_26954_Transcript_1/1_Conf_1.000 | 239  | 0  |          |                |     |         |     |    |                                  |
| Locus_26955_Transcript_1/1_Conf_1.000 | 148  | 0  |          |                |     |         |     |    |                                  |
| Locus_26956_Transcript_1/1_Conf_1.000 | 205  | 0  |          |                |     |         |     |    |                                  |
| Locus_26957_Transcript_1/1_Conf_1.000 | 142  | 0  |          |                |     |         |     |    |                                  |
| Locus_26958_Transcript_1/1_Conf_1.000 | 200  | 20 | 2.21E-25 | NP_495675.1    | 89  | 118.627 | 66  | 59 | hypothetical protein DH11.1      |
| Locus_26959_Transcript_1/1_Conf_1.000 | 142  | 0  |          |                |     |         |     |    |                                  |
| Locus_2696_Transcript_1/1_Conf_1.000  | 7915 | 0  |          |                |     |         |     |    |                                  |
| Locus_26960_Transcript_1/1_Conf_1.000 | 167  | 0  |          |                |     |         |     |    |                                  |
| Locus_26961_Transcript_1/1_Conf_1.000 | 167  | 0  |          |                |     |         |     |    |                                  |
| Locus_26962_Transcript_1/1_Conf_1.000 | 148  | 20 | 3.46E-18 | XP_519221.2    | 100 | 94.7449 | 42  | 42 | PREDICTED: similar to I3 protein |
| Locus_26963_Transcript_1/1_Conf_1.000 | 223  | 0  |          |                |     |         |     |    |                                  |
| Locus_26964_Transcript_1/1_Conf_1.000 | 169  | 0  |          |                |     |         |     |    |                                  |
| Locus_26965_Transcript_1/1_Conf_1.000 | 135  | 0  |          |                |     |         |     |    |                                  |

|                                       |     |    |          |                |    |         |     |     |                                         |
|---------------------------------------|-----|----|----------|----------------|----|---------|-----|-----|-----------------------------------------|
| Locus_26966_Transcript_1/1_Conf_1.000 | 268 | 20 | 3.30E-13 | CAA96571.1     | 60 | 78.1814 | 91  | 55  | parasite pepsinogen                     |
| Locus_26967_Transcript_1/1_Conf_1.000 | 154 | 0  |          |                |    |         |     |     |                                         |
| Locus_26968_Transcript_1/1_Conf_1.000 | 209 | 20 | 1.74E-14 | EFO23598.1     | 89 | 82.4185 | 49  | 44  | hypothetical protein LOAG_04888         |
| Locus_26969_Transcript_1/1_Conf_1.000 | 174 | 0  |          |                |    |         |     |     |                                         |
| Locus_2697_Transcript_1/1_Conf_1.000  | 596 | 20 | 1.62E-65 | NP_500188.1    | 98 | 252.677 | 161 | 158 | Vacuolar H ATPase family member (vha-3) |
| Locus_26970_Transcript_1/1_Conf_1.000 | 158 | 4  | 2.02E-10 | XP_001896931.1 | 70 | 68.9366 | 51  | 36  | Cadherin domain containing protein      |
| Locus_26971_Transcript_1/1_Conf_1.000 | 311 | 0  |          |                |    |         |     |     |                                         |
| Locus_26972_Transcript_1/1_Conf_1.000 | 432 | 0  |          |                |    |         |     |     |                                         |
| Locus_26973_Transcript_1/1_Conf_1.000 | 149 | 7  | 8.00E-07 | XP_002631522.1 | 70 | 56.9954 | 48  | 34  | Hypothetical protein CBG20688           |
| Locus_26974_Transcript_1/1_Conf_1.000 | 147 | 0  |          |                |    |         |     |     |                                         |
| Locus_26975_Transcript_1/1_Conf_1.000 | 139 | 0  |          |                |    |         |     |     |                                         |
| Locus_26976_Transcript_1/1_Conf_1.000 | 141 | 0  |          |                |    |         |     |     |                                         |
| Locus_26977_Transcript_1/1_Conf_1.000 | 242 | 0  |          |                |    |         |     |     |                                         |
| Locus_26978_Transcript_1/1_Conf_1.000 | 223 | 0  |          |                |    |         |     |     |                                         |
| Locus_26979_Transcript_1/1_Conf_1.000 | 235 | 4  | 2.36E-19 | NP_497665.2    | 76 | 98.5969 | 82  | 63  | hypothetical protein R148.5             |
| Locus_2698_Transcript_1/1_Conf_1.000  | 132 | 0  |          |                |    |         |     |     |                                         |
| Locus_26980_Transcript_1/1_Conf_1.000 | 161 | 20 | 6.23E-20 | XP_002633968.1 | 96 | 100.523 | 52  | 50  | C. briggsae CBR-MCA-1 protein           |
| Locus_26981_Transcript_1/1_Conf_1.000 | 132 | 0  |          |                |    |         |     |     |                                         |
| Locus_26982_Transcript_1/1_Conf_1.000 | 159 | 0  |          |                |    |         |     |     |                                         |
| Locus_26983_Transcript_1/1_Conf_1.000 | 249 | 0  |          |                |    |         |     |     |                                         |
| Locus_26984_Transcript_1/1_Conf_1.000 | 179 | 0  |          |                |    |         |     |     |                                         |
| Locus_26985_Transcript_1/1_Conf_1.000 | 224 | 0  |          |                |    |         |     |     |                                         |
| Locus_26986_Transcript_1/1_Conf_1.000 | 347 | 20 | 2.46E-16 | NP_495984.2    | 76 | 88.5817 | 69  | 53  | RAB family member (rab-39)              |
| Locus_26987_Transcript_1/1_Conf_1.000 | 174 | 0  |          |                |    |         |     |     |                                         |
| Locus_26988_Transcript_1/1_Conf_1.000 | 270 | 2  | 1.13E-05 | NP_492201.1    | 72 | 53.1434 | 43  | 31  | hypothetical protein C54G4.4            |
| Locus_26989_Transcript_1/1_Conf_1.000 | 175 | 0  |          |                |    |         |     |     |                                         |
| Locus_2699_Transcript_1/1_Conf_1.000  | 817 | 0  |          |                |    |         |     |     |                                         |
| Locus_26990_Transcript_1/1_Conf_1.000 | 167 | 0  |          |                |    |         |     |     |                                         |
| Locus_26991_Transcript_1/1_Conf_1.000 | 169 | 10 | 2.87E-09 | XP_002636377.1 | 74 | 65.0846 | 55  | 41  | Hypothetical protein CBG08678           |
| Locus_26992_Transcript_1/1_Conf_1.000 | 102 | 0  |          |                |    |         |     |     |                                         |
| Locus_26993_Transcript_1/1_Conf_1.000 | 152 | 0  |          |                |    |         |     |     |                                         |

|                                       |      |    |          |                |     |         |     |     |                                                |
|---------------------------------------|------|----|----------|----------------|-----|---------|-----|-----|------------------------------------------------|
| Locus_26994_Transcript_1/1_Conf_1.000 | 349  | 20 | 4.01E-51 | NP_509205.2    | 93  | 204.142 | 115 | 108 | P-GlycoProtein related family member (pgp-10)  |
| Locus_26995_Transcript_1/1_Conf_1.000 | 145  | 0  |          |                |     |         |     |     |                                                |
| Locus_26996_Transcript_1/1_Conf_1.000 | 422  | 19 | 4.15E-56 | XP_002637249.1 | 79  | 220.705 | 141 | 112 | Hypothetical protein CBG18928                  |
| Locus_26997_Transcript_1/1_Conf_1.000 | 145  | 3  | 1.32E-09 | NP_500870.2    | 81  | 66.2402 | 44  | 36  | hypothetical protein C06E7.2                   |
| Locus_26998_Transcript_1/1_Conf_1.000 | 151  | 0  |          |                |     |         |     |     |                                                |
| Locus_26999_Transcript_1/1_Conf_1.000 | 174  | 0  |          |                |     |         |     |     |                                                |
| Locus_27_Transcript_1/1_Conf_1.000    | 1156 | 20 | 4.63E-83 | NP_493177.2    | 81  | 312.768 | 238 | 194 | hypothetical protein W02D9.2                   |
| Locus_270_Transcript_1/8_Conf_0.267   | 425  | 3  | 5.12E-06 | EFO25531.1     | 58  | 54.299  | 41  | 24  | hypothetical protein LOAG_02955                |
| Locus_270_Transcript_2/8_Conf_0.267   | 467  | 3  | 5.13E-06 | EFO25531.1     | 58  | 54.299  | 41  | 24  | hypothetical protein LOAG_02955                |
| Locus_270_Transcript_3/8_Conf_0.367   | 738  | 6  | 9.96E-20 | EFO25531.1     | 62  | 101.293 | 85  | 53  | hypothetical protein LOAG_02955                |
| Locus_270_Transcript_4/8_Conf_0.300   | 558  | 6  | 9.91E-16 | EFO25531.1     | 64  | 87.0409 | 68  | 44  | hypothetical protein LOAG_02955                |
| Locus_270_Transcript_5/8_Conf_0.400   | 646  | 6  | 1.45E-15 | EFO25531.1     | 64  | 87.0409 | 68  | 44  | hypothetical protein LOAG_02955                |
| Locus_270_Transcript_6/8_Conf_0.133   | 348  | 0  |          |                |     |         |     |     |                                                |
| Locus_270_Transcript_7/8_Conf_0.367   | 559  | 7  | 5.08E-20 | EFO25531.1     | 62  | 101.293 | 85  | 53  | hypothetical protein LOAG_02955                |
| Locus_270_Transcript_8/8_Conf_0.367   | 517  | 6  | 7.86E-16 | EFO25531.1     | 64  | 87.0409 | 68  | 44  | hypothetical protein LOAG_02955                |
| Locus_2700_Transcript_1/1_Conf_1.000  | 755  | 20 | 9.88E-39 | NP_001129785.1 | 60  | 164.466 | 197 | 119 | hypothetical protein M04C9.3                   |
| Locus_27000_Transcript_1/1_Conf_1.000 | 155  | 0  |          |                |     |         |     |     |                                                |
| Locus_27001_Transcript_1/1_Conf_1.000 | 340  | 0  |          |                |     |         |     |     |                                                |
| Locus_27002_Transcript_1/1_Conf_1.000 | 184  | 20 | 2.33E-14 | XP_002820242.1 | 100 | 82.0333 | 40  | 40  | PREDICTED: proteasome subunit beta type-7-like |
| Locus_27003_Transcript_1/1_Conf_1.000 | 129  | 0  |          |                |     |         |     |     |                                                |
| Locus_27004_Transcript_1/1_Conf_1.000 | 149  | 0  |          |                |     |         |     |     |                                                |
| Locus_27005_Transcript_1/1_Conf_1.000 | 214  | 0  |          |                |     |         |     |     |                                                |
| Locus_27006_Transcript_1/1_Conf_1.000 | 197  | 3  | 1.59E-07 | XP_002631270.1 | 64  | 59.3066 | 67  | 43  | C. briggsae CBR-MAB-10 protein                 |
| Locus_27007_Transcript_1/1_Conf_1.000 | 167  | 0  |          |                |     |         |     |     |                                                |
| Locus_27008_Transcript_1/1_Conf_1.000 | 162  | 0  |          |                |     |         |     |     |                                                |
| Locus_27009_Transcript_1/1_Conf_1.000 | 140  | 0  |          |                |     |         |     |     |                                                |

|                                       |      |    |          |                |     |         |     |     |                                       |
|---------------------------------------|------|----|----------|----------------|-----|---------|-----|-----|---------------------------------------|
| Locus_2701_Transcript_1/1_Conf_1.000  | 2452 | 20 | 0        | XP_002642168.1 | 78  | 986.482 | 747 | 588 | Hypothetical protein CBG18133         |
| Locus_27010_Transcript_1/1_Conf_1.000 | 144  | 0  |          |                |     |         |     |     |                                       |
| Locus_27011_Transcript_1/1_Conf_1.000 | 266  | 0  |          |                |     |         |     |     |                                       |
| Locus_27012_Transcript_1/1_Conf_1.000 | 355  | 4  | 1.33E-30 | NP_741200.1    | 86  | 135.961 | 114 | 99  | Displaced Gonad family member (dig-1) |
| Locus_27013_Transcript_1/1_Conf_1.000 | 128  | 20 | 6.86E-11 | NP_502513.1    | 88  | 70.4774 | 42  | 37  | hypothetical protein C39E9.10         |
| Locus_27014_Transcript_1/1_Conf_1.000 | 147  | 0  |          |                |     |         |     |     |                                       |
| Locus_27015_Transcript_1/1_Conf_1.000 | 155  | 20 | 6.09E-07 | BAG60121.1     | 100 | 57.3806 | 51  | 51  | unnamed protein product               |
| Locus_27016_Transcript_1/1_Conf_1.000 | 221  | 0  |          |                |     |         |     |     |                                       |
| Locus_27017_Transcript_1/1_Conf_1.000 | 140  | 0  |          |                |     |         |     |     |                                       |
| Locus_27018_Transcript_1/1_Conf_1.000 | 268  | 0  |          |                |     |         |     |     |                                       |
| Locus_27019_Transcript_1/1_Conf_1.000 | 156  | 1  | 8.20E-04 | YP_480243.1    | 62  | 46.9802 | 51  | 32  | NUDIX hydrolase                       |



|                                       |      |    |          |                |     |         |     |     |                                                |
|---------------------------------------|------|----|----------|----------------|-----|---------|-----|-----|------------------------------------------------|
| Locus_2702_Transcript_1/2_Conf_1.000  | 1395 | 20 | 0        | NP_494846.1    | 87  | 785.793 | 464 | 408 | hypothetical protein F41C3.5                   |
| Locus_2702_Transcript_2/2_Conf_1.000  | 1266 | 20 | 0        | NP_494846.1    | 87  | 708.368 | 423 | 369 | hypothetical protein F41C3.5                   |
| Locus_27020_Transcript_1/1_Conf_1.000 | 161  | 20 | 6.45E-17 | EFO22677.1     | 86  | 90.5077 | 52  | 45  | derlin-2                                       |
| Locus_27021_Transcript_1/1_Conf_1.000 | 239  | 1  | 1.86E-16 | NP_505520.2    | 86  | 88.9669 | 50  | 43  | hypothetical protein F46B6.2                   |
| Locus_27022_Transcript_1/1_Conf_1.000 | 219  | 8  | 2.33E-06 | NP_492198.1    | 71  | 55.4546 | 45  | 32  | hypothetical protein H05L14.1                  |
| Locus_27023_Transcript_1/1_Conf_1.000 | 157  | 0  |          |                |     |         |     |     |                                                |
| Locus_27024_Transcript_1/1_Conf_1.000 | 312  | 20 | 3.92E-46 | XP_002914802.1 | 100 | 187.578 | 104 | 104 | PREDICTED: high mobility group protein B1-like |
| Locus_27025_Transcript_1/1_Conf_1.000 | 203  | 0  |          |                |     |         |     |     |                                                |
| Locus_27026_Transcript_1/1_Conf_1.000 | 190  | 11 | 6.94E-19 | NP_493718.1    | 85  | 97.0561 | 63  | 54  | PaTched Related family member (ptr-3)          |

|                                       |     |    |          |                |    |         |     |     |                                                          |
|---------------------------------------|-----|----|----------|----------------|----|---------|-----|-----|----------------------------------------------------------|
| Locus_27027_Transcript_1/1_Conf_1.000 | 169 | 15 | 3.27E-21 | NP_001129927.1 | 90 | 104.76  | 55  | 50  | PhosphoLipase C family member (plc-1)                    |
| Locus_27028_Transcript_1/1_Conf_1.000 | 136 | 0  |          |                |    |         |     |     |                                                          |
| Locus_27029_Transcript_1/1_Conf_1.000 | 145 | 0  |          |                |    |         |     |     |                                                          |
| Locus_2703_Transcript_1/1_Conf_1.000  | 619 | 20 | 9.27E-86 | XP_002648990.1 | 86 | 320.087 | 209 | 180 | Hypothetical protein CBG21322                            |
| Locus_27030_Transcript_1/1_Conf_1.000 | 603 | 20 | 5.16E-30 | EFO17504.1     | 70 | 134.806 | 134 | 95  | hypothetical protein LOAG_10996                          |
| Locus_27031_Transcript_1/1_Conf_1.000 | 490 | 3  | 1.87E-08 | AAT06310.2     | 81 | 62.3882 | 44  | 36  | putative calcium-independent phospholipase A2 isoform a  |
| Locus_27032_Transcript_1/1_Conf_1.000 | 249 | 20 | 1.31E-30 | NP_499308.1    | 82 | 135.961 | 82  | 68  | hypothetical protein D2045.5                             |
| Locus_27033_Transcript_1/1_Conf_1.000 | 242 | 0  |          |                |    |         |     |     |                                                          |
| Locus_27034_Transcript_1/1_Conf_1.000 | 419 | 0  |          |                |    |         |     |     |                                                          |
| Locus_27035_Transcript_1/1_Conf_1.000 | 143 | 0  |          |                |    |         |     |     |                                                          |
| Locus_27036_Transcript_1/1_Conf_1.000 | 239 | 0  |          |                |    |         |     |     |                                                          |
| Locus_27037_Transcript_1/1_Conf_1.000 | 221 | 3  | 5.19E-06 | XP_002633417.1 | 58 | 54.299  | 70  | 41  | C. briggsae CBR-TRPA-1 protein                           |
| Locus_27038_Transcript_1/1_Conf_1.000 | 184 | 20 | 1.01E-09 | XP_001898132.1 | 73 | 66.6254 | 60  | 44  | Utp21 specific WD40 associated domain containing protein |
| Locus_27039_Transcript_1/1_Conf_1.000 | 211 | 20 | 1.01E-30 | XP_002644104.1 | 98 | 136.346 | 65  | 64  | C. briggsae CBR-PLC-1 protein                            |

|                                       |      |    |           |                |     |         |     |     |                                                        |
|---------------------------------------|------|----|-----------|----------------|-----|---------|-----|-----|--------------------------------------------------------|
| Locus_2704_Transcript_1/4_Conf_0.667  | 1106 | 20 | 8.94E-129 | XP_002643552.1 | 86  | 464.537 | 296 | 255 | Hypothetical protein CBG16248                          |
| Locus_2704_Transcript_2/4_Conf_0.667  | 1110 | 20 | 3.10E-129 | XP_002643552.1 | 86  | 466.077 | 297 | 256 | Hypothetical protein CBG16248                          |
| Locus_2704_Transcript_3/4_Conf_0.667  | 1109 | 20 | 8.98E-129 | XP_002643552.1 | 86  | 464.537 | 296 | 255 | Hypothetical protein CBG16248                          |
| Locus_2704_Transcript_4/4_Conf_0.667  | 1106 | 20 | 8.94E-129 | XP_002643552.1 | 86  | 464.537 | 296 | 255 | Hypothetical protein CBG16248                          |
| Locus_27040_Transcript_1/1_Conf_1.000 | 144  | 0  |           |                |     |         |     |     |                                                        |
| Locus_27041_Transcript_1/1_Conf_1.000 | 511  | 20 | 2.17E-39  | XP_002636125.1 | 63  | 165.236 | 176 | 112 | Hypothetical protein CBG01375                          |
| Locus_27042_Transcript_1/1_Conf_1.000 | 156  | 0  |           |                |     |         |     |     |                                                        |
| Locus_27043_Transcript_1/1_Conf_1.000 | 248  | 0  |           |                |     |         |     |     |                                                        |
| Locus_27044_Transcript_1/1_Conf_1.000 | 180  | 2  | 4.88E-04  | XP_002638587.1 | 68  | 47.7506 | 44  | 30  | Hypothetical protein CBG05635                          |
| Locus_27045_Transcript_1/1_Conf_1.000 | 1308 | 20 | 4.19E-131 | NP_502420.2    | 76  | 472.626 | 443 | 339 | hypothetical protein C26H9A.2                          |
| Locus_27046_Transcript_1/1_Conf_1.000 | 137  | 0  |           |                |     |         |     |     |                                                        |
| Locus_27047_Transcript_1/1_Conf_1.000 | 345  | 20 | 9.93E-42  | NP_499056.1    | 86  | 172.94  | 109 | 94  | fatty acid ELongation family member (elo-4)            |
| Locus_27048_Transcript_1/1_Conf_1.000 | 315  | 0  |           |                |     |         |     |     |                                                        |
| Locus_27049_Transcript_1/1_Conf_1.000 | 142  | 0  |           |                |     |         |     |     |                                                        |
| Locus_2705_Transcript_1/1_Conf_1.000  | 195  | 0  |           |                |     |         |     |     |                                                        |
| Locus_27050_Transcript_1/1_Conf_1.000 | 131  | 0  |           |                |     |         |     |     |                                                        |
| Locus_27051_Transcript_1/1_Conf_1.000 | 166  | 0  |           |                |     |         |     |     |                                                        |
| Locus_27052_Transcript_1/1_Conf_1.000 | 213  | 20 | 2.39E-32  | XP_002825867.1 | 100 | 141.739 | 70  | 70  | PREDICTED: calcium and integrin-binding protein 1-like |
| Locus_27053_Transcript_1/1_Conf_1.000 | 136  | 0  |           |                |     |         |     |     |                                                        |
| Locus_27054_Transcript_1/1_Conf_1.000 | 156  | 0  |           |                |     |         |     |     |                                                        |
| Locus_27055_Transcript_1/1_Conf_1.000 | 128  | 0  |           |                |     |         |     |     |                                                        |
| Locus_27056_Transcript_1/1_Conf_1.000 | 160  | 8  | 2.62E-10  | NP_501419.2    | 66  | 68.5514 | 51  | 34  | hypothetical protein D2096.3                           |

|                                       |     |    |          |                |     |         |     |     |                                                                   |
|---------------------------------------|-----|----|----------|----------------|-----|---------|-----|-----|-------------------------------------------------------------------|
| Locus_27057_Transcript_1/1_Conf_1.000 | 138 | 0  |          |                |     |         |     |     |                                                                   |
| Locus_27058_Transcript_1/1_Conf_1.000 | 224 | 0  |          |                |     |         |     |     |                                                                   |
| Locus_27059_Transcript_1/1_Conf_1.000 | 147 | 3  | 1.32E-09 | EFO18230.1     | 82  | 66.2402 | 46  | 38  | CTG-2 protein                                                     |
| Locus_2706_Transcript_1/1_Conf_1.000  | 555 | 20 | 2.78E-42 | CAR63630.1     | 81  | 175.252 | 120 | 98  | hypothetical protein                                              |
| Locus_27060_Transcript_1/1_Conf_1.000 | 144 | 4  | 3.05E-06 | XP_002634052.1 | 72  | 55.0694 | 47  | 34  | C. briggsae CBR-VHA-5 protein                                     |
| Locus_27061_Transcript_1/1_Conf_1.000 | 133 | 0  |          |                |     |         |     |     |                                                                   |
| Locus_27062_Transcript_1/1_Conf_1.000 | 221 | 0  |          |                |     |         |     |     |                                                                   |
| Locus_27063_Transcript_1/1_Conf_1.000 | 137 | 0  |          |                |     |         |     |     |                                                                   |
| Locus_27064_Transcript_1/1_Conf_1.000 | 144 | 0  |          |                |     |         |     |     |                                                                   |
| Locus_27065_Transcript_1/1_Conf_1.000 | 206 | 0  |          |                |     |         |     |     |                                                                   |
| Locus_27066_Transcript_1/1_Conf_1.000 | 231 | 0  |          |                |     |         |     |     |                                                                   |
| Locus_27067_Transcript_1/1_Conf_1.000 | 137 | 0  |          |                |     |         |     |     |                                                                   |
| Locus_27068_Transcript_1/1_Conf_1.000 | 229 | 0  |          |                |     |         |     |     |                                                                   |
| Locus_27069_Transcript_1/1_Conf_1.000 | 164 | 2  | 3.09E-11 | XP_002639255.1 | 84  | 71.633  | 52  | 44  | C. briggsae CBR-OCRL-1 protein                                    |
| Locus_2707_Transcript_1/1_Conf_1.000  | 386 | 20 | 7.98E-44 | ABD75715.1     | 87  | 179.874 | 129 | 113 | vacuolar protein sorting factor                                   |
| Locus_27070_Transcript_1/1_Conf_1.000 | 238 | 20 | 3.87E-30 | NP_741809.1    | 88  | 134.42  | 78  | 69  | Beta Carbonic Anhydrase family member (bca-1)                     |
| Locus_27071_Transcript_1/1_Conf_1.000 | 172 | 20 | 4.88E-17 | XP_002633255.1 | 86  | 90.8929 | 53  | 46  | Hypothetical protein CBG05980                                     |
| Locus_27072_Transcript_1/1_Conf_1.000 | 198 | 0  |          |                |     |         |     |     |                                                                   |
| Locus_27073_Transcript_1/1_Conf_1.000 | 182 | 0  |          |                |     |         |     |     |                                                                   |
| Locus_27074_Transcript_1/1_Conf_1.000 | 195 | 1  | 2.22E-17 | CAR63594.1     | 79  | 92.0485 | 64  | 51  | hypothetical protein                                              |
| Locus_27075_Transcript_1/1_Conf_1.000 | 132 | 0  |          |                |     |         |     |     |                                                                   |
| Locus_27076_Transcript_1/1_Conf_1.000 | 131 | 0  |          |                |     |         |     |     |                                                                   |
| Locus_27077_Transcript_1/1_Conf_1.000 | 179 | 20 | 1.23E-20 | XP_002810153.1 | 100 | 102.834 | 48  | 48  | PREDICTED: LOW QUALITY PROTEIN: HCLS1-associated protein X-1-like |
| Locus_27078_Transcript_1/1_Conf_1.000 | 128 | 0  |          |                |     |         |     |     |                                                                   |

|                                       |      |    |          |                |    |         |     |     |                                                                                  |
|---------------------------------------|------|----|----------|----------------|----|---------|-----|-----|----------------------------------------------------------------------------------|
| Locus_27079_Transcript_1/1_Conf_1.000 | 172  | 20 | 2.27E-06 | XP_001897983.1 | 70 | 55.4546 | 54  | 38  | RIKEN cDNA 2700097009                                                            |
| Locus_2708_Transcript_1/1_Conf_1.000  | 1651 | 20 | 0        | NP_504038.1    | 80 | 638.647 | 496 | 400 | MTM (myotubularin) family member (mtm-9)                                         |
| Locus_27080_Transcript_1/1_Conf_1.000 | 133  | 0  |          |                |    |         |     |     |                                                                                  |
| Locus_27081_Transcript_1/1_Conf_1.000 | 155  | 0  |          |                |    |         |     |     |                                                                                  |
| Locus_27082_Transcript_1/1_Conf_1.000 | 157  | 0  |          |                |    |         |     |     |                                                                                  |
| Locus_27083_Transcript_1/1_Conf_1.000 | 730  | 20 | 2.87E-80 | XP_001900598.1 | 84 | 302.368 | 205 | 173 | probable DNA helicase ERCC2/XPD - southern platyfish                             |
| Locus_27084_Transcript_1/1_Conf_1.000 | 202  | 0  |          |                |    |         |     |     |                                                                                  |
| Locus_27085_Transcript_1/1_Conf_1.000 | 346  | 5  | 7.19E-08 | NP_502803.3    | 83 | 60.4622 | 43  | 36  | EPS (human endocytosis) related family member (eps-8)                            |
| Locus_27086_Transcript_1/1_Conf_1.000 | 243  | 0  |          |                |    |         |     |     |                                                                                  |
| Locus_27087_Transcript_1/1_Conf_1.000 | 191  | 0  |          |                |    |         |     |     |                                                                                  |
| Locus_27088_Transcript_1/1_Conf_1.000 | 203  | 20 | 1.68E-25 | NP_501861.1    | 92 | 119.013 | 67  | 62  | Mitochondrial Sorting of Proteins (yeast MSP) in Nematode family member (mspn-1) |
| Locus_27089_Transcript_1/1_Conf_1.000 | 163  | 0  |          |                |    |         |     |     |                                                                                  |

|                                       |      |    |          |                |    |         |     |     |                                                          |
|---------------------------------------|------|----|----------|----------------|----|---------|-----|-----|----------------------------------------------------------|
| Locus_2709_Transcript_1/1_Conf_1.000  | 726  | 20 | 4.32E-12 | AAD13339.1     | 46 | 75.8702 | 228 | 107 | ancylostoma-secreted protein 1 precursor                 |
| Locus_27090_Transcript_1/1_Conf_1.000 | 185  | 4  | 5.73E-13 | NP_495292.1    | 90 | 77.411  | 50  | 45  | hypothetical protein T25D10.4                            |
| Locus_27091_Transcript_1/1_Conf_1.000 | 154  | 0  |          |                |    |         |     |     |                                                          |
| Locus_27092_Transcript_1/1_Conf_1.000 | 144  | 0  |          |                |    |         |     |     |                                                          |
| Locus_27093_Transcript_1/1_Conf_1.000 | 194  | 0  |          |                |    |         |     |     |                                                          |
| Locus_27094_Transcript_1/1_Conf_1.000 | 238  | 0  |          |                |    |         |     |     |                                                          |
| Locus_27095_Transcript_1/1_Conf_1.000 | 222  | 2  | 7.71E-10 | NP_497795.1    | 75 | 67.0106 | 48  | 36  | Neuropeptide-Like Protein family member (nlp-10)         |
| Locus_27096_Transcript_1/1_Conf_1.000 | 192  | 0  |          |                |    |         |     |     |                                                          |
| Locus_27097_Transcript_1/1_Conf_1.000 | 139  | 0  |          |                |    |         |     |     |                                                          |
| Locus_27098_Transcript_1/1_Conf_1.000 | 151  | 0  |          |                |    |         |     |     |                                                          |
| Locus_27099_Transcript_1/1_Conf_1.000 | 183  | 20 | 2.65E-26 | CAR63533.1     | 98 | 121.709 | 61  | 60  | putative Vitellogenin-linked Transcript family member    |
| Locus_271_Transcript_1/1_Conf_1.000   | 2079 | 20 | 0        | NP_496968.1    | 84 | 865.529 | 620 | 525 | hypothetical protein Y48B6A.12                           |
| Locus_2710_Transcript_1/2_Conf_1.000  | 2499 | 0  |          |                |    |         |     |     |                                                          |
| Locus_2710_Transcript_2/2_Conf_1.000  | 2499 | 0  |          |                |    |         |     |     |                                                          |
| Locus_27100_Transcript_1/1_Conf_1.000 | 155  | 2  | 4.66E-07 | NP_499790.1    | 77 | 57.7658 | 45  | 35  | TWiK family of potassium channels family member (twk-40) |
| Locus_27101_Transcript_1/1_Conf_1.000 | 249  | 0  |          |                |    |         |     |     |                                                          |
| Locus_27102_Transcript_1/1_Conf_1.000 | 184  | 0  |          |                |    |         |     |     |                                                          |
| Locus_27103_Transcript_1/1_Conf_1.000 | 140  | 0  |          |                |    |         |     |     |                                                          |
| Locus_27104_Transcript_1/1_Conf_1.000 | 128  | 0  |          |                |    |         |     |     |                                                          |
| Locus_27105_Transcript_1/1_Conf_1.000 | 277  | 20 | 3.60E-20 | XP_001186243.1 | 69 | 101.293 | 92  | 64  | PREDICTED: hypothetical protein                          |
| Locus_27106_Transcript_1/1_Conf_1.000 | 158  | 20 | 5.13E-14 | XP_002636662.1 | 85 | 80.8777 | 42  | 36  | C. briggsae CBR-GANA-1 protein                           |
| Locus_27107_Transcript_1/1_Conf_1.000 | 162  | 0  |          |                |    |         |     |     |                                                          |
| Locus_27108_Transcript_1/1_Conf_1.000 | 139  | 2  | 2.26E-06 | NP_495695.2    | 74 | 55.4546 | 47  | 35  | hypothetical protein K02C4.5                             |
| Locus_27109_Transcript_1/1_Conf_1.000 | 159  | 1  | 6.26E-04 | XP_002630560.1 | 68 | 47.3654 | 48  | 33  | C. briggsae CBR-NPP-21 protein                           |
| Locus_2711_Transcript_1/1_Conf_1.000  | 225  | 20 | 1.31E-09 | EFO17291.1     | 56 | 66.2402 | 74  | 42  | hypothetical protein LOAG_11208                          |
| Locus_27110_Transcript_1/1_Conf_1.000 | 136  | 0  |          |                |    |         |     |     |                                                          |

|                                       |      |    |          |                |     |         |     |     |                                                       |
|---------------------------------------|------|----|----------|----------------|-----|---------|-----|-----|-------------------------------------------------------|
| Locus_27111_Transcript_1/1_Conf_1.000 | 184  | 20 | 9.73E-29 | NP_001137152.1 | 100 | 129.798 | 61  | 61  | glutathione S-transferase kappa 1 isoform c           |
| Locus_27112_Transcript_1/1_Conf_1.000 | 155  | 0  |          |                |     |         |     |     |                                                       |
| Locus_27113_Transcript_1/1_Conf_1.000 | 243  | 0  |          |                |     |         |     |     |                                                       |
| Locus_27114_Transcript_1/1_Conf_1.000 | 211  | 0  |          |                |     |         |     |     |                                                       |
| Locus_27115_Transcript_1/1_Conf_1.000 | 167  | 20 | 8.35E-25 | XP_002761262.1 | 100 | 116.701 | 55  | 55  | PREDICTED: coactosin-like protein-like                |
| Locus_27116_Transcript_1/1_Conf_1.000 | 308  | 2  | 5.96E-07 | NP_508809.1    | 86  | 57.3806 | 36  | 31  | hypothetical protein F55D10.4                         |
| Locus_27117_Transcript_1/1_Conf_1.000 | 273  | 0  |          |                |     |         |     |     |                                                       |
| Locus_27118_Transcript_1/1_Conf_1.000 | 148  | 0  |          |                |     |         |     |     |                                                       |
| Locus_27119_Transcript_1/1_Conf_1.000 | 145  | 3  | 1.51E-13 | NP_495697.2    | 93  | 79.337  | 48  | 45  | Lim and Transglutaminase Domain family member (ltd-1) |
| Locus_2712_Transcript_1/1_Conf_1.000  | 767  | 20 | 9.76E-82 | XP_002635274.1 | 86  | 307.375 | 227 | 197 | Hypothetical protein CBG11518                         |
| Locus_27120_Transcript_1/1_Conf_1.000 | 170  | 0  |          |                |     |         |     |     |                                                       |
| Locus_27121_Transcript_1/1_Conf_1.000 | 132  | 0  |          |                |     |         |     |     |                                                       |
| Locus_27122_Transcript_1/1_Conf_1.000 | 214  | 0  |          |                |     |         |     |     |                                                       |
| Locus_27123_Transcript_1/1_Conf_1.000 | 195  | 5  | 4.78E-20 | XP_002634857.1 | 89  | 100.908 | 64  | 57  | C. briggsae CBR-LGC-30 protein                        |
| Locus_27124_Transcript_1/1_Conf_1.000 | 256  | 0  |          |                |     |         |     |     |                                                       |
| Locus_27125_Transcript_1/1_Conf_1.000 | 173  | 0  |          |                |     |         |     |     |                                                       |
| Locus_27126_Transcript_1/1_Conf_1.000 | 212  | 0  |          |                |     |         |     |     |                                                       |
| Locus_27127_Transcript_1/1_Conf_1.000 | 145  | 0  |          |                |     |         |     |     |                                                       |
| Locus_27128_Transcript_1/1_Conf_1.000 | 136  | 0  |          |                |     |         |     |     |                                                       |
| Locus_27129_Transcript_1/1_Conf_1.000 | 215  | 0  |          |                |     |         |     |     |                                                       |
| Locus_2713_Transcript_1/2_Conf_1.000  | 1809 | 0  |          |                |     |         |     |     |                                                       |
| Locus_2713_Transcript_2/2_Conf_1.000  | 1908 | 0  |          |                |     |         |     |     |                                                       |
| Locus_27130_Transcript_1/1_Conf_1.000 | 258  | 0  |          |                |     |         |     |     |                                                       |
| Locus_27131_Transcript_1/1_Conf_1.000 | 130  | 0  |          |                |     |         |     |     |                                                       |
| Locus_27132_Transcript_1/1_Conf_1.000 | 117  | 0  |          |                |     |         |     |     |                                                       |
| Locus_27133_Transcript_1/1_Conf_1.000 | 387  | 0  |          |                |     |         |     |     |                                                       |
| Locus_27134_Transcript_1/1_Conf_1.000 | 305  | 3  | 1.98E-26 | XP_002630047.1 | 74  | 122.094 | 101 | 75  | Hypothetical protein CBG13418                         |
| Locus_27135_Transcript_1/1_Conf_1.000 | 175  | 1  | 4.72E-04 | XP_002631859.1 | 54  | 47.7506 | 57  | 31  | Hypothetical protein CBG07809                         |
| Locus_27136_Transcript_1/1_Conf_1.000 | 138  | 0  |          |                |     |         |     |     |                                                       |
| Locus_27137_Transcript_1/1_Conf_1.000 | 200  | 0  |          |                |     |         |     |     |                                                       |

|                                       |      |    |          |                |    |         |     |     |                                                                         |
|---------------------------------------|------|----|----------|----------------|----|---------|-----|-----|-------------------------------------------------------------------------|
| Locus_27138_Transcript_1/1_Conf_1.000 | 174  | 16 | 7.76E-15 | XP_002644219.1 | 76 | 83.5741 | 63  | 48  | Hypothetical protein CBG17217                                           |
| Locus_27139_Transcript_1/1_Conf_1.000 | 158  | 5  | 3.80E-09 | XP_002647112.1 | 88 | 64.6994 | 42  | 37  | C. briggsae CBR-FRM-8 protein                                           |
| Locus_2714_Transcript_1/1_Conf_1.000  | 2140 | 4  | 6.41E-48 | CAZ39159.1     | 47 | 197.208 | 576 | 274 | C. elegans protein C01C7.1b, partially confirmed by transcript evidence |
| Locus_27140_Transcript_1/1_Conf_1.000 | 176  | 20 | 1.41E-24 | NP_495614.3    | 96 | 115.931 | 58  | 56  | Na/H eXchanger family member (nhx-2)                                    |
| Locus_27141_Transcript_1/1_Conf_1.000 | 144  | 5  | 1.24E-15 | XP_002647501.1 | 91 | 86.2705 | 48  | 44  | Hypothetical protein CBG06575                                           |
| Locus_27142_Transcript_1/1_Conf_1.000 | 160  | 20 | 1.49E-05 | XP_002647042.1 | 69 | 52.7582 | 46  | 32  | Hypothetical protein CBG03560                                           |
| Locus_27143_Transcript_1/1_Conf_1.000 | 264  | 7  | 9.01E-11 | NP_492477.2    | 66 | 70.0922 | 83  | 55  | PRogression Of Meiosis family member (prom-1)                           |
| Locus_27144_Transcript_1/1_Conf_1.000 | 167  | 0  |          |                |    |         |     |     |                                                                         |
| Locus_27145_Transcript_1/1_Conf_1.000 | 133  | 0  |          |                |    |         |     |     |                                                                         |
| Locus_27146_Transcript_1/1_Conf_1.000 | 177  | 4  | 1.67E-09 | NP_510249.2    | 71 | 65.855  | 57  | 41  | TREhalase family member (tre-4)                                         |
| Locus_27147_Transcript_1/1_Conf_1.000 | 316  | 20 | 1.19E-18 | XP_002644672.1 | 64 | 96.2857 | 107 | 69  | C. briggsae CBR-VPS-41 protein                                          |
| Locus_27148_Transcript_1/1_Conf_1.000 | 133  | 6  | 6.38E-09 | XP_002636925.1 | 83 | 63.929  | 43  | 36  | C. briggsae CBR-RHR-1 protein                                           |
| Locus_27149_Transcript_1/1_Conf_1.000 | 132  | 0  |          |                |    |         |     |     |                                                                         |
| Locus_2715_Transcript_1/1_Conf_1.000  | 851  | 7  | 3.31E-07 | XP_002631036.1 | 48 | 60.077  | 187 | 90  | Hypothetical protein CBG02793                                           |



|                                       |     |    |          |                |     |         |     |    |                                                                  |
|---------------------------------------|-----|----|----------|----------------|-----|---------|-----|----|------------------------------------------------------------------|
| Locus_27150_Transcript_1/1_Conf_1.000 | 206 | 0  |          |                |     |         |     |    |                                                                  |
| Locus_27151_Transcript_1/1_Conf_1.000 | 131 | 0  |          |                |     |         |     |    |                                                                  |
| Locus_27152_Transcript_1/1_Conf_1.000 | 259 | 0  |          |                |     |         |     |    |                                                                  |
| Locus_27153_Transcript_1/1_Conf_1.000 | 139 | 0  |          |                |     |         |     |    |                                                                  |
| Locus_27154_Transcript_1/1_Conf_1.000 | 175 | 0  |          |                |     |         |     |    |                                                                  |
| Locus_27155_Transcript_1/1_Conf_1.000 | 190 | 20 | 1.77E-22 | A8X4H1.2       | 87  | 108.997 | 63  | 55 | Dual specificity tyrosine-phosphorylation-regulated kinase mbk-1 |
| Locus_27156_Transcript_1/1_Conf_1.000 | 135 | 0  |          |                |     |         |     |    |                                                                  |
| Locus_27157_Transcript_1/1_Conf_1.000 | 238 | 20 | 6.81E-35 | XP_002644000.1 | 97  | 150.214 | 79  | 77 | C. briggsae CBR-IFA-1 protein                                    |
| Locus_27158_Transcript_1/1_Conf_1.000 | 128 | 0  |          |                |     |         |     |    |                                                                  |
| Locus_27159_Transcript_1/1_Conf_1.000 | 161 | 20 | 5.10E-22 | NP_001022571.1 | 94  | 107.457 | 53  | 50 | NeuroFibroMatoSis homolog family member (nfm-1)                  |
| Locus_2716_Transcript_1/1_Conf_1.000  | 182 | 0  |          |                |     |         |     |    |                                                                  |
| Locus_27160_Transcript_1/1_Conf_1.000 | 141 | 0  |          |                |     |         |     |    |                                                                  |
| Locus_27161_Transcript_1/1_Conf_1.000 | 352 | 0  |          |                |     |         |     |    |                                                                  |
| Locus_27162_Transcript_1/1_Conf_1.000 | 143 | 0  |          |                |     |         |     |    |                                                                  |
| Locus_27163_Transcript_1/1_Conf_1.000 | 142 | 0  |          |                |     |         |     |    |                                                                  |
| Locus_27164_Transcript_1/1_Conf_1.000 | 142 | 20 | 2.65E-15 | EFO21255.1     | 87  | 85.1149 | 47  | 41 | hypothetical protein LOAG_07233                                  |
| Locus_27165_Transcript_1/1_Conf_1.000 | 134 | 0  |          |                |     |         |     |    |                                                                  |
| Locus_27166_Transcript_1/1_Conf_1.000 | 134 | 0  |          |                |     |         |     |    |                                                                  |
| Locus_27167_Transcript_1/1_Conf_1.000 | 230 | 0  |          |                |     |         |     |    |                                                                  |
| Locus_27168_Transcript_1/1_Conf_1.000 | 172 | 0  |          |                |     |         |     |    |                                                                  |
| Locus_27169_Transcript_1/1_Conf_1.000 | 129 | 0  |          |                |     |         |     |    |                                                                  |
| Locus_2717_Transcript_1/1_Conf_1.000  | 502 | 20 | 2.92E-17 | CAD28559.2     | 49  | 91.6633 | 146 | 72 | metalloprotease I                                                |
| Locus_27170_Transcript_1/1_Conf_1.000 | 216 | 5  | 2.32E-11 | NP_507813.1    | 67  | 72.0182 | 71  | 48 | hypothetical protein Y43F8C.13                                   |
| Locus_27171_Transcript_1/1_Conf_1.000 | 167 | 0  |          |                |     |         |     |    |                                                                  |
| Locus_27172_Transcript_1/1_Conf_1.000 | 138 | 0  |          |                |     |         |     |    |                                                                  |
| Locus_27173_Transcript_1/1_Conf_1.000 | 161 | 0  |          |                |     |         |     |    |                                                                  |
| Locus_27174_Transcript_1/1_Conf_1.000 | 131 | 0  |          |                |     |         |     |    |                                                                  |
| Locus_27175_Transcript_1/1_Conf_1.000 | 154 | 0  |          |                |     |         |     |    |                                                                  |
| Locus_27176_Transcript_1/1_Conf_1.000 | 266 | 20 | 2.51E-45 | AAH04358.1     | 100 | 184.882 | 88  | 88 | Transmembrane protein 176B                                       |

|                                       |     |    |          |                |    |         |     |     |                                                      |
|---------------------------------------|-----|----|----------|----------------|----|---------|-----|-----|------------------------------------------------------|
| Locus_27177_Transcript_1/1_Conf_1.000 | 255 | 20 | 1.88E-32 | XP_002634414.1 | 75 | 142.124 | 85  | 64  | C. briggsae CBR-EPI-1 protein                        |
| Locus_27178_Transcript_1/1_Conf_1.000 | 193 | 0  |          |                |    |         |     |     |                                                      |
| Locus_27179_Transcript_1/1_Conf_1.000 | 149 | 0  |          |                |    |         |     |     |                                                      |
| Locus_2718_Transcript_1/1_Conf_1.000  | 343 | 20 | 2.44E-56 | ACN93882.1     | 95 | 221.476 | 114 | 109 | putative glutamate-cysteine ligase catalytic subunit |
| Locus_27180_Transcript_1/1_Conf_1.000 | 138 | 0  |          |                |    |         |     |     |                                                      |
| Locus_27181_Transcript_1/1_Conf_1.000 | 174 | 0  |          |                |    |         |     |     |                                                      |
| Locus_27182_Transcript_1/1_Conf_1.000 | 159 | 0  |          |                |    |         |     |     |                                                      |
| Locus_27183_Transcript_1/1_Conf_1.000 | 150 | 0  |          |                |    |         |     |     |                                                      |
| Locus_27184_Transcript_1/1_Conf_1.000 | 158 | 20 | 4.06E-11 | EFO23046.1     | 75 | 71.2478 | 52  | 39  | TK/FER protein kinase                                |
| Locus_27185_Transcript_1/1_Conf_1.000 | 146 | 20 | 2.76E-07 | NP_495409.3    | 75 | 58.5362 | 49  | 37  | hypothetical protein C44B7.10                        |
| Locus_27186_Transcript_1/1_Conf_1.000 | 149 | 0  |          |                |    |         |     |     |                                                      |

|                                       |     |    |          |                |     |         |     |    |                                                 |
|---------------------------------------|-----|----|----------|----------------|-----|---------|-----|----|-------------------------------------------------|
| Locus_27187_Transcript_1/1_Conf_1.000 | 146 | 20 | 3.14E-19 | XP_002913731.1 | 100 | 98.2117 | 48  | 48 | PREDICTED: fibronectin-like isoform 4           |
| Locus_27188_Transcript_1/1_Conf_1.000 | 140 | 0  |          |                |     |         |     |    |                                                 |
| Locus_27189_Transcript_1/1_Conf_1.000 | 198 | 0  |          |                |     |         |     |    |                                                 |
| Locus_2719_Transcript_1/1_Conf_1.000  | 285 | 1  | 4.84E-04 | XP_002641754.1 | 57  | 47.7506 | 80  | 46 | C. briggsae CBR-EMB-30 protein                  |
| Locus_27190_Transcript_1/1_Conf_1.000 | 570 | 18 | 5.08E-26 | NP_001023369.1 | 63  | 121.324 | 153 | 97 | Nuclear Hormone Receptor family member (nhr-66) |
| Locus_27191_Transcript_1/1_Conf_1.000 | 439 | 0  |          |                |     |         |     |    |                                                 |
| Locus_27192_Transcript_1/1_Conf_1.000 | 155 | 20 | 9.68E-21 | AAZ91344.1     | 98  | 103.219 | 51  | 50 | Synaptotagmin protein 2                         |
| Locus_27193_Transcript_1/1_Conf_1.000 | 239 | 20 | 3.74E-25 | EFO23834.1     | 79  | 117.857 | 79  | 63 | hypothetical protein LOAG_04651                 |
| Locus_27194_Transcript_1/1_Conf_1.000 | 132 | 0  |          |                |     |         |     |    |                                                 |
| Locus_27195_Transcript_1/1_Conf_1.000 | 232 | 18 | 1.14E-21 | XP_002644475.1 | 76  | 106.301 | 77  | 59 | Hypothetical protein CBG14354                   |
| Locus_27196_Transcript_1/1_Conf_1.000 | 287 | 20 | 1.10E-40 | XP_002634234.1 | 89  | 169.474 | 95  | 85 | Hypothetical protein CBG01804                   |
| Locus_27197_Transcript_1/1_Conf_1.000 | 306 | 0  |          |                |     |         |     |    |                                                 |
| Locus_27198_Transcript_1/1_Conf_1.000 | 234 | 0  |          |                |     |         |     |    |                                                 |
| Locus_27199_Transcript_1/1_Conf_1.000 | 239 | 0  |          |                |     |         |     |    |                                                 |

|                                       |      |    |          |                |    |         |     |     |                                                                  |
|---------------------------------------|------|----|----------|----------------|----|---------|-----|-----|------------------------------------------------------------------|
| Locus_272_Transcript_1/4_Conf_0.400   | 897  | 20 | 1.15E-61 | CAO00417.1     | 62 | 241.121 | 261 | 163 | two-domain activation associated secreted protein ASP4 precursor |
| Locus_272_Transcript_2/4_Conf_0.200   | 185  | 0  |          |                |    |         |     |     |                                                                  |
| Locus_272_Transcript_3/4_Conf_0.300   | 253  | 9  | 1.32E-09 | CAO00417.1     | 60 | 66.2402 | 70  | 42  | two-domain activation associated secreted protein ASP4 precursor |
| Locus_272_Transcript_4/4_Conf_0.700   | 1404 | 20 | 1.96E-89 | CAO00417.1     | 57 | 334.339 | 444 | 254 | two-domain activation associated secreted protein ASP4 precursor |
| Locus_2720_Transcript_1/1_Conf_1.000  | 1925 | 20 | 1.30E-28 | XP_002129449.1 | 47 | 132.88  | 310 | 146 | PREDICTED: hypothetical protein                                  |
| Locus_27200_Transcript_1/1_Conf_1.000 | 142  | 0  |          |                |    |         |     |     |                                                                  |
| Locus_27201_Transcript_1/1_Conf_1.000 | 176  | 20 | 5.55E-21 | NP_001021871.1 | 93 | 103.99  | 58  | 54  | UNCoordinated family member (unc-13)                             |
| Locus_27202_Transcript_1/1_Conf_1.000 | 130  | 0  |          |                |    |         |     |     |                                                                  |
| Locus_27203_Transcript_1/1_Conf_1.000 | 163  | 0  |          |                |    |         |     |     |                                                                  |
| Locus_27204_Transcript_1/1_Conf_1.000 | 137  | 7  | 2.12E-04 | XP_002636031.1 | 71 | 48.9062 | 46  | 33  | Hypothetical protein CBG01269                                    |
| Locus_27205_Transcript_1/1_Conf_1.000 | 197  | 0  |          |                |    |         |     |     |                                                                  |
| Locus_27206_Transcript_1/1_Conf_1.000 | 217  | 6  | 7.94E-28 | XP_002639744.1 | 90 | 126.716 | 72  | 65  | C. briggsae CBR-LAM-3 protein                                    |
| Locus_27207_Transcript_1/1_Conf_1.000 | 162  | 0  |          |                |    |         |     |     |                                                                  |
| Locus_27208_Transcript_1/1_Conf_1.000 | 128  | 20 | 2.88E-09 | NP_505070.2    | 92 | 65.0846 | 39  | 36  | Valyl tRNA Synthetase family member (vrs-1)                      |
| Locus_27209_Transcript_1/1_Conf_1.000 | 143  | 0  |          |                |    |         |     |     |                                                                  |

|                                       |     |    |           |                |     |         |     |     |                                                                     |
|---------------------------------------|-----|----|-----------|----------------|-----|---------|-----|-----|---------------------------------------------------------------------|
| Locus_2721_Transcript_1/1_Conf_1.000  | 823 | 20 | 1.10E-121 | NP_492765.1    | 95  | 440.269 | 248 | 238 | Proteasome Alpha Subunit family member (pas-5)                      |
| Locus_27210_Transcript_1/1_Conf_1.000 | 251 | 1  | 1.61E-04  | XP_002639744.1 | 61  | 49.2914 | 83  | 51  | C. briggsae CBR-LAM-3 protein                                       |
| Locus_27211_Transcript_1/1_Conf_1.000 | 172 | 20 | 4.41E-18  | XP_002811661.1 | 100 | 94.3597 | 44  | 44  | PREDICTED: cyclin-L2-like                                           |
| Locus_27212_Transcript_1/1_Conf_1.000 | 132 | 2  | 7.29E-13  | NP_493603.1    | 93  | 77.0258 | 43  | 40  | PaTched Related family member (ptr-23)                              |
| Locus_27213_Transcript_1/1_Conf_1.000 | 209 | 1  | 4.89E-09  | NP_497674.3    | 68  | 64.3142 | 66  | 45  | hypothetical protein Y53G8AL.1                                      |
| Locus_27214_Transcript_1/1_Conf_1.000 | 210 | 0  |           |                |     |         |     |     |                                                                     |
| Locus_27215_Transcript_1/1_Conf_1.000 | 157 | 1  | 3.43E-18  | XP_002634588.1 | 98  | 94.7449 | 50  | 49  | Hypothetical protein CBG08399                                       |
| Locus_27216_Transcript_1/1_Conf_1.000 | 148 | 2  | 7.24E-08  | NP_504489.3    | 74  | 60.4622 | 50  | 37  | HEXosaminidase family member (hex-2)                                |
| Locus_27217_Transcript_1/1_Conf_1.000 | 200 | 0  |           |                |     |         |     |     |                                                                     |
| Locus_27218_Transcript_1/1_Conf_1.000 | 226 | 9  | 2.08E-23  | XP_002646356.1 | 81  | 112.079 | 76  | 62  | Hypothetical protein CBG12070                                       |
| Locus_27219_Transcript_1/1_Conf_1.000 | 213 | 0  |           |                |     |         |     |     |                                                                     |
| Locus_2722_Transcript_1/1_Conf_1.000  | 237 | 15 | 3.74E-25  | XP_001902374.1 | 91  | 117.857 | 78  | 71  | MYND finger family protein                                          |
| Locus_27220_Transcript_1/1_Conf_1.000 | 282 | 20 | 8.50E-33  | 2WS2           | 86  | 143.28  | 93  | 80  | The 2 AngstromStructure Of A Nu-Class Gst From Haemonchus Contortus |
| Locus_27221_Transcript_1/1_Conf_1.000 | 128 | 0  |           |                |     |         |     |     |                                                                     |

|                                       |     |    |          |                |     |         |    |    |                                                                        |
|---------------------------------------|-----|----|----------|----------------|-----|---------|----|----|------------------------------------------------------------------------|
| Locus_27222_Transcript_1/1_Conf_1.000 | 163 | 17 | 1.70E-09 | AAA28106.1     | 95  | 65.855  | 46 | 44 | DNA-binding protein mab5                                               |
| Locus_27223_Transcript_1/1_Conf_1.000 | 254 | 9  | 3.58E-15 | AAO18224.1     | 91  | 84.7297 | 47 | 43 | FMRFamide-like prepropeptide                                           |
| Locus_27224_Transcript_1/1_Conf_1.000 | 211 | 0  |          |                |     |         |    |    |                                                                        |
| Locus_27225_Transcript_1/1_Conf_1.000 | 137 | 0  |          |                |     |         |    |    |                                                                        |
| Locus_27226_Transcript_1/1_Conf_1.000 | 229 | 0  |          |                |     |         |    |    |                                                                        |
| Locus_27227_Transcript_1/1_Conf_1.000 | 131 | 0  |          |                |     |         |    |    |                                                                        |
| Locus_27228_Transcript_1/1_Conf_1.000 | 164 | 20 | 6.65E-14 | EFO24191.1     | 75  | 80.4925 | 53 | 40 | hypothetical protein LOAG_04290                                        |
| Locus_27229_Transcript_1/1_Conf_1.000 | 289 | 0  |          |                |     |         |    |    |                                                                        |
| Locus_2723_Transcript_1/2_Conf_1.000  | 325 | 0  |          |                |     |         |    |    |                                                                        |
| Locus_2723_Transcript_2/2_Conf_1.000  | 244 | 0  |          |                |     |         |    |    |                                                                        |
| Locus_27230_Transcript_1/1_Conf_1.000 | 158 | 7  | 2.38E-19 | NP_504415.2    | 98  | 98.5969 | 52 | 51 | Na/Ca eXchangers family member (ncx-2)                                 |
| Locus_27231_Transcript_1/1_Conf_1.000 | 281 | 20 | 2.24E-22 | XP_002644607.1 | 70  | 108.612 | 92 | 65 | Hypothetical protein CBG14563                                          |
| Locus_27232_Transcript_1/1_Conf_1.000 | 179 | 0  |          |                |     |         |    |    |                                                                        |
| Locus_27233_Transcript_1/1_Conf_1.000 | 297 | 20 | 1.37E-51 | XP_002805211.1 | 100 | 205.682 | 98 | 98 | PREDICTED: epididymal secretory protein E1 isoform 2                   |
| Locus_27234_Transcript_1/1_Conf_1.000 | 235 | 20 | 3.29E-21 | NP_490828.3    | 81  | 104.76  | 77 | 63 | HAIF transporter (PGP related) family member (haf-6)                   |
| Locus_27235_Transcript_1/1_Conf_1.000 | 275 | 0  |          |                |     |         |    |    |                                                                        |
| Locus_27236_Transcript_1/1_Conf_1.000 | 141 | 20 | 1.90E-13 | XP_002637557.1 | 86  | 78.9518 | 45 | 39 | Hypothetical protein CBG19289                                          |
| Locus_27237_Transcript_1/1_Conf_1.000 | 240 | 3  | 2.97E-06 | CAA91482.3     | 71  | 55.0694 | 80 | 57 | C. elegans protein T04F8.6, partially confirmed by transcript evidence |
| Locus_27238_Transcript_1/1_Conf_1.000 | 192 | 20 | 3.43E-18 | XP_002647771.1 | 82  | 94.7449 | 63 | 52 | C. briggsae CBR-PPH-5 protein                                          |

|                                       |      |    |          |                |     |         |     |     |                                                      |
|---------------------------------------|------|----|----------|----------------|-----|---------|-----|-----|------------------------------------------------------|
| Locus_27239_Transcript_1/1_Conf_1.000 | 506  |    |          |                |     |         |     |     |                                                      |
| Locus_2724_Transcript_1/2_Conf_1.000  | 1453 | 1  | 5.70E-23 | CAR63643.1     | 55  | 113.62  | 171 | 95  | hypothetical protein                                 |
| Locus_2724_Transcript_2/2_Conf_1.000  | 1453 | 1  | 5.69E-23 | CAR63643.1     | 55  | 113.62  | 171 | 95  | hypothetical protein                                 |
| Locus_27240_Transcript_1/1_Conf_1.000 | 128  | 0  |          |                |     |         |     |     |                                                      |
| Locus_27241_Transcript_1/1_Conf_1.000 | 177  | 0  |          |                |     |         |     |     |                                                      |
| Locus_27242_Transcript_1/1_Conf_1.000 | 235  | 0  |          |                |     |         |     |     |                                                      |
| Locus_27243_Transcript_1/1_Conf_1.000 | 251  | 0  |          |                |     |         |     |     |                                                      |
| Locus_27244_Transcript_1/1_Conf_1.000 | 309  | 0  |          |                |     |         |     |     |                                                      |
| Locus_27245_Transcript_1/1_Conf_1.000 | 202  | 5  | 1.69E-09 | XP_002640146.1 | 64  | 65.855  | 68  | 44  | C. briggsae CBR-GLY-2 protein                        |
| Locus_27246_Transcript_1/1_Conf_1.000 | 172  | 0  |          |                |     |         |     |     |                                                      |
| Locus_27247_Transcript_1/1_Conf_1.000 | 132  | 0  |          |                |     |         |     |     |                                                      |
| Locus_27248_Transcript_1/1_Conf_1.000 | 330  | 4  | 1.20E-31 | XP_002637246.1 | 86  | 139.428 | 109 | 94  | Hypothetical protein CBG18923                        |
| Locus_27249_Transcript_1/1_Conf_1.000 | 381  | 0  |          |                |     |         |     |     |                                                      |
| Locus_2725_Transcript_1/2_Conf_1.000  | 339  | 0  |          |                |     |         |     |     |                                                      |
| Locus_2725_Transcript_2/2_Conf_1.000  | 335  | 0  |          |                |     |         |     |     |                                                      |
| Locus_27250_Transcript_1/1_Conf_1.000 | 189  | 0  |          |                |     |         |     |     |                                                      |
| Locus_27251_Transcript_1/1_Conf_1.000 | 151  | 4  | 7.20E-16 | NP_001033432.1 | 89  | 87.0409 | 49  | 44  | hypothetical protein T19E7.6                         |
| Locus_27252_Transcript_1/1_Conf_1.000 | 201  | 0  |          |                |     |         |     |     |                                                      |
| Locus_27253_Transcript_1/1_Conf_1.000 | 193  | 0  |          |                |     |         |     |     |                                                      |
| Locus_27254_Transcript_1/1_Conf_1.000 | 317  | 0  |          |                |     |         |     |     |                                                      |
| Locus_27255_Transcript_1/1_Conf_1.000 | 156  | 0  |          |                |     |         |     |     |                                                      |
| Locus_27256_Transcript_1/1_Conf_1.000 | 135  | 0  |          |                |     |         |     |     |                                                      |
| Locus_27257_Transcript_1/1_Conf_1.000 | 146  | 0  |          |                |     |         |     |     |                                                      |
| Locus_27258_Transcript_1/1_Conf_1.000 | 629  | 20 | 1.47E-62 | NP_492775.2    | 74  | 243.047 | 209 | 155 | LAMinin related. See also lmb- family member (lam-3) |
| Locus_27259_Transcript_1/1_Conf_1.000 | 220  | 20 | 4.68E-15 | XP_002631639.1 | 69  | 84.3445 | 72  | 50  | Hypothetical protein CBG20828                        |
| Locus_2726_Transcript_1/1_Conf_1.000  | 1240 | 20 | 1.22E-92 | NP_499642.2    | 72  | 344.739 | 314 | 228 | Enhancer of PolyComb-like family member (epc-1)      |
| Locus_27260_Transcript_1/1_Conf_1.000 | 150  | 0  |          |                |     |         |     |     |                                                      |
| Locus_27261_Transcript_1/1_Conf_1.000 | 129  | 0  |          |                |     |         |     |     |                                                      |
| Locus_27262_Transcript_1/1_Conf_1.000 | 204  | 20 | 1.16E-18 | XP_002636748.1 | 76  | 96.2857 | 67  | 51  | Hypothetical protein CBG23475                        |
| Locus_27263_Transcript_1/1_Conf_1.000 | 252  | 0  |          |                |     |         |     |     |                                                      |
| Locus_27264_Transcript_1/1_Conf_1.000 | 287  | 0  |          |                |     |         |     |     |                                                      |
| Locus_27265_Transcript_1/1_Conf_1.000 | 478  | 0  |          |                |     |         |     |     |                                                      |
| Locus_27266_Transcript_1/1_Conf_1.000 | 151  | 0  |          |                |     |         |     |     |                                                      |
| Locus_27267_Transcript_1/1_Conf_1.000 | 164  | 0  |          |                |     |         |     |     |                                                      |
| Locus_27268_Transcript_1/1_Conf_1.000 | 199  | 20 | 1.21E-31 | EFO12308.1     | 100 | 139.428 | 66  | 66  | MYO-2                                                |

|                                       |      |    |          |                |     |         |     |     |                                                  |
|---------------------------------------|------|----|----------|----------------|-----|---------|-----|-----|--------------------------------------------------|
| Locus_27269_Transcript_1/1_Conf_1.000 | 132  | 0  |          |                |     |         |     |     |                                                  |
| Locus_2727_Transcript_1/4_Conf_0.600  | 1214 | 7  | 2.23E-91 | XP_002647070.1 | 84  | 340.502 | 224 | 189 | Hypothetical protein CBG03596                    |
| Locus_2727_Transcript_2/4_Conf_0.700  | 1357 | 7  | 2.62E-91 | XP_002647070.1 | 84  | 340.502 | 224 | 189 | Hypothetical protein CBG03596                    |
| Locus_2727_Transcript_3/4_Conf_0.700  | 1357 | 7  | 3.42E-91 | XP_002647070.1 | 84  | 340.117 | 224 | 189 | Hypothetical protein CBG03596                    |
| Locus_2727_Transcript_4/4_Conf_0.700  | 1357 | 7  | 2.62E-91 | XP_002647070.1 | 84  | 340.502 | 224 | 189 | Hypothetical protein CBG03596                    |
| Locus_27270_Transcript_1/1_Conf_1.000 | 144  | 0  |          |                |     |         |     |     |                                                  |
| Locus_27271_Transcript_1/1_Conf_1.000 | 176  | 20 | 5.54E-29 | BAG59028.1     | 100 | 130.568 | 58  | 58  | unnamed protein product                          |
| Locus_27272_Transcript_1/1_Conf_1.000 | 296  | 20 | 2.60E-34 | NP_501792.2    | 77  | 148.288 | 94  | 73  | abnormal GONad development family member (gon-1) |
| Locus_27273_Transcript_1/1_Conf_1.000 | 148  | 0  |          |                |     |         |     |     |                                                  |
| Locus_27274_Transcript_1/1_Conf_1.000 | 188  | 0  |          |                |     |         |     |     |                                                  |
| Locus_27275_Transcript_1/1_Conf_1.000 | 129  | 0  |          |                |     |         |     |     |                                                  |
| Locus_27276_Transcript_1/1_Conf_1.000 | 150  | 0  |          |                |     |         |     |     |                                                  |
| Locus_27277_Transcript_1/1_Conf_1.000 | 146  | 0  |          |                |     |         |     |     |                                                  |
| Locus_27278_Transcript_1/1_Conf_1.000 | 245  | 5  | 6.14E-20 | XP_002638957.1 | 75  | 100.523 | 81  | 61  | Hypothetical protein CBG22193                    |
| Locus_27279_Transcript_1/1_Conf_1.000 | 238  | 0  |          |                |     |         |     |     |                                                  |
| Locus_2728_Transcript_1/2_Conf_1.000  | 641  | 20 | 1.78E-50 | BAB59011.1     | 86  | 202.986 | 129 | 111 | nippocystatin                                    |
| Locus_2728_Transcript_2/2_Conf_1.000  | 641  | 20 | 1.78E-50 | BAB59011.1     | 86  | 202.986 | 129 | 111 | nippocystatin                                    |
| Locus_27280_Transcript_1/1_Conf_1.000 | 177  | 5  | 8.85E-11 | NP_501388.1    | 67  | 70.0922 | 61  | 41  | hypothetical protein K07H8.5                     |
| Locus_27281_Transcript_1/1_Conf_1.000 | 140  | 4  | 2.26E-06 | XP_002633417.1 | 76  | 55.4546 | 43  | 33  | C. briggsae CBR-TRPA-1 protein                   |
| Locus_27282_Transcript_1/1_Conf_1.000 | 148  | 0  |          |                |     |         |     |     |                                                  |



|                                       |      |    |          |                |     |         |     |     |                                                                   |
|---------------------------------------|------|----|----------|----------------|-----|---------|-----|-----|-------------------------------------------------------------------|
| Locus_27283_Transcript_1/1_Conf_1.000 | 138  | 20 | 3.72E-09 | XP_002923775.1 | 100 | 64.6994 | 46  | 46  | PREDICTED: hypothetical protein LOC100476237                      |
| Locus_27284_Transcript_1/1_Conf_1.000 | 250  | 0  |          |                |     |         |     |     |                                                                   |
| Locus_27285_Transcript_1/1_Conf_1.000 | 140  | 4  | 4.86E-09 | EFO27124.1     | 79  | 64.3142 | 44  | 35  | laminin alpha 1 chain                                             |
| Locus_27286_Transcript_1/1_Conf_1.000 | 145  | 0  |          |                |     |         |     |     |                                                                   |
| Locus_27287_Transcript_1/1_Conf_1.000 | 198  | 0  |          |                |     |         |     |     |                                                                   |
| Locus_27288_Transcript_1/1_Conf_1.000 | 187  | 0  |          |                |     |         |     |     |                                                                   |
| Locus_27289_Transcript_1/1_Conf_1.000 | 241  | 0  |          |                |     |         |     |     |                                                                   |
| Locus_2729_Transcript_1/2_Conf_1.000  | 1373 | 20 | 7.33E-49 | XP_002631067.1 | 49  | 199.519 | 426 | 209 | C. briggsae CBR-TRR-1 protein                                     |
| Locus_2729_Transcript_2/2_Conf_1.000  | 1240 | 20 | 7.30E-37 | XP_002631067.1 | 47  | 159.458 | 388 | 184 | C. briggsae CBR-TRR-1 protein                                     |
| Locus_27290_Transcript_1/1_Conf_1.000 | 214  | 0  |          |                |     |         |     |     |                                                                   |
| Locus_27291_Transcript_1/1_Conf_1.000 | 197  | 0  |          |                |     |         |     |     |                                                                   |
| Locus_27292_Transcript_1/1_Conf_1.000 | 148  | 0  |          |                |     |         |     |     |                                                                   |
| Locus_27293_Transcript_1/1_Conf_1.000 | 215  | 0  |          |                |     |         |     |     |                                                                   |
| Locus_27294_Transcript_1/1_Conf_1.000 | 161  | 0  |          |                |     |         |     |     |                                                                   |
| Locus_27295_Transcript_1/1_Conf_1.000 | 191  | 0  |          |                |     |         |     |     |                                                                   |
| Locus_27296_Transcript_1/1_Conf_1.000 | 587  | 20 | 8.46E-43 | NP_741631.2    | 64  | 177.178 | 196 | 126 | hypothetical protein C55A6.10                                     |
| Locus_27297_Transcript_1/1_Conf_1.000 | 145  | 20 | 9.14E-19 | Q2VIR3.2       | 100 | 96.6709 | 47  | 47  | Eukaryotic translation initiation factor 2 subunit 3-like protein |
| Locus_27298_Transcript_1/1_Conf_1.000 | 120  | 0  |          |                |     |         |     |     |                                                                   |

|                                       |      |    |           |                |     |         |      |     |                                                              |
|---------------------------------------|------|----|-----------|----------------|-----|---------|------|-----|--------------------------------------------------------------|
| Locus_27299_Transcript_1/1_Conf_1.000 | 322  | 20 | 4.62E-23  | XP_002643824.1 | 64  | 110.923 | 99   | 64  | Hypothetical protein CBG02040                                |
| Locus_273_Transcript_1/2_Conf_1.000   | 2670 | 20 | 0         | ACI49199.1     | 78  | 1068.91 | 885  | 696 | hypothetical protein Csp3_JD03.008                           |
| Locus_273_Transcript_2/2_Conf_1.000   | 1053 | 20 | 3.19E-80  | ACI49199.1     | 73  | 303.138 | 288  | 211 | hypothetical protein Csp3_JD03.008                           |
| Locus_2730_Transcript_1/2_Conf_0.833  | 542  | 0  |           |                |     |         |      |     |                                                              |
| Locus_2730_Transcript_2/2_Conf_0.833  | 536  | 0  |           |                |     |         |      |     |                                                              |
| Locus_27300_Transcript_1/1_Conf_1.000 | 144  | 0  |           |                |     |         |      |     |                                                              |
| Locus_27301_Transcript_1/1_Conf_1.000 | 132  | 0  |           |                |     |         |      |     |                                                              |
| Locus_27302_Transcript_1/1_Conf_1.000 | 160  | 20 | 1.48E-21  | 2XND           | 100 | 105.916 | 53   | 53  | CrystalStructure Of Bovine F1-C8 Sub-Complex Of Atp Synthase |
| Locus_27303_Transcript_1/1_Conf_1.000 | 138  | 4  | 2.58E-10  | NP_503353.2    | 84  | 68.5514 | 45   | 38  | hypothetical protein H24K24.4                                |
| Locus_27304_Transcript_1/1_Conf_1.000 | 148  | 0  |           |                |     |         |      |     |                                                              |
| Locus_27305_Transcript_1/1_Conf_1.000 | 162  | 0  |           |                |     |         |      |     |                                                              |
| Locus_27306_Transcript_1/1_Conf_1.000 | 316  | 20 | 4.47E-42  | NP_001022681.1 | 98  | 174.096 | 104  | 102 | hypothetical protein K11H3.7                                 |
| Locus_27307_Transcript_1/1_Conf_1.000 | 164  | 4  | 6.23E-12  | NP_491646.3    | 80  | 73.9442 | 45   | 36  | hypothetical protein F46F11.7                                |
| Locus_27308_Transcript_1/1_Conf_1.000 | 308  | 20 | 7.48E-26  | NP_500551.2    | 76  | 120.168 | 100  | 76  | hypothetical protein F55F10.1                                |
| Locus_27309_Transcript_1/1_Conf_1.000 | 398  | 20 | 7.83E-55  | XP_002643352.1 | 87  | 216.468 | 132  | 115 | C. briggsae CBR-KIN-25 protein                               |
| Locus_2731_Transcript_1/2_Conf_1.000  | 3499 | 20 | 6.78E-178 | NP_494796.2    | 55  | 629.787 | 1101 | 607 | hypothetical protein T05C1.4                                 |

|                                       |      |    |           |                |    |         |      |     |                                                                     |
|---------------------------------------|------|----|-----------|----------------|----|---------|------|-----|---------------------------------------------------------------------|
| Locus_2731_Transcript_2/2_Conf_1.000  | 3455 | 20 | 6.68E-178 | NP_494796.2    | 55 | 629.787 | 1101 | 607 | hypothetical protein T05C1.4                                        |
| Locus_27310_Transcript_1/1_Conf_1.000 | 213  | 0  |           |                |    |         |      |     |                                                                     |
| Locus_27311_Transcript_1/1_Conf_1.000 | 368  | 0  |           |                |    |         |      |     |                                                                     |
| Locus_27312_Transcript_1/1_Conf_1.000 | 130  | 2  | 2.69E-07  | NP_492590.1    | 76 | 58.5362 | 42   | 32  | hypothetical protein K02A11.3                                       |
| Locus_27313_Transcript_1/1_Conf_1.000 | 157  | 0  |           |                |    |         |      |     |                                                                     |
| Locus_27314_Transcript_1/1_Conf_1.000 | 207  | 4  | 1.62E-12  | XP_002632143.1 | 77 | 75.8702 | 66   | 51  | Hypothetical protein CBG07002                                       |
| Locus_27315_Transcript_1/1_Conf_1.000 | 300  | 20 | 3.15E-40  | NP_492177.2    | 89 | 167.933 | 99   | 89  | hypothetical protein R11A5.7                                        |
| Locus_27316_Transcript_1/1_Conf_1.000 | 133  | 0  |           |                |    |         |      |     |                                                                     |
| Locus_27317_Transcript_1/1_Conf_1.000 | 135  | 0  |           |                |    |         |      |     |                                                                     |
| Locus_27318_Transcript_1/1_Conf_1.000 | 340  | 5  | 2.91E-38  | NP_494711.1    | 84 | 161.384 | 98   | 83  | Prion-like-(Q/N-rich)-domain-bearing protein family member (pqn-48) |
| Locus_27319_Transcript_1/1_Conf_1.000 | 495  | 2  | 5.36E-32  | NP_500987.3    | 78 | 140.584 | 99   | 78  | hypothetical protein Y73B6BL.1                                      |
| Locus_2732_Transcript_1/2_Conf_1.000  | 639  | 20 | 4.49E-56  | XP_002643222.1 | 79 | 217.624 | 180  | 143 | Hypothetical protein CBG08087                                       |
| Locus_2732_Transcript_2/2_Conf_1.000  | 1317 | 20 | 5.69E-144 | XP_002643222.1 | 81 | 515.383 | 420  | 342 | Hypothetical protein CBG08087                                       |
| Locus_27320_Transcript_1/1_Conf_1.000 | 175  | 0  |           |                |    |         |      |     |                                                                     |
| Locus_27321_Transcript_1/1_Conf_1.000 | 218  | 7  | 2.02E-23  | XP_002643289.1 | 88 | 112.079 | 72   | 64  | C. briggsae CBR-DVE-1 protein                                       |
| Locus_27322_Transcript_1/1_Conf_1.000 | 160  | 0  |           |                |    |         |      |     |                                                                     |
| Locus_27323_Transcript_1/1_Conf_1.000 | 147  | 0  |           |                |    |         |      |     |                                                                     |

|                                       |     |    |          |                |    |         |     |     |                                                               |
|---------------------------------------|-----|----|----------|----------------|----|---------|-----|-----|---------------------------------------------------------------|
| Locus_27324_Transcript_1/1_Conf_1.000 | 199 | 3  | 3.20E-08 | XP_002638395.1 | 72 | 61.6178 | 50  | 36  | Hypothetical protein CBG18604                                 |
| Locus_27325_Transcript_1/1_Conf_1.000 | 268 | 7  | 3.38E-42 | NP_495495.1    | 93 | 174.481 | 88  | 82  | hypothetical protein E04F6.6                                  |
| Locus_27326_Transcript_1/1_Conf_1.000 | 157 | 0  |          |                |    |         |     |     |                                                               |
| Locus_27327_Transcript_1/1_Conf_1.000 | 164 | 0  |          |                |    |         |     |     |                                                               |
| Locus_27328_Transcript_1/1_Conf_1.000 | 220 | 0  |          |                |    |         |     |     |                                                               |
| Locus_27329_Transcript_1/1_Conf_1.000 | 204 | 0  |          |                |    |         |     |     |                                                               |
| Locus_2733_Transcript_1/1_Conf_1.000  | 647 | 20 | 4.94E-56 | P27613.1       | 79 | 221.476 | 164 | 130 | Globin-like host-protective antigen                           |
| Locus_27330_Transcript_1/1_Conf_1.000 | 300 | 0  |          |                |    |         |     |     |                                                               |
| Locus_27331_Transcript_1/1_Conf_1.000 | 128 | 0  |          |                |    |         |     |     |                                                               |
| Locus_27332_Transcript_1/1_Conf_1.000 | 228 | 0  |          |                |    |         |     |     |                                                               |
| Locus_27333_Transcript_1/1_Conf_1.000 | 224 | 0  |          |                |    |         |     |     |                                                               |
| Locus_27334_Transcript_1/1_Conf_1.000 | 268 | 20 | 5.78E-34 | NP_503052.1    | 93 | 147.132 | 88  | 82  | hypothetical protein C52D10.12                                |
| Locus_27335_Transcript_1/1_Conf_1.000 | 152 | 0  |          |                |    |         |     |     |                                                               |
| Locus_27336_Transcript_1/1_Conf_1.000 | 302 | 0  |          |                |    |         |     |     |                                                               |
| Locus_27337_Transcript_1/1_Conf_1.000 | 173 | 20 | 1.47E-13 | EFO26082.1     | 78 | 79.337  | 57  | 45  | hypothetical protein LOAG_02394                               |
| Locus_27338_Transcript_1/1_Conf_1.000 | 251 | 20 | 5.15E-27 | XP_002632128.1 | 86 | 124.02  | 83  | 72  | Hypothetical protein CBG06984                                 |
| Locus_27339_Transcript_1/1_Conf_1.000 | 173 | 4  | 5.97E-07 | EFO17910.1     | 72 | 57.3806 | 54  | 39  | hypothetical protein LOAG_10588                               |
| Locus_2734_Transcript_1/1_Conf_1.000  | 704 | 0  |          |                |    |         |     |     |                                                               |
| Locus_27340_Transcript_1/1_Conf_1.000 | 177 | 6  | 7.49E-10 | CAX65068.1     | 75 | 67.0106 | 54  | 41  | C. elegans protein K08C7.3d, confirmed by transcript evidence |
| Locus_27341_Transcript_1/1_Conf_1.000 | 133 | 0  |          |                |    |         |     |     |                                                               |
| Locus_27342_Transcript_1/1_Conf_1.000 | 257 | 0  |          |                |    |         |     |     |                                                               |
| Locus_27343_Transcript_1/1_Conf_1.000 | 212 | 6  | 8.86E-19 | ADI99915.1     | 81 | 96.6709 | 70  | 57  | hammerhead protein                                            |
| Locus_27344_Transcript_1/1_Conf_1.000 | 147 | 0  |          |                |    |         |     |     |                                                               |
| Locus_27345_Transcript_1/1_Conf_1.000 | 164 | 0  |          |                |    |         |     |     |                                                               |
| Locus_27346_Transcript_1/1_Conf_1.000 | 181 | 9  | 9.48E-16 | NP_498645.1    | 78 | 86.6557 | 60  | 47  | MUscle Positioning family member (mup-4)                      |
| Locus_27347_Transcript_1/1_Conf_1.000 | 131 | 0  |          |                |    |         |     |     |                                                               |
| Locus_27348_Transcript_1/1_Conf_1.000 | 142 | 0  |          |                |    |         |     |     |                                                               |
| Locus_27349_Transcript_1/1_Conf_1.000 | 173 | 0  |          |                |    |         |     |     |                                                               |
| Locus_2735_Transcript_1/2_Conf_1.000  | 539 | 0  |          |                |    |         |     |     |                                                               |
| Locus_2735_Transcript_2/2_Conf_1.000  | 557 | 0  |          |                |    |         |     |     |                                                               |
| Locus_27350_Transcript_1/1_Conf_1.000 | 130 | 0  |          |                |    |         |     |     |                                                               |

|                                       |     |    |          |                |     |         |     |     |                                                                                                           |
|---------------------------------------|-----|----|----------|----------------|-----|---------|-----|-----|-----------------------------------------------------------------------------------------------------------|
| Locus_27351_Transcript_1/1_Conf_1.000 | 183 | 20 | 1.56E-18 | NP_493616.1    | 87  | 95.9005 | 55  | 48  | hypothetical protein F33H2.5                                                                              |
| Locus_27352_Transcript_1/1_Conf_1.000 | 162 | 0  |          |                |     |         |     |     |                                                                                                           |
| Locus_27353_Transcript_1/1_Conf_1.000 | 134 | 0  |          |                |     |         |     |     |                                                                                                           |
| Locus_27354_Transcript_1/1_Conf_1.000 | 168 | 0  |          |                |     |         |     |     |                                                                                                           |
| Locus_27355_Transcript_1/1_Conf_1.000 | 189 | 0  |          |                |     |         |     |     |                                                                                                           |
| Locus_27356_Transcript_1/1_Conf_1.000 | 151 | 0  |          |                |     |         |     |     |                                                                                                           |
| Locus_27357_Transcript_1/1_Conf_1.000 | 204 | 0  |          |                |     |         |     |     |                                                                                                           |
| Locus_27358_Transcript_1/1_Conf_1.000 | 152 | 20 | 2.40E-11 | XP_002799163.1 | 100 | 72.0182 | 34  | 34  | PREDICTED: vigilin-like                                                                                   |
| Locus_27359_Transcript_1/1_Conf_1.000 | 271 | 0  |          |                |     |         |     |     |                                                                                                           |
| Locus_2736_Transcript_1/1_Conf_1.000  | 455 | 0  |          |                |     |         |     |     |                                                                                                           |
| Locus_27360_Transcript_1/1_Conf_1.000 | 403 | 0  |          |                |     |         |     |     |                                                                                                           |
| Locus_27361_Transcript_1/1_Conf_1.000 | 197 | 0  |          |                |     |         |     |     |                                                                                                           |
| Locus_27362_Transcript_1/1_Conf_1.000 | 503 | 20 | 1.02E-86 | AAM54172.2     | 99  | 322.398 | 167 | 166 | AF077541_9Alpha-catulin (catenin/vinculin related) protein 1, isoform d, confirmed by transcript evidence |
| Locus_27363_Transcript_1/1_Conf_1.000 | 527 | 9  | 5.08E-21 | XP_002643964.1 | 57  | 104.375 | 180 | 104 | C. briggsae CBR-HUM-4 protein                                                                             |
| Locus_27364_Transcript_1/1_Conf_1.000 | 243 | 0  |          |                |     |         |     |     |                                                                                                           |
| Locus_27365_Transcript_1/1_Conf_1.000 | 374 | 0  |          |                |     |         |     |     |                                                                                                           |
| Locus_27366_Transcript_1/1_Conf_1.000 | 167 | 0  |          |                |     |         |     |     |                                                                                                           |
| Locus_27367_Transcript_1/1_Conf_1.000 | 287 | 3  | 1.55E-10 | XP_002634616.1 | 56  | 69.3218 | 94  | 53  | Hypothetical protein CBG18470                                                                             |
| Locus_27368_Transcript_1/1_Conf_1.000 | 235 | 20 | 7.10E-16 | NP_502118.4    | 76  | 87.0409 | 77  | 59  | Gon-Two Like (TRP subfamily) family member (gtl-2)                                                        |

|                                       |      |    |          |                |     |         |    |    |                                                                                       |
|---------------------------------------|------|----|----------|----------------|-----|---------|----|----|---------------------------------------------------------------------------------------|
| Locus_27369_Transcript_1/1_Conf_1.000 | 142  | 20 | 1.36E-19 | XP_001714126.2 | 100 | 99.3673 | 47 | 47 | PREDICTED: similar to major histocompatibility complex, class II, DR beta 5 isoform 2 |
| Locus_2737_Transcript_1/1_Conf_1.000  | 1354 | 0  |          |                |     |         |    |    |                                                                                       |
| Locus_27370_Transcript_1/1_Conf_1.000 | 157  | 0  |          |                |     |         |    |    |                                                                                       |
| Locus_27371_Transcript_1/1_Conf_1.000 | 148  | 0  |          |                |     |         |    |    |                                                                                       |
| Locus_27372_Transcript_1/1_Conf_1.000 | 301  | 4  | 2.96E-22 | EFO24933.1     | 83  | 108.227 | 80 | 67 | AGC/PKN protein kinase                                                                |
| Locus_27373_Transcript_1/1_Conf_1.000 | 216  | 20 | 4.81E-33 | 2WII           | 100 | 144.05  | 72 | 72 | Complement C3b In Complex With Factor H Domains 1-4                                   |
| Locus_27374_Transcript_1/1_Conf_1.000 | 179  | 19 | 9.43E-21 | EAW95274.1     | 100 | 103.219 | 59 | 59 | hCG2040005                                                                            |
| Locus_27375_Transcript_1/1_Conf_1.000 | 178  | 0  |          |                |     |         |    |    |                                                                                       |

|                                       |     |    |          |                |     |         |     |    |                                                                  |
|---------------------------------------|-----|----|----------|----------------|-----|---------|-----|----|------------------------------------------------------------------|
| Locus_27376_Transcript_1/1_Conf_1.000 | 327 | 20 | 7.52E-42 | XP_002631558.1 | 82  | 173.326 | 106 | 87 | Hypothetical protein CBG20734                                    |
| Locus_27377_Transcript_1/1_Conf_1.000 | 142 | 20 | 3.46E-15 | XP_002646726.1 | 93  | 84.7297 | 44  | 41 | Hypothetical protein CBG13109                                    |
| Locus_27378_Transcript_1/1_Conf_1.000 | 188 | 0  |          |                |     |         |     |    |                                                                  |
| Locus_27379_Transcript_1/1_Conf_1.000 | 155 | 0  |          |                |     |         |     |    |                                                                  |
| Locus_2738_Transcript_1/1_Conf_1.000  | 264 | 20 | 4.58E-39 | NP_001022488.1 | 92  | 164.081 | 88  | 81 | UNCoordinated family member (unc-52)                             |
| Locus_27380_Transcript_1/1_Conf_1.000 | 216 | 0  |          |                |     |         |     |    |                                                                  |
| Locus_27381_Transcript_1/1_Conf_1.000 | 147 | 0  |          |                |     |         |     |    |                                                                  |
| Locus_27382_Transcript_1/1_Conf_1.000 | 205 | 0  |          |                |     |         |     |    |                                                                  |
| Locus_27383_Transcript_1/1_Conf_1.000 | 187 | 0  |          |                |     |         |     |    |                                                                  |
| Locus_27384_Transcript_1/1_Conf_1.000 | 205 | 0  |          |                |     |         |     |    |                                                                  |
| Locus_27385_Transcript_1/1_Conf_1.000 | 153 | 20 | 1.65E-20 | NP_937758.1    | 100 | 102.449 | 51  | 51 | TYRO protein tyrosine kinase-binding protein isoform 2 precursor |
| Locus_27386_Transcript_1/1_Conf_1.000 | 149 | 0  |          |                |     |         |     |    |                                                                  |
| Locus_27387_Transcript_1/1_Conf_1.000 | 141 | 9  | 1.27E-09 | XP_002643629.1 | 97  | 66.2402 | 47  | 46 | C. briggsae CBR-LET-2 protein                                    |
| Locus_27388_Transcript_1/1_Conf_1.000 | 139 | 0  |          |                |     |         |     |    |                                                                  |
| Locus_27389_Transcript_1/1_Conf_1.000 | 129 | 0  |          |                |     |         |     |    |                                                                  |
| Locus_2739_Transcript_1/1_Conf_1.000  | 493 | 0  |          |                |     |         |     |    |                                                                  |
| Locus_27390_Transcript_1/1_Conf_1.000 | 189 | 20 | 1.00E-09 | XP_002641412.1 | 70  | 66.6254 | 64  | 45 | Hypothetical protein CBG13278                                    |
| Locus_27391_Transcript_1/1_Conf_1.000 | 223 |    |          |                |     |         |     |    |                                                                  |
| Locus_27392_Transcript_1/1_Conf_1.000 | 147 | 20 | 2.10E-15 | BAH12126.1     | 100 | 85.5001 | 37  | 37 | unnamed protein product                                          |
| Locus_27393_Transcript_1/1_Conf_1.000 | 227 | 0  |          |                |     |         |     |    |                                                                  |
| Locus_27394_Transcript_1/1_Conf_1.000 | 180 | 0  |          |                |     |         |     |    |                                                                  |
| Locus_27395_Transcript_1/1_Conf_1.000 | 141 | 0  |          |                |     |         |     |    |                                                                  |

|                                       |      |    |          |                |     |         |      |     |                                                                           |
|---------------------------------------|------|----|----------|----------------|-----|---------|------|-----|---------------------------------------------------------------------------|
| Locus_27396_Transcript_1/1_Conf_1.000 | 136  | 20 | 1.85E-08 | ADJ19295.1     | 77  | 62.3882 | 44   | 34  | carbamoyl phosphate synthetase-aspartate transcarbamoylase-dihydroorotase |
| Locus_27397_Transcript_1/1_Conf_1.000 | 213  | 20 | 1.55E-31 | XP_002921123.1 | 100 | 139.043 | 70   | 70  | PREDICTED: proteasome activator complex subunit 2-like                    |
| Locus_27398_Transcript_1/1_Conf_1.000 | 207  | 0  |          |                |     |         |      |     |                                                                           |
| Locus_27399_Transcript_1/1_Conf_1.000 | 417  | 20 | 3.43E-34 | XP_002815693.1 | 70  | 147.902 | 129  | 91  | PREDICTED: LOW QUALITY PROTEIN: beta-hexosaminidase subunit beta-like     |
| Locus_274_Transcript_1/1_Conf_1.000   | 488  | 12 | 1.34E-30 | ACE79378.1     | 88  | 135.961 | 120  | 106 | surface-associated antigen 2                                              |
| Locus_2740_Transcript_1/4_Conf_0.625  | 1869 | 20 | 1.02E-62 |                | 47  | 246.128 | 631  | 298 | protein F20H11.2                                                          |
| Locus_2740_Transcript_2/4_Conf_0.625  | 3390 | 20 | 0        | ADF27719.1     | 60  | 841.262 | 1180 | 718 | notch signaling pathway homolog-1                                         |
| Locus_2740_Transcript_3/4_Conf_0.625  | 3591 | 20 | 0        |                | 59  | 841.262 | 1252 | 742 | protein F20H11.2                                                          |
| Locus_2740_Transcript_4/4_Conf_0.625  | 3597 | 20 | 0        |                | 59  | 841.647 | 1259 | 744 | protein F20H11.2                                                          |
| Locus_27400_Transcript_1/1_Conf_1.000 | 207  | 0  |          |                |     |         |      |     |                                                                           |
| Locus_27401_Transcript_1/1_Conf_1.000 | 279  | 0  |          |                |     |         |      |     |                                                                           |
| Locus_27402_Transcript_1/1_Conf_1.000 | 130  | 0  |          |                |     |         |      |     |                                                                           |
| Locus_27403_Transcript_1/1_Conf_1.000 | 133  | 0  |          |                |     |         |      |     |                                                                           |
| Locus_27404_Transcript_1/1_Conf_1.000 | 232  | 2  | 1.44E-08 | NP_495202.1    | 69  | 62.7734 | 65   | 45  | hypothetical protein ZK84.1                                               |



|                                       |      |    |          |                |    |         |      |     |                                                                   |
|---------------------------------------|------|----|----------|----------------|----|---------|------|-----|-------------------------------------------------------------------|
| Locus_27405_Transcript_1/1_Conf_1.000 | 135  | 20 | 1.62E-12 | XP_002643996.1 | 91 | 75.8702 | 45   | 41  | Hypothetical protein CBG17377                                     |
| Locus_27406_Transcript_1/1_Conf_1.000 | 173  | 19 | 1.68E-17 | NP_490744.1    | 83 | 92.4337 | 56   | 47  | fatty Acid CoA Synthetase family member (acs-13)                  |
| Locus_27407_Transcript_1/1_Conf_1.000 | 300  | 0  |          |                |    |         |      |     |                                                                   |
| Locus_27408_Transcript_1/1_Conf_1.000 | 157  | 0  |          |                |    |         |      |     |                                                                   |
| Locus_27409_Transcript_1/1_Conf_1.000 | 203  | 0  |          |                |    |         |      |     |                                                                   |
| Locus_2741_Transcript_1/1_Conf_1.000  | 4302 | 20 | 0        | NP_001023390.1 | 80 | 1392.87 | 1134 | 909 | PDZ eXchange Factor family member (pxf-1)                         |
| Locus_27410_Transcript_1/1_Conf_1.000 | 268  | 20 | 1.57E-31 | XP_001896231.1 | 80 | 139.043 | 88   | 71  | SEC14-like protein 4                                              |
| Locus_27411_Transcript_1/1_Conf_1.000 | 205  | 5  | 5.41E-16 | NP_500551.2    | 77 | 87.4261 | 63   | 49  | hypothetical protein F55F10.1                                     |
| Locus_27412_Transcript_1/1_Conf_1.000 | 237  | 0  |          |                |    |         |      |     |                                                                   |
| Locus_27413_Transcript_1/1_Conf_1.000 | 171  | 20 | 5.39E-16 | XP_001893633.1 | 84 | 87.4261 | 57   | 48  | protein F10G7.1                                                   |
| Locus_27414_Transcript_1/1_Conf_1.000 | 304  | 0  |          |                |    |         |      |     |                                                                   |
| Locus_27415_Transcript_1/1_Conf_1.000 | 187  | 3  | 1.04E-06 | NP_497814.3    | 79 | 56.6102 | 43   | 34  | UNCoordinated family member (unc-79)                              |
| Locus_27416_Transcript_1/1_Conf_1.000 | 450  | 20 | 5.74E-50 | NP_506358.3    | 78 | 200.29  | 150  | 118 | hypothetical protein C56A3.8                                      |
| Locus_27417_Transcript_1/1_Conf_1.000 | 199  | 0  |          |                |    |         |      |     |                                                                   |
| Locus_27418_Transcript_1/1_Conf_1.000 | 168  | 0  |          |                |    |         |      |     |                                                                   |
| Locus_27419_Transcript_1/1_Conf_1.000 | 178  | 3  | 9.14E-16 | XP_002639748.1 | 88 | 86.6557 | 51   | 45  | Hypothetical protein CBG24342                                     |
| Locus_2742_Transcript_1/1_Conf_1.000  | 150  | 0  |          |                |    |         |      |     |                                                                   |
| Locus_27420_Transcript_1/1_Conf_1.000 | 166  | 0  |          |                |    |         |      |     |                                                                   |
| Locus_27421_Transcript_1/1_Conf_1.000 | 217  | 1  | 5.54E-05 | XP_001899466.1 | 54 | 50.8322 | 92   | 50  | Hypothetical 84.0 kDa protein T23G5.2 in chromosome III, putative |
| Locus_27422_Transcript_1/1_Conf_1.000 | 166  | 0  |          |                |    |         |      |     |                                                                   |

|                                       |      |    |          |                |     |         |     |     |                                                         |
|---------------------------------------|------|----|----------|----------------|-----|---------|-----|-----|---------------------------------------------------------|
| Locus_27423_Transcript_1/1_Conf_1.000 | 525  | 20 | 1.72E-69 | AAD01960.1     | 90  | 265.388 | 175 | 159 | UNC-45                                                  |
| Locus_27424_Transcript_1/1_Conf_1.000 | 375  | 20 | 2.28E-38 | XP_002645548.1 | 77  | 161.77  | 108 | 84  | Hypothetical protein CBG05229                           |
| Locus_27425_Transcript_1/1_Conf_1.000 | 162  | 0  |          |                |     |         |     |     |                                                         |
| Locus_27426_Transcript_1/1_Conf_1.000 | 144  | 0  |          |                |     |         |     |     |                                                         |
| Locus_27427_Transcript_1/1_Conf_1.000 | 301  | 20 | 8.28E-49 | ADF56005.1     | 97  | 196.438 | 99  | 97  | nicotinic acetylcholine receptor non-alpha subunit 29.1 |
| Locus_27428_Transcript_1/1_Conf_1.000 | 139  | 0  |          |                |     |         |     |     |                                                         |
| Locus_27429_Transcript_1/1_Conf_1.000 | 246  | 7  | 1.51E-18 | NP_501963.1    | 69  | 95.9005 | 69  | 48  | PaTched Related family member (ptr-14)                  |
| Locus_2743_Transcript_1/1_Conf_1.000  | 1333 | 3  | 4.55E-48 | NP_509147.2    | 75  | 196.823 | 181 | 137 | GEX Interacting protein family member (gei-15)          |
| Locus_27430_Transcript_1/1_Conf_1.000 | 333  | 2  | 1.98E-10 | EFO22933.1     | 70  | 68.9366 | 88  | 62  | hypothetical protein LOAG_05552                         |
| Locus_27431_Transcript_1/1_Conf_1.000 | 143  | 0  |          |                |     |         |     |     |                                                         |
| Locus_27432_Transcript_1/1_Conf_1.000 | 263  | 0  |          |                |     |         |     |     |                                                         |
| Locus_27433_Transcript_1/1_Conf_1.000 | 145  | 20 | 1.56E-18 | EFO20921.1     | 91  | 95.9005 | 48  | 44  | NEK/NEK6 protein kinase                                 |
| Locus_27434_Transcript_1/1_Conf_1.000 | 162  | 2  | 2.00E-10 | NP_498385.2    | 80  | 68.9366 | 51  | 41  | hypothetical protein C56G2.4                            |
| Locus_27435_Transcript_1/1_Conf_1.000 | 157  | 0  |          |                |     |         |     |     |                                                         |
| Locus_27436_Transcript_1/1_Conf_1.000 | 236  | 8  | 2.20E-25 | XP_002642996.1 | 85  | 118.627 | 77  | 66  | C. briggsae CBR-UNC-45 protein                          |
| Locus_27437_Transcript_1/1_Conf_1.000 | 248  | 20 | 3.14E-24 | NP_001073331.1 | 100 | 114.775 | 55  | 55  | acyl-CoA-binding protein isoform 3                      |
| Locus_27438_Transcript_1/1_Conf_1.000 | 222  | 0  |          |                |     |         |     |     |                                                         |
| Locus_27439_Transcript_1/1_Conf_1.000 | 129  | 0  |          |                |     |         |     |     |                                                         |
| Locus_2744_Transcript_1/1_Conf_1.000  | 396  | 0  |          |                |     |         |     |     |                                                         |
| Locus_27440_Transcript_1/1_Conf_1.000 | 225  | 5  | 1.65E-12 | NP_001022641.1 | 54  | 75.8702 | 109 | 59  | LEThal family member (let-805)                          |
| Locus_27441_Transcript_1/1_Conf_1.000 | 260  | 20 | 1.95E-13 | XP_002630378.1 | 70  | 78.9518 | 77  | 54  | Hypothetical protein CBG04317                           |
| Locus_27442_Transcript_1/1_Conf_1.000 | 154  | 2  | 5.88E-10 | NP_001123185.1 | 76  | 67.3958 | 51  | 39  | hypothetical protein T21H8.1                            |

|                                       |      |    |           |                |     |         |     |     |                                                                        |
|---------------------------------------|------|----|-----------|----------------|-----|---------|-----|-----|------------------------------------------------------------------------|
| Locus_27443_Transcript_1/1_Conf_1.000 | 174  | 0  |           |                |     |         |     |     |                                                                        |
| Locus_27444_Transcript_1/1_Conf_1.000 | 136  | 0  |           |                |     |         |     |     |                                                                        |
| Locus_27445_Transcript_1/1_Conf_1.000 | 158  | 5  | 5.48E-16  | XP_002631013.1 | 86  | 87.4261 | 52  | 45  | C. briggsae CBR-PTR-18 protein                                         |
| Locus_27446_Transcript_1/1_Conf_1.000 | 207  | 0  |           |                |     |         |     |     |                                                                        |
| Locus_27447_Transcript_1/1_Conf_1.000 | 163  | 3  | 1.39E-11  | NP_001129849.1 | 77  | 72.7886 | 53  | 41  | Choline Kinase A family member (cka-1)                                 |
| Locus_27448_Transcript_1/1_Conf_1.000 | 199  | 0  |           |                |     |         |     |     |                                                                        |
| Locus_27449_Transcript_1/1_Conf_1.000 | 376  | 20 | 4.29E-45  | CAA84706.3     | 82  | 184.111 | 123 | 101 | C. elegans protein C38H2.1, partially confirmed by transcript evidence |
| Locus_2745_Transcript_1/2_Conf_0.500  | 1262 | 20 | 1.44E-157 | NP_507859.2    | 78  | 560.451 | 419 | 330 | hypothetical protein Y60A3A.14                                         |
| Locus_2745_Transcript_2/2_Conf_0.500  | 941  | 20 | 2.80E-154 | NP_001123113.1 | 91  | 548.895 | 300 | 273 | Cysteine PRotease related family member (cpr-6)                        |
| Locus_27450_Transcript_1/1_Conf_1.000 | 233  | 9  | 7.13E-16  | NP_495675.1    | 77  | 87.0409 | 77  | 60  | hypothetical protein DH11.1                                            |
| Locus_27451_Transcript_1/1_Conf_1.000 | 129  | 0  |           |                |     |         |     |     |                                                                        |
| Locus_27452_Transcript_1/1_Conf_1.000 | 139  | 0  |           |                |     |         |     |     |                                                                        |
| Locus_27453_Transcript_1/1_Conf_1.000 | 129  | 8  | 1.47E-13  | NP_001020988.1 | 90  | 79.337  | 42  | 38  | UNCoordinated family member (unc-89)                                   |
| Locus_27454_Transcript_1/1_Conf_1.000 | 163  | 20 | 1.06E-19  | NP_501709.2    | 92  | 99.7525 | 53  | 49  | Membrane Calcium ATPase family member (mca-1)                          |
| Locus_27455_Transcript_1/1_Conf_1.000 | 156  | 4  | 7.93E-07  | NP_497607.3    | 75  | 56.9954 | 52  | 39  | hypothetical protein Y71H2AM.7                                         |
| Locus_27456_Transcript_1/1_Conf_1.000 | 185  | 20 | 1.51E-13  | AAP36473.1     | 100 | 79.337  | 38  | 38  | Homo sapiens defender against cell death 1                             |
| Locus_27457_Transcript_1/1_Conf_1.000 | 131  | 0  |           |                |     |         |     |     |                                                                        |
| Locus_27458_Transcript_1/1_Conf_1.000 | 171  | 0  |           |                |     |         |     |     |                                                                        |
| Locus_27459_Transcript_1/1_Conf_1.000 | 201  | 0  |           |                |     |         |     |     |                                                                        |
| Locus_2746_Transcript_1/1_Conf_1.000  | 927  | 20 | 2.87E-103 | NP_001021125.1 | 75  | 379.407 | 313 | 235 | hypothetical protein B0361.2                                           |
| Locus_27460_Transcript_1/1_Conf_1.000 | 156  | 1  | 8.20E-04  | EFO23386.1     | 59  | 46.9802 | 54  | 32  | hypothetical protein LOAG_05100                                        |

|                                       |      |    |          |                |     |         |     |     |                                                                                                           |
|---------------------------------------|------|----|----------|----------------|-----|---------|-----|-----|-----------------------------------------------------------------------------------------------------------|
| Locus_27461_Transcript_1/1_Conf_1.000 | 158  | 0  |          |                |     |         |     |     |                                                                                                           |
| Locus_27462_Transcript_1/1_Conf_1.000 | 186  | 20 | 8.81E-14 | NP_001039751.1 | 78  | 80.1073 | 60  | 47  | estradiol 17-beta-dehydrogenase 11                                                                        |
| Locus_27463_Transcript_1/1_Conf_1.000 | 171  | 2  | 4.89E-09 | NP_493493.2    | 72  | 64.3142 | 55  | 40  | hypothetical protein F09C3.2                                                                              |
| Locus_27464_Transcript_1/1_Conf_1.000 | 129  | 20 | 9.55E-13 | XP_002634501.1 | 95  | 76.6406 | 42  | 40  | C. briggsae CBR-SMGL-2 protein                                                                            |
| Locus_27465_Transcript_1/1_Conf_1.000 | 199  | 20 | 1.81E-19 | XP_002633481.1 | 88  | 98.9821 | 63  | 56  | C. briggsae CBR-PHY-2 protein                                                                             |
| Locus_27466_Transcript_1/1_Conf_1.000 | 367  | 20 | 1.11E-29 | XP_002630906.1 | 82  | 132.88  | 101 | 83  | Hypothetical protein CBG02630                                                                             |
| Locus_27467_Transcript_1/1_Conf_1.000 | 268  | 20 | 2.13E-28 | XP_001896987.1 | 77  | 128.642 | 89  | 69  | Zinc finger, C2H2 type family protein                                                                     |
| Locus_27468_Transcript_1/1_Conf_1.000 | 271  | 0  |          |                |     |         |     |     |                                                                                                           |
| Locus_27469_Transcript_1/1_Conf_1.000 | 172  | 0  |          |                |     |         |     |     |                                                                                                           |
| Locus_2747_Transcript_1/1_Conf_1.000  | 1404 | 20 | 1.63E-35 | XP_002636192.1 | 46  | 155.221 | 417 | 192 | Hypothetical protein CBG12107                                                                             |
| Locus_27470_Transcript_1/1_Conf_1.000 | 227  | 0  |          |                |     |         |     |     |                                                                                                           |
| Locus_27471_Transcript_1/1_Conf_1.000 | 155  | 0  |          |                |     |         |     |     |                                                                                                           |
| Locus_27472_Transcript_1/1_Conf_1.000 | 143  | 20 | 3.46E-15 | EAW53398.1     | 100 | 84.7297 | 39  | 39  | S100 calcium binding protein A10 (annexin II ligand, calpactin I, light polypeptide (p11)), isoform CRA_b |
| Locus_27473_Transcript_1/1_Conf_1.000 | 131  | 0  |          |                |     |         |     |     |                                                                                                           |
| Locus_27474_Transcript_1/1_Conf_1.000 | 397  | 0  |          |                |     |         |     |     |                                                                                                           |
| Locus_27475_Transcript_1/1_Conf_1.000 | 204  | 13 | 5.41E-16 | XP_002639706.1 | 84  | 87.4261 | 64  | 54  | Hypothetical protein CBG12427                                                                             |
| Locus_27476_Transcript_1/1_Conf_1.000 | 269  | 0  |          |                |     |         |     |     |                                                                                                           |
| Locus_27477_Transcript_1/1_Conf_1.000 | 188  | 0  |          |                |     |         |     |     |                                                                                                           |
| Locus_27478_Transcript_1/1_Conf_1.000 | 191  | 0  |          |                |     |         |     |     |                                                                                                           |
| Locus_27479_Transcript_1/1_Conf_1.000 | 166  | 0  |          |                |     |         |     |     |                                                                                                           |
| Locus_2748_Transcript_1/3_Conf_0.500  | 328  | 0  |          |                |     |         |     |     |                                                                                                           |
| Locus_2748_Transcript_2/3_Conf_0.667  | 850  | 0  |          |                |     |         |     |     |                                                                                                           |
| Locus_2748_Transcript_3/3_Conf_0.667  | 853  | 0  |          |                |     |         |     |     |                                                                                                           |
| Locus_27480_Transcript_1/1_Conf_1.000 | 233  | 0  |          |                |     |         |     |     |                                                                                                           |
| Locus_27481_Transcript_1/1_Conf_1.000 | 185  | 0  |          |                |     |         |     |     |                                                                                                           |

|                                       |     |    |          |                |     |         |     |    |                                                                           |
|---------------------------------------|-----|----|----------|----------------|-----|---------|-----|----|---------------------------------------------------------------------------|
| Locus_27482_Transcript_1/1_Conf_1.000 | 151 | 20 | 1.07E-19 | XP_002815470.1 | 100 | 99.7525 | 50  | 50 | PREDICTED: t-complex protein 1 subunit epsilon-like                       |
| Locus_27483_Transcript_1/1_Conf_1.000 | 150 | 0  |          |                |     |         |     |    |                                                                           |
| Locus_27484_Transcript_1/1_Conf_1.000 | 145 | 0  |          |                |     |         |     |    |                                                                           |
| Locus_27485_Transcript_1/1_Conf_1.000 | 179 | 11 | 7.49E-10 | NP_505966.1    | 83  | 67.0106 | 53  | 44 | hypothetical protein T04F3.4                                              |
| Locus_27486_Transcript_1/1_Conf_1.000 | 182 | 20 | 3.26E-16 | XP_001101279.2 | 98  | 88.1965 | 56  | 55 | PREDICTED: transforming acidic coiled-coil-containing protein 3 isoform 2 |
| Locus_27487_Transcript_1/1_Conf_1.000 | 138 | 0  |          |                |     |         |     |    |                                                                           |
| Locus_27488_Transcript_1/1_Conf_1.000 | 147 | 8  | 1.72E-09 | XP_002631607.1 | 94  | 65.855  | 35  | 33 | Hypothetical protein CBG20788                                             |
| Locus_27489_Transcript_1/1_Conf_1.000 | 277 | 0  |          |                |     |         |     |    |                                                                           |
| Locus_2749_Transcript_1/1_Conf_1.000  | 476 | 20 | 1.73E-14 | NP_506514.1    | 64  | 82.4185 | 119 | 77 | hypothetical protein ZC376.6                                              |
| Locus_27490_Transcript_1/1_Conf_1.000 | 138 | 20 | 2.84E-17 | XP_002812010.1 | 100 | 91.6633 | 46  | 46 | PREDICTED: ras-related protein Rab-1A-like                                |
| Locus_27491_Transcript_1/1_Conf_1.000 | 143 | 0  |          |                |     |         |     |    |                                                                           |
| Locus_27492_Transcript_1/1_Conf_1.000 | 336 | 0  |          |                |     |         |     |    |                                                                           |
| Locus_27493_Transcript_1/1_Conf_1.000 | 146 | 0  |          |                |     |         |     |    |                                                                           |
| Locus_27494_Transcript_1/1_Conf_1.000 | 195 | 0  |          |                |     |         |     |    |                                                                           |
| Locus_27495_Transcript_1/1_Conf_1.000 | 196 | 5  | 2.00E-26 | CAR63717.1     | 90  | 122.094 | 65  | 59 | hypothetical protein                                                      |
| Locus_27496_Transcript_1/1_Conf_1.000 | 151 | 20 | 2.17E-12 | NP_500644.2    | 84  | 75.485  | 50  | 42 | hypothetical protein R11E3.1                                              |

|                                       |      |    |           |                |    |         |     |     |                                              |
|---------------------------------------|------|----|-----------|----------------|----|---------|-----|-----|----------------------------------------------|
| Locus_27497_Transcript_1/1_Conf_1.000 | 146  | 0  |           |                |    |         |     |     |                                              |
| Locus_27498_Transcript_1/1_Conf_1.000 | 187  | 20 | 7.99E-07  | EFO16346.1     | 72 | 56.9954 | 47  | 34  | hypothetical protein LOAG_12158              |
| Locus_27499_Transcript_1/1_Conf_1.000 | 193  | 0  |           |                |    |         |     |     |                                              |
| Locus_275_Transcript_1/1_Conf_1.000   | 1071 | 20 | 1.50E-141 | XP_002646059.1 | 82 | 506.908 | 360 | 298 | C. briggsae CBR-PMR-1 protein                |
| Locus_2750_Transcript_1/1_Conf_1.000  | 850  | 20 | 6.17E-46  | XP_001898424.1 | 61 | 188.734 | 231 | 141 | DEAD/H                                       |
| Locus_27500_Transcript_1/1_Conf_1.000 | 152  | 0  |           |                |    |         |     |     |                                              |
| Locus_27501_Transcript_1/1_Conf_1.000 | 174  | 0  |           |                |    |         |     |     |                                              |
| Locus_27502_Transcript_1/1_Conf_1.000 | 142  | 0  |           |                |    |         |     |     |                                              |
| Locus_27503_Transcript_1/1_Conf_1.000 | 195  | 0  |           |                |    |         |     |     |                                              |
| Locus_27504_Transcript_1/1_Conf_1.000 | 160  | 0  |           |                |    |         |     |     |                                              |
| Locus_27505_Transcript_1/1_Conf_1.000 | 327  | 0  |           |                |    |         |     |     |                                              |
| Locus_27506_Transcript_1/1_Conf_1.000 | 128  | 0  |           |                |    |         |     |     |                                              |
| Locus_27507_Transcript_1/1_Conf_1.000 | 193  | 12 | 1.60E-07  | EFO24873.1     | 65 | 59.3066 | 63  | 41  | hypothetical protein LOAG_03612              |
| Locus_27508_Transcript_1/1_Conf_1.000 | 347  | 20 | 8.72E-30  | XP_002642454.1 | 59 | 133.265 | 122 | 72  | Hypothetical protein CBG06864                |
| Locus_27509_Transcript_1/1_Conf_1.000 | 130  | 0  |           |                |    |         |     |     |                                              |
| Locus_2751_Transcript_1/1_Conf_1.000  | 324  | 0  |           |                |    |         |     |     |                                              |
| Locus_27510_Transcript_1/1_Conf_1.000 | 132  | 0  |           |                |    |         |     |     |                                              |
| Locus_27511_Transcript_1/1_Conf_1.000 | 219  | 20 | 6.96E-27  | NP_001022949.1 | 89 | 123.635 | 73  | 65  | GLYcosylation related family member (gly-11) |
| Locus_27512_Transcript_1/1_Conf_1.000 | 181  | 0  |           |                |    |         |     |     |                                              |
| Locus_27513_Transcript_1/1_Conf_1.000 | 164  | 0  |           |                |    |         |     |     |                                              |
| Locus_27514_Transcript_1/1_Conf_1.000 | 148  | 0  |           |                |    |         |     |     |                                              |

|                                       |     |    |          |                |     |         |     |    |                                                                         |
|---------------------------------------|-----|----|----------|----------------|-----|---------|-----|----|-------------------------------------------------------------------------|
| Locus_27515_Transcript_1/1_Conf_1.000 | 215 | 20 | 7.22E-21 | NP_501545.1    | 85  | 103.605 | 70  | 60 | RADIation sensitivity abnormal/yeast RAD-related family member (rad-26) |
| Locus_27516_Transcript_1/1_Conf_1.000 | 173 | 0  |          |                |     |         |     |    |                                                                         |
| Locus_27517_Transcript_1/1_Conf_1.000 | 167 | 0  |          |                |     |         |     |    |                                                                         |
| Locus_27518_Transcript_1/1_Conf_1.000 | 316 | 0  |          |                |     |         |     |    |                                                                         |
| Locus_27519_Transcript_1/1_Conf_1.000 | 133 | 20 | 2.34E-19 | 2AI6           | 100 | 98.5969 | 44  | 44 | SolutionStructure Of Human Phosphohistidine Phosphatase 1               |
| Locus_2752_Transcript_1/2_Conf_1.000  | 251 | 0  |          |                |     |         |     |    |                                                                         |
| Locus_2752_Transcript_2/2_Conf_1.000  | 228 | 0  |          |                |     |         |     |    |                                                                         |
| Locus_27520_Transcript_1/1_Conf_1.000 | 144 | 0  |          |                |     |         |     |    |                                                                         |
| Locus_27521_Transcript_1/1_Conf_1.000 | 202 | 0  |          |                |     |         |     |    |                                                                         |
| Locus_27522_Transcript_1/1_Conf_1.000 | 388 | 20 | 2.84E-25 | XP_002639805.1 | 63  | 118.242 | 126 | 80 | C. briggsae CBR-BCH-1 protein                                           |
| Locus_27523_Transcript_1/1_Conf_1.000 | 138 | 0  |          |                |     |         |     |    |                                                                         |
| Locus_27524_Transcript_1/1_Conf_1.000 | 129 | 0  |          |                |     |         |     |    |                                                                         |
| Locus_27525_Transcript_1/1_Conf_1.000 | 411 | 20 | 3.83E-30 | EFO20785.1     | 66  | 134.42  | 139 | 93 | TKL/MLK/HH498 protein kinase                                            |
| Locus_27526_Transcript_1/1_Conf_1.000 | 131 | 0  |          |                |     |         |     |    |                                                                         |
| Locus_27527_Transcript_1/1_Conf_1.000 | 144 | 0  |          |                |     |         |     |    |                                                                         |
| Locus_27528_Transcript_1/1_Conf_1.000 | 136 | 0  |          |                |     |         |     |    |                                                                         |
| Locus_27529_Transcript_1/1_Conf_1.000 | 175 | 0  |          |                |     |         |     |    |                                                                         |
| Locus_2753_Transcript_1/2_Conf_1.000  | 946 | 0  |          |                |     |         |     |    |                                                                         |
| Locus_2753_Transcript_2/2_Conf_1.000  | 857 | 0  |          |                |     |         |     |    |                                                                         |
| Locus_27530_Transcript_1/1_Conf_1.000 | 150 | 0  |          |                |     |         |     |    |                                                                         |
| Locus_27531_Transcript_1/1_Conf_1.000 | 138 | 0  |          |                |     |         |     |    |                                                                         |
| Locus_27532_Transcript_1/1_Conf_1.000 | 229 | 4  | 1.07E-19 | NP_001040774.1 | 81  | 99.7525 | 76  | 62 | hypothetical protein F40H3.1                                            |
| Locus_27533_Transcript_1/1_Conf_1.000 | 137 | 0  |          |                |     |         |     |    |                                                                         |
| Locus_27534_Transcript_1/1_Conf_1.000 | 160 | 20 | 5.46E-16 | NP_741109.1    | 86  | 87.4261 | 53  | 46 | FERM domain (protein4.1-ezrin-radixin-moesin) family member (frm-8)     |
| Locus_27535_Transcript_1/1_Conf_1.000 | 334 | 0  |          |                |     |         |     |    |                                                                         |
| Locus_27536_Transcript_1/1_Conf_1.000 | 145 | 4  | 4.71E-07 | XP_002631433.1 | 68  | 57.7658 | 48  | 33 | C. briggsae CBR-REV-1 protein                                           |
| Locus_27537_Transcript_1/1_Conf_1.000 | 138 | 0  |          |                |     |         |     |    |                                                                         |
| Locus_27538_Transcript_1/1_Conf_1.000 | 140 | 20 | 5.74E-10 | XP_001096533.2 | 100 | 67.3958 | 46  | 46 | PREDICTED: heterogeneous nuclear ribonucleoprotein A3-like isoform 3    |
| Locus_27539_Transcript_1/1_Conf_1.000 | 273 | 20 | 1.28E-33 | XP_002632193.1 | 83  | 145.976 | 90  | 75 | Hypothetical protein CBG07059                                           |

|                                       |      |    |          |                |     |         |     |     |                                                     |
|---------------------------------------|------|----|----------|----------------|-----|---------|-----|-----|-----------------------------------------------------|
| Locus_2754_Transcript_1/1_Conf_1.000  | 1523 | 20 | 1.44E-32 | EFO17966.1     | 63  | 145.591 | 202 | 128 | hypothetical protein LOAG_10533                     |
| Locus_27540_Transcript_1/1_Conf_1.000 | 148  | 0  |          |                |     |         |     |     |                                                     |
| Locus_27541_Transcript_1/1_Conf_1.000 | 178  | 11 | 8.85E-11 | ADD13547.1     | 80  | 70.0922 | 57  | 46  | Inositol triphosphate receptor protein 1, isoform h |
| Locus_27542_Transcript_1/1_Conf_1.000 | 172  | 20 | 9.85E-10 | XP_001899819.1 | 71  | 66.6254 | 56  | 40  | protein ZK524.3                                     |
| Locus_27543_Transcript_1/1_Conf_1.000 | 322  | 0  |          |                |     |         |     |     |                                                     |
| Locus_27544_Transcript_1/1_Conf_1.000 | 153  | 0  |          |                |     |         |     |     |                                                     |
| Locus_27545_Transcript_1/1_Conf_1.000 | 228  | 0  |          |                |     |         |     |     |                                                     |
| Locus_27546_Transcript_1/1_Conf_1.000 | 175  | 0  |          |                |     |         |     |     |                                                     |
| Locus_27547_Transcript_1/1_Conf_1.000 | 145  | 0  |          |                |     |         |     |     |                                                     |
| Locus_27548_Transcript_1/1_Conf_1.000 | 209  | 0  |          |                |     |         |     |     |                                                     |
| Locus_27549_Transcript_1/1_Conf_1.000 | 147  | 20 | 1.01E-17 | XP_002934764.1 | 100 | 93.2041 | 48  | 48  | PREDICTED: LOW QUALITY PROTEIN: myosin 9-like       |



|                                       |     |    |          |                |     |         |     |     |                                                                  |
|---------------------------------------|-----|----|----------|----------------|-----|---------|-----|-----|------------------------------------------------------------------|
| Locus_2755_Transcript_1/1_Conf_1.000  | 891 | 20 | 1.15E-13 | XP_002639934.1 | 49  | 81.6481 | 184 | 91  | C. briggsae CBR-DRH-3 protein                                    |
| Locus_27550_Transcript_1/1_Conf_1.000 | 148 | 20 | 3.13E-19 | XP_001114645.2 | 100 | 98.2117 | 49  | 49  | PREDICTED: ras GTPase-activating protein 4                       |
| Locus_27551_Transcript_1/1_Conf_1.000 | 201 | 0  |          |                |     |         |     |     |                                                                  |
| Locus_27552_Transcript_1/1_Conf_1.000 | 270 | 0  |          |                |     |         |     |     |                                                                  |
| Locus_27553_Transcript_1/1_Conf_1.000 | 152 | 0  |          |                |     |         |     |     |                                                                  |
| Locus_27554_Transcript_1/1_Conf_1.000 | 307 | 0  |          |                |     |         |     |     |                                                                  |
| Locus_27555_Transcript_1/1_Conf_1.000 | 146 | 0  |          |                |     |         |     |     |                                                                  |
| Locus_27556_Transcript_1/1_Conf_1.000 | 219 | 0  |          |                |     |         |     |     |                                                                  |
| Locus_27557_Transcript_1/1_Conf_1.000 | 188 | 20 | 6.29E-28 | BAG61003.1     | 100 | 127.102 | 62  | 62  | unnamed protein product                                          |
| Locus_27558_Transcript_1/1_Conf_1.000 | 315 | 20 | 7.90E-39 | NP_001022703.1 | 90  | 163.31  | 93  | 84  | TRP (transient receptor potential) channel family member (trp-2) |
| Locus_27559_Transcript_1/1_Conf_1.000 | 134 | 0  |          |                |     |         |     |     |                                                                  |
| Locus_2756_Transcript_1/1_Conf_1.000  | 392 | 8  | 7.15E-53 | NP_505622.1    | 90  | 209.92  | 121 | 110 | hypothetical protein ZK856.7                                     |

|                                       |     |    |          |                |     |         |     |    |                                                                         |
|---------------------------------------|-----|----|----------|----------------|-----|---------|-----|----|-------------------------------------------------------------------------|
| Locus_27560_Transcript_1/1_Conf_1.000 | 147 | 0  |          |                |     |         |     |    |                                                                         |
| Locus_27561_Transcript_1/1_Conf_1.000 | 199 | 0  |          |                |     |         |     |    |                                                                         |
| Locus_27562_Transcript_1/1_Conf_1.000 | 145 | 0  |          |                |     |         |     |    |                                                                         |
| Locus_27563_Transcript_1/1_Conf_1.000 | 353 | 20 | 2.28E-22 | XP_002646732.1 | 70  | 108.612 | 117 | 82 | Hypothetical protein CBG13117                                           |
| Locus_27564_Transcript_1/1_Conf_1.000 | 258 | 0  |          |                |     |         |     |    |                                                                         |
| Locus_27565_Transcript_1/1_Conf_1.000 | 243 | 0  |          |                |     |         |     |    |                                                                         |
| Locus_27566_Transcript_1/1_Conf_1.000 | 157 | 0  |          |                |     |         |     |    |                                                                         |
| Locus_27567_Transcript_1/1_Conf_1.000 | 135 | 0  |          |                |     |         |     |    |                                                                         |
| Locus_27568_Transcript_1/1_Conf_1.000 | 129 | 0  |          |                |     |         |     |    |                                                                         |
| Locus_27569_Transcript_1/1_Conf_1.000 | 147 | 13 | 2.49E-08 | NP_492438.1    | 78  | 62.003  | 47  | 37 | RADIation sensitivity abnormal/yeast RAD-related family member (rad-54) |
| Locus_2757_Transcript_1/1_Conf_1.000  | 507 | 0  |          |                |     |         |     |    |                                                                         |
| Locus_27570_Transcript_1/1_Conf_1.000 | 217 | 0  |          |                |     |         |     |    |                                                                         |
| Locus_27571_Transcript_1/1_Conf_1.000 | 151 | 0  |          |                |     |         |     |    |                                                                         |
| Locus_27572_Transcript_1/1_Conf_1.000 | 308 | 20 | 3.47E-31 | XP_002636973.1 | 84  | 137.887 | 102 | 86 | Hypothetical protein CBG09454                                           |
| Locus_27573_Transcript_1/1_Conf_1.000 | 136 | 1  | 6.16E-04 | NP_505768.1    | 70  | 47.3654 | 40  | 28 | hypothetical protein C29A12.6                                           |
| Locus_27574_Transcript_1/1_Conf_1.000 | 136 | 0  |          |                |     |         |     |    |                                                                         |
| Locus_27575_Transcript_1/1_Conf_1.000 | 260 | 20 | 4.46E-42 | 3078           | 100 | 174.096 | 86  | 86 | TheStructure Of Ca2+ Sensor (Case-12)                                   |
| Locus_27576_Transcript_1/1_Conf_1.000 | 139 | 0  |          |                |     |         |     |    |                                                                         |
| Locus_27577_Transcript_1/1_Conf_1.000 | 164 | 0  |          |                |     |         |     |    |                                                                         |
| Locus_27578_Transcript_1/1_Conf_1.000 | 246 | 6  | 1.36E-19 | XP_002634682.1 | 78  | 99.3673 | 71  | 56 | Hypothetical protein CBG19668                                           |

|                                       |      |    |          |                |     |         |     |    |                                                                     |
|---------------------------------------|------|----|----------|----------------|-----|---------|-----|----|---------------------------------------------------------------------|
| Locus_27579_Transcript_1/1_Conf_1.000 | 150  | 0  |          |                |     |         |     |    |                                                                     |
| Locus_2758_Transcript_1/1_Conf_1.000  | 713  | 2  | 1.09E-04 | NP_510325.1    | 42  | 51.2174 | 183 | 78 | Prion-like-(Q/N-rich)-domain-bearing protein family member (pqn-39) |
| Locus_27580_Transcript_1/1_Conf_1.000 | 139  | 20 | 4.38E-18 | XP_002343109.1 | 100 | 94.3597 | 45  | 45 | PREDICTED: hypothetical protein XP_002343109                        |
| Locus_27581_Transcript_1/1_Conf_1.000 | 216  | 0  |          |                |     |         |     |    |                                                                     |
| Locus_27582_Transcript_1/1_Conf_1.000 | 219  | 5  | 2.65E-18 | NP_001022683.1 | 83  | 95.1301 | 73  | 61 | hypothetical protein M01A8.2                                        |
| Locus_27583_Transcript_1/1_Conf_1.000 | 134  | 0  |          |                |     |         |     |    |                                                                     |
| Locus_27584_Transcript_1/1_Conf_1.000 | 199  | 0  |          |                |     |         |     |    |                                                                     |
| Locus_27585_Transcript_1/1_Conf_1.000 | 153  | 0  |          |                |     |         |     |    |                                                                     |
| Locus_27586_Transcript_1/1_Conf_1.000 | 137  | 0  |          |                |     |         |     |    |                                                                     |
| Locus_27587_Transcript_1/1_Conf_1.000 | 168  | 0  |          |                |     |         |     |    |                                                                     |
| Locus_27588_Transcript_1/1_Conf_1.000 | 139  | 0  |          |                |     |         |     |    |                                                                     |
| Locus_27589_Transcript_1/1_Conf_1.000 | 130  | 0  |          |                |     |         |     |    |                                                                     |
| Locus_2759_Transcript_1/1_Conf_1.000  | 432  | 20 | 1.37E-27 | NP_493029.1    | 84  | 125.946 | 79  | 67 | hypothetical protein R06C1.4                                        |
| Locus_27590_Transcript_1/1_Conf_1.000 | 134  | 0  |          |                |     |         |     |    |                                                                     |
| Locus_27591_Transcript_1/1_Conf_1.000 | 138  | 0  |          |                |     |         |     |    |                                                                     |
| Locus_27592_Transcript_1/1_Conf_1.000 | 132  | 0  |          |                |     |         |     |    |                                                                     |
| Locus_27593_Transcript_1/1_Conf_1.000 | 134  | 0  |          |                |     |         |     |    |                                                                     |
| Locus_27594_Transcript_1/1_Conf_1.000 | 173  | 0  |          |                |     |         |     |    |                                                                     |
| Locus_27595_Transcript_1/1_Conf_1.000 | 136  | 0  |          |                |     |         |     |    |                                                                     |
| Locus_27596_Transcript_1/1_Conf_1.000 | 201  | 2  | 4.17E-08 | NP_492188.1    | 62  | 61.2326 | 62  | 39 | GLoBin family member (glb-26)                                       |
| Locus_27597_Transcript_1/1_Conf_1.000 | 191  | 0  |          |                |     |         |     |    |                                                                     |
| Locus_27598_Transcript_1/1_Conf_1.000 | 143  | 20 | 2.56E-18 | P01023.3       | 100 | 95.1301 | 47  | 47 | Alpha-2-macroglobulin                                               |
| Locus_27599_Transcript_1/1_Conf_1.000 | 150  | 0  |          |                |     |         |     |    |                                                                     |
| Locus_276_Transcript_1/2_Conf_1.000   | 1459 | 20 | 6.72E-48 | NP_502125.1    | 88  | 196.438 | 107 | 95 | hypothetical protein B0035.1                                        |

|                                       |      |    |           |                |     |         |      |     |                                                                           |
|---------------------------------------|------|----|-----------|----------------|-----|---------|------|-----|---------------------------------------------------------------------------|
| Locus_276_Transcript_2/2_Conf_1.000   | 1426 | 20 | 6.50E-48  | NP_502125.1    | 88  | 196.438 | 107  | 95  | hypothetical protein B0035.1                                              |
| Locus_2760_Transcript_1/1_Conf_1.000  | 1130 | 20 | 5.46E-105 | NP_498407.1    | 74  | 385.571 | 327  | 244 | hypothetical protein C05D11.8                                             |
| Locus_27600_Transcript_1/1_Conf_1.000 | 157  | 0  |           |                |     |         |      |     |                                                                           |
| Locus_27601_Transcript_1/1_Conf_1.000 | 145  | 2  | 5.75E-05  | XP_001895662.1 | 66  | 50.8322 | 48   | 32  | ImpB/MucB/SamB family protein                                             |
| Locus_27602_Transcript_1/1_Conf_1.000 | 239  | 0  |           |                |     |         |      |     |                                                                           |
| Locus_27603_Transcript_1/1_Conf_1.000 | 135  | 20 | 1.05E-11  | NP_503758.4    | 81  | 73.1738 | 44   | 36  | KETtIN (Drosophila actin-binding) homolog family member (ketn-1)          |
| Locus_27604_Transcript_1/1_Conf_1.000 | 177  | 0  |           |                |     |         |      |     |                                                                           |
| Locus_27605_Transcript_1/1_Conf_1.000 | 137  | 0  |           |                |     |         |      |     |                                                                           |
| Locus_27606_Transcript_1/1_Conf_1.000 | 128  | 20 | 1.29E-09  | XP_002633255.1 | 80  | 66.2402 | 42   | 34  | Hypothetical protein CBG05980                                             |
| Locus_27607_Transcript_1/1_Conf_1.000 | 130  | 0  |           |                |     |         |      |     |                                                                           |
| Locus_27608_Transcript_1/1_Conf_1.000 | 162  | 0  |           |                |     |         |      |     |                                                                           |
| Locus_27609_Transcript_1/1_Conf_1.000 | 143  | 0  |           |                |     |         |      |     |                                                                           |
| Locus_2761_Transcript_1/1_Conf_1.000  | 2952 | 20 | 0         | CBB16332.1     | 65  | 812.757 | 1009 | 659 | C. elegans protein Y47D3A.29b, partially confirmed by transcript evidence |
| Locus_27610_Transcript_1/1_Conf_1.000 | 130  | 0  |           |                |     |         |      |     |                                                                           |
| Locus_27611_Transcript_1/1_Conf_1.000 | 165  | 0  |           |                |     |         |      |     |                                                                           |
| Locus_27612_Transcript_1/1_Conf_1.000 | 195  | 0  |           |                |     |         |      |     |                                                                           |
| Locus_27613_Transcript_1/1_Conf_1.000 | 164  | 20 | 2.21E-17  | XP_002633437.1 | 87  | 92.0485 | 54   | 47  | C. briggsae CBR-UNC-22 protein                                            |
| Locus_27614_Transcript_1/1_Conf_1.000 | 316  | 0  |           |                |     |         |      |     |                                                                           |
| Locus_27615_Transcript_1/1_Conf_1.000 | 151  | 14 | 2.74E-07  | NP_001032513.1 | 86  | 58.5362 | 37   | 32  | selenocysteine-specific elongation factor                                 |
| Locus_27616_Transcript_1/1_Conf_1.000 | 178  | 20 | 1.77E-27  | NP_758844.1    | 100 | 125.561 | 58   | 58  | gamma-secretase subunit PEN-2                                             |

|                                       |      |    |          |                |     |         |     |     |                                                                                                  |
|---------------------------------------|------|----|----------|----------------|-----|---------|-----|-----|--------------------------------------------------------------------------------------------------|
| Locus_27617_Transcript_1/1_Conf_1.000 | 156  | 20 | 7.40E-13 | EFO25007.1     | 76  | 77.0258 | 51  | 39  | hypothetical protein LOAG_03480                                                                  |
| Locus_27618_Transcript_1/1_Conf_1.000 | 167  | 0  |          |                |     |         |     |     |                                                                                                  |
| Locus_27619_Transcript_1/1_Conf_1.000 | 204  | 20 | 8.60E-30 | XP_002819585.1 | 100 | 133.265 | 67  | 67  | glutamate [NMDA] receptor-associated protein 1-like, partial                                     |
| Locus_2762_Transcript_1/1_Conf_1.000  | 1252 | 20 | 2.09E-31 | NP_508788.1    | 50  | 141.354 | 356 | 179 | LuNaPark (membrane protein) homolog family member (Inp-1)                                        |
| Locus_27620_Transcript_1/1_Conf_1.000 | 183  | 0  |          |                |     |         |     |     |                                                                                                  |
| Locus_27621_Transcript_1/1_Conf_1.000 | 203  | 0  |          |                |     |         |     |     |                                                                                                  |
| Locus_27622_Transcript_1/1_Conf_1.000 | 188  | 0  |          |                |     |         |     |     |                                                                                                  |
| Locus_27623_Transcript_1/1_Conf_1.000 | 208  | 0  |          |                |     |         |     |     |                                                                                                  |
| Locus_27624_Transcript_1/1_Conf_1.000 | 232  | 4  | 8.42E-17 | XP_001899484.1 | 68  | 90.1225 | 80  | 55  | Leucine Rich Repeat family protein                                                               |
| Locus_27625_Transcript_1/1_Conf_1.000 | 299  | 0  |          |                |     |         |     |     |                                                                                                  |
| Locus_27626_Transcript_1/1_Conf_1.000 | 206  | 0  |          |                |     |         |     |     |                                                                                                  |
| Locus_27627_Transcript_1/1_Conf_1.000 | 212  | 0  |          |                |     |         |     |     |                                                                                                  |
| Locus_27628_Transcript_1/1_Conf_1.000 | 132  | 0  |          |                |     |         |     |     |                                                                                                  |
| Locus_27629_Transcript_1/1_Conf_1.000 | 241  | 20 | 7.30E-13 | ZP_02025538.1  | 84  | 77.0258 | 51  | 43  | hypothetical protein EUBVEN_00788                                                                |
| Locus_2763_Transcript_1/1_Conf_1.000  | 419  | 20 | 3.88E-70 | XP_001159171.1 | 100 | 267.314 | 134 | 134 | PREDICTED: cytoplasmic polyadenylation element binding protein 1 isoform 3                       |
| Locus_27630_Transcript_1/1_Conf_1.000 | 271  | 5  | 1.38E-11 | ADI24623.1     | 60  | 72.7886 | 89  | 54  | Copine domain protein, atypical protein 2, isoform c, partially confirmed by transcript evidence |
| Locus_27631_Transcript_1/1_Conf_1.000 | 293  | 3  | 1.00E-09 | XP_002489033.1 | 75  | 66.6254 | 45  | 34  | hypothetical protein SORBIDRAFT_0351s002020                                                      |
| Locus_27632_Transcript_1/1_Conf_1.000 | 132  | 0  |          |                |     |         |     |     |                                                                                                  |
| Locus_27633_Transcript_1/1_Conf_1.000 | 243  | 0  |          |                |     |         |     |     |                                                                                                  |
| Locus_27634_Transcript_1/1_Conf_1.000 | 163  | 0  |          |                |     |         |     |     |                                                                                                  |

|                                       |     |    |          |                |     |         |     |     |                                                |
|---------------------------------------|-----|----|----------|----------------|-----|---------|-----|-----|------------------------------------------------|
| Locus_27635_Transcript_1/1_Conf_1.000 | 228 | 20 | 9.27E-40 | AAH14504.2     | 100 | 166.392 | 75  | 75  | P4HB protein                                   |
| Locus_27636_Transcript_1/1_Conf_1.000 | 188 | 20 | 1.60E-23 | XP_002631108.1 | 91  | 112.464 | 62  | 57  | Hypothetical protein CBG02883                  |
| Locus_27637_Transcript_1/1_Conf_1.000 | 195 | 0  |          |                |     |         |     |     |                                                |
| Locus_27638_Transcript_1/1_Conf_1.000 | 139 | 20 | 7.48E-18 | XP_002802342.1 | 100 | 93.5893 | 46  | 46  | PREDICTED: adenylate kinase 2, mitochondrial   |
| Locus_27639_Transcript_1/2_Conf_1.000 | 285 | 0  |          |                |     |         |     |     |                                                |
| Locus_27639_Transcript_2/2_Conf_1.000 | 285 | 0  |          |                |     |         |     |     |                                                |
| Locus_2764_Transcript_1/1_Conf_1.000  | 597 | 20 | 1.08E-40 | P31732.1       | 66  | 170.244 | 202 | 135 | Muscle cell intermediate filament protein OV71 |
| Locus_27640_Transcript_1/1_Conf_1.000 | 302 | 5  | 4.27E-29 | XP_002634479.1 | 81  | 130.954 | 106 | 86  | Hypothetical protein CBG10738                  |
| Locus_27641_Transcript_1/1_Conf_1.000 | 139 | 0  |          |                |     |         |     |     |                                                |
| Locus_27642_Transcript_1/1_Conf_1.000 | 245 | 0  |          |                |     |         |     |     |                                                |
| Locus_27643_Transcript_1/1_Conf_1.000 | 148 | 20 | 3.58E-23 | BAG64777.1     | 100 | 111.309 | 49  | 49  | unnamed protein product                        |
| Locus_27644_Transcript_1/1_Conf_1.000 | 148 | 0  |          |                |     |         |     |     |                                                |
| Locus_27645_Transcript_1/1_Conf_1.000 | 196 | 3  | 7.39E-13 | NP_497641.2    | 73  | 77.0258 | 65  | 48  | CaDHerin family member (cdh-1)                 |
| Locus_27646_Transcript_1/1_Conf_1.000 | 144 | 0  |          |                |     |         |     |     |                                                |
| Locus_27647_Transcript_1/1_Conf_1.000 | 132 | 0  |          |                |     |         |     |     |                                                |

|                                       |     |    |          |                |    |         |     |    |                                                     |
|---------------------------------------|-----|----|----------|----------------|----|---------|-----|----|-----------------------------------------------------|
| Locus_27648_Transcript_1/1_Conf_1.000 | 142 | 20 | 1.04E-11 | NP_001023062.1 | 82 | 73.1738 | 46  | 38 | Ligand-Gated ion Channel family member (lgc-43)     |
| Locus_27649_Transcript_1/1_Conf_1.000 | 135 | 20 | 5.38E-16 | ADD13547.1     | 95 | 87.4261 | 45  | 43 | Inositol triphosphate receptor protein 1, isoform h |
| Locus_2765_Transcript_1/1_Conf_1.000  | 682 | 20 | 8.34E-44 | NP_501998.1    | 87 | 181.03  | 109 | 95 | hypothetical protein T25B9.9                        |
| Locus_27650_Transcript_1/1_Conf_1.000 | 153 | 0  |          |                |    |         |     |    |                                                     |
| Locus_27651_Transcript_1/1_Conf_1.000 | 139 | 0  |          |                |    |         |     |    |                                                     |
| Locus_27652_Transcript_1/1_Conf_1.000 | 160 | 0  |          |                |    |         |     |    |                                                     |
| Locus_27653_Transcript_1/1_Conf_1.000 | 303 | 0  |          |                |    |         |     |    |                                                     |
| Locus_27654_Transcript_1/1_Conf_1.000 | 150 | 0  |          |                |    |         |     |    |                                                     |
| Locus_27655_Transcript_1/1_Conf_1.000 | 257 | 20 | 4.79E-36 | AAC32864.1     | 92 | 154.066 | 85  | 79 | putative potassium channel subunit n2P26            |
| Locus_27656_Transcript_1/1_Conf_1.000 | 172 | 0  |          |                |    |         |     |    |                                                     |
| Locus_27657_Transcript_1/1_Conf_1.000 | 189 | 12 | 4.65E-23 | XP_001894402.1 | 88 | 110.923 | 62  | 55 | PDZ domain containing protein                       |
| Locus_27658_Transcript_1/1_Conf_1.000 | 233 | 2  | 2.80E-12 | NP_497765.2    | 87 | 75.0998 | 77  | 67 | Adenylyl CYclase family member (acy-3)              |

|                                       |      |    |           |                |     |         |     |     |                                                                          |
|---------------------------------------|------|----|-----------|----------------|-----|---------|-----|-----|--------------------------------------------------------------------------|
| Locus_27659_Transcript_1/1_Conf_1.000 | 185  | 20 | 9.73E-29  | XP_001098702.2 | 100 | 129.798 | 61  | 61  | PREDICTED: transcription intermediary factor 1-beta isoform 4            |
| Locus_2766_Transcript_1/1_Conf_1.000  | 1423 | 20 | 7.73E-134 | EFO24850.1     | 95  | 481.871 | 269 | 256 | hypothetical protein LOAG_03629                                          |
| Locus_27660_Transcript_1/1_Conf_1.000 | 136  | 0  |           |                |     |         |     |     |                                                                          |
| Locus_27661_Transcript_1/1_Conf_1.000 | 228  | 0  |           |                |     |         |     |     |                                                                          |
| Locus_27662_Transcript_1/1_Conf_1.000 | 134  | 0  |           |                |     |         |     |     |                                                                          |
| Locus_27663_Transcript_1/1_Conf_1.000 | 226  | 3  | 1.65E-28  | NP_506242.2    | 89  | 129.028 | 75  | 67  | hypothetical protein R186.6                                              |
| Locus_27664_Transcript_1/1_Conf_1.000 | 265  | 20 | 9.94E-18  | NP_001021940.1 | 73  | 93.2041 | 94  | 69  | hypothetical protein C08H9.3                                             |
| Locus_27665_Transcript_1/1_Conf_1.000 | 253  | 19 | 6.98E-19  | XP_002644127.1 | 76  | 97.0561 | 84  | 64  | C. briggsae CBR-TAG-289 protein                                          |
| Locus_27666_Transcript_1/1_Conf_1.000 | 195  | 0  |           |                |     |         |     |     |                                                                          |
| Locus_27667_Transcript_1/1_Conf_1.000 | 137  | 0  |           |                |     |         |     |     |                                                                          |
| Locus_27668_Transcript_1/1_Conf_1.000 | 144  | 0  |           |                |     |         |     |     |                                                                          |
| Locus_27669_Transcript_1/1_Conf_1.000 | 179  | 20 | 1.19E-15  | CAA22108.2     | 82  | 86.2705 | 58  | 48  | C. elegans protein Y75B8A.24, partially confirmed by transcript evidence |
| Locus_2767_Transcript_1/3_Conf_0.600  | 487  | 0  |           |                |     |         |     |     |                                                                          |
| Locus_2767_Transcript_2/3_Conf_0.700  | 1114 | 0  |           |                |     |         |     |     |                                                                          |
| Locus_2767_Transcript_3/3_Conf_0.800  | 491  | 0  |           |                |     |         |     |     |                                                                          |
| Locus_27670_Transcript_1/1_Conf_1.000 | 149  | 0  |           |                |     |         |     |     |                                                                          |
| Locus_27671_Transcript_1/1_Conf_1.000 | 260  | 0  |           |                |     |         |     |     |                                                                          |
| Locus_27672_Transcript_1/1_Conf_1.000 | 132  | 4  | 3.28E-05  | NP_741744.2    | 74  | 51.6026 | 43  | 32  | hypothetical protein C15C7.7                                             |
| Locus_27673_Transcript_1/1_Conf_1.000 | 144  | 0  |           |                |     |         |     |     |                                                                          |
| Locus_27674_Transcript_1/1_Conf_1.000 | 309  | 0  |           |                |     |         |     |     |                                                                          |
| Locus_27675_Transcript_1/1_Conf_1.000 | 228  | 0  |           |                |     |         |     |     |                                                                          |
| Locus_27676_Transcript_1/1_Conf_1.000 | 130  | 0  |           |                |     |         |     |     |                                                                          |



|                                       |     |    |          |                |     |         |     |     |                                                   |
|---------------------------------------|-----|----|----------|----------------|-----|---------|-----|-----|---------------------------------------------------|
| Locus_27677_Transcript_1/1_Conf_1.000 | 166 | 0  |          |                |     |         |     |     |                                                   |
| Locus_27678_Transcript_1/1_Conf_1.000 | 154 | 0  |          |                |     |         |     |     |                                                   |
| Locus_27679_Transcript_1/1_Conf_1.000 | 157 | 0  |          |                |     |         |     |     |                                                   |
| Locus_2768_Transcript_1/2_Conf_1.000  | 220 | 20 | 2.17E-20 | ACI49170.1     | 98  | 102.064 | 53  | 52  | hypothetical protein Csp3_JD01.002                |
| Locus_2768_Transcript_2/2_Conf_1.000  | 393 | 20 | 9.28E-56 | NP_524709.1    | 94  | 219.55  | 122 | 115 | ribosomal protein S15Aa, isoform D                |
| Locus_27680_Transcript_1/1_Conf_1.000 | 160 | 0  |          |                |     |         |     |     |                                                   |
| Locus_27681_Transcript_1/1_Conf_1.000 | 401 | 20 | 2.22E-17 | XP_002638474.1 | 56  | 92.0485 | 111 | 63  | C. briggsae CBR-TTR-26 protein                    |
| Locus_27682_Transcript_1/1_Conf_1.000 | 137 | 2  | 7.78E-07 | NP_505688.1    | 73  | 56.9954 | 45  | 33  | Cdc-42 Related Protein family member (crp-1)      |
| Locus_27683_Transcript_1/1_Conf_1.000 | 174 | 0  |          |                |     |         |     |     |                                                   |
| Locus_27684_Transcript_1/1_Conf_1.000 | 169 | 0  |          |                |     |         |     |     |                                                   |
| Locus_27685_Transcript_1/1_Conf_1.000 | 229 | 0  |          |                |     |         |     |     |                                                   |
| Locus_27686_Transcript_1/1_Conf_1.000 | 240 | 20 | 5.04E-22 | XP_002647231.1 | 83  | 107.457 | 81  | 68  | C. briggsae CBR-SOS-1 protein                     |
| Locus_27687_Transcript_1/1_Conf_1.000 | 128 | 0  |          |                |     |         |     |     |                                                   |
| Locus_27688_Transcript_1/1_Conf_1.000 | 136 | 0  |          |                |     |         |     |     |                                                   |
| Locus_27689_Transcript_1/1_Conf_1.000 | 283 | 5  | 6.33E-12 | NP_497699.1    | 61  | 73.9442 | 92  | 57  | hypothetical protein C56G7.3                      |
| Locus_2769_Transcript_1/2_Conf_1.000  | 337 | 0  |          |                |     |         |     |     |                                                   |
| Locus_2769_Transcript_2/2_Conf_1.000  | 360 | 0  |          |                |     |         |     |     |                                                   |
| Locus_27690_Transcript_1/1_Conf_1.000 | 143 | 7  | 9.11E-16 | NP_495434.1    | 97  | 86.6557 | 43  | 42  | hypothetical protein C15F1.1                      |
| Locus_27691_Transcript_1/1_Conf_1.000 | 146 | 5  | 2.11E-15 | EFO16550.1     | 91  | 85.5001 | 47  | 43  | hypothetical protein LOAG_11955                   |
| Locus_27692_Transcript_1/1_Conf_1.000 | 216 | 20 | 2.02E-31 | XP_002937574.1 | 100 | 138.658 | 71  | 71  | PREDICTED: heat shock cognate 71 kDa protein-like |
| Locus_27693_Transcript_1/1_Conf_1.000 | 206 | 10 | 4.91E-09 | XP_002633479.1 | 71  | 64.3142 | 57  | 41  | Hypothetical protein CBG06250                     |
| Locus_27694_Transcript_1/1_Conf_1.000 | 198 | 7  | 6.63E-30 | XP_002636804.1 | 98  | 133.65  | 65  | 64  | C. briggsae CBR-EXP-2 protein                     |

|                                       |      |    |           |                |    |         |     |     |                                                                 |
|---------------------------------------|------|----|-----------|----------------|----|---------|-----|-----|-----------------------------------------------------------------|
| Locus_27695_Transcript_1/1_Conf_1.000 | 155  | 0  |           |                |    |         |     |     |                                                                 |
| Locus_27696_Transcript_1/1_Conf_1.000 | 175  | 0  |           |                |    |         |     |     |                                                                 |
| Locus_27697_Transcript_1/1_Conf_1.000 | 178  | 0  |           |                |    |         |     |     |                                                                 |
| Locus_27698_Transcript_1/1_Conf_1.000 | 238  | 0  |           |                |    |         |     |     |                                                                 |
| Locus_27699_Transcript_1/1_Conf_1.000 | 155  | 4  | 7.18E-16  | XP_002637927.1 | 90 | 87.0409 | 51  | 46  | Hypothetical protein CBG04739                                   |
| Locus_277_Transcript_1/1_Conf_1.000   | 1057 | 0  |           |                |    |         |     |     |                                                                 |
| Locus_2770_Transcript_1/1_Conf_1.000  | 1456 | 20 | 7.05E-106 | NP_499694.2    | 74 | 389.037 | 348 | 259 | hypothetical protein ZK1010.2                                   |
| Locus_27700_Transcript_1/1_Conf_1.000 | 136  | 0  |           |                |    |         |     |     |                                                                 |
| Locus_27701_Transcript_1/1_Conf_1.000 | 149  | 20 | 1.51E-05  | AAB61392.1     | 67 | 52.7582 | 49  | 33  | transposase                                                     |
| Locus_27702_Transcript_1/1_Conf_1.000 | 174  | 0  |           |                |    |         |     |     |                                                                 |
| Locus_27703_Transcript_1/1_Conf_1.000 | 217  | 0  |           |                |    |         |     |     |                                                                 |
| Locus_27704_Transcript_1/1_Conf_1.000 | 128  | 0  |           |                |    |         |     |     |                                                                 |
| Locus_27705_Transcript_1/1_Conf_1.000 | 180  | 1  | 4.88E-04  | XP_002639032.1 | 73 | 47.7506 | 45  | 33  | Hypothetical protein CBG22281                                   |
| Locus_27706_Transcript_1/1_Conf_1.000 | 275  | 20 | 5.20E-27  | AAC08430.1     | 89 | 124.02  | 68  | 61  | unknown                                                         |
| Locus_27707_Transcript_1/1_Conf_1.000 | 257  | 0  |           |                |    |         |     |     |                                                                 |
| Locus_27708_Transcript_1/1_Conf_1.000 | 151  | 0  |           |                |    |         |     |     |                                                                 |
| Locus_27709_Transcript_1/1_Conf_1.000 | 225  | 20 | 4.64E-23  | XP_002632693.1 | 83 | 110.923 | 73  | 61  | Hypothetical protein CBG21624                                   |
| Locus_2771_Transcript_1/1_Conf_1.000  | 308  | 0  |           |                |    |         |     |     |                                                                 |
| Locus_27710_Transcript_1/1_Conf_1.000 | 128  | 0  |           |                |    |         |     |     |                                                                 |
| Locus_27711_Transcript_1/1_Conf_1.000 | 136  | 0  |           |                |    |         |     |     |                                                                 |
| Locus_27712_Transcript_1/1_Conf_1.000 | 157  | 0  |           |                |    |         |     |     |                                                                 |
| Locus_27713_Transcript_1/1_Conf_1.000 | 130  | 0  |           |                |    |         |     |     |                                                                 |
| Locus_27714_Transcript_1/1_Conf_1.000 | 174  | 5  | 3.48E-15  | NP_741242.1    | 81 | 84.7297 | 58  | 47  | Dipeptidyl Peptidase Four (IV) family member (dpf-6)            |
| Locus_27715_Transcript_1/1_Conf_1.000 | 191  | 20 | 3.33E-21  | XP_001084759.2 | 98 | 104.76  | 63  | 62  | PREDICTED: myosin regulatory light polypeptide 9-like isoform 4 |
| Locus_27716_Transcript_1/1_Conf_1.000 | 251  | 0  |           |                |    |         |     |     |                                                                 |

|                                       |     |    |          |                |     |         |     |     |                                                |
|---------------------------------------|-----|----|----------|----------------|-----|---------|-----|-----|------------------------------------------------|
| Locus_27717_Transcript_1/1_Conf_1.000 | 135 | 18 | 2.96E-06 | XP_002756512.1 | 78  | 55.0694 | 38  | 30  | PREDICTED: cytochrome P450 2C20-like isoform 3 |
| Locus_27718_Transcript_1/1_Conf_1.000 | 166 | 20 | 4.58E-23 | XP_002919748.1 | 100 | 110.923 | 55  | 55  | PREDICTED: pyruvate kinase isozymes M1/M2-like |
| Locus_27719_Transcript_1/1_Conf_1.000 | 159 | 0  |          |                |     |         |     |     |                                                |
| Locus_2772_Transcript_1/1_Conf_1.000  | 735 | 0  |          |                |     |         |     |     |                                                |
| Locus_27720_Transcript_1/1_Conf_1.000 | 251 | 14 | 7.41E-42 | NP_510548.2    | 97  | 173.326 | 83  | 81  | hypothetical protein F39D8.3                   |
| Locus_27721_Transcript_1/1_Conf_1.000 | 141 | 0  |          |                |     |         |     |     |                                                |
| Locus_27722_Transcript_1/1_Conf_1.000 | 152 | 0  |          |                |     |         |     |     |                                                |
| Locus_27723_Transcript_1/1_Conf_1.000 | 262 | 0  |          |                |     |         |     |     |                                                |
| Locus_27724_Transcript_1/1_Conf_1.000 | 162 | 0  |          |                |     |         |     |     |                                                |
| Locus_27725_Transcript_1/1_Conf_1.000 | 189 | 0  |          |                |     |         |     |     |                                                |
| Locus_27726_Transcript_1/1_Conf_1.000 | 361 | 20 | 4.84E-41 | CAR63592.1     | 81  | 170.629 | 122 | 100 | hypothetical protein                           |
| Locus_27727_Transcript_1/1_Conf_1.000 | 156 | 0  |          |                |     |         |     |     |                                                |
| Locus_27728_Transcript_1/1_Conf_1.000 | 198 | 20 | 4.30E-29 | NP_001022190.1 | 98  | 130.954 | 66  | 65  | hypothetical protein F53A10.2                  |
| Locus_27729_Transcript_1/1_Conf_1.000 | 172 | 0  |          |                |     |         |     |     |                                                |
| Locus_2773_Transcript_1/1_Conf_1.000  | 273 | 20 | 1.28E-33 | ABP52060.1     | 96  | 145.976 | 79  | 76  | ribosomal protein L36                          |

|                                       |     |    |          |                |    |         |     |     |                                                                       |
|---------------------------------------|-----|----|----------|----------------|----|---------|-----|-----|-----------------------------------------------------------------------|
| Locus_27730_Transcript_1/1_Conf_1.000 | 309 | 20 | 3.94E-35 | XP_001902583.1 | 88 | 150.984 | 100 | 88  | Patched family protein                                                |
| Locus_27731_Transcript_1/1_Conf_1.000 | 133 | 0  |          |                |    |         |     |     |                                                                       |
| Locus_27732_Transcript_1/1_Conf_1.000 | 211 | 0  |          |                |    |         |     |     |                                                                       |
| Locus_27733_Transcript_1/1_Conf_1.000 | 175 | 0  |          |                |    |         |     |     |                                                                       |
| Locus_27734_Transcript_1/1_Conf_1.000 | 156 | 0  |          |                |    |         |     |     |                                                                       |
| Locus_27735_Transcript_1/1_Conf_1.000 | 147 | 0  |          |                |    |         |     |     |                                                                       |
| Locus_27736_Transcript_1/1_Conf_1.000 | 279 | 20 | 2.83E-33 | NP_001076680.1 | 82 | 144.821 | 93  | 77  | hypothetical protein F13H10.3                                         |
| Locus_27737_Transcript_1/1_Conf_1.000 | 211 | 0  |          |                |    |         |     |     |                                                                       |
| Locus_27738_Transcript_1/1_Conf_1.000 | 150 | 0  |          |                |    |         |     |     |                                                                       |
| Locus_27739_Transcript_1/1_Conf_1.000 | 162 | 0  |          |                |    |         |     |     |                                                                       |
| Locus_2774_Transcript_1/2_Conf_1.000  | 372 | 11 | 3.22E-08 | NP_490938.3    | 73 | 61.6178 | 80  | 59  | AFaDin (actin filament binding protein) homolog family member (afd-1) |
| Locus_2774_Transcript_2/2_Conf_1.000  | 383 | 11 | 3.18E-08 | NP_490938.3    | 73 | 61.6178 | 80  | 59  | AFaDin (actin filament binding protein) homolog family member (afd-1) |
| Locus_27740_Transcript_1/1_Conf_1.000 | 220 | 0  |          |                |    |         |     |     |                                                                       |
| Locus_27741_Transcript_1/1_Conf_1.000 | 270 | 20 | 5.96E-31 | EFO13452.1     | 78 | 137.117 | 90  | 71  | hypothetical protein LOAG_15077                                       |
| Locus_27742_Transcript_1/1_Conf_1.000 | 190 | 0  |          |                |    |         |     |     |                                                                       |
| Locus_27743_Transcript_1/1_Conf_1.000 | 162 | 5  | 8.69E-14 | XP_002631453.1 | 85 | 80.1073 | 54  | 46  | C. briggsae CBR-RIG-6 protein                                         |
| Locus_27744_Transcript_1/1_Conf_1.000 | 224 | 0  |          |                |    |         |     |     |                                                                       |
| Locus_27745_Transcript_1/1_Conf_1.000 | 539 | 4  | 5.02E-35 | NP_001024306.1 | 64 | 150.984 | 174 | 112 | Poly(ADP-ribose) Metabolism Enzyme family member (pme-5)              |
| Locus_27746_Transcript_1/1_Conf_1.000 | 191 | 0  |          |                |    |         |     |     |                                                                       |
| Locus_27747_Transcript_1/1_Conf_1.000 | 177 | 0  |          |                |    |         |     |     |                                                                       |
| Locus_27748_Transcript_1/1_Conf_1.000 | 156 | 20 | 2.22E-17 | NP_001022373.1 | 94 | 92.0485 | 51  | 48  | CLC-type chloride channel family member (clh-1)                       |

|                                       |      |    |           |                |     |         |     |     |                                                |
|---------------------------------------|------|----|-----------|----------------|-----|---------|-----|-----|------------------------------------------------|
| Locus_27749_Transcript_1/1_Conf_1.000 | 174  | 20 | 2.67E-15  | XP_002635372.1 | 80  | 85.1149 | 57  | 46  | C. briggsae CBR-RPM-1 protein                  |
| Locus_2775_Transcript_1/1_Conf_1.000  | 964  | 20 | 4.64E-136 | AAK28335.1     | 84  | 488.419 | 322 | 273 | glycogen synthase                              |
| Locus_27750_Transcript_1/1_Conf_1.000 | 235  | 12 | 5.61E-21  | XP_002633387.1 | 84  | 103.99  | 76  | 64  | C. briggsae CBR-TWK-25 protein                 |
| Locus_27751_Transcript_1/1_Conf_1.000 | 311  | 20 | 2.55E-42  | AAC38987.1     | 89  | 174.866 | 103 | 92  | P-glycoprotein                                 |
| Locus_27752_Transcript_1/1_Conf_1.000 | 360  | 20 | 4.11E-24  | XP_001899665.1 | 75  | 114.39  | 93  | 70  | LD41395p                                       |
| Locus_27753_Transcript_1/1_Conf_1.000 | 132  | 0  |           |                |     |         |     |     |                                                |
| Locus_27754_Transcript_1/1_Conf_1.000 | 132  | 0  |           |                |     |         |     |     |                                                |
| Locus_27755_Transcript_1/1_Conf_1.000 | 130  | 0  |           |                |     |         |     |     |                                                |
| Locus_27756_Transcript_1/1_Conf_1.000 | 144  | 3  | 5.94E-10  | XP_002634455.1 | 75  | 67.3958 | 48  | 36  | Hypothetical protein CBG10706                  |
| Locus_27757_Transcript_1/1_Conf_1.000 | 142  | 0  |           |                |     |         |     |     |                                                |
| Locus_27758_Transcript_1/1_Conf_1.000 | 151  | 20 | 1.50E-21  | XP_002811111.1 | 100 | 105.916 | 49  | 49  | PREDICTED: proteasome subunit beta type-2-like |
| Locus_27759_Transcript_1/1_Conf_1.000 | 375  | 0  |           |                |     |         |     |     |                                                |
| Locus_2776_Transcript_1/1_Conf_1.000  | 1022 | 20 | 5.28E-149 | NP_491023.2    | 91  | 531.561 | 276 | 253 | CathePsin Z family member (cpz-1)              |
| Locus_27760_Transcript_1/1_Conf_1.000 | 134  | 0  |           |                |     |         |     |     |                                                |

|                                       |     |    |          |                |     |         |    |    |                                             |
|---------------------------------------|-----|----|----------|----------------|-----|---------|----|----|---------------------------------------------|
| Locus_27761_Transcript_1/1_Conf_1.000 | 147 | 20 | 5.19E-06 | XP_002406495.1 | 70  | 54.299  | 47 | 33 | protein tyrosine phosphatase, putative      |
| Locus_27762_Transcript_1/1_Conf_1.000 | 290 | 2  | 2.92E-09 | XP_002635623.1 | 58  | 65.0846 | 91 | 53 | Hypothetical protein CBG21816               |
| Locus_27763_Transcript_1/1_Conf_1.000 | 128 | 0  |          |                |     |         |    |    |                                             |
| Locus_27764_Transcript_1/1_Conf_1.000 | 158 | 0  |          |                |     |         |    |    |                                             |
| Locus_27765_Transcript_1/1_Conf_1.000 | 180 | 0  |          |                |     |         |    |    |                                             |
| Locus_27766_Transcript_1/1_Conf_1.000 | 273 | 0  |          |                |     |         |    |    |                                             |
| Locus_27767_Transcript_1/1_Conf_1.000 | 135 | 20 | 1.16E-18 | XP_002756078.1 | 100 | 96.2857 | 44 | 44 | PREDICTED: coronin-1A isoform 1             |
| Locus_27768_Transcript_1/1_Conf_1.000 | 288 | 0  |          |                |     |         |    |    |                                             |
| Locus_27769_Transcript_1/1_Conf_1.000 | 191 | 0  |          |                |     |         |    |    |                                             |
| Locus_2777_Transcript_1/1_Conf_1.000  | 181 | 19 | 2.85E-12 | XP_001514349.1 | 80  | 75.0998 | 47 | 38 | PREDICTED: similar to F1Fo-ATPase subunit e |
| Locus_27770_Transcript_1/1_Conf_1.000 | 182 | 20 | 1.56E-18 | NP_509517.2    | 86  | 95.9005 | 59 | 51 | hypothetical protein C24A3.4                |
| Locus_27771_Transcript_1/1_Conf_1.000 | 169 | 0  |          |                |     |         |    |    |                                             |
| Locus_27772_Transcript_1/1_Conf_1.000 | 130 | 0  |          |                |     |         |    |    |                                             |

|                                       |      |    |          |                |    |         |     |     |                                                          |
|---------------------------------------|------|----|----------|----------------|----|---------|-----|-----|----------------------------------------------------------|
| Locus_27773_Transcript_1/1_Conf_1.000 | 152  | 20 | 9.71E-21 | NP_509032.1    | 92 | 103.219 | 50  | 46  | Drosophila ODD-skipped-like family member (odd-2)        |
| Locus_27774_Transcript_1/1_Conf_1.000 | 179  | 0  |          |                |    |         |     |     |                                                          |
| Locus_27775_Transcript_1/1_Conf_1.000 | 196  | 0  |          |                |    |         |     |     |                                                          |
| Locus_27776_Transcript_1/1_Conf_1.000 | 147  | 0  |          |                |    |         |     |     |                                                          |
| Locus_27777_Transcript_1/1_Conf_1.000 | 132  | 0  |          |                |    |         |     |     |                                                          |
| Locus_27778_Transcript_1/1_Conf_1.000 | 261  | 20 | 7.13E-24 | NP_493247.2    | 78 | 113.62  | 84  | 66  | hypothetical protein Y18D10A.9                           |
| Locus_27779_Transcript_1/1_Conf_1.000 | 129  | 0  |          |                |    |         |     |     |                                                          |
| Locus_2778_Transcript_1/1_Conf_1.000  | 471  | 20 | 7.19E-77 | EFO26349.1     | 96 | 289.656 | 157 | 151 | hypothetical protein LOAG_02130                          |
| Locus_27780_Transcript_1/1_Conf_1.000 | 160  | 4  | 1.26E-12 | EFO17909.1     | 83 | 76.2554 | 53  | 44  | hypothetical protein LOAG_10587                          |
| Locus_27781_Transcript_1/1_Conf_1.000 | 164  | 0  |          |                |    |         |     |     |                                                          |
| Locus_27782_Transcript_1/1_Conf_1.000 | 129  | 0  |          |                |    |         |     |     |                                                          |
| Locus_27783_Transcript_1/1_Conf_1.000 | 138  | 0  |          |                |    |         |     |     |                                                          |
| Locus_27784_Transcript_1/1_Conf_1.000 | 232  | 0  |          |                |    |         |     |     |                                                          |
| Locus_27785_Transcript_1/2_Conf_1.000 | 256  | 6  | 1.40E-11 | NP_495914.1    | 68 | 72.7886 | 85  | 58  | hypothetical protein C18E9.8                             |
| Locus_27785_Transcript_2/2_Conf_1.000 | 256  | 6  | 2.17E-12 | NP_495914.1    | 69 | 75.485  | 85  | 59  | hypothetical protein C18E9.8                             |
| Locus_27786_Transcript_1/1_Conf_1.000 | 239  | 0  |          |                |    |         |     |     |                                                          |
| Locus_27787_Transcript_1/1_Conf_1.000 | 177  | 0  |          |                |    |         |     |     |                                                          |
| Locus_27788_Transcript_1/1_Conf_1.000 | 177  | 5  | 1.12E-13 | XP_001897130.1 | 84 | 79.7221 | 58  | 49  | DNA-directed RNA polymerase, beta subunit family protein |
| Locus_27789_Transcript_1/1_Conf_1.000 | 170  | 0  |          |                |    |         |     |     |                                                          |
| Locus_2779_Transcript_1/2_Conf_1.000  | 1145 | 20 | 6.81E-79 | EFO19779.1     | 90 | 298.901 | 173 | 156 | ubiquitin-conjugating enzyme E2 H                        |
| Locus_2779_Transcript_2/2_Conf_1.000  | 1145 | 20 | 6.80E-79 | EFO19779.1     | 90 | 298.901 | 173 | 156 | ubiquitin-conjugating enzyme E2 H                        |

|                                       |     |    |          |                |    |         |     |    |                                                                  |
|---------------------------------------|-----|----|----------|----------------|----|---------|-----|----|------------------------------------------------------------------|
| Locus_27790_Transcript_1/1_Conf_1.000 | 188 | 4  | 7.46E-13 | XP_002636973.1 | 77 | 77.0258 | 62  | 48 | Hypothetical protein CBG09454                                    |
| Locus_27791_Transcript_1/1_Conf_1.000 | 247 | 1  | 1.91E-05 | XP_001965764.1 | 57 | 52.373  | 59  | 34 | GF22278                                                          |
| Locus_27792_Transcript_1/1_Conf_1.000 | 146 | 0  |          |                |    |         |     |    |                                                                  |
| Locus_27793_Transcript_1/1_Conf_1.000 | 166 | 0  |          |                |    |         |     |    |                                                                  |
| Locus_27794_Transcript_1/1_Conf_1.000 | 136 | 20 | 1.28E-09 | XP_002110106.1 | 82 | 66.2402 | 46  | 38 | hypothetical protein TRIADDRAFT_53727                            |
| Locus_27795_Transcript_1/1_Conf_1.000 | 139 | 20 | 1.28E-17 | EAX02335.1     | 97 | 92.8189 | 45  | 44 | ribonuclease/angiogenin inhibitor 1, isoform CRA_c               |
| Locus_27796_Transcript_1/1_Conf_1.000 | 215 | 20 | 2.17E-25 | XP_002634229.1 | 91 | 118.627 | 69  | 63 | C. briggsae CBR-UNC-26 protein                                   |
| Locus_27797_Transcript_1/1_Conf_1.000 | 134 | 0  |          |                |    |         |     |    |                                                                  |
| Locus_27798_Transcript_1/1_Conf_1.000 | 181 | 1  | 3.49E-10 | EDL90203.1     | 71 | 68.1662 | 52  | 37 | ATPase, H+ transporting, V0 subunit B (predicted), isoform CRA_c |
| Locus_27799_Transcript_1/1_Conf_1.000 | 146 | 0  |          |                |    |         |     |    |                                                                  |
| Locus_278_Transcript_1/1_Conf_1.000   | 322 | 0  |          |                |    |         |     |    |                                                                  |
| Locus_2780_Transcript_1/1_Conf_1.000  | 833 | 20 | 3.39E-09 | XP_001640075.1 | 50 | 66.6254 | 125 | 63 | predicted protein                                                |
| Locus_27800_Transcript_1/1_Conf_1.000 | 251 | 0  |          |                |    |         |     |    |                                                                  |
| Locus_27801_Transcript_1/1_Conf_1.000 | 224 | 0  |          |                |    |         |     |    |                                                                  |
| Locus_27802_Transcript_1/1_Conf_1.000 | 175 | 0  |          |                |    |         |     |    |                                                                  |
| Locus_27803_Transcript_1/1_Conf_1.000 | 131 | 0  |          |                |    |         |     |    |                                                                  |
| Locus_27804_Transcript_1/1_Conf_1.000 | 142 | 0  |          |                |    |         |     |    |                                                                  |



|                                       |      |    |          |                |     |         |     |     |                                                              |
|---------------------------------------|------|----|----------|----------------|-----|---------|-----|-----|--------------------------------------------------------------|
| Locus_27805_Transcript_1/1_Conf_1.000 | 211  | 20 | 5.94E-15 | EFO23287.1     | 71  | 83.9593 | 67  | 48  | hypothetical protein LOAG_05194                              |
| Locus_27806_Transcript_1/1_Conf_1.000 | 185  | 0  |          |                |     |         |     |     |                                                              |
| Locus_27807_Transcript_1/1_Conf_1.000 | 178  | 0  |          |                |     |         |     |     |                                                              |
| Locus_27808_Transcript_1/1_Conf_1.000 | 135  | 0  |          |                |     |         |     |     |                                                              |
| Locus_27809_Transcript_1/1_Conf_1.000 | 144  | 0  |          |                |     |         |     |     |                                                              |
| Locus_2781_Transcript_1/1_Conf_1.000  | 2375 | 20 | 0        | CAR63713.1     | 93  | 848.195 | 492 | 458 | putative ZYGote defective: embryonic lethal family member    |
| Locus_27810_Transcript_1/1_Conf_1.000 | 285  | 0  |          |                |     |         |     |     |                                                              |
| Locus_27811_Transcript_1/1_Conf_1.000 | 217  | 0  |          |                |     |         |     |     |                                                              |
| Locus_27812_Transcript_1/1_Conf_1.000 | 138  | 0  |          |                |     |         |     |     |                                                              |
| Locus_27813_Transcript_1/1_Conf_1.000 | 175  | 0  |          |                |     |         |     |     |                                                              |
| Locus_27814_Transcript_1/1_Conf_1.000 | 150  | 0  |          |                |     |         |     |     |                                                              |
| Locus_27815_Transcript_1/1_Conf_1.000 | 177  | 0  |          |                |     |         |     |     |                                                              |
| Locus_27816_Transcript_1/1_Conf_1.000 | 158  | 0  |          |                |     |         |     |     |                                                              |
| Locus_27817_Transcript_1/1_Conf_1.000 | 147  | 0  |          |                |     |         |     |     |                                                              |
| Locus_27818_Transcript_1/1_Conf_1.000 | 215  | 20 | 2.17E-33 | XP_002821617.1 | 100 | 145.206 | 71  | 71  | PREDICTED: peroxiredoxin-5, mitochondrial-like isoform 2     |
| Locus_27819_Transcript_1/1_Conf_1.000 | 154  | 2  | 3.02E-06 | NP_499757.2    | 63  | 55.0694 | 52  | 33  | hypothetical protein T03F6.4                                 |
| Locus_2782_Transcript_1/1_Conf_1.000  | 534  | 20 | 1.22E-09 | CAB04203.2     | 84  | 66.6254 | 44  | 37  | C. elegans protein F26H9.2, confirmed by transcript evidence |
| Locus_27820_Transcript_1/1_Conf_1.000 | 172  | 0  |          |                |     |         |     |     |                                                              |
| Locus_27821_Transcript_1/1_Conf_1.000 | 137  | 0  |          |                |     |         |     |     |                                                              |
| Locus_27822_Transcript_1/1_Conf_1.000 | 145  | 2  | 1.79E-06 | XP_002639197.1 | 72  | 55.8398 | 44  | 32  | Hypothetical protein CBG03740                                |
| Locus_27823_Transcript_1/1_Conf_1.000 | 160  | 0  |          |                |     |         |     |     |                                                              |
| Locus_27824_Transcript_1/1_Conf_1.000 | 233  | 20 | 4.92E-25 | NP_494721.1    | 88  | 117.472 | 72  | 64  | hypothetical protein R11F4.1                                 |
| Locus_27825_Transcript_1/1_Conf_1.000 | 187  | 0  |          |                |     |         |     |     |                                                              |
| Locus_27826_Transcript_1/1_Conf_1.000 | 148  | 0  |          |                |     |         |     |     |                                                              |

|                                       |      |    |           |                |     |         |     |     |                                                         |
|---------------------------------------|------|----|-----------|----------------|-----|---------|-----|-----|---------------------------------------------------------|
| Locus_27827_Transcript_1/1_Conf_1.000 | 255  | 2  | 9.08E-19  | XP_002643107.1 | 70  | 96.6709 | 82  | 58  | Hypothetical protein CBG23034                           |
| Locus_27828_Transcript_1/1_Conf_1.000 | 505  | 0  |           |                |     |         |     |     |                                                         |
| Locus_27829_Transcript_1/1_Conf_1.000 | 223  | 0  |           |                |     |         |     |     |                                                         |
| Locus_2783_Transcript_1/1_Conf_1.000  | 150  | 0  |           |                |     |         |     |     |                                                         |
| Locus_27830_Transcript_1/1_Conf_1.000 | 180  | 0  |           |                |     |         |     |     |                                                         |
| Locus_27831_Transcript_1/1_Conf_1.000 | 286  | 0  |           |                |     |         |     |     |                                                         |
| Locus_27832_Transcript_1/1_Conf_1.000 | 131  | 2  | 1.63E-04  | NP_492594.2    | 75  | 49.2914 | 44  | 33  | hypothetical protein F26E4.5                            |
| Locus_27833_Transcript_1/1_Conf_1.000 | 225  | 0  |           |                |     |         |     |     |                                                         |
| Locus_27834_Transcript_1/1_Conf_1.000 | 248  | 0  |           |                |     |         |     |     |                                                         |
| Locus_27835_Transcript_1/1_Conf_1.000 | 148  | 0  |           |                |     |         |     |     |                                                         |
| Locus_27836_Transcript_1/1_Conf_1.000 | 219  | 0  |           |                |     |         |     |     |                                                         |
| Locus_27837_Transcript_1/1_Conf_1.000 | 159  | 20 | 3.54E-15  | NP_492003.2    | 88  | 84.7297 | 53  | 47  | hypothetical protein W01A8.6                            |
| Locus_27838_Transcript_1/1_Conf_1.000 | 195  | 0  |           |                |     |         |     |     |                                                         |
| Locus_27839_Transcript_1/1_Conf_1.000 | 134  | 0  |           |                |     |         |     |     |                                                         |
| Locus_2784_Transcript_1/1_Conf_1.000  | 225  | 0  |           |                |     |         |     |     |                                                         |
| Locus_27840_Transcript_1/1_Conf_1.000 | 221  | 0  |           |                |     |         |     |     |                                                         |
| Locus_27841_Transcript_1/1_Conf_1.000 | 285  | 2  | 1.36E-14  | XP_002635263.1 | 85  | 82.8037 | 69  | 59  | Hypothetical protein CBG11507                           |
| Locus_27842_Transcript_1/1_Conf_1.000 | 170  | 20 | 2.51E-13  | XP_002155655.1 | 73  | 78.5666 | 56  | 41  | PREDICTED: similar to transposase homolog               |
| Locus_27843_Transcript_1/1_Conf_1.000 | 151  | 0  |           |                |     |         |     |     |                                                         |
| Locus_27844_Transcript_1/1_Conf_1.000 | 447  | 8  | 1.06E-11  | EFO14501.1     | 56  | 73.1738 | 121 | 68  | hypothetical protein LOAG_14017                         |
| Locus_27845_Transcript_1/1_Conf_1.000 | 414  | 8  | 6.75E-19  | AAT76297.1     | 85  | 97.0561 | 62  | 53  | FMRFamide-related peptide FLP-16 precursor              |
| Locus_27846_Transcript_1/1_Conf_1.000 | 174  | 0  |           |                |     |         |     |     |                                                         |
| Locus_27847_Transcript_1/1_Conf_1.000 | 161  | 0  |           |                |     |         |     |     |                                                         |
| Locus_27848_Transcript_1/1_Conf_1.000 | 129  | 0  |           |                |     |         |     |     |                                                         |
| Locus_27849_Transcript_1/1_Conf_1.000 | 300  | 20 | 1.43E-08  | NP_496176.1    | 64  | 62.7734 | 73  | 47  | beta-LACTamase domain containing family member (lact-2) |
| Locus_2785_Transcript_1/1_Conf_1.000  | 1271 | 20 | 2.05E-135 | XP_002636781.1 | 75  | 486.878 | 390 | 293 | Hypothetical protein CBG23516                           |
| Locus_27850_Transcript_1/1_Conf_1.000 | 143  | 20 | 4.83E-17  | XP_002912971.1 | 100 | 90.8929 | 47  | 47  | PREDICTED: core histone macro-H2A.1-like isoform 2      |

|                                       |     |    |          |                |    |         |     |     |                                                                            |
|---------------------------------------|-----|----|----------|----------------|----|---------|-----|-----|----------------------------------------------------------------------------|
| Locus_27851_Transcript_1/1_Conf_1.000 | 227 | 0  |          |                |    |         |     |     |                                                                            |
| Locus_27852_Transcript_1/1_Conf_1.000 | 189 | 0  |          |                |    |         |     |     |                                                                            |
| Locus_27853_Transcript_1/1_Conf_1.000 | 140 | 0  |          |                |    |         |     |     |                                                                            |
| Locus_27854_Transcript_1/1_Conf_1.000 | 205 | 0  |          |                |    |         |     |     |                                                                            |
| Locus_27855_Transcript_1/1_Conf_1.000 | 167 | 20 | 2.61E-10 | XP_002921983.1 | 80 | 68.5514 | 56  | 45  | PREDICTED: dual specificity mitogen-activated protein kinase kinase 7-like |
| Locus_27856_Transcript_1/1_Conf_1.000 | 149 | 2  | 2.49E-08 | XP_001891640.1 | 79 | 62.003  | 49  | 39  | zgc:55839                                                                  |
| Locus_27857_Transcript_1/1_Conf_1.000 | 151 | 0  |          |                |    |         |     |     |                                                                            |
| Locus_27858_Transcript_1/1_Conf_1.000 | 169 | 0  |          |                |    |         |     |     |                                                                            |
| Locus_27859_Transcript_1/1_Conf_1.000 | 186 | 0  |          |                |    |         |     |     |                                                                            |
| Locus_2786_Transcript_1/1_Conf_1.000  | 657 | 20 | 1.32E-51 | NP_505373.1    | 61 | 206.838 | 217 | 134 | hypothetical protein B0222.5                                               |
| Locus_27860_Transcript_1/1_Conf_1.000 | 174 | 0  |          |                |    |         |     |     |                                                                            |
| Locus_27861_Transcript_1/1_Conf_1.000 | 159 | 0  |          |                |    |         |     |     |                                                                            |
| Locus_27862_Transcript_1/1_Conf_1.000 | 217 | 6  | 1.50E-10 | NP_495280.1    | 69 | 69.3218 | 71  | 49  | hypothetical protein C32D5.12                                              |
| Locus_27863_Transcript_1/1_Conf_1.000 | 131 | 8  | 1.52E-10 | CAX65068.1     | 88 | 69.3218 | 43  | 38  | C. elegans protein K08C7.3d, confirmed by transcript evidence              |
| Locus_27864_Transcript_1/1_Conf_1.000 | 292 | 4  | 2.46E-16 | ACI49095.1     | 80 | 88.5817 | 65  | 52  | hypothetical protein Cbre_JD12.003                                         |
| Locus_27865_Transcript_1/1_Conf_1.000 | 237 | 13 | 5.41E-24 | NP_500282.2    | 80 | 114.005 | 77  | 62  | hypothetical protein Y54G2A.29                                             |
| Locus_27866_Transcript_1/1_Conf_1.000 | 213 | 3  | 1.16E-10 | XP_002644341.1 | 64 | 69.707  | 71  | 46  | Hypothetical protein CBG14163                                              |
| Locus_27867_Transcript_1/1_Conf_1.000 | 177 | 0  |          |                |    |         |     |     |                                                                            |
| Locus_27868_Transcript_1/1_Conf_1.000 | 234 | 9  | 3.52E-15 | EFO27462.1     | 77 | 84.7297 | 71  | 55  | hypothetical protein LOAG_01021                                            |
| Locus_27869_Transcript_1/1_Conf_1.000 | 329 | 0  |          |                |    |         |     |     |                                                                            |
| Locus_2787_Transcript_1/1_Conf_1.000  | 180 | 20 | 1.36E-22 | ACY40018.1     | 93 | 109.383 | 59  | 55  | C. elegans FLN-1 protein, isoform g                                        |
| Locus_27870_Transcript_1/1_Conf_1.000 | 263 | 20 | 3.90E-30 | NP_495674.2    | 87 | 134.42  | 87  | 76  | P-GlycoProtein related family member (pgp-11)                              |
| Locus_27871_Transcript_1/1_Conf_1.000 | 220 | 20 | 1.19E-10 | XP_002629878.1 | 69 | 69.707  | 72  | 50  | Hypothetical protein CBG21915                                              |

|                                       |     |    |          |                |     |         |    |    |                                                                       |
|---------------------------------------|-----|----|----------|----------------|-----|---------|----|----|-----------------------------------------------------------------------|
| Locus_27872_Transcript_1/1_Conf_1.000 | 254 | 20 | 1.97E-05 | EFN75741.1     | 62  | 52.373  | 58 | 36 | Serine protease easter                                                |
| Locus_27873_Transcript_1/1_Conf_1.000 | 142 | 20 | 2.94E-06 | NP_503278.2    | 68  | 55.0694 | 45 | 31 | UDP-GlucuronosylTransferase family member (ugt-42)                    |
| Locus_27874_Transcript_1/1_Conf_1.000 | 239 | 2  | 3.38E-34 | XP_002630454.1 | 93  | 147.902 | 79 | 74 | Hypothetical protein CBG11187                                         |
| Locus_27875_Transcript_1/1_Conf_1.000 | 176 | 3  | 6.58E-06 | XP_002631424.1 | 74  | 53.9138 | 47 | 35 | Hypothetical protein CBG03280                                         |
| Locus_27876_Transcript_1/1_Conf_1.000 | 142 | 0  |          |                |     |         |    |    |                                                                       |
| Locus_27877_Transcript_1/1_Conf_1.000 | 133 | 0  |          |                |     |         |    |    |                                                                       |
| Locus_27878_Transcript_1/1_Conf_1.000 | 128 | 19 | 9.25E-16 | XP_002807855.1 | 100 | 86.6557 | 42 | 42 | PREDICTED: LOW QUALITY PROTEIN: uncharacterized protein C19orf43-like |
| Locus_27879_Transcript_1/1_Conf_1.000 | 249 | 0  |          |                |     |         |    |    |                                                                       |
| Locus_2788_Transcript_1/1_Conf_1.000  | 878 | 0  |          |                |     |         |    |    |                                                                       |
| Locus_27880_Transcript_1/1_Conf_1.000 | 138 | 0  |          |                |     |         |    |    |                                                                       |
| Locus_27881_Transcript_1/1_Conf_1.000 | 139 | 0  |          |                |     |         |    |    |                                                                       |
| Locus_27882_Transcript_1/1_Conf_1.000 | 152 | 0  |          |                |     |         |    |    |                                                                       |
| Locus_27883_Transcript_1/1_Conf_1.000 | 328 | 0  |          |                |     |         |    |    |                                                                       |
| Locus_27884_Transcript_1/1_Conf_1.000 | 272 | 20 | 1.79E-27 | XP_002637669.1 | 82  | 125.561 | 90 | 74 | Hypothetical protein CBG19425                                         |
| Locus_27885_Transcript_1/1_Conf_1.000 | 316 | 20 | 1.76E-46 | XP_002746160.1 | 100 | 188.734 | 90 | 90 | PREDICTED: H/ACA ribonucleoprotein complex subunit 2-like             |
| Locus_27886_Transcript_1/1_Conf_1.000 | 145 | 0  |          |                |     |         |    |    |                                                                       |
| Locus_27887_Transcript_1/1_Conf_1.000 | 230 | 0  |          |                |     |         |    |    |                                                                       |

|                                       |      |    |          |                |     |         |     |     |                                                                                     |
|---------------------------------------|------|----|----------|----------------|-----|---------|-----|-----|-------------------------------------------------------------------------------------|
| Locus_27888_Transcript_1/1_Conf_1.000 | 270  | 20 | 1.34E-06 | XP_002597580.1 | 47  | 56.225  | 88  | 42  | hypothetical protein BRAFLDRAFT_82314                                               |
| Locus_27889_Transcript_1/1_Conf_1.000 | 226  | 0  |          |                |     |         |     |     |                                                                                     |
| Locus_2789_Transcript_1/1_Conf_1.000  | 680  | 5  | 2.11E-31 | NP_001021610.1 | 56  | 139.813 | 194 | 110 | hypothetical protein T05F1.6                                                        |
| Locus_27890_Transcript_1/1_Conf_1.000 | 144  | 0  |          |                |     |         |     |     |                                                                                     |
| Locus_27891_Transcript_1/1_Conf_1.000 | 178  | 0  |          |                |     |         |     |     |                                                                                     |
| Locus_27892_Transcript_1/1_Conf_1.000 | 173  | 0  |          |                |     |         |     |     |                                                                                     |
| Locus_27893_Transcript_1/1_Conf_1.000 | 159  | 20 | 4.17E-24 | XP_002747286.1 | 100 | 114.39  | 53  | 53  | PREDICTED: endoplasmic reticulum-Golgi intermediate compartment protein 3 isoform 2 |
| Locus_27894_Transcript_1/1_Conf_1.000 | 210  | 0  |          |                |     |         |     |     |                                                                                     |
| Locus_27895_Transcript_1/1_Conf_1.000 | 164  | 0  |          |                |     |         |     |     |                                                                                     |
| Locus_27896_Transcript_1/1_Conf_1.000 | 226  | 0  |          |                |     |         |     |     |                                                                                     |
| Locus_27897_Transcript_1/1_Conf_1.000 | 126  | 0  |          |                |     |         |     |     |                                                                                     |
| Locus_27898_Transcript_1/1_Conf_1.000 | 176  | 2  | 1.79E-11 | NP_510441.1    | 67  | 72.4034 | 53  | 36  | hypothetical protein F40E10.5                                                       |
| Locus_27899_Transcript_1/1_Conf_1.000 | 171  | 0  |          |                |     |         |     |     |                                                                                     |
| Locus_279_Transcript_1/1_Conf_1.000   | 780  | 20 | 3.66E-39 | NP_498519.1    | 55  | 166.007 | 221 | 123 | hypothetical protein F31E3.4                                                        |
| Locus_2790_Transcript_1/1_Conf_1.000  | 1104 | 20 | 1.12E-54 | XP_002639433.1 | 57  | 218.394 | 331 | 189 | C. briggsae CBR-PQN-19 protein                                                      |

|                                       |      |    |          |                |     |         |     |     |                                                                        |
|---------------------------------------|------|----|----------|----------------|-----|---------|-----|-----|------------------------------------------------------------------------|
| Locus_27900_Transcript_1/1_Conf_1.000 | 227  | 1  | 8.23E-04 | NP_497908.1    | 57  | 46.9802 | 68  | 39  | hypothetical protein F56F3.4                                           |
| Locus_27901_Transcript_1/1_Conf_1.000 | 290  | 0  |          |                |     |         |     |     |                                                                        |
| Locus_27902_Transcript_1/1_Conf_1.000 | 133  | 0  |          |                |     |         |     |     |                                                                        |
| Locus_27903_Transcript_1/1_Conf_1.000 | 129  | 0  |          |                |     |         |     |     |                                                                        |
| Locus_27904_Transcript_1/1_Conf_1.000 | 176  | 20 | 5.56E-13 | XP_002643114.1 | 78  | 77.411  | 56  | 44  | C. briggsae CBR-OSM-12 protein                                         |
| Locus_27905_Transcript_1/1_Conf_1.000 | 148  | 0  |          |                |     |         |     |     |                                                                        |
| Locus_27906_Transcript_1/1_Conf_1.000 | 155  | 0  |          |                |     |         |     |     |                                                                        |
| Locus_27907_Transcript_1/1_Conf_1.000 | 204  | 20 | 6.83E-19 | ZP_04861996.1  | 83  | 97.0561 | 67  | 56  | pyrroline-5-carboxylate reductase                                      |
| Locus_27908_Transcript_1/1_Conf_1.000 | 179  | 0  |          |                |     |         |     |     |                                                                        |
| Locus_27909_Transcript_1/1_Conf_1.000 | 145  | 0  |          |                |     |         |     |     |                                                                        |
| Locus_2791_Transcript_1/1_Conf_1.000  | 763  | 20 | 1.20E-23 | NP_498874.2    | 98  | 114.39  | 54  | 53  | hypothetical protein F42H10.3                                          |
| Locus_27910_Transcript_1/1_Conf_1.000 | 130  | 20 | 1.09E-16 | CBK19358.1     | 100 | 89.7373 | 43  | 43  | C. elegans protein 4R79.2b, partially confirmed by transcript evidence |
| Locus_27911_Transcript_1/1_Conf_1.000 | 153  | 13 | 1.27E-12 | CBA11992.1     | 83  | 76.2554 | 49  | 41  | endonuclease-reverse transcriptase HmRTE-e01                           |
| Locus_27912_Transcript_1/1_Conf_1.000 | 285  | 20 | 6.25E-44 | NP_001129826.1 | 93  | 180.259 | 94  | 88  | hypothetical protein T13H5.1                                           |
| Locus_27913_Transcript_1/1_Conf_1.000 | 162  | 0  |          |                |     |         |     |     |                                                                        |
| Locus_27914_Transcript_1/1_Conf_1.000 | 140  | 0  |          |                |     |         |     |     |                                                                        |
| Locus_27915_Transcript_1/1_Conf_1.000 | 145  | 16 | 1.08E-11 | XP_001894688.1 | 81  | 73.1738 | 43  | 35  | Protein-tyrosine phosphatase containing protein                        |
| Locus_27916_Transcript_1/1_Conf_1.000 | 134  | 0  |          |                |     |         |     |     |                                                                        |
| Locus_27917_Transcript_1/1_Conf_1.000 | 128  | 0  |          |                |     |         |     |     |                                                                        |
| Locus_27918_Transcript_1/1_Conf_1.000 | 198  | 2  | 6.02E-15 | NP_001023516.1 | 77  | 83.9593 | 61  | 47  | Temporarily Assigned Gene name family member (tag-273)                 |
| Locus_27919_Transcript_1/1_Conf_1.000 | 259  | 0  |          |                |     |         |     |     |                                                                        |
| Locus_2792_Transcript_1/1_Conf_1.000  | 2274 | 20 | 0        | XP_002642200.1 | 69  | 691.804 | 692 | 484 | C. briggsae CBR-ZYG-8 protein                                          |
| Locus_27920_Transcript_1/1_Conf_1.000 | 182  | 4  | 3.06E-06 | NP_001021463.1 | 59  | 55.0694 | 66  | 39  | SUPpressor of activated let-60 Ras family member (sur-2)               |
| Locus_27921_Transcript_1/1_Conf_1.000 | 132  | 3  | 9.52E-13 | XP_002640727.1 | 86  | 76.6406 | 44  | 38  | C. briggsae CBR-EXOC-8 protein                                         |
| Locus_27922_Transcript_1/1_Conf_1.000 | 339  | 0  |          |                |     |         |     |     |                                                                        |

|                                       |     |    |           |                |     |         |     |     |                                                              |
|---------------------------------------|-----|----|-----------|----------------|-----|---------|-----|-----|--------------------------------------------------------------|
| Locus_27923_Transcript_1/1_Conf_1.000 | 143 | 0  |           |                |     |         |     |     |                                                              |
| Locus_27924_Transcript_1/1_Conf_1.000 | 131 | 0  |           |                |     |         |     |     |                                                              |
| Locus_27925_Transcript_1/1_Conf_1.000 | 128 | 0  |           |                |     |         |     |     |                                                              |
| Locus_27926_Transcript_1/1_Conf_1.000 | 135 | 0  |           |                |     |         |     |     |                                                              |
| Locus_27927_Transcript_1/1_Conf_1.000 | 221 | 0  |           |                |     |         |     |     |                                                              |
| Locus_27928_Transcript_1/1_Conf_1.000 | 436 | 20 | 1.60E-36  | NP_501999.2    | 75  | 155.606 | 124 | 94  | hypothetical protein T25B9.10                                |
| Locus_27929_Transcript_1/1_Conf_1.000 | 215 | 20 | 5.01E-14  | XP_001377095.1 | 67  | 80.8777 | 73  | 49  | PREDICTED: similar to NGEF long                              |
| Locus_2793_Transcript_1/1_Conf_1.000  | 825 | 4  | 8.22E-16  | ACO15786.1     | 67  | 88.5817 | 119 | 80  | Hypothetical protein W10D9.6                                 |
| Locus_27930_Transcript_1/1_Conf_1.000 | 315 | 4  | 5.71E-05  | NP_496947.2    | 85  | 50.8322 | 35  | 30  | GUstatory Receptor family member (gur-4)                     |
| Locus_27931_Transcript_1/1_Conf_1.000 | 135 | 2  | 5.96E-07  | NP_001022528.1 | 84  | 57.3806 | 39  | 33  | hypothetical protein ZK669.7                                 |
| Locus_27932_Transcript_1/1_Conf_1.000 | 133 | 0  |           |                |     |         |     |     |                                                              |
| Locus_27933_Transcript_1/1_Conf_1.000 | 170 | 0  |           |                |     |         |     |     |                                                              |
| Locus_27934_Transcript_1/1_Conf_1.000 | 149 | 20 | 1.77E-22  | 3FBY           | 100 | 108.997 | 49  | 49  | The Signature Domain Of Cartilage Oligomeric Matrix Protein. |
| Locus_27935_Transcript_1/1_Conf_1.000 | 163 | 0  |           |                |     |         |     |     |                                                              |
| Locus_27936_Transcript_1/1_Conf_1.000 | 260 | 0  |           |                |     |         |     |     |                                                              |
| Locus_27937_Transcript_1/1_Conf_1.000 | 158 | 1  | 8.20E-04  | ADI61822.1     | 69  | 46.9802 | 42  | 29  | endonuclease-reverse transcriptase                           |
| Locus_27938_Transcript_1/1_Conf_1.000 | 137 | 0  |           |                |     |         |     |     |                                                              |
| Locus_27939_Transcript_1/1_Conf_1.000 | 279 | 0  |           |                |     |         |     |     |                                                              |
| Locus_2794_Transcript_1/1_Conf_1.000  | 781 | 20 | 1.78E-110 | NP_491004.1    | 87  | 402.905 | 260 | 228 | Fructose-1,6-BiPhosphatase family member (fbp-1)             |
| Locus_27940_Transcript_1/1_Conf_1.000 | 140 | 0  |           |                |     |         |     |     |                                                              |
| Locus_27941_Transcript_1/1_Conf_1.000 | 172 | 5  | 4.00E-11  | NP_509643.1    | 73  | 71.2478 | 57  | 42  | hypothetical protein F36G3.2                                 |
| Locus_27942_Transcript_1/1_Conf_1.000 | 132 | 0  |           |                |     |         |     |     |                                                              |
| Locus_27943_Transcript_1/1_Conf_1.000 | 139 | 0  |           |                |     |         |     |     |                                                              |
| Locus_27944_Transcript_1/1_Conf_1.000 | 144 | 0  |           |                |     |         |     |     |                                                              |
| Locus_27945_Transcript_1/1_Conf_1.000 | 198 | 0  |           |                |     |         |     |     |                                                              |
| Locus_27946_Transcript_1/1_Conf_1.000 | 132 | 0  |           |                |     |         |     |     |                                                              |
| Locus_27947_Transcript_1/1_Conf_1.000 | 184 | 0  |           |                |     |         |     |     |                                                              |
| Locus_27948_Transcript_1/1_Conf_1.000 | 141 | 0  |           |                |     |         |     |     |                                                              |
| Locus_27949_Transcript_1/1_Conf_1.000 | 260 | 0  |           |                |     |         |     |     |                                                              |

|                                       |     |    |          |                |    |         |     |     |                                                                                   |
|---------------------------------------|-----|----|----------|----------------|----|---------|-----|-----|-----------------------------------------------------------------------------------|
| Locus_2795_Transcript_1/1_Conf_1.000  | 804 | 20 | 7.53E-67 | XP_002639210.1 | 84 | 258.07  | 172 | 146 | C. briggsae CBR-SKR-1 protein                                                     |
| Locus_27950_Transcript_1/1_Conf_1.000 | 155 | 20 | 5.16E-06 | XP_002123114.1 | 79 | 54.299  | 44  | 35  | PREDICTED: similar to solute carrier family 15 (H+/peptide transporter), member 2 |
| Locus_27951_Transcript_1/1_Conf_1.000 | 149 | 0  |          |                |    |         |     |     |                                                                                   |
| Locus_27952_Transcript_1/1_Conf_1.000 | 155 | 15 | 6.08E-15 | NP_500082.1    | 82 | 83.9593 | 51  | 42  | CaLPain family member (clp-7)                                                     |
| Locus_27953_Transcript_1/1_Conf_1.000 | 192 | 0  |          |                |    |         |     |     |                                                                                   |
| Locus_27954_Transcript_1/1_Conf_1.000 | 289 | 0  |          |                |    |         |     |     |                                                                                   |
| Locus_27955_Transcript_1/1_Conf_1.000 | 474 | 20 | 1.56E-31 | XP_002599666.1 | 66 | 139.043 | 159 | 105 | hypothetical protein BRAFLDRAFT_70346                                             |
| Locus_27956_Transcript_1/1_Conf_1.000 | 186 | 0  |          |                |    |         |     |     |                                                                                   |
| Locus_27957_Transcript_1/1_Conf_1.000 | 204 | 0  |          |                |    |         |     |     |                                                                                   |
| Locus_27958_Transcript_1/1_Conf_1.000 | 177 | 0  |          |                |    |         |     |     |                                                                                   |
| Locus_27959_Transcript_1/1_Conf_1.000 | 147 | 19 | 3.97E-06 | NP_510616.2    | 76 | 54.6842 | 46  | 35  | Multidrug Resistance Protein family member (mrp-3)                                |
| Locus_2796_Transcript_1/2_Conf_1.000  | 920 | 20 | 4.26E-59 | XP_002634340.1 | 80 | 232.646 | 161 | 129 | Hypothetical protein CBG17684                                                     |



|                                       |     |    |          |                |    |         |     |     |                               |
|---------------------------------------|-----|----|----------|----------------|----|---------|-----|-----|-------------------------------|
| Locus_2796_Transcript_2/2_Conf_1.000  | 920 | 20 | 4.26E-59 | XP_002634340.1 | 80 | 232.646 | 161 | 129 | Hypothetical protein CBG17684 |
| Locus_27960_Transcript_1/1_Conf_1.000 | 134 | 0  |          |                |    |         |     |     |                               |
| Locus_27961_Transcript_1/1_Conf_1.000 | 231 | 0  |          |                |    |         |     |     |                               |
| Locus_27962_Transcript_1/1_Conf_1.000 | 164 | 0  |          |                |    |         |     |     |                               |
| Locus_27963_Transcript_1/1_Conf_1.000 | 150 | 20 | 1.23E-15 | 1TW9           | 84 | 86.2705 | 50  | 42  | Glutathione Transferase-2     |
| Locus_27964_Transcript_1/1_Conf_1.000 | 128 | 0  |          |                |    |         |     |     |                               |
| Locus_27965_Transcript_1/1_Conf_1.000 | 144 | 0  |          |                |    |         |     |     |                               |
| Locus_27966_Transcript_1/1_Conf_1.000 | 307 | 0  |          |                |    |         |     |     |                               |
| Locus_27967_Transcript_1/1_Conf_1.000 | 159 | 0  |          |                |    |         |     |     |                               |
| Locus_27968_Transcript_1/1_Conf_1.000 | 184 | 0  |          |                |    |         |     |     |                               |
| Locus_27969_Transcript_1/1_Conf_1.000 | 265 | 0  |          |                |    |         |     |     |                               |
| Locus_2797_Transcript_1/1_Conf_1.000  | 879 | 20 | 3.65E-89 | NP_491475.2    | 78 | 332.413 | 252 | 199 | hypothetical protein F21F3.1  |

|                                       |     |    |          |                |     |         |    |    |                                                                                      |
|---------------------------------------|-----|----|----------|----------------|-----|---------|----|----|--------------------------------------------------------------------------------------|
| Locus_27970_Transcript_1/1_Conf_1.000 | 137 | 20 | 1.79E-19 | XP_002810390.1 | 100 | 98.9821 | 43 | 43 | PREDICTED: LOW QUALITY PROTEIN:<br>neurogenic locus notch homolog protein 2-<br>like |
| Locus_27971_Transcript_1/1_Conf_1.000 | 161 | 0  |          |                |     |         |    |    |                                                                                      |
| Locus_27972_Transcript_1/1_Conf_1.000 | 166 | 20 | 9.23E-24 | BAG63567.1     | 100 | 113.235 | 54 | 54 | unnamed protein product                                                              |
| Locus_27973_Transcript_1/1_Conf_1.000 | 170 | 0  |          |                |     |         |    |    |                                                                                      |
| Locus_27974_Transcript_1/1_Conf_1.000 | 245 | 0  |          |                |     |         |    |    |                                                                                      |

|                                       |     |    |          |                |    |         |    |    |                                              |
|---------------------------------------|-----|----|----------|----------------|----|---------|----|----|----------------------------------------------|
| Locus_27975_Transcript_1/1_Conf_1.000 | 149 | 20 | 6.33E-12 | NP_498081.2    | 81 | 73.9442 | 49 | 40 | Aldehyde deHydrogenase family member (alh-1) |
| Locus_27976_Transcript_1/1_Conf_1.000 | 138 | 0  |          |                |    |         |    |    |                                              |
| Locus_27977_Transcript_1/1_Conf_1.000 | 158 | 0  |          |                |    |         |    |    |                                              |
| Locus_27978_Transcript_1/1_Conf_1.000 | 220 | 20 | 1.91E-08 | XP_002637730.1 | 62 | 62.3882 | 72 | 45 | Hypothetical protein CBG11596                |
| Locus_27979_Transcript_1/1_Conf_1.000 | 171 | 0  |          |                |    |         |    |    |                                              |

|                                       |      |    |           |                |     |         |     |     |                                                          |
|---------------------------------------|------|----|-----------|----------------|-----|---------|-----|-----|----------------------------------------------------------|
| Locus_2798_Transcript_1/2_Conf_1.000  | 1060 | 5  | 4.71E-31  | NP_492588.1    | 74  | 139.813 | 143 | 106 | GEI-4(Four) Interacting protein family member (gfi-2)    |
| Locus_2798_Transcript_2/2_Conf_1.000  | 1045 | 5  | 4.60E-31  | NP_492588.1    | 74  | 139.813 | 143 | 106 | GEI-4(Four) Interacting protein family member (gfi-2)    |
| Locus_27980_Transcript_1/1_Conf_1.000 | 221  | 0  |           |                |     |         |     |     |                                                          |
| Locus_27981_Transcript_1/1_Conf_1.000 | 355  | 0  |           |                |     |         |     |     |                                                          |
| Locus_27982_Transcript_1/1_Conf_1.000 | 144  | 0  |           |                |     |         |     |     |                                                          |
| Locus_27983_Transcript_1/1_Conf_1.000 | 147  | 0  |           |                |     |         |     |     |                                                          |
| Locus_27984_Transcript_1/1_Conf_1.000 | 129  | 0  |           |                |     |         |     |     |                                                          |
| Locus_27985_Transcript_1/1_Conf_1.000 | 160  | 20 | 2.90E-17  | XP_002633729.1 | 100 | 91.6633 | 52  | 52  | C. briggsae CBR-GLT-3 protein                            |
| Locus_27986_Transcript_1/1_Conf_1.000 | 393  | 20 | 2.09E-23  | XP_002640985.1 | 64  | 112.079 | 127 | 82  | C. briggsae CBR-CDH-12 protein                           |
| Locus_27987_Transcript_1/1_Conf_1.000 | 754  | 20 | 4.79E-118 | XP_002643750.1 | 92  | 427.943 | 251 | 233 | C. briggsae CBR-GRK-1 protein                            |
| Locus_27988_Transcript_1/1_Conf_1.000 | 161  | 2  | 9.34E-08  | NP_506285.1    | 67  | 60.077  | 49  | 33  | hypothetical protein F57B1.5                             |
| Locus_27989_Transcript_1/1_Conf_1.000 | 165  | 0  |           |                |     |         |     |     |                                                          |
| Locus_2799_Transcript_1/1_Conf_1.000  | 610  | 20 | 9.51E-88  | XP_002643349.1 | 88  | 326.635 | 203 | 180 | Hypothetical protein CBG15946                            |
| Locus_27990_Transcript_1/1_Conf_1.000 | 174  | 0  |           |                |     |         |     |     |                                                          |
| Locus_27991_Transcript_1/1_Conf_1.000 | 170  | 0  |           |                |     |         |     |     |                                                          |
| Locus_27992_Transcript_1/1_Conf_1.000 | 217  | 0  |           |                |     |         |     |     |                                                          |
| Locus_27993_Transcript_1/1_Conf_1.000 | 285  | 0  |           |                |     |         |     |     |                                                          |
| Locus_27994_Transcript_1/1_Conf_1.000 | 195  | 4  | 3.01E-06  | NP_001021463.1 | 59  | 55.0694 | 66  | 39  | SUppressor of activated let-60 Ras family member (sur-2) |

|                                       |      |    |           |                |    |         |     |     |                                                                                            |
|---------------------------------------|------|----|-----------|----------------|----|---------|-----|-----|--------------------------------------------------------------------------------------------|
| Locus_27995_Transcript_1/1_Conf_1.000 | 406  | 20 | 3.87E-22  | EFO20018.1     | 83 | 107.842 | 73  | 61  | negative elongation factor C/D                                                             |
| Locus_27996_Transcript_1/1_Conf_1.000 | 144  | 2  | 7.51E-05  | XP_002638650.1 | 72 | 50.447  | 43  | 31  | C. briggsae CBR-TGT-2 protein                                                              |
| Locus_27997_Transcript_1/1_Conf_1.000 | 158  | 20 | 4.49E-10  | NP_496490.2    | 76 | 67.781  | 51  | 39  | NEPrilysin metallopeptidase family member (nep-1)                                          |
| Locus_27998_Transcript_1/1_Conf_1.000 | 142  | 0  |           |                |    |         |     |     |                                                                                            |
| Locus_27999_Transcript_1/1_Conf_1.000 | 155  | 0  |           |                |    |         |     |     |                                                                                            |
| Locus_28_Transcript_1/5_Conf_0.125    | 624  | 20 | 1.57E-24  | XP_002639761.1 | 95 | 116.701 | 66  | 63  | C. briggsae CBR-PAB-1 protein                                                              |
| Locus_28_Transcript_2/5_Conf_0.250    | 1096 | 20 | 3.68E-34  | XP_002639761.1 | 92 | 150.214 | 90  | 83  | C. briggsae CBR-PAB-1 protein                                                              |
| Locus_28_Transcript_3/5_Conf_0.312    | 2043 | 20 | 2.03E-128 | NP_001021710.1 | 72 | 464.537 | 437 | 317 | PolyA Binding protein family member (pab-1)                                                |
| Locus_28_Transcript_4/5_Conf_0.375    | 2049 | 20 | 1.67E-130 | NP_001021710.1 | 72 | 471.47  | 437 | 318 | PolyA Binding protein family member (pab-1)                                                |
| Locus_28_Transcript_5/5_Conf_0.500    | 1576 | 20 | 0         | DAA05868.1     | 97 | 903.664 | 464 | 452 | TPA_inf: eukaryotic translation elongation factor 1A                                       |
| Locus_280_Transcript_1/4_Conf_0.700   | 2020 | 20 | 9.79E-59  | NP_492467.1    | 61 | 233.032 | 316 | 195 | mammalian ASPM (Abnormal SPindles and primary Microcephaly) homolog family member (aspm-1) |
| Locus_280_Transcript_2/4_Conf_0.700   | 2149 | 20 | 1.06E-58  | NP_492467.1    | 61 | 233.032 | 316 | 195 | mammalian ASPM (Abnormal SPindles and primary Microcephaly) homolog family member (aspm-1) |
| Locus_280_Transcript_3/4_Conf_0.700   | 2125 | 20 | 1.04E-58  | NP_492467.1    | 61 | 233.032 | 316 | 195 | mammalian ASPM (Abnormal SPindles and primary Microcephaly) homolog family member (aspm-1) |
| Locus_280_Transcript_4/4_Conf_0.700   | 2125 | 20 | 1.04E-58  | NP_492467.1    | 61 | 233.032 | 316 | 195 | mammalian ASPM (Abnormal SPindles and primary Microcephaly) homolog family member (aspm-1) |
| Locus_2800_Transcript_1/1_Conf_1.000  | 143  | 0  |           |                |    |         |     |     |                                                                                            |
| Locus_28000_Transcript_1/1_Conf_1.000 | 265  | 0  |           |                |    |         |     |     |                                                                                            |
| Locus_28001_Transcript_1/1_Conf_1.000 | 149  | 0  |           |                |    |         |     |     |                                                                                            |
| Locus_28002_Transcript_1/1_Conf_1.000 | 204  | 0  |           |                |    |         |     |     |                                                                                            |
| Locus_28003_Transcript_1/1_Conf_1.000 | 181  | 0  |           |                |    |         |     |     |                                                                                            |
| Locus_28004_Transcript_1/1_Conf_1.000 | 141  | 3  | 9.45E-05  | ABF57453.1     | 71 | 50.0618 | 38  | 27  | ZIM-3                                                                                      |
| Locus_28005_Transcript_1/1_Conf_1.000 | 135  | 2  | 2.50E-05  | EFO26456.1     | 69 | 51.9878 | 46  | 32  | hypothetical protein LOAG_02027                                                            |

|                                       |     |    |          |                |    |         |     |     |                                                           |
|---------------------------------------|-----|----|----------|----------------|----|---------|-----|-----|-----------------------------------------------------------|
| Locus_28006_Transcript_1/1_Conf_1.000 | 140 | 20 | 3.47E-15 | CBJ33591.1     | 88 | 84.7297 | 45  | 40  | conserved unknown protein                                 |
| Locus_28007_Transcript_1/1_Conf_1.000 | 159 | 0  |          |                |    |         |     |     |                                                           |
| Locus_28008_Transcript_1/1_Conf_1.000 | 128 | 0  |          |                |    |         |     |     |                                                           |
| Locus_28009_Transcript_1/1_Conf_1.000 | 233 | 4  | 1.03E-06 | XP_002630482.1 | 66 | 56.6102 | 80  | 53  | Hypothetical protein CBG11218                             |
| Locus_2801_Transcript_1/1_Conf_1.000  | 193 | 0  |          |                |    |         |     |     |                                                           |
| Locus_28010_Transcript_1/1_Conf_1.000 | 158 | 2  | 1.14E-05 | XP_002635599.1 | 78 | 53.1434 | 47  | 37  | Hypothetical protein CBG20588                             |
| Locus_28011_Transcript_1/1_Conf_1.000 | 179 | 0  |          |                |    |         |     |     |                                                           |
| Locus_28012_Transcript_1/1_Conf_1.000 | 182 | 0  |          |                |    |         |     |     |                                                           |
| Locus_28013_Transcript_1/1_Conf_1.000 | 260 | 0  |          |                |    |         |     |     |                                                           |
| Locus_28014_Transcript_1/1_Conf_1.000 | 143 | 0  |          |                |    |         |     |     |                                                           |
| Locus_28015_Transcript_1/1_Conf_1.000 | 160 | 1  | 4.18E-16 | XP_002804850.1 | 93 | 87.8113 | 45  | 42  | PREDICTED: hypothetical protein LOC100427666              |
| Locus_28016_Transcript_1/1_Conf_1.000 | 322 | 20 | 4.73E-52 | XP_002644419.1 | 94 | 207.223 | 107 | 101 | Hypothetical protein CBG14273                             |
| Locus_28017_Transcript_1/1_Conf_1.000 | 144 | 0  |          |                |    |         |     |     |                                                           |
| Locus_28018_Transcript_1/1_Conf_1.000 | 177 | 0  |          |                |    |         |     |     |                                                           |
| Locus_28019_Transcript_1/1_Conf_1.000 | 261 | 20 | 3.40E-42 | EFO21455.1     | 97 | 174.481 | 86  | 84  | voltage-gated calcium channel                             |
| Locus_2802_Transcript_2/2_Conf_0.964  | 106 | 0  |          |                |    |         |     |     |                                                           |
| Locus_28020_Transcript_1/1_Conf_1.000 | 142 | 0  |          |                |    |         |     |     |                                                           |
| Locus_28021_Transcript_1/1_Conf_1.000 | 181 | 0  |          |                |    |         |     |     |                                                           |
| Locus_28022_Transcript_1/1_Conf_1.000 | 135 | 1  | 6.59E-06 | NP_492131.1    | 77 | 53.9138 | 36  | 28  | RNA-dependent RNA polymerase Family family member (rrf-1) |
| Locus_28023_Transcript_1/1_Conf_1.000 | 135 | 20 | 1.12E-13 | XP_002630557.1 | 93 | 79.7221 | 44  | 41  | Hypothetical protein CBG13002                             |
| Locus_28024_Transcript_1/1_Conf_1.000 | 259 | 20 | 7.91E-23 | NP_510810.3    | 80 | 110.153 | 86  | 69  | PaTched Related family member (ptr-5)                     |
| Locus_28025_Transcript_1/1_Conf_1.000 | 388 | 20 | 9.77E-26 | XP_002646790.1 | 65 | 119.783 | 127 | 83  | Hypothetical protein CBG18441                             |
| Locus_28026_Transcript_1/1_Conf_1.000 | 245 | 0  |          |                |    |         |     |     |                                                           |

|                                       |      |    |          |                |     |         |     |     |                                                                         |  |
|---------------------------------------|------|----|----------|----------------|-----|---------|-----|-----|-------------------------------------------------------------------------|--|
| Locus_28027_Transcript_1/1_Conf_1.000 | 152  | 0  |          |                |     |         |     |     |                                                                         |  |
| Locus_28028_Transcript_1/1_Conf_1.000 | 261  | 20 | 1.03E-22 | CAD11605.1     | 70  | 109.768 | 85  | 60  | metalloprotease                                                         |  |
| Locus_28029_Transcript_1/1_Conf_1.000 | 139  | 0  |          |                |     |         |     |     |                                                                         |  |
| Locus_2803_Transcript_1/1_Conf_1.000  | 1171 | 20 | 2.50E-92 | NP_508654.1    | 67  | 343.584 | 364 | 246 | hypothetical protein F47B7.2                                            |  |
| Locus_28030_Transcript_1/1_Conf_1.000 | 138  | 20 | 4.54E-15 | NP_001165131.1 | 100 | 84.3445 | 45  | 45  | NADH-cytochrome b5 reductase 3 isoform 3                                |  |
| Locus_28031_Transcript_1/1_Conf_1.000 | 183  | 0  |          |                |     |         |     |     |                                                                         |  |
| Locus_28032_Transcript_1/1_Conf_1.000 | 214  | 2  | 4.70E-04 | XP_002639738.1 | 82  | 47.7506 | 34  | 28  | Hypothetical protein CBG12466                                           |  |
| Locus_28033_Transcript_1/1_Conf_1.000 | 152  | 0  |          |                |     |         |     |     |                                                                         |  |
| Locus_28034_Transcript_1/1_Conf_1.000 | 134  | 20 | 1.33E-06 | CBL43415.1     | 72  | 56.225  | 43  | 31  | C. elegans protein C32C4.2b, partially confirmed by transcript evidence |  |
| Locus_28035_Transcript_1/1_Conf_1.000 | 153  | 0  |          |                |     |         |     |     |                                                                         |  |
| Locus_28036_Transcript_1/1_Conf_1.000 | 137  | 0  |          |                |     |         |     |     |                                                                         |  |
| Locus_28037_Transcript_1/1_Conf_1.000 | 164  | 20 | 2.52E-21 | NP_494880.1    | 92  | 105.145 | 54  | 50  | COLLagen family member (col-73)                                         |  |
| Locus_28038_Transcript_1/1_Conf_1.000 | 222  | 3  | 1.96E-05 | XP_002634967.1 | 70  | 52.373  | 58  | 41  | Hypothetical protein CBG13503                                           |  |
| Locus_28039_Transcript_1/1_Conf_1.000 | 136  | 0  |          |                |     |         |     |     |                                                                         |  |
| Locus_2804_Transcript_1/1_Conf_1.000  | 647  | 20 | 8.73E-53 | XP_002634755.1 | 72  | 210.69  | 204 | 147 | Hypothetical protein CBG05349                                           |  |
| Locus_28040_Transcript_1/1_Conf_1.000 | 190  | 0  |          |                |     |         |     |     |                                                                         |  |
| Locus_28041_Transcript_1/1_Conf_1.000 | 224  | 0  |          |                |     |         |     |     |                                                                         |  |
| Locus_28042_Transcript_1/1_Conf_1.000 | 263  | 20 | 7.13E-24 | NP_001021097.1 | 77  | 113.62  | 86  | 67  | hypothetical protein F10G8.9                                            |  |
| Locus_28043_Transcript_1/1_Conf_1.000 | 169  | 2  | 7.83E-07 | NP_001022489.1 | 64  | 56.9954 | 56  | 36  | Homolog of Hedgehog AcylTransferase family member (hhat-1)              |  |
| Locus_28044_Transcript_1/1_Conf_1.000 | 170  | 0  |          |                |     |         |     |     |                                                                         |  |

|                                       |      |    |          |                |    |         |     |     |                                                        |
|---------------------------------------|------|----|----------|----------------|----|---------|-----|-----|--------------------------------------------------------|
| Locus_28045_Transcript_1/1_Conf_1.000 | 221  | 20 | 6.76E-14 | XP_001902718.1 | 68 | 80.4925 | 73  | 50  | leucyl aminopeptidase                                  |
| Locus_28046_Transcript_1/1_Conf_1.000 | 200  | 0  |          |                |    |         |     |     |                                                        |
| Locus_28047_Transcript_1/1_Conf_1.000 | 177  | 20 | 9.74E-26 | XP_002633391.1 | 98 | 119.783 | 58  | 57  | Hypothetical protein CBG06150                          |
| Locus_28048_Transcript_1/1_Conf_1.000 | 216  | 4  | 5.54E-05 | NP_508464.2    | 58 | 50.8322 | 72  | 42  | hypothetical protein F52H2.7                           |
| Locus_28049_Transcript_1/1_Conf_1.000 | 161  | 0  |          |                |    |         |     |     |                                                        |
| Locus_2805_Transcript_1/1_Conf_1.000  | 255  | 0  |          |                |    |         |     |     |                                                        |
| Locus_28050_Transcript_1/1_Conf_1.000 | 142  | 0  |          |                |    |         |     |     |                                                        |
| Locus_28051_Transcript_1/1_Conf_1.000 | 148  | 0  |          |                |    |         |     |     |                                                        |
| Locus_28052_Transcript_1/1_Conf_1.000 | 277  | 20 | 1.51E-26 | XP_002642928.1 | 71 | 122.479 | 92  | 66  | Hypothetical protein CBG15204                          |
| Locus_28053_Transcript_1/1_Conf_1.000 | 173  | 0  |          |                |    |         |     |     |                                                        |
| Locus_28054_Transcript_1/1_Conf_1.000 | 187  | 20 | 3.83E-17 | EFP02977.1     | 86 | 91.2781 | 61  | 53  | hypothetical protein CRE_28037                         |
| Locus_28055_Transcript_1/1_Conf_1.000 | 312  | 0  |          |                |    |         |     |     |                                                        |
| Locus_28056_Transcript_1/1_Conf_1.000 | 128  | 0  |          |                |    |         |     |     |                                                        |
| Locus_28057_Transcript_1/1_Conf_1.000 | 172  | 3  | 2.59E-18 | NP_505390.2    | 83 | 95.1301 | 56  | 47  | hypothetical protein F07C3.2                           |
| Locus_28058_Transcript_1/1_Conf_1.000 | 152  | 0  |          |                |    |         |     |     |                                                        |
| Locus_28059_Transcript_1/1_Conf_1.000 | 164  | 0  |          |                |    |         |     |     |                                                        |
| Locus_2806_Transcript_1/2_Conf_1.000  | 1320 | 20 | 0        | NP_493349.1    | 89 | 652.129 | 385 | 345 | Temporarily Assigned Gene name family member (tag-210) |
| Locus_2806_Transcript_2/2_Conf_1.000  | 1311 | 20 | 0        | NP_493349.1    | 89 | 652.129 | 385 | 345 | Temporarily Assigned Gene name family member (tag-210) |
| Locus_28060_Transcript_1/1_Conf_1.000 | 152  | 0  |          |                |    |         |     |     |                                                        |
| Locus_28061_Transcript_1/1_Conf_1.000 | 130  | 0  |          |                |    |         |     |     |                                                        |



|                                       |      |    |          |                |     |         |     |     |                                                                |
|---------------------------------------|------|----|----------|----------------|-----|---------|-----|-----|----------------------------------------------------------------|
| Locus_28062_Transcript_1/1_Conf_1.000 | 190  | 3  | 3.82E-09 | NP_497222.1    | 65  | 64.6994 | 60  | 39  | hypothetical protein T19C3.5                                   |
| Locus_28063_Transcript_1/1_Conf_1.000 | 144  | 0  |          |                |     |         |     |     |                                                                |
| Locus_28064_Transcript_1/1_Conf_1.000 | 171  | 0  |          |                |     |         |     |     |                                                                |
| Locus_28065_Transcript_1/1_Conf_1.000 | 184  | 0  |          |                |     |         |     |     |                                                                |
| Locus_28066_Transcript_1/1_Conf_1.000 | 145  | 0  |          |                |     |         |     |     |                                                                |
| Locus_28067_Transcript_1/1_Conf_1.000 | 172  | 0  |          |                |     |         |     |     |                                                                |
| Locus_28068_Transcript_1/1_Conf_1.000 | 209  | 0  |          |                |     |         |     |     |                                                                |
| Locus_28069_Transcript_1/1_Conf_1.000 | 129  | 20 | 3.51E-15 | XP_002800892.1 | 100 | 84.7297 | 42  | 42  | PREDICTED: transcription factor Dp-1-like                      |
| Locus_2807_Transcript_1/1_Conf_1.000  | 282  | 0  |          |                |     |         |     |     |                                                                |
| Locus_28070_Transcript_1/1_Conf_1.000 | 215  | 3  | 8.57E-06 | NP_492337.1    | 64  | 53.5286 | 48  | 31  | FERTilization defective (abnormal sperm) family member (fer-1) |
| Locus_28071_Transcript_1/1_Conf_1.000 | 252  | 14 | 1.01E-17 | NP_492132.1    | 72  | 93.2041 | 81  | 59  | Enhancer of Glp-One (glp-1) family member (ego-1)              |
| Locus_28072_Transcript_1/1_Conf_1.000 | 154  | 0  |          |                |     |         |     |     |                                                                |
| Locus_28073_Transcript_1/1_Conf_1.000 | 134  | 0  |          |                |     |         |     |     |                                                                |
| Locus_28074_Transcript_1/1_Conf_1.000 | 143  | 2  | 5.56E-05 | XP_002647069.1 | 71  | 50.8322 | 45  | 32  | C. briggsae CBR-TIM-1 protein                                  |
| Locus_28075_Transcript_1/1_Conf_1.000 | 218  | 0  |          |                |     |         |     |     |                                                                |
| Locus_28076_Transcript_1/1_Conf_1.000 | 161  | 0  |          |                |     |         |     |     |                                                                |
| Locus_28077_Transcript_1/1_Conf_1.000 | 176  | 0  |          |                |     |         |     |     |                                                                |
| Locus_28078_Transcript_1/1_Conf_1.000 | 280  | 20 | 1.08E-16 | EFP11552.1     | 67  | 89.7373 | 83  | 56  | CRE-TAG-151 protein                                            |
| Locus_28079_Transcript_1/1_Conf_1.000 | 217  | 2  | 5.35E-08 | EFO24359.1     | 63  | 60.8474 | 71  | 45  | hypothetical protein LOAG_04123                                |
| Locus_2808_Transcript_1/1_Conf_1.000  | 2039 | 20 | 0        | NP_001021772.1 | 68  | 852.432 | 662 | 454 | CELL Death abnormality family member (ced-1)                   |
| Locus_28080_Transcript_1/1_Conf_1.000 | 216  | 0  |          |                |     |         |     |     |                                                                |
| Locus_28081_Transcript_1/1_Conf_1.000 | 507  | 0  |          |                |     |         |     |     |                                                                |

|                                       |      |    |          |                |    |         |     |     |                                                          |
|---------------------------------------|------|----|----------|----------------|----|---------|-----|-----|----------------------------------------------------------|
| Locus_28082_Transcript_1/1_Conf_1.000 | 227  | 20 | 1.11E-08 | XP_002966539.1 | 67 | 63.1586 | 74  | 50  | hypothetical protein SELMODRAFT_407541                   |
| Locus_28083_Transcript_1/1_Conf_1.000 | 139  | 0  |          |                |    |         |     |     |                                                          |
| Locus_28084_Transcript_1/1_Conf_1.000 | 326  | 0  |          |                |    |         |     |     |                                                          |
| Locus_28085_Transcript_1/1_Conf_1.000 | 132  | 9  | 9.22E-08 | EFO15922.1     | 78 | 60.077  | 42  | 33  | hypothetical protein LOAG_12585                          |
| Locus_28086_Transcript_1/1_Conf_1.000 | 149  | 0  |          |                |    |         |     |     |                                                          |
| Locus_28087_Transcript_1/1_Conf_1.000 | 300  | 20 | 5.58E-29 | XP_001894414.1 | 81 | 130.568 | 100 | 81  | Sodium:neurotransmitter symporter family protein         |
| Locus_28088_Transcript_1/1_Conf_1.000 | 167  |    |          |                |    |         |     |     |                                                          |
| Locus_28089_Transcript_1/1_Conf_1.000 | 140  | 0  |          |                |    |         |     |     |                                                          |
| Locus_2809_Transcript_1/2_Conf_1.000  | 1107 | 20 | 9.84E-43 | XP_002641513.1 | 87 | 178.718 | 119 | 104 | Hypothetical protein CBG09808                            |
| Locus_2809_Transcript_2/2_Conf_1.000  | 899  | 20 | 9.84E-21 | XP_002641512.1 | 70 | 105.145 | 98  | 69  | Hypothetical protein CBG09807                            |
| Locus_28090_Transcript_1/1_Conf_1.000 | 191  | 0  |          |                |    |         |     |     |                                                          |
| Locus_28091_Transcript_1/1_Conf_1.000 | 173  | 0  |          |                |    |         |     |     |                                                          |
| Locus_28092_Transcript_1/1_Conf_1.000 | 247  | 0  |          |                |    |         |     |     |                                                          |
| Locus_28093_Transcript_1/1_Conf_1.000 | 152  | 20 | 4.66E-23 | XP_001892850.1 | 98 | 110.923 | 50  | 49  | Zinc finger, ZZ type family protein                      |
| Locus_28094_Transcript_1/1_Conf_1.000 | 219  | 0  |          |                |    |         |     |     |                                                          |
| Locus_28095_Transcript_1/1_Conf_1.000 | 388  | 20 | 2.11E-20 | XP_001193594.1 | 70 | 102.064 | 118 | 83  | PREDICTED: similar to endonuclease-reverse transcriptase |
| Locus_28096_Transcript_1/1_Conf_1.000 | 161  | 2  | 7.15E-08 | NP_496972.1    | 68 | 60.4622 | 50  | 34  | hypothetical protein Y54G11A.1                           |
| Locus_28097_Transcript_1/1_Conf_1.000 | 153  | 3  | 5.70E-13 | NP_503388.1    | 85 | 77.411  | 48  | 41  | PaTched Related family member (ptr-16)                   |
| Locus_28098_Transcript_1/1_Conf_1.000 | 133  | 0  |          |                |    |         |     |     |                                                          |
| Locus_28099_Transcript_1/1_Conf_1.000 | 188  | 0  |          |                |    |         |     |     |                                                          |

|                                       |      |    |          |                |     |         |     |     |                                 |
|---------------------------------------|------|----|----------|----------------|-----|---------|-----|-----|---------------------------------|
| Locus_281_Transcript_1/1_Conf_1.000   | 412  | 0  |          |                |     |         |     |     |                                 |
| Locus_2810_Transcript_1/1_Conf_1.000  | 412  | 0  |          |                |     |         |     |     |                                 |
| Locus_28100_Transcript_1/1_Conf_1.000 | 214  | 0  |          |                |     |         |     |     |                                 |
| Locus_28101_Transcript_1/1_Conf_1.000 | 131  | 0  |          |                |     |         |     |     |                                 |
| Locus_28102_Transcript_1/1_Conf_1.000 | 187  | 0  |          |                |     |         |     |     |                                 |
| Locus_28103_Transcript_1/1_Conf_1.000 | 135  | 0  |          |                |     |         |     |     |                                 |
| Locus_28104_Transcript_1/1_Conf_1.000 | 137  | 0  |          |                |     |         |     |     |                                 |
| Locus_28105_Transcript_1/1_Conf_1.000 | 158  | 20 | 3.01E-14 | XP_002641552.1 | 84  | 81.6481 | 52  | 44  | C. briggsae CBR-RBC-2 protein   |
| Locus_28106_Transcript_1/1_Conf_1.000 | 211  | 20 | 9.16E-32 | EFO86768.1     | 100 | 139.813 | 69  | 69  | hypothetical protein CRE_04506  |
| Locus_28107_Transcript_1/1_Conf_1.000 | 143  | 0  |          |                |     |         |     |     |                                 |
| Locus_28108_Transcript_1/1_Conf_1.000 | 148  | 3  | 5.20E-06 | NP_506157.3    | 73  | 54.299  | 38  | 28  | hypothetical protein ZC116.3    |
| Locus_28109_Transcript_1/1_Conf_1.000 | 371  | 0  |          |                |     |         |     |     |                                 |
| Locus_2811_Transcript_1/3_Conf_0.571  | 1121 | 4  | 1.07E-28 | NP_502516.2    | 51  | 132.109 | 240 | 124 | hypothetical protein C39E9.12   |
| Locus_2811_Transcript_2/3_Conf_0.714  | 1658 | 4  | 1.84E-28 | NP_502516.2    | 51  | 132.109 | 240 | 124 | hypothetical protein C39E9.12   |
| Locus_2811_Transcript_3/3_Conf_0.714  | 1631 | 4  | 1.80E-28 | NP_502516.2    | 51  | 132.109 | 240 | 124 | hypothetical protein C39E9.12   |
| Locus_28110_Transcript_1/1_Conf_1.000 | 165  | 0  |          |                |     |         |     |     |                                 |
| Locus_28111_Transcript_1/1_Conf_1.000 | 136  | 0  |          |                |     |         |     |     |                                 |
| Locus_28112_Transcript_1/1_Conf_1.000 | 134  | 0  |          |                |     |         |     |     |                                 |
| Locus_28113_Transcript_1/1_Conf_1.000 | 203  | 0  |          |                |     |         |     |     |                                 |
| Locus_28114_Transcript_1/1_Conf_1.000 | 137  | 0  |          |                |     |         |     |     |                                 |
| Locus_28115_Transcript_1/1_Conf_1.000 | 215  | 1  | 8.02E-04 | AAA50740.2     | 54  | 46.9802 | 55  | 30  | Hypothetical protein R12B2.2    |
| Locus_28116_Transcript_1/1_Conf_1.000 | 256  | 20 | 2.24E-17 | EFO25929.1     | 71  | 92.0485 | 80  | 57  | hypothetical protein LOAG_02551 |
| Locus_28117_Transcript_1/1_Conf_1.000 | 179  | 0  |          |                |     |         |     |     |                                 |

|                                       |      |    |          |                |    |         |     |     |                                 |
|---------------------------------------|------|----|----------|----------------|----|---------|-----|-----|---------------------------------|
| Locus_28118_Transcript_1/1_Conf_1.000 | 284  | 0  |          |                |    |         |     |     |                                 |
| Locus_28119_Transcript_1/1_Conf_1.000 | 172  | 7  | 1.20E-15 | NP_506408.1    | 92 | 86.2705 | 56  | 52  | hypothetical protein F20G2.3    |
| Locus_2812_Transcript_1/2_Conf_1.000  | 621  | 0  |          |                |    |         |     |     |                                 |
| Locus_2812_Transcript_2/2_Conf_1.000  | 568  | 0  |          |                |    |         |     |     |                                 |
| Locus_28120_Transcript_1/1_Conf_1.000 | 344  | 0  |          |                |    |         |     |     |                                 |
| Locus_28121_Transcript_1/1_Conf_1.000 | 147  | 0  |          |                |    |         |     |     |                                 |
| Locus_28123_Transcript_1/1_Conf_1.000 | 151  | 1  | 6.32E-04 | XP_002631617.1 | 64 | 47.3654 | 48  | 31  | Hypothetical protein CBG20802   |
| Locus_28124_Transcript_1/1_Conf_1.000 | 182  | 0  |          |                |    |         |     |     |                                 |
| Locus_28125_Transcript_1/1_Conf_1.000 | 154  | 0  |          |                |    |         |     |     |                                 |
| Locus_28126_Transcript_1/1_Conf_1.000 | 163  | 0  |          |                |    |         |     |     |                                 |
| Locus_28127_Transcript_1/1_Conf_1.000 | 345  | 0  |          |                |    |         |     |     |                                 |
| Locus_28128_Transcript_1/1_Conf_1.000 | 153  | 10 | 1.22E-15 | XP_002647008.1 | 84 | 86.2705 | 50  | 42  | Hypothetical protein CBG23794   |
| Locus_28129_Transcript_1/1_Conf_1.000 | 387  | 20 | 5.38E-08 | XP_002071418.1 | 48 | 60.8474 | 124 | 60  | GK25144                         |
| Locus_2813_Transcript_1/3_Conf_0.600  | 1462 | 20 | 0        | EFO28255.1     | 83 | 680.248 | 480 | 403 | hypothetical protein LOAG_00212 |
| Locus_2813_Transcript_2/3_Conf_0.600  | 1714 | 20 | 0        | EFO28255.1     | 83 | 679.863 | 481 | 403 | hypothetical protein LOAG_00212 |
| Locus_2813_Transcript_3/3_Conf_0.600  | 1714 | 20 | 0        | EFO28255.1     | 83 | 679.863 | 481 | 403 | hypothetical protein LOAG_00212 |
| Locus_28130_Transcript_1/1_Conf_1.000 | 447  | 0  |          |                |    |         |     |     |                                 |
| Locus_28131_Transcript_1/1_Conf_1.000 | 147  | 0  |          |                |    |         |     |     |                                 |
| Locus_28132_Transcript_1/1_Conf_1.000 | 138  | 0  |          |                |    |         |     |     |                                 |
| Locus_28133_Transcript_1/1_Conf_1.000 | 164  | 0  |          |                |    |         |     |     |                                 |
| Locus_28134_Transcript_1/1_Conf_1.000 | 348  | 0  |          |                |    |         |     |     |                                 |
| Locus_28135_Transcript_1/1_Conf_1.000 | 163  | 0  |          |                |    |         |     |     |                                 |
| Locus_28136_Transcript_1/1_Conf_1.000 | 160  | 0  |          |                |    |         |     |     |                                 |

|                                       |      |    |          |                |    |         |     |     |                                                          |
|---------------------------------------|------|----|----------|----------------|----|---------|-----|-----|----------------------------------------------------------|
| Locus_28137_Transcript_1/1_Conf_1.000 | 134  | 0  |          |                |    |         |     |     |                                                          |
| Locus_28138_Transcript_1/1_Conf_1.000 | 133  | 20 | 1.33E-06 | XP_002730593.1 | 85 | 56.225  | 40  | 34  | PREDICTED: aspartylglucosaminidase-like                  |
| Locus_28139_Transcript_1/1_Conf_1.000 | 154  | 0  |          |                |    |         |     |     |                                                          |
| Locus_2814_Transcript_1/3_Conf_0.400  | 1167 | 7  | 1.31E-16 | XP_002646437.1 | 53 | 92.0485 | 199 | 106 | C. briggsae CBR-TFG-1 protein                            |
| Locus_2814_Transcript_2/3_Conf_0.400  | 615  | 20 | 5.66E-19 | NP_498248.2    | 85 | 98.2117 | 62  | 53  | hypothetical protein Y37B11A.2                           |
| Locus_2814_Transcript_3/3_Conf_0.600  | 1570 | 4  | 1.96E-16 | XP_002646437.1 | 53 | 92.0485 | 199 | 106 | C. briggsae CBR-TFG-1 protein                            |
| Locus_28140_Transcript_1/1_Conf_1.000 | 144  | 0  |          |                |    |         |     |     |                                                          |
| Locus_28141_Transcript_1/1_Conf_1.000 | 490  | 20 | 1.86E-48 | EFO85679.1     | 88 | 195.282 | 125 | 110 | CRE-PYR-1 protein                                        |
| Locus_28142_Transcript_1/1_Conf_1.000 | 222  | 20 | 7.17E-32 | NP_001076639.1 | 94 | 140.198 | 74  | 70  | TWiK family of potassium channels family member (twk-39) |
| Locus_28143_Transcript_1/1_Conf_1.000 | 142  | 0  |          |                |    |         |     |     |                                                          |
| Locus_28144_Transcript_1/1_Conf_1.000 | 137  | 0  |          |                |    |         |     |     |                                                          |
| Locus_28145_Transcript_1/1_Conf_1.000 | 387  | 20 | 7.96E-52 | EFO15775.1     | 89 | 206.453 | 129 | 116 | hypothetical protein LOAG_12734                          |
| Locus_28146_Transcript_1/1_Conf_1.000 | 162  | 2  | 1.64E-04 | NP_495350.4    | 63 | 49.2914 | 52  | 33  | hypothetical protein T19D12.6                            |
| Locus_28147_Transcript_1/1_Conf_1.000 | 147  | 20 | 3.47E-10 | ACI49239.1     | 75 | 68.1662 | 48  | 36  | hypothetical protein Csp3_JD06.005                       |
| Locus_28148_Transcript_1/1_Conf_1.000 | 154  | 0  |          |                |    |         |     |     |                                                          |
| Locus_28149_Transcript_1/1_Conf_1.000 | 143  | 0  |          |                |    |         |     |     |                                                          |
| Locus_2815_Transcript_1/1_Conf_1.000  | 726  | 0  |          |                |    |         |     |     |                                                          |
| Locus_28150_Transcript_1/1_Conf_1.000 | 250  | 0  |          |                |    |         |     |     |                                                          |
| Locus_28151_Transcript_1/1_Conf_1.000 | 270  | 0  |          |                |    |         |     |     |                                                          |
| Locus_28152_Transcript_1/1_Conf_1.000 | 133  | 0  |          |                |    |         |     |     |                                                          |
| Locus_28153_Transcript_1/1_Conf_1.000 | 148  | 0  |          |                |    |         |     |     |                                                          |
| Locus_28154_Transcript_1/1_Conf_1.000 | 185  | 0  |          |                |    |         |     |     |                                                          |

|                                       |      |    |          |                |     |         |     |     |                                                 |
|---------------------------------------|------|----|----------|----------------|-----|---------|-----|-----|-------------------------------------------------|
| Locus_28155_Transcript_1/1_Conf_1.000 | 142  | 0  |          |                |     |         |     |     |                                                 |
| Locus_28156_Transcript_1/1_Conf_1.000 | 173  | 20 | 8.63E-14 | EFO21654.1     | 80  | 80.1073 | 56  | 45  | hypothetical protein LOAG_06832                 |
| Locus_28157_Transcript_1/1_Conf_1.000 | 275  | 0  |          |                |     |         |     |     |                                                 |
| Locus_28158_Transcript_1/1_Conf_1.000 | 136  | 0  |          |                |     |         |     |     |                                                 |
| Locus_28159_Transcript_1/1_Conf_1.000 | 144  | 0  |          |                |     |         |     |     |                                                 |
| Locus_2816_Transcript_1/2_Conf_1.000  | 1999 | 20 | 1.21E-77 | XP_002640488.1 | 50  | 295.819 | 667 | 338 | Hypothetical protein CBG13624                   |
| Locus_2816_Transcript_2/2_Conf_1.000  | 2005 | 20 | 9.33E-78 | XP_002640488.1 | 50  | 296.204 | 667 | 339 | Hypothetical protein CBG13624                   |
| Locus_28160_Transcript_1/1_Conf_1.000 | 147  | 20 | 2.56E-21 | XP_002812491.1 | 100 | 105.145 | 48  | 48  | PREDICTED: c-X-C chemokine receptor type 4-like |
| Locus_28161_Transcript_1/1_Conf_1.000 | 182  | 0  |          |                |     |         |     |     |                                                 |
| Locus_28162_Transcript_1/1_Conf_1.000 | 182  | 0  |          |                |     |         |     |     |                                                 |
| Locus_28163_Transcript_1/1_Conf_1.000 | 150  | 0  |          |                |     |         |     |     |                                                 |
| Locus_28164_Transcript_1/1_Conf_1.000 | 193  | 0  |          |                |     |         |     |     |                                                 |
| Locus_28165_Transcript_1/1_Conf_1.000 | 184  | 0  |          |                |     |         |     |     |                                                 |
| Locus_28166_Transcript_1/1_Conf_1.000 | 130  | 0  |          |                |     |         |     |     |                                                 |
| Locus_28167_Transcript_1/1_Conf_1.000 | 303  | 2  | 1.63E-04 | XP_002629805.1 | 64  | 49.2914 | 50  | 32  | Hypothetical protein CBG01049                   |
| Locus_28168_Transcript_1/1_Conf_1.000 | 169  | 0  |          |                |     |         |     |     |                                                 |
| Locus_28169_Transcript_1/1_Conf_1.000 | 313  | 4  | 2.49E-08 | NP_506187.2    | 66  | 62.003  | 62  | 41  | hypothetical protein C15C8.4                    |
| Locus_2817_Transcript_1/1_Conf_1.000  | 838  | 6  | 1.11E-07 | NP_001041121.1 | 47  | 61.6178 | 111 | 53  | hypothetical protein F53C11.5                   |
| Locus_28170_Transcript_1/1_Conf_1.000 | 160  | 0  |          |                |     |         |     |     |                                                 |
| Locus_28171_Transcript_1/1_Conf_1.000 | 146  | 0  |          |                |     |         |     |     |                                                 |
| Locus_28172_Transcript_1/1_Conf_1.000 | 149  | 0  |          |                |     |         |     |     |                                                 |

|                                       |     |    |          |                |     |         |     |     |                                                                      |
|---------------------------------------|-----|----|----------|----------------|-----|---------|-----|-----|----------------------------------------------------------------------|
| Locus_28173_Transcript_1/1_Conf_1.000 | 177 | 20 | 2.10E-28 | XP_002927413.1 | 100 | 128.642 | 58  | 58  | PREDICTED: eukaryotic translation initiation factor 3 subunit C-like |
| Locus_28174_Transcript_1/1_Conf_1.000 | 441 | 0  |          |                |     |         |     |     |                                                                      |
| Locus_28175_Transcript_1/1_Conf_1.000 | 353 | 20 | 7.59E-34 | EFO23183.1     | 77  | 146.747 | 114 | 88  | acetyltransferase                                                    |
| Locus_28176_Transcript_1/1_Conf_1.000 | 232 | 20 | 2.63E-18 | NP_494983.1    | 77  | 95.1301 | 67  | 52  | intestinal acid PHOSphatase family member (pho-1)                    |
| Locus_28177_Transcript_1/1_Conf_1.000 | 152 | 7  | 7.73E-10 | NP_504512.1    | 86  | 67.0106 | 51  | 44  | hypothetical protein F44E7.2                                         |
| Locus_28178_Transcript_1/1_Conf_1.000 | 322 | 0  |          |                |     |         |     |     |                                                                      |
| Locus_28179_Transcript_1/1_Conf_1.000 | 152 | 0  |          |                |     |         |     |     |                                                                      |
| Locus_2818_Transcript_1/1_Conf_1.000  | 541 | 0  |          |                |     |         |     |     |                                                                      |
| Locus_28180_Transcript_1/1_Conf_1.000 | 166 | 0  |          |                |     |         |     |     |                                                                      |
| Locus_28181_Transcript_1/1_Conf_1.000 | 178 | 0  |          |                |     |         |     |     |                                                                      |
| Locus_28182_Transcript_1/1_Conf_1.000 | 169 | 20 | 2.27E-22 | EFO92254.1     | 96  | 108.612 | 56  | 54  | hypothetical protein CRE_10947                                       |
| Locus_28183_Transcript_1/1_Conf_1.000 | 254 | 0  |          |                |     |         |     |     |                                                                      |
| Locus_28184_Transcript_1/1_Conf_1.000 | 226 | 0  |          |                |     |         |     |     |                                                                      |
| Locus_28185_Transcript_1/1_Conf_1.000 | 202 | 0  |          |                |     |         |     |     |                                                                      |
| Locus_28186_Transcript_1/1_Conf_1.000 | 142 | 0  |          |                |     |         |     |     |                                                                      |
| Locus_28187_Transcript_1/1_Conf_1.000 | 200 | 0  |          |                |     |         |     |     |                                                                      |
| Locus_28188_Transcript_1/1_Conf_1.000 | 132 | 2  | 2.13E-04 | EFO23475.1     | 69  | 48.9062 | 46  | 32  | hypothetical protein LOAG_05011                                      |
| Locus_28189_Transcript_1/1_Conf_1.000 | 217 | 2  | 1.56E-07 | NP_501398.1    | 67  | 59.3066 | 68  | 46  | hypothetical protein F35H10.5                                        |
| Locus_2819_Transcript_1/1_Conf_1.000  | 457 | 20 | 4.65E-52 | NP_001021667.1 | 86  | 207.223 | 128 | 111 | Nuclear Hormone Receptor family member (nhr-85)                      |
| Locus_28190_Transcript_1/1_Conf_1.000 | 179 | 0  |          |                |     |         |     |     |                                                                      |
| Locus_28191_Transcript_1/1_Conf_1.000 | 128 | 0  |          |                |     |         |     |     |                                                                      |
| Locus_28192_Transcript_1/1_Conf_1.000 | 154 | 0  |          |                |     |         |     |     |                                                                      |
| Locus_28193_Transcript_1/1_Conf_1.000 | 152 | 0  |          |                |     |         |     |     |                                                                      |
| Locus_28194_Transcript_1/1_Conf_1.000 | 129 | 0  |          |                |     |         |     |     |                                                                      |
| Locus_28195_Transcript_1/1_Conf_1.000 | 132 | 0  |          |                |     |         |     |     |                                                                      |

|                                       |      |    |          |                |     |         |     |     |                                                                                          |
|---------------------------------------|------|----|----------|----------------|-----|---------|-----|-----|------------------------------------------------------------------------------------------|
| Locus_28196_Transcript_1/1_Conf_1.000 | 157  | 0  |          |                |     |         |     |     |                                                                                          |
| Locus_28197_Transcript_1/1_Conf_1.000 | 247  | 0  |          |                |     |         |     |     |                                                                                          |
| Locus_28198_Transcript_1/1_Conf_1.000 | 168  | 20 | 1.09E-16 | EDM07288.1     | 100 | 89.7373 | 55  | 55  | KDEL (Lys-Asp-Glu-Leu) endoplasmic reticulum protein retention receptor 1, isoform CRA_b |
| Locus_28199_Transcript_1/1_Conf_1.000 | 147  | 0  |          |                |     |         |     |     |                                                                                          |
| Locus_282_Transcript_1/2_Conf_1.000   | 756  | 4  | 1.94E-50 | XP_002631619.1 | 58  | 203.371 | 248 | 146 | Hypothetical protein CBG20804                                                            |
| Locus_282_Transcript_2/2_Conf_1.000   | 738  | 6  | 5.60E-47 | XP_002631619.1 | 58  | 191.815 | 248 | 144 | Hypothetical protein CBG20804                                                            |
| Locus_2820_Transcript_1/1_Conf_1.000  | 819  | 0  |          |                |     |         |     |     |                                                                                          |
| Locus_28200_Transcript_1/1_Conf_1.000 | 134  | 0  |          |                |     |         |     |     |                                                                                          |
| Locus_28201_Transcript_1/1_Conf_1.000 | 445  | 0  |          |                |     |         |     |     |                                                                                          |
| Locus_28202_Transcript_1/1_Conf_1.000 | 142  | 0  |          |                |     |         |     |     |                                                                                          |
| Locus_28203_Transcript_1/1_Conf_1.000 | 149  | 0  |          |                |     |         |     |     |                                                                                          |
| Locus_28204_Transcript_1/1_Conf_1.000 | 241  | 20 | 4.60E-07 | XP_002813545.1 | 72  | 57.7658 | 47  | 34  | PREDICTED: histone-lysine N-methyltransferase SETMAR-like                                |
| Locus_28205_Transcript_1/1_Conf_1.000 | 260  | 0  |          |                |     |         |     |     |                                                                                          |
| Locus_28206_Transcript_1/1_Conf_1.000 | 189  | 11 | 1.36E-14 | NP_001040760.1 | 82  | 82.8037 | 62  | 51  | hypothetical protein F10G7.5                                                             |
| Locus_28207_Transcript_1/1_Conf_1.000 | 138  | 0  |          |                |     |         |     |     |                                                                                          |
| Locus_28208_Transcript_1/1_Conf_1.000 | 139  | 0  |          |                |     |         |     |     |                                                                                          |
| Locus_28209_Transcript_1/1_Conf_1.000 | 130  | 0  |          |                |     |         |     |     |                                                                                          |
| Locus_2821_Transcript_1/1_Conf_1.000  | 1192 | 20 | 1.97E-92 | NP_498105.1    | 75  | 343.969 | 323 | 245 | SYNTAXIN family member (syn-16)                                                          |
| Locus_28210_Transcript_1/1_Conf_1.000 | 128  | 0  |          |                |     |         |     |     |                                                                                          |
| Locus_28211_Transcript_1/1_Conf_1.000 | 216  | 20 | 1.27E-25 | EFO82830.1     | 93  | 119.398 | 72  | 67  | CRE-KLP-4 protein                                                                        |
| Locus_28212_Transcript_1/1_Conf_1.000 | 183  | 0  |          |                |     |         |     |     |                                                                                          |
| Locus_28213_Transcript_1/1_Conf_1.000 | 182  | 12 | 1.15E-18 | XP_002631133.1 | 88  | 96.2857 | 59  | 52  | C. briggsae CBR-CLH-2 protein                                                            |



|                                       |     |    |          |                |     |         |     |     |                                       |
|---------------------------------------|-----|----|----------|----------------|-----|---------|-----|-----|---------------------------------------|
| Locus_28214_Transcript_1/1_Conf_1.000 | 196 | 20 | 4.80E-12 | EFO86757.1     | 71  | 74.3294 | 64  | 46  | CRE-RPS-12 protein                    |
| Locus_28215_Transcript_1/1_Conf_1.000 | 133 | 0  |          |                |     |         |     |     |                                       |
| Locus_28216_Transcript_1/1_Conf_1.000 | 176 | 0  |          |                |     |         |     |     |                                       |
| Locus_28217_Transcript_1/1_Conf_1.000 | 190 | 0  |          |                |     |         |     |     |                                       |
| Locus_28218_Transcript_1/1_Conf_1.000 | 143 | 20 | 1.01E-14 | NP_001026997.1 | 100 | 83.1889 | 38  | 38  | BolA-like protein 2                   |
| Locus_28219_Transcript_1/1_Conf_1.000 | 134 | 0  |          |                |     |         |     |     |                                       |
| Locus_2822_Transcript_1/1_Conf_1.000  | 927 | 8  | 1.71E-55 | XP_002630572.1 | 66  | 220.705 | 215 | 142 | Hypothetical protein CBG13025         |
| Locus_28220_Transcript_1/1_Conf_1.000 | 168 | 0  |          |                |     |         |     |     |                                       |
| Locus_28221_Transcript_1/1_Conf_1.000 | 142 | 11 | 1.32E-06 | EFO19307.1     | 72  | 56.225  | 47  | 34  | hypothetical protein LOAG_09187       |
| Locus_28222_Transcript_1/1_Conf_1.000 | 133 | 1  | 1.13E-05 | CAJ43277.1     | 65  | 53.1434 | 35  | 23  | hypothetical protein                  |
| Locus_28223_Transcript_1/1_Conf_1.000 | 272 | 20 | 9.87E-26 | NP_001024619.1 | 83  | 119.783 | 85  | 71  | PhosphoLipase C family member (plc-1) |

|                                       |     |    |          |                |     |         |     |     |                                                 |
|---------------------------------------|-----|----|----------|----------------|-----|---------|-----|-----|-------------------------------------------------|
| Locus_28224_Transcript_1/1_Conf_1.000 | 139 | 20 | 9.77E-18 | DAA24281.1     | 100 | 93.2041 | 45  | 45  | 78 kDa glucose-regulated protein precursor      |
| Locus_28225_Transcript_1/1_Conf_1.000 | 284 | 20 | 6.51E-41 | EFO26082.1     | 94  | 170.244 | 92  | 87  | hypothetical protein LOAG_02394                 |
| Locus_28226_Transcript_1/1_Conf_1.000 | 259 | 0  |          |                |     |         |     |     |                                                 |
| Locus_28227_Transcript_1/1_Conf_1.000 | 167 | 2  | 4.91E-17 | NP_490820.1    | 85  | 90.8929 | 55  | 47  | hypothetical protein R06A10.4                   |
| Locus_28228_Transcript_1/1_Conf_1.000 | 333 | 2  | 1.98E-18 | EFO19525.1     | 76  | 95.5153 | 86  | 66  | hypothetical protein LOAG_08965                 |
| Locus_28229_Transcript_1/1_Conf_1.000 | 153 | 0  |          |                |     |         |     |     |                                                 |
| Locus_2823_Transcript_1/2_Conf_1.000  | 564 | 20 | 1.02E-39 | NP_500183.2    | 69  | 166.777 | 165 | 114 | hypothetical protein M70.4                      |
| Locus_2823_Transcript_2/2_Conf_1.000  | 564 | 20 | 1.02E-39 | NP_500183.2    | 69  | 166.777 | 165 | 114 | hypothetical protein M70.4                      |
| Locus_28230_Transcript_1/1_Conf_1.000 | 146 | 2  | 2.94E-17 | NP_502231.1    | 89  | 91.6633 | 48  | 43  | LiPocalin-Related protein family member (lpr-2) |
| Locus_28231_Transcript_1/1_Conf_1.000 | 183 | 0  |          |                |     |         |     |     |                                                 |
| Locus_28232_Transcript_1/1_Conf_1.000 | 191 | 0  |          |                |     |         |     |     |                                                 |
| Locus_28233_Transcript_1/1_Conf_1.000 | 278 | 3  | 7.30E-05 | XP_002639451.1 | 54  | 50.447  | 86  | 47  | C. briggsae CBR-SMG-5 protein                   |
| Locus_28234_Transcript_1/1_Conf_1.000 | 172 | 0  |          |                |     |         |     |     |                                                 |
| Locus_28235_Transcript_1/1_Conf_1.000 | 152 | 0  |          |                |     |         |     |     |                                                 |
| Locus_28236_Transcript_1/1_Conf_1.000 | 133 | 0  |          |                |     |         |     |     |                                                 |
| Locus_28237_Transcript_1/1_Conf_1.000 | 213 | 20 | 2.95E-14 | EFPO3780.1     | 65  | 81.6481 | 70  | 46  | CRE-SNF-9 protein                               |
| Locus_28238_Transcript_1/1_Conf_1.000 | 242 | 0  |          |                |     |         |     |     |                                                 |

|                                       |     |    |          |                |     |         |     |    |                                                                    |
|---------------------------------------|-----|----|----------|----------------|-----|---------|-----|----|--------------------------------------------------------------------|
| Locus_28239_Transcript_1/1_Conf_1.000 | 128 | 20 | 1.21E-15 | XP_002743098.1 | 100 | 86.2705 | 42  | 42 | PREDICTED: transitional endoplasmic reticulum ATPase-like          |
| Locus_2824_Transcript_1/1_Conf_1.000  | 384 | 0  |          |                |     |         |     |    |                                                                    |
| Locus_28240_Transcript_1/1_Conf_1.000 | 158 | 20 | 1.95E-21 | XP_002647993.1 | 92  | 105.531 | 52  | 48 | C. briggsae CBR-ACR-6 protein                                      |
| Locus_28241_Transcript_1/1_Conf_1.000 | 129 | 0  |          |                |     |         |     |    |                                                                    |
| Locus_28242_Transcript_1/1_Conf_1.000 | 242 | 3  | 7.80E-23 | EFP09464.1     | 80  | 110.153 | 71  | 57 | hypothetical protein CRE_25481                                     |
| Locus_28243_Transcript_1/1_Conf_1.000 | 216 | 20 | 1.77E-27 | XP_002920069.1 | 100 | 125.561 | 72  | 72 | PREDICTED: 10 kDa heat shock protein, mitochondrial-like isoform 1 |
| Locus_28244_Transcript_1/1_Conf_1.000 | 395 | 4  | 1.65E-20 | NP_497665.2    | 72  | 102.449 | 115 | 83 | hypothetical protein R148.5                                        |
| Locus_28245_Transcript_1/1_Conf_1.000 | 210 | 7  | 2.27E-06 | EFO90845.1     | 67  | 55.4546 | 59  | 40 | hypothetical protein CRE_09760                                     |
| Locus_28246_Transcript_1/1_Conf_1.000 | 195 | 20 | 7.39E-21 | XP_001103713.2 | 100 | 103.605 | 64  | 64 | PREDICTED: polyglutamine-binding protein 1-like isoform 5          |
| Locus_28247_Transcript_1/1_Conf_1.000 | 193 | 0  |          |                |     |         |     |    |                                                                    |
| Locus_28248_Transcript_1/1_Conf_1.000 | 260 | 5  | 1.61E-07 | EFO16233.1     | 63  | 59.3066 | 85  | 54 | variant SH3 domain-containing protein                              |

|                                       |     |    |          |                |     |         |     |     |                                                                |
|---------------------------------------|-----|----|----------|----------------|-----|---------|-----|-----|----------------------------------------------------------------|
| Locus_28249_Transcript_1/1_Conf_1.000 | 177 | 8  | 1.47E-05 | XP_002631188.1 | 87  | 52.7582 | 40  | 35  | Hypothetical protein CBG02977                                  |
| Locus_2825_Transcript_1/1_Conf_1.000  | 961 | 20 | 2.27E-50 | XP_002641997.1 | 54  | 203.756 | 274 | 150 | C. briggsae CBR-LEC-4 protein                                  |
| Locus_28250_Transcript_1/1_Conf_1.000 | 169 | 0  |          |                |     |         |     |     |                                                                |
| Locus_28251_Transcript_1/1_Conf_1.000 | 281 | 3  | 1.16E-10 | EFP08940.1     | 61  | 69.707  | 90  | 55  | hypothetical protein CRE_18077                                 |
| Locus_28252_Transcript_1/1_Conf_1.000 | 130 | 0  |          |                |     |         |     |     |                                                                |
| Locus_28253_Transcript_1/1_Conf_1.000 | 147 | 0  |          |                |     |         |     |     |                                                                |
| Locus_28254_Transcript_1/1_Conf_1.000 | 135 | 0  |          |                |     |         |     |     |                                                                |
| Locus_28255_Transcript_1/1_Conf_1.000 | 233 | 0  |          |                |     |         |     |     |                                                                |
| Locus_28256_Transcript_1/1_Conf_1.000 | 136 | 0  |          |                |     |         |     |     |                                                                |
| Locus_28257_Transcript_1/1_Conf_1.000 | 160 | 0  |          |                |     |         |     |     |                                                                |
| Locus_28258_Transcript_1/1_Conf_1.000 | 185 | 0  |          |                |     |         |     |     |                                                                |
| Locus_28259_Transcript_1/1_Conf_1.000 | 184 | 0  |          |                |     |         |     |     |                                                                |
| Locus_2826_Transcript_1/1_Conf_1.000  | 603 | 6  | 1.01E-25 | NP_001021203.1 | 57  | 120.553 | 185 | 107 | CEll Death abnormality family member (ced-4)                   |
| Locus_28260_Transcript_1/1_Conf_1.000 | 163 | 0  |          |                |     |         |     |     |                                                                |
| Locus_28261_Transcript_1/1_Conf_1.000 | 379 | 20 | 1.37E-43 |                | 83  | 179.104 | 116 | 97  | DNA topoisomerase II                                           |
| Locus_28262_Transcript_1/1_Conf_1.000 | 137 | 1  | 6.16E-04 | EFO23183.1     | 62  | 47.3654 | 45  | 28  | acetyltransferase                                              |
| Locus_28263_Transcript_1/1_Conf_1.000 | 152 | 20 | 4.82E-20 | XP_002827931.1 | 100 | 100.908 | 50  | 50  | PREDICTED: transmembrane channel-like protein 6-like isoform 1 |
| Locus_28264_Transcript_1/1_Conf_1.000 | 131 | 0  |          |                |     |         |     |     |                                                                |
| Locus_28265_Transcript_1/1_Conf_1.000 | 138 | 0  |          |                |     |         |     |     |                                                                |
| Locus_28266_Transcript_1/1_Conf_1.000 | 250 | 0  |          |                |     |         |     |     |                                                                |
| Locus_28267_Transcript_1/1_Conf_1.000 | 135 | 0  |          |                |     |         |     |     |                                                                |
| Locus_28268_Transcript_1/1_Conf_1.000 | 154 | 0  |          |                |     |         |     |     |                                                                |
| Locus_28269_Transcript_1/1_Conf_1.000 | 140 | 0  |          |                |     |         |     |     |                                                                |

|                                      |     |    |           |             |    |         |     |     |                                 |
|--------------------------------------|-----|----|-----------|-------------|----|---------|-----|-----|---------------------------------|
| Locus_2827_Transcript_1/5_Conf_0.167 | 284 | 20 | 9.44E-16  | EFN76148.1  | 81 | 86.6557 | 55  | 45  | S-adenosylmethionine synthetase |
| Locus_2827_Transcript_2/5_Conf_0.667 | 999 | 20 | 8.12E-155 | NP_500872.1 | 94 | 550.821 | 323 | 306 | hypothetical protein C06E7.1    |
| Locus_2827_Transcript_3/5_Conf_0.667 | 999 | 20 | 8.12E-155 | NP_500872.1 | 94 | 550.821 | 323 | 306 | hypothetical protein C06E7.1    |

|                                       |     |    |           |             |    |         |     |     |                                                                |
|---------------------------------------|-----|----|-----------|-------------|----|---------|-----|-----|----------------------------------------------------------------|
| Locus_2827_Transcript_4/5_Conf_0.667  | 999 | 20 | 8.12E-155 | NP_500872.1 | 94 | 550.821 | 323 | 306 | hypothetical protein C06E7.1                                   |
| Locus_2827_Transcript_5/5_Conf_0.667  | 999 | 20 | 8.12E-155 | NP_500872.1 | 94 | 550.821 | 323 | 306 | hypothetical protein C06E7.1                                   |
| Locus_28270_Transcript_1/1_Conf_1.000 | 135 | 0  |           |             |    |         |     |     |                                                                |
| Locus_28271_Transcript_1/1_Conf_1.000 | 144 | 0  |           |             |    |         |     |     |                                                                |
| Locus_28272_Transcript_1/1_Conf_1.000 | 159 | 0  |           |             |    |         |     |     |                                                                |
| Locus_28273_Transcript_1/1_Conf_1.000 | 155 | 0  |           |             |    |         |     |     |                                                                |
| Locus_28274_Transcript_1/1_Conf_1.000 | 131 | 2  | 7.35E-05  | EFO86287.1  | 95 | 50.447  | 42  | 40  | hypothetical protein CRE_01961                                 |
| Locus_28275_Transcript_1/1_Conf_1.000 | 128 | 0  |           |             |    |         |     |     |                                                                |
| Locus_28276_Transcript_1/1_Conf_1.000 | 179 | 0  |           |             |    |         |     |     |                                                                |
| Locus_28277_Transcript_1/1_Conf_1.000 | 262 | 20 | 5.88E-10  | CAQ48388.2  | 60 | 67.3958 | 90  | 54  | C. elegans protein C26H9A.1b, confirmed by transcript evidence |
| Locus_28278_Transcript_1/2_Conf_1.000 | 160 | 0  |           |             |    |         |     |     |                                                                |
| Locus_28278_Transcript_2/2_Conf_1.000 | 442 | 0  |           |             |    |         |     |     |                                                                |

|                                       |      |    |          |                |     |         |     |    |                                            |
|---------------------------------------|------|----|----------|----------------|-----|---------|-----|----|--------------------------------------------|
| Locus_28279_Transcript_1/1_Conf_1.000 | 130  | 20 | 7.55E-18 | EAW74399.1     | 100 | 93.5893 | 43  | 43 | SCY1-like 1 (S. cerevisiae), isoform CRA_e |
| Locus_2828_Transcript_1/1_Conf_1.000  | 1001 | 4  | 6.47E-19 | XP_001900077.1 | 55  | 99.3673 | 163 | 90 | hypothetical protein Bm1_43075             |
| Locus_28280_Transcript_1/1_Conf_1.000 | 164  | 10 | 2.46E-08 | EFP03890.1     | 92  | 62.003  | 42  | 39 | hypothetical protein CRE_28780             |
| Locus_28281_Transcript_1/1_Conf_1.000 | 158  | 0  |          |                |     |         |     |    |                                            |
| Locus_28282_Transcript_1/1_Conf_1.000 | 318  | 20 | 3.21E-24 | NP_490666.2    | 70  | 114.775 | 104 | 73 | hypothetical protein Y48G1C.4              |
| Locus_28283_Transcript_1/1_Conf_1.000 | 185  | 0  |          |                |     |         |     |    |                                            |
| Locus_28284_Transcript_1/1_Conf_1.000 | 176  | 20 | 1.05E-19 | EFO85683.1     | 92  | 99.7525 | 57  | 53 | hypothetical protein CRE_01767             |
| Locus_28285_Transcript_1/1_Conf_1.000 | 157  | 1  | 1.96E-05 | EFO26145.1     | 68  | 52.373  | 47  | 32 | ImpB/MucB/SamB family protein              |
| Locus_28286_Transcript_1/1_Conf_1.000 | 141  | 0  |          |                |     |         |     |    |                                            |
| Locus_28287_Transcript_1/1_Conf_1.000 | 156  | 0  |          |                |     |         |     |    |                                            |
| Locus_28288_Transcript_1/1_Conf_1.000 | 152  | 0  |          |                |     |         |     |    |                                            |
| Locus_28289_Transcript_1/1_Conf_1.000 | 200  | 0  |          |                |     |         |     |    |                                            |
| Locus_2829_Transcript_1/1_Conf_1.000  | 464  | 4  | 1.45E-08 | NP_491750.3    | 59  | 62.7734 | 118 | 70 | hypothetical protein C27A12.9              |
| Locus_28290_Transcript_1/1_Conf_1.000 | 128  | 0  |          |                |     |         |     |    |                                            |
| Locus_28291_Transcript_1/1_Conf_1.000 | 160  | 0  |          |                |     |         |     |    |                                            |
| Locus_28292_Transcript_1/1_Conf_1.000 | 128  | 0  |          |                |     |         |     |    |                                            |
| Locus_28293_Transcript_1/1_Conf_1.000 | 138  | 20 | 9.14E-16 | XP_002641343.1 | 91  | 86.6557 | 46  | 42 | C. briggsae CBR-DPY-18 protein             |
| Locus_28294_Transcript_1/1_Conf_1.000 | 192  | 0  |          |                |     |         |     |    |                                            |
| Locus_28295_Transcript_1/1_Conf_1.000 | 141  | 0  |          |                |     |         |     |    |                                            |
| Locus_28296_Transcript_1/1_Conf_1.000 | 145  | 6  | 1.20E-10 | XP_002637627.1 | 85  | 69.707  | 48  | 41 | Hypothetical protein CBG19372              |
| Locus_28297_Transcript_1/1_Conf_1.000 | 190  | 10 | 5.90E-18 | EFO86305.1     | 81  | 93.9745 | 54  | 44 | hypothetical protein CRE_01756             |
| Locus_28298_Transcript_1/1_Conf_1.000 | 145  | 0  |          |                |     |         |     |    |                                            |
| Locus_28299_Transcript_1/1_Conf_1.000 | 145  | 5  | 1.52E-05 | Q60P76.3       | 71  | 52.7582 | 45  | 32 | Spindle assembly abnormal protein 6        |
| Locus_283_Transcript_1/1_Conf_1.000   | 455  | 20 | 2.58E-26 | CAR63555.1     | 97  | 121.709 | 78  | 76 | putative 15 kDa selenoprotein precursor    |
| Locus_2830_Transcript_1/1_Conf_1.000  | 549  | 19 | 9.74E-24 | XP_001371696.1 | 77  | 109.383 | 79  | 61 | PREDICTED: hypothetical protein, partial   |
| Locus_28300_Transcript_1/1_Conf_1.000 | 141  | 0  |          |                |     |         |     |    |                                            |
| Locus_28301_Transcript_1/1_Conf_1.000 | 212  | 0  |          |                |     |         |     |    |                                            |

|                                       |     |    |          |                |    |         |     |     |                                                                      |
|---------------------------------------|-----|----|----------|----------------|----|---------|-----|-----|----------------------------------------------------------------------|
| Locus_28302_Transcript_1/1_Conf_1.000 | 196 | 20 | 2.63E-18 | EFP04543.1     | 86 | 95.1301 | 59  | 51  | hypothetical protein CRE_31199                                       |
| Locus_28303_Transcript_1/1_Conf_1.000 | 297 | 20 | 2.44E-24 | EFP05586.1     | 71 | 115.161 | 95  | 68  | hypothetical protein CRE_27168                                       |
| Locus_28304_Transcript_1/1_Conf_1.000 | 163 | 7  | 3.66E-12 | XP_002629928.1 | 83 | 74.7146 | 53  | 44  | Hypothetical protein CBG21976                                        |
| Locus_28305_Transcript_1/1_Conf_1.000 | 168 | 4  | 2.44E-16 | AAC47925.2     | 88 | 88.5817 | 53  | 47  | Hypothetical protein C02H7.2                                         |
| Locus_28306_Transcript_1/1_Conf_1.000 | 134 | 0  |          |                |    |         |     |     |                                                                      |
| Locus_28307_Transcript_1/1_Conf_1.000 | 168 | 0  |          |                |    |         |     |     |                                                                      |
| Locus_28308_Transcript_1/1_Conf_1.000 | 168 | 11 | 3.90E-06 | XP_002629645.1 | 65 | 54.6842 | 55  | 36  | Hypothetical protein CBG00850                                        |
| Locus_28309_Transcript_1/1_Conf_1.000 | 325 | 1  | 6.27E-04 | EFO85702.1     | 46 | 47.3654 | 106 | 49  | hypothetical protein CRE_01591                                       |
| Locus_2831_Transcript_1/2_Conf_1.000  | 569 | 20 | 9.90E-83 | XP_002641838.1 | 94 | 309.686 | 168 | 159 | C. briggsae CBR-GER-1 protein                                        |
| Locus_2831_Transcript_2/2_Conf_1.000  | 569 | 20 | 8.38E-82 | XP_002641838.1 | 94 | 306.605 | 168 | 158 | C. briggsae CBR-GER-1 protein                                        |
| Locus_28310_Transcript_1/1_Conf_1.000 | 150 | 0  |          |                |    |         |     |     |                                                                      |
| Locus_28311_Transcript_1/1_Conf_1.000 | 751 | 1  | 4.97E-06 | XP_001895120.1 | 41 | 55.8398 | 201 | 84  | IQ calmodulin-binding motif family protein                           |
| Locus_28312_Transcript_1/1_Conf_1.000 | 188 | 0  |          |                |    |         |     |     |                                                                      |
| Locus_28313_Transcript_1/1_Conf_1.000 | 135 | 0  |          |                |    |         |     |     |                                                                      |
| Locus_28314_Transcript_1/1_Conf_1.000 | 156 | 1  | 2.46E-08 | NP_001022279.1 | 94 | 62.003  | 38  | 36  | Serpentine Receptor, class AB (class A-like) family member (srab-14) |
| Locus_28315_Transcript_1/1_Conf_1.000 | 222 | 7  | 1.04E-30 | NP_510476.2    | 95 | 136.346 | 73  | 70  | hypothetical protein Y70D2A.1                                        |



|                                       |      |    |          |                |     |         |     |     |                                                            |
|---------------------------------------|------|----|----------|----------------|-----|---------|-----|-----|------------------------------------------------------------|
| Locus_28316_Transcript_1/1_Conf_1.000 | 237  | 1  | 3.62E-36 | ABC55426.1     | 100 | 154.451 | 71  | 71  | mutant truncated midkine B                                 |
| Locus_28317_Transcript_1/1_Conf_1.000 | 208  | 20 | 7.01E-32 | NP_498717.1    | 98  | 140.198 | 69  | 68  | hypothetical protein ZK688.2                               |
| Locus_28318_Transcript_1/1_Conf_1.000 | 131  | 2  | 7.33E-05 | XP_001893489.1 | 70  | 50.447  | 41  | 29  | Hepatocellular carcinoma-associated antigen 66             |
| Locus_28319_Transcript_1/1_Conf_1.000 | 166  | 0  |          |                |     |         |     |     |                                                            |
| Locus_2832_Transcript_1/1_Conf_1.000  | 447  | 20 | 7.80E-39 | NP_502549.2    | 82  | 163.31  | 133 | 110 | TransThyretin-Related family domain family member (ttr-51) |
| Locus_28320_Transcript_1/1_Conf_1.000 | 249  | 0  |          |                |     |         |     |     |                                                            |
| Locus_28321_Transcript_1/1_Conf_1.000 | 152  | 0  |          |                |     |         |     |     |                                                            |
| Locus_28322_Transcript_1/1_Conf_1.000 | 132  | 0  |          |                |     |         |     |     |                                                            |
| Locus_28323_Transcript_1/1_Conf_1.000 | 132  | 0  |          |                |     |         |     |     |                                                            |
| Locus_28324_Transcript_1/1_Conf_1.000 | 133  | 0  |          |                |     |         |     |     |                                                            |
| Locus_28325_Transcript_1/1_Conf_1.000 | 180  | 0  |          |                |     |         |     |     |                                                            |
| Locus_28326_Transcript_1/1_Conf_1.000 | 221  | 0  |          |                |     |         |     |     |                                                            |
| Locus_28327_Transcript_1/1_Conf_1.000 | 261  | 8  | 1.50E-05 | EFP07920.1     | 63  | 52.7582 | 80  | 51  | hypothetical protein CRE_14096                             |
| Locus_28328_Transcript_1/1_Conf_1.000 | 176  | 0  |          |                |     |         |     |     |                                                            |
| Locus_28329_Transcript_1/1_Conf_1.000 | 257  | 1  | 8.26E-12 | CAR63604.1     | 67  | 73.559  | 83  | 56  | hypothetical protein                                       |
| Locus_2833_Transcript_1/1_Conf_1.000  | 1388 | 20 | 5.11E-82 | XP_002632328.1 | 98  | 309.686 | 175 | 172 | C. briggsae CBR-ARF-6 protein                              |
| Locus_28330_Transcript_1/1_Conf_1.000 | 243  | 0  |          |                |     |         |     |     |                                                            |

|                                       |     |    |          |                |    |         |     |     |                                        |
|---------------------------------------|-----|----|----------|----------------|----|---------|-----|-----|----------------------------------------|
| Locus_28331_Transcript_1/1_Conf_1.000 | 150 | 0  |          |                |    |         |     |     |                                        |
| Locus_28332_Transcript_1/1_Conf_1.000 | 133 | 3  | 4.43E-10 | EFO89666.1     | 83 | 67.781  | 43  | 36  | hypothetical protein CRE_07374         |
| Locus_28333_Transcript_1/1_Conf_1.000 | 519 | 0  |          |                |    |         |     |     |                                        |
| Locus_28334_Transcript_1/1_Conf_1.000 | 244 | 0  |          |                |    |         |     |     |                                        |
| Locus_28335_Transcript_1/1_Conf_1.000 | 153 | 0  |          |                |    |         |     |     |                                        |
| Locus_28336_Transcript_1/1_Conf_1.000 | 283 | 20 | 5.35E-27 | XP_002635104.1 | 75 | 124.02  | 94  | 71  | Hypothetical protein CBG11324          |
| Locus_28337_Transcript_1/1_Conf_1.000 | 215 | 0  |          |                |    |         |     |     |                                        |
| Locus_28338_Transcript_1/1_Conf_1.000 | 130 | 0  |          |                |    |         |     |     |                                        |
| Locus_28339_Transcript_1/1_Conf_1.000 | 240 | 20 | 2.87E-17 | NP_001041183.1 | 75 | 91.6633 | 78  | 59  | Na/Ca eXchangers family member (ncx-1) |
| Locus_2834_Transcript_1/1_Conf_1.000  | 589 | 20 | 3.32E-31 | XP_002633524.1 | 62 | 138.658 | 182 | 114 | Hypothetical protein CBG05389          |
| Locus_28340_Transcript_1/1_Conf_1.000 | 195 | 0  |          |                |    |         |     |     |                                        |
| Locus_28341_Transcript_1/1_Conf_1.000 | 130 | 0  |          |                |    |         |     |     |                                        |
| Locus_28342_Transcript_1/1_Conf_1.000 | 225 | 9  | 1.04E-06 | EFO86810.1     | 54 | 56.6102 | 75  | 41  | hypothetical protein CRE_04697         |
| Locus_28343_Transcript_1/1_Conf_1.000 | 246 | 0  |          |                |    |         |     |     |                                        |
| Locus_28344_Transcript_1/1_Conf_1.000 | 168 | 20 | 1.74E-22 | BAD92875.1     | 98 | 108.997 | 54  | 53  | MHC class II antigen variant           |
| Locus_28345_Transcript_1/1_Conf_1.000 | 231 | 20 | 1.64E-20 | XP_002647214.1 | 80 | 102.449 | 76  | 61  | Hypothetical protein CBG22398          |

|                                       |     |    |           |                |    |         |     |     |                                 |
|---------------------------------------|-----|----|-----------|----------------|----|---------|-----|-----|---------------------------------|
| Locus_28346_Transcript_1/1_Conf_1.000 | 243 | 20 | 2.04E-23  | NP_491653.2    | 79 | 112.079 | 79  | 63  | hypothetical protein F55F8.3    |
| Locus_28347_Transcript_1/1_Conf_1.000 | 168 | 0  |           |                |    |         |     |     |                                 |
| Locus_28348_Transcript_1/1_Conf_1.000 | 135 | 6  | 5.06E-06  | AAK62032.1     | 77 | 54.299  | 36  | 28  | metalloprotease 1 precursor     |
| Locus_28349_Transcript_1/1_Conf_1.000 | 151 | 0  |           |                |    |         |     |     |                                 |
| Locus_2835_Transcript_1/1_Conf_1.000  | 278 | 8  | 1.24E-20  | XP_698903.4    | 84 | 102.834 | 64  | 54  | PREDICTED: hypothetical protein |
| Locus_28350_Transcript_1/1_Conf_1.000 | 148 | 0  |           |                |    |         |     |     |                                 |
| Locus_28351_Transcript_1/1_Conf_1.000 | 130 | 0  |           |                |    |         |     |     |                                 |
| Locus_28352_Transcript_1/1_Conf_1.000 | 181 | 5  | 1.32E-14  | NP_502573.1    | 78 | 82.8037 | 60  | 47  | hypothetical protein Y62E10A.6  |
| Locus_28353_Transcript_1/1_Conf_1.000 | 223 | 20 | 1.55E-34  | EFP12687.1     | 95 | 149.058 | 73  | 70  | CRE-LAM-3 protein               |
| Locus_28354_Transcript_1/1_Conf_1.000 | 144 | 6  | 1.16E-05  | XP_002641536.1 | 80 | 53.1434 | 47  | 38  | C. briggsae CBR-LET-805 protein |
| Locus_28355_Transcript_1/1_Conf_1.000 | 175 | 0  |           |                |    |         |     |     |                                 |
| Locus_28356_Transcript_1/1_Conf_1.000 | 166 | 1  | 1.81E-11  | NP_507678.2    | 79 | 72.4034 | 54  | 43  | hypothetical protein C54E10.2   |
| Locus_28357_Transcript_1/1_Conf_1.000 | 152 | 0  |           |                |    |         |     |     |                                 |
| Locus_28358_Transcript_1/1_Conf_1.000 | 143 | 0  |           |                |    |         |     |     |                                 |
| Locus_28359_Transcript_1/1_Conf_1.000 | 555 | 13 | 5.00E-100 | XP_002633317.1 | 97 | 367.081 | 185 | 180 | Hypothetical protein CBG06054   |
| Locus_2836_Transcript_1/1_Conf_1.000  | 522 | 4  | 4.03E-55  | NP_001033504.1 | 91 | 217.624 | 125 | 114 | hypothetical protein T23B12.11  |
| Locus_28360_Transcript_1/1_Conf_1.000 | 130 | 2  | 2.78E-04  | XP_002638523.1 | 70 | 48.521  | 41  | 29  | Hypothetical protein CBG05551   |

|                                       |     |    |          |                |     |         |    |    |                                                              |
|---------------------------------------|-----|----|----------|----------------|-----|---------|----|----|--------------------------------------------------------------|
| Locus_28361_Transcript_1/1_Conf_1.000 | 211 | 14 | 1.20E-07 | XP_001898113.1 | 53  | 59.6918 | 69 | 37 | EB module family protein                                     |
| Locus_28362_Transcript_1/1_Conf_1.000 | 204 | 0  |          |                |     |         |    |    |                                                              |
| Locus_28363_Transcript_1/1_Conf_1.000 | 184 | 0  |          |                |     |         |    |    |                                                              |
| Locus_28364_Transcript_1/1_Conf_1.000 | 175 | 0  |          |                |     |         |    |    |                                                              |
| Locus_28365_Transcript_1/1_Conf_1.000 | 162 | 20 | 8.40E-25 | EAW59542.1     | 100 | 116.701 | 53 | 53 | hCG2040023                                                   |
| Locus_28366_Transcript_1/1_Conf_1.000 | 190 | 20 | 7.70E-18 | NP_495838.2    | 84  | 93.5893 | 64 | 54 | PYRimidine biosynthesis family member (pyr-1)                |
| Locus_28367_Transcript_1/1_Conf_1.000 | 186 | 0  |          |                |     |         |    |    |                                                              |
| Locus_28368_Transcript_1/1_Conf_1.000 | 181 | 4  | 4.70E-15 | XP_002637525.1 | 86  | 84.3445 | 59 | 51 | Hypothetical protein CBG19248                                |
| Locus_28369_Transcript_1/1_Conf_1.000 | 135 | 20 | 3.72E-17 | NP_001165131.1 | 100 | 91.2781 | 45 | 45 | NADH-cytochrome b5 reductase 3 isoform 3                     |
| Locus_2837_Transcript_1/1_Conf_1.000  | 660 | 0  |          |                |     |         |    |    |                                                              |
| Locus_28370_Transcript_1/1_Conf_1.000 | 172 | 17 | 4.00E-11 | XP_002645256.1 | 92  | 71.2478 | 38 | 35 | Hypothetical protein CBG00135                                |
| Locus_28371_Transcript_1/1_Conf_1.000 | 187 | 0  |          |                |     |         |    |    |                                                              |
| Locus_28372_Transcript_1/1_Conf_1.000 | 174 | 20 | 1.72E-30 | AAD32452.1     | 100 | 135.576 | 58 | 58 | AF067168_1NADH-ubiquinone oxidoreductase B22 subunit homolog |
| Locus_28373_Transcript_1/1_Conf_1.000 | 162 | 0  |          |                |     |         |    |    |                                                              |
| Locus_28374_Transcript_1/1_Conf_1.000 | 325 | 0  |          |                |     |         |    |    |                                                              |
| Locus_28375_Transcript_1/1_Conf_1.000 | 130 | 0  |          |                |     |         |    |    |                                                              |
| Locus_28376_Transcript_1/1_Conf_1.000 | 296 | 0  |          |                |     |         |    |    |                                                              |

|                                       |      |    |           |                |     |         |     |     |                                        |
|---------------------------------------|------|----|-----------|----------------|-----|---------|-----|-----|----------------------------------------|
| Locus_28377_Transcript_1/1_Conf_1.000 | 129  | 4  | 7.83E-07  | EFO19582.1     | 76  | 56.9954 | 43  | 33  | hypothetical protein LOAG_08910        |
| Locus_28378_Transcript_1/1_Conf_1.000 | 143  | 0  |           |                |     |         |     |     |                                        |
| Locus_28379_Transcript_1/1_Conf_1.000 | 136  | 0  |           |                |     |         |     |     |                                        |
| Locus_2838_Transcript_1/1_Conf_1.000  | 1288 | 20 | 2.30E-158 | XP_002643018.1 | 86  | 563.148 | 361 | 312 | C. briggsae CBR-DNJ-10 protein         |
| Locus_28380_Transcript_1/1_Conf_1.000 | 134  | 0  |           |                |     |         |     |     |                                        |
| Locus_28381_Transcript_1/1_Conf_1.000 | 176  | 0  |           |                |     |         |     |     |                                        |
| Locus_28382_Transcript_1/1_Conf_1.000 | 144  | 20 | 9.17E-19  | XP_001150353.1 | 100 | 96.6709 | 48  | 48  | PREDICTED: similar to S863-3 isoform 5 |
| Locus_28383_Transcript_1/1_Conf_1.000 | 226  | 0  |           |                |     |         |     |     |                                        |
| Locus_28384_Transcript_1/1_Conf_1.000 | 156  | 0  |           |                |     |         |     |     |                                        |
| Locus_28385_Transcript_1/1_Conf_1.000 | 161  | 0  |           |                |     |         |     |     |                                        |
| Locus_28386_Transcript_1/1_Conf_1.000 | 156  | 0  |           |                |     |         |     |     |                                        |
| Locus_28387_Transcript_1/1_Conf_1.000 | 132  | 4  | 8.66E-06  | NP_506407.1    | 72  | 53.5286 | 37  | 27  | hypothetical protein F20G2.2           |
| Locus_28388_Transcript_1/1_Conf_1.000 | 185  | 0  |           |                |     |         |     |     |                                        |
| Locus_28389_Transcript_1/1_Conf_1.000 | 168  | 5  | 1.13E-05  | NP_510170.2    | 62  | 53.1434 | 56  | 35  | hypothetical protein K03A11.4          |
| Locus_2839_Transcript_1/3_Conf_0.400  | 479  | 0  |           |                |     |         |     |     |                                        |
| Locus_2839_Transcript_2/3_Conf_0.600  | 1360 | 20 | 3.38E-30  | XP_002638693.1 | 77  | 137.502 | 131 | 101 | Hypothetical protein CBG11890          |
| Locus_2839_Transcript_3/3_Conf_0.600  | 1309 | 20 | 3.19E-30  | XP_002638693.1 | 77  | 137.502 | 131 | 101 | Hypothetical protein CBG11890          |
| Locus_28390_Transcript_1/1_Conf_1.000 | 128  | 0  |           |                |     |         |     |     |                                        |
| Locus_28391_Transcript_1/1_Conf_1.000 | 166  | 0  |           |                |     |         |     |     |                                        |
| Locus_28392_Transcript_1/1_Conf_1.000 | 165  | 20 | 1.59E-07  | XP_001900461.1 | 80  | 59.3066 | 52  | 42  | Mast C-terminus family protein         |
| Locus_28393_Transcript_1/1_Conf_1.000 | 135  | 0  |           |                |     |         |     |     |                                        |
| Locus_28394_Transcript_1/1_Conf_1.000 | 161  | 0  |           |                |     |         |     |     |                                        |
| Locus_28395_Transcript_1/1_Conf_1.000 | 266  | 20 | 5.63E-29  | EFPO5198.1     | 80  | 130.568 | 88  | 71  | CRE-NHX-2 protein                      |

|                                       |     |    |          |                |     |         |     |     |                                 |
|---------------------------------------|-----|----|----------|----------------|-----|---------|-----|-----|---------------------------------|
| Locus_28396_Transcript_1/1_Conf_1.000 | 211 | 20 | 3.37E-18 | NP_496500.1    | 75  | 94.7449 | 68  | 51  | hypothetical protein VF13D12L3  |
| Locus_28397_Transcript_1/1_Conf_1.000 | 179 | 1  | 2.77E-04 | AAO63576.1     | 56  | 48.521  | 48  | 27  | secreted protein 4 precursor    |
| Locus_28398_Transcript_1/1_Conf_1.000 | 159 | 20 | 8.43E-25 | NP_001012983.1 | 100 | 116.701 | 52  | 52  | kallikrein-6 isoform B          |
| Locus_28399_Transcript_1/1_Conf_1.000 | 252 | 0  |          |                |     |         |     |     |                                 |
| Locus_284_Transcript_1/1_Conf_1.000   | 660 | 20 | 1.19E-60 | EFO22689.1     | 89  | 236.884 | 136 | 122 | hypothetical protein LOAG_05794 |

|                                       |      |    |          |                |    |         |     |    |                                                               |
|---------------------------------------|------|----|----------|----------------|----|---------|-----|----|---------------------------------------------------------------|
| Locus_2840_Transcript_1/1_Conf_1.000  | 231  | 13 | 1.17E-18 | EFO17816.1     | 69 | 96.2857 | 76  | 53 | hypothetical protein LOAG_10682                               |
| Locus_28400_Transcript_1/1_Conf_1.000 | 218  | 20 | 5.19E-11 | NP_001033571.1 | 76 | 70.8626 | 72  | 55 | Sulfate Permease family member (sulp-7)                       |
| Locus_28401_Transcript_1/1_Conf_1.000 | 149  | 0  |          |                |    |         |     |    |                                                               |
| Locus_28402_Transcript_1/1_Conf_1.000 | 138  | 0  |          |                |    |         |     |    |                                                               |
| Locus_28403_Transcript_1/1_Conf_1.000 | 154  | 20 | 6.11E-07 | EFP13149.1     | 76 | 57.3806 | 51  | 39 | CRE-CYP-13A6 protein                                          |
| Locus_28404_Transcript_1/1_Conf_1.000 | 283  | 0  |          |                |    |         |     |    |                                                               |
| Locus_28405_Transcript_1/1_Conf_1.000 | 250  | 0  |          |                |    |         |     |    |                                                               |
| Locus_28406_Transcript_1/1_Conf_1.000 | 148  | 0  |          |                |    |         |     |    |                                                               |
| Locus_28407_Transcript_1/1_Conf_1.000 | 341  | 3  | 4.83E-33 | NP_498314.2    | 77 | 144.05  | 111 | 86 | hypothetical protein ZK328.6                                  |
| Locus_28408_Transcript_1/1_Conf_1.000 | 194  | 0  |          |                |    |         |     |    |                                                               |
| Locus_28409_Transcript_1/1_Conf_1.000 | 341  | 20 | 9.07E-32 | XP_002643868.1 | 79 | 139.813 | 110 | 87 | Hypothetical protein CBG02104                                 |
| Locus_2841_Transcript_1/1_Conf_1.000  | 1116 | 0  |          |                |    |         |     |    |                                                               |
| Locus_28410_Transcript_1/1_Conf_1.000 | 226  | 1  | 3.69E-04 | AAK35187.1     | 59 | 48.1358 | 79  | 47 | AF352702_1activation associated secreted protein-like protein |
| Locus_28411_Transcript_1/1_Conf_1.000 | 143  | 0  |          |                |    |         |     |    |                                                               |
| Locus_28412_Transcript_1/1_Conf_1.000 | 189  | 0  |          |                |    |         |     |    |                                                               |
| Locus_28413_Transcript_1/1_Conf_1.000 | 218  | 20 | 1.04E-19 | XP_001200410.1 | 77 | 99.7525 | 70  | 54 | PREDICTED: similar to MGC53562 protein, partial               |
| Locus_28414_Transcript_1/1_Conf_1.000 | 150  | 0  |          |                |    |         |     |    |                                                               |
| Locus_28415_Transcript_1/1_Conf_1.000 | 184  | 0  |          |                |    |         |     |    |                                                               |
| Locus_28416_Transcript_1/1_Conf_1.000 | 144  | 0  |          |                |    |         |     |    |                                                               |

|                                       |     |    |          |                |     |         |     |    |                                                                                      |
|---------------------------------------|-----|----|----------|----------------|-----|---------|-----|----|--------------------------------------------------------------------------------------|
| Locus_28417_Transcript_1/1_Conf_1.000 | 271 | 20 | 9.24E-24 | EFO98755.1     | 82  | 113.235 | 90  | 74 | hypothetical protein CRE_25911                                                       |
| Locus_28418_Transcript_1/1_Conf_1.000 | 182 | 20 | 4.37E-26 | BAH13421.1     | 100 | 120.939 | 60  | 60 | unnamed protein product                                                              |
| Locus_28419_Transcript_1/1_Conf_1.000 | 420 | 20 | 1.34E-30 | NP_500551.2    | 65  | 135.961 | 145 | 95 | hypothetical protein F55F10.1                                                        |
| Locus_2842_Transcript_1/4_Conf_0.500  | 742 | 0  |          |                |     |         |     |    |                                                                                      |
| Locus_2842_Transcript_2/4_Conf_0.625  | 808 | 1  | 9.13E-04 | XP_002130630.1 | 34  | 48.521  | 171 | 59 | PREDICTED: similar to eukaryotic translation initiation factor 3, subunit 10 (theta) |
| Locus_2842_Transcript_3/4_Conf_0.250  | 565 | 0  |          |                |     |         |     |    |                                                                                      |
| Locus_2842_Transcript_4/4_Conf_0.625  | 758 | 0  |          |                |     |         |     |    |                                                                                      |
| Locus_28420_Transcript_1/1_Conf_1.000 | 207 | 0  |          |                |     |         |     |    |                                                                                      |
| Locus_28421_Transcript_1/1_Conf_1.000 | 157 | 0  |          |                |     |         |     |    |                                                                                      |
| Locus_28422_Transcript_1/1_Conf_1.000 | 144 | 0  |          |                |     |         |     |    |                                                                                      |
| Locus_28423_Transcript_1/1_Conf_1.000 | 195 | 5  | 7.18E-08 | EFO19074.1     | 60  | 60.4622 | 61  | 37 | hypothetical protein LOAG_09420                                                      |
| Locus_28424_Transcript_1/1_Conf_1.000 | 227 | 0  |          |                |     |         |     |    |                                                                                      |
| Locus_28425_Transcript_1/1_Conf_1.000 | 364 | 6  | 4.54E-23 | EFO21083.1     | 68  | 110.923 | 122 | 84 | hypothetical protein LOAG_07407                                                      |
| Locus_28426_Transcript_1/1_Conf_1.000 | 143 | 2  | 1.46E-05 | ADI61822.1     | 63  | 52.7582 | 47  | 30 | endonuclease-reverse transcriptase                                                   |



|                                       |     |    |          |                |     |         |     |     |                                                                         |
|---------------------------------------|-----|----|----------|----------------|-----|---------|-----|-----|-------------------------------------------------------------------------|
| Locus_28427_Transcript_1/1_Conf_1.000 | 223 | 20 | 1.27E-36 | P00736.2       | 100 | 155.992 | 73  | 73  | Complement C1r subcomponent                                             |
| Locus_28428_Transcript_1/1_Conf_1.000 | 175 | 20 | 3.05E-19 | NP_500129.1    | 91  | 98.2117 | 57  | 52  | hypothetical protein Y41D4A.6                                           |
| Locus_28429_Transcript_1/1_Conf_1.000 | 131 | 0  |          |                |     |         |     |     |                                                                         |
| Locus_2843_Transcript_1/1_Conf_1.000  | 215 | 0  |          |                |     |         |     |     |                                                                         |
| Locus_28430_Transcript_1/1_Conf_1.000 | 160 | 0  |          |                |     |         |     |     |                                                                         |
| Locus_28431_Transcript_1/1_Conf_1.000 | 142 | 4  | 7.71E-15 | EFO23136.1     | 89  | 83.5741 | 46  | 41  | hypothetical protein LOAG_05358                                         |
| Locus_28432_Transcript_1/1_Conf_1.000 | 196 | 2  | 5.69E-05 | XP_001899991.1 | 70  | 50.8322 | 51  | 36  | Hypothetical 48.3 kDa protein F07F6.1 in chromosome III, putative       |
| Locus_28433_Transcript_1/1_Conf_1.000 | 143 | 0  |          |                |     |         |     |     |                                                                         |
| Locus_28434_Transcript_1/1_Conf_1.000 | 145 | 5  | 1.24E-07 | NP_510427.1    | 81  | 59.6918 | 37  | 30  | hypothetical protein C44H4.4                                            |
| Locus_28435_Transcript_1/1_Conf_1.000 | 169 | 0  |          |                |     |         |     |     |                                                                         |
| Locus_28436_Transcript_1/1_Conf_1.000 | 156 | 0  |          |                |     |         |     |     |                                                                         |
| Locus_28437_Transcript_1/1_Conf_1.000 | 342 | 20 | 5.45E-56 | NP_497970.1    | 95  | 220.32  | 113 | 108 | Adenylyl CYclase family member (acy-1)                                  |
| Locus_28438_Transcript_1/1_Conf_1.000 | 138 | 4  | 8.57E-06 | XP_002636925.1 | 89  | 53.5286 | 46  | 41  | C. briggsae CBR-RHR-1 protein                                           |
| Locus_28439_Transcript_1/1_Conf_1.000 | 135 | 3  | 9.51E-05 | XP_002636379.1 | 67  | 50.0618 | 40  | 27  | Hypothetical protein CBG08681                                           |
| Locus_2844_Transcript_1/1_Conf_1.000  | 625 | 20 | 3.59E-53 | NP_001123142.1 | 72  | 211.846 | 196 | 143 | related to yeast Vacuolar Protein Sorting factor family member (vps-41) |
| Locus_28440_Transcript_1/1_Conf_1.000 | 147 | 0  |          |                |     |         |     |     |                                                                         |
| Locus_28441_Transcript_1/1_Conf_1.000 | 241 | 0  |          |                |     |         |     |     |                                                                         |

|                                       |     |    |          |                |     |         |     |    |                                                                                   |
|---------------------------------------|-----|----|----------|----------------|-----|---------|-----|----|-----------------------------------------------------------------------------------|
| Locus_28442_Transcript_1/1_Conf_1.000 | 228 | 2  | 5.30E-11 | XP_002643649.1 | 83  | 70.8626 | 62  | 52 | Hypothetical protein CBG16398                                                     |
| Locus_28443_Transcript_1/1_Conf_1.000 | 235 | 20 | 7.61E-18 | BAH12043.1     | 100 | 93.5893 | 78  | 78 | unnamed protein product                                                           |
| Locus_28444_Transcript_1/1_Conf_1.000 | 154 | 0  |          |                |     |         |     |    |                                                                                   |
| Locus_28445_Transcript_1/1_Conf_1.000 | 178 | 0  |          |                |     |         |     |    |                                                                                   |
| Locus_28446_Transcript_1/1_Conf_1.000 | 383 | 0  |          |                |     |         |     |    |                                                                                   |
| Locus_28447_Transcript_1/1_Conf_1.000 | 148 | 20 | 1.41E-19 | XP_002829227.1 | 100 | 99.3673 | 49  | 49 | PREDICTED: heterogeneous nuclear ribonucleoprotein L-like isoform 2               |
| Locus_28448_Transcript_1/1_Conf_1.000 | 400 | 0  |          |                |     |         |     |    |                                                                                   |
| Locus_28449_Transcript_1/1_Conf_1.000 | 224 | 0  |          |                |     |         |     |    |                                                                                   |
| Locus_2845_Transcript_1/2_Conf_1.000  | 631 | 3  | 1.16E-06 | NP_493591.2    | 54  | 57.3806 | 153 | 83 | Enhancer of unc-40 Ventral Axon guidance defects family member (eva-1)            |
| Locus_2845_Transcript_2/2_Conf_1.000  | 631 | 3  | 1.16E-06 | NP_493591.2    | 54  | 57.3806 | 153 | 83 | Enhancer of unc-40 Ventral Axon guidance defects family member (eva-1)            |
| Locus_28450_Transcript_1/1_Conf_1.000 | 184 | 20 | 3.26E-16 | EFP13302.1     | 83  | 88.1965 | 60  | 50 | CRE-PAT-2 protein                                                                 |
| Locus_28451_Transcript_1/1_Conf_1.000 | 152 | 0  |          |                |     |         |     |    |                                                                                   |
| Locus_28452_Transcript_1/1_Conf_1.000 | 140 | 20 | 3.26E-13 | NP_001024060.1 | 89  | 78.1814 | 46  | 41 | PAPS (adenosine 3'-phosphate 5'-phosphosulfate) Transporter family member (pst-1) |
| Locus_28453_Transcript_1/1_Conf_1.000 | 140 | 0  |          |                |     |         |     |    |                                                                                   |
| Locus_28454_Transcript_1/1_Conf_1.000 | 137 | 0  |          |                |     |         |     |    |                                                                                   |
| Locus_28455_Transcript_1/1_Conf_1.000 | 174 | 0  |          |                |     |         |     |    |                                                                                   |
| Locus_28456_Transcript_1/1_Conf_1.000 | 138 | 0  |          |                |     |         |     |    |                                                                                   |
| Locus_28457_Transcript_1/1_Conf_1.000 | 201 | 0  |          |                |     |         |     |    |                                                                                   |
| Locus_28458_Transcript_1/1_Conf_1.000 | 173 | 20 | 4.88E-25 | BAA07643.1     | 100 | 117.472 | 57  | 57 | KIAA0085                                                                          |
| Locus_28459_Transcript_1/1_Conf_1.000 | 129 | 0  |          |                |     |         |     |    |                                                                                   |
| Locus_2846_Transcript_1/1_Conf_1.000  | 195 | 0  |          |                |     |         |     |    |                                                                                   |
| Locus_28460_Transcript_1/1_Conf_1.000 | 156 | 0  |          |                |     |         |     |    |                                                                                   |
| Locus_28461_Transcript_1/1_Conf_1.000 | 245 | 0  |          |                |     |         |     |    |                                                                                   |
| Locus_28462_Transcript_1/1_Conf_1.000 | 192 | 0  |          |                |     |         |     |    |                                                                                   |
| Locus_28463_Transcript_1/1_Conf_1.000 | 169 | 0  |          |                |     |         |     |    |                                                                                   |
| Locus_28464_Transcript_1/1_Conf_1.000 | 145 | 0  |          |                |     |         |     |    |                                                                                   |
| Locus_28465_Transcript_1/1_Conf_1.000 | 197 | 3  | 9.00E-35 | NP_492020.1    | 100 | 149.828 | 65  | 65 | hypothetical protein K10D3.4                                                      |
| Locus_28466_Transcript_1/1_Conf_1.000 | 135 | 2  | 4.87E-09 | NP_001022489.1 | 78  | 64.3142 | 47  | 37 | Homolog of Hedgehog AcylTransferase family member (hhat-1)                        |
| Locus_28467_Transcript_1/1_Conf_1.000 | 259 | 0  |          |                |     |         |     |    |                                                                                   |
| Locus_28468_Transcript_1/1_Conf_1.000 | 171 | 4  | 3.63E-12 | NP_499313.2    | 87  | 74.7146 | 56  | 49 | hypothetical protein F43D9.1                                                      |
| Locus_28469_Transcript_1/1_Conf_1.000 | 131 | 0  |          |                |     |         |     |    |                                                                                   |

|                                       |     |    |          |                |    |         |     |     |                                                          |
|---------------------------------------|-----|----|----------|----------------|----|---------|-----|-----|----------------------------------------------------------|
| Locus_2847_Transcript_1/1_Conf_1.000  | 611 | 20 | 9.58E-64 | AAL06642.1     | 80 | 246.899 | 169 | 136 | serine-threonine protein kinase                          |
| Locus_28470_Transcript_1/1_Conf_1.000 | 148 | 0  |          |                |    |         |     |     |                                                          |
| Locus_28471_Transcript_1/1_Conf_1.000 | 140 | 0  |          |                |    |         |     |     |                                                          |
| Locus_28472_Transcript_1/1_Conf_1.000 | 275 | 20 | 1.98E-34 | EFO94520.1     | 85 | 148.673 | 84  | 72  | CRE-NHR-105 protein                                      |
| Locus_28473_Transcript_1/1_Conf_1.000 | 136 | 0  |          |                |    |         |     |     |                                                          |
| Locus_28474_Transcript_1/1_Conf_1.000 | 270 | 0  |          |                |    |         |     |     |                                                          |
| Locus_28475_Transcript_1/1_Conf_1.000 | 156 | 0  |          |                |    |         |     |     |                                                          |
| Locus_28476_Transcript_1/1_Conf_1.000 | 241 | 0  |          |                |    |         |     |     |                                                          |
| Locus_28477_Transcript_1/1_Conf_1.000 | 131 | 18 | 3.51E-15 | XP_003064997.1 | 97 | 84.7297 | 37  | 36  | predicted protein                                        |
| Locus_28478_Transcript_1/1_Conf_1.000 | 179 | 2  | 2.58E-10 | XP_002630273.1 | 76 | 68.5514 | 56  | 43  | Hypothetical protein CBG00701                            |
| Locus_28479_Transcript_1/1_Conf_1.000 | 191 | 4  | 8.22E-12 | XP_001896262.1 | 72 | 73.559  | 62  | 45  | 3'-5'-cyclic nucleotide phosphodiesterase family protein |
| Locus_2848_Transcript_1/1_Conf_1.000  | 733 | 20 | 5.53E-31 | NP_001041056.1 | 63 | 138.658 | 165 | 104 | hypothetical protein Y67H2A.2                            |

|                                       |     |    |          |                |    |         |     |     |                               |
|---------------------------------------|-----|----|----------|----------------|----|---------|-----|-----|-------------------------------|
| Locus_28480_Transcript_1/1_Conf_1.000 | 278 | 20 | 8.83E-43 | XP_002634414.1 | 87 | 176.407 | 91  | 80  | C. briggsae CBR-EPI-1 protein |
| Locus_28481_Transcript_1/1_Conf_1.000 | 133 | 0  |          |                |    |         |     |     |                               |
| Locus_28482_Transcript_1/1_Conf_1.000 | 136 | 0  |          |                |    |         |     |     |                               |
| Locus_28483_Transcript_1/1_Conf_1.000 | 155 | 0  |          |                |    |         |     |     |                               |
| Locus_28484_Transcript_1/1_Conf_1.000 | 227 | 0  |          |                |    |         |     |     |                               |
| Locus_28485_Transcript_1/1_Conf_1.000 | 134 | 20 | 9.85E-10 | XP_002640443.1 | 86 | 66.6254 | 44  | 38  | C. briggsae CBR-HAF-6 protein |
| Locus_28486_Transcript_1/1_Conf_1.000 | 170 | 0  |          |                |    |         |     |     |                               |
| Locus_28487_Transcript_1/1_Conf_1.000 | 463 | 20 | 5.13E-22 | EFO21647.1     | 59 | 107.457 | 139 | 83  | cpsf3-prov protein            |
| Locus_28488_Transcript_1/1_Conf_1.000 | 175 | 0  |          |                |    |         |     |     |                               |
| Locus_28489_Transcript_1/1_Conf_1.000 | 164 | 0  |          |                |    |         |     |     |                               |
| Locus_2849_Transcript_1/1_Conf_1.000  | 415 | 20 | 7.88E-60 | XP_002636570.1 | 91 | 233.032 | 136 | 125 | C. briggsae CBR-PYC-1 protein |
| Locus_28490_Transcript_1/1_Conf_1.000 | 166 | 0  |          |                |    |         |     |     |                               |
| Locus_28491_Transcript_1/1_Conf_1.000 | 144 | 0  |          |                |    |         |     |     |                               |
| Locus_28492_Transcript_1/1_Conf_1.000 | 165 | 0  |          |                |    |         |     |     |                               |
| Locus_28493_Transcript_1/1_Conf_1.000 | 133 | 0  |          |                |    |         |     |     |                               |
| Locus_28494_Transcript_1/1_Conf_1.000 | 155 | 20 | 4.08E-11 | XP_002643853.1 | 78 | 71.2478 | 51  | 40  | Hypothetical protein CBG02083 |
| Locus_28495_Transcript_1/1_Conf_1.000 | 209 | 0  |          |                |    |         |     |     |                               |
| Locus_28496_Transcript_1/1_Conf_1.000 | 192 | 0  |          |                |    |         |     |     |                               |
| Locus_28497_Transcript_1/1_Conf_1.000 | 194 | 0  |          |                |    |         |     |     |                               |
| Locus_28498_Transcript_1/1_Conf_1.000 | 159 | 1  | 2.92E-09 | YP_001152214.1 | 79 | 56.6102 | 44  | 35  | ORF124                        |
| Locus_28499_Transcript_1/1_Conf_1.000 | 165 | 0  |          |                |    |         |     |     |                               |
| Locus_285_Transcript_1/5_Conf_0.545   | 989 | 1  | 7.74E-17 | CAR63661.1     | 97 | 92.4337 | 41  | 40  | hypothetical protein          |
| Locus_285_Transcript_2/5_Conf_0.455   | 881 | 0  |          |                |    |         |     |     |                               |
| Locus_285_Transcript_3/5_Conf_0.455   | 989 | 1  | 7.74E-17 | CAR63661.1     | 97 | 92.4337 | 41  | 40  | hypothetical protein          |
| Locus_285_Transcript_4/5_Conf_0.182   | 720 | 7  | 3.82E-29 | CAR63661.1     | 78 | 132.494 | 103 | 81  | hypothetical protein          |
| Locus_285_Transcript_5/5_Conf_0.455   | 881 | 0  |          |                |    |         |     |     |                               |

|                                       |     |    |          |                |    |         |     |     |                                |
|---------------------------------------|-----|----|----------|----------------|----|---------|-----|-----|--------------------------------|
| Locus_2850_Transcript_1/1_Conf_1.000  | 541 | 20 | 4.34E-26 | XP_002647009.1 | 63 | 121.324 | 173 | 110 | C. briggsae CBR-DIV-1 protein  |
| Locus_28500_Transcript_1/1_Conf_1.000 | 300 | 0  |          |                |    |         |     |     |                                |
| Locus_28501_Transcript_1/1_Conf_1.000 | 192 | 3  | 1.55E-10 | NP_505451.1    | 68 | 69.3218 | 63  | 43  | hypothetical protein F11A3.1   |
| Locus_28502_Transcript_1/1_Conf_1.000 | 141 | 0  |          |                |    |         |     |     |                                |
| Locus_28503_Transcript_1/1_Conf_1.000 | 349 | 0  |          |                |    |         |     |     |                                |
| Locus_28504_Transcript_1/1_Conf_1.000 | 164 | 0  |          |                |    |         |     |     |                                |
| Locus_28505_Transcript_1/1_Conf_1.000 | 170 | 0  |          |                |    |         |     |     |                                |
| Locus_28506_Transcript_1/1_Conf_1.000 | 163 | 0  |          |                |    |         |     |     |                                |
| Locus_28507_Transcript_1/1_Conf_1.000 | 129 | 20 | 9.58E-13 | EFO92677.1     | 95 | 76.6406 | 42  | 40  | hypothetical protein CRE_16357 |
| Locus_28508_Transcript_1/1_Conf_1.000 | 224 | 7  | 3.25E-08 | NP_001122650.1 | 78 | 61.6178 | 74  | 58  | PaTChed family member (ptc-3)  |
| Locus_28509_Transcript_1/1_Conf_1.000 | 178 | 0  |          |                |    |         |     |     |                                |
| Locus_2851_Transcript_1/1_Conf_1.000  | 442 | 20 | 3.55E-23 | ACD88894.1     | 75 | 111.309 | 106 | 80  | transthyretin-like protein     |
| Locus_28510_Transcript_1/1_Conf_1.000 | 186 | 20 | 2.49E-08 | XP_002171686.1 | 81 | 62.003  | 48  | 39  | chaperone protein dnaJ 3       |
| Locus_28511_Transcript_1/1_Conf_1.000 | 367 | 7  | 5.18E-19 | XP_002631002.1 | 56 | 97.4413 | 139 | 78  | Hypothetical protein CBG02749  |
| Locus_28512_Transcript_1/1_Conf_1.000 | 162 | 10 | 2.99E-06 | XP_002631054.1 | 67 | 55.0694 | 49  | 33  | C. briggsae CBR-BTF-1 protein  |
| Locus_28513_Transcript_1/1_Conf_1.000 | 166 | 20 | 1.25E-12 | EFP05438.1     | 75 | 76.2554 | 54  | 41  | hypothetical protein CRE_27247 |
| Locus_28514_Transcript_1/1_Conf_1.000 | 332 | 0  |          |                |    |         |     |     |                                |
| Locus_28515_Transcript_1/1_Conf_1.000 | 186 | 4  | 6.78E-06 | EFO91751.1     | 62 | 53.9138 | 59  | 37  | CRE-SQV-8 protein              |

|                                       |     |    |          |                |     |         |     |    |                                 |
|---------------------------------------|-----|----|----------|----------------|-----|---------|-----|----|---------------------------------|
| Locus_28516_Transcript_1/1_Conf_1.000 | 135 | 20 | 3.38E-18 | BAG54183.1     | 100 | 94.7449 | 45  | 45 | unnamed protein product         |
| Locus_28517_Transcript_1/1_Conf_1.000 | 138 | 0  |          |                |     |         |     |    |                                 |
| Locus_28518_Transcript_1/1_Conf_1.000 | 128 | 0  |          |                |     |         |     |    |                                 |
| Locus_28519_Transcript_1/1_Conf_1.000 | 327 | 0  |          |                |     |         |     |    |                                 |
| Locus_2852_Transcript_1/1_Conf_1.000  | 758 | 2  | 1.72E-06 | XP_001896845.1 | 46  | 57.3806 | 156 | 72 | hypothetical protein Bm1_26975  |
| Locus_28520_Transcript_1/1_Conf_1.000 | 175 | 18 | 1.62E-12 | NP_491778.2    | 83  | 75.8702 | 48  | 40 | hypothetical protein T09B4.4    |
| Locus_28521_Transcript_1/1_Conf_1.000 | 130 | 0  |          |                |     |         |     |    |                                 |
| Locus_28522_Transcript_1/1_Conf_1.000 | 203 | 0  |          |                |     |         |     |    |                                 |
| Locus_28523_Transcript_1/1_Conf_1.000 | 140 | 0  |          |                |     |         |     |    |                                 |
| Locus_28524_Transcript_1/1_Conf_1.000 | 159 | 0  |          |                |     |         |     |    |                                 |
| Locus_28525_Transcript_1/1_Conf_1.000 | 227 | 6  | 4.81E-12 | XP_002638684.1 | 69  | 74.3294 | 75  | 52 | C. briggsae CBR-LRS-2 protein   |
| Locus_28526_Transcript_1/1_Conf_1.000 | 159 | 0  |          |                |     |         |     |    |                                 |
| Locus_28527_Transcript_1/1_Conf_1.000 | 169 | 0  |          |                |     |         |     |    |                                 |
| Locus_28528_Transcript_1/1_Conf_1.000 | 138 | 0  |          |                |     |         |     |    |                                 |
| Locus_28529_Transcript_1/1_Conf_1.000 | 256 | 0  |          |                |     |         |     |    |                                 |
| Locus_2853_Transcript_1/1_Conf_1.000  | 639 | 20 | 8.01E-35 | XP_002638640.1 | 80  | 150.984 | 115 | 92 | Hypothetical protein CBG05694   |
| Locus_28530_Transcript_1/1_Conf_1.000 | 249 | 0  |          |                |     |         |     |    |                                 |
| Locus_28531_Transcript_1/1_Conf_1.000 | 233 | 4  | 7.17E-08 | NP_499273.3    | 61  | 60.4622 | 83  | 51 | hypothetical protein R01H10.7   |
| Locus_28532_Transcript_1/1_Conf_1.000 | 224 | 0  |          |                |     |         |     |    |                                 |
| Locus_28533_Transcript_1/1_Conf_1.000 | 200 | 0  |          |                |     |         |     |    |                                 |
| Locus_28534_Transcript_1/1_Conf_1.000 | 315 | 0  |          |                |     |         |     |    |                                 |
| Locus_28535_Transcript_1/1_Conf_1.000 | 231 | 0  |          |                |     |         |     |    |                                 |
| Locus_28536_Transcript_1/1_Conf_1.000 | 130 | 0  |          |                |     |         |     |    |                                 |
| Locus_28537_Transcript_1/1_Conf_1.000 | 155 | 0  |          |                |     |         |     |    |                                 |
| Locus_28538_Transcript_1/1_Conf_1.000 | 148 | 20 | 2.75E-15 | FFP08562.1     | 93  | 85.1149 | 49  | 46 | hypothetical protein CRE_15512  |
| Locus_28539_Transcript_1/1_Conf_1.000 | 177 | 2  | 8.28E-09 | NP_500216.1    | 73  | 63.5438 | 57  | 42 | hypothetical protein Y69A2AR.16 |

|                                       |      |    |          |                |     |         |     |     |                                     |
|---------------------------------------|------|----|----------|----------------|-----|---------|-----|-----|-------------------------------------|
| Locus_2854_Transcript_1/2_Conf_1.000  | 1237 | 15 | 8.02E-44 | XP_001894670.1 | 51  | 182.57  | 397 | 204 | hypothetical protein Bm1_16065      |
| Locus_2854_Transcript_2/2_Conf_1.000  | 1237 | 15 | 8.02E-44 | XP_001894670.1 | 51  | 182.57  | 397 | 204 | hypothetical protein Bm1_16065      |
| Locus_28540_Transcript_1/1_Conf_1.000 | 140  | 0  |          |                |     |         |     |     |                                     |
| Locus_28541_Transcript_1/1_Conf_1.000 | 259  | 3  | 1.50E-05 | XP_002640312.1 | 67  | 52.7582 | 46  | 31  | Hypothetical protein CBG12852       |
| Locus_28542_Transcript_1/1_Conf_1.000 | 225  | 20 | 6.29E-12 | XP_002640011.1 | 90  | 73.9442 | 74  | 67  | Hypothetical protein CBG12481       |
| Locus_28543_Transcript_1/1_Conf_1.000 | 162  | 0  |          |                |     |         |     |     |                                     |
| Locus_28544_Transcript_1/1_Conf_1.000 | 140  | 3  | 1.47E-05 | EFP00055.1     | 69  | 52.7582 | 49  | 34  | hypothetical protein CRE_18594      |
| Locus_28545_Transcript_1/1_Conf_1.000 | 136  | 20 | 4.89E-09 | AAM97610.1     | 78  | 64.3142 | 41  | 32  | AF480920_1ADP/ATP carrier           |
| Locus_28546_Transcript_1/1_Conf_1.000 | 165  | 20 | 5.80E-18 | NP_492053.1    | 92  | 93.9745 | 54  | 50  | LEThal family member (let-75)       |
| Locus_28547_Transcript_1/1_Conf_1.000 | 148  | 0  |          |                |     |         |     |     |                                     |
| Locus_28548_Transcript_1/1_Conf_1.000 | 161  | 0  |          |                |     |         |     |     |                                     |
| Locus_28549_Transcript_1/1_Conf_1.000 | 268  |    |          |                |     |         |     |     |                                     |
| Locus_2855_Transcript_1/1_Conf_1.000  | 332  | 0  |          |                |     |         |     |     |                                     |
| Locus_28550_Transcript_1/1_Conf_1.000 | 132  | 20 | 3.39E-18 | XP_002804983.1 | 100 | 94.7449 | 43  | 43  | PREDICTED: isocitrate dehydrogenase |
| Locus_28551_Transcript_1/1_Conf_1.000 | 151  | 0  |          |                |     |         |     |     |                                     |

|                                       |     |    |          |                |     |         |     |     |                                                 |
|---------------------------------------|-----|----|----------|----------------|-----|---------|-----|-----|-------------------------------------------------|
| Locus_28552_Transcript_1/1_Conf_1.000 | 131 | 0  |          |                |     |         |     |     |                                                 |
| Locus_28553_Transcript_1/1_Conf_1.000 | 130 | 0  |          |                |     |         |     |     |                                                 |
| Locus_28554_Transcript_1/1_Conf_1.000 | 130 | 0  |          |                |     |         |     |     |                                                 |
| Locus_28555_Transcript_1/1_Conf_1.000 | 147 | 0  |          |                |     |         |     |     |                                                 |
| Locus_28556_Transcript_1/1_Conf_1.000 | 255 | 1  | 5.19E-06 | EFO17857.1     | 64  | 54.299  | 71  | 46  | CK1/TTBK protein kinase                         |
| Locus_28557_Transcript_1/1_Conf_1.000 | 137 | 0  |          |                |     |         |     |     |                                                 |
| Locus_28558_Transcript_1/1_Conf_1.000 | 236 | 20 | 1.06E-19 | BAG63075.1     | 100 | 99.7525 | 76  | 76  | unnamed protein product                         |
| Locus_28559_Transcript_1/1_Conf_1.000 | 183 | 20 | 1.15E-21 | XP_002642021.1 | 86  | 106.301 | 60  | 52  | C. briggsae CBR-COQ-8 protein                   |
| Locus_2856_Transcript_1/1_Conf_1.000  | 314 | 20 | 3.12E-35 | XP_002641973.1 | 84  | 151.369 | 101 | 85  | C. briggsae CBR-HSP-12.2 protein                |
| Locus_28560_Transcript_1/1_Conf_1.000 | 175 | 0  |          |                |     |         |     |     |                                                 |
| Locus_28561_Transcript_1/1_Conf_1.000 | 131 | 0  |          |                |     |         |     |     |                                                 |
| Locus_28562_Transcript_1/1_Conf_1.000 | 595 | 20 | 5.46E-29 | XP_001899696.1 | 60  | 131.339 | 170 | 103 | CCR4-Not complex component, Not1 family protein |
| Locus_28563_Transcript_1/1_Conf_1.000 | 132 | 0  |          |                |     |         |     |     |                                                 |
| Locus_28564_Transcript_1/1_Conf_1.000 | 210 | 20 | 3.72E-17 | NP_001024318.1 | 79  | 91.2781 | 67  | 53  | hypothetical protein ZK697.14                   |



|                                       |     |    |          |                |     |         |    |    |                                                                              |
|---------------------------------------|-----|----|----------|----------------|-----|---------|----|----|------------------------------------------------------------------------------|
| Locus_28565_Transcript_1/1_Conf_1.000 | 206 | 20 | 8.91E-35 | BAG65408.1     | 100 | 149.828 | 68 | 68 | unnamed protein product                                                      |
| Locus_28566_Transcript_1/1_Conf_1.000 | 286 | 20 | 2.84E-12 | XP_001894871.1 | 64  | 75.0998 | 77 | 50 | Leucine Rich Repeat family protein                                           |
| Locus_28567_Transcript_1/1_Conf_1.000 | 160 | 20 | 6.91E-11 | XP_002632976.1 | 76  | 70.4774 | 52 | 40 | Hypothetical protein CBG21736                                                |
| Locus_28568_Transcript_1/1_Conf_1.000 | 181 | 20 | 1.46E-13 | EFO87295.1     | 85  | 79.337  | 60 | 51 | hypothetical protein CRE_25800                                               |
| Locus_28569_Transcript_1/1_Conf_1.000 | 208 | 0  |          |                |     |         |    |    |                                                                              |
| Locus_2857_Transcript_1/1_Conf_1.000  | 737 | 20 | 1.09E-34 | NP_501636.2    | 91  | 150.984 | 84 | 77 | Vacuolar H ATPase family member (vha-17)                                     |
| Locus_28570_Transcript_1/1_Conf_1.000 | 252 |    |          |                |     |         |    |    |                                                                              |
| Locus_28571_Transcript_1/1_Conf_1.000 | 282 | 0  |          |                |     |         |    |    |                                                                              |
| Locus_28572_Transcript_1/1_Conf_1.000 | 198 | 0  |          |                |     |         |    |    |                                                                              |
| Locus_28573_Transcript_1/1_Conf_1.000 | 163 | 20 | 4.62E-15 | XP_002638818.1 | 83  | 84.3445 | 54 | 45 | Hypothetical protein CBG22021                                                |
| Locus_28574_Transcript_1/1_Conf_1.000 | 154 | 0  |          |                |     |         |    |    |                                                                              |
| Locus_28575_Transcript_1/1_Conf_1.000 | 129 | 0  |          |                |     |         |    |    |                                                                              |
| Locus_28576_Transcript_1/1_Conf_1.000 | 269 | 12 | 1.57E-39 | CAR63715.1     | 98  | 165.622 | 89 | 88 | putative NHL (ring finger b-box coiled coil) domain containing family member |
| Locus_28577_Transcript_1/1_Conf_1.000 | 147 | 0  |          |                |     |         |    |    |                                                                              |

|                                       |      |    |           |                |     |         |     |     |                                                             |
|---------------------------------------|------|----|-----------|----------------|-----|---------|-----|-----|-------------------------------------------------------------|
| Locus_28578_Transcript_1/1_Conf_1.000 | 210  | 20 | 1.20E-15  | Q0MQ98.1       | 100 | 86.2705 | 42  | 42  | NDUA4_GORGORecName: Full=NADH dehydrogenase                 |
| Locus_28579_Transcript_1/1_Conf_1.000 | 259  | 0  |           |                |     |         |     |     |                                                             |
| Locus_2858_Transcript_1/1_Conf_1.000  | 758  | 20 | 6.99E-109 | BAC06575.1     | 95  | 397.512 | 216 | 206 | As37                                                        |
| Locus_28580_Transcript_1/1_Conf_1.000 | 235  | 0  |           |                |     |         |     |     |                                                             |
| Locus_28581_Transcript_1/1_Conf_1.000 | 216  | 0  |           |                |     |         |     |     |                                                             |
| Locus_28582_Transcript_1/1_Conf_1.000 | 203  | 3  | 5.80E-18  | XP_002637648.1 | 85  | 93.9745 | 62  | 53  | C. briggsae CBR-FSHR-1 protein                              |
| Locus_28583_Transcript_1/1_Conf_1.000 | 150  | 20 | 1.27E-12  | XP_002644330.1 | 89  | 76.2554 | 48  | 43  | C. briggsae CBR-SPC-1 protein                               |
| Locus_28584_Transcript_1/1_Conf_1.000 | 176  | 0  |           |                |     |         |     |     |                                                             |
| Locus_28585_Transcript_1/1_Conf_1.000 | 133  | 0  |           |                |     |         |     |     |                                                             |
| Locus_28586_Transcript_1/1_Conf_1.000 | 142  | 0  |           |                |     |         |     |     |                                                             |
| Locus_28587_Transcript_1/1_Conf_1.000 | 204  | 20 | 2.68E-31  | EFPO7753.1     | 100 | 138.272 | 67  | 67  | CRE-EGL-44 protein                                          |
| Locus_28588_Transcript_1/1_Conf_1.000 | 293  | 20 | 2.20E-49  | XP_002926989.1 | 100 | 198.364 | 97  | 97  | PREDICTED: t-complex protein 1 subunit gamma-like isoform 2 |
| Locus_28589_Transcript_1/1_Conf_1.000 | 139  | 0  |           |                |     |         |     |     |                                                             |
| Locus_2859_Transcript_1/1_Conf_1.000  | 1038 | 20 | 3.26E-69  | NP_498947.1    | 73  | 266.544 | 267 | 195 | PeRoXisome assembly factor family member (prx-19)           |
| Locus_28590_Transcript_1/1_Conf_1.000 | 195  | 20 | 3.66E-28  | BAH13680.1     | 100 | 127.872 | 65  | 65  | unnamed protein product                                     |

|                                       |      |    |           |                |     |         |     |     |                                 |
|---------------------------------------|------|----|-----------|----------------|-----|---------|-----|-----|---------------------------------|
| Locus_28591_Transcript_1/1_Conf_1.000 | 174  | 20 | 1.12E-21  | EFO24540.1     | 92  | 106.301 | 57  | 53  | hypothetical protein LOAG_03946 |
| Locus_28592_Transcript_1/1_Conf_1.000 | 210  | 0  |           |                |     |         |     |     |                                 |
| Locus_28593_Transcript_1/1_Conf_1.000 | 396  | 0  |           |                |     |         |     |     |                                 |
| Locus_28594_Transcript_1/1_Conf_1.000 | 183  | 12 | 5.01E-17  | NP_001040770.1 | 75  | 90.8929 | 58  | 44  | hypothetical protein F26G1.9    |
| Locus_28595_Transcript_1/1_Conf_1.000 | 182  | 20 | 1.11E-21  | XP_002634423.1 | 91  | 106.301 | 59  | 54  | C. briggsae CBR-PTR-14 protein  |
| Locus_28596_Transcript_1/1_Conf_1.000 | 219  | 20 | 5.52E-32  | XP_002639929.1 | 91  | 140.584 | 73  | 67  | Hypothetical protein CBG08265   |
| Locus_28597_Transcript_1/1_Conf_1.000 | 131  | 0  |           |                |     |         |     |     |                                 |
| Locus_28598_Transcript_1/1_Conf_1.000 | 143  | 0  |           |                |     |         |     |     |                                 |
| Locus_28599_Transcript_1/1_Conf_1.000 | 148  | 0  |           |                |     |         |     |     |                                 |
| Locus_286_Transcript_1/2_Conf_1.000   | 1154 | 20 | 2.55E-174 | CAL30086.1     | 100 | 615.92  | 331 | 331 | calreticulin precursor          |
| Locus_286_Transcript_2/2_Conf_1.000   | 328  | 20 | 8.58E-46  | CAL30086.1     | 100 | 186.422 | 84  | 84  | calreticulin precursor          |
| Locus_2860_Transcript_1/2_Conf_1.000  | 1581 | 20 | 2.56E-56  | NP_501842.2    | 51  | 224.557 | 438 | 226 | hypothetical protein K08F4.2    |
| Locus_2860_Transcript_2/2_Conf_1.000  | 630  | 4  | 2.03E-27  | NP_501842.2    | 75  | 126.331 | 104 | 78  | hypothetical protein K08F4.2    |
| Locus_28600_Transcript_1/1_Conf_1.000 | 169  | 4  | 3.40E-10  | XP_002643114.1 | 73  | 68.1662 | 56  | 41  | C. briggsae CBR-OSM-12 protein  |
| Locus_28601_Transcript_1/1_Conf_1.000 | 186  | 0  |           |                |     |         |     |     |                                 |
| Locus_28602_Transcript_1/1_Conf_1.000 | 176  | 0  |           |                |     |         |     |     |                                 |
| Locus_28603_Transcript_1/1_Conf_1.000 | 131  | 0  |           |                |     |         |     |     |                                 |
| Locus_28604_Transcript_1/1_Conf_1.000 | 147  | 0  |           |                |     |         |     |     |                                 |
| Locus_28605_Transcript_1/1_Conf_1.000 | 138  | 0  |           |                |     |         |     |     |                                 |
| Locus_28606_Transcript_1/1_Conf_1.000 | 183  | 0  |           |                |     |         |     |     |                                 |
| Locus_28607_Transcript_1/1_Conf_1.000 | 147  | 0  |           |                |     |         |     |     |                                 |
| Locus_28608_Transcript_1/1_Conf_1.000 | 147  | 0  |           |                |     |         |     |     |                                 |
| Locus_28609_Transcript_1/1_Conf_1.000 | 167  | 0  |           |                |     |         |     |     |                                 |

|                                       |      |    |           |                |     |         |     |     |                                                                          |
|---------------------------------------|------|----|-----------|----------------|-----|---------|-----|-----|--------------------------------------------------------------------------|
| Locus_2861_Transcript_1/1_Conf_1.000  | 1246 | 20 | 5.89E-111 | XP_001894436.1 | 84  | 405.601 | 272 | 229 | heparan 6-O sulfotransferase HST-6                                       |
| Locus_28610_Transcript_1/1_Conf_1.000 | 151  | 0  |           |                |     |         |     |     |                                                                          |
| Locus_28611_Transcript_1/1_Conf_1.000 | 191  | 7  | 1.45E-08  | XP_002631564.1 | 80  | 62.7734 | 42  | 34  | Hypothetical protein CBG20740                                            |
| Locus_28612_Transcript_1/1_Conf_1.000 | 173  | 20 | 3.38E-18  | 3MTL           | 100 | 94.7449 | 57  | 57  | CrystalStructure OfThe Pctaire1 Kinase In Complex With Ind E804          |
| Locus_28613_Transcript_1/1_Conf_1.000 | 135  | 10 | 1.62E-12  | EFP02763.1     | 90  | 75.8702 | 44  | 40  | hypothetical protein CRE_28516                                           |
| Locus_28614_Transcript_1/1_Conf_1.000 | 160  | 0  |           |                |     |         |     |     |                                                                          |
| Locus_28615_Transcript_1/1_Conf_1.000 | 147  | 0  |           |                |     |         |     |     |                                                                          |
| Locus_28616_Transcript_1/1_Conf_1.000 | 142  | 0  |           |                |     |         |     |     |                                                                          |
| Locus_28617_Transcript_1/1_Conf_1.000 | 316  | 0  |           |                |     |         |     |     |                                                                          |
| Locus_28618_Transcript_1/1_Conf_1.000 | 139  | 20 | 4.68E-20  | EFB20679.1     | 100 | 100.908 | 46  | 46  | hypothetical protein PANDA_013768                                        |
| Locus_28619_Transcript_1/1_Conf_1.000 | 141  | 0  |           |                |     |         |     |     |                                                                          |
| Locus_2862_Transcript_1/1_Conf_1.000  | 925  | 20 | 1.60E-29  | XP_001897636.1 | 55  | 134.42  | 259 | 145 | hypothetical protein Bm1_30970                                           |
| Locus_28620_Transcript_1/1_Conf_1.000 | 199  | 0  |           |                |     |         |     |     |                                                                          |
| Locus_28621_Transcript_1/1_Conf_1.000 | 245  | 20 | 1.91E-29  | CAV31817.1     | 97  | 132.109 | 81  | 79  | C. elegans protein Y54G9A.3b, partially confirmed by transcript evidence |
| Locus_28622_Transcript_1/1_Conf_1.000 | 152  | 0  |           |                |     |         |     |     |                                                                          |
| Locus_28623_Transcript_1/1_Conf_1.000 | 226  | 5  | 2.24E-17  | XP_002633271.1 | 70  | 92.0485 | 75  | 53  | Hypothetical protein CBG06000                                            |
| Locus_28624_Transcript_1/1_Conf_1.000 | 276  | 20 | 2.25E-30  | XP_002631304.1 | 82  | 135.191 | 89  | 73  | Hypothetical protein CBG03118                                            |
| Locus_28625_Transcript_1/1_Conf_1.000 | 151  | 11 | 1.77E-14  | XP_002630350.1 | 86  | 82.4185 | 50  | 43  | Hypothetical protein CBG04280                                            |
| Locus_28626_Transcript_1/1_Conf_1.000 | 184  | 0  |           |                |     |         |     |     |                                                                          |
| Locus_28627_Transcript_1/1_Conf_1.000 | 155  | 20 | 1.41E-11  | XP_002637173.1 | 84  | 72.7886 | 51  | 43  | Hypothetical protein CBG09691                                            |
| Locus_28628_Transcript_1/1_Conf_1.000 | 185  | 20 | 9.77E-13  | NP_741217.1    | 77  | 76.6406 | 59  | 46  | EXOSome (multiexonuclease complex) component family member (exos-9)      |
| Locus_28629_Transcript_1/1_Conf_1.000 | 191  | 0  |           |                |     |         |     |     |                                                                          |

|                                       |      |    |           |                |     |         |     |     |                                                                                                |
|---------------------------------------|------|----|-----------|----------------|-----|---------|-----|-----|------------------------------------------------------------------------------------------------|
| Locus_2863_Transcript_1/1_Conf_1.000  | 1367 | 20 | 5.39E-169 | NP_001022138.1 | 82  | 598.586 | 451 | 374 | hypothetical protein F33G12.6                                                                  |
| Locus_28630_Transcript_1/1_Conf_1.000 | 134  | 8  | 1.63E-04  | XP_146277.8    | 66  | 49.2914 | 39  | 26  | PREDICTED: hypothetical protein                                                                |
| Locus_28631_Transcript_1/1_Conf_1.000 | 279  | 0  |           |                |     |         |     |     |                                                                                                |
| Locus_28632_Transcript_1/1_Conf_1.000 | 194  | 20 | 8.47E-25  | BAD96354.1     | 98  | 116.701 | 56  | 55  | HSPC163 protein variant                                                                        |
| Locus_28633_Transcript_1/1_Conf_1.000 | 138  | 20 | 8.55E-14  | 2KN6           | 100 | 80.1073 | 37  | 37  | Structure Of Full-Length Human Asc (Apoptosis-Associated Speck-Like Protein Containing A Card) |
| Locus_28634_Transcript_1/1_Conf_1.000 | 208  | 0  |           |                |     |         |     |     |                                                                                                |
| Locus_28635_Transcript_1/1_Conf_1.000 | 152  | 20 | 9.74E-21  | XP_002810367.1 | 100 | 103.219 | 50  | 50  | PREDICTED: e3 SUMO-protein ligase PIAS3-like isoform 2                                         |
| Locus_28636_Transcript_1/1_Conf_1.000 | 149  | 11 | 1.51E-05  | EFP07704.1     | 72  | 52.7582 | 44  | 32  | CRE-NHR-22 protein                                                                             |

|                                       |     |    |          |                |     |         |     |     |                                              |
|---------------------------------------|-----|----|----------|----------------|-----|---------|-----|-----|----------------------------------------------|
| Locus_28637_Transcript_1/1_Conf_1.000 | 207 | 20 | 4.14E-16 | ZP_06274641.1  | 76  | 87.8113 | 68  | 52  | Aldehyde Dehydrogenase                       |
| Locus_28638_Transcript_1/1_Conf_1.000 | 155 | 0  |          |                |     |         |     |     |                                              |
| Locus_28639_Transcript_1/1_Conf_1.000 | 139 | 0  |          |                |     |         |     |     |                                              |
| Locus_2864_Transcript_1/1_Conf_1.000  | 465 | 0  |          |                |     |         |     |     |                                              |
| Locus_28640_Transcript_1/1_Conf_1.000 | 479 | 20 | 1.91E-29 | XP_001898731.1 | 61  | 132.109 | 167 | 102 | Tyrosyl-DNA phosphodiesterase family protein |
| Locus_28641_Transcript_1/1_Conf_1.000 | 140 | 0  |          |                |     |         |     |     |                                              |
| Locus_28642_Transcript_1/1_Conf_1.000 | 151 | 0  |          |                |     |         |     |     |                                              |
| Locus_28643_Transcript_1/1_Conf_1.000 | 133 | 0  |          |                |     |         |     |     |                                              |
| Locus_28644_Transcript_1/1_Conf_1.000 | 142 | 20 | 1.78E-19 | XP_002824720.1 | 100 | 98.9821 | 46  | 46  | PREDICTED: NF-kappa-B inhibitor alpha-like   |

|                                       |      |    |          |                |    |         |     |     |                                              |
|---------------------------------------|------|----|----------|----------------|----|---------|-----|-----|----------------------------------------------|
| Locus_28645_Transcript_1/1_Conf_1.000 | 251  | 19 | 1.72E-06 | EFO21404.1     | 60 | 55.8398 | 90  | 54  | hypothetical protein LOAG_07083              |
| Locus_28646_Transcript_1/1_Conf_1.000 | 187  | 5  | 2.49E-16 | NP_504243.2    | 81 | 88.5817 | 61  | 50  | hypothetical protein Y61A9LA.1               |
| Locus_28647_Transcript_1/1_Conf_1.000 | 253  | 20 | 2.56E-37 | EFO86864.1     | 98 | 158.303 | 84  | 83  | CRE-PST-2 protein                            |
| Locus_28648_Transcript_1/1_Conf_1.000 | 160  | 0  |          |                |    |         |     |     |                                              |
| Locus_28649_Transcript_1/1_Conf_1.000 | 180  | 3  | 1.12E-05 | XP_002632187.1 | 83 | 53.1434 | 36  | 30  | Hypothetical protein CBG07050                |
| Locus_2865_Transcript_1/1_Conf_1.000  | 1353 | 20 | 9.65E-70 | NP_504235.2    | 54 | 268.855 | 476 | 261 | Drosophila SOS homolog family member (sos-1) |
| Locus_28650_Transcript_1/1_Conf_1.000 | 235  | 20 | 2.99E-14 | AAC05749.1     | 91 | 81.6481 | 78  | 71  | putative peroxisome microbody protein 175.1  |
| Locus_28651_Transcript_1/1_Conf_1.000 | 237  | 3  | 9.93E-10 | XP_002639815.1 | 79 | 66.6254 | 68  | 54  | Hypothetical protein CBG21340                |
| Locus_28652_Transcript_1/1_Conf_1.000 | 140  | 0  |          |                |    |         |     |     |                                              |
| Locus_28653_Transcript_1/1_Conf_1.000 | 128  | 0  |          |                |    |         |     |     |                                              |

|                                       |     |    |          |                |    |         |     |     |                                                     |
|---------------------------------------|-----|----|----------|----------------|----|---------|-----|-----|-----------------------------------------------------|
| Locus_28654_Transcript_1/1_Conf_1.000 | 167 | 20 | 2.53E-05 | EDL08051.1     | 55 | 51.9878 | 54  | 30  | mCG113993                                           |
| Locus_28655_Transcript_1/1_Conf_1.000 | 199 | 20 | 3.90E-14 | XP_002634566.1 | 75 | 81.2629 | 66  | 50  | Hypothetical protein CBG08372                       |
| Locus_28656_Transcript_1/1_Conf_1.000 | 162 | 0  |          |                |    |         |     |     |                                                     |
| Locus_28657_Transcript_1/1_Conf_1.000 | 145 | 0  |          |                |    |         |     |     |                                                     |
| Locus_28658_Transcript_1/1_Conf_1.000 | 144 | 0  |          |                |    |         |     |     |                                                     |
| Locus_28659_Transcript_1/1_Conf_1.000 | 153 | 0  |          |                |    |         |     |     |                                                     |
| Locus_2866_Transcript_1/1_Conf_1.000  | 645 | 3  | 1.07E-34 | XP_002633659.1 | 79 | 150.599 | 129 | 102 | Hypothetical protein CBG03332                       |
| Locus_28660_Transcript_1/1_Conf_1.000 | 184 | 0  |          |                |    |         |     |     |                                                     |
| Locus_28661_Transcript_1/1_Conf_1.000 | 189 | 0  |          |                |    |         |     |     |                                                     |
| Locus_28662_Transcript_1/1_Conf_1.000 | 128 | 20 | 7.37E-05 | XP_783686.2    | 72 | 50.447  | 36  | 26  | PREDICTED: similar to BTB (POZ) domain containing 9 |
| Locus_28663_Transcript_1/1_Conf_1.000 | 179 | 7  | 7.99E-20 | XP_002638768.1 | 90 | 100.138 | 54  | 49  | Hypothetical protein CBG05111                       |
| Locus_28664_Transcript_1/1_Conf_1.000 | 141 | 0  |          |                |    |         |     |     |                                                     |
| Locus_28665_Transcript_1/1_Conf_1.000 | 165 | 0  |          |                |    |         |     |     |                                                     |
| Locus_28666_Transcript_1/1_Conf_1.000 | 133 | 0  |          |                |    |         |     |     |                                                     |
| Locus_28667_Transcript_1/1_Conf_1.000 | 186 | 20 | 1.84E-11 | XP_002644034.1 | 77 | 72.4034 | 58  | 45  | C. briggsae CBR-SULP-7 protein                      |
| Locus_28668_Transcript_1/1_Conf_1.000 | 158 | 0  |          |                |    |         |     |     |                                                     |
| Locus_28669_Transcript_1/1_Conf_1.000 | 189 | 0  |          |                |    |         |     |     |                                                     |
| Locus_2867_Transcript_1/1_Conf_1.000  | 570 | 0  |          |                |    |         |     |     |                                                     |
| Locus_28670_Transcript_1/1_Conf_1.000 | 232 | 0  |          |                |    |         |     |     |                                                     |
| Locus_28671_Transcript_1/1_Conf_1.000 | 267 | 0  |          |                |    |         |     |     |                                                     |
| Locus_28672_Transcript_1/1_Conf_1.000 | 140 | 0  |          |                |    |         |     |     |                                                     |
| Locus_28673_Transcript_1/1_Conf_1.000 | 129 | 0  |          |                |    |         |     |     |                                                     |
| Locus_28674_Transcript_1/1_Conf_1.000 | 174 | 0  |          |                |    |         |     |     |                                                     |
| Locus_28675_Transcript_1/1_Conf_1.000 | 191 | 0  |          |                |    |         |     |     |                                                     |
| Locus_28676_Transcript_1/1_Conf_1.000 | 134 | 0  |          |                |    |         |     |     |                                                     |
| Locus_28677_Transcript_1/1_Conf_1.000 | 150 | 0  |          |                |    |         |     |     |                                                     |
| Locus_28678_Transcript_1/1_Conf_1.000 | 145 | 0  |          |                |    |         |     |     |                                                     |



|                                       |     |    |          |                |     |         |     |     |                                           |
|---------------------------------------|-----|----|----------|----------------|-----|---------|-----|-----|-------------------------------------------|
| Locus_28679_Transcript_1/1_Conf_1.000 | 195 | 0  |          |                |     |         |     |     |                                           |
| Locus_2868_Transcript_1/1_Conf_1.000  | 918 | 20 | 1.81E-25 | ABD85013.1     | 47  | 120.939 | 255 | 121 | OGA-1d                                    |
| Locus_28680_Transcript_1/1_Conf_1.000 | 131 | 0  |          |                |     |         |     |     |                                           |
| Locus_28681_Transcript_1/1_Conf_1.000 | 202 | 0  |          |                |     |         |     |     |                                           |
| Locus_28682_Transcript_1/1_Conf_1.000 | 167 | 20 | 1.21E-23 | EFP07527.1     | 100 | 112.849 | 55  | 55  | CRE-SNT-1 protein                         |
| Locus_28683_Transcript_1/1_Conf_1.000 | 139 | 20 | 1.12E-13 | AAL14108.1     | 88  | 79.7221 | 45  | 40  | GOP-1                                     |
| Locus_28684_Transcript_1/1_Conf_1.000 | 231 | 2  | 4.18E-16 | EFO22577.1     | 73  | 87.8113 | 76  | 56  | hypothetical protein LOAG_05911           |
| Locus_28685_Transcript_1/1_Conf_1.000 | 138 | 1  | 2.49E-05 | XP_001137788.1 | 100 | 51.9878 | 46  | 46  | PREDICTED: similar to put. HMG-17 protein |
| Locus_28686_Transcript_1/1_Conf_1.000 | 159 | 0  |          |                |     |         |     |     |                                           |
| Locus_28687_Transcript_1/1_Conf_1.000 | 147 | 0  |          |                |     |         |     |     |                                           |
| Locus_28688_Transcript_1/1_Conf_1.000 | 169 | 17 | 2.97E-06 | XP_002629645.1 | 68  | 55.0694 | 54  | 37  | Hypothetical protein CBG00850             |
| Locus_28689_Transcript_1/1_Conf_1.000 | 144 | 20 | 1.24E-07 | XP_002644714.1 | 80  | 59.6918 | 47  | 38  | C. briggsae CBR-SULP-2 protein            |

|                                       |     |    |          |                |    |         |     |     |                                       |
|---------------------------------------|-----|----|----------|----------------|----|---------|-----|-----|---------------------------------------|
| Locus_2869_Transcript_1/1_Conf_1.000  | 396 | 20 | 1.74E-70 | AAA51433.1     | 99 | 268.47  | 131 | 130 | guanine nucleotide regulatory protein |
| Locus_28690_Transcript_1/1_Conf_1.000 | 159 | 20 | 1.18E-18 | XP_002633760.1 | 85 | 96.2857 | 49  | 42  | C. briggsae CBR-GON-1 protein         |
| Locus_28691_Transcript_1/1_Conf_1.000 | 248 | 20 | 2.49E-21 | NP_491610.1    | 85 | 105.145 | 78  | 67  | hypothetical protein C09D4.3          |
| Locus_28692_Transcript_1/1_Conf_1.000 | 142 | 0  |          |                |    |         |     |     |                                       |
| Locus_28693_Transcript_1/1_Conf_1.000 | 180 | 1  | 8.02E-04 | XP_002639005.1 | 53 | 46.9802 | 66  | 35  | Hypothetical protein CBG22251         |
| Locus_28694_Transcript_1/1_Conf_1.000 | 156 | 0  |          |                |    |         |     |     |                                       |
| Locus_28695_Transcript_1/1_Conf_1.000 | 148 | 10 | 3.24E-16 | XP_002631213.1 | 97 | 88.1965 | 48  | 47  | Hypothetical protein CBG03010         |
| Locus_28696_Transcript_1/1_Conf_1.000 | 139 | 0  |          |                |    |         |     |     |                                       |

|                                       |     |    |          |                |     |         |     |     |                                                 |
|---------------------------------------|-----|----|----------|----------------|-----|---------|-----|-----|-------------------------------------------------|
| Locus_28697_Transcript_1/1_Conf_1.000 | 157 | 20 | 1.70E-25 | P02751.4       | 100 | 119.013 | 51  | 51  | Fibronectin                                     |
| Locus_28698_Transcript_1/1_Conf_1.000 | 153 | 0  |          |                |     |         |     |     |                                                 |
| Locus_28699_Transcript_1/1_Conf_1.000 | 190 | 0  |          |                |     |         |     |     |                                                 |
| Locus_287_Transcript_1/1_Conf_1.000   | 562 | 20 | 5.62E-75 | XP_002639641.1 | 87  | 283.878 | 185 | 161 | C. briggsae CBR-PRP-4 protein                   |
| Locus_2870_Transcript_1/1_Conf_1.000  | 466 | 3  | 7.65E-10 | XP_002347210.1 | 86  | 67.0106 | 60  | 52  | PREDICTED: similar to hCG2040253                |
| Locus_28700_Transcript_1/1_Conf_1.000 | 318 | 0  |          |                |     |         |     |     |                                                 |
| Locus_28701_Transcript_1/1_Conf_1.000 | 233 | 0  |          |                |     |         |     |     |                                                 |
| Locus_28702_Transcript_1/1_Conf_1.000 | 168 | 8  | 7.85E-07 | EFPO5191.1     | 69  | 56.9954 | 49  | 34  | CRE-CPNA-2 protein                              |
| Locus_28703_Transcript_1/1_Conf_1.000 | 168 | 20 | 2.27E-14 | NP_496465.1    | 86  | 82.0333 | 50  | 43  | hypothetical protein F54D5.12                   |
| Locus_28704_Transcript_1/1_Conf_1.000 | 138 | 0  |          |                |     |         |     |     |                                                 |
| Locus_28705_Transcript_1/1_Conf_1.000 | 145 | 12 | 2.34E-14 | EFP10814.1     | 93  | 82.0333 | 48  | 45  | hypothetical protein CRE_06204                  |
| Locus_28706_Transcript_1/1_Conf_1.000 | 174 | 5  | 1.24E-20 | EFP13291.1     | 94  | 102.834 | 56  | 53  | hypothetical protein CRE_12211                  |
| Locus_28707_Transcript_1/1_Conf_1.000 | 153 | 0  |          |                |     |         |     |     |                                                 |
| Locus_28708_Transcript_1/1_Conf_1.000 | 128 | 0  |          |                |     |         |     |     |                                                 |
| Locus_28709_Transcript_1/1_Conf_1.000 | 153 | 20 | 1.23E-07 | XP_002408840.1 | 73  | 59.6918 | 49  | 36  | snf2 histone linker PHD ring helicase, putative |
| Locus_2871_Transcript_1/3_Conf_0.333  | 234 | 15 | 5.81E-18 | NP_491221.1    | 92  | 93.9745 | 69  | 64  | PaTched Related family member (ptr-2)           |

|                                       |      |    |          |                |    |         |     |     |                                                                         |
|---------------------------------------|------|----|----------|----------------|----|---------|-----|-----|-------------------------------------------------------------------------|
| Locus_2871_Transcript_2/3_Conf_0.500  | 1845 | 20 | 0        | NP_491221.1    | 82 | 796.579 | 608 | 503 | PaTched Related family member (ptr-2)                                   |
| Locus_2871_Transcript_3/3_Conf_0.667  | 2664 | 20 | 0        | XP_002646298.1 | 83 | 1181.01 | 868 | 722 | Hypothetical protein CBG12004                                           |
| Locus_28710_Transcript_1/1_Conf_1.000 | 208  | 0  |          |                |    |         |     |     |                                                                         |
| Locus_28711_Transcript_1/1_Conf_1.000 | 215  | 5  | 5.19E-11 | CAV31765.1     | 74 | 70.8626 | 62  | 46  | C. elegans protein C33B4.3c, partially confirmed by transcript evidence |
| Locus_28712_Transcript_1/1_Conf_1.000 | 145  | 0  |          |                |    |         |     |     |                                                                         |
| Locus_28713_Transcript_1/1_Conf_1.000 | 133  | 0  |          |                |    |         |     |     |                                                                         |
| Locus_28714_Transcript_1/1_Conf_1.000 | 154  | 0  |          |                |    |         |     |     |                                                                         |
| Locus_28715_Transcript_1/1_Conf_1.000 | 189  | 0  |          |                |    |         |     |     |                                                                         |
| Locus_28716_Transcript_1/1_Conf_1.000 | 214  | 0  |          |                |    |         |     |     |                                                                         |
| Locus_28717_Transcript_1/1_Conf_1.000 | 162  | 4  | 7.15E-08 | EFP09199.1     | 79 | 60.4622 | 43  | 34  | CRE-CED-11 protein                                                      |
| Locus_28718_Transcript_1/1_Conf_1.000 | 273  | 20 | 4.10E-40 | NP_497665.2    | 94 | 167.548 | 91  | 86  | hypothetical protein R148.5                                             |
| Locus_28719_Transcript_1/1_Conf_1.000 | 164  | 0  |          |                |    |         |     |     |                                                                         |
| Locus_2872_Transcript_1/2_Conf_1.000  | 943  | 0  |          |                |    |         |     |     |                                                                         |
| Locus_2872_Transcript_2/2_Conf_1.000  | 766  | 8  | 2.14E-20 | NP_492047.1    | 55 | 103.605 | 106 | 59  | Chondroitin ProteoGlycan family member (cpg-3)                          |
| Locus_28720_Transcript_1/1_Conf_1.000 | 169  | 0  |          |                |    |         |     |     |                                                                         |
| Locus_28721_Transcript_1/1_Conf_1.000 | 158  | 3  | 3.01E-06 | EFO24692.1     | 67 | 55.0694 | 52  | 35  | protein-tyrosine phosphatase                                            |
| Locus_28722_Transcript_1/1_Conf_1.000 | 129  | 0  |          |                |    |         |     |     |                                                                         |
| Locus_28723_Transcript_1/1_Conf_1.000 | 174  | 2  | 2.78E-04 | NP_001024371.2 | 58 | 48.521  | 56  | 33  | hypothetical protein C07B5.4                                            |
| Locus_28724_Transcript_1/1_Conf_1.000 | 148  | 6  | 9.79E-13 | EFO23711.1     | 76 | 76.6406 | 47  | 36  | hypothetical protein LOAG_04772                                         |
| Locus_28725_Transcript_1/1_Conf_1.000 | 266  | 20 | 1.95E-13 | XP_001897825.1 | 73 | 78.9518 | 75  | 55  | Major Facilitator Superfamily protein                                   |

|                                       |      |    |           |                |     |         |     |     |                                                                  |
|---------------------------------------|------|----|-----------|----------------|-----|---------|-----|-----|------------------------------------------------------------------|
| Locus_28726_Transcript_1/1_Conf_1.000 | 296  | 20 | 4.93E-33  | EFP10194.1     | 95  | 144.05  | 72  | 69  | CRE-PPK-3 protein                                                |
| Locus_28727_Transcript_1/1_Conf_1.000 | 137  | 2  | 9.22E-08  | EFO88960.1     | 77  | 60.077  | 45  | 35  | hypothetical protein CRE_06660                                   |
| Locus_28728_Transcript_1/1_Conf_1.000 | 144  | 1  | 8.31E-04  | EFO13394.1     | 93  | 46.9802 | 44  | 41  | hypothetical protein LOAG_15135                                  |
| Locus_28729_Transcript_1/1_Conf_1.000 | 304  | 0  |           |                |     |         |     |     |                                                                  |
| Locus_2873_Transcript_1/1_Conf_1.000  | 1249 | 20 | 2.10E-116 | EFO24882.1     | 69  | 423.705 | 409 | 284 | hypothetical protein LOAG_03599                                  |
| Locus_28730_Transcript_1/1_Conf_1.000 | 158  | 0  |           |                |     |         |     |     |                                                                  |
| Locus_28731_Transcript_1/1_Conf_1.000 | 140  | 0  |           |                |     |         |     |     |                                                                  |
| Locus_28732_Transcript_1/1_Conf_1.000 | 152  | 20 | 7.46E-21  | XP_002832350.1 | 100 | 103.605 | 50  | 50  | PREDICTED: LOW QUALITY PROTEIN: filamin-A-like                   |
| Locus_28733_Transcript_1/1_Conf_1.000 | 232  | 0  |           |                |     |         |     |     |                                                                  |
| Locus_28734_Transcript_1/1_Conf_1.000 | 234  | 20 | 2.36E-35  | NP_505641.2    | 98  | 151.754 | 77  | 76  | Resistance to Inhibitors of Cholinesterase family member (ric-4) |

|                                       |      |    |          |                |    |         |     |     |                                                                             |
|---------------------------------------|------|----|----------|----------------|----|---------|-----|-----|-----------------------------------------------------------------------------|
| Locus_28735_Transcript_1/1_Conf_1.000 | 207  | 20 | 5.04E-22 | NP_001040658.2 | 86 | 107.457 | 68  | 59  | High Incidence of Males (increased X chromosome loss) family member (him-1) |
| Locus_28736_Transcript_1/1_Conf_1.000 | 135  | 0  |          |                |    |         |     |     |                                                                             |
| Locus_28737_Transcript_1/1_Conf_1.000 | 178  | 10 | 2.18E-17 | EFPO1431.1     | 86 | 92.0485 | 58  | 50  | CRE-UNC-89 protein                                                          |
| Locus_28738_Transcript_1/1_Conf_1.000 | 139  | 0  |          |                |    |         |     |     |                                                                             |
| Locus_28739_Transcript_1/1_Conf_1.000 | 332  | 20 | 3.28E-21 | ACI49074.1     | 72 | 104.76  | 93  | 67  | hypothetical protein Cbre_JD10.006                                          |
| Locus_2874_Transcript_1/1_Conf_1.000  | 3102 | 20 | 1.79E-49 | EFO22988.1     | 58 | 202.986 | 322 | 189 | hypothetical protein LOAG_05497                                             |
| Locus_28740_Transcript_1/1_Conf_1.000 | 349  | 3  | 2.31E-06 | XP_002646097.1 | 50 | 55.4546 | 118 | 59  | C. briggsae CBR-AMX-2 protein                                               |
| Locus_28741_Transcript_1/1_Conf_1.000 | 161  | 0  |          |                |    |         |     |     |                                                                             |
| Locus_28742_Transcript_1/1_Conf_1.000 | 135  | 0  |          |                |    |         |     |     |                                                                             |
| Locus_28743_Transcript_1/1_Conf_1.000 | 175  | 4  | 1.09E-16 | NP_508451.2    | 89 | 89.7373 | 49  | 44  | hypothetical protein K02E10.6                                               |
| Locus_28744_Transcript_1/1_Conf_1.000 | 191  | 0  |          |                |    |         |     |     |                                                                             |
| Locus_28745_Transcript_1/1_Conf_1.000 | 348  | 0  |          |                |    |         |     |     |                                                                             |
| Locus_28746_Transcript_1/1_Conf_1.000 | 200  | 0  |          |                |    |         |     |     |                                                                             |
| Locus_28747_Transcript_1/1_Conf_1.000 | 179  | 4  | 2.67E-15 | NP_501709.2    | 77 | 85.1149 | 59  | 46  | Membrane Calcium ATPase family member (mca-1)                               |
| Locus_28748_Transcript_1/1_Conf_1.000 | 385  | 0  |          |                |    |         |     |     |                                                                             |
| Locus_28749_Transcript_1/1_Conf_1.000 | 161  | 5  | 1.30E-17 | EFPO6805.1     | 90 | 92.8189 | 53  | 48  | hypothetical protein CRE_11195                                              |
| Locus_2875_Transcript_1/1_Conf_1.000  | 300  | 0  |          |                |    |         |     |     |                                                                             |
| Locus_28750_Transcript_1/1_Conf_1.000 | 141  | 0  |          |                |    |         |     |     |                                                                             |
| Locus_28751_Transcript_1/1_Conf_1.000 | 137  | 0  |          |                |    |         |     |     |                                                                             |
| Locus_28752_Transcript_1/1_Conf_1.000 | 269  | 20 | 5.25E-19 | NP_493135.2    | 67 | 97.4413 | 89  | 60  | GLYcosylation related family member (gly-16)                                |
| Locus_28753_Transcript_1/1_Conf_1.000 | 139  | 0  |          |                |    |         |     |     |                                                                             |
| Locus_28754_Transcript_1/1_Conf_1.000 | 174  | 0  |          |                |    |         |     |     |                                                                             |
| Locus_28755_Transcript_1/1_Conf_1.000 | 137  | 3  | 7.04E-08 | XP_002646095.1 | 77 | 60.4622 | 44  | 34  | C. briggsae CBR-HMR-1 protein                                               |
| Locus_28756_Transcript_1/1_Conf_1.000 | 207  | 0  |          |                |    |         |     |     |                                                                             |

|                                       |     |    |          |                |     |         |     |     |                                                                                                                            |
|---------------------------------------|-----|----|----------|----------------|-----|---------|-----|-----|----------------------------------------------------------------------------------------------------------------------------|
| Locus_28757_Transcript_1/1_Conf_1.000 | 231 | 20 | 9.34E-16 | EFO96466.1     | 73  | 86.6557 | 80  | 59  | hypothetical protein CRE_13856                                                                                             |
| Locus_28758_Transcript_1/1_Conf_1.000 | 141 | 0  |          |                |     |         |     |     |                                                                                                                            |
| Locus_28759_Transcript_1/1_Conf_1.000 | 136 | 0  |          |                |     |         |     |     |                                                                                                                            |
| Locus_2876_Transcript_1/1_Conf_1.000  | 909 | 20 | 5.71E-24 | XP_002641337.1 | 51  | 115.931 | 245 | 127 | C. briggsae CBR-CKU-70 protein                                                                                             |
| Locus_28760_Transcript_1/1_Conf_1.000 | 187 | 20 | 1.15E-29 | XP_002759346.1 | 100 | 132.88  | 62  | 62  | PREDICTED: eukaryotic translation initiation factor 3 subunit E                                                            |
| Locus_28761_Transcript_1/1_Conf_1.000 | 136 | 20 | 4.28E-05 | EFO27420.1     | 69  | 51.2174 | 42  | 29  | TK/FER protein kinase                                                                                                      |
| Locus_28762_Transcript_1/1_Conf_1.000 | 181 | 0  |          |                |     |         |     |     |                                                                                                                            |
| Locus_28763_Transcript_1/1_Conf_1.000 | 135 | 0  |          |                |     |         |     |     |                                                                                                                            |
| Locus_28764_Transcript_1/1_Conf_1.000 | 395 | 3  | 1.27E-12 | NP_001041053.1 | 65  | 76.2554 | 79  | 52  | hypothetical protein Y62E10A.20                                                                                            |
| Locus_28765_Transcript_1/1_Conf_1.000 | 128 | 0  |          |                |     |         |     |     |                                                                                                                            |
| Locus_28766_Transcript_1/1_Conf_1.000 | 132 | 20 | 1.52E-18 | 1LYA           | 100 | 95.9005 | 44  | 44  | CrystalStructures Of Native And Inhibited Forms Of Human Cathepsin D: Implications For Lysosomal Targeting And Drug Design |
| Locus_28767_Transcript_1/1_Conf_1.000 | 178 | 0  |          |                |     |         |     |     |                                                                                                                            |
| Locus_28768_Transcript_1/1_Conf_1.000 | 218 | 0  |          |                |     |         |     |     |                                                                                                                            |
| Locus_28769_Transcript_1/1_Conf_1.000 | 182 | 0  |          |                |     |         |     |     |                                                                                                                            |

|                                       |      |    |          |                |    |         |     |     |                                        |
|---------------------------------------|------|----|----------|----------------|----|---------|-----|-----|----------------------------------------|
| Locus_2877_Transcript_1/1_Conf_1.000  | 1549 | 20 | 0        | NP_495011.1    | 85 | 783.097 | 518 | 441 | Protein Kinase C family member (pkc-3) |
| Locus_28770_Transcript_1/1_Conf_1.000 | 151  | 0  |          |                |    |         |     |     |                                        |
| Locus_28771_Transcript_1/1_Conf_1.000 | 159  | 3  | 1.59E-15 | XP_002632481.1 | 88 | 85.8853 | 53  | 47  | Hypothetical protein CBG13716          |
| Locus_28772_Transcript_1/1_Conf_1.000 | 174  | 3  | 3.50E-07 | XP_002633353.1 | 72 | 58.151  | 55  | 40  | Hypothetical protein CBG06097          |
| Locus_28773_Transcript_1/1_Conf_1.000 | 146  | 14 | 3.16E-11 | EFO89614.1     | 80 | 71.633  | 46  | 37  | CRE-NAS-10 protein                     |
| Locus_28774_Transcript_1/1_Conf_1.000 | 190  | 0  |          |                |    |         |     |     |                                        |
| Locus_28775_Transcript_1/1_Conf_1.000 | 175  | 0  |          |                |    |         |     |     |                                        |
| Locus_28776_Transcript_1/1_Conf_1.000 | 130  | 0  |          |                |    |         |     |     |                                        |
| Locus_28777_Transcript_1/1_Conf_1.000 | 161  | 0  |          |                |    |         |     |     |                                        |
| Locus_28778_Transcript_1/1_Conf_1.000 | 131  | 0  |          |                |    |         |     |     |                                        |
| Locus_28779_Transcript_1/1_Conf_1.000 | 245  | 0  |          |                |    |         |     |     |                                        |
| Locus_2878_Transcript_1/1_Conf_1.000  | 438  | 0  |          |                |    |         |     |     |                                        |
| Locus_28780_Transcript_1/1_Conf_1.000 | 129  | 0  |          |                |    |         |     |     |                                        |
| Locus_28781_Transcript_1/1_Conf_1.000 | 186  | 0  |          |                |    |         |     |     |                                        |
| Locus_28782_Transcript_1/1_Conf_1.000 | 178  | 0  |          |                |    |         |     |     |                                        |
| Locus_28783_Transcript_1/1_Conf_1.000 | 154  | 0  |          |                |    |         |     |     |                                        |
| Locus_28784_Transcript_1/1_Conf_1.000 | 154  | 0  |          |                |    |         |     |     |                                        |



|                                       |     |    |          |                |     |         |    |    |                                              |
|---------------------------------------|-----|----|----------|----------------|-----|---------|----|----|----------------------------------------------|
| Locus_28785_Transcript_1/1_Conf_1.000 | 296 | 20 | 4.62E-15 | XP_002815150.1 | 100 | 84.3445 | 40 | 40 | PREDICTED: annexin A5-like                   |
| Locus_28786_Transcript_1/1_Conf_1.000 | 159 | 0  |          |                |     |         |    |    |                                              |
| Locus_28787_Transcript_1/1_Conf_1.000 | 135 | 0  |          |                |     |         |    |    |                                              |
| Locus_28788_Transcript_1/1_Conf_1.000 | 162 | 0  |          |                |     |         |    |    |                                              |
| Locus_28789_Transcript_1/1_Conf_1.000 | 183 | 0  |          |                |     |         |    |    |                                              |
| Locus_2879_Transcript_1/1_Conf_1.000  | 549 | 0  |          |                |     |         |    |    |                                              |
| Locus_28790_Transcript_1/1_Conf_1.000 | 145 | 0  |          |                |     |         |    |    |                                              |
| Locus_28791_Transcript_1/1_Conf_1.000 | 365 | 0  |          |                |     |         |    |    |                                              |
| Locus_28792_Transcript_1/1_Conf_1.000 | 255 | 4  | 3.82E-09 | XP_002639125.1 | 66  | 64.6994 | 72 | 48 | C. briggsae CBR-FER-1 protein                |
| Locus_28793_Transcript_1/1_Conf_1.000 | 158 | 0  |          |                |     |         |    |    |                                              |
| Locus_28794_Transcript_1/1_Conf_1.000 | 189 | 20 | 4.50E-18 | NP_001134686.1 | 79  | 94.3597 | 63 | 50 | 3-oxo-5-alpha-steroid 4-dehydrogenase 2      |
| Locus_28795_Transcript_1/1_Conf_1.000 | 175 | 20 | 2.59E-10 | XP_002806309.1 | 100 | 68.5514 | 35 | 35 | PREDICTED: moesin isoform 3                  |
| Locus_28796_Transcript_1/1_Conf_1.000 | 251 | 0  |          |                |     |         |    |    |                                              |
| Locus_28797_Transcript_1/1_Conf_1.000 | 138 | 20 | 1.20E-07 | XP_002441471.1 | 94  | 59.6918 | 36 | 34 | hypothetical protein<br>SORBIDRAFT_09g027400 |

|                                       |     |    |           |                |     |         |     |     |                                                                         |
|---------------------------------------|-----|----|-----------|----------------|-----|---------|-----|-----|-------------------------------------------------------------------------|
| Locus_28798_Transcript_1/1_Conf_1.000 | 174 | 3  | 6.18E-04  | XP_001511870.1 | 68  | 47.3654 | 47  | 32  | PREDICTED: similar to TMPRSS11A protein                                 |
| Locus_28799_Transcript_1/1_Conf_1.000 | 136 | 0  |           |                |     |         |     |     |                                                                         |
| Locus_288_Transcript_1/1_Conf_1.000   | 991 | 20 | 2.84E-43  | EFO18804.1     | 58  | 180.259 | 253 | 147 | hypothetical protein LOAG_09689                                         |
| Locus_2880_Transcript_1/1_Conf_1.000  | 382 | 20 | 2.32E-67  | AAU87984.1     | 100 | 258.07  | 127 | 127 | MHC class II antigen                                                    |
| Locus_28800_Transcript_1/1_Conf_1.000 | 154 | 0  |           |                |     |         |     |     |                                                                         |
| Locus_28801_Transcript_1/1_Conf_1.000 | 206 | 0  |           |                |     |         |     |     |                                                                         |
| Locus_28802_Transcript_1/1_Conf_1.000 | 129 | 20 | 2.20E-17  | XP_002916749.1 | 100 | 92.0485 | 43  | 43  | PREDICTED: LOW QUALITY PROTEIN: protein fat-free homolog                |
| Locus_28803_Transcript_1/1_Conf_1.000 | 258 | 0  |           |                |     |         |     |     |                                                                         |
| Locus_28804_Transcript_1/1_Conf_1.000 | 212 | 0  |           |                |     |         |     |     |                                                                         |
| Locus_28805_Transcript_1/1_Conf_1.000 | 130 | 0  |           |                |     |         |     |     |                                                                         |
| Locus_28806_Transcript_1/1_Conf_1.000 | 267 | 0  |           |                |     |         |     |     |                                                                         |
| Locus_28807_Transcript_1/1_Conf_1.000 | 209 | 0  |           |                |     |         |     |     |                                                                         |
| Locus_28808_Transcript_1/1_Conf_1.000 | 140 | 0  |           |                |     |         |     |     |                                                                         |
| Locus_28809_Transcript_1/1_Conf_1.000 | 298 | 20 | 7.55E-34  | NP_500274.2    | 84  | 146.747 | 93  | 79  | hypothetical protein Y54G2A.4                                           |
| Locus_2881_Transcript_1/1_Conf_1.000  | 729 | 20 | 1.37E-106 | NP_500005.1    | 91  | 389.808 | 225 | 205 | MAP kinase Activated protein Kinase family member (mak-2)               |
| Locus_28810_Transcript_1/1_Conf_1.000 | 137 | 15 | 1.24E-12  | NP_004853.2    | 100 | 76.2554 | 45  | 45  | lipopolysaccharide-induced tumor necrosis factor-alpha factor isoform 1 |
| Locus_28811_Transcript_1/1_Conf_1.000 | 169 | 0  |           |                |     |         |     |     |                                                                         |
| Locus_28812_Transcript_1/1_Conf_1.000 | 172 | 0  |           |                |     |         |     |     |                                                                         |
| Locus_28813_Transcript_1/1_Conf_1.000 | 151 | 0  |           |                |     |         |     |     |                                                                         |
| Locus_28814_Transcript_1/1_Conf_1.000 | 139 | 3  | 2.49E-13  | NP_001021694.1 | 90  | 78.5666 | 43  | 39  | EATing: abnormal pharyngeal pumping family member (eat-18)              |
| Locus_28815_Transcript_1/1_Conf_1.000 | 128 | 0  |           |                |     |         |     |     |                                                                         |
| Locus_28816_Transcript_1/1_Conf_1.000 | 159 | 20 | 7.89E-15  | ACF07996.1     | 100 | 83.5741 | 40  | 40  | splicing regulator SRrp37-2                                             |

|                                       |      |    |           |                |     |         |     |     |                                                         |
|---------------------------------------|------|----|-----------|----------------|-----|---------|-----|-----|---------------------------------------------------------|
| Locus_28817_Transcript_1/1_Conf_1.000 | 146  | 0  |           |                |     |         |     |     |                                                         |
| Locus_28818_Transcript_1/1_Conf_1.000 | 181  | 20 | 1.56E-15  | XP_002637502.1 | 80  | 85.8853 | 51  | 41  | Hypothetical protein CBG19223                           |
| Locus_28819_Transcript_1/1_Conf_1.000 | 137  | 0  |           |                |     |         |     |     |                                                         |
| Locus_2882_Transcript_1/1_Conf_1.000  | 1158 | 20 | 1.20E-38  | XP_001893474.1 | 50  | 165.236 | 398 | 199 | Rap/ran-GAP family protein                              |
| Locus_28820_Transcript_1/1_Conf_1.000 | 151  | 0  |           |                |     |         |     |     |                                                         |
| Locus_28821_Transcript_1/1_Conf_1.000 | 178  | 0  |           |                |     |         |     |     |                                                         |
| Locus_28822_Transcript_1/1_Conf_1.000 | 151  | 0  |           |                |     |         |     |     |                                                         |
| Locus_28823_Transcript_1/1_Conf_1.000 | 207  | 0  |           |                |     |         |     |     |                                                         |
| Locus_28824_Transcript_1/1_Conf_1.000 | 221  | 7  | 2.25E-17  | EFO99378.1     | 84  | 92.0485 | 73  | 62  | hypothetical protein CRE_18274                          |
| Locus_28825_Transcript_1/1_Conf_1.000 | 142  | 0  |           |                |     |         |     |     |                                                         |
| Locus_28826_Transcript_1/1_Conf_1.000 | 154  | 0  |           |                |     |         |     |     |                                                         |
| Locus_28827_Transcript_1/1_Conf_1.000 | 169  | 0  |           |                |     |         |     |     |                                                         |
| Locus_28828_Transcript_1/1_Conf_1.000 | 167  | 0  |           |                |     |         |     |     |                                                         |
| Locus_28829_Transcript_1/1_Conf_1.000 | 139  | 0  |           |                |     |         |     |     |                                                         |
| Locus_2883_Transcript_1/1_Conf_1.000  | 2420 | 20 | 3.36E-133 | XP_001902902.1 | 62  | 480.715 | 653 | 405 | Src substrate cortactin                                 |
| Locus_28830_Transcript_1/1_Conf_1.000 | 200  | 20 | 1.30E-09  | XP_969753.1    | 65  | 66.2402 | 66  | 43  | PREDICTED: similar to xylulokinase homolog              |
| Locus_28831_Transcript_1/1_Conf_1.000 | 139  | 0  |           |                |     |         |     |     |                                                         |
| Locus_28832_Transcript_1/1_Conf_1.000 | 128  | 0  |           |                |     |         |     |     |                                                         |
| Locus_28833_Transcript_1/1_Conf_1.000 | 181  | 0  |           |                |     |         |     |     |                                                         |
| Locus_28834_Transcript_1/1_Conf_1.000 | 149  | 20 | 3.95E-22  | XP_002749824.1 | 100 | 107.842 | 49  | 49  | PREDICTED: angio-associated migratory cell protein-like |
| Locus_28835_Transcript_1/1_Conf_1.000 | 776  | 20 | 1.35E-78  | NP_494394.1    | 70  | 296.975 | 258 | 182 | SQuashed Vulva family member (sqv-2)                    |

|                                       |     |    |          |                |     |         |    |    |                                                                              |
|---------------------------------------|-----|----|----------|----------------|-----|---------|----|----|------------------------------------------------------------------------------|
| Locus_28836_Transcript_1/1_Conf_1.000 | 135 | 9  | 9.52E-13 | AAH73141.1     | 100 | 76.6406 | 45 | 45 | YWHAZ protein                                                                |
| Locus_28837_Transcript_1/1_Conf_1.000 | 154 | 0  |          |                |     |         |    |    |                                                                              |
| Locus_28838_Transcript_1/1_Conf_1.000 | 141 | 0  |          |                |     |         |    |    |                                                                              |
| Locus_28839_Transcript_1/1_Conf_1.000 | 135 | 0  |          |                |     |         |    |    |                                                                              |
| Locus_2884_Transcript_1/1_Conf_1.000  | 381 | 2  | 7.34E-05 | NP_505735.1    | 53  | 50.447  | 97 | 52 | hypothetical protein T28B11.1                                                |
| Locus_28840_Transcript_1/1_Conf_1.000 | 204 | 20 | 3.82E-18 | XP_002644311.1 | 81  | 83.9593 | 53 | 43 | C. briggsae CBR-AQP-7 protein                                                |
| Locus_28841_Transcript_1/1_Conf_1.000 | 133 | 4  | 6.17E-20 | AAF67640.1     | 100 | 100.523 | 43 | 43 | AF220047_1uncharacterized hematopoietic stem/progenitor cells protein MDS027 |
| Locus_28842_Transcript_1/1_Conf_1.000 | 214 | 20 | 6.11E-36 | XP_002753109.1 | 100 | 153.68  | 71 | 71 | PREDICTED: phosphatidylethanolamine-binding protein 1-like                   |

|                                       |      |    |          |                |    |         |    |    |                                       |
|---------------------------------------|------|----|----------|----------------|----|---------|----|----|---------------------------------------|
| Locus_28843_Transcript_1/1_Conf_1.000 | 239  | 20 | 6.84E-19 | XP_001902900.1 | 86 | 97.0561 | 61 | 53 | Zinc finger, C2H2 type family protein |
| Locus_28844_Transcript_1/1_Conf_1.000 | 245  | 2  | 9.55E-05 | EFO92535.1     | 61 | 50.0618 | 80 | 49 | CRE-KLF-1 protein                     |
| Locus_28845_Transcript_1/1_Conf_1.000 | 140  | 0  |          |                |    |         |    |    |                                       |
| Locus_28846_Transcript_1/1_Conf_1.000 | 128  | 0  |          |                |    |         |    |    |                                       |
| Locus_28847_Transcript_1/1_Conf_1.000 | 143  | 0  |          |                |    |         |    |    |                                       |
| Locus_28848_Transcript_1/1_Conf_1.000 | 156  | 0  |          |                |    |         |    |    |                                       |
| Locus_28849_Transcript_1/1_Conf_1.000 | 174  | 0  |          |                |    |         |    |    |                                       |
| Locus_2885_Transcript_1/1_Conf_1.000  | 1284 | 20 | 1.55E-05 | XP_002407762.1 | 62 | 55.4546 | 51 | 32 | hypothetical protein lscW_ISCW000169  |
| Locus_28850_Transcript_1/1_Conf_1.000 | 140  | 2  | 8.03E-12 | EFO28433.1     | 88 | 73.559  | 45 | 40 | hypothetical protein LOAG_00029       |
| Locus_28851_Transcript_1/1_Conf_1.000 | 148  | 0  |          |                |    |         |    |    |                                       |
| Locus_28852_Transcript_1/1_Conf_1.000 | 147  | 0  |          |                |    |         |    |    |                                       |
| Locus_28853_Transcript_1/1_Conf_1.000 | 151  | 0  |          |                |    |         |    |    |                                       |
| Locus_28854_Transcript_1/1_Conf_1.000 | 156  | 0  |          |                |    |         |    |    |                                       |
| Locus_28855_Transcript_1/1_Conf_1.000 | 196  | 0  |          |                |    |         |    |    |                                       |

|                                       |      |    |          |                |     |         |     |     |                                                               |
|---------------------------------------|------|----|----------|----------------|-----|---------|-----|-----|---------------------------------------------------------------|
| Locus_28856_Transcript_1/1_Conf_1.000 | 227  | 20 | 5.86E-34 | EFO82668.1     | 94  | 147.132 | 75  | 71  | CRE-CCA-1 protein                                             |
| Locus_28857_Transcript_1/1_Conf_1.000 | 154  | 3  | 1.50E-05 | XP_002641380.1 | 82  | 52.7582 | 40  | 33  | Hypothetical protein CBG13237                                 |
| Locus_28858_Transcript_1/1_Conf_1.000 | 196  | 0  |          |                |     |         |     |     |                                                               |
| Locus_28859_Transcript_1/1_Conf_1.000 | 137  | 10 | 2.05E-15 | XP_002633437.1 | 91  | 85.5001 | 45  | 41  | C. briggsae CBR-UNC-22 protein                                |
| Locus_2886_Transcript_1/2_Conf_1.000  | 1223 | 20 | 1.13E-58 | XP_001897804.1 | 59  | 231.876 | 302 | 180 | LEM domain containing protein                                 |
| Locus_2886_Transcript_2/2_Conf_1.000  | 780  | 20 | 1.82E-38 | XP_002631646.1 | 64  | 163.696 | 181 | 116 | C. briggsae CBR-LEM-2 protein                                 |
| Locus_28860_Transcript_1/1_Conf_1.000 | 134  | 0  |          |                |     |         |     |     |                                                               |
| Locus_28861_Transcript_1/1_Conf_1.000 | 128  | 20 | 1.43E-16 | XP_001897649.1 | 100 | 89.3521 | 39  | 39  | Probable G protein-coupled receptor kinase F19C6.1            |
| Locus_28862_Transcript_1/1_Conf_1.000 | 211  | 0  |          |                |     |         |     |     |                                                               |
| Locus_28863_Transcript_1/1_Conf_1.000 | 162  | 0  |          |                |     |         |     |     |                                                               |
| Locus_28864_Transcript_1/1_Conf_1.000 | 162  | 0  |          |                |     |         |     |     |                                                               |
| Locus_28865_Transcript_1/1_Conf_1.000 | 145  | 6  | 2.42E-11 | EFO97329.1     | 86  | 72.0182 | 46  | 40  | hypothetical protein CRE_16676                                |
| Locus_28866_Transcript_1/1_Conf_1.000 | 129  | 0  |          |                |     |         |     |     |                                                               |
| Locus_28867_Transcript_1/1_Conf_1.000 | 145  | 10 | 3.38E-13 | CAX65068.1     | 85  | 78.1814 | 48  | 41  | C. elegans protein K08C7.3d, confirmed by transcript evidence |
| Locus_28868_Transcript_1/1_Conf_1.000 | 158  | 0  |          |                |     |         |     |     |                                                               |
| Locus_28869_Transcript_1/1_Conf_1.000 | 128  | 0  |          |                |     |         |     |     |                                                               |
| Locus_2887_Transcript_1/1_Conf_1.000  | 1547 | 20 | 3.04E-46 | AAF59653.4     | 45  | 191.045 | 529 | 239 | Hypothetical protein Y50D7A.1                                 |
| Locus_28870_Transcript_1/1_Conf_1.000 | 165  | 0  |          |                |     |         |     |     |                                                               |
| Locus_28871_Transcript_1/1_Conf_1.000 | 133  | 5  | 9.25E-08 | NP_495875.2    | 75  | 60.077  | 44  | 33  | hypothetical protein F07H5.9                                  |
| Locus_28872_Transcript_1/1_Conf_1.000 | 238  | 6  | 2.98E-22 | NP_001021650.1 | 81  | 108.227 | 79  | 64  | HaMmeRhead embryonic lethal family member (hmr-1)             |
| Locus_28873_Transcript_1/1_Conf_1.000 | 164  | 0  |          |                |     |         |     |     |                                                               |
| Locus_28874_Transcript_1/1_Conf_1.000 | 135  | 0  |          |                |     |         |     |     |                                                               |
| Locus_28875_Transcript_1/1_Conf_1.000 | 316  | 20 | 4.52E-18 | XP_001122229.1 | 67  | 94.3597 | 96  | 65  | PREDICTED: similar to Autophagy-specific gene 2 CG1241-PA     |

|                                       |     |    |          |                |     |         |    |    |                                                                         |
|---------------------------------------|-----|----|----------|----------------|-----|---------|----|----|-------------------------------------------------------------------------|
| Locus_28876_Transcript_1/1_Conf_1.000 | 129 | 0  |          |                |     |         |    |    |                                                                         |
| Locus_28877_Transcript_1/1_Conf_1.000 | 217 | 4  | 1.97E-18 | NP_001021339.1 | 76  | 95.5153 | 71 | 54 | defective SPERMATogenesis family member (spe-10)                        |
| Locus_28878_Transcript_1/1_Conf_1.000 | 197 | 20 | 2.29E-30 | BAG62970.1     | 100 | 135.191 | 65 | 65 | unnamed protein product                                                 |
| Locus_28879_Transcript_1/1_Conf_1.000 | 139 | 20 | 1.79E-19 | XP_002826207.1 | 100 | 98.9821 | 45 | 45 | PREDICTED: nodal modulator 1                                            |
| Locus_2888_Transcript_1/1_Conf_1.000  | 464 | 3  | 1.00E-09 | XP_001845923.1 | 58  | 66.6254 | 74 | 43 | conserved hypothetical protein                                          |
| Locus_28880_Transcript_1/1_Conf_1.000 | 168 | 0  |          |                |     |         |    |    |                                                                         |
| Locus_28881_Transcript_1/1_Conf_1.000 | 262 | 3  | 1.07E-11 | CAB00874.2     | 63  | 73.1738 | 84 | 53 | C. elegans protein R09H10.5, partially confirmed by transcript evidence |
| Locus_28882_Transcript_1/1_Conf_1.000 | 189 | 0  |          |                |     |         |    |    |                                                                         |
| Locus_28883_Transcript_1/1_Conf_1.000 | 128 | 20 | 2.20E-17 | ADN42857.1     | 100 | 92.0485 | 42 | 42 | CD5L-OKT3scFv-CD14 protein                                              |
| Locus_28884_Transcript_1/1_Conf_1.000 | 211 | 0  |          |                |     |         |    |    |                                                                         |
| Locus_28885_Transcript_1/1_Conf_1.000 | 143 | 0  |          |                |     |         |    |    |                                                                         |
| Locus_28886_Transcript_1/1_Conf_1.000 | 263 | 20 | 3.78E-25 | NP_001122835.1 | 83  | 117.857 | 87 | 73 | UNCoordinated family member (unc-22)                                    |
| Locus_28887_Transcript_1/1_Conf_1.000 | 175 | 0  |          |                |     |         |    |    |                                                                         |
| Locus_28888_Transcript_1/1_Conf_1.000 | 195 | 20 | 4.63E-23 | XP_001902120.1 | 86  | 110.923 | 65 | 56 | NAD-dependent malic enzyme, mitochondrial precursor                     |

|                                       |      |    |           |                |    |         |     |     |                                          |
|---------------------------------------|------|----|-----------|----------------|----|---------|-----|-----|------------------------------------------|
| Locus_28889_Transcript_1/1_Conf_1.000 | 151  | 0  |           |                |    |         |     |     |                                          |
| Locus_2889_Transcript_1/1_Conf_1.000  | 275  | 0  |           |                |    |         |     |     |                                          |
| Locus_28890_Transcript_1/1_Conf_1.000 | 130  | 0  |           |                |    |         |     |     |                                          |
| Locus_28891_Transcript_1/1_Conf_1.000 | 155  | 0  |           |                |    |         |     |     |                                          |
| Locus_28892_Transcript_1/1_Conf_1.000 | 143  | 0  |           |                |    |         |     |     |                                          |
| Locus_28893_Transcript_1/1_Conf_1.000 | 151  | 0  |           |                |    |         |     |     |                                          |
| Locus_28894_Transcript_1/1_Conf_1.000 | 133  | 13 | 7.06E-08  | CAM84574.1     | 83 | 60.4622 | 43  | 36  | intestinal prolyl carboxypeptidase 2     |
| Locus_28895_Transcript_1/1_Conf_1.000 | 139  | 0  |           |                |    |         |     |     |                                          |
| Locus_28896_Transcript_1/1_Conf_1.000 | 143  | 4  | 5.94E-07  | XP_002643980.1 | 84 | 57.3806 | 45  | 38  | C. briggsae CBR-OCT-2 protein            |
| Locus_28897_Transcript_1/1_Conf_1.000 | 172  | 0  |           |                |    |         |     |     |                                          |
| Locus_28898_Transcript_1/1_Conf_1.000 | 189  | 0  |           |                |    |         |     |     |                                          |
| Locus_28899_Transcript_1/1_Conf_1.000 | 158  | 0  |           |                |    |         |     |     |                                          |
| Locus_289_Transcript_1/1_Conf_1.000   | 607  | 0  |           |                |    |         |     |     |                                          |
| Locus_2890_Transcript_1/4_Conf_0.375  | 777  | 20 | 6.48E-113 | NP_508412.1    | 91 | 410.994 | 257 | 234 | Vacuolar H ATPase family member (vha-15) |
| Locus_2890_Transcript_2/4_Conf_0.625  | 1113 | 20 | 1.29E-167 | NP_508412.1    | 91 | 593.578 | 370 | 339 | Vacuolar H ATPase family member (vha-15) |



|                                       |      |    |           |                |    |         |     |     |                                          |
|---------------------------------------|------|----|-----------|----------------|----|---------|-----|-----|------------------------------------------|
| Locus_2890_Transcript_3/4_Conf_0.625  | 1113 | 20 | 1.29E-167 | NP_508412.1    | 91 | 593.578 | 370 | 339 | Vacuolar H ATPase family member (vha-15) |
| Locus_2890_Transcript_4/4_Conf_0.625  | 1113 | 20 | 1.29E-167 | NP_508412.1    | 91 | 593.578 | 370 | 339 | Vacuolar H ATPase family member (vha-15) |
| Locus_28900_Transcript_1/1_Conf_1.000 | 296  | 20 | 2.45E-24  | NP_510445.1    | 80 | 115.161 | 98  | 79  | TetraSPANin family member (tsp-8)        |
| Locus_28901_Transcript_1/1_Conf_1.000 | 531  | 4  | 8.51E-11  | EFP00646.1     | 57 | 70.4774 | 118 | 68  | hypothetical protein CRE_21280           |
| Locus_28902_Transcript_1/1_Conf_1.000 | 137  | 0  |           |                |    |         |     |     |                                          |
| Locus_28903_Transcript_1/1_Conf_1.000 | 178  | 7  | 3.85E-14  | NP_505448.1    | 80 | 81.2629 | 60  | 48  | GelSoliN-Like family member (gsnl-1)     |
| Locus_28904_Transcript_1/1_Conf_1.000 | 207  | 0  |           |                |    |         |     |     |                                          |
| Locus_28905_Transcript_1/1_Conf_1.000 | 128  | 0  |           |                |    |         |     |     |                                          |
| Locus_28906_Transcript_1/1_Conf_1.000 | 132  | 1  | 2.52E-05  | EAW64647.1     | 82 | 51.9878 | 35  | 29  | hCG2042149                               |
| Locus_28907_Transcript_1/1_Conf_1.000 | 193  | 8  | 1.27E-12  | XP_002640991.1 | 69 | 76.2554 | 63  | 44  | Hypothetical protein CBG11740            |
| Locus_28908_Transcript_1/1_Conf_1.000 | 230  | 0  |           |                |    |         |     |     |                                          |
| Locus_28909_Transcript_1/1_Conf_1.000 | 149  | 0  |           |                |    |         |     |     |                                          |
| Locus_2891_Transcript_1/1_Conf_1.000  | 392  | 20 | 4.38E-18  | XP_002635517.1 | 69 | 94.3597 | 91  | 63  | Hypothetical protein CBG08821            |
| Locus_28910_Transcript_1/1_Conf_1.000 | 197  | 6  | 3.81E-09  | XP_001892850.1 | 73 | 64.6994 | 61  | 45  | Zinc finger, ZZ type family protein      |

|                                       |      |    |          |                |     |         |     |     |                                                       |
|---------------------------------------|------|----|----------|----------------|-----|---------|-----|-----|-------------------------------------------------------|
| Locus_28911_Transcript_1/1_Conf_1.000 | 280  | 6  | 2.26E-06 | NP_505688.1    | 75  | 55.4546 | 45  | 34  | Cdc-42 Related Protein family member (crp-1)          |
| Locus_28912_Transcript_1/1_Conf_1.000 | 163  | 0  |          |                |     |         |     |     |                                                       |
| Locus_28913_Transcript_1/1_Conf_1.000 | 482  | 0  |          |                |     |         |     |     |                                                       |
| Locus_28914_Transcript_1/1_Conf_1.000 | 186  | 3  | 3.60E-07 | NP_509571.1    | 73  | 58.151  | 52  | 38  | hypothetical protein T20B5.2                          |
| Locus_28915_Transcript_1/1_Conf_1.000 | 148  | 0  |          |                |     |         |     |     |                                                       |
| Locus_28916_Transcript_1/1_Conf_1.000 | 139  | 0  |          |                |     |         |     |     |                                                       |
| Locus_28917_Transcript_1/1_Conf_1.000 | 148  | 20 | 6.33E-20 | XP_002922750.1 | 100 | 100.523 | 48  | 48  | PREDICTED: FACT complex subunit SSRP1-like            |
| Locus_28918_Transcript_1/1_Conf_1.000 | 171  | 0  |          |                |     |         |     |     |                                                       |
| Locus_28919_Transcript_1/1_Conf_1.000 | 198  | 0  |          |                |     |         |     |     |                                                       |
| Locus_2892_Transcript_1/1_Conf_1.000  | 873  | 20 | 1.75E-83 | NP_502775.2    | 85  | 313.538 | 198 | 169 | hypothetical protein Y57G11C.31                       |
| Locus_28920_Transcript_1/1_Conf_1.000 | 149  | 0  |          |                |     |         |     |     |                                                       |
| Locus_28921_Transcript_1/1_Conf_1.000 | 147  | 0  |          |                |     |         |     |     |                                                       |
| Locus_28922_Transcript_1/1_Conf_1.000 | 210  | 0  |          |                |     |         |     |     |                                                       |
| Locus_28923_Transcript_1/1_Conf_1.000 | 151  | 20 | 7.72E-18 | EFO98196.1     | 89  | 93.5893 | 49  | 44  | CRE-OCR-3 protein                                     |
| Locus_28924_Transcript_1/1_Conf_1.000 | 128  | 0  |          |                |     |         |     |     |                                                       |
| Locus_28925_Transcript_1/1_Conf_1.000 | 133  | 0  |          |                |     |         |     |     |                                                       |
| Locus_28926_Transcript_1/1_Conf_1.000 | 366  | 4  | 2.56E-18 | XP_002634375.1 | 73  | 95.1301 | 79  | 58  | C. briggsae CBR-UNC-24 protein                        |
| Locus_28927_Transcript_1/1_Conf_1.000 | 136  | 0  |          |                |     |         |     |     |                                                       |
| Locus_28928_Transcript_1/1_Conf_1.000 | 158  | 0  |          |                |     |         |     |     |                                                       |
| Locus_28929_Transcript_1/1_Conf_1.000 | 207  | 0  |          |                |     |         |     |     |                                                       |
| Locus_2893_Transcript_1/1_Conf_1.000  | 2625 | 20 | 0        | AAK31453.4     | 80  | 995.342 | 822 | 661 | Hypothetical protein C25H3.8                          |
| Locus_28930_Transcript_1/1_Conf_1.000 | 186  | 0  |          |                |     |         |     |     |                                                       |
| Locus_28931_Transcript_1/1_Conf_1.000 | 142  | 0  |          |                |     |         |     |     |                                                       |
| Locus_28932_Transcript_1/1_Conf_1.000 | 223  | 0  |          |                |     |         |     |     |                                                       |
| Locus_28933_Transcript_1/1_Conf_1.000 | 220  | 3  | 1.67E-04 | XP_002603962.1 | 61  | 49.2914 | 57  | 35  | hypothetical protein BRAFLDRAFT_71750                 |
| Locus_28934_Transcript_1/1_Conf_1.000 | 262  | 20 | 2.91E-17 | XP_002647628.1 | 67  | 91.6633 | 86  | 58  | Hypothetical protein CBG06721                         |
| Locus_28935_Transcript_1/1_Conf_1.000 | 177  | 0  |          |                |     |         |     |     |                                                       |
| Locus_28936_Transcript_1/1_Conf_1.000 | 131  | 0  |          |                |     |         |     |     |                                                       |
| Locus_28937_Transcript_1/1_Conf_1.000 | 146  | 5  | 1.98E-05 | ACV31094.1     | 95  | 52.373  | 48  | 46  | Glutamate receptor family (ampa) protein 4, isoform b |
| Locus_28938_Transcript_1/1_Conf_1.000 | 162  | 0  |          |                |     |         |     |     |                                                       |

|                                       |     |    |          |                |     |         |     |    |                                                                          |
|---------------------------------------|-----|----|----------|----------------|-----|---------|-----|----|--------------------------------------------------------------------------|
| Locus_28939_Transcript_1/1_Conf_1.000 | 249 | 0  |          |                |     |         |     |    |                                                                          |
| Locus_2894_Transcript_1/1_Conf_1.000  | 219 | 0  |          |                |     |         |     |    |                                                                          |
| Locus_28940_Transcript_1/1_Conf_1.000 | 165 | 2  | 1.93E-05 | XP_002635372.1 | 66  | 52.373  | 54  | 36 | C. briggsae CBR-RPM-1 protein                                            |
| Locus_28941_Transcript_1/1_Conf_1.000 | 128 | 20 | 2.06E-15 | XP_002912859.1 | 100 | 85.5001 | 41  | 41 | PREDICTED: homer protein homolog 3-like                                  |
| Locus_28942_Transcript_1/1_Conf_1.000 | 201 | 12 | 1.48E-13 | XP_002647861.1 | 75  | 79.337  | 66  | 50 | Hypothetical protein CBG23659                                            |
| Locus_28943_Transcript_1/1_Conf_1.000 | 210 | 0  |          |                |     |         |     |    |                                                                          |
| Locus_28944_Transcript_1/1_Conf_1.000 | 171 | 20 | 7.06E-08 | XP_002647283.1 | 92  | 60.4622 | 39  | 36 | Hypothetical protein CBG06323                                            |
| Locus_28945_Transcript_1/1_Conf_1.000 | 339 | 0  |          |                |     |         |     |    |                                                                          |
| Locus_28946_Transcript_1/1_Conf_1.000 | 397 | 14 | 3.57E-15 | EFO27653.1     | 64  | 84.7297 | 104 | 67 | hypothetical protein LOAG_00832                                          |
| Locus_28947_Transcript_1/1_Conf_1.000 | 178 | 0  |          |                |     |         |     |    |                                                                          |
| Locus_28948_Transcript_1/1_Conf_1.000 | 135 | 0  |          |                |     |         |     |    |                                                                          |
| Locus_28949_Transcript_1/1_Conf_1.000 | 139 | 0  |          |                |     |         |     |    |                                                                          |
| Locus_2895_Transcript_1/1_Conf_1.000  | 537 | 20 | 9.76E-39 | AAF08341.1     | 93  | 163.31  | 89  | 83 | AF064240_1peptidyl-prolyl cis-trans isomerase                            |
| Locus_28950_Transcript_1/1_Conf_1.000 | 168 | 0  |          |                |     |         |     |    |                                                                          |
| Locus_28951_Transcript_1/1_Conf_1.000 | 134 | 0  |          |                |     |         |     |    |                                                                          |
| Locus_28952_Transcript_1/1_Conf_1.000 | 185 | 20 | 1.12E-24 | NP_495675.1    | 95  | 116.316 | 61  | 58 | hypothetical protein DH11.1                                              |
| Locus_28953_Transcript_1/1_Conf_1.000 | 262 | 20 | 2.89E-33 | CAZ65495.1     | 87  | 144.821 | 87  | 76 | C. elegans protein F34D10.6a, partially confirmed by transcript evidence |

|                                       |     |    |          |                |     |         |     |    |                                                                         |
|---------------------------------------|-----|----|----------|----------------|-----|---------|-----|----|-------------------------------------------------------------------------|
| Locus_28954_Transcript_1/1_Conf_1.000 | 184 | 20 | 1.32E-17 | EFO91911.1     | 83  | 92.8189 | 61  | 51 | hypothetical protein CRE_12268                                          |
| Locus_28955_Transcript_1/1_Conf_1.000 | 155 | 0  |          |                |     |         |     |    |                                                                         |
| Locus_28956_Transcript_1/1_Conf_1.000 | 138 | 0  |          |                |     |         |     |    |                                                                         |
| Locus_28957_Transcript_1/1_Conf_1.000 | 231 | 3  | 4.49E-10 | NP_492438.1    | 77  | 67.781  | 53  | 41 | RADiation sensitivity abnormal/yeast RAD-related family member (rad-54) |
| Locus_28958_Transcript_1/1_Conf_1.000 | 347 | 7  | 3.57E-15 | EFO92670.1     | 62  | 84.7297 | 115 | 72 | hypothetical protein CRE_16359                                          |
| Locus_28959_Transcript_1/1_Conf_1.000 | 174 | 0  |          |                |     |         |     |    |                                                                         |
| Locus_2896_Transcript_1/1_Conf_1.000  | 173 | 0  |          |                |     |         |     |    |                                                                         |
| Locus_28960_Transcript_1/1_Conf_1.000 | 144 | 20 | 2.26E-17 | EFP05547.1     | 100 | 92.0485 | 47  | 47 | CRE-UNC-68 protein                                                      |
| Locus_28961_Transcript_1/1_Conf_1.000 | 131 | 0  |          |                |     |         |     |    |                                                                         |
| Locus_28962_Transcript_1/1_Conf_1.000 | 135 | 16 | 1.80E-11 | ADN00780.1     | 86  | 72.4034 | 44  | 38 | class 3 lipase protein                                                  |
| Locus_28963_Transcript_1/1_Conf_1.000 | 130 | 0  |          |                |     |         |     |    |                                                                         |
| Locus_28964_Transcript_1/1_Conf_1.000 | 149 | 0  |          |                |     |         |     |    |                                                                         |
| Locus_28965_Transcript_1/1_Conf_1.000 | 166 | 0  |          |                |     |         |     |    |                                                                         |
| Locus_28966_Transcript_1/1_Conf_1.000 | 154 | 0  |          |                |     |         |     |    |                                                                         |
| Locus_28967_Transcript_1/1_Conf_1.000 | 141 | 0  |          |                |     |         |     |    |                                                                         |
| Locus_28968_Transcript_1/1_Conf_1.000 | 224 | 0  |          |                |     |         |     |    |                                                                         |
| Locus_28969_Transcript_1/1_Conf_1.000 | 179 | 0  |          |                |     |         |     |    |                                                                         |
| Locus_2897_Transcript_1/1_Conf_1.000  | 413 | 4  | 3.70E-33 | CAR63680.1     | 75  | 144.436 | 113 | 85 | hypothetical protein                                                    |
| Locus_28970_Transcript_1/1_Conf_1.000 | 194 | 20 | 4.34E-29 | XP_002931630.1 | 100 | 130.954 | 64  | 64 | PREDICTED: receptor-type tyrosine-protein phosphatase F-like            |
| Locus_28971_Transcript_1/1_Conf_1.000 | 132 | 0  |          |                |     |         |     |    |                                                                         |
| Locus_28972_Transcript_1/1_Conf_1.000 | 142 | 0  |          |                |     |         |     |    |                                                                         |
| Locus_28973_Transcript_1/1_Conf_1.000 | 160 | 0  |          |                |     |         |     |    |                                                                         |
| Locus_28974_Transcript_1/1_Conf_1.000 | 143 | 12 | 2.41E-08 | EFO93074.1     | 80  | 62.003  | 47  | 38 | hypothetical protein CRE_10237                                          |

|                                       |     |    |          |                |     |         |     |     |                                                              |
|---------------------------------------|-----|----|----------|----------------|-----|---------|-----|-----|--------------------------------------------------------------|
| Locus_28975_Transcript_1/1_Conf_1.000 | 152 | 0  |          |                |     |         |     |     |                                                              |
| Locus_28976_Transcript_1/1_Conf_1.000 | 215 | 0  |          |                |     |         |     |     |                                                              |
| Locus_28977_Transcript_1/1_Conf_1.000 | 128 | 0  |          |                |     |         |     |     |                                                              |
| Locus_28978_Transcript_1/1_Conf_1.000 | 135 | 0  |          |                |     |         |     |     |                                                              |
| Locus_28979_Transcript_1/1_Conf_1.000 | 214 | 20 | 2.10E-28 | NP_504415.2    | 97  | 128.642 | 70  | 68  | Na/Ca eXchangers family member (ncx-2)                       |
| Locus_2898_Transcript_1/1_Conf_1.000  | 600 | 5  | 6.39E-49 | NP_497742.2    | 71  | 197.593 | 184 | 132 | hypothetical protein C46F11.5                                |
| Locus_28980_Transcript_1/1_Conf_1.000 | 164 | 0  |          |                |     |         |     |     |                                                              |
| Locus_28981_Transcript_1/1_Conf_1.000 | 141 | 1  | 4.71E-04 | XP_002639233.1 | 74  | 47.7506 | 43  | 32  | Hypothetical protein CBG03789                                |
| Locus_28982_Transcript_1/1_Conf_1.000 | 134 | 0  |          |                |     |         |     |     |                                                              |
| Locus_28983_Transcript_1/1_Conf_1.000 | 140 | 0  |          |                |     |         |     |     |                                                              |
| Locus_28984_Transcript_1/1_Conf_1.000 | 134 | 0  |          |                |     |         |     |     |                                                              |
| Locus_28985_Transcript_1/1_Conf_1.000 | 247 | 0  |          |                |     |         |     |     |                                                              |
| Locus_28986_Transcript_1/1_Conf_1.000 | 138 | 0  |          |                |     |         |     |     |                                                              |
| Locus_28987_Transcript_1/1_Conf_1.000 | 209 | 0  |          |                |     |         |     |     |                                                              |
| Locus_28988_Transcript_1/1_Conf_1.000 | 134 | 20 | 6.39E-17 | XP_002810085.1 | 100 | 90.5077 | 44  | 44  | PREDICTED: lamin-A/C-like                                    |
| Locus_28989_Transcript_1/1_Conf_1.000 | 144 | 20 | 2.58E-21 | XP_002814804.1 | 100 | 105.145 | 47  | 47  | PREDICTED: insulin-like growth factor-binding protein 7-like |

|                                       |      |    |          |                |     |         |     |     |                                                              |
|---------------------------------------|------|----|----------|----------------|-----|---------|-----|-----|--------------------------------------------------------------|
| Locus_2899_Transcript_1/2_Conf_1.000  | 2237 | 20 | 3.55E-65 | XP_002634092.1 | 68  | 254.603 | 272 | 187 | Hypothetical protein CBG01639                                |
| Locus_2899_Transcript_2/2_Conf_1.000  | 2237 | 20 | 3.55E-65 | XP_002634092.1 | 68  | 254.603 | 272 | 187 | Hypothetical protein CBG01639                                |
| Locus_28990_Transcript_1/1_Conf_1.000 | 135  | 0  |          |                |     |         |     |     |                                                              |
| Locus_28991_Transcript_1/1_Conf_1.000 | 153  | 20 | 1.27E-12 | XP_002819585.1 | 100 | 76.2554 | 50  | 50  | glutamate [NMDA] receptor-associated protein 1-like, partial |
| Locus_28992_Transcript_1/1_Conf_1.000 | 168  | 20 | 1.03E-06 | XP_001946020.1 | 68  | 56.6102 | 54  | 37  | PREDICTED: similar to CG8129 CG8129-PB                       |
| Locus_28993_Transcript_1/1_Conf_1.000 | 138  | 0  |          |                |     |         |     |     |                                                              |
| Locus_28994_Transcript_1/1_Conf_1.000 | 137  | 20 | 2.04E-15 | XP_002643681.1 | 95  | 85.5001 | 44  | 42  | Hypothetical protein CBG01860                                |
| Locus_28995_Transcript_1/1_Conf_1.000 | 142  | 0  |          |                |     |         |     |     |                                                              |
| Locus_28996_Transcript_1/1_Conf_1.000 | 129  | 1  | 1.11E-12 | AAA36776.1     | 100 | 76.2554 | 35  | 35  | transformation-related protein                               |
| Locus_28997_Transcript_1/1_Conf_1.000 | 149  | 0  |          |                |     |         |     |     |                                                              |
| Locus_28998_Transcript_1/1_Conf_1.000 | 139  | 0  |          |                |     |         |     |     |                                                              |
| Locus_28999_Transcript_1/1_Conf_1.000 | 135  | 0  |          |                |     |         |     |     |                                                              |
| Locus_29_Transcript_1/1_Conf_1.000    | 641  | 0  |          |                |     |         |     |     |                                                              |
| Locus_290_Transcript_1/3_Conf_0.500   | 341  | 14 | 6.10E-20 | CAA26849.1     | 64  | 100.523 | 101 | 65  | put. vitellogenin                                            |
| Locus_290_Transcript_2/3_Conf_0.750   | 1196 | 20 | 1.21E-57 | XP_002632391.1 | 83  | 228.409 | 156 | 130 | C. briggsae CBR-LACT-6 protein                               |
| Locus_290_Transcript_3/3_Conf_0.833   | 453  | 20 | 4.11E-32 | XP_002644638.1 | 64  | 140.969 | 150 | 97  | C. briggsae CBR-VIT-2 protein                                |
| Locus_2900_Transcript_1/1_Conf_1.000  | 957  | 7  | 7.02E-52 | XP_002635230.1 | 59  | 208.764 | 324 | 192 | C. briggsae CBR-NRF-5 protein                                |
| Locus_29000_Transcript_1/1_Conf_1.000 | 150  | 20 | 9.14E-11 | NP_499784.2    | 83  | 70.0922 | 49  | 41  | KELch-repeat containing protein family member (kel-3)        |
| Locus_29001_Transcript_1/1_Conf_1.000 | 142  | 0  |          |                |     |         |     |     |                                                              |
| Locus_29002_Transcript_1/1_Conf_1.000 | 189  | 0  |          |                |     |         |     |     |                                                              |
| Locus_29003_Transcript_1/1_Conf_1.000 | 302  | 0  |          |                |     |         |     |     |                                                              |

|                                       |     |    |          |                |     |         |     |     |                                                         |
|---------------------------------------|-----|----|----------|----------------|-----|---------|-----|-----|---------------------------------------------------------|
| Locus_29004_Transcript_1/1_Conf_1.000 | 135 | 4  | 1.28E-17 | EFO98604.1     | 95  | 92.8189 | 45  | 43  | CRE-ACY-1 protein                                       |
| Locus_29005_Transcript_1/1_Conf_1.000 | 217 | 0  |          |                |     |         |     |     |                                                         |
| Locus_29006_Transcript_1/1_Conf_1.000 | 135 | 2  | 1.25E-04 | NP_504545.2    | 68  | 49.6766 | 44  | 30  | hypothetical protein M03F8.4                            |
| Locus_29007_Transcript_1/1_Conf_1.000 | 146 | 20 | 3.15E-19 | XP_002821888.1 | 100 | 98.2117 | 47  | 47  | PREDICTED: glycosyltransferase-like protein LARGE2-like |
| Locus_29008_Transcript_1/1_Conf_1.000 | 145 | 17 | 2.05E-10 | XP_001901223.1 | 81  | 68.9366 | 48  | 39  | CLN3 protein                                            |
| Locus_29009_Transcript_1/1_Conf_1.000 | 164 | 6  | 9.63E-05 | AAB17945.1     | 62  | 50.0618 | 54  | 34  | mariner transposase                                     |
| Locus_2901_Transcript_1/1_Conf_1.000  | 547 | 20 | 2.43E-88 | XP_002643684.1 | 93  | 328.176 | 178 | 166 | C. briggsae CBR-NHR-1 protein                           |
| Locus_29010_Transcript_1/1_Conf_1.000 | 144 | 20 | 3.15E-19 | XP_002753706.1 | 100 | 98.2117 | 48  | 48  | PREDICTED: proteasome activator complex subunit 2-like  |
| Locus_29011_Transcript_1/1_Conf_1.000 | 132 | 0  |          |                |     |         |     |     |                                                         |
| Locus_29012_Transcript_1/1_Conf_1.000 | 130 | 0  |          |                |     |         |     |     |                                                         |
| Locus_29013_Transcript_1/1_Conf_1.000 | 132 | 0  |          |                |     |         |     |     |                                                         |
| Locus_29014_Transcript_1/1_Conf_1.000 | 156 | 20 | 2.22E-17 | XP_001161193.1 | 100 | 92.0485 | 42  | 42  | PREDICTED: similar to 16.7Kd protein isoform 1          |
| Locus_29015_Transcript_1/1_Conf_1.000 | 228 | 0  |          |                |     |         |     |     |                                                         |
| Locus_29016_Transcript_1/1_Conf_1.000 | 151 | 1  | 3.72E-04 | XP_002640228.1 | 85  | 48.1358 | 35  | 30  | C. briggsae CBR-ASD-2 protein                           |
| Locus_29017_Transcript_1/1_Conf_1.000 | 147 | 0  |          |                |     |         |     |     |                                                         |
| Locus_29018_Transcript_1/1_Conf_1.000 | 129 | 20 | 7.57E-18 | XP_002345467.1 | 100 | 93.5893 | 42  | 42  | PREDICTED: hypothetical protein                         |

|                                       |     |    |          |                |    |         |     |    |                                                                           |
|---------------------------------------|-----|----|----------|----------------|----|---------|-----|----|---------------------------------------------------------------------------|
| Locus_29019_Transcript_1/1_Conf_1.000 | 190 | 3  | 1.96E-05 | XP_002646129.1 | 70 | 52.373  | 41  | 29 | Hypothetical protein CBG08008                                             |
| Locus_2902_Transcript_1/3_Conf_0.667  | 860 | 20 | 1.01E-19 | AAO63576.1     | 51 | 101.679 | 172 | 88 | secreted protein 4 precursor                                              |
| Locus_2902_Transcript_2/3_Conf_0.667  | 904 | 20 | 5.46E-19 | AAO63576.1     | 52 | 99.3673 | 157 | 83 | secreted protein 4 precursor                                              |
| Locus_2902_Transcript_3/3_Conf_0.667  | 860 | 20 | 4.54E-20 | AAO63576.1     | 51 | 102.834 | 172 | 89 | secreted protein 4 precursor                                              |
| Locus_29020_Transcript_1/1_Conf_1.000 | 256 | 20 | 6.73E-30 | XP_002591083.1 | 84 | 133.65  | 83  | 70 | hypothetical protein BRAFLDRAFT_119067                                    |
| Locus_29021_Transcript_1/1_Conf_1.000 | 156 | 20 | 1.35E-14 | XP_002633417.1 | 86 | 82.8037 | 51  | 44 | C. briggsae CBR-TRPA-1 protein                                            |
| Locus_29022_Transcript_1/1_Conf_1.000 | 305 | 0  |          |                |    |         |     |    |                                                                           |
| Locus_29023_Transcript_1/2_Conf_1.000 | 222 | 0  |          |                |    |         |     |    |                                                                           |
| Locus_29023_Transcript_2/2_Conf_1.000 | 228 | 0  |          |                |    |         |     |    |                                                                           |
| Locus_29024_Transcript_1/1_Conf_1.000 | 162 | 5  | 5.47E-08 | XP_002639199.1 | 73 | 60.8474 | 52  | 38 | Hypothetical protein CBG03742                                             |
| Locus_29025_Transcript_1/1_Conf_1.000 | 162 | 20 | 5.29E-11 | EFP08914.1     | 84 | 70.8626 | 46  | 39 | hypothetical protein CRE_18067                                            |
| Locus_29026_Transcript_1/1_Conf_1.000 | 138 | 0  |          |                |    |         |     |    |                                                                           |
| Locus_29027_Transcript_1/1_Conf_1.000 | 131 | 0  |          |                |    |         |     |    |                                                                           |
| Locus_29028_Transcript_1/1_Conf_1.000 | 405 | 0  |          |                |    |         |     |    |                                                                           |
| Locus_29029_Transcript_1/1_Conf_1.000 | 160 | 0  |          |                |    |         |     |    |                                                                           |
| Locus_2903_Transcript_1/1_Conf_1.000  | 624 | 5  | 1.52E-11 | CAC35853.2     | 66 | 73.559  | 74  | 49 | C. elegans protein Y111B2A.24, partially confirmed by transcript evidence |
| Locus_29030_Transcript_1/1_Conf_1.000 | 151 | 0  |          |                |    |         |     |    |                                                                           |
| Locus_29031_Transcript_1/1_Conf_1.000 | 204 | 20 | 8.69E-06 | EFP13372.1     | 84 | 53.5286 | 38  | 32 | hypothetical protein CRE_11299                                            |
| Locus_29032_Transcript_1/1_Conf_1.000 | 200 | 20 | 3.52E-23 | NP_499198.1    | 87 | 111.309 | 66  | 58 | TransThyretin-Related family domain family member (ttr-4)                 |
| Locus_29033_Transcript_1/1_Conf_1.000 | 154 | 0  |          |                |    |         |     |    |                                                                           |
| Locus_29034_Transcript_1/1_Conf_1.000 | 152 | 0  |          |                |    |         |     |    |                                                                           |
| Locus_29035_Transcript_1/1_Conf_1.000 | 138 | 0  |          |                |    |         |     |    |                                                                           |
| Locus_29036_Transcript_1/1_Conf_1.000 | 173 | 0  |          |                |    |         |     |    |                                                                           |
| Locus_29037_Transcript_1/1_Conf_1.000 | 137 | 5  | 8.58E-14 | CAR97828.1     | 91 | 80.1073 | 45  | 41 | C. elegans protein F44G4.8b, confirmed by transcript evidence             |



|                                       |     |    |           |                |     |         |     |     |                                               |
|---------------------------------------|-----|----|-----------|----------------|-----|---------|-----|-----|-----------------------------------------------|
| Locus_29038_Transcript_1/1_Conf_1.000 | 143 | 0  |           |                |     |         |     |     |                                               |
| Locus_29039_Transcript_1/1_Conf_1.000 | 141 | 0  |           |                |     |         |     |     |                                               |
| Locus_2904_Transcript_1/1_Conf_1.000  | 974 | 20 | 7.59E-110 | XP_002643063.1 | 75  | 401.364 | 330 | 249 | Hypothetical protein CBG22980                 |
| Locus_29040_Transcript_1/1_Conf_1.000 | 209 | 0  |           |                |     |         |     |     |                                               |
| Locus_29041_Transcript_1/1_Conf_1.000 | 136 | 0  |           |                |     |         |     |     |                                               |
| Locus_29042_Transcript_1/1_Conf_1.000 | 195 | 7  | 1.54E-26  | EFO89638.1     | 87  | 122.479 | 63  | 55  | CRE-RHGF-1 protein                            |
| Locus_29043_Transcript_1/1_Conf_1.000 | 305 | 20 | 1.09E-08  | XP_388657.1    | 58  | 63.1586 | 77  | 45  | hypothetical protein FG08481.1                |
| Locus_29044_Transcript_1/1_Conf_1.000 | 141 | 0  |           |                |     |         |     |     |                                               |
| Locus_29045_Transcript_1/1_Conf_1.000 | 131 | 0  |           |                |     |         |     |     |                                               |
| Locus_29046_Transcript_1/1_Conf_1.000 | 180 | 0  |           |                |     |         |     |     |                                               |
| Locus_29047_Transcript_1/1_Conf_1.000 | 168 | 0  |           |                |     |         |     |     |                                               |
| Locus_29048_Transcript_1/1_Conf_1.000 | 175 | 0  |           |                |     |         |     |     |                                               |
| Locus_29049_Transcript_1/1_Conf_1.000 | 480 | 20 | 3.02E-43  | BAF30979.1     | 90  | 177.948 | 100 | 90  | mitochondrial elongation factor Tu2 precursor |
| Locus_2905_Transcript_1/1_Conf_1.000  | 164 | 0  |           |                |     |         |     |     |                                               |
| Locus_29050_Transcript_1/1_Conf_1.000 | 177 | 3  | 9.82E-10  | NP_001021087.1 | 72  | 66.6254 | 51  | 37  | hypothetical protein F08A10.1                 |
| Locus_29051_Transcript_1/1_Conf_1.000 | 173 | 0  |           |                |     |         |     |     |                                               |
| Locus_29052_Transcript_1/1_Conf_1.000 | 151 | 20 | 1.96E-21  | BAG60558.1     | 100 | 105.531 | 50  | 50  | unnamed protein product                       |

|                                       |     |    |          |                |    |         |     |     |                                                                                          |
|---------------------------------------|-----|----|----------|----------------|----|---------|-----|-----|------------------------------------------------------------------------------------------|
| Locus_29053_Transcript_1/1_Conf_1.000 | 165 | 20 | 1.76E-06 | XP_002731196.1 | 69 | 55.8398 | 53  | 37  | PREDICTED: sphingosine kinase A, B, putative-like                                        |
| Locus_29054_Transcript_1/1_Conf_1.000 | 133 | 2  | 2.97E-06 | NP_001022698.3 | 75 | 55.0694 | 45  | 34  | hypothetical protein R01H2.7                                                             |
| Locus_29055_Transcript_1/1_Conf_1.000 | 141 | 1  | 1.24E-04 | XP_002126093.1 | 62 | 49.6766 | 37  | 23  | PREDICTED: similar to sp4 protein                                                        |
| Locus_29056_Transcript_1/1_Conf_1.000 | 131 | 20 | 6.86E-11 | NP_741553.1    | 83 | 70.4774 | 42  | 35  | ALdehyde deHydrogenase family member (alh-4)                                             |
| Locus_29057_Transcript_1/1_Conf_1.000 | 148 | 0  |          |                |    |         |     |     |                                                                                          |
| Locus_29058_Transcript_1/1_Conf_1.000 | 196 | 0  |          |                |    |         |     |     |                                                                                          |
| Locus_29059_Transcript_1/1_Conf_1.000 | 149 | 0  |          |                |    |         |     |     |                                                                                          |
| Locus_2906_Transcript_1/1_Conf_1.000  | 731 | 20 | 1.47E-92 | XP_002641003.1 | 86 | 343.199 | 222 | 192 | C. briggsae CBR-TAT-1 protein                                                            |
| Locus_29060_Transcript_1/1_Conf_1.000 | 254 | 0  |          |                |    |         |     |     |                                                                                          |
| Locus_29061_Transcript_1/1_Conf_1.000 | 145 | 0  |          |                |    |         |     |     |                                                                                          |
| Locus_29062_Transcript_1/1_Conf_1.000 | 175 | 2  | 8.59E-22 | AAG43143.1     | 97 | 106.686 | 46  | 45  | AF061732_1My029 protein                                                                  |
| Locus_29063_Transcript_1/1_Conf_1.000 | 146 | 0  |          |                |    |         |     |     |                                                                                          |
| Locus_29064_Transcript_1/1_Conf_1.000 | 144 | 0  |          |                |    |         |     |     |                                                                                          |
| Locus_29065_Transcript_1/1_Conf_1.000 | 166 | 20 | 1.64E-12 | AAK68292.3     | 76 | 75.8702 | 55  | 42  | U28943_4Clc-type chloride channel protein 3, isoform b, confirmed by transcript evidence |
| Locus_29066_Transcript_1/1_Conf_1.000 | 209 | 0  |          |                |    |         |     |     |                                                                                          |
| Locus_29067_Transcript_1/1_Conf_1.000 | 185 | 20 | 2.50E-08 | EFP07235.1     | 91 | 62.003  | 61  | 56  | hypothetical protein CRE_13472                                                           |
| Locus_29068_Transcript_1/1_Conf_1.000 | 129 | 0  |          |                |    |         |     |     |                                                                                          |
| Locus_29069_Transcript_1/1_Conf_1.000 | 155 | 2  | 4.36E-05 | NP_508964.2    | 68 | 51.2174 | 45  | 31  | Regulator of G protein Signaling family member (rgs-6)                                   |
| Locus_2907_Transcript_1/1_Conf_1.000  | 805 | 20 | 1.90E-86 | NP_502016.2    | 79 | 323.168 | 270 | 214 | hypothetical protein F13E9.1                                                             |
| Locus_29070_Transcript_1/1_Conf_1.000 | 177 | 0  |          |                |    |         |     |     |                                                                                          |
| Locus_29071_Transcript_1/1_Conf_1.000 | 137 | 0  |          |                |    |         |     |     |                                                                                          |
| Locus_29072_Transcript_1/1_Conf_1.000 | 158 | 20 | 9.05E-11 | XP_002636118.1 | 78 | 70.0922 | 50  | 39  | Hypothetical protein CBG01364                                                            |
| Locus_29073_Transcript_1/1_Conf_1.000 | 169 | 0  |          |                |    |         |     |     |                                                                                          |

|                                       |      |    |           |                |    |         |     |     |                                                        |
|---------------------------------------|------|----|-----------|----------------|----|---------|-----|-----|--------------------------------------------------------|
| Locus_29074_Transcript_1/1_Conf_1.000 | 237  | 20 | 2.78E-28  | XP_001897168.1 | 84 | 128.257 | 79  | 67  | hypothetical protein                                   |
| Locus_29075_Transcript_1/1_Conf_1.000 | 142  | 0  |           |                |    |         |     |     |                                                        |
| Locus_29076_Transcript_1/1_Conf_1.000 | 146  | 2  | 6.82E-06  | NP_492081.1    | 70 | 53.9138 | 48  | 34  | hypothetical protein F07A5.3                           |
| Locus_29077_Transcript_1/1_Conf_1.000 | 148  | 2  | 1.05E-06  | NP_001021200.1 | 67 | 56.6102 | 49  | 33  | tryptophanyl (W) tRNA Synthetase family member (wrs-2) |
| Locus_29078_Transcript_1/1_Conf_1.000 | 133  | 3  | 5.40E-08  | XP_002640308.1 | 70 | 60.8474 | 48  | 34  | Hypothetical protein CBG12847                          |
| Locus_29079_Transcript_1/1_Conf_1.000 | 135  | 1  | 8.08E-04  | EFO90747.1     | 66 | 46.9802 | 51  | 34  | CRE-NHR-62 protein                                     |
| Locus_2908_Transcript_1/1_Conf_1.000  | 879  | 20 | 2.97E-107 | XP_002640012.1 | 80 | 392.504 | 278 | 224 | Hypothetical protein CBG12482                          |
| Locus_29080_Transcript_1/1_Conf_1.000 | 213  | 0  |           |                |    |         |     |     |                                                        |
| Locus_29081_Transcript_1/1_Conf_1.000 | 154  | 20 | 1.00E-17  | NP_001122835.1 | 88 | 93.2041 | 51  | 45  | UNCoordinated family member (unc-22)                   |
| Locus_29082_Transcript_1/1_Conf_1.000 | 210  | 20 | 6.80E-11  | ABD04163.1     | 85 | 70.4774 | 42  | 36  | plasma glutamate carboxypeptidase-like protein         |
| Locus_29083_Transcript_1/1_Conf_1.000 | 169  | 0  |           |                |    |         |     |     |                                                        |
| Locus_29084_Transcript_1/1_Conf_1.000 | 132  | 0  |           |                |    |         |     |     |                                                        |
| Locus_29086_Transcript_1/1_Conf_1.000 | 362  | 0  |           |                |    |         |     |     |                                                        |
| Locus_29087_Transcript_1/1_Conf_1.000 | 139  | 0  |           |                |    |         |     |     |                                                        |
| Locus_29088_Transcript_1/1_Conf_1.000 | 186  | 0  |           |                |    |         |     |     |                                                        |
| Locus_29089_Transcript_1/1_Conf_1.000 | 148  | 0  |           |                |    |         |     |     |                                                        |
| Locus_2909_Transcript_1/1_Conf_1.000  | 1760 | 20 | 4.06E-82  | XP_002637428.1 | 58 | 310.457 | 446 | 262 | C. briggsae CBR-GCK-1 protein                          |
| Locus_29090_Transcript_1/1_Conf_1.000 | 248  |    |           |                |    |         |     |     |                                                        |
| Locus_29091_Transcript_1/1_Conf_1.000 | 159  | 0  |           |                |    |         |     |     |                                                        |

|                                       |     |    |          |                |    |         |     |     |                                                                                                 |
|---------------------------------------|-----|----|----------|----------------|----|---------|-----|-----|-------------------------------------------------------------------------------------------------|
| Locus_29092_Transcript_1/1_Conf_1.000 | 135 | 1  | 2.78E-04 | XP_001366578.1 | 65 | 48.521  | 47  | 31  | PREDICTED: similar to CHKB protein                                                              |
| Locus_29093_Transcript_1/1_Conf_1.000 | 159 | 0  |          |                |    |         |     |     |                                                                                                 |
| Locus_29094_Transcript_1/1_Conf_1.000 | 224 | 20 | 1.78E-14 | XP_002729522.1 | 98 | 82.4185 | 50  | 49  | PREDICTED: heterogeneous nuclear ribonucleoprotein K                                            |
| Locus_29095_Transcript_1/1_Conf_1.000 | 159 | 20 | 3.80E-09 | NP_496938.1    | 67 | 64.6994 | 53  | 36  | hypothetical protein F01D5.8                                                                    |
| Locus_29096_Transcript_1/1_Conf_1.000 | 443 | 20 | 2.13E-52 | XP_001894880.1 | 80 | 208.379 | 147 | 119 | hypothetical protein                                                                            |
| Locus_29097_Transcript_1/1_Conf_1.000 | 240 | 0  |          |                |    |         |     |     |                                                                                                 |
| Locus_29098_Transcript_1/1_Conf_1.000 | 132 | 0  |          |                |    |         |     |     |                                                                                                 |
| Locus_29099_Transcript_1/1_Conf_1.000 | 165 | 0  |          |                |    |         |     |     |                                                                                                 |
| Locus_291_Transcript_1/2_Conf_1.000   | 158 | 7  | 4.96E-09 | NP_505384.2    | 75 | 64.3142 | 45  | 34  | ASpartyl Protease family member (asp-2)                                                         |
| Locus_291_Transcript_2/2_Conf_1.000   | 345 | 20 | 2.44E-21 | ADJ94115.1     | 80 | 82.4185 | 55  | 44  | aspartic protease                                                                               |
| Locus_2910_Transcript_1/1_Conf_1.000  | 479 | 0  |          |                |    |         |     |     |                                                                                                 |
| Locus_29100_Transcript_1/1_Conf_1.000 | 163 | 0  |          |                |    |         |     |     |                                                                                                 |
| Locus_29101_Transcript_1/1_Conf_1.000 | 153 | 20 | 1.23E-07 | ADI24637.1     | 66 | 59.6918 | 45  | 30  | Lin-12 and glp-1 x-hybridizing protein 1, isoform a, partially confirmed by transcript evidence |
| Locus_29102_Transcript_1/1_Conf_1.000 | 569 | 5  | 4.25E-25 | XP_002633543.1 | 58 | 118.242 | 191 | 111 | Hypothetical protein CBG05410                                                                   |
| Locus_29103_Transcript_1/1_Conf_1.000 | 189 | 20 | 2.39E-19 | EFO14883.1     | 87 | 98.5969 | 62  | 54  | TK/FER protein kinase                                                                           |

|                                       |     |    |          |                |     |         |     |     |                                                                        |
|---------------------------------------|-----|----|----------|----------------|-----|---------|-----|-----|------------------------------------------------------------------------|
| Locus_29104_Transcript_1/1_Conf_1.000 | 146 | 5  | 1.47E-08 | EFO93838.1     | 72  | 62.7734 | 48  | 35  | CRE-SPO-11 protein                                                     |
| Locus_29105_Transcript_1/1_Conf_1.000 | 171 | 0  |          |                |     |         |     |     |                                                                        |
| Locus_29106_Transcript_1/1_Conf_1.000 | 132 | 4  | 3.63E-04 | CAA84706.3     | 71  | 48.1358 | 42  | 30  | C. elegans protein C38H2.1, partially confirmed by transcript evidence |
| Locus_29107_Transcript_1/1_Conf_1.000 | 130 | 0  |          |                |     |         |     |     |                                                                        |
| Locus_29108_Transcript_1/1_Conf_1.000 | 149 | 0  |          |                |     |         |     |     |                                                                        |
| Locus_29109_Transcript_1/1_Conf_1.000 | 138 | 18 | 1.09E-08 | P30646.4       | 80  | 63.1586 | 45  | 36  | Uncharacterized sugar kinase R08D7.7                                   |
| Locus_2911_Transcript_1/1_Conf_1.000  | 531 | 20 | 1.86E-66 | NP_001164609.1 | 100 | 255.373 | 129 | 129 | clusterin isoform 3                                                    |
| Locus_29110_Transcript_1/1_Conf_1.000 | 372 | 4  | 8.46E-17 | Q60WT2.2       | 97  | 90.1225 | 47  | 46  | Alkaline ceramidase                                                    |
| Locus_29111_Transcript_1/1_Conf_1.000 | 144 | 0  |          |                |     |         |     |     |                                                                        |
| Locus_29112_Transcript_1/1_Conf_1.000 | 164 | 20 | 1.43E-24 | BAF83813.1     | 100 | 115.931 | 54  | 54  | unnamed protein product                                                |
| Locus_29113_Transcript_1/1_Conf_1.000 | 231 | 20 | 1.54E-26 | XP_002630880.1 | 85  | 122.479 | 77  | 66  | C. briggsae CBR-TAT-4.1 protein                                        |
| Locus_29114_Transcript_1/1_Conf_1.000 | 156 | 0  |          |                |     |         |     |     |                                                                        |
| Locus_29115_Transcript_1/1_Conf_1.000 | 205 | 0  |          |                |     |         |     |     |                                                                        |
| Locus_29116_Transcript_1/1_Conf_1.000 | 130 | 0  |          |                |     |         |     |     |                                                                        |

|                                       |     |    |          |                |     |         |     |     |                                                                                                     |
|---------------------------------------|-----|----|----------|----------------|-----|---------|-----|-----|-----------------------------------------------------------------------------------------------------|
| Locus_29117_Transcript_1/1_Conf_1.000 | 134 | 20 | 1.09E-16 | XP_002743762.1 | 100 | 89.7373 | 44  | 44  | PREDICTED: 60S ribosomal protein L9-like isoform 1                                                  |
| Locus_29118_Transcript_1/1_Conf_1.000 | 171 | 0  |          |                |     |         |     |     |                                                                                                     |
| Locus_29119_Transcript_1/1_Conf_1.000 | 129 | 4  | 3.64E-12 | EFP12691.1     | 88  | 74.7146 | 44  | 39  | hypothetical protein CRE_29767                                                                      |
| Locus_2912_Transcript_1/2_Conf_1.000  | 436 | 20 | 8.48E-46 | NP_001021536.1 | 89  | 186.422 | 115 | 103 | hypothetical protein K03E5.2                                                                        |
| Locus_2912_Transcript_2/2_Conf_1.000  | 708 | 20 | 1.44E-33 | ACO15785.1     | 89  | 147.132 | 87  | 78  | Hypothetical protein K03E5.2d                                                                       |
| Locus_29120_Transcript_1/1_Conf_1.000 | 148 | 0  |          |                |     |         |     |     |                                                                                                     |
| Locus_29121_Transcript_1/1_Conf_1.000 | 139 | 0  |          |                |     |         |     |     |                                                                                                     |
| Locus_29122_Transcript_1/1_Conf_1.000 | 152 | 0  |          |                |     |         |     |     |                                                                                                     |
| Locus_29123_Transcript_1/1_Conf_1.000 | 175 | 0  |          |                |     |         |     |     |                                                                                                     |
| Locus_29124_Transcript_1/1_Conf_1.000 | 164 | 0  |          |                |     |         |     |     |                                                                                                     |
| Locus_29125_Transcript_1/1_Conf_1.000 | 134 | 0  |          |                |     |         |     |     |                                                                                                     |
| Locus_29126_Transcript_1/1_Conf_1.000 | 238 | 0  |          |                |     |         |     |     |                                                                                                     |
| Locus_29127_Transcript_1/1_Conf_1.000 | 132 | 0  |          |                |     |         |     |     |                                                                                                     |
| Locus_29128_Transcript_1/1_Conf_1.000 | 152 | 7  | 8.53E-17 | EFO91579.1     | 87  | 90.1225 | 48  | 42  | hypothetical protein CRE_11978                                                                      |
| Locus_29129_Transcript_1/1_Conf_1.000 | 191 | 0  |          |                |     |         |     |     |                                                                                                     |
| Locus_2913_Transcript_1/2_Conf_1.000  | 870 | 20 | 2.71E-52 | NP_502816.2    | 63  | 209.92  | 274 | 173 | hypothetical protein Y41E3.10                                                                       |
| Locus_2913_Transcript_2/2_Conf_1.000  | 741 | 20 | 5.84E-52 | CAR63569.1     | 92  | 208.379 | 119 | 110 | putative elongation factor 1-beta/1-delta 1                                                         |
| Locus_29130_Transcript_1/1_Conf_1.000 | 137 | 20 | 3.61E-20 | XP_002810126.1 | 100 | 101.293 | 45  | 45  | PREDICTED: LOW QUALITY PROTEIN: disintegrin and metalloproteinase domain-containing protein 15-like |
| Locus_29131_Transcript_1/1_Conf_1.000 | 138 | 2  | 2.77E-04 | EFO19238.1     | 69  | 48.521  | 43  | 30  | hypothetical protein LOAG_09255                                                                     |
| Locus_29132_Transcript_1/1_Conf_1.000 | 163 | 1  | 7.86E-15 | BAG60904.1     | 100 | 83.5741 | 39  | 39  | unnamed protein product                                                                             |
| Locus_29133_Transcript_1/1_Conf_1.000 | 194 | 0  |          |                |     |         |     |     |                                                                                                     |
| Locus_29134_Transcript_1/1_Conf_1.000 | 148 | 0  |          |                |     |         |     |     |                                                                                                     |
| Locus_29135_Transcript_1/1_Conf_1.000 | 328 | 0  |          |                |     |         |     |     |                                                                                                     |
| Locus_29136_Transcript_1/1_Conf_1.000 | 169 | 0  |          |                |     |         |     |     |                                                                                                     |
| Locus_29137_Transcript_1/1_Conf_1.000 | 142 | 0  |          |                |     |         |     |     |                                                                                                     |
| Locus_29138_Transcript_1/1_Conf_1.000 | 137 | 0  |          |                |     |         |     |     |                                                                                                     |
| Locus_29139_Transcript_1/1_Conf_1.000 | 173 | 0  |          |                |     |         |     |     |                                                                                                     |
| Locus_2914_Transcript_1/1_Conf_1.000  | 139 | 0  |          |                |     |         |     |     |                                                                                                     |

|                                       |      |    |           |                |     |         |     |     |                                                                             |
|---------------------------------------|------|----|-----------|----------------|-----|---------|-----|-----|-----------------------------------------------------------------------------|
| Locus_29140_Transcript_1/1_Conf_1.000 | 152  | 3  | 1.51E-05  | NP_499028.1    | 77  | 52.7582 | 54  | 42  | NHL (ring finger b-box coiled coil) domain containing family member (nhl-1) |
| Locus_29141_Transcript_1/1_Conf_1.000 | 218  | 16 | 1.27E-09  | XP_002639681.1 | 63  | 66.2402 | 72  | 46  | Hypothetical protein CBG12400                                               |
| Locus_29142_Transcript_1/1_Conf_1.000 | 209  | 4  | 2.28E-06  | XP_002640308.1 | 69  | 55.4546 | 71  | 49  | Hypothetical protein CBG12847                                               |
| Locus_29143_Transcript_1/1_Conf_1.000 | 131  | 0  |           |                |     |         |     |     |                                                                             |
| Locus_29144_Transcript_1/1_Conf_1.000 | 142  | 8  | 1.01E-06  | EFO82374.1     | 79  | 56.6102 | 44  | 35  | CRE-MUP-2 protein                                                           |
| Locus_29145_Transcript_1/1_Conf_1.000 | 174  | 0  |           |                |     |         |     |     |                                                                             |
| Locus_29146_Transcript_1/1_Conf_1.000 | 147  | 0  |           |                |     |         |     |     |                                                                             |
| Locus_29147_Transcript_1/1_Conf_1.000 | 148  | 0  |           |                |     |         |     |     |                                                                             |
| Locus_29148_Transcript_1/1_Conf_1.000 | 136  | 19 | 2.27E-06  | XP_002933205.1 | 78  | 55.4546 | 41  | 32  | PREDICTED: TP53-regulating kinase                                           |
| Locus_29149_Transcript_1/1_Conf_1.000 | 169  | 0  |           |                |     |         |     |     |                                                                             |
| Locus_2915_Transcript_1/1_Conf_1.000  | 1437 | 20 | 1.20E-158 | NP_503730.1    | 82  | 564.303 | 388 | 319 | hypothetical protein Y45G12B.3                                              |
| Locus_29150_Transcript_1/1_Conf_1.000 | 185  | 0  |           |                |     |         |     |     |                                                                             |
| Locus_29151_Transcript_1/1_Conf_1.000 | 146  | 0  |           |                |     |         |     |     |                                                                             |
| Locus_29152_Transcript_1/1_Conf_1.000 | 206  | 2  | 7.57E-10  | NP_491490.1    | 61  | 67.0106 | 67  | 41  | hypothetical protein W03G9.5                                                |
| Locus_29153_Transcript_1/1_Conf_1.000 | 162  | 0  |           |                |     |         |     |     |                                                                             |
| Locus_29154_Transcript_1/1_Conf_1.000 | 181  | 2  | 7.53E-05  | XP_002633201.1 | 75  | 50.447  | 40  | 30  | C. briggsae CBR-NOL-10 protein                                              |
| Locus_29155_Transcript_1/1_Conf_1.000 | 155  | 20 | 5.00E-09  | EFO15925.1     | 70  | 64.3142 | 51  | 36  | amino acid permease                                                         |
| Locus_29156_Transcript_1/1_Conf_1.000 | 198  | 0  |           |                |     |         |     |     |                                                                             |
| Locus_29157_Transcript_1/1_Conf_1.000 | 166  | 20 | 1.21E-23  | EFO82569.1     | 100 | 112.849 | 55  | 55  | CRE-TBA-9 protein                                                           |

|                                       |      |    |           |                |     |         |     |     |                                                                                                   |
|---------------------------------------|------|----|-----------|----------------|-----|---------|-----|-----|---------------------------------------------------------------------------------------------------|
| Locus_29158_Transcript_1/1_Conf_1.000 | 165  | 20 | 2.14E-12  | XP_002645894.1 | 81  | 75.485  | 55  | 45  | Hypothetical protein CBG07647                                                                     |
| Locus_29159_Transcript_1/1_Conf_1.000 | 255  | 0  |           |                |     |         |     |     |                                                                                                   |
| Locus_2916_Transcript_1/1_Conf_1.000  | 1703 | 20 | 9.45E-153 | NP_498854.1    | 72  | 545.043 | 491 | 354 | Leucine AminoPeptidase family member (lap-1)                                                      |
| Locus_29160_Transcript_1/1_Conf_1.000 | 131  | 9  | 4.30E-13  | EFO82561.1     | 93  | 77.7962 | 43  | 40  | CRE-ACS-17 protein                                                                                |
| Locus_29161_Transcript_1/1_Conf_1.000 | 128  | 20 | 3.53E-15  | 3MCE           | 100 | 84.7297 | 42  | 42  | CrystalStructure OfThe Nac Domain Of Alpha Subunit Of Nascent Polypeptide-Associated Complex(Nac) |
| Locus_29162_Transcript_1/1_Conf_1.000 | 201  | 0  |           |                |     |         |     |     |                                                                                                   |
| Locus_29163_Transcript_1/1_Conf_1.000 | 134  | 2  | 4.75E-04  | EFO87316.1     | 70  | 47.7506 | 44  | 31  | CRE-DSC-4 protein                                                                                 |
| Locus_29164_Transcript_1/1_Conf_1.000 | 181  | 0  |           |                |     |         |     |     |                                                                                                   |
| Locus_29165_Transcript_1/1_Conf_1.000 | 138  | 0  |           |                |     |         |     |     |                                                                                                   |
| Locus_29166_Transcript_1/1_Conf_1.000 | 176  | 0  |           |                |     |         |     |     |                                                                                                   |
| Locus_29167_Transcript_1/1_Conf_1.000 | 129  | 20 | 1.58E-15  | XP_002745917.1 | 100 | 85.8853 | 42  | 42  | PREDICTED: heterogeneous nuclear ribonucleoproteins A2/B1-like                                    |
| Locus_29168_Transcript_1/1_Conf_1.000 | 173  | 0  |           |                |     |         |     |     |                                                                                                   |
| Locus_29169_Transcript_1/1_Conf_1.000 | 157  | 0  |           |                |     |         |     |     |                                                                                                   |
| Locus_2917_Transcript_1/1_Conf_1.000  | 316  | 20 | 8.52E-09  | NP_495668.1    | 46  | 63.5438 | 102 | 47  | hypothetical protein ZK669.2                                                                      |
| Locus_29170_Transcript_1/1_Conf_1.000 | 149  | 4  | 3.98E-06  | EFO93055.1     | 71  | 54.6842 | 49  | 35  | CRE-PSR-1 protein                                                                                 |
| Locus_29171_Transcript_1/1_Conf_1.000 | 163  | 0  |           |                |     |         |     |     |                                                                                                   |



|                                       |      |    |          |                |    |         |     |    |                                        |
|---------------------------------------|------|----|----------|----------------|----|---------|-----|----|----------------------------------------|
| Locus_29172_Transcript_1/1_Conf_1.000 | 133  | 5  | 5.07E-06 | EFO83717.1     | 78 | 54.299  | 37  | 29 | CRE-CDH-1 protein                      |
| Locus_29173_Transcript_1/1_Conf_1.000 | 155  | 0  |          |                |    |         |     |    |                                        |
| Locus_29174_Transcript_1/1_Conf_1.000 | 159  | 10 | 6.91E-11 | CAA72915.1     | 79 | 70.4774 | 49  | 39 | serine protease inhibitor-like protein |
| Locus_29175_Transcript_1/1_Conf_1.000 | 156  | 0  |          |                |    |         |     |    |                                        |
| Locus_29176_Transcript_1/1_Conf_1.000 | 137  | 0  |          |                |    |         |     |    |                                        |
| Locus_29177_Transcript_1/1_Conf_1.000 | 168  | 0  |          |                |    |         |     |    |                                        |
| Locus_29178_Transcript_1/1_Conf_1.000 | 147  | 0  |          |                |    |         |     |    |                                        |
| Locus_29179_Transcript_1/1_Conf_1.000 | 134  | 0  |          |                |    |         |     |    |                                        |
| Locus_2918_Transcript_1/2_Conf_1.000  | 1316 | 20 | 9.10E-09 | CAG01396.1     | 57 | 66.2402 | 115 | 66 | unnamed protein product                |
| Locus_2918_Transcript_2/2_Conf_1.000  | 1316 | 20 | 9.10E-09 | CAG01396.1     | 57 | 66.2402 | 115 | 66 | unnamed protein product                |
| Locus_29180_Transcript_1/1_Conf_1.000 | 136  | 0  |          |                |    |         |     |    |                                        |
| Locus_29181_Transcript_1/1_Conf_1.000 | 139  | 0  |          |                |    |         |     |    |                                        |
| Locus_29182_Transcript_1/1_Conf_1.000 | 159  | 20 | 2.23E-09 | EFO13528.1     | 69 | 65.4698 | 52  | 36 | hypothetical protein LOAG_14998        |
| Locus_29183_Transcript_1/1_Conf_1.000 | 131  | 0  |          |                |    |         |     |    |                                        |
| Locus_29184_Transcript_1/1_Conf_1.000 | 183  | 0  |          |                |    |         |     |    |                                        |
| Locus_29185_Transcript_1/1_Conf_1.000 | 136  | 0  |          |                |    |         |     |    |                                        |
| Locus_29186_Transcript_1/1_Conf_1.000 | 175  | 0  |          |                |    |         |     |    |                                        |
| Locus_29187_Transcript_1/1_Conf_1.000 | 171  | 0  |          |                |    |         |     |    |                                        |
| Locus_29188_Transcript_1/1_Conf_1.000 | 179  | 3  | 1.28E-09 | XP_002640845.1 | 69 | 66.2402 | 59  | 41 | C. briggsae CBR-CDH-1 protein          |
| Locus_29189_Transcript_1/1_Conf_1.000 | 158  | 20 | 3.22E-16 | NP_001040727.1 | 90 | 88.1965 | 52  | 47 | hypothetical protein C01F1.3           |

|                                       |      |    |           |                |     |         |     |     |                                                  |
|---------------------------------------|------|----|-----------|----------------|-----|---------|-----|-----|--------------------------------------------------|
| Locus_2919_Transcript_1/1_Conf_1.000  | 1136 | 20 | 1.27E-109 | NP_506579.1    | 92  | 400.979 | 233 | 216 | hypothetical protein F23B12.5                    |
| Locus_29190_Transcript_1/1_Conf_1.000 | 135  | 2  | 1.79E-11  | ABS45067.1     | 79  | 72.4034 | 44  | 35  | latrophilin-like protein 2                       |
| Locus_29191_Transcript_1/1_Conf_1.000 | 140  | 20 | 5.02E-22  | XP_002923042.1 | 100 | 107.457 | 46  | 46  | PREDICTED: lysyl oxidase homolog 1-like          |
| Locus_29192_Transcript_1/1_Conf_1.000 | 138  | 0  |           |                |     |         |     |     |                                                  |
| Locus_29193_Transcript_1/1_Conf_1.000 | 138  | 20 | 6.13E-12  | XP_002642560.1 | 84  | 73.9442 | 45  | 38  | C. briggsae CBR-RCQ-5 protein                    |
| Locus_29194_Transcript_1/1_Conf_1.000 | 221  | 0  |           |                |     |         |     |     |                                                  |
| Locus_29195_Transcript_1/1_Conf_1.000 | 176  | 0  |           |                |     |         |     |     |                                                  |
| Locus_29196_Transcript_1/1_Conf_1.000 | 135  | 0  |           |                |     |         |     |     |                                                  |
| Locus_29197_Transcript_1/1_Conf_1.000 | 171  | 0  |           |                |     |         |     |     |                                                  |
| Locus_29198_Transcript_1/1_Conf_1.000 | 137  | 20 | 2.50E-13  | NP_741756.1    | 93  | 78.5666 | 45  | 42  | Endophilin-Related Protein family member (erp-1) |
| Locus_29199_Transcript_1/1_Conf_1.000 | 173  | 0  |           |                |     |         |     |     |                                                  |
| Locus_292_Transcript_1/1_Conf_1.000   | 422  | 20 | 2.69E-47  | XP_001901347.1 | 82  | 191.43  | 140 | 116 | DNA excision repair protein ERCC-6               |
| Locus_2920_Transcript_1/1_Conf_1.000  | 385  | 0  |           |                |     |         |     |     |                                                  |
| Locus_29200_Transcript_1/1_Conf_1.000 | 166  | 5  | 1.13E-05  | NP_001022014.1 | 63  | 53.1434 | 55  | 35  | neuRonal IGCAM family member (rig-6)             |
| Locus_29201_Transcript_1/1_Conf_1.000 | 187  | 20 | 4.84E-12  | NP_510181.3    | 85  | 74.3294 | 62  | 53  | hypothetical protein F09A5.1                     |
| Locus_29202_Transcript_1/1_Conf_1.000 | 182  | 20 | 7.01E-19  | EFO24810.1     | 80  | 97.0561 | 60  | 48  | hypothetical protein LOAG_03675                  |

|                                       |     |    |          |                |    |         |     |    |                                                                    |
|---------------------------------------|-----|----|----------|----------------|----|---------|-----|----|--------------------------------------------------------------------|
| Locus_29203_Transcript_1/1_Conf_1.000 | 167 | 0  |          |                |    |         |     |    |                                                                    |
| Locus_29204_Transcript_1/1_Conf_1.000 | 150 | 0  |          |                |    |         |     |    |                                                                    |
| Locus_29205_Transcript_1/1_Conf_1.000 | 154 | 0  |          |                |    |         |     |    |                                                                    |
| Locus_29206_Transcript_1/1_Conf_1.000 | 157 | 20 | 3.33E-21 | EFO89626.1     | 96 | 104.76  | 52  | 50 | CRE-IFA-1 protein                                                  |
| Locus_29207_Transcript_1/1_Conf_1.000 | 136 | 0  |          |                |    |         |     |    |                                                                    |
| Locus_29208_Transcript_1/1_Conf_1.000 | 136 | 0  |          |                |    |         |     |    |                                                                    |
| Locus_29209_Transcript_1/1_Conf_1.000 | 177 | 0  |          |                |    |         |     |    |                                                                    |
| Locus_2921_Transcript_1/1_Conf_1.000  | 208 | 0  |          |                |    |         |     |    |                                                                    |
| Locus_29210_Transcript_1/1_Conf_1.000 | 224 | 12 | 2.25E-09 | EFO87962.1     | 80 | 65.4698 | 46  | 37 | hypothetical protein CRE_05718                                     |
| Locus_29211_Transcript_1/1_Conf_1.000 | 270 | 0  |          |                |    |         |     |    |                                                                    |
| Locus_29212_Transcript_1/1_Conf_1.000 | 146 | 15 | 9.82E-13 | EFP09685.1     | 89 | 76.6406 | 48  | 43 | CRE-SULP-3 protein                                                 |
| Locus_29213_Transcript_1/1_Conf_1.000 | 137 | 0  |          |                |    |         |     |    |                                                                    |
| Locus_29214_Transcript_1/1_Conf_1.000 | 147 | 20 | 7.00E-11 | NP_506684.3    | 81 | 70.4774 | 48  | 39 | hypothetical protein F02D8.4                                       |
| Locus_29215_Transcript_1/1_Conf_1.000 | 164 | 0  |          |                |    |         |     |    |                                                                    |
| Locus_29216_Transcript_1/1_Conf_1.000 | 225 | 0  |          |                |    |         |     |    |                                                                    |
| Locus_29217_Transcript_1/1_Conf_1.000 | 315 | 20 | 1.76E-38 | NP_494846.1    | 83 | 162.155 | 104 | 87 | hypothetical protein F41C3.5                                       |
| Locus_29218_Transcript_1/1_Conf_1.000 | 142 | 20 | 1.37E-11 | EFO91272.1     | 84 | 72.7886 | 46  | 39 | hypothetical protein CRE_04285                                     |
| Locus_29219_Transcript_1/1_Conf_1.000 | 208 | 20 | 1.05E-19 | NP_495473.2    | 79 | 99.7525 | 69  | 55 | SPONdin (extracellular matrix glycoprotein) family member (spon-1) |
| Locus_2922_Transcript_1/2_Conf_1.000  | 916 | 9  | 1.34E-04 | XP_001475360.1 | 40 | 51.6026 | 193 | 78 | PREDICTED: hypothetical protein                                    |
| Locus_2922_Transcript_2/2_Conf_1.000  | 505 | 0  |          |                |    |         |     |    |                                                                    |
| Locus_29220_Transcript_1/1_Conf_1.000 | 187 | 0  |          |                |    |         |     |    |                                                                    |
| Locus_29221_Transcript_1/1_Conf_1.000 | 129 | 0  |          |                |    |         |     |    |                                                                    |
| Locus_29222_Transcript_1/1_Conf_1.000 | 168 | 0  |          |                |    |         |     |    |                                                                    |
| Locus_29223_Transcript_1/1_Conf_1.000 | 137 | 1  | 2.78E-04 | EFO98227.1     | 68 | 48.521  | 45  | 31 | hypothetical protein CRE_15394                                     |
| Locus_29224_Transcript_1/1_Conf_1.000 | 152 | 0  |          |                |    |         |     |    |                                                                    |

|                                       |     |    |          |                |     |         |    |    |                                                        |
|---------------------------------------|-----|----|----------|----------------|-----|---------|----|----|--------------------------------------------------------|
| Locus_29225_Transcript_1/1_Conf_1.000 | 129 | 12 | 1.33E-14 | NP_001023646.1 | 97  | 82.8037 | 42 | 41 | AKT kinase family member (akt-1)                       |
| Locus_29226_Transcript_1/1_Conf_1.000 | 234 | 2  | 1.21E-15 | NP_493709.1    | 79  | 86.2705 | 77 | 61 | hypothetical protein K01A2.10                          |
| Locus_29227_Transcript_1/1_Conf_1.000 | 130 | 0  |          |                |     |         |    |    |                                                        |
| Locus_29228_Transcript_1/1_Conf_1.000 | 150 | 2  | 4.39E-05 | XP_001626861.1 | 72  | 51.2174 | 47 | 34 | predicted protein                                      |
| Locus_29229_Transcript_1/1_Conf_1.000 | 155 | 0  |          |                |     |         |    |    |                                                        |
| Locus_2923_Transcript_1/1_Conf_1.000  | 140 | 0  |          |                |     |         |    |    |                                                        |
| Locus_29230_Transcript_1/1_Conf_1.000 | 148 | 0  |          |                |     |         |    |    |                                                        |
| Locus_29231_Transcript_1/1_Conf_1.000 | 129 | 3  | 3.90E-06 | NP_493027.1    | 82  | 54.6842 | 39 | 32 | hypothetical protein R06C1.2                           |
| Locus_29232_Transcript_1/1_Conf_1.000 | 133 | 20 | 4.89E-17 | XP_002803107.1 | 100 | 90.8929 | 44 | 44 | PREDICTED: programmed cell death 6-interacting protein |
| Locus_29233_Transcript_1/1_Conf_1.000 | 148 | 0  |          |                |     |         |    |    |                                                        |
| Locus_29234_Transcript_1/1_Conf_1.000 | 141 | 0  |          |                |     |         |    |    |                                                        |
| Locus_29235_Transcript_1/1_Conf_1.000 | 137 | 0  |          |                |     |         |    |    |                                                        |
| Locus_29236_Transcript_1/1_Conf_1.000 | 130 | 20 | 2.61E-10 | XP_002642977.1 | 90  | 68.5514 | 40 | 36 | C. briggsae CBR-TTR-7 protein                          |
| Locus_29237_Transcript_1/1_Conf_1.000 | 133 | 0  |          |                |     |         |    |    |                                                        |
| Locus_29238_Transcript_1/1_Conf_1.000 | 170 | 0  |          |                |     |         |    |    |                                                        |
| Locus_29239_Transcript_1/1_Conf_1.000 | 270 | 1  | 1.21E-07 | EFP12879.1     | 63  | 59.6918 | 71 | 45 | hypothetical protein CRE_05993                         |
| Locus_2924_Transcript_1/2_Conf_1.000  | 307 | 20 | 1.51E-18 | NP_001133519.1 | 63  | 95.9005 | 73 | 46 | Granulins                                              |
| Locus_2924_Transcript_2/2_Conf_1.000  | 303 | 20 | 2.34E-19 | XP_002739994.1 | 62  | 98.5969 | 79 | 49 | PREDICTED: granulin-like, partial                      |
| Locus_29240_Transcript_1/1_Conf_1.000 | 129 | 0  |          |                |     |         |    |    |                                                        |
| Locus_29241_Transcript_1/1_Conf_1.000 | 180 | 0  |          |                |     |         |    |    |                                                        |
| Locus_29242_Transcript_1/1_Conf_1.000 | 133 | 0  |          |                |     |         |    |    |                                                        |
| Locus_29243_Transcript_1/1_Conf_1.000 | 133 | 0  |          |                |     |         |    |    |                                                        |
| Locus_29244_Transcript_1/1_Conf_1.000 | 147 | 0  |          |                |     |         |    |    |                                                        |
| Locus_29245_Transcript_1/1_Conf_1.000 | 340 | 0  |          |                |     |         |    |    |                                                        |
| Locus_29246_Transcript_1/1_Conf_1.000 | 152 | 0  |          |                |     |         |    |    |                                                        |

|                                       |      |    |          |                |     |         |     |     |                                                              |
|---------------------------------------|------|----|----------|----------------|-----|---------|-----|-----|--------------------------------------------------------------|
| Locus_29247_Transcript_1/1_Conf_1.000 | 141  | 20 | 7.99E-20 | EFO82306.1     | 97  | 100.138 | 46  | 45  | CRE-UBC-17 protein                                           |
| Locus_29248_Transcript_1/1_Conf_1.000 | 176  | 5  | 3.73E-17 | EFP07599.1     | 88  | 91.2781 | 52  | 46  | hypothetical protein CRE_26355                               |
| Locus_29249_Transcript_1/1_Conf_1.000 | 181  | 19 | 2.85E-12 | AAZ91344.1     | 100 | 75.0998 | 36  | 36  | Synaptotagmin protein 2                                      |
| Locus_2925_Transcript_1/1_Conf_1.000  | 1661 | 20 | 0        | AAF00539.1     | 94  | 744.577 | 403 | 381 | AF187690_1kinase JNK-1                                       |
| Locus_29250_Transcript_1/1_Conf_1.000 | 203  | 0  |          |                |     |         |     |     |                                                              |
| Locus_29251_Transcript_1/1_Conf_1.000 | 308  | 5  | 9.20E-16 | CAA94853.5     | 68  | 86.6557 | 76  | 52  | C. elegans protein ZK856.5, confirmed by transcript evidence |
| Locus_29252_Transcript_1/1_Conf_1.000 | 131  | 0  |          |                |     |         |     |     |                                                              |
| Locus_29253_Transcript_1/1_Conf_1.000 | 170  | 0  |          |                |     |         |     |     |                                                              |
| Locus_29254_Transcript_1/1_Conf_1.000 | 239  | 0  |          |                |     |         |     |     |                                                              |
| Locus_29255_Transcript_1/1_Conf_1.000 | 130  | 0  |          |                |     |         |     |     |                                                              |
| Locus_29256_Transcript_1/1_Conf_1.000 | 147  | 0  |          |                |     |         |     |     |                                                              |
| Locus_29257_Transcript_1/1_Conf_1.000 | 154  | 0  |          |                |     |         |     |     |                                                              |
| Locus_29258_Transcript_1/1_Conf_1.000 | 164  | 0  |          |                |     |         |     |     |                                                              |
| Locus_29259_Transcript_1/1_Conf_1.000 | 128  | 0  |          |                |     |         |     |     |                                                              |
| Locus_2926_Transcript_1/3_Conf_0.667  | 1135 | 2  | 3.22E-04 | NP_491414.3    | 39  | 50.8322 | 209 | 83  | hypothetical protein Y119C1A.1                               |
| Locus_2926_Transcript_2/3_Conf_0.667  | 1159 | 2  | 3.29E-04 | NP_491414.3    | 39  | 50.8322 | 209 | 83  | hypothetical protein Y119C1A.1                               |
| Locus_2926_Transcript_3/3_Conf_0.667  | 1165 | 2  | 3.32E-04 | NP_491414.3    | 39  | 50.8322 | 209 | 83  | hypothetical protein Y119C1A.1                               |
| Locus_29260_Transcript_1/1_Conf_1.000 | 136  | 0  |          |                |     |         |     |     |                                                              |
| Locus_29261_Transcript_1/1_Conf_1.000 | 173  | 0  |          |                |     |         |     |     |                                                              |
| Locus_29262_Transcript_1/1_Conf_1.000 | 189  | 20 | 2.02E-26 | XP_002645698.1 | 98  | 122.094 | 62  | 61  | Hypothetical protein CBG07358                                |
| Locus_29263_Transcript_1/1_Conf_1.000 | 230  | 0  |          |                |     |         |     |     |                                                              |
| Locus_29264_Transcript_1/1_Conf_1.000 | 187  | 0  |          |                |     |         |     |     |                                                              |

|                                       |     |    |          |                |     |         |    |    |                                                       |
|---------------------------------------|-----|----|----------|----------------|-----|---------|----|----|-------------------------------------------------------|
| Locus_29265_Transcript_1/1_Conf_1.000 | 159 | 20 | 5.46E-16 | XP_002812714.1 | 100 | 87.4261 | 52 | 52 | PREDICTED: collagen alpha-1(III) chain-like isoform 2 |
| Locus_29266_Transcript_1/1_Conf_1.000 | 223 | 0  |          |                |     |         |    |    |                                                       |
| Locus_29267_Transcript_1/1_Conf_1.000 | 128 | 0  |          |                |     |         |    |    |                                                       |
| Locus_29268_Transcript_1/1_Conf_1.000 | 135 | 0  |          |                |     |         |    |    |                                                       |
| Locus_29269_Transcript_1/1_Conf_1.000 | 228 | 0  |          |                |     |         |    |    |                                                       |
| Locus_2927_Transcript_1/1_Conf_1.000  | 169 | 18 | 1.17E-10 | Q94637.1       | 78  | 69.707  | 50 | 39 | Vitellogenin-6                                        |
| Locus_29270_Transcript_1/1_Conf_1.000 | 139 | 0  |          |                |     |         |    |    |                                                       |
| Locus_29271_Transcript_1/1_Conf_1.000 | 157 | 20 | 2.30E-14 | XP_002641185.1 | 84  | 82.0333 | 51 | 43 | Hypothetical protein CBG09046                         |
| Locus_29272_Transcript_1/1_Conf_1.000 | 186 | 0  |          |                |     |         |    |    |                                                       |
| Locus_29273_Transcript_1/1_Conf_1.000 | 146 | 0  |          |                |     |         |    |    |                                                       |
| Locus_29274_Transcript_1/1_Conf_1.000 | 224 | 2  | 1.27E-04 | NP_491075.2    | 60  | 49.6766 | 74 | 45 | hypothetical protein Y71F9AL.1                        |
| Locus_29275_Transcript_1/1_Conf_1.000 | 137 | 0  |          |                |     |         |    |    |                                                       |
| Locus_29276_Transcript_1/1_Conf_1.000 | 128 | 4  | 2.15E-04 | XP_002633509.1 | 66  | 48.9062 | 36 | 24 | Hypothetical protein CBG05371                         |
| Locus_29277_Transcript_1/1_Conf_1.000 | 164 | 20 | 6.04E-15 | NP_491303.3    | 84  | 83.9593 | 53 | 45 | hypothetical protein E01A2.5                          |
| Locus_29278_Transcript_1/1_Conf_1.000 | 169 | 0  |          |                |     |         |    |    |                                                       |

|                                       |      |    |           |                |     |         |     |     |                                                         |
|---------------------------------------|------|----|-----------|----------------|-----|---------|-----|-----|---------------------------------------------------------|
| Locus_29279_Transcript_1/1_Conf_1.000 | 294  | 20 | 5.58E-53  | BAG61199.1     | 100 | 210.305 | 98  | 98  | unnamed protein product                                 |
| Locus_2928_Transcript_1/2_Conf_1.000  | 3472 | 20 | 1.09E-135 | EFO28277.1     | 54  | 489.574 | 909 | 491 | piwi domain-containing protein                          |
| Locus_2928_Transcript_2/2_Conf_1.000  | 3282 | 20 | 1.02E-135 | EFO28277.1     | 54  | 489.574 | 909 | 491 | piwi domain-containing protein                          |
| Locus_29280_Transcript_1/1_Conf_1.000 | 160  | 4  | 1.26E-20  | XP_002634606.1 | 96  | 102.834 | 52  | 50  | Hypothetical protein CBG08423                           |
| Locus_29281_Transcript_1/1_Conf_1.000 | 159  | 20 | 1.34E-22  | XP_002637337.1 | 98  | 109.383 | 53  | 52  | Hypothetical protein CBG19032                           |
| Locus_29282_Transcript_1/1_Conf_1.000 | 143  | 0  |           |                |     |         |     |     |                                                         |
| Locus_29283_Transcript_1/1_Conf_1.000 | 130  | 0  |           |                |     |         |     |     |                                                         |
| Locus_29284_Transcript_1/1_Conf_1.000 | 148  | 0  |           |                |     |         |     |     |                                                         |
| Locus_29285_Transcript_1/1_Conf_1.000 | 203  | 0  |           |                |     |         |     |     |                                                         |
| Locus_29286_Transcript_1/1_Conf_1.000 | 128  | 0  |           |                |     |         |     |     |                                                         |
| Locus_29287_Transcript_1/1_Conf_1.000 | 159  | 0  |           |                |     |         |     |     |                                                         |
| Locus_29288_Transcript_1/1_Conf_1.000 | 139  | 0  |           |                |     |         |     |     |                                                         |
| Locus_29289_Transcript_1/1_Conf_1.000 | 139  | 0  |           |                |     |         |     |     |                                                         |
| Locus_2929_Transcript_1/1_Conf_1.000  | 990  | 20 | 8.46E-72  | NP_501038.1    | 66  | 275.018 | 325 | 217 | Dynein Chain, light Intermediate family member (dyci-1) |
| Locus_29290_Transcript_1/1_Conf_1.000 | 146  | 20 | 3.73E-12  | NP_497268.1    | 87  | 74.7146 | 48  | 42  | Caenorhabditis EpoxidE Hydrolase family member (ceeh-1) |
| Locus_29291_Transcript_1/1_Conf_1.000 | 144  | 0  |           |                |     |         |     |     |                                                         |
| Locus_29292_Transcript_1/1_Conf_1.000 | 164  | 0  |           |                |     |         |     |     |                                                         |
| Locus_29293_Transcript_1/1_Conf_1.000 | 210  | 0  |           |                |     |         |     |     |                                                         |
| Locus_29294_Transcript_1/1_Conf_1.000 | 149  | 0  |           |                |     |         |     |     |                                                         |
| Locus_29295_Transcript_1/1_Conf_1.000 | 283  | 0  |           |                |     |         |     |     |                                                         |
| Locus_29296_Transcript_1/1_Conf_1.000 | 210  | 0  |           |                |     |         |     |     |                                                         |
| Locus_29297_Transcript_1/1_Conf_1.000 | 189  | 5  | 1.15E-13  | EFO26857.1     | 74  | 79.7221 | 59  | 44  | leucine Rich Repeat family protein                      |

|                                       |      |    |          |                |     |         |     |     |                                                     |
|---------------------------------------|------|----|----------|----------------|-----|---------|-----|-----|-----------------------------------------------------|
| Locus_29298_Transcript_1/1_Conf_1.000 | 347  | 20 | 3.43E-34 | EFO20819.1     | 81  | 147.902 | 103 | 84  | CK1/TTBKL protein kinase                            |
| Locus_29299_Transcript_1/1_Conf_1.000 | 135  | 20 | 4.41E-18 | EAW99708.1     | 100 | 94.3597 | 44  | 44  | hCG40733, isoform CRA_d                             |
| Locus_293_Transcript_10/21_Conf_1.000 | 156  | 0  |          |                |     |         |     |     |                                                     |
| Locus_293_Transcript_11/21_Conf_1.000 | 198  | 20 | 7.88E-07 | XP_001179362.1 | 60  | 56.9954 | 61  | 37  | PREDICTED: similar to putative polyprotein, partial |
| Locus_293_Transcript_12/21_Conf_0.434 | 2010 | 8  | 2.87E-10 | XP_002648426.1 | 48  | 72.0182 | 165 | 80  | C. briggsae CBR-DCT-10 protein                      |
| Locus_293_Transcript_13/21_Conf_0.226 | 2911 | 20 | 4.86E-33 | NP_496141.1    | 42  | 148.288 | 568 | 240 | hypothetical protein C05C10.2                       |
| Locus_293_Transcript_14/21_Conf_0.151 | 2854 | 20 | 4.75E-33 | NP_496141.1    | 42  | 148.288 | 568 | 240 | hypothetical protein C05C10.2                       |
| Locus_293_Transcript_15/21_Conf_0.321 | 640  | 4  | 5.06E-05 | EEQ88932.1     | 44  | 51.9878 | 93  | 41  | conserved hypothetical protein                      |
| Locus_293_Transcript_16/21_Conf_0.491 | 4232 | 20 | 7.33E-33 | NP_496141.1    | 42  | 148.288 | 568 | 240 | hypothetical protein C05C10.2                       |



|                                       |      |    |          |                |    |         |     |     |                                          |
|---------------------------------------|------|----|----------|----------------|----|---------|-----|-----|------------------------------------------|
| Locus_293_Transcript_17/21_Conf_0.415 | 2066 | 8  | 2.97E-10 | XP_002648426.1 | 48 | 72.0182 | 165 | 80  | C. briggsae CBR-DCT-10 protein           |
| Locus_293_Transcript_18/21_Conf_0.094 | 1213 | 0  |          |                |    |         |     |     |                                          |
| Locus_293_Transcript_19/21_Conf_0.321 | 3470 | 20 | 2.24E-48 | XP_002648425.1 | 55 | 199.519 | 249 | 139 | Hypothetical protein CBG24691            |
| Locus_293_Transcript_20/21_Conf_0.151 | 2854 | 20 | 4.75E-33 | NP_496141.1    | 42 | 148.288 | 568 | 240 | hypothetical protein C05C10.2            |
| Locus_293_Transcript_21/21_Conf_0.434 | 2010 | 8  | 2.87E-10 | XP_002648426.1 | 48 | 72.0182 | 165 | 80  | C. briggsae CBR-DCT-10 protein           |
| Locus_293_Transcript_5/21_Conf_1.000  | 162  | 0  |          |                |    |         |     |     |                                          |
| Locus_293_Transcript_6/21_Conf_1.000  | 129  | 0  |          |                |    |         |     |     |                                          |
| Locus_293_Transcript_7/21_Conf_1.000  | 142  | 0  |          |                |    |         |     |     |                                          |
| Locus_293_Transcript_8/21_Conf_1.000  | 146  | 0  |          |                |    |         |     |     |                                          |
| Locus_293_Transcript_9/21_Conf_1.000  | 144  | 0  |          |                |    |         |     |     |                                          |
| Locus_2930_Transcript_1/1_Conf_1.000  | 1105 | 20 | 3.43E-96 | NP_498556.1    | 83 | 356.295 | 242 | 203 | hypothetical protein B0280.3             |
| Locus_29300_Transcript_1/1_Conf_1.000 | 169  | 0  |          |                |    |         |     |     |                                          |
| Locus_29301_Transcript_1/1_Conf_1.000 | 194  | 0  |          |                |    |         |     |     |                                          |
| Locus_29302_Transcript_1/1_Conf_1.000 | 357  | 20 | 2.25E-38 | XP_002645663.1 | 73 | 161.77  | 116 | 85  | Hypothetical protein CBG07306            |
| Locus_29303_Transcript_1/1_Conf_1.000 | 149  | 0  |          |                |    |         |     |     |                                          |
| Locus_29304_Transcript_1/1_Conf_1.000 | 148  | 5  | 1.08E-11 | XP_002647777.1 | 75 | 73.1738 | 48  | 36  | C. briggsae CBR-TSP-13 protein           |
| Locus_29305_Transcript_1/1_Conf_1.000 | 133  | 2  | 1.86E-08 | NP_492201.1    | 81 | 62.3882 | 43  | 35  | hypothetical protein C54G4.4             |
| Locus_29306_Transcript_1/1_Conf_1.000 | 238  | 11 | 1.80E-11 | XP_002646356.1 | 69 | 72.4034 | 79  | 55  | Hypothetical protein CBG12070            |
| Locus_29307_Transcript_1/1_Conf_1.000 | 215  | 20 | 1.24E-12 | XP_001902375.1 | 69 | 76.2554 | 72  | 50  | Protein kinase domain containing protein |
| Locus_29308_Transcript_1/1_Conf_1.000 | 130  | 1  | 6.22E-04 | NP_508551.1    | 65 | 47.3654 | 43  | 28  | hypothetical protein F28B4.3             |
| Locus_29309_Transcript_1/1_Conf_1.000 | 144  | 0  |          |                |    |         |     |     |                                          |

|                                       |     |    |          |                |     |         |     |     |                                                         |
|---------------------------------------|-----|----|----------|----------------|-----|---------|-----|-----|---------------------------------------------------------|
| Locus_2931_Transcript_1/1_Conf_1.000  | 488 | 20 | 2.51E-53 | ABD39381.1     | 83  | 211.46  | 143 | 119 | putative galectin protein 10                            |
| Locus_29310_Transcript_1/1_Conf_1.000 | 133 | 20 | 3.29E-05 | XP_002923582.1 | 100 | 51.6026 | 43  | 43  | PREDICTED: LOW QUALITY PROTEIN: membralin-like, partial |
| Locus_29311_Transcript_1/1_Conf_1.000 | 141 | 0  |          |                |     |         |     |     |                                                         |
| Locus_29312_Transcript_1/1_Conf_1.000 | 135 | 0  |          |                |     |         |     |     |                                                         |
| Locus_29313_Transcript_1/1_Conf_1.000 | 171 | 0  |          |                |     |         |     |     |                                                         |
| Locus_29314_Transcript_1/1_Conf_1.000 | 136 | 14 | 7.30E-05 | XP_002745176.1 | 70  | 50.447  | 34  | 24  | PREDICTED: hypothetical protein LOC100415433            |
| Locus_29315_Transcript_1/1_Conf_1.000 | 130 | 4  | 5.42E-08 | ACI49212.1     | 83  | 60.8474 | 42  | 35  | hypothetical protein Csp3_JD04.011                      |
| Locus_29316_Transcript_1/1_Conf_1.000 | 256 | 0  |          |                |     |         |     |     |                                                         |
| Locus_29317_Transcript_1/1_Conf_1.000 | 133 | 0  |          |                |     |         |     |     |                                                         |
| Locus_29318_Transcript_1/1_Conf_1.000 | 185 | 0  |          |                |     |         |     |     |                                                         |
| Locus_29319_Transcript_1/1_Conf_1.000 | 130 | 4  | 1.64E-04 | XP_002633829.1 | 63  | 49.2914 | 41  | 26  | Hypothetical protein CBG19861                           |
| Locus_2932_Transcript_1/1_Conf_1.000  | 821 | 20 | 2.02E-83 | NP_500363.1    | 96  | 313.153 | 189 | 183 | Cell Death abnormality family member (ced-10)           |
| Locus_29320_Transcript_1/1_Conf_1.000 | 298 | 2  | 3.52E-15 | XP_002645173.1 | 67  | 84.7297 | 85  | 57  | Hypothetical protein CBG16894                           |
| Locus_29321_Transcript_1/1_Conf_1.000 | 131 | 0  |          |                |     |         |     |     |                                                         |
| Locus_29322_Transcript_1/1_Conf_1.000 | 142 | 0  |          |                |     |         |     |     |                                                         |

|                                       |      |    |          |                |    |         |     |    |                                      |
|---------------------------------------|------|----|----------|----------------|----|---------|-----|----|--------------------------------------|
| Locus_29323_Transcript_1/1_Conf_1.000 | 131  | 3  | 2.97E-06 | AAZ82850.2     | 79 | 55.0694 | 43  | 34 | Hypothetical protein C01B10.11       |
| Locus_29324_Transcript_1/1_Conf_1.000 | 130  | 0  |          |                |    |         |     |    |                                      |
| Locus_29325_Transcript_1/1_Conf_1.000 | 133  | 0  |          |                |    |         |     |    |                                      |
| Locus_29326_Transcript_1/1_Conf_1.000 | 171  | 0  |          |                |    |         |     |    |                                      |
| Locus_29327_Transcript_1/1_Conf_1.000 | 144  | 0  |          |                |    |         |     |    |                                      |
| Locus_29328_Transcript_1/1_Conf_1.000 | 141  | 0  |          |                |    |         |     |    |                                      |
| Locus_29329_Transcript_1/1_Conf_1.000 | 138  | 0  |          |                |    |         |     |    |                                      |
| Locus_2933_Transcript_1/1_Conf_1.000  | 1170 | 2  | 1.31E-08 | XP_001899586.1 | 60 | 65.4698 | 113 | 68 | hypothetical protein                 |
| Locus_29330_Transcript_1/1_Conf_1.000 | 131  | 4  | 2.87E-17 | NP_001022641.1 | 97 | 91.6633 | 43  | 42 | LEThal family member (let-805)       |
| Locus_29331_Transcript_1/1_Conf_1.000 | 133  | 20 | 2.27E-14 | EFO24024.1     | 95 | 82.0333 | 44  | 42 | CMGC/DYRK/HIPK protein kinase        |
| Locus_29332_Transcript_1/1_Conf_1.000 | 311  | 20 | 2.48E-37 | NP_001023265.1 | 81 | 158.303 | 103 | 84 | UNCoordinated family member (unc-26) |
| Locus_29333_Transcript_1/1_Conf_1.000 | 140  | 0  |          |                |    |         |     |    |                                      |
| Locus_29334_Transcript_1/1_Conf_1.000 | 145  | 20 | 4.25E-16 | CAF91420.1     | 95 | 87.8113 | 47  | 45 | unnamed protein product              |
| Locus_29335_Transcript_1/1_Conf_1.000 | 131  | 20 | 8.96E-11 | EFO86831.1     | 86 | 70.0922 | 43  | 37 | hypothetical protein CRE_04808       |
| Locus_29336_Transcript_1/1_Conf_1.000 | 165  | 18 | 6.44E-09 | EFP07603.1     | 79 | 63.929  | 54  | 43 | hypothetical protein CRE_26305       |
| Locus_29337_Transcript_1/1_Conf_1.000 | 195  | 0  |          |                |    |         |     |    |                                      |

|                                       |     |    |          |                |     |         |     |     |                                                                          |
|---------------------------------------|-----|----|----------|----------------|-----|---------|-----|-----|--------------------------------------------------------------------------|
| Locus_29338_Transcript_1/1_Conf_1.000 | 129 | 20 | 4.91E-17 | XP_002913893.1 | 100 | 90.8929 | 42  | 42  | PREDICTED: LOW QUALITY PROTEIN: secreted frizzled-related protein 2-like |
| Locus_29339_Transcript_1/1_Conf_1.000 | 171 | 5  | 9.52E-21 | EFP08905.1     | 85  | 103.219 | 57  | 49  | hypothetical protein CRE_18030                                           |
| Locus_2934_Transcript_1/2_Conf_1.000  | 168 | 20 | 2.68E-23 | EFO21508.1     | 100 | 111.694 | 55  | 55  | ubiquitin C II                                                           |
| Locus_2934_Transcript_2/2_Conf_1.000  | 318 | 20 | 1.06E-51 | EFO21508.1     | 100 | 206.068 | 105 | 105 | ubiquitin C II                                                           |
| Locus_29340_Transcript_1/1_Conf_1.000 | 159 | 0  |          |                |     |         |     |     |                                                                          |
| Locus_29341_Transcript_1/1_Conf_1.000 | 134 | 20 | 7.83E-07 | EFP05831.1     | 84  | 56.9954 | 44  | 37  | CRE-PYC-1 protein                                                        |
| Locus_29342_Transcript_1/1_Conf_1.000 | 154 | 20 | 1.65E-20 | EAW50472.1     | 100 | 102.449 | 51  | 51  | hCG2042722                                                               |
| Locus_29343_Transcript_1/1_Conf_1.000 | 132 | 20 | 3.99E-19 | XP_002929374.1 | 100 | 97.8265 | 43  | 43  | PREDICTED: WD repeat-containing protein 1-like                           |
| Locus_29344_Transcript_1/1_Conf_1.000 | 134 | 0  |          |                |     |         |     |     |                                                                          |
| Locus_29345_Transcript_1/1_Conf_1.000 | 134 | 5  | 2.78E-12 | EFP07387.1     | 90  | 75.0998 | 44  | 40  | hypothetical protein CRE_26446                                           |

|                                       |      |    |          |                |     |         |     |     |                                                                                      |
|---------------------------------------|------|----|----------|----------------|-----|---------|-----|-----|--------------------------------------------------------------------------------------|
| Locus_29346_Transcript_1/1_Conf_1.000 | 150  | 20 | 3.12E-19 | BAG53122.1     | 100 | 98.2117 | 49  | 49  | unnamed protein product                                                              |
| Locus_29347_Transcript_1/1_Conf_1.000 | 151  | 0  |          |                |     |         |     |     |                                                                                      |
| Locus_29348_Transcript_1/1_Conf_1.000 | 131  | 0  |          |                |     |         |     |     |                                                                                      |
| Locus_29349_Transcript_1/1_Conf_1.000 | 181  | 4  | 1.41E-08 | NP_499313.2    | 63  | 62.7734 | 58  | 37  | hypothetical protein F43D9.1                                                         |
| Locus_2935_Transcript_1/1_Conf_1.000  | 635  | 20 | 7.93E-96 | NP_504202.1    | 95  | 353.599 | 187 | 179 | hypothetical protein F32D1.5                                                         |
| Locus_29350_Transcript_1/1_Conf_1.000 | 136  | 20 | 3.37E-18 | EFO21455.1     | 95  | 94.7449 | 45  | 43  | voltage-gated calcium channel                                                        |
| Locus_29351_Transcript_1/1_Conf_1.000 | 128  | 0  |          |                |     |         |     |     |                                                                                      |
| Locus_29352_Transcript_1/1_Conf_1.000 | 157  | 0  |          |                |     |         |     |     |                                                                                      |
| Locus_29353_Transcript_1/1_Conf_1.000 | 158  | 13 | 3.79E-17 | NP_501689.1    | 90  | 91.2781 | 52  | 47  | fatty acid ELongation family member (elo-1)                                          |
| Locus_29354_Transcript_1/1_Conf_1.000 | 279  | 20 | 2.76E-12 | EFO27955.1     | 72  | 75.0998 | 90  | 65  | leucyl aminopeptidase                                                                |
| Locus_29355_Transcript_1/1_Conf_1.000 | 139  | 20 | 1.97E-18 | XP_002826951.1 | 100 | 95.5153 | 45  | 45  | PREDICTED: complement component 1 Q subcomponent-binding protein, mitochondrial-like |
| Locus_29356_Transcript_1/1_Conf_1.000 | 145  | 10 | 1.24E-07 | NP_001022736.1 | 73  | 59.6918 | 45  | 33  | hypothetical protein R155.1                                                          |
| Locus_29357_Transcript_1/1_Conf_1.000 | 140  | 0  |          |                |     |         |     |     |                                                                                      |
| Locus_29358_Transcript_1/1_Conf_1.000 | 131  | 0  |          |                |     |         |     |     |                                                                                      |
| Locus_29359_Transcript_1/1_Conf_1.000 | 143  | 0  |          |                |     |         |     |     |                                                                                      |
| Locus_2936_Transcript_1/3_Conf_0.714  | 1036 | 2  | 3.53E-15 | XP_002639470.1 | 64  | 87.0409 | 96  | 62  | Hypothetical protein CBG04065                                                        |
| Locus_2936_Transcript_2/3_Conf_0.714  | 1033 | 2  | 3.51E-15 | XP_002639470.1 | 64  | 87.0409 | 96  | 62  | Hypothetical protein CBG04065                                                        |
| Locus_2936_Transcript_3/3_Conf_0.714  | 1033 | 2  | 3.51E-15 | XP_002639470.1 | 64  | 87.0409 | 96  | 62  | Hypothetical protein CBG04065                                                        |
| Locus_29360_Transcript_1/1_Conf_1.000 | 239  | 20 | 4.13E-32 | XP_002634052.1 | 94  | 140.969 | 79  | 75  | C. briggsae CBR-VHA-5 protein                                                        |
| Locus_29361_Transcript_1/1_Conf_1.000 | 130  | 0  |          |                |     |         |     |     |                                                                                      |

|                                       |     |    |          |                |     |         |     |     |                                                            |
|---------------------------------------|-----|----|----------|----------------|-----|---------|-----|-----|------------------------------------------------------------|
| Locus_29362_Transcript_1/1_Conf_1.000 | 156 | 20 | 1.55E-18 | XP_002629730.1 | 98  | 95.9005 | 52  | 51  | Hypothetical protein CBG00961                              |
| Locus_29363_Transcript_1/1_Conf_1.000 | 443 | 4  | 1.96E-05 | NP_496398.2    | 51  | 52.373  | 136 | 70  | hypothetical protein T06D8.1                               |
| Locus_29364_Transcript_1/1_Conf_1.000 | 177 | 3  | 1.24E-04 | EFO20410.1     | 73  | 49.6766 | 41  | 30  | hypothetical protein LOAG_08081                            |
| Locus_29365_Transcript_1/1_Conf_1.000 | 134 | 0  |          |                |     |         |     |     |                                                            |
| Locus_29366_Transcript_1/1_Conf_1.000 | 189 | 0  |          |                |     |         |     |     |                                                            |
| Locus_29367_Transcript_1/1_Conf_1.000 | 205 | 0  |          |                |     |         |     |     |                                                            |
| Locus_29368_Transcript_1/1_Conf_1.000 | 130 | 0  |          |                |     |         |     |     |                                                            |
| Locus_29369_Transcript_1/1_Conf_1.000 | 172 | 0  |          |                |     |         |     |     |                                                            |
| Locus_2937_Transcript_1/1_Conf_1.000  | 456 | 20 | 4.95E-70 | XP_002641885.1 | 93  | 266.929 | 151 | 141 | Hypothetical protein CBG16572                              |
| Locus_29370_Transcript_1/1_Conf_1.000 | 176 | 0  |          |                |     |         |     |     |                                                            |
| Locus_29371_Transcript_1/1_Conf_1.000 | 323 | 4  | 1.26E-12 | EFP11172.1     | 57  | 76.2554 | 106 | 61  | hypothetical protein CRE_30769                             |
| Locus_29372_Transcript_1/1_Conf_1.000 | 182 | 5  | 3.58E-20 | NP_508843.1    | 81  | 101.293 | 59  | 48  | hypothetical protein M03F4.6                               |
| Locus_29373_Transcript_1/1_Conf_1.000 | 233 | 0  |          |                |     |         |     |     |                                                            |
| Locus_29374_Transcript_1/1_Conf_1.000 | 128 | 0  |          |                |     |         |     |     |                                                            |
| Locus_29375_Transcript_1/1_Conf_1.000 | 138 | 20 | 7.49E-10 | XP_002744232.1 | 100 | 67.0106 | 45  | 45  | PREDICTED: heterogeneous nuclear ribonucleoprotein A0-like |
| Locus_29376_Transcript_1/1_Conf_1.000 | 128 | 20 | 5.83E-10 | EFO92321.1     | 86  | 67.3958 | 38  | 33  | CRE-EPI-1 protein                                          |
| Locus_29377_Transcript_1/1_Conf_1.000 | 141 | 20 | 2.57E-10 | EFO17147.1     | 84  | 68.5514 | 45  | 38  | TK/FER protein kinase                                      |
| Locus_29378_Transcript_1/1_Conf_1.000 | 145 | 0  |          |                |     |         |     |     |                                                            |
| Locus_29379_Transcript_1/1_Conf_1.000 | 284 | 20 | 3.45E-42 | EFO23504.1     | 91  | 174.481 | 94  | 86  | TK protein kinase                                          |
| Locus_2938_Transcript_1/1_Conf_1.000  | 687 | 6  | 1.32E-28 | CAD44516.1     | 52  | 130.568 | 228 | 119 | VAB-10B protein                                            |
| Locus_29380_Transcript_1/1_Conf_1.000 | 136 | 4  | 8.34E-09 | EFO88465.1     | 88  | 63.5438 | 44  | 39  | CRE-NRX-1 protein                                          |
| Locus_29381_Transcript_1/1_Conf_1.000 | 203 | 0  |          |                |     |         |     |     |                                                            |
| Locus_29382_Transcript_1/1_Conf_1.000 | 163 | 20 | 8.99E-11 | EFO24804.1     | 75  | 70.0922 | 52  | 39  | galactosyltransferase                                      |
| Locus_29383_Transcript_1/1_Conf_1.000 | 217 | 20 | 2.95E-06 | XP_313869.4    | 68  | 55.0694 | 47  | 32  | AGAP004566-PA                                              |

|                                       |     |    |          |                |     |         |     |    |                                                                                 |
|---------------------------------------|-----|----|----------|----------------|-----|---------|-----|----|---------------------------------------------------------------------------------|
| Locus_29384_Transcript_1/1_Conf_1.000 | 185 | 0  |          |                |     |         |     |    |                                                                                 |
| Locus_29385_Transcript_1/1_Conf_1.000 | 235 | 0  |          |                |     |         |     |    |                                                                                 |
| Locus_29386_Transcript_1/1_Conf_1.000 | 164 | 0  |          |                |     |         |     |    |                                                                                 |
| Locus_29387_Transcript_1/1_Conf_1.000 | 222 | 20 | 2.03E-26 | ACJ65168.1     | 91  | 122.094 | 74  | 68 | Uncoordinated protein 68, isoform b, partially confirmed by transcript evidence |
| Locus_29388_Transcript_1/1_Conf_1.000 | 238 | 20 | 1.33E-30 | EFO24957.1     | 85  | 135.961 | 78  | 67 | hypothetical protein LOAG_03532                                                 |
| Locus_29389_Transcript_1/1_Conf_1.000 | 136 | 0  |          |                |     |         |     |    |                                                                                 |
| Locus_2939_Transcript_1/3_Conf_0.714  | 633 | 20 | 4.44E-33 | XP_002156375.1 | 65  | 113.62  | 126 | 83 | PREDICTED: similar to haloacid dehalogenase-like hydrolase domain containing 1A |
| Locus_2939_Transcript_2/3_Conf_0.714  | 633 | 20 | 7.52E-33 | XP_002156375.1 | 64  | 113.235 | 125 | 81 | PREDICTED: similar to haloacid dehalogenase-like hydrolase domain containing 1A |
| Locus_2939_Transcript_3/3_Conf_0.714  | 633 | 20 | 5.78E-33 | XP_002156375.1 | 65  | 113.62  | 126 | 83 | PREDICTED: similar to haloacid dehalogenase-like hydrolase domain containing 1A |
| Locus_29390_Transcript_1/1_Conf_1.000 | 183 | 20 | 2.66E-26 | P02751.4       | 100 | 121.709 | 60  | 60 | Fibronectin                                                                     |
| Locus_29391_Transcript_1/1_Conf_1.000 | 143 | 0  |          |                |     |         |     |    |                                                                                 |
| Locus_29392_Transcript_1/1_Conf_1.000 | 131 | 0  |          |                |     |         |     |    |                                                                                 |

|                                       |      |    |           |                |     |         |     |     |                                                                       |
|---------------------------------------|------|----|-----------|----------------|-----|---------|-----|-----|-----------------------------------------------------------------------|
| Locus_29393_Transcript_1/1_Conf_1.000 | 239  | 20 | 4.14E-24  | EFO24654.1     | 82  | 114.39  | 78  | 64  | RNA polymerase Rpb1                                                   |
| Locus_29394_Transcript_1/1_Conf_1.000 | 132  | 3  | 2.06E-07  | EFP09033.1     | 76  | 58.9214 | 38  | 29  | hypothetical protein CRE_22505                                        |
| Locus_29395_Transcript_1/1_Conf_1.000 | 162  | 20 | 1.21E-23  | XP_001149698.1 | 100 | 112.849 | 53  | 53  | PREDICTED: nicotinamide N-methyltransferase isoform 1                 |
| Locus_29396_Transcript_1/1_Conf_1.000 | 156  | 3  | 2.73E-15  | EFP05940.1     | 88  | 85.1149 | 52  | 46  | CRE-NPR-13 protein                                                    |
| Locus_29397_Transcript_1/1_Conf_1.000 | 200  | 0  |           |                |     |         |     |     |                                                                       |
| Locus_29398_Transcript_1/1_Conf_1.000 | 162  | 0  |           |                |     |         |     |     |                                                                       |
| Locus_29399_Transcript_1/1_Conf_1.000 | 202  | 20 | 1.30E-09  | XP_002637502.1 | 65  | 66.2402 | 66  | 43  | Hypothetical protein CBG19223                                         |
| Locus_294_Transcript_1/2_Conf_1.000   | 2617 | 20 | 3.35E-102 | NP_510521.1    | 68  | 377.867 | 412 | 283 | Ubiquinol-Cytochrome c oxidoreductase complex family member (ucr-2.2) |
| Locus_294_Transcript_2/2_Conf_1.000   | 2617 | 20 | 4.37E-102 | NP_510521.1    | 68  | 377.481 | 412 | 283 | Ubiquinol-Cytochrome c oxidoreductase complex family member (ucr-2.2) |
| Locus_2940_Transcript_1/1_Conf_1.000  | 284  | 2  | 4.24E-16  | XP_002639243.1 | 73  | 87.8113 | 71  | 52  | Hypothetical protein CBG03801                                         |
| Locus_29400_Transcript_1/1_Conf_1.000 | 196  | 20 | 1.70E-17  | XP_512822.2    | 100 | 92.4337 | 43  | 43  | PREDICTED: Fc fragment of IgG, receptor, transporter, alpha           |
| Locus_29401_Transcript_1/1_Conf_1.000 | 137  | 20 | 9.17E-16  | XP_002808339.1 | 100 | 86.6557 | 45  | 45  | PREDICTED: LOW QUALITY PROTEIN: major vault protein-like              |
| Locus_29402_Transcript_1/1_Conf_1.000 | 226  | 0  |           |                |     |         |     |     |                                                                       |
| Locus_29403_Transcript_1/1_Conf_1.000 | 145  | 6  | 1.47E-08  | EFO97805.1     | 75  | 62.7734 | 48  | 36  | hypothetical protein CRE_15976                                        |
| Locus_29404_Transcript_1/1_Conf_1.000 | 139  | 0  |           |                |     |         |     |     |                                                                       |
| Locus_29405_Transcript_1/1_Conf_1.000 | 165  | 0  |           |                |     |         |     |     |                                                                       |
| Locus_29406_Transcript_1/1_Conf_1.000 | 174  | 0  |           |                |     |         |     |     |                                                                       |
| Locus_29407_Transcript_1/1_Conf_1.000 | 125  | 0  |           |                |     |         |     |     |                                                                       |
| Locus_29408_Transcript_1/1_Conf_1.000 | 297  | 2  | 1.22E-07  | XP_001901263.1 | 70  | 59.6918 | 94  | 66  | SEA domain containing protein                                         |



|                                       |     |    |          |                |     |         |     |     |                                                                    |
|---------------------------------------|-----|----|----------|----------------|-----|---------|-----|-----|--------------------------------------------------------------------|
| Locus_29409_Transcript_1/1_Conf_1.000 | 157 | 0  |          |                |     |         |     |     |                                                                    |
| Locus_2941_Transcript_1/2_Conf_1.000  | 944 | 20 | 5.30E-44 | CAR63571.1     | 87  | 182.57  | 113 | 99  | hypothetical protein                                               |
| Locus_2941_Transcript_2/2_Conf_1.000  | 944 | 20 | 5.30E-44 | CAR63571.1     | 87  | 182.57  | 113 | 99  | hypothetical protein                                               |
| Locus_29410_Transcript_1/1_Conf_1.000 | 197 | 5  | 2.08E-23 | NP_001022641.1 | 92  | 112.079 | 65  | 60  | LEThal family member (let-805)                                     |
| Locus_29411_Transcript_1/1_Conf_1.000 | 130 | 0  |          |                |     |         |     |     |                                                                    |
| Locus_29412_Transcript_1/1_Conf_1.000 | 147 | 5  | 8.86E-14 | EFO92682.1     | 83  | 80.1073 | 49  | 41  | hypothetical protein CRE_16353                                     |
| Locus_29413_Transcript_1/1_Conf_1.000 | 160 | 0  |          |                |     |         |     |     |                                                                    |
| Locus_29414_Transcript_1/1_Conf_1.000 | 163 | 20 | 6.43E-17 | NP_001024837.1 | 88  | 90.5077 | 54  | 48  | Gut granule LOss family member (glo-1)                             |
| Locus_29415_Transcript_1/1_Conf_1.000 | 158 | 0  |          |                |     |         |     |     |                                                                    |
| Locus_29416_Transcript_1/1_Conf_1.000 | 144 | 0  |          |                |     |         |     |     |                                                                    |
| Locus_29417_Transcript_1/1_Conf_1.000 | 141 | 0  |          |                |     |         |     |     |                                                                    |
| Locus_29418_Transcript_1/1_Conf_1.000 | 144 | 0  |          |                |     |         |     |     |                                                                    |
| Locus_29419_Transcript_1/1_Conf_1.000 | 128 | 9  | 3.90E-14 | EFPO2173.1     | 95  | 81.2629 | 42  | 40  | CRE-MLT-7 protein                                                  |
| Locus_2942_Transcript_1/1_Conf_1.000  | 902 | 20 | 2.04E-58 | NP_492120.1    | 86  | 230.335 | 146 | 126 | Methylmalonyl-CoA Epimerase family member (mce-1)                  |
| Locus_29420_Transcript_1/1_Conf_1.000 | 146 | 20 | 1.67E-20 | XP_002916766.1 | 100 | 102.449 | 48  | 48  | PREDICTED: ubiquitin thioesterase OTUB1-like                       |
| Locus_29421_Transcript_1/1_Conf_1.000 | 263 | 20 | 1.59E-15 | XP_001898877.1 | 69  | 85.8853 | 86  | 60  | oxidoreductase, short chain dehydrogenase/reductase family protein |
| Locus_29422_Transcript_1/1_Conf_1.000 | 146 | 0  |          |                |     |         |     |     |                                                                    |
| Locus_29423_Transcript_1/1_Conf_1.000 | 149 | 0  |          |                |     |         |     |     |                                                                    |
| Locus_29424_Transcript_1/1_Conf_1.000 | 147 | 1  | 4.10E-19 | XP_002825155.1 | 95  | 97.8265 | 48  | 46  | PREDICTED: hypothetical protein LOC100447004                       |
| Locus_29425_Transcript_1/1_Conf_1.000 | 144 | 0  |          |                |     |         |     |     |                                                                    |
| Locus_29426_Transcript_1/1_Conf_1.000 | 133 | 0  |          |                |     |         |     |     |                                                                    |
| Locus_29427_Transcript_1/1_Conf_1.000 | 150 | 0  |          |                |     |         |     |     |                                                                    |
| Locus_29428_Transcript_1/1_Conf_1.000 | 198 | 0  |          |                |     |         |     |     |                                                                    |
| Locus_29429_Transcript_1/1_Conf_1.000 | 270 | 0  |          |                |     |         |     |     |                                                                    |

|                                       |      |    |           |                |     |         |     |     |                                                                               |
|---------------------------------------|------|----|-----------|----------------|-----|---------|-----|-----|-------------------------------------------------------------------------------|
| Locus_2943_Transcript_1/1_Conf_1.000  | 1329 | 20 | 2.51E-131 | NP_508509.3    | 76  | 473.396 | 417 | 320 | hypothetical protein Y41G9A.3                                                 |
| Locus_29430_Transcript_1/1_Conf_1.000 | 131  | 0  |           |                |     |         |     |     |                                                                               |
| Locus_29431_Transcript_1/1_Conf_1.000 | 129  | 2  | 2.13E-04  | NP_509266.1    | 73  | 48.9062 | 41  | 30  | hypothetical protein F48E3.2                                                  |
| Locus_29432_Transcript_1/1_Conf_1.000 | 140  | 0  |           |                |     |         |     |     |                                                                               |
| Locus_29433_Transcript_1/1_Conf_1.000 | 133  | 0  |           |                |     |         |     |     |                                                                               |
| Locus_29434_Transcript_1/1_Conf_1.000 | 129  | 0  |           |                |     |         |     |     |                                                                               |
| Locus_29435_Transcript_1/1_Conf_1.000 | 136  | 0  |           |                |     |         |     |     |                                                                               |
| Locus_29436_Transcript_1/1_Conf_1.000 | 144  | 0  |           |                |     |         |     |     |                                                                               |
| Locus_29437_Transcript_1/1_Conf_1.000 | 128  | 0  |           |                |     |         |     |     |                                                                               |
| Locus_29438_Transcript_1/1_Conf_1.000 | 226  | 0  |           |                |     |         |     |     |                                                                               |
| Locus_29439_Transcript_1/1_Conf_1.000 | 151  | 20 | 3.71E-12  | NP_492786.1    | 83  | 74.7146 | 49  | 41  | Temporarily Assigned Gene name family member (tag-344)                        |
| Locus_2944_Transcript_1/2_Conf_1.000  | 1035 | 20 | 7.40E-106 | XP_002631598.1 | 76  | 388.267 | 346 | 265 | Hypothetical protein CBG20779                                                 |
| Locus_2944_Transcript_2/2_Conf_1.000  | 1035 | 20 | 7.40E-106 | XP_002631598.1 | 76  | 388.267 | 346 | 265 | Hypothetical protein CBG20779                                                 |
| Locus_29440_Transcript_1/1_Conf_1.000 | 136  | 0  |           |                |     |         |     |     |                                                                               |
| Locus_29441_Transcript_1/1_Conf_1.000 | 166  | 0  |           |                |     |         |     |     |                                                                               |
| Locus_29442_Transcript_1/1_Conf_1.000 | 159  | 0  |           |                |     |         |     |     |                                                                               |
| Locus_29443_Transcript_1/1_Conf_1.000 | 132  | 2  | 9.85E-10  | XP_002637526.1 | 80  | 66.6254 | 42  | 34  | Hypothetical protein CBG19249                                                 |
| Locus_29444_Transcript_1/1_Conf_1.000 | 146  | 0  |           |                |     |         |     |     |                                                                               |
| Locus_29445_Transcript_1/1_Conf_1.000 | 128  | 2  | 1.81E-11  | NP_508818.1    | 100 | 72.4034 | 37  | 37  | hypothetical protein F43C9.2                                                  |
| Locus_29446_Transcript_1/1_Conf_1.000 | 142  | 0  |           |                |     |         |     |     |                                                                               |
| Locus_29447_Transcript_1/1_Conf_1.000 | 150  | 0  |           |                |     |         |     |     |                                                                               |
| Locus_29448_Transcript_1/1_Conf_1.000 | 167  | 0  |           |                |     |         |     |     |                                                                               |
| Locus_29449_Transcript_1/1_Conf_1.000 | 173  | 20 | 5.21E-27  | XP_002930168.1 | 100 | 124.02  | 57  | 57  | PREDICTED: eukaryotic translation initiation factor 3 subunit B-like, partial |
| Locus_2945_Transcript_1/1_Conf_1.000  | 1586 | 20 | 1.85E-147 | NP_001021972.1 | 80  | 527.324 | 405 | 327 | DeHydrogenases, Short chain family member (dhs-6)                             |
| Locus_29450_Transcript_1/1_Conf_1.000 | 136  | 0  |           |                |     |         |     |     |                                                                               |
| Locus_29451_Transcript_1/1_Conf_1.000 | 173  | 0  |           |                |     |         |     |     |                                                                               |

|                                       |      |    |           |                |    |         |     |     |                               |
|---------------------------------------|------|----|-----------|----------------|----|---------|-----|-----|-------------------------------|
| Locus_29452_Transcript_1/1_Conf_1.000 | 141  | 0  |           |                |    |         |     |     |                               |
| Locus_29453_Transcript_1/1_Conf_1.000 | 144  | 0  |           |                |    |         |     |     |                               |
| Locus_29454_Transcript_1/1_Conf_1.000 | 180  | 0  |           |                |    |         |     |     |                               |
| Locus_29455_Transcript_1/1_Conf_1.000 | 168  | 0  |           |                |    |         |     |     |                               |
| Locus_29456_Transcript_1/1_Conf_1.000 | 134  | 0  |           |                |    |         |     |     |                               |
| Locus_29457_Transcript_1/1_Conf_1.000 | 141  | 0  |           |                |    |         |     |     |                               |
| Locus_29458_Transcript_1/1_Conf_1.000 | 139  | 0  |           |                |    |         |     |     |                               |
| Locus_29459_Transcript_1/1_Conf_1.000 | 395  | 20 | 2.93E-17  | XP_002633547.1 | 54 | 91.6633 | 131 | 71  | C. briggsae CBR-TRY-3 protein |
| Locus_2946_Transcript_1/1_Conf_1.000  | 1299 | 20 | 9.24E-131 | XP_002634340.1 | 89 | 471.47  | 288 | 257 | Hypothetical protein CBG17684 |
| Locus_29460_Transcript_1/1_Conf_1.000 | 149  | 4  | 1.15E-13  | XP_002630298.1 | 93 | 79.7221 | 49  | 46  | C. briggsae CBR-LTD-1 protein |
| Locus_29461_Transcript_1/1_Conf_1.000 | 164  | 20 | 4.47E-18  | XP_002636657.1 | 94 | 94.3597 | 54  | 51  | Hypothetical protein CBG23368 |
| Locus_29462_Transcript_1/1_Conf_1.000 | 211  | 0  |           |                |    |         |     |     |                               |
| Locus_29463_Transcript_1/1_Conf_1.000 | 188  | 0  |           |                |    |         |     |     |                               |

|                                       |     |    |          |                |     |         |     |     |                                 |
|---------------------------------------|-----|----|----------|----------------|-----|---------|-----|-----|---------------------------------|
| Locus_29464_Transcript_1/1_Conf_1.000 | 167 | 20 | 4.14E-24 | XP_001098693.2 | 100 | 114.39  | 55  | 55  | PREDICTED: annexin A1 isoform 4 |
| Locus_29465_Transcript_1/1_Conf_1.000 | 194 | 0  |          |                |     |         |     |     |                                 |
| Locus_29466_Transcript_1/1_Conf_1.000 | 164 | 0  |          |                |     |         |     |     |                                 |
| Locus_29467_Transcript_1/1_Conf_1.000 | 247 | 0  |          |                |     |         |     |     |                                 |
| Locus_29468_Transcript_1/1_Conf_1.000 | 149 | 0  |          |                |     |         |     |     |                                 |
| Locus_29469_Transcript_1/1_Conf_1.000 | 132 | 0  |          |                |     |         |     |     |                                 |
| Locus_2947_Transcript_1/1_Conf_1.000  | 822 | 20 | 6.39E-53 | AAN11402.1     | 68  | 211.846 | 198 | 135 | secreted-protein 1 precursor    |
| Locus_29470_Transcript_1/1_Conf_1.000 | 149 | 13 | 1.01E-09 | EFP10630.1     | 75  | 66.6254 | 48  | 36  | hypothetical protein CRE_01169  |
| Locus_29471_Transcript_1/1_Conf_1.000 | 143 | 0  |          |                |     |         |     |     |                                 |
| Locus_29472_Transcript_1/1_Conf_1.000 | 224 | 0  |          |                |     |         |     |     |                                 |
| Locus_29473_Transcript_1/1_Conf_1.000 | 136 | 12 | 8.34E-09 | EFO86758.1     | 80  | 63.5438 | 45  | 36  | hypothetical protein CRE_04840  |
| Locus_29474_Transcript_1/1_Conf_1.000 | 190 | 0  |          |                |     |         |     |     |                                 |
| Locus_29475_Transcript_1/1_Conf_1.000 | 148 | 0  |          |                |     |         |     |     |                                 |
| Locus_29476_Transcript_1/1_Conf_1.000 | 178 | 0  |          |                |     |         |     |     |                                 |
| Locus_29477_Transcript_1/1_Conf_1.000 | 223 | 5  | 4.68E-15 | XP_001899094.1 | 76  | 84.3445 | 59  | 45  | hypothetical protein            |
| Locus_29478_Transcript_1/1_Conf_1.000 | 134 | 20 | 3.06E-19 | EFO28104.1     | 100 | 98.2117 | 44  | 44  | hypothetical protein LOAG_00390 |
| Locus_29479_Transcript_1/1_Conf_1.000 | 168 | 0  |          |                |     |         |     |     |                                 |

|                                       |      |    |           |                |    |         |     |     |                                                      |
|---------------------------------------|------|----|-----------|----------------|----|---------|-----|-----|------------------------------------------------------|
| Locus_2948_Transcript_1/1_Conf_1.000  | 915  | 20 | 1.49E-96  | EFO19762.1     | 83 | 357.066 | 267 | 224 | serologically defined breast cancer antigen NY-BR-99 |
| Locus_29480_Transcript_1/1_Conf_1.000 | 170  | 0  |           |                |    |         |     |     |                                                      |
| Locus_29481_Transcript_1/1_Conf_1.000 | 130  | 0  |           |                |    |         |     |     |                                                      |
| Locus_29482_Transcript_1/1_Conf_1.000 | 134  | 0  |           |                |    |         |     |     |                                                      |
| Locus_29483_Transcript_1/1_Conf_1.000 | 132  | 0  |           |                |    |         |     |     |                                                      |
| Locus_29484_Transcript_1/1_Conf_1.000 | 219  | 5  | 1.32E-09  | EFPO6952.1     | 63 | 66.2402 | 71  | 45  | CRE-RHGF-2 protein                                   |
| Locus_29485_Transcript_1/1_Conf_1.000 | 266  | 0  |           |                |    |         |     |     |                                                      |
| Locus_29486_Transcript_1/1_Conf_1.000 | 148  | 0  |           |                |    |         |     |     |                                                      |
| Locus_29487_Transcript_1/1_Conf_1.000 | 136  | 0  |           |                |    |         |     |     |                                                      |
| Locus_29488_Transcript_1/1_Conf_1.000 | 228  | 20 | 5.48E-24  | EFO99702.1     | 86 | 114.005 | 73  | 63  | hypothetical protein CRE_18564                       |
| Locus_29489_Transcript_1/1_Conf_1.000 | 286  | 7  | 1.40E-35  | NP_001022641.1 | 84 | 152.525 | 93  | 79  | LEThal family member (let-805)                       |
| Locus_2949_Transcript_1/1_Conf_1.000  | 655  | 20 | 2.88E-91  | EFO24653.1     | 93 | 338.576 | 186 | 173 | WD40 repeat protein                                  |
| Locus_29490_Transcript_1/1_Conf_1.000 | 172  | 0  |           |                |    |         |     |     |                                                      |
| Locus_29491_Transcript_1/1_Conf_1.000 | 132  | 0  |           |                |    |         |     |     |                                                      |
| Locus_29492_Transcript_1/1_Conf_1.000 | 129  | 0  |           |                |    |         |     |     |                                                      |
| Locus_29493_Transcript_1/1_Conf_1.000 | 142  | 1  | 6.13E-04  | CAL57182.1     | 61 | 47.3654 | 47  | 29  | unnamed protein product                              |
| Locus_29494_Transcript_1/1_Conf_1.000 | 141  | 0  |           |                |    |         |     |     |                                                      |
| Locus_29495_Transcript_1/1_Conf_1.000 | 138  | 10 | 1.51E-10  | NP_508761.3    | 86 | 69.3218 | 44  | 38  | hypothetical protein F15A8.6                         |
| Locus_29496_Transcript_1/1_Conf_1.000 | 144  | 0  |           |                |    |         |     |     |                                                      |
| Locus_29497_Transcript_1/1_Conf_1.000 | 152  | 0  |           |                |    |         |     |     |                                                      |
| Locus_29498_Transcript_1/1_Conf_1.000 | 138  | 0  |           |                |    |         |     |     |                                                      |
| Locus_29499_Transcript_1/1_Conf_1.000 | 135  | 0  |           |                |    |         |     |     |                                                      |
| Locus_295_Transcript_1/1_Conf_1.000   | 2050 | 20 | 2.25E-127 | XP_002633790.1 | 58 | 461.07  | 615 | 361 | C. briggsae CBR-PIS-1 protein                        |
| Locus_2950_Transcript_1/1_Conf_1.000  | 129  | 0  |           |                |    |         |     |     |                                                      |
| Locus_29500_Transcript_1/1_Conf_1.000 | 159  | 0  |           |                |    |         |     |     |                                                      |
| Locus_29501_Transcript_1/1_Conf_1.000 | 139  | 0  |           |                |    |         |     |     |                                                      |
| Locus_29502_Transcript_1/1_Conf_1.000 | 143  | 0  |           |                |    |         |     |     |                                                      |
| Locus_29503_Transcript_1/1_Conf_1.000 | 156  | 0  |           |                |    |         |     |     |                                                      |
| Locus_29504_Transcript_1/1_Conf_1.000 | 136  | 0  |           |                |    |         |     |     |                                                      |
| Locus_29505_Transcript_1/1_Conf_1.000 | 128  | 0  |           |                |    |         |     |     |                                                      |
| Locus_29506_Transcript_1/1_Conf_1.000 | 176  | 0  |           |                |    |         |     |     |                                                      |
| Locus_29507_Transcript_1/1_Conf_1.000 | 153  | 4  | 7.95E-07  | XP_002735800.1 | 62 | 56.9954 | 48  | 30  | PREDICTED: matriptase-like                           |

|                                       |      |    |           |                |     |         |     |     |                                                                          |
|---------------------------------------|------|----|-----------|----------------|-----|---------|-----|-----|--------------------------------------------------------------------------|
| Locus_29508_Transcript_1/1_Conf_1.000 | 140  | 0  |           |                |     |         |     |     |                                                                          |
| Locus_29509_Transcript_1/1_Conf_1.000 | 142  | 0  |           |                |     |         |     |     |                                                                          |
| Locus_2951_Transcript_1/4_Conf_0.250  | 183  | 20 | 5.90E-26  | AAG44787.1     | 100 | 120.553 | 60  | 60  | AF271776_1DC48                                                           |
| Locus_2951_Transcript_2/4_Conf_0.250  | 225  | 20 | 4.33E-29  | AAG44787.1     | 97  | 130.954 | 69  | 67  | AF271776_1DC48                                                           |
| Locus_2951_Transcript_3/4_Conf_0.375  | 1476 | 20 | 2.39E-109 | ACK55735.1     | 96  | 400.593 | 257 | 249 | cytochrome c oxidase subunit III                                         |
| Locus_2951_Transcript_4/4_Conf_0.375  | 1476 | 20 | 1.31E-107 | ACK55735.1     | 96  | 394.815 | 257 | 249 | cytochrome c oxidase subunit III                                         |
| Locus_29510_Transcript_1/1_Conf_1.000 | 128  | 0  |           |                |     |         |     |     |                                                                          |
| Locus_29511_Transcript_1/1_Conf_1.000 | 232  | 20 | 2.71E-23  | EFO87048.1     | 85  | 111.694 | 77  | 66  | hypothetical protein CRE_19388                                           |
| Locus_29512_Transcript_1/1_Conf_1.000 | 168  | 3  | 7.06E-16  | NP_001023496.1 | 85  | 87.0409 | 55  | 47  | L1 CAM Adhesion molecule homolog family member (lad-2)                   |
| Locus_29513_Transcript_1/1_Conf_1.000 | 222  | 6  | 2.81E-36  | XP_002644616.1 | 97  | 154.836 | 73  | 71  | Hypothetical protein CBG14575                                            |
| Locus_29514_Transcript_1/1_Conf_1.000 | 138  | 0  |           |                |     |         |     |     |                                                                          |
| Locus_29515_Transcript_1/1_Conf_1.000 | 133  | 5  | 2.34E-11  | CAR63575.1     | 88  | 72.0182 | 44  | 39  | hypothetical protein                                                     |
| Locus_29516_Transcript_1/1_Conf_1.000 | 160  | 0  |           |                |     |         |     |     |                                                                          |
| Locus_29517_Transcript_1/1_Conf_1.000 | 141  | 0  |           |                |     |         |     |     |                                                                          |
| Locus_29518_Transcript_1/1_Conf_1.000 | 146  | 0  |           |                |     |         |     |     |                                                                          |
| Locus_29519_Transcript_1/1_Conf_1.000 | 139  | 0  |           |                |     |         |     |     |                                                                          |
| Locus_2952_Transcript_1/1_Conf_1.000  | 609  | 20 | 5.65E-40  | 2G64           | 88  | 167.933 | 108 | 96  | Structure Of Caenorhabditis Elegans 6-Pyruvoyl Tetrahydropterin Synthase |
| Locus_29520_Transcript_1/1_Conf_1.000 | 159  | 5  | 1.07E-11  | NP_496794.1    | 84  | 73.1738 | 50  | 42  | hypothetical protein F32A11.1                                            |
| Locus_29521_Transcript_1/1_Conf_1.000 | 138  | 1  | 6.59E-06  | CAC51085.1     | 80  | 53.9138 | 35  | 28  | hypothetical protein                                                     |
| Locus_29522_Transcript_1/1_Conf_1.000 | 132  | 0  |           |                |     |         |     |     |                                                                          |
| Locus_29523_Transcript_1/1_Conf_1.000 | 128  | 0  |           |                |     |         |     |     |                                                                          |
| Locus_29524_Transcript_1/1_Conf_1.000 | 129  | 0  |           |                |     |         |     |     |                                                                          |
| Locus_29525_Transcript_1/1_Conf_1.000 | 141  | 0  |           |                |     |         |     |     |                                                                          |
| Locus_29526_Transcript_1/1_Conf_1.000 | 153  | 0  |           |                |     |         |     |     |                                                                          |

|                                       |     |    |          |                |     |         |     |     |                                                         |
|---------------------------------------|-----|----|----------|----------------|-----|---------|-----|-----|---------------------------------------------------------|
| Locus_29527_Transcript_1/1_Conf_1.000 | 162 | 20 | 2.70E-23 | NP_076869.1    | 100 | 111.694 | 53  | 53  | vitamin K epoxide reductase complex subunit 1 isoform 1 |
| Locus_29528_Transcript_1/1_Conf_1.000 | 159 | 20 | 2.30E-14 | NP_501955.2    | 81  | 82.0333 | 53  | 43  | Eph(F)riN family member (efn-2)                         |
| Locus_29529_Transcript_1/1_Conf_1.000 | 197 | 0  |          |                |     |         |     |     |                                                         |
| Locus_2953_Transcript_1/1_Conf_1.000  | 504 | 0  |          |                |     |         |     |     |                                                         |
| Locus_29530_Transcript_1/1_Conf_1.000 | 149 | 0  |          |                |     |         |     |     |                                                         |
| Locus_29531_Transcript_1/1_Conf_1.000 | 141 | 0  |          |                |     |         |     |     |                                                         |
| Locus_29532_Transcript_1/1_Conf_1.000 | 177 | 20 | 3.37E-18 | NP_507242.1    | 84  | 94.7449 | 58  | 49  | PseudoUridine Synthase family member (pus-1)            |
| Locus_29533_Transcript_1/1_Conf_1.000 | 232 | 20 | 1.34E-22 | NP_001021650.1 | 78  | 109.383 | 76  | 60  | HaMmeRhead embryonic lethal family member (hmr-1)       |
| Locus_29534_Transcript_1/1_Conf_1.000 | 146 | 6  | 2.42E-11 | EFO84735.1     | 92  | 72.0182 | 39  | 36  | CRE-DYB-1 protein                                       |
| Locus_29535_Transcript_1/1_Conf_1.000 | 130 | 20 | 8.94E-19 | EFO97377.1     | 100 | 96.6709 | 43  | 43  | CRE-TBB-4 protein                                       |
| Locus_29536_Transcript_1/1_Conf_1.000 | 261 | 2  | 4.33E-13 | NP_493923.2    | 56  | 77.7962 | 102 | 58  | hypothetical protein T23F4.2                            |
| Locus_29537_Transcript_1/1_Conf_1.000 | 138 | 7  | 3.25E-13 | XP_002631460.1 | 86  | 78.1814 | 45  | 39  | Hypothetical protein CBG20612                           |
| Locus_29538_Transcript_1/1_Conf_1.000 | 135 | 0  |          |                |     |         |     |     |                                                         |
| Locus_29539_Transcript_1/1_Conf_1.000 | 246 | 0  |          |                |     |         |     |     |                                                         |
| Locus_2954_Transcript_1/2_Conf_1.000  | 987 | 20 | 5.32E-42 | EFO25643.1     | 59  | 176.022 | 271 | 162 | 3' exoribonuclease                                      |

|                                       |     |    |          |                |     |         |     |     |                                                                             |
|---------------------------------------|-----|----|----------|----------------|-----|---------|-----|-----|-----------------------------------------------------------------------------|
| Locus_2954_Transcript_2/2_Conf_1.000  | 987 | 20 | 5.32E-42 | EFO25643.1     | 59  | 176.022 | 271 | 162 | 3' exoribonuclease                                                          |
| Locus_29540_Transcript_1/1_Conf_1.000 | 136 | 0  |          |                |     |         |     |     |                                                                             |
| Locus_29541_Transcript_1/1_Conf_1.000 | 202 | 20 | 3.64E-28 | EFP06704.1     | 94  | 127.872 | 67  | 63  | CRE-PLC-3 protein                                                           |
| Locus_29542_Transcript_1/1_Conf_1.000 | 166 | 20 | 4.43E-26 | XP_002913893.1 | 100 | 120.939 | 55  | 55  | PREDICTED: LOW QUALITY PROTEIN:<br>secreted frizzled-related protein 2-like |
| Locus_29543_Transcript_1/1_Conf_1.000 | 193 | 3  | 1.36E-06 | NP_505267.1    | 82  | 56.225  | 52  | 43  | Regulator of Presynaptic Morphology family<br>member (rpm-1)                |
| Locus_29544_Transcript_1/1_Conf_1.000 | 156 | 0  |          |                |     |         |     |     |                                                                             |
| Locus_29545_Transcript_1/1_Conf_1.000 | 178 | 0  |          |                |     |         |     |     |                                                                             |
| Locus_29546_Transcript_1/1_Conf_1.000 | 202 | 0  |          |                |     |         |     |     |                                                                             |
| Locus_29547_Transcript_1/1_Conf_1.000 | 219 | 0  |          |                |     |         |     |     |                                                                             |
| Locus_29548_Transcript_1/1_Conf_1.000 | 133 | 0  |          |                |     |         |     |     |                                                                             |
| Locus_29549_Transcript_1/1_Conf_1.000 | 132 | 0  |          |                |     |         |     |     |                                                                             |
| Locus_2955_Transcript_1/1_Conf_1.000  | 271 | 0  |          |                |     |         |     |     |                                                                             |
| Locus_29550_Transcript_1/1_Conf_1.000 | 221 | 0  |          |                |     |         |     |     |                                                                             |
| Locus_29551_Transcript_1/1_Conf_1.000 | 160 | 20 | 3.78E-17 | XP_002640668.1 | 95  | 91.2781 | 44  | 42  | C. briggsae CBR-UNC-54 protein                                              |



|                                       |     |    |          |                |    |         |    |    |                                                           |
|---------------------------------------|-----|----|----------|----------------|----|---------|----|----|-----------------------------------------------------------|
| Locus_29552_Transcript_1/1_Conf_1.000 | 157 | 0  |          |                |    |         |    |    |                                                           |
| Locus_29553_Transcript_1/1_Conf_1.000 | 147 | 0  |          |                |    |         |    |    |                                                           |
| Locus_29554_Transcript_1/1_Conf_1.000 | 135 | 0  |          |                |    |         |    |    |                                                           |
| Locus_29555_Transcript_1/1_Conf_1.000 | 156 | 0  |          |                |    |         |    |    |                                                           |
| Locus_29556_Transcript_1/1_Conf_1.000 | 193 | 20 | 2.32E-06 | CAG06540.1     | 61 | 55.4546 | 62 | 38 | unnamed protein product                                   |
| Locus_29557_Transcript_1/1_Conf_1.000 | 130 | 0  |          |                |    |         |    |    |                                                           |
| Locus_29558_Transcript_1/1_Conf_1.000 | 138 | 13 | 3.37E-10 | ABN58658.1     | 78 | 68.1662 | 41 | 32 | lysozyme 1                                                |
| Locus_29559_Transcript_1/1_Conf_1.000 | 166 | 0  |          |                |    |         |    |    |                                                           |
| Locus_2956_Transcript_1/1_Conf_1.000  | 199 | 0  |          |                |    |         |    |    |                                                           |
| Locus_29560_Transcript_1/1_Conf_1.000 | 199 | 0  |          |                |    |         |    |    |                                                           |
| Locus_29561_Transcript_1/1_Conf_1.000 | 146 | 0  |          |                |    |         |    |    |                                                           |
| Locus_29562_Transcript_1/1_Conf_1.000 | 277 | 20 | 5.22E-11 | XP_002750114.1 | 74 | 70.8626 | 58 | 43 | PREDICTED: tRNA (cytosine-5-)-methyltransferase isoform 3 |
| Locus_29563_Transcript_1/1_Conf_1.000 | 165 | 0  |          |                |    |         |    |    |                                                           |
| Locus_29564_Transcript_1/1_Conf_1.000 | 155 | 0  |          |                |    |         |    |    |                                                           |
| Locus_29565_Transcript_1/1_Conf_1.000 | 143 | 0  |          |                |    |         |    |    |                                                           |

|                                       |     |    |          |                |     |         |     |    |                                                          |
|---------------------------------------|-----|----|----------|----------------|-----|---------|-----|----|----------------------------------------------------------|
| Locus_29566_Transcript_1/1_Conf_1.000 | 356 | 20 | 1.92E-29 | XP_002631218.1 | 73  | 132.109 | 113 | 83 | Hypothetical protein CBG03015                            |
| Locus_29567_Transcript_1/1_Conf_1.000 | 150 | 0  |          |                |     |         |     |    |                                                          |
| Locus_29568_Transcript_1/1_Conf_1.000 | 145 | 5  | 2.12E-07 | NP_505312.1    | 80  | 58.9214 | 40  | 32 | hypothetical protein T19A5.1                             |
| Locus_29569_Transcript_1/1_Conf_1.000 | 133 | 20 | 6.61E-14 | XP_002786436.1 | 86  | 80.4925 | 44  | 38 | DNA topoisomerase 2-alpha, putative                      |
| Locus_2957_Transcript_1/1_Conf_1.000  | 664 | 0  |          |                |     |         |     |    |                                                          |
| Locus_29570_Transcript_1/1_Conf_1.000 | 199 | 20 | 1.86E-32 | XP_002929659.1 | 100 | 142.124 | 66  | 66 | PREDICTED: GTP-binding nuclear protein Ran-like, partial |
| Locus_29571_Transcript_1/1_Conf_1.000 | 138 | 0  |          |                |     |         |     |    |                                                          |
| Locus_29572_Transcript_1/1_Conf_1.000 | 146 | 0  |          |                |     |         |     |    |                                                          |
| Locus_29573_Transcript_1/1_Conf_1.000 | 154 | 0  |          |                |     |         |     |    |                                                          |
| Locus_29574_Transcript_1/1_Conf_1.000 | 158 | 0  |          |                |     |         |     |    |                                                          |
| Locus_29575_Transcript_1/1_Conf_1.000 | 203 | 4  | 1.44E-08 | NP_871954.2    | 90  | 62.7734 | 43  | 39 | hypothetical protein C50D2.9                             |
| Locus_29576_Transcript_1/1_Conf_1.000 | 143 | 0  |          |                |     |         |     |    |                                                          |
| Locus_29577_Transcript_1/1_Conf_1.000 | 160 | 0  |          |                |     |         |     |    |                                                          |
| Locus_29578_Transcript_1/1_Conf_1.000 | 195 | 0  |          |                |     |         |     |    |                                                          |
| Locus_29579_Transcript_1/1_Conf_1.000 | 176 | 0  |          |                |     |         |     |    |                                                          |

|                                       |      |    |           |                |    |         |     |     |                                                        |
|---------------------------------------|------|----|-----------|----------------|----|---------|-----|-----|--------------------------------------------------------|
| Locus_2958_Transcript_1/1_Conf_1.000  | 1968 | 20 | 4.74E-151 | NP_498626.2    | 73 | 539.65  | 491 | 362 | hypothetical protein F08F8.2                           |
| Locus_29580_Transcript_1/1_Conf_1.000 | 188  | 4  | 4.25E-08  | XP_002640372.1 | 74 | 61.2326 | 58  | 43  | Hypothetical protein CBG20279                          |
| Locus_29581_Transcript_1/1_Conf_1.000 | 136  | 2  | 1.51E-10  | XP_002633945.1 | 91 | 69.3218 | 37  | 34  | C. briggsae CBR-ELO-1 protein                          |
| Locus_29582_Transcript_1/1_Conf_1.000 | 138  | 3  | 1.51E-10  | EFO98925.1     | 76 | 69.3218 | 46  | 35  | hypothetical protein CRE_19702                         |
| Locus_29583_Transcript_1/1_Conf_1.000 | 135  | 20 | 7.79E-15  | XP_002642327.1 | 91 | 83.5741 | 45  | 41  | C. briggsae CBR-TAT-3 protein                          |
| Locus_29584_Transcript_1/1_Conf_1.000 | 134  | 0  |           |                |    |         |     |     |                                                        |
| Locus_29585_Transcript_1/1_Conf_1.000 | 147  | 4  | 1.72E-09  | NP_491864.2    | 82 | 65.855  | 50  | 41  | hypothetical protein K06A5.8                           |
| Locus_29586_Transcript_1/1_Conf_1.000 | 132  | 0  |           |                |    |         |     |     |                                                        |
| Locus_29587_Transcript_1/1_Conf_1.000 | 171  | 5  | 3.29E-05  | NP_001122986.1 | 63 | 51.6026 | 47  | 30  | hypothetical protein R07B7.9                           |
| Locus_29588_Transcript_1/1_Conf_1.000 | 168  | 0  |           |                |    |         |     |     |                                                        |
| Locus_29589_Transcript_1/1_Conf_1.000 | 172  | 20 | 8.32E-17  | XP_002640829.1 | 89 | 90.1225 | 56  | 50  | C. briggsae CBR-ADS-1 protein                          |
| Locus_2959_Transcript_1/1_Conf_1.000  | 1526 | 20 | 2.98E-70  | NP_492634.1    | 59 | 270.781 | 393 | 235 | Temporarily Assigned Gene name family member (tag-179) |
| Locus_29590_Transcript_1/1_Conf_1.000 | 136  | 0  |           |                |    |         |     |     |                                                        |
| Locus_29591_Transcript_1/1_Conf_1.000 | 184  | 0  |           |                |    |         |     |     |                                                        |
| Locus_29592_Transcript_1/1_Conf_1.000 | 184  | 20 | 3.14E-11  | XP_002634427.1 | 62 | 71.633  | 61  | 38  | Hypothetical protein CBG04438                          |
| Locus_29593_Transcript_1/1_Conf_1.000 | 121  | 0  |           |                |    |         |     |     |                                                        |
| Locus_29594_Transcript_1/1_Conf_1.000 | 145  | 4  | 7.52E-13  | EFP12451.1     | 86 | 77.0258 | 45  | 39  | CRE-SET-18 protein                                     |
| Locus_29595_Transcript_1/1_Conf_1.000 | 135  | 13 | 1.42E-16  | EFP02173.1     | 97 | 89.3521 | 44  | 43  | CRE-MLT-7 protein                                      |
| Locus_29596_Transcript_1/1_Conf_1.000 | 200  | 0  |           |                |    |         |     |     |                                                        |
| Locus_29597_Transcript_1/1_Conf_1.000 | 163  | 2  | 1.30E-09  | NP_492348.1    | 75 | 66.2402 | 56  | 42  | hypothetical protein K07A12.2                          |
| Locus_29598_Transcript_1/1_Conf_1.000 | 129  | 0  |           |                |    |         |     |     |                                                        |
| Locus_29599_Transcript_1/1_Conf_1.000 | 175  | 0  |           |                |    |         |     |     |                                                        |

|                                       |      |    |           |                |     |         |     |     |                                       |
|---------------------------------------|------|----|-----------|----------------|-----|---------|-----|-----|---------------------------------------|
| Locus_296_Transcript_1/2_Conf_1.000   | 2474 | 20 | 0         | XP_002639316.1 | 83  | 1132.47 | 805 | 676 | C. briggsae CBR-MCM-4 protein         |
| Locus_296_Transcript_2/2_Conf_1.000   | 2162 | 20 | 0         | XP_002639316.1 | 87  | 1090.1  | 722 | 631 | C. briggsae CBR-MCM-4 protein         |
| Locus_2960_Transcript_1/1_Conf_1.000  | 2106 | 20 | 2.91E-170 | XP_002639569.1 | 64  | 603.594 | 721 | 466 | Hypothetical protein CBG04200         |
| Locus_29600_Transcript_1/1_Conf_1.000 | 132  | 2  | 1.33E-06  | XP_002630033.1 | 79  | 56.225  | 43  | 34  | C. briggsae CBR-PUF-12 protein        |
| Locus_29601_Transcript_1/1_Conf_1.000 | 134  | 1  | 2.13E-04  | NP_506714.1    | 68  | 48.9062 | 44  | 30  | hypothetical protein C01G10.9         |
| Locus_29602_Transcript_1/1_Conf_1.000 | 209  | 3  | 2.35E-11  | AAV79430.1     | 90  | 72.0182 | 42  | 38  | TGF-beta signaling molecule precursor |
| Locus_29603_Transcript_1/1_Conf_1.000 | 130  | 0  |           |                |     |         |     |     |                                       |
| Locus_29604_Transcript_1/1_Conf_1.000 | 244  | 0  |           |                |     |         |     |     |                                       |
| Locus_29605_Transcript_1/1_Conf_1.000 | 141  | 1  | 3.60E-04  | CAX83711.1     | 65  | 48.1358 | 44  | 29  | endonuclease-reverse transcriptase    |
| Locus_29606_Transcript_1/1_Conf_1.000 | 142  | 20 | 1.23E-20  | XP_001149559.1 | 100 | 102.834 | 46  | 46  | PREDICTED: similar to Rer1 protein    |
| Locus_29607_Transcript_1/1_Conf_1.000 | 179  | 0  |           |                |     |         |     |     |                                       |

|                                       |      |    |          |                |    |         |     |     |                                                               |
|---------------------------------------|------|----|----------|----------------|----|---------|-----|-----|---------------------------------------------------------------|
| Locus_29608_Transcript_1/1_Conf_1.000 | 129  | 20 | 5.61E-13 | EFO18101.1     | 95 | 77.411  | 42  | 40  | KIF16B                                                        |
| Locus_29609_Transcript_1/1_Conf_1.000 | 143  | 0  |          |                |    |         |     |     |                                                               |
| Locus_2961_Transcript_1/1_Conf_1.000  | 713  | 20 | 5.29E-76 | XP_002642217.1 | 82 | 288.115 | 199 | 165 | C. briggsae CBR-MMAB-1 protein                                |
| Locus_29610_Transcript_1/1_Conf_1.000 | 161  | 0  |          |                |    |         |     |     |                                                               |
| Locus_29611_Transcript_1/1_Conf_1.000 | 135  | 0  |          |                |    |         |     |     |                                                               |
| Locus_29612_Transcript_1/1_Conf_1.000 | 136  | 0  |          |                |    |         |     |     |                                                               |
| Locus_29613_Transcript_1/1_Conf_1.000 | 167  | 0  |          |                |    |         |     |     |                                                               |
| Locus_29614_Transcript_1/1_Conf_1.000 | 107  | 0  |          |                |    |         |     |     |                                                               |
| Locus_29615_Transcript_1/1_Conf_1.000 | 354  | 20 | 1.33E-30 | XP_002643095.1 | 71 | 135.961 | 117 | 84  | C. briggsae CBR-GLY-11 protein                                |
| Locus_29616_Transcript_1/1_Conf_1.000 | 136  | 5  | 1.92E-13 | XP_002645089.1 | 95 | 78.9518 | 44  | 42  | Hypothetical protein CBG16766                                 |
| Locus_29617_Transcript_1/1_Conf_1.000 | 137  | 0  |          |                |    |         |     |     |                                                               |
| Locus_29618_Transcript_1/1_Conf_1.000 | 139  | 9  | 9.17E-16 | XP_002633945.1 | 93 | 86.6557 | 45  | 42  | C. briggsae CBR-ELO-1 protein                                 |
| Locus_29619_Transcript_1/1_Conf_1.000 | 136  | 4  | 9.82E-10 | NP_501127.2    | 88 | 66.6254 | 45  | 40  | RNA Polymerase, Class III (C) family member (rpc-1)           |
| Locus_2962_Transcript_1/1_Conf_1.000  | 1030 | 6  | 7.43E-58 | NP_001023770.1 | 60 | 228.794 | 342 | 208 | ACyltransferase-like family member (acl-6)                    |
| Locus_29620_Transcript_1/1_Conf_1.000 | 189  | 0  |          |                |    |         |     |     |                                                               |
| Locus_29621_Transcript_1/1_Conf_1.000 | 203  | 0  |          |                |    |         |     |     |                                                               |
| Locus_29622_Transcript_1/1_Conf_1.000 | 167  | 20 | 4.44E-26 | CAX65068.1     | 96 | 120.939 | 55  | 53  | C. elegans protein K08C7.3d, confirmed by transcript evidence |
| Locus_29623_Transcript_1/1_Conf_1.000 | 143  | 0  |          |                |    |         |     |     |                                                               |
| Locus_29624_Transcript_1/1_Conf_1.000 | 152  | 20 | 1.46E-08 | EFO95751.1     | 77 | 62.7734 | 49  | 38  | hypothetical protein CRE_13895                                |
| Locus_29625_Transcript_1/1_Conf_1.000 | 209  | 20 | 2.77E-20 | EFP00995.1     | 84 | 101.679 | 69  | 58  | CRE-PIF-1 protein                                             |
| Locus_29626_Transcript_1/1_Conf_1.000 | 175  | 20 | 8.56E-22 | NP_502367.2    | 91 | 106.686 | 58  | 53  | hypothetical protein F28D1.9                                  |
| Locus_29627_Transcript_1/1_Conf_1.000 | 174  | 0  |          |                |    |         |     |     |                                                               |
| Locus_29628_Transcript_1/1_Conf_1.000 | 157  | 1  | 1.65E-04 | EFO19094.1     | 73 | 49.2914 | 45  | 33  | hypothetical protein LOAG_09400                               |

|                                       |     |    |          |                |     |         |    |    |                                                                      |
|---------------------------------------|-----|----|----------|----------------|-----|---------|----|----|----------------------------------------------------------------------|
| Locus_29629_Transcript_1/1_Conf_1.000 | 150 | 0  |          |                |     |         |    |    |                                                                      |
| Locus_2963_Transcript_1/1_Conf_1.000  | 324 | 5  | 3.42E-10 | XP_002642911.1 | 80  | 68.1662 | 82 | 66 | Hypothetical protein CBG15186                                        |
| Locus_29630_Transcript_1/1_Conf_1.000 | 130 | 0  |          |                |     |         |    |    |                                                                      |
| Locus_29631_Transcript_1/1_Conf_1.000 | 185 | 1  | 2.57E-21 | XP_002805791.1 | 98  | 105.145 | 52 | 51 | PREDICTED: hypothetical protein LOC100427250                         |
| Locus_29632_Transcript_1/1_Conf_1.000 | 132 | 0  |          |                |     |         |    |    |                                                                      |
| Locus_29633_Transcript_1/1_Conf_1.000 | 135 | 1  | 4.14E-08 | EFO20077.1     | 73  | 61.2326 | 45 | 33 | hypothetical protein LOAG_08413                                      |
| Locus_29634_Transcript_1/1_Conf_1.000 | 177 | 0  |          |                |     |         |    |    |                                                                      |
| Locus_29635_Transcript_1/1_Conf_1.000 | 214 | 6  | 9.80E-18 | XP_002636520.1 | 79  | 93.2041 | 67 | 53 | Hypothetical protein CBG23201                                        |
| Locus_29636_Transcript_1/1_Conf_1.000 | 135 | 0  |          |                |     |         |    |    |                                                                      |
| Locus_29637_Transcript_1/1_Conf_1.000 | 212 | 19 | 9.81E-26 | EFO97239.1     | 86  | 119.783 | 68 | 59 | hypothetical protein CRE_16805                                       |
| Locus_29638_Transcript_1/1_Conf_1.000 | 190 | 0  |          |                |     |         |    |    |                                                                      |
| Locus_29639_Transcript_1/1_Conf_1.000 | 152 | 0  |          |                |     |         |    |    |                                                                      |
| Locus_2964_Transcript_1/1_Conf_1.000  | 742 | 20 | 4.66E-25 | NP_501774.1    | 86  | 119.013 | 72 | 62 | hypothetical protein K07F5.15                                        |
| Locus_29640_Transcript_1/1_Conf_1.000 | 145 | 0  |          |                |     |         |    |    |                                                                      |
| Locus_29641_Transcript_1/1_Conf_1.000 | 213 | 0  |          |                |     |         |    |    |                                                                      |
| Locus_29642_Transcript_1/1_Conf_1.000 | 152 | 7  | 2.40E-11 | NP_509417.2    | 74  | 72.0182 | 50 | 37 | hypothetical protein F40B5.2                                         |
| Locus_29643_Transcript_1/1_Conf_1.000 | 154 | 0  |          |                |     |         |    |    |                                                                      |
| Locus_29644_Transcript_1/1_Conf_1.000 | 149 | 0  |          |                |     |         |    |    |                                                                      |
| Locus_29645_Transcript_1/1_Conf_1.000 | 132 | 0  |          |                |     |         |    |    |                                                                      |
| Locus_29646_Transcript_1/1_Conf_1.000 | 194 | 20 | 5.32E-19 | XP_002634345.1 | 85  | 97.4413 | 64 | 55 | Hypothetical protein CBG17689                                        |
| Locus_29647_Transcript_1/1_Conf_1.000 | 154 | 4  | 4.23E-08 | EFO20018.1     | 68  | 61.2326 | 50 | 34 | negative elongation factor C/D                                       |
| Locus_29648_Transcript_1/1_Conf_1.000 | 133 | 7  | 4.59E-07 | AAN11401.1     | 74  | 57.7658 | 43 | 32 | metalloprotease 1 precursor                                          |
| Locus_29649_Transcript_1/1_Conf_1.000 | 207 | 20 | 1.73E-30 | XP_002924002.1 | 100 | 135.576 | 69 | 69 | PREDICTED: sodium/potassium-transporting ATPase subunit alpha-3-like |
| Locus_2965_Transcript_1/1_Conf_1.000  | 162 | 1  | 9.62E-05 | AAO63576.1     | 61  | 50.0618 | 55 | 34 | secreted protein 4 precursor                                         |
| Locus_29650_Transcript_1/1_Conf_1.000 | 133 | 0  |          |                |     |         |    |    |                                                                      |

|                                       |      |    |           |                |     |         |     |     |                                                                            |
|---------------------------------------|------|----|-----------|----------------|-----|---------|-----|-----|----------------------------------------------------------------------------|
| Locus_29651_Transcript_1/1_Conf_1.000 | 208  | 20 | 2.04E-23  | CAQ09841.1     | 100 | 112.079 | 69  | 69  | major histocompatibility complex, class II, DM alpha                       |
| Locus_29652_Transcript_1/1_Conf_1.000 | 135  | 0  |           |                |     |         |     |     |                                                                            |
| Locus_29653_Transcript_1/1_Conf_1.000 | 143  | 8  | 4.23E-13  | EFO24387.1     | 88  | 77.7962 | 44  | 39  | hypothetical protein LOAG_04094                                            |
| Locus_29654_Transcript_1/1_Conf_1.000 | 160  | 0  |           |                |     |         |     |     |                                                                            |
| Locus_29655_Transcript_1/1_Conf_1.000 | 136  | 3  | 8.63E-06  | EFO24692.1     | 74  | 53.5286 | 39  | 29  | protein-tyrosine phosphatase                                               |
| Locus_29656_Transcript_1/1_Conf_1.000 | 154  | 1  | 4.84E-04  | NP_495874.2    | 61  | 47.7506 | 49  | 30  | hypothetical protein F07H5.8                                               |
| Locus_29657_Transcript_1/1_Conf_1.000 | 142  | 0  |           |                |     |         |     |     |                                                                            |
| Locus_29658_Transcript_1/1_Conf_1.000 | 147  | 0  |           |                |     |         |     |     |                                                                            |
| Locus_29659_Transcript_1/1_Conf_1.000 | 130  | 0  |           |                |     |         |     |     |                                                                            |
| Locus_2966_Transcript_1/1_Conf_1.000  | 389  | 20 | 3.67E-65  | ADF56000.1     | 96  | 250.751 | 129 | 125 | nicotinic acetylcholine receptor non-alpha subunit 29.4                    |
| Locus_29660_Transcript_1/1_Conf_1.000 | 143  | 19 | 3.04E-11  | EFO89653.1     | 86  | 71.633  | 46  | 40  | CRE-SER-7 protein                                                          |
| Locus_29661_Transcript_1/1_Conf_1.000 | 191  | 0  |           |                |     |         |     |     |                                                                            |
| Locus_29662_Transcript_1/1_Conf_1.000 | 191  | 0  |           |                |     |         |     |     |                                                                            |
| Locus_29663_Transcript_1/1_Conf_1.000 | 154  | 0  |           |                |     |         |     |     |                                                                            |
| Locus_29664_Transcript_1/1_Conf_1.000 | 143  | 0  |           |                |     |         |     |     |                                                                            |
| Locus_29665_Transcript_1/1_Conf_1.000 | 138  | 0  |           |                |     |         |     |     |                                                                            |
| Locus_29666_Transcript_1/1_Conf_1.000 | 145  | 0  |           |                |     |         |     |     |                                                                            |
| Locus_29667_Transcript_1/1_Conf_1.000 | 149  | 0  |           |                |     |         |     |     |                                                                            |
| Locus_29668_Transcript_1/1_Conf_1.000 | 162  | 0  |           |                |     |         |     |     |                                                                            |
| Locus_29669_Transcript_1/1_Conf_1.000 | 153  | 5  | 8.79E-06  | XP_002639840.1 | 69  | 53.5286 | 46  | 32  | C. briggsae CBR-ANC-1 protein                                              |
| Locus_2967_Transcript_1/1_Conf_1.000  | 2217 | 20 | 2.32E-109 | XP_001895587.1 | 56  | 401.364 | 630 | 358 | Bromodomain containing protein                                             |
| Locus_29670_Transcript_1/1_Conf_1.000 | 190  | 20 | 2.02E-18  | NP_001129835.1 | 82  | 95.5153 | 63  | 52  | Novel Channel type/putative Nematode Calcium channel family member (nca-2) |
| Locus_29671_Transcript_1/1_Conf_1.000 | 207  | 2  | 9.22E-08  | NP_502746.1    | 71  | 60.077  | 69  | 49  | hypothetical protein Y67A10A.9                                             |

|                                       |      |    |          |                |     |         |     |     |                                                            |
|---------------------------------------|------|----|----------|----------------|-----|---------|-----|-----|------------------------------------------------------------|
| Locus_29672_Transcript_1/1_Conf_1.000 | 187  | 20 | 1.01E-09 | XP_001902366.1 | 64  | 66.6254 | 62  | 40  | RIKEN cDNA 5730509K17 gene                                 |
| Locus_29673_Transcript_1/1_Conf_1.000 | 132  | 0  |          |                |     |         |     |     |                                                            |
| Locus_29674_Transcript_1/1_Conf_1.000 | 276  | 0  |          |                |     |         |     |     |                                                            |
| Locus_29675_Transcript_1/1_Conf_1.000 | 132  | 0  |          |                |     |         |     |     |                                                            |
| Locus_29676_Transcript_1/1_Conf_1.000 | 147  | 0  |          |                |     |         |     |     |                                                            |
| Locus_29677_Transcript_1/1_Conf_1.000 | 138  | 20 | 1.16E-18 | XP_002923578.1 | 100 | 96.2857 | 45  | 45  | PREDICTED: polypyrimidine tract-binding protein 1-like     |
| Locus_29678_Transcript_1/1_Conf_1.000 | 136  | 0  |          |                |     |         |     |     |                                                            |
| Locus_29679_Transcript_1/1_Conf_1.000 | 175  | 0  |          |                |     |         |     |     |                                                            |
| Locus_2968_Transcript_1/1_Conf_1.000  | 2001 | 20 | 0        | XP_002632121.1 | 83  | 641.343 | 454 | 381 | Hypothetical protein CBG06976                              |
| Locus_29680_Transcript_1/1_Conf_1.000 | 181  | 3  | 5.56E-05 | XP_002633837.1 | 55  | 50.8322 | 59  | 33  | Hypothetical protein CBG19875                              |
| Locus_29681_Transcript_1/1_Conf_1.000 | 141  | 0  |          |                |     |         |     |     |                                                            |
| Locus_29682_Transcript_1/1_Conf_1.000 | 154  | 0  |          |                |     |         |     |     |                                                            |
| Locus_29683_Transcript_1/1_Conf_1.000 | 140  | 14 | 1.05E-11 | NP_001024131.1 | 92  | 73.1738 | 41  | 38  | Peroxisomal Membrane Protein related family member (pmp-5) |
| Locus_29684_Transcript_1/1_Conf_1.000 | 132  | 0  |          |                |     |         |     |     |                                                            |
| Locus_29685_Transcript_1/1_Conf_1.000 | 150  | 3  | 1.50E-05 | NP_741539.2    | 83  | 52.7582 | 42  | 35  | hypothetical protein C18C4.5                               |
| Locus_29686_Transcript_1/1_Conf_1.000 | 139  | 0  |          |                |     |         |     |     |                                                            |
| Locus_29687_Transcript_1/1_Conf_1.000 | 144  | 0  |          |                |     |         |     |     |                                                            |
| Locus_29688_Transcript_1/1_Conf_1.000 | 178  | 0  |          |                |     |         |     |     |                                                            |
| Locus_29689_Transcript_1/1_Conf_1.000 | 149  | 0  |          |                |     |         |     |     |                                                            |
| Locus_2969_Transcript_1/1_Conf_1.000  | 743  | 20 | 1.75E-56 | XP_002634132.1 | 95  | 223.402 | 120 | 115 | C. briggsae CBR-HTZ-1 protein                              |



|                                       |      |    |          |                |    |         |     |     |                                               |
|---------------------------------------|------|----|----------|----------------|----|---------|-----|-----|-----------------------------------------------|
| Locus_29690_Transcript_1/1_Conf_1.000 | 129  | 7  | 8.66E-14 | XP_002640973.1 | 95 | 80.1073 | 43  | 41  | C. briggsae CBR-SNF-6 protein                 |
| Locus_29691_Transcript_1/1_Conf_1.000 | 180  | 0  |          |                |    |         |     |     |                                               |
| Locus_29692_Transcript_1/1_Conf_1.000 | 140  | 0  |          |                |    |         |     |     |                                               |
| Locus_29693_Transcript_1/1_Conf_1.000 | 256  | 20 | 1.96E-21 | XP_002636781.1 | 77 | 105.531 | 79  | 61  | Hypothetical protein CBG23516                 |
| Locus_29694_Transcript_1/1_Conf_1.000 | 159  | 4  | 1.76E-22 | EFO96815.1     | 96 | 108.997 | 51  | 49  | CRE-NPR-19 protein                            |
| Locus_29695_Transcript_1/1_Conf_1.000 | 142  | 0  |          |                |    |         |     |     |                                               |
| Locus_29696_Transcript_1/1_Conf_1.000 | 220  | 0  |          |                |    |         |     |     |                                               |
| Locus_29697_Transcript_1/1_Conf_1.000 | 238  | 0  |          |                |    |         |     |     |                                               |
| Locus_29698_Transcript_1/1_Conf_1.000 | 153  | 0  |          |                |    |         |     |     |                                               |
| Locus_29699_Transcript_1/1_Conf_1.000 | 202  | 0  |          |                |    |         |     |     |                                               |
| Locus_297_Transcript_1/2_Conf_1.000   | 2730 | 20 | 0        | NP_741403.2    | 86 | 1073.92 | 724 | 626 | Dynamin Related Protein family member (drp-1) |
| Locus_297_Transcript_2/2_Conf_1.000   | 2718 | 20 | 0        | NP_741403.2    | 86 | 1078.54 | 720 | 626 | Dynamin Related Protein family member (drp-1) |

|                                       |     |    |          |                |     |         |    |    |                                                                     |
|---------------------------------------|-----|----|----------|----------------|-----|---------|----|----|---------------------------------------------------------------------|
| Locus_2970_Transcript_1/1_Conf_1.000  | 797 | 20 | 5.69E-35 | NP_504688.1    | 97  | 152.14  | 93 | 91 | SyNaptoBrevin related family member (snb-1)                         |
| Locus_29700_Transcript_1/1_Conf_1.000 | 131 | 0  |          |                |     |         |    |    |                                                                     |
| Locus_29701_Transcript_1/1_Conf_1.000 | 131 | 0  |          |                |     |         |    |    |                                                                     |
| Locus_29702_Transcript_1/1_Conf_1.000 | 128 | 0  |          |                |     |         |    |    |                                                                     |
| Locus_29703_Transcript_1/1_Conf_1.000 | 176 | 0  |          |                |     |         |    |    |                                                                     |
| Locus_29704_Transcript_1/1_Conf_1.000 | 134 | 0  |          |                |     |         |    |    |                                                                     |
| Locus_29705_Transcript_1/1_Conf_1.000 | 142 | 0  |          |                |     |         |    |    |                                                                     |
| Locus_29706_Transcript_1/1_Conf_1.000 | 138 | 0  |          |                |     |         |    |    |                                                                     |
| Locus_29707_Transcript_1/1_Conf_1.000 | 148 | 0  |          |                |     |         |    |    |                                                                     |
| Locus_29708_Transcript_1/1_Conf_1.000 | 128 | 0  |          |                |     |         |    |    |                                                                     |
| Locus_29709_Transcript_1/1_Conf_1.000 | 146 | 20 | 7.50E-21 | P02751.4       | 100 | 103.605 | 48 | 48 | Fibronectin                                                         |
| Locus_2971_Transcript_1/1_Conf_1.000  | 814 | 5  | 1.78E-07 | NP_495966.2    | 52  | 60.8474 | 84 | 44 | Prion-like-(Q/N-rich)-domain-bearing protein family member (pqn-95) |
| Locus_29710_Transcript_1/1_Conf_1.000 | 174 | 0  |          |                |     |         |    |    |                                                                     |
| Locus_29711_Transcript_1/1_Conf_1.000 | 180 | 9  | 2.40E-16 | EFP10268.1     | 90  | 88.5817 | 55 | 50 | hypothetical protein CRE_24096                                      |
| Locus_29712_Transcript_1/1_Conf_1.000 | 128 | 0  |          |                |     |         |    |    |                                                                     |
| Locus_29713_Transcript_1/1_Conf_1.000 | 134 | 0  |          |                |     |         |    |    |                                                                     |
| Locus_29714_Transcript_1/1_Conf_1.000 | 211 | 8  | 3.38E-18 | NP_001021988.1 | 82  | 94.7449 | 70 | 58 | Epithelial Fusion Failure family member (eff-1)                     |
| Locus_29715_Transcript_1/1_Conf_1.000 | 129 | 0  |          |                |     |         |    |    |                                                                     |

|                                       |     |    |          |                |     |         |     |     |                                    |
|---------------------------------------|-----|----|----------|----------------|-----|---------|-----|-----|------------------------------------|
| Locus_29716_Transcript_1/1_Conf_1.000 | 155 | 0  |          |                |     |         |     |     |                                    |
| Locus_29717_Transcript_1/1_Conf_1.000 | 270 | 20 | 9.22E-32 | XP_002636599.1 | 89  | 139.813 | 89  | 80  | Hypothetical protein CBG23298      |
| Locus_29718_Transcript_1/1_Conf_1.000 | 157 | 0  |          |                |     |         |     |     |                                    |
| Locus_29719_Transcript_1/1_Conf_1.000 | 147 | 0  |          |                |     |         |     |     |                                    |
| Locus_2972_Transcript_1/1_Conf_1.000  | 992 | 20 | 9.30E-95 | XP_001896907.1 | 99  | 351.288 | 172 | 171 | RAS-like GTP-binding protein RhoA  |
| Locus_29720_Transcript_1/1_Conf_1.000 | 133 | 0  |          |                |     |         |     |     |                                    |
| Locus_29721_Transcript_1/1_Conf_1.000 | 147 | 0  |          |                |     |         |     |     |                                    |
| Locus_29722_Transcript_1/1_Conf_1.000 | 134 | 0  |          |                |     |         |     |     |                                    |
| Locus_29723_Transcript_1/1_Conf_1.000 | 128 | 0  |          |                |     |         |     |     |                                    |
| Locus_29724_Transcript_1/1_Conf_1.000 | 133 | 0  |          |                |     |         |     |     |                                    |
| Locus_29725_Transcript_1/1_Conf_1.000 | 159 | 1  | 3.68E-04 | XP_002634048.1 | 69  | 48.1358 | 52  | 36  | Hypothetical protein CBG01587      |
| Locus_29726_Transcript_1/1_Conf_1.000 | 185 | 3  | 6.36E-12 | EFP11317.1     | 72  | 73.9442 | 61  | 44  | hypothetical protein CRE_30788     |
| Locus_29727_Transcript_1/1_Conf_1.000 | 166 | 0  |          |                |     |         |     |     |                                    |
| Locus_29728_Transcript_1/1_Conf_1.000 | 162 | 0  |          |                |     |         |     |     |                                    |
| Locus_29729_Transcript_1/1_Conf_1.000 | 146 | 0  |          |                |     |         |     |     |                                    |
| Locus_2973_Transcript_1/1_Conf_1.000  | 387 | 20 | 4.38E-26 | NP_493029.1    | 84  | 120.939 | 82  | 69  | hypothetical protein R06C1.4       |
| Locus_29730_Transcript_1/1_Conf_1.000 | 196 | 20 | 3.91E-30 | XP_002931287.1 | 100 | 134.42  | 64  | 64  | PREDICTED: filamin-A-like, partial |
| Locus_29731_Transcript_1/1_Conf_1.000 | 178 | 0  |          |                |     |         |     |     |                                    |
| Locus_29732_Transcript_1/1_Conf_1.000 | 132 | 0  |          |                |     |         |     |     |                                    |
| Locus_29733_Transcript_1/1_Conf_1.000 | 163 | 0  |          |                |     |         |     |     |                                    |
| Locus_29734_Transcript_1/1_Conf_1.000 | 196 | 0  |          |                |     |         |     |     |                                    |
| Locus_29735_Transcript_1/1_Conf_1.000 | 335 | 0  |          |                |     |         |     |     |                                    |

|                                       |      |    |          |                |    |         |     |     |                                                                         |
|---------------------------------------|------|----|----------|----------------|----|---------|-----|-----|-------------------------------------------------------------------------|
| Locus_29736_Transcript_1/1_Conf_1.000 | 155  | 20 | 2.32E-14 | CAI99629.1     | 86 | 82.0333 | 51  | 44  | beta-1,3-glucuronosyltransferase                                        |
| Locus_29737_Transcript_1/1_Conf_1.000 | 194  | 0  |          |                |    |         |     |     |                                                                         |
| Locus_29738_Transcript_1/1_Conf_1.000 | 206  | 0  |          |                |    |         |     |     |                                                                         |
| Locus_29739_Transcript_1/1_Conf_1.000 | 137  | 0  |          |                |    |         |     |     |                                                                         |
| Locus_2974_Transcript_1/1_Conf_1.000  | 1713 | 20 | 0        | EFO23631.1     | 81 | 676.781 | 494 | 405 | nuclear matrix protein SNEV                                             |
| Locus_29740_Transcript_1/1_Conf_1.000 | 395  | 20 | 1.45E-24 | CAV31765.1     | 61 | 115.931 | 132 | 81  | C. elegans protein C33B4.3c, partially confirmed by transcript evidence |
| Locus_29741_Transcript_1/1_Conf_1.000 | 136  | 0  |          |                |    |         |     |     |                                                                         |
| Locus_29742_Transcript_1/1_Conf_1.000 | 146  | 6  | 4.89E-04 | EFP05634.1     | 70 | 47.7506 | 47  | 33  | CRE-UNC-70 protein                                                      |
| Locus_29743_Transcript_1/1_Conf_1.000 | 149  | 0  |          |                |    |         |     |     |                                                                         |
| Locus_29744_Transcript_1/1_Conf_1.000 | 161  | 20 | 1.31E-09 | EFO20785.1     | 73 | 66.2402 | 53  | 39  | TKL/MLK/HH498 protein kinase                                            |
| Locus_29745_Transcript_1/1_Conf_1.000 | 165  | 0  |          |                |    |         |     |     |                                                                         |
| Locus_29746_Transcript_1/1_Conf_1.000 | 144  | 0  |          |                |    |         |     |     |                                                                         |
| Locus_29747_Transcript_1/1_Conf_1.000 | 355  | 15 | 2.21E-17 | XP_001894784.1 | 72 | 92.0485 | 98  | 71  | glutaminase DH11.1                                                      |
| Locus_29748_Transcript_1/1_Conf_1.000 | 273  | 0  |          |                |    |         |     |     |                                                                         |
| Locus_29749_Transcript_1/1_Conf_1.000 | 178  | 0  |          |                |    |         |     |     |                                                                         |
| Locus_2975_Transcript_1/1_Conf_1.000  | 1291 | 20 | 0        | NP_509821.1    | 90 | 669.848 | 420 | 378 | hypothetical protein F47B10.1                                           |
| Locus_29750_Transcript_1/1_Conf_1.000 | 145  | 0  |          |                |    |         |     |     |                                                                         |
| Locus_29751_Transcript_1/1_Conf_1.000 | 173  | 0  |          |                |    |         |     |     |                                                                         |
| Locus_29752_Transcript_1/1_Conf_1.000 | 151  | 0  |          |                |    |         |     |     |                                                                         |
| Locus_29753_Transcript_1/1_Conf_1.000 | 139  | 0  |          |                |    |         |     |     |                                                                         |
| Locus_29754_Transcript_1/1_Conf_1.000 | 239  | 0  |          |                |    |         |     |     |                                                                         |
| Locus_29755_Transcript_1/1_Conf_1.000 | 212  | 5  | 3.39E-10 | EFO19747.1     | 71 | 68.1662 | 70  | 50  | hypothetical protein LOAG_08744                                         |
| Locus_29756_Transcript_1/1_Conf_1.000 | 132  | 0  |          |                |    |         |     |     |                                                                         |
| Locus_29757_Transcript_1/1_Conf_1.000 | 155  | 5  | 5.70E-13 | EFO85660.1     | 88 | 77.411  | 50  | 44  | CRE-DEP-1 protein                                                       |
| Locus_29758_Transcript_1/1_Conf_1.000 | 199  | 3  | 3.32E-13 | EFO85627.1     | 72 | 78.1814 | 66  | 48  | hypothetical protein CRE_01589                                          |
| Locus_29759_Transcript_1/1_Conf_1.000 | 131  | 0  |          |                |    |         |     |     |                                                                         |

|                                       |      |    |           |                |    |         |     |     |                                |
|---------------------------------------|------|----|-----------|----------------|----|---------|-----|-----|--------------------------------|
| Locus_2976_Transcript_1/1_Conf_1.000  | 1670 | 20 | 2.18E-178 | NP_495449.1    | 91 | 630.172 | 370 | 338 | hypothetical protein ZK1127.10 |
| Locus_29760_Transcript_1/1_Conf_1.000 | 130  | 2  | 4.14E-16  | NP_495241.1    | 97 | 87.8113 | 43  | 42  | hypothetical protein C30B5.5   |
| Locus_29761_Transcript_1/1_Conf_1.000 | 162  | 3  | 1.94E-05  | NP_001129867.1 | 84 | 52.373  | 51  | 43  | hypothetical protein T05E11.2  |
| Locus_29762_Transcript_1/1_Conf_1.000 | 233  | 0  |           |                |    |         |     |     |                                |
| Locus_29763_Transcript_1/1_Conf_1.000 | 243  | 0  |           |                |    |         |     |     |                                |
| Locus_29764_Transcript_1/1_Conf_1.000 | 130  | 0  |           |                |    |         |     |     |                                |
| Locus_29765_Transcript_1/1_Conf_1.000 | 128  | 8  | 2.52E-13  | NP_501548.2    | 90 | 78.5666 | 42  | 38  | hypothetical protein C27B7.7   |
| Locus_29766_Transcript_1/1_Conf_1.000 | 206  | 0  |           |                |    |         |     |     |                                |
| Locus_29767_Transcript_1/1_Conf_1.000 | 158  | 3  | 4.22E-08  | EFO86016.1     | 71 | 61.2326 | 49  | 35  | CRE-SET-14 protein             |
| Locus_29768_Transcript_1/1_Conf_1.000 | 143  | 0  |           |                |    |         |     |     |                                |
| Locus_29769_Transcript_1/1_Conf_1.000 | 231  | 0  |           |                |    |         |     |     |                                |
| Locus_2977_Transcript_1/1_Conf_1.000  | 1281 | 20 | 5.79E-61  | XP_002405164.1 | 50 | 239.58  | 436 | 222 | conserved hypothetical protein |

|                                       |      |    |           |                |     |         |     |     |                                               |
|---------------------------------------|------|----|-----------|----------------|-----|---------|-----|-----|-----------------------------------------------|
| Locus_29770_Transcript_1/1_Conf_1.000 | 179  | 20 | 1.32E-14  | XP_002630011.1 | 77  | 82.8037 | 59  | 46  | Hypothetical protein CBG13376                 |
| Locus_29771_Transcript_1/1_Conf_1.000 | 132  | 6  | 2.78E-04  | EFP00800.1     | 74  | 48.521  | 43  | 32  | CRE-UNC-80 protein                            |
| Locus_29772_Transcript_1/1_Conf_1.000 | 103  | 0  |           |                |     |         |     |     |                                               |
| Locus_29773_Transcript_1/1_Conf_1.000 | 145  | 0  |           |                |     |         |     |     |                                               |
| Locus_29774_Transcript_1/1_Conf_1.000 | 168  | 20 | 7.55E-26  | P00736.2       | 100 | 120.168 | 56  | 56  | Complement C1r subcomponent                   |
| Locus_29775_Transcript_1/1_Conf_1.000 | 213  | 0  |           |                |     |         |     |     |                                               |
| Locus_29776_Transcript_1/1_Conf_1.000 | 160  | 0  |           |                |     |         |     |     |                                               |
| Locus_29777_Transcript_1/1_Conf_1.000 | 135  | 20 | 2.34E-11  | XP_002632693.1 | 84  | 72.0182 | 45  | 38  | Hypothetical protein CBG21624                 |
| Locus_29778_Transcript_1/1_Conf_1.000 | 172  | 0  |           |                |     |         |     |     |                                               |
| Locus_29779_Transcript_1/1_Conf_1.000 | 144  | 0  |           |                |     |         |     |     |                                               |
| Locus_2978_Transcript_1/3_Conf_0.667  | 950  | 20 | 4.66E-64  | NP_502575.1    | 95  | 249.21  | 133 | 127 | hypothetical protein Y62E10A.10               |
| Locus_2978_Transcript_2/3_Conf_0.667  | 1232 | 20 | 3.07E-112 | NP_502575.1    | 94  | 409.838 | 227 | 214 | hypothetical protein Y62E10A.10               |
| Locus_2978_Transcript_3/3_Conf_0.667  | 1232 | 20 | 3.07E-112 | NP_502575.1    | 94  | 409.838 | 227 | 214 | hypothetical protein Y62E10A.10               |
| Locus_29780_Transcript_1/1_Conf_1.000 | 128  | 20 | 1.43E-16  | XP_002930057.1 | 100 | 89.3521 | 42  | 42  | PREDICTED: spliceosome RNA helicase BAT1-like |
| Locus_29781_Transcript_1/1_Conf_1.000 | 133  | 0  |           |                |     |         |     |     |                                               |
| Locus_29782_Transcript_1/1_Conf_1.000 | 160  | 0  |           |                |     |         |     |     |                                               |
| Locus_29783_Transcript_1/1_Conf_1.000 | 142  | 0  |           |                |     |         |     |     |                                               |

|                                       |     |    |          |                |     |         |     |    |                                                 |
|---------------------------------------|-----|----|----------|----------------|-----|---------|-----|----|-------------------------------------------------|
| Locus_29784_Transcript_1/1_Conf_1.000 | 129 | 5  | 2.28E-14 | XP_002644616.1 | 92  | 82.0333 | 40  | 37 | Hypothetical protein CBG14575                   |
| Locus_29785_Transcript_1/1_Conf_1.000 | 142 | 0  |          |                |     |         |     |    |                                                 |
| Locus_29786_Transcript_1/1_Conf_1.000 | 130 | 0  |          |                |     |         |     |    |                                                 |
| Locus_29787_Transcript_1/1_Conf_1.000 | 158 | 20 | 7.15E-16 | XP_002647072.1 | 88  | 87.0409 | 52  | 46 | Hypothetical protein CBG03598                   |
| Locus_29788_Transcript_1/1_Conf_1.000 | 133 | 0  |          |                |     |         |     |    |                                                 |
| Locus_29789_Transcript_1/1_Conf_1.000 | 146 | 0  |          |                |     |         |     |    |                                                 |
| Locus_2979_Transcript_1/1_Conf_1.000  | 156 | 0  |          |                |     |         |     |    |                                                 |
| Locus_29790_Transcript_1/1_Conf_1.000 | 102 | 0  |          |                |     |         |     |    |                                                 |
| Locus_29791_Transcript_1/1_Conf_1.000 | 157 | 0  |          |                |     |         |     |    |                                                 |
| Locus_29792_Transcript_1/1_Conf_1.000 | 151 | 0  |          |                |     |         |     |    |                                                 |
| Locus_29793_Transcript_1/1_Conf_1.000 | 150 | 0  |          |                |     |         |     |    |                                                 |
| Locus_29794_Transcript_1/1_Conf_1.000 | 137 | 0  |          |                |     |         |     |    |                                                 |
| Locus_29795_Transcript_1/1_Conf_1.000 | 146 | 20 | 3.49E-10 | XP_002640693.1 | 79  | 68.1662 | 48  | 38 | Hypothetical protein CBG19758                   |
| Locus_29796_Transcript_1/1_Conf_1.000 | 130 | 0  |          |                |     |         |     |    |                                                 |
| Locus_29797_Transcript_1/1_Conf_1.000 | 144 | 0  |          |                |     |         |     |    |                                                 |
| Locus_29798_Transcript_1/1_Conf_1.000 | 209 | 20 | 1.79E-19 | NP_499880.3    | 85  | 98.9821 | 68  | 58 | hypothetical protein R02D3.3                    |
| Locus_29799_Transcript_1/1_Conf_1.000 | 134 | 20 | 2.34E-11 | XP_002641945.1 | 81  | 72.0182 | 44  | 36 | C. briggsae CBR-TAG-198 protein                 |
| Locus_298_Transcript_1/1_Conf_1.000   | 231 | 4  | 4.32E-13 | XP_002635474.1 | 75  | 77.7962 | 68  | 51 | Hypothetical protein CBG08769                   |
| Locus_2980_Transcript_1/1_Conf_1.000  | 455 | 20 | 4.67E-52 | XP_002637604.1 | 84  | 207.223 | 117 | 99 | C. briggsae CBR-RBX-1 protein                   |
| Locus_29800_Transcript_1/1_Conf_1.000 | 193 | 0  |          |                |     |         |     |    |                                                 |
| Locus_29801_Transcript_1/1_Conf_1.000 | 132 | 0  |          |                |     |         |     |    |                                                 |
| Locus_29802_Transcript_1/1_Conf_1.000 | 262 | 0  |          |                |     |         |     |    |                                                 |
| Locus_29803_Transcript_1/1_Conf_1.000 | 229 | 0  |          |                |     |         |     |    |                                                 |
| Locus_29804_Transcript_1/1_Conf_1.000 | 142 | 0  |          |                |     |         |     |    |                                                 |
| Locus_29805_Transcript_1/1_Conf_1.000 | 134 | 20 | 1.05E-19 | XP_002917845.1 | 100 | 99.7525 | 44  | 44 | PREDICTED: cell division protein kinase 16-like |
| Locus_29806_Transcript_1/1_Conf_1.000 | 315 | 20 | 3.02E-22 | NP_503682.1    | 70  | 108.227 | 102 | 72 | hypothetical protein C01B4.8                    |
| Locus_29807_Transcript_1/1_Conf_1.000 | 134 | 0  |          |                |     |         |     |    |                                                 |

|                                       |      |    |          |                |     |         |     |     |                                                      |
|---------------------------------------|------|----|----------|----------------|-----|---------|-----|-----|------------------------------------------------------|
| Locus_29808_Transcript_1/1_Conf_1.000 | 224  | 4  | 4.08E-19 | NP_502312.2    | 77  | 97.8265 | 74  | 57  | Neurexin Like receptor family member (nlr-1)         |
| Locus_29809_Transcript_1/1_Conf_1.000 | 338  | 0  |          |                |     |         |     |     |                                                      |
| Locus_2981_Transcript_1/3_Conf_0.571  | 433  | 0  |          |                |     |         |     |     |                                                      |
| Locus_2981_Transcript_2/3_Conf_0.286  | 509  | 0  |          |                |     |         |     |     |                                                      |
| Locus_2981_Transcript_3/3_Conf_0.714  | 481  | 0  |          |                |     |         |     |     |                                                      |
| Locus_29810_Transcript_1/1_Conf_1.000 | 138  | 0  |          |                |     |         |     |     |                                                      |
| Locus_29811_Transcript_1/1_Conf_1.000 | 162  | 20 | 1.34E-14 | NP_497008.1    | 86  | 82.8037 | 53  | 46  | hypothetical protein K10H10.2                        |
| Locus_29813_Transcript_1/1_Conf_1.000 | 134  | 4  | 7.06E-16 | NP_502273.2    | 93  | 87.0409 | 44  | 41  | UNCoordinated family member (unc-22)                 |
| Locus_29814_Transcript_1/1_Conf_1.000 | 164  | 0  |          |                |     |         |     |     |                                                      |
| Locus_29815_Transcript_1/1_Conf_1.000 | 133  | 0  |          |                |     |         |     |     |                                                      |
| Locus_29816_Transcript_1/1_Conf_1.000 | 128  | 0  |          |                |     |         |     |     |                                                      |
| Locus_29817_Transcript_1/1_Conf_1.000 | 137  | 0  |          |                |     |         |     |     |                                                      |
| Locus_29818_Transcript_1/1_Conf_1.000 | 152  | 20 | 5.69E-21 | NP_499865.1    | 98  | 103.99  | 50  | 49  | hypothetical protein F29C4.6                         |
| Locus_29819_Transcript_1/1_Conf_1.000 | 143  | 0  |          |                |     |         |     |     |                                                      |
| Locus_2982_Transcript_1/1_Conf_1.000  | 1590 | 20 | 6.99E-70 | EFO22014.1     | 63  | 269.626 | 327 | 207 | actin                                                |
| Locus_29820_Transcript_1/1_Conf_1.000 | 166  | 20 | 3.52E-23 | XP_002760919.1 | 100 | 111.309 | 55  | 55  | PREDICTED: fumarate hydratase, mitochondrial         |
| Locus_29821_Transcript_1/1_Conf_1.000 | 145  | 0  |          |                |     |         |     |     |                                                      |
| Locus_29822_Transcript_1/1_Conf_1.000 | 139  | 2  | 9.14E-16 | NP_509421.2    | 91  | 86.6557 | 45  | 41  | TBC (Tre-2/Bub2/Cdc16) domain family member (tbc-18) |
| Locus_29823_Transcript_1/1_Conf_1.000 | 140  | 0  |          |                |     |         |     |     |                                                      |
| Locus_29824_Transcript_1/1_Conf_1.000 | 128  | 20 | 2.13E-12 | 2PBC           | 100 | 75.485  | 36  | 36  | Fk506-Binding Protein 2                              |
| Locus_29825_Transcript_1/1_Conf_1.000 | 139  | 0  |          |                |     |         |     |     |                                                      |
| Locus_29826_Transcript_1/1_Conf_1.000 | 129  | 0  |          |                |     |         |     |     |                                                      |
| Locus_29827_Transcript_1/1_Conf_1.000 | 155  | 0  |          |                |     |         |     |     |                                                      |



|                                       |      |    |           |                |     |         |     |     |                                                         |
|---------------------------------------|------|----|-----------|----------------|-----|---------|-----|-----|---------------------------------------------------------|
| Locus_29828_Transcript_1/1_Conf_1.000 | 158  | 0  |           |                |     |         |     |     |                                                         |
| Locus_29829_Transcript_1/1_Conf_1.000 | 135  | 0  |           |                |     |         |     |     |                                                         |
| Locus_2983_Transcript_1/1_Conf_1.000  | 1484 | 20 | 3.70E-110 | NP_493229.1    | 74  | 403.29  | 321 | 238 | hypothetical protein W02A11.1                           |
| Locus_29830_Transcript_1/1_Conf_1.000 | 135  | 0  |           |                |     |         |     |     |                                                         |
| Locus_29831_Transcript_1/1_Conf_1.000 | 168  | 6  | 4.45E-10  | NP_505281.1    | 76  | 67.781  | 51  | 39  | hypothetical protein F07B7.12                           |
| Locus_29832_Transcript_1/1_Conf_1.000 | 222  | 1  | 2.85E-04  | XP_002638606.1 | 76  | 48.521  | 34  | 26  | Hypothetical protein CBG05657                           |
| Locus_29833_Transcript_1/1_Conf_1.000 | 172  | 20 | 8.32E-25  | XP_002814671.1 | 100 | 116.701 | 57  | 57  | PREDICTED: cytosol aminopeptidase-like                  |
| Locus_29834_Transcript_1/1_Conf_1.000 | 196  | 0  |           |                |     |         |     |     |                                                         |
| Locus_29835_Transcript_1/1_Conf_1.000 | 180  | 0  |           |                |     |         |     |     |                                                         |
| Locus_29836_Transcript_1/1_Conf_1.000 | 247  | 11 | 2.40E-32  | EFP00800.1     | 90  | 141.739 | 82  | 74  | CRE-UNC-80 protein                                      |
| Locus_29837_Transcript_1/1_Conf_1.000 | 132  | 19 | 2.20E-09  | XP_001893904.1 | 79  | 65.4698 | 43  | 34  | Protein-tyrosine phosphatase containing protein         |
| Locus_29838_Transcript_1/1_Conf_1.000 | 144  | 0  |           |                |     |         |     |     |                                                         |
| Locus_29839_Transcript_1/1_Conf_1.000 | 164  | 20 | 2.80E-12  | NP_504648.1    | 75  | 75.0998 | 54  | 41  | Carnitine Palmitoyl Transferase family member (cpt-6)   |
| Locus_2984_Transcript_1/1_Conf_1.000  | 1790 | 20 | 0         | NP_001021021.1 | 84  | 704.516 | 479 | 407 | hypothetical protein C32F10.8                           |
| Locus_29840_Transcript_1/1_Conf_1.000 | 128  | 0  |           |                |     |         |     |     |                                                         |
| Locus_29841_Transcript_1/1_Conf_1.000 | 155  | 0  |           |                |     |         |     |     |                                                         |
| Locus_29842_Transcript_1/1_Conf_1.000 | 168  | 0  |           |                |     |         |     |     |                                                         |
| Locus_29843_Transcript_1/1_Conf_1.000 | 138  | 20 | 9.44E-21  | XP_519230.2    | 100 | 103.219 | 45  | 45  | PREDICTED: actin related protein 2/3 complex subunit 1B |
| Locus_29844_Transcript_1/1_Conf_1.000 | 216  | 3  | 8.83E-19  | NP_509817.2    | 73  | 96.6709 | 67  | 49  | hypothetical protein F47B10.5                           |
| Locus_29845_Transcript_1/1_Conf_1.000 | 198  | 20 | 4.17E-16  | XP_002637730.1 | 72  | 87.8113 | 62  | 45  | Hypothetical protein CBG11596                           |
| Locus_29846_Transcript_1/1_Conf_1.000 | 135  | 7  | 2.77E-12  | XP_002630633.1 | 91  | 75.0998 | 45  | 41  | C. briggsae CBR-NSY-1 protein                           |
| Locus_29847_Transcript_1/1_Conf_1.000 | 223  | 2  | 2.75E-07  | AAV58318.1     | 63  | 58.5362 | 63  | 40  | C-type lectin precursor                                 |

|                                       |      |    |          |                |     |         |     |     |                                                   |
|---------------------------------------|------|----|----------|----------------|-----|---------|-----|-----|---------------------------------------------------|
| Locus_29848_Transcript_1/1_Conf_1.000 | 148  | 20 | 6.74E-22 | XP_002818645.1 | 100 | 107.071 | 49  | 49  | PREDICTED: glutathione S-transferase kappa 1-like |
| Locus_29849_Transcript_1/1_Conf_1.000 | 198  | 0  |          |                |     |         |     |     |                                                   |
| Locus_2985_Transcript_1/2_Conf_1.000  | 2759 | 20 | 0        | NP_496710.1    | 89  | 1379    | 921 | 827 | hypothetical protein Y46G5A.4                     |
| Locus_2985_Transcript_2/2_Conf_1.000  | 2759 | 20 | 0        | NP_496710.1    | 89  | 1379    | 921 | 827 | hypothetical protein Y46G5A.4                     |
| Locus_29850_Transcript_1/1_Conf_1.000 | 128  | 0  |          |                |     |         |     |     |                                                   |
| Locus_29851_Transcript_1/1_Conf_1.000 | 128  | 0  |          |                |     |         |     |     |                                                   |
| Locus_29852_Transcript_1/1_Conf_1.000 | 177  | 4  | 2.85E-17 | NP_001123075.1 | 85  | 91.6633 | 57  | 49  | hypothetical protein ZC455.1                      |
| Locus_29853_Transcript_1/1_Conf_1.000 | 143  | 0  |          |                |     |         |     |     |                                                   |
| Locus_29854_Transcript_1/1_Conf_1.000 | 610  | 20 | 1.76E-57 | EFO85621.1     | 76  | 226.098 | 194 | 149 | CRE-LET-268 protein                               |
| Locus_29855_Transcript_1/1_Conf_1.000 | 135  | 2  | 2.05E-07 | NP_491888.2    | 80  | 58.9214 | 41  | 33  | hypothetical protein F57B10.9                     |
| Locus_29856_Transcript_1/1_Conf_1.000 | 136  | 0  |          |                |     |         |     |     |                                                   |
| Locus_29857_Transcript_1/1_Conf_1.000 | 140  | 5  | 3.26E-13 | XP_002647091.1 | 93  | 78.1814 | 46  | 43  | Hypothetical protein CBG03621                     |
| Locus_29858_Transcript_1/1_Conf_1.000 | 170  | 0  |          |                |     |         |     |     |                                                   |
| Locus_29859_Transcript_1/1_Conf_1.000 | 161  | 0  |          |                |     |         |     |     |                                                   |
| Locus_2986_Transcript_1/2_Conf_0.667  | 219  | 0  |          |                |     |         |     |     |                                                   |
| Locus_2986_Transcript_2/2_Conf_0.667  | 219  | 0  |          |                |     |         |     |     |                                                   |
| Locus_29860_Transcript_1/1_Conf_1.000 | 195  | 20 | 1.14E-13 | NP_001129849.1 | 77  | 79.7221 | 62  | 48  | Choline Kinase A family member (cka-1)            |

|                                       |      |    |          |                |     |         |     |     |                                                               |
|---------------------------------------|------|----|----------|----------------|-----|---------|-----|-----|---------------------------------------------------------------|
| Locus_29861_Transcript_1/1_Conf_1.000 | 154  | 15 | 2.09E-07 | XP_002643485.1 | 75  | 58.9214 | 48  | 36  | C. briggsae CBR-PKC-2 protein                                 |
| Locus_29862_Transcript_1/1_Conf_1.000 | 141  | 20 | 4.67E-20 | XP_002830831.1 | 100 | 100.908 | 46  | 46  | PREDICTED: integrin beta-2-like, partial                      |
| Locus_29863_Transcript_1/1_Conf_1.000 | 137  | 0  |          |                |     |         |     |     |                                                               |
| Locus_29864_Transcript_1/1_Conf_1.000 | 130  | 0  |          |                |     |         |     |     |                                                               |
| Locus_29865_Transcript_1/1_Conf_1.000 | 143  | 0  |          |                |     |         |     |     |                                                               |
| Locus_29866_Transcript_1/1_Conf_1.000 | 215  | 0  |          |                |     |         |     |     |                                                               |
| Locus_29867_Transcript_1/1_Conf_1.000 | 135  | 2  | 2.78E-04 | EFO86810.1     | 53  | 48.521  | 45  | 24  | hypothetical protein CRE_04697                                |
| Locus_29868_Transcript_1/1_Conf_1.000 | 145  | 0  |          |                |     |         |     |     |                                                               |
| Locus_29869_Transcript_1/1_Conf_1.000 | 137  | 0  |          |                |     |         |     |     |                                                               |
| Locus_2987_Transcript_1/1_Conf_1.000  | 2730 | 20 | 1.64E-99 | NP_001024740.1 | 64  | 369.007 | 379 | 243 | EATing: abnormal pharyngeal pumping family member (eat-20)    |
| Locus_29870_Transcript_1/1_Conf_1.000 | 130  | 20 | 3.40E-18 | EFO97249.1     | 100 | 94.7449 | 43  | 43  | CRE-MEC-4 protein                                             |
| Locus_29871_Transcript_1/1_Conf_1.000 | 345  | 2  | 4.98E-09 | NP_496830.2    | 74  | 64.3142 | 55  | 41  | hypothetical protein Y48E1C.4                                 |
| Locus_29872_Transcript_1/1_Conf_1.000 | 188  | 0  |          |                |     |         |     |     |                                                               |
| Locus_29873_Transcript_1/1_Conf_1.000 | 163  | 20 | 3.53E-23 | NP_001611.1    | 100 | 111.309 | 54  | 54  | neuroblast differentiation-associated protein AHNAK isoform 1 |
| Locus_29874_Transcript_1/1_Conf_1.000 | 131  | 0  |          |                |     |         |     |     |                                                               |
| Locus_29875_Transcript_1/1_Conf_1.000 | 134  | 14 | 5.42E-08 | EFP04426.1     | 79  | 60.8474 | 43  | 34  | CRE-TPST-2 protein                                            |
| Locus_29876_Transcript_1/1_Conf_1.000 | 158  | 0  |          |                |     |         |     |     |                                                               |
| Locus_29877_Transcript_1/1_Conf_1.000 | 132  | 0  |          |                |     |         |     |     |                                                               |
| Locus_29878_Transcript_1/1_Conf_1.000 | 143  | 20 | 5.36E-16 | EFP05547.1     | 93  | 87.4261 | 44  | 41  | CRE-UNC-68 protein                                            |
| Locus_29879_Transcript_1/1_Conf_1.000 | 130  | 0  |          |                |     |         |     |     |                                                               |
| Locus_2988_Transcript_1/1_Conf_1.000  | 205  | 1  | 1.63E-04 | XP_797470.2    | 69  | 49.2914 | 56  | 39  | PREDICTED: similar to KIAA1636 protein                        |

|                                       |     |    |          |                |     |         |     |     |                                |
|---------------------------------------|-----|----|----------|----------------|-----|---------|-----|-----|--------------------------------|
| Locus_29880_Transcript_1/1_Conf_1.000 | 142 | 0  |          |                |     |         |     |     |                                |
| Locus_29881_Transcript_1/1_Conf_1.000 | 136 | 0  |          |                |     |         |     |     |                                |
| Locus_29882_Transcript_1/1_Conf_1.000 | 245 | 20 | 2.05E-23 | XP_002736853.1 | 81  | 112.079 | 80  | 65  | PREDICTED: sirtuin 6-like      |
| Locus_29883_Transcript_1/1_Conf_1.000 | 162 | 0  |          |                |     |         |     |     |                                |
| Locus_29884_Transcript_1/1_Conf_1.000 | 130 | 20 | 8.91E-19 | XP_002819972.1 | 100 | 96.6709 | 43  | 43  | PREDICTED: cathepsin L1-like   |
| Locus_29885_Transcript_1/1_Conf_1.000 | 133 | 0  |          |                |     |         |     |     |                                |
| Locus_29886_Transcript_1/1_Conf_1.000 | 179 | 0  |          |                |     |         |     |     |                                |
| Locus_29887_Transcript_1/1_Conf_1.000 | 158 | 3  | 1.71E-09 | NP_507813.1    | 76  | 65.855  | 50  | 38  | hypothetical protein Y43F8C.13 |
| Locus_29888_Transcript_1/1_Conf_1.000 | 146 | 2  | 1.85E-11 | EAW97496.1     | 100 | 72.4034 | 48  | 48  | hCG2015138, isoform CRA_c      |
| Locus_29889_Transcript_1/1_Conf_1.000 | 150 | 0  |          |                |     |         |     |     |                                |
| Locus_2989_Transcript_1/2_Conf_1.000  | 216 | 0  |          |                |     |         |     |     |                                |
| Locus_2989_Transcript_2/2_Conf_1.000  | 915 | 20 | 8.31E-39 | XP_002644874.1 | 55  | 165.236 | 229 | 128 | C. briggsae CBR-LMP-1 protein  |
| Locus_29890_Transcript_1/1_Conf_1.000 | 157 | 0  |          |                |     |         |     |     |                                |
| Locus_29891_Transcript_1/1_Conf_1.000 | 139 | 20 | 1.32E-14 | XP_002631109.1 | 95  | 82.8037 | 45  | 43  | Hypothetical protein CBG02884  |
| Locus_29892_Transcript_1/1_Conf_1.000 | 143 | 0  |          |                |     |         |     |     |                                |

|                                       |      |    |          |                |     |         |     |     |                                                                                 |
|---------------------------------------|------|----|----------|----------------|-----|---------|-----|-----|---------------------------------------------------------------------------------|
| Locus_29893_Transcript_1/1_Conf_1.000 | 153  | 20 | 7.41E-21 | XP_002914092.1 | 100 | 103.605 | 51  | 51  | PREDICTED: spectrin beta chain, brain 1-like isoform 1                          |
| Locus_29894_Transcript_1/1_Conf_1.000 | 155  | 0  |          |                |     |         |     |     |                                                                                 |
| Locus_29895_Transcript_1/1_Conf_1.000 | 171  | 20 | 8.94E-11 | XP_002639888.1 | 72  | 70.0922 | 55  | 40  | C. briggsae CBR-DOD-18 protein                                                  |
| Locus_29896_Transcript_1/1_Conf_1.000 | 140  | 0  |          |                |     |         |     |     |                                                                                 |
| Locus_29897_Transcript_1/1_Conf_1.000 | 158  | 0  |          |                |     |         |     |     |                                                                                 |
| Locus_29898_Transcript_1/1_Conf_1.000 | 148  | 0  |          |                |     |         |     |     |                                                                                 |
| Locus_29899_Transcript_1/1_Conf_1.000 | 135  | 0  |          |                |     |         |     |     |                                                                                 |
| Locus_299_Transcript_1/1_Conf_1.000   | 2178 | 20 | 0        | XP_002642384.1 | 83  | 753.051 | 535 | 449 | Hypothetical protein CBG18388                                                   |
| Locus_2990_Transcript_1/2_Conf_1.000  | 3222 | 20 | 0        | AAA82421.2     | 67  | 892.493 | 984 | 669 | Far (factor arrest) like protein 11, partially confirmed by transcript evidence |
| Locus_2990_Transcript_2/2_Conf_1.000  | 3210 | 20 | 0        | AAA82421.2     | 67  | 892.493 | 982 | 667 | Far (factor arrest) like protein 11, partially confirmed by transcript evidence |
| Locus_29900_Transcript_1/1_Conf_1.000 | 128  | 0  |          |                |     |         |     |     |                                                                                 |
| Locus_29901_Transcript_1/1_Conf_1.000 | 165  | 20 | 2.53E-13 | EFP11117.1     | 86  | 78.5666 | 51  | 44  | CRE-ACY-2 protein                                                               |
| Locus_29902_Transcript_1/1_Conf_1.000 | 145  | 20 | 5.19E-14 | XP_002643080.1 | 89  | 80.8777 | 46  | 41  | C. briggsae CBR-GLY-5 protein                                                   |
| Locus_29903_Transcript_1/1_Conf_1.000 | 171  | 0  |          |                |     |         |     |     |                                                                                 |
| Locus_29904_Transcript_1/1_Conf_1.000 | 163  | 20 | 2.14E-12 | XP_002599844.1 | 72  | 75.485  | 54  | 39  | hypothetical protein BRAFLDRAFT_95534                                           |
| Locus_29905_Transcript_1/1_Conf_1.000 | 156  | 0  |          |                |     |         |     |     |                                                                                 |
| Locus_29906_Transcript_1/1_Conf_1.000 | 154  | 20 | 5.16E-14 | EFP03107.1     | 90  | 80.8777 | 51  | 46  | hypothetical protein CRE_28219                                                  |
| Locus_29907_Transcript_1/1_Conf_1.000 | 172  | 0  |          |                |     |         |     |     |                                                                                 |
| Locus_29908_Transcript_1/1_Conf_1.000 | 228  | 20 | 7.91E-15 | XP_001623132.1 | 61  | 83.5741 | 71  | 44  | predicted protein                                                               |

|                                       |     |    |          |                |     |         |     |    |                                                                                          |
|---------------------------------------|-----|----|----------|----------------|-----|---------|-----|----|------------------------------------------------------------------------------------------|
| Locus_29909_Transcript_1/1_Conf_1.000 | 194 | 1  | 9.73E-05 | XP_002634485.1 | 54  | 50.0618 | 64  | 35 | C. briggsae CBR-UGT-45 protein                                                           |
| Locus_2991_Transcript_1/1_Conf_1.000  | 357 | 3  | 1.68E-17 | NP_502746.1    | 62  | 92.4337 | 129 | 81 | hypothetical protein Y67A10A.9                                                           |
| Locus_29910_Transcript_1/1_Conf_1.000 | 143 | 0  |          |                |     |         |     |    |                                                                                          |
| Locus_29911_Transcript_1/1_Conf_1.000 | 201 | 0  |          |                |     |         |     |    |                                                                                          |
| Locus_29912_Transcript_1/1_Conf_1.000 | 148 | 4  | 2.11E-07 | XP_002638873.1 | 74  | 58.9214 | 47  | 35 | Hypothetical protein CBG22091                                                            |
| Locus_29913_Transcript_1/1_Conf_1.000 | 137 | 0  |          |                |     |         |     |    |                                                                                          |
| Locus_29914_Transcript_1/1_Conf_1.000 | 172 | 0  |          |                |     |         |     |    |                                                                                          |
| Locus_29915_Transcript_1/1_Conf_1.000 | 135 | 20 | 1.20E-07 | NP_496282.2    | 85  | 59.6918 | 42  | 36 | hypothetical protein C14A4.3                                                             |
| Locus_29916_Transcript_1/1_Conf_1.000 | 203 | 0  |          |                |     |         |     |    |                                                                                          |
| Locus_29917_Transcript_1/1_Conf_1.000 | 132 | 20 | 7.55E-18 | XP_001503266.1 | 100 | 93.5893 | 43  | 43 | PREDICTED: similar to N-ethylmaleimide sensitive fusion protein attachment protein alpha |
| Locus_29918_Transcript_1/1_Conf_1.000 | 146 | 20 | 3.37E-21 | EFO82930.1     | 100 | 104.76  | 48  | 48 | CRE-MEC-7 protein                                                                        |
| Locus_29919_Transcript_1/1_Conf_1.000 | 139 | 8  | 7.76E-15 | XP_002641231.1 | 93  | 83.5741 | 45  | 42 | Hypothetical protein CBG09097                                                            |
| Locus_2992_Transcript_1/1_Conf_1.000  | 684 | 4  | 6.28E-23 | NP_496534.1    | 59  | 111.694 | 157 | 93 | Nuclear Pore complex Protein family member (npp-3)                                       |
| Locus_29920_Transcript_1/1_Conf_1.000 | 163 | 0  |          |                |     |         |     |    |                                                                                          |
| Locus_29921_Transcript_1/1_Conf_1.000 | 129 | 0  |          |                |     |         |     |    |                                                                                          |
| Locus_29922_Transcript_1/1_Conf_1.000 | 148 | 0  |          |                |     |         |     |    |                                                                                          |
| Locus_29923_Transcript_1/1_Conf_1.000 | 129 | 0  |          |                |     |         |     |    |                                                                                          |
| Locus_29924_Transcript_1/1_Conf_1.000 | 143 | 13 | 1.01E-06 | AAK94763.1     | 74  | 56.6102 | 47  | 35 | GLY-19                                                                                   |
| Locus_29925_Transcript_1/1_Conf_1.000 | 224 | 5  | 5.34E-19 | XP_002629656.1 | 75  | 97.4413 | 74  | 56 | Hypothetical protein CBG00863                                                            |
| Locus_29926_Transcript_1/1_Conf_1.000 | 190 | 20 | 6.96E-11 | EFO21603.1     | 69  | 70.4774 | 59  | 41 | hypothetical protein LOAG_06885                                                          |
| Locus_29927_Transcript_1/1_Conf_1.000 | 142 | 0  |          |                |     |         |     |    |                                                                                          |
| Locus_29928_Transcript_1/1_Conf_1.000 | 190 | 0  |          |                |     |         |     |    |                                                                                          |
| Locus_29929_Transcript_1/1_Conf_1.000 | 129 | 0  |          |                |     |         |     |    |                                                                                          |

|                                       |      |    |          |                |    |         |     |     |                                                             |
|---------------------------------------|------|----|----------|----------------|----|---------|-----|-----|-------------------------------------------------------------|
| Locus_2993_Transcript_1/1_Conf_1.000  | 1985 | 20 | 0        | XP_002638846.1 | 69 | 725.317 | 683 | 477 | C. briggsae CBR-TOL-1 protein                               |
| Locus_29930_Transcript_1/1_Conf_1.000 | 141  | 5  | 2.67E-07 | XP_002641291.1 | 78 | 58.5362 | 47  | 37  | Hypothetical protein CBG05206                               |
| Locus_29931_Transcript_1/1_Conf_1.000 | 147  | 1  | 8.31E-04 | NP_502174.2    | 68 | 46.9802 | 50  | 34  | hypothetical protein M04B2.2                                |
| Locus_29932_Transcript_1/1_Conf_1.000 | 158  | 0  |          |                |    |         |     |     |                                                             |
| Locus_29933_Transcript_1/1_Conf_1.000 | 135  | 0  |          |                |    |         |     |     |                                                             |
| Locus_29934_Transcript_1/1_Conf_1.000 | 129  | 0  |          |                |    |         |     |     |                                                             |
| Locus_29935_Transcript_1/1_Conf_1.000 | 207  | 7  | 5.05E-14 | EFO24692.1     | 75 | 80.8777 | 58  | 44  | protein-tyrosine phosphatase                                |
| Locus_29936_Transcript_1/1_Conf_1.000 | 202  | 20 | 2.29E-14 | XP_002636250.1 | 67 | 82.0333 | 65  | 44  | Hypothetical protein CBG08530                               |
| Locus_29937_Transcript_1/1_Conf_1.000 | 146  | 0  |          |                |    |         |     |     |                                                             |
| Locus_29938_Transcript_1/1_Conf_1.000 | 134  | 20 | 1.13E-13 | NP_001041244.1 | 84 | 79.7221 | 44  | 37  | HunchBack Like (fly gap gene related) family member (hbl-1) |
| Locus_29939_Transcript_1/1_Conf_1.000 | 194  | 20 | 3.94E-14 | XP_394424.2    | 73 | 81.2629 | 64  | 47  | PREDICTED: similar to Tdc2 CG30446-PA                       |

|                                       |      |    |           |                |     |         |     |     |                                                                    |
|---------------------------------------|------|----|-----------|----------------|-----|---------|-----|-----|--------------------------------------------------------------------|
| Locus_2994_Transcript_1/2_Conf_1.000  | 1692 | 20 | 1.51E-118 | XP_002641709.1 | 70  | 431.409 | 437 | 310 | C. briggsae CBR-CED-7 protein                                      |
| Locus_2994_Transcript_2/2_Conf_1.000  | 799  | 20 | 2.57E-35  | XP_002641709.1 | 73  | 153.295 | 132 | 97  | C. briggsae CBR-CED-7 protein                                      |
| Locus_29940_Transcript_1/1_Conf_1.000 | 164  | 20 | 4.91E-25  | XP_002919104.1 | 100 | 117.472 | 54  | 54  | PREDICTED: LOW QUALITY PROTEIN:<br>collagen alpha-2(VI) chain-like |
| Locus_29941_Transcript_1/1_Conf_1.000 | 232  | 3  | 1.53E-18  | CAA51991.1     | 90  | 95.9005 | 77  | 70  | GABA A/glycine receptor subunit                                    |
| Locus_29942_Transcript_1/1_Conf_1.000 | 128  | 0  |           |                |     |         |     |     |                                                                    |
| Locus_29943_Transcript_1/1_Conf_1.000 | 142  | 0  |           |                |     |         |     |     |                                                                    |
| Locus_29944_Transcript_1/1_Conf_1.000 | 140  | 5  | 5.94E-15  | EFP07774.1     | 95  | 83.9593 | 46  | 44  | CRE-RPY-1 protein                                                  |
| Locus_29945_Transcript_1/1_Conf_1.000 | 184  | 0  |           |                |     |         |     |     |                                                                    |
| Locus_29946_Transcript_1/1_Conf_1.000 | 202  | 0  |           |                |     |         |     |     |                                                                    |
| Locus_29947_Transcript_1/1_Conf_1.000 | 205  | 4  | 5.42E-08  | NP_490909.2    | 57  | 60.8474 | 61  | 35  | Temporarily Assigned Gene name family<br>member (tag-96)           |
| Locus_29948_Transcript_1/1_Conf_1.000 | 222  | 0  |           |                |     |         |     |     |                                                                    |
| Locus_29949_Transcript_1/1_Conf_1.000 | 148  | 0  |           |                |     |         |     |     |                                                                    |



|                                       |      |    |           |                |    |         |     |     |                                                                     |
|---------------------------------------|------|----|-----------|----------------|----|---------|-----|-----|---------------------------------------------------------------------|
| Locus_2995_Transcript_1/1_Conf_1.000  | 1667 | 20 | 3.49E-152 | NP_507852.2    | 80 | 543.117 | 414 | 335 | phenylalanyl (F) tRNA Synthetase family member (frs-3)              |
| Locus_29950_Transcript_1/1_Conf_1.000 | 172  | 4  | 3.99E-19  | NP_001122833.1 | 94 | 97.8265 | 56  | 53  | hypothetical protein ZC518.1                                        |
| Locus_29951_Transcript_1/1_Conf_1.000 | 140  | 4  | 1.98E-10  | EFP07740.1     | 89 | 68.9366 | 38  | 34  | CRE-SRO-1 protein                                                   |
| Locus_29952_Transcript_1/1_Conf_1.000 | 134  | 0  |           |                |    |         |     |     |                                                                     |
| Locus_29953_Transcript_1/1_Conf_1.000 | 151  | 3  | 1.19E-18  | EFO83250.1     | 90 | 96.2857 | 50  | 45  | hypothetical protein CRE_13579                                      |
| Locus_29954_Transcript_1/1_Conf_1.000 | 175  | 0  |           |                |    |         |     |     |                                                                     |
| Locus_29955_Transcript_1/1_Conf_1.000 | 137  | 0  |           |                |    |         |     |     |                                                                     |
| Locus_29956_Transcript_1/1_Conf_1.000 | 138  | 20 | 2.19E-09  | 2WS2           | 78 | 65.4698 | 46  | 36  | The 2 AngstromStructure Of A Nu-Class Gst From Haemonchus Contortus |
| Locus_29957_Transcript_1/1_Conf_1.000 | 187  | 0  |           |                |    |         |     |     |                                                                     |
| Locus_29958_Transcript_1/1_Conf_1.000 | 150  | 0  |           |                |    |         |     |     |                                                                     |
| Locus_29959_Transcript_1/1_Conf_1.000 | 135  | 0  |           |                |    |         |     |     |                                                                     |
| Locus_2996_Transcript_1/1_Conf_1.000  | 2077 | 20 | 0         | XP_002639034.1 | 79 | 894.419 | 685 | 545 | C. briggsae CBR-SPE-15 protein                                      |
| Locus_29960_Transcript_1/1_Conf_1.000 | 128  | 0  |           |                |    |         |     |     |                                                                     |
| Locus_29961_Transcript_1/1_Conf_1.000 | 128  | 0  |           |                |    |         |     |     |                                                                     |
| Locus_29962_Transcript_1/1_Conf_1.000 | 177  | 20 | 1.51E-10  | EFO83746.1     | 80 | 69.3218 | 47  | 38  | hypothetical protein CRE_14220                                      |
| Locus_29963_Transcript_1/1_Conf_1.000 | 131  | 3  | 5.07E-06  | NP_001076772.1 | 74 | 54.299  | 43  | 32  | GEX Interacting protein family member (gei-3)                       |
| Locus_29964_Transcript_1/1_Conf_1.000 | 275  | 0  |           |                |    |         |     |     |                                                                     |
| Locus_29965_Transcript_1/1_Conf_1.000 | 202  | 0  |           |                |    |         |     |     |                                                                     |
| Locus_29966_Transcript_1/1_Conf_1.000 | 129  | 5  | 1.53E-10  | EFP00973.1     | 85 | 69.3218 | 42  | 36  | CRE-UNC-122 protein                                                 |
| Locus_29967_Transcript_1/1_Conf_1.000 | 129  | 0  |           |                |    |         |     |     |                                                                     |
| Locus_29968_Transcript_1/1_Conf_1.000 | 129  | 3  | 2.98E-06  | EFP05300.1     | 71 | 55.0694 | 42  | 30  | CRE-DHS-20 protein                                                  |
| Locus_29969_Transcript_1/1_Conf_1.000 | 140  | 0  |           |                |    |         |     |     |                                                                     |
| Locus_2997_Transcript_1/1_Conf_1.000  | 1671 | 14 | 3.84E-66  | NP_497136.2    | 51 | 257.299 | 580 | 297 | hypothetical protein F54C4.3                                        |
| Locus_29970_Transcript_1/1_Conf_1.000 | 140  | 0  |           |                |    |         |     |     |                                                                     |
| Locus_29971_Transcript_1/1_Conf_1.000 | 128  | 0  |           |                |    |         |     |     |                                                                     |
| Locus_29972_Transcript_1/1_Conf_1.000 | 154  | 20 | 2.93E-09  | EFO88893.1     | 85 | 65.0846 | 42  | 36  | CRE-WHT-4 protein                                                   |
| Locus_29973_Transcript_1/1_Conf_1.000 | 129  | 0  |           |                |    |         |     |     |                                                                     |
| Locus_29974_Transcript_1/1_Conf_1.000 | 139  | 0  |           |                |    |         |     |     |                                                                     |

|                                       |     |    |          |                |    |         |     |     |                                                                          |
|---------------------------------------|-----|----|----------|----------------|----|---------|-----|-----|--------------------------------------------------------------------------|
| Locus_29975_Transcript_1/1_Conf_1.000 | 166 | 20 | 1.21E-15 | CAA91463.2     | 85 | 86.2705 | 54  | 46  | C. elegans protein F42E11.1a, partially confirmed by transcript evidence |
| Locus_29976_Transcript_1/1_Conf_1.000 | 130 | 0  |          |                |    |         |     |     |                                                                          |
| Locus_29977_Transcript_1/1_Conf_1.000 | 142 | 14 | 7.01E-08 | EFP03255.1     | 73 | 60.4622 | 41  | 30  | hypothetical protein CRE_28627                                           |
| Locus_29978_Transcript_1/1_Conf_1.000 | 136 | 0  |          |                |    |         |     |     |                                                                          |
| Locus_29979_Transcript_1/1_Conf_1.000 | 175 | 0  |          |                |    |         |     |     |                                                                          |
| Locus_2998_Transcript_1/1_Conf_1.000  | 405 | 20 | 5.22E-27 | XP_001894245.1 | 77 | 124.02  | 113 | 88  | hypothetical protein Bm1_13905                                           |
| Locus_29980_Transcript_1/1_Conf_1.000 | 134 | 0  |          |                |    |         |     |     |                                                                          |
| Locus_29981_Transcript_1/1_Conf_1.000 | 130 | 5  | 1.25E-04 | NP_491872.1    | 67 | 49.6766 | 40  | 27  | hypothetical protein C55B7.3                                             |
| Locus_29982_Transcript_1/1_Conf_1.000 | 187 | 0  |          |                |    |         |     |     |                                                                          |
| Locus_29983_Transcript_1/1_Conf_1.000 | 174 | 4  | 1.62E-12 | NP_490836.1    | 78 | 75.8702 | 57  | 45  | hypothetical protein Y48G8AL.13                                          |
| Locus_29984_Transcript_1/1_Conf_1.000 | 142 | 5  | 1.61E-12 | EFO91467.1     | 86 | 75.8702 | 46  | 40  | hypothetical protein CRE_11941                                           |
| Locus_29985_Transcript_1/1_Conf_1.000 | 152 | 0  |          |                |    |         |     |     |                                                                          |
| Locus_29986_Transcript_1/1_Conf_1.000 | 165 | 0  |          |                |    |         |     |     |                                                                          |
| Locus_29987_Transcript_1/1_Conf_1.000 | 143 | 0  |          |                |    |         |     |     |                                                                          |
| Locus_29988_Transcript_1/1_Conf_1.000 | 322 | 0  |          |                |    |         |     |     |                                                                          |
| Locus_29989_Transcript_1/1_Conf_1.000 | 131 | 0  |          |                |    |         |     |     |                                                                          |
| Locus_2999_Transcript_1/1_Conf_1.000  | 253 | 0  |          |                |    |         |     |     |                                                                          |
| Locus_29990_Transcript_1/1_Conf_1.000 | 170 | 0  |          |                |    |         |     |     |                                                                          |
| Locus_29991_Transcript_1/1_Conf_1.000 | 144 | 0  |          |                |    |         |     |     |                                                                          |
| Locus_3_Transcript_1/3_Conf_0.625     | 223 | 18 | 7.45E-13 | Q94637.1       | 77 | 77.0258 | 58  | 45  | Vitellogenin-6                                                           |
| Locus_3_Transcript_3/3_Conf_0.875     | 468 | 20 | 5.99E-31 | Q94637.1       | 70 | 137.117 | 141 | 100 | Vitellogenin-6                                                           |

|                                      |      |    |          |                |    |         |     |     |                                                   |
|--------------------------------------|------|----|----------|----------------|----|---------|-----|-----|---------------------------------------------------|
| Locus_30_Transcript_1/1_Conf_1.000   | 540  | 20 | 1.13E-58 | NP_001040940.1 | 72 | 229.565 | 178 | 129 | PhosphatidylSerine Receptor family member (psr-1) |
| Locus_300_Transcript_1/3_Conf_0.800  | 2284 | 20 | 0        | XP_002631077.1 | 90 | 1134.78 | 714 | 645 | Hypothetical protein CBG02850                     |
| Locus_300_Transcript_2/3_Conf_0.800  | 2317 | 20 | 0        | XP_002631077.1 | 90 | 1149.81 | 717 | 652 | Hypothetical protein CBG02850                     |
| Locus_300_Transcript_3/3_Conf_0.800  | 2317 | 20 | 0        | XP_002631077.1 | 90 | 1149.81 | 717 | 652 | Hypothetical protein CBG02850                     |
| Locus_3000_Transcript_1/1_Conf_1.000 | 702  | 20 | 2.42E-65 | NP_500188.1    | 98 | 252.677 | 161 | 158 | Vacuolar H ATPase family member (vha-3)           |
| Locus_3001_Transcript_1/1_Conf_1.000 | 842  | 20 | 8.15E-51 | XP_002630448.1 | 67 | 204.912 | 214 | 144 | Hypothetical protein CBG11181                     |
| Locus_3002_Transcript_1/1_Conf_1.000 | 499  | 0  |          |                |    |         |     |     |                                                   |
| Locus_3003_Transcript_1/1_Conf_1.000 | 638  | 20 | 3.52E-59 | EFO18502.1     | 80 | 231.876 | 167 | 135 | hypothetical protein LOAG_09992                   |

|                                      |      |    |           |                |     |         |     |     |                                                                                      |
|--------------------------------------|------|----|-----------|----------------|-----|---------|-----|-----|--------------------------------------------------------------------------------------|
| Locus_3004_Transcript_1/1_Conf_1.000 | 727  | 20 | 2.16E-104 | NP_001012649.1 | 100 | 382.489 | 184 | 184 | interleukin-32 isoform B                                                             |
| Locus_3005_Transcript_1/1_Conf_1.000 | 378  | 0  |           |                |     |         |     |     |                                                                                      |
| Locus_3006_Transcript_1/1_Conf_1.000 | 130  | 0  |           |                |     |         |     |     |                                                                                      |
| Locus_3007_Transcript_1/3_Conf_0.500 | 568  | 3  | 7.42E-46  | AAT64963.1     | 86  | 187.193 | 126 | 109 | putative protein L3i10 isoform a                                                     |
| Locus_3007_Transcript_2/3_Conf_0.500 | 1201 | 4  | 7.52E-108 | AAT64964.1     | 81  | 395.201 | 332 | 270 | putative protein L3i10 isoform b                                                     |
| Locus_3007_Transcript_3/3_Conf_0.500 | 616  | 3  | 5.60E-51  | AAT64963.1     | 86  | 204.527 | 142 | 123 | putative protein L3i10 isoform a                                                     |
| Locus_3008_Transcript_1/1_Conf_1.000 | 1146 | 20 | 0         | AAC48152.3     | 87  | 650.973 | 364 | 318 | Laminin related. see also lmb- protein 2, partially confirmed by transcript evidence |
| Locus_3009_Transcript_1/2_Conf_1.000 | 761  | 20 | 1.82E-64  | NP_508683.1    | 84  | 249.98  | 166 | 141 | hypothetical protein T19D2.2                                                         |
| Locus_3009_Transcript_2/2_Conf_1.000 | 764  | 20 | 1.83E-64  | NP_508683.1    | 84  | 249.98  | 166 | 141 | hypothetical protein T19D2.2                                                         |
| Locus_301_Transcript_1/1_Conf_1.000  | 667  | 20 | 2.41E-109 | ABC40752.1     | 99  | 398.667 | 222 | 221 | myosin heavy chain                                                                   |
| Locus_3010_Transcript_1/1_Conf_1.000 | 696  | 13 | 4.36E-43  | NP_498762.2    | 73  | 178.718 | 200 | 146 | Anaphase Promoting Complex; see also mat family member (apc-2)                       |
| Locus_3011_Transcript_1/1_Conf_1.000 | 488  | 20 | 3.06E-59  | XP_002641482.1 | 88  | 231.106 | 154 | 136 | Hypothetical protein CBG09773                                                        |
| Locus_3012_Transcript_1/2_Conf_1.000 | 512  | 19 | 1.40E-38  | XP_003064993.1 | 95  | 162.54  | 82  | 78  | predicted protein                                                                    |
| Locus_3012_Transcript_2/2_Conf_1.000 | 330  | 12 | 2.34E-18  | XP_002489102.1 | 88  | 92.8189 | 50  | 44  | hypothetical protein SORBIDRAFT_0070s002020                                          |
| Locus_3013_Transcript_1/2_Conf_1.000 | 1216 | 3  | 1.44E-05  | NP_494766.1    | 38  | 55.4546 | 207 | 79  | hypothetical protein H20J04.3                                                        |
| Locus_3013_Transcript_2/2_Conf_1.000 | 273  | 0  |           |                |     |         |     |     |                                                                                      |

|                                      |      |    |           |                |    |         |     |     |                                                                         |
|--------------------------------------|------|----|-----------|----------------|----|---------|-----|-----|-------------------------------------------------------------------------|
| Locus_3014_Transcript_1/2_Conf_1.000 | 1182 | 20 | 2.69E-153 | NP_502812.1    | 85 | 534.258 | 346 | 296 | glutamyl(E)/glutaminy(Q) tRNA Synthetase family member (ers-1)          |
| Locus_3014_Transcript_2/2_Conf_1.000 | 1192 | 20 | 3.40E-161 | CBK19498.1     | 87 | 572.392 | 358 | 312 | C. elegans protein Y41E3.4c, partially confirmed by transcript evidence |
| Locus_3015_Transcript_1/1_Conf_1.000 | 563  | 14 | 6.26E-50  | NP_501856.2    | 87 | 200.675 | 116 | 102 | TransThyretin-Related family domain family member (ttr-53)              |
| Locus_3016_Transcript_1/1_Conf_1.000 | 2311 | 20 | 1.32E-163 | NP_001022054.1 | 82 | 581.637 | 446 | 366 | hypothetical protein D2085.5                                            |
| Locus_3017_Transcript_1/1_Conf_1.000 | 456  | 0  |           |                |    |         |     |     |                                                                         |
| Locus_3018_Transcript_1/1_Conf_1.000 | 867  | 4  | 6.68E-27  | XP_002642045.1 | 44 | 125.561 | 319 | 143 | C. briggsae CBR-TAG-325 protein                                         |
| Locus_3019_Transcript_1/1_Conf_1.000 | 583  | 20 | 5.03E-56  | NP_001023346.1 | 86 | 221.09  | 145 | 126 | hypothetical protein T01B11.2                                           |
| Locus_302_Transcript_1/1_Conf_1.000  | 153  | 0  |           |                |    |         |     |     |                                                                         |
| Locus_3020_Transcript_1/1_Conf_1.000 | 810  | 20 | 1.41E-89  | NP_510818.3    | 73 | 333.569 | 275 | 201 | hypothetical protein F10D7.5                                            |
| Locus_3021_Transcript_1/1_Conf_1.000 | 1596 | 20 | 1.38E-49  | NP_491846.2    | 54 | 202.216 | 388 | 213 | Suspended ANimation (anoxia-induced) defective family member (san-1)    |
| Locus_3022_Transcript_1/1_Conf_1.000 | 330  | 0  |           |                |    |         |     |     |                                                                         |
| Locus_3023_Transcript_1/2_Conf_1.000 | 639  | 20 | 4.51E-62  | XP_002631295.1 | 76 | 241.506 | 194 | 149 | Hypothetical protein CBG03108                                           |
| Locus_3023_Transcript_2/2_Conf_1.000 | 1736 | 20 | 0         | XP_002631295.1 | 72 | 664.07  | 571 | 415 | Hypothetical protein CBG03108                                           |
| Locus_3024_Transcript_1/1_Conf_1.000 | 1502 | 20 | 5.91E-55  | XP_001894000.1 | 54 | 219.935 | 377 | 205 | Zinc finger in N-recogin family protein                                 |
| Locus_3025_Transcript_1/1_Conf_1.000 | 1758 | 20 | 1.47E-140 | NP_497989.1    | 72 | 504.597 | 486 | 354 | Temporarily Assigned Gene name family member (tag-325)                  |

|                                      |      |    |           |                |    |         |     |     |                                                      |
|--------------------------------------|------|----|-----------|----------------|----|---------|-----|-----|------------------------------------------------------|
| Locus_3026_Transcript_1/1_Conf_1.000 | 572  | 20 | 3.39E-38  | NP_079868.1    | 80 | 161.77  | 119 | 96  | 60S ribosomal protein L35                            |
| Locus_3027_Transcript_1/2_Conf_1.000 | 2232 | 20 | 2.39E-45  | XP_002642470.1 | 47 | 188.734 | 567 | 270 | Hypothetical protein CBG06886                        |
| Locus_3027_Transcript_2/2_Conf_1.000 | 2223 | 20 | 8.45E-43  | XP_002642470.1 | 47 | 180.259 | 567 | 268 | Hypothetical protein CBG06886                        |
| Locus_3028_Transcript_1/2_Conf_1.000 | 984  | 0  |           |                |    |         |     |     |                                                      |
| Locus_3028_Transcript_2/2_Conf_1.000 | 548  | 0  |           |                |    |         |     |     |                                                      |
| Locus_3029_Transcript_1/4_Conf_0.625 | 2076 | 20 | 1.03E-111 | ABX10191.1     | 59 | 409.068 | 559 | 332 | amine oxidase (flavin containing) domain 2 isoform b |
| Locus_3029_Transcript_2/4_Conf_0.500 | 2017 | 20 | 9.96E-112 | ABX10191.1     | 59 | 409.068 | 559 | 332 | amine oxidase (flavin containing) domain 2 isoform b |

|                                      |      |    |           |             |     |         |     |     |                                                                          |
|--------------------------------------|------|----|-----------|-------------|-----|---------|-----|-----|--------------------------------------------------------------------------|
| Locus_3029_Transcript_3/4_Conf_0.625 | 2076 | 20 | 1.03E-111 | ABX10191.1  | 59  | 409.068 | 559 | 332 | amine oxidase (flavin containing) domain 2 isoform b                     |
| Locus_3029_Transcript_4/4_Conf_0.625 | 2076 | 20 | 1.03E-111 | ABX10191.1  | 59  | 409.068 | 559 | 332 | amine oxidase (flavin containing) domain 2 isoform b                     |
| Locus_303_Transcript_1/1_Conf_1.000  | 407  | 6  | 5.80E-10  | NP_694542.1 | 100 | 67.3958 | 85  | 85  | follicular dendritic cell secreted peptide precursor                     |
| Locus_3030_Transcript_1/1_Conf_1.000 | 162  | 0  |           |             |     |         |     |     |                                                                          |
| Locus_3031_Transcript_1/3_Conf_0.500 | 1482 | 20 | 0         | NP_499386.1 | 94  | 806.594 | 467 | 440 | SERCA (Sarco-Endoplasmic Reticulum Calcium ATPase) family member (sca-1) |

|                                      |      |    |           |                |     |         |      |     |                                                                          |
|--------------------------------------|------|----|-----------|----------------|-----|---------|------|-----|--------------------------------------------------------------------------|
| Locus_3031_Transcript_2/3_Conf_0.667 | 3251 | 20 | 0         | NP_499385.3    | 95  | 1757.27 | 998  | 954 | SERCA (Sarco-Endoplasmic Reticulum Calcium ATPase) family member (sca-1) |
| Locus_3031_Transcript_3/3_Conf_0.667 | 3664 | 20 | 0         | NP_499386.1    | 93  | 1785.77 | 1040 | 976 | SERCA (Sarco-Endoplasmic Reticulum Calcium ATPase) family member (sca-1) |
| Locus_3032_Transcript_1/1_Conf_1.000 | 1384 | 20 | 7.36E-81  | NP_493466.2    | 68  | 305.834 | 295  | 202 | hypothetical protein Y63D3A.8                                            |
| Locus_3033_Transcript_1/1_Conf_1.000 | 1420 | 0  |           |                |     |         |      |     |                                                                          |
| Locus_3034_Transcript_1/1_Conf_1.000 | 322  | 0  |           |                |     |         |      |     |                                                                          |
| Locus_3035_Transcript_1/1_Conf_1.000 | 1308 | 20 | 8.67E-153 | XP_002642393.1 | 80  | 544.658 | 379  | 304 | Hypothetical protein CBG18398                                            |
| Locus_3036_Transcript_1/1_Conf_1.000 | 238  | 20 | 1.01E-38  | ADI60307.1     | 100 | 162.925 | 79   | 79  | tubulin alpha 1                                                          |
| Locus_3037_Transcript_1/1_Conf_1.000 | 1405 | 7  | 1.45E-84  | NP_001076750.1 | 65  | 318.161 | 436  | 286 | UNCoordinated family member (unc-83)                                     |
| Locus_3038_Transcript_1/1_Conf_1.000 | 246  | 9  | 7.96E-36  | NP_741003.1    | 95  | 153.295 | 81   | 77  | hypothetical protein C18A3.4                                             |
| Locus_3039_Transcript_1/1_Conf_1.000 | 405  | 20 | 8.56E-46  | NP_001022488.1 | 79  | 186.422 | 123  | 98  | UNCoordinated family member (unc-52)                                     |
| Locus_304_Transcript_1/1_Conf_1.000  | 806  | 20 | 3.07E-52  | NP_499283.1    | 82  | 209.534 | 150  | 123 | abnormal MEthyl Viologen sensitivity family member (mev-1)               |



|                                      |      |    |           |                |    |         |      |     |                                                                           |
|--------------------------------------|------|----|-----------|----------------|----|---------|------|-----|---------------------------------------------------------------------------|
| Locus_3040_Transcript_1/1_Conf_1.000 | 945  | 20 | 8.53E-34  | EFO18489.1     | 56 | 148.673 | 200  | 112 | hypothetical protein LOAG_10003                                           |
| Locus_3041_Transcript_1/1_Conf_1.000 | 509  | 2  | 1.74E-04  | XP_001955271.1 | 44 | 49.2914 | 162  | 72  | GF16318                                                                   |
| Locus_3042_Transcript_1/7_Conf_0.111 | 792  | 20 | 1.04E-97  | NP_001122748.1 | 80 | 360.533 | 272  | 220 | UNCoordinated family member (unc-16)                                      |
| Locus_3042_Transcript_2/7_Conf_0.222 | 1518 | 20 | 1.94E-146 | CAX51690.1     | 75 | 523.857 | 483  | 364 | C. elegans protein ZK1098.10e, partially confirmed by transcript evidence |
| Locus_3042_Transcript_3/7_Conf_0.556 | 3577 | 20 | 0         | CAX51690.1     | 80 | 1428.69 | 1130 | 904 | C. elegans protein ZK1098.10e, partially confirmed by transcript evidence |
| Locus_3042_Transcript_4/7_Conf_0.667 | 3577 | 20 | 0         | XP_002641717.1 | 80 | 1411.74 | 1123 | 900 | C. briggsae CBR-UNC-16 protein                                            |
| Locus_3042_Transcript_5/7_Conf_0.556 | 3535 | 20 | 0         | XP_002641717.1 | 80 | 1411.74 | 1123 | 900 | C. briggsae CBR-UNC-16 protein                                            |
| Locus_3042_Transcript_6/7_Conf_0.611 | 3577 | 20 | 0         | XP_002641717.1 | 80 | 1411.74 | 1123 | 900 | C. briggsae CBR-UNC-16 protein                                            |
| Locus_3042_Transcript_7/7_Conf_0.556 | 3535 | 20 | 0         | XP_002641717.1 | 80 | 1411.74 | 1123 | 900 | C. briggsae CBR-UNC-16 protein                                            |
| Locus_3043_Transcript_1/1_Conf_1.000 | 629  | 4  | 2.15E-21  | XP_002641618.1 | 63 | 106.301 | 114  | 72  | Hypothetical protein CBG09938                                             |

|                                      |      |    |           |                |    |         |      |     |                                                      |
|--------------------------------------|------|----|-----------|----------------|----|---------|------|-----|------------------------------------------------------|
| Locus_3044_Transcript_1/1_Conf_1.000 | 1051 | 20 | 2.81E-161 | ADI24636.1     | 89 | 572.392 | 336  | 300 | Hypothetical protein C34F11.3c                       |
| Locus_3045_Transcript_1/1_Conf_1.000 | 1314 | 20 | 4.44E-72  | XP_001311491.1 | 47 | 276.559 | 444  | 211 | hypothetical protein                                 |
| Locus_3046_Transcript_1/2_Conf_1.000 | 3648 | 20 | 0         | NP_001129776.1 | 85 | 1671.75 | 1132 | 970 | Anion/Bicarbonate TranSporter family member (abts-1) |
| Locus_3046_Transcript_2/2_Conf_1.000 | 3689 | 20 | 0         | XP_002639486.1 | 86 | 1671.75 | 1114 | 961 | C. briggsae CBR-ABTS-1 protein                       |
| Locus_3047_Transcript_1/1_Conf_1.000 | 1321 | 20 | 5.53E-139 | EFO23503.1     | 78 | 498.819 | 438  | 346 | hypothetical protein LOAG_04985                      |
| Locus_3048_Transcript_1/1_Conf_1.000 | 498  | 20 | 2.02E-47  | ACI49119.1     | 83 | 191.815 | 122  | 102 | hypothetical protein Cbre_JD14.007                   |
| Locus_3049_Transcript_1/1_Conf_1.000 | 475  | 20 | 2.02E-71  | XP_001506584.1 | 97 | 271.552 | 137  | 134 | PREDICTED: similar to 40S ribosomal protein S12      |
| Locus_305_Transcript_1/3_Conf_0.750  | 2022 | 20 | 5.12E-116 | XP_001900703.1 | 67 | 423.32  | 453  | 305 | ES2 protein                                          |
| Locus_305_Transcript_2/3_Conf_0.750  | 2022 | 20 | 5.12E-116 | XP_001900703.1 | 67 | 423.32  | 453  | 305 | ES2 protein                                          |
| Locus_305_Transcript_3/3_Conf_0.750  | 2022 | 20 | 5.12E-116 | XP_001900703.1 | 67 | 423.32  | 453  | 305 | ES2 protein                                          |

|                                      |      |    |           |                |    |         |     |     |                                        |
|--------------------------------------|------|----|-----------|----------------|----|---------|-----|-----|----------------------------------------|
| Locus_3050_Transcript_1/2_Conf_1.000 | 615  | 20 | 2.00E-32  | XP_001902557.1 | 91 | 142.895 | 82  | 75  | Sr protein                             |
| Locus_3050_Transcript_2/2_Conf_1.000 | 374  | 0  |           |                |    |         |     |     |                                        |
| Locus_3051_Transcript_1/1_Conf_1.000 | 1238 | 2  | 1.34E-06  | XP_002633339.1 | 43 | 58.9214 | 210 | 92  | Hypothetical protein CBG06078          |
| Locus_3052_Transcript_1/1_Conf_1.000 | 1314 | 20 | 3.58E-122 | EFO26697.1     | 85 | 442.965 | 328 | 280 | Asna1 protein                          |
| Locus_3053_Transcript_1/1_Conf_1.000 | 1434 | 20 | 4.37E-68  | NP_492567.3    | 83 | 263.462 | 180 | 150 | ASF-Like family member (asfl-1)        |
| Locus_3054_Transcript_1/1_Conf_1.000 | 862  | 20 | 7.04E-146 | NP_506014.1    | 93 | 520.776 | 283 | 264 | Protein Kinase C family member (pkc-1) |
| Locus_3055_Transcript_1/1_Conf_1.000 | 362  | 20 | 1.78E-27  | XP_002642406.1 | 92 | 125.561 | 75  | 69  | Hypothetical protein CBG06800          |
| Locus_3056_Transcript_1/1_Conf_1.000 | 705  | 9  | 5.09E-23  | XP_002634196.1 | 64 | 112.079 | 164 | 106 | Hypothetical protein CBG01765          |
| Locus_3057_Transcript_1/3_Conf_0.500 | 564  | 20 | 1.02E-31  | NP_490730.2    | 58 | 140.198 | 220 | 128 | hypothetical protein Y50C1A.1          |
| Locus_3057_Transcript_2/3_Conf_0.333 | 1089 | 20 | 1.40E-118 | NP_490730.2    | 80 | 430.639 | 320 | 257 | hypothetical protein Y50C1A.1          |
| Locus_3057_Transcript_3/3_Conf_0.500 | 570  | 20 | 2.97E-34  | NP_490730.2    | 59 | 148.673 | 220 | 130 | hypothetical protein Y50C1A.1          |
| Locus_3058_Transcript_1/2_Conf_1.000 | 465  | 15 | 1.26E-12  | EFO23679.1     | 56 | 76.2554 | 169 | 96  | hypothetical protein LOAG_04806        |

|                                      |      |    |           |                |    |         |     |     |                                  |
|--------------------------------------|------|----|-----------|----------------|----|---------|-----|-----|----------------------------------|
| Locus_3058_Transcript_2/2_Conf_1.000 | 933  | 20 | 1.15E-59  | EFO23679.1     | 64 | 234.572 | 320 | 205 | hypothetical protein LOAG_04806  |
| Locus_3059_Transcript_1/1_Conf_1.000 | 1378 | 20 | 5.27E-172 | XP_002636443.1 | 91 | 608.601 | 355 | 324 | Hypothetical protein CBG23104    |
| Locus_306_Transcript_1/1_Conf_1.000  | 1277 | 20 | 1.26E-100 | NP_503397.1    | 98 | 371.318 | 205 | 201 | RAB family member (rab-1)        |
| Locus_3060_Transcript_1/1_Conf_1.000 | 1225 | 20 | 6.73E-136 | XP_002634443.1 | 88 | 488.419 | 318 | 281 | Hypothetical protein CBG04457    |
| Locus_3061_Transcript_1/1_Conf_1.000 | 680  | 20 | 5.49E-72  | XP_001900728.1 | 80 | 274.633 | 214 | 173 | RhoGAP domain containing protein |
| Locus_3062_Transcript_1/3_Conf_0.667 | 1767 | 20 | 6.71E-101 | NP_491793.1    | 57 | 372.859 | 511 | 296 | hypothetical protein T08B2.5     |

|                                      |      |    |           |                |    |         |     |     |                                |
|--------------------------------------|------|----|-----------|----------------|----|---------|-----|-----|--------------------------------|
| Locus_3062_Transcript_2/3_Conf_0.667 | 1824 | 20 | 1.67E-102 | NP_491793.1    | 56 | 378.252 | 550 | 313 | hypothetical protein T08B2.5   |
| Locus_3062_Transcript_3/3_Conf_0.667 | 1761 | 20 | 5.12E-101 | NP_491793.1    | 56 | 373.244 | 541 | 308 | hypothetical protein T08B2.5   |
| Locus_3063_Transcript_1/4_Conf_0.333 | 268  | 0  |           |                |    |         |     |     |                                |
| Locus_3063_Transcript_2/4_Conf_0.667 | 2019 | 20 | 7.50E-121 | NP_498834.1    | 63 | 424.476 | 498 | 315 | hypothetical protein ZC262.3   |
| Locus_3063_Transcript_3/4_Conf_0.556 | 2022 | 20 | 3.78E-127 | NP_498834.1    | 63 | 460.299 | 562 | 357 | hypothetical protein ZC262.3   |
| Locus_3063_Transcript_4/4_Conf_0.667 | 2026 | 20 | 3.79E-127 | NP_498834.1    | 63 | 460.299 | 562 | 357 | hypothetical protein ZC262.3   |
| Locus_3064_Transcript_1/1_Conf_1.000 | 348  | 0  |           |                |    |         |     |     |                                |
| Locus_3065_Transcript_1/1_Conf_1.000 | 316  | 0  |           |                |    |         |     |     |                                |
| Locus_3066_Transcript_1/1_Conf_1.000 | 837  | 20 | 4.67E-107 | NP_505613.1    | 86 | 391.734 | 277 | 239 | hypothetical protein C51E3.6   |
| Locus_3067_Transcript_1/2_Conf_1.000 | 1354 | 2  | 2.76E-08  | XP_001901141.1 | 54 | 64.6994 | 96  | 52  | hypothetical protein Bm1_48395 |
| Locus_3067_Transcript_2/2_Conf_1.000 | 1311 | 2  | 2.64E-08  | XP_001901141.1 | 54 | 64.6994 | 96  | 52  | hypothetical protein Bm1_48395 |
| Locus_3068_Transcript_1/1_Conf_1.000 | 1076 | 7  | 2.10E-26  | XP_002635262.1 | 50 | 124.405 | 281 | 143 | Hypothetical protein CBG11506  |
| Locus_3069_Transcript_1/1_Conf_1.000 | 764  | 20 | 1.82E-96  | XP_002641488.1 | 86 | 356.295 | 236 | 205 | Hypothetical protein CBG09779  |
| Locus_307_Transcript_1/1_Conf_1.000  | 2193 | 20 | 0         | XP_002642214.1 | 80 | 922.539 | 716 | 576 | C. briggsae CBR-RRT-1 protein  |

|                                      |      |    |           |                |    |         |     |     |                                          |
|--------------------------------------|------|----|-----------|----------------|----|---------|-----|-----|------------------------------------------|
| Locus_3070_Transcript_1/1_Conf_1.000 | 2533 | 20 | 1.13E-139 | EFO25200.1     | 65 | 502.286 | 539 | 351 | AGC/PDK1 protein kinase                  |
| Locus_3071_Transcript_1/1_Conf_1.000 | 1589 | 20 | 4.31E-120 | XP_002640623.1 | 67 | 436.417 | 463 | 312 | Hypothetical protein CBG08741            |
| Locus_3072_Transcript_1/1_Conf_1.000 | 706  | 5  | 3.65E-21  | NP_506082.2    | 74 | 105.916 | 81  | 60  | hypothetical protein F55C5.7             |
| Locus_3073_Transcript_1/1_Conf_1.000 | 1321 | 20 | 0         | NP_491515.2    | 97 | 671.003 | 348 | 338 | Vacuolar H ATPase family member (vha-16) |
| Locus_3074_Transcript_1/1_Conf_1.000 | 655  | 2  | 7.48E-15  | NP_001041133.1 | 52 | 84.7297 | 162 | 85  | hypothetical protein F58E10.1            |
| Locus_3075_Transcript_1/1_Conf_1.000 | 694  | 20 | 9.51E-83  | XP_002634020.1 | 80 | 310.457 | 230 | 186 | C. briggsae CBR-PMK-3 protein            |
| Locus_3076_Transcript_1/1_Conf_1.000 | 985  | 20 | 1.25E-83  | CAA10033.1     | 71 | 314.309 | 301 | 215 | DYS-1 protein                            |
| Locus_3077_Transcript_1/1_Conf_1.000 | 808  | 20 | 2.91E-34  | XP_001902547.1 | 60 | 149.828 | 215 | 129 | hypothetical protein Bm1_55450           |

|                                      |      |    |          |                |    |         |     |     |                                                               |
|--------------------------------------|------|----|----------|----------------|----|---------|-----|-----|---------------------------------------------------------------|
| Locus_3078_Transcript_1/2_Conf_1.000 | 2180 | 20 | 0        | XP_002633115.1 | 86 | 785.793 | 534 | 461 | C. briggsae CBR-KCC-1 protein                                 |
| Locus_3078_Transcript_2/2_Conf_1.000 | 2179 | 20 | 0        | XP_002633115.1 | 86 | 785.793 | 534 | 461 | C. briggsae CBR-KCC-1 protein                                 |
| Locus_3079_Transcript_1/1_Conf_1.000 | 767  | 20 | 1.98E-66 | EFO24807.1     | 85 | 256.529 | 162 | 138 | adaptin ear-binding coat-associated protein 1                 |
| Locus_308_Transcript_1/1_Conf_1.000  | 352  | 0  |          |                |    |         |     |     |                                                               |
| Locus_3080_Transcript_1/4_Conf_0.500 | 581  | 0  |          |                |    |         |     |     |                                                               |
| Locus_3080_Transcript_2/4_Conf_0.625 | 680  | 1  | 2.20E-04 | XP_002645979.1 | 47 | 50.0618 | 127 | 60  | C. briggsae CBR-NHR-48 protein                                |
| Locus_3080_Transcript_3/4_Conf_0.250 | 703  | 0  |          |                |    |         |     |     |                                                               |
| Locus_3080_Transcript_4/4_Conf_0.625 | 680  | 4  | 2.60E-05 | XP_002645979.1 | 47 | 53.1434 | 132 | 63  | C. briggsae CBR-NHR-48 protein                                |
| Locus_3081_Transcript_1/3_Conf_0.571 | 769  | 17 | 5.99E-71 | CAA85341.2     | 78 | 271.552 | 198 | 155 | C. elegans protein T09A5.12, confirmed by transcript evidence |
| Locus_3081_Transcript_2/3_Conf_0.714 | 171  | 3  | 3.38E-10 | CAA85341.2     | 89 | 68.1662 | 39  | 35  | C. elegans protein T09A5.12, confirmed by transcript evidence |
| Locus_3081_Transcript_3/3_Conf_0.571 | 679  | 17 | 2.31E-70 | CAA85341.2     | 78 | 269.24  | 196 | 153 | C. elegans protein T09A5.12, confirmed by transcript evidence |
| Locus_3082_Transcript_1/1_Conf_1.000 | 307  | 0  |          |                |    |         |     |     |                                                               |

|                                      |      |    |           |                |    |         |     |     |                                                                       |
|--------------------------------------|------|----|-----------|----------------|----|---------|-----|-----|-----------------------------------------------------------------------|
| Locus_3083_Transcript_1/1_Conf_1.000 | 2015 | 20 | 6.42E-10  | NP_491738.2    | 38 | 70.8626 | 307 | 118 | RiNg Finger protein family member (rnf-1)                             |
| Locus_3084_Transcript_1/2_Conf_1.000 | 807  | 20 | 1.76E-39  | XP_001893275.1 | 77 | 167.162 | 158 | 122 | LMBR1-like conserved region family protein                            |
| Locus_3084_Transcript_2/2_Conf_1.000 | 1569 | 20 | 5.81E-69  | XP_308875.3    | 55 | 266.544 | 483 | 269 | AGAP006880-PA                                                         |
| Locus_3085_Transcript_1/1_Conf_1.000 | 1036 | 20 | 8.29E-57  | NP_490957.1    | 58 | 225.328 | 302 | 176 | hypothetical protein Y39G10AR.9                                       |
| Locus_3086_Transcript_1/1_Conf_1.000 | 243  | 8  | 3.73E-09  | EFO21370.1     | 71 | 64.6994 | 80  | 57  | hypothetical protein LOAG_07121                                       |
| Locus_3087_Transcript_1/1_Conf_1.000 | 1314 | 2  | 6.48E-31  | XP_001902033.1 | 55 | 139.813 | 225 | 125 | ring finger protein 1                                                 |
| Locus_3088_Transcript_1/1_Conf_1.000 | 1753 | 20 | 1.82E-66  | EFO28449.1     | 56 | 258.455 | 428 | 240 | hypothetical protein LOAG_00045                                       |
| Locus_3089_Transcript_1/1_Conf_1.000 | 451  | 7  | 5.96E-31  | NP_001122868.1 | 69 | 137.117 | 146 | 101 | GLioTactin (Drosophila neuroligin-like) homolog family member (nrx-1) |
| Locus_309_Transcript_1/6_Conf_0.389  | 1013 | 20 | 3.59E-158 | XP_002638989.1 | 92 | 561.992 | 330 | 304 | C. briggsae CBR-RPL-4 protein                                         |
| Locus_309_Transcript_2/6_Conf_0.389  | 1055 | 20 | 5.31E-160 | XP_002638989.1 | 91 | 568.155 | 336 | 308 | C. briggsae CBR-RPL-4 protein                                         |



|                                      |      |    |           |                |    |         |     |     |                                                      |
|--------------------------------------|------|----|-----------|----------------|----|---------|-----|-----|------------------------------------------------------|
| Locus_309_Transcript_3/6_Conf_0.278  | 489  | 20 | 1.05E-51  | CAR63711.1     | 98 | 206.068 | 107 | 105 | putative Ribosomal Protein                           |
| Locus_309_Transcript_4/6_Conf_0.278  | 447  | 20 | 5.21E-51  | CAR63711.1     | 98 | 203.756 | 106 | 104 | putative Ribosomal Protein                           |
| Locus_309_Transcript_5/6_Conf_0.389  | 1144 | 20 | 6.65E-159 | XP_002638989.1 | 92 | 564.688 | 331 | 305 | C. briggsae CBR-RPL-4 protein                        |
| Locus_309_Transcript_6/6_Conf_0.389  | 1144 | 20 | 6.65E-159 | XP_002638989.1 | 92 | 564.688 | 331 | 305 | C. briggsae CBR-RPL-4 protein                        |
| Locus_3090_Transcript_1/1_Conf_1.000 | 2046 | 20 | 0         | NP_503733.1    | 87 | 1034.25 | 686 | 598 | NADH Ubiquinone Oxidoreductase family member (nuo-5) |
| Locus_3091_Transcript_1/1_Conf_1.000 | 351  | 0  |           |                |    |         |     |     |                                                      |
| Locus_3092_Transcript_1/1_Conf_1.000 | 953  | 15 | 3.81E-50  | NP_001040777.1 | 55 | 202.986 | 307 | 171 | hypothetical protein F41C3.8                         |
| Locus_3093_Transcript_1/2_Conf_1.000 | 522  | 0  |           |                |    |         |     |     |                                                      |
| Locus_3093_Transcript_2/2_Conf_1.000 | 522  | 0  |           |                |    |         |     |     |                                                      |
| Locus_3094_Transcript_1/1_Conf_1.000 | 1275 | 2  | 9.96E-05  | XP_002634488.1 | 59 | 52.7582 | 96  | 57  | C. briggsae CBR-VAB-2 protein                        |
| Locus_3095_Transcript_1/2_Conf_1.000 | 1866 | 20 | 2.78E-161 | NP_001129859.1 | 72 | 573.548 | 513 | 374 | Nuclear Hormone Receptor family member (nhr-34)      |

|                                      |      |    |           |                |    |         |     |     |                                                                         |
|--------------------------------------|------|----|-----------|----------------|----|---------|-----|-----|-------------------------------------------------------------------------|
| Locus_3095_Transcript_2/2_Conf_1.000 | 1849 | 20 | 1.84E-165 | NP_001129859.1 | 73 | 587.415 | 520 | 381 | Nuclear Hormone Receptor family member (nhr-34)                         |
| Locus_3096_Transcript_1/1_Conf_1.000 | 806  | 20 | 5.50E-110 | XP_002642113.1 | 89 | 401.364 | 240 | 215 | C. briggsae CBR-RPS-1 protein                                           |
| Locus_3097_Transcript_1/1_Conf_1.000 | 521  | 20 | 1.01E-34  | XP_002630640.1 | 87 | 149.828 | 112 | 98  | C. briggsae CBR-RPL-22 protein                                          |
| Locus_3098_Transcript_1/1_Conf_1.000 | 1243 | 20 | 1.68E-174 | NP_509658.1    | 89 | 616.69  | 414 | 369 | Multidrug Resistance Protein family member (mrp-4)                      |
| Locus_3099_Transcript_1/1_Conf_1.000 | 965  | 6  | 2.15E-24  | CAR97825.1     | 68 | 117.472 | 216 | 148 | C. elegans protein F32F2.1c, partially confirmed by transcript evidence |
| Locus_31_Transcript_1/2_Conf_1.000   | 493  | 20 | 7.29E-21  | EFO21324.1     | 64 | 103.605 | 125 | 81  | hypothetical protein LOAG_07166                                         |
| Locus_31_Transcript_2/2_Conf_1.000   | 493  | 20 | 7.29E-21  | EFO21324.1     | 64 | 103.605 | 125 | 81  | hypothetical protein LOAG_07166                                         |

|                                      |      |    |           |                |    |         |     |     |                                                       |
|--------------------------------------|------|----|-----------|----------------|----|---------|-----|-----|-------------------------------------------------------|
| Locus_310_Transcript_1/1_Conf_1.000  | 1197 | 20 | 3.19E-66  | XP_002634531.1 | 63 | 256.914 | 328 | 207 | C. briggsae CBR-TAF-2 protein                         |
| Locus_3100_Transcript_1/1_Conf_1.000 | 375  | 2  | 3.54E-15  | XP_002639243.1 | 72 | 84.7297 | 59  | 43  | Hypothetical protein CBG03801                         |
| Locus_3101_Transcript_1/1_Conf_1.000 | 1595 | 20 | 6.44E-132 | NP_500311.1    | 82 | 475.707 | 352 | 290 | hypothetical protein W08E12.7                         |
| Locus_3102_Transcript_1/1_Conf_1.000 | 951  | 20 | 5.66E-102 | NP_500214.1    | 89 | 375.17  | 276 | 248 | hypothetical protein Y69A2AR.18                       |
| Locus_3103_Transcript_1/1_Conf_1.000 | 370  | 0  |           |                |    |         |     |     |                                                       |
| Locus_3104_Transcript_1/1_Conf_1.000 | 1087 | 20 | 1.54E-125 | XP_001899737.1 | 91 | 453.751 | 335 | 305 | SMC proteins Flexible Hinge Domain containing protein |
| Locus_3105_Transcript_1/4_Conf_0.700 | 2125 | 20 | 0         | XP_001898310.1 | 91 | 1158.28 | 709 | 651 | DNA-directed RNA polymerase II largest subunit        |
| Locus_3105_Transcript_2/4_Conf_0.700 | 2125 | 20 | 0         | XP_001898310.1 | 91 | 1158.28 | 709 | 651 | DNA-directed RNA polymerase II largest subunit        |

|                                      |      |    |          |                |    |         |     |     |                                                |
|--------------------------------------|------|----|----------|----------------|----|---------|-----|-----|------------------------------------------------|
| Locus_3105_Transcript_3/4_Conf_0.700 | 2125 | 20 | 0        | XP_001898310.1 | 91 | 1158.28 | 709 | 651 | DNA-directed RNA polymerase II largest subunit |
| Locus_3105_Transcript_4/4_Conf_0.700 | 2125 | 20 | 0        | XP_001898310.1 | 91 | 1158.28 | 709 | 651 | DNA-directed RNA polymerase II largest subunit |
| Locus_3106_Transcript_1/1_Conf_1.000 | 490  | 0  |          |                |    |         |     |     |                                                |
| Locus_3107_Transcript_1/1_Conf_1.000 | 368  | 20 | 1.31E-30 | EFO22541.1     | 75 | 135.961 | 93  | 70  | CHromoDomain protein family member             |
| Locus_3108_Transcript_1/4_Conf_0.667 | 1940 | 20 | 0        | EFO25190.1     | 79 | 826.239 | 647 | 516 | hypothetical protein LOAG_03297                |
| Locus_3108_Transcript_2/4_Conf_0.667 | 1940 | 20 | 0        | EFO25190.1     | 79 | 826.239 | 647 | 516 | hypothetical protein LOAG_03297                |
| Locus_3108_Transcript_3/4_Conf_0.667 | 1969 | 20 | 0        | EFO25190.1     | 80 | 842.417 | 657 | 526 | hypothetical protein LOAG_03297                |
| Locus_3108_Transcript_4/4_Conf_0.667 | 1940 | 20 | 0        | EFO25190.1     | 79 | 826.239 | 647 | 516 | hypothetical protein LOAG_03297                |
| Locus_3109_Transcript_1/1_Conf_1.000 | 2903 | 6  | 1.20E-07 | EFO25743.1     | 38 | 63.929  | 263 | 102 | hypothetical protein LOAG_02738                |

|                                      |      |    |           |                |    |         |     |     |                                                                       |
|--------------------------------------|------|----|-----------|----------------|----|---------|-----|-----|-----------------------------------------------------------------------|
| Locus_311_Transcript_1/1_Conf_1.000  | 1554 | 20 | 1.46E-173 | XP_002644215.1 | 83 | 613.994 | 478 | 400 | C. briggsae CBR-ACL-5 protein                                         |
| Locus_3110_Transcript_1/1_Conf_1.000 | 178  | 0  |           |                |    |         |     |     |                                                                       |
| Locus_3111_Transcript_1/2_Conf_1.000 | 807  | 20 | 2.27E-79  | NP_001023903.1 | 80 | 299.671 | 202 | 163 | hypothetical protein F40A3.3                                          |
| Locus_3111_Transcript_2/2_Conf_1.000 | 810  | 20 | 8.59E-79  | NP_001023903.1 | 85 | 297.745 | 188 | 160 | hypothetical protein F40A3.3                                          |
| Locus_3112_Transcript_1/2_Conf_1.000 | 2176 | 20 | 2.47E-164 | NP_505174.3    | 82 | 583.948 | 433 | 356 | hypothetical protein F52E1.13                                         |
| Locus_3112_Transcript_2/2_Conf_1.000 | 2176 | 20 | 2.47E-164 | NP_505174.3    | 82 | 583.948 | 433 | 356 | hypothetical protein F52E1.13                                         |
| Locus_3113_Transcript_1/1_Conf_1.000 | 278  | 0  |           |                |    |         |     |     |                                                                       |
| Locus_3114_Transcript_1/1_Conf_1.000 | 1495 | 20 | 1.51E-135 | NP_504452.1    | 71 | 487.649 | 436 | 313 | DNaJ domain (prokaryotic heat shock protein) family member (dnj-19)   |
| Locus_3115_Transcript_1/2_Conf_1.000 | 1182 | 20 | 3.94E-77  | XP_002641753.1 | 66 | 293.123 | 314 | 209 | Hypothetical protein CBG10092                                         |
| Locus_3115_Transcript_2/2_Conf_1.000 | 1181 | 20 | 8.17E-75  | XP_002641753.1 | 84 | 285.419 | 186 | 157 | Hypothetical protein CBG10092                                         |
| Locus_3116_Transcript_1/1_Conf_1.000 | 1008 | 20 | 2.26E-128 | XP_002642775.1 | 88 | 462.996 | 307 | 271 | C. briggsae CBR-NEX-1 protein                                         |
| Locus_3117_Transcript_1/2_Conf_1.000 | 1160 | 20 | 6.52E-69  | NP_001021501.1 | 60 | 265.774 | 377 | 227 | UNCoordinated family member (unc-73)                                  |
| Locus_3117_Transcript_2/2_Conf_1.000 | 974  | 20 | 4.37E-57  | ACM46029.1     | 60 | 226.098 | 316 | 192 | Uncoordinated protein 73, isoform h, confirmed by transcript evidence |

|                                      |      |    |          |                |     |         |     |     |                                                    |
|--------------------------------------|------|----|----------|----------------|-----|---------|-----|-----|----------------------------------------------------|
| Locus_3118_Transcript_1/2_Conf_1.000 | 930  | 20 | 2.32E-52 | EFO20982.1     | 73  | 210.305 | 212 | 156 | ThiF family protein                                |
| Locus_3118_Transcript_2/2_Conf_1.000 | 930  | 20 | 3.03E-52 | EFO20982.1     | 73  | 209.92  | 212 | 156 | ThiF family protein                                |
| Locus_3119_Transcript_1/1_Conf_1.000 | 609  | 20 | 2.53E-56 | XP_002641486.1 | 85  | 222.246 | 135 | 116 | Hypothetical protein CBG09777                      |
| Locus_312_Transcript_1/1_Conf_1.000  | 1360 | 20 | 9.17E-36 | XP_001895788.1 | 76  | 155.992 | 122 | 93  | RNase H family protein                             |
| Locus_3120_Transcript_1/1_Conf_1.000 | 334  | 20 | 2.76E-12 | EFO20638.1     | 77  | 75.0998 | 59  | 46  | oxidoreductase                                     |
| Locus_3121_Transcript_1/5_Conf_0.545 | 811  | 20 | 2.89E-42 | CBA11992.1     | 58  | 176.407 | 267 | 157 | endonuclease-reverse transcriptase HmRTE-e01       |
| Locus_3121_Transcript_2/5_Conf_0.455 | 930  | 20 | 1.83E-57 | CBA11992.1     | 62  | 227.254 | 306 | 190 | endonuclease-reverse transcriptase HmRTE-e01       |
| Locus_3121_Transcript_3/5_Conf_0.545 | 1113 | 20 | 6.16E-77 | CBA11992.1     | 63  | 292.352 | 368 | 233 | endonuclease-reverse transcriptase HmRTE-e01       |
| Locus_3121_Transcript_4/5_Conf_0.273 | 788  | 20 | 2.11E-42 | CBA11992.1     | 59  | 176.792 | 265 | 157 | endonuclease-reverse transcriptase HmRTE-e01       |
| Locus_3121_Transcript_5/5_Conf_0.545 | 811  | 20 | 2.89E-42 | CBA11992.1     | 58  | 176.407 | 267 | 157 | endonuclease-reverse transcriptase HmRTE-e01       |
| Locus_3122_Transcript_1/1_Conf_1.000 | 852  | 20 | 1.67E-83 | EFO24144.1     | 85  | 313.538 | 191 | 164 | eukaryotic translation initiation factor 4E type 3 |
| Locus_3123_Transcript_1/2_Conf_1.000 | 1232 | 20 | 1.06E-88 | AAK57805.1     | 100 | 331.643 | 170 | 170 | putative retinol-binding protein                   |

|                                      |      |    |          |                |     |         |     |     |                                                                         |
|--------------------------------------|------|----|----------|----------------|-----|---------|-----|-----|-------------------------------------------------------------------------|
| Locus_3123_Transcript_2/2_Conf_1.000 | 1232 | 20 | 1.06E-88 | AAK57805.1     | 100 | 331.643 | 170 | 170 | putative retinol-binding protein                                        |
| Locus_3124_Transcript_1/1_Conf_1.000 | 313  | 0  |          |                |     |         |     |     |                                                                         |
| Locus_3125_Transcript_1/2_Conf_1.000 | 376  | 20 | 9.92E-26 | XP_002640523.1 | 82  | 119.783 | 81  | 67  | Hypothetical protein CBG18685                                           |
| Locus_3125_Transcript_2/2_Conf_1.000 | 280  | 20 | 1.72E-22 | NP_493023.1    | 82  | 108.997 | 73  | 60  | hypothetical protein R09B3.3                                            |
| Locus_3126_Transcript_1/1_Conf_1.000 | 704  | 20 | 4.63E-24 | XP_001894364.1 | 55  | 115.546 | 173 | 96  | YEATS family protein                                                    |
| Locus_3127_Transcript_1/3_Conf_0.400 | 641  | 8  | 6.75E-50 | NP_495747.1    | 75  | 201.06  | 192 | 145 | hypothetical protein K01C8.6                                            |
| Locus_3127_Transcript_2/3_Conf_0.400 | 294  | 1  | 5.66E-05 | XP_001902818.1 | 75  | 50.8322 | 40  | 30  | 50S ribosomal protein L10                                               |
| Locus_3127_Transcript_3/3_Conf_0.400 | 635  | 8  | 5.04E-50 | NP_495747.1    | 74  | 201.445 | 204 | 151 | hypothetical protein K01C8.6                                            |
| Locus_3128_Transcript_1/1_Conf_1.000 | 577  | 20 | 5.38E-55 | AAK31527.3     | 74  | 217.624 | 195 | 145 | Neuronal symmetry protein 1, partially confirmed by transcript evidence |
| Locus_3129_Transcript_1/1_Conf_1.000 | 880  | 11 | 9.16E-24 | NP_001022602.1 | 79  | 115.161 | 83  | 66  | MTM (myotubularin) family member (mtm-6)                                |
| Locus_313_Transcript_1/2_Conf_1.000  | 362  | 6  | 1.56E-23 | XP_002634040.1 | 69  | 112.464 | 120 | 83  | C. briggsae CBR-VIT-6 protein                                           |
| Locus_313_Transcript_2/2_Conf_1.000  | 249  | 6  | 5.53E-13 | XP_002634040.1 | 71  | 77.411  | 82  | 59  | C. briggsae CBR-VIT-6 protein                                           |

|                                      |      |    |           |                |    |         |     |     |                               |
|--------------------------------------|------|----|-----------|----------------|----|---------|-----|-----|-------------------------------|
| Locus_3130_Transcript_1/6_Conf_0.667 | 2085 | 20 | 1.60E-128 | XP_002641367.1 | 78 | 464.922 | 359 | 282 | C. briggsae CBR-GBF-1 protein |
| Locus_3130_Transcript_2/6_Conf_0.667 | 2085 | 20 | 1.60E-128 | XP_002641367.1 | 78 | 464.922 | 359 | 282 | C. briggsae CBR-GBF-1 protein |
| Locus_3130_Transcript_3/6_Conf_0.667 | 2085 | 20 | 1.60E-128 | XP_002641367.1 | 78 | 464.922 | 359 | 282 | C. briggsae CBR-GBF-1 protein |
| Locus_3130_Transcript_4/6_Conf_0.667 | 2092 | 20 | 6.50E-130 | XP_002641367.1 | 78 | 469.544 | 362 | 284 | C. briggsae CBR-GBF-1 protein |



|                                      |      |    |           |                |     |         |     |     |                               |
|--------------------------------------|------|----|-----------|----------------|-----|---------|-----|-----|-------------------------------|
| Locus_3130_Transcript_5/6_Conf_0.667 | 2097 | 20 | 1.61E-128 | XP_002641367.1 | 78  | 464.922 | 359 | 282 | C. briggsae CBR-GBF-1 protein |
| Locus_3130_Transcript_6/6_Conf_0.667 | 2085 | 20 | 1.60E-128 | XP_002641367.1 | 78  | 464.922 | 359 | 282 | C. briggsae CBR-GBF-1 protein |
| Locus_3131_Transcript_1/1_Conf_1.000 | 1152 | 20 | 5.47E-68  | XP_002639261.1 | 64  | 262.692 | 388 | 249 | Hypothetical protein CBG03822 |
| Locus_3132_Transcript_1/1_Conf_1.000 | 148  | 2  | 1.06E-18  | AAF36134.1     | 100 | 87.0409 | 37  | 37  | AF151048_1HSPC214             |
| Locus_3133_Transcript_1/1_Conf_1.000 | 141  | 0  |           |                |     |         |     |     |                               |
| Locus_3134_Transcript_1/1_Conf_1.000 | 211  | 0  |           |                |     |         |     |     |                               |
| Locus_3135_Transcript_1/1_Conf_1.000 | 1416 | 20 | 3.54E-46  | XP_002631000.1 | 66  | 190.66  | 321 | 213 | Hypothetical protein CBG02746 |

|                                      |      |    |           |                |     |         |     |     |                                 |
|--------------------------------------|------|----|-----------|----------------|-----|---------|-----|-----|---------------------------------|
| Locus_3136_Transcript_1/1_Conf_1.000 | 649  | 20 | 1.42E-34  | NP_491122.2    | 62  | 150.214 | 152 | 95  | hypothetical protein Y54E10A.17 |
| Locus_3137_Transcript_1/1_Conf_1.000 | 132  | 0  |           |                |     |         |     |     |                                 |
| Locus_3138_Transcript_1/1_Conf_1.000 | 648  | 3  | 9.85E-20  | XP_002632658.1 | 61  | 100.908 | 111 | 68  | Hypothetical protein CBG21582   |
| Locus_3139_Transcript_1/1_Conf_1.000 | 423  | 20 | 1.10E-08  | XP_002573439.1 | 53  | 63.1586 | 117 | 63  | syntaxin                        |
| Locus_314_Transcript_1/3_Conf_0.250  | 2506 | 20 | 4.66E-162 | NP_001021644.1 | 75  | 576.63  | 480 | 360 | hypothetical protein T28F2.4    |
| Locus_314_Transcript_2/3_Conf_0.625  | 1066 | 20 | 0         | NP_508841.1    | 100 | 675.626 | 335 | 335 | ACTin family member (act-4)     |

|                                      |      |    |           |                |    |         |     |     |                                                    |
|--------------------------------------|------|----|-----------|----------------|----|---------|-----|-----|----------------------------------------------------|
| Locus_314_Transcript_3/3_Conf_0.625  | 1066 | 20 | 0         | NP_505817.1    | 99 | 671.774 | 335 | 333 | ACTin family member (act-3)                        |
| Locus_3140_Transcript_1/3_Conf_0.500 | 409  | 0  |           |                |    |         |     |     |                                                    |
| Locus_3140_Transcript_2/3_Conf_0.667 | 448  | 0  |           |                |    |         |     |     |                                                    |
| Locus_3140_Transcript_3/3_Conf_0.667 | 454  | 0  |           |                |    |         |     |     |                                                    |
| Locus_3141_Transcript_1/3_Conf_0.714 | 2579 | 20 | 1.28E-122 | NP_001021969.1 | 71 | 445.662 | 386 | 276 | Cell Division Cycle related family member (cdc-14) |
| Locus_3141_Transcript_2/3_Conf_0.714 | 2575 | 20 | 1.28E-122 | NP_001021969.1 | 71 | 445.662 | 386 | 276 | Cell Division Cycle related family member (cdc-14) |
| Locus_3141_Transcript_3/3_Conf_0.714 | 2571 | 20 | 1.28E-122 | NP_001021969.1 | 71 | 445.662 | 386 | 276 | Cell Division Cycle related family member (cdc-14) |

|                                      |      |    |          |                |    |         |     |     |                                                                    |
|--------------------------------------|------|----|----------|----------------|----|---------|-----|-----|--------------------------------------------------------------------|
| Locus_3142_Transcript_1/1_Conf_1.000 | 1419 | 20 | 0        | NP_498047.1    | 97 | 819.305 | 424 | 412 | RNA Polymerase II (B) subunit family member (rpb-2)                |
| Locus_3143_Transcript_1/1_Conf_1.000 | 414  | 20 | 2.56E-18 | NP_498407.1    | 62 | 95.1301 | 135 | 84  | hypothetical protein C05D11.8                                      |
| Locus_3144_Transcript_1/4_Conf_0.625 | 1127 | 20 | 1.11E-73 | XP_001899238.1 | 57 | 281.567 | 399 | 230 | Low-density lipoprotein receptor repeat class B containing protein |
| Locus_3144_Transcript_2/4_Conf_0.250 | 481  | 2  | 5.71E-18 | XP_001899238.1 | 58 | 93.9745 | 148 | 86  | Low-density lipoprotein receptor repeat class B containing protein |
| Locus_3144_Transcript_3/4_Conf_0.625 | 1007 | 20 | 1.14E-55 | XP_001899238.1 | 51 | 221.476 | 399 | 207 | Low-density lipoprotein receptor repeat class B containing protein |
| Locus_3144_Transcript_4/4_Conf_0.625 | 1118 | 20 | 2.20E-74 | XP_001899238.1 | 57 | 283.878 | 399 | 230 | Low-density lipoprotein receptor repeat class B containing protein |
| Locus_3145_Transcript_1/3_Conf_0.571 | 1281 | 0  |          |                |    |         |     |     |                                                                    |
| Locus_3145_Transcript_2/3_Conf_0.571 | 1340 | 0  |          |                |    |         |     |     |                                                                    |
| Locus_3145_Transcript_3/3_Conf_0.714 | 1275 | 0  |          |                |    |         |     |     |                                                                    |
| Locus_3146_Transcript_1/1_Conf_1.000 | 322  | 20 | 9.26E-40 | ADD24466.1     | 86 | 166.392 | 106 | 92  | Ubiquitin                                                          |

|                                      |      |    |           |                |    |         |     |     |                                                      |
|--------------------------------------|------|----|-----------|----------------|----|---------|-----|-----|------------------------------------------------------|
| Locus_3147_Transcript_1/1_Conf_1.000 | 897  | 20 | 1.67E-28  | NP_505565.2    | 79 | 130.954 | 110 | 87  | hypothetical protein T07C12.11                       |
| Locus_3148_Transcript_1/1_Conf_1.000 | 302  | 20 | 3.38E-26  | XP_002637423.1 | 78 | 121.324 | 87  | 68  | C. briggsae CBR-TTR-47 protein                       |
| Locus_3149_Transcript_1/1_Conf_1.000 | 739  | 8  | 1.49E-07  | XP_002644389.1 | 84 | 60.8474 | 38  | 32  | C. briggsae CBR-UVT-5 protein                        |
| Locus_315_Transcript_1/1_Conf_1.000  | 1022 | 20 | 3.75E-62  | NP_504826.2    | 69 | 243.047 | 244 | 170 | hypothetical protein F09G2.2                         |
| Locus_3150_Transcript_1/1_Conf_1.000 | 1721 | 20 | 0         | NP_498984.1    | 82 | 781.171 | 569 | 468 | Eukaryotic Initiation Factor family member (eif-3.D) |
| Locus_3151_Transcript_1/1_Conf_1.000 | 139  | 0  |           |                |    |         |     |     |                                                      |
| Locus_3152_Transcript_1/1_Conf_1.000 | 557  | 0  |           |                |    |         |     |     |                                                      |
| Locus_3153_Transcript_1/1_Conf_1.000 | 741  | 20 | 2.35E-77  | NP_001022062.1 | 75 | 292.738 | 248 | 188 | Acyl CoA DeHydrogenase family member (acdh-12)       |
| Locus_3154_Transcript_1/1_Conf_1.000 | 740  | 20 | 2.63E-12  | ACI49237.1     | 50 | 76.6406 | 118 | 59  | hypothetical protein Csp3_ID06.003                   |
| Locus_3155_Transcript_1/1_Conf_1.000 | 923  | 20 | 2.06E-53  | NP_500551.2    | 61 | 213.772 | 308 | 189 | hypothetical protein F55F10.1                        |
| Locus_3156_Transcript_1/1_Conf_1.000 | 1118 | 20 | 2.77E-93  | NP_501548.2    | 65 | 346.665 | 381 | 251 | hypothetical protein C27B7.7                         |
| Locus_3157_Transcript_1/1_Conf_1.000 | 382  | 20 | 9.86E-18  | XP_798273.2    | 59 | 93.2041 | 122 | 73  | PREDICTED: similar to ABC transporter ABCA2, partial |
| Locus_3158_Transcript_1/1_Conf_1.000 | 868  | 10 | 1.69E-38  | XP_002644340.1 | 56 | 164.081 | 313 | 177 | C. briggsae CBR-RGL-1 protein                        |
| Locus_3159_Transcript_1/2_Conf_1.000 | 1805 | 20 | 6.77E-165 | AAA97973.2     | 75 | 585.489 | 560 | 420 | Hypothetical protein F21C10.7                        |
| Locus_3159_Transcript_2/2_Conf_1.000 | 1333 | 20 | 3.22E-94  | AAA97973.2     | 74 | 350.132 | 343 | 254 | Hypothetical protein F21C10.7                        |

|                                      |      |    |          |                |    |         |     |     |                                                        |
|--------------------------------------|------|----|----------|----------------|----|---------|-----|-----|--------------------------------------------------------|
| Locus_316_Transcript_1/1_Conf_1.000  | 681  | 5  | 7.62E-13 | XP_002639910.1 | 44 | 78.1814 | 232 | 103 | C. briggsae CBR-RBG-2 protein                          |
| Locus_3160_Transcript_1/1_Conf_1.000 | 2945 | 20 | 0        | XP_002634092.1 | 60 | 648.662 | 860 | 522 | Hypothetical protein CBG01639                          |
| Locus_3161_Transcript_1/2_Conf_1.000 | 299  | 0  |          |                |    |         |     |     |                                                        |
| Locus_3161_Transcript_2/2_Conf_1.000 | 2168 | 20 | 0        | XP_001899078.1 | 79 | 760.37  | 584 | 463 | Ubiquitin carboxyl-terminal hydrolase family protein   |
| Locus_3162_Transcript_1/1_Conf_1.000 | 430  | 0  |          |                |    |         |     |     |                                                        |
| Locus_3163_Transcript_1/1_Conf_1.000 | 599  | 20 | 4.20E-61 | XP_002646914.1 | 85 | 238.039 | 160 | 137 | Hypothetical protein CBG19616                          |
| Locus_3164_Transcript_1/1_Conf_1.000 | 1442 | 20 | 0        | XP_002645390.1 | 85 | 692.575 | 480 | 410 | C. briggsae CBR-SEC-15 protein                         |
| Locus_3165_Transcript_1/1_Conf_1.000 | 322  | 2  | 5.12E-14 | ABH10659.1     | 86 | 80.8777 | 50  | 43  | FMRFamide-related peptide FLP-21 precursor             |
| Locus_3166_Transcript_1/1_Conf_1.000 | 1627 | 4  | 1.17E-11 | XP_422162.2    | 39 | 76.2554 | 541 | 216 | PREDICTED: similar to telomere-associated protein RIF1 |
| Locus_3167_Transcript_1/1_Conf_1.000 | 560  | 0  |          |                |    |         |     |     |                                                        |
| Locus_3168_Transcript_1/1_Conf_1.000 | 449  | 9  | 2.21E-17 | XP_002631214.1 | 89 | 92.0485 | 59  | 53  | C. briggsae CBR-MPZ-1 protein                          |

|                                      |      |    |           |                |     |         |     |     |                                                    |
|--------------------------------------|------|----|-----------|----------------|-----|---------|-----|-----|----------------------------------------------------|
| Locus_3169_Transcript_1/1_Conf_1.000 | 776  | 20 | 2.98E-118 | EAW63270.1     | 100 | 428.713 | 212 | 212 | indoleamine-pyrrole 2,3 dioxygenase, isoform CRA_a |
| Locus_317_Transcript_1/1_Conf_1.000  | 1443 | 20 | 0         | XP_002630542.1 | 84  | 643.269 | 449 | 379 | Hypothetical protein CBG12983                      |
| Locus_3170_Transcript_1/1_Conf_1.000 | 755  | 0  |           |                |     |         |     |     |                                                    |
| Locus_3171_Transcript_1/1_Conf_1.000 | 472  | 0  |           |                |     |         |     |     |                                                    |
| Locus_3172_Transcript_1/1_Conf_1.000 | 720  | 20 | 2.34E-111 | XP_002646301.1 | 95  | 405.601 | 229 | 219 | C. briggsae CBR-UNC-11 protein                     |
| Locus_3173_Transcript_1/2_Conf_1.000 | 2483 | 20 | 2.41E-86  | XP_001664250.1 | 54  | 325.094 | 526 | 285 | hypothetical protein AaeL_AAEL014030               |
| Locus_3173_Transcript_2/2_Conf_1.000 | 2421 | 20 | 2.36E-86  | XP_001664250.1 | 54  | 325.094 | 526 | 285 | hypothetical protein AaeL_AAEL014030               |
| Locus_3174_Transcript_1/2_Conf_1.000 | 2190 | 20 | 0         | NP_001023556.1 | 91  | 1162.13 | 732 | 673 | Membrane Calcium ATPase family member (mca-3)      |

|                                      |      |    |          |                |    |         |     |     |                                               |
|--------------------------------------|------|----|----------|----------------|----|---------|-----|-----|-----------------------------------------------|
| Locus_3174_Transcript_2/2_Conf_1.000 | 2142 | 20 | 0        | NP_001023556.1 | 93 | 1170.22 | 717 | 673 | Membrane Calcium ATPase family member (mca-3) |
| Locus_3175_Transcript_1/1_Conf_1.000 | 395  | 0  |          |                |    |         |     |     |                                               |
| Locus_3176_Transcript_1/1_Conf_1.000 | 281  | 0  |          |                |    |         |     |     |                                               |
| Locus_3177_Transcript_1/1_Conf_1.000 | 1163 | 20 | 1.47E-44 | EFO27677.1     | 86 | 184.882 | 138 | 120 | hypothetical protein LOAG_00808               |
| Locus_3178_Transcript_1/4_Conf_0.333 | 389  | 20 | 1.85E-16 | XP_002639457.1 | 73 | 88.9669 | 71  | 52  | C. briggsae CBR-HRPF-1 protein                |
| Locus_3178_Transcript_2/4_Conf_0.667 | 1032 | 20 | 3.05E-35 | XP_002639457.1 | 42 | 153.68  | 388 | 166 | C. briggsae CBR-HRPF-1 protein                |
| Locus_3178_Transcript_3/4_Conf_0.667 | 1186 | 20 | 6.60E-32 | NP_740877.1    | 47 | 142.895 | 379 | 180 | HnRNP F homolog family member (hrpf-1)        |
| Locus_3178_Transcript_4/4_Conf_0.667 | 1212 | 20 | 6.84E-32 | NP_740877.1    | 47 | 142.895 | 379 | 180 | HnRNP F homolog family member (hrpf-1)        |
| Locus_3179_Transcript_1/1_Conf_1.000 | 573  | 0  |          |                |    |         |     |     |                                               |
| Locus_318_Transcript_1/3_Conf_0.700  | 2396 | 8  | 1.39E-22 | EFO22283.1     | 68 | 113.235 | 119 | 81  | WNK protein kinase                            |
| Locus_318_Transcript_2/3_Conf_0.800  | 4174 | 20 | 0        | XP_001896032.1 | 77 | 721.465 | 553 | 431 | Protein kinase domain containing protein      |



|                                      |      |    |           |                |    |         |     |     |                                               |
|--------------------------------------|------|----|-----------|----------------|----|---------|-----|-----|-----------------------------------------------|
| Locus_318_Transcript_3/3_Conf_0.800  | 4183 | 20 | 0         | XP_001896032.1 | 77 | 721.465 | 553 | 431 | Protein kinase domain containing protein      |
| Locus_3180_Transcript_1/1_Conf_1.000 | 1318 | 20 | 3.09E-65  | XP_001902430.1 | 60 | 253.832 | 374 | 225 | WD repeat domain, X-linked 1                  |
| Locus_3181_Transcript_1/1_Conf_1.000 | 232  | 0  |           |                |    |         |     |     |                                               |
| Locus_3182_Transcript_1/1_Conf_1.000 | 1239 | 20 | 4.30E-138 | EFO26116.1     | 74 | 495.738 | 409 | 303 | BRCA1-associated protein 2 containing protein |
| Locus_3183_Transcript_1/1_Conf_1.000 | 676  | 20 | 1.25E-76  | AAK31453.4     | 77 | 290.041 | 223 | 173 | Hypothetical protein C25H3.8                  |
| Locus_3184_Transcript_1/1_Conf_1.000 | 371  | 14 | 1.31E-25  | XP_002643051.1 | 69 | 119.398 | 111 | 77  | C. briggsae CBR-DPF-6 protein                 |
| Locus_3185_Transcript_1/1_Conf_1.000 | 186  | 20 | 1.83E-19  | XP_002646487.1 | 85 | 98.9821 | 61  | 52  | Hypothetical protein CBG19469                 |
| Locus_3186_Transcript_1/1_Conf_1.000 | 1263 | 20 | 4.95E-65  | EFO16437.1     | 54 | 253.062 | 389 | 211 | WD-repeat protein 22                          |
| Locus_3187_Transcript_1/1_Conf_1.000 | 885  | 20 | 5.37E-64  | NP_501500.1    | 75 | 248.825 | 224 | 168 | hypothetical protein F21D5.1                  |
| Locus_3188_Transcript_1/1_Conf_1.000 | 1388 | 20 | 5.30E-71  | XP_001895415.1 | 56 | 273.092 | 424 | 240 | TTC5 protein                                  |

|                                      |      |    |           |                |    |         |     |     |                                |
|--------------------------------------|------|----|-----------|----------------|----|---------|-----|-----|--------------------------------|
| Locus_3189_Transcript_1/1_Conf_1.000 | 995  | 20 | 1.80E-130 | XP_002639121.1 | 91 | 469.929 | 271 | 248 | Hypothetical protein CBG14940  |
| Locus_319_Transcript_1/1_Conf_1.000  | 332  | 20 | 7.05E-16  | XP_001896614.1 | 78 | 87.0409 | 65  | 51  | hypothetical protein Bm1_25775 |
| Locus_3190_Transcript_1/1_Conf_1.000 | 1395 | 4  | 1.37E-18  | NP_001040729.1 | 68 | 98.9821 | 85  | 58  | hypothetical protein C05C10.5  |
| Locus_3191_Transcript_1/2_Conf_1.000 | 407  | 20 | 3.72E-49  | XP_002641975.1 | 88 | 197.593 | 125 | 111 | C. briggsae CBR-RPL-21 protein |
| Locus_3191_Transcript_2/2_Conf_1.000 | 407  | 20 | 3.72E-49  | XP_002641975.1 | 88 | 197.593 | 125 | 111 | C. briggsae CBR-RPL-21 protein |
| Locus_3192_Transcript_1/1_Conf_1.000 | 200  | 0  |           |                |    |         |     |     |                                |
| Locus_3193_Transcript_1/1_Conf_1.000 | 304  | 0  |           |                |    |         |     |     |                                |
| Locus_3194_Transcript_1/2_Conf_1.000 | 1016 | 6  | 4.24E-66  | XP_002634901.1 | 64 | 256.144 | 346 | 223 | Hypothetical protein CBG22497  |
| Locus_3194_Transcript_2/2_Conf_1.000 | 1156 | 6  | 2.81E-80  | XP_002634901.1 | 65 | 303.523 | 391 | 255 | Hypothetical protein CBG22497  |
| Locus_3195_Transcript_1/1_Conf_1.000 | 2313 | 20 | 0         | NP_490830.2    | 77 | 759.985 | 598 | 462 | hypothetical protein Y48G8AL.5 |
| Locus_3196_Transcript_1/3_Conf_0.444 | 244  | 0  |           |                |    |         |     |     |                                |
| Locus_3196_Transcript_2/3_Conf_0.778 | 960  | 20 | 1.75E-34  | NP_495483.1    | 82 | 150.984 | 97  | 80  | hypothetical protein C27H5.3   |
| Locus_3196_Transcript_3/3_Conf_0.778 | 966  | 20 | 1.77E-34  | NP_495483.1    | 82 | 150.984 | 97  | 80  | hypothetical protein C27H5.3   |

|                                      |      |    |           |                |    |         |     |     |                                |
|--------------------------------------|------|----|-----------|----------------|----|---------|-----|-----|--------------------------------|
| Locus_3197_Transcript_1/3_Conf_0.714 | 687  | 6  | 2.66E-37  | XP_002630066.1 | 89 | 159.458 | 95  | 85  | Hypothetical protein CBG13442  |
| Locus_3197_Transcript_2/3_Conf_0.714 | 687  | 6  | 2.66E-37  | XP_002630066.1 | 89 | 159.458 | 95  | 85  | Hypothetical protein CBG13442  |
| Locus_3197_Transcript_3/3_Conf_0.714 | 687  | 6  | 2.66E-37  | XP_002630066.1 | 89 | 159.458 | 95  | 85  | Hypothetical protein CBG13442  |
| Locus_3198_Transcript_1/1_Conf_1.000 | 774  | 20 | 1.06E-06  | XP_002436012.1 | 42 | 58.151  | 141 | 60  | hemolectin, putative           |
| Locus_3199_Transcript_1/1_Conf_1.000 | 422  | 20 | 3.78E-33  | XP_002633344.1 | 67 | 144.436 | 144 | 97  | C. briggsae CBR-MAGI-1 protein |
| Locus_32_Transcript_1/1_Conf_1.000   | 1084 | 20 | 1.32E-161 | XP_002630674.1 | 94 | 573.548 | 305 | 289 | Hypothetical protein CBG02349  |
| Locus_320_Transcript_1/1_Conf_1.000  | 931  | 20 | 2.62E-88  | CAR63544.1     | 97 | 329.717 | 200 | 194 | putative Ribosomal Protein     |

|                                      |      |    |           |                |    |         |     |     |                                                   |
|--------------------------------------|------|----|-----------|----------------|----|---------|-----|-----|---------------------------------------------------|
| Locus_3200_Transcript_1/1_Conf_1.000 | 1313 | 20 | 1.22E-138 | NP_001024798.1 | 86 | 497.664 | 330 | 286 | Suppressor of Lneage defect family member (sli-1) |
| Locus_3201_Transcript_1/1_Conf_1.000 | 990  | 20 | 2.65E-49  | NP_498690.2    | 64 | 200.29  | 295 | 190 | hypothetical protein ZK686.2                      |
| Locus_3202_Transcript_1/1_Conf_1.000 | 1602 | 20 | 1.16E-72  | EFO21763.1     | 60 | 278.87  | 370 | 223 | WD domain-containing protein                      |
| Locus_3203_Transcript_1/1_Conf_1.000 | 482  | 20 | 2.73E-28  | NP_001076680.1 | 71 | 128.257 | 123 | 88  | hypothetical protein F13H10.3                     |
| Locus_3204_Transcript_1/1_Conf_1.000 | 216  | 0  |           |                |    |         |     |     |                                                   |
| Locus_3205_Transcript_1/1_Conf_1.000 | 348  | 0  |           |                |    |         |     |     |                                                   |
| Locus_3206_Transcript_1/1_Conf_1.000 | 210  | 5  | 1.20E-07  | NP_497707.1    | 70 | 59.6918 | 51  | 36  | hypothetical protein K01A11.2                     |
| Locus_3207_Transcript_1/2_Conf_1.000 | 813  | 1  | 1.84E-04  | XP_001894039.1 | 64 | 50.8322 | 56  | 36  | Rhodanese-like domain containing protein          |
| Locus_3207_Transcript_2/2_Conf_1.000 | 783  | 1  | 3.48E-05  | XP_001894039.1 | 49 | 53.1434 | 116 | 57  | Rhodanese-like domain containing protein          |
| Locus_3208_Transcript_1/1_Conf_1.000 | 1040 | 20 | 7.99E-52  | NP_495166.2    | 56 | 208.764 | 338 | 190 | hypothetical protein H41C03.3                     |
| Locus_3209_Transcript_1/6_Conf_0.250 | 374  | 20 | 9.62E-29  | NP_492616.1    | 66 | 129.798 | 111 | 74  | Nematode AStacin protease family member (nas-5)   |
| Locus_3209_Transcript_2/6_Conf_0.438 | 521  | 20 | 1.36E-39  | NP_492616.1    | 66 | 166.007 | 143 | 95  | Nematode AStacin protease family member (nas-5)   |
| Locus_3209_Transcript_3/6_Conf_0.375 | 392  | 20 | 2.47E-29  | NP_492616.1    | 66 | 131.724 | 111 | 74  | Nematode AStacin protease family member (nas-5)   |
| Locus_3209_Transcript_4/6_Conf_0.375 | 426  | 20 | 2.51E-29  | NP_492616.1    | 66 | 131.724 | 111 | 74  | Nematode AStacin protease family member (nas-5)   |
| Locus_3209_Transcript_5/6_Conf_0.312 | 258  | 20 | 6.27E-20  | NP_492616.1    | 66 | 100.523 | 86  | 57  | Nematode AStacin protease family member (nas-5)   |

|                                      |      |    |           |                |    |         |     |     |                                                 |
|--------------------------------------|------|----|-----------|----------------|----|---------|-----|-----|-------------------------------------------------|
| Locus_3209_Transcript_6/6_Conf_0.375 | 258  | 20 | 6.27E-20  | NP_492616.1    | 66 | 100.523 | 86  | 57  | Nematode ASTacin protease family member (nas-5) |
| Locus_321_Transcript_1/1_Conf_1.000  | 969  | 20 | 3.64E-96  | NP_505979.1    | 75 | 355.91  | 319 | 241 | hypothetical protein D2023.5                    |
| Locus_3210_Transcript_1/2_Conf_1.000 | 1343 | 20 | 1.75E-39  | NP_497592.1    | 52 | 168.318 | 317 | 167 | hypothetical protein Y71H2B.2                   |
| Locus_3210_Transcript_2/2_Conf_1.000 | 1343 | 20 | 1.03E-39  | NP_497592.1    | 52 | 169.088 | 317 | 168 | hypothetical protein Y71H2B.2                   |
| Locus_3211_Transcript_1/1_Conf_1.000 | 1095 | 20 | 4.65E-37  | NP_492456.2    | 62 | 159.844 | 235 | 146 | hypothetical protein F25H5.5                    |
| Locus_3212_Transcript_1/1_Conf_1.000 | 1298 | 0  |           |                |    |         |     |     |                                                 |
| Locus_3213_Transcript_1/1_Conf_1.000 | 1318 | 20 | 9.09E-142 | NP_001041137.1 | 73 | 508.064 | 427 | 315 | Alpha MANnosidase family member (aman-2)        |
| Locus_3214_Transcript_1/1_Conf_1.000 | 1520 | 20 | 0         | XP_002640929.1 | 91 | 743.806 | 464 | 426 | C. briggsae CBR-TUFM-1 protein                  |
| Locus_3215_Transcript_1/1_Conf_1.000 | 625  | 0  |           |                |    |         |     |     |                                                 |
| Locus_3216_Transcript_1/1_Conf_1.000 | 794  | 20 | 5.07E-60  | EFO24908.1     | 68 | 235.343 | 224 | 154 | oxysterol binding protein                       |
| Locus_3217_Transcript_1/2_Conf_1.000 | 1570 | 20 | 2.31E-150 | XP_002636889.1 | 68 | 536.954 | 528 | 360 | C. briggsae CBR-HEX-2 protein                   |
| Locus_3217_Transcript_2/2_Conf_1.000 | 580  | 20 | 1.89E-31  | XP_002636889.1 | 56 | 139.428 | 199 | 113 | C. briggsae CBR-HEX-2 protein                   |
| Locus_3218_Transcript_1/1_Conf_1.000 | 410  | 0  |           |                |    |         |     |     |                                                 |
| Locus_3219_Transcript_1/1_Conf_1.000 | 1319 | 20 | 2.66E-117 | CBW48561.1     | 73 | 426.787 | 373 | 273 | Hypothetical protein Y111B2A.12a                |
| Locus_322_Transcript_1/1_Conf_1.000  | 592  | 20 | 1.27E-54  | XP_002646548.1 | 84 | 216.468 | 145 | 122 | C. briggsae CBR-CPN-4 protein                   |
| Locus_3220_Transcript_1/2_Conf_1.000 | 647  | 20 | 4.64E-46  | NP_491198.1    | 83 | 188.348 | 159 | 133 | FerriTiN family member (ftn-2)                  |

|                                      |      |    |           |                |    |         |     |     |                                            |
|--------------------------------------|------|----|-----------|----------------|----|---------|-----|-----|--------------------------------------------|
| Locus_3220_Transcript_2/2_Conf_1.000 | 632  | 20 | 6.08E-48  | NP_491198.1    | 86 | 194.512 | 154 | 133 | FerriTIN family member (ftn-2)             |
| Locus_3221_Transcript_1/1_Conf_1.000 | 610  | 20 | 2.60E-69  | EFO15646.1     | 79 | 265.388 | 203 | 162 | hypothetical protein LOAG_12863            |
| Locus_3222_Transcript_1/1_Conf_1.000 | 1009 | 20 | 8.91E-117 | XP_002639985.1 | 96 | 424.476 | 226 | 219 | C. briggsae CBR-PAS-3 protein              |
| Locus_3223_Transcript_1/1_Conf_1.000 | 757  | 20 | 1.56E-108 | XP_002643138.1 | 86 | 396.356 | 251 | 218 | Hypothetical protein CBG15316              |
| Locus_3224_Transcript_1/1_Conf_1.000 | 146  | 0  |           |                |    |         |     |     |                                            |
| Locus_3225_Transcript_1/1_Conf_1.000 | 1077 | 20 | 4.97E-177 | NP_001022641.1 | 91 | 624.78  | 358 | 329 | LEThal family member (let-805)             |
| Locus_3226_Transcript_1/1_Conf_1.000 | 338  | 20 | 2.55E-42  | NP_495808.2    | 86 | 174.866 | 112 | 97  | STCH (truncated HSP) family member (stc-1) |
| Locus_3227_Transcript_1/1_Conf_1.000 | 382  | 0  |           |                |    |         |     |     |                                            |
| Locus_3228_Transcript_1/8_Conf_0.667 | 2038 | 0  |           |                |    |         |     |     |                                            |
| Locus_3228_Transcript_2/8_Conf_0.667 | 2038 | 0  |           |                |    |         |     |     |                                            |
| Locus_3228_Transcript_3/8_Conf_0.381 | 1404 | 0  |           |                |    |         |     |     |                                            |
| Locus_3228_Transcript_4/8_Conf_0.667 | 2038 | 0  |           |                |    |         |     |     |                                            |

|                                      |      |    |          |                |    |         |     |     |                                |
|--------------------------------------|------|----|----------|----------------|----|---------|-----|-----|--------------------------------|
| Locus_3228_Transcript_5/8_Conf_0.667 | 2038 | 0  |          |                |    |         |     |     |                                |
| Locus_3228_Transcript_6/8_Conf_0.667 | 2038 | 0  |          |                |    |         |     |     |                                |
| Locus_3228_Transcript_7/8_Conf_0.667 | 2038 | 0  |          |                |    |         |     |     |                                |
| Locus_3228_Transcript_8/8_Conf_0.667 | 2038 | 0  |          |                |    |         |     |     |                                |
| Locus_3229_Transcript_1/1_Conf_1.000 | 1590 | 1  | 1.06E-17 |                | 53 | 96.2857 | 150 | 80  | hypothetical 18K protein       |
| Locus_323_Transcript_1/1_Conf_1.000  | 1073 | 20 | 3.33E-24 | NP_501527.1    | 71 | 117.087 | 99  | 71  | COLLagen family member (col-3) |
| Locus_3230_Transcript_1/1_Conf_1.000 | 138  | 14 | 2.75E-12 | XP_002631560.1 | 86 | 75.0998 | 46  | 40  | Hypothetical protein CBG20736  |
| Locus_3231_Transcript_1/1_Conf_1.000 | 128  | 0  |          |                |    |         |     |     |                                |
| Locus_3232_Transcript_1/1_Conf_1.000 | 261  | 0  |          |                |    |         |     |     |                                |
| Locus_3233_Transcript_1/2_Conf_1.000 | 1534 | 20 | 0        | XP_002644811.1 | 93 | 702.205 | 437 | 407 | C. briggsae CBR-HSP-3 protein  |

|                                      |      |    |          |                |     |         |     |     |                                 |
|--------------------------------------|------|----|----------|----------------|-----|---------|-----|-----|---------------------------------|
| Locus_3233_Transcript_2/2_Conf_1.000 | 1534 | 20 | 0        | XP_002644811.1 | 93  | 702.205 | 437 | 407 | C. briggsae CBR-HSP-3 protein   |
| Locus_3234_Transcript_1/1_Conf_1.000 | 385  | 0  |          |                |     |         |     |     |                                 |
| Locus_3235_Transcript_1/1_Conf_1.000 | 419  | 20 | 2.14E-52 | EAX01930.1     | 100 | 208.379 | 113 | 113 | cytochrome c oxidase subunit Vb |
| Locus_3236_Transcript_1/1_Conf_1.000 | 207  | 0  |          |                |     |         |     |     |                                 |
| Locus_3237_Transcript_1/1_Conf_1.000 | 1109 | 20 | 1.07E-97 | XP_002643973.1 | 71  | 361.303 | 345 | 245 | C. briggsae CBR-PRX-12 protein  |
| Locus_3238_Transcript_1/1_Conf_1.000 | 892  | 20 | 4.92E-65 | NP_001122749.1 | 64  | 252.292 | 296 | 190 | hypothetical protein ZK643.3    |
| Locus_3239_Transcript_1/1_Conf_1.000 | 719  | 20 | 6.66E-34 | XP_001893083.1 | 57  | 148.288 | 180 | 103 | PHD-finger family protein       |
| Locus_324_Transcript_1/2_Conf_1.000  | 719  | 20 | 1.06E-47 | XP_002634550.1 | 99  | 194.126 | 116 | 115 | C. briggsae CBR-RPS-14 protein  |



|                                      |      |    |           |                |    |         |     |     |                                |
|--------------------------------------|------|----|-----------|----------------|----|---------|-----|-----|--------------------------------|
| Locus_324_Transcript_2/2_Conf_1.000  | 719  | 20 | 6.86E-47  | XP_002634550.1 | 99 | 191.43  | 116 | 115 | C. briggsae CBR-RPS-14 protein |
| Locus_3240_Transcript_1/1_Conf_1.000 | 2314 | 20 | 7.11E-117 | XP_002630611.1 | 67 | 426.402 | 488 | 328 | Hypothetical protein CBG02274  |
| Locus_3241_Transcript_1/1_Conf_1.000 | 918  | 20 | 3.95E-89  | XP_002643058.1 | 69 | 332.413 | 323 | 225 | C. briggsae CBR-DCR-1 protein  |
| Locus_3242_Transcript_1/2_Conf_1.000 | 473  | 4  | 6.62E-14  | NP_501671.1    | 72 | 80.4925 | 81  | 59  | hypothetical protein F38E11.5  |
| Locus_3242_Transcript_2/2_Conf_1.000 | 482  | 4  | 6.53E-14  | NP_501671.1    | 72 | 80.4925 | 81  | 59  | hypothetical protein F38E11.5  |
| Locus_3243_Transcript_1/1_Conf_1.000 | 1318 | 20 | 2.56E-27  | XP_002644673.1 | 54 | 127.872 | 238 | 129 | C. briggsae CBR-AGS-3 protein  |
| Locus_3244_Transcript_1/1_Conf_1.000 | 1634 | 20 | 1.41E-73  | NP_491642.2    | 53 | 281.952 | 549 | 296 | hypothetical protein F46F11.9  |
| Locus_3245_Transcript_1/1_Conf_1.000 | 792  | 20 | 4.11E-94  | XP_002636822.1 | 99 | 348.591 | 179 | 178 | C. briggsae CBR-RPT-2 protein  |

|                                      |      |    |           |                |    |         |     |     |                                                         |
|--------------------------------------|------|----|-----------|----------------|----|---------|-----|-----|---------------------------------------------------------|
| Locus_3246_Transcript_1/1_Conf_1.000 | 684  | 20 | 1.78E-110 | AAC47514.1     | 97 | 402.519 | 215 | 209 | RRM-type RNA binding protein                            |
| Locus_3247_Transcript_1/2_Conf_1.000 | 1434 | 20 | 4.06E-88  | XP_002639179.1 | 82 | 317.005 | 198 | 164 | Hypothetical protein CBG03720                           |
| Locus_3247_Transcript_2/2_Conf_1.000 | 1423 | 20 | 1.74E-93  | XP_002639179.1 | 81 | 347.821 | 229 | 186 | Hypothetical protein CBG03720                           |
| Locus_3248_Transcript_1/1_Conf_1.000 | 243  | 0  |           |                |    |         |     |     |                                                         |
| Locus_3249_Transcript_1/1_Conf_1.000 | 968  | 20 | 2.26E-106 | XP_001894227.1 | 82 | 389.808 | 271 | 223 | prolyl oligopeptidase family protein                    |
| Locus_325_Transcript_1/1_Conf_1.000  | 304  | 0  |           |                |    |         |     |     |                                                         |
| Locus_3250_Transcript_1/1_Conf_1.000 | 295  | 20 | 6.44E-17  | XP_002636703.1 | 67 | 90.5077 | 96  | 65  | Hypothetical protein CBG23421                           |
| Locus_3251_Transcript_1/2_Conf_1.000 | 447  | 20 | 4.12E-56  | NP_492193.2    | 83 | 220.705 | 151 | 126 | JunctoPHilin family member (jph-1)                      |
| Locus_3251_Transcript_2/2_Conf_1.000 | 456  | 20 | 1.03E-59  | NP_492193.2    | 85 | 232.646 | 151 | 129 | JunctoPHilin family member (jph-1)                      |
| Locus_3252_Transcript_1/2_Conf_1.000 | 1386 | 20 | 9.42E-161 | NP_001022992.1 | 81 | 571.237 | 387 | 315 | CYtoKinesis defect family member (cyk-3)                |
| Locus_3252_Transcript_2/2_Conf_1.000 | 1272 | 20 | 8.30E-161 | NP_001022992.1 | 81 | 571.237 | 387 | 315 | CYtoKinesis defect family member (cyk-3)                |
| Locus_3253_Transcript_1/1_Conf_1.000 | 524  | 20 | 4.03E-55  | XP_002630351.1 | 89 | 217.624 | 123 | 110 | C. briggsae CBR-TTR-41 protein                          |
| Locus_3254_Transcript_1/1_Conf_1.000 | 357  | 0  |           |                |    |         |     |     |                                                         |
| Locus_3255_Transcript_1/1_Conf_1.000 | 479  | 20 | 3.00E-67  | NP_502365.1    | 95 | 257.684 | 134 | 128 | Ribosomal Protein, Small subunit family member (rps-23) |
| Locus_3256_Transcript_1/1_Conf_1.000 | 865  | 20 | 2.46E-114 |                | 86 | 416.001 | 288 | 248 | protein C43E11.4                                        |

|                                      |      |    |          |                |    |         |     |     |                                                           |
|--------------------------------------|------|----|----------|----------------|----|---------|-----|-----|-----------------------------------------------------------|
| Locus_3257_Transcript_1/3_Conf_0.714 | 1230 | 20 | 6.21E-97 | XP_001901521.1 | 68 | 358.992 | 349 | 240 | Protein kinase domain containing protein                  |
| Locus_3257_Transcript_2/3_Conf_0.286 | 318  | 0  |          |                |    |         |     |     |                                                           |
| Locus_3257_Transcript_3/3_Conf_0.714 | 1230 | 20 | 6.21E-97 | XP_001901521.1 | 68 | 358.992 | 349 | 240 | Protein kinase domain containing protein                  |
| Locus_3258_Transcript_1/1_Conf_1.000 | 499  | 20 | 3.91E-67 | XP_002637724.1 | 97 | 257.299 | 140 | 136 | C. briggsae CBR-RPS-16 protein                            |
| Locus_3259_Transcript_1/2_Conf_1.000 | 624  | 20 | 1.91E-46 | NP_001022619.1 | 68 | 189.504 | 209 | 143 | NorDiHydroGuaiaretic acid resistant family member (ndg-4) |
| Locus_3259_Transcript_2/2_Conf_1.000 | 624  | 20 | 1.91E-46 | NP_001022619.1 | 68 | 189.504 | 209 | 143 | NorDiHydroGuaiaretic acid resistant family member (ndg-4) |

|                                      |      |    |           |                |     |         |     |     |                                          |
|--------------------------------------|------|----|-----------|----------------|-----|---------|-----|-----|------------------------------------------|
| Locus_326_Transcript_1/1_Conf_1.000  | 1656 | 20 | 4.45E-91  | NP_872037.1    | 76  | 340.117 | 350 | 268 | hypothetical protein F55C12.1            |
| Locus_3260_Transcript_1/1_Conf_1.000 | 248  | 0  |           |                |     |         |     |     |                                          |
| Locus_3261_Transcript_1/1_Conf_1.000 | 2313 | 7  | 4.59E-15  | EFO26059.1     | 41  | 88.1965 | 666 | 278 | hypothetical protein LOAG_02422          |
| Locus_3262_Transcript_1/1_Conf_1.000 | 189  | 8  | 3.34E-13  | NP_510810.3    | 75  | 78.1814 | 61  | 46  | PaTched Related family member (ptr-5)    |
| Locus_3263_Transcript_1/1_Conf_1.000 | 677  | 20 | 1.82E-51  | NP_492981.1    | 59  | 206.453 | 204 | 121 | hypothetical protein T22H2.6             |
| Locus_3264_Transcript_1/1_Conf_1.000 | 248  | 0  |           |                |     |         |     |     |                                          |
| Locus_3265_Transcript_1/1_Conf_1.000 | 710  | 20 | 2.10E-125 | XP_001915548.1 | 100 | 452.21  | 217 | 217 | PREDICTED: similar to QM protein         |
| Locus_3266_Transcript_1/1_Conf_1.000 | 2137 | 20 | 0         | XP_002639653.1 | 82  | 1087.4  | 725 | 600 | C. briggsae CBR-SUP-17 protein           |
| Locus_3267_Transcript_1/1_Conf_1.000 | 842  | 20 | 1.48E-68  | XP_002641467.1 | 83  | 263.848 | 206 | 173 | Hypothetical protein CBG09751            |
| Locus_3268_Transcript_1/1_Conf_1.000 | 276  | 0  |           |                |     |         |     |     |                                          |
| Locus_3269_Transcript_1/1_Conf_1.000 | 2326 | 20 | 0         | XP_001891733.1 | 70  | 774.622 | 763 | 537 | Laminin related. see also lmb- protein 1 |
| Locus_327_Transcript_1/2_Conf_1.000  | 673  | 20 | 3.42E-18  | NP_502288.1    | 48  | 95.9005 | 230 | 111 | hypothetical protein K08E4.6             |

|                                      |      |    |           |                |    |         |     |     |                                                     |
|--------------------------------------|------|----|-----------|----------------|----|---------|-----|-----|-----------------------------------------------------|
| Locus_327_Transcript_2/2_Conf_1.000  | 673  | 20 | 3.42E-18  | NP_502288.1    | 48 | 95.9005 | 230 | 111 | hypothetical protein K08E4.6                        |
| Locus_3270_Transcript_1/1_Conf_1.000 | 1143 | 20 | 6.10E-112 | XP_966556.1    | 76 | 408.683 | 312 | 240 | PREDICTED: similar to WD40 protein                  |
| Locus_3271_Transcript_1/1_Conf_1.000 | 1072 | 20 | 8.79E-134 | XP_002630463.1 | 85 | 481.1   | 304 | 260 | C. briggsae CBR-ART-1 protein                       |
| Locus_3272_Transcript_1/1_Conf_1.000 | 1448 | 20 | 1.65E-123 | XP_002631349.1 | 72 | 447.588 | 454 | 329 | Hypothetical protein CBG03180                       |
| Locus_3273_Transcript_1/1_Conf_1.000 | 468  | 3  | 7.61E-10  | NP_740837.1    | 88 | 67.0106 | 76  | 67  | NeurABin family member (nab-1)                      |
| Locus_3274_Transcript_1/1_Conf_1.000 | 1154 | 20 | 4.79E-64  | NP_491872.1    | 61 | 249.595 | 285 | 175 | hypothetical protein C55B7.3                        |
| Locus_3275_Transcript_1/1_Conf_1.000 | 804  | 20 | 2.37E-20  | XP_001629765.1 | 58 | 103.605 | 178 | 104 | predicted protein                                   |
| Locus_3276_Transcript_1/1_Conf_1.000 | 558  | 2  | 2.99E-04  | EFO26732.1     | 71 | 48.9062 | 52  | 37  | hypothetical protein LOAG_01748                     |
| Locus_3277_Transcript_1/1_Conf_1.000 | 1156 | 20 | 1.73E-146 | NP_001021908.1 | 81 | 523.472 | 389 | 316 | CAN cell Migration defective family member (cam-1)  |
| Locus_3278_Transcript_1/1_Conf_1.000 | 226  | 9  | 2.73E-07  | NP_001040795.1 | 60 | 58.5362 | 75  | 45  | Nuclear Pore complex Protein family member (npp-21) |
| Locus_3279_Transcript_1/1_Conf_1.000 | 447  | 0  |           |                |    |         |     |     |                                                     |
| Locus_328_Transcript_1/1_Conf_1.000  | 589  | 11 | 6.71E-16  | NP_492102.1    | 68 | 87.8113 | 99  | 68  | hypothetical protein T28F4.5                        |
| Locus_3280_Transcript_1/2_Conf_1.000 | 1042 | 20 | 7.36E-122 | XP_002636969.1 | 90 | 441.425 | 252 | 227 | Hypothetical protein CBG09450                       |
| Locus_3280_Transcript_2/2_Conf_1.000 | 1042 | 20 | 5.64E-122 | XP_002636969.1 | 90 | 441.81  | 252 | 227 | Hypothetical protein CBG09450                       |
| Locus_3281_Transcript_1/2_Conf_1.000 | 677  | 20 | 1.06E-59  | NP_001023605.1 | 84 | 233.802 | 197 | 166 | hypothetical protein ZC477.3                        |
| Locus_3281_Transcript_2/2_Conf_1.000 | 677  | 20 | 1.06E-59  | NP_001023605.1 | 84 | 233.802 | 197 | 166 | hypothetical protein ZC477.3                        |
| Locus_3282_Transcript_1/2_Conf_0.667 | 336  |    |           |                |    |         |     |     |                                                     |

|                                      |      |    |           |                |    |         |      |     |                                                                   |
|--------------------------------------|------|----|-----------|----------------|----|---------|------|-----|-------------------------------------------------------------------|
| Locus_3282_Transcript_2/2_Conf_0.667 | 336  |    |           |                |    |         |      |     |                                                                   |
| Locus_3283_Transcript_1/1_Conf_1.000 | 679  | 20 | 2.17E-44  | XP_001898089.1 | 74 | 182.956 | 203  | 151 | uridine monophosphate kinase                                      |
| Locus_3284_Transcript_1/1_Conf_1.000 | 1217 | 20 | 3.33E-111 | NP_492207.1    | 90 | 406.371 | 283  | 257 | Cytochrome C family member (cyc-1)                                |
| Locus_3285_Transcript_1/1_Conf_1.000 | 1106 | 20 | 6.82E-145 | XP_002643138.1 | 89 | 518.079 | 319  | 285 | Hypothetical protein CBG15316                                     |
| Locus_3286_Transcript_1/1_Conf_1.000 | 406  | 20 | 7.30E-21  | XP_001895616.1 | 64 | 103.605 | 137  | 89  | CG8232-PA                                                         |
| Locus_3287_Transcript_1/1_Conf_1.000 | 185  | 0  |           |                |    |         |      |     |                                                                   |
| Locus_3288_Transcript_1/1_Conf_1.000 | 414  | 20 | 3.69E-33  | NP_498778.1    | 82 | 144.436 | 104  | 86  | hypothetical protein D2007.4                                      |
| Locus_3289_Transcript_1/1_Conf_1.000 | 299  | 0  |           |                |    |         |      |     |                                                                   |
| Locus_329_Transcript_1/1_Conf_1.000  | 1222 | 20 | 7.04E-85  | XP_002640778.1 | 67 | 318.931 | 324  | 218 | C. briggsae CBR-FRL-1 protein                                     |
| Locus_3290_Transcript_1/2_Conf_1.000 | 207  | 0  |           |                |    |         |      |     |                                                                   |
| Locus_3290_Transcript_2/2_Conf_1.000 | 1877 | 20 | 0         | NP_499087.2    | 93 | 719.539 | 455  | 424 | BT (Bacillus thuringiensis) toxin REsistant family member (bre-3) |
| Locus_3291_Transcript_1/2_Conf_1.000 | 3308 | 20 | 0         | NP_001033397.1 | 78 | 1413.67 | 1060 | 833 | Sensory AXon guidance family member (sax-7)                       |

|                                      |      |    |           |                |    |         |      |     |                                                |
|--------------------------------------|------|----|-----------|----------------|----|---------|------|-----|------------------------------------------------|
| Locus_3291_Transcript_2/2_Conf_1.000 | 3674 | 20 | 0         | NP_001033395.1 | 78 | 1638.62 | 1240 | 971 | Sensory AXon guidance family member (sax-7)    |
| Locus_3292_Transcript_1/1_Conf_1.000 | 167  | 0  |           |                |    |         |      |     |                                                |
| Locus_3293_Transcript_1/1_Conf_1.000 | 379  | 20 | 1.93E-21  | XP_002647137.1 | 64 | 105.531 | 119  | 77  | Hypothetical protein CBG16435                  |
| Locus_3294_Transcript_1/1_Conf_1.000 | 2195 | 20 | 0         | ACI49172.1     | 65 | 642.114 | 745  | 491 | hypothetical protein Csp3_JD01.004             |
| Locus_3295_Transcript_1/1_Conf_1.000 | 692  | 20 | 2.18E-63  | XP_002640222.1 | 81 | 246.128 | 172  | 141 | Hypothetical protein CBG12733                  |
| Locus_3296_Transcript_1/1_Conf_1.000 | 690  | 20 | 5.00E-76  | XP_002639744.1 | 77 | 288.115 | 230  | 179 | C. briggsae CBR-LAM-3 protein                  |
| Locus_3297_Transcript_1/1_Conf_1.000 | 622  | 8  | 6.63E-76  | XP_002632697.1 | 83 | 287.345 | 206  | 172 | Hypothetical protein CBG21629                  |
| Locus_3298_Transcript_1/1_Conf_1.000 | 499  | 20 | 6.48E-54  | NP_499892.1    | 72 | 213.386 | 158  | 114 | hypothetical protein T21D12.12                 |
| Locus_3299_Transcript_1/1_Conf_1.000 | 2439 | 20 | 0         | XP_002648413.1 | 71 | 788.489 | 774  | 551 | Hypothetical protein CBG24676                  |
| Locus_33_Transcript_1/2_Conf_1.000   | 1770 | 20 | 0         | NP_502793.1    | 98 | 906.36  | 474  | 466 | hypothetical protein Y57G11C.15                |
| Locus_33_Transcript_2/2_Conf_1.000   | 1159 | 20 | 2.28E-114 | XP_001899170.1 | 98 | 416.772 | 216  | 212 | probable transport protein Sec61 alpha subunit |

|                                      |      |    |           |                |    |         |     |     |                                                               |
|--------------------------------------|------|----|-----------|----------------|----|---------|-----|-----|---------------------------------------------------------------|
| Locus_330_Transcript_1/1_Conf_1.000  | 456  | 20 | 1.61E-28  | XP_002633496.1 | 76 | 129.028 | 93  | 71  | Hypothetical protein CBG06268                                 |
| Locus_3300_Transcript_1/1_Conf_1.000 | 1728 | 20 | 0         | NP_497809.1    | 85 | 880.167 | 578 | 497 | Heavy chain, Unconventional Myosin family member (hum-5)      |
| Locus_3301_Transcript_1/1_Conf_1.000 | 1654 | 20 | 4.87E-122 | XP_001897908.1 | 72 | 442.965 | 385 | 280 | Innexin family protein                                        |
| Locus_3302_Transcript_1/1_Conf_1.000 | 616  | 20 | 1.37E-65  | NP_499797.1    | 78 | 253.062 | 191 | 149 | Polarity and Osmotic sensitivity Defect family member (pod-1) |
| Locus_3303_Transcript_1/1_Conf_1.000 | 321  | 0  |           |                |    |         |     |     |                                                               |
| Locus_3304_Transcript_1/1_Conf_1.000 | 625  | 20 | 2.23E-79  | EFO19891.1     | 86 | 298.901 | 197 | 170 | HCFC1 protein                                                 |
| Locus_3305_Transcript_1/1_Conf_1.000 | 1407 | 20 | 0         | XP_002633963.1 | 89 | 647.121 | 457 | 411 | C. briggsae CBR-AAT-1 protein                                 |
| Locus_3306_Transcript_1/1_Conf_1.000 | 2161 | 20 | 0         | NP_492638.1    | 84 | 943.725 | 628 | 529 | Eukaryotic Initiation Factor family member (eif-3.C)          |
| Locus_3307_Transcript_1/1_Conf_1.000 | 2718 | 20 | 2.84E-27  | XP_002639769.1 | 46 | 129.028 | 274 | 128 | C. briggsae CBR-DUO-3 protein                                 |
| Locus_3308_Transcript_1/1_Conf_1.000 | 2562 | 20 | 0         | EFO27141.1     | 83 | 690.263 | 510 | 425 | importin alpha-3 subunit                                      |
| Locus_3309_Transcript_1/1_Conf_1.000 | 756  | 0  |           |                |    |         |     |     |                                                               |
| Locus_331_Transcript_1/1_Conf_1.000  | 1021 | 20 | 3.38E-79  | NP_494564.2    | 68 | 299.671 | 328 | 224 | CYclin H family member (cyh-1)                                |



|                                      |      |    |           |                |     |         |     |     |                                                         |
|--------------------------------------|------|----|-----------|----------------|-----|---------|-----|-----|---------------------------------------------------------|
| Locus_3310_Transcript_1/3_Conf_0.667 | 2701 | 20 | 8.09E-67  | EFO22156.1     | 64  | 260.381 | 295 | 190 | hypothetical protein LOAG_06328                         |
| Locus_3310_Transcript_2/3_Conf_0.667 | 2713 | 20 | 8.13E-67  | EFO22156.1     | 64  | 260.381 | 295 | 190 | hypothetical protein LOAG_06328                         |
| Locus_3310_Transcript_3/3_Conf_0.667 | 2713 | 20 | 8.13E-67  | EFO22156.1     | 64  | 260.381 | 295 | 190 | hypothetical protein LOAG_06328                         |
| Locus_3311_Transcript_1/1_Conf_1.000 | 1410 | 20 | 3.78E-141 | XP_002633656.1 | 76  | 506.138 | 472 | 359 | C. briggsae CBR-GEX-3 protein                           |
| Locus_3312_Transcript_1/1_Conf_1.000 | 1202 | 20 | 2.65E-137 | XP_002634116.1 | 81  | 493.041 | 383 | 314 | C. briggsae CBR-SRS-1 protein                           |
| Locus_3313_Transcript_1/1_Conf_1.000 | 467  | 0  |           |                |     |         |     |     |                                                         |
| Locus_3314_Transcript_1/1_Conf_1.000 | 2237 | 20 | 2.00E-99  | NP_001122626.1 | 62  | 362.073 | 487 | 304 | DAB (Drosophila disabled) homolog family member (dab-1) |
| Locus_3315_Transcript_1/1_Conf_1.000 | 485  | 0  |           |                |     |         |     |     |                                                         |
| Locus_3316_Transcript_1/1_Conf_1.000 | 2044 | 20 | 0         | AAA93233.1     | 95  | 810.831 | 516 | 491 | CCT-2                                                   |
| Locus_3317_Transcript_1/1_Conf_1.000 | 591  | 20 | 6.26E-78  | NP_502542.1    | 100 | 293.893 | 150 | 150 | Ribosomal Protein, Large subunit family member (rpl-12) |

|                                      |      |    |           |                |    |         |     |     |                                                                                  |
|--------------------------------------|------|----|-----------|----------------|----|---------|-----|-----|----------------------------------------------------------------------------------|
| Locus_3319_Transcript_1/1_Conf_1.000 | 1057 | 20 | 2.59E-122 | NP_496336.1    | 87 | 442.965 | 271 | 238 | CAP-z protein family member (cap-2)                                              |
| Locus_332_Transcript_1/1_Conf_1.000  | 3010 | 20 | 0         | NP_508811.1    | 70 | 1024.23 | 957 | 675 | Alpha MANnosidase family member (aman-1)                                         |
| Locus_3320_Transcript_1/1_Conf_1.000 | 1047 | 20 | 2.56E-114 | XP_002639636.1 | 94 | 416.387 | 238 | 224 | C. briggsae CBR-PAS-4 protein                                                    |
| Locus_3321_Transcript_1/1_Conf_1.000 | 796  | 20 | 4.38E-128 | NP_505722.1    | 92 | 461.455 | 264 | 244 | SCP(Small C-terminal domain Phosphatase)-Like phosphatase family member (scpl-4) |
| Locus_3322_Transcript_1/1_Conf_1.000 | 262  | 0  |           |                |    |         |     |     |                                                                                  |
| Locus_3323_Transcript_1/1_Conf_1.000 | 147  | 0  |           |                |    |         |     |     |                                                                                  |
| Locus_3324_Transcript_1/2_Conf_1.000 | 540  | 20 | 6.90E-40  | CBA11992.1     | 65 | 167.162 | 179 | 118 | endonuclease-reverse transcriptase HmRTE-e01                                     |

|                                      |      |    |          |                |    |         |     |     |                                                        |
|--------------------------------------|------|----|----------|----------------|----|---------|-----|-----|--------------------------------------------------------|
| Locus_3324_Transcript_2/2_Conf_1.000 | 265  | 20 | 2.62E-10 | CBA11992.1     | 60 | 68.5514 | 87  | 53  | endonuclease-reverse transcriptase HmRTE-e01           |
| Locus_3325_Transcript_1/1_Conf_1.000 | 897  | 3  | 1.38E-06 | XP_729910.1    | 47 | 58.151  | 213 | 101 | hypothetical protein                                   |
| Locus_3326_Transcript_1/1_Conf_1.000 | 382  | 0  |          |                |    |         |     |     |                                                        |
| Locus_3327_Transcript_1/1_Conf_1.000 | 532  | 4  | 8.48E-11 | XP_002647160.1 | 61 | 70.4774 | 83  | 51  | C. briggsae CBR-FLP-9 protein                          |
| Locus_3328_Transcript_1/1_Conf_1.000 | 305  | 20 | 1.42E-16 | XP_001604031.1 | 85 | 89.3521 | 62  | 53  | PREDICTED: similar to conserved hypothetical protein   |
| Locus_3329_Transcript_1/1_Conf_1.000 | 483  | 20 | 2.70E-47 | NP_491792.1    | 95 | 191.43  | 100 | 95  | phenylalanyl (F) tRNA Synthetase family member (frs-1) |
| Locus_333_Transcript_1/5_Conf_0.167  | 203  | 0  |          |                |    |         |     |     |                                                        |
| Locus_333_Transcript_2/5_Conf_0.667  | 745  | 2  | 2.77E-09 | XP_002644899.1 | 55 | 66.6254 | 142 | 79  | C. briggsae CBR-CEH-60 protein                         |
| Locus_333_Transcript_3/5_Conf_0.167  | 339  | 0  |          |                |    |         |     |     |                                                        |
| Locus_333_Transcript_4/5_Conf_0.667  | 1071 | 20 | 1.54E-29 | XP_002644899.1 | 56 | 134.806 | 233 | 132 | C. briggsae CBR-CEH-60 protein                         |

|                                      |      |    |           |                |    |         |     |     |                                                        |
|--------------------------------------|------|----|-----------|----------------|----|---------|-----|-----|--------------------------------------------------------|
| Locus_333_Transcript_5/5_Conf_0.667  | 997  | 20 | 1.38E-29  | XP_002644899.1 | 56 | 134.806 | 233 | 132 | C. briggsae CBR-CEH-60 protein                         |
| Locus_3330_Transcript_1/1_Conf_1.000 | 179  | 0  |           |                |    |         |     |     |                                                        |
| Locus_3331_Transcript_1/1_Conf_1.000 | 438  | 0  |           |                |    |         |     |     |                                                        |
| Locus_3332_Transcript_1/2_Conf_1.000 | 360  | 0  |           |                |    |         |     |     |                                                        |
| Locus_3332_Transcript_2/2_Conf_1.000 | 354  | 0  |           |                |    |         |     |     |                                                        |
| Locus_3333_Transcript_1/1_Conf_1.000 | 1778 | 20 | 5.32E-122 | NP_501354.1    | 77 | 442.965 | 336 | 259 | hypothetical protein Y42H9AR.1                         |
| Locus_3334_Transcript_1/1_Conf_1.000 | 874  | 20 | 1.06E-80  | XP_002644659.1 | 70 | 304.294 | 271 | 192 | Hypothetical protein CBG14639                          |
| Locus_3335_Transcript_1/2_Conf_1.000 | 480  | 2  | 2.49E-05  | EFO22995.1     | 62 | 51.9878 | 48  | 30  | hypothetical protein LOAG_05488                        |
| Locus_3335_Transcript_2/2_Conf_1.000 | 482  | 0  |           |                |    |         |     |     |                                                        |
| Locus_3336_Transcript_1/1_Conf_1.000 | 359  | 0  |           |                |    |         |     |     |                                                        |
| Locus_3337_Transcript_1/1_Conf_1.000 | 610  | 20 | 3.40E-55  | ABW90417.1     | 81 | 154.451 | 101 | 82  | putative ribosomal protein S11                         |
| Locus_3338_Transcript_1/1_Conf_1.000 | 641  | 4  | 1.05E-10  | NP_499780.1    | 53 | 70.8626 | 99  | 53  | Temporarily Assigned Gene name family member (tag-164) |
| Locus_3339_Transcript_1/1_Conf_1.000 | 559  | 0  |           |                |    |         |     |     |                                                        |
| Locus_334_Transcript_1/1_Conf_1.000  | 1118 | 20 | 1.55E-19  | XP_002647027.1 | 56 | 101.679 | 187 | 106 | Hypothetical protein CBG03541                          |
| Locus_3340_Transcript_1/1_Conf_1.000 | 893  | 20 | 6.31E-129 | XP_002633912.1 | 92 | 464.537 | 265 | 246 | C. briggsae CBR-IVD-1 protein                          |
| Locus_3341_Transcript_1/1_Conf_1.000 | 746  | 20 | 1.95E-71  | EFO27286.1     | 77 | 273.092 | 248 | 191 | peptidase M16 inactive domain-containing protein       |

|                                      |      |    |           |                |    |         |     |     |                                                               |
|--------------------------------------|------|----|-----------|----------------|----|---------|-----|-----|---------------------------------------------------------------|
| Locus_3342_Transcript_1/1_Conf_1.000 | 328  | 0  |           |                |    |         |     |     |                                                               |
| Locus_3343_Transcript_1/2_Conf_1.000 | 2310 | 0  |           |                |    |         |     |     |                                                               |
| Locus_3343_Transcript_2/2_Conf_1.000 | 2211 | 0  |           |                |    |         |     |     |                                                               |
| Locus_3344_Transcript_1/1_Conf_1.000 | 1743 | 20 | 0         | XP_001898481.1 | 82 | 760.755 | 566 | 469 | Membrane-associated protein gex-3                             |
| Locus_3345_Transcript_1/1_Conf_1.000 | 627  | 20 | 1.43E-57  | CAA90256.2     | 75 | 226.483 | 185 | 139 | C. elegans protein F54C9.11, confirmed by transcript evidence |
| Locus_3346_Transcript_1/1_Conf_1.000 | 1511 | 20 | 2.23E-110 | NP_498475.1    | 70 | 404.06  | 399 | 281 | hypothetical protein F37A4.1                                  |
| Locus_3347_Transcript_1/1_Conf_1.000 | 356  | 20 | 3.37E-50  | CAR63538.1     | 84 | 201.06  | 118 | 100 | putative MFP2                                                 |
| Locus_3348_Transcript_1/1_Conf_1.000 | 1532 | 20 | 0         | Q60V73.3       | 89 | 762.296 | 463 | 415 | Serine hydroxymethyltransferase                               |
| Locus_3349_Transcript_1/1_Conf_1.000 | 782  | 20 | 5.95E-90  | XP_002634069.1 | 79 | 334.724 | 247 | 196 | Hypothetical protein CBG01611                                 |

|                                      |      |    |          |                |    |         |     |     |                                            |
|--------------------------------------|------|----|----------|----------------|----|---------|-----|-----|--------------------------------------------|
| Locus_335_Transcript_1/1_Conf_1.000  | 1260 | 20 | 1.70E-49 | NP_498943.2    | 44 | 201.445 | 491 | 220 | Zinc Finger Protein family member (zfp-1)  |
| Locus_3350_Transcript_1/1_Conf_1.000 | 736  | 3  | 2.60E-20 | XP_002630955.1 | 59 | 103.219 | 183 | 109 | C. briggsae CBR-WRN-1 protein              |
| Locus_3351_Transcript_1/1_Conf_1.000 | 678  | 20 | 1.99E-05 | XP_002192259.1 | 42 | 53.5286 | 271 | 114 | PREDICTED: similar to myosin heavy chain 6 |
| Locus_3352_Transcript_1/1_Conf_1.000 | 1147 | 20 | 8.17E-40 | NP_498484.1    | 58 | 169.088 | 227 | 132 | LIM domain family member (lim-8)           |
| Locus_3353_Transcript_1/1_Conf_1.000 | 269  | 20 | 9.24E-24 | XP_001898868.1 | 84 | 113.235 | 75  | 63  | fructose-1,6-bisphosphatase                |
| Locus_3354_Transcript_1/1_Conf_1.000 | 2074 | 20 | 3.08E-15 | NP_501981.2    | 45 | 88.5817 | 410 | 185 | hypothetical protein R102.5                |
| Locus_3355_Transcript_1/1_Conf_1.000 | 968  | 20 | 5.44E-68 | NP_504411.1    | 76 | 262.307 | 224 | 172 | hypothetical protein B0238.10              |
| Locus_3356_Transcript_1/1_Conf_1.000 | 598  | 0  |          |                |    |         |     |     |                                            |
| Locus_3357_Transcript_1/1_Conf_1.000 | 582  | 4  | 4.14E-34 | XP_001892872.1 | 54 | 148.288 | 192 | 104 | hypothetical protein Bm1_07015             |
| Locus_3358_Transcript_1/1_Conf_1.000 | 282  | 20 | 1.11E-32 | XP_002637177.1 | 80 | 142.895 | 94  | 76  | Hypothetical protein CBG09695              |

|                                      |      |    |           |                |    |         |     |     |                                                                                                                                                     |
|--------------------------------------|------|----|-----------|----------------|----|---------|-----|-----|-----------------------------------------------------------------------------------------------------------------------------------------------------|
| Locus_3359_Transcript_1/1_Conf_1.000 | 528  | 20 | 4.53E-33  | NP_501757.1    | 72 | 144.436 | 151 | 110 | yeast MTR (mRNA TRansport) homolog family member (mtr-4)                                                                                            |
| Locus_336_Transcript_1/1_Conf_1.000  | 762  | 20 | 2.75E-44  | NP_498872.1    | 74 | 182.956 | 157 | 117 | hypothetical protein F42H10.6                                                                                                                       |
| Locus_3360_Transcript_1/1_Conf_1.000 | 1636 | 20 | 7.86E-141 | XP_001899636.1 | 77 | 505.368 | 394 | 304 | Chain A, Two Seven-Bladed Beta-Propeller Domains Revealed By The Structure Of A C. Elegans Homologue Of Yeast Actin Interacting Protein 1, putative |
| Locus_3361_Transcript_1/1_Conf_1.000 | 338  | 1  | 3.85E-06  | XP_001901288.1 | 64 | 54.6842 | 101 | 65  | hypothetical protein Bm1_49115                                                                                                                      |
| Locus_3362_Transcript_1/1_Conf_1.000 | 768  | 20 | 5.25E-59  | NP_001129848.1 | 73 | 231.876 | 245 | 179 | hypothetical protein C27H2.2                                                                                                                        |
| Locus_3363_Transcript_1/1_Conf_1.000 | 1400 | 0  |           |                |    |         |     |     |                                                                                                                                                     |
| Locus_3364_Transcript_1/1_Conf_1.000 | 1812 | 20 | 1.07E-93  | AAL92523.1     | 51 | 348.977 | 680 | 352 | MAT-1                                                                                                                                               |
| Locus_3365_Transcript_1/1_Conf_1.000 | 567  | 20 | 1.23E-32  | XP_001901116.1 | 65 | 143.28  | 154 | 101 | BSD domain containing protein                                                                                                                       |
| Locus_3366_Transcript_1/1_Conf_1.000 | 1530 | 20 | 1.63E-92  | NP_504629.1    | 61 | 344.739 | 446 | 276 | hypothetical protein T05H4.10                                                                                                                       |
| Locus_3367_Transcript_1/1_Conf_1.000 | 559  | 0  |           |                |    |         |     |     |                                                                                                                                                     |
| Locus_3368_Transcript_1/3_Conf_0.714 | 1993 | 20 | 5.36E-09  | XP_002547406.1 | 46 | 67.781  | 235 | 110 | conserved hypothetical protein                                                                                                                      |

|                                      |      |    |           |                |     |         |     |     |                                 |
|--------------------------------------|------|----|-----------|----------------|-----|---------|-----|-----|---------------------------------|
| Locus_3368_Transcript_2/3_Conf_0.714 | 1984 | 20 | 5.33E-09  | XP_002547406.1 | 46  | 67.781  | 235 | 109 | conserved hypothetical protein  |
| Locus_3368_Transcript_3/3_Conf_0.714 | 1978 | 20 | 5.31E-09  | XP_002547406.1 | 46  | 67.781  | 235 | 110 | conserved hypothetical protein  |
| Locus_3369_Transcript_1/1_Conf_1.000 | 1036 | 20 | 1.22E-108 | NP_495629.2    | 79  | 397.512 | 278 | 222 | hypothetical protein B0228.7    |
| Locus_337_Transcript_1/1_Conf_1.000  | 178  | 20 | 7.71E-23  | EFO13894.1     | 100 | 110.153 | 54  | 54  | hypothetical protein LOAG_14633 |
| Locus_3370_Transcript_1/1_Conf_1.000 | 1360 | 20 | 1.05E-156 | XP_002642568.1 | 85  | 557.755 | 368 | 314 | C. briggsae CBR-RNR-2 protein   |



|                                      |      |    |           |                |     |         |     |     |                                                                |
|--------------------------------------|------|----|-----------|----------------|-----|---------|-----|-----|----------------------------------------------------------------|
| Locus_3371_Transcript_1/1_Conf_1.000 | 859  | 20 | 6.17E-118 | XP_002637181.1 | 95  | 427.943 | 231 | 220 | C. briggsae CBR-PAS-2 protein                                  |
| Locus_3372_Transcript_1/1_Conf_1.000 | 402  | 20 | 3.28E-37  | EFO22188.1     | 73  | 157.918 | 135 | 99  | hypothetical protein LOAG_06298                                |
| Locus_3373_Transcript_1/2_Conf_1.000 | 2190 | 20 | 0         | ACI49130.1     | 92  | 1107.05 | 673 | 621 | hypothetical protein Cbre_JD16.002                             |
| Locus_3373_Transcript_2/2_Conf_1.000 | 2190 | 20 | 0         | ACI49130.1     | 92  | 1107.05 | 673 | 621 | hypothetical protein Cbre_JD16.002                             |
| Locus_3374_Transcript_1/1_Conf_1.000 | 2489 | 20 | 1.53E-173 | NP_497969.1    | 65  | 614.764 | 851 | 558 | abnormal EMBroygenesis family member (emb-5)                   |
| Locus_3375_Transcript_1/1_Conf_1.000 | 990  | 20 | 8.24E-51  | NP_497852.1    | 56  | 205.297 | 304 | 173 | hypothetical protein T08A11.1                                  |
| Locus_3376_Transcript_1/1_Conf_1.000 | 1000 | 20 | 6.35E-68  | NP_496458.2    | 59  | 177.563 | 255 | 152 | hypothetical protein B0334.5                                   |
| Locus_3377_Transcript_1/1_Conf_1.000 | 843  | 20 | 2.63E-65  | NP_492711.1    | 63  | 253.062 | 321 | 203 | glutamyl(E)/glutaminy(Q) tRNA Synthetase family member (ers-2) |
| Locus_3378_Transcript_1/1_Conf_1.000 | 322  | 2  | 3.00E-14  | NP_493710.2    | 64  | 81.6481 | 104 | 67  | SarcoGlyCan Beta homolog family member (sgcb-1)                |
| Locus_3379_Transcript_1/1_Conf_1.000 | 252  | 20 | 6.50E-33  | P15941.3       | 100 | 143.665 | 64  | 64  | Mucin-1                                                        |

|                                      |      |    |          |                |    |         |     |     |                                                                              |
|--------------------------------------|------|----|----------|----------------|----|---------|-----|-----|------------------------------------------------------------------------------|
| Locus_338_Transcript_1/1_Conf_1.000  | 995  | 5  | 2.77E-30 | NP_499883.1    | 52 | 137.117 | 267 | 139 | Conserved Oligomeric Golgi (COG) Component family member (cogc-8)            |
| Locus_3380_Transcript_1/1_Conf_1.000 | 530  | 20 | 7.94E-54 | XP_002633876.1 | 74 | 213.386 | 177 | 131 | C. briggsae CBR-UNC-5 protein                                                |
| Locus_3381_Transcript_1/1_Conf_1.000 | 904  | 20 | 3.62E-63 | XP_001896403.1 | 83 | 246.128 | 173 | 145 | Hypothetical UPF0101 protein E02H1.6 in chromosome II                        |
| Locus_3382_Transcript_1/1_Conf_1.000 | 1143 | 20 | 4.65E-11 | NP_956425.1    | 51 | 73.559  | 145 | 74  | serine/threonine-protein phosphatase 2A regulatory subunit B'' subunit gamma |
| Locus_3383_Transcript_1/1_Conf_1.000 | 1037 | 20 | 2.11E-52 | XP_001900891.1 | 59 | 210.69  | 351 | 210 | Prion-like-                                                                  |
| Locus_3384_Transcript_1/2_Conf_1.000 | 1406 | 20 | 3.68E-96 | XP_002634609.1 | 67 | 356.681 | 399 | 270 | C. briggsae CBR-CSN-4 protein                                                |
| Locus_3384_Transcript_2/2_Conf_1.000 | 1388 | 20 | 3.64E-96 | XP_002634609.1 | 67 | 356.681 | 399 | 270 | C. briggsae CBR-CSN-4 protein                                                |
| Locus_3385_Transcript_1/1_Conf_1.000 | 744  | 5  | 1.46E-18 | NP_001041142.1 | 69 | 97.4413 | 115 | 80  | hypothetical protein H24G06.1                                                |
| Locus_3386_Transcript_1/1_Conf_1.000 | 1089 | 20 | 3.40E-48 | XP_002643585.1 | 62 | 196.823 | 323 | 203 | Hypothetical protein CBG16307                                                |
| Locus_3387_Transcript_1/1_Conf_1.000 | 1302 | 20 | 4.73E-34 | NP_001021463.1 | 44 | 150.214 | 449 | 202 | Suppressor of activated let-60 Ras family member (sur-2)                     |
| Locus_3388_Transcript_1/1_Conf_1.000 | 629  | 2  | 6.95E-04 | ACI49256.1     | 53 | 48.1358 | 88  | 47  | hypothetical protein Csp3_JD07.006                                           |
| Locus_3389_Transcript_1/1_Conf_1.000 | 421  | 2  | 4.80E-12 | XP_002630704.1 | 62 | 74.3294 | 124 | 77  | C. briggsae CBR-PINK-1 protein                                               |
| Locus_339_Transcript_1/1_Conf_1.000  | 330  | 0  |          |                |    |         |     |     |                                                                              |
| Locus_3390_Transcript_1/1_Conf_1.000 | 370  | 5  | 2.24E-09 | XP_001895978.1 | 57 | 65.4698 | 90  | 52  | hypothetical protein                                                         |
| Locus_3391_Transcript_1/1_Conf_1.000 | 1372 | 20 | 3.27E-73 | NP_741589.2    | 66 | 280.411 | 380 | 253 | hypothetical protein F44A2.5                                                 |
| Locus_3392_Transcript_1/1_Conf_1.000 | 998  | 20 | 1.52E-44 | XP_001893642.1 | 55 | 184.496 | 346 | 193 | hypothetical protein                                                         |

|                                      |      |    |           |                |    |         |     |     |                                                                      |
|--------------------------------------|------|----|-----------|----------------|----|---------|-----|-----|----------------------------------------------------------------------|
| Locus_3393_Transcript_1/2_Conf_1.000 | 2190 | 20 | 0         | NP_496958.2    | 83 | 1092.03 | 738 | 619 | XRN (mouse/S. cerevisiae) ribonuclease related family member (xrn-2) |
| Locus_3393_Transcript_2/2_Conf_1.000 | 2205 | 20 | 0         | NP_496958.2    | 82 | 1087.02 | 748 | 619 | XRN (mouse/S. cerevisiae) ribonuclease related family member (xrn-2) |
| Locus_3394_Transcript_1/1_Conf_1.000 | 299  | 3  | 5.26E-11  | NP_497918.1    | 57 | 70.8626 | 100 | 57  | UDP-GlucuronosylTransferase family member (ugt-62)                   |
| Locus_3395_Transcript_1/1_Conf_1.000 | 697  | 20 | 4.55E-08  | XP_001024133.1 | 50 | 62.3882 | 230 | 116 | Viral A-type inclusion protein repeat containing protein             |
| Locus_3396_Transcript_1/1_Conf_1.000 | 1296 | 20 | 1.41E-163 | NP_492613.1    | 79 | 580.482 | 421 | 334 | Nuclear Hormone Receptor family member (nhr-49)                      |
| Locus_3397_Transcript_1/1_Conf_1.000 | 410  | 0  |           |                |    |         |     |     |                                                                      |
| Locus_3398_Transcript_1/2_Conf_1.000 | 218  | 0  |           |                |    |         |     |     |                                                                      |
| Locus_3398_Transcript_2/2_Conf_1.000 | 224  | 0  |           |                |    |         |     |     |                                                                      |
| Locus_3399_Transcript_1/2_Conf_1.000 | 190  | 6  | 1.23E-07  | Q94637.1       | 74 | 59.6918 | 50  | 37  | Vitellogenin-6                                                       |
| Locus_3399_Transcript_2/2_Conf_1.000 | 213  | 13 | 5.01E-14  | Q94637.1       | 75 | 80.8777 | 70  | 53  | Vitellogenin-6                                                       |
| Locus_34_Transcript_1/1_Conf_1.000   | 1876 | 8  | 1.02E-70  | NP_502674.1    | 70 | 272.707 | 256 | 180 | abnormal cell LiNeage family member (lin-66)                         |
| Locus_340_Transcript_1/1_Conf_1.000  | 1891 | 20 | 6.06E-63  | EFA02576.1     | 55 | 246.899 | 362 | 200 | hypothetical protein TcasGA2_TC008294                                |
| Locus_3400_Transcript_1/1_Conf_1.000 | 1047 | 20 | 2.18E-97  | XP_002638764.1 | 73 | 360.147 | 351 | 257 | C. briggsae CBR-PTR-11 protein                                       |

|                                      |      |    |          |                |    |         |      |     |                                                                 |
|--------------------------------------|------|----|----------|----------------|----|---------|------|-----|-----------------------------------------------------------------|
| Locus_3401_Transcript_1/1_Conf_1.000 | 809  | 20 | 8.92E-84 | XP_002632974.1 | 80 | 314.309 | 236  | 191 | Hypothetical protein CBG21734                                   |
| Locus_3402_Transcript_1/1_Conf_1.000 | 618  | 1  | 8.36E-06 | XP_001481202.1 | 66 | 35.8094 | 36   | 24  | PREDICTED: hypothetical protein                                 |
| Locus_3403_Transcript_1/1_Conf_1.000 | 3592 | 20 | 0        | AAV41897.1     | 71 | 1094.34 | 1135 | 814 | SAX-2                                                           |
| Locus_3404_Transcript_1/1_Conf_1.000 | 1311 | 0  |          |                |    |         |      |     |                                                                 |
| Locus_3405_Transcript_1/1_Conf_1.000 | 791  | 20 | 4.01E-33 | CAB03248.2     | 63 | 145.976 | 244  | 154 | C. elegans protein R10D12.13a, confirmed by transcript evidence |
| Locus_3406_Transcript_1/1_Conf_1.000 | 329  | 0  |          |                |    |         |      |     |                                                                 |
| Locus_3407_Transcript_1/1_Conf_1.000 | 1757 | 20 | 6.27E-75 | EFO20911.1     | 56 | 286.574 | 467  | 265 | hypothetical protein LOAG_07578                                 |
| Locus_3408_Transcript_1/1_Conf_1.000 | 712  | 20 | 8.19E-61 | CAB97366.2     | 75 | 237.654 | 172  | 130 | putative cathepsin B.3                                          |
| Locus_3409_Transcript_1/1_Conf_1.000 | 377  | 20 | 1.07E-11 | XP_002631622.1 | 70 | 73.1738 | 65   | 46  | Hypothetical protein CBG20808                                   |
| Locus_341_Transcript_1/1_Conf_1.000  | 267  | 20 | 2.60E-26 | NP_499301.2    | 74 | 121.709 | 89   | 66  | hypothetical protein M03C11.8                                   |
| Locus_3410_Transcript_1/1_Conf_1.000 | 513  | 20 | 1.39E-49 | NP_497186.3    | 81 | 199.134 | 166  | 136 | hypothetical protein Y50D7A.8                                   |
| Locus_3411_Transcript_1/1_Conf_1.000 | 193  | 0  |          |                |    |         |      |     |                                                                 |
| Locus_3412_Transcript_1/1_Conf_1.000 | 376  | 0  |          |                |    |         |      |     |                                                                 |
| Locus_3413_Transcript_1/1_Conf_1.000 | 2015 | 20 | 0        | XP_001898016.1 | 74 | 728.398 | 619  | 462 | Valyl-tRNA synthetase                                           |
| Locus_3414_Transcript_1/1_Conf_1.000 | 415  | 20 | 1.22E-60 | NP_491357.1    | 88 | 235.728 | 137  | 121 | hypothetical protein ZK973.3                                    |
| Locus_3415_Transcript_1/1_Conf_1.000 | 1686 | 20 | 0        | XP_002640648.1 | 80 | 710.679 | 557  | 447 | C. briggsae CBR-SMP-1 protein                                   |
| Locus_3416_Transcript_1/1_Conf_1.000 | 1473 | 2  | 8.41E-14 | NP_505580.2    | 49 | 83.1889 | 231  | 114 | hypothetical protein F57A8.1                                    |
| Locus_3417_Transcript_1/1_Conf_1.000 | 800  | 20 | 1.49E-75 | NP_509566.1    | 74 | 286.96  | 217  | 162 | GLYcosylation related family member (gly-13)                    |
| Locus_3418_Transcript_1/1_Conf_1.000 | 642  | 20 | 8.52E-93 | NP_499359.1    | 92 | 343.584 | 200  | 185 | hypothetical protein Y39A1A.22                                  |

|                                      |      |    |           |                |    |         |      |     |                                                                       |
|--------------------------------------|------|----|-----------|----------------|----|---------|------|-----|-----------------------------------------------------------------------|
| Locus_3419_Transcript_1/1_Conf_1.000 | 784  | 20 | 8.62E-105 | NP_001022621.1 | 94 | 384.03  | 243  | 229 | proteasome Regulatory Particle, Non-ATPase-like family member (rpn-6) |
| Locus_342_Transcript_1/1_Conf_1.000  | 2481 | 20 | 0         | XP_002647701.1 | 67 | 761.911 | 843  | 565 | Hypothetical protein CBG17890                                         |
| Locus_3420_Transcript_1/1_Conf_1.000 | 555  | 20 | 3.91E-20  | XP_001897339.1 | 63 | 101.679 | 113  | 72  | Negative elongation factor A homolog                                  |
| Locus_3421_Transcript_1/1_Conf_1.000 | 2260 | 20 | 0         | NP_506069.1    | 74 | 699.508 | 592  | 443 | hypothetical protein T04H1.2                                          |
| Locus_3422_Transcript_1/1_Conf_1.000 | 344  | 20 | 5.67E-29  | A8XQD5.2       | 89 | 130.568 | 77   | 69  | Serine/threonine-protein kinase dkf-2                                 |
| Locus_3423_Transcript_1/1_Conf_1.000 | 722  | 9  | 6.10E-27  | XP_002641370.1 | 88 | 125.176 | 75   | 66  | Hypothetical protein CBG13227                                         |
| Locus_3424_Transcript_1/2_Conf_1.000 | 767  | 20 | 4.86E-73  | NP_001040919.1 | 76 | 278.485 | 204  | 157 | hypothetical protein C34D4.4                                          |
| Locus_3424_Transcript_2/2_Conf_1.000 | 761  | 20 | 1.48E-74  | NP_001040919.1 | 77 | 283.493 | 202  | 157 | hypothetical protein C34D4.4                                          |
| Locus_3425_Transcript_1/1_Conf_1.000 | 3824 | 20 | 0         | NP_001023059.1 | 57 | 741.88  | 1221 | 701 | hypothetical protein C42C1.4                                          |
| Locus_3426_Transcript_1/1_Conf_1.000 | 986  | 20 | 6.99E-119 | NP_001022986.1 | 83 | 431.409 | 281  | 236 | Tubulin Tyrosine Ligase Like family member (ttlI-4)                   |
| Locus_3427_Transcript_1/1_Conf_1.000 | 499  | 0  |           |                |    |         |      |     |                                                                       |
| Locus_3428_Transcript_1/1_Conf_1.000 | 1343 | 20 | 1.83E-129 | NP_491977.1    | 85 | 467.233 | 289  | 248 | hypothetical protein T10B11.2                                         |
| Locus_3429_Transcript_1/1_Conf_1.000 | 283  | 20 | 8.83E-14  | Q16937.1       | 62 | 80.1073 | 72   | 45  | Ancylostoma secreted protein                                          |
| Locus_343_Transcript_1/2_Conf_1.000  | 1889 | 20 | 3.49E-119 | NP_741086.1    | 60 | 433.721 | 546  | 332 | hypothetical protein F42G9.1                                          |
| Locus_343_Transcript_2/2_Conf_1.000  | 1862 | 20 | 3.10E-120 | NP_741086.1    | 60 | 437.187 | 541  | 330 | hypothetical protein F42G9.1                                          |

|                                      |      |    |           |                |    |         |     |     |                                                              |
|--------------------------------------|------|----|-----------|----------------|----|---------|-----|-----|--------------------------------------------------------------|
| Locus_3430_Transcript_1/1_Conf_1.000 | 3165 | 20 | 5.51E-155 | XP_002642899.1 | 57 | 553.518 | 814 | 470 | Hypothetical protein CBG15173                                |
| Locus_3431_Transcript_1/1_Conf_1.000 | 767  | 20 | 1.29E-49  | NP_872030.2    | 77 | 200.675 | 161 | 125 | hypothetical protein T02H6.1                                 |
| Locus_3432_Transcript_1/1_Conf_1.000 | 378  | 20 | 2.77E-36  | XP_002639351.1 | 76 | 154.836 | 113 | 87  | C. briggsae CBR-PCBD-1 protein                               |
| Locus_3433_Transcript_1/1_Conf_1.000 | 977  | 20 | 8.36E-24  | XP_002922036.1 | 46 | 115.546 | 250 | 117 | PREDICTED: serologically defined colon cancer antigen 1-like |
| Locus_3434_Transcript_1/1_Conf_1.000 | 350  | 0  |           |                |    |         |     |     |                                                              |
| Locus_3435_Transcript_1/1_Conf_1.000 | 1042 | 20 | 3.57E-84  | NP_740931.2    | 79 | 316.235 | 266 | 211 | hypothetical protein Y105E8A.3                               |
| Locus_3436_Transcript_1/1_Conf_1.000 | 470  | 20 | 3.72E-65  | NP_001022234.1 | 90 | 250.751 | 155 | 141 | hypothetical protein K05F1.6                                 |
| Locus_3437_Transcript_1/2_Conf_1.000 | 1155 | 19 | 1.20E-06  | XP_001583187.1 | 41 | 58.9214 | 221 | 91  | hypothetical protein                                         |
| Locus_3437_Transcript_2/2_Conf_1.000 | 2134 | 20 | 1.06E-10  | XP_001651055.1 | 37 | 73.559  | 561 | 211 | hypothetical protein AaeL_AAEL005529                         |
| Locus_3438_Transcript_1/1_Conf_1.000 | 695  | 20 | 1.86E-70  | EFO21591.1     | 76 | 269.626 | 224 | 172 | hypothetical protein LOAG_06900                              |
| Locus_3439_Transcript_1/3_Conf_0.714 | 1879 | 20 | 0         | NP_497939.2    | 77 | 774.622 | 626 | 485 | Suppressor/Enhancer of Lin-12 family member (sel-2)          |
| Locus_3439_Transcript_2/3_Conf_0.714 | 1879 | 20 | 0         | NP_497939.2    | 77 | 774.622 | 626 | 485 | Suppressor/Enhancer of Lin-12 family member (sel-2)          |
| Locus_3439_Transcript_3/3_Conf_0.714 | 1879 | 20 | 0         | NP_497939.2    | 77 | 774.622 | 626 | 485 | Suppressor/Enhancer of Lin-12 family member (sel-2)          |
| Locus_344_Transcript_1/2_Conf_1.000  | 2192 | 20 | 9.52E-140 | NP_504721.1    | 70 | 502.286 | 504 | 354 | Germinal Center Kinase family member (gck-2)                 |
| Locus_344_Transcript_2/2_Conf_1.000  | 2192 | 20 | 9.52E-140 | NP_504721.1    | 70 | 502.286 | 504 | 354 | Germinal Center Kinase family member (gck-2)                 |

|                                      |      |    |           |                |    |         |      |     |                                                                         |
|--------------------------------------|------|----|-----------|----------------|----|---------|------|-----|-------------------------------------------------------------------------|
| Locus_3440_Transcript_1/4_Conf_0.667 | 1566 | 20 | 2.77E-79  | CAA93884.2     | 53 | 300.827 | 537  | 287 | C. elegans protein ZK1067.2, partially confirmed by transcript evidence |
| Locus_3440_Transcript_2/4_Conf_0.333 | 393  | 20 | 6.06E-31  | XP_797977.1    | 70 | 137.117 | 131  | 92  | PREDICTED: similar to KIAA1404 protein                                  |
| Locus_3440_Transcript_3/4_Conf_0.667 | 1845 | 20 | 1.29E-102 | CAA93884.2     | 54 | 378.637 | 635  | 349 | C. elegans protein ZK1067.2, partially confirmed by transcript evidence |
| Locus_3440_Transcript_4/4_Conf_0.667 | 1566 | 20 | 4.73E-79  | CAA93884.2     | 53 | 300.056 | 537  | 288 | C. elegans protein ZK1067.2, partially confirmed by transcript evidence |
| Locus_3441_Transcript_1/5_Conf_0.600 | 1021 | 0  |           |                |    |         |      |     |                                                                         |
| Locus_3441_Transcript_2/5_Conf_0.300 | 455  | 0  |           |                |    |         |      |     |                                                                         |
| Locus_3441_Transcript_3/5_Conf_0.600 | 1008 | 0  |           |                |    |         |      |     |                                                                         |
| Locus_3441_Transcript_4/5_Conf_0.400 | 557  | 0  |           |                |    |         |      |     |                                                                         |
| Locus_3441_Transcript_5/5_Conf_0.600 | 1008 | 0  |           |                |    |         |      |     |                                                                         |
| Locus_3442_Transcript_1/2_Conf_1.000 | 3228 | 20 | 0         | NP_001122796.1 | 69 | 942.184 | 1038 | 721 | Kinesin-Like Protein family member (klp-12)                             |
| Locus_3442_Transcript_2/2_Conf_1.000 | 3192 | 20 | 0         | NP_001122796.1 | 70 | 944.495 | 1030 | 721 | Kinesin-Like Protein family member (klp-12)                             |
| Locus_3443_Transcript_1/3_Conf_0.600 | 423  | 1  | 6.26E-04  | XP_002648823.1 | 51 | 47.3654 | 62   | 32  | Hypothetical protein CBG16936                                           |
| Locus_3443_Transcript_2/3_Conf_0.600 | 457  | 1  | 2.12E-04  | XP_002648823.1 | 56 | 48.9062 | 57   | 32  | Hypothetical protein CBG16936                                           |
| Locus_3443_Transcript_3/3_Conf_0.600 | 455  | 1  | 6.19E-04  | XP_002648823.1 | 51 | 47.3654 | 62   | 32  | Hypothetical protein CBG16936                                           |
| Locus_3444_Transcript_1/1_Conf_1.000 | 145  | 5  | 3.85E-09  | NP_001122913.1 | 75 | 64.6994 | 48   | 36  | hypothetical protein F13H6.1                                            |
| Locus_3445_Transcript_1/1_Conf_1.000 | 1060 | 20 | 2.69E-119 | XP_002634504.1 | 75 | 432.95  | 344  | 260 | Hypothetical protein CBG08294                                           |
| Locus_3446_Transcript_1/1_Conf_1.000 | 1530 | 20 | 4.09E-152 | NP_506677.3    | 66 | 542.732 | 505  | 338 | hypothetical protein H12D21.10                                          |

|                                      |      |    |           |                |    |         |     |     |                                                                        |
|--------------------------------------|------|----|-----------|----------------|----|---------|-----|-----|------------------------------------------------------------------------|
| Locus_3447_Transcript_1/2_Conf_1.000 | 784  | 20 | 3.32E-56  | NP_491033.1    | 82 | 222.631 | 173 | 143 | YOP (yeast membrane trafficking protein) homolog family member (yop-1) |
| Locus_3447_Transcript_2/2_Conf_1.000 | 784  | 20 | 3.32E-56  | NP_491033.1    | 82 | 222.631 | 173 | 143 | YOP (yeast membrane trafficking protein) homolog family member (yop-1) |
| Locus_3448_Transcript_1/1_Conf_1.000 | 835  | 20 | 5.01E-69  | NP_505267.1    | 69 | 265.388 | 279 | 193 | Regulator of Presynaptic Morphology family member (rpm-1)              |
| Locus_3449_Transcript_1/1_Conf_1.000 | 206  | 2  | 2.98E-06  | CAA85409.2     | 66 | 55.0694 | 45  | 30  | C. elegans protein D2089.2, partially confirmed by transcript evidence |
| Locus_345_Transcript_1/1_Conf_1.000  | 1148 | 20 | 5.65E-41  | XP_002632956.1 | 70 | 172.94  | 141 | 99  | C. briggsae CBR-OMA-2 protein                                          |
| Locus_3450_Transcript_1/5_Conf_0.333 | 367  | 0  |           |                |    |         |     |     |                                                                        |
| Locus_3450_Transcript_2/5_Conf_0.333 | 244  | 0  |           |                |    |         |     |     |                                                                        |
| Locus_3450_Transcript_3/5_Conf_0.444 | 261  | 0  |           |                |    |         |     |     |                                                                        |
| Locus_3450_Transcript_4/5_Conf_0.333 | 389  | 0  |           |                |    |         |     |     |                                                                        |
| Locus_3450_Transcript_5/5_Conf_0.444 | 265  | 0  |           |                |    |         |     |     |                                                                        |
| Locus_3451_Transcript_1/1_Conf_1.000 | 474  | 20 | 7.53E-18  | ACF74367.1     | 51 | 93.5893 | 154 | 80  | Hypothetical protein R13F6.4d                                          |
| Locus_3452_Transcript_1/1_Conf_1.000 | 1211 | 20 | 3.18E-130 | NP_501071.1    | 77 | 469.544 | 393 | 306 | hypothetical protein T22D1.12                                          |
| Locus_3453_Transcript_1/1_Conf_1.000 | 607  | 20 | 2.09E-79  | NP_501866.1    | 81 | 298.901 | 202 | 165 | hypothetical protein C24F3.4                                           |
| Locus_3454_Transcript_1/1_Conf_1.000 | 260  | 0  |           |                |    |         |     |     |                                                                        |
| Locus_3455_Transcript_1/1_Conf_1.000 | 492  | 2  | 3.29E-05  | NP_497809.1    | 75 | 51.6026 | 37  | 28  | Heavy chain, Unconventional Myosin family member (hum-5)               |
| Locus_3456_Transcript_1/2_Conf_1.000 | 685  | 20 | 4.32E-48  | CAR63522.1     | 82 | 195.282 | 150 | 123 | putative heat shock protein                                            |
| Locus_3456_Transcript_2/2_Conf_1.000 | 663  | 20 | 4.00E-48  | CAR63522.1     | 82 | 195.282 | 150 | 123 | putative heat shock protein                                            |



|                                      |      |    |           |                |     |         |     |     |                                    |
|--------------------------------------|------|----|-----------|----------------|-----|---------|-----|-----|------------------------------------|
| Locus_3457_Transcript_1/1_Conf_1.000 | 1051 | 20 | 2.68E-95  | XP_002645228.1 | 75  | 353.214 | 293 | 221 | C. briggsae CBR-NHR-17 protein     |
| Locus_3458_Transcript_1/1_Conf_1.000 | 1116 | 0  |           |                |     |         |     |     |                                    |
| Locus_3459_Transcript_1/1_Conf_1.000 | 215  | 5  | 2.94E-14  | NP_508212.3    | 71  | 81.6481 | 57  | 41  | hypothetical protein C05D9.3       |
| Locus_346_Transcript_1/1_Conf_1.000  | 880  | 2  | 7.25E-21  | EFO27722.1     | 42  | 105.531 | 304 | 129 | zinc finger protein                |
| Locus_3460_Transcript_1/1_Conf_1.000 | 396  | 20 | 5.26E-43  | AAP36438.1     | 100 | 177.178 | 86  | 86  | Homo sapiens cystatin B (stefin B) |
| Locus_3461_Transcript_1/1_Conf_1.000 | 1399 | 20 | 0         | XP_002644944.1 | 87  | 647.506 | 434 | 378 | C. briggsae CBR-DHS-28 protein     |
| Locus_3462_Transcript_1/1_Conf_1.000 | 1501 | 20 | 8.95E-120 | NP_491339.2    | 68  | 435.261 | 502 | 346 | hypothetical protein C43E11.11     |
| Locus_3463_Transcript_1/2_Conf_1.000 | 445  | 20 | 2.21E-33  | XP_002641305.1 | 76  | 145.206 | 107 | 82  | C. briggsae CBR-TTR-15 protein     |
| Locus_3463_Transcript_2/2_Conf_1.000 | 269  | 0  |           |                |     |         |     |     |                                    |
| Locus_3464_Transcript_1/1_Conf_1.000 | 993  | 20 | 7.11E-119 | NP_001021041.1 | 84  | 431.409 | 320 | 271 | NeurABin family member (nab-1)     |
| Locus_3465_Transcript_1/3_Conf_0.312 | 650  | 0  |           |                |     |         |     |     |                                    |
| Locus_3465_Transcript_2/3_Conf_0.812 | 716  | 0  |           |                |     |         |     |     |                                    |
| Locus_3465_Transcript_3/3_Conf_0.781 | 870  | 0  |           |                |     |         |     |     |                                    |
| Locus_3466_Transcript_1/1_Conf_1.000 | 2583 | 20 | 0         | XP_002635777.1 | 65  | 806.979 | 812 | 533 | Hypothetical protein CBG10433      |
| Locus_3467_Transcript_1/1_Conf_1.000 | 163  | 0  |           |                |     |         |     |     |                                    |

|                                      |      |    |          |                |    |         |     |     |                                                  |
|--------------------------------------|------|----|----------|----------------|----|---------|-----|-----|--------------------------------------------------|
| Locus_3468_Transcript_1/1_Conf_1.000 | 500  | 20 | 2.52E-82 | AAR07614.1     | 94 | 307.76  | 166 | 157 | UNC-18                                           |
| Locus_3469_Transcript_1/1_Conf_1.000 | 369  | 0  |          |                |    |         |     |     |                                                  |
| Locus_347_Transcript_1/1_Conf_1.000  | 384  | 0  |          |                |    |         |     |     |                                                  |
| Locus_3470_Transcript_1/1_Conf_1.000 | 1024 | 20 | 4.57E-92 | NP_001122615.1 | 76 | 342.428 | 312 | 238 | PhytoChelatin Synthase family member (pcs-1)     |
| Locus_3471_Transcript_1/1_Conf_1.000 | 571  | 20 | 8.57E-66 | NP_508993.2    | 85 | 253.447 | 190 | 162 | fatty Acid CoA Synthetase family member (acs-17) |
| Locus_3472_Transcript_1/3_Conf_0.667 | 885  | 20 | 4.25E-69 | XP_002629686.1 | 56 | 265.774 | 296 | 167 | Hypothetical protein CBG00906                    |
| Locus_3472_Transcript_2/3_Conf_0.667 | 885  | 20 | 3.98E-67 | XP_002629686.1 | 55 | 259.225 | 296 | 165 | Hypothetical protein CBG00906                    |
| Locus_3472_Transcript_3/3_Conf_0.667 | 885  | 20 | 3.60E-68 | XP_002629686.1 | 56 | 262.692 | 296 | 166 | Hypothetical protein CBG00906                    |
| Locus_3473_Transcript_1/1_Conf_1.000 | 152  | 0  |          |                |    |         |     |     |                                                  |
| Locus_3474_Transcript_1/1_Conf_1.000 | 468  | 20 | 6.81E-51 | NP_001022362.1 | 77 | 203.371 | 154 | 120 | hypothetical protein T24F1.3                     |
| Locus_3475_Transcript_1/1_Conf_1.000 | 351  | 20 | 2.97E-30 | NP_001021765.1 | 71 | 134.806 | 119 | 85  | hypothetical protein Y47G6A.22                   |
| Locus_3476_Transcript_1/1_Conf_1.000 | 203  | 0  |          |                |    |         |     |     |                                                  |

|                                      |      |    |           |                |     |         |     |     |                                                                     |
|--------------------------------------|------|----|-----------|----------------|-----|---------|-----|-----|---------------------------------------------------------------------|
| Locus_3477_Transcript_1/1_Conf_1.000 | 1267 | 20 | 1.48E-109 | NP_492206.1    | 70  | 400.979 | 365 | 257 | hypothetical protein C54G4.7                                        |
| Locus_3478_Transcript_1/1_Conf_1.000 | 401  | 0  |           |                |     |         |     |     |                                                                     |
| Locus_3479_Transcript_1/1_Conf_1.000 | 524  | 0  |           |                |     |         |     |     |                                                                     |
| Locus_348_Transcript_1/2_Conf_1.000  | 1301 | 20 | 2.59E-24  | NP_497276.2    | 84  | 117.857 | 77  | 65  | RNP (RRM RNA binding domain) containing family member (rnp-5)       |
| Locus_348_Transcript_2/2_Conf_1.000  | 884  | 20 | 1.42E-24  | NP_497276.2    | 84  | 117.857 | 77  | 65  | RNP (RRM RNA binding domain) containing family member (rnp-5)       |
| Locus_3480_Transcript_1/2_Conf_1.000 | 532  | 0  |           |                |     |         |     |     |                                                                     |
| Locus_3480_Transcript_2/2_Conf_1.000 | 552  | 0  |           |                |     |         |     |     |                                                                     |
| Locus_3481_Transcript_1/1_Conf_1.000 | 273  | 20 | 6.13E-36  | XP_001115060.2 | 100 | 153.68  | 90  | 90  | PREDICTED: heat shock 70 kDa protein 1A/1B, partial                 |
| Locus_3482_Transcript_1/1_Conf_1.000 | 553  | 1  | 4.55E-05  | XP_001893891.1 | 48  | 51.6026 | 110 | 53  | hypothetical protein Bm1_12105                                      |
| Locus_3483_Transcript_1/5_Conf_0.762 | 1118 | 3  | 1.29E-31  | NP_493601.2    | 49  | 138.272 | 365 | 179 | FERM domain (protein4.1-ezrin-radixin-moesin) family member (frm-1) |
| Locus_3483_Transcript_2/5_Conf_0.095 | 239  | 0  |           |                |     |         |     |     |                                                                     |
| Locus_3483_Transcript_3/5_Conf_0.095 | 211  | 3  | 8.05E-04  | NP_493601.2    | 55  | 46.9802 | 61  | 34  | FERM domain (protein4.1-ezrin-radixin-moesin) family member (frm-1) |
| Locus_3483_Transcript_4/5_Conf_0.286 | 548  | 3  | 1.45E-11  | NP_493601.2    | 49  | 72.0182 | 151 | 75  | FERM domain (protein4.1-ezrin-radixin-moesin) family member (frm-1) |
| Locus_3483_Transcript_5/5_Conf_0.667 | 1112 | 3  | 9.15E-33  | NP_493601.2    | 49  | 142.124 | 364 | 180 | FERM domain (protein4.1-ezrin-radixin-moesin) family member (frm-1) |
| Locus_3484_Transcript_1/1_Conf_1.000 | 1132 | 20 | 9.93E-131 | NP_494926.1    | 88  | 471.085 | 297 | 264 | hypothetical protein F33G12.2                                       |

|                                      |      |    |           |                |     |         |     |     |                                                         |
|--------------------------------------|------|----|-----------|----------------|-----|---------|-----|-----|---------------------------------------------------------|
| Locus_3485_Transcript_1/1_Conf_1.000 | 1027 | 20 | 1.67E-126 | NP_505798.2    | 85  | 456.833 | 342 | 292 | Temporarily Assigned Gene name family member (tag-318)  |
| Locus_3486_Transcript_1/1_Conf_1.000 | 528  | 5  | 9.72E-44  | NP_494812.2    | 70  | 179.874 | 160 | 113 | hypothetical protein F35D11.3                           |
| Locus_3487_Transcript_1/1_Conf_1.000 | 286  | 0  |           |                |     |         |     |     |                                                         |
| Locus_3488_Transcript_1/1_Conf_1.000 | 2326 | 11 | 0         | ACI49173.1     | 80  | 1033.86 | 770 | 619 | hypothetical protein Csp3_JD02.001                      |
| Locus_3489_Transcript_1/1_Conf_1.000 | 1051 | 0  |           |                |     |         |     |     |                                                         |
| Locus_349_Transcript_1/1_Conf_1.000  | 431  | 20 | 6.98E-56  | EFO21508.1     | 100 | 219.935 | 111 | 111 | ubiquitin C II                                          |
| Locus_3490_Transcript_1/1_Conf_1.000 | 344  | 20 | 2.30E-38  | XP_002641745.1 | 93  | 161.77  | 89  | 83  | C. briggsae CBR-BAF-1 protein                           |
| Locus_3491_Transcript_1/2_Conf_1.000 | 2553 |    |           |                |     |         |     |     |                                                         |
| Locus_3491_Transcript_2/2_Conf_1.000 | 2463 |    |           |                |     |         |     |     |                                                         |
| Locus_3492_Transcript_1/1_Conf_1.000 | 1582 | 0  |           |                |     |         |     |     |                                                         |
| Locus_3493_Transcript_1/1_Conf_1.000 | 429  | 20 | 8.29E-41  | NP_500824.1    | 77  | 169.859 | 144 | 111 | FEMinization of XX and XO animals family member (fem-1) |
| Locus_3494_Transcript_1/1_Conf_1.000 | 575  | 20 | 6.52E-29  | EFO20453.1     | 89  | 130.954 | 67  | 60  | hypothetical protein LOAG_08036                         |
| Locus_3495_Transcript_1/1_Conf_1.000 | 1150 | 20 | 3.82E-146 | XP_002630335.1 | 86  | 522.316 | 337 | 290 | Hypothetical protein CBG04264                           |
| Locus_3496_Transcript_1/1_Conf_1.000 | 1943 | 20 | 0         | NP_500306.1    | 85  | 738.413 | 505 | 434 | hypothetical protein T26C12.1                           |

|                                      |      |    |           |                |    |         |      |     |                                                             |
|--------------------------------------|------|----|-----------|----------------|----|---------|------|-----|-------------------------------------------------------------|
| Locus_3497_Transcript_1/1_Conf_1.000 | 198  | 9  | 9.64E-05  | NP_001124681.1 | 69 | 50.0618 | 43   | 30  | tissue factor pathway inhibitor                             |
| Locus_3498_Transcript_1/1_Conf_1.000 | 2172 | 20 | 5.92E-134 | NP_001024066.1 | 70 | 483.026 | 491  | 345 | hypothetical protein R02F11.3                               |
| Locus_3499_Transcript_1/1_Conf_1.000 | 972  | 20 | 1.58E-115 | XP_002639232.1 | 93 | 420.239 | 263  | 247 | Hypothetical protein CBG03788                               |
| Locus_35_Transcript_1/1_Conf_1.000   | 608  | 0  |           |                |    |         |      |     |                                                             |
| Locus_350_Transcript_1/4_Conf_0.727  | 7517 | 20 | 0         | NP_501120.1    | 66 | 1180.62 | 1328 | 882 | hypothetical protein C34D4.14                               |
| Locus_350_Transcript_2/4_Conf_0.727  | 7514 | 20 | 0         | NP_501120.1    | 66 | 1177.54 | 1321 | 875 | hypothetical protein C34D4.14                               |
| Locus_350_Transcript_3/4_Conf_0.727  | 7568 | 20 | 0         | NP_501120.1    | 66 | 1177.54 | 1321 | 875 | hypothetical protein C34D4.14                               |
| Locus_350_Transcript_4/4_Conf_0.727  | 7523 | 20 | 0         | NP_501120.1    | 66 | 1177.54 | 1321 | 875 | hypothetical protein C34D4.14                               |
| Locus_3500_Transcript_1/2_Conf_1.000 | 1933 | 20 | 2.61E-170 | EFO25931.1     | 72 | 603.594 | 479  | 348 | hypothetical protein LOAG_02553                             |
| Locus_3500_Transcript_2/2_Conf_1.000 | 1933 | 20 | 2.61E-170 | EFO25931.1     | 72 | 603.594 | 479  | 348 | hypothetical protein LOAG_02553                             |
| Locus_3501_Transcript_1/1_Conf_1.000 | 867  | 20 | 1.03E-27  | NP_505643.1    | 54 | 128.257 | 217  | 119 | LYSozyme family member (lys-2)                              |
| Locus_3502_Transcript_1/2_Conf_1.000 | 647  | 0  |           |                |    |         |      |     |                                                             |
| Locus_3502_Transcript_2/2_Conf_1.000 | 647  | 0  |           |                |    |         |      |     |                                                             |
| Locus_3503_Transcript_1/1_Conf_1.000 | 375  | 20 | 2.20E-49  | NP_001021602.1 | 91 | 198.364 | 114  | 104 | RSK-pNinety (RSK-p90 kinase) homolog family member (rskn-1) |

|                                      |      |    |          |                |    |         |     |     |                                |
|--------------------------------------|------|----|----------|----------------|----|---------|-----|-----|--------------------------------|
| Locus_3504_Transcript_1/1_Conf_1.000 | 1014 | 20 | 4.35E-95 | XP_001898811.1 | 92 | 352.443 | 194 | 180 | GTP-binding protein SAR1       |
| Locus_3505_Transcript_1/1_Conf_1.000 | 430  | 0  |          |                |    |         |     |     |                                |
| Locus_3506_Transcript_1/3_Conf_0.571 | 550  | 0  |          |                |    |         |     |     |                                |
| Locus_3506_Transcript_2/3_Conf_0.714 | 652  | 0  |          |                |    |         |     |     |                                |
| Locus_3506_Transcript_3/3_Conf_0.714 | 652  | 0  |          |                |    |         |     |     |                                |
| Locus_3507_Transcript_1/1_Conf_1.000 | 767  | 20 | 4.13E-56 | NP_497852.1    | 70 | 222.246 | 207 | 145 | hypothetical protein T08A11.1  |
| Locus_3508_Transcript_1/2_Conf_1.000 | 2381 | 20 | 2.20E-28 | NP_001041193.1 | 44 | 132.494 | 407 | 183 | hypothetical protein Y45G5AM.9 |
| Locus_3508_Transcript_2/2_Conf_1.000 | 2285 | 20 | 2.16E-33 | NP_001041193.1 | 48 | 149.058 | 375 | 183 | hypothetical protein Y45G5AM.9 |
| Locus_3509_Transcript_1/1_Conf_1.000 | 380  | 6  | 4.45E-18 | NP_498205.1    | 58 | 94.3597 | 126 | 74  | hypothetical protein C05D2.10  |

|                                      |      |    |           |                |    |         |     |     |                                                                   |
|--------------------------------------|------|----|-----------|----------------|----|---------|-----|-----|-------------------------------------------------------------------|
| Locus_351_Transcript_1/1_Conf_1.000  | 1255 | 20 | 4.07E-152 | CAZ44323.1     | 98 | 542.347 | 297 | 293 | ADP/ATP translocase                                               |
| Locus_3510_Transcript_1/1_Conf_1.000 | 440  | 0  |           |                |    |         |     |     |                                                                   |
| Locus_3511_Transcript_1/1_Conf_1.000 | 427  | 20 | 2.78E-28  | EFO25877.1     | 68 | 128.257 | 144 | 98  | hypothetical protein LOAG_02605                                   |
| Locus_3512_Transcript_1/1_Conf_1.000 | 467  | 3  | 2.38E-11  | NP_001122666.1 | 55 | 72.0182 | 108 | 60  | hypothetical protein Y62F5A.12                                    |
| Locus_3513_Transcript_1/1_Conf_1.000 | 1171 | 20 | 3.78E-48  | ACV72655.1     | 64 | 196.823 | 219 | 141 | ZAG-1                                                             |
| Locus_3514_Transcript_1/1_Conf_1.000 | 1144 | 20 | 6.88E-39  | CAR63700.1     | 72 | 166.007 | 146 | 106 | hypothetical protein                                              |
| Locus_3515_Transcript_1/1_Conf_1.000 | 667  | 0  |           |                |    |         |     |     |                                                                   |
| Locus_3516_Transcript_1/2_Conf_1.000 | 657  | 20 | 2.17E-70  | P51535.1       | 91 | 269.24  | 153 | 140 | Myoglobin                                                         |
| Locus_3516_Transcript_2/2_Conf_1.000 | 588  | 20 | 3.07E-69  | P51535.1       | 90 | 265.003 | 153 | 139 | Myoglobin                                                         |
| Locus_3517_Transcript_1/1_Conf_1.000 | 277  | 0  |           |                |    |         |     |     |                                                                   |
| Locus_3518_Transcript_1/4_Conf_0.333 | 878  | 20 | 1.75E-67  | XP_001891995.1 | 65 | 260.381 | 288 | 188 | Not1 N-terminal domain, CCR4-Not complex component family protein |

|                                      |      |    |           |                |    |         |     |     |                                                                   |
|--------------------------------------|------|----|-----------|----------------|----|---------|-----|-----|-------------------------------------------------------------------|
| Locus_3518_Transcript_2/4_Conf_0.556 | 1743 | 20 | 1.11E-132 | NP_001076652.1 | 59 | 478.404 | 643 | 384 | NOT-Like (yeast CCR4/NOT complex component) family member (ntl-3) |
| Locus_3518_Transcript_3/4_Conf_0.667 | 1854 | 20 | 6.41E-134 | NP_001076652.1 | 62 | 482.641 | 636 | 395 | NOT-Like (yeast CCR4/NOT complex component) family member (ntl-3) |
| Locus_3518_Transcript_4/4_Conf_0.556 | 1752 | 20 | 1.12E-132 | NP_001076652.1 | 61 | 478.404 | 643 | 393 | NOT-Like (yeast CCR4/NOT complex component) family member (ntl-3) |
| Locus_3519_Transcript_1/1_Conf_1.000 | 307  | 2  | 1.08E-16  | NP_001023480.2 | 63 | 89.7373 | 82  | 52  | hypothetical protein Y4C6B.7                                      |
| Locus_352_Transcript_1/1_Conf_1.000  | 664  | 2  | 2.07E-12  | XP_002634845.1 | 45 | 76.6406 | 149 | 68  | Hypothetical protein CBG13961                                     |
| Locus_3520_Transcript_1/1_Conf_1.000 | 1084 | 20 | 2.44E-14  | XP_462314.1    | 47 | 84.3445 | 109 | 52  | DEHA2G17820p                                                      |
| Locus_3521_Transcript_1/3_Conf_0.667 | 1278 | 20 | 1.37E-62  | XP_001895616.1 | 53 | 244.973 | 434 | 234 | CG8232-PA                                                         |
| Locus_3521_Transcript_2/3_Conf_0.667 | 1278 | 20 | 1.37E-62  | XP_001895616.1 | 53 | 244.973 | 434 | 234 | CG8232-PA                                                         |
| Locus_3521_Transcript_3/3_Conf_0.667 | 1278 | 20 | 1.37E-62  | XP_001895616.1 | 53 | 244.973 | 434 | 234 | CG8232-PA                                                         |
| Locus_3522_Transcript_1/3_Conf_0.400 | 263  | 0  |           |                |    |         |     |     |                                                                   |
| Locus_3522_Transcript_2/3_Conf_0.600 | 513  | 0  |           |                |    |         |     |     |                                                                   |
| Locus_3522_Transcript_3/3_Conf_0.600 | 517  | 0  |           |                |    |         |     |     |                                                                   |
| Locus_3523_Transcript_1/1_Conf_1.000 | 841  | 0  |           |                |    |         |     |     |                                                                   |
| Locus_3524_Transcript_1/1_Conf_1.000 | 205  | 0  |           |                |    |         |     |     |                                                                   |
| Locus_3525_Transcript_1/1_Conf_1.000 | 738  | 0  |           |                |    |         |     |     |                                                                   |
| Locus_3526_Transcript_1/1_Conf_1.000 | 629  | 20 | 5.65E-30  | XP_001901339.1 | 72 | 134.806 | 161 | 117 | KIAA1259 protein                                                  |
| Locus_3527_Transcript_1/1_Conf_1.000 | 286  | 0  |           |                |    |         |     |     |                                                                   |
| Locus_3528_Transcript_1/1_Conf_1.000 | 1387 | 0  |           |                |    |         |     |     |                                                                   |



|                                      |      |    |           |                |    |         |     |     |                                                         |
|--------------------------------------|------|----|-----------|----------------|----|---------|-----|-----|---------------------------------------------------------|
| Locus_3529_Transcript_1/1_Conf_1.000 | 427  | 20 | 2.89E-09  | XP_001897817.1 | 67 | 65.0846 | 88  | 59  | immunodominant antigen homologue                        |
| Locus_353_Transcript_1/1_Conf_1.000  | 2614 | 20 | 0         | ACE63490.1     | 83 | 1102.43 | 767 | 639 | GABAB1 receptor subunit                                 |
| Locus_3530_Transcript_1/2_Conf_1.000 | 2551 | 0  |           |                |    |         |     |     |                                                         |
| Locus_3530_Transcript_2/2_Conf_1.000 | 2159 | 0  |           |                |    |         |     |     |                                                         |
| Locus_3531_Transcript_1/1_Conf_1.000 | 1527 | 20 | 7.49E-130 | NP_741208.1    | 81 | 468.774 | 377 | 309 | FlI1-Associated Protein homolog family member (flap-1)  |
| Locus_3532_Transcript_1/1_Conf_1.000 | 2419 | 20 | 3.52E-82  | XP_001894363.1 | 57 | 311.227 | 538 | 309 | Helicase conserved C-terminal domain containing protein |
| Locus_3533_Transcript_1/6_Conf_0.615 | 2189 | 20 | 0         | NP_505177.1    | 71 | 701.434 | 685 | 491 | hypothetical protein T23B12.6                           |
| Locus_3533_Transcript_2/6_Conf_0.615 | 2284 | 20 | 0         | NP_505177.1    | 71 | 701.434 | 685 | 491 | hypothetical protein T23B12.6                           |
| Locus_3533_Transcript_3/6_Conf_0.615 | 2288 | 20 | 0         | NP_505177.1    | 72 | 707.597 | 685 | 494 | hypothetical protein T23B12.6                           |
| Locus_3533_Transcript_4/6_Conf_0.615 | 2288 | 20 | 0         | NP_505177.1    | 71 | 701.049 | 685 | 491 | hypothetical protein T23B12.6                           |
| Locus_3533_Transcript_5/6_Conf_0.615 | 2288 | 20 | 0         | NP_505177.1    | 71 | 701.434 | 685 | 491 | hypothetical protein T23B12.6                           |
| Locus_3533_Transcript_6/6_Conf_0.615 | 2288 | 20 | 0         | NP_505177.1    | 71 | 701.434 | 685 | 491 | hypothetical protein T23B12.6                           |
| Locus_3534_Transcript_1/2_Conf_1.000 | 628  | 0  |           |                |    |         |     |     |                                                         |
| Locus_3534_Transcript_2/2_Conf_1.000 | 639  | 0  |           |                |    |         |     |     |                                                         |
| Locus_3535_Transcript_1/2_Conf_1.000 | 701  | 20 | 2.46E-94  | NP_502203.1    | 84 | 348.977 | 212 | 179 | hypothetical protein ZK809.3                            |
| Locus_3535_Transcript_2/2_Conf_1.000 | 701  | 20 | 6.48E-95  | NP_502203.1    | 84 | 350.903 | 212 | 180 | hypothetical protein ZK809.3                            |
| Locus_3536_Transcript_1/2_Conf_1.000 | 965  | 20 | 1.67E-85  | EFO22493.1     | 91 | 320.472 | 184 | 169 | U2af splicing factor protein 1                          |

|                                      |      |    |          |                |    |         |     |     |                                                        |
|--------------------------------------|------|----|----------|----------------|----|---------|-----|-----|--------------------------------------------------------|
| Locus_3536_Transcript_2/2_Conf_1.000 | 3157 | 20 | 1.17E-88 | EFO22493.1     | 94 | 333.183 | 185 | 174 | U2af splicing factor protein 1                         |
| Locus_3537_Transcript_1/1_Conf_1.000 | 514  | 20 | 1.02E-68 | XP_001894537.1 | 83 | 262.692 | 170 | 142 | Protein kinase domain containing protein               |
| Locus_3538_Transcript_1/4_Conf_0.700 | 2499 | 20 | 2.88E-87 | XP_002642053.1 | 49 | 328.176 | 678 | 338 | Hypothetical protein CBG17991                          |
| Locus_3538_Transcript_2/4_Conf_0.700 | 2499 | 20 | 4.91E-87 | NP_497980.1    | 56 | 327.405 | 505 | 284 | hypothetical protein B0393.3                           |
| Locus_3538_Transcript_3/4_Conf_0.700 | 2499 | 20 | 2.88E-87 | XP_002642053.1 | 49 | 328.176 | 678 | 338 | Hypothetical protein CBG17991                          |
| Locus_3538_Transcript_4/4_Conf_0.700 | 2499 | 20 | 2.88E-87 | XP_002642053.1 | 49 | 328.176 | 678 | 338 | Hypothetical protein CBG17991                          |
| Locus_3539_Transcript_1/1_Conf_1.000 | 250  | 2  | 9.43E-13 | XP_001893179.1 | 57 | 76.6406 | 90  | 52  | Mediator protein 4                                     |
| Locus_354_Transcript_1/1_Conf_1.000  | 1084 | 14 | 1.51E-48 | XP_002638589.1 | 67 | 197.978 | 187 | 126 | Hypothetical protein CBG05638                          |
| Locus_3540_Transcript_1/1_Conf_1.000 | 183  | 0  |          |                |    |         |     |     |                                                        |
| Locus_3541_Transcript_1/1_Conf_1.000 | 820  | 2  | 1.52E-38 | EFO21691.1     | 69 | 164.081 | 162 | 112 | hypothetical protein LOAG_06796                        |
| Locus_3542_Transcript_1/1_Conf_1.000 | 782  | 20 | 1.64E-55 | NP_494997.1    | 64 | 220.32  | 250 | 162 | VH1 dual-specificity phosphatase family member (vhp-1) |

|                                      |      |    |           |                |    |         |     |     |                                                     |
|--------------------------------------|------|----|-----------|----------------|----|---------|-----|-----|-----------------------------------------------------|
| Locus_3543_Transcript_1/1_Conf_1.000 | 675  | 20 | 3.33E-29  | XP_001898670.1 | 83 | 132.494 | 90  | 75  | ATPase, AAA family protein                          |
| Locus_3544_Transcript_1/2_Conf_0.833 | 434  | 0  |           |                |    |         |     |     |                                                     |
| Locus_3544_Transcript_2/2_Conf_0.833 | 533  | 0  |           |                |    |         |     |     |                                                     |
| Locus_3545_Transcript_1/1_Conf_1.000 | 377  | 0  |           |                |    |         |     |     |                                                     |
| Locus_3546_Transcript_1/1_Conf_1.000 | 892  | 2  | 6.11E-07  | XP_002632959.1 | 58 | 59.3066 | 74  | 43  | C. briggsae CBR-RAD-26 protein                      |
| Locus_3547_Transcript_1/1_Conf_1.000 | 417  | 0  |           |                |    |         |     |     |                                                     |
| Locus_3548_Transcript_1/3_Conf_0.667 | 1319 | 20 | 3.01E-153 | XP_001900091.1 | 90 | 546.199 | 381 | 345 | U5 small nuclear ribonucleoprotein 200 kDa helicase |
| Locus_3548_Transcript_2/3_Conf_0.667 | 1086 | 20 | 3.50E-53  | XP_001900091.1 | 85 | 213.386 | 165 | 141 | U5 small nuclear ribonucleoprotein 200 kDa helicase |
| Locus_3548_Transcript_3/3_Conf_0.667 | 1319 | 20 | 3.01E-153 | XP_001900091.1 | 90 | 546.199 | 381 | 345 | U5 small nuclear ribonucleoprotein 200 kDa helicase |

|                                      |      |    |           |                |    |         |      |     |                                                               |
|--------------------------------------|------|----|-----------|----------------|----|---------|------|-----|---------------------------------------------------------------|
| Locus_3549_Transcript_1/1_Conf_1.000 | 597  | 13 | 7.43E-50  | CAE54905.2     | 66 | 200.675 | 212  | 141 | C. elegans protein T12G3.2c, confirmed by transcript evidence |
| Locus_355_Transcript_1/1_Conf_1.000  | 1504 | 20 | 2.75E-169 | XP_002641541.1 | 79 | 599.742 | 460  | 367 | Hypothetical protein CBG09840                                 |
| Locus_3550_Transcript_1/1_Conf_1.000 | 1637 | 20 | 5.05E-172 | XP_002633647.1 | 74 | 608.986 | 539  | 400 | Hypothetical protein CBG03319                                 |
| Locus_3551_Transcript_1/1_Conf_1.000 | 445  | 6  | 2.62E-26  | XP_002637252.1 | 81 | 121.709 | 92   | 75  | C. briggsae CBR-ATP-4 protein                                 |
| Locus_3552_Transcript_1/1_Conf_1.000 | 1787 | 20 | 0         | XP_001898861.1 | 83 | 673.315 | 496  | 414 | Amino acid permease family protein                            |
| Locus_3553_Transcript_1/1_Conf_1.000 | 811  | 20 | 1.51E-91  | XP_002647020.1 | 77 | 340.117 | 251  | 194 | Hypothetical protein CBG24043                                 |
| Locus_3554_Transcript_1/1_Conf_1.000 | 509  | 20 | 5.40E-14  | XP_001298658.1 | 54 | 80.8777 | 102  | 56  | ankyrin repeat protein                                        |
| Locus_3555_Transcript_1/1_Conf_1.000 | 688  | 20 | 4.51E-53  | EFO27367.1     | 74 | 211.846 | 171  | 127 | hypothetical protein LOAG_01110                               |
| Locus_3556_Transcript_1/1_Conf_1.000 | 4967 | 20 | 0         | NP_001076722.2 | 55 | 990.719 | 1537 | 848 | hypothetical protein Y37A1B.17                                |
| Locus_3557_Transcript_1/1_Conf_1.000 | 857  | 9  | 1.11E-34  | NP_498408.1    | 62 | 151.369 | 210  | 131 | hypothetical protein C05D11.9                                 |
| Locus_3558_Transcript_1/1_Conf_1.000 | 754  | 20 | 7.03E-61  | XP_002629766.1 | 74 | 238.039 | 203  | 151 | Hypothetical protein CBG01004                                 |
| Locus_3559_Transcript_1/1_Conf_1.000 | 136  | 0  |           |                |    |         |      |     |                                                               |
| Locus_356_Transcript_1/1_Conf_1.000  | 1003 | 20 | 2.81E-38  | EFO23006.1     | 59 | 163.696 | 286  | 171 | mast family protein                                           |

|                                      |      |    |           |                |    |         |     |     |                                                                 |
|--------------------------------------|------|----|-----------|----------------|----|---------|-----|-----|-----------------------------------------------------------------|
| Locus_3560_Transcript_1/1_Conf_1.000 | 2595 | 20 | 1.05E-156 | XP_002641665.1 | 61 | 558.91  | 749 | 462 | Hypothetical protein CBG09993                                   |
| Locus_3561_Transcript_1/1_Conf_1.000 | 291  | 0  |           |                |    |         |     |     |                                                                 |
| Locus_3562_Transcript_1/1_Conf_1.000 | 568  |    |           |                |    |         |     |     |                                                                 |
| Locus_3563_Transcript_1/1_Conf_1.000 | 554  | 20 | 7.47E-24  | CAZ65519.1     | 60 | 114.005 | 155 | 94  | C. elegans protein R10D12.14d, confirmed by transcript evidence |
| Locus_3564_Transcript_1/1_Conf_1.000 | 245  | 20 | 4.70E-20  | XP_001894289.1 | 79 | 100.908 | 81  | 64  | hypothetical protein                                            |
| Locus_3565_Transcript_1/1_Conf_1.000 | 1281 | 20 | 3.66E-140 | XP_001896024.1 | 76 | 502.671 | 403 | 309 | DNA ligase III                                                  |
| Locus_3566_Transcript_1/4_Conf_0.700 | 2047 | 20 | 3.98E-116 | EFO18984.1     | 62 | 423.705 | 517 | 322 | hypothetical protein LOAG_09511                                 |
| Locus_3566_Transcript_2/4_Conf_0.700 | 2046 | 20 | 3.05E-116 | EFO18984.1     | 62 | 424.091 | 517 | 322 | hypothetical protein LOAG_09511                                 |
| Locus_3566_Transcript_3/4_Conf_0.700 | 2046 | 20 | 3.98E-116 | EFO18984.1     | 62 | 423.705 | 517 | 322 | hypothetical protein LOAG_09511                                 |
| Locus_3566_Transcript_4/4_Conf_0.700 | 2046 | 20 | 3.98E-116 | EFO18984.1     | 62 | 423.705 | 517 | 322 | hypothetical protein LOAG_09511                                 |
| Locus_3567_Transcript_1/1_Conf_1.000 | 606  | 0  |           |                |    |         |     |     |                                                                 |
| Locus_3568_Transcript_1/1_Conf_1.000 | 493  | 20 | 5.14E-75  | EFO24176.1     | 90 | 283.493 | 164 | 148 | hypothetical protein LOAG_04307                                 |

|                                      |      |    |           |                |    |         |     |     |                                                               |
|--------------------------------------|------|----|-----------|----------------|----|---------|-----|-----|---------------------------------------------------------------|
| Locus_3569_Transcript_1/3_Conf_0.714 | 729  | 20 | 1.12E-100 | XP_001897925.1 | 85 | 370.163 | 214 | 184 | zinc finger protein                                           |
| Locus_3569_Transcript_2/3_Conf_0.714 | 735  | 20 | 1.14E-100 | XP_001897925.1 | 85 | 370.163 | 214 | 184 | zinc finger protein                                           |
| Locus_3569_Transcript_3/3_Conf_0.714 | 735  | 20 | 1.14E-100 | XP_001897925.1 | 85 | 370.163 | 214 | 184 | zinc finger protein                                           |
| Locus_357_Transcript_1/1_Conf_1.000  | 1332 | 20 | 1.35E-100 | NP_499183.1    | 79 | 371.318 | 279 | 222 | hypothetical protein ZK632.12                                 |
| Locus_3570_Transcript_1/2_Conf_1.000 | 1536 | 20 | 3.33E-77  | NP_492527.1    | 54 | 293.893 | 491 | 266 | Kinesin-Like Protein family member (klp-16)                   |
| Locus_3570_Transcript_2/2_Conf_1.000 | 1333 | 20 | 4.83E-74  | NP_492527.1    | 55 | 283.108 | 431 | 240 | Kinesin-Like Protein family member (klp-16)                   |
| Locus_3571_Transcript_1/1_Conf_1.000 | 964  | 20 | 1.22E-136 | XP_002643251.1 | 86 | 490.345 | 318 | 274 | C. briggsae CBR-ILE-2 protein                                 |
| Locus_3572_Transcript_1/2_Conf_1.000 | 1032 | 20 | 2.88E-118 | CBK19479.1     | 77 | 429.483 | 346 | 269 | C. elegans protein W08D2.5b, confirmed by transcript evidence |
| Locus_3572_Transcript_2/2_Conf_1.000 | 1036 | 20 | 2.22E-118 | CBK19479.1     | 78 | 429.869 | 343 | 268 | C. elegans protein W08D2.5b, confirmed by transcript evidence |
| Locus_3573_Transcript_1/1_Conf_1.000 | 1292 | 20 | 0         | NP_509083.1    | 86 | 669.078 | 413 | 356 | hypothetical protein K10C2.4                                  |
| Locus_3574_Transcript_1/1_Conf_1.000 | 527  | 0  |           |                |    |         |     |     |                                                               |

|                                      |      |    |          |                |    |         |     |     |                                                         |
|--------------------------------------|------|----|----------|----------------|----|---------|-----|-----|---------------------------------------------------------|
| Locus_3575_Transcript_1/3_Conf_0.667 | 1060 | 20 | 4.68E-55 | XP_002647238.1 | 82 | 219.55  | 172 | 142 | Hypothetical protein CBG24582                           |
| Locus_3575_Transcript_2/3_Conf_0.667 | 1088 | 20 | 1.16E-56 | XP_002647238.1 | 63 | 224.942 | 283 | 180 | Hypothetical protein CBG24582                           |
| Locus_3575_Transcript_3/3_Conf_0.667 | 1060 | 20 | 4.68E-55 | XP_002647238.1 | 82 | 219.55  | 172 | 142 | Hypothetical protein CBG24582                           |
| Locus_3576_Transcript_1/1_Conf_1.000 | 1441 | 20 | 1.46E-71 | ABD37724.1     | 66 | 275.018 | 340 | 227 | catsup protein                                          |
| Locus_3577_Transcript_1/2_Conf_1.000 | 812  | 20 | 1.95E-22 | XP_002641634.1 | 74 | 110.538 | 117 | 87  | Hypothetical protein CBG09956                           |
| Locus_3577_Transcript_2/2_Conf_1.000 | 582  | 20 | 1.58E-25 | NP_001122751.1 | 61 | 119.783 | 183 | 113 | hypothetical protein ZK757.4                            |
| Locus_3578_Transcript_1/1_Conf_1.000 | 840  | 20 | 3.79E-48 | NP_492782.2    | 65 | 196.052 | 180 | 118 | hypothetical protein B0511.13                           |
| Locus_3579_Transcript_1/1_Conf_1.000 | 506  | 20 | 1.57E-42 | NP_500377.1    | 70 | 175.637 | 164 | 115 | hypothetical protein Y37E11B.3                          |
| Locus_358_Transcript_1/1_Conf_1.000  | 149  | 0  |          |                |    |         |     |     |                                                         |
| Locus_3580_Transcript_1/1_Conf_1.000 | 774  | 20 | 4.65E-79 | XP_002636980.1 | 74 | 298.516 | 264 | 197 | Hypothetical protein CBG09463                           |
| Locus_3581_Transcript_1/1_Conf_1.000 | 338  | 1  | 6.15E-04 | XP_001901253.1 | 69 | 47.3654 | 46  | 32  | Helicase conserved C-terminal domain containing protein |
| Locus_3582_Transcript_1/2_Conf_1.000 | 533  | 20 | 7.13E-34 | EFO22891.1     | 93 | 147.132 | 88  | 82  | small nuclear ribonucleoprotein sm d1                   |
| Locus_3582_Transcript_2/2_Conf_1.000 | 518  | 20 | 2.43E-33 | EFO22891.1     | 93 | 145.206 | 87  | 81  | small nuclear ribonucleoprotein sm d1                   |
| Locus_3583_Transcript_1/1_Conf_1.000 | 516  | 0  |          |                |    |         |     |     |                                                         |
| Locus_3584_Transcript_1/2_Conf_1.000 | 796  | 20 | 1.35E-52 | NP_497836.2    | 68 | 210.69  | 212 | 145 | hypothetical protein C16C10.1                           |

|                                      |      |    |           |                |    |         |     |     |                                                                        |
|--------------------------------------|------|----|-----------|----------------|----|---------|-----|-----|------------------------------------------------------------------------|
| Locus_3584_Transcript_2/2_Conf_1.000 | 1136 | 20 | 7.69E-107 | NP_497836.2    | 74 | 391.734 | 315 | 236 | hypothetical protein C16C10.1                                          |
| Locus_3585_Transcript_1/1_Conf_1.000 | 733  | 20 | 2.03E-33  | AAB42328.2     | 57 | 146.747 | 255 | 146 | Hypothetical protein C32E8.11                                          |
| Locus_3586_Transcript_1/1_Conf_1.000 | 625  | 20 | 1.13E-22  | XP_001902835.1 | 58 | 110.538 | 162 | 95  | G-patch domain containing protein                                      |
| Locus_3587_Transcript_1/2_Conf_1.000 | 1565 | 4  | 2.31E-09  | XP_001894598.1 | 60 | 68.5514 | 96  | 58  | BTB/POZ domain containing protein                                      |
| Locus_3587_Transcript_2/2_Conf_1.000 | 1772 | 2  | 4.79E-06  | XP_001894599.1 | 57 | 57.7658 | 82  | 47  | Zinc finger, C2H2 type family protein                                  |
| Locus_3588_Transcript_1/1_Conf_1.000 | 1083 | 2  | 9.16E-54  | NP_496193.1    | 63 | 215.312 | 369 | 234 | hypothetical protein F33H1.3                                           |
| Locus_3589_Transcript_1/1_Conf_1.000 | 1103 | 20 | 2.32E-44  | CAA98127.3     | 54 | 184.111 | 335 | 181 | C. elegans protein F53B2.5, partially confirmed by transcript evidence |
| Locus_359_Transcript_1/1_Conf_1.000  | 654  | 20 | 5.05E-104 | NP_505411.1    | 90 | 380.948 | 209 | 189 | ACyLtransferase-like family member (acl-14)                            |
| Locus_3590_Transcript_1/1_Conf_1.000 | 258  | 20 | 1.07E-27  | NP_498579.2    | 93 | 126.331 | 72  | 67  | Ribosomal Protein, Small subunit family member (rps-21)                |
| Locus_3591_Transcript_1/2_Conf_1.000 | 1448 | 20 | 0         | NP_493745.1    | 90 | 785.408 | 460 | 416 | hypothetical protein W07E6.2                                           |



|                                      |      |    |          |                |    |         |     |     |                                                                         |
|--------------------------------------|------|----|----------|----------------|----|---------|-----|-----|-------------------------------------------------------------------------|
| Locus_3591_Transcript_2/2_Conf_1.000 | 661  | 20 | 2.37E-93 | XP_002632198.1 | 91 | 345.51  | 197 | 180 | Hypothetical protein CBG07064                                           |
| Locus_3592_Transcript_1/1_Conf_1.000 | 277  | 20 | 2.10E-28 | CBA11608.1     | 81 | 128.642 | 88  | 72  | C. elegans protein F45H7.2d, partially confirmed by transcript evidence |
| Locus_3593_Transcript_1/1_Conf_1.000 | 570  | 20 | 7.54E-46 | EFO23137.1     | 75 | 187.193 | 165 | 125 | xeroderma Pigmentosum Group E Complementing protein                     |
| Locus_3594_Transcript_1/1_Conf_1.000 | 755  | 20 | 1.99E-47 | XP_002629739.1 | 60 | 193.356 | 254 | 153 | C. briggsae CBR-UFD-3 protein                                           |
| Locus_3595_Transcript_1/1_Conf_1.000 | 196  | 0  |          |                |    |         |     |     |                                                                         |
| Locus_3596_Transcript_1/2_Conf_1.000 | 1714 | 6  | 7.08E-31 | XP_002640485.1 | 47 | 140.198 | 386 | 184 | Hypothetical protein CBG13621                                           |
| Locus_3596_Transcript_2/2_Conf_1.000 | 2113 | 8  | 4.83E-48 | XP_002640485.1 | 47 | 197.593 | 550 | 262 | Hypothetical protein CBG13621                                           |
| Locus_3597_Transcript_1/1_Conf_1.000 | 386  | 20 | 1.84E-32 | NP_001021779.1 | 77 | 142.124 | 125 | 97  | hypothetical protein Y48G8AL.15                                         |
| Locus_3598_Transcript_1/1_Conf_1.000 | 1011 | 20 | 1.05E-40 | XP_002635613.1 | 56 | 171.785 | 287 | 162 | Hypothetical protein CBG21806                                           |
| Locus_3599_Transcript_1/2_Conf_1.000 | 514  | 0  |          |                |    |         |     |     |                                                                         |
| Locus_3599_Transcript_2/2_Conf_1.000 | 719  | 20 | 1.35E-10 | EFO18927.1     | 78 | 70.8626 | 64  | 50  | DNA polymerase epsilon p17 subunit                                      |
| Locus_36_Transcript_1/1_Conf_1.000   | 799  | 20 | 1.96E-51 | XP_002632297.1 | 66 | 206.838 | 264 | 175 | C. briggsae CBR-NOL-6 protein                                           |
| Locus_360_Transcript_1/1_Conf_1.000  | 1491 | 20 | 1.10E-53 | NP_495955.1    | 73 | 215.698 | 216 | 159 | hypothetical protein T23G7.3                                            |

|                                      |      |    |           |                |    |         |     |     |                                                                      |
|--------------------------------------|------|----|-----------|----------------|----|---------|-----|-----|----------------------------------------------------------------------|
| Locus_3600_Transcript_1/1_Conf_1.000 | 979  | 20 | 6.22E-27  | NP_496969.2    | 53 | 125.946 | 205 | 110 | JuMonJi (transcription factor) Domain protein family member (jmjd-2) |
| Locus_3601_Transcript_1/1_Conf_1.000 | 492  | 3  | 7.80E-23  | NP_504457.2    | 63 | 110.153 | 134 | 85  | hypothetical protein C24G6.3                                         |
| Locus_3602_Transcript_1/1_Conf_1.000 | 440  | 0  |           |                |    |         |     |     |                                                                      |
| Locus_3603_Transcript_1/1_Conf_1.000 | 1466 | 20 | 8.87E-149 | XP_002645112.1 | 89 | 531.561 | 320 | 286 | C. briggsae CBR-SEK-1 protein                                        |
| Locus_3604_Transcript_1/1_Conf_1.000 | 597  | 20 | 2.03E-31  | XP_002639296.1 | 66 | 139.428 | 179 | 119 | Hypothetical protein CBG03866                                        |
| Locus_3605_Transcript_1/2_Conf_1.000 | 2438 | 3  | 3.96E-33  | NP_871911.1    | 53 | 148.288 | 328 | 174 | Prion-like-(Q/N-rich)-domain-bearing protein family member (pqn-35)  |
| Locus_3605_Transcript_2/2_Conf_1.000 | 952  | 3  | 1.11E-33  | NP_871911.1    | 53 | 148.288 | 328 | 174 | Prion-like-(Q/N-rich)-domain-bearing protein family member (pqn-35)  |
| Locus_3606_Transcript_1/4_Conf_0.222 | 645  | 19 | 1.11E-23  | EFO22278.1     | 65 | 114.005 | 198 | 129 | hypothetical protein LOAG_06208                                      |
| Locus_3606_Transcript_2/4_Conf_0.667 | 1797 | 20 | 1.74E-112 | NP_492041.1    | 64 | 411.379 | 494 | 319 | Temporarily Assigned Gene name family member (tag-298)               |
| Locus_3606_Transcript_3/4_Conf_0.667 | 1797 | 20 | 1.74E-112 | NP_492041.1    | 64 | 411.379 | 494 | 319 | Temporarily Assigned Gene name family member (tag-298)               |
| Locus_3606_Transcript_4/4_Conf_0.667 | 1797 | 20 | 1.74E-112 | NP_492041.1    | 64 | 411.379 | 494 | 319 | Temporarily Assigned Gene name family member (tag-298)               |
| Locus_3607_Transcript_1/2_Conf_1.000 | 2031 | 20 | 3.62E-178 | NP_490688.1    | 73 | 629.787 | 551 | 403 | hypothetical protein F56C11.6                                        |
| Locus_3607_Transcript_2/2_Conf_1.000 | 1596 | 20 | 1.31E-148 | NP_490688.1    | 76 | 526.554 | 437 | 334 | hypothetical protein F56C11.6                                        |
| Locus_3608_Transcript_1/1_Conf_1.000 | 1701 | 20 | 2.16E-64  | XP_969757.1    | 56 | 251.521 | 387 | 219 | PREDICTED: similar to amsh                                           |
| Locus_3609_Transcript_1/1_Conf_1.000 | 441  | 20 | 4.04E-35  | NP_498990.1    | 75 | 150.984 | 134 | 101 | hypothetical protein F59B2.3                                         |

|                                      |      |    |           |                |    |         |     |     |                                                                          |
|--------------------------------------|------|----|-----------|----------------|----|---------|-----|-----|--------------------------------------------------------------------------|
| Locus_361_Transcript_1/1_Conf_1.000  | 1326 | 20 | 3.49E-141 | CAR97838.1     | 71 | 506.138 | 440 | 316 | C. elegans protein F54F11.2b, partially confirmed by transcript evidence |
| Locus_3610_Transcript_1/1_Conf_1.000 | 1133 | 20 | 0         | AAA50224.1     | 97 | 677.937 | 378 | 368 | RNA polymerase II, second largest subunit                                |
| Locus_3611_Transcript_1/1_Conf_1.000 | 1452 | 20 | 0         | XP_002636649.1 | 93 | 823.157 | 484 | 454 | Hypothetical protein CBG23360                                            |
| Locus_3612_Transcript_1/1_Conf_1.000 | 2002 | 20 | 0         | XP_002638871.1 | 74 | 670.618 | 594 | 442 | C. briggsae CBR-NPP-13 protein                                           |
| Locus_3613_Transcript_1/1_Conf_1.000 | 765  | 1  | 7.39E-05  | EFO27965.1     | 47 | 51.9878 | 123 | 58  | hypothetical protein LOAG_00531                                          |

|                                      |      |    |           |                |    |         |     |     |                                                |
|--------------------------------------|------|----|-----------|----------------|----|---------|-----|-----|------------------------------------------------|
| Locus_3614_Transcript_1/1_Conf_1.000 | 998  | 20 | 7.67E-105 | NP_001020979.1 | 70 | 384.8   | 340 | 239 | mRNA Capping Enzyme Like family member (cel-1) |
| Locus_3615_Transcript_1/1_Conf_1.000 | 1036 | 20 | 5.36E-64  | XP_001892710.1 | 79 | 249.21  | 215 | 170 | cleavage stimulation factor                    |
| Locus_3616_Transcript_1/1_Conf_1.000 | 570  | 2  | 5.27E-15  | NP_491922.1    | 88 | 84.7297 | 77  | 68  | hypothetical protein T23B3.2                   |
| Locus_3617_Transcript_1/1_Conf_1.000 | 1313 | 1  | 1.60E-13  | NP_505141.1    | 68 | 82.0333 | 72  | 49  | hypothetical protein W02D7.3                   |
| Locus_3618_Transcript_1/1_Conf_1.000 | 1489 | 20 | 4.06E-48  | NP_490811.3    | 53 | 197.208 | 391 | 209 | hypothetical protein Y34D9A.7                  |
| Locus_3619_Transcript_1/1_Conf_1.000 | 1106 | 20 | 2.83E-66  | AAC31568.1     | 76 | 256.914 | 226 | 173 | putative zinc metallopeptidase                 |
| Locus_362_Transcript_1/2_Conf_1.000  | 1473 | 20 | 1.12E-50  | XP_002646695.1 | 56 | 205.682 | 277 | 156 | Hypothetical protein CBG13072                  |
| Locus_362_Transcript_2/2_Conf_1.000  | 1425 | 20 | 6.09E-46  | XP_002646695.1 | 55 | 189.889 | 267 | 147 | Hypothetical protein CBG13072                  |
| Locus_3620_Transcript_1/1_Conf_1.000 | 1721 | 20 | 3.26E-44  | NP_499537.2    | 56 | 184.496 | 315 | 179 | hypothetical protein Y56A3A.2                  |
| Locus_3621_Transcript_1/1_Conf_1.000 | 371  | 3  | 1.90E-08  | NP_001021144.1 | 52 | 62.3882 | 97  | 51  | hypothetical protein C05D10.1                  |
| Locus_3622_Transcript_1/1_Conf_1.000 | 1328 | 20 | 3.26E-30  | EFO28160.1     | 51 | 137.502 | 249 | 127 | abnormal cell lineage protein 37               |
| Locus_3623_Transcript_1/1_Conf_1.000 | 484  | 0  |           |                |    |         |     |     |                                                |

|                                      |      |    |           |                |    |         |     |     |                                                                       |
|--------------------------------------|------|----|-----------|----------------|----|---------|-----|-----|-----------------------------------------------------------------------|
| Locus_3624_Transcript_1/1_Conf_1.000 | 680  | 20 | 1.13E-101 | 1TW9           | 98 | 373.244 | 187 | 185 | Glutathione Transferase-2                                             |
| Locus_3625_Transcript_1/1_Conf_1.000 | 336  | 0  |           |                |    |         |     |     |                                                                       |
| Locus_3626_Transcript_1/5_Conf_0.450 | 382  | 20 | 2.77E-20  | NP_492616.1    | 56 | 101.679 | 133 | 75  | Nematode AStacin protease family member (nas-5)                       |
| Locus_3626_Transcript_2/5_Conf_0.500 | 382  | 20 | 3.28E-21  | NP_492616.1    | 58 | 104.76  | 133 | 78  | Nematode AStacin protease family member (nas-5)                       |
| Locus_3626_Transcript_3/5_Conf_0.500 | 382  | 20 | 5.59E-21  | NP_492616.1    | 57 | 103.99  | 133 | 77  | Nematode AStacin protease family member (nas-5)                       |
| Locus_3626_Transcript_4/5_Conf_0.350 | 329  | 20 | 1.58E-15  | NP_492616.1    | 55 | 85.8853 | 115 | 64  | Nematode AStacin protease family member (nas-5)                       |
| Locus_3626_Transcript_5/5_Conf_0.600 | 382  | 20 | 4.28E-21  | NP_492616.1    | 57 | 104.375 | 133 | 77  | Nematode AStacin protease family member (nas-5)                       |
| Locus_3627_Transcript_1/1_Conf_1.000 | 445  | 2  | 4.18E-16  | NP_503135.1    | 56 | 87.8113 | 162 | 91  | hypothetical protein F56E10.1                                         |
| Locus_3628_Transcript_1/1_Conf_1.000 | 854  | 13 | 1.03E-40  | NP_506519.1    | 60 | 171.4   | 263 | 159 | hypothetical protein T16A9.5                                          |
| Locus_3629_Transcript_1/1_Conf_1.000 | 1950 | 3  | 1.54E-77  | XP_002647904.1 | 65 | 295.434 | 297 | 194 | Hypothetical protein CBG23772                                         |
| Locus_363_Transcript_1/7_Conf_0.333  | 1494 | 20 | 1.28E-50  | NP_001041009.1 | 91 | 201.445 | 111 | 102 | GLutamiNe synthetase (glutamate-ammonia ligase) family member (gln-3) |
| Locus_363_Transcript_2/7_Conf_0.500  | 2077 | 20 | 1.48E-33  | EFO21829.1     | 39 | 149.443 | 487 | 194 | hypothetical protein LOAG_06652                                       |

|                                      |      |    |          |                |    |         |     |     |                                                                       |
|--------------------------------------|------|----|----------|----------------|----|---------|-----|-----|-----------------------------------------------------------------------|
| Locus_363_Transcript_3/7_Conf_0.444  | 2041 | 20 | 1.35E-23 | XP_002641290.1 | 39 | 116.316 | 427 | 168 | Hypothetical protein CBG05204                                         |
| Locus_363_Transcript_4/7_Conf_0.556  | 2140 | 20 | 5.82E-33 | EFO21829.1     | 39 | 147.517 | 483 | 191 | hypothetical protein LOAG_06652                                       |
| Locus_363_Transcript_5/7_Conf_0.556  | 2092 | 20 | 1.49E-33 | EFO21829.1     | 39 | 149.443 | 487 | 194 | hypothetical protein LOAG_06652                                       |
| Locus_363_Transcript_6/7_Conf_0.389  | 2273 | 20 | 0        | NP_001041010.1 | 90 | 685.641 | 378 | 342 | GLutamiNe synthetase (glutamate-ammonia ligase) family member (gln-3) |
| Locus_363_Transcript_7/7_Conf_0.556  | 2146 | 20 | 1.54E-33 | EFO21829.1     | 39 | 149.443 | 487 | 194 | hypothetical protein LOAG_06652                                       |
| Locus_3630_Transcript_1/4_Conf_0.500 | 753  | 6  | 2.13E-33 |                | 59 | 146.747 | 235 | 139 | hypothetical protein B0511.12 - Caenorhabditis elegans                |
| Locus_3630_Transcript_2/4_Conf_0.625 | 708  | 6  | 1.88E-33 |                | 59 | 146.747 | 235 | 139 | hypothetical protein B0511.12 - Caenorhabditis elegans                |
| Locus_3630_Transcript_3/4_Conf_0.500 | 759  | 6  | 2.17E-33 |                | 59 | 146.747 | 235 | 139 | hypothetical protein B0511.12                                         |
| Locus_3630_Transcript_4/4_Conf_0.625 | 759  | 6  | 2.17E-33 |                | 59 | 146.747 | 235 | 139 | hypothetical protein B0511.12                                         |
| Locus_3631_Transcript_1/1_Conf_1.000 | 904  | 20 | 6.34E-84 | XP_002640662.1 | 67 | 315.079 | 327 | 220 | Hypothetical protein CBG19722                                         |

|                                      |      |    |           |                |    |         |     |     |                                                               |
|--------------------------------------|------|----|-----------|----------------|----|---------|-----|-----|---------------------------------------------------------------|
| Locus_3632_Transcript_1/1_Conf_1.000 | 1345 | 20 | 1.01E-111 | NP_001024778.2 | 66 | 408.297 | 438 | 293 | neuRonal IGCAM family member (rig-1)                          |
| Locus_3633_Transcript_1/1_Conf_1.000 | 1323 | 20 | 0         | NP_001076658.1 | 94 | 790.03  | 425 | 401 | abnormal CHEmotaxis family member (tax-6)                     |
| Locus_3634_Transcript_1/1_Conf_1.000 | 286  | 0  |           |                |    |         |     |     |                                                               |
| Locus_3635_Transcript_1/2_Conf_1.000 | 1186 | 20 | 8.45E-104 | NP_491614.1    | 77 | 381.719 | 343 | 267 | hypothetical protein F59A3.4                                  |
| Locus_3635_Transcript_2/2_Conf_1.000 | 1129 | 20 | 1.35E-103 | NP_491614.1    | 82 | 380.948 | 322 | 266 | hypothetical protein F59A3.4                                  |
| Locus_3636_Transcript_1/1_Conf_1.000 | 462  | 20 | 1.13E-53  | XP_002644337.1 | 84 | 212.616 | 144 | 122 | C. briggsae CBR-KLP-4 protein                                 |
| Locus_3637_Transcript_1/4_Conf_0.667 | 1004 | 20 | 1.75E-48  | XP_002200515.1 | 76 | 197.593 | 166 | 127 | PREDICTED: similar to splicing factor, arginine/serine-rich 5 |
| Locus_3637_Transcript_2/4_Conf_0.667 | 1094 | 20 | 1.13E-51  | ACI33535.1     | 73 | 208.379 | 186 | 137 | Splicing factor, arginine/serine-rich 5                       |
| Locus_3637_Transcript_3/4_Conf_0.444 | 1176 | 20 | 4.85E-19  | EFO18201.1     | 90 | 100.138 | 61  | 55  | Sfrs5 protein                                                 |
| Locus_3637_Transcript_4/4_Conf_0.667 | 1049 | 20 | 2.21E-49  | XP_002200515.1 | 75 | 200.675 | 172 | 130 | PREDICTED: similar to splicing factor, arginine/serine-rich 5 |
| Locus_3638_Transcript_1/1_Conf_1.000 | 1453 | 20 | 2.05E-89  | NP_498516.2    | 64 | 334.339 | 425 | 274 | LEThal family member (let-711)                                |
| Locus_3639_Transcript_1/2_Conf_1.000 | 328  | 14 | 4.60E-07  | AAN11402.1     | 58 | 57.7658 | 65  | 38  | secreted-protein 1 precursor                                  |
| Locus_3639_Transcript_2/2_Conf_1.000 | 773  | 20 | 4.85E-20  | AAO63577.1     | 48 | 102.449 | 207 | 100 | secreted protein 5 precursor                                  |
| Locus_364_Transcript_1/1_Conf_1.000  | 975  | 20 | 9.69E-89  | NP_501684.1    | 85 | 331.257 | 226 | 193 | hypothetical protein C33A12.7                                 |
| Locus_3640_Transcript_1/1_Conf_1.000 | 474  | 20 | 7.00E-40  | XP_002631404.1 | 93 | 166.777 | 109 | 102 | C. briggsae CBR-RPL-32 protein                                |

|                                      |      |    |           |                |     |         |      |      |                                                           |
|--------------------------------------|------|----|-----------|----------------|-----|---------|------|------|-----------------------------------------------------------|
| Locus_3641_Transcript_1/1_Conf_1.000 | 539  | 20 | 6.92E-77  | NP_001022571.1 | 87  | 290.041 | 180  | 157  | NeuroFibroMatoSis homolog family member (nfm-1)           |
| Locus_3642_Transcript_1/1_Conf_1.000 | 2000 | 20 | 3.00E-68  | NP_001022181.1 | 65  | 264.618 | 346  | 228  | UBX-containing protein in Nematode family member (ubxn-3) |
| Locus_3643_Transcript_1/1_Conf_1.000 | 802  | 20 | 2.85E-58  | XP_002642531.1 | 81  | 229.565 | 144  | 117  | C. briggsae CBR-RNF-121 protein                           |
| Locus_3644_Transcript_1/5_Conf_0.385 | 562  | 0  |           |                |     |         |      |      |                                                           |
| Locus_3644_Transcript_2/5_Conf_0.692 | 2252 | 1  | 7.85E-04  | XP_001612950.1 | 39  | 50.8322 | 229  | 91   | hypothetical protein                                      |
| Locus_3644_Transcript_3/5_Conf_0.538 | 2242 | 1  | 7.81E-04  | XP_001612950.1 | 39  | 50.8322 | 229  | 91   | hypothetical protein                                      |
| Locus_3644_Transcript_4/5_Conf_0.692 | 2182 | 0  |           |                |     |         |      |      |                                                           |
| Locus_3644_Transcript_5/5_Conf_0.692 | 2302 | 1  | 8.07E-04  | XP_001612950.1 | 39  | 50.8322 | 229  | 91   | hypothetical protein                                      |
| Locus_3645_Transcript_1/1_Conf_1.000 | 1287 | 20 | 1.72E-121 | XP_002634705.1 | 72  | 440.654 | 385  | 280  | Hypothetical protein CBG19691                             |
| Locus_3646_Transcript_1/1_Conf_1.000 | 3759 | 20 | 0         | XP_001895215.1 | 85  | 1762.27 | 1171 | 1002 | Disco-interacting protein 2 homolog                       |
| Locus_3647_Transcript_1/2_Conf_1.000 | 1389 | 20 | 1.88E-52  | NP_500023.1    | 69  | 211.46  | 197  | 136  | hypothetical protein Y55F3AM.9                            |
| Locus_3647_Transcript_2/2_Conf_1.000 | 1340 | 20 | 1.29E-50  | NP_500023.1    | 69  | 205.297 | 185  | 129  | hypothetical protein Y55F3AM.9                            |
| Locus_3648_Transcript_1/2_Conf_1.000 | 538  | 20 | 1.60E-57  | CAR63695.1     | 94  | 225.713 | 117  | 111  | putative GRP1 protein                                     |
| Locus_3648_Transcript_2/2_Conf_1.000 | 209  | 0  |           |                |     |         |      |      |                                                           |
| Locus_3649_Transcript_1/2_Conf_1.000 | 533  | 0  |           |                |     |         |      |      |                                                           |
| Locus_3649_Transcript_2/2_Conf_1.000 | 492  | 0  |           |                |     |         |      |      |                                                           |
| Locus_365_Transcript_1/3_Conf_0.375  | 784  | 20 | 3.53E-74  | ABV44405.1     | 100 | 282.337 | 203  | 203  | tropomyosin                                               |
| Locus_365_Transcript_2/3_Conf_0.500  | 1036 | 20 | 1.76E-107 | ABV44405.1     | 95  | 393.66  | 283  | 270  | tropomyosin                                               |
| Locus_365_Transcript_3/3_Conf_0.750  | 1468 | 20 | 4.30E-119 | ABV44405.1     | 100 | 432.95  | 284  | 284  | tropomyosin                                               |



|                                      |      |    |           |                |    |         |     |     |                                                               |
|--------------------------------------|------|----|-----------|----------------|----|---------|-----|-----|---------------------------------------------------------------|
| Locus_3650_Transcript_1/1_Conf_1.000 | 944  | 20 | 2.45E-116 | XP_001893694.1 | 92 | 348.591 | 209 | 193 | DNA replication licensing factor MCM3                         |
| Locus_3651_Transcript_1/1_Conf_1.000 | 403  | 0  |           |                |    |         |     |     |                                                               |
| Locus_3652_Transcript_1/1_Conf_1.000 | 630  | 20 | 4.67E-40  | CBK55599.1     | 80 | 168.318 | 118 | 95  | C. elegans protein R10E4.5b, confirmed by transcript evidence |
| Locus_3653_Transcript_1/1_Conf_1.000 | 361  | 20 | 4.72E-12  | NP_498790.1    | 75 | 74.3294 | 72  | 54  | SyNaptoBrevin related family member (snb-5)                   |
| Locus_3654_Transcript_1/1_Conf_1.000 | 994  | 0  |           |                |    |         |     |     |                                                               |
| Locus_3655_Transcript_1/1_Conf_1.000 | 1229 | 0  |           |                |    |         |     |     |                                                               |
| Locus_3656_Transcript_1/1_Conf_1.000 | 1021 | 20 | 1.71E-123 | NP_497842.1    | 89 | 446.817 | 289 | 258 | hypothetical protein R74.6                                    |
| Locus_3657_Transcript_1/2_Conf_1.000 | 2327 | 20 | 5.44E-24  | XP_002646538.1 | 56 | 117.857 | 167 | 95  | Hypothetical protein CBG20393                                 |
| Locus_3657_Transcript_2/2_Conf_1.000 | 2327 | 20 | 5.44E-24  | XP_002646538.1 | 56 | 117.857 | 167 | 95  | Hypothetical protein CBG20393                                 |

|                                      |      |    |           |                |    |         |     |     |                                                                    |
|--------------------------------------|------|----|-----------|----------------|----|---------|-----|-----|--------------------------------------------------------------------|
| Locus_3658_Transcript_1/1_Conf_1.000 | 934  | 20 | 7.85E-125 | XP_002641827.1 | 86 | 451.055 | 309 | 267 | C. briggsae CBR-CEH-20 protein                                     |
| Locus_3659_Transcript_1/2_Conf_1.000 | 2536 | 20 | 3.86E-172 | XP_002634030.1 | 64 | 610.142 | 774 | 499 | C. briggsae CBR-HGRS-1 protein                                     |
| Locus_3659_Transcript_2/2_Conf_1.000 | 2462 | 20 | 2.50E-168 | XP_002634030.1 | 70 | 597.43  | 646 | 455 | C. briggsae CBR-HGRS-1 protein                                     |
| Locus_366_Transcript_1/2_Conf_1.000  | 2344 | 20 | 0         | XP_002630695.1 | 80 | 1013.83 | 788 | 636 | C. briggsae CBR-SEC-6 protein                                      |
| Locus_366_Transcript_2/2_Conf_1.000  | 2344 | 20 | 0         | XP_002630695.1 | 80 | 1013.83 | 788 | 636 | C. briggsae CBR-SEC-6 protein                                      |
| Locus_3660_Transcript_1/1_Conf_1.000 | 1498 | 20 | 3.55E-76  | NP_505468.1    | 65 | 290.426 | 379 | 249 | EH (Eps-15-homology) domain Binding Protein family member (ehbp-1) |
| Locus_3661_Transcript_1/1_Conf_1.000 | 1310 | 20 | 2.73E-106 | XP_002641844.1 | 72 | 390.193 | 384 | 278 | Hypothetical protein CBG16518                                      |
| Locus_3662_Transcript_1/1_Conf_1.000 | 781  | 20 | 1.22E-42  | XP_002641444.1 | 60 | 177.563 | 217 | 132 | C. briggsae CBR-NPP-16 protein                                     |

|                                      |      |    |           |                |    |         |     |     |                                                                     |
|--------------------------------------|------|----|-----------|----------------|----|---------|-----|-----|---------------------------------------------------------------------|
| Locus_3663_Transcript_1/1_Conf_1.000 | 950  | 20 | 6.20E-117 | XP_002638962.1 | 79 | 424.861 | 296 | 234 | Hypothetical protein CBG22199                                       |
| Locus_3664_Transcript_1/1_Conf_1.000 | 518  | 2  | 5.10E-09  | XP_002640455.1 | 54 | 60.077  | 72  | 39  | Hypothetical protein CBG08512                                       |
| Locus_3665_Transcript_1/2_Conf_1.000 | 404  | 0  |           |                |    |         |     |     |                                                                     |
| Locus_3665_Transcript_2/2_Conf_1.000 | 556  | 0  |           |                |    |         |     |     |                                                                     |
| Locus_3666_Transcript_1/1_Conf_1.000 | 294  | 0  |           |                |    |         |     |     |                                                                     |
| Locus_3667_Transcript_1/1_Conf_1.000 | 820  | 20 | 1.23E-80  | NP_495409.3    | 92 | 303.908 | 175 | 162 | hypothetical protein C44B7.10                                       |
| Locus_3668_Transcript_1/3_Conf_0.333 | 250  | 0  |           |                |    |         |     |     |                                                                     |
| Locus_3668_Transcript_2/3_Conf_0.667 | 1324 | 9  | 3.96E-36  | NP_001022854.1 | 70 | 157.147 | 202 | 142 | Prion-like-(Q/N-rich)-domain-bearing protein family member (pqn-83) |
| Locus_3668_Transcript_3/3_Conf_0.667 | 1289 | 9  | 1.18E-37  | NP_001022853.1 | 65 | 162.155 | 283 | 184 | Prion-like-(Q/N-rich)-domain-bearing protein family member (pqn-83) |
| Locus_3669_Transcript_1/2_Conf_1.000 | 1014 | 2  | 3.09E-08  | XP_001894767.1 | 50 | 63.929  | 96  | 48  | hypothetical protein                                                |
| Locus_3669_Transcript_2/2_Conf_1.000 | 389  | 2  | 4.12E-08  | XP_001894767.1 | 74 | 61.2326 | 39  | 29  | hypothetical protein                                                |
| Locus_367_Transcript_1/1_Conf_1.000  | 855  | 20 | 4.51E-20  | XP_002637324.1 | 73 | 102.834 | 97  | 71  | C. briggsae CBR-SPN-4 protein                                       |
| Locus_3670_Transcript_1/2_Conf_1.000 | 1675 | 20 | 4.64E-112 | NP_500088.1    | 89 | 409.838 | 278 | 249 | hypothetical protein Y77E11A.1                                      |
| Locus_3670_Transcript_2/2_Conf_1.000 | 1592 | 20 | 4.33E-112 | NP_500088.1    | 89 | 409.838 | 278 | 249 | hypothetical protein Y77E11A.1                                      |

|                                      |     |    |           |                |     |         |     |     |                                           |
|--------------------------------------|-----|----|-----------|----------------|-----|---------|-----|-----|-------------------------------------------|
| Locus_3671_Transcript_1/1_Conf_1.000 | 934 | 20 | 1.22E-109 | XP_002632654.1 | 84  | 400.593 | 259 | 218 | Hypothetical protein CBG21577             |
| Locus_3672_Transcript_1/1_Conf_1.000 | 420 | 20 | 4.04E-27  | EFO16801.1     | 82  | 124.405 | 85  | 70  | RNA-binding protein                       |
| Locus_3673_Transcript_1/1_Conf_1.000 | 518 | 0  |           |                |     |         |     |     |                                           |
| Locus_3674_Transcript_1/1_Conf_1.000 | 228 | 20 | 9.60E-37  | XP_002925885.1 | 100 | 156.377 | 75  | 75  | PREDICTED: alpha-actinin-4-like isoform 3 |
| Locus_3675_Transcript_1/1_Conf_1.000 | 155 | 0  |           |                |     |         |     |     |                                           |
| Locus_3676_Transcript_1/3_Conf_0.667 | 624 | 20 | 4.55E-40  | ADJ94115.1     | 62  | 168.318 | 214 | 134 | aspartic protease                         |
| Locus_3676_Transcript_2/3_Conf_0.667 | 615 | 20 | 6.86E-41  | ADJ94115.1     | 63  | 171.014 | 214 | 135 | aspartic protease                         |

|                                      |      |    |           |                |    |         |     |     |                                                                  |
|--------------------------------------|------|----|-----------|----------------|----|---------|-----|-----|------------------------------------------------------------------|
| Locus_3676_Transcript_3/3_Conf_0.667 | 615  | 20 | 9.91E-40  | ADJ94115.1     | 62 | 167.162 | 214 | 133 | aspartic protease                                                |
| Locus_3677_Transcript_1/1_Conf_1.000 | 594  | 20 | 2.13E-57  | NP_001021702.1 | 74 | 225.713 | 201 | 150 | EXOCyst component family member (exoc-8)                         |
| Locus_3678_Transcript_1/3_Conf_0.818 | 2009 | 4  | 2.42E-17  | NP_498116.2    | 54 | 95.5153 | 185 | 100 | hypothetical protein C34E10.8                                    |
| Locus_3678_Transcript_2/3_Conf_0.818 | 2009 | 4  | 2.42E-17  | NP_498116.2    | 54 | 95.5153 | 185 | 100 | hypothetical protein C34E10.8                                    |
| Locus_3678_Transcript_3/3_Conf_0.818 | 2009 | 4  | 2.42E-17  | NP_498116.2    | 54 | 95.5153 | 185 | 100 | hypothetical protein C34E10.8                                    |
| Locus_3679_Transcript_1/1_Conf_1.000 | 594  | 20 | 1.90E-98  | XP_002637043.1 | 90 | 362.073 | 196 | 177 | C. briggsae CBR-EGL-3 protein                                    |
| Locus_368_Transcript_1/2_Conf_1.000  | 642  | 5  | 1.55E-14  | NP_492047.1    | 60 | 60.077  | 66  | 40  | Chondroitin ProteoGlycan family member (cpg-3)                   |
| Locus_368_Transcript_2/2_Conf_1.000  | 635  | 6  | 2.28E-18  | NP_492047.1    | 56 | 96.2857 | 102 | 58  | Chondroitin ProteoGlycan family member (cpg-3)                   |
| Locus_3680_Transcript_1/1_Conf_1.000 | 1934 | 20 | 0         | XP_001891856.1 | 89 | 1097.42 | 662 | 593 | UDP-N-acetylglucosamine--peptide N-acetylglucosaminyltransferase |
| Locus_3681_Transcript_1/1_Conf_1.000 | 2071 | 20 | 9.18E-161 | EFO26155.1     | 75 | 572.007 | 469 | 352 | pellino family protein                                           |
| Locus_3682_Transcript_1/1_Conf_1.000 | 2254 | 20 | 0         | XP_002645843.1 | 69 | 846.269 | 756 | 523 | C. briggsae CBR-TAG-53 protein                                   |
| Locus_3683_Transcript_1/1_Conf_1.000 | 542  | 20 | 2.70E-52  | XP_002639062.1 | 84 | 208.379 | 133 | 113 | Hypothetical protein CBG14873                                    |
| Locus_3684_Transcript_1/1_Conf_1.000 | 1008 | 20 | 4.19E-74  | XP_001898464.1 | 71 | 282.722 | 249 | 177 | Innexin inx-3                                                    |
| Locus_3685_Transcript_1/1_Conf_1.000 | 291  | 0  |           |                |    |         |     |     |                                                                  |
| Locus_3686_Transcript_1/1_Conf_1.000 | 465  | 2  | 5.13E-06  | CAB02779.3     | 48 | 54.299  | 162 | 78  | C. elegans protein C25D7.10, confirmed by transcript evidence    |
| Locus_3687_Transcript_1/2_Conf_1.000 | 901  | 20 | 1.42E-51  | ABD39381.1     | 86 | 207.608 | 144 | 124 | putative galectin protein 10                                     |

|                                      |      |    |           |                |    |         |     |     |                                 |
|--------------------------------------|------|----|-----------|----------------|----|---------|-----|-----|---------------------------------|
| Locus_3687_Transcript_2/2_Conf_1.000 | 504  | 20 | 8.59E-57  | ABD39381.1     | 84 | 223.016 | 154 | 130 | putative galectin protein 10    |
| Locus_3688_Transcript_1/1_Conf_1.000 | 2120 | 20 | 0         | XP_002647979.1 | 86 | 863.603 | 622 | 541 | Hypothetical protein CBG23896   |
| Locus_3689_Transcript_1/1_Conf_1.000 | 848  | 20 | 1.42E-143 | EFO24473.1     | 93 | 513.072 | 282 | 264 | hypothetical protein LOAG_04011 |
| Locus_369_Transcript_1/2_Conf_1.000  | 1382 | 20 | 5.51E-28  | EFO20907.1     | 60 | 130.183 | 156 | 95  | MH2 domain-containing protein   |
| Locus_369_Transcript_2/2_Conf_1.000  | 1382 | 20 | 5.51E-28  | EFO20907.1     | 60 | 130.183 | 156 | 95  | MH2 domain-containing protein   |
| Locus_3690_Transcript_1/1_Conf_1.000 | 513  | 0  |           |                |    |         |     |     |                                 |

|                                      |      |    |          |                |    |         |     |     |                                                           |
|--------------------------------------|------|----|----------|----------------|----|---------|-----|-----|-----------------------------------------------------------|
| Locus_3691_Transcript_1/1_Conf_1.000 | 1319 | 20 | 1.89E-38 | NP_498856.1    | 60 | 164.851 | 266 | 161 | UBX-containing protein in Nematode family member (ubxn-4) |
| Locus_3692_Transcript_1/2_Conf_1.000 | 405  | 0  |          |                |    |         |     |     |                                                           |
| Locus_3692_Transcript_2/2_Conf_1.000 | 403  | 0  |          |                |    |         |     |     |                                                           |
| Locus_3693_Transcript_1/1_Conf_1.000 | 360  | 0  |          |                |    |         |     |     |                                                           |
| Locus_3694_Transcript_1/2_Conf_1.000 | 771  | 2  | 8.03E-07 | NP_509351.1    | 54 | 58.5362 | 122 | 66  | hypothetical protein C34D10.1                             |
| Locus_3694_Transcript_2/2_Conf_1.000 | 364  | 0  |          |                |    |         |     |     |                                                           |
| Locus_3695_Transcript_1/1_Conf_1.000 | 467  | 20 | 9.35E-08 | XP_001910957.1 | 76 | 60.077  | 38  | 29  | hypothetical protein                                      |
| Locus_3696_Transcript_1/2_Conf_1.000 | 672  | 0  |          |                |    |         |     |     |                                                           |
| Locus_3696_Transcript_2/2_Conf_1.000 | 670  | 0  |          |                |    |         |     |     |                                                           |
| Locus_3697_Transcript_1/1_Conf_1.000 | 920  | 20 | 6.09E-70 | EFO24920.1     | 83 | 261.151 | 165 | 137 | hypothetical protein LOAG_03565                           |
| Locus_3698_Transcript_1/1_Conf_1.000 | 614  | 20 | 1.88E-83 | NP_498948.1    | 83 | 312.383 | 207 | 173 | Paralysed Arrest at Two-fold family member (pat-2)        |
| Locus_3699_Transcript_1/2_Conf_1.000 | 1219 | 20 | 1.91E-90 | NP_490836.1    | 81 | 337.421 | 250 | 203 | hypothetical protein Y48G8AL.13                           |
| Locus_3699_Transcript_2/2_Conf_1.000 | 1148 | 20 | 1.73E-90 | NP_490836.1    | 81 | 337.421 | 250 | 203 | hypothetical protein Y48G8AL.13                           |
| Locus_37_Transcript_1/1_Conf_1.000   | 684  | 20 | 6.37E-92 | NP_501167.1    | 91 | 340.887 | 199 | 183 | Ribosomal Protein, Small subunit family member (rps-8)    |

|                                      |      |    |          |                |    |         |      |      |                                                       |
|--------------------------------------|------|----|----------|----------------|----|---------|------|------|-------------------------------------------------------|
| Locus_370_Transcript_1/1_Conf_1.000  | 438  | 20 | 1.14E-50 | XP_001892564.1 | 79 | 202.601 | 147  | 117  | GTP-ase activating protein for Arf containing protein |
| Locus_3700_Transcript_1/1_Conf_1.000 | 4041 | 20 | 0        | NP_502082.1    | 86 | 1636.7  | 1171 | 1015 | Phasmid Socket Absent family member (psa-4)           |
| Locus_3701_Transcript_1/1_Conf_1.000 | 330  | 0  |          |                |    |         |      |      |                                                       |
| Locus_3702_Transcript_1/1_Conf_1.000 | 1934 |    |          |                |    |         |      |      |                                                       |
| Locus_3703_Transcript_1/1_Conf_1.000 | 141  | 0  |          |                |    |         |      |      |                                                       |
| Locus_3704_Transcript_1/2_Conf_1.000 | 1232 | 20 | 2.21E-86 | XP_002641003.1 | 78 | 323.939 | 266  | 209  | C. briggsae CBR-TAT-1 protein                         |
| Locus_3704_Transcript_2/2_Conf_1.000 | 1223 | 20 | 2.26E-83 | XP_002641003.1 | 77 | 313.923 | 266  | 206  | C. briggsae CBR-TAT-1 protein                         |
| Locus_3705_Transcript_1/1_Conf_1.000 | 463  | 20 | 3.81E-09 | EFA76032.1     | 49 | 64.6994 | 135  | 67   | pleckstrin domain-containing protein                  |
| Locus_3706_Transcript_1/1_Conf_1.000 | 648  | 14 | 3.48E-41 | XP_002641580.1 | 78 | 172.17  | 121  | 95   | Hypothetical protein CBG09882                         |
| Locus_3707_Transcript_1/1_Conf_1.000 | 296  | 2  | 2.90E-09 | XP_002633740.1 | 67 | 65.0846 | 56   | 38   | Hypothetical protein CBG03425                         |
| Locus_3708_Transcript_1/1_Conf_1.000 | 2473 | 20 | 0        | XP_002643033.1 | 92 | 1326.23 | 771  | 711  | C. briggsae CBR-ACO-2 protein                         |
| Locus_3709_Transcript_1/1_Conf_1.000 | 1558 | 2  | 2.62E-13 | XP_002637225.1 | 52 | 81.6481 | 330  | 174  | Hypothetical protein CBG18891                         |



|                                      |      |    |           |                |    |         |     |     |                                                                              |
|--------------------------------------|------|----|-----------|----------------|----|---------|-----|-----|------------------------------------------------------------------------------|
| Locus_371_Transcript_1/1_Conf_1.000  | 199  | 0  |           |                |    |         |     |     |                                                                              |
| Locus_3710_Transcript_1/1_Conf_1.000 | 779  | 20 | 3.25E-72  | EFO23722.1     | 71 | 275.789 | 262 | 188 | hypothetical protein LOAG_04763                                              |
| Locus_3711_Transcript_1/1_Conf_1.000 | 496  | 0  |           |                |    |         |     |     |                                                                              |
| Locus_3712_Transcript_1/1_Conf_1.000 | 621  | 20 | 1.79E-105 | BAB63947.1     | 95 | 385.571 | 195 | 186 | Ser/Thr protein phosphatase                                                  |
| Locus_3713_Transcript_1/1_Conf_1.000 | 2188 | 20 | 1.15E-169 | NP_495701.2    | 72 | 601.668 | 525 | 383 | IRE1 kinase related family member (ire-1)                                    |
| Locus_3714_Transcript_1/1_Conf_1.000 | 539  | 20 | 1.84E-45  | NP_500566.1    | 72 | 185.652 | 179 | 130 | WAPL (Drosophila Wings APart-Like cohesin interactor) family member (wapl-1) |
| Locus_3715_Transcript_1/1_Conf_1.000 | 891  | 20 | 7.84E-71  | NP_498323.2    | 85 | 271.552 | 188 | 160 | hypothetical protein C05D10.4                                                |
| Locus_3716_Transcript_1/1_Conf_1.000 | 758  | 20 | 1.37E-96  | NP_508182.1    | 87 | 356.681 | 217 | 190 | SphingoMyelin Synthase family member (sms-2)                                 |
| Locus_3717_Transcript_1/1_Conf_1.000 | 819  | 20 | 1.79E-39  | XP_001897933.1 | 75 | 167.162 | 163 | 123 | RE01069p                                                                     |

|                                      |      |    |          |                |    |         |      |     |                                                                 |
|--------------------------------------|------|----|----------|----------------|----|---------|------|-----|-----------------------------------------------------------------|
| Locus_3718_Transcript_1/1_Conf_1.000 | 1661 | 20 | 6.29E-61 | NP_504654.1    | 76 | 239.965 | 217  | 165 | UBiquitin C-terminal Hydrolase (family 1) family member (ubh-1) |
| Locus_3719_Transcript_1/1_Conf_1.000 | 382  | 0  |          |                |    |         |      |     |                                                                 |
| Locus_372_Transcript_1/1_Conf_1.000  | 2982 | 20 | 0        | NP_492113.2    | 77 | 1213.36 | 1011 | 781 | CHitin Synthase family member (chs-1)                           |
| Locus_3720_Transcript_1/2_Conf_1.000 | 1261 | 20 | 3.38E-98 | XP_002629732.1 | 66 | 363.229 | 379  | 252 | Hypothetical protein CBG00964                                   |
| Locus_3720_Transcript_2/2_Conf_1.000 | 1262 | 20 | 3.38E-98 | XP_002629732.1 | 66 | 363.229 | 379  | 252 | Hypothetical protein CBG00964                                   |
| Locus_3721_Transcript_1/1_Conf_1.000 | 924  | 20 | 1.13E-67 | NP_495001.1    | 73 | 261.151 | 241  | 178 | hypothetical protein F09E5.8                                    |
| Locus_3722_Transcript_1/1_Conf_1.000 | 836  | 20 | 2.00E-09 | EFO23681.1     | 75 | 67.3958 | 49   | 37  | hypothetical protein LOAG_04805                                 |
| Locus_3723_Transcript_1/1_Conf_1.000 | 477  | 20 | 3.57E-44 | NP_501221.1    | 77 | 181.03  | 140  | 108 | CytiDine Deaminase family member (cdd-2)                        |
| Locus_3724_Transcript_1/2_Conf_1.000 | 3259 | 4  | 4.79E-61 | NP_492524.2    | 58 | 241.506 | 348  | 204 | hypothetical protein F30A10.10                                  |
| Locus_3724_Transcript_2/2_Conf_1.000 | 3226 | 4  | 4.73E-61 | NP_492524.2    | 58 | 241.506 | 348  | 204 | hypothetical protein F30A10.10                                  |

|                                      |      |    |           |                |    |         |     |     |                                 |
|--------------------------------------|------|----|-----------|----------------|----|---------|-----|-----|---------------------------------|
| Locus_3725_Transcript_1/1_Conf_1.000 | 633  | 20 | 1.44E-105 | NP_001022641.1 | 94 | 385.956 | 211 | 200 | LEThal family member (let-805)  |
| Locus_3726_Transcript_1/1_Conf_1.000 | 310  | 0  |           |                |    |         |     |     |                                 |
| Locus_3727_Transcript_1/1_Conf_1.000 | 329  | 2  | 2.35E-19  | NP_498941.1    | 72 | 98.5969 | 76  | 55  | hypothetical protein K02D10.4   |
| Locus_3728_Transcript_1/2_Conf_1.000 | 1290 | 20 | 4.63E-58  | XP_002633353.1 | 66 | 229.95  | 250 | 167 | Hypothetical protein CBG06097   |
| Locus_3728_Transcript_2/2_Conf_1.000 | 678  | 2  | 4.90E-04  | XP_002633353.1 | 62 | 48.9062 | 51  | 32  | Hypothetical protein CBG06097   |
| Locus_3729_Transcript_1/1_Conf_1.000 | 513  | 20 | 4.27E-83  | NP_505708.2    | 92 | 310.457 | 170 | 158 | hypothetical protein F32G8.4    |
| Locus_373_Transcript_1/1_Conf_1.000  | 2864 | 20 | 0         | Q27665.1       | 94 | 1414.82 | 792 | 747 | 6-phosphofructokinase           |
| Locus_3730_Transcript_1/2_Conf_0.667 | 282  | 20 | 2.32E-14  | EFN87118.1     | 71 | 82.0333 | 59  | 42  | Four-domain proteases inhibitor |
| Locus_3730_Transcript_2/2_Conf_0.667 | 282  | 20 | 2.32E-14  | EFN87118.1     | 71 | 82.0333 | 59  | 42  | Four-domain proteases inhibitor |
| Locus_3731_Transcript_1/1_Conf_1.000 | 443  | 0  |           |                |    |         |     |     |                                 |
| Locus_3732_Transcript_1/1_Conf_1.000 | 232  | 0  |           |                |    |         |     |     |                                 |
| Locus_3733_Transcript_1/4_Conf_0.200 | 621  | 20 | 4.78E-50  | NP_740900.1    | 71 | 201.445 | 211 | 150 | hypothetical protein T08G11.1   |
| Locus_3733_Transcript_2/4_Conf_0.200 | 663  | 20 | 8.62E-51  | NP_740900.1    | 71 | 204.142 | 212 | 151 | hypothetical protein T08G11.1   |
| Locus_3733_Transcript_3/4_Conf_0.400 | 936  | 20 | 2.33E-76  | XP_002639673.1 | 69 | 290.041 | 313 | 216 | Hypothetical protein CBG12391   |
| Locus_3733_Transcript_4/4_Conf_0.400 | 936  | 20 | 1.16E-75  | XP_002639673.1 | 69 | 287.73  | 313 | 216 | Hypothetical protein CBG12391   |
| Locus_3734_Transcript_1/2_Conf_1.000 | 2440 | 20 | 3.36E-141 | XP_002639317.1 | 59 | 507.294 | 764 | 454 | C. briggsae CBR-ABT-2 protein   |
| Locus_3734_Transcript_2/2_Conf_1.000 | 2392 | 20 | 6.23E-140 | XP_002639317.1 | 58 | 503.056 | 762 | 449 | C. briggsae CBR-ABT-2 protein   |

|                                      |      |    |           |                |    |         |     |     |                                               |
|--------------------------------------|------|----|-----------|----------------|----|---------|-----|-----|-----------------------------------------------|
| Locus_3735_Transcript_1/2_Conf_1.000 | 908  | 20 | 4.72E-87  | XP_002630833.1 | 74 | 325.479 | 304 | 227 | C. briggsae CBR-VRK-1 protein                 |
| Locus_3735_Transcript_2/2_Conf_1.000 | 984  | 20 | 3.50E-94  | NP_495185.1    | 72 | 349.362 | 329 | 239 | Vaccinia Related Kinase family member (vrk-1) |
| Locus_3736_Transcript_1/2_Conf_1.000 | 1290 | 20 | 1.26E-111 | NP_498949.2    | 72 | 305.834 | 283 | 206 | hypothetical protein F54F2.9                  |
| Locus_3736_Transcript_2/2_Conf_1.000 | 1273 | 20 | 5.63E-117 | NP_498949.2    | 71 | 425.631 | 407 | 289 | hypothetical protein F54F2.9                  |
| Locus_3737_Transcript_1/1_Conf_1.000 | 1512 | 1  | 1.59E-07  | XP_002641068.1 | 38 | 62.3882 | 289 | 110 | Hypothetical protein CBG22485                 |
| Locus_3738_Transcript_1/1_Conf_1.000 | 305  | 17 | 1.09E-08  | NP_491980.1    | 63 | 63.1586 | 79  | 50  | hypothetical protein T10B11.6                 |
| Locus_3739_Transcript_1/1_Conf_1.000 | 405  | 20 | 3.05E-35  | EFN69632.1     | 70 | 151.369 | 135 | 95  | Poly [ADP-ribose] polymerase                  |
| Locus_374_Transcript_1/2_Conf_1.000  | 496  | 0  |           |                |    |         |     |     |                                               |
| Locus_374_Transcript_2/2_Conf_1.000  | 417  | 0  |           |                |    |         |     |     |                                               |
| Locus_3740_Transcript_1/1_Conf_1.000 | 874  | 20 | 6.40E-102 | NP_497716.1    | 86 | 374.785 | 267 | 231 | hypothetical protein C34C12.5                 |
| Locus_3741_Transcript_1/2_Conf_1.000 | 171  | 20 | 5.13E-13  | XP_001897838.1 | 81 | 70.8626 | 44  | 36  | GH25683p                                      |
| Locus_3741_Transcript_2/2_Conf_1.000 | 687  | 20 | 2.01E-77  | XP_002631727.1 | 85 | 292.738 | 229 | 196 | Hypothetical protein CBG20929                 |
| Locus_3742_Transcript_1/1_Conf_1.000 | 479  | 20 | 1.49E-58  | XP_002642088.1 | 87 | 228.794 | 140 | 122 | C. briggsae CBR-SEL-2 protein                 |
| Locus_3743_Transcript_1/1_Conf_1.000 | 647  | 1  | 3.47E-09  | CAH88354.1     | 86 | 65.855  | 38  | 33  | hypothetical protein PC101070.00.0            |
| Locus_3744_Transcript_1/1_Conf_1.000 | 1542 | 6  | 1.67E-28  | XP_002642047.1 | 50 | 132.109 | 378 | 189 | C. briggsae CBR-MEL-28 protein                |
| Locus_3745_Transcript_1/1_Conf_1.000 | 296  | 20 | 4.93E-17  | NP_496557.1    | 69 | 90.8929 | 100 | 69  | hypothetical protein Y17G7B.4                 |
| Locus_3746_Transcript_1/1_Conf_1.000 | 2079 | 0  |           |                |    |         |     |     |                                               |

|                                      |      |    |          |                |    |         |     |     |                                  |
|--------------------------------------|------|----|----------|----------------|----|---------|-----|-----|----------------------------------|
| Locus_3747_Transcript_1/1_Conf_1.000 | 623  | 20 | 2.54E-43 | XP_002646224.1 | 83 | 179.104 | 125 | 104 | Hypothetical protein CBG11916    |
| Locus_3748_Transcript_1/1_Conf_1.000 | 824  | 0  |          |                |    |         |     |     |                                  |
| Locus_3749_Transcript_1/1_Conf_1.000 | 1869 | 20 | 7.26E-85 | EFO18886.1     | 54 | 319.701 | 509 | 277 | GPI transamidase component PIG-T |
| Locus_375_Transcript_1/1_Conf_1.000  | 228  | 0  |          |                |    |         |     |     |                                  |
| Locus_3750_Transcript_1/1_Conf_1.000 | 275  | 0  |          |                |    |         |     |     |                                  |
| Locus_3751_Transcript_1/1_Conf_1.000 | 139  | 2  | 9.48E-05 | CAD20812.1     | 63 | 50.0618 | 44  | 28  | SXC2 protein                     |
| Locus_3752_Transcript_1/1_Conf_1.000 | 224  | 20 | 3.45E-18 | EFO17497.1     | 72 | 94.7449 | 73  | 53  | timeless protein                 |
| Locus_3753_Transcript_1/1_Conf_1.000 | 189  | 0  |          |                |    |         |     |     |                                  |
| Locus_3754_Transcript_1/1_Conf_1.000 | 851  | 20 | 3.26E-63 | NP_503010.2    | 72 | 246.128 | 211 | 154 | hypothetical protein Y116A8C.9   |

|                                      |      |    |          |                |    |         |     |     |                                |
|--------------------------------------|------|----|----------|----------------|----|---------|-----|-----|--------------------------------|
| Locus_3755_Transcript_1/2_Conf_1.000 | 1483 | 20 | 5.27E-48 | XP_002639198.1 | 85 | 196.823 | 145 | 124 | C. briggsae CBR-PABP-2 protein |
| Locus_3755_Transcript_2/2_Conf_1.000 | 1148 | 20 | 3.66E-48 | XP_002639198.1 | 85 | 196.823 | 145 | 124 | C. briggsae CBR-PABP-2 protein |
| Locus_3756_Transcript_1/1_Conf_1.000 | 1232 | 20 | 1.62E-12 | XP_001686160.1 | 49 | 78.5666 | 207 | 102 | hypothetical protein           |

|                                      |      |    |          |                |    |         |     |     |                                                                      |
|--------------------------------------|------|----|----------|----------------|----|---------|-----|-----|----------------------------------------------------------------------|
| Locus_3757_Transcript_1/2_Conf_1.000 | 1576 | 20 | 4.44E-93 | XP_001901466.1 | 61 | 346.665 | 452 | 276 | Paired amphipathic helix repeat family protein                       |
| Locus_3757_Transcript_2/2_Conf_1.000 | 762  | 20 | 1.92E-13 | XP_001901466.1 | 61 | 80.4925 | 107 | 66  | Paired amphipathic helix repeat family protein                       |
| Locus_3758_Transcript_1/1_Conf_1.000 | 581  | 1  | 5.74E-04 | XP_002640488.1 | 41 | 48.1358 | 219 | 91  | Hypothetical protein CBG13624                                        |
| Locus_3759_Transcript_1/1_Conf_1.000 | 1090 | 20 | 6.19E-58 | NP_001122646.1 | 66 | 229.18  | 269 | 178 | hypothetical protein T28D9.3                                         |
| Locus_376_Transcript_1/1_Conf_1.000  | 759  | 20 | 1.22E-60 | EFO23916.1     | 66 | 237.269 | 260 | 174 | transcription accessory protein                                      |
| Locus_3760_Transcript_1/1_Conf_1.000 | 446  | 9  | 2.44E-14 | AAA63241.1     | 84 | 65.855  | 38  | 32  | unknown                                                              |
| Locus_3761_Transcript_1/1_Conf_1.000 | 2360 | 20 | 0        | XP_002641127.1 | 92 | 1183.32 | 690 | 635 | Hypothetical protein CBG08977                                        |
| Locus_3762_Transcript_1/1_Conf_1.000 | 525  | 20 | 1.09E-23 | NP_496958.2    | 57 | 113.235 | 145 | 83  | XRN (mouse/S. cerevisiae) ribonuclease related family member (xrn-2) |

|                                      |      |    |           |                |    |         |     |     |                                                            |
|--------------------------------------|------|----|-----------|----------------|----|---------|-----|-----|------------------------------------------------------------|
| Locus_3763_Transcript_1/1_Conf_1.000 | 409  | 20 | 9.81E-26  | XP_002640785.1 | 73 | 119.783 | 96  | 71  | Hypothetical protein CBG15660                              |
| Locus_3764_Transcript_1/1_Conf_1.000 | 386  | 0  |           |                |    |         |     |     |                                                            |
| Locus_3765_Transcript_1/1_Conf_1.000 | 550  | 8  | 5.63E-16  | NP_492071.1    | 67 | 87.8113 | 105 | 71  | hypothetical protein F52A8.1                               |
| Locus_3766_Transcript_1/1_Conf_1.000 | 959  | 19 | 7.56E-30  | NP_001022050.1 | 55 | 135.576 | 247 | 138 | hypothetical protein D1069.3                               |
| Locus_3767_Transcript_1/1_Conf_1.000 | 466  | 4  | 3.66E-20  | XP_002631353.1 | 74 | 101.293 | 89  | 66  | Hypothetical protein CBG03186                              |
| Locus_3768_Transcript_1/1_Conf_1.000 | 671  | 4  | 8.90E-19  | XP_002632648.1 | 72 | 97.8265 | 106 | 77  | Hypothetical protein CBG21570                              |
| Locus_3769_Transcript_1/1_Conf_1.000 | 362  | 0  |           |                |    |         |     |     |                                                            |
| Locus_377_Transcript_1/1_Conf_1.000  | 1711 | 20 | 0         | NP_001023223.1 | 94 | 1009.59 | 558 | 529 | EGG Laying defective family member (egl-4)                 |
| Locus_3770_Transcript_1/1_Conf_1.000 | 809  | 20 | 9.62E-54  | NP_505810.2    | 61 | 214.542 | 266 | 164 | P21-Activated Kinase family member (pak-2)                 |
| Locus_3771_Transcript_1/1_Conf_1.000 | 1726 | 20 | 8.49E-101 | XP_001892143.1 | 74 | 372.474 | 292 | 218 | Protein kinase domain containing protein                   |
| Locus_3772_Transcript_1/1_Conf_1.000 | 198  | 1  | 8.16E-04  | NP_492172.1    | 60 | 46.9802 | 63  | 38  | Aspergillus NUclear Division related family member (nud-2) |



|                                      |      |    |          |                |    |         |     |     |                                               |
|--------------------------------------|------|----|----------|----------------|----|---------|-----|-----|-----------------------------------------------|
| Locus_3773_Transcript_1/1_Conf_1.000 | 1317 | 20 | 6.17E-98 | XP_002642672.1 | 72 | 362.459 | 312 | 226 | C. briggsae CBR-TAG-307 protein               |
| Locus_3774_Transcript_1/1_Conf_1.000 | 649  | 0  |          |                |    |         |     |     |                                               |
| Locus_3775_Transcript_1/1_Conf_1.000 | 850  | 20 | 2.02E-97 | XP_002643159.1 | 74 | 359.762 | 298 | 222 | C. briggsae CBR-VPS-33.1 protein              |
| Locus_3776_Transcript_1/1_Conf_1.000 | 1121 | 1  | 2.41E-04 | EFO17338.1     | 42 | 51.2174 | 291 | 125 | hypothetical protein LOAG_11160               |
| Locus_3777_Transcript_1/5_Conf_0.688 | 3033 | 20 | 0        | EFO25880.1     | 86 | 1261.51 | 886 | 765 | 26S proteasome regulatory complex subunit p97 |
| Locus_3777_Transcript_2/5_Conf_0.688 | 3033 | 20 | 0        | EFO25880.1     | 86 | 1259.97 | 886 | 765 | 26S proteasome regulatory complex subunit p97 |
| Locus_3777_Transcript_3/5_Conf_0.688 | 3033 | 20 | 0        | EFO25880.1     | 86 | 1261.51 | 886 | 765 | 26S proteasome regulatory complex subunit p97 |
| Locus_3777_Transcript_4/5_Conf_0.688 | 3033 | 20 | 0        | EFO25880.1     | 86 | 1261.51 | 886 | 765 | 26S proteasome regulatory complex subunit p97 |
| Locus_3777_Transcript_5/5_Conf_0.688 | 3033 | 20 | 0        | EFO25880.1     | 86 | 1261.51 | 886 | 765 | 26S proteasome regulatory complex subunit p97 |
| Locus_3778_Transcript_1/1_Conf_1.000 | 825  | 20 | 1.57E-83 | EFO27043.1     | 89 | 313.538 | 189 | 169 | small GTP binding protein                     |
| Locus_3779_Transcript_1/3_Conf_0.600 | 196  | 1  | 4.34E-05 | NP_494766.1    | 59 | 51.2174 | 72  | 43  | hypothetical protein H2OJ04.3                 |
| Locus_3779_Transcript_2/3_Conf_0.600 | 151  | 0  |          |                |    |         |     |     |                                               |
| Locus_3779_Transcript_3/3_Conf_0.600 | 202  | 1  | 1.64E-04 | NP_494766.1    | 59 | 49.2914 | 74  | 44  | hypothetical protein H2OJ04.3                 |
| Locus_378_Transcript_1/1_Conf_1.000  | 689  | 7  | 4.55E-21 | ABC86839.1     | 80 | 105.531 | 109 | 88  | depsiphilin                                   |

|                                      |      |    |          |                |     |         |     |     |                                           |
|--------------------------------------|------|----|----------|----------------|-----|---------|-----|-----|-------------------------------------------|
| Locus_3780_Transcript_1/1_Conf_1.000 | 182  | 0  |          |                |     |         |     |     |                                           |
| Locus_3781_Transcript_1/1_Conf_1.000 | 371  | 0  |          |                |     |         |     |     |                                           |
| Locus_3782_Transcript_1/1_Conf_1.000 | 1181 | 20 | 1.25E-99 | EFO19146.1     | 71  | 367.851 | 391 | 281 | hypothetical protein LOAG_09348           |
| Locus_3783_Transcript_1/1_Conf_1.000 | 428  | 20 | 1.13E-29 | NP_001022585.1 | 75  | 132.88  | 132 | 100 | hypothetical protein F43C1.6              |
| Locus_3784_Transcript_1/1_Conf_1.000 | 628  | 20 | 8.06E-69 | NP_504045.1    | 75  | 263.848 | 206 | 156 | hypothetical protein R08E5.3              |
| Locus_3785_Transcript_1/1_Conf_1.000 | 725  | 20 | 1.85E-39 | XP_002638213.1 | 84  | 166.777 | 226 | 192 | Hypothetical protein CBG22646             |
| Locus_3786_Transcript_1/1_Conf_1.000 | 236  | 3  | 5.45E-08 | NP_001022999.1 | 61  | 60.8474 | 78  | 48  | hypothetical protein ZK418.2              |
| Locus_3787_Transcript_1/1_Conf_1.000 | 151  | 20 | 1.50E-21 | XP_002822871.1 | 100 | 105.916 | 50  | 50  | PREDICTED: myeloid leukemia factor 2-like |
| Locus_3788_Transcript_1/1_Conf_1.000 | 373  | 20 | 1.39E-35 | XP_002632353.1 | 75  | 152.525 | 122 | 92  | Hypothetical protein CBG00367             |
| Locus_3789_Transcript_1/2_Conf_1.000 | 536  | 20 | 2.13E-46 | AAZ82856.1     | 83  | 188.734 | 112 | 93  | Hypothetical protein C24B5.4              |
| Locus_3789_Transcript_2/2_Conf_1.000 | 524  | 20 | 5.46E-44 | AAZ82856.1     | 82  | 180.644 | 108 | 89  | Hypothetical protein C24B5.4              |
| Locus_379_Transcript_1/1_Conf_1.000  | 822  | 1  | 1.44E-04 | XP_002632710.1 | 45  | 51.2174 | 183 | 84  | Hypothetical protein CBG18736             |
| Locus_3790_Transcript_1/1_Conf_1.000 | 210  | 17 | 1.67E-09 | NP_498750.2    | 62  | 65.855  | 69  | 43  | hypothetical protein F44B9.8              |
| Locus_3791_Transcript_1/1_Conf_1.000 | 150  | 0  |          |                |     |         |     |     |                                           |
| Locus_3792_Transcript_1/2_Conf_1.000 | 286  | 20 | 2.64E-18 | ABZ81538.1     | 81  | 95.1301 | 70  | 57  | K01G5.8a                                  |
| Locus_3792_Transcript_2/2_Conf_1.000 | 296  | 20 | 2.62E-18 | ABZ81538.1     | 81  | 95.1301 | 70  | 57  | K01G5.8a                                  |
| Locus_3793_Transcript_1/1_Conf_1.000 | 1049 | 20 | 8.84E-99 | XP_002631700.1 | 71  | 364.77  | 349 | 250 | Hypothetical protein CBG20899             |

|                                      |      |    |           |                |     |         |      |     |                                              |
|--------------------------------------|------|----|-----------|----------------|-----|---------|------|-----|----------------------------------------------|
| Locus_3794_Transcript_1/1_Conf_1.000 | 517  | 20 | 9.46E-70  | XP_001147989.1 | 100 | 266.159 | 164  | 164 | PREDICTED: similar to RPS27A protein         |
| Locus_3795_Transcript_1/2_Conf_1.000 | 1111 | 0  |           |                |     |         |      |     |                                              |
| Locus_3795_Transcript_2/2_Conf_1.000 | 1111 | 0  |           |                |     |         |      |     |                                              |
| Locus_3796_Transcript_1/1_Conf_1.000 | 950  | 20 | 3.41E-107 | NP_490886.2    | 80  | 392.504 | 305  | 244 | hypothetical protein Y71G12B.11              |
| Locus_3797_Transcript_1/1_Conf_1.000 | 223  | 20 | 4.68E-07  | EFN83858.1     | 75  | 57.7658 | 52   | 39  | Histone-lysine N-methyltransferase SETMAR    |
| Locus_3798_Transcript_1/2_Conf_1.000 | 1142 | 5  | 2.14E-24  | NP_499994.3    | 52  | 117.857 | 231  | 121 | hypothetical protein Y55F3BL.1               |
| Locus_3798_Transcript_2/2_Conf_1.000 | 1142 | 5  | 2.80E-24  | NP_499994.3    | 52  | 117.472 | 231  | 121 | hypothetical protein Y55F3BL.1               |
| Locus_3799_Transcript_1/1_Conf_1.000 | 372  | 11 | 4.78E-28  | XP_002637831.1 | 68  | 127.487 | 124  | 85  | C. briggsae CBR-NXF-2 protein                |
| Locus_38_Transcript_1/1_Conf_1.000   | 3553 | 20 | 0         | NP_509919.2    | 67  | 1177.93 | 1184 | 794 | hypothetical protein T25C12.3                |
| Locus_380_Transcript_1/1_Conf_1.000  | 912  | 12 | 1.04E-33  | NP_001021203.1 | 55  | 148.288 | 259  | 143 | Cell Death abnormality family member (ced-4) |
| Locus_3800_Transcript_1/1_Conf_1.000 | 684  | 0  |           |                |     |         |      |     |                                              |

|                                      |      |    |           |                |    |         |     |     |                                                          |
|--------------------------------------|------|----|-----------|----------------|----|---------|-----|-----|----------------------------------------------------------|
| Locus_3801_Transcript_1/1_Conf_1.000 | 1305 | 10 | 5.47E-06  | NP_001093288.1 | 72 | 56.9954 | 50  | 36  | hypothetical protein LOC100101190                        |
| Locus_3802_Transcript_1/4_Conf_0.375 | 403  | 0  |           |                |    |         |     |     |                                                          |
| Locus_3802_Transcript_2/4_Conf_0.625 | 696  | 20 | 2.25E-31  | XP_002640376.1 | 62 | 139.813 | 154 | 97  | Hypothetical protein CBG20283                            |
| Locus_3802_Transcript_3/4_Conf_0.625 | 787  | 20 | 2.85E-31  | XP_002640376.1 | 62 | 139.813 | 154 | 97  | Hypothetical protein CBG20283                            |
| Locus_3802_Transcript_4/4_Conf_0.625 | 787  | 20 | 2.85E-31  | XP_002640376.1 | 62 | 139.813 | 154 | 97  | Hypothetical protein CBG20283                            |
| Locus_3803_Transcript_1/1_Conf_1.000 | 157  | 0  |           |                |    |         |     |     |                                                          |
| Locus_3804_Transcript_1/1_Conf_1.000 | 1135 | 20 | 3.55E-128 | XP_002641391.1 | 80 | 462.611 | 336 | 270 | C. briggsae CBR-GLY-8 protein                            |
| Locus_3805_Transcript_1/1_Conf_1.000 | 852  | 20 | 1.29E-51  | NP_502302.2    | 63 | 207.608 | 247 | 157 | hypothetical protein M18.8                               |
| Locus_3806_Transcript_1/1_Conf_1.000 | 501  | 20 | 5.81E-58  | NP_497618.1    | 94 | 226.868 | 113 | 107 | hypothetical protein Y71H2AM.5                           |
| Locus_3807_Transcript_1/1_Conf_1.000 | 563  | 20 | 1.75E-68  | NP_497809.1    | 81 | 262.307 | 187 | 153 | Heavy chain, Unconventional Myosin family member (hum-5) |
| Locus_3808_Transcript_1/1_Conf_1.000 | 992  | 20 | 1.36E-37  | EFO25376.1     | 58 | 161.384 | 262 | 152 | hypothetical protein LOAG_03111                          |
| Locus_3809_Transcript_1/1_Conf_1.000 | 685  | 20 | 6.14E-103 | XP_002630706.1 | 98 | 377.481 | 228 | 225 | C. briggsae CBR-MOG-5 protein                            |
| Locus_381_Transcript_1/3_Conf_0.333  | 1111 | 20 | 7.69E-104 | NP_001021158.1 | 76 | 381.719 | 315 | 241 | UDP-GlucuronosylTransferase family member (ugt-60)       |
| Locus_381_Transcript_2/3_Conf_0.667  | 2798 | 20 | 0         | NP_001022808.1 | 82 | 676.781 | 470 | 390 | Loss of InTestine family member (lit-1)                  |

|                                      |      |    |           |                |    |         |      |     |                                                          |
|--------------------------------------|------|----|-----------|----------------|----|---------|------|-----|----------------------------------------------------------|
| Locus_381_Transcript_3/3_Conf_0.667  | 2798 | 20 | 0         | NP_001022808.1 | 82 | 676.781 | 470  | 390 | Loss of InTestine family member (lit-1)                  |
| Locus_3810_Transcript_1/1_Conf_1.000 | 436  | 0  |           |                |    |         |      |     |                                                          |
| Locus_3811_Transcript_1/1_Conf_1.000 | 487  | 1  | 1.26E-12  | EFO21463.1     | 65 | 76.2554 | 102  | 67  | hypothetical protein LOAG_07027                          |
| Locus_3812_Transcript_1/1_Conf_1.000 | 2220 | 20 | 1.07E-146 | NP_499628.1    | 63 | 525.398 | 756  | 480 | hypothetical protein Y49E10.23                           |
| Locus_3813_Transcript_1/1_Conf_1.000 | 892  | 18 | 1.49E-45  | XP_001895351.1 | 58 | 187.578 | 236  | 138 | hypothetical protein                                     |
| Locus_3814_Transcript_1/1_Conf_1.000 | 485  | 20 | 5.46E-32  | XP_002634232.1 | 93 | 140.584 | 79   | 74  | C. briggsae CBR-TTR-51 protein                           |
| Locus_3815_Transcript_1/1_Conf_1.000 | 233  | 8  | 1.44E-08  | ACM46025.1     | 60 | 62.7734 | 84   | 51  | Let-23 fertility effector/regulator protein 2, isoform d |
| Locus_3816_Transcript_1/2_Conf_1.000 | 4970 | 20 | 0         | NP_501755.2    | 74 | 1433.31 | 1247 | 934 | hypothetical protein W08D2.5                             |
| Locus_3816_Transcript_2/2_Conf_1.000 | 4948 | 20 | 0         | XP_002633783.1 | 78 | 839.721 | 707  | 556 | Hypothetical protein CBG03474                            |
| Locus_3817_Transcript_1/1_Conf_1.000 | 618  | 5  | 7.67E-48  | XP_002646179.1 | 71 | 194.126 | 180  | 128 | Hypothetical protein CBG23745                            |
| Locus_3818_Transcript_1/1_Conf_1.000 | 866  | 20 | 1.06E-16  | NP_504999.1    | 73 | 91.6633 | 115  | 84  | Clathrin Light Chain family member (cltc-1)              |
| Locus_3819_Transcript_1/1_Conf_1.000 | 485  | 0  |           |                |    |         |      |     |                                                          |
| Locus_382_Transcript_1/2_Conf_1.000  | 3771 | 20 | 0         | XP_001901573.1 | 80 | 1368.6  | 1024 | 822 | ube1-prov protein                                        |
| Locus_382_Transcript_2/2_Conf_1.000  | 3772 | 20 | 0         | XP_001901573.1 | 80 | 1368.6  | 1024 | 822 | ube1-prov protein                                        |

|                                      |      |    |           |                |    |         |     |     |                                                          |
|--------------------------------------|------|----|-----------|----------------|----|---------|-----|-----|----------------------------------------------------------|
| Locus_3820_Transcript_1/1_Conf_1.000 | 387  | 20 | 3.36E-18  | AD154942.1     | 95 | 94.7449 | 49  | 47  | heat shock protein 70                                    |
| Locus_3821_Transcript_1/1_Conf_1.000 | 1301 | 20 | 1.14E-96  | NP_509639.1    | 72 | 358.221 | 312 | 225 | hypothetical protein T09B9.2                             |
| Locus_3822_Transcript_1/1_Conf_1.000 | 216  | 20 | 1.55E-15  | NP_001021859.1 | 68 | 85.8853 | 70  | 48  | Variable ABnormal morphology family member (vab-10)      |
| Locus_3823_Transcript_1/1_Conf_1.000 | 957  | 20 | 7.29E-41  | NP_498575.1    | 59 | 172.17  | 266 | 157 | Etoposide-Induced Protein homolog family member (eip-24) |
| Locus_3824_Transcript_1/1_Conf_1.000 | 522  | 0  |           |                |    |         |     |     |                                                          |
| Locus_3825_Transcript_1/1_Conf_1.000 | 1801 | 20 | 0         | NP_001023008.1 | 80 | 688.723 | 524 | 423 | CULLin family member (cul-2)                             |
| Locus_3826_Transcript_1/1_Conf_1.000 | 811  | 20 | 1.36E-116 | NP_491953.1    | 86 | 423.32  | 269 | 233 | Temporarily Assigned Gene name family member (tag-203)   |
| Locus_3827_Transcript_1/3_Conf_0.400 | 459  | 4  | 2.40E-16  | NP_502207.1    | 62 | 88.5817 | 99  | 62  | hypothetical protein ZK792.1                             |
| Locus_3827_Transcript_2/3_Conf_0.600 | 481  | 4  | 2.40E-16  | NP_502207.1    | 62 | 88.5817 | 99  | 62  | hypothetical protein ZK792.1                             |

|                                      |      |    |           |                |    |         |     |     |                                              |
|--------------------------------------|------|----|-----------|----------------|----|---------|-----|-----|----------------------------------------------|
| Locus_3827_Transcript_3/3_Conf_0.600 | 514  | 4  | 2.64E-16  | NP_502207.1    | 62 | 88.5817 | 99  | 62  | hypothetical protein ZK792.1                 |
| Locus_3828_Transcript_1/2_Conf_1.000 | 185  | 0  |           |                |    |         |     |     |                                              |
| Locus_3828_Transcript_2/2_Conf_1.000 | 210  | 0  |           |                |    |         |     |     |                                              |
| Locus_3829_Transcript_1/1_Conf_1.000 | 615  | 2  | 5.49E-06  | NP_001022819.1 | 60 | 55.0694 | 116 | 70  | hypothetical protein Y111B2A.27              |
| Locus_383_Transcript_1/1_Conf_1.000  | 2619 | 20 | 2.40E-108 | XP_002636616.1 | 74 | 398.282 | 380 | 283 | C. briggsae CBR-PMS-2 protein                |
| Locus_3830_Transcript_1/2_Conf_1.000 | 511  | 20 | 7.91E-66  | NP_496868.1    | 88 | 253.062 | 169 | 149 | hypothetical protein C31C9.2                 |
| Locus_3830_Transcript_2/2_Conf_1.000 | 807  | 20 | 3.04E-108 | NP_496868.1    | 85 | 395.586 | 268 | 230 | hypothetical protein C31C9.2                 |
| Locus_3831_Transcript_1/1_Conf_1.000 | 1015 | 20 | 3.07E-32  | EFO27739.1     | 67 | 143.665 | 152 | 102 | hypothetical protein LOAG_00741              |
| Locus_3832_Transcript_1/1_Conf_1.000 | 232  | 0  |           |                |    |         |     |     |                                              |
| Locus_3833_Transcript_1/1_Conf_1.000 | 709  | 20 | 4.45E-59  | XP_002629937.1 | 73 | 231.876 | 230 | 170 | Hypothetical protein CBG03655                |
| Locus_3834_Transcript_1/1_Conf_1.000 | 129  | 0  |           |                |    |         |     |     |                                              |
| Locus_3835_Transcript_1/1_Conf_1.000 | 2941 | 20 | 1.69E-158 | NP_491206.1    | 59 | 565.074 | 708 | 423 | abnormal cell LINeage family member (lin-59) |

|                                      |      |    |          |                |    |         |     |     |                                                        |
|--------------------------------------|------|----|----------|----------------|----|---------|-----|-----|--------------------------------------------------------|
| Locus_3836_Transcript_1/1_Conf_1.000 | 393  | 0  |          |                |    |         |     |     |                                                        |
| Locus_3837_Transcript_1/1_Conf_1.000 | 544  | 20 | 3.23E-77 | XP_002642413.1 | 89 | 291.197 | 179 | 160 | Hypothetical protein CBG06810                          |
| Locus_3838_Transcript_1/2_Conf_1.000 | 1367 | 20 | 0        | XP_002641235.1 | 92 | 730.709 | 417 | 386 | C. briggsae CBR-RPT-3 protein                          |
| Locus_3838_Transcript_2/2_Conf_1.000 | 1367 | 20 | 0        | XP_002641235.1 | 92 | 730.709 | 417 | 386 | C. briggsae CBR-RPT-3 protein                          |
| Locus_3839_Transcript_1/1_Conf_1.000 | 951  | 20 | 8.21E-53 | ACD61688.1     | 88 | 211.846 | 129 | 114 | light chain 3                                          |
| Locus_384_Transcript_1/9_Conf_0.472  | 784  | 19 | 2.49E-11 | XP_710281.1    | 58 | 73.559  | 84  | 49  | hypothetical protein CaO19.6835                        |
| Locus_384_Transcript_2/9_Conf_0.472  | 784  | 20 | 2.49E-11 | XP_710281.1    | 58 | 73.559  | 84  | 49  | hypothetical protein CaO19.6835                        |
| Locus_384_Transcript_3/9_Conf_0.250  | 1406 | 20 | 1.80E-34 | P27613.1       | 85 | 151.754 | 100 | 85  | Globin-like host-protective antigen                    |
| Locus_384_Transcript_4/9_Conf_0.417  | 1302 | 20 | 6.37E-39 | NP_497227.1    | 86 | 166.392 | 131 | 113 | Temporarily Assigned Gene name family member (tag-266) |



|                                      |      |    |           |                |    |         |     |     |                                                           |
|--------------------------------------|------|----|-----------|----------------|----|---------|-----|-----|-----------------------------------------------------------|
| Locus_384_Transcript_5/9_Conf_0.333  | 720  | 20 | 6.91E-55  | P27613.1       | 85 | 218.009 | 145 | 124 | Globin-like host-protective antigen                       |
| Locus_384_Transcript_6/9_Conf_0.222  | 472  | 20 | 1.86E-16  | AAD51334.1     | 80 | 88.9669 | 55  | 44  | Kunitz type serine protease inhibitor                     |
| Locus_384_Transcript_7/9_Conf_0.250  | 2495 | 20 | 5.84E-165 | NP_491316.1    | 71 | 586.26  | 585 | 417 | EGG sterile (unfertilizable) family member (egg-5)        |
| Locus_384_Transcript_8/9_Conf_0.306  | 720  | 20 | 3.10E-55  | P27613.1       | 86 | 219.164 | 145 | 125 | Globin-like host-protective antigen                       |
| Locus_384_Transcript_9/9_Conf_0.472  | 784  | 20 | 2.49E-11  | XP_710281.1    | 58 | 73.559  | 84  | 49  | hypothetical protein CaO19.6835                           |
| Locus_3840_Transcript_1/1_Conf_1.000 | 1510 | 20 | 1.64E-121 | NP_491807.1    | 66 | 441.039 | 498 | 329 | hypothetical protein C48E7.2                              |
| Locus_3841_Transcript_1/1_Conf_1.000 | 765  | 4  | 2.36E-35  | NP_510155.3    | 55 | 153.295 | 255 | 142 | PIP Kinase family member (ppk-3)                          |
| Locus_3842_Transcript_1/1_Conf_1.000 | 2170 | 20 | 1.22E-155 | NP_498784.1    | 85 | 555.058 | 389 | 331 | BTB and MATH domain containing family member (bath-42)    |
| Locus_3843_Transcript_1/1_Conf_1.000 | 365  | 0  |           |                |    |         |     |     |                                                           |
| Locus_3844_Transcript_1/1_Conf_1.000 | 399  | 20 | 1.26E-20  | EFO18738.1     | 74 | 102.834 | 98  | 73  | hypothetical protein LOAG_09757                           |
| Locus_3845_Transcript_1/1_Conf_1.000 | 253  | 20 | 6.98E-19  | XP_002813545.1 | 71 | 97.0561 | 84  | 60  | PREDICTED: histone-lysine N-methyltransferase SETMAR-like |
| Locus_3846_Transcript_1/1_Conf_1.000 | 2080 | 20 | 0         | NP_001024735.1 | 77 | 664.07  | 505 | 392 | hypothetical protein H13N06.4                             |
| Locus_3847_Transcript_1/1_Conf_1.000 | 1331 | 13 | 1.76E-100 | NP_495958.1    | 68 | 370.933 | 384 | 262 | yeast SEC homolog family member (sec-5)                   |

|                                      |      |    |           |                |    |         |      |     |                                                                    |
|--------------------------------------|------|----|-----------|----------------|----|---------|------|-----|--------------------------------------------------------------------|
| Locus_3848_Transcript_1/1_Conf_1.000 | 3098 | 20 | 0         | NP_496844.3    | 61 | 729.169 | 1003 | 619 | hypothetical protein Y48E1B.14                                     |
| Locus_3849_Transcript_1/1_Conf_1.000 | 235  | 0  |           |                |    |         |      |     |                                                                    |
| Locus_385_Transcript_1/1_Conf_1.000  | 1564 | 20 | 3.44E-130 | NP_506581.1    | 66 | 469.929 | 518  | 345 | hypothetical protein F23B12.7                                      |
| Locus_3850_Transcript_1/1_Conf_1.000 | 533  | 0  |           |                |    |         |      |     |                                                                    |
| Locus_3851_Transcript_1/2_Conf_1.000 | 719  | 20 | 2.12E-64  | XP_001901265.1 | 92 | 249.595 | 140  | 129 | KH domain containing protein                                       |
| Locus_3851_Transcript_2/2_Conf_1.000 | 1281 | 20 | 8.04E-79  | XP_001901265.1 | 92 | 298.901 | 171  | 158 | KH domain containing protein                                       |
| Locus_3852_Transcript_1/1_Conf_1.000 | 978  | 20 | 9.04E-119 | NP_504231.1    | 83 | 431.024 | 300  | 250 | hypothetical protein T08H10.1                                      |
| Locus_3853_Transcript_1/1_Conf_1.000 | 360  | 7  | 4.88E-09  | NP_498217.2    | 51 | 64.3142 | 141  | 73  | abnormal embryonic PARTitioning of cytoplasm family member (par-3) |
| Locus_3854_Transcript_1/1_Conf_1.000 | 168  | 0  |           |                |    |         |      |     |                                                                    |
| Locus_3855_Transcript_1/1_Conf_1.000 | 737  | 20 | 3.98E-45  | EFO22481.1     | 66 | 185.652 | 211  | 141 | alix-SF                                                            |

|                                      |      |    |           |                |    |         |     |     |                                                        |
|--------------------------------------|------|----|-----------|----------------|----|---------|-----|-----|--------------------------------------------------------|
| Locus_3856_Transcript_1/2_Conf_1.000 | 1480 | 20 | 0         | EFO27216.1     | 79 | 647.121 | 461 | 367 | NPL4 family protein                                    |
| Locus_3856_Transcript_2/2_Conf_1.000 | 1788 | 20 | 0         | XP_002632107.1 | 75 | 674.47  | 524 | 394 | Hypothetical protein CBG06960                          |
| Locus_3857_Transcript_1/1_Conf_1.000 | 1680 | 20 | 6.72E-119 | NP_508768.1    | 64 | 432.565 | 534 | 346 | AuTophagy (yeast Atg homolog) family member (atg-16.1) |
| Locus_3858_Transcript_1/5_Conf_0.500 | 968  | 20 | 1.46E-12  | XP_002056110.1 | 44 | 78.1814 | 254 | 113 | GJ10405                                                |
| Locus_3858_Transcript_2/5_Conf_0.500 | 950  | 20 | 1.09E-12  | BAH03485.1     | 43 | 78.5666 | 264 | 115 | tick serine proteinase                                 |
| Locus_3858_Transcript_3/5_Conf_0.500 | 842  | 20 | 1.77E-13  | XP_002056110.1 | 44 | 80.8777 | 254 | 114 | GJ10405                                                |
| Locus_3858_Transcript_4/5_Conf_0.167 | 501  | 20 | 5.51E-08  | XP_002002129.1 | 59 | 60.8474 | 57  | 34  | GI17212                                                |
| Locus_3858_Transcript_5/5_Conf_0.500 | 842  | 20 | 8.81E-13  | BAH03485.1     | 43 | 78.5666 | 257 | 113 | tick serine proteinase                                 |
| Locus_3859_Transcript_1/1_Conf_1.000 | 508  | 20 | 2.51E-11  | XP_002129449.1 | 48 | 72.0182 | 168 | 81  | PREDICTED: hypothetical protein                        |

|                                      |      |    |           |                |    |         |     |     |                                                                            |
|--------------------------------------|------|----|-----------|----------------|----|---------|-----|-----|----------------------------------------------------------------------------|
| Locus_386_Transcript_1/1_Conf_1.000  | 1272 | 20 | 1.10E-120 | NP_491556.1    | 72 | 437.958 | 425 | 310 | human CLN (neuronal ceroid lipofuscinosis) related family member (cln-3.2) |
| Locus_3860_Transcript_1/1_Conf_1.000 | 1652 | 20 | 5.15E-148 | NP_509268.1    | 70 | 529.25  | 517 | 364 | hypothetical protein F48E3.3                                               |
| Locus_3861_Transcript_1/1_Conf_1.000 | 1974 | 20 | 1.14E-136 | EFO19280.1     | 84 | 491.886 | 324 | 273 | BTB/POZ domain-containing protein                                          |
| Locus_3862_Transcript_1/1_Conf_1.000 | 249  | 0  |           |                |    |         |     |     |                                                                            |
| Locus_3863_Transcript_1/1_Conf_1.000 | 857  | 0  |           |                |    |         |     |     |                                                                            |
| Locus_3864_Transcript_1/1_Conf_1.000 | 145  | 5  | 1.08E-11  | XP_002646369.1 | 82 | 73.1738 | 45  | 37  | Hypothetical protein CBG12087                                              |
| Locus_3865_Transcript_1/1_Conf_1.000 | 304  | 20 | 8.59E-22  | EFO22068.1     | 69 | 106.686 | 95  | 66  | hypothetical protein LOAG_06418                                            |
| Locus_3866_Transcript_1/1_Conf_1.000 | 749  | 20 | 2.50E-50  | NP_492760.1    | 70 | 202.986 | 187 | 132 | hypothetical protein F25H2.4                                               |
| Locus_3867_Transcript_1/1_Conf_1.000 | 820  | 20 | 4.40E-46  | XP_002639398.1 | 69 | 189.119 | 220 | 153 | C. briggsae CBR-UBXN-1 protein                                             |
| Locus_3868_Transcript_1/1_Conf_1.000 | 581  | 20 | 2.46E-55  | NP_499165.1    | 89 | 218.779 | 160 | 143 | Vacuolar H ATPase family member (vha-1)                                    |
| Locus_3869_Transcript_1/1_Conf_1.000 | 476  | 0  |           |                |    |         |     |     |                                                                            |

|                                      |      |    |          |                |    |         |     |     |                                                            |
|--------------------------------------|------|----|----------|----------------|----|---------|-----|-----|------------------------------------------------------------|
| Locus_387_Transcript_1/4_Conf_0.300  | 211  | 20 | 5.19E-19 | XP_001846568.1 | 91 | 97.4413 | 56  | 51  | conserved hypothetical protein                             |
| Locus_387_Transcript_2/4_Conf_0.300  | 253  | 20 | 4.83E-20 | XP_001846568.1 | 91 | 100.908 | 58  | 53  | conserved hypothetical protein                             |
| Locus_387_Transcript_3/4_Conf_0.400  | 629  | 20 | 4.85E-90 | XP_001894478.1 | 92 | 334.339 | 191 | 176 | 40S ribosomal protein S9                                   |
| Locus_387_Transcript_4/4_Conf_0.400  | 629  | 20 | 4.85E-90 | XP_001894478.1 | 92 | 334.339 | 191 | 176 | 40S ribosomal protein S9                                   |
| Locus_3870_Transcript_1/1_Conf_1.000 | 237  | 0  |          |                |    |         |     |     |                                                            |
| Locus_3871_Transcript_1/1_Conf_1.000 | 368  | 20 | 4.20E-37 | NP_496453.1    | 90 | 157.532 | 119 | 108 | TransThyretin-Related family domain family member (ttr-18) |
| Locus_3872_Transcript_1/1_Conf_1.000 | 913  | 7  | 9.47E-27 | XP_001896459.1 | 64 | 125.176 | 117 | 76  | hypothetical protein Bm1_24995                             |
| Locus_3873_Transcript_1/1_Conf_1.000 | 1115 | 4  | 1.64E-29 | XP_002638906.1 | 47 | 134.806 | 277 | 132 | Hypothetical protein CBG22132                              |
| Locus_3874_Transcript_1/7_Conf_0.312 | 1177 | 6  | 1.46E-07 | XP_002633011.1 | 46 | 62.003  | 151 | 70  | C. briggsae CBR-TAG-60 protein                             |
| Locus_3874_Transcript_2/7_Conf_0.125 | 877  | 6  | 2.94E-06 | NP_001040910.1 | 65 | 56.9954 | 67  | 44  | Temporarily Assigned Gene name family member (tag-60)      |
| Locus_3874_Transcript_3/7_Conf_0.562 | 1597 | 20 | 1.86E-46 | XP_002633011.1 | 52 | 191.815 | 335 | 177 | C. briggsae CBR-TAG-60 protein                             |
| Locus_3874_Transcript_4/7_Conf_0.438 | 1297 | 20 | 8.25E-47 | NP_001040908.1 | 54 | 192.586 | 283 | 155 | Temporarily Assigned Gene name family member (tag-60)      |
| Locus_3874_Transcript_5/7_Conf_0.438 | 670  | 20 | 1.19E-39 | NP_001040909.1 | 67 | 167.162 | 166 | 112 | Temporarily Assigned Gene name family member (tag-60)      |
| Locus_3874_Transcript_6/7_Conf_0.562 | 1657 | 20 | 1.89E-49 | NP_741479.1    | 54 | 201.83  | 359 | 195 | Temporarily Assigned Gene name family member (tag-60)      |
| Locus_3874_Transcript_7/7_Conf_0.562 | 1657 | 20 | 1.89E-49 | NP_741479.1    | 54 | 201.83  | 359 | 195 | Temporarily Assigned Gene name family member (tag-60)      |
| Locus_3875_Transcript_1/1_Conf_1.000 | 572  | 14 | 2.44E-20 | NP_499428.1    | 64 | 102.449 | 110 | 71  | hypothetical protein W09D6.5                               |
| Locus_3876_Transcript_1/1_Conf_1.000 | 1682 | 9  | 2.55E-09 | XP_002639259.1 | 46 | 68.5514 | 377 | 175 | C. briggsae CBR-SYS-1 protein                              |
| Locus_3877_Transcript_1/1_Conf_1.000 | 572  | 1  | 2.45E-04 | XP_001638787.1 | 40 | 49.2914 | 114 | 46  | predicted protein                                          |
| Locus_3878_Transcript_1/2_Conf_1.000 | 399  | 20 | 2.22E-17 | XP_002631292.1 | 64 | 92.0485 | 84  | 54  | Hypothetical protein CBG03105                              |
| Locus_3878_Transcript_2/2_Conf_1.000 | 399  | 20 | 2.90E-17 | XP_002631292.1 | 64 | 91.6633 | 84  | 54  | Hypothetical protein CBG03105                              |

|                                      |      |    |           |                |    |         |     |     |                                       |
|--------------------------------------|------|----|-----------|----------------|----|---------|-----|-----|---------------------------------------|
| Locus_3879_Transcript_1/1_Conf_1.000 | 1329 | 20 | 4.65E-85  | XP_001898423.1 | 58 | 319.701 | 452 | 263 | Mediator complex subunit rgr-1        |
| Locus_388_Transcript_1/3_Conf_0.714  | 1388 | 20 | 1.20E-139 | XP_002642167.1 | 81 | 501.13  | 388 | 318 | C. briggsae CBR-RPN-3 protein         |
| Locus_388_Transcript_2/3_Conf_0.714  | 1352 | 20 | 5.17E-140 | XP_002642167.1 | 82 | 502.286 | 390 | 320 | C. briggsae CBR-RPN-3 protein         |
| Locus_388_Transcript_3/3_Conf_0.714  | 1352 | 20 | 5.17E-140 | XP_002642167.1 | 82 | 502.286 | 390 | 320 | C. briggsae CBR-RPN-3 protein         |
| Locus_3880_Transcript_1/1_Conf_1.000 | 1120 | 20 | 4.96E-50  | EFO25088.1     | 63 | 202.986 | 209 | 133 | hypothetical protein LOAG_03398       |
| Locus_3881_Transcript_1/1_Conf_1.000 | 1335 | 6  | 2.87E-42  | XP_002631687.1 | 49 | 177.563 | 453 | 226 | Hypothetical protein CBG20880         |
| Locus_3882_Transcript_1/1_Conf_1.000 | 2363 | 20 | 3.80E-174 | EFO25239.1     | 68 | 616.69  | 623 | 426 | nonsense mRNA reducing factor 1 NORF1 |

|                                      |      |    |           |                |    |         |     |     |                                                                                   |
|--------------------------------------|------|----|-----------|----------------|----|---------|-----|-----|-----------------------------------------------------------------------------------|
| Locus_3883_Transcript_1/1_Conf_1.000 | 285  | 0  |           |                |    |         |     |     |                                                                                   |
| Locus_3884_Transcript_1/1_Conf_1.000 | 263  | 0  |           |                |    |         |     |     |                                                                                   |
| Locus_3885_Transcript_1/1_Conf_1.000 | 662  | 20 | 7.67E-68  | XP_002642264.1 | 96 | 260.766 | 141 | 136 | Hypothetical protein CBG18252                                                     |
| Locus_3886_Transcript_1/1_Conf_1.000 | 758  | 20 | 4.88E-86  | EFO19031.1     | 82 | 321.627 | 232 | 191 | hypothetical protein LOAG_09464                                                   |
| Locus_3887_Transcript_1/1_Conf_1.000 | 280  | 0  |           |                |    |         |     |     |                                                                                   |
| Locus_3888_Transcript_1/1_Conf_1.000 | 1180 | 0  |           |                |    |         |     |     |                                                                                   |
| Locus_3889_Transcript_1/1_Conf_1.000 | 1252 | 20 | 6.62E-78  | EFO20995.1     | 67 | 295.819 | 279 | 187 | TK/EPH protein kinase                                                             |
| Locus_389_Transcript_1/3_Conf_0.692  | 1721 | 20 | 2.74E-29  | EFO24026.1     | 37 | 130.954 | 388 | 146 | hypothetical protein LOAG_04466                                                   |
| Locus_389_Transcript_2/3_Conf_0.385  | 1000 | 20 | 1.17E-44  | XP_002640431.1 | 61 | 184.882 | 201 | 123 | Hypothetical protein CBG08482                                                     |
| Locus_389_Transcript_3/3_Conf_0.846  | 2169 | 20 | 7.14E-55  | XP_001895704.1 | 43 | 220.32  | 484 | 210 | Chitin binding Peritrophin-A domain containing protein                            |
| Locus_3890_Transcript_1/1_Conf_1.000 | 1452 | 20 | 1.75E-173 | NP_509673.1    | 85 | 613.609 | 408 | 348 | PhosphatidylSerine SYNthase family member (pssy-1)                                |
| Locus_3891_Transcript_1/1_Conf_1.000 | 1728 | 20 | 8.70E-138 | NP_504197.1    | 70 | 495.352 | 456 | 323 | FldGetin-Like (mammalian developmental AAA ATPase) related family member (figl-1) |
| Locus_3892_Transcript_1/1_Conf_1.000 | 1384 | 20 | 1.54E-179 | NP_500620.1    | 87 | 633.639 | 425 | 371 | hypothetical protein K08F11.5                                                     |

|                                      |      |    |          |                |    |         |     |     |                                                       |
|--------------------------------------|------|----|----------|----------------|----|---------|-----|-----|-------------------------------------------------------|
| Locus_3893_Transcript_1/1_Conf_1.000 | 651  | 20 | 7.60E-36 | NP_001021667.1 | 53 | 154.451 | 239 | 127 | Nuclear Hormone Receptor family member (nhr-85)       |
| Locus_3894_Transcript_1/1_Conf_1.000 | 632  | 0  |          |                |    |         |     |     |                                                       |
| Locus_3895_Transcript_1/1_Conf_1.000 | 508  | 20 | 4.38E-48 | NP_001040909.1 | 78 | 194.126 | 141 | 110 | Temporarily Assigned Gene name family member (tag-60) |
| Locus_3896_Transcript_1/1_Conf_1.000 | 465  | 20 | 5.05E-62 | EFO24292.1     | 92 | 240.35  | 138 | 128 | hypothetical protein LOAG_04189                       |
| Locus_3897_Transcript_1/1_Conf_1.000 | 223  | 20 | 5.13E-30 | XP_002633699.1 | 93 | 134.035 | 73  | 68  | Hypothetical protein CBG03382                         |
| Locus_3898_Transcript_1/1_Conf_1.000 | 454  | 0  |          |                |    |         |     |     |                                                       |
| Locus_3899_Transcript_1/2_Conf_1.000 | 355  | 5  | 1.38E-07 | XP_002642452.1 | 68 | 52.7582 | 64  | 44  | Hypothetical protein CBG06862                         |
| Locus_3899_Transcript_2/2_Conf_1.000 | 850  | 5  | 3.63E-30 | XP_002642452.1 | 60 | 136.346 | 183 | 110 | Hypothetical protein CBG06862                         |
| Locus_39_Transcript_1/1_Conf_1.000   | 223  | 0  |          |                |    |         |     |     |                                                       |
| Locus_390_Transcript_1/1_Conf_1.000  | 948  | 2  | 1.46E-33 | NP_495177.2    | 54 | 147.902 | 278 | 152 | hypothetical protein F59G1.4                          |
| Locus_3900_Transcript_1/1_Conf_1.000 | 666  | 0  |          |                |    |         |     |     |                                                       |
| Locus_3901_Transcript_1/1_Conf_1.000 | 1019 | 0  |          |                |    |         |     |     |                                                       |



|                                      |      |    |           |                |    |         |     |     |                                     |
|--------------------------------------|------|----|-----------|----------------|----|---------|-----|-----|-------------------------------------|
| Locus_3902_Transcript_1/1_Conf_1.000 | 1766 | 20 | 0         | AAS01769.1     | 96 | 1080.86 | 559 | 540 | monoclonal IgM antibody heavy chain |
| Locus_3903_Transcript_1/1_Conf_1.000 | 576  | 20 | 1.11E-84  | NP_509361.1    | 90 | 316.235 | 191 | 173 | hypothetical protein K07E3.4        |
| Locus_3904_Transcript_1/1_Conf_1.000 | 1026 | 3  | 2.39E-40  | NP_498499.1    | 55 | 170.629 | 326 | 181 | hypothetical protein K04C2.2        |
| Locus_3905_Transcript_1/1_Conf_1.000 | 1078 | 20 | 6.11E-151 | NP_497853.1    | 83 | 538.11  | 368 | 306 | hypothetical protein T08A11.2       |
| Locus_3906_Transcript_1/1_Conf_1.000 | 520  | 0  |           |                |    |         |     |     |                                     |
| Locus_3907_Transcript_1/1_Conf_1.000 | 773  | 0  |           |                |    |         |     |     |                                     |
| Locus_3908_Transcript_1/2_Conf_1.000 | 926  | 20 | 3.34E-19  | XP_001896227.1 | 54 | 100.138 | 164 | 89  | cDNA sequence BC017158              |
| Locus_3908_Transcript_2/2_Conf_1.000 | 842  | 20 | 4.96E-40  | XP_001896227.1 | 60 | 169.088 | 245 | 147 | cDNA sequence BC017158              |
| Locus_3909_Transcript_1/1_Conf_1.000 | 1223 | 20 | 1.49E-151 | NP_506558.2    | 81 | 540.421 | 391 | 317 | hypothetical protein Y49A3A.1       |
| Locus_391_Transcript_1/2_Conf_1.000  | 1162 | 20 | 1.08E-79  | XP_002641923.1 | 79 | 301.597 | 213 | 169 | C. briggsae CBR-RPL-6 protein       |

|                                      |      |    |           |                |    |         |     |     |                                                                           |
|--------------------------------------|------|----|-----------|----------------|----|---------|-----|-----|---------------------------------------------------------------------------|
| Locus_391_Transcript_2/2_Conf_1.000  | 432  | 20 | 1.84E-32  | NP_509305.1    | 70 | 142.124 | 142 | 100 | VIITellogenin structural genes (yolk protein genes) family member (vit-1) |
| Locus_3910_Transcript_1/1_Conf_1.000 | 1341 | 20 | 3.03E-108 | XP_001899078.1 | 64 | 396.741 | 450 | 290 | Ubiquitin carboxyl-terminal hydrolase family protein                      |
| Locus_3911_Transcript_1/2_Conf_1.000 | 2249 | 20 | 0         | XP_001896636.1 | 83 | 850.892 | 655 | 548 | metallopeptidase family M24 containing protein                            |
| Locus_3911_Transcript_2/2_Conf_1.000 | 2243 | 20 | 0         | XP_001896636.1 | 83 | 848.581 | 655 | 549 | metallopeptidase family M24 containing protein                            |
| Locus_3912_Transcript_1/5_Conf_0.615 | 2743 | 20 | 4.25E-47  | EFO26053.1     | 47 | 194.897 | 366 | 174 | hypothetical protein LOAG_02428                                           |
| Locus_3912_Transcript_2/5_Conf_0.692 | 2743 | 20 | 4.25E-47  | EFO26053.1     | 47 | 194.897 | 366 | 174 | hypothetical protein LOAG_02428                                           |
| Locus_3912_Transcript_3/5_Conf_0.692 | 2743 | 20 | 2.49E-47  | EFO26053.1     | 47 | 195.667 | 366 | 174 | hypothetical protein LOAG_02428                                           |
| Locus_3912_Transcript_4/5_Conf_0.154 | 1993 | 20 | 2.91E-39  | XP_001956619.1 | 35 | 168.318 | 672 | 239 | GF25304                                                                   |
| Locus_3912_Transcript_5/5_Conf_0.692 | 2743 | 20 | 4.25E-47  | EFO26053.1     | 47 | 194.897 | 366 | 174 | hypothetical protein LOAG_02428                                           |
| Locus_3913_Transcript_1/2_Conf_1.000 | 2533 | 20 | 1.83E-89  | EFO23006.1     | 56 | 335.495 | 571 | 321 | mast family protein                                                       |

|                                      |      |    |           |                |    |         |     |     |                                                                             |
|--------------------------------------|------|----|-----------|----------------|----|---------|-----|-----|-----------------------------------------------------------------------------|
| Locus_3913_Transcript_2/2_Conf_1.000 | 2494 | 20 | 3.28E-91  | EFO23006.1     | 57 | 341.273 | 558 | 321 | mast family protein                                                         |
| Locus_3914_Transcript_1/1_Conf_1.000 | 441  | 9  | 3.94E-06  | EFO15999.1     | 61 | 54.6842 | 85  | 52  | hypothetical protein LOAG_12508                                             |
| Locus_3915_Transcript_1/1_Conf_1.000 | 191  | 20 | 5.14E-22  | XP_002639175.1 | 90 | 107.457 | 63  | 57  | C. briggsae CBR-ILE-1 protein                                               |
| Locus_3916_Transcript_1/1_Conf_1.000 | 356  | 0  |           |                |    |         |     |     |                                                                             |
| Locus_3917_Transcript_1/1_Conf_1.000 | 708  | 20 | 1.35E-31  | NP_503358.1    | 57 | 140.584 | 218 | 126 | hypothetical protein Y50D4C.3                                               |
| Locus_3918_Transcript_1/1_Conf_1.000 | 2282 | 20 | 6.36E-94  | NP_741149.1    | 54 | 350.132 | 778 | 422 | splicing factor (Suppressor of White aPricot) related family member (swp-1) |
| Locus_3919_Transcript_1/1_Conf_1.000 | 571  | 20 | 1.63E-32  | EFO26326.1     | 71 | 142.895 | 121 | 87  | CAMK/TSSK protein kinase                                                    |
| Locus_392_Transcript_1/1_Conf_1.000  | 2010 | 20 | 7.96E-178 | NP_498394.1    | 64 | 628.632 | 580 | 376 | Temporarily Assigned Gene name family member (tag-182)                      |
| Locus_3920_Transcript_1/1_Conf_1.000 | 237  | 0  |           |                |    |         |     |     |                                                                             |
| Locus_3921_Transcript_1/1_Conf_1.000 | 462  | 0  |           |                |    |         |     |     |                                                                             |
| Locus_3922_Transcript_1/1_Conf_1.000 | 260  | 0  |           |                |    |         |     |     |                                                                             |
| Locus_3923_Transcript_1/1_Conf_1.000 | 261  | 0  |           |                |    |         |     |     |                                                                             |

|                                      |      |    |           |                |     |         |     |     |                                                 |
|--------------------------------------|------|----|-----------|----------------|-----|---------|-----|-----|-------------------------------------------------|
| Locus_3924_Transcript_1/1_Conf_1.000 | 1709 | 20 | 0         | NP_001022602.1 | 86  | 852.432 | 543 | 469 | MTM (myotubularin) family member (mtm-6)        |
| Locus_3925_Transcript_1/1_Conf_1.000 | 357  | 0  |           |                |     |         |     |     |                                                 |
| Locus_3926_Transcript_1/1_Conf_1.000 | 422  | 3  | 3.68E-04  | XP_002647667.1 | 44  | 48.1358 | 99  | 44  | Hypothetical protein CBG06778                   |
| Locus_3927_Transcript_1/1_Conf_1.000 | 1178 | 20 | 1.58E-94  | XP_002643814.1 | 76  | 350.903 | 327 | 251 | C. briggsae CBR-VANG-1 protein                  |
| Locus_3928_Transcript_1/2_Conf_1.000 | 783  | 0  |           |                |     |         |     |     |                                                 |
| Locus_3928_Transcript_2/2_Conf_1.000 | 771  | 2  | 2.86E-04  | XP_002633747.1 | 64  | 50.0618 | 67  | 43  | Hypothetical protein CBG03433                   |
| Locus_3929_Transcript_1/2_Conf_1.000 | 346  | 20 | 1.44E-24  | CAD28559.2     | 64  | 115.931 | 116 | 75  | metalloprotease I                               |
| Locus_3929_Transcript_2/2_Conf_1.000 | 346  | 20 | 1.44E-24  | CAD28559.2     | 64  | 115.931 | 116 | 75  | metalloprotease I                               |
| Locus_393_Transcript_1/1_Conf_1.000  | 846  | 20 | 1.48E-100 | XP_001898370.1 | 90  | 370.163 | 208 | 189 | Glycoprotein 25L2 precursor                     |
| Locus_3930_Transcript_1/1_Conf_1.000 | 480  | 20 | 1.82E-48  | AAL56427.1     | 89  | 195.282 | 116 | 104 | AF370722_1intracellular globin                  |
| Locus_3931_Transcript_1/1_Conf_1.000 | 401  | 20 | 3.07E-43  | XP_002078029.1 | 72  | 177.948 | 122 | 89  | GD23232                                         |
| Locus_3932_Transcript_1/1_Conf_1.000 | 1117 | 20 | 1.11E-09  | XP_002003390.1 | 36  | 68.9366 | 278 | 101 | GI17886                                         |
| Locus_3933_Transcript_1/1_Conf_1.000 | 410  | 0  |           |                |     |         |     |     |                                                 |
| Locus_3934_Transcript_1/1_Conf_1.000 | 248  | 20 | 1.07E-40  | 3047           | 100 | 169.474 | 82  | 82  | CrystalStructure Of Arfgap1-Arf1 Fusion Protein |
| Locus_3935_Transcript_1/1_Conf_1.000 | 874  | 20 | 1.07E-56  | XP_002640603.1 | 79  | 224.557 | 232 | 185 | Hypothetical protein CBG08714                   |
| Locus_3936_Transcript_1/1_Conf_1.000 | 344  | 20 | 4.62E-47  | NP_496210.2    | 86  | 190.66  | 113 | 98  | hypothetical protein F54B3.3                    |

|                                      |      |    |           |                |    |         |     |     |                                                                     |
|--------------------------------------|------|----|-----------|----------------|----|---------|-----|-----|---------------------------------------------------------------------|
| Locus_3937_Transcript_1/1_Conf_1.000 | 626  | 20 | 6.18E-21  | XP_002630862.1 | 65 | 104.76  | 143 | 93  | C. briggsae CBR-RRT-2 protein                                       |
| Locus_3938_Transcript_1/1_Conf_1.000 | 1246 | 20 | 0         | NP_492072.1    | 96 | 671.003 | 342 | 329 | G Protein, Beta subunit family member (gpb2)                        |
| Locus_3939_Transcript_1/1_Conf_1.000 | 945  | 0  |           |                |    |         |     |     |                                                                     |
| Locus_394_Transcript_1/2_Conf_0.500  | 2228 | 20 | 4.37E-23  | XP_001895972.1 | 41 | 114.775 | 470 | 194 | hypothetical protein Bm1_22580                                      |
| Locus_394_Transcript_2/2_Conf_0.500  | 972  | 2  | 5.60E-04  | XP_001809190.1 | 41 | 49.6766 | 94  | 39  | PREDICTED: similar to CG14607 CG14607-PA                            |
| Locus_3940_Transcript_1/1_Conf_1.000 | 830  | 6  | 3.70E-32  | NP_001122665.1 | 53 | 142.895 | 261 | 139 | Prion-like-(Q/N-rich)-domain-bearing protein family member (pqn-87) |
| Locus_3941_Transcript_1/1_Conf_1.000 | 1480 | 20 | 9.33E-138 | NP_493369.1    | 81 | 494.967 | 343 | 280 | hypothetical protein Y48G10A.3                                      |
| Locus_3942_Transcript_1/1_Conf_1.000 | 370  | 0  |           |                |    |         |     |     |                                                                     |
| Locus_3943_Transcript_1/1_Conf_1.000 | 468  | 12 | 1.63E-36  | CAC10528.1     | 69 | 155.606 | 167 | 116 | putative inositol 1,4,5-trisphosphate receptor                      |
| Locus_3944_Transcript_1/1_Conf_1.000 | 564  | 0  |           |                |    |         |     |     |                                                                     |
| Locus_3945_Transcript_1/1_Conf_1.000 | 377  | 2  | 1.30E-09  | XP_002634371.1 | 51 | 66.2402 | 145 | 74  | C. briggsae CBR-RIG-4 protein                                       |
| Locus_3946_Transcript_1/1_Conf_1.000 | 941  | 20 | 4.97E-127 | XP_002642617.1 | 95 | 458.373 | 267 | 254 | C. briggsae CBR-FUM-1 protein                                       |
| Locus_3947_Transcript_1/1_Conf_1.000 | 205  | 0  |           |                |    |         |     |     |                                                                     |
| Locus_3948_Transcript_1/1_Conf_1.000 | 2139 | 20 | 0         | NP_493746.1    | 72 | 747.658 | 690 | 499 | yeast PRP (splicing factor) related family member (prp-21)          |
| Locus_3949_Transcript_1/1_Conf_1.000 | 1235 | 20 | 1.08E-32  | NP_508206.2    | 59 | 145.591 | 245 | 145 | hypothetical protein K03E6.7                                        |

|                                      |      |    |           |                |     |         |     |     |                                                                   |
|--------------------------------------|------|----|-----------|----------------|-----|---------|-----|-----|-------------------------------------------------------------------|
| Locus_395_Transcript_1/1_Conf_1.000  | 1266 | 20 | 0         | NP_001022114.1 | 95  | 713.375 | 401 | 383 | proteasome Regulatory Particle, ATPase-like family member (rpt-4) |
| Locus_3950_Transcript_1/1_Conf_1.000 | 1631 | 20 | 9.02E-113 | NP_506043.1    | 68  | 412.149 | 445 | 303 | hypothetical protein C27A7.6                                      |
| Locus_3951_Transcript_1/1_Conf_1.000 | 232  | 2  | 1.03E-06  | XP_002643343.1 | 67  | 56.6102 | 65  | 44  | Hypothetical protein CBG15940                                     |
| Locus_3952_Transcript_1/1_Conf_1.000 | 904  | 4  | 3.76E-44  | NP_498871.2    | 90  | 182.956 | 99  | 90  | hypothetical protein F42H10.5                                     |
| Locus_3953_Transcript_1/1_Conf_1.000 | 1656 | 20 | 5.31E-60  | AAK54127.1     | 56  | 236.884 | 387 | 218 | AF367206_1nuclear receptor nhr-7A                                 |
| Locus_3954_Transcript_1/1_Conf_1.000 | 253  | 0  |           |                |     |         |     |     |                                                                   |
| Locus_3955_Transcript_1/1_Conf_1.000 | 311  | 20 | 3.93E-51  | 3ML6           | 100 | 204.142 | 103 | 103 | A Complex Between Dishevelled2 And Clathrin Adaptor Ap-2          |
| Locus_3956_Transcript_1/4_Conf_0.625 | 1035 | 20 | 1.29E-33  | XP_002641525.1 | 52  | 148.288 | 283 | 149 | Hypothetical protein CBG09821                                     |
| Locus_3956_Transcript_2/4_Conf_0.625 | 1071 | 20 | 1.35E-33  | XP_002641525.1 | 52  | 148.288 | 283 | 149 | Hypothetical protein CBG09821                                     |
| Locus_3956_Transcript_3/4_Conf_0.625 | 1079 | 20 | 7.99E-34  | XP_002641525.1 | 52  | 149.058 | 283 | 148 | Hypothetical protein CBG09821                                     |

|                                      |      |    |           |                |    |         |     |     |                                                                   |
|--------------------------------------|------|----|-----------|----------------|----|---------|-----|-----|-------------------------------------------------------------------|
| Locus_3956_Transcript_4/4_Conf_0.625 | 1079 | 20 | 1.36E-33  | XP_002641525.1 | 52 | 148.288 | 283 | 149 | Hypothetical protein CBG09821                                     |
| Locus_3957_Transcript_1/1_Conf_1.000 | 1488 | 20 | 8.79E-27  | XP_001898006.1 | 46 | 126.331 | 458 | 213 | BAT2 N-terminus family protein                                    |
| Locus_3958_Transcript_1/1_Conf_1.000 | 194  | 2  | 1.49E-21  | XP_002632383.1 | 87 | 105.916 | 64  | 56  | Hypothetical protein CBG00404                                     |
| Locus_3959_Transcript_1/1_Conf_1.000 | 311  | 20 | 9.15E-08  | XP_002427781.1 | 53 | 60.077  | 92  | 49  | protein phosphatase 2A, 59 kDa regulatory subunit B, putative     |
| Locus_396_Transcript_1/1_Conf_1.000  | 326  | 20 | 1.58E-23  | XP_001900150.1 | 91 | 112.464 | 62  | 57  | hypothetical protein                                              |
| Locus_3960_Transcript_1/1_Conf_1.000 | 804  | 20 | 1.29E-58  | Q8R3I3.2       | 65 | 230.72  | 268 | 176 | Conserved oligomeric Golgi complex subunit 6                      |
| Locus_3961_Transcript_1/1_Conf_1.000 | 888  | 20 | 3.31E-146 | NP_508537.1    | 95 | 521.931 | 295 | 282 | SPeCtrin family member (spc-1)                                    |
| Locus_3962_Transcript_1/3_Conf_0.500 | 785  | 20 | 2.86E-108 | NP_508609.1    | 85 | 395.586 | 259 | 221 | Unidentified Vitellogenin-linked Transcript family member (uvt-5) |
| Locus_3962_Transcript_2/3_Conf_0.333 | 945  | 20 | 1.33E-103 | NP_741749.1    | 87 | 380.563 | 242 | 212 | Unidentified Vitellogenin-linked Transcript family member (uvt-5) |
| Locus_3962_Transcript_3/3_Conf_0.667 | 824  | 20 | 5.88E-107 | NP_741749.1    | 82 | 391.349 | 279 | 229 | Unidentified Vitellogenin-linked Transcript family member (uvt-5) |

|                                      |      |    |          |                |    |         |     |     |                                                                         |
|--------------------------------------|------|----|----------|----------------|----|---------|-----|-----|-------------------------------------------------------------------------|
| Locus_3963_Transcript_1/1_Conf_1.000 | 873  | 20 | 1.32E-22 | XP_002641882.1 | 59 | 111.309 | 181 | 107 | C. briggsae CBR-BATH-41 protein                                         |
| Locus_3964_Transcript_1/1_Conf_1.000 | 645  | 20 | 1.70E-48 | CBW48579.1     | 90 | 196.438 | 104 | 94  | Hypothetical protein Y39B6A.2b                                          |
| Locus_3965_Transcript_1/1_Conf_1.000 | 1626 | 20 | 0        | NP_499264.1    | 92 | 829.321 | 464 | 428 | Citrate Synthase family member (cts-1)                                  |
| Locus_3966_Transcript_1/1_Conf_1.000 | 522  | 2  | 3.95E-10 | AAK31527.3     | 85 | 68.1662 | 40  | 34  | Neuronal symmetry protein 1, partially confirmed by transcript evidence |
| Locus_3967_Transcript_1/1_Conf_1.000 | 830  | 0  |          |                |    |         |     |     |                                                                         |
| Locus_3968_Transcript_1/2_Conf_1.000 | 1431 | 8  | 1.16E-36 | XP_001898914.1 | 46 | 159.073 | 411 | 193 | AN1-like Zinc finger family protein                                     |
| Locus_3968_Transcript_2/2_Conf_1.000 | 1431 | 8  | 1.16E-36 | XP_001898914.1 | 46 | 159.073 | 411 | 193 | AN1-like Zinc finger family protein                                     |



|                                      |     |    |           |                |    |         |     |     |                                                     |
|--------------------------------------|-----|----|-----------|----------------|----|---------|-----|-----|-----------------------------------------------------|
| Locus_3969_Transcript_1/1_Conf_1.000 | 944 | 20 | 1.46E-110 | NP_502753.2    | 91 | 403.675 | 226 | 206 | hypothetical protein LLC1.3                         |
| Locus_397_Transcript_1/2_Conf_1.000  | 788 | 20 | 2.33E-41  | XP_001894964.1 | 91 | 173.326 | 98  | 90  | ADP-ribose pyrophosphatase, mitochondrial precursor |
| Locus_397_Transcript_2/2_Conf_1.000  | 681 | 20 | 4.58E-42  | XP_001894964.1 | 91 | 175.252 | 99  | 91  | ADP-ribose pyrophosphatase, mitochondrial precursor |
| Locus_3970_Transcript_1/1_Conf_1.000 | 504 | 20 | 1.28E-52  | ACC54555.1     | 94 | 209.149 | 115 | 109 | macrophage migration inhibitory factor              |
| Locus_3971_Transcript_1/1_Conf_1.000 | 598 | 20 | 2.09E-52  | EFO26229.1     | 70 | 209.149 | 199 | 141 | hypothetical protein LOAG_02255                     |

|                                      |      |    |          |                |    |         |     |     |                                                |
|--------------------------------------|------|----|----------|----------------|----|---------|-----|-----|------------------------------------------------|
| Locus_3972_Transcript_1/4_Conf_0.750 | 1665 | 20 | 0        | XP_002630445.1 | 89 | 723.776 | 450 | 401 | Hypothetical protein CBG11178                  |
| Locus_3972_Transcript_2/4_Conf_0.750 | 1665 | 20 | 0        | XP_002630445.1 | 89 | 723.776 | 450 | 401 | Hypothetical protein CBG11178                  |
| Locus_3972_Transcript_3/4_Conf_0.750 | 1665 | 20 | 0        | XP_002630445.1 | 89 | 722.235 | 450 | 401 | Hypothetical protein CBG11178                  |
| Locus_3972_Transcript_4/4_Conf_0.750 | 1665 | 20 | 0        | XP_002630445.1 | 89 | 723.776 | 450 | 401 | Hypothetical protein CBG11178                  |
| Locus_3973_Transcript_1/1_Conf_1.000 | 933  | 0  |          |                |    |         |     |     |                                                |
| Locus_3974_Transcript_1/1_Conf_1.000 | 655  | 20 | 1.35E-56 | EFO13664.1     | 75 | 223.402 | 174 | 132 | hypothetical protein LOAG_14864                |
| Locus_3975_Transcript_1/2_Conf_1.000 | 608  | 20 | 4.23E-72 | NP_495885.1    | 84 | 274.633 | 183 | 155 | hypothetical protein T14D7.1                   |
| Locus_3975_Transcript_2/2_Conf_1.000 | 608  | 20 | 4.23E-72 | NP_495885.1    | 84 | 274.633 | 183 | 155 | hypothetical protein T14D7.1                   |
| Locus_3976_Transcript_1/1_Conf_1.000 | 1145 | 20 | 1.62E-72 | NP_500105.1    | 72 | 277.715 | 274 | 199 | Cell Death abnormality family member (ced-2)   |
| Locus_3977_Transcript_1/1_Conf_1.000 | 265  | 20 | 8.66E-30 | EFO24817.1     | 92 | 133.265 | 68  | 63  | immunoglobulin I-set domain-containing protein |
| Locus_3978_Transcript_1/1_Conf_1.000 | 283  | 20 | 9.12E-19 | XP_002644799.1 | 75 | 96.6709 | 82  | 62  | C. briggsae CBR-IPP-5 protein                  |
| Locus_3979_Transcript_1/1_Conf_1.000 | 2255 | 8  | 0        | NP_493757.2    | 70 | 731.095 | 696 | 488 | hypothetical protein C09E8.1                   |

|                                      |      |    |           |                |    |         |     |     |                                                                   |
|--------------------------------------|------|----|-----------|----------------|----|---------|-----|-----|-------------------------------------------------------------------|
| Locus_398_Transcript_1/1_Conf_1.000  | 166  | 0  |           |                |    |         |     |     |                                                                   |
| Locus_3980_Transcript_1/1_Conf_1.000 | 1662 | 20 | 1.01E-58  | NP_492305.2    | 61 | 232.646 | 314 | 194 | hypothetical protein K02B12.3                                     |
| Locus_3981_Transcript_1/1_Conf_1.000 | 1118 | 18 | 6.94E-28  | NP_491971.1    | 66 | 129.413 | 142 | 94  | hypothetical protein C48B6.3                                      |
| Locus_3982_Transcript_1/1_Conf_1.000 | 217  | 0  |           |                |    |         |     |     |                                                                   |
| Locus_3983_Transcript_1/1_Conf_1.000 | 255  | 0  |           |                |    |         |     |     |                                                                   |
| Locus_3984_Transcript_1/1_Conf_1.000 | 319  | 0  |           |                |    |         |     |     |                                                                   |
| Locus_3985_Transcript_1/1_Conf_1.000 | 898  | 20 | 3.06E-131 | XP_002643629.1 | 97 | 472.241 | 233 | 227 | C. briggsae CBR-LET-2 protein                                     |
| Locus_3986_Transcript_1/1_Conf_1.000 | 271  | 0  |           |                |    |         |     |     |                                                                   |
| Locus_3987_Transcript_1/2_Conf_1.000 | 1263 | 20 | 3.55E-180 | NP_001076670.1 | 92 | 635.565 | 359 | 333 | BT (Bacillus thuringiensis) toxin REsistant family member (bre-1) |
| Locus_3987_Transcript_2/2_Conf_1.000 | 1263 | 20 | 3.55E-180 | NP_001076670.1 | 92 | 635.565 | 359 | 333 | BT (Bacillus thuringiensis) toxin REsistant family member (bre-1) |
| Locus_3988_Transcript_1/2_Conf_1.000 | 394  | 0  |           |                |    |         |     |     |                                                                   |
| Locus_3988_Transcript_2/2_Conf_1.000 | 346  | 0  |           |                |    |         |     |     |                                                                   |
| Locus_3989_Transcript_1/1_Conf_1.000 | 448  | 20 | 2.43E-40  | XP_002646256.1 | 82 | 168.318 | 102 | 84  | Hypothetical protein CBG11960                                     |
| Locus_399_Transcript_1/1_Conf_1.000  | 668  | 6  | 2.09E-20  | NP_500576.1    | 59 | 103.219 | 151 | 90  | hypothetical protein M01H9.3                                      |
| Locus_3990_Transcript_1/1_Conf_1.000 | 676  | 20 | 1.52E-98  | XP_002645216.1 | 91 | 362.844 | 225 | 206 | Hypothetical protein CBG00074                                     |
| Locus_3991_Transcript_1/1_Conf_1.000 | 165  | 0  |           |                |    |         |     |     |                                                                   |

|                                      |      |    |           |                |    |         |      |     |                                                         |
|--------------------------------------|------|----|-----------|----------------|----|---------|------|-----|---------------------------------------------------------|
| Locus_3992_Transcript_1/1_Conf_1.000 | 477  | 20 | 2.39E-48  | NP_498221.1    | 84 | 194.897 | 132  | 111 | Ribosomal Protein, Small subunit family member (rps-12) |
| Locus_3993_Transcript_1/1_Conf_1.000 | 1016 | 20 | 5.00E-75  | XP_002632998.1 | 80 | 285.804 | 214  | 173 | C. briggsae CBR-LPL-1 protein                           |
| Locus_3994_Transcript_1/1_Conf_1.000 | 469  | 20 | 1.33E-46  | XP_002642740.1 | 77 | 189.119 | 143  | 111 | Hypothetical protein CBG21119                           |
| Locus_3995_Transcript_1/1_Conf_1.000 | 472  | 20 | 2.11E-52  | XP_002639634.1 | 83 | 208.379 | 143  | 120 | C. briggsae CBR-CLE-1 protein                           |
| Locus_3996_Transcript_1/2_Conf_1.000 | 1400 | 0  |           |                |    |         |      |     |                                                         |
| Locus_3996_Transcript_2/2_Conf_1.000 | 1359 | 0  |           |                |    |         |      |     |                                                         |
| Locus_3997_Transcript_1/1_Conf_1.000 | 783  | 2  | 2.26E-04  | NP_491417.1    | 47 | 50.447  | 106  | 50  | hypothetical protein B0041.8                            |
| Locus_3998_Transcript_1/4_Conf_0.667 | 1964 | 20 | 0         | EFO24333.1     | 85 | 866.685 | 553  | 475 | ring canal kelch protein                                |
| Locus_3998_Transcript_2/4_Conf_0.667 | 1964 | 20 | 0         | EFO24333.1     | 85 | 866.685 | 553  | 475 | ring canal kelch protein                                |
| Locus_3998_Transcript_3/4_Conf_0.667 | 1369 | 20 | 0         | EFO24333.1     | 87 | 724.161 | 456  | 399 | ring canal kelch protein                                |
| Locus_3998_Transcript_4/4_Conf_0.667 | 1964 | 20 | 0         | EFO24333.1     | 85 | 866.685 | 553  | 475 | ring canal kelch protein                                |
| Locus_3999_Transcript_1/2_Conf_1.000 | 977  | 8  | 3.85E-53  | NP_740845.1    | 60 | 213.001 | 277  | 167 | Nuclear Pore complex Protein family member (npp-6)      |
| Locus_3999_Transcript_2/2_Conf_1.000 | 4120 | 20 | 1.11E-118 | XP_002646176.1 | 47 | 433.335 | 1131 | 539 | C. briggsae CBR-NPP-6 protein                           |

|                                    |      |    |   |                |    |         |     |     |                                                      |
|------------------------------------|------|----|---|----------------|----|---------|-----|-----|------------------------------------------------------|
| Locus_4_Transcript_1/1_Conf_1.000  | 5417 | 20 | 0 | P07928.1       | 98 | 1014.99 | 522 | 515 | A' protein                                           |
| Locus_40_Transcript_1/2_Conf_1.000 | 3846 | 20 | 0 | NP_001024431.1 | 69 | 938.717 | 982 | 682 | Drosophila Discs Large homolog family member (dlg-1) |

|                                      |      |    |          |                |    |         |     |     |                                                                             |
|--------------------------------------|------|----|----------|----------------|----|---------|-----|-----|-----------------------------------------------------------------------------|
| Locus_40_Transcript_2/2_Conf_1.000   | 3834 | 20 | 0        | NP_001024431.1 | 69 | 944.495 | 978 | 682 | Drosophila Discs Large homolog family member (dlg-1)                        |
| Locus_400_Transcript_1/1_Conf_1.000  | 489  | 20 | 2.34E-43 | XP_001892438.1 | 77 | 178.333 | 138 | 107 | 60S ribosomal protein L23a                                                  |
| Locus_4000_Transcript_1/1_Conf_1.000 | 340  | 20 | 7.15E-45 | AAK29933.3     | 89 | 183.341 | 113 | 101 | Rab connectin related protein 2, partially confirmed by transcript evidence |
| Locus_4001_Transcript_1/1_Conf_1.000 | 2500 | 20 | 0        | XP_001899119.1 | 83 | 884.789 | 622 | 517 | L-plastin                                                                   |
| Locus_4002_Transcript_1/1_Conf_1.000 | 317  | 2  | 3.95E-14 | XP_002638797.1 | 73 | 81.2629 | 71  | 52  | Hypothetical protein CBG05152                                               |
| Locus_4003_Transcript_1/2_Conf_1.000 | 367  | 20 | 4.50E-31 | NP_494441.1    | 90 | 137.502 | 82  | 74  | hypothetical protein Y25C1A.5                                               |

|                                      |      |    |           |                |     |         |     |     |                                           |
|--------------------------------------|------|----|-----------|----------------|-----|---------|-----|-----|-------------------------------------------|
| Locus_4003_Transcript_2/2_Conf_1.000 | 1036 | 20 | 8.66E-139 | NP_494441.1    | 92  | 497.664 | 293 | 270 | hypothetical protein Y25C1A.5             |
| Locus_4004_Transcript_1/1_Conf_1.000 | 940  | 0  |           |                |     |         |     |     |                                           |
| Locus_4005_Transcript_1/1_Conf_1.000 | 848  | 20 | 1.42E-26  | EFO24363.1     | 50  | 124.405 | 306 | 155 | cytoplasmic intermediate filament protein |
| Locus_4006_Transcript_1/1_Conf_1.000 | 319  | 0  |           |                |     |         |     |     |                                           |
| Locus_4007_Transcript_1/1_Conf_1.000 | 1849 | 20 | 9.84E-135 | NP_503724.1    | 66  | 485.337 | 585 | 389 | hypothetical protein W02H5.8              |
| Locus_4008_Transcript_1/1_Conf_1.000 | 220  | 20 | 3.03E-22  | XP_002648832.1 | 82  | 108.227 | 73  | 60  | Hypothetical protein CBG16947             |
| Locus_4009_Transcript_1/1_Conf_1.000 | 508  | 20 | 1.85E-22  | XP_001902835.1 | 68  | 108.997 | 103 | 71  | G-patch domain containing protein         |
| Locus_401_Transcript_1/1_Conf_1.000  | 922  | 3  | 6.28E-10  | EFO19159.1     | 48  | 69.3218 | 195 | 95  | hypothetical protein LOAG_09335           |
| Locus_4010_Transcript_1/1_Conf_1.000 | 1058 | 20 | 5.43E-104 | NP_036555.1    | 100 | 382.104 | 203 | 203 | 60S ribosomal protein L13a                |
| Locus_4011_Transcript_1/1_Conf_1.000 | 1576 | 20 | 2.96E-113 | NP_499390.3    | 78  | 413.69  | 323 | 254 | HEXosaminidase family member (hex-3)      |
| Locus_4012_Transcript_1/1_Conf_1.000 | 697  | 5  | 2.32E-28  | XP_002640722.1 | 56  | 129.798 | 196 | 110 | Hypothetical protein CBG19790             |
| Locus_4013_Transcript_1/1_Conf_1.000 | 771  | 20 | 4.20E-56  | EFO17087.1     | 76  | 222.246 | 173 | 132 | acetyltransferase                         |
| Locus_4014_Transcript_1/2_Conf_1.000 | 455  | 0  |           |                |     |         |     |     |                                           |
| Locus_4014_Transcript_2/2_Conf_1.000 | 424  | 0  |           |                |     |         |     |     |                                           |
| Locus_4015_Transcript_1/1_Conf_1.000 | 615  | 20 | 1.91E-75  | NP_506259.2    | 84  | 285.804 | 200 | 168 | hypothetical protein W07G4.3              |
| Locus_4016_Transcript_1/1_Conf_1.000 | 517  | 0  |           |                |     |         |     |     |                                           |

|                                      |      |    |           |                |    |         |      |     |                                                        |
|--------------------------------------|------|----|-----------|----------------|----|---------|------|-----|--------------------------------------------------------|
| Locus_4017_Transcript_1/1_Conf_1.000 | 1575 | 20 | 4.99E-153 | XP_002639098.1 | 75 | 545.814 | 518  | 391 | C. briggsae CBR-UNC-40 protein                         |
| Locus_4018_Transcript_1/1_Conf_1.000 | 473  | 20 | 1.16E-50  | NP_491576.2    | 90 | 202.601 | 120  | 109 | PIP Kinase family member (ppk-1)                       |
| Locus_4019_Transcript_1/4_Conf_0.429 | 556  | 20 | 1.63E-34  | XP_002641709.1 | 75 | 149.443 | 132  | 100 | C. briggsae CBR-CED-7 protein                          |
| Locus_4019_Transcript_2/4_Conf_0.286 | 1141 | 20 | 7.75E-75  | NP_001021225.1 | 60 | 285.419 | 410  | 247 | Cell Death abnormality family member (ced-7)           |
| Locus_4019_Transcript_3/4_Conf_0.286 | 343  | 6  | 2.40E-11  | XP_002641709.1 | 77 | 72.0182 | 72   | 56  | C. briggsae CBR-CED-7 protein                          |
| Locus_4019_Transcript_4/4_Conf_0.571 | 2819 | 20 | 0         | NP_499115.2    | 59 | 669.848 | 1019 | 609 | Cell Death abnormality family member (ced-7)           |
| Locus_402_Transcript_1/1_Conf_1.000  | 1135 | 20 | 1.13E-150 | NP_495785.1    | 84 | 537.339 | 366  | 308 | phenylalanyl (F) tRNA Synthetase family member (frs-2) |
| Locus_4020_Transcript_1/1_Conf_1.000 | 908  | 11 | 4.83E-07  | NP_498234.1    | 43 | 59.6918 | 221  | 97  | hypothetical protein B0336.3                           |
| Locus_4021_Transcript_1/1_Conf_1.000 | 877  | 3  | 2.75E-04  | ABX00635.1     | 45 | 50.447  | 101  | 46  | collagen-like surface protein Sc1.52                   |
| Locus_4022_Transcript_1/1_Conf_1.000 | 195  | 0  |           |                |    |         |      |     |                                                        |
| Locus_4023_Transcript_1/1_Conf_1.000 | 701  | 20 | 2.13E-21  | XP_001902714.1 | 87 | 106.686 | 73   | 64  | GGL domain containing protein                          |



|                                      |      |    |          |                |    |         |     |     |                                              |
|--------------------------------------|------|----|----------|----------------|----|---------|-----|-----|----------------------------------------------|
| Locus_4024_Transcript_1/1_Conf_1.000 | 616  | 20 | 3.15E-78 | NP_493545.1    | 84 | 295.049 | 193 | 163 | hypothetical protein Y105E8B.5               |
| Locus_4025_Transcript_1/1_Conf_1.000 | 1260 | 20 | 0        | XP_002638763.1 | 89 | 675.626 | 420 | 375 | C. briggsae CBR-BLI-3 protein                |
| Locus_4026_Transcript_1/1_Conf_1.000 | 131  | 0  |          |                |    |         |     |     |                                              |
| Locus_4027_Transcript_1/1_Conf_1.000 | 212  | 20 | 6.33E-25 | NP_501339.2    | 91 | 117.087 | 71  | 65  | neuRonal IGCAM family member (rig-4)         |
| Locus_4028_Transcript_1/5_Conf_0.308 | 325  | 11 | 6.63E-30 | NP_495743.1    | 93 | 133.65  | 77  | 72  | Tyrosine DeCarboxylase family member (tdc-1) |
| Locus_4028_Transcript_2/5_Conf_0.385 | 1730 | 20 | 0        | XP_002630249.1 | 89 | 888.641 | 524 | 468 | C. briggsae CBR-TDC-1 protein                |

|                                      |      |    |           |                |    |         |     |     |                                                                            |
|--------------------------------------|------|----|-----------|----------------|----|---------|-----|-----|----------------------------------------------------------------------------|
| Locus_4028_Transcript_3/5_Conf_0.538 | 1939 | 20 | 0         | XP_002630249.1 | 87 | 1010.75 | 621 | 545 | C. briggsae CBR-TDC-1 protein                                              |
| Locus_4028_Transcript_4/5_Conf_0.538 | 1939 | 20 | 0         | XP_002630249.1 | 87 | 1011.91 | 621 | 545 | C. briggsae CBR-TDC-1 protein                                              |
| Locus_4028_Transcript_5/5_Conf_0.538 | 1939 | 20 | 0         | XP_002630249.1 | 87 | 1010.75 | 621 | 545 | C. briggsae CBR-TDC-1 protein                                              |
| Locus_4029_Transcript_1/1_Conf_1.000 | 1103 | 20 | 4.17E-94  | XP_002641869.1 | 61 | 349.362 | 398 | 243 | C. briggsae CBR-TEN-1 protein                                              |
| Locus_403_Transcript_1/1_Conf_1.000  | 1603 | 20 | 7.17E-131 | XP_001897997.1 | 62 | 472.241 | 517 | 324 | anion exchange protein                                                     |
| Locus_4030_Transcript_1/1_Conf_1.000 | 284  | 0  |           |                |    |         |     |     |                                                                            |
| Locus_4031_Transcript_1/3_Conf_0.714 | 2059 | 20 | 4.41E-131 | NP_492125.1    | 63 | 473.396 | 555 | 353 | WD Repeat protein family member (wdr-23)                                   |
| Locus_4031_Transcript_2/3_Conf_0.714 | 2089 | 20 | 2.64E-131 | NP_492124.1    | 64 | 474.167 | 544 | 351 | WD Repeat protein family member (wdr-23)                                   |
| Locus_4031_Transcript_3/3_Conf_0.714 | 2089 | 20 | 2.64E-131 | NP_492124.1    | 64 | 474.167 | 544 | 351 | WD Repeat protein family member (wdr-23)                                   |
| Locus_4032_Transcript_1/1_Conf_1.000 | 1644 | 20 | 2.04E-104 | NP_741233.2    | 63 | 384.415 | 494 | 315 | associated with RAN (nuclear import/export) function family member (ran-2) |
| Locus_4033_Transcript_1/1_Conf_1.000 | 1013 | 6  | 1.05E-40  | XP_001893296.1 | 74 | 171.785 | 135 | 100 | hypothetical protein Bm1_09125                                             |

|                                      |     |    |          |                |    |         |     |     |                                                |
|--------------------------------------|-----|----|----------|----------------|----|---------|-----|-----|------------------------------------------------|
| Locus_4034_Transcript_1/1_Conf_1.000 | 677 | 20 | 1.25E-60 | NP_505413.1    | 83 | 236.884 | 166 | 138 | hypothetical protein K07B1.4                   |
| Locus_4035_Transcript_1/1_Conf_1.000 | 666 | 20 | 3.44E-39 | AAN05752.1     | 70 | 165.622 | 158 | 112 | heat shock protein 20                          |
| Locus_4036_Transcript_1/1_Conf_1.000 | 283 | 0  |          |                |    |         |     |     |                                                |
| Locus_4037_Transcript_1/2_Conf_1.000 | 482 | 6  | 9.44E-13 | NP_498822.2    | 95 | 76.6406 | 43  | 41  | abnormal cell MIGration family member (mig-10) |
| Locus_4037_Transcript_2/2_Conf_1.000 | 469 | 6  | 5.09E-14 | NP_498822.2    | 62 | 80.8777 | 170 | 107 | abnormal cell MIGration family member (mig-10) |
| Locus_4038_Transcript_1/3_Conf_0.600 | 308 | 20 | 8.27E-25 | XP_002630890.1 | 76 | 116.701 | 101 | 77  | Hypothetical protein CBG02611                  |
| Locus_4038_Transcript_2/3_Conf_0.600 | 535 | 20 | 4.58E-49 | XP_002630890.1 | 77 | 197.593 | 170 | 131 | Hypothetical protein CBG02611                  |
| Locus_4038_Transcript_3/3_Conf_0.600 | 535 | 20 | 4.58E-49 | XP_002630890.1 | 77 | 197.593 | 170 | 131 | Hypothetical protein CBG02611                  |
| Locus_4039_Transcript_1/1_Conf_1.000 | 416 | 0  |          |                |    |         |     |     |                                                |
| Locus_404_Transcript_1/6_Conf_0.250  | 361 | 20 | 8.24E-41 | XP_002630755.1 | 78 | 169.859 | 121 | 95  | C. briggsae CBR-LYS-8 protein                  |
| Locus_404_Transcript_2/6_Conf_0.250  | 403 | 20 | 1.52E-42 | XP_002630755.1 | 78 | 175.637 | 125 | 98  | C. briggsae CBR-LYS-8 protein                  |
| Locus_404_Transcript_3/6_Conf_0.167  | 262 | 6  | 6.92E-11 | XP_002630755.1 | 68 | 70.4774 | 66  | 45  | C. briggsae CBR-LYS-8 protein                  |
| Locus_404_Transcript_4/6_Conf_0.167  | 262 | 6  | 6.92E-11 | XP_002630755.1 | 68 | 70.4774 | 66  | 45  | C. briggsae CBR-LYS-8 protein                  |
| Locus_404_Transcript_5/6_Conf_0.250  | 560 | 20 | 7.76E-53 | XP_002630755.1 | 73 | 210.305 | 168 | 123 | C. briggsae CBR-LYS-8 protein                  |
| Locus_404_Transcript_6/6_Conf_0.250  | 560 | 20 | 7.76E-53 | XP_002630755.1 | 73 | 210.305 | 168 | 123 | C. briggsae CBR-LYS-8 protein                  |
| Locus_4040_Transcript_1/1_Conf_1.000 | 415 | 0  |          |                |    |         |     |     |                                                |

|                                      |      |    |           |                |    |         |     |     |                                                           |
|--------------------------------------|------|----|-----------|----------------|----|---------|-----|-----|-----------------------------------------------------------|
| Locus_4041_Transcript_1/1_Conf_1.000 | 1045 | 20 | 1.39E-27  | EFO18829.1     | 77 | 128.257 | 90  | 70  | presenilin spe-4                                          |
| Locus_4042_Transcript_1/1_Conf_1.000 | 638  | 5  | 1.40E-15  | XP_002629878.1 | 59 | 87.0409 | 136 | 81  | Hypothetical protein CBG21915                             |
| Locus_4043_Transcript_1/1_Conf_1.000 | 728  | 20 | 2.35E-42  | EFO19902.1     | 66 | 176.407 | 215 | 142 | hypothetical protein LOAG_08593                           |
| Locus_4044_Transcript_1/1_Conf_1.000 | 769  | 0  |           |                |    |         |     |     |                                                           |
| Locus_4045_Transcript_1/2_Conf_1.000 | 2400 | 20 | 0         | NP_498740.2    | 92 | 1034.25 | 588 | 542 | CaLPain family member (clp-1)                             |
| Locus_4045_Transcript_2/2_Conf_1.000 | 2394 | 20 | 0         | NP_741237.1    | 92 | 1038.1  | 585 | 540 | CaLPain family member (clp-1)                             |
| Locus_4046_Transcript_1/1_Conf_1.000 | 1258 | 20 | 4.01E-75  | EFO19846.1     | 63 | 286.574 | 339 | 215 | cleavage and polyadenylation specificity factor subunit 2 |
| Locus_4047_Transcript_1/1_Conf_1.000 | 2303 | 20 | 0         | XP_002635521.1 | 93 | 1051.2  | 652 | 609 | C. briggsae CBR-HSP-6 protein                             |
| Locus_4048_Transcript_1/1_Conf_1.000 | 130  | 3  | 1.48E-05  | NP_495669.1    | 71 | 52.7582 | 42  | 30  | hypothetical protein ZK669.3                              |
| Locus_4049_Transcript_1/1_Conf_1.000 | 811  | 20 | 1.70E-151 | XP_002637345.1 | 99 | 539.265 | 270 | 268 | C. briggsae CBR-UNC-68 protein                            |

|                                      |      |    |           |                |    |         |     |     |                                                               |
|--------------------------------------|------|----|-----------|----------------|----|---------|-----|-----|---------------------------------------------------------------|
| Locus_405_Transcript_1/1_Conf_1.000  | 765  | 20 | 5.95E-63  | NP_491529.2    | 98 | 244.973 | 124 | 122 | hypothetical protein Y110A7A.6                                |
| Locus_4050_Transcript_1/1_Conf_1.000 | 717  | 20 | 4.89E-69  | NP_498404.1    | 72 | 265.003 | 234 | 170 | hypothetical protein C05D11.5                                 |
| Locus_4051_Transcript_1/1_Conf_1.000 | 395  | 0  |           |                |    |         |     |     |                                                               |
| Locus_4052_Transcript_1/1_Conf_1.000 | 223  | 2  | 9.42E-08  | XP_002640196.1 | 70 | 60.077  | 70  | 49  | C. briggsae CBR-CKR-1 protein                                 |
| Locus_4053_Transcript_1/2_Conf_1.000 | 537  | 0  |           |                |    |         |     |     |                                                               |
| Locus_4053_Transcript_2/2_Conf_1.000 | 575  | 0  |           |                |    |         |     |     |                                                               |
| Locus_4054_Transcript_1/2_Conf_1.000 | 1996 | 20 | 0         | NP_496987.1    | 78 | 773.081 | 659 | 517 | IMportin Beta family member (imb-2)                           |
| Locus_4054_Transcript_2/2_Conf_1.000 | 1996 | 20 | 0         | NP_496987.1    | 78 | 773.081 | 659 | 517 | IMportin Beta family member (imb-2)                           |
| Locus_4055_Transcript_1/1_Conf_1.000 | 1064 | 20 | 4.91E-137 | NP_509604.1    | 78 | 491.886 | 353 | 277 | abnormal NUClease family member (nuc-1)                       |
| Locus_4056_Transcript_1/1_Conf_1.000 | 493  | 3  | 3.29E-05  | XP_967620.1    | 44 | 51.6026 | 127 | 57  | PREDICTED: similar to anopheles stephensi ubiquitin, putative |

|                                      |      |    |          |                |    |         |     |     |                                                          |
|--------------------------------------|------|----|----------|----------------|----|---------|-----|-----|----------------------------------------------------------|
| Locus_4057_Transcript_1/1_Conf_1.000 | 778  | 5  | 5.28E-14 | XP_002638692.1 | 59 | 82.4185 | 159 | 95  | C. briggsae CBR-DCP-66 protein                           |
| Locus_4058_Transcript_1/2_Conf_1.000 | 518  | 3  | 3.40E-27 | NP_501320.2    | 69 | 124.79  | 126 | 88  | exPORTin (nuclear export receptor) family member (xpo-3) |
| Locus_4058_Transcript_2/2_Conf_1.000 | 518  | 3  | 2.61E-27 | NP_501320.2    | 70 | 125.176 | 126 | 89  | exPORTin (nuclear export receptor) family member (xpo-3) |
| Locus_4059_Transcript_1/4_Conf_0.375 | 678  | 20 | 2.76E-23 | EFO25573.1     | 53 | 112.849 | 198 | 106 | RING finger protein 20                                   |
| Locus_4059_Transcript_2/4_Conf_0.375 | 1225 | 20 | 7.15E-45 | EFO25573.1     | 77 | 186.037 | 140 | 109 | RING finger protein 20                                   |
| Locus_4059_Transcript_3/4_Conf_0.375 | 678  | 20 | 2.76E-23 | EFO25573.1     | 53 | 112.849 | 198 | 106 | RING finger protein 20                                   |
| Locus_4059_Transcript_4/4_Conf_0.375 | 1224 | 20 | 7.15E-45 | EFO25573.1     | 77 | 186.037 | 140 | 109 | RING finger protein 20                                   |
| Locus_406_Transcript_1/4_Conf_0.182  | 208  | 0  |          |                |    |         |     |     |                                                          |
| Locus_406_Transcript_2/4_Conf_0.364  | 2434 | 20 | 0        | NP_503306.1    | 88 | 898.656 | 568 | 501 | GEX Interacting protein family member (gei-7)            |
| Locus_406_Transcript_3/4_Conf_0.182  | 3197 | 20 | 0        | NP_503306.1    | 91 | 1646.33 | 969 | 887 | GEX Interacting protein family member (gei-7)            |
| Locus_406_Transcript_4/4_Conf_0.455  | 785  | 20 | 8.78E-41 | NP_492609.1    | 70 | 171.4   | 168 | 118 | hypothetical protein K10C3.2                             |
| Locus_4060_Transcript_1/1_Conf_1.000 | 175  | 0  |          |                |    |         |     |     |                                                          |
| Locus_4061_Transcript_1/1_Conf_1.000 | 221  | 0  |          |                |    |         |     |     |                                                          |
| Locus_4062_Transcript_1/4_Conf_0.625 | 818  | 20 | 9.71E-54 | XP_002632395.1 | 73 | 214.542 | 173 | 128 | C. briggsae CBR-ITSN-1 protein                           |
| Locus_4062_Transcript_2/4_Conf_0.625 | 818  | 20 | 9.71E-54 | XP_002632395.1 | 73 | 214.542 | 173 | 128 | C. briggsae CBR-ITSN-1 protein                           |

|                                      |      |    |           |                |    |         |     |     |                                                         |
|--------------------------------------|------|----|-----------|----------------|----|---------|-----|-----|---------------------------------------------------------|
| Locus_4062_Transcript_3/4_Conf_0.250 | 305  | 20 | 3.99E-19  | NP_503037.2    | 76 | 97.8265 | 68  | 52  | ITSN (intersectin) family member (itsn-1)               |
| Locus_4062_Transcript_4/4_Conf_0.625 | 818  | 20 | 9.71E-54  | XP_002632395.1 | 73 | 214.542 | 173 | 128 | C. briggsae CBR-ITSN-1 protein                          |
| Locus_4063_Transcript_1/1_Conf_1.000 | 889  | 20 | 1.16E-82  | NP_505265.1    | 77 | 310.842 | 245 | 190 | Temporarily Assigned Gene name family member (tag-117)  |
| Locus_4064_Transcript_1/1_Conf_1.000 | 560  | 20 | 3.86E-44  | 2CO0           | 83 | 181.415 | 125 | 104 | Wdr5 And Unmodified Histone H3 Complex At 2.25 Angstrom |
| Locus_4065_Transcript_1/1_Conf_1.000 | 763  | 20 | 3.12E-72  | NP_492523.1    | 89 | 275.789 | 158 | 142 | hypothetical protein F30A10.9                           |
| Locus_4066_Transcript_1/3_Conf_0.714 | 1941 | 20 | 5.26E-150 | NP_501023.3    | 79 | 344.739 | 236 | 187 | hypothetical protein C01B10.9                           |
| Locus_4066_Transcript_2/3_Conf_0.714 | 1952 | 20 | 2.38E-150 | NP_501023.3    | 78 | 444.121 | 324 | 255 | hypothetical protein C01B10.9                           |
| Locus_4066_Transcript_3/3_Conf_0.714 | 1945 | 20 | 1.83E-155 | NP_501023.3    | 73 | 554.288 | 475 | 350 | hypothetical protein C01B10.9                           |

|                                      |      |    |          |                |    |         |     |     |                                                               |
|--------------------------------------|------|----|----------|----------------|----|---------|-----|-----|---------------------------------------------------------------|
| Locus_4067_Transcript_1/2_Conf_1.000 | 760  | 20 | 4.53E-23 | EFO22249.1     | 62 | 112.464 | 133 | 83  | hypothetical protein LOAG_06236                               |
| Locus_4067_Transcript_2/2_Conf_1.000 | 893  | 20 | 6.09E-23 | EFO22249.1     | 62 | 112.464 | 133 | 83  | hypothetical protein LOAG_06236                               |
| Locus_4068_Transcript_1/1_Conf_1.000 | 574  | 0  |          |                |    |         |     |     |                                                               |
| Locus_4069_Transcript_1/2_Conf_1.000 | 1773 | 20 | 5.08E-40 | CAX65053.1     | 64 | 170.629 | 201 | 130 | C. elegans protein D1046.1b, confirmed by transcript evidence |
| Locus_4069_Transcript_2/2_Conf_1.000 | 1764 | 20 | 5.05E-40 | CAX65053.1     | 64 | 170.629 | 201 | 130 | C. elegans protein D1046.1b, confirmed by transcript evidence |
| Locus_407_Transcript_1/2_Conf_1.000  | 263  | 20 | 3.54E-15 | Q94637.1       | 67 | 84.7297 | 85  | 57  | Vitellogenin-6                                                |
| Locus_407_Transcript_2/2_Conf_1.000  | 147  | 0  |          |                |    |         |     |     |                                                               |
| Locus_4070_Transcript_1/2_Conf_1.000 | 1094 | 20 | 4.51E-08 | NP_001021459.2 | 35 | 63.5438 | 251 | 89  | hypothetical protein F36H2.3                                  |
| Locus_4070_Transcript_2/2_Conf_1.000 | 908  | 14 | 2.03E-05 | EAW56013.1     | 52 | 54.299  | 59  | 31  | complement component 6, isoform CRA_b                         |



|                                      |      |    |          |                |    |         |     |     |                                      |
|--------------------------------------|------|----|----------|----------------|----|---------|-----|-----|--------------------------------------|
| Locus_4071_Transcript_1/1_Conf_1.000 | 1167 | 20 | 3.97E-90 | XP_002643186.1 | 64 | 336.265 | 392 | 253 | C. briggsae CBR-ADR-2 protein        |
| Locus_4072_Transcript_1/1_Conf_1.000 | 397  | 20 | 1.10E-40 | XP_001895225.1 | 85 | 169.474 | 106 | 91  | 40S ribosomal protein S19S           |
| Locus_4073_Transcript_1/3_Conf_0.667 | 754  | 20 | 1.41E-85 | XP_002637829.1 | 90 | 320.087 | 198 | 179 | C. briggsae CBR-PAS-1 protein        |
| Locus_4073_Transcript_2/3_Conf_0.667 | 746  | 20 | 1.39E-85 | XP_002637829.1 | 90 | 320.087 | 198 | 179 | C. briggsae CBR-PAS-1 protein        |
| Locus_4073_Transcript_3/3_Conf_0.667 | 746  | 20 | 1.39E-85 | XP_002637829.1 | 90 | 320.087 | 198 | 179 | C. briggsae CBR-PAS-1 protein        |
| Locus_4074_Transcript_1/1_Conf_1.000 | 820  | 20 | 7.22E-65 | XP_001893127.1 | 84 | 251.521 | 205 | 173 | B-box type zinc-finger protein ncl-1 |
| Locus_4075_Transcript_1/2_Conf_1.000 | 835  | 0  |          |                |    |         |     |     |                                      |
| Locus_4075_Transcript_2/2_Conf_1.000 | 527  | 0  |          |                |    |         |     |     |                                      |

|                                      |      |    |           |                |    |         |     |     |                                         |
|--------------------------------------|------|----|-----------|----------------|----|---------|-----|-----|-----------------------------------------|
| Locus_4076_Transcript_1/1_Conf_1.000 | 405  | 8  | 2.43E-16  | XP_001900963.1 | 55 | 88.5817 | 122 | 68  | Zinc finger, C2H2 type family protein   |
| Locus_4077_Transcript_1/2_Conf_1.000 | 397  | 0  |           |                |    |         |     |     |                                         |
| Locus_4077_Transcript_2/2_Conf_1.000 | 397  | 0  |           |                |    |         |     |     |                                         |
| Locus_4078_Transcript_1/1_Conf_1.000 | 1198 | 20 | 0         | XP_002634527.1 | 89 | 660.603 | 373 | 332 | C. briggsae CBR-MAP-1 protein           |
| Locus_4079_Transcript_1/1_Conf_1.000 | 597  | 0  |           |                |    |         |     |     |                                         |
| Locus_408_Transcript_1/7_Conf_0.159  | 160  | 9  | 3.92E-06  | XP_002636068.1 | 77 | 54.6842 | 36  | 28  | Hypothetical protein CBG01308           |
| Locus_408_Transcript_2/7_Conf_0.068  | 305  | 0  |           |                |    |         |     |     |                                         |
| Locus_408_Transcript_3/7_Conf_0.136  | 153  | 7  | 1.15E-05  | XP_002636068.1 | 79 | 53.1434 | 34  | 27  | Hypothetical protein CBG01308           |
| Locus_408_Transcript_4/7_Conf_0.250  | 275  | 20 | 1.47E-13  | NP_505384.2    | 73 | 79.337  | 71  | 52  | ASpartyl Protease family member (asp-2) |
| Locus_408_Transcript_5/7_Conf_0.068  | 357  | 1  | 7.32E-05  | EFO20860.1     | 56 | 50.447  | 71  | 40  | hypothetical protein LOAG_07630         |
| Locus_408_Transcript_6/7_Conf_0.273  | 275  | 20 | 1.47E-13  | NP_505384.2    | 73 | 79.337  | 71  | 52  | ASpartyl Protease family member (asp-2) |
| Locus_408_Transcript_7/7_Conf_0.568  | 480  | 0  |           |                |    |         |     |     |                                         |
| Locus_4080_Transcript_1/2_Conf_1.000 | 1070 | 20 | 1.76E-142 | NP_496276.1    | 85 | 509.99  | 327 | 281 | hypothetical protein C06A1.3            |
| Locus_4080_Transcript_2/2_Conf_1.000 | 1070 | 20 | 1.76E-142 | NP_496276.1    | 85 | 509.99  | 327 | 281 | hypothetical protein C06A1.3            |

|                                      |      |    |           |                |     |         |     |     |                                            |
|--------------------------------------|------|----|-----------|----------------|-----|---------|-----|-----|--------------------------------------------|
| Locus_4081_Transcript_1/1_Conf_1.000 | 1728 | 20 | 2.70E-147 | XP_002640056.1 | 73  | 526.939 | 575 | 420 | Hypothetical protein CBG12532              |
| Locus_4082_Transcript_1/1_Conf_1.000 | 351  | 20 | 7.51E-58  | NP_006389.2    | 100 | 226.483 | 116 | 116 | ubiquitin D                                |
| Locus_4083_Transcript_1/1_Conf_1.000 | 476  | 20 | 6.13E-36  | XP_002637110.1 | 81  | 153.68  | 113 | 92  | Hypothetical protein CBG09610              |
| Locus_4084_Transcript_1/1_Conf_1.000 | 1266 | 20 | 1.56E-143 | XP_002634371.1 | 74  | 513.842 | 445 | 333 | C. briggsae CBR-RIG-4 protein              |
| Locus_4085_Transcript_1/3_Conf_0.714 | 3333 | 20 | 0         | NP_001021346.1 | 78  | 924.465 | 781 | 614 | EGg Laying defective family member (egl-8) |
| Locus_4085_Transcript_2/3_Conf_0.714 | 3333 | 20 | 0         | NP_001021346.1 | 78  | 924.465 | 781 | 614 | EGg Laying defective family member (egl-8) |

|                                      |      |    |           |                |    |         |     |     |                                                                      |
|--------------------------------------|------|----|-----------|----------------|----|---------|-----|-----|----------------------------------------------------------------------|
| Locus_4085_Transcript_3/3_Conf_0.714 | 3333 | 20 | 0         | NP_001021346.1 | 78 | 924.465 | 781 | 614 | EGg Laying defective family member (egl-8)                           |
| Locus_4086_Transcript_1/1_Conf_1.000 | 637  | 20 | 1.02E-82  | EFO20190.1     | 85 | 310.071 | 195 | 166 | hypothetical protein LOAG_08298                                      |
| Locus_4087_Transcript_1/1_Conf_1.000 | 497  | 5  | 3.03E-43  | XP_002646111.1 | 78 | 177.948 | 165 | 129 | C. briggsae CBR-PAD-1 protein                                        |
| Locus_4088_Transcript_1/1_Conf_1.000 | 954  | 20 | 7.33E-118 | NP_510032.1    | 93 | 427.943 | 252 | 235 | hypothetical protein M153.1                                          |
| Locus_4089_Transcript_1/1_Conf_1.000 | 1021 | 20 | 2.31E-128 | A8WPF0.2       | 88 | 462.996 | 265 | 234 | Succinate dehydrogenase ubiquinone iron-sulfur subunit, mitochondria |
| Locus_409_Transcript_1/1_Conf_1.000  | 1054 | 20 | 8.45E-57  | XP_002634781.1 | 91 | 225.328 | 135 | 124 | C. briggsae CBR-MDF-2 protein                                        |
| Locus_4090_Transcript_1/1_Conf_1.000 | 1066 | 20 | 1.89E-112 | XP_002630122.1 | 72 | 410.223 | 355 | 257 | Hypothetical protein CBG00524                                        |
| Locus_4091_Transcript_1/2_Conf_1.000 | 288  | 0  |           |                |    |         |     |     |                                                                      |
| Locus_4091_Transcript_2/2_Conf_1.000 | 288  | 0  |           |                |    |         |     |     |                                                                      |
| Locus_4092_Transcript_1/1_Conf_1.000 | 599  | 4  | 3.38E-10  | EFO21414.1     | 88 | 68.9366 | 45  | 40  | hypothetical protein LOAG_07072                                      |
| Locus_4093_Transcript_1/1_Conf_1.000 | 135  | 0  |           |                |    |         |     |     |                                                                      |
| Locus_4094_Transcript_1/5_Conf_0.600 | 439  | 16 | 2.64E-23  | XP_002646276.1 | 77 | 111.694 | 83  | 64  | C. briggsae CBR-ABF-2 protein                                        |
| Locus_4094_Transcript_2/5_Conf_0.600 | 597  | 8  | 6.52E-19  | XP_002646276.1 | 87 | 69.707  | 39  | 34  | C. briggsae CBR-ABF-2 protein                                        |
| Locus_4094_Transcript_3/5_Conf_0.600 | 406  | 16 | 2.68E-23  | XP_002646276.1 | 77 | 111.694 | 83  | 64  | C. briggsae CBR-ABF-2 protein                                        |
| Locus_4094_Transcript_4/5_Conf_0.667 | 475  | 16 | 2.67E-23  | XP_002646276.1 | 77 | 111.694 | 83  | 64  | C. briggsae CBR-ABF-2 protein                                        |
| Locus_4094_Transcript_5/5_Conf_0.667 | 539  | 16 | 3.37E-23  | XP_002646276.1 | 77 | 111.694 | 83  | 64  | C. briggsae CBR-ABF-2 protein                                        |

|                                      |      |    |           |                |    |         |     |     |                                      |
|--------------------------------------|------|----|-----------|----------------|----|---------|-----|-----|--------------------------------------|
| Locus_4095_Transcript_1/1_Conf_1.000 | 780  | 20 | 1.80E-62  | NP_001023515.1 | 66 | 243.432 | 250 | 166 | hypothetical protein Y55F3BR.8       |
| Locus_4096_Transcript_1/1_Conf_1.000 | 1002 | 20 | 6.54E-112 | XP_002639607.1 | 80 | 408.297 | 317 | 254 | C. briggsae CBR-PQN-44 protein       |
| Locus_4097_Transcript_1/1_Conf_1.000 | 1555 | 6  | 1.52E-53  | XP_002636852.1 | 49 | 215.312 | 550 | 273 | Hypothetical protein CBG09307        |
| Locus_4098_Transcript_1/1_Conf_1.000 | 1184 | 20 | 5.34E-175 | NP_496968.1    | 90 | 618.231 | 373 | 338 | hypothetical protein Y48B6A.12       |
| Locus_4099_Transcript_1/1_Conf_1.000 | 1322 | 20 | 0         | XP_002636685.1 | 95 | 647.121 | 346 | 329 | C. briggsae CBR-ELPC-3 protein       |
| Locus_41_Transcript_1/2_Conf_1.000   | 1485 | 20 | 0         | XP_002632913.1 | 89 | 800.816 | 494 | 443 | Hypothetical protein CBG21666        |
| Locus_41_Transcript_2/2_Conf_1.000   | 1489 | 20 | 0         | XP_002632913.1 | 89 | 802.357 | 495 | 444 | Hypothetical protein CBG21666        |
| Locus_410_Transcript_1/1_Conf_1.000  | 2412 | 7  | 4.08E-22  | NP_498236.1    | 47 | 111.694 | 284 | 136 | Worm aRMadillo family member (wrm-1) |
| Locus_4100_Transcript_1/1_Conf_1.000 | 258  | 0  |           |                |    |         |     |     |                                      |

|                                      |      |    |           |                |    |         |     |     |                                                 |
|--------------------------------------|------|----|-----------|----------------|----|---------|-----|-----|-------------------------------------------------|
| Locus_4101_Transcript_1/1_Conf_1.000 | 1059 | 20 | 6.95E-75  | NP_510256.1    | 73 | 285.419 | 249 | 184 | Cyclin-Dependent Kinase family member (cdk-4)   |
| Locus_4102_Transcript_1/1_Conf_1.000 | 237  | 0  |           |                |    |         |     |     |                                                 |
| Locus_4103_Transcript_1/2_Conf_1.000 | 424  | 1  | 1.14E-05  | NP_501319.2    | 49 | 53.1434 | 139 | 69  | hypothetical protein C49H3.4                    |
| Locus_4103_Transcript_2/2_Conf_1.000 | 840  | 12 | 2.16E-27  | NP_501319.2    | 52 | 127.102 | 232 | 122 | hypothetical protein C49H3.4                    |
| Locus_4104_Transcript_1/1_Conf_1.000 | 326  | 0  |           |                |    |         |     |     |                                                 |
| Locus_4105_Transcript_1/1_Conf_1.000 | 898  | 20 | 1.20E-127 | XP_002644931.1 | 88 | 460.299 | 280 | 249 | Hypothetical protein CBG10876                   |
| Locus_4106_Transcript_1/1_Conf_1.000 | 853  | 20 | 7.63E-28  | XP_001897730.1 | 56 | 128.642 | 238 | 135 | KH domain containing protein                    |
| Locus_4107_Transcript_1/2_Conf_1.000 | 1112 | 9  | 3.62E-53  | EFO20752.1     | 55 | 213.386 | 343 | 191 | AMOP domain-containing protein                  |
| Locus_4107_Transcript_2/2_Conf_1.000 | 1120 | 9  | 4.33E-54  | EFO20752.1     | 56 | 216.468 | 346 | 194 | AMOP domain-containing protein                  |
| Locus_4108_Transcript_1/3_Conf_0.600 | 991  | 20 | 2.30E-77  | NP_491666.2    | 75 | 293.508 | 247 | 187 | hypothetical protein T19B4.1                    |
| Locus_4108_Transcript_2/3_Conf_0.400 | 855  | 20 | 2.60E-76  |                | 75 | 289.656 | 245 | 185 | hypothetical protein C04F1.2                    |
| Locus_4108_Transcript_3/3_Conf_0.600 | 1391 | 20 | 3.77E-77  | NP_491666.2    | 75 | 293.508 | 247 | 187 | hypothetical protein T19B4.1                    |
| Locus_4109_Transcript_1/2_Conf_1.000 | 1468 | 3  | 2.67E-44  | NP_490916.4    | 50 | 184.496 | 478 | 242 | GTPase Activating Protein family member (gap-3) |

|                                      |      |    |           |                |    |         |     |     |                                 |
|--------------------------------------|------|----|-----------|----------------|----|---------|-----|-----|---------------------------------|
| Locus_4109_Transcript_2/2_Conf_1.000 | 1359 | 3  | 1.58E-11  | XP_002638860.1 | 51 | 75.485  | 258 | 132 | Hypothetical protein CBG22075   |
| Locus_411_Transcript_1/1_Conf_1.000  | 950  | 20 | 1.12E-41  | XP_002641584.1 | 84 | 174.866 | 111 | 94  | C. briggsae CBR-BATH-43 protein |
| Locus_4110_Transcript_1/1_Conf_1.000 | 948  | 20 | 1.15E-46  | EFO16839.1     | 62 | 191.43  | 224 | 139 | hypothetical protein LOAG_11664 |
| Locus_4111_Transcript_1/1_Conf_1.000 | 651  | 20 | 1.14E-23  | NP_001021488.1 | 59 | 114.005 | 141 | 84  | hypothetical protein F53F10.8   |
| Locus_4112_Transcript_1/2_Conf_1.000 | 1293 | 20 | 4.64E-66  | EFO21711.1     | 65 | 256.529 | 305 | 200 | hypothetical protein LOAG_06778 |
| Locus_4112_Transcript_2/2_Conf_1.000 | 1194 | 20 | 7.07E-66  | EFO21711.1     | 71 | 255.758 | 238 | 171 | hypothetical protein LOAG_06778 |
| Locus_4113_Transcript_1/3_Conf_0.714 | 963  | 20 | 1.06E-180 | XP_002632913.1 | 97 | 636.721 | 319 | 310 | Hypothetical protein CBG21666   |
| Locus_4113_Transcript_2/3_Conf_0.714 | 963  | 20 | 1.06E-180 | XP_002632913.1 | 97 | 636.721 | 319 | 310 | Hypothetical protein CBG21666   |

|                                      |      |    |           |                |    |         |     |     |                                                              |
|--------------------------------------|------|----|-----------|----------------|----|---------|-----|-----|--------------------------------------------------------------|
| Locus_4113_Transcript_3/3_Conf_0.714 | 963  | 20 | 1.06E-180 | XP_002632913.1 | 97 | 636.721 | 319 | 310 | Hypothetical protein CBG21666                                |
| Locus_4114_Transcript_1/1_Conf_1.000 | 1619 | 2  | 1.62E-05  | NP_505489.1    | 41 | 55.8398 | 474 | 195 | HoloCentric chromosome binding Protein family member (hcp-2) |
| Locus_4115_Transcript_1/1_Conf_1.000 | 1003 | 20 | 6.47E-35  | CAR63562.1     | 79 | 152.525 | 147 | 117 | putative COLLAGEN                                            |
| Locus_4116_Transcript_1/1_Conf_1.000 | 595  | 2  | 4.78E-25  | NP_492324.2    | 57 | 118.242 | 169 | 98  | hypothetical protein R05D11.9                                |
| Locus_4117_Transcript_1/1_Conf_1.000 | 657  | 0  |           |                |    |         |     |     |                                                              |
| Locus_4118_Transcript_1/1_Conf_1.000 | 491  | 20 | 1.71E-30  | XP_001926354.1 | 86 | 133.65  | 147 | 127 | PREDICTED: similar to 60S acidic ribosomal protein P1        |
| Locus_4119_Transcript_1/5_Conf_0.300 | 352  | 0  |           |                |    |         |     |     |                                                              |
| Locus_4119_Transcript_2/5_Conf_0.200 | 143  | 0  |           |                |    |         |     |     |                                                              |
| Locus_4119_Transcript_3/5_Conf_0.500 | 841  | 0  |           |                |    |         |     |     |                                                              |
| Locus_4119_Transcript_4/5_Conf_0.600 | 1145 | 0  |           |                |    |         |     |     |                                                              |
| Locus_4119_Transcript_5/5_Conf_0.600 | 651  | 0  |           |                |    |         |     |     |                                                              |
| Locus_412_Transcript_1/6_Conf_0.625  | 1244 | 20 | 2.92E-102 | AAT28331.1     | 96 | 376.711 | 196 | 190 | peroxiredoxin                                                |



|                                     |      |    |           |            |    |         |     |     |               |
|-------------------------------------|------|----|-----------|------------|----|---------|-----|-----|---------------|
| Locus_412_Transcript_2/6_Conf_0.625 | 1244 | 20 | 1.31E-102 | AAT28331.1 | 96 | 377.867 | 196 | 190 | peroxiredoxin |
| Locus_412_Transcript_3/6_Conf_0.375 | 1077 | 20 | 4.92E-92  | AAT28331.1 | 97 | 342.428 | 174 | 169 | peroxiredoxin |
| Locus_412_Transcript_4/6_Conf_0.375 | 1077 | 20 | 4.92E-92  | AAT28331.1 | 97 | 342.428 | 174 | 169 | peroxiredoxin |
| Locus_412_Transcript_5/6_Conf_0.375 | 759  | 20 | 5.78E-103 | AAT28331.1 | 96 | 377.867 | 196 | 190 | peroxiredoxin |

|                                      |      |    |           |                |    |         |      |     |                                                                          |
|--------------------------------------|------|----|-----------|----------------|----|---------|------|-----|--------------------------------------------------------------------------|
| Locus_412_Transcript_6/6_Conf_0.375  | 759  | 20 | 1.29E-102 | AAT28331.1     | 96 | 376.711 | 196  | 190 | peroxiredoxin                                                            |
| Locus_4120_Transcript_1/1_Conf_1.000 | 803  | 5  | 3.65E-05  | XP_001187240.1 | 40 | 53.1434 | 254  | 102 | PREDICTED: hypothetical protein                                          |
| Locus_4121_Transcript_1/1_Conf_1.000 | 3274 | 20 | 0         | XP_002639688.1 | 85 | 1613.97 | 1090 | 932 | C. briggsae CBR-FASN-1 protein                                           |
| Locus_4122_Transcript_1/1_Conf_1.000 | 849  | 8  | 6.74E-85  | CBL43423.1     | 70 | 318.161 | 278  | 197 | C. elegans protein C53A5.13b, partially confirmed by transcript evidence |
| Locus_4123_Transcript_1/1_Conf_1.000 | 640  | 20 | 2.75E-43  | CAE12199.1     | 63 | 179.104 | 213  | 136 | aspartyl protease precursor                                              |
| Locus_4124_Transcript_1/4_Conf_0.667 | 1289 | 20 | 3.62E-87  | NP_501092.1    | 66 | 326.635 | 339  | 224 | Conserved Oligomeric Golgi (COG) Component family member (cogc-2)        |

|                                      |      |    |          |             |    |         |     |     |                                                                      |
|--------------------------------------|------|----|----------|-------------|----|---------|-----|-----|----------------------------------------------------------------------|
| Locus_4124_Transcript_2/4_Conf_0.444 | 618  | 14 | 1.84E-25 | NP_501092.1 | 68 | 119.783 | 135 | 93  | Conserved Oligomeric Golgi (COG)<br>Component family member (cogc-2) |
| Locus_4124_Transcript_3/4_Conf_0.667 | 1289 | 20 | 9.54E-88 | NP_501092.1 | 66 | 328.561 | 339 | 224 | Conserved Oligomeric Golgi (COG)<br>Component family member (cogc-2) |
| Locus_4124_Transcript_4/4_Conf_0.667 | 1289 | 20 | 2.12E-87 | NP_501092.1 | 66 | 327.405 | 339 | 224 | Conserved Oligomeric Golgi (COG)<br>Component family member (cogc-2) |
| Locus_4125_Transcript_1/1_Conf_1.000 | 217  | 17 | 2.83E-17 |             | 78 | 91.6633 | 61  | 48  | hypothetical protein T07C4.5                                         |
| Locus_4126_Transcript_1/2_Conf_1.000 | 638  | 20 | 6.00E-67 | NP_496787.1 | 89 | 257.684 | 159 | 142 | hypothetical protein F29C12.4                                        |
| Locus_4126_Transcript_2/2_Conf_1.000 | 638  | 20 | 6.00E-67 | NP_496787.1 | 89 | 257.684 | 159 | 142 | hypothetical protein F29C12.4                                        |

|                                      |      |    |           |                |    |         |     |     |                                      |
|--------------------------------------|------|----|-----------|----------------|----|---------|-----|-----|--------------------------------------|
| Locus_4127_Transcript_1/1_Conf_1.000 | 194  | 20 | 3.11E-19  | NP_001020988.1 | 85 | 98.2117 | 63  | 54  | UNCoordinated family member (unc-89) |
| Locus_4128_Transcript_1/1_Conf_1.000 | 596  | 0  |           |                |    |         |     |     |                                      |
| Locus_4129_Transcript_1/1_Conf_1.000 | 515  | 0  |           |                |    |         |     |     |                                      |
| Locus_413_Transcript_1/4_Conf_0.250  | 113  | 0  |           |                |    |         |     |     |                                      |
| Locus_413_Transcript_2/4_Conf_0.375  | 1516 | 20 | 4.23E-101 | XP_001900801.1 | 83 | 373.244 | 242 | 202 | RNA recognition motif.               |
| Locus_413_Transcript_3/4_Conf_0.250  | 267  | 0  |           |                |    |         |     |     |                                      |
| Locus_413_Transcript_4/4_Conf_0.375  | 1488 | 20 | 1.78E-128 | NP_495121.1    | 85 | 464.151 | 314 | 267 | hypothetical protein C18A3.5         |
| Locus_4130_Transcript_1/1_Conf_1.000 | 925  | 20 | 6.58E-100 | XP_002636807.1 | 81 | 368.237 | 265 | 215 | Hypothetical protein CBG09249        |

|                                      |      |    |           |                |     |         |     |     |                                                  |
|--------------------------------------|------|----|-----------|----------------|-----|---------|-----|-----|--------------------------------------------------|
| Locus_4131_Transcript_1/1_Conf_1.000 | 649  | 20 | 2.31E-77  | CAR63584.1     | 98  | 292.352 | 148 | 146 | putative Rna polymerase ii (b) subunit protein 8 |
| Locus_4132_Transcript_1/1_Conf_1.000 | 1349 | 20 | 1.79E-100 | NP_491233.1    | 100 | 370.933 | 186 | 186 | UNCoordinated family member (unc-108)            |
| Locus_4133_Transcript_1/1_Conf_1.000 | 2373 | 9  | 4.58E-135 | XP_002639325.1 | 58  | 486.878 | 652 | 383 | Hypothetical protein CBG03903                    |
| Locus_4134_Transcript_1/5_Conf_0.636 | 1878 | 2  | 2.74E-15  | EFO25303.1     | 41  | 88.5817 | 595 | 248 | hypothetical protein LOAG_03184                  |
| Locus_4134_Transcript_2/5_Conf_0.636 | 1866 | 2  | 1.26E-12  | XP_001894872.1 | 37  | 79.7221 | 601 | 223 | hypothetical protein Bm1_17075                   |
| Locus_4134_Transcript_3/5_Conf_0.636 | 1878 | 2  | 2.74E-15  | EFO25303.1     | 41  | 88.5817 | 595 | 247 | hypothetical protein LOAG_03184                  |
| Locus_4134_Transcript_4/5_Conf_0.545 | 2051 | 2  | 4.39E-14  | EFO25303.1     | 41  | 84.7297 | 527 | 220 | hypothetical protein LOAG_03184                  |
| Locus_4134_Transcript_5/5_Conf_0.636 | 1878 | 2  | 2.74E-15  | EFO25303.1     | 41  | 88.5817 | 595 | 248 | hypothetical protein LOAG_03184                  |
| Locus_4135_Transcript_1/1_Conf_1.000 | 398  | 0  |           |                |     |         |     |     |                                                  |
| Locus_4136_Transcript_1/1_Conf_1.000 | 532  | 1  | 1.19E-04  | NP_492133.1    | 73  | 50.0618 | 38  | 28  | hypothetical protein F26A3.4                     |
| Locus_4137_Transcript_1/1_Conf_1.000 | 577  | 20 | 8.90E-50  | EFO28396.1     | 74  | 200.29  | 172 | 128 | hypothetical protein LOAG_00085                  |
| Locus_4138_Transcript_1/2_Conf_1.000 | 1010 | 20 | 2.39E-45  | XP_001866937.1 | 52  | 187.193 | 276 | 144 | scavenger receptor cysteine-rich protein         |
| Locus_4138_Transcript_2/2_Conf_1.000 | 1010 | 20 | 1.40E-45  | XP_001866937.1 | 52  | 187.963 | 276 | 144 | scavenger receptor cysteine-rich protein         |

|                                      |      |    |           |                |    |         |     |     |                                                                     |
|--------------------------------------|------|----|-----------|----------------|----|---------|-----|-----|---------------------------------------------------------------------|
| Locus_4139_Transcript_1/1_Conf_1.000 | 467  | 20 | 9.52E-61  | NP_001024141.1 | 96 | 236.113 | 152 | 146 | Germinal Center Kinase family member (gck-1)                        |
| Locus_414_Transcript_1/1_Conf_1.000  | 355  | 20 | 1.43E-16  | XP_002643168.1 | 76 | 89.3521 | 65  | 50  | Hypothetical protein CBG15349                                       |
| Locus_4140_Transcript_1/1_Conf_1.000 | 1277 | 0  |           |                |    |         |     |     |                                                                     |
| Locus_4141_Transcript_1/1_Conf_1.000 | 469  | 0  |           |                |    |         |     |     |                                                                     |
| Locus_4142_Transcript_1/2_Conf_1.000 | 652  | 4  | 5.66E-15  | XP_001902476.1 | 57 | 85.1149 | 113 | 65  | hypothetical protein Bm1_55090                                      |
| Locus_4142_Transcript_2/2_Conf_1.000 | 580  | 2  | 1.78E-05  | XP_001902476.1 | 51 | 53.1434 | 90  | 46  | hypothetical protein Bm1_55090                                      |
| Locus_4143_Transcript_1/1_Conf_1.000 | 1766 | 20 | 1.48E-124 | NP_510751.3    | 64 | 451.44  | 552 | 354 | Prion-like-(Q/N-rich)-domain-bearing protein family member (pqn-34) |
| Locus_4144_Transcript_1/1_Conf_1.000 | 292  | 20 | 3.31E-21  | AAO63577.1     | 65 | 104.76  | 82  | 54  | secreted protein 5 precursor                                        |
| Locus_4145_Transcript_1/1_Conf_1.000 | 622  | 2  | 4.69E-05  | NP_001021867.1 | 56 | 51.9878 | 71  | 40  | hypothetical protein ZK337.1                                        |
| Locus_4146_Transcript_1/1_Conf_1.000 | 1884 | 20 | 0         | XP_002646666.1 | 81 | 821.231 | 612 | 501 | Hypothetical protein CBG11104                                       |
| Locus_4147_Transcript_1/1_Conf_1.000 | 1145 | 17 | 1.89E-04  | XP_002160262.1 | 53 | 51.6026 | 65  | 35  | PREDICTED: similar to predicted protein                             |
| Locus_4148_Transcript_1/1_Conf_1.000 | 1546 | 20 | 1.25E-15  | XP_002642641.1 | 42 | 89.3521 | 211 | 90  | C. briggsae CBR-LIN-13 protein                                      |
| Locus_4149_Transcript_1/1_Conf_1.000 | 728  | 20 | 2.76E-59  | XP_002632384.1 | 78 | 232.646 | 193 | 152 | Hypothetical protein CBG00405                                       |
| Locus_415_Transcript_1/1_Conf_1.000  | 637  | 0  |           |                |    |         |     |     |                                                                     |

|                                      |      |    |           |                |    |         |      |      |                                  |
|--------------------------------------|------|----|-----------|----------------|----|---------|------|------|----------------------------------|
| Locus_4150_Transcript_1/1_Conf_1.000 | 350  | 0  |           |                |    |         |      |      |                                  |
| Locus_4151_Transcript_1/1_Conf_1.000 | 878  | 20 | 3.40E-79  | XP_002640842.1 | 65 | 299.286 | 310  | 204  | C. briggsae CBR-NHR-80 protein   |
| Locus_4152_Transcript_1/1_Conf_1.000 | 979  | 20 | 7.67E-110 | NP_001023646.1 | 88 | 401.364 | 243  | 214  | AKT kinase family member (akt-1) |
| Locus_4153_Transcript_1/5_Conf_0.308 | 1356 | 20 | 4.25E-150 | XP_001900871.1 | 75 | 535.798 | 454  | 342  | CHD4 protein                     |
| Locus_4153_Transcript_2/5_Conf_0.692 | 4354 | 20 | 0         | XP_001900871.1 | 82 | 1981.84 | 1465 | 1204 | CHD4 protein                     |

|                                      |      |    |          |                |    |         |      |      |                                                     |
|--------------------------------------|------|----|----------|----------------|----|---------|------|------|-----------------------------------------------------|
| Locus_4153_Transcript_3/5_Conf_0.692 | 4354 | 20 | 0        | XP_001900871.1 | 82 | 1981.84 | 1465 | 1204 | CHD4 protein                                        |
| Locus_4153_Transcript_4/5_Conf_0.692 | 4354 | 20 | 0        | XP_001900871.1 | 82 | 1981.84 | 1465 | 1204 | CHD4 protein                                        |
| Locus_4153_Transcript_5/5_Conf_0.692 | 4354 | 20 | 0        | XP_001900871.1 | 82 | 1981.84 | 1465 | 1204 | CHD4 protein                                        |
| Locus_4154_Transcript_1/1_Conf_1.000 | 3475 | 20 | 0        | NP_001023165.1 | 88 | 795.423 | 495  | 440  | TBC (Tre-2/Bub2/Cdc16) domain family member (tbc-3) |
| Locus_4155_Transcript_1/1_Conf_1.000 | 298  | 0  |          |                |    |         |      |      |                                                     |
| Locus_4156_Transcript_1/1_Conf_1.000 | 822  | 20 | 1.02E-34 | NP_491439.1    | 62 | 151.369 | 191  | 119  | hypothetical protein C10H11.8                       |
| Locus_4157_Transcript_1/1_Conf_1.000 | 234  | 0  |          |                |    |         |      |      |                                                     |
| Locus_4158_Transcript_1/1_Conf_1.000 | 691  | 0  |          |                |    |         |      |      |                                                     |



|                                      |      |    |           |                |    |         |     |     |                                                                |
|--------------------------------------|------|----|-----------|----------------|----|---------|-----|-----|----------------------------------------------------------------|
| Locus_4159_Transcript_1/1_Conf_1.000 | 701  | 20 | 4.23E-70  | NP_001041277.1 | 79 | 268.47  | 233 | 185 | hypothetical protein PDB1.1                                    |
| Locus_416_Transcript_1/1_Conf_1.000  | 425  | 0  |           |                |    |         |     |     |                                                                |
| Locus_4160_Transcript_1/1_Conf_1.000 | 359  | 20 | 2.25E-38  | XP_002636996.1 | 83 | 161.77  | 111 | 93  | C. briggsae CBR-SHW-3 protein                                  |
| Locus_4161_Transcript_1/1_Conf_1.000 | 655  | 20 | 6.69E-56  | P51535.1       | 84 | 221.09  | 152 | 128 | Myoglobin                                                      |
| Locus_4162_Transcript_1/1_Conf_1.000 | 593  | 20 | 7.64E-84  | EFO25040.1     | 92 | 313.538 | 181 | 168 | microsomal signal peptidase 21 kDa subunit                     |
| Locus_4163_Transcript_1/1_Conf_1.000 | 646  | 2  | 5.19E-05  | NP_796363.2    | 47 | 51.9878 | 203 | 96  | melanoma inhibitory activity protein 3 precursor               |
| Locus_4164_Transcript_1/1_Conf_1.000 | 1507 | 0  |           |                |    |         |     |     |                                                                |
| Locus_4165_Transcript_1/1_Conf_1.000 | 411  | 0  |           |                |    |         |     |     |                                                                |
| Locus_4166_Transcript_1/1_Conf_1.000 | 2739 | 20 | 0         | A8XYX2.2       | 64 | 827.009 | 891 | 574 | Cap-specific mRNA (nucleoside-2'-O-)-methyltransferase 1A      |
| Locus_4167_Transcript_1/1_Conf_1.000 | 589  | 2  | 3.45E-12  | NP_496178.1    | 46 | 75.485  | 221 | 103 | PUF (Pumilio/FBF) domain-containing family member (puf-12)     |
| Locus_4168_Transcript_1/2_Conf_1.000 | 2389 | 20 | 1.70E-129 | XP_002637508.1 | 58 | 468.389 | 781 | 456 | C. briggsae CBR-TAG-232 protein                                |
| Locus_4168_Transcript_2/2_Conf_1.000 | 2377 | 20 | 2.60E-130 | XP_002637508.1 | 58 | 471.085 | 777 | 454 | C. briggsae CBR-TAG-232 protein                                |
| Locus_4169_Transcript_1/2_Conf_1.000 | 793  | 20 | 6.44E-39  | NP_501576.2    | 76 | 165.236 | 149 | 114 | Mitochondrial Processing Peptidase Beta family member (mppb-1) |
| Locus_4169_Transcript_2/2_Conf_1.000 | 774  | 20 | 6.14E-39  | NP_501576.2    | 76 | 165.236 | 149 | 114 | Mitochondrial Processing Peptidase Beta family member (mppb-1) |
| Locus_417_Transcript_1/1_Conf_1.000  | 1205 | 20 | 2.20E-99  | XP_001902724.1 | 76 | 367.081 | 305 | 234 | TPR Domain containing protein                                  |

|                                      |      |    |          |                |     |         |     |     |                                                            |
|--------------------------------------|------|----|----------|----------------|-----|---------|-----|-----|------------------------------------------------------------|
| Locus_4170_Transcript_1/1_Conf_1.000 | 832  | 20 | 7.15E-84 | XP_002401479.1 | 74  | 314.694 | 241 | 179 | U3 snoRNP-associated protein, putative                     |
| Locus_4171_Transcript_1/1_Conf_1.000 | 621  | 20 | 4.32E-59 | XP_002630862.1 | 73  | 231.491 | 213 | 157 | C. briggsae CBR-RRT-2 protein                              |
| Locus_4172_Transcript_1/1_Conf_1.000 | 322  | 20 | 7.91E-07 | NP_506068.1    | 54  | 56.9954 | 82  | 45  | TransThyretin-Related family domain family member (ttr-22) |
| Locus_4173_Transcript_1/1_Conf_1.000 | 620  | 14 | 1.62E-13 | ACD85816.1     | 100 | 80.1073 | 38  | 38  | forkhead transcription factor DAF-16                       |
| Locus_4174_Transcript_1/2_Conf_1.000 | 1414 | 20 | 0        | XP_002642507.1 | 94  | 726.087 | 403 | 381 | C. briggsae CBR-PDHK-2 protein                             |

|                                      |      |    |           |                |    |         |     |     |                                                               |
|--------------------------------------|------|----|-----------|----------------|----|---------|-----|-----|---------------------------------------------------------------|
| Locus_4174_Transcript_2/2_Conf_1.000 | 1399 | 20 | 0         | XP_002642507.1 | 95 | 729.939 | 398 | 380 | C. briggsae CBR-PDHK-2 protein                                |
| Locus_4175_Transcript_1/1_Conf_1.000 | 230  | 0  |           |                |    |         |     |     |                                                               |
| Locus_4176_Transcript_1/1_Conf_1.000 | 1270 | 20 | 2.84E-52  | XP_002641255.1 | 76 | 210.69  | 178 | 136 | Hypothetical protein CBG05166                                 |
| Locus_4177_Transcript_1/1_Conf_1.000 | 293  | 20 | 3.79E-17  | EFO22910.1     | 63 | 91.2781 | 97  | 62  | hypothetical protein LOAG_05577                               |
| Locus_4178_Transcript_1/2_Conf_1.000 | 2636 | 20 | 5.54E-121 | NP_510291.1    | 63 | 440.269 | 472 | 301 | ADAM (disintegrin plus metalloprotease) family member (adm-2) |
| Locus_4178_Transcript_2/2_Conf_1.000 | 2636 | 20 | 9.45E-121 | NP_510291.1    | 63 | 439.499 | 472 | 301 | ADAM (disintegrin plus metalloprotease) family member (adm-2) |
| Locus_4179_Transcript_1/1_Conf_1.000 | 405  | 20 | 3.39E-26  | XP_001892616.1 | 72 | 121.324 | 129 | 93  | 60S ribosomal protein L28                                     |

|                                      |      |    |   |                |    |         |     |     |                               |
|--------------------------------------|------|----|---|----------------|----|---------|-----|-----|-------------------------------|
| Locus_418_Transcript_1/2_Conf_1.000  | 2055 | 20 | 0 | XP_002644811.1 | 95 | 858.981 | 496 | 472 | C. briggsae CBR-HSP-3 protein |
| Locus_418_Transcript_2/2_Conf_1.000  | 2186 | 20 | 0 | XP_002644811.1 | 93 | 1107.82 | 655 | 612 | C. briggsae CBR-HSP-3 protein |
| Locus_4180_Transcript_1/1_Conf_1.000 | 304  | 0  |   |                |    |         |     |     |                               |
| Locus_4181_Transcript_1/1_Conf_1.000 | 321  | 0  |   |                |    |         |     |     |                               |

|                                      |      |    |           |                |    |         |     |     |                                                                            |
|--------------------------------------|------|----|-----------|----------------|----|---------|-----|-----|----------------------------------------------------------------------------|
| Locus_4182_Transcript_1/1_Conf_1.000 | 1275 | 20 | 1.82E-115 | NP_499740.1    | 77 | 420.624 | 353 | 274 | Nuclear Pore complex Protein family member (npp-18)                        |
| Locus_4183_Transcript_1/1_Conf_1.000 | 2086 | 7  | 1.44E-20  | XP_002630547.1 | 51 | 106.301 | 285 | 147 | C. briggsae CBR-NFI-1 protein                                              |
| Locus_4184_Transcript_1/1_Conf_1.000 | 1580 | 20 | 4.46E-93  | XP_002631791.1 | 68 | 346.665 | 384 | 264 | Hypothetical protein CBG21009                                              |
| Locus_4185_Transcript_1/1_Conf_1.000 | 188  | 2  | 7.99E-07  | CBK19481.1     | 58 | 56.9954 | 77  | 45  | C. elegans protein Y105C5A.15a, partially confirmed by transcript evidence |
| Locus_4186_Transcript_1/1_Conf_1.000 | 1086 | 20 | 1.86E-38  | EFO23447.1     | 53 | 164.466 | 312 | 167 | hypothetical protein LOAG_05038                                            |
| Locus_4187_Transcript_1/1_Conf_1.000 | 821  | 20 | 2.10E-72  | NP_498410.1    | 81 | 276.559 | 207 | 168 | Temporarily Assigned Gene name family member (tag-170)                     |
| Locus_4188_Transcript_1/1_Conf_1.000 | 774  | 20 | 2.79E-108 | NP_500304.3    | 85 | 395.586 | 257 | 221 | hypothetical protein Y67D8A.1                                              |
| Locus_4189_Transcript_1/1_Conf_1.000 | 1415 | 20 | 1.95E-129 | XP_002639126.1 | 84 | 467.233 | 382 | 322 | C. briggsae CBR-CRN-1 protein                                              |
| Locus_419_Transcript_1/2_Conf_1.000  | 1432 | 20 | 3.34E-60  | CAR63574.1     | 75 | 237.269 | 233 | 176 | putative X-box Binding Protein                                             |
| Locus_419_Transcript_2/2_Conf_1.000  | 1409 | 20 | 3.77E-52  | CAR63574.1     | 81 | 168.703 | 137 | 112 | putative X-box Binding Protein                                             |
| Locus_4190_Transcript_1/1_Conf_1.000 | 509  | 20 | 6.79E-33  | XP_445145.1    | 71 | 143.665 | 136 | 97  | hypothetical protein                                                       |
| Locus_4191_Transcript_1/4_Conf_0.200 | 337  | 0  |           |                |    |         |     |     |                                                                            |
| Locus_4191_Transcript_2/4_Conf_0.500 | 811  | 0  |           |                |    |         |     |     |                                                                            |
| Locus_4191_Transcript_3/4_Conf_0.200 | 313  | 0  |           |                |    |         |     |     |                                                                            |

|                                      |      |    |           |                |    |         |     |     |                                                     |
|--------------------------------------|------|----|-----------|----------------|----|---------|-----|-----|-----------------------------------------------------|
| Locus_4191_Transcript_4/4_Conf_0.600 | 1252 | 0  |           |                |    |         |     |     |                                                     |
| Locus_4192_Transcript_1/1_Conf_1.000 | 606  | 5  | 5.34E-75  | XP_002644396.1 | 89 | 284.263 | 188 | 168 | Hypothetical protein CBG14241                       |
| Locus_4193_Transcript_1/1_Conf_1.000 | 1657 | 20 | 0         | ACT34056.1     | 94 | 991.875 | 533 | 506 | glutamate dehydrogenase                             |
| Locus_4194_Transcript_1/1_Conf_1.000 | 1111 | 20 | 3.91E-132 | XP_002639434.1 | 81 | 475.707 | 369 | 299 | Hypothetical protein CBG04027                       |
| Locus_4195_Transcript_1/1_Conf_1.000 | 289  | 11 | 2.55E-21  | NP_001023856.1 | 72 | 105.145 | 97  | 70  | hypothetical protein F26F12.3                       |
| Locus_4196_Transcript_1/1_Conf_1.000 | 1569 | 20 | 1.25E-87  | XP_002639910.1 | 57 | 328.561 | 521 | 300 | C. briggsae CBR-RBG-2 protein                       |
| Locus_4197_Transcript_1/1_Conf_1.000 | 669  | 0  |           |                |    |         |     |     |                                                     |
| Locus_4198_Transcript_1/2_Conf_1.000 | 1115 | 20 | 2.36E-52  | NP_871822.1    | 69 | 210.69  | 222 | 154 | hypothetical protein T08B2.5                        |
| Locus_4198_Transcript_2/2_Conf_1.000 | 1121 | 20 | 2.38E-52  | NP_871822.1    | 69 | 210.69  | 222 | 154 | hypothetical protein T08B2.5                        |
| Locus_4199_Transcript_1/2_Conf_1.000 | 1776 | 20 | 6.29E-115 | NP_001022054.1 | 66 | 419.468 | 468 | 311 | hypothetical protein D2085.5                        |
| Locus_4199_Transcript_2/2_Conf_1.000 | 1782 | 20 | 6.32E-115 | NP_001022054.1 | 66 | 419.468 | 468 | 311 | hypothetical protein D2085.5                        |
| Locus_42_Transcript_1/1_Conf_1.000   | 496  | 4  | 1.37E-11  | NP_496194.2    | 50 | 72.7886 | 127 | 64  | hypothetical protein F33H1.4                        |
| Locus_420_Transcript_1/1_Conf_1.000  | 1369 | 20 | 4.28E-49  | AAD31839.1     | 47 | 200.29  | 446 | 213 | AF132291_1nancylostoma-secreted protein 1 precursor |
| Locus_4200_Transcript_1/1_Conf_1.000 | 488  | 5  | 3.79E-09  | XP_002632516.1 | 56 | 64.6994 | 105 | 59  | Hypothetical protein CBG13762                       |
| Locus_4201_Transcript_1/1_Conf_1.000 | 208  | 0  |           |                |    |         |     |     |                                                     |
| Locus_4202_Transcript_1/1_Conf_1.000 | 568  | 20 | 1.95E-54  | NP_496208.2    | 80 | 215.698 | 147 | 119 | hypothetical protein T01E8.6                        |

|                                      |      |    |           |                |    |         |     |     |                                                                  |
|--------------------------------------|------|----|-----------|----------------|----|---------|-----|-----|------------------------------------------------------------------|
| Locus_4203_Transcript_1/1_Conf_1.000 | 1195 | 20 | 1.28E-99  | XP_002634113.1 | 70 | 367.851 | 331 | 235 | Hypothetical protein CBG01666                                    |
| Locus_4204_Transcript_1/1_Conf_1.000 | 354  | 0  |           |                |    |         |     |     |                                                                  |
| Locus_4205_Transcript_1/3_Conf_0.286 | 1039 | 20 | 1.74E-131 | NP_001021395.1 | 81 | 473.396 | 350 | 284 | Receptor Mediated Endocytosis family member (rme-8)              |
| Locus_4205_Transcript_2/3_Conf_0.714 | 1752 | 20 | 0         | NP_001021395.1 | 80 | 781.171 | 587 | 473 | Receptor Mediated Endocytosis family member (rme-8)              |
| Locus_4205_Transcript_3/3_Conf_0.714 | 1752 | 20 | 0         | NP_001021395.1 | 80 | 781.171 | 587 | 473 | Receptor Mediated Endocytosis family member (rme-8)              |
| Locus_4206_Transcript_1/6_Conf_0.333 | 1170 | 20 | 8.21E-19  | AAO63577.1     | 40 | 99.3673 | 359 | 146 | secreted protein 5 precursor                                     |
| Locus_4206_Transcript_2/6_Conf_0.333 | 1170 | 20 | 8.21E-19  | AAO63577.1     | 40 | 99.3673 | 356 | 145 | secreted protein 5 precursor                                     |
| Locus_4206_Transcript_3/6_Conf_0.333 | 1421 | 13 | 8.55E-08  | AAO63577.1     | 45 | 63.1586 | 180 | 82  | secreted protein 5 precursor                                     |
| Locus_4206_Transcript_4/6_Conf_0.167 | 827  | 10 | 3.69E-16  | AAO63577.1     | 41 | 89.7373 | 268 | 111 | secreted protein 5 precursor                                     |
| Locus_4206_Transcript_5/6_Conf_0.167 | 827  | 10 | 2.82E-16  | AAO63577.1     | 41 | 90.1225 | 265 | 109 | secreted protein 5 precursor                                     |
| Locus_4206_Transcript_6/6_Conf_0.333 | 1421 | 13 | 8.55E-08  | AAO63577.1     | 45 | 63.1586 | 180 | 82  | secreted protein 5 precursor                                     |
| Locus_4207_Transcript_1/1_Conf_1.000 | 603  | 0  |           |                |    |         |     |     |                                                                  |
| Locus_4208_Transcript_1/4_Conf_0.429 | 463  | 0  |           |                |    |         |     |     |                                                                  |
| Locus_4208_Transcript_2/4_Conf_0.286 | 132  | 0  |           |                |    |         |     |     |                                                                  |
| Locus_4208_Transcript_3/4_Conf_0.286 | 144  | 0  |           |                |    |         |     |     |                                                                  |
| Locus_4208_Transcript_4/4_Conf_0.429 | 469  | 0  |           |                |    |         |     |     |                                                                  |
| Locus_4209_Transcript_1/1_Conf_1.000 | 1660 | 20 | 0         | NP_498245.2    | 82 | 672.929 | 508 | 418 | related to Islet cell Diabetes Autoantigen family member (ida-1) |
| Locus_421_Transcript_1/2_Conf_1.000  | 566  | 20 | 2.34E-52  | NP_499203.1    | 79 | 208.764 | 145 | 115 | TransThyretin-Related family domain family member (ttr-2)        |
| Locus_421_Transcript_2/2_Conf_1.000  | 566  | 20 | 2.34E-52  | NP_499203.1    | 79 | 208.764 | 145 | 115 | TransThyretin-Related family domain family member (ttr-2)        |
| Locus_4210_Transcript_1/1_Conf_1.000 | 297  | 1  | 2.80E-04  | CAN78088.1     | 68 | 48.521  | 44  | 30  | hypothetical protein                                             |

|                                      |      |    |           |                |    |         |     |     |                                                       |
|--------------------------------------|------|----|-----------|----------------|----|---------|-----|-----|-------------------------------------------------------|
| Locus_4211_Transcript_1/1_Conf_1.000 | 485  | 20 | 1.80E-59  | EFO20716.1     | 82 | 231.876 | 156 | 129 | cytoplasmic polyadenylation element binding protein 3 |
| Locus_4212_Transcript_1/1_Conf_1.000 | 443  | 20 | 1.53E-50  | XP_002634002.1 | 89 | 202.216 | 146 | 131 | Hypothetical protein CBG20109                         |
| Locus_4213_Transcript_1/1_Conf_1.000 | 624  | 20 | 9.53E-22  | XP_425111.1    | 56 | 107.457 | 155 | 87  | PREDICTED: similar to FLJ11171 protein                |
| Locus_4214_Transcript_1/1_Conf_1.000 | 355  | 20 | 1.20E-31  | XP_002747045.1 | 94 | 139.428 | 75  | 71  | PREDICTED: 60S ribosomal protein L39-like             |
| Locus_4215_Transcript_1/1_Conf_1.000 | 487  | 0  |           |                |    |         |     |     |                                                       |
| Locus_4216_Transcript_1/1_Conf_1.000 | 1261 | 20 | 4.18E-64  | NP_504838.1    | 59 | 249.98  | 372 | 222 | hypothetical protein C05C8.5                          |
| Locus_4217_Transcript_1/1_Conf_1.000 | 692  | 0  |           |                |    |         |     |     |                                                       |
| Locus_4218_Transcript_1/2_Conf_1.000 | 1597 | 20 | 4.99E-100 | XP_002631038.1 | 64 | 369.777 | 367 | 236 | C. briggsae CBR-ZYX-1 protein                         |
| Locus_4218_Transcript_2/2_Conf_1.000 | 1228 | 20 | 5.26E-80  | NP_496776.1    | 82 | 302.753 | 193 | 160 | ZYXin family member (zyx-1)                           |
| Locus_4219_Transcript_1/1_Conf_1.000 | 445  | 2  | 5.29E-11  | XP_002632166.1 | 71 | 70.8626 | 67  | 48  | Hypothetical protein CBG07025                         |



|                                      |      |    |           |                |    |         |     |     |                                                          |
|--------------------------------------|------|----|-----------|----------------|----|---------|-----|-----|----------------------------------------------------------|
| Locus_422_Transcript_1/1_Conf_1.000  | 797  | 20 | 9.28E-70  | NP_491066.1    | 95 | 267.7   | 142 | 135 | ARp2/3 complex component family member (arx-1)           |
| Locus_4220_Transcript_1/1_Conf_1.000 | 536  | 2  | 3.67E-06  | EFO23913.1     | 56 | 55.0694 | 60  | 34  | hypothetical protein LOAG_04573                          |
| Locus_4221_Transcript_1/1_Conf_1.000 | 257  | 7  | 2.31E-14  | XP_001893855.1 | 70 | 82.0333 | 85  | 60  | Viral A-type inclusion protein repeat containing protein |
| Locus_4222_Transcript_1/1_Conf_1.000 | 1702 | 20 | 1.24E-144 | NP_500183.2    | 70 | 518.079 | 493 | 346 | hypothetical protein M70.4                               |
| Locus_4223_Transcript_1/1_Conf_1.000 | 1305 | 20 | 2.15E-119 | NP_492553.1    | 70 | 433.721 | 440 | 312 | hypothetical protein T05F1.1                             |
| Locus_4224_Transcript_1/1_Conf_1.000 | 187  | 0  |           |                |    |         |     |     |                                                          |
| Locus_4225_Transcript_1/1_Conf_1.000 | 1420 | 20 | 5.45E-63  | XP_001899135.1 | 71 | 246.514 | 220 | 158 | chromosome 6 open reading frame 106, isoform a           |
| Locus_4226_Transcript_1/1_Conf_1.000 | 533  | 20 | 1.09E-66  | XP_002639843.1 | 84 | 256.144 | 176 | 149 | C. briggsae CBR-DHC-1 protein                            |
| Locus_4227_Transcript_1/2_Conf_1.000 | 963  | 20 | 3.52E-51  | NP_506110.1    | 61 | 206.453 | 261 | 160 | CaDmium Responsive family member (cdr-4)                 |
| Locus_4227_Transcript_2/2_Conf_1.000 | 963  | 20 | 1.13E-49  | NP_506110.1    | 60 | 201.445 | 261 | 158 | CaDmium Responsive family member (cdr-4)                 |

|                                      |      |    |           |                |    |         |     |     |                                                                         |
|--------------------------------------|------|----|-----------|----------------|----|---------|-----|-----|-------------------------------------------------------------------------|
| Locus_4228_Transcript_1/1_Conf_1.000 | 1106 | 20 | 0         | NP_001021838.1 | 91 | 650.203 | 368 | 338 | Glucose-6-Phosphate Isomerase family member (gpi-1)                     |
| Locus_4229_Transcript_1/1_Conf_1.000 | 1255 | 0  |           |                |    |         |     |     |                                                                         |
| Locus_423_Transcript_1/1_Conf_1.000  | 418  | 0  |           |                |    |         |     |     |                                                                         |
| Locus_4230_Transcript_1/1_Conf_1.000 | 130  | 0  |           |                |    |         |     |     |                                                                         |
| Locus_4231_Transcript_1/1_Conf_1.000 | 304  | 20 | 7.29E-13  | XP_002575537.1 | 71 | 77.0258 | 78  | 56  | hypothetical protein                                                    |
| Locus_4232_Transcript_1/3_Conf_0.571 | 1012 | 11 | 6.12E-49  | NP_499235.1    | 57 | 199.134 | 348 | 199 | hypothetical protein T16G12.6                                           |
| Locus_4232_Transcript_2/3_Conf_0.286 | 1852 | 20 | 1.02E-123 | XP_002641591.1 | 63 | 448.743 | 601 | 380 | Hypothetical protein CBG09895                                           |
| Locus_4232_Transcript_3/3_Conf_0.571 | 1012 | 12 | 4.69E-49  | NP_499235.1    | 57 | 199.519 | 348 | 200 | hypothetical protein T16G12.6                                           |
| Locus_4233_Transcript_1/1_Conf_1.000 | 1028 | 20 | 3.64E-81  | CBX25214.1     | 72 | 306.22  | 332 | 242 | Hypothetical protein ZK593.5c                                           |
| Locus_4234_Transcript_1/1_Conf_1.000 | 706  | 9  | 3.95E-92  | XP_002644423.1 | 84 | 341.658 | 201 | 170 | C. briggsae CBR-TAG-18 protein                                          |
| Locus_4235_Transcript_1/1_Conf_1.000 | 1614 | 20 | 9.71E-160 | XP_002638502.1 | 70 | 568.155 | 512 | 361 | C. briggsae CBR-FRE-1 protein                                           |
| Locus_4236_Transcript_1/1_Conf_1.000 | 2423 | 20 | 0         | NP_001122827.1 | 68 | 723.776 | 809 | 558 | Suppressor with Morphological effect on Genitalia family member (smg-3) |

|                                      |      |    |           |             |    |         |     |     |                                                                                                                                                                                                      |
|--------------------------------------|------|----|-----------|-------------|----|---------|-----|-----|------------------------------------------------------------------------------------------------------------------------------------------------------------------------------------------------------|
| Locus_4237_Transcript_1/1_Conf_1.000 | 1360 | 20 | 2.66E-160 | NP_498119.1 | 86 | 569.696 | 390 | 336 | Gro-1 OPeron gene family member (gop-3)                                                                                                                                                              |
| Locus_4238_Transcript_1/1_Conf_1.000 | 902  | 0  |           |             |    |         |     |     |                                                                                                                                                                                                      |
| Locus_4239_Transcript_1/1_Conf_1.000 | 894  | 20 | 1.59E-63  | XP_395319.2 | 74 | 247.284 | 219 | 164 | PREDICTED: similar to Peroxiredoxin-6 (Antioxidant protein 2) (1-Cys peroxiredoxin) (1-Cys PRX) (Acidic calcium-independent phospholipase A2) (aiPLA2) (Non-selenium glutathione peroxidase) (NSGPx) |
| Locus_424_Transcript_1/4_Conf_0.500  | 407  | 0  |           |             |    |         |     |     |                                                                                                                                                                                                      |
| Locus_424_Transcript_2/4_Conf_0.625  | 350  | 0  |           |             |    |         |     |     |                                                                                                                                                                                                      |
| Locus_424_Transcript_3/4_Conf_0.375  | 816  | 20 | 4.41E-14  | XP_785187.1 | 55 | 82.8037 | 127 | 70  | PREDICTED: similar to polymerase (DNA directed), epsilon 3 (p17 subunit)                                                                                                                             |
| Locus_424_Transcript_4/4_Conf_0.625  | 425  | 0  |           |             |    |         |     |     |                                                                                                                                                                                                      |
| Locus_4240_Transcript_1/1_Conf_1.000 | 291  | 20 | 1.25E-36  | NP_495614.3 | 89 | 155.992 | 96  | 86  | Na/H eXchanger family member (nhx-2)                                                                                                                                                                 |
| Locus_4241_Transcript_1/1_Conf_1.000 | 542  | 20 | 8.68E-51  | AAF71303.1  | 70 | 203.371 | 182 | 129 | AF229855_1dual oxidase                                                                                                                                                                               |
| Locus_4242_Transcript_1/1_Conf_1.000 | 176  | 0  |           |             |    |         |     |     |                                                                                                                                                                                                      |
| Locus_4243_Transcript_1/1_Conf_1.000 | 606  | 20 | 1.06E-14  | NP_505017.1 | 42 | 83.9593 | 228 | 96  | PaPiliIN (Drosophila ECM protein) homolog family member (ppn-1)                                                                                                                                      |
| Locus_4244_Transcript_1/1_Conf_1.000 | 1191 | 20 | 2.95E-72  | NP_510428.1 | 67 | 276.944 | 316 | 212 | TAK1 kinase/MOM-4 binding Protein family member (tap-1)                                                                                                                                              |
| Locus_4245_Transcript_1/1_Conf_1.000 | 713  | 0  |           |             |    |         |     |     |                                                                                                                                                                                                      |

|                                      |      |    |          |                |     |         |     |     |                                                             |
|--------------------------------------|------|----|----------|----------------|-----|---------|-----|-----|-------------------------------------------------------------|
| Locus_4246_Transcript_1/1_Conf_1.000 | 625  | 20 | 1.86E-25 | NP_001040951.1 | 100 | 119.783 | 56  | 56  | MiniBrain Kinase (Drosophila) homolog family member (mbk-2) |
| Locus_4247_Transcript_1/1_Conf_1.000 | 216  | 20 | 1.55E-31 | XP_002631133.1 | 100 | 139.043 | 71  | 71  | C. briggsae CBR-CLH-2 protein                               |
| Locus_4248_Transcript_1/1_Conf_1.000 | 1398 | 20 | 3.58E-59 |                | 58  | 233.802 | 407 | 239 | hypothetical protein C56G2.7                                |
| Locus_4249_Transcript_1/1_Conf_1.000 | 726  | 20 | 8.53E-85 | XP_002632404.1 | 81  | 317.39  | 241 | 196 | Hypothetical protein CBG00428                               |
| Locus_425_Transcript_1/1_Conf_1.000  | 2507 | 20 | 0        | XP_002633774.1 | 81  | 874.774 | 648 | 528 | Hypothetical protein CBG03464                               |
| Locus_4250_Transcript_1/1_Conf_1.000 | 470  | 2  | 6.03E-07 | NP_499181.1    | 76  | 57.3806 | 52  | 40  | hypothetical protein ZK632.10                               |
| Locus_4251_Transcript_1/1_Conf_1.000 | 405  | 0  |          |                |     |         |     |     |                                                             |
| Locus_4252_Transcript_1/1_Conf_1.000 | 1069 | 20 | 5.11E-33 | NP_495126.1    | 56  | 146.362 | 237 | 133 | hypothetical protein C18A3.2                                |
| Locus_4253_Transcript_1/1_Conf_1.000 | 919  | 20 | 1.23E-90 | NP_505623.1    | 92  | 337.421 | 195 | 180 | hypothetical protein ZK856.8                                |
| Locus_4254_Transcript_1/1_Conf_1.000 | 191  | 20 | 1.11E-08 | XP_792833.1    | 71  | 63.1586 | 53  | 38  | PREDICTED: hypothetical protein                             |

|                                      |      |    |          |                |     |         |     |     |                                                     |
|--------------------------------------|------|----|----------|----------------|-----|---------|-----|-----|-----------------------------------------------------|
| Locus_4255_Transcript_1/1_Conf_1.000 | 355  | 20 | 6.83E-27 | NP_508504.2    | 76  | 123.635 | 117 | 89  | Non-muscle MYosin family member (nmy-1)             |
| Locus_4256_Transcript_1/3_Conf_0.333 | 337  | 0  |          |                |     |         |     |     |                                                     |
| Locus_4256_Transcript_2/3_Conf_0.667 | 807  | 0  |          |                |     |         |     |     |                                                     |
| Locus_4256_Transcript_3/3_Conf_0.667 | 807  | 0  |          |                |     |         |     |     |                                                     |
| Locus_4257_Transcript_1/1_Conf_1.000 | 504  | 4  | 3.19E-27 | NP_495156.1    | 74  | 124.79  | 100 | 74  | TBC (Tre-2/Bub2/Cdc16) domain family member (tbc-2) |
| Locus_4258_Transcript_1/1_Conf_1.000 | 143  | 0  |          |                |     |         |     |     |                                                     |
| Locus_4259_Transcript_1/1_Conf_1.000 | 278  | 20 | 2.84E-33 | AAH36203.2     | 100 | 144.821 | 91  | 91  | TMBIM6 protein                                      |
| Locus_426_Transcript_1/1_Conf_1.000  | 3238 | 20 | 0        | NP_001021793.1 | 68  | 676.011 | 664 | 455 | Vasa- and Belle-like Helicase family member (vbh-1) |
| Locus_4260_Transcript_1/1_Conf_1.000 | 589  | 0  |          |                |     |         |     |     |                                                     |
| Locus_4261_Transcript_1/1_Conf_1.000 | 1242 | 20 | 8.87E-67 | NP_492185.2    | 66  | 258.84  | 333 | 222 | SMG-associated and Lethal family member (smgl-1)    |

|                                      |      |    |           |                |     |         |     |     |                                                                                                       |
|--------------------------------------|------|----|-----------|----------------|-----|---------|-----|-----|-------------------------------------------------------------------------------------------------------|
| Locus_4262_Transcript_1/2_Conf_1.000 | 1280 | 20 | 1.18E-130 | AAV38311.1     | 100 | 471.085 | 229 | 229 | CD74 antigen (invariant polypeptide of major histocompatibility complex, class II antigen-associated) |
| Locus_4262_Transcript_2/2_Conf_1.000 | 814  | 20 | 4.65E-40  | XP_001166356.1 | 100 | 169.088 | 74  | 74  | PREDICTED: CD74 antigen isoform 17                                                                    |
| Locus_4263_Transcript_1/1_Conf_1.000 | 1159 | 20 | 1.13E-12  | XP_001898172.1 | 62  | 78.9518 | 112 | 70  | hypothetical protein Bm1_33625                                                                        |

|                                      |     |    |          |                |     |         |     |     |                                            |
|--------------------------------------|-----|----|----------|----------------|-----|---------|-----|-----|--------------------------------------------|
| Locus_4264_Transcript_1/1_Conf_1.000 | 430 | 20 | 1.12E-29 | EAW99547.1     | 100 | 132.88  | 66  | 66  | thymosin, beta 10, isoform CRA_a           |
| Locus_4265_Transcript_1/1_Conf_1.000 | 939 | 0  |          |                |     |         |     |     |                                            |
| Locus_4266_Transcript_1/1_Conf_1.000 | 897 | 20 | 1.68E-12 | XP_002636474.1 | 56  | 77.7962 | 143 | 81  | C. briggsae CBR-IMA-1 protein              |
| Locus_4267_Transcript_1/3_Conf_0.714 | 980 | 20 | 1.72E-77 | XP_002432576.1 | 79  | 293.893 | 240 | 190 | COP9 signalosome complex subunit, putative |
| Locus_4267_Transcript_2/3_Conf_0.714 | 980 | 20 | 1.32E-77 | XP_002432576.1 | 79  | 294.278 | 240 | 190 | COP9 signalosome complex subunit, putative |
| Locus_4267_Transcript_3/3_Conf_0.714 | 980 | 20 | 1.32E-77 | XP_002432576.1 | 79  | 294.278 | 240 | 190 | COP9 signalosome complex subunit, putative |
| Locus_4268_Transcript_1/1_Conf_1.000 | 518 | 20 | 4.55E-64 | EFO16320.1     | 81  | 247.284 | 172 | 140 | hypothetical protein LOAG_12187            |
| Locus_4269_Transcript_1/2_Conf_1.000 | 445 | 20 | 6.65E-30 | XP_001892499.1 | 85  | 133.65  | 131 | 112 | hypothetical protein                       |

|                                      |      |    |          |                |    |         |     |     |                                 |
|--------------------------------------|------|----|----------|----------------|----|---------|-----|-----|---------------------------------|
| Locus_4269_Transcript_2/2_Conf_1.000 | 445  | 20 | 6.65E-30 | XP_001892499.1 | 85 | 133.65  | 131 | 112 | hypothetical protein            |
| Locus_427_Transcript_1/6_Conf_0.154  | 167  | 0  |          |                |    |         |     |     |                                 |
| Locus_427_Transcript_2/6_Conf_0.308  | 1641 | 14 | 7.42E-14 | EFO27228.1     | 43 | 83.5741 | 264 | 114 | hypothetical protein LOAG_01257 |
| Locus_427_Transcript_3/6_Conf_0.538  | 1864 | 20 | 1.75E-22 | XP_002632234.1 | 76 | 112.464 | 142 | 109 | C. briggsae CBR-VIG-1 protein   |
| Locus_427_Transcript_4/6_Conf_0.538  | 1840 | 5  | 9.78E-18 | XP_002632234.1 | 75 | 96.6709 | 134 | 101 | C. briggsae CBR-VIG-1 protein   |
| Locus_427_Transcript_5/6_Conf_0.154  | 970  | 14 | 1.32E-13 | EFO27228.1     | 43 | 81.6481 | 240 | 105 | hypothetical protein LOAG_01257 |
| Locus_427_Transcript_6/6_Conf_0.538  | 1855 | 20 | 1.74E-22 | XP_002632234.1 | 76 | 112.464 | 142 | 109 | C. briggsae CBR-VIG-1 protein   |
| Locus_4270_Transcript_1/1_Conf_1.000 | 370  | 15 | 1.11E-16 | XP_002631239.1 | 86 | 89.7373 | 53  | 46  | C. briggsae CBR-LACT-3 protein  |
| Locus_4271_Transcript_1/2_Conf_1.000 | 1940 | 19 | 8.22E-23 | NP_871687.1    | 46 | 113.62  | 577 | 269 | hypothetical protein R148.3     |
| Locus_4271_Transcript_2/2_Conf_1.000 | 1928 | 19 | 1.39E-22 | NP_871687.1    | 44 | 112.849 | 575 | 258 | hypothetical protein R148.3     |



|                                      |      |    |           |            |    |         |     |     |                      |
|--------------------------------------|------|----|-----------|------------|----|---------|-----|-----|----------------------|
| Locus_4272_Transcript_1/2_Conf_1.000 | 1247 | 20 | 8.51E-110 | CAR63699.1 | 82 | 401.749 | 292 | 241 | hypothetical protein |
| Locus_4272_Transcript_2/2_Conf_1.000 | 1229 | 20 | 8.89E-112 | CAR63699.1 | 84 | 408.297 | 286 | 241 | hypothetical protein |
| Locus_4273_Transcript_1/2_Conf_1.000 | 1198 | 20 | 3.58E-126 | CAR63589.1 | 97 | 456.062 | 236 | 231 | hypothetical protein |
| Locus_4273_Transcript_2/2_Conf_1.000 | 273  | 0  |           |            |    |         |     |     |                      |

|                                      |      |    |          |                |    |         |     |     |                                                                     |
|--------------------------------------|------|----|----------|----------------|----|---------|-----|-----|---------------------------------------------------------------------|
| Locus_4274_Transcript_1/1_Conf_1.000 | 1122 | 20 | 1.67E-21 | XP_788324.1    | 45 | 108.227 | 340 | 156 | PREDICTED: hypothetical protein                                     |
| Locus_4275_Transcript_1/1_Conf_1.000 | 1864 | 20 | 1.13E-37 | XP_001892946.1 | 46 | 162.925 | 504 | 232 | Leucine Rich Repeat family protein                                  |
| Locus_4276_Transcript_1/1_Conf_1.000 | 476  | 20 | 2.18E-25 | NP_504518.3    | 80 | 118.627 | 98  | 79  | Nuclear Hormone Receptor family member (nhr-142)                    |
| Locus_4277_Transcript_1/4_Conf_0.375 | 846  | 20 | 1.11E-63 | NP_493601.2    | 64 | 247.669 | 275 | 177 | FERM domain (protein4.1-ezrin-radixin-moesin) family member (frm-1) |
| Locus_4277_Transcript_2/4_Conf_0.500 | 902  | 20 | 1.37E-62 | XP_002640640.1 | 75 | 244.202 | 211 | 159 | C. briggsae CBR-FRM-1 protein                                       |
| Locus_4277_Transcript_3/4_Conf_0.500 | 410  | 1  | 2.05E-15 | NP_493601.2    | 75 | 85.5001 | 70  | 53  | FERM domain (protein4.1-ezrin-radixin-moesin) family member (frm-1) |

|                                      |     |    |           |                |    |         |     |     |                                            |
|--------------------------------------|-----|----|-----------|----------------|----|---------|-----|-----|--------------------------------------------|
| Locus_4277_Transcript_4/4_Conf_0.500 | 825 | 20 | 1.17E-62  | XP_002640640.1 | 75 | 244.202 | 211 | 159 | C. briggsae CBR-FRM-1 protein              |
| Locus_4278_Transcript_1/1_Conf_1.000 | 198 | 5  | 8.70E-14  | NP_504318.2    | 68 | 80.1073 | 58  | 40  | hypothetical protein H23N18.5              |
| Locus_4279_Transcript_1/1_Conf_1.000 | 397 | 20 | 2.13E-60  | NP_504700.2    | 94 | 234.958 | 132 | 125 | hypothetical protein W02F12.5              |
| Locus_428_Transcript_1/1_Conf_1.000  | 980 | 20 | 2.30E-114 | ACZ13335.1     | 89 | 416.387 | 281 | 252 | 60S ribosomal protein L5                   |
| Locus_4280_Transcript_1/1_Conf_1.000 | 191 | 2  | 7.45E-05  | NP_491893.1    | 62 | 50.447  | 62  | 39  | BAG1 (human) homolog family member (bag-1) |
| Locus_4281_Transcript_1/1_Conf_1.000 | 515 | 20 | 4.64E-29  | NP_503100.1    | 63 | 130.954 | 155 | 99  | hypothetical protein C30H6.7               |
| Locus_4282_Transcript_1/2_Conf_1.000 | 690 | 0  |           |                |    |         |     |     |                                            |
| Locus_4282_Transcript_2/2_Conf_1.000 | 690 | 0  |           |                |    |         |     |     |                                            |
| Locus_4283_Transcript_1/1_Conf_1.000 | 264 | 0  |           |                |    |         |     |     |                                            |
| Locus_4284_Transcript_1/1_Conf_1.000 | 294 | 0  |           |                |    |         |     |     |                                            |

|                                      |      |    |           |                |    |         |     |     |                                                                         |
|--------------------------------------|------|----|-----------|----------------|----|---------|-----|-----|-------------------------------------------------------------------------|
| Locus_4285_Transcript_1/1_Conf_1.000 | 357  | 20 | 2.92E-62  | NP_490960.1    | 97 | 241.121 | 119 | 116 | hypothetical protein Y39G10AR.8                                         |
| Locus_4286_Transcript_1/1_Conf_1.000 | 471  | 20 | 3.86E-38  | XP_002641188.1 | 75 | 160.999 | 146 | 110 | Hypothetical protein CBG09049                                           |
| Locus_4287_Transcript_1/1_Conf_1.000 | 561  | 0  |           |                |    |         |     |     |                                                                         |
| Locus_4288_Transcript_1/1_Conf_1.000 | 253  | 20 | 1.31E-33  | NP_507688.2    | 90 | 145.976 | 84  | 76  | Cytochrome P450 family member (cyp-42A1)                                |
| Locus_4289_Transcript_1/5_Conf_0.300 | 510  | 20 | 1.84E-30  | NP_499604.1    | 68 | 135.576 | 142 | 97  | hypothetical protein Y75B8A.31                                          |
| Locus_4289_Transcript_2/5_Conf_0.600 | 1031 | 20 | 1.83E-48  | NP_499604.1    | 58 | 197.593 | 298 | 174 | hypothetical protein Y75B8A.31                                          |
| Locus_4289_Transcript_3/5_Conf_0.400 | 600  | 6  | 3.31E-13  | NP_499604.1    | 54 | 78.9518 | 142 | 77  | hypothetical protein Y75B8A.31                                          |
| Locus_4289_Transcript_4/5_Conf_0.600 | 1076 | 20 | 1.76E-49  | NP_499604.1    | 58 | 201.06  | 298 | 175 | hypothetical protein Y75B8A.31                                          |
| Locus_4289_Transcript_5/5_Conf_0.600 | 1076 | 20 | 1.76E-49  | NP_499604.1    | 58 | 201.06  | 298 | 175 | hypothetical protein Y75B8A.31                                          |
| Locus_429_Transcript_1/1_Conf_1.000  | 1378 | 20 | 5.63E-174 | XP_002645934.1 | 78 | 615.15  | 460 | 363 | Hypothetical protein CBG07699                                           |
| Locus_4290_Transcript_1/2_Conf_1.000 | 1241 | 20 | 1.45E-77  | NP_001040885.1 | 61 | 294.664 | 414 | 255 | Suppressor with Morphological effect on Genitalia family member (smg-6) |
| Locus_4290_Transcript_2/2_Conf_1.000 | 775  | 20 | 7.75E-42  | NP_001040885.1 | 61 | 174.866 | 251 | 155 | Suppressor with Morphological effect on Genitalia family member (smg-6) |
| Locus_4291_Transcript_1/1_Conf_1.000 | 1511 | 0  |           |                |    |         |     |     |                                                                         |
| Locus_4292_Transcript_1/7_Conf_0.667 | 2675 | 20 | 0         | NP_001122864.1 | 81 | 908.286 | 680 | 554 | hypothetical protein C27A7.5                                            |
| Locus_4292_Transcript_2/7_Conf_0.667 | 2675 | 20 | 0         | NP_001122864.1 | 81 | 908.286 | 680 | 554 | hypothetical protein C27A7.5                                            |

|                                      |      |    |           |                |    |         |     |     |                                              |
|--------------------------------------|------|----|-----------|----------------|----|---------|-----|-----|----------------------------------------------|
| Locus_4292_Transcript_3/7_Conf_0.667 | 2675 | 20 | 0         | NP_001122864.1 | 81 | 908.286 | 680 | 554 | hypothetical protein C27A7.5                 |
| Locus_4292_Transcript_4/7_Conf_0.667 | 2675 | 20 | 0         | NP_001122864.1 | 81 | 908.672 | 680 | 555 | hypothetical protein C27A7.5                 |
| Locus_4292_Transcript_5/7_Conf_0.667 | 2675 | 20 | 0         | NP_001122864.1 | 81 | 908.286 | 680 | 554 | hypothetical protein C27A7.5                 |
| Locus_4292_Transcript_6/7_Conf_0.667 | 2610 | 20 | 0         | NP_001122863.1 | 82 | 889.797 | 654 | 538 | hypothetical protein C27A7.5                 |
| Locus_4292_Transcript_7/7_Conf_0.667 | 2675 | 20 | 0         | NP_001122864.1 | 81 | 908.286 | 680 | 554 | hypothetical protein C27A7.5                 |
| Locus_4293_Transcript_1/1_Conf_1.000 | 1647 | 20 | 0         | NP_498263.2    | 93 | 719.924 | 430 | 404 | ALdehyde deHydrogenase family member (alh-9) |
| Locus_4294_Transcript_1/1_Conf_1.000 | 398  | 20 | 1.25E-44  | XP_002643084.1 | 78 | 182.57  | 127 | 100 | C. briggsae CBR-TAG-174 protein              |
| Locus_4295_Transcript_1/1_Conf_1.000 | 956  | 9  | 1.99E-06  | AAO63577.1     | 42 | 57.7658 | 195 | 82  | secreted protein 5 precursor                 |
| Locus_4296_Transcript_1/1_Conf_1.000 | 1356 | 20 | 3.08E-108 | XP_002637346.1 | 83 | 396.741 | 274 | 229 | Hypothetical protein CBG19044                |
| Locus_4297_Transcript_1/1_Conf_1.000 | 1370 | 6  | 7.83E-43  | NP_502427.1    | 60 | 179.489 | 271 | 164 | hypothetical protein C27D8.2                 |
| Locus_4298_Transcript_1/1_Conf_1.000 | 477  | 0  |           |                |    |         |     |     |                                              |
| Locus_4299_Transcript_1/1_Conf_1.000 | 720  | 1  | 1.12E-04  | XP_002648956.1 | 56 | 51.2174 | 67  | 38  | Hypothetical protein CBG21271                |
| Locus_43_Transcript_1/1_Conf_1.000   | 1853 | 20 | 2.61E-119 | NP_493252.3    | 55 | 434.106 | 685 | 381 | PAtternng Defective family member (pad-1)    |
| Locus_430_Transcript_1/2_Conf_1.000  | 381  | 0  |           |                |    |         |     |     |                                              |
| Locus_430_Transcript_2/2_Conf_1.000  | 348  | 0  |           |                |    |         |     |     |                                              |

|                                      |      |    |           |                |    |         |     |     |                                                                                        |
|--------------------------------------|------|----|-----------|----------------|----|---------|-----|-----|----------------------------------------------------------------------------------------|
| Locus_4300_Transcript_1/1_Conf_1.000 | 305  | 20 | 7.51E-26  | XP_001524092.1 | 74 | 120.168 | 100 | 74  | alanyl-tRNA synthetase                                                                 |
| Locus_4301_Transcript_1/1_Conf_1.000 | 136  | 0  |           |                |    |         |     |     |                                                                                        |
| Locus_4302_Transcript_1/1_Conf_1.000 | 2312 | 20 | 5.52E-61  | NP_491143.2    | 51 | 240.736 | 479 | 248 | hypothetical protein Y44E3A.4                                                          |
| Locus_4303_Transcript_1/2_Conf_1.000 | 1213 | 9  | 1.02E-19  | XP_001895343.1 | 50 | 102.449 | 253 | 127 | hypothetical protein Bm1_19440                                                         |
| Locus_4303_Transcript_2/2_Conf_1.000 | 1213 | 9  | 1.02E-19  | XP_001895343.1 | 50 | 102.449 | 253 | 127 | hypothetical protein Bm1_19440                                                         |
| Locus_4304_Transcript_1/1_Conf_1.000 | 1749 | 20 | 0         | NP_001021458.1 | 93 | 930.628 | 539 | 503 | Transbilayer Amphipath Transporters (subfamily IV P-type ATPase) family member (tat-5) |
| Locus_4305_Transcript_1/3_Conf_0.714 | 1881 | 20 | 0         | XP_002638911.1 | 72 | 645.966 | 561 | 409 | C. briggsae CBR-MAB-20 protein                                                         |
| Locus_4305_Transcript_2/3_Conf_0.714 | 1881 | 20 | 0         | XP_002638911.1 | 72 | 644.04  | 561 | 408 | C. briggsae CBR-MAB-20 protein                                                         |
| Locus_4305_Transcript_3/3_Conf_0.714 | 1881 | 20 | 0         | XP_002638911.1 | 72 | 644.425 | 561 | 408 | C. briggsae CBR-MAB-20 protein                                                         |
| Locus_4306_Transcript_1/1_Conf_1.000 | 332  | 0  |           |                |    |         |     |     |                                                                                        |
| Locus_4307_Transcript_1/1_Conf_1.000 | 1227 | 20 | 5.33E-149 | NP_001041048.1 | 81 | 531.946 | 372 | 305 | EPS (human endocytosis) related family member (eps-8)                                  |
| Locus_4308_Transcript_1/1_Conf_1.000 | 1206 | 20 | 4.25E-34  | XP_002643647.1 | 63 | 150.214 | 182 | 115 | Hypothetical protein CBG16396                                                          |
| Locus_4309_Transcript_1/1_Conf_1.000 | 349  | 20 | 5.06E-54  | AAC08964.1     | 91 | 213.772 | 116 | 106 | breakpoint cluster region protein 1                                                    |
| Locus_431_Transcript_1/1_Conf_1.000  | 1309 | 20 | 9.52E-176 | XP_002635624.1 | 92 | 620.928 | 363 | 334 | Hypothetical protein CBG21817                                                          |
| Locus_4310_Transcript_1/1_Conf_1.000 | 599  | 7  | 5.39E-08  | XP_001902780.1 | 70 | 61.6178 | 82  | 58  | Hypothetical RING finger protein C16C10.7 in chromosome III, putative                  |

|                                      |      |    |          |                |     |         |     |     |                                              |
|--------------------------------------|------|----|----------|----------------|-----|---------|-----|-----|----------------------------------------------|
| Locus_4311_Transcript_1/1_Conf_1.000 | 797  | 20 | 5.11E-60 | XP_002637270.1 | 75  | 235.343 | 218 | 165 | C. briggsae CBR-UBH-3 protein                |
| Locus_4312_Transcript_1/1_Conf_1.000 | 452  | 20 | 7.86E-23 | AAO63577.1     | 62  | 73.9442 | 69  | 43  | secreted protein 5 precursor                 |
| Locus_4313_Transcript_1/1_Conf_1.000 | 610  | 2  | 2.03E-05 | XP_002644841.1 | 52  | 53.1434 | 123 | 65  | C. briggsae CBR-HSP-43 protein               |
| Locus_4314_Transcript_1/1_Conf_1.000 | 339  | 2  | 1.89E-37 | EAW57511.1     | 100 | 158.688 | 74  | 74  | selenoprotein W, 1                           |
| Locus_4315_Transcript_1/1_Conf_1.000 | 154  | 0  |          |                |     |         |     |     |                                              |
| Locus_4316_Transcript_1/1_Conf_1.000 | 202  | 20 | 2.35E-19 | XP_002798881.1 | 100 | 98.5969 | 49  | 49  | PREDICTED: hypothetical protein LOC100426778 |
| Locus_4317_Transcript_1/1_Conf_1.000 | 578  | 20 | 4.59E-30 | XP_002641501.1 | 77  | 134.806 | 105 | 81  | Hypothetical protein CBG09795                |
| Locus_4318_Transcript_1/1_Conf_1.000 | 944  | 9  | 1.66E-21 | EFO25158.1     | 49  | 107.842 | 321 | 159 | hypothetical protein LOAG_03331              |
| Locus_4319_Transcript_1/1_Conf_1.000 | 255  | 0  |          |                |     |         |     |     |                                              |
| Locus_432_Transcript_1/1_Conf_1.000  | 1133 | 20 | 3.27E-49 | XP_002641402.1 | 62  | 200.29  | 235 | 147 | Hypothetical protein CBG13264                |
| Locus_4320_Transcript_1/1_Conf_1.000 | 821  | 20 | 6.10E-72 | AAF66614.1     | 71  | 275.018 | 260 | 187 | AF142441_1H+/oligopeptide symporter OPT-3    |
| Locus_4321_Transcript_1/1_Conf_1.000 | 625  | 0  |          |                |     |         |     |     |                                              |
| Locus_4322_Transcript_1/1_Conf_1.000 | 800  | 20 | 2.31E-60 | NP_491318.2    | 83  | 236.498 | 158 | 132 | hypothetical protein R12E2.12                |
| Locus_4323_Transcript_1/1_Conf_1.000 | 141  | 0  |          |                |     |         |     |     |                                              |

|                                      |      |    |           |                |    |         |     |     |                                           |
|--------------------------------------|------|----|-----------|----------------|----|---------|-----|-----|-------------------------------------------|
| Locus_4324_Transcript_1/1_Conf_1.000 | 137  | 20 | 5.56E-13  | CAB40412.1     | 95 | 77.411  | 43  | 41  | hexokinase                                |
| Locus_4325_Transcript_1/1_Conf_1.000 | 1142 | 20 | 8.17E-08  | XP_002740738.1 | 44 | 62.7734 | 157 | 70  | PREDICTED: mannose receptor C type 1-like |
| Locus_4326_Transcript_1/4_Conf_0.500 | 946  | 20 | 5.64E-78  | XP_002631434.1 | 65 | 295.434 | 313 | 206 | Hypothetical protein CBG03294             |
| Locus_4326_Transcript_2/4_Conf_0.600 | 1715 | 20 | 1.74E-146 | XP_002631434.1 | 68 | 524.242 | 504 | 346 | Hypothetical protein CBG03294             |
| Locus_4326_Transcript_3/4_Conf_0.200 | 812  | 20 | 2.25E-95  | XP_002631434.1 | 78 | 352.829 | 250 | 196 | Hypothetical protein CBG03294             |



|                                      |      |    |           |                |    |         |     |     |                                 |
|--------------------------------------|------|----|-----------|----------------|----|---------|-----|-----|---------------------------------|
| Locus_4326_Transcript_4/4_Conf_0.500 | 946  | 20 | 3.31E-78  | XP_002631434.1 | 66 | 296.204 | 313 | 207 | Hypothetical protein CBG03294   |
| Locus_4327_Transcript_1/2_Conf_1.000 | 602  | 20 | 8.08E-44  | EFO22586.1     | 75 | 180.644 | 145 | 110 | hypothetical protein LOAG_05898 |
| Locus_4327_Transcript_2/2_Conf_1.000 | 773  | 20 | 1.40E-43  | EFO22586.1     | 75 | 180.644 | 145 | 110 | hypothetical protein LOAG_05898 |
| Locus_4328_Transcript_1/1_Conf_1.000 | 1215 | 2  | 7.15E-05  | EFO24344.1     | 55 | 53.1434 | 114 | 63  | hypothetical protein LOAG_04140 |
| Locus_4329_Transcript_1/1_Conf_1.000 | 149  | 0  |           |                |    |         |     |     |                                 |
| Locus_433_Transcript_1/2_Conf_1.000  | 1524 | 20 | 1.81E-176 | ADL62852.1     | 91 | 623.624 | 366 | 335 | thioredoxin reductase 1         |

|                                      |      |    |           |                |    |         |     |     |                                                   |
|--------------------------------------|------|----|-----------|----------------|----|---------|-----|-----|---------------------------------------------------|
| Locus_433_Transcript_2/2_Conf_1.000  | 1523 | 20 | 1.81E-176 | ADL62852.1     | 91 | 623.624 | 366 | 335 | thioredoxin reductase 1                           |
| Locus_4330_Transcript_1/1_Conf_1.000 | 435  | 0  |           |                |    |         |     |     |                                                   |
| Locus_4331_Transcript_1/1_Conf_1.000 | 890  | 20 | 6.61E-62  | NP_491985.4    | 59 | 241.891 | 318 | 189 | hypothetical protein C30F12.1                     |
| Locus_4332_Transcript_1/2_Conf_1.000 | 1608 | 4  | 3.83E-15  | NP_497968.2    | 50 | 87.8113 | 173 | 87  | hypothetical protein T04A8.15                     |
| Locus_4332_Transcript_2/2_Conf_1.000 | 651  | 0  |           |                |    |         |     |     |                                                   |
| Locus_4333_Transcript_1/4_Conf_0.375 | 302  | 20 | 1.80E-19  | NP_001040940.1 | 77 | 98.9821 | 71  | 55  | PhosphatidylSerine Receptor family member (psr-1) |
| Locus_4333_Transcript_2/4_Conf_0.375 | 344  | 20 | 3.69E-20  | NP_001040940.1 | 76 | 101.293 | 76  | 58  | PhosphatidylSerine Receptor family member (psr-1) |

|                                      |      |    |           |                |    |         |     |     |                                                              |
|--------------------------------------|------|----|-----------|----------------|----|---------|-----|-----|--------------------------------------------------------------|
| Locus_4333_Transcript_3/4_Conf_0.375 | 1344 | 20 | 2.02E-136 | NP_001040940.1 | 82 | 490.345 | 311 | 258 | PhosphatidylSerine Receptor family member (psr-1)            |
| Locus_4333_Transcript_4/4_Conf_0.375 | 1344 | 20 | 7.68E-136 | NP_001040940.1 | 82 | 488.419 | 310 | 257 | PhosphatidylSerine Receptor family member (psr-1)            |
| Locus_4334_Transcript_1/1_Conf_1.000 | 309  | 4  | 3.36E-10  | NP_001021494.1 | 61 | 68.1662 | 88  | 54  | hypothetical protein F55A12.2                                |
| Locus_4335_Transcript_1/1_Conf_1.000 | 742  | 3  | 1.04E-32  | XP_002631406.1 | 54 | 144.436 | 262 | 142 | Hypothetical protein CBG03256                                |
| Locus_4336_Transcript_1/1_Conf_1.000 | 233  | 20 | 5.63E-21  | NP_502295.1    | 87 | 103.99  | 70  | 61  | yeast MON (monensin-resistant) homolog family member (mon-2) |

|                                      |      |    |           |                |    |         |     |     |                                 |
|--------------------------------------|------|----|-----------|----------------|----|---------|-----|-----|---------------------------------|
| Locus_4337_Transcript_1/1_Conf_1.000 | 254  | 5  | 8.83E-14  | CAA10033.1     | 75 | 80.1073 | 77  | 58  | DYS-1 protein                   |
| Locus_4338_Transcript_1/1_Conf_1.000 | 1015 | 20 | 1.28E-62  | NP_492137.1    | 66 | 244.588 | 326 | 217 | hypothetical protein T24B1.1    |
| Locus_4339_Transcript_1/1_Conf_1.000 | 789  | 20 | 5.18E-73  | XP_002632288.1 | 72 | 278.485 | 259 | 189 | C. briggsae CBR-COGC-4 protein  |
| Locus_434_Transcript_1/1_Conf_1.000  | 814  | 20 | 9.02E-52  | XP_002643395.1 | 61 | 207.994 | 233 | 144 | Hypothetical protein CBG16009   |
| Locus_4340_Transcript_1/2_Conf_1.000 | 1669 | 20 | 5.36E-177 | XP_002641207.1 | 78 | 625.55  | 471 | 369 | Hypothetical protein CBG09068   |
| Locus_4340_Transcript_2/2_Conf_1.000 | 1289 | 20 | 1.24E-103 | XP_002641207.1 | 75 | 381.333 | 301 | 228 | Hypothetical protein CBG09068   |
| Locus_4341_Transcript_1/1_Conf_1.000 | 436  | 4  | 1.45E-45  | NP_001023919.2 | 83 | 185.652 | 149 | 124 | hypothetical protein F43D2.6    |
| Locus_4342_Transcript_1/1_Conf_1.000 | 1274 | 20 | 2.20E-137 | EFO18770.1     | 84 | 493.426 | 310 | 262 | hypothetical protein LOAG_09726 |
| Locus_4343_Transcript_1/1_Conf_1.000 | 505  | 20 | 1.21E-26  | XP_002630816.1 | 71 | 122.865 | 135 | 96  | Hypothetical protein CBG02517   |
| Locus_4344_Transcript_1/1_Conf_1.000 | 579  | 0  |           |                |    |         |     |     |                                 |
| Locus_4345_Transcript_1/1_Conf_1.000 | 1042 | 9  | 3.08E-19  | XP_002640504.1 | 42 | 100.523 | 407 | 173 | Hypothetical protein CBG13643   |
| Locus_4346_Transcript_1/1_Conf_1.000 | 1250 | 20 | 0         | XP_002645884.1 | 87 | 679.863 | 416 | 362 | Hypothetical protein CBG07632   |
| Locus_4347_Transcript_1/1_Conf_1.000 | 174  | 2  | 1.01E-14  | XP_002634119.1 | 77 | 83.1889 | 63  | 49  | Hypothetical protein CBG01673   |
| Locus_4348_Transcript_1/1_Conf_1.000 | 455  | 20 | 2.41E-32  | XP_001895412.1 | 77 | 141.739 | 118 | 92  | TB2/DP1, HVA22 family protein   |

|                                      |      |    |           |                |    |         |     |     |                                                    |
|--------------------------------------|------|----|-----------|----------------|----|---------|-----|-----|----------------------------------------------------|
| Locus_4349_Transcript_1/1_Conf_1.000 | 312  | 1  | 4.85E-04  | NP_498634.1    | 56 | 47.7506 | 62  | 35  | hypothetical protein T20B12.3                      |
| Locus_435_Transcript_1/1_Conf_1.000  | 1063 | 20 | 9.90E-21  | NP_001122564.1 | 75 | 105.531 | 84  | 63  | hypothetical protein ZC434.7                       |
| Locus_4350_Transcript_1/1_Conf_1.000 | 192  | 20 | 5.13E-14  | NP_001123038.1 | 84 | 80.8777 | 52  | 44  | hypothetical protein Y39B6A.3                      |
| Locus_4351_Transcript_1/1_Conf_1.000 | 553  | 2  | 3.98E-09  | XP_001896166.1 | 77 | 65.0846 | 48  | 37  | hypothetical protein Bm1_23545                     |
| Locus_4352_Transcript_1/1_Conf_1.000 | 1483 | 14 | 5.67E-26  | EFO25413.1     | 52 | 123.635 | 322 | 170 | hypothetical protein LOAG_03070                    |
| Locus_4353_Transcript_1/1_Conf_1.000 | 1318 | 20 | 4.51E-24  | XP_002637076.1 | 48 | 117.087 | 286 | 138 | Hypothetical protein CBG09575                      |
| Locus_4354_Transcript_1/1_Conf_1.000 | 294  | 0  |           |                |    |         |     |     |                                                    |
| Locus_4355_Transcript_1/1_Conf_1.000 | 151  | 4  | 2.74E-07  | NP_491850.2    | 74 | 58.5362 | 50  | 37  | Nuclear Cap-Binding Protein family member (ncbp-1) |
| Locus_4356_Transcript_1/3_Conf_0.714 | 1959 | 20 | 3.47E-170 | EFO22264.1     | 80 | 603.208 | 432 | 348 | CMGC/CDK/CDK8 protein kinase                       |
| Locus_4356_Transcript_2/3_Conf_0.714 | 1950 | 20 | 3.45E-170 | EFO22264.1     | 80 | 603.208 | 432 | 348 | CMGC/CDK/CDK8 protein kinase                       |
| Locus_4356_Transcript_3/3_Conf_0.714 | 1950 | 20 | 3.45E-170 | EFO22264.1     | 80 | 603.208 | 432 | 348 | CMGC/CDK/CDK8 protein kinase                       |

|                                      |      |    |           |                |    |         |      |     |                                                           |
|--------------------------------------|------|----|-----------|----------------|----|---------|------|-----|-----------------------------------------------------------|
| Locus_4357_Transcript_1/1_Conf_1.000 | 131  | 0  |           |                |    |         |      |     |                                                           |
| Locus_4358_Transcript_1/1_Conf_1.000 | 4197 | 20 | 0         | A8PIX4.2       | 69 | 1171.76 | 1255 | 876 | Protein KIAA0664 homolog                                  |
| Locus_4359_Transcript_1/2_Conf_1.000 | 314  | 1  | 6.34E-04  |                | 57 | 47.3654 | 54   | 31  | hypothetical protein F55C12.3                             |
| Locus_4359_Transcript_2/2_Conf_1.000 | 314  | 0  |           |                |    |         |      |     |                                                           |
| Locus_436_Transcript_1/1_Conf_1.000  | 2656 | 20 | 0         | NP_499039.1    | 90 | 1336.63 | 788  | 713 | RiboNucleotide Reductase family member (rnr-1)            |
| Locus_4360_Transcript_1/1_Conf_1.000 | 691  | 0  |           |                |    |         |      |     |                                                           |
| Locus_4361_Transcript_1/1_Conf_1.000 | 479  | 20 | 3.02E-43  | XP_002646753.1 | 73 | 177.948 | 152  | 111 | Hypothetical protein CBG13150                             |
| Locus_4362_Transcript_1/1_Conf_1.000 | 1411 | 20 | 1.49E-12  | XP_002645688.1 | 65 | 78.9518 | 76   | 50  | <i>C. briggsae</i> CBR-ELT-3 protein                      |
| Locus_4363_Transcript_1/1_Conf_1.000 | 1977 | 20 | 2.21E-156 | XP_001892663.1 | 68 | 557.37  | 607  | 413 | Elongation factor Tu C-terminal domain containing protein |
| Locus_4364_Transcript_1/1_Conf_1.000 | 583  | 20 | 3.51E-33  | CBW48565.1     | 60 | 145.206 | 190  | 115 | Hypothetical protein Y111B2A.22d                          |
| Locus_4365_Transcript_1/1_Conf_1.000 | 932  | 20 | 1.65E-82  | XP_002640293.1 | 75 | 310.457 | 260  | 196 | Hypothetical protein CBG12819                             |
| Locus_4366_Transcript_1/1_Conf_1.000 | 803  | 20 | 3.05E-44  | XP_001893343.1 | 58 | 182.956 | 230  | 135 | threonyl-tRNA synthetase, cytoplasmic                     |
| Locus_4367_Transcript_1/1_Conf_1.000 | 2216 | 20 | 0         | EFO24137.1     | 82 | 644.81  | 464  | 384 | structure-specific recognition protein 1                  |
| Locus_4368_Transcript_1/1_Conf_1.000 | 279  | 20 | 8.83E-19  | NP_001123180.1 | 76 | 96.6709 | 71   | 54  | hypothetical protein T08A9.11                             |

|                                      |      |    |           |                |     |         |     |     |                                             |
|--------------------------------------|------|----|-----------|----------------|-----|---------|-----|-----|---------------------------------------------|
| Locus_4369_Transcript_1/1_Conf_1.000 | 429  | 20 | 3.26E-37  | XP_001896422.1 | 81  | 157.918 | 111 | 91  | 28S ribosomal protein S21, mitochondrial    |
| Locus_437_Transcript_1/1_Conf_1.000  | 1553 | 20 | 0         | NP_498915.1    | 92  | 721.079 | 425 | 391 | hypothetical protein B0303.3                |
| Locus_4370_Transcript_1/1_Conf_1.000 | 140  | 0  |           |                |     |         |     |     |                                             |
| Locus_4371_Transcript_1/1_Conf_1.000 | 2195 | 20 | 1.46E-172 | NP_495257.3    | 71  | 611.298 | 573 | 412 | Biotin Protein Ligase family member (bpl-1) |
| Locus_4372_Transcript_1/1_Conf_1.000 | 254  | 0  |           |                |     |         |     |     |                                             |
| Locus_4373_Transcript_1/5_Conf_0.300 | 732  | 20 | 3.86E-125 | AAL06641.1     | 97  | 451.44  | 244 | 238 | serine-threonine protein kinase             |
| Locus_4373_Transcript_2/5_Conf_0.200 | 456  | 20 | 1.22E-68  | AAL06641.1     | 98  | 262.307 | 134 | 132 | serine-threonine protein kinase             |
| Locus_4373_Transcript_3/5_Conf_0.200 | 720  | 8  | 5.52E-28  | AAL06641.1     | 100 | 128.642 | 65  | 65  | serine-threonine protein kinase             |
| Locus_4373_Transcript_4/5_Conf_0.300 | 1432 | 20 | 1.09E-135 | AAL06641.1     | 90  | 488.034 | 312 | 282 | serine-threonine protein kinase             |
| Locus_4373_Transcript_5/5_Conf_0.600 | 2292 | 20 | 0         | AAL06641.1     | 93  | 1006.13 | 599 | 559 | serine-threonine protein kinase             |
| Locus_4374_Transcript_1/1_Conf_1.000 | 1524 | 20 | 5.63E-69  | XP_002630560.1 | 59  | 266.544 | 506 | 302 | C. briggsae CBR-NPP-21 protein              |

|                                      |      |    |           |                |    |         |     |     |                                                             |
|--------------------------------------|------|----|-----------|----------------|----|---------|-----|-----|-------------------------------------------------------------|
| Locus_4375_Transcript_1/1_Conf_1.000 | 377  | 20 | 3.28E-45  | NP_495680.1    | 77 | 184.496 | 122 | 95  | Nose Resistant to Fluoxetine family member (nrf-6)          |
| Locus_4376_Transcript_1/1_Conf_1.000 | 508  | 20 | 1.16E-32  | XP_001900891.1 | 65 | 142.895 | 169 | 110 | Prion-like-                                                 |
| Locus_4377_Transcript_1/1_Conf_1.000 | 1218 | 20 | 1.76E-128 | NP_501067.1    | 83 | 463.766 | 347 | 289 | RUVB (recombination protein) homolog family member (ruvb-2) |
| Locus_4378_Transcript_1/1_Conf_1.000 | 347  | 0  |           |                |    |         |     |     |                                                             |
| Locus_4379_Transcript_1/1_Conf_1.000 | 129  | 0  |           |                |    |         |     |     |                                                             |
| Locus_438_Transcript_1/2_Conf_1.000  | 1127 | 20 | 6.16E-133 | XP_002638927.1 | 79 | 478.404 | 370 | 293 | Hypothetical protein CBG22153                               |
| Locus_438_Transcript_2/2_Conf_1.000  | 1103 | 20 | 8.90E-129 | XP_002638927.1 | 80 | 464.537 | 362 | 293 | Hypothetical protein CBG22153                               |



|                                      |      |    |           |                |    |         |     |     |                                                         |
|--------------------------------------|------|----|-----------|----------------|----|---------|-----|-----|---------------------------------------------------------|
| Locus_4380_Transcript_1/1_Conf_1.000 | 1366 | 20 | 0         | XP_002641617.1 | 93 | 666.766 | 398 | 372 | C. briggsae CBR-MOG-1 protein                           |
| Locus_4381_Transcript_1/2_Conf_1.000 | 886  | 7  | 2.15E-04  | XP_001179012.1 | 49 | 50.8322 | 121 | 60  | PREDICTED: similar to ankyrin 2,3/unc44                 |
| Locus_4381_Transcript_2/2_Conf_1.000 | 886  | 7  | 2.15E-04  | XP_001179012.1 | 49 | 50.8322 | 121 | 60  | PREDICTED: similar to ankyrin 2,3/unc44                 |
| Locus_4382_Transcript_1/1_Conf_1.000 | 2041 | 20 | 3.60E-109 | NP_497766.3    | 55 | 400.593 | 715 | 395 | MTM (myotubularin) family member (mtm-3)                |
| Locus_4383_Transcript_1/1_Conf_1.000 | 653  | 0  |           |                |    |         |     |     |                                                         |
| Locus_4384_Transcript_1/2_Conf_1.000 | 507  | 0  |           |                |    |         |     |     |                                                         |
| Locus_4384_Transcript_2/2_Conf_1.000 | 504  | 0  |           |                |    |         |     |     |                                                         |
| Locus_4385_Transcript_1/1_Conf_1.000 | 153  | 0  |           |                |    |         |     |     |                                                         |
| Locus_4386_Transcript_1/1_Conf_1.000 | 813  | 7  | 4.82E-29  | XP_002646135.1 | 60 | 132.494 | 190 | 114 | Hypothetical protein CBG08014                           |
| Locus_4387_Transcript_1/1_Conf_1.000 | 462  | 20 | 9.22E-72  | NP_498231.1    | 98 | 272.707 | 140 | 138 | Ribosomal Protein, Large subunit family member (rpl-23) |
| Locus_4388_Transcript_1/1_Conf_1.000 | 285  | 20 | 5.67E-37  | EFO25086.1     | 88 | 157.147 | 95  | 84  | DNA topoisomerase III                                   |
| Locus_4389_Transcript_1/1_Conf_1.000 | 542  | 5  | 3.80E-22  | NP_496303.1    | 63 | 108.227 | 133 | 85  | hypothetical protein D2089.3                            |
| Locus_439_Transcript_1/1_Conf_1.000  | 812  | 4  | 3.64E-53  | NP_504396.1    | 55 | 212.616 | 268 | 150 | hypothetical protein Y49G5B.1                           |

|                                      |      |    |           |                |    |         |     |     |                                                            |
|--------------------------------------|------|----|-----------|----------------|----|---------|-----|-----|------------------------------------------------------------|
| Locus_4390_Transcript_1/1_Conf_1.000 | 343  | 20 | 1.49E-29  | XP_002633281.1 | 88 | 132.494 | 85  | 75  | Hypothetical protein CBG06010                              |
| Locus_4391_Transcript_1/1_Conf_1.000 | 186  | 3  | 2.25E-09  | EFO23813.1     | 78 | 65.4698 | 47  | 37  | cuticlin 1                                                 |
| Locus_4392_Transcript_1/1_Conf_1.000 | 750  | 20 | 3.87E-67  | XP_002637159.1 | 72 | 258.84  | 226 | 163 | C. briggsae CBR-AQP-6 protein                              |
| Locus_4393_Transcript_1/1_Conf_1.000 | 1565 | 20 | 0         | NP_495986.3    | 86 | 706.442 | 465 | 402 | EATing: abnormal pharyngeal pumping family member (eat-3)  |
| Locus_4394_Transcript_1/1_Conf_1.000 | 380  | 0  |           |                |    |         |     |     |                                                            |
| Locus_4395_Transcript_1/1_Conf_1.000 | 1140 | 20 | 2.68E-51  | EFO18896.1     | 62 | 207.223 | 267 | 167 | hypothetical protein LOAG_09599                            |
| Locus_4396_Transcript_1/1_Conf_1.000 | 576  | 2  | 2.06E-22  | NP_494855.1    | 77 | 109.383 | 94  | 73  | Toxin-regulated Target of p38MAPK family member (ttm-2)    |
| Locus_4397_Transcript_1/1_Conf_1.000 | 1167 | 20 | 4.33E-137 | XP_002631107.1 | 90 | 492.271 | 274 | 249 | Hypothetical protein CBG02882                              |
| Locus_4398_Transcript_1/1_Conf_1.000 | 134  | 0  |           |                |    |         |     |     |                                                            |
| Locus_4399_Transcript_1/1_Conf_1.000 | 274  | 20 | 7.04E-16  | EFO15742.1     | 74 | 87.0409 | 75  | 56  | hypothetical protein LOAG_12768                            |
| Locus_44_Transcript_1/1_Conf_1.000   | 1749 | 20 | 7.66E-174 | NP_505626.1    | 70 | 615.15  | 591 | 417 | Temporarily Assigned Gene name family member (tag-315)     |
| Locus_440_Transcript_1/3_Conf_0.818  | 456  | 0  |           |                |    |         |     |     |                                                            |
| Locus_440_Transcript_2/3_Conf_0.727  | 449  | 0  |           |                |    |         |     |     |                                                            |
| Locus_440_Transcript_3/3_Conf_0.818  | 449  | 0  |           |                |    |         |     |     |                                                            |
| Locus_4400_Transcript_1/1_Conf_1.000 | 323  | 4  | 1.06E-19  | XP_002632143.1 | 67 | 99.7525 | 108 | 73  | Hypothetical protein CBG07002                              |
| Locus_4401_Transcript_1/1_Conf_1.000 | 1086 | 20 | 4.89E-47  | NP_491524.1    | 54 | 192.971 | 355 | 194 | Elongator complex Protein Component family member (elpc-1) |
| Locus_4402_Transcript_1/2_Conf_0.500 | 1272 | 20 | 2.85E-44  | XP_002593284.1 | 73 | 184.111 | 157 | 115 | hypothetical protein BRAFLDRAFT_123638                     |

|                                      |      |    |           |                |    |         |      |     |                                                          |
|--------------------------------------|------|----|-----------|----------------|----|---------|------|-----|----------------------------------------------------------|
| Locus_4402_Transcript_2/2_Conf_0.500 | 1421 | 20 | 1.75E-61  | XP_002637106.1 | 87 | 241.506 | 137  | 120 | Hypothetical protein CBG09606                            |
| Locus_4403_Transcript_1/4_Conf_0.250 | 798  | 0  |           |                |    |         |      |     |                                                          |
| Locus_4403_Transcript_2/4_Conf_0.250 | 756  | 0  |           |                |    |         |      |     |                                                          |
| Locus_4403_Transcript_3/4_Conf_0.375 | 1318 | 20 | 8.19E-42  | XP_001895085.1 | 71 | 176.022 | 163  | 117 | MGC80088 protein                                         |
| Locus_4403_Transcript_4/4_Conf_0.375 | 1318 | 20 | 2.38E-41  | XP_001895085.1 | 71 | 174.481 | 162  | 116 | MGC80088 protein                                         |
| Locus_4404_Transcript_1/1_Conf_1.000 | 479  | 20 | 2.30E-67  | NP_509528.1    | 83 | 258.07  | 159  | 133 | hypothetical protein T25B6.2                             |
| Locus_4405_Transcript_1/2_Conf_1.000 | 447  | 8  | 2.06E-31  | NP_741590.1    | 72 | 138.658 | 125  | 91  | Heavy chain, Unconventional Myosin family member (hum-2) |
| Locus_4405_Transcript_2/2_Conf_1.000 | 345  | 8  | 1.39E-27  | NP_505433.3    | 73 | 125.946 | 116  | 85  | Heavy chain, Unconventional Myosin family member (hum-2) |
| Locus_4406_Transcript_1/1_Conf_1.000 | 304  | 11 | 5.39E-16  | ABW05396.1     | 97 | 87.4261 | 45   | 44  | paramyosin isoform 3                                     |
| Locus_4407_Transcript_1/1_Conf_1.000 | 436  | 20 | 2.09E-52  | XP_002639557.1 | 90 | 208.379 | 120  | 109 | Hypothetical protein CBG04188                            |
| Locus_4408_Transcript_1/1_Conf_1.000 | 2007 | 20 | 1.15E-176 | XP_002644619.1 | 75 | 624.78  | 603  | 456 | C. briggsae CBR-LFI-1 protein                            |
| Locus_4409_Transcript_1/2_Conf_1.000 | 434  | 0  |           |                |    |         |      |     |                                                          |
| Locus_4409_Transcript_2/2_Conf_1.000 | 434  | 0  |           |                |    |         |      |     |                                                          |
| Locus_441_Transcript_1/3_Conf_0.714  | 3236 | 20 | 0         | EFO26360.1     | 90 | 1665.59 | 1008 | 911 | TOPoisomerase family member                              |

|                                      |      |    |          |                |    |         |      |     |                                     |
|--------------------------------------|------|----|----------|----------------|----|---------|------|-----|-------------------------------------|
| Locus_441_Transcript_2/3_Conf_0.714  | 3236 | 20 | 0        | EFO26360.1     | 90 | 1665.59 | 1008 | 911 | TOPoisomerase family member         |
| Locus_441_Transcript_3/3_Conf_0.714  | 3236 | 20 | 0        | EFO26360.1     | 90 | 1665.59 | 1008 | 911 | TOPoisomerase family member         |
| Locus_4410_Transcript_1/1_Conf_1.000 | 955  | 20 | 1.43E-84 | XP_002639511.1 | 76 | 189.504 | 190  | 145 | Hypothetical protein CBG04116       |
| Locus_4411_Transcript_1/1_Conf_1.000 | 522  | 20 | 3.32E-33 | EFO27393.1     | 66 | 144.821 | 166  | 110 | cisplatin                           |
| Locus_4412_Transcript_1/1_Conf_1.000 | 740  | 20 | 1.53E-44 | NP_510225.2    | 68 | 183.726 | 227  | 156 | hypothetical protein C49F8.2        |
| Locus_4413_Transcript_1/1_Conf_1.000 | 166  | 0  |          |                |    |         |      |     |                                     |
| Locus_4414_Transcript_1/1_Conf_1.000 | 266  | 1  | 7.14E-08 | XP_001899340.1 | 72 | 60.4622 | 50   | 36  | c-MYC promoter-binding protein IRLB |
| Locus_4415_Transcript_1/1_Conf_1.000 | 213  | 0  |          |                |    |         |      |     |                                     |
| Locus_4416_Transcript_1/1_Conf_1.000 | 438  | 20 | 3.21E-45 | XP_002646760.1 | 85 | 184.496 | 114  | 98  | C. briggsae CBR-NAS-7 protein       |

|                                      |      |    |           |                |    |         |     |     |                                                        |
|--------------------------------------|------|----|-----------|----------------|----|---------|-----|-----|--------------------------------------------------------|
| Locus_4417_Transcript_1/4_Conf_0.375 | 814  | 20 | 1.08E-113 | XP_002642846.1 | 92 | 413.69  | 258 | 238 | C. briggsae CBR-PPK-2 protein                          |
| Locus_4417_Transcript_2/4_Conf_0.375 | 772  | 20 | 5.77E-114 | XP_002642846.1 | 92 | 414.461 | 257 | 237 | C. briggsae CBR-PPK-2 protein                          |
| Locus_4417_Transcript_3/4_Conf_0.375 | 1083 | 20 | 3.42E-117 | XP_002642846.1 | 92 | 426.017 | 269 | 249 | C. briggsae CBR-PPK-2 protein                          |
| Locus_4417_Transcript_4/4_Conf_0.375 | 1083 | 20 | 6.88E-118 | XP_002642846.1 | 92 | 428.328 | 269 | 249 | C. briggsae CBR-PPK-2 protein                          |
| Locus_4418_Transcript_1/1_Conf_1.000 | 1295 | 20 | 1.55E-45  | Q16937.1       | 47 | 188.348 | 427 | 204 | Ancylostoma secreted protein                           |
| Locus_4419_Transcript_1/1_Conf_1.000 | 336  | 20 | 5.01E-22  | XP_002399229.1 | 70 | 107.457 | 103 | 73  | spermatogenesis-associated protein, putative           |
| Locus_442_Transcript_1/2_Conf_1.000  | 592  | 20 | 4.11E-37  | XP_002641835.1 | 61 | 158.303 | 195 | 120 | C. briggsae CBR-CYK-1 protein                          |
| Locus_442_Transcript_2/2_Conf_1.000  | 592  | 20 | 4.11E-37  | XP_002641835.1 | 61 | 158.303 | 195 | 120 | C. briggsae CBR-CYK-1 protein                          |
| Locus_4420_Transcript_1/1_Conf_1.000 | 148  | 0  |           |                |    |         |     |     |                                                        |
| Locus_4421_Transcript_1/1_Conf_1.000 | 628  | 20 | 4.80E-13  | XP_001956818.1 | 75 | 78.5666 | 86  | 65  | GF24383                                                |
| Locus_4422_Transcript_1/1_Conf_1.000 | 367  | 0  |           |                |    |         |     |     |                                                        |
| Locus_4423_Transcript_1/1_Conf_1.000 | 626  | 0  |           |                |    |         |     |     |                                                        |
| Locus_4424_Transcript_1/1_Conf_1.000 | 720  | 20 | 2.80E-64  | NP_508919.2    | 67 | 249.21  | 247 | 166 | hypothetical protein C03F11.3                          |
| Locus_4425_Transcript_1/1_Conf_1.000 | 667  | 2  | 3.14E-08  | EFO19250.1     | 50 | 62.7734 | 189 | 96  | hypothetical protein LOAG_09244                        |
| Locus_4426_Transcript_1/1_Conf_1.000 | 831  | 2  | 1.17E-09  | AAT78565.1     | 92 | 68.1662 | 65  | 60  | putative protein                                       |
| Locus_4427_Transcript_1/5_Conf_0.667 | 2549 | 20 | 0         | XP_002642903.1 | 73 | 963.755 | 854 | 628 | C. briggsae CBR-ZER-1 protein                          |
| Locus_4427_Transcript_2/5_Conf_0.167 | 513  | 5  | 1.35E-20  | XP_002642903.1 | 57 | 102.834 | 188 | 108 | C. briggsae CBR-ZER-1 protein                          |
| Locus_4427_Transcript_3/5_Conf_0.667 | 2549 | 20 | 0         | XP_002642903.1 | 73 | 963.755 | 854 | 628 | C. briggsae CBR-ZER-1 protein                          |
| Locus_4427_Transcript_4/5_Conf_0.667 | 2549 | 20 | 0         | XP_002642903.1 | 73 | 963.755 | 854 | 628 | C. briggsae CBR-ZER-1 protein                          |
| Locus_4427_Transcript_5/5_Conf_0.667 | 2549 | 20 | 0         | XP_002642903.1 | 73 | 963.755 | 854 | 628 | C. briggsae CBR-ZER-1 protein                          |
| Locus_4428_Transcript_1/1_Conf_1.000 | 618  | 20 | 3.93E-52  | XP_001902415.1 | 69 | 208.379 | 193 | 135 | RNA-metabolising metallo-beta-lactamase family protein |
| Locus_4429_Transcript_1/1_Conf_1.000 | 1197 | 0  |           |                |    |         |     |     |                                                        |
| Locus_443_Transcript_1/1_Conf_1.000  | 812  | 18 | 2.14E-37  | NP_001023053.1 | 55 | 160.229 | 231 | 129 | hypothetical protein C39E9.8                           |

|                                      |      |    |           |             |    |         |     |     |                                                                                        |
|--------------------------------------|------|----|-----------|-------------|----|---------|-----|-----|----------------------------------------------------------------------------------------|
| Locus_4430_Transcript_1/1_Conf_1.000 | 699  | 20 | 1.85E-49  | NP_492550.3 | 82 | 199.904 | 186 | 153 | hypothetical protein K07A1.10                                                          |
| Locus_4431_Transcript_1/1_Conf_1.000 | 205  | 0  |           |             |    |         |     |     |                                                                                        |
| Locus_4432_Transcript_1/2_Conf_1.000 | 2034 | 1  | 8.22E-05  | NP_497945.1 | 43 | 53.9138 | 130 | 56  | C-type LECTin family member (clec-152)                                                 |
| Locus_4432_Transcript_2/2_Conf_1.000 | 395  | 0  |           |             |    |         |     |     |                                                                                        |
| Locus_4433_Transcript_1/1_Conf_1.000 | 270  | 0  |           |             |    |         |     |     |                                                                                        |
| Locus_4434_Transcript_1/1_Conf_1.000 | 384  | 0  |           |             |    |         |     |     |                                                                                        |
| Locus_4435_Transcript_1/1_Conf_1.000 | 662  | 0  |           |             |    |         |     |     |                                                                                        |
| Locus_4436_Transcript_1/2_Conf_1.000 | 1351 | 20 | 9.34E-57  | NP_506514.1 | 52 | 225.713 | 480 | 251 | hypothetical protein ZC376.6                                                           |
| Locus_4436_Transcript_2/2_Conf_1.000 | 1342 | 20 | 7.08E-57  | EFO25154.1  | 53 | 226.098 | 461 | 247 | hypothetical protein LOAG_03327                                                        |
| Locus_4437_Transcript_1/2_Conf_1.000 | 1059 | 20 | 9.35E-88  | NP_494919.1 | 91 | 328.176 | 208 | 190 | hypothetical protein T27F7.1                                                           |
| Locus_4437_Transcript_2/2_Conf_1.000 | 1049 | 20 | 9.17E-88  | NP_494919.1 | 91 | 328.176 | 208 | 190 | hypothetical protein T27F7.1                                                           |
| Locus_4438_Transcript_1/1_Conf_1.000 | 1213 | 20 | 5.28E-117 | NP_491780.1 | 86 | 425.631 | 269 | 233 | hypothetical protein T09B4.9                                                           |
| Locus_4439_Transcript_1/3_Conf_0.500 | 1149 | 20 | 3.91E-66  | AAM98022.4  | 75 | 256.529 | 239 | 181 | Abnormal dye filling protein 14, isoform d, partially confirmed by transcript evidence |
| Locus_4439_Transcript_2/3_Conf_0.500 | 1151 | 20 | 1.88E-52  | AAM98022.4  | 73 | 211.075 | 203 | 149 | Abnormal dye filling protein 14, isoform d, partially confirmed by transcript evidence |

|                                      |      |    |           |                |    |         |     |     |                                                                                        |
|--------------------------------------|------|----|-----------|----------------|----|---------|-----|-----|----------------------------------------------------------------------------------------|
| Locus_4439_Transcript_3/3_Conf_0.500 | 901  | 20 | 2.66E-66  | AAM98022.4     | 75 | 256.529 | 239 | 181 | Abnormal dye filling protein 14, isoform d, partially confirmed by transcript evidence |
| Locus_444_Transcript_1/1_Conf_1.000  | 467  | 2  | 2.08E-07  | NP_001024433.1 | 76 | 58.9214 | 43  | 33  | hypothetical protein C26B9.1                                                           |
| Locus_4440_Transcript_1/1_Conf_1.000 | 575  | 20 | 4.81E-40  | NP_508166.1    | 64 | 167.933 | 193 | 124 | ImmunoGlobulin-like Cell adhesion Molecule family member (igcm-1)                      |
| Locus_4441_Transcript_1/1_Conf_1.000 | 1131 | 10 | 2.19E-45  | NP_508610.3    | 52 | 187.578 | 382 | 200 | Regulator of G protein Signaling family member (rgs-7)                                 |
| Locus_4442_Transcript_1/1_Conf_1.000 | 756  | 20 | 2.71E-44  | XP_002640702.1 | 73 | 182.956 | 175 | 128 | Hypothetical protein CBG19768                                                          |
| Locus_4443_Transcript_1/1_Conf_1.000 | 492  | 20 | 1.85E-40  | XP_002631925.1 | 91 | 168.703 | 104 | 95  | Hypothetical protein CBG07915                                                          |
| Locus_4444_Transcript_1/1_Conf_1.000 | 487  | 2  | 2.21E-25  | NP_508128.1    | 64 | 118.627 | 139 | 90  | hypothetical protein F13C5.5                                                           |
| Locus_4445_Transcript_1/1_Conf_1.000 | 1570 | 20 | 4.40E-109 | NP_494782.1    | 63 | 399.823 | 484 | 306 | hypothetical protein ZK430.1                                                           |
| Locus_4446_Transcript_1/2_Conf_1.000 | 630  | 2  | 2.33E-15  | CAR63657.1     | 88 | 86.2705 | 52  | 46  | hypothetical protein                                                                   |
| Locus_4446_Transcript_2/2_Conf_1.000 | 626  | 2  | 2.27E-15  | CAR63657.1     | 88 | 86.2705 | 52  | 46  | hypothetical protein                                                                   |
| Locus_4447_Transcript_1/1_Conf_1.000 | 387  | 20 | 5.73E-26  | EFO15541.1     | 77 | 120.553 | 90  | 70  | speckle-type POZ protein                                                               |
| Locus_4448_Transcript_1/1_Conf_1.000 | 1345 | 20 | 1.14E-155 | XP_002641168.1 | 78 | 554.288 | 430 | 338 | Hypothetical protein CBG09025                                                          |
| Locus_4449_Transcript_1/1_Conf_1.000 | 569  | 20 | 2.73E-40  | XP_002641669.1 | 68 | 168.703 | 158 | 108 | Hypothetical protein CBG09999                                                          |
| Locus_445_Transcript_1/1_Conf_1.000  | 656  | 3  | 3.56E-41  | XP_001136340.1 | 97 | 172.17  | 107 | 104 | PREDICTED: hypothetical protein                                                        |
| Locus_4450_Transcript_1/1_Conf_1.000 | 1187 | 20 | 1.40E-82  | XP_002639996.1 | 64 | 311.227 | 374 | 241 | Hypothetical protein CBG10826                                                          |

|                                      |      |    |           |                |    |         |     |     |                                        |
|--------------------------------------|------|----|-----------|----------------|----|---------|-----|-----|----------------------------------------|
| Locus_4451_Transcript_1/4_Conf_0.444 | 1198 | 20 | 4.51E-20  | XP_002642641.1 | 39 | 103.605 | 426 | 169 | C. briggsae CBR-LIN-13 protein         |
| Locus_4451_Transcript_2/4_Conf_0.667 | 2980 | 20 | 1.41E-35  | XP_002642641.1 | 38 | 156.762 | 723 | 275 | C. briggsae CBR-LIN-13 protein         |
| Locus_4451_Transcript_3/4_Conf_0.667 | 2409 | 20 | 1.03E-33  | XP_002642641.1 | 39 | 150.214 | 504 | 201 | C. briggsae CBR-LIN-13 protein         |
| Locus_4451_Transcript_4/4_Conf_0.667 | 2980 | 20 | 1.41E-35  | XP_002642641.1 | 38 | 156.762 | 723 | 275 | C. briggsae CBR-LIN-13 protein         |
| Locus_4452_Transcript_1/1_Conf_1.000 | 396  | 0  |           |                |    |         |     |     |                                        |
| Locus_4453_Transcript_1/3_Conf_0.571 | 626  | 0  |           |                |    |         |     |     |                                        |
| Locus_4453_Transcript_2/3_Conf_0.571 | 715  | 0  |           |                |    |         |     |     |                                        |
| Locus_4453_Transcript_3/3_Conf_0.714 | 737  | 0  |           |                |    |         |     |     |                                        |
| Locus_4454_Transcript_1/2_Conf_1.000 | 702  | 20 | 2.90E-26  | XP_002631067.1 | 46 | 122.865 | 272 | 126 | C. briggsae CBR-TRR-1 protein          |
| Locus_4454_Transcript_2/2_Conf_1.000 | 702  | 20 | 2.90E-26  | XP_002631067.1 | 46 | 122.865 | 272 | 126 | C. briggsae CBR-TRR-1 protein          |
| Locus_4455_Transcript_1/1_Conf_1.000 | 716  | 0  |           |                |    |         |     |     |                                        |
| Locus_4456_Transcript_1/1_Conf_1.000 | 460  | 20 | 5.17E-19  | XP_001898200.1 | 65 | 97.4413 | 99  | 65  | hypothetical protein Bm1_33765         |
| Locus_4457_Transcript_1/2_Conf_1.000 | 724  | 1  | 4.29E-04  | CAR63546.1     | 51 | 49.2914 | 92  | 47  | hypothetical protein                   |
| Locus_4457_Transcript_2/2_Conf_1.000 | 535  | 1  | 3.43E-04  | CAR63546.1     | 51 | 48.521  | 92  | 47  | hypothetical protein                   |
| Locus_4458_Transcript_1/1_Conf_1.000 | 621  | 3  | 1.36E-04  | XP_002637469.1 | 75 | 50.447  | 45  | 34  | Hypothetical protein CBG19185          |
| Locus_4459_Transcript_1/2_Conf_1.000 | 942  | 20 | 5.72E-123 | AAC78238.2     | 89 | 444.891 | 315 | 281 | Guanylyl cyclase protein 28, isoform d |



|                                      |      |    |           |                |    |         |     |     |                                                    |
|--------------------------------------|------|----|-----------|----------------|----|---------|-----|-----|----------------------------------------------------|
| Locus_4459_Transcript_2/2_Conf_1.000 | 981  | 20 | 8.18E-136 | NP_001021600.1 | 88 | 487.649 | 328 | 290 | Guanylyl CYclase family member (gcy-28)            |
| Locus_446_Transcript_1/1_Conf_1.000  | 1139 | 20 | 2.01E-22  | EFO23042.1     | 63 | 111.309 | 177 | 113 | hypothetical protein LOAG_05445                    |
| Locus_4460_Transcript_1/1_Conf_1.000 | 1368 | 20 | 2.69E-160 | XP_001895648.1 | 82 | 569.696 | 424 | 348 | Pre-mRNA cleavage complex II protein Clp1          |
| Locus_4461_Transcript_1/1_Conf_1.000 | 573  | 20 | 3.58E-27  | NP_500829.2    | 60 | 125.176 | 144 | 87  | hypothetical protein T12E12.1                      |
| Locus_4462_Transcript_1/1_Conf_1.000 | 323  | 0  |           |                |    |         |     |     |                                                    |
| Locus_4463_Transcript_1/7_Conf_0.667 | 4125 | 20 | 0         | NP_500102.3    | 70 | 847.81  | 859 | 603 | Nuclear Pore complex Protein family member (npp-8) |
| Locus_4463_Transcript_2/7_Conf_0.667 | 4125 | 20 | 0         | NP_500102.3    | 70 | 847.81  | 859 | 603 | Nuclear Pore complex Protein family member (npp-8) |
| Locus_4463_Transcript_3/7_Conf_0.667 | 4125 | 20 | 0         | NP_500102.3    | 70 | 847.81  | 859 | 603 | Nuclear Pore complex Protein family member (npp-8) |
| Locus_4463_Transcript_4/7_Conf_0.667 | 4125 | 20 | 0         | NP_500102.3    | 70 | 847.81  | 859 | 603 | Nuclear Pore complex Protein family member (npp-8) |
| Locus_4463_Transcript_5/7_Conf_0.667 | 4125 | 20 | 0         | NP_500102.3    | 70 | 848.966 | 859 | 603 | Nuclear Pore complex Protein family member (npp-8) |

|                                      |      |    |           |                |     |         |     |     |                                                                                       |
|--------------------------------------|------|----|-----------|----------------|-----|---------|-----|-----|---------------------------------------------------------------------------------------|
| Locus_4463_Transcript_6/7_Conf_0.333 | 1543 | 20 | 4.56E-135 | NP_500102.3    | 70  | 486.108 | 471 | 331 | Nuclear Pore complex Protein family member (npp-8)                                    |
| Locus_4463_Transcript_7/7_Conf_0.667 | 4125 | 20 | 0         | NP_500102.3    | 70  | 847.81  | 859 | 603 | Nuclear Pore complex Protein family member (npp-8)                                    |
| Locus_4464_Transcript_1/2_Conf_1.000 | 539  | 0  |           |                |     |         |     |     |                                                                                       |
| Locus_4464_Transcript_2/2_Conf_1.000 | 539  | 0  |           |                |     |         |     |     |                                                                                       |
| Locus_4465_Transcript_1/1_Conf_1.000 | 620  | 20 | 5.49E-54  | NP_494921.1    | 66  | 214.542 | 206 | 136 | hypothetical protein F59A6.5                                                          |
| Locus_4466_Transcript_1/1_Conf_1.000 | 711  | 20 | 1.74E-111 | EFB23493.1     | 94  | 405.986 | 224 | 211 | hypothetical protein PANDA_016815                                                     |
| Locus_4467_Transcript_1/1_Conf_1.000 | 362  | 0  |           |                |     |         |     |     |                                                                                       |
| Locus_4468_Transcript_1/1_Conf_1.000 | 176  | 0  |           |                |     |         |     |     |                                                                                       |
| Locus_4469_Transcript_1/1_Conf_1.000 | 451  | 20 | 5.71E-66  | XP_001172323.1 | 100 | 253.447 | 125 | 125 | PREDICTED: similar to Proteasome (prosome, macropain) subunit, beta type, 4 isoform 1 |
| Locus_447_Transcript_1/1_Conf_1.000  | 889  | 20 | 1.66E-105 | AAK62032.1     | 77  | 386.726 | 296 | 229 | metalloprotease 1 precursor                                                           |
| Locus_4470_Transcript_1/1_Conf_1.000 | 1700 | 20 | 1.08E-151 | NP_507025.1    | 82  | 505.368 | 384 | 318 | hypothetical protein T10C6.6                                                          |

|                                      |      |    |           |                |    |         |     |     |                                          |
|--------------------------------------|------|----|-----------|----------------|----|---------|-----|-----|------------------------------------------|
| Locus_4471_Transcript_1/1_Conf_1.000 | 1431 | 20 | 9.71E-68  | XP_002641056.1 | 85 | 262.307 | 199 | 170 | Hypothetical protein CBG22467            |
| Locus_4472_Transcript_1/1_Conf_1.000 | 380  | 0  |           |                |    |         |     |     |                                          |
| Locus_4473_Transcript_1/1_Conf_1.000 | 525  | 20 | 1.52E-49  | CAG25499.1     | 75 | 199.134 | 159 | 120 | heat shock protein 20                    |
| Locus_4474_Transcript_1/1_Conf_1.000 | 130  | 0  |           |                |    |         |     |     |                                          |
| Locus_4475_Transcript_1/4_Conf_0.333 | 250  | 20 | 3.46E-15  | NP_497979.1    | 64 | 84.7297 | 78  | 50  | RaB GAP related family member (rbg-3)    |
| Locus_4475_Transcript_2/4_Conf_0.222 | 250  | 20 | 3.46E-15  | NP_497979.1    | 64 | 84.7297 | 78  | 50  | RaB GAP related family member (rbg-3)    |
| Locus_4475_Transcript_3/4_Conf_0.556 | 1800 | 20 | 4.41E-140 | NP_497979.1    | 65 | 503.056 | 552 | 361 | RaB GAP related family member (rbg-3)    |
| Locus_4475_Transcript_4/4_Conf_0.556 | 1800 | 20 | 4.41E-140 | NP_497979.1    | 65 | 503.056 | 552 | 361 | RaB GAP related family member (rbg-3)    |
| Locus_4476_Transcript_1/1_Conf_1.000 | 1207 | 0  |           |                |    |         |     |     |                                          |
| Locus_4477_Transcript_1/1_Conf_1.000 | 439  | 3  | 8.00E-04  | NP_510264.1    | 71 | 46.9802 | 38  | 27  | Carbonic AnHydrase family member (cah-4) |
| Locus_4478_Transcript_1/1_Conf_1.000 | 1017 | 0  |           |                |    |         |     |     |                                          |
| Locus_4479_Transcript_1/1_Conf_1.000 | 206  | 3  | 1.58E-07  | NP_001024958.1 | 81 | 59.3066 | 55  | 45  | hypothetical protein Y34B4A.4            |
| Locus_448_Transcript_1/1_Conf_1.000  | 695  | 3  | 9.36E-22  | XP_002642236.1 | 52 | 107.842 | 198 | 104 | Hypothetical protein CBG18218            |
| Locus_4480_Transcript_1/1_Conf_1.000 | 705  | 20 | 3.86E-55  | XP_002645121.1 | 86 | 218.779 | 178 | 154 | C. briggsae CBR-TRAP-3 protein           |
| Locus_4481_Transcript_1/2_Conf_1.000 | 965  | 2  | 1.40E-07  | NP_496943.1    | 47 | 61.6178 | 160 | 76  | hypothetical protein W01G7.4             |
| Locus_4481_Transcript_2/2_Conf_1.000 | 953  | 2  | 1.37E-07  | NP_496943.1    | 47 | 61.6178 | 160 | 76  | hypothetical protein W01G7.4             |
| Locus_4482_Transcript_1/1_Conf_1.000 | 1532 | 20 | 2.95E-09  | ACI47264.1     | 48 | 68.1662 | 196 | 96  | high mobility group protein A2           |

|                                      |      |    |           |                |    |         |     |     |                                                                          |
|--------------------------------------|------|----|-----------|----------------|----|---------|-----|-----|--------------------------------------------------------------------------|
| Locus_4483_Transcript_1/1_Conf_1.000 | 1306 | 20 | 1.48E-144 | XP_002637506.1 | 78 | 517.309 | 380 | 300 | C. briggsae CBR-INX-10 protein                                           |
| Locus_4484_Transcript_1/1_Conf_1.000 | 372  | 0  |           |                |    |         |     |     |                                                                          |
| Locus_4485_Transcript_1/1_Conf_1.000 | 441  |    |           |                |    |         |     |     |                                                                          |
| Locus_4486_Transcript_1/1_Conf_1.000 | 1742 | 7  | 3.83E-08  | XP_001508179.1 | 39 | 64.6994 | 268 | 107 | PREDICTED: similar to single-strand telomeric DNA-binding protein; cPot1 |
| Locus_4487_Transcript_1/1_Conf_1.000 | 464  | 20 | 3.91E-38  | XP_002640722.1 | 76 | 160.999 | 151 | 115 | Hypothetical protein CBG19790                                            |
| Locus_4488_Transcript_1/1_Conf_1.000 | 872  | 20 | 2.21E-62  | XP_001902350.1 | 64 | 243.432 | 270 | 174 | Myosin XVIIIa                                                            |
| Locus_4489_Transcript_1/3_Conf_0.667 | 744  | 20 | 2.50E-18  | XP_002198796.1 | 46 | 96.6709 | 238 | 110 | PREDICTED: similar to sqstm1 protein, partial                            |
| Locus_4489_Transcript_2/3_Conf_0.667 | 726  | 20 | 3.30E-20  | XP_002198796.1 | 48 | 102.834 | 232 | 113 | PREDICTED: similar to sqstm1 protein, partial                            |
| Locus_4489_Transcript_3/3_Conf_0.667 | 750  | 20 | 4.63E-20  | XP_002198796.1 | 47 | 102.449 | 240 | 113 | PREDICTED: similar to sqstm1 protein, partial                            |
| Locus_449_Transcript_1/1_Conf_1.000  | 582  | 0  |           |                |    |         |     |     |                                                                          |
| Locus_4490_Transcript_1/2_Conf_1.000 | 586  | 20 | 1.94E-55  | NP_504577.1    | 76 | 219.164 | 183 | 140 | hypothetical protein F17A9.2                                             |
| Locus_4490_Transcript_2/2_Conf_1.000 | 390  | 20 | 1.77E-35  | NP_504577.1    | 78 | 152.14  | 129 | 101 | hypothetical protein F17A9.2                                             |
| Locus_4491_Transcript_1/1_Conf_1.000 | 236  | 1  | 8.14E-04  | NP_495034.1    | 63 | 46.9802 | 46  | 29  | CalEXcitin family member (cex-1)                                         |
| Locus_4492_Transcript_1/1_Conf_1.000 | 407  | 0  |           |                |    |         |     |     |                                                                          |
| Locus_4493_Transcript_1/1_Conf_1.000 | 335  | 20 | 3.25E-29  | XP_002631614.1 | 84 | 131.339 | 112 | 95  | C. briggsae CBR-MAC-1 protein                                            |
| Locus_4494_Transcript_1/1_Conf_1.000 | 509  | 8  | 2.51E-11  | EFO20561.1     | 80 | 72.0182 | 52  | 42  | frizzled/Smoothed family membrane region containing protein              |
| Locus_4495_Transcript_1/1_Conf_1.000 | 1623 | 20 | 5.34E-174 | XP_002639918.1 | 78 | 615.535 | 517 | 407 | C. briggsae CBR-NMY-2 protein                                            |

|                                      |      |    |           |                |     |         |     |     |                                                                          |
|--------------------------------------|------|----|-----------|----------------|-----|---------|-----|-----|--------------------------------------------------------------------------|
| Locus_4496_Transcript_1/1_Conf_1.000 | 1381 | 8  | 1.89E-36  | ABC70182.1     | 45  | 158.303 | 531 | 243 | sprint                                                                   |
| Locus_4497_Transcript_1/1_Conf_1.000 | 140  | 0  |           |                |     |         |     |     |                                                                          |
| Locus_4498_Transcript_1/1_Conf_1.000 | 180  | 0  |           |                |     |         |     |     |                                                                          |
| Locus_4499_Transcript_1/1_Conf_1.000 | 542  | 0  |           |                |     |         |     |     |                                                                          |
| Locus_45_Transcript_1/1_Conf_1.000   | 458  | 0  |           |                |     |         |     |     |                                                                          |
| Locus_450_Transcript_1/2_Conf_1.000  | 726  | 20 | 2.11E-67  | NP_510606.1    | 77  | 259.61  | 201 | 155 | ACyLtransferase-like family member (acl-1)                               |
| Locus_450_Transcript_2/2_Conf_1.000  | 726  | 20 | 2.11E-67  | NP_510606.1    | 77  | 259.61  | 201 | 155 | ACyLtransferase-like family member (acl-1)                               |
| Locus_4500_Transcript_1/3_Conf_0.714 | 936  | 10 | 1.57E-64  | NP_510687.2    | 64  | 250.751 | 262 | 170 | ALG-1 INteracting protein family member (ain-1)                          |
| Locus_4500_Transcript_2/3_Conf_0.714 | 1893 | 11 | 3.00E-78  | NP_510687.2    | 64  | 297.745 | 319 | 205 | ALG-1 INteracting protein family member (ain-1)                          |
| Locus_4500_Transcript_3/3_Conf_0.714 | 948  | 11 | 8.79E-63  | NP_510687.2    | 63  | 244.973 | 266 | 170 | ALG-1 INteracting protein family member (ain-1)                          |
| Locus_4501_Transcript_1/1_Conf_1.000 | 1302 | 20 | 2.35E-142 | A8XEQ8.2       | 81  | 509.99  | 397 | 323 | Ubiquitin-like modifier-activating enzyme 5                              |
| Locus_4502_Transcript_1/1_Conf_1.000 | 468  | 20 | 7.06E-40  | CAX32485.1     | 66  | 166.777 | 155 | 103 | C. elegans protein T20D3.11b, partially confirmed by transcript evidence |
| Locus_4503_Transcript_1/1_Conf_1.000 | 2744 | 20 | 7.73E-174 | XP_002640239.1 | 57  | 615.92  | 852 | 491 | C. briggsae CBR-DPF-3 protein                                            |
| Locus_4504_Transcript_1/1_Conf_1.000 | 2171 | 20 | 0         | NP_508988.2    | 70  | 748.429 | 718 | 508 | TBC (Tre-2/Bub2/Cdc16) domain family member (tbc-16)                     |
| Locus_4505_Transcript_1/1_Conf_1.000 | 251  | 1  | 1.46E-05  | EFO14401.1     | 61  | 52.7582 | 68  | 42  | hypothetical protein LOAG_14117                                          |
| Locus_4506_Transcript_1/1_Conf_1.000 | 539  | 0  |           |                |     |         |     |     |                                                                          |
| Locus_4507_Transcript_1/1_Conf_1.000 | 220  | 20 | 3.96E-14  | XP_002763591.1 | 100 | 81.2629 | 40  | 40  | PREDICTED: programmed cell death protein 5-like, partial                 |
| Locus_4508_Transcript_1/1_Conf_1.000 | 961  | 12 | 2.61E-38  | CAR97833.1     | 55  | 163.696 | 280 | 154 | C. elegans protein F46G10.5b, partially confirmed by transcript evidence |
| Locus_4509_Transcript_1/1_Conf_1.000 | 335  | 20 | 5.40E-08  |                | 60  | 60.8474 | 86  | 52  | hypothetical protein C45H4.5                                             |

|                                      |      |    |           |                |    |         |     |     |                                    |
|--------------------------------------|------|----|-----------|----------------|----|---------|-----|-----|------------------------------------|
| Locus_451_Transcript_1/1_Conf_1.000  | 1747 | 20 | 1.29E-96  | EFO21369.1     | 75 | 358.607 | 400 | 301 | hypothetical protein LOAG_07120    |
| Locus_4510_Transcript_1/1_Conf_1.000 | 796  | 20 | 1.93E-75  | EFO20638.1     | 73 | 286.574 | 266 | 196 | oxidoreductase                     |
| Locus_4511_Transcript_1/1_Conf_1.000 | 384  | 6  | 1.92E-05  | EFO26532.1     | 73 | 52.373  | 41  | 30  | hypothetical protein LOAG_01952    |
| Locus_4512_Transcript_1/2_Conf_1.000 | 494  | 0  |           |                |    |         |     |     |                                    |
| Locus_4512_Transcript_2/2_Conf_1.000 | 494  | 0  |           |                |    |         |     |     |                                    |
| Locus_4513_Transcript_1/1_Conf_1.000 | 636  | 20 | 8.41E-53  | XP_002630191.1 | 71 | 210.69  | 213 | 153 | C. briggsae CBR-KAP-1 protein      |
| Locus_4514_Transcript_1/1_Conf_1.000 | 241  | 0  |           |                |    |         |     |     |                                    |
| Locus_4515_Transcript_1/1_Conf_1.000 | 963  | 20 | 2.36E-164 | NP_501507.1    | 95 | 582.408 | 319 | 306 | hypothetical protein F21D5.7       |
| Locus_4516_Transcript_1/1_Conf_1.000 | 574  | 0  |           |                |    |         |     |     |                                    |
| Locus_4517_Transcript_1/1_Conf_1.000 | 833  | 20 | 7.71E-54  | ACI49101.1     | 58 | 214.927 | 282 | 166 | hypothetical protein Cbre_JD13.003 |

|                                      |      |    |           |                |     |         |     |     |                                                                          |
|--------------------------------------|------|----|-----------|----------------|-----|---------|-----|-----|--------------------------------------------------------------------------|
| Locus_4518_Transcript_1/1_Conf_1.000 | 1575 | 2  | 1.46E-27  | NP_505209.2    | 41  | 129.028 | 517 | 215 | hypothetical protein F25G6.9                                             |
| Locus_4519_Transcript_1/1_Conf_1.000 | 1105 | 13 | 2.74E-61  | NP_505472.1    | 57  | 240.35  | 312 | 180 | hypothetical protein F25B3.2                                             |
| Locus_452_Transcript_1/1_Conf_1.000  | 1284 | 20 | 1.99E-77  | XP_001900502.1 | 89  | 294.278 | 178 | 160 | High mobility group protein 1.2                                          |
| Locus_4520_Transcript_1/1_Conf_1.000 | 1095 | 3  | 7.17E-38  | NP_492450.2    | 52  | 162.54  | 261 | 136 | hypothetical protein ZK858.5                                             |
| Locus_4521_Transcript_1/1_Conf_1.000 | 1563 | 20 | 4.81E-132 | XP_002637141.1 | 67  | 476.093 | 530 | 359 | C. briggsae CBR-VPS-54 protein                                           |
| Locus_4522_Transcript_1/1_Conf_1.000 | 171  | 10 | 1.02E-06  | NP_493023.1    | 81  | 56.6102 | 37  | 30  | hypothetical protein R09B3.3                                             |
| Locus_4523_Transcript_1/1_Conf_1.000 | 242  | 20 | 9.79E-34  | XP_002641514.1 | 89  | 146.362 | 78  | 70  | Hypothetical protein CBG09809                                            |
| Locus_4524_Transcript_1/1_Conf_1.000 | 1195 | 20 | 1.37E-85  | NP_001122662.1 | 71  | 321.242 | 284 | 202 | hypothetical protein Y51H1A.1                                            |
| Locus_4525_Transcript_1/1_Conf_1.000 | 133  | 20 | 6.37E-17  | XP_002923730.1 | 100 | 90.5077 | 44  | 44  | PREDICTED: heterogeneous nuclear ribonucleoprotein U-like protein 1-like |
| Locus_4526_Transcript_1/1_Conf_1.000 | 637  | 0  |           |                |     |         |     |     |                                                                          |
| Locus_4527_Transcript_1/1_Conf_1.000 | 483  | 20 | 9.88E-58  | NP_497892.1    | 94  | 226.098 | 119 | 112 | PeRoxireDoXin family member (prdx-3)                                     |

|                                      |      |    |           |                |    |         |     |     |                                                      |
|--------------------------------------|------|----|-----------|----------------|----|---------|-----|-----|------------------------------------------------------|
| Locus_4528_Transcript_1/1_Conf_1.000 | 674  | 20 | 2.35E-51  | NP_498232.3    | 62 | 206.068 | 240 | 151 | hypothetical protein B0336.11                        |
| Locus_4529_Transcript_1/1_Conf_1.000 | 431  | 20 | 4.01E-11  | EFO22187.1     | 52 | 71.2478 | 121 | 63  | hypothetical protein LOAG_06297                      |
| Locus_453_Transcript_1/1_Conf_1.000  | 592  | 20 | 7.67E-68  | NP_501876.2    | 79 | 260.381 | 197 | 157 | Enoyl-CoA Hydratase family member (ech-8)            |
| Locus_4530_Transcript_1/1_Conf_1.000 | 966  | 20 | 3.07E-87  | NP_493559.1    | 87 | 326.25  | 189 | 166 | hypothetical protein K05C4.2                         |
| Locus_4531_Transcript_1/1_Conf_1.000 | 1373 | 20 | 2.68E-176 | XP_002630542.1 | 84 | 622.854 | 434 | 365 | Hypothetical protein CBG12983                        |
| Locus_4532_Transcript_1/2_Conf_1.000 | 925  | 20 | 8.97E-65  | XP_002630642.1 | 68 | 251.521 | 250 | 170 | Hypothetical protein CBG02311                        |
| Locus_4532_Transcript_2/2_Conf_1.000 | 932  | 20 | 9.08E-65  | XP_002630642.1 | 68 | 251.521 | 250 | 170 | Hypothetical protein CBG02311                        |
| Locus_4533_Transcript_1/1_Conf_1.000 | 196  | 0  |           |                |    |         |     |     |                                                      |
| Locus_4534_Transcript_1/1_Conf_1.000 | 806  | 2  | 8.46E-10  | XP_002642839.1 | 48 | 68.5514 | 146 | 71  | Hypothetical protein CBG21243                        |
| Locus_4535_Transcript_1/1_Conf_1.000 | 164  | 10 | 5.63E-13  | NP_001129757.1 | 77 | 77.411  | 54  | 42  | hypothetical protein C31H5.6                         |
| Locus_4536_Transcript_1/1_Conf_1.000 | 1471 | 20 | 1.24E-174 | XP_002633787.1 | 80 | 617.461 | 439 | 355 | C. briggsae CBR-FAT-3 protein                        |
| Locus_4537_Transcript_1/1_Conf_1.000 | 617  | 0  |           |                |    |         |     |     |                                                      |
| Locus_4538_Transcript_1/1_Conf_1.000 | 511  | 0  |           |                |    |         |     |     |                                                      |
| Locus_4539_Transcript_1/1_Conf_1.000 | 1568 | 20 | 4.91E-68  | XP_001901161.1 | 68 | 263.462 | 264 | 181 | EF hand family protein                               |
| Locus_454_Transcript_1/1_Conf_1.000  | 327  | 0  |           |                |    |         |     |     |                                                      |
| Locus_4540_Transcript_1/1_Conf_1.000 | 323  | 20 | 5.24E-43  | XP_002638500.1 | 84 | 177.178 | 106 | 90  | C. briggsae CBR-SSU-1 protein                        |
| Locus_4541_Transcript_1/1_Conf_1.000 | 1282 | 20 | 3.42E-146 | XP_002639894.1 | 80 | 522.702 | 422 | 341 | C. briggsae CBR-CDC-48.3 protein                     |
| Locus_4542_Transcript_1/1_Conf_1.000 | 581  | 0  |           |                |    |         |     |     |                                                      |
| Locus_4543_Transcript_1/1_Conf_1.000 | 179  | 2  | 1.46E-05  | NP_499455.1    | 74 | 52.7582 | 43  | 32  | Tumorous Enhancer of Glp-1(gf) family member (teg-1) |
| Locus_4544_Transcript_1/1_Conf_1.000 | 2302 | 20 | 5.16E-51  | NP_001122786.1 | 52 | 207.608 | 376 | 199 | abnormal GONad development family member (gon-4)     |



|                                      |      |    |           |                |    |         |     |     |                                                         |
|--------------------------------------|------|----|-----------|----------------|----|---------|-----|-----|---------------------------------------------------------|
| Locus_4545_Transcript_1/1_Conf_1.000 | 275  | 7  | 3.49E-23  | NP_499632.1    | 76 | 111.309 | 81  | 62  | hypothetical protein Y111B2A.2                          |
| Locus_4546_Transcript_1/1_Conf_1.000 | 312  | 1  | 2.93E-17  | NP_001023963.1 | 82 | 91.6633 | 64  | 53  | hypothetical protein F53F4.16                           |
| Locus_4547_Transcript_1/2_Conf_1.000 | 1312 | 20 | 2.19E-79  | NP_495428.1    | 64 | 300.827 | 386 | 250 | PyroPhosPhorylase family member (ppp-1)                 |
| Locus_4547_Transcript_2/2_Conf_1.000 | 1312 | 20 | 4.88E-79  | NP_495428.1    | 64 | 299.671 | 386 | 250 | PyroPhosPhorylase family member (ppp-1)                 |
| Locus_4548_Transcript_1/1_Conf_1.000 | 142  | 0  |           |                |    |         |     |     |                                                         |
| Locus_4549_Transcript_1/1_Conf_1.000 | 1178 | 20 | 3.11E-175 | AAT06310.2     | 90 | 619.002 | 392 | 355 | putative calcium-independent phospholipase A2 isoform a |
| Locus_455_Transcript_1/2_Conf_1.000  | 1431 | 20 | 6.19E-123 | XP_002633002.1 | 68 | 445.662 | 485 | 331 | Hypothetical protein CBG21768                           |
| Locus_455_Transcript_2/2_Conf_1.000  | 378  | 2  | 2.36E-11  | XP_002633002.1 | 55 | 72.0182 | 127 | 71  | Hypothetical protein CBG21768                           |

|                                      |      |    |          |                |     |         |     |     |                                                                |
|--------------------------------------|------|----|----------|----------------|-----|---------|-----|-----|----------------------------------------------------------------|
| Locus_4550_Transcript_1/1_Conf_1.000 | 210  | 20 | 4.12E-16 | XP_509413.2    | 100 | 87.8113 | 40  | 40  | PREDICTED: similar to phosphatidylethanolamine binding protein |
| Locus_4551_Transcript_1/1_Conf_1.000 | 188  | 0  |          |                |     |         |     |     |                                                                |
| Locus_4552_Transcript_1/1_Conf_1.000 | 890  | 20 | 1.92E-61 | XP_001894591.1 | 68  | 240.35  | 230 | 157 | Twik (KCNK-like) family of potassium channels, alpha subunit 5 |
| Locus_4553_Transcript_1/1_Conf_1.000 | 356  | 20 | 2.69E-15 | EFO21183.1     | 67  | 85.1149 | 118 | 80  | cell cycle-regulated factor p78                                |
| Locus_4554_Transcript_1/1_Conf_1.000 | 1702 | 20 | 5.85E-78 | EFO19556.1     | 65  | 296.59  | 331 | 217 | hypothetical protein LOAG_08937                                |
| Locus_4555_Transcript_1/1_Conf_1.000 | 458  | 0  |          |                |     |         |     |     |                                                                |

|                                      |      |    |           |                |    |         |     |     |                                                                               |
|--------------------------------------|------|----|-----------|----------------|----|---------|-----|-----|-------------------------------------------------------------------------------|
| Locus_4556_Transcript_1/2_Conf_1.000 | 307  | 20 | 1.72E-22  | XP_001901402.1 | 76 | 108.997 | 82  | 63  | SacI homology domain containing protein                                       |
| Locus_4556_Transcript_2/2_Conf_1.000 | 991  | 20 | 2.86E-128 | XP_001901402.1 | 79 | 462.611 | 335 | 267 | SacI homology domain containing protein                                       |
| Locus_4557_Transcript_1/1_Conf_1.000 | 354  | 20 | 4.59E-15  | NP_496453.1    | 60 | 84.3445 | 101 | 61  | TransThyretin-Related family domain family member (ttr-18)                    |
| Locus_4558_Transcript_1/1_Conf_1.000 | 295  | 20 | 3.64E-28  | AAB62695.1     | 90 | 127.872 | 98  | 89  | P-type ATPase                                                                 |
| Locus_4559_Transcript_1/1_Conf_1.000 | 1358 | 20 | 2.74E-48  | XP_002645668.1 | 60 | 197.593 | 293 | 177 | <i>C. briggsae</i> CBR-DYC-1 protein                                          |
| Locus_456_Transcript_1/1_Conf_1.000  | 1545 | 20 | 5.99E-119 | CBL87054.2     | 67 | 432.565 | 510 | 345 | <i>C. elegans</i> protein F54E4.1, partially confirmed by transcript evidence |
| Locus_4560_Transcript_1/1_Conf_1.000 | 200  | 0  |           |                |    |         |     |     |                                                                               |

|                                      |      |    |           |                |    |         |     |     |                                       |  |
|--------------------------------------|------|----|-----------|----------------|----|---------|-----|-----|---------------------------------------|--|
| Locus_4561_Transcript_1/1_Conf_1.000 | 652  | 0  |           |                |    |         |     |     |                                       |  |
| Locus_4562_Transcript_1/1_Conf_1.000 | 347  | 20 | 1.77E-14  | AAD51334.1     | 77 | 82.4185 | 54  | 42  | Kunitz type serine protease inhibitor |  |
| Locus_4563_Transcript_1/3_Conf_0.714 | 1713 | 4  | 3.77E-16  | XP_002642660.1 | 38 | 91.2781 | 348 | 133 | Hypothetical protein CBG12241         |  |
| Locus_4563_Transcript_2/3_Conf_0.714 | 1731 | 4  | 8.45E-16  | XP_002642660.1 | 41 | 90.1225 | 285 | 119 | Hypothetical protein CBG12241         |  |
| Locus_4563_Transcript_3/3_Conf_0.714 | 1746 | 4  | 8.55E-16  | XP_002642660.1 | 41 | 90.1225 | 285 | 119 | Hypothetical protein CBG12241         |  |
| Locus_4564_Transcript_1/1_Conf_1.000 | 566  | 20 | 3.84E-71  | NP_495527.2    | 80 | 271.166 | 178 | 144 | hypothetical protein F45E12.5         |  |
| Locus_4565_Transcript_1/1_Conf_1.000 | 817  | 20 | 3.11E-68  | XP_001892948.1 | 81 | 262.692 | 186 | 151 | Nuclear movement protein              |  |
| Locus_4566_Transcript_1/1_Conf_1.000 | 1323 | 20 | 1.13E-91  | EFO22421.1     | 68 | 341.658 | 342 | 234 | hypothetical protein LOAG_06064       |  |
| Locus_4567_Transcript_1/1_Conf_1.000 | 944  | 20 | 3.64E-69  | XP_002637052.1 | 61 | 266.159 | 307 | 189 | C. briggsae CBR-TAG-143 protein       |  |
| Locus_4568_Transcript_1/1_Conf_1.000 | 809  | 20 | 3.86E-95  | NP_499340.1    | 87 | 352.058 | 224 | 196 | hypothetical protein Y39A1A.6         |  |
| Locus_4569_Transcript_1/2_Conf_1.000 | 435  | 0  |           |                |    |         |     |     |                                       |  |
| Locus_4569_Transcript_2/2_Conf_1.000 | 313  | 0  |           |                |    |         |     |     |                                       |  |
| Locus_457_Transcript_1/1_Conf_1.000  | 844  | 20 | 3.50E-53  | XP_002723895.1 | 97 | 154.836 | 76  | 74  | PREDICTED: hypothetical protein       |  |
| Locus_4570_Transcript_1/1_Conf_1.000 | 2146 | 20 | 0         | XP_002640017.1 | 76 | 882.478 | 701 | 536 | Hypothetical protein CBG12487         |  |
| Locus_4571_Transcript_1/1_Conf_1.000 | 198  | 0  |           |                |    |         |     |     |                                       |  |
| Locus_4572_Transcript_1/1_Conf_1.000 | 293  | 0  |           |                |    |         |     |     |                                       |  |
| Locus_4573_Transcript_1/1_Conf_1.000 | 1573 | 20 | 1.15E-141 | NP_495226.1    | 87 | 508.064 | 374 | 329 | hypothetical protein C29H12.2         |  |

|                                      |      |    |           |                |    |         |     |     |                                                                   |
|--------------------------------------|------|----|-----------|----------------|----|---------|-----|-----|-------------------------------------------------------------------|
| Locus_4574_Transcript_1/1_Conf_1.000 | 481  | 20 | 3.40E-79  | AAH82286.1     | 96 | 297.36  | 157 | 152 | Rps16 protein                                                     |
| Locus_4575_Transcript_1/1_Conf_1.000 | 261  | 0  |           |                |    |         |     |     |                                                                   |
| Locus_4576_Transcript_1/1_Conf_1.000 | 250  | 20 | 9.69E-34  | EFO25239.1     | 92 | 146.362 | 82  | 76  | nonsense mRNA reducing factor 1 NORF1                             |
| Locus_4577_Transcript_1/1_Conf_1.000 | 684  | 10 | 1.15E-16  | NP_499594.2    | 55 | 90.8929 | 177 | 98  | TIMeless (Drosophila/mammal) related family member (tim-1)        |
| Locus_4578_Transcript_1/2_Conf_1.000 | 1889 | 20 | 9.79E-130 | XP_002629661.1 | 80 | 468.774 | 356 | 288 | C. briggsae CBR-MEL-11 protein                                    |
| Locus_4578_Transcript_2/2_Conf_1.000 | 939  | 20 | 9.05E-20  | NP_001021929.1 | 70 | 102.064 | 106 | 75  | Maternal Effect Lethal family member (mel-11)                     |
| Locus_4579_Transcript_1/2_Conf_1.000 | 696  | 0  |           |                |    |         |     |     |                                                                   |
| Locus_4579_Transcript_2/2_Conf_1.000 | 657  | 0  |           |                |    |         |     |     |                                                                   |
| Locus_458_Transcript_1/1_Conf_1.000  | 2445 | 20 | 0         | NP_505188.3    | 77 | 1075.85 | 818 | 636 | PeroXidasiN (Drosophila peroxidase) homolog family member (pxn-1) |
| Locus_4580_Transcript_1/1_Conf_1.000 | 1626 | 20 | 2.41E-166 | XP_002642943.1 | 88 | 590.112 | 378 | 336 | Hypothetical protein CBG15221                                     |
| Locus_4581_Transcript_1/2_Conf_1.000 | 1656 | 20 | 1.23E-48  | EFO24260.1     | 53 | 199.134 | 324 | 172 | hypothetical protein LOAG_04229                                   |
| Locus_4581_Transcript_2/2_Conf_1.000 | 1662 | 20 | 1.23E-48  | EFO24260.1     | 53 | 199.134 | 324 | 172 | hypothetical protein LOAG_04229                                   |

|                                      |      |    |           |                |    |         |     |     |                                                                  |
|--------------------------------------|------|----|-----------|----------------|----|---------|-----|-----|------------------------------------------------------------------|
| Locus_4582_Transcript_1/1_Conf_1.000 | 1306 | 20 | 4.12E-62  | XP_002643053.1 | 69 | 243.432 | 235 | 164 | C. briggsae CBR-IDI-1 protein                                    |
| Locus_4583_Transcript_1/1_Conf_1.000 | 482  | 20 | 1.27E-17  | CAO00417.1     | 72 | 92.8189 | 80  | 58  | two-domain activation associated secreted protein ASP4 precursor |
| Locus_4584_Transcript_1/1_Conf_1.000 | 312  | 0  |           |                |    |         |     |     |                                                                  |
| Locus_4585_Transcript_1/1_Conf_1.000 | 452  | 4  | 1.63E-12  | XP_001894575.1 | 61 | 75.8702 | 93  | 57  | MGC80099 protein                                                 |
| Locus_4586_Transcript_1/1_Conf_1.000 | 1067 | 5  | 3.64E-39  | XP_002639270.1 | 53 | 166.777 | 310 | 166 | Hypothetical protein CBG03832                                    |
| Locus_4587_Transcript_1/1_Conf_1.000 | 587  | 15 | 1.11E-18  | NP_510576.2    | 61 | 97.0561 | 127 | 78  | hypothetical protein K09E9.1                                     |
| Locus_4588_Transcript_1/1_Conf_1.000 | 1444 | 20 | 1.09E-167 | NP_500801.2    | 83 | 594.349 | 437 | 363 | hypothetical protein ZK616.4                                     |
| Locus_4589_Transcript_1/1_Conf_1.000 | 857  | 20 | 8.75E-40  | NP_496722.1    | 53 | 168.318 | 277 | 149 | hypothetical protein Y46G5A.18                                   |
| Locus_459_Transcript_1/1_Conf_1.000  | 698  | 20 | 2.01E-72  | NP_001021128.1 | 82 | 276.174 | 185 | 153 | PhosphatidylSerine Decarboxylase family member (psd-1)           |
| Locus_4590_Transcript_1/1_Conf_1.000 | 145  | 0  |           |                |    |         |     |     |                                                                  |
| Locus_4591_Transcript_1/1_Conf_1.000 | 566  | 0  |           |                |    |         |     |     |                                                                  |
| Locus_4592_Transcript_1/3_Conf_0.667 | 1744 | 2  | 4.47E-57  | XP_002640509.1 | 48 | 227.254 | 593 | 285 | C. briggsae CBR-RGA-2 protein                                    |
| Locus_4592_Transcript_2/3_Conf_0.667 | 1962 | 20 | 1.89E-83  | XP_002640509.1 | 51 | 315.079 | 666 | 342 | C. briggsae CBR-RGA-2 protein                                    |
| Locus_4592_Transcript_3/3_Conf_0.667 | 1962 | 20 | 5.87E-85  | XP_002640509.1 | 51 | 320.087 | 665 | 343 | C. briggsae CBR-RGA-2 protein                                    |
| Locus_4593_Transcript_1/1_Conf_1.000 | 308  | 20 | 9.17E-16  | XP_002640530.1 | 77 | 86.6557 | 63  | 49  | Hypothetical protein CBG18692                                    |
| Locus_4594_Transcript_1/1_Conf_1.000 | 1520 | 20 | 6.84E-67  | AAF04557.1     | 58 | 259.61  | 391 | 227 | AF177870_1putative PP2C protein phosphatase FEM-2                |
| Locus_4595_Transcript_1/1_Conf_1.000 | 1642 | 20 | 4.33E-147 | NP_495411.2    | 66 | 526.168 | 527 | 350 | hypothetical protein C44B7.2                                     |

|                                      |      |    |           |                |    |         |     |     |                                            |
|--------------------------------------|------|----|-----------|----------------|----|---------|-----|-----|--------------------------------------------|
| Locus_4596_Transcript_1/1_Conf_1.000 | 2185 | 20 | 8.04E-22  | EFO26676.1     | 50 | 110.538 | 224 | 113 | hypothetical protein LOAG_01812            |
| Locus_4597_Transcript_1/1_Conf_1.000 | 166  | 2  | 9.28E-08  | XP_001900302.1 | 77 | 60.077  | 48  | 37  | MSP domain protein                         |
| Locus_4598_Transcript_1/1_Conf_1.000 | 1087 | 20 | 6.27E-111 | NP_001024378.1 | 75 | 405.216 | 365 | 275 | P21-Activated Kinase family member (pak-1) |
| Locus_4599_Transcript_1/1_Conf_1.000 | 1107 | 20 | 5.51E-86  | NP_001024374.1 | 86 | 322.398 | 207 | 180 | Heat Shock Protein family member (hsp-25)  |
| Locus_46_Transcript_1/4_Conf_0.625   | 1770 | 20 | 2.81E-123 | NP_510300.1    | 82 | 447.203 | 312 | 258 | hypothetical protein F55F3.3               |
| Locus_46_Transcript_2/4_Conf_0.625   | 2140 | 20 | 2.72E-123 | NP_510300.1    | 81 | 447.588 | 320 | 262 | hypothetical protein F55F3.3               |

|                                      |      |    |           |             |    |         |     |     |                                             |
|--------------------------------------|------|----|-----------|-------------|----|---------|-----|-----|---------------------------------------------|
| Locus_46_Transcript_3/4_Conf_0.625   | 1792 | 20 | 4.86E-123 | NP_510300.1 | 83 | 446.432 | 312 | 259 | hypothetical protein F55F3.3                |
| Locus_46_Transcript_4/4_Conf_0.625   | 1792 | 20 | 1.08E-122 | NP_510300.1 | 82 | 445.277 | 312 | 258 | hypothetical protein F55F3.3                |
| Locus_460_Transcript_1/1_Conf_1.000  | 2043 | 20 | 0         | NP_491994.2 | 80 | 902.508 | 688 | 555 | hypothetical protein H06O01.2               |
| Locus_4600_Transcript_1/1_Conf_1.000 | 411  | 0  |           |             |    |         |     |     |                                             |
| Locus_4601_Transcript_1/1_Conf_1.000 | 322  | 0  |           |             |    |         |     |     |                                             |
| Locus_4602_Transcript_1/1_Conf_1.000 | 1510 | 20 | 2.27E-155 | NP_507906.1 | 82 | 553.518 | 384 | 318 | Phasmid Socket Absent family member (psa-1) |



|                                      |      |    |           |                |    |         |     |     |                                          |
|--------------------------------------|------|----|-----------|----------------|----|---------|-----|-----|------------------------------------------|
| Locus_4603_Transcript_1/1_Conf_1.000 | 1829 | 20 | 4.60E-177 | NP_509122.1    | 71 | 625.935 | 615 | 439 | hypothetical protein F38B6.4             |
| Locus_4604_Transcript_1/1_Conf_1.000 | 549  | 20 | 3.51E-34  | NP_741467.1    | 63 | 148.288 | 167 | 106 | hypothetical protein C09G4.2             |
| Locus_4605_Transcript_1/2_Conf_1.000 | 1170 | 20 | 1.87E-55  | XP_001900783.1 | 62 | 221.09  | 256 | 161 | Protein kinase domain containing protein |
| Locus_4605_Transcript_2/2_Conf_1.000 | 1205 | 20 | 1.95E-55  | XP_001900783.1 | 62 | 221.09  | 256 | 161 | Protein kinase domain containing protein |
| Locus_4606_Transcript_1/1_Conf_1.000 | 369  | 0  |           |                |    |         |     |     |                                          |
| Locus_4607_Transcript_1/3_Conf_0.429 | 230  | 0  |           |                |    |         |     |     |                                          |
| Locus_4607_Transcript_2/3_Conf_0.429 | 685  | 20 | 4.82E-15  | NP_741604.1    | 55 | 85.5001 | 105 | 58  | hypothetical protein T11A5.6             |
| Locus_4607_Transcript_3/3_Conf_0.571 | 814  | 20 | 6.76E-15  | NP_741604.1    | 55 | 85.5001 | 105 | 58  | hypothetical protein T11A5.6             |
| Locus_4608_Transcript_1/3_Conf_0.571 | 992  | 20 | 4.08E-58  | XP_002636579.1 | 91 | 229.565 | 128 | 117 | Hypothetical protein CBG23273            |

|                                      |      |    |           |                |    |         |     |     |                                                             |
|--------------------------------------|------|----|-----------|----------------|----|---------|-----|-----|-------------------------------------------------------------|
| Locus_4608_Transcript_2/3_Conf_0.429 | 1023 | 20 | 4.31E-58  | XP_002636579.1 | 91 | 229.565 | 128 | 117 | Hypothetical protein CBG23273                               |
| Locus_4608_Transcript_3/3_Conf_0.429 | 949  | 20 | 2.65E-59  | NP_505967.1    | 76 | 233.417 | 171 | 131 | hypothetical protein F55A11.1                               |
| Locus_4609_Transcript_1/1_Conf_1.000 | 2472 | 20 | 2.37E-134 | XP_001900503.1 | 70 | 484.567 | 471 | 332 | Ubiquitin interaction motif family protein                  |
| Locus_461_Transcript_1/1_Conf_1.000  | 987  | 20 | 4.39E-129 | ABP52061.1     | 99 | 465.307 | 255 | 254 | ribosomal protein s4a                                       |
| Locus_4610_Transcript_1/3_Conf_0.667 | 1174 | 20 | 1.15E-121 | XP_002641869.1 | 71 | 441.039 | 399 | 287 | C. briggsae CBR-TEN-1 protein                               |
| Locus_4610_Transcript_2/3_Conf_0.333 | 845  | 20 | 6.21E-91  | XP_002641869.1 | 75 | 338.191 | 269 | 202 | C. briggsae CBR-TEN-1 protein                               |
| Locus_4610_Transcript_3/3_Conf_0.500 | 1083 | 20 | 6.44E-116 | XP_002641869.1 | 71 | 421.779 | 381 | 273 | C. briggsae CBR-TEN-1 protein                               |
| Locus_4611_Transcript_1/1_Conf_1.000 | 178  | 0  |           |                |    |         |     |     |                                                             |
| Locus_4612_Transcript_1/1_Conf_1.000 | 204  | 20 | 5.59E-21  | NP_503392.2    | 88 | 103.99  | 68  | 60  | hypothetical protein Y50D4A.4                               |
| Locus_4613_Transcript_1/2_Conf_1.000 | 2675 | 20 | 0         | NP_001023309.1 | 65 | 701.819 | 786 | 513 | Zygotic epidermal ENclosure defective family member (zen-4) |
| Locus_4613_Transcript_2/2_Conf_1.000 | 560  | 2  | 1.34E-04  | XP_002572590.1 | 53 | 50.0618 | 58  | 31  | rabkinesin-6-related                                        |
| Locus_4614_Transcript_1/1_Conf_1.000 | 609  | 20 | 6.41E-68  | XP_002647499.1 | 92 | 260.766 | 150 | 139 | Hypothetical protein CBG06573                               |

|                                      |      |    |          |                |    |         |      |     |                                 |
|--------------------------------------|------|----|----------|----------------|----|---------|------|-----|---------------------------------|
| Locus_4615_Transcript_1/1_Conf_1.000 | 1016 | 20 | 1.40E-85 | ABV03828.1     | 95 | 320.857 | 189  | 180 | hypothetical protein            |
| Locus_4616_Transcript_1/1_Conf_1.000 | 507  | 20 | 1.79E-33 | XP_002631110.1 | 72 | 145.591 | 118  | 85  | Hypothetical protein CBG02885   |
| Locus_4617_Transcript_1/1_Conf_1.000 | 213  | 4  | 6.11E-20 | XP_002640432.1 | 81 | 100.523 | 74   | 60  | C. briggsae CBR-GRH-1 protein   |
| Locus_4618_Transcript_1/1_Conf_1.000 | 352  | 0  |          |                |    |         |      |     |                                 |
| Locus_4619_Transcript_1/2_Conf_1.000 | 400  | 0  |          |                |    |         |      |     |                                 |
| Locus_4619_Transcript_2/2_Conf_1.000 | 352  | 0  |          |                |    |         |      |     |                                 |
| Locus_462_Transcript_1/1_Conf_1.000  | 4236 | 20 | 0        | NP_498926.2    | 82 | 1436.01 | 1096 | 909 | hypothetical protein ZK370.4    |
| Locus_4620_Transcript_1/1_Conf_1.000 | 1177 | 0  |          |                |    |         |      |     |                                 |
| Locus_4621_Transcript_1/1_Conf_1.000 | 645  |    |          |                |    |         |      |     |                                 |
| Locus_4622_Transcript_1/1_Conf_1.000 | 800  | 20 | 6.75E-44 | XP_002646141.1 | 70 | 181.8   | 177  | 124 | Hypothetical protein CBG08021   |
| Locus_4623_Transcript_1/1_Conf_1.000 | 567  | 20 | 1.95E-54 | XP_002641356.1 | 74 | 215.698 | 182  | 136 | Hypothetical protein CBG13210   |
| Locus_4624_Transcript_1/2_Conf_1.000 | 1342 | 20 | 1.25E-45 | EFO27300.1     | 55 | 188.734 | 276  | 152 | hypothetical protein LOAG_01183 |
| Locus_4624_Transcript_2/2_Conf_1.000 | 697  | 0  |          |                |    |         |      |     |                                 |
| Locus_4625_Transcript_1/3_Conf_0.714 | 1312 | 20 | 3.42E-40 | NP_493727.1    | 46 | 170.629 | 470  | 219 | hypothetical protein C24H12.5   |
| Locus_4625_Transcript_2/3_Conf_0.714 | 1312 | 20 | 5.27E-41 | NP_493727.1    | 46 | 173.326 | 470  | 220 | hypothetical protein C24H12.5   |
| Locus_4625_Transcript_3/3_Conf_0.714 | 1312 | 20 | 1.53E-40 | NP_493727.1    | 46 | 171.785 | 470  | 219 | hypothetical protein C24H12.5   |
| Locus_4626_Transcript_1/1_Conf_1.000 | 538  | 0  |          |                |    |         |      |     |                                 |
| Locus_4627_Transcript_1/1_Conf_1.000 | 733  | 4  | 6.58E-08 | EFO24085.1     | 49 | 62.003  | 205  | 101 | hypothetical protein LOAG_04401 |
| Locus_4628_Transcript_1/1_Conf_1.000 | 313  | 0  |          |                |    |         |      |     |                                 |

|                                      |      |    |           |                |    |         |     |     |                                                                                |
|--------------------------------------|------|----|-----------|----------------|----|---------|-----|-----|--------------------------------------------------------------------------------|
| Locus_4629_Transcript_1/1_Conf_1.000 | 2356 | 20 | 0         | NP_499309.1    | 72 | 647.892 | 580 | 422 | CULLin family member (cul-1)                                                   |
| Locus_463_Transcript_1/1_Conf_1.000  | 730  | 20 | 2.60E-73  | NP_740998.1    | 80 | 279.256 | 212 | 171 | hypothetical protein C25H3.7                                                   |
| Locus_4630_Transcript_1/1_Conf_1.000 | 255  | 2  | 2.82E-28  | NP_491808.1    | 83 | 128.257 | 79  | 66  | hypothetical protein C48E7.1                                                   |
| Locus_4631_Transcript_1/1_Conf_1.000 | 813  | 20 | 6.21E-77  | NP_001022958.1 | 79 | 291.582 | 213 | 169 | hypothetical protein Y82E9BR.14                                                |
| Locus_4632_Transcript_1/1_Conf_1.000 | 1023 | 10 | 1.90E-05  | XP_002632458.1 | 52 | 54.6842 | 84  | 44  | Hypothetical protein CBG13680                                                  |
| Locus_4633_Transcript_1/1_Conf_1.000 | 385  | 20 | 3.03E-51  | NP_491357.1    | 86 | 204.527 | 127 | 110 | hypothetical protein ZK973.3                                                   |
| Locus_4634_Transcript_1/2_Conf_1.000 | 583  | 20 | 5.80E-20  | BAB68205.1     | 71 | 101.293 | 109 | 78  | keratin-like protein                                                           |
| Locus_4634_Transcript_2/2_Conf_1.000 | 583  | 20 | 5.80E-20  | BAB68205.1     | 71 | 101.293 | 109 | 78  | keratin-like protein                                                           |
| Locus_4635_Transcript_1/1_Conf_1.000 | 469  | 0  |           |                |    |         |     |     |                                                                                |
| Locus_4636_Transcript_1/1_Conf_1.000 | 674  | 20 | 8.69E-22  | NP_741210.2    | 66 | 107.842 | 108 | 72  | CYtoKinesis defect family member (cyk-1)                                       |
| Locus_4637_Transcript_1/1_Conf_1.000 | 1654 | 20 | 1.05E-100 | NP_510485.2    | 68 | 372.089 | 400 | 275 | TBC (Tre-2/Bub2/Cdc16) domain family member (tbc-1)                            |
| Locus_4638_Transcript_1/2_Conf_1.000 | 1823 | 20 | 1.37E-72  | XP_002638661.1 | 49 | 278.87  | 629 | 312 | <i>C. briggsae</i> CBR-LIN-10 protein                                          |
| Locus_4638_Transcript_2/2_Conf_1.000 | 1147 | 20 | 3.78E-45  | XP_002638661.1 | 51 | 186.808 | 395 | 202 | <i>C. briggsae</i> CBR-LIN-10 protein                                          |
| Locus_4639_Transcript_1/1_Conf_1.000 | 1126 | 5  | 3.75E-05  | CBK19446.1     | 49 | 53.9138 | 101 | 50  | <i>C. elegans</i> protein F25H8.5f, partially confirmed by transcript evidence |
| Locus_464_Transcript_1/1_Conf_1.000  | 2760 | 20 | 0         | NP_001024053.1 | 95 | 1477.23 | 918 | 874 | UNCoordinated family member (unc-70)                                           |

|                                      |      |    |           |                |    |         |     |     |                                                               |
|--------------------------------------|------|----|-----------|----------------|----|---------|-----|-----|---------------------------------------------------------------|
| Locus_4640_Transcript_1/1_Conf_1.000 | 370  | 20 | 1.14E-29  | XP_002635292.1 | 88 | 132.88  | 85  | 75  | Hypothetical protein CBG11539                                 |
| Locus_4641_Transcript_1/1_Conf_1.000 | 997  | 20 | 7.06E-159 | NP_492714.1    | 92 | 564.303 | 315 | 290 | hypothetical protein ZC434.8                                  |
| Locus_4642_Transcript_1/1_Conf_1.000 | 556  | 20 | 1.17E-40  | NP_506225.1    | 77 | 169.859 | 136 | 105 | TransThyretin-Related family domain family member (ttr-27)    |
| Locus_4643_Transcript_1/3_Conf_0.714 | 1746 | 0  |           |                |    |         |     |     |                                                               |
| Locus_4643_Transcript_2/3_Conf_0.714 | 1835 | 0  |           |                |    |         |     |     |                                                               |
| Locus_4643_Transcript_3/3_Conf_0.714 | 1736 | 0  |           |                |    |         |     |     |                                                               |
| Locus_4644_Transcript_1/1_Conf_1.000 | 682  | 20 | 1.04E-78  | XP_002634015.1 | 91 | 296.975 | 171 | 156 | Hypothetical protein CBG01548                                 |
| Locus_4645_Transcript_1/1_Conf_1.000 | 465  | 0  |           |                |    |         |     |     |                                                               |
| Locus_4646_Transcript_1/1_Conf_1.000 | 209  | 1  | 2.13E-04  | XP_001891653.1 | 63 | 48.9062 | 55  | 35  | 2700029M09Rik protein                                         |
| Locus_4647_Transcript_1/1_Conf_1.000 | 258  | 0  |           |                |    |         |     |     |                                                               |
| Locus_4648_Transcript_1/1_Conf_1.000 | 235  | 0  |           |                |    |         |     |     |                                                               |
| Locus_4649_Transcript_1/1_Conf_1.000 | 180  | 0  |           |                |    |         |     |     |                                                               |
| Locus_465_Transcript_1/1_Conf_1.000  | 2975 | 0  |           |                |    |         |     |     |                                                               |
| Locus_4650_Transcript_1/1_Conf_1.000 | 872  | 20 | 1.67E-110 | NP_498925.1    | 83 | 403.29  | 273 | 227 | Huntingtin Interacting Protein Related family member (hipr-1) |
| Locus_4651_Transcript_1/1_Conf_1.000 | 516  | 3  | 3.77E-18  | NP_496534.1    | 54 | 94.7449 | 166 | 91  | Nuclear Pore complex Protein family member (npp-3)            |
| Locus_4652_Transcript_1/2_Conf_1.000 | 1460 | 20 | 7.38E-71  | XP_002633363.1 | 64 | 272.707 | 331 | 215 | Hypothetical protein CBG06107                                 |
| Locus_4652_Transcript_2/2_Conf_1.000 | 1460 | 20 | 5.65E-71  | XP_002633363.1 | 65 | 273.092 | 331 | 216 | Hypothetical protein CBG06107                                 |
| Locus_4653_Transcript_1/1_Conf_1.000 | 568  | 3  | 5.93E-11  | ABB53347.1     | 46 | 71.2478 | 175 | 81  | secreted protein 5 precursor                                  |

|                                      |      |    |           |                |    |         |     |     |                                 |
|--------------------------------------|------|----|-----------|----------------|----|---------|-----|-----|---------------------------------|
| Locus_4654_Transcript_1/1_Conf_1.000 | 1548 | 20 | 0         | XP_002642624.1 | 86 | 785.408 | 497 | 432 | C. briggsae CBR-ALH-12 protein  |
| Locus_4655_Transcript_1/2_Conf_1.000 | 2128 | 4  | 4.57E-38  | NP_001022043.1 | 49 | 164.466 | 525 | 258 | hypothetical protein C56E6.3    |
| Locus_4655_Transcript_2/2_Conf_1.000 | 2128 | 4  | 4.57E-38  | NP_001022043.1 | 49 | 164.466 | 525 | 258 | hypothetical protein C56E6.3    |
| Locus_4656_Transcript_1/1_Conf_1.000 | 1243 | 3  | 3.83E-86  | XP_002636840.1 | 68 | 323.168 | 316 | 218 | Hypothetical protein CBG09291   |
| Locus_4657_Transcript_1/1_Conf_1.000 | 555  | 20 | 9.30E-22  | EFO17919.1     | 59 | 107.071 | 149 | 88  | hypothetical protein LOAG_10578 |
| Locus_4658_Transcript_1/1_Conf_1.000 | 363  | 20 | 7.67E-47  | EAW59538.1     | 96 | 189.889 | 106 | 102 | hCG2043238                      |
| Locus_4659_Transcript_1/1_Conf_1.000 | 1415 | 20 | 1.91E-84  | EFO18353.1     | 64 | 317.775 | 348 | 225 | protein-tyrosine phosphatase    |
| Locus_466_Transcript_1/1_Conf_1.000  | 874  | 20 | 6.27E-57  | XP_002637708.1 | 66 | 225.328 | 253 | 168 | Hypothetical protein CBG11573   |
| Locus_4660_Transcript_1/1_Conf_1.000 | 1297 | 1  | 5.41E-06  | EFO21658.1     | 48 | 56.9954 | 201 | 97  | hypothetical protein LOAG_06829 |
| Locus_4661_Transcript_1/1_Conf_1.000 | 1761 | 20 | 2.29E-117 | XP_002636578.1 | 73 | 427.557 | 409 | 302 | C. briggsae CBR-SYN-3 protein   |
| Locus_4662_Transcript_1/1_Conf_1.000 | 1650 | 20 | 1.89E-150 | CAB40412.1     | 75 | 537.339 | 478 | 362 | hexokinase                      |
| Locus_4663_Transcript_1/2_Conf_0.667 | 150  | 0  |           |                |    |         |     |     |                                 |
| Locus_4663_Transcript_2/2_Conf_0.667 | 150  | 0  |           |                |    |         |     |     |                                 |

|                                      |      |    |           |                |    |         |     |     |                                                                        |
|--------------------------------------|------|----|-----------|----------------|----|---------|-----|-----|------------------------------------------------------------------------|
| Locus_4664_Transcript_1/1_Conf_1.000 | 128  | 0  |           |                |    |         |     |     |                                                                        |
| Locus_4665_Transcript_1/2_Conf_1.000 | 1242 | 20 | 1.93E-146 | NP_510634.1    | 88 | 523.472 | 325 | 289 | hypothetical protein ZK1073.1                                          |
| Locus_4665_Transcript_2/2_Conf_1.000 | 1233 | 20 | 1.91E-146 | NP_510634.1    | 89 | 523.472 | 322 | 288 | hypothetical protein ZK1073.1                                          |
| Locus_4666_Transcript_1/1_Conf_1.000 | 1129 | 2  | 2.00E-06  | XP_001902477.1 | 42 | 58.151  | 291 | 123 | hypothetical protein Bm1_55095                                         |
| Locus_4667_Transcript_1/1_Conf_1.000 | 614  | 0  |           |                |    |         |     |     |                                                                        |
| Locus_4668_Transcript_1/1_Conf_1.000 | 913  | 20 | 1.65E-63  | NP_496489.1    | 71 | 247.284 | 232 | 167 | proteasome Regulatory Particle, Non-ATPase-like family member (rpn-12) |
| Locus_4669_Transcript_1/2_Conf_1.000 | 685  | 20 | 3.12E-22  | NP_499554.1    | 75 | 109.383 | 113 | 85  | TRanslocon-Associated Protein family member (trap-4)                   |
| Locus_4669_Transcript_2/2_Conf_1.000 | 685  | 20 | 2.02E-21  | NP_499554.1    | 75 | 106.686 | 113 | 85  | TRanslocon-Associated Protein family member (trap-4)                   |
| Locus_467_Transcript_1/3_Conf_0.571  | 794  | 20 | 3.43E-24  | NP_492722.2    | 57 | 116.316 | 165 | 95  | Temporarily Assigned Gene name family member (tag-353)                 |
| Locus_467_Transcript_2/3_Conf_0.714  | 1290 | 20 | 8.48E-44  | NP_492722.2    | 48 | 182.57  | 404 | 197 | Temporarily Assigned Gene name family member (tag-353)                 |
| Locus_467_Transcript_3/3_Conf_0.714  | 1233 | 20 | 2.18E-41  | NP_492722.2    | 48 | 174.481 | 393 | 190 | Temporarily Assigned Gene name family member (tag-353)                 |
| Locus_4670_Transcript_1/1_Conf_1.000 | 512  | 0  |           |                |    |         |     |     |                                                                        |
| Locus_4671_Transcript_1/3_Conf_0.667 | 2699 | 20 | 0         | XP_002640712.1 | 79 | 1191.79 | 903 | 721 | C. briggsae CBR-AGEF-1 protein                                         |

|                                      |      |    |          |                |    |         |     |     |                                 |
|--------------------------------------|------|----|----------|----------------|----|---------|-----|-----|---------------------------------|
| Locus_4671_Transcript_2/3_Conf_0.667 | 2697 | 20 | 0        | XP_002640712.1 | 79 | 1182.55 | 903 | 719 | C. briggsae CBR-AGEF-1 protein  |
| Locus_4671_Transcript_3/3_Conf_0.667 | 2691 | 20 | 0        | XP_002640712.1 | 79 | 1187.56 | 901 | 719 | C. briggsae CBR-AGEF-1 protein  |
| Locus_4672_Transcript_1/1_Conf_1.000 | 461  | 0  |          |                |    |         |     |     |                                 |
| Locus_4673_Transcript_1/1_Conf_1.000 | 812  | 16 | 2.51E-62 | NP_508891.1    | 65 | 243.047 | 220 | 144 | hypothetical protein Y34B4A.9   |
| Locus_4674_Transcript_1/1_Conf_1.000 | 332  | 20 | 5.21E-27 | NP_501808.1    | 82 | 124.02  | 107 | 88  | hypothetical protein F44D12.3   |
| Locus_4675_Transcript_1/1_Conf_1.000 | 360  | 20 | 3.26E-21 | XP_001895511.1 | 97 | 104.76  | 75  | 73  | histone H2A                     |
| Locus_4676_Transcript_1/1_Conf_1.000 | 1193 | 0  |          |                |    |         |     |     |                                 |
| Locus_4677_Transcript_1/1_Conf_1.000 | 372  | 20 | 5.44E-40 | EFO24868.1     | 74 | 167.162 | 119 | 89  | hypothetical protein LOAG_03617 |



|                                      |      |    |           |                |     |         |     |     |                                   |
|--------------------------------------|------|----|-----------|----------------|-----|---------|-----|-----|-----------------------------------|
| Locus_4678_Transcript_1/1_Conf_1.000 | 951  | 20 | 7.29E-118 | NP_493393.1    | 81  | 427.943 | 298 | 243 | hypothetical protein W09C5.7      |
| Locus_4679_Transcript_1/1_Conf_1.000 | 577  | 20 | 7.23E-76  | NP_001023236.1 | 78  | 286.96  | 191 | 150 | hypothetical protein F56H11.1     |
| Locus_468_Transcript_1/2_Conf_1.000  | 124  | 0  |           |                |     |         |     |     |                                   |
| Locus_468_Transcript_2/2_Conf_1.000  | 117  | 0  |           |                |     |         |     |     |                                   |
| Locus_4680_Transcript_1/1_Conf_1.000 | 1582 | 20 | 3.65E-103 | NP_501841.1    | 64  | 380.178 | 465 | 302 | hypothetical protein K08F4.1      |
| Locus_4681_Transcript_1/1_Conf_1.000 | 1624 | 20 | 1.21E-125 | EFO23482.1     | 69  | 454.907 | 479 | 332 | DIRP family protein               |
| Locus_4682_Transcript_1/1_Conf_1.000 | 739  | 0  |           |                |     |         |     |     |                                   |
| Locus_4683_Transcript_1/1_Conf_1.000 | 284  | 0  |           |                |     |         |     |     |                                   |
| Locus_4684_Transcript_1/1_Conf_1.000 | 533  | 20 | 1.62E-86  | AAX29372.1     | 100 | 322.013 | 158 | 158 | ribosomal protein S11             |
| Locus_4685_Transcript_1/1_Conf_1.000 | 552  | 20 | 2.83E-31  | AAG22849.1     | 94  | 138.658 | 84  | 79  | histone H3                        |
| Locus_4686_Transcript_1/1_Conf_1.000 | 443  | 20 | 9.28E-48  | XP_002646073.1 | 78  | 192.971 | 144 | 113 | Hypothetical protein CBG07939     |
| Locus_4687_Transcript_1/1_Conf_1.000 | 451  | 0  |           |                |     |         |     |     |                                   |
| Locus_4688_Transcript_1/3_Conf_0.500 | 764  | 20 | 9.97E-95  | EFB25528.1     | 100 | 350.517 | 172 | 172 | hypothetical protein PANDA_002954 |

|                                      |      |    |          |                |     |         |     |     |                                                                    |
|--------------------------------------|------|----|----------|----------------|-----|---------|-----|-----|--------------------------------------------------------------------|
| Locus_4688_Transcript_2/3_Conf_0.500 | 764  | 20 | 9.97E-95 | EFB25528.1     | 100 | 350.517 | 172 | 172 | hypothetical protein PANDA_002954                                  |
| Locus_4688_Transcript_3/3_Conf_0.500 | 743  | 20 | 7.63E-52 | XP_002819177.1 | 100 | 207.994 | 103 | 103 | PREDICTED: translationally-controlled tumor protein-like isoform 1 |
| Locus_4689_Transcript_1/2_Conf_1.000 | 232  | 0  |          |                |     |         |     |     |                                                                    |
| Locus_4689_Transcript_2/2_Conf_1.000 | 251  | 0  |          |                |     |         |     |     |                                                                    |
| Locus_469_Transcript_1/3_Conf_0.429  | 516  | 0  |          |                |     |         |     |     |                                                                    |
| Locus_469_Transcript_2/3_Conf_0.429  | 1128 | 20 | 1.11E-73 | NP_503425.2    | 94  | 281.567 | 164 | 155 | UNCoordinated family member (unc-60)                               |
| Locus_469_Transcript_3/3_Conf_0.429  | 1325 | 20 | 3.47E-32 | NP_495483.1    | 82  | 144.05  | 97  | 80  | hypothetical protein C27H5.3                                       |
| Locus_4690_Transcript_1/2_Conf_1.000 | 430  | 0  |          |                |     |         |     |     |                                                                    |
| Locus_4690_Transcript_2/2_Conf_1.000 | 428  | 0  |          |                |     |         |     |     |                                                                    |
| Locus_4691_Transcript_1/1_Conf_1.000 | 313  | 1  | 9.78E-05 | EDL84402.1     | 82  | 50.0618 | 52  | 43  | procollagen, type I, alpha 2                                       |
| Locus_4692_Transcript_1/1_Conf_1.000 | 449  | 0  |          |                |     |         |     |     |                                                                    |
| Locus_4693_Transcript_1/1_Conf_1.000 | 538  | 0  |          |                |     |         |     |     |                                                                    |

|                                      |      |    |           |                |     |         |     |     |                                           |
|--------------------------------------|------|----|-----------|----------------|-----|---------|-----|-----|-------------------------------------------|
| Locus_4694_Transcript_1/1_Conf_1.000 | 279  | 20 | 2.10E-28  | BAI45831.1     | 100 | 128.642 | 92  | 92  | lipolysis stimulated lipoprotein receptor |
| Locus_4695_Transcript_1/1_Conf_1.000 | 1095 | 20 | 1.01E-116 | XP_002639317.1 | 75  | 424.476 | 366 | 275 | C. briggsae CBR-ABT-2 protein             |
| Locus_4696_Transcript_1/1_Conf_1.000 | 420  | 10 | 1.03E-14  | EFO27265.1     | 76  | 83.1889 | 65  | 50  | hypothetical protein LOAG_01219           |
| Locus_4697_Transcript_1/1_Conf_1.000 | 1227 | 20 | 1.61E-20  | NP_497863.2    | 50  | 105.145 | 191 | 96  | hypothetical protein R10E4.11             |
| Locus_4698_Transcript_1/1_Conf_1.000 | 997  | 0  |           |                |     |         |     |     |                                           |
| Locus_4699_Transcript_1/2_Conf_1.000 | 3473 | 20 | 0         | NP_495387.2    | 69  | 1041.95 | 881 | 610 | hypothetical protein T13C2.6              |
| Locus_4699_Transcript_2/2_Conf_1.000 | 3410 | 20 | 0         | NP_495387.2    | 69  | 1046.57 | 890 | 615 | hypothetical protein T13C2.6              |
| Locus_47_Transcript_1/1_Conf_1.000   | 1662 | 20 | 1.84E-52  | XP_002630615.1 | 53  | 211.846 | 394 | 210 | Hypothetical protein CBG02280             |
| Locus_470_Transcript_1/1_Conf_1.000  | 389  | 20 | 8.02E-12  | XP_002589394.1 | 61  | 73.559  | 92  | 57  | hypothetical protein BRAFLDRAFT_121800    |
| Locus_4700_Transcript_1/1_Conf_1.000 | 714  | 20 | 7.23E-65  | NP_499489.1    | 70  | 251.136 | 231 | 163 | hypothetical protein Y66D12A.13           |
| Locus_4701_Transcript_1/4_Conf_0.700 | 1192 | 20 | 9.95E-28  | NP_001122519.1 | 70  | 129.028 | 140 | 99  | hypothetical protein T19A6.3              |

|                                        |      |    |           |                |     |         |     |     |                                                                             |
|----------------------------------------|------|----|-----------|----------------|-----|---------|-----|-----|-----------------------------------------------------------------------------|
| Locus_4701_Transcript_2/4_Conf_0.700   | 1192 | 20 | 5.83E-28  | NP_001122519.1 | 70  | 129.798 | 140 | 99  | hypothetical protein T19A6.3                                                |
| Locus_4701_Transcript_3/4_Conf_0.700   | 1186 | 20 | 5.79E-28  | NP_001122519.1 | 70  | 129.798 | 140 | 99  | hypothetical protein T19A6.3                                                |
| Locus_4701_Transcript_4/4_Conf_0.700   | 1186 | 20 | 5.79E-28  | NP_001122519.1 | 70  | 129.798 | 140 | 99  | hypothetical protein T19A6.3                                                |
| Locus_4702_Transcript_1/2_Conf_1.000   | 290  | 5  | 2.15E-28  | NP_502016.2    | 87  | 128.642 | 83  | 73  | hypothetical protein F13E9.1                                                |
| Locus_4702_Transcript_2/2_Conf_1.000   | 291  | 5  | 2.14E-28  | NP_502016.2    | 87  | 128.642 | 83  | 73  | hypothetical protein F13E9.1                                                |
| Locus_4703_Transcript_1/1_Conf_1.000   | 1421 | 1  | 7.49E-04  | XP_505344.1    | 40  | 50.0618 | 124 | 50  | YALIOF12793p                                                                |
| Locus_4704_Transcript_1/1_Conf_1.000   | 229  | 20 | 1.14E-29  | XP_001082945.2 | 100 | 132.88  | 59  | 59  | PREDICTED: 40S ribosomal protein S29-like, partial                          |
| Locus_4705_Transcript_1/1_Conf_1.000   | 671  | 20 | 2.84E-41  | EFO25736.1     | 65  | 172.555 | 199 | 131 | hypothetical protein LOAG_02750                                             |
| Locus_4706_Transcript_1/12_Conf_1.000  | 161  | 0  |           |                |     |         |     |     |                                                                             |
| Locus_4706_Transcript_10/12_Conf_0.179 | 1059 | 0  |           |                |     |         |     |     |                                                                             |
| Locus_4706_Transcript_11/12_Conf_0.179 | 1059 | 0  |           |                |     |         |     |     |                                                                             |
| Locus_4706_Transcript_12/12_Conf_0.321 | 1011 | 0  |           |                |     |         |     |     |                                                                             |
| Locus_4706_Transcript_2/12_Conf_1.000  | 161  | 0  |           |                |     |         |     |     |                                                                             |
| Locus_4706_Transcript_3/12_Conf_0.179  | 1059 | 0  |           |                |     |         |     |     |                                                                             |
| Locus_4706_Transcript_4/12_Conf_0.179  | 1059 | 0  |           |                |     |         |     |     |                                                                             |
| Locus_4706_Transcript_5/12_Conf_0.321  | 1011 | 0  |           |                |     |         |     |     |                                                                             |
| Locus_4706_Transcript_6/12_Conf_0.286  | 1621 | 0  |           |                |     |         |     |     |                                                                             |
| Locus_4706_Transcript_7/12_Conf_0.286  | 1621 | 0  |           |                |     |         |     |     |                                                                             |
| Locus_4706_Transcript_8/12_Conf_0.179  | 1084 | 0  |           |                |     |         |     |     |                                                                             |
| Locus_4706_Transcript_9/12_Conf_0.179  | 1084 | 0  |           |                |     |         |     |     |                                                                             |
| Locus_4707_Transcript_1/1_Conf_1.000   | 1956 | 20 | 1.21E-114 | POC657.2       | 71  | 418.698 | 401 | 288 | Mediator of RNA polymerase II transcription subunit 13                      |
| Locus_4708_Transcript_1/1_Conf_1.000   | 1394 | 20 | 2.39E-164 | XP_002642536.1 | 79  | 583.178 | 466 | 371 | C. briggsae CBR-LRS-1 protein                                               |
| Locus_4709_Transcript_1/1_Conf_1.000   | 677  | 20 | 1.34E-54  | AAK29933.3     | 68  | 216.853 | 224 | 154 | Rab connectin related protein 2, partially confirmed by transcript evidence |

|                                      |      |    |          |                |    |         |     |     |                                                                     |
|--------------------------------------|------|----|----------|----------------|----|---------|-----|-----|---------------------------------------------------------------------|
| Locus_471_Transcript_1/1_Conf_1.000  | 1304 | 20 | 6.27E-95 | NP_741757.1    | 84 | 352.443 | 240 | 203 | Endophilin-Related Protein family member (erp-1)                    |
| Locus_4710_Transcript_1/1_Conf_1.000 | 1237 | 20 | 4.48E-95 | NP_501006.1    | 78 | 352.829 | 298 | 234 | DNaJ domain (prokaryotic heat shock protein) family member (dnj-11) |
| Locus_4711_Transcript_1/1_Conf_1.000 | 204  | 0  |          |                |    |         |     |     |                                                                     |
| Locus_4712_Transcript_1/1_Conf_1.000 | 502  | 0  |          |                |    |         |     |     |                                                                     |
| Locus_4713_Transcript_1/1_Conf_1.000 | 1224 | 20 | 7.38E-50 | NP_492079.1    | 55 | 202.601 | 362 | 200 | INneXin family member (inx-14)                                      |
| Locus_4714_Transcript_1/1_Conf_1.000 | 858  | 7  | 2.71E-73 | XP_002630128.1 | 78 | 279.641 | 226 | 177 | Hypothetical protein CBG00530                                       |
| Locus_4715_Transcript_1/1_Conf_1.000 | 1395 | 20 | 4.77E-96 | XP_002639374.1 | 60 | 356.295 | 461 | 279 | Hypothetical protein CBG03958                                       |
| Locus_4716_Transcript_1/1_Conf_1.000 | 402  | 3  | 8.09E-28 | XP_002643229.1 | 64 | 126.716 | 130 | 84  | Hypothetical protein CBG08094                                       |
| Locus_4717_Transcript_1/1_Conf_1.000 | 399  | 5  | 1.88E-16 | AAL77521.1     | 86 | 88.9669 | 59  | 51  | L80003_1guanylyl cyclase                                            |
| Locus_4718_Transcript_1/1_Conf_1.000 | 412  | 0  |          |                |    |         |     |     |                                                                     |
| Locus_4719_Transcript_1/1_Conf_1.000 | 1150 | 20 | 3.76E-85 | NP_509396.1    | 66 | 319.701 | 374 | 247 | Kinase Suppressor of activated Ras family member (ksr-1)            |
| Locus_472_Transcript_1/1_Conf_1.000  | 357  | 20 | 4.56E-54 | XP_001231536.1 | 97 | 184.496 | 89  | 87  | PREDICTED: similar to Ac1147                                        |
| Locus_4720_Transcript_1/1_Conf_1.000 | 306  | 0  |          |                |    |         |     |     |                                                                     |
| Locus_4721_Transcript_1/1_Conf_1.000 | 186  | 0  |          |                |    |         |     |     |                                                                     |
| Locus_4722_Transcript_1/1_Conf_1.000 | 260  | 20 | 2.01E-26 | XP_002629686.1 | 66 | 122.094 | 86  | 57  | Hypothetical protein CBG00906                                       |

|                                      |      |    |           |                |    |         |     |     |                                      |
|--------------------------------------|------|----|-----------|----------------|----|---------|-----|-----|--------------------------------------|
| Locus_4723_Transcript_1/3_Conf_0.600 | 2038 | 20 | 7.76E-96  | XP_002639673.1 | 74 | 356.295 | 325 | 242 | Hypothetical protein CBG12391        |
| Locus_4723_Transcript_2/3_Conf_0.400 | 785  | 20 | 2.59E-109 | ACD85815.1     | 91 | 399.053 | 251 | 229 | forkhead transcription factor DAF-16 |
| Locus_4723_Transcript_3/3_Conf_0.600 | 2696 | 20 | 6.63E-170 | XP_002639673.1 | 73 | 602.823 | 549 | 406 | Hypothetical protein CBG12391        |

|                                      |      |    |          |                |    |         |     |     |                                         |
|--------------------------------------|------|----|----------|----------------|----|---------|-----|-----|-----------------------------------------|
| Locus_4724_Transcript_1/1_Conf_1.000 | 792  | 20 | 3.05E-89 | NP_509768.1    | 89 | 332.413 | 221 | 198 | SYnapse Defective family member (syd-2) |
| Locus_4725_Transcript_1/1_Conf_1.000 | 497  | 20 | 7.99E-36 | NP_498091.1    | 68 | 153.295 | 148 | 102 | hypothetical protein Y54H5A.1           |
| Locus_4726_Transcript_1/1_Conf_1.000 | 469  | 19 | 3.90E-14 | NP_001022134.1 | 54 | 81.2629 | 150 | 81  | hypothetical protein F32A5.1            |
| Locus_4727_Transcript_1/1_Conf_1.000 | 753  | 20 | 1.36E-80 | EFO15635.1     | 73 | 303.523 | 257 | 190 | histone deacetylase 7A                  |
| Locus_4728_Transcript_1/1_Conf_1.000 | 316  | 1  | 2.83E-12 | NP_497506.3    | 62 | 75.0998 | 96  | 60  | hypothetical protein Y48G9A.3           |
| Locus_4729_Transcript_1/1_Conf_1.000 | 1142 | 20 | 2.85E-77 | XP_002639579.1 | 72 | 293.508 | 287 | 207 | C. briggsae CBR-COGC-3 protein          |
| Locus_473_Transcript_1/1_Conf_1.000  | 1200 | 20 | 1.82E-45 | NP_001021222.1 | 83 | 187.963 | 123 | 103 | hypothetical protein C46F11.6           |
| Locus_4730_Transcript_1/1_Conf_1.000 | 434  | 8  | 3.72E-25 | EFO25373.1     | 90 | 117.857 | 71  | 64  | laterally symmetric protein 2           |
| Locus_4731_Transcript_1/1_Conf_1.000 | 792  | 0  |          |                |    |         |     |     |                                         |
| Locus_4732_Transcript_1/1_Conf_1.000 | 640  | 0  |          |                |    |         |     |     |                                         |
| Locus_4733_Transcript_1/1_Conf_1.000 | 843  | 20 | 2.38E-58 | XP_002636734.1 | 82 | 229.95  | 187 | 154 | Hypothetical protein CBG23457           |

|                                      |      |    |           |                |    |         |     |     |                                                                     |  |
|--------------------------------------|------|----|-----------|----------------|----|---------|-----|-----|---------------------------------------------------------------------|--|
| Locus_4734_Transcript_1/1_Conf_1.000 | 693  | 0  |           |                |    |         |     |     |                                                                     |  |
| Locus_4735_Transcript_1/1_Conf_1.000 | 1299 | 20 | 6.84E-17  | XP_001686160.1 | 45 | 93.2041 | 337 | 154 | hypothetical protein                                                |  |
| Locus_4736_Transcript_1/1_Conf_1.000 | 171  | 20 | 6.59E-14  | NP_001033378.1 | 82 | 80.4925 | 56  | 46  | Acyl CoA DeHydrogenase family member (acdh-11)                      |  |
| Locus_4737_Transcript_1/1_Conf_1.000 | 313  | 0  |           |                |    |         |     |     |                                                                     |  |
| Locus_4738_Transcript_1/1_Conf_1.000 | 226  | 0  |           |                |    |         |     |     |                                                                     |  |
| Locus_4739_Transcript_1/1_Conf_1.000 | 1066 | 4  | 2.62E-13  | NP_001022570.1 | 45 | 80.8777 | 286 | 131 | CYLinDromatosis (human disease gene) homolog family member (cyld-1) |  |
| Locus_474_Transcript_1/1_Conf_1.000  | 1263 | 20 | 3.54E-71  | XP_002638777.1 | 57 | 273.478 | 384 | 219 | C. briggsae CBR-NAS-30 protein                                      |  |
| Locus_4740_Transcript_1/1_Conf_1.000 | 267  | 20 | 2.06E-15  | NP_510369.2    | 66 | 85.5001 | 78  | 52  | Cytochrome P450 family member (cyp-13B2)                            |  |
| Locus_4741_Transcript_1/1_Conf_1.000 | 2195 | 20 | 0         | XP_002641659.1 | 81 | 660.603 | 475 | 387 | C. briggsae CBR-CNX-1 protein                                       |  |
| Locus_4742_Transcript_1/1_Conf_1.000 | 307  | 0  |           |                |    |         |     |     |                                                                     |  |
| Locus_4743_Transcript_1/2_Conf_0.500 | 620  | 20 | 6.23E-74  | XP_002631314.1 | 92 | 280.796 | 164 | 151 | C. briggsae CBR-LDH-1 protein                                       |  |
| Locus_4743_Transcript_2/2_Conf_0.750 | 1200 | 20 | 1.27E-155 | XP_002631314.1 | 93 | 553.903 | 333 | 311 | C. briggsae CBR-LDH-1 protein                                       |  |
| Locus_4744_Transcript_1/1_Conf_1.000 | 913  | 3  | 3.02E-57  | XP_002644945.1 | 79 | 226.483 | 165 | 131 | C. briggsae CBR-GEI-15 protein                                      |  |
| Locus_4745_Transcript_1/1_Conf_1.000 | 736  | 20 | 1.51E-52  | XP_002637823.1 | 75 | 210.305 | 169 | 128 | Hypothetical protein CBG04612                                       |  |



|                                      |      |    |           |                |    |         |     |     |                                 |
|--------------------------------------|------|----|-----------|----------------|----|---------|-----|-----|---------------------------------|
| Locus_4746_Transcript_1/1_Conf_1.000 | 353  | 0  |           |                |    |         |     |     |                                 |
| Locus_4747_Transcript_1/1_Conf_1.000 | 494  | 20 | 5.06E-14  | EFO19472.1     | 76 | 80.8777 | 55  | 42  | hypothetical protein LOAG_09023 |
| Locus_4748_Transcript_1/1_Conf_1.000 | 200  | 20 | 7.86E-15  | EFO25038.1     | 73 | 83.5741 | 57  | 42  | ribosomal protein rps15a        |
| Locus_4749_Transcript_1/1_Conf_1.000 | 1128 | 20 | 6.10E-72  | NP_001122953.1 | 64 | 275.789 | 334 | 217 | hypothetical protein F53H10.2   |
| Locus_475_Transcript_1/1_Conf_1.000  | 1129 | 20 | 1.09E-137 | XP_002642128.1 | 87 | 494.197 | 324 | 285 | Hypothetical protein CBG18075   |
| Locus_4750_Transcript_1/1_Conf_1.000 | 1415 | 3  | 5.70E-04  | EFN86671.1     | 47 | 50.447  | 104 | 49  | hypothetical protein EAI_03706  |
| Locus_4751_Transcript_1/1_Conf_1.000 | 211  | 0  |           |                |    |         |     |     |                                 |
| Locus_4752_Transcript_1/1_Conf_1.000 | 216  | 20 | 1.50E-10  | NP_501645.1    | 81 | 69.3218 | 43  | 35  | hypothetical protein T20D3.8    |
| Locus_4753_Transcript_1/1_Conf_1.000 | 257  | 20 | 3.56E-23  | XP_002642088.1 | 86 | 111.309 | 67  | 58  | C. briggsae CBR-SEL-2 protein   |
| Locus_4754_Transcript_1/1_Conf_1.000 | 451  | 20 | 5.05E-30  | XP_002642343.1 | 65 | 134.035 | 158 | 103 | C. briggsae CBR-CNT-2 protein   |

|                                      |      |    |           |                |    |         |     |     |                                            |
|--------------------------------------|------|----|-----------|----------------|----|---------|-----|-----|--------------------------------------------|
| Locus_4755_Transcript_1/1_Conf_1.000 | 334  | 20 | 9.46E-29  | XP_002640337.1 | 80 | 129.798 | 102 | 82  | Hypothetical protein CBG12886              |
| Locus_4756_Transcript_1/1_Conf_1.000 | 659  | 20 | 5.18E-56  | A8Y1R8.2       | 86 | 221.476 | 144 | 124 | Nuclear cap-binding protein subunit 2      |
| Locus_4757_Transcript_1/1_Conf_1.000 | 361  | 4  | 5.57E-13  | NP_491231.2    | 59 | 77.411  | 103 | 61  | hypothetical protein C32E8.11              |
| Locus_4758_Transcript_1/1_Conf_1.000 | 2090 | 20 | 2.93E-106 | XP_001897036.1 | 72 | 390.963 | 517 | 373 | Laminin-like protein C54D1.5 precursor     |
| Locus_4759_Transcript_1/1_Conf_1.000 | 518  | 3  | 2.21E-18  | XP_001896542.1 | 55 | 95.5153 | 186 | 104 | hypothetical protein Bm1_25410             |
| Locus_476_Transcript_1/1_Conf_1.000  | 449  | 0  |           |                |    |         |     |     |                                            |
| Locus_4760_Transcript_1/1_Conf_1.000 | 687  | 20 | 6.92E-70  | NP_505399.1    | 76 | 267.7   | 229 | 175 | hypothetical protein ZK682.2               |
| Locus_4761_Transcript_1/1_Conf_1.000 | 258  | 4  | 2.47E-08  | EFO22604.1     | 67 | 62.003  | 76  | 51  | RPN-3 protein                              |
| Locus_4762_Transcript_1/1_Conf_1.000 | 650  | 20 | 1.67E-51  | NP_506166.1    | 75 | 206.453 | 169 | 128 | hypothetical protein W05B10.4              |
| Locus_4763_Transcript_1/1_Conf_1.000 | 407  | 20 | 1.05E-43  | NP_001023224.1 | 96 | 179.489 | 84  | 81  | EGG Laying defective family member (egl-4) |
| Locus_4764_Transcript_1/1_Conf_1.000 | 289  | 20 | 3.79E-33  | XP_002637628.1 | 84 | 144.436 | 96  | 81  | Hypothetical protein CBG19373              |
| Locus_4765_Transcript_1/1_Conf_1.000 | 485  | 20 | 4.02E-51  | XP_002639970.1 | 80 | 204.142 | 150 | 120 | C. briggsae CBR-LFE-2 protein              |
| Locus_4766_Transcript_1/1_Conf_1.000 | 963  | 0  |           |                |    |         |     |     |                                            |
| Locus_4767_Transcript_1/1_Conf_1.000 | 945  | 20 | 3.54E-72  | XP_001901072.1 | 74 | 276.174 | 254 | 190 | Negative elongation factor C/D             |
| Locus_4768_Transcript_1/1_Conf_1.000 | 800  | 0  |           |                |    |         |     |     |                                            |

|                                      |      |    |          |                |    |         |     |     |                                              |
|--------------------------------------|------|----|----------|----------------|----|---------|-----|-----|----------------------------------------------|
| Locus_4769_Transcript_1/1_Conf_1.000 | 316  | 0  |          |                |    |         |     |     |                                              |
| Locus_4777_Transcript_1/1_Conf_1.000 | 610  | 20 | 1.12E-88 | NP_497791.1    | 86 | 329.717 | 202 | 175 | NITrilase family member (nit-1)              |
| Locus_4770_Transcript_1/1_Conf_1.000 | 1491 | 5  | 1.56E-07 | XP_002641851.1 | 56 | 62.3882 | 87  | 49  | C. briggsae CBR-WIP-1 protein                |
| Locus_4771_Transcript_1/1_Conf_1.000 | 450  | 3  | 5.07E-14 | NP_001024707.1 | 55 | 80.8777 | 141 | 78  | UNCoordinated family member (unc-84)         |
| Locus_4772_Transcript_1/1_Conf_1.000 | 804  | 20 | 1.24E-85 | XP_002632607.1 | 98 | 320.472 | 163 | 161 | C. briggsae CBR-ARL-8 protein                |
| Locus_4773_Transcript_1/1_Conf_1.000 | 329  | 20 | 2.05E-31 | XP_001895767.1 | 77 | 138.658 | 109 | 84  | ncbp1-prov protein-like                      |
| Locus_4774_Transcript_1/1_Conf_1.000 | 337  | 0  |          |                |    |         |     |     |                                              |
| Locus_4775_Transcript_1/2_Conf_1.000 | 1921 | 20 | 0        | NP_491281.1    | 79 | 646.351 | 499 | 396 | Alanyl tRNA Synthetase family member (ars-2) |

|                                      |      |    |           |                |    |         |     |     |                                                              |
|--------------------------------------|------|----|-----------|----------------|----|---------|-----|-----|--------------------------------------------------------------|
| Locus_4775_Transcript_2/2_Conf_1.000 | 3179 | 20 | 0         | NP_491281.1    | 86 | 1490.71 | 968 | 833 | Alanyl tRNA Synthetase family member (ars-2)                 |
| Locus_4776_Transcript_1/1_Conf_1.000 | 402  | 20 | 9.30E-08  | XP_001945955.1 | 57 | 60.077  | 85  | 49  | PREDICTED: similar to conserved hypothetical protein         |
| Locus_4777_Transcript_1/1_Conf_1.000 | 342  | 5  | 1.96E-13  | AAL35733.2     | 65 | 78.9518 | 82  | 54  | AC103567_7Hypothetical protein Y51F10.6                      |
| Locus_4778_Transcript_1/1_Conf_1.000 | 129  | 0  |           |                |    |         |     |     |                                                              |
| Locus_4779_Transcript_1/1_Conf_1.000 | 398  | 1  | 8.48E-09  | NP_741716.2    | 67 | 63.5438 | 80  | 54  | hypothetical protein F55A4.8                                 |
| Locus_478_Transcript_1/1_Conf_1.000  | 547  | 20 | 2.54E-53  | XP_002633479.1 | 79 | 211.846 | 173 | 137 | Hypothetical protein CBG06250                                |
| Locus_4780_Transcript_1/1_Conf_1.000 | 325  | 20 | 2.97E-30  | EFO19570.1     | 80 | 134.806 | 91  | 73  | MH2 domain-containing protein                                |
| Locus_4781_Transcript_1/1_Conf_1.000 | 1553 | 20 | 3.97E-179 | NP_001033376.1 | 84 | 632.484 | 408 | 343 | hypothetical protein Y39E4A.3                                |
| Locus_4782_Transcript_1/1_Conf_1.000 | 535  | 0  |           |                |    |         |     |     |                                                              |
| Locus_4783_Transcript_1/1_Conf_1.000 | 258  | 0  |           |                |    |         |     |     |                                                              |
| Locus_4784_Transcript_1/1_Conf_1.000 | 484  | 0  |           |                |    |         |     |     |                                                              |
| Locus_4785_Transcript_1/1_Conf_1.000 | 247  | 0  |           |                |    |         |     |     |                                                              |
| Locus_4786_Transcript_1/1_Conf_1.000 | 129  | 0  |           |                |    |         |     |     |                                                              |
| Locus_4787_Transcript_1/2_Conf_1.000 | 2230 | 20 | 2.20E-91  | CAA92687.2     | 57 | 341.658 | 624 | 357 | C. elegans protein T01H3.3, confirmed by transcript evidence |
| Locus_4787_Transcript_2/2_Conf_1.000 | 2230 | 20 | 6.40E-91  | CAA92687.2     | 57 | 340.117 | 624 | 357 | C. elegans protein T01H3.3, confirmed by transcript evidence |
| Locus_4788_Transcript_1/1_Conf_1.000 | 301  | 0  |           |                |    |         |     |     |                                                              |
| Locus_4789_Transcript_1/2_Conf_1.000 | 1881 | 20 | 2.01E-58  | NP_740838.1    | 49 | 231.876 | 616 | 303 | hypothetical protein C44E4.1                                 |
| Locus_4789_Transcript_2/2_Conf_1.000 | 2508 | 20 | 1.69E-87  |                | 50 | 328.946 | 792 | 403 | protein C44E4.1a                                             |

|                                      |      |    |           |                |     |         |     |     |                                                                         |
|--------------------------------------|------|----|-----------|----------------|-----|---------|-----|-----|-------------------------------------------------------------------------|
| Locus_479_Transcript_1/1_Conf_1.000  | 669  | 20 | 3.68E-73  | NP_493394.1    | 88  | 278.485 | 177 | 156 | hypothetical protein W09C5.8                                            |
| Locus_4790_Transcript_1/1_Conf_1.000 | 719  | 20 | 1.81E-39  | XP_001900667.1 | 69  | 166.777 | 162 | 112 | Hypothetical 26.6 kDa protein T19C3.4 in chromosome III, putative       |
| Locus_4791_Transcript_1/1_Conf_1.000 | 1444 | 20 | 9.67E-124 | XP_002646894.1 | 72  | 448.358 | 482 | 348 | Hypothetical protein CBG19592                                           |
| Locus_4792_Transcript_1/2_Conf_1.000 | 411  | 0  |           |                |     |         |     |     |                                                                         |
| Locus_4792_Transcript_2/2_Conf_1.000 | 520  | 0  |           |                |     |         |     |     |                                                                         |
| Locus_4793_Transcript_1/1_Conf_1.000 | 1470 | 20 | 1.41E-170 | EFO22286.1     | 85  | 603.979 | 415 | 353 | hypothetical protein LOAG_06198                                         |
| Locus_4794_Transcript_1/1_Conf_1.000 | 402  | 20 | 3.29E-21  | CAN99691.2     | 65  | 104.76  | 140 | 91  | C. elegans protein F54B3.1b, partially confirmed by transcript evidence |
| Locus_4795_Transcript_1/1_Conf_1.000 | 392  | 20 | 2.91E-38  | XP_001897484.1 | 100 | 161.384 | 75  | 75  | Dynein light chain 1, cytoplasmic                                       |
| Locus_4796_Transcript_1/1_Conf_1.000 | 753  | 8  | 1.34E-19  | NP_001122567.1 | 63  | 100.908 | 118 | 75  | hypothetical protein ZK484.1                                            |
| Locus_4797_Transcript_1/1_Conf_1.000 | 608  | 0  |           |                |     |         |     |     |                                                                         |
| Locus_4798_Transcript_1/1_Conf_1.000 | 334  | 0  |           |                |     |         |     |     |                                                                         |
| Locus_4799_Transcript_1/1_Conf_1.000 | 290  | 5  | 3.01E-14  | XP_002639656.1 | 73  | 81.6481 | 65  | 48  | Hypothetical protein CBG12372                                           |
| Locus_48_Transcript_1/3_Conf_0.714   | 2079 | 20 | 0         | NP_001022777.1 | 83  | 854.744 | 574 | 480 | Prolyl tRNA Synthetase family member (prs-1)                            |
| Locus_48_Transcript_2/3_Conf_0.714   | 2079 | 20 | 0         | NP_001022777.1 | 83  | 856.67  | 574 | 480 | Prolyl tRNA Synthetase family member (prs-1)                            |

|                                      |      |    |           |                |    |         |     |     |                                                   |
|--------------------------------------|------|----|-----------|----------------|----|---------|-----|-----|---------------------------------------------------|
| Locus_48_Transcript_3/3_Conf_0.714   | 2079 | 20 | 0         | NP_001022777.1 | 83 | 856.67  | 574 | 480 | Prolyl tRNA Synthetase family member (prs-1)      |
| Locus_480_Transcript_1/1_Conf_1.000  | 391  | 5  | 2.73E-28  | XP_002629758.1 | 72 | 128.257 | 108 | 78  | Hypothetical protein CBG00994                     |
| Locus_4800_Transcript_1/1_Conf_1.000 | 223  | 20 | 2.28E-26  | XP_002825112.1 | 96 | 98.2117 | 51  | 49  | PREDICTED: 40S ribosomal protein SA-like, partial |
| Locus_4801_Transcript_1/3_Conf_0.500 | 823  | 20 | 2.30E-119 | NP_001122815.1 | 89 | 432.565 | 264 | 236 | STAT transcription factor family member (sta-1)   |
| Locus_4801_Transcript_2/3_Conf_0.500 | 823  | 20 | 2.30E-119 | NP_001122815.1 | 89 | 432.565 | 264 | 236 | STAT transcription factor family member (sta-1)   |
| Locus_4801_Transcript_3/3_Conf_0.333 | 385  | 0  |           |                |    |         |     |     |                                                   |
| Locus_4802_Transcript_1/2_Conf_1.000 | 639  | 20 | 5.56E-28  | XP_002642547.1 | 81 | 128.257 | 96  | 78  | Hypothetical protein CBG20173                     |
| Locus_4802_Transcript_2/2_Conf_1.000 | 636  | 20 | 5.49E-28  | XP_002642547.1 | 81 | 128.257 | 96  | 78  | Hypothetical protein CBG20173                     |

|                                      |      |    |           |                |    |         |     |     |                               |
|--------------------------------------|------|----|-----------|----------------|----|---------|-----|-----|-------------------------------|
| Locus_4803_Transcript_1/1_Conf_1.000 | 791  | 20 | 1.35E-105 | XP_001898121.1 | 86 | 386.726 | 253 | 220 | Cab39 protein                 |
| Locus_4804_Transcript_1/1_Conf_1.000 | 428  | 20 | 5.41E-32  | NP_507590.2    | 65 | 140.584 | 137 | 90  | hypothetical protein C08E8.2  |
| Locus_4805_Transcript_1/2_Conf_1.000 | 2576 | 20 | 0         | NP_498362.1    | 90 | 1243.02 | 743 | 669 | hypothetical protein T12A2.2  |
| Locus_4805_Transcript_2/2_Conf_1.000 | 2576 | 20 | 0         | NP_498362.1    | 90 | 1243.02 | 743 | 669 | hypothetical protein T12A2.2  |
| Locus_4806_Transcript_1/1_Conf_1.000 | 660  | 20 | 8.27E-38  | NP_001022574.1 | 73 | 160.999 | 136 | 100 | hypothetical protein F42A10.9 |

|                                      |     |    |          |                |    |         |     |     |                                  |
|--------------------------------------|-----|----|----------|----------------|----|---------|-----|-----|----------------------------------|
| Locus_4807_Transcript_1/2_Conf_1.000 | 794 | 20 | 1.05E-89 | NP_501105.2    | 94 | 333.954 | 194 | 183 | Dense Body family member (deb-1) |
| Locus_4807_Transcript_2/2_Conf_1.000 | 761 | 20 | 1.87E-85 | NP_741437.1    | 95 | 319.701 | 183 | 175 | Dense Body family member (deb-1) |
| Locus_4808_Transcript_1/1_Conf_1.000 | 449 | 20 | 6.61E-38 | XP_002640077.1 | 80 | 160.229 | 148 | 119 | Hypothetical protein CBG12562    |
| Locus_4809_Transcript_1/1_Conf_1.000 | 467 | 20 | 2.79E-28 | XP_002646150.1 | 83 | 128.257 | 80  | 67  | C. briggsae CBR-VRS-2 protein    |
| Locus_481_Transcript_1/8_Conf_0.300  | 614 | 0  |          |                |    |         |     |     |                                  |
| Locus_481_Transcript_2/8_Conf_0.300  | 656 | 0  |          |                |    |         |     |     |                                  |
| Locus_481_Transcript_3/8_Conf_0.200  | 224 | 0  |          |                |    |         |     |     |                                  |



|                                      |      |    |           |                |    |         |     |     |                                                             |  |
|--------------------------------------|------|----|-----------|----------------|----|---------|-----|-----|-------------------------------------------------------------|--|
| Locus_481_Transcript_4/8_Conf_0.200  | 224  | 0  |           |                |    |         |     |     |                                                             |  |
| Locus_481_Transcript_5/8_Conf_0.350  | 515  | 0  |           |                |    |         |     |     |                                                             |  |
| Locus_481_Transcript_6/8_Conf_0.350  | 515  | 0  |           |                |    |         |     |     |                                                             |  |
| Locus_481_Transcript_7/8_Conf_0.200  | 210  | 0  |           |                |    |         |     |     |                                                             |  |
| Locus_481_Transcript_8/8_Conf_0.200  | 210  | 0  |           |                |    |         |     |     |                                                             |  |
| Locus_4810_Transcript_1/1_Conf_1.000 | 1331 | 20 | 1.20E-141 | NP_497545.1    | 73 | 507.679 | 434 | 318 | hypothetical protein H14E04.2                               |  |
| Locus_4811_Transcript_1/1_Conf_1.000 | 243  | 0  |           |                |    |         |     |     |                                                             |  |
| Locus_4812_Transcript_1/1_Conf_1.000 | 897  | 11 | 1.67E-28  | NP_506519.1    | 57 | 130.954 | 266 | 154 | hypothetical protein T16A9.5                                |  |
| Locus_4813_Transcript_1/1_Conf_1.000 | 161  | 0  |           |                |    |         |     |     |                                                             |  |
| Locus_4814_Transcript_1/1_Conf_1.000 | 759  | 20 | 6.85E-96  | NP_497088.3    | 85 | 354.369 | 228 | 195 | hypothetical protein Y53F4B.4                               |  |
| Locus_4815_Transcript_1/1_Conf_1.000 | 923  | 20 | 4.54E-93  | XP_002637195.1 | 75 | 345.51  | 307 | 231 | C. briggsae CBR-LIG-1 protein                               |  |
| Locus_4816_Transcript_1/1_Conf_1.000 | 279  | 0  |           |                |    |         |     |     |                                                             |  |
| Locus_4817_Transcript_1/2_Conf_1.000 | 639  | 0  |           |                |    |         |     |     |                                                             |  |
| Locus_4817_Transcript_2/2_Conf_1.000 | 619  | 0  |           |                |    |         |     |     |                                                             |  |
| Locus_4818_Transcript_1/1_Conf_1.000 | 1915 | 20 | 3.89E-158 | CAR63668.1     | 96 | 563.148 | 341 | 328 | putative eukaryotic translation initiation factor 5         |  |
| Locus_4819_Transcript_1/2_Conf_1.000 | 1240 | 20 | 6.60E-155 | NP_001040645.1 | 86 | 551.592 | 387 | 336 | RSK-pNinety (RSK-p90 kinase) homolog family member (rskn-2) |  |

|                                      |      |    |           |                |    |         |     |     |                                                             |
|--------------------------------------|------|----|-----------|----------------|----|---------|-----|-----|-------------------------------------------------------------|
| Locus_4819_Transcript_2/2_Conf_1.000 | 1222 | 20 | 1.14E-151 | NP_001040645.1 | 85 | 540.806 | 387 | 331 | RSK-pNinety (RSK-p90 kinase) homolog family member (rskn-2) |
| Locus_482_Transcript_1/1_Conf_1.000  | 797  | 4  | 2.56E-19  | XP_002639966.1 | 53 | 100.138 | 129 | 69  | Hypothetical protein CBG10790                               |
| Locus_4820_Transcript_1/1_Conf_1.000 | 1240 | 20 | 7.87E-124 | XP_002631383.1 | 82 | 448.358 | 297 | 245 | Hypothetical protein CBG03225                               |
| Locus_4821_Transcript_1/2_Conf_1.000 | 1360 | 20 | 1.50E-70  | NP_498908.2    | 72 | 271.552 | 252 | 183 | hypothetical protein F22B7.9                                |
| Locus_4821_Transcript_2/2_Conf_1.000 | 1348 | 20 | 1.17E-67  | NP_498908.2    | 71 | 261.922 | 252 | 181 | hypothetical protein F22B7.9                                |
| Locus_4822_Transcript_1/1_Conf_1.000 | 608  | 2  | 2.52E-16  | NP_497585.1    | 47 | 89.3521 | 190 | 91  | G Protein, Alpha subunit family member (gpa-17)             |
| Locus_4823_Transcript_1/1_Conf_1.000 | 927  | 20 | 7.78E-117 | NP_506620.1    | 87 | 424.476 | 309 | 271 | Peroxisomal Membrane Protein related family member (pmp-3)  |

|                                      |      |    |           |                |     |         |     |     |                                                               |
|--------------------------------------|------|----|-----------|----------------|-----|---------|-----|-----|---------------------------------------------------------------|
| Locus_4824_Transcript_1/1_Conf_1.000 | 356  | 20 | 2.35E-27  | EAW76795.1     | 100 | 125.176 | 118 | 118 | collagen, type I, alpha 2, isoform CRA_b                      |
| Locus_4825_Transcript_1/3_Conf_0.600 | 642  | 4  | 6.45E-16  | XP_002642726.1 | 62  | 88.1965 | 136 | 85  | Hypothetical protein CBG21101                                 |
| Locus_4825_Transcript_2/3_Conf_0.400 | 1017 | 20 | 4.91E-38  | NP_509098.2    | 81  | 162.925 | 119 | 97  | TransThyretin-Related family domain family member (ttr-35)    |
| Locus_4825_Transcript_3/3_Conf_0.600 | 636  | 4  | 1.19E-14  | XP_002642726.1 | 63  | 83.9593 | 133 | 84  | Hypothetical protein CBG21101                                 |
| Locus_4826_Transcript_1/1_Conf_1.000 | 1479 | 20 | 4.45E-156 | NP_500829.2    | 87  | 555.829 | 314 | 276 | hypothetical protein T12E12.1                                 |
| Locus_4827_Transcript_1/1_Conf_1.000 | 255  | 0  |           |                |     |         |     |     |                                                               |
| Locus_4828_Transcript_1/1_Conf_1.000 | 369  | 20 | 6.73E-14  | NP_490924.1    | 86  | 80.4925 | 51  | 44  | hypothetical protein Y37E3.4                                  |
| Locus_4829_Transcript_1/1_Conf_1.000 | 1107 | 20 | 1.87E-134 | NP_741458.2    | 84  | 483.411 | 335 | 282 | P38 Map Kinase family member (pmk-2)                          |
| Locus_483_Transcript_1/1_Conf_1.000  | 154  | 0  |           |                |     |         |     |     |                                                               |
| Locus_4830_Transcript_1/1_Conf_1.000 | 626  | 7  | 9.35E-86  | XP_002639961.1 | 93  | 320.087 | 172 | 160 | Hypothetical protein CBG10781                                 |
| Locus_4831_Transcript_1/1_Conf_1.000 | 602  | 20 | 3.64E-28  | EFO17895.1     | 58  | 128.642 | 199 | 117 | hypothetical protein LOAG_10603                               |
| Locus_4832_Transcript_1/2_Conf_1.000 | 2329 | 20 | 4.60E-148 | NP_741253.1    | 74  | 530.02  | 546 | 406 | Huntingtin Interacting Protein Related family member (hipr-1) |

|                                      |      |    |           |                |    |         |     |     |                                                               |
|--------------------------------------|------|----|-----------|----------------|----|---------|-----|-----|---------------------------------------------------------------|
| Locus_4832_Transcript_2/2_Conf_1.000 | 2220 | 20 | 1.95E-148 | NP_741253.1    | 74 | 531.176 | 549 | 409 | Huntingtin Interacting Protein Related family member (hipr-1) |
| Locus_4833_Transcript_1/2_Conf_1.000 | 771  | 20 | 9.59E-85  | NP_500420.3    | 79 | 317.39  | 256 | 204 | hypothetical protein M02B7.5                                  |
| Locus_4833_Transcript_2/2_Conf_1.000 | 771  | 20 | 9.59E-85  | NP_500420.3    | 79 | 317.39  | 256 | 204 | hypothetical protein M02B7.5                                  |
| Locus_4834_Transcript_1/1_Conf_1.000 | 943  | 20 | 5.76E-99  | NP_505433.3    | 73 | 365.155 | 326 | 240 | Heavy chain, Unconventional Myosin family member (hum-2)      |
| Locus_4835_Transcript_1/1_Conf_1.000 | 758  | 20 | 5.24E-72  | NP_495226.1    | 75 | 275.018 | 244 | 183 | hypothetical protein C29H12.2                                 |
| Locus_4836_Transcript_1/1_Conf_1.000 | 936  | 20 | 3.47E-88  | EFO23001.1     | 75 | 329.331 | 276 | 208 | DnaJ domain-containing protein                                |
| Locus_4837_Transcript_1/1_Conf_1.000 | 350  | 0  |           |                |    |         |     |     |                                                               |
| Locus_4838_Transcript_1/1_Conf_1.000 | 947  | 20 | 6.22E-85  | NP_001022321.1 | 74 | 318.546 | 276 | 205 | hypothetical protein T05H10.7                                 |
| Locus_4839_Transcript_1/1_Conf_1.000 | 1925 | 20 | 5.49E-112 | EFO19589.1     | 60 | 409.838 | 610 | 369 | hypothetical protein LOAG_08898                               |
| Locus_484_Transcript_1/2_Conf_1.000  | 2369 | 20 | 0         | XP_002637005.1 | 78 | 944.88  | 790 | 618 | Hypothetical protein CBG09497                                 |
| Locus_484_Transcript_2/2_Conf_1.000  | 449  | 15 | 1.79E-43  | XP_002637005.1 | 85 | 178.718 | 141 | 121 | Hypothetical protein CBG09497                                 |
| Locus_4840_Transcript_1/1_Conf_1.000 | 212  | 0  |           |                |    |         |     |     |                                                               |
| Locus_4841_Transcript_1/1_Conf_1.000 | 1076 | 20 | 9.35E-168 | ACI49189.1     | 86 | 593.964 | 360 | 312 | hypothetical protein Csp3_JD02.017                            |
| Locus_4842_Transcript_1/2_Conf_1.000 | 1476 | 7  | 1.93E-34  | XP_002639516.1 | 50 | 151.754 | 350 | 175 | C. briggsae CBR-SOP-3 protein                                 |
| Locus_4842_Transcript_2/2_Conf_1.000 | 1476 | 7  | 3.30E-34  | XP_002639516.1 | 50 | 150.984 | 350 | 175 | C. briggsae CBR-SOP-3 protein                                 |

|                                      |      |    |           |                |    |         |     |     |                                                          |
|--------------------------------------|------|----|-----------|----------------|----|---------|-----|-----|----------------------------------------------------------|
| Locus_4843_Transcript_1/2_Conf_1.000 | 1686 | 20 | 8.96E-180 | NP_509562.1    | 83 | 634.795 | 497 | 417 | hypothetical protein B0416.5                             |
| Locus_4843_Transcript_2/2_Conf_1.000 | 1686 | 20 | 8.96E-180 | NP_509562.1    | 83 | 634.795 | 497 | 417 | hypothetical protein B0416.5                             |
| Locus_4844_Transcript_1/1_Conf_1.000 | 447  | 20 | 4.61E-15  | XP_001951470.1 | 70 | 84.3445 | 116 | 82  | PREDICTED: similar to Histone H2B                        |
| Locus_4845_Transcript_1/1_Conf_1.000 | 841  | 20 | 8.59E-101 | NP_741567.1    | 86 | 370.933 | 267 | 231 | eXPORtin (nuclear export receptor) family member (xpo-1) |
| Locus_4846_Transcript_1/1_Conf_1.000 | 650  | 20 | 2.24E-72  | XP_002636805.1 | 74 | 275.789 | 216 | 161 | C. briggsae CBR-TTN-1 protein                            |
| Locus_4847_Transcript_1/1_Conf_1.000 | 345  | 7  | 8.49E-09  | NP_506102.2    | 66 | 63.5438 | 84  | 56  | hypothetical protein K01D12.15                           |
| Locus_4848_Transcript_1/1_Conf_1.000 | 1109 | 20 | 3.15E-174 | NP_490817.3    | 91 | 615.535 | 355 | 326 | G protein, Subunit Alpha family member (gsa-1)           |
| Locus_4849_Transcript_1/1_Conf_1.000 | 377  | 20 | 2.50E-61  | NP_001022488.1 | 94 | 238.039 | 125 | 118 | UNCoordinated family member (unc-52)                     |
| Locus_485_Transcript_1/1_Conf_1.000  | 545  | 20 | 2.58E-50  | XP_002644436.1 | 80 | 201.83  | 146 | 118 | C. briggsae CBR-TTR-48 protein                           |
| Locus_4850_Transcript_1/1_Conf_1.000 | 545  | 0  |           |                |    |         |     |     |                                                          |
| Locus_4851_Transcript_1/1_Conf_1.000 | 1536 | 20 | 3.11E-75  | NP_499691.1    | 84 | 287.345 | 245 | 208 | Toxin-regulated Target of p38MAPK family member (ttm-1)  |
| Locus_4852_Transcript_1/1_Conf_1.000 | 840  | 2  | 5.53E-07  | EFO28396.1     | 51 | 59.3066 | 128 | 66  | hypothetical protein LOAG_00085                          |
| Locus_4853_Transcript_1/1_Conf_1.000 | 140  | 0  |           |                |    |         |     |     |                                                          |

|                                      |      |    |           |                |    |         |     |     |                                                     |
|--------------------------------------|------|----|-----------|----------------|----|---------|-----|-----|-----------------------------------------------------|
| Locus_4854_Transcript_1/1_Conf_1.000 | 479  | 20 | 5.72E-26  | ACG69807.1     | 95 | 120.553 | 62  | 59  | putative cytochrome c                               |
| Locus_4855_Transcript_1/1_Conf_1.000 | 2491 | 20 | 8.17E-42  | NP_001129758.1 | 54 | 177.178 | 298 | 163 | hypothetical protein C41D11.3                       |
| Locus_4856_Transcript_1/2_Conf_1.000 | 1052 | 20 | 2.73E-31  | XP_002642169.1 | 87 | 140.584 | 110 | 96  | Hypothetical protein CBG18134                       |
| Locus_4856_Transcript_2/2_Conf_1.000 | 1052 | 20 | 2.73E-31  | XP_002642169.1 | 87 | 140.584 | 110 | 96  | Hypothetical protein CBG18134                       |
| Locus_4857_Transcript_1/1_Conf_1.000 | 1584 | 20 | 6.65E-113 | NP_001122530.1 | 72 | 412.535 | 445 | 324 | Enhancer of Ksr-1 Lethality family member (ekl-4)   |
| Locus_4858_Transcript_1/1_Conf_1.000 | 826  | 0  |           |                |    |         |     |     |                                                     |
| Locus_4859_Transcript_1/1_Conf_1.000 | 1228 | 20 | 2.78E-89  | XP_002639463.1 | 83 | 333.569 | 223 | 186 | C. briggsae CBR-OBR-4 protein                       |
| Locus_486_Transcript_1/1_Conf_1.000  | 486  | 20 | 3.41E-26  | ACS37721.1     | 58 | 121.324 | 129 | 75  | C-type lectin-1                                     |
| Locus_4860_Transcript_1/1_Conf_1.000 | 772  | 20 | 1.31E-49  | XP_001901087.1 | 77 | 200.675 | 155 | 120 | Phosphatidylinositol 3- and 4-kinase family protein |
| Locus_4861_Transcript_1/1_Conf_1.000 | 474  | 20 | 3.99E-19  | XP_002630586.1 | 68 | 97.8265 | 74  | 51  | Hypothetical protein CBG13044                       |
| Locus_4862_Transcript_1/1_Conf_1.000 | 1366 | 20 | 0         | EFO27753.1     | 85 | 657.136 | 454 | 388 | RNA helicase                                        |
| Locus_4863_Transcript_1/1_Conf_1.000 | 498  | 20 | 1.84E-24  | XP_002641305.1 | 68 | 115.546 | 124 | 85  | C. briggsae CBR-TTR-15 protein                      |
| Locus_4864_Transcript_1/1_Conf_1.000 | 1186 | 20 | 3.58E-70  | NP_509826.1    | 59 | 270.011 | 399 | 236 | DystroGlycaN family member (dgn-1)                  |

|                                      |      |    |           |                |    |         |     |     |                                         |
|--------------------------------------|------|----|-----------|----------------|----|---------|-----|-----|-----------------------------------------|
| Locus_4865_Transcript_1/1_Conf_1.000 | 840  | 20 | 5.73E-113 | XP_002648488.1 | 90 | 411.379 | 247 | 223 | C. briggsae CBR-PBS-6 protein           |
| Locus_4866_Transcript_1/1_Conf_1.000 | 1705 | 20 | 0         | CAR63601.1     | 96 | 710.679 | 407 | 391 | putative ABC transporter family protein |
| Locus_4867_Transcript_1/1_Conf_1.000 | 373  | 20 | 2.29E-38  | XP_002629818.1 | 90 | 161.77  | 94  | 85  | Hypothetical protein CBG01062           |
| Locus_4868_Transcript_1/1_Conf_1.000 | 139  | 20 | 1.51E-18  | NP_001139295.1 | 97 | 95.9005 | 46  | 45  | glutathione peroxidase 4                |
| Locus_4869_Transcript_1/1_Conf_1.000 | 863  | 4  | 8.05E-25  | EFO24091.1     | 52 | 118.627 | 247 | 129 | hypothetical protein LOAG_04390         |
| Locus_487_Transcript_1/1_Conf_1.000  | 151  | 0  |           |                |    |         |     |     |                                         |
| Locus_4870_Transcript_1/1_Conf_1.000 | 237  | 0  |           |                |    |         |     |     |                                         |
| Locus_4871_Transcript_1/1_Conf_1.000 | 575  | 20 | 3.97E-18  | XP_001892000.1 | 75 | 95.1301 | 80  | 60  | linker histone H1 and H5 family protein |
| Locus_4872_Transcript_1/1_Conf_1.000 | 131  | 20 | 5.42E-08  | XP_002643552.1 | 76 | 60.8474 | 43  | 33  | Hypothetical protein CBG16248           |

|                                      |      |    |          |                |    |         |     |     |                                 |
|--------------------------------------|------|----|----------|----------------|----|---------|-----|-----|---------------------------------|
| Locus_4873_Transcript_1/1_Conf_1.000 | 573  | 20 | 2.09E-35 | NP_505651.2    | 91 | 152.525 | 91  | 83  | ThioRedoXin                     |
| Locus_4874_Transcript_1/1_Conf_1.000 | 765  | 20 | 8.59E-62 | XP_002641517.1 | 70 | 241.121 | 258 | 181 | Hypothetical protein CBG09813   |
| Locus_4875_Transcript_1/1_Conf_1.000 | 606  | 4  | 2.36E-14 | EFO19606.1     | 53 | 82.8037 | 163 | 88  | hypothetical protein LOAG_08888 |
| Locus_4876_Transcript_1/2_Conf_1.000 | 568  | 20 | 1.77E-31 | XP_002631556.1 | 57 | 139.428 | 207 | 119 | Hypothetical protein CBG20732   |
| Locus_4876_Transcript_2/2_Conf_1.000 | 303  | 20 | 5.04E-22 | XP_002631556.1 | 75 | 107.457 | 100 | 75  | Hypothetical protein CBG20732   |
| Locus_4877_Transcript_1/1_Conf_1.000 | 544  | 20 | 5.25E-11 | EFN60827.1     | 52 | 71.2478 | 184 | 96  | Integrator complex subunit 1    |
| Locus_4878_Transcript_1/1_Conf_1.000 | 503  | 2  | 2.91E-25 | XP_002631529.1 | 75 | 118.242 | 89  | 67  | Hypothetical protein CBG20695   |
| Locus_4879_Transcript_1/1_Conf_1.000 | 522  | 18 | 2.64E-14 | XP_002637399.1 | 59 | 82.0333 | 100 | 59  | Hypothetical protein CBG19106   |
| Locus_488_Transcript_1/1_Conf_1.000  | 2103 | 20 | 0        | P29190.1       | 97 | 1232.24 | 617 | 599 | Phosphoenolpyruvate carboxylase |
| Locus_4880_Transcript_1/1_Conf_1.000 | 1372 | 20 | 3.52E-51 | EFO18525.1     | 86 | 207.223 | 116 | 100 | translocation protein 1         |
| Locus_4881_Transcript_1/1_Conf_1.000 | 284  | 20 | 2.25E-17 | ADF88235.1     | 96 | 92.0485 | 62  | 60  | NADH dehydrogenase subunit 2    |
| Locus_4882_Transcript_1/1_Conf_1.000 | 552  | 20 | 6.88E-78 | XP_002013329.1 | 87 | 293.508 | 179 | 156 | GL23471                         |



|                                      |      |    |           |                |    |         |     |     |                                                                            |
|--------------------------------------|------|----|-----------|----------------|----|---------|-----|-----|----------------------------------------------------------------------------|
| Locus_4883_Transcript_1/1_Conf_1.000 | 1609 | 20 | 7.92E-154 | XP_002645854.1 | 77 | 548.51  | 453 | 352 | Hypothetical protein CBG07591                                              |
| Locus_4884_Transcript_1/1_Conf_1.000 | 627  | 20 | 4.00E-68  | XP_002630697.1 | 80 | 261.536 | 201 | 161 | Hypothetical protein CBG02379                                              |
| Locus_4885_Transcript_1/2_Conf_1.000 | 1159 | 20 | 8.61E-29  | NP_491442.1    | 61 | 132.494 | 136 | 84  | VILiN related family member (viln-1)                                       |
| Locus_4885_Transcript_2/2_Conf_1.000 | 1472 | 20 | 4.16E-13  | NP_491442.1    | 56 | 80.8777 | 97  | 55  | VILiN related family member (viln-1)                                       |
| Locus_4886_Transcript_1/1_Conf_1.000 | 2412 | 0  |           |                |    |         |     |     |                                                                            |
| Locus_4887_Transcript_1/1_Conf_1.000 | 376  | 20 | 1.75E-22  | XP_001894296.1 | 66 | 108.997 | 130 | 87  | hypothetical protein                                                       |
| Locus_4888_Transcript_1/1_Conf_1.000 | 2056 | 20 | 0         | ACJ65163.1     | 74 | 677.167 | 661 | 492 | Dishevelled related protein 1, isoform c, confirmed by transcript evidence |
| Locus_4889_Transcript_1/1_Conf_1.000 | 253  | 0  |           |                |    |         |     |     |                                                                            |
| Locus_489_Transcript_1/1_Conf_1.000  | 997  | 20 | 2.59E-161 | NP_001021269.1 | 95 | 572.392 | 332 | 318 | UNCoordinated family member (unc-44)                                       |
| Locus_4890_Transcript_1/1_Conf_1.000 | 525  | 1  | 5.65E-04  | XP_002640830.1 | 53 | 47.7506 | 71  | 38  | Hypothetical protein CBG15717                                              |
| Locus_4891_Transcript_1/1_Conf_1.000 | 352  | 0  |           |                |    |         |     |     |                                                                            |
| Locus_4892_Transcript_1/1_Conf_1.000 | 768  | 20 | 1.45E-08  | XP_002166584.1 | 45 | 64.3142 | 195 | 89  | PREDICTED: similar to harbinger transposase derived 1                      |
| Locus_4893_Transcript_1/1_Conf_1.000 | 369  | 20 | 1.59E-39  | XP_002634501.1 | 95 | 165.622 | 122 | 117 | C. briggsae CBR-SMGL-2 protein                                             |

|                                      |      |    |          |                |    |         |     |     |                                          |
|--------------------------------------|------|----|----------|----------------|----|---------|-----|-----|------------------------------------------|
| Locus_4894_Transcript_1/1_Conf_1.000 | 1067 | 20 | 7.24E-80 | XP_001895783.1 | 80 | 301.982 | 210 | 170 | BTB/POZ domain containing protein 9      |
| Locus_4895_Transcript_1/1_Conf_1.000 | 414  | 20 | 2.46E-53 | A8XP97.2       | 73 | 211.46  | 168 | 123 | Voltage-dependent calcium channel unc-36 |
| Locus_4896_Transcript_1/2_Conf_1.000 | 392  | 2  | 3.84E-06 | XP_002643096.1 | 60 | 54.6842 | 70  | 42  | Hypothetical protein CBG23020            |
| Locus_4896_Transcript_2/2_Conf_1.000 | 382  | 2  | 3.89E-06 | XP_002643096.1 | 60 | 54.6842 | 70  | 42  | Hypothetical protein CBG23020            |
| Locus_4897_Transcript_1/1_Conf_1.000 | 305  | 20 | 2.05E-15 | EFN66847.1     | 60 | 85.5001 | 96  | 58  | hypothetical protein EAG_08499           |
| Locus_4898_Transcript_1/2_Conf_1.000 | 1506 | 20 | 0        | NP_001023021.1 | 92 | 815.839 | 497 | 461 | UNCoordinated family member (unc-32)     |
| Locus_4898_Transcript_2/2_Conf_1.000 | 550  | 20 | 1.91E-64 | NP_001023017.1 | 97 | 248.825 | 148 | 144 | UNCoordinated family member (unc-32)     |
| Locus_4899_Transcript_1/1_Conf_1.000 | 324  | 4  | 2.52E-21 | XP_002630899.1 | 72 | 105.145 | 95  | 69  | Hypothetical protein CBG02621            |
| Locus_49_Transcript_1/10_Conf_0.069  | 335  | 0  |          |                |    |         |     |     |                                          |
| Locus_49_Transcript_10/10_Conf_0.172 | 1558 | 20 | 1.04E-86 | XP_002646109.1 | 72 | 325.479 | 295 | 213 | C. briggsae CBR-CAR-1 protein            |
| Locus_49_Transcript_2/10_Conf_0.276  | 3217 | 20 | 0        | XP_002647053.1 | 85 | 845.884 | 572 | 488 | Hypothetical protein CBG03574            |
| Locus_49_Transcript_3/10_Conf_0.172  | 747  | 0  |          |                |    |         |     |     |                                          |
| Locus_49_Transcript_4/10_Conf_0.138  | 637  | 20 | 9.40E-12 | NP_505347.1    | 49 | 74.3294 | 97  | 48  | hypothetical protein C25E10.10           |
| Locus_49_Transcript_5/10_Conf_0.310  | 794  | 0  |          |                |    |         |     |     |                                          |
| Locus_49_Transcript_6/10_Conf_0.172  | 507  | 20 | 6.60E-12 | NP_505347.1    | 49 | 73.9442 | 97  | 48  | hypothetical protein C25E10.10           |

|                                      |      |    |           |                |     |         |     |     |                                  |
|--------------------------------------|------|----|-----------|----------------|-----|---------|-----|-----|----------------------------------|
| Locus_49_Transcript_7/10_Conf_0.276  | 3202 | 20 | 0         | XP_002647053.1 | 86  | 851.277 | 567 | 488 | Hypothetical protein CBG03574    |
| Locus_49_Transcript_8/10_Conf_0.241  | 670  | 0  |           |                |     |         |     |     |                                  |
| Locus_49_Transcript_9/10_Conf_0.172  | 637  | 20 | 1.23E-11  | NP_505347.1    | 49  | 73.9442 | 97  | 48  | hypothetical protein C25E10.10   |
| Locus_490_Transcript_1/1_Conf_1.000  | 2088 | 20 | 3.23E-121 | NP_500128.2    | 71  | 440.654 | 392 | 279 | hypothetical protein Y41D4A.5    |
| Locus_4900_Transcript_1/1_Conf_1.000 | 884  | 5  | 2.23E-86  | NP_508189.2    | 72  | 323.168 | 262 | 189 | hypothetical protein C44C1.1     |
| Locus_4901_Transcript_1/1_Conf_1.000 | 400  | 20 | 4.44E-42  | NP_741118.1    | 86  | 174.096 | 102 | 88  | hypothetical protein C35D10.17   |
| Locus_4902_Transcript_1/1_Conf_1.000 | 2191 | 20 | 0         | XP_002641856.1 | 83  | 773.852 | 539 | 452 | Hypothetical protein CBG16531    |
| Locus_4903_Transcript_1/1_Conf_1.000 | 277  | 0  |           |                |     |         |     |     |                                  |
| Locus_4904_Transcript_1/1_Conf_1.000 | 685  | 1  | 3.46E-05  | EFA84423.1     | 37  | 52.7582 | 215 | 81  | hypothetical protein PPL_02455   |
| Locus_4905_Transcript_1/1_Conf_1.000 | 1252 | 20 | 5.97E-87  | XP_002640292.1 | 74  | 325.865 | 343 | 255 | C. briggsae CBR-RPN-10 protein   |
| Locus_4906_Transcript_1/1_Conf_1.000 | 195  | 20 | 9.65E-13  | XP_002639478.1 | 78  | 76.6406 | 65  | 51  | C. briggsae CBR-CYP-36A1 protein |
| Locus_4907_Transcript_1/1_Conf_1.000 | 124  | 0  |           |                |     |         |     |     |                                  |
| Locus_4908_Transcript_1/1_Conf_1.000 | 215  | 2  | 1.19E-15  | XP_002632399.1 | 87  | 86.2705 | 54  | 47  | Hypothetical protein CBG00422    |
| Locus_4909_Transcript_1/1_Conf_1.000 | 413  | 20 | 1.83E-56  | BAG61974.1     | 100 | 221.861 | 133 | 133 | unnamed protein product          |
| Locus_491_Transcript_1/1_Conf_1.000  | 261  | 4  | 1.10E-24  | NP_491427.1    | 84  | 116.316 | 86  | 73  | hypothetical protein W09C3.4     |
| Locus_4910_Transcript_1/1_Conf_1.000 | 460  | 0  |           |                |     |         |     |     |                                  |

|                                      |      |    |           |             |    |         |     |     |                                                          |
|--------------------------------------|------|----|-----------|-------------|----|---------|-----|-----|----------------------------------------------------------|
| Locus_4911_Transcript_1/2_Conf_1.000 | 2430 | 20 | 5.16E-166 | NP_505433.3 | 70 | 589.726 | 671 | 470 | Heavy chain, Unconventional Myosin family member (hum-2) |
| Locus_4911_Transcript_2/2_Conf_1.000 | 2032 | 20 | 2.78E-170 | NP_505433.3 | 69 | 603.594 | 702 | 489 | Heavy chain, Unconventional Myosin family member (hum-2) |
| Locus_4912_Transcript_1/2_Conf_1.000 | 1033 | 20 | 2.02E-79  | NP_499811.1 | 68 | 300.442 | 352 | 241 | hypothetical protein T12D8.8                             |
| Locus_4912_Transcript_2/2_Conf_1.000 | 1027 | 20 | 1.81E-80  | NP_499811.1 | 69 | 303.908 | 352 | 243 | hypothetical protein T12D8.8                             |
| Locus_4913_Transcript_1/1_Conf_1.000 | 361  | 9  | 6.36E-17  | NP_502038.1 | 56 | 90.5077 | 120 | 68  | hypothetical protein Y69E1A.1                            |
| Locus_4914_Transcript_1/1_Conf_1.000 | 1553 | 4  | 1.24E-39  | NP_741760.1 | 61 | 169.088 | 249 | 152 | hypothetical protein ZK470.2                             |
| Locus_4915_Transcript_1/3_Conf_0.571 | 410  | 4  | 4.73E-12  | NP_492733.2 | 71 | 74.3294 | 102 | 73  | hypothetical protein Y106G6H.8                           |
| Locus_4915_Transcript_2/3_Conf_0.286 | 334  | 0  |           |             |    |         |     |     |                                                          |
| Locus_4915_Transcript_3/3_Conf_0.571 | 649  | 20 | 5.77E-28  | NP_492733.2 | 84 | 128.257 | 113 | 95  | hypothetical protein Y106G6H.8                           |
| Locus_4916_Transcript_1/1_Conf_1.000 | 191  | 0  |           |             |    |         |     |     |                                                          |

|                                      |      |    |          |                |     |         |     |     |                                                     |
|--------------------------------------|------|----|----------|----------------|-----|---------|-----|-----|-----------------------------------------------------|
| Locus_4917_Transcript_1/1_Conf_1.000 | 136  | 20 | 9.79E-18 | XP_002924612.1 | 100 | 93.2041 | 43  | 43  | PREDICTED: thioredoxin-interacting protein-like     |
| Locus_4918_Transcript_1/2_Conf_1.000 | 1705 | 20 | 9.45E-44 | NP_001122631.1 | 64  | 182.956 | 206 | 132 | ELAV-Type RNA binding protein family member (etr-1) |
| Locus_4918_Transcript_2/2_Conf_1.000 | 1155 | 20 | 5.53E-44 | NP_001122631.1 | 64  | 182.956 | 206 | 132 | ELAV-Type RNA binding protein family member (etr-1) |
| Locus_4919_Transcript_1/1_Conf_1.000 | 488  | 20 | 5.57E-61 | XP_002640340.1 | 81  | 236.884 | 162 | 132 | Hypothetical protein CBG12889                       |
| Locus_492_Transcript_1/1_Conf_1.000  | 614  | 20 | 4.25E-35 | NP_499850.2    | 64  | 151.754 | 210 | 135 | hypothetical protein Y38C1AB.4                      |
| Locus_4920_Transcript_1/1_Conf_1.000 | 533  | 0  |          |                |     |         |     |     |                                                     |

|                                      |      |    |           |                |     |         |     |     |                                                                                           |
|--------------------------------------|------|----|-----------|----------------|-----|---------|-----|-----|-------------------------------------------------------------------------------------------|
| Locus_4921_Transcript_1/1_Conf_1.000 | 651  | 20 | 1.02E-56  | NP_001022032.1 | 78  | 223.787 | 214 | 168 | TRRAP-like (transcription/transformation domain-associated protein) family member (trr-1) |
| Locus_4922_Transcript_1/2_Conf_1.000 | 1597 | 0  |           |                |     |         |     |     |                                                                                           |
| Locus_4922_Transcript_2/2_Conf_1.000 | 1684 | 0  |           |                |     |         |     |     |                                                                                           |
| Locus_4923_Transcript_1/1_Conf_1.000 | 1205 | 20 | 1.29E-107 | NP_501179.1    | 91  | 394.43  | 223 | 204 | hypothetical protein T12B3.4                                                              |
| Locus_4924_Transcript_1/1_Conf_1.000 | 793  | 20 | 1.42E-78  | XP_001892448.1 | 71  | 296.975 | 259 | 184 | Hypothetical FAD-dependent oxidoreductase YEL047C                                         |
| Locus_4925_Transcript_1/1_Conf_1.000 | 497  | 20 | 6.73E-51  | XP_002646932.1 | 80  | 203.371 | 150 | 120 | Hypothetical protein CBG19637                                                             |
| Locus_4926_Transcript_1/2_Conf_1.000 | 1248 | 20 | 1.18E-42  | NP_501537.2    | 55  | 178.718 | 338 | 188 | hypothetical protein C09G9.2                                                              |
| Locus_4926_Transcript_2/2_Conf_1.000 | 1260 | 20 | 1.18E-42  | NP_501537.2    | 55  | 178.718 | 338 | 188 | hypothetical protein C09G9.2                                                              |
| Locus_4927_Transcript_1/1_Conf_1.000 | 522  | 0  |           |                |     |         |     |     |                                                                                           |
| Locus_4928_Transcript_1/1_Conf_1.000 | 497  | 20 | 1.77E-59  | 3ICH           | 100 | 231.876 | 111 | 111 | CrystalStructure Of Cyclophilin B At 1.2 A Resolution                                     |
| Locus_4929_Transcript_1/1_Conf_1.000 | 2178 | 20 | 2.09E-54  | NP_001024674.1 | 56  | 218.779 | 422 | 238 | hypothetical protein F46H5.2                                                              |
| Locus_493_Transcript_1/2_Conf_1.000  | 1083 | 20 | 5.42E-22  | EFO25448.1     | 61  | 109.768 | 124 | 76  | hypothetical protein LOAG_03031                                                           |

|                                      |      |    |           |                |    |         |     |     |                                                           |
|--------------------------------------|------|----|-----------|----------------|----|---------|-----|-----|-----------------------------------------------------------|
| Locus_493_Transcript_2/2_Conf_1.000  | 1083 | 20 | 5.42E-22  | EFO25448.1     | 61 | 109.768 | 124 | 76  | hypothetical protein LOAG_03031                           |
| Locus_4930_Transcript_1/1_Conf_1.000 | 131  | 0  |           |                |    |         |     |     |                                                           |
| Locus_4931_Transcript_1/1_Conf_1.000 | 159  | 0  |           |                |    |         |     |     |                                                           |
| Locus_4932_Transcript_1/1_Conf_1.000 | 356  | 20 | 1.91E-53  | NP_506269.1    | 94 | 211.846 | 117 | 110 | EATing: abnormal pharyngeal pumping family member (eat-6) |
| Locus_4933_Transcript_1/1_Conf_1.000 | 581  | 20 | 3.13E-26  | NP_001023538.1 | 92 | 122.094 | 75  | 69  | hypothetical protein Y59E9AL.7                            |
| Locus_4934_Transcript_1/1_Conf_1.000 | 1195 | 20 | 3.62E-70  | XP_002642930.1 | 66 | 270.011 | 277 | 184 | Hypothetical protein CBG15206                             |
| Locus_4935_Transcript_1/1_Conf_1.000 | 534  | 18 | 7.86E-25  | ABU49430.1     | 60 | 117.087 | 186 | 113 | PRO-2                                                     |
| Locus_4936_Transcript_1/1_Conf_1.000 | 926  | 20 | 5.37E-110 | EFO21345.1     | 85 | 401.749 | 306 | 261 | hypothetical protein LOAG_07143                           |
| Locus_4937_Transcript_1/1_Conf_1.000 | 1102 | 20 | 2.08E-77  | XP_002634984.1 | 67 | 293.893 | 299 | 203 | Hypothetical protein CBG13522                             |

|                                      |      |    |           |                |     |         |     |     |                                                       |
|--------------------------------------|------|----|-----------|----------------|-----|---------|-----|-----|-------------------------------------------------------|
| Locus_4938_Transcript_1/1_Conf_1.000 | 2317 | 20 | 8.97E-128 | XP_002120082.1 | 60  | 462.611 | 728 | 439 | PREDICTED: similar to predicted protein               |
| Locus_4939_Transcript_1/1_Conf_1.000 | 115  | 0  |           |                |     |         |     |     |                                                       |
| Locus_494_Transcript_1/1_Conf_1.000  | 2365 | 20 | 0         | NP_001122768.1 | 79  | 833.558 | 671 | 536 | Lin-48 EXpression abnormal family member (lex-1)      |
| Locus_4940_Transcript_1/1_Conf_1.000 | 552  | 20 | 1.88E-59  | ACD88896.1     | 90  | 232.261 | 122 | 111 | conserved hypothetical protein                        |
| Locus_4941_Transcript_1/1_Conf_1.000 | 1324 | 6  | 3.45E-48  | NP_490757.2    | 54  | 197.208 | 348 | 191 | hypothetical protein F56A6.4                          |
| Locus_4942_Transcript_1/1_Conf_1.000 | 579  | 20 | 6.05E-54  | AAN61521.1     | 71  | 214.157 | 184 | 132 | 301kDa_2 protein                                      |
| Locus_4943_Transcript_1/1_Conf_1.000 | 377  | 20 | 1.02E-38  | AAV38313.1     | 100 | 162.925 | 123 | 123 | CD81 antigen (target of antiproliferative antibody 1) |
| Locus_4944_Transcript_1/1_Conf_1.000 | 1454 | 20 | 2.20E-75  | XP_001900175.1 | 58  | 287.73  | 467 | 271 | hypothetical protein Bm1_43570                        |
| Locus_4945_Transcript_1/5_Conf_0.692 | 1763 | 20 | 4.82E-75  | XP_002637065.1 | 75  | 286.96  | 255 | 192 | Hypothetical protein CBG09562                         |
| Locus_4945_Transcript_2/5_Conf_0.692 | 1907 | 20 | 4.16E-136 | XP_001892930.1 | 64  | 489.96  | 547 | 353 | KH domain containing protein                          |
| Locus_4945_Transcript_3/5_Conf_0.692 | 1900 | 20 | 8.34E-137 | XP_001892930.1 | 64  | 492.271 | 548 | 354 | KH domain containing protein                          |



|                                      |      |    |           |                |    |         |     |     |                                                                     |
|--------------------------------------|------|----|-----------|----------------|----|---------|-----|-----|---------------------------------------------------------------------|
| Locus_4945_Transcript_4/5_Conf_0.538 | 2094 | 20 | 1.31E-138 | XP_001892446.1 | 66 | 498.434 | 508 | 339 | KH domain containing protein                                        |
| Locus_4945_Transcript_5/5_Conf_0.692 | 1964 | 20 | 8.64E-137 | XP_001892930.1 | 64 | 492.271 | 548 | 354 | KH domain containing protein                                        |
| Locus_4946_Transcript_1/1_Conf_1.000 | 1200 | 6  | 2.46E-58  | NP_506085.2    | 53 | 230.72  | 413 | 220 | FERM domain (protein4.1-ezrin-radixin-moesin) family member (frm-7) |
| Locus_4947_Transcript_1/1_Conf_1.000 | 874  | 20 | 3.27E-114 | XP_001897557.1 | 92 | 415.616 | 233 | 216 | Tyrosine-protein kinase abl-1                                       |
| Locus_4948_Transcript_1/1_Conf_1.000 | 312  | 20 | 5.13E-46  | NP_493549.1    | 93 | 187.193 | 104 | 97  | hypothetical protein Y54E5A.1                                       |
| Locus_4949_Transcript_1/1_Conf_1.000 | 225  | 0  |           |                |    |         |     |     |                                                                     |
| Locus_495_Transcript_1/1_Conf_1.000  | 654  | 20 | 5.09E-80  | ACV20978.1     | 91 | 301.212 | 190 | 174 | small subunit ribosomal protein 7                                   |
| Locus_4950_Transcript_1/1_Conf_1.000 | 461  | 20 | 1.90E-13  | XP_002647593.1 | 57 | 78.9518 | 109 | 63  | C. briggsae CBR-TTR-44 protein                                      |
| Locus_4951_Transcript_1/2_Conf_1.000 | 1860 | 20 | 1.10E-117 | NP_510751.3    | 60 | 428.713 | 588 | 357 | Prion-like-(Q/N-rich)-domain-bearing protein family member (pqn-34) |
| Locus_4951_Transcript_2/2_Conf_1.000 | 1908 | 20 | 6.68E-118 | NP_510751.3    | 59 | 429.483 | 600 | 356 | Prion-like-(Q/N-rich)-domain-bearing protein family member (pqn-34) |
| Locus_4952_Transcript_1/1_Conf_1.000 | 1430 | 20 | 0         | XP_002649082.1 | 89 | 728.398 | 473 | 422 | C. briggsae CBR-HAF-4 protein                                       |
| Locus_4953_Transcript_1/1_Conf_1.000 | 375  | 20 | 2.85E-65  | NP_501921.1    | 99 | 251.136 | 124 | 123 | G Protein, Alpha subunit family member (gpa-7)                      |
| Locus_4954_Transcript_1/1_Conf_1.000 | 203  | 0  |           |                |    |         |     |     |                                                                     |
| Locus_4955_Transcript_1/1_Conf_1.000 | 284  | 0  |           |                |    |         |     |     |                                                                     |

|                                      |      |    |           |                |    |         |     |     |                                           |
|--------------------------------------|------|----|-----------|----------------|----|---------|-----|-----|-------------------------------------------|
| Locus_4956_Transcript_1/1_Conf_1.000 | 506  | 20 | 3.27E-56  | AAR07614.1     | 96 | 221.09  | 117 | 113 | UNC-18                                    |
| Locus_4957_Transcript_1/1_Conf_1.000 | 1795 | 0  |           |                |    |         |     |     |                                           |
| Locus_4958_Transcript_1/3_Conf_0.571 | 567  | 20 | 6.28E-45  | NP_495437.2    | 81 | 184.111 | 128 | 104 | hypothetical protein C52E12.4             |
| Locus_4958_Transcript_2/3_Conf_0.714 | 1581 | 20 | 6.10E-167 | NP_495437.2    | 79 | 592.038 | 473 | 374 | hypothetical protein C52E12.4             |
| Locus_4958_Transcript_3/3_Conf_0.714 | 1581 | 20 | 6.10E-167 | NP_495437.2    | 79 | 592.038 | 473 | 374 | hypothetical protein C52E12.4             |
| Locus_4959_Transcript_1/1_Conf_1.000 | 749  | 20 | 6.51E-83  | XP_002645375.1 | 88 | 311.227 | 198 | 175 | Hypothetical protein CBG15443             |
| Locus_496_Transcript_1/1_Conf_1.000  | 918  | 20 | 3.00E-121 | XP_002642328.1 | 81 | 439.113 | 316 | 256 | Hypothetical protein CBG18323             |
| Locus_4960_Transcript_1/1_Conf_1.000 | 210  | 0  |           |                |    |         |     |     |                                           |
| Locus_4961_Transcript_1/1_Conf_1.000 | 826  | 20 | 1.96E-126 | XP_002920761.1 | 98 | 456.062 | 246 | 243 | PREDICTED: 60S ribosomal protein L7a-like |
| Locus_4962_Transcript_1/1_Conf_1.000 | 1521 | 20 | 7.69E-135 | NP_501005.2    | 71 | 485.337 | 435 | 313 | hypothetical protein F38A5.2              |
| Locus_4963_Transcript_1/1_Conf_1.000 | 536  | 0  |           |                |    |         |     |     |                                           |

|                                      |      |    |           |                |    |         |     |     |                                                                                           |
|--------------------------------------|------|----|-----------|----------------|----|---------|-----|-----|-------------------------------------------------------------------------------------------|
| Locus_4964_Transcript_1/1_Conf_1.000 | 732  | 20 | 2.89E-88  | NP_498666.2    | 77 | 328.946 | 244 | 189 | hypothetical protein R13A5.11                                                             |
| Locus_4965_Transcript_1/1_Conf_1.000 | 1863 | 20 | 1.14E-122 | NP_001024265.1 | 84 | 445.277 | 353 | 300 | hypothetical protein Y58G8A.4                                                             |
| Locus_4966_Transcript_1/1_Conf_1.000 | 913  | 20 | 1.77E-49  | XP_002630879.1 | 66 | 200.675 | 213 | 141 | C. briggsae CBR-TAT-4.2 protein                                                           |
| Locus_4967_Transcript_1/1_Conf_1.000 | 792  | 20 | 4.70E-90  | NP_491477.2    | 78 | 335.109 | 262 | 205 | IMportin Beta family member (imb-1)                                                       |
| Locus_4968_Transcript_1/2_Conf_1.000 | 457  | 0  |           |                |    |         |     |     |                                                                                           |
| Locus_4968_Transcript_2/2_Conf_1.000 | 364  | 0  |           |                |    |         |     |     |                                                                                           |
| Locus_4969_Transcript_1/1_Conf_1.000 | 637  | 20 | 6.08E-19  | NP_503713.1    | 69 | 98.2117 | 114 | 79  | hypothetical protein F53E10.6                                                             |
| Locus_497_Transcript_1/1_Conf_1.000  | 221  | 0  |           |                |    |         |     |     |                                                                                           |
| Locus_4970_Transcript_1/1_Conf_1.000 | 372  | 20 | 4.34E-13  | NP_001022032.1 | 52 | 77.7962 | 131 | 69  | TRRAP-like (transcription/transformation domain-associated protein) family member (trr-1) |
| Locus_4971_Transcript_1/1_Conf_1.000 | 1054 | 20 | 1.92E-109 | XP_002642775.1 | 79 | 400.208 | 318 | 254 | C. briggsae CBR-NEX-1 protein                                                             |
| Locus_4972_Transcript_1/1_Conf_1.000 | 333  | 0  |           |                |    |         |     |     |                                                                                           |
| Locus_4973_Transcript_1/1_Conf_1.000 | 893  | 20 | 5.37E-112 | XP_002635351.1 | 80 | 408.297 | 289 | 234 | Hypothetical protein CBG01522                                                             |
| Locus_4974_Transcript_1/3_Conf_0.714 | 2715 | 20 | 0         | XP_002634170.1 | 90 | 1548.1  | 909 | 823 | Hypothetical protein CBG01737                                                             |
| Locus_4974_Transcript_2/3_Conf_0.714 | 2715 | 20 | 0         | XP_002634170.1 | 90 | 1548.1  | 909 | 823 | Hypothetical protein CBG01737                                                             |

|                                      |      |    |           |                |    |         |     |     |                                  |
|--------------------------------------|------|----|-----------|----------------|----|---------|-----|-----|----------------------------------|
| Locus_4974_Transcript_3/3_Conf_0.714 | 2715 | 20 | 0         | XP_002634170.1 | 90 | 1548.1  | 909 | 823 | Hypothetical protein CBG01737    |
| Locus_4975_Transcript_1/1_Conf_1.000 | 329  | 0  |           |                |    |         |     |     |                                  |
| Locus_4976_Transcript_1/1_Conf_1.000 | 226  | 0  |           |                |    |         |     |     |                                  |
| Locus_4977_Transcript_1/1_Conf_1.000 | 1247 | 20 | 3.65E-153 | NP_501838.2    | 79 | 545.814 | 373 | 296 | hypothetical protein C04G2.9     |
| Locus_4978_Transcript_1/1_Conf_1.000 | 635  | 20 | 2.56E-86  | XP_002642565.1 | 85 | 322.013 | 213 | 182 | C. briggsae CBR-UNC-79.2 protein |
| Locus_4979_Transcript_1/1_Conf_1.000 | 659  | 20 | 1.17E-23  | XP_001895818.1 | 59 | 114.005 | 158 | 94  | BC023488 protein                 |
| Locus_498_Transcript_1/2_Conf_1.000  | 1157 | 20 | 4.14E-124 | ACO59962.1     | 99 | 449.129 | 232 | 230 | 14-3-3 protein isoform 2         |
| Locus_498_Transcript_2/2_Conf_1.000  | 1157 | 20 | 4.29E-113 | ACO59962.1     | 94 | 412.535 | 232 | 219 | 14-3-3 protein isoform 2         |
| Locus_4980_Transcript_1/1_Conf_1.000 | 381  | 20 | 1.67E-49  | CAB40412.1     | 86 | 198.749 | 124 | 107 | hexokinase                       |
| Locus_4981_Transcript_1/1_Conf_1.000 | 223  | 0  |           |                |    |         |     |     |                                  |
| Locus_4982_Transcript_1/2_Conf_1.000 | 676  | 0  |           |                |    |         |     |     |                                  |
| Locus_4982_Transcript_2/2_Conf_1.000 | 658  | 0  |           |                |    |         |     |     |                                  |
| Locus_4983_Transcript_1/2_Conf_1.000 | 765  | 20 | 4.43E-42  | NP_495256.1    | 69 | 175.637 | 245 | 171 | hypothetical protein F13H8.2     |
| Locus_4983_Transcript_2/2_Conf_1.000 | 765  | 20 | 2.05E-47  | NP_495256.1    | 71 | 193.356 | 245 | 174 | hypothetical protein F13H8.2     |

|                                      |      |    |           |                |     |         |     |     |                                                      |
|--------------------------------------|------|----|-----------|----------------|-----|---------|-----|-----|------------------------------------------------------|
| Locus_4984_Transcript_1/1_Conf_1.000 | 743  | 20 | 6.52E-19  | XP_001773533.1 | 49  | 98.5969 | 229 | 114 | predicted protein                                    |
| Locus_4985_Transcript_1/2_Conf_1.000 | 1487 | 20 | 4.40E-103 | NP_001024648.1 | 66  | 379.793 | 403 | 266 | Wrapper/Rega-1/Klingon homolog family member (wrk-1) |
| Locus_4985_Transcript_2/2_Conf_1.000 | 1463 | 20 | 2.52E-103 | XP_002645506.1 | 66  | 380.563 | 394 | 262 | C. briggsae CBR-WRK-1 protein                        |
| Locus_4986_Transcript_1/1_Conf_1.000 | 213  | 20 | 2.16E-33  | AAX36984.1     | 100 | 145.206 | 71  | 71  | cystatin C                                           |
| Locus_4987_Transcript_1/2_Conf_1.000 | 2227 | 20 | 0         | XP_002646666.1 | 78  | 963.37  | 736 | 576 | Hypothetical protein CBG11104                        |
| Locus_4987_Transcript_2/2_Conf_1.000 | 2227 | 20 | 0         | XP_002646666.1 | 78  | 960.674 | 736 | 575 | Hypothetical protein CBG11104                        |

|                                      |      |    |          |             |    |         |     |     |                                                                    |
|--------------------------------------|------|----|----------|-------------|----|---------|-----|-----|--------------------------------------------------------------------|
| Locus_4988_Transcript_1/1_Conf_1.000 | 715  | 20 | 1.86E-28 | NP_497591.1 | 58 | 130.183 | 195 | 115 | Protein Phosphatase Four Regulatory subunit family member (ppfr-4) |
| Locus_4989_Transcript_1/1_Conf_1.000 | 783  | 8  | 1.40E-30 | NP_494855.1 | 51 | 137.502 | 242 | 125 | Toxin-regulated Target of p38MAPK family member (ttm-2)            |
| Locus_499_Transcript_1/1_Conf_1.000  | 1298 | 20 | 0        | EFO19684.1  | 97 | 641.728 | 315 | 308 | LEThal family member                                               |

|                                      |      |    |           |                |    |         |     |     |                                          |
|--------------------------------------|------|----|-----------|----------------|----|---------|-----|-----|------------------------------------------|
| Locus_4990_Transcript_1/1_Conf_1.000 | 376  | 20 | 1.57E-55  | XP_001892323.1 | 89 | 218.779 | 125 | 112 | Histone deacetylase family protein       |
| Locus_4991_Transcript_1/4_Conf_0.700 | 943  | 20 | 2.55E-155 | XP_002634908.1 | 92 | 552.362 | 317 | 293 | Hypothetical protein CBG22506            |
| Locus_4991_Transcript_2/4_Conf_0.700 | 943  | 20 | 2.55E-155 | XP_002634908.1 | 92 | 552.362 | 317 | 293 | Hypothetical protein CBG22506            |
| Locus_4991_Transcript_3/4_Conf_0.700 | 943  | 20 | 2.55E-155 | XP_002634908.1 | 92 | 552.362 | 317 | 293 | Hypothetical protein CBG22506            |
| Locus_4991_Transcript_4/4_Conf_0.700 | 943  | 20 | 2.55E-155 | XP_002634908.1 | 92 | 552.362 | 317 | 293 | Hypothetical protein CBG22506            |
| Locus_4992_Transcript_1/1_Conf_1.000 | 1146 |    |           |                |    |         |     |     |                                          |
| Locus_4993_Transcript_1/1_Conf_1.000 | 193  | 0  |           |                |    |         |     |     |                                          |
| Locus_4994_Transcript_1/1_Conf_1.000 | 1566 | 6  | 1.75E-49  | NP_491682.1    | 52 | 201.83  | 391 | 206 | MTK1/MEKK4 homolog family member (mtk-1) |
| Locus_4995_Transcript_1/1_Conf_1.000 | 473  | 20 | 2.68E-23  | EFO23433.1     | 64 | 111.694 | 164 | 105 | hypothetical protein LOAG_05051          |

|                                      |      |    |           |                |     |         |      |     |                                                                        |
|--------------------------------------|------|----|-----------|----------------|-----|---------|------|-----|------------------------------------------------------------------------|
| Locus_4996_Transcript_1/4_Conf_0.333 | 759  | 20 | 1.10E-85  | XP_002634246.1 | 75  | 320.472 | 251  | 190 | Hypothetical protein CBG01816                                          |
| Locus_4996_Transcript_2/4_Conf_0.333 | 304  | 0  |           |                |     |         |      |     |                                                                        |
| Locus_4996_Transcript_3/4_Conf_0.333 | 304  | 0  |           |                |     |         |      |     |                                                                        |
| Locus_4996_Transcript_4/4_Conf_0.333 | 1075 | 20 | 9.20E-107 | XP_002634246.1 | 74  | 391.349 | 331  | 245 | Hypothetical protein CBG01816                                          |
| Locus_4997_Transcript_1/1_Conf_1.000 | 412  | 0  |           |                |     |         |      |     |                                                                        |
| Locus_4998_Transcript_1/1_Conf_1.000 | 1151 | 20 | 2.77E-96  | XP_002642492.1 | 81  | 356.681 | 277  | 225 | Hypothetical protein CBG06912                                          |
| Locus_4999_Transcript_1/1_Conf_1.000 | 550  | 4  | 1.87E-11  | AAQ23189.1     | 83  | 72.7886 | 61   | 51  | FMRFamide-related peptide FLP-12 precursor                             |
| Locus_5_Transcript_1/2_Conf_1.000    | 203  | 1  | 2.44E-08  | Q94637.1       | 70  | 62.003  | 58   | 41  | Vitellogenin-6                                                         |
| Locus_5_Transcript_2/2_Conf_1.000    | 228  | 7  | 1.07E-11  | Q94637.1       | 69  | 73.1738 | 72   | 50  | Vitellogenin-6                                                         |
| Locus_50_Transcript_1/1_Conf_1.000   | 3336 | 20 | 0         | NP_498516.2    | 75  | 1287.71 | 1136 | 855 | LEThal family member (let-711)                                         |
| Locus_500_Transcript_1/1_Conf_1.000  | 567  | 20 | 6.97E-28  | AAH70248.1     | 100 | 127.487 | 64   | 64  | TMSB4X protein                                                         |
| Locus_5000_Transcript_1/1_Conf_1.000 | 706  | 20 | 2.55E-107 | ACY40018.1     | 92  | 392.119 | 234  | 217 | C. elegans FLN-1 protein, isoform g                                    |
| Locus_5001_Transcript_1/1_Conf_1.000 | 703  | 2  | 1.26E-21  | NP_507188.3    | 52  | 107.457 | 206  | 109 | hypothetical protein Y32B12B.2                                         |
| Locus_5002_Transcript_1/1_Conf_1.000 | 1120 | 0  |           |                |     |         |      |     |                                                                        |
| Locus_5003_Transcript_1/1_Conf_1.000 | 388  | 20 | 1.67E-25  | CBL87054.2     | 71  | 119.013 | 118  | 84  | C. elegans protein F54E4.1, partially confirmed by transcript evidence |
| Locus_5004_Transcript_1/2_Conf_1.000 | 2235 | 20 | 0         | CAD44516.1     | 85  | 1039.25 | 754  | 642 | VAB-10B protein                                                        |



|                                      |      |    |          |                |    |         |     |     |                                                                   |
|--------------------------------------|------|----|----------|----------------|----|---------|-----|-----|-------------------------------------------------------------------|
| Locus_5004_Transcript_2/2_Conf_1.000 | 1718 | 20 | 0        | NP_001040721.1 | 91 | 850.121 | 572 | 524 | Variable ABnormal morphology family member (vab-10)               |
| Locus_5005_Transcript_1/1_Conf_1.000 | 183  | 0  |          |                |    |         |     |     |                                                                   |
| Locus_5006_Transcript_1/2_Conf_1.000 | 461  | 0  |          |                |    |         |     |     |                                                                   |
| Locus_5006_Transcript_2/2_Conf_1.000 | 332  | 0  |          |                |    |         |     |     |                                                                   |
| Locus_5007_Transcript_1/1_Conf_1.000 | 579  | 6  | 1.97E-04 | XP_605047.5    | 50 | 49.6766 | 104 | 52  | PREDICTED: myosin, heavy polypeptide 15                           |
| Locus_5008_Transcript_1/1_Conf_1.000 | 225  | 0  |          |                |    |         |     |     |                                                                   |
| Locus_5009_Transcript_1/1_Conf_1.000 | 839  | 20 | 5.99E-54 | XP_001896299.1 | 64 | 215.312 | 283 | 182 | PHD-finger family protein                                         |
| Locus_501_Transcript_1/2_Conf_1.000  | 470  | 20 | 4.15E-32 | XP_002632184.1 | 69 | 140.969 | 136 | 94  | C. briggsae CBR-FAR-7 protein                                     |
| Locus_501_Transcript_2/2_Conf_1.000  | 470  | 20 | 1.09E-32 | XP_002632184.1 | 69 | 142.895 | 136 | 95  | C. briggsae CBR-FAR-7 protein                                     |
| Locus_5010_Transcript_1/1_Conf_1.000 | 314  | 0  |          |                |    |         |     |     |                                                                   |
| Locus_5011_Transcript_1/1_Conf_1.000 | 182  | 0  |          |                |    |         |     |     |                                                                   |
| Locus_5012_Transcript_1/1_Conf_1.000 | 465  | 8  | 9.01E-19 | NP_001122883.1 | 66 | 96.6709 | 109 | 72  | Temporarily Assigned Gene name family member (tag-333)            |
| Locus_5013_Transcript_1/1_Conf_1.000 | 2557 | 20 | 0        | NP_502032.2    | 70 | 745.347 | 691 | 484 | RB (Retinoblastoma Binding protein) Related family member (rbr-2) |
| Locus_5014_Transcript_1/1_Conf_1.000 | 251  | 0  |          |                |    |         |     |     |                                                                   |
| Locus_5015_Transcript_1/1_Conf_1.000 | 511  | 20 | 4.82E-47 | XP_001900792.1 | 77 | 190.66  | 159 | 124 | Transcription initiation factor IIE, beta subunit                 |
| Locus_5016_Transcript_1/2_Conf_1.000 | 1678 | 20 | 3.32E-09 | NP_957423.1    | 55 | 68.1662 | 139 | 77  | nuclear receptor coactivator 4                                    |
| Locus_5016_Transcript_2/2_Conf_1.000 | 1678 | 20 | 3.32E-09 | NP_957423.1    | 55 | 68.1662 | 139 | 77  | nuclear receptor coactivator 4                                    |
| Locus_5017_Transcript_1/1_Conf_1.000 | 338  | 2  | 6.57E-06 | EFO16139.1     | 59 | 53.9138 | 66  | 39  | hypothetical protein LOAG_12369                                   |
| Locus_5018_Transcript_1/1_Conf_1.000 | 363  | 3  | 2.32E-27 | XP_002634982.1 | 70 | 125.176 | 120 | 85  | C. briggsae CBR-DSC-4 protein                                     |
| Locus_5019_Transcript_1/1_Conf_1.000 | 548  | 20 | 3.00E-46 | XP_002629673.1 | 76 | 188.348 | 143 | 109 | Hypothetical protein CBG00891                                     |
| Locus_502_Transcript_1/1_Conf_1.000  | 1472 | 20 | 6.52E-75 | NP_741591.1    | 79 | 286.189 | 201 | 160 | hypothetical protein F36D4.5                                      |
| Locus_5020_Transcript_1/1_Conf_1.000 | 592  | 20 | 6.77E-40 | CAR63685.1     | 81 | 167.548 | 112 | 91  | putative Nuclear/nucleolar GTP-binding Protein                    |
| Locus_5021_Transcript_1/1_Conf_1.000 | 873  | 0  |          |                |    |         |     |     |                                                                   |

|                                      |      |    |           |                |    |         |     |     |                                |
|--------------------------------------|------|----|-----------|----------------|----|---------|-----|-----|--------------------------------|
| Locus_5022_Transcript_1/1_Conf_1.000 | 763  | 20 | 1.18E-79  | XP_002633490.1 | 84 | 300.442 | 205 | 173 | Hypothetical protein CBG06262  |
| Locus_5023_Transcript_1/1_Conf_1.000 | 811  | 0  |           |                |    |         |     |     |                                |
| Locus_5024_Transcript_1/1_Conf_1.000 | 168  | 0  |           |                |    |         |     |     |                                |
| Locus_5025_Transcript_1/2_Conf_1.000 | 392  | 20 | 1.03E-43  | NP_491217.1    | 87 | 179.489 | 113 | 99  | hypothetical protein C32E8.5   |
| Locus_5025_Transcript_2/2_Conf_1.000 | 392  | 20 | 1.03E-43  | NP_491217.1    | 87 | 179.489 | 113 | 99  | hypothetical protein C32E8.5   |
| Locus_5026_Transcript_1/1_Conf_1.000 | 1165 | 20 | 8.12E-27  | XP_002634838.1 | 70 | 125.946 | 113 | 80  | Hypothetical protein CBG13948  |
| Locus_5027_Transcript_1/1_Conf_1.000 | 978  | 20 | 2.23E-117 | NP_497288.1    | 83 | 426.402 | 307 | 257 | hypothetical protein F23H11.3  |
| Locus_5028_Transcript_1/1_Conf_1.000 | 609  | 4  | 2.23E-28  | NP_492856.1    | 82 | 129.413 | 117 | 96  | hypothetical protein Y52B11A.4 |
| Locus_5029_Transcript_1/1_Conf_1.000 | 576  | 20 | 5.58E-44  | XP_001901288.1 | 67 | 181.03  | 174 | 118 | hypothetical protein Bm1_49115 |
| Locus_503_Transcript_1/1_Conf_1.000  | 1366 | 5  | 5.09E-18  | XP_001896971.1 | 48 | 97.0561 | 270 | 130 | hypothetical protein Bm1_27600 |
| Locus_5030_Transcript_1/1_Conf_1.000 | 1131 | 20 | 1.86E-36  | XP_002640157.1 | 73 | 157.918 | 138 | 101 | C. briggsae CBR-XPG-1 protein  |
| Locus_5031_Transcript_1/1_Conf_1.000 | 1080 | 0  |           |                |    |         |     |     |                                |

|                                      |      |    |          |                |    |         |     |     |                                  |
|--------------------------------------|------|----|----------|----------------|----|---------|-----|-----|----------------------------------|
| Locus_5032_Transcript_1/1_Conf_1.000 | 1018 | 20 | 3.37E-71 | AAC47238.1     | 71 | 273.092 | 326 | 232 | non-muscle myosin heavy chain II |
| Locus_5033_Transcript_1/1_Conf_1.000 | 1472 | 12 | 1.43E-21 | EFO22036.1     | 43 | 108.997 | 393 | 171 | hypothetical protein LOAG_06451  |
| Locus_5034_Transcript_1/2_Conf_1.000 | 1418 | 20 | 1.10E-39 | EFO18357.1     | 47 | 169.088 | 428 | 204 | hypothetical protein LOAG_10138  |
| Locus_5034_Transcript_2/2_Conf_1.000 | 1343 | 20 | 1.35E-31 | EFO18357.1     | 47 | 142.124 | 370 | 174 | hypothetical protein LOAG_10138  |
| Locus_5035_Transcript_1/1_Conf_1.000 | 685  | 13 | 1.19E-21 | XP_002644671.1 | 55 | 107.457 | 196 | 108 | Hypothetical protein CBG14652    |
| Locus_5036_Transcript_1/1_Conf_1.000 | 156  | 0  |          |                |    |         |     |     |                                  |

|                                      |      |    |           |                |     |         |     |     |                                                            |
|--------------------------------------|------|----|-----------|----------------|-----|---------|-----|-----|------------------------------------------------------------|
| Locus_5037_Transcript_1/1_Conf_1.000 | 672  | 20 | 3.76E-33  | EFO27562.1     | 63  | 145.591 | 163 | 103 | hypothetical protein LOAG_00926                            |
| Locus_5038_Transcript_1/2_Conf_1.000 | 536  | 20 | 1.79E-69  | NP_495617.1    | 92  | 265.388 | 174 | 161 | hypothetical protein B0495.2                               |
| Locus_5038_Transcript_2/2_Conf_1.000 | 530  | 20 | 1.49E-68  | NP_495617.1    | 92  | 262.307 | 172 | 159 | hypothetical protein B0495.2                               |
| Locus_5039_Transcript_1/1_Conf_1.000 | 754  | 20 | 1.52E-47  | NP_505561.1    | 75  | 193.741 | 145 | 110 | TransThyretin-Related family domain family member (ttr-46) |
| Locus_504_Transcript_1/4_Conf_0.556  | 1636 | 20 | 2.15E-122 | XP_002641173.1 | 96  | 444.121 | 261 | 251 | Hypothetical protein CBG09034                              |
| Locus_504_Transcript_2/4_Conf_0.444  | 373  | 0  |           |                |     |         |     |     |                                                            |
| Locus_504_Transcript_3/4_Conf_0.667  | 1813 | 20 | 2.45E-122 | XP_002641173.1 | 96  | 444.121 | 261 | 251 | Hypothetical protein CBG09034                              |
| Locus_504_Transcript_4/4_Conf_0.667  | 1807 | 20 | 2.44E-122 | XP_002641173.1 | 96  | 444.121 | 261 | 251 | Hypothetical protein CBG09034                              |
| Locus_5040_Transcript_1/1_Conf_1.000 | 269  | 3  | 4.44E-18  | NP_500238.1    | 73  | 94.3597 | 82  | 60  | hypothetical protein Y69A2AR.3                             |
| Locus_5041_Transcript_1/1_Conf_1.000 | 906  | 20 | 8.48E-137 | NP_002267.2    | 100 | 490.73  | 271 | 271 | keratin, type I cytoskeletal 19                            |
| Locus_5042_Transcript_1/1_Conf_1.000 | 536  | 0  |           |                |     |         |     |     |                                                            |

|                                      |      |    |           |                |    |         |     |     |                                                                           |
|--------------------------------------|------|----|-----------|----------------|----|---------|-----|-----|---------------------------------------------------------------------------|
| Locus_5043_Transcript_1/1_Conf_1.000 | 688  | 20 | 1.03E-97  | NP_509898.1    | 90 | 360.147 | 227 | 206 | ACOnitase family member (aco-1)                                           |
| Locus_5044_Transcript_1/1_Conf_1.000 | 606  | 20 | 1.92E-40  | XP_001899743.1 | 62 | 169.474 | 203 | 127 | ATP-dependent DNA helicase II, 70 kDa subunit                             |
| Locus_5045_Transcript_1/1_Conf_1.000 | 727  | 20 | 4.62E-14  | XP_001894238.1 | 42 | 82.4185 | 273 | 116 | Zinc finger, C2H2 type family protein                                     |
| Locus_5046_Transcript_1/1_Conf_1.000 | 1449 | 20 | 1.60E-134 | NP_498454.2    | 67 | 484.182 | 439 | 295 | hypothetical protein F20H11.1                                             |
| Locus_5047_Transcript_1/1_Conf_1.000 | 1162 | 20 | 3.42E-118 | NP_001041162.1 | 89 | 429.483 | 259 | 232 | Bacterially Un-Swollen (M. nematophilum resistant) family member (bus-19) |
| Locus_5048_Transcript_1/1_Conf_1.000 | 811  | 20 | 1.17E-43  | NP_491682.1    | 68 | 181.03  | 174 | 119 | MTK1/MEKK4 homolog family member (mtk-1)                                  |
| Locus_5049_Transcript_1/1_Conf_1.000 | 374  | 2  | 3.33E-05  | EFO26501.1     | 49 | 51.6026 | 97  | 48  | hypothetical protein LOAG_01987                                           |
| Locus_505_Transcript_1/1_Conf_1.000  | 956  | 20 | 1.50E-70  | XP_002640350.1 | 73 | 270.781 | 241 | 176 | Hypothetical protein CBG20246                                             |
| Locus_5050_Transcript_1/1_Conf_1.000 | 470  | 20 | 2.05E-47  | XP_002639628.1 | 87 | 191.815 | 117 | 102 | C. briggsae CBR-ASG-1 protein                                             |
| Locus_5051_Transcript_1/1_Conf_1.000 | 164  | 0  |           |                |    |         |     |     |                                                                           |
| Locus_5052_Transcript_1/1_Conf_1.000 | 263  | 20 | 2.54E-13  | XP_001891725.1 | 64 | 78.5666 | 87  | 56  | hypothetical protein                                                      |

|                                      |      |    |           |                |    |         |     |     |                                                                                           |
|--------------------------------------|------|----|-----------|----------------|----|---------|-----|-----|-------------------------------------------------------------------------------------------|
| Locus_5053_Transcript_1/1_Conf_1.000 | 717  | 4  | 1.88E-20  | XP_002640718.1 | 50 | 103.605 | 186 | 94  | Hypothetical protein CBG19785                                                             |
| Locus_5054_Transcript_1/1_Conf_1.000 | 734  | 20 | 7.90E-70  | NP_508020.1    | 84 | 267.7   | 178 | 151 | Seven B Two (mammalian 7BT prohormone convertase chaperone) homolog family member (sbt-1) |
| Locus_5055_Transcript_1/2_Conf_1.000 | 817  | 20 | 1.84E-36  | EFO20733.1     | 58 | 157.147 | 198 | 116 | hypothetical protein LOAG_07757                                                           |
| Locus_5055_Transcript_2/2_Conf_1.000 | 817  | 20 | 1.84E-36  | EFO20733.1     | 58 | 157.147 | 198 | 116 | hypothetical protein LOAG_07757                                                           |
| Locus_5056_Transcript_1/1_Conf_1.000 | 1087 | 20 | 1.33E-60  | XP_001902393.1 | 74 | 238.039 | 192 | 143 | hypothetical protein                                                                      |
| Locus_5057_Transcript_1/2_Conf_1.000 | 726  | 20 | 2.07E-22  | NP_492671.1    | 76 | 110.153 | 86  | 66  | hypothetical protein Y106G6D.7                                                            |
| Locus_5057_Transcript_2/2_Conf_1.000 | 1487 | 20 | 6.93E-32  | NP_492671.1    | 83 | 143.28  | 104 | 87  | hypothetical protein Y106G6D.7                                                            |
| Locus_5058_Transcript_1/1_Conf_1.000 | 541  | 20 | 4.05E-32  | NP_501668.1    | 75 | 141.354 | 107 | 81  | Heat Shock Protein family member (hsp-12.6)                                               |
| Locus_5059_Transcript_1/2_Conf_1.000 | 828  | 20 | 1.62E-120 | CAR63570.1     | 91 | 436.417 | 270 | 248 | putative epsilon subunit of coatomer protein complex isoform 2                            |
| Locus_5059_Transcript_2/2_Conf_1.000 | 828  | 20 | 1.62E-120 | CAR63570.1     | 91 | 436.417 | 270 | 248 | putative epsilon subunit of coatomer protein complex isoform 2                            |
| Locus_506_Transcript_1/1_Conf_1.000  | 698  | 20 | 1.69E-95  | NP_501835.2    | 88 | 352.829 | 231 | 205 | DIS3 (yeast disjunction abnormal) exonuclease homolog family member (dis-3)               |
| Locus_5060_Transcript_1/1_Conf_1.000 | 421  | 20 | 5.62E-45  | NP_495261.1    | 84 | 183.726 | 120 | 101 | hypothetical protein F13H8.7                                                              |
| Locus_5061_Transcript_1/1_Conf_1.000 | 428  | 20 | 5.61E-21  | XP_002630359.1 | 68 | 103.99  | 138 | 95  | C. briggsae CBR-TAG-151 protein                                                           |
| Locus_5062_Transcript_1/2_Conf_1.000 | 387  | 0  |           |                |    |         |     |     |                                                                                           |
| Locus_5062_Transcript_2/2_Conf_1.000 | 444  | 0  |           |                |    |         |     |     |                                                                                           |
| Locus_5063_Transcript_1/1_Conf_1.000 | 512  | 0  |           |                |    |         |     |     |                                                                                           |
| Locus_5064_Transcript_1/1_Conf_1.000 | 979  | 20 | 3.62E-51  | XP_002639893.1 | 96 | 206.453 | 104 | 100 | Hypothetical protein CBG08215                                                             |
| Locus_5065_Transcript_1/1_Conf_1.000 | 176  | 20 | 2.26E-06  | XP_002640064.1 | 67 | 55.4546 | 56  | 38  | Hypothetical protein CBG12546                                                             |
| Locus_5066_Transcript_1/1_Conf_1.000 | 223  | 0  |           |                |    |         |     |     |                                                                                           |
| Locus_5067_Transcript_1/1_Conf_1.000 | 1247 | 15 | 8.93E-59  | XP_002642646.1 | 72 | 232.261 | 208 | 150 | Hypothetical protein CBG00026                                                             |

|                                      |      |    |           |                |    |         |     |     |                                                      |
|--------------------------------------|------|----|-----------|----------------|----|---------|-----|-----|------------------------------------------------------|
| Locus_5068_Transcript_1/1_Conf_1.000 | 1034 | 20 | 1.91E-154 | NP_502054.2    | 87 | 549.666 | 341 | 297 | Aldehyde deHydrogenase family member (alh-3)         |
| Locus_5069_Transcript_1/2_Conf_1.000 | 784  | 20 | 7.83E-90  | XP_002639463.1 | 83 | 334.339 | 233 | 194 | C. briggsae CBR-OBR-4 protein                        |
| Locus_5069_Transcript_2/2_Conf_1.000 | 739  | 20 | 1.56E-89  | XP_002639463.1 | 83 | 333.183 | 224 | 188 | C. briggsae CBR-OBR-4 protein                        |
| Locus_507_Transcript_1/1_Conf_1.000  | 852  | 20 | 5.53E-103 | NP_491370.1    | 84 | 378.252 | 273 | 231 | Eukaryotic Initiation Factor family member (eif-3.H) |
| Locus_5070_Transcript_1/1_Conf_1.000 | 404  | 0  |           |                |    |         |     |     |                                                      |
| Locus_5071_Transcript_1/1_Conf_1.000 | 507  | 0  |           |                |    |         |     |     |                                                      |
| Locus_5072_Transcript_1/2_Conf_1.000 | 2697 | 20 | 1.10E-47  | XP_002634045.1 | 61 | 196.823 | 239 | 146 | Hypothetical protein CBG01584                        |
| Locus_5072_Transcript_2/2_Conf_1.000 | 2694 | 20 | 1.10E-47  | XP_002634045.1 | 61 | 196.823 | 239 | 146 | Hypothetical protein CBG01584                        |
| Locus_5073_Transcript_1/1_Conf_1.000 | 1471 | 20 | 4.62E-113 | XP_002643397.1 | 71 | 412.92  | 408 | 292 | Hypothetical protein CBG16012                        |
| Locus_5074_Transcript_1/1_Conf_1.000 | 2349 | 20 | 3.96E-131 | XP_001895542.1 | 78 | 473.781 | 342 | 270 | Biotin/lipoate A/B protein ligase family protein     |

|                                      |      |    |           |                |    |         |     |     |                                                 |
|--------------------------------------|------|----|-----------|----------------|----|---------|-----|-----|-------------------------------------------------|
| Locus_5075_Transcript_1/1_Conf_1.000 | 2022 | 20 | 7.29E-163 | NP_001024873.1 | 83 | 578.941 | 437 | 367 | Nuclear Hormone Receptor family member (nhr-40) |
| Locus_5076_Transcript_1/1_Conf_1.000 | 585  | 20 | 7.34E-71  | AAA97927.1     | 81 | 270.396 | 193 | 158 | hum-3                                           |
| Locus_5077_Transcript_1/1_Conf_1.000 | 1106 | 20 | 4.02E-121 | NP_498559.1    | 81 | 439.113 | 331 | 269 | hypothetical protein B0280.1                    |
| Locus_5078_Transcript_1/1_Conf_1.000 | 240  | 0  |           |                |    |         |     |     |                                                 |
| Locus_5079_Transcript_1/2_Conf_0.500 | 977  | 20 | 4.72E-43  | NP_001040990.1 | 56 | 179.489 | 280 | 158 | hypothetical protein T23B5.1                    |
| Locus_5079_Transcript_2/2_Conf_0.500 | 977  | 20 | 4.72E-43  | NP_001040990.1 | 56 | 179.489 | 280 | 158 | hypothetical protein T23B5.1                    |
| Locus_508_Transcript_1/1_Conf_1.000  | 2300 | 20 | 2.46E-69  | NP_001022696.1 | 56 | 268.47  | 504 | 283 | hypothetical protein M88.5                      |



|                                      |      |    |           |                |    |         |     |     |                                                             |
|--------------------------------------|------|----|-----------|----------------|----|---------|-----|-----|-------------------------------------------------------------|
| Locus_5080_Transcript_1/1_Conf_1.000 | 280  | 0  |           |                |    |         |     |     |                                                             |
| Locus_5081_Transcript_1/1_Conf_1.000 | 824  | 20 | 7.31E-49  | NP_493396.1    | 62 | 198.364 | 259 | 163 | hypothetical protein W04A4.5                                |
| Locus_5082_Transcript_1/1_Conf_1.000 | 160  | 0  |           |                |    |         |     |     |                                                             |
| Locus_5083_Transcript_1/1_Conf_1.000 | 561  | 20 | 1.82E-49  | NP_492376.1    | 67 | 199.134 | 198 | 134 | MAFBx (F-box protein) homolog family member (mfb-1)         |
| Locus_5084_Transcript_1/1_Conf_1.000 | 1201 | 20 | 2.16E-38  | NP_510818.3    | 45 | 164.466 | 345 | 156 | hypothetical protein F10D7.5                                |
| Locus_5085_Transcript_1/1_Conf_1.000 | 465  | 20 | 8.15E-20  | XP_001900333.1 | 66 | 100.138 | 105 | 70  | Anaphase promoting complex subunit 8 / cdc23 family protein |
| Locus_5086_Transcript_1/1_Conf_1.000 | 278  | 0  |           |                |    |         |     |     |                                                             |
| Locus_5087_Transcript_1/1_Conf_1.000 | 613  | 20 | 5.58E-19  | XP_001629955.1 | 86 | 98.2117 | 67  | 58  | predicted protein                                           |
| Locus_5088_Transcript_1/1_Conf_1.000 | 695  | 0  |           |                |    |         |     |     |                                                             |
| Locus_5089_Transcript_1/1_Conf_1.000 | 1191 | 3  | 7.32E-47  | NP_871624.2    | 50 | 192.586 | 362 | 183 | hypothetical protein B0336.7                                |
| Locus_509_Transcript_1/1_Conf_1.000  | 461  | 5  | 2.39E-32  | NP_505714.1    | 74 | 141.739 | 119 | 89  | LiPid Depleted family member (lpd-9)                        |
| Locus_5090_Transcript_1/1_Conf_1.000 | 651  | 9  | 9.10E-106 | NP_502119.2    | 95 | 386.726 | 215 | 205 | hypothetical protein F54D1.6                                |
| Locus_5091_Transcript_1/2_Conf_1.000 | 721  | 20 | 1.21E-67  | NP_492333.1    | 80 | 260.381 | 193 | 155 | hypothetical protein F43G9.3                                |
| Locus_5091_Transcript_2/2_Conf_1.000 | 916  | 20 | 7.67E-85  | NP_492333.1    | 82 | 318.161 | 226 | 186 | hypothetical protein F43G9.3                                |
| Locus_5092_Transcript_1/1_Conf_1.000 | 269  | 20 | 8.08E-28  | XP_002637628.1 | 84 | 126.716 | 88  | 74  | Hypothetical protein CBG19373                               |

|                                      |      |    |          |                |    |         |      |     |                                                        |
|--------------------------------------|------|----|----------|----------------|----|---------|------|-----|--------------------------------------------------------|
| Locus_5093_Transcript_1/1_Conf_1.000 | 945  | 3  | 1.79E-07 | Q60YF6.3       | 49 | 61.2326 | 130  | 64  | Mediator of RNA polymerase II transcription subunit 29 |
| Locus_5094_Transcript_1/1_Conf_1.000 | 1093 | 20 | 6.47E-31 | EFO19409.1     | 78 | 139.428 | 109  | 86  | hypothetical protein LOAG_09084                        |
| Locus_5095_Transcript_1/1_Conf_1.000 | 479  | 4  | 5.03E-14 | XP_002630619.1 | 67 | 80.8777 | 96   | 65  | Hypothetical protein CBG02284                          |
| Locus_5096_Transcript_1/1_Conf_1.000 | 931  | 20 | 3.79E-87 | XP_002633510.1 | 91 | 325.865 | 226  | 206 | C. briggsae CBR-VHA-8 protein                          |
| Locus_5097_Transcript_1/1_Conf_1.000 | 524  | 0  |          |                |    |         |      |     |                                                        |
| Locus_5098_Transcript_1/3_Conf_0.714 | 1618 | 20 | 2.07E-93 | NP_492960.1    | 73 | 347.821 | 301  | 220 | hypothetical protein C17D12.1                          |
| Locus_5098_Transcript_2/3_Conf_0.714 | 1614 | 20 | 2.06E-93 | NP_492960.1    | 73 | 347.821 | 301  | 220 | hypothetical protein C17D12.1                          |
| Locus_5098_Transcript_3/3_Conf_0.714 | 1614 | 20 | 2.06E-93 | NP_492960.1    | 73 | 347.821 | 301  | 220 | hypothetical protein C17D12.1                          |
| Locus_5099_Transcript_1/1_Conf_1.000 | 401  | 0  |          |                |    |         |      |     |                                                        |
| Locus_51_Transcript_1/1_Conf_1.000   | 343  | 14 | 1.60E-15 | XP_002634040.1 | 68 | 85.8853 | 119  | 81  | C. briggsae CBR-VIT-6 protein                          |
| Locus_510_Transcript_1/1_Conf_1.000  | 3540 | 20 | 0        | XP_002645914.1 | 71 | 1224.54 | 1162 | 831 | Hypothetical protein CBG07670                          |
| Locus_5100_Transcript_1/1_Conf_1.000 | 324  | 0  |          |                |    |         |      |     |                                                        |
| Locus_5101_Transcript_1/1_Conf_1.000 | 417  | 0  |          |                |    |         |      |     |                                                        |
| Locus_5102_Transcript_1/1_Conf_1.000 | 215  | 0  |          |                |    |         |      |     |                                                        |
| Locus_5103_Transcript_1/1_Conf_1.000 | 1367 | 20 | 2.77E-48 | XP_001899202.1 | 55 | 197.593 | 319  | 177 | RGL1                                                   |
| Locus_5104_Transcript_1/1_Conf_1.000 | 360  | 20 | 5.90E-47 | NP_497894.1    | 84 | 190.274 | 113  | 96  | hypothetical protein R07E5.13                          |

|                                      |      |    |           |                |     |         |     |     |                                                                           |
|--------------------------------------|------|----|-----------|----------------|-----|---------|-----|-----|---------------------------------------------------------------------------|
| Locus_5105_Transcript_1/1_Conf_1.000 | 495  | 20 | 1.36E-35  | XP_002630954.1 | 67  | 152.525 | 158 | 107 | C. briggsae CBR-TAG-184 protein                                           |
| Locus_5106_Transcript_1/1_Conf_1.000 | 605  | 5  | 1.19E-10  | NP_001021852.2 | 58  | 70.4774 | 73  | 43  | hypothetical protein ZC434.9                                              |
| Locus_5107_Transcript_1/1_Conf_1.000 | 138  | 9  | 5.56E-05  | EFO27233.1     | 62  | 50.8322 | 45  | 28  | CAMK/MLCK protein kinase                                                  |
| Locus_5108_Transcript_1/1_Conf_1.000 | 172  | 0  |           |                |     |         |     |     |                                                                           |
| Locus_5109_Transcript_1/1_Conf_1.000 | 247  | 20 | 1.79E-11  | XP_002834351.1 | 100 | 72.4034 | 59  | 59  | PREDICTED: hypothetical protein<br>LOC100438152                           |
| Locus_511_Transcript_1/3_Conf_0.556  | 512  | 0  |           |                |     |         |     |     |                                                                           |
| Locus_511_Transcript_2/3_Conf_0.222  | 513  | 0  |           |                |     |         |     |     |                                                                           |
| Locus_511_Transcript_3/3_Conf_0.667  | 240  | 0  |           |                |     |         |     |     |                                                                           |
| Locus_5110_Transcript_1/1_Conf_1.000 | 452  | 2  | 4.02E-11  | XP_002632149.1 | 54  | 71.2478 | 103 | 56  | Hypothetical protein CBG07008                                             |
| Locus_5111_Transcript_1/1_Conf_1.000 | 1614 | 20 | 1.08E-142 | CAA84693.3     | 74  | 511.531 | 539 | 402 | C. elegans protein D2045.2, partially<br>confirmed by transcript evidence |

|                                      |      |    |           |                |    |         |     |     |                                                                         |
|--------------------------------------|------|----|-----------|----------------|----|---------|-----|-----|-------------------------------------------------------------------------|
| Locus_5112_Transcript_1/1_Conf_1.000 | 358  | 20 | 8.57E-38  | NP_492033.1    | 97 | 159.844 | 82  | 80  | hypothetical protein M05B5.4                                            |
| Locus_5113_Transcript_1/4_Conf_0.250 | 1233 | 0  |           |                |    |         |     |     |                                                                         |
| Locus_5113_Transcript_2/4_Conf_0.250 | 1275 | 0  |           |                |    |         |     |     |                                                                         |
| Locus_5113_Transcript_3/4_Conf_0.375 | 1742 | 0  |           |                |    |         |     |     |                                                                         |
| Locus_5113_Transcript_4/4_Conf_0.375 | 1742 | 0  |           |                |    |         |     |     |                                                                         |
| Locus_5114_Transcript_1/1_Conf_1.000 | 489  | 20 | 1.47E-29  | NP_001022138.1 | 62 | 132.494 | 153 | 96  | hypothetical protein F33G12.6                                           |
| Locus_5115_Transcript_1/1_Conf_1.000 | 498  | 1  | 5.56E-05  | XP_001440076.1 | 54 | 50.8322 | 111 | 61  | hypothetical protein                                                    |
| Locus_5116_Transcript_1/1_Conf_1.000 | 582  | 0  |           |                |    |         |     |     |                                                                         |
| Locus_5117_Transcript_1/1_Conf_1.000 | 603  | 20 | 4.63E-55  | NP_502998.2    | 75 | 218.009 | 196 | 147 | Maternal Effect Lethal family member (mel-46)                           |
| Locus_5118_Transcript_1/1_Conf_1.000 | 930  | 20 | 6.78E-153 | XP_002640032.1 | 91 | 544.273 | 311 | 286 | Hypothetical protein CBG12504                                           |
| Locus_5119_Transcript_1/1_Conf_1.000 | 778  | 20 | 1.16E-61  | NP_001123010.1 | 65 | 240.736 | 269 | 177 | related to yeast Vacuolar Protein Sorting factor family member (vps-39) |
| Locus_512_Transcript_1/5_Conf_0.667  | 1956 | 20 | 2.09E-66  | XP_002642054.1 | 66 | 258.455 | 267 | 178 | Hypothetical protein CBG17992                                           |
| Locus_512_Transcript_2/5_Conf_0.667  | 2105 | 20 | 2.36E-79  | XP_002642054.1 | 67 | 301.597 | 302 | 204 | Hypothetical protein CBG17992                                           |
| Locus_512_Transcript_3/5_Conf_0.667  | 2105 | 20 | 2.36E-79  | XP_002642054.1 | 67 | 301.597 | 302 | 204 | Hypothetical protein CBG17992                                           |
| Locus_512_Transcript_4/5_Conf_0.667  | 2102 | 20 | 2.36E-79  | XP_002642054.1 | 67 | 301.597 | 302 | 204 | Hypothetical protein CBG17992                                           |
| Locus_512_Transcript_5/5_Conf_0.667  | 2105 | 20 | 2.36E-79  | XP_002642054.1 | 67 | 301.597 | 302 | 204 | Hypothetical protein CBG17992                                           |
| Locus_5120_Transcript_1/1_Conf_1.000 | 417  | 0  |           |                |    |         |     |     |                                                                         |

|                                      |      |    |          |                |    |         |     |     |                                               |
|--------------------------------------|------|----|----------|----------------|----|---------|-----|-----|-----------------------------------------------|
| Locus_5121_Transcript_1/4_Conf_0.556 | 546  | 20 | 1.04E-06 | ZP_02693165.1  | 45 | 56.9954 | 155 | 71  | hypothetical protein Epulo_08463              |
| Locus_5121_Transcript_2/4_Conf_0.667 | 962  | 20 | 5.66E-09 | XP_002630833.1 | 41 | 66.2402 | 264 | 109 | C. briggsae CBR-VRK-1 protein                 |
| Locus_5121_Transcript_3/4_Conf_0.222 | 508  | 2  | 2.28E-04 | NP_495185.1    | 69 | 48.9062 | 46  | 32  | Vaccinia Related Kinase family member (vrk-1) |
| Locus_5121_Transcript_4/4_Conf_0.667 | 962  |    |          |                |    |         |     |     |                                               |
| Locus_5122_Transcript_1/1_Conf_1.000 | 432  | 20 | 2.25E-38 | XP_002644784.1 | 74 | 161.77  | 131 | 97  | Hypothetical protein CBG14799                 |
| Locus_5123_Transcript_1/1_Conf_1.000 | 347  | 0  |          |                |    |         |     |     |                                               |
| Locus_5124_Transcript_1/1_Conf_1.000 | 953  | 20 | 7.59E-91 | XP_002630191.1 | 73 | 338.191 | 327 | 241 | C. briggsae CBR-KAP-1 protein                 |
| Locus_5125_Transcript_1/1_Conf_1.000 | 367  | 20 | 8.51E-22 | EFO17196.1     | 78 | 106.686 | 83  | 65  | hypothetical protein LOAG_11307               |
| Locus_5126_Transcript_1/1_Conf_1.000 | 2388 | 20 | 0        | XP_002633792.1 | 85 | 1204.89 | 808 | 690 | Hypothetical protein CBG03484                 |

|                                      |      |    |           |                |    |         |     |     |                                                            |
|--------------------------------------|------|----|-----------|----------------|----|---------|-----|-----|------------------------------------------------------------|
| Locus_5127_Transcript_1/1_Conf_1.000 | 636  | 20 | 3.62E-88  | NP_872179.1    | 91 | 328.176 | 198 | 182 | Chaperonin Containing TCP-1 family member (cct-7)          |
| Locus_5128_Transcript_1/1_Conf_1.000 | 685  | 20 | 1.48E-56  | NP_492393.1    | 74 | 223.402 | 202 | 151 | Heavy chain, Unconventional Myosin family member (hum-1)   |
| Locus_5129_Transcript_1/1_Conf_1.000 | 1114 | 20 | 3.70E-114 | NP_502795.2    | 69 | 416.001 | 370 | 258 | Homolog of Hedgehog AcylTransferase family member (hhat-2) |
| Locus_513_Transcript_1/2_Conf_1.000  | 2102 | 20 | 0         | NP_001022041.1 | 91 | 1107.43 | 691 | 632 | UNCoordinated family member (unc-104)                      |
| Locus_513_Transcript_2/2_Conf_1.000  | 2108 | 20 | 0         | NP_001022041.1 | 91 | 1102.43 | 693 | 632 | UNCoordinated family member (unc-104)                      |
| Locus_5130_Transcript_1/1_Conf_1.000 | 491  | 0  |           |                |    |         |     |     |                                                            |
| Locus_5131_Transcript_1/2_Conf_1.000 | 666  | 20 | 3.55E-44  | XP_002640159.1 | 90 | 182.185 | 110 | 99  | C. briggsae CBR-DAD-1 protein                              |
| Locus_5131_Transcript_2/2_Conf_1.000 | 204  | 0  |           |                |    |         |     |     |                                                            |

|                                      |      |    |           |                |    |         |     |     |                                                               |
|--------------------------------------|------|----|-----------|----------------|----|---------|-----|-----|---------------------------------------------------------------|
| Locus_5132_Transcript_1/1_Conf_1.000 | 679  | 20 | 1.16E-29  | EFO24192.1     | 57 | 134.035 | 190 | 110 | hypothetical protein LOAG_04291                               |
| Locus_5133_Transcript_1/1_Conf_1.000 | 383  | 0  |           |                |    |         |     |     |                                                               |
| Locus_5134_Transcript_1/1_Conf_1.000 | 1229 | 20 | 4.62E-68  | NP_001022547.1 | 80 | 263.077 | 200 | 160 | hypothetical protein F23H11.9                                 |
| Locus_5135_Transcript_1/1_Conf_1.000 | 229  | 4  | 5.66E-13  | XP_001891849.1 | 73 | 77.411  | 68  | 50  | Retinoblastoma-associated protein A domain containing protein |
| Locus_5136_Transcript_1/1_Conf_1.000 | 695  | 20 | 6.11E-114 | XP_002632905.1 | 92 | 414.075 | 228 | 211 | Hypothetical protein CBG21657                                 |
| Locus_5137_Transcript_1/1_Conf_1.000 | 532  | 0  |           |                |    |         |     |     |                                                               |
| Locus_5138_Transcript_1/1_Conf_1.000 | 709  | 20 | 1.24E-85  | XP_002631237.1 | 84 | 320.087 | 234 | 197 | C. briggsae CBR-RSP-7 protein                                 |
| Locus_5139_Transcript_1/1_Conf_1.000 | 907  | 20 | 2.82E-23  | NP_001076697.1 | 55 | 113.62  | 200 | 110 | Ref/ALY RNA export adaptor family member (aly-3)              |
| Locus_514_Transcript_1/1_Conf_1.000  | 351  | 20 | 1.30E-17  | NP_492539.1    | 67 | 92.8189 | 86  | 58  | LEM domain protein family member (lem-3)                      |
| Locus_5140_Transcript_1/1_Conf_1.000 | 808  | 20 | 8.12E-61  | XP_001898049.1 | 74 | 238.039 | 230 | 172 | 3' exoribonuclease family, domain 2 containing protein        |
| Locus_5141_Transcript_1/2_Conf_1.000 | 1355 | 0  |           |                |    |         |     |     |                                                               |
| Locus_5141_Transcript_2/2_Conf_1.000 | 797  | 0  |           |                |    |         |     |     |                                                               |
| Locus_5142_Transcript_1/1_Conf_1.000 | 234  | 0  |           |                |    |         |     |     |                                                               |
| Locus_5143_Transcript_1/1_Conf_1.000 | 1156 | 20 | 7.32E-113 | NP_491924.1    | 74 | 411.764 | 354 | 264 | hypothetical protein W02D3.4                                  |
| Locus_5144_Transcript_1/1_Conf_1.000 | 212  | 20 | 1.85E-16  | XP_002647661.1 | 98 | 88.9669 | 57  | 56  | C. briggsae CBR-NCX-2 protein                                 |

|                                      |      |    |           |                |    |         |     |     |                                                              |
|--------------------------------------|------|----|-----------|----------------|----|---------|-----|-----|--------------------------------------------------------------|
| Locus_5145_Transcript_1/1_Conf_1.000 | 1569 | 20 | 1.46E-104 | XP_002639426.1 | 82 | 384.8   | 261 | 216 | Hypothetical protein CBG04019                                |
| Locus_5146_Transcript_1/1_Conf_1.000 | 913  | 20 | 2.39E-54  | XP_001902781.1 | 73 | 216.853 | 203 | 149 | Ring canal kelch protein                                     |
| Locus_5147_Transcript_1/2_Conf_1.000 | 853  | 0  |           |                |    |         |     |     |                                                              |
| Locus_5147_Transcript_2/2_Conf_1.000 | 852  | 0  |           |                |    |         |     |     |                                                              |
| Locus_5148_Transcript_1/1_Conf_1.000 | 283  | 6  | 1.08E-11  | NP_507633.1    | 88 | 73.1738 | 36  | 32  | hypothetical protein Y51A2D.14                               |
| Locus_5149_Transcript_1/1_Conf_1.000 | 947  | 20 | 3.34E-38  | XP_002640137.1 | 76 | 163.31  | 132 | 101 | C. briggsae CBR-CDC-25.1 protein                             |
| Locus_515_Transcript_1/1_Conf_1.000  | 803  | 5  | 9.28E-09  | XP_001900765.1 | 56 | 65.0846 | 107 | 60  | hypothetical protein Bm1_46515                               |
| Locus_5150_Transcript_1/1_Conf_1.000 | 493  | 0  |           |                |    |         |     |     |                                                              |
| Locus_5151_Transcript_1/2_Conf_1.000 | 908  | 2  | 1.10E-43  | NP_491566.1    | 62 | 181.415 | 223 | 140 | hypothetical protein F48C1.6                                 |
| Locus_5151_Transcript_2/2_Conf_1.000 | 908  | 2  | 1.10E-43  | NP_491566.1    | 62 | 181.415 | 223 | 140 | hypothetical protein F48C1.6                                 |
| Locus_5152_Transcript_1/1_Conf_1.000 | 247  | 0  |           |                |    |         |     |     |                                                              |
| Locus_5153_Transcript_1/1_Conf_1.000 | 417  | 0  |           |                |    |         |     |     |                                                              |
| Locus_5154_Transcript_1/1_Conf_1.000 | 504  | 4  | 2.36E-22  | NP_497264.1    | 58 | 108.612 | 173 | 101 | hypothetical protein B0412.3                                 |
| Locus_5155_Transcript_1/1_Conf_1.000 | 976  | 20 | 7.84E-131 | NP_001022191.1 | 89 | 471.085 | 325 | 292 | BCS1 (mitochondrial chaperone) homolog family member (bcs-1) |
| Locus_5156_Transcript_1/1_Conf_1.000 | 705  | 20 | 3.86E-55  | NP_492377.1    | 73 | 218.779 | 191 | 141 | SUPpressor family member (sup-17)                            |
| Locus_5157_Transcript_1/1_Conf_1.000 | 529  | 0  |           |                |    |         |     |     |                                                              |



|                                      |      |    |           |                |    |         |     |     |                               |
|--------------------------------------|------|----|-----------|----------------|----|---------|-----|-----|-------------------------------|
| Locus_5158_Transcript_1/1_Conf_1.000 | 778  | 20 | 1.19E-98  | XP_002630624.1 | 92 | 363.614 | 205 | 190 | C. briggsae CBR-PBS-3 protein |
| Locus_5159_Transcript_1/1_Conf_1.000 | 268  | 0  |           |                |    |         |     |     |                               |
| Locus_516_Transcript_1/1_Conf_1.000  | 182  | 1  | 2.19E-04  | XP_002647616.1 | 63 | 48.9062 | 44  | 28  | Hypothetical protein CBG06707 |
| Locus_5160_Transcript_1/1_Conf_1.000 | 1098 | 20 | 3.22E-171 | NP_493572.2    | 91 | 605.52  | 344 | 314 | hypothetical protein F39B2.8  |
| Locus_5161_Transcript_1/2_Conf_1.000 | 852  | 20 | 7.19E-119 | NP_509509.1    | 85 | 431.024 | 268 | 229 | hypothetical protein D1009.1  |
| Locus_5161_Transcript_2/2_Conf_1.000 | 1413 | 20 | 5.60E-177 | XP_002645319.1 | 78 | 625.165 | 471 | 368 | Hypothetical protein CBG00242 |
| Locus_5162_Transcript_1/5_Conf_0.364 | 1230 | 0  |           |                |    |         |     |     |                               |
| Locus_5162_Transcript_2/5_Conf_0.364 | 1438 | 0  |           |                |    |         |     |     |                               |
| Locus_5162_Transcript_3/5_Conf_0.364 | 1046 | 0  |           |                |    |         |     |     |                               |
| Locus_5162_Transcript_4/5_Conf_0.273 | 693  | 0  |           |                |    |         |     |     |                               |
| Locus_5162_Transcript_5/5_Conf_0.364 | 1438 | 0  |           |                |    |         |     |     |                               |
| Locus_5163_Transcript_1/1_Conf_1.000 | 572  | 0  |           |                |    |         |     |     |                               |
| Locus_5164_Transcript_1/1_Conf_1.000 | 1329 | 20 | 4.09E-65  | XP_002635088.1 | 55 | 253.447 | 381 | 212 | C. briggsae CBR-ASP-6 protein |

|                                      |      |    |           |                |    |         |     |     |                                                                                    |
|--------------------------------------|------|----|-----------|----------------|----|---------|-----|-----|------------------------------------------------------------------------------------|
| Locus_5165_Transcript_1/1_Conf_1.000 | 234  | 20 | 4.74E-28  | XP_002048633.1 | 88 | 127.487 | 76  | 67  | GJ11250                                                                            |
| Locus_5166_Transcript_1/1_Conf_1.000 | 608  | 3  | 1.48E-08  | XP_002633586.1 | 61 | 63.5438 | 92  | 57  | C. briggsae CBR-SMG-3 protein                                                      |
| Locus_5167_Transcript_1/1_Conf_1.000 | 202  | 0  |           |                |    |         |     |     |                                                                                    |
| Locus_5168_Transcript_1/1_Conf_1.000 | 823  | 20 | 1.41E-92  | NP_001022714.1 | 81 | 343.584 | 262 | 214 | ALIX (Apoptosis-linked gene 2 interacting protein X) homolog family member (alx-1) |
| Locus_5169_Transcript_1/2_Conf_1.000 | 1180 | 0  |           |                |    |         |     |     |                                                                                    |
| Locus_5169_Transcript_2/2_Conf_1.000 | 1129 | 0  |           |                |    |         |     |     |                                                                                    |
| Locus_517_Transcript_1/5_Conf_0.500  | 1547 | 7  | 2.72E-79  | XP_002631173.1 | 70 | 300.827 | 279 | 198 | Hypothetical protein CBG02959                                                      |
| Locus_517_Transcript_2/5_Conf_0.200  | 501  | 8  | 2.83E-04  | CAA92456.3     | 41 | 48.521  | 158 | 66  | C. elegans protein C53B4.4b, partially confirmed by transcript evidence            |
| Locus_517_Transcript_3/5_Conf_0.500  | 1760 | 7  | 3.22E-79  | XP_002631173.1 | 70 | 300.827 | 279 | 198 | Hypothetical protein CBG02959                                                      |
| Locus_517_Transcript_4/5_Conf_0.400  | 812  | 8  | 9.08E-04  | CAA92456.3     | 41 | 48.521  | 158 | 66  | C. elegans protein C53B4.4b, partially confirmed by transcript evidence            |
| Locus_517_Transcript_5/5_Conf_0.500  | 1673 | 7  | 3.03E-79  | XP_002631173.1 | 70 | 300.827 | 279 | 198 | Hypothetical protein CBG02959                                                      |
| Locus_5170_Transcript_1/1_Conf_1.000 | 1200 | 20 | 1.36E-24  | XP_002635272.1 | 55 | 118.627 | 354 | 196 | Hypothetical protein CBG11516                                                      |
| Locus_5171_Transcript_1/1_Conf_1.000 | 578  | 0  |           |                |    |         |     |     |                                                                                    |
| Locus_5172_Transcript_1/1_Conf_1.000 | 397  | 0  |           |                |    |         |     |     |                                                                                    |
| Locus_5173_Transcript_1/1_Conf_1.000 | 275  | 20 | 3.59E-36  | AAD31839.1     | 85 | 154.451 | 91  | 78  | AF132291_1nancylostoma-secreted protein 1 precursor                                |
| Locus_5174_Transcript_1/1_Conf_1.000 | 983  | 20 | 2.61E-158 | CBI70492.1     | 94 | 562.377 | 328 | 309 | vacuolar ATPase a subunit                                                          |
| Locus_5175_Transcript_1/3_Conf_0.667 | 1913 | 20 | 3.72E-68  | XP_001899496.1 | 64 | 264.233 | 346 | 222 | LIM-domain binding protein                                                         |
| Locus_5175_Transcript_2/3_Conf_0.667 | 1828 | 20 | 1.21E-68  | XP_001899496.1 | 55 | 265.774 | 441 | 244 | LIM-domain binding protein                                                         |
| Locus_5175_Transcript_3/3_Conf_0.667 | 1934 | 20 | 1.86E-67  | XP_001899496.1 | 64 | 261.922 | 346 | 222 | LIM-domain binding protein                                                         |
| Locus_5176_Transcript_1/1_Conf_1.000 | 407  | 0  |           |                |    |         |     |     |                                                                                    |
| Locus_5177_Transcript_1/1_Conf_1.000 | 371  | 0  |           |                |    |         |     |     |                                                                                    |
| Locus_5178_Transcript_1/1_Conf_1.000 | 1614 | 20 | 2.30E-68  | XP_001892034.1 | 58 | 264.618 | 396 | 232 | erythroblast macrophage protein EMP                                                |

|                                      |      |    |           |                |    |         |     |     |                                                          |
|--------------------------------------|------|----|-----------|----------------|----|---------|-----|-----|----------------------------------------------------------|
| Locus_5179_Transcript_1/1_Conf_1.000 | 460  | 20 | 4.84E-17  | EFO16233.1     | 59 | 90.8929 | 122 | 73  | variant SH3 domain-containing protein                    |
| Locus_518_Transcript_1/2_Conf_1.000  | 548  | 20 | 6.04E-55  | XP_002639660.1 | 96 | 217.238 | 151 | 145 | C. briggsae CBR-RPS-15 protein                           |
| Locus_518_Transcript_2/2_Conf_1.000  | 536  | 20 | 8.34E-51  | XP_002639660.1 | 93 | 203.371 | 151 | 141 | C. briggsae CBR-RPS-15 protein                           |
| Locus_5180_Transcript_1/1_Conf_1.000 | 425  | 20 | 1.16E-50  | NP_491930.1    | 89 | 202.601 | 137 | 123 | DiHydroOrotate Dehydrogenas family member (dhod-1)       |
| Locus_5181_Transcript_1/1_Conf_1.000 | 560  | 0  |           |                |    |         |     |     |                                                          |
| Locus_5182_Transcript_1/1_Conf_1.000 | 891  | 20 | 6.67E-54  | NP_510298.1    | 87 | 215.312 | 141 | 124 | AMP-Activated Kinase Beta subunit family member (aakb-1) |
| Locus_5183_Transcript_1/1_Conf_1.000 | 774  | 4  | 8.19E-84  | NP_501169.1    | 80 | 314.309 | 232 | 187 | hypothetical protein F42C5.9                             |
| Locus_5184_Transcript_1/1_Conf_1.000 | 1066 | 20 | 4.31E-141 | NP_499987.2    | 86 | 505.368 | 322 | 278 | hypothetical protein F56B3.8                             |
| Locus_5185_Transcript_1/2_Conf_1.000 | 978  | 20 | 1.37E-58  | NP_504573.1    | 72 | 231.106 | 191 | 138 | hypothetical protein Y38A10A.7                           |

|                                      |      |    |           |                |    |         |     |     |                                                                                                        |
|--------------------------------------|------|----|-----------|----------------|----|---------|-----|-----|--------------------------------------------------------------------------------------------------------|
| Locus_5185_Transcript_2/2_Conf_1.000 | 801  | 20 | 8.91E-36  | XP_002639559.1 | 97 | 154.836 | 80  | 78  | C. briggsae CBR-MEK-2 protein                                                                          |
| Locus_5186_Transcript_1/1_Conf_1.000 | 773  | 0  |           |                |    |         |     |     |                                                                                                        |
| Locus_5187_Transcript_1/1_Conf_1.000 | 392  | 0  |           |                |    |         |     |     |                                                                                                        |
| Locus_5188_Transcript_1/1_Conf_1.000 | 2163 | 20 | 4.53E-118 | ADK24110.1     | 55 | 430.254 | 759 | 418 | Eps15 (endocytosis protein) homologous sequence protein 1, isoform b, confirmed by transcript evidence |
| Locus_5189_Transcript_1/1_Conf_1.000 | 206  | 0  |           |                |    |         |     |     |                                                                                                        |
| Locus_519_Transcript_1/1_Conf_1.000  | 634  | 0  |           |                |    |         |     |     |                                                                                                        |
| Locus_5190_Transcript_1/1_Conf_1.000 | 2178 | 1  | 7.54E-04  | CAR63599.1     | 56 | 50.8322 | 78  | 44  | hypothetical protein                                                                                   |
| Locus_5191_Transcript_1/1_Conf_1.000 | 1858 | 20 | 1.76E-115 | EFO25151.1     | 58 | 421.394 | 631 | 370 | MutS domain III family protein                                                                         |
| Locus_5192_Transcript_1/1_Conf_1.000 | 445  | 0  |           |                |    |         |     |     |                                                                                                        |
| Locus_5193_Transcript_1/1_Conf_1.000 | 607  | 20 | 2.67E-50  | NP_498260.2    | 93 | 202.216 | 116 | 109 | DEAD box helicase homolog family member (ddx-23)                                                       |
| Locus_5194_Transcript_1/1_Conf_1.000 | 597  | 20 | 7.73E-31  | YP_003592777.1 | 57 | 137.502 | 198 | 113 | alkaline phosphatase                                                                                   |
| Locus_5195_Transcript_1/1_Conf_1.000 | 603  | 20 | 2.91E-41  | XP_002639088.1 | 70 | 172.17  | 165 | 116 | C. briggsae CBR-TAG-83 protein                                                                         |
| Locus_5196_Transcript_1/2_Conf_1.000 | 910  | 20 | 9.72E-32  | EFO19475.1     | 73 | 141.739 | 124 | 91  | adrenal gland protein AD-001                                                                           |
| Locus_5196_Transcript_2/2_Conf_1.000 | 657  | 20 | 5.22E-32  | EFO19475.1     | 73 | 141.739 | 124 | 91  | adrenal gland protein AD-001                                                                           |

|                                      |      |    |           |                |    |         |     |     |                                                                           |
|--------------------------------------|------|----|-----------|----------------|----|---------|-----|-----|---------------------------------------------------------------------------|
| Locus_5197_Transcript_1/2_Conf_1.000 | 577  | 4  | 4.30E-28  | Q20548.2       | 69 | 128.257 | 160 | 111 | Probable RING finger protein 207 homolog                                  |
| Locus_5197_Transcript_2/2_Conf_1.000 | 577  | 4  | 4.30E-28  | Q20548.2       | 69 | 128.257 | 160 | 111 | Probable RING finger protein 207 homolog                                  |
| Locus_5198_Transcript_1/1_Conf_1.000 | 172  | 0  |           |                |    |         |     |     |                                                                           |
| Locus_5199_Transcript_1/1_Conf_1.000 | 1296 | 20 | 1.23E-159 | NP_497264.1    | 78 | 567.385 | 454 | 356 | hypothetical protein B0412.3                                              |
| Locus_52_Transcript_1/1_Conf_1.000   | 428  | 20 | 1.69E-17  | CAY80864.1     | 68 | 92.4337 | 74  | 51  | Bat2p                                                                     |
| Locus_520_Transcript_1/1_Conf_1.000  | 617  | 20 | 6.00E-45  | XP_002647198.1 | 72 | 184.496 | 180 | 130 | C. briggsae CBR-LACT-9 protein                                            |
| Locus_5200_Transcript_1/1_Conf_1.000 | 657  | 20 | 5.77E-31  | NP_501284.1    | 59 | 138.272 | 177 | 105 | Temporarily Assigned Gene name family member (tag-321)                    |
| Locus_5201_Transcript_1/1_Conf_1.000 | 1060 | 20 | 2.04E-42  | NP_001024128.1 | 62 | 177.563 | 319 | 200 | EEA1 (Early Endosome Antigen, Rab effector) homolog family member (eea-1) |
| Locus_5202_Transcript_1/1_Conf_1.000 | 253  | 2  | 2.18E-04  | XP_002167274.1 | 52 | 48.9062 | 76  | 40  | PREDICTED: similar to Chromobox protein homolog 5                         |
| Locus_5203_Transcript_1/1_Conf_1.000 | 234  | 0  |           |                |    |         |     |     |                                                                           |
| Locus_5204_Transcript_1/1_Conf_1.000 | 1482 | 20 | 1.61E-105 | EFO27140.1     | 67 | 387.882 | 397 | 269 | mannose-6-phosphate isomerase                                             |
| Locus_5205_Transcript_1/1_Conf_1.000 | 433  | 0  |           |                |    |         |     |     |                                                                           |
| Locus_5206_Transcript_1/1_Conf_1.000 | 142  | 0  |           |                |    |         |     |     |                                                                           |
| Locus_5207_Transcript_1/2_Conf_1.000 | 1141 | 20 | 2.22E-122 | NP_493209.1    | 78 | 443.351 | 350 | 274 | NuDiX family member (ndx-1)                                               |
| Locus_5207_Transcript_2/2_Conf_1.000 | 1141 | 20 | 2.22E-122 | NP_493209.1    | 78 | 443.351 | 350 | 274 | NuDiX family member (ndx-1)                                               |
| Locus_5208_Transcript_1/2_Conf_1.000 | 476  | 9  | 1.33E-14  | EFO21491.1     | 59 | 82.8037 | 136 | 81  | hypothetical protein LOAG_06999                                           |
| Locus_5208_Transcript_2/2_Conf_1.000 | 288  | 0  |           |                |    |         |     |     |                                                                           |
| Locus_5209_Transcript_1/2_Conf_1.000 | 3271 | 20 | 6.74E-164 | XP_002631594.1 | 80 | 583.178 | 481 | 387 | C. briggsae CBR-ALH-7 protein                                             |
| Locus_5209_Transcript_2/2_Conf_1.000 | 1687 | 20 | 4.56E-124 |                | 61 | 440.654 | 540 | 334 | protein F43G9.7                                                           |
| Locus_521_Transcript_1/1_Conf_1.000  | 2381 | 20 | 0         | NP_490886.2    | 69 | 734.561 | 780 | 544 | hypothetical protein Y71G12B.11                                           |
| Locus_5210_Transcript_1/1_Conf_1.000 | 566  | 20 | 5.80E-27  | EFO25650.1     | 71 | 124.405 | 138 | 99  | hypothetical protein LOAG_02839                                           |
| Locus_5211_Transcript_1/1_Conf_1.000 | 1690 | 20 | 1.92E-97  | XP_002632959.1 | 76 | 361.303 | 326 | 248 | C. briggsae CBR-RAD-26 protein                                            |
| Locus_5212_Transcript_1/1_Conf_1.000 | 598  | 0  |           |                |    |         |     |     |                                                                           |

|                                      |      |    |           |                |     |         |     |     |                                                        |
|--------------------------------------|------|----|-----------|----------------|-----|---------|-----|-----|--------------------------------------------------------|
| Locus_5213_Transcript_1/1_Conf_1.000 | 706  | 20 | 8.49E-103 | NP_001022764.1 | 88  | 377.096 | 237 | 209 | BTB and MATH domain containing family member (bath-43) |
| Locus_5214_Transcript_1/1_Conf_1.000 | 440  | 0  |           |                |     |         |     |     |                                                        |
| Locus_5215_Transcript_1/1_Conf_1.000 | 777  | 20 | 1.17E-45  | XP_002646524.1 | 90  | 187.578 | 109 | 99  | C. briggsae CBR-SNR-2 protein                          |
| Locus_5216_Transcript_1/1_Conf_1.000 | 450  | 20 | 3.01E-83  | XP_002763611.1 | 100 | 310.842 | 149 | 149 | PREDICTED: 60S ribosomal protein L3-like isoform 1     |
| Locus_5217_Transcript_1/1_Conf_1.000 | 338  | 20 | 3.25E-21  | NP_508961.2    | 66  | 104.76  | 107 | 71  | Cytochrome P450 family member (cyp-43A1)               |
| Locus_5218_Transcript_1/1_Conf_1.000 | 1259 | 20 | 2.06E-71  | NP_491343.1    | 64  | 274.248 | 408 | 264 | Cell Division Cycle related family member (cdc-6)      |
| Locus_5219_Transcript_1/1_Conf_1.000 | 679  | 20 | 1.66E-44  | XP_002642246.1 | 81  | 183.341 | 161 | 131 | Hypothetical protein CBG18231                          |
| Locus_522_Transcript_1/3_Conf_0.333  | 228  | 0  |           |                |     |         |     |     |                                                        |

|                                      |      |    |          |                |    |         |     |     |                                                       |
|--------------------------------------|------|----|----------|----------------|----|---------|-----|-----|-------------------------------------------------------|
| Locus_522_Transcript_2/3_Conf_0.667  | 1607 | 20 | 3.27E-83 | XP_002639488.1 | 57 | 313.923 | 487 | 282 | C. briggsae CBR-NPP-2 protein                         |
| Locus_522_Transcript_3/3_Conf_0.667  | 1607 | 20 | 1.47E-83 | XP_002639488.1 | 58 | 315.079 | 487 | 283 | C. briggsae CBR-NPP-2 protein                         |
| Locus_5220_Transcript_1/6_Conf_0.688 | 4917 | 20 | 0        | NP_001021830.1 | 83 | 940.258 | 693 | 582 | ABC Transporter, Mitochondrial family member (abtm-1) |
| Locus_5220_Transcript_2/6_Conf_0.125 | 283  | 0  |          |                |    |         |     |     |                                                       |
| Locus_5220_Transcript_3/6_Conf_0.125 | 283  | 0  |          |                |    |         |     |     |                                                       |
| Locus_5220_Transcript_4/6_Conf_0.688 | 4917 | 20 | 0        | NP_001021830.1 | 83 | 940.258 | 693 | 582 | ABC Transporter, Mitochondrial family member (abtm-1) |
| Locus_5220_Transcript_5/6_Conf_0.688 | 4917 | 20 | 0        | NP_001021830.1 | 83 | 940.258 | 693 | 582 | ABC Transporter, Mitochondrial family member (abtm-1) |
| Locus_5220_Transcript_6/6_Conf_0.688 | 4917 | 20 | 0        | NP_001021830.1 | 83 | 940.258 | 693 | 582 | ABC Transporter, Mitochondrial family member (abtm-1) |

|                                      |      |    |           |                |    |         |     |     |                                                           |
|--------------------------------------|------|----|-----------|----------------|----|---------|-----|-----|-----------------------------------------------------------|
| Locus_5221_Transcript_1/2_Conf_1.000 | 1060 | 20 | 1.05E-155 |                | 88 | 553.903 | 353 | 312 | IMP dehydrogenase (EC 1.1.1.205) T22D1.3                  |
| Locus_5221_Transcript_2/2_Conf_1.000 | 1415 | 20 | 0         | XP_002633039.1 | 88 | 766.148 | 483 | 426 | Hypothetical protein CBG05718                             |
| Locus_5222_Transcript_1/1_Conf_1.000 | 855  | 20 | 7.04E-98  | NP_495552.2    | 81 | 361.303 | 237 | 193 | Nematode ASTacin protease family member (nas-7)           |
| Locus_5223_Transcript_1/1_Conf_1.000 | 401  | 20 | 7.28E-61  | NP_492363.1    | 91 | 236.498 | 131 | 120 | yeast PRP (splicing factor) related family member (prp-4) |
| Locus_5224_Transcript_1/1_Conf_1.000 | 1437 | 20 | 7.55E-153 | NP_492343.2    | 85 | 545.043 | 371 | 318 | Silencing In Germline defective family member (sig-7)     |
| Locus_5225_Transcript_1/1_Conf_1.000 | 1331 | 20 | 5.03E-156 | XP_001901254.1 | 77 | 555.444 | 417 | 325 | Regulator of nonsense transcripts 1 homolog               |
| Locus_5226_Transcript_1/1_Conf_1.000 | 159  | 9  | 2.54E-13  | XP_002646356.1 | 82 | 78.5666 | 51  | 42  | Hypothetical protein CBG12070                             |
| Locus_5227_Transcript_1/1_Conf_1.000 | 313  | 4  | 2.23E-33  | XP_002633326.1 | 83 | 145.206 | 100 | 83  | Hypothetical protein CBG06063                             |
| Locus_5228_Transcript_1/1_Conf_1.000 | 1259 | 20 | 1.71E-33  | XP_002639589.1 | 51 | 148.288 | 358 | 185 | Hypothetical protein CBG04227                             |
| Locus_5229_Transcript_1/1_Conf_1.000 | 202  | 0  |           |                |    |         |     |     |                                                           |



|                                      |      |    |          |             |    |         |     |     |                                                 |
|--------------------------------------|------|----|----------|-------------|----|---------|-----|-----|-------------------------------------------------|
| Locus_523_Transcript_1/1_Conf_1.000  | 695  | 20 | 1.43E-62 | EFO17307.1  | 74 | 243.432 | 230 | 171 | hypothetical protein LOAG_11192                 |
| Locus_5230_Transcript_1/1_Conf_1.000 | 1028 | 20 | 2.37E-64 | NP_497807.1 | 67 | 250.366 | 238 | 161 | hypothetical protein T02C12.2                   |
| Locus_5231_Transcript_1/2_Conf_1.000 | 1861 | 20 | 0        | NP_505977.1 | 91 | 961.059 | 585 | 533 | Pyruvate Carboxylase family member (pyc-1)      |
| Locus_5231_Transcript_2/2_Conf_1.000 | 1834 | 20 | 0        | NP_505977.1 | 92 | 968.763 | 576 | 533 | Pyruvate Carboxylase family member (pyc-1)      |
| Locus_5232_Transcript_1/1_Conf_1.000 | 296  | 20 | 2.00E-18 | XP_536549.2 | 97 | 95.5153 | 88  | 86  | PREDICTED: similar to 40S ribosomal protein S25 |

|                                      |      |    |           |                |     |         |     |     |                                                                     |
|--------------------------------------|------|----|-----------|----------------|-----|---------|-----|-----|---------------------------------------------------------------------|
| Locus_5233_Transcript_1/1_Conf_1.000 | 1017 | 20 | 8.43E-124 | XP_001088540.2 | 100 | 270.396 | 199 | 199 | PREDICTED: hypothetical protein LOC700140                           |
| Locus_5234_Transcript_1/1_Conf_1.000 | 689  | 2  | 2.19E-07  | NP_498866.1    | 61  | 60.077  | 72  | 44  | Prion-like-(Q/N-rich)-domain-bearing protein family member (pqn-96) |
| Locus_5235_Transcript_1/1_Conf_1.000 | 357  | 0  |           |                |     |         |     |     |                                                                     |
| Locus_5236_Transcript_1/1_Conf_1.000 | 829  | 20 | 1.30E-61  | XP_002641966.1 | 71  | 240.736 | 202 | 144 | Hypothetical protein CBG16672                                       |
| Locus_5237_Transcript_1/2_Conf_1.000 | 1055 | 20 | 3.80E-49  | NP_495976.1    | 76  | 199.904 | 167 | 127 | hypothetical protein C01G6.4                                        |
| Locus_5237_Transcript_2/2_Conf_1.000 | 1058 | 20 | 3.82E-49  | NP_495976.1    | 76  | 199.904 | 167 | 127 | hypothetical protein C01G6.4                                        |
| Locus_5238_Transcript_1/1_Conf_1.000 | 318  | 20 | 4.33E-29  | XP_001894880.1 | 76  | 130.954 | 104 | 80  | hypothetical protein                                                |
| Locus_5239_Transcript_1/1_Conf_1.000 | 923  | 5  | 3.77E-39  | Q61T02.2       | 53  | 166.392 | 315 | 168 | Lysine-specific demethylase rbr-2                                   |

|                                      |      |    |           |                |    |         |     |     |                                                                              |
|--------------------------------------|------|----|-----------|----------------|----|---------|-----|-----|------------------------------------------------------------------------------|
| Locus_524_Transcript_1/1_Conf_1.000  | 1241 | 20 | 0         | NP_509693.1    | 88 | 658.677 | 407 | 360 | hypothetical protein W07E11.1                                                |
| Locus_5240_Transcript_1/1_Conf_1.000 | 250  | 0  |           |                |    |         |     |     |                                                                              |
| Locus_5241_Transcript_1/1_Conf_1.000 | 180  | 8  | 8.57E-17  | NP_501908.2    | 86 | 90.1225 | 58  | 50  | hypothetical protein Y43C5B.3                                                |
| Locus_5242_Transcript_1/2_Conf_1.000 | 730  | 8  | 2.24E-16  | NP_500566.1    | 48 | 90.1225 | 251 | 122 | WAPL (Drosophila Wings APart-Like cohesin interactor) family member (wapl-1) |
| Locus_5242_Transcript_2/2_Conf_1.000 | 721  | 11 | 1.61E-19  | NP_500566.1    | 47 | 100.523 | 248 | 119 | WAPL (Drosophila Wings APart-Like cohesin interactor) family member (wapl-1) |
| Locus_5243_Transcript_1/3_Conf_0.500 | 695  | 20 | 6.28E-18  | XP_002639457.1 | 75 | 95.1301 | 79  | 60  | <i>C. briggsae</i> CBR-HRPF-1 protein                                        |
| Locus_5243_Transcript_2/3_Conf_0.500 | 683  | 20 | 6.02E-18  | XP_002639457.1 | 75 | 95.1301 | 79  | 60  | <i>C. briggsae</i> CBR-HRPF-1 protein                                        |
| Locus_5243_Transcript_3/3_Conf_0.500 | 683  | 20 | 6.02E-18  | XP_002639457.1 | 75 | 95.1301 | 79  | 60  | <i>C. briggsae</i> CBR-HRPF-1 protein                                        |
| Locus_5244_Transcript_1/1_Conf_1.000 | 139  | 0  |           |                |    |         |     |     |                                                                              |
| Locus_5245_Transcript_1/1_Conf_1.000 | 794  | 20 | 3.13E-110 | NP_505980.1    | 86 | 402.134 | 264 | 228 | hypothetical protein D2023.6                                                 |

|                                      |      |    |           |                |    |         |     |     |                               |
|--------------------------------------|------|----|-----------|----------------|----|---------|-----|-----|-------------------------------|
| Locus_5246_Transcript_1/1_Conf_1.000 | 1065 | 20 | 4.24E-80  | NP_493639.1    | 71 | 302.753 | 329 | 236 | hypothetical protein F23F1.5  |
| Locus_5247_Transcript_1/2_Conf_1.000 | 728  | 20 | 2.97E-45  | NP_501852.1    | 63 | 186.037 | 241 | 154 | hypothetical protein T14G10.7 |
| Locus_5247_Transcript_2/2_Conf_1.000 | 728  | 20 | 2.97E-45  | NP_501852.1    | 63 | 186.037 | 241 | 154 | hypothetical protein T14G10.7 |
| Locus_5248_Transcript_1/1_Conf_1.000 | 523  | 1  | 4.23E-04  | XP_002637717.1 | 42 | 48.1358 | 176 | 74  | C. briggsae CBR-SDC-3 protein |
| Locus_5249_Transcript_1/1_Conf_1.000 | 867  | 20 | 3.32E-18  | NP_497087.1    | 61 | 96.6709 | 122 | 75  | hypothetical protein Y53F4B.3 |
| Locus_525_Transcript_1/3_Conf_0.667  | 1811 | 20 | 1.94E-111 | XP_002638547.1 | 71 | 407.912 | 380 | 273 | Hypothetical protein CBG05583 |
| Locus_525_Transcript_2/3_Conf_0.667  | 1429 | 20 | 5.79E-113 | XP_002638547.1 | 70 | 412.535 | 390 | 276 | Hypothetical protein CBG05583 |

|                                      |      |    |           |                |    |         |     |     |                                                                     |
|--------------------------------------|------|----|-----------|----------------|----|---------|-----|-----|---------------------------------------------------------------------|
| Locus_525_Transcript_3/3_Conf_0.667  | 1802 | 20 | 1.93E-111 | XP_002638547.1 | 71 | 407.912 | 383 | 272 | Hypothetical protein CBG05583                                       |
| Locus_5250_Transcript_1/1_Conf_1.000 | 516  | 20 | 7.83E-32  | XP_002632939.1 | 74 | 140.198 | 119 | 89  | Hypothetical protein CBG21694                                       |
| Locus_5251_Transcript_1/1_Conf_1.000 | 810  | 2  | 1.76E-15  | NP_001024867.1 | 56 | 87.4261 | 169 | 95  | hypothetical protein T01B4.3                                        |
| Locus_5252_Transcript_1/4_Conf_0.667 | 1401 | 20 | 2.56E-73  | NP_504395.2    | 53 | 280.796 | 480 | 259 | hypothetical protein Y47A7.1                                        |
| Locus_5252_Transcript_2/4_Conf_0.667 | 1956 | 20 | 2.45E-91  | NP_504395.2    | 52 | 341.273 | 645 | 340 | hypothetical protein Y47A7.1                                        |
| Locus_5252_Transcript_3/4_Conf_0.667 | 1956 | 20 | 4.18E-91  | NP_504395.2    | 52 | 340.502 | 645 | 339 | hypothetical protein Y47A7.1                                        |
| Locus_5252_Transcript_4/4_Conf_0.667 | 1956 | 20 | 4.18E-91  | NP_504395.2    | 52 | 340.502 | 645 | 339 | hypothetical protein Y47A7.1                                        |
| Locus_5253_Transcript_1/1_Conf_1.000 | 448  | 4  | 3.31E-05  | XP_001888410.1 | 62 | 51.6026 | 53  | 33  | predicted protein                                                   |
| Locus_5254_Transcript_1/1_Conf_1.000 | 341  | 0  |           |                |    |         |     |     |                                                                     |
| Locus_5255_Transcript_1/1_Conf_1.000 | 1262 | 20 | 3.72E-113 | NP_741036.2    | 88 | 412.92  | 325 | 287 | DNaJ domain (prokaryotic heat shock protein) family member (dnj-20) |
| Locus_5256_Transcript_1/1_Conf_1.000 | 918  | 4  | 2.62E-16  | XP_002648995.1 | 53 | 90.5077 | 189 | 101 | C. briggsae CBR-CID-1 protein                                       |
| Locus_5257_Transcript_1/1_Conf_1.000 | 356  | 0  |           |                |    |         |     |     |                                                                     |
| Locus_5258_Transcript_1/1_Conf_1.000 | 1524 | 20 | 3.55E-164 | NP_001022322.1 | 89 | 582.793 | 378 | 337 | hypothetical protein T05H10.7                                       |
| Locus_5259_Transcript_1/1_Conf_1.000 | 771  | 20 | 5.00E-33  | XP_001896542.1 | 55 | 145.591 | 254 | 140 | hypothetical protein Bm1_25410                                      |

|                                      |     |    |          |                |    |         |     |     |                                         |
|--------------------------------------|-----|----|----------|----------------|----|---------|-----|-----|-----------------------------------------|
| Locus_526_Transcript_1/3_Conf_0.714  | 886 | 20 | 1.96E-67 | EFO25012.1     | 74 | 235.343 | 197 | 146 | hypothetical protein LOAG_03476         |
| Locus_526_Transcript_2/3_Conf_0.286  | 842 | 20 | 2.44E-63 | NP_498874.2    | 89 | 246.514 | 137 | 123 | hypothetical protein F42H10.3           |
| Locus_526_Transcript_3/3_Conf_0.714  | 791 | 20 | 9.44E-75 | NP_498874.2    | 71 | 284.263 | 228 | 164 | hypothetical protein F42H10.3           |
| Locus_5260_Transcript_1/2_Conf_1.000 | 718 | 20 | 1.75E-42 | XP_001893741.1 | 72 | 176.792 | 135 | 98  | LIM domain containing protein           |
| Locus_5260_Transcript_2/2_Conf_1.000 | 718 | 20 | 1.75E-42 | XP_001893741.1 | 72 | 176.792 | 135 | 98  | LIM domain containing protein           |
| Locus_5261_Transcript_1/1_Conf_1.000 | 609 | 20 | 1.13E-80 | XP_002629767.1 | 92 | 303.138 | 153 | 141 | Hypothetical protein CBG01005           |
| Locus_5262_Transcript_1/1_Conf_1.000 | 745 | 20 | 1.21E-97 | XP_002629847.1 | 89 | 360.147 | 244 | 219 | C. briggsae CBR-EAT-3 protein           |
| Locus_5263_Transcript_1/1_Conf_1.000 | 251 | 9  | 5.18E-11 | NP_001023416.1 | 66 | 70.8626 | 59  | 39  | Helix Loop Helix family member (hIh-30) |
| Locus_5264_Transcript_1/1_Conf_1.000 | 775 | 0  |          |                |    |         |     |     |                                         |
| Locus_5265_Transcript_1/1_Conf_1.000 | 311 | 0  |          |                |    |         |     |     |                                         |
| Locus_5266_Transcript_1/1_Conf_1.000 | 519 | 0  |          |                |    |         |     |     |                                         |

|                                      |      |    |           |                |    |         |     |     |                                                      |
|--------------------------------------|------|----|-----------|----------------|----|---------|-----|-----|------------------------------------------------------|
| Locus_5267_Transcript_1/1_Conf_1.000 | 717  | 20 | 1.33E-74  | XP_002631269.1 | 85 | 283.493 | 187 | 159 | Hypothetical protein CBG03077                        |
| Locus_5268_Transcript_1/3_Conf_0.286 | 741  | 6  | 1.11E-34  | XP_002636592.1 | 50 | 150.984 | 291 | 147 | C. briggsae CBR-APE-1 protein                        |
| Locus_5268_Transcript_2/3_Conf_0.714 | 2045 | 20 | 2.32E-132 | XP_002636592.1 | 66 | 477.633 | 524 | 346 | C. briggsae CBR-APE-1 protein                        |
| Locus_5268_Transcript_3/3_Conf_0.714 | 2045 | 20 | 2.32E-132 | XP_002636592.1 | 66 | 477.633 | 524 | 346 | C. briggsae CBR-APE-1 protein                        |
| Locus_5269_Transcript_1/1_Conf_1.000 | 1287 | 20 | 2.32E-17  | XP_002639309.1 | 67 | 94.7449 | 101 | 68  | C. briggsae CBR-ICP-1 protein                        |
| Locus_527_Transcript_1/1_Conf_1.000  | 666  | 20 | 8.44E-46  | XP_002643165.1 | 69 | 187.578 | 165 | 114 | Hypothetical protein CBG15346                        |
| Locus_5270_Transcript_1/1_Conf_1.000 | 599  | 20 | 5.73E-26  | XP_002630901.1 | 93 | 121.324 | 63  | 59  | Hypothetical protein CBG02625                        |
| Locus_5271_Transcript_1/1_Conf_1.000 | 335  | 20 | 2.25E-38  | NP_498053.2    | 81 | 161.77  | 111 | 91  | hypothetical protein C27F2.9                         |
| Locus_5272_Transcript_1/1_Conf_1.000 | 656  | 0  |           |                |    |         |     |     |                                                      |
| Locus_5273_Transcript_1/1_Conf_1.000 | 1697 | 20 | 0         | XP_002639055.1 | 87 | 816.609 | 551 | 480 | C. briggsae CBR-GCY-28 protein                       |
| Locus_5274_Transcript_1/1_Conf_1.000 | 1273 | 1  | 2.60E-21  | EFO18350.1     | 64 | 107.842 | 114 | 74  | hypothetical protein LOAG_10146                      |
| Locus_5275_Transcript_1/1_Conf_1.000 | 298  | 20 | 2.26E-46  | XP_002631126.1 | 95 | 188.348 | 99  | 95  | C. briggsae CBR-SHN-1 protein                        |
| Locus_5276_Transcript_1/1_Conf_1.000 | 1289 | 20 | 2.79E-71  | XP_001900679.1 | 56 | 273.863 | 391 | 220 | Endonuclease/Exonuclease/phosphatase family protein  |
| Locus_5277_Transcript_1/1_Conf_1.000 | 3242 | 20 | 4.08E-129 | EFO26197.1     | 74 | 467.618 | 375 | 278 | zinc finger protein                                  |
| Locus_5278_Transcript_1/1_Conf_1.000 | 659  | 6  | 2.50E-34  | NP_001021024.1 | 60 | 149.443 | 156 | 95  | IntraMembrane Protease (IMPAS) family member (imp-1) |
| Locus_5279_Transcript_1/1_Conf_1.000 | 229  | 0  |           |                |    |         |     |     |                                                      |
| Locus_528_Transcript_1/2_Conf_1.000  | 1393 | 20 | 2.64E-46  | NP_492005.1    | 69 | 191.045 | 192 | 133 | hypothetical protein F22D6.2                         |

|                                      |      |    |           |                |    |         |     |     |                                                          |
|--------------------------------------|------|----|-----------|----------------|----|---------|-----|-----|----------------------------------------------------------|
| Locus_528_Transcript_2/2_Conf_1.000  | 1378 | 20 | 1.10E-44  | NP_492005.1    | 65 | 185.652 | 192 | 126 | hypothetical protein F22D6.2                             |
| Locus_5280_Transcript_1/1_Conf_1.000 | 571  | 1  | 1.88E-04  | EFN66680.1     | 45 | 49.6766 | 192 | 87  | Ubiquitin associated and SH3 domain-containing protein B |
| Locus_5281_Transcript_1/1_Conf_1.000 | 320  | 0  |           |                |    |         |     |     |                                                          |
| Locus_5282_Transcript_1/1_Conf_1.000 | 287  | 0  |           |                |    |         |     |     |                                                          |
| Locus_5283_Transcript_1/1_Conf_1.000 | 756  | 0  |           |                |    |         |     |     |                                                          |
| Locus_5284_Transcript_1/1_Conf_1.000 | 1128 | 20 | 2.22E-106 | AAV41897.1     | 76 | 390.193 | 382 | 292 | SAX-2                                                    |
| Locus_5285_Transcript_1/3_Conf_0.600 | 546  | 8  | 1.77E-22  | XP_002646171.1 | 62 | 109.383 | 127 | 80  | C. briggsae CBR-APB-3 protein                            |
| Locus_5285_Transcript_2/3_Conf_0.600 | 604  | 9  | 1.36E-22  | XP_002646171.1 | 62 | 110.153 | 127 | 80  | C. briggsae CBR-APB-3 protein                            |
| Locus_5285_Transcript_3/3_Conf_0.600 | 604  | 8  | 2.32E-22  | XP_002646171.1 | 62 | 109.383 | 127 | 80  | C. briggsae CBR-APB-3 protein                            |
| Locus_5286_Transcript_1/1_Conf_1.000 | 228  | 20 | 1.94E-29  | NP_500082.1    | 88 | 132.109 | 75  | 66  | CaLPain family member (clp-7)                            |
| Locus_5287_Transcript_1/1_Conf_1.000 | 368  | 0  |           |                |    |         |     |     |                                                          |
| Locus_5288_Transcript_1/2_Conf_1.000 | 549  | 20 | 6.51E-89  | XP_002639128.1 | 95 | 330.102 | 182 | 173 | C. briggsae CBR-SPG-7 protein                            |



|                                      |      |    |           |                |    |         |     |     |                                                               |
|--------------------------------------|------|----|-----------|----------------|----|---------|-----|-----|---------------------------------------------------------------|
| Locus_5288_Transcript_2/2_Conf_1.000 | 231  | 20 | 1.43E-32  | XP_002639128.1 | 97 | 142.51  | 76  | 74  | C. briggsae CBR-SPG-7 protein                                 |
| Locus_5289_Transcript_1/3_Conf_0.667 | 610  | 20 | 1.65E-31  | XP_002647662.1 | 55 | 139.813 | 181 | 101 | Hypothetical protein CBG06772                                 |
| Locus_5289_Transcript_2/3_Conf_0.667 | 618  | 20 | 1.72E-31  | NP_504413.1    | 55 | 139.813 | 159 | 89  | hypothetical protein Y49G5A.1                                 |
| Locus_5289_Transcript_3/3_Conf_0.667 | 618  | 20 | 2.93E-31  | XP_002647662.1 | 55 | 139.043 | 180 | 100 | Hypothetical protein CBG06772                                 |
| Locus_529_Transcript_1/1_Conf_1.000  | 603  | 20 | 1.15E-29  | EFO26691.1     | 89 | 133.65  | 89  | 80  | dynein light chain 2B                                         |
| Locus_5290_Transcript_1/1_Conf_1.000 | 1254 | 20 | 2.53E-162 | NP_500894.1    | 77 | 576.244 | 426 | 329 | INneXin family member (inx-7)                                 |
| Locus_5291_Transcript_1/1_Conf_1.000 | 335  | 20 | 1.97E-34  | XP_002637506.1 | 98 | 148.673 | 72  | 71  | C. briggsae CBR-INX-10 protein                                |
| Locus_5292_Transcript_1/1_Conf_1.000 | 306  | 20 | 2.33E-27  | EFO16836.1     | 74 | 125.176 | 100 | 74  | autophagy protein Apg9 containing protein                     |
| Locus_5293_Transcript_1/1_Conf_1.000 | 978  | 20 | 5.23E-50  | NP_001040678.1 | 88 | 202.601 | 117 | 103 | hypothetical protein K11D2.4                                  |
| Locus_5294_Transcript_1/1_Conf_1.000 | 962  | 20 | 1.71E-114 | AAT28332.1     | 99 | 416.772 | 198 | 197 | glutathione peroxidase                                        |
| Locus_5295_Transcript_1/1_Conf_1.000 | 1306 | 20 | 1.33E-44  | NP_506059.1    | 64 | 185.267 | 242 | 156 | RNP (RRM RNA binding domain) containing family member (rnp-1) |
| Locus_5296_Transcript_1/1_Conf_1.000 | 451  | 0  |           |                |    |         |     |     |                                                               |
| Locus_5297_Transcript_1/1_Conf_1.000 | 442  | 0  |           |                |    |         |     |     |                                                               |
| Locus_5298_Transcript_1/1_Conf_1.000 | 182  | 0  |           |                |    |         |     |     |                                                               |
| Locus_5299_Transcript_1/1_Conf_1.000 | 385  | 20 | 1.28E-25  | EFO23813.1     | 66 | 119.398 | 109 | 73  | cuticlin 1                                                    |
| Locus_53_Transcript_1/1_Conf_1.000   | 607  | 20 | 1.15E-61  | ACS37721.1     | 83 | 239.965 | 142 | 118 | C-type lectin-1                                               |

|                                      |      |    |          |                |    |         |     |     |                                                         |
|--------------------------------------|------|----|----------|----------------|----|---------|-----|-----|---------------------------------------------------------|
| Locus_530_Transcript_1/1_Conf_1.000  | 1687 | 20 | 1.18E-30 | EFO21568.1     | 48 | 139.428 | 321 | 157 | hypothetical protein LOAG_06919                         |
| Locus_5300_Transcript_1/1_Conf_1.000 | 1078 | 20 | 4.94E-84 | EFO18955.1     | 76 | 315.849 | 284 | 216 | protein phosphatase 2C containing protein               |
| Locus_5301_Transcript_1/1_Conf_1.000 | 497  | 20 | 1.23E-44 | NP_493571.1    | 95 | 182.57  | 92  | 88  | Ribosomal Protein, Small subunit family member (rps-26) |
| Locus_5302_Transcript_1/1_Conf_1.000 | 826  | 20 | 5.59E-81 | XP_002642370.1 | 66 | 305.064 | 277 | 183 | C. briggsae CBR-RAB-33 protein                          |
| Locus_5303_Transcript_1/1_Conf_1.000 | 577  | 20 | 1.79E-58 | EFO21722.1     | 81 | 229.18  | 197 | 160 | A-macroglobulin complement component family protein     |
| Locus_5304_Transcript_1/1_Conf_1.000 | 811  | 20 | 2.12E-77 | NP_741838.1    | 72 | 293.123 | 248 | 180 | GLYcosylation related family member (gly-12)            |
| Locus_5305_Transcript_1/1_Conf_1.000 | 622  | 20 | 1.31E-23 | XP_001631156.1 | 63 | 113.62  | 150 | 95  | predicted protein                                       |
| Locus_5306_Transcript_1/1_Conf_1.000 | 1077 | 20 | 1.06E-78 | NP_497264.1    | 66 | 298.13  | 349 | 233 | hypothetical protein B0412.3                            |
| Locus_5307_Transcript_1/1_Conf_1.000 | 579  | 0  |          |                |    |         |     |     |                                                         |
| Locus_5308_Transcript_1/1_Conf_1.000 | 799  | 20 | 9.29E-94 | NP_504502.1    | 84 | 347.436 | 234 | 198 | hypothetical protein F25B4.1                            |
| Locus_5309_Transcript_1/1_Conf_1.000 | 150  | 0  |          |                |    |         |     |     |                                                         |
| Locus_531_Transcript_1/1_Conf_1.000  | 700  | 20 | 3.71E-58 | EFO15889.1     | 66 | 228.794 | 236 | 156 | hypothetical protein LOAG_12619                         |
| Locus_5310_Transcript_1/2_Conf_1.000 | 682  | 20 | 3.47E-74 | NP_509589.1    | 75 | 281.952 | 209 | 158 | hypothetical protein ZK899.2                            |
| Locus_5310_Transcript_2/2_Conf_1.000 | 682  | 20 | 1.01E-73 | NP_509589.1    | 75 | 280.411 | 209 | 158 | hypothetical protein ZK899.2                            |
| Locus_5311_Transcript_1/1_Conf_1.000 | 263  | 20 | 3.00E-14 | XP_002638233.1 | 69 | 81.6481 | 82  | 57  | Hypothetical protein CBG15892                           |
| Locus_5312_Transcript_1/1_Conf_1.000 | 301  | 0  |          |                |    |         |     |     |                                                         |

|                                      |      |    |           |                |    |         |     |     |                                                   |
|--------------------------------------|------|----|-----------|----------------|----|---------|-----|-----|---------------------------------------------------|
| Locus_5313_Transcript_1/3_Conf_0.667 | 799  | 20 | 1.10E-94  | NP_490891.1    | 88 | 350.517 | 269 | 237 | hypothetical protein Y71G12B.8                    |
| Locus_5313_Transcript_2/3_Conf_0.667 | 799  | 20 | 1.10E-94  | NP_490891.1    | 88 | 350.517 | 269 | 237 | hypothetical protein Y71G12B.8                    |
| Locus_5313_Transcript_3/3_Conf_0.667 | 799  | 20 | 1.10E-94  | NP_490891.1    | 88 | 350.517 | 269 | 237 | hypothetical protein Y71G12B.8                    |
| Locus_5314_Transcript_1/1_Conf_1.000 | 199  | 8  | 6.01E-23  | XP_002637217.1 | 90 | 110.538 | 64  | 58  | Hypothetical protein CBG18883                     |
| Locus_5315_Transcript_1/1_Conf_1.000 | 944  | 20 | 3.83E-127 | XP_002633092.1 | 90 | 458.759 | 279 | 252 | Hypothetical protein CBG05779                     |
| Locus_5316_Transcript_1/1_Conf_1.000 | 420  | 20 | 1.88E-16  | NP_491552.2    | 53 | 88.9669 | 143 | 76  | LEThal family member (let-363)                    |
| Locus_5317_Transcript_1/1_Conf_1.000 | 1788 | 20 | 2.31E-157 | NP_498283.1    | 70 | 560.451 | 564 | 400 | hypothetical protein C28H8.3                      |
| Locus_5318_Transcript_1/1_Conf_1.000 | 756  | 0  |           |                |    |         |     |     |                                                   |
| Locus_5319_Transcript_1/1_Conf_1.000 | 688  | 5  | 3.73E-15  | XP_002647047.1 | 46 | 85.8853 | 247 | 115 | Hypothetical protein CBG03565                     |
| Locus_532_Transcript_1/1_Conf_1.000  | 510  | 20 | 3.04E-25  | NP_492974.2    | 74 | 118.242 | 87  | 65  | Kex-2 Proprotein Convertase family member (kpc-1) |
| Locus_5320_Transcript_1/1_Conf_1.000 | 1678 | 20 | 3.18E-161 | NP_001023664.1 | 86 | 573.163 | 414 | 359 | Kinesin Light Chain family member (klc-2)         |
| Locus_5321_Transcript_1/1_Conf_1.000 | 1072 | 2  | 4.84E-07  | XP_001897538.1 | 46 | 60.077  | 174 | 81  | hypothetical protein Bm1_30495                    |
| Locus_5322_Transcript_1/1_Conf_1.000 | 908  | 20 | 2.67E-90  | EFO28128.1     | 74 | 336.265 | 309 | 230 | hypothetical protein LOAG_00362                   |
| Locus_5323_Transcript_1/1_Conf_1.000 | 1079 | 2  | 2.05E-13  | NP_740965.2    | 48 | 81.2629 | 265 | 129 | hypothetical protein B0432.13                     |

|                                      |      |    |          |             |     |         |     |     |                                                                     |
|--------------------------------------|------|----|----------|-------------|-----|---------|-----|-----|---------------------------------------------------------------------|
| Locus_5324_Transcript_1/1_Conf_1.000 | 1783 | 20 | 0        | NP_502054.2 | 88  | 870.922 | 572 | 506 | ALdehyde deHydrogenase family member (alh-3)                        |
| Locus_5325_Transcript_1/1_Conf_1.000 | 1275 | 20 | 1.77E-86 | NP_494438.2 | 75  | 324.324 | 271 | 204 | hypothetical protein Y25C1A.7                                       |
| Locus_5326_Transcript_1/2_Conf_1.000 | 308  | 20 | 9.82E-10 | NP_498217.2 | 75  | 66.6254 | 56  | 42  | abnormal embryonic PARTitioning of cytoplasm family member (par-3)  |
| Locus_5326_Transcript_2/2_Conf_1.000 | 280  | 0  |          |             |     |         |     |     |                                                                     |
| Locus_5327_Transcript_1/4_Conf_0.583 | 714  | 7  | 1.25E-16 | NP_493601.2 | 45  | 90.8929 | 242 | 111 | FERM domain (protein4.1-ezrin-radixin-moesin) family member (frm-1) |
| Locus_5327_Transcript_2/4_Conf_0.583 | 723  | 4  | 2.51E-12 | NP_493601.2 | 45  | 76.6406 | 243 | 110 | FERM domain (protein4.1-ezrin-radixin-moesin) family member (frm-1) |
| Locus_5327_Transcript_3/4_Conf_0.250 | 748  | 5  | 3.18E-21 | NP_493601.2 | 44  | 106.301 | 258 | 116 | FERM domain (protein4.1-ezrin-radixin-moesin) family member (frm-1) |
| Locus_5327_Transcript_4/4_Conf_0.583 | 723  | 6  | 3.74E-16 | NP_493601.2 | 45  | 89.3521 | 242 | 110 | FERM domain (protein4.1-ezrin-radixin-moesin) family member (frm-1) |
| Locus_5328_Transcript_1/1_Conf_1.000 | 499  | 2  | 2.41E-08 | NP_500336.1 | 65  | 62.003  | 64  | 42  | Mitochondrial ATPase Inhibitor family member (mai-2)                |
| Locus_5329_Transcript_1/2_Conf_1.000 | 432  | 20 | 3.46E-47 |             | 100 | 191.045 | 95  | 95  | histone H4                                                          |

|                                      |      |    |          |                |     |         |     |     |                                       |
|--------------------------------------|------|----|----------|----------------|-----|---------|-----|-----|---------------------------------------|
| Locus_5329_Transcript_2/2_Conf_1.000 | 432  | 20 | 3.46E-47 |                | 100 | 191.045 | 95  | 95  | histone H4                            |
| Locus_533_Transcript_1/1_Conf_1.000  | 2216 | 20 | 0        | NP_501213.1    | 81  | 966.837 | 722 | 591 | PhosphoLipase C family member (plc-4) |
| Locus_5330_Transcript_1/1_Conf_1.000 | 190  | 0  |          |                |     |         |     |     |                                       |
| Locus_5331_Transcript_1/1_Conf_1.000 | 738  | 0  |          |                |     |         |     |     |                                       |
| Locus_5332_Transcript_1/1_Conf_1.000 | 330  | 0  |          |                |     |         |     |     |                                       |
| Locus_5333_Transcript_1/1_Conf_1.000 | 1354 | 20 | 0        | NP_508999.2    | 95  | 668.692 | 367 | 349 | protein KINase family member (kin-2)  |
| Locus_5334_Transcript_1/1_Conf_1.000 | 1003 | 20 | 3.22E-26 | XP_001899531.1 | 78  | 123.635 | 104 | 82  | LD36024p                              |

|                                      |      |    |           |                |    |         |     |     |                                                |
|--------------------------------------|------|----|-----------|----------------|----|---------|-----|-----|------------------------------------------------|
| Locus_5335_Transcript_1/1_Conf_1.000 | 808  | 20 | 1.77E-140 | NP_001024972.1 | 94 | 502.671 | 269 | 255 | abnormal cell MIGration family member (mig-15) |
| Locus_5336_Transcript_1/1_Conf_1.000 | 557  | 3  | 1.21E-21  | XP_002640682.1 | 56 | 106.686 | 187 | 105 | Hypothetical protein CBG19744                  |
| Locus_5337_Transcript_1/1_Conf_1.000 | 1344 | 20 | 2.00E-168 | NP_001024587.1 | 81 | 596.66  | 435 | 355 | abnormal cell LiNeage family member (lin-2)    |
| Locus_5338_Transcript_1/1_Conf_1.000 | 618  | 20 | 2.30E-60  | NP_496100.1    | 76 | 235.728 | 207 | 159 | hypothetical protein Y53C12B.1                 |
| Locus_5339_Transcript_1/1_Conf_1.000 | 420  | 3  | 5.45E-32  | ACJ65067.1     | 71 | 140.584 | 132 | 95  | Lgc-53                                         |
| Locus_534_Transcript_1/2_Conf_1.000  | 1804 | 9  | 8.23E-62  | NP_741594.1    | 48 | 243.047 | 635 | 308 | hypothetical protein H24G06.1                  |
| Locus_534_Transcript_2/2_Conf_1.000  | 1723 | 9  | 2.84E-64  | NP_741594.1    | 50 | 251.136 | 611 | 306 | hypothetical protein H24G06.1                  |
| Locus_5340_Transcript_1/1_Conf_1.000 | 321  | 20 | 4.46E-26  | XP_002640628.1 | 73 | 120.939 | 99  | 73  | C. briggsae CBR-EAT-18 protein                 |
| Locus_5341_Transcript_1/1_Conf_1.000 | 240  | 0  |           |                |    |         |     |     |                                                |
| Locus_5342_Transcript_1/2_Conf_1.000 | 1083 | 20 | 4.24E-71  | NP_505573.1    | 74 | 160.999 | 136 | 101 | Uridine DiPhosphatase family member (uda-1)    |
| Locus_5342_Transcript_2/2_Conf_1.000 | 959  | 20 | 3.13E-76  | NP_505573.1    | 75 | 289.656 | 266 | 202 | Uridine DiPhosphatase family member (uda-1)    |

|                                      |      |    |           |                |    |         |     |     |                                                |
|--------------------------------------|------|----|-----------|----------------|----|---------|-----|-----|------------------------------------------------|
| Locus_5343_Transcript_1/3_Conf_0.667 | 1700 | 20 | 6.56E-21  | AAB04136.1     | 59 | 107.071 | 130 | 77  | RNA helicase                                   |
| Locus_5343_Transcript_2/3_Conf_0.667 | 1692 | 20 | 6.53E-21  | AAB04136.1     | 59 | 107.071 | 130 | 77  | RNA helicase                                   |
| Locus_5343_Transcript_3/3_Conf_0.667 | 1692 | 20 | 6.53E-21  | AAB04136.1     | 59 | 107.071 | 130 | 77  | RNA helicase                                   |
| Locus_5344_Transcript_1/1_Conf_1.000 | 632  | 0  |           |                |    |         |     |     |                                                |
| Locus_5345_Transcript_1/1_Conf_1.000 | 622  | 4  | 3.96E-12  | XP_001893623.1 | 55 | 75.485  | 161 | 89  | hypothetical protein Bm1_10755                 |
| Locus_5346_Transcript_1/1_Conf_1.000 | 354  |    |           |                |    |         |     |     |                                                |
| Locus_5347_Transcript_1/1_Conf_1.000 | 316  | 0  |           |                |    |         |     |     |                                                |
| Locus_5348_Transcript_1/1_Conf_1.000 | 165  | 0  |           |                |    |         |     |     |                                                |
| Locus_5349_Transcript_1/2_Conf_1.000 | 743  | 20 | 3.23E-26  | NP_491477.2    | 67 | 122.865 | 126 | 85  | IMportin Beta family member (imb-1)            |
| Locus_5349_Transcript_2/2_Conf_1.000 | 743  | 20 | 3.23E-26  | NP_491477.2    | 67 | 122.865 | 126 | 85  | IMportin Beta family member (imb-1)            |
| Locus_535_Transcript_1/3_Conf_0.600  | 924  | 20 | 1.64E-58  | XP_002639611.1 | 67 | 230.72  | 238 | 160 | C. briggsae CBR-PPK-1 protein                  |
| Locus_535_Transcript_2/3_Conf_0.400  | 971  | 20 | 1.76E-58  | XP_002639611.1 | 67 | 230.72  | 238 | 160 | C. briggsae CBR-PPK-1 protein                  |
| Locus_535_Transcript_3/3_Conf_0.600  | 1448 | 20 | 3.18E-58  | XP_002639611.1 | 67 | 230.72  | 238 | 160 | C. briggsae CBR-PPK-1 protein                  |
| Locus_5350_Transcript_1/1_Conf_1.000 | 803  | 20 | 3.32E-107 | NP_001022275.1 | 83 | 392.119 | 266 | 223 | abnormal cell MIGration family member (mig-14) |
| Locus_5351_Transcript_1/1_Conf_1.000 | 609  | 0  |           |                |    |         |     |     |                                                |
| Locus_5352_Transcript_1/1_Conf_1.000 | 318  | 2  | 1.71E-09  | NP_496913.1    | 68 | 65.855  | 64  | 44  | hypothetical protein W02B8.1                   |
| Locus_5353_Transcript_1/1_Conf_1.000 | 335  | 0  |           |                |    |         |     |     |                                                |
| Locus_5354_Transcript_1/1_Conf_1.000 | 1547 | 20 | 3.40E-114 | Q61UC4.2       | 89 | 416.772 | 259 | 232 | Raf homolog serine/threonine-protein kinase    |
| Locus_5355_Transcript_1/1_Conf_1.000 | 404  | 20 | 6.03E-07  | XP_002742168.1 | 57 | 57.3806 | 84  | 48  | PREDICTED: hypothetical protein                |

|                                      |      |    |           |                |    |         |     |     |                                       |
|--------------------------------------|------|----|-----------|----------------|----|---------|-----|-----|---------------------------------------|
| Locus_5356_Transcript_1/3_Conf_0.667 | 538  | 20 | 4.12E-21  | BAB68205.1     | 69 | 104.76  | 121 | 84  | keratin-like protein                  |
| Locus_5356_Transcript_2/3_Conf_0.667 | 545  | 20 | 4.29E-21  | BAB68205.1     | 69 | 104.76  | 121 | 84  | keratin-like protein                  |
| Locus_5356_Transcript_3/3_Conf_0.333 | 322  | 3  | 1.70E-09  | BAB68205.1     | 69 | 65.855  | 73  | 51  | keratin-like protein                  |
| Locus_5357_Transcript_1/1_Conf_1.000 | 128  | 9  | 1.58E-07  | AAN16458.1     | 87 | 59.3066 | 39  | 34  | tyramine receptor long isoform SER-2  |
| Locus_5358_Transcript_1/1_Conf_1.000 | 559  | 20 | 2.19E-39  | XP_002635284.1 | 74 | 165.622 | 176 | 131 | Hypothetical protein CBG11531         |
| Locus_5359_Transcript_1/1_Conf_1.000 | 487  | 20 | 9.98E-10  | XP_002646279.1 | 50 | 66.6254 | 165 | 84  | C. briggsae CBR-COL-51 protein        |
| Locus_536_Transcript_1/1_Conf_1.000  | 1183 | 20 | 6.77E-162 | XP_002636692.1 | 82 | 574.704 | 395 | 327 | Hypothetical protein CBG23406         |
| Locus_5360_Transcript_1/2_Conf_1.000 | 489  | 0  |           |                |    |         |     |     |                                       |
| Locus_5360_Transcript_2/2_Conf_1.000 | 393  | 0  |           |                |    |         |     |     |                                       |
| Locus_5361_Transcript_1/1_Conf_1.000 | 449  | 20 | 7.59E-18  | NP_502415.1    | 62 | 93.5893 | 108 | 68  | hypothetical protein Y55D9A.2         |
| Locus_5362_Transcript_1/1_Conf_1.000 | 168  | 0  |           |                |    |         |     |     |                                       |
| Locus_5363_Transcript_1/1_Conf_1.000 | 346  | 0  |           |                |    |         |     |     |                                       |
| Locus_5364_Transcript_1/1_Conf_1.000 | 633  | 0  |           |                |    |         |     |     |                                       |
| Locus_5365_Transcript_1/1_Conf_1.000 | 678  | 0  |           |                |    |         |     |     |                                       |
| Locus_5366_Transcript_1/1_Conf_1.000 | 958  | 20 | 5.01E-66  | XP_001900961.1 | 65 | 255.758 | 240 | 158 | Zinc finger, C2H2 type family protein |
| Locus_5367_Transcript_1/1_Conf_1.000 | 325  | 20 | 2.21E-17  | EFO20157.1     | 74 | 92.0485 | 104 | 77  | hypothetical protein LOAG_08332       |
| Locus_5368_Transcript_1/1_Conf_1.000 | 806  | 20 | 4.40E-75  | NP_502329.3    | 75 | 285.419 | 271 | 205 | hypothetical protein C42C1.2          |
| Locus_5369_Transcript_1/1_Conf_1.000 | 1613 | 20 | 7.20E-30  | XP_002129449.1 | 49 | 136.732 | 298 | 147 | PREDICTED: hypothetical protein       |
| Locus_537_Transcript_1/1_Conf_1.000  | 1098 | 3  | 1.59E-77  | CAR63557.1     | 80 | 294.278 | 306 | 246 | hypothetical protein                  |
| Locus_5370_Transcript_1/2_Conf_1.000 | 893  | 0  |           |                |    |         |     |     |                                       |
| Locus_5370_Transcript_2/2_Conf_1.000 | 893  | 0  |           |                |    |         |     |     |                                       |



|                                      |      |    |           |                |     |         |     |     |                                                 |  |
|--------------------------------------|------|----|-----------|----------------|-----|---------|-----|-----|-------------------------------------------------|--|
| Locus_5371_Transcript_1/1_Conf_1.000 | 295  | 0  |           |                |     |         |     |     |                                                 |  |
| Locus_5372_Transcript_1/1_Conf_1.000 | 463  | 3  | 1.77E-06  | XP_002129449.1 | 49  | 55.8398 | 130 | 64  | PREDICTED: hypothetical protein                 |  |
| Locus_5373_Transcript_1/1_Conf_1.000 | 496  | 20 | 2.72E-68  | XP_532633.2    | 95  | 261.151 | 148 | 142 | PREDICTED: similar to 60S ribosomal protein L32 |  |
| Locus_5374_Transcript_1/3_Conf_0.667 | 1546 | 20 | 4.17E-104 | XP_002637782.1 | 71  | 383.259 | 378 | 270 | Hypothetical protein CBG04567                   |  |
| Locus_5374_Transcript_2/3_Conf_0.667 | 1442 | 20 | 5.50E-103 | NP_872134.1    | 70  | 379.407 | 339 | 239 | hypothetical protein C54G10.4                   |  |
| Locus_5374_Transcript_3/3_Conf_0.667 | 1399 | 20 | 2.37E-103 | NP_872134.1    | 71  | 380.563 | 359 | 256 | hypothetical protein C54G10.4                   |  |
| Locus_5375_Transcript_1/1_Conf_1.000 | 1637 | 20 | 2.61E-152 |                | 70  | 543.502 | 517 | 365 | hypothetical protein ZK1151.2a                  |  |
| Locus_5376_Transcript_1/1_Conf_1.000 | 238  | 0  |           |                |     |         |     |     |                                                 |  |
| Locus_5377_Transcript_1/1_Conf_1.000 | 621  | 20 | 2.29E-52  | A8WMY4.2       | 74  | 209.149 | 197 | 147 | Nicotinic receptor-associated protein 1         |  |
| Locus_5378_Transcript_1/1_Conf_1.000 | 823  | 20 | 1.64E-141 | P01876.2       | 100 | 506.138 | 274 | 274 | Ig alpha-1 chain C region                       |  |
| Locus_5379_Transcript_1/1_Conf_1.000 | 566  | 20 | 1.48E-30  | XP_002645738.1 | 69  | 136.346 | 134 | 93  | Hypothetical protein CBG07411                   |  |
| Locus_538_Transcript_1/1_Conf_1.000  | 224  | 0  |           |                |     |         |     |     |                                                 |  |
| Locus_5380_Transcript_1/1_Conf_1.000 | 498  | 0  |           |                |     |         |     |     |                                                 |  |
| Locus_5381_Transcript_1/1_Conf_1.000 | 470  | 0  |           |                |     |         |     |     |                                                 |  |
| Locus_5382_Transcript_1/2_Conf_1.000 | 1687 | 20 | 8.64E-74  | NP_872031.2    | 57  | 282.722 | 424 | 242 | hypothetical protein Y39F10B.1                  |  |
| Locus_5382_Transcript_2/2_Conf_1.000 | 1660 | 20 | 8.46E-74  | NP_872031.2    | 57  | 282.722 | 424 | 242 | hypothetical protein Y39F10B.1                  |  |
| Locus_5383_Transcript_1/1_Conf_1.000 | 846  | 20 | 2.48E-63  | XP_002646187.1 | 85  | 246.514 | 174 | 149 | Hypothetical protein CBG24492                   |  |
| Locus_5384_Transcript_1/1_Conf_1.000 | 328  | 0  |           |                |     |         |     |     |                                                 |  |
| Locus_5385_Transcript_1/2_Conf_1.000 | 471  | 20 | 7.01E-48  | XP_001892004.1 | 98  | 193.356 | 103 | 101 | histone H2B 2                                   |  |

|                                      |      |    |          |                |    |         |     |     |                                                                      |
|--------------------------------------|------|----|----------|----------------|----|---------|-----|-----|----------------------------------------------------------------------|
| Locus_5385_Transcript_2/2_Conf_1.000 | 471  | 20 | 7.01E-48 | XP_001892004.1 | 98 | 193.356 | 103 | 101 | histone H2B 2                                                        |
| Locus_5386_Transcript_1/1_Conf_1.000 | 492  | 20 | 5.23E-19 | XP_001898723.1 | 58 | 97.4413 | 115 | 67  | LD46868p                                                             |
| Locus_5387_Transcript_1/1_Conf_1.000 | 611  | 20 | 1.03E-41 | NP_001022469.1 | 66 | 173.711 | 189 | 126 | Eukaryotic Initiation Factor family member (eif-3.B)                 |
| Locus_5388_Transcript_1/1_Conf_1.000 | 328  | 20 | 7.53E-34 | XP_001896464.1 | 97 | 146.747 | 70  | 68  | PHD finger-like domain protein 5A                                    |
| Locus_5389_Transcript_1/1_Conf_1.000 | 726  | 0  |          |                |    |         |     |     |                                                                      |
| Locus_539_Transcript_1/1_Conf_1.000  | 1757 | 7  | 1.66E-59 | XP_002642111.1 | 51 | 235.343 | 497 | 256 | C. briggsae CBR-ATF-7 protein                                        |
| Locus_5390_Transcript_1/1_Conf_1.000 | 299  | 0  |          |                |    |         |     |     |                                                                      |
| Locus_5391_Transcript_1/1_Conf_1.000 | 793  | 0  |          |                |    |         |     |     |                                                                      |
| Locus_5392_Transcript_1/4_Conf_0.500 | 611  | 0  |          |                |    |         |     |     |                                                                      |
| Locus_5392_Transcript_2/4_Conf_0.250 | 654  | 0  |          |                |    |         |     |     |                                                                      |
| Locus_5392_Transcript_3/4_Conf_0.500 | 627  | 0  |          |                |    |         |     |     |                                                                      |
| Locus_5392_Transcript_4/4_Conf_0.500 | 611  | 0  |          |                |    |         |     |     |                                                                      |
| Locus_5393_Transcript_1/2_Conf_1.000 | 940  | 20 | 1.49E-22 | NP_506340.1    | 48 | 111.309 | 224 | 109 | FERM domain (protein4.1-ezrin-radixin-moesin) family member (frm-10) |
| Locus_5393_Transcript_2/2_Conf_1.000 | 181  | 0  |          |                |    |         |     |     |                                                                      |
| Locus_5394_Transcript_1/1_Conf_1.000 | 396  | 0  |          |                |    |         |     |     |                                                                      |

|                                      |      |    |          |                |    |         |     |     |                                                                    |
|--------------------------------------|------|----|----------|----------------|----|---------|-----|-----|--------------------------------------------------------------------|
| Locus_5395_Transcript_1/1_Conf_1.000 | 698  | 20 | 1.12E-98 | NP_493377.1    | 85 | 265.003 | 170 | 145 | Valyl tRNA Synthetase family member (vrs-2)                        |
| Locus_5396_Transcript_1/1_Conf_1.000 | 738  | 0  |          |                |    |         |     |     |                                                                    |
| Locus_5397_Transcript_1/1_Conf_1.000 | 875  | 3  | 1.32E-14 | XP_001900988.1 | 50 | 84.7297 | 222 | 112 | hypothetical protein Bm1_47635                                     |
| Locus_5398_Transcript_1/1_Conf_1.000 | 1081 | 20 | 3.45E-69 | XP_002642651.1 | 77 | 266.544 | 243 | 188 | C. briggsae CBR-MTX-2 protein                                      |
| Locus_5399_Transcript_1/1_Conf_1.000 | 906  | 20 | 5.03E-97 | NP_492687.1    | 78 | 358.607 | 282 | 220 | Aryl Hydrocarbon receptor Associated protein family member (aha-1) |
| Locus_54_Transcript_1/1_Conf_1.000   | 296  | 0  |          |                |    |         |     |     |                                                                    |

|                                      |      |    |           |                |    |         |     |     |                                                     |
|--------------------------------------|------|----|-----------|----------------|----|---------|-----|-----|-----------------------------------------------------|
| Locus_540_Transcript_1/1_Conf_1.000  | 1752 | 20 | 2.44E-103 | XP_002640656.1 | 60 | 380.948 | 522 | 315 | C. briggsae CBR-AEX-5 protein                       |
| Locus_5400_Transcript_1/1_Conf_1.000 | 533  | 20 | 4.20E-18  | NP_497020.2    | 51 | 94.7449 | 184 | 94  | Suppressor of PAR-Two defect family member (spat-1) |
| Locus_5401_Transcript_1/1_Conf_1.000 | 1047 | 20 | 1.01E-86  | XP_002639396.1 | 96 | 324.709 | 205 | 198 | Hypothetical protein CBG03984                       |
| Locus_5402_Transcript_1/1_Conf_1.000 | 1364 | 20 | 3.14E-68  | XP_002644068.1 | 57 | 263.848 | 459 | 262 | Hypothetical protein CBG17536                       |
| Locus_5403_Transcript_1/1_Conf_1.000 | 1218 | 20 | 8.59E-75  | NP_501910.1    | 68 | 285.419 | 326 | 222 | hypothetical protein R11A8.2                        |
| Locus_5404_Transcript_1/1_Conf_1.000 | 603  | 20 | 1.96E-37  | XP_002641945.1 | 56 | 159.458 | 200 | 112 | C. briggsae CBR-TAG-198 protein                     |
| Locus_5405_Transcript_1/1_Conf_1.000 | 416  | 4  | 5.72E-18  | NP_505735.1    | 57 | 93.9745 | 136 | 78  | hypothetical protein T28B11.1                       |

|                                      |      |    |           |             |    |         |     |     |                                                        |
|--------------------------------------|------|----|-----------|-------------|----|---------|-----|-----|--------------------------------------------------------|
| Locus_5406_Transcript_1/1_Conf_1.000 | 490  | 20 | 1.27E-73  | NP_502014.2 | 88 | 278.87  | 160 | 141 | hypothetical protein T11G6.8                           |
| Locus_5407_Transcript_1/1_Conf_1.000 | 1341 | 20 | 0         | EFO25450.1  | 91 | 731.095 | 423 | 389 | cleavage stimulation factor                            |
| Locus_5408_Transcript_1/1_Conf_1.000 | 810  | 20 | 1.01E-103 | NP_491953.1 | 90 | 380.563 | 227 | 206 | Temporarily Assigned Gene name family member (tag-203) |
| Locus_5409_Transcript_1/1_Conf_1.000 | 1115 | 6  | 1.10E-33  | A8X9H4.2    | 48 | 148.673 | 292 | 141 | Chondroitin proteoglycan 4                             |
| Locus_541_Transcript_1/4_Conf_0.692  | 1542 | 20 | 0         | ADK47524.1  | 92 | 576.244 | 320 | 297 | enolase                                                |
| Locus_541_Transcript_2/4_Conf_0.231  | 298  | 0  |           |             |    |         |     |     |                                                        |
| Locus_541_Transcript_3/4_Conf_0.692  | 1542 | 20 | 0         | ADK47524.1  | 92 | 576.244 | 320 | 297 | enolase                                                |

|                                      |      |    |          |                |    |         |     |     |                                    |
|--------------------------------------|------|----|----------|----------------|----|---------|-----|-----|------------------------------------|
| Locus_541_Transcript_4/4_Conf_0.692  | 1542 | 20 | 0        | ADK47524.1     | 92 | 576.244 | 320 | 297 | enolase                            |
| Locus_5410_Transcript_1/1_Conf_1.000 | 378  | 0  |          |                |    |         |     |     |                                    |
| Locus_5411_Transcript_1/1_Conf_1.000 | 675  | 20 | 2.03E-18 | EFO27874.1     | 54 | 96.6709 | 122 | 67  | hypothetical protein LOAG_00617    |
| Locus_5412_Transcript_1/1_Conf_1.000 | 1054 | 0  |          |                |    |         |     |     |                                    |
| Locus_5413_Transcript_1/1_Conf_1.000 | 309  | 0  |          |                |    |         |     |     |                                    |
| Locus_5414_Transcript_1/1_Conf_1.000 | 951  | 17 | 1.40E-44 | XP_002643035.1 | 60 | 184.496 | 264 | 161 | C. briggsae CBR-CLP-1 protein      |
| Locus_5415_Transcript_1/1_Conf_1.000 | 650  | 13 | 2.95E-32 | NP_492669.2    | 71 | 142.51  | 122 | 87  | hypothetical protein Y106G6D.6     |
| Locus_5416_Transcript_1/1_Conf_1.000 | 619  | 20 | 9.71E-43 | NP_510540.1    | 66 | 177.178 | 204 | 136 | hypothetical protein C33A11.1      |
| Locus_5417_Transcript_1/1_Conf_1.000 | 541  | 20 | 1.17E-47 | XP_002635582.1 | 82 | 192.971 | 159 | 131 | C. briggsae CBR-TTR-33 protein     |
| Locus_5418_Transcript_1/1_Conf_1.000 | 648  | 5  | 1.91E-39 | ACI49189.1     | 70 | 166.392 | 155 | 110 | hypothetical protein Csp3_JD02.017 |
| Locus_5419_Transcript_1/1_Conf_1.000 | 335  | 0  |          |                |    |         |     |     |                                    |
| Locus_542_Transcript_1/1_Conf_1.000  | 624  | 20 | 1.55E-64 | NP_494767.1    | 81 | 249.595 | 206 | 168 | hypothetical protein H20J04.2      |
| Locus_5420_Transcript_1/2_Conf_1.000 | 1458 | 20 | 0        | XP_001899599.1 | 85 | 700.664 | 454 | 388 | DNA-binding protein LAG-1          |
| Locus_5420_Transcript_2/2_Conf_1.000 | 1458 | 20 | 0        | XP_001899599.1 | 85 | 700.664 | 454 | 388 | DNA-binding protein LAG-1          |
| Locus_5421_Transcript_1/1_Conf_1.000 | 238  | 0  |          |                |    |         |     |     |                                    |
| Locus_5422_Transcript_1/1_Conf_1.000 | 1370 | 6  | 8.02E-72 | NP_741168.1    | 53 | 275.789 | 439 | 237 | hypothetical protein C05D10.1      |
| Locus_5423_Transcript_1/1_Conf_1.000 | 1172 | 20 | 9.20E-87 | NP_502294.1    | 73 | 325.094 | 298 | 219 | hypothetical protein F11A10.5      |
| Locus_5424_Transcript_1/1_Conf_1.000 | 506  | 2  | 5.83E-13 | NP_001023217.1 | 57 | 77.411  | 113 | 65  | hypothetical protein F53H1.4       |

|                                      |      |    |           |                |    |         |     |     |                                                                         |
|--------------------------------------|------|----|-----------|----------------|----|---------|-----|-----|-------------------------------------------------------------------------|
| Locus_5425_Transcript_1/1_Conf_1.000 | 1097 | 20 | 2.04E-109 | XP_002637274.1 | 78 | 400.208 | 318 | 249 | Hypothetical protein CBG18957                                           |
| Locus_5426_Transcript_1/1_Conf_1.000 | 228  | 20 | 1.82E-11  | XP_002636806.1 | 83 | 72.4034 | 48  | 40  | Hypothetical protein CBG09248                                           |
| Locus_5427_Transcript_1/1_Conf_1.000 | 166  | 0  |           |                |    |         |     |     |                                                                         |
| Locus_5428_Transcript_1/1_Conf_1.000 | 1038 | 0  |           |                |    |         |     |     |                                                                         |
| Locus_5429_Transcript_1/1_Conf_1.000 | 275  | 11 | 4.42E-10  | EFO20463.1     | 64 | 67.781  | 87  | 56  | hypothetical protein LOAG_08027                                         |
| Locus_543_Transcript_1/2_Conf_1.000  | 1349 | 20 | 1.02E-79  | XP_002646267.1 | 89 | 301.982 | 189 | 169 | Hypothetical protein CBG11972                                           |
| Locus_543_Transcript_2/2_Conf_1.000  | 1290 | 20 | 3.30E-80  | XP_002646267.1 | 89 | 303.523 | 191 | 170 | Hypothetical protein CBG11972                                           |
| Locus_5430_Transcript_1/1_Conf_1.000 | 886  | 20 | 8.23E-89  | ACI49172.1     | 72 | 331.257 | 285 | 206 | hypothetical protein Csp3_JD01.004                                      |
| Locus_5431_Transcript_1/1_Conf_1.000 | 525  | 20 | 6.76E-74  | NP_741553.1    | 89 | 280.026 | 174 | 156 | ALdehyde deHydrogenase family member (alh-4)                            |
| Locus_5432_Transcript_1/1_Conf_1.000 | 593  | 0  |           |                |    |         |     |     |                                                                         |
| Locus_5433_Transcript_1/1_Conf_1.000 | 615  | 0  |           |                |    |         |     |     |                                                                         |
| Locus_5434_Transcript_1/1_Conf_1.000 | 176  | 0  |           |                |    |         |     |     |                                                                         |
| Locus_5435_Transcript_1/1_Conf_1.000 | 786  | 0  |           |                |    |         |     |     |                                                                         |
| Locus_5436_Transcript_1/1_Conf_1.000 | 2264 | 20 | 8.10E-33  | CAZ65529.1     | 42 | 147.132 | 766 | 325 | C. elegans protein T28C6.7b, partially confirmed by transcript evidence |

|                                      |      |    |           |                |    |         |     |     |                                                 |
|--------------------------------------|------|----|-----------|----------------|----|---------|-----|-----|-------------------------------------------------|
| Locus_5437_Transcript_1/1_Conf_1.000 | 541  | 20 | 5.13E-27  | XP_002629901.1 | 71 | 124.405 | 135 | 96  | Hypothetical protein CBG21942                   |
| Locus_5438_Transcript_1/1_Conf_1.000 | 579  | 20 | 3.97E-13  | NP_001041239.1 | 50 | 78.5666 | 216 | 108 | abnormal DAuer Formation family member (daf-12) |
| Locus_5439_Transcript_1/2_Conf_1.000 | 484  | 0  |           |                |    |         |     |     |                                                 |
| Locus_5439_Transcript_2/2_Conf_1.000 | 484  | 0  |           |                |    |         |     |     |                                                 |
| Locus_544_Transcript_1/1_Conf_1.000  | 1344 | 0  |           |                |    |         |     |     |                                                 |
| Locus_5440_Transcript_1/2_Conf_0.500 | 1395 | 20 | 1.28E-149 | XP_001899556.1 | 86 | 534.258 | 359 | 310 | GDP-mannose pyrophosphorylase B, isoform 2      |
| Locus_5440_Transcript_2/2_Conf_0.500 | 1395 | 20 | 3.36E-150 | XP_001899556.1 | 86 | 536.184 | 359 | 310 | GDP-mannose pyrophosphorylase B, isoform 2      |
| Locus_5441_Transcript_1/1_Conf_1.000 | 1026 | 20 | 5.42E-93  | NP_499106.1    | 78 | 345.51  | 291 | 227 | hypothetical protein ZK1098.4                   |
| Locus_5442_Transcript_1/1_Conf_1.000 | 890  | 0  |           |                |    |         |     |     |                                                 |
| Locus_5443_Transcript_1/2_Conf_1.000 | 1062 | 20 | 2.57E-69  | XP_002630380.1 | 83 | 266.929 | 221 | 184 | C. briggsae CBR-VPS-32.1 protein                |
| Locus_5443_Transcript_2/2_Conf_1.000 | 1059 | 20 | 2.56E-69  | XP_002630380.1 | 83 | 266.929 | 221 | 184 | C. briggsae CBR-VPS-32.1 protein                |
| Locus_5444_Transcript_1/1_Conf_1.000 | 428  | 20 | 5.06E-30  | NP_491765.2    | 64 | 134.035 | 142 | 92  | hypothetical protein T27A3.2                    |
| Locus_5445_Transcript_1/1_Conf_1.000 | 467  | 0  |           |                |    |         |     |     |                                                 |
| Locus_5446_Transcript_1/3_Conf_0.667 | 1158 | 4  | 3.72E-48  | XP_002643393.1 | 49 | 196.823 | 428 | 211 | Hypothetical protein CBG16006                   |
| Locus_5446_Transcript_2/3_Conf_0.667 | 1792 | 4  | 5.28E-69  | XP_002643393.1 | 51 | 266.929 | 460 | 239 | Hypothetical protein CBG16006                   |
| Locus_5446_Transcript_3/3_Conf_0.667 | 1792 | 4  | 2.01E-68  | XP_002643393.1 | 51 | 265.003 | 460 | 239 | Hypothetical protein CBG16006                   |
| Locus_5447_Transcript_1/1_Conf_1.000 | 352  | 0  |           |                |    |         |     |     |                                                 |
| Locus_5448_Transcript_1/1_Conf_1.000 | 1149 | 4  | 7.92E-43  | XP_002633035.1 | 58 | 179.104 | 339 | 197 | Hypothetical protein CBG05711                   |
| Locus_5449_Transcript_1/1_Conf_1.000 | 196  | 20 | 4.48E-10  | XP_002639044.1 | 75 | 67.781  | 48  | 36  | Hypothetical protein CBG22296                   |



|                                      |      |    |          |                |     |         |     |     |                                                                              |
|--------------------------------------|------|----|----------|----------------|-----|---------|-----|-----|------------------------------------------------------------------------------|
| Locus_545_Transcript_1/1_Conf_1.000  | 416  | 0  |          |                |     |         |     |     |                                                                              |
| Locus_5450_Transcript_1/1_Conf_1.000 | 737  | 11 | 5.95E-41 | XP_002639670.1 | 61  | 171.785 | 191 | 117 | Hypothetical protein CBG12388                                                |
| Locus_5451_Transcript_1/1_Conf_1.000 | 1422 | 12 | 0        | NP_001022641.1 | 89  | 712.99  | 472 | 421 | LEThal family member (let-805)                                               |
| Locus_5452_Transcript_1/1_Conf_1.000 | 1067 | 20 | 1.10E-11 | NP_498678.3    | 42  | 75.485  | 194 | 83  | abnormal cell LiNeage family member (lin-13)                                 |
| Locus_5453_Transcript_1/1_Conf_1.000 | 608  | 4  | 5.23E-30 | XP_002639325.1 | 74  | 134.806 | 113 | 84  | Hypothetical protein CBG03903                                                |
| Locus_5454_Transcript_1/1_Conf_1.000 | 395  |    |          |                |     |         |     |     |                                                                              |
| Locus_5455_Transcript_1/1_Conf_1.000 | 347  | 20 | 2.81E-28 | NP_500566.1    | 73  | 128.257 | 116 | 85  | WAPL (Drosophila Wings APart-Like cohesin interactor) family member (wapl-1) |
| Locus_5456_Transcript_1/1_Conf_1.000 | 140  | 20 | 1.28E-17 | CAI42449.1     | 100 | 92.8189 | 46  | 46  | ubiquitously-expressed transcript                                            |
| Locus_5457_Transcript_1/1_Conf_1.000 | 398  | 20 | 2.77E-68 | NP_001022641.1 | 98  | 261.151 | 132 | 130 | LEThal family member (let-805)                                               |

|                                      |      |    |           |                |     |         |     |     |                                                     |
|--------------------------------------|------|----|-----------|----------------|-----|---------|-----|-----|-----------------------------------------------------|
| Locus_5458_Transcript_1/1_Conf_1.000 | 769  | 20 | 2.74E-116 | NP_001021588.1 | 90  | 422.165 | 247 | 224 | hypothetical protein R11A5.4                        |
| Locus_5459_Transcript_1/1_Conf_1.000 | 181  | 20 | 5.93E-18  | XP_002639611.1 | 91  | 93.9745 | 60  | 55  | C. briggsae CBR-PPK-1 protein                       |
| Locus_546_Transcript_1/1_Conf_1.000  | 788  | 0  |           |                |     |         |     |     |                                                     |
| Locus_5460_Transcript_1/1_Conf_1.000 | 255  | 20 | 1.49E-29  | XP_002708870.1 | 100 | 132.494 | 65  | 65  | PREDICTED: ribosomal protein S8-like                |
| Locus_5461_Transcript_1/1_Conf_1.000 | 405  | 0  |           |                |     |         |     |     |                                                     |
| Locus_5462_Transcript_1/1_Conf_1.000 | 523  | 20 | 1.29E-69  | XP_002642725.1 | 88  | 265.774 | 175 | 154 | C. briggsae CBR-ABCF-3 protein                      |
| Locus_5463_Transcript_1/1_Conf_1.000 | 162  | 0  |           |                |     |         |     |     |                                                     |
| Locus_5464_Transcript_1/1_Conf_1.000 | 792  | 1  | 2.02E-08  | XP_001892596.1 | 45  | 63.929  | 239 | 109 | hypothetical protein Bm1_05610                      |
| Locus_5465_Transcript_1/1_Conf_1.000 | 661  | 0  |           |                |     |         |     |     |                                                     |
| Locus_5466_Transcript_1/1_Conf_1.000 | 1004 | 20 | 1.36E-109 | NP_501361.1    | 82  | 400.593 | 278 | 228 | Iron-Sulfur Protein family member (isp-1)           |
| Locus_5467_Transcript_1/1_Conf_1.000 | 1128 | 20 | 3.00E-103 | NP_499094.1    | 88  | 379.793 | 257 | 228 | Vacuolar H ATPase family member (vha-14)            |
| Locus_5468_Transcript_1/1_Conf_1.000 | 1042 | 20 | 6.02E-124 | XP_002644545.1 | 85  | 448.358 | 312 | 268 | C. briggsae CBR-ASB-2 protein                       |
| Locus_5469_Transcript_1/1_Conf_1.000 | 527  | 20 | 2.84E-72  | NP_001122631.1 | 88  | 274.633 | 160 | 141 | ELAV-Type RNA binding protein family member (etr-1) |
| Locus_547_Transcript_1/1_Conf_1.000  | 808  | 0  |           |                |     |         |     |     |                                                     |

|                                      |      |    |           |                |    |         |      |     |                                                        |
|--------------------------------------|------|----|-----------|----------------|----|---------|------|-----|--------------------------------------------------------|
| Locus_5470_Transcript_1/1_Conf_1.000 | 353  | 5  | 4.46E-18  | XP_001897390.1 | 68 | 94.3597 | 101  | 69  | Presenilin spe-4                                       |
| Locus_5471_Transcript_1/1_Conf_1.000 | 2010 | 20 | 6.31E-175 | NP_505661.1    | 83 | 619.002 | 444  | 372 | hypothetical protein K07C5.6                           |
| Locus_5472_Transcript_1/1_Conf_1.000 | 663  | 20 | 1.01E-75  | NP_492486.2    | 80 | 286.96  | 220  | 178 | hypothetical protein C12C8.2                           |
| Locus_5473_Transcript_1/1_Conf_1.000 | 848  | 0  |           |                |    |         |      |     |                                                        |
| Locus_5474_Transcript_1/1_Conf_1.000 | 456  | 0  |           |                |    |         |      |     |                                                        |
| Locus_5475_Transcript_1/1_Conf_1.000 | 217  | 0  |           |                |    |         |      |     |                                                        |
| Locus_5476_Transcript_1/1_Conf_1.000 | 1858 | 20 | 1.76E-115 | NP_493543.1    | 72 | 421.394 | 383  | 279 | BTB and MATH domain containing family member (bath-40) |
| Locus_5477_Transcript_1/1_Conf_1.000 | 494  | 0  |           |                |    |         |      |     |                                                        |
| Locus_5478_Transcript_1/5_Conf_0.692 | 3363 | 20 | 0         | NP_001021395.1 | 85 | 1632.08 | 1134 | 974 | Receptor Mediated Endocytosis family member (rme-8)    |
| Locus_5478_Transcript_2/5_Conf_0.692 | 3363 | 20 | 0         | NP_001021395.1 | 85 | 1632.08 | 1134 | 974 | Receptor Mediated Endocytosis family member (rme-8)    |
| Locus_5478_Transcript_3/5_Conf_0.615 | 3152 | 20 | 0         | NP_001021395.1 | 86 | 1538.86 | 1064 | 922 | Receptor Mediated Endocytosis family member (rme-8)    |
| Locus_5478_Transcript_4/5_Conf_0.692 | 3363 | 20 | 0         | NP_001021395.1 | 85 | 1632.08 | 1134 | 974 | Receptor Mediated Endocytosis family member (rme-8)    |
| Locus_5478_Transcript_5/5_Conf_0.692 | 3363 | 20 | 0         | NP_001021395.1 | 85 | 1632.08 | 1134 | 974 | Receptor Mediated Endocytosis family member (rme-8)    |
| Locus_5479_Transcript_1/1_Conf_1.000 | 392  | 20 | 9.68E-42  | EFO16124.1     | 81 | 172.94  | 129  | 105 | protein-tyrosine phosphatase                           |
| Locus_548_Transcript_1/1_Conf_1.000  | 825  | 1  | 5.52E-04  | AAP83584.1     | 41 | 49.2914 | 175  | 73  | DNA-topoisomerase II                                   |
| Locus_5480_Transcript_1/1_Conf_1.000 | 728  | 20 | 7.60E-25  | NP_508544.2    | 77 | 118.242 | 103  | 80  | hypothetical protein C15C7.1                           |
| Locus_5481_Transcript_1/1_Conf_1.000 | 579  | 1  | 3.37E-04  | NP_506662.1    | 45 | 48.9062 | 133  | 60  | hypothetical protein ZC412.3                           |
| Locus_5482_Transcript_1/1_Conf_1.000 | 323  | 0  |           |                |    |         |      |     |                                                        |

|                                      |      |    |          |                |    |         |     |     |                                                                            |
|--------------------------------------|------|----|----------|----------------|----|---------|-----|-----|----------------------------------------------------------------------------|
| Locus_5483_Transcript_1/1_Conf_1.000 | 598  | 12 | 3.44E-63 | XP_002641548.1 | 76 | 244.973 | 205 | 156 | C. briggsae CBR-FEH-1 protein                                              |
| Locus_5484_Transcript_1/1_Conf_1.000 | 747  | 20 | 9.40E-82 | EFO18967.1     | 76 | 307.375 | 249 | 190 | LIM domain-containing protein                                              |
| Locus_5485_Transcript_1/2_Conf_1.000 | 422  | 3  | 2.02E-10 | NP_490799.2    | 44 | 68.9366 | 139 | 62  | SHC (Src Homology domain C-terminal) adaptor homolog family member (shc-1) |
| Locus_5485_Transcript_2/2_Conf_1.000 | 392  | 2  | 3.97E-11 | XP_002638780.1 | 62 | 71.2478 | 80  | 50  | C. briggsae CBR-SHC-1 protein                                              |
| Locus_5486_Transcript_1/2_Conf_1.000 | 1374 | 20 | 1.06E-47 | EFO24053.1     | 88 | 195.667 | 117 | 104 | hypothetical protein LOAG_04430                                            |
| Locus_5486_Transcript_2/2_Conf_1.000 | 1368 | 20 | 1.80E-47 | EFO24053.1     | 94 | 194.897 | 106 | 100 | hypothetical protein LOAG_04430                                            |
| Locus_5487_Transcript_1/1_Conf_1.000 | 587  | 20 | 1.87E-74 | NP_492952.1    | 87 | 282.337 | 172 | 150 | hypothetical protein F15D3.6                                               |
| Locus_5488_Transcript_1/1_Conf_1.000 | 1163 | 5  | 2.06E-30 | NP_001041082.1 | 51 | 137.887 | 319 | 165 | hypothetical protein C14C10.2                                              |
| Locus_5489_Transcript_1/1_Conf_1.000 | 461  | 0  |          |                |    |         |     |     |                                                                            |
| Locus_549_Transcript_1/3_Conf_0.600  | 2239 | 20 | 2.23E-67 | XP_002644641.1 | 62 | 261.922 | 375 | 234 | C. briggsae CBR-APL-1 protein                                              |
| Locus_549_Transcript_2/3_Conf_0.400  | 135  | 2  | 1.28E-09 | XP_002630033.1 | 85 | 66.2402 | 42  | 36  | C. briggsae CBR-PUF-12 protein                                             |

|                                      |      |    |           |                |    |         |     |     |                                                     |
|--------------------------------------|------|----|-----------|----------------|----|---------|-----|-----|-----------------------------------------------------|
| Locus_549_Transcript_3/3_Conf_0.400  | 3076 | 20 | 0         | XP_002644641.1 | 70 | 701.819 | 696 | 490 | C. briggsae CBR-APL-1 protein                       |
| Locus_5490_Transcript_1/1_Conf_1.000 | 267  | 20 | 8.38E-17  | XP_002630362.1 | 75 | 90.1225 | 83  | 63  | C. briggsae CBR-RPN-5 protein                       |
| Locus_5491_Transcript_1/1_Conf_1.000 | 442  | 20 | 1.44E-16  | AAO63576.1     | 50 | 89.3521 | 133 | 67  | secreted protein 4 precursor                        |
| Locus_5492_Transcript_1/1_Conf_1.000 | 604  | 0  |           |                |    |         |     |     |                                                     |
| Locus_5493_Transcript_1/1_Conf_1.000 | 132  | 0  |           |                |    |         |     |     |                                                     |
| Locus_5494_Transcript_1/1_Conf_1.000 | 447  | 2  | 1.06E-11  | NP_498724.3    | 53 | 73.1738 | 152 | 82  | Nuclear Pore complex Protein family member (npp-15) |
| Locus_5495_Transcript_1/1_Conf_1.000 | 831  | 0  |           |                |    |         |     |     |                                                     |
| Locus_5496_Transcript_1/4_Conf_0.429 | 1171 | 20 | 2.63E-150 | NP_499032.1    | 78 | 536.184 | 391 | 307 | INtegrin Alpha family member (ina-1)                |
| Locus_5496_Transcript_2/4_Conf_0.429 | 1410 | 20 | 8.12E-152 | NP_499032.1    | 78 | 541.576 | 400 | 312 | INtegrin Alpha family member (ina-1)                |
| Locus_5496_Transcript_3/4_Conf_0.286 | 233  | 0  |           |                |    |         |     |     |                                                     |
| Locus_5496_Transcript_4/4_Conf_0.429 | 1219 | 20 | 4.31E-151 | NP_499032.1    | 77 | 538.88  | 400 | 311 | INtegrin Alpha family member (ina-1)                |
| Locus_5497_Transcript_1/1_Conf_1.000 | 660  | 4  | 1.24E-17  | XP_001894367.1 | 51 | 93.9745 | 205 | 105 | hypothetical protein Bm1_14505                      |
| Locus_5498_Transcript_1/2_Conf_1.000 | 2610 | 20 | 0         | NP_001123198.1 | 68 | 679.093 | 776 | 531 | GTPase Activating Protein family member (gap-2)     |
| Locus_5498_Transcript_2/2_Conf_1.000 | 2556 | 20 | 0         | NP_509597.1    | 69 | 681.789 | 759 | 525 | GTPase Activating Protein family member (gap-2)     |

|                                      |      |    |   |             |    |         |     |     |                                 |
|--------------------------------------|------|----|---|-------------|----|---------|-----|-----|---------------------------------|
| Locus_5499_Transcript_1/4_Conf_0.700 | 1711 | 20 | 0 | NP_499487.1 | 96 | 871.307 | 524 | 504 | hypothetical protein Y66D12A.15 |
| Locus_5499_Transcript_2/4_Conf_0.700 | 1711 | 20 | 0 | NP_499487.1 | 96 | 871.307 | 524 | 504 | hypothetical protein Y66D12A.15 |

|                                      |      |    |          |                |    |         |     |     |                                 |
|--------------------------------------|------|----|----------|----------------|----|---------|-----|-----|---------------------------------|
| Locus_5499_Transcript_3/4_Conf_0.700 | 1711 | 20 | 0        | NP_499487.1    | 96 | 871.307 | 524 | 504 | hypothetical protein Y66D12A.15 |
| Locus_5499_Transcript_4/4_Conf_0.700 | 1711 | 20 | 0        | NP_499487.1    | 96 | 871.307 | 524 | 504 | hypothetical protein Y66D12A.15 |
| Locus_55_Transcript_1/2_Conf_0.889   | 705  | 5  | 5.84E-11 | XP_002630572.1 | 46 | 72.0182 | 160 | 74  | Hypothetical protein CBG13025   |
| Locus_55_Transcript_2/2_Conf_0.889   | 705  | 5  | 5.84E-11 | XP_002630572.1 | 46 | 72.0182 | 160 | 74  | Hypothetical protein CBG13025   |
| Locus_550_Transcript_1/1_Conf_1.000  | 201  | 0  |          |                |    |         |     |     |                                 |

|                                      |      |    |           |                |    |         |     |     |                                                                            |
|--------------------------------------|------|----|-----------|----------------|----|---------|-----|-----|----------------------------------------------------------------------------|
| Locus_5500_Transcript_1/1_Conf_1.000 | 829  | 20 | 3.02E-42  | XP_002642343.1 | 66 | 176.407 | 205 | 137 | C. briggsae CBR-CNT-2 protein                                              |
| Locus_5501_Transcript_1/1_Conf_1.000 | 1075 | 15 | 1.21E-74  | XP_002639830.1 | 69 | 284.648 | 359 | 249 | C. briggsae CBR-EXOC-7 protein                                             |
| Locus_5502_Transcript_1/1_Conf_1.000 | 1085 | 7  | 6.43E-07  | NP_509538.1    | 66 | 59.6918 | 68  | 45  | Apical Junction Molecule family member (ajm-1)                             |
| Locus_5503_Transcript_1/1_Conf_1.000 | 599  | 0  |           |                |    |         |     |     |                                                                            |
| Locus_5504_Transcript_1/1_Conf_1.000 | 427  | 0  |           |                |    |         |     |     |                                                                            |
| Locus_5505_Transcript_1/1_Conf_1.000 | 764  | 20 | 3.70E-65  | NP_490990.2    | 71 | 252.292 | 259 | 184 | hypothetical protein Y23H5B.5                                              |
| Locus_5506_Transcript_1/1_Conf_1.000 | 851  | 20 | 7.54E-44  | NP_504952.1    | 67 | 181.8   | 276 | 186 | hypothetical protein F19F10.9                                              |
| Locus_5507_Transcript_1/1_Conf_1.000 | 1825 | 20 | 0         | NP_508711.1    | 96 | 919.457 | 492 | 477 | Vacuolar H ATPase family member (vha-12)                                   |
| Locus_5508_Transcript_1/1_Conf_1.000 | 1377 | 20 | 1.09E-148 | A8XXC7.2       | 81 | 477.248 | 323 | 264 | WD repeat and FYVE domain-containing protein 2                             |
| Locus_5509_Transcript_1/1_Conf_1.000 | 144  | 0  |           |                |    |         |     |     |                                                                            |
| Locus_551_Transcript_1/1_Conf_1.000  | 1936 | 8  | 5.82E-53  | XP_002632887.1 | 52 | 213.772 | 509 | 266 | Hypothetical protein CBG15095                                              |
| Locus_5510_Transcript_1/1_Conf_1.000 | 1544 | 0  |           |                |    |         |     |     |                                                                            |
| Locus_5511_Transcript_1/1_Conf_1.000 | 865  | 3  | 4.60E-20  | NP_872067.1    | 54 | 102.834 | 222 | 122 | hypothetical protein M176.11                                               |
| Locus_5512_Transcript_1/1_Conf_1.000 | 435  | 0  |           |                |    |         |     |     |                                                                            |
| Locus_5513_Transcript_1/1_Conf_1.000 | 1300 | 1  | 1.75E-04  | CAB55122.3     | 37 | 51.9878 | 331 | 124 | C. elegans protein Y116A8C.16a, partially confirmed by transcript evidence |
| Locus_5514_Transcript_1/1_Conf_1.000 | 248  | 10 | 1.08E-08  | NP_493100.1    | 57 | 63.1586 | 82  | 47  | hypothetical protein F41D3.11                                              |
| Locus_5515_Transcript_1/1_Conf_1.000 | 506  | 20 | 1.68E-52  | XP_002642602.1 | 84 | 208.764 | 137 | 116 | C. briggsae CBR-TTR-8 protein                                              |
| Locus_5516_Transcript_1/2_Conf_0.667 | 167  | 0  |           |                |    |         |     |     |                                                                            |
| Locus_5516_Transcript_2/2_Conf_0.667 | 167  | 0  |           |                |    |         |     |     |                                                                            |
| Locus_5517_Transcript_1/1_Conf_1.000 | 327  | 0  |           |                |    |         |     |     |                                                                            |



|                                      |      |    |          |                |    |         |     |     |                                                                    |
|--------------------------------------|------|----|----------|----------------|----|---------|-----|-----|--------------------------------------------------------------------|
| Locus_5518_Transcript_1/1_Conf_1.000 | 1317 | 20 | 0        | XP_002641348.1 | 96 | 647.506 | 365 | 352 | Hypothetical protein CBG13201                                      |
| Locus_5519_Transcript_1/2_Conf_1.000 | 500  | 0  |          |                |    |         |     |     |                                                                    |
| Locus_5519_Transcript_2/2_Conf_1.000 | 487  | 4  | 3.32E-05 | XP_001120514.1 | 66 | 51.6026 | 60  | 40  | PREDICTED: hypothetical protein, partial                           |
| Locus_552_Transcript_1/2_Conf_0.500  | 737  | 5  | 3.48E-49 | XP_002645475.1 | 92 | 199.134 | 139 | 129 | Hypothetical protein CBG22717                                      |
| Locus_552_Transcript_2/2_Conf_0.500  | 1899 | 20 | 7.93E-79 | NP_001023574.1 | 90 | 299.671 | 192 | 173 | homologous to Drosophila SQD (squid) protein family member (sqd-1) |
| Locus_5520_Transcript_1/1_Conf_1.000 | 837  | 2  | 1.39E-18 | NP_510115.1    | 90 | 97.8265 | 55  | 50  | Nuclear Hormone Receptor family member (nhr-17)                    |
| Locus_5521_Transcript_1/2_Conf_1.000 | 1643 | 1  | 9.09E-04 | XP_756627.1    | 39 | 50.0618 | 243 | 95  | hypothetical protein UM00480.1                                     |
| Locus_5521_Transcript_2/2_Conf_1.000 | 1552 | 1  | 8.42E-04 | XP_756627.1    | 39 | 50.0618 | 243 | 95  | hypothetical protein UM00480.1                                     |
| Locus_5522_Transcript_1/1_Conf_1.000 | 339  | 5  | 3.96E-11 | NP_502366.1    | 71 | 71.2478 | 90  | 64  | Dolichol Phosphate Mannosyltransferase family member (dpm-3)       |
| Locus_5523_Transcript_1/1_Conf_1.000 | 164  | 0  |          |                |    |         |     |     |                                                                    |
| Locus_5524_Transcript_1/1_Conf_1.000 | 1171 | 20 | 1.19E-17 | XP_001629578.1 | 45 | 95.5153 | 277 | 126 | predicted protein                                                  |
| Locus_5525_Transcript_1/3_Conf_0.714 | 1372 | 0  |          |                |    |         |     |     |                                                                    |
| Locus_5525_Transcript_2/3_Conf_0.571 | 1404 | 0  |          |                |    |         |     |     |                                                                    |
| Locus_5525_Transcript_3/3_Conf_0.714 | 1377 | 0  |          |                |    |         |     |     |                                                                    |

|                                      |      |    |           |                |     |         |     |     |                                           |
|--------------------------------------|------|----|-----------|----------------|-----|---------|-----|-----|-------------------------------------------|
| Locus_5526_Transcript_1/1_Conf_1.000 | 688  | 20 | 4.03E-94  | ACH43609.1     | 100 | 348.206 | 175 | 175 | putative 40S ribosomal protein S9         |
| Locus_5527_Transcript_1/1_Conf_1.000 | 1403 | 20 | 1.86E-23  | AAN11402.1     | 39  | 115.161 | 449 | 176 | secreted-protein 1 precursor              |
| Locus_5528_Transcript_1/1_Conf_1.000 | 1045 | 9  | 1.34E-30  | NP_500018.3    | 95  | 138.272 | 80  | 76  | PLeXin family member (plx-1)              |
| Locus_5529_Transcript_1/1_Conf_1.000 | 527  | 20 | 4.71E-51  | XP_002633191.1 | 94  | 204.142 | 128 | 121 | C. briggsae CBR-DIF-1 protein             |
| Locus_553_Transcript_1/1_Conf_1.000  | 183  | 2  | 3.60E-07  | XP_002643084.1 | 68  | 58.151  | 58  | 40  | C. briggsae CBR-TAG-174 protein           |
| Locus_5530_Transcript_1/1_Conf_1.000 | 555  | 20 | 1.76E-12  | NP_495338.1    | 55  | 76.2554 | 129 | 72  | hypothetical protein C56C10.9             |
| Locus_5531_Transcript_1/1_Conf_1.000 | 486  | 20 | 2.12E-52  | XP_002646152.1 | 77  | 208.379 | 159 | 123 | C. briggsae CBR-GPI-1 protein             |
| Locus_5532_Transcript_1/1_Conf_1.000 | 1611 | 20 | 0         | XP_002642367.1 | 83  | 738.799 | 548 | 456 | Hypothetical protein CBG18370             |
| Locus_5533_Transcript_1/1_Conf_1.000 | 473  | 0  |           |                |     |         |     |     |                                           |
| Locus_5534_Transcript_1/1_Conf_1.000 | 459  | 20 | 1.26E-49  | XP_001106448.2 | 96  | 199.134 | 105 | 101 | PREDICTED: 60S ribosomal protein L36-like |
| Locus_5535_Transcript_1/1_Conf_1.000 | 1116 | 20 | 7.95E-133 | ABL61878.1     | 97  | 478.019 | 372 | 361 | cytochrome b                              |
| Locus_5536_Transcript_1/1_Conf_1.000 | 357  | 0  |           |                |     |         |     |     |                                           |
| Locus_5537_Transcript_1/1_Conf_1.000 | 663  | 8  | 4.03E-24  | XP_002648487.1 | 59  | 115.546 | 223 | 133 | Hypothetical protein CBG24777             |
| Locus_5538_Transcript_1/2_Conf_1.000 | 282  | 0  |           |                |     |         |     |     |                                           |
| Locus_5538_Transcript_2/2_Conf_1.000 | 283  | 0  |           |                |     |         |     |     |                                           |
| Locus_5539_Transcript_1/2_Conf_1.000 | 449  | 0  |           |                |     |         |     |     |                                           |
| Locus_5539_Transcript_2/2_Conf_1.000 | 401  | 0  |           |                |     |         |     |     |                                           |
| Locus_554_Transcript_1/1_Conf_1.000  | 498  | 2  | 3.04E-19  | XP_002631443.1 | 75  | 98.2117 | 92  | 69  | Hypothetical protein CBG03305             |
| Locus_5540_Transcript_1/1_Conf_1.000 | 230  | 0  |           |                |     |         |     |     |                                           |

|                                      |      |    |           |                |    |         |     |     |                                                                        |
|--------------------------------------|------|----|-----------|----------------|----|---------|-----|-----|------------------------------------------------------------------------|
| Locus_5541_Transcript_1/1_Conf_1.000 | 333  | 2  | 9.54E-25  | XP_001116236.1 | 93 | 86.2705 | 46  | 43  | PREDICTED: hypothetical protein LOC718269                              |
| Locus_5542_Transcript_1/2_Conf_1.000 | 1183 | 20 | 9.15E-159 | XP_001893248.1 | 83 | 564.303 | 395 | 329 | Pre-B cell enhancing factor precursor                                  |
| Locus_5542_Transcript_2/2_Conf_1.000 | 448  | 20 | 4.56E-47  | XP_001893248.1 | 77 | 190.66  | 149 | 116 | Pre-B cell enhancing factor precursor                                  |
| Locus_5543_Transcript_1/2_Conf_1.000 | 1619 | 20 | 2.24E-55  | EFO22579.1     | 52 | 221.476 | 457 | 238 | hypothetical protein LOAG_05905                                        |
| Locus_5543_Transcript_2/2_Conf_1.000 | 1619 | 20 | 6.50E-55  | EFO22579.1     | 52 | 219.935 | 457 | 238 | hypothetical protein LOAG_05905                                        |
| Locus_5544_Transcript_1/1_Conf_1.000 | 295  | 0  |           |                |    |         |     |     |                                                                        |
| Locus_5545_Transcript_1/1_Conf_1.000 | 285  | 20 | 2.02E-26  | NP_507688.2    | 95 | 122.094 | 70  | 67  | Cytochrome P450 family member (cyp-42A1)                               |
| Locus_5546_Transcript_1/1_Conf_1.000 | 364  | 20 | 3.13E-32  | XP_002635588.1 | 73 | 141.354 | 124 | 91  | C. briggsae CBR-IMB-4 protein                                          |
| Locus_5547_Transcript_1/1_Conf_1.000 | 312  | 20 | 9.43E-16  | XP_001895783.1 | 64 | 86.6557 | 98  | 63  | BTB/POZ domain containing protein 9                                    |
| Locus_5548_Transcript_1/1_Conf_1.000 | 878  | 0  |           |                |    |         |     |     |                                                                        |
| Locus_5549_Transcript_1/1_Conf_1.000 | 850  | 20 | 3.16E-50  | NP_496146.1    | 67 | 202.986 | 226 | 153 | Ubiquitin Fusion Degradation (yeast UFD homolog) family member (ufd-3) |
| Locus_555_Transcript_1/1_Conf_1.000  | 674  | 7  | 1.24E-52  | XP_002646995.1 | 68 | 210.305 | 199 | 137 | C. briggsae CBR-LIN-66 protein                                         |
| Locus_5550_Transcript_1/1_Conf_1.000 | 716  | 20 | 2.43E-28  | NP_505643.1    | 57 | 129.798 | 205 | 117 | LYSozyme family member (lys-2)                                         |
| Locus_5551_Transcript_1/1_Conf_1.000 | 756  | 20 | 7.63E-39  | NP_500698.1    | 67 | 164.851 | 171 | 115 | Sperm-Specific family, class Q family member (ssq-2)                   |

|                                      |      |    |           |                |     |         |      |     |                                                                |
|--------------------------------------|------|----|-----------|----------------|-----|---------|------|-----|----------------------------------------------------------------|
| Locus_5552_Transcript_1/1_Conf_1.000 | 595  | 0  |           |                |     |         |      |     |                                                                |
| Locus_5553_Transcript_1/1_Conf_1.000 | 854  | 20 | 1.09E-66  | XP_001899907.1 | 71  | 257.684 | 223  | 160 | MOZ/SAS family protein                                         |
| Locus_5554_Transcript_1/1_Conf_1.000 | 588  | 1  | 9.72E-07  | XP_002129638.1 | 42  | 57.3806 | 135  | 58  | PREDICTED: similar to matrix metalloproteinase e               |
| Locus_5555_Transcript_1/1_Conf_1.000 | 441  | 0  |           |                |     |         |      |     |                                                                |
| Locus_5556_Transcript_1/1_Conf_1.000 | 961  | 20 | 2.43E-52  | EFO20472.1     | 82  | 210.305 | 166  | 137 | hypothetical protein LOAG_08015                                |
| Locus_5557_Transcript_1/1_Conf_1.000 | 971  | 20 | 1.31E-45  | XP_001901812.1 | 56  | 187.963 | 267  | 150 | RNase3 domain containing protein                               |
| Locus_5558_Transcript_1/1_Conf_1.000 | 1078 | 20 | 8.67E-97  | XP_001897984.1 | 73  | 358.221 | 306  | 226 | Leucine carboxyl methyltransferase family protein              |
| Locus_5559_Transcript_1/1_Conf_1.000 | 180  | 0  |           |                |     |         |      |     |                                                                |
| Locus_556_Transcript_1/2_Conf_1.000  | 3043 | 20 | 0         | NP_001122729.1 | 74  | 795.808 | 739  | 554 | Oxysterol Binding protein (OSBP) Related family member (obr-1) |
| Locus_556_Transcript_2/2_Conf_1.000  | 3209 | 20 | 0         | XP_002641357.1 | 77  | 844.729 | 717  | 555 | C. briggsae CBR-OBR-1 protein                                  |
| Locus_5560_Transcript_1/1_Conf_1.000 | 265  | 0  |           |                |     |         |      |     |                                                                |
| Locus_5561_Transcript_1/1_Conf_1.000 | 585  | 20 | 5.79E-84  | CAJ57642.1     | 100 | 313.923 | 147  | 147 | putative ubiquitin conjugating enzyme 2                        |
| Locus_5562_Transcript_1/2_Conf_1.000 | 992  | 20 | 2.68E-09  | XP_002096947.1 | 57  | 67.3958 | 98   | 56  | GE24773                                                        |
| Locus_5562_Transcript_2/2_Conf_1.000 | 899  | 20 | 2.27E-09  | XP_002096947.1 | 57  | 67.3958 | 98   | 56  | GE24773                                                        |
| Locus_5563_Transcript_1/1_Conf_1.000 | 2990 | 20 | 1.04E-179 | NP_493625.4    | 56  | 635.565 | 1012 | 571 | hypothetical protein F31C3.3                                   |
| Locus_5564_Transcript_1/1_Conf_1.000 | 913  | 0  |           |                |     |         |      |     |                                                                |

|                                      |      |    |           |                |    |         |      |     |                                                                                  |
|--------------------------------------|------|----|-----------|----------------|----|---------|------|-----|----------------------------------------------------------------------------------|
| Locus_5565_Transcript_1/1_Conf_1.000 | 466  | 0  |           |                |    |         |      |     |                                                                                  |
| Locus_5566_Transcript_1/1_Conf_1.000 | 884  | 20 | 3.42E-103 | Q20390.2       | 83 | 379.022 | 261  | 219 | Palmitoyl-protein thioesterase 1                                                 |
| Locus_5567_Transcript_1/1_Conf_1.000 | 568  | 20 | 3.52E-88  | ADI24632.1     | 87 | 327.791 | 186  | 163 | Hypothetical protein C25H3.9a                                                    |
| Locus_5568_Transcript_1/1_Conf_1.000 | 3389 | 20 | 0         | ACI49172.1     | 68 | 1056.97 | 1146 | 780 | hypothetical protein Csp3_JD01.004                                               |
| Locus_5569_Transcript_1/1_Conf_1.000 | 827  | 20 | 6.48E-29  | NP_497279.2    | 57 | 132.109 | 235  | 135 | EXOSome (multiexonuclease complex) component family member (exos-4.2)            |
| Locus_557_Transcript_1/2_Conf_1.000  | 465  | 20 | 1.06E-46  | NP_510575.1    | 80 | 122.094 | 83   | 67  | yeast ERV (ER to Golgi transport Vesicle protein) homolog family member (erv-46) |
| Locus_557_Transcript_2/2_Conf_1.000  | 431  | 20 | 5.18E-51  | NP_510575.1    | 80 | 203.756 | 143  | 115 | yeast ERV (ER to Golgi transport Vesicle protein) homolog family member (erv-46) |
| Locus_5570_Transcript_1/1_Conf_1.000 | 601  | 20 | 2.74E-92  | XP_001893622.1 | 91 | 341.658 | 199  | 183 | Leucine Rich Repeat family protein                                               |

|                                      |      |    |           |                |    |         |     |     |                                        |
|--------------------------------------|------|----|-----------|----------------|----|---------|-----|-----|----------------------------------------|
| Locus_5571_Transcript_1/1_Conf_1.000 | 995  | 20 | 7.97E-70  | NP_502172.1    | 78 | 268.47  | 195 | 153 | human GAS41-Like family member (gfl-1) |
| Locus_5572_Transcript_1/3_Conf_0.667 | 888  | 20 | 1.63E-60  | NP_500065.2    | 82 | 237.269 | 163 | 134 | hypothetical protein F53H1.3           |
| Locus_5572_Transcript_2/3_Conf_0.667 | 1017 | 20 | 2.05E-60  | NP_500065.2    | 82 | 237.269 | 163 | 134 | hypothetical protein F53H1.3           |
| Locus_5572_Transcript_3/3_Conf_0.667 | 1004 | 20 | 2.00E-60  | NP_500065.2    | 82 | 237.269 | 163 | 134 | hypothetical protein F53H1.3           |
| Locus_5573_Transcript_1/2_Conf_1.000 | 3530 | 20 | 2.23E-136 | XP_002642010.1 | 90 | 491.886 | 286 | 260 | C. briggsae CBR-NHL-2 protein          |
| Locus_5573_Transcript_2/2_Conf_1.000 | 3175 | 20 | 1.97E-136 | XP_002642010.1 | 90 | 491.886 | 286 | 260 | C. briggsae CBR-NHL-2 protein          |
| Locus_5574_Transcript_1/1_Conf_1.000 | 436  | 20 | 4.63E-60  | XP_002638749.1 | 88 | 233.802 | 150 | 133 | Hypothetical protein CBG18552          |
| Locus_5575_Transcript_1/1_Conf_1.000 | 580  | 0  |           |                |    |         |     |     |                                        |
| Locus_5576_Transcript_1/2_Conf_1.000 | 1208 | 0  |           |                |    |         |     |     |                                        |
| Locus_5576_Transcript_2/2_Conf_1.000 | 1172 | 3  | 9.74E-04  | NP_510818.3    | 52 | 49.2914 | 98  | 51  | hypothetical protein F10D7.5           |
| Locus_5577_Transcript_1/1_Conf_1.000 | 436  | 6  | 2.66E-15  | XP_001900298.1 | 54 | 85.1149 | 133 | 72  | putative WD-40 repeat protein          |
| Locus_5578_Transcript_1/1_Conf_1.000 | 1062 | 20 | 2.24E-81  | NP_498605.1    | 89 | 306.99  | 180 | 161 | hypothetical protein B0361.10          |
| Locus_5579_Transcript_1/2_Conf_1.000 | 1185 | 20 | 4.13E-151 | NP_506018.1    | 88 | 538.88  | 357 | 316 | hypothetical protein F10C2.5           |

|                                      |      |    |           |                |    |         |     |     |                                                                         |
|--------------------------------------|------|----|-----------|----------------|----|---------|-----|-----|-------------------------------------------------------------------------|
| Locus_5579_Transcript_2/2_Conf_1.000 | 1185 | 20 | 4.13E-151 | NP_506018.1    | 88 | 538.88  | 357 | 316 | hypothetical protein F10C2.5                                            |
| Locus_558_Transcript_1/1_Conf_1.000  | 1252 | 20 | 1.44E-165 | NP_497182.2    | 92 | 587.03  | 343 | 318 | hypothetical protein Y50D7A.2                                           |
| Locus_5580_Transcript_1/1_Conf_1.000 | 285  | 20 | 9.38E-24  | XP_001897193.1 | 86 | 113.235 | 95  | 82  | GH21176p                                                                |
| Locus_5581_Transcript_1/3_Conf_0.600 | 395  | 20 | 1.66E-12  | NP_001129837.1 | 85 | 75.8702 | 48  | 41  | hypothetical protein F35G12.4                                           |
| Locus_5581_Transcript_2/3_Conf_0.600 | 484  | 20 | 1.65E-12  | NP_001129837.1 | 85 | 75.8702 | 48  | 41  | hypothetical protein F35G12.4                                           |
| Locus_5581_Transcript_3/3_Conf_0.400 | 2234 | 20 | 0         | A8Q2R5.2       | 75 | 770     | 671 | 505 | WD repeat-containing protein 48 homolog                                 |
| Locus_5582_Transcript_1/1_Conf_1.000 | 1083 | 10 | 5.78E-32  | NP_504492.1    | 53 | 142.895 | 279 | 149 | hypothetical protein C14C11.1                                           |
| Locus_5583_Transcript_1/1_Conf_1.000 | 2257 | 20 | 2.85E-62  | CAZ65529.1     | 47 | 244.973 | 702 | 336 | C. elegans protein T28C6.7b, partially confirmed by transcript evidence |
| Locus_5584_Transcript_1/2_Conf_1.000 | 1248 | 5  | 7.35E-53  | AAM12419.1     | 56 | 212.616 | 396 | 224 | spliced leader 175 kDa protein                                          |
| Locus_5584_Transcript_2/2_Conf_1.000 | 699  | 5  | 1.37E-36  | XP_002632824.1 | 59 | 157.147 | 232 | 139 | C. briggsae CBR-SNA-2 protein                                           |
| Locus_5585_Transcript_1/1_Conf_1.000 | 440  | 4  | 3.03E-19  | NP_492852.1    | 68 | 98.2117 | 99  | 68  | hypothetical protein Y95D11A.1                                          |

|                                      |      |    |           |                |     |         |      |     |                                                      |
|--------------------------------------|------|----|-----------|----------------|-----|---------|------|-----|------------------------------------------------------|
| Locus_5586_Transcript_1/1_Conf_1.000 | 718  | 20 | 9.82E-78  | XP_002640810.1 | 84  | 293.893 | 198  | 167 | C. briggsae CBR-PES-4 protein                        |
| Locus_5587_Transcript_1/1_Conf_1.000 | 1428 | 20 | 6.66E-93  | XP_002641467.1 | 82  | 345.895 | 245  | 201 | Hypothetical protein CBG09751                        |
| Locus_5588_Transcript_1/1_Conf_1.000 | 3075 | 20 | 0         | NP_496534.1    | 60  | 727.243 | 1112 | 669 | Nuclear Pore complex Protein family member (npp-3)   |
| Locus_5589_Transcript_1/1_Conf_1.000 | 2239 | 20 | 2.75E-25  | EFO28145.1     | 50  | 122.094 | 365  | 183 | hypothetical protein LOAG_00351                      |
| Locus_559_Transcript_1/2_Conf_1.000  | 701  | 20 | 1.97E-51  | NP_502790.1    | 87  | 206.453 | 131  | 114 | NADH Ubiquinone Oxidoreductase family member (nuo-3) |
| Locus_559_Transcript_2/2_Conf_1.000  | 233  | 5  | 4.95E-09  | NP_001122821.1 | 87  | 64.3142 | 40   | 35  | NADH Ubiquinone Oxidoreductase family member (nuo-3) |
| Locus_5590_Transcript_1/1_Conf_1.000 | 1173 | 20 | 4.73E-91  | NP_498395.1    | 77  | 339.347 | 324  | 251 | hypothetical protein C16A3.6                         |
| Locus_5591_Transcript_1/1_Conf_1.000 | 463  | 0  |           |                |     |         |      |     |                                                      |
| Locus_5592_Transcript_1/1_Conf_1.000 | 733  | 20 | 1.99E-105 | BAC25813.1     | 100 | 385.956 | 214  | 214 | unnamed protein product                              |
| Locus_5593_Transcript_1/1_Conf_1.000 | 929  | 20 | 8.35E-103 | EFO22451.1     | 75  | 377.867 | 309  | 233 | hypothetical protein LOAG_06034                      |



|                                      |      |    |           |                |    |         |     |     |                                                                   |
|--------------------------------------|------|----|-----------|----------------|----|---------|-----|-----|-------------------------------------------------------------------|
| Locus_5594_Transcript_1/3_Conf_0.333 | 696  | 20 | 1.76E-60  | XP_002640329.1 | 80 | 236.498 | 177 | 142 | Hypothetical protein CBG12877                                     |
| Locus_5594_Transcript_2/3_Conf_0.667 | 2781 | 20 | 0         | NP_491672.1    | 96 | 766.148 | 429 | 415 | proteasome Regulatory Particle, ATPase-like family member (rpt-5) |
| Locus_5594_Transcript_3/3_Conf_0.667 | 2784 | 20 | 0         | NP_491672.1    | 96 | 766.148 | 429 | 415 | proteasome Regulatory Particle, ATPase-like family member (rpt-5) |
| Locus_5595_Transcript_1/1_Conf_1.000 | 535  | 20 | 8.08E-46  | NP_499308.1    | 73 | 186.808 | 160 | 117 | hypothetical protein D2045.5                                      |
| Locus_5596_Transcript_1/1_Conf_1.000 | 1552 | 20 | 0         | XP_002643479.1 | 88 | 861.677 | 526 | 468 | C. briggsae CBR-FLNA-1 protein                                    |
| Locus_5597_Transcript_1/1_Conf_1.000 | 165  | 0  |           |                |    |         |     |     |                                                                   |
| Locus_5598_Transcript_1/1_Conf_1.000 | 1084 | 4  | 4.43E-141 | NP_505848.1    | 88 | 505.368 | 315 | 279 | hypothetical protein T19B10.2                                     |
| Locus_5599_Transcript_1/1_Conf_1.000 | 972  | 20 | 1.31E-69  | XP_002633511.1 | 76 | 267.7   | 225 | 173 | Hypothetical protein CBG05373                                     |
| Locus_56_Transcript_1/3_Conf_0.714   | 2503 | 20 | 1.79E-113 | NP_501082.2    | 51 | 415.231 | 809 | 418 | hypothetical protein C25A8.4                                      |

|                                      |      |    |           |                |    |         |     |     |                                         |
|--------------------------------------|------|----|-----------|----------------|----|---------|-----|-----|-----------------------------------------|
| Locus_56_Transcript_2/3_Conf_0.714   | 2503 | 20 | 1.52E-112 | NP_501082.2    | 51 | 412.149 | 809 | 417 | hypothetical protein C25A8.4            |
| Locus_56_Transcript_3/3_Conf_0.714   | 2503 | 20 | 8.89E-113 | NP_501082.2    | 51 | 412.92  | 809 | 417 | hypothetical protein C25A8.4            |
| Locus_560_Transcript_1/1_Conf_1.000  | 218  | 2  | 2.57E-10  | XP_002647686.1 | 65 | 68.5514 | 78  | 51  | Hypothetical protein CBG17874           |
| Locus_5600_Transcript_1/1_Conf_1.000 | 351  | 16 | 9.22E-40  | XP_002645128.1 | 85 | 166.392 | 107 | 92  | C. briggsae CBR-NSY-4 protein           |
| Locus_5601_Transcript_1/1_Conf_1.000 | 645  | 5  | 2.74E-14  | NP_508012.2    | 65 | 82.8037 | 81  | 53  | hypothetical protein Y44A6D.3           |
| Locus_5602_Transcript_1/1_Conf_1.000 | 576  | 20 | 2.07E-06  | XP_002190459.1 | 71 | 56.225  | 56  | 40  | PREDICTED: DEK oncogene (DNA binding)   |
| Locus_5603_Transcript_1/2_Conf_1.000 | 671  | 6  | 1.52E-10  | NP_001023411.1 | 51 | 70.4774 | 137 | 71  | Helix Loop Helix family member (hlh-30) |
| Locus_5603_Transcript_2/2_Conf_1.000 | 593  | 2  | 1.58E-04  | NP_500461.1    | 47 | 50.0618 | 108 | 51  | Helix Loop Helix family member (hlh-30) |
| Locus_5604_Transcript_1/2_Conf_1.000 | 1198 | 20 | 1.44E-167 | XP_002640277.1 | 83 | 593.578 | 419 | 351 | Hypothetical protein CBG12802           |

|                                      |      |    |           |                |    |         |     |     |                                                                      |
|--------------------------------------|------|----|-----------|----------------|----|---------|-----|-----|----------------------------------------------------------------------|
| Locus_5604_Transcript_2/2_Conf_1.000 | 1192 | 20 | 7.07E-167 | XP_002640277.1 | 83 | 591.267 | 417 | 349 | Hypothetical protein CBG12802                                        |
| Locus_5605_Transcript_1/2_Conf_1.000 | 1828 | 20 | 1.49E-34  | NP_491344.1    | 44 | 152.525 | 521 | 233 | Conserved Oligomeric Golgi (COG)<br>Component family member (cogc-5) |
| Locus_5605_Transcript_2/2_Conf_1.000 | 1819 | 20 | 6.64E-35  | NP_491344.1    | 44 | 153.68  | 518 | 233 | Conserved Oligomeric Golgi (COG)<br>Component family member (cogc-5) |
| Locus_5606_Transcript_1/1_Conf_1.000 | 150  | 0  |           |                |    |         |     |     |                                                                      |

|                                      |      |    |           |                |    |         |     |     |                                |
|--------------------------------------|------|----|-----------|----------------|----|---------|-----|-----|--------------------------------|
| Locus_5607_Transcript_1/3_Conf_0.714 | 2137 | 20 | 1.49E-129 | XP_001896367.1 | 62 | 468.389 | 521 | 327 | ELM2 domain containing protein |
| Locus_5607_Transcript_2/3_Conf_0.714 | 2137 | 20 | 1.14E-129 | XP_001896367.1 | 62 | 468.774 | 521 | 327 | ELM2 domain containing protein |
| Locus_5607_Transcript_3/3_Conf_0.714 | 2137 | 20 | 1.49E-129 | XP_001896367.1 | 62 | 468.389 | 521 | 327 | ELM2 domain containing protein |
| Locus_5608_Transcript_1/1_Conf_1.000 | 531  | 0  |           |                |    |         |     |     |                                |
| Locus_5609_Transcript_1/3_Conf_0.600 | 593  | 20 | 9.51E-18  | CAR63567.1     | 77 | 93.9745 | 70  | 54  | putative COLlagen              |
| Locus_5609_Transcript_2/3_Conf_0.600 | 902  | 20 | 2.79E-15  | CAR63567.1     | 79 | 87.0409 | 62  | 49  | putative COLlagen              |
| Locus_5609_Transcript_3/3_Conf_0.600 | 927  | 20 | 2.41E-17  | CAR63567.1     | 77 | 93.9745 | 70  | 54  | putative COLlagen              |
| Locus_561_Transcript_1/1_Conf_1.000  | 1226 | 19 | 1.86E-77  | XP_002634261.1 | 78 | 294.278 | 221 | 173 | Hypothetical protein CBG01832  |
| Locus_5610_Transcript_1/1_Conf_1.000 | 1451 | 20 | 0         | XP_002642172.1 | 85 | 682.174 | 452 | 386 | Hypothetical protein CBG18137  |

|                                       |      |    |           |                |    |         |     |     |                                                               |
|---------------------------------------|------|----|-----------|----------------|----|---------|-----|-----|---------------------------------------------------------------|
| Locus_5611_Transcript_1/1_Conf_1.000  | 780  | 20 | 1.59E-26  |                | 57 | 124.02  | 127 | 73  | protein F33E11.3                                              |
| Locus_5612_Transcript_1/1_Conf_1.000  | 536  | 2  | 2.07E-25  | NP_491390.2    | 54 | 119.013 | 179 | 97  | hypothetical protein D1007.15                                 |
| Locus_5613_Transcript_1/1_Conf_1.000  | 268  | 0  |           |                |    |         |     |     |                                                               |
| Locus_5614_Transcript_1/1_Conf_1.000  | 177  | 0  |           |                |    |         |     |     |                                                               |
| Locus_5615_Transcript_1/1_Conf_1.000  | 688  | 5  | 6.15E-18  | XP_002630482.1 | 46 | 95.1301 | 229 | 106 | Hypothetical protein CBG11218                                 |
| Locus_5616_Transcript_1/1_Conf_1.000  | 422  | 3  | 8.19E-12  | NP_001024778.2 | 56 | 73.559  | 125 | 70  | neuRonal IGCAM family member (rig-1)                          |
| Locus_5617_Transcript_1/1_Conf_1.000  | 413  | 7  | 1.40E-56  | CAD44145.2     | 87 | 222.246 | 138 | 121 | C. elegans protein T21C9.3b, confirmed by transcript evidence |
| Locus_5618_Transcript_1/1_Conf_1.000  | 1383 | 20 | 6.10E-35  | XP_793959.2    | 54 | 153.295 | 247 | 135 | PREDICTED: similar to ENSANGP00000010363                      |
| Locus_5619_Transcript_1/1_Conf_1.000  | 1085 | 20 | 1.11E-83  | XP_002631436.1 | 91 | 314.694 | 215 | 196 | C. briggsae CBR-VHA-4 protein                                 |
| Locus_562_Transcript_1/10_Conf_0.154  | 298  | 0  |           |                |    |         |     |     |                                                               |
| Locus_562_Transcript_10/10_Conf_0.577 | 1820 | 20 | 8.49E-107 |                | 62 | 392.504 | 453 | 281 | protein F28E10.3                                              |
| Locus_562_Transcript_2/10_Conf_0.615  | 1865 | 20 | 8.77E-107 |                | 62 | 392.504 | 453 | 281 | protein F28E10.3                                              |
| Locus_562_Transcript_3/10_Conf_0.154  | 624  | 20 | 2.17E-58  |                | 70 | 229.18  | 219 | 155 | protein F47C8.1                                               |
| Locus_562_Transcript_4/10_Conf_0.577  | 1758 | 20 | 5.22E-94  |                | 63 | 347.051 | 394 | 249 | Rte-1 element                                                 |
| Locus_562_Transcript_5/10_Conf_0.115  | 654  | 20 | 2.01E-60  |                | 70 | 236.113 | 227 | 159 | protein F47C8.1                                               |
| Locus_562_Transcript_6/10_Conf_0.077  | 440  | 20 | 3.01E-35  | AAC72298.1     | 78 | 151.369 | 118 | 93  | reverse transcriptase                                         |
| Locus_562_Transcript_7/10_Conf_0.308  | 1069 | 20 | 1.20E-82  |                | 66 | 311.227 | 322 | 215 | protein F47C8.1                                               |
| Locus_562_Transcript_8/10_Conf_0.115  | 343  | 0  |           |                |    |         |     |     |                                                               |

|                                      |      |    |           |                |    |         |     |     |                                                     |
|--------------------------------------|------|----|-----------|----------------|----|---------|-----|-----|-----------------------------------------------------|
| Locus_562_Transcript_9/10_Conf_0.423 | 2038 | 20 | 9.77E-107 |                | 62 | 392.504 | 453 | 281 | protein F28E10.3                                    |
| Locus_5620_Transcript_1/3_Conf_0.667 | 731  | 20 | 9.99E-33  | NP_493619.1    | 61 | 144.436 | 198 | 122 | hypothetical protein F33H2.2                        |
| Locus_5620_Transcript_2/3_Conf_0.667 | 734  | 20 | 8.54E-32  | NP_493619.1    | 61 | 141.354 | 198 | 121 | hypothetical protein F33H2.2                        |
| Locus_5620_Transcript_3/3_Conf_0.667 | 734  | 20 | 1.01E-32  | NP_493619.1    | 61 | 144.436 | 198 | 122 | hypothetical protein F33H2.2                        |
| Locus_5621_Transcript_1/1_Conf_1.000 | 1232 | 10 | 2.82E-57  | NP_510823.1    | 75 | 227.254 | 175 | 132 | OSMotic avoidance abnormal family member (osm-11)   |
| Locus_5622_Transcript_1/1_Conf_1.000 | 340  | 0  |           |                |    |         |     |     |                                                     |
| Locus_5623_Transcript_1/2_Conf_1.000 | 859  | 20 | 1.68E-107 | NP_502119.2    | 80 | 393.275 | 275 | 221 | hypothetical protein F54D1.6                        |
| Locus_5623_Transcript_2/2_Conf_1.000 | 721  | 20 | 1.29E-93  | NP_502119.2    | 81 | 346.665 | 238 | 195 | hypothetical protein F54D1.6                        |
| Locus_5624_Transcript_1/1_Conf_1.000 | 763  | 20 | 2.00E-103 | XP_002634283.1 | 85 | 379.407 | 245 | 209 | C. briggsae CBR-HRS-1 protein                       |
| Locus_5625_Transcript_1/1_Conf_1.000 | 329  | 0  |           |                |    |         |     |     |                                                     |
| Locus_5626_Transcript_1/1_Conf_1.000 | 1046 | 20 | 1.26E-129 | XP_002640711.1 | 96 | 467.233 | 259 | 251 | Hypothetical protein CBG19778                       |
| Locus_5627_Transcript_1/1_Conf_1.000 | 886  | 0  |           |                |    |         |     |     |                                                     |
| Locus_5628_Transcript_1/1_Conf_1.000 | 1070 | 5  | 8.57E-89  | XP_002630376.1 | 67 | 331.643 | 356 | 240 | Hypothetical protein CBG04315                       |
| Locus_5629_Transcript_1/1_Conf_1.000 | 154  | 0  |           |                |    |         |     |     |                                                     |
| Locus_563_Transcript_1/1_Conf_1.000  | 1007 | 20 | 1.86E-90  | NP_505145.1    | 92 | 337.035 | 197 | 182 | Suppressor/Enhancer of Lin-12 family member (sel-9) |
| Locus_5630_Transcript_1/1_Conf_1.000 | 969  | 20 | 6.32E-32  | XP_001899729.1 | 52 | 142.51  | 276 | 144 | Posterior Sex Combs gene.                           |
| Locus_5631_Transcript_1/1_Conf_1.000 | 239  | 20 | 7.56E-18  | XP_002640883.1 | 80 | 93.5893 | 68  | 55  | Hypothetical protein CBG15774                       |
| Locus_5632_Transcript_1/2_Conf_1.000 | 318  | 0  |           |                |    |         |     |     |                                                     |
| Locus_5632_Transcript_2/2_Conf_1.000 | 375  | 0  |           |                |    |         |     |     |                                                     |

|                                      |      |    |          |                |    |         |     |     |                                                                           |
|--------------------------------------|------|----|----------|----------------|----|---------|-----|-----|---------------------------------------------------------------------------|
| Locus_5633_Transcript_1/1_Conf_1.000 | 1378 | 20 | 1.69E-61 | NP_497866.2    | 65 | 241.506 | 285 | 186 | Defective in Cullin Neddylation family member (dcn-1)                     |
| Locus_5634_Transcript_1/1_Conf_1.000 | 214  | 0  |          |                |    |         |     |     |                                                                           |
| Locus_5635_Transcript_1/1_Conf_1.000 | 734  | 5  | 3.14E-26 | NP_001021652.1 | 52 | 122.865 | 251 | 133 | FANCI (Fanconi anemia complex component I) homolog family member (fnci-1) |
| Locus_5636_Transcript_1/1_Conf_1.000 | 334  | 0  |          |                |    |         |     |     |                                                                           |
| Locus_5637_Transcript_1/1_Conf_1.000 | 544  | 20 | 2.17E-73 | NP_504512.1    | 89 | 278.485 | 172 | 154 | hypothetical protein F44E7.2                                              |
| Locus_5638_Transcript_1/1_Conf_1.000 | 1206 | 20 | 0        | XP_002636771.1 | 93 | 682.174 | 402 | 376 | C. briggsae CBR-ATN-1 protein                                             |
| Locus_5639_Transcript_1/1_Conf_1.000 | 688  | 20 | 5.88E-61 | NP_499913.1    | 73 | 238.039 | 228 | 168 | Sphingosine Phosphate Lyase family member (spl-1)                         |
| Locus_564_Transcript_1/7_Conf_0.500  | 1048 | 8  | 1.82E-27 | ADN00784.1     | 71 | 127.872 | 105 | 75  | parasitic stage specific protein 2                                        |
| Locus_564_Transcript_2/7_Conf_0.222  | 479  | 11 | 3.58E-28 | ADN00784.1     | 71 | 127.872 | 105 | 75  | parasitic stage specific protein 2                                        |
| Locus_564_Transcript_3/7_Conf_0.667  | 1535 | 13 | 3.15E-27 | ADN00784.1     | 71 | 127.872 | 105 | 75  | parasitic stage specific protein 2                                        |
| Locus_564_Transcript_4/7_Conf_0.667  | 1547 | 13 | 3.16E-27 | ADN00784.1     | 71 | 127.872 | 105 | 75  | parasitic stage specific protein 2                                        |
| Locus_564_Transcript_5/7_Conf_0.611  | 1547 | 8  | 3.16E-27 | ADN00784.1     | 71 | 127.872 | 105 | 75  | parasitic stage specific protein 2                                        |
| Locus_564_Transcript_6/7_Conf_0.167  | 549  | 16 | 1.05E-38 | ADN00784.1     | 73 | 163.31  | 122 | 90  | parasitic stage specific protein 2                                        |
| Locus_564_Transcript_7/7_Conf_0.667  | 1547 | 13 | 3.16E-27 | ADN00784.1     | 71 | 127.872 | 105 | 75  | parasitic stage specific protein 2                                        |

|                                      |      |    |           |                |    |         |     |     |                                                 |
|--------------------------------------|------|----|-----------|----------------|----|---------|-----|-----|-------------------------------------------------|
| Locus_5640_Transcript_1/1_Conf_1.000 | 744  | 20 | 5.28E-85  | XP_002635306.1 | 82 | 318.161 | 239 | 196 | C. briggsae CBR-ATGR-18 protein                 |
| Locus_5641_Transcript_1/1_Conf_1.000 | 794  | 20 | 3.60E-90  | XP_001899472.1 | 82 | 335.495 | 261 | 216 | Patatin-like phospholipase family protein       |
| Locus_5642_Transcript_1/1_Conf_1.000 | 160  | 0  |           |                |    |         |     |     |                                                 |
| Locus_5643_Transcript_1/1_Conf_1.000 | 778  | 20 | 9.19E-59  | XP_002634987.1 | 75 | 231.106 | 208 | 158 | Hypothetical protein CBG13527                   |
| Locus_5644_Transcript_1/3_Conf_0.667 | 362  | 20 | 1.16E-18  | XP_001892049.1 | 74 | 96.2857 | 67  | 50  | Variant SH3 domain containing protein           |
| Locus_5644_Transcript_2/3_Conf_0.667 | 377  | 20 | 1.18E-18  | XP_001892049.1 | 74 | 96.2857 | 67  | 50  | Variant SH3 domain containing protein           |
| Locus_5644_Transcript_3/3_Conf_0.667 | 362  | 20 | 1.16E-18  | XP_001892049.1 | 74 | 96.2857 | 67  | 50  | Variant SH3 domain containing protein           |
| Locus_5645_Transcript_1/1_Conf_1.000 | 682  | 20 | 2.03E-90  | XP_001894987.1 | 93 | 335.88  | 202 | 189 | RE32166p                                        |
| Locus_5646_Transcript_1/1_Conf_1.000 | 368  | 20 | 1.22E-52  | CAR63541.1     | 96 | 209.149 | 112 | 108 | putative Ribosomal Protein                      |
| Locus_5647_Transcript_1/1_Conf_1.000 | 1754 | 20 | 0         | NP_495453.1    | 87 | 872.463 | 558 | 488 | lysyl (K) tRNA Synthetase family member (krs-1) |
| Locus_5648_Transcript_1/2_Conf_1.000 | 654  | 0  |           |                |    |         |     |     |                                                 |
| Locus_5648_Transcript_2/2_Conf_1.000 | 658  | 0  |           |                |    |         |     |     |                                                 |
| Locus_5649_Transcript_1/1_Conf_1.000 | 1467 | 20 | 8.08E-134 | EFO18685.1     | 86 | 481.871 | 337 | 293 | DNA topoisomerase I                             |
| Locus_565_Transcript_1/1_Conf_1.000  | 262  | 0  |           |                |    |         |     |     |                                                 |
| Locus_5650_Transcript_1/1_Conf_1.000 | 464  | 0  |           |                |    |         |     |     |                                                 |



|                                      |      |    |           |                |     |         |     |     |                                                        |
|--------------------------------------|------|----|-----------|----------------|-----|---------|-----|-----|--------------------------------------------------------|
| Locus_5651_Transcript_1/1_Conf_1.000 | 575  | 20 | 5.88E-38  | NP_508239.1    | 88  | 160.999 | 102 | 90  | Temporarily Assigned Gene name family member (tag-303) |
| Locus_5652_Transcript_1/1_Conf_1.000 | 470  | 20 | 3.30E-13  | EFO27956.1     | 74  | 78.1814 | 58  | 43  | leucine Rich Repeat family protein                     |
| Locus_5653_Transcript_1/1_Conf_1.000 | 614  | 20 | 6.17E-18  | XP_001900211.1 | 50  | 94.7449 | 202 | 102 | Peptidase family M13 containing protein                |
| Locus_5654_Transcript_1/2_Conf_1.000 | 1361 | 20 | 4.35E-107 | XP_001899430.1 | 66  | 285.034 | 264 | 175 | Nuclear hormone receptor family member nhr-3           |
| Locus_5654_Transcript_2/2_Conf_1.000 | 1282 | 20 | 1.83E-123 | NP_510423.1    | 72  | 447.203 | 434 | 316 | Nuclear Hormone Receptor family member (nhr-3)         |
| Locus_5655_Transcript_1/1_Conf_1.000 | 193  | 0  |           |                |     |         |     |     |                                                        |
| Locus_5656_Transcript_1/1_Conf_1.000 | 1536 | 7  | 3.25E-40  | NP_501316.2    | 52  | 171.014 | 366 | 192 | hypothetical protein C49H3.6                           |
| Locus_5657_Transcript_1/1_Conf_1.000 | 1587 | 20 | 1.08E-163 | NP_491363.1    | 88  | 581.252 | 385 | 340 | Dynein Heavy Chain family member (dhc-1)               |
| Locus_5658_Transcript_1/1_Conf_1.000 | 155  | 20 | 4.65E-15  | NP_001182573.1 | 100 | 84.3445 | 39  | 39  | pyruvate kinase isozymes M1/M2 isoform 1               |

|                                      |      |    |          |                |    |         |     |     |                                                                        |
|--------------------------------------|------|----|----------|----------------|----|---------|-----|-----|------------------------------------------------------------------------|
| Locus_5659_Transcript_1/1_Conf_1.000 | 863  | 9  | 4.88E-30 | AAA20077.1     | 65 | 135.961 | 155 | 102 | CDS structure deduced from alignment with <i>C. elegans</i> ced-9 gene |
| Locus_566_Transcript_1/6_Conf_0.762  | 616  | 20 | 3.10E-37 | P27613.1       | 76 | 132.494 | 104 | 80  | Globin-like host-protective antigen                                    |
| Locus_566_Transcript_2/6_Conf_0.476  | 599  | 20 | 2.94E-30 | P27613.1       | 77 | 135.576 | 104 | 81  | Globin-like host-protective antigen                                    |
| Locus_566_Transcript_3/6_Conf_0.571  | 599  | 20 | 1.50E-35 | P27613.1       | 77 | 135.576 | 104 | 81  | Globin-like host-protective antigen                                    |
| Locus_566_Transcript_4/6_Conf_0.524  | 600  | 20 | 2.98E-30 | P27613.1       | 77 | 135.576 | 104 | 81  | Globin-like host-protective antigen                                    |
| Locus_566_Transcript_5/6_Conf_0.762  | 537  | 20 | 1.04E-36 | P27613.1       | 80 | 130.183 | 98  | 79  | Globin-like host-protective antigen                                    |
| Locus_566_Transcript_6/6_Conf_0.762  | 616  | 20 | 3.73E-38 | P27613.1       | 77 | 135.576 | 104 | 81  | Globin-like host-protective antigen                                    |
| Locus_5660_Transcript_1/1_Conf_1.000 | 1283 | 20 | 1.83E-06 | XP_001897358.1 | 40 | 58.5362 | 212 | 86  | hypothetical protein                                                   |
| Locus_5661_Transcript_1/1_Conf_1.000 | 502  | 0  |          |                |    |         |     |     |                                                                        |

|                                      |      |    |           |                |    |         |     |     |                                             |
|--------------------------------------|------|----|-----------|----------------|----|---------|-----|-----|---------------------------------------------|
| Locus_5662_Transcript_1/1_Conf_1.000 | 402  | 20 | 1.09E-24  | NP_491926.1    | 79 | 116.316 | 106 | 84  | Lipid Binding Protein family member (lbp-6) |
| Locus_5663_Transcript_1/1_Conf_1.000 | 462  | 0  |           |                |    |         |     |     |                                             |
| Locus_5664_Transcript_1/1_Conf_1.000 | 1066 | 5  | 2.99E-25  | XP_002639089.1 | 42 | 120.553 | 382 | 161 | C. briggsae CBR-TAG-163 protein             |
| Locus_5665_Transcript_1/2_Conf_1.000 | 515  | 0  |           |                |    |         |     |     |                                             |
| Locus_5665_Transcript_2/2_Conf_1.000 | 473  | 0  |           |                |    |         |     |     |                                             |
| Locus_5666_Transcript_1/1_Conf_1.000 | 982  | 20 | 1.03E-45  | NP_496406.2    | 51 | 188.348 | 326 | 169 | hypothetical protein T06D8.9                |
| Locus_5667_Transcript_1/1_Conf_1.000 | 164  | 0  |           |                |    |         |     |     |                                             |
| Locus_5668_Transcript_1/2_Conf_1.000 | 476  | 4  | 9.54E-05  | AAY29120.1     | 52 | 50.0618 | 136 | 71  | cement precursor protein 3B variant 1       |
| Locus_5668_Transcript_2/2_Conf_1.000 | 428  | 0  |           |                |    |         |     |     |                                             |
| Locus_5669_Transcript_1/1_Conf_1.000 | 662  | 20 | 8.29E-30  | XP_002642918.1 | 56 | 134.42  | 224 | 126 | Hypothetical protein CBG15194               |
| Locus_567_Transcript_1/1_Conf_1.000  | 650  | 20 | 1.42E-26  | NP_501527.1    | 79 | 123.635 | 89  | 71  | COLLagen family member (col-3)              |
| Locus_5670_Transcript_1/1_Conf_1.000 | 318  | 20 | 1.95E-13  | XP_002640077.1 | 90 | 78.9518 | 63  | 57  | Hypothetical protein CBG12562               |
| Locus_5671_Transcript_1/1_Conf_1.000 | 1203 | 20 | 9.49E-127 | XP_002639344.1 | 86 | 457.988 | 321 | 279 | C. briggsae CBR-TMD-1 protein               |

|                                      |      |    |           |                |    |         |     |     |                                                                    |
|--------------------------------------|------|----|-----------|----------------|----|---------|-----|-----|--------------------------------------------------------------------|
| Locus_5672_Transcript_1/2_Conf_1.000 | 1506 | 20 | 2.55E-98  | NP_502122.1    | 80 | 363.999 | 290 | 233 | DNaJ domain (prokaryotic heat shock protein) family member (dnj-1) |
| Locus_5672_Transcript_2/2_Conf_1.000 | 1518 | 20 | 2.58E-98  | NP_502122.1    | 80 | 363.999 | 290 | 233 | DNaJ domain (prokaryotic heat shock protein) family member (dnj-1) |
| Locus_5673_Transcript_1/4_Conf_0.222 | 244  | 2  | 5.29E-06  | XP_002646454.1 | 66 | 52.7582 | 56  | 37  | Hypothetical protein CBG18864                                      |
| Locus_5673_Transcript_2/4_Conf_0.333 | 1011 | 20 | 6.57E-35  | XP_002646454.1 | 72 | 152.525 | 137 | 99  | Hypothetical protein CBG18864                                      |
| Locus_5673_Transcript_3/4_Conf_0.444 | 597  | 7  | 5.04E-06  | XP_002646454.1 | 60 | 55.0694 | 68  | 41  | Hypothetical protein CBG18864                                      |
| Locus_5673_Transcript_4/4_Conf_0.444 | 824  | 20 | 1.52E-46  | NP_493447.2    | 73 | 190.66  | 183 | 135 | hypothetical protein Y71A12C.2                                     |
| Locus_5674_Transcript_1/2_Conf_1.000 | 820  | 20 | 1.12E-57  | XP_002646753.1 | 77 | 227.639 | 184 | 142 | Hypothetical protein CBG13150                                      |
| Locus_5674_Transcript_2/2_Conf_1.000 | 820  | 20 | 1.12E-57  | XP_002646753.1 | 77 | 227.639 | 184 | 142 | Hypothetical protein CBG13150                                      |
| Locus_5675_Transcript_1/1_Conf_1.000 | 1459 | 20 | 2.17E-147 | NP_501256.1    | 83 | 526.939 | 359 | 298 | hypothetical protein F33D4.4                                       |
| Locus_5676_Transcript_1/1_Conf_1.000 | 865  | 20 | 1.31E-107 | NP_001024749.1 | 83 | 393.66  | 287 | 239 | High temperature-Induced Dauer formation family member (hid-1)     |
| Locus_5677_Transcript_1/1_Conf_1.000 | 2622 | 20 | 0         | EFO19478.1     | 85 | 1247.65 | 875 | 748 | U5 snRNP-associated protein                                        |
| Locus_5678_Transcript_1/1_Conf_1.000 | 505  | 4  | 7.13E-11  | EFO26249.1     | 74 | 70.4774 | 62  | 46  | hypothetical protein LOAG_02232                                    |

|                                      |      |    |           |                |     |         |     |     |                                                                      |
|--------------------------------------|------|----|-----------|----------------|-----|---------|-----|-----|----------------------------------------------------------------------|
| Locus_5679_Transcript_1/1_Conf_1.000 | 1125 | 20 | 8.08E-08  | XP_002629684.1 | 59  | 62.7734 | 79  | 47  | C. briggsae CBR-ERGO-1.1 protein                                     |
| Locus_568_Transcript_1/1_Conf_1.000  | 1376 | 20 | 1.14E-41  | XP_001901854.1 | 50  | 175.637 | 258 | 130 | Zinc finger, C2H2 type family protein                                |
| Locus_5680_Transcript_1/1_Conf_1.000 | 2813 | 20 | 0         | NP_496945.3    | 63  | 815.839 | 994 | 636 | XRN (mouse/S. cerevisiae) ribonuclease related family member (xrn-1) |
| Locus_5681_Transcript_1/1_Conf_1.000 | 1147 | 20 | 5.35E-116 | XP_002630350.1 | 78  | 422.165 | 351 | 276 | Hypothetical protein CBG04280                                        |
| Locus_5682_Transcript_1/1_Conf_1.000 | 407  | 20 | 1.55E-71  | XP_002714405.1 | 100 | 271.937 | 132 | 132 | PREDICTED: tubulin, beta 5-like                                      |
| Locus_5683_Transcript_1/1_Conf_1.000 | 225  | 5  | 2.47E-16  | NP_001041092.2 | 94  | 88.5817 | 52  | 49  | Motor AXon guidance family member (max-1)                            |
| Locus_5684_Transcript_1/1_Conf_1.000 | 1553 | 20 | 0         | XP_002629737.1 | 88  | 642.114 | 399 | 354 | Hypothetical protein CBG00970                                        |
| Locus_5685_Transcript_1/1_Conf_1.000 | 1447 | 6  | 3.11E-130 | NP_001123061.1 | 67  | 469.929 | 485 | 325 | hypothetical protein Y69H2.15                                        |
| Locus_5686_Transcript_1/1_Conf_1.000 | 1147 | 20 | 4.68E-120 | XP_002639984.1 | 75  | 435.647 | 319 | 242 | C. briggsae CBR-CHP-1 protein                                        |
| Locus_5687_Transcript_1/1_Conf_1.000 | 257  | 0  |           |                |     |         |     |     |                                                                      |

|                                      |      |    |           |                |    |         |     |     |                                                                  |
|--------------------------------------|------|----|-----------|----------------|----|---------|-----|-----|------------------------------------------------------------------|
| Locus_5688_Transcript_1/1_Conf_1.000 | 1064 | 20 | 5.30E-107 | XP_002643153.1 | 77 | 392.119 | 368 | 286 | C. briggsae CBR-RHA-2 protein                                    |
| Locus_5689_Transcript_1/1_Conf_1.000 | 214  | 0  |           |                |    |         |     |     |                                                                  |
| Locus_569_Transcript_1/2_Conf_1.000  | 796  | 20 | 1.10E-62  | NP_497181.2    | 91 | 244.202 | 145 | 133 | hypothetical protein Y50D7A.3                                    |
| Locus_569_Transcript_2/2_Conf_1.000  | 873  | 20 | 5.04E-123 | NP_497181.2    | 83 | 444.891 | 308 | 256 | hypothetical protein Y50D7A.3                                    |
| Locus_5690_Transcript_1/1_Conf_1.000 | 580  | 11 | 1.66E-19  | NP_503758.4    | 45 | 99.7525 | 181 | 82  | KETtIN (Drosophila actin-binding) homolog family member (ketn-1) |
| Locus_5691_Transcript_1/2_Conf_1.000 | 351  | 2  | 6.25E-04  | XP_001900384.1 | 49 | 47.3654 | 87  | 43  | Protein kinase domain containing protein                         |
| Locus_5691_Transcript_2/2_Conf_1.000 | 300  | 0  |           |                |    |         |     |     |                                                                  |
| Locus_5692_Transcript_1/1_Conf_1.000 | 1870 | 20 | 9.02E-27  | AAO63577.1     | 52 | 126.716 | 200 | 105 | secreted protein 5 precursor                                     |
| Locus_5693_Transcript_1/1_Conf_1.000 | 532  | 5  | 6.29E-06  | XP_001897921.1 | 53 | 54.299  | 128 | 68  | RhoGEF domain containing protein                                 |

|                                      |      |    |           |                |    |         |     |     |                                 |
|--------------------------------------|------|----|-----------|----------------|----|---------|-----|-----|---------------------------------|
| Locus_5694_Transcript_1/1_Conf_1.000 | 1302 | 20 | 1.69E-132 | NP_502171.1    | 83 | 477.248 | 325 | 272 | hypothetical protein M04B2.4    |
| Locus_5695_Transcript_1/1_Conf_1.000 | 664  | 20 | 1.52E-47  | NP_492692.1    | 72 | 193.356 | 172 | 125 | hypothetical protein Y106G6E.4  |
| Locus_5696_Transcript_1/1_Conf_1.000 | 334  | 1  | 8.06E-04  | EFO13988.1     | 51 | 46.9802 | 77  | 40  | ephrin EFN-4                    |
| Locus_5697_Transcript_1/1_Conf_1.000 | 317  | 5  | 1.23E-15  | XP_001891653.1 | 60 | 86.2705 | 101 | 61  | 2700029M09Rik protein           |
| Locus_5698_Transcript_1/1_Conf_1.000 | 490  | 3  | 1.21E-07  | XP_002634680.1 | 77 | 59.6918 | 44  | 34  | Hypothetical protein CBG19666   |
| Locus_5699_Transcript_1/2_Conf_1.000 | 1055 | 4  | 4.25E-08  | XP_002632110.1 | 55 | 63.5438 | 144 | 80  | Hypothetical protein CBG06964   |
| Locus_5699_Transcript_2/2_Conf_1.000 | 1058 | 4  | 4.27E-08  | XP_002632110.1 | 55 | 63.5438 | 144 | 80  | Hypothetical protein CBG06964   |
| Locus_57_Transcript_1/3_Conf_0.778   | 1445 | 19 | 1.14E-15  | XP_001892587.1 | 77 | 89.3521 | 74  | 57  | hypothetical protein Bm1_05565  |
| Locus_57_Transcript_2/3_Conf_0.778   | 1440 | 4  | 7.37E-15  | XP_001892587.1 | 76 | 86.6557 | 73  | 56  | hypothetical protein Bm1_05565  |
| Locus_57_Transcript_3/3_Conf_0.778   | 1445 | 19 | 1.14E-15  | XP_001892587.1 | 77 | 89.3521 | 74  | 57  | hypothetical protein Bm1_05565  |
| Locus_570_Transcript_1/1_Conf_1.000  | 1915 | 20 | 0         | XP_002639664.1 | 90 | 1063.52 | 639 | 579 | C. briggsae CBR-HUM-1 protein   |
| Locus_5700_Transcript_1/1_Conf_1.000 | 248  | 20 | 1.77E-35  | CAR63700.1     | 96 | 152.14  | 82  | 79  | hypothetical protein            |
| Locus_5701_Transcript_1/1_Conf_1.000 | 1635 | 20 | 3.81E-111 | XP_002639727.1 | 69 | 406.757 | 436 | 303 | Hypothetical protein CBG12454   |
| Locus_5702_Transcript_1/2_Conf_1.000 | 640  | 0  |           |                |    |         |     |     |                                 |
| Locus_5702_Transcript_2/2_Conf_1.000 | 625  | 1  | 7.72E-04  | NP_001036881.1 | 41 | 46.2098 | 118 | 49  | annexin B13                     |
| Locus_5703_Transcript_1/1_Conf_1.000 | 651  | 20 | 1.67E-83  | NP_509898.1    | 90 | 312.768 | 184 | 166 | ACOnitase family member (aco-1) |
| Locus_5704_Transcript_1/1_Conf_1.000 | 994  | 20 | 2.34E-37  | NP_498151.2    | 53 | 160.614 | 212 | 114 | hypothetical protein Y32H12A.8  |

|                                      |      |    |           |                |     |         |     |     |                                      |
|--------------------------------------|------|----|-----------|----------------|-----|---------|-----|-----|--------------------------------------|
| Locus_5705_Transcript_1/1_Conf_1.000 | 414  | 20 | 8.50E-30  | EFO21331.1     | 80  | 133.265 | 102 | 82  | expressed sequence                   |
| Locus_5706_Transcript_1/1_Conf_1.000 | 420  | 0  |           |                |     |         |     |     |                                      |
| Locus_5707_Transcript_1/1_Conf_1.000 | 971  | 20 | 1.22E-67  | NP_493616.1    | 66  | 261.151 | 333 | 220 | hypothetical protein F33H2.5         |
| Locus_5708_Transcript_1/1_Conf_1.000 | 144  | 1  | 8.31E-04  | XP_002642902.1 | 66  | 46.9802 | 48  | 32  | Hypothetical protein CBG15176        |
| Locus_5709_Transcript_1/1_Conf_1.000 | 434  | 0  |           |                |     |         |     |     |                                      |
| Locus_571_Transcript_1/1_Conf_1.000  | 1622 | 20 | 0         | XP_002641813.1 | 94  | 667.537 | 389 | 366 | C. briggsae CBR-INF-1 protein        |
| Locus_5710_Transcript_1/1_Conf_1.000 | 1132 | 20 | 0         | XP_002931172.1 | 100 | 754.592 | 373 | 373 | PREDICTED: actin, cytoplasmic 2-like |
| Locus_5711_Transcript_1/4_Conf_0.222 | 403  | 20 | 7.80E-39  | AAN11401.1     | 74  | 163.31  | 134 | 100 | metalloprotease 1 precursor          |
| Locus_5711_Transcript_2/4_Conf_0.667 | 1213 | 20 | 1.05E-149 | AAN11401.1     | 78  | 534.258 | 405 | 316 | metalloprotease 1 precursor          |
| Locus_5711_Transcript_3/4_Conf_0.667 | 1213 | 20 | 1.80E-149 | AAN11401.1     | 77  | 533.487 | 405 | 313 | metalloprotease 1 precursor          |



|                                      |      |    |           |                |    |         |     |     |                                                                |
|--------------------------------------|------|----|-----------|----------------|----|---------|-----|-----|----------------------------------------------------------------|
| Locus_5711_Transcript_4/4_Conf_0.667 | 1213 | 20 | 2.35E-149 | AAN11401.1     | 77 | 533.102 | 405 | 315 | metalloprotease 1 precursor                                    |
| Locus_5712_Transcript_1/1_Conf_1.000 | 1117 | 20 | 1.19E-136 | XP_002635531.1 | 86 | 490.73  | 319 | 276 | Hypothetical protein CBG08841                                  |
| Locus_5713_Transcript_1/1_Conf_1.000 | 509  | 0  |           |                |    |         |     |     |                                                                |
| Locus_5714_Transcript_1/1_Conf_1.000 | 1420 | 20 | 4.61E-179 | XP_002647109.1 | 88 | 632.098 | 398 | 351 | Hypothetical protein CBG20301                                  |
| Locus_5715_Transcript_1/1_Conf_1.000 | 286  | 0  |           |                |    |         |     |     |                                                                |
| Locus_5716_Transcript_1/1_Conf_1.000 | 224  | 0  |           |                |    |         |     |     |                                                                |
| Locus_5717_Transcript_1/1_Conf_1.000 | 944  | 20 | 6.56E-111 | NP_501576.2    | 84 | 404.831 | 284 | 240 | Mitochondrial Processing Peptidase Beta family member (mppb-1) |
| Locus_5718_Transcript_1/1_Conf_1.000 | 1984 | 20 | 4.26E-91  | EFO23961.1     | 65 | 340.502 | 402 | 265 | hypothetical protein LOAG_04523                                |
| Locus_5719_Transcript_1/1_Conf_1.000 | 548  | 20 | 1.89E-32  | XP_002631685.1 | 73 | 142.51  | 107 | 79  | Hypothetical protein CBG20878                                  |
| Locus_572_Transcript_1/1_Conf_1.000  | 509  | 0  |           |                |    |         |     |     |                                                                |
| Locus_5720_Transcript_1/1_Conf_1.000 | 229  | 7  | 3.21E-16  | XP_001894589.1 | 69 | 88.1965 | 75  | 52  | DnaJ domain containing protein                                 |
| Locus_5721_Transcript_1/1_Conf_1.000 | 678  | 0  |           |                |    |         |     |     |                                                                |
| Locus_5722_Transcript_1/3_Conf_0.667 | 606  | 20 | 1.20E-34  | NP_001022362.1 | 66 | 150.214 | 155 | 103 | hypothetical protein T24F1.3                                   |
| Locus_5722_Transcript_2/3_Conf_0.667 | 633  | 20 | 7.81E-35  | NP_001022362.1 | 65 | 150.984 | 155 | 102 | hypothetical protein T24F1.3                                   |

|                                      |      |    |           |                |    |         |      |     |                                                                           |
|--------------------------------------|------|----|-----------|----------------|----|---------|------|-----|---------------------------------------------------------------------------|
| Locus_5722_Transcript_3/3_Conf_0.667 | 633  | 20 | 1.33E-34  | NP_001022362.1 | 66 | 150.214 | 155  | 103 | hypothetical protein T24F1.3                                              |
| Locus_5723_Transcript_1/1_Conf_1.000 | 584  | 20 | 2.75E-70  | CBW44402.1     | 86 | 268.47  | 194  | 167 | C. elegans protein Y59A8B.22c, partially confirmed by transcript evidence |
| Locus_5724_Transcript_1/1_Conf_1.000 | 744  | 20 | 2.74E-41  | NP_502144.1    | 54 | 172.94  | 256  | 140 | hypothetical protein T01G1.3                                              |
| Locus_5725_Transcript_1/1_Conf_1.000 | 533  | 20 | 6.05E-25  | NP_505963.3    | 61 | 117.472 | 145  | 89  | hypothetical protein T04F3.1                                              |
| Locus_5726_Transcript_1/1_Conf_1.000 | 379  | 20 | 1.64E-12  | NP_001021200.1 | 62 | 75.8702 | 64   | 40  | tryptophanyl (W) tRNA Synthetase family member (wrs-2)                    |
| Locus_5727_Transcript_1/1_Conf_1.000 | 1055 | 20 | 2.16E-153 | AAC38987.1     | 89 | 546.199 | 351  | 315 | P-glycoprotein                                                            |
| Locus_5728_Transcript_1/1_Conf_1.000 | 734  | 20 | 3.89E-93  | NP_492379.1    | 81 | 345.125 | 246  | 200 | hypothetical protein F36A2.2                                              |
| Locus_5729_Transcript_1/2_Conf_1.000 | 3238 | 20 | 0         | XP_002631481.1 | 90 | 1717.98 | 1082 | 980 | Hypothetical protein CBG20636                                             |

|                                      |      |    |           |                |    |         |     |     |                                                     |
|--------------------------------------|------|----|-----------|----------------|----|---------|-----|-----|-----------------------------------------------------|
| Locus_5729_Transcript_2/2_Conf_1.000 | 3234 | 20 | 0         | XP_002631481.1 | 90 | 1466.06 | 936 | 843 | Hypothetical protein CBG20636                       |
| Locus_573_Transcript_1/3_Conf_0.750  | 3823 | 20 | 0         | EFO20496.1     | 72 | 977.622 | 929 | 676 | hypothetical protein LOAG_07994                     |
| Locus_573_Transcript_2/3_Conf_0.750  | 3823 | 20 | 0         | EFO20496.1     | 72 | 977.622 | 929 | 676 | hypothetical protein LOAG_07994                     |
| Locus_573_Transcript_3/3_Conf_0.750  | 3823 | 20 | 0         | EFO20496.1     | 72 | 977.622 | 929 | 676 | hypothetical protein LOAG_07994                     |
| Locus_5730_Transcript_1/1_Conf_1.000 | 413  | 20 | 3.12E-48  | A8XP97.2       | 81 | 194.512 | 139 | 113 | Voltage-dependent calcium channel unc-36            |
| Locus_5731_Transcript_1/1_Conf_1.000 | 588  | 20 | 5.42E-66  | NP_498541.1    | 86 | 254.218 | 153 | 133 | Ubiquitin Conjugating enzyme family member (ubc-18) |
| Locus_5732_Transcript_1/2_Conf_0.500 | 2382 | 20 | 1.28E-177 | NP_001129765.1 | 73 | 628.246 | 500 | 369 | hypothetical protein F16A11.1                       |
| Locus_5732_Transcript_2/2_Conf_0.500 | 2382 | 20 | 3.36E-178 | NP_001129765.1 | 73 | 630.172 | 500 | 369 | hypothetical protein F16A11.1                       |
| Locus_5733_Transcript_1/1_Conf_1.000 | 335  | 20 | 1.09E-08  | NP_001123161.1 | 58 | 63.1586 | 77  | 45  | hypothetical protein K03A11.6                       |
| Locus_5734_Transcript_1/2_Conf_1.000 | 481  | 0  |           |                |    |         |     |     |                                                     |
| Locus_5734_Transcript_2/2_Conf_1.000 | 481  | 0  |           |                |    |         |     |     |                                                     |

|                                      |      |    |          |                |    |         |     |     |                                                               |
|--------------------------------------|------|----|----------|----------------|----|---------|-----|-----|---------------------------------------------------------------|
| Locus_5735_Transcript_1/2_Conf_1.000 | 264  | 18 | 2.07E-15 | XP_002642178.1 | 65 | 85.5001 | 86  | 56  | C. briggsae CBR-UBXN-4 protein                                |
| Locus_5735_Transcript_2/2_Conf_1.000 | 264  | 19 | 1.59E-15 | XP_002642178.1 | 65 | 85.8853 | 86  | 56  | C. briggsae CBR-UBXN-4 protein                                |
| Locus_5736_Transcript_1/1_Conf_1.000 | 1530 | 20 | 9.46E-24 | EFO25952.1     | 51 | 116.316 | 170 | 87  | hypothetical protein LOAG_02532                               |
| Locus_5737_Transcript_1/2_Conf_1.000 | 568  | 0  |          |                |    |         |     |     |                                                               |
| Locus_5737_Transcript_2/2_Conf_1.000 | 424  | 0  |          |                |    |         |     |     |                                                               |
| Locus_5738_Transcript_1/1_Conf_1.000 | 145  | 20 | 3.25E-16 | XP_002640875.1 | 93 | 88.1965 | 47  | 44  | C. briggsae CBR-UNC-71 protein                                |
| Locus_5739_Transcript_1/1_Conf_1.000 | 235  | 20 | 7.85E-15 | CAZ65483.1     | 85 | 83.5741 | 67  | 57  | C. elegans protein F02H6.5b, confirmed by transcript evidence |
| Locus_574_Transcript_1/1_Conf_1.000  | 1462 | 20 | 0        | XP_001894819.1 | 99 | 757.673 | 376 | 375 | actin                                                         |
| Locus_5740_Transcript_1/1_Conf_1.000 | 192  | 20 | 1.60E-07 | XP_001623630.1 | 70 | 59.3066 | 64  | 45  | predicted protein                                             |
| Locus_5741_Transcript_1/1_Conf_1.000 | 143  | 0  |          |                |    |         |     |     |                                                               |

|                                      |      |    |           |                |    |         |     |     |                                              |
|--------------------------------------|------|----|-----------|----------------|----|---------|-----|-----|----------------------------------------------|
| Locus_5742_Transcript_1/1_Conf_1.000 | 535  | 2  | 8.09E-05  | XP_002953870.1 | 51 | 49.2914 | 70  | 36  | hypothetical protein VOLCADRAFT_118487       |
| Locus_5743_Transcript_1/1_Conf_1.000 | 360  | 1  | 2.27E-06  | NP_001122488.1 | 54 | 55.4546 | 102 | 56  | hypothetical protein F56H1.7                 |
| Locus_5744_Transcript_1/4_Conf_0.250 | 224  | 0  |           |                |    |         |     |     |                                              |
| Locus_5744_Transcript_2/4_Conf_0.375 | 295  | 0  |           |                |    |         |     |     |                                              |
| Locus_5744_Transcript_3/4_Conf_0.500 | 375  | 0  |           |                |    |         |     |     |                                              |
| Locus_5744_Transcript_4/4_Conf_0.625 | 396  | 0  |           |                |    |         |     |     |                                              |
| Locus_5745_Transcript_1/1_Conf_1.000 | 366  | 13 | 3.03E-11  | XP_001899331.1 | 73 | 71.633  | 64  | 47  | FYVE zinc finger family protein              |
| Locus_5746_Transcript_1/1_Conf_1.000 | 493  | 8  | 5.18E-51  | NP_508552.1    | 71 | 203.756 | 161 | 115 | hypothetical protein F40F4.6                 |
| Locus_5747_Transcript_1/1_Conf_1.000 | 766  | 20 | 8.12E-28  | XP_002641869.1 | 55 | 128.257 | 248 | 138 | C. briggsae CBR-TEN-1 protein                |
| Locus_5748_Transcript_1/1_Conf_1.000 | 362  | 20 | 1.79E-11  | ADD20274.1     | 70 | 72.4034 | 61  | 43  | heterochromatin-associated protein hP1       |
| Locus_5749_Transcript_1/6_Conf_0.111 | 137  | 0  |           |                |    |         |     |     |                                              |
| Locus_5749_Transcript_2/6_Conf_0.556 | 683  | 0  |           |                |    |         |     |     |                                              |
| Locus_5749_Transcript_3/6_Conf_0.500 | 351  | 0  |           |                |    |         |     |     |                                              |
| Locus_5749_Transcript_4/6_Conf_0.333 | 683  | 0  |           |                |    |         |     |     |                                              |
| Locus_5749_Transcript_5/6_Conf_0.556 | 519  | 0  |           |                |    |         |     |     |                                              |
| Locus_5749_Transcript_6/6_Conf_0.556 | 683  | 0  |           |                |    |         |     |     |                                              |
| Locus_575_Transcript_1/1_Conf_1.000  | 683  | 0  |           |                |    |         |     |     |                                              |
| Locus_5750_Transcript_1/1_Conf_1.000 | 524  | 4  | 8.72E-42  | XP_002634224.1 | 80 | 173.326 | 130 | 105 | Hypothetical protein CBG01794                |
| Locus_5751_Transcript_1/5_Conf_0.364 | 1686 | 20 | 2.10E-120 | NP_740922.1    | 64 | 437.573 | 426 | 273 | Cell Death abnormality family member (ced-1) |

|                                      |      |    |           |                |    |         |     |     |                                              |
|--------------------------------------|------|----|-----------|----------------|----|---------|-----|-----|----------------------------------------------|
| Locus_5751_Transcript_2/5_Conf_0.364 | 1245 | 20 | 5.88E-119 | NP_740922.1    | 66 | 432.18  | 400 | 264 | Cell Death abnormality family member (ced-1) |
| Locus_5751_Transcript_3/5_Conf_0.273 | 698  | 0  |           |                |    |         |     |     |                                              |
| Locus_5751_Transcript_4/5_Conf_0.364 | 1623 | 20 | 1.75E-116 | NP_001021772.1 | 68 | 424.476 | 386 | 264 | Cell Death abnormality family member (ced-1) |
| Locus_5751_Transcript_5/5_Conf_0.545 | 1800 | 20 | 4.29E-119 | NP_740922.1    | 61 | 433.335 | 447 | 276 | Cell Death abnormality family member (ced-1) |
| Locus_5752_Transcript_1/2_Conf_1.000 | 561  | 20 | 3.93E-44  | XP_002633663.1 | 69 | 181.415 | 175 | 121 | Hypothetical protein CBG03338                |
| Locus_5752_Transcript_2/2_Conf_1.000 | 557  | 20 | 1.28E-38  | XP_002633663.1 | 74 | 107.457 | 90  | 67  | Hypothetical protein CBG03338                |
| Locus_5753_Transcript_1/1_Conf_1.000 | 833  | 20 | 7.45E-57  | XP_002639338.1 | 66 | 224.942 | 216 | 143 | Hypothetical protein CBG03917                |
| Locus_5754_Transcript_1/1_Conf_1.000 | 753  | 0  |           |                |    |         |     |     |                                              |

|                                      |      |    |           |                |     |         |      |     |                                                                   |
|--------------------------------------|------|----|-----------|----------------|-----|---------|------|-----|-------------------------------------------------------------------|
| Locus_5755_Transcript_1/1_Conf_1.000 | 922  | 20 | 1.44E-30  | NP_741494.1    | 55  | 137.887 | 273  | 151 | Temporarily Assigned Gene name family member (tag-115)            |
| Locus_5756_Transcript_1/1_Conf_1.000 | 5390 | 20 | 0         | XP_002646579.1 | 65  | 901.738 | 1087 | 712 | C. briggsae CBR-CRML-1 protein                                    |
| Locus_5757_Transcript_1/1_Conf_1.000 | 431  | 5  | 4.13E-24  | AAV50097.1     | 69  | 114.39  | 143  | 100 | intersectin 2                                                     |
| Locus_5758_Transcript_1/1_Conf_1.000 | 361  | 20 | 2.67E-15  | EFO22120.1     | 61  | 85.1149 | 110  | 68  | hypothetical protein LOAG_06363                                   |
| Locus_5759_Transcript_1/2_Conf_1.000 | 687  | 20 | 1.11E-43  | ABA00169.1     | 70  | 180.644 | 166  | 117 | Plexin protein 1                                                  |
| Locus_5759_Transcript_2/2_Conf_1.000 | 687  | 20 | 1.11E-43  | ABA00169.1     | 70  | 180.644 | 166  | 117 | Plexin protein 1                                                  |
| Locus_576_Transcript_1/1_Conf_1.000  | 238  | 20 | 2.67E-39  | AAH65733.1     | 100 | 164.851 | 79   | 79  | IGH@ protein                                                      |
| Locus_5760_Transcript_1/1_Conf_1.000 | 179  | 5  | 1.61E-12  | XP_002642067.1 | 81  | 75.8702 | 58   | 47  | Hypothetical protein CBG18006                                     |
| Locus_5761_Transcript_1/1_Conf_1.000 | 646  | 20 | 5.52E-23  | XP_001899289.1 | 53  | 111.694 | 210  | 112 | hypothetical protein                                              |
| Locus_5762_Transcript_1/1_Conf_1.000 | 128  | 0  |           |                |     |         |      |     |                                                                   |
| Locus_5763_Transcript_1/1_Conf_1.000 | 638  | 2  | 1.84E-07  | XP_002637126.1 | 55  | 60.077  | 133  | 74  | Hypothetical protein CBG09628                                     |
| Locus_5764_Transcript_1/1_Conf_1.000 | 422  | 20 | 6.87E-43  | XP_002631614.1 | 79  | 176.792 | 130  | 103 | C. briggsae CBR-MAC-1 protein                                     |
| Locus_5765_Transcript_1/1_Conf_1.000 | 863  | 20 | 5.45E-106 | NP_504635.1    | 84  | 388.267 | 277  | 235 | GAstrulation Defective family member (gad-1)                      |
| Locus_5766_Transcript_1/1_Conf_1.000 | 769  | 8  | 8.49E-17  | XP_002634977.1 | 46  | 91.6633 | 249  | 115 | Hypothetical protein CBG13513                                     |
| Locus_5767_Transcript_1/2_Conf_1.000 | 480  | 0  |           |                |     |         |      |     |                                                                   |
| Locus_5767_Transcript_2/2_Conf_1.000 | 232  | 2  | 1.26E-04  | XP_528085.1    | 55  | 49.6766 | 54   | 30  | PREDICTED: tumor necrosis factor receptor superfamily, member 10c |

|                                      |      |    |           |                |    |         |     |     |                                                            |
|--------------------------------------|------|----|-----------|----------------|----|---------|-----|-----|------------------------------------------------------------|
| Locus_5768_Transcript_1/1_Conf_1.000 | 1659 | 20 | 2.77E-125 | XP_002638998.1 | 63 | 453.751 | 523 | 332 | Hypothetical protein CBG22244                              |
| Locus_5769_Transcript_1/1_Conf_1.000 | 178  | 0  |           |                |    |         |     |     |                                                            |
| Locus_577_Transcript_1/1_Conf_1.000  | 3139 | 20 | 0         | ABO07440.1     | 99 | 1347.8  | 843 | 837 | paramyosin                                                 |
| Locus_5770_Transcript_1/1_Conf_1.000 | 288  | 20 | 5.48E-24  | NP_001033541.1 | 71 | 114.005 | 94  | 67  | TransThyretin-Related family domain family member (ttr-36) |
| Locus_5771_Transcript_1/1_Conf_1.000 | 256  | 0  |           |                |    |         |     |     |                                                            |
| Locus_5772_Transcript_1/1_Conf_1.000 | 464  | 20 | 1.02E-78  | XP_002637229.1 | 97 | 295.819 | 154 | 150 | C. briggsae CBR-TAG-59 protein                             |
| Locus_5773_Transcript_1/1_Conf_1.000 | 682  | 20 | 4.10E-75  | NP_505154.1    | 76 | 285.034 | 217 | 167 | More Of MS family member (mom-2)                           |



|                                      |      |    |           |                |    |         |     |     |                                                            |
|--------------------------------------|------|----|-----------|----------------|----|---------|-----|-----|------------------------------------------------------------|
| Locus_5774_Transcript_1/1_Conf_1.000 | 605  | 20 | 1.23E-15  | ZP_07335120.1  | 57 | 87.0409 | 145 | 83  | adenylate cyclase                                          |
| Locus_5775_Transcript_1/2_Conf_1.000 | 1354 | 20 | 3.34E-163 | NP_740905.1    | 85 | 579.326 | 425 | 362 | EATing: abnormal pharyngeal pumping family member (eat-16) |
| Locus_5775_Transcript_2/2_Conf_1.000 | 1354 | 20 | 3.34E-163 | NP_740905.1    | 85 | 579.326 | 425 | 362 | EATing: abnormal pharyngeal pumping family member (eat-16) |
| Locus_5776_Transcript_1/1_Conf_1.000 | 425  | 0  |           |                |    |         |     |     |                                                            |
| Locus_5777_Transcript_1/1_Conf_1.000 | 351  | 0  |           |                |    |         |     |     |                                                            |
| Locus_5778_Transcript_1/1_Conf_1.000 | 1120 | 0  |           |                |    |         |     |     |                                                            |
| Locus_5779_Transcript_1/1_Conf_1.000 | 456  | 0  |           |                |    |         |     |     |                                                            |
| Locus_578_Transcript_1/2_Conf_1.000  | 625  | 20 | 1.15E-75  | ABR87130.1     | 92 | 286.574 | 193 | 179 | large subunit ribosomal protein 1                          |
| Locus_578_Transcript_2/2_Conf_1.000  | 483  | 20 | 3.66E-28  | ABR87128.1     | 88 | 127.872 | 76  | 67  | large subunit ribosomal protein 1                          |
| Locus_5780_Transcript_1/2_Conf_1.000 | 1311 | 15 | 2.39E-09  | XP_002634943.1 | 48 | 68.1662 | 128 | 62  | Hypothetical protein CBG22545                              |
| Locus_5780_Transcript_2/2_Conf_1.000 | 771  | 0  |           |                |    |         |     |     |                                                            |
| Locus_5781_Transcript_1/1_Conf_1.000 | 776  | 20 | 3.98E-38  | NP_505071.1    | 72 | 162.54  | 142 | 103 | hypothetical protein ZC513.5                               |
| Locus_5782_Transcript_1/1_Conf_1.000 | 132  | 0  |           |                |    |         |     |     |                                                            |

|                                      |      |    |           |                |    |         |     |     |                                                                       |
|--------------------------------------|------|----|-----------|----------------|----|---------|-----|-----|-----------------------------------------------------------------------|
| Locus_5783_Transcript_1/2_Conf_1.000 | 1225 | 20 | 3.64E-73  | XP_001896695.1 | 60 | 280.026 | 386 | 233 | Hr1 repeat family protein                                             |
| Locus_5783_Transcript_2/2_Conf_1.000 | 1213 | 20 | 3.35E-71  | XP_001896695.1 | 59 | 273.478 | 385 | 228 | Hr1 repeat family protein                                             |
| Locus_5784_Transcript_1/1_Conf_1.000 | 972  | 20 | 6.84E-10  | XP_002125751.1 | 36 | 69.3218 | 294 | 107 | PREDICTED: similar to Thrombospondin type 1 domain containing protein |
| Locus_5785_Transcript_1/2_Conf_1.000 | 937  | 6  | 1.49E-14  | XP_002638931.1 | 44 | 84.7297 | 307 | 136 | Hypothetical protein CBG22158                                         |
| Locus_5785_Transcript_2/2_Conf_1.000 | 937  | 6  | 3.00E-15  | XP_002638931.1 | 44 | 87.0409 | 307 | 136 | Hypothetical protein CBG22158                                         |
| Locus_5786_Transcript_1/1_Conf_1.000 | 746  | 2  | 2.87E-06  | NP_001022555.1 | 74 | 56.6102 | 43  | 32  | Homeobox family member (ceh-20)                                       |
| Locus_5787_Transcript_1/3_Conf_0.286 | 277  | 0  |           |                |    |         |     |     |                                                                       |
| Locus_5787_Transcript_2/3_Conf_0.286 | 741  | 16 | 2.31E-24  | XP_002642356.1 | 50 | 116.701 | 208 | 105 | Hypothetical protein CBG18353                                         |
| Locus_5787_Transcript_3/3_Conf_0.714 | 984  | 16 | 1.71E-24  | XP_002642356.1 | 49 | 117.857 | 219 | 109 | Hypothetical protein CBG18353                                         |
| Locus_5788_Transcript_1/1_Conf_1.000 | 950  | 20 | 1.05E-31  | EFO28280.1     | 83 | 141.739 | 100 | 83  | hypothetical protein LOAG_00204                                       |
| Locus_5789_Transcript_1/1_Conf_1.000 | 259  | 0  |           |                |    |         |     |     |                                                                       |
| Locus_579_Transcript_1/1_Conf_1.000  | 306  | 0  |           |                |    |         |     |     |                                                                       |
| Locus_5790_Transcript_1/1_Conf_1.000 | 321  | 0  |           |                |    |         |     |     |                                                                       |
| Locus_5791_Transcript_1/1_Conf_1.000 | 1072 | 20 | 1.11E-120 | NP_504235.2    | 73 | 437.573 | 385 | 284 | Drosophila SOS homolog family member (sos-1)                          |
| Locus_5792_Transcript_1/1_Conf_1.000 | 274  | 0  |           |                |    |         |     |     |                                                                       |
| Locus_5793_Transcript_1/1_Conf_1.000 | 1868 | 0  |           |                |    |         |     |     |                                                                       |
| Locus_5794_Transcript_1/1_Conf_1.000 | 1441 | 0  |           |                |    |         |     |     |                                                                       |
| Locus_5795_Transcript_1/1_Conf_1.000 | 187  | 20 | 2.73E-23  | CAR63675.1     | 93 | 111.694 | 61  | 57  | hypothetical protein                                                  |

|                                      |      |    |           |                |    |         |     |     |                                                        |
|--------------------------------------|------|----|-----------|----------------|----|---------|-----|-----|--------------------------------------------------------|
| Locus_5796_Transcript_1/2_Conf_1.000 | 1037 | 7  | 4.46E-10  | CAL56095.1     | 50 | 70.0922 | 160 | 81  | DNA-directed RNA polymerase (ISS)                      |
| Locus_5796_Transcript_2/2_Conf_1.000 | 1037 | 2  | 2.89E-09  | CAL56095.1     | 51 | 67.3958 | 160 | 82  | DNA-directed RNA polymerase (ISS)                      |
| Locus_5797_Transcript_1/2_Conf_1.000 | 1089 | 20 | 3.17E-62  | XP_002632974.1 | 57 | 243.432 | 390 | 224 | Hypothetical protein CBG21734                          |
| Locus_5797_Transcript_2/2_Conf_1.000 | 1089 | 20 | 2.43E-62  | XP_002632974.1 | 56 | 243.817 | 390 | 222 | Hypothetical protein CBG21734                          |
| Locus_5798_Transcript_1/3_Conf_0.400 | 516  | 20 | 2.98E-23  | NP_001026796.1 | 56 | 111.694 | 171 | 97  | hypothetical protein C06G8.3                           |
| Locus_5798_Transcript_2/3_Conf_0.400 | 573  | 20 | 2.55E-49  | XP_002648032.1 | 83 | 198.749 | 153 | 128 | Hypothetical protein CBG24005                          |
| Locus_5798_Transcript_3/3_Conf_0.600 | 1024 | 20 | 7.56E-79  | NP_500517.1    | 66 | 298.516 | 323 | 216 | hypothetical protein F30B5.7                           |
| Locus_5799_Transcript_1/1_Conf_1.000 | 1110 | 0  |           |                |    |         |     |     |                                                        |
| Locus_58_Transcript_1/1_Conf_1.000   | 744  | 20 | 4.57E-121 | NP_507683.2    | 93 | 437.958 | 246 | 230 | tryptophanyl (W) tRNA Synthetase family member (wrs-1) |
| Locus_580_Transcript_1/1_Conf_1.000  | 738  | 20 | 2.36E-37  | XP_002639986.1 | 66 | 159.844 | 204 | 135 | Hypothetical protein CBG10814                          |
| Locus_5800_Transcript_1/1_Conf_1.000 | 749  | 0  |           |                |    |         |     |     |                                                        |
| Locus_5801_Transcript_1/1_Conf_1.000 | 1044 | 20 | 1.04E-83  | XP_001902233.1 | 68 | 314.694 | 327 | 225 | ThiF family protein                                    |
| Locus_5802_Transcript_1/3_Conf_0.667 | 676  | 0  |           |                |    |         |     |     |                                                        |
| Locus_5802_Transcript_2/3_Conf_0.667 | 664  | 0  |           |                |    |         |     |     |                                                        |
| Locus_5802_Transcript_3/3_Conf_0.667 | 676  | 0  |           |                |    |         |     |     |                                                        |
| Locus_5803_Transcript_1/1_Conf_1.000 | 200  | 0  |           |                |    |         |     |     |                                                        |

|                                       |      |    |           |                |    |         |     |     |                                                                            |
|---------------------------------------|------|----|-----------|----------------|----|---------|-----|-----|----------------------------------------------------------------------------|
| Locus_5804_Transcript_1/1_Conf_1.000  | 1058 | 0  |           |                |    |         |     |     |                                                                            |
| Locus_5805_Transcript_1/1_Conf_1.000  | 1052 | 20 | 5.83E-58  | NP_497831.1    | 62 | 229.18  | 333 | 209 | CCDC (human Coiled Coil Domain Containing) homolog family member (ccdc-55) |
| Locus_5806_Transcript_1/1_Conf_1.000  | 566  | 20 | 1.74E-31  | EFO23470.1     | 71 | 139.428 | 128 | 92  | hypothetical protein LOAG_05017                                            |
| Locus_5807_Transcript_1/1_Conf_1.000  | 1569 | 20 | 3.68E-148 | NP_490712.1    | 76 | 529.635 | 422 | 322 | hypothetical protein C53D5.1                                               |
| Locus_5808_Transcript_1/1_Conf_1.000  | 865  | 0  |           |                |    |         |     |     |                                                                            |
| Locus_5809_Transcript_1/2_Conf_1.000  | 2110 | 20 | 5.89E-46  | EFO24874.1     | 50 | 190.66  | 716 | 365 | kinesin motor domain-containing protein                                    |
| Locus_5809_Transcript_2/2_Conf_1.000  | 2104 | 20 | 2.23E-45  | EFO24874.1     | 52 | 188.734 | 622 | 328 | kinesin motor domain-containing protein                                    |
| Locus_581_Transcript_10/13_Conf_0.469 | 1897 | 20 | 5.96E-135 | XP_002637289.1 | 64 | 486.108 | 574 | 370 | Hypothetical protein CBG18976                                              |
| Locus_581_Transcript_11/13_Conf_0.188 | 877  | 20 | 5.44E-69  | XP_002637289.1 | 71 | 265.388 | 248 | 177 | Hypothetical protein CBG18976                                              |
| Locus_581_Transcript_12/13_Conf_0.188 | 1288 | 20 | 5.23E-86  | XP_002637289.1 | 62 | 322.783 | 421 | 264 | Hypothetical protein CBG18976                                              |
| Locus_581_Transcript_13/13_Conf_0.469 | 1897 | 20 | 1.33E-134 | XP_002637289.1 | 64 | 484.952 | 574 | 370 | Hypothetical protein CBG18976                                              |
| Locus_581_Transcript_2/13_Conf_1.000  | 144  | 0  |           |                |    |         |     |     |                                                                            |
| Locus_581_Transcript_3/13_Conf_1.000  | 151  | 0  |           |                |    |         |     |     |                                                                            |
| Locus_581_Transcript_4/13_Conf_0.406  | 1897 | 20 | 1.02E-134 | XP_002637289.1 | 64 | 485.337 | 574 | 371 | Hypothetical protein CBG18976                                              |
| Locus_581_Transcript_5/13_Conf_0.469  | 1897 | 20 | 4.57E-135 | XP_002637289.1 | 64 | 486.493 | 574 | 371 | Hypothetical protein CBG18976                                              |
| Locus_581_Transcript_6/13_Conf_0.062  | 342  | 20 | 2.82E-20  | XP_002637289.1 | 73 | 101.679 | 90  | 66  | Hypothetical protein CBG18976                                              |
| Locus_581_Transcript_7/13_Conf_0.438  | 1900 | 20 | 1.74E-134 | XP_002637289.1 | 64 | 484.567 | 574 | 370 | Hypothetical protein CBG18976                                              |
| Locus_581_Transcript_8/13_Conf_0.469  | 1909 | 20 | 1.34E-134 | XP_002637289.1 | 64 | 484.952 | 574 | 370 | Hypothetical protein CBG18976                                              |
| Locus_581_Transcript_9/13_Conf_0.125  | 430  | 20 | 3.27E-21  | XP_002637289.1 | 71 | 104.76  | 117 | 84  | Hypothetical protein CBG18976                                              |
| Locus_5810_Transcript_1/1_Conf_1.000  | 566  | 0  |           |                |    |         |     |     |                                                                            |
| Locus_5811_Transcript_1/1_Conf_1.000  | 825  | 20 | 1.82E-39  | ACO15788.1     | 48 | 167.162 | 321 | 156 | Hypothetical protein Y55F3BL.1                                             |
| Locus_5812_Transcript_1/1_Conf_1.000  | 309  | 20 | 1.95E-42  | NP_493658.2    | 89 | 175.252 | 102 | 91  | hypothetical protein C50D2.8                                               |
| Locus_5813_Transcript_1/1_Conf_1.000  | 853  | 20 | 1.97E-100 | XP_002646710.1 | 80 | 369.777 | 265 | 214 | C. briggsae CBR-MAOC-1 protein                                             |

|                                      |      |    |          |                |    |         |     |     |                                                        |
|--------------------------------------|------|----|----------|----------------|----|---------|-----|-----|--------------------------------------------------------|
| Locus_5814_Transcript_1/1_Conf_1.000 | 907  | 0  |          |                |    |         |     |     |                                                        |
| Locus_5815_Transcript_1/1_Conf_1.000 | 1054 | 20 | 7.84E-87 | EFO20564.1     | 70 | 325.094 | 338 | 238 | hypothetical protein LOAG_07924                        |
| Locus_5816_Transcript_1/1_Conf_1.000 | 618  | 20 | 2.47E-46 | XP_002630829.1 | 74 | 189.119 | 170 | 126 | C. briggsae CBR-VPS-35 protein                         |
| Locus_5817_Transcript_1/1_Conf_1.000 | 582  | 20 | 6.53E-72 | NP_495666.3    | 81 | 273.863 | 186 | 151 | Temporarily Assigned Gene name family member (tag-341) |
| Locus_5818_Transcript_1/1_Conf_1.000 | 362  | 20 | 6.09E-52 | XP_002639368.1 | 88 | 206.838 | 120 | 106 | C. briggsae CBR-GNRR-1 protein                         |
| Locus_5819_Transcript_1/5_Conf_0.200 | 258  | 2  | 1.18E-10 | XP_002634825.1 | 64 | 69.707  | 73  | 47  | Hypothetical protein CBG13933                          |
| Locus_5819_Transcript_2/5_Conf_0.600 | 2449 | 20 | 2.84E-47 | XP_002634825.1 | 47 | 195.282 | 540 | 258 | Hypothetical protein CBG13933                          |
| Locus_5819_Transcript_3/5_Conf_0.500 | 1407 | 20 | 3.28E-44 | XP_002634825.1 | 48 | 184.111 | 510 | 249 | Hypothetical protein CBG13933                          |
| Locus_5819_Transcript_4/5_Conf_0.200 | 616  | 0  |          |                |    |         |     |     |                                                        |
| Locus_5819_Transcript_5/5_Conf_0.600 | 2449 | 20 | 2.84E-47 | XP_002634825.1 | 48 | 195.282 | 536 | 261 | Hypothetical protein CBG13933                          |
| Locus_582_Transcript_1/1_Conf_1.000  | 1462 | 20 | 0        | XP_001899189.1 | 98 | 801.201 | 431 | 425 | tubulin alpha chain - mouse                            |

|                                      |      |    |           |                |    |         |     |     |                                 |
|--------------------------------------|------|----|-----------|----------------|----|---------|-----|-----|---------------------------------|
| Locus_5820_Transcript_1/1_Conf_1.000 | 439  | 20 | 3.41E-71  | EFO25124.1     | 97 | 270.781 | 136 | 133 | bromodomain containing protein  |
| Locus_5821_Transcript_1/1_Conf_1.000 | 1095 | 20 | 2.41E-110 | NP_490766.2    | 76 | 403.29  | 363 | 279 | hypothetical protein Y65B4A.8   |
| Locus_5822_Transcript_1/1_Conf_1.000 | 156  | 0  |           |                |    |         |     |     |                                 |
| Locus_5823_Transcript_1/2_Conf_1.000 | 205  | 0  |           |                |    |         |     |     |                                 |
| Locus_5823_Transcript_2/2_Conf_1.000 | 186  | 0  |           |                |    |         |     |     |                                 |
| Locus_5824_Transcript_1/1_Conf_1.000 | 959  | 6  | 1.58E-11  | EFO21616.1     | 76 | 74.7146 | 51  | 39  | hypothetical protein LOAG_06869 |
| Locus_5825_Transcript_1/3_Conf_0.714 | 634  | 20 | 3.59E-72  | XP_002640528.1 | 94 | 275.018 | 145 | 137 | C. briggsae CBR-MAG-1 protein   |

|                                      |      |    |           |                |    |         |     |     |                                |
|--------------------------------------|------|----|-----------|----------------|----|---------|-----|-----|--------------------------------|
| Locus_5825_Transcript_2/3_Conf_0.714 | 634  | 20 | 3.59E-72  | XP_002640528.1 | 94 | 275.018 | 145 | 137 | C. briggsae CBR-MAG-1 protein  |
| Locus_5825_Transcript_3/3_Conf_0.714 | 634  | 20 | 3.59E-72  | XP_002640528.1 | 94 | 275.018 | 145 | 137 | C. briggsae CBR-MAG-1 protein  |
| Locus_5826_Transcript_1/1_Conf_1.000 | 655  | 20 | 7.94E-41  | XP_002638953.1 | 60 | 171.014 | 225 | 137 | C. briggsae CBR-PPFR-1 protein |
| Locus_5827_Transcript_1/1_Conf_1.000 | 617  | 0  |           |                |    |         |     |     |                                |
| Locus_5828_Transcript_1/2_Conf_1.000 | 2161 | 20 | 1.59E-155 | XP_002630265.1 | 74 | 554.673 | 498 | 372 | C. briggsae CBR-RAN-3 protein  |
| Locus_5828_Transcript_2/2_Conf_1.000 | 1602 | 20 | 1.49E-152 | XP_002630265.1 | 75 | 544.273 | 476 | 360 | C. briggsae CBR-RAN-3 protein  |
| Locus_5829_Transcript_1/1_Conf_1.000 | 781  | 0  |           |                |    |         |     |     |                                |
| Locus_583_Transcript_1/1_Conf_1.000  | 190  | 0  |           |                |    |         |     |     |                                |

|                                      |      |    |          |                |    |         |     |     |                                                                        |
|--------------------------------------|------|----|----------|----------------|----|---------|-----|-----|------------------------------------------------------------------------|
| Locus_5830_Transcript_1/1_Conf_1.000 | 788  | 20 | 2.73E-74 | EFO15724.1     | 82 | 282.722 | 192 | 159 | hypothetical protein LOAG_12785                                        |
| Locus_5831_Transcript_1/1_Conf_1.000 | 778  | 20 | 1.04E-78 | NP_495878.1    | 92 | 297.36  | 178 | 164 | RER (Retention in Endoplasmic Reticulum) homolog family member (rer-1) |
| Locus_5832_Transcript_1/1_Conf_1.000 | 859  | 20 | 2.99E-80 | NP_508729.2    | 86 | 302.753 | 232 | 200 | hypothetical protein C52B9.4                                           |
| Locus_5833_Transcript_1/1_Conf_1.000 | 631  | 20 | 4.76E-85 | NP_497420.1    | 88 | 317.775 | 209 | 184 | hypothetical protein Y67D2.6                                           |
| Locus_5834_Transcript_1/1_Conf_1.000 | 322  | 4  | 9.59E-20 | XP_002640750.1 | 75 | 94.7449 | 86  | 65  | Hypothetical protein CBG24187                                          |
| Locus_5835_Transcript_1/2_Conf_1.000 | 569  | 20 | 1.83E-36 | XP_002632946.1 | 87 | 155.992 | 91  | 80  | Hypothetical protein CBG21702                                          |
| Locus_5835_Transcript_2/2_Conf_1.000 | 568  | 20 | 4.82E-37 | XP_002632946.1 | 88 | 157.918 | 92  | 81  | Hypothetical protein CBG21702                                          |
| Locus_5836_Transcript_1/1_Conf_1.000 | 1196 | 20 | 1.85E-90 | NP_001022690.2 | 66 | 337.421 | 372 | 249 | hypothetical protein M01F1.9                                           |
| Locus_5837_Transcript_1/1_Conf_1.000 | 1514 | 20 | 0        | NP_492851.1    | 90 | 767.303 | 437 | 397 | yeast PRP (splicing factor) related family member (prp-17)             |
| Locus_5838_Transcript_1/1_Conf_1.000 | 590  | 20 | 1.99E-60 | XP_002646611.1 | 84 | 235.728 | 166 | 140 | Hypothetical protein CBG20496                                          |
| Locus_5839_Transcript_1/1_Conf_1.000 | 1372 | 20 | 8.66E-50 | XP_001900673.1 | 57 | 202.601 | 394 | 228 | cutaneous T-cell lymphoma tumor antigen se70-2                         |
| Locus_584_Transcript_1/1_Conf_1.000  | 593  | 14 | 6.39E-06 | XP_002615609.1 | 44 | 54.6842 | 191 | 85  | hypothetical protein CLUG_04491                                        |
| Locus_5840_Transcript_1/1_Conf_1.000 | 450  | 20 | 3.59E-52 | NP_001122835.1 | 86 | 207.608 | 151 | 130 | UNCoordinated family member (unc-22)                                   |



|                                      |      |    |          |                |     |         |     |     |                                           |
|--------------------------------------|------|----|----------|----------------|-----|---------|-----|-----|-------------------------------------------|
| Locus_5841_Transcript_1/1_Conf_1.000 | 627  | 20 | 4.57E-72 | NP_510828.1    | 95  | 274.633 | 151 | 144 | Myosin Light Chain family member (mlc-2)  |
| Locus_5842_Transcript_1/1_Conf_1.000 | 612  | 20 | 9.07E-70 | XP_001608164.1 | 100 | 266.929 | 137 | 137 | PREDICTED: hypothetical protein isoform 1 |
| Locus_5843_Transcript_1/1_Conf_1.000 | 736  | 20 | 4.13E-34 | XP_002642801.1 | 53  | 149.058 | 226 | 122 | C. briggsae CBR-CUA-1 protein             |
| Locus_5844_Transcript_2/4_Conf_0.429 | 537  | 0  |          |                |     |         |     |     |                                           |
| Locus_5844_Transcript_3/4_Conf_0.286 | 679  | 0  |          |                |     |         |     |     |                                           |
| Locus_5844_Transcript_4/4_Conf_0.429 | 546  | 0  |          |                |     |         |     |     |                                           |
| Locus_5845_Transcript_1/1_Conf_1.000 | 910  | 1  | 8.57E-04 | XP_001863637.1 | 36  | 48.9062 | 259 | 94  | conserved hypothetical protein            |
| Locus_5846_Transcript_1/1_Conf_1.000 | 511  | 20 | 1.90E-43 | NP_503392.2    | 70  | 178.718 | 170 | 120 | hypothetical protein Y50D4A.4             |
| Locus_5847_Transcript_1/1_Conf_1.000 | 1128 | 0  |          |                |     |         |     |     |                                           |
| Locus_5848_Transcript_1/1_Conf_1.000 | 404  | 0  |          |                |     |         |     |     |                                           |

|                                      |      |    |          |                |    |         |     |     |                                                                     |
|--------------------------------------|------|----|----------|----------------|----|---------|-----|-----|---------------------------------------------------------------------|
| Locus_5849_Transcript_1/1_Conf_1.000 | 1248 | 20 | 2.26E-94 | NP_494763.1    | 83 | 350.517 | 241 | 201 | Spliceosome-Associated Protein family member (sap-1)                |
| Locus_585_Transcript_1/1_Conf_1.000  | 1411 | 6  | 1.06E-26 | XP_002640792.1 | 40 | 125.946 | 493 | 198 | Hypothetical protein CBG15667                                       |
| Locus_5850_Transcript_1/1_Conf_1.000 | 1407 | 20 | 5.18E-82 | NP_502405.1    | 58 | 309.686 | 396 | 230 | hypothetical protein K08E7.1                                        |
| Locus_5851_Transcript_1/3_Conf_0.667 | 983  | 20 | 5.09E-45 | 3KRN           | 65 | 186.037 | 210 | 137 | CrystalStructure Of C. Elegans Cell-Death-Related Nuclease 5(Crn-5) |
| Locus_5851_Transcript_2/3_Conf_0.667 | 781  | 20 | 2.62E-45 | 3KRN           | 64 | 186.422 | 210 | 136 | CrystalStructure Of C. Elegans Cell-Death-Related Nuclease 5(Crn-5) |
| Locus_5851_Transcript_3/3_Conf_0.667 | 983  | 20 | 1.13E-44 | 3KRN           | 64 | 184.882 | 210 | 136 | CrystalStructure Of C. Elegans Cell-Death-Related Nuclease 5(Crn-5) |
| Locus_5852_Transcript_1/1_Conf_1.000 | 290  | 1  | 1.66E-04 | NP_491250.1    | 72 | 49.2914 | 62  | 45  | hypothetical protein C50F2.3                                        |
| Locus_5853_Transcript_1/1_Conf_1.000 | 472  | 1  | 3.64E-04 | EFO17906.1     | 42 | 48.1358 | 140 | 60  | hypothetical protein LOAG_10592                                     |
| Locus_5854_Transcript_1/1_Conf_1.000 | 2165 | 0  |          |                |    |         |     |     |                                                                     |
| Locus_5855_Transcript_1/1_Conf_1.000 | 215  | 4  | 2.41E-08 | NP_509687.1    | 60 | 62.003  | 63  | 38  | hypothetical protein ZC373.2                                        |
| Locus_5856_Transcript_1/1_Conf_1.000 | 379  | 20 | 7.60E-10 | EFO27824.1     | 55 | 67.0106 | 87  | 48  | hypothetical protein LOAG_00660                                     |
| Locus_5857_Transcript_1/1_Conf_1.000 | 478  | 0  |          |                |    |         |     |     |                                                                     |
| Locus_5858_Transcript_1/1_Conf_1.000 | 352  | 20 | 9.27E-24 | XP_002642390.1 | 74 | 113.235 | 117 | 87  | Hypothetical protein CBG18394                                       |
| Locus_5859_Transcript_1/1_Conf_1.000 | 305  | 0  |          |                |    |         |     |     |                                                                     |
| Locus_586_Transcript_1/2_Conf_1.000  | 593  | 0  |          |                |    |         |     |     |                                                                     |
| Locus_586_Transcript_2/2_Conf_1.000  | 491  | 0  |          |                |    |         |     |     |                                                                     |
| Locus_5860_Transcript_1/2_Conf_1.000 | 1491 | 20 | 6.26E-57 | NP_001122591.1 | 51 | 226.483 | 383 | 196 | hypothetical protein C23H3.3                                        |
| Locus_5860_Transcript_2/2_Conf_1.000 | 1437 | 20 | 2.04E-57 | XP_002632139.1 | 56 | 228.024 | 362 | 204 | Hypothetical protein CBG06998                                       |
| Locus_5861_Transcript_1/2_Conf_1.000 | 1368 | 20 | 1.53E-30 | EFO20174.1     | 53 | 138.658 | 224 | 120 | hypothetical protein LOAG_08316                                     |

|                                      |      |    |           |                |    |         |     |     |                                                         |  |
|--------------------------------------|------|----|-----------|----------------|----|---------|-----|-----|---------------------------------------------------------|--|
| Locus_5861_Transcript_2/2_Conf_1.000 | 382  | 0  |           |                |    |         |     |     |                                                         |  |
| Locus_5862_Transcript_1/1_Conf_1.000 | 211  | 0  |           |                |    |         |     |     |                                                         |  |
| Locus_5863_Transcript_1/6_Conf_0.643 | 1713 | 20 | 2.18E-173 | NP_741561.1    | 82 | 613.609 | 443 | 364 | hypothetical protein Y57E12AL.1                         |  |
| Locus_5863_Transcript_2/6_Conf_0.571 | 1652 | 20 | 3.54E-173 | NP_741561.1    | 82 | 612.838 | 436 | 361 | hypothetical protein Y57E12AL.1                         |  |
| Locus_5863_Transcript_3/6_Conf_0.571 | 1634 | 20 | 7.28E-171 | NP_741561.1    | 81 | 605.134 | 436 | 355 | hypothetical protein Y57E12AL.1                         |  |
| Locus_5863_Transcript_4/6_Conf_0.643 | 1685 | 20 | 5.61E-174 | NP_741561.1    | 82 | 615.535 | 443 | 364 | hypothetical protein Y57E12AL.1                         |  |
| Locus_5863_Transcript_5/6_Conf_0.643 | 1688 | 20 | 2.14E-173 | NP_741561.1    | 82 | 613.609 | 443 | 364 | hypothetical protein Y57E12AL.1                         |  |
| Locus_5863_Transcript_6/6_Conf_0.643 | 1685 | 20 | 2.13E-173 | NP_741561.1    | 82 | 613.609 | 443 | 364 | hypothetical protein Y57E12AL.1                         |  |
| Locus_5864_Transcript_1/1_Conf_1.000 | 380  | 2  | 4.32E-05  | EFO21827.1     | 62 | 51.2174 | 53  | 33  | hypothetical protein LOAG_06660                         |  |
| Locus_5865_Transcript_1/2_Conf_1.000 | 671  | 20 | 1.37E-27  | XP_002637373.1 | 79 | 127.102 | 82  | 65  | Hypothetical protein CBG19074                           |  |
| Locus_5865_Transcript_2/2_Conf_1.000 | 671  | 20 | 1.37E-27  | XP_002637373.1 | 79 | 127.102 | 82  | 65  | Hypothetical protein CBG19074                           |  |
| Locus_5866_Transcript_1/1_Conf_1.000 | 493  | 20 | 5.30E-88  | XP_002639940.1 | 96 | 326.635 | 164 | 159 | Hypothetical protein CBG08279                           |  |
| Locus_5867_Transcript_1/1_Conf_1.000 | 940  | 1  | 4.82E-05  | XP_002642207.1 | 46 | 53.1434 | 158 | 74  | C. briggsae CBR-KBP-2 protein                           |  |
| Locus_5868_Transcript_1/1_Conf_1.000 | 401  | 0  |           |                |    |         |     |     |                                                         |  |
| Locus_5869_Transcript_1/2_Conf_1.000 | 1988 | 20 | 3.60E-106 | NP_001022928.1 | 64 | 390.578 | 443 | 284 | Rab Escort Protein homolog family member (rep-1)        |  |
| Locus_5869_Transcript_2/2_Conf_1.000 | 1973 | 20 | 5.49E-107 | NP_001022928.1 | 64 | 393.275 | 438 | 284 | Rab Escort Protein homolog family member (rep-1)        |  |
| Locus_587_Transcript_1/1_Conf_1.000  | 366  | 20 | 4.09E-16  | NP_500824.1    | 60 | 87.8113 | 119 | 72  | FEMinization of XX and XO animals family member (fem-1) |  |
| Locus_5870_Transcript_1/1_Conf_1.000 | 539  | 20 | 2.47E-58  | EFO18399.1     | 81 | 228.409 | 159 | 130 | geranylgeranyl pyrophosphate synthetase                 |  |

|                                      |      |    |          |                |    |         |     |     |                                      |
|--------------------------------------|------|----|----------|----------------|----|---------|-----|-----|--------------------------------------|
| Locus_5871_Transcript_1/1_Conf_1.000 | 627  | 20 | 1.98E-67 | XP_002648826.1 | 78 | 259.225 | 207 | 162 | C. briggsae CBR-GIP-2 protein        |
| Locus_5872_Transcript_1/1_Conf_1.000 | 575  | 0  |          |                |    |         |     |     |                                      |
| Locus_5873_Transcript_1/1_Conf_1.000 | 1915 | 20 | 6.86E-38 | NP_490662.1    | 45 | 163.696 | 449 | 205 | hypothetical protein Y74C9A.4        |
| Locus_5874_Transcript_1/1_Conf_1.000 | 844  | 20 | 1.09E-95 | NP_741437.1    | 80 | 353.984 | 268 | 215 | Dense Body family member (deb-1)     |
| Locus_5875_Transcript_1/1_Conf_1.000 | 718  | 0  |          |                |    |         |     |     |                                      |
| Locus_5876_Transcript_1/1_Conf_1.000 | 291  | 20 | 2.90E-25 | XP_002630908.1 | 72 | 118.242 | 96  | 70  | Hypothetical protein CBG02632        |
| Locus_5877_Transcript_1/1_Conf_1.000 | 384  | 0  |          |                |    |         |     |     |                                      |
| Locus_5878_Transcript_1/1_Conf_1.000 | 503  | 4  | 2.01E-34 | XP_002648378.1 | 91 | 148.673 | 99  | 91  | Hypothetical protein CBG24627        |
| Locus_5879_Transcript_1/1_Conf_1.000 | 456  | 0  |          |                |    |         |     |     |                                      |
| Locus_588_Transcript_1/1_Conf_1.000  | 893  | 20 | 1.82E-35 | ADD38287.1     | 82 | 154.066 | 111 | 92  | yippee-like 5                        |
| Locus_5880_Transcript_1/1_Conf_1.000 | 183  | 5  | 1.28E-04 | NP_497046.1    | 72 | 49.6766 | 37  | 27  | UNCoordinated family member (unc-52) |
| Locus_5881_Transcript_1/2_Conf_1.000 | 354  | 20 | 2.27E-22 | NP_496850.2    | 73 | 108.612 | 106 | 78  | hypothetical protein Y48E1B.5        |
| Locus_5881_Transcript_2/2_Conf_1.000 | 354  | 20 | 2.97E-22 | NP_496850.2    | 73 | 108.227 | 106 | 78  | hypothetical protein Y48E1B.5        |
| Locus_5882_Transcript_1/1_Conf_1.000 | 567  | 20 | 6.94E-44 | XP_002629858.1 | 88 | 180.644 | 117 | 104 | Hypothetical protein CBG21892        |
| Locus_5883_Transcript_1/2_Conf_1.000 | 270  | 0  |          |                |    |         |     |     |                                      |
| Locus_5883_Transcript_2/2_Conf_1.000 | 570  | 4  | 7.84E-27 | NP_494791.1    | 63 | 124.02  | 121 | 77  | hypothetical protein T05C1.1         |
| Locus_5884_Transcript_1/2_Conf_1.000 | 428  | 20 | 1.24E-60 | NP_498711.1    | 88 | 235.728 | 142 | 125 | TYRosinase family member (tyr-1)     |
| Locus_5884_Transcript_2/2_Conf_1.000 | 428  | 20 | 1.24E-60 | NP_498711.1    | 88 | 235.728 | 142 | 125 | TYRosinase family member (tyr-1)     |
| Locus_5885_Transcript_1/1_Conf_1.000 | 279  | 0  |          |                |    |         |     |     |                                      |
| Locus_5886_Transcript_1/1_Conf_1.000 | 427  | 19 | 5.82E-10 | AAO63578.1     | 49 | 67.3958 | 113 | 56  | secreted protein 6 precursor         |
| Locus_5887_Transcript_1/1_Conf_1.000 | 631  | 0  |          |                |    |         |     |     |                                      |

|                                      |      |    |          |                |    |         |     |     |                                                                     |
|--------------------------------------|------|----|----------|----------------|----|---------|-----|-----|---------------------------------------------------------------------|
| Locus_5888_Transcript_1/1_Conf_1.000 | 2375 | 12 | 6.58E-33 | NP_493601.2    | 39 | 147.517 | 593 | 235 | FERM domain (protein4.1-ezrin-radixin-moesin) family member (frm-1) |
| Locus_5889_Transcript_1/1_Conf_1.000 | 410  | 20 | 3.15E-32 | NP_509145.2    | 68 | 141.354 | 135 | 93  | AuTophagy (yeast Atg homolog) family member (atg-2)                 |
| Locus_589_Transcript_1/1_Conf_1.000  | 447  | 0  |          |                |    |         |     |     |                                                                     |
| Locus_5890_Transcript_1/1_Conf_1.000 | 786  | 20 | 2.09E-66 | NP_500504.1    | 78 | 256.529 | 212 | 166 | RNP (RRM RNA binding domain) containing family member (rnp-2)       |
| Locus_5891_Transcript_1/1_Conf_1.000 | 640  | 0  |          |                |    |         |     |     |                                                                     |
| Locus_5892_Transcript_1/1_Conf_1.000 | 512  | 20 | 4.64E-66 | XP_002641985.1 | 83 | 253.832 | 173 | 145 | Hypothetical protein CBG09207                                       |
| Locus_5893_Transcript_1/1_Conf_1.000 | 2295 | 20 | 0        | XP_002645186.1 | 70 | 687.567 | 739 | 524 | Hypothetical protein CBG16916                                       |
| Locus_5894_Transcript_1/1_Conf_1.000 | 139  | 0  |          |                |    |         |     |     |                                                                     |
| Locus_5895_Transcript_1/1_Conf_1.000 | 742  | 20 | 3.07E-85 | NP_498730.1    | 81 | 318.931 | 219 | 179 | LEThal family member (let-754)                                      |
| Locus_5896_Transcript_1/1_Conf_1.000 | 954  | 0  |          |                |    |         |     |     |                                                                     |
| Locus_5897_Transcript_1/1_Conf_1.000 | 130  | 0  |          |                |    |         |     |     |                                                                     |
| Locus_5898_Transcript_1/1_Conf_1.000 | 944  | 0  |          |                |    |         |     |     |                                                                     |

|                                      |      |    |           |                |     |         |     |     |                                                                                 |
|--------------------------------------|------|----|-----------|----------------|-----|---------|-----|-----|---------------------------------------------------------------------------------|
| Locus_5899_Transcript_1/1_Conf_1.000 | 361  | 20 | 8.25E-41  | BAE31040.1     | 100 | 169.859 | 81  | 81  | unnamed protein product                                                         |
| Locus_59_Transcript_1/3_Conf_0.400   | 1403 | 20 | 5.89E-78  | XP_001892703.1 | 78  | 296.204 | 231 | 182 | Uncharacterized protein family UPF0005 containing protein                       |
| Locus_59_Transcript_2/3_Conf_0.400   | 1125 | 0  |           |                |     |         |     |     |                                                                                 |
| Locus_59_Transcript_3/3_Conf_0.600   | 1444 | 20 | 2.33E-77  | XP_001892703.1 | 79  | 294.278 | 229 | 181 | Uncharacterized protein family UPF0005 containing protein                       |
| Locus_590_Transcript_1/1_Conf_1.000  | 134  | 0  |           |                |     |         |     |     |                                                                                 |
| Locus_5900_Transcript_1/1_Conf_1.000 | 542  | 20 | 3.51E-68  | NP_496205.2    | 82  | 261.151 | 182 | 151 | PhosphoLipase C family member (plc-3)                                           |
| Locus_5901_Transcript_1/1_Conf_1.000 | 337  | 20 | 9.42E-29  | NP_001022673.1 | 80  | 129.798 | 90  | 72  | NADC (Na <sup>+</sup> -coupled dicarboxylate transporter) family member (nac-3) |
| Locus_5902_Transcript_1/2_Conf_1.000 | 538  | 20 | 1.47E-10  | XP_784255.2    | 61  | 69.707  | 86  | 53  | PREDICTED: similar to Msx-2 interacting nuclear target protein                  |
| Locus_5902_Transcript_2/2_Conf_1.000 | 544  | 20 | 4.92E-09  | XP_784255.2    | 60  | 64.6994 | 88  | 53  | PREDICTED: similar to Msx-2 interacting nuclear target protein                  |
| Locus_5903_Transcript_1/1_Conf_1.000 | 1052 | 20 | 4.47E-167 | XP_002633820.1 | 93  | 591.652 | 350 | 327 | Hypothetical protein CBG19850                                                   |
| Locus_5904_Transcript_1/1_Conf_1.000 | 760  | 20 | 5.01E-22  | AAO63576.1     | 55  | 108.997 | 168 | 94  | secreted protein 4 precursor                                                    |

|                                      |      |    |           |                |    |         |     |     |                                                                              |
|--------------------------------------|------|----|-----------|----------------|----|---------|-----|-----|------------------------------------------------------------------------------|
| Locus_5905_Transcript_1/1_Conf_1.000 | 949  | 20 | 2.80E-101 | NP_492283.1    | 73 | 372.859 | 310 | 227 | hypothetical protein F02E9.7                                                 |
| Locus_5906_Transcript_1/1_Conf_1.000 | 1284 | 2  | 2.80E-47  | NP_506277.1    | 60 | 194.126 | 240 | 146 | High Incidence of Males (increased X chromosome loss) family member (him-17) |
| Locus_5907_Transcript_1/1_Conf_1.000 | 449  | 20 | 1.33E-46  | NP_497589.3    | 91 | 189.119 | 111 | 102 | hypothetical protein Y71H2B.5                                                |
| Locus_5908_Transcript_1/2_Conf_1.000 | 1815 | 20 | 3.41E-140 | XP_002646134.1 | 74 | 503.442 | 447 | 333 | Hypothetical protein CBG08013                                                |
| Locus_5908_Transcript_2/2_Conf_1.000 | 1662 | 20 | 1.06E-124 | XP_002646134.1 | 83 | 451.825 | 325 | 270 | Hypothetical protein CBG08013                                                |
| Locus_5909_Transcript_1/1_Conf_1.000 | 365  | 20 | 8.78E-43  | XP_002642916.1 | 83 | 176.407 | 118 | 98  | C. briggsae CBR-TAG-168 protein                                              |
| Locus_591_Transcript_1/1_Conf_1.000  | 2233 | 20 | 0         | XP_002645529.1 | 90 | 1018.07 | 645 | 583 | C. briggsae CBR-SDHA-1 protein                                               |
| Locus_5910_Transcript_1/2_Conf_1.000 | 470  | 20 | 2.99E-14  | XP_001512056.1 | 53 | 81.6481 | 174 | 93  | PREDICTED: hypothetical protein, partial                                     |
| Locus_5910_Transcript_2/2_Conf_1.000 | 462  | 20 | 1.23E-07  | CAG11756.1     | 70 | 59.6918 | 65  | 46  | unnamed protein product                                                      |
| Locus_5911_Transcript_1/1_Conf_1.000 | 1319 | 20 | 1.59E-61  | NP_493587.1    | 86 | 241.506 | 150 | 130 | UBiquitin Conjugating enzyme family member (ubc-16)                          |
| Locus_5912_Transcript_1/1_Conf_1.000 | 1024 | 20 | 5.48E-37  | CBI63237.1     | 59 | 159.458 | 335 | 198 | C. elegans protein Y111B2A.4a, partially confirmed by transcript evidence    |
| Locus_5913_Transcript_1/1_Conf_1.000 | 1357 | 20 | 2.15E-77  | XP_001901579.1 | 65 | 294.278 | 319 | 210 | Piwi domain containing protein                                               |
| Locus_5914_Transcript_1/1_Conf_1.000 | 274  | 20 | 1.51E-26  | CAA10033.1     | 83 | 122.479 | 89  | 74  | DYS-1 protein                                                                |

|                                      |      |    |          |                |    |         |     |     |                                                                      |
|--------------------------------------|------|----|----------|----------------|----|---------|-----|-----|----------------------------------------------------------------------|
| Locus_5915_Transcript_1/2_Conf_1.000 | 355  | 20 | 1.02E-38 | XP_001895467.1 | 82 | 162.925 | 120 | 99  | DEAD/DEAH box helicase family protein                                |
| Locus_5915_Transcript_2/2_Conf_1.000 | 355  | 20 | 1.02E-38 | XP_001895467.1 | 82 | 162.925 | 120 | 99  | DEAD/DEAH box helicase family protein                                |
| Locus_5916_Transcript_1/1_Conf_1.000 | 168  | 0  |          |                |    |         |     |     |                                                                      |
| Locus_5917_Transcript_1/2_Conf_1.000 | 316  | 20 | 5.66E-37 | NP_001023110.1 | 83 | 157.147 | 105 | 88  | Homolog Of ELAC2 (cancer susceptibility locus) family member (hoe-1) |
| Locus_5917_Transcript_2/2_Conf_1.000 | 316  | 20 | 5.66E-37 | NP_001023110.1 | 83 | 157.147 | 105 | 88  | Homolog Of ELAC2 (cancer susceptibility locus) family member (hoe-1) |
| Locus_5918_Transcript_1/1_Conf_1.000 | 813  | 1  | 1.36E-07 | XP_001897896.1 | 45 | 61.2326 | 259 | 117 | RNA binding motif protein 21                                         |
| Locus_5919_Transcript_1/1_Conf_1.000 | 889  | 0  |          |                |    |         |     |     |                                                                      |
| Locus_592_Transcript_1/1_Conf_1.000  | 218  | 20 | 1.96E-26 | NP_001023936.1 | 90 | 122.094 | 72  | 65  | hypothetical protein F46B6.6                                         |
| Locus_5920_Transcript_1/1_Conf_1.000 | 261  | 20 | 7.65E-10 | NP_493426.2    | 70 | 67.0106 | 54  | 38  | TAF (TBP-associated transcription factor) family member (taf-1)      |
| Locus_5921_Transcript_1/1_Conf_1.000 | 324  | 0  |          |                |    |         |     |     |                                                                      |
| Locus_5922_Transcript_1/1_Conf_1.000 | 1550 | 0  |          |                |    |         |     |     |                                                                      |
| Locus_5923_Transcript_1/1_Conf_1.000 | 242  | 20 | 1.73E-22 | XP_002636587.1 | 77 | 108.997 | 77  | 60  | C. briggsae CBR-TRE-3 protein                                        |
| Locus_5924_Transcript_1/1_Conf_1.000 | 175  | 0  |          |                |    |         |     |     |                                                                      |
| Locus_5925_Transcript_1/1_Conf_1.000 | 206  | 0  |          |                |    |         |     |     |                                                                      |
| Locus_5926_Transcript_1/1_Conf_1.000 | 650  | 0  |          |                |    |         |     |     |                                                                      |
| Locus_5927_Transcript_1/1_Conf_1.000 | 691  | 20 | 8.87E-57 | NP_505743.1    | 75 | 224.172 | 216 | 162 | hypothetical protein F28H7.3                                         |



|                                      |      |    |           |                |    |         |     |     |                                                                             |
|--------------------------------------|------|----|-----------|----------------|----|---------|-----|-----|-----------------------------------------------------------------------------|
| Locus_5928_Transcript_1/2_Conf_1.000 | 3240 | 20 | 0         | AAB99830.2     | 90 | 1746.48 | 969 | 875 | thrombospondin                                                              |
| Locus_5928_Transcript_2/2_Conf_1.000 | 3176 | 20 | 0         | AAB99830.2     | 90 | 1744.55 | 968 | 874 | thrombospondin                                                              |
| Locus_5929_Transcript_1/1_Conf_1.000 | 1174 | 20 | 5.18E-122 | NP_508618.2    | 72 | 442.195 | 372 | 271 | CRAL/TRIO and GOLD domain suppressor of activated Ras family member (cgr-1) |
| Locus_593_Transcript_1/1_Conf_1.000  | 559  | 20 | 1.17E-08  | XP_002731776.1 | 63 | 63.5438 | 85  | 54  | PREDICTED: CASP-like transcription factor                                   |
| Locus_5930_Transcript_1/1_Conf_1.000 | 1411 | 20 | 1.79E-74  | NP_501296.1    | 60 | 284.648 | 463 | 280 | hypothetical protein C33H5.17                                               |

|                                      |      |    |           |                |    |         |     |     |                                                     |
|--------------------------------------|------|----|-----------|----------------|----|---------|-----|-----|-----------------------------------------------------|
| Locus_5931_Transcript_1/1_Conf_1.000 | 651  | 20 | 1.75E-40  | XP_002641488.1 | 92 | 169.859 | 101 | 93  | Hypothetical protein CBG09779                       |
| Locus_5932_Transcript_1/1_Conf_1.000 | 671  | 20 | 7.65E-79  | XP_002641616.1 | 80 | 297.36  | 224 | 180 | C. briggsae CBR-ALX-1 protein                       |
| Locus_5933_Transcript_1/1_Conf_1.000 | 1959 | 20 | 7.25E-160 | NP_498059.2    | 66 | 568.926 | 615 | 412 | hypothetical protein C27F2.8                        |
| Locus_5934_Transcript_1/1_Conf_1.000 | 1040 | 20 | 6.01E-116 | XP_001897557.1 | 80 | 421.779 | 297 | 240 | Tyrosine-protein kinase abl-1                       |
| Locus_5935_Transcript_1/1_Conf_1.000 | 707  | 0  |           |                |    |         |     |     |                                                     |
| Locus_5936_Transcript_1/1_Conf_1.000 | 179  | 17 | 5.02E-06  | ACZ54691.1     | 73 | 54.299  | 38  | 28  | Uncoordinated protein 82, isoform f                 |
| Locus_5937_Transcript_1/1_Conf_1.000 | 624  | 20 | 2.31E-76  | XP_002641247.1 | 87 | 288.886 | 188 | 164 | Hypothetical protein CBG09115                       |
| Locus_5938_Transcript_1/1_Conf_1.000 | 1412 | 5  | 3.22E-07  | XP_002402770.1 | 43 | 61.2326 | 175 | 76  | conserved hypothetical protein                      |
| Locus_5939_Transcript_1/1_Conf_1.000 | 397  | 0  |           |                |    |         |     |     |                                                     |
| Locus_594_Transcript_1/1_Conf_1.000  | 514  | 20 | 1.88E-30  | NP_741323.1    | 69 | 135.576 | 122 | 85  | hypothetical protein K08D12.3                       |
| Locus_5940_Transcript_1/1_Conf_1.000 | 917  | 20 | 2.34E-41  | XP_002641848.1 | 77 | 173.711 | 131 | 102 | Hypothetical protein CBG16522                       |
| Locus_5941_Transcript_1/1_Conf_1.000 | 2012 | 20 | 0         | NP_497939.2    | 76 | 775.778 | 696 | 530 | Suppressor/Enhancer of Lin-12 family member (sel-2) |
| Locus_5942_Transcript_1/1_Conf_1.000 | 382  | 0  |           |                |    |         |     |     |                                                     |
| Locus_5943_Transcript_1/1_Conf_1.000 | 213  | 0  |           |                |    |         |     |     |                                                     |
| Locus_5944_Transcript_1/1_Conf_1.000 | 569  | 20 | 3.14E-12  | EFO23513.1     | 69 | 75.485  | 62  | 43  | CMGC/CDK/CRK7 protein kinase                        |
| Locus_5945_Transcript_1/1_Conf_1.000 | 484  | 0  |           |                |    |         |     |     |                                                     |
| Locus_5946_Transcript_1/1_Conf_1.000 | 144  | 0  |           |                |    |         |     |     |                                                     |
| Locus_5947_Transcript_1/1_Conf_1.000 | 324  | 0  |           |                |    |         |     |     |                                                     |
| Locus_5948_Transcript_1/3_Conf_0.286 | 303  | 5  | 1.68E-17  | XP_002641479.1 | 71 | 92.4337 | 77  | 55  | Hypothetical protein CBG09770                       |

|                                      |      |    |           |                |    |         |      |     |                                                                        |
|--------------------------------------|------|----|-----------|----------------|----|---------|------|-----|------------------------------------------------------------------------|
| Locus_5948_Transcript_2/3_Conf_0.429 | 1039 | 20 | 2.70E-116 | NP_741113.3    | 84 | 422.935 | 311  | 263 | hypothetical protein C32A3.3                                           |
| Locus_5948_Transcript_3/3_Conf_0.571 | 1256 | 20 | 4.34E-138 | XP_002641479.1 | 83 | 495.738 | 366  | 305 | Hypothetical protein CBG09770                                          |
| Locus_5949_Transcript_1/1_Conf_1.000 | 1229 | 20 | 1.51E-127 | CAD28559.2     | 72 | 460.685 | 405  | 295 | metalloprotease I                                                      |
| Locus_595_Transcript_1/1_Conf_1.000  | 1948 | 20 | 0         | NP_001024192.1 | 94 | 1025    | 570  | 541 | Receptor Mediated Endocytosis family member (rme-1)                    |
| Locus_5950_Transcript_1/1_Conf_1.000 | 321  | 0  |           |                |    |         |      |     |                                                                        |
| Locus_5951_Transcript_1/1_Conf_1.000 | 1230 | 20 | 5.64E-82  | XP_002631148.1 | 84 | 309.301 | 213  | 179 | C. briggsae CBR-RAGA-1 protein                                         |
| Locus_5952_Transcript_1/1_Conf_1.000 | 3073 | 20 | 0         | XP_001895334.1 | 58 | 790.03  | 1069 | 625 | Protein kinase domain containing protein                               |
| Locus_5953_Transcript_1/1_Conf_1.000 | 405  | 0  |           |                |    |         |      |     |                                                                        |
| Locus_5954_Transcript_1/1_Conf_1.000 | 571  | 0  |           |                |    |         |      |     |                                                                        |
| Locus_5955_Transcript_1/1_Conf_1.000 | 347  | 2  | 7.43E-05  | XP_002632142.1 | 48 | 50.447  | 137  | 67  | Hypothetical protein CBG07001                                          |
| Locus_5956_Transcript_1/2_Conf_1.000 | 2726 | 20 | 1.04E-53  | NP_741547.1    | 65 | 216.853 | 235  | 153 | hypothetical protein R01B10.6                                          |
| Locus_5956_Transcript_2/2_Conf_1.000 | 2605 | 20 | 2.12E-48  | NP_504568.1    | 64 | 199.134 | 290  | 186 | JAMP (JNK1-Associated Membrane Protein) homolog family member (jamp-1) |
| Locus_5957_Transcript_1/1_Conf_1.000 | 245  | 0  |           |                |    |         |      |     |                                                                        |
| Locus_5958_Transcript_1/1_Conf_1.000 | 178  | 0  |           |                |    |         |      |     |                                                                        |
| Locus_5959_Transcript_1/1_Conf_1.000 | 170  | 0  |           |                |    |         |      |     |                                                                        |
| Locus_596_Transcript_1/1_Conf_1.000  | 897  | 20 | 2.95E-150 | NP_495019.1    | 95 | 535.413 | 298  | 286 | Masculinisation Of Germline family member (mog-5)                      |
| Locus_5960_Transcript_1/1_Conf_1.000 | 326  | 0  |           |                |    |         |      |     |                                                                        |
| Locus_5961_Transcript_1/2_Conf_1.000 | 2162 | 13 | 1.96E-12  | XP_002641123.1 | 38 | 79.337  | 495  | 193 | Hypothetical protein CBG08972                                          |

|                                      |      |    |           |                |    |         |     |     |                                         |
|--------------------------------------|------|----|-----------|----------------|----|---------|-----|-----|-----------------------------------------|
| Locus_5961_Transcript_2/2_Conf_1.000 | 2162 | 13 | 1.96E-12  | XP_002641123.1 | 38 | 79.337  | 495 | 193 | Hypothetical protein CBG08972           |
| Locus_5962_Transcript_1/1_Conf_1.000 | 615  | 5  | 6.07E-05  | XP_001662306.1 | 53 | 51.6026 | 66  | 35  | cysteine-rich venom protein, putative   |
| Locus_5963_Transcript_1/1_Conf_1.000 | 515  | 0  |           |                |    |         |     |     |                                         |
| Locus_5964_Transcript_1/2_Conf_1.000 | 513  | 0  |           |                |    |         |     |     |                                         |
| Locus_5964_Transcript_2/2_Conf_1.000 | 406  | 0  |           |                |    |         |     |     |                                         |
| Locus_5965_Transcript_1/1_Conf_1.000 | 851  | 20 | 3.34E-92  | NP_001021185.2 | 81 | 342.428 | 232 | 188 | PaXilLin homolo family member (pxl-1)   |
| Locus_5966_Transcript_1/1_Conf_1.000 | 334  | 0  |           |                |    |         |     |     |                                         |
| Locus_5967_Transcript_1/3_Conf_0.667 | 948  | 20 | 7.09E-113 | NP_507943.1    | 83 | 411.379 | 298 | 249 | hypothetical protein B0250.5            |
| Locus_5967_Transcript_2/3_Conf_0.667 | 1062 | 20 | 1.44E-112 | NP_507943.1    | 83 | 410.609 | 298 | 249 | hypothetical protein B0250.5            |
| Locus_5967_Transcript_3/3_Conf_0.667 | 1062 | 20 | 8.43E-113 | NP_507943.1    | 83 | 411.379 | 298 | 249 | hypothetical protein B0250.5            |
| Locus_5968_Transcript_1/1_Conf_1.000 | 1118 | 20 | 7.23E-118 | EFO24874.1     | 79 | 428.328 | 340 | 271 | kinesin motor domain-containing protein |
| Locus_5969_Transcript_1/1_Conf_1.000 | 440  | 20 | 1.04E-35  | XP_002635001.1 | 86 | 152.91  | 96  | 83  | Hypothetical protein CBG13541           |
| Locus_597_Transcript_1/2_Conf_1.000  | 655  | 1  | 3.48E-12  | EFO23299.1     | 53 | 75.8702 | 140 | 75  | hypothetical protein LOAG_05186         |
| Locus_597_Transcript_2/2_Conf_1.000  | 640  | 1  | 6.59E-13  | EFO23299.1     | 55 | 78.1814 | 135 | 75  | hypothetical protein LOAG_05186         |
| Locus_5970_Transcript_1/1_Conf_1.000 | 146  | 0  |           |                |    |         |     |     |                                         |
| Locus_5971_Transcript_1/1_Conf_1.000 | 578  | 0  |           |                |    |         |     |     |                                         |
| Locus_5972_Transcript_1/1_Conf_1.000 | 530  | 13 | 2.50E-07  | NP_001076676.1 | 48 | 58.9214 | 130 | 63  | hypothetical protein F13E9.14           |
| Locus_5973_Transcript_1/1_Conf_1.000 | 1206 | 20 | 1.20E-12  | NP_502137.1    | 48 | 78.9518 | 185 | 89  | hypothetical protein F54E12.2           |

|                                      |      |    |           |                |     |         |     |     |                                                    |
|--------------------------------------|------|----|-----------|----------------|-----|---------|-----|-----|----------------------------------------------------|
| Locus_5974_Transcript_1/1_Conf_1.000 | 474  | 0  |           |                |     |         |     |     |                                                    |
| Locus_5975_Transcript_1/1_Conf_1.000 | 185  |    |           |                |     |         |     |     |                                                    |
| Locus_5976_Transcript_1/1_Conf_1.000 | 187  | 20 | 1.23E-23  | NP_001129905.1 | 90  | 112.849 | 61  | 55  | hypothetical protein T03D8.6                       |
| Locus_5977_Transcript_1/1_Conf_1.000 | 703  | 20 | 2.20E-50  |                | 96  | 202.986 | 198 | 191 | URF 2                                              |
| Locus_5978_Transcript_1/1_Conf_1.000 | 1164 | 0  |           |                |     |         |     |     |                                                    |
| Locus_5979_Transcript_1/1_Conf_1.000 | 770  | 2  | 6.96E-11  | XP_002644947.1 | 58  | 72.0182 | 124 | 73  | Hypothetical protein CBG10904                      |
| Locus_598_Transcript_1/1_Conf_1.000  | 786  | 20 | 1.12E-19  | EFO24565.1     | 51  | 101.293 | 211 | 109 | hypothetical protein LOAG_03922                    |
| Locus_5980_Transcript_1/1_Conf_1.000 | 362  | 20 | 2.84E-33  | XP_001898731.1 | 68  | 144.821 | 119 | 81  | Tyrosyl-DNA phosphodiesterase family protein       |
| Locus_5981_Transcript_1/2_Conf_1.000 | 481  | 5  | 1.66E-17  | XP_002641872.1 | 54  | 92.4337 | 158 | 86  | C. briggsae CBR-LIM-8 protein                      |
| Locus_5981_Transcript_2/2_Conf_1.000 | 474  | 5  | 1.09E-16  | XP_002641872.1 | 55  | 89.7373 | 150 | 83  | C. briggsae CBR-LIM-8 protein                      |
| Locus_5982_Transcript_1/1_Conf_1.000 | 240  | 2  | 1.13E-13  | NP_498270.1    | 71  | 79.7221 | 77  | 55  | hypothetical protein F01F1.3                       |
| Locus_5983_Transcript_1/1_Conf_1.000 | 485  | 0  |           |                |     |         |     |     |                                                    |
| Locus_5984_Transcript_1/1_Conf_1.000 | 636  | 20 | 1.53E-70  | XP_002639544.1 | 82  | 269.626 | 184 | 152 | Hypothetical protein CBG04173                      |
| Locus_5985_Transcript_1/1_Conf_1.000 | 230  | 2  | 1.00E-09  | NP_001076661.1 | 60  | 66.6254 | 76  | 46  | hypothetical protein C10C6.7                       |
| Locus_5986_Transcript_1/1_Conf_1.000 | 219  | 20 | 9.39E-32  | AAA27981.1     | 100 | 139.813 | 68  | 68  | clathrin-associated protein homologue              |
| Locus_5987_Transcript_1/1_Conf_1.000 | 180  | 20 | 7.03E-11  | XP_002641457.1 | 72  | 70.4774 | 58  | 42  | C. briggsae CBR-TOP-3 protein                      |
| Locus_5988_Transcript_1/1_Conf_1.000 | 1279 | 20 | 1.22E-135 | XP_002641208.1 | 74  | 487.649 | 428 | 319 | C. briggsae CBR-DPF-4 protein                      |
| Locus_5989_Transcript_1/1_Conf_1.000 | 1232 | 20 | 4.31E-90  | NP_490882.3    | 88  | 336.265 | 195 | 172 | UBiquitin Conjugating enzyme family member (ubc-3) |
| Locus_599_Transcript_1/1_Conf_1.000  | 1005 | 20 | 2.56E-31  | EFO27395.1     | 56  | 140.584 | 291 | 165 | hypothetical protein LOAG_01089                    |
| Locus_5990_Transcript_1/1_Conf_1.000 | 1369 | 20 | 1.82E-116 | NP_506229.1    | 69  | 424.091 | 395 | 273 | hypothetical protein F54F3.3                       |

|                                      |     |    |           |                |     |         |     |     |                                             |
|--------------------------------------|-----|----|-----------|----------------|-----|---------|-----|-----|---------------------------------------------|
| Locus_5991_Transcript_1/1_Conf_1.000 | 597 | 20 | 2.22E-70  | XP_002714405.1 | 100 | 268.855 | 130 | 130 | PREDICTED: tubulin, beta 5-like             |
| Locus_5992_Transcript_1/1_Conf_1.000 | 499 | 20 | 2.32E-27  | NP_001033395.1 | 86  | 125.176 | 76  | 66  | Sensory AXon guidance family member (sax-7) |
| Locus_5993_Transcript_1/1_Conf_1.000 | 245 | 20 | 1.32E-22  | XP_002634349.1 | 96  | 109.383 | 54  | 52  | Hypothetical protein CBG17698               |
| Locus_5994_Transcript_1/2_Conf_1.000 | 304 | 4  | 5.78E-10  | NP_504792.1    | 62  | 67.3958 | 88  | 55  | hypothetical protein Y57E12AL.6             |
| Locus_5994_Transcript_2/2_Conf_1.000 | 539 | 4  | 1.97E-31  | NP_504792.1    | 72  | 139.043 | 129 | 94  | hypothetical protein Y57E12AL.6             |
| Locus_5995_Transcript_1/1_Conf_1.000 | 813 | 0  |           |                |     |         |     |     |                                             |
| Locus_5996_Transcript_1/1_Conf_1.000 | 149 | 0  |           |                |     |         |     |     |                                             |
| Locus_5997_Transcript_1/1_Conf_1.000 | 459 | 20 | 8.73E-51  | NP_493580.1    | 80  | 202.986 | 146 | 117 | hypothetical protein K11B4.1                |
| Locus_5998_Transcript_1/1_Conf_1.000 | 773 | 20 | 1.33E-102 | NP_506303.1    | 84  | 376.711 | 257 | 218 | hypothetical protein C50B6.7                |

|                                      |      |    |          |                |    |         |     |     |                                                                     |
|--------------------------------------|------|----|----------|----------------|----|---------|-----|-----|---------------------------------------------------------------------|
| Locus_5999_Transcript_1/2_Conf_1.000 | 399  | 10 | 3.30E-29 | XP_002723896.1 | 95 | 131.339 | 81  | 77  | PREDICTED: hypothetical protein                                     |
| Locus_5999_Transcript_2/2_Conf_1.000 | 399  | 10 | 1.25E-28 | XP_002723896.1 | 95 | 129.413 | 81  | 77  | PREDICTED: hypothetical protein                                     |
| Locus_6_Transcript_1/3_Conf_0.667    | 507  | 20 | 1.51E-40 | XP_001901336.1 | 90 | 169.088 | 98  | 89  | DNA-directed RNA polymerases I, II, and III<br>14.4 kDa polypeptide |
| Locus_6_Transcript_2/3_Conf_0.667    | 497  | 20 | 1.41E-40 | XP_001901336.1 | 90 | 169.088 | 98  | 89  | DNA-directed RNA polymerases I, II, and III<br>14.4 kDa polypeptide |
| Locus_6_Transcript_3/3_Conf_0.667    | 517  | 20 | 1.57E-40 | XP_001901336.1 | 90 | 169.088 | 98  | 89  | DNA-directed RNA polymerases I, II, and III<br>14.4 kDa polypeptide |
| Locus_60_Transcript_1/1_Conf_1.000   | 1691 | 20 | 0        | ABC86837.1     | 94 | 808.52  | 507 | 479 | depsiphilin                                                         |
| Locus_600_Transcript_1/1_Conf_1.000  | 758  | 20 | 7.56E-71 | XP_002637003.1 | 87 | 271.166 | 187 | 164 | C. briggsae CBR-EIF-3.K protein                                     |
| Locus_6000_Transcript_1/1_Conf_1.000 | 259  | 0  |          |                |    |         |     |     |                                                                     |
| Locus_6001_Transcript_1/1_Conf_1.000 | 355  | 1  | 1.53E-10 | ACV31095.1     | 78 | 69.3218 | 46  | 36  | Hypothetical protein C25H3.17                                       |

|                                      |      |    |          |                |    |         |     |     |                                                                                 |
|--------------------------------------|------|----|----------|----------------|----|---------|-----|-----|---------------------------------------------------------------------------------|
| Locus_6002_Transcript_1/1_Conf_1.000 | 1851 | 20 | 2.03E-55 | EFO25299.1     | 47 | 221.861 | 633 | 303 | piwi domain-containing protein                                                  |
| Locus_6003_Transcript_1/1_Conf_1.000 | 1497 | 20 | 0        |                | 93 | 862.448 | 464 | 432 | splice form 1 - Caenorhabditis elegans                                          |
| Locus_6004_Transcript_1/1_Conf_1.000 | 317  | 20 | 3.94E-22 | XP_002635866.1 | 68 | 107.842 | 109 | 75  | Hypothetical protein CBG01082                                                   |
| Locus_6005_Transcript_1/1_Conf_1.000 | 167  | 3  | 5.09E-06 | XP_002630376.1 | 69 | 54.299  | 55  | 38  | Hypothetical protein CBG04315                                                   |
| Locus_6006_Transcript_1/1_Conf_1.000 | 1594 | 20 | 9.12E-86 | XP_002634702.1 | 72 | 322.398 | 266 | 192 | C. briggsae CBR-TAG-182 protein                                                 |
| Locus_6007_Transcript_1/2_Conf_1.000 | 560  | 20 | 1.74E-36 | NP_504599.2    | 66 | 155.992 | 180 | 119 | Myotonic dystrophy-Related, Cdc42-binding Kinase homolog family member (mrck-1) |
| Locus_6007_Transcript_2/2_Conf_1.000 | 545  | 20 | 2.50E-37 | NP_504599.2    | 66 | 158.688 | 175 | 117 | Myotonic dystrophy-Related, Cdc42-binding Kinase homolog family member (mrck-1) |
| Locus_6008_Transcript_1/1_Conf_1.000 | 776  | 0  |          |                |    |         |     |     |                                                                                 |



|                                      |      |    |          |                |    |         |      |      |                                                             |
|--------------------------------------|------|----|----------|----------------|----|---------|------|------|-------------------------------------------------------------|
| Locus_6009_Transcript_1/1_Conf_1.000 | 544  | 20 | 8.85E-51 | NP_498128.1    | 93 | 203.371 | 113  | 106  | Clock (biological timing) abnormality family member (clk-1) |
| Locus_601_Transcript_1/1_Conf_1.000  | 3462 | 20 | 0        | NP_491363.1    | 91 | 1976.06 | 1165 | 1066 | Dynein Heavy Chain family member (dhc-1)                    |
| Locus_6010_Transcript_1/1_Conf_1.000 | 939  | 20 | 2.09E-16 | XP_969818.1    | 56 | 90.8929 | 142  | 80   | PREDICTED: similar to AGAP008118-PA                         |
| Locus_6011_Transcript_1/2_Conf_1.000 | 1690 | 20 | 8.35E-85 | XP_002630905.1 | 72 | 319.316 | 282  | 204  | C. briggsae CBR-SET-4 protein                               |
| Locus_6011_Transcript_2/2_Conf_1.000 | 1690 | 20 | 8.35E-85 | XP_002630905.1 | 72 | 319.316 | 282  | 204  | C. briggsae CBR-SET-4 protein                               |
| Locus_6012_Transcript_1/1_Conf_1.000 | 468  | 0  |          |                |    |         |      |      |                                                             |
| Locus_6013_Transcript_1/1_Conf_1.000 | 315  | 4  | 9.41E-08 | XP_001899300.1 | 67 | 60.077  | 70   | 47   | Negative elongation factor B homolog                        |

|                                      |      |    |          |                |    |         |     |     |                                            |
|--------------------------------------|------|----|----------|----------------|----|---------|-----|-----|--------------------------------------------|
| Locus_6014_Transcript_1/1_Conf_1.000 | 1575 | 20 | 0        | XP_002644583.1 | 82 | 729.554 | 508 | 419 | C. briggsae CBR-GLIT-1 protein             |
| Locus_6015_Transcript_1/1_Conf_1.000 | 449  | 5  | 4.43E-34 | NP_491893.1    | 71 | 147.517 | 146 | 105 | BAG1 (human) homolog family member (bag-1) |
| Locus_6016_Transcript_1/2_Conf_1.000 | 580  | 20 | 2.99E-61 | XP_002631151.1 | 87 | 238.424 | 165 | 144 | Hypothetical protein CBG02935              |
| Locus_6016_Transcript_2/2_Conf_1.000 | 710  | 20 | 4.77E-53 | XP_002631151.1 | 87 | 211.846 | 165 | 144 | Hypothetical protein CBG02935              |
| Locus_6017_Transcript_1/2_Conf_1.000 | 1093 | 20 | 1.62E-98 | XP_002639122.1 | 86 | 363.999 | 261 | 227 | Hypothetical protein CBG14941              |
| Locus_6017_Transcript_2/2_Conf_1.000 | 1020 | 20 | 1.46E-98 | XP_002639122.1 | 86 | 363.999 | 261 | 227 | Hypothetical protein CBG14941              |
| Locus_6018_Transcript_1/2_Conf_1.000 | 781  | 2  | 2.56E-08 | NP_492595.1    | 46 | 63.5438 | 153 | 71  | hypothetical protein F26E4.4               |
| Locus_6018_Transcript_2/2_Conf_1.000 | 1397 | 4  | 2.11E-27 | NP_492595.1    | 44 | 128.257 | 395 | 175 | hypothetical protein F26E4.4               |
| Locus_6019_Transcript_1/1_Conf_1.000 | 357  | 0  |          |                |    |         |     |     |                                            |
| Locus_602_Transcript_1/1_Conf_1.000  | 1097 | 20 | 1.10E-70 | NP_001122975.1 | 63 | 271.552 | 336 | 212 | hypothetical protein K10C8.3               |
| Locus_6020_Transcript_1/1_Conf_1.000 | 149  | 0  |          |                |    |         |     |     |                                            |

|                                      |      |    |           |                |    |         |     |     |                                                                |
|--------------------------------------|------|----|-----------|----------------|----|---------|-----|-----|----------------------------------------------------------------|
| Locus_6021_Transcript_1/1_Conf_1.000 | 505  | 0  |           |                |    |         |     |     |                                                                |
| Locus_6022_Transcript_1/1_Conf_1.000 | 442  | 20 | 2.42E-80  | XP_533842.2    | 98 | 301.212 | 147 | 145 | PREDICTED: similar to ribosomal protein L18a                   |
| Locus_6023_Transcript_1/1_Conf_1.000 | 195  | 0  |           |                |    |         |     |     |                                                                |
| Locus_6024_Transcript_1/3_Conf_0.500 | 752  | 20 | 1.56E-84  | EFO26720.1     | 78 | 316.62  | 234 | 183 | hypothetical protein LOAG_01771                                |
| Locus_6024_Transcript_2/3_Conf_0.500 | 803  | 20 | 2.92E-87  | EFO26720.1     | 77 | 325.865 | 248 | 191 | hypothetical protein LOAG_01771                                |
| Locus_6024_Transcript_3/3_Conf_0.333 | 1379 | 20 | 1.18E-155 | XP_002640277.1 | 84 | 554.288 | 400 | 338 | Hypothetical protein CBG12802                                  |
| Locus_6025_Transcript_1/1_Conf_1.000 | 853  | 20 | 2.08E-25  | EFO24662.1     | 75 | 120.553 | 110 | 83  | hypothetical protein LOAG_03822                                |
| Locus_6026_Transcript_1/1_Conf_1.000 | 550  | 20 | 1.68E-36  | NP_493125.2    | 65 | 155.992 | 166 | 109 | hypothetical protein T09E11.9                                  |
| Locus_6027_Transcript_1/1_Conf_1.000 | 850  | 0  |           |                |    |         |     |     |                                                                |
| Locus_6028_Transcript_1/1_Conf_1.000 | 1006 | 20 | 2.56E-31  | NP_001021834.1 | 80 | 140.584 | 88  | 71  | hypothetical protein Y87G2A.18                                 |
| Locus_6029_Transcript_1/2_Conf_1.000 | 1561 | 5  | 9.00E-30  | NP_508196.1    | 56 | 136.346 | 319 | 180 | STAUfen (dsRNA binding protein) homolog family member (stau-1) |
| Locus_6029_Transcript_2/2_Conf_1.000 | 1556 | 5  | 8.95E-30  | NP_508196.1    | 56 | 136.346 | 319 | 180 | STAUfen (dsRNA binding protein) homolog family member (stau-1) |
| Locus_603_Transcript_1/1_Conf_1.000  | 655  | 20 | 5.44E-82  | NP_491242.2    | 81 | 307.76  | 220 | 180 | hypothetical protein T03F1.7                                   |

|                                      |      |    |           |                |    |         |     |     |                                                                          |
|--------------------------------------|------|----|-----------|----------------|----|---------|-----|-----|--------------------------------------------------------------------------|
| Locus_6030_Transcript_1/2_Conf_1.000 | 1519 | 20 | 1.14E-146 | XP_002641256.1 | 72 | 524.628 | 504 | 363 | Hypothetical protein CBG05167                                            |
| Locus_6030_Transcript_2/2_Conf_1.000 | 1519 | 20 | 1.14E-146 | XP_002641256.1 | 72 | 524.628 | 504 | 363 | Hypothetical protein CBG05167                                            |
| Locus_6031_Transcript_1/1_Conf_1.000 | 200  | 0  |           |                |    |         |     |     |                                                                          |
| Locus_6032_Transcript_1/1_Conf_1.000 | 1603 | 20 | 1.34E-153 | NP_001040704.1 | 74 | 547.74  | 445 | 333 | DNAI domain (prokaryotic heat shock protein) family member (dnj-27)      |
| Locus_6033_Transcript_1/1_Conf_1.000 | 667  | 20 | 1.32E-107 | NP_497139.1    | 92 | 392.889 | 217 | 201 | Paralysed Arrest at Two-fold family member (pat-4)                       |
| Locus_6034_Transcript_1/5_Conf_0.600 | 1611 | 20 | 5.62E-83  | NP_498281.2    | 59 | 313.153 | 375 | 223 | hypothetical protein C28H8.9                                             |
| Locus_6034_Transcript_2/5_Conf_0.500 | 1562 | 20 | 2.35E-54  | XP_002641182.1 | 74 | 218.009 | 155 | 116 | Hypothetical protein CBG09043                                            |
| Locus_6034_Transcript_3/5_Conf_0.500 | 1710 | 20 | 6.09E-83  | NP_498281.2    | 59 | 313.153 | 375 | 223 | hypothetical protein C28H8.9                                             |
| Locus_6034_Transcript_4/5_Conf_0.200 | 757  | 20 | 2.77E-81  | NP_504559.1    | 96 | 305.834 | 157 | 152 | AdaPtin, Small chain (clathrin associated complex) family member (aps-1) |
| Locus_6034_Transcript_5/5_Conf_0.500 | 1653 | 20 | 5.82E-83  | NP_498281.2    | 59 | 313.153 | 375 | 223 | hypothetical protein C28H8.9                                             |
| Locus_6035_Transcript_1/2_Conf_1.000 | 1379 | 20 | 3.37E-102 | NP_508025.1    | 61 | 376.711 | 447 | 275 | hypothetical protein F31D4.2                                             |
| Locus_6035_Transcript_2/2_Conf_1.000 | 1379 | 20 | 4.40E-102 | NP_508025.1    | 61 | 376.326 | 447 | 275 | hypothetical protein F31D4.2                                             |

|                                      |      |    |           |                |    |         |     |     |                                                                             |
|--------------------------------------|------|----|-----------|----------------|----|---------|-----|-----|-----------------------------------------------------------------------------|
| Locus_6036_Transcript_1/1_Conf_1.000 | 427  | 20 | 1.41E-56  | NP_493413.1    | 89 | 222.246 | 134 | 120 | NuDiX family member (ndx-4)                                                 |
| Locus_6037_Transcript_1/1_Conf_1.000 | 444  | 20 | 1.63E-36  | AAK29933.3     | 77 | 155.606 | 127 | 99  | Rab connectin related protein 2, partially confirmed by transcript evidence |
| Locus_6038_Transcript_1/1_Conf_1.000 | 518  | 0  |           |                |    |         |     |     |                                                                             |
| Locus_6039_Transcript_1/2_Conf_1.000 | 2680 | 20 | 0         | NP_494939.1    | 76 | 940.643 | 769 | 589 | PhosphoLipase D family member (pld-1)                                       |
| Locus_6039_Transcript_2/2_Conf_1.000 | 595  | 2  | 3.93E-11  | XP_002630650.1 | 52 | 72.0182 | 127 | 67  | C. briggsae CBR-PLD-1 protein                                               |
| Locus_604_Transcript_1/2_Conf_1.000  | 594  | 12 | 4.21E-05  | XP_002644369.1 | 56 | 51.9878 | 83  | 47  | C. briggsae CBR-VIT-4 protein                                               |
| Locus_604_Transcript_2/2_Conf_1.000  | 594  | 12 | 4.21E-05  | XP_002644369.1 | 56 | 51.9878 | 83  | 47  | C. briggsae CBR-VIT-4 protein                                               |
| Locus_6040_Transcript_1/1_Conf_1.000 | 1435 | 20 | 3.29E-15  | XP_002755952.1 | 46 | 87.8113 | 443 | 205 | PREDICTED: myosin-11                                                        |
| Locus_6041_Transcript_1/2_Conf_1.000 | 802  | 20 | 1.59E-117 | CAR63542.1     | 91 | 426.402 | 265 | 242 | putative Pre-mRNA splicing protein                                          |
| Locus_6041_Transcript_2/2_Conf_1.000 | 802  | 20 | 9.94E-120 | CAR63542.1     | 91 | 433.721 | 265 | 242 | putative Pre-mRNA splicing protein                                          |
| Locus_6042_Transcript_1/1_Conf_1.000 | 941  | 20 | 6.63E-55  | XP_002633449.1 | 57 | 218.779 | 319 | 185 | C. briggsae CBR-SPT-5 protein                                               |
| Locus_6043_Transcript_1/1_Conf_1.000 | 1802 | 20 | 2.52E-111 | NP_497803.1    | 60 | 407.527 | 553 | 333 | hypothetical protein C36E8.1                                                |
| Locus_6044_Transcript_1/2_Conf_1.000 | 647  | 20 | 3.46E-25  | CAD21647.3     | 65 | 119.013 | 138 | 91  | C. elegans protein T03F6.6, confirmed by transcript evidence                |
| Locus_6044_Transcript_2/2_Conf_1.000 | 327  | 20 | 1.25E-12  | CAD21647.3     | 66 | 76.2554 | 86  | 57  | C. elegans protein T03F6.6, confirmed by transcript evidence                |

|                                      |      |    |          |                |    |         |     |     |                                                                             |
|--------------------------------------|------|----|----------|----------------|----|---------|-----|-----|-----------------------------------------------------------------------------|
| Locus_6045_Transcript_1/1_Conf_1.000 | 604  | 7  | 3.33E-45 | XP_002639766.1 | 66 | 185.267 | 203 | 135 | C. briggsae CBR-SEC-8 protein                                               |
| Locus_6046_Transcript_1/2_Conf_1.000 | 2391 | 20 | 0        | NP_503512.1    | 85 | 875.544 | 535 | 458 | GLYcosylation related family member (gly-7)                                 |
| Locus_6046_Transcript_2/2_Conf_1.000 | 2391 | 20 | 0        | NP_503512.1    | 85 | 875.544 | 535 | 458 | GLYcosylation related family member (gly-7)                                 |
| Locus_6047_Transcript_1/2_Conf_1.000 | 1746 | 20 | 1.19E-41 | NP_741137.1    | 53 | 176.022 | 331 | 176 | SKP2 (S phase Kinase associated Protein Two) homolog family member (skpt-1) |
| Locus_6047_Transcript_2/2_Conf_1.000 | 1746 | 20 | 1.19E-41 | NP_741137.1    | 53 | 176.022 | 331 | 177 | SKP2 (S phase Kinase associated Protein Two) homolog family member (skpt-1) |
| Locus_6048_Transcript_1/1_Conf_1.000 | 582  | 20 | 3.85E-56 | XP_002647989.1 | 77 | 221.476 | 167 | 130 | C. briggsae CBR-LPD-5 protein                                               |
| Locus_6049_Transcript_1/1_Conf_1.000 | 697  | 20 | 5.48E-62 | NP_502014.2    | 66 | 241.506 | 234 | 156 | hypothetical protein T11G6.8                                                |
| Locus_605_Transcript_1/1_Conf_1.000  | 1332 | 20 | 0        | XP_002638488.1 | 94 | 807.749 | 443 | 418 | C. briggsae CBR-SEC-23 protein                                              |
| Locus_6050_Transcript_1/1_Conf_1.000 | 205  | 0  |          |                |    |         |     |     |                                                                             |
| Locus_6051_Transcript_1/1_Conf_1.000 | 335  | 0  |          |                |    |         |     |     |                                                                             |

|                                      |      |    |           |                |    |         |     |     |                                                        |
|--------------------------------------|------|----|-----------|----------------|----|---------|-----|-----|--------------------------------------------------------|
| Locus_6052_Transcript_1/2_Conf_1.000 | 538  | 20 | 9.35E-74  | NP_001040633.1 | 83 | 279.641 | 178 | 148 | hypothetical protein B0261.4                           |
| Locus_6052_Transcript_2/2_Conf_1.000 | 538  | 20 | 9.35E-74  | NP_001040633.1 | 83 | 279.641 | 178 | 148 | hypothetical protein B0261.4                           |
| Locus_6053_Transcript_1/1_Conf_1.000 | 642  | 20 | 1.28E-72  | XP_002632892.1 | 82 | 276.559 | 213 | 175 | Hypothetical protein CBG15100                          |
| Locus_6054_Transcript_1/1_Conf_1.000 | 222  | 0  |           |                |    |         |     |     |                                                        |
| Locus_6055_Transcript_1/1_Conf_1.000 | 1361 | 20 | 2.06E-128 | NP_491552.2    | 66 | 463.766 | 507 | 337 | LEThal family member (let-363)                         |
| Locus_6056_Transcript_1/1_Conf_1.000 | 1663 | 20 | 4.08E-68  | NP_498027.2    | 60 | 263.848 | 335 | 201 | Temporarily Assigned Gene name family member (tag-340) |
| Locus_6057_Transcript_1/1_Conf_1.000 | 1670 | 20 | 4.76E-08  | NP_823528.1    | 39 | 64.3142 | 301 | 119 | hypothetical protein SAV_2352                          |
| Locus_6058_Transcript_1/1_Conf_1.000 | 330  | 20 | 8.30E-33  | XP_002646441.1 | 88 | 143.28  | 88  | 78  | Hypothetical protein CBG18827                          |

|                                      |      |    |           |                |     |         |     |     |                                                                                                     |
|--------------------------------------|------|----|-----------|----------------|-----|---------|-----|-----|-----------------------------------------------------------------------------------------------------|
| Locus_6059_Transcript_1/1_Conf_1.000 | 577  | 20 | 2.81E-112 | XP_002834824.1 | 100 | 407.912 | 191 | 191 | PREDICTED: LOW QUALITY PROTEIN:<br>guanine nucleotide-binding protein subunit<br>beta-2-like 1-like |
| Locus_606_Transcript_1/1_Conf_1.000  | 852  | 3  | 3.20E-26  | NP_509267.2    | 50  | 123.25  | 271 | 138 | hypothetical protein F48E3.4                                                                        |
| Locus_6060_Transcript_1/1_Conf_1.000 | 587  | 20 | 1.59E-49  | XP_002640081.1 | 89  | 199.519 | 124 | 111 | C. briggsae CBR-RPS-17 protein                                                                      |
| Locus_6061_Transcript_1/1_Conf_1.000 | 872  | 20 | 2.35E-80  | NP_499291.1    | 73  | 303.138 | 272 | 201 | Uridine MonoPhosphate Synthetase family<br>member (umps-1)                                          |
| Locus_6062_Transcript_1/1_Conf_1.000 | 515  | 20 | 5.84E-40  | XP_002640655.1 | 84  | 167.162 | 125 | 106 | Hypothetical protein CBG19713                                                                       |
| Locus_6063_Transcript_1/1_Conf_1.000 | 401  | 2  | 1.26E-04  | NP_496786.2    | 55  | 49.6766 | 67  | 37  | hypothetical protein F29C12.3                                                                       |
| Locus_6064_Transcript_1/3_Conf_0.500 | 2033 | 2  | 3.20E-33  | XP_002631528.1 | 72  | 148.288 | 159 | 116 | Hypothetical protein CBG20694                                                                       |
| Locus_6064_Transcript_2/3_Conf_0.500 | 906  | 1  | 4.48E-37  | XP_002631528.1 | 69  | 159.458 | 185 | 128 | Hypothetical protein CBG20694                                                                       |
| Locus_6064_Transcript_3/3_Conf_0.667 | 2042 | 2  | 3.22E-33  | XP_002631528.1 | 72  | 148.288 | 159 | 116 | Hypothetical protein CBG20694                                                                       |
| Locus_6065_Transcript_1/1_Conf_1.000 | 654  | 0  |           |                |     |         |     |     |                                                                                                     |
| Locus_6066_Transcript_1/1_Conf_1.000 | 822  | 20 | 5.02E-82  | ACI49151.1     | 78  | 308.531 | 232 | 183 | hypothetical protein Cbre_JD20.006                                                                  |
| Locus_6067_Transcript_1/1_Conf_1.000 | 215  | 0  |           |                |     |         |     |     |                                                                                                     |
| Locus_6068_Transcript_1/1_Conf_1.000 | 804  | 0  |           |                |     |         |     |     |                                                                                                     |
| Locus_6069_Transcript_1/1_Conf_1.000 | 793  | 3  | 2.47E-06  | NP_501541.2    | 52  | 56.9954 | 184 | 96  | hypothetical protein C09G9.5                                                                        |
| Locus_607_Transcript_1/6_Conf_0.125  | 612  | 0  |           |                |     |         |     |     |                                                                                                     |
| Locus_607_Transcript_5/6_Conf_0.321  | 544  | 0  |           |                |     |         |     |     |                                                                                                     |
| Locus_6070_Transcript_1/2_Conf_0.571 | 473  | 7  | 1.24E-36  | NP_740819.2    | 70  | 155.992 | 157 | 110 | hypothetical protein F32B5.6                                                                        |
| Locus_6070_Transcript_2/2_Conf_0.571 | 829  | 8  | 6.23E-72  | NP_740819.2    | 70  | 275.018 | 274 | 194 | hypothetical protein F32B5.6                                                                        |
| Locus_6071_Transcript_1/1_Conf_1.000 | 311  | 20 | 6.11E-20  | NP_001022386.1 | 68  | 100.523 | 103 | 71  | hypothetical protein W02B12.12                                                                      |
| Locus_6072_Transcript_1/1_Conf_1.000 | 337  | 0  |           |                |     |         |     |     |                                                                                                     |
| Locus_6073_Transcript_1/1_Conf_1.000 | 1752 | 20 | 2.83E-160 | NP_490931.1    | 86  | 570.081 | 356 | 309 | hypothetical protein Y37E3.11                                                                       |



|                                      |      |    |           |                |    |         |     |     |                                                                  |
|--------------------------------------|------|----|-----------|----------------|----|---------|-----|-----|------------------------------------------------------------------|
| Locus_6074_Transcript_1/1_Conf_1.000 | 477  | 3  | 1.67E-17  | XP_002636192.1 | 56 | 92.4337 | 159 | 90  | Hypothetical protein CBG12107                                    |
| Locus_6075_Transcript_1/1_Conf_1.000 | 328  | 9  | 1.21E-07  | CAO00417.1     | 67 | 59.6918 | 58  | 39  | two-domain activation associated secreted protein ASP4 precursor |
| Locus_6076_Transcript_1/1_Conf_1.000 | 435  | 20 | 2.47E-37  | XP_002641005.1 | 96 | 158.303 | 85  | 82  | C. briggsae CBR-SNR-6 protein                                    |
| Locus_6077_Transcript_1/1_Conf_1.000 | 510  | 20 | 3.35E-32  | EFO19245.1     | 71 | 141.354 | 121 | 87  | AGC/PDK1 protein kinase                                          |
| Locus_6078_Transcript_2/3_Conf_0.714 | 310  | 0  |           |                |    |         |     |     |                                                                  |
| Locus_6078_Transcript_3/3_Conf_0.714 | 235  | 0  |           |                |    |         |     |     |                                                                  |
| Locus_6079_Transcript_1/1_Conf_1.000 | 431  | 0  |           |                |    |         |     |     |                                                                  |
| Locus_608_Transcript_1/1_Conf_1.000  | 917  | 20 | 5.67E-88  | EFO22999.1     | 75 | 328.561 | 257 | 193 | hypothetical protein LOAG_05485                                  |
| Locus_6080_Transcript_1/1_Conf_1.000 | 642  | 20 | 2.26E-61  | CAQ48388.2     | 74 | 239.195 | 203 | 152 | C. elegans protein C26H9A.1b, confirmed by transcript evidence   |
| Locus_6081_Transcript_1/1_Conf_1.000 | 941  | 20 | 1.00E-127 | NP_498093.1    | 89 | 460.685 | 309 | 278 | Glycyl tRNA Synthetase family member (grs-1)                     |
| Locus_6082_Transcript_1/1_Conf_1.000 | 1370 | 20 | 9.57E-41  | NP_491704.1    | 62 | 172.555 | 221 | 138 | VAP (VAMP-associated protein) Related family member (vpr-1)      |
| Locus_6083_Transcript_1/1_Conf_1.000 | 1546 | 2  | 2.04E-34  | XP_001897733.1 | 51 | 151.754 | 246 | 126 | hypothetical protein Bm1_31440                                   |
| Locus_6084_Transcript_1/1_Conf_1.000 | 713  | 0  |           |                |    |         |     |     |                                                                  |
| Locus_6085_Transcript_1/1_Conf_1.000 | 360  | 20 | 6.53E-38  | AAC38987.1     | 97 | 160.229 | 92  | 90  | P-glycoprotein                                                   |

|                                      |      |    |          |                |    |         |     |     |                                                                         |
|--------------------------------------|------|----|----------|----------------|----|---------|-----|-----|-------------------------------------------------------------------------|
| Locus_6086_Transcript_1/1_Conf_1.000 | 355  | 20 | 1.24E-36 | NP_001022869.1 | 77 | 155.992 | 124 | 96  | hypothetical protein Y42G9A.4                                           |
| Locus_6087_Transcript_1/1_Conf_1.000 | 395  | 5  | 2.56E-13 | NP_510311.2    | 65 | 78.5666 | 141 | 92  | hypothetical protein T21H8.1                                            |
| Locus_6088_Transcript_1/1_Conf_1.000 | 142  | 0  |          |                |    |         |     |     |                                                                         |
| Locus_6089_Transcript_1/1_Conf_1.000 | 712  | 3  | 2.41E-28 | NP_491606.2    | 56 | 129.798 | 238 | 134 | hypothetical protein C09D4.4                                            |
| Locus_609_Transcript_1/1_Conf_1.000  | 321  | 2  | 4.63E-15 | XP_001232842.1 | 71 | 84.3445 | 80  | 57  | PREDICTED: hypothetical protein                                         |
| Locus_6090_Transcript_1/1_Conf_1.000 | 605  | 4  | 3.97E-14 | XP_002641242.1 | 56 | 82.0333 | 136 | 77  | Hypothetical protein CBG09110                                           |
| Locus_6091_Transcript_1/1_Conf_1.000 | 209  | 20 | 1.47E-13 | CAR97821.1     | 78 | 79.337  | 66  | 52  | C. elegans protein F11C1.5d, partially confirmed by transcript evidence |
| Locus_6092_Transcript_1/1_Conf_1.000 | 270  | 20 | 7.02E-40 | XP_002642413.1 | 96 | 166.777 | 89  | 86  | Hypothetical protein CBG06810                                           |
| Locus_6093_Transcript_1/1_Conf_1.000 | 381  | 20 | 6.59E-30 | XP_001898426.1 | 67 | 133.65  | 134 | 90  | Bromodomain containing protein                                          |
| Locus_6094_Transcript_1/1_Conf_1.000 | 287  | 0  |          |                |    |         |     |     |                                                                         |
| Locus_6095_Transcript_1/1_Conf_1.000 | 842  | 10 | 3.02E-21 | XP_001886292.1 | 47 | 106.686 | 227 | 107 | predicted protein                                                       |
| Locus_6096_Transcript_1/1_Conf_1.000 | 1453 | 20 | 0        | NP_492730.2    | 86 | 781.941 | 485 | 421 | hypothetical protein Y106G6H.5                                          |
| Locus_6097_Transcript_1/1_Conf_1.000 | 639  | 5  | 8.77E-66 | NP_504033.2    | 74 | 253.832 | 227 | 169 | hypothetical protein T27C4.1                                            |
| Locus_6098_Transcript_1/6_Conf_0.667 | 2903 | 20 | 0        | NP_490938.3    | 61 | 681.404 | 978 | 600 | AFaDin (actin filament binding protein) homolog family member (afd-1)   |
| Locus_6098_Transcript_2/6_Conf_0.667 | 2903 | 20 | 0        | NP_490938.3    | 61 | 680.633 | 978 | 599 | AFaDin (actin filament binding protein) homolog family member (afd-1)   |

|                                      |      |    |           |                |     |         |      |      |                                                                       |
|--------------------------------------|------|----|-----------|----------------|-----|---------|------|------|-----------------------------------------------------------------------|
| Locus_6098_Transcript_3/6_Conf_0.667 | 2903 | 20 | 0         | NP_490938.3    | 61  | 681.404 | 978  | 600  | AFaDin (actin filament binding protein) homolog family member (afd-1) |
| Locus_6098_Transcript_4/6_Conf_0.667 | 2903 | 20 | 0         | NP_490938.3    | 61  | 681.404 | 978  | 600  | AFaDin (actin filament binding protein) homolog family member (afd-1) |
| Locus_6098_Transcript_5/6_Conf_0.533 | 2610 | 20 | 0         | NP_490938.3    | 62  | 664.455 | 906  | 565  | AFaDin (actin filament binding protein) homolog family member (afd-1) |
| Locus_6098_Transcript_6/6_Conf_0.667 | 2903 | 20 | 0         | NP_490938.3    | 61  | 681.404 | 978  | 600  | AFaDin (actin filament binding protein) homolog family member (afd-1) |
| Locus_6099_Transcript_1/1_Conf_1.000 | 434  | 20 | 2.33E-27  | XP_002633403.1 | 62  | 125.176 | 130  | 81   | Hypothetical protein CBG06165                                         |
| Locus_61_Transcript_1/1_Conf_1.000   | 3571 | 20 | 0         | NP_741632.2    | 86  | 1571.6  | 1194 | 1034 | SMALL family member (sma-1)                                           |
| Locus_610_Transcript_1/2_Conf_1.000  | 1193 | 20 | 1.91E-79  | EFO20642.1     | 76  | 300.827 | 235  | 180  | hypothetical protein LOAG_07844                                       |
| Locus_610_Transcript_2/2_Conf_1.000  | 1305 | 20 | 2.17E-79  | EFO20642.1     | 76  | 300.827 | 235  | 180  | hypothetical protein LOAG_07844                                       |
| Locus_6100_Transcript_1/1_Conf_1.000 | 168  | 1  | 4.14E-16  | CAR63626.1     | 90  | 87.8113 | 53   | 48   | hypothetical protein                                                  |
| Locus_6101_Transcript_1/2_Conf_1.000 | 486  | 0  |           |                |     |         |      |      |                                                                       |
| Locus_6101_Transcript_2/2_Conf_1.000 | 642  | 0  |           |                |     |         |      |      |                                                                       |
| Locus_6102_Transcript_1/1_Conf_1.000 | 339  | 20 | 2.14E-57  | XP_002801893.1 | 100 | 224.942 | 113  | 113  | PREDICTED: translocon-associated protein subunit beta-like isoform 2  |
| Locus_6103_Transcript_1/1_Conf_1.000 | 240  | 0  |           |                |     |         |      |      |                                                                       |
| Locus_6104_Transcript_1/1_Conf_1.000 | 1091 | 20 | 8.19E-127 | NP_001023928.1 | 77  | 457.988 | 356  | 275  | hypothetical protein F44E7.4                                          |

|                                      |      |    |           |                |    |         |     |     |                                                            |
|--------------------------------------|------|----|-----------|----------------|----|---------|-----|-----|------------------------------------------------------------|
| Locus_6105_Transcript_1/1_Conf_1.000 | 604  | 20 | 2.20E-97  | XP_002644536.1 | 98 | 358.607 | 201 | 198 | C. briggsae CBR-DPY-23 protein                             |
| Locus_6106_Transcript_1/1_Conf_1.000 | 1415 | 20 | 1.81E-159 | XP_002629880.1 | 83 | 567     | 391 | 327 | Hypothetical protein CBG21917                              |
| Locus_6107_Transcript_1/1_Conf_1.000 | 828  | 20 | 7.90E-59  | NP_001083402.1 | 74 | 231.491 | 211 | 157 | RAB21, member RAS oncogene family                          |
| Locus_6108_Transcript_1/1_Conf_1.000 | 1405 | 20 | 4.62E-06  | XP_002712937.1 | 49 | 57.3806 | 130 | 64  | PREDICTED: nuclear matrix transcription factor 4 isoform 1 |
| Locus_6109_Transcript_1/1_Conf_1.000 | 307  | 0  |           |                |    |         |     |     |                                                            |
| Locus_611_Transcript_1/1_Conf_1.000  | 859  | 7  | 1.67E-22  | A8X0L9.2       | 52 | 110.923 | 234 | 123 | Tat-binding homolog 7                                      |
| Locus_6110_Transcript_1/1_Conf_1.000 | 690  | 12 | 1.09E-38  | NP_498612.1    | 55 | 164.081 | 226 | 125 | hypothetical protein F56C9.7                               |

|                                      |      |    |           |                |    |         |     |     |                                                |
|--------------------------------------|------|----|-----------|----------------|----|---------|-----|-----|------------------------------------------------|
| Locus_6111_Transcript_1/1_Conf_1.000 | 538  | 4  | 1.20E-20  | XP_002635869.1 | 60 | 103.219 | 133 | 80  | Hypothetical protein CBG01085                  |
| Locus_6112_Transcript_1/1_Conf_1.000 | 466  | 20 | 2.06E-39  | EFO21364.1     | 74 | 165.236 | 131 | 98  | dCMP deaminase                                 |
| Locus_6113_Transcript_1/1_Conf_1.000 | 225  | 20 | 1.22E-23  | NP_491275.2    | 87 | 112.849 | 74  | 65  | hypothetical protein F47B3.6                   |
| Locus_6114_Transcript_1/1_Conf_1.000 | 177  | 0  |           |                |    |         |     |     |                                                |
| Locus_6115_Transcript_1/2_Conf_1.000 | 486  | 20 | 2.45E-24  | NP_498400.1    | 94 | 115.161 | 70  | 66  | hypothetical protein C16A3.1                   |
| Locus_6115_Transcript_2/2_Conf_1.000 | 588  | 20 | 3.93E-24  | NP_498400.1    | 94 | 115.161 | 70  | 66  | hypothetical protein C16A3.1                   |
| Locus_6116_Transcript_1/1_Conf_1.000 | 510  | 0  |           |                |    |         |     |     |                                                |
| Locus_6117_Transcript_1/1_Conf_1.000 | 849  | 20 | 2.18E-67  | XP_001895891.1 | 66 | 259.996 | 282 | 187 | ubiquitin-conjugating enzyme E2Q               |
| Locus_6118_Transcript_1/1_Conf_1.000 | 395  | 0  |           |                |    |         |     |     |                                                |
| Locus_6119_Transcript_1/1_Conf_1.000 | 193  | 8  | 1.11E-08  | XP_002638736.1 | 68 | 63.1586 | 57  | 39  | C. briggsae CBR-EGO-1 protein                  |
| Locus_612_Transcript_1/2_Conf_1.000  | 1411 | 20 | 4.21E-116 | NP_001023759.2 | 75 | 422.935 | 340 | 255 | hypothetical protein DC2.3                     |
| Locus_612_Transcript_2/2_Conf_1.000  | 1411 | 20 | 3.56E-115 | NP_001023759.2 | 74 | 419.853 | 340 | 254 | hypothetical protein DC2.3                     |
| Locus_6120_Transcript_1/2_Conf_1.000 | 1796 | 20 | 8.41E-83  | NP_498020.1    | 98 | 312.768 | 169 | 166 | ARp2/3 complex component family member (arx-6) |

|                                      |      |    |           |                |    |         |     |     |                                                                        |
|--------------------------------------|------|----|-----------|----------------|----|---------|-----|-----|------------------------------------------------------------------------|
| Locus_6120_Transcript_2/2_Conf_1.000 | 1796 | 20 | 8.41E-83  | NP_498020.1    | 98 | 312.768 | 169 | 166 | ARp2/3 complex component family member (arx-6)                         |
| Locus_6121_Transcript_1/1_Conf_1.000 | 479  | 20 | 1.05E-11  | EFO18092.1     | 64 | 73.1738 | 90  | 58  | hypothetical protein LOAG_10406                                        |
| Locus_6122_Transcript_1/1_Conf_1.000 | 1035 | 20 | 3.31E-122 | EFO24060.1     | 81 | 442.58  | 304 | 248 | hypothetical protein LOAG_04426                                        |
| Locus_6123_Transcript_1/1_Conf_1.000 | 136  | 0  |           |                |    |         |     |     |                                                                        |
| Locus_6124_Transcript_1/2_Conf_1.000 | 564  | 0  |           |                |    |         |     |     |                                                                        |
| Locus_6124_Transcript_2/2_Conf_1.000 | 995  | 20 | 5.58E-31  | XP_002632984.1 | 62 | 139.428 | 156 | 98  | Hypothetical protein CBG21747                                          |
| Locus_6125_Transcript_1/1_Conf_1.000 | 497  | 7  | 9.66E-74  | CAD44145.2     | 87 | 279.256 | 166 | 146 | C. elegans protein T21C9.3b, confirmed by transcript evidence          |
| Locus_6126_Transcript_1/1_Conf_1.000 | 1173 | 20 | 1.15E-129 | NP_741303.2    | 90 | 467.618 | 299 | 271 | hypothetical protein F38A1.8                                           |
| Locus_6127_Transcript_1/1_Conf_1.000 | 1294 | 20 | 1.05E-134 | NP_500157.2    | 77 | 484.567 | 385 | 299 | Cleavage and Polyadenylation Specificity Factor family member (cpsf-1) |
| Locus_6128_Transcript_1/1_Conf_1.000 | 901  | 20 | 5.49E-96  | EFO25036.1     | 76 | 355.14  | 248 | 190 | CUP-2 protein                                                          |
| Locus_6129_Transcript_1/2_Conf_1.000 | 1436 | 2  | 7.33E-15  | XP_002636412.1 | 41 | 86.6557 | 279 | 115 | Hypothetical protein CBG23065                                          |
| Locus_6129_Transcript_2/2_Conf_1.000 | 1436 | 2  | 7.33E-15  | XP_002636412.1 | 41 | 86.6557 | 279 | 115 | Hypothetical protein CBG23065                                          |

|                                     |      |    |   |             |    |        |     |     |                                                                  |
|-------------------------------------|------|----|---|-------------|----|--------|-----|-----|------------------------------------------------------------------|
| Locus_613_Transcript_1/3_Conf_0.667 | 1684 | 20 | 0 | NP_505733.1 | 98 | 645.58 | 315 | 311 | yeast Glc Seven-like Phosphatases family member ( <i>gsp-1</i> ) |
| Locus_613_Transcript_2/3_Conf_0.667 | 1744 | 20 | 0 | NP_505733.1 | 98 | 645.58 | 315 | 311 | yeast Glc Seven-like Phosphatases family member ( <i>gsp-1</i> ) |
| Locus_613_Transcript_3/3_Conf_0.667 | 1672 | 20 | 0 | NP_505733.1 | 98 | 645.58 | 315 | 311 | yeast Glc Seven-like Phosphatases family member ( <i>gsp-1</i> ) |

|                                      |      |    |           |                |    |         |     |     |                                                                                    |
|--------------------------------------|------|----|-----------|----------------|----|---------|-----|-----|------------------------------------------------------------------------------------|
| Locus_6130_Transcript_1/1_Conf_1.000 | 356  | 20 | 3.15E-48  | NP_001022190.1 | 91 | 194.512 | 118 | 108 | hypothetical protein F53A10.2                                                      |
| Locus_6131_Transcript_1/1_Conf_1.000 | 320  | 20 | 9.31E-32  | NP_001024956.1 | 80 | 139.813 | 103 | 83  | hypothetical protein Y26E6A.3                                                      |
| Locus_6132_Transcript_1/4_Conf_0.375 | 712  | 8  | 3.70E-45  | CAR63526.1     | 93 | 185.652 | 105 | 98  | hypothetical protein                                                               |
| Locus_6132_Transcript_2/4_Conf_0.625 | 1542 | 20 | 9.77E-154 | CAR63526.1     | 94 | 548.125 | 341 | 322 | hypothetical protein                                                               |
| Locus_6132_Transcript_3/4_Conf_0.625 | 1617 | 20 | 1.04E-153 | CAR63526.1     | 94 | 548.125 | 341 | 322 | hypothetical protein                                                               |
| Locus_6132_Transcript_4/4_Conf_0.625 | 1617 | 20 | 1.04E-153 | CAR63526.1     | 94 | 548.125 | 341 | 322 | hypothetical protein                                                               |
| Locus_6133_Transcript_1/1_Conf_1.000 | 306  | 0  |           |                |    |         |     |     |                                                                                    |
| Locus_6134_Transcript_1/2_Conf_0.500 | 1172 | 0  |           |                |    |         |     |     |                                                                                    |
| Locus_6134_Transcript_2/2_Conf_0.875 | 1172 | 0  |           |                |    |         |     |     |                                                                                    |
| Locus_6135_Transcript_1/1_Conf_1.000 | 922  | 20 | 1.92E-67  | ADI24626.1     | 87 | 260.381 | 174 | 152 | Dehydrogenases, short chain protein 27, partially confirmed by transcript evidence |
| Locus_6136_Transcript_1/1_Conf_1.000 | 584  | 20 | 2.68E-41  | NP_001076703.1 | 75 | 172.17  | 146 | 110 | hypothetical protein T11G6.2                                                       |
| Locus_6137_Transcript_1/1_Conf_1.000 | 1270 | 20 | 1.42E-128 | NP_506418.1    | 80 | 464.151 | 344 | 276 | Seven WD repeats, AN11 family member (swan-1)                                      |
| Locus_6138_Transcript_1/1_Conf_1.000 | 1135 | 20 | 1.13E-150 | AAO62949.1     | 90 | 537.339 | 335 | 303 | neuronal acetylcholinesterase precursor                                            |



|                                      |      |    |           |                |    |         |     |     |                                                                           |
|--------------------------------------|------|----|-----------|----------------|----|---------|-----|-----|---------------------------------------------------------------------------|
| Locus_6139_Transcript_1/1_Conf_1.000 | 1177 | 20 | 9.81E-121 | CBB16332.1     | 75 | 437.958 | 395 | 299 | C. elegans protein Y47D3A.29b, partially confirmed by transcript evidence |
| Locus_614_Transcript_1/2_Conf_1.000  | 1301 | 5  | 3.74E-23  | NP_001033342.1 | 47 | 114.005 | 326 | 155 | hypothetical protein ZK177.4                                              |
| Locus_614_Transcript_2/2_Conf_1.000  | 1301 | 5  | 3.74E-23  | NP_001033342.1 | 47 | 114.005 | 326 | 155 | hypothetical protein ZK177.4                                              |
| Locus_6140_Transcript_1/1_Conf_1.000 | 1665 | 20 | 0         | NP_001122812.1 | 78 | 778.474 | 598 | 472 | TBC (Tre-2/Bub2/Cdc16) domain family member (tbc-9)                       |
| Locus_6141_Transcript_1/1_Conf_1.000 | 1284 | 20 | 8.58E-97  | NP_498746.1    | 67 | 358.607 | 372 | 250 | hypothetical protein F44B9.5                                              |
| Locus_6142_Transcript_1/2_Conf_1.000 | 311  | 0  |           |                |    |         |     |     |                                                                           |
| Locus_6142_Transcript_2/2_Conf_1.000 | 287  | 0  |           |                |    |         |     |     |                                                                           |
| Locus_6143_Transcript_1/1_Conf_1.000 | 925  | 3  | 1.31E-23  | NP_872046.1    | 43 | 114.775 | 340 | 148 | hypothetical protein ZK131.11                                             |
| Locus_6144_Transcript_1/1_Conf_1.000 | 1201 | 20 | 1.88E-167 | NP_495750.1    | 94 | 593.193 | 337 | 318 | Chaperonin Containing TCP-1 family member (cct-4)                         |
| Locus_6145_Transcript_1/1_Conf_1.000 | 390  | 20 | 5.70E-26  | XP_001897340.1 | 67 | 120.553 | 128 | 87  | BTB/POZ domain containing protein                                         |
| Locus_6146_Transcript_1/1_Conf_1.000 | 870  | 20 | 2.05E-92  | XP_002642445.1 | 78 | 343.199 | 288 | 225 | Hypothetical protein CBG06850                                             |
| Locus_6147_Transcript_1/1_Conf_1.000 | 326  | 20 | 1.62E-52  | XP_002747844.1 | 97 | 208.764 | 103 | 100 | PREDICTED: 60S ribosomal protein L37a-like                                |

|                                      |      |    |           |                |     |         |     |     |                                                        |
|--------------------------------------|------|----|-----------|----------------|-----|---------|-----|-----|--------------------------------------------------------|
| Locus_6148_Transcript_1/1_Conf_1.000 | 1322 | 4  | 1.32E-07  | NP_506662.1    | 47  | 62.3882 | 219 | 103 | hypothetical protein ZC412.3                           |
| Locus_6149_Transcript_1/1_Conf_1.000 | 880  | 8  | 2.04E-15  | XP_001902629.1 | 55  | 87.4261 | 226 | 126 | Zinc finger, C2H2 type family protein                  |
| Locus_615_Transcript_1/1_Conf_1.000  | 899  | 20 | 1.67E-28  | XP_001895197.1 | 64  | 130.954 | 151 | 97  | Piwi domain containing protein                         |
| Locus_6150_Transcript_1/1_Conf_1.000 | 633  | 4  | 7.57E-30  | XP_001900891.1 | 64  | 134.42  | 195 | 125 | Prion-like-                                            |
| Locus_6151_Transcript_1/1_Conf_1.000 | 501  | 20 | 2.14E-44  | CAD11604.1     | 81  | 181.8   | 116 | 95  | cystathionine beta-synthase                            |
| Locus_6152_Transcript_1/1_Conf_1.000 | 326  | 0  |           |                |     |         |     |     |                                                        |
| Locus_6153_Transcript_1/1_Conf_1.000 | 241  | 20 | 3.48E-39  | ACT66687.1     | 100 | 164.466 | 80  | 80  | glutathione S-transferase pi                           |
| Locus_6154_Transcript_1/1_Conf_1.000 | 1436 | 20 | 1.76E-101 | XP_001898939.1 | 65  | 374.4   | 414 | 273 | Immunoglobulin I-set domain containing protein         |
| Locus_6155_Transcript_1/1_Conf_1.000 | 1424 | 20 | 1.60E-147 | NP_492149.1    | 84  | 527.324 | 369 | 312 | Temporarily Assigned Gene name family member (tag-173) |
| Locus_6156_Transcript_1/1_Conf_1.000 | 375  | 20 | 2.00E-18  | XP_002644331.1 | 82  | 95.5153 | 76  | 63  | Hypothetical protein CBG14140                          |
| Locus_6157_Transcript_1/1_Conf_1.000 | 638  | 20 | 5.81E-62  | NP_496426.1    | 73  | 241.121 | 199 | 147 | hypothetical protein B0491.1                           |

|                                      |      |    |           |                |    |         |     |     |                                                                |
|--------------------------------------|------|----|-----------|----------------|----|---------|-----|-----|----------------------------------------------------------------|
| Locus_6158_Transcript_1/1_Conf_1.000 | 627  | 0  |           |                |    |         |     |     |                                                                |
| Locus_6159_Transcript_1/1_Conf_1.000 | 744  | 9  | 1.92E-10  | XP_001901704.1 | 59 | 70.4774 | 94  | 56  | hypothetical protein                                           |
| Locus_616_Transcript_1/1_Conf_1.000  | 1270 | 20 | 6.13E-39  | XP_001895592.1 | 59 | 166.392 | 270 | 160 | RIKEN cDNA 2810405J04                                          |
| Locus_6160_Transcript_1/1_Conf_1.000 | 490  | 20 | 1.68E-41  | XP_002637289.1 | 73 | 172.17  | 155 | 114 | Hypothetical protein CBG18976                                  |
| Locus_6161_Transcript_1/1_Conf_1.000 | 622  | 20 | 4.80E-42  | XP_001902295.1 | 70 | 174.866 | 177 | 125 | T-complex protein 11 containing protein                        |
| Locus_6162_Transcript_1/1_Conf_1.000 | 225  | 20 | 8.73E-30  | XP_001900704.1 | 90 | 133.265 | 73  | 66  | Protein kinase domain containing protein                       |
| Locus_6163_Transcript_1/1_Conf_1.000 | 704  | 20 | 2.35E-52  | XP_001901522.1 | 78 | 209.534 | 149 | 117 | EBF3-S                                                         |
| Locus_6164_Transcript_1/3_Conf_0.400 | 380  | 0  |           |                |    |         |     |     |                                                                |
| Locus_6164_Transcript_2/3_Conf_0.400 | 456  | 3  | 6.58E-06  | XP_002644494.1 | 57 | 53.9138 | 78  | 45  | Hypothetical protein CBG14382                                  |
| Locus_6164_Transcript_3/3_Conf_0.400 | 552  | 20 | 1.18E-45  | NP_741765.1    | 71 | 186.422 | 180 | 128 | tubulin folding COfactor E-Like protein family member (coel-1) |
| Locus_6165_Transcript_1/1_Conf_1.000 | 1271 | 20 | 1.23E-172 | NP_491027.1    | 89 | 610.527 | 372 | 333 | hypothetical protein F32B5.1                                   |
| Locus_6166_Transcript_1/1_Conf_1.000 | 539  | 20 | 2.09E-65  | XP_002641725.1 | 85 | 251.906 | 179 | 153 | Hypothetical protein CBG10062                                  |
| Locus_6167_Transcript_1/1_Conf_1.000 | 848  | 20 | 1.09E-135 | NP_510438.1    | 97 | 486.878 | 277 | 269 | CalSeQuestrin family member (csq-1)                            |
| Locus_6168_Transcript_1/3_Conf_0.667 | 2082 | 20 | 5.14E-119 | NP_741593.1    | 58 | 433.335 | 623 | 366 | hypothetical protein H24G06.1                                  |
| Locus_6168_Transcript_2/3_Conf_0.667 | 1936 | 20 | 1.55E-122 | NP_741593.1    | 59 | 444.891 | 622 | 371 | hypothetical protein H24G06.1                                  |
| Locus_6168_Transcript_3/3_Conf_0.667 | 2031 | 20 | 2.82E-122 | NP_741593.1    | 60 | 444.121 | 606 | 366 | hypothetical protein H24G06.1                                  |
| Locus_6169_Transcript_1/1_Conf_1.000 | 217  | 0  |           |                |    |         |     |     |                                                                |
| Locus_617_Transcript_1/1_Conf_1.000  | 184  | 0  |           |                |    |         |     |     |                                                                |

|                                      |      |    |          |                |     |         |     |     |                                    |
|--------------------------------------|------|----|----------|----------------|-----|---------|-----|-----|------------------------------------|
| Locus_6170_Transcript_1/1_Conf_1.000 | 786  | 3  | 4.14E-14 | XP_002639978.1 | 65  | 82.8037 | 131 | 86  | C. briggsae CBR-FHOD-1 protein     |
| Locus_6171_Transcript_1/1_Conf_1.000 | 323  | 0  |          |                |     |         |     |     |                                    |
| Locus_6172_Transcript_1/1_Conf_1.000 | 621  | 4  | 6.31E-18 | EFO24663.1     | 74  | 94.7449 | 98  | 73  | swan                               |
| Locus_6173_Transcript_1/2_Conf_1.000 | 680  | 20 | 4.52E-50 | XP_001900652.1 | 70  | 201.83  | 226 | 159 | Leucine Rich Repeat family protein |
| Locus_6173_Transcript_2/2_Conf_1.000 | 680  | 20 | 1.01E-49 | XP_001900652.1 | 69  | 200.675 | 226 | 158 | Leucine Rich Repeat family protein |
| Locus_6174_Transcript_1/1_Conf_1.000 | 750  | 20 | 1.43E-53 | AAX29951.1     | 100 | 213.772 | 100 | 100 | beta-2-microglobulin               |
| Locus_6175_Transcript_1/1_Conf_1.000 | 789  | 20 | 5.04E-52 | XP_002642969.1 | 66  | 208.764 | 225 | 150 | Hypothetical protein CBG15253      |
| Locus_6176_Transcript_1/1_Conf_1.000 | 591  | 3  | 9.15E-37 | NP_504540.2    | 62  | 157.147 | 193 | 121 | hypothetical protein C04E6.11      |
| Locus_6177_Transcript_1/1_Conf_1.000 | 334  | 4  | 1.37E-11 | XP_002639436.1 | 81  | 72.7886 | 64  | 52  | Hypothetical protein CBG04029      |
| Locus_6178_Transcript_1/1_Conf_1.000 | 1837 | 20 | 0        | ACI49195.1     | 99  | 707.597 | 355 | 353 | hypothetical protein Csp3_JD03.004 |
| Locus_6179_Transcript_1/1_Conf_1.000 | 259  | 0  |          |                |     |         |     |     |                                    |
| Locus_618_Transcript_1/1_Conf_1.000  | 470  | 20 | 1.37E-43 | XP_002640960.1 | 91  | 179.104 | 110 | 101 | Hypothetical protein CBG11702      |

|                                      |      |    |          |                |    |         |     |     |                                                                     |
|--------------------------------------|------|----|----------|----------------|----|---------|-----|-----|---------------------------------------------------------------------|
| Locus_6180_Transcript_1/1_Conf_1.000 | 268  | 14 | 2.00E-10 | EFO22013.1     | 77 | 68.9366 | 54  | 42  | ATP synthase subunit epsilon                                        |
| Locus_6181_Transcript_1/1_Conf_1.000 | 487  | 20 | 5.42E-40 | CAX65081.1     | 78 | 167.162 | 129 | 101 | C. elegans protein Y105E8A.7e, confirmed by transcript evidence     |
| Locus_6182_Transcript_1/1_Conf_1.000 | 684  | 20 | 1.68E-84 | NP_505885.2    | 97 | 316.235 | 169 | 164 | CalciNeurin B family member (cnb-1)                                 |
| Locus_6183_Transcript_1/1_Conf_1.000 | 490  | 3  | 4.03E-11 | XP_002631220.1 | 50 | 71.2478 | 132 | 67  | C. briggsae CBR-NPP-19 protein                                      |
| Locus_6184_Transcript_1/1_Conf_1.000 | 423  | 0  |          |                |    |         |     |     |                                                                     |
| Locus_6185_Transcript_1/1_Conf_1.000 | 2050 | 20 | 6.74E-31 | XP_001902695.1 | 54 | 140.584 | 188 | 103 | cytoplasmic polyadenylation element binding protein CPEB2, putative |
| Locus_6186_Transcript_1/3_Conf_0.714 | 1097 | 3  | 9.46E-06 | XP_973428.1    | 41 | 55.8398 | 225 | 94  | PREDICTED: similar to SJCHGC06573 protein                           |
| Locus_6186_Transcript_2/3_Conf_0.714 | 1160 | 0  |          |                |    |         |     |     |                                                                     |
| Locus_6186_Transcript_3/3_Conf_0.714 | 1160 | 2  | 2.98E-05 | XP_973428.1    | 39 | 54.299  | 236 | 93  | PREDICTED: similar to SJCHGC06573 protein                           |
| Locus_6187_Transcript_1/1_Conf_1.000 | 395  | 20 | 1.88E-40 | EFO25784.1     | 75 | 168.703 | 138 | 104 | hypothetical protein LOAG_02706                                     |
| Locus_6188_Transcript_1/1_Conf_1.000 | 465  | 1  | 1.88E-08 | CAH23216.1     | 50 | 62.3882 | 133 | 67  | putative L3 ES protein                                              |
| Locus_6189_Transcript_1/1_Conf_1.000 | 432  | 0  |          |                |    |         |     |     |                                                                     |
| Locus_619_Transcript_1/2_Conf_1.000  | 1711 | 9  | 8.69E-05 | XP_002664701.1 | 44 | 53.5286 | 166 | 74  | PREDICTED: HLA-B-associated transcript 3-like                       |
| Locus_619_Transcript_2/2_Conf_1.000  | 1462 | 0  |          |                |    |         |     |     |                                                                     |
| Locus_6190_Transcript_1/1_Conf_1.000 | 548  | 20 | 1.39E-51 | NP_497419.1    | 75 | 206.068 | 149 | 113 | hypothetical protein Y67D2.3                                        |
| Locus_6191_Transcript_1/1_Conf_1.000 | 336  | 20 | 1.15E-18 | XP_001953272.1 | 67 | 96.2857 | 108 | 73  | GF17288                                                             |

|                                      |      |    |           |                |    |         |     |     |                                                    |
|--------------------------------------|------|----|-----------|----------------|----|---------|-----|-----|----------------------------------------------------|
| Locus_6192_Transcript_1/1_Conf_1.000 | 534  | 20 | 4.76E-30  | NP_500308.2    | 62 | 134.42  | 178 | 111 | hypothetical protein T26C12.3                      |
| Locus_6193_Transcript_1/1_Conf_1.000 | 1227 | 20 | 2.78E-89  | NP_500410.2    | 65 | 333.569 | 388 | 253 | UDP-GlucuronosylTransferase family member (ugt-45) |
| Locus_6194_Transcript_1/2_Conf_1.000 | 1249 | 20 | 4.19E-32  | XP_002401494.1 | 67 | 143.665 | 162 | 109 | F-box containing protein, putative                 |
| Locus_6194_Transcript_2/2_Conf_1.000 | 339  | 2  | 1.72E-06  | XP_002640966.1 | 72 | 55.8398 | 51  | 37  | Hypothetical protein CBG11709                      |
| Locus_6195_Transcript_1/1_Conf_1.000 | 395  | 1  | 4.84E-04  | NP_508284.1    | 46 | 47.7506 | 67  | 31  | hypothetical protein F09E10.6                      |
| Locus_6196_Transcript_1/1_Conf_1.000 | 833  | 20 | 1.38E-10  | XP_002644140.1 | 95 | 71.2478 | 41  | 39  | C. briggsae CBR-SDN-1 protein                      |
| Locus_6197_Transcript_1/1_Conf_1.000 | 2054 | 20 | 0         | XP_002630402.1 | 83 | 762.296 | 533 | 445 | Hypothetical protein CBG04341                      |
| Locus_6198_Transcript_1/1_Conf_1.000 | 880  | 20 | 2.20E-110 | ACJ65179.1     | 93 | 402.905 | 220 | 205 | Hypothetical protein Y67D8C.10d                    |
| Locus_6199_Transcript_1/1_Conf_1.000 | 1023 | 0  |           |                |    |         |     |     |                                                    |
| Locus_62_Transcript_1/1_Conf_1.000   | 1496 | 20 | 0         | NP_501802.2    | 84 | 681.789 | 469 | 395 | hypothetical protein C47E12.3                      |
| Locus_620_Transcript_1/1_Conf_1.000  | 1790 | 20 | 0         | XP_002647028.1 | 85 | 840.106 | 552 | 473 | C. briggsae CBR-EMB-8 protein                      |

|                                      |      |    |           |                |    |         |     |     |                                                     |
|--------------------------------------|------|----|-----------|----------------|----|---------|-----|-----|-----------------------------------------------------|
| Locus_6200_Transcript_1/1_Conf_1.000 | 301  | 3  | 9.49E-37  | NP_501647.2    | 87 | 156.377 | 102 | 89  | hypothetical protein T20D3.11                       |
| Locus_6201_Transcript_1/1_Conf_1.000 | 536  | 20 | 4.31E-31  | NP_001021859.1 | 66 | 137.887 | 168 | 111 | Variable ABnormal morphology family member (vab-10) |
| Locus_6202_Transcript_1/1_Conf_1.000 | 613  | 0  |           |                |    |         |     |     |                                                     |
| Locus_6203_Transcript_1/1_Conf_1.000 | 503  | 20 | 2.64E-18  | NP_001122441.1 | 61 | 95.1301 | 95  | 58  | hypothetical protein F02E9.10                       |
| Locus_6204_Transcript_1/1_Conf_1.000 | 1443 | 20 | 1.11E-111 | EFO23151.1     | 69 | 408.297 | 360 | 251 | transcriptional regulator                           |
| Locus_6205_Transcript_1/1_Conf_1.000 | 243  | 0  |           |                |    |         |     |     |                                                     |
| Locus_6206_Transcript_1/1_Conf_1.000 | 605  | 0  |           |                |    |         |     |     |                                                     |
| Locus_6207_Transcript_1/1_Conf_1.000 | 400  | 0  |           |                |    |         |     |     |                                                     |
| Locus_6208_Transcript_1/1_Conf_1.000 | 473  | 20 | 3.47E-55  | NP_505616.2    | 86 | 217.624 | 152 | 132 | CULLin family member (cul-5)                        |
| Locus_6209_Transcript_1/1_Conf_1.000 | 825  | 20 | 2.38E-31  | XP_002639510.1 | 67 | 140.198 | 134 | 91  | C. briggsae CBR-YOP-1 protein                       |
| Locus_621_Transcript_1/2_Conf_1.000  | 947  | 1  | 1.90E-25  | CAR63707.1     | 61 | 120.939 | 151 | 93  | hypothetical protein                                |
| Locus_621_Transcript_2/2_Conf_1.000  | 964  | 1  | 1.83E-15  | CAR63707.1     | 55 | 87.8113 | 130 | 72  | hypothetical protein                                |
| Locus_6210_Transcript_1/1_Conf_1.000 | 1477 | 0  |           |                |    |         |     |     |                                                     |

|                                      |      |    |           |                |    |         |     |     |                                                                     |
|--------------------------------------|------|----|-----------|----------------|----|---------|-----|-----|---------------------------------------------------------------------|
| Locus_6211_Transcript_1/1_Conf_1.000 | 576  | 20 | 2.55E-105 | NP_501715.1    | 98 | 384.8   | 191 | 189 | Acetylcholine-gated Chloride Channel family member (acc-1)          |
| Locus_6212_Transcript_1/1_Conf_1.000 | 153  | 0  |           |                |    |         |     |     |                                                                     |
| Locus_6213_Transcript_1/1_Conf_1.000 | 432  | 0  |           |                |    |         |     |     |                                                                     |
| Locus_6214_Transcript_1/1_Conf_1.000 | 868  | 0  |           |                |    |         |     |     |                                                                     |
| Locus_6215_Transcript_1/3_Conf_0.667 | 768  | 20 | 2.05E-79  | NP_506260.1    | 76 | 299.671 | 261 | 199 | hypothetical protein W07G4.4                                        |
| Locus_6215_Transcript_2/3_Conf_0.667 | 768  | 20 | 2.05E-79  | NP_506260.1    | 76 | 299.671 | 261 | 199 | hypothetical protein W07G4.4                                        |
| Locus_6215_Transcript_3/3_Conf_0.667 | 768  | 20 | 2.05E-79  | NP_506260.1    | 76 | 299.671 | 261 | 199 | hypothetical protein W07G4.4                                        |
| Locus_6216_Transcript_1/2_Conf_0.500 | 966  | 0  |           |                |    |         |     |     |                                                                     |
| Locus_6216_Transcript_2/2_Conf_0.833 | 651  | 0  |           |                |    |         |     |     |                                                                     |
| Locus_6217_Transcript_1/1_Conf_1.000 | 1805 | 20 | 3.36E-47  | EFA03559.1     | 64 | 194.512 | 265 | 171 | hypothetical protein TcasGA2_TC013564                               |
| Locus_6218_Transcript_1/1_Conf_1.000 | 1287 | 20 | 3.51E-82  | ACI49105.1     | 67 | 310.071 | 322 | 217 | hypothetical protein Cbre_JD13.007                                  |
| Locus_6219_Transcript_1/1_Conf_1.000 | 681  | 20 | 2.59E-45  | NP_492839.4    | 71 | 186.037 | 240 | 172 | Leucine-rich repeats, Ras-like domain, Kinase family member (lrk-1) |
| Locus_622_Transcript_1/1_Conf_1.000  | 169  | 20 | 2.51E-21  | XP_002640076.1 | 92 | 105.145 | 55  | 51  | Hypothetical protein CBG12561                                       |
| Locus_6220_Transcript_1/1_Conf_1.000 | 261  | 0  |           |                |    |         |     |     |                                                                     |
| Locus_6221_Transcript_1/1_Conf_1.000 | 575  | 3  | 1.07E-31  | NP_505169.2    | 65 | 140.198 | 140 | 92  | hypothetical protein F52E1.9                                        |
| Locus_6222_Transcript_1/1_Conf_1.000 | 964  | 5  | 1.90E-04  | XP_001494660.2 | 41 | 51.2174 | 257 | 106 | PREDICTED: similar to Fibrous sheath CABYR binding protein          |
| Locus_6223_Transcript_1/2_Conf_1.000 | 286  | 0  |           |                |    |         |     |     |                                                                     |
| Locus_6223_Transcript_2/2_Conf_1.000 | 277  | 0  |           |                |    |         |     |     |                                                                     |
| Locus_6224_Transcript_1/1_Conf_1.000 | 819  | 8  | 1.13E-09  | Q61QK6.2       | 90 | 68.1662 | 42  | 38  | Protein melted homolog                                              |



|                                      |      |    |           |                |    |         |     |     |                                                                  |
|--------------------------------------|------|----|-----------|----------------|----|---------|-----|-----|------------------------------------------------------------------|
| Locus_6225_Transcript_1/1_Conf_1.000 | 1254 | 20 | 0         | NP_001022939.1 | 97 | 739.954 | 418 | 409 | hypothetical protein Y71H2B.10                                   |
| Locus_6226_Transcript_1/3_Conf_0.667 | 680  | 20 | 2.35E-115 | A8WJR8.2       | 99 | 418.698 | 225 | 223 | Dual specificity tyrosine-phosphorylation-regulated kinase mbk-2 |
| Locus_6226_Transcript_2/3_Conf_0.667 | 758  | 20 | 1.23E-129 | A8WJR8.2       | 98 | 466.463 | 251 | 246 | Dual specificity tyrosine-phosphorylation-regulated kinase mbk-2 |
| Locus_6226_Transcript_3/3_Conf_0.667 | 680  | 20 | 2.35E-115 | A8WJR8.2       | 99 | 418.698 | 225 | 223 | Dual specificity tyrosine-phosphorylation-regulated kinase mbk-2 |
| Locus_6227_Transcript_1/1_Conf_1.000 | 423  | 11 | 2.62E-18  | NP_001022851.1 | 58 | 95.1301 | 133 | 78  | GLYcosylation related family member (gly-5)                      |

|                                      |      |    |           |                |    |         |     |     |                                                                             |
|--------------------------------------|------|----|-----------|----------------|----|---------|-----|-----|-----------------------------------------------------------------------------|
| Locus_6228_Transcript_1/1_Conf_1.000 | 601  | 20 | 3.91E-14  | NP_740774.1    | 59 | 82.0333 | 82  | 49  | hypothetical protein Y48G1A.4                                               |
| Locus_6229_Transcript_1/1_Conf_1.000 | 607  | 20 | 5.21E-46  | NP_495103.1    | 69 | 187.963 | 195 | 135 | ZYGote defective: embryonic lethal family member (zyg-1)                    |
| Locus_623_Transcript_1/1_Conf_1.000  | 2625 | 20 | 0         | NP_001040817.1 | 68 | 715.687 | 703 | 484 | NHL (ring finger b-box coiled coil) domain containing family member (nhl-3) |
| Locus_6230_Transcript_1/2_Conf_1.000 | 430  | 0  |           |                |    |         |     |     |                                                                             |
| Locus_6230_Transcript_2/2_Conf_1.000 | 470  | 0  |           |                |    |         |     |     |                                                                             |
| Locus_6231_Transcript_1/1_Conf_1.000 | 755  | 2  | 2.22E-06  | EFO24024.1     | 61 | 56.9954 | 76  | 47  | CMGC/DYRK/HIPK protein kinase                                               |
| Locus_6232_Transcript_1/1_Conf_1.000 | 663  | 7  | 8.43E-14  | EFO27864.1     | 51 | 81.2629 | 145 | 74  | hypothetical protein LOAG_00607                                             |
| Locus_6233_Transcript_1/1_Conf_1.000 | 585  | 20 | 1.34E-56  | XP_002630082.1 | 83 | 223.016 | 160 | 133 | Hypothetical protein CBG13461                                               |
| Locus_6234_Transcript_1/1_Conf_1.000 | 464  | 20 | 2.71E-39  | XP_002631669.1 | 93 | 164.851 | 98  | 92  | C. briggsae CBR-MOG-4 protein                                               |
| Locus_6235_Transcript_1/1_Conf_1.000 | 1235 | 20 | 1.69E-102 | NP_501452.1    | 68 | 377.481 | 410 | 279 | Acyl CoA DeHydrogenase family member (acdh-13)                              |
| Locus_6236_Transcript_1/1_Conf_1.000 | 1758 | 20 | 3.56E-78  | EFO23262.1     | 52 | 297.36  | 557 | 295 | hypothetical protein LOAG_05225                                             |
| Locus_6237_Transcript_1/1_Conf_1.000 | 591  | 2  | 9.87E-07  | XP_002634618.1 | 50 | 57.3806 | 174 | 87  | Hypothetical protein CBG18472                                               |
| Locus_6238_Transcript_1/1_Conf_1.000 | 304  | 0  |           |                |    |         |     |     |                                                                             |
| Locus_6239_Transcript_1/1_Conf_1.000 | 338  | 0  |           |                |    |         |     |     |                                                                             |
| Locus_624_Transcript_1/3_Conf_0.250  | 1124 | 20 | 7.91E-64  | NP_492709.2    | 67 | 248.825 | 245 | 166 | hypothetical protein ZC434.4                                                |
| Locus_624_Transcript_2/3_Conf_0.250  | 125  | 0  |           |                |    |         |     |     |                                                                             |

|                                      |      |    |          |                |     |         |     |     |                                                                     |
|--------------------------------------|------|----|----------|----------------|-----|---------|-----|-----|---------------------------------------------------------------------|
| Locus_624_Transcript_3/3_Conf_0.625  | 349  | 20 | 1.49E-13 | AAD51334.1     | 61  | 79.337  | 83  | 51  | Kunitz type serine protease inhibitor                               |
| Locus_6240_Transcript_1/1_Conf_1.000 | 568  | 4  | 8.28E-13 | XP_002634109.1 | 56  | 77.411  | 124 | 70  | C. briggsae CBR-CSN-3 protein                                       |
| Locus_6241_Transcript_1/1_Conf_1.000 | 147  | 0  |          |                |     |         |     |     |                                                                     |
| Locus_6242_Transcript_1/1_Conf_1.000 | 370  | 20 | 2.45E-48 | ACX53263.1     | 92  | 194.897 | 116 | 107 | glutathione S-transferase-3                                         |
| Locus_6243_Transcript_1/4_Conf_0.250 | 876  | 0  |          |                |     |         |     |     |                                                                     |
| Locus_6243_Transcript_2/4_Conf_0.250 | 551  | 7  | 2.88E-28 | NP_491629.1    | 73  | 128.642 | 108 | 79  | Prion-like-(Q/N-rich)-domain-bearing protein family member (pqn-52) |
| Locus_6243_Transcript_3/4_Conf_0.250 | 941  | 0  |          |                |     |         |     |     |                                                                     |
| Locus_6243_Transcript_4/4_Conf_0.500 | 493  | 7  | 2.50E-29 | NP_491629.1    | 68  | 131.724 | 124 | 85  | Prion-like-(Q/N-rich)-domain-bearing protein family member (pqn-52) |
| Locus_6244_Transcript_1/1_Conf_1.000 | 593  | 4  | 6.82E-16 | NP_495920.1    | 64  | 87.8113 | 89  | 57  | hypothetical protein F44G4.3                                        |
| Locus_6245_Transcript_1/1_Conf_1.000 | 351  | 20 | 6.40E-33 | XP_001513459.1 | 100 | 143.665 | 68  | 68  | PREDICTED: similar to insulinoma protein (rig), partial             |
| Locus_6246_Transcript_1/1_Conf_1.000 | 128  | 0  |          |                |     |         |     |     |                                                                     |
| Locus_6247_Transcript_1/1_Conf_1.000 | 425  | 20 | 1.35E-06 | XP_003064014.1 | 53  | 56.225  | 106 | 57  | predicted protein                                                   |
| Locus_6248_Transcript_1/1_Conf_1.000 | 1381 | 20 | 1.75E-82 | NP_510459.1    | 65  | 311.227 | 374 | 244 | EPsiN (endocytic protein) homolog family member (epn-1)             |
| Locus_6249_Transcript_1/1_Conf_1.000 | 967  | 8  | 1.30E-45 | NP_505068.1    | 55  | 187.963 | 265 | 146 | hypothetical protein F43H9.4                                        |
| Locus_625_Transcript_1/1_Conf_1.000  | 1397 | 7  | 3.20E-92 | XP_002639943.1 | 67  | 343.584 | 377 | 255 | C. briggsae CBR-MDT-28 protein                                      |
| Locus_6250_Transcript_1/1_Conf_1.000 | 477  | 20 | 1.60E-44 | NP_001024594.1 | 73  | 182.185 | 134 | 98  | Invertebrate LYsozyme family member (iils-5)                        |
| Locus_6251_Transcript_1/2_Conf_0.500 | 656  | 3  | 1.72E-19 | NP_503096.1    | 56  | 100.138 | 163 | 92  | Temporarily Assigned Gene name family member (tag-141)              |
| Locus_6251_Transcript_2/2_Conf_0.750 | 992  | 20 | 5.18E-37 | XP_002632379.1 | 51  | 159.458 | 285 | 147 | C. briggsae CBR-TAG-141 protein                                     |
| Locus_6252_Transcript_1/2_Conf_1.000 | 397  | 0  |          |                |     |         |     |     |                                                                     |

|                                      |      |    |           |                |     |         |     |     |                                                  |
|--------------------------------------|------|----|-----------|----------------|-----|---------|-----|-----|--------------------------------------------------|
| Locus_6252_Transcript_2/2_Conf_1.000 | 396  | 0  |           |                |     |         |     |     |                                                  |
| Locus_6253_Transcript_1/1_Conf_1.000 | 401  | 20 | 1.17E-42  | XP_002740677.1 | 79  | 176.022 | 133 | 106 | PREDICTED: cyclin-dependent kinase 2-like        |
| Locus_6254_Transcript_1/1_Conf_1.000 | 479  | 1  | 4.71E-04  | XP_002121584.1 | 41  | 47.7506 | 121 | 50  | PREDICTED: similar to F36H2.3                    |
| Locus_6255_Transcript_1/1_Conf_1.000 | 1418 | 20 | 7.01E-103 | NP_001122517.1 | 62  | 379.022 | 440 | 277 | hypothetical protein T08G11.4                    |
| Locus_6256_Transcript_1/3_Conf_0.714 | 988  | 0  |           |                |     |         |     |     |                                                  |
| Locus_6256_Transcript_2/3_Conf_0.714 | 988  | 1  | 7.52E-04  | YP_001857748.1 | 48  | 49.2914 | 60  | 29  | hypothetical protein Bphy_1520                   |
| Locus_6256_Transcript_3/3_Conf_0.714 | 988  | 0  |           |                |     |         |     |     |                                                  |
| Locus_6257_Transcript_1/1_Conf_1.000 | 538  | 20 | 1.00E-67  | NP_492274.3    | 84  | 259.61  | 178 | 151 | hypothetical protein T19A6.1                     |
| Locus_6258_Transcript_1/1_Conf_1.000 | 341  | 1  | 6.30E-25  | XP_002345943.1 | 100 | 117.087 | 55  | 55  | PREDICTED: hypothetical protein                  |
| Locus_6259_Transcript_1/1_Conf_1.000 | 381  | 0  |           |                |     |         |     |     |                                                  |
| Locus_626_Transcript_1/1_Conf_1.000  | 311  | 0  |           |                |     |         |     |     |                                                  |
| Locus_6260_Transcript_1/1_Conf_1.000 | 773  | 20 | 1.48E-85  | CAR63564.1     | 90  | 320.087 | 186 | 169 | hypothetical protein                             |
| Locus_6261_Transcript_1/1_Conf_1.000 | 616  | 2  | 4.33E-19  | EFO18701.1     | 63  | 98.5969 | 82  | 52  | hypothetical protein LOAG_09794                  |
| Locus_6262_Transcript_1/1_Conf_1.000 | 1053 | 20 | 2.51E-101 | NP_508993.2    | 71  | 373.244 | 356 | 255 | fatty Acid CoA Synthetase family member (acs-17) |
| Locus_6263_Transcript_1/6_Conf_0.438 | 990  | 2  | 1.26E-29  | XP_002642371.1 | 65  | 103.219 | 92  | 60  | Hypothetical protein CBG18375                    |
| Locus_6263_Transcript_2/6_Conf_0.188 | 806  | 9  | 6.13E-85  | XP_002642371.1 | 79  | 318.161 | 269 | 215 | Hypothetical protein CBG18375                    |
| Locus_6263_Transcript_3/6_Conf_0.125 | 486  | 0  |           |                |     |         |     |     |                                                  |

|                                      |      |    |           |                |    |         |     |     |                                                                         |
|--------------------------------------|------|----|-----------|----------------|----|---------|-----|-----|-------------------------------------------------------------------------|
| Locus_6263_Transcript_4/6_Conf_0.312 | 477  | 2  | 3.25E-21  | XP_002642371.1 | 78 | 104.76  | 69  | 54  | Hypothetical protein CBG18375                                           |
| Locus_6263_Transcript_5/6_Conf_0.562 | 1589 | 9  | 8.69E-119 | XP_002642371.1 | 76 | 400.593 | 351 | 267 | Hypothetical protein CBG18375                                           |
| Locus_6263_Transcript_6/6_Conf_0.438 | 978  | 2  | 4.31E-30  | XP_002642371.1 | 65 | 103.219 | 92  | 60  | Hypothetical protein CBG18375                                           |
| Locus_6264_Transcript_1/1_Conf_1.000 | 1016 | 20 | 2.57E-71  | EFO27594.1     | 74 | 273.478 | 191 | 142 | CXXC zinc finger family protein                                         |
| Locus_6265_Transcript_1/1_Conf_1.000 | 438  | 0  |           |                |    |         |     |     |                                                                         |
| Locus_6266_Transcript_1/1_Conf_1.000 | 446  | 0  |           |                |    |         |     |     |                                                                         |
| Locus_6267_Transcript_1/1_Conf_1.000 | 1112 | 20 | 2.31E-108 | XP_002631581.1 | 76 | 396.741 | 335 | 257 | Hypothetical protein CBG20759                                           |
| Locus_6268_Transcript_1/1_Conf_1.000 | 350  | 0  |           |                |    |         |     |     |                                                                         |
| Locus_6269_Transcript_1/3_Conf_0.714 | 1191 | 6  | 3.10E-21  | XP_002642656.1 | 47 | 107.457 | 380 | 180 | Hypothetical protein CBG00040                                           |
| Locus_6269_Transcript_2/3_Conf_0.714 | 1191 | 6  | 3.10E-21  | XP_002642656.1 | 48 | 107.457 | 365 | 176 | Hypothetical protein CBG00040                                           |
| Locus_6269_Transcript_3/3_Conf_0.714 | 1191 | 6  | 4.05E-21  | XP_002642656.1 | 47 | 107.071 | 380 | 180 | Hypothetical protein CBG00040                                           |
| Locus_627_Transcript_1/1_Conf_1.000  | 853  | 20 | 7.58E-52  | NP_001022932.1 | 70 | 208.379 | 240 | 170 | SMN (Survival of Motor Neuron protein)<br>Related family member (smr-1) |
| Locus_6270_Transcript_1/1_Conf_1.000 | 225  | 0  |           |                |    |         |     |     |                                                                         |
| Locus_6271_Transcript_1/1_Conf_1.000 | 792  | 20 | 2.68E-77  | NP_495177.2    | 76 | 292.738 | 263 | 200 | hypothetical protein F59G1.4                                            |
| Locus_6272_Transcript_1/1_Conf_1.000 | 493  | 0  |           |                |    |         |     |     |                                                                         |
| Locus_6273_Transcript_1/1_Conf_1.000 | 276  | 20 | 2.58E-10  | NP_496323.1    | 60 | 68.5514 | 85  | 51  | SET (trithorax/polycomb) domain<br>containing family member (set-14)    |

|                                      |      |    |           |                |    |         |     |     |                                    |
|--------------------------------------|------|----|-----------|----------------|----|---------|-----|-----|------------------------------------|
| Locus_6274_Transcript_1/1_Conf_1.000 | 437  | 20 | 8.24E-33  | EFO27859.1     | 84 | 143.28  | 88  | 74  | hypothetical protein LOAG_00621    |
| Locus_6275_Transcript_1/2_Conf_1.000 | 274  | 0  |           |                |    |         |     |     |                                    |
| Locus_6275_Transcript_2/2_Conf_1.000 | 271  | 0  |           |                |    |         |     |     |                                    |
| Locus_6276_Transcript_1/1_Conf_1.000 | 342  | 20 | 2.22E-49  | XP_002639673.1 | 97 | 198.364 | 106 | 103 | Hypothetical protein CBG12391      |
| Locus_6277_Transcript_1/1_Conf_1.000 | 959  | 20 | 8.92E-148 | XP_002643079.1 | 87 | 527.324 | 319 | 280 | C. briggsae CBR-ABCE-1 protein     |
| Locus_6278_Transcript_1/1_Conf_1.000 | 391  | 5  | 4.68E-20  | EFO23406.1     | 71 | 100.908 | 99  | 71  | hypothetical protein LOAG_05080    |
| Locus_6279_Transcript_1/1_Conf_1.000 | 1584 | 20 | 2.56E-64  | XP_001899505.1 | 50 | 251.136 | 470 | 238 | p70                                |
| Locus_628_Transcript_1/1_Conf_1.000  | 299  | 0  |           |                |    |         |     |     |                                    |
| Locus_6280_Transcript_1/2_Conf_1.000 | 456  | 2  | 1.72E-30  | NP_505746.2    | 71 | 135.576 | 135 | 96  | hypothetical protein F28H7.8       |
| Locus_6280_Transcript_2/2_Conf_1.000 | 447  | 4  | 5.23E-35  | NP_505746.2    | 75 | 150.599 | 132 | 99  | hypothetical protein F28H7.8       |
| Locus_6281_Transcript_1/1_Conf_1.000 | 462  | 20 | 1.70E-25  | NP_508934.1    | 98 | 119.013 | 57  | 56  | hypothetical protein T23F2.3       |
| Locus_6282_Transcript_1/1_Conf_1.000 | 1045 | 20 | 7.42E-114 | NP_509670.2    | 83 | 414.846 | 312 | 262 | hypothetical protein C17G1.7       |
| Locus_6283_Transcript_1/1_Conf_1.000 | 877  | 20 | 5.23E-88  | NP_492451.2    | 78 | 328.561 | 287 | 224 | hypothetical protein ZK858.6       |
| Locus_6284_Transcript_1/1_Conf_1.000 | 455  | 20 | 7.75E-31  | NP_502573.1    | 70 | 136.732 | 121 | 85  | hypothetical protein Y62E10A.6     |
| Locus_6285_Transcript_1/1_Conf_1.000 | 833  | 4  | 6.79E-34  | XP_002646138.1 | 49 | 148.673 | 278 | 137 | Hypothetical protein CBG08018      |
| Locus_6286_Transcript_1/1_Conf_1.000 | 316  | 4  | 9.99E-34  | NP_490674.3    | 79 | 146.362 | 105 | 83  | hypothetical protein Y48G1C.8      |
| Locus_6287_Transcript_1/1_Conf_1.000 | 383  | 0  |           |                |    |         |     |     |                                    |
| Locus_6288_Transcript_1/1_Conf_1.000 | 155  | 0  |           |                |    |         |     |     |                                    |
| Locus_6289_Transcript_1/1_Conf_1.000 | 950  | 20 | 1.61E-56  | NP_001024415.2 | 62 | 224.172 | 245 | 154 | TetraSPanin family member (tsp-21) |

|                                      |      |    |          |                |    |         |     |     |                                  |
|--------------------------------------|------|----|----------|----------------|----|---------|-----|-----|----------------------------------|
| Locus_629_Transcript_1/1_Conf_1.000  | 660  | 20 | 6.78E-32 | XP_002639453.1 | 67 | 141.354 | 138 | 93  | Hypothetical protein CBG04048    |
| Locus_6290_Transcript_1/1_Conf_1.000 | 820  | 20 | 2.10E-64 | XP_002634989.1 | 88 | 249.98  | 147 | 130 | Hypothetical protein CBG13529    |
| Locus_6291_Transcript_1/3_Conf_0.600 | 1015 | 20 | 8.86E-56 | XP_002639565.1 | 89 | 221.861 | 139 | 125 | Hypothetical protein CBG04196    |
| Locus_6291_Transcript_2/3_Conf_0.600 | 643  | 20 | 1.12E-68 | XP_002639565.1 | 89 | 263.462 | 167 | 149 | Hypothetical protein CBG04196    |
| Locus_6291_Transcript_3/3_Conf_0.600 | 1099 | 20 | 1.22E-69 | XP_002639565.1 | 89 | 268.085 | 167 | 150 | Hypothetical protein CBG04196    |
| Locus_6292_Transcript_1/1_Conf_1.000 | 312  | 0  |          |                |    |         |     |     |                                  |
| Locus_6293_Transcript_1/1_Conf_1.000 | 544  | 18 | 1.73E-38 | NP_493277.2    | 86 | 162.54  | 116 | 100 | hypothetical protein C47B2.9     |
| Locus_6294_Transcript_1/1_Conf_1.000 | 191  | 0  |          |                |    |         |     |     |                                  |
| Locus_6295_Transcript_1/1_Conf_1.000 | 549  | 5  | 9.58E-24 | NP_001021818.1 | 76 | 113.62  | 135 | 103 | hypothetical protein Y71G12B.11  |
| Locus_6296_Transcript_1/1_Conf_1.000 | 170  | 0  |          |                |    |         |     |     |                                  |
| Locus_6297_Transcript_1/1_Conf_1.000 | 399  | 0  |          |                |    |         |     |     |                                  |
| Locus_6298_Transcript_1/1_Conf_1.000 | 2837 | 20 | 0        | XP_002633378.1 | 82 | 1070.84 | 775 | 640 | C. briggsae CBR-SEC-24.1 protein |

|                                      |      |    |          |                |    |         |     |     |                                               |
|--------------------------------------|------|----|----------|----------------|----|---------|-----|-----|-----------------------------------------------|
| Locus_6299_Transcript_1/1_Conf_1.000 | 575  | 20 | 2.37E-71 | NP_495838.2    | 85 | 271.937 | 191 | 164 | PYrimidine biosynthesis family member (pyr-1) |
| Locus_63_Transcript_1/1_Conf_1.000   | 1079 | 20 | 1.54E-77 | NP_492437.1    | 94 | 294.278 | 160 | 151 | Sorting NeXin family member (snx-3)           |
| Locus_630_Transcript_1/3_Conf_0.375  | 155  | 6  | 2.23E-09 | XP_002634040.1 | 78 | 65.4698 | 51  | 40  | C. briggsae CBR-VIT-6 protein                 |
| Locus_630_Transcript_2/3_Conf_0.625  | 173  | 8  | 1.98E-10 | XP_002634040.1 | 78 | 68.9366 | 56  | 44  | C. briggsae CBR-VIT-6 protein                 |
| Locus_630_Transcript_3/3_Conf_0.750  | 180  | 8  | 1.57E-10 | XP_002634040.1 | 77 | 69.3218 | 58  | 45  | C. briggsae CBR-VIT-6 protein                 |
| Locus_6300_Transcript_1/1_Conf_1.000 | 649  | 20 | 7.79E-25 | XP_394749.3    | 89 | 117.857 | 66  | 59  | PREDICTED: similar to jumeau CG4029-PA        |
| Locus_6301_Transcript_1/1_Conf_1.000 | 374  | 20 | 8.38E-49 | XP_002634876.1 | 88 | 196.438 | 125 | 111 | Hypothetical protein CBG10542                 |



|                                      |      |    |           |                |     |         |     |     |                                                                     |
|--------------------------------------|------|----|-----------|----------------|-----|---------|-----|-----|---------------------------------------------------------------------|
| Locus_6302_Transcript_1/1_Conf_1.000 | 1047 | 20 | 4.49E-135 | XP_002641834.1 | 84  | 485.337 | 336 | 283 | C. briggsae CBR-RFL-1 protein                                       |
| Locus_6303_Transcript_1/1_Conf_1.000 | 417  | 1  | 1.66E-04  | AAD13339.1     | 53  | 49.2914 | 100 | 53  | ancylostoma-secreted protein 1 precursor                            |
| Locus_6304_Transcript_1/1_Conf_1.000 | 1176 | 1  | 1.16E-04  | XP_001902660.1 | 47  | 52.373  | 122 | 58  | hypothetical protein Bm1_56010                                      |
| Locus_6305_Transcript_1/1_Conf_1.000 | 329  | 20 | 4.59E-15  | EFN88165.1     | 73  | 84.3445 | 82  | 60  | Pantothenate kinase 4                                               |
| Locus_6306_Transcript_1/1_Conf_1.000 | 396  | 1  | 2.91E-17  | ADA77640.2     | 54  | 91.6633 | 106 | 58  | Hypothetical protein ZC404.15                                       |
| Locus_6307_Transcript_1/2_Conf_1.000 | 300  | 20 | 8.28E-49  | ADN23570.1     | 100 | 196.438 | 99  | 99  | ubiquitin                                                           |
| Locus_6307_Transcript_2/2_Conf_1.000 | 179  | 20 | 1.96E-26  | XP_002347402.1 | 100 | 122.094 | 59  | 59  | PREDICTED: similar to Os05g0242100                                  |
| Locus_6308_Transcript_1/2_Conf_1.000 | 1204 | 0  |           |                |     |         |     |     |                                                                     |
| Locus_6308_Transcript_2/2_Conf_1.000 | 697  | 0  |           |                |     |         |     |     |                                                                     |
| Locus_6309_Transcript_1/1_Conf_1.000 | 279  | 15 | 1.77E-43  | NP_510226.1    | 97  | 178.718 | 85  | 83  | hypothetical protein C49F8.3                                        |
| Locus_631_Transcript_1/1_Conf_1.000  | 1009 | 20 | 5.06E-112 | XP_002639548.1 | 80  | 408.683 | 319 | 256 | C. briggsae CBR-LPD-6 protein                                       |
| Locus_6310_Transcript_1/1_Conf_1.000 | 130  | 0  |           |                |     |         |     |     |                                                                     |
| Locus_6311_Transcript_1/1_Conf_1.000 | 901  | 0  |           |                |     |         |     |     |                                                                     |
| Locus_6312_Transcript_1/1_Conf_1.000 | 330  | 2  | 1.74E-06  | NP_501888.2    | 50  | 55.8398 | 109 | 55  | Prion-like-(Q/N-rich)-domain-bearing protein family member (pqn-55) |
| Locus_6313_Transcript_1/1_Conf_1.000 | 1025 | 20 | 1.06E-72  | XP_002644744.1 | 66  | 278.1   | 307 | 204 | C. briggsae CBR-SYM-3 protein                                       |
| Locus_6314_Transcript_1/1_Conf_1.000 | 762  | 2  | 4.13E-24  | EFO16535.1     | 54  | 115.931 | 224 | 122 | hypothetical protein LOAG_11971                                     |
| Locus_6315_Transcript_1/1_Conf_1.000 | 274  | 20 | 3.59E-36  | NP_499157.2    | 87  | 154.451 | 90  | 79  | hypothetical protein T05G5.8                                        |
| Locus_6316_Transcript_1/2_Conf_1.000 | 430  | 20 | 1.19E-55  | ACD86935.1     | 99  | 219.164 | 107 | 106 | ubiquitin/60s ribosomal protein L40 fusion                          |

|                                      |     |    |          |                |     |         |     |     |                                                                          |
|--------------------------------------|-----|----|----------|----------------|-----|---------|-----|-----|--------------------------------------------------------------------------|
| Locus_6316_Transcript_2/2_Conf_1.000 | 430 | 20 | 1.19E-55 | ACD86935.1     | 99  | 219.164 | 107 | 106 | ubiquitin/60s ribosomal protein L40 fusion                               |
| Locus_6317_Transcript_1/1_Conf_1.000 | 318 | 0  |          |                |     |         |     |     |                                                                          |
| Locus_6318_Transcript_1/1_Conf_1.000 | 156 | 0  |          |                |     |         |     |     |                                                                          |
| Locus_6319_Transcript_1/1_Conf_1.000 | 337 | 0  |          |                |     |         |     |     |                                                                          |
| Locus_632_Transcript_1/1_Conf_1.000  | 768 | 20 | 2.61E-58 | NP_501277.1    | 69  | 229.565 | 206 | 144 | hypothetical protein C46A5.1                                             |
| Locus_6320_Transcript_1/1_Conf_1.000 | 437 | 20 | 3.02E-35 | NP_496721.2    | 80  | 151.369 | 110 | 89  | Carnitine Palmitoyl Transferase family member (cpt-1)                    |
| Locus_6321_Transcript_1/1_Conf_1.000 | 246 | 20 | 2.03E-23 | NP_493945.1    | 83  | 112.079 | 79  | 66  | hypothetical protein Y57G7A.10                                           |
| Locus_6322_Transcript_1/1_Conf_1.000 | 652 | 20 | 1.74E-48 | ABD39381.1     | 76  | 196.438 | 170 | 130 | putative galectin protein 10                                             |
| Locus_6323_Transcript_1/1_Conf_1.000 | 484 | 0  |          |                |     |         |     |     |                                                                          |
| Locus_6324_Transcript_1/1_Conf_1.000 | 130 | 20 | 5.06E-14 | NP_494571.1    | 100 | 80.8777 | 42  | 42  | AdaPtin, Delta chain (clathrin associated complex) family member (apd-3) |
| Locus_6325_Transcript_1/1_Conf_1.000 | 387 | 18 | 2.66E-23 | XP_002633945.1 | 81  | 111.694 | 79  | 64  | C. briggsae CBR-ELO-1 protein                                            |
| Locus_6326_Transcript_1/1_Conf_1.000 | 531 | 0  |          |                |     |         |     |     |                                                                          |
| Locus_6327_Transcript_1/1_Conf_1.000 | 315 | 0  |          |                |     |         |     |     |                                                                          |
| Locus_6328_Transcript_1/1_Conf_1.000 | 145 | 20 | 1.91E-16 | XP_002647014.1 | 91  | 88.9669 | 46  | 42  | Hypothetical protein CBG23800                                            |
| Locus_6329_Transcript_1/1_Conf_1.000 | 387 | 0  |          |                |     |         |     |     |                                                                          |

|                                      |      |    |           |                |    |         |     |     |                                                                         |
|--------------------------------------|------|----|-----------|----------------|----|---------|-----|-----|-------------------------------------------------------------------------|
| Locus_633_Transcript_1/4_Conf_0.556  | 540  | 20 | 3.66E-30  | AAL09375.1     | 88 | 103.605 | 62  | 55  | AF305957_1vitellogenin                                                  |
| Locus_633_Transcript_2/4_Conf_0.556  | 540  | 20 | 1.96E-24  | AAL09375.1     | 80 | 84.3445 | 66  | 53  | AF305957_1vitellogenin                                                  |
| Locus_633_Transcript_3/4_Conf_0.444  | 436  | 20 | 2.41E-39  | AAL09375.1     | 91 | 134.035 | 79  | 72  | AF305957_1vitellogenin                                                  |
| Locus_633_Transcript_4/4_Conf_0.444  | 394  | 19 | 2.80E-34  | AAL09375.1     | 90 | 110.153 | 65  | 59  | AF305957_1vitellogenin                                                  |
| Locus_6330_Transcript_1/1_Conf_1.000 | 964  | 20 | 3.47E-107 | CAX65065.1     | 68 | 392.504 | 354 | 241 | C. elegans protein K01A6.2c, partially confirmed by transcript evidence |
| Locus_6331_Transcript_1/1_Conf_1.000 | 467  | 20 | 2.14E-28  | EFO17782.1     | 71 | 128.642 | 117 | 84  | hypothetical protein LOAG_10716                                         |
| Locus_6332_Transcript_1/1_Conf_1.000 | 618  | 20 | 9.34E-62  | NP_504486.4    | 70 | 240.35  | 216 | 153 | Adenylyl CYclase family member (acy-4)                                  |
| Locus_6333_Transcript_1/1_Conf_1.000 | 397  | 9  | 2.70E-47  | AAT02161.1     | 85 | 191.43  | 118 | 101 | hypothetical protein L3ni22                                             |
| Locus_6334_Transcript_1/1_Conf_1.000 | 366  | 0  |           |                |    |         |     |     |                                                                         |
| Locus_6335_Transcript_1/1_Conf_1.000 | 902  | 20 | 8.55E-65  | NP_001021463.1 | 61 | 251.521 | 303 | 187 | SUppressor of activated let-60 Ras family member (sur-2)                |
| Locus_6336_Transcript_1/1_Conf_1.000 | 1483 | 20 | 3.81E-131 | NP_001122780.1 | 68 | 473.011 | 452 | 309 | hypothetical protein F41H10.6                                           |
| Locus_6337_Transcript_1/1_Conf_1.000 | 330  | 20 | 1.99E-10  | XP_002640972.1 | 60 | 68.9366 | 95  | 57  | Hypothetical protein CBG11719                                           |
| Locus_6338_Transcript_1/1_Conf_1.000 | 577  | 20 | 2.12E-43  | NP_495253.2    | 76 | 179.104 | 139 | 106 | Neuronal Membrane GlycoProtein family member (nmgp-1)                   |
| Locus_6339_Transcript_1/2_Conf_1.000 | 393  | 0  |           |                |    |         |     |     |                                                                         |
| Locus_6339_Transcript_2/2_Conf_1.000 | 587  | 0  |           |                |    |         |     |     |                                                                         |
| Locus_634_Transcript_1/1_Conf_1.000  | 329  | 20 | 1.47E-21  | NP_501808.1    | 86 | 105.916 | 89  | 77  | hypothetical protein F44D12.3                                           |

|                                      |      |    |           |                |     |         |     |     |                                                                                            |
|--------------------------------------|------|----|-----------|----------------|-----|---------|-----|-----|--------------------------------------------------------------------------------------------|
| Locus_6340_Transcript_1/1_Conf_1.000 | 637  | 6  | 1.15E-09  | ADM53754.1     | 47  | 67.3958 | 157 | 75  | Hypothetical protein Y51H7C.5                                                              |
| Locus_6341_Transcript_1/3_Conf_0.571 | 1155 | 20 | 9.70E-65  | XP_002642926.1 | 75  | 251.906 | 208 | 158 | Hypothetical protein CBG15202                                                              |
| Locus_6341_Transcript_2/3_Conf_0.571 | 1167 | 20 | 9.86E-65  | XP_002642926.1 | 75  | 251.906 | 208 | 158 | Hypothetical protein CBG15202                                                              |
| Locus_6341_Transcript_3/3_Conf_0.286 | 712  | 14 | 1.27E-53  | NP_001021233.1 | 65  | 213.772 | 217 | 143 | hypothetical protein D2045.9                                                               |
| Locus_6342_Transcript_1/1_Conf_1.000 | 357  | 0  |           |                |     |         |     |     |                                                                                            |
| Locus_6343_Transcript_1/1_Conf_1.000 | 149  | 0  |           |                |     |         |     |     |                                                                                            |
| Locus_6344_Transcript_1/3_Conf_0.600 | 582  | 20 | 7.58E-20  | XP_002646157.1 | 53  | 100.908 | 156 | 83  | C. briggsae CBR-PNG-1 protein                                                              |
| Locus_6344_Transcript_2/3_Conf_0.600 | 590  | 20 | 5.87E-20  | XP_002646157.1 | 53  | 101.293 | 156 | 83  | C. briggsae CBR-PNG-1 protein                                                              |
| Locus_6344_Transcript_3/3_Conf_0.600 | 578  | 20 | 7.34E-20  | XP_002646157.1 | 53  | 100.908 | 156 | 83  | C. briggsae CBR-PNG-1 protein                                                              |
| Locus_6345_Transcript_1/4_Conf_0.333 | 232  | 0  |           |                |     |         |     |     |                                                                                            |
| Locus_6345_Transcript_2/4_Conf_0.444 | 721  | 0  |           |                |     |         |     |     |                                                                                            |
| Locus_6345_Transcript_3/4_Conf_0.556 | 704  | 0  |           |                |     |         |     |     |                                                                                            |
| Locus_6345_Transcript_4/4_Conf_0.556 | 721  | 0  |           |                |     |         |     |     |                                                                                            |
| Locus_6346_Transcript_1/1_Conf_1.000 | 844  | 8  | 2.62E-73  | XP_002636989.1 | 77  | 279.641 | 227 | 175 | C. briggsae CBR-TRY-10 protein                                                             |
| Locus_6347_Transcript_1/4_Conf_0.250 | 318  | 20 | 3.18E-56  | CAA23781.1     | 100 | 221.09  | 106 | 106 | unnamed protein product                                                                    |
| Locus_6347_Transcript_2/4_Conf_0.500 | 1085 | 20 | 8.67E-129 | P20039.1       | 95  | 464.537 | 258 | 247 | HLA class II histocompatibility antigen                                                    |
| Locus_6347_Transcript_3/4_Conf_0.500 | 1042 | 20 | 2.14E-129 | XP_002343977.1 | 99  | 466.463 | 248 | 247 | PREDICTED: similar to HLA class II histocompatibility antigen, DRB1-7 beta chain isoform 1 |

|                                      |      |    |           |                |     |         |      |     |                                                                                            |
|--------------------------------------|------|----|-----------|----------------|-----|---------|------|-----|--------------------------------------------------------------------------------------------|
| Locus_6347_Transcript_4/4_Conf_0.500 | 1055 | 20 | 4.39E-130 | XP_002343977.1 | 100 | 468.774 | 248  | 248 | PREDICTED: similar to HLA class II histocompatibility antigen, DRB1-7 beta chain isoform 1 |
| Locus_6348_Transcript_1/1_Conf_1.000 | 317  | 0  |           |                |     |         |      |     |                                                                                            |
| Locus_6349_Transcript_1/1_Conf_1.000 | 883  | 20 | 1.46E-37  | XP_002634401.1 | 62  | 160.999 | 190  | 119 | C. briggsae CBR-PQN-55 protein                                                             |
| Locus_635_Transcript_1/1_Conf_1.000  | 3098 | 20 | 0         | NP_507684.4    | 82  | 1447.57 | 1056 | 872 | abnormal EMBroygenesis family member (emb-4)                                               |
| Locus_6350_Transcript_1/1_Conf_1.000 | 883  | 20 | 5.84E-103 | NP_491513.2    | 83  | 378.252 | 257  | 214 | Formin HOMology Domain family member (fhod-1)                                              |
| Locus_6351_Transcript_1/1_Conf_1.000 | 411  | 0  |           |                |     |         |      |     |                                                                                            |
| Locus_6352_Transcript_1/1_Conf_1.000 | 1684 | 20 | 0         | XP_001891652.1 | 92  | 940.258 | 560  | 516 | myosin heavy chain, nonmuscle type 1                                                       |

|                                      |      |    |           |                |     |         |     |     |                                                                                    |
|--------------------------------------|------|----|-----------|----------------|-----|---------|-----|-----|------------------------------------------------------------------------------------|
| Locus_6353_Transcript_1/1_Conf_1.000 | 183  | 20 | 1.27E-20  | XP_002819595.1 | 100 | 102.834 | 56  | 56  | PREDICTED: glycosylphosphatidylinositol anchor attachment 1 protein-like isoform 2 |
| Locus_6354_Transcript_1/1_Conf_1.000 | 532  | 0  |           |                |     |         |     |     |                                                                                    |
| Locus_6355_Transcript_1/4_Conf_0.200 | 634  | 3  | 4.93E-13  | CAA85490.2     | 67  | 78.5666 | 79  | 53  | C. elegans protein C14B1.9, confirmed by transcript evidence                       |
| Locus_6355_Transcript_2/4_Conf_0.200 | 676  | 3  | 5.71E-13  | CAA85490.2     | 67  | 78.5666 | 79  | 53  | C. elegans protein C14B1.9, confirmed by transcript evidence                       |
| Locus_6355_Transcript_3/4_Conf_0.700 | 2307 | 3  | 7.06E-16  | CAA85490.2     | 42  | 90.8929 | 259 | 111 | C. elegans protein C14B1.9, confirmed by transcript evidence                       |
| Locus_6355_Transcript_4/4_Conf_0.700 | 2307 | 3  | 7.06E-16  | CAA85490.2     | 42  | 90.8929 | 259 | 111 | C. elegans protein C14B1.9, confirmed by transcript evidence                       |
| Locus_6356_Transcript_1/1_Conf_1.000 | 1269 | 20 | 3.31E-93  | NP_497756.2    | 67  | 346.665 | 387 | 260 | hypothetical protein F34D10.2                                                      |
| Locus_6357_Transcript_1/1_Conf_1.000 | 372  | 20 | 4.77E-36  | XP_001893740.1 | 72  | 154.066 | 126 | 91  | ATP-dependent helicase DDX1                                                        |
| Locus_6358_Transcript_1/1_Conf_1.000 | 1173 | 20 | 9.56E-84  | XP_002633876.1 | 70  | 315.079 | 296 | 210 | C. briggsae CBR-UNC-5 protein                                                      |
| Locus_6359_Transcript_1/1_Conf_1.000 | 1977 | 20 | 0         | NP_001040977.1 | 81  | 835.869 | 593 | 485 | Carnitine Palmitoyl Transferase family member (cpt-2)                              |
| Locus_636_Transcript_1/1_Conf_1.000  | 528  | 20 | 3.95E-45  | XP_002646754.1 | 90  | 184.496 | 131 | 119 | C. briggsae CBR-RPB-4 protein                                                      |
| Locus_6360_Transcript_1/2_Conf_1.000 | 320  | 0  |           |                |     |         |     |     |                                                                                    |
| Locus_6360_Transcript_2/2_Conf_1.000 | 320  | 0  |           |                |     |         |     |     |                                                                                    |
| Locus_6361_Transcript_1/1_Conf_1.000 | 582  | 20 | 1.91E-55  | CAR63581.1     | 92  | 219.164 | 145 | 134 | putative COLLAGEN                                                                  |
| Locus_6362_Transcript_1/1_Conf_1.000 | 304  | 20 | 1.16E-18  | XP_002644368.1 | 60  | 96.2857 | 99  | 60  | C. briggsae CBR-CHT-1 protein                                                      |
| Locus_6363_Transcript_1/1_Conf_1.000 | 514  | 20 | 2.01E-40  | NP_001071986.1 | 84  | 168.703 | 113 | 96  | transcription factor protein                                                       |
| Locus_6364_Transcript_1/1_Conf_1.000 | 1227 | 20 | 1.73E-123 | XP_002630374.1 | 73  | 447.203 | 410 | 302 | Hypothetical protein CBG04313                                                      |

|                                      |      |    |           |                |    |         |     |     |                                                                         |
|--------------------------------------|------|----|-----------|----------------|----|---------|-----|-----|-------------------------------------------------------------------------|
| Locus_6365_Transcript_1/1_Conf_1.000 | 1388 | 20 | 2.64E-54  | XP_001899295.1 | 67 | 217.624 | 257 | 174 | AT08590p                                                                |
| Locus_6366_Transcript_1/2_Conf_1.000 | 354  | 0  |           |                |    |         |     |     |                                                                         |
| Locus_6366_Transcript_2/2_Conf_1.000 | 299  | 0  |           |                |    |         |     |     |                                                                         |
| Locus_6367_Transcript_1/1_Conf_1.000 | 644  | 0  |           |                |    |         |     |     |                                                                         |
| Locus_6368_Transcript_1/1_Conf_1.000 | 135  | 0  |           |                |    |         |     |     |                                                                         |
| Locus_6369_Transcript_1/1_Conf_1.000 | 683  | 20 | 4.44E-37  | EFO28162.1     | 84 | 158.688 | 101 | 85  | PAB-dependent Poly(A) specific ribonuclease subunit                     |
| Locus_637_Transcript_1/1_Conf_1.000  | 1247 | 20 | 1.03E-131 | XP_002638689.1 | 75 | 474.552 | 397 | 299 | Hypothetical protein CBG11884                                           |
| Locus_6370_Transcript_1/1_Conf_1.000 | 740  | 20 | 7.36E-31  | XP_002629815.1 | 63 | 138.272 | 162 | 103 | C. briggsae CBR-ARC-1 protein                                           |
| Locus_6371_Transcript_1/1_Conf_1.000 | 645  | 20 | 2.65E-25  | NP_491382.1    | 55 | 119.398 | 151 | 84  | hypothetical protein Y119C1B.5                                          |
| Locus_6372_Transcript_1/1_Conf_1.000 | 289  | 0  |           |                |    |         |     |     |                                                                         |
| Locus_6373_Transcript_1/2_Conf_1.000 | 848  | 0  |           |                |    |         |     |     |                                                                         |
| Locus_6373_Transcript_2/2_Conf_1.000 | 848  | 0  |           |                |    |         |     |     |                                                                         |
| Locus_6374_Transcript_1/1_Conf_1.000 | 637  | 20 | 3.88E-74  | Q612R3.2       | 90 | 281.567 | 191 | 173 | Pre-mRNA-splicing factor syf-2                                          |
| Locus_6375_Transcript_1/1_Conf_1.000 | 327  | 3  | 2.27E-22  | NP_496707.1    | 76 | 108.612 | 68  | 52  | hypothetical protein Y38E10A.24                                         |
| Locus_6376_Transcript_1/1_Conf_1.000 | 436  | 0  |           |                |    |         |     |     |                                                                         |
| Locus_6377_Transcript_1/1_Conf_1.000 | 374  | 20 | 2.07E-39  | XP_002634452.1 | 87 | 165.236 | 105 | 92  | Hypothetical protein CBG04467                                           |
| Locus_6378_Transcript_1/1_Conf_1.000 | 483  | 5  | 2.14E-36  | CAX65056.1     | 66 | 155.221 | 160 | 107 | C. elegans protein F25C8.3d, partially confirmed by transcript evidence |
| Locus_6379_Transcript_1/1_Conf_1.000 | 1037 | 20 | 3.44E-103 | NP_509242.1    | 77 | 379.407 | 311 | 241 | hypothetical protein C07D8.6                                            |
| Locus_638_Transcript_1/1_Conf_1.000  | 676  | 20 | 1.48E-53  | NP_509508.1    | 82 | 213.386 | 141 | 117 | Neuropeptide-Like Protein family member (nlp-14)                        |
| Locus_6380_Transcript_1/3_Conf_0.667 | 922  | 20 | 1.43E-46  | NP_499473.2    | 56 | 191.045 | 252 | 142 | hypothetical protein Y47D3B.11                                          |

|                                      |      |    |           |                |     |         |     |     |                                                          |
|--------------------------------------|------|----|-----------|----------------|-----|---------|-----|-----|----------------------------------------------------------|
| Locus_6380_Transcript_2/3_Conf_0.667 | 923  | 20 | 1.87E-46  | NP_499473.2    | 56  | 190.66  | 252 | 142 | hypothetical protein Y47D3B.11                           |
| Locus_6380_Transcript_3/3_Conf_0.667 | 923  | 20 | 1.43E-46  | NP_499473.2    | 56  | 191.045 | 252 | 142 | hypothetical protein Y47D3B.11                           |
| Locus_6381_Transcript_1/1_Conf_1.000 | 132  | 0  |           |                |     |         |     |     |                                                          |
| Locus_6382_Transcript_1/1_Conf_1.000 | 744  | 20 | 6.73E-56  | NP_502170.3    | 63  | 221.476 | 255 | 163 | TWIK family of potassium channels family member (twk-25) |
| Locus_6383_Transcript_1/1_Conf_1.000 | 435  | 20 | 6.79E-11  | NP_500024.1    | 90  | 70.4774 | 42  | 38  | AuTophagy (yeast Atg homolog) family member (atg-3)      |
| Locus_6384_Transcript_1/1_Conf_1.000 | 237  | 2  | 2.14E-04  | XP_002639618.1 | 66  | 48.9062 | 50  | 33  | Hypothetical protein CBG12331                            |
| Locus_6385_Transcript_1/1_Conf_1.000 | 569  | 20 | 1.26E-61  | XP_002640720.1 | 76  | 239.58  | 194 | 149 | C. briggsae CBR-TAG-301 protein                          |
| Locus_6386_Transcript_1/1_Conf_1.000 | 409  | 0  |           |                |     |         |     |     |                                                          |
| Locus_6387_Transcript_1/1_Conf_1.000 | 597  | 20 | 7.01E-24  | XP_002636443.1 | 95  | 114.39  | 64  | 61  | Hypothetical protein CBG23104                            |
| Locus_6388_Transcript_1/1_Conf_1.000 | 484  | 20 | 1.74E-70  | XP_002636769.1 | 94  | 268.47  | 142 | 134 | C. briggsae CBR-EGL-10 protein                           |
| Locus_6389_Transcript_1/1_Conf_1.000 | 1203 | 20 | 1.28E-131 | XP_002643608.1 | 74  | 474.167 | 381 | 285 | Hypothetical protein CBG16342                            |
| Locus_639_Transcript_1/1_Conf_1.000  | 790  | 20 | 8.71E-121 | NP_001180485.1 | 100 | 437.187 | 232 | 232 | 60S ribosomal protein L7                                 |
| Locus_6390_Transcript_1/1_Conf_1.000 | 143  | 0  |           |                |     |         |     |     |                                                          |
| Locus_6391_Transcript_1/1_Conf_1.000 | 355  | 0  |           |                |     |         |     |     |                                                          |
| Locus_6392_Transcript_1/1_Conf_1.000 | 501  | 3  | 1.60E-07  | XP_002642798.1 | 41  | 59.3066 | 154 | 64  | C. briggsae CBR-ZTF-8 protein                            |
| Locus_6393_Transcript_1/1_Conf_1.000 | 301  | 5  | 1.02E-06  | NP_496328.2    | 65  | 56.6102 | 64  | 42  | hypothetical protein R06F6.8                             |



|                                      |      |    |           |                |    |         |     |     |                                             |
|--------------------------------------|------|----|-----------|----------------|----|---------|-----|-----|---------------------------------------------|
| Locus_6394_Transcript_1/1_Conf_1.000 | 230  | 0  |           |                |    |         |     |     |                                             |
| Locus_6395_Transcript_1/1_Conf_1.000 | 1223 | 20 | 1.17E-71  | NP_491478.1    | 66 | 275.018 | 307 | 204 | hypothetical protein F28B3.5                |
| Locus_6396_Transcript_1/1_Conf_1.000 | 767  | 20 | 2.05E-47  | XP_001898097.1 | 62 | 193.356 | 229 | 142 | Asparaginase family protein                 |
| Locus_6397_Transcript_1/1_Conf_1.000 | 1988 | 20 | 5.33E-126 | XP_001897054.1 | 63 | 456.447 | 560 | 355 | Fes/CIP4 homology domain containing protein |
| Locus_6398_Transcript_1/2_Conf_1.000 | 711  | 20 | 6.08E-56  | NP_001040796.1 | 72 | 221.476 | 222 | 161 | hypothetical protein R12C12.6               |
| Locus_6398_Transcript_2/2_Conf_1.000 | 711  | 20 | 4.65E-56  | NP_001040796.1 | 72 | 221.861 | 222 | 161 | hypothetical protein R12C12.6               |
| Locus_6399_Transcript_1/4_Conf_0.250 | 1819 | 20 | 1.34E-136 | XP_001896629.1 | 74 | 491.5   | 448 | 332 | U-box domain containing protein             |
| Locus_6399_Transcript_2/4_Conf_0.250 | 1861 | 20 | 7.34E-138 | XP_001896629.1 | 74 | 495.738 | 448 | 332 | U-box domain containing protein             |
| Locus_6399_Transcript_3/4_Conf_0.375 | 2212 | 20 | 6.01E-158 | XP_001896629.1 | 69 | 562.762 | 578 | 403 | U-box domain containing protein             |
| Locus_6399_Transcript_4/4_Conf_0.375 | 2212 | 20 | 3.19E-159 | XP_001896629.1 | 69 | 567     | 578 | 403 | U-box domain containing protein             |
| Locus_64_Transcript_1/5_Conf_0.429   | 625  | 20 | 1.13E-14  | XP_002698332.1 | 75 | 83.9593 | 72  | 54  | PREDICTED: hypothetical protein             |
| Locus_64_Transcript_2/5_Conf_0.571   | 934  | 20 | 4.74E-21  | XP_002631414.1 | 75 | 106.301 | 93  | 70  | C. briggsae CBR-DNJ-23 protein              |
| Locus_64_Transcript_3/5_Conf_0.571   | 608  | 20 | 2.52E-16  | XP_002698332.1 | 75 | 89.3521 | 76  | 57  | PREDICTED: hypothetical protein             |
| Locus_64_Transcript_4/5_Conf_0.143   | 913  | 20 | 3.35E-40  | XP_001364158.1 | 61 | 169.859 | 253 | 156 | PREDICTED: similar to DnaJ protein SB73     |
| Locus_64_Transcript_5/5_Conf_0.643   | 638  | 20 | 2.83E-16  | XP_002698332.1 | 75 | 89.3521 | 76  | 57  | PREDICTED: hypothetical protein             |
| Locus_640_Transcript_1/9_Conf_0.135  | 729  | 1  | 1.50E-04  | AAP94887.1     | 59 | 50.8322 | 77  | 46  | MFP3                                        |
| Locus_640_Transcript_2/9_Conf_0.189  | 368  | 4  | 1.72E-06  | NP_505347.1    | 49 | 55.8398 | 71  | 35  | hypothetical protein C25E10.10              |
| Locus_640_Transcript_3/9_Conf_0.378  | 448  | 4  | 1.75E-06  | NP_505347.1    | 49 | 55.8398 | 71  | 35  | hypothetical protein C25E10.10              |
| Locus_640_Transcript_4/9_Conf_0.432  | 1477 | 12 | 1.44E-05  | NP_505347.1    | 49 | 55.8398 | 71  | 35  | hypothetical protein C25E10.10              |
| Locus_640_Transcript_5/9_Conf_0.324  | 421  | 4  | 1.77E-06  | NP_505347.1    | 49 | 55.8398 | 71  | 35  | hypothetical protein C25E10.10              |
| Locus_640_Transcript_6/9_Conf_0.378  | 445  | 4  | 1.76E-06  | NP_505347.1    | 49 | 55.8398 | 71  | 35  | hypothetical protein C25E10.10              |

|                                      |      |    |           |                |    |         |     |     |                                                      |
|--------------------------------------|------|----|-----------|----------------|----|---------|-----|-----|------------------------------------------------------|
| Locus_640_Transcript_7/9_Conf_0.432  | 1480 | 12 | 1.45E-05  | NP_505347.1    | 49 | 55.8398 | 71  | 35  | hypothetical protein C25E10.10                       |
| Locus_640_Transcript_8/9_Conf_0.270  | 394  | 4  | 1.77E-06  | NP_505347.1    | 49 | 55.8398 | 71  | 35  | hypothetical protein C25E10.10                       |
| Locus_640_Transcript_9/9_Conf_0.378  | 404  | 4  | 1.75E-06  | NP_505347.1    | 49 | 55.8398 | 71  | 35  | hypothetical protein C25E10.10                       |
| Locus_6400_Transcript_1/1_Conf_1.000 | 895  | 1  | 6.37E-04  | NP_506414.1    | 44 | 49.2914 | 149 | 67  | hypothetical protein F53C11.4                        |
| Locus_6401_Transcript_1/1_Conf_1.000 | 180  | 5  | 8.89E-06  | XP_001898505.1 | 74 | 53.5286 | 43  | 32  | ALKBH protein                                        |
| Locus_6402_Transcript_1/1_Conf_1.000 | 799  | 20 | 1.56E-40  | NP_498848.2    | 63 | 170.629 | 212 | 135 | histone METHyltransferase-like family member (met-2) |
| Locus_6403_Transcript_1/1_Conf_1.000 | 840  | 20 | 2.08E-46  | A8XEZ1.3       | 60 | 190.274 | 265 | 160 | Cell death abnormality protein 12                    |
| Locus_6404_Transcript_1/1_Conf_1.000 | 1256 | 4  | 1.35E-14  | XP_002637928.1 | 41 | 85.5001 | 251 | 105 | Hypothetical protein CBG04740                        |
| Locus_6405_Transcript_1/1_Conf_1.000 | 473  | 0  |           |                |    |         |     |     |                                                      |
| Locus_6406_Transcript_1/1_Conf_1.000 | 1391 | 20 | 8.26E-133 | NP_001021564.1 | 86 | 478.404 | 381 | 328 | hypothetical protein K10C3.5                         |
| Locus_6407_Transcript_1/1_Conf_1.000 | 406  | 0  |           |                |    |         |     |     |                                                      |
| Locus_6408_Transcript_1/1_Conf_1.000 | 855  | 4  | 2.25E-11  | XP_002642002.1 | 61 | 73.9442 | 101 | 62  | C. briggsae CBR-MTM-3 protein                        |
| Locus_6409_Transcript_1/1_Conf_1.000 | 455  | 0  |           |                |    |         |     |     |                                                      |
| Locus_641_Transcript_1/1_Conf_1.000  | 422  | 0  |           |                |    |         |     |     |                                                      |

|                                      |      |    |           |                |    |         |     |     |                                                        |
|--------------------------------------|------|----|-----------|----------------|----|---------|-----|-----|--------------------------------------------------------|
| Locus_6410_Transcript_1/1_Conf_1.000 | 1122 | 20 | 3.65E-85  | XP_001902701.1 | 87 | 319.701 | 230 | 201 | I/LWEQ domain containing protein                       |
| Locus_6411_Transcript_1/1_Conf_1.000 | 233  | 20 | 6.02E-23  | NP_490842.1    | 96 | 110.538 | 60  | 58  | SUMO (ubiquitin-related) homolog family member (smo-1) |
| Locus_6412_Transcript_1/2_Conf_1.000 | 1385 | 20 | 2.04E-123 | NP_496557.1    | 90 | 447.203 | 262 | 237 | hypothetical protein Y17G7B.4                          |
| Locus_6412_Transcript_2/2_Conf_1.000 | 1385 | 20 | 2.04E-123 | NP_496557.1    | 90 | 447.203 | 262 | 237 | hypothetical protein Y17G7B.4                          |
| Locus_6413_Transcript_1/1_Conf_1.000 | 529  | 0  |           |                |    |         |     |     |                                                        |
| Locus_6414_Transcript_1/1_Conf_1.000 | 277  | 14 | 6.80E-11  | XP_002644932.1 | 61 | 70.4774 | 80  | 49  | Hypothetical protein CBG10877                          |
| Locus_6415_Transcript_1/1_Conf_1.000 | 1629 | 20 | 5.47E-110 | NP_493307.3    | 60 | 402.905 | 558 | 339 | hypothetical protein F22G12.5                          |
| Locus_6416_Transcript_1/1_Conf_1.000 | 147  | 0  |           |                |    |         |     |     |                                                        |
| Locus_6417_Transcript_1/1_Conf_1.000 | 498  | 5  | 1.04E-19  | XP_002647027.1 | 50 | 99.7525 | 163 | 82  | Hypothetical protein CBG03541                          |
| Locus_6418_Transcript_1/1_Conf_1.000 | 1228 | 20 | 1.00E-155 | NP_499637.2    | 79 | 554.288 | 412 | 328 | hypothetical protein Y111B2A.8                         |
| Locus_6419_Transcript_1/2_Conf_1.000 | 1260 | 20 | 2.77E-100 | NP_492022.3    | 83 | 370.163 | 261 | 217 | hypothetical protein H37N21.1                          |
| Locus_6419_Transcript_2/2_Conf_1.000 | 1248 | 20 | 5.02E-102 | NP_492022.3    | 84 | 375.941 | 257 | 217 | hypothetical protein H37N21.1                          |

|                                     |      |    |           |            |    |         |     |     |                       |
|-------------------------------------|------|----|-----------|------------|----|---------|-----|-----|-----------------------|
| Locus_642_Transcript_1/8_Conf_0.237 | 1521 | 20 | 0         | ACU00668.1 | 98 | 823.928 | 449 | 444 | heat shock protein 90 |
| Locus_642_Transcript_2/8_Conf_0.237 | 1563 | 20 | 0         | ACU00668.1 | 98 | 834.713 | 466 | 461 | heat shock protein 90 |
| Locus_642_Transcript_3/8_Conf_0.184 | 802  | 20 | 7.14E-110 | ACU00668.1 | 98 | 400.979 | 209 | 206 | heat shock protein 90 |
| Locus_642_Transcript_4/8_Conf_0.184 | 760  | 20 | 6.38E-110 | ACU00668.1 | 98 | 400.979 | 209 | 206 | heat shock protein 90 |
| Locus_642_Transcript_5/8_Conf_0.316 | 1156 | 20 | 4.22E-169 | ACU00668.1 | 98 | 598.586 | 371 | 366 | heat shock protein 90 |
| Locus_642_Transcript_6/8_Conf_0.316 | 1114 | 20 | 5.80E-168 | ACU00668.1 | 98 | 594.734 | 365 | 361 | heat shock protein 90 |
| Locus_642_Transcript_7/8_Conf_0.421 | 2269 | 20 | 0         | ACU00668.1 | 98 | 1197.19 | 707 | 698 | heat shock protein 90 |
| Locus_642_Transcript_8/8_Conf_0.421 | 2269 | 20 | 0         | ACU00668.1 | 98 | 1189.87 | 707 | 698 | heat shock protein 90 |

|                                      |      |    |           |                |    |         |     |     |                                                                                    |
|--------------------------------------|------|----|-----------|----------------|----|---------|-----|-----|------------------------------------------------------------------------------------|
| Locus_6420_Transcript_1/1_Conf_1.000 | 1421 | 20 | 1.19E-126 | EFO17442.1     | 82 | 457.988 | 351 | 288 | rad51                                                                              |
| Locus_6421_Transcript_1/1_Conf_1.000 | 528  | 20 | 1.22E-54  | AAV28323.2     | 74 | 216.083 | 169 | 126 | Hypothetical protein T15B7.1                                                       |
| Locus_6422_Transcript_1/1_Conf_1.000 | 778  | 4  | 9.98E-05  | NP_001022715.1 | 54 | 51.6026 | 77  | 42  | ALIX (Apoptosis-linked gene 2 interacting protein X) homolog family member (alx-1) |
| Locus_6423_Transcript_1/1_Conf_1.000 | 561  | 20 | 2.54E-59  | XP_001892087.1 | 86 | 231.876 | 141 | 122 | hypothetical protein                                                               |
| Locus_6424_Transcript_1/1_Conf_1.000 | 139  | 0  |           |                |    |         |     |     |                                                                                    |
| Locus_6425_Transcript_1/1_Conf_1.000 | 547  | 20 | 1.89E-40  | XP_002643588.1 | 64 | 169.088 | 170 | 110 | Hypothetical protein CBG16310                                                      |
| Locus_6426_Transcript_1/1_Conf_1.000 | 1368 | 20 | 1.79E-71  | AAI42660.1     | 71 | 274.633 | 244 | 174 | MYST3 protein                                                                      |
| Locus_6427_Transcript_1/1_Conf_1.000 | 940  | 20 | 4.11E-97  | XP_001895541.1 | 75 | 358.992 | 295 | 222 | CG6179-PA                                                                          |
| Locus_6428_Transcript_1/1_Conf_1.000 | 347  | 1  | 5.15E-06  | XP_001902020.1 | 63 | 54.299  | 63  | 40  | PRP39 pre-mRNA processing factor 39 homolog                                        |
| Locus_6429_Transcript_1/1_Conf_1.000 | 363  | 0  |           |                |    |         |     |     |                                                                                    |
| Locus_643_Transcript_1/1_Conf_1.000  | 1546 | 5  | 3.62E-15  | XP_001899830.1 | 61 | 87.8113 | 88  | 54  | Associated with TFs and helicases family protein                                   |
| Locus_6430_Transcript_1/1_Conf_1.000 | 1667 | 20 | 1.62E-40  | XP_002636574.1 | 58 | 172.17  | 295 | 172 | Hypothetical protein CBG23268                                                      |

|                                      |      |    |           |                |    |         |     |     |                                              |
|--------------------------------------|------|----|-----------|----------------|----|---------|-----|-----|----------------------------------------------|
| Locus_6431_Transcript_1/1_Conf_1.000 | 1292 | 20 | 8.79E-150 | NP_502179.1    | 81 | 534.643 | 398 | 326 | Slit-Robo GAP homolog family member (srgp-1) |
| Locus_6432_Transcript_1/1_Conf_1.000 | 912  | 20 | 3.25E-152 | XP_002634958.1 | 97 | 541.962 | 303 | 294 | Hypothetical protein CBG13493                |
| Locus_6433_Transcript_1/1_Conf_1.000 | 476  | 2  | 1.25E-04  | EFO16985.1     | 51 | 49.6766 | 99  | 51  | hypothetical protein LOAG_11519              |
| Locus_6434_Transcript_1/1_Conf_1.000 | 578  | 19 | 1.09E-47  | XP_002636620.1 | 87 | 193.356 | 118 | 103 | Hypothetical protein CBG23324                |
| Locus_6435_Transcript_1/1_Conf_1.000 | 609  | 20 | 3.51E-74  | NP_497801.1    | 94 | 281.567 | 135 | 127 | hypothetical protein Y1A5A.1                 |
| Locus_6436_Transcript_1/6_Conf_0.409 | 200  | 0  |           |                |    |         |     |     |                                              |
| Locus_6436_Transcript_3/6_Conf_0.136 | 169  | 0  |           |                |    |         |     |     |                                              |
| Locus_6436_Transcript_4/6_Conf_0.409 | 284  | 0  |           |                |    |         |     |     |                                              |
| Locus_6436_Transcript_5/6_Conf_0.182 | 391  | 0  |           |                |    |         |     |     |                                              |
| Locus_6437_Transcript_1/1_Conf_1.000 | 484  | 4  | 4.81E-12  | XP_002630639.1 | 52 | 74.3294 | 149 | 78  | Hypothetical protein CBG02308                |
| Locus_6438_Transcript_1/1_Conf_1.000 | 1061 | 20 | 8.91E-22  | EFO25960.1     | 50 | 108.997 | 261 | 132 | hypothetical protein LOAG_02517              |

|                                      |      |    |           |                |    |         |     |     |                                             |
|--------------------------------------|------|----|-----------|----------------|----|---------|-----|-----|---------------------------------------------|
| Locus_6439_Transcript_1/1_Conf_1.000 | 953  | 20 | 5.70E-46  | NP_001129817.1 | 72 | 189.119 | 193 | 140 | CLear family member (clr-1)                 |
| Locus_644_Transcript_1/3_Conf_0.600  | 324  | 20 | 2.78E-28  | NP_505384.2    | 69 | 128.257 | 108 | 75  | ASpartyl Protease family member (asp-2)     |
| Locus_644_Transcript_2/3_Conf_0.400  | 153  | 20 | 2.55E-13  | XP_002637505.1 | 86 | 78.5666 | 46  | 40  | C. briggsae CBR-ASP-2 protein               |
| Locus_644_Transcript_3/3_Conf_0.800  | 597  | 20 | 2.47E-53  | NP_505384.2    | 72 | 212.231 | 170 | 124 | ASpartyl Protease family member (asp-2)     |
| Locus_6440_Transcript_1/1_Conf_1.000 | 479  | 0  |           |                |    |         |     |     |                                             |
| Locus_6441_Transcript_1/2_Conf_1.000 | 1007 | 20 | 1.04E-125 | XP_002636421.1 | 81 | 454.136 | 333 | 272 | C. briggsae CBR-PPTR-2 protein              |
| Locus_6441_Transcript_2/2_Conf_1.000 | 829  | 4  | 2.85E-08  | XP_002636421.1 | 57 | 63.5438 | 98  | 56  | C. briggsae CBR-PPTR-2 protein              |
| Locus_6442_Transcript_1/2_Conf_1.000 | 471  | 20 | 4.57E-31  | XP_001900251.1 | 75 | 137.502 | 114 | 86  | Pecanex-like protein 1                      |
| Locus_6442_Transcript_2/2_Conf_1.000 | 423  | 20 | 4.60E-31  | XP_001900251.1 | 75 | 137.502 | 114 | 86  | Pecanex-like protein 1                      |
| Locus_6443_Transcript_1/1_Conf_1.000 | 152  | 0  |           |                |    |         |     |     |                                             |
| Locus_6444_Transcript_1/1_Conf_1.000 | 452  | 20 | 3.50E-23  | CAR63624.1     | 88 | 111.309 | 68  | 60  | putative CU (copper) Chaperonin             |
| Locus_6445_Transcript_1/1_Conf_1.000 | 2348 | 20 | 0         | NP_001024216.1 | 77 | 663.685 | 520 | 401 | GLYcosylation related family member (gly-4) |
| Locus_6446_Transcript_1/1_Conf_1.000 | 1325 | 2  | 4.12E-17  | EFO22800.1     | 52 | 93.9745 | 153 | 81  | hypothetical protein LOAG_05685             |
| Locus_6447_Transcript_1/1_Conf_1.000 | 830  | 0  |           |                |    |         |     |     |                                             |
| Locus_6448_Transcript_1/1_Conf_1.000 | 301  | 0  |           |                |    |         |     |     |                                             |
| Locus_6449_Transcript_1/1_Conf_1.000 | 782  | 0  |           |                |    |         |     |     |                                             |
| Locus_645_Transcript_1/1_Conf_1.000  | 1992 | 20 | 1.13E-83  | NP_498275.2    | 79 | 315.849 | 247 | 197 | hypothetical protein F01F1.1                |
| Locus_6450_Transcript_1/1_Conf_1.000 | 207  | 0  |           |                |    |         |     |     |                                             |

|                                      |      |    |           |                |    |         |     |     |                                 |
|--------------------------------------|------|----|-----------|----------------|----|---------|-----|-----|---------------------------------|
| Locus_6451_Transcript_1/1_Conf_1.000 | 694  | 20 | 1.29E-71  | XP_001902350.1 | 81 | 273.478 | 230 | 188 | Myosin XVIII A                  |
| Locus_6452_Transcript_1/1_Conf_1.000 | 923  | 20 | 2.30E-129 | XP_002640077.1 | 91 | 466.077 | 310 | 284 | Hypothetical protein CBG12562   |
| Locus_6453_Transcript_1/1_Conf_1.000 | 718  | 20 | 7.33E-49  | NP_741658.1    | 67 | 197.978 | 197 | 132 | hypothetical protein Y39B6A.39  |
| Locus_6454_Transcript_1/1_Conf_1.000 | 418  | 20 | 7.40E-29  | XP_002630899.1 | 68 | 130.183 | 113 | 77  | Hypothetical protein CBG02621   |
| Locus_6455_Transcript_1/1_Conf_1.000 | 411  | 20 | 1.59E-34  | EFO26815.1     | 67 | 137.502 | 126 | 85  | hypothetical protein LOAG_01669 |
| Locus_6456_Transcript_1/2_Conf_1.000 | 526  | 0  |           |                |    |         |     |     |                                 |
| Locus_6456_Transcript_2/2_Conf_1.000 | 511  | 0  |           |                |    |         |     |     |                                 |
| Locus_6457_Transcript_1/1_Conf_1.000 | 379  | 0  |           |                |    |         |     |     |                                 |
| Locus_6458_Transcript_1/1_Conf_1.000 | 244  | 0  |           |                |    |         |     |     |                                 |
| Locus_6459_Transcript_1/1_Conf_1.000 | 773  | 20 | 1.05E-14  | XP_002643138.1 | 92 | 84.7297 | 52  | 48  | Hypothetical protein CBG15316   |
| Locus_646_Transcript_1/2_Conf_1.000  | 605  | 0  |           |                |    |         |     |     |                                 |
| Locus_646_Transcript_2/2_Conf_1.000  | 609  | 0  |           |                |    |         |     |     |                                 |
| Locus_6460_Transcript_1/1_Conf_1.000 | 564  | 4  | 3.41E-19  | EFO22637.1     | 50 | 98.5969 | 184 | 93  | hypothetical protein LOAG_05847 |
| Locus_6461_Transcript_1/2_Conf_1.000 | 410  | 0  |           |                |    |         |     |     |                                 |
| Locus_6461_Transcript_2/2_Conf_1.000 | 1094 | 20 | 2.22E-39  | XP_002637143.1 | 60 | 167.548 | 224 | 136 | Hypothetical protein CBG09645   |



|                                      |      |    |           |                |    |         |     |     |                                                                        |
|--------------------------------------|------|----|-----------|----------------|----|---------|-----|-----|------------------------------------------------------------------------|
| Locus_6462_Transcript_1/1_Conf_1.000 | 373  | 4  | 6.27E-12  | CAR63558.1     | 97 | 73.9442 | 41  | 40  | hypothetical protein                                                   |
| Locus_6463_Transcript_1/1_Conf_1.000 | 270  | 20 | 3.73E-33  | NP_509949.1    | 88 | 144.436 | 89  | 79  | SideroFlexiN (mitochondrial iron transporter) family member (sfxn-1.5) |
| Locus_6464_Transcript_1/1_Conf_1.000 | 128  | 0  |           |                |    |         |     |     |                                                                        |
| Locus_6465_Transcript_1/2_Conf_1.000 | 954  | 20 | 8.20E-77  | XP_002633289.1 | 74 | 291.582 | 259 | 192 | Hypothetical protein CBG06018                                          |
| Locus_6465_Transcript_2/2_Conf_1.000 | 948  | 20 | 8.19E-77  | XP_002633289.1 | 74 | 291.582 | 259 | 192 | Hypothetical protein CBG06018                                          |
| Locus_6466_Transcript_1/2_Conf_1.000 | 574  | 0  |           |                |    |         |     |     |                                                                        |
| Locus_6466_Transcript_2/2_Conf_1.000 | 574  | 0  |           |                |    |         |     |     |                                                                        |
| Locus_6467_Transcript_1/2_Conf_1.000 | 1243 | 20 | 3.59E-84  | XP_002632395.1 | 67 | 316.62  | 314 | 212 | C. briggsae CBR-ITSN-1 protein                                         |
| Locus_6467_Transcript_2/2_Conf_1.000 | 1243 | 20 | 3.59E-84  | XP_002632395.1 | 67 | 316.62  | 314 | 212 | C. briggsae CBR-ITSN-1 protein                                         |
| Locus_6468_Transcript_1/1_Conf_1.000 | 177  | 2  | 1.01E-06  | XP_002642439.1 | 75 | 56.6102 | 44  | 33  | Hypothetical protein CBG06843                                          |
| Locus_6469_Transcript_1/1_Conf_1.000 | 314  | 20 | 1.45E-16  | XP_001894239.1 | 69 | 89.3521 | 78  | 54  | Peptidase M16 inactive domain containing protein                       |
| Locus_647_Transcript_1/1_Conf_1.000  | 923  | 20 | 1.35E-121 | XP_002640679.1 | 89 | 440.269 | 259 | 232 | C. briggsae CBR-PBS-5 protein                                          |
| Locus_6470_Transcript_1/1_Conf_1.000 | 132  | 0  |           |                |    |         |     |     |                                                                        |

|                                      |      |    |          |                |     |         |     |     |                                                                       |
|--------------------------------------|------|----|----------|----------------|-----|---------|-----|-----|-----------------------------------------------------------------------|
| Locus_6471_Transcript_1/1_Conf_1.000 | 354  | 20 | 2.18E-57 | EAW56803.1     | 100 | 224.942 | 108 | 108 | eukaryotic translation initiation factor 3, subunit 12, isoform CRA_a |
| Locus_6472_Transcript_1/1_Conf_1.000 | 701  | 20 | 2.38E-97 | NP_504837.1    | 88  | 358.992 | 231 | 205 | hypothetical protein C05C8.2                                          |
| Locus_6473_Transcript_1/1_Conf_1.000 | 716  | 20 | 1.19E-83 | EFO26364.1     | 87  | 313.538 | 219 | 191 | pontin                                                                |
| Locus_6474_Transcript_1/1_Conf_1.000 | 759  | 2  | 2.85E-09 | EFO19794.1     | 47  | 66.6254 | 231 | 109 | hypothetical protein LOAG_08700                                       |
| Locus_6475_Transcript_1/2_Conf_1.000 | 531  | 20 | 1.13E-47 | 1TW9           | 76  | 192.971 | 139 | 106 | Glutathione Transferase-2                                             |
| Locus_6475_Transcript_2/2_Conf_1.000 | 530  | 20 | 1.71E-48 | 1TW9           | 76  | 195.667 | 139 | 107 | Glutathione Transferase-2                                             |
| Locus_6476_Transcript_1/1_Conf_1.000 | 1002 | 20 | 8.70E-48 | XP_002640031.1 | 73  | 195.282 | 196 | 144 | Hypothetical protein CBG12503                                         |
| Locus_6477_Transcript_1/1_Conf_1.000 | 156  | 0  |          |                |     |         |     |     |                                                                       |
| Locus_6478_Transcript_1/1_Conf_1.000 | 399  | 20 | 5.21E-67 | YP_001700362.1 | 96  | 256.914 | 132 | 127 | cytochrome c oxidase subunit II                                       |
| Locus_6479_Transcript_1/2_Conf_1.000 | 950  | 6  | 1.80E-07 | EFO25761.1     | 57  | 61.2326 | 101 | 58  | hypothetical protein LOAG_02722                                       |

|                                      |      |    |           |                |    |         |     |     |                                                          |
|--------------------------------------|------|----|-----------|----------------|----|---------|-----|-----|----------------------------------------------------------|
| Locus_6479_Transcript_2/2_Conf_1.000 | 950  | 6  | 1.80E-07  | EFO25761.1     | 57 | 61.2326 | 101 | 58  | hypothetical protein LOAG_02722                          |
| Locus_648_Transcript_1/2_Conf_1.000  | 1072 | 0  |           |                |    |         |     |     |                                                          |
| Locus_648_Transcript_2/2_Conf_1.000  | 637  | 0  |           |                |    |         |     |     |                                                          |
| Locus_6480_Transcript_1/1_Conf_1.000 | 382  | 20 | 3.26E-37  | NP_741249.1    | 86 | 157.918 | 103 | 89  | hypothetical protein C02F5.7                             |
| Locus_6481_Transcript_1/3_Conf_0.500 | 662  | 0  |           |                |    |         |     |     |                                                          |
| Locus_6481_Transcript_2/3_Conf_0.667 | 896  | 0  |           |                |    |         |     |     |                                                          |
| Locus_6481_Transcript_3/3_Conf_0.667 | 851  | 0  |           |                |    |         |     |     |                                                          |
| Locus_6482_Transcript_1/1_Conf_1.000 | 312  | 0  |           |                |    |         |     |     |                                                          |
| Locus_6483_Transcript_1/1_Conf_1.000 | 974  | 20 | 2.46E-76  |                | 71 | 290.041 | 312 | 224 | hypothetical protein R13H4.4 -<br>Caenorhabditis elegans |
| Locus_6484_Transcript_1/1_Conf_1.000 | 1867 | 20 | 5.29E-19  | EFO19565.1     | 59 | 100.908 | 99  | 59  | hypothetical protein LOAG_08928                          |
| Locus_6485_Transcript_1/2_Conf_1.000 | 926  | 20 | 3.96E-121 | XP_002646071.1 | 95 | 438.728 | 246 | 234 | C. briggsae CBR-EIF-6 protein                            |
| Locus_6485_Transcript_2/2_Conf_1.000 | 926  | 20 | 3.96E-121 | XP_002646071.1 | 95 | 438.728 | 246 | 234 | C. briggsae CBR-EIF-6 protein                            |
| Locus_6486_Transcript_1/1_Conf_1.000 | 284  | 0  |           |                |    |         |     |     |                                                          |
| Locus_6487_Transcript_1/3_Conf_0.667 | 629  | 0  |           |                |    |         |     |     |                                                          |
| Locus_6487_Transcript_2/3_Conf_0.667 | 641  | 0  |           |                |    |         |     |     |                                                          |
| Locus_6487_Transcript_3/3_Conf_0.667 | 635  | 0  |           |                |    |         |     |     |                                                          |
| Locus_6488_Transcript_1/1_Conf_1.000 | 266  | 0  |           |                |    |         |     |     |                                                          |
| Locus_6489_Transcript_1/3_Conf_0.600 | 659  | 20 | 2.82E-78  | NP_497230.2    | 85 | 295.434 | 230 | 197 | hypothetical protein W06E11.7                            |
| Locus_6489_Transcript_2/3_Conf_0.600 | 664  | 20 | 7.48E-79  | NP_497230.2    | 85 | 297.36  | 231 | 198 | hypothetical protein W06E11.7                            |
| Locus_6489_Transcript_3/3_Conf_0.600 | 664  | 20 | 7.48E-79  | NP_497230.2    | 85 | 297.36  | 231 | 198 | hypothetical protein W06E11.7                            |

|                                      |      |    |           |                |    |         |     |     |                                                                       |
|--------------------------------------|------|----|-----------|----------------|----|---------|-----|-----|-----------------------------------------------------------------------|
| Locus_649_Transcript_1/1_Conf_1.000  | 968  | 20 | 1.23E-120 | XP_002639257.1 | 80 | 437.187 | 301 | 241 | C. briggsae CBR-FCE-1 protein                                         |
| Locus_6490_Transcript_1/1_Conf_1.000 | 441  | 20 | 6.44E-41  | NP_001021001.1 | 73 | 170.244 | 146 | 107 | hypothetical protein C17E4.11                                         |
| Locus_6491_Transcript_1/2_Conf_1.000 | 993  | 1  | 9.92E-04  | NP_495617.1    | 54 | 48.9062 | 70  | 38  | hypothetical protein B0495.2                                          |
| Locus_6491_Transcript_2/2_Conf_1.000 | 1143 | 20 | 3.10E-23  | XP_001894905.1 | 62 | 114.005 | 129 | 81  | Protein kinase domain containing protein                              |
| Locus_6492_Transcript_1/2_Conf_1.000 | 909  | 20 | 1.31E-44  | XP_002630112.1 | 89 | 184.496 | 109 | 98  | Hypothetical protein CBG00513                                         |
| Locus_6492_Transcript_2/2_Conf_1.000 | 709  | 20 | 3.38E-91  | XP_002630112.1 | 83 | 338.576 | 235 | 197 | Hypothetical protein CBG00513                                         |
| Locus_6493_Transcript_1/1_Conf_1.000 | 678  | 20 | 2.10E-47  | XP_001900963.1 | 77 | 192.971 | 131 | 102 | Zinc finger, C2H2 type family protein                                 |
| Locus_6494_Transcript_1/1_Conf_1.000 | 684  | 0  |           |                |    |         |     |     |                                                                       |
| Locus_6495_Transcript_1/1_Conf_1.000 | 320  | 0  |           |                |    |         |     |     |                                                                       |
| Locus_6496_Transcript_1/3_Conf_0.600 | 514  | 5  | 1.31E-15  | NP_490938.3    | 55 | 86.2705 | 169 | 93  | AFaDin (actin filament binding protein) homolog family member (afd-1) |
| Locus_6496_Transcript_2/3_Conf_0.600 | 514  | 5  | 3.56E-21  | NP_490938.3    | 55 | 104.76  | 169 | 93  | AFaDin (actin filament binding protein) homolog family member (afd-1) |
| Locus_6496_Transcript_3/3_Conf_0.600 | 514  | 5  | 1.31E-15  | NP_490938.3    | 55 | 86.2705 | 169 | 93  | AFaDin (actin filament binding protein) homolog family member (afd-1) |
| Locus_6497_Transcript_1/1_Conf_1.000 | 948  | 20 | 4.24E-49  | XP_002647074.1 | 82 | 199.519 | 200 | 165 | C. briggsae CBR-CCDC-47 protein                                       |
| Locus_6498_Transcript_1/1_Conf_1.000 | 304  | 0  |           |                |    |         |     |     |                                                                       |
| Locus_6499_Transcript_1/1_Conf_1.000 | 888  | 20 | 1.44E-32  | NP_740784.1    | 79 | 144.436 | 146 | 116 | hypothetical protein Y92H12BL5                                        |
| Locus_65_Transcript_1/1_Conf_1.000   | 1058 | 20 | 2.85E-20  | XP_002634864.1 | 45 | 103.99  | 350 | 160 | Hypothetical protein CBG13985                                         |
| Locus_650_Transcript_1/1_Conf_1.000  | 1106 | 11 | 2.81E-90  | XP_002643974.1 | 70 | 336.65  | 364 | 258 | Hypothetical protein CBG17350                                         |

|                                      |      |    |          |                |    |         |     |     |                                                     |
|--------------------------------------|------|----|----------|----------------|----|---------|-----|-----|-----------------------------------------------------|
| Locus_6500_Transcript_1/4_Conf_0.700 | 1314 | 20 | 5.28E-49 | XP_002637569.1 | 52 | 199.904 | 393 | 205 | C. briggsae CBR-MDF-1 protein                       |
| Locus_6500_Transcript_2/4_Conf_0.700 | 1314 | 20 | 8.42E-47 | XP_002637569.1 | 52 | 192.586 | 395 | 207 | C. briggsae CBR-MDF-1 protein                       |
| Locus_6500_Transcript_3/4_Conf_0.700 | 1314 | 20 | 1.44E-46 | XP_002637569.1 | 51 | 191.815 | 395 | 205 | C. briggsae CBR-MDF-1 protein                       |
| Locus_6500_Transcript_4/4_Conf_0.700 | 1314 | 20 | 1.44E-46 | XP_002637569.1 | 51 | 191.815 | 395 | 205 | C. briggsae CBR-MDF-1 protein                       |
| Locus_6501_Transcript_1/3_Conf_0.222 | 268  | 0  |          |                |    |         |     |     |                                                     |
| Locus_6501_Transcript_2/3_Conf_0.556 | 899  | 0  |          |                |    |         |     |     |                                                     |
| Locus_6501_Transcript_3/3_Conf_0.556 | 633  | 0  |          |                |    |         |     |     |                                                     |
| Locus_6502_Transcript_1/1_Conf_1.000 | 662  | 20 | 2.38E-69 | XP_002632485.1 | 74 | 265.774 | 221 | 164 | C. briggsae CBR-NHR-5 protein                       |
| Locus_6503_Transcript_1/1_Conf_1.000 | 768  | 20 | 4.73E-76 | NP_500272.2    | 97 | 288.5   | 150 | 146 | UBiquitin Conjugating enzyme family member (ubc-13) |
| Locus_6504_Transcript_1/1_Conf_1.000 | 730  | 20 | 5.06E-77 | XP_001899513.1 | 75 | 291.582 | 243 | 183 | AIDA-1b                                             |
| Locus_6505_Transcript_1/1_Conf_1.000 | 254  | 0  |          |                |    |         |     |     |                                                     |

|                                      |      |    |           |                |    |         |     |     |                                  |
|--------------------------------------|------|----|-----------|----------------|----|---------|-----|-----|----------------------------------|
| Locus_6506_Transcript_1/1_Conf_1.000 | 982  | 20 | 2.65E-110 | XP_001897993.1 | 86 | 402.905 | 256 | 222 | F-box-like/WD-repeat protein ebi |
| Locus_6507_Transcript_1/1_Conf_1.000 | 413  | 20 | 8.52E-38  | XP_002631238.1 | 98 | 159.844 | 98  | 97  | Hypothetical protein CBG03041    |
| Locus_6508_Transcript_1/1_Conf_1.000 | 777  | 0  |           |                |    |         |     |     |                                  |
| Locus_6509_Transcript_1/1_Conf_1.000 | 1968 | 20 | 0         | NP_497134.1    | 93 | 1148.27 | 610 | 573 | hypothetical protein W05G11.6    |
| Locus_651_Transcript_1/1_Conf_1.000  | 2032 | 20 | 0         | XP_002630114.1 | 91 | 1110.9  | 677 | 621 | C. briggsae CBR-PYR-1 protein    |
| Locus_6510_Transcript_1/1_Conf_1.000 | 171  | 0  |           |                |    |         |     |     |                                  |
| Locus_6511_Transcript_1/1_Conf_1.000 | 542  | 20 | 1.81E-56  | XP_002631495.1 | 77 | 222.246 | 180 | 140 | Hypothetical protein CBG20655    |
| Locus_6512_Transcript_1/1_Conf_1.000 | 430  | 20 | 1.68E-25  | XP_001896542.1 | 71 | 119.013 | 107 | 76  | hypothetical protein Bm1_25410   |

|                                      |      |    |          |                |    |         |     |     |                                                                                   |
|--------------------------------------|------|----|----------|----------------|----|---------|-----|-----|-----------------------------------------------------------------------------------|
| Locus_6513_Transcript_1/1_Conf_1.000 | 387  | 4  | 7.03E-08 | XP_002634312.1 | 71 | 60.4622 | 102 | 73  | Hypothetical protein CBG17653                                                     |
| Locus_6514_Transcript_1/1_Conf_1.000 | 401  | 0  |          |                |    |         |     |     |                                                                                   |
| Locus_6515_Transcript_1/2_Conf_1.000 | 350  | 0  |          |                |    |         |     |     |                                                                                   |
| Locus_6515_Transcript_2/2_Conf_1.000 | 594  | 0  |          |                |    |         |     |     |                                                                                   |
| Locus_6516_Transcript_1/1_Conf_1.000 | 801  | 20 | 3.14E-65 | ACB13196.1     | 65 | 252.677 | 261 | 171 | metalloproteinase                                                                 |
| Locus_6517_Transcript_1/3_Conf_0.714 | 745  | 20 | 2.43E-35 | NP_001041127.1 | 85 | 123.635 | 91  | 78  | hypothetical protein F57A8.2                                                      |
| Locus_6517_Transcript_2/3_Conf_0.714 | 708  | 20 | 4.63E-40 | NP_001041127.1 | 81 | 168.703 | 140 | 114 | hypothetical protein F57A8.2                                                      |
| Locus_6517_Transcript_3/3_Conf_0.714 | 708  | 20 | 4.63E-40 | NP_001041127.1 | 81 | 168.703 | 140 | 114 | hypothetical protein F57A8.2                                                      |
| Locus_6518_Transcript_1/1_Conf_1.000 | 753  | 20 | 7.70E-92 | XP_002640801.1 | 83 | 340.887 | 252 | 211 | Hypothetical protein CBG15682                                                     |
| Locus_6519_Transcript_1/1_Conf_1.000 | 412  | 5  | 1.73E-14 | XP_002634119.1 | 60 | 82.4185 | 143 | 86  | Hypothetical protein CBG01673                                                     |
| Locus_652_Transcript_1/1_Conf_1.000  | 1113 | 4  | 1.14E-22 | XP_002642990.1 | 60 | 112.079 | 177 | 107 | Hypothetical protein CBG15276                                                     |
| Locus_6520_Transcript_1/1_Conf_1.000 | 286  | 12 | 1.31E-17 | A8X6H1.2       | 75 | 92.8189 | 77  | 58  | cGMP-dependent protein kinase egl-4                                               |
| Locus_6521_Transcript_1/1_Conf_1.000 | 664  | 20 | 3.37E-63 | NP_510184.1    | 80 | 245.358 | 182 | 146 | hypothetical protein F09A5.4                                                      |
| Locus_6522_Transcript_1/1_Conf_1.000 | 662  | 3  | 4.87E-22 | NP_493601.2    | 49 | 108.612 | 205 | 101 | FERM domain (protein4.1-ezrin-radixin-moesin) family member (frm-1)               |
| Locus_6523_Transcript_1/1_Conf_1.000 | 256  | 5  | 6.97E-11 | XP_002640260.1 | 65 | 70.4774 | 73  | 48  | Hypothetical protein CBG12785                                                     |
| Locus_6524_Transcript_1/1_Conf_1.000 | 526  | 7  | 6.19E-35 | NP_500156.2    | 65 | 150.599 | 160 | 104 | XPC (Xeroderma Pigmentosum group C) DNA repair gene homolog family member (xpc-1) |
| Locus_6525_Transcript_1/1_Conf_1.000 | 451  | 20 | 7.24E-53 | XP_002633385.1 | 91 | 209.92  | 148 | 136 | Hypothetical protein CBG06141                                                     |

|                                      |      |    |           |                |    |         |     |     |                                                                         |
|--------------------------------------|------|----|-----------|----------------|----|---------|-----|-----|-------------------------------------------------------------------------|
| Locus_6526_Transcript_1/1_Conf_1.000 | 544  | 20 | 3.56E-84  | AAK31527.3     | 90 | 314.309 | 185 | 168 | Neuronal symmetry protein 1, partially confirmed by transcript evidence |
| Locus_6527_Transcript_1/1_Conf_1.000 | 419  | 0  |           |                |    |         |     |     |                                                                         |
| Locus_6528_Transcript_1/1_Conf_1.000 | 383  | 20 | 4.41E-34  | EFO26258.1     | 74 | 147.517 | 127 | 95  | hypothetical protein LOAG_02227                                         |
| Locus_6529_Transcript_1/1_Conf_1.000 | 323  | 20 | 1.10E-32  | XP_002639452.1 | 79 | 142.895 | 99  | 79  | Hypothetical protein CBG04047                                           |
| Locus_653_Transcript_1/1_Conf_1.000  | 1105 | 20 | 5.98E-133 | NP_491004.1    | 84 | 478.404 | 335 | 283 | Fructose-1,6-BiPhosphatase family member (fbp-1)                        |
| Locus_6530_Transcript_1/3_Conf_0.714 | 710  | 20 | 6.85E-68  | XP_002639600.1 | 79 | 261.151 | 207 | 165 | C. briggsae CBR-ATP-3 protein                                           |
| Locus_6530_Transcript_2/3_Conf_0.714 | 710  | 20 | 1.53E-67  | XP_002639600.1 | 79 | 259.996 | 207 | 165 | C. briggsae CBR-ATP-3 protein                                           |



|                                      |      |    |           |                |     |         |     |     |                                                                          |
|--------------------------------------|------|----|-----------|----------------|-----|---------|-----|-----|--------------------------------------------------------------------------|
| Locus_6530_Transcript_3/3_Conf_0.714 | 710  | 20 | 1.53E-67  | XP_002639600.1 | 79  | 259.996 | 207 | 165 | C. briggsae CBR-ATP-3 protein                                            |
| Locus_6531_Transcript_1/1_Conf_1.000 | 194  | 20 | 6.03E-31  | XP_002832350.1 | 100 | 137.117 | 64  | 64  | PREDICTED: LOW QUALITY PROTEIN: filamin-A-like                           |
| Locus_6532_Transcript_1/1_Conf_1.000 | 134  | 0  |           |                |     |         |     |     |                                                                          |
| Locus_6533_Transcript_1/1_Conf_1.000 | 749  | 0  |           |                |     |         |     |     |                                                                          |
| Locus_6534_Transcript_1/1_Conf_1.000 | 296  | 0  |           |                |     |         |     |     |                                                                          |
| Locus_6535_Transcript_1/1_Conf_1.000 | 151  | 9  | 1.90E-08  | CAB60377.4     | 74  | 62.3882 | 39  | 29  | C. elegans protein Y46G5A.29, partially confirmed by transcript evidence |
| Locus_6536_Transcript_1/1_Conf_1.000 | 1121 | 20 | 1.70E-167 | XP_002643348.1 | 89  | 593.193 | 371 | 331 | Hypothetical protein CBG15945                                            |
| Locus_6537_Transcript_1/1_Conf_1.000 | 312  | 20 | 1.27E-36  | XP_002634847.1 | 75  | 155.992 | 116 | 88  | Hypothetical protein CBG13964                                            |

|                                      |     |    |           |                |    |         |     |     |                                              |
|--------------------------------------|-----|----|-----------|----------------|----|---------|-----|-----|----------------------------------------------|
| Locus_6538_Transcript_1/1_Conf_1.000 | 721 | 11 | 1.51E-17  | NP_492859.1    | 50 | 93.9745 | 131 | 66  | hypothetical protein Y52B11A.8               |
| Locus_6539_Transcript_1/1_Conf_1.000 | 473 | 4  | 6.36E-41  | NP_499683.1    | 92 | 170.244 | 147 | 136 | hypothetical protein Y37D8A.16               |
| Locus_654_Transcript_1/1_Conf_1.000  | 605 | 20 | 1.49E-45  | NP_001021553.1 | 79 | 186.422 | 149 | 119 | DeoxyUTPase family member (dut-1)            |
| Locus_6540_Transcript_1/1_Conf_1.000 | 539 | 6  | 8.30E-22  | XP_002636434.1 | 67 | 107.071 | 105 | 71  | Hypothetical protein CBG23095                |
| Locus_6541_Transcript_1/1_Conf_1.000 | 539 | 20 | 4.81E-62  | NP_492812.2    | 92 | 240.736 | 138 | 127 | hypothetical protein B0205.6                 |
| Locus_6542_Transcript_1/2_Conf_1.000 | 940 | 6  | 3.82E-51  | XP_002639860.1 | 66 | 146.362 | 150 | 100 | Hypothetical protein CBG12214                |
| Locus_6542_Transcript_2/2_Conf_1.000 | 936 | 6  | 1.33E-55  | XP_002639860.1 | 60 | 221.09  | 291 | 175 | Hypothetical protein CBG12214                |
| Locus_6543_Transcript_1/1_Conf_1.000 | 504 | 20 | 1.10E-11  | Q7ZWS2.2       | 57 | 73.1738 | 122 | 70  | Cytosolic 5'-nucleotidase III-like protein A |
| Locus_6544_Transcript_1/1_Conf_1.000 | 707 | 20 | 2.92E-103 | XP_002643185.1 | 92 | 378.637 | 212 | 197 | Hypothetical protein CBG24154                |
| Locus_6545_Transcript_1/1_Conf_1.000 | 685 | 20 | 2.19E-84  | NP_509394.1    | 83 | 315.849 | 206 | 171 | hypothetical protein M60.7                   |
| Locus_6546_Transcript_1/1_Conf_1.000 | 651 | 5  | 1.02E-48  | AAI09380.1     | 85 | 197.208 | 119 | 102 | AF305962_1putative protein hc43.4            |

|                                      |      |    |          |                |    |         |     |     |                                                          |
|--------------------------------------|------|----|----------|----------------|----|---------|-----|-----|----------------------------------------------------------|
| Locus_6547_Transcript_1/5_Conf_0.571 | 960  | 18 | 3.67E-08 | XP_002738326.1 | 41 | 63.5438 | 142 | 59  | PREDICTED: neurogenic locus notch homolog protein 2-like |
| Locus_6547_Transcript_2/5_Conf_0.214 | 939  | 20 | 4.98E-10 | EFO20860.1     | 43 | 69.707  | 186 | 80  | hypothetical protein LOAG_07630                          |
| Locus_6547_Transcript_3/5_Conf_0.714 | 1703 | 20 | 5.04E-21 | NP_001021459.2 | 36 | 107.457 | 481 | 174 | hypothetical protein F36H2.3                             |
| Locus_6547_Transcript_4/5_Conf_0.714 | 1881 | 20 | 8.24E-20 | EFO20860.1     | 39 | 103.605 | 477 | 187 | hypothetical protein LOAG_07630                          |
| Locus_6547_Transcript_5/5_Conf_0.714 | 1860 | 20 | 8.12E-20 | NP_001021459.2 | 36 | 103.605 | 481 | 174 | hypothetical protein F36H2.3                             |
| Locus_6548_Transcript_1/1_Conf_1.000 | 541  | 20 | 4.56E-84 | XP_002636692.1 | 91 | 313.923 | 180 | 164 | Hypothetical protein CBG23406                            |
| Locus_6549_Transcript_1/1_Conf_1.000 | 727  | 20 | 8.53E-85 | XP_001894578.1 | 82 | 317.39  | 227 | 188 | RuvB-like 1                                              |

|                                      |     |    |           |                |    |         |     |     |                                                                                                          |
|--------------------------------------|-----|----|-----------|----------------|----|---------|-----|-----|----------------------------------------------------------------------------------------------------------|
| Locus_655_Transcript_1/1_Conf_1.000  | 891 | 20 | 3.47E-119 | XP_001140124.1 | 99 | 432.18  | 246 | 244 | PREDICTED: similar to Ferritin heavy chain (Ferritin H subunit) (Proliferation-inducing gene 15 protein) |
| Locus_6550_Transcript_1/1_Conf_1.000 | 679 | 0  |           |                |    |         |     |     |                                                                                                          |
| Locus_6551_Transcript_1/1_Conf_1.000 | 611 | 20 | 1.49E-32  | NP_497850.2    | 65 | 143.28  | 178 | 116 | hypothetical protein F43C1.3                                                                             |
| Locus_6552_Transcript_1/1_Conf_1.000 | 266 | 20 | 2.88E-33  | NP_510447.1    | 87 | 144.821 | 87  | 76  | hypothetical protein C05G5.1                                                                             |
| Locus_6553_Transcript_1/1_Conf_1.000 | 346 | 20 | 5.14E-14  | XP_002639864.1 | 75 | 80.8777 | 69  | 52  | C. briggsae CBR-AHA-1 protein                                                                            |
| Locus_6554_Transcript_1/1_Conf_1.000 | 244 | 20 | 1.33E-14  | XP_002638796.1 | 69 | 82.8037 | 82  | 57  | Hypothetical protein CBG05151                                                                            |
| Locus_6555_Transcript_1/1_Conf_1.000 | 470 | 0  |           |                |    |         |     |     |                                                                                                          |

|                                      |      |    |           |             |    |         |     |     |                                                   |
|--------------------------------------|------|----|-----------|-------------|----|---------|-----|-----|---------------------------------------------------|
| Locus_6556_Transcript_1/1_Conf_1.000 | 202  | 4  | 4.45E-10  | NP_492694.1 | 88 | 67.781  | 44  | 39  | CaSeiN Kinase family member (csnk-1)              |
| Locus_6557_Transcript_1/1_Conf_1.000 | 846  | 20 | 1.90E-47  | NP_493357.2 | 76 | 193.741 | 208 | 160 | hypothetical protein C01A2.4                      |
| Locus_6558_Transcript_1/1_Conf_1.000 | 374  | 0  |           |             |    |         |     |     |                                                   |
| Locus_6559_Transcript_1/1_Conf_1.000 | 478  | 20 | 2.82E-49  | NP_501503.1 | 75 | 197.978 | 159 | 120 | hypothetical protein F21D5.5                      |
| Locus_6560_Transcript_1/1_Conf_1.000 | 1621 | 20 | 0         | NP_498646.1 | 96 | 772.696 | 410 | 396 | Conserved Germline Helicase family member (cgh-1) |
| Locus_6560_Transcript_1/1_Conf_1.000 | 1823 | 20 | 4.52E-128 | EFO24175.1  | 61 | 456.833 | 591 | 361 | hypothetical protein LOAG_04314                   |

|                                      |      |    |           |                |    |         |     |     |                                                                     |
|--------------------------------------|------|----|-----------|----------------|----|---------|-----|-----|---------------------------------------------------------------------|
| Locus_6561_Transcript_1/1_Conf_1.000 | 423  | 20 | 1.99E-34  | NP_498632.1    | 79 | 148.673 | 102 | 81  | hypothetical protein T20B12.7                                       |
| Locus_6562_Transcript_1/1_Conf_1.000 | 421  | 0  |           |                |    |         |     |     |                                                                     |
| Locus_6563_Transcript_1/2_Conf_1.000 | 1527 | 20 | 1.10E-56  | NP_498099.1    | 58 | 225.713 | 332 | 195 | Caffeine Induced Death (S. pombe Cid) homolog family member (cid-1) |
| Locus_6563_Transcript_2/2_Conf_1.000 | 1637 | 20 | 1.20E-56  | NP_498099.1    | 58 | 225.713 | 332 | 195 | Caffeine Induced Death (S. pombe Cid) homolog family member (cid-1) |
| Locus_6564_Transcript_1/1_Conf_1.000 | 1848 | 20 | 2.36E-104 | EFO19265.1     | 60 | 384.415 | 512 | 311 | hypothetical protein LOAG_09228                                     |
| Locus_6565_Transcript_1/1_Conf_1.000 | 1113 | 20 | 9.21E-73  | NP_510385.1    | 72 | 278.485 | 240 | 174 | hypothetical protein C11H1.3                                        |
| Locus_6566_Transcript_1/1_Conf_1.000 | 466  | 2  | 2.00E-26  | XP_002637429.1 | 58 | 122.094 | 158 | 92  | Hypothetical protein CBG19140                                       |
| Locus_6567_Transcript_1/1_Conf_1.000 | 890  | 20 | 2.12E-76  | XP_001902331.1 | 85 | 290.041 | 196 | 168 | RNA polymerase Rpb7, N-terminal domain containing protein           |
| Locus_6568_Transcript_1/1_Conf_1.000 | 1331 | 20 | 2.96E-140 | NP_871868.1    | 74 | 503.056 | 442 | 331 | hypothetical protein F36A2.9                                        |

|                                      |      |    |           |                |    |         |     |     |                                |
|--------------------------------------|------|----|-----------|----------------|----|---------|-----|-----|--------------------------------|
| Locus_6569_Transcript_1/1_Conf_1.000 | 1033 | 20 | 9.48E-154 | XP_002632369.1 | 89 | 547.354 | 344 | 308 | C. briggsae CBR-PMP-4 protein  |
| Locus_657_Transcript_1/1_Conf_1.000  | 257  | 2  | 4.65E-23  | NP_500609.1    | 86 | 110.923 | 80  | 69  | hypothetical protein F29B9.11  |
| Locus_6570_Transcript_1/1_Conf_1.000 | 573  | 20 | 4.68E-19  | XP_002644813.1 | 65 | 98.2117 | 144 | 94  | Hypothetical protein CBG14831  |
| Locus_6571_Transcript_1/1_Conf_1.000 | 376  | 0  |           |                |    |         |     |     |                                |
| Locus_6572_Transcript_1/1_Conf_1.000 | 1185 | 0  |           |                |    |         |     |     |                                |
| Locus_6573_Transcript_1/1_Conf_1.000 | 354  | 20 | 5.39E-40  | XP_002632111.1 | 83 | 167.162 | 120 | 100 | Hypothetical protein CBG06965  |
| Locus_6574_Transcript_1/1_Conf_1.000 | 300  | 0  |           |                |    |         |     |     |                                |
| Locus_6575_Transcript_1/1_Conf_1.000 | 279  | 20 | 6.95E-40  | 1TW9           | 93 | 166.777 | 93  | 87  | Glutathione Transferase-2      |
| Locus_6576_Transcript_1/1_Conf_1.000 | 480  | 20 | 1.14E-42  | NP_001022050.1 | 74 | 176.022 | 158 | 117 | hypothetical protein D1069.3   |
| Locus_6577_Transcript_1/1_Conf_1.000 | 268  | 0  |           |                |    |         |     |     |                                |
| Locus_6578_Transcript_1/1_Conf_1.000 | 949  | 20 | 1.21E-104 | XP_002642649.1 | 79 | 384.03  | 296 | 235 | Hypothetical protein CBG00031  |
| Locus_6579_Transcript_1/1_Conf_1.000 | 873  | 20 | 1.00E-46  | XP_001895786.1 | 60 | 191.43  | 289 | 174 | Fringe-like family protein     |
| Locus_658_Transcript_1/1_Conf_1.000  | 1111 | 20 | 1.51E-67  | XP_002636702.1 | 71 | 261.151 | 251 | 179 | C. briggsae CBR-RAD-50 protein |
| Locus_6580_Transcript_1/1_Conf_1.000 | 250  | 2  | 3.24E-13  | XP_002647590.1 | 66 | 78.1814 | 72  | 48  | Hypothetical protein CBG06678  |
| Locus_6581_Transcript_1/1_Conf_1.000 | 328  | 0  |           |                |    |         |     |     |                                |

|                                      |      |    |           |                |     |         |     |     |                                                                    |
|--------------------------------------|------|----|-----------|----------------|-----|---------|-----|-----|--------------------------------------------------------------------|
| Locus_6582_Transcript_1/1_Conf_1.000 | 362  | 20 | 8.23E-49  | XP_002636649.1 | 87  | 196.438 | 122 | 107 | Hypothetical protein CBG23360                                      |
| Locus_6583_Transcript_1/1_Conf_1.000 | 2337 | 0  |           |                |     |         |     |     |                                                                    |
| Locus_6584_Transcript_1/1_Conf_1.000 | 432  | 0  |           |                |     |         |     |     |                                                                    |
| Locus_6585_Transcript_1/1_Conf_1.000 | 219  | 20 | 2.10E-23  | XP_002825864.1 | 100 | 112.079 | 54  | 54  | PREDICTED: isocitrate dehydrogenase                                |
| Locus_6586_Transcript_1/1_Conf_1.000 | 2393 | 20 | 5.33E-99  | XP_001891601.1 | 53  | 367.081 | 745 | 397 | Centromere/kinetochore Zw10 family protein                         |
| Locus_6587_Transcript_1/1_Conf_1.000 | 554  | 0  |           |                |     |         |     |     |                                                                    |
| Locus_6588_Transcript_1/1_Conf_1.000 | 678  | 20 | 1.60E-63  | NP_491980.1    | 69  | 246.514 | 225 | 156 | hypothetical protein T10B11.6                                      |
| Locus_6589_Transcript_1/1_Conf_1.000 | 667  | 2  | 2.74E-20  | NP_492020.1    | 100 | 102.834 | 43  | 43  | hypothetical protein K10D3.4                                       |
| Locus_659_Transcript_1/1_Conf_1.000  | 637  | 5  | 2.02E-30  | XP_002641414.1 | 84  | 136.346 | 79  | 67  | Hypothetical protein CBG13281                                      |
| Locus_6590_Transcript_1/2_Conf_1.000 | 1106 | 20 | 5.77E-144 | NP_000993.1    | 100 | 514.998 | 317 | 317 | 60S acidic ribosomal protein P0                                    |
| Locus_6590_Transcript_2/2_Conf_1.000 | 920  | 20 | 2.91E-108 | XP_862838.1    | 100 | 395.971 | 255 | 255 | PREDICTED: similar to acidic ribosomal phosphoprotein P0 isoform 3 |
| Locus_6591_Transcript_1/1_Conf_1.000 | 294  | 0  |           |                |     |         |     |     |                                                                    |



|                                      |     |    |           |                |    |         |     |     |                                              |
|--------------------------------------|-----|----|-----------|----------------|----|---------|-----|-----|----------------------------------------------|
| Locus_6592_Transcript_1/1_Conf_1.000 | 652 | 20 | 9.68E-124 | NP_492694.1    | 99 | 446.432 | 217 | 215 | CaSeiN Kinase family member (csnk-1)         |
| Locus_6593_Transcript_1/1_Conf_1.000 | 234 | 0  |           |                |    |         |     |     |                                              |
| Locus_6594_Transcript_1/1_Conf_1.000 | 418 | 20 | 3.09E-51  | NP_492738.1    | 82 | 204.527 | 138 | 114 | hypothetical protein Y106G6H.14              |
| Locus_6595_Transcript_1/1_Conf_1.000 | 171 | 0  |           |                |    |         |     |     |                                              |
| Locus_6596_Transcript_1/1_Conf_1.000 | 668 | 0  |           |                |    |         |     |     |                                              |
| Locus_6597_Transcript_1/1_Conf_1.000 | 466 | 6  | 3.32E-05  | NP_001075187.1 | 56 | 51.6026 | 81  | 46  | family with sequence similarity 8, member A1 |
| Locus_6598_Transcript_1/1_Conf_1.000 | 934 | 20 | 5.30E-97  | NP_510177.1    | 83 | 358.607 | 271 | 227 | hypothetical protein F17H10.1                |
| Locus_6599_Transcript_1/1_Conf_1.000 | 879 | 20 | 1.26E-73  | XP_002647283.1 | 72 | 280.796 | 277 | 201 | Hypothetical protein CBG06323                |
| Locus_66_Transcript_1/2_Conf_1.000   | 352 | 15 | 1.34E-14  | NP_495283.2    | 68 | 82.8037 | 74  | 51  | C-type LECTin family member (clec-88)        |
| Locus_66_Transcript_2/2_Conf_1.000   | 364 | 15 | 1.32E-14  | NP_495283.2    | 68 | 82.8037 | 74  | 51  | C-type LECTin family member (clec-88)        |

|                                      |      |    |           |                |    |         |     |     |                               |
|--------------------------------------|------|----|-----------|----------------|----|---------|-----|-----|-------------------------------|
| Locus_660_Transcript_1/2_Conf_1.000  | 1725 | 20 | 3.67E-112 | XP_002642056.1 | 84 | 410.223 | 280 | 237 | C. briggsae CBR-RPS-0 protein |
| Locus_660_Transcript_2/2_Conf_1.000  | 1725 | 20 | 3.67E-112 | XP_002642056.1 | 84 | 410.223 | 280 | 237 | C. briggsae CBR-RPS-0 protein |
| Locus_6600_Transcript_1/1_Conf_1.000 | 353  | 0  |           |                |    |         |     |     |                               |
| Locus_6601_Transcript_1/1_Conf_1.000 | 1064 | 20 | 4.98E-89  | CBW38507.1     | 72 | 332.413 | 302 | 218 | calcium-activated apyrase     |
| Locus_6602_Transcript_1/2_Conf_1.000 | 1556 | 20 | 1.10E-120 | XP_002631928.1 | 84 | 438.343 | 287 | 243 | Hypothetical protein CBG07920 |
| Locus_6602_Transcript_2/2_Conf_1.000 | 1550 | 20 | 1.10E-120 | XP_002631928.1 | 84 | 438.343 | 287 | 243 | Hypothetical protein CBG07920 |

|                                      |      |    |           |                |    |         |     |     |                                                       |
|--------------------------------------|------|----|-----------|----------------|----|---------|-----|-----|-------------------------------------------------------|
| Locus_6603_Transcript_1/1_Conf_1.000 | 1627 | 20 | 8.12E-122 | XP_969056.1    | 65 | 442.195 | 480 | 315 | PREDICTED: similar to ubiquitin specific peptidase 14 |
| Locus_6604_Transcript_1/2_Conf_1.000 | 969  | 20 | 6.66E-82  | EFO24805.1     | 84 | 308.531 | 220 | 185 | ubiquitin conjugating enzyme 6                        |
| Locus_6604_Transcript_2/2_Conf_1.000 | 347  | 0  |           |                |    |         |     |     |                                                       |
| Locus_6605_Transcript_1/1_Conf_1.000 | 994  | 20 | 7.40E-92  | NP_492685.2    | 80 | 341.658 | 236 | 191 | hypothetical protein C25A1.12                         |
| Locus_6606_Transcript_1/1_Conf_1.000 | 522  | 0  |           |                |    |         |     |     |                                                       |
| Locus_6607_Transcript_1/1_Conf_1.000 | 382  | 20 | 1.24E-28  | NP_499781.1    | 94 | 129.413 | 69  | 65  | hypothetical protein T27E9.2                          |
| Locus_6608_Transcript_1/1_Conf_1.000 | 208  | 1  | 2.34E-11  | NP_001021186.1 | 86 | 72.0182 | 36  | 31  | PaXILlin homolo family member (pxl-1)                 |
| Locus_6609_Transcript_1/2_Conf_1.000 | 829  | 20 | 1.57E-99  | XP_002633512.1 | 77 | 366.696 | 279 | 215 | C. briggsae CBR-DYCI-1 protein                        |
| Locus_6609_Transcript_2/2_Conf_1.000 | 829  | 20 | 1.57E-99  | XP_002633512.1 | 77 | 366.696 | 279 | 215 | C. briggsae CBR-DYCI-1 protein                        |
| Locus_661_Transcript_1/1_Conf_1.000  | 1277 | 20 | 4.35E-101 | XP_002639326.1 | 92 | 372.859 | 211 | 195 | C. briggsae CBR-RAB-11.1 protein                      |
| Locus_6610_Transcript_1/1_Conf_1.000 | 707  | 0  |           |                |    |         |     |     |                                                       |

|                                      |      |    |          |                |    |         |     |     |                                                   |
|--------------------------------------|------|----|----------|----------------|----|---------|-----|-----|---------------------------------------------------|
| Locus_6611_Transcript_1/1_Conf_1.000 | 269  | 20 | 5.39E-40 | NP_001024394.1 | 98 | 167.162 | 89  | 88  | Glutamate Transporter family member (glt-1)       |
| Locus_6612_Transcript_1/1_Conf_1.000 | 339  | 2  | 4.69E-04 | NP_498926.2    | 50 | 47.7506 | 132 | 67  | hypothetical protein ZK370.4                      |
| Locus_6613_Transcript_1/3_Conf_0.714 | 836  | 0  |          |                |    |         |     |     |                                                   |
| Locus_6613_Transcript_2/3_Conf_0.429 | 1441 | 20 | 7.82E-41 | NP_493453.1    | 54 | 172.94  | 264 | 145 | hypothetical protein F47G4.4                      |
| Locus_6613_Transcript_3/3_Conf_0.714 | 1589 | 20 | 8.89E-41 | NP_493453.1    | 54 | 172.94  | 264 | 145 | hypothetical protein F47G4.4                      |
| Locus_6614_Transcript_1/1_Conf_1.000 | 362  | 4  | 3.15E-24 | XP_002644930.1 | 74 | 114.775 | 85  | 63  | C. briggsae CBR-SMF-1 protein                     |
| Locus_6615_Transcript_1/1_Conf_1.000 | 694  | 20 | 9.51E-83 | EFO18010.1     | 90 | 310.457 | 183 | 166 | n-terminal acetyltransferase complex ard1 subunit |
| Locus_6616_Transcript_1/1_Conf_1.000 | 484  | 20 | 2.79E-52 | XP_002638821.1 | 77 | 207.994 | 158 | 123 | Hypothetical protein CBG22025                     |
| Locus_6617_Transcript_1/2_Conf_1.000 | 713  | 20 | 6.67E-79 | XP_002639371.1 | 90 | 297.745 | 166 | 150 | Hypothetical protein CBG03955                     |
| Locus_6617_Transcript_2/2_Conf_1.000 | 673  | 20 | 2.18E-81 | XP_002639371.1 | 90 | 305.834 | 171 | 155 | Hypothetical protein CBG03955                     |
| Locus_6618_Transcript_1/1_Conf_1.000 | 441  | 2  | 3.02E-06 | NP_509418.2    | 61 | 55.0694 | 94  | 58  | hypothetical protein F40B5.2                      |
| Locus_6619_Transcript_1/1_Conf_1.000 | 829  | 20 | 1.59E-67 | NP_001021638.1 | 68 | 260.381 | 264 | 180 | hypothetical protein T23G11.6                     |

|                                      |      |    |           |                |     |         |     |     |                                                        |
|--------------------------------------|------|----|-----------|----------------|-----|---------|-----|-----|--------------------------------------------------------|
| Locus_662_Transcript_1/1_Conf_1.000  | 1142 | 20 | 1.67E-69  | XP_002636320.1 | 85  | 267.7   | 168 | 144 | Hypothetical protein CBG08613                          |
| Locus_6620_Transcript_1/1_Conf_1.000 | 822  | 20 | 1.59E-11  | EFA07557.1     | 42  | 74.3294 | 252 | 106 | serine protease P135                                   |
| Locus_6621_Transcript_1/1_Conf_1.000 | 180  | 0  |           |                |     |         |     |     |                                                        |
| Locus_6622_Transcript_1/1_Conf_1.000 | 1137 | 20 | 1.07E-132 | NP_498118.1    | 82  | 477.633 | 330 | 273 | Gro-1 OPeron gene family member (gop-2)                |
| Locus_6623_Transcript_1/1_Conf_1.000 | 543  | 0  |           |                |     |         |     |     |                                                        |
| Locus_6624_Transcript_1/1_Conf_1.000 | 240  | 20 | 7.74E-39  | NP_116024.1    | 100 | 163.31  | 79  | 79  | transmembrane protein 147                              |
| Locus_6625_Transcript_1/1_Conf_1.000 | 189  | 0  |           |                |     |         |     |     |                                                        |
| Locus_6626_Transcript_1/1_Conf_1.000 | 405  | 20 | 1.84E-56  | EFO26908.1     | 87  | 221.861 | 135 | 118 | hypothetical protein LOAG_01583                        |
| Locus_6627_Transcript_1/1_Conf_1.000 | 340  | 10 | 1.36E-27  | XP_002636230.1 | 70  | 125.946 | 112 | 79  | Hypothetical protein CBG12154                          |
| Locus_6628_Transcript_1/2_Conf_1.000 | 1493 | 20 | 0         | XP_002632895.1 | 84  | 727.628 | 489 | 415 | Hypothetical protein CBG15103                          |
| Locus_6628_Transcript_2/2_Conf_1.000 | 457  | 20 | 1.36E-43  | XP_001893128.1 | 78  | 179.104 | 122 | 96  | Aminopeptidase P, N-terminal domain containing protein |
| Locus_6629_Transcript_1/1_Conf_1.000 | 177  | 1  | 1.08E-08  | AAD51334.1     | 76  | 63.1586 | 39  | 30  | Kunitz type serine protease inhibitor                  |

|                                      |      |    |          |                |     |         |     |     |                               |
|--------------------------------------|------|----|----------|----------------|-----|---------|-----|-----|-------------------------------|
| Locus_663_Transcript_1/2_Conf_1.000  | 976  | 20 | 3.58E-67 | EFO22193.1     | 100 | 259.61  | 126 | 126 | ADP-ribosylation factor 1     |
| Locus_663_Transcript_2/2_Conf_1.000  | 976  | 20 | 3.59E-67 | EFO22193.1     | 100 | 259.61  | 126 | 126 | ADP-ribosylation factor 1     |
| Locus_6630_Transcript_1/1_Conf_1.000 | 1004 | 3  | 1.90E-10 | ACE00317.1     | 48  | 71.2478 | 178 | 87  | hypothetical protein          |
| Locus_6631_Transcript_1/2_Conf_1.000 | 1076 | 20 | 2.43E-99 | XP_002633457.1 | 71  | 366.696 | 326 | 234 | Hypothetical protein CBG06225 |

|                                      |      |    |          |                |    |         |     |     |                                                                              |
|--------------------------------------|------|----|----------|----------------|----|---------|-----|-----|------------------------------------------------------------------------------|
| Locus_6631_Transcript_2/2_Conf_1.000 | 1375 | 20 | 2.04E-99 | XP_002633457.1 | 69 | 367.466 | 343 | 239 | Hypothetical protein CBG06225                                                |
| Locus_6632_Transcript_1/1_Conf_1.000 | 687  | 20 | 6.47E-76 | NP_505219.1    | 95 | 287.73  | 216 | 206 | hypothetical protein F41E6.9                                                 |
| Locus_6633_Transcript_1/1_Conf_1.000 | 602  | 0  |          |                |    |         |     |     |                                                                              |
| Locus_6634_Transcript_1/1_Conf_1.000 | 571  | 20 | 7.58E-30 | XP_002641347.1 | 72 | 134.035 | 101 | 73  | C. briggsae CBR-PEN-2 protein                                                |
| Locus_6635_Transcript_1/1_Conf_1.000 | 412  | 20 | 2.56E-34 | NP_498593.1    | 68 | 148.288 | 140 | 96  | hypothetical protein R151.10                                                 |
| Locus_6636_Transcript_1/1_Conf_1.000 | 1642 | 20 | 8.13E-45 | XP_001121003.1 | 58 | 186.422 | 278 | 162 | PREDICTED: similar to Protein tyrosine phosphatase 69D CG10975-PB, isoform B |
| Locus_6637_Transcript_1/1_Conf_1.000 | 1338 | 0  |          |                |    |         |     |     |                                                                              |
| Locus_6638_Transcript_1/1_Conf_1.000 | 238  | 0  |          |                |    |         |     |     |                                                                              |
| Locus_6639_Transcript_1/1_Conf_1.000 | 165  | 0  |          |                |    |         |     |     |                                                                              |
| Locus_664_Transcript_1/1_Conf_1.000  | 177  | 20 | 9.43E-21 | ACV20956.1     | 98 | 103.219 | 51  | 50  | large subunit ribosomal protein 29                                           |
| Locus_6640_Transcript_1/1_Conf_1.000 | 849  | 20 | 2.52E-23 | EFO27046.1     | 60 | 113.62  | 168 | 101 | hypothetical protein LOAG_01444                                              |

|                                      |      |    |           |                |    |         |     |     |                                                                     |
|--------------------------------------|------|----|-----------|----------------|----|---------|-----|-----|---------------------------------------------------------------------|
| Locus_6641_Transcript_1/1_Conf_1.000 | 607  | 20 | 2.01E-98  | NP_001040704.1 | 91 | 362.073 | 201 | 183 | DNAJ domain (prokaryotic heat shock protein) family member (dnj-27) |
| Locus_6642_Transcript_1/1_Conf_1.000 | 845  | 20 | 1.98E-113 | NP_499300.1    | 89 | 412.92  | 259 | 232 | hypothetical protein M03C11.7                                       |
| Locus_6643_Transcript_1/1_Conf_1.000 | 1045 | 20 | 8.12E-145 | NP_492591.1    | 84 | 517.694 | 333 | 282 | SUppressor of activated let-60 Ras family member (sur-6)            |
| Locus_6644_Transcript_1/1_Conf_1.000 | 1099 | 20 | 4.48E-64  | NP_492228.1    | 58 | 249.595 | 365 | 213 | MAternally affected Uncoordination family member (mau-2)            |
| Locus_6645_Transcript_1/1_Conf_1.000 | 200  | 3  | 1.49E-05  | NP_741793.1    | 66 | 52.7582 | 54  | 36  | hypothetical protein T23F2.2                                        |
| Locus_6646_Transcript_1/1_Conf_1.000 | 635  | 20 | 8.03E-56  | XP_002646099.1 | 86 | 220.705 | 176 | 152 | C. briggsae CBR-NHX-8 protein                                       |
| Locus_6647_Transcript_1/1_Conf_1.000 | 488  | 20 | 5.44E-32  | NP_495687.1    | 81 | 140.584 | 110 | 90  | APurinic/apyrimidinic endoNuclease family member (apn-1)            |
| Locus_6648_Transcript_1/1_Conf_1.000 | 335  | 20 | 1.28E-25  | XP_002641403.1 | 75 | 119.398 | 90  | 68  | Hypothetical protein CBG13266                                       |
| Locus_6649_Transcript_1/1_Conf_1.000 | 371  | 0  |           |                |    |         |     |     |                                                                     |
| Locus_665_Transcript_1/1_Conf_1.000  | 1102 | 20 | 4.66E-61  | CAA60046.1     | 65 | 239.58  | 311 | 205 | cytoplasmic intermediate filament protein                           |
| Locus_6650_Transcript_1/1_Conf_1.000 | 426  | 7  | 1.86E-24  | XP_002646458.1 | 61 | 115.546 | 141 | 87  | Hypothetical protein CBG18870                                       |



|                                      |      |    |           |                |     |         |     |     |                                                 |
|--------------------------------------|------|----|-----------|----------------|-----|---------|-----|-----|-------------------------------------------------|
| Locus_6651_Transcript_1/1_Conf_1.000 | 1537 | 3  | 2.34E-30  | NP_491674.2    | 45  | 138.272 | 520 | 235 | hypothetical protein F56H1.5                    |
| Locus_6652_Transcript_1/4_Conf_0.500 | 766  | 6  | 8.63E-46  | NP_741957.1    | 77  | 187.963 | 205 | 159 | hypothetical protein T23E7.2                    |
| Locus_6652_Transcript_2/4_Conf_0.500 | 905  | 7  | 3.28E-56  | XP_002643698.1 | 72  | 223.016 | 227 | 164 | Hypothetical protein CBG01887                   |
| Locus_6652_Transcript_3/4_Conf_0.500 | 1273 | 7  | 1.66E-76  | NP_741957.1    | 82  | 291.197 | 295 | 244 | hypothetical protein T23E7.2                    |
| Locus_6652_Transcript_4/4_Conf_0.500 | 751  | 6  | 1.17E-47  | NP_741957.1    | 79  | 194.126 | 200 | 159 | hypothetical protein T23E7.2                    |
| Locus_6653_Transcript_1/1_Conf_1.000 | 391  | 5  | 1.96E-26  | NP_492018.1    | 69  | 122.094 | 123 | 85  | UNCoordinated family member (unc-14)            |
| Locus_6654_Transcript_1/1_Conf_1.000 | 578  | 20 | 7.95E-91  | XP_528436.2    | 100 | 336.65  | 168 | 168 | PREDICTED: similar to 60S ribosomal protein L12 |
| Locus_6655_Transcript_1/1_Conf_1.000 | 439  | 0  |           |                |     |         |     |     |                                                 |
| Locus_6656_Transcript_1/1_Conf_1.000 | 850  | 20 | 1.06E-21  | EFO24421.1     | 70  | 108.227 | 78  | 55  | hypothetical protein LOAG_04066                 |
| Locus_6657_Transcript_1/1_Conf_1.000 | 1175 | 20 | 1.63E-75  | XP_002643218.1 | 61  | 287.73  | 342 | 210 | Hypothetical protein CBG08083                   |
| Locus_6658_Transcript_1/1_Conf_1.000 | 349  | 0  |           |                |     |         |     |     |                                                 |
| Locus_6659_Transcript_1/1_Conf_1.000 | 313  | 20 | 4.22E-24  | ACN10033.1     | 87  | 114.39  | 73  | 64  | 60S ribosomal protein L38                       |
| Locus_666_Transcript_1/1_Conf_1.000  | 1937 | 20 | 0         | XP_002632236.1 | 86  | 875.544 | 564 | 489 | C. briggsae CBR-ALH-6 protein                   |
| Locus_6660_Transcript_1/1_Conf_1.000 | 1197 | 20 | 3.11E-146 | XP_002635317.1 | 80  | 522.702 | 353 | 285 | C. briggsae CBR-TAG-196 protein                 |

|                                      |      |    |           |                |     |         |      |     |                                 |
|--------------------------------------|------|----|-----------|----------------|-----|---------|------|-----|---------------------------------|
| Locus_6661_Transcript_1/1_Conf_1.000 | 147  | 20 | 7.47E-13  | EFO26471.1     | 81  | 77.0258 | 49   | 40  | hypothetical protein LOAG_02007 |
| Locus_6662_Transcript_1/1_Conf_1.000 | 527  | 20 | 5.80E-25  | NP_508584.3    | 61  | 117.472 | 139  | 85  | hypothetical protein ZK563.5    |
| Locus_6663_Transcript_1/1_Conf_1.000 | 174  | 0  |           |                |     |         |      |     |                                 |
| Locus_6664_Transcript_1/1_Conf_1.000 | 516  | 20 | 4.86E-66  | XP_002646370.1 | 87  | 253.832 | 170  | 149 | Hypothetical protein CBG12088   |
| Locus_6665_Transcript_1/1_Conf_1.000 | 447  | 7  | 6.02E-15  | XP_002633498.1 | 65  | 83.9593 | 132  | 86  | Hypothetical protein CBG06270   |
| Locus_6666_Transcript_1/2_Conf_1.000 | 2057 | 20 | 5.13E-180 | NP_504828.1    | 72  | 635.95  | 689  | 497 | hypothetical protein C13F10.4   |
| Locus_6666_Transcript_2/2_Conf_1.000 | 3029 | 20 | 0         | NP_504828.1    | 75  | 1050.43 | 1014 | 762 | hypothetical protein C13F10.4   |
| Locus_6667_Transcript_1/1_Conf_1.000 | 954  | 20 | 1.06E-100 | XP_002642966.1 | 92  | 370.933 | 227  | 209 | Hypothetical protein CBG15250   |
| Locus_6668_Transcript_1/1_Conf_1.000 | 207  | 0  |           |                |     |         |      |     |                                 |
| Locus_6669_Transcript_1/1_Conf_1.000 | 470  | 20 | 4.27E-45  | CAI19674.1     | 100 | 184.111 | 119  | 119 | S100 calcium binding protein A1 |
| Locus_667_Transcript_1/1_Conf_1.000  | 789  | 20 | 4.00E-41  | CAR63644.1     | 90  | 172.555 | 104  | 94  | hypothetical protein            |
| Locus_6670_Transcript_1/1_Conf_1.000 | 273  | 0  |           |                |     |         |      |     |                                 |
| Locus_6671_Transcript_1/3_Conf_0.286 | 539  | 20 | 5.20E-24  | XP_002633511.1 | 58  | 114.39  | 165  | 96  | Hypothetical protein CBG05373   |
| Locus_6671_Transcript_2/3_Conf_0.571 | 995  | 20 | 3.47E-57  | NP_501039.1    | 59  | 226.483 | 330  | 197 | hypothetical protein C17H12.2   |
| Locus_6671_Transcript_3/3_Conf_0.571 | 663  | 20 | 1.17E-31  | XP_002633511.1 | 58  | 140.584 | 211  | 123 | Hypothetical protein CBG05373   |

|                                      |      |    |          |                |    |         |     |     |                                                         |
|--------------------------------------|------|----|----------|----------------|----|---------|-----|-----|---------------------------------------------------------|
| Locus_6672_Transcript_1/1_Conf_1.000 | 1136 | 20 | 3.44E-06 | NP_001158439.1 | 62 | 57.3806 | 67  | 42  | forkhead box N1                                         |
| Locus_6673_Transcript_1/1_Conf_1.000 | 671  | 20 | 1.26E-81 | NP_509937.1    | 89 | 306.605 | 179 | 161 | hypothetical protein F52D10.2                           |
| Locus_6674_Transcript_1/1_Conf_1.000 | 584  | 0  |          |                |    |         |     |     |                                                         |
| Locus_6675_Transcript_1/1_Conf_1.000 | 836  | 2  | 3.18E-23 | NP_491096.1    | 56 | 113.235 | 146 | 82  | Zinc finger Transcription Factor family member (ztf-23) |
| Locus_6676_Transcript_1/1_Conf_1.000 | 275  | 0  |          |                |    |         |     |     |                                                         |
| Locus_6677_Transcript_1/1_Conf_1.000 | 1125 | 20 | 4.72E-16 | XP_002647607.1 | 48 | 90.1225 | 293 | 141 | C. briggsae CBR-FRM-10 protein                          |
| Locus_6678_Transcript_1/1_Conf_1.000 | 273  | 20 | 3.73E-17 | XP_002639283.1 | 65 | 91.2781 | 92  | 60  | C. briggsae CBR-NAS-5 protein                           |
| Locus_6679_Transcript_1/2_Conf_1.000 | 357  | 20 | 1.73E-38 | XP_002646110.1 | 94 | 162.155 | 86  | 81  | Hypothetical protein CBG07988                           |
| Locus_6679_Transcript_2/2_Conf_1.000 | 357  | 20 | 2.25E-38 | XP_002646110.1 | 93 | 161.77  | 86  | 80  | Hypothetical protein CBG07988                           |
| Locus_668_Transcript_1/3_Conf_0.667  | 1018 | 6  | 7.37E-18 | XP_002634397.1 | 51 | 95.9005 | 186 | 95  | Hypothetical protein CBG04400                           |
| Locus_668_Transcript_2/3_Conf_0.667  | 1060 | 6  | 7.80E-18 | XP_002634397.1 | 51 | 95.9005 | 186 | 95  | Hypothetical protein CBG04400                           |
| Locus_668_Transcript_3/3_Conf_0.667  | 1066 | 6  | 7.88E-18 | XP_002634397.1 | 51 | 95.9005 | 186 | 95  | Hypothetical protein CBG04400                           |

|                                      |      |    |          |                |     |         |     |     |                                 |
|--------------------------------------|------|----|----------|----------------|-----|---------|-----|-----|---------------------------------|
| Locus_6680_Transcript_1/1_Conf_1.000 | 328  | 20 | 4.12E-40 | NP_490960.1    | 92  | 167.548 | 93  | 86  | hypothetical protein Y39G10AR.8 |
| Locus_6681_Transcript_1/1_Conf_1.000 | 1135 | 13 | 5.82E-30 | XP_002639466.1 | 48  | 136.346 | 377 | 184 | C. briggsae CBR-MTK-1 protein   |
| Locus_6682_Transcript_1/1_Conf_1.000 | 188  | 0  |          |                |     |         |     |     |                                 |
| Locus_6683_Transcript_1/1_Conf_1.000 | 664  | 2  | 3.10E-08 | XP_001897181.1 | 51  | 62.7734 | 167 | 86  | hypothetical protein Bm1_28665  |
| Locus_6684_Transcript_1/1_Conf_1.000 | 208  | 0  |          |                |     |         |     |     |                                 |
| Locus_6685_Transcript_1/1_Conf_1.000 | 172  | 20 | 4.55E-23 | XP_002752963.1 | 100 | 110.923 | 56  | 56  | PREDICTED: endoplasmin-like     |

|                                      |      |    |           |                |     |         |     |     |                                             |
|--------------------------------------|------|----|-----------|----------------|-----|---------|-----|-----|---------------------------------------------|
| Locus_6686_Transcript_1/1_Conf_1.000 | 2283 | 20 | 0         | XP_002640044.1 | 83  | 806.209 | 570 | 474 | C. briggsae CBR-GON-2 protein               |
| Locus_6687_Transcript_1/1_Conf_1.000 | 452  | 20 | 2.26E-38  | ACI49192.1     | 76  | 161.77  | 123 | 94  | hypothetical protein Csp3_JD03.001          |
| Locus_6688_Transcript_1/1_Conf_1.000 | 550  | 20 | 2.16E-92  | XP_002636622.1 | 97  | 341.658 | 181 | 177 | C. briggsae CBR-SMA-1 protein               |
| Locus_6689_Transcript_1/1_Conf_1.000 | 732  | 20 | 1.52E-113 | NP_492097.1    | 93  | 412.92  | 231 | 217 | hypothetical protein ZK524.4                |
| Locus_669_Transcript_1/1_Conf_1.000  | 958  | 20 | 6.03E-120 | XP_002637229.1 | 80  | 434.876 | 318 | 255 | C. briggsae CBR-TAG-59 protein              |
| Locus_6690_Transcript_1/1_Conf_1.000 | 646  | 3  | 9.05E-42  | NP_495433.1    | 65  | 174.096 | 172 | 112 | hypothetical protein C15F1.2                |
| Locus_6691_Transcript_1/1_Conf_1.000 | 776  | 20 | 3.78E-105 | NP_001122569.1 | 84  | 385.185 | 258 | 219 | hypothetical protein ZK849.2                |
| Locus_6692_Transcript_1/1_Conf_1.000 | 886  | 12 | 1.06E-35  | ACI49247.1     | 62  | 154.836 | 216 | 134 | hypothetical protein Csp3_JD06.013          |
| Locus_6693_Transcript_1/1_Conf_1.000 | 256  | 0  |           |                |     |         |     |     |                                             |
| Locus_6694_Transcript_1/1_Conf_1.000 | 1234 | 0  |           |                |     |         |     |     |                                             |
| Locus_6695_Transcript_1/1_Conf_1.000 | 610  | 20 | 1.12E-104 | XP_512797.2    | 100 | 382.874 | 192 | 192 | PREDICTED: similar to ribosomal protein L18 |
| Locus_6696_Transcript_1/3_Conf_0.500 | 346  | 0  |           |                |     |         |     |     |                                             |
| Locus_6696_Transcript_2/3_Conf_0.500 | 387  | 0  |           |                |     |         |     |     |                                             |
| Locus_6696_Transcript_3/3_Conf_0.500 | 353  | 0  |           |                |     |         |     |     |                                             |
| Locus_6697_Transcript_1/1_Conf_1.000 | 186  | 2  | 1.72E-09  | NP_495901.1    | 71  | 65.855  | 56  | 40  | hypothetical protein T21B10.3               |

|                                      |      |    |          |                |     |         |     |     |                                                      |
|--------------------------------------|------|----|----------|----------------|-----|---------|-----|-----|------------------------------------------------------|
| Locus_6698_Transcript_1/1_Conf_1.000 | 617  | 20 | 1.33E-68 | NP_502420.2    | 81  | 263.077 | 205 | 167 | hypothetical protein C26H9A.2                        |
| Locus_6699_Transcript_1/1_Conf_1.000 | 591  | 2  | 1.09E-05 | NP_500390.1    | 53  | 53.9138 | 104 | 56  | hypothetical protein CC8.1                           |
| Locus_67_Transcript_1/3_Conf_0.667   | 963  | 20 | 7.15E-28 | NP_741576.1    | 66  | 129.028 | 169 | 112 | AuTophagy (yeast Atg homolog) family member (atg-18) |
| Locus_67_Transcript_2/3_Conf_0.667   | 972  | 20 | 7.27E-28 | NP_741576.1    | 66  | 129.028 | 169 | 112 | AuTophagy (yeast Atg homolog) family member (atg-18) |
| Locus_67_Transcript_3/3_Conf_0.667   | 972  | 20 | 7.27E-28 | NP_741576.1    | 66  | 129.028 | 169 | 112 | AuTophagy (yeast Atg homolog) family member (atg-18) |
| Locus_670_Transcript_1/1_Conf_1.000  | 2223 | 5  | 2.82E-30 | XP_002643154.1 | 47  | 138.658 | 430 | 205 | Hypothetical protein CBG15334                        |
| Locus_6700_Transcript_1/2_Conf_1.000 | 815  | 7  | 2.02E-27 | XP_002631928.1 | 86  | 127.102 | 82  | 71  | Hypothetical protein CBG07920                        |
| Locus_6700_Transcript_2/2_Conf_1.000 | 340  | 14 | 2.16E-33 | XP_002631928.1 | 85  | 145.206 | 95  | 81  | Hypothetical protein CBG07920                        |
| Locus_6701_Transcript_1/2_Conf_1.000 | 940  | 20 | 6.03E-40 | NP_497731.1    | 53  | 169.088 | 292 | 155 | Nuclear Hormone Receptor family member (nhr-6)       |
| Locus_6701_Transcript_2/2_Conf_1.000 | 832  | 20 | 1.32E-45 | NP_497731.1    | 52  | 187.578 | 282 | 147 | Nuclear Hormone Receptor family member (nhr-6)       |
| Locus_6702_Transcript_1/1_Conf_1.000 | 266  | 1  | 8.96E-27 | ABM85051.1     | 100 | 123.25  | 55  | 55  | parathymosin                                         |
| Locus_6703_Transcript_1/1_Conf_1.000 | 984  | 0  |          |                |     |         |     |     |                                                      |
| Locus_6704_Transcript_1/1_Conf_1.000 | 239  | 1  | 1.64E-04 | AAD13339.1     | 56  | 49.2914 | 55  | 31  | ancylostoma-secreted protein 1 precursor             |
| Locus_6705_Transcript_1/1_Conf_1.000 | 634  | 20 | 1.97E-62 | NP_510787.2    | 81  | 242.662 | 160 | 130 | hypothetical protein T08G2.2                         |

|                                      |      |    |           |                |    |         |     |     |                                               |  |
|--------------------------------------|------|----|-----------|----------------|----|---------|-----|-----|-----------------------------------------------|--|
| Locus_6706_Transcript_1/1_Conf_1.000 | 616  | 0  |           |                |    |         |     |     |                                               |  |
| Locus_6707_Transcript_1/1_Conf_1.000 | 320  | 2  | 1.27E-04  | NP_495712.1    | 50 | 49.6766 | 106 | 53  | abnormal EMBroygenesis family member (emb-27) |  |
| Locus_6708_Transcript_1/1_Conf_1.000 | 198  | 2  | 2.22E-09  | NP_001040757.1 | 75 | 65.4698 | 69  | 52  | hypothetical protein EEED8.10                 |  |
| Locus_6709_Transcript_1/1_Conf_1.000 | 464  | 20 | 2.79E-52  | XP_002639502.1 | 75 | 207.994 | 153 | 115 | Hypothetical protein CBG04103                 |  |
| Locus_671_Transcript_1/1_Conf_1.000  | 154  | 0  |           |                |    |         |     |     |                                               |  |
| Locus_6710_Transcript_1/1_Conf_1.000 | 1348 | 0  |           |                |    |         |     |     |                                               |  |
| Locus_6711_Transcript_1/1_Conf_1.000 | 675  | 20 | 5.42E-80  | NP_502775.2    | 86 | 301.212 | 184 | 160 | hypothetical protein Y57G11C.31               |  |
| Locus_6712_Transcript_1/2_Conf_0.500 | 940  | 20 | 3.14E-105 | XP_002641673.1 | 85 | 385.956 | 264 | 227 | C. briggsae CBR-ECH-6 protein                 |  |
| Locus_6712_Transcript_2/2_Conf_0.500 | 940  | 20 | 4.84E-106 | XP_002641673.1 | 85 | 388.652 | 264 | 227 | C. briggsae CBR-ECH-6 protein                 |  |
| Locus_6713_Transcript_1/1_Conf_1.000 | 134  | 0  |           |                |    |         |     |     |                                               |  |
| Locus_6714_Transcript_1/1_Conf_1.000 | 379  | 0  |           |                |    |         |     |     |                                               |  |
| Locus_6715_Transcript_1/1_Conf_1.000 | 978  | 20 | 6.80E-66  | XP_002633541.1 | 77 | 255.373 | 212 | 165 | C. briggsae CBR-DNJ-11 protein                |  |
| Locus_6716_Transcript_1/1_Conf_1.000 | 1706 | 20 | 6.32E-165 | XP_002630808.1 | 77 | 585.489 | 485 | 375 | Hypothetical protein CBG02508                 |  |

|                                      |      |    |           |                |    |         |     |     |                                                          |
|--------------------------------------|------|----|-----------|----------------|----|---------|-----|-----|----------------------------------------------------------|
| Locus_6717_Transcript_1/1_Conf_1.000 | 883  | 20 | 7.35E-114 | XP_002634965.1 | 88 | 414.461 | 254 | 224 | Hypothetical protein CBG13501                            |
| Locus_6718_Transcript_1/1_Conf_1.000 | 426  | 20 | 1.73E-46  | XP_002646732.1 | 79 | 188.734 | 143 | 114 | Hypothetical protein CBG13117                            |
| Locus_6719_Transcript_1/1_Conf_1.000 | 224  | 20 | 1.11E-08  | XP_001892755.1 | 75 | 63.1586 | 52  | 39  | TBC domain containing protein                            |
| Locus_672_Transcript_1/4_Conf_0.222  | 316  | 20 | 6.93E-27  |                | 76 | 123.635 | 103 | 79  | hypothetical protein C25H3.4 -<br>Caenorhabditis elegans |
| Locus_672_Transcript_2/4_Conf_0.667  | 1624 | 20 | 1.38E-113 | AAK31455.4     | 62 | 414.846 | 514 | 321 | Hypothetical protein C25H3.4                             |
| Locus_672_Transcript_3/4_Conf_0.667  | 1624 | 20 | 2.36E-113 | AAK31455.4     | 62 | 414.075 | 514 | 321 | Hypothetical protein C25H3.4                             |
| Locus_672_Transcript_4/4_Conf_0.667  | 1624 | 20 | 1.06E-113 | AAK31455.4     | 62 | 415.231 | 514 | 321 | Hypothetical protein C25H3.4                             |
| Locus_6720_Transcript_1/1_Conf_1.000 | 637  | 0  |           |                |    |         |     |     |                                                          |
| Locus_6721_Transcript_1/1_Conf_1.000 | 818  | 20 | 2.37E-84  | XP_002646101.1 | 77 | 316.235 | 228 | 177 | Hypothetical protein CBG07973                            |
| Locus_6722_Transcript_1/1_Conf_1.000 | 658  | 20 | 4.88E-30  | XP_001899346.1 | 57 | 135.191 | 185 | 106 | Hsp20/alpha crystallin family protein                    |
| Locus_6723_Transcript_1/2_Conf_1.000 | 1264 | 20 | 3.80E-57  | NP_497575.2    | 63 | 226.868 | 312 | 199 | Homeobox family member (ceh-44)                          |



|                                      |      |    |          |                |    |         |     |     |                                           |
|--------------------------------------|------|----|----------|----------------|----|---------|-----|-----|-------------------------------------------|
| Locus_6723_Transcript_2/2_Conf_1.000 | 534  | 20 | 3.20E-18 | NP_497575.2    | 65 | 95.1301 | 143 | 93  | Homeobox family member (ceh-44)           |
| Locus_6724_Transcript_1/1_Conf_1.000 | 1324 | 20 | 7.24E-30 | NP_741539.2    | 49 | 136.346 | 428 | 213 | hypothetical protein C18C4.5              |
| Locus_6725_Transcript_1/1_Conf_1.000 | 630  | 20 | 6.71E-55 | XP_002632404.1 | 72 | 217.624 | 211 | 153 | Hypothetical protein CBG00428             |
| Locus_6726_Transcript_1/1_Conf_1.000 | 466  | 20 | 1.85E-72 | XP_002633699.1 | 92 | 275.018 | 155 | 143 | Hypothetical protein CBG03382             |
| Locus_6727_Transcript_1/1_Conf_1.000 | 1516 | 20 | 6.93E-11 | XP_002618430.1 | 51 | 73.559  | 147 | 75  | hypothetical protein CLUG_01889           |
| Locus_6728_Transcript_1/1_Conf_1.000 | 400  | 20 | 1.99E-50 | XP_002634510.1 | 82 | 201.83  | 132 | 109 | Hypothetical protein CBG08301             |
| Locus_6729_Transcript_1/1_Conf_1.000 | 204  | 20 | 1.24E-28 | NP_741697.2    | 88 | 129.413 | 68  | 60  | Protein PHosphatase family member (pph-5) |
| Locus_673_Transcript_1/2_Conf_1.000  | 487  | 2  | 1.59E-07 | CAR63546.1     | 48 | 59.3066 | 123 | 60  | hypothetical protein                      |
| Locus_673_Transcript_2/2_Conf_1.000  | 343  | 2  | 1.23E-07 | CAR63546.1     | 52 | 59.6918 | 96  | 50  | hypothetical protein                      |

|                                      |      |    |           |                |    |         |     |     |                                                             |
|--------------------------------------|------|----|-----------|----------------|----|---------|-----|-----|-------------------------------------------------------------|
| Locus_6730_Transcript_1/1_Conf_1.000 | 389  | 20 | 2.56E-34  | XP_002631067.1 | 74 | 148.288 | 118 | 88  | C. briggsae CBR-TRR-1 protein                               |
| Locus_6731_Transcript_1/1_Conf_1.000 | 210  | 5  | 3.16E-08  | XP_002637665.1 | 75 | 61.6178 | 45  | 34  | C. briggsae CBR-APT-10 protein                              |
| Locus_6732_Transcript_1/1_Conf_1.000 | 480  | 1  | 1.91E-05  | EFO19799.1     | 54 | 52.373  | 74  | 40  | hypothetical protein LOAG_08693                             |
| Locus_6733_Transcript_1/1_Conf_1.000 | 162  | 0  |           |                |    |         |     |     |                                                             |
| Locus_6734_Transcript_1/2_Conf_1.000 | 1088 | 20 | 2.59E-48  | EFO15646.1     | 81 | 197.208 | 140 | 114 | hypothetical protein LOAG_12863                             |
| Locus_6734_Transcript_2/2_Conf_1.000 | 887  | 9  | 1.59E-15  | XP_002637541.1 | 83 | 87.8113 | 61  | 51  | C. briggsae CBR-HUM-2 protein                               |
| Locus_6735_Transcript_1/1_Conf_1.000 | 704  | 20 | 9.03E-20  | XP_001898015.1 | 56 | 101.293 | 148 | 84  | FtsJ-like methyltransferase family protein                  |
| Locus_6736_Transcript_1/1_Conf_1.000 | 2089 | 20 | 0         | NP_493657.2    | 83 | 712.22  | 504 | 423 | hypothetical protein C50D2.7                                |
| Locus_6737_Transcript_1/1_Conf_1.000 | 535  | 0  |           |                |    |         |     |     |                                                             |
| Locus_6738_Transcript_1/1_Conf_1.000 | 524  | 20 | 1.26E-40  | Q09600.2       | 67 | 169.474 | 174 | 118 | Vacuolar protein sorting-associated protein 11 homolog      |
| Locus_6739_Transcript_1/1_Conf_1.000 | 139  | 0  |           |                |    |         |     |     |                                                             |
| Locus_674_Transcript_1/1_Conf_1.000  | 1380 | 20 | 3.02E-143 | EFO23198.1     | 78 | 513.072 | 420 | 331 | dolichyl-di-phosphooligosaccharide-protein glycotransferase |
| Locus_6740_Transcript_1/1_Conf_1.000 | 646  | 20 | 1.65E-35  | XP_002633290.1 | 63 | 153.295 | 184 | 116 | Hypothetical protein CBG06019                               |

|                                      |      |    |          |                |     |         |     |     |                                                                    |
|--------------------------------------|------|----|----------|----------------|-----|---------|-----|-----|--------------------------------------------------------------------|
| Locus_6741_Transcript_1/1_Conf_1.000 | 1074 | 20 | 7.95E-34 | NP_502425.2    | 54  | 149.058 | 320 | 173 | hypothetical protein C27D8.4                                       |
| Locus_6742_Transcript_1/1_Conf_1.000 | 530  | 3  | 1.02E-08 | NP_490722.2    | 48  | 63.5438 | 179 | 87  | hypothetical protein Y48G1A.1                                      |
| Locus_6743_Transcript_1/2_Conf_1.000 | 1057 | 20 | 0        | XP_002646949.1 | 97  | 640.573 | 350 | 341 | C. briggsae CBR-APD-3 protein                                      |
| Locus_6743_Transcript_2/2_Conf_1.000 | 1057 | 20 | 0        | XP_002646949.1 | 97  | 640.573 | 350 | 341 | C. briggsae CBR-APD-3 protein                                      |
| Locus_6744_Transcript_1/2_Conf_1.000 | 381  | 20 | 9.89E-10 | XP_002635041.1 | 53  | 66.6254 | 81  | 43  | Hypothetical protein CBG13587                                      |
| Locus_6744_Transcript_2/2_Conf_1.000 | 342  | 20 | 2.93E-09 | XP_001896707.1 | 63  | 65.0846 | 65  | 41  | Zinc knuckle family protein                                        |
| Locus_6745_Transcript_1/1_Conf_1.000 | 658  | 5  | 2.01E-92 | NP_001040851.1 | 85  | 342.428 | 217 | 185 | UNCoordinated family member (unc-36)                               |
| Locus_6746_Transcript_1/1_Conf_1.000 | 133  | 2  | 6.37E-17 | BAD92214.1     | 100 | 90.5077 | 44  | 44  | ribosomal protein L4 variant                                       |
| Locus_6747_Transcript_1/2_Conf_1.000 | 729  | 20 | 7.39E-36 | NP_498217.2    | 55  | 154.836 | 254 | 141 | abnormal embryonic PARTitioning of cytoplasm family member (par-3) |
| Locus_6747_Transcript_2/2_Conf_1.000 | 606  | 7  | 1.09E-19 | NP_498217.2    | 48  | 100.523 | 212 | 102 | abnormal embryonic PARTitioning of cytoplasm family member (par-3) |
| Locus_6748_Transcript_1/1_Conf_1.000 | 425  | 0  |          |                |     |         |     |     |                                                                    |
| Locus_6749_Transcript_1/1_Conf_1.000 | 594  | 0  |          |                |     |         |     |     |                                                                    |
| Locus_675_Transcript_1/1_Conf_1.000  | 1082 | 3  | 3.75E-15 | XP_002631375.1 | 44  | 87.0409 | 327 | 144 | Hypothetical protein CBG03217                                      |

|                                      |      |    |           |                |    |         |     |     |                                                                                        |
|--------------------------------------|------|----|-----------|----------------|----|---------|-----|-----|----------------------------------------------------------------------------------------|
| Locus_6750_Transcript_1/1_Conf_1.000 | 325  | 20 | 3.27E-45  | NP_508504.2    | 90 | 184.496 | 108 | 98  | Non-muscle MYosin family member (nmy-1)                                                |
| Locus_6751_Transcript_1/2_Conf_1.000 | 882  | 20 | 2.65E-63  | NP_509962.1    | 76 | 246.514 | 218 | 166 | Glutathione S-Transferase family member (gst-42)                                       |
| Locus_6751_Transcript_2/2_Conf_1.000 | 880  | 20 | 2.63E-63  | NP_509962.1    | 76 | 246.514 | 218 | 166 | Glutathione S-Transferase family member (gst-42)                                       |
| Locus_6752_Transcript_1/1_Conf_1.000 | 570  | 0  |           |                |    |         |     |     |                                                                                        |
| Locus_6753_Transcript_1/1_Conf_1.000 | 1838 | 20 | 5.69E-151 | XP_001898046.1 | 77 | 539.265 | 459 | 354 | interferon-induced double-stranded RNA-activated protein kinase inhibitor              |
| Locus_6754_Transcript_1/1_Conf_1.000 | 448  | 0  |           |                |    |         |     |     |                                                                                        |
| Locus_6755_Transcript_1/1_Conf_1.000 | 417  | 4  | 7.45E-05  | XP_002630769.1 | 47 | 50.447  | 108 | 51  | Hypothetical protein CBG02464                                                          |
| Locus_6756_Transcript_1/1_Conf_1.000 | 500  | 0  |           |                |    |         |     |     |                                                                                        |
| Locus_6757_Transcript_1/1_Conf_1.000 | 696  | 20 | 3.34E-43  | NP_741586.1    | 61 | 179.104 | 220 | 136 | SPAStin (human neurodegeneration-associated AAA ATPase) related family member (spas-1) |
| Locus_6758_Transcript_1/1_Conf_1.000 | 748  | 3  | 1.43E-21  | NP_510840.2    | 51 | 107.457 | 229 | 118 | hypothetical protein F31A3.5                                                           |
| Locus_6759_Transcript_1/1_Conf_1.000 | 488  | 20 | 6.86E-35  | XP_001897214.1 | 76 | 150.214 | 111 | 85  | Transcription initiation factor IIA, gamma subunit, helical domain containing protein  |
| Locus_676_Transcript_1/2_Conf_1.000  | 4384 | 20 | 0         | XP_002631075.1 | 69 | 478.789 | 493 | 345 | Hypothetical protein CBG02847                                                          |
| Locus_676_Transcript_2/2_Conf_1.000  | 4380 | 20 | 0         | XP_002631075.1 | 70 | 865.529 | 823 | 583 | Hypothetical protein CBG02847                                                          |
| Locus_6760_Transcript_1/1_Conf_1.000 | 515  | 0  |           |                |    |         |     |     |                                                                                        |
| Locus_6761_Transcript_1/1_Conf_1.000 | 311  | 20 | 1.84E-24  | XP_001894880.1 | 89 | 115.546 | 75  | 67  | hypothetical protein                                                                   |
| Locus_6762_Transcript_1/1_Conf_1.000 | 323  | 0  |           |                |    |         |     |     |                                                                                        |
| Locus_6763_Transcript_1/1_Conf_1.000 | 202  | 0  |           |                |    |         |     |     |                                                                                        |
| Locus_6764_Transcript_1/1_Conf_1.000 | 438  | 20 | 9.03E-48  | XP_002631150.1 | 79 | 192.971 | 136 | 108 | Hypothetical protein CBG02934                                                          |
| Locus_6765_Transcript_1/1_Conf_1.000 | 390  | 20 | 5.90E-23  | XP_001901686.1 | 68 | 110.538 | 124 | 85  | Cohesin subunit SA-1                                                                   |

|                                      |      |    |          |                |    |         |     |     |                                                                         |
|--------------------------------------|------|----|----------|----------------|----|---------|-----|-----|-------------------------------------------------------------------------|
| Locus_6766_Transcript_1/1_Conf_1.000 | 1070 | 20 | 1.18E-29 | XP_002645186.1 | 49 | 135.191 | 361 | 180 | Hypothetical protein CBG16916                                           |
| Locus_6767_Transcript_1/1_Conf_1.000 | 714  | 20 | 3.61E-40 | XP_001895119.1 | 57 | 169.088 | 239 | 137 | eIF4-gamma/eIF5/eIF2-epsilon family protein                             |
| Locus_6768_Transcript_1/1_Conf_1.000 | 233  | 0  |          |                |    |         |     |     |                                                                         |
| Locus_6769_Transcript_1/1_Conf_1.000 | 391  | 0  |          |                |    |         |     |     |                                                                         |
| Locus_677_Transcript_1/3_Conf_0.667  | 721  | 20 | 4.30E-81 | EFO21976.1     | 79 | 305.064 | 238 | 190 | hypothetical protein LOAG_06510                                         |
| Locus_677_Transcript_2/3_Conf_0.667  | 721  | 20 | 4.30E-81 | EFO21976.1     | 79 | 305.064 | 238 | 190 | hypothetical protein LOAG_06510                                         |
| Locus_677_Transcript_3/3_Conf_0.667  | 721  | 20 | 4.30E-81 | EFO21976.1     | 79 | 305.064 | 238 | 190 | hypothetical protein LOAG_06510                                         |
| Locus_6770_Transcript_1/1_Conf_1.000 | 142  | 0  |          |                |    |         |     |     |                                                                         |
| Locus_6771_Transcript_1/1_Conf_1.000 | 468  | 4  | 2.99E-14 | NP_506247.1    | 52 | 81.6481 | 167 | 87  | hypothetical protein R186.7                                             |
| Locus_6772_Transcript_1/1_Conf_1.000 | 1308 | 20 | 3.04E-81 | NP_498411.1    | 60 | 306.99  | 443 | 269 | related to yeast Vacuolar Protein Sorting factor family member (vps-16) |

|                                      |      |    |          |                |     |         |     |     |                                                            |
|--------------------------------------|------|----|----------|----------------|-----|---------|-----|-----|------------------------------------------------------------|
| Locus_6773_Transcript_1/1_Conf_1.000 | 1338 | 20 | 4.25E-78 | XP_002639286.1 | 54  | 296.59  | 468 | 253 | C. briggsae CBR-MOM-4 protein                              |
| Locus_6774_Transcript_1/1_Conf_1.000 | 577  | 20 | 3.85E-61 | NP_496178.1    | 80  | 238.039 | 191 | 154 | PUF (Pumilio/FBF) domain-containing family member (puf-12) |
| Locus_6775_Transcript_1/1_Conf_1.000 | 603  | 20 | 6.94E-43 | AAP36640.1     | 100 | 177.563 | 96  | 96  | Homo sapiens matrix Gla protein                            |
| Locus_6776_Transcript_1/1_Conf_1.000 | 663  | 20 | 1.09E-45 | XP_002631042.1 | 93  | 187.193 | 106 | 99  | C. briggsae CBR-MAX-2 protein                              |
| Locus_6777_Transcript_1/1_Conf_1.000 | 233  | 20 | 3.66E-12 | EFN62114.1     | 84  | 74.7146 | 46  | 39  | Metastasis-associated protein MTA1                         |

|                                      |      |    |           |                |    |         |     |     |                                                                         |
|--------------------------------------|------|----|-----------|----------------|----|---------|-----|-----|-------------------------------------------------------------------------|
| Locus_6778_Transcript_1/1_Conf_1.000 | 756  | 20 | 8.30E-94  | NP_495679.1    | 83 | 347.436 | 237 | 197 | hypothetical protein C08B11.3                                           |
| Locus_6779_Transcript_1/1_Conf_1.000 | 716  | 20 | 9.64E-110 | XP_002645511.1 | 95 | 400.208 | 237 | 226 | C. briggsae CBR-TAG-123 protein                                         |
| Locus_678_Transcript_1/1_Conf_1.000  | 309  | 4  | 5.34E-24  | XP_002633595.1 | 71 | 114.005 | 100 | 71  | Hypothetical protein CBG05472                                           |
| Locus_6780_Transcript_1/1_Conf_1.000 | 286  | 4  | 1.84E-11  | NP_492341.1    | 61 | 72.4034 | 102 | 63  | hypothetical protein F43G9.12                                           |
| Locus_6781_Transcript_1/1_Conf_1.000 | 169  | 0  |           |                |    |         |     |     |                                                                         |
| Locus_6782_Transcript_1/1_Conf_1.000 | 655  | 20 | 1.58E-81  | Q61QK6.2       | 83 | 306.22  | 218 | 182 | Protein melted homolog                                                  |
| Locus_6783_Transcript_1/1_Conf_1.000 | 1713 | 20 | 6.64E-138 | NP_504828.1    | 67 | 495.738 | 581 | 394 | hypothetical protein C13F10.4                                           |
| Locus_6784_Transcript_1/1_Conf_1.000 | 616  | 11 | 1.53E-32  | XP_002630779.1 | 71 | 143.28  | 204 | 145 | Hypothetical protein CBG02475                                           |
| Locus_6785_Transcript_1/1_Conf_1.000 | 647  | 0  |           |                |    |         |     |     |                                                                         |
| Locus_6786_Transcript_1/1_Conf_1.000 | 2080 | 20 | 1.29E-162 | NP_501320.2    | 68 | 578.17  | 635 | 436 | eXPOrtin (nuclear export receptor) family member (xpo-3)                |
| Locus_6787_Transcript_1/1_Conf_1.000 | 517  | 2  | 4.18E-09  | NP_501033.1    | 49 | 64.6994 | 138 | 68  | Suppressor with Morphological effect on Genitalia family member (smg-7) |
| Locus_6788_Transcript_1/1_Conf_1.000 | 273  | 20 | 1.24E-12  | EFO26611.1     | 59 | 76.2554 | 93  | 55  | hypothetical protein LOAG_01867                                         |
| Locus_6789_Transcript_1/2_Conf_1.000 | 1787 | 20 | 2.88E-75  | XP_001895294.1 | 59 | 287.73  | 360 | 213 | Endonuclease/Exonuclease/phosphatase family protein                     |
| Locus_6789_Transcript_2/2_Conf_1.000 | 1616 | 20 | 2.53E-75  | XP_001895294.1 | 59 | 287.73  | 360 | 213 | Endonuclease/Exonuclease/phosphatase family protein                     |
| Locus_679_Transcript_1/1_Conf_1.000  | 929  | 0  |           |                |    |         |     |     |                                                                         |
| Locus_6790_Transcript_1/2_Conf_1.000 | 887  | 20 | 1.31E-102 | NP_498052.1    | 90 | 377.096 | 237 | 215 | hypothetical protein C27F2.5                                            |

|                                      |      |    |           |                |    |         |     |     |                                                        |
|--------------------------------------|------|----|-----------|----------------|----|---------|-----|-----|--------------------------------------------------------|
| Locus_6790_Transcript_2/2_Conf_1.000 | 887  | 20 | 1.31E-102 | NP_498052.1    | 90 | 377.096 | 237 | 215 | hypothetical protein C27F2.5                           |
| Locus_6791_Transcript_1/1_Conf_1.000 | 320  | 20 | 2.14E-36  | EFO25190.1     | 94 | 155.221 | 106 | 100 | hypothetical protein LOAG_03297                        |
| Locus_6792_Transcript_1/1_Conf_1.000 | 204  | 4  | 2.87E-17  | XP_002641184.1 | 81 | 91.6633 | 66  | 54  | Hypothetical protein CBG09045                          |
| Locus_6793_Transcript_1/1_Conf_1.000 | 403  | 4  | 9.24E-32  | XP_002643061.1 | 79 | 139.813 | 93  | 74  | Hypothetical protein CBG22978                          |
| Locus_6794_Transcript_1/1_Conf_1.000 | 329  | 0  |           |                |    |         |     |     |                                                        |
| Locus_6795_Transcript_1/1_Conf_1.000 | 496  | 6  | 4.57E-07  | EFO24754.1     | 52 | 57.7658 | 101 | 53  | hypothetical protein LOAG_03725                        |
| Locus_6796_Transcript_1/1_Conf_1.000 | 2008 | 20 | 1.88E-86  | NP_507625.2    | 54 | 325.094 | 600 | 326 | hypothetical protein Y51A2D.7                          |
| Locus_6797_Transcript_1/1_Conf_1.000 | 646  | 2  | 9.12E-18  | XP_002641661.1 | 53 | 94.3597 | 223 | 120 | Hypothetical protein CBG09989                          |
| Locus_6798_Transcript_1/1_Conf_1.000 | 1487 | 20 | 1.84E-125 | NP_506580.1    | 70 | 454.136 | 400 | 282 | Temporarily Assigned Gene name family member (tag-114) |
| Locus_6799_Transcript_1/1_Conf_1.000 | 160  | 0  |           |                |    |         |     |     |                                                        |



|                                      |      |    |           |                |    |         |     |     |                                                                         |
|--------------------------------------|------|----|-----------|----------------|----|---------|-----|-----|-------------------------------------------------------------------------|
| Locus_68_Transcript_1/1_Conf_1.000   | 1070 | 20 | 3.68E-124 | NP_495526.1    | 90 | 449.129 | 311 | 282 | BRF (transcription factor) homolog family member (brf-1)                |
| Locus_680_Transcript_1/1_Conf_1.000  | 995  | 0  |           |                |    |         |     |     |                                                                         |
| Locus_6800_Transcript_1/1_Conf_1.000 | 342  | 20 | 1.88E-40  | ACX53263.1     | 83 | 168.703 | 115 | 96  | glutathione S-transferase-3                                             |
| Locus_6801_Transcript_1/1_Conf_1.000 | 229  | 0  |           |                |    |         |     |     |                                                                         |
| Locus_6802_Transcript_1/1_Conf_1.000 | 283  | 0  |           |                |    |         |     |     |                                                                         |
| Locus_6803_Transcript_1/1_Conf_1.000 | 975  | 20 | 1.53E-126 | XP_002646072.1 | 89 | 456.833 | 277 | 247 | C. briggsae CBR-PBS-2 protein                                           |
| Locus_6804_Transcript_1/1_Conf_1.000 | 491  | 20 | 6.83E-35  | CAZ65501.2     | 67 | 150.214 | 154 | 104 | C. elegans protein F46C3.3c, partially confirmed by transcript evidence |
| Locus_6805_Transcript_1/1_Conf_1.000 | 551  | 20 | 2.89E-12  | XP_002639902.1 | 52 | 75.485  | 117 | 61  | Hypothetical protein CBG08226                                           |

|                                      |      |    |           |                |     |         |     |     |                                                        |
|--------------------------------------|------|----|-----------|----------------|-----|---------|-----|-----|--------------------------------------------------------|
| Locus_6806_Transcript_1/1_Conf_1.000 | 763  | 20 | 9.13E-56  | XP_002632596.1 | 62  | 221.09  | 254 | 159 | Hypothetical protein CBG23720                          |
| Locus_6807_Transcript_1/1_Conf_1.000 | 858  | 20 | 2.10E-41  | XP_002637083.1 | 65  | 173.711 | 277 | 181 | Hypothetical protein CBG09582                          |
| Locus_6808_Transcript_1/1_Conf_1.000 | 143  | 4  | 2.17E-17  | NP_509299.1    | 95  | 92.0485 | 47  | 45  | hypothetical protein C53C9.2                           |
| Locus_6809_Transcript_1/1_Conf_1.000 | 2474 | 20 | 0         | NP_494706.1    | 74  | 812.757 | 741 | 553 | Temporarily Assigned Gene name family member (tag-218) |
| Locus_681_Transcript_1/1_Conf_1.000  | 1971 | 12 | 6.95E-102 | XP_001902665.1 | 59  | 376.326 | 584 | 347 | hypothetical protein Bm1_56035                         |
| Locus_6810_Transcript_1/1_Conf_1.000 | 330  | 0  |           |                |     |         |     |     |                                                        |
| Locus_6811_Transcript_1/1_Conf_1.000 | 440  | 0  |           |                |     |         |     |     |                                                        |
| Locus_6812_Transcript_1/1_Conf_1.000 | 423  | 0  |           |                |     |         |     |     |                                                        |
| Locus_6813_Transcript_1/1_Conf_1.000 | 497  | 20 | 2.34E-19  | XP_002647213.1 | 81  | 98.5969 | 69  | 56  | Hypothetical protein CBG22395                          |
| Locus_6814_Transcript_1/1_Conf_1.000 | 848  | 20 | 1.20E-134 | CAR63671.1     | 93  | 483.411 | 283 | 264 | hypothetical protein                                   |
| Locus_6815_Transcript_1/1_Conf_1.000 | 199  | 0  |           |                |     |         |     |     |                                                        |
| Locus_6816_Transcript_1/2_Conf_1.000 | 1164 | 20 | 5.74E-73  | EFO26307.1     | 58  | 279.256 | 379 | 222 | hypothetical protein LOAG_02179                        |
| Locus_6816_Transcript_2/2_Conf_1.000 | 1164 | 20 | 5.74E-73  | EFO26307.1     | 58  | 279.256 | 379 | 222 | hypothetical protein LOAG_02179                        |
| Locus_6817_Transcript_1/1_Conf_1.000 | 406  | 20 | 1.19E-63  | XP_002643626.1 | 100 | 245.743 | 134 | 134 | Hypothetical protein CBG16368                          |
| Locus_6818_Transcript_1/1_Conf_1.000 | 414  | 4  | 2.84E-09  | EFO23348.1     | 52  | 65.0846 | 123 | 64  | hypothetical protein LOAG_05138                        |

|                                      |      |    |          |                |    |         |     |     |                                 |
|--------------------------------------|------|----|----------|----------------|----|---------|-----|-----|---------------------------------|
| Locus_6819_Transcript_1/1_Conf_1.000 | 241  | 5  | 2.19E-17 | XP_002641966.1 | 72 | 92.0485 | 74  | 54  | Hypothetical protein CBG16672   |
| Locus_682_Transcript_1/1_Conf_1.000  | 251  | 0  |          |                |    |         |     |     |                                 |
| Locus_6820_Transcript_1/1_Conf_1.000 | 933  | 20 | 7.84E-16 | XP_001891682.1 | 52 | 88.9669 | 153 | 80  | MRG family protein              |
| Locus_6821_Transcript_1/1_Conf_1.000 | 194  | 0  |          |                |    |         |     |     |                                 |
| Locus_6822_Transcript_1/1_Conf_1.000 | 855  | 4  | 1.11E-26 | NP_501353.2    | 44 | 124.79  | 309 | 139 | hypothetical protein Y42H9AR.4  |
| Locus_6823_Transcript_1/1_Conf_1.000 | 503  | 20 | 2.54E-37 | AAO18223.1     | 95 | 158.303 | 108 | 103 | FMRFamide-like propeptide       |
| Locus_6824_Transcript_1/1_Conf_1.000 | 799  | 0  |          |                |    |         |     |     |                                 |
| Locus_6825_Transcript_1/1_Conf_1.000 | 408  | 20 | 5.34E-48 | EFO26660.1     | 95 | 193.741 | 105 | 100 | ELC-1 protein                   |
| Locus_6826_Transcript_1/1_Conf_1.000 | 1878 | 20 | 3.86E-94 | XP_001898111.1 | 73 | 350.517 | 317 | 233 | tumor suppressor.               |
| Locus_6827_Transcript_1/1_Conf_1.000 | 341  | 0  |          |                |    |         |     |     |                                 |
| Locus_6828_Transcript_1/1_Conf_1.000 | 524  | 16 | 1.41E-07 | XP_001901397.1 | 56 | 59.6918 | 97  | 55  | hypothetical protein Bm1_49650  |
| Locus_6829_Transcript_1/1_Conf_1.000 | 329  | 0  |          |                |    |         |     |     |                                 |
| Locus_683_Transcript_1/1_Conf_1.000  | 777  | 0  |          |                |    |         |     |     |                                 |
| Locus_6830_Transcript_1/1_Conf_1.000 | 1381 | 20 | 2.01E-62 | EFO18349.1     | 53 | 244.588 | 471 | 254 | cation efflux family protein    |
| Locus_6831_Transcript_1/1_Conf_1.000 | 757  | 20 | 1.49E-26 | EFO19591.1     | 53 | 124.02  | 242 | 130 | hypothetical protein LOAG_08901 |
| Locus_6832_Transcript_1/1_Conf_1.000 | 370  | 20 | 8.49E-17 | XP_002632195.1 | 60 | 90.1225 | 120 | 73  | Hypothetical protein CBG07061   |

|                                      |      |    |           |                |     |         |     |     |                                                                                 |
|--------------------------------------|------|----|-----------|----------------|-----|---------|-----|-----|---------------------------------------------------------------------------------|
| Locus_6833_Transcript_1/1_Conf_1.000 | 313  | 20 | 3.92E-54  | NP_001076604.1 | 100 | 214.157 | 104 | 104 | NSF (N-ethylmaleimide sensitive secretion factor) homolog family member (nsf-1) |
| Locus_6834_Transcript_1/1_Conf_1.000 | 671  | 20 | 1.35E-83  | XP_002641314.1 | 87  | 313.153 | 208 | 182 | Hypothetical protein CBG24614                                                   |
| Locus_6835_Transcript_1/2_Conf_1.000 | 1203 | 20 | 2.82E-54  | NP_001122489.1 | 72  | 217.238 | 174 | 126 | hypothetical protein F57C9.4                                                    |
| Locus_6835_Transcript_2/2_Conf_1.000 | 1515 | 20 | 3.88E-54  | NP_001122489.1 | 72  | 217.238 | 174 | 126 | hypothetical protein F57C9.4                                                    |
| Locus_6836_Transcript_1/1_Conf_1.000 | 592  | 20 | 6.68E-88  | XP_002646151.1 | 95  | 327.02  | 169 | 161 | C. briggsae CBR-UBC-14 protein                                                  |
| Locus_6837_Transcript_1/1_Conf_1.000 | 645  | 5  | 4.35E-36  | XP_002639422.1 | 72  | 155.221 | 135 | 98  | C. briggsae CBR-NOAH-1 protein                                                  |
| Locus_6838_Transcript_1/1_Conf_1.000 | 805  | 3  | 7.14E-40  | XP_002643513.1 | 57  | 121.324 | 202 | 116 | Hypothetical protein CBG16187                                                   |
| Locus_6839_Transcript_1/1_Conf_1.000 | 1587 | 20 | 1.67E-156 | NP_506445.2    | 83  | 557.37  | 367 | 308 | Serine Palmitoyl Transferase family member (sptl-3)                             |
| Locus_684_Transcript_1/1_Conf_1.000  | 372  | 20 | 2.81E-12  | NP_491944.2    | 74  | 75.0998 | 93  | 69  | hypothetical protein C37A2.7                                                    |
| Locus_6840_Transcript_1/1_Conf_1.000 | 500  | 2  | 1.73E-06  | CAR63610.1     | 55  | 55.8398 | 98  | 54  | putative IQ calmodulin-binding motif domain protein                             |
| Locus_6841_Transcript_1/1_Conf_1.000 | 976  | 0  |           |                |     |         |     |     |                                                                                 |
| Locus_6842_Transcript_1/1_Conf_1.000 | 1168 | 20 | 8.40E-157 | NP_492974.2    | 89  | 557.755 | 377 | 337 | Kex-2 Proprotein Convertase family member (kpc-1)                               |
| Locus_6843_Transcript_1/2_Conf_1.000 | 505  | 6  | 1.57E-50  | NP_502119.2    | 87  | 202.216 | 156 | 136 | hypothetical protein F54D1.6                                                    |
| Locus_6843_Transcript_2/2_Conf_1.000 | 548  | 6  | 1.10E-64  | NP_502119.2    | 88  | 249.595 | 183 | 162 | hypothetical protein F54D1.6                                                    |

|                                      |      |    |          |                |    |         |     |     |                               |
|--------------------------------------|------|----|----------|----------------|----|---------|-----|-----|-------------------------------|
| Locus_6844_Transcript_1/1_Conf_1.000 | 834  | 20 | 2.92E-93 | NP_498042.1    | 77 | 345.895 | 278 | 215 | hypothetical protein C26E6.12 |
| Locus_6845_Transcript_1/2_Conf_1.000 | 2149 | 20 | 0        | XP_002640683.1 | 72 | 699.123 | 680 | 492 | C. briggsae CBR-HMP-2 protein |
| Locus_6845_Transcript_2/2_Conf_1.000 | 2149 | 20 | 0        | XP_002640683.1 | 72 | 699.123 | 680 | 492 | C. briggsae CBR-HMP-2 protein |
| Locus_6846_Transcript_1/1_Conf_1.000 | 584  | 20 | 1.25E-22 | XP_002632629.1 | 64 | 110.153 | 118 | 76  | Hypothetical protein CBG21543 |

|                                      |     |    |           |                |     |         |     |     |                                                              |
|--------------------------------------|-----|----|-----------|----------------|-----|---------|-----|-----|--------------------------------------------------------------|
| Locus_6847_Transcript_1/1_Conf_1.000 | 765 | 20 | 1.53E-34  | NP_508944.1    | 66  | 150.599 | 208 | 138 | SULfate Permease family member (sulp-2)                      |
| Locus_6848_Transcript_1/1_Conf_1.000 | 318 | 0  |           |                |     |         |     |     |                                                              |
| Locus_6849_Transcript_1/3_Conf_0.571 | 492 | 0  |           |                |     |         |     |     |                                                              |
| Locus_6849_Transcript_2/3_Conf_0.714 | 854 | 20 | 1.10E-42  | NP_496363.1    | 88  | 177.948 | 107 | 95  | LEThal family member (let-858)                               |
| Locus_6849_Transcript_3/3_Conf_0.714 | 854 | 20 | 1.10E-42  | NP_496363.1    | 88  | 177.948 | 107 | 95  | LEThal family member (let-858)                               |
| Locus_685_Transcript_1/1_Conf_1.000  | 694 | 2  | 2.73E-13  | NP_497898.1    | 64  | 79.7221 | 116 | 75  | hypothetical protein R07E5.7                                 |
| Locus_6850_Transcript_1/1_Conf_1.000 | 411 | 20 | 1.40E-40  | XP_002821646.1 | 100 | 169.088 | 84  | 84  | PREDICTED: protein phosphatase 1 regulatory subunit 14B-like |
| Locus_6851_Transcript_1/1_Conf_1.000 | 331 | 4  | 2.19E-17  | NP_495565.2    | 70  | 92.0485 | 96  | 68  | A Kinase Anchor protein family member (aka-1)                |
| Locus_6852_Transcript_1/2_Conf_1.000 | 369 | 20 | 2.38E-27  | EFO20609.1     | 70  | 125.176 | 121 | 85  | importin-beta domain-containing protein                      |
| Locus_6852_Transcript_2/2_Conf_1.000 | 369 | 20 | 2.38E-27  | EFO20609.1     | 70  | 125.176 | 121 | 85  | importin-beta domain-containing protein                      |
| Locus_6853_Transcript_1/1_Conf_1.000 | 683 | 20 | 1.73E-57  | CAR63681.1     | 89  | 226.483 | 149 | 133 | putative Temporarily Assigned Gene name family member        |
| Locus_6854_Transcript_1/1_Conf_1.000 | 861 | 20 | 7.85E-113 | XP_002637127.1 | 85  | 410.994 | 284 | 242 | Hypothetical protein CBG09629                                |
| Locus_6855_Transcript_1/2_Conf_1.000 | 592 | 20 | 6.48E-75  | NP_495708.1    | 81  | 283.878 | 197 | 161 | hypothetical protein F10B5.2                                 |
| Locus_6855_Transcript_2/2_Conf_1.000 | 601 | 20 | 3.04E-75  | NP_495708.1    | 81  | 285.034 | 199 | 162 | hypothetical protein F10B5.2                                 |
| Locus_6856_Transcript_1/1_Conf_1.000 | 309 | 2  | 2.76E-04  | NP_495437.2    | 56  | 48.521  | 67  | 38  | hypothetical protein C52E12.4                                |

|                                      |      |    |           |                |    |         |     |     |                                                |  |
|--------------------------------------|------|----|-----------|----------------|----|---------|-----|-----|------------------------------------------------|--|
| Locus_6857_Transcript_1/1_Conf_1.000 | 270  | 0  |           |                |    |         |     |     |                                                |  |
| Locus_6858_Transcript_1/1_Conf_1.000 | 866  | 20 | 7.04E-53  | NP_507155.1    | 56 | 211.846 | 245 | 138 | hypothetical protein F26D2.13                  |  |
| Locus_6859_Transcript_1/1_Conf_1.000 | 1213 | 20 | 8.41E-123 | NP_510450.1    | 87 | 444.891 | 320 | 279 | hypothetical protein C05G5.4                   |  |
| Locus_686_Transcript_1/1_Conf_1.000  | 369  | 0  |           |                |    |         |     |     |                                                |  |
| Locus_6860_Transcript_1/1_Conf_1.000 | 1113 | 20 | 6.94E-129 | NP_871953.1    | 85 | 464.922 | 292 | 251 | hypothetical protein T05H10.6                  |  |
| Locus_6861_Transcript_1/1_Conf_1.000 | 208  | 0  |           |                |    |         |     |     |                                                |  |
| Locus_6862_Transcript_1/1_Conf_1.000 | 543  | 20 | 1.32E-62  | NP_001022442.1 | 80 | 242.662 | 176 | 141 | hypothetical protein Y46G5A.35                 |  |
| Locus_6863_Transcript_1/1_Conf_1.000 | 887  | 20 | 2.17E-89  | AAA96224.2     | 68 | 333.183 | 295 | 201 | Hypothetical protein T07H6.4                   |  |
| Locus_6864_Transcript_1/1_Conf_1.000 | 421  | 20 | 4.74E-52  | P51547.1       | 92 | 207.223 | 113 | 105 | Extracellular superoxide dismutase [Cu-Zn]     |  |
| Locus_6865_Transcript_1/1_Conf_1.000 | 265  | 2  | 9.96E-10  | XP_001901651.1 | 84 | 66.6254 | 45  | 38  | hypothetical protein Bm1_50915                 |  |
| Locus_6866_Transcript_1/2_Conf_1.000 | 648  | 20 | 4.40E-36  | AAN05752.1     | 69 | 155.221 | 153 | 106 | heat shock protein 20                          |  |
| Locus_6866_Transcript_2/2_Conf_1.000 | 667  | 20 | 4.64E-36  | AAN05752.1     | 69 | 155.221 | 153 | 106 | heat shock protein 20                          |  |
| Locus_6867_Transcript_1/1_Conf_1.000 | 371  | 20 | 2.39E-19  | NP_505778.1    | 97 | 98.5969 | 68  | 66  | EndoMitotic Oocytes family member (emo-1)      |  |
| Locus_6868_Transcript_1/1_Conf_1.000 | 244  | 20 | 5.72E-34  | NP_508756.2    | 94 | 147.132 | 79  | 75  | Lateral Signaling Target family member (lst-2) |  |

|                                      |      |    |           |                |     |         |     |     |                                                                          |
|--------------------------------------|------|----|-----------|----------------|-----|---------|-----|-----|--------------------------------------------------------------------------|
| Locus_6869_Transcript_1/1_Conf_1.000 | 172  | 20 | 2.68E-07  | XP_001898157.1 | 62  | 58.5362 | 48  | 30  | EGF-like domain containing protein                                       |
| Locus_687_Transcript_1/1_Conf_1.000  | 661  | 20 | 4.35E-63  | NP_740937.1    | 73  | 244.973 | 219 | 162 | AdaPtin, Gamma chain (clathrin associated complex) family member (apg-1) |
| Locus_6870_Transcript_1/1_Conf_1.000 | 750  | 20 | 1.57E-60  | XP_001901409.1 | 75  | 236.884 | 172 | 129 | TM2 domain containing protein                                            |
| Locus_6871_Transcript_1/1_Conf_1.000 | 821  | 3  | 6.42E-13  | NP_490864.2    | 53  | 78.9518 | 146 | 78  | hypothetical protein Y92H12A.3                                           |
| Locus_6872_Transcript_1/1_Conf_1.000 | 1030 | 20 | 4.54E-148 | NP_492146.1    | 91  | 528.48  | 332 | 304 | hypothetical protein F27D4.1                                             |
| Locus_6873_Transcript_1/1_Conf_1.000 | 244  | 20 | 4.52E-39  | NP_001122684.1 | 100 | 164.081 | 81  | 81  | UNCoordinated family member (unc-103)                                    |



|                                      |      |    |           |                |    |         |     |     |                                          |
|--------------------------------------|------|----|-----------|----------------|----|---------|-----|-----|------------------------------------------|
| Locus_6874_Transcript_1/1_Conf_1.000 | 348  | 13 | 6.62E-46  | NP_498645.1    | 82 | 186.808 | 116 | 96  | MUscle Positioning family member (mup-4) |
| Locus_6875_Transcript_1/1_Conf_1.000 | 169  | 20 | 5.40E-24  | XP_002639165.1 | 98 | 114.005 | 55  | 54  | C. briggsae CBR-RPL-24.2 protein         |
| Locus_6876_Transcript_1/1_Conf_1.000 | 1018 | 20 | 5.24E-40  | XP_001893474.1 | 48 | 169.474 | 324 | 157 | Rap/ran-GAP family protein               |
| Locus_6877_Transcript_1/2_Conf_1.000 | 1476 | 5  | 8.10E-41  | NP_001041154.2 | 51 | 172.94  | 314 | 163 | hypothetical protein R31.2               |
| Locus_6877_Transcript_2/2_Conf_1.000 | 1410 | 5  | 4.31E-36  | XP_002636623.1 | 62 | 157.147 | 174 | 108 | Hypothetical protein CBG23327            |
| Locus_6878_Transcript_1/1_Conf_1.000 | 389  | 0  |           |                |    |         |     |     |                                          |
| Locus_6879_Transcript_1/1_Conf_1.000 | 634  | 20 | 1.16E-46  | XP_002647555.1 | 66 | 190.274 | 228 | 152 | Hypothetical protein CBG06641            |
| Locus_688_Transcript_1/1_Conf_1.000  | 623  | 20 | 1.63E-90  | XP_002642599.1 | 95 | 335.88  | 186 | 177 | C. briggsae CBR-RPL-9 protein            |
| Locus_6880_Transcript_1/1_Conf_1.000 | 1154 | 20 | 3.51E-107 | XP_002646111.1 | 71 | 392.889 | 384 | 273 | C. briggsae CBR-PAD-1 protein            |
| Locus_6881_Transcript_1/1_Conf_1.000 | 593  | 20 | 1.76E-80  | XP_002645216.1 | 88 | 302.368 | 181 | 160 | Hypothetical protein CBG00074            |
| Locus_6882_Transcript_1/1_Conf_1.000 | 262  | 0  |           |                |    |         |     |     |                                          |
| Locus_6883_Transcript_1/2_Conf_1.000 | 766  | 20 | 1.35E-115 | CAR63545.1     | 89 | 419.853 | 254 | 227 | putative Hsp90 protein                   |

|                                      |      |    |          |                |     |         |     |     |                                                                                                |
|--------------------------------------|------|----|----------|----------------|-----|---------|-----|-----|------------------------------------------------------------------------------------------------|
| Locus_6883_Transcript_2/2_Conf_1.000 | 389  | 20 | 4.97E-54 | CAR63545.1     | 89  | 213.772 | 129 | 116 | putative Hsp90 protein                                                                         |
| Locus_6884_Transcript_1/1_Conf_1.000 | 1249 | 20 | 3.50E-79 | NP_499802.2    | 75  | 300.056 | 271 | 204 | hypothetical protein Y76A2B.6                                                                  |
| Locus_6885_Transcript_1/1_Conf_1.000 | 1245 | 0  |          |                |     |         |     |     |                                                                                                |
| Locus_6886_Transcript_1/1_Conf_1.000 | 664  | 20 | 1.74E-43 | XP_002647987.1 | 78  | 179.874 | 146 | 115 | Hypothetical protein CBG23928                                                                  |
| Locus_6887_Transcript_1/1_Conf_1.000 | 697  | 3  | 2.85E-18 | NP_490661.1    | 68  | 96.2857 | 120 | 82  | Neuropeptide-Like Protein family member (nlp-40)                                               |
| Locus_6888_Transcript_1/1_Conf_1.000 | 199  | 0  |          |                |     |         |     |     |                                                                                                |
| Locus_6889_Transcript_1/1_Conf_1.000 | 181  | 20 | 4.70E-15 | NP_001180506.1 | 100 | 84.3445 | 41  | 41  | 40S ribosomal protein S2                                                                       |
| Locus_689_Transcript_1/1_Conf_1.000  | 1539 | 20 | 2.04E-42 | NP_505233.2    | 62  | 178.333 | 226 | 142 | hypothetical protein ZC190.4                                                                   |
| Locus_6890_Transcript_1/1_Conf_1.000 | 727  | 20 | 1.25E-27 | XP_002643195.1 | 74  | 127.487 | 102 | 76  | C. briggsae CBR-TAG-303 protein                                                                |
| Locus_6891_Transcript_1/1_Conf_1.000 | 232  | 0  |          |                |     |         |     |     |                                                                                                |
| Locus_6892_Transcript_1/1_Conf_1.000 | 577  | 20 | 9.77E-73 | NP_001040648.2 | 82  | 276.559 | 183 | 151 | hypothetical protein F02E9.9                                                                   |
| Locus_6893_Transcript_1/1_Conf_1.000 | 624  | 20 | 7.00E-49 | XP_001900859.1 | 72  | 197.593 | 206 | 150 | Leucine Rich Repeat family protein                                                             |
| Locus_6894_Transcript_1/1_Conf_1.000 | 370  | 20 | 2.02E-18 | NP_493275.1    | 66  | 95.5153 | 125 | 83  | SELB (SelB homolog) translation factor for selenocysteine incorporation family member (selb-1) |
| Locus_6895_Transcript_1/1_Conf_1.000 | 523  | 0  |          |                |     |         |     |     |                                                                                                |
| Locus_6896_Transcript_1/1_Conf_1.000 | 174  | 0  |          |                |     |         |     |     |                                                                                                |
| Locus_6897_Transcript_1/1_Conf_1.000 | 150  | 5  | 2.47E-16 | NP_001024902.1 | 92  | 88.5817 | 50  | 46  | hypothetical protein T10B10.4                                                                  |

|                                      |      |    |           |                |    |         |     |     |                                                                  |
|--------------------------------------|------|----|-----------|----------------|----|---------|-----|-----|------------------------------------------------------------------|
| Locus_6898_Transcript_1/1_Conf_1.000 | 280  | 20 | 1.51E-18  | EFO20414.1     | 76 | 95.9005 | 75  | 57  | hypothetical protein LOAG_08075                                  |
| Locus_6899_Transcript_1/1_Conf_1.000 | 1274 | 20 | 2.20E-28  | NP_001040680.1 | 64 | 131.339 | 153 | 98  | UNCoordinated family member (unc-57)                             |
| Locus_69_Transcript_1/1_Conf_1.000   | 1164 | 20 | 1.29E-32  | EFO22902.1     | 46 | 145.206 | 290 | 134 | rnf126-prov protein                                              |
| Locus_690_Transcript_1/3_Conf_0.286  | 307  | 0  |           |                |    |         |     |     |                                                                  |
| Locus_690_Transcript_2/3_Conf_0.714  | 1605 | 20 | 9.12E-118 | CAR63572.1     | 85 | 428.713 | 386 | 329 | putative Prion-like-(q/n-rich)-domain-bearing protein protein 51 |
| Locus_690_Transcript_3/3_Conf_0.714  | 1605 | 20 | 1.08E-118 | CAR63572.1     | 85 | 431.795 | 386 | 330 | putative Prion-like-(q/n-rich)-domain-bearing protein protein 51 |
| Locus_6900_Transcript_1/1_Conf_1.000 | 351  | 0  |           |                |    |         |     |     |                                                                  |
| Locus_6901_Transcript_1/1_Conf_1.000 | 749  | 2  | 1.81E-16  | NP_506154.1    | 64 | 90.5077 | 157 | 101 | hypothetical protein C14C10.6                                    |
| Locus_6902_Transcript_1/1_Conf_1.000 | 237  | 0  |           |                |    |         |     |     |                                                                  |
| Locus_6903_Transcript_1/1_Conf_1.000 | 377  | 20 | 3.39E-50  | CAA10033.1     | 87 | 201.06  | 125 | 109 | DYS-1 protein                                                    |
| Locus_6904_Transcript_1/1_Conf_1.000 | 334  | 0  |           |                |    |         |     |     |                                                                  |
| Locus_6905_Transcript_1/2_Conf_1.000 | 593  | 3  | 3.28E-10  | NP_498558.1    | 49 | 68.9366 | 129 | 64  | hypothetical protein B0280.10                                    |
| Locus_6905_Transcript_2/2_Conf_1.000 | 667  | 3  | 4.38E-10  | NP_498558.1    | 49 | 68.9366 | 129 | 64  | hypothetical protein B0280.10                                    |

|                                      |      |    |           |                |    |         |     |     |                                                                         |
|--------------------------------------|------|----|-----------|----------------|----|---------|-----|-----|-------------------------------------------------------------------------|
| Locus_6906_Transcript_1/1_Conf_1.000 | 2267 | 20 | 0         | NP_501283.1    | 82 | 870.152 | 657 | 541 | yeast SEC homolog family member (sec-10)                                |
| Locus_6907_Transcript_1/1_Conf_1.000 | 452  | 20 | 7.75E-47  | EFO22906.1     | 88 | 189.889 | 113 | 100 | hypothetical protein LOAG_05578                                         |
| Locus_6908_Transcript_1/2_Conf_1.000 | 1249 | 20 | 1.71E-25  | NP_502785.2    | 67 | 121.709 | 137 | 92  | hypothetical protein Y57G11C.9                                          |
| Locus_6908_Transcript_2/2_Conf_1.000 | 1243 | 20 | 1.69E-25  | NP_502785.2    | 67 | 121.709 | 137 | 92  | hypothetical protein Y57G11C.9                                          |
| Locus_6909_Transcript_1/1_Conf_1.000 | 966  | 20 | 7.86E-67  | NP_001123010.1 | 64 | 258.455 | 301 | 193 | related to yeast Vacuolar Protein Sorting factor family member (vps-39) |
| Locus_691_Transcript_1/3_Conf_0.625  | 2370 | 20 | 2.23E-73  | DAA04553.1     | 58 | 281.952 | 600 | 348 | TPA_exp: ANC-1                                                          |
| Locus_691_Transcript_2/3_Conf_0.375  | 2810 | 20 | 3.05E-117 | NP_491353.2    | 59 | 427.943 | 919 | 547 | abnormal nuclear ANChorage family member (anc-1)                        |
| Locus_691_Transcript_3/3_Conf_0.625  | 2962 | 20 | 1.96E-130 | DAA04553.1     | 57 | 471.855 | 966 | 554 | TPA_exp: ANC-1                                                          |

|                                      |      |    |           |                |    |         |     |     |                                              |
|--------------------------------------|------|----|-----------|----------------|----|---------|-----|-----|----------------------------------------------|
| Locus_6910_Transcript_1/3_Conf_0.714 | 668  | 20 | 5.23E-88  | NP_740947.2    | 92 | 327.791 | 212 | 196 | hypothetical protein Y105E8A.19              |
| Locus_6910_Transcript_2/3_Conf_0.714 | 668  | 20 | 5.23E-88  | NP_740947.2    | 92 | 327.791 | 212 | 196 | hypothetical protein Y105E8A.19              |
| Locus_6910_Transcript_3/3_Conf_0.714 | 668  | 20 | 5.23E-88  | NP_740947.2    | 92 | 327.791 | 212 | 196 | hypothetical protein Y105E8A.19              |
| Locus_6911_Transcript_1/1_Conf_1.000 | 1434 | 20 | 2.94E-173 | XP_002642675.1 | 75 | 612.838 | 460 | 349 | C. briggsae CBR-TAG-282 protein              |
| Locus_6912_Transcript_1/1_Conf_1.000 | 1485 | 20 | 0         | XP_001897051.1 | 85 | 749.199 | 496 | 425 | RNA polymerase Rpb1, domain 1 family protein |

|                                      |      |    |           |                |    |         |     |     |                                                                   |
|--------------------------------------|------|----|-----------|----------------|----|---------|-----|-----|-------------------------------------------------------------------|
| Locus_6913_Transcript_1/1_Conf_1.000 | 2157 | 20 | 3.74E-104 | EFO23880.1     | 61 | 384.03  | 487 | 300 | transportin-SR                                                    |
| Locus_6914_Transcript_1/1_Conf_1.000 | 579  | 20 | 3.30E-68  | NP_506714.1    | 79 | 261.536 | 186 | 147 | hypothetical protein C01G10.9                                     |
| Locus_6915_Transcript_1/1_Conf_1.000 | 1410 | 20 | 8.24E-104 | EFO23138.1     | 70 | 382.104 | 402 | 283 | CPSF A subunit region family protein                              |
| Locus_6916_Transcript_1/1_Conf_1.000 | 624  | 20 | 1.12E-54  | XP_001901976.1 | 68 | 216.853 | 212 | 146 | Protein kinase domain containing protein                          |
| Locus_6917_Transcript_1/1_Conf_1.000 | 991  | 10 | 5.56E-23  | NP_741460.2    | 77 | 112.849 | 90  | 70  | WASP (actin cytoskeleton modulator) homolog family member (wsp-1) |
| Locus_6918_Transcript_1/1_Conf_1.000 | 387  | 20 | 1.07E-64  | NP_740855.2    | 98 | 249.21  | 128 | 126 | hypothetical protein F46F11.1                                     |
| Locus_6919_Transcript_1/1_Conf_1.000 | 1217 | 20 | 5.21E-64  | AAY58318.1     | 55 | 249.595 | 342 | 191 | C-type lectin precursor                                           |
| Locus_692_Transcript_1/1_Conf_1.000  | 129  | 0  |           |                |    |         |     |     |                                                                   |
| Locus_6920_Transcript_1/2_Conf_1.000 | 856  | 12 | 4.23E-10  | XP_002588239.1 | 68 | 69.707  | 90  | 62  | hypothetical protein BRAFLDRAFT_86686                             |
| Locus_6920_Transcript_2/2_Conf_1.000 | 808  | 8  | 5.53E-09  | XP_002588239.1 | 62 | 65.855  | 104 | 65  | hypothetical protein BRAFLDRAFT_86686                             |
| Locus_6921_Transcript_1/1_Conf_1.000 | 455  | 20 | 1.05E-35  | CAA72916.2     | 65 | 152.91  | 151 | 99  | serine protease inhibitor-like protein                            |

|                                      |     |    |          |                |    |         |     |    |                                       |
|--------------------------------------|-----|----|----------|----------------|----|---------|-----|----|---------------------------------------|
| Locus_6922_Transcript_1/1_Conf_1.000 | 221 | 20 | 2.40E-19 | AAB50206.1     | 79 | 98.5969 | 64  | 51 | unknown                               |
| Locus_6923_Transcript_1/1_Conf_1.000 | 269 | 0  |          |                |    |         |     |    |                                       |
| Locus_6924_Transcript_1/1_Conf_1.000 | 197 | 0  |          |                |    |         |     |    |                                       |
| Locus_6925_Transcript_1/1_Conf_1.000 | 237 | 20 | 7.31E-21 | NP_492593.2    | 79 | 103.605 | 64  | 51 | hypothetical protein F26E4.3          |
| Locus_6926_Transcript_1/1_Conf_1.000 | 406 | 20 | 4.27E-29 | XP_001902803.1 | 85 | 130.954 | 89  | 76 | Hypothetical HIT-like protein F21C3.3 |
| Locus_6927_Transcript_1/1_Conf_1.000 | 314 | 20 | 1.07E-27 | EFN83990.1     | 75 | 126.331 | 104 | 79 | DNA damage-binding protein 1          |
| Locus_6928_Transcript_1/1_Conf_1.000 | 547 | 3  | 2.66E-10 | EFO20474.1     | 50 | 68.9366 | 162 | 82 | SNARE domain-containing protein       |
| Locus_6929_Transcript_1/1_Conf_1.000 | 176 | 0  |          |                |    |         |     |    |                                       |
| Locus_693_Transcript_1/1_Conf_1.000  | 309 | 0  |          |                |    |         |     |    |                                       |
| Locus_6930_Transcript_1/1_Conf_1.000 | 220 | 4  | 9.14E-11 | EFO24279.1     | 72 | 70.0922 | 50  | 36 | hypothetical protein LOAG_04211       |

|                                      |      |    |           |                |    |         |     |     |                                                                     |
|--------------------------------------|------|----|-----------|----------------|----|---------|-----|-----|---------------------------------------------------------------------|
| Locus_6931_Transcript_1/1_Conf_1.000 | 140  | 0  |           |                |    |         |     |     |                                                                     |
| Locus_6932_Transcript_1/1_Conf_1.000 | 495  | 2  | 3.06E-11  | XP_002631386.1 | 48 | 71.633  | 137 | 66  | Hypothetical protein CBG03228                                       |
| Locus_6933_Transcript_1/2_Conf_1.000 | 309  | 2  | 1.32E-06  | NP_494766.1    | 72 | 56.225  | 51  | 37  | hypothetical protein H20J04.3                                       |
| Locus_6933_Transcript_2/2_Conf_1.000 | 315  | 2  | 6.75E-06  | NP_494766.1    | 69 | 53.9138 | 56  | 39  | hypothetical protein H20J04.3                                       |
| Locus_6934_Transcript_1/1_Conf_1.000 | 449  | 20 | 1.69E-17  | XP_001899578.1 | 57 | 92.4337 | 152 | 87  | Hyaluronidase family protein                                        |
| Locus_6935_Transcript_1/1_Conf_1.000 | 482  | 20 | 4.20E-45  | EFO20390.1     | 77 | 184.111 | 160 | 124 | subtilase                                                           |
| Locus_6936_Transcript_1/1_Conf_1.000 | 458  | 0  |           |                |    |         |     |     |                                                                     |
| Locus_6937_Transcript_1/1_Conf_1.000 | 178  | 0  |           |                |    |         |     |     |                                                                     |
| Locus_6938_Transcript_1/2_Conf_1.000 | 1739 | 20 | 1.28E-96  | NP_001040987.1 | 79 | 358.607 | 226 | 180 | ALP/Enigma encoding family member (alp-1)                           |
| Locus_6938_Transcript_2/2_Conf_1.000 | 1739 | 20 | 1.28E-96  | NP_001040987.1 | 79 | 358.607 | 226 | 180 | ALP/Enigma encoding family member (alp-1)                           |
| Locus_6939_Transcript_1/1_Conf_1.000 | 1155 | 6  | 8.17E-80  | NP_500907.1    | 66 | 301.982 | 345 | 228 | Prion-like-(Q/N-rich)-domain-bearing protein family member (pqn-22) |
| Locus_694_Transcript_1/1_Conf_1.000  | 817  | 20 | 1.19E-35  | XP_002630316.1 | 96 | 154.451 | 87  | 84  | Hypothetical protein CBG04239                                       |
| Locus_6940_Transcript_1/3_Conf_0.714 | 1419 | 20 | 3.57E-139 | XP_002639103.1 | 75 | 499.59  | 424 | 318 | C. briggsae CBR-TAG-345 protein                                     |
| Locus_6940_Transcript_2/3_Conf_0.714 | 1419 | 20 | 2.09E-139 | XP_002639103.1 | 75 | 500.36  | 424 | 319 | C. briggsae CBR-TAG-345 protein                                     |



|                                      |      |    |           |                |    |         |     |     |                                                                     |
|--------------------------------------|------|----|-----------|----------------|----|---------|-----|-----|---------------------------------------------------------------------|
| Locus_6940_Transcript_3/3_Conf_0.714 | 1419 | 20 | 2.09E-139 | XP_002639103.1 | 75 | 500.36  | 424 | 319 | C. briggsae CBR-TAG-345 protein                                     |
| Locus_6941_Transcript_1/1_Conf_1.000 | 195  | 20 | 2.21E-25  | NP_500306.1    | 98 | 118.627 | 64  | 63  | hypothetical protein T26C12.1                                       |
| Locus_6942_Transcript_1/1_Conf_1.000 | 369  | 0  |           |                |    |         |     |     |                                                                     |
| Locus_6943_Transcript_1/1_Conf_1.000 | 404  | 0  |           |                |    |         |     |     |                                                                     |
| Locus_6944_Transcript_1/1_Conf_1.000 | 499  | 2  | 2.02E-39  | NP_505312.1    | 69 | 165.236 | 165 | 115 | hypothetical protein T19A5.1                                        |
| Locus_6945_Transcript_1/1_Conf_1.000 | 396  | 20 | 3.68E-12  | XP_001896161.1 | 51 | 74.7146 | 129 | 67  | tRNA intron endonuclease family protein                             |
| Locus_6946_Transcript_1/1_Conf_1.000 | 1402 | 5  | 9.91E-09  | NP_506662.1    | 39 | 66.2402 | 244 | 97  | hypothetical protein ZC412.3                                        |
| Locus_6947_Transcript_1/3_Conf_0.333 | 357  | 14 | 1.05E-35  | NP_491391.3    | 76 | 152.91  | 107 | 82  | Prion-like-(Q/N-rich)-domain-bearing protein family member (pqn-24) |
| Locus_6947_Transcript_2/3_Conf_0.667 | 718  | 13 | 7.87E-35  | NP_491391.3    | 78 | 151.369 | 103 | 81  | Prion-like-(Q/N-rich)-domain-bearing protein family member (pqn-24) |
| Locus_6947_Transcript_3/3_Conf_0.667 | 680  | 13 | 7.01E-35  | NP_491391.3    | 78 | 151.369 | 103 | 81  | Prion-like-(Q/N-rich)-domain-bearing protein family member (pqn-24) |
| Locus_6948_Transcript_1/1_Conf_1.000 | 334  | 20 | 1.02E-14  | XP_002639918.1 | 67 | 83.1889 | 109 | 74  | C. briggsae CBR-NMY-2 protein                                       |

|                                      |      |    |          |                |     |         |     |     |                                                       |
|--------------------------------------|------|----|----------|----------------|-----|---------|-----|-----|-------------------------------------------------------|
| Locus_6949_Transcript_1/1_Conf_1.000 | 197  | 20 | 7.39E-13 | XP_002923753.1 | 100 | 77.0258 | 35  | 35  | PREDICTED: rRNA 2'-O-methyltransferase fibrillar-like |
| Locus_695_Transcript_1/1_Conf_1.000  | 1751 | 20 | 0        | XP_002641757.1 | 86  | 644.81  | 444 | 384 | Hypothetical protein CBG10097                         |
| Locus_6950_Transcript_1/1_Conf_1.000 | 506  | 20 | 1.20E-42 | XP_001898472.1 | 68  | 176.022 | 167 | 114 | Trehalase family protein                              |
| Locus_6951_Transcript_1/1_Conf_1.000 | 622  | 0  |          |                |     |         |     |     |                                                       |
| Locus_6952_Transcript_1/1_Conf_1.000 | 218  | 20 | 1.66E-25 | NP_001122677.1 | 92  | 119.013 | 56  | 52  | PaXilin homolo family member (pxl-1)                  |
| Locus_6953_Transcript_1/2_Conf_1.000 | 503  | 20 | 2.08E-31 | NP_495010.2    | 78  | 138.658 | 111 | 87  | hypothetical protein F09E5.2                          |
| Locus_6953_Transcript_2/2_Conf_1.000 | 698  | 20 | 4.96E-63 | NP_495010.2    | 73  | 244.973 | 213 | 157 | hypothetical protein F09E5.2                          |
| Locus_6954_Transcript_1/1_Conf_1.000 | 569  | 0  |          |                |     |         |     |     |                                                       |
| Locus_6955_Transcript_1/1_Conf_1.000 | 858  | 20 | 2.17E-30 | EFO27189.1     | 78  | 137.117 | 103 | 81  | hypothetical protein LOAG_01295                       |

|                                      |      |    |           |                |    |         |     |     |                                        |
|--------------------------------------|------|----|-----------|----------------|----|---------|-----|-----|----------------------------------------|
| Locus_6956_Transcript_1/1_Conf_1.000 | 572  | 20 | 8.24E-85  | NP_001122711.1 | 86 | 316.62  | 192 | 167 | CBP/p300 homolog family member (cbp-1) |
| Locus_6957_Transcript_1/1_Conf_1.000 | 1386 | 20 | 1.05E-135 | NP_497949.1    | 86 | 488.034 | 314 | 272 | hypothetical protein T23F11.1          |
| Locus_6958_Transcript_1/2_Conf_1.000 | 1226 | 4  | 1.11E-13  | XP_002641036.1 | 54 | 82.4185 | 211 | 115 | C. briggsae CBR-EPC-1 protein          |
| Locus_6958_Transcript_2/2_Conf_1.000 | 454  | 0  |           |                |    |         |     |     |                                        |
| Locus_6959_Transcript_1/1_Conf_1.000 | 221  | 0  |           |                |    |         |     |     |                                        |
| Locus_696_Transcript_1/4_Conf_0.625  | 2348 | 20 | 9.34E-157 | XP_002632235.1 | 60 | 558.91  | 755 | 454 | Hypothetical protein CBG07108          |
| Locus_696_Transcript_2/4_Conf_0.625  | 2351 | 20 | 9.35E-157 | XP_002632235.1 | 60 | 558.91  | 755 | 454 | Hypothetical protein CBG07108          |
| Locus_696_Transcript_3/4_Conf_0.625  | 2351 | 20 | 5.49E-157 | XP_002632235.1 | 60 | 559.681 | 755 | 454 | Hypothetical protein CBG07108          |
| Locus_696_Transcript_4/4_Conf_0.625  | 2351 | 20 | 9.35E-157 | XP_002632235.1 | 60 | 558.91  | 755 | 454 | Hypothetical protein CBG07108          |
| Locus_6960_Transcript_1/1_Conf_1.000 | 996  | 20 | 2.24E-88  | NP_501500.1    | 67 | 330.102 | 331 | 222 | hypothetical protein F21D5.1           |
| Locus_6961_Transcript_1/1_Conf_1.000 | 658  | 20 | 2.74E-73  | NP_504842.1    | 81 | 278.87  | 192 | 157 | hypothetical protein C05C8.1           |
| Locus_6962_Transcript_1/1_Conf_1.000 | 331  | 0  |           |                |    |         |     |     |                                        |
| Locus_6963_Transcript_1/1_Conf_1.000 | 340  | 0  |           |                |    |         |     |     |                                        |

|                                      |      |    |           |                |    |         |     |     |                                                                                                                |
|--------------------------------------|------|----|-----------|----------------|----|---------|-----|-----|----------------------------------------------------------------------------------------------------------------|
| Locus_6964_Transcript_1/1_Conf_1.000 | 346  | 16 | 2.73E-07  | NP_496959.1    | 78 | 58.5362 | 41  | 32  | EATing: abnormal pharyngeal pumping family member (eat-2)                                                      |
| Locus_6965_Transcript_1/2_Conf_1.000 | 394  | 20 | 3.01E-30  | XP_002641403.1 | 68 | 134.806 | 131 | 90  | Hypothetical protein CBG13266                                                                                  |
| Locus_6965_Transcript_2/2_Conf_1.000 | 394  | 20 | 6.70E-30  | XP_002641403.1 | 67 | 133.65  | 131 | 89  | Hypothetical protein CBG13266                                                                                  |
| Locus_6966_Transcript_1/1_Conf_1.000 | 559  | 3  | 1.02E-28  | NP_001021864.1 | 59 | 130.183 | 175 | 104 | human KRIT 1 (Krev interaction trapped/cerebral cavernous malformation 1) homolog family member (kri-1)        |
| Locus_6967_Transcript_1/1_Conf_1.000 | 563  | 20 | 1.53E-72  | NP_499089.1    | 95 | 275.789 | 148 | 141 | aspartyl(D) tRNA Synthetase family member (drs-1)                                                              |
| Locus_6968_Transcript_1/1_Conf_1.000 | 375  | 0  |           |                |    |         |     |     |                                                                                                                |
| Locus_6969_Transcript_1/1_Conf_1.000 | 1055 | 20 | 2.19E-105 | NP_490765.1    | 81 | 386.726 | 277 | 227 | hypothetical protein Y65B4A.1                                                                                  |
| Locus_697_Transcript_1/1_Conf_1.000  | 290  | 6  | 1.15E-05  | XP_002639634.1 | 70 | 53.1434 | 51  | 36  | C. briggsae CBR-CLE-1 protein                                                                                  |
| Locus_6970_Transcript_1/1_Conf_1.000 | 543  | 0  |           |                |    |         |     |     |                                                                                                                |
| Locus_6971_Transcript_1/1_Conf_1.000 | 247  | 0  |           |                |    |         |     |     |                                                                                                                |
| Locus_6972_Transcript_1/1_Conf_1.000 | 758  | 20 | 1.46E-98  | XP_002636819.1 | 86 | 363.229 | 243 | 211 | C. briggsae CBR-DHS-17 protein                                                                                 |
| Locus_6973_Transcript_1/1_Conf_1.000 | 1111 | 20 | 3.12E-105 | NP_498078.2    | 82 | 386.341 | 284 | 233 | hypothetical protein C45G9.2                                                                                   |
| Locus_6974_Transcript_1/1_Conf_1.000 | 161  | 10 | 3.20E-16  | XP_002638706.1 | 91 | 88.1965 | 48  | 44  | Hypothetical protein CBG00285                                                                                  |
| Locus_6975_Transcript_1/2_Conf_1.000 | 2156 | 20 | 8.33E-96  | ADE60688.1     | 49 | 356.295 | 744 | 371 | Larp (rna binding la related protein) homolog protein 1, isoform b, partially confirmed by transcript evidence |
| Locus_6975_Transcript_2/2_Conf_1.000 | 2099 | 20 | 4.72E-96  | ADE60688.1     | 51 | 357.066 | 725 | 370 | Larp (rna binding la related protein) homolog protein 1, isoform b, partially confirmed by transcript evidence |

|                                      |      |    |           |                |    |         |     |     |                                                                                        |
|--------------------------------------|------|----|-----------|----------------|----|---------|-----|-----|----------------------------------------------------------------------------------------|
| Locus_6976_Transcript_1/1_Conf_1.000 | 1239 | 20 | 1.45E-85  | NP_499392.1    | 64 | 321.242 | 418 | 269 | Oxidative stress Induced family member (oxi-1)                                         |
| Locus_6977_Transcript_1/1_Conf_1.000 | 468  | 4  | 1.09E-24  | XP_001895501.1 | 65 | 116.316 | 146 | 96  | PAN domain containing protein                                                          |
| Locus_6978_Transcript_1/2_Conf_1.000 | 1921 | 6  | 5.66E-24  | NP_510744.1    | 46 | 117.472 | 415 | 194 | hypothetical protein F52G3.1                                                           |
| Locus_6978_Transcript_2/2_Conf_1.000 | 1870 | 4  | 1.22E-23  | NP_510744.1    | 46 | 116.316 | 408 | 190 | hypothetical protein F52G3.1                                                           |
| Locus_6979_Transcript_1/1_Conf_1.000 | 495  | 20 | 9.38E-61  | NP_490755.1    | 86 | 236.113 | 165 | 143 | Heavy chain, Unconventional Myosin family member (hum-7)                               |
| Locus_698_Transcript_1/1_Conf_1.000  | 1002 | 20 | 8.07E-78  | NP_504700.2    | 70 | 295.049 | 327 | 229 | hypothetical protein W02F12.5                                                          |
| Locus_6980_Transcript_1/1_Conf_1.000 | 594  | 0  |           |                |    |         |     |     |                                                                                        |
| Locus_6981_Transcript_1/1_Conf_1.000 | 566  | 20 | 7.26E-62  | NP_001023252.1 | 82 | 240.35  | 189 | 155 | Transbilayer Amphipath Transporters (subfamily IV P-type ATPase) family member (tat-2) |
| Locus_6982_Transcript_1/2_Conf_1.000 | 1494 | 3  | 8.88E-11  | XP_001894599.1 | 50 | 73.1738 | 151 | 76  | Zinc finger, C2H2 type family protein                                                  |
| Locus_6982_Transcript_2/2_Conf_1.000 | 1485 | 3  | 5.71E-10  | XP_001894599.1 | 58 | 70.4774 | 87  | 51  | Zinc finger, C2H2 type family protein                                                  |
| Locus_6983_Transcript_1/1_Conf_1.000 | 385  | 20 | 5.36E-40  | XP_001891916.1 | 90 | 167.162 | 83  | 75  | cysteine-rich protein 1                                                                |
| Locus_6984_Transcript_1/1_Conf_1.000 | 1421 | 20 | 1.90E-124 | XP_002638998.1 | 67 | 450.669 | 485 | 328 | Hypothetical protein CBG22244                                                          |
| Locus_6985_Transcript_1/1_Conf_1.000 | 517  | 0  |           |                |    |         |     |     |                                                                                        |
| Locus_6986_Transcript_1/1_Conf_1.000 | 700  | 20 | 2.41E-57  | XP_002644345.1 | 85 | 226.098 | 150 | 128 | C. briggsae CBR-LBP-3 protein                                                          |
| Locus_6987_Transcript_1/1_Conf_1.000 | 644  | 0  |           |                |    |         |     |     |                                                                                        |
| Locus_6988_Transcript_1/1_Conf_1.000 | 331  | 4  | 3.62E-20  | XP_002641171.1 | 68 | 101.293 | 110 | 75  | C. briggsae CBR-DCT-6 protein                                                          |
| Locus_6989_Transcript_1/1_Conf_1.000 | 1475 | 11 | 6.91E-117 | NP_001129817.1 | 67 | 425.631 | 433 | 291 | CLear family member (clr-1)                                                            |
| Locus_699_Transcript_1/1_Conf_1.000  | 621  | 0  |           |                |    |         |     |     |                                                                                        |
| Locus_6990_Transcript_1/2_Conf_1.000 | 507  | 1  | 9.87E-08  | CAR63546.1     | 61 | 60.077  | 73  | 45  | hypothetical protein                                                                   |

|                                      |      |    |           |                |    |         |     |     |                                                                         |
|--------------------------------------|------|----|-----------|----------------|----|---------|-----|-----|-------------------------------------------------------------------------|
| Locus_6990_Transcript_2/2_Conf_1.000 | 523  | 2  | 1.15E-09  | CAR63546.1     | 58 | 66.6254 | 92  | 54  | hypothetical protein                                                    |
| Locus_6991_Transcript_1/1_Conf_1.000 | 408  | 0  |           |                |    |         |     |     |                                                                         |
| Locus_6992_Transcript_1/1_Conf_1.000 | 336  | 20 | 8.27E-17  | XP_002634761.1 | 65 | 90.1225 | 96  | 63  | C. briggsae CBR-TTR-20 protein                                          |
| Locus_6993_Transcript_1/1_Conf_1.000 | 702  | 20 | 8.75E-15  | XP_001898381.1 | 56 | 84.7297 | 187 | 106 | Plus-3 domain containing protein                                        |
| Locus_6994_Transcript_1/1_Conf_1.000 | 1890 | 20 | 8.66E-102 | XP_001897613.1 | 62 | 375.941 | 492 | 308 | SPRY domain containing protein                                          |
| Locus_6995_Transcript_1/1_Conf_1.000 | 931  | 8  | 2.03E-48  | XP_001901365.1 | 54 | 197.208 | 311 | 168 | hypothetical protein                                                    |
| Locus_6996_Transcript_1/1_Conf_1.000 | 1821 | 3  | 4.34E-127 | NP_001021809.1 | 60 | 459.914 | 618 | 372 | Branching AbnorMal family member (bam-2)                                |
| Locus_6997_Transcript_1/1_Conf_1.000 | 374  | 20 | 2.69E-55  | NP_001122835.1 | 92 | 218.009 | 124 | 115 | UNCoordinated family member (unc-22)                                    |
| Locus_6998_Transcript_1/1_Conf_1.000 | 393  | 1  | 2.83E-04  | XP_001440076.1 | 54 | 48.521  | 106 | 58  | hypothetical protein                                                    |
| Locus_6999_Transcript_1/1_Conf_1.000 | 712  | 0  |           |                |    |         |     |     |                                                                         |
| Locus_7_Transcript_1/1_Conf_1.000    | 1110 | 20 | 6.72E-108 | NP_498722.1    | 82 | 395.201 | 267 | 220 | GLYcosylation related family member (gly-3)                             |
| Locus_70_Transcript_1/4_Conf_0.700   | 1934 | 20 | 4.46E-162 | EFO20898.1     | 90 | 576.244 | 370 | 334 | ankyrin repeat-containing protein                                       |
| Locus_70_Transcript_2/4_Conf_0.200   | 547  | 20 | 1.10E-56  | CBK19467.1     | 83 | 223.016 | 159 | 133 | C. elegans protein R11A8.7e, partially confirmed by transcript evidence |
| Locus_70_Transcript_3/4_Conf_0.700   | 1934 | 20 | 4.46E-162 | EFO20898.1     | 90 | 576.244 | 370 | 334 | ankyrin repeat-containing protein                                       |
| Locus_70_Transcript_4/4_Conf_0.700   | 1934 | 20 | 4.46E-162 | EFO20898.1     | 90 | 576.244 | 370 | 334 | ankyrin repeat-containing protein                                       |

|                                      |      |    |          |                |    |         |     |     |                                                                  |
|--------------------------------------|------|----|----------|----------------|----|---------|-----|-----|------------------------------------------------------------------|
| Locus_700_Transcript_1/1_Conf_1.000  | 1156 | 0  |          |                |    |         |     |     |                                                                  |
| Locus_7000_Transcript_1/1_Conf_1.000 | 336  | 20 | 1.83E-48 | NP_506125.1    | 93 | 195.282 | 108 | 101 | EGg Laying defective family member (egl-10)                      |
| Locus_7001_Transcript_1/4_Conf_0.333 | 185  | 0  |          |                |    |         |     |     |                                                                  |
| Locus_7001_Transcript_2/4_Conf_0.333 | 171  | 0  |          |                |    |         |     |     |                                                                  |
| Locus_7001_Transcript_3/4_Conf_0.333 | 173  | 0  |          |                |    |         |     |     |                                                                  |
| Locus_7001_Transcript_4/4_Conf_0.500 | 162  | 0  |          |                |    |         |     |     |                                                                  |
| Locus_7002_Transcript_1/1_Conf_1.000 | 819  | 0  |          |                |    |         |     |     |                                                                  |
| Locus_7003_Transcript_1/1_Conf_1.000 | 251  | 0  |          |                |    |         |     |     |                                                                  |
| Locus_7004_Transcript_1/1_Conf_1.000 | 642  | 20 | 8.96E-34 | AAK57805.1     | 65 | 147.517 | 170 | 112 | putative retinol-binding protein                                 |
| Locus_7005_Transcript_1/1_Conf_1.000 | 529  | 19 | 2.26E-16 | NP_498982.1    | 57 | 88.9669 | 183 | 105 | hypothetical protein R08D7.1                                     |
| Locus_7006_Transcript_1/1_Conf_1.000 | 3202 | 20 | 9.39E-86 | XP_001895110.1 | 55 | 323.553 | 493 | 274 | ARID/BRIGHT DNA binding domain containing protein                |
| Locus_7007_Transcript_1/1_Conf_1.000 | 331  | 20 | 2.05E-15 | XP_853757.1    | 71 | 85.5001 | 85  | 61  | PREDICTED: similar to UPF0197 protein C11orf10 homolog isoform 2 |
| Locus_7008_Transcript_1/1_Conf_1.000 | 376  | 20 | 1.49E-13 | XP_001861443.1 | 54 | 79.337  | 108 | 59  | set domain protein                                               |
| Locus_7009_Transcript_1/1_Conf_1.000 | 425  | 3  | 1.35E-06 | NP_499532.2    | 55 | 56.225  | 89  | 49  | hypothetical protein C18D11.3                                    |
| Locus_701_Transcript_1/2_Conf_1.000  | 546  | 0  |          |                |    |         |     |     |                                                                  |
| Locus_701_Transcript_2/2_Conf_1.000  | 552  | 0  |          |                |    |         |     |     |                                                                  |
| Locus_7010_Transcript_1/1_Conf_1.000 | 290  | 0  |          |                |    |         |     |     |                                                                  |
| Locus_7011_Transcript_1/1_Conf_1.000 | 478  | 20 | 5.70E-42 | ADN00783.1     | 86 | 173.711 | 107 | 93  | collagen protein                                                 |
| Locus_7012_Transcript_1/1_Conf_1.000 | 230  | 0  |          |                |    |         |     |     |                                                                  |
| Locus_7013_Transcript_1/1_Conf_1.000 | 880  | 20 | 5.92E-31 | NP_741223.1    | 52 | 139.043 | 262 | 137 | hypothetical protein F56C9.10                                    |

|                                      |      |    |           |                |    |         |     |     |                                 |
|--------------------------------------|------|----|-----------|----------------|----|---------|-----|-----|---------------------------------|
| Locus_7014_Transcript_1/1_Conf_1.000 | 159  | 1  | 2.15E-04  | NP_496764.1    | 79 | 48.9062 | 39  | 31  | hypothetical protein Y38F1A.6   |
| Locus_7015_Transcript_1/1_Conf_1.000 | 457  | 20 | 6.53E-30  | EFO27449.1     | 79 | 133.65  | 106 | 84  | hypothetical protein LOAG_01039 |
| Locus_7016_Transcript_1/1_Conf_1.000 | 1130 | 7  | 4.56E-35  | XP_001894177.1 | 50 | 153.295 | 358 | 182 | GYF domain containing protein   |
| Locus_7017_Transcript_1/1_Conf_1.000 | 1049 | 9  | 5.50E-08  | NP_001021459.2 | 39 | 63.1586 | 270 | 106 | hypothetical protein F36H2.3    |
| Locus_7018_Transcript_1/3_Conf_0.571 | 2056 | 20 | 4.23E-158 | EFO22782.1     | 68 | 563.148 | 603 | 411 | hypothetical protein LOAG_05703 |
| Locus_7018_Transcript_2/3_Conf_0.714 | 3071 | 20 | 1.61E-159 | EFO22782.1     | 57 | 568.54  | 853 | 491 | hypothetical protein LOAG_05703 |
| Locus_7018_Transcript_3/3_Conf_0.714 | 3071 | 20 | 1.61E-159 | EFO22782.1     | 57 | 568.54  | 853 | 491 | hypothetical protein LOAG_05703 |
| Locus_7019_Transcript_1/1_Conf_1.000 | 344  | 2  | 3.70E-04  | NP_500403.2    | 69 | 48.1358 | 39  | 27  | hypothetical protein Y37E11AM.3 |
| Locus_702_Transcript_1/1_Conf_1.000  | 502  | 0  |           |                |    |         |     |     |                                 |
| Locus_7020_Transcript_1/1_Conf_1.000 | 134  | 7  | 4.28E-05  | XP_001895616.1 | 70 | 51.2174 | 44  | 31  | CG8232-PA                       |
| Locus_7021_Transcript_1/1_Conf_1.000 | 1407 | 20 | 2.45E-23  | XP_001891682.1 | 44 | 114.775 | 374 | 168 | MRG family protein              |
| Locus_7022_Transcript_1/1_Conf_1.000 | 418  | 0  |           |                |    |         |     |     |                                 |
| Locus_7023_Transcript_1/1_Conf_1.000 | 266  | 20 | 4.58E-39  | NP_499055.1    | 90 | 164.081 | 87  | 79  | hypothetical protein C40H1.6    |



|                                      |      |    |           |                |    |         |     |     |                                                                           |
|--------------------------------------|------|----|-----------|----------------|----|---------|-----|-----|---------------------------------------------------------------------------|
| Locus_7024_Transcript_1/1_Conf_1.000 | 278  | 20 | 5.56E-13  | NP_509645.1    | 66 | 77.411  | 75  | 50  | DumPY : shorter than wild-type family member (dpy-22)                     |
| Locus_7025_Transcript_1/1_Conf_1.000 | 1410 | 20 | 1.04E-114 | XP_001898527.1 | 85 | 418.313 | 349 | 297 | Hsp90 co-chaperone Cdc37                                                  |
| Locus_7026_Transcript_1/1_Conf_1.000 | 1899 | 20 | 0         | NP_501797.1    | 83 | 761.525 | 523 | 436 | DiHydroPyrimidinase family member (dhp-2)                                 |
| Locus_7027_Transcript_1/2_Conf_1.000 | 1777 | 20 | 2.55E-124 | NP_505950.1    | 87 | 450.669 | 308 | 269 | mammalian SKIP (Ski interacting protein) homolog family member (skp-1)    |
| Locus_7027_Transcript_2/2_Conf_1.000 | 1777 | 20 | 5.14E-125 | NP_505950.1    | 87 | 452.981 | 308 | 269 | mammalian SKIP (Ski interacting protein) homolog family member (skp-1)    |
| Locus_7028_Transcript_1/1_Conf_1.000 | 637  | 0  |           |                |    |         |     |     |                                                                           |
| Locus_7029_Transcript_1/1_Conf_1.000 | 743  | 0  |           |                |    |         |     |     |                                                                           |
| Locus_703_Transcript_1/1_Conf_1.000  | 3203 | 20 | 0         | NP_001023909.2 | 69 | 899.042 | 945 | 654 | SMEK (Dictyostelium Suppressor of MEK null) homolog family member (smk-1) |
| Locus_7030_Transcript_1/1_Conf_1.000 | 420  | 0  |           |                |    |         |     |     |                                                                           |
| Locus_7031_Transcript_1/1_Conf_1.000 | 674  | 1  | 8.73E-06  | NP_490861.3    | 46 | 54.6842 | 181 | 85  | hypothetical protein Y92H12A.5                                            |
| Locus_7032_Transcript_1/1_Conf_1.000 | 279  | 0  |           |                |    |         |     |     |                                                                           |
| Locus_7033_Transcript_1/1_Conf_1.000 | 794  | 20 | 1.34E-52  | NP_498248.2    | 62 | 210.69  | 270 | 169 | hypothetical protein Y37B11A.2                                            |

|                                      |      |    |           |                |    |         |     |     |                                                               |
|--------------------------------------|------|----|-----------|----------------|----|---------|-----|-----|---------------------------------------------------------------|
| Locus_7034_Transcript_1/1_Conf_1.000 | 1332 | 20 | 5.87E-96  | Q61CA3.2       | 78 | 355.91  | 271 | 212 | Serine/threonine-protein phosphatase Pgam5                    |
| Locus_7035_Transcript_1/1_Conf_1.000 | 415  | 0  |           |                |    |         |     |     |                                                               |
| Locus_7036_Transcript_1/1_Conf_1.000 | 241  | 0  |           |                |    |         |     |     |                                                               |
| Locus_7037_Transcript_1/1_Conf_1.000 | 226  | 0  |           |                |    |         |     |     |                                                               |
| Locus_7038_Transcript_1/1_Conf_1.000 | 182  | 20 | 4.10E-27  | XP_002639744.1 | 91 | 124.405 | 57  | 52  | C. briggsae CBR-LAM-3 protein                                 |
| Locus_7039_Transcript_1/1_Conf_1.000 | 670  | 6  | 4.73E-12  | XP_002641929.1 | 47 | 75.485  | 171 | 82  | Hypothetical protein CBG16628                                 |
| Locus_704_Transcript_1/1_Conf_1.000  | 1158 | 20 | 1.23E-75  | P34563.1       | 96 | 288.115 | 157 | 151 | Eukaryotic translation initiation factor 5A-1                 |
| Locus_7040_Transcript_1/2_Conf_1.000 | 444  | 3  | 1.07E-11  | CAA99805.3     | 51 | 73.1738 | 123 | 63  | C. elegans protein C54D10.4, confirmed by transcript evidence |
| Locus_7040_Transcript_2/2_Conf_1.000 | 737  | 3  | 2.44E-10  | CAA99805.3     | 52 | 70.0922 | 123 | 65  | C. elegans protein C54D10.4, confirmed by transcript evidence |
| Locus_7041_Transcript_1/1_Conf_1.000 | 1493 | 20 | 2.39E-157 | XP_002629982.1 | 69 | 560.066 | 502 | 349 | Hypothetical protein CBG13344                                 |
| Locus_7042_Transcript_1/1_Conf_1.000 | 283  | 6  | 2.25E-17  | XP_002634542.1 | 67 | 92.0485 | 93  | 63  | Hypothetical protein CBG08339                                 |
| Locus_7043_Transcript_1/1_Conf_1.000 | 808  | 20 | 9.46E-110 | XP_002637057.1 | 82 | 400.593 | 266 | 220 | C. briggsae CBR-DAF-36 protein                                |
| Locus_7044_Transcript_1/1_Conf_1.000 | 2122 | 20 | 0         | NP_502420.2    | 74 | 695.656 | 668 | 498 | hypothetical protein C26H9A.2                                 |
| Locus_7045_Transcript_1/1_Conf_1.000 | 745  | 20 | 9.69E-63  | EFO19115.1     | 63 | 244.202 | 246 | 155 | SPE-10 protein                                                |

|                                      |      |    |           |                |    |         |     |     |                                                          |
|--------------------------------------|------|----|-----------|----------------|----|---------|-----|-----|----------------------------------------------------------|
| Locus_7046_Transcript_1/1_Conf_1.000 | 734  | 20 | 2.25E-24  | XP_001896246.1 | 73 | 116.701 | 110 | 81  | hypothetical protein Bm1_23945                           |
| Locus_7047_Transcript_1/1_Conf_1.000 | 1307 | 20 | 1.18E-101 | XP_002643347.1 | 95 | 374.785 | 205 | 196 | C. briggsae CBR-RAB-6.2 protein                          |
| Locus_7048_Transcript_1/1_Conf_1.000 | 230  | 2  | 1.65E-04  | NP_492267.1    | 54 | 49.2914 | 64  | 35  | Cytochrome P450 family member (cyp-36A1)                 |
| Locus_7049_Transcript_1/1_Conf_1.000 | 996  | 20 | 4.71E-171 | NP_500284.2    | 94 | 604.749 | 332 | 315 | Enhancer of Efl-1 mutant phenotype family member (eel-1) |
| Locus_705_Transcript_1/1_Conf_1.000  | 560  | 8  | 1.99E-24  | NP_498724.3    | 59 | 115.931 | 198 | 117 | Nuclear Pore complex Protein family member (npp-15)      |
| Locus_7050_Transcript_1/1_Conf_1.000 | 580  | 20 | 1.06E-66  | XP_002642172.1 | 87 | 256.529 | 166 | 146 | Hypothetical protein CBG18137                            |
| Locus_7051_Transcript_1/1_Conf_1.000 | 295  | 0  |           |                |    |         |     |     |                                                          |
| Locus_7052_Transcript_1/1_Conf_1.000 | 333  | 0  |           |                |    |         |     |     |                                                          |

|                                      |      |    |           |                |     |         |     |     |                                                          |
|--------------------------------------|------|----|-----------|----------------|-----|---------|-----|-----|----------------------------------------------------------|
| Locus_7053_Transcript_1/2_Conf_1.000 | 2710 | 20 | 0         | NP_490716.1    | 75  | 935.25  | 808 | 611 | eXPORtin (nuclear export receptor) family member (xpo-2) |
| Locus_7053_Transcript_2/2_Conf_1.000 | 2710 | 20 | 0         | NP_490716.1    | 75  | 934.865 | 808 | 611 | eXPORtin (nuclear export receptor) family member (xpo-2) |
| Locus_7054_Transcript_1/1_Conf_1.000 | 1441 | 20 | 1.25E-46  | EFO23215.1     | 66  | 192.2   | 195 | 130 | hypothetical protein LOAG_05271                          |
| Locus_7055_Transcript_1/1_Conf_1.000 | 752  | 16 | 9.27E-45  | NP_001021024.1 | 60  | 184.496 | 257 | 156 | IntraMembrane Protease (IMPAS) family member (imp-1)     |
| Locus_7056_Transcript_1/1_Conf_1.000 | 676  | 20 | 2.78E-84  | XP_002641561.1 | 95  | 315.464 | 171 | 164 | C. briggsae CBR-MLC-4 protein                            |
| Locus_7057_Transcript_1/1_Conf_1.000 | 2231 | 20 | 9.99E-169 | NP_741778.1    | 75  | 598.586 | 526 | 397 | TBC (Tre-2/Bub2/Cdc16) domain family member (tbc-7)      |
| Locus_7058_Transcript_1/1_Conf_1.000 | 424  | 20 | 5.74E-74  | XP_002914026.1 | 100 | 280.026 | 140 | 140 | PREDICTED: polyadenylate-binding protein 1-like          |
| Locus_7059_Transcript_1/1_Conf_1.000 | 343  | 0  |           |                |     |         |     |     |                                                          |
| Locus_706_Transcript_1/1_Conf_1.000  | 349  | 0  |           |                |     |         |     |     |                                                          |

|                                      |      |    |           |                |    |         |     |     |                                                                |
|--------------------------------------|------|----|-----------|----------------|----|---------|-----|-----|----------------------------------------------------------------|
| Locus_7060_Transcript_1/2_Conf_1.000 | 2186 | 20 | 4.52E-49  | NP_001024042.1 | 40 | 201.06  | 671 | 275 | plant Late Embryo Abundant (LEA) related family member (lea-1) |
| Locus_7060_Transcript_2/2_Conf_1.000 | 2120 | 20 | 7.74E-46  | NP_001024042.1 | 39 | 190.274 | 663 | 259 | plant Late Embryo Abundant (LEA) related family member (lea-1) |
| Locus_7061_Transcript_1/1_Conf_1.000 | 589  | 0  |           |                |    |         |     |     |                                                                |
| Locus_7062_Transcript_1/1_Conf_1.000 | 910  | 20 | 1.19E-29  | NP_497899.1    | 48 | 134.806 | 311 | 152 | Caenorhabditis KU family member (cku-80)                       |
| Locus_7063_Transcript_1/1_Conf_1.000 | 796  | 3  | 1.28E-10  | EFO20340.1     | 47 | 71.2478 | 221 | 105 | hypothetical protein LOAG_08148                                |
| Locus_7064_Transcript_1/1_Conf_1.000 | 949  | 20 | 1.56E-152 | NP_001022641.1 | 89 | 543.117 | 316 | 284 | LEThal family member (let-805)                                 |
| Locus_7065_Transcript_1/1_Conf_1.000 | 243  | 0  |           |                |    |         |     |     |                                                                |
| Locus_7066_Transcript_1/1_Conf_1.000 | 170  | 0  |           |                |    |         |     |     |                                                                |
| Locus_7067_Transcript_1/1_Conf_1.000 | 535  | 20 | 2.70E-25  | XP_002631178.1 | 62 | 118.627 | 132 | 82  | C. briggsae CBR-MAT-2 protein                                  |
| Locus_7068_Transcript_1/1_Conf_1.000 | 946  | 20 | 1.68E-106 | XP_001895342.1 | 90 | 390.193 | 316 | 287 | CLC chloride channel protein                                   |
| Locus_7069_Transcript_1/1_Conf_1.000 | 781  | 0  |           |                |    |         |     |     |                                                                |
| Locus_707_Transcript_1/1_Conf_1.000  | 1835 | 20 | 1.83E-141 | NP_496328.2    | 63 | 507.679 | 643 | 408 | hypothetical protein R06F6.8                                   |
| Locus_7070_Transcript_1/1_Conf_1.000 | 701  | 20 | 2.77E-37  | XP_002642051.1 | 55 | 159.458 | 235 | 131 | Hypothetical protein CBG17988                                  |
| Locus_7071_Transcript_1/1_Conf_1.000 | 2394 | 20 | 2.85E-84  | XP_001893145.1 | 66 | 318.161 | 343 | 229 | hypothetical protein                                           |
| Locus_7072_Transcript_1/1_Conf_1.000 | 210  | 0  |           |                |    |         |     |     |                                                                |

|                                      |      |    |          |                |    |         |     |     |                                     |
|--------------------------------------|------|----|----------|----------------|----|---------|-----|-----|-------------------------------------|
| Locus_7073_Transcript_1/1_Conf_1.000 | 304  | 0  |          |                |    |         |     |     |                                     |
| Locus_7074_Transcript_1/1_Conf_1.000 | 569  | 20 | 1.26E-61 | XP_002642872.1 | 78 | 239.58  | 176 | 138 | Hypothetical protein CBG15142       |
| Locus_7075_Transcript_1/1_Conf_1.000 | 264  | 1  | 1.49E-05 | NP_001041196.1 | 45 | 52.7582 | 85  | 39  | hypothetical protein Y50D4A.1       |
| Locus_7076_Transcript_1/1_Conf_1.000 | 468  | 5  | 5.62E-21 | EFO18382.1     | 58 | 103.99  | 154 | 90  | hypothetical protein LOAG_10114     |
| Locus_7077_Transcript_1/1_Conf_1.000 | 582  | 20 | 7.08E-26 | XP_001894111.1 | 71 | 120.939 | 123 | 88  | IWS1 C-terminus family protein      |
| Locus_7078_Transcript_1/1_Conf_1.000 | 587  | 20 | 1.58E-73 | NP_496353.1    | 89 | 279.256 | 167 | 149 | hypothetical protein R03D7.1        |
| Locus_7079_Transcript_1/1_Conf_1.000 | 307  | 0  |          |                |    |         |     |     |                                     |
| Locus_708_Transcript_1/2_Conf_1.000  | 1801 | 20 | 4.42E-15 | EFO16453.1     | 56 | 87.8113 | 137 | 77  | UBX domain-containing protein       |
| Locus_708_Transcript_2/2_Conf_1.000  | 1801 | 20 | 4.42E-15 | EFO16453.1     | 56 | 87.8113 | 137 | 77  | UBX domain-containing protein       |
| Locus_7080_Transcript_1/1_Conf_1.000 | 517  | 20 | 4.27E-46 | XP_002640548.1 | 80 | 187.578 | 171 | 137 | Hypothetical protein CBG15812       |
| Locus_7081_Transcript_1/1_Conf_1.000 | 330  | 20 | 1.16E-26 | XP_001898915.1 | 90 | 122.865 | 96  | 87  | Uncoordinated protein 44, isoform e |

|                                      |      |    |          |                |    |         |     |     |                                                                  |
|--------------------------------------|------|----|----------|----------------|----|---------|-----|-----|------------------------------------------------------------------|
| Locus_7082_Transcript_1/1_Conf_1.000 | 199  | 20 | 9.27E-24 | ACI49074.1     | 89 | 113.235 | 66  | 59  | hypothetical protein Cbre_JD10.006                               |
| Locus_7083_Transcript_1/1_Conf_1.000 | 374  | 0  |          |                |    |         |     |     |                                                                  |
| Locus_7084_Transcript_1/1_Conf_1.000 | 372  | 20 | 1.38E-51 | EFO18771.1     | 88 | 205.682 | 122 | 108 | fumarylacetoacetate hydrolase domain containing 1                |
| Locus_7085_Transcript_1/1_Conf_1.000 | 253  | 0  |          |                |    |         |     |     |                                                                  |
| Locus_7086_Transcript_1/2_Conf_1.000 | 191  | 0  |          |                |    |         |     |     |                                                                  |
| Locus_7086_Transcript_2/2_Conf_1.000 | 200  | 0  |          |                |    |         |     |     |                                                                  |
| Locus_7087_Transcript_1/1_Conf_1.000 | 467  | 20 | 7.11E-32 | XP_001202573.1 | 71 | 140.198 | 157 | 112 | PREDICTED: similar to damaged-DNA recognition protein 1, partial |
| Locus_7088_Transcript_1/1_Conf_1.000 | 180  | 0  |          |                |    |         |     |     |                                                                  |
| Locus_7089_Transcript_1/1_Conf_1.000 | 404  | 5  | 3.17E-40 | NP_497814.3    | 84 | 167.933 | 138 | 116 | UNCoordinated family member (unc-79)                             |
| Locus_709_Transcript_1/2_Conf_1.000  | 959  | 0  |          |                |    |         |     |     |                                                                  |
| Locus_709_Transcript_2/2_Conf_1.000  | 953  | 0  |          |                |    |         |     |     |                                                                  |
| Locus_7090_Transcript_1/1_Conf_1.000 | 246  | 0  |          |                |    |         |     |     |                                                                  |
| Locus_7091_Transcript_1/1_Conf_1.000 | 314  | 8  | 1.44E-40 | ABS45067.1     | 84 | 169.088 | 100 | 84  | latrophilin-like protein 2                                       |
| Locus_7092_Transcript_1/1_Conf_1.000 | 542  | 20 | 4.58E-68 | AAS49411.1     | 88 | 260.766 | 147 | 130 | putative neuromuscular acetylcholinesterase                      |
| Locus_7093_Transcript_1/1_Conf_1.000 | 395  | 0  |          |                |    |         |     |     |                                                                  |
| Locus_7094_Transcript_1/1_Conf_1.000 | 348  | 0  |          |                |    |         |     |     |                                                                  |
| Locus_7095_Transcript_1/2_Conf_1.000 | 438  | 0  |          |                |    |         |     |     |                                                                  |
| Locus_7095_Transcript_2/2_Conf_1.000 | 405  | 0  |          |                |    |         |     |     |                                                                  |
| Locus_7096_Transcript_1/2_Conf_1.000 | 1185 | 4  | 4.31E-07 | CAR63632.1     | 60 | 60.4622 | 87  | 53  | hypothetical protein                                             |
| Locus_7096_Transcript_2/2_Conf_1.000 | 639  | 1  | 1.74E-13 | CAR63632.1     | 59 | 80.1073 | 114 | 68  | hypothetical protein                                             |
| Locus_7097_Transcript_1/1_Conf_1.000 | 477  | 0  |          |                |    |         |     |     |                                                                  |
| Locus_7098_Transcript_1/1_Conf_1.000 | 631  | 20 | 1.45E-33 | NP_493385.2    | 64 | 146.747 | 208 | 135 | hypothetical protein Y87G2A.13                                   |

|                                      |      |    |           |                |    |         |     |     |                                                               |
|--------------------------------------|------|----|-----------|----------------|----|---------|-----|-----|---------------------------------------------------------------|
| Locus_7099_Transcript_1/1_Conf_1.000 | 1244 | 20 | 5.01E-78  | XP_001894589.1 | 71 | 296.204 | 280 | 200 | DnaJ domain containing protein                                |
| Locus_71_Transcript_1/1_Conf_1.000   | 1124 | 20 | 2.93E-34  | ACO09264.1     | 60 | 150.599 | 240 | 144 | Acidic leucine-rich nuclear phosphoprotein 32 family member A |
| Locus_710_Transcript_1/4_Conf_0.500  | 1004 | 20 | 1.02E-88  | NP_001040945.1 | 88 | 331.257 | 195 | 173 | human HnRNP A1 homolog family member (hrp-1)                  |
| Locus_710_Transcript_2/4_Conf_0.625  | 1020 | 20 | 1.05E-88  | NP_001040945.1 | 88 | 331.257 | 195 | 173 | human HnRNP A1 homolog family member (hrp-1)                  |
| Locus_710_Transcript_3/4_Conf_0.625  | 1041 | 20 | 4.51E-87  | NP_001040945.1 | 89 | 325.865 | 191 | 170 | human HnRNP A1 homolog family member (hrp-1)                  |
| Locus_710_Transcript_4/4_Conf_0.625  | 1029 | 20 | 1.06E-88  | NP_001040945.1 | 88 | 331.257 | 195 | 173 | human HnRNP A1 homolog family member (hrp-1)                  |
| Locus_7100_Transcript_1/1_Conf_1.000 | 574  | 20 | 4.07E-39  | XP_002630213.1 | 67 | 164.851 | 191 | 128 | Hypothetical protein CBG00623                                 |
| Locus_7101_Transcript_1/1_Conf_1.000 | 481  | 20 | 1.38E-72  | NP_001040755.1 | 91 | 275.404 | 156 | 142 | UBiquitin Conjugating enzyme family member (ubc-6)            |
| Locus_7102_Transcript_1/1_Conf_1.000 | 1504 | 0  |           |                |    |         |     |     |                                                               |
| Locus_7103_Transcript_1/1_Conf_1.000 | 469  | 20 | 5.07E-30  | ACI49105.1     | 81 | 134.035 | 103 | 84  | hypothetical protein Cbre_JD13.007                            |
| Locus_7104_Transcript_1/1_Conf_1.000 | 133  | 0  |           |                |    |         |     |     |                                                               |
| Locus_7105_Transcript_1/1_Conf_1.000 | 477  | 0  |           |                |    |         |     |     |                                                               |
| Locus_7106_Transcript_1/1_Conf_1.000 | 1908 | 20 | 6.37E-169 | AAS49411.1     | 71 | 598.971 | 551 | 392 | putative neuromuscular acetylcholinesterase                   |



|                                      |      |    |           |                |     |         |     |     |                                                                                    |
|--------------------------------------|------|----|-----------|----------------|-----|---------|-----|-----|------------------------------------------------------------------------------------|
| Locus_7107_Transcript_1/1_Conf_1.000 | 325  | 20 | 1.68E-41  | BAG57092.1     | 100 | 172.17  | 79  | 79  | unnamed protein product                                                            |
| Locus_7108_Transcript_1/1_Conf_1.000 | 1408 | 0  |           |                |     |         |     |     |                                                                                    |
| Locus_7109_Transcript_1/1_Conf_1.000 | 474  | 0  |           |                |     |         |     |     |                                                                                    |
| Locus_711_Transcript_1/1_Conf_1.000  | 1161 | 20 | 1.99E-25  | XP_002641700.1 | 72  | 121.324 | 115 | 83  | C. briggsae CBR-HLH-11 protein                                                     |
| Locus_7110_Transcript_1/1_Conf_1.000 | 908  | 20 | 2.37E-46  | XP_001901856.1 | 88  | 190.274 | 130 | 115 | Serine/threonine protein phosphatase 2A, 56 kDa regulatory subunit,epsilon isoform |
| Locus_7111_Transcript_1/2_Conf_1.000 | 427  | 0  |           |                |     |         |     |     |                                                                                    |
| Locus_7111_Transcript_2/2_Conf_1.000 | 431  | 0  |           |                |     |         |     |     |                                                                                    |
| Locus_7112_Transcript_1/1_Conf_1.000 | 532  | 0  |           |                |     |         |     |     |                                                                                    |
| Locus_7113_Transcript_1/1_Conf_1.000 | 1769 | 20 | 9.94E-129 | EFO20039.1     | 64  | 465.307 | 611 | 394 | GRP1 binding protein                                                               |
| Locus_7114_Transcript_1/1_Conf_1.000 | 640  | 20 | 2.64E-62  | NP_499704.1    | 75  | 242.276 | 216 | 162 | Cytochrome P450 family member (cyp-13A11)                                          |
| Locus_7115_Transcript_1/1_Conf_1.000 | 277  | 0  |           |                |     |         |     |     |                                                                                    |
| Locus_7116_Transcript_1/1_Conf_1.000 | 1312 | 20 | 0         | NP_497970.1    | 81  | 642.499 | 427 | 349 | Adenylyl Cyclase family member (acy-1)                                             |
| Locus_7117_Transcript_1/1_Conf_1.000 | 1157 | 20 | 4.95E-85  | NP_001041112.1 | 70  | 319.316 | 326 | 231 | hypothetical protein F33E11.6                                                      |
| Locus_7118_Transcript_1/1_Conf_1.000 | 417  | 0  |           |                |     |         |     |     |                                                                                    |
| Locus_7119_Transcript_1/1_Conf_1.000 | 354  | 20 | 1.04E-59  | NP_497814.3    | 96  | 232.646 | 117 | 113 | UNCoordinated family member (unc-79)                                               |
| Locus_712_Transcript_1/2_Conf_1.000  | 1111 | 0  |           |                |     |         |     |     |                                                                                    |
| Locus_712_Transcript_2/2_Conf_1.000  | 1111 | 0  |           |                |     |         |     |     |                                                                                    |

|                                      |      |    |           |                |    |         |     |     |                                                |
|--------------------------------------|------|----|-----------|----------------|----|---------|-----|-----|------------------------------------------------|
| Locus_7120_Transcript_1/1_Conf_1.000 | 501  | 0  |           |                |    |         |     |     |                                                |
| Locus_7121_Transcript_1/3_Conf_0.714 | 455  | 20 | 7.51E-26  | CBA11992.1     | 59 | 120.168 | 144 | 85  | endonuclease-reverse transcriptase HmRTE-e01   |
| Locus_7121_Transcript_2/3_Conf_0.429 | 455  | 20 | 1.91E-21  | CBA11992.1     | 59 | 105.531 | 144 | 86  | endonuclease-reverse transcriptase HmRTE-e01   |
| Locus_7121_Transcript_3/3_Conf_0.714 | 455  | 20 | 6.79E-27  | CBA11992.1     | 59 | 123.635 | 144 | 85  | endonuclease-reverse transcriptase HmRTE-e01   |
| Locus_7122_Transcript_1/1_Conf_1.000 | 1181 | 20 | 3.81E-64  | NP_500304.3    | 70 | 249.98  | 206 | 146 | hypothetical protein Y67D8A.1                  |
| Locus_7123_Transcript_1/1_Conf_1.000 | 637  | 20 | 8.82E-119 | XP_002644713.1 | 94 | 429.869 | 212 | 200 | C. briggsae CBR-UNC-97 protein                 |
| Locus_7124_Transcript_1/1_Conf_1.000 | 386  | 6  | 8.26E-41  | XP_002639325.1 | 78 | 169.859 | 128 | 101 | Hypothetical protein CBG03903                  |
| Locus_7125_Transcript_1/1_Conf_1.000 | 1149 | 20 | 8.26E-16  | XP_001883167.1 | 48 | 89.3521 | 175 | 85  | SET domain-containing protein                  |
| Locus_7126_Transcript_1/1_Conf_1.000 | 960  | 5  | 8.69E-143 | NP_510486.2    | 86 | 510.76  | 319 | 277 | hypothetical protein F20D1.3                   |
| Locus_7127_Transcript_1/1_Conf_1.000 | 1261 | 20 | 6.65E-70  | NP_498223.2    | 88 | 269.24  | 184 | 163 | Regulator of CalciNeurin family member (rcn-1) |
| Locus_7128_Transcript_1/1_Conf_1.000 | 1840 | 20 | 0         | XP_002644321.1 | 94 | 647.892 | 362 | 343 | C. briggsae CBR-PCCB-1 protein                 |
| Locus_7129_Transcript_1/1_Conf_1.000 | 232  | 0  |           |                |    |         |     |     |                                                |

|                                      |      |    |          |                |    |         |     |     |                                                                                           |
|--------------------------------------|------|----|----------|----------------|----|---------|-----|-----|-------------------------------------------------------------------------------------------|
| Locus_713_Transcript_1/1_Conf_1.000  | 481  | 20 | 1.45E-37 | XP_002643164.1 | 90 | 159.073 | 96  | 87  | C. briggsae CBR-HIPR-1 protein                                                            |
| Locus_7130_Transcript_1/1_Conf_1.000 | 1028 | 20 | 3.80E-54 | EFO26993.1     | 71 | 216.468 | 254 | 181 | hypothetical protein LOAG_01489                                                           |
| Locus_7131_Transcript_1/2_Conf_1.000 | 291  | 0  |          |                |    |         |     |     |                                                                                           |
| Locus_7131_Transcript_2/2_Conf_1.000 | 921  | 0  |          |                |    |         |     |     |                                                                                           |
| Locus_7132_Transcript_1/1_Conf_1.000 | 540  | 20 | 2.46E-29 | XP_002642209.1 | 70 | 132.109 | 110 | 77  | C. briggsae CBR-ROM-1 protein                                                             |
| Locus_7133_Transcript_1/1_Conf_1.000 | 362  | 0  |          |                |    |         |     |     |                                                                                           |
| Locus_7134_Transcript_1/1_Conf_1.000 | 449  | 5  | 1.34E-14 | XP_002629878.1 | 62 | 82.8037 | 98  | 61  | Hypothetical protein CBG21915                                                             |
| Locus_7135_Transcript_1/1_Conf_1.000 | 413  | 20 | 1.89E-45 | XP_002630183.1 | 85 | 185.267 | 120 | 103 | C. briggsae CBR-FLI-1 protein                                                             |
| Locus_7136_Transcript_1/1_Conf_1.000 | 1900 | 20 | 2.05E-34 | NP_490825.3    | 51 | 152.14  | 223 | 114 | hypothetical protein Y48G8AL.10                                                           |
| Locus_7137_Transcript_1/1_Conf_1.000 | 536  | 20 | 1.98E-68 | XP_002638874.1 | 83 | 261.922 | 179 | 149 | Hypothetical protein CBG22093                                                             |
| Locus_7138_Transcript_1/1_Conf_1.000 | 580  | 0  |          |                |    |         |     |     |                                                                                           |
| Locus_7139_Transcript_1/4_Conf_0.667 | 1488 | 20 | 7.08E-85 | NP_001022032.1 | 58 | 319.316 | 507 | 299 | TRRAP-like (transcription/transformation domain-associated protein) family member (trr-1) |

|                                      |      |    |           |                |    |         |     |     |                                                                                           |
|--------------------------------------|------|----|-----------|----------------|----|---------|-----|-----|-------------------------------------------------------------------------------------------|
| Locus_7139_Transcript_2/4_Conf_0.222 | 696  | 20 | 1.19E-40  | NP_001022032.1 | 60 | 170.629 | 234 | 142 | TRRAP-like (transcription/transformation domain-associated protein) family member (trr-1) |
| Locus_7139_Transcript_3/4_Conf_0.667 | 1489 | 20 | 1.02E-83  | NP_001022032.1 | 58 | 315.464 | 507 | 298 | TRRAP-like (transcription/transformation domain-associated protein) family member (trr-1) |
| Locus_7139_Transcript_4/4_Conf_0.444 | 1368 | 20 | 1.12E-81  | NP_001022032.1 | 60 | 308.531 | 456 | 275 | TRRAP-like (transcription/transformation domain-associated protein) family member (trr-1) |
| Locus_714_Transcript_1/1_Conf_1.000  | 472  | 20 | 1.21E-41  | NP_505420.1    | 77 | 132.88  | 110 | 85  | hypothetical protein K07B1.7                                                              |
| Locus_7140_Transcript_1/1_Conf_1.000 | 157  | 20 | 5.87E-10  | XP_002639473.1 | 74 | 67.3958 | 50  | 37  | C. briggsae CBR-RNT-1 protein                                                             |
| Locus_7141_Transcript_1/1_Conf_1.000 | 879  |    |           |                |    |         |     |     |                                                                                           |
| Locus_7142_Transcript_1/1_Conf_1.000 | 1314 | 20 | 5.65E-160 | NP_492650.1    | 82 | 568.54  | 374 | 308 | Nuclear Pore complex Protein family member (npp-17)                                       |
| Locus_7143_Transcript_1/1_Conf_1.000 | 1221 | 20 | 1.27E-126 | NP_492732.2    | 76 | 457.603 | 392 | 298 | yeast SEC homolog family member (sec-8)                                                   |
| Locus_7144_Transcript_1/1_Conf_1.000 | 143  | 0  |           |                |    |         |     |     |                                                                                           |
| Locus_7145_Transcript_1/1_Conf_1.000 | 374  | 20 | 3.52E-47  | XP_002640000.1 | 88 | 191.045 | 115 | 102 | Hypothetical protein CBG10830                                                             |
| Locus_7146_Transcript_1/1_Conf_1.000 | 319  | 0  |           |                |    |         |     |     |                                                                                           |
| Locus_7147_Transcript_1/1_Conf_1.000 | 1389 | 0  |           |                |    |         |     |     |                                                                                           |
| Locus_7148_Transcript_1/1_Conf_1.000 | 823  | 20 | 2.34E-71  | XP_002648140.1 | 70 | 273.092 | 260 | 182 | Hypothetical protein CBG24216                                                             |
| Locus_7149_Transcript_1/1_Conf_1.000 | 291  | 7  | 2.08E-07  | XP_001894678.1 | 51 | 58.9214 | 79  | 41  | hypothetical protein Bm1_16105                                                            |

|                                      |      |    |           |                |    |         |     |     |                                                               |
|--------------------------------------|------|----|-----------|----------------|----|---------|-----|-----|---------------------------------------------------------------|
| Locus_715_Transcript_1/1_Conf_1.000  | 2166 | 20 | 2.31E-138 | XP_002634680.1 | 65 | 497.664 | 589 | 385 | Hypothetical protein CBG19666                                 |
| Locus_7150_Transcript_1/1_Conf_1.000 | 563  | 0  |           |                |    |         |     |     |                                                               |
| Locus_7151_Transcript_1/1_Conf_1.000 | 187  | 0  |           |                |    |         |     |     |                                                               |
| Locus_7152_Transcript_1/1_Conf_1.000 | 1240 | 20 | 1.12E-170 | NP_508537.1    | 87 | 603.979 | 413 | 361 | SPeCtrin family member (spc-1)                                |
| Locus_7153_Transcript_1/1_Conf_1.000 | 288  | 0  |           |                |    |         |     |     |                                                               |
| Locus_7154_Transcript_1/2_Conf_1.000 | 1134 | 20 | 8.76E-119 | NP_001023639.1 | 81 | 431.409 | 313 | 255 | hypothetical protein C10F3.4                                  |
| Locus_7154_Transcript_2/2_Conf_1.000 | 1925 | 20 | 1.02E-166 | XP_002636829.1 | 78 | 591.652 | 453 | 357 | Hypothetical protein CBG09277                                 |
| Locus_7155_Transcript_1/1_Conf_1.000 | 133  | 0  |           |                |    |         |     |     |                                                               |
| Locus_7156_Transcript_1/1_Conf_1.000 | 1084 | 20 | 4.25E-59  | EFO25446.1     | 59 | 233.032 | 325 | 192 | CK1/DUAL protein kinase                                       |
| Locus_7157_Transcript_1/1_Conf_1.000 | 1062 | 16 | 2.41E-168 | CBK19475.1     | 87 | 595.89  | 358 | 312 | C. elegans protein T12G3.2e, confirmed by transcript evidence |
| Locus_7158_Transcript_1/1_Conf_1.000 | 2538 | 20 | 0         | XP_002644612.1 | 72 | 797.734 | 762 | 551 | C. briggsae CBR-PES-22 protein                                |

|                                      |      |    |          |                |     |         |     |     |                                                                  |
|--------------------------------------|------|----|----------|----------------|-----|---------|-----|-----|------------------------------------------------------------------|
| Locus_7159_Transcript_1/1_Conf_1.000 | 845  | 20 | 1.27E-51 | NP_502291.1    | 61  | 207.608 | 267 | 163 | hypothetical protein F11A10.7                                    |
| Locus_716_Transcript_1/1_Conf_1.000  | 635  | 0  |          |                |     |         |     |     |                                                                  |
| Locus_7160_Transcript_1/1_Conf_1.000 | 1109 | 20 | 2.94E-71 | NP_506709.1    | 68  | 273.478 | 249 | 171 | OTUBain deubiquitylating protease homolog family member (otub-1) |
| Locus_7161_Transcript_1/1_Conf_1.000 | 788  | 20 | 3.02E-65 | XP_002646659.1 | 68  | 252.677 | 270 | 186 | C. briggsae CBR-NURF-1 protein                                   |
| Locus_7162_Transcript_1/1_Conf_1.000 | 1088 | 20 | 8.30E-63 | EFO20377.1     | 63  | 245.358 | 294 | 188 | plk/plk-unclassified protein kinase                              |
| Locus_7163_Transcript_1/1_Conf_1.000 | 448  | 0  |          |                |     |         |     |     |                                                                  |
| Locus_7164_Transcript_1/1_Conf_1.000 | 302  | 3  | 1.48E-05 | EFO23400.1     | 54  | 52.7582 | 100 | 54  | hypothetical protein LOAG_05084                                  |
| Locus_7165_Transcript_1/1_Conf_1.000 | 150  | 20 | 1.77E-14 | XP_002825167.1 | 100 | 82.4185 | 39  | 39  | PREDICTED: heat shock protein HSP 90-alpha                       |
| Locus_7166_Transcript_1/1_Conf_1.000 | 219  | 0  |          |                |     |         |     |     |                                                                  |
| Locus_7167_Transcript_1/1_Conf_1.000 | 265  | 3  | 2.54E-05 | NP_499134.2    | 53  | 51.9878 | 88  | 47  | GEX Interacting protein family member (gei-13)                   |
| Locus_7168_Transcript_1/1_Conf_1.000 | 552  | 20 | 3.26E-11 | EFO16473.1     | 86  | 72.0182 | 93  | 80  | zinc finger protein                                              |
| Locus_7169_Transcript_1/1_Conf_1.000 | 148  | 0  |          |                |     |         |     |     |                                                                  |

|                                      |      |    |          |                |     |         |     |     |                                       |
|--------------------------------------|------|----|----------|----------------|-----|---------|-----|-----|---------------------------------------|
| Locus_717_Transcript_1/1_Conf_1.000  | 2244 | 20 | 0        | NP_001024107.1 | 95  | 756.903 | 413 | 396 | hypothetical protein T05H4.6          |
| Locus_7170_Transcript_1/1_Conf_1.000 | 374  | 20 | 1.02E-62 | P02751.4       | 100 | 242.662 | 119 | 119 | Fibronectin                           |
| Locus_7171_Transcript_1/1_Conf_1.000 | 713  | 5  | 3.27E-09 | NP_001122637.1 | 48  | 66.2402 | 215 | 104 | hypothetical protein T12C9.7          |
| Locus_7172_Transcript_1/1_Conf_1.000 | 552  | 20 | 1.01E-36 | NP_001022657.1 | 64  | 156.762 | 164 | 106 | hypothetical protein K02F3.12         |
| Locus_7173_Transcript_1/1_Conf_1.000 | 410  | 20 | 1.28E-25 | XP_002637141.1 | 58  | 119.398 | 143 | 83  | C. briggsae CBR-VPS-54 protein        |
| Locus_7174_Transcript_1/1_Conf_1.000 | 526  | 20 | 5.96E-46 | NP_496343.1    | 69  | 187.193 | 191 | 132 | PaTched Related family member (ptr-8) |
| Locus_7175_Transcript_1/1_Conf_1.000 | 338  | 20 | 2.84E-25 | NP_498092.4    | 69  | 118.242 | 120 | 83  | hypothetical protein Y54H5A.4         |
| Locus_7176_Transcript_1/1_Conf_1.000 | 544  | 4  | 1.43E-16 | XP_002639215.1 | 56  | 89.7373 | 155 | 88  | C. briggsae CBR-NPP-14 protein        |
| Locus_7177_Transcript_1/1_Conf_1.000 | 163  | 0  |          |                |     |         |     |     |                                       |
| Locus_7178_Transcript_1/1_Conf_1.000 | 435  | 0  |          |                |     |         |     |     |                                       |
| Locus_7179_Transcript_1/1_Conf_1.000 | 419  | 0  |          |                |     |         |     |     |                                       |

|                                      |      |    |           |             |    |         |     |     |                                                     |
|--------------------------------------|------|----|-----------|-------------|----|---------|-----|-----|-----------------------------------------------------|
| Locus_718_Transcript_1/1_Conf_1.000  | 435  | 20 | 4.47E-71  | NP_491363.1 | 97 | 270.396 | 144 | 140 | Dynein Heavy Chain family member (dhc-1)            |
| Locus_7180_Transcript_1/1_Conf_1.000 | 1285 | 20 | 2.64E-138 | NP_508026.1 | 79 | 496.508 | 402 | 319 | FK506-Binding protein family member (fkb-6)         |
| Locus_7181_Transcript_1/1_Conf_1.000 | 479  | 5  | 1.56E-23  | NP_491337.1 | 59 | 112.464 | 133 | 79  | EXOCyst component family member (exoc-7)            |
| Locus_7182_Transcript_1/3_Conf_0.600 | 737  | 20 | 2.65E-65  | NP_500086.1 | 69 | 252.677 | 226 | 158 | Nuclear Pore complex Protein family member (npp-20) |
| Locus_7182_Transcript_2/3_Conf_0.400 | 449  | 20 | 4.42E-42  | NP_500086.1 | 69 | 174.096 | 148 | 103 | Nuclear Pore complex Protein family member (npp-20) |



|                                      |      |    |           |                |    |         |     |     |                                                        |
|--------------------------------------|------|----|-----------|----------------|----|---------|-----|-----|--------------------------------------------------------|
| Locus_7182_Transcript_3/3_Conf_0.600 | 864  | 20 | 6.14E-65  | NP_500086.1    | 69 | 251.906 | 226 | 158 | Nuclear Pore complex Protein family member (npp-20)    |
| Locus_7183_Transcript_1/1_Conf_1.000 | 364  | 0  |           |                |    |         |     |     |                                                        |
| Locus_7184_Transcript_1/2_Conf_1.000 | 393  | 20 | 1.53E-50  | XP_002634173.1 | 88 | 202.216 | 130 | 115 | C. briggsae CBR-HOE-1 protein                          |
| Locus_7184_Transcript_2/2_Conf_1.000 | 393  | 20 | 1.53E-50  | XP_002634173.1 | 88 | 202.216 | 130 | 115 | C. briggsae CBR-HOE-1 protein                          |
| Locus_7185_Transcript_1/2_Conf_1.000 | 915  | 2  | 5.44E-06  | EFO25449.1     | 51 | 56.225  | 116 | 60  | hypothetical protein LOAG_03032                        |
| Locus_7185_Transcript_2/2_Conf_1.000 | 764  | 3  | 3.89E-06  | EFO25449.1     | 51 | 56.225  | 116 | 60  | hypothetical protein LOAG_03032                        |
| Locus_7186_Transcript_1/1_Conf_1.000 | 549  | 20 | 3.06E-46  | XP_002642216.1 | 76 | 188.348 | 171 | 130 | C. briggsae CBR-ULA-1 protein                          |
| Locus_7187_Transcript_1/2_Conf_1.000 | 732  | 0  |           |                |    |         |     |     |                                                        |
| Locus_7187_Transcript_2/2_Conf_1.000 | 628  | 0  |           |                |    |         |     |     |                                                        |
| Locus_7188_Transcript_1/1_Conf_1.000 | 549  | 20 | 6.17E-47  | ACI49253.1     | 74 | 190.66  | 158 | 117 | hypothetical protein Csp3_JD07.003                     |
| Locus_7189_Transcript_1/1_Conf_1.000 | 1116 | 20 | 1.31E-135 | XP_002648365.1 | 81 | 487.263 | 371 | 303 | C. briggsae CBR-DNJ-9 protein                          |
| Locus_719_Transcript_1/1_Conf_1.000  | 461  | 0  |           |                |    |         |     |     |                                                        |
| Locus_7190_Transcript_1/1_Conf_1.000 | 364  | 20 | 8.50E-38  | NP_497892.1    | 86 | 159.844 | 93  | 80  | PeRoxireDoXin family member (prdx-3)                   |
| Locus_7191_Transcript_1/1_Conf_1.000 | 444  | 2  | 3.43E-10  | XP_002641308.1 | 55 | 68.1662 | 110 | 61  | Hypothetical protein CBG24608                          |
| Locus_7192_Transcript_1/1_Conf_1.000 | 1201 | 20 | 1.11E-151 | NP_491792.1    | 81 | 540.806 | 395 | 320 | phenylalanyl (F) tRNA Synthetase family member (frs-1) |
| Locus_7193_Transcript_1/2_Conf_1.000 | 993  | 20 | 2.12E-30  | EFO16980.1     | 61 | 137.502 | 194 | 119 | hypothetical protein LOAG_11522                        |

|                                      |      |    |           |                |    |         |     |     |                                                 |
|--------------------------------------|------|----|-----------|----------------|----|---------|-----|-----|-------------------------------------------------|
| Locus_7193_Transcript_2/2_Conf_1.000 | 770  | 20 | 1.35E-30  | EFO16980.1     | 61 | 137.502 | 194 | 119 | hypothetical protein LOAG_11522                 |
| Locus_7194_Transcript_1/1_Conf_1.000 | 777  | 4  | 1.86E-51  | NP_510540.1    | 65 | 206.838 | 264 | 172 | hypothetical protein C33A11.1                   |
| Locus_7195_Transcript_1/1_Conf_1.000 | 559  | 3  | 2.43E-30  | XP_002636924.1 | 60 | 135.576 | 164 | 99  | C. briggsae CBR-ACL-6 protein                   |
| Locus_7196_Transcript_1/1_Conf_1.000 | 873  | 15 | 6.55E-22  | NP_500721.1    | 69 | 108.997 | 121 | 84  | hypothetical protein C02B10.2                   |
| Locus_7197_Transcript_1/1_Conf_1.000 | 665  | 0  |           |                |    |         |     |     |                                                 |
| Locus_7198_Transcript_1/1_Conf_1.000 | 159  | 0  |           |                |    |         |     |     |                                                 |
| Locus_7199_Transcript_1/1_Conf_1.000 | 1208 | 4  | 1.99E-07  | NP_504527.2    | 41 | 61.6178 | 347 | 145 | hypothetical protein F26F12.3                   |
| Locus_72_Transcript_1/1_Conf_1.000   | 3001 | 20 | 0         | NP_502196.1    | 77 | 1226.85 | 924 | 716 | Methionyl tRNA Synthetase family member (mrs-1) |
| Locus_720_Transcript_1/1_Conf_1.000  | 459  | 20 | 3.09E-64  | XP_520919.2    | 99 | 247.669 | 142 | 141 | PREDICTED: similar to ribosomal protein L28     |
| Locus_7200_Transcript_1/1_Conf_1.000 | 865  | 5  | 4.39E-71  | XP_002642699.1 | 80 | 272.322 | 205 | 166 | C. briggsae CBR-TAG-250 protein                 |
| Locus_7201_Transcript_1/1_Conf_1.000 | 732  | 0  |           |                |    |         |     |     |                                                 |
| Locus_7202_Transcript_1/1_Conf_1.000 | 899  | 20 | 4.75E-116 | ABY74339.1     | 89 | 421.779 | 250 | 224 | SPARC precursor                                 |
| Locus_7203_Transcript_1/2_Conf_1.000 | 336  | 8  | 1.56E-15  | XP_002633360.1 | 76 | 85.8853 | 63  | 48  | C. briggsae CBR-PRX-2 protein                   |
| Locus_7203_Transcript_2/2_Conf_1.000 | 334  | 0  |           |                |    |         |     |     |                                                 |
| Locus_7204_Transcript_1/3_Conf_0.667 | 1477 | 20 | 4.42E-55  | EFO25376.1     | 53 | 220.32  | 423 | 228 | hypothetical protein LOAG_03111                 |
| Locus_7204_Transcript_2/3_Conf_0.667 | 1441 | 20 | 7.29E-55  | EFO25376.1     | 53 | 219.55  | 423 | 227 | hypothetical protein LOAG_03111                 |
| Locus_7204_Transcript_3/3_Conf_0.667 | 1477 | 20 | 3.39E-55  | EFO25376.1     | 53 | 220.705 | 423 | 228 | hypothetical protein LOAG_03111                 |
| Locus_7205_Transcript_1/1_Conf_1.000 | 519  | 0  |           |                |    |         |     |     |                                                 |
| Locus_7206_Transcript_1/3_Conf_0.200 | 250  | 0  |           |                |    |         |     |     |                                                 |
| Locus_7206_Transcript_2/3_Conf_0.400 | 497  | 0  |           |                |    |         |     |     |                                                 |
| Locus_7206_Transcript_3/3_Conf_0.700 | 1128 | 20 | 7.06E-28  | XP_001899178.1 | 61 | 129.413 | 163 | 101 | hypothetical protein                            |

|                                      |      |    |           |                |    |         |     |     |                                |
|--------------------------------------|------|----|-----------|----------------|----|---------|-----|-----|--------------------------------|
| Locus_7207_Transcript_1/1_Conf_1.000 | 288  | 20 | 2.38E-27  | XP_002634722.1 | 75 | 125.176 | 88  | 66  | Hypothetical protein CBG24065  |
| Locus_7208_Transcript_1/1_Conf_1.000 | 500  | 11 | 6.48E-54  | NP_496839.1    | 74 | 213.386 | 163 | 122 | hypothetical protein F45H10.3  |
| Locus_7209_Transcript_1/1_Conf_1.000 | 543  | 20 | 9.74E-66  | XP_002643274.1 | 88 | 253.062 | 176 | 155 | C. briggsae CBR-MRP-2 protein  |
| Locus_721_Transcript_1/1_Conf_1.000  | 1729 | 20 | 4.05E-127 | NP_497103.1    | 69 | 459.914 | 493 | 345 | hypothetical protein Y53F4B.18 |
| Locus_7210_Transcript_1/1_Conf_1.000 | 420  | 20 | 2.21E-33  | XP_002631488.1 | 64 | 145.206 | 146 | 94  | C. briggsae CBR-PTR-8 protein  |
| Locus_7211_Transcript_1/1_Conf_1.000 | 281  | 0  |           |                |    |         |     |     |                                |
| Locus_7212_Transcript_1/1_Conf_1.000 | 199  | 5  | 4.46E-18  | NP_001129755.1 | 94 | 94.3597 | 50  | 47  | GLOBIN family member (glb-8)   |
| Locus_7213_Transcript_1/1_Conf_1.000 | 228  | 0  |           |                |    |         |     |     |                                |
| Locus_7214_Transcript_1/2_Conf_1.000 | 701  | 4  | 4.39E-59  | NP_505032.1    | 61 | 231.876 | 265 | 163 | hypothetical protein F40A3.6   |
| Locus_7214_Transcript_2/2_Conf_1.000 | 662  | 4  | 1.66E-62  | NP_505032.1    | 65 | 243.047 | 252 | 164 | hypothetical protein F40A3.6   |
| Locus_7215_Transcript_1/1_Conf_1.000 | 709  | 20 | 2.21E-50  | XP_002634804.1 | 73 | 202.986 | 189 | 139 | Hypothetical protein CBG13909  |
| Locus_7216_Transcript_1/1_Conf_1.000 | 1522 | 20 | 4.39E-114 | XP_002634131.1 | 75 | 416.387 | 357 | 271 | Hypothetical protein CBG01690  |
| Locus_7217_Transcript_1/1_Conf_1.000 | 1017 | 20 | 7.37E-18  | XP_002634379.1 | 48 | 95.9005 | 218 | 105 | Hypothetical protein CBG17732  |
| Locus_7218_Transcript_1/1_Conf_1.000 | 784  | 5  | 1.12E-11  | NP_871663.1    | 44 | 74.7146 | 231 | 103 | hypothetical protein ZK688.5   |
| Locus_7219_Transcript_1/2_Conf_1.000 | 502  | 4  | 3.44E-18  | XP_002642801.1 | 64 | 94.7449 | 117 | 75  | C. briggsae CBR-CUA-1 protein  |

|                                      |      |    |           |                |    |         |     |     |                                                                        |
|--------------------------------------|------|----|-----------|----------------|----|---------|-----|-----|------------------------------------------------------------------------|
| Locus_7219_Transcript_2/2_Conf_1.000 | 705  | 20 | 7.01E-73  | XP_002642801.1 | 77 | 277.715 | 240 | 186 | C. briggsae CBR-CUA-1 protein                                          |
| Locus_722_Transcript_1/1_Conf_1.000  | 187  | 20 | 3.34E-21  | EFO23627.1     | 88 | 104.76  | 62  | 55  | elongation factor Tu domain-containing protein                         |
| Locus_7220_Transcript_1/2_Conf_1.000 | 1853 | 20 | 9.62E-106 | EFO27328.1     | 64 | 389.037 | 448 | 291 | calpain D                                                              |
| Locus_7220_Transcript_2/2_Conf_1.000 | 1858 | 20 | 9.97E-111 | EFO27328.1     | 65 | 405.601 | 461 | 301 | calpain D                                                              |
| Locus_7221_Transcript_1/1_Conf_1.000 | 151  | 0  |           |                |    |         |     |     |                                                                        |
| Locus_7222_Transcript_1/2_Conf_1.000 | 852  | 20 | 1.22E-126 | XP_002641359.1 | 92 | 456.833 | 253 | 233 | C. briggsae CBR-RSKS-1 protein                                         |
| Locus_7222_Transcript_2/2_Conf_1.000 | 1365 | 20 | 1.48E-126 | NP_499447.1    | 76 | 457.603 | 356 | 271 | RSK-pSeventy (RSK-p70 kinase) homolog family member (rsk-1)            |
| Locus_7223_Transcript_1/1_Conf_1.000 | 347  | 0  |           |                |    |         |     |     |                                                                        |
| Locus_7224_Transcript_1/1_Conf_1.000 | 810  | 0  |           |                |    |         |     |     |                                                                        |
| Locus_7225_Transcript_1/3_Conf_0.667 | 1930 | 20 | 0         | CAB01686.2     | 71 | 655.21  | 639 | 460 | C. elegans protein C35C5.6, partially confirmed by transcript evidence |
| Locus_7225_Transcript_2/3_Conf_0.667 | 1930 | 20 | 0         | CAB01686.2     | 71 | 655.21  | 639 | 460 | C. elegans protein C35C5.6, partially confirmed by transcript evidence |
| Locus_7225_Transcript_3/3_Conf_0.333 | 688  | 20 | 2.90E-76  | CAB01686.2     | 84 | 288.886 | 221 | 187 | C. elegans protein C35C5.6, partially confirmed by transcript evidence |
| Locus_7226_Transcript_1/1_Conf_1.000 | 860  | 20 | 3.33E-55  | XP_002630541.1 | 82 | 219.55  | 168 | 139 | Hypothetical protein CBG12982                                          |
| Locus_7227_Transcript_1/1_Conf_1.000 | 218  | 0  |           |                |    |         |     |     |                                                                        |
| Locus_7228_Transcript_1/1_Conf_1.000 | 603  | 4  | 3.23E-32  | XP_002630724.1 | 56 | 142.124 | 191 | 107 | Hypothetical protein CBG02408                                          |

|                                      |      |    |           |                |     |         |     |     |                                              |
|--------------------------------------|------|----|-----------|----------------|-----|---------|-----|-----|----------------------------------------------|
| Locus_7229_Transcript_1/2_Conf_1.000 | 1887 | 20 | 0         | EFO23157.1     | 92  | 1036.17 | 627 | 583 | U5 small nuclear ribonucleoprotein helicase  |
| Locus_7229_Transcript_2/2_Conf_1.000 | 1022 | 20 | 9.28E-162 | EFO23157.1     | 90  | 573.933 | 338 | 306 | U5 small nuclear ribonucleoprotein helicase  |
| Locus_723_Transcript_1/1_Conf_1.000  | 609  | 20 | 4.02E-62  | EFO16136.1     | 100 | 241.506 | 115 | 115 | heterotrimeric G protein alpha subunit       |
| Locus_7230_Transcript_1/1_Conf_1.000 | 400  | 1  | 2.61E-34  | CAR63592.1     | 74  | 148.288 | 118 | 88  | hypothetical protein                         |
| Locus_7231_Transcript_1/1_Conf_1.000 | 461  | 20 | 3.10E-56  | XP_001158172.1 | 99  | 221.09  | 106 | 105 | PREDICTED: similar to MAT8 protein isoform 8 |
| Locus_7232_Transcript_1/1_Conf_1.000 | 212  | 0  |           |                |     |         |     |     |                                              |
| Locus_7233_Transcript_1/1_Conf_1.000 | 526  | 20 | 2.06E-30  | NP_494756.1    | 72  | 135.576 | 131 | 95  | hypothetical protein C01F1.1                 |
| Locus_7234_Transcript_1/1_Conf_1.000 | 908  | 20 | 9.55E-72  | NP_509790.2    | 74  | 274.633 | 270 | 202 | hypothetical protein F13E6.5                 |
| Locus_7235_Transcript_1/3_Conf_0.333 | 610  | 20 | 1.48E-48  | XP_002639833.1 | 69  | 196.438 | 188 | 131 | C. briggsae CBR-MET-1 protein                |
| Locus_7235_Transcript_2/3_Conf_0.778 | 1115 | 20 | 7.59E-51  | XP_002639833.1 | 68  | 205.682 | 202 | 138 | C. briggsae CBR-MET-1 protein                |
| Locus_7235_Transcript_3/3_Conf_0.778 | 1176 | 20 | 1.94E-68  | XP_002639833.1 | 56  | 264.233 | 392 | 222 | C. briggsae CBR-MET-1 protein                |

|                                      |      |    |           |                |    |         |     |     |                                                 |
|--------------------------------------|------|----|-----------|----------------|----|---------|-----|-----|-------------------------------------------------|
| Locus_7236_Transcript_1/1_Conf_1.000 | 258  | 20 | 1.49E-21  | EFO18882.1     | 76 | 105.916 | 86  | 66  | hypothetical protein LOAG_09612                 |
| Locus_7237_Transcript_1/1_Conf_1.000 | 810  | 20 | 1.43E-57  | XP_002636834.1 | 90 | 227.254 | 138 | 125 | Hypothetical protein CBG09283                   |
| Locus_7238_Transcript_1/1_Conf_1.000 | 600  | 5  | 3.76E-33  | NP_499878.3    | 55 | 145.206 | 214 | 118 | COP-9 SigNalosome subunit family member (csn-3) |
| Locus_7239_Transcript_1/2_Conf_1.000 | 590  | 0  |           |                |    |         |     |     |                                                 |
| Locus_7239_Transcript_2/2_Conf_1.000 | 590  | 0  |           |                |    |         |     |     |                                                 |
| Locus_724_Transcript_1/1_Conf_1.000  | 1251 | 3  | 4.09E-11  | XP_002642878.1 | 42 | 73.9442 | 333 | 141 | Hypothetical protein CBG15148                   |
| Locus_7240_Transcript_1/1_Conf_1.000 | 934  | 9  | 1.13E-14  | XP_001895525.1 | 50 | 85.1149 | 167 | 85  | MIF4G domain containing protein                 |
| Locus_7241_Transcript_1/1_Conf_1.000 | 2556 | 20 | 0         | XP_002637095.1 | 73 | 695.271 | 689 | 505 | C. briggsae CBR-CASH-1 protein                  |
| Locus_7242_Transcript_1/1_Conf_1.000 | 1294 | 20 | 4.85E-140 | NP_500340.1    | 86 | 502.286 | 354 | 307 | hypothetical protein C04C3.3                    |
| Locus_7243_Transcript_1/1_Conf_1.000 | 220  | 0  |           |                |    |         |     |     |                                                 |
| Locus_7244_Transcript_1/1_Conf_1.000 | 1153 | 20 | 2.76E-128 | NP_498204.1    | 77 | 462.996 | 360 | 278 | hypothetical protein C05D2.10                   |
| Locus_7245_Transcript_1/1_Conf_1.000 | 145  | 0  |           |                |    |         |     |     |                                                 |

|                                      |      |    |           |                |    |         |      |     |                                                                    |
|--------------------------------------|------|----|-----------|----------------|----|---------|------|-----|--------------------------------------------------------------------|
| Locus_7246_Transcript_1/1_Conf_1.000 | 552  | 20 | 1.52E-101 | AAB99830.2     | 94 | 372.089 | 184  | 174 | thrombospondin                                                     |
| Locus_7247_Transcript_1/1_Conf_1.000 | 1089 | 14 | 7.32E-51  | POC5E7.1       | 57 | 205.682 | 343  | 196 | Phosphatidylinositol 3-kinase age-1                                |
| Locus_7248_Transcript_1/1_Conf_1.000 | 883  | 20 | 1.36E-51  | NP_490762.1    | 82 | 207.608 | 210  | 174 | hypothetical protein Y65B4A.3                                      |
| Locus_7249_Transcript_1/1_Conf_1.000 | 233  | 20 | 1.17E-26  | NP_741342.2    | 89 | 122.865 | 76   | 68  | MAD (yeast Mitosis Arrest DeFicient) related family member (mdf-2) |
| Locus_725_Transcript_1/2_Conf_1.000  | 3231 | 20 | 0         | NP_001129788.1 | 69 | 1075.46 | 1084 | 748 | abnormal GONad development family member (gon-2)                   |
| Locus_725_Transcript_2/2_Conf_1.000  | 3219 | 20 | 0         | NP_001129788.1 | 68 | 1070.84 | 1080 | 745 | abnormal GONad development family member (gon-2)                   |
| Locus_7250_Transcript_1/1_Conf_1.000 | 969  | 20 | 2.46E-68  | XP_001895121.1 | 73 | 263.462 | 226  | 167 | hypothetical protein                                               |
| Locus_7251_Transcript_1/1_Conf_1.000 | 767  | 5  | 3.42E-18  | XP_002644049.1 | 54 | 96.2857 | 181  | 98  | C. briggsae CBR-CLC-1 protein                                      |
| Locus_7252_Transcript_1/2_Conf_1.000 | 599  | 20 | 3.82E-46  | NP_001022376.1 | 90 | 188.348 | 108  | 98  | hypothetical protein T27F7.3                                       |

|                                      |      |    |           |                |    |         |     |     |                                       |
|--------------------------------------|------|----|-----------|----------------|----|---------|-----|-----|---------------------------------------|
| Locus_7252_Transcript_2/2_Conf_1.000 | 485  | 20 | 1.59E-41  | ACI49017.1     | 90 | 104.76  | 60  | 54  | hypothetical protein Cbre_JD04.002    |
| Locus_7253_Transcript_1/1_Conf_1.000 | 344  | 11 | 1.18E-34  | NP_501890.1    | 76 | 149.443 | 116 | 89  | hypothetical protein R09E10.5         |
| Locus_7254_Transcript_1/1_Conf_1.000 | 1483 | 20 | 9.68E-135 | XP_002633395.1 | 70 | 484.952 | 504 | 353 | C. briggsae CBR-KIN-4 protein         |
| Locus_7255_Transcript_1/1_Conf_1.000 | 919  | 20 | 4.15E-38  | XP_001897556.1 | 64 | 162.925 | 190 | 123 | Tyrosine-protein kinase abl-1         |
| Locus_7256_Transcript_1/1_Conf_1.000 | 691  | 0  |           |                |    |         |     |     |                                       |
| Locus_7257_Transcript_1/1_Conf_1.000 | 818  | 20 | 2.92E-50  | XP_001900655.1 | 66 | 202.986 | 188 | 125 | Skb1 methyltransferase family protein |
| Locus_7258_Transcript_1/1_Conf_1.000 | 347  | 20 | 1.03E-30  | NP_498641.1    | 74 | 136.346 | 113 | 84  | hypothetical protein H14A12.3         |
| Locus_7259_Transcript_1/1_Conf_1.000 | 248  | 0  |           |                |    |         |     |     |                                       |
| Locus_726_Transcript_1/1_Conf_1.000  | 1114 | 20 | 1.16E-75  | NP_509227.2    | 60 | 288.115 | 374 | 227 | hypothetical protein K03A1.2          |
| Locus_7260_Transcript_1/1_Conf_1.000 | 450  | 20 | 8.32E-33  | EFO25368.1     | 68 | 143.28  | 143 | 98  | cytochrome P450                       |
| Locus_7261_Transcript_1/1_Conf_1.000 | 316  | 0  |           |                |    |         |     |     |                                       |
| Locus_7262_Transcript_1/1_Conf_1.000 | 547  | 20 | 3.77E-65  | NP_497726.2    | 91 | 251.136 | 143 | 131 | hypothetical protein M01F1.7          |



|                                      |      |    |           |                |    |         |     |     |                                                                        |
|--------------------------------------|------|----|-----------|----------------|----|---------|-----|-----|------------------------------------------------------------------------|
| Locus_7263_Transcript_1/1_Conf_1.000 | 606  | 20 | 8.84E-62  | NP_001040875.1 | 74 | 240.35  | 212 | 158 | hypothetical protein T23G5.2                                           |
| Locus_7264_Transcript_1/1_Conf_1.000 | 301  | 0  |           |                |    |         |     |     |                                                                        |
| Locus_7265_Transcript_1/1_Conf_1.000 | 377  | 0  |           |                |    |         |     |     |                                                                        |
| Locus_7266_Transcript_1/1_Conf_1.000 | 930  | 20 | 2.24E-55  | NP_495987.1    | 74 | 220.32  | 235 | 174 | hypothetical protein D2013.6                                           |
| Locus_7267_Transcript_1/1_Conf_1.000 | 375  | 0  |           |                |    |         |     |     |                                                                        |
| Locus_7268_Transcript_1/1_Conf_1.000 | 1575 | 20 | 3.10E-70  | NP_498631.2    | 78 | 270.781 | 246 | 193 | Myc and Mondo-Like family member (mml-1)                               |
| Locus_7269_Transcript_1/1_Conf_1.000 | 307  | 16 | 5.36E-24  | CBL87054.2     | 72 | 114.005 | 102 | 74  | C. elegans protein F54E4.1, partially confirmed by transcript evidence |
| Locus_727_Transcript_1/1_Conf_1.000  | 244  | 0  |           |                |    |         |     |     |                                                                        |
| Locus_7270_Transcript_1/1_Conf_1.000 | 165  | 3  | 1.21E-15  | NP_001023496.1 | 88 | 86.2705 | 54  | 48  | L1 CAM Adhesion molecule homolog family member (lad-2)                 |
| Locus_7271_Transcript_1/1_Conf_1.000 | 608  | 20 | 3.72E-52  | XP_001901281.1 | 66 | 208.379 | 208 | 138 | Myb-like DNA-binding domain containing protein                         |
| Locus_7272_Transcript_1/1_Conf_1.000 | 626  | 20 | 4.85E-50  | NP_496299.1    | 65 | 201.445 | 196 | 129 | beta-LACTamase domain containing family member (lact-3)                |
| Locus_7273_Transcript_1/1_Conf_1.000 | 405  | 6  | 2.87E-25  | XP_002646949.1 | 75 | 118.242 | 126 | 95  | C. briggsae CBR-APD-3 protein                                          |
| Locus_7274_Transcript_1/1_Conf_1.000 | 947  | 1  | 1.37E-07  | CAR63629.1     | 52 | 61.6178 | 104 | 55  | hypothetical protein                                                   |
| Locus_7275_Transcript_1/1_Conf_1.000 | 1214 | 20 | 1.85E-170 | NP_500304.3    | 84 | 603.208 | 407 | 343 | hypothetical protein Y67D8A.1                                          |
| Locus_7276_Transcript_1/1_Conf_1.000 | 280  | 0  |           |                |    |         |     |     |                                                                        |
| Locus_7277_Transcript_1/1_Conf_1.000 | 474  | 3  | 7.81E-07  | NP_493601.2    | 47 | 56.9954 | 141 | 67  | FERM domain (protein4.1-ezrin-radixin-moesin) family member (frm-1)    |
| Locus_7278_Transcript_1/1_Conf_1.000 | 1030 | 20 | 8.18E-73  | XP_002631068.1 | 81 | 278.485 | 183 | 150 | C. briggsae CBR-NEP-1 protein                                          |
| Locus_7279_Transcript_1/2_Conf_1.000 | 318  | 0  |           |                |    |         |     |     |                                                                        |
| Locus_7279_Transcript_2/2_Conf_1.000 | 265  | 0  |           |                |    |         |     |     |                                                                        |
| Locus_728_Transcript_1/4_Conf_0.700  | 2835 | 20 | 0         | XP_002637629.1 | 78 | 848.966 | 617 | 486 | C. briggsae CBR-ZTF-7 protein                                          |
| Locus_728_Transcript_2/4_Conf_0.700  | 2832 | 20 | 0         | XP_002637629.1 | 78 | 853.588 | 616 | 486 | C. briggsae CBR-ZTF-7 protein                                          |

|                                      |      |    |           |                |    |         |     |     |                                                                                |
|--------------------------------------|------|----|-----------|----------------|----|---------|-----|-----|--------------------------------------------------------------------------------|
| Locus_728_Transcript_3/4_Conf_0.700  | 2832 | 20 | 0         | XP_002637629.1 | 78 | 853.588 | 616 | 486 | C. briggsae CBR-ZTF-7 protein                                                  |
| Locus_728_Transcript_4/4_Conf_0.700  | 2832 | 20 | 0         | XP_002637629.1 | 78 | 853.588 | 616 | 486 | C. briggsae CBR-ZTF-7 protein                                                  |
| Locus_7280_Transcript_1/1_Conf_1.000 | 991  | 20 | 3.09E-90  | NP_504045.1    | 72 | 336.265 | 325 | 235 | hypothetical protein R08E5.3                                                   |
| Locus_7281_Transcript_1/1_Conf_1.000 | 620  | 20 | 7.18E-46  | CAO00417.1     | 70 | 187.578 | 175 | 123 | two-domain activation associated secreted protein ASP4 precursor               |
| Locus_7282_Transcript_1/1_Conf_1.000 | 1920 | 20 | 5.90E-114 | NP_001003994.1 | 58 | 416.387 | 600 | 348 | MORC family CW-type zinc finger 2                                              |
| Locus_7283_Transcript_1/1_Conf_1.000 | 358  | 20 | 6.38E-17  | XP_001901741.1 | 71 | 90.5077 | 74  | 53  | Eukaryotic-type DNA primase, large subunit family protein                      |
| Locus_7284_Transcript_1/1_Conf_1.000 | 2314 | 20 | 2.57E-175 | NP_492758.1    | 76 | 620.542 | 530 | 404 | hypothetical protein F25H2.2                                                   |
| Locus_7285_Transcript_1/1_Conf_1.000 | 154  | 0  |           |                |    |         |     |     |                                                                                |
| Locus_7286_Transcript_1/1_Conf_1.000 | 1274 | 20 | 2.48E-72  | XP_002631278.1 | 61 | 277.33  | 341 | 210 | C. briggsae CBR-PQN-47 protein                                                 |
| Locus_7287_Transcript_1/3_Conf_0.400 | 305  | 0  |           |                |    |         |     |     |                                                                                |
| Locus_7287_Transcript_2/3_Conf_0.600 | 566  | 20 | 1.64E-21  | XP_001895408.1 | 68 | 106.301 | 102 | 70  | Helix-loop-helix DNA-binding domain containing protein                         |
| Locus_7287_Transcript_3/3_Conf_0.600 | 567  | 16 | 1.45E-10  | XP_001369674.1 | 54 | 50.447  | 112 | 61  | PREDICTED: similar to max isoform 1                                            |
| Locus_7288_Transcript_1/1_Conf_1.000 | 444  | 20 | 2.60E-42  | XP_002631150.1 | 74 | 174.866 | 149 | 111 | Hypothetical protein CBG02934                                                  |
| Locus_7289_Transcript_1/1_Conf_1.000 | 564  | 20 | 4.57E-48  | XP_537270.1    | 78 | 194.512 | 164 | 129 | PREDICTED: similar to haloacid dehalogenase-like hydrolase domain containing 2 |

|                                      |      |    |           |                |    |         |     |     |                                                             |
|--------------------------------------|------|----|-----------|----------------|----|---------|-----|-----|-------------------------------------------------------------|
| Locus_729_Transcript_1/1_Conf_1.000  | 996  | 20 | 2.99E-133 | NP_501211.1    | 92 | 479.174 | 282 | 262 | hypothetical protein R05G6.7                                |
| Locus_7290_Transcript_1/1_Conf_1.000 | 493  | 4  | 2.35E-19  | NP_741449.1    | 56 | 98.5969 | 153 | 87  | hypothetical protein C06A6.2                                |
| Locus_7291_Transcript_1/1_Conf_1.000 | 1647 | 20 | 6.03E-173 | XP_002641548.1 | 84 | 612.068 | 412 | 350 | C. briggsae CBR-FEH-1 protein                               |
| Locus_7292_Transcript_1/1_Conf_1.000 | 438  | 20 | 6.24E-57  | NP_001041140.1 | 88 | 223.402 | 131 | 116 | hypothetical protein F58H1.7                                |
| Locus_7293_Transcript_1/1_Conf_1.000 | 1267 | 6  | 7.19E-56  | XP_002642052.1 | 62 | 222.631 | 274 | 171 | Hypothetical protein CBG17990                               |
| Locus_7294_Transcript_1/1_Conf_1.000 | 734  | 20 | 5.17E-37  | NP_510460.2    | 63 | 158.688 | 174 | 111 | MiniBrain Kinase (Drosophila) homolog family member (mbk-1) |
| Locus_7295_Transcript_1/1_Conf_1.000 | 1153 | 20 | 3.60E-19  | XP_002636474.1 | 48 | 100.523 | 352 | 169 | C. briggsae CBR-IMA-1 protein                               |
| Locus_7296_Transcript_1/1_Conf_1.000 | 1444 | 20 | 1.85E-82  | XP_002642257.1 | 75 | 311.227 | 273 | 207 | C. briggsae CBR-SET-16 protein                              |
| Locus_7297_Transcript_1/1_Conf_1.000 | 373  | 20 | 6.02E-39  | XP_002635565.1 | 94 | 163.696 | 123 | 116 | Hypothetical protein CBG20548                               |
| Locus_7298_Transcript_1/1_Conf_1.000 | 404  | 20 | 1.09E-40  | EFO19039.1     | 81 | 169.474 | 134 | 109 | Tln1 protein                                                |

|                                      |      |    |           |                |    |         |     |     |                               |
|--------------------------------------|------|----|-----------|----------------|----|---------|-----|-----|-------------------------------|
| Locus_7299_Transcript_1/1_Conf_1.000 | 414  | 20 | 1.83E-24  | BAJ10384.1     | 71 | 115.546 | 91  | 65  | aurora kinase                 |
| Locus_73_Transcript_1/5_Conf_0.429   | 432  | 0  |           |                |    |         |     |     |                               |
| Locus_73_Transcript_2/5_Conf_0.190   | 1164 | 20 | 2.99E-130 | NP_501838.2    | 74 | 469.544 | 368 | 274 | hypothetical protein C04G2.9  |
| Locus_73_Transcript_3/5_Conf_0.190   | 1164 | 20 | 2.99E-130 | NP_501838.2    | 74 | 469.544 | 368 | 274 | hypothetical protein C04G2.9  |
| Locus_73_Transcript_4/5_Conf_0.095   | 553  | 20 | 2.14E-71  | P51535.1       | 92 | 271.937 | 154 | 142 | Myoglobin                     |
| Locus_73_Transcript_5/5_Conf_0.619   | 795  | 20 | 6.07E-37  | XP_002634040.1 | 58 | 158.688 | 236 | 139 | C. briggsae CBR-VIT-6 protein |
| Locus_730_Transcript_1/1_Conf_1.000  | 2820 | 20 | 0         | NP_001040989.1 | 86 | 1228.39 | 873 | 754 | hypothetical protein T14G10.5 |

|                                      |      |    |           |                |    |         |     |     |                                                |
|--------------------------------------|------|----|-----------|----------------|----|---------|-----|-----|------------------------------------------------|
| Locus_7300_Transcript_1/3_Conf_0.667 | 1230 | 20 | 3.13E-157 | NP_500191.3    | 86 | 559.296 | 393 | 338 | ParaPleGiN AAA protease family member (ppgn-1) |
| Locus_7300_Transcript_2/3_Conf_0.667 | 1215 | 20 | 4.01E-157 | NP_500191.3    | 86 | 558.91  | 393 | 338 | ParaPleGiN AAA protease family member (ppgn-1) |
| Locus_7300_Transcript_3/3_Conf_0.667 | 1215 | 20 | 3.07E-157 | NP_500191.3    | 86 | 559.296 | 393 | 338 | ParaPleGiN AAA protease family member (ppgn-1) |
| Locus_7301_Transcript_1/1_Conf_1.000 | 466  | 6  | 3.90E-30  | NP_741868.1    | 87 | 134.42  | 82  | 72  | Apical Junction Molecule family member (ajm-1) |
| Locus_7302_Transcript_1/1_Conf_1.000 | 1582 | 20 | 0         | XP_002638687.1 | 79 | 640.958 | 471 | 375 | Hypothetical protein CBG11882                  |
| Locus_7303_Transcript_1/1_Conf_1.000 | 739  | 20 | 1.73E-72  | XP_002636543.1 | 75 | 276.559 | 244 | 184 | Hypothetical protein CBG23230                  |

|                                      |      |    |           |                |    |         |     |     |                                       |
|--------------------------------------|------|----|-----------|----------------|----|---------|-----|-----|---------------------------------------|
| Locus_7304_Transcript_1/1_Conf_1.000 | 239  | 3  | 3.89E-06  | NP_741355.2    | 64 | 54.6842 | 62  | 40  | hypothetical protein Y67D8A.2         |
| Locus_7305_Transcript_1/1_Conf_1.000 | 2327 | 20 | 1.72E-86  | XP_002648991.1 | 67 | 325.479 | 318 | 214 | C. briggsae CBR-ULP-1 protein         |
| Locus_7306_Transcript_1/1_Conf_1.000 | 1815 | 20 | 0         | NP_499949.2    | 84 | 801.201 | 550 | 463 | Gut on EXterior family member (gex-2) |
| Locus_7307_Transcript_1/1_Conf_1.000 | 1176 | 20 | 6.39E-104 | NP_492254.1    | 96 | 382.104 | 186 | 180 | protein KINase family member (kin-10) |

|                                      |      |    |           |                |    |         |     |     |                                                         |
|--------------------------------------|------|----|-----------|----------------|----|---------|-----|-----|---------------------------------------------------------|
| Locus_7308_Transcript_1/3_Conf_0.400 | 274  | 0  |           |                |    |         |     |     |                                                         |
| Locus_7308_Transcript_2/3_Conf_0.400 | 447  | 2  | 6.24E-04  | XP_002091979.1 | 72 | 47.3654 | 61  | 44  | GE11922                                                 |
| Locus_7308_Transcript_3/3_Conf_0.400 | 1159 | 20 | 8.59E-37  | XP_002647311.1 | 56 | 159.073 | 346 | 195 | Hypothetical protein CBG06352                           |
| Locus_7309_Transcript_1/1_Conf_1.000 | 484  | 20 | 6.23E-36  | NP_491096.1    | 70 | 153.68  | 129 | 91  | Zinc finger Transcription Factor family member (ztf-23) |
| Locus_731_Transcript_1/3_Conf_0.667  | 780  | 20 | 2.17E-108 | NP_498642.1    | 92 | 395.971 | 229 | 212 | FUMarase family member (fum-1)                          |
| Locus_731_Transcript_2/3_Conf_0.667  | 834  | 20 | 2.81E-112 | NP_498642.1    | 93 | 409.068 | 247 | 230 | FUMarase family member (fum-1)                          |
| Locus_731_Transcript_3/3_Conf_0.667  | 834  | 20 | 2.81E-112 | NP_498642.1    | 93 | 409.068 | 247 | 230 | FUMarase family member (fum-1)                          |
| Locus_7310_Transcript_1/1_Conf_1.000 | 333  | 0  |           |                |    |         |     |     |                                                         |
| Locus_7311_Transcript_1/1_Conf_1.000 | 163  | 0  |           |                |    |         |     |     |                                                         |
| Locus_7312_Transcript_1/1_Conf_1.000 | 360  | 13 | 7.00E-32  | A8Y3Q1.2       | 79 | 140.198 | 104 | 83  | Putative 28S ribosomal protein S5                       |

|                                      |      |    |           |                |     |         |     |     |                                                                     |
|--------------------------------------|------|----|-----------|----------------|-----|---------|-----|-----|---------------------------------------------------------------------|
| Locus_7313_Transcript_1/1_Conf_1.000 | 712  | 20 | 4.64E-64  | XP_001898420.1 | 71  | 248.44  | 215 | 154 | ATP-dependent DNA helicase, RecQ family protein                     |
| Locus_7314_Transcript_1/1_Conf_1.000 | 518  | 20 | 9.46E-70  | ACR27076.1     | 100 | 266.159 | 122 | 122 | transforming growth protein 2-like protein                          |
| Locus_7315_Transcript_1/1_Conf_1.000 | 1258 | 20 | 1.97E-114 | EFO20863.1     | 72  | 417.157 | 418 | 301 | hypothetical protein LOAG_07626                                     |
| Locus_7316_Transcript_1/2_Conf_1.000 | 768  | 0  |           |                |     |         |     |     |                                                                     |
| Locus_7316_Transcript_2/2_Conf_1.000 | 720  | 0  |           |                |     |         |     |     |                                                                     |
| Locus_7317_Transcript_1/1_Conf_1.000 | 446  | 20 | 4.00E-59  | AAX43301.1     | 100 | 230.72  | 115 | 115 | ribosomal protein L30                                               |
| Locus_7318_Transcript_1/1_Conf_1.000 | 300  | 0  |           |                |     |         |     |     |                                                                     |
| Locus_7319_Transcript_1/1_Conf_1.000 | 664  | 20 | 3.81E-107 | NP_499860.1    | 94  | 391.349 | 208 | 197 | TPA (tetradecanoyl phorbol acetate) resistant family member (tpa-1) |
| Locus_732_Transcript_1/1_Conf_1.000  | 971  | 20 | 1.90E-28  | EFO24421.1     | 50  | 130.954 | 244 | 124 | hypothetical protein LOAG_04066                                     |
| Locus_7320_Transcript_1/1_Conf_1.000 | 1063 | 20 | 0         | ACZ64269.1     | 96  | 666.381 | 352 | 338 | astacin metalloprotease b                                           |
| Locus_7321_Transcript_1/1_Conf_1.000 | 305  | 0  |           |                |     |         |     |     |                                                                     |
| Locus_7322_Transcript_1/1_Conf_1.000 | 392  | 0  |           |                |     |         |     |     |                                                                     |
| Locus_7323_Transcript_1/2_Conf_1.000 | 1246 | 4  | 9.98E-18  | XP_002640607.1 | 53  | 95.9005 | 182 | 97  | Hypothetical protein CBG08718                                       |
| Locus_7323_Transcript_2/2_Conf_1.000 | 388  | 0  |           |                |     |         |     |     |                                                                     |
| Locus_7324_Transcript_1/1_Conf_1.000 | 306  | 0  |           |                |     |         |     |     |                                                                     |
| Locus_7325_Transcript_1/1_Conf_1.000 | 286  | 5  | 9.40E-16  | NP_502089.1    | 69  | 86.6557 | 84  | 58  | PreFoldin (molecular chaperone) family member (pfd-1)               |



|                                      |      |    |           |                |    |         |      |     |                                                                              |
|--------------------------------------|------|----|-----------|----------------|----|---------|------|-----|------------------------------------------------------------------------------|
| Locus_7326_Transcript_1/1_Conf_1.000 | 189  | 2  | 5.71E-05  | EFO20005.1     | 75 | 50.8322 | 37   | 28  | RhoGAP domain-containing protein                                             |
| Locus_7327_Transcript_1/1_Conf_1.000 | 1004 | 20 | 4.07E-138 | XP_002641056.1 | 85 | 495.352 | 320  | 273 | Hypothetical protein CBG22467                                                |
| Locus_7328_Transcript_1/1_Conf_1.000 | 1009 | 20 | 4.99E-43  | EFO22115.1     | 57 | 179.489 | 308  | 176 | hypothetical protein LOAG_06367                                              |
| Locus_7329_Transcript_1/1_Conf_1.000 | 1296 | 5  | 9.42E-51  | XP_002646407.1 | 61 | 205.682 | 230  | 142 | Hypothetical protein CBG15386                                                |
| Locus_733_Transcript_1/2_Conf_1.000  | 3295 | 20 | 0         | NP_001020999.1 | 56 | 734.561 | 1096 | 617 | abnormal cell LiNeage family member (lin-41)                                 |
| Locus_733_Transcript_2/2_Conf_1.000  | 3235 | 20 | 0         | NP_001020999.1 | 57 | 744.577 | 1077 | 618 | abnormal cell LiNeage family member (lin-41)                                 |
| Locus_7330_Transcript_1/2_Conf_1.000 | 715  | 7  | 6.86E-15  | NP_499074.2    | 46 | 85.1149 | 241  | 113 | abnormal EMBroygenesis family member (emb-30)                                |
| Locus_7330_Transcript_2/2_Conf_1.000 | 547  | 7  | 1.50E-13  | XP_002641754.1 | 47 | 79.7221 | 188  | 90  | C. briggsae CBR-EMB-30 protein                                               |
| Locus_7331_Transcript_1/1_Conf_1.000 | 197  | 0  |           |                |    |         |      |     |                                                                              |
| Locus_7332_Transcript_1/1_Conf_1.000 | 1152 | 20 | 1.06E-103 | NP_493980.1    | 82 | 381.333 | 308  | 253 | hypothetical protein H17B01.4                                                |
| Locus_7333_Transcript_1/1_Conf_1.000 | 736  | 20 | 7.06E-26  | NP_001122423.1 | 75 | 121.709 | 86   | 65  | hypothetical protein C25A1.16                                                |
| Locus_7334_Transcript_1/1_Conf_1.000 | 744  | 0  |           |                |    |         |      |     |                                                                              |
| Locus_7335_Transcript_1/1_Conf_1.000 | 376  | 20 | 1.39E-19  | NP_508184.2    | 90 | 99.3673 | 55   | 50  | AdaPtin, Mu/medium chain (clathrin associated complex) family member (apm-3) |

|                                      |     |    |          |                |    |         |     |     |                                                          |
|--------------------------------------|-----|----|----------|----------------|----|---------|-----|-----|----------------------------------------------------------|
| Locus_7336_Transcript_1/1_Conf_1.000 | 723 | 20 | 8.21E-72 | NP_499667.1    | 83 | 274.248 | 184 | 153 | Arp2/3 complex component family member (arx-5)           |
| Locus_7337_Transcript_1/1_Conf_1.000 | 429 | 1  | 9.57E-05 | EFO27420.1     | 54 | 50.0618 | 68  | 37  | TK/FER protein kinase                                    |
| Locus_7338_Transcript_1/1_Conf_1.000 | 681 | 20 | 2.04E-74 | XP_002646580.1 | 82 | 282.722 | 205 | 170 | C. briggsae CBR-XPA-1 protein                            |
| Locus_7339_Transcript_1/1_Conf_1.000 | 207 | 2  | 1.47E-05 | NP_497647.1    | 72 | 52.7582 | 44  | 32  | hypothetical protein Y55D5A.3                            |
| Locus_734_Transcript_1/1_Conf_1.000  | 915 | 0  |          |                |    |         |     |     |                                                          |
| Locus_7340_Transcript_1/1_Conf_1.000 | 333 | 6  | 4.56E-15 | XP_001899397.1 | 62 | 84.3445 | 108 | 68  | hypothetical protein Bm1_39710                           |
| Locus_7341_Transcript_1/1_Conf_1.000 | 176 | 0  |          |                |    |         |     |     |                                                          |
| Locus_7342_Transcript_1/1_Conf_1.000 | 594 | 20 | 1.07E-24 | XP_002637561.1 | 79 | 117.087 | 98  | 78  | Hypothetical protein CBG19294                            |
| Locus_7343_Transcript_1/2_Conf_1.000 | 643 | 20 | 2.44E-31 | NP_500284.2    | 63 | 139.428 | 217 | 138 | Enhancer of Efl-1 mutant phenotype family member (eel-1) |
| Locus_7343_Transcript_2/2_Conf_1.000 | 637 | 20 | 7.40E-33 | NP_500284.2    | 64 | 144.436 | 215 | 138 | Enhancer of Efl-1 mutant phenotype family member (eel-1) |
| Locus_7344_Transcript_1/1_Conf_1.000 | 390 | 0  |          |                |    |         |     |     |                                                          |
| Locus_7345_Transcript_1/1_Conf_1.000 | 996 | 20 | 4.41E-52 | XP_002646168.1 | 70 | 209.534 | 215 | 151 | Hypothetical protein CBG23731                            |
| Locus_7346_Transcript_1/1_Conf_1.000 | 751 | 20 | 9.46E-90 | NP_497347.3    | 79 | 333.954 | 249 | 199 | hypothetical protein Y119D3B.16                          |
| Locus_7347_Transcript_1/1_Conf_1.000 | 683 | 20 | 5.41E-43 | XP_002642660.1 | 58 | 178.333 | 200 | 116 | Hypothetical protein CBG12241                            |
| Locus_7348_Transcript_1/1_Conf_1.000 | 559 | 0  |          |                |    |         |     |     |                                                          |
| Locus_7349_Transcript_1/2_Conf_1.000 | 557 | 20 | 4.25E-75 | NP_495662.2    | 85 | 284.263 | 184 | 157 | PaTChed family member (ptc-1)                            |

|                                      |      |    |           |                |    |         |     |         |                                                |
|--------------------------------------|------|----|-----------|----------------|----|---------|-----|---------|------------------------------------------------|
| Locus_7349_Transcript_2/2_Conf_1.000 | 557  | 20 | 4.25E-75  | NP_495662.2    | 85 | 284.263 | 184 | 157     | PaTChed family member (ptc-1)                  |
| Locus_735_Transcript_1/1_Conf_1.000  | 229  | 0  |           |                |    |         |     |         |                                                |
| Locus_7350_Transcript_1/1_Conf_1.000 | 1715 | 20 | 0         | EFO23679.1     | 70 | 641.728 | 608 | 431     | hypothetical protein LOAG_04806                |
| Locus_7351_Transcript_1/1_Conf_1.000 | 459  | 1  | 9.46E-05  | EFA84537.1     | 76 | 50.0618 | 38  | 29      | putative transmembrane protein                 |
| Locus_7352_Transcript_1/2_Conf_1.000 | 651  | 3  | 6.35E-83  | NP_498952.1    | 83 | 310.842 | 212 | 176     | hypothetical protein F44E2.4                   |
| Locus_7352_Transcript_2/2_Conf_1.000 | 651  | 3  | 6.35E-83  | NP_498952.1    | 83 | 310.842 | 212 | 176     | hypothetical protein F44E2.4                   |
| Locus_7353_Transcript_1/1_Conf_1.000 | 159  | 3  | 7.64E-10  | NP_001122554.1 | 82 | 67.0106 | 50  | 41      | hypothetical protein Y71G12A.2                 |
| Locus_7354_Transcript_1/1_Conf_1.000 | 361  | 0  |           |                |    |         |     |         |                                                |
| Locus_7355_Transcript_1/1_Conf_1.000 | 1080 | 20 | 2.42E-139 | XP_002639071.1 | 83 | 499.59  | 344 | 288     | C. briggsae CBR-TOM-1 protein                  |
| Locus_7356_Transcript_1/1_Conf_1.000 | 1389 | 9  | 9.33E-60  | NP_499134.2    | 75 | 235.728 | 197 | 149     | GEX Interacting protein family member (gei-13) |
| Locus_7357_Transcript_1/1_Conf_1.000 | 173  | 20 | 2.76E-20  | XP_002643051.1 | 87 | 101.679 | 57  | 50      | C. briggsae CBR-DPF-6 protein                  |
| Locus_7358_Transcript_1/1_Conf_1.000 | 493  | 20 | 2.19E-33  | XP_001892233.1 | 87 | 145.206 | 89  | 78<br>3 | mothers against decapentaplegic homolog 3      |

|                                      |      |    |           |                |    |         |     |     |                                                                                      |
|--------------------------------------|------|----|-----------|----------------|----|---------|-----|-----|--------------------------------------------------------------------------------------|
| Locus_7359_Transcript_1/1_Conf_1.000 | 715  | 20 | 8.46E-98  | XP_002640509.1 | 86 | 360.533 | 238 | 207 | C. briggsae CBR-RGA-2 protein                                                        |
| Locus_736_Transcript_1/1_Conf_1.000  | 1126 | 20 | 0         | NP_497787.1    | 95 | 690.649 | 375 | 358 | Paralysed Arrest at Two-fold family member (pat-3)                                   |
| Locus_7360_Transcript_1/2_Conf_1.000 | 375  | 0  |           |                |    |         |     |     |                                                                                      |
| Locus_7360_Transcript_2/2_Conf_1.000 | 381  | 0  |           |                |    |         |     |     |                                                                                      |
| Locus_7361_Transcript_1/1_Conf_1.000 | 329  | 0  |           |                |    |         |     |     |                                                                                      |
| Locus_7362_Transcript_1/1_Conf_1.000 | 1421 | 20 | 3.78E-56  | XP_002634601.1 | 55 | 223.787 | 363 | 203 | C. briggsae CBR-DCAP-1 protein                                                       |
| Locus_7363_Transcript_1/2_Conf_1.000 | 1002 | 20 | 5.69E-132 | NP_498822.2    | 82 | 474.937 | 335 | 276 | abnormal cell MIGration family member (mig-10)                                       |
| Locus_7363_Transcript_2/2_Conf_1.000 | 1002 | 20 | 5.69E-132 | NP_498822.2    | 82 | 474.937 | 335 | 276 | abnormal cell MIGration family member (mig-10)                                       |
| Locus_7364_Transcript_1/2_Conf_1.000 | 647  | 20 | 1.67E-13  | XP_002646166.1 | 70 | 58.5362 | 54  | 38  | Hypothetical protein CBG23728                                                        |
| Locus_7364_Transcript_2/2_Conf_1.000 | 532  | 20 | 3.22E-18  | NP_492164.1    | 67 | 95.1301 | 129 | 87  | hypothetical protein F30F8.3                                                         |
| Locus_7365_Transcript_1/1_Conf_1.000 | 536  | 20 | 1.38E-53  | NP_502166.1    | 86 | 212.616 | 138 | 119 | MBF (multiprotein bridging factor) transcriptional coactivator family member (mbf-1) |
| Locus_7366_Transcript_1/1_Conf_1.000 | 436  | 0  |           |                |    |         |     |     |                                                                                      |
| Locus_7367_Transcript_1/1_Conf_1.000 | 391  | 20 | 3.47E-15  | NP_497059.1    | 60 | 84.7297 | 129 | 78  | TACC (transforming acid coiled coil) protein family member (tac-1)                   |
| Locus_7368_Transcript_1/2_Conf_1.000 | 1947 | 20 | 3.46E-146 | XP_002630713.1 | 71 | 523.472 | 532 | 381 | Hypothetical protein CBG02397                                                        |
| Locus_7368_Transcript_2/2_Conf_1.000 | 1903 | 20 | 9.85E-146 | XP_002630713.1 | 70 | 521.931 | 517 | 366 | Hypothetical protein CBG02397                                                        |

|                                      |      |    |           |                |     |         |     |     |                                                                                                |
|--------------------------------------|------|----|-----------|----------------|-----|---------|-----|-----|------------------------------------------------------------------------------------------------|
| Locus_7369_Transcript_1/1_Conf_1.000 | 1143 | 20 | 6.20E-56  | EFO20168.1     | 53  | 222.631 | 366 | 197 | PHD-finger family protein                                                                      |
| Locus_737_Transcript_1/2_Conf_1.000  | 602  | 20 | 7.88E-15  | XP_002435868.1 | 73  | 84.3445 | 72  | 53  | ubiquitin specific protease, putative                                                          |
| Locus_737_Transcript_2/2_Conf_1.000  | 533  | 20 | 1.96E-07  | CBH11658.1     | 74  | 59.3066 | 51  | 38  | ubiquitin hydrolase, putative                                                                  |
| Locus_7370_Transcript_1/1_Conf_1.000 | 304  | 0  |           |                |     |         |     |     |                                                                                                |
| Locus_7371_Transcript_1/1_Conf_1.000 | 527  | 2  | 1.88E-07  | XP_002647571.1 | 53  | 59.3066 | 95  | 51  | Hypothetical protein CBG06657                                                                  |
| Locus_7372_Transcript_1/1_Conf_1.000 | 423  | 0  |           |                |     |         |     |     |                                                                                                |
| Locus_7373_Transcript_1/1_Conf_1.000 | 277  | 20 | 4.10E-32  | 3HOF           | 100 | 140.969 | 68  | 68  | Structure Of Macrophage Migration Inhibitory Factor (Mif) With Caffeic Acid At 1.9a Resolution |
| Locus_7374_Transcript_1/1_Conf_1.000 | 311  | 20 | 5.32E-40  | NP_001076680.1 | 87  | 167.162 | 103 | 90  | hypothetical protein F13H10.3                                                                  |
| Locus_7375_Transcript_1/1_Conf_1.000 | 1417 | 20 | 2.00E-174 | NP_499157.2    | 80  | 616.69  | 475 | 383 | hypothetical protein T05G5.8                                                                   |
| Locus_7376_Transcript_1/1_Conf_1.000 | 375  | 20 | 5.07E-38  | XP_001899898.1 | 77  | 160.614 | 119 | 92  | LMBR1-like conserved region family protein                                                     |
| Locus_7377_Transcript_1/1_Conf_1.000 | 804  | 20 | 2.73E-117 | XP_001898305.1 | 85  | 425.631 | 268 | 229 | Transmembrane 9 superfamily protein member 2 precursor, putative                               |

|                                      |      |    |           |                |    |         |     |     |                                                   |
|--------------------------------------|------|----|-----------|----------------|----|---------|-----|-----|---------------------------------------------------|
| Locus_7378_Transcript_1/1_Conf_1.000 | 564  | 20 | 8.53E-79  | XP_002637342.1 | 93 | 296.59  | 187 | 174 | C. briggsae CBR-UNC-70 protein                    |
| Locus_7379_Transcript_1/1_Conf_1.000 | 585  | 0  |           |                |    |         |     |     |                                                   |
| Locus_738_Transcript_1/1_Conf_1.000  | 347  | 12 | 7.17E-16  | NP_502675.4    | 62 | 87.0409 | 106 | 66  | hypothetical protein Y37A1A.3                     |
| Locus_7380_Transcript_1/1_Conf_1.000 | 290  | 0  |           |                |    |         |     |     |                                                   |
| Locus_7381_Transcript_1/1_Conf_1.000 | 791  | 0  |           |                |    |         |     |     |                                                   |
| Locus_7382_Transcript_1/1_Conf_1.000 | 457  | 20 | 1.67E-09  | NP_494315.1    | 58 | 65.855  | 100 | 58  | hypothetical protein F22E5.8                      |
| Locus_7383_Transcript_1/1_Conf_1.000 | 1653 | 20 | 5.91E-144 | XP_002645201.1 | 78 | 515.768 | 411 | 324 | C. briggsae CBR-BCAT-1 protein                    |
| Locus_7384_Transcript_1/1_Conf_1.000 | 285  | 20 | 3.81E-25  | NP_509879.2    | 76 | 117.857 | 96  | 73  | hypothetical protein C03A3.2                      |
| Locus_7385_Transcript_1/1_Conf_1.000 | 315  | 18 | 1.11E-08  | NP_740774.1    | 69 | 63.1586 | 86  | 60  | hypothetical protein Y48G1A.4                     |
| Locus_7386_Transcript_1/2_Conf_1.000 | 1130 | 20 | 2.37E-108 | XP_002638797.1 | 75 | 396.741 | 315 | 238 | Hypothetical protein CBG05152                     |
| Locus_7386_Transcript_2/2_Conf_1.000 | 1087 | 20 | 2.23E-108 | XP_002638797.1 | 75 | 396.741 | 315 | 238 | Hypothetical protein CBG05152                     |
| Locus_7387_Transcript_1/1_Conf_1.000 | 721  | 20 | 1.63E-88  | NP_496708.2    | 79 | 329.717 | 239 | 189 | hypothetical protein Y46G5A.2                     |
| Locus_7388_Transcript_1/1_Conf_1.000 | 1313 | 20 | 1.11E-131 | NP_506513.1    | 78 | 474.552 | 345 | 272 | TRNA Methylase family member (trm-1)              |
| Locus_7389_Transcript_1/1_Conf_1.000 | 320  | 20 | 4.03E-43  | NP_001021405.1 | 87 | 177.563 | 106 | 93  | asparaginyl tRNA Synthetase family member (nrs-1) |
| Locus_739_Transcript_1/1_Conf_1.000  | 722  | 20 | 6.62E-90  | EFO24963.1     | 80 | 334.339 | 240 | 192 | hypothetical protein LOAG_03520                   |
| Locus_7390_Transcript_1/1_Conf_1.000 | 158  | 0  |           |                |    |         |     |     |                                                   |
| Locus_7391_Transcript_1/1_Conf_1.000 | 250  | 0  |           |                |    |         |     |     |                                                   |

|                                      |      |    |           |                |    |         |     |     |                                                          |
|--------------------------------------|------|----|-----------|----------------|----|---------|-----|-----|----------------------------------------------------------|
| Locus_7392_Transcript_1/1_Conf_1.000 | 500  | 20 | 1.01E-30  | NP_492783.1    | 77 | 136.346 | 104 | 81  | Temporarily Assigned Gene name family member (tag-264)   |
| Locus_7393_Transcript_1/1_Conf_1.000 | 228  | 0  |           |                |    |         |     |     |                                                          |
| Locus_7394_Transcript_1/1_Conf_1.000 | 359  | 20 | 7.49E-42  | XP_002629939.1 | 85 | 173.326 | 115 | 98  | Hypothetical protein CBG03659                            |
| Locus_7395_Transcript_1/1_Conf_1.000 | 1286 | 20 | 5.87E-138 | NP_506417.1    | 85 | 495.352 | 323 | 275 | Seven WD repeats, AN11 family member (swan-2)            |
| Locus_7396_Transcript_1/1_Conf_1.000 | 154  | 6  | 1.83E-11  | NP_001021110.1 | 86 | 72.4034 | 50  | 43  | CAISYntenin/Alcadein homolog family member (casy-1)      |
| Locus_7397_Transcript_1/1_Conf_1.000 | 664  | 1  | 3.79E-06  | ACI49256.1     | 48 | 55.8398 | 140 | 68  | hypothetical protein Csp3_JD07.006                       |
| Locus_7398_Transcript_1/2_Conf_1.000 | 673  | 20 | 3.18E-40  | NP_500284.2    | 60 | 169.088 | 220 | 134 | Enhancer of Efl-1 mutant phenotype family member (eel-1) |
| Locus_7398_Transcript_2/2_Conf_1.000 | 741  | 20 | 6.92E-45  | XP_002633684.1 | 60 | 184.882 | 246 | 149 | C. briggsae CBR-EEL-1 protein                            |
| Locus_7399_Transcript_1/1_Conf_1.000 | 1225 | 20 | 1.37E-112 | NP_001020973.1 | 74 | 410.994 | 408 | 303 | hypothetical protein B0414.8                             |
| Locus_74_Transcript_1/1_Conf_1.000   | 1095 | 20 | 1.34E-68  | XP_002645928.1 | 80 | 264.618 | 186 | 150 | C. briggsae CBR-TAG-97 protein                           |
| Locus_740_Transcript_1/3_Conf_0.500  | 420  | 0  |           |                |    |         |     |     |                                                          |
| Locus_740_Transcript_2/3_Conf_0.667  | 942  | 20 | 6.97E-20  | EFO19007.1     | 48 | 102.449 | 245 | 118 | hypothetical protein LOAG_09488                          |
| Locus_740_Transcript_3/3_Conf_0.500  | 421  | 0  |           |                |    |         |     |     |                                                          |

|                                      |      |    |           |                |     |         |     |     |                                                               |
|--------------------------------------|------|----|-----------|----------------|-----|---------|-----|-----|---------------------------------------------------------------|
| Locus_7400_Transcript_1/2_Conf_1.000 | 701  | 20 | 2.60E-19  | EFO16251.1     | 92  | 99.7525 | 54  | 50  | hypothetical protein LOAG_12257                               |
| Locus_7400_Transcript_2/2_Conf_1.000 | 608  | 20 | 2.20E-20  | CAO82046.4     | 86  | 102.834 | 60  | 52  | C. elegans protein F43D9.3b, confirmed by transcript evidence |
| Locus_7401_Transcript_1/1_Conf_1.000 | 1411 | 6  | 5.97E-62  | NP_741405.1    | 55  | 243.047 | 459 | 255 | SKINhead family member (skn-1)                                |
| Locus_7402_Transcript_1/1_Conf_1.000 | 1232 | 20 | 1.94E-74  | NP_491320.1    | 83  | 284.263 | 183 | 152 | hypothetical protein R12E2.13                                 |
| Locus_7403_Transcript_1/1_Conf_1.000 | 548  | 20 | 1.41E-11  | AAD51334.1     | 65  | 73.1738 | 61  | 40  | Kunitz type serine protease inhibitor                         |
| Locus_7404_Transcript_1/1_Conf_1.000 | 141  | 0  |           |                |     |         |     |     |                                                               |
| Locus_7405_Transcript_1/1_Conf_1.000 | 506  | 3  | 4.03E-22  | ACI49066.1     | 70  | 107.842 | 117 | 83  | hypothetical protein Cbre_JD09.010                            |
| Locus_7406_Transcript_1/2_Conf_1.000 | 652  | 4  | 3.90E-32  | EFO22827.1     | 63  | 142.124 | 172 | 109 | hypothetical protein LOAG_05660                               |
| Locus_7406_Transcript_2/2_Conf_1.000 | 912  | 4  | 3.45E-53  | EFO22827.1     | 61  | 213.001 | 267 | 165 | hypothetical protein LOAG_05660                               |
| Locus_7407_Transcript_1/1_Conf_1.000 | 1416 | 3  | 3.93E-29  | NP_492328.1    | 52  | 134.035 | 232 | 122 | yeast Enhancer of DeCapping homolog family member (edc-3)     |
| Locus_7408_Transcript_1/1_Conf_1.000 | 754  | 7  | 7.06E-45  | NP_001023039.1 | 84  | 184.882 | 131 | 111 | EXCreatory canal abnormal family member (exc-5)               |
| Locus_7409_Transcript_1/1_Conf_1.000 | 734  | 20 | 2.70E-86  | AAP36551.1     | 100 | 322.398 | 178 | 178 | Homo sapiens FXD domain containing ion transport regulator 5  |
| Locus_741_Transcript_1/1_Conf_1.000  | 670  | 20 | 2.43E-117 | XP_002799759.1 | 100 | 425.246 | 211 | 211 | PREDICTED: 40S ribosomal protein S2-like                      |
| Locus_7410_Transcript_1/3_Conf_0.714 | 899  | 20 | 4.53E-50  | XP_002633239.1 | 62  | 202.601 | 311 | 193 | C. briggsae CBR-DNC-1 protein                                 |
| Locus_7410_Transcript_2/3_Conf_0.714 | 899  | 20 | 1.32E-49  | XP_002633239.1 | 62  | 201.06  | 311 | 193 | C. briggsae CBR-DNC-1 protein                                 |



|                                      |      |    |           |                |    |         |     |     |                                        |
|--------------------------------------|------|----|-----------|----------------|----|---------|-----|-----|----------------------------------------|
| Locus_7410_Transcript_3/3_Conf_0.714 | 899  | 20 | 1.32E-49  | XP_002633239.1 | 62 | 201.06  | 311 | 193 | C. briggsae CBR-DNC-1 protein          |
| Locus_7411_Transcript_1/2_Conf_1.000 | 624  | 0  |           |                |    |         |     |     |                                        |
| Locus_7411_Transcript_2/2_Conf_1.000 | 615  | 0  |           |                |    |         |     |     |                                        |
| Locus_7412_Transcript_1/1_Conf_1.000 | 1586 | 20 | 1.39E-94  | NP_503136.2    | 58 | 351.673 | 501 | 294 | hypothetical protein Y38C9A.1          |
| Locus_7413_Transcript_1/1_Conf_1.000 | 268  | 3  | 3.19E-08  | NP_494366.2    | 81 | 61.6178 | 44  | 36  | hypothetical protein F08D12.1          |
| Locus_7414_Transcript_1/1_Conf_1.000 | 446  | 0  |           |                |    |         |     |     |                                        |
| Locus_7415_Transcript_1/1_Conf_1.000 | 439  | 2  | 2.40E-08  | XP_001898153.1 | 70 | 62.003  | 58  | 41  | RNA polymerase II:SUBUNIT=110kD.       |
| Locus_7416_Transcript_1/1_Conf_1.000 | 487  | 14 | 6.23E-20  | XP_002645614.1 | 60 | 100.523 | 123 | 75  | Hypothetical protein CBG05337          |
| Locus_7417_Transcript_1/1_Conf_1.000 | 406  | 0  |           |                |    |         |     |     |                                        |
| Locus_7418_Transcript_1/1_Conf_1.000 | 854  | 20 | 1.11E-127 | XP_002636822.1 | 99 | 460.299 | 248 | 246 | C. briggsae CBR-RPT-2 protein          |
| Locus_7419_Transcript_1/1_Conf_1.000 | 609  | 2  | 6.96E-14  | NP_508128.1    | 74 | 81.2629 | 83  | 62  | hypothetical protein F13C5.5           |
| Locus_742_Transcript_1/1_Conf_1.000  | 1034 | 20 | 3.00E-91  | NP_001129807.1 | 70 | 339.732 | 316 | 222 | hypothetical protein C08H9.2           |
| Locus_7420_Transcript_1/1_Conf_1.000 | 777  | 20 | 6.77E-78  | XP_002593329.1 | 79 | 294.664 | 235 | 186 | hypothetical protein BRAFLDRAFT_119583 |

|                                      |      |    |           |                |     |         |     |     |                                           |
|--------------------------------------|------|----|-----------|----------------|-----|---------|-----|-----|-------------------------------------------|
| Locus_7421_Transcript_1/1_Conf_1.000 | 821  | 20 | 2.76E-40  | EFO26611.1     | 57  | 169.859 | 242 | 139 | hypothetical protein LOAG_01867           |
| Locus_7422_Transcript_1/1_Conf_1.000 | 141  | 0  |           |                |     |         |     |     |                                           |
| Locus_7423_Transcript_1/1_Conf_1.000 | 274  | 0  |           |                |     |         |     |     |                                           |
| Locus_7424_Transcript_1/1_Conf_1.000 | 973  | 20 | 4.52E-54  | NP_501489.2    | 79  | 216.083 | 169 | 134 | hypothetical protein F08B4.5              |
| Locus_7425_Transcript_1/1_Conf_1.000 | 1527 | 20 | 5.93E-127 | NP_498138.2    | 70  | 459.144 | 400 | 282 | hypothetical protein F52C9.3              |
| Locus_7426_Transcript_1/1_Conf_1.000 | 253  | 20 | 9.67E-45  | XP_002818294.1 | 100 | 182.956 | 84  | 84  | PREDICTED: collagen alpha-2(I) chain-like |
| Locus_7427_Transcript_1/1_Conf_1.000 | 745  | 20 | 4.18E-82  | XP_002634568.1 | 90  | 308.531 | 180 | 163 | Hypothetical protein CBG08374             |
| Locus_7428_Transcript_1/1_Conf_1.000 | 546  | 20 | 2.40E-11  | EFO24929.1     | 64  | 72.4034 | 77  | 50  | hypothetical protein LOAG_03556           |
| Locus_7429_Transcript_1/2_Conf_0.500 | 1720 | 20 | 2.62E-110 | XP_002630825.1 | 56  | 404.06  | 681 | 383 | Hypothetical protein CBG02527             |
| Locus_7429_Transcript_2/2_Conf_0.500 | 1720 | 20 | 2.62E-110 | XP_002630825.1 | 56  | 404.06  | 681 | 383 | Hypothetical protein CBG02527             |
| Locus_743_Transcript_1/1_Conf_1.000  | 788  | 20 | 3.82E-60  | XP_002635477.1 | 82  | 235.728 | 200 | 165 | Hypothetical protein CBG08772             |
| Locus_7430_Transcript_1/1_Conf_1.000 | 568  | 20 | 1.14E-54  | XP_002640720.1 | 77  | 216.468 | 190 | 148 | C. briggsae CBR-TAG-301 protein           |

|                                      |      |    |           |                |    |         |     |     |                                                           |
|--------------------------------------|------|----|-----------|----------------|----|---------|-----|-----|-----------------------------------------------------------|
| Locus_7431_Transcript_1/1_Conf_1.000 | 313  | 20 | 2.15E-44  | NP_492363.1    | 95 | 181.8   | 103 | 98  | yeast PRP (splicing factor) related family member (prp-4) |
| Locus_7432_Transcript_1/1_Conf_1.000 | 632  | 20 | 4.22E-41  | XP_001899546.1 | 68 | 171.785 | 167 | 115 | hypothetical protein                                      |
| Locus_7433_Transcript_1/1_Conf_1.000 | 498  | 20 | 3.09E-72  | NP_492593.2    | 87 | 274.248 | 165 | 144 | hypothetical protein F26E4.3                              |
| Locus_7434_Transcript_1/1_Conf_1.000 | 841  | 20 | 7.19E-23  | XP_002634943.1 | 49 | 112.079 | 212 | 104 | Hypothetical protein CBG22545                             |
| Locus_7435_Transcript_1/1_Conf_1.000 | 407  | 0  |           |                |    |         |     |     |                                                           |
| Locus_7436_Transcript_1/2_Conf_1.000 | 540  | 20 | 1.02E-67  | NP_500987.3    | 88 | 259.61  | 149 | 132 | hypothetical protein Y73B6BL.1                            |
| Locus_7436_Transcript_2/2_Conf_1.000 | 417  | 2  | 4.33E-37  | NP_500987.3    | 63 | 157.532 | 149 | 94  | hypothetical protein Y73B6BL.1                            |
| Locus_7437_Transcript_1/1_Conf_1.000 | 160  | 0  |           |                |    |         |     |     |                                                           |
| Locus_7438_Transcript_1/1_Conf_1.000 | 776  | 20 | 4.91E-121 | NP_001129749.1 | 95 | 437.958 | 262 | 249 | abnormal cell LiNeage family member (lin-10)              |
| Locus_7439_Transcript_1/1_Conf_1.000 | 328  | 20 | 2.60E-26  | XP_002631178.1 | 71 | 121.709 | 108 | 77  | C. briggsae CBR-MAT-2 protein                             |
| Locus_744_Transcript_1/1_Conf_1.000  | 1468 | 20 | 1.64E-118 | XP_001894786.1 | 76 | 431.024 | 335 | 256 | DnaJ homolog subfamily B member 4                         |
| Locus_7440_Transcript_1/1_Conf_1.000 | 673  | 0  |           |                |    |         |     |     |                                                           |
| Locus_7441_Transcript_1/1_Conf_1.000 | 138  | 13 | 3.47E-15  | EFO15646.1     | 91 | 84.7297 | 45  | 41  | hypothetical protein LOAG_12863                           |
| Locus_7442_Transcript_1/1_Conf_1.000 | 487  | 5  | 2.89E-25  | NP_001123108.1 | 70 | 118.242 | 135 | 95  | hypothetical protein C14H10.3                             |
| Locus_7443_Transcript_1/1_Conf_1.000 | 355  | 20 | 1.41E-56  | EFO26612.1     | 93 | 222.246 | 118 | 110 | hypothetical protein LOAG_01868                           |

|                                      |      |    |           |                |    |         |     |     |                                                                          |
|--------------------------------------|------|----|-----------|----------------|----|---------|-----|-----|--------------------------------------------------------------------------|
| Locus_7444_Transcript_1/1_Conf_1.000 | 922  | 20 | 2.94E-100 | XP_002637600.1 | 80 | 369.392 | 294 | 238 | C. briggsae CBR-SULP-8 protein                                           |
| Locus_7445_Transcript_1/1_Conf_1.000 | 721  | 20 | 2.20E-93  | NP_491261.1    | 90 | 345.895 | 198 | 180 | Proteasome Beta Subunit family member (pbs-4)                            |
| Locus_7446_Transcript_1/1_Conf_1.000 | 206  | 0  |           |                |    |         |     |     |                                                                          |
| Locus_7447_Transcript_1/1_Conf_1.000 | 528  | 20 | 1.26E-75  | NP_497920.3    | 90 | 285.804 | 150 | 135 | hypothetical protein M88.7                                               |
| Locus_7448_Transcript_1/1_Conf_1.000 | 501  | 20 | 1.77E-06  | XP_001839086.2 | 54 | 55.8398 | 118 | 64  | hypothetical protein CC1G_10651                                          |
| Locus_7449_Transcript_1/1_Conf_1.000 | 1222 | 20 | 2.88E-171 | NP_499556.1    | 82 | 605.905 | 407 | 337 | NitFhit family member (nft-1)                                            |
| Locus_745_Transcript_1/1_Conf_1.000  | 350  | 0  |           |                |    |         |     |     |                                                                          |
| Locus_7450_Transcript_1/1_Conf_1.000 | 391  | 19 | 5.17E-19  | NP_498112.1    | 60 | 97.4413 | 134 | 81  | Protein arginine MethylTransferase family member (prmt-5)                |
| Locus_7451_Transcript_1/1_Conf_1.000 | 1220 | 20 | 1.15E-103 | CAQ58114.2     | 76 | 381.333 | 311 | 238 | C. elegans protein H21P03.3c, partially confirmed by transcript evidence |
| Locus_7452_Transcript_1/1_Conf_1.000 | 722  | 4  | 4.78E-64  | XP_002636230.1 | 71 | 248.44  | 246 | 176 | Hypothetical protein CBG12154                                            |

|                                      |     |    |          |                |    |         |     |     |                                                     |
|--------------------------------------|-----|----|----------|----------------|----|---------|-----|-----|-----------------------------------------------------|
| Locus_7453_Transcript_1/1_Conf_1.000 | 465 | 20 | 5.63E-29 | EFO18511.1     | 72 | 130.568 | 104 | 75  | zinc finger in N-recognin family protein            |
| Locus_7454_Transcript_1/1_Conf_1.000 | 798 | 20 | 1.44E-86 | NP_508216.1    | 81 | 323.553 | 249 | 202 | Sorting NeXin family member (snx-1)                 |
| Locus_7455_Transcript_1/1_Conf_1.000 | 912 | 20 | 4.61E-90 | XP_002646678.1 | 84 | 335.495 | 217 | 184 | Hypothetical protein CBG11120                       |
| Locus_7456_Transcript_1/1_Conf_1.000 | 843 | 0  |          |                |    |         |     |     |                                                     |
| Locus_7457_Transcript_1/1_Conf_1.000 | 707 | 20 | 2.00E-19 | EFO23663.1     | 72 | 100.138 | 111 | 80  | myosin xviii                                        |
| Locus_7458_Transcript_1/1_Conf_1.000 | 331 | 6  | 2.05E-23 | EFO20439.1     | 66 | 112.079 | 112 | 74  | hypothetical protein LOAG_08053                     |
| Locus_7459_Transcript_1/1_Conf_1.000 | 189 | 0  |          |                |    |         |     |     |                                                     |
| Locus_746_Transcript_1/1_Conf_1.000  | 620 | 20 | 1.32E-23 | XP_001895452.1 | 59 | 113.62  | 169 | 101 | DNA mismatch repair protein MutL containing protein |
| Locus_7460_Transcript_1/1_Conf_1.000 | 639 | 5  | 5.41E-07 | NP_498661.1    | 74 | 58.5362 | 62  | 46  | LiPid Depleted family member (lpd-7)                |
| Locus_7461_Transcript_1/1_Conf_1.000 | 667 | 0  |          |                |    |         |     |     |                                                     |
| Locus_7462_Transcript_1/1_Conf_1.000 | 297 | 0  |          |                |    |         |     |     |                                                     |

|                                      |      |    |           |                |    |         |     |     |                                                      |
|--------------------------------------|------|----|-----------|----------------|----|---------|-----|-----|------------------------------------------------------|
| Locus_7463_Transcript_1/1_Conf_1.000 | 341  | 20 | 5.16E-19  | NP_501593.1    | 93 | 97.4413 | 48  | 45  | RNA Polymerase II (B) subunit family member (rpb-12) |
| Locus_7464_Transcript_1/1_Conf_1.000 | 368  | 20 | 4.65E-36  | XP_002648989.1 | 85 | 154.066 | 109 | 93  | C. briggsae CBR-GRS-1 protein                        |
| Locus_7465_Transcript_1/1_Conf_1.000 | 1626 | 20 | 1.30E-103 | XP_002641128.1 | 61 | 381.719 | 472 | 291 | Hypothetical protein CBG08978                        |
| Locus_7466_Transcript_1/1_Conf_1.000 | 1068 | 20 | 1.25E-55  | XP_002031100.1 | 70 | 221.476 | 227 | 161 | GM24211                                              |
| Locus_7467_Transcript_1/1_Conf_1.000 | 1585 | 20 | 9.09E-70  | XP_001899173.1 | 52 | 269.24  | 550 | 288 | ENTH domain containing protein                       |
| Locus_7468_Transcript_1/1_Conf_1.000 | 1030 | 20 | 1.93E-98  | NP_506927.2    | 83 | 363.614 | 293 | 246 | HAIF transporter (PGP related) family member (haf-3) |
| Locus_7469_Transcript_1/2_Conf_1.000 | 638  | 3  | 1.01E-05  | EFO26068.1     | 39 | 54.299  | 207 | 82  | hypothetical protein LOAG_02419                      |
| Locus_7469_Transcript_2/2_Conf_1.000 | 638  | 4  | 7.71E-06  | AAI39651.1     | 41 | 54.6842 | 180 | 75  | Si:busm1-142b24.1 protein                            |
| Locus_747_Transcript_1/1_Conf_1.000  | 357  | 0  |           |                |    |         |     |     |                                                      |
| Locus_7470_Transcript_1/1_Conf_1.000 | 577  | 20 | 5.41E-39  | XP_002636914.1 | 62 | 164.466 | 191 | 119 | Hypothetical protein CBG09378                        |
| Locus_7471_Transcript_1/1_Conf_1.000 | 601  | 20 | 1.57E-47  | NP_491262.2    | 81 | 192.971 | 160 | 131 | hypothetical protein T20F5.3                         |
| Locus_7472_Transcript_1/1_Conf_1.000 | 289  | 20 | 8.44E-33  | EFO16727.1     | 81 | 143.28  | 95  | 77  | hypothetical protein LOAG_11776                      |
| Locus_7473_Transcript_1/1_Conf_1.000 | 139  | 0  |           |                |    |         |     |     |                                                      |
| Locus_7474_Transcript_1/1_Conf_1.000 | 458  | 20 | 2.19E-09  | CBW48565.1     | 67 | 65.4698 | 74  | 50  | Hypothetical protein Y111B2A.22d                     |

|                                      |      |    |          |                |    |         |     |     |                                 |
|--------------------------------------|------|----|----------|----------------|----|---------|-----|-----|---------------------------------|
| Locus_7475_Transcript_1/1_Conf_1.000 | 226  | 20 | 1.31E-09 | EFO27829.1     | 64 | 66.2402 | 74  | 48  | hypothetical protein LOAG_00642 |
| Locus_7476_Transcript_1/2_Conf_1.000 | 1632 | 20 | 1.24E-61 | XP_002629747.1 | 66 | 242.276 | 271 | 181 | Hypothetical protein CBG00981   |
| Locus_7476_Transcript_2/2_Conf_1.000 | 929  | 20 | 6.32E-26 | XP_002629747.1 | 63 | 122.479 | 138 | 87  | Hypothetical protein CBG00981   |
| Locus_7477_Transcript_1/1_Conf_1.000 | 1120 | 10 | 3.72E-05 | XP_002043842.1 | 39 | 53.9138 | 222 | 87  | GM17783                         |
| Locus_7478_Transcript_1/1_Conf_1.000 | 1732 | 20 | 0        | XP_002638790.1 | 95 | 706.442 | 405 | 386 | Hypothetical protein CBG05145   |
| Locus_7479_Transcript_1/1_Conf_1.000 | 1867 | 20 | 4.14E-56 | XP_002634522.1 | 57 | 224.172 | 323 | 187 | Hypothetical protein CBG08316   |

|                                      |      |    |           |                |    |         |      |     |                                                 |
|--------------------------------------|------|----|-----------|----------------|----|---------|------|-----|-------------------------------------------------|
| Locus_748_Transcript_1/1_Conf_1.000  | 3305 | 20 | 0         | EFO24929.1     | 63 | 928.702 | 1141 | 729 | hypothetical protein LOAG_03556                 |
| Locus_7480_Transcript_1/1_Conf_1.000 | 562  | 20 | 3.35E-19  | EFO16288.1     | 73 | 98.5969 | 84   | 62  | hypothetical protein LOAG_12221                 |
| Locus_7481_Transcript_1/1_Conf_1.000 | 1183 | 20 | 4.03E-114 | NP_493376.1    | 96 | 416.001 | 215  | 207 | Aboc, EXpulsion defective family member (aex-6) |
| Locus_7482_Transcript_1/1_Conf_1.000 | 754  | 20 | 1.91E-58  | XP_002642487.1 | 81 | 229.95  | 150  | 122 | Hypothetical protein CBG06906                   |
| Locus_7483_Transcript_1/1_Conf_1.000 | 268  | 0  |           |                |    |         |      |     |                                                 |



|                                      |      |    |           |                |    |         |     |     |                                                   |
|--------------------------------------|------|----|-----------|----------------|----|---------|-----|-----|---------------------------------------------------|
| Locus_7484_Transcript_1/2_Conf_1.000 | 1507 | 20 | 5.98E-31  | EFO21559.1     | 52 | 140.198 | 360 | 190 | hypothetical protein LOAG_06930                   |
| Locus_7484_Transcript_2/2_Conf_1.000 | 1461 | 20 | 5.73E-31  | EFO21559.1     | 52 | 140.198 | 360 | 190 | hypothetical protein LOAG_06930                   |
| Locus_7485_Transcript_1/1_Conf_1.000 | 168  | 20 | 9.22E-16  | NP_490714.1    | 83 | 86.6557 | 55  | 46  | hypothetical protein C53D5.5                      |
| Locus_7486_Transcript_1/1_Conf_1.000 | 327  | 20 | 4.26E-45  | NP_001122528.1 | 87 | 184.111 | 108 | 95  | Cation transporting ATPase family member (catp-1) |
| Locus_7487_Transcript_1/2_Conf_1.000 | 673  | 0  |           |                |    |         |     |     |                                                   |
| Locus_7487_Transcript_2/2_Conf_1.000 | 545  | 0  |           |                |    |         |     |     |                                                   |
| Locus_7488_Transcript_1/1_Conf_1.000 | 452  | 0  |           |                |    |         |     |     |                                                   |
| Locus_7489_Transcript_1/1_Conf_1.000 | 364  | 20 | 4.48E-63  | XP_573067.2    | 98 | 243.817 | 119 | 117 | PREDICTED: ribosomal protein S10-like             |
| Locus_749_Transcript_1/1_Conf_1.000  | 1536 | 20 | 0         | XP_001898544.1 | 83 | 724.161 | 511 | 429 | Probable methylenetetrahydrofolate reductase      |
| Locus_7490_Transcript_1/1_Conf_1.000 | 290  | 0  |           |                |    |         |     |     |                                                   |
| Locus_7491_Transcript_1/1_Conf_1.000 | 746  | 20 | 1.11E-58  | NP_492616.1    | 66 | 230.72  | 248 | 164 | Nematode AStacin protease family member (nas-5)   |
| Locus_7492_Transcript_1/1_Conf_1.000 | 1178 | 20 | 3.57E-155 | AAW82658.1     | 95 | 552.362 | 317 | 303 | cyclophilin                                       |
| Locus_7493_Transcript_1/1_Conf_1.000 | 232  | 1  | 1.93E-04  | XP_002633725.1 | 52 | 35.4242 | 61  | 32  | Hypothetical protein CBG03410                     |

|                                      |     |    |          |                |    |         |     |     |                                 |
|--------------------------------------|-----|----|----------|----------------|----|---------|-----|-----|---------------------------------|
| Locus_7494_Transcript_1/1_Conf_1.000 | 373 | 20 | 2.52E-53 | A8X3A7.2       | 87 | 211.46  | 124 | 109 | Integrin alpha pat-2            |
| Locus_7495_Transcript_1/1_Conf_1.000 | 717 | 20 | 1.69E-45 | NP_498418.2    | 67 | 186.808 | 179 | 120 | hypothetical protein T26A5.5    |
| Locus_7496_Transcript_1/1_Conf_1.000 | 790 | 20 | 1.66E-87 | ABW16951.1     | 97 | 326.635 | 165 | 161 | E2 ubiquitin conjugating enzyme |
| Locus_7497_Transcript_1/1_Conf_1.000 | 359 | 0  |          |                |    |         |     |     |                                 |
| Locus_7498_Transcript_1/1_Conf_1.000 | 580 | 20 | 1.76E-45 | XP_002634139.1 | 76 | 186.037 | 194 | 148 | Hypothetical protein CBG01700   |
| Locus_7499_Transcript_1/1_Conf_1.000 | 383 | 0  |          |                |    |         |     |     |                                 |
| Locus_75_Transcript_1/2_Conf_1.000   | 379 | 0  |          |                |    |         |     |     |                                 |
| Locus_75_Transcript_2/2_Conf_1.000   | 225 | 0  |          |                |    |         |     |     |                                 |
| Locus_750_Transcript_1/1_Conf_1.000  | 398 | 0  |          |                |    |         |     |     |                                 |

|                                      |      |    |           |                |    |         |     |     |                                                                 |
|--------------------------------------|------|----|-----------|----------------|----|---------|-----|-----|-----------------------------------------------------------------|
| Locus_7500_Transcript_1/1_Conf_1.000 | 950  | 20 | 3.25E-158 | XP_002640630.1 | 97 | 561.992 | 301 | 292 | C. briggsae CBR-APG-1 protein                                   |
| Locus_7501_Transcript_1/1_Conf_1.000 | 629  | 20 | 1.46E-94  | NP_499324.1    | 90 | 349.362 | 207 | 187 | 4-HydroxyPhenylpyruvate Dioxygenase (HPD) family member (hpd-1) |
| Locus_7502_Transcript_1/1_Conf_1.000 | 251  | 20 | 2.39E-32  | XP_002642075.1 | 90 | 141.739 | 83  | 75  | C. briggsae CBR-TAG-243 protein                                 |
| Locus_7503_Transcript_1/1_Conf_1.000 | 255  | 3  | 1.88E-40  | XP_002647011.1 | 94 | 168.703 | 84  | 79  | Hypothetical protein CBG23797                                   |
| Locus_7504_Transcript_1/1_Conf_1.000 | 280  | 2  | 3.60E-04  | CBN75987.1     | 62 | 48.1358 | 53  | 33  | conserved unknown protein                                       |
| Locus_7505_Transcript_1/1_Conf_1.000 | 357  | 20 | 2.51E-13  | AAZ67091.1     | 60 | 78.5666 | 99  | 60  | transposase                                                     |
| Locus_7506_Transcript_1/1_Conf_1.000 | 919  | 0  |           |                |    |         |     |     |                                                                 |
| Locus_7507_Transcript_1/1_Conf_1.000 | 1172 | 0  |           |                |    |         |     |     |                                                                 |
| Locus_7508_Transcript_1/1_Conf_1.000 | 426  | 20 | 1.11E-77  | NP_497235.2    | 99 | 292.352 | 141 | 140 | G-protein-coupled Receptor Kinase family member (grk-2)         |
| Locus_7509_Transcript_1/1_Conf_1.000 | 547  | 0  |           |                |    |         |     |     |                                                                 |
| Locus_751_Transcript_1/1_Conf_1.000  | 831  | 20 | 5.51E-60  | NP_495670.1    | 71 | 235.343 | 261 | 187 | hypothetical protein ZK669.4                                    |
| Locus_7510_Transcript_1/1_Conf_1.000 | 271  | 0  |           |                |    |         |     |     |                                                                 |
| Locus_7511_Transcript_1/1_Conf_1.000 | 802  | 20 | 7.58E-19  | XP_001901969.1 | 51 | 98.5969 | 212 | 110 | hypothetical protein                                            |
| Locus_7512_Transcript_1/1_Conf_1.000 | 428  | 9  | 9.57E-21  | NP_503523.2    | 58 | 103.219 | 126 | 74  | hypothetical protein Y32G9A.8                                   |

|                                      |      |    |           |                |    |         |     |     |                                              |
|--------------------------------------|------|----|-----------|----------------|----|---------|-----|-----|----------------------------------------------|
| Locus_7513_Transcript_1/1_Conf_1.000 | 1119 | 20 | 3.83E-135 | XP_002646930.1 | 81 | 485.723 | 369 | 302 | Hypothetical protein CBG19635                |
| Locus_7514_Transcript_1/1_Conf_1.000 | 786  | 10 | 8.36E-07  | XP_002634943.1 | 48 | 58.5362 | 132 | 64  | Hypothetical protein CBG22545                |
| Locus_7515_Transcript_1/1_Conf_1.000 | 832  | 20 | 2.64E-62  | XP_002637746.1 | 61 | 243.047 | 306 | 189 | C. briggsae CBR-TAG-333 protein              |
| Locus_7516_Transcript_1/1_Conf_1.000 | 1129 | 0  |           |                |    |         |     |     |                                              |
| Locus_7517_Transcript_1/1_Conf_1.000 | 666  | 20 | 1.16E-87  | XP_002645390.1 | 85 | 326.635 | 225 | 192 | C. briggsae CBR-SEC-15 protein               |
| Locus_7518_Transcript_1/1_Conf_1.000 | 1098 | 20 | 5.48E-62  | XP_001898944.1 | 57 | 242.662 | 361 | 207 | Protein kinase domain containing protein     |
| Locus_7519_Transcript_1/2_Conf_1.000 | 608  | 20 | 2.56E-77  | BAC01801.1     | 99 | 291.967 | 157 | 156 | immunoglobulin lambda light chain VLJ region |
| Locus_7519_Transcript_2/2_Conf_1.000 | 598  | 20 | 1.10E-77  | ACF34413.1     | 96 | 293.123 | 154 | 148 | immunoglobulin light chain                   |
| Locus_752_Transcript_1/1_Conf_1.000  | 578  | 20 | 1.28E-72  | XP_001892288.1 | 78 | 276.174 | 192 | 151 | UPF0017 protein CG3488                       |
| Locus_7520_Transcript_1/1_Conf_1.000 | 462  | 20 | 2.08E-31  | NP_506713.1    | 73 | 138.658 | 123 | 90  | hypothetical protein C01G10.10               |
| Locus_7521_Transcript_1/1_Conf_1.000 | 1396 | 11 | 2.33E-34  | NP_497280.1    | 66 | 151.369 | 145 | 96  | hypothetical protein T24C4.2                 |
| Locus_7522_Transcript_1/1_Conf_1.000 | 312  | 0  |           |                |    |         |     |     |                                              |

|                                      |      |    |           |                |    |         |     |     |                                                            |
|--------------------------------------|------|----|-----------|----------------|----|---------|-----|-----|------------------------------------------------------------|
| Locus_7523_Transcript_1/3_Conf_0.400 | 791  | 20 | 1.98E-48  | XP_002632461.1 | 66 | 196.823 | 262 | 174 | C. briggsae CBR-MEL-46 protein                             |
| Locus_7523_Transcript_2/3_Conf_0.600 | 2560 | 20 | 8.96E-68  | NP_502998.2    | 46 | 263.462 | 828 | 387 | Maternal Effect Lethal family member (mel-46)              |
| Locus_7523_Transcript_3/3_Conf_0.600 | 2558 | 20 | 8.95E-68  | NP_502998.2    | 46 | 263.462 | 828 | 387 | Maternal Effect Lethal family member (mel-46)              |
| Locus_7524_Transcript_1/1_Conf_1.000 | 659  | 20 | 9.38E-82  | NP_001021395.1 | 84 | 306.99  | 201 | 170 | Receptor Mediated Endocytosis family member (rme-8)        |
| Locus_7525_Transcript_1/1_Conf_1.000 | 421  | 6  | 1.70E-33  | XP_002639089.1 | 73 | 145.591 | 142 | 104 | C. briggsae CBR-TAG-163 protein                            |
| Locus_7526_Transcript_1/1_Conf_1.000 | 1416 | 20 | 3.02E-130 | NP_505415.2    | 74 | 469.929 | 438 | 326 | COenzyme Q (ubiquinone) biosynthesis family member (coq-6) |
| Locus_7527_Transcript_1/1_Conf_1.000 | 387  | 0  |           |                |    |         |     |     |                                                            |
| Locus_7528_Transcript_1/4_Conf_0.500 | 1636 | 20 | 0         | XP_002634760.1 | 98 | 1042.72 | 545 | 539 | C. briggsae CBR-RPB-1 protein                              |
| Locus_7528_Transcript_2/4_Conf_0.625 | 1953 | 20 | 0         | XP_002634760.1 | 98 | 1196.42 | 651 | 639 | C. briggsae CBR-RPB-1 protein                              |

|                                      |      |    |          |                |    |         |     |     |                                             |
|--------------------------------------|------|----|----------|----------------|----|---------|-----|-----|---------------------------------------------|
| Locus_7528_Transcript_3/4_Conf_0.500 | 1965 | 20 | 0        | XP_002634760.1 | 94 | 1167.53 | 659 | 626 | C. briggsae CBR-RPB-1 protein               |
| Locus_7528_Transcript_4/4_Conf_0.625 | 2214 | 20 | 0        | XP_002634760.1 | 95 | 1311.21 | 742 | 709 | C. briggsae CBR-RPB-1 protein               |
| Locus_7529_Transcript_1/5_Conf_0.636 | 1349 | 20 | 1.80E-92 | XP_002642319.1 | 73 | 344.354 | 291 | 214 | C. briggsae CBR-TAG-331 protein             |
| Locus_7529_Transcript_2/5_Conf_0.636 | 1350 | 20 | 1.80E-92 | XP_002642319.1 | 73 | 344.354 | 291 | 214 | C. briggsae CBR-TAG-331 protein             |
| Locus_7529_Transcript_3/5_Conf_0.636 | 1476 | 20 | 2.03E-92 | XP_002642319.1 | 73 | 344.354 | 291 | 214 | C. briggsae CBR-TAG-331 protein             |
| Locus_7529_Transcript_4/5_Conf_0.636 | 1350 | 20 | 2.69E-96 | NP_499375.1    | 68 | 357.066 | 360 | 245 | RiNg Finger protein family member (rnf-113) |
| Locus_7529_Transcript_5/5_Conf_0.636 | 1350 | 20 | 1.80E-92 | XP_002642319.1 | 73 | 344.354 | 291 | 214 | C. briggsae CBR-TAG-331 protein             |
| Locus_753_Transcript_1/1_Conf_1.000  | 567  | 4  | 8.46E-50 | NP_500037.2    | 73 | 200.29  | 177 | 130 | hypothetical protein Y55F3AR.1              |

|                                      |      |    |           |                |    |         |     |     |                                                          |
|--------------------------------------|------|----|-----------|----------------|----|---------|-----|-----|----------------------------------------------------------|
| Locus_7530_Transcript_1/1_Conf_1.000 | 1072 | 20 | 6.58E-97  | XP_001894445.1 | 68 | 358.607 | 357 | 245 | amine oxidase, flavin-containing family protein          |
| Locus_7531_Transcript_1/2_Conf_1.000 | 2656 | 20 | 4.37E-166 | XP_001899928.1 | 63 | 590.112 | 788 | 504 | hypothetical protein Bm1_42320                           |
| Locus_7531_Transcript_2/2_Conf_1.000 | 2566 | 20 | 1.44E-166 | XP_001899928.1 | 63 | 591.652 | 801 | 509 | hypothetical protein Bm1_42320                           |
| Locus_7532_Transcript_1/1_Conf_1.000 | 209  | 20 | 7.04E-16  | XP_002636002.1 | 75 | 87.0409 | 66  | 50  | Hypothetical protein CBG01236                            |
| Locus_7533_Transcript_1/1_Conf_1.000 | 1124 | 20 | 2.43E-105 | NP_496089.3    | 69 | 386.726 | 379 | 264 | ARF-related in C-term (ARD family) family member (arc-1) |
| Locus_7534_Transcript_1/1_Conf_1.000 | 612  | 20 | 2.64E-61  | XP_002640467.1 | 84 | 238.81  | 168 | 142 | C. briggsae CBR-PFD-3 protein                            |
| Locus_7535_Transcript_1/1_Conf_1.000 | 570  | 20 | 4.00E-47  | NP_500082.1    | 76 | 191.43  | 152 | 116 | CaLPain family member (clp-7)                            |
| Locus_7536_Transcript_1/1_Conf_1.000 | 594  | 20 | 7.38E-26  | XP_002641410.1 | 89 | 120.939 | 68  | 61  | C. briggsae CBR-TIN-10 protein                           |

|                                      |      |    |          |                |    |         |     |     |                                      |
|--------------------------------------|------|----|----------|----------------|----|---------|-----|-----|--------------------------------------|
| Locus_7537_Transcript_1/2_Conf_1.000 | 1762 | 20 | 2.47E-79 | XP_001891652.1 | 76 | 301.212 | 305 | 234 | myosin heavy chain, nonmuscle type 1 |
| Locus_7537_Transcript_2/2_Conf_1.000 | 1756 | 20 | 7.64E-81 | XP_001891652.1 | 77 | 306.22  | 303 | 234 | myosin heavy chain, nonmuscle type 1 |
| Locus_7538_Transcript_1/1_Conf_1.000 | 318  | 1  | 5.69E-05 | CAR63546.1     | 53 | 50.8322 | 98  | 52  | hypothetical protein                 |



|                                      |      |    |           |                |    |         |     |     |                                                                                                  |
|--------------------------------------|------|----|-----------|----------------|----|---------|-----|-----|--------------------------------------------------------------------------------------------------|
| Locus_7539_Transcript_1/1_Conf_1.000 | 1307 | 20 | 4.00E-49  | NP_502599.2    | 62 | 200.29  | 296 | 184 | TBC (Tre-2/Bub2/Cdc16) domain family member (tbc-9)                                              |
| Locus_754_Transcript_1/3_Conf_0.667  | 1840 | 20 | 1.50E-159 | NP_505653.1    | 71 | 567.77  | 564 | 403 | hypothetical protein B0024.11                                                                    |
| Locus_754_Transcript_2/3_Conf_0.667  | 1840 | 20 | 5.69E-159 | NP_505653.1    | 71 | 565.844 | 564 | 402 | hypothetical protein B0024.11                                                                    |
| Locus_754_Transcript_3/3_Conf_0.667  | 1840 | 20 | 1.50E-159 | NP_505653.1    | 71 | 567.77  | 564 | 403 | hypothetical protein B0024.11                                                                    |
| Locus_7540_Transcript_1/1_Conf_1.000 | 452  | 0  |           |                |    |         |     |     |                                                                                                  |
| Locus_7541_Transcript_1/1_Conf_1.000 | 184  | 0  |           |                |    |         |     |     |                                                                                                  |
| Locus_7542_Transcript_1/1_Conf_1.000 | 1227 | 20 | 7.51E-119 | XP_002639561.1 | 74 | 431.795 | 367 | 272 | Hypothetical protein CBG04192                                                                    |
| Locus_7543_Transcript_1/1_Conf_1.000 | 701  | 20 | 1.91E-46  | NP_505751.1    | 68 | 189.889 | 198 | 136 | hypothetical protein D1054.3                                                                     |
| Locus_7544_Transcript_1/1_Conf_1.000 | 500  | 0  |           |                |    |         |     |     |                                                                                                  |
| Locus_7545_Transcript_1/2_Conf_1.000 | 245  | 0  |           |                |    |         |     |     |                                                                                                  |
| Locus_7545_Transcript_2/2_Conf_1.000 | 257  | 0  |           |                |    |         |     |     |                                                                                                  |
| Locus_7546_Transcript_1/1_Conf_1.000 | 1153 | 20 | 1.03E-66  | NP_495959.1    | 82 | 258.455 | 179 | 147 | Phosphatase Interacting with RNA/RNP family member (pir-1)                                       |
| Locus_7547_Transcript_1/1_Conf_1.000 | 830  | 20 | 2.20E-101 | CAD28559.2     | 76 | 372.859 | 277 | 211 | metalloprotease I                                                                                |
| Locus_7548_Transcript_1/1_Conf_1.000 | 629  | 20 | 2.54E-22  | NP_492739.1    | 65 | 109.383 | 113 | 74  | hypothetical protein Y106G6H.15                                                                  |
| Locus_7549_Transcript_1/1_Conf_1.000 | 648  | 20 | 1.06E-61  | XP_002631164.1 | 73 | 172.94  | 142 | 105 | Hypothetical protein CBG02950                                                                    |
| Locus_755_Transcript_1/1_Conf_1.000  | 1179 | 20 | 5.71E-161 | A8WTI8.2       | 91 | 571.622 | 367 | 335 | Elongation factor G                                                                              |
| Locus_7550_Transcript_1/1_Conf_1.000 | 357  | 0  |           |                |    |         |     |     |                                                                                                  |
| Locus_7551_Transcript_1/1_Conf_1.000 | 480  | 4  | 4.38E-10  | AAA50679.3     | 60 | 67.781  | 129 | 78  | Bard homolog (tumor suppressor gene bard1) protein 1, partially confirmed by transcript evidence |

|                                      |      |    |           |                |     |         |     |     |                                                                          |
|--------------------------------------|------|----|-----------|----------------|-----|---------|-----|-----|--------------------------------------------------------------------------|
| Locus_7552_Transcript_1/1_Conf_1.000 | 1329 | 20 | 0         | ABS45069.1     | 100 | 781.941 | 413 | 413 | slowpoke potassium channel family member SLO-1                           |
| Locus_7553_Transcript_1/1_Conf_1.000 | 1498 | 20 | 1.01E-139 | XP_002640865.1 | 79  | 501.516 | 385 | 306 | Hypothetical protein CBG15756                                            |
| Locus_7554_Transcript_1/2_Conf_1.000 | 648  | 20 | 3.79E-96  | XP_002631515.1 | 91  | 354.755 | 198 | 181 | Hypothetical protein CBG20679                                            |
| Locus_7554_Transcript_2/2_Conf_1.000 | 648  | 20 | 3.79E-96  | XP_002631515.1 | 91  | 354.755 | 198 | 181 | Hypothetical protein CBG20679                                            |
| Locus_7555_Transcript_1/1_Conf_1.000 | 641  | 15 | 3.00E-82  | NP_001122770.1 | 86  | 308.531 | 210 | 182 | hypothetical protein F13E9.11                                            |
| Locus_7556_Transcript_1/1_Conf_1.000 | 412  | 0  |           |                |     |         |     |     |                                                                          |
| Locus_7557_Transcript_1/1_Conf_1.000 | 734  | 20 | 2.19E-11  | CAZ39166.1     | 65  | 73.559  | 69  | 45  | C. elegans protein T20D3.3c, confirmed by transcript evidence            |
| Locus_7558_Transcript_1/1_Conf_1.000 | 398  | 6  | 4.34E-21  | XP_002639073.1 | 64  | 104.375 | 119 | 77  | C. briggsae CBR-PQN-52 protein                                           |
| Locus_7559_Transcript_1/1_Conf_1.000 | 532  | 6  | 1.31E-19  | NP_501035.1    | 62  | 99.7525 | 129 | 80  | hypothetical protein H34C03.2                                            |
| Locus_756_Transcript_1/1_Conf_1.000  | 1890 | 20 | 3.77E-89  | NP_499364.1    | 61  | 333.954 | 388 | 238 | hypothetical protein W09D10.1                                            |
| Locus_7560_Transcript_1/1_Conf_1.000 | 627  | 0  |           |                |     |         |     |     |                                                                          |
| Locus_7561_Transcript_1/1_Conf_1.000 | 390  | 0  |           |                |     |         |     |     |                                                                          |
| Locus_7562_Transcript_1/1_Conf_1.000 | 675  | 20 | 2.71E-55  | CAB60494.2     | 67  | 219.164 | 222 | 149 | C. elegans protein Y39C12A.1, partially confirmed by transcript evidence |
| Locus_7563_Transcript_1/2_Conf_1.000 | 1479 | 20 | 5.41E-61  | XP_002643057.1 | 54  | 239.965 | 374 | 205 | C. briggsae CBR-APC-2 protein                                            |
| Locus_7563_Transcript_2/2_Conf_1.000 | 1479 | 20 | 7.06E-61  | XP_002643057.1 | 54  | 239.58  | 374 | 204 | C. briggsae CBR-APC-2 protein                                            |
| Locus_7564_Transcript_1/1_Conf_1.000 | 1056 | 20 | 8.67E-102 | ABC69942.1     | 70  | 374.785 | 369 | 260 | STIP                                                                     |
| Locus_7565_Transcript_1/1_Conf_1.000 | 387  | 20 | 2.58E-10  | NP_508439.2    | 53  | 68.5514 | 113 | 61  | hypothetical protein C43H6.1                                             |

|                                      |      |    |          |                |    |         |     |     |                                          |
|--------------------------------------|------|----|----------|----------------|----|---------|-----|-----|------------------------------------------|
| Locus_7566_Transcript_1/1_Conf_1.000 | 425  | 20 | 1.53E-26 | EFO27261.1     | 88 | 122.479 | 79  | 70  | APB-1 protein                            |
| Locus_7567_Transcript_1/2_Conf_0.846 | 822  | 0  |          |                |    |         |     |     |                                          |
| Locus_7567_Transcript_2/2_Conf_0.615 | 120  | 0  |          |                |    |         |     |     |                                          |
| Locus_7568_Transcript_1/1_Conf_1.000 | 247  | 20 | 6.97E-32 | NP_502298.2    | 95 | 140.198 | 72  | 69  | Dynein Light Chain family member (dlc-2) |
| Locus_7569_Transcript_1/2_Conf_1.000 | 1229 | 20 | 3.63E-89 | XP_002644425.1 | 70 | 333.183 | 280 | 197 | Hypothetical protein CBG14281            |
| Locus_7569_Transcript_2/2_Conf_1.000 | 1073 | 20 | 1.85E-91 | XP_002644425.1 | 70 | 340.502 | 286 | 201 | Hypothetical protein CBG14281            |
| Locus_757_Transcript_1/1_Conf_1.000  | 3219 | 20 | 5.00E-95 | XP_002630387.1 | 51 | 354.369 | 866 | 444 | Hypothetical protein CBG04326            |
| Locus_7570_Transcript_1/1_Conf_1.000 | 621  | 3  | 3.71E-10 | XP_002630813.1 | 50 | 68.9366 | 188 | 94  | Hypothetical protein CBG02513            |
| Locus_7571_Transcript_1/1_Conf_1.000 | 530  | 20 | 2.02E-57 | NP_508464.2    | 79 | 225.328 | 170 | 135 | hypothetical protein F52H2.7             |

|                                      |      |    |          |                |    |         |     |     |                                 |
|--------------------------------------|------|----|----------|----------------|----|---------|-----|-----|---------------------------------|
| Locus_7572_Transcript_1/1_Conf_1.000 | 1506 | 20 | 0        | NP_500051.2    | 81 | 660.988 | 484 | 395 | hypothetical protein Y104H12D.3 |
| Locus_7573_Transcript_1/1_Conf_1.000 | 248  | 0  |          |                |    |         |     |     |                                 |
| Locus_7574_Transcript_1/1_Conf_1.000 | 284  | 3  | 5.00E-17 | XP_002635262.1 | 81 | 90.8929 | 65  | 53  | Hypothetical protein CBG11506   |
| Locus_7575_Transcript_1/1_Conf_1.000 | 1014 | 20 | 6.56E-59 | NP_492123.2    | 64 | 232.261 | 274 | 178 | hypothetical protein D2030.8    |
| Locus_7576_Transcript_1/1_Conf_1.000 | 794  | 20 | 6.60E-68 | XP_002642974.1 | 69 | 261.536 | 265 | 183 | Hypothetical protein CBG15258   |
| Locus_7577_Transcript_1/1_Conf_1.000 | 486  | 3  | 3.21E-08 | XP_001901749.1 | 55 | 61.6178 | 96  | 53  | hypothetical protein Bm1_51405  |
| Locus_7578_Transcript_1/1_Conf_1.000 | 838  | 20 | 9.22E-63 | NP_492422.2    | 73 | 244.588 | 230 | 169 | SYNTAXIN family member (syn-13) |
| Locus_7579_Transcript_1/1_Conf_1.000 | 375  | 0  |          |                |    |         |     |     |                                 |
| Locus_758_Transcript_1/1_Conf_1.000  | 1268 | 20 | 0        | NP_492905.1    | 86 | 643.269 | 411 | 357 | hypothetical protein H25P06.1   |

|                                      |      |    |           |                |    |         |     |     |                                 |
|--------------------------------------|------|----|-----------|----------------|----|---------|-----|-----|---------------------------------|
| Locus_7580_Transcript_1/1_Conf_1.000 | 446  | 20 | 1.81E-35  | EFO21791.1     | 72 | 152.14  | 151 | 109 | hypothetical protein LOAG_06693 |
| Locus_7581_Transcript_1/1_Conf_1.000 | 283  | 0  |           |                |    |         |     |     |                                 |
| Locus_7582_Transcript_1/1_Conf_1.000 | 552  | 20 | 2.02E-45  | XP_002631190.1 | 65 | 185.652 | 173 | 114 | Hypothetical protein CBG02979   |
| Locus_7583_Transcript_1/1_Conf_1.000 | 626  | 0  |           |                |    |         |     |     |                                 |
| Locus_7584_Transcript_1/1_Conf_1.000 | 352  | 20 | 7.58E-26  | XP_001963617.1 | 85 | 120.168 | 77  | 66  | GF20488                         |
| Locus_7585_Transcript_1/1_Conf_1.000 | 290  | 0  |           |                |    |         |     |     |                                 |
| Locus_7586_Transcript_1/1_Conf_1.000 | 846  | 20 | 3.32E-84  | NP_495670.1    | 88 | 315.849 | 198 | 175 | hypothetical protein ZK669.4    |
| Locus_7587_Transcript_1/1_Conf_1.000 | 567  | 5  | 2.54E-62  | XP_002637803.1 | 87 | 241.891 | 133 | 117 | C. briggsae CBR-RIL-1 protein   |
| Locus_7588_Transcript_1/1_Conf_1.000 | 1158 | 20 | 2.50E-145 | XP_002647642.1 | 79 | 519.62  | 366 | 290 | Hypothetical protein CBG06741   |
| Locus_7589_Transcript_1/1_Conf_1.000 | 726  | 20 | 1.52E-41  | EFO25430.1     | 69 | 173.711 | 168 | 117 | hypothetical protein LOAG_03054 |
| Locus_759_Transcript_1/1_Conf_1.000  | 419  | 7  | 1.44E-24  | XP_002638694.1 | 63 | 115.931 | 138 | 88  | C. briggsae CBR-CHS-1 protein   |
| Locus_7590_Transcript_1/1_Conf_1.000 | 443  | 0  |           |                |    |         |     |     |                                 |
| Locus_7591_Transcript_1/1_Conf_1.000 | 676  | 0  |           |                |    |         |     |     |                                 |

|                                      |      |    |           |                |    |         |     |     |                                                                     |
|--------------------------------------|------|----|-----------|----------------|----|---------|-----|-----|---------------------------------------------------------------------|
| Locus_7592_Transcript_1/1_Conf_1.000 | 679  | 20 | 5.71E-53  | NP_491075.2    | 70 | 211.46  | 200 | 141 | hypothetical protein Y71F9AL.1                                      |
| Locus_7593_Transcript_1/1_Conf_1.000 | 386  | 4  | 7.31E-05  | EFO22388.1     | 71 | 50.447  | 38  | 27  | hypothetical protein LOAG_06099                                     |
| Locus_7594_Transcript_1/1_Conf_1.000 | 495  | 20 | 1.15E-50  | NP_490687.1    | 83 | 202.601 | 134 | 112 | PaTched Related family member (ptr-11)                              |
| Locus_7595_Transcript_1/1_Conf_1.000 | 1820 | 20 | 2.24E-107 | O18023.4       | 63 | 394.43  | 517 | 330 | Ig-like and fibronectin type-III domain-containing protein C25G4.10 |
| Locus_7596_Transcript_1/1_Conf_1.000 | 266  | 20 | 7.12E-16  | XP_002944626.1 | 81 | 87.0409 | 58  | 47  | PREDICTED: LYR motif-containing protein 5A                          |
| Locus_7597_Transcript_1/1_Conf_1.000 | 418  | 0  |           |                |    |         |     |     |                                                                     |
| Locus_7598_Transcript_1/1_Conf_1.000 | 240  | 20 | 7.53E-18  | NP_740774.1    | 80 | 93.5893 | 78  | 63  | hypothetical protein Y48G1A.4                                       |
| Locus_7599_Transcript_1/1_Conf_1.000 | 1010 | 20 | 1.38E-109 | NP_496879.1    | 76 | 400.593 | 331 | 252 | yeast BUB homolog family member (bub-3)                             |

|                                      |      |    |          |                |    |         |     |     |                                                         |
|--------------------------------------|------|----|----------|----------------|----|---------|-----|-----|---------------------------------------------------------|
| Locus_76_Transcript_1/1_Conf_1.000   | 1532 | 20 | 0        | AAT28330.1     | 94 | 934.865 | 500 | 470 | catalase                                                |
| Locus_760_Transcript_1/1_Conf_1.000  | 829  | 20 | 2.13E-96 | NP_499964.1    | 94 | 356.295 | 204 | 192 | Ribosomal Protein, Large subunit family member (rpl-15) |
| Locus_7600_Transcript_1/1_Conf_1.000 | 1543 | 20 | 1.87E-96 | NP_001036083.1 | 63 | 357.836 | 475 | 302 | poly [ADP-ribose] polymerase 2 isoform 2                |
| Locus_7601_Transcript_1/1_Conf_1.000 | 210  | 4  | 4.87E-09 | NP_500403.2    | 65 | 64.3142 | 64  | 42  | hypothetical protein Y37E11AM.3                         |
| Locus_7602_Transcript_1/1_Conf_1.000 | 1119 | 0  |          |                |    |         |     |     |                                                         |
| Locus_7603_Transcript_1/1_Conf_1.000 | 270  | 2  | 1.38E-11 | XP_002637757.1 | 69 | 72.7886 | 62  | 43  | Hypothetical protein CBG04540                           |
| Locus_7604_Transcript_1/1_Conf_1.000 | 608  | 20 | 6.85E-22 | XP_002637325.1 | 55 | 107.842 | 202 | 112 | C. briggsae CBR-SPE-39 protein                          |
| Locus_7605_Transcript_1/1_Conf_1.000 | 296  | 20 | 2.78E-44 | AAA18259.1     | 96 | 181.415 | 95  | 92  | protein kinase C                                        |
| Locus_7606_Transcript_1/1_Conf_1.000 | 885  | 20 | 9.21E-48 | NP_508182.1    | 88 | 194.897 | 104 | 92  | SphingoMyelin Synthase family member (sms-2)            |
| Locus_7607_Transcript_1/1_Conf_1.000 | 352  | 0  |          |                |    |         |     |     |                                                         |
| Locus_7608_Transcript_1/1_Conf_1.000 | 217  | 0  |          |                |    |         |     |     |                                                         |
| Locus_7609_Transcript_1/1_Conf_1.000 | 453  | 0  |          |                |    |         |     |     |                                                         |

|                                      |      |    |           |                |    |         |     |     |                                                               |
|--------------------------------------|------|----|-----------|----------------|----|---------|-----|-----|---------------------------------------------------------------|
| Locus_761_Transcript_1/1_Conf_1.000  | 704  | 20 | 5.05E-63  | XP_002632404.1 | 76 | 244.973 | 217 | 166 | Hypothetical protein CBG00428                                 |
| Locus_7610_Transcript_1/1_Conf_1.000 | 411  | 5  | 7.72E-31  | NP_492455.1    | 75 | 136.732 | 135 | 102 | hypothetical protein F25H5.6                                  |
| Locus_7611_Transcript_1/1_Conf_1.000 | 1590 | 20 | 9.24E-30  | EFO22136.1     | 48 | 136.346 | 282 | 137 | hypothetical protein LOAG_06352                               |
| Locus_7612_Transcript_1/2_Conf_1.000 | 454  | 20 | 1.28E-41  | NP_499775.1    | 84 | 172.555 | 126 | 107 | hypothetical protein F45G2.8                                  |
| Locus_7612_Transcript_2/2_Conf_1.000 | 968  | 20 | 6.70E-42  | XP_002642810.1 | 76 | 175.637 | 152 | 117 | Hypothetical protein CBG21206                                 |
| Locus_7613_Transcript_1/1_Conf_1.000 | 1373 | 20 | 5.24E-172 | NP_502812.1    | 81 | 608.601 | 452 | 369 | glutamyl(E)/glutamyl(Q) tRNA Synthetase family member (ers-1) |
| Locus_7614_Transcript_1/1_Conf_1.000 | 1223 | 20 | 1.34E-51  | XP_001893816.1 | 59 | 208.379 | 299 | 177 | Protein kinase domain containing protein                      |
| Locus_7615_Transcript_1/1_Conf_1.000 | 870  | 20 | 6.11E-12  | XP_001902481.1 | 52 | 75.8702 | 112 | 59  | PHD-finger family protein                                     |
| Locus_7616_Transcript_1/1_Conf_1.000 | 217  | 0  |           |                |    |         |     |     |                                                               |
| Locus_7617_Transcript_1/1_Conf_1.000 | 520  | 0  |           |                |    |         |     |     |                                                               |
| Locus_7618_Transcript_1/1_Conf_1.000 | 896  | 0  |           |                |    |         |     |     |                                                               |
| Locus_7619_Transcript_1/1_Conf_1.000 | 792  | 20 | 2.54E-27  | XP_002643058.1 | 49 | 126.716 | 271 | 133 | C. briggsae CBR-DCR-1 protein                                 |
| Locus_762_Transcript_1/1_Conf_1.000  | 1407 | 20 | 3.19E-140 | NP_001021565.1 | 74 | 503.056 | 473 | 354 | hypothetical protein K10C3.5                                  |



|                                      |      |    |          |                |    |         |     |     |                                      |
|--------------------------------------|------|----|----------|----------------|----|---------|-----|-----|--------------------------------------|
| Locus_7620_Transcript_1/1_Conf_1.000 | 1219 | 20 | 5.54E-90 | NP_497972.1    | 92 | 335.88  | 192 | 177 | R-RAS related family member (ras-2)  |
| Locus_7621_Transcript_1/1_Conf_1.000 | 698  | 20 | 8.13E-82 | XP_001891630.1 | 86 | 307.375 | 212 | 183 | Rho-GTPase-activating                |
| Locus_7622_Transcript_1/2_Conf_1.000 | 1992 | 20 | 0        | NP_501878.1    | 91 | 959.903 | 598 | 545 | hypothetical protein F01G10.1        |
| Locus_7622_Transcript_2/2_Conf_1.000 | 1992 | 20 | 0        | NP_501878.1    | 90 | 958.362 | 598 | 544 | hypothetical protein F01G10.1        |
| Locus_7623_Transcript_1/1_Conf_1.000 | 516  | 0  |          |                |    |         |     |     |                                      |
| Locus_7624_Transcript_1/1_Conf_1.000 | 247  | 2  | 1.12E-05 | NP_496395.1    | 75 | 53.1434 | 45  | 34  | LIn-26 Related family member (lir-3) |
| Locus_7625_Transcript_1/1_Conf_1.000 | 567  | 20 | 6.05E-56 | XP_002639922.1 | 77 | 220.705 | 186 | 144 | Hypothetical protein CBG08254        |
| Locus_7626_Transcript_1/1_Conf_1.000 | 1075 | 20 | 7.46E-24 | XP_001894716.1 | 52 | 115.931 | 238 | 125 | Bromodomain containing protein       |
| Locus_7627_Transcript_1/1_Conf_1.000 | 370  | 0  |          |                |    |         |     |     |                                      |
| Locus_7628_Transcript_1/1_Conf_1.000 | 136  | 0  |          |                |    |         |     |     |                                      |
| Locus_7629_Transcript_1/2_Conf_1.000 | 662  | 6  | 2.19E-14 | CBW48395.1     | 47 | 83.1889 | 153 | 73  | Hypothetical protein F54C8.6d        |
| Locus_7629_Transcript_2/2_Conf_1.000 | 595  | 6  | 1.31E-14 | CBW48395.1     | 47 | 83.5741 | 167 | 80  | Hypothetical protein F54C8.6d        |
| Locus_763_Transcript_1/2_Conf_1.000  | 2856 | 20 | 0        | XP_002648178.1 | 67 | 794.267 | 852 | 571 | C. briggsae CBR-RPN-2 protein        |
| Locus_763_Transcript_2/2_Conf_1.000  | 2856 | 20 | 0        | XP_002648178.1 | 67 | 794.267 | 852 | 571 | C. briggsae CBR-RPN-2 protein        |
| Locus_7630_Transcript_1/1_Conf_1.000 | 149  | 0  |          |                |    |         |     |     |                                      |
| Locus_7631_Transcript_1/1_Conf_1.000 | 467  | 4  | 5.62E-37 | XP_002641228.1 | 76 | 157.147 | 140 | 107 | C. briggsae CBR-IDA-1 protein        |

|                                      |      |    |          |                |     |         |     |     |                                                 |
|--------------------------------------|------|----|----------|----------------|-----|---------|-----|-----|-------------------------------------------------|
| Locus_7632_Transcript_1/1_Conf_1.000 | 648  | 20 | 1.08E-42 | CAD44516.1     | 69  | 177.178 | 211 | 147 | VAB-10B protein                                 |
| Locus_7633_Transcript_1/1_Conf_1.000 | 605  | 0  |          |                |     |         |     |     |                                                 |
| Locus_7634_Transcript_1/1_Conf_1.000 | 1214 | 20 | 1.25E-09 | XP_002593043.1 | 43  | 68.9366 | 250 | 108 | hypothetical protein BRAFLDRAFT_120702          |
| Locus_7635_Transcript_1/3_Conf_0.600 | 432  | 20 | 1.15E-34 | NP_499768.2    | 84  | 149.443 | 97  | 82  | Nematode ASTacin protease family member (nas-1) |
| Locus_7635_Transcript_2/3_Conf_0.600 | 562  | 20 | 2.01E-56 | NP_499768.2    | 90  | 222.246 | 130 | 117 | Nematode ASTacin protease family member (nas-1) |
| Locus_7635_Transcript_3/3_Conf_0.600 | 463  | 20 | 1.18E-34 | NP_499768.2    | 84  | 149.443 | 97  | 82  | Nematode ASTacin protease family member (nas-1) |
| Locus_7636_Transcript_1/1_Conf_1.000 | 271  | 20 | 7.74E-47 | NP_001171651.1 | 100 | 189.889 | 89  | 89  | glucose-6-phosphate isomerase isoform 1         |
| Locus_7637_Transcript_1/1_Conf_1.000 | 889  | 2  | 1.89E-08 | XP_001895354.1 | 53  | 64.3142 | 95  | 51  | SAP domain containing protein                   |
| Locus_7638_Transcript_1/1_Conf_1.000 | 265  | 0  |          |                |     |         |     |     |                                                 |
| Locus_7639_Transcript_1/1_Conf_1.000 | 633  | 3  | 3.62E-40 | NP_001076704.1 | 74  | 168.703 | 152 | 113 | hypothetical protein T12A7.2                    |
| Locus_764_Transcript_1/2_Conf_1.000  | 499  | 20 | 1.15E-34 | EFO15898.1     | 100 | 149.443 | 72  | 72  | hypothetical protein LOAG_12610                 |
| Locus_764_Transcript_2/2_Conf_1.000  | 337  | 20 | 1.15E-34 | EFO15898.1     | 100 | 149.443 | 72  | 72  | hypothetical protein LOAG_12610                 |
| Locus_7640_Transcript_1/1_Conf_1.000 | 514  | 20 | 3.66E-42 | NP_490985.1    | 96  | 174.481 | 90  | 87  | hypothetical protein Y74C10AL.2                 |
| Locus_7641_Transcript_1/1_Conf_1.000 | 167  | 0  |          |                |     |         |     |     |                                                 |
| Locus_7642_Transcript_1/1_Conf_1.000 | 555  | 3  | 7.37E-19 | NP_505214.2    | 61  | 97.4413 | 134 | 83  | hypothetical protein C10B5.3                    |

|                                      |      |    |          |                |    |         |     |     |                                             |
|--------------------------------------|------|----|----------|----------------|----|---------|-----|-----|---------------------------------------------|
| Locus_7643_Transcript_1/1_Conf_1.000 | 865  | 20 | 5.33E-93 | NP_001021171.1 | 87 | 345.125 | 233 | 205 | PDF Receptor homolog family member (pdfr-1) |
| Locus_7644_Transcript_1/2_Conf_1.000 | 662  | 20 | 1.11E-66 | EFO18438.1     | 72 | 256.914 | 202 | 146 | zinc finger protein                         |
| Locus_7644_Transcript_2/2_Conf_1.000 | 503  | 20 | 1.86E-64 | EFO18438.1     | 79 | 248.44  | 168 | 133 | zinc finger protein                         |
| Locus_7645_Transcript_1/1_Conf_1.000 | 1358 | 20 | 0        | XP_002642598.1 | 86 | 643.269 | 445 | 383 | C. briggsae CBR-LPD-7 protein               |
| Locus_7646_Transcript_1/1_Conf_1.000 | 605  | 20 | 9.59E-77 | AAK62032.1     | 78 | 290.041 | 200 | 157 | metalloprotease 1 precursor                 |
| Locus_7647_Transcript_1/1_Conf_1.000 | 264  | 0  |          |                |    |         |     |     |                                             |
| Locus_7648_Transcript_1/1_Conf_1.000 | 469  | 0  |          |                |    |         |     |     |                                             |
| Locus_7649_Transcript_1/1_Conf_1.000 | 284  | 0  |          |                |    |         |     |     |                                             |
| Locus_765_Transcript_1/1_Conf_1.000  | 471  | 0  |          |                |    |         |     |     |                                             |
| Locus_7650_Transcript_1/1_Conf_1.000 | 182  | 0  |          |                |    |         |     |     |                                             |
| Locus_7651_Transcript_1/1_Conf_1.000 | 396  | 20 | 4.03E-43 | EFO27558.1     | 90 | 177.563 | 98  | 89  | hypothetical protein LOAG_00922             |

|                                      |      |    |          |                |     |         |     |     |                                                          |
|--------------------------------------|------|----|----------|----------------|-----|---------|-----|-----|----------------------------------------------------------|
| Locus_7652_Transcript_1/1_Conf_1.000 | 560  | 3  | 5.24E-25 | NP_871894.1    | 58  | 117.857 | 156 | 92  | hypothetical protein Y48G1C.10                           |
| Locus_7653_Transcript_1/1_Conf_1.000 | 147  | 0  |          |                |     |         |     |     |                                                          |
| Locus_7654_Transcript_1/1_Conf_1.000 | 545  | 20 | 5.70E-74 | NP_001122835.1 | 89  | 280.411 | 181 | 162 | UNCoordinated family member (unc-22)                     |
| Locus_7655_Transcript_1/1_Conf_1.000 | 178  | 20 | 5.92E-15 | NP_901429.1    | 84  | 83.9593 | 57  | 48  | hydroxymethylglutaryl-CoA lyase                          |
| Locus_7656_Transcript_1/1_Conf_1.000 | 692  | 2  | 9.29E-14 | XP_002637429.1 | 46  | 81.2629 | 243 | 114 | Hypothetical protein CBG19140                            |
| Locus_7657_Transcript_1/1_Conf_1.000 | 253  | 20 | 5.50E-32 | NP_491780.1    | 92  | 140.584 | 84  | 78  | hypothetical protein T09B4.9                             |
| Locus_7658_Transcript_2/3_Conf_0.400 | 108  | 0  |          |                |     |         |     |     |                                                          |
| Locus_7658_Transcript_3/3_Conf_0.880 | 127  | 0  |          |                |     |         |     |     |                                                          |
| Locus_7659_Transcript_1/1_Conf_1.000 | 359  | 20 | 5.39E-24 | NP_004065.1    | 100 | 114.005 | 54  | 54  | cytochrome c oxidase subunit 8A, mitochondrial precursor |
| Locus_766_Transcript_1/1_Conf_1.000  | 1246 | 0  |          |                |     |         |     |     |                                                          |
| Locus_7660_Transcript_1/1_Conf_1.000 | 796  | 20 | 4.46E-64 | XP_002646315.1 | 85  | 248.825 | 180 | 153 | C. briggsae CBR-MSH-2 protein                            |
| Locus_7661_Transcript_1/1_Conf_1.000 | 422  | 20 | 8.65E-54 | NP_500135.1    | 95  | 213.001 | 140 | 134 | hypothetical protein Y41D4A.8                            |
| Locus_7662_Transcript_1/1_Conf_1.000 | 534  | 20 | 1.32E-72 | XP_002643655.1 | 80  | 275.789 | 175 | 140 | Hypothetical protein CBG16407                            |

|                                      |     |    |          |                |    |         |     |     |                                                                  |
|--------------------------------------|-----|----|----------|----------------|----|---------|-----|-----|------------------------------------------------------------------|
| Locus_7663_Transcript_1/1_Conf_1.000 | 784 | 7  | 1.50E-40 | XP_002638694.1 | 80 | 170.629 | 142 | 115 | C. briggsae CBR-CHS-1 protein                                    |
| Locus_7664_Transcript_1/1_Conf_1.000 | 872 | 20 | 3.77E-62 | XP_002639468.1 | 76 | 242.662 | 249 | 190 | Hypothetical protein CBG04063                                    |
| Locus_7665_Transcript_1/1_Conf_1.000 | 757 | 2  | 2.65E-07 | XP_002634335.1 | 51 | 60.077  | 112 | 58  | C. briggsae CBR-SGO-1 protein                                    |
| Locus_7666_Transcript_1/1_Conf_1.000 | 633 | 6  | 4.92E-21 | NP_496175.1    | 59 | 105.145 | 167 | 99  | Dorsal Intercalation and Elongation defect family member (die-1) |
| Locus_7667_Transcript_1/1_Conf_1.000 | 263 | 0  |          |                |    |         |     |     |                                                                  |
| Locus_7668_Transcript_1/1_Conf_1.000 | 185 | 0  |          |                |    |         |     |     |                                                                  |
| Locus_7669_Transcript_1/1_Conf_1.000 | 907 | 20 | 4.88E-84 | NP_496290.2    | 90 | 315.464 | 213 | 192 | hypothetical protein C14A4.11                                    |
| Locus_767_Transcript_1/6_Conf_0.500  | 527 | 0  |          |                |    |         |     |     |                                                                  |
| Locus_767_Transcript_2/6_Conf_0.500  | 569 | 0  |          |                |    |         |     |     |                                                                  |
| Locus_767_Transcript_3/6_Conf_0.643  | 789 | 0  |          |                |    |         |     |     |                                                                  |
| Locus_767_Transcript_4/6_Conf_0.643  | 789 | 0  |          |                |    |         |     |     |                                                                  |
| Locus_767_Transcript_5/6_Conf_0.643  | 779 | 0  |          |                |    |         |     |     |                                                                  |
| Locus_767_Transcript_6/6_Conf_0.643  | 779 | 0  |          |                |    |         |     |     |                                                                  |
| Locus_7670_Transcript_1/1_Conf_1.000 | 624 | 20 | 2.18E-42 | NP_501803.1    | 86 | 176.022 | 114 | 99  | hypothetical protein C47E12.2                                    |
| Locus_7671_Transcript_1/1_Conf_1.000 | 280 | 0  |          |                |    |         |     |     |                                                                  |
| Locus_7672_Transcript_1/1_Conf_1.000 | 831 | 20 | 2.24E-53 | EFO27237.1     | 64 | 213.386 | 261 | 169 | autophagy protein Apg5 containing protein                        |
| Locus_7673_Transcript_1/1_Conf_1.000 | 309 | 20 | 1.11E-37 | EFO15860.1     | 81 | 159.458 | 102 | 83  | mannosidase                                                      |

|                                      |      |    |           |                |    |         |     |     |                                              |
|--------------------------------------|------|----|-----------|----------------|----|---------|-----|-----|----------------------------------------------|
| Locus_7674_Transcript_1/1_Conf_1.000 | 325  | 4  | 2.61E-26  | NP_507807.1    | 68 | 121.709 | 107 | 73  | hypothetical protein Y43F8C.7                |
| Locus_7675_Transcript_1/1_Conf_1.000 | 402  | 20 | 2.77E-36  | NP_497467.1    | 92 | 154.836 | 81  | 75  | human DDP related family member (ddp-1)      |
| Locus_7676_Transcript_1/1_Conf_1.000 | 129  | 20 | 9.25E-08  | XP_001898759.1 | 91 | 60.077  | 34  | 31  | collagen col-34                              |
| Locus_7677_Transcript_1/1_Conf_1.000 | 261  | 0  |           |                |    |         |     |     |                                              |
| Locus_7678_Transcript_1/1_Conf_1.000 | 1061 | 20 | 1.01E-49  | NP_494168.1    | 59 | 201.83  | 246 | 147 | hypothetical protein F07E5.5                 |
| Locus_7679_Transcript_1/1_Conf_1.000 | 685  | 20 | 8.97E-62  | XP_001893093.1 | 75 | 240.736 | 204 | 154 | Leucine Rich Repeat family protein           |
| Locus_768_Transcript_1/2_Conf_1.000  | 256  | 20 | 1.35E-22  | NP_502076.2    | 83 | 109.383 | 68  | 57  | hypothetical protein T05E11.6                |
| Locus_768_Transcript_2/2_Conf_1.000  | 724  | 20 | 3.65E-104 | XP_002633281.1 | 95 | 381.719 | 226 | 216 | Hypothetical protein CBG06010                |
| Locus_7680_Transcript_1/1_Conf_1.000 | 225  | 4  | 6.71E-14  | NP_500551.2    | 72 | 80.4925 | 73  | 53  | hypothetical protein F55F10.1                |
| Locus_7681_Transcript_1/1_Conf_1.000 | 632  | 20 | 4.08E-44  | XP_001900929.1 | 67 | 181.8   | 164 | 111 | Zinc finger DHHC domain containing protein 2 |
| Locus_7682_Transcript_1/1_Conf_1.000 | 1089 | 20 | 4.67E-106 | NP_497086.1    | 80 | 389.037 | 269 | 216 | fatty acid ELongation family member (elo-9)  |
| Locus_7683_Transcript_1/3_Conf_0.714 | 1240 | 10 | 9.53E-37  | XP_002646603.1 | 78 | 159.073 | 157 | 123 | Hypothetical protein CBG20487                |
| Locus_7683_Transcript_2/3_Conf_0.714 | 1244 | 10 | 9.57E-37  | XP_002646603.1 | 78 | 159.073 | 157 | 123 | Hypothetical protein CBG20487                |
| Locus_7683_Transcript_3/3_Conf_0.714 | 1244 | 10 | 9.57E-37  | XP_002646603.1 | 78 | 159.073 | 157 | 123 | Hypothetical protein CBG20487                |
| Locus_7684_Transcript_1/1_Conf_1.000 | 717  | 20 | 2.35E-63  | NP_510091.2    | 76 | 246.128 | 211 | 162 | hypothetical protein T18D3.3                 |

|                                      |      |    |           |                |    |         |     |     |                                              |
|--------------------------------------|------|----|-----------|----------------|----|---------|-----|-----|----------------------------------------------|
| Locus_7685_Transcript_1/1_Conf_1.000 | 1160 | 0  |           |                |    |         |     |     |                                              |
| Locus_7686_Transcript_1/1_Conf_1.000 | 209  | 12 | 2.96E-14  | NP_497506.3    | 76 | 81.6481 | 69  | 53  | hypothetical protein Y48G9A.3                |
| Locus_7687_Transcript_1/2_Conf_1.000 | 937  | 16 | 9.50E-62  | AAK93964.1     | 87 | 241.506 | 139 | 122 | AF395836_1putative chitinase                 |
| Locus_7687_Transcript_2/2_Conf_1.000 | 937  | 16 | 9.50E-62  | AAK93964.1     | 87 | 241.506 | 139 | 122 | AF395836_1putative chitinase                 |
| Locus_7688_Transcript_1/1_Conf_1.000 | 360  | 0  |           |                |    |         |     |     |                                              |
| Locus_7689_Transcript_1/2_Conf_1.000 | 1431 | 20 | 5.39E-26  | XP_001898684.1 | 77 | 123.635 | 87  | 67  | ring finger-H2 protein                       |
| Locus_7689_Transcript_2/2_Conf_1.000 | 1419 | 20 | 5.33E-26  | XP_001898684.1 | 77 | 123.635 | 87  | 67  | ring finger-H2 protein                       |
| Locus_769_Transcript_1/2_Conf_1.000  | 998  | 20 | 3.29E-140 | NP_498081.2    | 90 | 502.286 | 324 | 293 | Aldehyde deHydrogenase family member (alh-1) |
| Locus_769_Transcript_2/2_Conf_1.000  | 998  | 20 | 3.29E-140 | NP_498081.2    | 90 | 502.286 | 324 | 293 | Aldehyde deHydrogenase family member (alh-1) |
| Locus_7690_Transcript_1/2_Conf_1.000 | 335  | 2  | 9.52E-05  | XP_002631178.1 | 48 | 50.0618 | 103 | 50  | C. briggsae CBR-MAT-2 protein                |

|                                      |      |    |           |                |     |         |     |     |                                                    |
|--------------------------------------|------|----|-----------|----------------|-----|---------|-----|-----|----------------------------------------------------|
| Locus_7690_Transcript_2/2_Conf_1.000 | 792  | 12 | 1.71E-15  | XP_002631178.1 | 47  | 87.4261 | 225 | 106 | C. briggsae CBR-MAT-2 protein                      |
| Locus_7691_Transcript_1/1_Conf_1.000 | 138  | 0  |           |                |     |         |     |     |                                                    |
| Locus_7692_Transcript_1/1_Conf_1.000 | 603  | 20 | 5.35E-19  | XP_002646918.1 | 57  | 98.2117 | 137 | 79  | Hypothetical protein CBG19620                      |
| Locus_7693_Transcript_1/1_Conf_1.000 | 284  | 20 | 2.10E-15  | XP_002731916.1 | 100 | 85.5001 | 40  | 40  | PREDICTED: Ab1-108-like                            |
| Locus_7694_Transcript_1/1_Conf_1.000 | 539  | 20 | 5.38E-21  | XP_001898220.1 | 58  | 104.375 | 187 | 109 | multidrug Resistance Protein family member (mrp-5) |
| Locus_7695_Transcript_1/1_Conf_1.000 | 1522 | 0  |           |                |     |         |     |     |                                                    |
| Locus_7696_Transcript_1/1_Conf_1.000 | 633  | 20 | 7.28E-49  | XP_002601552.1 | 76  | 197.593 | 163 | 124 | hypothetical protein BRAFLDRAFT_115609             |
| Locus_7697_Transcript_1/1_Conf_1.000 | 643  | 20 | 1.56E-70  | XP_002639255.1 | 71  | 269.626 | 227 | 162 | C. briggsae CBR-OCRL-1 protein                     |
| Locus_7698_Transcript_1/1_Conf_1.000 | 669  | 9  | 2.42E-16  | NP_491045.1    | 54  | 89.7373 | 183 | 100 | hypothetical protein W03D8.10                      |
| Locus_7699_Transcript_1/2_Conf_1.000 | 2581 | 20 | 1.33E-119 | EFO23614.1     | 60  | 435.647 | 578 | 348 | hypothetical protein LOAG_04870                    |
| Locus_7699_Transcript_2/2_Conf_1.000 | 1684 | 20 | 1.94E-33  | XP_001897063.1 | 53  | 148.673 | 315 | 167 | Bromodomain containing protein                     |
| Locus_77_Transcript_1/3_Conf_0.286   | 1433 | 4  | 3.56E-78  | XP_002639057.1 | 68  | 296.975 | 320 | 220 | Hypothetical protein CBG14867                      |



|                                      |      |    |           |                |    |         |     |     |                                                      |
|--------------------------------------|------|----|-----------|----------------|----|---------|-----|-----|------------------------------------------------------|
| Locus_77_Transcript_2/3_Conf_0.714   | 3285 | 20 | 0         | XP_002639057.1 | 70 | 834.328 | 890 | 623 | Hypothetical protein CBG14867                        |
| Locus_77_Transcript_3/3_Conf_0.571   | 2050 | 20 | 1.66E-138 | XP_002639057.1 | 68 | 498.049 | 528 | 361 | Hypothetical protein CBG14867                        |
| Locus_770_Transcript_1/1_Conf_1.000  | 1075 | 20 | 7.54E-101 | NP_490988.2    | 80 | 371.703 | 279 | 225 | Eukaryotic Initiation Factor family member (eif-3.1) |
| Locus_7700_Transcript_1/1_Conf_1.000 | 598  | 0  |           |                |    |         |     |     |                                                      |
| Locus_7701_Transcript_1/1_Conf_1.000 | 506  | 6  | 1.81E-14  | XP_001898639.1 | 65 | 82.4185 | 88  | 58  | Conserved hypothetical protein                       |
| Locus_7702_Transcript_1/1_Conf_1.000 | 392  | 4  | 9.15E-08  | NP_871894.1    | 50 | 60.077  | 130 | 66  | hypothetical protein Y48G1C.10                       |
| Locus_7703_Transcript_1/1_Conf_1.000 | 719  | 20 | 4.54E-91  | XP_002641406.1 | 80 | 338.191 | 243 | 196 | Hypothetical protein CBG13269                        |
| Locus_7704_Transcript_1/1_Conf_1.000 | 564  | 20 | 7.60E-19  | NP_001021028.1 | 63 | 97.4413 | 164 | 104 | Cyclin E family member (cye-1)                       |
| Locus_7705_Transcript_1/1_Conf_1.000 | 311  | 20 | 2.03E-15  | XP_001899951.1 | 74 | 85.5001 | 66  | 49  | Veph-A                                               |
| Locus_7706_Transcript_1/1_Conf_1.000 | 1154 | 20 | 0         | NP_503059.2    | 87 | 638.262 | 384 | 337 | hypothetical protein ZK550.3                         |
| Locus_7707_Transcript_1/1_Conf_1.000 | 373  | 0  |           |                |    |         |     |     |                                                      |
| Locus_7708_Transcript_1/1_Conf_1.000 | 758  | 20 | 9.92E-55  | NP_497173.1    | 74 | 217.624 | 193 | 144 | MaX-Like family member (mxl-2)                       |

|                                      |      |    |          |                |    |         |      |      |                                                           |
|--------------------------------------|------|----|----------|----------------|----|---------|------|------|-----------------------------------------------------------|
| Locus_7709_Transcript_1/1_Conf_1.000 | 671  | 20 | 1.24E-36 | XP_002643105.1 | 70 | 157.147 | 145  | 102  | C. briggsae CBR-PHP-3 protein                             |
| Locus_771_Transcript_1/2_Conf_1.000  | 622  | 20 | 3.20E-54 | XP_002633339.1 | 69 | 215.312 | 197  | 137  | Hypothetical protein CBG06078                             |
| Locus_771_Transcript_2/2_Conf_1.000  | 622  | 20 | 1.88E-54 | XP_002633339.1 | 69 | 216.083 | 197  | 137  | Hypothetical protein CBG06078                             |
| Locus_7710_Transcript_1/1_Conf_1.000 | 155  | 0  |          |                |    |         |      |      |                                                           |
| Locus_7711_Transcript_1/1_Conf_1.000 | 3350 | 20 | 0        | NP_498785.1    | 98 | 2165.58 | 1115 | 1098 | yeast PRP (splicing factor) related family member (prp-8) |

|                                      |     |    |           |                |     |         |     |     |                                       |
|--------------------------------------|-----|----|-----------|----------------|-----|---------|-----|-----|---------------------------------------|
| Locus_7712_Transcript_1/1_Conf_1.000 | 368 | 20 | 5.85E-47  | BAG72555.2     | 100 | 190.274 | 92  | 92  | filamin A alpha                       |
| Locus_7713_Transcript_1/1_Conf_1.000 | 768 | 20 | 1.20E-79  | XP_002643175.1 | 95  | 300.442 | 167 | 159 | C. briggsae CBR-PSD-1 protein         |
| Locus_7714_Transcript_1/1_Conf_1.000 | 568 | 20 | 4.78E-61  | ACI49202.1     | 82  | 237.654 | 189 | 156 | hypothetical protein Csp3_JD04.001    |
| Locus_7715_Transcript_1/1_Conf_1.000 | 175 | 4  | 1.37E-19  | A8XQD5.2       | 91  | 99.3673 | 57  | 52  | Serine/threonine-protein kinase dkf-2 |
| Locus_7716_Transcript_1/1_Conf_1.000 | 936 | 20 | 6.90E-129 | NP_001021220.1 | 83  | 464.537 | 313 | 261 | hypothetical protein C46F11.2         |
| Locus_7717_Transcript_1/1_Conf_1.000 | 233 | 20 | 2.21E-17  | XP_002632141.1 | 76  | 92.0485 | 71  | 54  | C. briggsae CBR-TRE-5 protein         |

|                                      |      |    |          |                |    |         |     |     |                                                       |
|--------------------------------------|------|----|----------|----------------|----|---------|-----|-----|-------------------------------------------------------|
| Locus_7718_Transcript_1/1_Conf_1.000 | 271  | 0  |          |                |    |         |     |     |                                                       |
| Locus_7719_Transcript_1/1_Conf_1.000 | 315  | 20 | 1.07E-11 | XP_002641902.1 | 82 | 73.1738 | 74  | 61  | Hypothetical protein CBG16598                         |
| Locus_772_Transcript_1/3_Conf_0.667  | 697  | 20 | 8.19E-58 | NP_741466.1    | 72 | 227.639 | 201 | 146 | SaPosin-like Protein family member (spp-10)           |
| Locus_772_Transcript_2/3_Conf_0.667  | 718  | 20 | 3.17E-60 | NP_741465.1    | 66 | 235.728 | 237 | 158 | SaPosin-like Protein family member (spp-10)           |
| Locus_772_Transcript_3/3_Conf_0.667  | 718  | 20 | 3.17E-60 | NP_741465.1    | 66 | 235.728 | 237 | 158 | SaPosin-like Protein family member (spp-10)           |
| Locus_7720_Transcript_1/1_Conf_1.000 | 804  | 0  |          |                |    |         |     |     |                                                       |
| Locus_7721_Transcript_1/1_Conf_1.000 | 134  | 0  |          |                |    |         |     |     |                                                       |
| Locus_7722_Transcript_1/1_Conf_1.000 | 352  | 0  |          |                |    |         |     |     |                                                       |
| Locus_7723_Transcript_1/1_Conf_1.000 | 415  | 0  |          |                |    |         |     |     |                                                       |
| Locus_7724_Transcript_1/1_Conf_1.000 | 920  | 0  |          |                |    |         |     |     |                                                       |
| Locus_7725_Transcript_1/1_Conf_1.000 | 726  | 20 | 6.01E-30 | XP_002637262.1 | 63 | 135.191 | 134 | 85  | C. briggsae CBR-ACL-9 protein                         |
| Locus_7726_Transcript_1/1_Conf_1.000 | 1582 | 20 | 6.82E-17 | XP_002630594.1 | 43 | 93.5893 | 270 | 118 | C. briggsae CBR-AKA-1 protein                         |
| Locus_7727_Transcript_1/1_Conf_1.000 | 508  | 20 | 4.98E-68 | XP_001900116.1 | 89 | 260.381 | 165 | 148 | SMC proteins Flexible Hinge Domain containing protein |
| Locus_7728_Transcript_1/1_Conf_1.000 | 377  | 15 | 7.17E-39 | XP_002804494.1 | 94 | 154.451 | 100 | 94  | PREDICTED: hypothetical protein LOC698789             |
| Locus_7729_Transcript_1/1_Conf_1.000 | 874  | 20 | 1.79E-11 | XP_001898275.1 | 43 | 74.3294 | 308 | 133 | GRIP domain containing protein                        |

|                                      |      |    |          |                |    |         |     |     |                                 |
|--------------------------------------|------|----|----------|----------------|----|---------|-----|-----|---------------------------------|
| Locus_773_Transcript_1/1_Conf_1.000  | 2088 | 20 | 0        | EFO26258.1     | 74 | 744.191 | 676 | 501 | hypothetical protein LOAG_02227 |
| Locus_7730_Transcript_1/1_Conf_1.000 | 294  | 20 | 1.13E-29 | NP_510494.2    | 88 | 132.88  | 89  | 79  | hypothetical protein C18B12.6   |
| Locus_7731_Transcript_1/1_Conf_1.000 | 361  | 0  |          |                |    |         |     |     |                                 |
| Locus_7732_Transcript_1/1_Conf_1.000 | 315  | 20 | 2.46E-32 | NP_506242.2    | 78 | 141.739 | 103 | 81  | hypothetical protein R186.6     |
| Locus_7733_Transcript_1/1_Conf_1.000 | 250  | 20 | 2.09E-28 | XP_002634371.1 | 86 | 128.642 | 82  | 71  | C. briggsae CBR-RIG-4 protein   |
| Locus_7734_Transcript_1/1_Conf_1.000 | 154  | 0  |          |                |    |         |     |     |                                 |
| Locus_7735_Transcript_1/2_Conf_1.000 | 881  | 20 | 3.37E-18 | XP_002072569.1 | 47 | 96.6709 | 194 | 92  | GK13666                         |
| Locus_7735_Transcript_2/2_Conf_1.000 | 869  | 20 | 3.32E-18 | XP_002072569.1 | 47 | 96.6709 | 194 | 92  | GK13666                         |
| Locus_7736_Transcript_1/1_Conf_1.000 | 508  | 0  |          |                |    |         |     |     |                                 |
| Locus_7737_Transcript_1/1_Conf_1.000 | 449  | 0  |          |                |    |         |     |     |                                 |
| Locus_7738_Transcript_1/1_Conf_1.000 | 401  | 20 | 9.62E-21 | BAB68205.1     | 70 | 103.219 | 112 | 79  | keratin-like protein            |
| Locus_7739_Transcript_1/1_Conf_1.000 | 865  | 0  |          |                |    |         |     |     |                                 |

|                                      |      |    |           |                |    |         |     |     |                                          |
|--------------------------------------|------|----|-----------|----------------|----|---------|-----|-----|------------------------------------------|
| Locus_774_Transcript_1/2_Conf_1.000  | 1496 | 5  | 5.70E-42  | NP_741151.1    | 85 | 176.792 | 120 | 103 | MeDiaTor family member (mdt-15)          |
| Locus_774_Transcript_2/2_Conf_1.000  | 1433 | 5  | 1.12E-39  | NP_741151.1    | 95 | 169.088 | 90  | 86  | MeDiaTor family member (mdt-15)          |
| Locus_7740_Transcript_1/1_Conf_1.000 | 1324 | 20 | 1.96E-160 | CAJ43810.1     | 77 | 570.081 | 427 | 333 | astacin-like metalloprotease             |
| Locus_7741_Transcript_1/1_Conf_1.000 | 379  | 3  | 1.86E-24  | XP_002632304.1 | 63 | 115.546 | 118 | 75  | Hypothetical protein CBG07208            |
| Locus_7742_Transcript_1/1_Conf_1.000 | 275  | 20 | 6.16E-20  | NP_503171.1    | 74 | 100.523 | 85  | 63  | hypothetical protein F33E11.3            |
| Locus_7743_Transcript_1/1_Conf_1.000 | 1665 | 20 | 2.53E-110 | EFO26375.1     | 64 | 404.06  | 554 | 360 | hypothetical protein LOAG_02108          |
| Locus_7744_Transcript_1/1_Conf_1.000 | 615  | 20 | 4.14E-62  | NP_510264.1    | 73 | 241.506 | 190 | 139 | Carbonic AnHydrase family member (cah-4) |

|                                      |      |    |           |                |    |         |     |     |                                                     |
|--------------------------------------|------|----|-----------|----------------|----|---------|-----|-----|-----------------------------------------------------|
| Locus_7745_Transcript_1/2_Conf_1.000 | 794  | 20 | 5.38E-86  | NP_502083.1    | 86 | 321.627 | 217 | 188 | Alcohol/Ribitol Dehydrogenase family member (ard-1) |
| Locus_7745_Transcript_2/2_Conf_1.000 | 794  | 20 | 5.38E-86  | NP_502083.1    | 86 | 321.627 | 217 | 188 | Alcohol/Ribitol Dehydrogenase family member (ard-1) |
| Locus_7746_Transcript_1/1_Conf_1.000 | 1203 | 2  | 2.68E-04  | XP_001299868.1 | 47 | 51.2174 | 134 | 64  | hypothetical protein                                |
| Locus_7747_Transcript_1/2_Conf_1.000 | 974  | 20 | 9.23E-124 | ABQ88321.1     | 84 | 447.588 | 296 | 250 | transposase                                         |
| Locus_7747_Transcript_2/2_Conf_1.000 | 264  | 20 | 1.18E-11  | ABQ88321.1     | 72 | 72.7886 | 58  | 42  | transposase                                         |

|                                      |      |    |           |                |    |         |     |     |                                                            |
|--------------------------------------|------|----|-----------|----------------|----|---------|-----|-----|------------------------------------------------------------|
| Locus_7748_Transcript_1/1_Conf_1.000 | 1879 | 20 | 0         | CAA60047.1     | 96 | 962.214 | 529 | 512 | cytoplasmic intermediate filament protein                  |
| Locus_7749_Transcript_1/1_Conf_1.000 | 1855 | 20 | 8.29E-166 | NP_001021778.1 | 84 | 588.571 | 391 | 332 | C-terminal Src Kinase family member (csk-1)                |
| Locus_775_Transcript_1/1_Conf_1.000  | 569  | 20 | 4.64E-48  | NP_740944.1    | 96 | 194.512 | 110 | 106 | Ribosomal Protein, Small subunit family member (rps-20)    |
| Locus_7750_Transcript_1/1_Conf_1.000 | 231  | 0  |           |                |    |         |     |     |                                                            |
| Locus_7751_Transcript_1/1_Conf_1.000 | 646  | 20 | 1.44E-63  | XP_002635372.1 | 75 | 246.514 | 213 | 161 | C. briggsae CBR-RPM-1 protein                              |
| Locus_7752_Transcript_1/1_Conf_1.000 | 627  | 0  |           |                |    |         |     |     |                                                            |
| Locus_7753_Transcript_1/1_Conf_1.000 | 730  | 20 | 2.89E-48  | XP_002630311.1 | 58 | 196.052 | 243 | 143 | C. briggsae CBR-CTNS-1 protein                             |
| Locus_7754_Transcript_1/3_Conf_0.667 | 1055 | 20 | 1.02E-86  | NP_494280.3    | 79 | 324.709 | 310 | 245 | MNAT (menage a trois) TFIIF subunit family member (mnat-1) |



|                                      |      |    |          |                |     |         |     |     |                                                                                       |
|--------------------------------------|------|----|----------|----------------|-----|---------|-----|-----|---------------------------------------------------------------------------------------|
| Locus_7754_Transcript_2/3_Conf_0.667 | 1083 | 20 | 7.93E-85 | NP_494280.3    | 79  | 263.077 | 198 | 157 | MNAT (menage a trois) TFIIF subunit family member (mnat-1)                            |
| Locus_7754_Transcript_3/3_Conf_0.667 | 1060 | 20 | 1.03E-86 | NP_494280.3    | 79  | 324.709 | 310 | 245 | MNAT (menage a trois) TFIIF subunit family member (mnat-1)                            |
| Locus_7755_Transcript_1/2_Conf_1.000 | 440  | 2  | 5.35E-08 | NP_001023436.1 | 59  | 60.8474 | 136 | 81  | hypothetical protein Y37E11AL.3                                                       |
| Locus_7755_Transcript_2/2_Conf_1.000 | 440  | 2  | 5.35E-08 | NP_001023436.1 | 59  | 60.8474 | 136 | 81  | hypothetical protein Y37E11AL.3                                                       |
| Locus_7756_Transcript_1/1_Conf_1.000 | 553  | 20 | 3.22E-51 | XP_002632168.1 | 75  | 204.912 | 184 | 139 | C. briggsae CBR-PQN-85 protein                                                        |
| Locus_7757_Transcript_1/1_Conf_1.000 | 253  | 20 | 4.21E-32 | AAK31527.3     | 90  | 140.969 | 81  | 73  | Neuronal symmetry protein 1, partially confirmed by transcript evidence               |
| Locus_7758_Transcript_1/1_Conf_1.000 | 840  | 20 | 2.02E-33 | CAO00417.1     | 48  | 147.132 | 283 | 137 | two-domain activation associated secreted protein ASP4 precursor                      |
| Locus_7759_Transcript_1/1_Conf_1.000 | 1416 | 0  |          |                |     |         |     |     |                                                                                       |
| Locus_776_Transcript_1/1_Conf_1.000  | 886  | 20 | 6.13E-68 | EFO14607.1     | 67  | 261.922 | 222 | 150 | TRE-2 protein                                                                         |
| Locus_7760_Transcript_1/1_Conf_1.000 | 131  | 20 | 2.52E-05 | XP_002809331.1 | 100 | 51.9878 | 41  | 41  | PREDICTED: LOW QUALITY PROTEIN: interferon regulatory factor 2-binding protein 2-like |
| Locus_7761_Transcript_1/2_Conf_1.000 | 395  | 5  | 5.52E-08 | EFO18202.1     | 88  | 60.8474 | 36  | 32  | hypothetical protein LOAG_10292                                                       |

|                                      |      |    |           |                |    |         |     |     |                                                           |
|--------------------------------------|------|----|-----------|----------------|----|---------|-----|-----|-----------------------------------------------------------|
| Locus_7761_Transcript_2/2_Conf_1.000 | 389  | 5  | 5.38E-08  | EFO18202.1     | 88 | 60.8474 | 36  | 32  | hypothetical protein LOAG_10292                           |
| Locus_7762_Transcript_1/1_Conf_1.000 | 679  | 20 | 6.96E-59  | NP_491663.1    | 79 | 231.106 | 177 | 140 | hypothetical protein T19B4.3                              |
| Locus_7763_Transcript_1/1_Conf_1.000 | 322  | 0  |           |                |    |         |     |     |                                                           |
| Locus_7764_Transcript_1/1_Conf_1.000 | 428  | 0  |           |                |    |         |     |     |                                                           |
| Locus_7765_Transcript_1/1_Conf_1.000 | 625  | 20 | 8.42E-103 | XP_001473838.1 | 99 | 376.711 | 203 | 202 | PREDICTED: similar to ribosomal protein L15 isoform 1     |
| Locus_7766_Transcript_1/1_Conf_1.000 | 413  | 20 | 7.99E-28  | NP_495790.1    | 70 | 126.716 | 132 | 93  | beta-LACTamase domain containing family member (lact-4)   |
| Locus_7767_Transcript_1/1_Conf_1.000 | 162  | 0  |           |                |    |         |     |     |                                                           |
| Locus_7768_Transcript_1/1_Conf_1.000 | 319  | 4  | 1.15E-05  | A8Y236.2       | 48 | 53.1434 | 80  | 39  | Putative polypeptide N-acetylgalactosaminyltransferase 10 |
| Locus_7769_Transcript_1/1_Conf_1.000 | 2564 | 20 | 2.31E-31  | CAR63726.1     | 79 | 142.51  | 158 | 125 | hypothetical protein                                      |
| Locus_777_Transcript_1/1_Conf_1.000  | 1870 | 20 | 0         | NP_496508.1    | 99 | 692.96  | 340 | 338 | G Protein, Beta subunit family member (gpb1)              |
| Locus_7770_Transcript_1/1_Conf_1.000 | 727  | 20 | 1.21E-38  | NP_502448.1    | 81 | 164.081 | 107 | 87  | hypothetical protein ZK896.9                              |
| Locus_7771_Transcript_1/1_Conf_1.000 | 676  | 0  |           |                |    |         |     |     |                                                           |
| Locus_7772_Transcript_1/3_Conf_0.333 | 787  | 20 | 1.18E-69  | NP_498146.1    | 79 | 267.314 | 193 | 153 | DeHydrogenases, Short chain family member (dhs-9)         |

|                                      |      |    |           |                |    |         |     |     |                                                   |
|--------------------------------------|------|----|-----------|----------------|----|---------|-----|-----|---------------------------------------------------|
| Locus_7772_Transcript_2/3_Conf_0.333 | 441  | 20 | 2.28E-46  | NP_498146.1    | 78 | 188.348 | 136 | 107 | DeHydrogenases, Short chain family member (dhs-9) |
| Locus_7772_Transcript_3/3_Conf_0.667 | 1203 | 20 | 9.22E-114 | NP_498146.1    | 78 | 414.846 | 321 | 252 | DeHydrogenases, Short chain family member (dhs-9) |
| Locus_7773_Transcript_1/2_Conf_1.000 | 1932 | 20 | 0         | EFO21446.1     | 86 | 726.087 | 511 | 441 | hypothetical protein LOAG_07043                   |
| Locus_7773_Transcript_2/2_Conf_1.000 | 1932 | 20 | 0         | EFO21446.1     | 86 | 726.087 | 511 | 441 | hypothetical protein LOAG_07043                   |
| Locus_7774_Transcript_1/1_Conf_1.000 | 1098 | 4  | 2.87E-103 | NP_491469.2    | 85 | 379.793 | 256 | 219 | hypothetical protein F25F8.1                      |
| Locus_7775_Transcript_1/3_Conf_0.611 | 156  | 0  |           |                |    |         |     |     |                                                   |
| Locus_7775_Transcript_2/3_Conf_0.722 | 139  | 0  |           |                |    |         |     |     |                                                   |
| Locus_7775_Transcript_3/3_Conf_0.778 | 122  | 0  |           |                |    |         |     |     |                                                   |
| Locus_7776_Transcript_1/1_Conf_1.000 | 247  | 3  | 8.56E-14  | NP_495495.1    | 65 | 80.1073 | 81  | 53  | hypothetical protein E04F6.6                      |
| Locus_7777_Transcript_1/1_Conf_1.000 | 1158 | 20 | 2.23E-85  | XP_002639094.1 | 64 | 320.472 | 351 | 227 | Hypothetical protein CBG14913                     |
| Locus_7778_Transcript_1/1_Conf_1.000 | 157  | 0  |           |                |    |         |     |     |                                                   |
| Locus_7779_Transcript_1/1_Conf_1.000 | 360  | 0  |           |                |    |         |     |     |                                                   |
| Locus_778_Transcript_1/1_Conf_1.000  | 155  | 20 | 1.11E-08  | XP_002632600.1 | 92 | 63.1586 | 51  | 47  | Hypothetical protein CBG21499                     |
| Locus_7780_Transcript_1/1_Conf_1.000 | 720  | 20 | 4.46E-70  | XP_002642216.1 | 74 | 268.47  | 240 | 179 | C. briggsae CBR-ULA-1 protein                     |
| Locus_7781_Transcript_1/1_Conf_1.000 | 704  | 0  |           |                |    |         |     |     |                                                   |
| Locus_7782_Transcript_1/1_Conf_1.000 | 369  | 7  | 3.68E-20  | NP_001041091.2 | 72 | 101.293 | 99  | 72  | Motor AXon guidance family member (max-1)         |
| Locus_7783_Transcript_1/1_Conf_1.000 | 317  | 20 | 5.63E-53  | XP_002801758.1 | 98 | 210.305 | 102 | 100 | PREDICTED: 60S ribosomal protein L37-like         |
| Locus_7784_Transcript_1/1_Conf_1.000 | 615  | 20 | 3.89E-44  | XP_002647583.1 | 66 | 181.8   | 198 | 131 | C. briggsae CBR-CHK-1 protein                     |
| Locus_7785_Transcript_1/1_Conf_1.000 | 380  | 2  | 2.21E-17  | XP_002636950.1 | 57 | 92.0485 | 119 | 68  | C. briggsae CBR-HIM-17 protein                    |
| Locus_7786_Transcript_1/1_Conf_1.000 | 232  | 0  |           |                |    |         |     |     |                                                   |

|                                      |      |    |           |                |    |         |     |     |                                                       |
|--------------------------------------|------|----|-----------|----------------|----|---------|-----|-----|-------------------------------------------------------|
| Locus_7787_Transcript_1/3_Conf_0.600 | 1384 | 20 | 0         | NP_491013.1    | 83 | 671.389 | 452 | 376 | Cysteinyl tRNA Synthetase family member (crs-1)       |
| Locus_7787_Transcript_2/3_Conf_0.600 | 959  | 20 | 3.82E-82  | XP_001897270.1 | 76 | 309.301 | 278 | 214 | cysteinyl tRNA synthetase protein 1, isoform b        |
| Locus_7787_Transcript_3/3_Conf_0.600 | 1721 | 20 | 0         | NP_491013.1    | 79 | 729.169 | 537 | 429 | Cysteinyl tRNA Synthetase family member (crs-1)       |
| Locus_7788_Transcript_1/1_Conf_1.000 | 1009 | 20 | 6.51E-51  | A8XZU0.2       | 71 | 205.682 | 199 | 142 | Probable cytosolic Fe-S cluster assembly factor oxy-4 |
| Locus_7789_Transcript_1/1_Conf_1.000 | 751  | 20 | 1.65E-17  | AAV66873.1     | 62 | 93.9745 | 114 | 71  | FUN14 family protein                                  |
| Locus_779_Transcript_1/2_Conf_1.000  | 1103 | 20 | 2.45E-94  | NP_492310.1    | 68 | 350.132 | 355 | 243 | hypothetical protein K02B12.7                         |
| Locus_779_Transcript_2/2_Conf_1.000  | 1588 | 20 | 1.35E-105 | NP_492310.1    | 65 | 388.267 | 424 | 278 | hypothetical protein K02B12.7                         |
| Locus_7790_Transcript_1/2_Conf_1.000 | 1055 | 7  | 1.82E-51  | NP_493473.2    | 59 | 207.608 | 289 | 173 | hypothetical protein C37A5.7                          |
| Locus_7790_Transcript_2/2_Conf_1.000 | 950  | 3  | 3.26E-33  | NP_493473.2    | 50 | 146.747 | 289 | 147 | hypothetical protein C37A5.7                          |
| Locus_7791_Transcript_1/1_Conf_1.000 | 495  | 0  |           |                |    |         |     |     |                                                       |
| Locus_7792_Transcript_1/1_Conf_1.000 | 150  | 0  |           |                |    |         |     |     |                                                       |
| Locus_7793_Transcript_1/1_Conf_1.000 | 802  | 20 | 4.48E-104 | NP_499587.1    | 90 | 381.719 | 225 | 204 | hypothetical protein Y75B8A.14                        |
| Locus_7794_Transcript_1/2_Conf_1.000 | 231  | 20 | 6.90E-11  | XP_001894671.1 | 67 | 70.4774 | 70  | 47  | Protein kinase domain containing protein              |
| Locus_7794_Transcript_2/2_Conf_1.000 | 231  | 20 | 5.28E-11  | XP_001894671.1 | 67 | 70.8626 | 70  | 47  | Protein kinase domain containing protein              |
| Locus_7795_Transcript_1/1_Conf_1.000 | 469  | 20 | 4.84E-73  | NP_501418.1    | 91 | 276.944 | 156 | 143 | SQuashed Vulva family member (sqv-1)                  |

|                                      |      |    |           |                |    |         |     |     |                                         |
|--------------------------------------|------|----|-----------|----------------|----|---------|-----|-----|-----------------------------------------|
| Locus_7796_Transcript_1/1_Conf_1.000 | 782  | 20 | 3.20E-43  | NP_001020983.1 | 89 | 179.489 | 115 | 103 | TOLI (Drosophila) family member (tol-1) |
| Locus_7797_Transcript_1/2_Conf_1.000 | 908  | 20 | 3.27E-88  | NP_499493.1    | 82 | 329.331 | 231 | 190 | hypothetical protein Y66D12A.9          |
| Locus_7797_Transcript_2/2_Conf_1.000 | 908  | 20 | 3.27E-88  | NP_499493.1    | 82 | 329.331 | 231 | 190 | hypothetical protein Y66D12A.9          |
| Locus_7798_Transcript_1/1_Conf_1.000 | 172  | 0  |           |                |    |         |     |     |                                         |
| Locus_7799_Transcript_1/1_Conf_1.000 | 433  | 20 | 4.10E-40  | 2O55           | 89 | 167.548 | 104 | 93  | Macrophage Migration Inhibitory Factor  |
| Locus_78_Transcript_1/3_Conf_0.400   | 512  | 20 | 4.23E-35  |                | 85 | 150.984 | 105 | 90  | hypothetical protein T22B7.             |
| Locus_78_Transcript_2/3_Conf_0.600   | 581  | 20 | 3.21E-47  |                | 85 | 191.815 | 128 | 110 | hypothetical protein T22B7.3            |
| Locus_78_Transcript_3/3_Conf_0.600   | 1266 | 20 | 4.00E-123 | NP_508952.2    | 87 | 446.047 | 281 | 247 | hypothetical protein T22B7.3            |
| Locus_780_Transcript_1/2_Conf_1.000  | 1869 | 20 | 0         | XP_002647383.1 | 88 | 768.844 | 505 | 445 | C. briggsae CBR-CGP-1 protein           |
| Locus_780_Transcript_2/2_Conf_1.000  | 1863 | 20 | 0         | XP_002647383.1 | 88 | 773.852 | 503 | 445 | C. briggsae CBR-CGP-1 protein           |

|                                      |      |    |           |                |    |         |     |     |                                          |
|--------------------------------------|------|----|-----------|----------------|----|---------|-----|-----|------------------------------------------|
| Locus_7800_Transcript_1/2_Conf_1.000 | 1383 | 20 | 1.13E-89  | XP_002639203.1 | 74 | 335.109 | 307 | 229 | C. briggsae CBR-MEC-8 protein            |
| Locus_7800_Transcript_2/2_Conf_1.000 | 1448 | 20 | 1.20E-89  | XP_002639203.1 | 74 | 335.109 | 307 | 229 | C. briggsae CBR-MEC-8 protein            |
| Locus_7801_Transcript_1/1_Conf_1.000 | 234  | 0  |           |                |    |         |     |     |                                          |
| Locus_7802_Transcript_1/1_Conf_1.000 | 160  | 0  |           |                |    |         |     |     |                                          |
| Locus_7803_Transcript_1/1_Conf_1.000 | 573  | 0  |           |                |    |         |     |     |                                          |
| Locus_7804_Transcript_1/1_Conf_1.000 | 842  | 20 | 9.67E-36  | XP_001898512.1 | 66 | 154.836 | 168 | 111 | Protein kinase domain containing protein |
| Locus_7805_Transcript_1/1_Conf_1.000 | 824  | 20 | 1.79E-71  | NP_740841.1    | 75 | 273.478 | 269 | 204 | protein KINase family member (kin-32)    |
| Locus_7806_Transcript_1/1_Conf_1.000 | 858  | 20 | 2.24E-43  | XP_001900229.1 | 62 | 180.259 | 233 | 146 | FAT domain containing protein            |
| Locus_7807_Transcript_1/1_Conf_1.000 | 169  | 0  |           |                |    |         |     |     |                                          |
| Locus_7808_Transcript_1/2_Conf_1.000 | 2094 | 20 | 0         | XP_002633289.1 | 68 | 660.988 | 650 | 448 | Hypothetical protein CBG06018            |
| Locus_7808_Transcript_2/2_Conf_1.000 | 2094 | 20 | 0         | XP_002633289.1 | 68 | 660.988 | 650 | 448 | Hypothetical protein CBG06018            |
| Locus_7809_Transcript_1/1_Conf_1.000 | 544  | 0  |           |                |    |         |     |     |                                          |
| Locus_781_Transcript_1/1_Conf_1.000  | 1322 | 20 | 2.38E-174 | NP_500998.1    | 84 | 616.305 | 431 | 365 | hypothetical protein C43G2.1             |

|                                      |      |    |           |                |     |         |      |     |                                                                         |
|--------------------------------------|------|----|-----------|----------------|-----|---------|------|-----|-------------------------------------------------------------------------|
| Locus_7810_Transcript_1/3_Conf_0.600 | 505  | 20 | 5.41E-43  | NP_001024914.1 | 70  | 177.178 | 167  | 118 | hypothetical protein T14G8.3                                            |
| Locus_7810_Transcript_2/3_Conf_0.600 | 505  | 20 | 7.06E-43  | NP_001024914.1 | 70  | 176.792 | 167  | 117 | hypothetical protein T14G8.3                                            |
| Locus_7810_Transcript_3/3_Conf_0.600 | 505  | 20 | 7.06E-43  | NP_001024914.1 | 70  | 176.792 | 167  | 117 | hypothetical protein T14G8.3                                            |
| Locus_7811_Transcript_1/1_Conf_1.000 | 466  | 20 | 1.58E-39  | BAG59908.1     | 100 | 165.622 | 83   | 83  | unnamed protein product                                                 |
| Locus_7812_Transcript_1/1_Conf_1.000 | 323  | 0  |           |                |     |         |      |     |                                                                         |
| Locus_7813_Transcript_1/1_Conf_1.000 | 381  | 0  |           |                |     |         |      |     |                                                                         |
| Locus_7814_Transcript_1/1_Conf_1.000 | 3628 | 20 | 0         | NP_491855.1    | 61  | 732.25  | 1097 | 676 | Nuclear Pore complex Protein family member (npp-12)                     |
| Locus_7815_Transcript_1/1_Conf_1.000 | 708  | 20 | 1.67E-106 | ACK44110.1     | 96  | 389.423 | 201  | 194 | manganese superoxide dismutase precursor                                |
| Locus_7816_Transcript_1/1_Conf_1.000 | 604  | 20 | 2.06E-95  | XP_002640056.1 | 99  | 352.058 | 195  | 194 | Hypothetical protein CBG12532                                           |
| Locus_7817_Transcript_1/1_Conf_1.000 | 228  | 0  |           |                |     |         |      |     |                                                                         |
| Locus_7818_Transcript_1/1_Conf_1.000 | 336  | 2  | 3.61E-04  | CBM41222.1     | 44  | 48.1358 | 92   | 41  | C. elegans protein T10G3.3b, partially confirmed by transcript evidence |
| Locus_7819_Transcript_1/2_Conf_1.000 | 1053 | 5  | 3.35E-29  | XP_002639130.1 | 44  | 133.65  | 384  | 172 | Hypothetical protein CBG14950                                           |
| Locus_7819_Transcript_2/2_Conf_1.000 | 451  | 6  | 3.29E-13  | ABD94095.1     | 48  | 78.1814 | 146  | 71  | Hypothetical protein W05F2.4a                                           |
| Locus_782_Transcript_1/1_Conf_1.000  | 331  | 20 | 2.05E-23  | ACI49074.1     | 68  | 112.079 | 110  | 75  | hypothetical protein Cbre_JD10.006                                      |
| Locus_7820_Transcript_1/1_Conf_1.000 | 263  | 2  | 7.90E-15  | NP_492351.1    | 82  | 83.5741 | 52   | 43  | hypothetical protein K07A12.7                                           |

|                                      |      |    |          |                |    |         |     |     |                                               |
|--------------------------------------|------|----|----------|----------------|----|---------|-----|-----|-----------------------------------------------|
| Locus_7821_Transcript_1/1_Conf_1.000 | 493  | 20 | 1.77E-75 | NP_504661.1    | 96 | 285.034 | 164 | 159 | Daf-12, REdundant with family member (dre-1)  |
| Locus_7822_Transcript_1/1_Conf_1.000 | 890  | 20 | 4.91E-49 | EFO15488.1     | 61 | 199.134 | 242 | 148 | hypothetical protein LOAG_13022               |
| Locus_7823_Transcript_1/1_Conf_1.000 | 659  | 2  | 2.13E-09 | XP_001891619.1 | 60 | 66.6254 | 147 | 89  | PH domain containing protein                  |
| Locus_7824_Transcript_1/1_Conf_1.000 | 459  | 20 | 3.21E-53 | NP_501505.1    | 88 | 211.075 | 124 | 110 | hypothetical protein F21D5.8                  |
| Locus_7825_Transcript_1/1_Conf_1.000 | 1268 | 20 | 4.19E-80 | XP_002647044.1 | 57 | 303.138 | 458 | 264 | C. briggsae CBR-ELPC-2 protein                |
| Locus_7826_Transcript_1/1_Conf_1.000 | 501  | 0  |          |                |    |         |     |     |                                               |
| Locus_7827_Transcript_1/2_Conf_1.000 | 1528 | 20 | 1.53E-90 | EFO25005.1     | 57 | 338.191 | 447 | 259 | hypothetical protein LOAG_03478               |
| Locus_7827_Transcript_2/2_Conf_1.000 | 1363 | 20 | 9.12E-68 | EFO25005.1     | 70 | 262.307 | 225 | 159 | hypothetical protein LOAG_03478               |
| Locus_7828_Transcript_1/1_Conf_1.000 | 731  | 20 | 1.48E-68 | XP_001899812.1 | 74 | 263.462 | 232 | 173 | hypothetical protein Bm1_41765                |
| Locus_7829_Transcript_1/1_Conf_1.000 | 718  | 20 | 9.78E-94 | XP_002639432.1 | 81 | 347.051 | 239 | 195 | C. briggsae CBR-TYR-4 protein                 |
| Locus_783_Transcript_1/1_Conf_1.000  | 644  | 20 | 3.98E-66 | XP_002629858.1 | 92 | 254.988 | 150 | 138 | Hypothetical protein CBG21892                 |
| Locus_7830_Transcript_1/1_Conf_1.000 | 176  | 0  |          |                |    |         |     |     |                                               |
| Locus_7831_Transcript_1/1_Conf_1.000 | 529  | 0  |          |                |    |         |     |     |                                               |
| Locus_7832_Transcript_1/2_Conf_1.000 | 318  | 9  | 1.15E-05 | XP_809492.1    | 67 | 53.1434 | 65  | 44  | vesicular transport-associated repeat protein |
| Locus_7832_Transcript_2/2_Conf_1.000 | 264  | 6  | 4.33E-05 | XP_001640051.1 | 62 | 51.2174 | 72  | 45  | predicted protein                             |
| Locus_7833_Transcript_1/1_Conf_1.000 | 672  | 0  |          |                |    |         |     |     |                                               |
| Locus_7834_Transcript_1/1_Conf_1.000 | 685  | 20 | 7.30E-80 | XP_002636225.1 | 79 | 300.827 | 225 | 179 | Hypothetical protein CBG12149                 |
| Locus_7835_Transcript_1/1_Conf_1.000 | 452  | 20 | 3.71E-57 | XP_001899521.1 | 94 | 224.172 | 117 | 110 | Disorganized muscle protein 1                 |
| Locus_7836_Transcript_1/1_Conf_1.000 | 808  | 0  |          |                |    |         |     |     |                                               |
| Locus_7837_Transcript_1/1_Conf_1.000 | 701  | 20 | 1.12E-46 | EFO21887.1     | 91 | 190.66  | 104 | 95  | SCPL-2 protein                                |



|                                      |      |    |          |                |    |         |     |     |                                                                                      |
|--------------------------------------|------|----|----------|----------------|----|---------|-----|-----|--------------------------------------------------------------------------------------|
| Locus_7838_Transcript_1/1_Conf_1.000 | 773  | 2  | 1.79E-06 | XP_002404556.1 | 48 | 57.3806 | 201 | 98  | nuclear hormone receptor 48, putative                                                |
| Locus_7839_Transcript_1/1_Conf_1.000 | 817  | 20 | 6.49E-66 | CAX32485.1     | 71 | 254.988 | 271 | 194 | C. elegans protein T20D3.11b, partially confirmed by transcript evidence             |
| Locus_784_Transcript_1/1_Conf_1.000  | 2055 | 20 | 0        | NP_505508.1    | 79 | 781.556 | 552 | 440 | hypothetical protein F40F9.6                                                         |
| Locus_7840_Transcript_1/1_Conf_1.000 | 788  | 15 | 4.42E-16 | XP_002637665.1 | 42 | 89.3521 | 258 | 109 | C. briggsae CBR-APT-10 protein                                                       |
| Locus_7841_Transcript_1/1_Conf_1.000 | 900  | 20 | 1.23E-71 | AAC47112.1     | 66 | 274.248 | 287 | 190 | sel-1                                                                                |
| Locus_7842_Transcript_1/1_Conf_1.000 | 293  | 20 | 2.80E-20 | NP_492590.1    | 71 | 101.679 | 96  | 69  | hypothetical protein K02A11.3                                                        |
| Locus_7843_Transcript_1/1_Conf_1.000 | 1209 | 20 | 6.27E-86 | NP_001022524.1 | 73 | 322.398 | 264 | 193 | CoBaLamin deficiency, C complementation group (human) homolog family member (cblc-1) |
| Locus_7844_Transcript_1/1_Conf_1.000 | 505  | 0  |          |                |    |         |     |     |                                                                                      |
| Locus_7845_Transcript_1/1_Conf_1.000 | 306  | 0  |          |                |    |         |     |     |                                                                                      |
| Locus_7846_Transcript_1/1_Conf_1.000 | 278  | 0  |          |                |    |         |     |     |                                                                                      |
| Locus_7847_Transcript_1/1_Conf_1.000 | 861  | 20 | 6.56E-43 | NP_508196.1    | 57 | 178.718 | 238 | 136 | STAUfen (dsRNA binding protein) homolog family member (stau-1)                       |
| Locus_7848_Transcript_1/2_Conf_1.000 | 1431 | 0  |          |                |    |         |     |     |                                                                                      |
| Locus_7848_Transcript_2/2_Conf_1.000 | 696  | 0  |          |                |    |         |     |     |                                                                                      |
| Locus_7849_Transcript_1/1_Conf_1.000 | 373  | 0  |          |                |    |         |     |     |                                                                                      |
| Locus_785_Transcript_1/7_Conf_0.444  | 908  | 0  |          |                |    |         |     |     |                                                                                      |
| Locus_785_Transcript_2/7_Conf_0.500  | 957  | 0  |          |                |    |         |     |     |                                                                                      |
| Locus_785_Transcript_3/7_Conf_0.389  | 851  | 0  |          |                |    |         |     |     |                                                                                      |
| Locus_785_Transcript_4/7_Conf_0.167  | 674  | 0  |          |                |    |         |     |     |                                                                                      |
| Locus_785_Transcript_5/7_Conf_0.167  | 674  | 0  |          |                |    |         |     |     |                                                                                      |
| Locus_785_Transcript_6/7_Conf_0.500  | 978  | 0  |          |                |    |         |     |     |                                                                                      |

|                                      |      |    |           |             |    |         |     |     |                                                      |  |
|--------------------------------------|------|----|-----------|-------------|----|---------|-----|-----|------------------------------------------------------|--|
| Locus_785_Transcript_7/7_Conf_0.556  | 978  | 0  |           |             |    |         |     |     |                                                      |  |
| Locus_7850_Transcript_1/1_Conf_1.000 | 250  | 0  |           |             |    |         |     |     |                                                      |  |
| Locus_7851_Transcript_1/2_Conf_1.000 | 1185 | 20 | 1.30E-112 | AAA68954.1  | 80 | 410.994 | 330 | 264 | UNC-76                                               |  |
| Locus_7851_Transcript_2/2_Conf_1.000 | 1194 | 20 | 8.53E-112 | AAA68954.1  | 79 | 408.297 | 332 | 265 | UNC-76                                               |  |
| Locus_7852_Transcript_1/1_Conf_1.000 | 580  | 20 | 6.03E-62  | ADM53749.1  | 76 | 240.736 | 181 | 138 | Hypothetical protein F45F2.9b                        |  |
| Locus_7853_Transcript_1/2_Conf_1.000 | 754  | 20 | 1.31E-98  | NP_741467.1 | 86 | 233.802 | 161 | 139 | hypothetical protein C09G4.2                         |  |
| Locus_7853_Transcript_2/2_Conf_1.000 | 746  | 20 | 5.08E-104 | NP_741467.1 | 86 | 381.333 | 249 | 216 | hypothetical protein C09G4.2                         |  |
| Locus_7854_Transcript_1/2_Conf_1.000 | 1061 | 20 | 2.09E-79  | NP_491513.2 | 85 | 300.442 | 213 | 182 | Formin HOMology Domain family member (fhod-1)        |  |
| Locus_7854_Transcript_2/2_Conf_1.000 | 871  | 20 | 1.69E-78  | NP_491513.2 | 89 | 296.975 | 193 | 172 | Formin HOMology Domain family member (fhod-1)        |  |
| Locus_7855_Transcript_1/1_Conf_1.000 | 416  | 0  |           |             |    |         |     |     |                                                      |  |
| Locus_7856_Transcript_1/1_Conf_1.000 | 1203 | 20 | 0         | ACN93882.1  | 94 | 737.643 | 401 | 378 | putative glutamate-cysteine ligase catalytic subunit |  |
| Locus_7857_Transcript_1/1_Conf_1.000 | 228  | 20 | 4.47E-26  | NP_504502.1 | 88 | 120.939 | 76  | 67  | hypothetical protein F25B4.1                         |  |
| Locus_7858_Transcript_1/2_Conf_1.000 | 342  | 0  |           |             |    |         |     |     |                                                      |  |
| Locus_7858_Transcript_2/2_Conf_1.000 | 342  | 0  |           |             |    |         |     |     |                                                      |  |

|                                      |      |    |           |                |    |         |     |     |                                                        |
|--------------------------------------|------|----|-----------|----------------|----|---------|-----|-----|--------------------------------------------------------|
| Locus_7859_Transcript_1/2_Conf_1.000 | 596  | 20 | 1.26E-17  | EFN84094.1     | 54 | 93.5893 | 174 | 95  | Dehydrogenase/reductase SDR family member 7            |
| Locus_7859_Transcript_2/2_Conf_1.000 | 947  | 20 | 1.61E-24  | NP_001085784.1 | 53 | 117.857 | 267 | 143 | dehydrogenase/reductase (SDR family) member 7          |
| Locus_786_Transcript_1/2_Conf_1.000  | 1234 | 20 | 1.51E-42  | EFO20187.1     | 54 | 178.333 | 322 | 176 | nuclear factor I                                       |
| Locus_786_Transcript_2/2_Conf_1.000  | 1207 | 20 | 2.75E-41  | XP_001902121.1 | 61 | 174.096 | 234 | 143 | MH1 domain containing protein                          |
| Locus_7860_Transcript_1/1_Conf_1.000 | 785  | 5  | 7.59E-85  | NP_492783.1    | 79 | 317.775 | 229 | 182 | Temporarily Assigned Gene name family member (tag-264) |
| Locus_7861_Transcript_1/1_Conf_1.000 | 294  | 0  |           |                |    |         |     |     |                                                        |
| Locus_7862_Transcript_1/1_Conf_1.000 | 382  | 3  | 1.99E-10  | AAA96289.2     | 80 | 68.9366 | 55  | 44  | Hypothetical protein D1014.2                           |
| Locus_7863_Transcript_1/1_Conf_1.000 | 325  | 20 | 6.61E-38  | NP_496205.2    | 86 | 160.229 | 108 | 93  | PhosphoLipase C family member (plc-3)                  |
| Locus_7864_Transcript_1/1_Conf_1.000 | 1270 | 20 | 1.21E-111 | EFO18387.1     | 76 | 407.912 | 359 | 273 | hypothetical protein LOAG_10109                        |
| Locus_7865_Transcript_1/1_Conf_1.000 | 578  | 20 | 3.05E-58  | NP_491282.1    | 89 | 228.409 | 141 | 126 | CalPoNin family member (cpn-3)                         |
| Locus_7866_Transcript_1/2_Conf_1.000 | 1210 | 20 | 3.11E-85  | XP_002631227.1 | 66 | 320.087 | 384 | 257 | Hypothetical protein CBG03025                          |
| Locus_7866_Transcript_2/2_Conf_1.000 | 747  | 20 | 1.98E-47  | NP_496307.1    | 68 | 193.356 | 247 | 168 | hypothetical protein C09G5.2                           |
| Locus_7867_Transcript_1/1_Conf_1.000 | 603  | 0  |           |                |    |         |     |     |                                                        |
| Locus_7868_Transcript_1/1_Conf_1.000 | 265  | 0  |           |                |    |         |     |     |                                                        |

|                                      |      |    |          |                |    |         |     |     |                                                        |
|--------------------------------------|------|----|----------|----------------|----|---------|-----|-----|--------------------------------------------------------|
| Locus_7869_Transcript_1/2_Conf_1.000 | 3179 | 20 | 2.38E-73 | EFO21171.1     | 54 | 282.337 | 446 | 244 | PHD-finger family protein                              |
| Locus_7869_Transcript_2/2_Conf_1.000 | 3159 | 20 | 2.36E-73 | EFO21171.1     | 54 | 282.337 | 446 | 244 | PHD-finger family protein                              |
| Locus_787_Transcript_1/3_Conf_0.571  | 1915 | 20 | 3.07E-46 | XP_001895704.1 | 38 | 191.43  | 652 | 251 | Chitin binding Peritrophin-A domain containing protein |
| Locus_787_Transcript_2/3_Conf_0.714  | 2120 | 20 | 3.47E-46 | XP_001895704.1 | 38 | 191.43  | 652 | 251 | Chitin binding Peritrophin-A domain containing protein |

|                                      |      |    |           |                |    |         |     |     |                                                                     |
|--------------------------------------|------|----|-----------|----------------|----|---------|-----|-----|---------------------------------------------------------------------|
| Locus_787_Transcript_3/3_Conf_0.714  | 1947 | 20 | 1.31E-44  | XP_001895704.1 | 40 | 186.037 | 695 | 279 | Chitin binding Peritrophin-A domain containing protein              |
| Locus_7870_Transcript_1/1_Conf_1.000 | 324  | 13 | 5.45E-16  | XP_002646301.1 | 74 | 87.4261 | 91  | 68  | C. briggsae CBR-UNC-11 protein                                      |
| Locus_7871_Transcript_1/1_Conf_1.000 | 599  | 4  | 8.61E-06  | NP_495677.1    | 47 | 54.299  | 200 | 94  | ZYGote defective: embryonic lethal family member (zyg-11)           |
| Locus_7872_Transcript_1/1_Conf_1.000 | 2232 | 20 | 6.05E-174 | NP_001022570.1 | 63 | 615.92  | 670 | 424 | CYLindromatosis (human disease gene) homolog family member (cyld-1) |
| Locus_7873_Transcript_1/1_Conf_1.000 | 654  | 0  |           |                |    |         |     |     |                                                                     |
| Locus_7874_Transcript_1/1_Conf_1.000 | 179  | 20 | 6.78E-11  | EFO23362.1     | 75 | 70.4774 | 49  | 37  | CAP-Gly domain-containing protein                                   |
| Locus_7875_Transcript_1/1_Conf_1.000 | 1130 | 0  |           |                |    |         |     |     |                                                                     |
| Locus_7876_Transcript_1/2_Conf_1.000 | 581  | 0  |           |                |    |         |     |     |                                                                     |
| Locus_7876_Transcript_2/2_Conf_1.000 | 581  | 0  |           |                |    |         |     |     |                                                                     |
| Locus_7877_Transcript_1/1_Conf_1.000 | 306  | 0  |           |                |    |         |     |     |                                                                     |
| Locus_7878_Transcript_1/1_Conf_1.000 | 229  | 20 | 1.81E-27  | NP_497480.2    | 89 | 125.561 | 76  | 68  | POLH (DNA polymerase eta) homolog family member (polh-1)            |
| Locus_7879_Transcript_1/1_Conf_1.000 | 200  | 0  |           |                |    |         |     |     |                                                                     |
| Locus_788_Transcript_1/2_Conf_1.000  | 1107 | 20 | 6.36E-50  | AAB09129.2     | 72 | 202.601 | 184 | 134 | Hypothetical protein M02B7.4                                        |
| Locus_788_Transcript_2/2_Conf_1.000  | 1107 | 20 | 6.37E-50  | AAB09129.2     | 72 | 202.601 | 184 | 134 | Hypothetical protein M02B7.4                                        |
| Locus_7880_Transcript_1/1_Conf_1.000 | 287  | 0  |           |                |    |         |     |     |                                                                     |
| Locus_7881_Transcript_1/1_Conf_1.000 | 812  | 20 | 2.24E-111 | NP_497625.3    | 91 | 405.986 | 243 | 223 | hypothetical protein Y71H2AM.1                                      |
| Locus_7882_Transcript_1/1_Conf_1.000 | 629  | 20 | 1.63E-61  | XP_002639893.1 | 87 | 239.58  | 151 | 132 | Hypothetical protein CBG08215                                       |
| Locus_7883_Transcript_1/1_Conf_1.000 | 667  | 0  |           |                |    |         |     |     |                                                                     |
| Locus_7884_Transcript_1/1_Conf_1.000 | 811  | 20 | 1.26E-21  | AAO63577.1     | 46 | 107.842 | 242 | 112 | secreted protein 5 precursor                                        |
| Locus_7885_Transcript_1/1_Conf_1.000 | 203  | 0  |           |                |    |         |     |     |                                                                     |

|                                      |      |    |           |                |    |         |     |     |                                                                                                     |
|--------------------------------------|------|----|-----------|----------------|----|---------|-----|-----|-----------------------------------------------------------------------------------------------------|
| Locus_7886_Transcript_1/2_Conf_1.000 | 870  | 20 | 5.78E-87  | XP_002635267.1 | 78 | 325.094 | 264 | 207 | C. briggsae CBR-LETM-1 protein                                                                      |
| Locus_7886_Transcript_2/2_Conf_1.000 | 824  | 20 | 3.71E-85  | NP_506382.1    | 82 | 318.931 | 234 | 194 | LETM1 (Leucine zipper, EF-hand, TransMembrane mitochondrial protein) homolog family member (letm-1) |
| Locus_7887_Transcript_1/2_Conf_1.000 | 2062 | 20 | 0         | XP_002644202.1 | 83 | 850.121 | 629 | 526 | Hypothetical protein CBG17192                                                                       |
| Locus_7887_Transcript_2/2_Conf_1.000 | 1073 | 20 | 4.50E-138 | XP_002644202.1 | 83 | 495.352 | 358 | 299 | Hypothetical protein CBG17192                                                                       |
| Locus_7888_Transcript_1/1_Conf_1.000 | 699  | 4  | 1.34E-07  | EFO17538.1     | 45 | 60.8474 | 192 | 88  | hypothetical protein LOAG_10961                                                                     |
| Locus_7889_Transcript_1/1_Conf_1.000 | 339  | 20 | 3.44E-39  | XP_002636622.1 | 84 | 164.466 | 112 | 95  | C. briggsae CBR-SMA-1 protein                                                                       |
| Locus_789_Transcript_1/1_Conf_1.000  | 159  | 0  |           |                |    |         |     |     |                                                                                                     |
| Locus_7890_Transcript_1/1_Conf_1.000 | 188  | 2  | 6.76E-06  | NP_001022051.1 | 81 | 53.9138 | 43  | 35  | SREBP Cleavage activating Protein (SCAP) homolog family member (scp-1)                              |
| Locus_7891_Transcript_1/1_Conf_1.000 | 501  | 20 | 2.37E-35  | EFO23330.1     | 98 | 151.754 | 78  | 77  | GTP-binding regulatory protein alpha chain                                                          |
| Locus_7892_Transcript_1/1_Conf_1.000 | 870  | 20 | 9.25E-77  | EFO24390.1     | 72 | 291.197 | 258 | 187 | hypothetical protein LOAG_04097                                                                     |
| Locus_7893_Transcript_1/1_Conf_1.000 | 150  | 0  |           |                |    |         |     |     |                                                                                                     |
| Locus_7894_Transcript_1/1_Conf_1.000 | 193  | 5  | 1.65E-12  | NP_001122450.1 | 89 | 75.8702 | 46  | 41  | hypothetical protein F10G8.8                                                                        |
| Locus_7895_Transcript_1/2_Conf_1.000 | 491  | 20 | 1.13E-29  | NP_507487.1    | 75 | 132.88  | 142 | 107 | P-GlycoProtein related family member (pgp-9)                                                        |
| Locus_7895_Transcript_2/2_Conf_1.000 | 1094 | 20 | 5.91E-117 | NP_507487.1    | 83 | 425.246 | 345 | 289 | P-GlycoProtein related family member (pgp-9)                                                        |

|                                      |      |    |           |                |    |         |     |     |                                |
|--------------------------------------|------|----|-----------|----------------|----|---------|-----|-----|--------------------------------|
| Locus_7896_Transcript_1/1_Conf_1.000 | 657  | 20 | 3.02E-72  | XP_002634540.1 | 81 | 275.404 | 186 | 151 | C. briggsae CBR-EGL-21 protein |
| Locus_7897_Transcript_1/1_Conf_1.000 | 1350 | 20 | 3.50E-104 | XP_002645345.1 | 90 | 383.259 | 309 | 280 | C. briggsae CBR-TNT-2 protein  |
| Locus_7898_Transcript_1/1_Conf_1.000 | 312  | 20 | 1.14E-45  | NP_001022869.1 | 91 | 186.037 | 103 | 94  | hypothetical protein Y42G9A.4  |
| Locus_7899_Transcript_1/1_Conf_1.000 | 140  | 0  |           |                |    |         |     |     |                                |
| Locus_79_Transcript_1/1_Conf_1.000   | 302  | 20 | 5.96E-31  | XP_002640973.1 | 88 | 137.117 | 98  | 87  | C. briggsae CBR-SNF-6 protein  |
| Locus_790_Transcript_1/4_Conf_0.200  | 867  | 20 | 1.12E-90  | XP_002642802.1 | 94 | 337.421 | 178 | 168 | C. briggsae CBR-ABCF-2 protein |
| Locus_790_Transcript_2/4_Conf_0.200  | 825  | 20 | 1.12E-89  | XP_002642802.1 | 94 | 333.954 | 175 | 165 | C. briggsae CBR-ABCF-2 protein |
| Locus_790_Transcript_3/4_Conf_0.400  | 2206 | 20 | 0         | XP_002642802.1 | 94 | 1036.17 | 568 | 539 | C. briggsae CBR-ABCF-2 protein |
| Locus_790_Transcript_4/4_Conf_0.400  | 2206 | 20 | 0         | XP_002642802.1 | 94 | 1037.33 | 570 | 540 | C. briggsae CBR-ABCF-2 protein |

|                                      |      |    |           |                |    |         |     |     |                                       |
|--------------------------------------|------|----|-----------|----------------|----|---------|-----|-----|---------------------------------------|
| Locus_7900_Transcript_1/1_Conf_1.000 | 1068 | 20 | 2.56E-117 | XP_002633370.1 | 81 | 426.402 | 321 | 261 | Hypothetical protein CBG06117         |
| Locus_7901_Transcript_1/1_Conf_1.000 | 405  | 0  |           |                |    |         |     |     |                                       |
| Locus_7902_Transcript_1/2_Conf_1.000 | 491  | 0  |           |                |    |         |     |     |                                       |
| Locus_7902_Transcript_2/2_Conf_1.000 | 491  | 0  |           |                |    |         |     |     |                                       |
| Locus_7903_Transcript_1/1_Conf_1.000 | 368  | 0  |           |                |    |         |     |     |                                       |
| Locus_7904_Transcript_1/1_Conf_1.000 | 797  | 20 | 3.41E-72  | XP_002629818.1 | 83 | 275.789 | 184 | 153 | Hypothetical protein CBG01062         |
| Locus_7905_Transcript_1/1_Conf_1.000 | 1636 | 20 | 2.67E-72  | EFO22647.1     | 57 | 277.715 | 435 | 251 | DEAD/DEAH box helicase                |
| Locus_7906_Transcript_1/1_Conf_1.000 | 1309 | 20 | 0         | ACI02330.1     | 92 | 727.628 | 409 | 379 | aspartic protease 1                   |
| Locus_7907_Transcript_1/1_Conf_1.000 | 365  | 20 | 5.36E-16  | XP_001894880.1 | 75 | 87.4261 | 74  | 56  | hypothetical protein                  |
| Locus_7908_Transcript_1/1_Conf_1.000 | 479  | 20 | 1.70E-70  | XP_002832118.1 | 98 | 268.47  | 141 | 139 | PREDICTED: histone H3.3-like, partial |



|                                      |      |    |          |                |    |         |     |     |                                    |
|--------------------------------------|------|----|----------|----------------|----|---------|-----|-----|------------------------------------|
| Locus_7909_Transcript_1/1_Conf_1.000 | 1077 | 20 | 1.66E-39 | ACI49198.1     | 94 | 167.933 | 118 | 112 | hypothetical protein Csp3_JD03.007 |
| Locus_791_Transcript_1/3_Conf_0.714  | 2639 | 20 | 0        | XP_002642195.1 | 89 | 1264.98 | 805 | 723 | C. briggsae CBR-UNC-116 protein    |
| Locus_791_Transcript_2/3_Conf_0.714  | 2648 | 20 | 0        | XP_002642195.1 | 89 | 1264.98 | 806 | 723 | C. briggsae CBR-UNC-116 protein    |

|                                      |      |    |           |                |    |         |     |     |                                           |
|--------------------------------------|------|----|-----------|----------------|----|---------|-----|-----|-------------------------------------------|
| Locus_791_Transcript_3/3_Conf_0.714  | 2648 | 20 | 0         | XP_002642195.1 | 89 | 1264.98 | 806 | 723 | C. briggsae CBR-UNC-116 protein           |
| Locus_7910_Transcript_1/1_Conf_1.000 | 423  | 20 | 3.08E-35  | NP_499963.1    | 79 | 151.369 | 101 | 80  | hypothetical protein K11H12.1             |
| Locus_7911_Transcript_1/1_Conf_1.000 | 1254 | 20 | 4.18E-149 | NP_493388.1    | 81 | 532.332 | 409 | 332 | UNCoordinated family member (unc-59)      |
| Locus_7912_Transcript_1/1_Conf_1.000 | 610  | 0  |           |                |    |         |     |     |                                           |
| Locus_7913_Transcript_1/1_Conf_1.000 | 846  | 20 | 4.26E-31  | EFO20247.1     | 64 | 139.428 | 167 | 108 | transcription initiation factor IID       |
| Locus_7914_Transcript_1/1_Conf_1.000 | 578  | 0  |           |                |    |         |     |     |                                           |
| Locus_7915_Transcript_1/1_Conf_1.000 | 252  | 3  | 6.13E-07  | AAF60449.3     | 61 | 57.3806 | 84  | 52  | Hypothetical protein Y17G9B.8             |
| Locus_7916_Transcript_1/1_Conf_1.000 | 974  | 20 | 6.93E-79  | XP_001899472.1 | 73 | 298.516 | 276 | 204 | Patatin-like phospholipase family protein |
| Locus_7917_Transcript_1/1_Conf_1.000 | 218  | 0  |           |                |    |         |     |     |                                           |
| Locus_7918_Transcript_1/2_Conf_1.000 | 979  | 20 | 3.27E-60  | XP_001893007.1 | 79 | 236.498 | 184 | 147 | DJ-1 family protein                       |
| Locus_7918_Transcript_2/2_Conf_1.000 | 680  | 20 | 1.18E-74  | NP_493695.1    | 87 | 283.493 | 175 | 153 | hypothetical protein B0432.3              |

|                                      |      |    |          |                |    |         |     |     |                                                  |
|--------------------------------------|------|----|----------|----------------|----|---------|-----|-----|--------------------------------------------------|
| Locus_7919_Transcript_1/1_Conf_1.000 | 597  | 20 | 1.41E-32 | XP_002644685.1 | 78 | 143.28  | 161 | 126 | C. briggsae CBR-SYN-1 protein                    |
| Locus_792_Transcript_1/1_Conf_1.000  | 1419 | 20 | 6.18E-91 | EFO27641.1     | 63 | 339.347 | 477 | 304 | sympleskin                                       |
| Locus_7920_Transcript_1/1_Conf_1.000 | 882  | 20 | 7.91E-92 | NP_001021719.1 | 79 | 341.273 | 251 | 199 | hypothetical protein Y110A7A.9                   |
| Locus_7921_Transcript_1/1_Conf_1.000 | 220  | 19 | 1.15E-13 | NP_495353.1    | 70 | 79.7221 | 71  | 50  | hypothetical protein T19D12.9                    |
| Locus_7922_Transcript_1/1_Conf_1.000 | 362  | 20 | 2.85E-25 | AAC70065.1     | 66 | 118.242 | 121 | 81  | MutS homolog                                     |
| Locus_7923_Transcript_1/3_Conf_0.714 | 1051 | 20 | 6.31E-12 | XP_002648823.1 | 40 | 76.2554 | 250 | 100 | Hypothetical protein CBG16936                    |
| Locus_7923_Transcript_2/3_Conf_0.714 | 1051 | 20 | 2.17E-12 | XP_002648823.1 | 38 | 77.7962 | 259 | 100 | Hypothetical protein CBG16936                    |
| Locus_7923_Transcript_3/3_Conf_0.714 | 1051 | 20 | 6.31E-12 | XP_002648823.1 | 38 | 76.2554 | 256 | 98  | Hypothetical protein CBG16936                    |
| Locus_7924_Transcript_1/1_Conf_1.000 | 634  | 20 | 1.51E-70 | XP_002629723.1 | 75 | 269.626 | 197 | 149 | C. briggsae CBR-UGT-58 protein                   |
| Locus_7925_Transcript_1/1_Conf_1.000 | 619  | 4  | 1.32E-23 | NP_496091.1    | 70 | 113.62  | 99  | 70  | Neuropeptide-Like Protein family member (nlp-11) |
| Locus_7926_Transcript_1/1_Conf_1.000 | 693  | 20 | 5.10E-44 | ABF69526.1     | 80 | 181.8   | 140 | 113 | unknown                                          |
| Locus_7927_Transcript_1/1_Conf_1.000 | 192  | 0  |          |                |    |         |     |     |                                                  |
| Locus_7928_Transcript_1/1_Conf_1.000 | 508  | 20 | 1.46E-35 | XP_002639165.1 | 82 | 152.525 | 117 | 96  | C. briggsae CBR-RPL-24.2 protein                 |
| Locus_7929_Transcript_1/1_Conf_1.000 | 549  | 0  |          |                |    |         |     |     |                                                  |

|                                      |      |    |          |                |    |         |      |      |                                                  |
|--------------------------------------|------|----|----------|----------------|----|---------|------|------|--------------------------------------------------|
| Locus_793_Transcript_1/1_Conf_1.000  | 5511 | 20 | 0        | NP_506153.1    | 71 | 1993.01 | 1833 | 1318 | hypothetical protein C14C10.5                    |
| Locus_7930_Transcript_1/3_Conf_0.400 | 455  | 0  |          |                |    |         |      |      |                                                  |
| Locus_7930_Transcript_2/3_Conf_0.400 | 745  | 20 | 1.79E-16 | NP_001076697.1 | 58 | 90.5077 | 153  | 89   | Ref/ALY RNA export adaptor family member (aly-3) |
| Locus_7930_Transcript_3/3_Conf_0.600 | 963  | 20 | 4.34E-25 | NP_001076697.1 | 60 | 119.783 | 179  | 108  | Ref/ALY RNA export adaptor family member (aly-3) |
| Locus_7931_Transcript_1/1_Conf_1.000 | 853  | 8  | 4.79E-22 | NP_001023856.1 | 51 | 109.383 | 224  | 116  | hypothetical protein F26F12.3                    |
| Locus_7932_Transcript_1/1_Conf_1.000 | 1048 | 20 | 7.49E-98 | XP_002633628.1 | 76 | 361.688 | 288  | 219  | Hypothetical protein CBG05511                    |
| Locus_7933_Transcript_1/1_Conf_1.000 | 414  | 0  |          |                |    |         |      |      |                                                  |
| Locus_7934_Transcript_1/1_Conf_1.000 | 995  | 20 | 1.09E-34 | XP_002639861.1 | 73 | 151.754 | 126  | 93   | C. briggsae CBR-CSNK-1 protein                   |
| Locus_7935_Transcript_1/2_Conf_1.000 | 887  | 20 | 3.39E-42 | XP_001898751.1 | 65 | 176.407 | 201  | 131  | UBX domain containing protein                    |
| Locus_7935_Transcript_2/2_Conf_1.000 | 887  | 20 | 7.07E-40 | EFO17525.1     | 64 | 168.703 | 188  | 121  | hypothetical protein LOAG_10973                  |
| Locus_7936_Transcript_1/1_Conf_1.000 | 1537 | 10 | 2.24E-57 | XP_002639135.1 | 49 | 228.024 | 528  | 260  | C. briggsae CBR-SEP-1 protein                    |
| Locus_7937_Transcript_1/1_Conf_1.000 | 290  | 8  | 2.47E-08 | NP_495685.1    | 65 | 62.003  | 94   | 62   | hypothetical protein C08B11.8                    |

|                                      |      |    |           |                |    |         |     |     |                                                    |
|--------------------------------------|------|----|-----------|----------------|----|---------|-----|-----|----------------------------------------------------|
| Locus_7938_Transcript_1/1_Conf_1.000 | 1237 | 20 | 1.43E-117 | NP_496403.1    | 86 | 427.557 | 258 | 224 | Cytochrome C Heme-Lyase family member (cchl-1)     |
| Locus_7939_Transcript_1/1_Conf_1.000 | 632  | 0  |           |                |    |         |     |     |                                                    |
| Locus_794_Transcript_1/1_Conf_1.000  | 2028 | 20 | 2.13E-154 | XP_001900974.1 | 75 | 550.821 | 465 | 352 | hnRNP-R, Q splicing factor family protein          |
| Locus_7940_Transcript_1/1_Conf_1.000 | 213  | 20 | 3.82E-30  | XP_002630350.1 | 94 | 134.42  | 71  | 67  | Hypothetical protein CBG04280                      |
| Locus_7941_Transcript_1/1_Conf_1.000 | 139  | 0  |           |                |    |         |     |     |                                                    |
| Locus_7942_Transcript_1/1_Conf_1.000 | 1230 | 9  | 1.41E-32  | XP_001900721.1 | 51 | 145.206 | 279 | 145 | hypothetical protein                               |
| Locus_7943_Transcript_1/1_Conf_1.000 | 456  | 0  |           |                |    |         |     |     |                                                    |
| Locus_7944_Transcript_1/3_Conf_0.667 | 2189 | 20 | 1.36E-162 | XP_002633518.1 | 67 | 578.17  | 586 | 397 | Hypothetical protein CBG05381                      |
| Locus_7944_Transcript_2/3_Conf_0.333 | 558  | 20 | 8.88E-49  | XP_002633518.1 | 80 | 196.823 | 134 | 108 | Hypothetical protein CBG05381                      |
| Locus_7944_Transcript_3/3_Conf_0.667 | 2189 | 20 | 3.04E-162 | XP_002633518.1 | 67 | 577.015 | 586 | 397 | Hypothetical protein CBG05381                      |
| Locus_7945_Transcript_1/1_Conf_1.000 | 257  | 0  |           |                |    |         |     |     |                                                    |
| Locus_7946_Transcript_1/1_Conf_1.000 | 133  | 0  |           |                |    |         |     |     |                                                    |
| Locus_7947_Transcript_1/1_Conf_1.000 | 1100 | 5  | 1.50E-35  | NP_491011.1    | 54 | 154.836 | 274 | 150 | hypothetical protein Y23H5A.3                      |
| Locus_7948_Transcript_1/1_Conf_1.000 | 367  | 0  |           |                |    |         |     |     |                                                    |
| Locus_7949_Transcript_1/1_Conf_1.000 | 134  | 0  |           |                |    |         |     |     |                                                    |
| Locus_795_Transcript_1/3_Conf_0.571  | 1410 | 0  |           |                |    |         |     |     |                                                    |
| Locus_795_Transcript_2/3_Conf_0.714  | 1703 | 0  |           |                |    |         |     |     |                                                    |
| Locus_795_Transcript_3/3_Conf_0.571  | 1410 | 0  |           |                |    |         |     |     |                                                    |
| Locus_7950_Transcript_1/1_Conf_1.000 | 578  | 0  |           |                |    |         |     |     |                                                    |
| Locus_7951_Transcript_1/1_Conf_1.000 | 240  | 0  |           |                |    |         |     |     |                                                    |
| Locus_7952_Transcript_1/1_Conf_1.000 | 2500 | 2  | 2.57E-11  | NP_491665.1    | 44 | 75.8702 | 241 | 108 | Nuclear Pore complex Protein family member (npp-7) |

|                                      |      |    |           |                |    |         |     |     |                                                       |
|--------------------------------------|------|----|-----------|----------------|----|---------|-----|-----|-------------------------------------------------------|
| Locus_7953_Transcript_1/1_Conf_1.000 | 382  | 20 | 3.15E-48  | CAR63533.1     | 98 | 194.512 | 101 | 99  | putative Vitellogenin-linked Transcript family member |
| Locus_7954_Transcript_1/1_Conf_1.000 | 701  | 20 | 9.19E-41  | XP_002639642.1 | 65 | 171.014 | 178 | 116 | Hypothetical protein CBG12356                         |
| Locus_7955_Transcript_1/1_Conf_1.000 | 718  | 0  |           |                |    |         |     |     |                                                       |
| Locus_7956_Transcript_1/1_Conf_1.000 | 528  | 0  |           |                |    |         |     |     |                                                       |
| Locus_7957_Transcript_1/3_Conf_0.667 | 2046 | 20 | 2.45E-65  | NP_490809.2    | 49 | 254.988 | 562 | 279 | SPindle Defective family member (spd-1)               |
| Locus_7957_Transcript_2/3_Conf_0.667 | 1845 | 20 | 1.82E-72  | NP_490809.2    | 54 | 278.485 | 512 | 279 | SPindle Defective family member (spd-1)               |
| Locus_7957_Transcript_3/3_Conf_0.667 | 1995 | 20 | 2.37E-65  | NP_490809.2    | 49 | 254.988 | 562 | 279 | SPindle Defective family member (spd-1)               |
| Locus_7958_Transcript_1/1_Conf_1.000 | 198  | 2  | 9.95E-10  | XP_002638852.1 | 70 | 66.6254 | 65  | 46  | Hypothetical protein CBG22064                         |
| Locus_7959_Transcript_1/1_Conf_1.000 | 1032 | 20 | 2.46E-93  | XP_002630650.1 | 77 | 346.665 | 284 | 221 | C. briggsae CBR-PLD-1 protein                         |
| Locus_796_Transcript_1/6_Conf_0.800  | 2035 | 20 | 2.32E-116 | EFO27998.1     | 77 | 424.476 | 366 | 283 | DnaJ chaperonine                                      |
| Locus_796_Transcript_2/6_Conf_0.800  | 2035 | 20 | 6.10E-117 | EFO27998.1     | 77 | 426.402 | 366 | 283 | DnaJ chaperonine                                      |
| Locus_796_Transcript_3/6_Conf_0.800  | 2035 | 20 | 6.10E-117 | EFO27998.1     | 77 | 426.402 | 366 | 283 | DnaJ chaperonine                                      |
| Locus_796_Transcript_4/6_Conf_0.800  | 2035 | 20 | 6.10E-117 | EFO27998.1     | 77 | 426.402 | 366 | 283 | DnaJ chaperonine                                      |
| Locus_796_Transcript_5/6_Conf_0.800  | 2035 | 20 | 6.10E-117 | EFO27998.1     | 77 | 426.402 | 366 | 283 | DnaJ chaperonine                                      |
| Locus_796_Transcript_6/6_Conf_0.800  | 2035 | 20 | 6.10E-117 | EFO27998.1     | 77 | 426.402 | 366 | 283 | DnaJ chaperonine                                      |
| Locus_7960_Transcript_1/1_Conf_1.000 | 129  | 0  |           |                |    |         |     |     |                                                       |

|                                      |      |    |          |                |     |         |     |     |                                                                                |
|--------------------------------------|------|----|----------|----------------|-----|---------|-----|-----|--------------------------------------------------------------------------------|
| Locus_7961_Transcript_1/1_Conf_1.000 | 1051 | 20 | 2.36E-67 | ADI24655.1     | 65  | 260.381 | 237 | 156 | Hypothetical protein F52C9.1                                                   |
| Locus_7962_Transcript_1/1_Conf_1.000 | 675  | 0  |          |                |     |         |     |     |                                                                                |
| Locus_7963_Transcript_1/2_Conf_1.000 | 380  | 0  |          |                |     |         |     |     |                                                                                |
| Locus_7963_Transcript_2/2_Conf_1.000 | 332  | 0  |          |                |     |         |     |     |                                                                                |
| Locus_7964_Transcript_1/1_Conf_1.000 | 1569 | 20 | 3.31E-56 | EFO22562.1     | 50  | 224.172 | 414 | 211 | hypothetical protein LOAG_05922                                                |
| Locus_7965_Transcript_1/1_Conf_1.000 | 240  | 13 | 2.42E-24 | CAR63681.1     | 84  | 115.161 | 78  | 66  | putative Temporarily Assigned Gene name family member                          |
| Locus_7966_Transcript_1/1_Conf_1.000 | 193  | 0  |          |                |     |         |     |     |                                                                                |
| Locus_7967_Transcript_1/1_Conf_1.000 | 330  | 20 | 1.16E-18 | XP_002809274.1 | 100 | 96.2857 | 54  | 54  | PREDICTED: LOW QUALITY PROTEIN: heterogeneous nuclear ribonucleoprotein U-like |
| Locus_7968_Transcript_1/1_Conf_1.000 | 602  | 20 | 1.29E-33 | XP_002636713.1 | 58  | 146.747 | 177 | 103 | Hypothetical protein CBG23432                                                  |
| Locus_7969_Transcript_1/2_Conf_0.750 | 496  | 0  |          |                |     |         |     |     |                                                                                |
| Locus_7969_Transcript_2/2_Conf_0.875 | 381  | 0  |          |                |     |         |     |     |                                                                                |
| Locus_797_Transcript_1/1_Conf_1.000  | 1429 | 20 | 2.66E-41 | XP_002637617.1 | 51  | 174.481 | 317 | 163 | Hypothetical protein CBG19360                                                  |
| Locus_7970_Transcript_1/1_Conf_1.000 | 469  | 20 | 6.81E-51 | EFO26835.1     | 83  | 203.371 | 136 | 114 | hypothetical protein LOAG_01645                                                |
| Locus_7971_Transcript_1/1_Conf_1.000 | 463  | 0  |          |                |     |         |     |     |                                                                                |
| Locus_7972_Transcript_1/1_Conf_1.000 | 192  | 0  |          |                |     |         |     |     |                                                                                |
| Locus_7973_Transcript_1/1_Conf_1.000 | 499  | 2  | 4.26E-05 | NP_001122827.1 | 52  | 51.2174 | 105 | 55  | Suppressor with Morphological effect on Genitalia family member (smg-3)        |

|                                      |      |    |           |                |    |         |     |     |                                |
|--------------------------------------|------|----|-----------|----------------|----|---------|-----|-----|--------------------------------|
| Locus_7974_Transcript_1/1_Conf_1.000 | 611  | 20 | 4.61E-50  | XP_002642650.1 | 69 | 201.445 | 203 | 142 | Hypothetical protein CBG00032  |
| Locus_7975_Transcript_1/1_Conf_1.000 | 730  | 20 | 3.46E-118 | XP_002637342.1 | 92 | 428.328 | 241 | 224 | C. briggsae CBR-UNC-70 protein |
| Locus_7976_Transcript_1/1_Conf_1.000 | 500  | 20 | 4.82E-41  | XP_002641443.1 | 94 | 170.629 | 93  | 88  | Hypothetical protein CBG13312  |
| Locus_7977_Transcript_1/1_Conf_1.000 | 458  | 0  |           |                |    |         |     |     |                                |
| Locus_7978_Transcript_1/1_Conf_1.000 | 456  | 0  |           |                |    |         |     |     |                                |
| Locus_7979_Transcript_1/1_Conf_1.000 | 1791 | 20 | 5.92E-20  | XP_001304086.1 | 44 | 103.99  | 569 | 256 | hypothetical protein           |
| Locus_798_Transcript_1/1_Conf_1.000  | 229  | 0  |           |                |    |         |     |     |                                |
| Locus_7980_Transcript_1/1_Conf_1.000 | 889  | 20 | 8.98E-43  | XP_001895635.1 | 57 | 178.333 | 292 | 168 | hypothetical protein Bm1_20905 |



|                                      |      |    |           |                |    |         |     |     |                                 |
|--------------------------------------|------|----|-----------|----------------|----|---------|-----|-----|---------------------------------|
| Locus_7981_Transcript_1/2_Conf_1.000 | 899  | 20 | 9.92E-76  | XP_001902483.1 | 86 | 280.026 | 181 | 157 | Rnp                             |
| Locus_7981_Transcript_2/2_Conf_1.000 | 2706 | 20 | 2.49E-116 | XP_001902483.1 | 87 | 424.861 | 272 | 237 | Rnp                             |
| Locus_7982_Transcript_1/1_Conf_1.000 | 760  | 2  | 5.03E-06  | XP_002640813.1 | 51 | 55.8398 | 93  | 48  | Hypothetical protein CBG15698   |
| Locus_7983_Transcript_1/1_Conf_1.000 | 356  | 0  |           |                |    |         |     |     |                                 |
| Locus_7984_Transcript_1/2_Conf_1.000 | 1041 | 0  |           |                |    |         |     |     |                                 |
| Locus_7984_Transcript_2/2_Conf_1.000 | 1041 | 0  |           |                |    |         |     |     |                                 |
| Locus_7985_Transcript_1/1_Conf_1.000 | 629  | 20 | 8.69E-39  | XP_002631393.1 | 67 | 164.081 | 182 | 122 | C. briggsae CBR-TAG-169 protein |
| Locus_7986_Transcript_1/2_Conf_1.000 | 562  | 0  |           |                |    |         |     |     |                                 |
| Locus_7986_Transcript_2/2_Conf_1.000 | 562  | 0  |           |                |    |         |     |     |                                 |
| Locus_7987_Transcript_1/1_Conf_1.000 | 805  | 20 | 9.44E-94  | XP_002641346.1 | 82 | 347.436 | 236 | 195 | Hypothetical protein CBG13199   |

|                                      |      |    |           |                |     |         |     |     |                                                             |
|--------------------------------------|------|----|-----------|----------------|-----|---------|-----|-----|-------------------------------------------------------------|
| Locus_7988_Transcript_1/1_Conf_1.000 | 228  | 20 | 2.13E-44  | 3K6S           | 100 | 181.8   | 75  | 75  | Structure Of Integrin Alphaxbeta2 Ectodomain                |
| Locus_7989_Transcript_1/1_Conf_1.000 | 218  | 0  |           |                |     |         |     |     |                                                             |
| Locus_799_Transcript_1/1_Conf_1.000  | 558  | 20 | 1.58E-21  | ABJ99064.1     | 64  | 106.301 | 149 | 96  | Hypothetical protein W03A3.2                                |
| Locus_7990_Transcript_1/1_Conf_1.000 | 1009 | 20 | 1.87E-90  | ACI49253.1     | 79  | 337.035 | 262 | 208 | hypothetical protein Csp3_JD07.003                          |
| Locus_7991_Transcript_1/1_Conf_1.000 | 381  | 20 | 6.31E-65  | NP_001040798.1 | 99  | 249.98  | 126 | 125 | PhosphoDiEsterase family member (pde-4)                     |
| Locus_7992_Transcript_1/1_Conf_1.000 | 599  | 7  | 4.33E-74  | ABM91438.1     | 88  | 281.182 | 171 | 152 | defective mitochondrial respiration family member protein 1 |
| Locus_7993_Transcript_1/1_Conf_1.000 | 457  | 20 | 1.26E-73  | XP_002763539.1 | 100 | 278.87  | 138 | 138 | PREDICTED: 60S ribosomal protein L3-like isoform 2          |
| Locus_7994_Transcript_1/1_Conf_1.000 | 731  | 20 | 2.65E-09  | XP_001580142.1 | 52  | 66.6254 | 120 | 63  | small GTP-binding protein                                   |
| Locus_7995_Transcript_1/1_Conf_1.000 | 957  | 20 | 1.39E-124 | NP_001122555.1 | 87  | 450.284 | 321 | 282 | PhosphoDiEsterase family member (pde-6)                     |

|                                      |      |    |           |                |    |         |     |     |                                                             |
|--------------------------------------|------|----|-----------|----------------|----|---------|-----|-----|-------------------------------------------------------------|
| Locus_7996_Transcript_1/1_Conf_1.000 | 721  | 20 | 1.64E-64  | NP_495324.2    | 66 | 249.98  | 240 | 159 | human WRN (Werner's syndrome) related family member (wrn-1) |
| Locus_7997_Transcript_1/1_Conf_1.000 | 302  | 0  |           |                |    |         |     |     |                                                             |
| Locus_7998_Transcript_1/1_Conf_1.000 | 340  | 0  |           |                |    |         |     |     |                                                             |
| Locus_7999_Transcript_1/1_Conf_1.000 | 1083 | 20 | 2.01E-109 | NP_490891.1    | 77 | 400.208 | 384 | 296 | hypothetical protein Y71G12B.8                              |
| Locus_8_Transcript_1/2_Conf_1.000    | 155  | 3  | 3.81E-09  | XP_001891902.1 | 80 | 64.6994 | 45  | 36  | rRNA promoter binding protein                               |
| Locus_8_Transcript_2/2_Conf_1.000    | 175  | 3  | 3.73E-09  | XP_001891902.1 | 80 | 64.6994 | 45  | 36  | rRNA promoter binding protein                               |
| Locus_80_Transcript_1/2_Conf_1.000   | 2194 | 20 | 1.66E-68  | NP_498382.2    | 63 | 218.009 | 243 | 155 | hypothetical protein F47D12.9                               |
| Locus_80_Transcript_2/2_Conf_1.000   | 2156 | 20 | 2.61E-73  | NP_498382.2    | 54 | 281.567 | 490 | 269 | hypothetical protein F47D12.9                               |
| Locus_800_Transcript_1/4_Conf_0.250  | 165  | 0  |           |                |    |         |     |     |                                                             |
| Locus_800_Transcript_2/4_Conf_0.250  | 207  | 0  |           |                |    |         |     |     |                                                             |
| Locus_800_Transcript_3/4_Conf_0.375  | 302  | 0  |           |                |    |         |     |     |                                                             |
| Locus_800_Transcript_4/4_Conf_0.375  | 302  | 0  |           |                |    |         |     |     |                                                             |
| Locus_8000_Transcript_1/1_Conf_1.000 | 279  | 20 | 1.19E-23  | XP_002636179.1 | 91 | 112.849 | 67  | 61  | Hypothetical protein CBG01436                               |
| Locus_8001_Transcript_1/1_Conf_1.000 | 977  | 20 | 8.15E-112 | XP_002636654.1 | 84 | 407.912 | 304 | 256 | C. briggsae CBR-CLH-6 protein                               |

|                                      |      |    |           |                |    |         |     |     |                                                                                                |
|--------------------------------------|------|----|-----------|----------------|----|---------|-----|-----|------------------------------------------------------------------------------------------------|
| Locus_8002_Transcript_1/1_Conf_1.000 | 1796 | 20 | 8.16E-70  | ACZ54694.1     | 58 | 269.626 | 438 | 256 | Nuclear pore complex protein protein 10, isoform b, partially confirmed by transcript evidence |
| Locus_8003_Transcript_1/1_Conf_1.000 | 532  | 20 | 1.65E-22  | NP_501199.1    | 54 | 109.383 | 181 | 98  | hypothetical protein F55G1.9                                                                   |
| Locus_8004_Transcript_1/1_Conf_1.000 | 350  | 0  |           |                |    |         |     |     |                                                                                                |
| Locus_8005_Transcript_1/1_Conf_1.000 | 691  | 20 | 4.33E-112 | XP_002643213.1 | 93 | 407.912 | 230 | 214 | C. briggsae CBR-DGK-1 protein                                                                  |
| Locus_8006_Transcript_1/1_Conf_1.000 | 182  | 2  | 2.19E-04  | XP_001893253.1 | 66 | 48.9062 | 60  | 40  | hypothetical protein Bm1_08910                                                                 |
| Locus_8007_Transcript_1/1_Conf_1.000 | 307  | 20 | 7.02E-16  | XP_002640572.1 | 70 | 87.0409 | 91  | 64  | C. briggsae CBR-DNJ-27 protein                                                                 |
| Locus_8008_Transcript_1/1_Conf_1.000 | 473  | 0  |           |                |    |         |     |     |                                                                                                |
| Locus_8009_Transcript_1/1_Conf_1.000 | 765  | 2  | 8.42E-17  | XP_002635239.1 | 49 | 91.6633 | 209 | 104 | Hypothetical protein CBG11483                                                                  |
| Locus_801_Transcript_1/2_Conf_1.000  | 1202 | 12 | 1.11E-26  | CBH29664.1     | 56 | 125.561 | 167 | 95  | C. elegans protein F49E2.5k, confirmed by transcript evidence                                  |
| Locus_801_Transcript_2/2_Conf_1.000  | 256  | 11 | 6.49E-25  | CBH29664.1     | 85 | 117.087 | 87  | 74  | C. elegans protein F49E2.5k, confirmed by transcript evidence                                  |
| Locus_8010_Transcript_1/1_Conf_1.000 | 846  | 0  |           |                |    |         |     |     |                                                                                                |
| Locus_8011_Transcript_1/1_Conf_1.000 | 1492 | 0  |           |                |    |         |     |     |                                                                                                |
| Locus_8012_Transcript_1/1_Conf_1.000 | 433  | 20 | 1.84E-40  | NP_001033512.1 | 71 | 168.703 | 130 | 93  | Lipid Binding Protein family member (lbp-9)                                                    |

|                                      |      |    |          |                |    |         |     |     |                                                         |
|--------------------------------------|------|----|----------|----------------|----|---------|-----|-----|---------------------------------------------------------|
| Locus_8013_Transcript_1/2_Conf_1.000 | 1406 | 20 | 1.33E-53 | ACI48997.1     | 57 | 215.312 | 355 | 205 | hypothetical protein Cbre_JD01.004                      |
| Locus_8013_Transcript_2/2_Conf_1.000 | 1199 | 20 | 1.65E-30 | ACI48997.1     | 52 | 138.272 | 286 | 151 | hypothetical protein Cbre_JD01.004                      |
| Locus_8014_Transcript_1/1_Conf_1.000 | 1281 | 20 | 1.09E-75 | NP_493579.1    | 54 | 288.5   | 363 | 197 | hypothetical protein F39B2.1                            |
| Locus_8015_Transcript_1/1_Conf_1.000 | 652  | 0  |          |                |    |         |     |     |                                                         |
| Locus_8016_Transcript_1/1_Conf_1.000 | 257  | 0  |          |                |    |         |     |     |                                                         |
| Locus_8017_Transcript_1/1_Conf_1.000 | 290  | 20 | 6.70E-22 | EFO26876.1     | 73 | 107.071 | 89  | 65  | hypothetical protein LOAG_01599                         |
| Locus_8018_Transcript_1/1_Conf_1.000 | 687  | 0  |          |                |    |         |     |     |                                                         |
| Locus_8019_Transcript_1/1_Conf_1.000 | 350  |    |          |                |    |         |     |     |                                                         |
| Locus_802_Transcript_1/1_Conf_1.000  | 572  | 20 | 1.61E-72 | NP_502794.1    | 98 | 275.789 | 154 | 151 | Ribosomal Protein, Small subunit family member (rps-18) |
| Locus_8020_Transcript_1/1_Conf_1.000 | 400  | 2  | 2.08E-07 | XP_002644748.1 | 71 | 58.9214 | 57  | 41  | Hypothetical protein CBG14752                           |
| Locus_8021_Transcript_1/1_Conf_1.000 | 143  | 0  |          |                |    |         |     |     |                                                         |
| Locus_8022_Transcript_1/1_Conf_1.000 | 518  | 20 | 5.25E-28 | XP_002639581.1 | 68 | 127.487 | 135 | 93  | C. briggsae CBR-NXT-1 protein                           |

|                                      |      |    |          |                |    |         |     |     |                                                                                  |
|--------------------------------------|------|----|----------|----------------|----|---------|-----|-----|----------------------------------------------------------------------------------|
| Locus_8023_Transcript_1/1_Conf_1.000 | 622  | 20 | 3.46E-16 | XP_002645688.1 | 77 | 88.9669 | 57  | 44  | C. briggsae CBR-ELT-3 protein                                                    |
| Locus_8024_Transcript_1/1_Conf_1.000 | 181  | 4  | 5.75E-13 | XP_002644617.1 | 77 | 77.411  | 54  | 42  | C. briggsae CBR-CALU-1 protein                                                   |
| Locus_8025_Transcript_1/1_Conf_1.000 | 1058 | 20 | 4.07E-59 | NP_497624.2    | 72 | 233.032 | 187 | 136 | hypothetical protein Y71H2AM.2                                                   |
| Locus_8026_Transcript_1/1_Conf_1.000 | 618  | 20 | 7.67E-48 | XP_002641294.1 | 78 | 194.126 | 147 | 116 | Hypothetical protein CBG05209                                                    |
| Locus_8027_Transcript_1/1_Conf_1.000 | 584  | 20 | 2.58E-60 | CBK19514.1     | 77 | 235.343 | 193 | 150 | C. elegans protein Y73F8A.24b, partially confirmed by transcript evidence        |
| Locus_8028_Transcript_1/1_Conf_1.000 | 694  | 0  |          |                |    |         |     |     |                                                                                  |
| Locus_8029_Transcript_1/1_Conf_1.000 | 259  | 0  |          |                |    |         |     |     |                                                                                  |
| Locus_803_Transcript_1/1_Conf_1.000  | 422  | 20 | 2.61E-42 | NP_510575.1    | 81 | 174.866 | 133 | 108 | yeast ERV (ER to Golgi transport Vesicle protein) homolog family member (erv-46) |
| Locus_8030_Transcript_1/1_Conf_1.000 | 333  | 0  |          |                |    |         |     |     |                                                                                  |
| Locus_8031_Transcript_1/3_Conf_0.600 | 1069 | 20 | 6.94E-14 | XP_002640100.1 | 85 | 82.8037 | 71  | 61  | Hypothetical protein CBG12588                                                    |
| Locus_8031_Transcript_2/3_Conf_0.400 | 675  | 0  |          |                |    |         |     |     |                                                                                  |
| Locus_8031_Transcript_3/3_Conf_0.600 | 860  | 20 | 3.05E-16 | XP_002640100.1 | 79 | 90.1225 | 86  | 68  | Hypothetical protein CBG12588                                                    |
| Locus_8032_Transcript_1/2_Conf_1.000 | 863  | 20 | 1.35E-72 | XP_001639978.1 | 66 | 277.33  | 258 | 172 | predicted protein                                                                |

|                                      |      |    |           |                |    |         |     |     |                                                 |
|--------------------------------------|------|----|-----------|----------------|----|---------|-----|-----|-------------------------------------------------|
| Locus_8032_Transcript_2/2_Conf_1.000 | 503  | 20 | 1.44E-40  | NP_001135503.1 | 65 | 169.088 | 160 | 104 | hydroxyacylglutathione hydrolase, mitochondrial |
| Locus_8033_Transcript_1/1_Conf_1.000 | 579  | 0  |           |                |    |         |     |     |                                                 |
| Locus_8034_Transcript_1/1_Conf_1.000 | 227  | 20 | 1.14E-21  | AAR86713.1     | 77 | 106.301 | 75  | 58  | LIN-45 isoform 3                                |
| Locus_8035_Transcript_1/1_Conf_1.000 | 595  | 13 | 2.13E-57  | NP_001022814.1 | 73 | 225.713 | 196 | 144 | ODoRant response abnormal family member (odr-4) |
| Locus_8036_Transcript_1/1_Conf_1.000 | 2429 | 20 | 1.28E-124 | XP_002636412.1 | 54 | 452.21  | 854 | 466 | Hypothetical protein CBG23065                   |
| Locus_8037_Transcript_1/2_Conf_1.000 | 767  | 20 | 1.33E-54  | XP_002634394.1 | 90 | 217.238 | 126 | 114 | C. briggsae CBR-UNC-43 protein                  |
| Locus_8037_Transcript_2/2_Conf_1.000 | 721  | 20 | 1.81E-71  | XP_002634394.1 | 91 | 273.092 | 158 | 145 | C. briggsae CBR-UNC-43 protein                  |

|                                      |      |    |          |                |    |         |     |     |                                                                           |
|--------------------------------------|------|----|----------|----------------|----|---------|-----|-----|---------------------------------------------------------------------------|
| Locus_8038_Transcript_1/1_Conf_1.000 | 385  | 20 | 1.67E-25 | CAR97823.1     | 64 | 119.013 | 125 | 81  | C. elegans protein F26H11.2i, partially confirmed by transcript evidence  |
| Locus_8039_Transcript_1/1_Conf_1.000 | 1031 | 4  | 6.60E-06 | CBH16810.1     | 46 | 56.225  | 150 | 70  | hypothetical protein, conserved, (fragment)                               |
| Locus_804_Transcript_1/1_Conf_1.000  | 458  | 0  |          |                |    |         |     |     |                                                                           |
| Locus_8040_Transcript_1/1_Conf_1.000 | 794  | 5  | 1.33E-60 | NP_001024958.1 | 68 | 237.269 | 276 | 188 | hypothetical protein Y34B4A.4                                             |
| Locus_8041_Transcript_1/2_Conf_1.000 | 749  | 20 | 4.64E-97 | BAF62082.1     | 81 | 358.221 | 249 | 203 | inositol-1(or 4)-monophosphatase                                          |
| Locus_8041_Transcript_2/2_Conf_1.000 | 613  | 20 | 1.22E-74 | BAF62083.1     | 79 | 283.108 | 203 | 161 | inositol-1(or 4)-monophosphatase                                          |
| Locus_8042_Transcript_1/1_Conf_1.000 | 869  | 20 | 5.82E-39 | NP_871685.1    | 71 | 165.622 | 139 | 100 | hypothetical protein Y71H2AR.3                                            |
| Locus_8043_Transcript_1/1_Conf_1.000 | 128  | 0  |          |                |    |         |     |     |                                                                           |
| Locus_8044_Transcript_1/2_Conf_1.000 | 292  | 20 | 7.89E-23 | CAX51690.1     | 82 | 110.153 | 79  | 65  | C. elegans protein ZK1098.10e, partially confirmed by transcript evidence |
| Locus_8044_Transcript_2/2_Conf_1.000 | 292  | 20 | 7.89E-23 | CAX51690.1     | 82 | 110.153 | 79  | 65  | C. elegans protein ZK1098.10e, partially confirmed by transcript evidence |
| Locus_8045_Transcript_1/1_Conf_1.000 | 284  | 0  |          |                |    |         |     |     |                                                                           |
| Locus_8046_Transcript_1/2_Conf_1.000 | 844  | 20 | 6.67E-77 | NP_001021702.1 | 75 | 291.582 | 264 | 200 | EXOCyst component family member (exoc-8)                                  |
| Locus_8046_Transcript_2/2_Conf_1.000 | 844  | 20 | 6.67E-77 | NP_001021702.1 | 75 | 291.582 | 264 | 200 | EXOCyst component family member (exoc-8)                                  |
| Locus_8047_Transcript_1/1_Conf_1.000 | 488  | 0  |          |                |    |         |     |     |                                                                           |
| Locus_8048_Transcript_1/1_Conf_1.000 | 292  | 5  | 1.22E-07 | NP_001032983.1 | 65 | 59.6918 | 67  | 44  | hypothetical protein W05F2.4                                              |
| Locus_8049_Transcript_1/1_Conf_1.000 | 410  | 0  |          |                |    |         |     |     |                                                                           |



|                                      |      |    |           |                |    |         |     |     |                                                                             |
|--------------------------------------|------|----|-----------|----------------|----|---------|-----|-----|-----------------------------------------------------------------------------|
| Locus_805_Transcript_1/1_Conf_1.000  | 1228 | 20 | 2.14E-81  | CAB58173.1     | 75 | 307.375 | 285 | 215 | putative nucleosome binding protein                                         |
| Locus_8050_Transcript_1/2_Conf_1.000 | 507  | 13 | 4.01E-09  | NP_493130.2    | 65 | 64.6994 | 81  | 53  | hypothetical protein T09E11.6                                               |
| Locus_8050_Transcript_2/2_Conf_1.000 | 342  | 0  |           |                |    |         |     |     |                                                                             |
| Locus_8051_Transcript_1/1_Conf_1.000 | 1353 | 20 | 3.87E-111 | XP_002631410.1 | 87 | 406.371 | 270 | 236 | C. briggsae CBR-CLH-5 protein                                               |
| Locus_8052_Transcript_1/1_Conf_1.000 | 934  | 20 | 2.27E-31  | EFO24018.1     | 49 | 140.584 | 322 | 158 | hypothetical protein LOAG_04470                                             |
| Locus_8053_Transcript_1/1_Conf_1.000 | 990  | 2  | 6.82E-13  | XP_002646310.1 | 42 | 79.337  | 303 | 128 | C. briggsae CBR-LIN-59 protein                                              |
| Locus_8054_Transcript_1/1_Conf_1.000 | 589  | 20 | 3.41E-52  | NP_501835.2    | 80 | 208.379 | 161 | 130 | DIS3 (yeast disjunction abnormal) exonuclease homolog family member (dis-3) |
| Locus_8055_Transcript_1/1_Conf_1.000 | 344  | 20 | 9.70E-21  | NP_001041064.1 | 67 | 103.219 | 110 | 74  | Nuclear Hormone Receptor family member (nhr-11)                             |
| Locus_8056_Transcript_1/1_Conf_1.000 | 305  | 3  | 6.58E-22  | XP_002630273.1 | 70 | 107.071 | 96  | 68  | Hypothetical protein CBG00701                                               |
| Locus_8057_Transcript_1/1_Conf_1.000 | 1107 | 20 | 1.44E-118 | NP_001024629.1 | 83 | 430.639 | 303 | 252 | TBC (Tre-2/Bub2/Cdc16) domain family member (tbc-11)                        |
| Locus_8058_Transcript_1/1_Conf_1.000 | 538  | 20 | 3.11E-69  | XP_002648832.1 | 83 | 264.618 | 179 | 149 | Hypothetical protein CBG16947                                               |
| Locus_8059_Transcript_1/2_Conf_1.000 | 342  | 20 | 4.37E-13  | ZP_06975916.1  | 46 | 77.7962 | 106 | 49  | hypothetical protein Krac_1188                                              |

|                                      |      |    |          |                |    |         |     |     |                                       |
|--------------------------------------|------|----|----------|----------------|----|---------|-----|-----|---------------------------------------|
| Locus_8059_Transcript_2/2_Conf_1.000 | 243  | 20 | 5.57E-13 | ZP_06975916.1  | 52 | 77.411  | 75  | 39  | hypothetical protein Krac_1188        |
| Locus_806_Transcript_1/1_Conf_1.000  | 553  | 6  | 9.18E-06 | XP_002633233.1 | 47 | 53.9138 | 98  | 47  | Hypothetical protein CBG05953         |
| Locus_8060_Transcript_1/1_Conf_1.000 | 441  | 0  |          |                |    |         |     |     |                                       |
| Locus_8061_Transcript_1/1_Conf_1.000 | 320  | 0  |          |                |    |         |     |     |                                       |
| Locus_8062_Transcript_1/1_Conf_1.000 | 133  | 0  |          |                |    |         |     |     |                                       |
| Locus_8063_Transcript_1/1_Conf_1.000 | 1761 | 20 | 4.11E-50 | NP_001040717.1 | 72 | 204.142 | 170 | 123 | hypothetical protein ZC328.3          |
| Locus_8064_Transcript_1/1_Conf_1.000 | 1314 | 20 | 2.27E-76 | XP_002639475.1 | 55 | 290.812 | 448 | 250 | Hypothetical protein CBG04073         |
| Locus_8065_Transcript_1/1_Conf_1.000 | 482  | 20 | 4.48E-47 | NP_496500.1    | 82 | 190.66  | 130 | 107 | hypothetical protein VF13D12L3        |
| Locus_8066_Transcript_1/1_Conf_1.000 | 762  | 20 | 2.32E-59 | XP_002637192.1 | 91 | 233.032 | 136 | 125 | Hypothetical protein CBG09713         |
| Locus_8067_Transcript_1/1_Conf_1.000 | 613  | 20 | 3.62E-18 | XP_002110470.1 | 76 | 95.5153 | 63  | 48  | hypothetical protein TRIADDRAFT_22842 |

|                                      |      |    |           |                |     |         |     |     |                                                            |
|--------------------------------------|------|----|-----------|----------------|-----|---------|-----|-----|------------------------------------------------------------|
| Locus_8068_Transcript_1/1_Conf_1.000 | 677  | 20 | 4.73E-84  | XP_002633628.1 | 92  | 314.694 | 185 | 171 | Hypothetical protein CBG05511                              |
| Locus_8069_Transcript_1/1_Conf_1.000 | 191  | 2  | 3.12E-11  | NP_505848.1    | 83  | 71.633  | 48  | 40  | hypothetical protein T19B10.2                              |
| Locus_807_Transcript_1/2_Conf_1.000  | 804  | 0  |           |                |     |         |     |     |                                                            |
| Locus_807_Transcript_2/2_Conf_1.000  | 794  | 0  |           |                |     |         |     |     |                                                            |
| Locus_8070_Transcript_1/1_Conf_1.000 | 522  | 20 | 1.44E-44  | XP_002645875.1 | 67  | 182.57  | 178 | 121 | Hypothetical protein CBG07619                              |
| Locus_8071_Transcript_1/1_Conf_1.000 | 358  | 19 | 1.79E-19  | XP_001902614.1 | 65  | 98.9821 | 113 | 74  | Elongation factor Tu GTP binding domain containing protein |
| Locus_8072_Transcript_1/1_Conf_1.000 | 164  | 0  |           |                |     |         |     |     |                                                            |
| Locus_8073_Transcript_1/1_Conf_1.000 | 1021 | 4  | 1.64E-33  | XP_002640038.1 | 51  | 147.902 | 314 | 163 | Hypothetical protein CBG12510                              |
| Locus_8074_Transcript_1/1_Conf_1.000 | 886  | 0  |           |                |     |         |     |     |                                                            |
| Locus_8075_Transcript_1/1_Conf_1.000 | 671  | 20 | 7.48E-42  | NP_490871.1    | 93  | 174.481 | 89  | 83  | hypothetical protein Y73E7A.6                              |
| Locus_8076_Transcript_1/1_Conf_1.000 | 541  | 4  | 3.69E-09  | CAR63553.1     | 47  | 65.0846 | 167 | 79  | putative major allergen                                    |
| Locus_8077_Transcript_1/1_Conf_1.000 | 148  | 18 | 3.14E-11  | EAW82497.1     | 100 | 71.633  | 48  | 48  | tetracycline transporter-like protein, isoform CRA_b       |
| Locus_8078_Transcript_1/1_Conf_1.000 | 340  | 4  | 2.66E-07  | NP_001040915.1 | 69  | 58.5362 | 52  | 36  | hypothetical protein C27D8.3                               |
| Locus_8079_Transcript_1/1_Conf_1.000 | 246  | 20 | 1.72E-30  | XP_002633475.1 | 83  | 135.576 | 81  | 68  | C. briggsae CBR-NLR-1 protein                              |
| Locus_808_Transcript_1/1_Conf_1.000  | 922  | 20 | 1.07E-118 | NP_741632.2    | 81  | 430.639 | 304 | 248 | SMALL family member (sma-1)                                |
| Locus_8080_Transcript_1/1_Conf_1.000 | 193  | 0  |           |                |     |         |     |     |                                                            |

|                                      |      |    |           |                |     |         |     |     |                                                                 |  |
|--------------------------------------|------|----|-----------|----------------|-----|---------|-----|-----|-----------------------------------------------------------------|--|
| Locus_8081_Transcript_1/1_Conf_1.000 | 247  | 0  |           |                |     |         |     |     |                                                                 |  |
| Locus_8082_Transcript_1/1_Conf_1.000 | 940  |    |           |                |     |         |     |     |                                                                 |  |
| Locus_8083_Transcript_1/1_Conf_1.000 | 672  | 20 | 2.70E-23  | XP_002631601.1 | 56  | 112.849 | 191 | 107 | Hypothetical protein CBG20782                                   |  |
| Locus_8084_Transcript_1/1_Conf_1.000 | 939  | 20 | 1.47E-78  | NP_506083.1    | 74  | 297.36  | 305 | 228 | hypothetical protein F55C5.8                                    |  |
| Locus_8085_Transcript_1/1_Conf_1.000 | 351  | 20 | 2.51E-45  | NP_001125384.1 | 100 | 184.882 | 113 | 113 | ubiquitin-like protein fubi and ribosomal protein S30 precursor |  |
| Locus_8086_Transcript_1/1_Conf_1.000 | 642  | 20 | 2.49E-84  | XP_002641730.1 | 88  | 315.464 | 197 | 175 | Hypothetical protein CBG10069                                   |  |
| Locus_8087_Transcript_1/1_Conf_1.000 | 1259 | 20 | 4.16E-64  |                | 54  | 249.98  | 423 | 232 | R01H10.1 protein (clone R01H10)                                 |  |
| Locus_8088_Transcript_1/1_Conf_1.000 | 1251 | 20 | 1.08E-128 | NP_001024720.1 | 82  | 464.537 | 379 | 313 | Na/H exchanger family member (nhx-5)                            |  |
| Locus_8089_Transcript_1/1_Conf_1.000 | 517  | 20 | 1.37E-52  | NP_001041127.1 | 88  | 209.149 | 129 | 114 | hypothetical protein F57A8.2                                    |  |
| Locus_809_Transcript_1/4_Conf_0.538  | 463  | 10 | 9.96E-34  | XP_002581843.1 | 61  | 146.362 | 157 | 97  | hypothetical protein                                            |  |
| Locus_809_Transcript_2/4_Conf_0.615  | 663  | 13 | 1.74E-51  | XP_001896587.1 | 57  | 206.453 | 246 | 141 | hypothetical protein Bm1_25640                                  |  |
| Locus_809_Transcript_3/4_Conf_0.615  | 663  | 13 | 2.96E-51  | XP_001896587.1 | 57  | 205.682 | 246 | 141 | hypothetical protein Bm1_25640                                  |  |
| Locus_809_Transcript_4/4_Conf_0.769  | 885  | 13 | 3.04E-75  | XP_002581843.1 | 61  | 286.189 | 316 | 195 | hypothetical protein                                            |  |
| Locus_8090_Transcript_1/2_Conf_1.000 | 941  | 20 | 1.68E-82  | NP_492139.3    | 66  | 310.457 | 326 | 216 | hypothetical protein T23G11.7                                   |  |
| Locus_8090_Transcript_2/2_Conf_1.000 | 917  | 20 | 1.04E-81  | NP_492139.3    | 66  | 307.76  | 314 | 210 | hypothetical protein T23G11.7                                   |  |
| Locus_8091_Transcript_1/1_Conf_1.000 | 414  | 0  |           |                |     |         |     |     |                                                                 |  |
| Locus_8092_Transcript_1/1_Conf_1.000 | 297  | 20 | 1.09E-24  | ABQ88321.1     | 74  | 116.316 | 98  | 73  | transposase                                                     |  |
| Locus_8093_Transcript_1/2_Conf_1.000 | 1631 | 20 | 0         | XP_002642444.1 | 88  | 758.444 | 458 | 407 | Hypothetical protein CBG06849                                   |  |
| Locus_8093_Transcript_2/2_Conf_1.000 | 1631 | 20 | 0         | XP_002642444.1 | 88  | 758.444 | 458 | 407 | Hypothetical protein CBG06849                                   |  |

|                                      |      |    |           |                |    |         |     |     |                                                                              |
|--------------------------------------|------|----|-----------|----------------|----|---------|-----|-----|------------------------------------------------------------------------------|
| Locus_8094_Transcript_1/1_Conf_1.000 | 375  | 20 | 1.75E-30  | CAV31772.1     | 74 | 135.576 | 115 | 86  | C. elegans protein F25H5.3e, partially confirmed by transcript evidence      |
| Locus_8095_Transcript_1/1_Conf_1.000 | 755  | 20 | 8.25E-86  | XP_002647214.1 | 87 | 320.857 | 200 | 175 | Hypothetical protein CBG22398                                                |
| Locus_8096_Transcript_1/1_Conf_1.000 | 1108 | 20 | 2.98E-132 | NP_491666.2    | 78 | 476.093 | 357 | 282 | hypothetical protein T19B4.1                                                 |
| Locus_8097_Transcript_1/3_Conf_0.625 | 1200 | 20 | 4.26E-111 | AAK62032.1     | 68 | 405.986 | 413 | 283 | metalloprotease 1 precursor                                                  |
| Locus_8097_Transcript_2/3_Conf_0.750 | 1498 | 20 | 2.43E-117 | AAN11401.1     | 65 | 427.172 | 440 | 287 | metalloprotease 1 precursor                                                  |
| Locus_8097_Transcript_3/3_Conf_0.625 | 951  | 20 | 1.13E-94  | AAK62032.1     | 70 | 350.903 | 330 | 231 | metalloprotease 1 precursor                                                  |
| Locus_8098_Transcript_1/1_Conf_1.000 | 182  | 0  |           |                |    |         |     |     |                                                                              |
| Locus_8099_Transcript_1/1_Conf_1.000 | 1253 | 20 | 7.91E-39  | NP_498253.1    | 51 | 166.007 | 421 | 217 | High Incidence of Males (increased X chromosome loss) family member (him-10) |
| Locus_81_Transcript_1/1_Conf_1.000   | 1055 | 4  | 2.47E-40  | XP_002633516.1 | 65 | 170.629 | 205 | 134 | Hypothetical protein CBG05378                                                |
| Locus_810_Transcript_1/1_Conf_1.000  | 652  | 15 | 4.76E-38  | NP_001022833.1 | 88 | 161.77  | 135 | 119 | hypothetical protein Y37D8A.25                                               |
| Locus_8100_Transcript_1/2_Conf_1.000 | 675  | 3  | 4.22E-16  | EFO27562.1     | 64 | 88.9669 | 99  | 64  | hypothetical protein LOAG_00926                                              |
| Locus_8100_Transcript_2/2_Conf_1.000 | 1228 | 20 | 1.27E-33  | EFO27562.1     | 55 | 148.673 | 249 | 139 | hypothetical protein LOAG_00926                                              |
| Locus_8101_Transcript_1/1_Conf_1.000 | 291  | 0  |           |                |    |         |     |     |                                                                              |
| Locus_8102_Transcript_1/1_Conf_1.000 | 472  | 20 | 2.12E-36  | NP_507905.2    | 69 | 155.221 | 152 | 105 | hypothetical protein Y113G7B.24                                              |
| Locus_8103_Transcript_1/1_Conf_1.000 | 580  | 20 | 1.45E-31  | BAE41498.1     | 73 | 139.813 | 110 | 81  | unnamed protein product                                                      |
| Locus_8104_Transcript_1/1_Conf_1.000 | 1261 | 20 | 4.05E-51  | NP_741830.1    | 56 | 206.838 | 420 | 237 | hypothetical protein F46H5.7                                                 |

|                                      |      |    |           |                |    |         |     |     |                                                                  |
|--------------------------------------|------|----|-----------|----------------|----|---------|-----|-----|------------------------------------------------------------------|
| Locus_8105_Transcript_1/1_Conf_1.000 | 614  | 20 | 5.77E-16  | BAF63671.1     | 53 | 88.1965 | 179 | 95  | protein disulfide isomerase-2                                    |
| Locus_8106_Transcript_1/1_Conf_1.000 | 1093 | 20 | 1.37E-81  | NP_506707.2    | 96 | 307.76  | 181 | 174 | RAP homolog (vertebrate Rap GTPase family) family member (rap-2) |
| Locus_8107_Transcript_1/1_Conf_1.000 | 171  | 0  |           |                |    |         |     |     |                                                                  |
| Locus_8108_Transcript_1/2_Conf_1.000 | 2081 | 0  |           |                |    |         |     |     |                                                                  |
| Locus_8108_Transcript_2/2_Conf_1.000 | 2072 | 0  |           |                |    |         |     |     |                                                                  |
| Locus_8109_Transcript_1/1_Conf_1.000 | 935  | 20 | 1.69E-119 | NP_496299.1    | 79 | 433.335 | 311 | 248 | beta-LACTamase domain containing family member (lact-3)          |
| Locus_811_Transcript_1/1_Conf_1.000  | 420  | 20 | 2.69E-47  | NP_501886.1    | 80 | 191.43  | 137 | 110 | THymidine Kinase family member (thk-1)                           |
| Locus_8110_Transcript_1/1_Conf_1.000 | 213  | 18 | 1.56E-07  | AAD51334.1     | 86 | 59.3066 | 36  | 31  | Kunitz type serine protease inhibitor                            |
| Locus_8111_Transcript_1/1_Conf_1.000 | 182  | 0  |           |                |    |         |     |     |                                                                  |
| Locus_8112_Transcript_1/1_Conf_1.000 | 865  | 20 | 2.00E-23  | XP_002645934.1 | 53 | 114.005 | 206 | 110 | Hypothetical protein CBG07699                                    |
| Locus_8113_Transcript_1/1_Conf_1.000 | 529  | 20 | 7.18E-55  | XP_002641774.1 | 85 | 216.853 | 140 | 120 | C. briggsae CBR-TTR-5 protein                                    |
| Locus_8114_Transcript_1/1_Conf_1.000 | 639  | 20 | 6.33E-40  | ADK91433.1     | 69 | 167.933 | 145 | 101 | c-type lectin 1                                                  |
| Locus_8115_Transcript_1/1_Conf_1.000 | 865  | 20 | 9.93E-132 | NP_741507.1    | 92 | 473.781 | 290 | 268 | hypothetical protein H24K24.3                                    |
| Locus_8116_Transcript_1/1_Conf_1.000 | 965  | 2  | 3.94E-10  | XP_002645111.1 | 50 | 70.0922 | 146 | 73  | Hypothetical protein CBG16801                                    |
| Locus_8117_Transcript_1/1_Conf_1.000 | 183  | 7  | 4.84E-20  | XP_002647883.1 | 88 | 100.908 | 61  | 54  | Hypothetical protein CBG23714                                    |

|                                      |      |    |           |                |    |         |     |     |                                                                         |
|--------------------------------------|------|----|-----------|----------------|----|---------|-----|-----|-------------------------------------------------------------------------|
| Locus_8118_Transcript_1/1_Conf_1.000 | 136  | 0  |           |                |    |         |     |     |                                                                         |
| Locus_8119_Transcript_1/1_Conf_1.000 | 403  | 10 | 1.53E-18  | XP_002647546.1 | 61 | 95.9005 | 113 | 69  | C. briggsae CBR-PME-5 protein                                           |
| Locus_812_Transcript_1/4_Conf_0.625  | 1256 | 20 | 5.54E-101 | XP_002629984.1 | 75 | 372.474 | 313 | 236 | C. briggsae CBR-UBH-4 protein                                           |
| Locus_812_Transcript_2/4_Conf_0.375  | 651  | 20 | 6.81E-69  | XP_002629984.1 | 76 | 264.233 | 217 | 166 | C. briggsae CBR-UBH-4 protein                                           |
| Locus_812_Transcript_3/4_Conf_0.625  | 1268 | 20 | 5.62E-101 | XP_002629984.1 | 75 | 372.474 | 313 | 236 | C. briggsae CBR-UBH-4 protein                                           |
| Locus_812_Transcript_4/4_Conf_0.375  | 868  | 20 | 4.38E-95  | XP_002629984.1 | 76 | 352.058 | 289 | 220 | C. briggsae CBR-UBH-4 protein                                           |
| Locus_8120_Transcript_1/1_Conf_1.000 | 1350 | 0  |           |                |    |         |     |     |                                                                         |
| Locus_8121_Transcript_1/1_Conf_1.000 | 256  | 1  | 8.82E-06  | EDL12487.1     | 70 | 53.5286 | 55  | 39  | eukaryotic translation initiation factor 5A, isoform CRA_j              |
| Locus_8122_Transcript_1/1_Conf_1.000 | 390  | 20 | 2.65E-23  | NP_001021054.1 | 68 | 111.694 | 125 | 86  | Suppressor with Morphological effect on Genitalia family member (smg-1) |
| Locus_8123_Transcript_1/1_Conf_1.000 | 422  | 0  |           |                |    |         |     |     |                                                                         |

|                                      |      |    |           |                |    |         |     |     |                                                                         |
|--------------------------------------|------|----|-----------|----------------|----|---------|-----|-----|-------------------------------------------------------------------------|
| Locus_8124_Transcript_1/1_Conf_1.000 | 1935 | 20 | 2.64E-130 | AAC28740.1     | 59 | 470.7   | 657 | 388 | putative zinc metallopeptidase                                          |
| Locus_8125_Transcript_1/1_Conf_1.000 | 330  | 0  |           |                |    |         |     |     |                                                                         |
| Locus_8126_Transcript_1/1_Conf_1.000 | 367  | 0  |           |                |    |         |     |     |                                                                         |
| Locus_8127_Transcript_1/1_Conf_1.000 | 347  | 20 | 3.77E-41  | XP_002640078.1 | 85 | 171.014 | 107 | 92  | Hypothetical protein CBG12563                                           |
| Locus_8128_Transcript_1/1_Conf_1.000 | 364  | 3  | 4.26E-05  | NP_001024412.1 | 52 | 51.2174 | 76  | 40  | hypothetical protein C17G1.4                                            |
| Locus_8129_Transcript_1/1_Conf_1.000 | 537  | 20 | 3.59E-33  | EFO24135.1     | 76 | 144.821 | 121 | 92  | hypothetical protein LOAG_04354                                         |
| Locus_813_Transcript_1/1_Conf_1.000  | 276  | 0  |           |                |    |         |     |     |                                                                         |
| Locus_8130_Transcript_1/3_Conf_0.571 | 812  | 20 | 9.12E-105 | AAN11401.1     | 77 | 384.03  | 269 | 208 | metalloprotease 1 precursor                                             |
| Locus_8130_Transcript_2/3_Conf_0.714 | 1002 | 20 | 2.74E-118 | AAN11401.1     | 74 | 429.483 | 327 | 243 | metalloprotease 1 precursor                                             |
| Locus_8130_Transcript_3/3_Conf_0.714 | 1002 | 20 | 6.11E-118 | AAN11401.1     | 74 | 428.328 | 327 | 242 | metalloprotease 1 precursor                                             |
| Locus_8131_Transcript_1/2_Conf_1.000 | 427  | 20 | 1.05E-51  | EFO26601.1     | 76 | 206.068 | 140 | 107 | CK1/WORM6 protein kinase                                                |
| Locus_8131_Transcript_2/2_Conf_1.000 | 747  | 20 | 1.18E-108 | XP_002640076.1 | 84 | 396.741 | 250 | 212 | Hypothetical protein CBG12561                                           |
| Locus_8132_Transcript_1/1_Conf_1.000 | 153  | 0  |           |                |    |         |     |     |                                                                         |
| Locus_8133_Transcript_1/2_Conf_1.000 | 904  | 0  |           |                |    |         |     |     |                                                                         |
| Locus_8133_Transcript_2/2_Conf_1.000 | 904  | 0  |           |                |    |         |     |     |                                                                         |
| Locus_8134_Transcript_1/1_Conf_1.000 | 454  | 20 | 2.57E-42  | CAA92791.2     | 71 | 174.866 | 150 | 107 | C. elegans protein C33A12.6, partially confirmed by transcript evidence |



|                                      |      |    |           |                |    |         |     |     |                                                    |
|--------------------------------------|------|----|-----------|----------------|----|---------|-----|-----|----------------------------------------------------|
| Locus_8135_Transcript_1/1_Conf_1.000 | 325  | 11 | 2.61E-18  | XP_001900506.1 | 70 | 95.1301 | 89  | 63  | CG7038-PA                                          |
| Locus_8136_Transcript_1/1_Conf_1.000 | 298  | 0  |           |                |    |         |     |     |                                                    |
| Locus_8137_Transcript_1/1_Conf_1.000 | 439  | 2  | 1.66E-09  | EFO28054.1     | 59 | 65.855  | 101 | 60  | hypothetical protein LOAG_00426                    |
| Locus_8138_Transcript_1/2_Conf_1.000 | 1637 | 20 | 1.52E-168 | A8XJW8.2       | 81 | 597.43  | 482 | 392 | Serine/threonine-protein kinase cst-1              |
| Locus_8138_Transcript_2/2_Conf_1.000 | 1099 | 20 | 2.75E-138 | A8XJW8.2       | 88 | 496.123 | 328 | 289 | Serine/threonine-protein kinase cst-1              |
| Locus_8139_Transcript_1/1_Conf_1.000 | 527  | 20 | 8.30E-56  | NP_505698.2    | 78 | 219.935 | 175 | 138 | hypothetical protein C35A5.8                       |
| Locus_814_Transcript_1/1_Conf_1.000  | 1197 | 20 | 3.83E-120 | NP_741296.1    | 79 | 436.032 | 348 | 277 | hypothetical protein K11H12.8                      |
| Locus_8140_Transcript_1/3_Conf_0.600 | 439  | 20 | 2.56E-26  | EFO17754.1     | 68 | 121.709 | 126 | 86  | RNA pol II accessory factor                        |
| Locus_8140_Transcript_2/3_Conf_0.600 | 480  | 20 | 2.56E-26  | EFO17754.1     | 68 | 121.709 | 126 | 86  | RNA pol II accessory factor                        |
| Locus_8140_Transcript_3/3_Conf_0.600 | 481  | 20 | 2.56E-26  | EFO17754.1     | 68 | 121.709 | 126 | 86  | RNA pol II accessory factor                        |
| Locus_8141_Transcript_1/2_Conf_1.000 | 311  | 20 | 1.50E-34  | NP_500412.1    | 77 | 149.058 | 103 | 80  | Variable ABnormal morphology family member (vab-2) |
| Locus_8141_Transcript_2/2_Conf_1.000 | 298  | 20 | 2.43E-32  | NP_500412.1    | 78 | 141.739 | 97  | 76  | Variable ABnormal morphology family member (vab-2) |
| Locus_8142_Transcript_1/1_Conf_1.000 | 198  | 7  | 4.60E-23  | XP_002633317.1 | 86 | 110.923 | 65  | 56  | Hypothetical protein CBG06054                      |
| Locus_8143_Transcript_1/1_Conf_1.000 | 239  | 20 | 9.56E-13  | XP_002632532.1 | 89 | 76.6406 | 39  | 35  | C. briggsae CBR-DPY-4 protein                      |
| Locus_8144_Transcript_1/1_Conf_1.000 | 1020 | 20 | 2.12E-81  | EFO16147.1     | 79 | 306.99  | 236 | 188 | major facilitator superfamily transporter          |
| Locus_8145_Transcript_1/1_Conf_1.000 | 249  | 3  | 1.36E-11  | XP_002639131.1 | 71 | 72.7886 | 66  | 47  | Hypothetical protein CBG14951                      |

|                                      |      |    |           |                |    |         |     |     |                                                        |
|--------------------------------------|------|----|-----------|----------------|----|---------|-----|-----|--------------------------------------------------------|
| Locus_8146_Transcript_1/1_Conf_1.000 | 217  | 20 | 9.73E-18  | XP_001902041.1 | 80 | 93.2041 | 67  | 54  | Protein kinase domain containing protein               |
| Locus_8147_Transcript_1/1_Conf_1.000 | 737  | 5  | 1.92E-23  | Q09261.2       | 67 | 113.62  | 189 | 128 | Uncharacterized protein C32A3.2                        |
| Locus_8148_Transcript_1/1_Conf_1.000 | 325  | 5  | 1.34E-14  | XP_002644049.1 | 67 | 82.8037 | 91  | 61  | C. briggsae CBR-CLC-1 protein                          |
| Locus_8149_Transcript_1/1_Conf_1.000 | 497  | 0  |           |                |    |         |     |     |                                                        |
| Locus_815_Transcript_1/2_Conf_1.000  | 1588 | 20 | 2.26E-153 | XP_002631561.1 | 81 | 546.969 | 364 | 296 | C. briggsae CBR-GLN-2 protein                          |
| Locus_815_Transcript_2/2_Conf_1.000  | 1528 | 20 | 2.16E-153 | XP_002631561.1 | 81 | 546.969 | 364 | 296 | C. briggsae CBR-GLN-2 protein                          |
| Locus_8150_Transcript_1/2_Conf_1.000 | 593  | 4  | 1.97E-31  | XP_002647590.1 | 67 | 139.428 | 179 | 121 | Hypothetical protein CBG06678                          |
| Locus_8150_Transcript_2/2_Conf_1.000 | 593  | 4  | 8.86E-32  | XP_002647590.1 | 67 | 140.584 | 179 | 121 | Hypothetical protein CBG06678                          |
| Locus_8151_Transcript_1/1_Conf_1.000 | 346  | 0  |           |                |    |         |     |     |                                                        |
| Locus_8152_Transcript_1/1_Conf_1.000 | 788  | 20 | 1.74E-20  | XP_002132160.1 | 51 | 103.99  | 209 | 108 | PREDICTED: similar to coiled-coil domain containing 53 |
| Locus_8153_Transcript_1/1_Conf_1.000 | 183  | 0  |           |                |    |         |     |     |                                                        |
| Locus_8154_Transcript_1/1_Conf_1.000 | 417  | 0  |           |                |    |         |     |     |                                                        |
| Locus_8155_Transcript_1/1_Conf_1.000 | 830  | 20 | 1.50E-33  | CAR63677.1     | 84 | 147.517 | 139 | 118 | putative SPERmatogenesis family member                 |
| Locus_8156_Transcript_1/1_Conf_1.000 | 244  | 0  |           |                |    |         |     |     |                                                        |
| Locus_8157_Transcript_1/1_Conf_1.000 | 1034 | 0  |           |                |    |         |     |     |                                                        |

|                                      |      |    |           |                |    |         |     |     |                                                     |
|--------------------------------------|------|----|-----------|----------------|----|---------|-----|-----|-----------------------------------------------------|
| Locus_8158_Transcript_1/3_Conf_0.500 | 554  | 20 | 3.01E-57  | NP_493024.1    | 86 | 224.942 | 138 | 119 | UBiquitin Conjugating enzyme family member (ubc-12) |
| Locus_8158_Transcript_2/3_Conf_0.667 | 682  | 20 | 1.05E-70  | NP_493024.1    | 85 | 270.396 | 180 | 154 | UBiquitin Conjugating enzyme family member (ubc-12) |
| Locus_8158_Transcript_3/3_Conf_0.667 | 683  | 20 | 1.05E-70  | NP_493024.1    | 85 | 270.396 | 180 | 154 | UBiquitin Conjugating enzyme family member (ubc-12) |
| Locus_8159_Transcript_1/1_Conf_1.000 | 2330 | 20 | 0         | NP_500130.1    | 93 | 979.548 | 572 | 532 | hypothetical protein Y41D4A.4                       |
| Locus_816_Transcript_1/1_Conf_1.000  | 793  | 4  | 4.98E-07  | AAF68853.2     | 40 | 59.3066 | 267 | 107 | AF162774_1Nopp140-like nucleolar protein            |
| Locus_8160_Transcript_1/1_Conf_1.000 | 637  | 0  |           |                |    |         |     |     |                                                     |
| Locus_8161_Transcript_1/1_Conf_1.000 | 568  | 3  | 3.25E-17  | XP_002645238.1 | 60 | 92.0485 | 120 | 73  | C. briggsae CBR-SCD-1 protein                       |
| Locus_8162_Transcript_1/1_Conf_1.000 | 1430 | 20 | 1.24E-123 | NP_499891.1    | 79 | 447.973 | 367 | 291 | Paralysed Arrest at Two-fold family member (pat-6)  |
| Locus_8163_Transcript_1/1_Conf_1.000 | 637  | 0  |           |                |    |         |     |     |                                                     |

|                                      |      |    |           |                |    |         |     |     |                                                |
|--------------------------------------|------|----|-----------|----------------|----|---------|-----|-----|------------------------------------------------|
| Locus_8164_Transcript_1/1_Conf_1.000 | 675  | 9  | 6.50E-25  | NP_492047.1    | 63 | 118.242 | 106 | 67  | Chondroitin ProteoGlycan family member (cpg-3) |
| Locus_8165_Transcript_1/1_Conf_1.000 | 379  | 20 | 9.27E-16  | XP_002647707.1 | 63 | 86.6557 | 60  | 38  | Hypothetical protein CBG17896                  |
| Locus_8166_Transcript_1/1_Conf_1.000 | 957  | 20 | 6.71E-95  | NP_501775.1    | 67 | 351.673 | 344 | 233 | Nuclear Hormone Receptor family member (nhr-4) |
| Locus_8167_Transcript_1/3_Conf_0.333 | 292  | 3  | 5.83E-26  | NP_499012.2    | 76 | 120.553 | 99  | 76  | hypothetical protein F02A9.4                   |
| Locus_8167_Transcript_2/3_Conf_0.333 | 730  | 20 | 3.27E-84  | XP_002642413.1 | 81 | 315.464 | 232 | 190 | Hypothetical protein CBG06810                  |
| Locus_8167_Transcript_3/3_Conf_0.667 | 1184 | 20 | 5.81E-113 | NP_499012.2    | 73 | 412.149 | 385 | 284 | hypothetical protein F02A9.4                   |
| Locus_8168_Transcript_1/1_Conf_1.000 | 232  | 20 | 8.42E-17  | XP_002641573.1 | 77 | 90.1225 | 66  | 51  | C. briggsae CBR-TTLL-4 protein                 |
| Locus_8169_Transcript_1/1_Conf_1.000 | 282  | 0  |           |                |    |         |     |     |                                                |
| Locus_817_Transcript_1/5_Conf_0.333  | 2033 | 20 | 2.08E-141 | XP_001893221.1 | 78 | 507.679 | 402 | 316 | splicing factor, CC1-like family protein       |
| Locus_817_Transcript_2/5_Conf_0.222  | 279  | 0  |           |                |    |         |     |     |                                                |
| Locus_817_Transcript_3/5_Conf_0.222  | 286  | 4  | 2.32E-06  | XP_002639234.1 | 68 | 55.4546 | 76  | 52  | Hypothetical protein CBG03790                  |
| Locus_817_Transcript_4/5_Conf_0.222  | 286  | 4  | 2.32E-06  | XP_002639234.1 | 68 | 55.4546 | 76  | 52  | Hypothetical protein CBG03790                  |

|                                      |      |    |           |                |    |         |     |     |                                                                      |
|--------------------------------------|------|----|-----------|----------------|----|---------|-----|-----|----------------------------------------------------------------------|
| Locus_817_Transcript_5/5_Conf_0.444  | 2013 | 20 | 2.05E-141 | XP_001893221.1 | 78 | 507.679 | 402 | 316 | splicing factor, CC1-like family protein                             |
| Locus_8170_Transcript_1/1_Conf_1.000 | 530  | 20 | 1.35E-69  | XP_002646472.1 | 87 | 265.774 | 176 | 154 | C. briggsae CBR-NSF-1 protein                                        |
| Locus_8171_Transcript_1/1_Conf_1.000 | 1095 | 20 | 3.98E-113 | XP_002631003.1 | 75 | 412.535 | 364 | 273 | Hypothetical protein CBG02750                                        |
| Locus_8172_Transcript_1/1_Conf_1.000 | 2235 | 20 | 0         | NP_502064.1    | 71 | 680.248 | 637 | 454 | AuTophagy (yeast Atg homolog) family member (atg-7)                  |
| Locus_8173_Transcript_1/1_Conf_1.000 | 141  | 20 | 1.56E-07  | NP_509407.1    | 63 | 59.3066 | 49  | 31  | Activated in Blocked Unfolded protein response family member (abu-9) |
| Locus_8174_Transcript_1/1_Conf_1.000 | 333  | 0  |           |                |    |         |     |     |                                                                      |
| Locus_8175_Transcript_1/1_Conf_1.000 | 145  | 0  |           |                |    |         |     |     |                                                                      |
| Locus_8176_Transcript_1/1_Conf_1.000 | 455  | 0  |           |                |    |         |     |     |                                                                      |
| Locus_8177_Transcript_1/1_Conf_1.000 | 406  | 0  |           |                |    |         |     |     |                                                                      |
| Locus_8178_Transcript_1/1_Conf_1.000 | 463  | 5  | 2.02E-18  | NP_495016.1    | 52 | 95.5153 | 159 | 83  | hypothetical protein EEED8.16                                        |
| Locus_8179_Transcript_1/2_Conf_1.000 | 525  | 0  |           |                |    |         |     |     |                                                                      |
| Locus_8179_Transcript_2/2_Conf_1.000 | 512  | 0  |           |                |    |         |     |     |                                                                      |
| Locus_818_Transcript_1/1_Conf_1.000  | 1390 | 20 | 5.31E-47  | XP_001898350.1 | 66 | 193.356 | 214 | 143 | Temporarily assigned gene name protein 44, isoform c                 |

|                                      |      |    |          |                |    |         |     |     |                                                                                         |
|--------------------------------------|------|----|----------|----------------|----|---------|-----|-----|-----------------------------------------------------------------------------------------|
| Locus_8180_Transcript_1/1_Conf_1.000 | 2611 | 20 | 0        | XP_001899737.1 | 75 | 900.197 | 759 | 571 | SMC proteins Flexible Hinge Domain containing protein                                   |
| Locus_8181_Transcript_1/2_Conf_1.000 | 349  | 0  |          |                |    |         |     |     |                                                                                         |
| Locus_8181_Transcript_2/2_Conf_1.000 | 277  | 0  |          |                |    |         |     |     |                                                                                         |
| Locus_8182_Transcript_1/1_Conf_1.000 | 996  | 20 | 9.27E-26 | NP_499543.2    | 51 | 122.094 | 279 | 145 | hypothetical protein Y56A3A.11                                                          |
| Locus_8183_Transcript_1/1_Conf_1.000 | 204  | 0  |          |                |    |         |     |     |                                                                                         |
| Locus_8184_Transcript_1/1_Conf_1.000 | 668  | 20 | 2.29E-59 | EFO24227.1     | 70 | 232.646 | 199 | 141 | hypothetical protein LOAG_04258                                                         |
| Locus_8185_Transcript_1/2_Conf_1.000 | 1113 | 6  | 3.51E-64 | ACV31098.1     | 68 | 249.98  | 324 | 221 | Temporarily assigned gene name protein 250, isoform a, confirmed by transcript evidence |
| Locus_8185_Transcript_2/2_Conf_1.000 | 1101 | 6  | 2.23E-63 | ACV31098.1     | 67 | 247.284 | 325 | 219 | Temporarily assigned gene name protein 250, isoform a, confirmed by transcript evidence |
| Locus_8186_Transcript_1/1_Conf_1.000 | 425  | 4  | 3.63E-36 | XP_002638375.1 | 73 | 154.451 | 141 | 104 | Hypothetical protein CBG18580                                                           |
| Locus_8187_Transcript_1/1_Conf_1.000 | 448  | 20 | 6.61E-38 | NP_504245.3    | 82 | 160.229 | 134 | 111 | hypothetical protein Y61A9LA.10                                                         |
| Locus_8188_Transcript_1/1_Conf_1.000 | 232  | 0  |          |                |    |         |     |     |                                                                                         |
| Locus_8189_Transcript_1/1_Conf_1.000 | 765  | 0  |          |                |    |         |     |     |                                                                                         |
| Locus_819_Transcript_1/1_Conf_1.000  | 455  | 0  |          |                |    |         |     |     |                                                                                         |
| Locus_8190_Transcript_1/1_Conf_1.000 | 188  | 20 | 6.52E-17 | NP_741529.1    | 91 | 90.5077 | 62  | 57  | hypothetical protein C37H5.6                                                            |
| Locus_8191_Transcript_1/1_Conf_1.000 | 925  | 20 | 2.89E-63 | NP_509119.3    | 61 | 246.514 | 319 | 196 | Nuclear Hormone Receptor family member (nhr-173)                                        |
| Locus_8192_Transcript_1/1_Conf_1.000 | 318  | 4  | 6.94E-11 | EFO27060.1     | 88 | 70.4774 | 44  | 39  | hypothetical protein LOAG_01427                                                         |
| Locus_8193_Transcript_1/1_Conf_1.000 | 195  | 0  |          |                |    |         |     |     |                                                                                         |
| Locus_8194_Transcript_1/1_Conf_1.000 | 386  | 0  |          |                |    |         |     |     |                                                                                         |
| Locus_8195_Transcript_1/1_Conf_1.000 | 157  | 0  |          |                |    |         |     |     |                                                                                         |
| Locus_8196_Transcript_1/1_Conf_1.000 | 634  | 0  |          |                |    |         |     |     |                                                                                         |

|                                      |      |    |           |                |    |         |     |     |                                           |
|--------------------------------------|------|----|-----------|----------------|----|---------|-----|-----|-------------------------------------------|
| Locus_8197_Transcript_1/2_Conf_1.000 | 383  | 16 | 4.87E-33  | XP_001895776.1 | 74 | 144.05  | 127 | 94  | PDZ domain containing protein             |
| Locus_8197_Transcript_2/2_Conf_1.000 | 122  | 11 | 8.44E-09  | XP_002633733.1 | 89 | 63.5438 | 39  | 35  | Hypothetical protein CBG03418             |
| Locus_8198_Transcript_1/1_Conf_1.000 | 323  | 0  |           |                |    |         |     |     |                                           |
| Locus_8199_Transcript_1/1_Conf_1.000 | 257  | 4  | 4.52E-10  | NP_496498.1    | 67 | 67.781  | 73  | 49  | hypothetical protein C47D12.8             |
| Locus_82_Transcript_1/1_Conf_1.000   | 225  | 20 | 3.00E-30  | EFO21255.1     | 95 | 134.806 | 66  | 63  | hypothetical protein LOAG_07233           |
| Locus_820_Transcript_1/1_Conf_1.000  | 1135 | 20 | 3.17E-169 | NP_499743.2    | 91 | 598.971 | 366 | 336 | hypothetical protein Y43F4B.7             |
| Locus_8200_Transcript_1/1_Conf_1.000 | 229  | 4  | 9.98E-18  | XP_002638921.1 | 73 | 93.2041 | 75  | 55  | Hypothetical protein CBG22147             |
| Locus_8201_Transcript_1/1_Conf_1.000 | 565  | 0  |           |                |    |         |     |     |                                           |
| Locus_8202_Transcript_1/1_Conf_1.000 | 864  | 2  | 3.41E-23  | NP_500834.1    | 49 | 113.235 | 249 | 124 | hypothetical protein C39H7.4              |
| Locus_8203_Transcript_1/2_Conf_1.000 | 471  | 20 | 5.75E-42  | ACI49049.1     | 67 | 173.711 | 154 | 104 | hypothetical protein Cbre_JD08.001        |
| Locus_8203_Transcript_2/2_Conf_1.000 | 471  | 20 | 5.75E-42  | ACI49049.1     | 67 | 173.711 | 154 | 104 | hypothetical protein Cbre_JD08.001        |
| Locus_8204_Transcript_1/1_Conf_1.000 | 1468 | 20 | 1.91E-50  | EFO26149.1     | 52 | 204.912 | 496 | 262 | rad50 family protein                      |
| Locus_8205_Transcript_1/1_Conf_1.000 | 294  | 20 | 1.21E-39  | EFO21605.1     | 92 | 166.007 | 99  | 92  | hypothetical protein LOAG_06883           |
| Locus_8206_Transcript_1/1_Conf_1.000 | 677  | 20 | 2.65E-18  | XP_001898812.1 | 59 | 96.2857 | 128 | 76  | Autophagy protein Apg6 containing protein |

|                                      |     |    |          |                |    |         |     |     |                                         |
|--------------------------------------|-----|----|----------|----------------|----|---------|-----|-----|-----------------------------------------|
| Locus_8207_Transcript_1/1_Conf_1.000 | 779 | 20 | 8.88E-62 | NP_508504.2    | 82 | 241.121 | 258 | 212 | Non-muscle MYosin family member (nmy-1) |
| Locus_8208_Transcript_1/1_Conf_1.000 | 773 | 20 | 9.31E-72 | XP_002637243.1 | 65 | 274.248 | 293 | 192 | Hypothetical protein CBG18919           |
| Locus_8209_Transcript_1/1_Conf_1.000 | 777 | 20 | 9.00E-14 | EFN79173.1     | 45 | 81.6481 | 181 | 83  | Chromobox protein-like protein 5        |
| Locus_821_Transcript_1/3_Conf_0.600  | 516 | 20 | 3.46E-88 | ACS37721.1     | 98 | 327.405 | 153 | 150 | C-type lectin-1                         |
| Locus_821_Transcript_2/3_Conf_0.600  | 504 | 20 | 8.81E-86 | ACS37721.1     | 96 | 319.316 | 153 | 147 | C-type lectin-1                         |
| Locus_821_Transcript_3/3_Conf_0.600  | 504 | 20 | 1.41E-83 | ACS37721.1     | 94 | 311.997 | 153 | 144 | C-type lectin-1                         |
| Locus_8210_Transcript_1/1_Conf_1.000 | 787 | 0  |          |                |    |         |     |     |                                         |
| Locus_8211_Transcript_1/1_Conf_1.000 | 154 | 0  |          |                |    |         |     |     |                                         |
| Locus_8212_Transcript_1/1_Conf_1.000 | 491 | 4  | 1.12E-45 | NP_001022641.1 | 76 | 186.037 | 142 | 109 | LEThal family member (let-805)          |



|                                      |      |    |          |                |    |         |     |     |                                 |
|--------------------------------------|------|----|----------|----------------|----|---------|-----|-----|---------------------------------|
| Locus_8213_Transcript_1/1_Conf_1.000 | 926  | 2  | 6.00E-69 | XP_002639154.1 | 74 | 265.388 | 250 | 186 | Hypothetical protein CBG14981   |
| Locus_8214_Transcript_1/4_Conf_0.250 | 438  | 5  | 8.82E-11 | XP_002649011.1 | 51 | 70.0922 | 145 | 74  | Hypothetical protein CBG21458   |
| Locus_8214_Transcript_2/4_Conf_0.333 | 438  | 5  | 3.96E-11 | XP_002649011.1 | 51 | 71.2478 | 145 | 75  | Hypothetical protein CBG21458   |
| Locus_8214_Transcript_3/4_Conf_0.500 | 794  | 20 | 5.67E-19 | NP_494220.2    | 42 | 98.9821 | 291 | 124 | hypothetical protein F54A3.1    |
| Locus_8214_Transcript_4/4_Conf_0.583 | 1145 | 20 | 6.06E-19 | NP_494220.2    | 43 | 99.7525 | 293 | 128 | hypothetical protein F54A3.1    |
| Locus_8215_Transcript_1/1_Conf_1.000 | 757  | 20 | 2.22E-38 | EFO25502.1     | 56 | 163.31  | 274 | 156 | F/Y-rich family protein         |
| Locus_8216_Transcript_1/1_Conf_1.000 | 277  | 0  |          |                |    |         |     |     |                                 |
| Locus_8217_Transcript_1/1_Conf_1.000 | 1137 | 20 | 1.75E-42 | NP_500514.1    | 59 | 177.948 | 242 | 144 | hypothetical protein F30B5.4    |
| Locus_8218_Transcript_1/3_Conf_0.571 | 823  | 20 | 8.56E-82 | NP_498415.2    | 80 | 307.76  | 205 | 166 | LEThal family member (let-721)  |
| Locus_8218_Transcript_2/3_Conf_0.714 | 1893 | 20 | 0        | XP_002634690.1 | 86 | 897.886 | 562 | 486 | C. briggsae CBR-LET-721 protein |

|                                      |      |    |          |                |    |         |     |     |                                                                                   |
|--------------------------------------|------|----|----------|----------------|----|---------|-----|-----|-----------------------------------------------------------------------------------|
| Locus_8218_Transcript_3/3_Conf_0.571 | 823  | 20 | 2.94E-82 | NP_498415.2    | 80 | 309.301 | 205 | 166 | LEThal family member (let-721)                                                    |
| Locus_8219_Transcript_1/1_Conf_1.000 | 203  | 20 | 5.99E-23 | NP_492127.1    | 83 | 110.538 | 66  | 55  | Low-density lipoprotein Receptor Related family member (Irp-1)                    |
| Locus_822_Transcript_1/1_Conf_1.000  | 846  | 20 | 6.07E-78 | NP_510144.1    | 73 | 295.049 | 265 | 194 | Branched Chain AminoTransferase family member (bcat-1)                            |
| Locus_8220_Transcript_1/1_Conf_1.000 | 368  | 5  | 1.23E-20 | NP_508500.1    | 71 | 102.834 | 122 | 87  | VANG (Van Gogh/Strabismus planar polarity protein) homolog family member (vang-1) |
| Locus_8221_Transcript_1/2_Conf_1.000 | 1606 | 20 | 2.19E-95 | EFO23215.1     | 55 | 354.369 | 574 | 318 | hypothetical protein LOAG_05271                                                   |
| Locus_8221_Transcript_2/2_Conf_1.000 | 1594 | 20 | 4.67E-90 | NP_501725.2    | 55 | 336.65  | 538 | 300 | hypothetical protein ZK1251.9                                                     |
| Locus_8222_Transcript_1/1_Conf_1.000 | 577  | 20 | 2.67E-54 | NP_505112.1    | 79 | 215.312 | 163 | 129 | hypothetical protein F20D6.11                                                     |
| Locus_8223_Transcript_1/1_Conf_1.000 | 384  | 0  |          |                |    |         |     |     |                                                                                   |
| Locus_8224_Transcript_1/1_Conf_1.000 | 143  | 0  |          |                |    |         |     |     |                                                                                   |
| Locus_8225_Transcript_1/1_Conf_1.000 | 429  | 0  |          |                |    |         |     |     |                                                                                   |
| Locus_8226_Transcript_1/2_Conf_1.000 | 356  | 20 | 7.54E-34 | XP_002630143.1 | 85 | 146.747 | 87  | 74  | Hypothetical protein CBG00545                                                     |
| Locus_8226_Transcript_2/2_Conf_1.000 | 360  | 20 | 7.48E-34 | XP_002630143.1 | 85 | 146.747 | 87  | 74  | Hypothetical protein CBG00545                                                     |
| Locus_8227_Transcript_1/1_Conf_1.000 | 437  | 11 | 1.08E-24 | EFO27980.1     | 75 | 116.316 | 112 | 84  | hypothetical protein LOAG_00505                                                   |
| Locus_8228_Transcript_1/1_Conf_1.000 | 344  | 0  |          |                |    |         |     |     |                                                                                   |
| Locus_8229_Transcript_1/1_Conf_1.000 | 568  | 2  | 2.32E-23 | XP_002640320.1 | 65 | 112.464 | 151 | 99  | C. briggsae CBR-DNJ-4 protein                                                     |

|                                      |      |    |           |                |     |         |     |     |                                                     |
|--------------------------------------|------|----|-----------|----------------|-----|---------|-----|-----|-----------------------------------------------------|
| Locus_823_Transcript_1/1_Conf_1.000  | 1374 | 20 | 8.67E-58  | EFO22339.1     | 59  | 229.18  | 300 | 177 | protein-tyrosine phosphatase                        |
| Locus_8230_Transcript_1/1_Conf_1.000 | 701  | 0  |           |                |     |         |     |     |                                                     |
| Locus_8231_Transcript_1/1_Conf_1.000 | 199  | 20 | 2.36E-27  | XP_002640690.1 | 95  | 125.176 | 65  | 62  | Hypothetical protein CBG19753                       |
| Locus_8232_Transcript_1/1_Conf_1.000 | 462  | 20 | 3.08E-59  | XP_002646888.1 | 86  | 231.106 | 149 | 129 | C. briggsae CBR-PTC-3 protein                       |
| Locus_8233_Transcript_1/1_Conf_1.000 | 798  | 5  | 2.77E-05  | Q62635.1       | 54  | 53.5286 | 103 | 56  | Mucin-2                                             |
| Locus_8234_Transcript_1/1_Conf_1.000 | 339  | 20 | 1.34E-59  | NP_505734.2    | 100 | 232.261 | 113 | 113 | Protein PHosphatase family member (pph-1)           |
| Locus_8235_Transcript_1/3_Conf_0.400 | 606  | 20 | 2.32E-70  | NP_001122565.1 | 81  | 268.855 | 197 | 160 | Variable ABnormal morphology family member (vab-10) |
| Locus_8235_Transcript_2/3_Conf_0.400 | 762  | 20 | 9.71E-74  | XP_002640549.1 | 86  | 280.796 | 209 | 180 | C. briggsae CBR-VAB-10 protein                      |
| Locus_8235_Transcript_3/3_Conf_0.600 | 1034 | 20 | 2.96E-139 | NP_001021857.1 | 87  | 499.204 | 346 | 303 | Variable ABnormal morphology family member (vab-10) |
| Locus_8236_Transcript_1/2_Conf_1.000 | 1104 | 20 | 1.21E-117 | XP_002637723.1 | 94  | 427.557 | 237 | 223 | C. briggsae CBR-FIB-1 protein                       |

|                                      |      |    |           |                |     |         |     |     |                                                                                |
|--------------------------------------|------|----|-----------|----------------|-----|---------|-----|-----|--------------------------------------------------------------------------------|
| Locus_8236_Transcript_2/2_Conf_1.000 | 1173 | 20 | 1.32E-117 | XP_002637723.1 | 94  | 427.557 | 237 | 223 | C. briggsae CBR-FIB-1 protein                                                  |
| Locus_8237_Transcript_1/1_Conf_1.000 | 502  | 20 | 1.05E-91  | 2QUJ           | 100 | 338.961 | 167 | 167 | CrystalStructures Of Human Tryptophanyl-Trna Synthetase In Complex With Trpamp |
| Locus_8238_Transcript_1/1_Conf_1.000 | 417  | 0  |           |                |     |         |     |     |                                                                                |
| Locus_8239_Transcript_1/1_Conf_1.000 | 1101 | 20 | 2.51E-123 | NP_499913.1    | 81  | 446.432 | 327 | 267 | Sphingosine Phosphate Lyase family member (spl-1)                              |
| Locus_824_Transcript_1/4_Conf_0.200  | 395  | 4  | 1.15E-13  | XP_002630872.1 | 64  | 79.7221 | 88  | 57  | Hypothetical protein CBG02589                                                  |
| Locus_824_Transcript_2/4_Conf_0.600  | 582  | 4  | 1.81E-13  | XP_002630872.1 | 64  | 79.7221 | 88  | 57  | Hypothetical protein CBG02589                                                  |
| Locus_824_Transcript_3/4_Conf_0.400  | 530  | 4  | 1.37E-13  | XP_002630872.1 | 64  | 79.7221 | 88  | 57  | Hypothetical protein CBG02589                                                  |
| Locus_824_Transcript_4/4_Conf_0.600  | 640  | 4  | 2.27E-13  | XP_002630872.1 | 64  | 79.7221 | 88  | 57  | Hypothetical protein CBG02589                                                  |
| Locus_8240_Transcript_1/1_Conf_1.000 | 643  | 20 | 2.77E-51  | NP_502576.1    | 89  | 205.682 | 141 | 126 | RAB family member (rab-19)                                                     |
| Locus_8241_Transcript_1/1_Conf_1.000 | 535  | 2  | 3.00E-08  | XP_002642044.1 | 75  | 62.003  | 48  | 36  | Hypothetical protein CBG17981                                                  |

|                                      |      |    |           |                |     |         |     |     |                                                                |
|--------------------------------------|------|----|-----------|----------------|-----|---------|-----|-----|----------------------------------------------------------------|
| Locus_8242_Transcript_1/1_Conf_1.000 | 625  | 20 | 1.19E-64  | BAG53869.1     | 100 | 249.98  | 129 | 129 | unnamed protein product                                        |
| Locus_8243_Transcript_1/2_Conf_1.000 | 856  | 20 | 1.12E-111 | XP_002645468.1 | 79  | 407.142 | 276 | 219 | Hypothetical protein CBG22707                                  |
| Locus_8243_Transcript_2/2_Conf_1.000 | 1471 | 20 | 5.41E-146 | NP_001123112.1 | 64  | 522.316 | 540 | 348 | hypothetical protein C17H11.6                                  |
| Locus_8244_Transcript_1/1_Conf_1.000 | 1058 | 2  | 3.38E-13  | XP_002638647.1 | 53  | 80.4925 | 160 | 86  | C. briggsae CBR-REPS-1 protein                                 |
| Locus_8245_Transcript_1/1_Conf_1.000 | 320  | 20 | 5.26E-43  | XP_002928912.1 | 100 | 177.178 | 106 | 106 | PREDICTED: tubulin beta chain-like                             |
| Locus_8246_Transcript_1/2_Conf_1.000 | 736  | 0  |           |                |     |         |     |     |                                                                |
| Locus_8246_Transcript_2/2_Conf_1.000 | 736  | 0  |           |                |     |         |     |     |                                                                |
| Locus_8247_Transcript_1/1_Conf_1.000 | 289  | 0  |           |                |     |         |     |     |                                                                |
| Locus_8248_Transcript_1/1_Conf_1.000 | 1637 | 12 | 4.57E-56  | NP_001021044.1 | 51  | 223.787 | 485 | 251 | hypothetical protein C45G3.5                                   |
| Locus_8249_Transcript_1/1_Conf_1.000 | 875  | 5  | 4.27E-05  | XP_001944113.1 | 43  | 53.1434 | 182 | 80  | PREDICTED: similar to splicing factor, arginine/serine-rich 16 |
| Locus_825_Transcript_1/2_Conf_1.000  | 1007 | 20 | 1.87E-82  | CBW38507.1     | 72  | 310.457 | 285 | 206 | calcium-activated apyrase                                      |
| Locus_825_Transcript_2/2_Conf_1.000  | 431  | 3  | 3.76E-09  | CBW38507.1     | 72  | 64.6994 | 62  | 45  | calcium-activated apyrase                                      |
| Locus_8250_Transcript_1/1_Conf_1.000 | 241  | 3  | 1.05E-11  | XP_002489033.1 | 76  | 73.1738 | 47  | 36  | hypothetical protein SORBIDRAFT_0351s002020                    |
| Locus_8251_Transcript_1/2_Conf_1.000 | 1257 | 20 | 3.74E-89  | NP_491448.2    | 68  | 333.183 | 335 | 231 | hypothetical protein M04F3.5                                   |
| Locus_8251_Transcript_2/2_Conf_1.000 | 1367 | 20 | 2.47E-89  | NP_491448.2    | 69  | 333.954 | 335 | 232 | hypothetical protein M04F3.5                                   |

|                                      |      |    |           |                |    |         |     |     |                                        |
|--------------------------------------|------|----|-----------|----------------|----|---------|-----|-----|----------------------------------------|
| Locus_8252_Transcript_1/1_Conf_1.000 | 431  | 20 | 6.60E-22  | XP_002816802.1 | 69 | 107.071 | 103 | 72  | PREDICTED: protein CutA-like isoform 3 |
| Locus_8253_Transcript_1/1_Conf_1.000 | 377  | 0  |           |                |    |         |     |     |                                        |
| Locus_8254_Transcript_1/1_Conf_1.000 | 1217 | 20 | 3.68E-110 | NP_490930.1    | 85 | 402.905 | 308 | 263 | hypothetical protein Y37E3.10          |
| Locus_8255_Transcript_1/1_Conf_1.000 | 401  | 20 | 1.43E-40  | NP_001122905.1 | 74 | 169.088 | 133 | 99  | hypothetical protein F09G2.8           |
| Locus_8256_Transcript_1/1_Conf_1.000 | 526  | 20 | 5.96E-46  | XP_002632331.1 | 72 | 187.193 | 162 | 118 | <i>C. briggsae</i> CBR-ROM-4 protein   |
| Locus_8257_Transcript_1/2_Conf_1.000 | 689  | 20 | 6.94E-62  | XP_002636565.1 | 73 | 241.121 | 214 | 158 | Hypothetical protein CBG23257          |
| Locus_8257_Transcript_2/2_Conf_1.000 | 652  | 20 | 6.83E-61  | XP_002636565.1 | 72 | 237.654 | 214 | 156 | Hypothetical protein CBG23257          |
| Locus_8258_Transcript_1/1_Conf_1.000 | 465  |    |           |                |    |         |     |     |                                        |
| Locus_8259_Transcript_1/1_Conf_1.000 | 613  | 20 | 8.51E-60  | CAR63645.1     | 79 | 233.802 | 166 | 132 | hypothetical protein                   |

|                                      |      |    |           |                |    |         |     |     |                                                                            |
|--------------------------------------|------|----|-----------|----------------|----|---------|-----|-----|----------------------------------------------------------------------------|
| Locus_826_Transcript_1/1_Conf_1.000  | 518  | 20 | 2.41E-57  | NP_001021661.1 | 96 | 224.942 | 125 | 120 | AFaDin (actin filament binding protein) homolog family member (afd-1)      |
| Locus_8260_Transcript_1/1_Conf_1.000 | 138  | 0  |           |                |    |         |     |     |                                                                            |
| Locus_8261_Transcript_1/1_Conf_1.000 | 276  | 0  |           |                |    |         |     |     |                                                                            |
| Locus_8262_Transcript_1/1_Conf_1.000 | 964  | 20 | 9.58E-57  | XP_002630381.1 | 94 | 224.942 | 128 | 121 | C. briggsae CBR-ICD-1 protein                                              |
| Locus_8263_Transcript_1/1_Conf_1.000 | 223  | 20 | 3.95E-14  | CBK19482.1     | 72 | 81.2629 | 73  | 53  | C. elegans protein Y116A8C.13b, partially confirmed by transcript evidence |
| Locus_8264_Transcript_1/1_Conf_1.000 | 190  | 20 | 6.48E-25  | XP_002640347.1 | 95 | 117.087 | 63  | 60  | C. briggsae CBR-HAF-9 protein                                              |
| Locus_8265_Transcript_1/1_Conf_1.000 | 735  | 20 | 3.53E-118 | XP_002639586.1 | 92 | 428.328 | 241 | 222 | C. briggsae CBR-ARX-1 protein                                              |
| Locus_8266_Transcript_1/1_Conf_1.000 | 1485 | 20 | 0         | NP_001122838.1 | 90 | 680.248 | 439 | 399 | hypothetical protein B0399.1                                               |
| Locus_8267_Transcript_1/1_Conf_1.000 | 204  | 0  |           |                |    |         |     |     |                                                                            |
| Locus_8268_Transcript_1/1_Conf_1.000 | 302  | 0  |           |                |    |         |     |     |                                                                            |

|                                      |      |    |           |                |    |         |     |     |                                                                             |
|--------------------------------------|------|----|-----------|----------------|----|---------|-----|-----|-----------------------------------------------------------------------------|
| Locus_8269_Transcript_1/1_Conf_1.000 | 669  | 20 | 3.60E-28  | EFO26050.1     | 57 | 129.028 | 225 | 130 | PEK/PEK protein kinase                                                      |
| Locus_827_Transcript_1/1_Conf_1.000  | 1090 | 20 | 2.30E-129 | NP_001033540.1 | 86 | 466.463 | 284 | 245 | hypothetical protein F08C6.2                                                |
| Locus_8270_Transcript_1/1_Conf_1.000 | 977  | 8  | 7.03E-47  | XP_002634253.1 | 57 | 192.2   | 276 | 159 | Hypothetical protein CBG01824                                               |
| Locus_8271_Transcript_1/1_Conf_1.000 | 1242 | 7  | 1.03E-06  | NP_001022708.1 | 45 | 59.3066 | 247 | 113 | Inhibitor of NFKappaB Kinase Epsilon subunit homolog family member (ikke-1) |
| Locus_8272_Transcript_1/1_Conf_1.000 | 822  | 0  |           |                |    |         |     |     |                                                                             |
| Locus_8273_Transcript_1/1_Conf_1.000 | 456  | 0  |           |                |    |         |     |     |                                                                             |
| Locus_8274_Transcript_1/1_Conf_1.000 | 381  | 0  |           |                |    |         |     |     |                                                                             |
| Locus_8275_Transcript_1/1_Conf_1.000 | 233  | 0  |           |                |    |         |     |     |                                                                             |



|                                      |      |    |          |                |    |         |     |     |                                                       |
|--------------------------------------|------|----|----------|----------------|----|---------|-----|-----|-------------------------------------------------------|
| Locus_8276_Transcript_1/1_Conf_1.000 | 713  | 20 | 8.86E-23 | NP_491676.2    | 59 | 111.309 | 190 | 113 | hypothetical protein T22E7.1                          |
| Locus_8277_Transcript_1/1_Conf_1.000 | 687  | 20 | 7.68E-61 | XP_002643159.1 | 71 | 237.654 | 230 | 164 | C. briggsae CBR-VPS-33.1 protein                      |
| Locus_8278_Transcript_1/1_Conf_1.000 | 443  | 20 | 2.14E-44 | NP_510443.4    | 84 | 181.8   | 113 | 96  | Temporarily Assigned Gene name family member (tag-53) |
| Locus_8279_Transcript_1/1_Conf_1.000 | 190  | 0  |          |                |    |         |     |     |                                                       |
| Locus_828_Transcript_1/1_Conf_1.000  | 1254 | 20 | 3.32E-53 | XP_002630959.1 | 58 | 213.772 | 234 | 138 | C. briggsae CBR-DIE-1 protein                         |
| Locus_8280_Transcript_1/1_Conf_1.000 | 399  | 20 | 7.59E-34 | XP_002633337.1 | 71 | 146.747 | 132 | 95  | C. briggsae CBR-KLP-12 protein                        |
| Locus_8281_Transcript_1/1_Conf_1.000 | 169  | 0  |          |                |    |         |     |     |                                                       |
| Locus_8282_Transcript_1/2_Conf_1.000 | 640  | 20 | 9.12E-47 | NP_501598.2    | 64 | 190.66  | 214 | 137 | Prolyl Carboxy Peptidase like family member (pcp-3)   |
| Locus_8282_Transcript_2/2_Conf_1.000 | 592  | 20 | 3.36E-39 | NP_501598.2    | 62 | 165.236 | 198 | 123 | Prolyl Carboxy Peptidase like family member (pcp-3)   |

|                                      |      |    |           |                |     |         |     |     |                                                                                                   |
|--------------------------------------|------|----|-----------|----------------|-----|---------|-----|-----|---------------------------------------------------------------------------------------------------|
| Locus_8283_Transcript_1/1_Conf_1.000 | 184  | 0  |           |                |     |         |     |     |                                                                                                   |
| Locus_8284_Transcript_1/1_Conf_1.000 | 210  | 20 | 5.94E-15  | NP_001024837.1 | 81  | 83.9593 | 70  | 57  | Gut granule LOss family member (glo-1)                                                            |
| Locus_8285_Transcript_1/1_Conf_1.000 | 238  | 0  |           |                |     |         |     |     |                                                                                                   |
| Locus_8286_Transcript_1/1_Conf_1.000 | 1547 | 20 | 6.74E-179 | XP_002640548.1 | 81  | 631.713 | 516 | 422 | Hypothetical protein CBG15812                                                                     |
| Locus_8287_Transcript_1/2_Conf_1.000 | 1007 | 0  |           |                |     |         |     |     |                                                                                                   |
| Locus_8287_Transcript_2/2_Conf_1.000 | 920  | 0  |           |                |     |         |     |     |                                                                                                   |
| Locus_8288_Transcript_1/1_Conf_1.000 | 1441 | 20 | 1.21E-25  | EFO19124.1     | 69  | 122.479 | 112 | 78  | origin recognition complex subunit 1                                                              |
| Locus_8289_Transcript_1/1_Conf_1.000 | 354  | 0  |           |                |     |         |     |     |                                                                                                   |
| Locus_829_Transcript_1/1_Conf_1.000  | 678  | 7  | 9.49E-24  | NP_001129836.1 | 62  | 114.39  | 132 | 83  | Nuclear Hormone Receptor family member (nhr-6)                                                    |
| Locus_8290_Transcript_1/1_Conf_1.000 | 277  | 0  |           |                |     |         |     |     |                                                                                                   |
| Locus_8291_Transcript_1/1_Conf_1.000 | 571  | 20 | 1.36E-87  | XP_002633641.1 | 92  | 325.865 | 189 | 174 | C. briggsae CBR-KCC-3 protein                                                                     |
| Locus_8292_Transcript_1/1_Conf_1.000 | 144  | 0  |           |                |     |         |     |     |                                                                                                   |
| Locus_8293_Transcript_1/1_Conf_1.000 | 289  | 5  | 4.66E-07  | XP_002647600.1 | 52  | 57.7658 | 88  | 46  | Hypothetical protein CBG06690                                                                     |
| Locus_8294_Transcript_1/1_Conf_1.000 | 470  | 20 | 1.12E-53  | ABY68595.1     | 100 | 212.616 | 105 | 105 | myosin light chain 6                                                                              |
| Locus_8295_Transcript_1/1_Conf_1.000 | 303  | 20 | 5.94E-31  | NP_506060.2    | 87  | 137.117 | 80  | 70  | hypothetical protein ZK836.2                                                                      |
| Locus_8296_Transcript_1/3_Conf_0.571 | 652  | 4  | 1.48E-47  | NP_872015.1    | 89  | 193.356 | 116 | 104 | hypothetical protein R12C12.9                                                                     |
| Locus_8296_Transcript_2/3_Conf_0.571 | 770  | 4  | 4.62E-47  | NP_872015.1    | 82  | 192.2   | 141 | 116 | hypothetical protein R12C12.9                                                                     |
| Locus_8296_Transcript_3/3_Conf_0.714 | 995  | 4  | 3.82E-72  | NP_495203.1    | 81  | 276.174 | 249 | 202 | hypothetical protein R12C12.9                                                                     |
| Locus_8297_Transcript_1/1_Conf_1.000 | 219  | 0  |           |                |     |         |     |     |                                                                                                   |
| Locus_8298_Transcript_1/1_Conf_1.000 | 457  | 20 | 7.72E-31  | ACM46026.1     | 65  | 136.732 | 132 | 87  | Temporarily assigned gene name protein 233, isoform a, partially confirmed by transcript evidence |

|                                      |      |    |           |                |    |         |     |     |                                                                  |
|--------------------------------------|------|----|-----------|----------------|----|---------|-----|-----|------------------------------------------------------------------|
| Locus_8299_Transcript_1/1_Conf_1.000 | 858  | 20 | 3.72E-22  | XP_002637261.1 | 62 | 109.768 | 135 | 84  | C. briggsae CBR-ACL-8 protein                                    |
| Locus_83_Transcript_1/1_Conf_1.000   | 163  | 1  | 3.91E-06  | CAR63637.1     | 67 | 54.6842 | 52  | 35  | hypothetical protein                                             |
| Locus_830_Transcript_1/1_Conf_1.000  | 1535 | 20 | 1.33E-134 | NP_001033386.1 | 86 | 484.567 | 340 | 294 | similar to Transporter Of divalent Cations family member (toc-1) |
| Locus_8300_Transcript_1/1_Conf_1.000 | 154  | 0  |           |                |    |         |     |     |                                                                  |
| Locus_8301_Transcript_1/1_Conf_1.000 | 672  | 20 | 2.03E-87  | NP_001021852.2 | 82 | 325.865 | 224 | 184 | hypothetical protein ZC434.9                                     |
| Locus_8302_Transcript_1/1_Conf_1.000 | 204  | 0  |           |                |    |         |     |     |                                                                  |
| Locus_8303_Transcript_1/1_Conf_1.000 | 1179 | 5  | 4.99E-48  | NP_497319.1    | 63 | 196.438 | 398 | 251 | hypothetical protein Y46E12BL.2                                  |
| Locus_8304_Transcript_1/1_Conf_1.000 | 638  | 20 | 5.89E-14  | XP_002740228.1 | 52 | 81.6481 | 161 | 84  | PREDICTED: transducin (beta)-like 1 X-linked receptor 1-like     |
| Locus_8305_Transcript_1/1_Conf_1.000 | 513  | 20 | 6.72E-20  | NP_501726.1    | 89 | 100.523 | 56  | 50  | hypothetical protein K01H12.1                                    |
| Locus_8306_Transcript_1/1_Conf_1.000 | 1799 | 20 | 2.49E-34  | XP_002637479.1 | 45 | 151.754 | 516 | 237 | Hypothetical protein CBG19196                                    |
| Locus_8307_Transcript_1/1_Conf_1.000 | 523  | 20 | 2.02E-14  | XP_002166584.1 | 52 | 82.4185 | 155 | 82  | PREDICTED: similar to harbinger transposase derived 1            |
| Locus_8308_Transcript_1/2_Conf_1.000 | 349  | 0  |           |                |    |         |     |     |                                                                  |
| Locus_8308_Transcript_2/2_Conf_1.000 | 228  | 0  |           |                |    |         |     |     |                                                                  |

|                                      |      |    |           |                |    |         |     |     |                                                                      |
|--------------------------------------|------|----|-----------|----------------|----|---------|-----|-----|----------------------------------------------------------------------|
| Locus_8309_Transcript_1/1_Conf_1.000 | 176  | 0  |           |                |    |         |     |     |                                                                      |
| Locus_831_Transcript_1/1_Conf_1.000  | 1453 | 20 | 5.64E-172 | XP_002641924.1 | 96 | 608.601 | 329 | 319 | Hypothetical protein CBG16623                                        |
| Locus_8310_Transcript_1/1_Conf_1.000 | 1432 | 11 | 3.42E-97  | ADI24669.1     | 69 | 360.147 | 393 | 272 | Hypothetical protein ZK355.2a                                        |
| Locus_8311_Transcript_1/1_Conf_1.000 | 279  | 5  | 5.92E-15  | XP_002646401.1 | 74 | 83.9593 | 91  | 68  | C. briggsae CBR-DYS-1 protein                                        |
| Locus_8312_Transcript_1/3_Conf_0.667 | 563  | 0  |           |                |    |         |     |     |                                                                      |
| Locus_8312_Transcript_2/3_Conf_0.667 | 563  | 0  |           |                |    |         |     |     |                                                                      |
| Locus_8312_Transcript_3/3_Conf_0.667 | 560  | 0  |           |                |    |         |     |     |                                                                      |
| Locus_8313_Transcript_1/1_Conf_1.000 | 334  | 0  |           |                |    |         |     |     |                                                                      |
| Locus_8314_Transcript_1/1_Conf_1.000 | 1290 | 20 | 4.24E-136 | EFO27607.1     | 80 | 489.189 | 341 | 273 | histone deacetylase 3                                                |
| Locus_8315_Transcript_1/1_Conf_1.000 | 537  | 20 | 3.38E-15  | XP_001896288.1 | 49 | 85.1149 | 167 | 82  | mbt repeat family protein                                            |
| Locus_8316_Transcript_1/1_Conf_1.000 | 394  | 20 | 9.39E-16  | NP_502032.2    | 50 | 86.6557 | 140 | 71  | RB (Retinoblastoma Binding protein)<br>Related family member (rbr-2) |
| Locus_8317_Transcript_1/1_Conf_1.000 | 800  | 20 | 5.50E-62  | XP_001891671.1 | 64 | 241.891 | 266 | 172 | RhoGEF domain containing protein                                     |
| Locus_8318_Transcript_1/1_Conf_1.000 | 456  | 20 | 1.55E-47  | NP_001021638.1 | 78 | 192.2   | 151 | 119 | hypothetical protein T23G11.6                                        |
| Locus_8319_Transcript_1/1_Conf_1.000 | 505  | 0  |           |                |    |         |     |     |                                                                      |
| Locus_832_Transcript_1/1_Conf_1.000  | 982  | 20 | 5.62E-52  | XP_001900183.1 | 63 | 209.149 | 231 | 147 | ERG2 and Sigma1 receptor like protein                                |
| Locus_8320_Transcript_1/1_Conf_1.000 | 296  | 0  |           |                |    |         |     |     |                                                                      |
| Locus_8321_Transcript_1/1_Conf_1.000 | 276  | 0  |           |                |    |         |     |     |                                                                      |

|                                      |      |    |           |                |    |         |     |     |                                                                           |
|--------------------------------------|------|----|-----------|----------------|----|---------|-----|-----|---------------------------------------------------------------------------|
| Locus_8322_Transcript_1/1_Conf_1.000 | 584  | 20 | 2.65E-73  | NP_001024865.1 | 84 | 278.485 | 194 | 163 | DumPY : shorter than wild-type family member (dpy-23)                     |
| Locus_8323_Transcript_1/1_Conf_1.000 | 1060 | 20 | 2.73E-71  | NP_001024128.1 | 67 | 273.478 | 302 | 204 | EEA1 (Early Endosome Antigen, Rab effector) homolog family member (eea-1) |
| Locus_8324_Transcript_1/1_Conf_1.000 | 900  | 20 | 1.30E-105 | NP_001076711.1 | 81 | 387.111 | 274 | 224 | hypothetical protein T20D3.5                                              |
| Locus_8325_Transcript_1/1_Conf_1.000 | 1414 | 20 | 3.24E-108 | NP_502137.1    | 66 | 396.741 | 445 | 296 | hypothetical protein F54E12.2                                             |
| Locus_8326_Transcript_1/1_Conf_1.000 | 381  | 0  |           |                |    |         |     |     |                                                                           |
| Locus_8327_Transcript_1/1_Conf_1.000 | 362  | 20 | 1.66E-41  | NP_741369.1    | 86 | 172.17  | 120 | 104 | hypothetical protein Y24D9A.8                                             |
| Locus_8328_Transcript_1/2_Conf_1.000 | 1735 | 20 | 1.16E-89  | NP_506685.2    | 54 | 335.495 | 537 | 295 | hypothetical protein T01C3.1                                              |
| Locus_8328_Transcript_2/2_Conf_1.000 | 1761 | 20 | 9.05E-90  | NP_506685.2    | 54 | 335.88  | 551 | 301 | hypothetical protein T01C3.1                                              |
| Locus_8329_Transcript_1/1_Conf_1.000 | 133  | 0  |           |                |    |         |     |     |                                                                           |
| Locus_833_Transcript_1/2_Conf_1.000  | 295  | 0  |           |                |    |         |     |     |                                                                           |
| Locus_833_Transcript_2/2_Conf_1.000  | 721  | 2  | 9.76E-17  | NP_509050.1    | 55 | 91.2781 | 206 | 115 | hypothetical protein W05H9.1                                              |
| Locus_8330_Transcript_1/1_Conf_1.000 | 204  | 6  | 7.33E-05  | AAD31839.1     | 68 | 50.447  | 38  | 26  | AF132291_1ancylostoma-secreted protein 1 precursor                        |

|                                      |      |    |          |                |     |         |     |     |                                                                        |
|--------------------------------------|------|----|----------|----------------|-----|---------|-----|-----|------------------------------------------------------------------------|
| Locus_8331_Transcript_1/1_Conf_1.000 | 170  | 20 | 8.04E-28 | BAG63035.1     | 100 | 126.716 | 56  | 56  | unnamed protein product                                                |
| Locus_8332_Transcript_1/1_Conf_1.000 | 265  | 4  | 2.45E-16 | NP_492856.1    | 87  | 88.5817 | 54  | 47  | hypothetical protein Y52B11A.4                                         |
| Locus_8333_Transcript_1/1_Conf_1.000 | 802  | 20 | 3.13E-73 | CAB05153.2     | 71  | 279.256 | 264 | 190 | C. elegans protein C49C3.1, partially confirmed by transcript evidence |
| Locus_8334_Transcript_1/1_Conf_1.000 | 284  | 4  | 6.13E-07 | XP_002641312.1 | 94  | 57.3806 | 34  | 32  | C. briggsae CBR-UNC-50 protein                                         |
| Locus_8335_Transcript_1/1_Conf_1.000 | 320  | 0  |          |                |     |         |     |     |                                                                        |
| Locus_8336_Transcript_1/1_Conf_1.000 | 506  | 5  | 1.02E-57 | XP_002643839.1 | 78  | 226.098 | 167 | 131 | Hypothetical protein CBG02063                                          |
| Locus_8337_Transcript_1/1_Conf_1.000 | 358  | 0  |          |                |     |         |     |     |                                                                        |
| Locus_8338_Transcript_1/1_Conf_1.000 | 716  | 0  |          |                |     |         |     |     |                                                                        |
| Locus_8339_Transcript_1/2_Conf_1.000 | 1372 | 20 | 1.46E-97 | NP_001024379.1 | 96  | 361.303 | 187 | 181 | P21-Activated Kinase family member (pak-1)                             |
| Locus_8339_Transcript_2/2_Conf_1.000 | 633  | 0  |          |                |     |         |     |     |                                                                        |

|                                      |      |    |           |                |    |         |     |     |                                                                         |
|--------------------------------------|------|----|-----------|----------------|----|---------|-----|-----|-------------------------------------------------------------------------|
| Locus_834_Transcript_1/1_Conf_1.000  | 2867 | 20 | 0         | XP_002636072.1 | 95 | 1456.43 | 840 | 798 | Hypothetical protein CBG01313                                           |
| Locus_8340_Transcript_1/1_Conf_1.000 | 439  | 14 | 6.31E-17  | CAR63608.1     | 67 | 90.5077 | 73  | 49  | hypothetical protein                                                    |
| Locus_8341_Transcript_1/1_Conf_1.000 | 402  | 0  |           |                |    |         |     |     |                                                                         |
| Locus_8342_Transcript_1/1_Conf_1.000 | 369  | 0  |           |                |    |         |     |     |                                                                         |
| Locus_8343_Transcript_1/1_Conf_1.000 | 957  | 1  | 2.89E-05  | NP_500284.2    | 43 | 53.9138 | 232 | 101 | Enhancer of Efl-1 mutant phenotype family member (eel-1)                |
| Locus_8344_Transcript_1/1_Conf_1.000 | 1494 | 20 | 5.47E-69  | EFO20206.1     | 53 | 266.544 | 424 | 226 | hypothetical protein LOAG_08284                                         |
| Locus_8345_Transcript_1/1_Conf_1.000 | 364  | 0  |           |                |    |         |     |     |                                                                         |
| Locus_8346_Transcript_1/1_Conf_1.000 | 959  | 20 | 1.65E-109 | NP_001021765.1 | 87 | 400.208 | 254 | 223 | hypothetical protein Y47G6A.22                                          |
| Locus_8347_Transcript_1/1_Conf_1.000 | 224  | 0  |           |                |    |         |     |     |                                                                         |
| Locus_8348_Transcript_1/1_Conf_1.000 | 363  | 7  | 1.08E-24  | NP_509919.2    | 70 | 116.316 | 120 | 85  | hypothetical protein T25C12.3                                           |
| Locus_8349_Transcript_1/1_Conf_1.000 | 445  | 0  |           |                |    |         |     |     |                                                                         |
| Locus_835_Transcript_1/1_Conf_1.000  | 452  | 20 | 1.51E-58  | CAA21686.2     | 83 | 228.794 | 151 | 126 | C. elegans protein Y54E2A.4, partially confirmed by transcript evidence |
| Locus_8350_Transcript_1/1_Conf_1.000 | 545  | 0  |           |                |    |         |     |     |                                                                         |

|                                      |      |    |           |                |    |         |     |     |                                        |
|--------------------------------------|------|----|-----------|----------------|----|---------|-----|-----|----------------------------------------|
| Locus_8351_Transcript_1/1_Conf_1.000 | 1471 | 2  | 5.03E-51  | EFO25215.1     | 72 | 206.838 | 187 | 136 | hypothetical protein LOAG_03273        |
| Locus_8352_Transcript_1/1_Conf_1.000 | 2354 | 3  | 2.85E-04  | XP_002048623.1 | 38 | 52.373  | 286 | 111 | GJ11255                                |
| Locus_8353_Transcript_1/1_Conf_1.000 | 469  | 0  |           |                |    |         |     |     |                                        |
| Locus_8354_Transcript_1/1_Conf_1.000 | 247  | 20 | 3.83E-30  | AAZ82849.1     | 85 | 134.42  | 82  | 70  | Cam kinase kinase protein 1, isoform b |
| Locus_8355_Transcript_1/1_Conf_1.000 | 260  | 20 | 4.35E-13  | XP_002435696.1 | 68 | 77.7962 | 85  | 58  | ABC transporter, putative              |
| Locus_8356_Transcript_1/1_Conf_1.000 | 1217 | 20 | 2.56E-95  | XP_002640701.1 | 79 | 353.599 | 309 | 245 | C. briggsae CBR-MTX-1 protein          |
| Locus_8357_Transcript_1/1_Conf_1.000 | 460  | 20 | 3.13E-24  | NP_505980.1    | 77 | 114.775 | 97  | 75  | hypothetical protein D2023.6           |
| Locus_8358_Transcript_1/1_Conf_1.000 | 336  | 0  |           |                |    |         |     |     |                                        |
| Locus_8359_Transcript_1/1_Conf_1.000 | 421  | 4  | 2.38E-11  | XP_001891718.1 | 55 | 72.0182 | 114 | 63  | hypothetical protein Bm1_01005         |
| Locus_836_Transcript_1/1_Conf_1.000  | 481  | 0  |           |                |    |         |     |     |                                        |
| Locus_8360_Transcript_1/1_Conf_1.000 | 847  | 20 | 1.04E-77  | XP_002643992.1 | 77 | 294.278 | 275 | 213 | Hypothetical protein CBG17372          |
| Locus_8361_Transcript_1/1_Conf_1.000 | 1580 | 20 | 1.12E-144 | CAP30936.1     | 74 | 518.079 | 524 | 388 | C. briggsae CBR-BMK-1 protein          |
| Locus_8362_Transcript_3/3_Conf_0.571 | 275  | 20 | 1.02E-14  | Q16937.1       | 61 | 83.1889 | 72  | 44  | Ancylostoma secreted protein           |
| Locus_8363_Transcript_1/1_Conf_1.000 | 600  | 20 | 4.29E-37  | XP_001899812.1 | 62 | 158.303 | 208 | 129 | hypothetical protein Bm1_41765         |
| Locus_8364_Transcript_1/1_Conf_1.000 | 182  | 0  |           |                |    |         |     |     |                                        |



|                                      |      |    |          |                |     |         |     |     |                                                                                    |
|--------------------------------------|------|----|----------|----------------|-----|---------|-----|-----|------------------------------------------------------------------------------------|
| Locus_8365_Transcript_1/1_Conf_1.000 | 158  | 20 | 1.44E-08 | XP_002748197.1 | 100 | 62.7734 | 38  | 38  | PREDICTED: probable ATP-dependent RNA helicase DDX5 isoform 4                      |
| Locus_8366_Transcript_1/1_Conf_1.000 | 194  | 1  | 9.70E-05 | XP_001894296.1 | 65  | 50.0618 | 63  | 41  | hypothetical protein                                                               |
| Locus_8367_Transcript_1/2_Conf_1.000 | 604  | 20 | 6.02E-71 | XP_002630890.1 | 80  | 270.781 | 200 | 160 | Hypothetical protein CBG02611                                                      |
| Locus_8367_Transcript_2/2_Conf_1.000 | 604  | 20 | 1.34E-70 | XP_002630890.1 | 80  | 269.626 | 200 | 160 | Hypothetical protein CBG02611                                                      |
| Locus_8368_Transcript_1/1_Conf_1.000 | 497  | 20 | 2.03E-47 | EFO18549.1     | 77  | 191.815 | 160 | 124 | hypothetical protein LOAG_09946                                                    |
| Locus_8369_Transcript_1/1_Conf_1.000 | 742  | 20 | 8.97E-69 | NP_496154.1    | 76  | 264.233 | 198 | 152 | hypothetical protein R53.5                                                         |
| Locus_837_Transcript_1/1_Conf_1.000  | 398  | 20 | 2.38E-19 | CBW44358.1     | 87  | 98.5969 | 62  | 54  | C. elegans protein C01G10.11f, partially confirmed by transcript evidence          |
| Locus_8370_Transcript_1/1_Conf_1.000 | 283  | 0  |          |                |     |         |     |     |                                                                                    |
| Locus_8371_Transcript_1/1_Conf_1.000 | 448  | 20 | 1.56E-63 | NP_001022715.1 | 93  | 245.358 | 147 | 138 | ALIX (Apoptosis-linked gene 2 interacting protein X) homolog family member (alx-1) |
| Locus_8372_Transcript_1/1_Conf_1.000 | 1155 | 0  |          |                |     |         |     |     |                                                                                    |
| Locus_8373_Transcript_1/3_Conf_0.667 | 525  | 4  | 1.53E-09 | NP_499522.2    | 53  | 66.2402 | 107 | 57  | GBF1(Golgi-specific Brefeldin-A-resistant Factor 1) homolog family member (gbf-1)  |
| Locus_8373_Transcript_2/3_Conf_0.667 | 525  | 4  | 3.42E-09 | NP_499522.2    | 53  | 65.0846 | 107 | 57  | GBF1(Golgi-specific Brefeldin-A-resistant Factor 1) homolog family member (gbf-1)  |
| Locus_8373_Transcript_3/3_Conf_0.667 | 525  | 4  | 3.42E-09 | NP_499522.2    | 53  | 65.0846 | 107 | 57  | GBF1(Golgi-specific Brefeldin-A-resistant Factor 1) homolog family member (gbf-1)  |
| Locus_8374_Transcript_1/2_Conf_1.000 | 291  | 0  |          |                |     |         |     |     |                                                                                    |
| Locus_8374_Transcript_2/2_Conf_1.000 | 291  | 0  |          |                |     |         |     |     |                                                                                    |
| Locus_8375_Transcript_1/1_Conf_1.000 | 142  | 0  |          |                |     |         |     |     |                                                                                    |
| Locus_8376_Transcript_1/1_Conf_1.000 | 533  | 14 | 2.73E-09 | AAI34162.1     | 43  | 65.4698 | 172 | 74  | Zgc:162945 protein                                                                 |
| Locus_8377_Transcript_1/1_Conf_1.000 | 1301 | 20 | 9.09E-70 | NP_498555.1    | 55  | 268.855 | 373 | 208 | hypothetical protein B0280.9                                                       |
| Locus_8378_Transcript_1/1_Conf_1.000 | 220  | 0  |          |                |     |         |     |     |                                                                                    |
| Locus_8379_Transcript_1/1_Conf_1.000 | 715  | 20 | 1.15E-70 | NP_493375.2    | 74  | 270.396 | 227 | 168 | AuTophagy (yeast Atg homolog) family member (atg-4.1)                              |

|                                      |      |    |           |                |    |         |     |     |                                                           |
|--------------------------------------|------|----|-----------|----------------|----|---------|-----|-----|-----------------------------------------------------------|
| Locus_838_Transcript_1/1_Conf_1.000  | 1102 | 20 | 1.11E-46  | NP_001021419.1 | 66 | 191.815 | 192 | 127 | hypothetical protein F27C1.2                              |
| Locus_8380_Transcript_1/1_Conf_1.000 | 444  | 0  |           |                |    |         |     |     |                                                           |
| Locus_8381_Transcript_1/1_Conf_1.000 | 669  | 20 | 1.74E-115 | NP_498808.2    | 98 | 419.083 | 222 | 218 | hypothetical protein C02F5.3                              |
| Locus_8382_Transcript_1/1_Conf_1.000 | 242  | 20 | 3.62E-12  | XP_002637016.1 | 85 | 74.7146 | 47  | 40  | C. briggsae CBR-TTR-27 protein                            |
| Locus_8383_Transcript_1/1_Conf_1.000 | 1016 | 20 | 2.94E-67  | NP_499760.1    | 81 | 259.996 | 208 | 169 | Quinoid Dihydropteridine Reductase family member (qdpr-1) |
| Locus_8384_Transcript_1/3_Conf_0.600 | 277  | 20 | 3.37E-18  | XP_002639974.1 | 68 | 94.7449 | 80  | 55  | C. briggsae CBR-PHAT-2 protein                            |
| Locus_8384_Transcript_2/3_Conf_0.600 | 413  | 20 | 4.68E-28  | NP_491507.1    | 60 | 127.487 | 142 | 86  | hypothetical protein C46H11.7                             |
| Locus_8384_Transcript_3/3_Conf_0.600 | 413  | 20 | 4.68E-28  | NP_491507.1    | 60 | 127.487 | 142 | 86  | hypothetical protein C46H11.7                             |
| Locus_8385_Transcript_1/1_Conf_1.000 | 274  | 20 | 1.01E-38  | XP_001891673.1 | 95 | 162.925 | 90  | 86  | hypothetical protein Bm1_00760                            |
| Locus_8386_Transcript_1/1_Conf_1.000 | 508  | 0  |           |                |    |         |     |     |                                                           |
| Locus_8387_Transcript_1/2_Conf_1.000 | 780  | 20 | 4.22E-120 | XP_002631757.1 | 90 | 434.876 | 254 | 230 | Hypothetical protein CBG20965                             |
| Locus_8387_Transcript_2/2_Conf_1.000 | 780  | 20 | 4.22E-120 | XP_002631757.1 | 90 | 434.876 | 254 | 230 | Hypothetical protein CBG20965                             |
| Locus_8388_Transcript_1/1_Conf_1.000 | 821  | 20 | 4.60E-11  | XP_002642235.1 | 63 | 72.7886 | 84  | 53  | C. briggsae CBR-BRD-1 protein                             |
| Locus_8389_Transcript_1/1_Conf_1.000 | 573  | 20 | 5.66E-57  | NP_501190.1    | 70 | 224.172 | 200 | 140 | Temporarily Assigned Gene name family member (tag-224)    |
| Locus_839_Transcript_1/1_Conf_1.000  | 295  | 0  |           |                |    |         |     |     |                                                           |
| Locus_8390_Transcript_1/2_Conf_1.000 | 832  | 6  | 6.31E-56  | NP_001023468.1 | 52 | 221.861 | 330 | 174 | hypothetical protein Y45F10B.13                           |
| Locus_8390_Transcript_2/2_Conf_1.000 | 796  | 6  | 4.62E-61  | NP_001023468.1 | 59 | 238.81  | 294 | 175 | hypothetical protein Y45F10B.13                           |
| Locus_8391_Transcript_1/1_Conf_1.000 | 1789 | 20 | 1.17E-92  | NP_500332.1    | 64 | 345.51  | 427 | 275 | Vacuolar H ATPase family member (vha-19)                  |
| Locus_8392_Transcript_1/1_Conf_1.000 | 223  | 0  |           |                |    |         |     |     |                                                           |
| Locus_8393_Transcript_1/2_Conf_1.000 | 827  | 2  | 1.89E-12  | XP_001902674.1 | 68 | 77.411  | 76  | 52  | hypothetical protein                                      |

|                                      |      |    |           |                |     |         |     |     |                                 |
|--------------------------------------|------|----|-----------|----------------|-----|---------|-----|-----|---------------------------------|
| Locus_8393_Transcript_2/2_Conf_1.000 | 505  | 2  | 5.83E-13  | XP_001902674.1 | 68  | 77.411  | 76  | 52  | hypothetical protein            |
| Locus_8394_Transcript_1/1_Conf_1.000 | 923  | 20 | 1.64E-42  | XP_002644147.1 | 85  | 177.563 | 140 | 119 | Hypothetical protein CBG04517   |
| Locus_8395_Transcript_1/1_Conf_1.000 | 344  | 0  |           |                |     |         |     |     |                                 |
| Locus_8396_Transcript_1/1_Conf_1.000 | 1729 | 20 | 1.94E-137 | XP_002647576.1 | 75  | 494.197 | 398 | 301 | Hypothetical protein CBG06663   |
| Locus_8397_Transcript_1/1_Conf_1.000 | 195  | 20 | 1.76E-14  | BAJ04734.1     | 100 | 82.4185 | 60  | 60  | T-cell receptor beta chain      |
| Locus_8398_Transcript_1/1_Conf_1.000 | 392  | 5  | 2.72E-52  | NP_001129755.1 | 90  | 207.994 | 130 | 118 | GLoBin family member (glb-8)    |
| Locus_8399_Transcript_1/1_Conf_1.000 | 858  | 2  | 4.88E-06  | EFO26249.1     | 41  | 56.225  | 135 | 56  | hypothetical protein LOAG_02232 |
| Locus_84_Transcript_1/1_Conf_1.000   | 400  | 0  |           |                |     |         |     |     |                                 |
| Locus_840_Transcript_1/1_Conf_1.000  | 1447 | 20 | 2.11E-94  | AAX47336.1     | 62  | 350.903 | 489 | 307 | beta-catenin                    |
| Locus_8400_Transcript_1/1_Conf_1.000 | 969  | 9  | 6.46E-69  | AAT12422.1     | 70  | 265.388 | 322 | 227 | hypothetical protein isoform a  |
| Locus_8401_Transcript_1/1_Conf_1.000 | 180  | 0  |           |                |     |         |     |     |                                 |
| Locus_8402_Transcript_1/1_Conf_1.000 | 1397 | 20 | 2.56E-166 | NP_001041102.1 | 78  | 589.726 | 442 | 348 | hypothetical protein F21A3.2    |
| Locus_8403_Transcript_1/1_Conf_1.000 | 365  | 0  |           |                |     |         |     |     |                                 |
| Locus_8404_Transcript_1/1_Conf_1.000 | 448  | 20 | 5.73E-66  | NP_494213.2    | 88  | 253.447 | 149 | 132 | hypothetical protein Y59C2A.1   |
| Locus_8405_Transcript_1/1_Conf_1.000 | 542  | 0  |           |                |     |         |     |     |                                 |

|                                      |      |    |           |                |    |         |     |     |                                                                    |
|--------------------------------------|------|----|-----------|----------------|----|---------|-----|-----|--------------------------------------------------------------------|
| Locus_8406_Transcript_1/1_Conf_1.000 | 978  | 20 | 5.89E-102 | XP_002648981.1 | 79 | 375.17  | 276 | 219 | Hypothetical protein CBG21312                                      |
| Locus_8407_Transcript_1/1_Conf_1.000 | 566  | 20 | 4.56E-56  | NP_498409.1    | 86 | 221.09  | 148 | 128 | hypothetical protein C05D11.10                                     |
| Locus_8408_Transcript_1/1_Conf_1.000 | 213  | 0  |           |                |    |         |     |     |                                                                    |
| Locus_8409_Transcript_1/1_Conf_1.000 | 189  | 9  | 5.50E-16  | NP_503758.4    | 79 | 87.4261 | 63  | 50  | KETtIN (Drosophila actin-binding) homolog family member (ketn-1)   |
| Locus_841_Transcript_1/1_Conf_1.000  | 573  | 20 | 1.22E-43  | EFO19802.1     | 82 | 179.874 | 117 | 96  | MSP domain-containing protein                                      |
| Locus_8410_Transcript_1/1_Conf_1.000 | 273  | 20 | 3.99E-19  | NP_492913.1    | 68 | 97.8265 | 91  | 62  | PNG (Peptide:N-Glycanase) homolog family member (png-1)            |
| Locus_8411_Transcript_1/1_Conf_1.000 | 2769 | 20 | 0         | NP_499680.1    | 70 | 901.738 | 892 | 631 | UNCoordinated family member (unc-71)                               |
| Locus_8412_Transcript_1/1_Conf_1.000 | 609  | 20 | 4.77E-55  | XP_002430642.1 | 72 | 218.009 | 200 | 144 | dual specificity mitogen-activated protein kinase kinase, putative |
| Locus_8413_Transcript_1/1_Conf_1.000 | 521  | 20 | 4.69E-32  | NP_508937.1    | 72 | 140.969 | 122 | 89  | hypothetical protein C54G7.2                                       |
| Locus_8414_Transcript_1/1_Conf_1.000 | 623  | 4  | 8.78E-28  | XP_001897082.1 | 56 | 127.487 | 173 | 98  | hypothetical protein Bm1_28160                                     |
| Locus_8415_Transcript_1/1_Conf_1.000 | 136  | 0  |           |                |    |         |     |     |                                                                    |
| Locus_8416_Transcript_1/1_Conf_1.000 | 593  | 20 | 2.72E-81  | XP_001639298.1 | 89 | 305.064 | 192 | 171 | predicted protein                                                  |
| Locus_8417_Transcript_1/1_Conf_1.000 | 1250 | 20 | 2.27E-78  | NP_502544.1    | 57 | 297.36  | 417 | 240 | abnormal cell LiNeage family member (lin-54)                       |
| Locus_8418_Transcript_1/1_Conf_1.000 | 302  | 0  |           |                |    |         |     |     |                                                                    |
| Locus_8419_Transcript_1/1_Conf_1.000 | 277  | 0  |           |                |    |         |     |     |                                                                    |

|                                      |      |    |          |                |    |         |     |     |                                                         |
|--------------------------------------|------|----|----------|----------------|----|---------|-----|-----|---------------------------------------------------------|
| Locus_842_Transcript_1/3_Conf_0.667  | 677  | 20 | 1.58E-79 | NP_498081.2    | 93 | 299.671 | 173 | 161 | ALdehyde deHydrogenase family member (alh-1)            |
| Locus_842_Transcript_2/3_Conf_0.667  | 668  | 20 | 1.99E-79 | NP_498081.2    | 92 | 299.286 | 173 | 160 | ALdehyde deHydrogenase family member (alh-1)            |
| Locus_842_Transcript_3/3_Conf_0.667  | 677  | 20 | 2.06E-79 | NP_498081.2    | 92 | 299.286 | 173 | 160 | ALdehyde deHydrogenase family member (alh-1)            |
| Locus_8420_Transcript_1/1_Conf_1.000 | 200  | 0  |          |                |    |         |     |     |                                                         |
| Locus_8421_Transcript_1/1_Conf_1.000 | 690  | 20 | 2.20E-39 | NP_001041033.1 | 64 | 166.392 | 192 | 123 | beta-LACTamase domain containing family member (lact-9) |
| Locus_8422_Transcript_1/1_Conf_1.000 | 679  | 20 | 4.51E-58 | NP_001024434.1 | 69 | 228.409 | 222 | 155 | hypothetical protein C26B9.1                            |
| Locus_8423_Transcript_1/1_Conf_1.000 | 682  | 20 | 6.00E-34 | XP_002645176.1 | 81 | 148.288 | 109 | 89  | C. briggsae CBR-VEM-1 protein                           |
| Locus_8424_Transcript_1/1_Conf_1.000 | 1136 | 20 | 5.27E-31 | XP_002639002.1 | 53 | 139.813 | 280 | 150 | Hypothetical protein CBG22248                           |
| Locus_8425_Transcript_1/1_Conf_1.000 | 252  | 0  |          |                |    |         |     |     |                                                         |
| Locus_8426_Transcript_1/1_Conf_1.000 | 2612 | 20 | 0        | NP_740830.2    | 60 | 788.875 | 931 | 566 | hypothetical protein Y47G6A.29                          |
| Locus_8427_Transcript_1/1_Conf_1.000 | 203  | 3  | 4.01E-27 | AAM82167.1     | 92 | 124.405 | 67  | 62  | gamma-butyrobetaine,2-oxoglutarate dioxygenase          |
| Locus_8428_Transcript_1/1_Conf_1.000 | 158  | 0  |          |                |    |         |     |     |                                                         |
| Locus_8429_Transcript_1/1_Conf_1.000 | 186  | 0  |          |                |    |         |     |     |                                                         |
| Locus_843_Transcript_1/5_Conf_0.692  | 2784 | 20 | 0        | ABA00169.1     | 78 | 1233.01 | 942 | 739 | Plexin protein 1                                        |

|                                      |      |    |          |             |    |         |     |     |                                        |
|--------------------------------------|------|----|----------|-------------|----|---------|-----|-----|----------------------------------------|
| Locus_843_Transcript_2/5_Conf_0.692  | 2784 | 20 | 0        | ABA00169.1  | 78 | 1233.01 | 942 | 739 | Plexin protein 1                       |
| Locus_843_Transcript_3/5_Conf_0.692  | 2784 | 20 | 0        | ABA00169.1  | 78 | 1233.01 | 942 | 739 | Plexin protein 1                       |
| Locus_843_Transcript_4/5_Conf_0.692  | 2784 | 20 | 0        | ABA00169.1  | 78 | 1233.01 | 942 | 739 | Plexin protein 1                       |
| Locus_843_Transcript_5/5_Conf_0.692  | 2784 | 20 | 0        | ABA00169.1  | 78 | 1233.01 | 942 | 739 | Plexin protein 1                       |
| Locus_8430_Transcript_1/1_Conf_1.000 | 482  | 8  | 1.36E-11 | ACP34146.1  | 60 | 72.7886 | 125 | 76  | Hypothetical protein F56B3.4a          |
| Locus_8431_Transcript_1/1_Conf_1.000 | 1026 | 20 | 1.25E-89 | NP_493283.3 | 73 | 334.339 | 310 | 228 | hypothetical protein W05B5.2           |
| Locus_8432_Transcript_1/1_Conf_1.000 | 265  | 0  |          |             |    |         |     |     |                                        |
| Locus_8433_Transcript_1/1_Conf_1.000 | 714  | 0  |          |             |    |         |     |     |                                        |
| Locus_8434_Transcript_1/1_Conf_1.000 | 174  | 0  |          |             |    |         |     |     |                                        |
| Locus_8435_Transcript_1/1_Conf_1.000 | 654  | 3  | 2.72E-49 | NP_497970.1 | 65 | 199.134 | 232 | 152 | Adenylyl Cyclase family member (acy-1) |

|                                      |      |    |          |                |    |         |     |     |                                                     |
|--------------------------------------|------|----|----------|----------------|----|---------|-----|-----|-----------------------------------------------------|
| Locus_8436_Transcript_1/1_Conf_1.000 | 743  | 20 | 1.81E-69 | NP_502083.1    | 74 | 266.544 | 250 | 187 | Alcohol/Ribitol Dehydrogenase family member (ard-1) |
| Locus_8437_Transcript_1/1_Conf_1.000 | 1805 | 20 | 0        | NP_001022257.1 | 72 | 640.573 | 602 | 434 | hypothetical protein M106.4                         |
| Locus_8438_Transcript_1/2_Conf_1.000 | 1553 | 20 | 1.98E-45 | NP_505976.2    | 71 | 188.348 | 172 | 123 | hypothetical protein D2023.3                        |
| Locus_8438_Transcript_2/2_Conf_1.000 | 1384 | 20 | 1.71E-45 | NP_505976.2    | 71 | 188.348 | 172 | 123 | hypothetical protein D2023.3                        |
| Locus_8439_Transcript_1/1_Conf_1.000 | 705  | 20 | 2.09E-93 | Q27539.2       | 91 | 345.895 | 210 | 192 | ATP-dependent Clp protease proteolytic subunit 1    |
| Locus_844_Transcript_1/1_Conf_1.000  | 538  | 0  |          |                |    |         |     |     |                                                     |

|                                      |      |    |          |                |    |         |     |     |                                                     |
|--------------------------------------|------|----|----------|----------------|----|---------|-----|-----|-----------------------------------------------------|
| Locus_8440_Transcript_1/1_Conf_1.000 | 244  | 7  | 4.41E-10 | NP_503178.1    | 68 | 67.781  | 58  | 40  | AuTophagy (yeast Atg homolog) family member (atg-9) |
| Locus_8441_Transcript_1/1_Conf_1.000 | 131  | 0  |          |                |    |         |     |     |                                                     |
| Locus_8442_Transcript_1/1_Conf_1.000 | 182  | 2  | 2.95E-09 | EFO23249.1     | 80 | 65.0846 | 40  | 32  | hypothetical protein LOAG_05238                     |
| Locus_8443_Transcript_1/1_Conf_1.000 | 581  | 20 | 1.82E-50 | XP_002640505.1 | 77 | 202.601 | 153 | 118 | Hypothetical protein CBG13644                       |
| Locus_8444_Transcript_1/1_Conf_1.000 | 417  | 8  | 2.32E-06 | XP_001344986.1 | 50 | 55.4546 | 122 | 62  | PREDICTED: zinc finger protein-like                 |
| Locus_8445_Transcript_1/1_Conf_1.000 | 494  | 9  | 4.39E-50 | NP_502314.1    | 74 | 200.675 | 167 | 124 | hypothetical protein F35G2.1                        |
| Locus_8446_Transcript_1/2_Conf_1.000 | 654  | 20 | 3.82E-35 | AAL09376.1     | 98 | 152.14  | 96  | 95  | AF305958_1putative protein hc28.3                   |
| Locus_8446_Transcript_2/2_Conf_1.000 | 510  | 20 | 1.90E-35 | AAL09376.1     | 98 | 152.14  | 96  | 95  | AF305958_1putative protein hc28.3                   |
| Locus_8447_Transcript_1/1_Conf_1.000 | 558  | 0  |          |                |    |         |     |     |                                                     |
| Locus_8448_Transcript_1/2_Conf_1.000 | 953  | 5  | 9.74E-38 | EFO24641.1     | 48 | 161.77  | 327 | 159 | hypothetical protein LOAG_03848                     |
| Locus_8448_Transcript_2/2_Conf_1.000 | 953  | 5  | 6.75E-39 | EFO24641.1     | 49 | 165.622 | 318 | 158 | hypothetical protein LOAG_03848                     |
| Locus_8449_Transcript_1/1_Conf_1.000 | 412  | 0  |          |                |    |         |     |     |                                                     |
| Locus_845_Transcript_1/3_Conf_0.714  | 1488 | 0  |          |                |    |         |     |     |                                                     |
| Locus_845_Transcript_2/3_Conf_0.714  | 1602 | 0  |          |                |    |         |     |     |                                                     |
| Locus_845_Transcript_3/3_Conf_0.714  | 1587 | 0  |          |                |    |         |     |     |                                                     |
| Locus_8450_Transcript_1/1_Conf_1.000 | 683  | 0  |          |                |    |         |     |     |                                                     |
| Locus_8451_Transcript_1/1_Conf_1.000 | 1118 | 20 | 1.82E-44 | XP_002634200.1 | 54 | 184.496 | 333 | 181 | C. briggsae CBR-NOL-9 protein                       |
| Locus_8452_Transcript_1/1_Conf_1.000 | 448  | 0  |          |                |    |         |     |     |                                                     |
| Locus_8453_Transcript_1/1_Conf_1.000 | 349  | 4  | 1.13E-29 | NP_501852.1    | 78 | 132.88  | 114 | 89  | hypothetical protein T14G10.7                       |
| Locus_8454_Transcript_1/1_Conf_1.000 | 333  | 8  | 5.38E-16 | NP_001022317.1 | 63 | 87.4261 | 111 | 71  | abnormal cell MIGration family member (mig-5)       |
| Locus_8455_Transcript_1/1_Conf_1.000 | 1873 | 20 | 2.58E-90 | XP_002641350.1 | 54 | 337.806 | 586 | 322 | Hypothetical protein CBG13203                       |
| Locus_8456_Transcript_1/1_Conf_1.000 | 498  | 20 | 1.49E-58 | XP_002642846.1 | 88 | 228.794 | 143 | 126 | C. briggsae CBR-PPK-2 protein                       |
| Locus_8457_Transcript_1/1_Conf_1.000 | 272  | 2  | 4.56E-31 | XP_002640091.1 | 91 | 137.502 | 71  | 65  | Hypothetical protein CBG12578                       |
| Locus_8458_Transcript_1/1_Conf_1.000 | 581  | 20 | 1.40E-42 | XP_002637561.1 | 62 | 176.407 | 193 | 121 | Hypothetical protein CBG19294                       |



|                                      |      |    |          |                |    |         |     |     |                                                               |
|--------------------------------------|------|----|----------|----------------|----|---------|-----|-----|---------------------------------------------------------------|
| Locus_8459_Transcript_1/1_Conf_1.000 | 843  | 10 | 1.40E-58 | XP_002646355.1 | 65 | 230.72  | 287 | 187 | Hypothetical protein CBG12069                                 |
| Locus_846_Transcript_1/6_Conf_0.267  | 1282 | 20 | 9.56E-05 | ACD88885.1     | 62 | 48.521  | 59  | 37  | propionyl-coenzyme A carboxylase beta subunit                 |
| Locus_846_Transcript_2/6_Conf_0.200  | 1204 | 20 | 8.80E-05 | ACD88885.1     | 62 | 48.521  | 59  | 37  | propionyl-coenzyme A carboxylase beta subunit                 |
| Locus_846_Transcript_3/6_Conf_0.400  | 1797 | 0  |          |                |    |         |     |     |                                                               |
| Locus_846_Transcript_4/6_Conf_0.267  | 662  | 0  |          |                |    |         |     |     |                                                               |
| Locus_846_Transcript_5/6_Conf_0.467  | 1917 | 20 | 3.21E-06 | NP_999066.1    | 40 | 51.9878 | 216 | 87  | propionyl-CoA carboxylase beta chain, mitochondrial precursor |
| Locus_846_Transcript_6/6_Conf_0.400  | 1882 | 20 | 6.55E-09 | XP_002636628.1 | 75 | 67.3958 | 53  | 40  | Hypothetical protein CBG23332                                 |
| Locus_8460_Transcript_1/1_Conf_1.000 | 221  | 20 | 1.36E-22 | XP_002634980.1 | 84 | 109.383 | 73  | 62  | C. briggsae CBR-ARK-1 protein                                 |
| Locus_8461_Transcript_1/1_Conf_1.000 | 328  | 0  |          |                |    |         |     |     |                                                               |
| Locus_8462_Transcript_1/1_Conf_1.000 | 941  | 20 | 1.05E-92 | NP_498798.2    | 87 | 344.354 | 212 | 186 | hypothetical protein C30A5.3                                  |
| Locus_8463_Transcript_1/1_Conf_1.000 | 215  | 0  |          |                |    |         |     |     |                                                               |
| Locus_8464_Transcript_1/1_Conf_1.000 | 540  | 3  | 3.23E-13 | XP_002636882.1 | 56 | 78.5666 | 151 | 86  | Hypothetical protein CBG09343                                 |
| Locus_8465_Transcript_1/1_Conf_1.000 | 545  | 20 | 6.35E-49 | XP_002636807.1 | 71 | 197.208 | 177 | 127 | Hypothetical protein CBG09249                                 |
| Locus_8466_Transcript_1/1_Conf_1.000 | 690  | 20 | 3.99E-49 | NP_495988.1    | 82 | 198.749 | 139 | 114 | Eukaryotic Initiation Factor family member (eif-3.F)          |

|                                      |     |    |          |                |     |         |     |     |                               |
|--------------------------------------|-----|----|----------|----------------|-----|---------|-----|-----|-------------------------------|
| Locus_8467_Transcript_1/1_Conf_1.000 | 691 | 20 | 3.85E-60 | P02452.5       | 100 | 235.343 | 121 | 121 | Collagen alpha-1(I) chain     |
| Locus_8468_Transcript_1/4_Conf_0.667 | 670 | 20 | 1.61E-44 | XP_002634876.1 | 60  | 183.341 | 222 | 134 | Hypothetical protein CBG10542 |
| Locus_8468_Transcript_2/4_Conf_0.667 | 691 | 20 | 3.74E-47 | XP_002634876.1 | 59  | 192.2   | 232 | 139 | Hypothetical protein CBG10542 |
| Locus_8468_Transcript_3/4_Conf_0.667 | 670 | 20 | 5.53E-45 | XP_002634876.1 | 60  | 184.882 | 222 | 134 | Hypothetical protein CBG10542 |
| Locus_8468_Transcript_4/4_Conf_0.667 | 670 | 20 | 7.23E-45 | XP_002634876.1 | 60  | 184.496 | 222 | 134 | Hypothetical protein CBG10542 |
| Locus_8469_Transcript_1/1_Conf_1.000 | 443 | 20 | 2.53E-45 | XP_002634584.1 | 77  | 184.882 | 147 | 114 | Hypothetical protein CBG08395 |
| Locus_847_Transcript_1/1_Conf_1.000  | 739 | 3  | 1.80E-61 | XP_002637472.1 | 69  | 239.965 | 249 | 173 | Hypothetical protein CBG19188 |
| Locus_8470_Transcript_1/1_Conf_1.000 | 360 | 20 | 2.83E-41 | XP_002645846.1 | 80  | 171.4   | 111 | 89  | Hypothetical protein CBG07580 |
| Locus_8471_Transcript_1/1_Conf_1.000 | 202 | 0  |          |                |     |         |     |     |                               |

|                                      |     |    |          |                |    |         |     |     |                                                        |
|--------------------------------------|-----|----|----------|----------------|----|---------|-----|-----|--------------------------------------------------------|
| Locus_8472_Transcript_1/1_Conf_1.000 | 525 | 20 | 9.26E-23 | NP_500844.1    | 55 | 110.153 | 170 | 95  | BECLIN (human autophagy) homolog family member (bec-1) |
| Locus_8473_Transcript_1/1_Conf_1.000 | 481 | 20 | 6.44E-62 | NP_492686.1    | 88 | 239.965 | 151 | 133 | hypothetical protein C25A1.13                          |
| Locus_8474_Transcript_1/1_Conf_1.000 | 383 | 0  |          |                |    |         |     |     |                                                        |
| Locus_8475_Transcript_1/1_Conf_1.000 | 465 | 0  |          |                |    |         |     |     |                                                        |
| Locus_8476_Transcript_1/1_Conf_1.000 | 579 | 20 | 3.25E-15 | XP_002639397.1 | 46 | 85.5001 | 180 | 83  | Hypothetical protein CBG03985                          |
| Locus_8477_Transcript_1/3_Conf_0.500 | 874 | 20 | 1.43E-93 | EFO19444.1     | 78 | 347.051 | 284 | 224 | Cullin 3                                               |

|                                      |      |    |          |                |    |         |     |     |                                 |
|--------------------------------------|------|----|----------|----------------|----|---------|-----|-----|---------------------------------|
| Locus_8477_Transcript_2/3_Conf_0.333 | 1631 | 20 | 1.96E-83 | EFO19444.1     | 79 | 314.694 | 254 | 203 | Cullin 3                        |
| Locus_8477_Transcript_3/3_Conf_0.667 | 2101 | 20 | 0        | EFO19444.1     | 73 | 783.867 | 706 | 522 | Cullin 3                        |
| Locus_8478_Transcript_1/1_Conf_1.000 | 613  | 20 | 1.01E-52 | EFO28302.1     | 69 | 210.305 | 192 | 134 | hypothetical protein LOAG_00195 |
| Locus_8479_Transcript_1/1_Conf_1.000 | 153  | 0  |          |                |    |         |     |     |                                 |
| Locus_848_Transcript_1/1_Conf_1.000  | 459  | 0  |          |                |    |         |     |     |                                 |
| Locus_8480_Transcript_1/1_Conf_1.000 | 584  | 20 | 1.08E-50 | XP_002644307.1 | 87 | 203.371 | 133 | 116 | Hypothetical protein CBG14099   |
| Locus_8481_Transcript_1/1_Conf_1.000 | 291  | 0  |          |                |    |         |     |     |                                 |

|                                      |      |    |          |                |     |         |     |     |                                                          |
|--------------------------------------|------|----|----------|----------------|-----|---------|-----|-----|----------------------------------------------------------|
| Locus_8482_Transcript_1/1_Conf_1.000 | 1411 | 20 | 0        | AAP36911.1     | 100 | 788.104 | 388 | 388 | Homo sapiens GNAS complex locus                          |
| Locus_8483_Transcript_1/1_Conf_1.000 | 846  | 20 | 2.55E-76 | XP_002635156.1 | 71  | 289.656 | 265 | 189 | Hypothetical protein CBG11386                            |
| Locus_8484_Transcript_1/1_Conf_1.000 | 322  | 20 | 7.12E-24 | ABC25099.1     | 88  | 113.62  | 62  | 55  | transcription regulator                                  |
| Locus_8485_Transcript_1/1_Conf_1.000 | 832  | 20 | 3.58E-51 | XP_002639652.1 | 85  | 206.068 | 134 | 115 | C. briggsae CBR-MFB-1 protein                            |
| Locus_8486_Transcript_1/1_Conf_1.000 | 1366 | 20 | 0        | XP_002632951.1 | 89  | 650.203 | 405 | 363 | C. briggsae CBR-RPN-7 protein                            |
| Locus_8487_Transcript_1/1_Conf_1.000 | 188  | 0  |          |                |     |         |     |     |                                                          |
| Locus_8488_Transcript_1/1_Conf_1.000 | 1258 | 20 | 1.13E-61 | NP_001129849.1 | 54  | 241.891 | 385 | 209 | Choline Kinase A family member (cka-1)                   |
| Locus_8489_Transcript_1/1_Conf_1.000 | 425  | 20 | 7.32E-37 | NP_500284.2    | 60  | 156.762 | 171 | 103 | Enhancer of Efl-1 mutant phenotype family member (eel-1) |

|                                      |      |    |           |                |    |         |     |     |                                 |
|--------------------------------------|------|----|-----------|----------------|----|---------|-----|-----|---------------------------------|
| Locus_849_Transcript_1/2_Conf_1.000  | 1567 | 20 | 2.62E-162 | XP_002640294.1 | 96 | 576.63  | 336 | 324 | C. briggsae CBR-KIN-3 protein   |
| Locus_849_Transcript_2/2_Conf_1.000  | 1502 | 20 | 2.49E-162 | XP_002640294.1 | 96 | 576.63  | 336 | 324 | C. briggsae CBR-KIN-3 protein   |
| Locus_8490_Transcript_1/1_Conf_1.000 | 1361 | 20 | 0         | NP_491711.2    | 84 | 669.463 | 453 | 382 | hypothetical protein C34G6.1    |
| Locus_8491_Transcript_1/1_Conf_1.000 | 1126 | 20 | 2.99E-103 | EFO17909.1     | 75 | 379.793 | 375 | 283 | hypothetical protein LOAG_10587 |
| Locus_8492_Transcript_1/1_Conf_1.000 | 1077 | 20 | 1.83E-54  | XP_002646916.1 | 76 | 217.624 | 162 | 124 | C. briggsae CBR-UBC-15 protein  |
| Locus_8493_Transcript_1/3_Conf_0.286 | 399  | 20 | 1.39E-19  | NP_499684.1    | 80 | 99.3673 | 70  | 56  | hypothetical protein Y37D8A.17  |
| Locus_8493_Transcript_2/3_Conf_0.571 | 793  | 20 | 1.30E-31  | NP_499684.1    | 72 | 140.969 | 118 | 86  | hypothetical protein Y37D8A.17  |
| Locus_8493_Transcript_3/3_Conf_0.714 | 990  | 20 | 2.56E-60  | NP_499684.1    | 73 | 236.884 | 235 | 172 | hypothetical protein Y37D8A.17  |
| Locus_8494_Transcript_1/2_Conf_1.000 | 218  | 0  |           |                |    |         |     |     |                                 |
| Locus_8494_Transcript_2/2_Conf_1.000 | 242  | 0  |           |                |    |         |     |     |                                 |

|                                      |      |    |           |                |    |         |     |     |                                                                 |
|--------------------------------------|------|----|-----------|----------------|----|---------|-----|-----|-----------------------------------------------------------------|
| Locus_8495_Transcript_1/1_Conf_1.000 | 755  | 20 | 1.09E-53  | NP_499472.1    | 63 | 214.157 | 270 | 172 | Sterol regulatory element Binding Protein family member (sbp-1) |
| Locus_8496_Transcript_1/1_Conf_1.000 | 1267 | 20 | 2.05E-119 | XP_002633848.1 | 85 | 433.721 | 309 | 265 | C. briggsae CBR-CSN-5 protein                                   |
| Locus_8497_Transcript_1/1_Conf_1.000 | 561  | 3  | 4.54E-08  | NP_492036.2    | 50 | 61.6178 | 142 | 71  | hypothetical protein C01H6.2                                    |
| Locus_8498_Transcript_1/1_Conf_1.000 | 1576 | 18 | 4.38E-24  | NP_499886.1    | 41 | 117.472 | 346 | 142 | hypothetical protein R02D3.7                                    |
| Locus_8499_Transcript_1/1_Conf_1.000 | 990  | 20 | 1.59E-94  | EFO21654.1     | 70 | 350.517 | 329 | 232 | hypothetical protein LOAG_06832                                 |
| Locus_85_Transcript_1/3_Conf_0.286   | 588  | 20 | 3.41E-44  | NP_491529.2    | 91 | 181.8   | 114 | 104 | hypothetical protein Y110A7A.6                                  |
| Locus_85_Transcript_2/3_Conf_0.714   | 733  | 20 | 4.82E-43  | XP_002638373.1 | 94 | 178.718 | 91  | 86  | C. briggsae CBR-CYN-3 protein                                   |
| Locus_85_Transcript_3/3_Conf_0.714   | 649  | 20 | 1.89E-79  | XP_002638373.1 | 94 | 299.286 | 171 | 161 | C. briggsae CBR-CYN-3 protein                                   |
| Locus_850_Transcript_1/3_Conf_0.714  | 2467 | 20 | 0         | NP_740855.2    | 78 | 999.194 | 816 | 641 | hypothetical protein F46F11.1                                   |
| Locus_850_Transcript_2/3_Conf_0.714  | 2467 | 20 | 0         | NP_740855.2    | 78 | 999.194 | 816 | 641 | hypothetical protein F46F11.1                                   |
| Locus_850_Transcript_3/3_Conf_0.714  | 2467 | 20 | 0         | NP_740855.2    | 78 | 999.194 | 816 | 641 | hypothetical protein F46F11.1                                   |
| Locus_8500_Transcript_1/2_Conf_1.000 | 377  | 20 | 2.59E-58  | XP_002343536.1 | 99 | 228.024 | 118 | 117 | PREDICTED: similar to Os05g0242100                              |
| Locus_8500_Transcript_2/2_Conf_1.000 | 378  | 20 | 1.98E-50  | XP_002343536.1 | 92 | 201.83  | 109 | 101 | PREDICTED: similar to Os05g0242100                              |

|                                      |      |    |           |                |    |         |     |     |                                        |
|--------------------------------------|------|----|-----------|----------------|----|---------|-----|-----|----------------------------------------|
| Locus_8501_Transcript_1/2_Conf_1.000 | 2158 | 20 | 7.23E-15  | XP_001900806.1 | 43 | 87.4261 | 296 | 130 | Topors protein                         |
| Locus_8501_Transcript_2/2_Conf_1.000 | 2143 | 20 | 7.17E-15  | XP_001900806.1 | 43 | 87.4261 | 296 | 130 | Topors protein                         |
| Locus_8502_Transcript_1/1_Conf_1.000 | 707  | 20 | 3.13E-89  | NP_741143.1    | 82 | 332.028 | 232 | 192 | hypothetical protein F09F7.4           |
| Locus_8503_Transcript_1/1_Conf_1.000 | 513  | 20 | 4.93E-47  | XP_002641224.1 | 75 | 190.66  | 169 | 127 | Hypothetical protein CBG09088          |
| Locus_8504_Transcript_1/1_Conf_1.000 | 423  | 20 | 5.59E-45  | NP_491529.2    | 96 | 183.726 | 101 | 97  | hypothetical protein Y110A7A.6         |
| Locus_8505_Transcript_1/1_Conf_1.000 | 1068 | 20 | 1.80E-70  | AAC47126.1     | 86 | 270.781 | 178 | 154 | cyclophilin isoform 5                  |
| Locus_8506_Transcript_1/1_Conf_1.000 | 143  | 0  |           |                |    |         |     |     |                                        |
| Locus_8507_Transcript_1/1_Conf_1.000 | 533  | 20 | 4.96E-19  | NP_502368.1    | 70 | 97.8265 | 97  | 68  | Gut on Exterior family member (gex-3)  |
| Locus_8508_Transcript_1/1_Conf_1.000 | 430  | 0  |           |                |    |         |     |     |                                        |
| Locus_8509_Transcript_1/1_Conf_1.000 | 662  | 20 | 5.90E-52  | AAG29103.2     | 67 | 207.994 | 188 | 126 | AF273084_1zinc metallopeptidase 1      |
| Locus_851_Transcript_1/1_Conf_1.000  | 919  | 20 | 1.30E-116 | EFO22550.1     | 80 | 423.705 | 307 | 248 | TATA binding protein associated factor |



|                                      |     |    |          |                |    |         |     |     |                                             |
|--------------------------------------|-----|----|----------|----------------|----|---------|-----|-----|---------------------------------------------|
| Locus_8510_Transcript_1/1_Conf_1.000 | 223 | 4  | 8.50E-17 | XP_002642787.1 | 85 | 90.1225 | 61  | 52  | C. briggsae CBR-GOP-3 protein               |
| Locus_8511_Transcript_1/1_Conf_1.000 | 829 | 4  | 4.84E-24 | XP_002639112.1 | 50 | 115.931 | 286 | 144 | Hypothetical protein CBG14931               |
| Locus_8512_Transcript_1/1_Conf_1.000 | 295 | 0  |          |                |    |         |     |     |                                             |
| Locus_8513_Transcript_1/1_Conf_1.000 | 353 | 20 | 8.58E-62 | XP_533657.2    | 99 | 239.58  | 117 | 116 | PREDICTED: similar to ribosomal protein S19 |
| Locus_8514_Transcript_1/1_Conf_1.000 | 498 | 2  | 1.46E-05 | XP_002643186.1 | 51 | 52.7582 | 58  | 30  | C. briggsae CBR-ADR-2 protein               |
| Locus_8515_Transcript_1/1_Conf_1.000 | 670 | 0  |          |                |    |         |     |     |                                             |
| Locus_8516_Transcript_1/1_Conf_1.000 | 513 | 0  |          |                |    |         |     |     |                                             |
| Locus_8517_Transcript_1/1_Conf_1.000 | 178 | 20 | 1.56E-15 | NP_505174.3    | 86 | 85.8853 | 58  | 50  | hypothetical protein F52E1.13               |
| Locus_8518_Transcript_1/1_Conf_1.000 | 925 | 20 | 3.03E-12 | NP_001023625.1 | 51 | 77.0258 | 256 | 132 | hypothetical protein ZK809.5                |
| Locus_8519_Transcript_1/1_Conf_1.000 | 704 | 0  |          |                |    |         |     |     |                                             |

|                                      |      |    |           |                |     |         |     |     |                                                                                                                                                                                                     |
|--------------------------------------|------|----|-----------|----------------|-----|---------|-----|-----|-----------------------------------------------------------------------------------------------------------------------------------------------------------------------------------------------------|
| Locus_852_Transcript_1/1_Conf_1.000  | 783  | 20 | 5.37E-123 | XP_002641343.1 | 92  | 444.506 | 260 | 240 | C. briggsae CBR-DPY-18 protein                                                                                                                                                                      |
| Locus_8520_Transcript_1/1_Conf_1.000 | 1461 | 20 | 2.60E-116 | XP_002643548.1 | 69  | 423.705 | 495 | 342 | Hypothetical protein CBG16244                                                                                                                                                                       |
| Locus_8521_Transcript_1/1_Conf_1.000 | 320  | 20 | 9.06E-11  | ACS37721.1     | 65  | 70.0922 | 79  | 52  | C-type lectin-1                                                                                                                                                                                     |
| Locus_8522_Transcript_1/1_Conf_1.000 | 335  | 20 | 1.19E-39  | XP_002662404.1 | 80  | 166.007 | 109 | 88  | PREDICTED: raptor-like                                                                                                                                                                              |
| Locus_8523_Transcript_1/1_Conf_1.000 | 232  | 0  |           |                |     |         |     |     |                                                                                                                                                                                                     |
| Locus_8524_Transcript_1/1_Conf_1.000 | 197  | 0  |           |                |     |         |     |     |                                                                                                                                                                                                     |
| Locus_8525_Transcript_1/1_Conf_1.000 | 741  | 20 | 5.35E-122 | XP_001158457.1 | 100 | 441.039 | 234 | 234 | PREDICTED: similar to 40S ribosomal protein SA (p40) (34/67 kDa laminin receptor) (Colon carcinoma laminin-binding protein) (NEM/1CHD4) (Multidrug resistance-associated protein MGr1-Ag) isoform 2 |
| Locus_8526_Transcript_1/2_Conf_1.000 | 1126 | 20 | 2.89E-98  | NP_495993.2    | 76  | 363.229 | 277 | 211 | hypothetical protein F42A8.3                                                                                                                                                                        |
| Locus_8526_Transcript_2/2_Conf_1.000 | 1125 | 20 | 3.78E-98  | NP_495993.2    | 77  | 362.844 | 272 | 210 | hypothetical protein F42A8.3                                                                                                                                                                        |
| Locus_8527_Transcript_1/2_Conf_1.000 | 1234 | 20 | 1.23E-44  | AAA67723.1     | 66  | 185.267 | 259 | 173 | ribonucleoprotein                                                                                                                                                                                   |

|                                      |      |    |           |                |    |         |     |     |                                             |
|--------------------------------------|------|----|-----------|----------------|----|---------|-----|-----|---------------------------------------------|
| Locus_8528_Transcript_1/1_Conf_1.000 | 2160 | 20 | 0         | XP_001899924.1 | 77 | 677.167 | 604 | 469 | symbol                                      |
| Locus_8529_Transcript_1/2_Conf_1.000 | 1271 | 20 | 9.91E-114 | XP_002644745.1 | 95 | 414.846 | 244 | 232 | C. briggsae CBR-SFT-4 protein               |
| Locus_8529_Transcript_2/2_Conf_1.000 | 1132 | 20 | 1.43E-129 | XP_002644745.1 | 93 | 467.233 | 277 | 260 | C. briggsae CBR-SFT-4 protein               |
| Locus_853_Transcript_1/3_Conf_0.714  | 1269 | 20 | 3.46E-58  | NP_001022851.1 | 82 | 230.335 | 135 | 112 | GLYcosylation related family member (gly-5) |
| Locus_853_Transcript_2/3_Conf_0.714  | 2265 | 20 | 0         | NP_001022852.1 | 90 | 795.808 | 467 | 422 | GLYcosylation related family member (gly-5) |
| Locus_853_Transcript_3/3_Conf_0.714  | 2264 | 20 | 0         | NP_001022852.1 | 90 | 795.808 | 467 | 422 | GLYcosylation related family member (gly-5) |
| Locus_8530_Transcript_1/1_Conf_1.000 | 321  | 2  | 1.95E-05  | NP_001021809.1 | 58 | 52.373  | 73  | 43  | Branching AbnorMal family member (bam-2)    |

|                                      |      |    |           |                |    |         |     |     |                                                             |
|--------------------------------------|------|----|-----------|----------------|----|---------|-----|-----|-------------------------------------------------------------|
| Locus_8531_Transcript_1/1_Conf_1.000 | 1575 | 20 | 3.62E-111 | NP_494807.1    | 59 | 406.757 | 541 | 322 | Variable ABnormal morphology family member (vab-1)          |
| Locus_8532_Transcript_1/1_Conf_1.000 | 1113 | 20 | 9.98E-27  | XP_002601395.1 | 65 | 125.561 | 173 | 114 | hypothetical protein BRAFLDRAFT_130395                      |
| Locus_8533_Transcript_1/1_Conf_1.000 | 329  | 20 | 1.51E-50  | EFO19620.1     | 90 | 202.216 | 109 | 99  | histone acetyltransferase                                   |
| Locus_8534_Transcript_1/1_Conf_1.000 | 174  | 0  |           |                |    |         |     |     |                                                             |
| Locus_8535_Transcript_1/1_Conf_1.000 | 407  | 3  | 1.58E-15  | XP_002644589.1 | 55 | 85.8853 | 129 | 72  | C. briggsae CBR-LON-2 protein                               |
| Locus_8536_Transcript_1/1_Conf_1.000 | 320  | 0  |           |                |    |         |     |     |                                                             |
| Locus_8537_Transcript_1/1_Conf_1.000 | 397  | 14 | 2.23E-09  | XP_001894326.1 | 57 | 65.4698 | 95  | 55  | DEK protein                                                 |
| Locus_8538_Transcript_1/1_Conf_1.000 | 1172 | 0  |           |                |    |         |     |     |                                                             |
| Locus_8539_Transcript_1/1_Conf_1.000 | 1208 | 20 | 1.01E-35  | NP_001024508.1 | 47 | 155.606 | 334 | 158 | hypothetical protein D1009.3                                |
| Locus_854_Transcript_1/1_Conf_1.000  | 2399 | 20 | 1.73E-73  | XP_001896545.1 | 48 | 282.337 | 517 | 249 | hypothetical protein Bm1_25425                              |
| Locus_8540_Transcript_1/1_Conf_1.000 | 623  | 2  | 2.25E-07  | XP_002638582.1 | 66 | 59.6918 | 50  | 33  | Hypothetical protein CBG05629                               |
| Locus_8541_Transcript_1/1_Conf_1.000 | 368  | 6  | 1.27E-17  | NP_499447.1    | 74 | 92.8189 | 101 | 75  | RSK-pSeventy (RSK-p70 kinase) homolog family member (rks-1) |
| Locus_8542_Transcript_1/1_Conf_1.000 | 530  | 4  | 7.03E-10  | NP_501107.1    | 48 | 67.3958 | 165 | 80  | hypothetical protein ZC477.5                                |
| Locus_8543_Transcript_1/2_Conf_1.000 | 1331 | 20 | 6.53E-63  | NP_491059.2    | 77 | 246.128 | 201 | 156 | hypothetical protein Y71F9AL.10                             |

|                                      |      |    |           |                |    |         |     |     |                                                               |
|--------------------------------------|------|----|-----------|----------------|----|---------|-----|-----|---------------------------------------------------------------|
| Locus_8543_Transcript_2/2_Conf_1.000 | 1292 | 20 | 6.91E-62  | NP_491059.2    | 73 | 242.662 | 198 | 146 | hypothetical protein Y71F9AL.10                               |
| Locus_8544_Transcript_1/1_Conf_1.000 | 199  | 0  |           |                |    |         |     |     |                                                               |
| Locus_8545_Transcript_1/1_Conf_1.000 | 885  | 20 | 6.52E-86  | XP_002642853.1 | 90 | 321.627 | 221 | 200 | C. briggsae CBR-CKR-2 protein                                 |
| Locus_8546_Transcript_1/1_Conf_1.000 | 744  | 20 | 8.15E-86  | NP_510666.1    | 83 | 320.857 | 248 | 207 | hypothetical protein F01G12.6                                 |
| Locus_8547_Transcript_1/1_Conf_1.000 | 518  | 0  |           |                |    |         |     |     |                                                               |
| Locus_8548_Transcript_1/1_Conf_1.000 | 301  | 3  | 1.13E-21  | NP_508552.1    | 69 | 106.301 | 100 | 69  | hypothetical protein F40F4.6                                  |
| Locus_8549_Transcript_1/1_Conf_1.000 | 2448 | 6  | 4.26E-27  | EFO27105.1     | 41 | 128.257 | 531 | 220 | hypothetical protein LOAG_01374                               |
| Locus_855_Transcript_1/1_Conf_1.000  | 1172 | 20 | 0         | NP_492711.1    | 88 | 641.343 | 387 | 341 | glutamyl(E)/glutamyl(Q) tRNA Synthetase family member (ers-2) |
| Locus_8550_Transcript_1/1_Conf_1.000 | 360  | 4  | 8.87E-19  | NP_502082.1    | 64 | 96.6709 | 113 | 73  | Phasmid Socket Absent family member (psa-4)                   |
| Locus_8551_Transcript_1/1_Conf_1.000 | 132  | 8  | 2.59E-10  | NP_496440.1    | 81 | 68.5514 | 43  | 35  | hypothetical protein W02B12.1                                 |
| Locus_8552_Transcript_1/1_Conf_1.000 | 327  | 0  |           |                |    |         |     |     |                                                               |
| Locus_8553_Transcript_1/1_Conf_1.000 | 450  | 0  |           |                |    |         |     |     |                                                               |
| Locus_8554_Transcript_1/1_Conf_1.000 | 224  | 13 | 1.78E-06  | XP_002631239.1 | 69 | 55.8398 | 52  | 36  | C. briggsae CBR-LACT-3 protein                                |
| Locus_8555_Transcript_1/1_Conf_1.000 | 1673 | 20 | 2.00E-139 | NP_491674.2    | 73 | 500.745 | 415 | 307 | hypothetical protein F56H1.5                                  |
| Locus_8556_Transcript_1/2_Conf_1.000 | 1646 | 20 | 6.31E-122 | XP_001893038.1 | 72 | 442.58  | 390 | 282 | Thioredoxin family protein                                    |

|                                      |      |    |           |                |    |         |     |     |                                                                                        |
|--------------------------------------|------|----|-----------|----------------|----|---------|-----|-----|----------------------------------------------------------------------------------------|
| Locus_8556_Transcript_2/2_Conf_1.000 | 1622 | 20 | 4.58E-125 | XP_001893038.1 | 72 | 452.981 | 390 | 284 | Thioredoxin family protein                                                             |
| Locus_8557_Transcript_1/1_Conf_1.000 | 324  | 4  | 3.53E-15  | XP_002642484.1 | 73 | 84.7297 | 94  | 69  | Hypothetical protein CBG06903                                                          |
| Locus_8558_Transcript_1/1_Conf_1.000 | 348  | 0  |           |                |    |         |     |     |                                                                                        |
| Locus_8559_Transcript_1/2_Conf_1.000 | 1538 | 20 | 3.17E-128 | NP_490867.3    | 82 | 463.381 | 413 | 342 | hypothetical protein Y73E7A.3                                                          |
| Locus_8559_Transcript_2/2_Conf_1.000 | 307  | 0  |           |                |    |         |     |     |                                                                                        |
| Locus_856_Transcript_1/1_Conf_1.000  | 1887 | 20 | 1.59E-71  | NP_506151.1    | 53 | 275.404 | 643 | 346 | hypothetical protein C14C10.4                                                          |
| Locus_8560_Transcript_1/1_Conf_1.000 | 966  | 0  |           |                |    |         |     |     |                                                                                        |
| Locus_8561_Transcript_1/1_Conf_1.000 | 1850 | 20 | 0         | NP_001040665.1 | 97 | 884.019 | 495 | 483 | Transbilayer Amphipath Transporters (subfamily IV P-type ATPase) family member (tat-5) |
| Locus_8562_Transcript_1/1_Conf_1.000 | 514  | 0  |           |                |    |         |     |     |                                                                                        |
| Locus_8563_Transcript_1/1_Conf_1.000 | 341  | 0  |           |                |    |         |     |     |                                                                                        |
| Locus_8564_Transcript_1/1_Conf_1.000 | 323  | 20 | 6.40E-49  | XP_001899339.1 | 94 | 196.823 | 107 | 101 | protein unc-22                                                                         |
| Locus_8565_Transcript_1/1_Conf_1.000 | 901  | 20 | 2.78E-140 | NP_495863.1    | 91 | 502.286 | 293 | 267 | Phenylalanine Hydroxylase family member (pah-1)                                        |
| Locus_8566_Transcript_1/1_Conf_1.000 | 1024 | 20 | 2.14E-57  | XP_001902793.1 | 66 | 227.254 | 187 | 125 | Laminin EGF-like                                                                       |
| Locus_8567_Transcript_1/1_Conf_1.000 | 578  | 20 | 2.26E-61  | EFO22680.1     | 81 | 238.81  | 192 | 157 | hypothetical protein LOAG_05804                                                        |
| Locus_8568_Transcript_1/1_Conf_1.000 | 380  | 0  |           |                |    |         |     |     |                                                                                        |
| Locus_8569_Transcript_1/1_Conf_1.000 | 701  | 20 | 1.52E-27  | NP_499390.3    | 50 | 127.102 | 221 | 111 | HEXosaminidase family member (hex-3)                                                   |

|                                      |     |    |          |                |    |         |     |     |                                                                                                                                                                                 |
|--------------------------------------|-----|----|----------|----------------|----|---------|-----|-----|---------------------------------------------------------------------------------------------------------------------------------------------------------------------------------|
| Locus_857_Transcript_1/1_Conf_1.000  | 398 | 3  | 2.91E-17 | NP_741656.2    | 69 | 91.6633 | 76  | 53  | hypothetical protein Y39B6A.41                                                                                                                                                  |
| Locus_8570_Transcript_1/1_Conf_1.000 | 273 | 0  |          |                |    |         |     |     |                                                                                                                                                                                 |
| Locus_8571_Transcript_1/1_Conf_1.000 | 222 | 0  |          |                |    |         |     |     |                                                                                                                                                                                 |
| Locus_8572_Transcript_1/1_Conf_1.000 | 150 | 0  |          |                |    |         |     |     |                                                                                                                                                                                 |
| Locus_8573_Transcript_1/2_Conf_1.000 | 323 | 0  |          |                |    |         |     |     |                                                                                                                                                                                 |
| Locus_8573_Transcript_2/2_Conf_1.000 | 320 | 0  |          |                |    |         |     |     |                                                                                                                                                                                 |
| Locus_8574_Transcript_1/1_Conf_1.000 | 894 | 4  | 6.13E-23 | NP_506080.1    | 50 | 112.464 | 290 | 146 | hypothetical protein F55C5.4                                                                                                                                                    |
| Locus_8575_Transcript_1/1_Conf_1.000 | 181 | 0  |          |                |    |         |     |     |                                                                                                                                                                                 |
| Locus_8576_Transcript_1/1_Conf_1.000 | 534 | 3  | 1.48E-39 | XP_002642777.1 | 67 | 166.007 | 173 | 117 | Hypothetical protein CBG21170                                                                                                                                                   |
| Locus_8577_Transcript_1/1_Conf_1.000 | 136 | 0  |          |                |    |         |     |     |                                                                                                                                                                                 |
| Locus_8578_Transcript_1/1_Conf_1.000 | 348 | 20 | 1.34E-38 | NP_502856.1    | 81 | 162.54  | 115 | 94  | Nuclear Hormone Receptor family member (nhr-5)                                                                                                                                  |
| Locus_8579_Transcript_1/2_Conf_1.000 | 420 | 20 | 3.33E-05 | XP_002128415.1 | 61 | 51.6026 | 62  | 38  | PREDICTED: similar to Microspherule protein 1                                                                                                                                   |
| Locus_8579_Transcript_2/2_Conf_1.000 | 387 | 20 | 3.27E-05 | XP_002128415.1 | 61 | 51.6026 | 62  | 38  | PREDICTED: similar to Microspherule protein 1                                                                                                                                   |
| Locus_858_Transcript_1/1_Conf_1.000  | 352 | 20 | 2.52E-29 | XP_001138809.1 | 98 | 131.724 | 115 | 113 | PREDICTED: similar to Protein S100-A6 (S100 calcium-binding protein A6) (Calcyclin) (Prolactin receptor-associated protein) (PRA) (Growth factor-inducible protein 2A9) (MLN 4) |

|                                      |      |    |          |             |    |         |     |    |                                                         |
|--------------------------------------|------|----|----------|-------------|----|---------|-----|----|---------------------------------------------------------|
| Locus_8580_Transcript_1/1_Conf_1.000 | 202  | 20 | 3.89E-14 | NP_506236.1 | 73 | 81.2629 | 68  | 50 | hypothetical protein T16G1.4                            |
| Locus_8581_Transcript_1/1_Conf_1.000 | 515  | 20 | 9.10E-09 | ABP94090.1  | 53 | 63.5438 | 105 | 56 | venom C-type lectin galactose binding isoform variant 1 |
| Locus_8582_Transcript_1/1_Conf_1.000 | 369  | 0  |          |             |    |         |     |    |                                                         |
| Locus_8583_Transcript_1/2_Conf_1.000 | 694  | 20 | 2.15E-26 | BAB68205.1  | 75 | 123.25  | 115 | 87 | keratin-like protein                                    |
| Locus_8583_Transcript_2/2_Conf_1.000 | 764  | 20 | 2.86E-25 | BAB68205.1  | 74 | 119.783 | 115 | 86 | keratin-like protein                                    |
| Locus_8584_Transcript_1/1_Conf_1.000 | 1053 | 20 | 7.99E-23 | EFO23240.1  | 84 | 112.464 | 75  | 63 | protein-tyrosine phosphatase                            |



|                                      |     |    |          |                |    |         |     |     |                                        |
|--------------------------------------|-----|----|----------|----------------|----|---------|-----|-----|----------------------------------------|
| Locus_8585_Transcript_1/1_Conf_1.000 | 354 | 20 | 7.05E-32 | NP_492254.1    | 79 | 140.198 | 105 | 83  | protein KINase family member (kin-10)  |
| Locus_8586_Transcript_1/1_Conf_1.000 | 256 | 0  |          |                |    |         |     |     |                                        |
| Locus_8587_Transcript_1/1_Conf_1.000 | 721 | 20 | 1.63E-88 | NP_501686.2    | 81 | 329.717 | 217 | 177 | hypothetical protein C33A12.3          |
| Locus_8588_Transcript_1/1_Conf_1.000 | 425 | 1  | 1.64E-20 | EFO27968.1     | 57 | 102.449 | 140 | 80  | hypothetical protein LOAG_00508        |
| Locus_8589_Transcript_1/1_Conf_1.000 | 488 | 6  | 2.63E-10 | XP_002638485.1 | 67 | 68.5514 | 76  | 51  | Hypothetical protein CBG12913          |
| Locus_859_Transcript_1/2_Conf_1.000  | 817 | 20 | 1.76E-71 | AAF13167.1     | 74 | 273.478 | 203 | 152 | AF173174_1CLC chloride channel protein |
| Locus_859_Transcript_2/2_Conf_1.000  | 811 | 20 | 7.29E-70 | AAF13167.1     | 73 | 268.085 | 203 | 150 | AF173174_1CLC chloride channel protein |
| Locus_8590_Transcript_1/1_Conf_1.000 | 585 | 0  |          |                |    |         |     |     |                                        |

|                                      |     |    |          |                |    |         |     |     |                                                                        |
|--------------------------------------|-----|----|----------|----------------|----|---------|-----|-----|------------------------------------------------------------------------|
| Locus_8591_Transcript_1/1_Conf_1.000 | 888 | 20 | 1.07E-19 | XP_001897316.1 | 57 | 101.679 | 205 | 117 | hypothetical protein                                                   |
| Locus_8592_Transcript_1/2_Conf_1.000 | 273 | 20 | 5.96E-15 | NP_501769.1    | 77 | 83.9593 | 58  | 45  | hypothetical protein K07F5.12                                          |
| Locus_8592_Transcript_2/2_Conf_1.000 | 225 | 5  | 5.51E-08 | XP_002633781.1 | 76 | 60.8474 | 42  | 32  | Hypothetical protein CBG03472                                          |
| Locus_8593_Transcript_1/1_Conf_1.000 | 617 | 20 | 1.21E-29 | XP_002642925.1 | 63 | 133.65  | 165 | 105 | Hypothetical protein CBG15201                                          |
| Locus_8594_Transcript_1/1_Conf_1.000 | 157 | 0  |          |                |    |         |     |     |                                                                        |
| Locus_8595_Transcript_1/1_Conf_1.000 | 443 | 9  | 7.61E-42 | CAA86058.2     | 83 | 173.326 | 144 | 120 | C. elegans protein B0393.5, partially confirmed by transcript evidence |

|                                      |      |    |           |                |     |         |     |     |                                                           |
|--------------------------------------|------|----|-----------|----------------|-----|---------|-----|-----|-----------------------------------------------------------|
| Locus_8596_Transcript_1/1_Conf_1.000 | 797  | 20 | 1.60E-37  | EFO16938.1     | 74  | 160.614 | 131 | 98  | hypothetical protein LOAG_11565                           |
| Locus_8597_Transcript_1/1_Conf_1.000 | 264  | 0  |           |                |     |         |     |     |                                                           |
| Locus_8598_Transcript_1/1_Conf_1.000 | 625  | 20 | 2.46E-86  | NP_505879.1    | 89  | 322.013 | 200 | 178 | hypothetical protein F47G9.1                              |
| Locus_8599_Transcript_1/1_Conf_1.000 | 352  | 0  |           |                |     |         |     |     |                                                           |
| Locus_86_Transcript_1/1_Conf_1.000   | 394  | 0  |           |                |     |         |     |     |                                                           |
| Locus_860_Transcript_1/1_Conf_1.000  | 736  | 20 | 2.19E-43  | XP_002640130.1 | 60  | 179.874 | 235 | 142 | C. briggsae CBR-NPP-12 protein                            |
| Locus_8600_Transcript_1/1_Conf_1.000 | 699  | 20 | 1.16E-51  | NP_496729.2    | 75  | 207.223 | 194 | 146 | Beta-Carotene 15,15'-MonoOxygenase family member (bcmo-1) |
| Locus_8601_Transcript_1/1_Conf_1.000 | 621  | 2  | 6.26E-42  | XP_002631595.1 | 60  | 174.481 | 206 | 125 | Hypothetical protein CBG20775                             |
| Locus_8602_Transcript_1/1_Conf_1.000 | 594  | 0  |           |                |     |         |     |     |                                                           |
| Locus_8603_Transcript_1/1_Conf_1.000 | 249  | 20 | 3.58E-12  | XP_001893353.1 | 69  | 74.7146 | 69  | 48  | Protein-tyrosine phosphatase containing protein           |
| Locus_8604_Transcript_1/1_Conf_1.000 | 1889 | 20 | 2.56E-154 | NP_001021859.1 | 67  | 550.436 | 624 | 419 | Variable ABnormal morphology family member (vab-10)       |
| Locus_8605_Transcript_1/1_Conf_1.000 | 507  | 0  |           |                |     |         |     |     |                                                           |
| Locus_8606_Transcript_1/1_Conf_1.000 | 1206 | 20 | 2.88E-107 | NP_510713.1    | 74  | 393.275 | 362 | 271 | Cyclase ASsociated protein Homolog family member (cas-1)  |
| Locus_8607_Transcript_1/1_Conf_1.000 | 668  | 20 | 1.34E-67  | XP_001510969.1 | 100 | 259.996 | 143 | 143 | PREDICTED: similar to Mus musculus ribosomal protein L19  |
| Locus_8608_Transcript_1/1_Conf_1.000 | 388  | 0  |           |                |     |         |     |     |                                                           |
| Locus_8609_Transcript_1/1_Conf_1.000 | 674  | 20 | 7.29E-53  | NP_497275.1    | 66  | 211.075 | 199 | 132 | hypothetical protein K02F3.10                             |

|                                      |      |    |           |                |    |         |     |     |                                                      |
|--------------------------------------|------|----|-----------|----------------|----|---------|-----|-----|------------------------------------------------------|
| Locus_861_Transcript_1/1_Conf_1.000  | 1867 | 0  |           |                |    |         |     |     |                                                      |
| Locus_8610_Transcript_1/1_Conf_1.000 | 409  | 20 | 1.20E-15  | XP_002640083.1 | 58 | 86.2705 | 137 | 80  | C. briggsae CBR-FRK-1 protein                        |
| Locus_8611_Transcript_1/1_Conf_1.000 | 324  | 0  |           |                |    |         |     |     |                                                      |
| Locus_8612_Transcript_1/1_Conf_1.000 | 412  | 0  |           |                |    |         |     |     |                                                      |
| Locus_8613_Transcript_1/1_Conf_1.000 | 547  | 5  | 6.12E-07  | CAA10033.1     | 51 | 57.7658 | 164 | 85  | DYS-1 protein                                        |
| Locus_8614_Transcript_1/1_Conf_1.000 | 364  | 20 | 1.19E-23  | NP_502448.1    | 72 | 112.849 | 100 | 72  | hypothetical protein ZK896.9                         |
| Locus_8615_Transcript_1/1_Conf_1.000 | 358  | 20 | 4.72E-20  | NP_001021401.1 | 79 | 100.908 | 62  | 49  | hypothetical protein F21F3.7                         |
| Locus_8616_Transcript_1/1_Conf_1.000 | 257  | 20 | 1.60E-23  | CAR63542.1     | 98 | 112.464 | 57  | 56  | putative Pre-mRNA splicing protein                   |
| Locus_8617_Transcript_1/1_Conf_1.000 | 668  | 20 | 3.66E-49  | EFO22579.1     | 74 | 198.749 | 171 | 127 | hypothetical protein LOAG_05905                      |
| Locus_8618_Transcript_1/1_Conf_1.000 | 860  | 20 | 5.39E-122 | XP_002637013.1 | 79 | 441.425 | 288 | 228 | C. briggsae CBR-NID-1 protein                        |
| Locus_8619_Transcript_1/1_Conf_1.000 | 1814 | 20 | 1.61E-81  | XP_001895729.1 | 55 | 308.531 | 507 | 282 | Ubiquitin carboxyl-terminal hydrolase family protein |
| Locus_862_Transcript_1/2_Conf_1.000  | 2085 | 8  | 5.40E-68  | NP_741334.3    | 68 | 263.848 | 253 | 173 | hypothetical protein Y71G10AL.1                      |
| Locus_862_Transcript_2/2_Conf_1.000  | 2079 | 8  | 5.38E-68  | NP_741334.3    | 68 | 263.848 | 253 | 173 | hypothetical protein Y71G10AL.1                      |

|                                      |      |    |          |                |    |         |     |     |                                                                      |
|--------------------------------------|------|----|----------|----------------|----|---------|-----|-----|----------------------------------------------------------------------|
| Locus_8620_Transcript_1/1_Conf_1.000 | 975  | 20 | 8.38E-16 | EFO24312.1     | 50 | 88.9669 | 212 | 107 | hypothetical protein LOAG_04179                                      |
| Locus_8621_Transcript_1/1_Conf_1.000 | 480  | 0  |          |                |    |         |     |     |                                                                      |
| Locus_8622_Transcript_1/1_Conf_1.000 | 273  | 0  |          |                |    |         |     |     |                                                                      |
| Locus_8623_Transcript_1/1_Conf_1.000 | 358  | 0  |          |                |    |         |     |     |                                                                      |
| Locus_8624_Transcript_1/1_Conf_1.000 | 610  | 20 | 1.49E-40 | EFO18652.1     | 64 | 169.859 | 204 | 131 | hypothetical protein LOAG_09840                                      |
| Locus_8625_Transcript_1/1_Conf_1.000 | 859  | 11 | 3.68E-54 | NP_001023577.1 | 68 | 216.083 | 237 | 163 | Prion-like-(Q/N-rich)-domain-bearing protein family member (pqn-89)  |
| Locus_8626_Transcript_1/1_Conf_1.000 | 328  | 5  | 1.74E-30 | AAL77521.1     | 77 | 135.576 | 109 | 84  | L80003_1guanylyl cyclase                                             |
| Locus_8627_Transcript_1/1_Conf_1.000 | 685  | 20 | 1.58E-66 | NP_001022840.1 | 84 | 256.529 | 187 | 158 | hypothetical protein Y39A1A.21                                       |
| Locus_8628_Transcript_1/1_Conf_1.000 | 139  | 0  |          |                |    |         |     |     |                                                                      |
| Locus_8629_Transcript_1/1_Conf_1.000 | 1059 | 2  | 1.43E-11 | XP_001898424.1 | 48 | 75.0998 | 254 | 124 | DEAD/H                                                               |
| Locus_863_Transcript_1/2_Conf_1.000  | 709  | 20 | 1.34E-55 | NP_001023947.1 | 62 | 220.32  | 236 | 148 | Farnesylated-proteins Converting Enzyme (FACE) family member (fce-2) |
| Locus_863_Transcript_2/2_Conf_1.000  | 709  | 20 | 1.75E-55 | NP_001023947.1 | 62 | 219.935 | 236 | 148 | Farnesylated-proteins Converting Enzyme (FACE) family member (fce-2) |
| Locus_8630_Transcript_1/2_Conf_1.000 | 351  | 0  |          |                |    |         |     |     |                                                                      |
| Locus_8630_Transcript_2/2_Conf_1.000 | 357  | 0  |          |                |    |         |     |     |                                                                      |
| Locus_8631_Transcript_1/1_Conf_1.000 | 674  | 20 | 3.51E-39 | NP_001041137.1 | 56 | 165.622 | 225 | 126 | Alpha MANnosidase family member (aman-2)                             |
| Locus_8632_Transcript_1/1_Conf_1.000 | 915  | 20 | 1.38E-17 | XP_001896161.1 | 63 | 94.7449 | 105 | 67  | tRNA intron endonuclease family protein                              |

|                                      |      |    |          |                |     |         |     |     |                                                                |
|--------------------------------------|------|----|----------|----------------|-----|---------|-----|-----|----------------------------------------------------------------|
| Locus_8633_Transcript_1/1_Conf_1.000 | 331  | 20 | 3.50E-23 | XP_002636475.1 | 64  | 111.309 | 110 | 71  | Hypothetical protein CBG23146                                  |
| Locus_8634_Transcript_1/1_Conf_1.000 | 277  | 20 | 7.46E-34 | NP_500240.1    | 83  | 146.747 | 92  | 77  | hypothetical protein Y69A2AR.31                                |
| Locus_8635_Transcript_1/1_Conf_1.000 | 922  | 7  | 9.02E-25 | P34288.4       | 76  | 118.627 | 90  | 69  | GTPase-activating protein pac-1                                |
| Locus_8636_Transcript_1/1_Conf_1.000 | 757  | 20 | 7.34E-58 | XP_002634587.1 | 68  | 228.024 | 220 | 150 | Hypothetical protein CBG08398                                  |
| Locus_8637_Transcript_1/1_Conf_1.000 | 349  | 20 | 1.64E-28 | XP_002642830.1 | 84  | 129.028 | 115 | 97  | Hypothetical protein CBG21229                                  |
| Locus_8638_Transcript_1/1_Conf_1.000 | 641  | 20 | 3.02E-58 | ACI49192.1     | 71  | 228.794 | 211 | 151 | hypothetical protein Csp3_JD03.001                             |
| Locus_8639_Transcript_1/1_Conf_1.000 | 985  | 9  | 9.44E-07 | XP_394132.3    | 55  | 58.9214 | 93  | 52  | PREDICTED: similar to CG31646-PA                               |
| Locus_864_Transcript_1/1_Conf_1.000  | 1251 | 20 | 2.56E-21 | XP_002633442.1 | 47  | 107.842 | 227 | 107 | Hypothetical protein CBG06210                                  |
| Locus_8640_Transcript_1/1_Conf_1.000 | 149  | 2  | 7.73E-10 | XP_002638375.1 | 79  | 67.0106 | 43  | 34  | Hypothetical protein CBG18580                                  |
| Locus_8641_Transcript_1/1_Conf_1.000 | 721  | 20 | 2.32E-26 | NP_508196.1    | 71  | 123.25  | 139 | 100 | STAUfen (dsRNA binding protein) homolog family member (stau-1) |
| Locus_8642_Transcript_1/1_Conf_1.000 | 225  | 20 | 3.80E-25 | EAW84826.1     | 100 | 117.857 | 53  | 53  | NADH dehydrogenase (ubiquinone) 1 alpha subcomplex, 13         |
| Locus_8643_Transcript_1/1_Conf_1.000 | 631  | 20 | 4.09E-36 | XP_001892146.1 | 68  | 155.221 | 165 | 113 | coronin 2A                                                     |

|                                      |      |    |          |                |    |         |     |     |                                                |
|--------------------------------------|------|----|----------|----------------|----|---------|-----|-----|------------------------------------------------|
| Locus_8644_Transcript_1/1_Conf_1.000 | 381  | 5  | 5.57E-37 | ABS50363.1     | 88 | 157.147 | 101 | 89  | LIM domain protein variant                     |
| Locus_8645_Transcript_1/1_Conf_1.000 | 1024 | 20 | 3.06E-88 | NP_497510.2    | 66 | 329.717 | 356 | 236 | hypothetical protein C39B5.6                   |
| Locus_8646_Transcript_1/2_Conf_1.000 | 281  | 0  |          |                |    |         |     |     |                                                |
| Locus_8646_Transcript_2/2_Conf_1.000 | 275  | 0  |          |                |    |         |     |     |                                                |
| Locus_8647_Transcript_1/1_Conf_1.000 | 157  | 0  |          |                |    |         |     |     |                                                |
| Locus_8648_Transcript_1/1_Conf_1.000 | 545  | 20 | 1.24E-52 | XP_002639368.1 | 88 | 209.534 | 135 | 120 | C. briggsae CBR-GNRR-1 protein                 |
| Locus_8649_Transcript_1/1_Conf_1.000 | 372  | 0  |          |                |    |         |     |     |                                                |
| Locus_865_Transcript_1/1_Conf_1.000  | 495  | 0  |          |                |    |         |     |     |                                                |
| Locus_8650_Transcript_1/1_Conf_1.000 | 242  | 7  | 1.52E-18 | EFO27604.1     | 75 | 95.9005 | 77  | 58  | hypothetical protein LOAG_00873                |
| Locus_8651_Transcript_1/1_Conf_1.000 | 256  | 0  |          |                |    |         |     |     |                                                |
| Locus_8652_Transcript_1/1_Conf_1.000 | 392  | 20 | 2.84E-17 | NP_494886.1    | 89 | 91.6633 | 66  | 59  | hypothetical protein R05F9.6                   |
| Locus_8653_Transcript_1/1_Conf_1.000 | 654  | 14 | 1.24E-09 | EFN66847.1     | 49 | 67.3958 | 111 | 55  | hypothetical protein EAG_08499                 |
| Locus_8654_Transcript_1/1_Conf_1.000 | 1698 | 20 | 1.72E-45 | NP_001024604.1 | 61 | 188.734 | 219 | 135 | abnormal DAuer Formation family member (daf-3) |
| Locus_8655_Transcript_1/1_Conf_1.000 | 195  | 0  |          |                |    |         |     |     |                                                |
| Locus_8656_Transcript_1/1_Conf_1.000 | 545  | 0  |          |                |    |         |     |     |                                                |

|                                      |      |    |          |                |    |         |     |     |                                                      |
|--------------------------------------|------|----|----------|----------------|----|---------|-----|-----|------------------------------------------------------|
| Locus_8657_Transcript_1/1_Conf_1.000 | 835  | 20 | 1.20E-46 | NP_503446.1    | 62 | 191.045 | 200 | 124 | Cell Division Cycle related family member (cdc-25.2) |
| Locus_8658_Transcript_1/1_Conf_1.000 | 130  | 3  | 1.48E-05 | NP_499466.1    | 62 | 52.7582 | 59  | 37  | Neuropeptide-Like Protein family member (nlp-21)     |
| Locus_8659_Transcript_1/1_Conf_1.000 | 494  | 20 | 2.77E-20 | XP_001894296.1 | 58 | 101.679 | 167 | 98  | hypothetical protein                                 |
| Locus_866_Transcript_1/1_Conf_1.000  | 380  | 5  | 1.69E-09 | XP_001896009.1 | 59 | 65.855  | 93  | 55  | hypothetical protein Bm1_22765                       |
| Locus_8660_Transcript_1/2_Conf_1.000 | 1112 | 7  | 7.87E-24 | XP_001902037.1 | 46 | 115.931 | 317 | 146 | hypothetical protein Bm1_52845                       |
| Locus_8660_Transcript_2/2_Conf_1.000 | 1112 | 7  | 1.59E-24 | XP_001902037.1 | 47 | 118.242 | 317 | 151 | hypothetical protein Bm1_52845                       |
| Locus_8661_Transcript_1/1_Conf_1.000 | 1542 | 20 | 3.41E-98 | A8XU68.2       | 69 | 363.614 | 321 | 223 | 5'-tyrosyl-DNA phosphodiesterase                     |
| Locus_8662_Transcript_1/1_Conf_1.000 | 367  | 20 | 4.23E-13 | NP_499492.1    | 56 | 77.7962 | 112 | 63  | hypothetical protein Y66D12A.10                      |
| Locus_8663_Transcript_1/1_Conf_1.000 | 886  | 20 | 8.31E-57 | NP_505919.3    | 67 | 224.942 | 246 | 167 | hypothetical protein C55A6.3                         |
| Locus_8664_Transcript_1/2_Conf_1.000 | 1881 | 9  | 4.84E-12 | EFO25616.1     | 41 | 77.7962 | 314 | 130 | hypothetical protein LOAG_02872                      |
| Locus_8664_Transcript_2/2_Conf_1.000 | 1833 | 9  | 4.68E-12 | EFO25616.1     | 41 | 77.7962 | 314 | 130 | hypothetical protein LOAG_02872                      |
| Locus_8665_Transcript_1/1_Conf_1.000 | 661  | 20 | 2.55E-71 | XP_002630825.1 | 85 | 272.322 | 219 | 187 | Hypothetical protein CBG02527                        |



|                                      |      |    |           |                |    |         |     |     |                                                   |
|--------------------------------------|------|----|-----------|----------------|----|---------|-----|-----|---------------------------------------------------|
| Locus_8666_Transcript_1/1_Conf_1.000 | 713  | 20 | 3.70E-37  | AAO39173.1     | 68 | 159.073 | 207 | 141 | nuclear receptor NHR-32                           |
| Locus_8667_Transcript_1/4_Conf_0.667 | 1578 | 20 | 2.93E-161 | XP_002641487.1 | 80 | 573.163 | 476 | 382 | Hypothetical protein CBG09778                     |
| Locus_8667_Transcript_2/4_Conf_0.667 | 1673 | 20 | 4.13E-161 | XP_002641487.1 | 80 | 572.778 | 476 | 381 | Hypothetical protein CBG09778                     |
| Locus_8667_Transcript_3/4_Conf_0.556 | 1650 | 20 | 7.91E-165 | XP_002641487.1 | 80 | 585.104 | 467 | 377 | Hypothetical protein CBG09778                     |
| Locus_8667_Transcript_4/4_Conf_0.667 | 1673 | 20 | 3.16E-161 | XP_002641487.1 | 80 | 573.163 | 476 | 382 | Hypothetical protein CBG09778                     |
| Locus_8668_Transcript_1/1_Conf_1.000 | 568  | 4  | 6.51E-34  | NP_490772.2    | 59 | 147.517 | 191 | 114 | hypothetical protein Y18H1A.3                     |
| Locus_8669_Transcript_1/1_Conf_1.000 | 699  | 20 | 2.94E-63  | XP_002639231.1 | 72 | 245.743 | 204 | 147 | Hypothetical protein CBG03787                     |
| Locus_867_Transcript_1/1_Conf_1.000  | 915  | 20 | 3.68E-87  | NP_496490.2    | 71 | 325.865 | 306 | 218 | NEPrilysin metallopeptidase family member (nep-1) |
| Locus_8670_Transcript_1/1_Conf_1.000 | 347  | 4  | 1.88E-32  | NP_503059.2    | 85 | 142.124 | 115 | 98  | hypothetical protein ZK550.3                      |
| Locus_8671_Transcript_1/1_Conf_1.000 | 853  | 0  |           |                |    |         |     |     |                                                   |
| Locus_8672_Transcript_1/1_Conf_1.000 | 699  | 4  | 4.86E-50  | XP_002632215.1 | 90 | 201.83  | 128 | 116 | Hypothetical protein CBG07083                     |

|                                      |      |    |           |                |    |         |     |     |                                |
|--------------------------------------|------|----|-----------|----------------|----|---------|-----|-----|--------------------------------|
| Locus_8673_Transcript_1/3_Conf_0.286 | 342  | 20 | 1.95E-29  | XP_002633708.1 | 77 | 132.109 | 102 | 79  | C. briggsae CBR-TRAM-1 protein |
| Locus_8673_Transcript_2/3_Conf_0.714 | 1604 | 20 | 1.56E-101 | XP_002633708.1 | 73 | 374.785 | 332 | 244 | C. briggsae CBR-TRAM-1 protein |
| Locus_8673_Transcript_3/3_Conf_0.714 | 1607 | 20 | 1.56E-101 | XP_002633708.1 | 73 | 374.785 | 332 | 244 | C. briggsae CBR-TRAM-1 protein |
| Locus_8674_Transcript_1/2_Conf_1.000 | 181  | 0  |           |                |    |         |     |     |                                |
| Locus_8674_Transcript_2/2_Conf_1.000 | 190  | 0  |           |                |    |         |     |     |                                |
| Locus_8675_Transcript_1/1_Conf_1.000 | 436  | 0  |           |                |    |         |     |     |                                |
| Locus_8676_Transcript_1/1_Conf_1.000 | 161  | 0  |           |                |    |         |     |     |                                |
| Locus_8677_Transcript_1/1_Conf_1.000 | 748  | 0  |           |                |    |         |     |     |                                |
| Locus_8678_Transcript_1/1_Conf_1.000 | 925  | 20 | 1.05E-105 | XP_002631798.1 | 87 | 387.497 | 246 | 216 | C. briggsae CBR-TPI-1 protein  |

|                                      |      |    |           |                |    |         |     |     |                                                 |
|--------------------------------------|------|----|-----------|----------------|----|---------|-----|-----|-------------------------------------------------|
| Locus_8679_Transcript_1/1_Conf_1.000 | 1378 | 20 | 2.87E-77  | XP_002631175.1 | 88 | 293.893 | 186 | 165 | Hypothetical protein CBG02961                   |
| Locus_868_Transcript_1/1_Conf_1.000  | 550  | 8  | 3.53E-10  | AAO63578.1     | 46 | 68.5514 | 166 | 78  | secreted protein 6 precursor                    |
| Locus_8680_Transcript_1/1_Conf_1.000 | 1079 | 20 | 3.75E-108 | NP_499084.1    | 72 | 395.971 | 320 | 233 | hypothetical protein B0464.9                    |
| Locus_8681_Transcript_1/1_Conf_1.000 | 270  | 14 | 3.63E-12  | CAC38987.1     | 94 | 74.7146 | 36  | 34  | cooperia receptor-like protein                  |
| Locus_8682_Transcript_1/2_Conf_1.000 | 1246 | 0  |           |                |    |         |     |     |                                                 |
| Locus_8682_Transcript_2/2_Conf_1.000 | 1198 | 0  |           |                |    |         |     |     |                                                 |
| Locus_8683_Transcript_1/1_Conf_1.000 | 451  | 20 | 2.42E-32  | EFO19871.1     | 98 | 141.739 | 74  | 73  | hypothetical protein LOAG_08622                 |
| Locus_8684_Transcript_1/1_Conf_1.000 | 270  | 0  |           |                |    |         |     |     |                                                 |
| Locus_8685_Transcript_1/1_Conf_1.000 | 1049 | 20 | 2.21E-41  | NP_498335.1    | 55 | 174.096 | 275 | 153 | NeuroFibroMatosis homolog family member (nfm-1) |
| Locus_8686_Transcript_1/1_Conf_1.000 | 836  | 17 | 8.28E-64  | CAB59919.1     | 65 | 248.054 | 310 | 204 | hypothetical protein                            |
| Locus_8687_Transcript_1/1_Conf_1.000 | 769  | 20 | 3.64E-60  | XP_002631097.1 | 80 | 235.728 | 187 | 151 | Hypothetical protein CBG02871                   |

|                                      |      |    |           |                |    |         |     |     |                                                                     |
|--------------------------------------|------|----|-----------|----------------|----|---------|-----|-----|---------------------------------------------------------------------|
| Locus_8688_Transcript_1/1_Conf_1.000 | 616  | 10 | 3.44E-08  | AAO63578.1     | 42 | 62.3882 | 154 | 66  | secreted protein 6 precursor                                        |
| Locus_8689_Transcript_1/1_Conf_1.000 | 711  | 1  | 1.02E-10  | NP_001122712.1 | 52 | 71.2478 | 149 | 78  | hypothetical protein R10E9.3                                        |
| Locus_869_Transcript_1/2_Conf_1.000  | 1978 | 20 | 0         | NP_493464.1    | 80 | 711.835 | 539 | 436 | DNaJ domain (prokaryotic heat shock protein) family member (dnj-29) |
| Locus_869_Transcript_2/2_Conf_1.000  | 1972 | 20 | 0         | NP_493464.1    | 81 | 717.998 | 536 | 437 | DNaJ domain (prokaryotic heat shock protein) family member (dnj-29) |
| Locus_8690_Transcript_1/1_Conf_1.000 | 296  | 0  |           |                |    |         |     |     |                                                                     |
| Locus_8691_Transcript_1/1_Conf_1.000 | 1008 | 0  |           |                |    |         |     |     |                                                                     |
| Locus_8692_Transcript_1/1_Conf_1.000 | 660  | 0  |           |                |    |         |     |     |                                                                     |
| Locus_8693_Transcript_1/1_Conf_1.000 | 195  | 0  |           |                |    |         |     |     |                                                                     |
| Locus_8694_Transcript_1/1_Conf_1.000 | 798  | 20 | 1.09E-118 | NP_001024542.1 | 82 | 430.254 | 277 | 228 | UNCoordinated family member (unc-115)                               |
| Locus_8695_Transcript_1/1_Conf_1.000 | 517  | 4  | 8.93E-36  | XP_002630694.1 | 70 | 153.295 | 174 | 122 | Hypothetical protein CBG02376                                       |
| Locus_8696_Transcript_1/1_Conf_1.000 | 337  | 20 | 1.83E-32  | XP_002639509.1 | 96 | 142.124 | 77  | 74  | C. briggsae CBR-SNR-7 protein                                       |
| Locus_8697_Transcript_1/1_Conf_1.000 | 1146 | 20 | 3.56E-144 | NP_501372.1    | 81 | 515.768 | 387 | 315 | PCTAIRE class cell cycle kinase family member (pct-1)               |
| Locus_8698_Transcript_1/1_Conf_1.000 | 418  | 0  |           |                |    |         |     |     |                                                                     |
| Locus_8699_Transcript_1/2_Conf_1.000 | 1908 | 20 | 0         | XP_002634993.1 | 85 | 664.07  | 469 | 401 | Hypothetical protein CBG13533                                       |
| Locus_8699_Transcript_2/2_Conf_1.000 | 1908 | 20 | 0         | XP_002634993.1 | 85 | 664.07  | 469 | 401 | Hypothetical protein CBG13533                                       |

|                                      |      |    |           |                |    |         |      |      |                                                   |
|--------------------------------------|------|----|-----------|----------------|----|---------|------|------|---------------------------------------------------|
| Locus_87_Transcript_1/2_Conf_1.000   | 6171 | 20 | 0         | XP_002639045.1 | 79 | 1720.29 | 1343 | 1065 | C. briggsae CBR-TAG-192 protein                   |
| Locus_87_Transcript_2/2_Conf_1.000   | 6156 | 20 | 0         | XP_002639045.1 | 79 | 1726.07 | 1338 | 1065 | C. briggsae CBR-TAG-192 protein                   |
| Locus_870_Transcript_1/1_Conf_1.000  | 706  | 20 | 4.84E-82  | EFO20586.1     | 79 | 308.145 | 235  | 187  | anion exchange protein                            |
| Locus_8700_Transcript_1/1_Conf_1.000 | 620  | 0  |           |                |    |         |      |      |                                                   |
| Locus_8701_Transcript_1/1_Conf_1.000 | 994  | 20 | 1.83E-74  | XP_002640627.1 | 82 | 283.878 | 209  | 172  | C. briggsae CBR-UNC-95 protein                    |
| Locus_8702_Transcript_1/1_Conf_1.000 | 141  | 4  | 2.66E-07  | EFO20706.1     | 73 | 58.5362 | 45   | 33   | hypothetical protein LOAG_07782                   |
| Locus_8703_Transcript_1/1_Conf_1.000 | 1785 | 0  |           |                |    |         |      |      |                                                   |
| Locus_8704_Transcript_1/1_Conf_1.000 | 820  | 20 | 2.30E-95  | NP_001021021.1 | 87 | 352.829 | 225  | 197  | hypothetical protein C32F10.8                     |
| Locus_8705_Transcript_1/1_Conf_1.000 | 210  | 0  |           |                |    |         |      |      |                                                   |
| Locus_8706_Transcript_1/1_Conf_1.000 | 155  | 2  | 3.02E-06  | NP_498825.1    | 66 | 55.0694 | 48   | 32   | hypothetical protein F10E9.4                      |
| Locus_8707_Transcript_1/1_Conf_1.000 | 1015 | 20 | 4.35E-95  | NP_495019.1    | 76 | 352.443 | 321  | 247  | Masculinisation Of Germline family member (mog-5) |
| Locus_8708_Transcript_1/2_Conf_1.000 | 2517 | 20 | 4.03E-105 | XP_002634366.1 | 57 | 387.497 | 587  | 340  | Hypothetical protein CBG17718                     |

|                                      |      |    |           |                |    |         |     |     |                                                                         |
|--------------------------------------|------|----|-----------|----------------|----|---------|-----|-----|-------------------------------------------------------------------------|
| Locus_8708_Transcript_2/2_Conf_1.000 | 2517 | 20 | 4.03E-105 | XP_002634366.1 | 57 | 387.497 | 587 | 340 | Hypothetical protein CBG17718                                           |
| Locus_8709_Transcript_1/1_Conf_1.000 | 271  | 6  | 4.44E-10  | NP_497545.1    | 69 | 67.781  | 89  | 62  | hypothetical protein H14E04.2                                           |
| Locus_871_Transcript_1/1_Conf_1.000  | 1198 | 20 | 1.55E-137 | XP_002641677.1 | 85 | 493.812 | 316 | 270 | C. briggsae CBR-CDK-1 protein                                           |
| Locus_8710_Transcript_1/1_Conf_1.000 | 281  | 0  |           |                |    |         |     |     |                                                                         |
| Locus_8711_Transcript_1/1_Conf_1.000 | 290  | 0  |           |                |    |         |     |     |                                                                         |
| Locus_8712_Transcript_1/1_Conf_1.000 | 488  | 20 | 2.43E-40  | NP_496534.1    | 68 | 168.318 | 162 | 111 | Nuclear Pore complex Protein family member (npp-3)                      |
| Locus_8713_Transcript_1/1_Conf_1.000 | 926  | 20 | 2.35E-81  | XP_002647135.1 | 73 | 306.605 | 247 | 181 | Hypothetical protein CBG16432                                           |
| Locus_8714_Transcript_1/1_Conf_1.000 | 205  | 0  |           |                |    |         |     |     |                                                                         |
| Locus_8715_Transcript_1/1_Conf_1.000 | 582  | 0  |           |                |    |         |     |     |                                                                         |
| Locus_8716_Transcript_1/2_Conf_1.000 | 1741 | 20 | 4.19E-47  | CAR97812.1     | 46 | 194.126 | 619 | 289 | C. elegans protein C36A4.8a, partially confirmed by transcript evidence |
| Locus_8716_Transcript_2/2_Conf_1.000 | 1741 | 20 | 5.47E-47  | CAR97812.1     | 47 | 193.741 | 619 | 291 | C. elegans protein C36A4.8a, partially confirmed by transcript evidence |
| Locus_8717_Transcript_1/1_Conf_1.000 | 476  | 20 | 3.98E-27  | NP_741529.1    | 82 | 124.405 | 84  | 69  | hypothetical protein C37H5.6                                            |
| Locus_8718_Transcript_1/1_Conf_1.000 | 329  | 2  | 5.98E-23  | NP_498314.2    | 71 | 110.538 | 110 | 79  | hypothetical protein ZK328.6                                            |

|                                      |      |    |           |                |    |         |     |     |                                                        |
|--------------------------------------|------|----|-----------|----------------|----|---------|-----|-----|--------------------------------------------------------|
| Locus_8719_Transcript_1/1_Conf_1.000 | 203  | 3  | 3.89E-14  | XP_002634053.1 | 81 | 81.2629 | 65  | 53  | Hypothetical protein CBG01593                          |
| Locus_872_Transcript_1/1_Conf_1.000  | 651  | 0  |           |                |    |         |     |     |                                                        |
| Locus_8720_Transcript_1/2_Conf_1.000 | 1352 | 12 | 2.47E-41  | XP_002633559.1 | 68 | 174.481 | 153 | 105 | C. briggsae CBR-PQN-89 protein                         |
| Locus_8720_Transcript_2/2_Conf_1.000 | 1352 | 12 | 2.47E-41  | XP_002633559.1 | 68 | 174.481 | 153 | 105 | C. briggsae CBR-PQN-89 protein                         |
| Locus_8721_Transcript_1/1_Conf_1.000 | 354  | 12 | 2.98E-06  | EEE23923.1     | 50 | 55.0694 | 108 | 55  | hypothetical protein TGGT1_030040                      |
| Locus_8722_Transcript_1/1_Conf_1.000 | 669  | 0  |           |                |    |         |     |     |                                                        |
| Locus_8723_Transcript_1/2_Conf_1.000 | 1364 | 20 | 4.43E-30  | NP_740929.2    | 79 | 137.117 | 102 | 81  | hypothetical protein Y105E8A.1                         |
| Locus_8723_Transcript_2/2_Conf_1.000 | 1326 | 20 | 4.26E-30  | NP_740929.2    | 79 | 137.117 | 102 | 81  | hypothetical protein Y105E8A.1                         |
| Locus_8724_Transcript_1/1_Conf_1.000 | 751  | 4  | 1.02E-51  | NP_495268.1    | 80 | 207.608 | 145 | 117 | GLoBin family member (glb-10)                          |
| Locus_8725_Transcript_1/1_Conf_1.000 | 858  | 20 | 9.41E-42  | XP_002638524.1 | 59 | 174.866 | 260 | 154 | C. briggsae CBR-AMX-3 protein                          |
| Locus_8726_Transcript_1/1_Conf_1.000 | 988  | 20 | 3.82E-40  | EFO13398.1     | 56 | 169.859 | 228 | 128 | hypothetical protein LOAG_15131                        |
| Locus_8727_Transcript_1/1_Conf_1.000 | 242  | 10 | 2.86E-17  | XP_002643956.1 | 66 | 91.6633 | 75  | 50  | Hypothetical protein CBG17315                          |
| Locus_8728_Transcript_1/1_Conf_1.000 | 1010 | 20 | 2.38E-61  | ACN93882.1     | 96 | 240.35  | 126 | 121 | putative glutamate-cysteine ligase catalytic subunit   |
| Locus_8729_Transcript_1/1_Conf_1.000 | 603  | 0  |           |                |    |         |     |     |                                                        |
| Locus_873_Transcript_1/1_Conf_1.000  | 1765 | 20 | 0         | NP_510711.2    | 84 | 704.516 | 464 | 392 | AMP-Activated Kinase family member (aak-2)             |
| Locus_8730_Transcript_1/1_Conf_1.000 | 690  | 20 | 2.30E-113 | XP_002798294.1 | 95 | 412.149 | 218 | 209 | PREDICTED: hypothetical protein LOC100430699 isoform 1 |
| Locus_8731_Transcript_1/3_Conf_0.667 | 990  | 20 | 3.29E-108 | XP_002631117.1 | 73 | 395.971 | 325 | 240 | Hypothetical protein CBG02892                          |

|                                      |      |    |           |                |    |         |     |     |                               |
|--------------------------------------|------|----|-----------|----------------|----|---------|-----|-----|-------------------------------|
| Locus_8731_Transcript_2/3_Conf_0.667 | 991  | 20 | 3.29E-108 | XP_002631117.1 | 73 | 395.971 | 325 | 240 | Hypothetical protein CBG02892 |
| Locus_8731_Transcript_3/3_Conf_0.667 | 990  | 20 | 3.29E-108 | XP_002631117.1 | 73 | 395.971 | 325 | 240 | Hypothetical protein CBG02892 |
| Locus_8732_Transcript_1/1_Conf_1.000 | 147  | 0  |           |                |    |         |     |     |                               |
| Locus_8733_Transcript_1/1_Conf_1.000 | 520  | 20 | 8.00E-32  | XP_002646686.1 | 69 | 140.198 | 144 | 100 | Hypothetical protein CBG13063 |
| Locus_8734_Transcript_1/4_Conf_0.667 | 1290 | 0  |           |                |    |         |     |     |                               |
| Locus_8734_Transcript_2/4_Conf_0.222 | 316  | 0  |           |                |    |         |     |     |                               |
| Locus_8734_Transcript_3/4_Conf_0.667 | 1290 | 0  |           |                |    |         |     |     |                               |
| Locus_8734_Transcript_4/4_Conf_0.667 | 1290 | 0  |           |                |    |         |     |     |                               |
| Locus_8735_Transcript_1/1_Conf_1.000 | 404  | 20 | 2.79E-12  | XP_001892288.1 | 59 | 75.0998 | 92  | 55  | UPF0017 protein CG3488        |
| Locus_8736_Transcript_1/1_Conf_1.000 | 660  | 20 | 1.08E-45  | XP_001895971.1 | 63 | 187.193 | 219 | 139 | hypothetical protein          |
| Locus_8737_Transcript_1/1_Conf_1.000 | 470  | 7  | 2.62E-10  | NP_491776.1    | 59 | 68.5514 | 81  | 48  | hypothetical protein T09B4.7  |
| Locus_8738_Transcript_1/1_Conf_1.000 | 270  | 4  | 5.07E-14  | NP_497743.1    | 65 | 80.8777 | 93  | 61  | hypothetical protein C46F11.4 |
| Locus_8739_Transcript_1/1_Conf_1.000 | 983  | 20 | 3.81E-125 | XP_002642323.1 | 89 | 452.21  | 265 | 237 | C. briggsae CBR-RIB-2 protein |
| Locus_874_Transcript_1/1_Conf_1.000  | 1817 | 20 | 3.22E-106 | XP_001900236.1 | 59 | 390.578 | 541 | 321 | CUT domain containing protein |



|                                      |      |    |           |                |    |         |     |     |                                                          |  |
|--------------------------------------|------|----|-----------|----------------|----|---------|-----|-----|----------------------------------------------------------|--|
| Locus_8740_Transcript_1/1_Conf_1.000 | 123  | 0  |           |                |    |         |     |     |                                                          |  |
| Locus_8741_Transcript_1/1_Conf_1.000 | 186  | 0  |           |                |    |         |     |     |                                                          |  |
| Locus_8742_Transcript_1/2_Conf_1.000 | 1173 | 20 | 2.09E-38  | XP_395372.2    | 48 | 164.466 | 331 | 162 | PREDICTED: similar to CG7565-PA                          |  |
| Locus_8742_Transcript_2/2_Conf_1.000 | 1173 | 20 | 7.93E-38  | XP_395372.2    | 48 | 162.54  | 331 | 161 | PREDICTED: similar to CG7565-PA                          |  |
| Locus_8743_Transcript_1/1_Conf_1.000 | 393  | 0  |           |                |    |         |     |     |                                                          |  |
| Locus_8744_Transcript_1/1_Conf_1.000 | 1155 | 4  | 9.86E-09  | NP_506662.1    | 40 | 65.855  | 225 | 92  | hypothetical protein ZC412.3                             |  |
| Locus_8745_Transcript_1/1_Conf_1.000 | 549  | 20 | 1.19E-74  | XP_002647384.1 | 85 | 282.722 | 187 | 160 | Hypothetical protein CBG06449                            |  |
| Locus_8746_Transcript_1/1_Conf_1.000 | 487  | 20 | 2.96E-62  | NP_508943.3    | 95 | 241.121 | 118 | 113 | UNCoordinated family member (unc-97)                     |  |
| Locus_8747_Transcript_1/1_Conf_1.000 | 1005 | 20 | 4.26E-111 | NP_507876.1    | 82 | 405.601 | 293 | 242 | DeCapping Scavenger enzyme homolog family member (dcs-1) |  |
| Locus_8748_Transcript_1/1_Conf_1.000 | 1545 | 20 | 0         | NP_492785.1    | 91 | 723.005 | 432 | 395 | Eukaryotic Initiation Factor family member (eif-3.E)     |  |
| Locus_8749_Transcript_1/1_Conf_1.000 | 299  | 0  |           |                |    |         |     |     |                                                          |  |
| Locus_875_Transcript_1/1_Conf_1.000  | 233  | 0  |           |                |    |         |     |     |                                                          |  |
| Locus_8750_Transcript_1/1_Conf_1.000 | 174  | 0  |           |                |    |         |     |     |                                                          |  |
| Locus_8751_Transcript_1/1_Conf_1.000 | 1151 | 4  | 9.75E-17  | NP_741942.1    | 47 | 92.4337 | 269 | 129 | Suppressor of activated let-60 Ras family member (sur-7) |  |
| Locus_8752_Transcript_1/1_Conf_1.000 | 355  | 20 | 9.19E-40  | XP_002632757.1 | 81 | 166.392 | 117 | 95  | C. briggsae CBR-EOR-1 protein                            |  |
| Locus_8753_Transcript_1/1_Conf_1.000 | 446  | 20 | 1.68E-57  | EFO14962.1     | 85 | 225.328 | 144 | 123 | AQR protein                                              |  |
| Locus_8754_Transcript_1/1_Conf_1.000 | 703  | 2  | 2.82E-05  | AAY29120.1     | 44 | 53.1434 | 223 | 100 | cement precursor protein 3B variant 1                    |  |

|                                      |      |    |          |                |    |         |     |     |                                                           |
|--------------------------------------|------|----|----------|----------------|----|---------|-----|-----|-----------------------------------------------------------|
| Locus_8755_Transcript_1/1_Conf_1.000 | 1920 | 20 | 2.55E-08 | XP_002194548.1 | 39 | 65.4698 | 470 | 185 | PREDICTED: death inducer-obliterator 1                    |
| Locus_8756_Transcript_1/1_Conf_1.000 | 680  | 0  |          |                |    |         |     |     |                                                           |
| Locus_8757_Transcript_1/1_Conf_1.000 | 425  | 20 | 3.16E-56 | EFO19846.1     | 86 | 221.09  | 140 | 121 | cleavage and polyadenylation specificity factor subunit 2 |
| Locus_8758_Transcript_1/1_Conf_1.000 | 349  | 16 | 3.21E-16 | CAA40299.1     | 86 | 88.1965 | 116 | 100 | alpha1(IV) collagen                                       |
| Locus_8759_Transcript_1/1_Conf_1.000 | 488  | 20 | 3.16E-56 | XP_001902033.1 | 78 | 221.09  | 157 | 123 | ring finger protein 1                                     |
| Locus_876_Transcript_1/1_Conf_1.000  | 352  | 19 | 6.02E-15 | AAD51334.1     | 81 | 83.9593 | 55  | 45  | Kunitz type serine protease inhibitor                     |
| Locus_8760_Transcript_1/2_Conf_1.000 | 785  | 0  |          |                |    |         |     |     |                                                           |
| Locus_8760_Transcript_2/2_Conf_1.000 | 693  | 1  | 8.80E-04 | XP_001717004.1 | 40 | 48.1358 | 115 | 46  | PREDICTED: hypothetical protein                           |
| Locus_8761_Transcript_1/2_Conf_1.000 | 707  | 20 | 7.98E-85 | NP_871967.1    | 89 | 317.39  | 188 | 168 | TBC (Tre-2/Bub2/Cdc16) domain family member (tbc-15)      |
| Locus_8761_Transcript_2/2_Conf_1.000 | 780  | 20 | 2.19E-84 | NP_871967.1    | 89 | 316.235 | 188 | 168 | TBC (Tre-2/Bub2/Cdc16) domain family member (tbc-15)      |
| Locus_8762_Transcript_1/1_Conf_1.000 | 704  | 20 | 3.60E-85 | AAG29105.1     | 75 | 318.546 | 234 | 177 | AF273705_1zinc metallopeptidase 2 MEP2                    |
| Locus_8763_Transcript_1/1_Conf_1.000 | 397  | 0  |          |                |    |         |     |     |                                                           |
| Locus_8764_Transcript_1/1_Conf_1.000 | 533  | 4  | 3.28E-63 | NP_501400.1    | 85 | 244.588 | 161 | 138 | hypothetical protein F35H10.10                            |
| Locus_8765_Transcript_1/1_Conf_1.000 | 351  | 20 | 6.42E-25 | NP_502129.1    | 93 | 117.087 | 66  | 62  | hypothetical protein B0035.5                              |

|                                      |      |    |          |                |    |         |     |     |                                                                          |
|--------------------------------------|------|----|----------|----------------|----|---------|-----|-----|--------------------------------------------------------------------------|
| Locus_8766_Transcript_1/2_Conf_1.000 | 679  | 20 | 7.27E-24 | EFO17488.1     | 62 | 114.775 | 140 | 87  | hypothetical protein LOAG_11011                                          |
| Locus_8766_Transcript_2/2_Conf_1.000 | 679  | 20 | 7.27E-24 | EFO17488.1     | 62 | 114.775 | 140 | 87  | hypothetical protein LOAG_11011                                          |
| Locus_8767_Transcript_1/1_Conf_1.000 | 764  | 20 | 5.19E-43 | EFO27634.1     | 83 | 178.718 | 112 | 94  | hypothetical protein LOAG_00851                                          |
| Locus_8768_Transcript_1/1_Conf_1.000 | 206  | 0  |          |                |    |         |     |     |                                                                          |
| Locus_8769_Transcript_1/1_Conf_1.000 | 353  | 0  |          |                |    |         |     |     |                                                                          |
| Locus_877_Transcript_1/2_Conf_1.000  | 330  | 0  |          |                |    |         |     |     |                                                                          |
| Locus_877_Transcript_2/2_Conf_1.000  | 344  | 0  |          |                |    |         |     |     |                                                                          |
| Locus_8770_Transcript_1/2_Conf_1.000 | 1171 | 4  | 2.83E-11 | EFO22760.1     | 43 | 74.3294 | 191 | 84  | hypothetical protein LOAG_05724                                          |
| Locus_8770_Transcript_2/2_Conf_1.000 | 1162 | 4  | 1.81E-10 | EFO22760.1     | 43 | 71.633  | 198 | 87  | hypothetical protein LOAG_05724                                          |
| Locus_8771_Transcript_1/2_Conf_1.000 | 1926 | 0  |          |                |    |         |     |     |                                                                          |
| Locus_8771_Transcript_2/2_Conf_1.000 | 356  | 3  | 1.64E-04 | XP_001896320.1 | 75 | 49.2914 | 44  | 33  | Bromodomain containing protein                                           |
| Locus_8772_Transcript_1/1_Conf_1.000 | 593  | 20 | 1.51E-39 | XP_002637033.1 | 69 | 166.392 | 143 | 100 | C. briggsae CBR-AOS-1 protein                                            |
| Locus_8773_Transcript_1/1_Conf_1.000 | 133  | 0  |          |                |    |         |     |     |                                                                          |
| Locus_8774_Transcript_1/3_Conf_0.600 | 362  | 0  |          |                |    |         |     |     |                                                                          |
| Locus_8774_Transcript_2/3_Conf_0.600 | 363  | 0  |          |                |    |         |     |     |                                                                          |
| Locus_8774_Transcript_3/3_Conf_0.600 | 362  | 0  |          |                |    |         |     |     |                                                                          |
| Locus_8775_Transcript_1/1_Conf_1.000 | 285  | 20 | 4.06E-35 | CAA21622.4     | 90 | 150.984 | 94  | 85  | C. elegans protein Y43F8C.12, partially confirmed by transcript evidence |
| Locus_8776_Transcript_1/2_Conf_1.000 | 519  | 0  |          |                |    |         |     |     |                                                                          |
| Locus_8776_Transcript_2/2_Conf_1.000 | 520  | 0  |          |                |    |         |     |     |                                                                          |
| Locus_8777_Transcript_1/1_Conf_1.000 | 578  | 20 | 1.56E-70 | NP_500620.1    | 85 | 269.24  | 181 | 154 | hypothetical protein K08F11.5                                            |
| Locus_8778_Transcript_1/2_Conf_1.000 | 364  | 10 | 1.24E-04 | XP_002043604.1 | 48 | 49.6766 | 103 | 50  | GM16842                                                                  |
| Locus_8778_Transcript_2/2_Conf_1.000 | 370  | 13 | 4.37E-05 | XP_002043604.1 | 48 | 51.2174 | 107 | 52  | GM16842                                                                  |

|                                      |      |    |          |                |     |         |     |     |                                           |
|--------------------------------------|------|----|----------|----------------|-----|---------|-----|-----|-------------------------------------------|
| Locus_8779_Transcript_1/2_Conf_1.000 | 351  | 8  | 3.31E-11 | XP_002633023.1 | 59  | 68.9366 | 71  | 42  | Hypothetical protein CBG21797             |
| Locus_8779_Transcript_2/2_Conf_1.000 | 1318 | 20 | 2.80E-58 | NP_501604.2    | 66  | 230.72  | 261 | 173 | hypothetical protein C46C2.2              |
| Locus_878_Transcript_1/1_Conf_1.000  | 1422 | 7  | 3.85E-08 | NP_492632.1    | 44  | 64.3142 | 139 | 62  | hypothetical protein T24D1.5              |
| Locus_8780_Transcript_1/1_Conf_1.000 | 952  | 20 | 1.65E-61 | XP_002643891.1 | 58  | 240.736 | 310 | 180 | Hypothetical protein CBG02143             |
| Locus_8781_Transcript_1/1_Conf_1.000 | 285  | 20 | 4.23E-08 | CAN88212.1     | 53  | 61.2326 | 71  | 38  | notch homolog 1b                          |
| Locus_8782_Transcript_1/2_Conf_1.000 | 370  | 0  |          |                |     |         |     |     |                                           |
| Locus_8782_Transcript_2/2_Conf_1.000 | 375  | 0  |          |                |     |         |     |     |                                           |
| Locus_8783_Transcript_1/1_Conf_1.000 | 715  | 0  |          |                |     |         |     |     |                                           |
| Locus_8784_Transcript_1/1_Conf_1.000 | 503  | 20 | 3.18E-64 | XP_002640833.1 | 85  | 247.669 | 167 | 142 | C. briggsae CBR-KLP-20 protein            |
| Locus_8785_Transcript_1/1_Conf_1.000 | 978  | 8  | 1.88E-15 | EFO18438.1     | 47  | 87.8113 | 232 | 110 | zinc finger protein                       |
| Locus_8786_Transcript_1/1_Conf_1.000 | 656  | 0  |          |                |     |         |     |     |                                           |
| Locus_8787_Transcript_1/1_Conf_1.000 | 236  | 20 | 3.64E-20 | NP_499865.1    | 76  | 101.293 | 73  | 56  | hypothetical protein F29C4.6              |
| Locus_8788_Transcript_1/1_Conf_1.000 | 158  | 0  |          |                |     |         |     |     |                                           |
| Locus_8789_Transcript_1/1_Conf_1.000 | 394  | 20 | 3.09E-51 | XP_002919231.1 | 100 | 204.527 | 126 | 126 | PREDICTED: 60S ribosomal protein L31-like |

|                                      |     |    |          |                |    |         |     |     |                                                                          |
|--------------------------------------|-----|----|----------|----------------|----|---------|-----|-----|--------------------------------------------------------------------------|
| Locus_879_Transcript_1/1_Conf_1.000  | 598 | 20 | 1.22E-60 | XP_002640640.1 | 71 | 236.498 | 203 | 146 | C. briggsae CBR-FRM-1 protein                                            |
| Locus_8790_Transcript_1/1_Conf_1.000 | 254 | 0  |          |                |    |         |     |     |                                                                          |
| Locus_8791_Transcript_1/1_Conf_1.000 | 162 | 0  |          |                |    |         |     |     |                                                                          |
| Locus_8792_Transcript_1/1_Conf_1.000 | 887 | 20 | 1.19E-71 | A8XFF4.2       | 67 | 274.248 | 297 | 201 | Protein arginine N-methyltransferase 7                                   |
| Locus_8793_Transcript_1/1_Conf_1.000 | 239 | 6  | 2.13E-20 | AAT12422.1     | 78 | 102.064 | 79  | 62  | hypothetical protein isoform a                                           |
| Locus_8794_Transcript_1/1_Conf_1.000 | 583 | 20 | 2.26E-48 | NP_507205.2    | 63 | 195.667 | 180 | 114 | O-ACYLtransferase homolog family member (oac-53)                         |
| Locus_8795_Transcript_1/1_Conf_1.000 | 294 | 0  |          |                |    |         |     |     |                                                                          |
| Locus_8796_Transcript_1/1_Conf_1.000 | 419 | 12 | 1.23E-07 | XP_001161945.1 | 58 | 59.6918 | 68  | 40  | PREDICTED: pleckstrin homology-like domain, family B, member 1 isoform 1 |
| Locus_8797_Transcript_1/1_Conf_1.000 | 203 | 20 | 7.59E-10 | EFO26165.1     | 63 | 67.0106 | 65  | 41  | hypothetical protein LOAG_02323                                          |
| Locus_8798_Transcript_1/1_Conf_1.000 | 552 | 20 | 1.43E-75 | NP_492476.1    | 89 | 285.804 | 187 | 168 | hypothetical protein F14B4.3                                             |
| Locus_8799_Transcript_1/1_Conf_1.000 | 689 | 6  | 2.56E-48 | NP_506082.2    | 63 | 196.052 | 233 | 148 | hypothetical protein F55C5.7                                             |
| Locus_88_Transcript_1/1_Conf_1.000   | 351 | 20 | 3.08E-27 | ACI49235.1     | 83 | 124.79  | 103 | 86  | hypothetical protein Csp3_JD06.001                                       |

|                                      |      |    |           |                |    |         |     |     |                                                                                        |
|--------------------------------------|------|----|-----------|----------------|----|---------|-----|-----|----------------------------------------------------------------------------------------|
| Locus_880_Transcript_1/1_Conf_1.000  | 2673 | 20 | 0         | NP_490744.1    | 83 | 980.704 | 718 | 603 | fatty Acid CoA Synthetase family member (acs-13)                                       |
| Locus_8800_Transcript_1/1_Conf_1.000 | 1147 | 19 | 9.34E-36  | NP_001023856.1 | 48 | 155.606 | 360 | 174 | hypothetical protein F26F12.3                                                          |
| Locus_8801_Transcript_1/1_Conf_1.000 | 782  | 5  | 1.65E-23  | NP_001021410.2 | 59 | 114.005 | 149 | 89  | LIM domain family member (lim-9)                                                       |
| Locus_8802_Transcript_1/1_Conf_1.000 | 378  | 0  |           |                |    |         |     |     |                                                                                        |
| Locus_8803_Transcript_1/1_Conf_1.000 | 515  | 20 | 3.66E-42  | XP_002640970.1 | 70 | 174.481 | 177 | 124 | Hypothetical protein CBG11716                                                          |
| Locus_8804_Transcript_1/1_Conf_1.000 | 319  | 0  |           |                |    |         |     |     |                                                                                        |
| Locus_8805_Transcript_1/2_Conf_1.000 | 2335 | 20 | 1.15E-106 | ADE60683.1     | 72 | 392.504 | 339 | 247 | Diacylglycerol kinase protein 4, isoform a, partially confirmed by transcript evidence |

|                                      |      |    |           |                |    |         |     |     |                                                                                        |
|--------------------------------------|------|----|-----------|----------------|----|---------|-----|-----|----------------------------------------------------------------------------------------|
| Locus_8805_Transcript_2/2_Conf_1.000 | 2323 | 20 | 1.14E-106 | ADE60683.1     | 72 | 392.504 | 339 | 247 | Diacylglycerol kinase protein 4, isoform a, partially confirmed by transcript evidence |
| Locus_8806_Transcript_1/2_Conf_1.000 | 461  | 0  |           |                |    |         |     |     |                                                                                        |
| Locus_8806_Transcript_2/2_Conf_1.000 | 461  | 0  |           |                |    |         |     |     |                                                                                        |
| Locus_8807_Transcript_1/1_Conf_1.000 | 606  | 20 | 1.84E-59  | XP_002641254.1 | 78 | 232.646 | 185 | 145 | C. briggsae CBR-DHS-9 protein                                                          |
| Locus_8808_Transcript_1/1_Conf_1.000 | 635  | 20 | 1.28E-61  | NP_500216.1    | 76 | 239.965 | 211 | 162 | hypothetical protein Y69A2AR.16                                                        |
| Locus_8809_Transcript_1/1_Conf_1.000 | 133  | 0  |           |                |    |         |     |     |                                                                                        |
| Locus_881_Transcript_1/1_Conf_1.000  | 2797 | 20 | 4.17E-175 | XP_002639624.1 | 62 | 620.157 | 820 | 516 | C. briggsae CBR-LSS-4 protein                                                          |
| Locus_8810_Transcript_1/1_Conf_1.000 | 477  | 20 | 4.21E-53  | XP_002641484.1 | 83 | 210.69  | 159 | 133 | Hypothetical protein CBG09775                                                          |
| Locus_8811_Transcript_1/1_Conf_1.000 | 221  | 0  |           |                |    |         |     |     |                                                                                        |
| Locus_8812_Transcript_1/1_Conf_1.000 | 148  | 2  | 5.01E-09  | NP_498946.1    | 77 | 64.3142 | 45  | 35  | hypothetical protein F54F2.7                                                           |

|                                      |      |    |           |                |    |         |     |     |                                                       |
|--------------------------------------|------|----|-----------|----------------|----|---------|-----|-----|-------------------------------------------------------|
| Locus_8813_Transcript_1/1_Conf_1.000 | 692  | 20 | 9.12E-78  | XP_001899166.1 | 80 | 293.893 | 208 | 167 | GTP-ase activating protein for Arf containing protein |
| Locus_8814_Transcript_1/1_Conf_1.000 | 1128 | 20 | 1.66E-61  | CAR63701.1     | 92 | 241.121 | 138 | 128 | hypothetical protein                                  |
| Locus_8815_Transcript_1/1_Conf_1.000 | 290  | 3  | 3.23E-08  | ACI49149.1     | 69 | 61.6178 | 59  | 41  | hypothetical protein Cbre_JD20.004                    |
| Locus_8816_Transcript_1/1_Conf_1.000 | 386  | 20 | 1.80E-11  | EFO19656.1     | 57 | 72.4034 | 106 | 61  | hypothetical protein LOAG_08835                       |
| Locus_8817_Transcript_1/1_Conf_1.000 | 435  | 20 | 2.75E-20  | XP_002639937.1 | 88 | 101.679 | 71  | 63  | Hypothetical protein CBG08274                         |
| Locus_8818_Transcript_1/1_Conf_1.000 | 623  | 0  |           |                |    |         |     |     |                                                       |
| Locus_8819_Transcript_1/1_Conf_1.000 | 1006 | 20 | 1.89E-159 | NP_498260.2    | 92 | 566.229 | 335 | 310 | DEAD box helicase homolog family member (ddx-23)      |
| Locus_882_Transcript_1/1_Conf_1.000  | 445  | 20 | 1.65E-12  | NP_491682.1    | 68 | 75.8702 | 93  | 64  | MTK1/MEKK4 homolog family member (mtk-1)              |
| Locus_8820_Transcript_1/1_Conf_1.000 | 696  | 0  |           |                |    |         |     |     |                                                       |
| Locus_8821_Transcript_1/1_Conf_1.000 | 714  | 20 | 1.16E-46  | NP_508439.2    | 63 | 190.66  | 235 | 149 | hypothetical protein C43H6.1                          |



|                                      |      |    |           |                |    |         |     |     |                                                         |
|--------------------------------------|------|----|-----------|----------------|----|---------|-----|-----|---------------------------------------------------------|
| Locus_8822_Transcript_1/1_Conf_1.000 | 1464 | 2  | 9.88E-07  |                | 72 | 59.6918 | 51  | 37  | C02F5.1 protein                                         |
| Locus_8823_Transcript_1/1_Conf_1.000 | 154  | 0  |           |                |    |         |     |     |                                                         |
| Locus_8824_Transcript_1/3_Conf_0.714 | 1262 | 20 | 9.04E-71  | XP_002631291.1 | 83 | 261.536 | 184 | 154 | Hypothetical protein CBG03104                           |
| Locus_8824_Transcript_2/3_Conf_0.714 | 921  | 20 | 3.86E-76  | NP_496245.1    | 81 | 289.271 | 212 | 173 | hypothetical protein ZK673.2                            |
| Locus_8824_Transcript_3/3_Conf_0.714 | 1186 | 20 | 5.71E-76  | NP_496245.1    | 81 | 289.271 | 212 | 173 | hypothetical protein ZK673.2                            |
| Locus_8825_Transcript_1/1_Conf_1.000 | 139  | 0  |           |                |    |         |     |     |                                                         |
| Locus_8826_Transcript_1/1_Conf_1.000 | 425  | 0  |           |                |    |         |     |     |                                                         |
| Locus_8827_Transcript_1/2_Conf_1.000 | 773  | 20 | 3.10E-67  | XP_002645151.1 | 91 | 259.225 | 157 | 143 | C. briggsae CBR-TNT-3 protein                           |
| Locus_8827_Transcript_2/2_Conf_1.000 | 612  | 20 | 1.89E-67  | XP_002645151.1 | 91 | 259.225 | 157 | 143 | C. briggsae CBR-TNT-3 protein                           |
| Locus_8828_Transcript_1/1_Conf_1.000 | 159  | 0  |           |                |    |         |     |     |                                                         |
| Locus_8829_Transcript_1/1_Conf_1.000 | 531  | 20 | 1.48E-39  | XP_002643586.1 | 66 | 166.007 | 179 | 119 | C. briggsae CBR-SYM-4 protein                           |
| Locus_883_Transcript_1/2_Conf_1.000  | 303  | 12 | 2.42E-24  | NP_498341.1    | 72 | 115.161 | 94  | 68  | hypothetical protein F42A10.7                           |
| Locus_883_Transcript_2/2_Conf_1.000  | 303  | 12 | 2.41E-24  | NP_498341.1    | 72 | 115.161 | 94  | 68  | hypothetical protein F42A10.7                           |
| Locus_8830_Transcript_1/1_Conf_1.000 | 411  | 20 | 1.01E-38  | NP_503109.1    | 75 | 162.925 | 124 | 93  | beta-LACTamase domain containing family member (lact-6) |
| Locus_8831_Transcript_1/1_Conf_1.000 | 589  | 20 | 8.09E-62  | NP_508978.3    | 77 | 240.35  | 195 | 152 | hypothetical protein F13D11.4                           |
| Locus_8832_Transcript_1/1_Conf_1.000 | 216  | 0  |           |                |    |         |     |     |                                                         |
| Locus_8833_Transcript_1/2_Conf_1.000 | 648  | 20 | 6.45E-104 | XP_002640347.1 | 94 | 380.563 | 216 | 205 | C. briggsae CBR-HAF-9 protein                           |

|                                      |      |    |           |                |    |         |     |     |                                                                            |
|--------------------------------------|------|----|-----------|----------------|----|---------|-----|-----|----------------------------------------------------------------------------|
| Locus_8833_Transcript_2/2_Conf_1.000 | 337  | 20 | 3.29E-53  | CAP37340.2     | 95 | 211.075 | 112 | 107 | CBR-HAF-9 protein                                                          |
| Locus_8834_Transcript_1/1_Conf_1.000 | 633  | 20 | 2.50E-57  | NP_492322.1    | 88 | 225.713 | 133 | 118 | associated with RAN (nuclear import/export) function family member (ran-4) |
| Locus_8835_Transcript_1/1_Conf_1.000 | 1411 | 20 | 3.52E-46  | XP_002637954.1 | 55 | 190.66  | 391 | 218 | Hypothetical protein CBG04771                                              |
| Locus_8836_Transcript_1/2_Conf_1.000 | 677  | 2  | 2.32E-06  | NP_001022338.1 | 67 | 56.6102 | 43  | 29  | hypothetical protein T09F3.5                                               |
| Locus_8836_Transcript_2/2_Conf_1.000 | 677  | 2  | 2.32E-06  | NP_001022338.1 | 67 | 56.6102 | 43  | 29  | hypothetical protein T09F3.5                                               |
| Locus_8837_Transcript_1/1_Conf_1.000 | 409  | 20 | 8.85E-35  | XP_002632524.1 | 78 | 149.828 | 118 | 93  | Hypothetical protein CBG13772                                              |
| Locus_8838_Transcript_1/2_Conf_1.000 | 1091 | 20 | 5.34E-102 | NP_491765.2    | 68 | 375.555 | 344 | 236 | hypothetical protein T27A3.2                                               |
| Locus_8838_Transcript_2/2_Conf_1.000 | 1134 | 20 | 3.02E-103 | NP_491765.2    | 68 | 379.793 | 348 | 239 | hypothetical protein T27A3.2                                               |
| Locus_8839_Transcript_1/1_Conf_1.000 | 838  | 2  | 2.21E-32  | XP_001891951.1 | 53 | 143.665 | 277 | 149 | hypothetical protein                                                       |
| Locus_884_Transcript_1/1_Conf_1.000  | 327  | 0  |           |                |    |         |     |     |                                                                            |
| Locus_8840_Transcript_1/1_Conf_1.000 | 1219 | 20 | 1.39E-32  | XP_001899905.1 | 53 | 145.206 | 267 | 142 | F-box domain containing protein                                            |
| Locus_8841_Transcript_1/1_Conf_1.000 | 231  | 12 | 7.37E-13  | XP_001897369.1 | 77 | 77.0258 | 61  | 47  | Protein kinase domain containing protein                                   |

|                                      |      |    |           |                |    |         |     |     |                                  |  |
|--------------------------------------|------|----|-----------|----------------|----|---------|-----|-----|----------------------------------|--|
| Locus_8842_Transcript_1/1_Conf_1.000 | 130  | 0  |           |                |    |         |     |     |                                  |  |
| Locus_8843_Transcript_1/1_Conf_1.000 | 318  | 0  |           |                |    |         |     |     |                                  |  |
| Locus_8844_Transcript_1/1_Conf_1.000 | 184  | 1  | 9.80E-05  | ABI52743.1     | 53 | 50.0618 | 65  | 35  | 10 kDa putative secreted protein |  |
| Locus_8845_Transcript_1/1_Conf_1.000 | 619  | 9  | 1.46E-14  | XP_002642159.1 | 51 | 83.5741 | 163 | 84  | Hypothetical protein CBG18119    |  |
| Locus_8846_Transcript_1/1_Conf_1.000 | 1078 | 20 | 5.91E-37  | XP_002630854.1 | 66 | 159.458 | 206 | 138 | C. briggsae CBR-RAN-5 protein    |  |
| Locus_8847_Transcript_1/1_Conf_1.000 | 1521 | 20 | 7.92E-148 | AAA18956.1     | 96 | 528.48  | 285 | 275 | Sur-1 MAP kinase                 |  |
| Locus_8848_Transcript_1/1_Conf_1.000 | 1172 | 20 | 1.35E-29  | XP_002644148.1 | 43 | 135.191 | 391 | 170 | Hypothetical protein CBG04520    |  |
| Locus_8849_Transcript_1/1_Conf_1.000 | 293  | 0  |           |                |    |         |     |     |                                  |  |
| Locus_885_Transcript_1/3_Conf_0.286  | 541  | 5  | 2.82E-09  | NP_499247.2    | 57 | 65.4698 | 85  | 49  | hypothetical protein ZK1128.2    |  |
| Locus_885_Transcript_2/3_Conf_0.714  | 1766 | 20 | 2.50E-108 | EFO26532.1     | 70 | 258.84  | 258 | 182 | hypothetical protein LOAG_01952  |  |
| Locus_885_Transcript_3/3_Conf_0.714  | 1750 | 20 | 1.52E-113 | EFO26532.1     | 65 | 414.846 | 485 | 318 | hypothetical protein LOAG_01952  |  |

|                                      |      |    |           |                |    |         |     |     |                                                                |
|--------------------------------------|------|----|-----------|----------------|----|---------|-----|-----|----------------------------------------------------------------|
| Locus_8850_Transcript_1/1_Conf_1.000 | 1048 | 20 | 1.66E-105 | NP_497416.4    | 79 | 387.111 | 294 | 235 | Sodium:Neurotransmitter symporter Family family member (snf-6) |
| Locus_8851_Transcript_1/1_Conf_1.000 | 1212 | 16 | 6.84E-32  | NP_001023856.1 | 46 | 142.895 | 370 | 172 | hypothetical protein F26F12.3                                  |
| Locus_8852_Transcript_1/1_Conf_1.000 | 242  | 0  |           |                |    |         |     |     |                                                                |
| Locus_8853_Transcript_1/1_Conf_1.000 | 235  | 0  |           |                |    |         |     |     |                                                                |
| Locus_8854_Transcript_1/1_Conf_1.000 | 302  | 2  | 8.66E-06  | NP_494563.1    | 66 | 53.5286 | 60  | 40  | hypothetical protein Y49F6B.2                                  |
| Locus_8855_Transcript_1/1_Conf_1.000 | 1639 | 13 | 2.53E-30  | EFO25015.1     | 46 | 138.272 | 380 | 177 | hypothetical protein LOAG_03469                                |
| Locus_8856_Transcript_1/2_Conf_1.000 | 824  | 20 | 2.06E-51  | NP_496985.1    | 85 | 206.838 | 129 | 110 | hypothetical protein R06A4.9                                   |
| Locus_8856_Transcript_2/2_Conf_1.000 | 1897 | 20 | 0         | XP_001898532.1 | 81 | 770     | 528 | 430 | wdc146                                                         |
| Locus_8857_Transcript_1/3_Conf_0.222 | 180  | 0  |           |                |    |         |     |     |                                                                |
| Locus_8857_Transcript_2/3_Conf_0.556 | 677  | 20 | 9.43E-08  | CAK12529.1     | 50 | 61.2326 | 155 | 78  | putative group 3 late embryogenesis abundant protein           |
| Locus_8857_Transcript_3/3_Conf_0.667 | 587  | 20 | 2.75E-09  | NP_001024044.1 | 46 | 65.855  | 158 | 73  | hypothetical protein K08H10.2                                  |
| Locus_8858_Transcript_1/2_Conf_1.000 | 1264 | 20 | 1.68E-105 | XP_002631048.1 | 81 | 387.497 | 310 | 253 | Hypothetical protein CBG02810                                  |
| Locus_8858_Transcript_2/2_Conf_1.000 | 381  | 2  | 3.63E-12  | NP_496794.1    | 73 | 74.7146 | 90  | 66  | hypothetical protein F32A11.1                                  |

|                                      |      |    |           |                |    |         |     |     |                                                              |
|--------------------------------------|------|----|-----------|----------------|----|---------|-----|-----|--------------------------------------------------------------|
| Locus_8859_Transcript_1/1_Conf_1.000 | 589  | 14 | 1.65E-14  | XP_002646138.1 | 48 | 83.1889 | 189 | 91  | Hypothetical protein CBG08018                                |
| Locus_886_Transcript_1/3_Conf_0.714  | 3456 | 20 | 3.34E-161 | NP_494929.3    | 60 | 574.318 | 892 | 536 | hypothetical protein F33G12.5                                |
| Locus_886_Transcript_2/3_Conf_0.714  | 3501 | 20 | 5.39E-167 | NP_494929.3    | 60 | 593.578 | 897 | 546 | hypothetical protein F33G12.5                                |
| Locus_886_Transcript_3/3_Conf_0.714  | 3486 | 20 | 7.49E-169 | NP_494929.3    | 61 | 599.742 | 892 | 546 | hypothetical protein F33G12.5                                |
| Locus_8860_Transcript_1/1_Conf_1.000 | 563  | 20 | 7.62E-64  | XP_973257.1    | 76 | 246.899 | 180 | 138 | PREDICTED: similar to adp,atp carrier protein                |
| Locus_8861_Transcript_1/1_Conf_1.000 | 372  | 20 | 1.89E-08  | XP_001629102.1 | 91 | 62.3882 | 35  | 32  | predicted protein                                            |
| Locus_8862_Transcript_1/1_Conf_1.000 | 329  | 4  | 1.43E-08  | EFO17660.1     | 51 | 62.7734 | 97  | 50  | zinc finger protein                                          |
| Locus_8863_Transcript_1/1_Conf_1.000 | 643  | 20 | 1.62E-67  | NP_502295.1    | 78 | 259.61  | 199 | 156 | yeast MON (monensin-resistant) homolog family member (mon-2) |
| Locus_8864_Transcript_1/1_Conf_1.000 | 262  | 20 | 1.02E-38  | XP_002635291.1 | 91 | 162.925 | 87  | 80  | Hypothetical protein CBG11538                                |
| Locus_8865_Transcript_1/1_Conf_1.000 | 458  | 20 | 7.16E-61  | XP_002745056.1 | 95 | 236.498 | 143 | 137 | PREDICTED: 40S ribosomal protein S24-like                    |
| Locus_8866_Transcript_1/1_Conf_1.000 | 633  | 20 | 3.85E-58  | EFO15888.1     | 71 | 228.409 | 196 | 141 | mediator protein 20                                          |

|                                      |      |    |          |                |    |         |     |     |                                                            |
|--------------------------------------|------|----|----------|----------------|----|---------|-----|-----|------------------------------------------------------------|
| Locus_8867_Transcript_1/1_Conf_1.000 | 470  | 20 | 3.26E-61 | NP_001021979.1 | 90 | 237.654 | 156 | 141 | Serine Palmitoyl Transferase family family member (sptl-1) |
| Locus_8868_Transcript_1/1_Conf_1.000 | 200  | 20 | 3.64E-28 | EDL24575.1     | 95 | 127.872 | 66  | 63  | mCG140959, isoform CRA_e                                   |
| Locus_8869_Transcript_1/1_Conf_1.000 | 879  | 20 | 7.61E-87 | AAC39119.1     | 78 | 324.709 | 239 | 187 | low-affinity peptide transporter                           |
| Locus_887_Transcript_1/2_Conf_1.000  | 1113 | 0  |          |                |    |         |     |     |                                                            |
| Locus_887_Transcript_2/2_Conf_1.000  | 894  | 0  |          |                |    |         |     |     |                                                            |
| Locus_8870_Transcript_1/2_Conf_1.000 | 494  | 20 | 9.17E-40 | XP_002640765.1 | 94 | 166.392 | 85  | 80  | C. briggsae CBR-CKS-1 protein                              |
| Locus_8870_Transcript_2/2_Conf_1.000 | 485  | 20 | 9.29E-40 | XP_002640765.1 | 94 | 166.392 | 85  | 80  | C. briggsae CBR-CKS-1 protein                              |
| Locus_8871_Transcript_1/1_Conf_1.000 | 368  | 20 | 1.82E-40 | ACJ01664.1     | 79 | 168.703 | 122 | 97  | DAF-12 C4                                                  |

|                                      |      |    |           |                |     |         |     |     |                                                              |
|--------------------------------------|------|----|-----------|----------------|-----|---------|-----|-----|--------------------------------------------------------------|
| Locus_8872_Transcript_1/1_Conf_1.000 | 330  | 20 | 2.66E-39  | AAF82410.1     | 88  | 164.851 | 109 | 96  | AF221132_1diacylglycerol acyltransferase                     |
| Locus_8873_Transcript_1/1_Conf_1.000 | 472  | 17 | 1.13E-05  | ZP_05118388.1  | 47  | 53.1434 | 143 | 68  | peptidase S1 and S6, chymotrypsin/Hap                        |
| Locus_8874_Transcript_1/1_Conf_1.000 | 319  | 20 | 1.74E-54  | ADK47995.1     | 100 | 215.312 | 106 | 106 | c-myc promoter-binding protein 1                             |
| Locus_8875_Transcript_1/1_Conf_1.000 | 549  | 20 | 1.38E-30  | XP_001894778.1 | 55  | 136.346 | 200 | 111 | Pyridine nucleotide-disulphide oxidoreductase family protein |
| Locus_8876_Transcript_1/1_Conf_1.000 | 247  | 20 | 7.25E-13  | NP_508461.1    | 85  | 77.0258 | 71  | 61  | Amino Acid Transporter family member (aat-3)                 |
| Locus_8877_Transcript_1/1_Conf_1.000 | 327  | 20 | 7.32E-21  | NP_741234.1    | 72  | 103.605 | 91  | 66  | hypothetical protein C29E4.12                                |
| Locus_8878_Transcript_1/1_Conf_1.000 | 1203 | 20 | 4.44E-100 | NP_490725.2    | 70  | 369.392 | 351 | 249 | hypothetical protein R119.2                                  |
| Locus_8879_Transcript_1/1_Conf_1.000 | 147  | 2  | 1.08E-19  | XP_002824585.1 | 100 | 99.7525 | 48  | 48  | PREDICTED: hypothetical protein LOC100433574                 |
| Locus_888_Transcript_1/1_Conf_1.000  | 501  | 20 | 3.51E-63  | NP_501223.1    | 88  | 244.202 | 141 | 125 | DIFferentiation abnormal family member (dif-1)               |
| Locus_8880_Transcript_1/1_Conf_1.000 | 167  | 0  |           |                |     |         |     |     |                                                              |
| Locus_8881_Transcript_1/1_Conf_1.000 | 273  | 0  |           |                |     |         |     |     |                                                              |
| Locus_8882_Transcript_1/1_Conf_1.000 | 671  | 20 | 4.39E-42  | XP_002630027.1 | 80  | 175.252 | 171 | 138 | Hypothetical protein CBG13394                                |
| Locus_8883_Transcript_1/1_Conf_1.000 | 425  | 0  |           |                |     |         |     |     |                                                              |

|                                      |      |    |           |                |    |         |     |     |                                                                  |
|--------------------------------------|------|----|-----------|----------------|----|---------|-----|-----|------------------------------------------------------------------|
| Locus_8884_Transcript_1/1_Conf_1.000 | 1229 | 20 | 0         | NP_001023451.1 | 93 | 649.432 | 382 | 357 | Vacuolar H ATPase family member (vha-11)                         |
| Locus_8885_Transcript_1/1_Conf_1.000 | 1620 | 20 | 9.71E-176 | NP_502354.2    | 80 | 621.313 | 475 | 382 | yeast SEC homolog family member (sec-24.2)                       |
| Locus_8886_Transcript_1/1_Conf_1.000 | 1301 | 0  |           |                |    |         |     |     |                                                                  |
| Locus_8887_Transcript_1/1_Conf_1.000 | 876  | 20 | 2.03E-132 | AAX42917.1     | 99 | 476.093 | 252 | 251 | serine protease inhibitor Kunitz type 2                          |
| Locus_8888_Transcript_1/1_Conf_1.000 | 439  | 20 | 3.68E-33  | CBK19483.1     | 66 | 144.436 | 136 | 90  | C. elegans protein Y116A8C.27b, confirmed by transcript evidence |
| Locus_8889_Transcript_1/1_Conf_1.000 | 1564 | 20 | 6.03E-42  | NP_504247.2    | 52 | 176.792 | 443 | 233 | hypothetical protein F54D11.2                                    |
| Locus_889_Transcript_1/1_Conf_1.000  | 1883 | 20 | 4.24E-125 | NP_740883.1    | 66 | 453.366 | 511 | 338 | hypothetical protein F15C11.2                                    |



|                                      |      |    |           |                |    |         |     |     |                                                        |
|--------------------------------------|------|----|-----------|----------------|----|---------|-----|-----|--------------------------------------------------------|
| Locus_8890_Transcript_1/1_Conf_1.000 | 923  | 20 | 8.86E-89  | XP_002630114.1 | 70 | 331.257 | 312 | 220 | C. briggsae CBR-PYR-1 protein                          |
| Locus_8891_Transcript_1/1_Conf_1.000 | 606  | 20 | 1.40E-91  | NP_492587.1    | 86 | 339.347 | 201 | 174 | GEI-4(Four) Interacting protein family member (gfi-2)  |
| Locus_8892_Transcript_1/1_Conf_1.000 | 347  | 1  | 2.83E-04  | XP_002643135.1 | 56 | 48.521  | 85  | 48  | Hypothetical protein CBG15312                          |
| Locus_8893_Transcript_1/1_Conf_1.000 | 889  | 20 | 7.22E-101 | XP_002629959.1 | 75 | 371.318 | 295 | 224 | Hypothetical protein CBG03683                          |
| Locus_8894_Transcript_1/1_Conf_1.000 | 1053 | 20 | 6.62E-94  | NP_509282.2    | 76 | 348.591 | 297 | 227 | Temporarily Assigned Gene name family member (tag-197) |
| Locus_8895_Transcript_1/1_Conf_1.000 | 250  | 20 | 3.81E-30  | ADF56001.1     | 98 | 134.42  | 82  | 81  | nicotinic acetylcholine receptor alpha subunit 38      |
| Locus_8896_Transcript_1/1_Conf_1.000 | 352  | 0  |           |                |    |         |     |     |                                                        |
| Locus_8897_Transcript_1/2_Conf_1.000 | 904  | 20 | 3.19E-35  | NP_499252.2    | 81 | 153.295 | 109 | 89  | hypothetical protein ZK1128.7                          |

|                                      |      |    |           |                |     |         |     |     |                                         |
|--------------------------------------|------|----|-----------|----------------|-----|---------|-----|-----|-----------------------------------------|
| Locus_8897_Transcript_2/2_Conf_1.000 | 948  | 20 | 3.48E-35  | NP_499252.2    | 81  | 153.295 | 109 | 89  | hypothetical protein ZK1128.7           |
| Locus_8898_Transcript_1/1_Conf_1.000 | 585  | 20 | 5.84E-52  | NP_001123151.1 | 77  | 207.608 | 172 | 133 | hypothetical protein F55A4.8            |
| Locus_8899_Transcript_1/1_Conf_1.000 | 153  | 20 | 1.76E-22  | XP_002917905.1 | 100 | 108.997 | 50  | 50  | PREDICTED: nucleobindin-1-like          |
| Locus_89_Transcript_2/3_Conf_0.333   | 2094 | 20 | 0         | NP_001021542.1 | 86  | 1013.83 | 660 | 573 | BListered cuticle family member (bli-4) |
| Locus_89_Transcript_3/3_Conf_0.500   | 3188 | 20 | 0         | NP_001021543.1 | 82  | 1325.46 | 917 | 752 | BListered cuticle family member (bli-4) |
| Locus_890_Transcript_1/1_Conf_1.000  | 703  | 0  |           |                |     |         |     |     |                                         |
| Locus_8900_Transcript_1/1_Conf_1.000 | 529  | 20 | 1.46E-31  | NP_504540.2    | 64  | 139.428 | 171 | 111 | hypothetical protein C04E6.11           |
| Locus_8901_Transcript_1/3_Conf_0.571 | 1935 | 20 | 1.46E-112 | XP_002630472.1 | 68  | 411.764 | 385 | 264 | Hypothetical protein CBG11206           |
| Locus_8901_Transcript_2/3_Conf_0.714 | 2273 | 20 | 8.21E-118 | XP_002630472.1 | 61  | 429.483 | 477 | 295 | Hypothetical protein CBG11206           |
| Locus_8901_Transcript_3/3_Conf_0.571 | 1941 | 20 | 1.46E-112 | XP_002630472.1 | 68  | 411.764 | 385 | 264 | Hypothetical protein CBG11206           |

|                                      |      |    |           |                |    |         |     |     |                                                      |
|--------------------------------------|------|----|-----------|----------------|----|---------|-----|-----|------------------------------------------------------|
| Locus_8902_Transcript_1/1_Conf_1.000 | 610  | 20 | 5.66E-40  | XP_002630921.1 | 61 | 167.933 | 193 | 118 | Hypothetical protein CBG02647                        |
| Locus_8903_Transcript_1/1_Conf_1.000 | 312  | 20 | 3.56E-39  | XP_002633437.1 | 85 | 164.466 | 103 | 88  | C. briggsae CBR-UNC-22 protein                       |
| Locus_8904_Transcript_1/1_Conf_1.000 | 593  | 20 | 8.58E-27  | NP_494807.1    | 61 | 124.02  | 152 | 93  | Variable ABnormal morphology family member (vab-1)   |
| Locus_8905_Transcript_1/1_Conf_1.000 | 218  | 0  |           |                |    |         |     |     |                                                      |
| Locus_8906_Transcript_1/2_Conf_1.000 | 363  | 6  | 1.91E-13  | EFO27506.1     | 95 | 78.9518 | 43  | 41  | hypothetical protein LOAG_00970                      |
| Locus_8906_Transcript_2/2_Conf_1.000 | 407  | 0  |           |                |    |         |     |     |                                                      |
| Locus_8907_Transcript_1/1_Conf_1.000 | 224  | 20 | 1.11E-16  | XP_002639771.1 | 81 | 89.7373 | 71  | 58  | Hypothetical protein CBG02217                        |
| Locus_8908_Transcript_1/3_Conf_0.750 | 2029 | 20 | 2.87E-167 | XP_002631785.1 | 71 | 593.578 | 571 | 408 | Hypothetical protein CBG20998                        |
| Locus_8908_Transcript_2/3_Conf_0.750 | 2029 | 20 | 2.87E-167 | XP_002631785.1 | 71 | 593.578 | 571 | 408 | Hypothetical protein CBG20998                        |
| Locus_8908_Transcript_3/3_Conf_0.750 | 2029 | 20 | 2.87E-167 | XP_002631785.1 | 71 | 593.578 | 571 | 408 | Hypothetical protein CBG20998                        |
| Locus_8909_Transcript_1/1_Conf_1.000 | 247  | 1  | 5.94E-07  | CAG28316.1     | 72 | 57.3806 | 43  | 31  | spindle assembly abnormal protein 5, SAS-5           |
| Locus_891_Transcript_1/1_Conf_1.000  | 760  | 0  |           |                |    |         |     |     |                                                      |
| Locus_8910_Transcript_1/1_Conf_1.000 | 259  | 1  | 6.30E-04  | AAO12213.1     | 61 | 47.3654 | 39  | 24  | serine protease 1                                    |
| Locus_8911_Transcript_1/1_Conf_1.000 | 884  | 20 | 8.66E-123 | XP_002645904.1 | 86 | 444.121 | 294 | 254 | C. briggsae CBR-MRP-5 protein                        |
| Locus_8912_Transcript_1/2_Conf_1.000 | 1881 | 20 | 0         | NP_495537.1    | 73 | 696.427 | 608 | 449 | HAIF transporter (PGP related) family member (haf-2) |

|                                      |      |    |           |                |    |         |     |     |                                                               |
|--------------------------------------|------|----|-----------|----------------|----|---------|-----|-----|---------------------------------------------------------------|
| Locus_8912_Transcript_2/2_Conf_1.000 | 1881 | 20 | 0         | NP_495537.1    | 73 | 696.427 | 608 | 449 | HAIF transporter (PGP related) family member (haf-2)          |
| Locus_8913_Transcript_1/2_Conf_1.000 | 795  | 20 | 1.18E-48  | XP_002630890.1 | 80 | 197.593 | 172 | 139 | Hypothetical protein CBG02611                                 |
| Locus_8913_Transcript_2/2_Conf_1.000 | 594  | 20 | 3.31E-26  | XP_002630890.1 | 78 | 122.094 | 117 | 92  | Hypothetical protein CBG02611                                 |
| Locus_8914_Transcript_1/1_Conf_1.000 | 372  | 4  | 9.99E-18  | NP_505689.1    | 63 | 93.2041 | 126 | 80  | hypothetical protein Y32F6B.1                                 |
| Locus_8915_Transcript_1/1_Conf_1.000 | 1023 | 20 | 2.52E-74  | CBIG3220.1     | 83 | 283.493 | 191 | 159 | C. elegans protein F53A2.6a, confirmed by transcript evidence |
| Locus_8916_Transcript_1/1_Conf_1.000 | 641  | 20 | 7.51E-25  | NP_499644.1    | 79 | 117.857 | 92  | 73  | hypothetical protein Y111B2A.13                               |
| Locus_8917_Transcript_1/1_Conf_1.000 | 636  | 0  |           |                |    |         |     |     |                                                               |
| Locus_8918_Transcript_1/1_Conf_1.000 | 863  | 20 | 7.91E-89  | NP_506413.1    | 79 | 331.257 | 283 | 224 | hypothetical protein F53C11.3                                 |
| Locus_8919_Transcript_1/1_Conf_1.000 | 324  | 4  | 1.81E-11  | XP_002639110.1 | 74 | 72.4034 | 62  | 46  | C. briggsae CBR-ELO-8 protein                                 |
| Locus_892_Transcript_1/1_Conf_1.000  | 1677 | 20 | 4.05E-132 | EFO19476.1     | 94 | 476.478 | 286 | 269 | hypothetical protein LOAG_09017                               |

|                                      |     |    |           |                |     |         |     |     |                                                             |
|--------------------------------------|-----|----|-----------|----------------|-----|---------|-----|-----|-------------------------------------------------------------|
| Locus_8920_Transcript_1/1_Conf_1.000 | 876 | 20 | 6.52E-22  | BAH83642.1     | 63  | 108.997 | 128 | 81  | AP-2                                                        |
| Locus_8921_Transcript_1/1_Conf_1.000 | 502 | 0  |           |                |     |         |     |     |                                                             |
| Locus_8922_Transcript_1/1_Conf_1.000 | 130 | 20 | 5.78E-18  | XP_002825166.1 | 100 | 93.9745 | 43  | 43  | PREDICTED: cytoplasmic dynein 1 heavy chain 1-like, partial |
| Locus_8923_Transcript_1/1_Conf_1.000 | 365 | 20 | 4.85E-17  | XP_002636354.1 | 57  | 90.8929 | 114 | 65  | Hypothetical protein CBG08651                               |
| Locus_8924_Transcript_1/1_Conf_1.000 | 943 | 20 | 1.91E-110 | XP_001894879.1 | 85  | 403.29  | 280 | 239 | Dedicator of cytokinesis family protein                     |
| Locus_8925_Transcript_1/1_Conf_1.000 | 158 | 0  |           |                |     |         |     |     |                                                             |
| Locus_8926_Transcript_1/3_Conf_0.600 | 861 | 10 | 8.37E-06  | XP_795905.1    | 45  | 55.4546 | 171 | 78  | PREDICTED: similar to cyclin B3                             |
| Locus_8926_Transcript_2/3_Conf_0.400 | 685 | 14 | 5.35E-06  | XP_795905.1    | 45  | 55.4546 | 171 | 78  | PREDICTED: similar to cyclin B3                             |
| Locus_8926_Transcript_3/3_Conf_0.600 | 978 | 10 | 1.03E-05  | XP_795905.1    | 45  | 55.4546 | 171 | 78  | PREDICTED: similar to cyclin B3                             |

|                                      |      |    |           |                |    |         |     |     |                                     |
|--------------------------------------|------|----|-----------|----------------|----|---------|-----|-----|-------------------------------------|
| Locus_8927_Transcript_1/1_Conf_1.000 | 2101 | 20 | 0         | ACY39994.1     | 79 | 845.114 | 681 | 540 | C. elegans FLN-2 protein, isoform d |
| Locus_8928_Transcript_1/1_Conf_1.000 | 298  | 0  |           |                |    |         |     |     |                                     |
| Locus_8929_Transcript_1/1_Conf_1.000 | 636  | 0  |           |                |    |         |     |     |                                     |
| Locus_893_Transcript_1/1_Conf_1.000  | 1742 | 20 | 1.01E-125 | NP_502036.1    | 78 | 455.292 | 390 | 306 | hypothetical protein ZK593.8        |
| Locus_8930_Transcript_1/1_Conf_1.000 | 953  | 20 | 4.88E-122 | XP_002630884.1 | 94 | 441.81  | 294 | 278 | C. briggsae CBR-PHB-2 protein       |
| Locus_8931_Transcript_1/1_Conf_1.000 | 1004 | 20 | 7.73E-113 | XP_002649082.1 | 89 | 411.379 | 266 | 237 | C. briggsae CBR-HAF-4 protein       |
| Locus_8932_Transcript_1/1_Conf_1.000 | 475  | 0  |           |                |    |         |     |     |                                     |
| Locus_8933_Transcript_1/1_Conf_1.000 | 516  | 0  |           |                |    |         |     |     |                                     |
| Locus_8934_Transcript_1/1_Conf_1.000 | 350  | 20 | 4.16E-40  | XP_002642654.1 | 83 | 167.548 | 104 | 87  | C. briggsae CBR-PCP-1.1 protein     |
| Locus_8935_Transcript_1/1_Conf_1.000 | 443  | 2  | 3.92E-30  | XP_002638582.1 | 66 | 134.42  | 148 | 99  | Hypothetical protein CBG05629       |
| Locus_8936_Transcript_1/1_Conf_1.000 | 282  | 0  |           |                |    |         |     |     |                                     |
| Locus_8937_Transcript_1/1_Conf_1.000 | 162  | 0  |           |                |    |         |     |     |                                     |
| Locus_8938_Transcript_1/1_Conf_1.000 | 462  | 13 | 3.42E-34  | NP_001021706.1 | 80 | 147.902 | 101 | 81  | hypothetical protein Y106G6D.8      |
| Locus_8939_Transcript_1/1_Conf_1.000 | 484  | 20 | 4.92E-49  | NP_499001.1    | 74 | 197.208 | 162 | 121 | hypothetical protein R107.2         |
| Locus_894_Transcript_1/1_Conf_1.000  | 348  | 0  |           |                |    |         |     |     |                                     |
| Locus_8940_Transcript_1/1_Conf_1.000 | 701  | 20 | 1.73E-39  | NP_492382.2    | 80 | 166.777 | 116 | 93  | hypothetical protein F36A2.8        |
| Locus_8941_Transcript_1/1_Conf_1.000 | 1519 | 0  |           |                |    |         |     |     |                                     |

|                                      |      |    |           |                |    |         |     |     |                                                                         |
|--------------------------------------|------|----|-----------|----------------|----|---------|-----|-----|-------------------------------------------------------------------------|
| Locus_8942_Transcript_1/1_Conf_1.000 | 888  | 20 | 2.81E-129 | XP_002646930.1 | 93 | 465.692 | 290 | 270 | Hypothetical protein CBG19635                                           |
| Locus_8943_Transcript_1/1_Conf_1.000 | 773  | 20 | 2.71E-71  | NP_498544.1    | 76 | 272.707 | 224 | 172 | hypothetical protein ZK418.5                                            |
| Locus_8944_Transcript_1/2_Conf_1.000 | 1496 | 20 | 1.62E-121 | CAB05598.2     | 69 | 441.039 | 496 | 347 | C. elegans protein R11A5.1a, partially confirmed by transcript evidence |
| Locus_8944_Transcript_2/2_Conf_1.000 | 922  | 20 | 1.75E-44  | CAB05601.2     | 60 | 184.111 | 305 | 184 | C. elegans protein R11A5.1b, partially confirmed by transcript evidence |
| Locus_8945_Transcript_1/2_Conf_1.000 | 604  | 0  |           |                |    |         |     |     |                                                                         |
| Locus_8945_Transcript_2/2_Conf_1.000 | 601  | 0  |           |                |    |         |     |     |                                                                         |
| Locus_8946_Transcript_1/1_Conf_1.000 | 564  | 11 | 1.81E-20  | NP_504170.1    | 68 | 102.834 | 115 | 79  | Neuropeptide-Like Protein family member (nlp-13)                        |
| Locus_8947_Transcript_1/1_Conf_1.000 | 515  | 0  |           |                |    |         |     |     |                                                                         |
| Locus_8948_Transcript_1/1_Conf_1.000 | 369  | 0  |           |                |    |         |     |     |                                                                         |
| Locus_8949_Transcript_1/1_Conf_1.000 | 139  | 0  |           |                |    |         |     |     |                                                                         |
| Locus_895_Transcript_1/1_Conf_1.000  | 1000 | 20 | 3.05E-77  | NP_491855.1    | 70 | 293.123 | 333 | 235 | Nuclear Pore complex Protein family member (npp-12)                     |
| Locus_8950_Transcript_1/1_Conf_1.000 | 644  | 4  | 1.17E-25  | XP_002638473.1 | 53 | 120.553 | 214 | 115 | Hypothetical protein CBG12901                                           |
| Locus_8951_Transcript_1/1_Conf_1.000 | 412  | 20 | 1.31E-38  | AAQ75756.1     | 81 | 162.54  | 103 | 84  | zinc metallopeptidase 6                                                 |
| Locus_8952_Transcript_1/1_Conf_1.000 | 634  | 20 | 1.06E-31  | EFO22999.1     | 74 | 140.584 | 174 | 129 | hypothetical protein LOAG_05485                                         |
| Locus_8953_Transcript_1/1_Conf_1.000 | 1077 | 20 | 1.42E-123 | NP_001021728.1 | 85 | 447.203 | 362 | 309 | Na/H eXchanger family member (nhx-8)                                    |

|                                      |      |    |           |                |    |         |     |     |                                                                          |
|--------------------------------------|------|----|-----------|----------------|----|---------|-----|-----|--------------------------------------------------------------------------|
| Locus_8954_Transcript_1/1_Conf_1.000 | 815  | 20 | 2.26E-103 | NP_495800.1    | 85 | 379.407 | 237 | 202 | hypothetical protein T13H5.5                                             |
| Locus_8955_Transcript_1/1_Conf_1.000 | 158  | 0  |           |                |    |         |     |     |                                                                          |
| Locus_8956_Transcript_1/1_Conf_1.000 | 978  | 3  | 1.82E-10  | XP_002642436.1 | 43 | 71.2478 | 318 | 137 | Hypothetical protein CBG06840                                            |
| Locus_8957_Transcript_1/1_Conf_1.000 | 619  | 0  |           |                |    |         |     |     |                                                                          |
| Locus_8958_Transcript_1/1_Conf_1.000 | 276  | 0  |           |                |    |         |     |     |                                                                          |
| Locus_8959_Transcript_1/1_Conf_1.000 | 761  | 20 | 5.69E-42  | NP_498935.1    | 74 | 175.252 | 167 | 124 | MiTochondrial Single Stranded DNA binding protein family member (mtss-1) |
| Locus_896_Transcript_1/6_Conf_0.667  | 2520 | 20 | 0         | XP_002641666.1 | 85 | 1089.72 | 764 | 654 | C. briggsae CBR-MCM-6 protein                                            |
| Locus_896_Transcript_2/6_Conf_0.667  | 2516 | 20 | 0         | XP_002641666.1 | 85 | 1089.72 | 764 | 654 | C. briggsae CBR-MCM-6 protein                                            |



|                                     |      |    |   |                |    |         |     |     |                               |
|-------------------------------------|------|----|---|----------------|----|---------|-----|-----|-------------------------------|
| Locus_896_Transcript_3/6_Conf_0.667 | 2516 | 20 | 0 | XP_002641666.1 | 85 | 1089.72 | 764 | 654 | C. briggsae CBR-MCM-6 protein |
| Locus_896_Transcript_4/6_Conf_0.667 | 2516 | 20 | 0 | XP_002641666.1 | 85 | 1089.72 | 764 | 654 | C. briggsae CBR-MCM-6 protein |
| Locus_896_Transcript_5/6_Conf_0.667 | 2516 | 20 | 0 | XP_002641666.1 | 85 | 1089.72 | 764 | 654 | C. briggsae CBR-MCM-6 protein |

|                                      |      |    |           |                |    |         |     |     |                                      |
|--------------------------------------|------|----|-----------|----------------|----|---------|-----|-----|--------------------------------------|
| Locus_896_Transcript_6/6_Conf_0.667  | 2516 | 20 | 0         | XP_002641666.1 | 85 | 1089.72 | 764 | 654 | C. briggsae CBR-MCM-6 protein        |
| Locus_8960_Transcript_1/1_Conf_1.000 | 178  | 0  |           |                |    |         |     |     |                                      |
| Locus_8961_Transcript_1/1_Conf_1.000 | 310  | 0  |           |                |    |         |     |     |                                      |
| Locus_8962_Transcript_1/1_Conf_1.000 | 1315 | 20 | 1.07E-142 | XP_002632302.1 | 72 | 511.146 | 411 | 300 | Hypothetical protein CBG07203        |
| Locus_8963_Transcript_1/1_Conf_1.000 | 198  | 20 | 9.59E-21  | NP_001020988.1 | 85 | 103.219 | 63  | 54  | UNCoordinated family member (unc-89) |

|                                      |      |    |           |                |    |         |     |     |                                                            |
|--------------------------------------|------|----|-----------|----------------|----|---------|-----|-----|------------------------------------------------------------|
| Locus_8964_Transcript_1/1_Conf_1.000 | 506  | 20 | 3.38E-53  | NP_509229.1    | 76 | 211.075 | 169 | 130 | Suppressor of activated let-60 Ras family member (sur-5)   |
| Locus_8965_Transcript_1/1_Conf_1.000 | 614  | 20 | 7.20E-59  | NP_506513.1    | 75 | 230.72  | 184 | 139 | TRNA Methylase family member (trm-1)                       |
| Locus_8966_Transcript_1/1_Conf_1.000 | 272  | 0  |           |                |    |         |     |     |                                                            |
| Locus_8967_Transcript_1/1_Conf_1.000 | 189  | 0  |           |                |    |         |     |     |                                                            |
| Locus_8968_Transcript_1/1_Conf_1.000 | 249  | 20 | 5.33E-24  | NP_491246.4    | 82 | 114.005 | 82  | 68  | COenzyme Q (ubiquinone) biosynthesis family member (coq-4) |
| Locus_8969_Transcript_1/1_Conf_1.000 | 372  | 0  |           |                |    |         |     |     |                                                            |
| Locus_897_Transcript_1/3_Conf_0.294  | 364  | 0  |           |                |    |         |     |     |                                                            |
| Locus_897_Transcript_2/3_Conf_0.412  | 401  | 2  | 2.22E-09  | ABB53347.1     | 56 | 65.4698 | 72  | 41  | secreted protein 5 precursor                               |
| Locus_897_Transcript_3/3_Conf_0.824  | 453  | 1  | 3.63E-04  | ABB53347.1     | 55 | 48.1358 | 76  | 42  | secreted protein 5 precursor                               |
| Locus_8970_Transcript_1/1_Conf_1.000 | 551  | 0  |           |                |    |         |     |     |                                                            |
| Locus_8971_Transcript_1/1_Conf_1.000 | 556  | 20 | 1.42E-62  | AAC78238.2     | 79 | 242.662 | 191 | 151 | Guanylyl cyclase protein 28, isoform d                     |
| Locus_8972_Transcript_1/1_Conf_1.000 | 433  | 20 | 9.49E-21  | XP_001893053.1 | 70 | 103.219 | 109 | 77  | hypothetical protein                                       |
| Locus_8973_Transcript_1/1_Conf_1.000 | 830  | 4  | 1.45E-36  | NP_001022299.1 | 65 | 157.532 | 147 | 97  | hypothetical protein T01E8.8                               |
| Locus_8974_Transcript_1/1_Conf_1.000 | 1085 | 20 | 4.32E-112 | NP_502898.1    | 82 | 409.068 | 281 | 231 | hypothetical protein Y105C5B.9                             |
| Locus_8975_Transcript_1/1_Conf_1.000 | 671  | 20 | 2.47E-61  | NP_497657.1    | 78 | 239.195 | 195 | 154 | SurFeit homolog family member (sft-1)                      |
| Locus_8976_Transcript_1/2_Conf_1.000 | 394  | 1  | 1.66E-04  | ZP_01156726.1  | 51 | 49.2914 | 62  | 32  | helicase, putative                                         |
| Locus_8976_Transcript_2/2_Conf_1.000 | 312  | 1  | 1.67E-04  | ZP_01156726.1  | 51 | 49.2914 | 62  | 32  | helicase, putative                                         |
| Locus_8977_Transcript_1/1_Conf_1.000 | 136  | 0  |           |                |    |         |     |     |                                                            |
| Locus_8978_Transcript_1/1_Conf_1.000 | 167  | 0  |           |                |    |         |     |     |                                                            |
| Locus_8979_Transcript_1/1_Conf_1.000 | 238  | 0  |           |                |    |         |     |     |                                                            |

|                                      |      |    |           |                |    |         |     |     |                                              |
|--------------------------------------|------|----|-----------|----------------|----|---------|-----|-----|----------------------------------------------|
| Locus_898_Transcript_1/2_Conf_1.000  | 308  | 20 | 2.95E-14  | NP_501241.1    | 85 | 81.6481 | 62  | 53  | Pur alpha Like Protein family member (plp-1) |
| Locus_898_Transcript_2/2_Conf_1.000  | 829  | 20 | 3.21E-60  | EFO17451.1     | 73 | 236.113 | 241 | 176 | PurA ssDNA and RNA-binding protein           |
| Locus_8980_Transcript_1/1_Conf_1.000 | 1046 | 4  | 2.38E-11  | NP_502521.2    | 52 | 74.3294 | 218 | 114 | hypothetical protein B0564.7                 |
| Locus_8981_Transcript_1/1_Conf_1.000 | 404  | 20 | 9.17E-56  | XP_002629896.1 | 85 | 219.55  | 134 | 114 | Hypothetical protein CBG21934                |
| Locus_8982_Transcript_1/1_Conf_1.000 | 291  | 0  |           |                |    |         |     |     |                                              |
| Locus_8983_Transcript_1/1_Conf_1.000 | 512  | 0  |           |                |    |         |     |     |                                              |
| Locus_8984_Transcript_1/1_Conf_1.000 | 1129 | 20 | 2.15E-101 | NP_497943.2    | 75 | 373.629 | 377 | 285 | hypothetical protein F10F2.4                 |
| Locus_8985_Transcript_1/1_Conf_1.000 | 433  | 5  | 2.39E-56  | A8XP97.2       | 83 | 221.476 | 144 | 120 | Voltage-dependent calcium channel unc-36     |
| Locus_8986_Transcript_1/2_Conf_1.000 | 202  | 0  |           |                |    |         |     |     |                                              |

|                                      |      |    |           |                |    |         |     |     |                                                                 |
|--------------------------------------|------|----|-----------|----------------|----|---------|-----|-----|-----------------------------------------------------------------|
| Locus_8986_Transcript_2/2_Conf_1.000 | 652  | 20 | 4.16E-42  | CAR63706.1     | 89 | 175.252 | 115 | 103 | putative FOS (B-Zip transcription factor) homolog family member |
| Locus_8987_Transcript_1/1_Conf_1.000 | 1371 | 5  | 3.62E-64  | XP_002642202.1 | 54 | 250.366 | 410 | 222 | Hypothetical protein CBG18175                                   |
| Locus_8988_Transcript_1/1_Conf_1.000 | 509  |    |           |                |    |         |     |     |                                                                 |
| Locus_8989_Transcript_1/1_Conf_1.000 | 1550 | 20 | 9.67E-93  | NP_492602.1    | 59 | 345.51  | 519 | 307 | HRD-Like (E3 ubiquitin ligase related) family member (hrd1-1)   |
| Locus_899_Transcript_1/3_Conf_0.667  | 615  | 6  | 1.76E-12  | XP_002632465.1 | 57 | 76.6406 | 97  | 56  | C. briggsae CBR-JAC-1 protein                                   |
| Locus_899_Transcript_2/3_Conf_0.667  | 619  | 6  | 1.79E-12  | XP_002632465.1 | 57 | 76.6406 | 97  | 56  | C. briggsae CBR-JAC-1 protein                                   |
| Locus_899_Transcript_3/3_Conf_0.667  | 615  | 6  | 1.76E-12  | XP_002632465.1 | 57 | 76.6406 | 97  | 56  | C. briggsae CBR-JAC-1 protein                                   |
| Locus_8990_Transcript_1/1_Conf_1.000 | 1258 | 20 | 4.21E-141 | XP_002647075.1 | 94 | 505.753 | 272 | 256 | C. briggsae CBR-PAT-3 protein                                   |
| Locus_8991_Transcript_1/1_Conf_1.000 | 262  | 3  | 1.44E-08  | NP_498871.2    | 58 | 62.7734 | 87  | 51  | hypothetical protein F42H10.5                                   |
| Locus_8992_Transcript_1/2_Conf_1.000 | 224  | 0  |           |                |    |         |     |     |                                                                 |
| Locus_8992_Transcript_2/2_Conf_1.000 | 681  | 2  | 9.02E-06  | NP_001041088.1 | 41 | 54.6842 | 230 | 95  | hypothetical protein C27A7.3                                    |

|                                      |      |    |           |                |    |         |     |     |                                                                |
|--------------------------------------|------|----|-----------|----------------|----|---------|-----|-----|----------------------------------------------------------------|
| Locus_8993_Transcript_1/1_Conf_1.000 | 664  | 20 | 4.71E-65  | NP_499755.1    | 87 | 251.521 | 173 | 152 | LIS-1 (human lissencephaly gene) related family member (lis-1) |
| Locus_8994_Transcript_1/1_Conf_1.000 | 1562 | 20 | 1.79E-70  | XP_002639296.1 | 55 | 271.552 | 495 | 274 | Hypothetical protein CBG03866                                  |
| Locus_8995_Transcript_1/1_Conf_1.000 | 866  | 20 | 1.78E-80  | NP_741661.1    | 75 | 303.523 | 260 | 195 | hypothetical protein Y39B6A.36                                 |
| Locus_8996_Transcript_1/1_Conf_1.000 | 1042 | 20 | 2.54E-106 | NP_001122738.1 | 72 | 389.808 | 332 | 242 | hypothetical protein Y67D2.4                                   |
| Locus_8997_Transcript_1/1_Conf_1.000 | 548  | 20 | 1.82E-51  | NP_499777.1    | 90 | 205.682 | 123 | 111 | hypothetical protein F45G2.10                                  |
| Locus_8998_Transcript_1/1_Conf_1.000 | 2417 | 20 | 5.85E-53  | EFO26605.1     | 50 | 214.157 | 484 | 242 | hypothetical protein LOAG_01878                                |
| Locus_8999_Transcript_1/1_Conf_1.000 | 179  | 0  |           |                |    |         |     |     |                                                                |

|                                   |      |    |   |                |    |         |     |     |                               |
|-----------------------------------|------|----|---|----------------|----|---------|-----|-----|-------------------------------|
| Locus_9_Transcript_1/5_Conf_0.750 | 2646 | 20 | 0 | XP_002646785.1 | 88 | 1246.11 | 832 | 733 | C. briggsae CBR-MCM-2 protein |
| Locus_9_Transcript_2/5_Conf_0.750 | 2646 | 20 | 0 | XP_002646785.1 | 88 | 1246.11 | 832 | 733 | C. briggsae CBR-MCM-2 protein |
| Locus_9_Transcript_3/5_Conf_0.750 | 2646 | 20 | 0 | XP_002646785.1 | 88 | 1246.11 | 832 | 733 | C. briggsae CBR-MCM-2 protein |

|                                      |      |    |           |                |    |         |     |     |                                     |
|--------------------------------------|------|----|-----------|----------------|----|---------|-----|-----|-------------------------------------|
| Locus_9_Transcript_4/5_Conf_0.750    | 2646 | 20 | 0         | XP_002646785.1 | 88 | 1246.11 | 832 | 733 | C. briggsae CBR-MCM-2 protein       |
| Locus_9_Transcript_5/5_Conf_0.750    | 2646 | 20 | 0         | XP_002646785.1 | 88 | 1246.11 | 832 | 733 | C. briggsae CBR-MCM-2 protein       |
| Locus_90_Transcript_1/1_Conf_1.000   | 221  | 2  | 4.69E-07  | P27613.1       | 85 | 57.7658 | 35  | 30  | Globin-like host-protective antigen |
| Locus_900_Transcript_1/1_Conf_1.000  | 1374 | 20 | 0         | XP_002636570.1 | 94 | 756.133 | 457 | 430 | C. briggsae CBR-PYC-1 protein       |
| Locus_9000_Transcript_1/1_Conf_1.000 | 1218 | 20 | 1.15E-119 | AAK31453.4     | 71 | 434.491 | 421 | 300 | Hypothetical protein C25H3.8        |



|                                      |      |    |           |                |     |         |     |     |                                                                             |
|--------------------------------------|------|----|-----------|----------------|-----|---------|-----|-----|-----------------------------------------------------------------------------|
| Locus_9001_Transcript_1/1_Conf_1.000 | 214  | 20 | 2.32E-19  | Q5RE15.2       | 100 | 98.5969 | 47  | 47  | 26S proteasome non-ATPase regulatory subunit 8                              |
| Locus_9002_Transcript_1/1_Conf_1.000 | 1149 | 20 | 3.37E-118 | EFO26333.1     | 78  | 429.483 | 325 | 254 | hypothetical protein LOAG_02157                                             |
| Locus_9003_Transcript_1/1_Conf_1.000 | 567  | 20 | 2.93E-26  | EFO27926.1     | 70  | 122.094 | 132 | 93  | hypothetical protein LOAG_00563                                             |
| Locus_9004_Transcript_1/1_Conf_1.000 | 638  | 20 | 6.17E-88  | XP_002634875.1 | 89  | 327.405 | 211 | 188 | Hypothetical protein CBG10541                                               |
| Locus_9005_Transcript_1/1_Conf_1.000 | 1537 | 5  | 1.20E-18  | XP_001899377.1 | 62  | 99.3673 | 141 | 88  | hypothetical protein Bm1_39610                                              |
| Locus_9006_Transcript_1/1_Conf_1.000 | 489  | 20 | 1.63E-36  | NP_505849.2    | 66  | 155.606 | 160 | 107 | hypothetical protein T19B10.3                                               |
| Locus_9007_Transcript_1/1_Conf_1.000 | 273  | 20 | 3.72E-33  | AAK29933.3     | 90  | 144.436 | 91  | 82  | Rab connectin related protein 2, partially confirmed by transcript evidence |
| Locus_9008_Transcript_1/1_Conf_1.000 | 1785 | 20 | 6.90E-53  | XP_001900516.1 | 52  | 213.386 | 455 | 241 | hypothetical protein Bm1_45270                                              |
| Locus_9009_Transcript_1/1_Conf_1.000 | 128  | 0  |           |                |     |         |     |     |                                                                             |
| Locus_901_Transcript_1/1_Conf_1.000  | 431  | 0  |           |                |     |         |     |     |                                                                             |
| Locus_9010_Transcript_1/1_Conf_1.000 | 1025 | 20 | 4.06E-40  | XP_001896056.1 | 55  | 169.859 | 346 | 192 | hypothetical protein                                                        |
| Locus_9011_Transcript_1/1_Conf_1.000 | 773  | 20 | 6.29E-44  | EFO25106.1     | 57  | 181.8   | 258 | 149 | hypothetical protein LOAG_03373                                             |
| Locus_9012_Transcript_1/1_Conf_1.000 | 1015 | 20 | 5.17E-72  | XP_002631797.1 | 73  | 275.789 | 334 | 247 | C. briggsae CBR-CYN-16 protein                                              |
| Locus_9013_Transcript_1/1_Conf_1.000 | 504  | 20 | 6.17E-47  | XP_001896343.1 | 69  | 190.274 | 163 | 114 | Arginine-tRNA-protein transferase, C terminus containing protein            |
| Locus_9014_Transcript_1/1_Conf_1.000 | 1103 | 20 | 2.84E-159 | XP_002639536.1 | 91  | 565.844 | 338 | 308 | C. briggsae CBR-FBP-1 protein                                               |
| Locus_9015_Transcript_1/1_Conf_1.000 | 577  | 11 | 1.34E-13  | XP_002643226.1 | 52  | 80.1073 | 140 | 74  | Hypothetical protein CBG08091                                               |
| Locus_9016_Transcript_1/3_Conf_0.714 | 1450 | 20 | 1.15E-124 | EFO15931.1     | 69  | 451.44  | 399 | 279 | hypothetical protein LOAG_12577                                             |

|                                        |      |    |           |            |     |         |     |     |                                 |
|----------------------------------------|------|----|-----------|------------|-----|---------|-----|-----|---------------------------------|
| Locus_9016_Transcript_2/3_Conf_0.714   | 1450 | 20 | 1.96E-124 | EFO15931.1 | 69  | 450.669 | 399 | 279 | hypothetical protein LOAG_12577 |
| Locus_9016_Transcript_3/3_Conf_0.714   | 1450 | 20 | 1.15E-124 | EFO15931.1 | 69  | 451.44  | 399 | 279 | hypothetical protein LOAG_12577 |
| Locus_9017_Transcript_1/1_Conf_1.000   | 216  | 0  |           |            |     |         |     |     |                                 |
| Locus_9018_Transcript_1/10_Conf_0.077  | 246  | 20 | 1.27E-41  | ABU86835.1 | 97  | 172.555 | 81  | 79  | MHC class I antigen             |
| Locus_9018_Transcript_10/10_Conf_0.500 | 616  | 20 | 6.28E-119 | AAA03661.1 | 98  | 430.254 | 205 | 202 | lymphocyte antigen              |
| Locus_9018_Transcript_2/10_Conf_0.385  | 689  | 20 | 3.49E-130 | CBW44114.1 | 97  | 468.003 | 229 | 223 | MHC class I antigen             |
| Locus_9018_Transcript_3/10_Conf_0.192  | 277  | 20 | 7.43E-50  | CBX19818.1 | 100 | 199.904 | 92  | 92  | MHC class I antigen             |
| Locus_9018_Transcript_4/10_Conf_0.115  | 345  | 20 | 4.14E-64  | ADN92657.1 | 100 | 247.284 | 115 | 115 | MHC class I antigen             |
| Locus_9018_Transcript_5/10_Conf_0.115  | 286  | 20 | 1.26E-52  | ADN92581.1 | 100 | 209.149 | 95  | 95  | MHC class I antigen             |

|                                       |     |    |           |                |     |         |     |     |                                 |
|---------------------------------------|-----|----|-----------|----------------|-----|---------|-----|-----|---------------------------------|
| Locus_9018_Transcript_6/10_Conf_0.115 | 265 | 20 | 2.68E-47  | BAI50007.1     | 100 | 191.43  | 88  | 88  | MHC class I antigen             |
| Locus_9018_Transcript_7/10_Conf_0.423 | 616 | 20 | 3.94E-113 | CBV36823.1     | 99  | 410.994 | 205 | 203 | MHC class I antigen             |
| Locus_9018_Transcript_8/10_Conf_0.385 | 538 | 20 | 3.41E-100 | ABS29696.1     | 96  | 367.466 | 179 | 173 | MHC class I antigen             |
| Locus_9018_Transcript_9/10_Conf_0.115 | 418 | 20 | 1.25E-76  | CAD62286.1     | 97  | 288.886 | 139 | 136 | MHC class I antigen             |
| Locus_9019_Transcript_1/1_Conf_1.000  | 683 | 20 | 1.61E-71  | XP_002633890.1 | 84  | 273.092 | 174 | 147 | Hypothetical protein CBG19952   |
| Locus_902_Transcript_1/1_Conf_1.000   | 520 | 20 | 3.82E-50  | AAN11401.1     | 71  | 201.06  | 156 | 112 | metalloprotease 1 precursor     |
| Locus_9020_Transcript_1/2_Conf_1.000  | 879 | 20 | 7.85E-92  | NP_506824.1    | 76  | 341.273 | 262 | 201 | hypothetical protein T06E6.1    |
| Locus_9020_Transcript_2/2_Conf_1.000  | 879 | 20 | 7.85E-92  | NP_506824.1    | 76  | 341.273 | 262 | 201 | hypothetical protein T06E6.1    |
| Locus_9021_Transcript_1/1_Conf_1.000  | 150 | 1  | 2.84E-04  | ACY03364.1     | 71  | 48.521  | 35  | 25  | facilitative hexose transporter |
| Locus_9022_Transcript_1/1_Conf_1.000  | 131 | 0  |           |                |     |         |     |     |                                 |

|                                      |      |    |           |                |    |         |     |     |                                                                 |
|--------------------------------------|------|----|-----------|----------------|----|---------|-----|-----|-----------------------------------------------------------------|
| Locus_9023_Transcript_1/3_Conf_0.333 | 255  | 20 | 3.12E-19  | EFO19966.1     | 72 | 98.2117 | 83  | 60  | hypothetical protein LOAG_08525                                 |
| Locus_9023_Transcript_2/3_Conf_0.667 | 1119 | 20 | 7.44E-147 | EFO19966.1     | 82 | 524.628 | 371 | 307 | hypothetical protein LOAG_08525                                 |
| Locus_9023_Transcript_3/3_Conf_0.667 | 1119 | 20 | 6.30E-146 | EFO19966.1     | 82 | 521.546 | 371 | 306 | hypothetical protein LOAG_08525                                 |
| Locus_9024_Transcript_1/1_Conf_1.000 | 476  | 0  |           |                |    |         |     |     |                                                                 |
| Locus_9025_Transcript_1/1_Conf_1.000 | 452  | 0  |           |                |    |         |     |     |                                                                 |
| Locus_9026_Transcript_1/1_Conf_1.000 | 1635 | 20 | 4.86E-74  | EFO26882.1     | 55 | 283.493 | 565 | 316 | synembryn                                                       |
| Locus_9027_Transcript_1/1_Conf_1.000 | 137  | 0  |           |                |    |         |     |     |                                                                 |
| Locus_9028_Transcript_1/1_Conf_1.000 | 438  | 6  | 1.84E-16  | XP_002631371.1 | 58 | 88.9669 | 140 | 82  | Hypothetical protein CBG03213                                   |
| Locus_9029_Transcript_1/1_Conf_1.000 | 546  | 20 | 9.38E-32  | NP_501279.1    | 79 | 140.198 | 103 | 82  | human HCF1 related family member (hcf-1)                        |
| Locus_903_Transcript_1/3_Conf_0.667  | 398  | 4  | 4.80E-12  | XP_002640867.1 | 70 | 74.3294 | 60  | 42  | Hypothetical protein CBG15758                                   |
| Locus_903_Transcript_2/3_Conf_0.500  | 455  | 4  | 1.16E-10  | XP_002640867.1 | 65 | 69.707  | 61  | 40  | Hypothetical protein CBG15758                                   |
| Locus_903_Transcript_3/3_Conf_0.667  | 416  | 4  | 4.68E-12  | XP_002640867.1 | 70 | 74.3294 | 60  | 42  | Hypothetical protein CBG15758                                   |
| Locus_9030_Transcript_1/1_Conf_1.000 | 689  | 6  | 1.47E-11  | NP_502195.3    | 58 | 73.9442 | 129 | 75  | hypothetical protein F58B3.4                                    |
| Locus_9031_Transcript_1/1_Conf_1.000 | 1014 | 20 | 9.02E-109 | XP_002638606.1 | 75 | 397.897 | 337 | 253 | Hypothetical protein CBG05657                                   |
| Locus_9032_Transcript_1/1_Conf_1.000 | 245  | 0  |           |                |    |         |     |     |                                                                 |
| Locus_9033_Transcript_1/2_Conf_1.000 | 323  | 2  | 2.54E-05  | CAT01093.1     | 50 | 51.9878 | 59  | 30  | C. elegans protein Y53C12A.10, confirmed by transcript evidence |
| Locus_9033_Transcript_2/2_Conf_1.000 | 822  | 20 | 8.85E-79  | CAT01093.1     | 82 | 297.745 | 197 | 163 | C. elegans protein Y53C12A.10, confirmed by transcript evidence |
| Locus_9034_Transcript_1/1_Conf_1.000 | 441  | 0  |           |                |    |         |     |     |                                                                 |

|                                      |      |    |           |                |    |         |     |     |                                 |
|--------------------------------------|------|----|-----------|----------------|----|---------|-----|-----|---------------------------------|
| Locus_9035_Transcript_1/1_Conf_1.000 | 1160 | 20 | 0         | NP_501998.1    | 92 | 645.195 | 375 | 345 | hypothetical protein T25B9.9    |
| Locus_9036_Transcript_1/1_Conf_1.000 | 628  | 20 | 1.57E-64  | NP_496100.1    | 76 | 249.595 | 216 | 166 | hypothetical protein Y53C12B.1  |
| Locus_9037_Transcript_1/1_Conf_1.000 | 1208 | 20 | 6.19E-118 | XP_002645068.1 | 73 | 428.713 | 395 | 291 | C. briggsae CBR-TAG-197 protein |

|                                      |     |    |          |                |    |         |     |     |                               |
|--------------------------------------|-----|----|----------|----------------|----|---------|-----|-----|-------------------------------|
| Locus_9038_Transcript_1/1_Conf_1.000 | 925 | 20 | 9.92E-64 | XP_002639900.1 | 66 | 248.054 | 308 | 204 | C. briggsae CBR-APR-1 protein |
| Locus_9039_Transcript_1/2_Conf_1.000 | 273 | 4  | 4.55E-31 | XP_002637828.1 | 82 | 137.502 | 90  | 74  | Hypothetical protein CBG04618 |
| Locus_9039_Transcript_2/2_Conf_1.000 | 273 | 4  | 4.55E-31 | XP_002637828.1 | 82 | 137.502 | 90  | 74  | Hypothetical protein CBG04618 |
| Locus_904_Transcript_1/1_Conf_1.000  | 713 | 12 | 1.08E-36 | XP_002646571.1 | 64 | 157.532 | 162 | 105 | Hypothetical protein CBG20429 |

|                                      |      |    |           |                |    |         |     |     |                                                    |
|--------------------------------------|------|----|-----------|----------------|----|---------|-----|-----|----------------------------------------------------|
| Locus_9040_Transcript_1/1_Conf_1.000 | 639  | 20 | 1.08E-47  | NP_501093.1    | 66 | 193.741 | 209 | 139 | Kinesin-Like Protein family member (klp-18)        |
| Locus_9041_Transcript_1/1_Conf_1.000 | 227  | 0  |           |                |    |         |     |     |                                                    |
| Locus_9042_Transcript_1/1_Conf_1.000 | 169  | 0  |           |                |    |         |     |     |                                                    |
| Locus_9043_Transcript_1/1_Conf_1.000 | 144  | 0  |           |                |    |         |     |     |                                                    |
| Locus_9044_Transcript_1/1_Conf_1.000 | 363  | 0  |           |                |    |         |     |     |                                                    |
| Locus_9045_Transcript_1/1_Conf_1.000 | 375  | 0  |           |                |    |         |     |     |                                                    |
| Locus_9046_Transcript_1/1_Conf_1.000 | 1376 | 6  | 8.11E-56  | XP_002646592.1 | 49 | 222.631 | 469 | 232 | C. briggsae CBR-EKL-1 protein                      |
| Locus_9047_Transcript_1/1_Conf_1.000 | 552  | 20 | 6.25E-63  | NP_504274.2    | 79 | 243.817 | 185 | 147 | UDP-GlucuronosylTransferase family member (ugt-61) |
| Locus_9048_Transcript_1/1_Conf_1.000 | 1751 | 20 | 0         | XP_002630326.1 | 85 | 814.683 | 575 | 489 | Hypothetical protein CBG04253                      |
| Locus_9049_Transcript_1/1_Conf_1.000 | 975  | 20 | 2.92E-85  | NP_497835.1    | 75 | 319.701 | 262 | 199 | hypothetical protein C16C10.2                      |
| Locus_905_Transcript_1/1_Conf_1.000  | 778  |    |           |                |    |         |     |     |                                                    |
| Locus_9050_Transcript_1/1_Conf_1.000 | 278  | 20 | 2.33E-27  | XP_002631614.1 | 85 | 125.176 | 90  | 77  | C. briggsae CBR-MAC-1 protein                      |
| Locus_9051_Transcript_1/2_Conf_1.000 | 938  | 20 | 3.50E-56  | NP_497422.3    | 61 | 223.016 | 274 | 169 | hypothetical protein Y67D2.2                       |
| Locus_9051_Transcript_2/2_Conf_1.000 | 1647 | 20 | 1.46E-110 | NP_497422.3    | 65 | 404.831 | 470 | 307 | hypothetical protein Y67D2.2                       |

|                                      |      |    |           |                |    |         |     |     |                                                                         |
|--------------------------------------|------|----|-----------|----------------|----|---------|-----|-----|-------------------------------------------------------------------------|
| Locus_9052_Transcript_1/1_Conf_1.000 | 330  | 20 | 4.13E-24  | NP_498815.1    | 79 | 114.39  | 97  | 77  | hypothetical protein F09G8.3                                            |
| Locus_9053_Transcript_1/1_Conf_1.000 | 174  | 0  |           |                |    |         |     |     |                                                                         |
| Locus_9054_Transcript_1/1_Conf_1.000 | 597  | 20 | 7.01E-24  | EFO25241.1     | 76 | 114.39  | 93  | 71  | CMGC/CDK protein kinase                                                 |
| Locus_9055_Transcript_1/1_Conf_1.000 | 362  | 20 | 5.56E-21  | XP_001895126.1 | 87 | 103.99  | 66  | 58  | hypothetical protein                                                    |
| Locus_9056_Transcript_1/5_Conf_0.714 | 2663 | 20 | 8.79E-66  | NP_499624.2    | 43 | 256.914 | 850 | 366 | ANillin (actin binding protein) family member (ani-1)                   |
| Locus_9056_Transcript_2/5_Conf_0.714 | 2729 | 20 | 2.15E-67  | NP_499624.2    | 42 | 262.307 | 873 | 375 | ANillin (actin binding protein) family member (ani-1)                   |
| Locus_9056_Transcript_3/5_Conf_0.643 | 2720 | 20 | 9.63E-68  | NP_499624.2    | 42 | 263.462 | 868 | 372 | ANillin (actin binding protein) family member (ani-1)                   |
| Locus_9056_Transcript_4/5_Conf_0.714 | 2717 | 20 | 1.06E-66  | NP_499624.2    | 43 | 259.996 | 869 | 375 | ANillin (actin binding protein) family member (ani-1)                   |
| Locus_9056_Transcript_5/5_Conf_0.714 | 2717 | 20 | 1.81E-66  | NP_499624.2    | 42 | 259.225 | 868 | 372 | ANillin (actin binding protein) family member (ani-1)                   |
| Locus_9057_Transcript_1/1_Conf_1.000 | 373  | 20 | 4.80E-12  | NP_497657.1    | 64 | 74.3294 | 84  | 54  | SurFeit homolog family member (sft-1)                                   |
| Locus_9058_Transcript_1/1_Conf_1.000 | 920  | 3  | 7.52E-56  | XP_002629981.1 | 82 | 221.861 | 155 | 128 | Hypothetical protein CBG13343                                           |
| Locus_9059_Transcript_1/1_Conf_1.000 | 381  | 0  |           |                |    |         |     |     |                                                                         |
| Locus_906_Transcript_1/1_Conf_1.000  | 1936 | 20 | 1.54E-154 | A8XXC0.2       | 66 | 551.206 | 560 | 375 | Tubulin--tyrosine ligase-like protein 12                                |
| Locus_9060_Transcript_1/1_Conf_1.000 | 620  | 20 | 2.00E-80  | CAR97821.1     | 82 | 302.368 | 207 | 170 | C. elegans protein F11C1.5d, partially confirmed by transcript evidence |
| Locus_9061_Transcript_1/1_Conf_1.000 | 289  | 0  |           |                |    |         |     |     |                                                                         |
| Locus_9062_Transcript_1/1_Conf_1.000 | 457  | 20 | 2.03E-39  | XP_002646729.1 | 89 | 165.236 | 113 | 101 | C. briggsae CBR-PRX-13 protein                                          |
| Locus_9063_Transcript_1/1_Conf_1.000 | 251  | 6  | 3.23E-29  | XP_002641621.1 | 86 | 131.339 | 83  | 72  | Hypothetical protein CBG09941                                           |
| Locus_9064_Transcript_1/1_Conf_1.000 | 419  | 20 | 3.77E-57  | ACD88894.1     | 92 | 224.172 | 128 | 118 | transthyretin-like protein                                              |
| Locus_9065_Transcript_1/1_Conf_1.000 | 315  | 0  |           |                |    |         |     |     |                                                                         |



|                                      |      |    |           |                |    |         |     |     |                                 |
|--------------------------------------|------|----|-----------|----------------|----|---------|-----|-----|---------------------------------|
| Locus_9066_Transcript_1/1_Conf_1.000 | 416  | 20 | 3.43E-55  | EFO20551.1     | 90 | 217.624 | 129 | 117 | hypothetical protein LOAG_07939 |
| Locus_9067_Transcript_1/2_Conf_1.000 | 471  | 20 | 1.13E-21  | NP_492409.2    | 56 | 106.301 | 146 | 83  | hypothetical protein F53B6.7    |
| Locus_9067_Transcript_2/2_Conf_1.000 | 527  | 20 | 5.43E-23  | XP_002639679.1 | 58 | 110.923 | 163 | 96  | Hypothetical protein CBG12398   |
| Locus_9068_Transcript_1/2_Conf_1.000 | 1213 | 20 | 4.43E-105 | XP_002646593.1 | 69 | 227.639 | 218 | 151 | C. briggsae CBR-PRPF-4 protein  |
| Locus_9068_Transcript_2/2_Conf_1.000 | 1107 | 20 | 6.47E-111 | XP_002646593.1 | 76 | 405.216 | 320 | 245 | C. briggsae CBR-PRPF-4 protein  |
| Locus_9069_Transcript_1/1_Conf_1.000 | 206  | 0  |           |                |    |         |     |     |                                 |
| Locus_907_Transcript_1/1_Conf_1.000  | 1870 | 20 | 0         | XP_002649013.1 | 91 | 887.486 | 538 | 492 | Hypothetical protein CBG21460   |
| Locus_9070_Transcript_1/1_Conf_1.000 | 800  | 20 | 2.40E-49  | XP_001950093.1 | 61 | 199.904 | 255 | 156 | PREDICTED: similar to cullin    |

|                                      |      |    |          |                |    |         |     |     |                                                             |
|--------------------------------------|------|----|----------|----------------|----|---------|-----|-----|-------------------------------------------------------------|
| Locus_9071_Transcript_1/1_Conf_1.000 | 434  | 20 | 1.19E-39 | XP_001899873.1 | 77 | 166.007 | 111 | 86  | protein kinase C substrate 80K-H                            |
| Locus_9072_Transcript_1/1_Conf_1.000 | 870  | 20 | 1.57E-84 | Q03566.2       | 77 | 317.005 | 280 | 218 | Probable G-protein coupled receptor tkr-1                   |
| Locus_9073_Transcript_1/2_Conf_1.000 | 1391 | 20 | 0        | XP_002630467.1 | 91 | 721.85  | 465 | 425 | C. briggsae CBR-UNC-104 protein                             |
| Locus_9073_Transcript_2/2_Conf_1.000 | 1397 | 20 | 0        | XP_002630467.1 | 91 | 721.85  | 466 | 425 | C. briggsae CBR-UNC-104 protein                             |
| Locus_9074_Transcript_1/1_Conf_1.000 | 1271 | 0  |          |                |    |         |     |     |                                                             |
| Locus_9075_Transcript_1/1_Conf_1.000 | 385  | 0  |          |                |    |         |     |     |                                                             |
| Locus_9076_Transcript_1/1_Conf_1.000 | 348  | 20 | 8.36E-49 | NP_491993.1    | 95 | 196.438 | 115 | 110 | CRAL/TRIO and GOLD domain containing family member (ctg-1)  |
| Locus_9077_Transcript_1/1_Conf_1.000 | 227  | 19 | 9.08E-11 | XP_001901053.1 | 65 | 70.0922 | 75  | 49  | Frizzled/Smoothed family membrane region containing protein |

|                                      |      |    |          |                |    |         |     |     |                                                |
|--------------------------------------|------|----|----------|----------------|----|---------|-----|-----|------------------------------------------------|
| Locus_9078_Transcript_1/1_Conf_1.000 | 432  | 4  | 5.21E-19 | XP_002634885.1 | 55 | 97.4413 | 134 | 74  | Hypothetical protein CBG10553                  |
| Locus_9079_Transcript_1/1_Conf_1.000 | 622  | 20 | 6.05E-45 | XP_002644547.1 | 69 | 184.496 | 156 | 109 | C. briggsae CBR-DGK-2 protein                  |
| Locus_908_Transcript_1/1_Conf_1.000  | 172  | 20 | 2.50E-13 | 1TOV           | 88 | 78.5666 | 43  | 38  | Cap-Gly Domain Of F53f4.3                      |
| Locus_9080_Transcript_1/3_Conf_0.714 | 2649 | 7  | 4.12E-15 | XP_001896575.1 | 42 | 88.5817 | 416 | 178 | hypothetical protein Bm1_25580                 |
| Locus_9080_Transcript_2/3_Conf_0.714 | 2649 | 12 | 4.12E-15 | XP_001896575.1 | 42 | 88.5817 | 416 | 178 | hypothetical protein Bm1_25580                 |
| Locus_9080_Transcript_3/3_Conf_0.714 | 2649 | 10 | 4.12E-15 | XP_001896575.1 | 42 | 88.5817 | 416 | 178 | hypothetical protein Bm1_25580                 |
| Locus_9081_Transcript_1/1_Conf_1.000 | 222  | 20 | 6.29E-20 | EFN80829.1     | 81 | 100.523 | 74  | 60  | Dephospho-CoA kinase domain-containing protein |
| Locus_9082_Transcript_1/1_Conf_1.000 | 1805 | 14 | 3.44E-84 | EFO26517.1     | 72 | 317.39  | 280 | 204 | hypothetical protein LOAG_01973                |
| Locus_9083_Transcript_1/1_Conf_1.000 | 559  | 0  |          |                |    |         |     |     |                                                |
| Locus_9084_Transcript_1/1_Conf_1.000 | 950  | 20 | 3.20E-97 | XP_002647026.1 | 73 | 359.377 | 306 | 225 | C. briggsae CBR-PUP-2 protein                  |
| Locus_9085_Transcript_1/1_Conf_1.000 | 653  | 20 | 3.71E-91 | XP_002637616.1 | 85 | 338.191 | 218 | 187 | Hypothetical protein CBG19359                  |
| Locus_9086_Transcript_1/1_Conf_1.000 | 1035 | 20 | 2.35E-27 | CAG02388.1     | 60 | 127.487 | 140 | 84  | unnamed protein product                        |

|                                      |      |    |          |                |    |         |     |     |                                                                  |
|--------------------------------------|------|----|----------|----------------|----|---------|-----|-----|------------------------------------------------------------------|
| Locus_9087_Transcript_1/1_Conf_1.000 | 2072 | 20 | 0        | ADC52457.1     | 98 | 835.484 | 512 | 502 | NADH dehydrogenase subunit 5                                     |
| Locus_9088_Transcript_1/1_Conf_1.000 | 458  | 0  |          |                |    |         |     |     |                                                                  |
| Locus_9089_Transcript_1/1_Conf_1.000 | 216  | 20 | 1.60E-28 | CAR63545.1     | 91 | 129.028 | 72  | 66  | putative Hsp90 protein                                           |
| Locus_909_Transcript_1/1_Conf_1.000  | 390  | 4  | 2.03E-15 | EFO23348.1     | 60 | 85.5001 | 129 | 78  | hypothetical protein LOAG_05138                                  |
| Locus_9090_Transcript_1/1_Conf_1.000 | 1151 | 0  |          |                |    |         |     |     |                                                                  |
| Locus_9091_Transcript_1/2_Conf_1.000 | 775  | 20 | 2.75E-47 | NP_498576.1    | 80 | 192.971 | 148 | 119 | hypothetical protein F37C12.1                                    |
| Locus_9091_Transcript_2/2_Conf_1.000 | 773  | 20 | 2.73E-47 | NP_498576.1    | 80 | 192.971 | 148 | 119 | hypothetical protein F37C12.1                                    |
| Locus_9092_Transcript_1/1_Conf_1.000 | 488  | 0  |          |                |    |         |     |     |                                                                  |
| Locus_9093_Transcript_1/2_Conf_1.000 | 1244 | 20 | 1.66E-97 | NP_492092.1    | 69 | 360.918 | 368 | 256 | hypothetical protein C15A11.7                                    |
| Locus_9093_Transcript_2/2_Conf_1.000 | 1146 | 20 | 2.67E-99 | XP_002646241.1 | 72 | 366.696 | 330 | 238 | Hypothetical protein CBG11935                                    |
| Locus_9094_Transcript_1/1_Conf_1.000 | 302  | 11 | 3.39E-18 | XP_002639148.1 | 71 | 94.7449 | 100 | 71  | C. briggsae CBR-SULP-6 protein                                   |
| Locus_9095_Transcript_1/1_Conf_1.000 | 830  | 20 | 1.43E-92 | NP_001040789.1 | 84 | 343.584 | 276 | 233 | hypothetical protein H20J04.4                                    |
| Locus_9096_Transcript_1/1_Conf_1.000 | 592  | 3  | 1.86E-13 | NP_871669.1    | 49 | 79.7221 | 175 | 86  | SET (trithorax/polycomb) domain containing family member (set-3) |
| Locus_9097_Transcript_1/1_Conf_1.000 | 562  | 4  | 3.05E-04 | CAZ65476.1     | 58 | 48.9062 | 58  | 34  | C. elegans protein C36B1.8c, confirmed by transcript evidence    |
| Locus_9098_Transcript_1/1_Conf_1.000 | 156  | 0  |          |                |    |         |     |     |                                                                  |
| Locus_9099_Transcript_1/1_Conf_1.000 | 868  | 20 | 1.75E-43 | NP_001122880.1 | 52 | 180.644 | 293 | 154 | Temporarily Assigned Gene name family member (tag-333)           |

|                                      |      |    |           |                |    |         |      |     |                                                   |
|--------------------------------------|------|----|-----------|----------------|----|---------|------|-----|---------------------------------------------------|
| Locus_91_Transcript_1/2_Conf_1.000   | 1814 | 20 | 5.06E-35  | XP_783989.2    | 43 | 154.066 | 591  | 256 | PREDICTED: similar to Rad50-interacting protein 1 |
| Locus_91_Transcript_2/2_Conf_1.000   | 1814 | 20 | 5.06E-35  | XP_783989.2    | 43 | 154.066 | 591  | 256 | PREDICTED: similar to Rad50-interacting protein 1 |
| Locus_910_Transcript_1/1_Conf_1.000  | 3597 | 20 | 5.27E-101 | XP_001900253.1 | 46 | 374.4   | 1179 | 549 | hypothetical protein Bm1_43955                    |
| Locus_9100_Transcript_1/1_Conf_1.000 | 553  | 20 | 1.89E-51  | XP_002637738.1 | 86 | 205.682 | 129  | 112 | Hypothetical protein CBG11604                     |
| Locus_9101_Transcript_1/1_Conf_1.000 | 1046 | 20 | 6.56E-78  | XP_002629707.1 | 68 | 295.434 | 309  | 211 | Hypothetical protein CBG00934                     |
| Locus_9102_Transcript_1/1_Conf_1.000 | 135  | 20 | 2.05E-07  | P30616.1       | 68 | 58.9214 | 45   | 31  | Pyruvate kinase 2                                 |
| Locus_9103_Transcript_1/1_Conf_1.000 | 143  | 0  |           |                |    |         |      |     |                                                   |
| Locus_9104_Transcript_1/1_Conf_1.000 | 326  | 20 | 2.52E-29  | XP_002642780.1 | 74 | 131.724 | 106  | 79  | Hypothetical protein CBG21174                     |
| Locus_9105_Transcript_1/1_Conf_1.000 | 478  | 20 | 1.65E-49  | XP_001901593.1 | 80 | 198.749 | 157  | 126 | Elongation factor G C-terminus family protein     |
| Locus_9106_Transcript_1/1_Conf_1.000 | 701  | 20 | 9.97E-104 | NP_500145.2    | 88 | 380.178 | 234  | 206 | hypothetical protein F52C12.4                     |
| Locus_9107_Transcript_1/1_Conf_1.000 | 408  | 20 | 1.72E-54  | XP_002642177.1 | 86 | 215.312 | 132  | 114 | Hypothetical protein CBG18144                     |
| Locus_9108_Transcript_1/2_Conf_1.000 | 682  | 20 | 4.12E-59  | CAM84574.1     | 67 | 231.876 | 209  | 141 | intestinal prolyl carboxypeptidase 2              |
| Locus_9108_Transcript_2/2_Conf_1.000 | 789  | 20 | 2.18E-63  | CAM84574.1     | 62 | 246.514 | 261  | 163 | intestinal prolyl carboxypeptidase 2              |

|                                      |      |    |           |                |    |         |     |     |                                                   |
|--------------------------------------|------|----|-----------|----------------|----|---------|-----|-----|---------------------------------------------------|
| Locus_9109_Transcript_1/2_Conf_1.000 | 977  | 20 | 1.19E-70  | NP_507245.1    | 62 | 271.166 | 316 | 197 | hypothetical protein T20B3.1                      |
| Locus_9109_Transcript_2/2_Conf_1.000 | 977  | 20 | 1.41E-71  | NP_507245.1    | 62 | 274.248 | 316 | 198 | hypothetical protein T20B3.1                      |
| Locus_911_Transcript_1/1_Conf_1.000  | 1600 | 20 | 5.52E-107 | NP_741223.1    | 67 | 392.889 | 458 | 307 | hypothetical protein F56C9.10                     |
| Locus_9110_Transcript_1/1_Conf_1.000 | 209  | 0  |           |                |    |         |     |     |                                                   |
| Locus_9111_Transcript_1/1_Conf_1.000 | 472  | 20 | 2.26E-38  | NP_497853.1    | 73 | 161.77  | 160 | 117 | hypothetical protein T08A11.2                     |
| Locus_9112_Transcript_1/1_Conf_1.000 | 422  | 20 | 2.89E-33  | NP_499585.1    | 75 | 144.821 | 140 | 106 | OSMotic avoidance abnormal family member (osm-12) |
| Locus_9113_Transcript_1/1_Conf_1.000 | 437  | 2  | 2.04E-07  | NP_001024812.1 | 46 | 58.9214 | 99  | 46  | hypothetical protein M163.8                       |
| Locus_9114_Transcript_1/1_Conf_1.000 | 348  | 2  | 2.30E-06  | NP_497103.1    | 54 | 55.4546 | 93  | 51  | hypothetical protein Y53F4B.18                    |
| Locus_9115_Transcript_1/2_Conf_1.000 | 1651 | 0  |           |                |    |         |     |     |                                                   |
| Locus_9115_Transcript_2/2_Conf_1.000 | 1501 | 0  |           |                |    |         |     |     |                                                   |
| Locus_9116_Transcript_1/1_Conf_1.000 | 591  | 0  |           |                |    |         |     |     |                                                   |
| Locus_9117_Transcript_1/1_Conf_1.000 | 382  | 20 | 1.09E-32  | XP_002641709.1 | 73 | 142.895 | 125 | 92  | C. briggsae CBR-CED-7 protein                     |
| Locus_9118_Transcript_1/1_Conf_1.000 | 441  | 20 | 1.29E-49  | XP_002636806.1 | 80 | 199.134 | 147 | 118 | Hypothetical protein CBG09248                     |
| Locus_9119_Transcript_1/1_Conf_1.000 | 375  | 20 | 7.11E-24  | NP_491986.1    | 57 | 113.62  | 128 | 74  | hypothetical protein C30F12.2                     |

|                                      |     |    |          |                |    |         |     |     |                                   |
|--------------------------------------|-----|----|----------|----------------|----|---------|-----|-----|-----------------------------------|
| Locus_912_Transcript_1/1_Conf_1.000  | 774 | 20 | 6.31E-60 | NP_508674.1    | 92 | 234.958 | 138 | 127 | SUPpressor family member (sup-12) |
| Locus_9120_Transcript_1/2_Conf_1.000 | 728 | 20 | 5.95E-62 | XP_002631267.1 | 75 | 241.506 | 242 | 183 | C. briggsae CBR-PRO-1 protein     |
| Locus_9120_Transcript_2/2_Conf_1.000 | 728 | 20 | 7.77E-62 | XP_002631267.1 | 75 | 241.121 | 242 | 183 | C. briggsae CBR-PRO-1 protein     |
| Locus_9121_Transcript_1/1_Conf_1.000 | 991 | 2  | 1.17E-04 | XP_002021005.1 | 37 | 51.9878 | 176 | 66  | GL25064                           |
| Locus_9122_Transcript_1/1_Conf_1.000 | 659 | 5  | 2.18E-46 | XP_002644341.1 | 60 | 189.504 | 220 | 133 | Hypothetical protein CBG14163     |
| Locus_9123_Transcript_1/1_Conf_1.000 | 253 | 1  | 1.32E-17 | NP_001023480.2 | 77 | 92.8189 | 74  | 57  | hypothetical protein Y4C6B.7      |
| Locus_9124_Transcript_1/1_Conf_1.000 | 302 | 1  | 1.25E-04 | NP_001022284.1 | 52 | 49.6766 | 70  | 37  | hypothetical protein R12C12.10    |
| Locus_9125_Transcript_1/1_Conf_1.000 | 507 | 0  |          |                |    |         |     |     |                                   |
| Locus_9126_Transcript_1/1_Conf_1.000 | 283 | 0  |          |                |    |         |     |     |                                   |
| Locus_9127_Transcript_1/1_Conf_1.000 | 468 | 20 | 7.84E-23 | CAB03414.3     | 55 | 110.153 | 158 | 87  | Hypothetical protein T23G11.5a    |
| Locus_9128_Transcript_1/2_Conf_1.000 | 487 | 20 | 9.77E-82 | EFO23081.1     | 98 | 305.834 | 160 | 157 | adaptor protein complex AP-2      |
| Locus_9128_Transcript_2/2_Conf_1.000 | 543 | 20 | 9.35E-93 | EFO23081.1     | 97 | 342.813 | 180 | 176 | adaptor protein complex AP-2      |
| Locus_9129_Transcript_1/1_Conf_1.000 | 427 | 20 | 1.28E-49 | XP_002640436.1 | 78 | 199.134 | 141 | 110 | Hypothetical protein CBG08488     |
| Locus_913_Transcript_1/1_Conf_1.000  | 436 | 0  |          |                |    |         |     |     |                                   |

|                                      |      |    |           |                |    |         |     |     |                                                                       |
|--------------------------------------|------|----|-----------|----------------|----|---------|-----|-----|-----------------------------------------------------------------------|
| Locus_9130_Transcript_1/1_Conf_1.000 | 341  | 20 | 3.12E-32  | XP_002630855.1 | 84 | 141.354 | 90  | 76  | Hypothetical protein CBG02570                                         |
| Locus_9131_Transcript_1/1_Conf_1.000 | 1244 | 20 | 2.17E-89  | NP_490849.4    | 62 | 333.954 | 399 | 251 | SET (trithorax/polycomb) domain containing family member (set-29)     |
| Locus_9132_Transcript_1/1_Conf_1.000 | 1183 | 20 | 6.18E-131 | NP_496280.1    | 79 | 471.855 | 346 | 276 | mammalian cell Death Associated Protein related family member (dap-3) |
| Locus_9133_Transcript_1/2_Conf_1.000 | 903  | 20 | 1.07E-56  | XP_002634163.1 | 69 | 175.252 | 168 | 116 | Hypothetical protein CBG01728                                         |
| Locus_9133_Transcript_2/2_Conf_1.000 | 847  | 20 | 7.97E-62  | XP_002634163.1 | 70 | 241.506 | 226 | 159 | Hypothetical protein CBG01728                                         |
| Locus_9134_Transcript_1/1_Conf_1.000 | 726  | 20 | 3.36E-73  | NP_499802.2    | 80 | 278.87  | 210 | 170 | hypothetical protein Y76A2B.6                                         |
| Locus_9135_Transcript_1/1_Conf_1.000 | 829  | 20 | 3.94E-42  | EFO26950.1     | 60 | 176.022 | 249 | 151 | eukaryotic translation initiation factor 3 subunit 8                  |
| Locus_9136_Transcript_1/1_Conf_1.000 | 297  | 0  |           |                |    |         |     |     |                                                                       |
| Locus_9137_Transcript_1/1_Conf_1.000 | 224  | 0  |           |                |    |         |     |     |                                                                       |
| Locus_9138_Transcript_1/2_Conf_1.000 | 1362 | 20 | 1.10E-75  | NP_001033372.1 | 88 | 238.81  | 153 | 135 | hypothetical protein T15B12.1                                         |
| Locus_9138_Transcript_2/2_Conf_1.000 | 1319 | 20 | 3.76E-79  | NP_001033372.1 | 78 | 300.056 | 242 | 189 | hypothetical protein T15B12.1                                         |
| Locus_9139_Transcript_1/1_Conf_1.000 | 418  | 0  |           |                |    |         |     |     |                                                                       |
| Locus_914_Transcript_1/3_Conf_0.714  | 2649 | 20 | 0         | NP_741748.2    | 72 | 744.191 | 704 | 511 | Sensory AXon guidance family member (sax-3)                           |
| Locus_914_Transcript_2/3_Conf_0.714  | 2667 | 20 | 0         | NP_741748.2    | 75 | 784.252 | 694 | 522 | Sensory AXon guidance family member (sax-3)                           |
| Locus_914_Transcript_3/3_Conf_0.714  | 2700 | 20 | 0         | NP_741748.2    | 74 | 777.704 | 704 | 524 | Sensory AXon guidance family member (sax-3)                           |



|                                      |      |    |           |                |     |         |     |     |                                                                                     |
|--------------------------------------|------|----|-----------|----------------|-----|---------|-----|-----|-------------------------------------------------------------------------------------|
| Locus_9140_Transcript_1/1_Conf_1.000 | 354  | 20 | 3.62E-28  | XP_001897467.1 | 79  | 127.872 | 89  | 71  | CAP-Gly domain containing protein                                                   |
| Locus_9141_Transcript_1/1_Conf_1.000 | 199  | 20 | 4.59E-31  | XP_002917824.1 | 100 | 137.502 | 65  | 65  | PREDICTED: LOW QUALITY PROTEIN:<br>ubiquitin-like modifier-activating enzyme 1-like |
| Locus_9142_Transcript_1/1_Conf_1.000 | 835  | 20 | 1.04E-74  | XP_002640365.1 | 82  | 284.263 | 182 | 150 | Hypothetical protein CBG20269                                                       |
| Locus_9143_Transcript_1/1_Conf_1.000 | 501  | 20 | 1.14E-29  | CAR63556.1     | 74  | 132.88  | 167 | 124 | putative Lin-5 (Five) Interacting protein                                           |
| Locus_9144_Transcript_1/1_Conf_1.000 | 1046 | 20 | 8.39E-150 | AAR07614.1     | 94  | 534.258 | 294 | 278 | UNC-18                                                                              |
| Locus_9145_Transcript_1/1_Conf_1.000 | 860  | 0  |           |                |     |         |     |     |                                                                                     |
| Locus_9146_Transcript_1/1_Conf_1.000 | 860  | 0  |           |                |     |         |     |     |                                                                                     |
| Locus_9147_Transcript_1/6_Conf_0.154 | 249  | 1  | 2.49E-05  | NP_490891.1    | 59  | 51.9878 | 64  | 38  | hypothetical protein Y71G12B.8                                                      |

|                                      |      |    |          |                |     |         |     |     |                                                                                |
|--------------------------------------|------|----|----------|----------------|-----|---------|-----|-----|--------------------------------------------------------------------------------|
| Locus_9147_Transcript_2/6_Conf_0.462 | 1633 | 20 | 3.71E-74 | EFO21790.1     | 68  | 283.878 | 301 | 205 | hypothetical protein LOAG_06696                                                |
| Locus_9147_Transcript_3/6_Conf_0.615 | 2057 | 20 | 4.95E-74 | EFO21790.1     | 68  | 283.878 | 301 | 205 | hypothetical protein LOAG_06696                                                |
| Locus_9147_Transcript_4/6_Conf_0.462 | 1633 | 20 | 3.71E-74 | EFO21790.1     | 68  | 283.878 | 301 | 205 | hypothetical protein LOAG_06696                                                |
| Locus_9147_Transcript_5/6_Conf_0.231 | 548  | 2  | 1.90E-16 | NP_490891.1    | 59  | 89.3521 | 121 | 72  | hypothetical protein Y71G12B.8                                                 |
| Locus_9147_Transcript_6/6_Conf_0.462 | 1633 | 20 | 3.71E-74 | EFO21790.1     | 68  | 283.878 | 301 | 205 | hypothetical protein LOAG_06696                                                |
| Locus_9148_Transcript_1/1_Conf_1.000 | 231  | 0  |          |                |     |         |     |     |                                                                                |
| Locus_9149_Transcript_1/1_Conf_1.000 | 479  | 4  | 4.38E-26 | XP_002632865.1 | 88  | 120.939 | 70  | 62  | Hypothetical protein CBG15064                                                  |
| Locus_915_Transcript_1/1_Conf_1.000  | 635  | 20 | 7.02E-60 | NP_499173.1    | 75  | 234.187 | 212 | 160 | hypothetical protein ZK632.3                                                   |
| Locus_9150_Transcript_1/1_Conf_1.000 | 470  | 2  | 2.60E-26 | NP_497272.1    | 83  | 121.709 | 93  | 78  | hypothetical protein K02F3.9                                                   |
| Locus_9151_Transcript_1/1_Conf_1.000 | 558  | 5  | 1.29E-15 | XP_002644427.1 | 100 | 86.6557 | 58  | 58  | Hypothetical protein CBG14284                                                  |
| Locus_9152_Transcript_1/1_Conf_1.000 | 344  | 20 | 5.62E-61 | 2QUJ           | 100 | 236.884 | 114 | 114 | CrystalStructures Of Human Tryptophanyl-Trna Synthetase In Complex With Trpamp |
| Locus_9153_Transcript_1/1_Conf_1.000 | 128  | 8  | 8.68E-06 | XP_002633175.1 | 73  | 53.5286 | 42  | 31  | Hypothetical protein CBG05887                                                  |
| Locus_9154_Transcript_1/1_Conf_1.000 | 809  | 0  |          |                |     |         |     |     |                                                                                |
| Locus_9155_Transcript_1/1_Conf_1.000 | 317  | 6  | 4.82E-12 | NP_504235.2    | 55  | 74.3294 | 104 | 58  | Drosophila SOS homolog family member (sos-1)                                   |
| Locus_9156_Transcript_1/4_Conf_0.538 | 1317 | 20 | 1.43E-70 | NP_493353.3    | 63  | 271.552 | 266 | 168 | Specificity Protein) Transcription Factor family member (sptf-3)               |
| Locus_9156_Transcript_2/4_Conf_0.308 | 454  | 3  | 1.42E-08 | XP_001902916.1 | 50  | 62.7734 | 115 | 58  | Zinc finger, C2H2 type family protein                                          |
| Locus_9156_Transcript_3/4_Conf_0.308 | 347  | 0  |          |                |     |         |     |     |                                                                                |

|                                      |      |    |           |                |    |         |     |     |                                                                        |
|--------------------------------------|------|----|-----------|----------------|----|---------|-----|-----|------------------------------------------------------------------------|
| Locus_9156_Transcript_4/4_Conf_0.538 | 1311 | 20 | 1.68E-71  | NP_493353.3    | 62 | 274.633 | 266 | 167 | Specificity Protein) Transcription Factor family member (sptf-3)       |
| Locus_9157_Transcript_1/1_Conf_1.000 | 373  | 0  |           |                |    |         |     |     |                                                                        |
| Locus_9158_Transcript_1/1_Conf_1.000 | 328  | 20 | 1.80E-19  | XP_001898245.1 | 71 | 98.9821 | 97  | 69  | Protein kinase domain containing protein                               |
| Locus_9159_Transcript_1/1_Conf_1.000 | 196  | 0  |           |                |    |         |     |     |                                                                        |
| Locus_916_Transcript_1/1_Conf_1.000  | 239  | 0  |           |                |    |         |     |     |                                                                        |
| Locus_9160_Transcript_1/1_Conf_1.000 | 1069 | 20 | 1.07E-131 | NP_501169.1    | 87 | 474.167 | 333 | 293 | hypothetical protein F42C5.9                                           |
| Locus_9161_Transcript_1/1_Conf_1.000 | 920  | 20 | 2.85E-71  | NP_500157.2    | 76 | 273.092 | 263 | 202 | Cleavage and Polyadenylation Specificity Factor family member (cpsf-1) |
| Locus_9162_Transcript_1/1_Conf_1.000 | 255  | 20 | 2.47E-16  | XP_002637827.1 | 94 | 88.5817 | 85  | 80  | Hypothetical protein CBG04617                                          |
| Locus_9163_Transcript_1/1_Conf_1.000 | 659  | 2  | 1.43E-05  | EFO18975.1     | 89 | 53.9138 | 37  | 33  | hypothetical protein LOAG_09519                                        |
| Locus_9164_Transcript_1/1_Conf_1.000 | 1249 | 20 | 3.40E-58  | XP_001891849.1 | 55 | 230.335 | 415 | 232 | Retinoblastoma-associated protein A domain containing protein          |
| Locus_9165_Transcript_1/1_Conf_1.000 | 747  | 0  |           |                |    |         |     |     |                                                                        |
| Locus_9166_Transcript_1/1_Conf_1.000 | 520  | 20 | 2.68E-11  | EFO23036.1     | 42 | 72.0182 | 145 | 62  | CBP-B                                                                  |
| Locus_9167_Transcript_1/1_Conf_1.000 | 189  | 0  |           |                |    |         |     |     |                                                                        |
| Locus_9168_Transcript_1/1_Conf_1.000 | 330  | 0  |           |                |    |         |     |     |                                                                        |
| Locus_9169_Transcript_1/1_Conf_1.000 | 398  | 2  | 7.31E-07  | XP_002633405.1 | 65 | 41.2022 | 38  | 25  | C. briggsae CBR-LPR-2 protein                                          |
| Locus_917_Transcript_1/8_Conf_0.632  | 2750 | 20 | 1.37E-29  | XP_002670743.1 | 37 | 136.732 | 616 | 229 | predicted protein                                                      |
| Locus_917_Transcript_2/8_Conf_0.632  | 2725 | 20 | 3.59E-30  | XP_002670743.1 | 36 | 138.658 | 612 | 225 | predicted protein                                                      |

|                                      |      |    |          |                |    |         |     |     |                                                                       |
|--------------------------------------|------|----|----------|----------------|----|---------|-----|-----|-----------------------------------------------------------------------|
| Locus_917_Transcript_3/8_Conf_0.526  | 2359 | 20 | 3.03E-30 | XP_002670743.1 | 36 | 138.658 | 612 | 225 | predicted protein                                                     |
| Locus_917_Transcript_4/8_Conf_0.526  | 2393 | 20 | 3.08E-30 | XP_002670743.1 | 36 | 138.658 | 612 | 225 | predicted protein                                                     |
| Locus_917_Transcript_5/8_Conf_0.368  | 1715 | 20 | 6.00E-22 | XP_003045704.1 | 36 | 110.538 | 393 | 143 | hypothetical protein NECHADRAFT_34117                                 |
| Locus_917_Transcript_6/8_Conf_0.316  | 1027 | 20 | 3.70E-25 | AAO63577.1     | 52 | 120.168 | 189 | 99  | secreted protein 5 precursor                                          |
| Locus_917_Transcript_7/8_Conf_0.105  | 305  | 20 | 2.51E-13 | AAO63577.1     | 57 | 78.5666 | 90  | 52  | secreted protein 5 precursor                                          |
| Locus_917_Transcript_8/8_Conf_0.632  | 2750 | 20 | 3.60E-30 | XP_002670743.1 | 36 | 138.658 | 612 | 225 | predicted protein                                                     |
| Locus_9170_Transcript_1/1_Conf_1.000 | 398  | 20 | 1.18E-34 | NP_497604.2    | 78 | 149.443 | 126 | 99  | SET (trithorax/polycomb) domain containing family member (set-27)     |
| Locus_9171_Transcript_1/1_Conf_1.000 | 409  | 20 | 4.38E-42 | NP_502295.1    | 90 | 174.096 | 121 | 109 | yeast MON (monensin-resistant) homolog family member (mon-2)          |
| Locus_9172_Transcript_1/1_Conf_1.000 | 366  | 20 | 2.17E-17 | ACI49172.1     | 67 | 92.0485 | 113 | 76  | hypothetical protein Csp3_JD01.004                                    |
| Locus_9173_Transcript_1/1_Conf_1.000 | 637  | 20 | 9.65E-41 | XP_001895169.1 | 72 | 170.629 | 161 | 117 | TM2 domain containing protein                                         |
| Locus_9174_Transcript_1/1_Conf_1.000 | 962  | 20 | 1.70E-13 | NP_496141.1    | 43 | 81.2629 | 229 | 100 | hypothetical protein C05C10.2                                         |
| Locus_9175_Transcript_1/1_Conf_1.000 | 341  | 2  | 6.07E-36 | NP_500987.3    | 75 | 153.68  | 112 | 84  | hypothetical protein Y73B6BL.1                                        |
| Locus_9176_Transcript_1/1_Conf_1.000 | 358  | 0  |          |                |    |         |     |     |                                                                       |
| Locus_9177_Transcript_1/1_Conf_1.000 | 715  | 20 | 5.21E-47 | XP_002648157.1 | 79 | 191.815 | 150 | 119 | Hypothetical protein CBG24238                                         |
| Locus_9178_Transcript_1/1_Conf_1.000 | 227  | 0  |          |                |    |         |     |     |                                                                       |
| Locus_9179_Transcript_1/1_Conf_1.000 | 306  | 20 | 2.10E-28 | NP_498391.1    | 74 | 128.642 | 100 | 74  | hypothetical protein C56G2.15                                         |
| Locus_918_Transcript_1/3_Conf_0.600  | 669  | 0  |          |                |    |         |     |     |                                                                       |
| Locus_918_Transcript_2/3_Conf_0.400  | 2103 | 20 | 0        | CAD44515.1     | 78 | 680.633 | 547 | 431 | VAB-10A protein                                                       |
| Locus_918_Transcript_3/3_Conf_0.400  | 2324 | 20 | 0        | NP_509293.1    | 88 | 1055.43 | 709 | 626 | Propionyl Coenzyme A Carboxylase Alpha subunit family member (pcca-1) |

|                                      |      |    |           |                |     |         |     |     |                                                                   |
|--------------------------------------|------|----|-----------|----------------|-----|---------|-----|-----|-------------------------------------------------------------------|
| Locus_9180_Transcript_1/1_Conf_1.000 | 451  |    |           |                |     |         |     |     |                                                                   |
| Locus_9181_Transcript_1/1_Conf_1.000 | 675  | 20 | 1.05E-99  | NP_502268.1    | 88  | 366.696 | 218 | 194 | TRNA Guanine Transglycosylase family member (tgt-1)               |
| Locus_9182_Transcript_1/1_Conf_1.000 | 199  | 0  |           |                |     |         |     |     |                                                                   |
| Locus_9183_Transcript_1/1_Conf_1.000 | 172  | 0  |           |                |     |         |     |     |                                                                   |
| Locus_9184_Transcript_1/1_Conf_1.000 | 903  | 20 | 2.20E-52  | NP_505927.2    | 57  | 210.305 | 307 | 175 | CCCH-type zinc finger transcription factor family member (ccch-1) |
| Locus_9185_Transcript_1/1_Conf_1.000 | 329  | 0  |           |                |     |         |     |     |                                                                   |
| Locus_9186_Transcript_1/1_Conf_1.000 | 502  | 0  |           |                |     |         |     |     |                                                                   |
| Locus_9187_Transcript_1/1_Conf_1.000 | 982  | 20 | 5.15E-122 | NP_001024981.1 | 82  | 441.81  | 327 | 270 | Lin-5 (Five) Interacting protein family member (lfi-1)            |
| Locus_9188_Transcript_1/1_Conf_1.000 | 436  | 0  |           |                |     |         |     |     |                                                                   |
| Locus_9189_Transcript_1/1_Conf_1.000 | 268  | 0  |           |                |     |         |     |     |                                                                   |
| Locus_919_Transcript_1/1_Conf_1.000  | 2103 | 20 | 0         | XP_002643773.1 | 91  | 1176.39 | 700 | 641 | Hypothetical protein CBG01975                                     |
| Locus_9190_Transcript_1/1_Conf_1.000 | 1246 | 20 | 0         | AAP36549.1     | 100 | 674.085 | 335 | 335 | Homo sapiens glyceraldehyde-3-phosphate dehydrogenase             |
| Locus_9191_Transcript_1/2_Conf_1.000 | 1974 | 20 | 0         | NP_502558.2    | 70  | 660.603 | 655 | 465 | hypothetical protein Y67H2A.7                                     |
| Locus_9191_Transcript_2/2_Conf_1.000 | 1974 | 20 | 0         | NP_502558.2    | 70  | 659.062 | 655 | 465 | hypothetical protein Y67H2A.7                                     |
| Locus_9192_Transcript_1/1_Conf_1.000 | 398  | 9  | 1.94E-29  | ACS72232.1     | 71  | 132.109 | 129 | 92  | hypothetical protein                                              |
| Locus_9193_Transcript_1/1_Conf_1.000 | 263  | 4  | 6.67E-22  | NP_001040644.1 | 95  | 107.071 | 71  | 68  | hypothetical protein C53H9.3                                      |
| Locus_9194_Transcript_1/1_Conf_1.000 | 324  | 2  | 1.94E-05  | NP_510576.2    | 65  | 52.373  | 52  | 34  | hypothetical protein K09E9.1                                      |

|                                      |      |    |          |                |     |         |      |     |                                    |
|--------------------------------------|------|----|----------|----------------|-----|---------|------|-----|------------------------------------|
| Locus_9195_Transcript_1/1_Conf_1.000 | 3664 | 20 | 0        | XP_001898232.1 | 67  | 945.651 | 1095 | 743 | kap beta 3 protein                 |
| Locus_9196_Transcript_1/1_Conf_1.000 | 262  | 3  | 5.86E-10 | NP_001122554.1 | 62  | 67.3958 | 78   | 49  | hypothetical protein Y71G12A.2     |
| Locus_9197_Transcript_1/1_Conf_1.000 | 390  | 20 | 3.35E-18 | NP_491679.1    | 62  | 94.7449 | 114  | 71  | RuNT related family member (rnt-1) |
| Locus_9198_Transcript_1/1_Conf_1.000 | 798  | 20 | 2.68E-08 | EFO27106.1     | 71  | 63.5438 | 83   | 59  | D10ErtD718e protein                |
| Locus_9199_Transcript_1/1_Conf_1.000 | 294  | 20 | 1.24E-52 | AAH03896.2     | 100 | 209.149 | 98   | 98  | Rpl17 protein                      |
| Locus_92_Transcript_1/1_Conf_1.000   | 1778 | 20 | 0        | NP_740994.1    | 89  | 823.157 | 519  | 466 | hypothetical protein C17G10.9      |
| Locus_920_Transcript_1/1_Conf_1.000  | 217  | 0  |          |                |     |         |      |     |                                    |
| Locus_9200_Transcript_1/3_Conf_0.600 | 505  | 20 | 1.25E-39 | NP_001032988.1 | 74  | 166.007 | 162  | 120 | hypothetical protein Y51F10.4      |
| Locus_9200_Transcript_2/3_Conf_0.600 | 710  | 20 | 4.18E-49 | NP_001032988.1 | 68  | 198.749 | 251  | 173 | hypothetical protein Y51F10.4      |
| Locus_9200_Transcript_3/3_Conf_0.600 | 505  | 20 | 1.25E-39 | NP_001032988.1 | 74  | 166.007 | 162  | 120 | hypothetical protein Y51F10.4      |
| Locus_9201_Transcript_1/1_Conf_1.000 | 1018 | 5  | 3.41E-31 | XP_002636261.1 | 51  | 140.198 | 239  | 124 | C. briggsae CBR-LIN-25 protein     |
| Locus_9202_Transcript_1/1_Conf_1.000 | 766  | 2  | 2.45E-16 | NP_500786.1    | 52  | 90.1225 | 231  | 121 | hypothetical protein Y4C6B.1       |

|                                      |      |    |          |                |     |         |     |     |                                                     |
|--------------------------------------|------|----|----------|----------------|-----|---------|-----|-----|-----------------------------------------------------|
| Locus_9203_Transcript_1/1_Conf_1.000 | 675  | 20 | 1.10E-56 | EFO23663.1     | 73  | 223.787 | 208 | 153 | myosin xviii                                        |
| Locus_9204_Transcript_1/1_Conf_1.000 | 374  | 0  |          |                |     |         |     |     |                                                     |
| Locus_9205_Transcript_1/1_Conf_1.000 | 1418 | 3  | 1.82E-34 | NP_498724.3    | 46  | 151.754 | 466 | 218 | Nuclear Pore complex Protein family member (npp-15) |
| Locus_9206_Transcript_1/1_Conf_1.000 | 263  | 20 | 1.63E-44 | CBW39478.1     | 100 | 182.185 | 87  | 87  | MHC class II antigen                                |
| Locus_9207_Transcript_1/1_Conf_1.000 | 131  | 0  |          |                |     |         |     |     |                                                     |
| Locus_9208_Transcript_1/1_Conf_1.000 | 509  | 2  | 1.80E-09 | NP_491390.2    | 51  | 65.855  | 167 | 86  | hypothetical protein D1007.15                       |
| Locus_9209_Transcript_1/2_Conf_1.000 | 594  | 20 | 1.92E-58 | NP_497750.1    | 84  | 229.18  | 152 | 128 | hypothetical protein C14B1.5                        |
| Locus_9209_Transcript_2/2_Conf_1.000 | 779  | 20 | 3.49E-58 | NP_497750.1    | 84  | 229.18  | 152 | 128 | hypothetical protein C14B1.5                        |
| Locus_921_Transcript_1/1_Conf_1.000  | 284  | 0  |          |                |     |         |     |     |                                                     |
| Locus_9210_Transcript_1/1_Conf_1.000 | 256  | 0  |          |                |     |         |     |     |                                                     |
| Locus_9211_Transcript_1/1_Conf_1.000 | 332  | 0  |          |                |     |         |     |     |                                                     |
| Locus_9212_Transcript_1/1_Conf_1.000 | 157  | 0  |          |                |     |         |     |     |                                                     |
| Locus_9213_Transcript_1/2_Conf_1.000 | 1129 | 20 | 1.07E-92 | XP_002633395.1 | 63  | 344.739 | 422 | 267 | C. briggsae CBR-KIN-4 protein                       |

|                                      |      |    |          |                |    |         |     |     |                                                   |
|--------------------------------------|------|----|----------|----------------|----|---------|-----|-----|---------------------------------------------------|
| Locus_9213_Transcript_2/2_Conf_1.000 | 1114 | 20 | 5.19E-92 | NP_502161.2    | 63 | 342.428 | 420 | 268 | protein KINase family member (kin-4)              |
| Locus_9214_Transcript_1/1_Conf_1.000 | 618  | 20 | 1.42E-09 | XP_001898759.1 | 67 | 67.0106 | 120 | 81  | collagen col-34                                   |
| Locus_9215_Transcript_1/1_Conf_1.000 | 311  | 0  |          |                |    |         |     |     |                                                   |
| Locus_9216_Transcript_1/2_Conf_1.000 | 546  | 20 | 1.03E-46 | XP_002631580.1 | 71 | 189.889 | 171 | 123 | Hypothetical protein CBG20758                     |
| Locus_9216_Transcript_2/2_Conf_1.000 | 651  | 20 | 3.51E-57 | XP_002631580.1 | 72 | 225.328 | 200 | 145 | Hypothetical protein CBG20758                     |
| Locus_9217_Transcript_1/1_Conf_1.000 | 593  | 20 | 2.47E-66 | NP_495019.1    | 96 | 255.373 | 131 | 126 | Masculinisation Of Germline family member (mog-5) |
| Locus_9218_Transcript_1/1_Conf_1.000 | 594  | 0  |          |                |    |         |     |     |                                                   |
| Locus_9219_Transcript_1/1_Conf_1.000 | 574  | 0  |          |                |    |         |     |     |                                                   |
| Locus_922_Transcript_1/1_Conf_1.000  | 624  | 20 | 4.26E-38 | EFO26612.1     | 61 | 161.77  | 203 | 125 | hypothetical protein LOAG_01868                   |
| Locus_9220_Transcript_1/1_Conf_1.000 | 1076 | 20 | 1.32E-12 | NP_001021459.2 | 40 | 78.5666 | 262 | 107 | hypothetical protein F36H2.3                      |
| Locus_9221_Transcript_1/1_Conf_1.000 | 149  | 0  |          |                |    |         |     |     |                                                   |
| Locus_9222_Transcript_1/1_Conf_1.000 | 267  | 0  |          |                |    |         |     |     |                                                   |
| Locus_9223_Transcript_1/1_Conf_1.000 | 1731 | 0  |          |                |    |         |     |     |                                                   |
| Locus_9224_Transcript_1/1_Conf_1.000 | 202  | 0  |          |                |    |         |     |     |                                                   |



|                                      |      |    |           |                |    |         |     |     |                                                       |
|--------------------------------------|------|----|-----------|----------------|----|---------|-----|-----|-------------------------------------------------------|
| Locus_9225_Transcript_1/1_Conf_1.000 | 436  | 20 | 1.36E-35  | XP_002631793.1 | 75 | 152.525 | 132 | 100 | C. briggsae CBR-CNT-1 protein                         |
| Locus_9226_Transcript_1/1_Conf_1.000 | 1386 | 20 | 4.23E-161 | NP_498311.2    | 74 | 572.392 | 482 | 361 | CYtoKinesis defect family member (cyk-3)              |
| Locus_9227_Transcript_1/1_Conf_1.000 | 812  | 20 | 1.78E-108 | NP_499799.1    | 86 | 396.356 | 256 | 221 | fatty Acid CoA Synthetase family member (acs-14)      |
| Locus_9228_Transcript_1/2_Conf_1.000 | 677  | 0  |           |                |    |         |     |     |                                                       |
| Locus_9228_Transcript_2/2_Conf_1.000 | 675  | 0  |           |                |    |         |     |     |                                                       |
| Locus_9229_Transcript_1/1_Conf_1.000 | 489  | 5  | 7.85E-15  | XP_002642876.1 | 74 | 83.5741 | 87  | 65  | Hypothetical protein CBG15146                         |
| Locus_923_Transcript_1/1_Conf_1.000  | 2530 | 20 | 0         | XP_002631365.1 | 77 | 834.713 | 720 | 558 | C. briggsae CBR-RHA-1 protein                         |
| Locus_9230_Transcript_1/1_Conf_1.000 | 591  | 20 | 8.45E-83  | NP_498936.1    | 89 | 310.071 | 186 | 167 | hypothetical protein K02D10.1                         |
| Locus_9231_Transcript_1/1_Conf_1.000 | 208  | 5  | 1.05E-11  |                | 70 | 73.1738 | 67  | 47  | hypothetical protein T26A5.5 - Caenorhabditis elegans |
| Locus_9232_Transcript_1/1_Conf_1.000 | 342  | 20 | 4.21E-24  | XP_002640824.1 | 77 | 114.39  | 92  | 71  | Hypothetical protein CBG15711                         |

|                                      |      |    |          |                |    |         |     |     |                                                                |
|--------------------------------------|------|----|----------|----------------|----|---------|-----|-----|----------------------------------------------------------------|
| Locus_9233_Transcript_1/1_Conf_1.000 | 928  | 3  | 8.04E-05 | XP_001992050.1 | 49 | 52.373  | 171 | 85  | GH24427                                                        |
| Locus_9234_Transcript_1/1_Conf_1.000 | 179  | 0  |          |                |    |         |     |     |                                                                |
| Locus_9235_Transcript_1/2_Conf_1.000 | 2397 | 20 | 0        | XP_002642710.1 | 88 | 1163.67 | 763 | 675 | C. briggsae CBR-MCM-5 protein                                  |
| Locus_9235_Transcript_2/2_Conf_1.000 | 2609 | 20 | 0        | XP_002642710.1 | 88 | 1161.75 | 762 | 674 | C. briggsae CBR-MCM-5 protein                                  |
| Locus_9236_Transcript_1/2_Conf_1.000 | 131  | 0  |          |                |    |         |     |     |                                                                |
| Locus_9237_Transcript_1/1_Conf_1.000 | 342  | 20 | 1.10E-56 | XP_002637464.1 | 97 | 222.631 | 113 | 110 | Hypothetical protein CBG19177                                  |
| Locus_9238_Transcript_1/1_Conf_1.000 | 291  | 2  | 1.11E-08 | NP_505680.2    | 68 | 63.1586 | 54  | 37  | hypothetical protein Y32F6A.4                                  |
| Locus_9239_Transcript_1/1_Conf_1.000 | 884  | 20 | 5.53E-61 | NP_001022960.1 | 84 | 238.81  | 166 | 140 | hypothetical protein Y82E9BR.16                                |
| Locus_924_Transcript_1/2_Conf_1.000  | 478  | 8  | 5.57E-05 | XP_002644234.1 | 66 | 50.8322 | 84  | 56  | C. briggsae CBR-MIG-15 protein                                 |
| Locus_924_Transcript_2/2_Conf_1.000  | 238  | 0  |          |                |    |         |     |     |                                                                |
| Locus_9240_Transcript_1/1_Conf_1.000 | 1877 | 20 | 0        | NP_740814.1    | 90 | 836.254 | 542 | 490 | alpha-CaTulin (catenin/vinculin related) family member (ctn-1) |

|                                      |      |    |           |                |    |         |     |     |                                                                   |
|--------------------------------------|------|----|-----------|----------------|----|---------|-----|-----|-------------------------------------------------------------------|
| Locus_9241_Transcript_1/1_Conf_1.000 | 455  | 20 | 1.61E-44  |                | 88 | 182.185 | 109 | 96  | hypothetical protein T26E3.3                                      |
| Locus_9242_Transcript_1/1_Conf_1.000 | 319  | 0  |           |                |    |         |     |     |                                                                   |
| Locus_9243_Transcript_1/1_Conf_1.000 | 565  | 20 | 6.62E-31  | XP_001900298.1 | 61 | 137.502 | 180 | 111 | putative WD-40 repeat protein                                     |
| Locus_9244_Transcript_1/2_Conf_1.000 | 826  | 20 | 2.82E-141 | NP_741181.1    | 95 | 505.368 | 275 | 263 | hypothetical protein T12A2.15                                     |
| Locus_9244_Transcript_2/2_Conf_1.000 | 826  | 20 | 2.82E-141 | NP_741181.1    | 95 | 505.368 | 275 | 263 | hypothetical protein T12A2.15                                     |
| Locus_9245_Transcript_1/1_Conf_1.000 | 142  | 3  | 4.23E-13  | NP_492772.1    | 85 | 77.7962 | 47  | 40  | SET (trithorax/polycomb) domain containing family member (set-18) |
| Locus_9246_Transcript_1/1_Conf_1.000 | 173  | 0  |           |                |    |         |     |     |                                                                   |
| Locus_9247_Transcript_1/1_Conf_1.000 | 605  | 1  | 6.14E-07  | EFO26102.1     | 48 | 58.151  | 130 | 63  | hypothetical protein LOAG_02385                                   |
| Locus_9248_Transcript_1/1_Conf_1.000 | 292  | 2  | 6.71E-06  | NP_506151.1    | 58 | 53.9138 | 67  | 39  | hypothetical protein C14C10.4                                     |
| Locus_9249_Transcript_1/1_Conf_1.000 | 195  | 4  | 2.22E-09  | NP_001022814.1 | 70 | 65.4698 | 57  | 40  | ODoRant response abnormal family member (odr-4)                   |
| Locus_925_Transcript_1/5_Conf_0.692  | 1879 | 20 | 2.15E-36  | XP_002630499.1 | 56 | 158.688 | 302 | 170 | Hypothetical protein CBG11240                                     |
| Locus_925_Transcript_2/5_Conf_0.692  | 1879 | 20 | 3.11E-35  | XP_002630499.1 | 56 | 154.836 | 288 | 164 | Hypothetical protein CBG11240                                     |
| Locus_925_Transcript_3/5_Conf_0.692  | 1879 | 20 | 2.15E-36  | XP_002630499.1 | 56 | 158.688 | 302 | 170 | Hypothetical protein CBG11240                                     |
| Locus_925_Transcript_4/5_Conf_0.692  | 1879 | 20 | 2.38E-35  | XP_002630499.1 | 55 | 155.221 | 302 | 169 | Hypothetical protein CBG11240                                     |
| Locus_925_Transcript_5/5_Conf_0.692  | 1879 | 20 | 2.15E-36  | XP_002630499.1 | 56 | 158.688 | 302 | 170 | Hypothetical protein CBG11240                                     |
| Locus_9250_Transcript_1/1_Conf_1.000 | 559  | 20 | 8.26E-71  | NP_494991.1    | 78 | 270.011 | 187 | 147 | Phosphoethanolamine Methyltransferase family member (pmt-1)       |
| Locus_9251_Transcript_1/1_Conf_1.000 | 236  | 0  |           |                |    |         |     |     |                                                                   |

|                                      |      |    |          |                |     |         |     |     |                                                                                        |
|--------------------------------------|------|----|----------|----------------|-----|---------|-----|-----|----------------------------------------------------------------------------------------|
| Locus_9252_Transcript_1/1_Conf_1.000 | 683  | 20 | 4.75E-31 | NP_001023271.1 | 66  | 138.658 | 145 | 96  | hypothetical protein K07F5.16                                                          |
| Locus_9253_Transcript_1/1_Conf_1.000 | 234  | 3  | 5.44E-16 | XP_002646617.1 | 87  | 87.4261 | 58  | 51  | Hypothetical protein CBG20503                                                          |
| Locus_9254_Transcript_1/1_Conf_1.000 | 539  | 20 | 2.25E-43 | NP_001123184.1 | 77  | 178.718 | 136 | 106 | O-GlcNAc selective N-Acetyl-beta-D-glucosaminidase (O-GlcNAcase) family member (oga-1) |
| Locus_9255_Transcript_1/1_Conf_1.000 | 490  | 20 | 2.32E-75 | AAP36586.1     | 100 | 284.648 | 135 | 135 | Homo sapiens lectin, galactoside-binding, soluble, 1 (galectin 1)                      |
| Locus_9256_Transcript_1/1_Conf_1.000 | 349  | 0  |          |                |     |         |     |     |                                                                                        |
| Locus_9257_Transcript_1/1_Conf_1.000 | 230  | 20 | 1.64E-20 | XP_001895480.1 | 81  | 102.449 | 75  | 61  | Immunoglobulin I-set domain containing protein                                         |
| Locus_9258_Transcript_1/1_Conf_1.000 | 592  | 20 | 1.08E-45 | NP_741659.2    | 73  | 186.808 | 158 | 116 | REPS (RalBP1-associated Eps domain-containing protein) homolog family member (reps-1)  |
| Locus_9259_Transcript_1/1_Conf_1.000 | 531  | 3  | 9.33E-26 | NP_490738.1    | 81  | 120.168 | 82  | 67  | hypothetical protein W04C9.2                                                           |
| Locus_926_Transcript_1/1_Conf_1.000  | 692  | 0  |          |                |     |         |     |     |                                                                                        |
| Locus_9260_Transcript_1/1_Conf_1.000 | 1210 | 20 | 2.64E-76 | EFO22906.1     | 70  | 290.426 | 277 | 196 | hypothetical protein LOAG_05578                                                        |
| Locus_9261_Transcript_1/1_Conf_1.000 | 422  | 20 | 2.38E-19 | XP_002735650.1 | 52  | 98.5969 | 128 | 67  | PREDICTED: low density lipoprotein receptor-related protein 1-like, partial            |

|                                      |      |    |           |                |    |         |     |     |                                                             |
|--------------------------------------|------|----|-----------|----------------|----|---------|-----|-----|-------------------------------------------------------------|
| Locus_9262_Transcript_1/1_Conf_1.000 | 175  | 20 | 9.82E-10  | NP_501480.2    | 68 | 66.6254 | 57  | 39  | Cytochrome P450 family member (cyp-33E1)                    |
| Locus_9263_Transcript_1/2_Conf_1.000 | 1058 | 20 | 3.36E-37  | EFO19657.1     | 51 | 160.229 | 316 | 162 | hypothetical protein LOAG_08836                             |
| Locus_9263_Transcript_2/2_Conf_1.000 | 1070 | 20 | 3.42E-37  | EFO19657.1     | 51 | 160.229 | 316 | 162 | hypothetical protein LOAG_08836                             |
| Locus_9264_Transcript_1/1_Conf_1.000 | 521  | 0  |           |                |    |         |     |     |                                                             |
| Locus_9265_Transcript_1/1_Conf_1.000 | 607  | 0  |           |                |    |         |     |     |                                                             |
| Locus_9266_Transcript_1/1_Conf_1.000 | 797  | 20 | 8.14E-66  | XP_002633365.1 | 79 | 254.603 | 226 | 179 | Hypothetical protein CBG06109                               |
| Locus_9267_Transcript_1/1_Conf_1.000 | 1495 | 20 | 3.03E-152 | XP_002630028.1 | 77 | 543.117 | 456 | 352 | Hypothetical protein CBG13395                               |
| Locus_9268_Transcript_1/1_Conf_1.000 | 1212 | 20 | 7.68E-92  | XP_001902417.1 | 66 | 342.043 | 387 | 256 | BTB/POZ domain containing protein                           |
| Locus_9269_Transcript_1/1_Conf_1.000 | 1107 | 20 | 3.52E-133 | XP_002645119.1 | 79 | 479.174 | 363 | 288 | Hypothetical protein CBG16813                               |
| Locus_927_Transcript_1/2_Conf_1.000  | 266  | 0  |           |                |    |         |     |     |                                                             |
| Locus_927_Transcript_2/2_Conf_1.000  | 168  | 0  |           |                |    |         |     |     |                                                             |
| Locus_9270_Transcript_1/1_Conf_1.000 | 343  | 20 | 4.34E-37  | XP_002642871.1 | 85 | 157.532 | 98  | 84  | Hypothetical protein CBG15141                               |
| Locus_9271_Transcript_1/2_Conf_1.000 | 1009 | 20 | 3.97E-32  | XP_002631067.1 | 46 | 143.28  | 330 | 154 | C. briggsae CBR-TRR-1 protein                               |
| Locus_9271_Transcript_2/2_Conf_1.000 | 1114 | 20 | 4.62E-32  | XP_002631067.1 | 46 | 143.28  | 330 | 154 | C. briggsae CBR-TRR-1 protein                               |
| Locus_9272_Transcript_1/1_Conf_1.000 | 634  | 0  |           |                |    |         |     |     |                                                             |
| Locus_9273_Transcript_1/1_Conf_1.000 | 543  | 5  | 3.86E-38  | NP_494991.1    | 71 | 161.384 | 138 | 98  | Phosphoethanolamine Methyltransferase family member (pmt-1) |
| Locus_9274_Transcript_1/1_Conf_1.000 | 634  | 20 | 1.63E-40  | XP_002640675.1 | 89 | 169.859 | 111 | 99  | Hypothetical protein CBG19737                               |
| Locus_9275_Transcript_1/1_Conf_1.000 | 609  | 20 | 8.41E-52  | XP_002648175.1 | 84 | 207.223 | 139 | 118 | Hypothetical protein CBG24261                               |

|                                      |      |    |           |                |    |         |     |     |                                                       |  |
|--------------------------------------|------|----|-----------|----------------|----|---------|-----|-----|-------------------------------------------------------|--|
| Locus_9276_Transcript_1/1_Conf_1.000 | 167  | 0  |           |                |    |         |     |     |                                                       |  |
| Locus_9277_Transcript_1/1_Conf_1.000 | 415  | 4  | 1.46E-13  | XP_002635293.1 | 90 | 79.337  | 41  | 37  | C. briggsae CBR-GRL-17 protein                        |  |
| Locus_9278_Transcript_1/2_Conf_1.000 | 496  | 2  | 6.18E-04  | ACF82543.1     | 38 | 47.3654 | 151 | 58  | unknown                                               |  |
| Locus_9278_Transcript_2/2_Conf_1.000 | 529  | 2  | 4.42E-04  | ACF82543.1     | 38 | 48.1358 | 144 | 55  | unknown                                               |  |
| Locus_9279_Transcript_1/2_Conf_1.000 | 237  | 0  |           |                |    |         |     |     |                                                       |  |
| Locus_9279_Transcript_2/2_Conf_1.000 | 276  | 0  |           |                |    |         |     |     |                                                       |  |
| Locus_928_Transcript_1/1_Conf_1.000  | 1287 | 20 | 1.84E-131 | NP_741009.1    | 82 | 473.781 | 341 | 283 | hypothetical protein C56C10.7                         |  |
| Locus_9280_Transcript_1/2_Conf_1.000 | 881  | 20 | 8.22E-49  | NP_494448.1    | 73 | 198.364 | 172 | 127 | hypothetical protein Y25C1A.13                        |  |
| Locus_9280_Transcript_2/2_Conf_1.000 | 1209 | 20 | 1.37E-48  | NP_494448.1    | 73 | 198.364 | 172 | 127 | hypothetical protein Y25C1A.13                        |  |
| Locus_9281_Transcript_1/1_Conf_1.000 | 282  | 20 | 1.55E-42  | XP_002646472.1 | 98 | 175.637 | 94  | 93  | C. briggsae CBR-NSF-1 protein                         |  |
| Locus_9282_Transcript_1/1_Conf_1.000 | 831  | 20 | 7.20E-60  | NP_510484.1    | 86 | 234.958 | 165 | 142 | hypothetical protein F20D1.1                          |  |
| Locus_9283_Transcript_1/1_Conf_1.000 | 287  | 20 | 4.20E-32  | NP_495697.2    | 92 | 140.969 | 94  | 87  | Lim and Transglutaminase Domain family member (ltd-1) |  |
| Locus_9284_Transcript_1/1_Conf_1.000 | 845  | 6  | 5.37E-18  | ACI49218.1     | 49 | 95.9005 | 210 | 103 | hypothetical protein Csp3_JD05.003                    |  |
| Locus_9285_Transcript_1/1_Conf_1.000 | 312  | 0  |           |                |    |         |     |     |                                                       |  |
| Locus_9286_Transcript_1/2_Conf_1.000 | 1505 | 20 | 2.06E-15  | EFA81073.1     | 56 | 88.5817 | 126 | 71  | hypothetical protein PPL_05909                        |  |
| Locus_9286_Transcript_2/2_Conf_1.000 | 1475 | 20 | 2.00E-15  | EFA81073.1     | 56 | 88.5817 | 126 | 71  | hypothetical protein PPL_05909                        |  |
| Locus_9287_Transcript_1/1_Conf_1.000 | 173  | 0  |           |                |    |         |     |     |                                                       |  |
| Locus_9288_Transcript_1/1_Conf_1.000 | 547  | 0  |           |                |    |         |     |     |                                                       |  |
| Locus_9289_Transcript_1/1_Conf_1.000 | 1987 | 6  | 2.99E-52  | EFO23863.1     | 50 | 211.46  | 441 | 222 | hypothetical protein LOAG_04618                       |  |

|                                     |      |    |          |                |    |         |     |     |                                                                                   |
|-------------------------------------|------|----|----------|----------------|----|---------|-----|-----|-----------------------------------------------------------------------------------|
| Locus_929_Transcript_1/9_Conf_0.545 | 2096 | 20 | 0        | XP_002641367.1 | 80 | 944.88  | 694 | 560 | C. briggsae CBR-GBF-1 protein                                                     |
| Locus_929_Transcript_2/9_Conf_0.545 | 2096 | 20 | 0        | XP_002641367.1 | 80 | 945.266 | 694 | 560 | C. briggsae CBR-GBF-1 protein                                                     |
| Locus_929_Transcript_3/9_Conf_0.500 | 2096 | 20 | 0        | XP_002641367.1 | 80 | 944.88  | 694 | 560 | C. briggsae CBR-GBF-1 protein                                                     |
| Locus_929_Transcript_4/9_Conf_0.545 | 2096 | 20 | 0        | XP_002641367.1 | 80 | 944.88  | 694 | 560 | C. briggsae CBR-GBF-1 protein                                                     |
| Locus_929_Transcript_5/9_Conf_0.136 | 369  | 20 | 4.80E-28 | NP_499522.2    | 83 | 127.487 | 116 | 97  | GBF1(Golgi-specific Brefeldin-A-resistant Factor 1) homolog family member (gbf-1) |
| Locus_929_Transcript_6/9_Conf_0.545 | 2096 | 20 | 0        | XP_002641367.1 | 80 | 946.036 | 694 | 560 | C. briggsae CBR-GBF-1 protein                                                     |

|                                      |      |    |           |                |    |         |     |     |                                                                                   |
|--------------------------------------|------|----|-----------|----------------|----|---------|-----|-----|-----------------------------------------------------------------------------------|
| Locus_929_Transcript_7/9_Conf_0.136  | 369  | 20 | 4.80E-28  | NP_499522.2    | 83 | 127.487 | 116 | 97  | GBF1(Golgi-specific Brefeldin-A-resistant Factor 1) homolog family member (gbf-1) |
| Locus_929_Transcript_8/9_Conf_0.318  | 1130 | 20 | 1.18E-83  | XP_002641367.1 | 83 | 314.694 | 219 | 182 | C. briggsae CBR-GBF-1 protein                                                     |
| Locus_929_Transcript_9/9_Conf_0.545  | 2096 | 20 | 0         | XP_002641367.1 | 80 | 944.88  | 694 | 560 | C. briggsae CBR-GBF-1 protein                                                     |
| Locus_9290_Transcript_1/1_Conf_1.000 | 1055 | 20 | 8.32E-113 | NP_494721.1    | 82 | 411.379 | 304 | 250 | hypothetical protein R11F4.1                                                      |
| Locus_9291_Transcript_1/2_Conf_1.000 | 329  | 0  |           |                |    |         |     |     |                                                                                   |
| Locus_9291_Transcript_2/2_Conf_1.000 | 329  | 0  |           |                |    |         |     |     |                                                                                   |



|                                      |      |    |           |                |    |         |     |     |                                                                          |
|--------------------------------------|------|----|-----------|----------------|----|---------|-----|-----|--------------------------------------------------------------------------|
| Locus_9292_Transcript_1/1_Conf_1.000 | 569  | 20 | 1.22E-64  | EFO26328.1     | 81 | 249.595 | 183 | 150 | hypothetical protein LOAG_02152                                          |
| Locus_9293_Transcript_1/1_Conf_1.000 | 644  | 0  |           |                |    |         |     |     |                                                                          |
| Locus_9294_Transcript_1/1_Conf_1.000 | 224  | 0  |           |                |    |         |     |     |                                                                          |
| Locus_9295_Transcript_1/2_Conf_1.000 | 665  | 0  |           |                |    |         |     |     |                                                                          |
| Locus_9295_Transcript_2/2_Conf_1.000 | 668  | 0  |           |                |    |         |     |     |                                                                          |
| Locus_9296_Transcript_1/1_Conf_1.000 | 279  | 1  | 2.66E-15  | NP_001076673.1 | 73 | 85.1149 | 67  | 49  | hypothetical protein F01G4.6                                             |
| Locus_9297_Transcript_1/1_Conf_1.000 | 1451 | 20 | 4.77E-163 | NP_001022412.1 | 73 | 578.941 | 521 | 381 | CeNTaurin family member (cnt-1)                                          |
| Locus_9298_Transcript_1/1_Conf_1.000 | 177  | 0  |           |                |    |         |     |     |                                                                          |
| Locus_9299_Transcript_1/1_Conf_1.000 | 412  | 20 | 2.04E-23  | EFO20527.1     | 70 | 112.079 | 95  | 67  | hypothetical protein LOAG_07962                                          |
| Locus_93_Transcript_1/6_Conf_0.444   | 916  | 20 | 4.56E-37  | NP_001123117.1 | 67 | 159.458 | 182 | 122 | VITellogenin structural genes (yolk protein genes) family member (vit-2) |
| Locus_93_Transcript_2/6_Conf_0.444   | 916  | 20 | 3.99E-33  | NP_001123117.1 | 66 | 146.362 | 168 | 112 | VITellogenin structural genes (yolk protein genes) family member (vit-2) |
| Locus_93_Transcript_3/6_Conf_0.361   | 521  | 20 | 7.24E-33  | Q94637.1       | 71 | 143.665 | 151 | 108 | Vitellogenin-6                                                           |
| Locus_93_Transcript_4/6_Conf_0.361   | 563  | 20 | 2.16E-34  | NP_001123117.1 | 63 | 149.058 | 185 | 118 | VITellogenin structural genes (yolk protein genes) family member (vit-2) |
| Locus_93_Transcript_5/6_Conf_0.444   | 816  | 20 | 3.69E-53  | NP_001123117.1 | 63 | 212.616 | 277 | 177 | VITellogenin structural genes (yolk protein genes) family member (vit-2) |
| Locus_93_Transcript_6/6_Conf_0.444   | 774  | 20 | 2.94E-49  | NP_001123117.1 | 63 | 199.519 | 263 | 167 | VITellogenin structural genes (yolk protein genes) family member (vit-2) |

|                                      |     |    |          |                |    |         |     |     |                                                                |
|--------------------------------------|-----|----|----------|----------------|----|---------|-----|-----|----------------------------------------------------------------|
| Locus_930_Transcript_1/1_Conf_1.000  | 685 | 20 | 1.34E-49 | CAR63550.1     | 92 | 200.29  | 135 | 125 | putative Mediator of RNA polymerase II transcription subunit 6 |
| Locus_9300_Transcript_1/1_Conf_1.000 | 496 | 17 | 1.13E-05 | XP_002869793.1 | 56 | 53.1434 | 73  | 41  | predicted protein                                              |

|                                      |      |    |          |                |     |         |     |     |                                                             |
|--------------------------------------|------|----|----------|----------------|-----|---------|-----|-----|-------------------------------------------------------------|
| Locus_9301_Transcript_1/1_Conf_1.000 | 166  | 1  | 4.44E-18 | AAG39288.1     | 100 | 94.3597 | 55  | 55  | AF113217_1MSTP037                                           |
| Locus_9302_Transcript_1/2_Conf_1.000 | 1411 | 16 | 8.74E-13 | XP_002639571.1 | 42  | 79.7221 | 325 | 138 | Hypothetical protein CBG04202                               |
| Locus_9302_Transcript_2/2_Conf_1.000 | 1405 | 7  | 8.69E-13 | XP_002639571.1 | 42  | 79.7221 | 325 | 138 | Hypothetical protein CBG04202                               |
| Locus_9303_Transcript_1/1_Conf_1.000 | 328  | 20 | 4.01E-19 | XP_002640962.1 | 83  | 97.8265 | 65  | 54  | Hypothetical protein CBG11705                               |
| Locus_9304_Transcript_1/1_Conf_1.000 | 370  | 20 | 2.31E-14 | EFO23176.1     | 60  | 82.0333 | 86  | 52  | hypothetical protein LOAG_05303                             |
| Locus_9305_Transcript_1/1_Conf_1.000 | 675  | 19 | 1.78E-14 | XP_001504747.2 | 48  | 83.5741 | 185 | 90  | PREDICTED: similar to survival of motor neuron 1, telomeric |
| Locus_9306_Transcript_1/1_Conf_1.000 | 182  | 20 | 1.56E-18 | XP_002637557.1 | 91  | 95.9005 | 56  | 51  | Hypothetical protein CBG19289                               |
| Locus_9307_Transcript_1/1_Conf_1.000 | 234  | 0  |          |                |     |         |     |     |                                                             |
| Locus_9308_Transcript_1/1_Conf_1.000 | 155  | 0  |          |                |     |         |     |     |                                                             |
| Locus_9309_Transcript_1/1_Conf_1.000 | 834  | 0  |          |                |     |         |     |     |                                                             |
| Locus_931_Transcript_1/1_Conf_1.000  | 355  | 20 | 1.58E-15 | XP_002643787.1 | 57  | 85.8853 | 124 | 71  | Hypothetical protein CBG01998                               |
| Locus_9310_Transcript_1/1_Conf_1.000 | 157  | 0  |          |                |     |         |     |     |                                                             |

|                                      |      |    |          |                |    |         |     |     |                                                                        |
|--------------------------------------|------|----|----------|----------------|----|---------|-----|-----|------------------------------------------------------------------------|
| Locus_9311_Transcript_1/1_Conf_1.000 | 494  | 20 | 1.78E-51 | ABV23486.2     | 77 | 205.297 | 157 | 121 | Hypothetical protein Y94H6A.7                                          |
| Locus_9312_Transcript_1/3_Conf_0.400 | 401  | 3  | 1.03E-06 | NP_502349.1    | 68 | 56.6102 | 58  | 40  | Ubiquitin Fusion Degradation (yeast UFD homolog) family member (ufd-1) |
| Locus_9312_Transcript_2/3_Conf_0.600 | 1018 | 20 | 1.62E-73 | NP_502349.1    | 68 | 280.796 | 288 | 198 | Ubiquitin Fusion Degradation (yeast UFD homolog) family member (ufd-1) |
| Locus_9312_Transcript_3/3_Conf_0.600 | 1000 | 20 | 1.12E-71 | NP_502349.1    | 68 | 274.633 | 281 | 193 | Ubiquitin Fusion Degradation (yeast UFD homolog) family member (ufd-1) |
| Locus_9313_Transcript_1/1_Conf_1.000 | 165  | 0  |          |                |    |         |     |     |                                                                        |
| Locus_9314_Transcript_1/1_Conf_1.000 | 485  | 20 | 4.95E-25 | XP_001898906.1 | 71 | 117.472 | 113 | 81  | Male sterility protein                                                 |
| Locus_9315_Transcript_1/1_Conf_1.000 | 149  | 1  | 7.49E-05 | XP_001520666.1 | 85 | 50.447  | 34  | 29  | PREDICTED: similar to snRNP core protein SMX5d                         |
| Locus_9316_Transcript_1/2_Conf_1.000 | 528  | 1  | 4.42E-04 | XP_001975649.1 | 47 | 48.1358 | 131 | 62  | GG20442                                                                |
| Locus_9316_Transcript_2/2_Conf_1.000 | 528  | 1  | 4.42E-04 | XP_001975649.1 | 47 | 48.1358 | 131 | 62  | GG20442                                                                |
| Locus_9317_Transcript_1/1_Conf_1.000 | 674  | 20 | 9.25E-40 | XP_002634958.1 | 79 | 167.548 | 148 | 117 | Hypothetical protein CBG13493                                          |
| Locus_9318_Transcript_1/1_Conf_1.000 | 293  | 0  |          |                |    |         |     |     |                                                                        |
| Locus_9319_Transcript_1/1_Conf_1.000 | 303  | 20 | 1.05E-27 | XP_002637403.1 | 78 | 126.331 | 91  | 71  | Hypothetical protein CBG19110                                          |
| Locus_932_Transcript_1/2_Conf_1.000  | 2353 | 20 | 2.29E-70 | XP_001894300.1 | 73 | 271.937 | 244 | 179 | DnaJ domain containing protein                                         |
| Locus_932_Transcript_2/2_Conf_1.000  | 1053 | 20 | 2.00E-74 | XP_001894300.1 | 67 | 283.878 | 302 | 204 | DnaJ domain containing protein                                         |
| Locus_9320_Transcript_1/1_Conf_1.000 | 449  | 0  |          |                |    |         |     |     |                                                                        |

|                                      |      |    |           |                |     |         |     |     |                                                                                  |
|--------------------------------------|------|----|-----------|----------------|-----|---------|-----|-----|----------------------------------------------------------------------------------|
| Locus_9321_Transcript_1/1_Conf_1.000 | 510  | 20 | 2.23E-52  | NP_496492.1    | 87  | 208.379 | 132 | 115 | hypothetical protein C47D12.2                                                    |
| Locus_9322_Transcript_1/1_Conf_1.000 | 327  | 20 | 5.05E-30  | XP_001148215.1 | 100 | 134.035 | 81  | 81  | PREDICTED: guanylate binding protein 2, interferon-inducible isoform 1           |
| Locus_9323_Transcript_1/1_Conf_1.000 | 176  | 4  | 3.73E-09  | XP_002638565.1 | 86  | 64.6994 | 38  | 33  | Hypothetical protein CBG05606                                                    |
| Locus_9324_Transcript_1/1_Conf_1.000 | 161  | 0  |           |                |     |         |     |     |                                                                                  |
| Locus_9325_Transcript_1/1_Conf_1.000 | 147  | 0  |           |                |     |         |     |     |                                                                                  |
| Locus_9326_Transcript_1/1_Conf_1.000 | 475  | 0  |           |                |     |         |     |     |                                                                                  |
| Locus_9327_Transcript_1/1_Conf_1.000 | 410  | 0  |           |                |     |         |     |     |                                                                                  |
| Locus_9328_Transcript_1/3_Conf_0.778 | 1493 | 20 | 8.29E-09  | XP_002166796.1 | 40  | 66.6254 | 422 | 170 | PREDICTED: similar to U1 small nuclear ribonucleoprotein A, partial              |
| Locus_9328_Transcript_2/3_Conf_0.778 | 1322 | 6  | 5.94E-08  | XP_002166796.1 | 40  | 63.5438 | 430 | 173 | PREDICTED: similar to U1 small nuclear ribonucleoprotein A, partial              |
| Locus_9328_Transcript_3/3_Conf_0.778 | 1550 | 19 | 8.67E-09  | XP_002166796.1 | 40  | 66.6254 | 422 | 170 | PREDICTED: similar to U1 small nuclear ribonucleoprotein A, partial              |
| Locus_9329_Transcript_1/1_Conf_1.000 | 171  | 0  |           |                |     |         |     |     |                                                                                  |
| Locus_933_Transcript_1/1_Conf_1.000  | 212  | 0  |           |                |     |         |     |     |                                                                                  |
| Locus_9330_Transcript_1/1_Conf_1.000 | 1742 | 20 | 3.25E-90  | ACI49036.1     | 77  | 309.686 | 231 | 179 | hypothetical protein Cbre_JD07.003                                               |
| Locus_9331_Transcript_1/1_Conf_1.000 | 1136 | 20 | 2.85E-77  | NP_491454.2    | 72  | 293.508 | 257 | 187 | hypothetical protein F54D7.2                                                     |
| Locus_9332_Transcript_1/1_Conf_1.000 | 916  | 20 | 4.34E-88  | XP_001898477.1 | 73  | 328.946 | 286 | 211 | E1-E2 ATPase family protein                                                      |
| Locus_9333_Transcript_1/1_Conf_1.000 | 757  | 20 | 4.07E-24  | XP_002638619.1 | 51  | 115.931 | 229 | 118 | Hypothetical protein CBG05671                                                    |
| Locus_9334_Transcript_1/1_Conf_1.000 | 1317 | 20 | 8.49E-148 | NP_502604.1    | 83  | 528.094 | 376 | 313 | SELD (SeID homolog) involved in selenophosphate synthesis family member (seld-1) |
| Locus_9335_Transcript_1/1_Conf_1.000 | 934  | 20 | 5.01E-63  | XP_001898033.1 | 66  | 245.743 | 301 | 199 | UDP-glucose:Glycoprotein Glucosyltransferase containing protein                  |

|                                      |      |    |           |                |    |         |     |     |                                                     |
|--------------------------------------|------|----|-----------|----------------|----|---------|-----|-----|-----------------------------------------------------|
| Locus_9336_Transcript_1/1_Conf_1.000 | 303  | 0  |           |                |    |         |     |     |                                                     |
| Locus_9337_Transcript_1/1_Conf_1.000 | 245  | 0  |           |                |    |         |     |     |                                                     |
| Locus_9338_Transcript_1/1_Conf_1.000 | 568  | 0  |           |                |    |         |     |     |                                                     |
| Locus_9339_Transcript_1/1_Conf_1.000 | 751  | 20 | 2.80E-33  | NP_496325.1    | 54 | 146.362 | 230 | 126 | Nuclear Pore complex Protein family member (npp-19) |
| Locus_934_Transcript_1/2_Conf_1.000  | 411  | 20 | 8.55E-22  | XP_002132837.1 | 57 | 106.686 | 130 | 75  | GA26044                                             |
| Locus_934_Transcript_2/2_Conf_1.000  | 1482 | 20 | 1.82E-32  | EFN76280.1     | 52 | 145.206 | 280 | 148 | Serine/threonine-protein kinase grp                 |
| Locus_9340_Transcript_1/1_Conf_1.000 | 439  | 0  |           |                |    |         |     |     |                                                     |
| Locus_9341_Transcript_1/1_Conf_1.000 | 312  | 0  |           |                |    |         |     |     |                                                     |
| Locus_9342_Transcript_1/3_Conf_0.400 | 1173 | 20 | 4.51E-142 | XP_002647050.1 | 97 | 508.834 | 269 | 263 | C. briggsae CBR-UNC-64 protein                      |

|                                      |      |    |           |                |    |         |     |     |                                                     |
|--------------------------------------|------|----|-----------|----------------|----|---------|-----|-----|-----------------------------------------------------|
| Locus_9342_Transcript_2/3_Conf_0.600 | 1178 | 20 | 2.48E-148 | NP_001022615.1 | 96 | 529.635 | 291 | 281 | UNCoordinated family member (unc-64)                |
| Locus_9342_Transcript_3/3_Conf_0.600 | 1113 | 20 | 8.44E-143 | XP_002647050.1 | 95 | 511.146 | 293 | 281 | C. briggsae CBR-UNC-64 protein                      |
| Locus_9343_Transcript_1/1_Conf_1.000 | 737  | 20 | 2.21E-112 | NP_001122565.1 | 96 | 409.068 | 245 | 236 | Variable ABnormal morphology family member (vab-10) |
| Locus_9344_Transcript_1/1_Conf_1.000 | 681  | 20 | 2.15E-07  | XP_001898127.1 | 43 | 60.077  | 192 | 84  | CG32584-PB                                          |
| Locus_9345_Transcript_1/1_Conf_1.000 | 550  | 20 | 6.83E-38  | XP_001902677.1 | 66 | 160.614 | 154 | 103 | 5'-nucleotidase, cytosolic III                      |
| Locus_9346_Transcript_1/1_Conf_1.000 | 198  | 0  |           |                |    |         |     |     |                                                     |

|                                      |      |    |           |                |    |         |     |     |                                                                         |
|--------------------------------------|------|----|-----------|----------------|----|---------|-----|-----|-------------------------------------------------------------------------|
| Locus_9347_Transcript_1/1_Conf_1.000 | 143  | 20 | 9.11E-16  | XP_791039.2    | 91 | 86.6557 | 47  | 43  | PREDICTED: similar to HCF                                               |
| Locus_9348_Transcript_1/1_Conf_1.000 | 343  | 0  |           |                |    |         |     |     |                                                                         |
| Locus_9349_Transcript_1/2_Conf_1.000 | 1027 | 20 | 2.13E-119 | XP_002631088.1 | 92 | 423.705 | 247 | 229 | Hypothetical protein CBG02861                                           |
| Locus_9349_Transcript_2/2_Conf_1.000 | 1448 | 20 | 0         | NP_496469.1    | 91 | 668.692 | 396 | 363 | hypothetical protein F54D5.7                                            |
| Locus_935_Transcript_1/1_Conf_1.000  | 922  | 20 | 1.96E-104 | NP_498671.2    | 82 | 383.259 | 256 | 212 | Uridine PhosPhorylase family member (upp-1)                             |
| Locus_9350_Transcript_1/1_Conf_1.000 | 939  | 20 | 4.29E-62  | NP_741714.1    | 75 | 242.662 | 237 | 179 | related to yeast Vacuolar Protein Sorting factor family member (vps-45) |
| Locus_9351_Transcript_1/1_Conf_1.000 | 794  | 20 | 9.22E-70  | NP_495662.2    | 86 | 267.7   | 236 | 205 | PaTChed family member (ptc-1)                                           |
| Locus_9352_Transcript_1/1_Conf_1.000 | 770  | 4  | 2.09E-23  | XP_002640753.1 | 56 | 113.62  | 195 | 110 | Hypothetical protein CBG24190                                           |
| Locus_9353_Transcript_1/1_Conf_1.000 | 775  | 20 | 2.43E-19  | CAA21536.2     | 64 | 100.138 | 115 | 74  | C. elegans protein Y37D8A.21, confirmed by transcript evidence          |
| Locus_9354_Transcript_1/1_Conf_1.000 | 414  | 20 | 2.66E-15  | EFO19751.1     | 76 | 85.1149 | 71  | 54  | prefoldin subunit 4                                                     |
| Locus_9355_Transcript_1/1_Conf_1.000 | 287  | 0  |           |                |    |         |     |     |                                                                         |



|                                      |      |    |           |                |    |         |     |     |                                                 |
|--------------------------------------|------|----|-----------|----------------|----|---------|-----|-----|-------------------------------------------------|
| Locus_9356_Transcript_1/1_Conf_1.000 | 384  | 20 | 2.58E-26  | XP_002631057.1 | 86 | 121.709 | 73  | 63  | Hypothetical protein CBG02821                   |
| Locus_9357_Transcript_1/1_Conf_1.000 | 1197 | 20 | 9.17E-106 | XP_001900080.1 | 71 | 388.267 | 369 | 263 | Protein-tyrosine phosphatase containing protein |
| Locus_9358_Transcript_1/1_Conf_1.000 | 616  | 20 | 3.41E-40  | EFO26237.1     | 66 | 168.703 | 170 | 113 | hypothetical protein LOAG_02249                 |
| Locus_9359_Transcript_1/1_Conf_1.000 | 200  | 0  |           |                |    |         |     |     |                                                 |
| Locus_936_Transcript_1/1_Conf_1.000  | 1563 | 20 | 0         | XP_002631703.1 | 83 | 704.516 | 502 | 420 | Hypothetical protein CBG20902                   |
| Locus_9360_Transcript_1/1_Conf_1.000 | 553  | 20 | 3.79E-60  | NP_500728.1    | 80 | 234.572 | 161 | 130 | hypothetical protein C24D10.6                   |
| Locus_9361_Transcript_1/1_Conf_1.000 | 388  | 20 | 4.36E-42  | XP_001891800.1 | 86 | 174.096 | 129 | 112 | hypothetical protein                            |
| Locus_9362_Transcript_1/1_Conf_1.000 | 1257 | 20 | 0         | ACJ65067.1     | 96 | 726.087 | 378 | 363 | Lgc-53                                          |
| Locus_9363_Transcript_1/1_Conf_1.000 | 142  | 6  | 1.01E-06  | XP_002639297.1 | 70 | 56.6102 | 41  | 29  | Hypothetical protein CBG03867                   |

|                                      |      |    |           |                |    |         |     |     |                                                                        |
|--------------------------------------|------|----|-----------|----------------|----|---------|-----|-----|------------------------------------------------------------------------|
| Locus_9364_Transcript_1/1_Conf_1.000 | 1265 | 20 | 2.58E-122 | XP_002640436.1 | 77 | 443.351 | 351 | 271 | Hypothetical protein CBG08488                                          |
| Locus_9365_Transcript_1/1_Conf_1.000 | 652  | 20 | 3.89E-48  | NP_001023390.1 | 82 | 195.282 | 125 | 103 | PDZ eXchange Factor family member (pxf-1)                              |
| Locus_9366_Transcript_1/1_Conf_1.000 | 525  | 0  |           |                |    |         |     |     |                                                                        |
| Locus_9367_Transcript_1/1_Conf_1.000 | 289  | 2  | 1.94E-29  | EAW99534.1     | 90 | 132.109 | 73  | 66  | hCG1989828                                                             |
| Locus_9368_Transcript_1/1_Conf_1.000 | 188  | 0  |           |                |    |         |     |     |                                                                        |
| Locus_9369_Transcript_1/1_Conf_1.000 | 1251 | 20 | 7.73E-119 | NP_500157.2    | 68 | 431.795 | 430 | 295 | Cleavage and Polyadenylation Specificity Factor family member (cpsf-1) |
| Locus_937_Transcript_1/1_Conf_1.000  | 1615 | 0  |           |                |    |         |     |     |                                                                        |
| Locus_9370_Transcript_1/1_Conf_1.000 | 131  | 0  |           |                |    |         |     |     |                                                                        |
| Locus_9371_Transcript_1/1_Conf_1.000 | 407  | 20 | 2.85E-41  | NP_505349.1    | 90 | 171.4   | 94  | 85  | hypothetical protein C25E10.12                                         |
| Locus_9372_Transcript_1/1_Conf_1.000 | 339  | 20 | 5.00E-14  | Q16937.1       | 62 | 80.8777 | 72  | 45  | Ancylostoma secreted protein                                           |
| Locus_9373_Transcript_1/1_Conf_1.000 | 540  | 2  | 2.74E-04  | XP_001893013.1 | 44 | 48.9062 | 169 | 75  | hypothetical protein Bm1_07715                                         |
| Locus_9374_Transcript_1/1_Conf_1.000 | 318  | 0  |           |                |    |         |     |     |                                                                        |
| Locus_9375_Transcript_1/1_Conf_1.000 | 898  | 20 | 4.25E-40  | EFO27819.1     | 76 | 169.474 | 172 | 131 | hypothetical protein LOAG_00655                                        |
| Locus_9376_Transcript_1/1_Conf_1.000 | 977  | 20 | 7.41E-97  | NP_492351.1    | 78 | 358.221 | 283 | 221 | hypothetical protein K07A12.7                                          |
| Locus_9377_Transcript_1/1_Conf_1.000 | 437  | 20 | 3.22E-45  | XP_001902787.1 | 83 | 184.496 | 132 | 110 | SD24044p                                                               |
| Locus_9378_Transcript_1/1_Conf_1.000 | 268  | 20 | 1.99E-26  | XP_001896269.1 | 90 | 122.094 | 88  | 80  | BTB/POZ domain containing protein                                      |
| Locus_9379_Transcript_1/1_Conf_1.000 | 1073 | 5  | 1.72E-12  | A8X9H4.2       | 61 | 78.1814 | 83  | 51  | Chondroitin proteoglycan 4                                             |
| Locus_938_Transcript_1/1_Conf_1.000  | 1667 | 20 | 9.74E-179 | NP_495768.1    | 74 | 631.328 | 496 | 371 | hypothetical protein F49E12.1                                          |
| Locus_9380_Transcript_1/1_Conf_1.000 | 315  | 0  |           |                |    |         |     |     |                                                                        |
| Locus_9381_Transcript_1/2_Conf_1.000 | 673  | 5  | 3.78E-17  | NP_495424.2    | 51 | 92.4337 | 158 | 82  | hypothetical protein F22D3.6                                           |
| Locus_9381_Transcript_2/2_Conf_1.000 | 468  | 5  | 2.21E-17  | NP_495424.2    | 51 | 92.0485 | 157 | 81  | hypothetical protein F22D3.6                                           |
| Locus_9382_Transcript_1/1_Conf_1.000 | 517  | 3  | 7.38E-06  | XP_002932706.1 | 39 | 53.9138 | 158 | 63  | PREDICTED: hypothetical protein LOC779458                              |

|                                      |      |    |           |                |    |         |     |     |                                                                            |
|--------------------------------------|------|----|-----------|----------------|----|---------|-----|-----|----------------------------------------------------------------------------|
| Locus_9383_Transcript_1/1_Conf_1.000 | 731  | 3  | 3.81E-16  | XP_002631172.1 | 79 | 89.3521 | 63  | 50  | Hypothetical protein CBG02958                                              |
| Locus_9384_Transcript_1/2_Conf_1.000 | 1497 | 3  | 8.51E-54  | NP_001041132.1 | 51 | 216.083 | 523 | 268 | hypothetical protein F58E10.1                                              |
| Locus_9384_Transcript_2/2_Conf_1.000 | 1539 | 3  | 1.66E-68  | NP_001041133.1 | 53 | 265.003 | 562 | 302 | hypothetical protein F58E10.1                                              |
| Locus_9385_Transcript_1/2_Conf_1.000 | 705  | 0  |           |                |    |         |     |     |                                                                            |
| Locus_9385_Transcript_2/2_Conf_1.000 | 320  | 0  |           |                |    |         |     |     |                                                                            |
| Locus_9386_Transcript_1/1_Conf_1.000 | 468  | 7  | 1.06E-11  | XP_001893483.1 | 54 | 73.1738 | 146 | 79  | hypothetical protein Bm1_10050                                             |
| Locus_9387_Transcript_1/1_Conf_1.000 | 525  | 3  | 2.62E-09  | NP_491108.2    | 63 | 65.4698 | 102 | 65  | LiPid Depleted family member (lpd-6)                                       |
| Locus_9388_Transcript_1/1_Conf_1.000 | 863  | 4  | 4.12E-37  | XP_001893140.1 | 64 | 159.458 | 172 | 111 | hypothetical protein Bm1_08345                                             |
| Locus_9389_Transcript_1/1_Conf_1.000 | 238  | 0  |           |                |    |         |     |     |                                                                            |
| Locus_939_Transcript_1/2_Conf_1.000  | 449  | 20 | 4.59E-31  | EFO16907.1     | 82 | 137.502 | 106 | 87  | sarcoma antigen NY-SAR-91                                                  |
| Locus_939_Transcript_2/2_Conf_1.000  | 449  | 20 | 4.58E-31  | EFO16907.1     | 82 | 137.502 | 106 | 87  | sarcoma antigen NY-SAR-91                                                  |
| Locus_9390_Transcript_1/3_Conf_0.500 | 748  | 20 | 1.34E-120 | NP_510442.2    | 93 | 436.417 | 240 | 225 | hypothetical protein F40E10.6                                              |
| Locus_9390_Transcript_2/3_Conf_0.500 | 766  | 20 | 5.66E-122 | NP_510442.2    | 90 | 441.039 | 253 | 230 | hypothetical protein F40E10.6                                              |
| Locus_9390_Transcript_3/3_Conf_0.500 | 765  | 20 | 8.73E-123 | NP_510442.2    | 91 | 443.736 | 255 | 233 | hypothetical protein F40E10.6                                              |
| Locus_9391_Transcript_1/1_Conf_1.000 | 424  | 12 | 4.14E-48  | CBK19481.1     | 92 | 194.126 | 108 | 100 | C. elegans protein Y105C5A.15a, partially confirmed by transcript evidence |
| Locus_9392_Transcript_1/1_Conf_1.000 | 406  | 20 | 1.74E-22  | NP_001021008.1 | 59 | 108.997 | 132 | 78  | PolyBRoMo domain containing family member (pbrm-1)                         |
| Locus_9393_Transcript_1/1_Conf_1.000 | 1502 | 20 | 8.63E-14  | EFO20919.1     | 54 | 83.1889 | 122 | 66  | hypothetical protein LOAG_07571                                            |
| Locus_9394_Transcript_1/1_Conf_1.000 | 277  | 20 | 2.18E-17  | CBL43463.1     | 83 | 92.0485 | 59  | 49  | C. elegans protein Y52B11C.1, partially confirmed by transcript evidence   |
| Locus_9395_Transcript_1/1_Conf_1.000 | 777  | 20 | 1.77E-94  | CAZ65484.1     | 78 | 349.747 | 257 | 203 | C. elegans protein F02H6.5c, confirmed by transcript evidence              |
| Locus_9396_Transcript_1/1_Conf_1.000 | 567  | 20 | 3.44E-43  | EFO23880.1     | 80 | 178.333 | 172 | 139 | transportin-SR                                                             |

|                                      |      |    |           |                |    |         |     |     |                                                     |
|--------------------------------------|------|----|-----------|----------------|----|---------|-----|-----|-----------------------------------------------------|
| Locus_9397_Transcript_1/1_Conf_1.000 | 655  | 20 | 2.69E-89  | NP_504166.2    | 86 | 332.028 | 218 | 188 | hypothetical protein H43107.2                       |
| Locus_9398_Transcript_1/1_Conf_1.000 | 220  | 20 | 5.91E-18  | EFO24415.1     | 80 | 93.9745 | 72  | 58  | hypothetical protein LOAG_04067                     |
| Locus_9399_Transcript_1/1_Conf_1.000 | 1394 | 20 | 9.08E-164 | NP_001022390.1 | 85 | 581.252 | 428 | 365 | Rho GTPase Activating protein family member (rga-1) |
| Locus_94_Transcript_1/4_Conf_0.214   | 461  | 9  | 2.25E-06  | NP_495083.1    | 45 | 55.4546 | 97  | 44  | LYSozyme family member (lys-8)                      |
| Locus_94_Transcript_2/4_Conf_0.214   | 419  | 9  | 3.02E-06  | NP_495083.1    | 45 | 55.0694 | 95  | 43  | LYSozyme family member (lys-8)                      |
| Locus_94_Transcript_3/4_Conf_0.429   | 840  | 20 | 4.65E-30  | NP_495083.1    | 52 | 135.961 | 216 | 113 | LYSozyme family member (lys-8)                      |
| Locus_94_Transcript_4/4_Conf_0.429   | 840  | 20 | 4.65E-30  | NP_495083.1    | 52 | 135.961 | 216 | 113 | LYSozyme family member (lys-8)                      |
| Locus_940_Transcript_1/2_Conf_1.000  | 2766 | 4  | 2.13E-30  | NP_495686.2    | 45 | 139.428 | 514 | 233 | hypothetical protein T05H10.1                       |
| Locus_940_Transcript_2/2_Conf_1.000  | 2766 | 4  | 6.19E-30  | NP_495686.2    | 45 | 137.887 | 514 | 233 | hypothetical protein T05H10.1                       |
| Locus_9400_Transcript_1/1_Conf_1.000 | 145  | 0  |           |                |    |         |     |     |                                                     |
| Locus_9401_Transcript_1/1_Conf_1.000 | 446  | 0  |           |                |    |         |     |     |                                                     |

|                                      |      |    |           |                |    |         |     |     |                                                        |
|--------------------------------------|------|----|-----------|----------------|----|---------|-----|-----|--------------------------------------------------------|
| Locus_9402_Transcript_1/1_Conf_1.000 | 1124 | 20 | 6.11E-149 | NP_508927.2    | 86 | 531.561 | 356 | 307 | DihydroPYrimidine Dehydrogenase family member (dpyd-1) |
| Locus_9403_Transcript_1/1_Conf_1.000 | 1236 | 20 | 0         | EFO21881.1     | 96 | 673.7   | 378 | 364 | DNA-directed RNA polymerase II second largest subunit  |
| Locus_9404_Transcript_1/1_Conf_1.000 | 166  | 20 | 4.44E-18  | NP_509932.2    | 92 | 94.3597 | 54  | 50  | LEVamisole resistant family member (lev-8)             |
| Locus_9405_Transcript_1/1_Conf_1.000 | 244  | 0  |           |                |    |         |     |     |                                                        |
| Locus_9406_Transcript_1/2_Conf_1.000 | 780  | 0  |           |                |    |         |     |     |                                                        |
| Locus_9406_Transcript_2/2_Conf_1.000 | 1175 | 1  | 2.57E-04  | CAR63591.1     | 69 | 51.2174 | 52  | 36  | putative myelin transcription factor 1-like            |
| Locus_9407_Transcript_1/1_Conf_1.000 | 360  | 0  |           |                |    |         |     |     |                                                        |
| Locus_9408_Transcript_1/1_Conf_1.000 | 184  | 0  |           |                |    |         |     |     |                                                        |
| Locus_9409_Transcript_1/1_Conf_1.000 | 789  | 20 | 6.54E-76  | NP_509268.1    | 86 | 288.115 | 186 | 160 | hypothetical protein F48E3.3                           |
| Locus_941_Transcript_1/1_Conf_1.000  | 523  | 4  | 4.62E-43  | XP_002642171.1 | 73 | 177.563 | 148 | 109 | Hypothetical protein CBG18136                          |
| Locus_9410_Transcript_1/2_Conf_1.000 | 1711 | 20 | 0         |                | 76 | 644.425 | 535 | 409 | protein C16A3.1                                        |

|                                      |      |    |           |          |    |         |     |     |                                                                      |
|--------------------------------------|------|----|-----------|----------|----|---------|-----|-----|----------------------------------------------------------------------|
| Locus_9410_Transcript_2/2_Conf_1.000 | 1887 | 20 | 0         |          | 76 | 641.343 | 534 | 408 | protein C16A3.1                                                      |
| Locus_9411_Transcript_1/3_Conf_0.400 | 542  | 20 | 1.52E-71  | A8WPF0.2 | 82 | 272.322 | 186 | 154 | Succinate dehydrogenase ubiquinone iron-sulfur subunit, mitochondria |
| Locus_9411_Transcript_2/3_Conf_0.600 | 943  | 20 | 3.25E-118 | A8WPF0.2 | 91 | 429.098 | 240 | 220 | Succinate dehydrogenase ubiquinone iron-sulfur subunit, mitochondria |
| Locus_9411_Transcript_3/3_Conf_0.400 | 638  | 20 | 1.09E-68  | A8WPF0.2 | 92 | 263.462 | 139 | 129 | Succinate dehydrogenase ubiquinone iron-sulfur subunit, mitochondria |

|                                      |      |    |           |                |    |         |     |     |                                                                |
|--------------------------------------|------|----|-----------|----------------|----|---------|-----|-----|----------------------------------------------------------------|
| Locus_9412_Transcript_1/1_Conf_1.000 | 524  | 10 | 1.49E-25  | XP_002645282.1 | 80 | 119.398 | 110 | 89  | C. briggsae CBR-AJM-1 protein                                  |
| Locus_9413_Transcript_1/1_Conf_1.000 | 316  | 5  | 1.27E-04  | NP_001123111.1 | 66 | 49.6766 | 50  | 33  | PeRoXisome assembly factor family member (prx-3)               |
| Locus_9414_Transcript_1/1_Conf_1.000 | 340  | 5  | 4.66E-28  | XP_002646741.1 | 76 | 127.487 | 109 | 83  | Hypothetical protein CBG13135                                  |
| Locus_9415_Transcript_1/1_Conf_1.000 | 247  | 0  |           |                |    |         |     |     |                                                                |
| Locus_9416_Transcript_1/2_Conf_1.000 | 1244 | 20 | 2.67E-71  | EFO20351.1     | 58 | 273.863 | 402 | 237 | phosphatidylinositol 3                                         |
| Locus_9416_Transcript_2/2_Conf_1.000 | 1244 | 20 | 8.03E-68  | EFO20351.1     | 58 | 262.307 | 402 | 237 | phosphatidylinositol 3                                         |
| Locus_9417_Transcript_1/2_Conf_1.000 | 1077 | 20 | 3.55E-74  | EFO28087.1     | 66 | 283.108 | 291 | 194 | coronin 2A                                                     |
| Locus_9417_Transcript_2/2_Conf_1.000 | 1078 | 20 | 3.55E-74  | EFO28087.1     | 66 | 283.108 | 291 | 194 | coronin 2A                                                     |
| Locus_9418_Transcript_1/1_Conf_1.000 | 431  | 20 | 5.19E-43  | NP_491270.2    | 72 | 177.178 | 143 | 104 | Low-density lipoprotein Receptor Related family member (Irp-2) |
| Locus_9419_Transcript_1/1_Conf_1.000 | 271  | 1  | 8.11E-04  | CAB40818.1     | 54 | 46.9802 | 92  | 50  | intermediate filament                                          |
| Locus_942_Transcript_1/1_Conf_1.000  | 2062 | 20 | 7.70E-176 | XP_002633023.1 | 85 | 622.083 | 424 | 363 | Hypothetical protein CBG21797                                  |
| Locus_9420_Transcript_1/1_Conf_1.000 | 929  | 4  | 1.42E-09  | NP_001022632.1 | 50 | 68.1662 | 159 | 80  | Gamma-tubulin Interacting Protein family member (gip-1)        |
| Locus_9421_Transcript_1/1_Conf_1.000 | 453  | 1  | 1.63E-04  | XP_002648823.1 | 42 | 49.2914 | 87  | 37  | Hypothetical protein CBG16936                                  |
| Locus_9422_Transcript_1/1_Conf_1.000 | 397  | 9  | 1.02E-46  | XP_002633446.1 | 89 | 189.504 | 118 | 106 | Hypothetical protein CBG06214                                  |

|                                      |      |    |          |                |     |         |     |     |                                                                           |
|--------------------------------------|------|----|----------|----------------|-----|---------|-----|-----|---------------------------------------------------------------------------|
| Locus_9423_Transcript_1/1_Conf_1.000 | 1115 | 20 | 2.80E-37 | EFO18643.1     | 70  | 160.614 | 167 | 117 | dual specificity phosphatase                                              |
| Locus_9424_Transcript_1/1_Conf_1.000 | 1295 | 8  | 3.43E-69 | CBW44396.1     | 64  | 266.929 | 332 | 214 | C. elegans protein Y43F8B.1e, partially confirmed by transcript evidence  |
| Locus_9425_Transcript_1/1_Conf_1.000 | 1564 | 20 | 3.27E-80 | NP_496542.1    | 55  | 303.908 | 478 | 265 | hypothetical protein ZK930.1                                              |
| Locus_9426_Transcript_1/1_Conf_1.000 | 138  | 0  |          |                |     |         |     |     |                                                                           |
| Locus_9427_Transcript_1/1_Conf_1.000 | 359  | 2  | 9.20E-24 | XP_002643597.1 | 71  | 113.235 | 92  | 66  | Hypothetical protein CBG16326                                             |
| Locus_9428_Transcript_1/1_Conf_1.000 | 1016 | 0  |          |                |     |         |     |     |                                                                           |
| Locus_9429_Transcript_1/3_Conf_0.846 | 1357 | 1  | 7.07E-04 | XP_001369383.1 | 38  | 50.0618 | 451 | 175 | PREDICTED: similar to cellulosomal scaffoldin anchoring protein, putative |
| Locus_9429_Transcript_2/3_Conf_0.846 | 1357 | 2  | 1.86E-04 | XP_001369383.1 | 39  | 51.9878 | 451 | 176 | PREDICTED: similar to cellulosomal scaffoldin anchoring protein, putative |
| Locus_9429_Transcript_3/3_Conf_0.846 | 1357 | 0  |          |                |     |         |     |     |                                                                           |
| Locus_943_Transcript_1/1_Conf_1.000  | 201  | 16 | 8.64E-22 | XP_001624697.1 | 81  | 106.686 | 66  | 54  | predicted protein                                                         |
| Locus_9430_Transcript_1/1_Conf_1.000 | 378  | 0  |          |                |     |         |     |     |                                                                           |
| Locus_9431_Transcript_1/1_Conf_1.000 | 794  | 0  |          |                |     |         |     |     |                                                                           |
| Locus_9432_Transcript_1/1_Conf_1.000 | 565  | 20 | 3.58E-85 | XP_002645087.1 | 93  | 317.775 | 188 | 176 | Hypothetical protein CBG16761                                             |
| Locus_9433_Transcript_1/1_Conf_1.000 | 378  | 20 | 5.19E-59 | BAG57116.1     | 100 | 230.335 | 105 | 105 | unnamed protein product                                                   |
| Locus_9434_Transcript_1/1_Conf_1.000 | 1285 | 20 | 3.99E-86 | NP_495323.1    | 61  | 323.168 | 426 | 261 | Temporarily Assigned Gene name family member (tag-184)                    |
| Locus_9435_Transcript_1/3_Conf_0.400 | 299  | 0  |          |                |     |         |     |     |                                                                           |
| Locus_9435_Transcript_2/3_Conf_0.600 | 1064 | 20 | 4.57E-42 | XP_002640153.1 | 76  | 176.407 | 209 | 159 | Hypothetical protein CBG12652                                             |
| Locus_9435_Transcript_3/3_Conf_0.600 | 1166 | 20 | 5.60E-44 | XP_002640153.1 | 72  | 182.956 | 228 | 166 | Hypothetical protein CBG12652                                             |
| Locus_9436_Transcript_1/1_Conf_1.000 | 137  | 20 | 3.73E-09 | NP_001123161.1 | 69  | 64.6994 | 42  | 29  | hypothetical protein K03A11.6                                             |
| Locus_9437_Transcript_1/1_Conf_1.000 | 226  | 20 | 1.27E-12 | XP_002742121.1 | 68  | 76.2554 | 74  | 51  | PREDICTED: endonuclease-reverse transcriptase HmRTE-e01-like, partial     |
| Locus_9438_Transcript_1/1_Conf_1.000 | 588  | 20 | 2.63E-20 | CAD21647.3     | 60  | 102.449 | 157 | 95  | C. elegans protein T03F6.6, confirmed by transcript evidence              |



|                                      |      |    |           |                |    |         |     |     |                                                                         |
|--------------------------------------|------|----|-----------|----------------|----|---------|-----|-----|-------------------------------------------------------------------------|
| Locus_9439_Transcript_1/1_Conf_1.000 | 1146 | 0  |           |                |    |         |     |     |                                                                         |
| Locus_944_Transcript_1/2_Conf_1.000  | 1498 | 20 | 2.32E-51  | XP_001894111.1 | 83 | 207.994 | 179 | 149 | IWS1 C-terminus family protein                                          |
| Locus_944_Transcript_2/2_Conf_1.000  | 1492 | 20 | 2.30E-51  | XP_001894111.1 | 83 | 207.994 | 179 | 149 | IWS1 C-terminus family protein                                          |
| Locus_9440_Transcript_1/2_Conf_1.000 | 364  | 20 | 7.71E-31  | NP_001021422.1 | 73 | 136.732 | 120 | 88  | hypothetical protein F27D4.7                                            |
| Locus_9440_Transcript_2/2_Conf_1.000 | 364  | 20 | 7.71E-31  | NP_001021422.1 | 73 | 136.732 | 120 | 88  | hypothetical protein F27D4.7                                            |
| Locus_9441_Transcript_1/1_Conf_1.000 | 705  | 20 | 8.55E-79  | NP_503409.1    | 86 | 297.36  | 189 | 164 | SyNapTotagmin family member (snt-5)                                     |
| Locus_9442_Transcript_1/2_Conf_1.000 | 350  | 0  |           |                |    |         |     |     |                                                                         |
| Locus_9442_Transcript_2/2_Conf_1.000 | 348  | 0  |           |                |    |         |     |     |                                                                         |
| Locus_9443_Transcript_1/1_Conf_1.000 | 905  | 20 | 4.25E-80  | XP_002633330.1 | 79 | 302.368 | 263 | 209 | C. briggsae CBR-DNJ-2 protein                                           |
| Locus_9444_Transcript_1/1_Conf_1.000 | 593  | 20 | 6.02E-97  | CAR63664.1     | 94 | 357.066 | 197 | 186 | putative Dynein Heavy Chain family member                               |
| Locus_9445_Transcript_1/1_Conf_1.000 | 142  | 0  |           |                |    |         |     |     |                                                                         |
| Locus_9446_Transcript_1/1_Conf_1.000 | 351  | 20 | 7.60E-18  | NP_507806.2    | 72 | 93.5893 | 84  | 61  | hypothetical protein Y43F8C.6                                           |
| Locus_9447_Transcript_1/1_Conf_1.000 | 395  | 0  |           |                |    |         |     |     |                                                                         |
| Locus_9448_Transcript_1/1_Conf_1.000 | 308  | 4  | 3.49E-07  | CBM41222.1     | 53 | 58.151  | 82  | 44  | C. elegans protein T10G3.3b, partially confirmed by transcript evidence |
| Locus_9449_Transcript_1/1_Conf_1.000 | 1028 | 20 | 5.64E-74  | XP_002639957.1 | 76 | 282.337 | 230 | 176 | C. briggsae CBR-SNF-1 protein                                           |
| Locus_945_Transcript_1/3_Conf_0.750  | 391  | 0  |           |                |    |         |     |     |                                                                         |
| Locus_945_Transcript_2/3_Conf_0.625  | 392  | 0  |           |                |    |         |     |     |                                                                         |
| Locus_945_Transcript_3/3_Conf_0.750  | 391  | 0  |           |                |    |         |     |     |                                                                         |
| Locus_9450_Transcript_1/1_Conf_1.000 | 426  | 6  | 9.86E-34  | NP_499474.1    | 82 | 146.362 | 103 | 85  | BED-type zinc finger transcription factor family member (bed-2)         |
| Locus_9451_Transcript_1/2_Conf_1.000 | 839  | 20 | 3.23E-116 | NP_503114.1    | 86 | 422.165 | 267 | 230 | fatty acid ELONGation family member (elo-2)                             |
| Locus_9451_Transcript_2/2_Conf_1.000 | 839  | 20 | 9.39E-116 | NP_503114.1    | 85 | 420.624 | 267 | 229 | fatty acid ELONGation family member (elo-2)                             |
| Locus_9452_Transcript_1/1_Conf_1.000 | 414  | 20 | 3.23E-29  | NP_507813.1    | 65 | 131.339 | 135 | 89  | hypothetical protein Y43F8C.13                                          |
| Locus_9453_Transcript_1/1_Conf_1.000 | 732  | 20 | 9.10E-42  | XP_002641174.1 | 76 | 174.481 | 135 | 103 | Hypothetical protein CBG09035                                           |
| Locus_9454_Transcript_1/1_Conf_1.000 | 1583 | 20 | 2.18E-156 | CAA84656.2     | 71 | 556.984 | 538 | 383 | C. elegans protein F10F2.2, confirmed by transcript evidence            |
| Locus_9455_Transcript_1/1_Conf_1.000 | 364  | 20 | 6.52E-30  | XP_002645988.1 | 75 | 133.65  | 111 | 84  | Hypothetical protein CBG07773                                           |

|                                      |      |    |           |                |    |         |     |     |                                 |
|--------------------------------------|------|----|-----------|----------------|----|---------|-----|-----|---------------------------------|
| Locus_9456_Transcript_1/1_Conf_1.000 | 336  | 0  |           |                |    |         |     |     |                                 |
| Locus_9457_Transcript_1/1_Conf_1.000 | 571  | 0  |           |                |    |         |     |     |                                 |
| Locus_9458_Transcript_1/1_Conf_1.000 | 210  | 0  |           |                |    |         |     |     |                                 |
| Locus_9459_Transcript_1/1_Conf_1.000 | 814  | 20 | 2.90E-50  | XP_002634501.1 | 61 | 202.986 | 286 | 177 | C. briggsae CBR-SMGL-2 protein  |
| Locus_946_Transcript_1/1_Conf_1.000  | 1283 | 1  | 1.00E-04  | NP_493046.2    | 50 | 52.7582 | 124 | 62  | hypothetical protein F58D5.5    |
| Locus_9460_Transcript_1/1_Conf_1.000 | 261  | 0  |           |                |    |         |     |     |                                 |
| Locus_9461_Transcript_1/1_Conf_1.000 | 303  | 0  |           |                |    |         |     |     |                                 |
| Locus_9462_Transcript_1/1_Conf_1.000 | 274  | 0  |           |                |    |         |     |     |                                 |
| Locus_9463_Transcript_1/1_Conf_1.000 | 177  | 0  |           |                |    |         |     |     |                                 |
| Locus_9464_Transcript_1/1_Conf_1.000 | 203  | 0  |           |                |    |         |     |     |                                 |
| Locus_9465_Transcript_1/1_Conf_1.000 | 353  | 20 | 5.23E-43  | XP_002642228.1 | 90 | 177.178 | 93  | 84  | Hypothetical protein CBG18204   |
| Locus_9466_Transcript_1/1_Conf_1.000 | 522  | 3  | 4.21E-20  | XP_002633326.1 | 68 | 101.293 | 116 | 79  | Hypothetical protein CBG06063   |
| Locus_9467_Transcript_1/1_Conf_1.000 | 290  | 0  |           |                |    |         |     |     |                                 |
| Locus_9468_Transcript_1/1_Conf_1.000 | 442  | 3  | 1.14E-21  | XP_002637243.1 | 72 | 106.301 | 142 | 103 | Hypothetical protein CBG18919   |
| Locus_9469_Transcript_1/1_Conf_1.000 | 1274 | 20 | 8.42E-113 | XP_001899184.1 | 63 | 411.764 | 466 | 298 | SWIM zinc finger family protein |
| Locus_947_Transcript_1/2_Conf_1.000  | 804  | 5  | 6.92E-12  | XP_002634825.1 | 59 | 75.485  | 137 | 81  | Hypothetical protein CBG13933   |
| Locus_947_Transcript_2/2_Conf_1.000  | 804  | 5  | 6.92E-12  | XP_002634825.1 | 59 | 75.485  | 137 | 81  | Hypothetical protein CBG13933   |
| Locus_9470_Transcript_1/1_Conf_1.000 | 650  | 20 | 5.18E-53  | XP_002645123.1 | 76 | 211.46  | 177 | 136 | Hypothetical protein CBG16817   |
| Locus_9471_Transcript_1/1_Conf_1.000 | 553  | 0  |           |                |    |         |     |     |                                 |
| Locus_9472_Transcript_1/1_Conf_1.000 | 301  | 0  |           |                |    |         |     |     |                                 |
| Locus_9473_Transcript_1/2_Conf_1.000 | 919  | 0  |           |                |    |         |     |     |                                 |
| Locus_9473_Transcript_2/2_Conf_1.000 | 444  | 0  |           |                |    |         |     |     |                                 |
| Locus_9474_Transcript_1/1_Conf_1.000 | 496  | 0  |           |                |    |         |     |     |                                 |

|                                      |      |    |           |                |    |         |     |     |                                                           |
|--------------------------------------|------|----|-----------|----------------|----|---------|-----|-----|-----------------------------------------------------------|
| Locus_9475_Transcript_1/1_Conf_1.000 | 177  | 20 | 3.13E-24  | NP_506269.1    | 98 | 114.775 | 58  | 57  | EATing: abnormal pharyngeal pumping family member (eat-6) |
| Locus_9476_Transcript_1/1_Conf_1.000 | 260  | 5  | 7.40E-21  | XP_001897819.1 | 89 | 103.605 | 66  | 59  | Surfeit locus protein 5 containing protein                |
| Locus_9477_Transcript_1/1_Conf_1.000 | 952  | 20 | 8.85E-140 | XP_002642201.1 | 86 | 500.745 | 297 | 256 | C. briggsae CBR-ARX-3 protein                             |
| Locus_9478_Transcript_1/1_Conf_1.000 | 1230 | 20 | 3.16E-125 | XP_002642224.1 | 86 | 452.981 | 292 | 253 | Hypothetical protein CBG18198                             |
| Locus_9479_Transcript_1/1_Conf_1.000 | 1011 | 5  | 5.83E-100 | NP_001022726.1 | 79 | 368.622 | 321 | 256 | hypothetical protein R144.12                              |
| Locus_948_Transcript_1/2_Conf_1.000  | 362  | 0  |           |                |    |         |     |     |                                                           |
| Locus_948_Transcript_2/2_Conf_1.000  | 362  | 0  |           |                |    |         |     |     |                                                           |

|                                      |      |    |          |                |    |         |     |     |                                                           |
|--------------------------------------|------|----|----------|----------------|----|---------|-----|-----|-----------------------------------------------------------|
| Locus_9480_Transcript_1/1_Conf_1.000 | 515  | 20 | 8.97E-57 | EFO25632.1     | 84 | 223.016 | 167 | 141 | zinc finger protein                                       |
| Locus_9481_Transcript_1/1_Conf_1.000 | 281  | 0  |          |                |    |         |     |     |                                                           |
| Locus_9482_Transcript_1/1_Conf_1.000 | 297  | 2  | 2.36E-19 | NP_506377.2    | 71 | 98.5969 | 91  | 65  | hypothetical protein F53F4.12                             |
| Locus_9483_Transcript_1/1_Conf_1.000 | 159  | 0  |          |                |    |         |     |     |                                                           |
| Locus_9484_Transcript_1/1_Conf_1.000 | 1050 | 0  |          |                |    |         |     |     |                                                           |
| Locus_9485_Transcript_1/1_Conf_1.000 | 178  | 0  |          |                |    |         |     |     |                                                           |
| Locus_9486_Transcript_1/1_Conf_1.000 | 335  | 0  |          |                |    |         |     |     |                                                           |
| Locus_9487_Transcript_1/1_Conf_1.000 | 749  | 20 | 1.23E-65 | XP_002641974.1 | 85 | 253.832 | 163 | 140 | Hypothetical protein CBG16681                             |
| Locus_9488_Transcript_1/1_Conf_1.000 | 618  | 20 | 1.18E-48 | XP_001892599.1 | 81 | 196.823 | 156 | 127 | oxidoreductase, zinc-binding dehydrogenase family protein |
| Locus_9489_Transcript_1/1_Conf_1.000 | 887  | 20 | 3.70E-81 | XP_002642305.1 | 78 | 305.834 | 254 | 199 | Hypothetical protein CBG18297                             |
| Locus_949_Transcript_1/1_Conf_1.000  | 1470 | 20 | 5.23E-32 | AAO63576.1     | 60 | 143.665 | 175 | 105 | secreted protein 4 precursor                              |
| Locus_9490_Transcript_1/1_Conf_1.000 | 302  | 0  |          |                |    |         |     |     |                                                           |
| Locus_9491_Transcript_1/1_Conf_1.000 | 148  | 0  |          |                |    |         |     |     |                                                           |
| Locus_9492_Transcript_1/2_Conf_1.000 | 1226 | 20 | 7.66E-39 | NP_001122711.1 | 61 | 166.007 | 186 | 114 | CBP/p300 homolog family member (cbp-1)                    |

|                                      |      |    |           |                |    |         |     |     |                                                         |
|--------------------------------------|------|----|-----------|----------------|----|---------|-----|-----|---------------------------------------------------------|
| Locus_9492_Transcript_2/2_Conf_1.000 | 1217 | 20 | 2.88E-38  | NP_001122711.1 | 61 | 164.081 | 183 | 113 | CBP/p300 homolog family member (cbp-1)                  |
| Locus_9493_Transcript_1/1_Conf_1.000 | 366  | 1  | 3.25E-05  | NP_490742.1    | 56 | 51.6026 | 75  | 42  | DEfective P granules and Sterile family member (deps-1) |
| Locus_9494_Transcript_1/1_Conf_1.000 | 1787 | 20 | 0         | EFO27339.1     | 78 | 737.643 | 601 | 474 | dynein heavy chain protein 1                            |
| Locus_9495_Transcript_1/1_Conf_1.000 | 613  | 10 | 6.13E-42  | ADI24664.1     | 81 | 174.481 | 132 | 107 | Hypothetical protein Y38C1AA.14                         |
| Locus_9496_Transcript_1/1_Conf_1.000 | 562  | 0  |           |                |    |         |     |     |                                                         |
| Locus_9497_Transcript_1/1_Conf_1.000 | 596  | 4  | 4.78E-25  | XP_002644764.1 | 85 | 118.242 | 77  | 66  | Hypothetical protein CBG14775                           |
| Locus_9498_Transcript_1/1_Conf_1.000 | 131  | 0  |           |                |    |         |     |     |                                                         |
| Locus_9499_Transcript_1/1_Conf_1.000 | 762  | 20 | 1.77E-75  | EFO21942.1     | 77 | 286.574 | 225 | 175 | kynurenine-oxoglutarate transaminase                    |
| Locus_95_Transcript_1/1_Conf_1.000   | 1105 | 20 | 1.61E-53  | XP_002636220.1 | 56 | 214.542 | 315 | 177 | Hypothetical protein CBG12141                           |
| Locus_950_Transcript_1/1_Conf_1.000  | 1825 | 20 | 7.87E-09  | ACD88885.1     | 67 | 65.855  | 76  | 51  | propionyl-coenzyme A carboxylase beta subunit           |
| Locus_9500_Transcript_1/1_Conf_1.000 | 320  | 20 | 1.87E-40  | NP_498418.2    | 80 | 168.703 | 108 | 87  | hypothetical protein T26A5.5                            |
| Locus_9501_Transcript_1/1_Conf_1.000 | 1076 | 20 | 1.62E-119 | NP_504433.2    | 89 | 433.721 | 258 | 232 | hypothetical protein F08F3.4                            |
| Locus_9502_Transcript_1/1_Conf_1.000 | 163  | 0  |           |                |    |         |     |     |                                                         |
| Locus_9503_Transcript_1/1_Conf_1.000 | 598  | 0  |           |                |    |         |     |     |                                                         |
| Locus_9504_Transcript_1/1_Conf_1.000 | 369  | 3  | 1.71E-09  | NP_492202.2    | 55 | 65.855  | 121 | 67  | hypothetical protein C54G4.3                            |
| Locus_9505_Transcript_1/1_Conf_1.000 | 335  | 4  | 3.27E-13  | XP_002638288.1 | 61 | 78.1814 | 103 | 63  | Hypothetical protein CBG22835                           |

|                                      |      |    |           |                |    |         |     |     |                                                     |
|--------------------------------------|------|----|-----------|----------------|----|---------|-----|-----|-----------------------------------------------------|
| Locus_9506_Transcript_1/1_Conf_1.000 | 267  | 5  | 2.89E-09  | XP_002639084.1 | 63 | 65.0846 | 85  | 54  | Hypothetical protein CBG14902                       |
| Locus_9507_Transcript_1/1_Conf_1.000 | 407  | 0  |           |                |    |         |     |     |                                                     |
| Locus_9508_Transcript_1/2_Conf_1.000 | 1293 | 20 | 1.99E-109 | NP_501598.2    | 74 | 400.593 | 315 | 235 | Prolyl Carboxy Peptidase like family member (pcp-3) |
| Locus_9508_Transcript_2/2_Conf_1.000 | 443  | 20 | 5.44E-48  | XP_002633021.1 | 76 | 193.741 | 147 | 112 | Hypothetical protein CBG21793                       |
| Locus_9509_Transcript_1/1_Conf_1.000 | 694  | 20 | 7.30E-75  | XP_002640668.1 | 95 | 284.263 | 231 | 220 | C. briggsae CBR-UNC-54 protein                      |
| Locus_951_Transcript_1/1_Conf_1.000  | 816  | 0  |           |                |    |         |     |     |                                                     |
| Locus_9510_Transcript_1/1_Conf_1.000 | 230  | 0  |           |                |    |         |     |     |                                                     |
| Locus_9511_Transcript_1/1_Conf_1.000 | 364  | 20 | 3.59E-20  | XP_002630503.1 | 76 | 101.293 | 101 | 77  | Hypothetical protein CBG24740                       |
| Locus_9512_Transcript_1/1_Conf_1.000 | 253  | 0  |           |                |    |         |     |     |                                                     |
| Locus_9513_Transcript_1/1_Conf_1.000 | 925  | 20 | 4.00E-89  | XP_002643773.1 | 92 | 332.413 | 188 | 173 | Hypothetical protein CBG01975                       |
| Locus_9514_Transcript_1/1_Conf_1.000 | 905  | 1  | 4.97E-04  | NP_501638.1    | 39 | 49.6766 | 237 | 94  | hypothetical protein F49C12.15                      |
| Locus_9515_Transcript_1/1_Conf_1.000 | 834  | 20 | 7.34E-20  | XP_001897972.1 | 53 | 102.064 | 186 | 99  | YY1-associated factor 2                             |
| Locus_9516_Transcript_1/1_Conf_1.000 | 481  | 5  | 9.10E-24  | XP_002633740.1 | 65 | 113.235 | 135 | 89  | Hypothetical protein CBG03425                       |
| Locus_9517_Transcript_1/1_Conf_1.000 | 587  | 20 | 4.65E-33  | NP_506445.2    | 72 | 144.821 | 122 | 88  | Serine Palmitoyl Transferase family member (sptl-3) |
| Locus_9518_Transcript_1/1_Conf_1.000 | 210  | 0  |           |                |    |         |     |     |                                                     |
| Locus_9519_Transcript_1/1_Conf_1.000 | 358  | 0  |           |                |    |         |     |     |                                                     |
| Locus_952_Transcript_1/1_Conf_1.000  | 834  | 0  |           |                |    |         |     |     |                                                     |
| Locus_9520_Transcript_1/1_Conf_1.000 | 169  | 0  |           |                |    |         |     |     |                                                     |
| Locus_9521_Transcript_1/1_Conf_1.000 | 260  | 0  |           |                |    |         |     |     |                                                     |
| Locus_9522_Transcript_1/1_Conf_1.000 | 879  | 20 | 4.08E-48  | XP_002636541.1 | 55 | 196.052 | 299 | 165 | Hypothetical protein CBG23228                       |
| Locus_9523_Transcript_1/1_Conf_1.000 | 328  | 0  |           |                |    |         |     |     |                                                     |

|                                      |      |    |           |                |    |         |     |     |                                                          |
|--------------------------------------|------|----|-----------|----------------|----|---------|-----|-----|----------------------------------------------------------|
| Locus_9524_Transcript_1/1_Conf_1.000 | 1351 | 20 | 1.32E-26  | XP_002725019.1 | 43 | 125.561 | 309 | 135 | PREDICTED: aminoacidate-semialdehyde dehydrogenase-like  |
| Locus_9525_Transcript_1/1_Conf_1.000 | 370  | 0  |           |                |    |         |     |     |                                                          |
| Locus_9526_Transcript_1/1_Conf_1.000 | 372  | 20 | 9.63E-29  | XP_002643980.1 | 89 | 129.798 | 82  | 73  | C. briggsae CBR-OCT-2 protein                            |
| Locus_9527_Transcript_1/1_Conf_1.000 | 1401 | 20 | 4.99E-77  | XP_001895135.1 | 55 | 293.123 | 456 | 254 | replication factor A 73 kDa subunit                      |
| Locus_9528_Transcript_1/1_Conf_1.000 | 506  | 20 | 9.61E-16  | XP_001948496.1 | 48 | 86.6557 | 129 | 62  | PREDICTED: hypothetical protein                          |
| Locus_9529_Transcript_1/1_Conf_1.000 | 576  | 20 | 2.34E-50  | NP_490774.2    | 73 | 202.216 | 194 | 142 | PIF1p DNA helicase (yeast) homolog family member (pif-1) |
| Locus_953_Transcript_1/3_Conf_0.714  | 826  | 20 | 8.72E-42  | NP_741664.1    | 56 | 174.866 | 268 | 152 | hypothetical protein Y39B6A.33                           |
| Locus_953_Transcript_2/3_Conf_0.714  | 826  | 20 | 1.49E-41  | NP_741664.1    | 56 | 174.096 | 268 | 152 | hypothetical protein Y39B6A.33                           |
| Locus_953_Transcript_3/3_Conf_0.714  | 826  | 20 | 1.49E-41  | NP_741664.1    | 56 | 174.096 | 268 | 152 | hypothetical protein Y39B6A.33                           |
| Locus_9530_Transcript_1/1_Conf_1.000 | 568  | 0  |           |                |    |         |     |     |                                                          |
| Locus_9531_Transcript_1/1_Conf_1.000 | 535  | 20 | 1.21E-41  | XP_002642389.1 | 69 | 172.94  | 155 | 108 | C. briggsae CBR-TAG-235 protein                          |
| Locus_9532_Transcript_1/1_Conf_1.000 | 1646 | 20 | 1.83E-129 | ACI49172.1     | 68 | 467.618 | 550 | 374 | hypothetical protein Csp3_JD01.004                       |
| Locus_9533_Transcript_1/1_Conf_1.000 | 1097 | 20 | 3.82E-23  | XP_002129449.1 | 48 | 113.62  | 245 | 118 | PREDICTED: hypothetical protein                          |

|                                      |      |    |           |                |    |         |     |     |                                                                        |
|--------------------------------------|------|----|-----------|----------------|----|---------|-----|-----|------------------------------------------------------------------------|
| Locus_9534_Transcript_1/1_Conf_1.000 | 304  | 20 | 3.59E-36  | XP_002642379.1 | 83 | 154.451 | 99  | 83  | Hypothetical protein CBG18383                                          |
| Locus_9535_Transcript_1/1_Conf_1.000 | 2596 | 20 | 0         | NP_493625.4    | 70 | 887.871 | 890 | 625 | hypothetical protein F31C3.3                                           |
| Locus_9536_Transcript_1/1_Conf_1.000 | 320  | 20 | 1.48E-53  | AAB99830.2     | 93 | 212.231 | 106 | 99  | thrombospondin                                                         |
| Locus_9537_Transcript_1/1_Conf_1.000 | 1135 | 20 | 8.82E-95  | EFO23011.1     | 71 | 351.673 | 327 | 233 | zinc finger protein 395                                                |
| Locus_9538_Transcript_1/1_Conf_1.000 | 706  | 20 | 2.63E-120 | NP_492020.1    | 98 | 435.261 | 201 | 198 | hypothetical protein K10D3.4                                           |
| Locus_9539_Transcript_1/1_Conf_1.000 | 810  | 0  |           |                |    |         |     |     |                                                                        |
| Locus_954_Transcript_1/4_Conf_0.333  | 1764 | 20 | 1.11E-87  | NP_500618.1    | 83 | 328.946 | 233 | 195 | COP9/Signalosome and eIF3 complex shared subunit family member (cif-1) |
| Locus_954_Transcript_2/4_Conf_0.333  | 1764 | 20 | 1.11E-87  | NP_500618.1    | 83 | 328.946 | 233 | 195 | COP9/Signalosome and eIF3 complex shared subunit family member (cif-1) |
| Locus_954_Transcript_3/4_Conf_0.417  | 1648 | 20 | 8.51E-135 | NP_500618.1    | 78 | 485.337 | 390 | 308 | COP9/Signalosome and eIF3 complex shared subunit family member (cif-1) |
| Locus_954_Transcript_4/4_Conf_0.417  | 1648 | 20 | 8.51E-135 | NP_500618.1    | 78 | 485.337 | 390 | 308 | COP9/Signalosome and eIF3 complex shared subunit family member (cif-1) |



|                                      |      |    |           |                |    |         |     |     |                                                 |
|--------------------------------------|------|----|-----------|----------------|----|---------|-----|-----|-------------------------------------------------|
| Locus_9540_Transcript_1/1_Conf_1.000 | 349  | 20 | 7.06E-56  | XP_002804745.1 | 96 | 219.935 | 112 | 108 | PREDICTED: hypothetical protein<br>LOC100430062 |
| Locus_9541_Transcript_1/2_Conf_1.000 | 848  | 4  | 1.33E-24  | XP_002631646.1 | 43 | 117.857 | 333 | 145 | C. briggsae CBR-LEM-2 protein                   |
| Locus_9541_Transcript_2/2_Conf_1.000 | 830  | 17 | 2.57E-25  | XP_002631646.1 | 43 | 120.168 | 333 | 145 | C. briggsae CBR-LEM-2 protein                   |
| Locus_9542_Transcript_1/1_Conf_1.000 | 222  | 0  |           |                |    |         |     |     |                                                 |
| Locus_9543_Transcript_1/1_Conf_1.000 | 331  | 4  | 2.43E-08  | XP_310525.4    | 88 | 62.003  | 35  | 31  | AGAP000558-PA                                   |
| Locus_9544_Transcript_1/1_Conf_1.000 | 918  | 5  | 1.09E-30  | XP_002636795.1 | 58 | 138.272 | 244 | 143 | Hypothetical protein CBG23538                   |
| Locus_9545_Transcript_1/1_Conf_1.000 | 414  | 0  |           |                |    |         |     |     |                                                 |
| Locus_9546_Transcript_1/1_Conf_1.000 | 818  | 20 | 3.45E-59  | XP_002636774.1 | 80 | 232.646 | 205 | 164 | Hypothetical protein CBG23508                   |
| Locus_9547_Transcript_1/1_Conf_1.000 | 873  | 20 | 5.06E-107 | XP_002633377.1 | 80 | 391.734 | 308 | 249 | C. briggsae CBR-TAG-13 protein                  |
| Locus_9548_Transcript_1/1_Conf_1.000 | 519  | 3  | 5.21E-15  | NP_001041224.1 | 72 | 84.3445 | 79  | 57  | hypothetical protein C35B8.4                    |
| Locus_9549_Transcript_1/2_Conf_1.000 | 466  | 0  |           |                |    |         |     |     |                                                 |
| Locus_9549_Transcript_2/2_Conf_1.000 | 1968 | 20 | 2.55E-96  | XP_001898467.1 | 63 | 357.836 | 475 | 303 | FYVE zinc finger family protein                 |

|                                      |     |    |          |                |     |         |     |     |                                                      |
|--------------------------------------|-----|----|----------|----------------|-----|---------|-----|-----|------------------------------------------------------|
| Locus_955_Transcript_1/1_Conf_1.000  | 622 | 20 | 8.70E-60 | XP_002632116.1 | 82  | 233.802 | 159 | 131 | Hypothetical protein CBG06970                        |
| Locus_9550_Transcript_1/1_Conf_1.000 | 455 | 20 | 1.73E-22 | NP_001022488.1 | 65  | 108.997 | 149 | 97  | UNCoordinated family member (unc-52)                 |
| Locus_9551_Transcript_1/1_Conf_1.000 | 946 | 20 | 3.55E-64 | XP_002638764.1 | 65  | 249.595 | 297 | 196 | C. briggsae CBR-PTR-11 protein                       |
| Locus_9552_Transcript_1/1_Conf_1.000 | 325 | 20 | 5.05E-46 | XP_002642541.1 | 92  | 187.193 | 108 | 100 | C. briggsae CBR-DNJ-16 protein                       |
| Locus_9553_Transcript_1/1_Conf_1.000 | 137 | 0  |          |                |     |         |     |     |                                                      |
| Locus_9554_Transcript_1/1_Conf_1.000 | 185 | 0  |          |                |     |         |     |     |                                                      |
| Locus_9555_Transcript_1/1_Conf_1.000 | 399 | 20 | 5.27E-27 | XP_002639434.1 | 80  | 124.02  | 96  | 77  | Hypothetical protein CBG04027                        |
| Locus_9556_Transcript_1/1_Conf_1.000 | 354 | 20 | 1.58E-15 | XP_001893896.1 | 100 | 85.8853 | 39  | 39  | ubiquitin                                            |
| Locus_9557_Transcript_1/1_Conf_1.000 | 818 | 20 | 1.62E-16 | NP_507534.1    | 63  | 90.8929 | 119 | 75  | hypothetical protein Y37H2A.1                        |
| Locus_9558_Transcript_1/1_Conf_1.000 | 429 | 0  |          |                |     |         |     |     |                                                      |
| Locus_9559_Transcript_1/2_Conf_1.000 | 585 | 20 | 3.21E-42 | NP_496711.1    | 81  | 175.252 | 122 | 100 | Phosphatidylinositol SYNthase family member (pisy-1) |
| Locus_9559_Transcript_2/2_Conf_1.000 | 447 | 20 | 1.16E-42 | NP_496711.1    | 80  | 176.022 | 125 | 101 | Phosphatidylinositol SYNthase family member (pisy-1) |
| Locus_956_Transcript_1/1_Conf_1.000  | 299 | 20 | 3.07E-27 | XP_001898464.1 | 75  | 124.79  | 98  | 74  | Innexin inx-3                                        |
| Locus_9560_Transcript_1/1_Conf_1.000 | 447 | 20 | 1.81E-19 | NP_741285.1    | 75  | 98.9821 | 87  | 66  | hypothetical protein Y38C1AA.1                       |
| Locus_9561_Transcript_1/1_Conf_1.000 | 188 | 0  |          |                |     |         |     |     |                                                      |
| Locus_9562_Transcript_1/1_Conf_1.000 | 212 | 0  |          |                |     |         |     |     |                                                      |
| Locus_9563_Transcript_1/1_Conf_1.000 | 459 | 0  |          |                |     |         |     |     |                                                      |
| Locus_9564_Transcript_1/4_Conf_0.375 | 347 | 20 | 1.94E-29 | XP_002646542.1 | 86  | 132.109 | 86  | 74  | Hypothetical protein CBG20397                        |

|                                      |      |    |           |                |    |         |     |     |                                 |
|--------------------------------------|------|----|-----------|----------------|----|---------|-----|-----|---------------------------------|
| Locus_9564_Transcript_2/4_Conf_0.375 | 305  | 20 | 5.94E-31  | XP_002646542.1 | 86 | 137.117 | 90  | 78  | Hypothetical protein CBG20397   |
| Locus_9564_Transcript_3/4_Conf_0.375 | 1171 | 20 | 5.62E-60  | XP_002646542.1 | 81 | 236.113 | 162 | 132 | Hypothetical protein CBG20397   |
| Locus_9564_Transcript_4/4_Conf_0.375 | 1171 | 20 | 9.59E-60  | XP_002646542.1 | 81 | 235.343 | 161 | 131 | Hypothetical protein CBG20397   |
| Locus_9565_Transcript_1/1_Conf_1.000 | 129  | 0  |           |                |    |         |     |     |                                 |
| Locus_9566_Transcript_1/1_Conf_1.000 | 259  | 3  | 1.89E-08  | NP_509643.1    | 58 | 62.3882 | 90  | 53  | hypothetical protein F36G3.2    |
| Locus_9567_Transcript_1/1_Conf_1.000 | 390  | 0  |           |                |    |         |     |     |                                 |
| Locus_9568_Transcript_1/1_Conf_1.000 | 130  | 0  |           |                |    |         |     |     |                                 |
| Locus_9569_Transcript_1/1_Conf_1.000 | 1051 | 20 | 1.66E-137 | XP_002640755.1 | 90 | 493.426 | 299 | 272 | C. briggsae CBR-ARX-4 protein   |
| Locus_957_Transcript_1/1_Conf_1.000  | 1916 | 20 | 9.86E-53  | NP_501987.1    | 61 | 213.001 | 273 | 169 | Cyclin B family member (cyb-1)  |
| Locus_9570_Transcript_1/1_Conf_1.000 | 591  | 2  | 4.24E-42  | NP_498567.1    | 64 | 174.866 | 194 | 125 | hypothetical protein K04G7.1    |
| Locus_9571_Transcript_1/1_Conf_1.000 | 162  | 20 | 2.70E-15  | XP_002633256.1 | 91 | 85.1149 | 46  | 42  | Hypothetical protein CBG05981   |
| Locus_9572_Transcript_1/1_Conf_1.000 | 1007 | 10 | 1.08E-13  | EFO15513.1     | 50 | 82.0333 | 221 | 112 | hypothetical protein LOAG_12997 |
| Locus_9573_Transcript_1/3_Conf_0.500 | 454  | 20 | 1.42E-08  | XP_002639129.1 | 44 | 62.7734 | 152 | 68  | Hypothetical protein CBG14949   |

|                                      |      |    |          |                |    |         |     |     |                                      |
|--------------------------------------|------|----|----------|----------------|----|---------|-----|-----|--------------------------------------|
| Locus_9573_Transcript_2/3_Conf_0.333 | 638  | 20 | 2.40E-07 | XP_001373707.1 | 42 | 59.6918 | 157 | 66  | PREDICTED: similar to epithin        |
| Locus_9573_Transcript_3/3_Conf_0.500 | 454  | 20 | 1.42E-08 | XP_002639129.1 | 44 | 62.7734 | 152 | 68  | Hypothetical protein CBG14949        |
| Locus_9574_Transcript_1/1_Conf_1.000 | 173  | 5  | 2.77E-12 | XP_002638900.1 | 78 | 75.0998 | 57  | 45  | Hypothetical protein CBG22126        |
| Locus_9575_Transcript_1/1_Conf_1.000 | 305  | 0  |          |                |    |         |     |     |                                      |
| Locus_9576_Transcript_1/1_Conf_1.000 | 239  | 4  | 1.02E-22 | CBA10135.1     | 93 | 109.768 | 79  | 74  | DAF-16B transcription factor         |
| Locus_9577_Transcript_1/1_Conf_1.000 | 730  | 0  |          |                |    |         |     |     |                                      |
| Locus_9578_Transcript_1/1_Conf_1.000 | 1352 | 20 | 6.22E-77 | NP_001024778.2 | 64 | 292.738 | 342 | 222 | neuRonal IGCAM family member (rig-1) |
| Locus_9579_Transcript_1/1_Conf_1.000 | 299  | 5  | 1.14E-05 | EFO27165.1     | 57 | 53.1434 | 64  | 37  | hypothetical protein LOAG_01310      |
| Locus_958_Transcript_1/1_Conf_1.000  | 614  | 0  |          |                |    |         |     |     |                                      |
| Locus_9580_Transcript_1/1_Conf_1.000 | 226  | 20 | 1.65E-12 | XP_001648264.1 | 76 | 75.8702 | 60  | 46  | aromatic amino acid decarboxylase    |
| Locus_9581_Transcript_1/1_Conf_1.000 | 152  | 0  |          |                |    |         |     |     |                                      |
| Locus_9582_Transcript_1/1_Conf_1.000 | 1924 | 5  | 4.72E-63 | XP_002640718.1 | 46 | 247.284 | 650 | 305 | Hypothetical protein CBG19785        |
| Locus_9583_Transcript_1/1_Conf_1.000 | 342  | 0  |          |                |    |         |     |     |                                      |
| Locus_9584_Transcript_1/1_Conf_1.000 | 484  | 1  | 1.96E-05 | EFO23192.1     | 66 | 52.373  | 39  | 26  | Mob1/phocein family protein          |
| Locus_9585_Transcript_1/1_Conf_1.000 | 748  | 20 | 3.14E-61 | XP_001898476.1 | 88 | 239.195 | 164 | 145 | Amino acid permease family protein   |
| Locus_9586_Transcript_1/1_Conf_1.000 | 583  | 20 | 9.81E-52 | NP_493553.1    | 80 | 206.838 | 152 | 122 | hypothetical protein Y54E5A.5        |
| Locus_9587_Transcript_1/1_Conf_1.000 | 180  | 0  |          |                |    |         |     |     |                                      |
| Locus_9588_Transcript_1/1_Conf_1.000 | 359  | 20 | 2.68E-23 | NP_505849.2    | 59 | 111.694 | 123 | 73  | hypothetical protein T19B10.3        |
| Locus_9589_Transcript_1/1_Conf_1.000 | 771  | 20 | 1.51E-21 | AAK60209.1     | 52 | 107.457 | 185 | 98  | vap-1                                |
| Locus_959_Transcript_1/1_Conf_1.000  | 203  | 0  |          |                |    |         |     |     |                                      |

|                                      |      |    |           |                |    |         |     |     |                                                          |
|--------------------------------------|------|----|-----------|----------------|----|---------|-----|-----|----------------------------------------------------------|
| Locus_9590_Transcript_1/1_Conf_1.000 | 1053 | 20 | 9.41E-32  | AAO63577.1     | 50 | 142.124 | 256 | 129 | secreted protein 5 precursor                             |
| Locus_9591_Transcript_1/1_Conf_1.000 | 897  | 5  | 2.05E-18  | NP_001022759.1 | 45 | 97.4413 | 238 | 108 | hypothetical protein T12D8.9                             |
| Locus_9592_Transcript_1/1_Conf_1.000 | 302  | 0  |           |                |    |         |     |     |                                                          |
| Locus_9593_Transcript_1/1_Conf_1.000 | 166  | 20 | 8.94E-19  | EFO18176.1     | 94 | 96.6709 | 54  | 51  | hypothetical protein LOAG_10319                          |
| Locus_9594_Transcript_1/1_Conf_1.000 | 1510 | 20 | 3.98E-67  | XP_002637568.1 | 56 | 260.381 | 457 | 257 | Hypothetical protein CBG19301                            |
| Locus_9595_Transcript_1/1_Conf_1.000 | 337  | 20 | 3.94E-43  | NP_502964.2    | 85 | 177.563 | 112 | 96  | hypothetical protein Y51H4A.7                            |
| Locus_9596_Transcript_1/1_Conf_1.000 | 711  | 20 | 1.30E-74  | XP_001899675.1 | 84 | 283.493 | 205 | 174 | Zinc finger DHHC domain containing protein 5             |
| Locus_9597_Transcript_1/1_Conf_1.000 | 128  | 0  |           |                |    |         |     |     |                                                          |
| Locus_9598_Transcript_1/1_Conf_1.000 | 682  | 20 | 6.57E-65  | NP_499895.2    | 73 | 251.136 | 229 | 168 | hypothetical protein T21D12.9                            |
| Locus_9599_Transcript_1/1_Conf_1.000 | 172  | 4  | 8.06E-12  | NP_495784.1    | 81 | 73.559  | 55  | 45  | ZYGote defective: embryonic lethal family member (zyg-9) |
| Locus_96_Transcript_1/1_Conf_1.000   | 629  | 20 | 1.70E-26  | NP_493023.1    | 85 | 123.25  | 78  | 67  | hypothetical protein R09B3.3                             |
| Locus_960_Transcript_1/1_Conf_1.000  | 1329 | 20 | 1.37E-153 | O44126.1       | 97 | 547.354 | 279 | 272 | 32 kDa beta-galactoside-binding lectin                   |
| Locus_9600_Transcript_1/2_Conf_1.000 | 498  | 0  |           |                |    |         |     |     |                                                          |
| Locus_9600_Transcript_2/2_Conf_1.000 | 494  | 0  |           |                |    |         |     |     |                                                          |
| Locus_9601_Transcript_1/2_Conf_1.000 | 753  | 20 | 6.66E-19  | NP_497810.1    | 54 | 98.5969 | 214 | 116 | ReCQ DNA helicase family member (rcq-5)                  |
| Locus_9601_Transcript_2/2_Conf_1.000 | 756  | 20 | 6.72E-19  | NP_497810.1    | 54 | 98.5969 | 214 | 116 | ReCQ DNA helicase family member (rcq-5)                  |
| Locus_9602_Transcript_1/1_Conf_1.000 | 734  | 13 | 3.02E-45  | NP_509422.1    | 67 | 186.037 | 173 | 116 | hypothetical protein F41D9.2                             |
| Locus_9603_Transcript_1/1_Conf_1.000 | 959  | 1  | 4.18E-04  | NP_648504.2    | 39 | 50.0618 | 259 | 102 | mucin 68D                                                |
| Locus_9604_Transcript_1/1_Conf_1.000 | 902  | 20 | 2.36E-22  | XP_002639720.1 | 47 | 110.538 | 280 | 133 | Hypothetical protein CBG12446                            |
| Locus_9605_Transcript_1/1_Conf_1.000 | 261  | 0  |           |                |    |         |     |     |                                                          |
| Locus_9606_Transcript_1/1_Conf_1.000 | 856  | 20 | 8.21E-30  | NP_495102.1    | 65 | 135.191 | 141 | 92  | hypothetical protein F59E12.11                           |
| Locus_9607_Transcript_1/1_Conf_1.000 | 242  | 3  | 1.29E-09  | XP_001902362.1 | 65 | 66.2402 | 76  | 50  | hypothetical protein Bm1_54520                           |

|                                      |      |    |          |                |     |         |     |     |                                                                         |
|--------------------------------------|------|----|----------|----------------|-----|---------|-----|-----|-------------------------------------------------------------------------|
| Locus_9608_Transcript_1/1_Conf_1.000 | 399  | 20 | 1.92E-61 | NP_001018146.1 | 100 | 238.424 | 116 | 116 | nucleoside diphosphate kinase B                                         |
| Locus_9609_Transcript_1/1_Conf_1.000 | 417  | 20 | 4.79E-36 | CAZ39159.1     | 78  | 154.066 | 116 | 91  | C. elegans protein C01C7.1b, partially confirmed by transcript evidence |
| Locus_961_Transcript_1/1_Conf_1.000  | 204  | 0  |          |                |     |         |     |     |                                                                         |
| Locus_9610_Transcript_1/1_Conf_1.000 | 565  | 20 | 1.09E-49 | XP_001898209.1 | 80  | 199.904 | 150 | 120 | Variant SH3 domain containing protein                                   |
| Locus_9611_Transcript_1/4_Conf_0.286 | 333  | 0  |          |                |     |         |     |     |                                                                         |
| Locus_9611_Transcript_2/4_Conf_0.429 | 684  | 0  |          |                |     |         |     |     |                                                                         |
| Locus_9611_Transcript_3/4_Conf_0.571 | 973  | 0  |          |                |     |         |     |     |                                                                         |
| Locus_9611_Transcript_4/4_Conf_0.429 | 675  | 0  |          |                |     |         |     |     |                                                                         |
| Locus_9612_Transcript_1/1_Conf_1.000 | 806  | 20 | 1.73E-79 | NP_490770.1    | 79  | 300.056 | 204 | 163 | hypothetical protein Y18H1A.4                                           |
| Locus_9613_Transcript_1/1_Conf_1.000 | 294  | 0  |          |                |     |         |     |     |                                                                         |
| Locus_9614_Transcript_1/1_Conf_1.000 | 1878 | 20 | 0        | NP_741684.2    | 81  | 704.901 | 628 | 513 | PROximal proliferation in germline family member (pro-3)                |

|                                      |      |    |           |                |     |         |     |     |                                               |
|--------------------------------------|------|----|-----------|----------------|-----|---------|-----|-----|-----------------------------------------------|
| Locus_9615_Transcript_1/1_Conf_1.000 | 1154 | 20 | 4.55E-14  | XP_001899498.1 | 66  | 83.5741 | 117 | 78  | Core histone H2A/H2B/H3/H4 family protein     |
| Locus_9616_Transcript_1/1_Conf_1.000 | 580  | 0  |           |                |     |         |     |     |                                               |
| Locus_9617_Transcript_1/1_Conf_1.000 | 617  | 0  |           |                |     |         |     |     |                                               |
| Locus_9618_Transcript_1/1_Conf_1.000 | 455  | 20 | 1.76E-75  | NP_001024407.1 | 98  | 285.034 | 151 | 149 | INneXin family member (inx-1)                 |
| Locus_9619_Transcript_1/1_Conf_1.000 | 646  | 20 | 2.25E-16  | NP_501363.1    | 69  | 89.7373 | 82  | 57  | P38 Map Kinase family member (pmk-3)          |
| Locus_962_Transcript_1/1_Conf_1.000  | 230  | 2  | 3.78E-25  | XP_002642486.1 | 86  | 117.857 | 76  | 66  | Hypothetical protein CBG06905                 |
| Locus_9620_Transcript_1/1_Conf_1.000 | 263  | 4  | 1.88E-08  | EFO24584.1     | 73  | 62.3882 | 56  | 41  | hypothetical protein LOAG_03906               |
| Locus_9621_Transcript_1/1_Conf_1.000 | 1156 | 20 | 1.42E-15  | EFO26150.1     | 68  | 88.5817 | 89  | 61  | RNase3 domain-containing protein              |
| Locus_9622_Transcript_1/1_Conf_1.000 | 836  | 20 | 2.30E-106 | NP_492651.1    | 100 | 389.423 | 190 | 190 | Neuronal Calcium Sensor family member (ncs-2) |
| Locus_9623_Transcript_1/1_Conf_1.000 | 375  | 6  | 1.49E-13  | Q94125.6       | 56  | 79.337  | 134 | 76  | Phosphatidylinositol 3-kinase age-1           |
| Locus_9624_Transcript_1/1_Conf_1.000 | 299  | 20 | 3.28E-29  | XP_002642057.1 | 90  | 131.339 | 99  | 90  | C. briggsae CBR-COL-89 protein                |
| Locus_9625_Transcript_1/1_Conf_1.000 | 221  | 0  |           |                |     |         |     |     |                                               |
| Locus_9626_Transcript_1/1_Conf_1.000 | 361  | 2  | 7.77E-15  | NP_001021401.1 | 55  | 83.5741 | 102 | 57  | hypothetical protein F21F3.7                  |
| Locus_9627_Transcript_1/1_Conf_1.000 | 287  | 0  |           |                |     |         |     |     |                                               |
| Locus_9628_Transcript_1/1_Conf_1.000 | 357  | 20 | 1.91E-29  | NP_496328.2    | 72  | 132.109 | 111 | 81  | hypothetical protein R06F6.8                  |
| Locus_9629_Transcript_1/1_Conf_1.000 | 523  | 20 | 5.89E-14  | XP_001991589.1 | 51  | 80.8777 | 131 | 68  | GH11980                                       |

|                                      |      |    |           |                |    |         |     |     |                                                                    |
|--------------------------------------|------|----|-----------|----------------|----|---------|-----|-----|--------------------------------------------------------------------|
| Locus_963_Transcript_1/1_Conf_1.000  | 1776 | 20 | 0         | XP_002637342.1 | 89 | 842.803 | 527 | 473 | C. briggsae CBR-UNC-70 protein                                     |
| Locus_9630_Transcript_1/1_Conf_1.000 | 405  | 20 | 1.68E-25  | NP_494789.1    | 64 | 119.013 | 128 | 83  | hypothetical protein W06B4.2                                       |
| Locus_9631_Transcript_1/1_Conf_1.000 | 693  | 20 | 1.78E-113 | XP_002634804.1 | 94 | 412.535 | 230 | 217 | Hypothetical protein CBG13909                                      |
| Locus_9632_Transcript_1/1_Conf_1.000 | 245  | 0  |           |                |    |         |     |     |                                                                    |
| Locus_9633_Transcript_1/1_Conf_1.000 | 457  | 20 | 2.33E-19  | NP_497591.1    | 68 | 98.5969 | 86  | 59  | Protein Phosphatase Four Regulatory subunit family member (ppfr-4) |



|                                      |      |    |          |                |     |         |     |     |                                           |
|--------------------------------------|------|----|----------|----------------|-----|---------|-----|-----|-------------------------------------------|
| Locus_9634_Transcript_1/1_Conf_1.000 | 290  | 5  | 4.98E-09 | XP_002638740.1 | 62  | 64.3142 | 100 | 62  | Hypothetical protein CBG18542             |
| Locus_9635_Transcript_1/1_Conf_1.000 | 232  | 0  |          |                |     |         |     |     |                                           |
| Locus_9636_Transcript_1/3_Conf_0.750 | 1378 | 20 | 2.24E-21 | EFO24656.1     | 42  | 108.227 | 456 | 193 | hypothetical protein LOAG_03825           |
| Locus_9636_Transcript_2/3_Conf_0.750 | 1369 | 20 | 6.45E-21 | EFO24656.1     | 40  | 106.686 | 451 | 183 | hypothetical protein LOAG_03825           |
| Locus_9636_Transcript_3/3_Conf_0.750 | 1378 | 20 | 2.92E-21 | EFO24656.1     | 42  | 107.842 | 456 | 193 | hypothetical protein LOAG_03825           |
| Locus_9637_Transcript_1/1_Conf_1.000 | 204  | 20 | 5.39E-32 | XP_001162433.1 | 100 | 140.584 | 68  | 68  | PREDICTED: hypothetical protein isoform 1 |

|                                      |      |    |           |                |    |         |     |     |                                                      |
|--------------------------------------|------|----|-----------|----------------|----|---------|-----|-----|------------------------------------------------------|
| Locus_9638_Transcript_1/1_Conf_1.000 | 1587 | 20 | 1.29E-140 | XP_002636698.1 | 91 | 504.597 | 398 | 364 | C. briggsae CBR-MYO-3 protein                        |
| Locus_9639_Transcript_1/1_Conf_1.000 | 413  | 20 | 3.01E-59  | XP_001103861.2 | 99 | 231.106 | 124 | 123 | PREDICTED: 60S ribosomal protein L35a-like isoform 2 |
| Locus_964_Transcript_1/2_Conf_1.000  | 852  | 20 | 3.42E-36  | XP_001897844.1 | 74 | 156.377 | 151 | 113 | Glucosamine 6-phosphate N-acetyltransferase          |
| Locus_964_Transcript_2/2_Conf_1.000  | 972  | 20 | 4.25E-36  | XP_001897844.1 | 74 | 156.377 | 151 | 113 | Glucosamine 6-phosphate N-acetyltransferase          |
| Locus_9640_Transcript_1/1_Conf_1.000 | 250  | 0  |           |                |    |         |     |     |                                                      |
| Locus_9641_Transcript_1/1_Conf_1.000 | 841  | 20 | 1.80E-82  | XP_002634238.1 | 76 | 310.071 | 289 | 221 | Hypothetical protein CBG01808                        |
| Locus_9642_Transcript_1/1_Conf_1.000 | 176  | 1  | 1.62E-04  | EFO21687.1     | 66 | 49.2914 | 48  | 32  | hypothetical protein LOAG_06803                      |
| Locus_9643_Transcript_1/2_Conf_1.000 | 245  | 0  |           |                |    |         |     |     |                                                      |
| Locus_9643_Transcript_2/2_Conf_1.000 | 444  | 0  |           |                |    |         |     |     |                                                      |
| Locus_9644_Transcript_1/1_Conf_1.000 | 589  | 20 | 3.42E-36  | XP_002635180.1 | 69 | 155.221 | 178 | 124 | Hypothetical protein CBG11418                        |

|                                      |      |    |           |                |    |         |     |     |                                |
|--------------------------------------|------|----|-----------|----------------|----|---------|-----|-----|--------------------------------|
| Locus_9645_Transcript_1/1_Conf_1.000 | 316  | 8  | 1.40E-11  | XP_002633387.1 | 51 | 72.7886 | 123 | 63  | C. briggsae CBR-TWK-25 protein |
| Locus_9646_Transcript_1/2_Conf_1.000 | 679  | 0  |           |                |    |         |     |     |                                |
| Locus_9646_Transcript_2/2_Conf_1.000 | 859  | 0  |           |                |    |         |     |     |                                |
| Locus_9647_Transcript_1/1_Conf_1.000 | 368  | 2  | 5.92E-07  | NP_741438.1    | 63 | 57.3806 | 52  | 33  | hypothetical protein D2024.5   |
| Locus_9648_Transcript_1/4_Conf_0.600 | 1629 | 20 | 9.86E-152 | EFO20351.1     | 69 | 541.576 | 553 | 384 | phosphatidylinositol 3         |
| Locus_9648_Transcript_2/4_Conf_0.700 | 2415 | 20 | 0         | EFO20351.1     | 64 | 692.575 | 803 | 518 | phosphatidylinositol 3         |
| Locus_9648_Transcript_3/4_Conf_0.700 | 2415 | 20 | 0         | EFO20351.1     | 64 | 693.73  | 803 | 518 | phosphatidylinositol 3         |

|                                      |      |    |           |                |    |         |     |     |                                                            |
|--------------------------------------|------|----|-----------|----------------|----|---------|-----|-----|------------------------------------------------------------|
| Locus_9648_Transcript_4/4_Conf_0.700 | 2415 | 20 | 0         | EFO20351.1     | 64 | 692.189 | 803 | 518 | phosphatidylinositol 3                                     |
| Locus_9649_Transcript_1/1_Conf_1.000 | 246  | 4  | 2.10E-20  | XP_002644999.1 | 75 | 102.064 | 83  | 63  | C. briggsae CBR-PGP-10 protein                             |
| Locus_965_Transcript_1/1_Conf_1.000  | 1000 | 20 | 4.24E-95  | ACS48688.1     | 96 | 352.443 | 314 | 304 | NADH dehydrogenase subunit 1                               |
| Locus_9650_Transcript_1/2_Conf_1.000 | 1676 | 17 | 4.11E-76  | NP_497189.2    | 76 | 290.426 | 302 | 230 | GEX Interacting protein family member (gei-4)              |
| Locus_9650_Transcript_2/2_Conf_1.000 | 1649 | 17 | 4.02E-76  | NP_497189.2    | 76 | 290.426 | 302 | 230 | GEX Interacting protein family member (gei-4)              |
| Locus_9651_Transcript_1/1_Conf_1.000 | 1374 | 20 | 7.73E-107 | XP_002037129.1 | 71 | 392.119 | 363 | 261 | GM12747                                                    |
| Locus_9652_Transcript_1/1_Conf_1.000 | 221  | 0  |           |                |    |         |     |     |                                                            |
| Locus_9653_Transcript_1/1_Conf_1.000 | 520  | 3  | 4.87E-21  | NP_001023671.1 | 67 | 104.375 | 159 | 108 | hypothetical protein C24B9.3                               |
| Locus_9654_Transcript_1/1_Conf_1.000 | 830  | 20 | 9.21E-108 | XP_001896104.1 | 82 | 394.045 | 280 | 232 | RNA lariat debranching enzyme                              |
| Locus_9655_Transcript_1/1_Conf_1.000 | 489  | 4  | 2.61E-18  | NP_001021055.1 | 57 | 95.1301 | 172 | 99  | EYA (Drosophila eyes absent) homolog family member (eya-1) |
| Locus_9656_Transcript_1/1_Conf_1.000 | 163  | 0  |           |                |    |         |     |     |                                                            |
| Locus_9657_Transcript_1/1_Conf_1.000 | 202  | 0  |           |                |    |         |     |     |                                                            |

|                                      |      |    |          |                |    |         |     |     |                                |
|--------------------------------------|------|----|----------|----------------|----|---------|-----|-----|--------------------------------|
| Locus_9658_Transcript_1/1_Conf_1.000 | 265  | 0  |          |                |    |         |     |     |                                |
| Locus_9659_Transcript_1/2_Conf_1.000 | 332  | 0  |          |                |    |         |     |     |                                |
| Locus_9659_Transcript_2/2_Conf_1.000 | 346  | 0  |          |                |    |         |     |     |                                |
| Locus_966_Transcript_1/2_Conf_1.000  | 755  | 20 | 8.33E-54 | NP_496228.1    | 77 | 214.542 | 133 | 103 | hypothetical protein C07E3.9   |
| Locus_966_Transcript_2/2_Conf_1.000  | 759  | 20 | 8.47E-54 | NP_496228.1    | 77 | 214.542 | 133 | 103 | hypothetical protein C07E3.9   |
| Locus_9660_Transcript_1/1_Conf_1.000 | 1187 | 20 | 0        | XP_003108860.1 | 90 | 659.448 | 395 | 358 | hypothetical protein CRE_11716 |
| Locus_9661_Transcript_1/1_Conf_1.000 | 1056 | 5  | 2.05E-18 | NP_495603.1    | 62 | 97.8265 | 166 | 103 | hypothetical protein F18A1.6   |

|                                      |      |    |           |                |    |         |     |     |                                                    |
|--------------------------------------|------|----|-----------|----------------|----|---------|-----|-----|----------------------------------------------------|
| Locus_9662_Transcript_1/1_Conf_1.000 | 1439 | 20 | 4.75E-139 | NP_497918.1    | 70 | 499.204 | 455 | 321 | UDP-GlucuronosylTransferase family member (ugt-62) |
| Locus_9663_Transcript_1/1_Conf_1.000 | 425  | 0  |           |                |    |         |     |     |                                                    |
| Locus_9664_Transcript_1/1_Conf_1.000 | 218  | 0  |           |                |    |         |     |     |                                                    |
| Locus_9665_Transcript_1/1_Conf_1.000 | 390  | 4  | 4.52E-23  | NP_510548.2    | 68 | 110.923 | 133 | 91  | hypothetical protein F39D8.3                       |
| Locus_9666_Transcript_1/1_Conf_1.000 | 1179 | 20 | 1.29E-112 | NP_491479.2    | 72 | 410.994 | 370 | 268 | ACyltransferase-like family member (acl-11)        |
| Locus_9667_Transcript_1/1_Conf_1.000 | 707  | 4  | 1.10E-17  | XP_002637263.1 | 51 | 94.3597 | 248 | 128 | Hypothetical protein CBG18943                      |
| Locus_9668_Transcript_1/1_Conf_1.000 | 1196 | 20 | 4.51E-121 | EFO25561.1     | 86 | 439.113 | 307 | 265 | RhoGAP domain-containing protein                   |
| Locus_9669_Transcript_1/1_Conf_1.000 | 1413 | 6  | 1.82E-18  |                | 42 | 98.5969 | 380 | 161 | hypothetical protein EEED8.1                       |
| Locus_967_Transcript_1/1_Conf_1.000  | 850  | 20 | 1.38E-138 | XP_002636769.1 | 95 | 496.508 | 263 | 251 | C. briggsae CBR-EGL-10 protein                     |
| Locus_9670_Transcript_1/1_Conf_1.000 | 935  | 20 | 1.92E-38  | XP_002641105.1 | 56 | 164.081 | 238 | 135 | Hypothetical protein CBG17486                      |
| Locus_9671_Transcript_1/2_Conf_1.000 | 576  | 20 | 1.28E-64  | XP_002639248.1 | 83 | 249.595 | 173 | 144 | C. briggsae CBR-SUR-6 protein                      |
| Locus_9671_Transcript_2/2_Conf_1.000 | 582  | 20 | 1.32E-64  | XP_002639248.1 | 83 | 249.595 | 173 | 144 | C. briggsae CBR-SUR-6 protein                      |

|                                      |      |    |           |                |     |         |     |     |                                                                     |
|--------------------------------------|------|----|-----------|----------------|-----|---------|-----|-----|---------------------------------------------------------------------|
| Locus_9672_Transcript_1/1_Conf_1.000 | 353  | 20 | 1.47E-45  | NP_001024761.1 | 83  | 185.652 | 118 | 98  | ForKHead transcription factor family member (fkh-9)                 |
| Locus_9673_Transcript_1/1_Conf_1.000 | 394  | 20 | 2.28E-62  | XP_002629875.1 | 95  | 241.506 | 131 | 125 | C. briggsae CBR-LET-75 protein                                      |
| Locus_9674_Transcript_1/2_Conf_1.000 | 658  | 16 | 6.83E-24  | NP_493670.2    | 86  | 114.775 | 80  | 69  | hypothetical protein T25D3.4                                        |
| Locus_9674_Transcript_2/2_Conf_1.000 | 254  | 16 | 3.23E-24  | NP_493670.2    | 86  | 114.775 | 80  | 69  | hypothetical protein T25D3.4                                        |
| Locus_9675_Transcript_1/1_Conf_1.000 | 252  | 20 | 2.65E-26  | NP_741109.1    | 79  | 121.709 | 83  | 66  | FERM domain (protein4.1-ezrin-radixin-moesin) family member (frm-8) |
| Locus_9676_Transcript_1/1_Conf_1.000 | 248  | 20 | 5.90E-31  | XP_002923900.1 | 100 | 137.117 | 67  | 67  | PREDICTED: 60S ribosomal protein L22-like                           |
| Locus_9677_Transcript_1/1_Conf_1.000 | 853  | 5  | 4.96E-19  | NP_001022203.1 | 48  | 99.3673 | 326 | 157 | hypothetical protein F54D5.5                                        |
| Locus_9678_Transcript_1/1_Conf_1.000 | 1273 | 20 | 3.73E-161 | NP_494737.1    | 81  | 572.392 | 438 | 355 | Temporarily Assigned Gene name family member (tag-149)              |

|                                      |      |    |           |                |     |         |     |     |                                                    |
|--------------------------------------|------|----|-----------|----------------|-----|---------|-----|-----|----------------------------------------------------|
| Locus_9679_Transcript_1/1_Conf_1.000 | 630  | 0  |           |                |     |         |     |     |                                                    |
| Locus_968_Transcript_1/1_Conf_1.000  | 243  | 0  |           |                |     |         |     |     |                                                    |
| Locus_9680_Transcript_1/1_Conf_1.000 | 872  | 0  |           |                |     |         |     |     |                                                    |
| Locus_9681_Transcript_1/2_Conf_1.000 | 431  | 0  |           |                |     |         |     |     |                                                    |
| Locus_9681_Transcript_2/2_Conf_1.000 | 431  | 0  |           |                |     |         |     |     |                                                    |
| Locus_9682_Transcript_1/1_Conf_1.000 | 652  | 0  |           |                |     |         |     |     |                                                    |
| Locus_9683_Transcript_1/1_Conf_1.000 | 747  | 2  | 2.28E-19  | XP_002636542.1 | 72  | 100.138 | 97  | 70  | C. briggsae CBR-TLL-5 protein                      |
| Locus_9684_Transcript_1/1_Conf_1.000 | 997  | 20 | 4.46E-20  | EFO17367.1     | 81  | 103.219 | 70  | 57  | hypothetical protein LOAG_11131                    |
| Locus_9685_Transcript_1/1_Conf_1.000 | 1352 | 20 | 3.27E-110 | EFO20721.1     | 69  | 403.29  | 444 | 310 | hypothetical protein LOAG_07768                    |
| Locus_9686_Transcript_1/1_Conf_1.000 | 288  | 20 | 1.04E-14  | XP_002642404.1 | 68  | 83.1889 | 86  | 59  | Hypothetical protein CBG06798                      |
| Locus_9687_Transcript_1/1_Conf_1.000 | 544  | 0  |           |                |     |         |     |     |                                                    |
| Locus_9688_Transcript_1/2_Conf_1.000 | 908  | 20 | 1.52E-85  | NP_001023017.1 | 73  | 320.472 | 300 | 221 | UNCoordinated family member (unc-32)               |
| Locus_9688_Transcript_2/2_Conf_1.000 | 902  | 20 | 6.70E-102 | NP_001023018.1 | 76  | 374.785 | 294 | 224 | UNCoordinated family member (unc-32)               |
| Locus_9689_Transcript_1/1_Conf_1.000 | 373  | 20 | 3.06E-67  | XP_002833943.1 | 100 | 257.684 | 124 | 124 | PREDICTED: 60S ribosomal protein L5-like isoform 2 |
| Locus_969_Transcript_1/1_Conf_1.000  | 473  | 0  |           |                |     |         |     |     |                                                    |
| Locus_9690_Transcript_1/2_Conf_1.000 | 455  | 0  |           |                |     |         |     |     |                                                    |
| Locus_9690_Transcript_2/2_Conf_1.000 | 407  | 0  |           |                |     |         |     |     |                                                    |
| Locus_9691_Transcript_1/1_Conf_1.000 | 559  | 20 | 4.26E-51  | ACZ13335.1     | 78  | 204.527 | 157 | 124 | 60S ribosomal protein L5                           |



|                                      |      |    |           |                |    |         |     |     |                                                    |
|--------------------------------------|------|----|-----------|----------------|----|---------|-----|-----|----------------------------------------------------|
| Locus_9692_Transcript_1/1_Conf_1.000 | 1401 | 20 | 7.57E-134 | NP_491994.2    | 75 | 481.871 | 470 | 355 | hypothetical protein H06O01.2                      |
| Locus_9693_Transcript_1/1_Conf_1.000 | 486  | 0  |           |                |    |         |     |     |                                                    |
| Locus_9694_Transcript_1/1_Conf_1.000 | 190  | 0  |           |                |    |         |     |     |                                                    |
| Locus_9695_Transcript_1/1_Conf_1.000 | 422  | 3  | 3.10E-19  | NP_741539.2    | 71 | 98.2117 | 110 | 79  | hypothetical protein C18C4.5                       |
| Locus_9696_Transcript_1/1_Conf_1.000 | 212  | 0  |           |                |    |         |     |     |                                                    |
| Locus_9697_Transcript_1/1_Conf_1.000 | 238  | 0  |           |                |    |         |     |     |                                                    |
| Locus_9698_Transcript_1/1_Conf_1.000 | 522  | 20 | 4.62E-43  | XP_002642541.1 | 73 | 177.563 | 173 | 127 | C. briggsae CBR-DNJ-16 protein                     |
| Locus_9699_Transcript_1/1_Conf_1.000 | 610  | 20 | 2.36E-62  | NP_001024672.1 | 72 | 242.276 | 204 | 147 | yeast SIR related family member (sir-2.2)          |
| Locus_97_Transcript_10/17_Conf_0.302 | 1213 | 20 | 3.19E-16  | ABB53347.1     | 40 | 68.9366 | 197 | 79  | secreted protein 5 precursor                       |
| Locus_97_Transcript_12/17_Conf_0.283 | 991  | 20 | 8.35E-12  | ABB53347.1     | 40 | 68.9366 | 197 | 79  | secreted protein 5 precursor                       |
| Locus_97_Transcript_13/17_Conf_0.302 | 943  | 20 | 4.52E-11  | AAN11402.1     | 42 | 73.1738 | 226 | 95  | secreted-protein 1 precursor                       |
| Locus_97_Transcript_14/17_Conf_0.321 | 1228 | 20 | 9.28E-16  | ABB53347.1     | 40 | 68.9366 | 197 | 79  | secreted protein 5 precursor                       |
| Locus_97_Transcript_15/17_Conf_0.377 | 1228 | 20 | 1.35E-13  | ABB53347.1     | 41 | 67.0106 | 153 | 63  | secreted protein 5 precursor                       |
| Locus_97_Transcript_16/17_Conf_0.170 | 678  | 20 | 1.57E-10  | AAO63577.1     | 40 | 70.4774 | 230 | 93  | secreted protein 5 precursor                       |
| Locus_97_Transcript_17/17_Conf_0.321 | 1228 | 20 | 3.64E-14  | ABB53347.1     | 40 | 68.9366 | 197 | 79  | secreted protein 5 precursor                       |
| Locus_97_Transcript_4/17_Conf_1.000  | 177  | 0  |           |                |    |         |     |     |                                                    |
| Locus_97_Transcript_5/17_Conf_1.000  | 130  | 0  |           |                |    |         |     |     |                                                    |
| Locus_97_Transcript_6/17_Conf_1.000  | 256  | 0  |           |                |    |         |     |     |                                                    |
| Locus_97_Transcript_7/17_Conf_1.000  | 207  | 0  |           |                |    |         |     |     |                                                    |
| Locus_97_Transcript_8/17_Conf_0.264  | 1212 | 20 | 3.58E-14  | ABB53347.1     | 40 | 68.9366 | 197 | 79  | secreted protein 5 precursor                       |
| Locus_97_Transcript_9/17_Conf_0.038  | 532  | 3  | 2.82E-06  | NP_491269.1    | 50 | 55.4546 | 114 | 57  | EGG sterile (unfertilizable) family member (egg-4) |
| Locus_970_Transcript_1/4_Conf_0.500  | 427  | 0  |           |                |    |         |     |     |                                                    |
| Locus_970_Transcript_2/4_Conf_0.667  | 527  | 0  |           |                |    |         |     |     |                                                    |
| Locus_970_Transcript_3/4_Conf_0.750  | 1161 | 20 | 5.24E-26  | XP_002633697.1 | 85 | 123.25  | 76  | 65  | Hypothetical protein CBG03380                      |
| Locus_970_Transcript_4/4_Conf_0.750  | 536  | 0  |           |                |    |         |     |     |                                                    |
| Locus_9700_Transcript_1/1_Conf_1.000 | 135  | 5  | 5.21E-11  | XP_002644341.1 | 76 | 70.8626 | 42  | 32  | Hypothetical protein CBG14163                      |

|                                      |      |    |           |                |     |         |     |     |                                                                         |
|--------------------------------------|------|----|-----------|----------------|-----|---------|-----|-----|-------------------------------------------------------------------------|
| Locus_9701_Transcript_1/1_Conf_1.000 | 146  | 20 | 1.12E-16  | XP_002639062.1 | 93  | 89.7373 | 48  | 45  | Hypothetical protein CBG14873                                           |
| Locus_9702_Transcript_1/1_Conf_1.000 | 414  | 4  | 5.00E-22  | XP_002632204.1 | 78  | 107.457 | 80  | 63  | Hypothetical protein CBG07071                                           |
| Locus_9703_Transcript_1/1_Conf_1.000 | 490  | 20 | 6.77E-67  | CAX65056.1     | 85  | 256.529 | 163 | 140 | C. elegans protein F25C8.3d, partially confirmed by transcript evidence |
| Locus_9704_Transcript_1/1_Conf_1.000 | 988  | 20 | 2.82E-43  | NP_493626.1    | 80  | 180.259 | 138 | 111 | hypothetical protein F31C3.4                                            |
| Locus_9705_Transcript_1/1_Conf_1.000 | 1002 | 1  | 9.11E-05  | XP_001900983.1 | 45  | 52.373  | 115 | 52  | La domain containing protein                                            |
| Locus_9706_Transcript_1/2_Conf_1.000 | 1525 | 14 | 3.84E-09  | NP_496398.2    | 41  | 67.781  | 376 | 156 | hypothetical protein T06D8.1                                            |
| Locus_9706_Transcript_2/2_Conf_1.000 | 1525 | 12 | 4.69E-07  | NP_496398.2    | 49  | 60.8474 | 212 | 105 | hypothetical protein T06D8.1                                            |
| Locus_9707_Transcript_1/1_Conf_1.000 | 729  | 20 | 3.27E-84  | NP_510603.1    | 77  | 315.464 | 241 | 186 | hypothetical protein F59F4.1                                            |
| Locus_9708_Transcript_1/1_Conf_1.000 | 758  | 20 | 2.02E-15  | XP_002129449.1 | 46  | 87.0409 | 235 | 110 | PREDICTED: hypothetical protein                                         |
| Locus_9709_Transcript_1/1_Conf_1.000 | 408  | 0  |           |                |     |         |     |     |                                                                         |
| Locus_971_Transcript_1/1_Conf_1.000  | 303  | 0  |           |                |     |         |     |     |                                                                         |
| Locus_9710_Transcript_1/1_Conf_1.000 | 661  | 20 | 2.13E-118 | XP_002748370.1 | 100 | 428.713 | 213 | 213 | PREDICTED: 40S ribosomal protein S3a-like                               |

|                                      |      |    |          |                |    |         |     |     |                                                                                |
|--------------------------------------|------|----|----------|----------------|----|---------|-----|-----|--------------------------------------------------------------------------------|
| Locus_9711_Transcript_1/1_Conf_1.000 | 311  | 6  | 7.70E-31 | AAT07449.1     | 90 | 136.732 | 82  | 74  | putative protein                                                               |
| Locus_9712_Transcript_1/1_Conf_1.000 | 269  | 20 | 2.35E-35 | NP_494721.1    | 92 | 151.754 | 89  | 82  | hypothetical protein R11F4.1                                                   |
| Locus_9713_Transcript_1/1_Conf_1.000 | 2331 | 20 | 3.65E-36 | CAN99691.2     | 47 | 158.303 | 416 | 196 | <i>C. elegans</i> protein F54B3.1b, partially confirmed by transcript evidence |
| Locus_9714_Transcript_1/1_Conf_1.000 | 380  | 20 | 2.89E-09 | XP_002739063.1 | 51 | 65.0846 | 119 | 61  | PREDICTED: Rho-GTPase-activating protein, putative-like                        |
| Locus_9715_Transcript_1/1_Conf_1.000 | 406  |    |          |                |    |         |     |     |                                                                                |
| Locus_9716_Transcript_1/2_Conf_1.000 | 1271 | 20 | 1.07E-91 | XP_002637127.1 | 83 | 341.658 | 255 | 212 | Hypothetical protein CBG09629                                                  |
| Locus_9716_Transcript_2/2_Conf_1.000 | 902  | 20 | 6.28E-92 | XP_002637127.1 | 83 | 341.658 | 255 | 212 | Hypothetical protein CBG09629                                                  |
| Locus_9717_Transcript_1/1_Conf_1.000 | 629  | 20 | 1.60E-16 | EFO25022.1     | 80 | 90.1225 | 65  | 52  | hypothetical protein LOAG_03465                                                |
| Locus_9718_Transcript_1/1_Conf_1.000 | 166  | 20 | 1.80E-19 | NP_504235.2    | 94 | 98.9821 | 55  | 52  | <i>Drosophila</i> SOS homolog family member ( <i>sos-1</i> )                   |
| Locus_9719_Transcript_1/1_Conf_1.000 | 310  | 0  |          |                |    |         |     |     |                                                                                |
| Locus_972_Transcript_1/1_Conf_1.000  | 592  | 0  |          |                |    |         |     |     |                                                                                |
| Locus_9720_Transcript_1/1_Conf_1.000 | 267  | 18 | 9.29E-08 | YP_001531603.1 | 65 | 60.077  | 60  | 39  | putative Acyl-CoA synthetases (AMP-forming)/AMP-acid ligases II                |
| Locus_9721_Transcript_1/1_Conf_1.000 | 235  | 20 | 4.17E-08 | XP_001896983.1 | 65 | 61.2326 | 58  | 38  | small nuclear ribonucleoprotein                                                |

|                                      |      |    |          |                |    |         |     |     |                                                                    |
|--------------------------------------|------|----|----------|----------------|----|---------|-----|-----|--------------------------------------------------------------------|
| Locus_9722_Transcript_1/2_Conf_1.000 | 1227 | 2  | 7.02E-08 | NP_500719.1    | 42 | 63.1586 | 251 | 106 | hypothetical protein C02B10.5                                      |
| Locus_9722_Transcript_2/2_Conf_1.000 | 632  | 2  | 8.04E-08 | XP_002633911.1 | 57 | 61.2326 | 109 | 63  | Hypothetical protein CBG19977                                      |
| Locus_9723_Transcript_1/1_Conf_1.000 | 478  | 20 | 4.55E-15 | EFO25858.1     | 46 | 84.3445 | 167 | 77  | low-density lipoprotein receptor repeat class B containing protein |
| Locus_9724_Transcript_1/2_Conf_1.000 | 1091 | 3  | 9.63E-27 | NP_491750.3    | 47 | 125.561 | 380 | 180 | hypothetical protein C27A12.9                                      |
| Locus_9724_Transcript_2/2_Conf_1.000 | 1038 | 3  | 2.02E-15 | EFO24581.1     | 44 | 63.5438 | 205 | 92  | hypothetical protein LOAG_03903                                    |
| Locus_9725_Transcript_1/1_Conf_1.000 | 418  | 9  | 2.07E-55 | NP_493641.2    | 88 | 218.394 | 138 | 122 | hypothetical protein F23F1.2                                       |
| Locus_9726_Transcript_1/1_Conf_1.000 | 342  | 20 | 9.40E-16 | XP_001892364.1 | 62 | 86.6557 | 114 | 71  | Helix-hairpin-helix motif family protein                           |
| Locus_9727_Transcript_1/1_Conf_1.000 | 863  | 0  |          |                |    |         |     |     |                                                                    |
| Locus_9728_Transcript_1/1_Conf_1.000 | 744  | 20 | 3.44E-68 | NP_508994.1    | 69 | 262.307 | 253 | 176 | abnormal cell MIGration family member (mig-23)                     |
| Locus_9729_Transcript_1/2_Conf_1.000 | 770  | 4  | 9.03E-35 | XP_002631099.1 | 55 | 151.369 | 256 | 141 | C. briggsae CBR-OOC-3 protein                                      |
| Locus_9729_Transcript_2/2_Conf_1.000 | 731  | 4  | 3.55E-30 | XP_002631099.1 | 53 | 135.961 | 242 | 130 | C. briggsae CBR-OOC-3 protein                                      |

|                                      |      |    |           |                |    |         |     |     |                                                                  |
|--------------------------------------|------|----|-----------|----------------|----|---------|-----|-----|------------------------------------------------------------------|
| Locus_973_Transcript_1/1_Conf_1.000  | 1097 | 20 | 1.99E-80  | NP_505829.1    | 92 | 303.908 | 175 | 161 | ATP synthase subunit family member (atp-5)                       |
| Locus_9730_Transcript_1/4_Conf_0.700 | 1245 | 20 | 6.94E-120 | XP_001896847.1 | 77 | 435.261 | 352 | 273 | Activator 1 38 kDa subunit (Replication factor C 38 kDa subunit) |
| Locus_9730_Transcript_2/4_Conf_0.700 | 1245 | 20 | 6.94E-120 | XP_001896847.1 | 77 | 435.261 | 352 | 273 | Activator 1 38 kDa subunit (Replication factor C 38 kDa subunit) |
| Locus_9730_Transcript_3/4_Conf_0.700 | 1245 | 20 | 6.94E-120 | XP_001896847.1 | 77 | 435.261 | 352 | 273 | Activator 1 38 kDa subunit (Replication factor C 38 kDa subunit) |

|                                      |      |    |           |                |    |         |     |     |                                                                  |
|--------------------------------------|------|----|-----------|----------------|----|---------|-----|-----|------------------------------------------------------------------|
| Locus_9730_Transcript_4/4_Conf_0.700 | 1245 | 20 | 6.94E-120 | XP_001896847.1 | 77 | 435.261 | 352 | 273 | Activator 1 38 kDa subunit (Replication factor C 38 kDa subunit) |
| Locus_9731_Transcript_1/1_Conf_1.000 | 1189 | 20 | 5.34E-90  | NP_001022020.1 | 68 | 335.88  | 398 | 274 | PeRoXisome assembly factor family member (prx-5)                 |
| Locus_9732_Transcript_1/1_Conf_1.000 | 326  | 6  | 6.67E-06  | EFO27165.1     | 48 | 53.9138 | 95  | 46  | hypothetical protein LOAG_01310                                  |
| Locus_9733_Transcript_1/2_Conf_1.000 | 1078 | 20 | 1.19E-29  | EFO18262.1     | 68 | 135.191 | 122 | 83  | hypothetical protein LOAG_10233                                  |
| Locus_9733_Transcript_2/2_Conf_1.000 | 1021 | 20 | 1.10E-29  | EFO18262.1     | 68 | 135.191 | 122 | 83  | hypothetical protein LOAG_10233                                  |
| Locus_9734_Transcript_1/1_Conf_1.000 | 306  | 20 | 4.53E-31  | NP_505629.2    | 83 | 137.502 | 101 | 84  | abnormal DAuer Formation family member (daf-36)                  |
| Locus_9735_Transcript_1/1_Conf_1.000 | 1057 | 20 | 3.80E-73  | XP_001893036.1 | 78 | 279.641 | 232 | 181 | SMC family, C-terminal domain containing protein                 |
| Locus_9736_Transcript_1/1_Conf_1.000 | 1040 | 2  | 1.38E-11  | XP_002632825.1 | 41 | 75.0998 | 278 | 115 | Hypothetical protein CBG15012                                    |
| Locus_9737_Transcript_1/2_Conf_1.000 | 1587 | 1  | 3.90E-04  | CBK22679.2     | 40 | 51.2174 | 362 | 146 | unnamed protein product                                          |
| Locus_9737_Transcript_2/2_Conf_1.000 | 720  | 0  |           |                |    |         |     |     |                                                                  |
| Locus_9738_Transcript_1/1_Conf_1.000 | 511  | 3  | 2.59E-08  | XP_002636261.1 | 54 | 62.003  | 124 | 67  | C. briggsae CBR-LIN-25 protein                                   |
| Locus_9739_Transcript_1/1_Conf_1.000 | 501  | 0  |           |                |    |         |     |     |                                                                  |
| Locus_974_Transcript_1/1_Conf_1.000  | 1069 | 4  | 3.08E-46  | XP_001901375.1 | 66 | 190.274 | 215 | 143 | hypothetical protein Bm1_49545                                   |

|                                      |     |    |          |                |    |         |     |     |                                                                                                                |
|--------------------------------------|-----|----|----------|----------------|----|---------|-----|-----|----------------------------------------------------------------------------------------------------------------|
| Locus_9740_Transcript_1/1_Conf_1.000 | 762 | 20 | 1.12E-37 | Q94125.6       | 78 | 160.999 | 122 | 96  | Phosphatidylinositol 3-kinase age-1                                                                            |
| Locus_9741_Transcript_1/1_Conf_1.000 | 253 | 0  |          |                |    |         |     |     |                                                                                                                |
| Locus_9742_Transcript_1/1_Conf_1.000 | 680 | 20 | 6.94E-67 | NP_509174.1    | 77 | 257.684 | 188 | 146 | hypothetical protein C16E9.2                                                                                   |
| Locus_9743_Transcript_1/1_Conf_1.000 | 743 | 0  |          |                |    |         |     |     |                                                                                                                |
| Locus_9744_Transcript_1/1_Conf_1.000 | 613 | 20 | 8.32E-23 | XP_001641064.1 | 64 | 110.923 | 117 | 75  | predicted protein                                                                                              |
| Locus_9745_Transcript_1/1_Conf_1.000 | 299 | 20 | 2.42E-48 | A8XQD5.2       | 96 | 194.897 | 99  | 96  | Serine/threonine-protein kinase dkf-2                                                                          |
| Locus_9746_Transcript_1/1_Conf_1.000 | 428 | 0  |          |                |    |         |     |     |                                                                                                                |
| Locus_9747_Transcript_1/1_Conf_1.000 | 423 | 20 | 2.35E-51 | XP_396773.2    | 80 | 204.912 | 140 | 113 | PREDICTED: similar to Probable phospholipid-transporting ATPase ID (ATPase class I type 8B member 2) isoform 1 |
| Locus_9748_Transcript_1/1_Conf_1.000 | 486 | 20 | 2.80E-20 | EFO28285.1     | 75 | 101.679 | 80  | 60  | hypothetical protein LOAG_00209                                                                                |
| Locus_9749_Transcript_1/2_Conf_1.000 | 376 | 2  | 7.13E-16 | EFO20991.1     | 61 | 87.0409 | 109 | 67  | hypothetical protein LOAG_07497                                                                                |
| Locus_9749_Transcript_2/2_Conf_1.000 | 848 | 2  | 4.14E-18 | EFO20991.1     | 51 | 96.2857 | 252 | 129 | hypothetical protein LOAG_07497                                                                                |
| Locus_975_Transcript_1/1_Conf_1.000  | 212 | 13 | 9.49E-13 | CAA26849.1     | 76 | 76.6406 | 64  | 49  | put. vitellogenin                                                                                              |

|                                      |     |    |          |                |    |         |     |     |                                                                                       |
|--------------------------------------|-----|----|----------|----------------|----|---------|-----|-----|---------------------------------------------------------------------------------------|
| Locus_9750_Transcript_1/3_Conf_0.667 | 769 | 20 | 3.73E-89 | NP_491654.1    | 80 | 332.028 | 248 | 199 | CIR (transcription factor CBF1 Interacting coRepressor) homolog family member (cir-1) |
| Locus_9750_Transcript_2/3_Conf_0.667 | 769 | 20 | 2.41E-96 | NP_491654.1    | 80 | 355.91  | 248 | 199 | CIR (transcription factor CBF1 Interacting coRepressor) homolog family member (cir-1) |
| Locus_9750_Transcript_3/3_Conf_0.667 | 769 | 20 | 3.73E-89 | NP_491654.1    | 80 | 332.028 | 248 | 199 | CIR (transcription factor CBF1 Interacting coRepressor) homolog family member (cir-1) |
| Locus_9751_Transcript_1/1_Conf_1.000 | 497 | 20 | 2.72E-76 | XP_002629829.1 | 90 | 287.73  | 164 | 149 | C. briggsae CBR-PLC-3 protein                                                         |
| Locus_9752_Transcript_1/1_Conf_1.000 | 638 | 20 | 1.94E-49 | EFO26908.1     | 76 | 199.519 | 181 | 138 | hypothetical protein LOAG_01583                                                       |
| Locus_9753_Transcript_1/1_Conf_1.000 | 398 | 0  |          |                |    |         |     |     |                                                                                       |
| Locus_9754_Transcript_1/1_Conf_1.000 | 282 | 0  |          |                |    |         |     |     |                                                                                       |
| Locus_9755_Transcript_1/1_Conf_1.000 | 584 | 20 | 1.24E-62 | XP_002636962.1 | 78 | 243.047 | 195 | 153 | C. briggsae CBR-MAX-1 protein                                                         |
| Locus_9756_Transcript_1/1_Conf_1.000 | 299 | 1  | 8.70E-06 | AAF59456.4     | 58 | 53.5286 | 73  | 43  | Smg-associated and lethal protein 2, partially confirmed by transcript evidence       |



|                                      |      |    |           |                |     |         |     |     |                                                                         |
|--------------------------------------|------|----|-----------|----------------|-----|---------|-----|-----|-------------------------------------------------------------------------|
| Locus_9757_Transcript_1/1_Conf_1.000 | 288  | 20 | 1.50E-13  | XP_002761974.1 | 100 | 79.337  | 37  | 37  | PREDICTED: coatomer subunit epsilon-like                                |
| Locus_9758_Transcript_1/1_Conf_1.000 | 446  | 20 | 4.05E-11  | NP_001040712.1 | 90  | 71.2478 | 60  | 54  | hypothetical protein Y73E7A.1                                           |
| Locus_9759_Transcript_1/1_Conf_1.000 | 245  | 0  |           |                |     |         |     |     |                                                                         |
| Locus_976_Transcript_1/3_Conf_0.667  | 1552 | 20 | 0         | ACS29571.1     | 99  | 796.579 | 427 | 426 | beta-tubulin isotype 2                                                  |
| Locus_976_Transcript_2/3_Conf_0.667  | 1656 | 20 | 0         | AAP20435.1     | 97  | 820.461 | 455 | 444 | beta-tubulin isotype 2                                                  |
| Locus_976_Transcript_3/3_Conf_0.667  | 1638 | 20 | 0         | AAP20435.1     | 98  | 827.009 | 449 | 444 | beta-tubulin isotype 2                                                  |
| Locus_9760_Transcript_1/2_Conf_1.000 | 839  | 20 | 5.62E-44  | CBW48423.1     | 82  | 182.185 | 134 | 111 | Hypothetical protein M04G12.1d                                          |
| Locus_9760_Transcript_2/2_Conf_1.000 | 742  | 20 | 4.48E-44  | CBW48423.1     | 82  | 182.185 | 134 | 111 | Hypothetical protein M04G12.1d                                          |
| Locus_9761_Transcript_1/1_Conf_1.000 | 213  | 3  | 4.54E-15  | NP_504167.1    | 95  | 84.3445 | 48  | 46  | hypothetical protein H43I07.1                                           |
| Locus_9762_Transcript_1/1_Conf_1.000 | 724  | 20 | 1.88E-92  | NP_502613.2    | 81  | 342.813 | 241 | 196 | QUInine non-avoider family member (qui-1)                               |
| Locus_9763_Transcript_1/1_Conf_1.000 | 478  | 5  | 4.53E-31  | CAR97841.1     | 77  | 137.502 | 130 | 101 | C. elegans protein F59A2.2b, partially confirmed by transcript evidence |
| Locus_9764_Transcript_1/1_Conf_1.000 | 856  | 20 | 1.72E-128 | CAE11873.1     | 100 | 462.996 | 239 | 239 | hypothetical protein                                                    |

|                                      |      |    |          |                |    |         |     |     |                                                                         |
|--------------------------------------|------|----|----------|----------------|----|---------|-----|-----|-------------------------------------------------------------------------|
| Locus_9765_Transcript_1/1_Conf_1.000 | 799  | 20 | 1.46E-30 | XP_001898119.1 | 55 | 137.502 | 277 | 153 | Surp module family protein                                              |
| Locus_9766_Transcript_1/1_Conf_1.000 | 407  | 0  |          |                |    |         |     |     |                                                                         |
| Locus_9767_Transcript_1/1_Conf_1.000 | 157  | 20 | 3.79E-17 | ACI48997.1     | 90 | 91.2781 | 52  | 47  | hypothetical protein Cbre_JD01.004                                      |
| Locus_9768_Transcript_1/1_Conf_1.000 | 1087 |    |          |                |    |         |     |     |                                                                         |
| Locus_9769_Transcript_1/1_Conf_1.000 | 284  | 0  |          |                |    |         |     |     |                                                                         |
| Locus_977_Transcript_1/1_Conf_1.000  | 2402 | 20 | 0        | XP_002643773.1 | 89 | 1281.93 | 802 | 715 | Hypothetical protein CBG01975                                           |
| Locus_9770_Transcript_1/1_Conf_1.000 | 154  | 0  |          |                |    |         |     |     |                                                                         |
| Locus_9771_Transcript_1/1_Conf_1.000 | 916  | 20 | 1.83E-70 | NP_496339.1    | 67 | 270.396 | 308 | 209 | ORC family member (orc-2)                                               |
| Locus_9772_Transcript_1/2_Conf_1.000 | 496  | 20 | 5.90E-47 | CBA11613.1     | 73 | 190.274 | 136 | 100 | C. elegans protein F54F3.1c, partially confirmed by transcript evidence |
| Locus_9772_Transcript_2/2_Conf_1.000 | 481  | 20 | 3.43E-47 | CBA11613.1     | 74 | 191.045 | 132 | 98  | C. elegans protein F54F3.1c, partially confirmed by transcript evidence |
| Locus_9773_Transcript_1/1_Conf_1.000 | 187  | 0  |          |                |    |         |     |     |                                                                         |
| Locus_9774_Transcript_1/1_Conf_1.000 | 361  | 20 | 4.54E-31 | XP_002639522.1 | 86 | 137.502 | 82  | 71  | Hypothetical protein CBG04128                                           |
| Locus_9775_Transcript_1/1_Conf_1.000 | 988  | 20 | 1.72E-16 | XP_002645247.1 | 55 | 91.2781 | 204 | 113 | Hypothetical protein CBG00124                                           |
| Locus_9776_Transcript_1/1_Conf_1.000 | 344  | 0  |          |                |    |         |     |     |                                                                         |
| Locus_9777_Transcript_1/1_Conf_1.000 | 195  | 4  | 1.88E-08 | Q22141.2       | 78 | 62.3882 | 47  | 37  | Post-GPI attachment to proteins factor 2                                |

|                                      |      |    |           |                |    |         |     |     |                                        |
|--------------------------------------|------|----|-----------|----------------|----|---------|-----|-----|----------------------------------------|
| Locus_9778_Transcript_1/1_Conf_1.000 | 325  | 20 | 3.88E-38  | NP_504553.1    | 86 | 160.999 | 106 | 92  | Adenylyl Cyclase family member (acy-2) |
| Locus_9779_Transcript_1/1_Conf_1.000 | 403  | 0  |           |                |    |         |     |     |                                        |
| Locus_978_Transcript_1/4_Conf_0.333  | 1108 | 20 | 3.00E-116 | NP_491824.1    | 80 | 422.935 | 343 | 277 | IMportin Alpha family member (ima-2)   |
| Locus_978_Transcript_2/4_Conf_0.667  | 1725 | 20 | 2.34E-175 | NP_491824.1    | 79 | 620.157 | 514 | 411 | IMportin Alpha family member (ima-2)   |
| Locus_978_Transcript_3/4_Conf_0.667  | 1716 | 20 | 3.05E-175 | NP_491824.1    | 79 | 619.772 | 514 | 410 | IMportin Alpha family member (ima-2)   |
| Locus_978_Transcript_4/4_Conf_0.667  | 1725 | 20 | 2.34E-175 | NP_491824.1    | 79 | 620.157 | 514 | 411 | IMportin Alpha family member (ima-2)   |
| Locus_9780_Transcript_1/1_Conf_1.000 | 347  | 20 | 2.81E-28  | XP_002633391.1 | 68 | 128.257 | 111 | 76  | Hypothetical protein CBG06150          |
| Locus_9781_Transcript_1/1_Conf_1.000 | 366  | 4  | 2.03E-15  | NP_493592.1    | 74 | 85.5001 | 78  | 58  | hypothetical protein F32A7.4           |
| Locus_9782_Transcript_1/1_Conf_1.000 | 273  | 0  |           |                |    |         |     |     |                                        |
| Locus_9783_Transcript_1/1_Conf_1.000 | 195  | 0  |           |                |    |         |     |     |                                        |
| Locus_9784_Transcript_1/1_Conf_1.000 | 487  | 20 | 6.19E-44  | EFO16233.1     | 70 | 180.259 | 162 | 114 | variant SH3 domain-containing protein  |
| Locus_9785_Transcript_1/1_Conf_1.000 | 320  | 8  | 1.18E-18  | EFO18114.1     | 59 | 96.2857 | 116 | 69  | hypothetical protein LOAG_10384        |
| Locus_9786_Transcript_1/1_Conf_1.000 | 487  | 19 | 3.37E-66  | XP_002633478.1 | 84 | 254.218 | 164 | 139 | Hypothetical protein CBG06249          |

|                                      |      |    |          |                |    |         |     |     |                                            |
|--------------------------------------|------|----|----------|----------------|----|---------|-----|-----|--------------------------------------------|
| Locus_9787_Transcript_1/2_Conf_1.000 | 439  | 2  | 2.94E-06 | XP_001917324.1 | 50 | 55.0694 | 102 | 52  | PREDICTED: similar to proteoglycan 3       |
| Locus_9787_Transcript_2/2_Conf_1.000 | 506  | 20 | 2.15E-07 | P83514.1       | 52 | 58.9214 | 105 | 55  | Struthiocalcin-1                           |
| Locus_9788_Transcript_1/1_Conf_1.000 | 886  | 20 | 2.65E-87 | XP_002634120.1 | 86 | 326.25  | 205 | 178 | Hypothetical protein CBG01674              |
| Locus_9789_Transcript_1/1_Conf_1.000 | 798  | 20 | 5.04E-15 | NP_001033343.1 | 45 | 85.8853 | 210 | 96  | hypothetical protein B0336.5               |
| Locus_979_Transcript_1/1_Conf_1.000  | 2563 | 20 | 2.92E-26 | XP_002639167.1 | 54 | 125.561 | 207 | 112 | C. briggsae CBR-HSR-9 protein              |
| Locus_9790_Transcript_1/1_Conf_1.000 | 775  | 0  |          |                |    |         |     |     |                                            |
| Locus_9791_Transcript_1/1_Conf_1.000 | 959  | 20 | 1.66E-69 | NP_492749.2    | 74 | 267.314 | 316 | 234 | abnormal CHEmotaxis family member (che-13) |
| Locus_9792_Transcript_1/1_Conf_1.000 | 1139 | 0  |          |                |    |         |     |     |                                            |
| Locus_9793_Transcript_1/1_Conf_1.000 | 308  | 5  | 4.41E-10 | XP_002641150.1 | 62 | 67.781  | 90  | 56  | Hypothetical protein CBG09002              |
| Locus_9794_Transcript_1/1_Conf_1.000 | 486  | 0  |          |                |    |         |     |     |                                            |
| Locus_9795_Transcript_1/1_Conf_1.000 | 314  | 20 | 3.01E-38 | XP_002646356.1 | 84 | 161.384 | 103 | 87  | Hypothetical protein CBG12070              |
| Locus_9796_Transcript_1/1_Conf_1.000 | 162  | 20 | 5.63E-13 | NP_492483.1    | 82 | 77.411  | 50  | 41  | hypothetical protein F26H9.5               |
| Locus_9797_Transcript_1/2_Conf_1.000 | 991  | 0  |          |                |    |         |     |     |                                            |
| Locus_9797_Transcript_2/2_Conf_1.000 | 976  | 0  |          |                |    |         |     |     |                                            |
| Locus_9798_Transcript_1/1_Conf_1.000 | 488  | 20 | 6.61E-46 | NP_504486.4    | 82 | 186.808 | 139 | 115 | Adenylyl CYclase family member (acy-4)     |

|                                      |      |    |          |                |    |         |     |     |                                                      |
|--------------------------------------|------|----|----------|----------------|----|---------|-----|-----|------------------------------------------------------|
| Locus_9799_Transcript_1/1_Conf_1.000 | 474  | 20 | 4.98E-62 | XP_002644184.1 | 95 | 240.35  | 141 | 134 | C. briggsae CBR-ERD-2 protein                        |
| Locus_98_Transcript_1/2_Conf_1.000   | 251  | 0  |          |                |    |         |     |     |                                                      |
| Locus_98_Transcript_2/2_Conf_1.000   | 251  | 0  |          |                |    |         |     |     |                                                      |
| Locus_980_Transcript_1/1_Conf_1.000  | 3160 | 20 | 4.48E-56 | XP_001896046.1 | 61 | 224.942 | 247 | 152 | mbt repeat family protein                            |
| Locus_9800_Transcript_1/1_Conf_1.000 | 333  | 6  | 1.73E-22 | EFO27944.1     | 72 | 108.997 | 83  | 60  | PWWP domain-containing protein                       |
| Locus_9801_Transcript_1/1_Conf_1.000 | 515  | 20 | 2.59E-88 | XP_002644330.1 | 98 | 327.791 | 171 | 169 | C. briggsae CBR-SPC-1 protein                        |
| Locus_9802_Transcript_1/1_Conf_1.000 | 149  | 0  |          |                |    |         |     |     |                                                      |
| Locus_9803_Transcript_1/1_Conf_1.000 | 320  | 6  | 7.67E-10 | NP_501124.1    | 58 | 67.0106 | 85  | 50  | hypothetical protein C34D4.3                         |
| Locus_9804_Transcript_1/1_Conf_1.000 | 479  | 3  | 1.16E-10 | NP_491340.2    | 52 | 69.707  | 119 | 62  | histone METHyltransferase-like family member (met-1) |
| Locus_9805_Transcript_1/1_Conf_1.000 | 1547 | 20 | 9.40E-64 | NP_493980.1    | 51 | 249.21  | 517 | 268 | hypothetical protein H17B01.4                        |
| Locus_9806_Transcript_1/1_Conf_1.000 | 693  | 20 | 5.45E-46 | XP_002640726.1 | 99 | 188.348 | 146 | 145 | C. briggsae CBR-LEV-11 protein, isoform a            |
| Locus_9807_Transcript_1/1_Conf_1.000 | 131  | 0  |          |                |    |         |     |     |                                                      |

|                                      |      |    |           |                |    |         |     |     |                                          |
|--------------------------------------|------|----|-----------|----------------|----|---------|-----|-----|------------------------------------------|
| Locus_9808_Transcript_1/1_Conf_1.000 | 198  | 2  | 1.34E-06  | BAA09730.1     | 60 | 56.225  | 65  | 39  | receptor tyrosine kinase                 |
| Locus_9809_Transcript_1/1_Conf_1.000 | 356  | 2  | 9.60E-05  | A8WL06.2       | 61 | 50.0618 | 57  | 35  | Homeobox protein unc-62                  |
| Locus_981_Transcript_1/1_Conf_1.000  | 1114 | 2  | 2.01E-27  | XP_002636560.1 | 85 | 127.872 | 74  | 63  | Hypothetical protein CBG23251            |
| Locus_9810_Transcript_1/1_Conf_1.000 | 625  | 11 | 1.65E-74  | NP_498645.1    | 79 | 282.722 | 206 | 163 | MUscle Positioning family member (mup-4) |
| Locus_9811_Transcript_1/1_Conf_1.000 | 357  | 20 | 1.68E-25  | XP_002644857.1 | 61 | 119.013 | 118 | 72  | Hypothetical protein CBG05030            |
| Locus_9812_Transcript_1/2_Conf_1.000 | 2153 | 20 | 7.13E-164 | XP_001900316.1 | 60 | 582.408 | 738 | 443 | GATA zinc finger family protein          |
| Locus_9812_Transcript_2/2_Conf_1.000 | 2153 | 20 | 7.13E-164 | XP_001900316.1 | 60 | 582.408 | 738 | 443 | GATA zinc finger family protein          |
| Locus_9813_Transcript_1/1_Conf_1.000 | 677  | 20 | 9.94E-58  | NP_496281.1    | 77 | 227.254 | 177 | 138 | hypothetical protein C14A4.14            |
| Locus_9814_Transcript_1/1_Conf_1.000 | 321  | 2  | 2.53E-29  | NP_500597.1    | 69 | 131.724 | 105 | 73  | hypothetical protein F19C7.1             |
| Locus_9815_Transcript_1/1_Conf_1.000 | 195  | 0  |           |                |    |         |     |     |                                          |
| Locus_9816_Transcript_1/1_Conf_1.000 | 932  | 0  |           |                |    |         |     |     |                                          |
| Locus_9817_Transcript_1/1_Conf_1.000 | 292  | 0  |           |                |    |         |     |     |                                          |
| Locus_9818_Transcript_1/1_Conf_1.000 | 657  | 20 | 1.02E-11  | XP_001901150.1 | 48 | 74.3294 | 178 | 87  | topoisomerase                            |
| Locus_9819_Transcript_1/1_Conf_1.000 | 247  | 0  |           |                |    |         |     |     |                                          |

|                                      |      |    |           |                |    |         |     |     |                                                       |
|--------------------------------------|------|----|-----------|----------------|----|---------|-----|-----|-------------------------------------------------------|
| Locus_982_Transcript_1/1_Conf_1.000  | 1067 | 20 | 3.61E-180 | XP_002636834.1 | 92 | 635.18  | 355 | 328 | Hypothetical protein CBG09283                         |
| Locus_9820_Transcript_1/1_Conf_1.000 | 1609 | 20 | 3.54E-53  | XP_001979947.1 | 49 | 214.157 | 452 | 225 | GG21187                                               |
| Locus_9821_Transcript_1/1_Conf_1.000 | 583  | 10 | 1.74E-24  | NP_500399.2    | 54 | 116.316 | 181 | 98  | hypothetical protein Y37E11AL.2                       |
| Locus_9822_Transcript_1/1_Conf_1.000 | 463  | 0  |           |                |    |         |     |     |                                                       |
| Locus_9823_Transcript_1/1_Conf_1.000 | 151  | 0  |           |                |    |         |     |     |                                                       |
| Locus_9824_Transcript_1/1_Conf_1.000 | 783  | 20 | 5.83E-69  | XP_001899165.1 | 70 | 265.003 | 232 | 164 | hypothetical protein                                  |
| Locus_9825_Transcript_1/1_Conf_1.000 | 380  | 0  |           |                |    |         |     |     |                                                       |
| Locus_9826_Transcript_1/1_Conf_1.000 | 471  | 0  |           |                |    |         |     |     |                                                       |
| Locus_9827_Transcript_1/1_Conf_1.000 | 248  | 20 | 2.83E-33  | XP_002630581.1 | 89 | 144.821 | 82  | 73  | Hypothetical protein CBG13037                         |
| Locus_9828_Transcript_1/1_Conf_1.000 | 779  | 4  | 7.38E-08  | EFO27630.1     | 43 | 62.003  | 208 | 90  | hypothetical protein LOAG_00847                       |
| Locus_9829_Transcript_1/1_Conf_1.000 | 132  | 0  |           |                |    |         |     |     |                                                       |
| Locus_983_Transcript_1/1_Conf_1.000  | 2125 | 20 | 1.81E-127 | NP_001023842.1 | 70 | 461.455 | 449 | 318 | Temporarily Assigned Gene name family member (tag-93) |
| Locus_9830_Transcript_1/1_Conf_1.000 | 133  | 0  |           |                |    |         |     |     |                                                       |
| Locus_9831_Transcript_1/1_Conf_1.000 | 470  | 2  | 1.81E-11  | EFO19956.1     | 53 | 72.4034 | 146 | 78  | hypothetical protein LOAG_08535                       |
| Locus_9832_Transcript_1/1_Conf_1.000 | 201  | 20 | 4.90E-25  | AAA03517.1     | 88 | 117.472 | 67  | 59  | kinesin-related protein                               |
| Locus_9833_Transcript_1/1_Conf_1.000 | 364  | 0  |           |                |    |         |     |     |                                                       |

|                                      |      |    |          |                |    |         |     |     |                                                       |
|--------------------------------------|------|----|----------|----------------|----|---------|-----|-----|-------------------------------------------------------|
| Locus_9834_Transcript_1/1_Conf_1.000 | 408  | 20 | 6.30E-57 | XP_002642615.1 | 80 | 223.402 | 136 | 109 | C. briggsae CBR-MUP-4 protein                         |
| Locus_9835_Transcript_1/3_Conf_0.667 | 1371 | 20 | 1.21E-51 | NP_499624.2    | 56 | 208.764 | 281 | 160 | ANlllin (actin binding protein) family member (ani-1) |
| Locus_9835_Transcript_2/3_Conf_0.667 | 1421 | 20 | 1.26E-51 | NP_499624.2    | 56 | 208.764 | 281 | 160 | ANlllin (actin binding protein) family member (ani-1) |
| Locus_9835_Transcript_3/3_Conf_0.667 | 1366 | 20 | 1.20E-51 | NP_499624.2    | 56 | 208.764 | 281 | 160 | ANlllin (actin binding protein) family member (ani-1) |
| Locus_9837_Transcript_1/1_Conf_1.000 | 323  | 3  | 2.81E-04 | EFO17760.1     | 62 | 48.521  | 77  | 48  | hypothetical protein LOAG_10739                       |
| Locus_9838_Transcript_1/1_Conf_1.000 | 185  | 0  |          |                |    |         |     |     |                                                       |
| Locus_9839_Transcript_1/1_Conf_1.000 | 177  | 20 | 9.14E-16 | CAC10528.1     | 79 | 86.6557 | 59  | 47  | putative inositol 1,4,5-trisphosphate receptor        |
| Locus_984_Transcript_1/1_Conf_1.000  | 1797 | 20 | 2.02E-60 | XP_002647233.1 | 45 | 238.424 | 653 | 296 | Hypothetical protein CBG24575                         |
| Locus_9840_Transcript_1/1_Conf_1.000 | 457  | 0  |          |                |    |         |     |     |                                                       |
| Locus_9841_Transcript_1/1_Conf_1.000 | 799  | 0  |          |                |    |         |     |     |                                                       |
| Locus_9842_Transcript_1/3_Conf_0.600 | 590  | 0  |          |                |    |         |     |     |                                                       |
| Locus_9842_Transcript_2/3_Conf_0.400 | 763  | 0  |          |                |    |         |     |     |                                                       |
| Locus_9842_Transcript_3/3_Conf_0.600 | 590  | 0  |          |                |    |         |     |     |                                                       |



|                                      |      |    |           |                |    |         |     |     |                                                  |
|--------------------------------------|------|----|-----------|----------------|----|---------|-----|-----|--------------------------------------------------|
| Locus_9843_Transcript_1/1_Conf_1.000 | 716  | 20 | 8.27E-61  | ACI49081.1     | 69 | 237.654 | 215 | 150 | hypothetical protein Cbre_JD11.005               |
| Locus_9844_Transcript_1/1_Conf_1.000 | 632  | 20 | 7.93E-56  | EFO18183.1     | 76 | 220.705 | 150 | 115 | hypothetical protein LOAG_10311                  |
| Locus_9845_Transcript_1/2_Conf_1.000 | 289  | 20 | 1.07E-11  | EFO22450.1     | 67 | 73.1738 | 52  | 35  | cold-shock DNA-binding domain-containing protein |
| Locus_9845_Transcript_2/2_Conf_1.000 | 606  | 14 | 1.87E-11  | EFO22450.1     | 67 | 73.1738 | 52  | 35  | cold-shock DNA-binding domain-containing protein |
| Locus_9846_Transcript_1/1_Conf_1.000 | 216  | 7  | 1.01E-06  | XP_002633498.1 | 65 | 56.6102 | 64  | 42  | Hypothetical protein CBG06270                    |
| Locus_9847_Transcript_1/1_Conf_1.000 | 167  | 0  |           |                |    |         |     |     |                                                  |
| Locus_9848_Transcript_1/1_Conf_1.000 | 191  | 5  | 1.90E-08  | NP_505419.3    | 82 | 62.3882 | 56  | 46  | hypothetical protein K07B1.7                     |
| Locus_9849_Transcript_1/2_Conf_1.000 | 1030 | 20 | 4.11E-141 | NP_491574.1    | 86 | 505.368 | 343 | 297 | hypothetical protein F55A12.8                    |
| Locus_9849_Transcript_2/2_Conf_1.000 | 736  | 20 | 5.48E-95  | XP_002639614.1 | 87 | 351.288 | 246 | 215 | Hypothetical protein CBG12327                    |
| Locus_985_Transcript_1/1_Conf_1.000  | 464  | 20 | 1.98E-74  | XP_001900952.1 | 93 | 281.567 | 147 | 137 | G10 protein homolog                              |
| Locus_9850_Transcript_1/1_Conf_1.000 | 335  | 0  |           |                |    |         |     |     |                                                  |

|                                      |      |    |           |                |    |         |     |     |                                                                         |
|--------------------------------------|------|----|-----------|----------------|----|---------|-----|-----|-------------------------------------------------------------------------|
| Locus_9851_Transcript_1/1_Conf_1.000 | 248  | 20 | 8.00E-20  | ABR87581.1     | 98 | 100.138 | 52  | 51  | small subunit ribosomal protein 28                                      |
| Locus_9852_Transcript_1/2_Conf_1.000 | 607  | 20 | 4.75E-15  | XP_002636626.1 | 69 | 85.1149 | 104 | 72  | C. briggsae CBR-AMAN-2 protein                                          |
| Locus_9852_Transcript_2/2_Conf_1.000 | 601  | 20 | 4.62E-15  | XP_002636626.1 | 69 | 85.1149 | 104 | 72  | C. briggsae CBR-AMAN-2 protein                                          |
| Locus_9853_Transcript_1/2_Conf_1.000 | 1147 | 20 | 6.46E-45  | XP_002640501.1 | 53 | 186.037 | 311 | 166 | Hypothetical protein CBG13640                                           |
| Locus_9853_Transcript_2/2_Conf_1.000 | 1096 | 20 | 1.03E-44  | XP_002640501.1 | 53 | 185.267 | 308 | 164 | Hypothetical protein CBG13640                                           |
| Locus_9854_Transcript_1/1_Conf_1.000 | 1030 | 20 | 2.19E-134 | NP_493036.1    | 82 | 483.026 | 307 | 253 | hypothetical protein Y53C10A.5                                          |
| Locus_9855_Transcript_1/3_Conf_0.667 | 514  | 10 | 2.08E-37  | XP_002634376.1 | 72 | 158.688 | 154 | 111 | C. briggsae CBR-ORA-1 protein                                           |
| Locus_9855_Transcript_2/3_Conf_0.667 | 514  | 10 | 2.08E-37  | XP_002634376.1 | 72 | 158.688 | 154 | 111 | C. briggsae CBR-ORA-1 protein                                           |
| Locus_9855_Transcript_3/3_Conf_0.667 | 514  | 10 | 2.08E-37  | XP_002634376.1 | 72 | 158.688 | 154 | 111 | C. briggsae CBR-ORA-1 protein                                           |
| Locus_9856_Transcript_1/1_Conf_1.000 | 368  | 20 | 2.39E-32  | XP_002646356.1 | 76 | 141.739 | 121 | 92  | Hypothetical protein CBG12070                                           |
| Locus_9857_Transcript_1/2_Conf_1.000 | 472  | 0  |           |                |    |         |     |     |                                                                         |
| Locus_9857_Transcript_2/2_Conf_1.000 | 416  | 0  |           |                |    |         |     |     |                                                                         |
| Locus_9858_Transcript_1/1_Conf_1.000 | 466  | 20 | 1.48E-29  | XP_001898226.1 | 65 | 132.494 | 152 | 99  | exosome component 2                                                     |
| Locus_9859_Transcript_1/1_Conf_1.000 | 453  | 5  | 6.31E-49  | NP_500240.1    | 75 | 196.823 | 154 | 116 | hypothetical protein Y69A2AR.31                                         |
| Locus_986_Transcript_1/1_Conf_1.000  | 2063 | 20 | 1.75E-95  | XP_002641590.1 | 63 | 355.14  | 438 | 280 | Hypothetical protein CBG09894                                           |
| Locus_9860_Transcript_1/1_Conf_1.000 | 543  | 20 | 1.43E-08  | XP_001101104.1 | 55 | 63.1586 | 97  | 54  | PREDICTED: hepatitis B virus X-interacting protein isoform 4            |
| Locus_9861_Transcript_1/1_Conf_1.000 | 323  | 20 | 3.51E-47  | XP_002640613.1 | 96 | 191.045 | 100 | 96  | Hypothetical protein CBG08724                                           |
| Locus_9862_Transcript_1/1_Conf_1.000 | 595  | 2  | 1.45E-05  | XP_001893945.1 | 54 | 53.5286 | 91  | 50  | hypothetical protein Bm1_12375                                          |
| Locus_9863_Transcript_1/1_Conf_1.000 | 1184 | 20 | 8.81E-61  | NP_493014.1    | 63 | 238.81  | 338 | 214 | hypothetical protein Y47H9C.7                                           |
| Locus_9864_Transcript_1/1_Conf_1.000 | 909  | 20 | 1.10E-75  | CBA11613.1     | 69 | 287.73  | 286 | 198 | C. elegans protein F54F3.1c, partially confirmed by transcript evidence |
| Locus_9865_Transcript_1/1_Conf_1.000 | 323  | 0  |           |                |    |         |     |     |                                                                         |
| Locus_9866_Transcript_1/1_Conf_1.000 | 508  | 20 | 2.27E-20  | NP_491200.1    | 80 | 102.064 | 87  | 70  | hypothetical protein D1037.1                                            |
| Locus_9867_Transcript_1/3_Conf_0.600 | 805  | 0  |           |                |    |         |     |     |                                                                         |
| Locus_9867_Transcript_2/3_Conf_0.400 | 790  | 0  |           |                |    |         |     |     |                                                                         |

|                                      |      |    |           |                |    |         |     |     |                                                                     |  |
|--------------------------------------|------|----|-----------|----------------|----|---------|-----|-----|---------------------------------------------------------------------|--|
| Locus_9867_Transcript_3/3_Conf_0.600 | 801  | 0  |           |                |    |         |     |     |                                                                     |  |
| Locus_9868_Transcript_1/1_Conf_1.000 | 495  | 1  | 2.96E-06  | NP_501238.1    | 45 | 55.0694 | 161 | 73  | hypothetical protein F45E4.3                                        |  |
| Locus_9869_Transcript_1/1_Conf_1.000 | 856  | 2  | 1.08E-13  | EFO20450.1     | 48 | 81.6481 | 183 | 88  | hypothetical protein LOAG_08039                                     |  |
| Locus_987_Transcript_1/2_Conf_1.000  | 1046 | 20 | 2.03E-87  | XP_002642883.1 | 90 | 327.02  | 192 | 174 | C. briggsae CBR-RAB-18 protein                                      |  |
| Locus_987_Transcript_2/2_Conf_1.000  | 1019 | 20 | 1.97E-87  | XP_002642883.1 | 90 | 327.02  | 192 | 174 | C. briggsae CBR-RAB-18 protein                                      |  |
| Locus_9870_Transcript_1/1_Conf_1.000 | 439  | 0  |           |                |    |         |     |     |                                                                     |  |
| Locus_9871_Transcript_1/1_Conf_1.000 | 1071 | 5  | 7.53E-93  | XP_002636984.1 | 84 | 345.125 | 233 | 196 | Hypothetical protein CBG09472                                       |  |
| Locus_9872_Transcript_1/1_Conf_1.000 | 328  | 2  | 1.69E-17  | XP_002641529.1 | 61 | 92.4337 | 85  | 52  | Hypothetical protein CBG09826                                       |  |
| Locus_9873_Transcript_1/1_Conf_1.000 | 613  | 3  | 1.67E-31  | XP_002643749.1 | 62 | 139.813 | 204 | 128 | Hypothetical protein CBG01946                                       |  |
| Locus_9874_Transcript_1/1_Conf_1.000 | 1049 | 20 | 1.83E-120 | NP_492839.4    | 79 | 436.802 | 347 | 277 | Leucine-rich repeats, Ras-like domain, Kinase family member (Irk-1) |  |
| Locus_9875_Transcript_1/1_Conf_1.000 | 271  | 1  | 1.02E-14  | CAR63536.1     | 71 | 83.1889 | 71  | 51  | hypothetical protein                                                |  |
| Locus_9876_Transcript_1/1_Conf_1.000 | 357  | 4  | 1.02E-06  | NP_491791.1    | 65 | 56.6102 | 61  | 40  | hypothetical protein T08B2.8                                        |  |
| Locus_9877_Transcript_1/1_Conf_1.000 | 794  | 20 | 1.23E-98  | XP_002633097.1 | 86 | 363.614 | 255 | 220 | C. briggsae CBR-RPC-1 protein                                       |  |
| Locus_9878_Transcript_1/1_Conf_1.000 | 235  | 0  |           |                |    |         |     |     |                                                                     |  |
| Locus_9879_Transcript_1/1_Conf_1.000 | 471  | 0  |           |                |    |         |     |     |                                                                     |  |

|                                      |      |    |           |                |    |         |     |     |                                                        |
|--------------------------------------|------|----|-----------|----------------|----|---------|-----|-----|--------------------------------------------------------|
| Locus_988_Transcript_1/1_Conf_1.000  | 753  | 20 | 7.19E-98  | NP_502077.1    | 93 | 360.918 | 202 | 188 | Ribosomal Protein, Small subunit family member (rps-5) |
| Locus_9880_Transcript_1/1_Conf_1.000 | 170  | 20 | 5.78E-18  | XP_002646171.1 | 87 | 93.9745 | 56  | 49  | C. briggsae CBR-APB-3 protein                          |
| Locus_9881_Transcript_1/1_Conf_1.000 | 1464 | 20 | 8.42E-99  | NP_497659.1    | 74 | 365.54  | 289 | 214 | hypothetical protein Y53G8B.2                          |
| Locus_9882_Transcript_1/1_Conf_1.000 | 299  | 4  | 1.30E-09  | XP_002629686.1 | 64 | 66.2402 | 90  | 58  | Hypothetical protein CBG00906                          |
| Locus_9883_Transcript_1/1_Conf_1.000 | 467  | 2  | 1.14E-13  | NP_502446.2    | 69 | 79.7221 | 79  | 55  | hypothetical protein M02B1.2                           |
| Locus_9884_Transcript_1/1_Conf_1.000 | 391  | 1  | 9.47E-05  | EFO16804.1     | 47 | 50.0618 | 111 | 53  | hypothetical protein LOAG_11699                        |
| Locus_9885_Transcript_1/2_Conf_1.000 | 1636 | 20 | 7.81E-165 | BAB61756.1     | 74 | 585.104 | 456 | 341 | N-deactylase/N-sulfotransferase                        |
| Locus_9885_Transcript_2/2_Conf_1.000 | 1636 | 20 | 5.06E-164 | BAB61756.1     | 74 | 582.408 | 456 | 340 | N-deactylase/N-sulfotransferase                        |
| Locus_9886_Transcript_1/1_Conf_1.000 | 316  | 0  |           |                |    |         |     |     |                                                        |

|                                      |      |    |           |                |    |         |     |     |                                                                  |
|--------------------------------------|------|----|-----------|----------------|----|---------|-----|-----|------------------------------------------------------------------|
| Locus_9887_Transcript_1/1_Conf_1.000 | 667  | 20 | 1.10E-53  | NP_509947.1    | 69 | 213.772 | 222 | 154 | hypothetical protein T04F8.2                                     |
| Locus_9888_Transcript_1/1_Conf_1.000 | 620  | 12 | 1.28E-18  | XP_002646180.1 | 57 | 97.0561 | 145 | 84  | Hypothetical protein CBG23746                                    |
| Locus_9889_Transcript_1/1_Conf_1.000 | 424  | 2  | 5.66E-05  | NP_001023316.1 | 73 | 50.8322 | 34  | 25  | hypothetical protein M04B2.6                                     |
| Locus_989_Transcript_1/1_Conf_1.000  | 1481 | 20 | 2.28E-168 | XP_001891856.1 | 88 | 596.66  | 393 | 348 | UDP-N-acetylglucosamine--peptide N-acetylglucosaminyltransferase |
| Locus_9890_Transcript_1/1_Conf_1.000 | 141  | 4  | 8.83E-11  | EFO27903.1     | 83 | 70.0922 | 43  | 36  | mediator complex subunit rgr-1                                   |
| Locus_9891_Transcript_1/1_Conf_1.000 | 399  | 0  |           |                |    |         |     |     |                                                                  |
| Locus_9892_Transcript_1/1_Conf_1.000 | 297  | 0  |           |                |    |         |     |     |                                                                  |
| Locus_9893_Transcript_1/1_Conf_1.000 | 577  | 20 | 1.80E-34  | XP_001894647.1 | 60 | 149.443 | 187 | 114 | CG33108-PA                                                       |
| Locus_9894_Transcript_1/1_Conf_1.000 | 518  | 12 | 2.29E-07  | XP_002634855.1 | 64 | 58.9214 | 78  | 50  | C. briggsae CBR-DNJ-15 protein                                   |
| Locus_9895_Transcript_1/3_Conf_0.667 | 989  | 20 | 8.40E-80  | AAA21167.2     | 81 | 301.597 | 226 | 184 | Hypothetical protein F57B9.1                                     |
| Locus_9895_Transcript_2/3_Conf_0.333 | 486  | 20 | 2.14E-28  | AAA21167.2     | 79 | 128.642 | 97  | 77  | Hypothetical protein F57B9.1                                     |
| Locus_9895_Transcript_3/3_Conf_0.667 | 989  | 20 | 8.40E-80  | AAA21167.2     | 81 | 301.597 | 226 | 184 | Hypothetical protein F57B9.1                                     |
| Locus_9896_Transcript_1/1_Conf_1.000 | 378  | 3  | 7.12E-08  | XP_002646489.1 | 91 | 60.4622 | 36  | 33  | Hypothetical protein CBG19471                                    |
| Locus_9897_Transcript_1/1_Conf_1.000 | 1204 | 20 | 4.35E-55  | NP_501435.1    | 56 | 219.935 | 276 | 155 | hypothetical protein T26A8.4                                     |
| Locus_9898_Transcript_1/1_Conf_1.000 | 324  | 0  |           |                |    |         |     |     |                                                                  |
| Locus_9899_Transcript_1/1_Conf_1.000 | 1140 | 20 | 7.56E-46  | XP_001893150.1 | 56 | 189.119 | 347 | 197 | hypothetical protein Bm1_08395                                   |
| Locus_99_Transcript_1/3_Conf_0.727   | 236  | 19 | 4.76E-12  | XP_001891902.1 | 77 | 74.3294 | 49  | 38  | rRNA promoter binding protein                                    |
| Locus_99_Transcript_2/3_Conf_0.545   | 251  | 20 | 1.19E-15  | XP_001893546.1 | 78 | 86.2705 | 57  | 45  | unspecific monooxygenase                                         |

|                                      |      |    |           |                |     |         |     |     |                                                                       |
|--------------------------------------|------|----|-----------|----------------|-----|---------|-----|-----|-----------------------------------------------------------------------|
| Locus_99_Transcript_3/3_Conf_0.818   | 255  | 20 | 1.23E-15  | XP_001893546.1 | 78  | 86.2705 | 57  | 45  | unspecific monooxygenase                                              |
| Locus_990_Transcript_1/1_Conf_1.000  | 1550 | 20 | 6.36E-153 | NP_740966.1    | 75  | 545.428 | 484 | 365 | hypothetical protein C24H12.4                                         |
| Locus_9900_Transcript_1/1_Conf_1.000 | 628  | 20 | 5.61E-54  | XP_002631704.1 | 71  | 214.542 | 202 | 144 | Hypothetical protein CBG20903                                         |
| Locus_9901_Transcript_1/1_Conf_1.000 | 486  | 4  | 1.58E-31  | NP_501219.1    | 74  | 139.043 | 124 | 92  | hypothetical protein R05G6.1                                          |
| Locus_9902_Transcript_1/1_Conf_1.000 | 348  | 20 | 3.63E-44  | XP_002643480.1 | 86  | 181.03  | 113 | 98  | Hypothetical protein CBG16145                                         |
| Locus_9903_Transcript_1/1_Conf_1.000 | 938  | 20 | 4.17E-25  | EFN66773.1     | 57  | 119.783 | 191 | 109 | Cullin-4B                                                             |
| Locus_9904_Transcript_1/1_Conf_1.000 | 1163 | 20 | 1.21E-22  | XP_001896275.1 | 45  | 112.079 | 386 | 175 | Ubiquitin carboxyl-terminal hydrolase family protein                  |
| Locus_9905_Transcript_1/1_Conf_1.000 | 659  | 20 | 1.05E-40  | EFO24231.1     | 88  | 170.629 | 114 | 101 | transcription elongation factor SPT4                                  |
| Locus_9906_Transcript_1/1_Conf_1.000 | 475  | 20 | 6.37E-17  | XP_002631797.1 | 78  | 90.5077 | 66  | 52  | C. briggsae CBR-CYN-16 protein                                        |
| Locus_9907_Transcript_1/1_Conf_1.000 | 364  | 4  | 8.56E-14  | XP_001895599.1 | 61  | 80.1073 | 83  | 51  | hypothetical protein Bm1_20725                                        |
| Locus_9908_Transcript_1/1_Conf_1.000 | 706  | 20 | 1.05E-44  | XP_002637085.1 | 59  | 184.111 | 242 | 144 | Hypothetical protein CBG09584                                         |
| Locus_9909_Transcript_1/1_Conf_1.000 | 132  | 0  |           |                |     |         |     |     |                                                                       |
| Locus_991_Transcript_1/1_Conf_1.000  | 622  | 20 | 3.00E-44  | NP_491456.2    | 70  | 182.185 | 183 | 129 | hypothetical protein F57C9.6                                          |
| Locus_9910_Transcript_1/1_Conf_1.000 | 288  | 20 | 5.11E-38  | NP_783313.1    | 100 | 160.614 | 91  | 91  | NADH dehydrogenase ubiquinone 1 alpha subcomplex subunit 11 isoform 1 |
| Locus_9911_Transcript_1/1_Conf_1.000 | 1154 | 20 | 1.85E-124 | XP_002641545.1 | 91  | 450.284 | 268 | 246 | Hypothetical protein CBG09844                                         |

|                                      |      |    |           |                |    |         |     |     |                                                                                |
|--------------------------------------|------|----|-----------|----------------|----|---------|-----|-----|--------------------------------------------------------------------------------|
| Locus_9912_Transcript_1/1_Conf_1.000 | 1172 | 20 | 4.19E-39  | NP_502675.4    | 62 | 166.777 | 213 | 134 | hypothetical protein Y37A1A.3                                                  |
| Locus_9913_Transcript_1/1_Conf_1.000 | 724  | 20 | 2.26E-29  | XP_001891854.1 | 73 | 133.265 | 150 | 110 | Conserved oligomeric Golgi complex component 4                                 |
| Locus_9914_Transcript_1/1_Conf_1.000 | 503  | 0  |           |                |    |         |     |     |                                                                                |
| Locus_9915_Transcript_1/1_Conf_1.000 | 1034 | 20 | 8.24E-65  | XP_002637680.1 | 74 | 251.906 | 199 | 148 | C. briggsae CBR-UDA-1 protein                                                  |
| Locus_9916_Transcript_1/1_Conf_1.000 | 680  | 20 | 3.57E-55  | XP_002636583.1 | 63 | 218.779 | 229 | 146 | Hypothetical protein CBG23277                                                  |
| Locus_9917_Transcript_1/1_Conf_1.000 | 219  | 0  |           |                |    |         |     |     |                                                                                |
| Locus_9918_Transcript_1/1_Conf_1.000 | 1384 | 20 | 7.44E-158 | AAQ06435.1     | 83 | 561.607 | 391 | 327 | ABC6 protein                                                                   |
| Locus_9919_Transcript_1/1_Conf_1.000 | 382  | 0  |           |                |    |         |     |     |                                                                                |
| Locus_992_Transcript_1/2_Conf_1.000  | 1138 | 20 | 2.20E-69  | XP_002637173.1 | 71 | 267.314 | 267 | 190 | Hypothetical protein CBG09691                                                  |
| Locus_992_Transcript_2/2_Conf_1.000  | 1138 | 20 | 2.20E-69  | XP_002637173.1 | 71 | 267.314 | 267 | 190 | Hypothetical protein CBG09691                                                  |
| Locus_9920_Transcript_1/1_Conf_1.000 | 191  | 0  |           |                |    |         |     |     |                                                                                |
| Locus_9921_Transcript_1/1_Conf_1.000 | 202  | 0  |           |                |    |         |     |     |                                                                                |
| Locus_9922_Transcript_1/1_Conf_1.000 | 395  | 8  | 2.30E-30  | XP_002639325.1 | 67 | 135.191 | 134 | 91  | Hypothetical protein CBG03903                                                  |
| Locus_9923_Transcript_1/1_Conf_1.000 | 321  | 6  | 1.14E-21  | XP_002644355.1 | 63 | 106.301 | 107 | 68  | C. briggsae CBR-DDR-2 protein                                                  |
| Locus_9924_Transcript_1/2_Conf_1.000 | 361  | 20 | 1.20E-15  | XP_002196552.1 | 57 | 86.2705 | 106 | 61  | PREDICTED: similar to ubiquitin specific protease 5 (isopeptidase T) isoform 1 |
| Locus_9924_Transcript_2/2_Conf_1.000 | 361  | 20 | 1.20E-15  | XP_002196552.1 | 57 | 86.2705 | 106 | 61  | PREDICTED: similar to ubiquitin specific protease 5 (isopeptidase T) isoform 1 |
| Locus_9925_Transcript_1/1_Conf_1.000 | 725  | 20 | 5.21E-26  | XP_001626797.1 | 61 | 122.094 | 190 | 116 | predicted protein                                                              |

|                                      |      |    |           |                |    |         |     |     |                               |
|--------------------------------------|------|----|-----------|----------------|----|---------|-----|-----|-------------------------------|
| Locus_9926_Transcript_1/2_Conf_1.000 | 1288 | 20 | 1.00E-153 | NP_501087.1    | 81 | 547.74  | 383 | 314 | hypothetical protein C06G3.5  |
| Locus_9926_Transcript_2/2_Conf_1.000 | 1288 | 20 | 1.00E-153 | NP_501087.1    | 81 | 547.74  | 383 | 314 | hypothetical protein C06G3.5  |
| Locus_9927_Transcript_1/1_Conf_1.000 | 902  | 20 | 3.38E-45  | XP_002629727.1 | 59 | 186.422 | 256 | 153 | Hypothetical protein CBG00958 |
| Locus_9928_Transcript_1/1_Conf_1.000 | 208  | 17 | 1.68E-17  | XP_002643097.1 | 82 | 92.4337 | 57  | 47  | Hypothetical protein CBG23021 |
| Locus_9929_Transcript_1/1_Conf_1.000 | 501  | 20 | 4.32E-45  | XP_002642024.1 | 70 | 184.111 | 166 | 117 | Hypothetical protein CBG17960 |
| Locus_993_Transcript_1/1_Conf_1.000  | 1526 | 20 | 0         | XP_002641126.1 | 83 | 671.774 | 473 | 393 | C. briggsae CBR-UCR-1 protein |



|                                      |      |    |           |                |     |         |     |     |                                                                   |
|--------------------------------------|------|----|-----------|----------------|-----|---------|-----|-----|-------------------------------------------------------------------|
| Locus_9930_Transcript_1/1_Conf_1.000 | 874  | 20 | 8.34E-110 | XP_002636865.1 | 92  | 400.979 | 227 | 209 | Hypothetical protein CBG09322                                     |
| Locus_9931_Transcript_1/2_Conf_1.000 | 430  | 20 | 8.88E-35  | XP_001893025.1 | 82  | 149.828 | 97  | 80  | enhancer of rudimentary homolog                                   |
| Locus_9931_Transcript_2/2_Conf_1.000 | 460  | 20 | 8.77E-35  | XP_001893025.1 | 82  | 149.828 | 97  | 80  | enhancer of rudimentary homolog                                   |
| Locus_9932_Transcript_1/1_Conf_1.000 | 227  | 18 | 4.49E-18  | NP_001023620.1 | 74  | 94.3597 | 75  | 56  | hypothetical protein ZK792.4                                      |
| Locus_9933_Transcript_1/1_Conf_1.000 | 250  | 20 | 1.72E-06  | ADD18404.1     | 63  | 55.8398 | 58  | 37  | clip-domain serine protease                                       |
| Locus_9934_Transcript_1/1_Conf_1.000 | 171  | 0  |           |                |     |         |     |     |                                                                   |
| Locus_9935_Transcript_1/1_Conf_1.000 | 210  | 20 | 7.73E-31  | XP_002819977.1 | 97  | 136.732 | 70  | 68  | PREDICTED: hypothetical protein LOC100458687                      |
| Locus_9936_Transcript_1/1_Conf_1.000 | 1016 | 0  |           |                |     |         |     |     |                                                                   |
| Locus_9937_Transcript_1/1_Conf_1.000 | 219  | 0  |           |                |     |         |     |     |                                                                   |
| Locus_9938_Transcript_1/1_Conf_1.000 | 156  | 20 | 1.82E-19  | ABC40752.1     | 100 | 98.9821 | 51  | 51  | myosin heavy chain                                                |
| Locus_9939_Transcript_1/1_Conf_1.000 | 312  | 6  | 1.45E-16  | XP_001891702.1 | 77  | 89.3521 | 62  | 48  | Hypothetical 30.5 kDa protein ZK1321.3 in chromosome II, putative |
| Locus_994_Transcript_1/2_Conf_1.000  | 2096 | 1  | 4.23E-04  | NP_001166287.1 | 37  | 51.6026 | 421 | 157 | sericin 2 isoform 1 precursor                                     |
| Locus_994_Transcript_2/2_Conf_1.000  | 573  | 0  |           |                |     |         |     |     |                                                                   |
| Locus_9940_Transcript_1/1_Conf_1.000 | 633  | 0  |           |                |     |         |     |     |                                                                   |

|                                      |      |    |          |                |    |         |     |     |                                                           |
|--------------------------------------|------|----|----------|----------------|----|---------|-----|-----|-----------------------------------------------------------|
| Locus_9941_Transcript_1/1_Conf_1.000 | 471  | 4  | 8.04E-36 | XP_002646088.1 | 69 | 153.295 | 155 | 108 | Hypothetical protein CBG07955                             |
| Locus_9942_Transcript_1/1_Conf_1.000 | 1132 | 0  |          |                |    |         |     |     |                                                           |
| Locus_9943_Transcript_1/1_Conf_1.000 | 404  | 4  | 3.78E-09 | XP_001899104.1 | 55 | 64.6994 | 99  | 55  | hypothetical protein Bm1_38255                            |
| Locus_9944_Transcript_1/2_Conf_1.000 | 365  | 20 | 3.96E-27 | NP_492616.1    | 67 | 124.405 | 115 | 78  | Nematode ASTacin protease family member (nas-5)           |
| Locus_9944_Transcript_2/2_Conf_1.000 | 494  | 20 | 2.12E-28 | NP_492616.1    | 58 | 128.642 | 162 | 95  | Nematode ASTacin protease family member (nas-5)           |
| Locus_9945_Transcript_1/1_Conf_1.000 | 562  | 20 | 8.74E-52 | NP_495017.1    | 75 | 206.838 | 187 | 142 | PINK (PTEN-induced kinase) homolog family member (pink-1) |
| Locus_9946_Transcript_1/1_Conf_1.000 | 589  | 20 | 1.07E-05 | XP_001318162.1 | 48 | 53.9138 | 135 | 65  | viral A-type inclusion protein                            |

|                                      |      |    |           |                |    |         |     |     |                                                           |
|--------------------------------------|------|----|-----------|----------------|----|---------|-----|-----|-----------------------------------------------------------|
| Locus_9947_Transcript_1/1_Conf_1.000 | 300  | 20 | 7.01E-48  | NP_504661.1    | 95 | 193.356 | 99  | 95  | Daf-12, REdundant with family member (dre-1)              |
| Locus_9948_Transcript_1/1_Conf_1.000 | 133  | 0  |           |                |    |         |     |     |                                                           |
| Locus_9949_Transcript_1/1_Conf_1.000 | 728  | 20 | 6.55E-77  | NP_001122460.1 | 76 | 291.197 | 241 | 184 | Ortholog of Drosophila DRoShA gene family member (drsh-1) |
| Locus_995_Transcript_1/2_Conf_1.000  | 1145 | 20 | 7.96E-112 | NP_741085.1    | 71 | 408.297 | 383 | 275 | hypothetical protein F42G9.6                              |
| Locus_995_Transcript_2/2_Conf_1.000  | 1055 | 20 | 4.13E-112 | NP_741084.1    | 74 | 409.068 | 354 | 265 | hypothetical protein F42G9.6                              |
| Locus_9950_Transcript_1/1_Conf_1.000 | 166  | 0  |           |                |    |         |     |     |                                                           |
| Locus_9951_Transcript_1/1_Conf_1.000 | 1379 |    |           |                |    |         |     |     |                                                           |
| Locus_9952_Transcript_1/1_Conf_1.000 | 499  | 0  |           |                |    |         |     |     |                                                           |
| Locus_9953_Transcript_1/1_Conf_1.000 | 172  | 0  |           |                |    |         |     |     |                                                           |
| Locus_9954_Transcript_1/1_Conf_1.000 | 131  | 20 | 2.51E-13  | NP_495706.2    | 95 | 78.5666 | 43  | 41  | hypothetical protein F10B5.8                              |
| Locus_9955_Transcript_1/1_Conf_1.000 | 227  | 20 | 2.72E-23  | EFO26146.1     | 83 | 111.694 | 74  | 62  | hypothetical protein LOAG_02340                           |
| Locus_9956_Transcript_1/1_Conf_1.000 | 677  | 20 | 2.05E-87  | XP_002633788.1 | 83 | 325.865 | 219 | 183 | C. briggsae CBR-FAT-4 protein                             |
| Locus_9957_Transcript_1/1_Conf_1.000 | 404  | 0  |           |                |    |         |     |     |                                                           |
| Locus_9958_Transcript_1/1_Conf_1.000 | 459  | 0  |           |                |    |         |     |     |                                                           |
| Locus_9959_Transcript_1/1_Conf_1.000 | 230  | 20 | 5.49E-08  | XP_001896251.1 | 71 | 60.8474 | 45  | 32  | GRF zinc finger family protein                            |
| Locus_996_Transcript_1/1_Conf_1.000  | 1227 | 20 | 5.03E-115 | CAR63667.1     | 82 | 419.083 | 278 | 228 | putative WD-repeat protein                                |
| Locus_9960_Transcript_1/1_Conf_1.000 | 374  | 0  |           |                |    |         |     |     |                                                           |

|                                      |     |    |           |                |     |         |     |     |                                                   |
|--------------------------------------|-----|----|-----------|----------------|-----|---------|-----|-----|---------------------------------------------------|
| Locus_9961_Transcript_1/1_Conf_1.000 | 565 | 20 | 5.89E-88  | NP_001122711.1 | 89  | 327.02  | 188 | 168 | CBP/p300 homolog family member (cbp-1)            |
| Locus_9962_Transcript_1/1_Conf_1.000 | 220 | 0  |           |                |     |         |     |     |                                                   |
| Locus_9963_Transcript_1/1_Conf_1.000 | 299 | 20 | 6.87E-11  | XP_002923775.1 | 100 | 70.4774 | 60  | 60  | PREDICTED: hypothetical protein<br>LOC100476237   |
| Locus_9964_Transcript_1/1_Conf_1.000 | 145 | 0  |           |                |     |         |     |     |                                                   |
| Locus_9965_Transcript_1/1_Conf_1.000 | 894 | 20 | 1.42E-104 | NP_496177.2    | 90  | 383.645 | 250 | 227 | Proteasome Alpha Subunit family member<br>(pas-7) |
| Locus_9966_Transcript_1/1_Conf_1.000 | 189 | 20 | 1.54E-26  | EAW55604.1     | 100 | 122.479 | 62  | 62  | hypothetical protein FLJ14346, isoform<br>CRA_c   |

|                                      |      |    |          |                |    |         |     |     |                                         |
|--------------------------------------|------|----|----------|----------------|----|---------|-----|-----|-----------------------------------------|
| Locus_9967_Transcript_1/1_Conf_1.000 | 326  | 20 | 5.42E-32 | XP_002640962.1 | 79 | 140.584 | 108 | 86  | Hypothetical protein CBG11705           |
| Locus_9968_Transcript_1/1_Conf_1.000 | 398  | 20 | 5.10E-38 | NP_001022450.1 | 77 | 160.614 | 132 | 102 | hypothetical protein Y48E1A.1           |
| Locus_9969_Transcript_1/1_Conf_1.000 | 219  | 20 | 1.36E-14 | EFO25702.1     | 73 | 82.8037 | 72  | 53  | hypothetical protein LOAG_02781         |
| Locus_997_Transcript_1/1_Conf_1.000  | 376  | 20 | 4.58E-47 | ABX75173.1     | 86 | 190.66  | 108 | 93  | RNA polymerase III 12.5 kDa polypeptide |
| Locus_9970_Transcript_1/2_Conf_1.000 | 333  | 20 | 8.57E-22 | EFO25910.1     | 81 | 106.686 | 69  | 56  | hypothetical protein LOAG_02581         |
| Locus_9970_Transcript_2/2_Conf_1.000 | 333  | 20 | 8.58E-22 | EFO25910.1     | 81 | 106.686 | 69  | 56  | hypothetical protein LOAG_02581         |
| Locus_9971_Transcript_1/1_Conf_1.000 | 716  | 20 | 1.46E-65 | XP_002646453.1 | 87 | 253.447 | 154 | 135 | C. briggsae CBR-SMD-1 protein           |
| Locus_9972_Transcript_1/1_Conf_1.000 | 1107 | 20 | 1.07E-89 | XP_001893326.1 | 72 | 334.724 | 304 | 219 | Dehydrogenases, short chain protein 30  |

|                                      |     |    |           |                |     |         |     |     |                                                                    |
|--------------------------------------|-----|----|-----------|----------------|-----|---------|-----|-----|--------------------------------------------------------------------|
| Locus_9973_Transcript_1/1_Conf_1.000 | 363 | 0  |           |                |     |         |     |     |                                                                    |
| Locus_9974_Transcript_1/1_Conf_1.000 | 347 | 0  |           |                |     |         |     |     |                                                                    |
| Locus_9975_Transcript_1/1_Conf_1.000 | 629 | 19 | 5.26E-44  | NP_510787.2    | 77  | 181.415 | 134 | 104 | hypothetical protein T08G2.2                                       |
| Locus_9976_Transcript_1/1_Conf_1.000 | 597 | 20 | 8.00E-28  | NP_499817.2    | 53  | 127.487 | 188 | 101 | Acyl-Coenzyme A Binding Protein family member (acbp-5)             |
| Locus_9977_Transcript_1/1_Conf_1.000 | 233 | 20 | 4.91E-33  | XP_002647642.1 | 90  | 144.05  | 77  | 70  | Hypothetical protein CBG06741                                      |
| Locus_9978_Transcript_1/1_Conf_1.000 | 440 | 20 | 2.15E-49  | XP_002642413.1 | 93  | 198.364 | 113 | 106 | Hypothetical protein CBG06810                                      |
| Locus_9979_Transcript_1/1_Conf_1.000 | 979 | 20 | 3.77E-24  | XP_001893256.1 | 87  | 116.701 | 64  | 56  | Hypothetical zinc finger protein B0310.2 in chromosome X, putative |
| Locus_998_Transcript_1/1_Conf_1.000  | 285 | 20 | 4.33E-45  | EFO21508.1     | 100 | 184.111 | 94  | 94  | ubiquitin C II                                                     |
| Locus_9980_Transcript_1/1_Conf_1.000 | 490 | 20 | 1.12E-53  | XP_002641555.1 | 86  | 212.616 | 143 | 123 | Hypothetical protein CBG09854                                      |
| Locus_9981_Transcript_1/1_Conf_1.000 | 251 | 0  |           |                |     |         |     |     |                                                                    |
| Locus_9982_Transcript_1/1_Conf_1.000 | 593 | 20 | 1.24E-17  | XP_787754.1    | 62  | 93.5893 | 100 | 62  | PREDICTED: similar to Autophagy-specific protein, putative         |
| Locus_9983_Transcript_1/1_Conf_1.000 | 410 | 0  |           |                |     |         |     |     |                                                                    |
| Locus_9984_Transcript_1/1_Conf_1.000 | 914 | 20 | 3.64E-103 | XP_002643347.1 | 96  | 379.022 | 205 | 197 | C. briggsae CBR-RAB-6.2 protein                                    |
| Locus_9985_Transcript_1/1_Conf_1.000 | 475 | 4  | 7.01E-32  | XP_002634331.1 | 75  | 140.198 | 132 | 99  | C. briggsae CBR-IMP-3 protein                                      |
| Locus_9986_Transcript_1/1_Conf_1.000 | 464 | 5  | 1.35E-22  | XP_001892273.1 | 57  | 109.383 | 157 | 91  | hypothetical protein                                               |
| Locus_9987_Transcript_1/1_Conf_1.000 | 978 | 6  | 4.01E-42  | XP_002639130.1 | 74  | 176.407 | 166 | 123 | Hypothetical protein CBG14950                                      |
| Locus_9988_Transcript_1/1_Conf_1.000 | 251 | 0  |           |                |     |         |     |     |                                                                    |

|                                      |      |    |          |                |    |         |      |      |                               |
|--------------------------------------|------|----|----------|----------------|----|---------|------|------|-------------------------------|
| Locus_9989_Transcript_1/1_Conf_1.000 | 302  | 20 | 1.93E-13 | XP_001902812.1 | 97 | 78.9518 | 37   | 36   | 40S ribosomal protein S29     |
| Locus_999_Transcript_1/3_Conf_0.400  | 3371 | 20 | 0        | ABC40752.1     | 97 | 1927.91 | 1113 | 1088 | myosin heavy chain            |
| Locus_999_Transcript_2/3_Conf_0.400  | 3622 | 20 | 0        | ABC40752.1     | 97 | 2083.92 | 1194 | 1168 | myosin heavy chain            |
| Locus_999_Transcript_3/3_Conf_0.400  | 776  | 20 | 5.19E-46 | XP_002646204.1 | 84 | 188.734 | 132  | 111  | C. briggsae CBR-PFN-1 protein |
| Locus_9990_Transcript_1/1_Conf_1.000 | 480  | 20 | 6.09E-28 | NP_001022027.1 | 63 | 127.102 | 160  | 102  | hypothetical protein C44B7.6  |
| Locus_9991_Transcript_1/1_Conf_1.000 | 363  | 0  |          |                |    |         |      |      |                               |
| Locus_9992_Transcript_1/2_Conf_1.000 | 581  | 20 | 2.37E-58 | XP_002631391.1 | 79 | 228.794 | 154  | 123  | Hypothetical protein CBG03233 |

|                                      |      |    |           |                |    |         |     |     |                               |
|--------------------------------------|------|----|-----------|----------------|----|---------|-----|-----|-------------------------------|
| Locus_9992_Transcript_2/2_Conf_1.000 | 701  | 20 | 3.71E-58  | XP_002631391.1 | 79 | 228.794 | 154 | 123 | Hypothetical protein CBG03233 |
| Locus_9993_Transcript_1/1_Conf_1.000 | 1399 | 20 | 1.14E-105 | XP_002646302.1 | 72 | 388.267 | 321 | 234 | Hypothetical protein CBG12009 |
| Locus_9994_Transcript_1/1_Conf_1.000 | 180  | 20 | 2.11E-15  | XP_001895773.1 | 81 | 85.5001 | 54  | 44  | CG30390-PA                    |
| Locus_9995_Transcript_1/1_Conf_1.000 | 930  | 20 | 2.29E-100 | NP_498815.1    | 76 | 369.777 | 298 | 229 | hypothetical protein F09G8.3  |
| Locus_9996_Transcript_1/1_Conf_1.000 | 215  | 2  | 7.01E-08  | XP_002638798.1 | 80 | 60.4622 | 46  | 37  | C. briggsae CBR-PIF-1 protein |
| Locus_9997_Transcript_1/1_Conf_1.000 | 969  | 20 | 8.58E-130 | XP_002633709.1 | 86 | 467.618 | 299 | 259 | Hypothetical protein CBG03392 |
| Locus_9998_Transcript_1/1_Conf_1.000 | 537  | 0  |           |                |    |         |     |     |                               |
| Locus_9999_Transcript_1/1_Conf_1.000 | 273  | 0  |           |                |    |         |     |     |                               |



| BLAST2GO                     |                                                |                  |                                                                                                                                     |                              |              |                                                                                 |
|------------------------------|------------------------------------------------|------------------|-------------------------------------------------------------------------------------------------------------------------------------|------------------------------|--------------|---------------------------------------------------------------------------------|
| Specie                       | Blast2GO Seq. Description                      | #GOs (Annotated) | GOs (Annotated)                                                                                                                     | GOs Mapped but not annotated | Enzyme Codes | InterProScan                                                                    |
| -                            |                                                | 0                |                                                                                                                                     |                              |              | SignalP (SIGNALP)                                                               |
| -                            |                                                | 0                |                                                                                                                                     |                              |              | IPR017956                                                                       |
| -                            |                                                | 0                |                                                                                                                                     |                              |              | IPR017956                                                                       |
| -                            |                                                | 0                |                                                                                                                                     |                              |              | IPR017956                                                                       |
| Nippostrongylus brasiliensis | globin                                         | 6                | F:GO:0020037;<br>C:GO:0005615;<br>C:GO:0005737;<br>F:GO:0005344;<br>P:GO:0015671;<br>F:GO:0019825                                   | -                            |              | IPR009050; IPR012292                                                            |
| Caenorhabditis briggsae      | tricarboxylate transport mitochondrial         | 8                | F:GO:0005371;<br>F:GO:0005488;<br>C:GO:0005743;<br>C:GO:0016006;<br>C:GO:0005811;<br>P:GO:0006843;<br>P:GO:0055085;<br>C:GO:0016021 | -                            |              | IPR001993; IPR018108;<br>G3DSA:1.50.40.10 (GENE3D),<br>PTHR11896:SF62 (PANTHER) |
| Brugia malayi                | hypothetical protein Bm1_08910 [Brugia malayi] | 0                |                                                                                                                                     |                              |              | -                                                                               |
| Loa loa                      | protein suppressor of forked                   | 2                | P:GO:0009792;<br>P:GO:0000003                                                                                                       | -                            |              | IPR008847; PTHR19980 (PANTHER)                                                  |
| Caenorhabditis elegans       | dopey family member 1                          | 2                | P:GO:0015031;<br>P:GO:0007275                                                                                                       | -                            |              | IPR007249; PTHR14042 (PANTHER)                                                  |
| Caenorhabditis briggsae      | gamma-glutamyl cyclotransferase                | 4                | F:GO:0003839;<br>P:GO:0001836;<br>C:GO:0005829;<br>F:GO:0042803                                                                     | -                            | EC:2.3.2.4   | SignalP (SIGNALP)                                                               |
| -                            |                                                | 0                |                                                                                                                                     |                              |              | SignalP (SIGNALP)                                                               |
| -                            |                                                | 0                |                                                                                                                                     |                              |              | SignalP (SIGNALP)                                                               |
| -                            |                                                | 0                |                                                                                                                                     |                              |              | SignalP (SIGNALP)                                                               |
| Homo sapiens                 | immunoglobulin heavy chain                     | 4                | P:GO:0018298;<br>P:GO:0006955;<br>F:GO:0003823;<br>F:GO:0005515                                                                     | -                            |              | SignalP (SIGNALP)                                                               |
| -                            |                                                | 0                |                                                                                                                                     |                              |              | SignalP (SIGNALP)                                                               |
| Caenorhabditis elegans       | carnitine acetyltransferase                    | 3                | F:GO:0008415;<br>P:GO:0040011;<br>C:GO:0005739                                                                                      | -                            |              | -                                                                               |

|                                |                                                                               |    |                                                                                                                                                                                                                                                            |                               |                                                         |                                                                                                                                                       |
|--------------------------------|-------------------------------------------------------------------------------|----|------------------------------------------------------------------------------------------------------------------------------------------------------------------------------------------------------------------------------------------------------------|-------------------------------|---------------------------------------------------------|-------------------------------------------------------------------------------------------------------------------------------------------------------|
| Brugia malayi                  | vinculin family protein                                                       | 15 | P:GO:0016337;<br>C:GO:0030424;<br>P:GO:0021942;<br>C:GO:0005913;<br>P:GO:0048854;<br>P:GO:0051823;<br>P:GO:0060134;<br>F:GO:0045296;<br>C:GO:0015629;<br>P:GO:0007409;<br>F:GO:0005200;<br>C:GO:0016323;<br>C:GO:0030027;<br>C:GO:0005737;<br>P:GO:0048813 | -                             | -                                                       |                                                                                                                                                       |
| -                              | -                                                                             | 0  |                                                                                                                                                                                                                                                            |                               |                                                         | -                                                                                                                                                     |
| -                              | -                                                                             | 0  |                                                                                                                                                                                                                                                            |                               |                                                         | -                                                                                                                                                     |
| Brachyspira hyodysenteriae WA1 | cop1-interacting protein 4                                                    | 0  |                                                                                                                                                                                                                                                            |                               |                                                         | -                                                                                                                                                     |
| Caenorhabditis elegans         | solute carrier family 12 (potassium chloride transporters) member 6 isoform 2 | 3  | P:GO:0055085;<br>P:GO:0006811;<br>C:GO:0016020                                                                                                                                                                                                             | -                             |                                                         | PTHR11827 (PANTHER),<br>PTHR11827:SF5 (PANTHER)                                                                                                       |
| Loa loa                        | alpha beta hydrolase2                                                         | 2  | F:GO:0016298;<br>P:GO:0006629                                                                                                                                                                                                                              | -                             |                                                         | G3DSA:3.40.50.1820 (GENE3D),<br>PTHR10794 (PANTHER),<br>PTHR10794:SF9 (PANTHER), SSF53474<br>(SUPERFAMILY)                                            |
| -                              | -                                                                             | 0  |                                                                                                                                                                                                                                                            |                               |                                                         | IPR013083; SSF57850 (SUPERFAMILY)                                                                                                                     |
| Caenorhabditis briggsae        | briggsae cbr-emb-9 protein                                                    | 4  | F:GO:0005515;<br>P:GO:0009987;<br>P:GO:0016043;<br>C:GO:0005581                                                                                                                                                                                            | -                             |                                                         | IPR008160; PTHR10499 (PANTHER),<br>PTHR10499:SF114 (PANTHER)                                                                                          |
| Caenorhabditis briggsae        | ras-like protein 2                                                            | 9  | F:GO:0005525;<br>C:GO:0005622;<br>F:GO:0005515;<br>P:GO:0006913;<br>P:GO:0030335;<br>P:GO:0006886;<br>C:GO:0016020;<br>P:GO:0007265;<br>F:GO:0003924                                                                                                       | -                             | EC:3.6.5.1;<br>EC:3.6.5.2;<br>EC:3.6.5.3;<br>EC:3.6.5.4 | IPR001806; IPR003577; IPR005225;<br>IPR013753; IPR015592; IPR020849;<br>G3DSA:3.40.50.300 (GENE3D),<br>PTHR11708 (PANTHER), SSF52540<br>(SUPERFAMILY) |
| -                              | -                                                                             | 0  |                                                                                                                                                                                                                                                            |                               |                                                         | -                                                                                                                                                     |
| -                              | -                                                                             | 0  |                                                                                                                                                                                                                                                            |                               |                                                         | -                                                                                                                                                     |
| Ancylostoma caninum            | secreted protein 6 precursor                                                  | 0  |                                                                                                                                                                                                                                                            | C:GO:0005576                  |                                                         | -                                                                                                                                                     |
| Caenorhabditis elegans         | hypothetical protein F10G8.8 [Caenorhabditis elegans]                         | 0  |                                                                                                                                                                                                                                                            | F:GO:0005515                  |                                                         | IPR001849                                                                                                                                             |
| Ailuropoda melanoleuca         | daz associated protein 1                                                      | 8  | C:GO:0005730;<br>P:GO:0007283;<br>P:GO:0030154;<br>C:GO:0005844;<br>F:GO:0003723;<br>P:GO:0007275;<br>C:GO:0005739;<br>F:GO:0000166                                                                                                                        | -                             |                                                         | IPR000504; IPR012677; PTHR10432<br>(PANTHER), PTHR10432:SF10<br>(PANTHER), SSF54928 (SUPERFAMILY)                                                     |
| Caenorhabditis briggsae        | briggsae cbr-tnt-3 protein                                                    | 0  |                                                                                                                                                                                                                                                            | P:GO:0006952;<br>P:GO:0043050 |                                                         | -                                                                                                                                                     |

|                           |                                                                               |    |                                                                                                                                                                                                                          |   |            |                                                                                                                                                                                              |
|---------------------------|-------------------------------------------------------------------------------|----|--------------------------------------------------------------------------------------------------------------------------------------------------------------------------------------------------------------------------|---|------------|----------------------------------------------------------------------------------------------------------------------------------------------------------------------------------------------|
| Caenorhabditis sp. PS1010 | galactoki-se 2                                                                | 3  | P:GO:0005975;<br>P:GO:0044237;<br>F:GO:0004335                                                                                                                                                                           | - | EC:2.7.1.6 | IPR000705; IPR006203; IPR006204;<br>IPR006206; IPR013750; IPR014721;<br>IPR020568; G3DSA:3.30.70.890<br>(GENE3D), PTHR10457 (PANTHER),<br>PTHR10457:SF7 (PANTHER), SSF55060<br>(SUPERFAMILY) |
| Caenorhabditis elegans    | small nucleolar ribonucleoprotein complex subunit                             | 1  | P:GO:0006898                                                                                                                                                                                                             | - |            | IPR001680; IPR015943; IPR017986;<br>IPR019781; IPR019782; PTHR19853<br>(PANTHER)                                                                                                             |
|                           |                                                                               | 0  |                                                                                                                                                                                                                          |   |            |                                                                                                                                                                                              |
| Loa loa                   | r- polymerase-associated protein rtf1 homolog                                 | 10 | P:GO:0035121;<br>C:GO:0005730;<br>P:GO:0043473;<br>P:GO:0007507;<br>P:GO:0014032;<br>F:GO:0005515;<br>P:GO:0016043;<br>P:GO:0001756;<br>C:GO:0005737;<br>P:GO:0006350                                                    | - |            | IPR004343; PTHR13115 (PANTHER)                                                                                                                                                               |
|                           |                                                                               | 0  |                                                                                                                                                                                                                          |   |            |                                                                                                                                                                                              |
| Caenorhabditis briggsae   | heat shock protein 75                                                         | 6  | P:GO:0006457;<br>C:GO:0005811;<br>P:GO:0006950;<br>P:GO:0040010;<br>F:GO:0005524;<br>F:GO:0051082                                                                                                                        | - |            | IPR001404; IPR003594; IPR020575;<br>PTHR11528:SF24 (PANTHER)                                                                                                                                 |
| Caenorhabditis elegans    | sphingomyelin phosphodiesterase neutral membrane<br>(neutral sphingomyeli-se) | 3  | P:GO:0050794;<br>F:GO:0016787;<br>C:GO:0016020                                                                                                                                                                           | - |            | IPR005135; G3DSA:3.60.10.10<br>(GENE3D), PTHR12393 (PANTHER)                                                                                                                                 |
|                           |                                                                               | 0  |                                                                                                                                                                                                                          |   |            |                                                                                                                                                                                              |
| Caenorhabditis briggsae   | u2 snrnp auxiliary factor small subunit                                       | 13 | F:GO:0003723;<br>C:GO:0015030;<br>C:GO:0005681;<br>F:GO:0008270;<br>P:GO:0040007;<br>F:GO:0050733;<br>P:GO:0040035;<br>P:GO:0018996;<br>P:GO:0002119;<br>F:GO:0000166;<br>P:GO:0040011;<br>P:GO:0000398;<br>P:GO:0009792 | - |            | IPR000504; IPR000571; IPR009145;<br>IPR012677; SSF54928 (SUPERFAMILY)                                                                                                                        |
| Caenorhabditis briggsae   | u2 snrnp auxiliary factor small subunit                                       | 13 | F:GO:0003723;<br>C:GO:0015030;<br>C:GO:0005681;<br>F:GO:0008270;<br>P:GO:0040007;<br>F:GO:0050733;<br>P:GO:0040035;<br>P:GO:0018996;<br>P:GO:0002119;<br>F:GO:0000166;<br>P:GO:0040011;<br>P:GO:0000398;<br>P:GO:0009792 | - |            | IPR000504; IPR000571; IPR009145;<br>IPR012677; SSF54928 (SUPERFAMILY)                                                                                                                        |

|                           |                                                               |   |                                                                                                   |                                                |             |                                                                                                                                                                         |
|---------------------------|---------------------------------------------------------------|---|---------------------------------------------------------------------------------------------------|------------------------------------------------|-------------|-------------------------------------------------------------------------------------------------------------------------------------------------------------------------|
| Caenorhabditis elegans    | hypothetical protein T07C12.12 [Caenorhabditis elegans]       | 0 |                                                                                                   |                                                |             | PTHR14790 (PANTHER), PTHR14790:SF2 (PANTHER)                                                                                                                            |
| Loa loa                   | upf3 regulator of nonsense transcripts homolog a              | 1 | F:GO:0005488                                                                                      | -                                              |             | IPR005120; IPR012677; IPR018247; PTHR13112 (PANTHER), SSF54928 (SUPERFAMILY)                                                                                            |
| Loa loa                   | protein ki-se n2                                              | 5 | P:GO:0006468;<br>C:GO:0005622;<br>F:GO:0005524;<br>P:GO:0007165;<br>F:GO:0004674                  | -                                              | EC:2.7.11.0 | IPR000719; IPR000961; IPR008271; IPR011009; IPR017442; IPR017892; G3DSA:1.10.510.10 (GENE3D), G3DSA:3.30.200.20 (GENE3D), PTHR22985 (PANTHER), PTHR22985:SF54 (PANTHER) |
| Caenorhabditis elegans    | regulator of g-protein sig-ling 7                             | 2 | F:GO:0004871;<br>P:GO:0023052                                                                     | -                                              |             | IPR000342; IPR016137; G3DSA:1.10.167.10 (GENE3D), G3DSA:1.10.196.10 (GENE3D), PTHR10845 (PANTHER), PTHR10845:SF29 (PANTHER)                                             |
| Brugia malayi             | transcription elongation factor b polypeptide 1               | 1 | F:GO:0005515                                                                                      | -                                              |             | IPR011333; IPR016073; PTHR20648 (PANTHER)                                                                                                                               |
| Caenorhabditis sp. PS1010 | mr- cap guanine-n7 methyltransferase                          | 4 | F:GO:0004482;<br>P:GO:0006370;<br>F:GO:0003723;<br>C:GO:0005634                                   | -                                              | EC:2.1.1.56 | IPR004971; G3DSA:3.40.50.150 (GENE3D), PTHR12189 (PANTHER), SSF53335 (SUPERFAMILY)                                                                                      |
|                           | -                                                             | 0 |                                                                                                   |                                                |             | -                                                                                                                                                                       |
|                           | -                                                             | 0 |                                                                                                   |                                                |             | -                                                                                                                                                                       |
| Pongo abelii              | cd68 molecule                                                 | 5 | C:GO:0005624;<br>C:GO:0016021;<br>C:GO:0005765;<br>C:GO:0010008;<br>C:GO:0005886                  | -                                              |             | IPR002000; PTHR11506:SF2 (PANTHER)                                                                                                                                      |
| Caenorhabditis elegans    | elegans protein partially confirmed by transcript evidence    | 0 |                                                                                                   | F:GO:0004385;<br>C:GO:0016020;<br>F:GO:0005515 |             | IPR001478; G3DSA:2.30.42.10 (GENE3D), PTHR10316 (PANTHER), PTHR10316:SF7 (PANTHER)                                                                                      |
| Ancylostoma caninum       | metalloprotease 1 precursor                                   | 3 | F:GO:0046872;<br>P:GO:0000003;<br>F:GO:0008237                                                    | -                                              |             | IPR001506; IPR013032; G3DSA:3.40.390.10 (GENE3D), PTHR10127 (PANTHER), PTHR10127:SF65 (PANTHER), SSF55486 (SUPERFAMILY)                                                 |
| Ancylostoma caninum       | metalloprotease 1 precursor                                   | 3 | F:GO:0046872;<br>P:GO:0000003;<br>F:GO:0008237                                                    | -                                              |             | IPR001506; IPR013032; G3DSA:3.40.390.10 (GENE3D), PTHR10127 (PANTHER), PTHR10127:SF65 (PANTHER), SSF55486 (SUPERFAMILY)                                                 |
| Caenorhabditis elegans    | hepatocellular carcinoma-associated antigen 59 family protein | 0 |                                                                                                   | F:GO:0005509                                   |             | IPR010756; PTHR13486:SF1 (PANTHER)                                                                                                                                      |
|                           | -                                                             | 0 |                                                                                                   |                                                |             | -                                                                                                                                                                       |
|                           | -                                                             | 0 |                                                                                                   |                                                |             | -                                                                                                                                                                       |
| Caenorhabditis elegans    | tyrosyl-tr- synthetase                                        | 6 | P:GO:0000003;<br>F:GO:0000166;<br>P:GO:0006418;<br>F:GO:0004831;<br>P:GO:0009792;<br>P:GO:0007040 | -                                              | EC:6.1.1.1  | IPR002305; IPR015624; G3DSA:1.10.240.10 (GENE3D), PTHR11946 (PANTHER), SignalP (SIGNALP), SSF52374 (SUPERFAMILY)                                                        |

|                         |                                                  |    |                                                                                                                                                                                                                                                                                                                                                                                                                                                                         |                                                                                                                                     |                                                                                                           |
|-------------------------|--------------------------------------------------|----|-------------------------------------------------------------------------------------------------------------------------------------------------------------------------------------------------------------------------------------------------------------------------------------------------------------------------------------------------------------------------------------------------------------------------------------------------------------------------|-------------------------------------------------------------------------------------------------------------------------------------|-----------------------------------------------------------------------------------------------------------|
| Caenorhabditis elegans  | zipper cg15792-pd                                | 32 | P:GO:0045200;<br>C:GO:0016461;<br>P:GO:0035159;<br>P:GO:0031036;<br>C:GO:0016460;<br>P:GO:0007409;<br>P:GO:0035072;<br>P:GO:0007443;<br>P:GO:0007395;<br>P:GO:0045214;<br>P:GO:0035017;<br>C:GO:0016021;<br>P:GO:0006936;<br>P:GO:0007297;<br>P:GO:0046663;<br>F:GO:0003779;<br>P:GO:0001736;<br>F:GO:0032027;<br>P:GO:0008258;<br>P:GO:0051259;<br>P:GO:0016203;<br>C:GO:0032154;<br>C:GO:0045179;<br>F:GO:0003774;<br>P:GO:0045184;<br>P:GO:0035317;<br>C:GO:0030018; | -                                                                                                                                   | IPR001609; PTHR13140 (PANTHER),<br>PTHR13140:SF23 (PANTHER),<br>SSF52540 (SUPERFAMILY)                    |
| Loa loa                 | hypothetical protein LOAG_00061 [Loa loa]        | 0  |                                                                                                                                                                                                                                                                                                                                                                                                                                                                         | F:GO:0030246                                                                                                                        | -                                                                                                         |
| Brugia malayi           | sec63 domain containing protein                  | 1  | F:GO:0005515                                                                                                                                                                                                                                                                                                                                                                                                                                                            | -                                                                                                                                   | G3DSA:2.60.40.150 (GENE3D),<br>PTHR11752 (PANTHER),<br>PTHR11752:SF7 (PANTHER)                            |
| Caenorhabditis briggsae | elegans protein confirmed by transcript evidence | 0  |                                                                                                                                                                                                                                                                                                                                                                                                                                                                         | C:GO:0016021;<br>P:GO:0055085                                                                                                       | IPR011701; IPR016196;<br>G3DSA:1.20.1250.20 (GENE3D),<br>PTHR11662 (PANTHER),<br>PTHR11662:SF17 (PANTHER) |
|                         |                                                  | 0  |                                                                                                                                                                                                                                                                                                                                                                                                                                                                         |                                                                                                                                     |                                                                                                           |
| Caenorhabditis elegans  | loc443620 protein                                | 0  |                                                                                                                                                                                                                                                                                                                                                                                                                                                                         | F:GO:0003674;<br>C:GO:0005737;<br>F:GO:0004872;<br>F:GO:0004871;<br>F:GO:0004930;<br>C:GO:0016021;<br>P:GO:0007165;<br>P:GO:0007186 | IPR019167; PTHR21551 (PANTHER)                                                                            |
|                         |                                                  | 0  |                                                                                                                                                                                                                                                                                                                                                                                                                                                                         |                                                                                                                                     |                                                                                                           |
| Caenorhabditis briggsae | chromosome 9 open reading frame 5                | 1  | F:GO:0005515                                                                                                                                                                                                                                                                                                                                                                                                                                                            | -                                                                                                                                   | IPR000215; SignalP (SIGNALP)                                                                              |
| Caenorhabditis briggsae | chromosome 9 open reading frame 5                | 1  | F:GO:0005515                                                                                                                                                                                                                                                                                                                                                                                                                                                            | -                                                                                                                                   | IPR000215; SignalP (SIGNALP)                                                                              |
| Pan troglodytes         | ribonuclease pancreatic precursor                | 3  | C:GO:0005576;<br>F:GO:0003676;<br>F:GO:0004522                                                                                                                                                                                                                                                                                                                                                                                                                          | -                                                                                                                                   | EC:3.1.27.5<br>SignalP (SIGNALP)                                                                          |
| Caenorhabditis elegans  | zinc c2h2 type family protein                    | 0  |                                                                                                                                                                                                                                                                                                                                                                                                                                                                         | F:GO:0003676;<br>P:GO:0045944;<br>F:GO:0008270;<br>C:GO:0005634;<br>P:GO:0006917;<br>C:GO:0005622                                   | IPR007087; IPR015880; PTHR14738<br>(PANTHER), PTHR14738:SF6<br>(PANTHER)                                  |

|                         |                                                                                   |    |                                                                                                                                                                       |                                                                                                                    |            |                                                                                                                  |
|-------------------------|-----------------------------------------------------------------------------------|----|-----------------------------------------------------------------------------------------------------------------------------------------------------------------------|--------------------------------------------------------------------------------------------------------------------|------------|------------------------------------------------------------------------------------------------------------------|
| Loa loa                 | zinc c2h2 type family protein                                                     | 6  | P:GO:0009987;<br>F:GO:0008270;<br>F:GO:0003676;<br>C:GO:0005622;<br>F:GO:0005515;<br>P:GO:0040015                                                                     | -                                                                                                                  |            | IPR007087; IPR013087; IPR015880;<br>PTHR11389 (PANTHER), SSF57667<br>(SUPERFAMILY)                               |
| Caenorhabditis briggsae | mitochondrial ribosomal protein l1                                                | 10 | P:GO:0006412;<br>P:GO:0040010;<br>F:GO:0003723;<br>P:GO:0006396;<br>C:GO:0005840;<br>P:GO:0008340;<br>F:GO:0003735;<br>P:GO:0002119;<br>P:GO:0006898;<br>P:GO:0009792 | -                                                                                                                  | EC:3.6.5.3 | IPR002143; PTHR23105 (PANTHER),<br>PTHR23105:SF8 (PANTHER)                                                       |
| Caenorhabditis elegans  | par-6 at contacts (abnormal early localization of par-6)<br>family member (pac-1) | 2  | F:GO:0005100;<br>P:GO:0007266                                                                                                                                         | -                                                                                                                  |            | -                                                                                                                |
| -                       | -                                                                                 | 0  |                                                                                                                                                                       |                                                                                                                    |            | SignalP (SIGNALP)                                                                                                |
| -                       | -                                                                                 | 0  |                                                                                                                                                                       |                                                                                                                    |            | -                                                                                                                |
| -                       | -                                                                                 | 0  |                                                                                                                                                                       |                                                                                                                    |            | -                                                                                                                |
| -                       | -                                                                                 | 0  |                                                                                                                                                                       |                                                                                                                    |            | -                                                                                                                |
| -                       | -                                                                                 | 0  |                                                                                                                                                                       |                                                                                                                    |            | -                                                                                                                |
| Caenorhabditis briggsae | ubiquinol-cytochrome c chaperone family protein                                   | 1  | P:GO:0009792                                                                                                                                                          | -                                                                                                                  |            | -                                                                                                                |
| Loa loa                 | taf2 r- polymerase tata box binding protein -associated<br>150kda                 | 7  | P:GO:0010552;<br>P:GO:0006367;<br>F:GO:0010843;<br>P:GO:0000086;<br>C:GO:0033276;<br>F:GO:0005515;<br>C:GO:0005669                                                    | -                                                                                                                  |            | IPR014782; PTHR15137 (PANTHER),<br>PTHR15137:SF7 (PANTHER), SSF55486<br>(SUPERFAMILY), SSF63737<br>(SUPERFAMILY) |
| Brugia malayi           | c2h2 transcription factor                                                         | 0  |                                                                                                                                                                       | P:GO:0006355;<br>F:GO:0046872;<br>F:GO:0003676;<br>P:GO:0008150;<br>F:GO:0008270;<br>C:GO:0005634;<br>C:GO:0005622 |            | IPR007087; IPR013087; IPR015880;<br>PTHR11389 (PANTHER), SSF57667<br>(SUPERFAMILY)                               |

|                         |                                                                      |    |                                                                                                                                                                                                                                                                                                                                                                                                                                                                        |   |            |                                                                                           |
|-------------------------|----------------------------------------------------------------------|----|------------------------------------------------------------------------------------------------------------------------------------------------------------------------------------------------------------------------------------------------------------------------------------------------------------------------------------------------------------------------------------------------------------------------------------------------------------------------|---|------------|-------------------------------------------------------------------------------------------|
| Caenorhabditis briggsae | protein transport protein sec23                                      | 28 | P:GO:0008360;<br>F:GO:0005515;<br>F:GO:0008270;<br>P:GO:0035293;<br>P:GO:0040010;<br>P:GO:0006898;<br>P:GO:0034394;<br>C:GO:0030127;<br>P:GO:0048081;<br>P:GO:0007029;<br>P:GO:0018996;<br>P:GO:0006886;<br>P:GO:0050774;<br>P:GO:0007030;<br>P:GO:0009792;<br>P:GO:0035149;<br>F:GO:0005096;<br>P:GO:0016203;<br>P:GO:0022409;<br>C:GO:0005795;<br>P:GO:0002119;<br>P:GO:0006888;<br>P:GO:0030011;<br>P:GO:0048477;<br>P:GO:0030421;<br>C:GO:0005783;<br>P:GO:0003331 | - |            | IPR006895; IPR006896; PTHR11141 (PANTHER), SSF53300 (SUPERFAMILY), SSF81995 (SUPERFAMILY) |
| Loa loa                 | mitochondrial import inner membrane translocase subunit              | 9  | F:GO:0015450;<br>C:GO:0005743;<br>F:GO:0046872;<br>P:GO:0045039;<br>P:GO:0040035;<br>C:GO:0042719;<br>P:GO:0040011;<br>P:GO:0009792;<br>P:GO:0040018                                                                                                                                                                                                                                                                                                                   | - |            | IPR004217; PTHR10898 (PANTHER), PTHR10898:SF9 (PANTHER), SSF144122 (SUPERFAMILY)          |
| Loa loa                 | egl-1 suppressor uptake defective raf enhancer family member (eor-2) | 0  |                                                                                                                                                                                                                                                                                                                                                                                                                                                                        |   |            | -                                                                                         |
| Caenorhabditis briggsae | atp synthase subunit mitochondrial                                   | 4  | P:GO:0006412;<br>P:GO:0006139;<br>P:GO:0044281;<br>C:GO:0005737                                                                                                                                                                                                                                                                                                                                                                                                        | - | EC:3.6.5.3 | G3DSA:3.80.10.10 (GENE3D), PTHR13382 (PANTHER), SignalP (SIGNALP)                         |
| Caenorhabditis elegans  | iron-sulfur cluster scaffold variant 2                               | 9  | P:GO:0009792;<br>P:GO:0002119;<br>P:GO:0016226;<br>F:GO:0051536;<br>F:GO:0005506;<br>F:GO:0032947;<br>P:GO:0040007;<br>C:GO:0005829;<br>C:GO:0005739                                                                                                                                                                                                                                                                                                                   | - |            | -                                                                                         |
|                         | -                                                                    | 0  |                                                                                                                                                                                                                                                                                                                                                                                                                                                                        |   |            | SignalP (SIGNALP)                                                                         |
|                         | -                                                                    | 0  |                                                                                                                                                                                                                                                                                                                                                                                                                                                                        |   |            | -                                                                                         |
|                         | -                                                                    | 0  |                                                                                                                                                                                                                                                                                                                                                                                                                                                                        |   |            | -                                                                                         |
|                         | -                                                                    | 0  |                                                                                                                                                                                                                                                                                                                                                                                                                                                                        |   |            | -                                                                                         |
| Loa loa                 | briggsae cbr-mec-17 protein                                          | 0  |                                                                                                                                                                                                                                                                                                                                                                                                                                                                        |   |            | IPR007965                                                                                 |

|                         |                                                       |    |  |                                                                                                                                                                                                                                                                                                                                                                                                    |  |                                                                                                                                                                                                |
|-------------------------|-------------------------------------------------------|----|--|----------------------------------------------------------------------------------------------------------------------------------------------------------------------------------------------------------------------------------------------------------------------------------------------------------------------------------------------------------------------------------------------------|--|------------------------------------------------------------------------------------------------------------------------------------------------------------------------------------------------|
| Loa loa                 | kh domain containing protein                          | 0  |  | F:GO:0003723                                                                                                                                                                                                                                                                                                                                                                                       |  | IPR002110; IPR020683; PTHR18958 (PANTHER), PTHR18958:SF281 (PANTHER)                                                                                                                           |
| Caenorhabditis elegans  | elegans protein confirmed by transcript evidence      | 0  |  | C:GO:0033162;<br>C:GO:0005634;<br>C:GO:0019717;<br>C:GO:0014069;<br>C:GO:0005789;<br>C:GO:0005783;<br>C:GO:0045202;<br>C:GO:0033267;<br>P:GO:0048812;<br>C:GO:0043197;<br>C:GO:0010008;<br>C:GO:0030054;<br>C:GO:0005737;<br>C:GO:0005768;<br>C:GO:0030672;<br>C:GO:0031410;<br>C:GO:0030426;<br>C:GO:0045211;<br>P:GO:0031532;<br>C:GO:0005886;<br>P:GO:0060159;<br>C:GO:0043005;<br>P:GO:0031175 |  | -                                                                                                                                                                                              |
|                         | -                                                     | 0  |  |                                                                                                                                                                                                                                                                                                                                                                                                    |  | SignalP (SIGNALP)                                                                                                                                                                              |
| Caenorhabditis elegans  | riken cd- isoform cra_a                               | 0  |  | F:GO:0003676;<br>F:GO:0003674;<br>F:GO:0000166;<br>P:GO:0008150;<br>C:GO:0005575                                                                                                                                                                                                                                                                                                                   |  | -                                                                                                                                                                                              |
| Caenorhabditis elegans  | hypothetical protein Y47A7.1 [Caenorhabditis elegans] | 0  |  | F:GO:0005488                                                                                                                                                                                                                                                                                                                                                                                       |  | -                                                                                                                                                                                              |
|                         | -                                                     | 0  |  |                                                                                                                                                                                                                                                                                                                                                                                                    |  | -                                                                                                                                                                                              |
|                         | -                                                     | 0  |  |                                                                                                                                                                                                                                                                                                                                                                                                    |  | -                                                                                                                                                                                              |
| Caenorhabditis elegans  | hypothetical protein C46H3.2 [Caenorhabditis elegans] | 0  |  |                                                                                                                                                                                                                                                                                                                                                                                                    |  | -                                                                                                                                                                                              |
| Caenorhabditis briggsae | elongation factor tu gtp binding domain containing 2  | 15 |  | F:GO:0003746;<br>C:GO:0015030;<br>P:GO:0000910;<br>P:GO:0040007;<br>C:GO:0016607;<br>P:GO:0000003;<br>P:GO:0008380;<br>P:GO:0018996;<br>P:GO:0002119;<br>F:GO:0005515;<br>P:GO:0040011;<br>F:GO:0003924;<br>C:GO:0030529;<br>P:GO:0009792;<br>F:GO:0005525                                                                                                                                         |  | EC:3.6.5.1;<br>EC:3.6.5.2;<br>EC:3.6.5.3;<br>EC:3.6.5.4<br>IPR000795; IPR005225;<br>G3DSA:3.40.50.300 (GENE3D),<br>PTHR23115 (PANTHER),<br>PTHR23115:SF15 (PANTHER),<br>SSF52540 (SUPERFAMILY) |



|                         |                                                  |    |                                                                                                                                                                                                                                                                                                                                |                                                                 |                                                                                                                                                         |
|-------------------------|--------------------------------------------------|----|--------------------------------------------------------------------------------------------------------------------------------------------------------------------------------------------------------------------------------------------------------------------------------------------------------------------------------|-----------------------------------------------------------------|---------------------------------------------------------------------------------------------------------------------------------------------------------|
| Homo sapiens            | peptide transporter                              | 19 | F:GO:0046979;<br>C:GO:0042825;<br>P:GO:0019060;<br>F:GO:0015197;<br>C:GO:0005792;<br>P:GO:0042270;<br>F:GO:0043531;<br>C:GO:0005829;<br>F:GO:0046982;<br>F:GO:0046978;<br>P:GO:0046967;<br>P:GO:0015833;<br>F:GO:0042626;<br>P:GO:0019885;<br>P:GO:0055085;<br>F:GO:0042605;<br>F:GO:0042803;<br>F:GO:0005524;<br>C:GO:0005739 | -                                                               | IPR011527; IPR017940;<br>G3DSA:1.20.1560.10 (GENE3D),<br>PTHR19242 (PANTHER),<br>PTHR19242:SF79 (PANTHER), SignalP<br>(SIGNALP)                         |
| Loa loa                 | organic solute transporter alpha                 | 0  |                                                                                                                                                                                                                                                                                                                                | C:GO:0016021;<br>P:GO:0009792;<br>F:GO:0005215;<br>P:GO:0006810 | -                                                                                                                                                       |
| Caenorhabditis elegans  | g-protein coupled receptor                       | 5  | F:GO:0004872;<br>P:GO:0035075;<br>P:GO:0040017;<br>P:GO:0007186;<br>C:GO:0016021                                                                                                                                                                                                                                               | -                                                               | IPR000276; IPR017452;<br>G3DSA:1.20.1070.10 (GENE3D),<br>PTHR19266 (PANTHER),<br>PTHR19266:SF68 (PANTHER), SignalP<br>(SIGNALP), SSF81321 (SUPERFAMILY) |
|                         | -                                                | 0  |                                                                                                                                                                                                                                                                                                                                |                                                                 | -                                                                                                                                                       |
| Caenorhabditis elegans  | elegans protein confirmed by transcript evidence | 1  | F:GO:0005515                                                                                                                                                                                                                                                                                                                   | -                                                               | IPR000866; IPR012335; IPR012336;<br>IPR017936; PTHR13871 (PANTHER),<br>PTHR13871:SF4 (PANTHER), SignalP<br>(SIGNALP)                                    |
| Caenorhabditis elegans  | elegans protein confirmed by transcript evidence | 1  | F:GO:0005515                                                                                                                                                                                                                                                                                                                   | -                                                               | IPR000866; IPR012335; IPR012336;<br>IPR017936; PTHR13871 (PANTHER),<br>PTHR13871:SF4 (PANTHER), SignalP<br>(SIGNALP)                                    |
| Caenorhabditis briggsae | briggsae cbr-hum-7 protein                       | 5  | F:GO:0046872;<br>C:GO:0016459;<br>F:GO:0005524;<br>P:GO:0007165;<br>F:GO:0003774                                                                                                                                                                                                                                               | -                                                               | -                                                                                                                                                       |
| Caenorhabditis briggsae | briggsae cbr-nol-6 protein                       | 0  |                                                                                                                                                                                                                                                                                                                                |                                                                 | -                                                                                                                                                       |
| Brugia malayi           | asparagi-se family protein                       | 0  |                                                                                                                                                                                                                                                                                                                                | F:GO:0005488;<br>F:GO:0016787                                   | -                                                                                                                                                       |
| Caenorhabditis elegans  | briggsae cbr-pvf-1 protein                       | 1  | F:GO:0016301                                                                                                                                                                                                                                                                                                                   | -                                                               | IPR000072; IPR004153; IPR017948;<br>G3DSA:2.10.90.10 (GENE3D),<br>PTHR11633 (PANTHER),<br>PTHR11633:SF1 (PANTHER), SSF57501<br>(SUPERFAMILY)            |
| Brugia malayi           | protein mitochondrial precursor                  | 1  | F:GO:0005488                                                                                                                                                                                                                                                                                                                   | -                                                               | IPR000740; PTHR21237:SF8<br>(PANTHER), SignalP (SIGNALP)                                                                                                |
|                         | -                                                | 0  |                                                                                                                                                                                                                                                                                                                                |                                                                 | -                                                                                                                                                       |
| Caenorhabditis elegans  | zinc finger ccch-type containing 15              | 3  | F:GO:0046872;<br>C:GO:0044424;<br>P:GO:0019221                                                                                                                                                                                                                                                                                 | -                                                               | IPR000571; G3DSA:4.10.1000.10<br>(GENE3D), PTHR12681 (PANTHER),<br>SSF90229 (SUPERFAMILY)                                                               |

|                         |                                                               |    |                                                                                                                                                                       |   |                            |                                                                                                                        |
|-------------------------|---------------------------------------------------------------|----|-----------------------------------------------------------------------------------------------------------------------------------------------------------------------|---|----------------------------|------------------------------------------------------------------------------------------------------------------------|
| Caenorhabditis elegans  | zinc finger ccch-type containing 15                           | 3  | F:GO:0046872;<br>C:GO:0044424;<br>P:GO:0019221                                                                                                                        | - |                            | IPR000571; G3DSA:4.10.1000.10 (GENE3D), PTHR12681 (PANTHER), SSF90229 (SUPERFAMILY)                                    |
| Caenorhabditis elegans  | mlx interacting protein                                       | 9  | F:GO:0030528;<br>P:GO:0040010;<br>F:GO:0005488;<br>P:GO:0045449;<br>P:GO:0002119;<br>P:GO:0006898;<br>P:GO:0009792;<br>C:GO:0005737;<br>C:GO:0005634                  | - |                            | PTHR15741 (PANTHER), PTHR15741:SF1 (PANTHER)                                                                           |
| Brugia malayi           | endoribonuclease dicer                                        | 10 | F:GO:0004525;<br>P:GO:0006396;<br>C:GO:0005622;<br>F:GO:0003677;<br>F:GO:0003725;<br>F:GO:0003993;<br>F:GO:0005524;<br>F:GO:0005515;<br>P:GO:0035194;<br>F:GO:0004386 | - | EC:3.1.26.3;<br>EC:3.1.3.2 | IPR006935; IPR014021; G3DSA:3.40.50.300 (GENE3D), PTHR14950 (PANTHER), PTHR14950:SF3 (PANTHER), SSF52540 (SUPERFAMILY) |
|                         | -                                                             | 0  |                                                                                                                                                                       |   |                            | -                                                                                                                      |
| Caenorhabditis briggsae | briggsae cbr-cka-1 protein                                    | 6  | C:GO:0005887;<br>F:GO:0019904;<br>C:GO:0005938;<br>F:GO:0005069;<br>F:GO:0005080;<br>P:GO:0006612                                                                     | - |                            | -                                                                                                                      |
| Caenorhabditis elegans  | 4-hydroxyphenylpyruvate dioxyge-se                            | 9  | C:GO:0005829;<br>P:GO:0040010;<br>F:GO:0003868;<br>C:GO:0000139;<br>F:GO:0046872;<br>P:GO:0055114;<br>P:GO:0006559;<br>P:GO:0006572;<br>C:GO:0005789                  | - | EC:1.13.11.2<br>7          | IPR004360; IPR005956; G3DSA:3.10.180.10 (GENE3D), SSF54593 (SUPERFAMILY)                                               |
| Caenorhabditis elegans  | 4-hydroxyphenylpyruvate dioxyge-se                            | 9  | C:GO:0005829;<br>P:GO:0040010;<br>F:GO:0003868;<br>C:GO:0000139;<br>F:GO:0046872;<br>P:GO:0055114;<br>P:GO:0006559;<br>P:GO:0006572;<br>C:GO:0005789                  | - | EC:1.13.11.2<br>7          | IPR004360; IPR005956; G3DSA:3.10.180.10 (GENE3D), SSF54593 (SUPERFAMILY)                                               |
| Caenorhabditis elegans  | 4-hydroxyphenylpyruvate dioxyge-se                            | 9  | C:GO:0005829;<br>P:GO:0040010;<br>F:GO:0003868;<br>C:GO:0000139;<br>F:GO:0046872;<br>P:GO:0055114;<br>P:GO:0006559;<br>P:GO:0006572;<br>C:GO:0005789                  | - | EC:1.13.11.2<br>7          | IPR004360; IPR005956; G3DSA:3.10.180.10 (GENE3D), SSF54593 (SUPERFAMILY)                                               |
| Loa loa                 | retinoblastoma-associated protein a domain containing protein | 0  |                                                                                                                                                                       |   |                            | IPR013763                                                                                                              |

|                         |                                                              |   |                                                                                                                                     |                                                                                                                    |                                                                    |
|-------------------------|--------------------------------------------------------------|---|-------------------------------------------------------------------------------------------------------------------------------------|--------------------------------------------------------------------------------------------------------------------|--------------------------------------------------------------------|
|                         | -                                                            | 0 |                                                                                                                                     |                                                                                                                    | -                                                                  |
| Caenorhabditis briggsae | Hypothetical protein CBG14951 [Caenorhabditis briggsae]      | 0 |                                                                                                                                     |                                                                                                                    | -                                                                  |
|                         | -                                                            | 0 |                                                                                                                                     |                                                                                                                    | -                                                                  |
|                         | -                                                            | 0 |                                                                                                                                     |                                                                                                                    | -                                                                  |
| Caenorhabditis briggsae | vacuolar protein sorting-associated protein                  | 1 | P:GO:0008104                                                                                                                        | -                                                                                                                  | -                                                                  |
| Loa loa                 | cap-gly domain containing protein                            | 0 |                                                                                                                                     |                                                                                                                    | IPR022157; PTHR18916 (PANTHER), PTHR18916:SF2 (PANTHER)            |
| Caenorhabditis briggsae | ke (drosophila actin-binding) homolog family member (ketn-1) | 1 | P:GO:0000003                                                                                                                        | -                                                                                                                  | -                                                                  |
| Caenorhabditis briggsae | adenosylmethionine decarboxylase 1                           | 6 | P:GO:0006597;<br>F:GO:0004014;<br>P:GO:0008295;<br>P:GO:0040011;<br>C:GO:0005829;<br>P:GO:0007413                                   | -                                                                                                                  | EC:4.1.1.50 IPR001985; IPR016067; IPR018166                        |
|                         | -                                                            | 0 |                                                                                                                                     |                                                                                                                    | -                                                                  |
| Caenorhabditis briggsae | aliphatic nitrilase                                          | 3 | F:GO:0016810;<br>P:GO:0000003;<br>P:GO:0006807                                                                                      | -                                                                                                                  | IPR003010; PTHR23088 (PANTHER)                                     |
| Caenorhabditis elegans  | msp domain containing protein                                | 0 |                                                                                                                                     | C:GO:0005856;<br>F:GO:0005198                                                                                      | IPR000535; IPR008962; PTHR21513 (PANTHER), PTHR21513:SF2 (PANTHER) |
| Caenorhabditis briggsae | briggsae cbr-aph-2 protein                                   | 8 | P:GO:0009792;<br>P:GO:0048598;<br>P:GO:0007219;<br>C:GO:0005886;<br>P:GO:0060465;<br>P:GO:0018991;<br>P:GO:0040010;<br>P:GO:0060581 | -                                                                                                                  | SignalP (SIGNALP)                                                  |
|                         | -                                                            | 0 |                                                                                                                                     |                                                                                                                    | -                                                                  |
|                         | -                                                            | 0 |                                                                                                                                     |                                                                                                                    | -                                                                  |
| Caenorhabditis briggsae | gamma-glutamyltranspeptidase family protein                  | 1 | F:GO:0003840                                                                                                                        | -                                                                                                                  | EC:2.3.2.2 IPR000101; SignalP (SIGNALP), SSF56235 (SUPERFAMILY)    |
| Caenorhabditis elegans  | briggsae cbr-met-2 protein                                   | 0 |                                                                                                                                     | F:GO:0008168;<br>F:GO:0016740;<br>F:GO:0008270;<br>F:GO:0018024;<br>P:GO:0016568;<br>C:GO:0005634;<br>F:GO:0003677 | PTHR22884 (PANTHER), PTHR22884:SF24 (PANTHER)                      |
|                         | -                                                            | 0 |                                                                                                                                     |                                                                                                                    | -                                                                  |
|                         | -                                                            | 0 |                                                                                                                                     |                                                                                                                    | -                                                                  |

|                           |                                           |    |                                                                                                                                                                                                                                                                                                               |   |                                                                                                                                 |
|---------------------------|-------------------------------------------|----|---------------------------------------------------------------------------------------------------------------------------------------------------------------------------------------------------------------------------------------------------------------------------------------------------------------|---|---------------------------------------------------------------------------------------------------------------------------------|
| Candida dubliniensis CD36 | viral a-type inclusion protein            | 0  | F:GO:0008565;<br>P:GO:0006886;<br>F:GO:0003674;<br>F:GO:0005524;<br>C:GO:0016020;<br>C:GO:0016459;<br>C:GO:0000139;<br>P:GO:0008150;<br>F:GO:0000166;<br>P:GO:0048280;<br>C:GO:0005737;<br>F:GO:0005488;<br>F:GO:0003779;<br>F:GO:0003774;<br>P:GO:0055114;<br>C:GO:0005622;<br>F:GO:0032440;<br>F:GO:0016491 | - | -                                                                                                                               |
| Candida dubliniensis CD36 | viral a-type inclusion protein            | 12 | P:GO:0009653;<br>P:GO:0006810;<br>F:GO:0005515;<br>F:GO:0017111;<br>C:GO:0044430;<br>C:GO:0015629;<br>P:GO:0051649;<br>P:GO:0006996;<br>P:GO:0030154;<br>P:GO:0002376;<br>C:GO:0005886;<br>C:GO:0044444                                                                                                       | - | EC:3.6.1.15 -                                                                                                                   |
| Ostertagia ostertagi      | calcium-dependent apyrase                 | 1  | F:GO:0016787                                                                                                                                                                                                                                                                                                  | - | -                                                                                                                               |
| -                         | -                                         | 0  |                                                                                                                                                                                                                                                                                                               |   |                                                                                                                                 |
| Loa loa                   | hypothetical protein LOAG_14552 [Loa loa] | 0  |                                                                                                                                                                                                                                                                                                               |   | SignalP (SIGNALP)                                                                                                               |
| Oryza sativa Indica Group | histone deacetylase hd2                   | 0  |                                                                                                                                                                                                                                                                                                               |   | -                                                                                                                               |
| Caenorhabditis briggsae   | plexin a                                  | 3  | F:GO:0004872;<br>P:GO:0007411;<br>C:GO:0016020                                                                                                                                                                                                                                                                | - | IPR002165; IPR003659; IPR015943;<br>IPR016201; G3DSA:3.30.1680.10<br>(GENE3D), PTHR22625 (PANTHER),<br>PTHR22625:SF11 (PANTHER) |
| Caenorhabditis briggsae   | plexin a                                  | 3  | F:GO:0004872;<br>P:GO:0007411;<br>C:GO:0016020                                                                                                                                                                                                                                                                | - | IPR002165; IPR003659; IPR015943;<br>IPR016201; G3DSA:3.30.1680.10<br>(GENE3D), PTHR22625 (PANTHER),<br>PTHR22625:SF11 (PANTHER) |
| Caenorhabditis briggsae   | plexin a                                  | 3  | F:GO:0004872;<br>P:GO:0007411;<br>C:GO:0016020                                                                                                                                                                                                                                                                | - | IPR002165; IPR003659; IPR015943;<br>IPR016201; G3DSA:3.30.1680.10<br>(GENE3D), PTHR22625 (PANTHER),<br>PTHR22625:SF11 (PANTHER) |
| Caenorhabditis elegans    | ornithine aminotransferase precursor      | 4  | P:GO:0006591;<br>F:GO:0030170;<br>C:GO:0005759;<br>F:GO:0004587                                                                                                                                                                                                                                               | - | EC:2.6.1.13 -                                                                                                                   |
| -                         | -                                         | 0  |                                                                                                                                                                                                                                                                                                               |   | -                                                                                                                               |

|                        |                                            |    |                                                                                                                                                                                                                                                                                                                                                                                                                                                       |   |             |                                                                                                                                    |
|------------------------|--------------------------------------------|----|-------------------------------------------------------------------------------------------------------------------------------------------------------------------------------------------------------------------------------------------------------------------------------------------------------------------------------------------------------------------------------------------------------------------------------------------------------|---|-------------|------------------------------------------------------------------------------------------------------------------------------------|
| Loa loa                | mitochondrial phosphate carrier protein    | 13 | P:GO:0055085;<br>P:GO:0040010;<br>P:GO:0006310;<br>C:GO:0005743;<br>F:GO:0015293;<br>P:GO:0006091;<br>P:GO:0040035;<br>F:GO:0003677;<br>P:GO:0002119;<br>F:GO:0015320;<br>P:GO:0009792;<br>P:GO:0015074;<br>C:GO:0005887                                                                                                                                                                                                                              | - | -           |                                                                                                                                    |
| Loa loa                | glycosyl hydrolase family 85 protein       | 2  | F:GO:0016798;<br>C:GO:0005622                                                                                                                                                                                                                                                                                                                                                                                                                         | - |             | IPR005201                                                                                                                          |
| Caenorhabditis elegans | briggsae cbr-nmy-2 protein                 | 26 | P:GO:0046664;<br>F:GO:0017111;<br>P:GO:0045200;<br>F:GO:0000166;<br>P:GO:0035159;<br>P:GO:0031036;<br>C:GO:0016460;<br>P:GO:0007443;<br>P:GO:0007395;<br>P:GO:0045214;<br>P:GO:0035017;<br>P:GO:0006936;<br>P:GO:0007297;<br>P:GO:0046663;<br>F:GO:0032027;<br>P:GO:0008258;<br>P:GO:0051259;<br>P:GO:0016203;<br>C:GO:0032154;<br>C:GO:0045179;<br>P:GO:0045184;<br>P:GO:0035317;<br>C:GO:0030018;<br>C:GO:0005886;<br>P:GO:0007435;<br>P:GO:0000910 | - | EC:3.6.1.15 | IPR002928; PTHR13140 (PANTHER),<br>PTHR13140:SF23 (PANTHER)                                                                        |
| Loa loa                | structural maintenance of chromosomes smc2 | 4  | F:GO:0005524;<br>P:GO:0051276;<br>C:GO:0005694;<br>F:GO:0005515                                                                                                                                                                                                                                                                                                                                                                                       | - |             | IPR003395; IPR017871;<br>G3DSA:3.40.50.300 (GENE3D),<br>PTHR18937 (PANTHER),<br>PTHR18937:SF9 (PANTHER), SSF52540<br>(SUPERFAMILY) |

|                        |                                              |    |                                                                                                                                                                                                                                           |   |             |                                                                                                                |
|------------------------|----------------------------------------------|----|-------------------------------------------------------------------------------------------------------------------------------------------------------------------------------------------------------------------------------------------|---|-------------|----------------------------------------------------------------------------------------------------------------|
| Caenorhabditis elegans | udp-glucose pyrophosphorylase 2              | 14 | F:GO:0003983;<br>F:GO:0032557;<br>P:GO:0040010;<br>P:GO:0008340;<br>C:GO:0005625;<br>F:GO:0046872;<br>F:GO:0042802;<br>P:GO:0019255;<br>F:GO:0005536;<br>P:GO:0006011;<br>P:GO:0002119;<br>P:GO:0009792;<br>P:GO:0006065;<br>C:GO:0005737 | - | EC:2.7.7.9  | -                                                                                                              |
| -                      | -                                            | 0  |                                                                                                                                                                                                                                           |   |             | IPR000436; IPR016060                                                                                           |
| Homo sapiens           | ubiquitin-conjugating enzyme e2l 6           | 8  | P:GO:0032020;<br>P:GO:0019941;<br>F:GO:0005515;<br>P:GO:0016567;<br>F:GO:0005524;<br>F:GO:0004842;<br>P:GO:0051246;<br>F:GO:0042296                                                                                                       | - | EC:6.3.2.19 | -                                                                                                              |
| -                      | -                                            | 0  |                                                                                                                                                                                                                                           |   |             | -                                                                                                              |
| -                      | -                                            | 0  |                                                                                                                                                                                                                                           |   |             | -                                                                                                              |
| Homo sapiens           | immunoglobulin heavy chain                   | 4  | P:GO:0018298;<br>P:GO:0006955;<br>F:GO:0003823;<br>F:GO:0005515                                                                                                                                                                           | - |             | -                                                                                                              |
| Caenorhabditis elegans | hypoxia associated factor                    | 5  | P:GO:0040007;<br>P:GO:0040035;<br>P:GO:0018996;<br>P:GO:0002119;<br>P:GO:0040011                                                                                                                                                          | - |             | IPR005011                                                                                                      |
| Caenorhabditis elegans | phosphoribosylformylglyci-midine synthase    | 4  | P:GO:0040010;<br>P:GO:0009168;<br>F:GO:0005515;<br>F:GO:0004642                                                                                                                                                                           | - | EC:6.3.5.3  | IPR000728; IPR010918; IPR016188;<br>PTHR10099 (PANTHER), SSF109736<br>(SUPERFAMILY), SSF82697<br>(SUPERFAMILY) |
| -                      | -                                            | 0  |                                                                                                                                                                                                                                           |   |             | -                                                                                                              |
| -                      | -                                            | 0  |                                                                                                                                                                                                                                           |   |             | -                                                                                                              |
| -                      | -                                            | 0  |                                                                                                                                                                                                                                           |   |             | -                                                                                                              |
| Brugia malayi          | zinc finger protein 587-like                 | 8  | P:GO:0040010;<br>F:GO:0008270;<br>F:GO:0003676;<br>C:GO:0005622;<br>P:GO:0040035;<br>P:GO:0002119;<br>P:GO:0040011;<br>P:GO:0009792                                                                                                       | - |             | IPR007087; IPR013087; IPR015880;<br>PTHR11389 (PANTHER), SSF57667<br>(SUPERFAMILY)                             |
| Caenorhabditis elegans | yr51_caeel ame: full=uncharacterized protein | 4  | P:GO:0010171;<br>P:GO:0002119;<br>P:GO:0018996;<br>P:GO:0040010                                                                                                                                                                           | - |             | -                                                                                                              |

|                             |                                                       |   |                                                                                                                    |                                                                                  |                                                         |                                                                                                                                                                                     |
|-----------------------------|-------------------------------------------------------|---|--------------------------------------------------------------------------------------------------------------------|----------------------------------------------------------------------------------|---------------------------------------------------------|-------------------------------------------------------------------------------------------------------------------------------------------------------------------------------------|
| Caenorhabditis briggsae     | trehalase family protein                              | 7 | F:GO:0004135;<br>P:GO:0009792;<br>P:GO:0002119;<br>P:GO:0005978;<br>P:GO:0005991;<br>P:GO:0040007;<br>F:GO:0004555 | -                                                                                | EC:3.2.1.33;<br>EC:3.2.1.28                             | IPR001661; IPR008928;<br>PTHR23403:SF1 (PANTHER)                                                                                                                                    |
| Caenorhabditis elegans      | ras-related protein rab-                              | 5 | F:GO:0005525;<br>C:GO:0005886;<br>P:GO:0007264;<br>F:GO:0003924;<br>P:GO:0015031                                   | -                                                                                | EC:3.6.5.1;<br>EC:3.6.5.2;<br>EC:3.6.5.3;<br>EC:3.6.5.4 | IPR001806; IPR002078; IPR003579;<br>IPR005225; IPR013753; IPR020851;<br>G3DSA:3.40.50.300 (GENE3D),<br>PTHR11708 (PANTHER),<br>PTHR11708:SF230 (PANTHER),<br>SSF52540 (SUPERFAMILY) |
| Caenorhabditis elegans      | uncoordinated family member (unc-82)                  | 0 |                                                                                                                    | F:GO:0004672;<br>F:GO:0005524;<br>F:GO:0000166;<br>P:GO:0006468;<br>F:GO:0004674 |                                                         | -                                                                                                                                                                                   |
| Caenorhabditis elegans      | flavin monooxygenase                                  | 7 | F:GO:0004499;<br>F:GO:0050661;<br>P:GO:0055114;<br>P:GO:0000003;<br>C:GO:0031227;<br>C:GO:0016021;<br>F:GO:0050660 | -                                                                                | EC:1.14.13.8                                            | IPR000960; IPR020946;<br>G3DSA:3.50.50.60 (GENE3D),<br>PTHR23023 (PANTHER),<br>PTHR23023:SF4 (PANTHER), SSF51905<br>(SUPERFAMILY)                                                   |
| Caenorhabditis elegans      | mitogen-activated protein kinase associated protein 1 | 1 | C:GO:0044464                                                                                                       | -                                                                                |                                                         | IPR008828                                                                                                                                                                           |
| Angiostrongylus cantonensis | elegans protein confirmed by transcript evidence      | 3 | P:GO:0009792;<br>F:GO:0005488;<br>P:GO:0000003                                                                     | -                                                                                |                                                         | IPR011990; IPR013026; IPR013105;<br>IPR019734; PTHR16056 (PANTHER),<br>SSF48452 (SUPERFAMILY)                                                                                       |
| Angiostrongylus cantonensis | elegans protein confirmed by transcript evidence      | 3 | P:GO:0009792;<br>F:GO:0005488;<br>P:GO:0000003                                                                     | -                                                                                |                                                         | IPR011990; IPR013026; IPR013105;<br>IPR019734; PTHR16056 (PANTHER),<br>SSF48452 (SUPERFAMILY)                                                                                       |
| Loa loa                     | hook homolog 1                                        | 7 | C:GO:0070695;<br>C:GO:0030897;<br>P:GO:0008333;<br>F:GO:0042802;<br>P:GO:0045022;<br>P:GO:0007032;<br>P:GO:0007040 | -                                                                                |                                                         | IPR008636; PTHR18947 (PANTHER),<br>PTHR18947:SF8 (PANTHER),<br>SSF116907 (SUPERFAMILY)                                                                                              |
| -                           | -                                                     | 0 |                                                                                                                    |                                                                                  |                                                         | IPR008191; G3DSA:2.30.30.140<br>(GENE3D), SSF63748 (SUPERFAMILY)                                                                                                                    |
| -                           | -                                                     | 0 |                                                                                                                    |                                                                                  |                                                         | SignalP (SIGNALP)                                                                                                                                                                   |
| -                           | -                                                     | 0 |                                                                                                                    |                                                                                  |                                                         | IPR008191; G3DSA:2.30.30.140<br>(GENE3D), SSF63748 (SUPERFAMILY)                                                                                                                    |
| -                           | -                                                     | 0 |                                                                                                                    |                                                                                  |                                                         | -                                                                                                                                                                                   |

|                         |                                                            |    |                                                                                                                                                                                                                                                                                                                                                                                                                                                                        |                               |                                                                                   |                                                                                                                                                           |
|-------------------------|------------------------------------------------------------|----|------------------------------------------------------------------------------------------------------------------------------------------------------------------------------------------------------------------------------------------------------------------------------------------------------------------------------------------------------------------------------------------------------------------------------------------------------------------------|-------------------------------|-----------------------------------------------------------------------------------|-----------------------------------------------------------------------------------------------------------------------------------------------------------|
| Pongo abelii            | type alpha 1                                               | 31 | P:GO:0060351;<br>P:GO:0001957;<br>P:GO:0071363;<br>P:GO:0007605;<br>P:GO:0034505;<br>P:GO:0042542;<br>P:GO:0001649;<br>P:GO:0009612;<br>P:GO:0001568;<br>P:GO:0060325;<br>F:GO:0005201;<br>C:GO:0005615;<br>P:GO:0048706;<br>P:GO:0015031;<br>F:GO:0048407;<br>C:GO:0005737;<br>P:GO:0043434;<br>P:GO:0071300;<br>P:GO:0007601;<br>P:GO:0010812;<br>C:GO:0005584;<br>F:GO:0042802;<br>P:GO:0060346;<br>P:GO:0032964;<br>P:GO:0030199;<br>P:GO:0051591;<br>P:GO:0031960 | -                             | IPR000885; PTHR10499 (PANTHER),<br>PTHR10499:SF71 (PANTHER), PS51461<br>(PROFILE) |                                                                                                                                                           |
| Caenorhabditis elegans  | elegans protein partially confirmed by transcript evidence | 0  |                                                                                                                                                                                                                                                                                                                                                                                                                                                                        | F:GO:0008270;<br>C:GO:0005622 | -                                                                                 |                                                                                                                                                           |
| Caenorhabditis briggsae | rho-associated protein ki-se 1                             | 19 | P:GO:0050901;<br>P:GO:0032060;<br>P:GO:0006468;<br>P:GO:0007266;<br>C:GO:0000139;<br>P:GO:0007275;<br>C:GO:0005814;<br>P:GO:0022614;<br>C:GO:0005829;<br>P:GO:0043524;<br>F:GO:0017049;<br>F:GO:0046872;<br>P:GO:0030036;<br>F:GO:0004674;<br>F:GO:0042802;<br>P:GO:0030154;<br>P:GO:0048477;<br>F:GO:0005524;<br>P:GO:0000910                                                                                                                                         | -                             | EC:2.7.11.0                                                                       | IPR000719; IPR008271; IPR011009;<br>IPR017441; IPR017442; IPR020684;<br>G3DSA:1.10.510.10 (GENE3D),<br>G3DSA:3.30.200.20 (GENE3D),<br>PTHR22988 (PANTHER) |
| -                       | -                                                          | 0  |                                                                                                                                                                                                                                                                                                                                                                                                                                                                        |                               | -                                                                                 |                                                                                                                                                           |
| -                       | -                                                          | 0  |                                                                                                                                                                                                                                                                                                                                                                                                                                                                        |                               | -                                                                                 |                                                                                                                                                           |
| -                       | -                                                          | 0  |                                                                                                                                                                                                                                                                                                                                                                                                                                                                        |                               | -                                                                                 |                                                                                                                                                           |



|                         |                                                            |   |                                                                                                                                                      |                                                                                                                                                                                                                                                            |  |                                                                                                             |
|-------------------------|------------------------------------------------------------|---|------------------------------------------------------------------------------------------------------------------------------------------------------|------------------------------------------------------------------------------------------------------------------------------------------------------------------------------------------------------------------------------------------------------------|--|-------------------------------------------------------------------------------------------------------------|
| Caenorhabditis briggsae | ubiquitin carboxyl-terminal hydrolase 8                    | 0 |                                                                                                                                                      | F:GO:0004221;<br>C:GO:0005769;<br>F:GO:0016787;<br>C:GO:0019897;<br>P:GO:0071108;<br>P:GO:0007032;<br>P:GO:0006511;<br>F:GO:0008234;<br>P:GO:0070536;<br>F:GO:0004843;<br>F:GO:0008233;<br>C:GO:0005622;<br>F:GO:0005515;<br>P:GO:0007265;<br>C:GO:0005829 |  | IPR001763                                                                                                   |
|                         | -                                                          | 0 |                                                                                                                                                      |                                                                                                                                                                                                                                                            |  | -                                                                                                           |
|                         | -                                                          | 0 |                                                                                                                                                      |                                                                                                                                                                                                                                                            |  | -                                                                                                           |
|                         | -                                                          | 0 |                                                                                                                                                      |                                                                                                                                                                                                                                                            |  | -                                                                                                           |
|                         | -                                                          | 0 |                                                                                                                                                      |                                                                                                                                                                                                                                                            |  | -                                                                                                           |
| Brugia malayi           | hmg box family protein                                     | 9 | C:GO:0005737;<br>F:GO:0016566;<br>P:GO:0016055;<br>F:GO:0003677;<br>P:GO:0008356;<br>F:GO:0008134;<br>F:GO:0019901;<br>C:GO:0005634;<br>F:GO:0042826 | -                                                                                                                                                                                                                                                          |  | IPR000910; IPR009071; PTHR10373 (PANTHER), PTHR10373:SF1 (PANTHER)                                          |
| Brugia malayi           | hmg box family protein                                     | 9 | C:GO:0005737;<br>F:GO:0016566;<br>P:GO:0016055;<br>F:GO:0003677;<br>P:GO:0008356;<br>F:GO:0008134;<br>F:GO:0019901;<br>C:GO:0005634;<br>F:GO:0042826 | -                                                                                                                                                                                                                                                          |  | -                                                                                                           |
| Loa loa                 | methylosome subunit picln                                  | 7 | P:GO:0065008;<br>P:GO:0040010;<br>P:GO:0000003;<br>P:GO:0002119;<br>P:GO:0040011;<br>P:GO:0006898;<br>P:GO:0009792                                   | -                                                                                                                                                                                                                                                          |  | IPR003521; PTHR21399 (PANTHER), PF03517 (PFAM)                                                              |
| Caenorhabditis briggsae | methylosome subunit picln                                  | 7 | P:GO:0040010;<br>P:GO:0048676;<br>P:GO:0000003;<br>P:GO:0002119;<br>P:GO:0040011;<br>P:GO:0006898;<br>P:GO:0009792                                   | -                                                                                                                                                                                                                                                          |  | IPR003521; PTHR21399 (PANTHER), PF03517 (PFAM)                                                              |
| Caenorhabditis elegans  | elegans protein partially confirmed by transcript evidence | 1 | F:GO:0004672                                                                                                                                         | -                                                                                                                                                                                                                                                          |  | IPR000719; IPR011009; IPR017442; G3DSA:1.10.510.10 (GENE3D), PTHR11295 (PANTHER), PTHR11295:SF112 (PANTHER) |

|                             |                                                            |   |                                                                                                                                                      |   |                                                                                  |                                                                                                             |
|-----------------------------|------------------------------------------------------------|---|------------------------------------------------------------------------------------------------------------------------------------------------------|---|----------------------------------------------------------------------------------|-------------------------------------------------------------------------------------------------------------|
| Caenorhabditis elegans      | elegans protein partially confirmed by transcript evidence | 1 | F:GO:0004672                                                                                                                                         | - |                                                                                  | IPR000719; IPR011009; IPR017442; G3DSA:1.10.510.10 (GENE3D), PTHR11295 (PANTHER), PTHR11295:SF112 (PANTHER) |
| Caenorhabditis elegans      | metabotropic glutamate receptor                            | 4 | P:GO:0007186;<br>C:GO:0016021;<br>P:GO:0007165;<br>F:GO:0004930                                                                                      | - |                                                                                  | G3DSA:3.40.50.2300 (GENE3D), PTHR11336 (PANTHER), PTHR11336:SF8 (PANTHER), SSF53822 (SUPERFAMILY)           |
| Caenorhabditis elegans      | cg16791 cg16791-pa                                         | 0 |                                                                                                                                                      |   |                                                                                  | -                                                                                                           |
|                             | -                                                          | 0 |                                                                                                                                                      |   |                                                                                  | -                                                                                                           |
| Caenorhabditis elegans      | uncoordi-ted family member (unc-79)                        | 0 |                                                                                                                                                      |   | F:GO:0005488                                                                     | PTHR21696 (PANTHER)                                                                                         |
| Caenorhabditis elegans      | vesicle transport protein got1b                            | 6 | F:GO:0004871;<br>C:GO:0005794;<br>P:GO:0043123;<br>P:GO:0006810;<br>C:GO:0016020;<br>C:GO:0005783                                                    | - |                                                                                  | -                                                                                                           |
|                             | -                                                          | 0 |                                                                                                                                                      |   |                                                                                  | -                                                                                                           |
| Brugia malayi               | ser thr protein phosphatase                                | 0 |                                                                                                                                                      |   | F:GO:0016787;<br>F:GO:0005506;<br>F:GO:0005515;<br>F:GO:0030145;<br>F:GO:0004721 | IPR006186; G3DSA:3.60.21.10 (GENE3D), PTHR11668:SF2 (PANTHER), SSF56300 (SUPERFAMILY)                       |
| Brugia malayi               | transcription initiation factor tfiid subunit 13           | 4 | F:GO:0003702;<br>F:GO:0003677;<br>F:GO:0003743;<br>P:GO:0006366                                                                                      | - |                                                                                  | -                                                                                                           |
|                             | -                                                          | 0 |                                                                                                                                                      |   |                                                                                  | -                                                                                                           |
|                             | -                                                          | 0 |                                                                                                                                                      |   |                                                                                  | -                                                                                                           |
|                             | -                                                          | 0 |                                                                                                                                                      |   |                                                                                  | SignalP (SIGNALP)                                                                                           |
|                             | -                                                          | 0 |                                                                                                                                                      |   |                                                                                  | -                                                                                                           |
|                             | -                                                          | 0 |                                                                                                                                                      |   |                                                                                  | -                                                                                                           |
| Caenorhabditis elegans      | briggsae cbr-gpc-2 protein                                 | 9 | C:GO:0016028;<br>F:GO:0004871;<br>P:GO:0007186;<br>P:GO:0007602;<br>P:GO:0035046;<br>C:GO:0005834;<br>F:GO:0003924;<br>P:GO:0009792;<br>C:GO:0005737 | - |                                                                                  | EC:3.6.5.1;<br>EC:3.6.5.2;<br>EC:3.6.5.3;<br>EC:3.6.5.4                                                     |
| Angiostrongylus cantonensis | pq loop repeat protein                                     | 0 |                                                                                                                                                      |   | F:GO:0003674;<br>F:GO:0016853;<br>F:GO:0047750;<br>C:GO:0005575                  | IPR006603; PF04193 (PFAM), SignalP (SIGNALP)                                                                |
|                             | -                                                          | 0 |                                                                                                                                                      |   |                                                                                  | -                                                                                                           |

|                         |                                                            |   |                                                                                                                                                      |                                                                                                                                                                                                                          |                           |                                                                                                                             |
|-------------------------|------------------------------------------------------------|---|------------------------------------------------------------------------------------------------------------------------------------------------------|--------------------------------------------------------------------------------------------------------------------------------------------------------------------------------------------------------------------------|---------------------------|-----------------------------------------------------------------------------------------------------------------------------|
| Caenorhabditis elegans  | zinc zz type family protein                                | 0 |                                                                                                                                                      | F:GO:0000166;<br>F:GO:0003779;<br>F:GO:0005524;<br>P:GO:0015870;<br>F:GO:0008270;<br>P:GO:0046716;<br>C:GO:0016010;<br>P:GO:0040017;<br>C:GO:0016459;<br>F:GO:0003774;<br>P:GO:0007271;<br>F:GO:0005515;<br>F:GO:0005277 |                           | IPR018159; G3DSA:1.20.58.60 (GENE3D), SSF46966 (SUPERFAMILY)                                                                |
| Caenorhabditis elegans  | elegans protein partially confirmed by transcript evidence | 1 | F:GO:0005515                                                                                                                                         | -                                                                                                                                                                                                                        |                           | -                                                                                                                           |
| Caenorhabditis briggsae | serine--pyruvate aminotransferase                          | 7 | P:GO:0046487;<br>C:GO:0005777;<br>P:GO:0009058;<br>P:GO:0006625;<br>F:GO:0008453;<br>F:GO:0042803;<br>F:GO:0030170                                   | -                                                                                                                                                                                                                        | EC:2.6.1.44               | IPR015421; IPR015424; PTHR21152 (PANTHER), PTHR21152:SF5 (PANTHER), SignalP (SIGNALP)                                       |
| Caenorhabditis briggsae | ccr4 associated                                            | 9 | P:GO:0040035;<br>P:GO:0009792;<br>P:GO:0010171;<br>P:GO:0002119;<br>F:GO:0003676;<br>C:GO:0043186;<br>C:GO:0000932;<br>C:GO:0005634;<br>P:GO:0051729 | -                                                                                                                                                                                                                        |                           | IPR006941; IPR012337; G3DSA:3.30.420.10 (GENE3D), PTHR10797 (PANTHER)                                                       |
|                         | -                                                          | 0 |                                                                                                                                                      |                                                                                                                                                                                                                          |                           | -                                                                                                                           |
| Caenorhabditis briggsae | Hypothetical protein CBG01673 [Caenorhabditis briggsae]    | 6 | P:GO:0043254;<br>P:GO:0006355;<br>F:GO:0005524;<br>F:GO:0016887;<br>F:GO:0008134;<br>C:GO:0005634                                                    | -                                                                                                                                                                                                                        |                           | PTHR22908 (PANTHER), PTHR22908:SF13 (PANTHER)                                                                               |
| Caenorhabditis briggsae | carbamoyl-phosphate synthase                               | 7 | P:GO:0006541;<br>F:GO:0016812;<br>F:GO:0016597;<br>F:GO:0004086;<br>F:GO:0005524;<br>P:GO:0006207;<br>F:GO:0004070                                   | -                                                                                                                                                                                                                        | EC:3.5.2.0;<br>EC:2.1.3.2 | IPR005479; IPR005483; IPR011761; IPR013815; IPR013816; PTHR11405 (PANTHER), PTHR11405:SF3 (PANTHER), SSF56059 (SUPERFAMILY) |
| Loa loa                 | ifa-1                                                      | 3 | C:GO:0005882;<br>F:GO:0005198;<br>F:GO:0005515                                                                                                       | -                                                                                                                                                                                                                        |                           | SignalP (SIGNALP)                                                                                                           |
| Brugia malayi           | trehalose 6-phosphate synthase                             | 3 | F:GO:0003825;<br>P:GO:0034608;<br>P:GO:0005992                                                                                                       | -                                                                                                                                                                                                                        | EC:2.4.1.15               | IPR001830; G3DSA:3.40.50.2000 (GENE3D), PTHR10788 (PANTHER), SSF53756 (SUPERFAMILY)                                         |
|                         | -                                                          | 0 |                                                                                                                                                      |                                                                                                                                                                                                                          |                           | SignalP (SIGNALP)                                                                                                           |
|                         |                                                            | 0 |                                                                                                                                                      |                                                                                                                                                                                                                          |                           |                                                                                                                             |
| Caenorhabditis briggsae | scavenger receptor class a- c-type lectin (agap009143-pa)  | 3 | F:GO:0005044;<br>F:GO:0005488;<br>C:GO:0016020                                                                                                       | -                                                                                                                                                                                                                        |                           | IPR001190; IPR017448; G3DSA:3.10.250.10 (GENE3D), PTHR19331 (PANTHER), PTHR19331:SF7 (PANTHER)                              |

|                         |                                                            |  |    |                                                                                                                                                                                                         |   |                                                |                                                                                                                                                                                              |
|-------------------------|------------------------------------------------------------|--|----|---------------------------------------------------------------------------------------------------------------------------------------------------------------------------------------------------------|---|------------------------------------------------|----------------------------------------------------------------------------------------------------------------------------------------------------------------------------------------------|
| Caenorhabditis briggsae | annexin a7                                                 |  | 3  | P:GO:0065008;<br>F:GO:0005515;<br>C:GO:0044464                                                                                                                                                          | - |                                                | IPR001464; IPR018252; IPR018502;<br>PTHR10502:SF30 (PANTHER)                                                                                                                                 |
|                         | -                                                          |  | 0  |                                                                                                                                                                                                         |   |                                                | IPR017997                                                                                                                                                                                    |
|                         | -                                                          |  | 0  |                                                                                                                                                                                                         |   |                                                | IPR003071                                                                                                                                                                                    |
| Caenorhabditis elegans  | elegans protein partially confirmed by transcript evidence |  | 3  | F:GO:0004872;<br>F:GO:0005515;<br>P:GO:0006350                                                                                                                                                          | - |                                                | IPR000536; IPR008946; PTHR11865<br>(PANTHER), PTHR11865:SF236<br>(PANTHER)                                                                                                                   |
|                         | -                                                          |  | 0  |                                                                                                                                                                                                         |   |                                                | -                                                                                                                                                                                            |
|                         | -                                                          |  | 0  |                                                                                                                                                                                                         |   |                                                | -                                                                                                                                                                                            |
|                         | -                                                          |  | 0  |                                                                                                                                                                                                         |   |                                                | SignalP (SIGNALP)                                                                                                                                                                            |
| Caenorhabditis elegans  | elegans protein partially confirmed by transcript evidence |  | 4  | F:GO:0005488;<br>P:GO:0044237;<br>P:GO:0043170;<br>P:GO:0044238                                                                                                                                         | - |                                                | IPR000152; IPR000742; IPR001881;<br>IPR006210; IPR013032; IPR013091;<br>IPR018097; G3DSA:2.10.25.10<br>(GENE3D), PTHR11201 (PANTHER),<br>PTHR11201:SF87 (PANTHER),<br>SSF57196 (SUPERFAMILY) |
| Caenorhabditis briggsae | Hypothetical protein CBG14899 [Caenorhabditis briggsae]    |  | 0  |                                                                                                                                                                                                         |   |                                                | IPR007356; PTHR13563:SF3<br>(PANTHER)                                                                                                                                                        |
|                         | -                                                          |  | 0  |                                                                                                                                                                                                         |   |                                                | -                                                                                                                                                                                            |
|                         | -                                                          |  | 0  |                                                                                                                                                                                                         |   |                                                | -                                                                                                                                                                                            |
| Caenorhabditis elegans  | elegans protein confirmed by transcript evidence           |  | 5  | P:GO:0018996;<br>P:GO:0009792;<br>P:GO:0040017;<br>P:GO:0040010;<br>P:GO:0040035                                                                                                                        | - |                                                | -                                                                                                                                                                                            |
| Loa loa                 | briggsae cbr-apb-1 protein                                 |  | 12 | C:GO:0005829;<br>P:GO:0040007;<br>F:GO:0030276;<br>P:GO:0000003;<br>C:GO:0030666;<br>P:GO:0002119;<br>P:GO:0050690;<br>C:GO:0030117;<br>P:GO:0006898;<br>P:GO:0009792;<br>P:GO:0015031;<br>C:GO:0005886 | - |                                                | IPR008152; IPR009028; IPR012295;<br>IPR013037; IPR013041; IPR015151;<br>PTHR11134 (PANTHER),<br>PTHR11134:SF3 (PANTHER)                                                                      |
| Caenorhabditis elegans  | elegans protein confirmed by transcript evidence           |  | 0  |                                                                                                                                                                                                         |   |                                                | -                                                                                                                                                                                            |
| Caenorhabditis elegans  | elegans protein confirmed by transcript evidence           |  | 0  |                                                                                                                                                                                                         |   |                                                | -                                                                                                                                                                                            |
|                         | -                                                          |  | 0  |                                                                                                                                                                                                         |   |                                                | -                                                                                                                                                                                            |
| Caenorhabditis elegans  | chromosome 19 open reading frame 52                        |  | 0  |                                                                                                                                                                                                         |   | F:GO:0003674;<br>P:GO:0008150;<br>C:GO:0005575 | IPR019322; PTHR21435 (PANTHER)                                                                                                                                                               |
| Caenorhabditis briggsae | Hypothetical protein CBG06447 [Caenorhabditis briggsae]    |  | 0  |                                                                                                                                                                                                         |   |                                                | -                                                                                                                                                                                            |
| Caenorhabditis elegans  | kinesin-associated protein 3                               |  | 11 | P:GO:0006810;<br>F:GO:0019894;<br>F:GO:0032266;<br>P:GO:0008285;<br>P:GO:0006461;<br>C:GO:0016939;<br>P:GO:0007017;<br>P:GO:0007165;<br>P:GO:0046587;<br>P:GO:0008104;<br>C:GO:0005783                  | - |                                                | IPR008658; PTHR15605:SF1<br>(PANTHER), PF05804 (PFAM), SignalP<br>(SIGNALP)                                                                                                                  |
|                         | -                                                          |  | 0  |                                                                                                                                                                                                         |   |                                                | -                                                                                                                                                                                            |

|                         |                                                  |    |                                                                                                                                                                                                                                                                                                                                                 |                                                                                                   |            |                                                                                                                                                                                                                                                                                              |
|-------------------------|--------------------------------------------------|----|-------------------------------------------------------------------------------------------------------------------------------------------------------------------------------------------------------------------------------------------------------------------------------------------------------------------------------------------------|---------------------------------------------------------------------------------------------------|------------|----------------------------------------------------------------------------------------------------------------------------------------------------------------------------------------------------------------------------------------------------------------------------------------------|
| Caenorhabditis briggsae | -related lipid transfer domain containing 7      | 0  |                                                                                                                                                                                                                                                                                                                                                 | C:GO:0005739                                                                                      |            | IPR002913; G3DSA:3.30.530.20 (GENE3D), PTHR19308 (PANTHER), SSF55961 (SUPERFAMILY)                                                                                                                                                                                                           |
| Caenorhabditis briggsae | leptin receptor overlapping transcript-like 1    | 0  |                                                                                                                                                                                                                                                                                                                                                 | F:GO:0003674;<br>F:GO:0004872;<br>C:GO:0016021;<br>C:GO:0016020;<br>P:GO:0008150;<br>C:GO:0005575 |            | IPR007262; PSS1257 (PROFILE), SignalP (SIGNALP)                                                                                                                                                                                                                                              |
| Caenorhabditis elegans  | briggsae cbr-nrf-5 protein                       | 0  |                                                                                                                                                                                                                                                                                                                                                 | F:GO:0008289                                                                                      |            | IPR001124; IPR017943; G3DSA:3.15.20.10 (GENE3D)                                                                                                                                                                                                                                              |
| Caenorhabditis briggsae | cytochrome family subfamily polypeptide 12       | 5  | F:GO:0004497;<br>F:GO:0005506;<br>F:GO:0005515;<br>P:GO:0008152;<br>C:GO:0016020                                                                                                                                                                                                                                                                | -                                                                                                 |            | IPR001128; IPR002401; IPR017972; PTHR19383:SF66 (PANTHER)                                                                                                                                                                                                                                    |
| Caenorhabditis briggsae | elegans protein confirmed by transcript evidence | 0  |                                                                                                                                                                                                                                                                                                                                                 | F:GO:0005515                                                                                      |            | -                                                                                                                                                                                                                                                                                            |
| Caenorhabditis briggsae | --+ k+ atpase alpha subunit                      | 20 | P:GO:0008340;<br>P:GO:0015672;<br>P:GO:0035158;<br>P:GO:0008360;<br>P:GO:0051124;<br>P:GO:0035159;<br>P:GO:0019991;<br>P:GO:0009612;<br>P:GO:0006754;<br>F:GO:0005391;<br>P:GO:0001700;<br>C:GO:0005918;<br>P:GO:0007268;<br>C:GO:0005890;<br>P:GO:0009266;<br>C:GO:0005634;<br>F:GO:0005524;<br>P:GO:0050905;<br>P:GO:0001894;<br>P:GO:0008344 | -                                                                                                 | EC:3.6.3.9 | IPR001757; IPR005775; IPR005834; IPR006068; IPR006069; IPR008250; IPR018303; G3DSA:1.20.1110.10 (GENE3D), G3DSA:2.70.150.10 (GENE3D), G3DSA:3.40.1110.10 (GENE3D), PTHR11939:SF100 (PANTHER), SSF56784 (SUPERFAMILY), SSF81653 (SUPERFAMILY), SSF81660 (SUPERFAMILY), SSF81665 (SUPERFAMILY) |
| Caenorhabditis elegans  | --+ k+-atpase alpha subunit                      | 20 | P:GO:0008340;<br>P:GO:0015672;<br>P:GO:0035158;<br>P:GO:0008360;<br>P:GO:0051124;<br>P:GO:0035159;<br>P:GO:0019991;<br>P:GO:0009612;<br>P:GO:0006754;<br>F:GO:0005391;<br>P:GO:0001700;<br>C:GO:0005918;<br>P:GO:0007268;<br>C:GO:0005890;<br>P:GO:0009266;<br>C:GO:0005634;<br>F:GO:0005524;<br>P:GO:0050905;<br>P:GO:0001894;<br>P:GO:0008344 | -                                                                                                 | EC:3.6.3.9 | IPR001757; IPR005834; IPR006068; IPR006069; G3DSA:1.20.1110.10 (GENE3D), G3DSA:3.40.1110.10 (GENE3D), PTHR11939:SF100 (PANTHER), SSF56784 (SUPERFAMILY), SSF81660 (SUPERFAMILY), SSF81665 (SUPERFAMILY)                                                                                      |

|                         |                                                            |   |                                                                                                                                     |                                                                                                                                     |                            |                                                                                        |
|-------------------------|------------------------------------------------------------|---|-------------------------------------------------------------------------------------------------------------------------------------|-------------------------------------------------------------------------------------------------------------------------------------|----------------------------|----------------------------------------------------------------------------------------|
| Caenorhabditis briggsae | aminomethyltransferase (glycine cleavage system protein t) | 4 | P:GO:0006546;<br>F:GO:0004047;<br>F:GO:0008483;<br>C:GO:0005739                                                                     | -                                                                                                                                   | EC:2.1.2.10;<br>EC:2.6.1.0 | IPR013977; PTHR13847 (PANTHER),<br>PTHR13847:SF5 (PANTHER),<br>SSF101790 (SUPERFAMILY) |
| Caenorhabditis elegans  | atp-binding sub-family b (mdr tap) member 9 isoform 1      | 5 | F:GO:0016887;<br>P:GO:0006810;<br>C:GO:0016020;<br>F:GO:0000166;<br>F:GO:0005215                                                    | -                                                                                                                                   |                            | SignalP (SIGNALP)                                                                      |
| Caenorhabditis elegans  | abc transporter family protein                             | 0 |                                                                                                                                     | F:GO:0005524;<br>F:GO:0016887;<br>F:GO:0000166;<br>C:GO:0016021;<br>F:GO:0042626;<br>F:GO:0017111;<br>P:GO:0055085;<br>P:GO:0006810 |                            | SignalP (SIGNALP)                                                                      |
| -                       | -                                                          | 0 |                                                                                                                                     |                                                                                                                                     |                            | SignalP (SIGNALP)                                                                      |
| Caenorhabditis elegans  | hypothetical protein ZK418.2 [Caenorhabditis elegans]      | 0 |                                                                                                                                     | F:GO:0005515                                                                                                                        |                            | IPR000210; IPR011333; IPR013069                                                        |
| -                       | -                                                          | 0 |                                                                                                                                     |                                                                                                                                     |                            | -                                                                                      |
| -                       | -                                                          | 0 |                                                                                                                                     |                                                                                                                                     |                            | SignalP (SIGNALP)                                                                      |
| Caenorhabditis elegans  | probable -dh dehydroge-se 1 alpha subcomplex subunit 12    | 3 | F:GO:0009055;<br>F:GO:0008137;<br>C:GO:0016020                                                                                      | -                                                                                                                                   | EC:1.6.5.3                 | IPR007763                                                                              |
| Caenorhabditis elegans  | d- polymerase epsilon                                      | 8 | F:GO:0016779;<br>F:GO:0003676;<br>P:GO:0040035;<br>P:GO:0040011;<br>P:GO:0006139;<br>P:GO:0006997;<br>P:GO:0002009;<br>P:GO:0009792 | -                                                                                                                                   | EC:2.7.7.0                 | IPR013697; PTHR10670 (PANTHER)                                                         |
| Caenorhabditis briggsae | briggsae cbr-unc-45 protein                                | 1 | F:GO:0005488                                                                                                                        | -                                                                                                                                   |                            | PTHR22904 (PANTHER),<br>PTHR22904:SF28 (PANTHER)                                       |
| Caenorhabditis briggsae | lin-5 interacting protein family member (lfi-1)            | 6 | C:GO:0005737;<br>C:GO:0000776;<br>F:GO:0005515;<br>C:GO:0044430;<br>P:GO:0000279;<br>C:GO:0015630                                   | -                                                                                                                                   |                            | -                                                                                      |
| Caenorhabditis elegans  | lin-5 interacting protein family member (lfi-1)            | 4 | F:GO:0005515;<br>C:GO:0005694;<br>P:GO:0009987;<br>C:GO:0044446                                                                     | -                                                                                                                                   |                            | PD968187 (PRODOM)                                                                      |
| Caenorhabditis elegans  | atm interactor                                             | 0 |                                                                                                                                     | F:GO:0003676;<br>F:GO:0046872;<br>F:GO:0003674;<br>P:GO:0008150;<br>F:GO:0008270;<br>C:GO:0005634;<br>C:GO:0005575;<br>C:GO:0005622 |                            | IPR007087; IPR015880; PTHR10593<br>(PANTHER), PTHR10593:SF10<br>(PANTHER)              |
| Caenorhabditis elegans  | glycosylphosphatidylinositol anchor attachment 1 -like     | 0 |                                                                                                                                     | C:GO:0042765;<br>C:GO:0016021;<br>P:GO:0016255                                                                                      |                            | IPR007246; SignalP (SIGNALP)                                                           |

|                         |                                                                                           |   |                                                                                                                      |                                                                                                   |             |                                                                                                                                                                  |
|-------------------------|-------------------------------------------------------------------------------------------|---|----------------------------------------------------------------------------------------------------------------------|---------------------------------------------------------------------------------------------------|-------------|------------------------------------------------------------------------------------------------------------------------------------------------------------------|
| Caenorhabditis briggsae | elegans protein confirmed by transcript evidence                                          |   | P:GO:0009792;<br>F:GO:0004356;<br>5 F:GO:0005515;<br>F:GO:0005524;<br>P:GO:0006542                                   | -                                                                                                 | EC:6.3.1.2  | IPR008146; IPR008147; IPR014746;<br>G3DSA:3.10.20.70 (GENE3D),<br>PTHR20852 (PANTHER),<br>PTHR20852:SF14 (PANTHER), SignalP<br>(SIGNALP), SSF55931 (SUPERFAMILY) |
| Loa loa                 | n terminus of rad21 rec8 like protein                                                     | 0 |                                                                                                                      | C:GO:0000228                                                                                      |             | -                                                                                                                                                                |
| Caenorhabditis briggsae | briggsae cbr-rlbp-1 protein                                                               | 0 |                                                                                                                      | P:GO:0007165;<br>C:GO:0005622                                                                     |             | PTHR12783 (PANTHER),<br>PTHR12783:SF1 (PANTHER)                                                                                                                  |
| Caenorhabditis briggsae | briggsae cbr-rlbp-1 protein                                                               | 0 |                                                                                                                      | P:GO:0007165;<br>C:GO:0005622                                                                     |             | PTHR12783 (PANTHER),<br>PTHR12783:SF1 (PANTHER)                                                                                                                  |
| Caenorhabditis briggsae | briggsae cbr-rlbp-1 protein                                                               | 0 |                                                                                                                      | P:GO:0007165;<br>C:GO:0005622                                                                     |             | PTHR12783 (PANTHER),<br>PTHR12783:SF1 (PANTHER)                                                                                                                  |
| Callithrix jacchus      | solute carrier family 25 (mitochondrial carrier adenine nucleotide translocator) member 6 | 7 | P:GO:0006915;<br>F:GO:0005515;<br>P:GO:0055085;<br>7 F:GO:0005471;<br>C:GO:0005744;<br>C:GO:0016021;<br>P:GO:0044419 | -                                                                                                 |             | -                                                                                                                                                                |
|                         | -                                                                                         | 0 |                                                                                                                      |                                                                                                   |             | IPR000436; SignalP (SIGNALP)                                                                                                                                     |
| Caenorhabditis elegans  | diazepam binding                                                                          | 2 | F:GO:0000062;<br>P:GO:0019915                                                                                        | -                                                                                                 |             | IPR000582; IPR014352; IPR022408;<br>PTHR23310:SF12 (PANTHER)                                                                                                     |
| Caenorhabditis briggsae | mitochondrial folate transporter carrier                                                  | 6 | F:GO:0005488;<br>P:GO:0055085;<br>P:GO:0040010;<br>P:GO:0008340;<br>C:GO:0016021;<br>C:GO:0005739                    | -                                                                                                 |             | IPR001993; IPR018108;<br>G3DSA:1.50.40.10 (GENE3D),<br>PTHR11896:SF73 (PANTHER)                                                                                  |
| Caenorhabditis elegans  | fip1 motif family protein                                                                 | 1 | P:GO:0009792                                                                                                         | -                                                                                                 |             | IPR007854; PTHR13484 (PANTHER)                                                                                                                                   |
| Caenorhabditis elegans  | fip1 motif family protein                                                                 | 1 | P:GO:0009792                                                                                                         | -                                                                                                 |             | IPR007854; PTHR13484 (PANTHER)                                                                                                                                   |
|                         | -                                                                                         | 0 |                                                                                                                      |                                                                                                   |             | -                                                                                                                                                                |
|                         | -                                                                                         | 0 |                                                                                                                      |                                                                                                   |             | -                                                                                                                                                                |
| Caenorhabditis elegans  | nuclear hormone receptor family member (nhr-25)                                           | 1 | F:GO:0070016                                                                                                         | -                                                                                                 |             | IPR001723; IPR008946; PTHR11865<br>(PANTHER), PTHR11865:SF205<br>(PANTHER)                                                                                       |
|                         | -                                                                                         | 0 |                                                                                                                      |                                                                                                   |             | SignalP (SIGNALP)                                                                                                                                                |
|                         | -                                                                                         | 0 |                                                                                                                      |                                                                                                   |             | -                                                                                                                                                                |
|                         | -                                                                                         | 0 |                                                                                                                      |                                                                                                   |             | SignalP (SIGNALP)                                                                                                                                                |
| Haemonchus contortus    | cysteine protei-se                                                                        | 2 | P:GO:0008152;<br>F:GO:0008234                                                                                        | -                                                                                                 |             | IPR000169; IPR000668; IPR013128;<br>IPR015643; G3DSA:3.90.70.10<br>(GENE3D), SignalP (SIGNALP),<br>SSF54001 (SUPERFAMILY)                                        |
|                         | -                                                                                         | 0 |                                                                                                                      |                                                                                                   |             | -                                                                                                                                                                |
| Loa loa                 | s1 r- binding domain containing protein                                                   | 0 |                                                                                                                      | F:GO:0003723;<br>F:GO:0005488;<br>P:GO:0006397;<br>P:GO:0006396;<br>C:GO:0005622;<br>C:GO:0005634 |             | IPR003029; IPR012340; IPR016027;<br>IPR022967; PTHR23270 (PANTHER)                                                                                               |
| Caenorhabditis briggsae | hatching enzyme                                                                           | 3 | F:GO:0004222;<br>P:GO:0006508;<br>F:GO:0008270                                                                       | -                                                                                                 | EC:3.4.24.0 | IPR001506; G3DSA:3.40.390.10<br>(GENE3D), PTHR10127 (PANTHER),<br>PTHR10127:SF80 (PANTHER)                                                                       |
| Brugia malayi           | lateral sig-ling target protein 2 homolog                                                 | 5 | C:GO:0005829;<br>C:GO:0031901;<br>P:GO:0007175;<br>F:GO:0046872;<br>F:GO:0032266                                     | -                                                                                                 |             | SignalP (SIGNALP)                                                                                                                                                |

|                         |                                          |    |                                                                                                                                                                                                         |                                                                                                                    |                   |                                                                                             |
|-------------------------|------------------------------------------|----|---------------------------------------------------------------------------------------------------------------------------------------------------------------------------------------------------------|--------------------------------------------------------------------------------------------------------------------|-------------------|---------------------------------------------------------------------------------------------|
| Caenorhabditis elegans  | uncoordinated family member (unc-13)     | 1  | F:GO:0046872                                                                                                                                                                                            | -                                                                                                                  |                   | IPR000008; IPR008973; IPR018029; IPR020477; G3DSA:2.60.40.150 (GENE3D), PTHR10480 (PANTHER) |
| Caenorhabditis briggsae | uncharacterized transposase-like protein | 0  |                                                                                                                                                                                                         | F:GO:0046872;<br>P:GO:0055114;<br>F:GO:0009055;<br>F:GO:0016491;<br>F:GO:0020037;<br>F:GO:0005506;<br>F:GO:0004497 | -                 |                                                                                             |
| Caenorhabditis elegans  | g protein-coupled receptor isoform cra_a | 1  | C:GO:0016020                                                                                                                                                                                            |                                                                                                                    |                   | -                                                                                           |
| Caenorhabditis elegans  | cysteine dioxygenase                     | 12 | F:GO:0017172;<br>C:GO:0005829;<br>F:GO:0008198;<br>P:GO:0007595;<br>P:GO:0045471;<br>P:GO:0055114;<br>P:GO:0033762;<br>P:GO:0019452;<br>P:GO:0051384;<br>P:GO:0051591;<br>P:GO:0043200;<br>C:GO:0005886 | -                                                                                                                  | EC:1.13.11.2<br>0 | -                                                                                           |
|                         | -                                        | 0  |                                                                                                                                                                                                         |                                                                                                                    |                   | SignalP (SIGNALP)                                                                           |
|                         | -                                        | 0  |                                                                                                                                                                                                         |                                                                                                                    |                   | -                                                                                           |
| Caenorhabditis elegans  | arginyltransferase 1                     | 4  | C:GO:0005737;<br>F:GO:0004057;<br>P:GO:0016598;<br>C:GO:0005634                                                                                                                                         | -                                                                                                                  | EC:2.3.2.8        | IPR007471; PTHR21367 (PANTHER)                                                              |
| Caenorhabditis briggsae | cg15738 cg15738-pa                       | 0  |                                                                                                                                                                                                         | P:GO:0009058;<br>C:GO:0005739;<br>F:GO:0003674;<br>F:GO:0016740;<br>P:GO:0008150                                   |                   | -                                                                                           |
|                         | -                                        | 0  |                                                                                                                                                                                                         |                                                                                                                    |                   | -                                                                                           |
|                         | -                                        | 0  |                                                                                                                                                                                                         |                                                                                                                    |                   | -                                                                                           |
| Brugia malayi           | tripeptidylpeptidase ii                  | 5  | P:GO:0019915;<br>F:GO:0042277;<br>P:GO:0006508;<br>C:GO:0005625;<br>F:GO:0008240                                                                                                                        | -                                                                                                                  |                   | IPR000209; IPR015500; PTHR10795:SF33 (PANTHER)                                              |



|                         |                             |    |                                                                                                                                                                                                                                                                                                                                                                                                                                                                         |   |             |                                                            |
|-------------------------|-----------------------------|----|-------------------------------------------------------------------------------------------------------------------------------------------------------------------------------------------------------------------------------------------------------------------------------------------------------------------------------------------------------------------------------------------------------------------------------------------------------------------------|---|-------------|------------------------------------------------------------|
| Caenorhabditis briggsae | myosin heavy chain          | 36 | P:GO:0046664;<br>P:GO:0045200;<br>C:GO:0016461;<br>P:GO:0035159;<br>P:GO:0031036;<br>P:GO:0035072;<br>P:GO:0007443;<br>P:GO:0007395;<br>P:GO:0045214;<br>P:GO:0035017;<br>P:GO:0007297;<br>C:GO:0031672;<br>P:GO:0046663;<br>F:GO:0003779;<br>F:GO:0000146;<br>P:GO:0001736;<br>F:GO:0008307;<br>F:GO:0032027;<br>P:GO:0008258;<br>P:GO:0051259;<br>P:GO:0016203;<br>C:GO:0032154;<br>C:GO:0045179;<br>F:GO:0032440;<br>P:GO:0045184;<br>C:GO:0005863;<br>P:GO:0035317; | - | EC:1.3.1.74 | SignalP (SIGNALP)                                          |
| Caenorhabditis briggsae | ceramide ki-se              | 1  | F:GO:0016301                                                                                                                                                                                                                                                                                                                                                                                                                                                            | - |             | IPR001206; PTHR12358 (PANTHER),<br>PTHR12358:SF6 (PANTHER) |
| Ancylostoma caninum     | venom allergen-like protein | 1  | P:GO:0009987                                                                                                                                                                                                                                                                                                                                                                                                                                                            | - |             | IPR001283; IPR014044;<br>PTHR10334:SF11 (PANTHER)          |
| Caenorhabditis briggsae | briggsae cbr-cap-1 protein  | 14 | P:GO:0035220;<br>P:GO:0040010;<br>C:GO:0071203;<br>P:GO:0006911;<br>F:GO:0003779;<br>P:GO:0009792;<br>P:GO:0010591;<br>P:GO:0002119;<br>C:GO:0008290;<br>C:GO:0005869;<br>P:GO:0007018;<br>P:GO:0007294;<br>P:GO:0051016;<br>C:GO:0016324                                                                                                                                                                                                                               | - |             | IPR002189; IPR017865; SSF90096<br>(SUPERFAMILY)            |

|                              |                                                            |    |                                                                                                                                                                                                                                                                             |                                                                                                   |                                                         |                                                                                                                      |
|------------------------------|------------------------------------------------------------|----|-----------------------------------------------------------------------------------------------------------------------------------------------------------------------------------------------------------------------------------------------------------------------------|---------------------------------------------------------------------------------------------------|---------------------------------------------------------|----------------------------------------------------------------------------------------------------------------------|
| Caenorhabditis briggsae      | sig-I recognition particle 54 kda protein                  | 16 | F:GO:0008144;<br>C:GO:0005786;<br>F:GO:0030942;<br>F:GO:0043021;<br>C:GO:0005730;<br>F:GO:0008312;<br>C:GO:0016607;<br>P:GO:0000003;<br>P:GO:0006617;<br>F:GO:0019003;<br>P:GO:0002119;<br>F:GO:0005515;<br>F:GO:0003924;<br>P:GO:0042493;<br>P:GO:0006616;<br>F:GO:0005525 | -                                                                                                 | EC:3.6.5.4;<br>EC:3.6.5.1;<br>EC:3.6.5.2;<br>EC:3.6.5.3 | IPR004125; PTHR11564 (PANTHER),<br>PTHR11564:SF5 (PANTHER)                                                           |
| -                            | -                                                          | 0  |                                                                                                                                                                                                                                                                             |                                                                                                   |                                                         | -                                                                                                                    |
| -                            | -                                                          | 0  |                                                                                                                                                                                                                                                                             |                                                                                                   |                                                         | IPR017956                                                                                                            |
| Caenorhabditis elegans       | monofunctio-l c1-tetrahydrofolate mitochondrial precursor  | 8  | C:GO:0005739;<br>F:GO:0004488;<br>F:GO:0004477;<br>P:GO:0009257;<br>P:GO:0006730;<br>F:GO:0005524;<br>F:GO:0005515;<br>F:GO:0004329                                                                                                                                         | -                                                                                                 | EC:1.5.1.5;<br>EC:3.5.4.9;<br>EC:6.3.4.3                | IPR000559; G3DSA:3.10.410.10<br>(GENE3D), PTHR10025 (PANTHER),<br>PTHR10025:SF4 (PANTHER), SSF52540<br>(SUPERFAMILY) |
| -                            | -                                                          | 0  |                                                                                                                                                                                                                                                                             |                                                                                                   |                                                         | -                                                                                                                    |
| Caenorhabditis elegans       | nol6 protein                                               | 0  |                                                                                                                                                                                                                                                                             | C:GO:0005694;<br>F:GO:0003723;<br>C:GO:0000794;<br>P:GO:0006364;<br>C:GO:0005634;<br>C:GO:0005730 |                                                         | IPR005554                                                                                                            |
| Caenorhabditis briggsae      | elegans protein partially confirmed by transcript evidence | 0  |                                                                                                                                                                                                                                                                             |                                                                                                   |                                                         | -                                                                                                                    |
| Caenorhabditis elegans       | mitochondrial ribosomal protein l40                        | 4  | P:GO:0009792;<br>P:GO:0002119;<br>P:GO:0000003;<br>P:GO:0040007                                                                                                                                                                                                             | -                                                                                                 |                                                         | IPR019192; PTHR13359 (PANTHER),<br>SignalP (SIGNALP)                                                                 |
| -                            | -                                                          | 0  |                                                                                                                                                                                                                                                                             |                                                                                                   |                                                         | -                                                                                                                    |
| Brugia malayi                | elegans protein confirmed by transcript evidence           | 4  | P:GO:0000003;<br>P:GO:0040010;<br>P:GO:0006898;<br>P:GO:0002119                                                                                                                                                                                                             | -                                                                                                 |                                                         | IPR004296; PTHR21592 (PANTHER),<br>SignalP (SIGNALP)                                                                 |
| Caenorhabditis elegans       | hypothetical protein C01B10.3 [Caenorhabditis elegans]     | 1  | F:GO:0005515                                                                                                                                                                                                                                                                | -                                                                                                 |                                                         | IPR005135; PTHR12997 (PANTHER),<br>PTHR12997:SF3 (PANTHER)                                                           |
| Caenorhabditis elegans       | elegans protein confirmed by transcript evidence           | 1  | C:GO:0044425                                                                                                                                                                                                                                                                | -                                                                                                 |                                                         | IPR002490; PTHR11629:SF23<br>(PANTHER)                                                                               |
| Caenorhabditis elegans       | glycerophosphoryl diester phosphodiesterase                | 3  | P:GO:0006071;<br>F:GO:0008889;<br>P:GO:0006629                                                                                                                                                                                                                              | -                                                                                                 | EC:3.1.4.46                                             | -                                                                                                                    |
| Dictyostelium discoideum AX4 | nudix hydrolase 8                                          | 0  |                                                                                                                                                                                                                                                                             | F:GO:0016787;<br>F:GO:0000210                                                                     |                                                         | IPR000086; IPR003293; IPR015797;<br>IPR020084; IPR020476; PTHR13994<br>(PANTHER), PS51462 (PROFILE)                  |
| -                            | -                                                          | 0  |                                                                                                                                                                                                                                                                             |                                                                                                   |                                                         | -                                                                                                                    |
| -                            | -                                                          | 0  |                                                                                                                                                                                                                                                                             |                                                                                                   |                                                         | -                                                                                                                    |

|                         |                                                      |    |                                                                                                                                                                                        |                                                                                                                                     |             |                                                                                                                                                |
|-------------------------|------------------------------------------------------|----|----------------------------------------------------------------------------------------------------------------------------------------------------------------------------------------|-------------------------------------------------------------------------------------------------------------------------------------|-------------|------------------------------------------------------------------------------------------------------------------------------------------------|
| Caenorhabditis briggsae | polymerase (d- directed) epsilon                     | 11 | P:GO:0040035;<br>P:GO:0009792;<br>F:GO:0003887;<br>P:GO:0006260;<br>F:GO:0003677;<br>P:GO:0006997;<br>P:GO:0040011;<br>C:GO:0005634;<br>F:GO:0008270;<br>F:GO:0000166;<br>P:GO:0002009 | -                                                                                                                                   | EC:2.7.7.7  | IPR006133; IPR012337;<br>G3DSA:3.30.420.10 (GENE3D),<br>PTHR10670 (PANTHER)                                                                    |
| -                       | -                                                    | 0  |                                                                                                                                                                                        |                                                                                                                                     |             | -                                                                                                                                              |
| Caenorhabditis briggsae | cg16865 cg16865-pa                                   | 1  | F:GO:0005515                                                                                                                                                                           | -                                                                                                                                   |             | PTHR13420 (PANTHER)                                                                                                                            |
| Haemonchus contortus    | astacin metalloprotease b                            | 1  | F:GO:0008233                                                                                                                                                                           | -                                                                                                                                   |             | SignalP (SIGNALP)                                                                                                                              |
| Caenorhabditis briggsae | d-2-like helicase                                    | 3  | C:GO:0043231;<br>P:GO:0006260;<br>F:GO:0016787                                                                                                                                         | -                                                                                                                                   |             | IPR007807; IPR014001; IPR014021;<br>G3DSA:3.40.50.300 (GENE3D),<br>PTHR10887 (PANTHER),<br>PTHR10887:SF14 (PANTHER),<br>SSF52540 (SUPERFAMILY) |
| Homo sapiens            | immunoglobulin kappa light chain variable region vk1 | 4  | C:GO:0005576;<br>F:GO:0005515;<br>F:GO:0003823;<br>P:GO:0006955                                                                                                                        | -                                                                                                                                   |             | IPR003596; IPR013106; IPR013783;<br>PTHR23267 (PANTHER),<br>PTHR23267:SF33 (PANTHER),<br>SSF48726 (SUPERFAMILY)                                |
| Caenorhabditis briggsae | amp-dependent synthetase and ligase                  | 0  |                                                                                                                                                                                        | F:GO:0003987;<br>P:GO:0006629;<br>F:GO:0004467;<br>F:GO:0016874;<br>C:GO:0016021;<br>P:GO:0008152;<br>F:GO:0003824;<br>P:GO:0019915 |             | IPR000873; G3DSA:3.40.50.980<br>(GENE3D), PTHR11968 (PANTHER),<br>PTHR11968:SF43 (PANTHER),<br>SSF56801 (SUPERFAMILY)                          |
| -                       | -                                                    | 0  |                                                                                                                                                                                        |                                                                                                                                     |             | -                                                                                                                                              |
| Homo sapiens            | complement component q alpha polypeptide             | 5  | C:GO:0005602;<br>P:GO:0045087;<br>C:GO:0005794;<br>P:GO:0006958;<br>P:GO:0007267                                                                                                       | -                                                                                                                                   |             | -                                                                                                                                              |
| Loa loa                 | peptidyl-prolyl cis-trans isomerase g                | 5  | P:GO:0006457;<br>C:GO:0071011;<br>P:GO:0000398;<br>F:GO:0003755;<br>C:GO:0071013                                                                                                       | -                                                                                                                                   | EC:5.2.1.8  | IPR002130; IPR015891; PTHR11071<br>(PANTHER), PTHR11071:SF56<br>(PANTHER)                                                                      |
| Caenorhabditis elegans  | ubiquitin carboxyl-termi-l hydrolase 28              | 9  | F:GO:0004221;<br>P:GO:0010212;<br>P:GO:0042771;<br>F:GO:0004843;<br>F:GO:0005515;<br>P:GO:0000077;<br>P:GO:0016579;<br>C:GO:0005654;<br>P:GO:0008283                                   | -                                                                                                                                   | EC:3.1.2.15 | IPR001394; IPR018200; PTHR10420<br>(PANTHER), PTHR10420:SF2<br>(PANTHER), SSF54001 (SUPERFAMILY)                                               |
| Caenorhabditis briggsae | glycine dehydroge-se                                 | 5  | F:GO:0004375;<br>F:GO:0030170;<br>P:GO:0055114;<br>F:GO:0016829;<br>P:GO:0019464                                                                                                       | -                                                                                                                                   | EC:1.4.4.2  | IPR015421; IPR015424; IPR020581                                                                                                                |

|                                  |                                                            |  |   |                                                                                                                                     |   |            |                                                                                                     |
|----------------------------------|------------------------------------------------------------|--|---|-------------------------------------------------------------------------------------------------------------------------------------|---|------------|-----------------------------------------------------------------------------------------------------|
| Caenorhabditis elegans           | tyrosyl-tr- synthetase                                     |  | 3 | P:GO:0009792;<br>P:GO:0000003;<br>P:GO:0006412                                                                                      | - | EC:3.6.5.3 | -                                                                                                   |
| Caenorhabditis elegans           | 28s ribosomal protein mitochondrial                        |  | 6 | P:GO:0006412;<br>P:GO:0040010;<br>C:GO:0005840;<br>F:GO:0003735;<br>P:GO:0006898;<br>P:GO:0009792                                   | - | EC:3.6.5.3 | IPR000307; PTHR12919:SF1 (PANTHER)                                                                  |
| Caenorhabditis elegans           | adipocyte plasma membrane-associated protein               |  | 2 | C:GO:0044464;<br>F:GO:0003824                                                                                                       | - |            | IPR004141; IPR011042; IPR018119; PTHR10426:SF6 (PANTHER), SignalP (SIGNALP), SSF63829 (SUPERFAMILY) |
|                                  | -                                                          |  | 0 |                                                                                                                                     |   |            | -                                                                                                   |
|                                  | -                                                          |  | 0 |                                                                                                                                     |   |            | -                                                                                                   |
| Caenorhabditis briggsae          | elegans protein confirmed by transcript evidence           |  | 0 |                                                                                                                                     |   |            | -                                                                                                   |
| Brugia malayi                    | novel rho gtpase activation protein                        |  | 0 | P:GO:0050790;<br>F:GO:0003674;<br>C:GO:0005737;<br>P:GO:0008150;<br>P:GO:0007165;<br>F:GO:0005515;<br>C:GO:0005575;<br>C:GO:0005622 |   |            | IPR000198; IPR004148; IPR008936; PTHR14130 (PANTHER), SSF103657 (SUPERFAMILY)                       |
|                                  | -                                                          |  | 0 |                                                                                                                                     |   |            | -                                                                                                   |
| Caenorhabditis briggsae          | olfactomedin 1                                             |  | 0 |                                                                                                                                     |   |            | IPR003112; PTHR23192 (PANTHER), PTHR23192:SF6 (PANTHER)                                             |
| Ascaris suum                     | spliced leader 30 kda protein                              |  | 0 |                                                                                                                                     |   |            | -                                                                                                   |
|                                  | -                                                          |  | 0 |                                                                                                                                     |   |            | -                                                                                                   |
| Loa loa                          | lethal family member (let-805)                             |  | 8 | P:GO:0018996;<br>P:GO:0009792;<br>P:GO:0008340;<br>P:GO:0000003;<br>F:GO:0005515;<br>P:GO:0006898;<br>P:GO:0002119;<br>P:GO:0040011 | - |            | IPR003961; IPR008957; IPR013783; PR00014 (PRINTS), PTHR10489 (PANTHER), PTHR10489:SF17 (PANTHER)    |
| Brugia malayi                    | btb poz domain containing protein                          |  | 1 | F:GO:0005515                                                                                                                        | - |            | IPR002083; IPR008974; IPR013322                                                                     |
| Loa loa                          | elegans protein partially confirmed by transcript evidence |  | 1 | C:GO:0005811                                                                                                                        | - |            | IPR000120; PTHR11895:SF5 (PANTHER)                                                                  |
| Caenorhabditis briggsae          | deah (asp-glu-ala-his) box polypeptide 16                  |  | 5 | F:GO:0003724;<br>F:GO:0008026;<br>F:GO:0003676;<br>F:GO:0005515;<br>F:GO:0005524                                                    | - |            | IPR001482; G3DSA:3.40.50.300 (GENE3D), PTHR18934 (PANTHER), SSF52540 (SUPERFAMILY)                  |
|                                  | -                                                          |  | 0 |                                                                                                                                     |   |            | -                                                                                                   |
| Caenorhabditis briggsae          | probable tr- pseudouridine synthase 2                      |  | 2 | P:GO:0016070;<br>F:GO:0005515                                                                                                       | - |            | IPR002501; IPR020103; PTHR13195 (PANTHER)                                                           |
|                                  | -                                                          |  | 0 |                                                                                                                                     |   |            | -                                                                                                   |
| Loa loa                          | suppressor of ty 16 homolog                                |  | 5 | P:GO:0018996;<br>C:GO:0005654;<br>P:GO:0009792;<br>P:GO:0001703;<br>P:GO:0006350                                                    | - |            | IPR000994; G3DSA:3.40.350.10 (GENE3D), PTHR13980 (PANTHER), PTHR13980:SF6 (PANTHER)                 |
| Leishmania major strain Friedlin | proteophosphoglycan ppg4                                   |  | 0 |                                                                                                                                     |   |            | F:GO:0005524;<br>F:GO:0004479;<br>P:GO:0006412;<br>F:GO:0003774;<br>C:GO:0016459                    |

|                         |                                                                                 |    |                                                                                                                                                                                                                                           |   |             |                                                                                                                                                                                                   |
|-------------------------|---------------------------------------------------------------------------------|----|-------------------------------------------------------------------------------------------------------------------------------------------------------------------------------------------------------------------------------------------|---|-------------|---------------------------------------------------------------------------------------------------------------------------------------------------------------------------------------------------|
| Caenorhabditis elegans  | hus1-like protein                                                               | 2  | P:GO:0006259;<br>P:GO:0006974                                                                                                                                                                                                             | - |             | IPR007150                                                                                                                                                                                         |
| Caenorhabditis briggsae | acid phosphatase-like 2                                                         | 1  | F:GO:0016787                                                                                                                                                                                                                              | - |             | IPR000560; G3DSA:3.40.50.1240 (GENE3D), PTHR11567 (PANTHER), PTHR11567:SF6 (PANTHER), SSF53254 (SUPERFAMILY)                                                                                      |
| -                       | -                                                                               | 0  |                                                                                                                                                                                                                                           |   |             | -                                                                                                                                                                                                 |
| Caenorhabditis elegans  | mitogen-activated protein ki-se ki-se ki-se 15                                  | 4  | P:GO:0006468;<br>F:GO:0005515;<br>F:GO:0005524;<br>F:GO:0004674                                                                                                                                                                           | - | EC:2.7.11.0 | -                                                                                                                                                                                                 |
| Caenorhabditis briggsae | isocitrate dehydroge-se                                                         | 10 | C:GO:0005962;<br>P:GO:0006103;<br>P:GO:0006734;<br>P:GO:0055114;<br>F:GO:0004449;<br>P:GO:0006099;<br>F:GO:0051287;<br>F:GO:0005515;<br>F:GO:0000287;<br>P:GO:0006102                                                                     | - | EC:1.1.1.41 | IPR001804; PTHR11835:SF5 (PANTHER), SSF53659 (SUPERFAMILY)                                                                                                                                        |
| Caenorhabditis elegans  | elegans protein confirmed by transcript evidence                                | 0  |                                                                                                                                                                                                                                           |   |             | -                                                                                                                                                                                                 |
| -                       | -                                                                               | 0  |                                                                                                                                                                                                                                           |   |             | -                                                                                                                                                                                                 |
| Caenorhabditis elegans  | short chain dehydroge-se reductase family protein                               | 14 | F:GO:0001968;<br>P:GO:0008340;<br>P:GO:0042303;<br>P:GO:0032350;<br>P:GO:0008610;<br>F:GO:0016491;<br>P:GO:0010811;<br>P:GO:0030540;<br>F:GO:0005518;<br>C:GO:0031012;<br>F:GO:0008201;<br>P:GO:0030198;<br>C:GO:0016020;<br>P:GO:0009790 | - |             | IPR002198; IPR002347; IPR016040; IPR020904; PTHR19410:SF38 (PANTHER), SignalP (SIGNALP), SSF51735 (SUPERFAMILY)                                                                                   |
| -                       | -                                                                               | 0  |                                                                                                                                                                                                                                           |   |             | -                                                                                                                                                                                                 |
| -                       | -                                                                               | 0  |                                                                                                                                                                                                                                           |   |             | -                                                                                                                                                                                                 |
| Caenorhabditis briggsae | abnormal dye filling protein isoform partially confirmed by transcript evidence | 6  | C:GO:0005737;<br>C:GO:0000776;<br>F:GO:0005515;<br>C:GO:0044430;<br>P:GO:0000279;<br>C:GO:0015630                                                                                                                                         | - |             | PTHR23159 (PANTHER), PTHR23159:SF6 (PANTHER)                                                                                                                                                      |
| Caenorhabditis elegans  | ccr (yeast ccr4 not complex component) homolog family member (ccr-4)            | 12 | F:GO:0030528;<br>P:GO:0008340;<br>P:GO:0000289;<br>P:GO:0040002;<br>C:GO:0030014;<br>F:GO:0005515;<br>P:GO:0040011;<br>P:GO:0048477;<br>P:GO:0009792;<br>C:GO:0005737;<br>F:GO:0016787;<br>P:GO:0040018                                   | - |             | IPR001611; IPR003591; IPR005135; PR00019 (PRINTS), G3DSA:3.60.10.10 (GENE3D), G3DSA:3.80.10.10 (GENE3D), PTHR12121 (PANTHER), PTHR12121:SF13 (PANTHER), PS51450 (PROFILE), SSF52058 (SUPERFAMILY) |

|                        |                                                                      |    |                                                                                                                                                                                                                          |                                                |                                                                                                                                                                                                                  |
|------------------------|----------------------------------------------------------------------|----|--------------------------------------------------------------------------------------------------------------------------------------------------------------------------------------------------------------------------|------------------------------------------------|------------------------------------------------------------------------------------------------------------------------------------------------------------------------------------------------------------------|
| Caenorhabditis elegans | ccr (yeast ccr4 not complex component) homolog family member (ccr-4) | 12 | F:GO:0030528;<br>P:GO:0008340;<br>P:GO:0000289;<br>P:GO:0040002;<br>C:GO:0030014;<br>F:GO:0005515;<br>P:GO:0040011;<br>P:GO:0048477;<br>P:GO:0009792;<br>C:GO:0005737;<br>F:GO:0016787;<br>P:GO:0040018                  | -                                              | IPR001611; IPR003591; IPR005135;<br>PR00019 (PRINTS), G3DSA:3.60.10.10<br>(GENE3D), G3DSA:3.80.10.10<br>(GENE3D), PTHR12121 (PANTHER),<br>PTHR12121:SF13 (PANTHER), PS51450<br>(PROFILE), SSF52058 (SUPERFAMILY) |
| Drosophila simulans    | isoform b                                                            | 0  |                                                                                                                                                                                                                          | F:GO:0003677;<br>F:GO:0005215;<br>P:GO:0006810 | -                                                                                                                                                                                                                |
| Caenorhabditis elegans | gamma-soluble nsf attachment protein                                 | 4  | F:GO:0005488;<br>C:GO:0043231;<br>C:GO:0044444;<br>P:GO:0009987                                                                                                                                                          | -                                              | IPR000744; IPR011990;<br>PTHR13768:SF2 (PANTHER), SSF48452<br>(SUPERFAMILY)                                                                                                                                      |
| Caenorhabditis elegans | heparan sulfate proteoglycan 2                                       | 13 | P:GO:0048704;<br>P:GO:0030155;<br>P:GO:0002062;<br>P:GO:0007420;<br>P:GO:0045995;<br>C:GO:0005606;<br>P:GO:0030334;<br>F:GO:0005102;<br>P:GO:0001958;<br>P:GO:0048738;<br>P:GO:0008104;<br>P:GO:0030198;<br>P:GO:0060351 | -                                              | IPR002049; G3DSA:2.10.25.10<br>(GENE3D), PTHR10574 (PANTHER),<br>PTHR10574:SF25 (PANTHER),<br>SSF57196 (SUPERFAMILY)                                                                                             |
| -                      | -                                                                    | 0  |                                                                                                                                                                                                                          |                                                | -                                                                                                                                                                                                                |
| Drosophila sechellia   | isoform c                                                            | 0  |                                                                                                                                                                                                                          | F:GO:0003779;<br>P:GO:0030036                  | -                                                                                                                                                                                                                |
| Caenorhabditis elegans | elegans protein confirmed by transcript evidence                     | 1  | F:GO:0005515                                                                                                                                                                                                             | -                                              | -                                                                                                                                                                                                                |
| -                      | -                                                                    | 0  |                                                                                                                                                                                                                          |                                                | -                                                                                                                                                                                                                |
| Brugia malayi          | chromobox protein                                                    | 7  | P:GO:0006333;<br>C:GO:0043234;<br>C:GO:0000785;<br>C:GO:0005634;<br>C:GO:0005705;<br>F:GO:0005515;<br>F:GO:0003682                                                                                                       | -                                              | IPR000953; IPR008251; IPR016197;<br>IPR017984; IPR018125;<br>G3DSA:2.40.50.40 (GENE3D),<br>PTHR22812 (PANTHER),<br>PTHR22812:SF4 (PANTHER)                                                                       |
| Brugia malayi          | chromobox protein                                                    | 7  | P:GO:0006333;<br>C:GO:0043234;<br>C:GO:0000785;<br>C:GO:0005634;<br>C:GO:0005705;<br>F:GO:0005515;<br>F:GO:0003682                                                                                                       | -                                              | IPR000953; IPR008251; IPR016197;<br>IPR017984; IPR018125;<br>G3DSA:2.40.50.40 (GENE3D),<br>PTHR22812 (PANTHER),<br>PTHR22812:SF4 (PANTHER)                                                                       |
| -                      | -                                                                    | 0  |                                                                                                                                                                                                                          |                                                | -                                                                                                                                                                                                                |
| -                      | -                                                                    | 0  |                                                                                                                                                                                                                          |                                                | -                                                                                                                                                                                                                |
| -                      | -                                                                    | 0  |                                                                                                                                                                                                                          |                                                | -                                                                                                                                                                                                                |
| Caenorhabditis elegans | hypothetical protein F57C9.6 [Caenorhabditis elegans]                | 0  |                                                                                                                                                                                                                          | C:GO:0016021;<br>P:GO:0007186                  | -                                                                                                                                                                                                                |
| Caenorhabditis elegans | hypothetical protein Y67D8B.4 [Caenorhabditis elegans]               | 0  |                                                                                                                                                                                                                          |                                                | -                                                                                                                                                                                                                |
| -                      | -                                                                    | 0  |                                                                                                                                                                                                                          |                                                | -                                                                                                                                                                                                                |

|                             |                                                            |    |                                                                                                                                                                                                                                                                                                                                                                                                                                      |                                                                                                                                                      |            |                                                                                                                                |
|-----------------------------|------------------------------------------------------------|----|--------------------------------------------------------------------------------------------------------------------------------------------------------------------------------------------------------------------------------------------------------------------------------------------------------------------------------------------------------------------------------------------------------------------------------------|------------------------------------------------------------------------------------------------------------------------------------------------------|------------|--------------------------------------------------------------------------------------------------------------------------------|
|                             | -                                                          | 0  |                                                                                                                                                                                                                                                                                                                                                                                                                                      |                                                                                                                                                      |            | -                                                                                                                              |
|                             | -                                                          | 0  |                                                                                                                                                                                                                                                                                                                                                                                                                                      |                                                                                                                                                      |            | -                                                                                                                              |
| Caenorhabditis elegans      | hypothetical protein B0222.9 [Caenorhabditis elegans]      | 0  |                                                                                                                                                                                                                                                                                                                                                                                                                                      | F:GO:0005506;<br>F:GO:0009055;<br>F:GO:0050660;<br>P:GO:0055114;<br>F:GO:0051537;<br>F:GO:0016491;<br>F:GO:0051536;<br>F:GO:0003824;<br>F:GO:0046872 |            | PTHR11908 (PANTHER),<br>PTHR11908:SF6 (PANTHER)                                                                                |
|                             | -                                                          | 0  |                                                                                                                                                                                                                                                                                                                                                                                                                                      |                                                                                                                                                      |            | -                                                                                                                              |
|                             | -                                                          | 0  |                                                                                                                                                                                                                                                                                                                                                                                                                                      |                                                                                                                                                      |            | -                                                                                                                              |
| Caenorhabditis elegans      | ph domain containing protein                               | 0  |                                                                                                                                                                                                                                                                                                                                                                                                                                      | F:GO:0046872;<br>F:GO:0005089;<br>F:GO:0008270;<br>P:GO:0035023;<br>C:GO:0005622                                                                     |            | -                                                                                                                              |
| Caenorhabditis elegans      | d- polymerase alpha catalytic subunit                      | 25 | P:GO:0045596;<br>C:GO:0016363;<br>P:GO:0000084;<br>F:GO:0019103;<br>F:GO:0003690;<br>P:GO:0046677;<br>C:GO:0005730;<br>F:GO:0003887;<br>F:GO:0030337;<br>F:GO:0032403;<br>P:GO:0006303;<br>F:GO:0003896;<br>P:GO:0006272;<br>P:GO:0000731;<br>P:GO:0006298;<br>C:GO:0000785;<br>F:GO:0017076;<br>P:GO:0006270;<br>C:GO:0005635;<br>P:GO:0006273;<br>C:GO:0005658;<br>C:GO:0005654;<br>P:GO:0008283;<br>C:GO:0005737;<br>F:GO:0003682 | -                                                                                                                                                    | EC:2.7.7.7 | IPR000276; IPR015088; PTHR10322<br>(PANTHER), PTHR10322:SF3<br>(PANTHER)                                                       |
| Loa loa                     | ring finger protein 170                                    | 1  | F:GO:0005488                                                                                                                                                                                                                                                                                                                                                                                                                         | -                                                                                                                                                    |            | IPR001841; IPR010652; IPR013083;<br>IPR017907; IPR018957; PTHR22894<br>(PANTHER), SignalP (SIGNALP),<br>SSF57850 (SUPERFAMILY) |
|                             | -                                                          | 0  |                                                                                                                                                                                                                                                                                                                                                                                                                                      |                                                                                                                                                      |            | -                                                                                                                              |
| Loa loa                     | elegans protein partially confirmed by transcript evidence | 1  | F:GO:0016787                                                                                                                                                                                                                                                                                                                                                                                                                         | -                                                                                                                                                    |            | IPR006186; G3DSA:3.60.21.10<br>(GENE3D), SSF56300 (SUPERFAMILY)                                                                |
| Angiostrongylus cantonensis | proline-rich protein prcc                                  | 2  | F:GO:0005515;<br>P:GO:0040011                                                                                                                                                                                                                                                                                                                                                                                                        | -                                                                                                                                                    |            | IPR018800                                                                                                                      |
| Bombyx mori                 | endonuclease-reverse transcriptase                         | 3  | F:GO:0003676;<br>F:GO:0016740;<br>F:GO:0000166                                                                                                                                                                                                                                                                                                                                                                                       | -                                                                                                                                                    |            | -                                                                                                                              |
|                             | -                                                          | 0  |                                                                                                                                                                                                                                                                                                                                                                                                                                      |                                                                                                                                                      |            | -                                                                                                                              |
| Caenorhabditis briggsae     | Hypothetical protein CBG18490 [Caenorhabditis briggsae]    | 0  |                                                                                                                                                                                                                                                                                                                                                                                                                                      |                                                                                                                                                      |            | -                                                                                                                              |
|                             | -                                                          | 0  |                                                                                                                                                                                                                                                                                                                                                                                                                                      |                                                                                                                                                      |            | -                                                                                                                              |

|                         |                                                       |    |                                                                                                                                                                                                                                           |                                                                                                   |                                                                                                                         |
|-------------------------|-------------------------------------------------------|----|-------------------------------------------------------------------------------------------------------------------------------------------------------------------------------------------------------------------------------------------|---------------------------------------------------------------------------------------------------|-------------------------------------------------------------------------------------------------------------------------|
| Caenorhabditis elegans  | hypothetical protein T04C4.1 [Caenorhabditis elegans] | 0  |                                                                                                                                                                                                                                           |                                                                                                   | -                                                                                                                       |
|                         | -                                                     | 0  |                                                                                                                                                                                                                                           |                                                                                                   | SignalP (SIGNALP)                                                                                                       |
| Caenorhabditis elegans  | zinc transporter zip9                                 | 3  | P:GO:0030001;<br>C:GO:0016020;<br>F:GO:0046873                                                                                                                                                                                            | -                                                                                                 | IPR003689; PTHR16133 (PANTHER)                                                                                          |
| Caenorhabditis briggsae | pyruvate muscle                                       | 14 | P:GO:0012501;<br>C:GO:0005829;<br>F:GO:0030955;<br>F:GO:0016830;<br>C:GO:0005739;<br>F:GO:0005524;<br>F:GO:0004743;<br>F:GO:0005515;<br>F:GO:0000287;<br>P:GO:0006096;<br>C:GO:0019861;<br>P:GO:0006725;<br>P:GO:0009792;<br>C:GO:0005634 | -                                                                                                 | EC:2.7.1.40<br>IPR001697; IPR015793; IPR015813;<br>IPR018209                                                            |
| Necator americanus      | elegans protein confirmed by transcript evidence      | 2  | F:GO:0005515;<br>P:GO:0008340                                                                                                                                                                                                             | -                                                                                                 | IPR004045; IPR004046; IPR010987;<br>IPR012335; IPR012336; IPR017933;<br>PTHR11571 (PANTHER),<br>PTHR11571:SF6 (PANTHER) |
|                         | -                                                     | 0  |                                                                                                                                                                                                                                           |                                                                                                   | -                                                                                                                       |
| Caenorhabditis briggsae | ribosome production factor 1                          | 10 | P:GO:0006412;<br>C:GO:0005730;<br>P:GO:0006364;<br>F:GO:0019843;<br>P:GO:0040007;<br>F:GO:0005524;<br>P:GO:0002119;<br>F:GO:0004812;<br>C:GO:0030529;<br>P:GO:0006898                                                                     | -                                                                                                 | EC:3.6.5.3<br>IPR007109; PTHR22734 (PANTHER)                                                                            |
|                         | -                                                     | 0  |                                                                                                                                                                                                                                           |                                                                                                   | -                                                                                                                       |
| Caenorhabditis elegans  | diacylglycerol ki-se epsilon                          | 0  |                                                                                                                                                                                                                                           | F:GO:0016301;<br>P:GO:0007205;<br>F:GO:0004143;<br>F:GO:0016740;<br>C:GO:0016021;<br>P:GO:0023034 | IPR000756; IPR001206; PTHR11255<br>(PANTHER), PTHR11255:SF7<br>(PANTHER)                                                |
| Caenorhabditis briggsae | elegans protein confirmed by transcript evidence      | 8  | P:GO:0009792;<br>F:GO:0004743;<br>F:GO:0016830;<br>P:GO:0006725;<br>F:GO:0005515;<br>F:GO:0030955;<br>F:GO:0000287;<br>P:GO:0006096                                                                                                       | -                                                                                                 | EC:2.7.1.40<br>IPR001697; IPR015793; IPR015794;<br>IPR015795; IPR015813                                                 |
| Caenorhabditis elegans  | placental protein 11                                  | 3  | F:GO:0004521;<br>F:GO:0003723;<br>P:GO:0008152                                                                                                                                                                                            | -                                                                                                 | PTHR12439 (PANTHER), SSF142877<br>(SUPERFAMILY)                                                                         |
| Caenorhabditis briggsae | briggsae cbr-gob-1 protein                            | 0  |                                                                                                                                                                                                                                           | F:GO:0016787;<br>F:GO:0004805                                                                     | -                                                                                                                       |



|                           |                                                                     |   |                                                                                                                    |                                                                                                                                                                                                                                                            |            |                                                                                                                                                                                                                    |
|---------------------------|---------------------------------------------------------------------|---|--------------------------------------------------------------------------------------------------------------------|------------------------------------------------------------------------------------------------------------------------------------------------------------------------------------------------------------------------------------------------------------|------------|--------------------------------------------------------------------------------------------------------------------------------------------------------------------------------------------------------------------|
| Caenorhabditis elegans    | briggsae cbr-sep-1 protein                                          | 7 | F:GO:0008233;<br>C:GO:0043229;<br>P:GO:0006996;<br>P:GO:0007059;<br>P:GO:0019538;<br>P:GO:0007127;<br>F:GO:0005515 | -                                                                                                                                                                                                                                                          | -          |                                                                                                                                                                                                                    |
|                           | -                                                                   | 0 |                                                                                                                    |                                                                                                                                                                                                                                                            |            | -                                                                                                                                                                                                                  |
|                           | -                                                                   | 0 |                                                                                                                    |                                                                                                                                                                                                                                                            |            | -                                                                                                                                                                                                                  |
| Caenorhabditis elegans    | slowpoke potassium channel family member (slo-2)                    | 0 |                                                                                                                    | F:GO:0015269;<br>F:GO:0005488;<br>P:GO:0008152;<br>C:GO:0016020;<br>F:GO:0003824;<br>P:GO:0006813;<br>F:GO:0005216                                                                                                                                         |            | -                                                                                                                                                                                                                  |
|                           | -                                                                   | 0 |                                                                                                                    |                                                                                                                                                                                                                                                            |            | -                                                                                                                                                                                                                  |
| Danio rerio               | kiaa1033 protein                                                    | 0 |                                                                                                                    | P:GO:0016197;<br>C:GO:0071203                                                                                                                                                                                                                              |            | -                                                                                                                                                                                                                  |
| Danio rerio               | kiaa1033 protein                                                    | 0 |                                                                                                                    | P:GO:0016197;<br>C:GO:0071203                                                                                                                                                                                                                              |            | -                                                                                                                                                                                                                  |
| Danio rerio               | kiaa1033 protein                                                    | 0 |                                                                                                                    | P:GO:0016197;<br>C:GO:0071203                                                                                                                                                                                                                              |            | -                                                                                                                                                                                                                  |
|                           | -                                                                   | 0 |                                                                                                                    |                                                                                                                                                                                                                                                            |            | -                                                                                                                                                                                                                  |
|                           |                                                                     |   |                                                                                                                    |                                                                                                                                                                                                                                                            |            | IPR000152; IPR000742; IPR001881;<br>IPR006209; IPR006210; IPR013032;<br>IPR018097; PRO0010 (PRINTS),<br>G3DSA:2.10.25.10 (GENE3D),<br>PTHR11201 (PANTHER),<br>PTHR11201:SF226 (PANTHER),<br>SSF57196 (SUPERFAMILY) |
| Caenorhabditis briggsae   | isoform b                                                           | 3 | F:GO:0004591;<br>F:GO:0030976;<br>P:GO:0006096                                                                     | -                                                                                                                                                                                                                                                          | EC:1.2.4.2 | IPR011603                                                                                                                                                                                                          |
|                           | -                                                                   | 0 |                                                                                                                    |                                                                                                                                                                                                                                                            |            | -                                                                                                                                                                                                                  |
| Caenorhabditis sp. PS1010 | hypothetical protein Csp3_JD07.006 [Caenorhabditis sp. PS1010]      | 0 |                                                                                                                    |                                                                                                                                                                                                                                                            |            | -                                                                                                                                                                                                                  |
| Loa loa                   | prion-like-(q n-rich)-domain-bearing protein family member (pqn-42) | 0 |                                                                                                                    | F:GO:0008430                                                                                                                                                                                                                                               |            | IPR007671; PTHR10105 (PANTHER),<br>SignalP (SIGNALP)                                                                                                                                                               |
| Haemonchus contortus      | aspartyl protease family member (asp-2)                             | 4 | P:GO:0008219;<br>F:GO:0016787;<br>F:GO:0005515;<br>P:GO:0040011                                                    | -                                                                                                                                                                                                                                                          |            | IPR001461; IPR001969; IPR009007;<br>IPR021109; PTHR13683:SF53<br>(PANTHER), SignalP (SIGNALP)                                                                                                                      |
| Pongo abelii              | histone-lysine n-methyltransferase setmar                           | 0 |                                                                                                                    | F:GO:0016740;<br>F:GO:0004803;<br>P:GO:0006313;<br>F:GO:0008168;<br>C:GO:0005634;<br>F:GO:0003677;<br>F:GO:0016787;<br>F:GO:0008270;<br>F:GO:0018024;<br>P:GO:0016568;<br>P:GO:0015074;<br>P:GO:0006281;<br>C:GO:0005575;<br>F:GO:0046872;<br>F:GO:0004519 |            | -                                                                                                                                                                                                                  |

|                               |                                                  |    |                                                                                                                                                                                                                                                                             |                                                                                                                                                                       |  |                                                                                                                                               |
|-------------------------------|--------------------------------------------------|----|-----------------------------------------------------------------------------------------------------------------------------------------------------------------------------------------------------------------------------------------------------------------------------|-----------------------------------------------------------------------------------------------------------------------------------------------------------------------|--|-----------------------------------------------------------------------------------------------------------------------------------------------|
| Caenorhabditis elegans        | elegans protein confirmed by transcript evidence | 1  | C:GO:0044464                                                                                                                                                                                                                                                                | -                                                                                                                                                                     |  | IPR000904; IPR001605; IPR001849; IPR011993; G3DSA:1.10.1000.11 (GENE3D), PTHR10663 (PANTHER), PTHR10663:SF3 (PANTHER), SSF50729 (SUPERFAMILY) |
| Caenorhabditis elegans        | elegans protein confirmed by transcript evidence | 1  | C:GO:0044464                                                                                                                                                                                                                                                                | -                                                                                                                                                                     |  | IPR000904; IPR001605; IPR001849; IPR011993; G3DSA:1.10.1000.11 (GENE3D), PTHR10663 (PANTHER), PTHR10663:SF3 (PANTHER), SSF50729 (SUPERFAMILY) |
| Strongylocentrotus purpuratus | replication factor c p37 subunit                 | 0  |                                                                                                                                                                                                                                                                             | F:GO:0016740;<br>F:GO:0003677;<br>C:GO:0005663;<br>P:GO:0006260;<br>F:GO:0003887;<br>F:GO:0000166;<br>F:GO:0017111;<br>F:GO:0005524;<br>F:GO:0016779;<br>F:GO:0003689 |  | IPR008921; IPR013748; G3DSA:1.20.272.10 (GENE3D), SignalP (SIGNALP)                                                                           |
| Caenorhabditis briggsae       | briggsae cbr-gbf-1 protein                       | 13 | C:GO:0005829;<br>P:GO:0008610;<br>C:GO:0005739;<br>P:GO:0046903;<br>F:GO:0005086;<br>P:GO:0045449;<br>P:GO:0032012;<br>F:GO:0003677;<br>F:GO:0016563;<br>F:GO:0005515;<br>C:GO:0044431;<br>F:GO:0003824;<br>C:GO:0005634                                                    | -                                                                                                                                                                     |  | -                                                                                                                                             |
| Caenorhabditis briggsae       | briggsae cbr-gbf-1 protein                       | 16 | C:GO:0005829;<br>C:GO:0005777;<br>P:GO:0008610;<br>C:GO:0005739;<br>P:GO:0046903;<br>F:GO:0005086;<br>P:GO:0045449;<br>C:GO:0005795;<br>P:GO:0032012;<br>F:GO:0003677;<br>C:GO:0005788;<br>F:GO:0016563;<br>F:GO:0005515;<br>C:GO:0005801;<br>F:GO:0003824;<br>C:GO:0005634 | -                                                                                                                                                                     |  | -                                                                                                                                             |
| Equus caballus                | c-type lectin domain family member a             | 2  | C:GO:0044464;<br>F:GO:0005488                                                                                                                                                                                                                                               | -                                                                                                                                                                     |  | IPR001304; IPR016186; IPR016187; PTHR22800 (PANTHER), SignalP (SIGNALP)                                                                       |

|                         |                                                              |    |                                                                                                                                                                       |   |              |                                                                                                                                                                                                                     |
|-------------------------|--------------------------------------------------------------|----|-----------------------------------------------------------------------------------------------------------------------------------------------------------------------|---|--------------|---------------------------------------------------------------------------------------------------------------------------------------------------------------------------------------------------------------------|
|                         |                                                              |    |                                                                                                                                                                       |   |              | IPR000152; IPR000742; IPR001881; IPR006209; IPR006210; IPR013032; IPR018097; PRO0010 (PRINTS), G3DSA:2.10.25.10 (GENE3D), PTHR11201 (PANTHER), PTHR11201:SF245 (PANTHER), SignalP (SIGNALP), SSF57196 (SUPERFAMILY) |
|                         | -                                                            | 0  |                                                                                                                                                                       |   |              | -                                                                                                                                                                                                                   |
|                         | -                                                            | 0  |                                                                                                                                                                       |   |              | -                                                                                                                                                                                                                   |
|                         | -                                                            | 0  |                                                                                                                                                                       |   |              | -                                                                                                                                                                                                                   |
| Danio rerio             | novel protein containing multiple sushi domains (scr repeat) | 0  |                                                                                                                                                                       |   |              | IPR000436; IPR016060; SignalP (SIGNALP)                                                                                                                                                                             |
| Caenorhabditis elegans  | elegans protein partially confirmed by transcript evidence   | 6  | P:GO:0006633;<br>F:GO:0004768;<br>F:GO:0005506;<br>P:GO:0055114;<br>C:GO:0016021;<br>C:GO:0005783                                                                     | - | EC:1.14.19.1 | -                                                                                                                                                                                                                   |
| Caenorhabditis elegans  | elegans protein partially confirmed by transcript evidence   | 6  | P:GO:0006633;<br>F:GO:0004768;<br>F:GO:0005506;<br>P:GO:0055114;<br>C:GO:0016021;<br>C:GO:0005783                                                                     | - | EC:1.14.19.1 | IPR015876; PTHR11351 (PANTHER), PTHR11351:SF14 (PANTHER)                                                                                                                                                            |
| Caenorhabditis elegans  | elegans protein partially confirmed by transcript evidence   | 4  | P:GO:0006633;<br>F:GO:0004768;<br>P:GO:0055114;<br>C:GO:0016021                                                                                                       | - | EC:1.14.19.1 | IPR005804; IPR015876; PTHR11351 (PANTHER), PTHR11351:SF14 (PANTHER)                                                                                                                                                 |
| Caenorhabditis elegans  | elegans protein partially confirmed by transcript evidence   | 4  | P:GO:0006633;<br>F:GO:0004768;<br>P:GO:0055114;<br>C:GO:0016021                                                                                                       | - | EC:1.14.19.1 | IPR005804; IPR015876; PTHR11351 (PANTHER), PTHR11351:SF14 (PANTHER)                                                                                                                                                 |
| Caenorhabditis elegans  | protein vprbp-like                                           | 2  | C:GO:0044424;<br>F:GO:0005488                                                                                                                                         | - |              | PTHR13129 (PANTHER)                                                                                                                                                                                                 |
| Caenorhabditis elegans  | d-2-hydroxyglutarate mitochondrial                           | 4  | F:GO:0016614;<br>P:GO:0008152;<br>F:GO:0050660;<br>P:GO:0010038                                                                                                       | - |              | IPR004113; IPR016164; PTHR11748 (PANTHER), PTHR11748:SF7 (PANTHER)                                                                                                                                                  |
|                         | -                                                            | 0  |                                                                                                                                                                       |   |              | -                                                                                                                                                                                                                   |
| Caenorhabditis briggsae | death-associated protein ki-se 1                             | 10 | P:GO:0009103;<br>F:GO:0005516;<br>P:GO:0007243;<br>F:GO:0004674;<br>F:GO:0005524;<br>C:GO:0015629;<br>P:GO:0008624;<br>C:GO:0005737;<br>C:GO:0016020;<br>P:GO:0006468 | - | EC:2.7.11.0  | IPR000719; IPR011009; IPR017441; IPR017442; IPR020675; IPR020676; G3DSA:3.30.200.20 (GENE3D)                                                                                                                        |
| Brugia malayi           | prpf39 protein                                               | 2  | C:GO:0005730;<br>P:GO:0006396                                                                                                                                         | - |              | IPR003107; IPR011990; PTHR17204 (PANTHER), PTHR17204:SF5 (PANTHER), SSF48452 (SUPERFAMILY)                                                                                                                          |

|                         |                                                                    |    |                                                                                                                                                                                                                          |   |                                   |                                                                                                                                                          |
|-------------------------|--------------------------------------------------------------------|----|--------------------------------------------------------------------------------------------------------------------------------------------------------------------------------------------------------------------------|---|-----------------------------------|----------------------------------------------------------------------------------------------------------------------------------------------------------|
| Caenorhabditis elegans  | beta-adrenergic receptor ki-se 2                                   | 13 | F:GO:0047696;<br>P:GO:0002029;<br>C:GO:0030424;<br>C:GO:0045202;<br>C:GO:0043197;<br>F:GO:0004872;<br>F:GO:0004703;<br>F:GO:0005524;<br>C:GO:0043198;<br>F:GO:0031698;<br>P:GO:0007165;<br>C:GO:0005634;<br>P:GO:0006468 | - | EC:2.7.11.15<br>;<br>EC:2.7.11.16 | SignalP (SIGNALP)                                                                                                                                        |
|                         | -                                                                  | 0  |                                                                                                                                                                                                                          |   |                                   | -                                                                                                                                                        |
|                         | -                                                                  | 0  |                                                                                                                                                                                                                          |   |                                   | -                                                                                                                                                        |
| Ostertagia ostertagi    | ribosomal protein l38                                              | 7  | P:GO:0009790;<br>P:GO:0040035;<br>P:GO:0002119;<br>C:GO:0005840;<br>F:GO:0003735;<br>P:GO:0040010;<br>P:GO:0006412                                                                                                       | - | EC:3.6.5.3                        | -                                                                                                                                                        |
| Caenorhabditis elegans  | low-density lipoprotein receptor repeat class b containing protein | 8  | P:GO:0006810;<br>C:GO:0016021;<br>P:GO:0050789;<br>F:GO:0032403;<br>P:GO:0009987;<br>C:GO:0005886;<br>P:GO:0008152;<br>F:GO:0034185                                                                                      | - |                                   | -                                                                                                                                                        |
| Caenorhabditis briggsae | ww domain-binding protein 4                                        | 5  | P:GO:0008380;<br>P:GO:0032501;<br>F:GO:0005515;<br>C:GO:0044428;<br>P:GO:0006397                                                                                                                                         | - |                                   | IPR000690; IPR001202; IPR003604;<br>IPR013085; G3DSA:2.20.70.10<br>(GENE3D), PTHR13173 (PANTHER),<br>PTHR13173:SF10 (PANTHER),<br>SSF57667 (SUPERFAMILY) |
|                         | -                                                                  | 0  |                                                                                                                                                                                                                          |   |                                   | -                                                                                                                                                        |
| Caenorhabditis elegans  | fra10ac1 protein isoform 2                                         | 1  | F:GO:0005515                                                                                                                                                                                                             | - |                                   | IPR019129; PTHR11567 (PANTHER),<br>PTHR11567:SF25 (PANTHER)                                                                                              |
| Caenorhabditis briggsae | prp31 pre-mr- processing factor 31 homolog                         | 11 | C:GO:0071339;<br>C:GO:0015030;<br>F:GO:0003676;<br>C:GO:0016607;<br>P:GO:0040035;<br>P:GO:0018996;<br>P:GO:0040011;<br>C:GO:0046540;<br>P:GO:0002009;<br>P:GO:0001703;<br>P:GO:0000244                                   | - |                                   | -                                                                                                                                                        |
| Loa loa                 | component of oligomeric golgi complex 6                            | 1  | C:GO:0005794                                                                                                                                                                                                             | - |                                   | -                                                                                                                                                        |
| Caenorhabditis briggsae | elegans protein partially confirmed by transcript evidence         | 1  | F:GO:0005515                                                                                                                                                                                                             | - |                                   | PTHR22746 (PANTHER),<br>PTHR22746:SF6 (PANTHER)                                                                                                          |
|                         | -                                                                  | 0  |                                                                                                                                                                                                                          |   |                                   | -                                                                                                                                                        |

|                         |                                                            |    |                                                                                                                                                                       |                                                |                            |                                                                                                                                                                                |
|-------------------------|------------------------------------------------------------|----|-----------------------------------------------------------------------------------------------------------------------------------------------------------------------|------------------------------------------------|----------------------------|--------------------------------------------------------------------------------------------------------------------------------------------------------------------------------|
| Homo sapiens            | mhc class ii antigen                                       | 9  | C:GO:0005789;<br>C:GO:0005887;<br>C:GO:0042613;<br>C:GO:0005794;<br>P:GO:0002504;<br>C:GO:0031902;<br>C:GO:0005765;<br>F:GO:0032395;<br>P:GO:0006955                  | -                                              | -                          |                                                                                                                                                                                |
| -                       | -                                                          | 0  |                                                                                                                                                                       |                                                |                            | -                                                                                                                                                                              |
| Brugia malayi           | yrmc_caee1_ame: full=uncharacterized protein               | 0  |                                                                                                                                                                       |                                                |                            | -                                                                                                                                                                              |
| Loa loa                 | hypothetical protein LOAG_10600 [Loa loa]                  | 0  |                                                                                                                                                                       |                                                |                            | -                                                                                                                                                                              |
| Loa loa                 | yrmc_caee1_ame: full=uncharacterized protein               | 0  |                                                                                                                                                                       |                                                |                            | -                                                                                                                                                                              |
| Drosophila simulans     | surfeit 6                                                  | 4  | P:GO:0002119;<br>P:GO:0040007;<br>P:GO:0006898;<br>P:GO:0044085                                                                                                       | -                                              |                            | IPR007019                                                                                                                                                                      |
| Loa loa                 | elegans protein partially confirmed by transcript evidence | 0  |                                                                                                                                                                       | F:GO:0004500;<br>C:GO:0016021;<br>P:GO:0006548 |                            | IPR004877; IPR005018; IPR006593;<br>PTHR23130 (PANTHER), SignalP<br>(SIGNALP)                                                                                                  |
| Caenorhabditis briggsae | polyprenyl synthetase family protein                       | 4  | P:GO:0009792;<br>P:GO:0002119;<br>F:GO:0016740;<br>P:GO:0040007                                                                                                       | -                                              |                            | IPR000092; IPR008949; PTHR11525<br>(PANTHER)                                                                                                                                   |
| Caenorhabditis elegans  | hypothetical protein K06A4.7 [Caenorhabditis elegans]      | 0  |                                                                                                                                                                       |                                                |                            | -                                                                                                                                                                              |
| Caenorhabditis briggsae | cytidine deami-se                                          | 10 | P:GO:0009790;<br>P:GO:0046087;<br>C:GO:0005622;<br>F:GO:0047844;<br>F:GO:0003723;<br>F:GO:0005515;<br>P:GO:0006217;<br>F:GO:0004126;<br>F:GO:0008270;<br>P:GO:0009451 | -                                              | EC:3.5.4.14;<br>EC:3.5.4.5 | IPR002125; IPR006262; IPR016193;<br>G3DSA:3.40.140.10 (GENE3D),<br>PTHR11644 (PANTHER)                                                                                         |
| Caenorhabditis elegans  | xpg i-region family protein                                | 1  | F:GO:0004518                                                                                                                                                          | -                                              |                            | IPR006084; IPR006085; IPR006086;<br>IPR008918; IPR020045;<br>G3DSA:1.10.150.20 (GENE3D),<br>G3DSA:3.40.50.1010 (GENE3D),<br>PTHR11081:SF8 (PANTHER), SSF88723<br>(SUPERFAMILY) |
| Caenorhabditis elegans  | xpg i-region family protein                                | 1  | F:GO:0004518                                                                                                                                                          | -                                              |                            | IPR006084; IPR006085; IPR006086;<br>IPR008918; IPR020045;<br>G3DSA:1.10.150.20 (GENE3D),<br>G3DSA:3.40.50.1010 (GENE3D),<br>PTHR11081:SF8 (PANTHER), SSF88723<br>(SUPERFAMILY) |
| -                       | -                                                          | 0  |                                                                                                                                                                       |                                                |                            | -                                                                                                                                                                              |
| Caenorhabditis elegans  | amplified in osteosarcoma                                  | 1  | P:GO:0009987                                                                                                                                                          | -                                              |                            | IPR009011; IPR012913; PTHR15414<br>(PANTHER)                                                                                                                                   |
| Loa loa                 | protein-tyrosine phosphatase containing protein            | 2  | F:GO:0016791;<br>P:GO:0006796                                                                                                                                         | -                                              | EC:3.1.3.0                 | -                                                                                                                                                                              |
| Caenorhabditis elegans  | polypeptide n-acetylgalactosaminyltransferase 10           | 5  | C:GO:0000139;<br>F:GO:0004653;<br>F:GO:0005529;<br>F:GO:0046872;<br>C:GO:0016021                                                                                      | -                                              | EC:2.4.1.41                | IPR000772; IPR008997;<br>G3DSA:2.80.10.50 (GENE3D),<br>PTHR11675 (PANTHER), SSF53448<br>(SUPERFAMILY)                                                                          |

|                         |                                                            |    |                                                                                                                                                                       |              |             |                                                                                                                                                                  |
|-------------------------|------------------------------------------------------------|----|-----------------------------------------------------------------------------------------------------------------------------------------------------------------------|--------------|-------------|------------------------------------------------------------------------------------------------------------------------------------------------------------------|
| Caenorhabditis elegans  | polypeptide n-acetylgalactosaminyltransferase 10           | 5  | C:GO:0000139;<br>F:GO:0004653;<br>F:GO:0005529;<br>F:GO:0046872;<br>C:GO:0016021                                                                                      | -            | EC:2.4.1.41 | IPR000772; IPR008997;<br>G3DSA:2.80.10.50 (GENE3D),<br>PTHR11675 (PANTHER), SSF53448<br>(SUPERFAMILY)                                                            |
| Caenorhabditis elegans  | polypeptide n-acetylgalactosaminyltransferase 10           | 5  | C:GO:0000139;<br>F:GO:0004653;<br>F:GO:0005529;<br>F:GO:0046872;<br>C:GO:0016021                                                                                      | -            | EC:2.4.1.41 | IPR000772; IPR008997;<br>G3DSA:2.80.10.50 (GENE3D),<br>PTHR11675 (PANTHER), SSF53448<br>(SUPERFAMILY)                                                            |
|                         | -                                                          | 0  |                                                                                                                                                                       |              |             | -                                                                                                                                                                |
| Caenorhabditis briggsae | briggsae cbr-tat-3 protein                                 | 7  | C:GO:0016021;<br>F:GO:0015662;<br>P:GO:0006754;<br>F:GO:0005524;<br>P:GO:0015914;<br>F:GO:0000287;<br>F:GO:0004012                                                    | -            | EC:3.6.3.1  | IPR001757; IPR008250;<br>G3DSA:2.70.150.10 (GENE3D),<br>PTHR11939:SF14 (PANTHER),<br>SSF81653 (SUPERFAMILY)                                                      |
| Caenorhabditis briggsae | briggsae cbr-tat-3 protein                                 | 7  | C:GO:0016021;<br>F:GO:0015662;<br>P:GO:0006754;<br>F:GO:0005524;<br>P:GO:0015914;<br>F:GO:0000287;<br>F:GO:0004012                                                    | -            | EC:3.6.3.1  | IPR001757; IPR008250;<br>G3DSA:2.70.150.10 (GENE3D),<br>PTHR11939:SF14 (PANTHER),<br>SSF81653 (SUPERFAMILY)                                                      |
| Caenorhabditis elegans  | elegans protein partially confirmed by transcript evidence | 0  |                                                                                                                                                                       |              |             | SignalP (SIGNALP)                                                                                                                                                |
| Caenorhabditis elegans  | elegans protein partially confirmed by transcript evidence | 0  |                                                                                                                                                                       |              |             | SignalP (SIGNALP)                                                                                                                                                |
| Caenorhabditis briggsae | loc495281 protein                                          | 1  | P:GO:0000003                                                                                                                                                          | -            |             | IPR000408; IPR009091; PTHR11254<br>(PANTHER), PTHR11254:SF8<br>(PANTHER)                                                                                         |
|                         | -                                                          | 0  |                                                                                                                                                                       |              |             | -                                                                                                                                                                |
|                         | -                                                          | 0  |                                                                                                                                                                       |              |             | -                                                                                                                                                                |
| Caenorhabditis elegans  | phosphomevalo-te ki-se                                     | 10 | P:GO:0040010;<br>P:GO:0000003;<br>P:GO:0018996;<br>F:GO:0004631;<br>F:GO:0005515;<br>P:GO:0016310;<br>P:GO:0006694;<br>C:GO:0044464;<br>P:GO:0009792;<br>P:GO:0008299 | -            | EC:2.7.4.2  | IPR005919; G3DSA:3.40.50.300<br>(GENE3D)                                                                                                                         |
| Caenorhabditis elegans  | ring finger 1                                              | 1  | F:GO:0005488                                                                                                                                                          | -            |             | IPR000571; IPR001841; IPR013083;<br>IPR017907; IPR018957; PTHR11224<br>(PANTHER), PTHR11224:SF19<br>(PANTHER), SSF57850 (SUPERFAMILY),<br>SSF90229 (SUPERFAMILY) |
| Caenorhabditis briggsae | elegans protein partially confirmed by transcript evidence | 0  |                                                                                                                                                                       | P:GO:0000003 |             | IPR001005                                                                                                                                                        |
|                         | -                                                          | 0  |                                                                                                                                                                       |              |             | -                                                                                                                                                                |
| Caenorhabditis elegans  | protein ki-se domain containing protein                    | 7  | P:GO:0040035;<br>P:GO:0009792;<br>P:GO:0002119;<br>P:GO:0040018;<br>P:GO:0040015;<br>P:GO:0018996;<br>P:GO:0040011                                                    | -            |             | IPR011009; PTHR11909 (PANTHER),<br>PTHR11909:SF11 (PANTHER)                                                                                                      |

|                         |                                                                          |    |                                                                                                                                                                                                                                                                                              |   |                                                                 |                                                               |
|-------------------------|--------------------------------------------------------------------------|----|----------------------------------------------------------------------------------------------------------------------------------------------------------------------------------------------------------------------------------------------------------------------------------------------|---|-----------------------------------------------------------------|---------------------------------------------------------------|
| Caenorhabditis elegans  | protein ki-se domain containing protein                                  | 7  | P:GO:0040035;<br>P:GO:0009792;<br>P:GO:0002119;<br>P:GO:0040018;<br>P:GO:0040015;<br>P:GO:0018996;<br>P:GO:0040011                                                                                                                                                                           | - |                                                                 | IPR011009; PTHR11909 (PANTHER),<br>PTHR11909:SF11 (PANTHER)   |
| Trichoplax adhaerens    | histone deacetylase 11                                                   | 7  | F:GO:0004407;<br>P:GO:0016575;<br>C:GO:0000118;<br>F:GO:0008134;<br>C:GO:0005737;<br>P:GO:0014003;<br>C:GO:0005886                                                                                                                                                                           | - |                                                                 | IPR000286; PTHR10625:SF9<br>(PANTHER), SSF52768 (SUPERFAMILY) |
| Caenorhabditis elegans  | protein                                                                  | 1  | F:GO:0005488                                                                                                                                                                                                                                                                                 | - |                                                                 | IPR015422; IPR015424                                          |
|                         | -                                                                        | 0  |                                                                                                                                                                                                                                                                                              |   |                                                                 | -                                                             |
|                         | -                                                                        | 0  |                                                                                                                                                                                                                                                                                              |   |                                                                 | -                                                             |
| Caenorhabditis elegans  | uncoordinated protein isoform partially confirmed by transcript evidence | 8  | F:GO:0004872;<br>P:GO:0006629;<br>F:GO:0005219;<br>P:GO:0006816;<br>P:GO:0006874;<br>P:GO:0055085;<br>F:GO:0005509;<br>C:GO:0016021                                                                                                                                                          | - |                                                                 | IPR015925; PTHR13715:SF11<br>(PANTHER)                        |
|                         | -                                                                        | 0  |                                                                                                                                                                                                                                                                                              |   |                                                                 | -                                                             |
|                         | -                                                                        | 0  |                                                                                                                                                                                                                                                                                              |   |                                                                 | -                                                             |
| Caenorhabditis briggsae | 4-aminobutyrate mitochondrial                                            | 17 | P:GO:0001666;<br>P:GO:0009450;<br>P:GO:0045776;<br>C:GO:0032144;<br>C:GO:0005739;<br>P:GO:0045471;<br>P:GO:0010039;<br>F:GO:0003867;<br>P:GO:0007620;<br>P:GO:0007626;<br>P:GO:0048148;<br>P:GO:0042135;<br>P:GO:0035094;<br>C:GO:0019717;<br>P:GO:0042493;<br>F:GO:0042803;<br>F:GO:0030170 | - | EC:2.6.1.19                                                     | IPR004631; IPR005814; IPR015422;<br>IPR015424                 |
|                         | -                                                                        | 0  |                                                                                                                                                                                                                                                                                              |   |                                                                 | SignalP (SIGNALP)                                             |
| Caenorhabditis elegans  | matrix domain-containing protein mitochondrial                           | 0  |                                                                                                                                                                                                                                                                                              |   | C:GO:0005741;<br>F:GO:0003674;<br>P:GO:0006886;<br>C:GO:0005575 | IPR003690; PTHR13068 (PANTHER)                                |
|                         | -                                                                        | 0  |                                                                                                                                                                                                                                                                                              |   |                                                                 | -                                                             |

|                         |                                                      |    |                                                                                                                                                                                        |                                                                                                                    |             |                                                                                                                                                                                                                    |
|-------------------------|------------------------------------------------------|----|----------------------------------------------------------------------------------------------------------------------------------------------------------------------------------------|--------------------------------------------------------------------------------------------------------------------|-------------|--------------------------------------------------------------------------------------------------------------------------------------------------------------------------------------------------------------------|
| Caenorhabditis elegans  | suppressor of 3-like 1 ( cerevisiae)                 | 11 | F:GO:0003678;<br>P:GO:0040010;<br>P:GO:0032508;<br>F:GO:0003723;<br>P:GO:0000003;<br>C:GO:0042645;<br>F:GO:0003677;<br>P:GO:0002119;<br>F:GO:0000166;<br>P:GO:0006898;<br>P:GO:0009792 | -                                                                                                                  |             | IPR001650; IPR022192;<br>G3DSA:3.40.50.300 (GENE3D),<br>PTHR12131 (PANTHER), SSF52540<br>(SUPERFAMILY)                                                                                                             |
| Caenorhabditis elegans  | suppressor of 3-like 1 ( cerevisiae)                 | 11 | F:GO:0003678;<br>P:GO:0040010;<br>P:GO:0032508;<br>F:GO:0003723;<br>P:GO:0000003;<br>C:GO:0042645;<br>F:GO:0003677;<br>P:GO:0002119;<br>F:GO:0000166;<br>P:GO:0006898;<br>P:GO:0009792 | -                                                                                                                  |             | IPR001650; IPR022192;<br>G3DSA:3.40.50.300 (GENE3D),<br>PTHR12131 (PANTHER), SSF52540<br>(SUPERFAMILY)                                                                                                             |
| Caenorhabditis elegans  | suppressor of 3-like 1 ( cerevisiae)                 | 11 | F:GO:0003678;<br>P:GO:0040010;<br>P:GO:0032508;<br>F:GO:0003723;<br>P:GO:0000003;<br>C:GO:0042645;<br>F:GO:0003677;<br>P:GO:0002119;<br>F:GO:0000166;<br>P:GO:0006898;<br>P:GO:0009792 | -                                                                                                                  |             | IPR001650; IPR022192;<br>G3DSA:3.40.50.300 (GENE3D),<br>PTHR12131 (PANTHER), SSF52540<br>(SUPERFAMILY)                                                                                                             |
| Caenorhabditis elegans  | rab3 gtpase-activating protein non-catalytic subunit | 1  | F:GO:0030234                                                                                                                                                                           | -                                                                                                                  |             | PTHR12472 (PANTHER)                                                                                                                                                                                                |
|                         |                                                      | 0  |                                                                                                                                                                                        |                                                                                                                    |             | SignalP (SIGNALP)                                                                                                                                                                                                  |
| Caenorhabditis elegans  | cg6459-pa                                            | 5  | F:GO:0005515;<br>C:GO:0005759;<br>P:GO:0040010;<br>P:GO:0040011;<br>P:GO:0002009                                                                                                       | -                                                                                                                  |             | -                                                                                                                                                                                                                  |
| Caenorhabditis briggsae | atp-binding sub-family c (cfr mrp) member 2          | 3  | F:GO:0005488;<br>C:GO:0044459;<br>F:GO:0017111                                                                                                                                         | -                                                                                                                  | EC:3.6.1.15 | IPR001140; IPR003439; IPR003593;<br>IPR011527; IPR017871; IPR017940;<br>G3DSA:1.20.1560.10 (GENE3D),<br>G3DSA:3.40.50.300 (GENE3D),<br>PTHR19242 (PANTHER),<br>PTHR19242:SF36 (PANTHER),<br>SSF52540 (SUPERFAMILY) |
| Caenorhabditis briggsae | briggsae cbr-ppk-3 protein                           | 0  |                                                                                                                                                                                        | F:GO:0046872;<br>F:GO:0005524;<br>P:GO:0044267;<br>P:GO:0046488;<br>F:GO:0016307;<br>F:GO:0008270;<br>F:GO:0005515 |             | -                                                                                                                                                                                                                  |



|                         |                                                                   |    |                                                                                                                                                                                                                                           |   |            |                                                                                                                                                        |
|-------------------------|-------------------------------------------------------------------|----|-------------------------------------------------------------------------------------------------------------------------------------------------------------------------------------------------------------------------------------------|---|------------|--------------------------------------------------------------------------------------------------------------------------------------------------------|
| Caenorhabditis elegans  | glucose transporter                                               | 3  | F:GO:0022891;<br>C:GO:0016021;<br>P:GO:0055085                                                                                                                                                                                            | - |            | IPR003663; IPR005828; IPR016196;<br>IPR020846; G3DSA:1.20.1250.20<br>(GENE3D), PTHR11600 (PANTHER),<br>PTHR11600:SF107 (PANTHER), SignalP<br>(SIGNALP) |
| Brugia malayi           | nedd8 activating enzyme e1 subunit 1                              | 7  | C:GO:0005626;<br>P:GO:0042981;<br>P:GO:0031574;<br>F:GO:0019781;<br>P:GO:0045116;<br>F:GO:0046982;<br>C:GO:0005737                                                                                                                        | - |            | IPR000594; IPR009036; IPR016040;<br>PTHR10953 (PANTHER),<br>PTHR10953:SF29 (PANTHER)                                                                   |
| Caenorhabditis briggsae | gamma-glutamyltranspeptidase family protein                       | 1  | F:GO:0003840                                                                                                                                                                                                                              | - | EC:2.3.2.2 | IPR000101; SSF56235 (SUPERFAMILY)                                                                                                                      |
| Brugia malayi           | coiled-coil domain-containing protein 58                          | 1  | C:GO:0005739                                                                                                                                                                                                                              | - |            | IPR019171                                                                                                                                              |
| Loa loa                 | protein ki-se domain containing protein                           | 5  | P:GO:0006468;<br>F:GO:0004672;<br>F:GO:0005524;<br>P:GO:0019915;<br>P:GO:0006898                                                                                                                                                          | - |            | IPR000719; IPR011009; IPR017442;<br>G3DSA:1.10.510.10 (GENE3D),<br>PTHR11909 (PANTHER),<br>PTHR11909:SF19 (PANTHER)                                    |
| Caenorhabditis elegans  | gamma-secretase subunit aph-1                                     | 14 | P:GO:0040010;<br>C:GO:0043231;<br>P:GO:0044267;<br>P:GO:0048598;<br>P:GO:0048599;<br>P:GO:0060581;<br>P:GO:0007219;<br>P:GO:0034394;<br>C:GO:0044425;<br>C:GO:0044444;<br>P:GO:0040011;<br>P:GO:0009057;<br>P:GO:0009792;<br>P:GO:0060465 | - |            | SignalP (SIGNALP)                                                                                                                                      |
| Brugia malayi           | low-density lipoprotein                                           | 3  | F:GO:0004872;<br>C:GO:0016021;<br>F:GO:0005509                                                                                                                                                                                            | - |            | SignalP (SIGNALP)                                                                                                                                      |
| Brugia malayi           | ring finger protein 13                                            | 1  | F:GO:0005488                                                                                                                                                                                                                              | - |            | IPR003137; G3DSA:3.50.30.30<br>(GENE3D), PTHR22765 (PANTHER),<br>PTHR22765:SF1 (PANTHER), SignalP<br>(SIGNALP)                                         |
| Caenorhabditis briggsae | phospholipid-transporting atpase 1 (aminophospholipid flippase 1) | 8  | P:GO:0006810;<br>F:GO:0043492;<br>P:GO:0046034;<br>F:GO:0022892;<br>F:GO:0046872;<br>F:GO:0016820;<br>F:GO:0000166;<br>C:GO:0016020                                                                                                       | - | EC:3.6.3.0 | SignalP (SIGNALP)                                                                                                                                      |
| Caenorhabditis elegans  | mitochondrial ribosomal protein s22                               | 4  | P:GO:0002119;<br>P:GO:0000003;<br>P:GO:0040007;<br>P:GO:0006898                                                                                                                                                                           | - |            | IPR019374; PTHR13071 (PANTHER)                                                                                                                         |
| Caenorhabditis elegans  | mitochondrial ribosomal protein s22                               | 4  | P:GO:0002119;<br>P:GO:0000003;<br>P:GO:0040007;<br>P:GO:0006898                                                                                                                                                                           | - |            | IPR019374; PTHR13071 (PANTHER)                                                                                                                         |

|                              |                                                            |   |                                                                                                                                                      |                                                                                  |             |                                                                                                                                                                              |
|------------------------------|------------------------------------------------------------|---|------------------------------------------------------------------------------------------------------------------------------------------------------|----------------------------------------------------------------------------------|-------------|------------------------------------------------------------------------------------------------------------------------------------------------------------------------------|
| Dictyostelium discoideum AX4 | n-termi-l ki-se-like protein                               | 0 |                                                                                                                                                      | F:GO:0016301;<br>F:GO:0004672;<br>F:GO:0005524;<br>F:GO:0005488;<br>P:GO:0006468 |             | G3DSA:3.30.200.20 (GENE3D),<br>PTHR12984 (PANTHER),<br>PTHR12984:SF4 (PANTHER)                                                                                               |
|                              | -                                                          | 0 |                                                                                                                                                      |                                                                                  |             | SignalP (SIGNALP)                                                                                                                                                            |
| Caenorhabditis elegans       | briggsae cbr-tag-151 protein                               | 3 | P:GO:0009792;<br>P:GO:0040010;<br>P:GO:0040011                                                                                                       | -                                                                                |             | -                                                                                                                                                                            |
| Caenorhabditis elegans       | elegans protein partially confirmed by transcript evidence | 5 | P:GO:0045449;<br>P:GO:0007399;<br>P:GO:0030154;<br>F:GO:0003700;<br>C:GO:0044464                                                                     | -                                                                                |             | PTHR13029 (PANTHER),<br>PTHR13029:SF7 (PANTHER)                                                                                                                              |
|                              | -                                                          | 0 |                                                                                                                                                      |                                                                                  |             | -                                                                                                                                                                            |
|                              | -                                                          | 0 |                                                                                                                                                      |                                                                                  |             | -                                                                                                                                                                            |
|                              | -                                                          | 0 |                                                                                                                                                      |                                                                                  |             | -                                                                                                                                                                            |
| Caenorhabditis briggsae      | riken cd- 2400010d15                                       | 1 | F:GO:0005515                                                                                                                                         | -                                                                                |             | IPR009755; PTHR12897 (PANTHER)                                                                                                                                               |
|                              | -                                                          | 0 |                                                                                                                                                      |                                                                                  |             | -                                                                                                                                                                            |
|                              | -                                                          | 0 |                                                                                                                                                      |                                                                                  |             | -                                                                                                                                                                            |
| Caenorhabditis elegans       | ankyrin repeat-containing                                  | 0 |                                                                                                                                                      |                                                                                  |             | IPR001452; IPR001660; IPR010993;<br>IPR011511; IPR013761; IPR021129;<br>G3DSA:2.30.30.40 (GENE3D),<br>PTHR18958 (PANTHER),<br>PTHR18958:SF31 (PANTHER)                       |
| Ancylostoma ceylanicum       | serine protease                                            | 2 | F:GO:0004867;<br>F:GO:0008233                                                                                                                        | -                                                                                |             | IPR002223; IPR020901; PTHR10083<br>(PANTHER), PTHR10083:SF39<br>(PANTHER), SignalP (SIGNALP)                                                                                 |
|                              | -                                                          | 0 |                                                                                                                                                      |                                                                                  |             | SignalP (SIGNALP)                                                                                                                                                            |
|                              | -                                                          | 0 |                                                                                                                                                      |                                                                                  |             | IPR000436; IPR016060                                                                                                                                                         |
| Caenorhabditis briggsae      | briggsae cbr-syn-2 protein                                 | 2 | F:GO:0005515;<br>P:GO:0016081                                                                                                                        | -                                                                                |             | IPR006011; IPR010989;<br>G3DSA:1.20.58.70 (GENE3D),<br>PTHR19957 (PANTHER),<br>PTHR19957:SF28 (PANTHER)                                                                      |
|                              | -                                                          | 0 |                                                                                                                                                      |                                                                                  |             | -                                                                                                                                                                            |
| Caenorhabditis elegans       | pyridoxal ki-se                                            | 2 | P:GO:0008615;<br>F:GO:0008478                                                                                                                        | -                                                                                | EC:2.7.1.35 | IPR011611; G3DSA:3.40.1190.20<br>(GENE3D), PTHR10534 (PANTHER),<br>SSF53613 (SUPERFAMILY)                                                                                    |
|                              | -                                                          | 0 |                                                                                                                                                      |                                                                                  |             | -                                                                                                                                                                            |
| Caenorhabditis briggsae      | ufm1-specific protease 2                                   | 1 | F:GO:0008233                                                                                                                                         | -                                                                                |             | IPR012462; PTHR13226 (PANTHER),<br>PTHR13226:SF5 (PANTHER)                                                                                                                   |
| Caenorhabditis elegans       | ap-1 complex subunit mu-1                                  | 6 | P:GO:0016183;<br>P:GO:0007269;<br>P:GO:0040025;<br>F:GO:0005515;<br>P:GO:0006886;<br>C:GO:0030121                                                    | -                                                                                |             | IPR001392; IPR008968; IPR011012;<br>IPR018240; IPR022775;<br>G3DSA:2.60.40.1170 (GENE3D),<br>G3DSA:3.30.450.60 (GENE3D),<br>PTHR11998 (PANTHER),<br>PTHR11998:SF11 (PANTHER) |
| Brugia malayi                | hypothetical protein Bm1_28590 [Brugia malayi]             | 0 |                                                                                                                                                      |                                                                                  |             | -                                                                                                                                                                            |
| Brugia malayi                | fatty acid amide hydrolase                                 | 9 | F:GO:0016788;<br>F:GO:0005543;<br>P:GO:0009062;<br>P:GO:0000003;<br>F:GO:0004040;<br>C:GO:0044425;<br>C:GO:0031090;<br>F:GO:0042803;<br>F:GO:0017064 | -                                                                                | EC:3.5.1.4  | IPR000120; PTHR11895:SF4<br>(PANTHER)                                                                                                                                        |
|                              | -                                                          | 0 |                                                                                                                                                      |                                                                                  |             | -                                                                                                                                                                            |

|                           |                                                                                                                |   |                                                                                                                                     |                                                                                                                                                                                                         |  |                                                                                                             |
|---------------------------|----------------------------------------------------------------------------------------------------------------|---|-------------------------------------------------------------------------------------------------------------------------------------|---------------------------------------------------------------------------------------------------------------------------------------------------------------------------------------------------------|--|-------------------------------------------------------------------------------------------------------------|
|                           | -                                                                                                              | 0 |                                                                                                                                     |                                                                                                                                                                                                         |  | -                                                                                                           |
| Caenorhabditis briggsae   | briggsae cbr-unc-26 protein                                                                                    | 2 | F:GO:0004437;<br>F:GO:0005488                                                                                                       | -                                                                                                                                                                                                       |  | IPR015047                                                                                                   |
| Brugia malayi             | hypothetical protein [Brugia malayi]                                                                           | 0 |                                                                                                                                     | P:GO:0009792                                                                                                                                                                                            |  | IPR020683; PTHR18958 (PANTHER),<br>PTHR18958:SF203 (PANTHER)                                                |
|                           | -                                                                                                              | 0 |                                                                                                                                     |                                                                                                                                                                                                         |  | -                                                                                                           |
|                           | -                                                                                                              | 0 |                                                                                                                                     |                                                                                                                                                                                                         |  | -                                                                                                           |
| Caenorhabditis elegans    | elegans protein partially confirmed by transcript evidence                                                     | 0 |                                                                                                                                     | F:GO:0003723;<br>P:GO:0000003;<br>F:GO:0005488;<br>P:GO:0009792                                                                                                                                         |  | SignalP (SIGNALP)                                                                                           |
|                           |                                                                                                                |   |                                                                                                                                     |                                                                                                                                                                                                         |  | IPR000923; IPR002172; PTHR10529<br>(PANTHER), PTHR10529:SF2<br>(PANTHER)                                    |
|                           | -                                                                                                              | 0 |                                                                                                                                     |                                                                                                                                                                                                         |  | -                                                                                                           |
| Caenorhabditis sp. PS1010 | hypothetical protein Csp3_JD07.006 [Caenorhabditis sp. PS1010]                                                 | 0 |                                                                                                                                     |                                                                                                                                                                                                         |  | -                                                                                                           |
| Brugia malayi             | lethal family member (let-805)                                                                                 | 8 | P:GO:0018996;<br>P:GO:0009792;<br>P:GO:0008340;<br>P:GO:0000003;<br>F:GO:0005515;<br>P:GO:0006898;<br>P:GO:0002119;<br>P:GO:0040011 | -                                                                                                                                                                                                       |  | -                                                                                                           |
| Caenorhabditis briggsae   | pat2_caebr ame: full=integrin alpha pat-2 ame:<br>full=paralyzed arrest at two-fold protein 2 flags: precursor | 8 | P:GO:0009792;<br>P:GO:0002119;<br>P:GO:0018991;<br>P:GO:0032940;<br>P:GO:0040007;<br>P:GO:0006898;<br>C:GO:0016020;<br>P:GO:0040039 | -                                                                                                                                                                                                       |  | G3DSA:2.60.40.1530 (GENE3D),<br>PTHR23220 (PANTHER),<br>PTHR23220:SF11 (PANTHER),<br>SSF69179 (SUPERFAMILY) |
|                           | -                                                                                                              | 0 |                                                                                                                                     |                                                                                                                                                                                                         |  | -                                                                                                           |
|                           | -                                                                                                              | 0 |                                                                                                                                     |                                                                                                                                                                                                         |  | SignalP (SIGNALP)                                                                                           |
| Geobacillus sp. G11MC16   | hypothetical protein G11MC16DRAFT_3625 [Geobacillus sp. G11MC16]                                               | 0 |                                                                                                                                     | C:GO:0016020;<br>F:GO:0005515                                                                                                                                                                           |  | -                                                                                                           |
| Zea mays                  | unknown [Zea mays]                                                                                             | 0 |                                                                                                                                     |                                                                                                                                                                                                         |  | -                                                                                                           |
| Lilium longiflorum        | protein                                                                                                        | 0 |                                                                                                                                     | F:GO:0005515                                                                                                                                                                                            |  | -                                                                                                           |
| Lilium longiflorum        | hypothetical protein [Lilium longiflorum]                                                                      | 0 |                                                                                                                                     |                                                                                                                                                                                                         |  | -                                                                                                           |
| Loa loa                   | ifa-1                                                                                                          | 3 | C:GO:0005882;<br>F:GO:0005198;<br>F:GO:0005515                                                                                      | -                                                                                                                                                                                                       |  | IPR001664; IPR016044; PD936484<br>(PRODOM), PTHR23239:SF13<br>(PANTHER)                                     |
|                           | -                                                                                                              | 0 |                                                                                                                                     |                                                                                                                                                                                                         |  | -                                                                                                           |
| Caenorhabditis briggsae   | dap (death associated protein ki-se) like ki-se family member<br>(dlk-1)                                       | 0 |                                                                                                                                     | F:GO:0016740;<br>F:GO:0004674;<br>C:GO:0045202;<br>F:GO:0004672;<br>C:GO:0030054;<br>P:GO:0006468;<br>F:GO:0000166;<br>F:GO:0005524;<br>F:GO:0016301;<br>F:GO:0004709;<br>F:GO:0005515;<br>F:GO:0046872 |  | PTHR23257 (PANTHER),<br>PTHR23257:SF85 (PANTHER)                                                            |
|                           | -                                                                                                              | 0 |                                                                                                                                     |                                                                                                                                                                                                         |  | -                                                                                                           |
|                           | -                                                                                                              | 0 |                                                                                                                                     |                                                                                                                                                                                                         |  | SignalP (SIGNALP)                                                                                           |

|                         |                                         |    |                                                                                                                                                                                        |   |            |                                                                                                                                                              |
|-------------------------|-----------------------------------------|----|----------------------------------------------------------------------------------------------------------------------------------------------------------------------------------------|---|------------|--------------------------------------------------------------------------------------------------------------------------------------------------------------|
| Caenorhabditis briggsae | mitochondrial ribosomal protein s2      | 7  | P:GO:0009792;<br>P:GO:0002119;<br>F:GO:0003735;<br>P:GO:0040010;<br>C:GO:0015935;<br>P:GO:0006898;<br>P:GO:0006412                                                                     | - | EC:3.6.5.3 | IPR001865; IPR005706; IPR018130                                                                                                                              |
| -                       | -                                       | 0  | -                                                                                                                                                                                      | - | -          | -                                                                                                                                                            |
| Loa loa                 | f-box and wd repeat domain containing 7 | 11 | C:GO:0030424;<br>C:GO:0005730;<br>C:GO:0019005;<br>P:GO:0046660;<br>P:GO:0032876;<br>P:GO:0016567;<br>P:GO:0007062;<br>F:GO:0005515;<br>P:GO:0045746;<br>P:GO:0031146;<br>C:GO:0005654 | - |            | IPR001680; IPR011044; IPR011046;<br>IPR015943; IPR017986; IPR019775;<br>IPR019781; IPR019782; IPR020472;<br>PTHR22844 (PANTHER),<br>PTHR22844:SF11 (PANTHER) |
| Loa loa                 | f-box and wd repeat domain containing 7 | 11 | C:GO:0030424;<br>C:GO:0005730;<br>C:GO:0019005;<br>P:GO:0046660;<br>P:GO:0032876;<br>P:GO:0016567;<br>P:GO:0007062;<br>F:GO:0005515;<br>P:GO:0045746;<br>P:GO:0031146;<br>C:GO:0005654 | - |            | IPR001680; IPR011046; IPR015943;<br>IPR017986; IPR019775; IPR019781;<br>IPR019782; IPR020472; PTHR22844<br>(PANTHER), PTHR22844:SF11<br>(PANTHER)            |
| -                       | -                                       | 0  | -                                                                                                                                                                                      | - | -          | SignalP (SIGNALP)                                                                                                                                            |
| Caenorhabditis elegans  | briggsae cbr-sec-5 protein              | 1  | P:GO:0000003                                                                                                                                                                           | - |            | PTHR13043 (PANTHER)                                                                                                                                          |
| -                       | -                                       | 0  | -                                                                                                                                                                                      | - | -          | -                                                                                                                                                            |
| -                       | -                                       | 0  | -                                                                                                                                                                                      | - | -          | -                                                                                                                                                            |
| -                       | -                                       | 0  | -                                                                                                                                                                                      | - | -          | -                                                                                                                                                            |
| Caenorhabditis elegans  | peptide methionine sulfoxide reductase  | 2  | P:GO:0019538;<br>F:GO:0016671                                                                                                                                                          | - | EC:1.8.4.0 | IPR002569; PTHR10173 (PANTHER)                                                                                                                               |
| -                       | -                                       | 0  | -                                                                                                                                                                                      | - | -          | SignalP (SIGNALP)                                                                                                                                            |
| -                       | -                                       | 0  | -                                                                                                                                                                                      | - | -          | -                                                                                                                                                            |
| -                       | -                                       | 0  | -                                                                                                                                                                                      | - | -          | -                                                                                                                                                            |
| Caenorhabditis briggsae | ubiquitin-conjugating enzyme e2-25kd    | 3  | P:GO:0051246;<br>F:GO:0019787;<br>P:GO:0043687                                                                                                                                         | - |            | IPR000449; IPR000608; IPR009060;<br>IPR015940; IPR016135;<br>G3DSA:1.10.8.10 (GENE3D),<br>PTHR11621 (PANTHER),<br>PTHR11621:SF28 (PANTHER)                   |
| Caenorhabditis briggsae | ubiquitin-conjugating enzyme e2-25kd    | 3  | P:GO:0051246;<br>F:GO:0019787;<br>P:GO:0043687                                                                                                                                         | - |            | IPR000449; IPR000608; IPR009060;<br>IPR015940; IPR016135;<br>G3DSA:1.10.8.10 (GENE3D),<br>PTHR11621 (PANTHER),<br>PTHR11621:SF28 (PANTHER)                   |
| Loa loa                 | exosome component 10                    | 5  | C:GO:0005730;<br>P:GO:0006378;<br>C:GO:0000176;<br>F:GO:0003824;<br>C:GO:0005652                                                                                                       | - |            | IPR002121; IPR002562; IPR010997;<br>IPR012337; G3DSA:3.30.420.10<br>(GENE3D), PTHR12124 (PANTHER),<br>PTHR12124:SF2 (PANTHER)                                |

|                                |                                                                  |    |                                                                                                                                                                                                                                                            |   |                                            |                                                                                                                                                                                    |
|--------------------------------|------------------------------------------------------------------|----|------------------------------------------------------------------------------------------------------------------------------------------------------------------------------------------------------------------------------------------------------------|---|--------------------------------------------|------------------------------------------------------------------------------------------------------------------------------------------------------------------------------------|
| Caenorhabditis elegans         | aldh9a1a protein                                                 | 15 | C:GO:0005829;<br>F:GO:0043176;<br>C:GO:0015630;<br>C:GO:0005739;<br>P:GO:0001889;<br>P:GO:0055114;<br>P:GO:0045329;<br>F:GO:0051287;<br>F:GO:0019145;<br>P:GO:0006081;<br>P:GO:0042136;<br>F:GO:0042803;<br>F:GO:0047105;<br>F:GO:0004029;<br>C:GO:0005634 | - | EC:1.2.1.19;<br>EC:1.2.1.47;<br>EC:1.2.1.3 | SignalP (SIGNALP)                                                                                                                                                                  |
| Caenorhabditis briggsae        | rhomboid 5 homolog 2-like                                        | 1  | C:GO:0016020                                                                                                                                                                                                                                               | - |                                            | IPR002610; IPR022764;<br>G3DSA:1.20.1540.10 (GENE3D),<br>SignalP (SIGNALP), SSF144091<br>(SUPERFAMILY)                                                                             |
| Caenorhabditis elegans         | r- exonuclease 4                                                 | 4  | C:GO:0005730;<br>F:GO:0003700;<br>F:GO:0004518;<br>P:GO:0006355                                                                                                                                                                                            | - |                                            | IPR006055; IPR012337; IPR013520;<br>IPR018228; G3DSA:3.30.420.10<br>(GENE3D), PTHR12801 (PANTHER),<br>PTHR12801:SF5 (PANTHER)                                                      |
| Caenorhabditis elegans         | r- exonuclease 4                                                 | 4  | C:GO:0005730;<br>F:GO:0003700;<br>F:GO:0004518;<br>P:GO:0006355                                                                                                                                                                                            | - |                                            | IPR006055; IPR012337; IPR013520;<br>IPR018228; G3DSA:3.30.420.10<br>(GENE3D), PTHR12801 (PANTHER),<br>PTHR12801:SF5 (PANTHER)                                                      |
| Loa loa                        | nuclear nucleic acid-binding protein c1d                         | 2  | F:GO:0005488;<br>C:GO:0044424                                                                                                                                                                                                                              | - |                                            | IPR011082                                                                                                                                                                          |
|                                | -                                                                | 0  |                                                                                                                                                                                                                                                            |   |                                            | -                                                                                                                                                                                  |
|                                | -                                                                | 0  |                                                                                                                                                                                                                                                            |   |                                            | -                                                                                                                                                                                  |
|                                | -                                                                | 0  |                                                                                                                                                                                                                                                            |   |                                            | -                                                                                                                                                                                  |
|                                | -                                                                | 0  |                                                                                                                                                                                                                                                            |   |                                            | -                                                                                                                                                                                  |
| Caenorhabditis elegans         | ser thr-rich protein t10 in dgcr region                          | 0  |                                                                                                                                                                                                                                                            |   |                                            | IPR008551                                                                                                                                                                          |
| Caenorhabditis briggsae        | dual specificity phosphatase 14-like                             | 4  | F:GO:0004725;<br>F:GO:0008138;<br>P:GO:0016311;<br>C:GO:0044424                                                                                                                                                                                            | - | EC:3.1.3.48                                | IPR000340; IPR000387; IPR016130;<br>IPR020417; IPR020420; IPR020422;<br>G3DSA:3.90.190.10 (GENE3D),<br>PTHR10159 (PANTHER),<br>PTHR10159:SF21 (PANTHER),<br>SSF52799 (SUPERFAMILY) |
| Gemmata obscuriglobus UQM 2246 | serine racemase                                                  | 1  | F:GO:0003824                                                                                                                                                                                                                                               | - |                                            | IPR000634; IPR001926; PTHR10314<br>(PANTHER), PTHR10314:SF17<br>(PANTHER)                                                                                                          |
| Loa loa                        | enhancer of mr- decapping 4                                      | 1  | C:GO:0044424                                                                                                                                                                                                                                               | - |                                            | IPR011044; IPR015943; PTHR15598<br>(PANTHER)                                                                                                                                       |
| Caenorhabditis briggsae        | glycosyl hydrolases family 31 protein                            | 3  | F:GO:0030246;<br>P:GO:0005975;<br>F:GO:0004553                                                                                                                                                                                                             | - | EC:3.2.1.0                                 | IPR000322; IPR011013;<br>PTHR22762:SF10 (PANTHER)                                                                                                                                  |
|                                | -                                                                | 0  |                                                                                                                                                                                                                                                            |   |                                            | -                                                                                                                                                                                  |
| Caenorhabditis briggsae        | yms5_caeel ame: full=uncharacterized protein flags:<br>precursor | 0  |                                                                                                                                                                                                                                                            |   | P:GO:0007160;<br>C:GO:0016021              | SignalP (SIGNALP)                                                                                                                                                                  |

|                         |                                                                   |   |                                                                 |                                                                                                                                                                                                                                                                                                                                                                  |                                                                                                     |
|-------------------------|-------------------------------------------------------------------|---|-----------------------------------------------------------------|------------------------------------------------------------------------------------------------------------------------------------------------------------------------------------------------------------------------------------------------------------------------------------------------------------------------------------------------------------------|-----------------------------------------------------------------------------------------------------|
| Pongo abelii            | isoform cra_b                                                     | 0 |                                                                 | P:GO:0030030;<br>P:GO:0001842;<br>P:GO:0006468;<br>C:GO:0005634;<br>P:GO:0043200;<br>P:GO:0006606;<br>P:GO:0045792;<br>P:GO:0030836;<br>P:GO:0030010;<br>C:GO:0030864;<br>P:GO:0007015;<br>P:GO:0000910;<br>P:GO:0006928;<br>C:GO:0030027;<br>C:GO:0005737;<br>P:GO:0001755;<br>C:GO:0005829;<br>C:GO:0005622;<br>C:GO:0005856;<br>C:GO:0031252;<br>C:GO:0005576 | -                                                                                                   |
|                         |                                                                   | 0 |                                                                 |                                                                                                                                                                                                                                                                                                                                                                  |                                                                                                     |
|                         |                                                                   | 0 |                                                                 |                                                                                                                                                                                                                                                                                                                                                                  |                                                                                                     |
| Caenorhabditis elegans  | scavenger receptor class member 2                                 | 2 | P:GO:0040035;<br>C:GO:0016020                                   | -                                                                                                                                                                                                                                                                                                                                                                | IPR002159; PTHR11923:SF8 (PANTHER), SignalP (SIGNALP)                                               |
|                         |                                                                   | 0 |                                                                 |                                                                                                                                                                                                                                                                                                                                                                  |                                                                                                     |
| Loa loa                 | elegans protein partially confirmed by transcript evidence        | 0 |                                                                 | F:GO:0004500;<br>P:GO:0006548                                                                                                                                                                                                                                                                                                                                    | -                                                                                                   |
| Ancylostoma ceylanicum  | briggsae cbr-sas-5 protein                                        | 0 |                                                                 | C:GO:0005737;<br>P:GO:0007049;<br>C:GO:0005856;<br>P:GO:0007275;<br>F:GO:0005515;<br>C:GO:0005814                                                                                                                                                                                                                                                                | PD127281 (PRODOM)                                                                                   |
| Loa loa                 | dpy-30 homolog                                                    | 1 | F:GO:0005515                                                    | -                                                                                                                                                                                                                                                                                                                                                                | IPR007858; PTHR23356 (PANTHER), SignalP (SIGNALP)                                                   |
| Caenorhabditis briggsae | phospholipid-transporting atpase 1 (aminophospholipid flippase 1) | 3 | F:GO:0005488;<br>F:GO:0016817;<br>F:GO:0005215                  | -                                                                                                                                                                                                                                                                                                                                                                | IPR001757; IPR018303; G3DSA:3.40.1110.10 (GENE3D), PTHR11939:SF14 (PANTHER), SSF56784 (SUPERFAMILY) |
|                         |                                                                   | 0 |                                                                 |                                                                                                                                                                                                                                                                                                                                                                  |                                                                                                     |
| Brugia malayi           | zinc finger protein 161 homolog                                   | 4 | F:GO:0003677;<br>C:GO:0005622;<br>F:GO:0005515;<br>F:GO:0008270 | -                                                                                                                                                                                                                                                                                                                                                                | IPR000210; IPR011333; IPR013069; PTHR23228 (PANTHER), PTHR23228:SF46 (PANTHER)                      |
| Caenorhabditis briggsae | zinc finger protein                                               | 0 |                                                                 | F:GO:0008270;<br>C:GO:0005622                                                                                                                                                                                                                                                                                                                                    | IPR007087; IPR015880; SSF57667 (SUPERFAMILY)                                                        |
| Brugia malayi           | thioredoxin domain-containing protein 11                          | 0 |                                                                 | C:GO:0005789;<br>P:GO:0045454;<br>C:GO:0016021;<br>C:GO:0016020;<br>C:GO:0005783                                                                                                                                                                                                                                                                                 | IPR012335; IPR012336                                                                                |
| Caenorhabditis briggsae | Hypothetical protein CBG08318 [Caenorhabditis briggsae]           | 0 |                                                                 |                                                                                                                                                                                                                                                                                                                                                                  | SignalP (SIGNALP)                                                                                   |
| Caenorhabditis briggsae | briggsae cbr-flp-5 protein                                        | 0 |                                                                 | P:GO:0007218                                                                                                                                                                                                                                                                                                                                                     | -                                                                                                   |
|                         |                                                                   | 0 |                                                                 |                                                                                                                                                                                                                                                                                                                                                                  |                                                                                                     |
|                         |                                                                   | 0 |                                                                 |                                                                                                                                                                                                                                                                                                                                                                  |                                                                                                     |
| Caenorhabditis elegans  | hypothetical protein ZK1248.15 [Caenorhabditis elegans]           | 0 |                                                                 |                                                                                                                                                                                                                                                                                                                                                                  | IPR001202; G3DSA:2.20.70.10 (GENE3D)                                                                |

|                         |                                                          |    |                                                                                                                                                                                                                                                                                              |   |                                                                                                                    |                                                                                                                                   |
|-------------------------|----------------------------------------------------------|----|----------------------------------------------------------------------------------------------------------------------------------------------------------------------------------------------------------------------------------------------------------------------------------------------|---|--------------------------------------------------------------------------------------------------------------------|-----------------------------------------------------------------------------------------------------------------------------------|
| Caenorhabditis briggsae | chloride intracellular channel                           | 1  | F:GO:0005488                                                                                                                                                                                                                                                                                 | - |                                                                                                                    | IPR010987; PTHR11260 (PANTHER), PTHR11260:SF1 (PANTHER)                                                                           |
|                         |                                                          | 0  |                                                                                                                                                                                                                                                                                              |   |                                                                                                                    | -                                                                                                                                 |
| Macaca mulatta          | sh3 domain binding glutamic acid-rich protein like 3     | 6  | P:GO:0045454;<br>C:GO:0005737;<br>P:GO:0008152;<br>F:GO:0009055;<br>F:GO:0015035;<br>C:GO:0005634                                                                                                                                                                                            | - |                                                                                                                    | -                                                                                                                                 |
|                         |                                                          | 0  |                                                                                                                                                                                                                                                                                              |   |                                                                                                                    | SignalP (SIGNALP)                                                                                                                 |
| Caenorhabditis elegans  | ain family member (clp-1)                                | 7  | C:GO:0005737;<br>P:GO:0016540;<br>F:GO:0004198;<br>F:GO:0005509;<br>P:GO:0008219;<br>C:GO:0016021;<br>P:GO:0006508                                                                                                                                                                           | - |                                                                                                                    | IPR000169; IPR001300; IPR022684; G3DSA:3.90.70.10 (GENE3D), PTHR10183 (PANTHER), PTHR10183:SF45 (PANTHER), SSF54001 (SUPERFAMILY) |
| Caenorhabditis elegans  | ubiquitin-conjugating enzyme e2 variant 2                | 17 | P:GO:0000209;<br>F:GO:0005515;<br>P:GO:0006355;<br>P:GO:0008283;<br>C:GO:0005829;<br>F:GO:0016563;<br>P:GO:0043524;<br>P:GO:0032436;<br>C:GO:0031372;<br>P:GO:0043123;<br>F:GO:0019787;<br>P:GO:0010976;<br>P:GO:0000729;<br>P:GO:0051092;<br>C:GO:0005634;<br>P:GO:0045739;<br>P:GO:0051965 | - |                                                                                                                    | -                                                                                                                                 |
|                         |                                                          | 0  |                                                                                                                                                                                                                                                                                              |   |                                                                                                                    | -                                                                                                                                 |
|                         |                                                          | 0  |                                                                                                                                                                                                                                                                                              |   |                                                                                                                    | -                                                                                                                                 |
| Loa loa                 | f y-rich n-terminus family protein                       | 0  |                                                                                                                                                                                                                                                                                              |   | F:GO:0046872;<br>F:GO:0008168;<br>F:GO:0016740;<br>F:GO:0008270;<br>F:GO:0005515;<br>F:GO:0003677;<br>C:GO:0005634 | IPR018555                                                                                                                         |
|                         |                                                          | 0  |                                                                                                                                                                                                                                                                                              |   |                                                                                                                    | -                                                                                                                                 |
| Caenorhabditis briggsae | 39s ribosomal protein                                    | 7  | P:GO:0009792;<br>P:GO:0002119;<br>C:GO:0005762;<br>F:GO:0003735;<br>P:GO:0040007;<br>P:GO:0006898;<br>P:GO:0006412                                                                                                                                                                           | - | EC:3.6.5.3                                                                                                         | IPR019373; PTHR13409 (PANTHER)                                                                                                    |
| Caenorhabditis elegans  | hypothetical protein Y37E11AL.2 [Caenorhabditis elegans] | 0  |                                                                                                                                                                                                                                                                                              |   | F:GO:0004864;<br>P:GO:0043666;<br>P:GO:0009966                                                                     | -                                                                                                                                 |

|                         |                                                         |    |                                                                                                                                                                                                                                                                                              |   |                               |                                                                                                           |
|-------------------------|---------------------------------------------------------|----|----------------------------------------------------------------------------------------------------------------------------------------------------------------------------------------------------------------------------------------------------------------------------------------------|---|-------------------------------|-----------------------------------------------------------------------------------------------------------|
| Caenorhabditis briggsae | briggsae cbr-igg-1 protein                              | 17 | F:GO:0050811;<br>F:GO:0008017;<br>C:GO:0005764;<br>C:GO:0005875;<br>C:GO:0000421;<br>P:GO:0008340;<br>C:GO:0005874;<br>F:GO:0004872;<br>P:GO:0000226;<br>C:GO:0015629;<br>P:GO:0007165;<br>F:GO:0048487;<br>P:GO:0031396;<br>P:GO:0015031;<br>C:GO:0005794;<br>C:GO:0005790;<br>C:GO:0005886 | - |                               | IPR004241; G3DSA:3.10.20.90 (GENE3D), PTHR10969:SF5 (PANTHER), SSF54236 (SUPERFAMILY)                     |
| Homo sapiens            | complement c1r subcomponent precursor                   | 6  | F:GO:0004252;<br>P:GO:0045087;<br>F:GO:0005509;<br>P:GO:0006958;<br>C:GO:0005576;<br>P:GO:0006508                                                                                                                                                                                            | - | EC:3.4.21.0                   | IPR001254; IPR009003; IPR018114; G3DSA:2.40.10.10 (GENE3D), PTHR19355 (PANTHER), PTHR19355:SF44 (PANTHER) |
| Caenorhabditis briggsae | endonuclease mitochondrial                              | 8  | P:GO:0006261;<br>F:GO:0046872;<br>F:GO:0004521;<br>F:GO:0003676;<br>F:GO:0004123;<br>F:GO:0005515;<br>C:GO:0005739;<br>F:GO:0004520                                                                                                                                                          | - | EC:4.4.1.1                    | -                                                                                                         |
| Caenorhabditis elegans  | Hypothetical protein CBG16427 [Caenorhabditis briggsae] | 0  |                                                                                                                                                                                                                                                                                              |   | C:GO:0005622;<br>P:GO:0006810 | -                                                                                                         |
| Caenorhabditis elegans  | solute carrier family member 28                         | 10 | P:GO:0055085;<br>P:GO:0048250;<br>P:GO:0040010;<br>F:GO:0005488;<br>F:GO:0005381;<br>P:GO:0043249;<br>C:GO:0016021;<br>C:GO:0005743;<br>P:GO:0035162;<br>P:GO:0009792                                                                                                                        | - |                               | IPR001993; IPR018108; G3DSA:1.50.40.10 (GENE3D), PTHR11896:SF77 (PANTHER)                                 |
| Caenorhabditis elegans  | ankyrin repeat domain 40                                | 0  |                                                                                                                                                                                                                                                                                              |   |                               | SignalP (SIGNALP)                                                                                         |
| Caenorhabditis elegans  | zinc cchc domain containing 11                          | 8  | F:GO:0016779;<br>P:GO:0016070;<br>F:GO:0005488;<br>P:GO:0010468;<br>P:GO:0050794;<br>P:GO:0007166;<br>C:GO:0044424;<br>P:GO:0001816                                                                                                                                                          | - | EC:2.7.7.0                    | SignalP (SIGNALP)                                                                                         |
| -                       | -                                                       | 0  |                                                                                                                                                                                                                                                                                              |   |                               | -                                                                                                         |
| -                       | -                                                       | 0  |                                                                                                                                                                                                                                                                                              |   |                               | -                                                                                                         |



|                         |                                       |   |                                                                                                                                     |   |                                                                                                                                                      |
|-------------------------|---------------------------------------|---|-------------------------------------------------------------------------------------------------------------------------------------|---|------------------------------------------------------------------------------------------------------------------------------------------------------|
| Caenorhabditis briggsae | chloride channel 7                    | 7 | P:GO:0055085;<br>F:GO:0005247;<br>C:GO:0016021;<br>C:GO:0031410;<br>P:GO:0006821;<br>F:GO:0005515;<br>P:GO:0009268                  | - | IPR001807; IPR006311; IPR014743;<br>PTHR11689:SF15 (PANTHER)                                                                                         |
| Brugia malayi           | apoptosis-inducing mitochondrion- 1   | 8 | P:GO:0030263;<br>C:GO:0005739;<br>P:GO:0006309;<br>F:GO:0009055;<br>F:GO:0005515;<br>C:GO:0000267;<br>P:GO:0008630;<br>C:GO:0005634 | - | IPR001327; IPR013027; PR00411<br>(PRINTS), G3DSA:3.50.50.60<br>(GENE3D), PTHR22912 (PANTHER),<br>PTHR22912:SF32 (PANTHER),<br>SSF51905 (SUPERFAMILY) |
| Callithrix jacchus      | ribosomal protein l4                  | 5 | F:GO:0003735;<br>F:GO:0003723;<br>F:GO:0005515;<br>C:GO:0022625;<br>P:GO:0006414                                                    | - | IPR002136; G3DSA:3.40.1370.10<br>(GENE3D), PTHR19431 (PANTHER),<br>SignalP (SIGNALP)                                                                 |
| -                       | -                                     | 0 |                                                                                                                                     |   | SignalP (SIGNALP)                                                                                                                                    |
| -                       | -                                     | 0 |                                                                                                                                     |   | IPR018122                                                                                                                                            |
| -                       | -                                     | 0 |                                                                                                                                     |   | -                                                                                                                                                    |
| -                       | -                                     | 0 |                                                                                                                                     |   | IPR018122                                                                                                                                            |
| -                       | -                                     | 0 |                                                                                                                                     |   | IPR018122                                                                                                                                            |
| -                       | -                                     | 0 |                                                                                                                                     |   | -                                                                                                                                                    |
| Brugia malayi           | cyclin c                              | 0 | F:GO:0016301;<br>F:GO:0003674;<br>P:GO:0006350;<br>P:GO:0007275;<br>P:GO:0045449;<br>F:GO:0005515;<br>C:GO:0005634                  |   | IPR006670; IPR006671; IPR011028;<br>IPR013763; IPR015429; PIRSF028758<br>(PIR), PTHR10026:SF7 (PANTHER)                                              |
| Brugia malayi           | cyclin c                              | 0 | F:GO:0016301;<br>F:GO:0003674;<br>P:GO:0006350;<br>P:GO:0007275;<br>P:GO:0045449;<br>F:GO:0005515;<br>C:GO:0005634                  |   | IPR006670; IPR006671; IPR011028;<br>IPR013763; IPR015429; PIRSF028758<br>(PIR), PTHR10026:SF7 (PANTHER)                                              |
| -                       | -                                     | 0 |                                                                                                                                     |   | SignalP (SIGNALP)                                                                                                                                    |
| Caenorhabditis elegans  | dsh homolog 3                         | 3 | P:GO:0007275;<br>F:GO:0004871;<br>F:GO:0042802                                                                                      | - | -                                                                                                                                                    |
| Caenorhabditis briggsae | briggsae cbr-lin-33 protein           | 1 | P:GO:0008219                                                                                                                        | - | -                                                                                                                                                    |
| Caenorhabditis briggsae | corneal wound healing-related protein | 2 | F:GO:0005515;<br>C:GO:0005737                                                                                                       | - | IPR007244; PTHR21373 (PANTHER)                                                                                                                       |
| Caenorhabditis briggsae | dihydroorotate dehydroge-se           | 6 | F:GO:0004158;<br>C:GO:0005743;<br>P:GO:0055114;<br>P:GO:0006222;<br>P:GO:0050794;<br>P:GO:0006207                                   | - | EC:1.3.3.1<br>IPR001295; IPR005719; IPR012135;<br>IPR013785; PTHR11938 (PANTHER),<br>PTHR11938:SF7 (PANTHER), SSF51395<br>(SUPERFAMILY)              |
| Caenorhabditis elegans  | muscle lim protein                    | 1 | F:GO:0008270                                                                                                                        | - | IPR001781; PTHR18973 (PANTHER),<br>PTHR18973:SF77 (PANTHER),<br>SSF57716 (SUPERFAMILY)                                                               |

|                            |                                           |    |                                                                                                                                                                                                                                                                             |                               |                                                                                                                                                           |
|----------------------------|-------------------------------------------|----|-----------------------------------------------------------------------------------------------------------------------------------------------------------------------------------------------------------------------------------------------------------------------------|-------------------------------|-----------------------------------------------------------------------------------------------------------------------------------------------------------|
| Caenorhabditis briggsae    | muscle lim protein                        | 1  | F:GO:0008270                                                                                                                                                                                                                                                                | -                             | IPR001781; PTHR18973 (PANTHER), PTHR18973:SF77 (PANTHER), SSF57716 (SUPERFAMILY)                                                                          |
| Caenorhabditis elegans     | muscle lim protein                        | 1  | F:GO:0008270                                                                                                                                                                                                                                                                | -                             | IPR001781; PTHR18973 (PANTHER), PTHR18973:SF77 (PANTHER), SSF57716 (SUPERFAMILY)                                                                          |
| Caenorhabditis briggsae    | ras-related protein rab-8a                | 16 | C:GO:0030425;<br>P:GO:0007264;<br>P:GO:0048169;<br>P:GO:0048210;<br>P:GO:0051223;<br>C:GO:0016023;<br>C:GO:0055037;<br>C:GO:0043025;<br>F:GO:0019901;<br>P:GO:0042384;<br>C:GO:0014069;<br>C:GO:0031513;<br>P:GO:0006904;<br>C:GO:0005794;<br>F:GO:0005525;<br>C:GO:0005886 | -                             | IPR001806; IPR003579; IPR005225; IPR013753; IPR020851; G3DSA:3.40.50.300 (GENE3D), PTHR11708 (PANTHER), PTHR11708:SF229 (PANTHER), SSF52540 (SUPERFAMILY) |
| Acyrtosiphon pisum         | cg32795 cg32795-pb                        | 1  | C:GO:0044464                                                                                                                                                                                                                                                                | -                             | -                                                                                                                                                         |
|                            | -                                         | 0  |                                                                                                                                                                                                                                                                             |                               | -                                                                                                                                                         |
|                            | -                                         | 0  |                                                                                                                                                                                                                                                                             |                               | -                                                                                                                                                         |
|                            | -                                         | 0  |                                                                                                                                                                                                                                                                             |                               | -                                                                                                                                                         |
|                            | -                                         | 0  |                                                                                                                                                                                                                                                                             |                               | -                                                                                                                                                         |
| Pediculus humanus corporis | 5 -nucleotidase domain-containing         | 0  |                                                                                                                                                                                                                                                                             | F:GO:0008253;<br>F:GO:0016787 | -                                                                                                                                                         |
| Loa loa                    | zinc cchc domain containing 24            | 1  | F:GO:0005488                                                                                                                                                                                                                                                                | -                             | IPR001878                                                                                                                                                 |
|                            | -                                         | 0  |                                                                                                                                                                                                                                                                             |                               | -                                                                                                                                                         |
|                            | -                                         | 0  |                                                                                                                                                                                                                                                                             |                               | -                                                                                                                                                         |
| Caenorhabditis briggsae    | atpase aaa domain containing 1            | 11 | P:GO:0010171;<br>P:GO:0002119;<br>F:GO:0016887;<br>F:GO:0005515;<br>F:GO:0005524;<br>C:GO:0016021;<br>P:GO:0040007;<br>C:GO:0005739;<br>P:GO:0006310;<br>F:GO:0009378;<br>P:GO:0006281                                                                                      | -                             | IPR003959; IPR003960; G3DSA:1.10.8.60 (GENE3D), G3DSA:3.40.50.300 (GENE3D), PTHR23074 (PANTHER), PTHR23074:SF20 (PANTHER), SSF52540 (SUPERFAMILY)         |
|                            | -                                         | 0  |                                                                                                                                                                                                                                                                             |                               | PS51257 (PROFILE), SignalP (SIGNALP)                                                                                                                      |
| Harpegnathos saltator      | slc44a3 protein                           | 0  |                                                                                                                                                                                                                                                                             | C:GO:0016021;<br>C:GO:0016020 | IPR007603; SignalP (SIGNALP)                                                                                                                              |
| Caenorhabditis elegans     | integral membrane protein                 | 0  |                                                                                                                                                                                                                                                                             |                               | IPR019336; PTHR23252 (PANTHER), PTHR23252:SF3 (PANTHER), SignalP (SIGNALP)                                                                                |
| Brugia malayi              | mouse nedd8 related family member (ned-8) | 8  | P:GO:0008589;<br>P:GO:0045116;<br>P:GO:0051438;<br>P:GO:0008283;<br>F:GO:0005515;<br>P:GO:0006511;<br>P:GO:0030162;<br>P:GO:0031647                                                                                                                                         | -                             | IPR000626; IPR019954; IPR019955; IPR019956; G3DSA:3.10.20.90 (GENE3D), PTHR10666 (PANTHER), PTHR10666:SF11 (PANTHER), SSF54236 (SUPERFAMILY)              |

|                                     |                                                          |   |                                                                                                                                     |                                                                                                                                                                                                                                                                                                               |                                                                                                                                                                         |
|-------------------------------------|----------------------------------------------------------|---|-------------------------------------------------------------------------------------------------------------------------------------|---------------------------------------------------------------------------------------------------------------------------------------------------------------------------------------------------------------------------------------------------------------------------------------------------------------|-------------------------------------------------------------------------------------------------------------------------------------------------------------------------|
| Loa loa                             | transcription initiation factor alpha subunit            | 8 | F:GO:0030528;<br>P:GO:0008340;<br>F:GO:0003676;<br>P:GO:0040035;<br>P:GO:0050794;<br>P:GO:0006898;<br>P:GO:0009792;<br>P:GO:0006350 | -                                                                                                                                                                                                                                                                                                             | IPR008851; PTHR13011 (PANTHER)                                                                                                                                          |
| Caenorhabditis elegans              | hypothetical protein Y37E11AL.5 [Caenorhabditis elegans] | 0 |                                                                                                                                     | P:GO:0007218;<br>F:GO:0005509;<br>P:GO:0007156;<br>C:GO:0016021;<br>C:GO:0016020;<br>C:GO:0005886                                                                                                                                                                                                             | SignalP (SIGNALP)                                                                                                                                                       |
|                                     | -                                                        | 0 |                                                                                                                                     |                                                                                                                                                                                                                                                                                                               | -                                                                                                                                                                       |
|                                     | -                                                        | 0 |                                                                                                                                     |                                                                                                                                                                                                                                                                                                               | -                                                                                                                                                                       |
| Meyerozyma guilliermondii ATCC 6260 | protein phosphatase regulatory subunit 7                 | 0 |                                                                                                                                     | F:GO:0030234;<br>P:GO:0000003;<br>C:GO:0005634;<br>F:GO:0030528;<br>P:GO:0006355;<br>P:GO:0016568;<br>P:GO:0009792;<br>P:GO:0008150;<br>F:GO:0003682;<br>C:GO:0005737;<br>P:GO:0007165;<br>F:GO:0004888;<br>P:GO:0045449;<br>C:GO:0031224;<br>F:GO:0005515;<br>P:GO:0045087;<br>P:GO:0040010;<br>F:GO:0008599 | -                                                                                                                                                                       |
| Loa loa                             | cyclin-dependent ki-se 2 associated protein 1            | 0 |                                                                                                                                     | F:GO:0016301                                                                                                                                                                                                                                                                                                  | IPR001680; IPR011046; IPR015943;<br>IPR017986; IPR019775; IPR019781;<br>IPR019782; PTHR22850 (PANTHER),<br>PTHR22850:SF5 (PANTHER)                                      |
| Loa loa                             | wd domain protein                                        | 0 |                                                                                                                                     |                                                                                                                                                                                                                                                                                                               | IPR001680; IPR011046; IPR015943;<br>IPR017986; IPR019775; IPR019781;<br>IPR019782; PTHR22850 (PANTHER),<br>PTHR22850:SF17 (PANTHER)                                     |
|                                     | -                                                        | 0 |                                                                                                                                     |                                                                                                                                                                                                                                                                                                               | -                                                                                                                                                                       |
|                                     | -                                                        | 0 |                                                                                                                                     |                                                                                                                                                                                                                                                                                                               | -                                                                                                                                                                       |
| Caenorhabditis elegans              | acyl- thioesterase ii                                    | 2 | P:GO:0019915;<br>F:GO:0016787                                                                                                       | -                                                                                                                                                                                                                                                                                                             | IPR003703; G3DSA:3.10.129.10<br>(GENE3D), PTHR11066:SF3<br>(PANTHER), SSF54637 (SUPERFAMILY)                                                                            |
| Caenorhabditis elegans              | probable cation-transporting atpase in chromosome        | 5 | F:GO:0016820;<br>F:GO:0016887;<br>F:GO:0000166;<br>P:GO:0008152;<br>C:GO:0016020                                                    | -                                                                                                                                                                                                                                                                                                             | EC:3.6.3.0<br>IPR001757; G3DSA:3.40.1110.10<br>(GENE3D), G3DSA:3.40.50.1000<br>(GENE3D), PTHR11939:SF48<br>(PANTHER), SSF56784 (SUPERFAMILY),<br>SSF81660 (SUPERFAMILY) |
|                                     | -                                                        | 0 |                                                                                                                                     |                                                                                                                                                                                                                                                                                                               | SignalP (SIGNALP)                                                                                                                                                       |
|                                     | -                                                        | 0 |                                                                                                                                     |                                                                                                                                                                                                                                                                                                               | -                                                                                                                                                                       |

|                         |                                                 |    |                                                                                                                                                                                                                                           |   |             |                                                                                                                                                                                                                |
|-------------------------|-------------------------------------------------|----|-------------------------------------------------------------------------------------------------------------------------------------------------------------------------------------------------------------------------------------------|---|-------------|----------------------------------------------------------------------------------------------------------------------------------------------------------------------------------------------------------------|
| Brugia malayi           | briggsae cbr-ptb-1 protein                      | 14 | P:GO:0007219;<br>P:GO:0008103;<br>F:GO:0005515;<br>P:GO:0008586;<br>F:GO:0000166;<br>F:GO:0000900;<br>F:GO:0003730;<br>C:GO:0005737;<br>P:GO:0000398;<br>P:GO:0008587;<br>P:GO:0007319;<br>F:GO:0008187;<br>C:GO:0005634;<br>C:GO:0030529 | - | -           | -                                                                                                                                                                                                              |
| Caenorhabditis elegans  | v-raf murine sarcoma viral oncogene homolog b1  | 2  | F:GO:0016301;<br>F:GO:0005515                                                                                                                                                                                                             | - | -           | IPR002219; IPR003116;<br>G3DSA:3.10.20.90 (GENE3D),<br>G3DSA:3.30.60.20 (GENE3D),<br>PTHR23257 (PANTHER),<br>PTHR23257:SF97 (PANTHER), SignalP<br>(SIGNALP), SSF54236 (SUPERFAMILY),<br>SSF57889 (SUPERFAMILY) |
| Caenorhabditis elegans  | microtubule associated serine threonine ki-se 3 | 7  | P:GO:0009792;<br>P:GO:0006468;<br>F:GO:0005515;<br>F:GO:0005524;<br>F:GO:0000287;<br>P:GO:0000003;<br>F:GO:0004674                                                                                                                        | - | EC:2.7.11.0 | IPR000719; IPR011009; IPR015022;<br>IPR017442; G3DSA:3.30.200.20<br>(GENE3D), PTHR22985 (PANTHER),<br>PTHR22985:SF42 (PANTHER)                                                                                 |
| Caenorhabditis briggsae | d-glucuronyl c5-epimerase                       | 6  | P:GO:0044272;<br>C:GO:0005794;<br>P:GO:0030201;<br>F:GO:0016857;<br>C:GO:0016020;<br>P:GO:0006024                                                                                                                                         | - | EC:5.1.3.0  | PTHR13174 (PANTHER)                                                                                                                                                                                            |
| -                       | -                                               | 0  |                                                                                                                                                                                                                                           |   |             | SignalP (SIGNALP)                                                                                                                                                                                              |
| Caenorhabditis elegans  | ubiquitin specific peptidase 15                 | 5  | F:GO:0005488;<br>P:GO:0044238;<br>P:GO:0044260;<br>P:GO:0009792;<br>F:GO:0016787                                                                                                                                                          | - |             | IPR001394; PTHR10420 (PANTHER),<br>PTHR10420:SF68 (PANTHER),<br>SSF54001 (SUPERFAMILY)                                                                                                                         |
| Caenorhabditis elegans  | ubiquitin specific peptidase 15                 | 5  | F:GO:0005488;<br>P:GO:0044238;<br>P:GO:0044260;<br>P:GO:0009792;<br>F:GO:0016787                                                                                                                                                          | - |             | IPR001394; PTHR10420 (PANTHER),<br>PTHR10420:SF68 (PANTHER),<br>SSF54001 (SUPERFAMILY)                                                                                                                         |
| -                       | -                                               | 0  |                                                                                                                                                                                                                                           |   |             | -                                                                                                                                                                                                              |
| Caenorhabditis elegans  | transcription elongation regulator 1            | 6  | P:GO:0040035;<br>P:GO:0010171;<br>P:GO:0002119;<br>P:GO:0016246;<br>P:GO:0040011;<br>P:GO:0040007                                                                                                                                         | - |             | IPR001202; IPR002713;<br>G3DSA:2.20.70.10 (GENE3D)                                                                                                                                                             |
| Caenorhabditis elegans  | transcription elongation regulator 1            | 6  | P:GO:0040035;<br>P:GO:0010171;<br>P:GO:0002119;<br>P:GO:0016246;<br>P:GO:0040011;<br>P:GO:0040007                                                                                                                                         | - |             | IPR001202; IPR002713;<br>G3DSA:2.20.70.10 (GENE3D)                                                                                                                                                             |

|                           |                                                             |   |                                                                                                                                                      |                                                                                                   |                                    |                                                                                                                                                                             |
|---------------------------|-------------------------------------------------------------|---|------------------------------------------------------------------------------------------------------------------------------------------------------|---------------------------------------------------------------------------------------------------|------------------------------------|-----------------------------------------------------------------------------------------------------------------------------------------------------------------------------|
|                           | -                                                           | 0 |                                                                                                                                                      |                                                                                                   |                                    | SignalP (SIGNALP)                                                                                                                                                           |
|                           | -                                                           | 0 |                                                                                                                                                      |                                                                                                   |                                    | -                                                                                                                                                                           |
| Caenorhabditis elegans    | d-se domain containing 2                                    | 0 |                                                                                                                                                      | F:GO:0016888;<br>F:GO:0003674;<br>F:GO:0016787;<br>P:GO:0008150;<br>F:GO:0004518;<br>C:GO:0005634 |                                    | IPR001130; IPR015992; IPR018228;<br>G3DSA:3.20.20.140 (GENE3D),<br>SSF51556 (SUPERFAMILY)                                                                                   |
| Teladorsagia circumcincta | nicotinic acetylcholine receptor alpha subunit              | 6 | F:GO:0004872;<br>C:GO:0045211;<br>C:GO:0030054;<br>P:GO:0006811;<br>C:GO:0016021;<br>F:GO:0004889                                                    | -                                                                                                 |                                    | IPR006029; IPR006201;<br>G3DSA:1.20.120.370 (GENE3D),<br>PTHR18945:SF88 (PANTHER), SignalP<br>(SIGNALP)                                                                     |
| Caenorhabditis elegans    | pan domain containing protein                               | 0 |                                                                                                                                                      |                                                                                                   |                                    | -                                                                                                                                                                           |
| Caenorhabditis briggsae   | -dh dehydroge-se 1 beta 22kda                               | 6 | P:GO:0040010;<br>P:GO:0022900;<br>C:GO:0005747;<br>P:GO:0002119;<br>F:GO:0003954;<br>P:GO:0006898                                                    | -                                                                                                 | EC:1.6.99.3                        | PTHR12868 (PANTHER)                                                                                                                                                         |
| Caenorhabditis briggsae   | -dh dehydroge-se                                            | 5 | P:GO:0002119;<br>C:GO:0005743;<br>C:GO:0070469;<br>P:GO:0040010;<br>P:GO:0006898                                                                     | -                                                                                                 |                                    | PTHR12868 (PANTHER)                                                                                                                                                         |
| Caenorhabditis elegans    | ctu2_caeel ame: full=cytoplasmic tr- 2-thiolation protein 2 | 2 | C:GO:0005737;<br>P:GO:0006400                                                                                                                        | -                                                                                                 |                                    | PTHR20882 (PANTHER),<br>PTHR20882:SF4 (PANTHER)                                                                                                                             |
| Brugia malayi             | nuclear r- export factor 2                                  | 2 | P:GO:0006810;<br>C:GO:0031981                                                                                                                        | -                                                                                                 |                                    | IPR005637; IPR009060; IPR018222;<br>G3DSA:1.10.8.10 (GENE3D),<br>G3DSA:3.10.450.50 (GENE3D),<br>PTHR10662 (PANTHER),<br>PTHR10662:SF21 (PANTHER),<br>SSF54427 (SUPERFAMILY) |
| Caenorhabditis elegans    | ell associated factor 2                                     | 4 | C:GO:0005730;<br>P:GO:0045449;<br>F:GO:0005515;<br>C:GO:0005654                                                                                      | -                                                                                                 |                                    | IPR019194; PTHR15970 (PANTHER),<br>PTHR15970:SF3 (PANTHER)                                                                                                                  |
| Ancylostoma caninum       | tissue factor pathway isoform cra_a                         | 1 | P:GO:0065007                                                                                                                                         | -                                                                                                 |                                    | IPR002223; IPR020901; PTHR10083<br>(PANTHER), PTHR10083:SF17<br>(PANTHER)                                                                                                   |
| Caenorhabditis elegans    | elegans protein partially confirmed by transcript evidence  | 0 |                                                                                                                                                      |                                                                                                   |                                    | -                                                                                                                                                                           |
|                           | -                                                           | 0 |                                                                                                                                                      |                                                                                                   |                                    | IPR001810                                                                                                                                                                   |
|                           | -                                                           | 0 |                                                                                                                                                      |                                                                                                   |                                    | -                                                                                                                                                                           |
| Caenorhabditis briggsae   | phytanoyl- peroxisomal precursor                            | 9 | F:GO:0046872;<br>F:GO:0048244;<br>C:GO:0005777;<br>F:GO:0031418;<br>F:GO:0005515;<br>P:GO:0055114;<br>F:GO:0016702;<br>P:GO:0001561;<br>C:GO:0005739 | -                                                                                                 | EC:1.14.11.1<br>8;<br>EC:1.13.11.0 | IPR008775; G3DSA:2.60.120.620<br>(GENE3D), PTHR21308 (PANTHER),<br>SSF51197 (SUPERFAMILY)                                                                                   |
| Caenorhabditis briggsae   | intraflagellar transport 140 homolog                        | 1 | F:GO:0005488                                                                                                                                         | -                                                                                                 |                                    | PTHR15722 (PANTHER),<br>PTHR15722:SF7 (PANTHER)                                                                                                                             |
| Caenorhabditis briggsae   | Hypothetical protein CBG23816 [Caenorhabditis briggsae]     | 0 |                                                                                                                                                      |                                                                                                   |                                    | IPR015880                                                                                                                                                                   |

|                             |                                                                 |    |                                                                                                                                                                       |                                                                                                                                                                                                                                                             |                                                                                        |
|-----------------------------|-----------------------------------------------------------------|----|-----------------------------------------------------------------------------------------------------------------------------------------------------------------------|-------------------------------------------------------------------------------------------------------------------------------------------------------------------------------------------------------------------------------------------------------------|----------------------------------------------------------------------------------------|
| Angiostrongylus cantonensis | elegans protein confirmed by transcript evidence                | 2  | P:GO:0009792;<br>P:GO:0040002                                                                                                                                         | -                                                                                                                                                                                                                                                           | IPR002486; PTHR10499 (PANTHER),<br>PTHR10499:SF58 (PANTHER), SignalP<br>(SIGNALP)      |
| Caenorhabditis elegans      | serine threonine-protein phosphatase 2a regulatory subunit<br>b | 10 | P:GO:0008340;<br>P:GO:0000003;<br>P:GO:0040010;<br>C:GO:0044464;<br>P:GO:0009792;<br>P:GO:0002119;<br>F:GO:0019888;<br>F:GO:0003824;<br>F:GO:0005488;<br>P:GO:0043666 | -                                                                                                                                                                                                                                                           | IPR004327; SSF140984 (SUPERFAMILY)                                                     |
| Caenorhabditis elegans      | f-box domain containing protein                                 | 0  |                                                                                                                                                                       | P:GO:0030163;<br>F:GO:0001948;<br>F:GO:0005515;<br>C:GO:0019005                                                                                                                                                                                             | IPR001810; IPR022364;<br>G3DSA:1.20.1280.50 (GENE3D)                                   |
| Caenorhabditis elegans      | suppressor of presenilin defect family member (spr-4)           | 0  |                                                                                                                                                                       | F:GO:0005216;<br>C:GO:0016021;<br>C:GO:0016020;<br>P:GO:0006813;<br>C:GO:0005634;<br>P:GO:0006811;<br>P:GO:0006810;<br>F:GO:0003676;<br>F:GO:0003674;<br>F:GO:0008270;<br>C:GO:0005575;<br>C:GO:0005622;<br>P:GO:00055085;<br>F:GO:0046872;<br>F:GO:0005249 | IPR007087; IPR015880; PTHR11389<br>(PANTHER), SSF57667 (SUPERFAMILY)                   |
| Caenorhabditis briggsae     | elegans protein confirmed by transcript evidence                | 0  |                                                                                                                                                                       |                                                                                                                                                                                                                                                             | SignalP (SIGNALP)                                                                      |
| Caenorhabditis elegans      | briggsae cbr-epac-1 protein                                     | 4  | P:GO:0007264;<br>C:GO:0005622;<br>F:GO:0005085;<br>P:GO:0008152                                                                                                       | -                                                                                                                                                                                                                                                           | IPR008937; PTHR23113:SF22<br>(PANTHER), SignalP (SIGNALP),<br>SSF54236 (SUPERFAMILY)   |
| Brugia malayi               | lsm5 protein                                                    | 4  | F:GO:0003676;<br>C:GO:0005681;<br>C:GO:0030532;<br>P:GO:0000398                                                                                                       | -                                                                                                                                                                                                                                                           | IPR001163; IPR006649; IPR010920;<br>G3DSA:2.30.30.100 (GENE3D),<br>PTHR20971 (PANTHER) |
| Caenorhabditis elegans      | elegans protein confirmed by transcript evidence                | 0  |                                                                                                                                                                       |                                                                                                                                                                                                                                                             | SignalP (SIGNALP)                                                                      |
| Caenorhabditis elegans      | elegans protein confirmed by transcript evidence                | 0  |                                                                                                                                                                       |                                                                                                                                                                                                                                                             | SignalP (SIGNALP)                                                                      |
| Caenorhabditis elegans      | briggsae cbr-ttr-47 protein                                     | 1  | P:GO:0040011                                                                                                                                                          | -                                                                                                                                                                                                                                                           | SignalP (SIGNALP)                                                                      |
| Loa loa                     | regulatory-associated protein of mtor                           | 4  | F:GO:0003993;<br>F:GO:0005488;<br>P:GO:0001934;<br>P:GO:0006974                                                                                                       | -                                                                                                                                                                                                                                                           | EC:3.1.3.2<br>IPR004083; PTHR12848:SF7<br>(PANTHER), SignalP (SIGNALP)                 |
| Caenorhabditis elegans      | u6 snr--associated sm-like protein lsm8                         | 5  | F:GO:0017070;<br>F:GO:0005515;<br>C:GO:0030529;<br>C:GO:0005634;<br>P:GO:0000398                                                                                      | -                                                                                                                                                                                                                                                           | IPR001163; IPR006649; IPR010920;<br>G3DSA:2.30.30.100 (GENE3D),<br>PTHR15588 (PANTHER) |
|                             | -                                                               | 0  |                                                                                                                                                                       |                                                                                                                                                                                                                                                             | -                                                                                      |

|                        |                                                                 |    |                                                                                                                                                                                                                                                                                                                                                                                                                                                                        |                                                                 |                   |
|------------------------|-----------------------------------------------------------------|----|------------------------------------------------------------------------------------------------------------------------------------------------------------------------------------------------------------------------------------------------------------------------------------------------------------------------------------------------------------------------------------------------------------------------------------------------------------------------|-----------------------------------------------------------------|-------------------|
| Caenorhabditis elegans | patched family protein                                          | 13 | P:GO:0009792;<br>P:GO:0002119;<br>F:GO:0008158;<br>P:GO:0040018;<br>P:GO:0001703;<br>P:GO:0018996;<br>P:GO:0000910;<br>P:GO:0006810;<br>P:GO:0040010;<br>P:GO:0000003;<br>P:GO:0040011;<br>C:GO:0016021;<br>F:GO:0005215                                                                                                                                                                                                                                               | -                                                               | -                 |
| -                      | -                                                               | 0  | -                                                                                                                                                                                                                                                                                                                                                                                                                                                                      | -                                                               | -                 |
| Caenorhabditis elegans | elegans protein partially confirmed by transcript evidence      | 0  |                                                                                                                                                                                                                                                                                                                                                                                                                                                                        | P:GO:0000003;<br>F:GO:0005089;<br>P:GO:0035023;<br>C:GO:0005622 | -                 |
| Caenorhabditis elegans | eph receptor tyrosine ki-se                                     | 10 | C:GO:0016021;<br>P:GO:0016319;<br>P:GO:0007391;<br>F:GO:0005515;<br>P:GO:0007409;<br>F:GO:0000166;<br>P:GO:0007165;<br>F:GO:0005003;<br>C:GO:0005886;<br>P:GO:0006468                                                                                                                                                                                                                                                                                                  | -                                                               | -                 |
| Caenorhabditis elegans | udp-glucose:glycoprotein glucosyltransferase containing protein | 1  | F:GO:0016757                                                                                                                                                                                                                                                                                                                                                                                                                                                           | -                                                               | IPR009448         |
| -                      | -                                                               | 0  | -                                                                                                                                                                                                                                                                                                                                                                                                                                                                      | -                                                               | -                 |
| Homo sapiens           | type alpha 1                                                    | 31 | P:GO:0001957;<br>P:GO:0001957;<br>P:GO:0071363;<br>P:GO:0007605;<br>P:GO:0034505;<br>P:GO:0042542;<br>P:GO:0001649;<br>P:GO:0009612;<br>P:GO:0001568;<br>P:GO:0060325;<br>F:GO:0005201;<br>C:GO:0005615;<br>P:GO:0048706;<br>P:GO:0015031;<br>F:GO:0048407;<br>C:GO:0005737;<br>P:GO:0043434;<br>P:GO:0071300;<br>P:GO:0007601;<br>P:GO:0010812;<br>C:GO:0005584;<br>F:GO:0042802;<br>P:GO:0060346;<br>P:GO:0032964;<br>P:GO:0030199;<br>P:GO:0051591;<br>P:GO:0031960 | -                                                               | SignalP (SIGNALP) |

|                         |                                                       |   |                                                                                  |              |             |                                                                                                                                                  |
|-------------------------|-------------------------------------------------------|---|----------------------------------------------------------------------------------|--------------|-------------|--------------------------------------------------------------------------------------------------------------------------------------------------|
|                         | -                                                     | 0 |                                                                                  |              |             | -                                                                                                                                                |
| Caenorhabditis elegans  | vacuolar protein sorting 26 homolog b                 | 5 | C:GO:0030904;<br>P:GO:0015031;<br>C:GO:0005829;<br>P:GO:0000003;<br>P:GO:0007034 | -            |             | IPR005377; PTHR12233 (PANTHER)                                                                                                                   |
|                         | -                                                     | 0 |                                                                                  |              |             | -                                                                                                                                                |
| Haemochus contortus     | briggsae cbr-gst- protein                             | 4 | P:GO:0008340;<br>F:GO:0004364;<br>P:GO:0040010;<br>F:GO:0005515                  | -            | EC:2.5.1.18 | IPR004045; IPR010987; IPR012335;<br>IPR012336; IPR017933; PTHR11571<br>(PANTHER), PTHR11571:SF6<br>(PANTHER)                                     |
| Caenorhabditis elegans  | monocarboxylate transporter                           | 0 |                                                                                  | P:GO:0055085 |             | IPR011701; IPR016196;<br>G3DSA:1.20.1250.20 (GENE3D),<br>PTHR11360 (PANTHER),<br>PTHR11360:SF10 (PANTHER), SignalP<br>(SIGNALP)                  |
|                         | -                                                     | 0 |                                                                                  |              |             | -                                                                                                                                                |
|                         | -                                                     | 0 |                                                                                  |              |             | -                                                                                                                                                |
| Caenorhabditis briggsae | phosphatidylinositol 3-ki-se regulatory subunit       | 5 | C:GO:0005622;<br>P:GO:0040024;<br>P:GO:0008340;<br>F:GO:0019901;<br>P:GO:0008286 | -            |             | -                                                                                                                                                |
| Caenorhabditis elegans  | hypothetical protein T01E8.5 [Caenorhabditis elegans] | 0 |                                                                                  |              |             | -                                                                                                                                                |
|                         | -                                                     | 0 |                                                                                  |              |             | -                                                                                                                                                |
| Loa loa                 | cell cycle regulator mat89bb homolog                  | 1 | P:GO:0007049                                                                     | -            |             | IPR019355; PTHR12955 (PANTHER)                                                                                                                   |
|                         | -                                                     | 0 |                                                                                  |              |             | -                                                                                                                                                |
| Caenorhabditis briggsae | transmembrane protein 144                             | 1 | P:GO:0002119                                                                     | -            |             | IPR012435; SignalP (SIGNALP)                                                                                                                     |
| Caenorhabditis elegans  | elegans protein confirmed by transcript evidence      | 0 |                                                                                  |              |             | -                                                                                                                                                |
| Brugia malayi           | cyclin fold protein 1 variant b                       | 1 | P:GO:0048589                                                                     | -            |             | -                                                                                                                                                |
| Caenorhabditis elegans  | protein-tyrosine phosphatase containing protein       | 3 | F:GO:0016791;<br>P:GO:0009792;<br>P:GO:0000003                                   | -            | EC:3.1.3.0  | IPR000242; IPR000387; IPR016130;<br>G3DSA:3.90.190.10 (GENE3D),<br>PTHR19134 (PANTHER),<br>PTHR19134:SF26 (PANTHER),<br>SSF52799 (SUPERFAMILY)   |
| Caenorhabditis briggsae | elegans protein confirmed by transcript evidence      | 0 |                                                                                  |              |             | IPR010558; SignalP (SIGNALP)                                                                                                                     |
|                         | -                                                     | 0 |                                                                                  |              |             | IPR003124; IPR021854; PTHR23331<br>(PANTHER)                                                                                                     |
| Caenorhabditis elegans  | briggsae cbr-cid-1 protein                            | 1 | F:GO:0005488                                                                     | -            |             | IPR002058; G3DSA:3.30.460.10<br>(GENE3D), PTHR12271 (PANTHER),<br>PTHR12271:SF15 (PANTHER),<br>SSF81301 (SUPERFAMILY), SSF81631<br>(SUPERFAMILY) |
| Caenorhabditis elegans  | zinc cchc domain containing 6                         | 1 | F:GO:0005488                                                                     | -            |             | IPR002058; G3DSA:3.30.460.10<br>(GENE3D), PTHR12271 (PANTHER),<br>PTHR12271:SF15 (PANTHER),<br>SSF81301 (SUPERFAMILY), SSF81631<br>(SUPERFAMILY) |
| Caenorhabditis elegans  | zinc cchc domain containing 6                         | 1 | F:GO:0005488                                                                     | -            |             | IPR002058; G3DSA:3.30.460.10<br>(GENE3D), PTHR12271 (PANTHER),<br>PTHR12271:SF15 (PANTHER),<br>SSF81301 (SUPERFAMILY), SSF81631<br>(SUPERFAMILY) |
| Caenorhabditis elegans  | leucyl-tr- synthetase                                 | 5 | F:GO:0004823;<br>P:GO:0006429;<br>F:GO:0005515;<br>F:GO:0005524;<br>C:GO:0005829 | -            | EC:6.1.1.4  | IPR014729; PTHR11946 (PANTHER),<br>PTHR11946:SF6 (PANTHER), SSF52374<br>(SUPERFAMILY)                                                            |



|                             |                                                     |   |                                                                                                                                     |                                                |            |                                                                                                                           |
|-----------------------------|-----------------------------------------------------|---|-------------------------------------------------------------------------------------------------------------------------------------|------------------------------------------------|------------|---------------------------------------------------------------------------------------------------------------------------|
| Loa loa                     | gpi mannosyltransferase 2                           | 4 | P:GO:0040007;<br>P:GO:0040035;<br>P:GO:0002119;<br>P:GO:0009792                                                                     | -                                              |            | PF04188 (PFAM)                                                                                                            |
| Teladorsagia circumcincta   | protein disulfide isomerase                         | 4 | P:GO:0045454;<br>F:GO:0003756;<br>C:GO:0016020;<br>C:GO:0005783                                                                     | -                                              | EC:5.3.4.1 | -                                                                                                                         |
| -                           | -                                                   | 0 |                                                                                                                                     |                                                |            | PR01228 (PRINTS)                                                                                                          |
| -                           | -                                                   | 0 |                                                                                                                                     |                                                |            | -                                                                                                                         |
| -                           | -                                                   | 0 |                                                                                                                                     |                                                |            | PR01228 (PRINTS)                                                                                                          |
| -                           | -                                                   | 0 |                                                                                                                                     |                                                |            | PR01228 (PRINTS)                                                                                                          |
| -                           | -                                                   | 0 |                                                                                                                                     |                                                |            | PR01228 (PRINTS)                                                                                                          |
| -                           | -                                                   | 0 |                                                                                                                                     |                                                |            | PR01228 (PRINTS)                                                                                                          |
| -                           | -                                                   | 0 |                                                                                                                                     |                                                |            | -                                                                                                                         |
| Loa loa                     | selenocysteine lyase                                | 3 | P:GO:0009792;<br>P:GO:0006520;<br>F:GO:0003824                                                                                      | -                                              |            | IPR000192; IPR015421; IPR015422;<br>IPR015424; PTHR11601 (PANTHER)                                                        |
|                             |                                                     |   |                                                                                                                                     |                                                |            | IPR003598; IPR007110; IPR013098;<br>IPR013783; PTHR19897 (PANTHER),<br>SSF48726 (SUPERFAMILY)                             |
| Caenorhabditis elegans      | ophagy (yeast atg homolog) family member (atg-11)   | 0 |                                                                                                                                     |                                                |            | -                                                                                                                         |
| -                           | -                                                   | 0 |                                                                                                                                     |                                                |            | -                                                                                                                         |
| Caenorhabditis briggsae     | briggsae cbr-cdc- protein                           | 0 |                                                                                                                                     | F:GO:0005524;<br>F:GO:0000166;<br>F:GO:0017111 |            | -                                                                                                                         |
| Angiostrongylus cantonensis | elegans protein confirmed by transcript evidence    | 5 | F:GO:0003700;<br>F:GO:0043565;<br>F:GO:0046983;<br>C:GO:0005634;<br>P:GO:0006355                                                    | -                                              |            | IPR001630; G3DSA:1.20.5.170<br>(GENE3D), PTHR22952 (PANTHER),<br>PTHR22952:SF11 (PANTHER)                                 |
| Caenorhabditis briggsae     | elegans protein confirmed by transcript evidence    | 2 | F:GO:0042302;<br>C:GO:0016021                                                                                                       | -                                              |            | -                                                                                                                         |
| -                           | -                                                   | 0 |                                                                                                                                     |                                                |            | -                                                                                                                         |
| -                           | -                                                   | 0 |                                                                                                                                     |                                                |            | -                                                                                                                         |
| -                           | -                                                   | 0 |                                                                                                                                     |                                                |            | SignalP (SIGNALP)                                                                                                         |
| Caenorhabditis elegans      | programmed cell death 2                             | 7 | P:GO:0040035;<br>P:GO:0009792;<br>P:GO:0002119;<br>F:GO:0005488;<br>P:GO:0040010;<br>C:GO:0044464;<br>P:GO:0006898                  | -                                              |            | IPR002893; PTHR12298 (PANTHER),<br>PTHR12298:SF4 (PANTHER),<br>SSF144232 (SUPERFAMILY)                                    |
| Caenorhabditis elegans      | nuclear pore complex protein family member (npp-13) | 0 |                                                                                                                                     | C:GO:0005643;<br>P:GO:0006810                  |            | -                                                                                                                         |
| Caenorhabditis briggsae     | class type                                          | 8 | C:GO:0016021;<br>F:GO:0015662;<br>P:GO:0006754;<br>F:GO:0005524;<br>P:GO:0015914;<br>F:GO:0005515;<br>F:GO:0000287;<br>F:GO:0004012 | -                                              | EC:3.6.3.1 | IPR001757; G3DSA:3.40.50.1000<br>(GENE3D), PTHR11939:SF19<br>(PANTHER), SSF56784 (SUPERFAMILY),<br>SSF81665 (SUPERFAMILY) |

|                         |                                                            |   |                                                                                                   |                                                                                                                                                      |             |                                                                                                                                                        |
|-------------------------|------------------------------------------------------------|---|---------------------------------------------------------------------------------------------------|------------------------------------------------------------------------------------------------------------------------------------------------------|-------------|--------------------------------------------------------------------------------------------------------------------------------------------------------|
| Nematostella vectensis  | endonuclease-reverse transcriptase                         | 0 |                                                                                                   | F:GO:0003723;<br>F:GO:0004527;<br>P:GO:0006278;<br>F:GO:0004519;<br>F:GO:0003964                                                                     |             | -                                                                                                                                                      |
| -                       | -                                                          | 0 |                                                                                                   |                                                                                                                                                      |             | -                                                                                                                                                      |
| Loa loa                 | prefoldin subunit 6                                        | 2 | C:GO:0005737;<br>F:GO:0005515                                                                     | -                                                                                                                                                    |             | IPR002777; IPR009053;<br>G3DSA:1.10.287.370 (GENE3D),<br>PTHR21431 (PANTHER)                                                                           |
| Caenorhabditis elegans  | integrator complex subunit 4                               | 6 | P:GO:0009987;<br>P:GO:0007369;<br>P:GO:0050789;<br>P:GO:0040007;<br>P:GO:0000003;<br>P:GO:0010467 | -                                                                                                                                                    |             | IPR011989; IPR016024; PTHR20938<br>(PANTHER), SignalP (SIGNALP)                                                                                        |
| Ancylostoma caninum     | metalloprotease 1 precursor                                | 1 | F:GO:0008237                                                                                      | -                                                                                                                                                    |             | IPR001506; IPR006026;<br>G3DSA:3.40.390.10 (GENE3D),<br>PTHR10127 (PANTHER),<br>PTHR10127:SF65 (PANTHER), SignalP<br>(SIGNALP), SSF55486 (SUPERFAMILY) |
| Caenorhabditis elegans  | gex interacting protein family member (gei-16)             | 1 | F:GO:0005515                                                                                      | -                                                                                                                                                    |             | -                                                                                                                                                      |
| Loa loa                 | ankyrin repeat protein                                     | 0 |                                                                                                   | P:GO:0006915;<br>F:GO:0000166;<br>F:GO:0017111;<br>F:GO:0003674;<br>F:GO:0005524;<br>P:GO:0007165;<br>F:GO:0005515;<br>P:GO:0008150;<br>F:GO:0005488 |             | SignalP (SIGNALP)                                                                                                                                      |
| -                       | -                                                          | 0 |                                                                                                   |                                                                                                                                                      |             | -                                                                                                                                                      |
| Caenorhabditis elegans  | leucyl-tr- synthetase                                      | 4 | C:GO:0005737;<br>F:GO:0004823;<br>P:GO:0006429;<br>F:GO:0005524                                   | -                                                                                                                                                    | EC:6.1.1.4  | IPR002300; IPR009008;<br>G3DSA:3.90.740.10 (GENE3D)                                                                                                    |
| Caenorhabditis briggsae | general transcription factor 3c polypeptide 3              | 3 | F:GO:0005488;<br>P:GO:0040010;<br>P:GO:0006898                                                    | -                                                                                                                                                    |             | SignalP (SIGNALP)                                                                                                                                      |
| Caenorhabditis elegans  | briggsae cbr-mlt-7 protein                                 | 4 | F:GO:0020037;<br>P:GO:0055114;<br>F:GO:0004601;<br>P:GO:0006979                                   | -                                                                                                                                                    | EC:1.11.1.7 | IPR002007; IPR006032; IPR010255;<br>IPR019791; PTHR11475 (PANTHER),<br>PTHR11475:SF9 (PANTHER)                                                         |
| -                       | -                                                          | 0 |                                                                                                   |                                                                                                                                                      |             | -                                                                                                                                                      |
| -                       | -                                                          | 0 |                                                                                                   |                                                                                                                                                      |             | -                                                                                                                                                      |
| -                       | -                                                          | 0 |                                                                                                   |                                                                                                                                                      |             | -                                                                                                                                                      |
| Caenorhabditis briggsae | tbc (tre-2 bub2 cdc16) domain family member (tbc-16)       | 0 |                                                                                                   | P:GO:0032313;<br>C:GO:0005622;<br>F:GO:0005097                                                                                                       |             | -                                                                                                                                                      |
| -                       | -                                                          | 0 |                                                                                                   |                                                                                                                                                      |             | IPR001778                                                                                                                                              |
| Caenorhabditis elegans  | elegans protein partially confirmed by transcript evidence | 0 |                                                                                                   |                                                                                                                                                      |             | -                                                                                                                                                      |
| -                       | -                                                          | 0 |                                                                                                   |                                                                                                                                                      |             | -                                                                                                                                                      |
| -                       | -                                                          | 0 |                                                                                                   |                                                                                                                                                      |             | SignalP (SIGNALP)                                                                                                                                      |

|                         |                               |    |                                                                                                                                                                                                                                                                                                                                |   |             |                                                                                                                                                           |
|-------------------------|-------------------------------|----|--------------------------------------------------------------------------------------------------------------------------------------------------------------------------------------------------------------------------------------------------------------------------------------------------------------------------------|---|-------------|-----------------------------------------------------------------------------------------------------------------------------------------------------------|
| Caenorhabditis briggsae | patched family protein        | 10 | P:GO:0040025;<br>F:GO:0008158;<br>P:GO:0040018;<br>P:GO:0018996;<br>P:GO:0040002;<br>P:GO:0000003;<br>P:GO:0008340;<br>P:GO:0040011;<br>C:GO:0016021;<br>P:GO:0019915                                                                                                                                                          | - |             | IPR000731; IPR003392; PTHR10796 (PANTHER), PTHR10796:SF14 (PANTHER), SignalP (SIGNALP), SSF82866 (SUPERFAMILY)                                            |
| Ostertagia ostertagi    | scaffold attachment factor b  | 2  | F:GO:0003676;<br>F:GO:0000166                                                                                                                                                                                                                                                                                                  | - |             | -                                                                                                                                                         |
| Ostertagia ostertagi    | scaffold attachment factor b  | 1  | F:GO:0005488                                                                                                                                                                                                                                                                                                                   | - |             | IPR000504; IPR003034; IPR012677; G3DSA:1.10.720.30 (GENE3D), PTHR15683 (PANTHER), PTHR15683:SF2 (PANTHER), SSF54928 (SUPERFAMILY), SSF68906 (SUPERFAMILY) |
| Loa loa                 | fkbp-rapamycin associated     | 3  | F:GO:0016773;<br>F:GO:0016301;<br>F:GO:0000166                                                                                                                                                                                                                                                                                 | - | EC:2.7.1.0  | IPR000403; IPR011009; PTHR11139 (PANTHER), PTHR11139:SF9 (PANTHER)                                                                                        |
| Caenorhabditis briggsae | leishmanolysin-like peptidase | 19 | F:GO:0008270;<br>P:GO:0008354;<br>P:GO:0051225;<br>P:GO:0007420;<br>P:GO:0051298;<br>P:GO:0007076;<br>P:GO:0007052;<br>P:GO:0007100;<br>C:GO:0031252;<br>P:GO:0051301;<br>F:GO:0004222;<br>P:GO:0006508;<br>P:GO:0007155;<br>P:GO:0007444;<br>P:GO:0045842;<br>P:GO:0008406;<br>C:GO:0005737;<br>P:GO:0006338;<br>C:GO:0016020 | - | EC:3.4.24.0 | IPR001577; G3DSA:3.90.132.10 (GENE3D), SSF55486 (SUPERFAMILY)                                                                                             |
|                         | -                             | 0  |                                                                                                                                                                                                                                                                                                                                |   |             | -                                                                                                                                                         |

|                           |                                                  |    |                                                                                                                                                                                                                                                                                                                                                                                                    |   |             |                                                                                                             |
|---------------------------|--------------------------------------------------|----|----------------------------------------------------------------------------------------------------------------------------------------------------------------------------------------------------------------------------------------------------------------------------------------------------------------------------------------------------------------------------------------------------|---|-------------|-------------------------------------------------------------------------------------------------------------|
| Acyrtosiphon pisum        | isoform b                                        | 23 | P:GO:0007411;<br>P:GO:0031987;<br>P:GO:0001964;<br>P:GO:0007398;<br>P:GO:0016360;<br>P:GO:0007498;<br>P:GO:0045747;<br>P:GO:0042048;<br>P:GO:0008356;<br>P:GO:0045314;<br>F:GO:0004842;<br>P:GO:0030707;<br>C:GO:0044425;<br>P:GO:0007422;<br>P:GO:0008104;<br>P:GO:0007413;<br>P:GO:0002121;<br>P:GO:0030718;<br>C:GO:0048471;<br>C:GO:0005886;<br>F:GO:0005488;<br>P:GO:0007476;<br>P:GO:0048854 | - | EC:6.3.2.19 | IPR006573                                                                                                   |
|                           | -                                                | 0  |                                                                                                                                                                                                                                                                                                                                                                                                    |   |             | -                                                                                                           |
| Caenorhabditis briggsae   | elegans protein confirmed by transcript evidence | 0  |                                                                                                                                                                                                                                                                                                                                                                                                    |   |             | SignalP (SIGNALP)                                                                                           |
| Caenorhabditis sp. PS1010 | nicastrin                                        | 13 | P:GO:0040010;<br>P:GO:0018991;<br>P:GO:0044260;<br>P:GO:0048598;<br>P:GO:0060581;<br>F:GO:0016874;<br>P:GO:0007219;<br>P:GO:0019538;<br>P:GO:0010467;<br>P:GO:0009792;<br>C:GO:0005737;<br>P:GO:0060465;<br>C:GO:0005886                                                                                                                                                                           | - |             | -                                                                                                           |
| Caenorhabditis elegans    | coiled-coil domain-containing protein 85c-a      | 1  | F:GO:0005515                                                                                                                                                                                                                                                                                                                                                                                       | - |             | IPR019359; PTHR13546 (PANTHER), PTHR13546:SF1 (PANTHER), SignalP (SIGNALP)                                  |
|                           | -                                                | 0  |                                                                                                                                                                                                                                                                                                                                                                                                    |   |             | -                                                                                                           |
|                           | -                                                | 0  |                                                                                                                                                                                                                                                                                                                                                                                                    |   |             | SignalP (SIGNALP)                                                                                           |
|                           | -                                                | 0  |                                                                                                                                                                                                                                                                                                                                                                                                    |   |             | SignalP (SIGNALP)                                                                                           |
| Caenorhabditis elegans    | elegans protein confirmed by transcript evidence | 5  | P:GO:0002119;<br>P:GO:0018991;<br>P:GO:0040010;<br>P:GO:0006898;<br>P:GO:0008406                                                                                                                                                                                                                                                                                                                   | - |             | -                                                                                                           |
|                           | -                                                | 0  |                                                                                                                                                                                                                                                                                                                                                                                                    |   |             | IPR008162                                                                                                   |
| Loa loa                   | wdr9 form a                                      | 5  | F:GO:0030528;<br>P:GO:0006357;<br>F:GO:0016740;<br>F:GO:0005515;<br>C:GO:0005634                                                                                                                                                                                                                                                                                                                   | - |             | IPR001680; IPR008162; IPR011046; IPR015943; IPR017986; IPR019775; IPR019781; IPR019782; PTHR16266 (PANTHER) |

|                         |                                                            |    |                                                                                                                                                                                                                                           |                                                                                  |                                                                                                                      |
|-------------------------|------------------------------------------------------------|----|-------------------------------------------------------------------------------------------------------------------------------------------------------------------------------------------------------------------------------------------|----------------------------------------------------------------------------------|----------------------------------------------------------------------------------------------------------------------|
| Loa loa                 | wdr9 form a                                                | 5  | F:GO:0030528;<br>P:GO:0006357;<br>F:GO:0016740;<br>F:GO:0005515;<br>C:GO:0005634                                                                                                                                                          | -                                                                                | IPR001680; IPR008162; IPR011046;<br>IPR015943; IPR017986; IPR019775;<br>IPR019781; IPR019782; PTHR16266<br>(PANTHER) |
| Loa loa                 | wdr9 form a                                                | 5  | F:GO:0030528;<br>P:GO:0006357;<br>F:GO:0016740;<br>F:GO:0005515;<br>C:GO:0005634                                                                                                                                                          | -                                                                                | IPR001680; IPR008162; IPR011046;<br>IPR015943; IPR017986; IPR019775;<br>IPR019781; IPR019782; PTHR16266<br>(PANTHER) |
| Loa loa                 | wdr9 form a                                                | 5  | F:GO:0030528;<br>P:GO:0006357;<br>F:GO:0016740;<br>F:GO:0005515;<br>C:GO:0005634                                                                                                                                                          | -                                                                                | IPR001680; IPR008162; IPR011046;<br>IPR015943; IPR017986; IPR019775;<br>IPR019781; IPR019782; PTHR16266<br>(PANTHER) |
| Caenorhabditis briggsae | fungus metazoan origin like protein variant 2              | 2  | C:GO:0016020;<br>C:GO:0005739                                                                                                                                                                                                             | -                                                                                | -                                                                                                                    |
| Caenorhabditis elegans  | elegans protein partially confirmed by transcript evidence | 0  |                                                                                                                                                                                                                                           |                                                                                  | -                                                                                                                    |
|                         | -                                                          | 0  |                                                                                                                                                                                                                                           |                                                                                  | -                                                                                                                    |
|                         | -                                                          | 0  |                                                                                                                                                                                                                                           |                                                                                  | -                                                                                                                    |
| Caenorhabditis elegans  | s-adenosylmethionine mitochondrial carrier protein         | 3  | P:GO:0006810;<br>C:GO:0016020;<br>C:GO:0005739                                                                                                                                                                                            | -                                                                                | IPR001993; IPR018108;<br>G3DSA:1.50.40.10 (GENE3D),<br>PTHR11896:SF45 (PANTHER)                                      |
|                         | -                                                          | 0  |                                                                                                                                                                                                                                           |                                                                                  | IPR000990; SignalP (SIGNALP)                                                                                         |
| Caenorhabditis briggsae | briggsae cbr-inx- protein                                  | 6  | P:GO:0040035;<br>C:GO:0005921;<br>P:GO:0040010;<br>P:GO:0040011;<br>P:GO:0019915;<br>P:GO:0002009                                                                                                                                         | -                                                                                | IPR000990                                                                                                            |
| Caenorhabditis elegans  | i in family member (inx-17)                                | 2  | C:GO:0005921;<br>P:GO:0000003                                                                                                                                                                                                             | -                                                                                | IPR000990                                                                                                            |
| Brugia malayi           | c6orf174 protein                                           | 0  |                                                                                                                                                                                                                                           | F:GO:0003674;<br>C:GO:0016021;<br>C:GO:0016020;<br>P:GO:0008150;<br>C:GO:0005575 | -                                                                                                                    |
|                         | -                                                          | 0  |                                                                                                                                                                                                                                           |                                                                                  | -                                                                                                                    |
| Caenorhabditis elegans  | histone h2a                                                | 14 | P:GO:0006952;<br>P:GO:0040010;<br>C:GO:0000786;<br>P:GO:0006281;<br>P:GO:0018991;<br>P:GO:0045449;<br>P:GO:0040035;<br>F:GO:0043565;<br>P:GO:0002119;<br>P:GO:0040011;<br>P:GO:0006334;<br>P:GO:0006997;<br>P:GO:0009792;<br>C:GO:0005634 | -                                                                                | IPR002119; IPR007125; IPR009072                                                                                      |

|                            |                                      |    |                                                                                                                                                                                                                                           |   |             |                                                                            |
|----------------------------|--------------------------------------|----|-------------------------------------------------------------------------------------------------------------------------------------------------------------------------------------------------------------------------------------------|---|-------------|----------------------------------------------------------------------------|
| Caenorhabditis elegans     | histone h2a                          | 14 | P:GO:0006952;<br>P:GO:0040010;<br>C:GO:0000786;<br>P:GO:0006281;<br>P:GO:0018991;<br>P:GO:0045449;<br>P:GO:0040035;<br>F:GO:0043565;<br>P:GO:0002119;<br>P:GO:0040011;<br>P:GO:0006334;<br>P:GO:0006997;<br>P:GO:0009792;<br>C:GO:0005634 | - |             | IPR002119; IPR007125; IPR009072;<br>SignalP (SIGNALP)                      |
| Pediculus humanus corporis | sex-determining protein fem-1        | 1  | F:GO:0005515                                                                                                                                                                                                                              | - |             | IPR002110; IPR020683; PTHR18958<br>(PANTHER), PTHR18958:SF131<br>(PANTHER) |
| Caenorhabditis briggsae    | brca2 and cdkn1a interacting protein | 3  | P:GO:0007275;<br>P:GO:0000003;<br>P:GO:0009987                                                                                                                                                                                            | - |             | PTHR13261 (PANTHER)                                                        |
|                            |                                      | 0  |                                                                                                                                                                                                                                           |   |             | -                                                                          |
|                            |                                      | 0  |                                                                                                                                                                                                                                           |   |             | -                                                                          |
| Caenorhabditis elegans     | topoisomerase iii beta               | 4  | P:GO:0006268;<br>F:GO:0003917;<br>C:GO:0005694;<br>P:GO:0006265                                                                                                                                                                           | - | EC:5.99.1.2 | IPR000380; IPR006171;<br>G3DSA:3.40.50.140 (GENE3D)                        |
| Caenorhabditis elegans     | d- topoisomerase 3-beta-1            | 7  | P:GO:0006268;<br>F:GO:0003917;<br>F:GO:0005515;<br>C:GO:0005694;<br>P:GO:0006265;<br>C:GO:0005634;<br>F:GO:0000166                                                                                                                        | - | EC:5.99.1.2 | IPR000380; IPR006171;<br>G3DSA:3.40.50.140 (GENE3D)                        |
| Pediculus humanus corporis | wolf-hirschhorn syndrome candidate 1 | 4  | F:GO:0005488;<br>P:GO:0051789;<br>P:GO:0018023;<br>C:GO:0005634                                                                                                                                                                           | - |             | -                                                                          |

|                         |                                                         |    |                                                                                                                                                                                                                                                                                                                                                                                                                                      |                                                                 |             |                                                                                                              |
|-------------------------|---------------------------------------------------------|----|--------------------------------------------------------------------------------------------------------------------------------------------------------------------------------------------------------------------------------------------------------------------------------------------------------------------------------------------------------------------------------------------------------------------------------------|-----------------------------------------------------------------|-------------|--------------------------------------------------------------------------------------------------------------|
| Caenorhabditis elegans  | briggsae cbr-nmy-2 protein                              | 25 | P:GO:0046664;<br>F:GO:0017111;<br>P:GO:0045200;<br>P:GO:0035159;<br>P:GO:0031036;<br>C:GO:0016460;<br>P:GO:0007443;<br>P:GO:0007395;<br>P:GO:0045214;<br>P:GO:0035017;<br>P:GO:0006936;<br>P:GO:0007297;<br>P:GO:0046663;<br>F:GO:0032027;<br>P:GO:0008258;<br>P:GO:0051259;<br>P:GO:0016203;<br>C:GO:0032154;<br>C:GO:0045179;<br>P:GO:0045184;<br>P:GO:0035317;<br>C:GO:0030018;<br>C:GO:0005886;<br>P:GO:0007435;<br>P:GO:0000910 | -                                                               | EC:3.6.1.15 | IPR004009; PTHR13140 (PANTHER),<br>PTHR13140:SF23 (PANTHER),<br>SSF52540 (SUPERFAMILY)                       |
|                         | -                                                       | 0  |                                                                                                                                                                                                                                                                                                                                                                                                                                      |                                                                 |             | -                                                                                                            |
|                         | -                                                       | 0  |                                                                                                                                                                                                                                                                                                                                                                                                                                      |                                                                 |             | -                                                                                                            |
| Brugia malayi           | elegans protein confirmed by transcript evidence        | 0  |                                                                                                                                                                                                                                                                                                                                                                                                                                      | F:GO:0003674;<br>C:GO:0016021;<br>C:GO:0016020;<br>P:GO:0008150 |             | IPR006634; SignalP (SIGNALP)                                                                                 |
| Caenorhabditis briggsae | -dh-ubiquinone oxidoreductase fe-s protein 7            | 13 | F:GO:0048038;<br>P:GO:0006810;<br>P:GO:0022900;<br>F:GO:0008137;<br>C:GO:0005739;<br>F:GO:0046872;<br>P:GO:0040035;<br>F:GO:0051539;<br>P:GO:0010171;<br>P:GO:0002119;<br>C:GO:0070469;<br>P:GO:0009792;<br>P:GO:0040018                                                                                                                                                                                                             | -                                                               | EC:1.6.5.3  | IPR006137; IPR006138; IPR014406;<br>G3DSA:3.40.50.700 (GENE3D), SignalP<br>(SIGNALP), SSF56770 (SUPERFAMILY) |
| Caenorhabditis elegans  | malate l-lactate dehydroge-se family protein            | 2  | F:GO:0016491;<br>P:GO:0055114                                                                                                                                                                                                                                                                                                                                                                                                        | -                                                               |             | IPR003767; G3DSA:3.30.1370.60<br>(GENE3D)                                                                    |
| Caenorhabditis briggsae | Hypothetical protein CBG07069 [Caenorhabditis briggsae] | 0  |                                                                                                                                                                                                                                                                                                                                                                                                                                      |                                                                 |             | -                                                                                                            |
| Caenorhabditis briggsae | dy-ctin 5                                               | 2  | P:GO:0035046;<br>C:GO:0005869                                                                                                                                                                                                                                                                                                                                                                                                        | -                                                               |             | IPR011004; G3DSA:2.160.10.10<br>(GENE3D), PTHR13061 (PANTHER)                                                |

|                                      |                                                                 |   |                                                                 |                                                                                                                                                                                                                                                                                              |   |                                                                                               |
|--------------------------------------|-----------------------------------------------------------------|---|-----------------------------------------------------------------|----------------------------------------------------------------------------------------------------------------------------------------------------------------------------------------------------------------------------------------------------------------------------------------------|---|-----------------------------------------------------------------------------------------------|
| Pseudonaja textilis                  | tissue factor pathway inhibitor 2-like                          | 0 |                                                                 | F:GO:0004222;<br>P:GO:0018298;<br>P:GO:0006810;<br>F:GO:0008270;<br>C:GO:0005792;<br>C:GO:0005578;<br>F:GO:0008237;<br>C:GO:0031012;<br>P:GO:0010951;<br>C:GO:0005576;<br>F:GO:0030414;<br>F:GO:0008233;<br>P:GO:0009405;<br>F:GO:0004867;<br>P:GO:0051604;<br>F:GO:0005488;<br>P:GO:0010466 | - |                                                                                               |
| Caenorhabditis elegans               | family with sequence similarity member isoform cra_a            | 0 |                                                                 | P:GO:0008150;<br>F:GO:0005515;<br>C:GO:0005575                                                                                                                                                                                                                                               |   | IPR007518                                                                                     |
| Caenorhabditis elegans               | calcium-activated potassium channel                             | 4 | F:GO:0015269;<br>P:GO:0006813;<br>C:GO:0016021;<br>F:GO:0005516 | -                                                                                                                                                                                                                                                                                            |   | IPR004178; IPR015449;<br>G3DSA:1.10.287.70 (GENE3D),<br>PTHR10153:SF6 (PANTHER)               |
| Nasonia vitripennis                  | acyl-coa-binding protein acbp                                   | 1 | F:GO:0005488                                                    | -                                                                                                                                                                                                                                                                                            |   | IPR000582; IPR014352                                                                          |
| Caenorhabditis elegans               | elegans protein confirmed by transcript evidence                | 0 |                                                                 |                                                                                                                                                                                                                                                                                              |   | -                                                                                             |
| Caenorhabditis elegans               | U12964_12Hypothetical protein F26F4.9a [Caenorhabditis elegans] | 0 |                                                                 |                                                                                                                                                                                                                                                                                              |   | IPR009703                                                                                     |
| Brugia malayi                        | cpsf a subunit region family protein                            | 1 | F:GO:0005515                                                    | -                                                                                                                                                                                                                                                                                            |   | IPR004871; PTHR10644 (PANTHER),<br>PTHR10644:SF3 (PANTHER)                                    |
| Caenorhabditis elegans               | tetratricopeptide repeat domain 36                              | 0 |                                                                 | F:GO:0005488                                                                                                                                                                                                                                                                                 |   | IPR001440; IPR011990; IPR013026;<br>IPR019734; PTHR21405 (PANTHER),<br>SSF48452 (SUPERFAMILY) |
| Streptomyces flavogriseus ATCC 33331 | glycosyl transferase family 51                                  | 0 |                                                                 | C:GO:0009274;<br>P:GO:0008360;<br>F:GO:0008658;<br>P:GO:0009273;<br>F:GO:0016740;<br>P:GO:0007047;<br>F:GO:0003824;<br>P:GO:0009252                                                                                                                                                          | - |                                                                                               |
| -                                    | -                                                               | 0 |                                                                 |                                                                                                                                                                                                                                                                                              |   | -                                                                                             |
| -                                    | -                                                               | 0 |                                                                 |                                                                                                                                                                                                                                                                                              |   | -                                                                                             |
| -                                    | -                                                               | 0 |                                                                 |                                                                                                                                                                                                                                                                                              |   | -                                                                                             |
| Frog virus 3                         | hypothetical protein FV3gorf43R [Frog virus 3]                  | 0 |                                                                 |                                                                                                                                                                                                                                                                                              |   | -                                                                                             |
| -                                    | -                                                               | 0 |                                                                 |                                                                                                                                                                                                                                                                                              |   | -                                                                                             |
| Caenorhabditis elegans               | elegans protein confirmed by transcript evidence                | 0 |                                                                 |                                                                                                                                                                                                                                                                                              |   | -                                                                                             |
| Teladorsagia circumcincta            | galectin                                                        | 3 | F:GO:0005515;<br>F:GO:0005529;<br>P:GO:0000003                  | -                                                                                                                                                                                                                                                                                            |   | IPR001079; IPR008985; IPR013320;<br>PTHR11346:SF29 (PANTHER)                                  |
| -                                    | -                                                               | 0 |                                                                 |                                                                                                                                                                                                                                                                                              |   | -                                                                                             |
| -                                    | -                                                               | 0 |                                                                 |                                                                                                                                                                                                                                                                                              |   | -                                                                                             |



|                         |                                                     |    |                                                                                                                                                                                                                                                                                                                                |                                                                                                                                                      |                             |                                                                            |
|-------------------------|-----------------------------------------------------|----|--------------------------------------------------------------------------------------------------------------------------------------------------------------------------------------------------------------------------------------------------------------------------------------------------------------------------------|------------------------------------------------------------------------------------------------------------------------------------------------------|-----------------------------|----------------------------------------------------------------------------|
| Caenorhabditis elegans  | xanthine dehydroge-se                               | 19 | C:GO:0005829;<br>P:GO:0008340;<br>P:GO:0007595;<br>F:GO:0051537;<br>C:GO:0005777;<br>P:GO:0055114;<br>F:GO:0009055;<br>P:GO:0010044;<br>F:GO:0004855;<br>F:GO:0004854;<br>F:GO:0043546;<br>P:GO:0030856;<br>F:GO:0042803;<br>C:GO:0005576;<br>F:GO:0050660;<br>P:GO:0009115;<br>F:GO:0005506;<br>P:GO:0045453;<br>F:GO:0030151 | -                                                                                                                                                    | EC:1.17.3.2;<br>EC:1.17.1.4 | -                                                                          |
| Caenorhabditis elegans  | inositol polyphosphate ki-se family protein         | 0  |                                                                                                                                                                                                                                                                                                                                | F:GO:0016301;<br>F:GO:0008440                                                                                                                        |                             | IPR005522; PTHR12400:SF21 (PANTHER), SSF56104 (SUPERFAMILY)                |
| Caenorhabditis briggsae | exosome component 10                                | 2  | P:GO:0044237;<br>F:GO:0003824                                                                                                                                                                                                                                                                                                  | -                                                                                                                                                    |                             | IPR002562; IPR012337; PTHR12124 (PANTHER), PTHR12124:SF2 (PANTHER)         |
| -                       | -                                                   | 0  |                                                                                                                                                                                                                                                                                                                                |                                                                                                                                                      |                             | -                                                                          |
| Caenorhabditis elegans  | briggsae cbr-npp-14 protein                         | 0  |                                                                                                                                                                                                                                                                                                                                |                                                                                                                                                      |                             | IPR015943; PTHR23193 (PANTHER), PTHR23193:SF1 (PANTHER), SignalP (SIGNALP) |
| -                       | -                                                   | 0  |                                                                                                                                                                                                                                                                                                                                |                                                                                                                                                      |                             | -                                                                          |
| Caenorhabditis elegans  | nuclear pore complex protein family member (npp-16) | 1  | P:GO:0000003                                                                                                                                                                                                                                                                                                                   | -                                                                                                                                                    |                             | -                                                                          |
| -                       | -                                                   | 0  |                                                                                                                                                                                                                                                                                                                                |                                                                                                                                                      |                             | SignalP (SIGNALP)                                                          |
| Caenorhabditis elegans  | coiled-coil and c2 domain containing 1a             | 1  | F:GO:0005515                                                                                                                                                                                                                                                                                                                   | -                                                                                                                                                    |                             | -                                                                          |
| Brugia malayi           | leucyl tr- synthetase family member (lrs-2)         | 0  |                                                                                                                                                                                                                                                                                                                                | F:GO:0016874;<br>P:GO:0006418;<br>F:GO:0000166;<br>F:GO:0004823;<br>C:GO:0005737;<br>P:GO:0006412;<br>F:GO:0005524;<br>P:GO:0006429;<br>F:GO:0004812 |                             | SignalP (SIGNALP)                                                          |
| -                       | -                                                   | 0  |                                                                                                                                                                                                                                                                                                                                |                                                                                                                                                      |                             | -                                                                          |
| Caenorhabditis briggsae | briggsae cbr-dys-1 protein                          | 7  | P:GO:0007271;<br>F:GO:0005515;<br>P:GO:0040017;<br>C:GO:0016010;<br>F:GO:0005277;<br>P:GO:0015870;<br>P:GO:0046716                                                                                                                                                                                                             | -                                                                                                                                                    |                             | -                                                                          |

|                         |                                                                       |    |                                                                                                                                                                                                                                                                             |   |             |                                                                                                 |
|-------------------------|-----------------------------------------------------------------------|----|-----------------------------------------------------------------------------------------------------------------------------------------------------------------------------------------------------------------------------------------------------------------------------|---|-------------|-------------------------------------------------------------------------------------------------|
| Caenorhabditis briggsae | udp-glucose dehydroge-se                                              | 16 | P:GO:0007427;<br>F:GO:0003979;<br>P:GO:0007224;<br>P:GO:0016055;<br>P:GO:0016319;<br>P:GO:0055114;<br>P:GO:0007507;<br>F:GO:0042802;<br>P:GO:0042048;<br>P:GO:0015014;<br>P:GO:0008543;<br>F:GO:0051287;<br>P:GO:0002121;<br>P:GO:0007509;<br>P:GO:0007428;<br>P:GO:0030206 | - | EC:1.1.1.22 | IPR008927; IPR014026; IPR014027;<br>IPR014028; IPR016040; IPR021157;<br>PTHR11374:SF3 (PANTHER) |
| Caenorhabditis elegans  | cytochrome p450                                                       | 8  | P:GO:0040018;<br>F:GO:0004497;<br>F:GO:0005506;<br>P:GO:0040010;<br>P:GO:0000003;<br>P:GO:0008340;<br>F:GO:0016705;<br>P:GO:0040011                                                                                                                                         | - |             | IPR001128; IPR002401; IPR017972;<br>PTHR19383:SF176 (PANTHER)                                   |
| Caenorhabditis elegans  | inositol monophosphatase domain containing 1                          | 9  | C:GO:0016021;<br>P:GO:0009791;<br>P:GO:0030204;<br>P:GO:0002063;<br>P:GO:0001958;<br>P:GO:0042733;<br>F:GO:0004437;<br>P:GO:0008299;<br>F:GO:0008254                                                                                                                        | - | EC:3.1.3.6  | IPR000760; G3DSA:3.30.540.10<br>(GENE3D), PTHR20854:SF8<br>(PANTHER), SSF56655 (SUPERFAMILY)    |
| Homo sapiens            | -dh dehydroge-se subunit 3                                            | 8  | P:GO:0009642;<br>P:GO:0006979;<br>P:GO:0006810;<br>P:GO:0009725;<br>F:GO:0008137;<br>C:GO:0005747;<br>C:GO:0016021;<br>P:GO:0006120                                                                                                                                         | - | EC:1.6.5.3  | -                                                                                               |
| Caenorhabditis elegans  | alpha- -mannosylglycoprotein 6-beta-n-acetylglucosaminyltransferase a | 3  | P:GO:0006487;<br>C:GO:0044464;<br>F:GO:0008375                                                                                                                                                                                                                              | - |             | PTHR15075 (PANTHER)                                                                             |
| Caenorhabditis elegans  | alpha- -mannosylglycoprotein 6-beta-n-acetylglucosaminyltransferase a | 3  | P:GO:0006487;<br>C:GO:0044464;<br>F:GO:0008375                                                                                                                                                                                                                              | - |             | PTHR15075 (PANTHER)                                                                             |
| -                       | -                                                                     | 0  |                                                                                                                                                                                                                                                                             |   |             | -                                                                                               |
| Caenorhabditis briggsae | temporarily assigned gene -me family member (tag-308)                 | 0  |                                                                                                                                                                                                                                                                             |   |             | -                                                                                               |

|                         |                                                    |    |                                                                                                                                                                                                                                                                                                               |   |             |                                                                                                                                                                             |
|-------------------------|----------------------------------------------------|----|---------------------------------------------------------------------------------------------------------------------------------------------------------------------------------------------------------------------------------------------------------------------------------------------------------------|---|-------------|-----------------------------------------------------------------------------------------------------------------------------------------------------------------------------|
| Caenorhabditis elegans  | vacuolar atp synthase subunit h                    | 17 | F:GO:0046961;<br>F:GO:0005515;<br>P:GO:0040007;<br>P:GO:0015991;<br>P:GO:0040011;<br>P:GO:0040002;<br>P:GO:0007035;<br>P:GO:0018996;<br>C:GO:0005829;<br>P:GO:0050690;<br>P:GO:0009792;<br>P:GO:0015986;<br>P:GO:0006897;<br>P:GO:0002119;<br>C:GO:0000221;<br>C:GO:0005886;<br>F:GO:0030234                  | - | EC:3.6.3.14 | IPR004908; IPR011987; IPR016024                                                                                                                                             |
| Caenorhabditis elegans  | vacuolar atp synthase subunit h                    | 18 | F:GO:0046961;<br>F:GO:0005515;<br>P:GO:0040007;<br>P:GO:0015991;<br>P:GO:0040011;<br>P:GO:0040002;<br>P:GO:0007035;<br>P:GO:0018996;<br>C:GO:0005829;<br>P:GO:0050690;<br>P:GO:0009792;<br>P:GO:0015986;<br>P:GO:0006897;<br>P:GO:0002119;<br>C:GO:0000221;<br>C:GO:0005886;<br>P:GO:0044419;<br>F:GO:0030234 | - | EC:3.6.3.14 | IPR004908; IPR011987; IPR016024                                                                                                                                             |
| Caenorhabditis elegans  | p-type had subfamily ic                            | 5  | P:GO:0006811;<br>F:GO:0016820;<br>F:GO:0000166;<br>P:GO:0008152;<br>C:GO:0016020                                                                                                                                                                                                                              | - | EC:3.6.3.0  | IPR001757; G3DSA:3.40.1110.10 (GENE3D), PTHR11939:SF63 (PANTHER), SSF81660 (SUPERFAMILY)                                                                                    |
| -                       | -                                                  | 0  |                                                                                                                                                                                                                                                                                                               |   |             | -                                                                                                                                                                           |
| Haemonchus contortus    | hc38                                               | 0  |                                                                                                                                                                                                                                                                                                               |   |             | -                                                                                                                                                                           |
| Caenorhabditis briggsae | protein tyrosine phosphatase family member (ptp-3) | 8  | P:GO:0007391;<br>C:GO:0005912;<br>C:GO:0005887;<br>F:GO:0005001;<br>F:GO:0005515;<br>P:GO:0007399;<br>P:GO:0006470;<br>P:GO:0007185                                                                                                                                                                           | - |             | IPR000242; IPR000387; IPR003961; IPR008957; IPR013783; G3DSA:3.90.190.10 (GENE3D), PTHR19134 (PANTHER), PTHR19134:SF48 (PANTHER), SignalP (SIGNALP), SSF52799 (SUPERFAMILY) |
| Caenorhabditis briggsae | protein tyrosine phosphatase family member (ptp-3) | 5  | F:GO:0004725;<br>P:GO:0007391;<br>C:GO:0005912;<br>P:GO:0007399;<br>P:GO:0006470                                                                                                                                                                                                                              | - | EC:3.1.3.48 | IPR003961; IPR008957; IPR013783; PTHR10489 (PANTHER), SignalP (SIGNALP)                                                                                                     |
| -                       | -                                                  | 0  |                                                                                                                                                                                                                                                                                                               |   |             | -                                                                                                                                                                           |

|                         |                                                            |    |                                                                                                                                                                                                                                                                                                               |                                                                 |            |                                                                      |
|-------------------------|------------------------------------------------------------|----|---------------------------------------------------------------------------------------------------------------------------------------------------------------------------------------------------------------------------------------------------------------------------------------------------------------|-----------------------------------------------------------------|------------|----------------------------------------------------------------------|
| Macaca mulatta          | profilin 1                                                 | 18 | P:GO:0071363;<br>F:GO:0005546;<br>F:GO:0005102;<br>C:GO:0015629;<br>C:GO:0019717;<br>C:GO:0005576;<br>P:GO:0008064;<br>C:GO:0005829;<br>F:GO:0003779;<br>F:GO:0070064;<br>P:GO:0051054;<br>P:GO:0001843;<br>F:GO:0017048;<br>P:GO:0050434;<br>P:GO:0045944;<br>P:GO:0051496;<br>C:GO:0005634;<br>C:GO:0045202 | -                                                               |            | SignalP (SIGNALP)                                                    |
|                         |                                                            | 0  |                                                                                                                                                                                                                                                                                                               |                                                                 |            |                                                                      |
| Caenorhabditis elegans  | elegans protein partially confirmed by transcript evidence | 4  | C:GO:0016021;<br>C:GO:0009986;<br>F:GO:0015171;<br>P:GO:0055085                                                                                                                                                                                                                                               | -                                                               |            | IPR002293; IPR004841;<br>PTHR11785:SF76 (PANTHER), SignalP (SIGNALP) |
| Caenorhabditis elegans  | riken cd- 2010309e21 gene                                  | 0  |                                                                                                                                                                                                                                                                                                               | C:GO:0005739;<br>F:GO:0003674;<br>C:GO:0005737;<br>P:GO:0008150 |            | IPR008560                                                            |
| Caenorhabditis elegans  | mitochondrial ribosomal protein s7                         | 5  | F:GO:0003735;<br>F:GO:0003723;<br>C:GO:0022627;<br>P:GO:0006412;<br>C:GO:0005739                                                                                                                                                                                                                              | -                                                               | EC:3.6.5.3 | IPR000235; PTHR11205:SF12 (PANTHER), SignalP (SIGNALP)               |
| Caenorhabditis elegans  | mitochondrial ribosomal protein s7                         | 5  | F:GO:0003735;<br>F:GO:0003723;<br>C:GO:0022627;<br>P:GO:0006412;<br>C:GO:0005739                                                                                                                                                                                                                              | -                                                               | EC:3.6.5.3 | IPR000235; PTHR11205:SF12 (PANTHER), SignalP (SIGNALP)               |
|                         |                                                            | 0  |                                                                                                                                                                                                                                                                                                               |                                                                 |            |                                                                      |
| Caenorhabditis briggsae | methyltransferase-like protein 4                           | 0  |                                                                                                                                                                                                                                                                                                               | F:GO:0003676;<br>P:GO:0006139;<br>F:GO:0008168;<br>P:GO:0032259 |            | IPR002052; IPR007757; PTHR14475 (PANTHER)                            |
|                         |                                                            | 0  |                                                                                                                                                                                                                                                                                                               |                                                                 |            |                                                                      |
| Caenorhabditis briggsae | abc1 family protein                                        | 0  |                                                                                                                                                                                                                                                                                                               | F:GO:0004672;<br>F:GO:0005524;<br>P:GO:0006468                  |            | IPR004147; IPR011009; PTHR10566 (PANTHER), PTHR10566:SF7 (PANTHER)   |
| Caenorhabditis briggsae | abc1 family protein                                        | 0  |                                                                                                                                                                                                                                                                                                               | F:GO:0004672;<br>F:GO:0005524;<br>P:GO:0006468                  |            | IPR004147; IPR011009; PTHR10566 (PANTHER), PTHR10566:SF7 (PANTHER)   |
| Caenorhabditis briggsae | abc1 family protein                                        | 0  |                                                                                                                                                                                                                                                                                                               | F:GO:0004672;<br>F:GO:0005524;<br>P:GO:0006468                  |            | IPR004147; IPR011009; PTHR10566 (PANTHER), PTHR10566:SF7 (PANTHER)   |

|                             |                                                            |    |                                                                                                                                                                                                                                                                                              |                                                                                  |             |                                                                                                                                                       |
|-----------------------------|------------------------------------------------------------|----|----------------------------------------------------------------------------------------------------------------------------------------------------------------------------------------------------------------------------------------------------------------------------------------------|----------------------------------------------------------------------------------|-------------|-------------------------------------------------------------------------------------------------------------------------------------------------------|
| Pongo abelii                | zyxin                                                      | 13 | F:GO:0008270;<br>P:GO:0007267;<br>C:GO:0005913;<br>C:GO:0001725;<br>P:GO:0007155;<br>C:GO:0005925;<br>F:GO:0005515;<br>P:GO:0007165;<br>P:GO:0044419;<br>C:GO:0005737;<br>P:GO:0050727;<br>C:GO:0005634;<br>C:GO:0005887                                                                     | -                                                                                | -           |                                                                                                                                                       |
| Caenorhabditis briggsae     | briggsae cbr-asp-2 protein                                 | 4  | P:GO:0008219;<br>F:GO:0016787;<br>F:GO:0005515;<br>P:GO:0040011                                                                                                                                                                                                                              | -                                                                                |             | IPR001461; IPR001969; IPR009007;<br>IPR021109; PTHR13683:SF53<br>(PANTHER)                                                                            |
| Caenorhabditis briggsae     | proteasome subunit alpha type-1                            | 17 | P:GO:0008340;<br>P:GO:0000003;<br>F:GO:0005515;<br>P:GO:0051437;<br>P:GO:0040007;<br>P:GO:0040011;<br>P:GO:0051436;<br>F:GO:0004298;<br>P:GO:0002862;<br>C:GO:0005737;<br>P:GO:0018996;<br>C:GO:0019773;<br>F:GO:0001530;<br>P:GO:0009792;<br>P:GO:0002119;<br>P:GO:0031145;<br>C:GO:0005634 | -                                                                                | EC:3.4.25.0 | IPR000426; IPR001353;<br>G3DSA:3.60.20.10 (GENE3D),<br>PTHR11599 (PANTHER),<br>PTHR11599:SF12 (PANTHER), PS51475<br>(PROFILE), SSF56235 (SUPERFAMILY) |
| Angiostrongylus cantonensis | elegans protein confirmed by transcript evidence           | 3  | F:GO:0005515;<br>F:GO:0042302;<br>C:GO:0016021                                                                                                                                                                                                                                               | -                                                                                |             | -                                                                                                                                                     |
| Caenorhabditis elegans      | elegans protein confirmed by transcript evidence           | 1  | C:GO:0016021                                                                                                                                                                                                                                                                                 | -                                                                                |             | -                                                                                                                                                     |
| -                           | -                                                          | 0  |                                                                                                                                                                                                                                                                                              |                                                                                  |             | -                                                                                                                                                     |
| Caenorhabditis briggsae     | elegans protein confirmed by transcript evidence           | 0  |                                                                                                                                                                                                                                                                                              |                                                                                  |             | -                                                                                                                                                     |
| -                           | -                                                          | 0  |                                                                                                                                                                                                                                                                                              |                                                                                  |             | -                                                                                                                                                     |
| Caenorhabditis elegans      | hypothetical protein F59G1.4 [Caenorhabditis elegans]      | 1  | F:GO:0005488                                                                                                                                                                                                                                                                                 | -                                                                                |             | -                                                                                                                                                     |
| Caenorhabditis elegans      | hypothetical protein F59G1.4 [Caenorhabditis elegans]      | 1  | F:GO:0005488                                                                                                                                                                                                                                                                                 | -                                                                                |             | -                                                                                                                                                     |
| -                           | -                                                          | 0  |                                                                                                                                                                                                                                                                                              |                                                                                  |             | SignalP (SIGNALP)                                                                                                                                     |
| -                           | -                                                          | 0  |                                                                                                                                                                                                                                                                                              |                                                                                  |             | -                                                                                                                                                     |
| Caenorhabditis elegans      | fan1_caeel ame: full=fanconi-associated nuclease 1 homolog | 2  | F:GO:0005515;<br>P:GO:0006281                                                                                                                                                                                                                                                                | -                                                                                |             | -                                                                                                                                                     |
| Caenorhabditis briggsae     | nuclear transport factor 2 (ntf-2)                         | 0  |                                                                                                                                                                                                                                                                                              | C:GO:0005622;<br>P:GO:0006810                                                    |             | -                                                                                                                                                     |
| Caenorhabditis elegans      | briggsae cbr-lin-13 protein                                | 0  |                                                                                                                                                                                                                                                                                              | F:GO:0003674;<br>P:GO:0040027;<br>F:GO:0008270;<br>C:GO:0005622;<br>C:GO:0005634 |             | IPR015880; IPR017956                                                                                                                                  |

|                         |                                                                      |    |                                                                                                                                                                                                                                                                                              |                                                |             |                                                                                                                                    |
|-------------------------|----------------------------------------------------------------------|----|----------------------------------------------------------------------------------------------------------------------------------------------------------------------------------------------------------------------------------------------------------------------------------------------|------------------------------------------------|-------------|------------------------------------------------------------------------------------------------------------------------------------|
| Caenorhabditis briggsae | cellular senescence inhibited gene protein                           | 10 | P:GO:0040035;<br>P:GO:0009792;<br>P:GO:0002119;<br>P:GO:0044260;<br>F:GO:0005488;<br>C:GO:0005622;<br>P:GO:0040010;<br>P:GO:0010467;<br>P:GO:0008340;<br>P:GO:0044238                                                                                                                        | -                                              |             | IPR002143; PTHR23105 (PANTHER),<br>PTHR23105:SF3 (PANTHER)                                                                         |
| Caenorhabditis briggsae | briggsae cbr-prp-4 protein                                           | 0  |                                                                                                                                                                                                                                                                                              | P:GO:0008380                                   |             | -                                                                                                                                  |
| Haemonchus contortus    | cysteine protei-se                                                   | 7  | P:GO:0009792;<br>P:GO:0002119;<br>F:GO:0008233;<br>F:GO:0005515;<br>P:GO:0040011;<br>P:GO:0040007;<br>P:GO:0006898                                                                                                                                                                           | -                                              |             | IPR000169; IPR000668; IPR013128;<br>IPR015643; G3DSA:3.90.70.10<br>(GENE3D), SignalP (SIGNALP),<br>SSF54001 (SUPERFAMILY)          |
| Caenorhabditis elegans  | ccch-type zinc finger transcription factor family member<br>(ccch-3) | 0  |                                                                                                                                                                                                                                                                                              | F:GO:0003676;<br>F:GO:0046872;<br>F:GO:0008270 |             | IPR000571; G3DSA:4.10.1000.10<br>(GENE3D), SSF90229 (SUPERFAMILY)                                                                  |
| Harpegnathos saltator   | histone -like                                                        | 5  | C:GO:0000786;<br>F:GO:0003677;<br>P:GO:0006334;<br>F:GO:0005515;<br>C:GO:0005634                                                                                                                                                                                                             | -                                              |             | IPR000164; IPR007125; IPR009072                                                                                                    |
| Loa loa                 | protein argo-ute-2                                                   | 1  | F:GO:0003676                                                                                                                                                                                                                                                                                 | -                                              |             | PTHR22891 (PANTHER)                                                                                                                |
|                         | -                                                                    | 0  |                                                                                                                                                                                                                                                                                              |                                                |             | IPR018378                                                                                                                          |
| Pongo abelii            | ribosomal protein l6                                                 | 6  | F:GO:0003677;<br>F:GO:0003735;<br>F:GO:0003723;<br>C:GO:0022625;<br>P:GO:0006355;<br>P:GO:0006414                                                                                                                                                                                            | -                                              |             | IPR000915; IPR014722                                                                                                               |
| Caenorhabditis elegans  | zinc zz type family protein                                          | 17 | C:GO:0030054;<br>F:GO:0005277;<br>P:GO:0015870;<br>P:GO:0007528;<br>P:GO:0007527;<br>P:GO:0001954;<br>F:GO:0046872;<br>C:GO:0030864;<br>F:GO:0051015;<br>P:GO:0007271;<br>C:GO:0005624;<br>C:GO:0031594;<br>P:GO:0046716;<br>P:GO:0040017;<br>C:GO:0030426;<br>C:GO:0016010;<br>P:GO:0006936 | -                                              |             | IPR001202; IPR015153;<br>G3DSA:2.20.70.10 (GENE3D),<br>PTHR11915 (PANTHER),<br>PTHR11915:SF57 (PANTHER),<br>SSF47473 (SUPERFAMILY) |
|                         | -                                                                    | 0  |                                                                                                                                                                                                                                                                                              |                                                |             | -                                                                                                                                  |
| Camponotus floridanus   | d- methyltransferase                                                 | 5  | F:GO:0003886;<br>P:GO:0044260;<br>F:GO:0003676;<br>P:GO:0010467;<br>P:GO:0090304                                                                                                                                                                                                             | -                                              | EC:2.1.1.37 | -                                                                                                                                  |

|                         |                                                         |    |                                                                                                                                                                       |   |            |                                                                                                                                  |
|-------------------------|---------------------------------------------------------|----|-----------------------------------------------------------------------------------------------------------------------------------------------------------------------|---|------------|----------------------------------------------------------------------------------------------------------------------------------|
| Caenorhabditis briggsae | briggsae cbr-cej-1 protein                              | 3  | P:GO:0009792;<br>P:GO:0000281;<br>F:GO:0008061                                                                                                                        | - |            | IPR002557; G3DSA:2.170.140.10 (GENE3D), PTHR23301 (PANTHER)                                                                      |
| Caenorhabditis briggsae | briggsae cbr-cej-1 protein                              | 3  | P:GO:0009792;<br>P:GO:0000281;<br>F:GO:0008061                                                                                                                        | - |            | IPR002557; G3DSA:2.170.140.10 (GENE3D), PTHR23301 (PANTHER)                                                                      |
| Caenorhabditis briggsae | briggsae cbr-cej-1 protein                              | 3  | P:GO:0009792;<br>P:GO:0000281;<br>F:GO:0008061                                                                                                                        | - |            | IPR002557; G3DSA:2.170.140.10 (GENE3D), PTHR23301 (PANTHER)                                                                      |
| Caenorhabditis briggsae | Hypothetical protein CBG11055 [Caenorhabditis briggsae] | 0  |                                                                                                                                                                       |   |            | -                                                                                                                                |
|                         | -                                                       | 0  |                                                                                                                                                                       |   |            | -                                                                                                                                |
|                         |                                                         |    |                                                                                                                                                                       |   |            | IPR003599; IPR007110; IPR010939; IPR013098; IPR013783; PTHR19897 (PANTHER), PTHR19897:SF9 (PANTHER), SSF48726 (SUPERFAMILY)      |
| Caenorhabditis briggsae | glycine dehydroge-se                                    | 10 | F:GO:0004375;<br>F:GO:0030170;<br>F:GO:0016594;<br>F:GO:0009055;<br>P:GO:0055114;<br>F:GO:0016829;<br>C:GO:0005960;<br>C:GO:0005739;<br>F:GO:0042803;<br>P:GO:0019464 | - | EC:1.4.4.2 | IPR015421; IPR015424; IPR020581                                                                                                  |
| Caenorhabditis briggsae | glycine dehydroge-se                                    | 10 | F:GO:0004375;<br>F:GO:0030170;<br>F:GO:0016594;<br>F:GO:0009055;<br>P:GO:0055114;<br>F:GO:0016829;<br>C:GO:0005960;<br>C:GO:0005739;<br>F:GO:0042803;<br>P:GO:0019464 | - | EC:1.4.4.2 | IPR015421; IPR015424; IPR020581                                                                                                  |
|                         | -                                                       | 0  |                                                                                                                                                                       |   |            | -                                                                                                                                |
| Caenorhabditis elegans  | probable e3 ubiquitin-protein ligase mycbp2             | 4  | F:GO:0008270;<br>F:GO:0005515;<br>P:GO:0030071;<br>C:GO:0005680                                                                                                       | - |            | PTHR12846 (PANTHER), PTHR12846:SF2 (PANTHER)                                                                                     |
| Caenorhabditis elegans  | mgc89486 protein                                        | 7  | P:GO:0040010;<br>P:GO:0040035;<br>P:GO:0010171;<br>P:GO:0002119;<br>P:GO:0040011;<br>P:GO:0006898;<br>P:GO:0009792                                                    | - |            | -                                                                                                                                |
| Loa loa                 | patatin-like phospholipase domain containing 4          | 1  | P:GO:0008152                                                                                                                                                          | - |            | IPR002641; IPR016035; PTHR12406 (PANTHER)                                                                                        |
|                         | -                                                       | 0  |                                                                                                                                                                       |   |            | -                                                                                                                                |
| Caenorhabditis elegans  | t family of potassium channels family member (twk-39)   | 0  |                                                                                                                                                                       |   |            | -                                                                                                                                |
| Loa loa                 | f-box only protein 11                                   | 6  | C:GO:0005737;<br>P:GO:0007605;<br>P:GO:0006464;<br>F:GO:0005515;<br>F:GO:0016274;<br>C:GO:0005634                                                                     | - |            | IPR001810; IPR006626; IPR011050; IPR012334; IPR022364; G3DSA:1.20.1280.50 (GENE3D), PTHR22990 (PANTHER), PTHR22990:SF6 (PANTHER) |

|                           |                                                  |   |                                                                                                                                     |                                                                                                                    |                                                                                                                                              |
|---------------------------|--------------------------------------------------|---|-------------------------------------------------------------------------------------------------------------------------------------|--------------------------------------------------------------------------------------------------------------------|----------------------------------------------------------------------------------------------------------------------------------------------|
| Loa loa                   | f-box only protein 11                            | 6 | C:GO:0005737;<br>P:GO:0007605;<br>P:GO:0006464;<br>F:GO:0005515;<br>F:GO:0016274;<br>C:GO:0005634                                   | -                                                                                                                  | IPR001810; IPR006626; IPR011050;<br>IPR012334; IPR022364;<br>G3DSA:1.20.1280.50 (GENE3D),<br>PTHR22990 (PANTHER),<br>PTHR22990:SF6 (PANTHER) |
| Caenorhabditis elegans    | vesicle trafficking protein sec22b               | 6 | C:GO:0000139;<br>C:GO:0005789;<br>C:GO:0005793;<br>F:GO:0005515;<br>C:GO:0016021;<br>P:GO:0006888                                   | -                                                                                                                  | IPR001388; IPR010908; IPR011012;<br>G3DSA:1.20.5.110 (GENE3D),<br>PTHR21136 (PANTHER),<br>PTHR21136:SF4 (PANTHER)                            |
|                           | -                                                | 0 |                                                                                                                                     |                                                                                                                    | -                                                                                                                                            |
|                           | -                                                | 0 |                                                                                                                                     |                                                                                                                    | -                                                                                                                                            |
|                           | -                                                | 0 |                                                                                                                                     |                                                                                                                    | -                                                                                                                                            |
| Callithrix jacchus        | 40s ribosomal protein s27                        | 8 | P:GO:0008283;<br>F:GO:0003677;<br>F:GO:0003735;<br>F:GO:0005515;<br>C:GO:0022627;<br>C:GO:0005634;<br>F:GO:0008270;<br>P:GO:0006414 | -                                                                                                                  | IPR000592; IPR011332;<br>G3DSA:2.20.25.100 (GENE3D)                                                                                          |
| Culex quinquefasciatus    | e3 ubiquitin-protein ligase trim33 isoform 1     | 1 | F:GO:0005488                                                                                                                        | -                                                                                                                  | IPR001841; IPR013083; PTHR13712<br>(PANTHER)                                                                                                 |
| Caenorhabditis briggsae   | retinol dehydroge-se 14                          | 3 | P:GO:0008152;<br>C:GO:0044444;<br>C:GO:0043231                                                                                      | -                                                                                                                  | IPR002198; IPR016040;<br>PTHR19410:SF98 (PANTHER),<br>SSF51735 (SUPERFAMILY)                                                                 |
| Caenorhabditis briggsae   | retinol dehydroge-se 14                          | 3 | P:GO:0008152;<br>C:GO:0044444;<br>C:GO:0043231                                                                                      | -                                                                                                                  | IPR002198; IPR002347; IPR016040;<br>PTHR19410:SF98 (PANTHER),<br>SSF51735 (SUPERFAMILY)                                                      |
| Caenorhabditis briggsae   | elegans protein confirmed by transcript evidence | 0 |                                                                                                                                     | P:GO:0000003;<br>P:GO:0040010;<br>P:GO:0006898;<br>P:GO:0002119;<br>P:GO:0040007                                   | IPR004296; PTHR21592 (PANTHER)                                                                                                               |
| Caenorhabditis briggsae   | denn madd domain containing 4c                   | 0 |                                                                                                                                     | F:GO:0003674;<br>P:GO:0008150                                                                                      | PTHR12296 (PANTHER),<br>PTHR12296:SF3 (PANTHER), PS51498<br>(PROFILE)                                                                        |
|                           | -                                                | 0 |                                                                                                                                     |                                                                                                                    | -                                                                                                                                            |
|                           | -                                                | 0 |                                                                                                                                     |                                                                                                                    | -                                                                                                                                            |
| Teladorsagia circumcincta | briggsae cbr-flp-32 protein                      | 0 |                                                                                                                                     |                                                                                                                    | -                                                                                                                                            |
| Brugia malayi             | innexin family protein                           | 0 |                                                                                                                                     | P:GO:0000003;<br>C:GO:0016021;<br>P:GO:0040011;<br>P:GO:0040035;<br>P:GO:0040010;<br>P:GO:0002009;<br>C:GO:0005921 | IPR000990                                                                                                                                    |
| Brugia malayi             | innexin family protein                           | 0 |                                                                                                                                     | P:GO:0000003;<br>C:GO:0016021;<br>P:GO:0040011;<br>P:GO:0040035;<br>P:GO:0040010;<br>P:GO:0002009;<br>C:GO:0005921 | IPR000990                                                                                                                                    |
|                           | -                                                | 0 |                                                                                                                                     |                                                                                                                    | -                                                                                                                                            |



|                              |                                                            |   |                                                                                                   |                                                                                  |                                                                                            |
|------------------------------|------------------------------------------------------------|---|---------------------------------------------------------------------------------------------------|----------------------------------------------------------------------------------|--------------------------------------------------------------------------------------------|
|                              | -                                                          | 0 |                                                                                                   |                                                                                  | -                                                                                          |
|                              | -                                                          | 0 |                                                                                                   |                                                                                  | -                                                                                          |
|                              | -                                                          | 0 |                                                                                                   |                                                                                  | SignalP (SIGNALP)                                                                          |
| Caenorhabditis briggsae      | lps glycosyltransferase family protein                     | 5 | P:GO:0040035;<br>F:GO:0005515;<br>P:GO:0040010;<br>P:GO:0040011;<br>P:GO:0002009                  | -                                                                                | IPR002654; PTHR10730 (PANTHER)                                                             |
| Caenorhabditis elegans       | mitochondrial carrier protein                              | 6 | F:GO:0005488;<br>C:GO:0005743;<br>F:GO:0022857;<br>P:GO:0055085;<br>P:GO:0006839;<br>C:GO:0016021 | -                                                                                | IPR001993; IPR002067; IPR018108;<br>G3DSA:1.50.40.10 (GENE3D),<br>PTHR11896:SF38 (PANTHER) |
| Caenorhabditis elegans       | elegans protein confirmed by transcript evidence           | 0 |                                                                                                   | P:GO:0000003;<br>F:GO:0005488;<br>C:GO:0016021;<br>P:GO:0009792                  | IPR011990; IPR013026; PTHR16056<br>(PANTHER), SSF48452 (SUPERFAMILY)                       |
|                              | -                                                          | 0 |                                                                                                   |                                                                                  | -                                                                                          |
|                              | -                                                          | 0 |                                                                                                   |                                                                                  | -                                                                                          |
| Caenorhabditis elegans       | uncoordinated family member (unc-115)                      | 3 | P:GO:0007010;<br>F:GO:0003779;<br>F:GO:0008270                                                    | -                                                                                | IPR001781; PTHR18973 (PANTHER),<br>PTHR18973:SF90 (PANTHER),<br>SSF57716 (SUPERFAMILY)     |
| Nippostrongylus brasiliensis | 60s acidic ribosomal protein p1                            | 5 | P:GO:0009792;<br>C:GO:0005840;<br>F:GO:0003735;<br>F:GO:0005515;<br>P:GO:0006414                  | -                                                                                | IPR001813; IPR001859; PTHR21141<br>(PANTHER), PTHR21141:SF6<br>(PANTHER)                   |
|                              | -                                                          | 0 |                                                                                                   |                                                                                  | -                                                                                          |
| Caenorhabditis briggsae      | isoform b                                                  | 4 | F:GO:0009982;<br>F:GO:0003723;<br>P:GO:0001522;<br>P:GO:0008033                                   | -                                                                                | EC:5.4.99.12<br>IPR001406; IPR020095; IPR020097;<br>IPR020103                              |
| Caenorhabditis elegans       | adducin family member (add-2)                              | 1 | F:GO:0046872                                                                                      | -                                                                                | IPR001303; PTHR10672 (PANTHER),<br>PTHR10672:SF3 (PANTHER)                                 |
| Caenorhabditis elegans       | adducin family member (add-2)                              | 1 | F:GO:0046872                                                                                      | -                                                                                | IPR001303; PTHR10672 (PANTHER),<br>PTHR10672:SF3 (PANTHER)                                 |
| Caenorhabditis elegans       | hypothetical protein F52C12.2 [Caenorhabditis elegans]     | 0 |                                                                                                   | F:GO:0004672;<br>F:GO:0005524;<br>F:GO:0003824;<br>F:GO:0004713;<br>P:GO:0006468 | -                                                                                          |
|                              | -                                                          | 0 |                                                                                                   |                                                                                  | SignalP (SIGNALP)                                                                          |
| Caenorhabditis elegans       | d- polymerase family exonuclease domain containing protein | 5 | P:GO:0040035;<br>P:GO:0009792;<br>P:GO:0006997;<br>P:GO:0040011;<br>P:GO:0002009                  | -                                                                                | -                                                                                          |
|                              | -                                                          | 0 |                                                                                                   |                                                                                  | -                                                                                          |

|                         |                                                            |    |                                                                                                                                                                                                                          |                                                                                                                                                                                                                          |                                                                                                                  |
|-------------------------|------------------------------------------------------------|----|--------------------------------------------------------------------------------------------------------------------------------------------------------------------------------------------------------------------------|--------------------------------------------------------------------------------------------------------------------------------------------------------------------------------------------------------------------------|------------------------------------------------------------------------------------------------------------------|
| Caenorhabditis briggsae | briggsae cbr-atn-1 protein                                 | 13 | P:GO:0040010;<br>C:GO:0030018;<br>P:GO:0007016;<br>F:GO:0005509;<br>P:GO:0007629;<br>C:GO:0055120;<br>P:GO:0051017;<br>P:GO:0031532;<br>F:GO:0051015;<br>F:GO:0042802;<br>C:GO:0005925;<br>P:GO:0007067;<br>P:GO:0009792 | -                                                                                                                                                                                                                        | IPR011992; IPR014837; IPR018249;<br>PTHR11915 (PANTHER),<br>PTHR11915:SF47 (PANTHER),<br>SSF47473 (SUPERFAMILY)  |
| -                       | -                                                          | 0  |                                                                                                                                                                                                                          |                                                                                                                                                                                                                          | -                                                                                                                |
| Caenorhabditis elegans  | brca1 interacting protein c-termi-l helicase 1             | 8  | F:GO:0003676;<br>P:GO:0071295;<br>F:GO:0008026;<br>P:GO:0008285;<br>F:GO:0000166;<br>P:GO:0006139;<br>C:GO:0005737;<br>C:GO:0005634                                                                                      | -                                                                                                                                                                                                                        | IPR006555; PTHR11472 (PANTHER),<br>PTHR11472:SF6 (PANTHER)                                                       |
| Brugia malayi           | 13s condensin xcap-d2 partial                              | 7  | P:GO:0006996;<br>F:GO:0005488;<br>C:GO:0043234;<br>P:GO:0007049;<br>C:GO:0044446;<br>C:GO:0000793;<br>C:GO:0005634                                                                                                       | -                                                                                                                                                                                                                        | IPR011989; IPR016024                                                                                             |
| Caenorhabditis elegans  | elegans protein partially confirmed by transcript evidence | 0  |                                                                                                                                                                                                                          |                                                                                                                                                                                                                          | -                                                                                                                |
| -                       | -                                                          | 0  |                                                                                                                                                                                                                          |                                                                                                                                                                                                                          | -                                                                                                                |
| Caenorhabditis briggsae | briggsae cbr-lsm-1 protein                                 | 0  |                                                                                                                                                                                                                          | F:GO:0003676;<br>C:GO:0030529                                                                                                                                                                                            | -                                                                                                                |
| -                       | -                                                          | 0  |                                                                                                                                                                                                                          |                                                                                                                                                                                                                          | -                                                                                                                |
| Loa loa                 | transcriptio-l regulating factor 1-like                    | 0  |                                                                                                                                                                                                                          | P:GO:0007283;<br>C:GO:0005634;<br>F:GO:0003677;<br>F:GO:0003676;<br>F:GO:0008270;<br>F:GO:0003674;<br>P:GO:0007275;<br>P:GO:0030154;<br>C:GO:0005622;<br>F:GO:0046872;<br>P:GO:0006350;<br>P:GO:0008150;<br>P:GO:0045449 | IPR007087; IPR013087; IPR015880;<br>PTHR23224 (PANTHER),<br>PTHR23224:SF459 (PANTHER),<br>SSF57667 (SUPERFAMILY) |
| Caenorhabditis elegans  | cyclin l2                                                  | 7  | P:GO:0009792;<br>P:GO:0002119;<br>P:GO:0000003;<br>P:GO:0008340;<br>P:GO:0040011;<br>P:GO:0040007;<br>C:GO:0005634                                                                                                       | -                                                                                                                                                                                                                        | IPR004367; IPR006670; IPR011028;<br>IPR013763; IPR015429; IPR015431                                              |
| -                       | -                                                          | 0  |                                                                                                                                                                                                                          |                                                                                                                                                                                                                          | -                                                                                                                |
| -                       | -                                                          | 0  |                                                                                                                                                                                                                          |                                                                                                                                                                                                                          | -                                                                                                                |

|                         |                                           |    |                                                                                                                                                                                                         |                                                                                                                    |                                                                                  |
|-------------------------|-------------------------------------------|----|---------------------------------------------------------------------------------------------------------------------------------------------------------------------------------------------------------|--------------------------------------------------------------------------------------------------------------------|----------------------------------------------------------------------------------|
| Caenorhabditis elegans  | ap-2 complex subunit alpha-2              | 12 | C:GO:0005829;<br>F:GO:0008565;<br>P:GO:0040010;<br>F:GO:0008022;<br>P:GO:0000003;<br>F:GO:0008289;<br>P:GO:0050690;<br>C:GO:0030122;<br>P:GO:0040011;<br>P:GO:0006898;<br>P:GO:0006886;<br>P:GO:0009792 | -                                                                                                                  | IPR002553; IPR011989; PTHR22780 (PANTHER), PTHR22780:SF4 (PANTHER)               |
| Caenorhabditis elegans  | ap-2 complex subunit alpha-2              | 12 | C:GO:0005829;<br>F:GO:0008565;<br>P:GO:0040010;<br>F:GO:0008022;<br>P:GO:0000003;<br>F:GO:0008289;<br>P:GO:0050690;<br>C:GO:0030122;<br>P:GO:0040011;<br>P:GO:0006898;<br>P:GO:0006886;<br>P:GO:0009792 | -                                                                                                                  | IPR002553; IPR011989; PTHR22780 (PANTHER), PTHR22780:SF4 (PANTHER)               |
| Caenorhabditis briggsae | mpv17 protein                             | 2  | C:GO:0016020;<br>C:GO:0005739                                                                                                                                                                           | -                                                                                                                  | SignalP (SIGNALP)                                                                |
|                         | -                                         | 0  |                                                                                                                                                                                                         |                                                                                                                    | -                                                                                |
| Caenorhabditis briggsae | marvel domain containing 2                | 0  |                                                                                                                                                                                                         | C:GO:0008023;<br>F:GO:0016944;<br>C:GO:0016021;<br>C:GO:0030054;<br>C:GO:0016020;<br>C:GO:0005923;<br>P:GO:0006368 | -                                                                                |
|                         | -                                         | 0  |                                                                                                                                                                                                         |                                                                                                                    | -                                                                                |
|                         | -                                         | 0  |                                                                                                                                                                                                         |                                                                                                                    | -                                                                                |
| Loa loa                 | ph domain containing protein              | 4  | C:GO:0005737;<br>F:GO:0005515;<br>C:GO:0043229;<br>P:GO:0009987                                                                                                                                         | -                                                                                                                  | PTHR21538 (PANTHER), PTHR21538:SF10 (PANTHER)                                    |
| Loa loa                 | ph domain containing protein              | 4  | C:GO:0005737;<br>F:GO:0005515;<br>C:GO:0043229;<br>P:GO:0009987                                                                                                                                         | -                                                                                                                  | PTHR21538 (PANTHER), PTHR21538:SF10 (PANTHER)                                    |
| Caenorhabditis elegans  | transcription termi-tion r- polymerase ii | 12 | F:GO:0008094;<br>F:GO:0005515;<br>C:GO:0008023;<br>F:GO:0003717;<br>P:GO:0030878;<br>P:GO:0060023;<br>C:GO:0005737;<br>P:GO:0060022;<br>F:GO:0003677;<br>P:GO:0009887;<br>F:GO:0003700;<br>P:GO:0045893 | -                                                                                                                  | IPR000330; PTHR10799 (PANTHER), PTHR10799:SF63 (PANTHER), SSF52540 (SUPERFAMILY) |
|                         | -                                         | 0  |                                                                                                                                                                                                         |                                                                                                                    | -                                                                                |

|                         |                                                  |    |                                                                                                                                                                                                                                                                                              |   |                                                                                                                                     |                                                                               |
|-------------------------|--------------------------------------------------|----|----------------------------------------------------------------------------------------------------------------------------------------------------------------------------------------------------------------------------------------------------------------------------------------------|---|-------------------------------------------------------------------------------------------------------------------------------------|-------------------------------------------------------------------------------|
| Callithrix jacchus      | ribophorin isoform cra_a                         | 9  | C:GO:0008250;<br>C:GO:0019718;<br>P:GO:0018279;<br>C:GO:0016021;<br>C:GO:0042470;<br>P:GO:0015833;<br>C:GO:0030867;<br>F:GO:0005515;<br>F:GO:0004579                                                                                                                                         | - | EC:2.4.1.119                                                                                                                        | IPR007676                                                                     |
|                         | -                                                | 0  |                                                                                                                                                                                                                                                                                              |   |                                                                                                                                     | -                                                                             |
| Caenorhabditis briggsae | elegans protein confirmed by transcript evidence | 0  |                                                                                                                                                                                                                                                                                              |   | P:GO:0000003;<br>P:GO:0040035;<br>P:GO:0040010;<br>P:GO:0009792;<br>P:GO:0040007;<br>P:GO:0019915;<br>P:GO:0002009                  | -                                                                             |
|                         | -                                                | 0  |                                                                                                                                                                                                                                                                                              |   |                                                                                                                                     | SignalP (SIGNALP)                                                             |
| Caenorhabditis elegans  | zinc finger protein                              | 17 | F:GO:0030528;<br>F:GO:0005515;<br>P:GO:0006357;<br>P:GO:0040010;<br>P:GO:0006898;<br>C:GO:0071011;<br>P:GO:0040011;<br>F:GO:0046872;<br>P:GO:0000398;<br>P:GO:0009792;<br>P:GO:0002009;<br>F:GO:0003677;<br>P:GO:0002119;<br>P:GO:0002121;<br>P:GO:0010171;<br>C:GO:0043232;<br>P:GO:0040035 | - |                                                                                                                                     | PTHR11208 (PANTHER),<br>PTHR11208:SF5 (PANTHER)                               |
| Caenorhabditis briggsae | elegans protein confirmed by transcript evidence | 1  | C:GO:0031012                                                                                                                                                                                                                                                                                 | - |                                                                                                                                     | -                                                                             |
| Brugia malayi           | ppib protein                                     | 7  | P:GO:0006457;<br>C:GO:0005788;<br>F:GO:0005515;<br>C:GO:0042470;<br>P:GO:0051169;<br>F:GO:0042277;<br>F:GO:0003755                                                                                                                                                                           | - | EC:5.2.1.8                                                                                                                          | IPR002130; IPR015891; IPR020892;<br>PTHR11071 (PANTHER), SignalP<br>(SIGNALP) |
| Caenorhabditis elegans  | briggsae cbr-hmt-1 protein                       | 0  |                                                                                                                                                                                                                                                                                              |   | F:GO:0005524;<br>F:GO:0016887;<br>F:GO:0000166;<br>C:GO:0016021;<br>F:GO:0042626;<br>F:GO:0017111;<br>P:GO:0055085;<br>P:GO:0006810 | -                                                                             |
|                         | -                                                | 0  |                                                                                                                                                                                                                                                                                              |   |                                                                                                                                     | -                                                                             |
|                         | -                                                | 0  |                                                                                                                                                                                                                                                                                              |   |                                                                                                                                     | -                                                                             |

|                         |                                                            |   |                                                                                                   |                                                                                                                                                                                                                                           |  |                                                                                            |
|-------------------------|------------------------------------------------------------|---|---------------------------------------------------------------------------------------------------|-------------------------------------------------------------------------------------------------------------------------------------------------------------------------------------------------------------------------------------------|--|--------------------------------------------------------------------------------------------|
| Caenorhabditis elegans  | elegans protein partially confirmed by transcript evidence | 0 |                                                                                                   | F:GO:0020037;<br>F:GO:0005506;<br>C:GO:0016021;<br>F:GO:0009055;<br>P:GO:0000003;<br>P:GO:0040018;<br>P:GO:0055114;<br>F:GO:0016491;<br>C:GO:0005575;<br>P:GO:0008340;<br>P:GO:0040011;<br>P:GO:0040010;<br>F:GO:0046872;<br>F:GO:0004497 |  | IPR001128; PTHR19383:SF176 (PANTHER)                                                       |
| Caenorhabditis briggsae | elegans protein confirmed by transcript evidence           | 2 | P:GO:0040010;<br>P:GO:0040011                                                                     | -                                                                                                                                                                                                                                         |  | IPR004888; PTHR10412 (PANTHER)                                                             |
| Caenorhabditis briggsae | -dh oxidase                                                | 4 | P:GO:0008152;<br>F:GO:0003824;<br>P:GO:0043581;<br>P:GO:0051301                                   | -                                                                                                                                                                                                                                         |  | IPR013785; PTHR22893 (PANTHER), PTHR22893:SF6 (PANTHER), SSF51395 (SUPERFAMILY)            |
| Caenorhabditis briggsae | -dh oxidase                                                | 3 | P:GO:0008152;<br>F:GO:0003824;<br>P:GO:0043581                                                    | -                                                                                                                                                                                                                                         |  | IPR001155; IPR013785; PTHR22893 (PANTHER), PTHR22893:SF6 (PANTHER), SSF51395 (SUPERFAMILY) |
| Caenorhabditis elegans  | kinesin-like protein family member (klp-12)                | 0 |                                                                                                   | F:GO:0005524;<br>P:GO:0009792;<br>P:GO:0007018;<br>P:GO:0007067;<br>F:GO:0005515                                                                                                                                                          |  | -                                                                                          |
| Drosophila grimshawi    | cug-bp- and etr-3-like factor 1                            | 2 | F:GO:0003676;<br>F:GO:0000166                                                                     | -                                                                                                                                                                                                                                         |  | IPR015903; PTHR10432 (PANTHER)                                                             |
| Homo sapiens            | cold shock domain containing r--binding                    | 6 | C:GO:0005737;<br>F:GO:0003677;<br>F:GO:0003723;<br>F:GO:0005515;<br>P:GO:0008584;<br>P:GO:0006355 | -                                                                                                                                                                                                                                         |  | PTHR12913 (PANTHER)                                                                        |
| Brugia malayi           | dy-ctin 4                                                  | 0 |                                                                                                   | P:GO:0035046                                                                                                                                                                                                                              |  | -                                                                                          |
|                         | -                                                          | 0 |                                                                                                   |                                                                                                                                                                                                                                           |  | IPR000436; IPR016060; SignalP (SIGNALP)                                                    |
|                         | -                                                          | 0 |                                                                                                   |                                                                                                                                                                                                                                           |  | IPR000436; IPR016060; SignalP (SIGNALP)                                                    |
| Caenorhabditis briggsae | elegans protein partially confirmed by transcript evidence | 0 |                                                                                                   |                                                                                                                                                                                                                                           |  | IPR000436; IPR016060; SignalP (SIGNALP)                                                    |
| Caenorhabditis briggsae | elegans protein partially confirmed by transcript evidence | 0 |                                                                                                   |                                                                                                                                                                                                                                           |  | IPR000436; IPR016060; SignalP (SIGNALP)                                                    |
|                         | -                                                          | 0 |                                                                                                   |                                                                                                                                                                                                                                           |  | IPR000436; IPR016060; SignalP (SIGNALP)                                                    |
| Caenorhabditis briggsae | Hypothetical protein CBG16936 [Caenorhabditis briggsae]    | 0 |                                                                                                   |                                                                                                                                                                                                                                           |  | IPR000436; IPR016060; SignalP (SIGNALP)                                                    |
| Caenorhabditis elegans  | briggsae cbr-unc-14 protein                                | 0 |                                                                                                   |                                                                                                                                                                                                                                           |  | IPR004012                                                                                  |
| Caenorhabditis briggsae | cleavage and polyadenylation specific factor 1             | 4 | P:GO:0006378;<br>C:GO:0005847;<br>F:GO:0003676;<br>P:GO:0006379                                   | -                                                                                                                                                                                                                                         |  | SignalP (SIGNALP)                                                                          |
| Caenorhabditis briggsae | briggsae cbr-pqn-55 protein                                | 0 |                                                                                                   | F:GO:0008270                                                                                                                                                                                                                              |  | -                                                                                          |

|                           |                                            |    |                                                                                                                                                                                                                                                                                              |   |                             |                                                                                                                                                           |
|---------------------------|--------------------------------------------|----|----------------------------------------------------------------------------------------------------------------------------------------------------------------------------------------------------------------------------------------------------------------------------------------------|---|-----------------------------|-----------------------------------------------------------------------------------------------------------------------------------------------------------|
| Caenorhabditis elegans    | discoidin domain receptor member 2         | 13 | P:GO:0040010;<br>F:GO:0004674;<br>C:GO:0016021;<br>F:GO:0004872;<br>P:GO:0007169;<br>F:GO:0004713;<br>F:GO:0005524;<br>P:GO:0007155;<br>F:GO:0005518;<br>P:GO:0007165;<br>C:GO:0016324;<br>P:GO:0008284;<br>P:GO:0006468                                                                     | - | EC:2.7.11.0;<br>EC:2.7.10.0 | IPR000719; IPR001245; IPR008266;<br>IPR011009; IPR020685; IPR020742;<br>G3DSA:1.10.510.10 (GENE3D)                                                        |
| -                         | -                                          | 0  |                                                                                                                                                                                                                                                                                              |   |                             | -                                                                                                                                                         |
| Caenorhabditis briggsae   | dead (asp-glu-ala-asp) box polypeptide 55  | 7  | P:GO:0009987;<br>P:GO:0040010;<br>F:GO:0003676;<br>P:GO:0000003;<br>P:GO:0002119;<br>F:GO:0000166;<br>F:GO:0004386                                                                                                                                                                           | - |                             | IPR000629; IPR001650; IPR011545;<br>IPR014021; G3DSA:3.40.50.300<br>(GENE3D), PTHR10967 (PANTHER),<br>PTHR10967:SF26 (PANTHER),<br>SSF52540 (SUPERFAMILY) |
| Caenorhabditis briggsae   | microfibrillar-associated protein 1        | 17 | P:GO:0016246;<br>F:GO:0005515;<br>P:GO:0040010;<br>P:GO:0006898;<br>C:GO:0071011;<br>P:GO:0010389;<br>P:GO:0018996;<br>C:GO:0071013;<br>P:GO:0000398;<br>P:GO:0009792;<br>C:GO:0005578;<br>F:GO:0003711;<br>C:GO:0043234;<br>P:GO:0002119;<br>P:GO:0032968;<br>P:GO:0001703;<br>P:GO:0040035 | - |                             | SignalIP (SIGNALP)                                                                                                                                        |
| Caenorhabditis sp. PS1010 | eprs protein                               | 5  | C:GO:0005829;<br>F:GO:0004827;<br>F:GO:0005515;<br>P:GO:0006418;<br>F:GO:0004818                                                                                                                                                                                                             | - | EC:6.1.1.15;<br>EC:6.1.1.17 | IPR000738; IPR009068                                                                                                                                      |
| -                         | -                                          | 0  |                                                                                                                                                                                                                                                                                              |   |                             | -                                                                                                                                                         |
| Caenorhabditis elegans    | kinesin-like protein family member (klp-4) | 6  | C:GO:0000235;<br>P:GO:0007018;<br>F:GO:0005515;<br>F:GO:0005524;<br>P:GO:0051294;<br>F:GO:0003777                                                                                                                                                                                            | - |                             | IPR022140; PTHR16012 (PANTHER),<br>PTHR16012:SF65 (PANTHER)                                                                                               |
| Caenorhabditis elegans    | mpp10 protein                              | 6  | P:GO:0040035;<br>P:GO:0002119;<br>P:GO:0040010;<br>P:GO:0006364;<br>P:GO:0006898;<br>C:GO:0030529                                                                                                                                                                                            | - |                             | -                                                                                                                                                         |

|                            |                                                            |    |                                                                                                                                                                                                                                                                                                               |                                                |             |                                                                                                                   |
|----------------------------|------------------------------------------------------------|----|---------------------------------------------------------------------------------------------------------------------------------------------------------------------------------------------------------------------------------------------------------------------------------------------------------------|------------------------------------------------|-------------|-------------------------------------------------------------------------------------------------------------------|
| Oscheius sp. (strain CEW1) | briggsae cbr-vit-5 protein                                 | 4  | P:GO:0009792;<br>P:GO:0008340;<br>P:GO:0040010;<br>F:GO:0005515                                                                                                                                                                                                                                               | -                                              | -           | -                                                                                                                 |
| -                          | -                                                          | 0  |                                                                                                                                                                                                                                                                                                               |                                                |             | SignalP (SIGNALP)                                                                                                 |
| -                          | -                                                          | 0  |                                                                                                                                                                                                                                                                                                               |                                                |             | -                                                                                                                 |
| -                          | -                                                          | 0  |                                                                                                                                                                                                                                                                                                               |                                                |             | SignalP (SIGNALP)                                                                                                 |
| -                          | -                                                          | 0  |                                                                                                                                                                                                                                                                                                               |                                                |             | SignalP (SIGNALP)                                                                                                 |
| Loa loa                    | briggsae cbr-ekl-1 protein                                 | 0  |                                                                                                                                                                                                                                                                                                               | P:GO:0000003;<br>P:GO:0016246;<br>P:GO:0009792 |             | -                                                                                                                 |
| -                          | -                                                          | 0  |                                                                                                                                                                                                                                                                                                               |                                                |             | -                                                                                                                 |
| Caenorhabditis elegans     | elegans protein confirmed by transcript evidence           | 4  | P:GO:0040010;<br>P:GO:0009792;<br>P:GO:0000003;<br>P:GO:0040011                                                                                                                                                                                                                                               | -                                              |             | -                                                                                                                 |
| Caenorhabditis elegans     | elegans protein partially confirmed by transcript evidence | 3  | C:GO:0016021;<br>P:GO:0008340;<br>F:GO:0008378                                                                                                                                                                                                                                                                | -                                              |             | PTHR23033 (PANTHER),<br>PTHR23033:SF1 (PANTHER)                                                                   |
| Brugia malayi              | hypothetical protein Bm1_15295 [Brugia malayi]             | 0  |                                                                                                                                                                                                                                                                                                               |                                                |             | -                                                                                                                 |
| Caenorhabditis briggsae    | oxidoreductase htatip2 isoform b                           | 8  | P:GO:0034641;<br>F:GO:0016491;<br>P:GO:0009058;<br>C:GO:0044424;<br>F:GO:0050662;<br>P:GO:0044238;<br>P:GO:0050794;<br>P:GO:0032502                                                                                                                                                                           | -                                              |             | IPR016040; SSF51735 (SUPERFAMILY)                                                                                 |
| Caenorhabditis elegans     | elegans protein confirmed by transcript evidence           | 0  |                                                                                                                                                                                                                                                                                                               | C:GO:0005739;<br>C:GO:0016021;<br>C:GO:0016020 |             | IPR009688; PTHR21377 (PANTHER),<br>SignalP (SIGNALP)                                                              |
| Caenorhabditis briggsae    | tetraspanin family protein                                 | 1  | C:GO:0016021                                                                                                                                                                                                                                                                                                  | -                                              |             | IPR018499; PTHR19282 (PANTHER),<br>PTHR19282:SF54 (PANTHER)                                                       |
| Caenorhabditis briggsae    | elegans protein partially confirmed by transcript evidence | 0  |                                                                                                                                                                                                                                                                                                               |                                                |             | -                                                                                                                 |
| Caenorhabditis briggsae    | Hypothetical protein CBG09061 [Caenorhabditis briggsae]    | 0  |                                                                                                                                                                                                                                                                                                               |                                                |             | IPR016021                                                                                                         |
| Brugia malayi              | d- topoisomerase 2-beta-like                               | 18 | P:GO:0001764;<br>F:GO:0005080;<br>C:GO:0005829;<br>P:GO:0030900;<br>C:GO:0005730;<br>P:GO:0006355;<br>F:GO:0008022;<br>C:GO:0070603;<br>F:GO:0005524;<br>P:GO:0007409;<br>F:GO:0003700;<br>F:GO:0003918;<br>C:GO:0000792;<br>F:GO:0046982;<br>C:GO:0005654;<br>P:GO:0006265;<br>F:GO:0042826;<br>F:GO:0003682 | -                                              | EC:5.99.1.3 | IPR001154; IPR001241; IPR013759;<br>IPR013760; PTHR10169 (PANTHER),<br>PTHR10169:SF2 (PANTHER)                    |
| Caenorhabditis elegans     | elegans protein partially confirmed by transcript evidence | 0  |                                                                                                                                                                                                                                                                                                               | C:GO:0016021;<br>P:GO:0007186                  |             | IPR019427; G3DSA:1.20.1070.10<br>(GENE3D), PTHR22751 (PANTHER),<br>PTHR22751:SF12 (PANTHER), SignalP<br>(SIGNALP) |

|                             |                                                       |  |   |                                                                                                                                     |                                                                 |                                                                                                                                                              |
|-----------------------------|-------------------------------------------------------|--|---|-------------------------------------------------------------------------------------------------------------------------------------|-----------------------------------------------------------------|--------------------------------------------------------------------------------------------------------------------------------------------------------------|
| Caenorhabditis elegans      | domain containing protein                             |  | 3 | C:GO:0005622;<br>P:GO:0007165;<br>F:GO:0016787                                                                                      | -                                                               | -                                                                                                                                                            |
| Caenorhabditis elegans      | hypothetical protein F26F4.2 [Caenorhabditis elegans] |  | 0 |                                                                                                                                     | F:GO:0005515                                                    | -                                                                                                                                                            |
|                             | -                                                     |  | 0 |                                                                                                                                     |                                                                 | IPR000242; G3DSA:3.90.190.10 (GENE3D)                                                                                                                        |
| Brugia malayi               | ser thr protein phosphatase family protein            |  | 1 | F:GO:0016787                                                                                                                        | -                                                               | IPR004843; IPR006186;<br>G3DSA:3.60.21.10 (GENE3D),<br>SSF56300 (SUPERFAMILY)                                                                                |
| Loa loa                     | kiaa1433 protein                                      |  | 1 | F:GO:0005515                                                                                                                        | -                                                               | IPR019131; PTHR23166 (PANTHER),<br>PTHR23166:SF6 (PANTHER)                                                                                                   |
|                             | -                                                     |  | 0 |                                                                                                                                     |                                                                 | -                                                                                                                                                            |
|                             | -                                                     |  | 0 |                                                                                                                                     |                                                                 | -                                                                                                                                                            |
|                             | -                                                     |  | 0 |                                                                                                                                     |                                                                 | -                                                                                                                                                            |
|                             | -                                                     |  | 0 |                                                                                                                                     |                                                                 | -                                                                                                                                                            |
| Loa loa                     | protein-tyrosine phosphatase containing protein       |  | 2 | F:GO:0016791;<br>P:GO:0000003                                                                                                       | -                                                               | EC:3.1.3.0<br>IPR000242; IPR000387; IPR016130;<br>G3DSA:3.90.190.10 (GENE3D),<br>PTHR19134 (PANTHER),<br>PTHR19134:SF26 (PANTHER),<br>SSF52799 (SUPERFAMILY) |
| Loa loa                     | protein-tyrosine phosphatase containing protein       |  | 2 | F:GO:0016791;<br>P:GO:0000003                                                                                                       | -                                                               | EC:3.1.3.0<br>IPR000242; IPR000387; IPR016130;<br>G3DSA:3.90.190.10 (GENE3D),<br>PTHR19134 (PANTHER),<br>PTHR19134:SF26 (PANTHER),<br>SSF52799 (SUPERFAMILY) |
|                             | -                                                     |  | 0 |                                                                                                                                     |                                                                 | SignalP (SIGNALP)                                                                                                                                            |
|                             | -                                                     |  | 0 |                                                                                                                                     |                                                                 | -                                                                                                                                                            |
| Angiostrongylus cantonensis | elegans protein confirmed by transcript evidence      |  | 0 |                                                                                                                                     |                                                                 | -                                                                                                                                                            |
| Angiostrongylus cantonensis | elegans protein confirmed by transcript evidence      |  | 0 |                                                                                                                                     |                                                                 | -                                                                                                                                                            |
| Loa loa                     | sema domain containing protein                        |  | 0 |                                                                                                                                     | F:GO:0004872;<br>P:GO:0007275;<br>C:GO:0016020;<br>C:GO:0005576 | IPR001627; IPR015943; PSS1257 (PROFILE), SignalP (SIGNALP)                                                                                                   |
|                             | -                                                     |  | 0 |                                                                                                                                     |                                                                 | -                                                                                                                                                            |
| Haemonchus contortus        | phosphoenolpyruvate carboxyke-se                      |  | 8 | P:GO:0006107;<br>C:GO:0005625;<br>C:GO:0005739;<br>F:GO:0046872;<br>P:GO:0051384;<br>P:GO:0006094;<br>F:GO:0004613;<br>F:GO:0005525 | -                                                               | EC:4.1.1.32<br>IPR008209; IPR013035; SSF53795 (SUPERFAMILY)                                                                                                  |
| Caenorhabditis elegans      | elegans protein confirmed by transcript evidence      |  | 4 | P:GO:0009792;<br>P:GO:0002119;<br>P:GO:0040010;<br>P:GO:0006898                                                                     | -                                                               | SignalP (SIGNALP)                                                                                                                                            |
|                             | -                                                     |  | 0 |                                                                                                                                     |                                                                 | -                                                                                                                                                            |
| Dictyocaulus viviparus      | troponin fast skeletal                                |  | 1 | F:GO:0005509                                                                                                                        | -                                                               | IPR002048; IPR011992; IPR018247;<br>IPR018248; IPR018249; PTHR23050 (PANTHER), PTHR23050:SF10 (PANTHER), SSF47473 (SUPERFAMILY)                              |
|                             | -                                                     |  | 0 |                                                                                                                                     |                                                                 | -                                                                                                                                                            |
| Caenorhabditis elegans      | briggsae cbr-flp-33 protein                           |  | 0 |                                                                                                                                     |                                                                 | SignalP (SIGNALP)                                                                                                                                            |
|                             | -                                                     |  | 0 |                                                                                                                                     |                                                                 | -                                                                                                                                                            |
| Caenorhabditis elegans      | odulin family member (tmd-2)                          |  | 2 | C:GO:0005856;<br>F:GO:0005523                                                                                                       | -                                                               | IPR004934; PTHR10901:SF4 (PANTHER)                                                                                                                           |
| Brugia malayi               | hypothetical protein Bm1_08935 [Brugia malayi]        |  | 0 |                                                                                                                                     |                                                                 | -                                                                                                                                                            |



|                        |                                                  |    |                                                                                                                                                                                                                                                                                                                                |   |              |                                                                                                                |
|------------------------|--------------------------------------------------|----|--------------------------------------------------------------------------------------------------------------------------------------------------------------------------------------------------------------------------------------------------------------------------------------------------------------------------------|---|--------------|----------------------------------------------------------------------------------------------------------------|
| Caenorhabditis elegans | zinc c2h2 type family protein                    | 16 | P:GO:0007427;<br>P:GO:0007390;<br>P:GO:0007417;<br>P:GO:0016204;<br>F:GO:0008270;<br>F:GO:0003676;<br>P:GO:0042440;<br>P:GO:0007525;<br>F:GO:0004757;<br>P:GO:0055114;<br>P:GO:0006729;<br>P:GO:0045449;<br>P:GO:0006911;<br>P:GO:0007398;<br>C:GO:0005634;<br>F:GO:0003702                                                    | - | EC:1.1.1.153 | IPR007087; IPR013087; IPR015880;<br>PTHR10042 (PANTHER),<br>PTHR10042:SF2 (PANTHER), SSF57667<br>(SUPERFAMILY) |
| Caenorhabditis elegans | zinc c2h2 type family protein                    | 19 | P:GO:0021612;<br>F:GO:0030528;<br>P:GO:0030278;<br>F:GO:0008270;<br>P:GO:0032868;<br>P:GO:0007611;<br>P:GO:0048168;<br>P:GO:0021660;<br>P:GO:0008045;<br>F:GO:0031625;<br>P:GO:0014037;<br>P:GO:0035284;<br>F:GO:0003677;<br>P:GO:0021666;<br>P:GO:0007622;<br>F:GO:0003700;<br>P:GO:0045944;<br>P:GO:0042552;<br>C:GO:0005634 | - |              | IPR007087; IPR013087; IPR015880;<br>PTHR10042 (PANTHER),<br>PTHR10042:SF2 (PANTHER), SSF57667<br>(SUPERFAMILY) |
| Caenorhabditis elegans | yr51_caeel ame: full=uncharacterized protein     | 5  | P:GO:0010171;<br>P:GO:0002119;<br>P:GO:0018996;<br>P:GO:0040010;<br>P:GO:0008152                                                                                                                                                                                                                                               | - |              | -                                                                                                              |
| Caenorhabditis elegans | elegans protein confirmed by transcript evidence | 0  |                                                                                                                                                                                                                                                                                                                                |   |              | IPR001534                                                                                                      |
| Caenorhabditis elegans | elegans protein confirmed by transcript evidence | 0  |                                                                                                                                                                                                                                                                                                                                |   |              | IPR001534                                                                                                      |
| Loa loa                | hypothetical protein LOAG_00601 [Loa loa]        | 0  |                                                                                                                                                                                                                                                                                                                                |   |              | PTHR16206 (PANTHER)                                                                                            |
| Loa loa                | hypothetical protein LOAG_00601 [Loa loa]        | 0  |                                                                                                                                                                                                                                                                                                                                |   |              | PTHR16206 (PANTHER)                                                                                            |
| Brugia malayi          | small optic lobes homolog                        | 5  | F:GO:0003676;<br>C:GO:0005622;<br>P:GO:0006508;<br>F:GO:0004198;<br>F:GO:0008270                                                                                                                                                                                                                                               | - |              | -                                                                                                              |
| Brugia malayi          | formin binding protein 11-related protein        | 6  | P:GO:0009792;<br>P:GO:0002119;<br>P:GO:0018991;<br>F:GO:0005515;<br>P:GO:0040010;<br>P:GO:0006898                                                                                                                                                                                                                              | - |              | IPR002713; PTHR11864 (PANTHER)                                                                                 |

|                        |                                                              |    |                                                                                                                                                                                                                                                                             |                               |             |                                                                                                                 |
|------------------------|--------------------------------------------------------------|----|-----------------------------------------------------------------------------------------------------------------------------------------------------------------------------------------------------------------------------------------------------------------------------|-------------------------------|-------------|-----------------------------------------------------------------------------------------------------------------|
| Caenorhabditis elegans | -dh dehydroge-se iron-sulfur protein mitochondrial precursor | 4  | F:GO:0003723;<br>F:GO:0008137;<br>P:GO:0055114;<br>C:GO:0005747                                                                                                                                                                                                             | -                             | EC:1.6.5.3  | IPR001268; IPR010218; IPR020396;<br>PTHR10884 (PANTHER),<br>PTHR10884:SF5 (PANTHER),<br>SSF143243 (SUPERFAMILY) |
| Loa loa                | fragile site-associated protein                              | 0  |                                                                                                                                                                                                                                                                             | C:GO:0016021;<br>C:GO:0016020 |             | IPR018863                                                                                                       |
| Caenorhabditis elegans | methionyl aminopeptidase 2                                   | 16 | F:GO:0003743;<br>P:GO:0007276;<br>P:GO:0040010;<br>P:GO:0016055;<br>P:GO:0031365;<br>F:GO:0046872;<br>P:GO:0018206;<br>F:GO:0004177;<br>P:GO:0006508;<br>F:GO:0005515;<br>F:GO:0008235;<br>P:GO:0006898;<br>P:GO:0016485;<br>P:GO:0009792;<br>P:GO:0008406;<br>C:GO:0005737 | -                             | EC:3.4.11.0 | -                                                                                                               |
| Caenorhabditis elegans | methionyl aminopeptidase 2                                   | 16 | F:GO:0003743;<br>P:GO:0007276;<br>P:GO:0040010;<br>P:GO:0016055;<br>P:GO:0031365;<br>F:GO:0046872;<br>P:GO:0018206;<br>F:GO:0004177;<br>P:GO:0006508;<br>F:GO:0005515;<br>F:GO:0008235;<br>P:GO:0006898;<br>P:GO:0016485;<br>P:GO:0009792;<br>P:GO:0008406;<br>C:GO:0005737 | -                             | EC:3.4.11.0 | -                                                                                                               |
| Caenorhabditis elegans | methionyl aminopeptidase 2                                   | 16 | F:GO:0003743;<br>P:GO:0007276;<br>P:GO:0040010;<br>P:GO:0016055;<br>P:GO:0031365;<br>F:GO:0046872;<br>P:GO:0018206;<br>F:GO:0004177;<br>P:GO:0006508;<br>F:GO:0005515;<br>F:GO:0008235;<br>P:GO:0006898;<br>P:GO:0016485;<br>P:GO:0009792;<br>P:GO:0008406;<br>C:GO:0005737 | -                             | EC:3.4.11.0 | IPR000994; IPR001714; IPR002468;<br>IPR011991; SSF46785 (SUPERFAMILY)                                           |

|                         |                                                            |    |                                                                                                                                                                                                                                                                             |                                                                                                                                                                                        |             |                                                                                                                                         |
|-------------------------|------------------------------------------------------------|----|-----------------------------------------------------------------------------------------------------------------------------------------------------------------------------------------------------------------------------------------------------------------------------|----------------------------------------------------------------------------------------------------------------------------------------------------------------------------------------|-------------|-----------------------------------------------------------------------------------------------------------------------------------------|
| Caenorhabditis elegans  | methionyl aminopeptidase 2                                 | 16 | F:GO:0003743;<br>P:GO:0007276;<br>P:GO:0040010;<br>P:GO:0016055;<br>P:GO:0031365;<br>F:GO:0046872;<br>P:GO:0018206;<br>F:GO:0004177;<br>P:GO:0006508;<br>F:GO:0005515;<br>F:GO:0008235;<br>P:GO:0006898;<br>P:GO:0016485;<br>P:GO:0009792;<br>P:GO:0008406;<br>C:GO:0005737 | -                                                                                                                                                                                      | EC:3.4.11.0 | -                                                                                                                                       |
|                         | -                                                          | 0  |                                                                                                                                                                                                                                                                             |                                                                                                                                                                                        |             | -                                                                                                                                       |
| Caenorhabditis elegans  | alkylated d- repair protein alkb-like protein 8            | 4  | F:GO:0005488;<br>P:GO:0040010;<br>P:GO:0008152;<br>F:GO:0008168                                                                                                                                                                                                             | -                                                                                                                                                                                      | EC:2.1.1.0  | IPR013216; G3DSA:2.60.120.590 (GENE3D), G3DSA:3.40.50.150 (GENE3D), PTHR13069 (PANTHER), SSF51197 (SUPERFAMILY), SSF53335 (SUPERFAMILY) |
|                         | -                                                          | 0  |                                                                                                                                                                                                                                                                             |                                                                                                                                                                                        |             | -                                                                                                                                       |
| Caenorhabditis briggsae | Hypothetical protein CBG15174 [Caenorhabditis briggsae]    | 0  |                                                                                                                                                                                                                                                                             |                                                                                                                                                                                        |             | -                                                                                                                                       |
|                         | -                                                          | 0  |                                                                                                                                                                                                                                                                             |                                                                                                                                                                                        |             | -                                                                                                                                       |
| Caenorhabditis elegans  | briggsae cbr-sel-13 protein                                | 0  |                                                                                                                                                                                                                                                                             |                                                                                                                                                                                        |             | -                                                                                                                                       |
| Caenorhabditis elegans  | guanylyl cyclase family member (gcy-28)                    | 0  |                                                                                                                                                                                                                                                                             | C:GO:0016020;<br>F:GO:0004383;<br>F:GO:0004672;<br>P:GO:0009190;<br>P:GO:0006182;<br>P:GO:0006468;<br>F:GO:0000166;<br>F:GO:0005524;<br>F:GO:0008528;<br>F:GO:0016829;<br>F:GO:0016849 |             | -                                                                                                                                       |
|                         | -                                                          | 0  |                                                                                                                                                                                                                                                                             |                                                                                                                                                                                        |             | -                                                                                                                                       |
|                         | -                                                          | 0  |                                                                                                                                                                                                                                                                             |                                                                                                                                                                                        |             | IPR001810; IPR022364; G3DSA:1.20.1280.50 (GENE3D)                                                                                       |
| Caenorhabditis briggsae | autophagy protein 9                                        | 4  | C:GO:0044444;<br>C:GO:0043229;<br>C:GO:0016020;<br>P:GO:0006914                                                                                                                                                                                                             | -                                                                                                                                                                                      |             | IPR007241; PTHR13038:SF11 (PANTHER), SignalP (SIGNALP)                                                                                  |
| Loa loa                 | elegans protein partially confirmed by transcript evidence | 0  |                                                                                                                                                                                                                                                                             | C:GO:0005643;<br>P:GO:0016973                                                                                                                                                          |             | -                                                                                                                                       |
| Caenorhabditis briggsae | cleft lip and palate transmembrane protein 1-like protein  | 2  | C:GO:0016021;<br>P:GO:0006915                                                                                                                                                                                                                                               | -                                                                                                                                                                                      |             | IPR008429                                                                                                                               |
|                         | -                                                          | 0  |                                                                                                                                                                                                                                                                             |                                                                                                                                                                                        |             | -                                                                                                                                       |
|                         | -                                                          | 0  |                                                                                                                                                                                                                                                                             |                                                                                                                                                                                        |             | -                                                                                                                                       |

|                               |                                                            |    |                                                                                                                                                                       |   |                                                                                                                                                    |
|-------------------------------|------------------------------------------------------------|----|-----------------------------------------------------------------------------------------------------------------------------------------------------------------------|---|----------------------------------------------------------------------------------------------------------------------------------------------------|
| synthetic construct           | s100 calcium binding protein a11                           | 10 | C:GO:0001726;<br>P:GO:0008156;<br>F:GO:0005509;<br>F:GO:0048154;<br>P:GO:0008285;<br>F:GO:0048306;<br>P:GO:0007165;<br>F:GO:0042803;<br>C:GO:0005737;<br>C:GO:0005634 | - | IPR001751; IPR011992; IPR013787;<br>IPR018247; IPR018248; IPR018249;<br>PTHR11639 (PANTHER),<br>PTHR11639:SF7 (PANTHER), SSF47473<br>(SUPERFAMILY) |
| -                             | -                                                          | 0  | -                                                                                                                                                                     | - | -                                                                                                                                                  |
| -                             | -                                                          | 0  | -                                                                                                                                                                     | - | -                                                                                                                                                  |
| Sclerotinia sclerotiorum 1980 | d- polymerase iii subunits gamma and tau                   | 0  | F:GO:0016740;<br>F:GO:0003677;<br>P:GO:0006260;<br>F:GO:0000166;<br>F:GO:0003887;<br>F:GO:0017111;<br>F:GO:0005524;<br>F:GO:0016779;<br>C:GO:0009360                  | - | -                                                                                                                                                  |
| Sclerotinia sclerotiorum 1980 | d- polymerase iii subunits gamma and tau                   | 0  | F:GO:0016740;<br>F:GO:0003677;<br>P:GO:0006260;<br>F:GO:0000166;<br>F:GO:0003887;<br>F:GO:0017111;<br>F:GO:0005524;<br>F:GO:0016779;<br>C:GO:0009360                  | - | -                                                                                                                                                  |
| Caenorhabditis briggsae       | elegans protein partially confirmed by transcript evidence | 0  | -                                                                                                                                                                     | - | -                                                                                                                                                  |
| Caenorhabditis elegans        | hypoxia-inducible factor 1 alpha                           | 1  | P:GO:0045449                                                                                                                                                          | - | IPR000014; IPR013767;<br>G3DSA:3.30.450.20 (GENE3D),<br>PTHR23043 (PANTHER), SSF55785<br>(SUPERFAMILY)                                             |
| -                             | -                                                          | 0  | -                                                                                                                                                                     | - | -                                                                                                                                                  |
| Caenorhabditis briggsae       | ef-hand calcium binding domain 4b                          | 10 | F:GO:0005509;<br>P:GO:0007264;<br>P:GO:0006913;<br>F:GO:0005515;<br>P:GO:0032237;<br>P:GO:0006886;<br>C:GO:0005737;<br>P:GO:0002115;<br>C:GO:0005634;<br>F:GO:0005525 | - | IPR001806; IPR013753; IPR020851;<br>G3DSA:3.40.50.300 (GENE3D),<br>PTHR11708 (PANTHER),<br>PTHR11708:SF253 (PANTHER),<br>SSF52540 (SUPERFAMILY)    |
| Caenorhabditis elegans        | cation-transporting atpase                                 | 5  | F:GO:0005388;<br>C:GO:0016021;<br>P:GO:0006754;<br>F:GO:0005524;<br>P:GO:0006812                                                                                      | - | EC:3.6.3.8<br>IPR001757; IPR018303;<br>G3DSA:3.40.1110.10 (GENE3D),<br>PTHR11939:SF48 (PANTHER)                                                    |
| Caenorhabditis elegans        | elegans protein confirmed by transcript evidence           | 0  | -                                                                                                                                                                     | - | SignalP (SIGNALP)                                                                                                                                  |
| Haemonchus contortus          | elegans protein confirmed by transcript evidence           | 4  | P:GO:0040019;<br>P:GO:0009792;<br>P:GO:0040010;<br>P:GO:0002119                                                                                                       | - | -                                                                                                                                                  |

|                         |                                                            |  |   |                                                                                                   |   |                                                                                      |
|-------------------------|------------------------------------------------------------|--|---|---------------------------------------------------------------------------------------------------|---|--------------------------------------------------------------------------------------|
| Caenorhabditis elegans  | innexin protein 13                                         |  | 5 | P:GO:0040035;<br>C:GO:0005921;<br>P:GO:0040010;<br>P:GO:0040011;<br>P:GO:0002009                  | - | SignalP (SIGNALP)                                                                    |
|                         | -                                                          |  | 0 |                                                                                                   |   | -                                                                                    |
| Brugia malayi           | rho guanine nucleotide exchange factor 7                   |  | 4 | P:GO:0043065;<br>F:GO:0005085;<br>P:GO:0007165;<br>C:GO:0005737                                   | - | IPR000219; PTHR22826 (PANTHER),<br>PTHR22826:SF16 (PANTHER)                          |
| Caenorhabditis elegans  | isoform b                                                  |  | 2 | P:GO:0009792;<br>F:GO:0005488                                                                     | - | IPR002181; IPR014715; IPR014716;<br>PTHR19143 (PANTHER),<br>PTHR19143:SF28 (PANTHER) |
|                         | -                                                          |  | 0 |                                                                                                   |   | -                                                                                    |
| Caenorhabditis briggsae | Hypothetical protein CBG04107 [Caenorhabditis briggsae]    |  | 0 |                                                                                                   |   | -                                                                                    |
| Caenorhabditis briggsae | Hypothetical protein CBG04107 [Caenorhabditis briggsae]    |  | 0 |                                                                                                   |   | -                                                                                    |
| Caenorhabditis briggsae | elegans protein confirmed by transcript evidence           |  | 0 |                                                                                                   |   | IPR009673                                                                            |
|                         | -                                                          |  | 0 |                                                                                                   |   | SignalP (SIGNALP)                                                                    |
|                         | -                                                          |  | 0 |                                                                                                   |   | -                                                                                    |
|                         | -                                                          |  | 0 |                                                                                                   |   | SignalP (SIGNALP)                                                                    |
| Caenorhabditis elegans  | elegans protein partially confirmed by transcript evidence |  | 0 | P:GO:0006355;<br>F:GO:0003676;<br>C:GO:0016021;<br>F:GO:0008270;<br>C:GO:0005622;<br>P:GO:0007186 |   | IPR007087; IPR013087; IPR015880;<br>PTHR11389 (PANTHER), SSF57667<br>(SUPERFAMILY)   |
| Loa loa                 | elegans protein partially confirmed by transcript evidence |  | 0 | P:GO:0006355;<br>F:GO:0003676;<br>C:GO:0016021;<br>F:GO:0008270;<br>C:GO:0005622;<br>P:GO:0007186 |   | IPR007087; IPR013087; IPR015880;<br>PTHR11389 (PANTHER), SSF57667<br>(SUPERFAMILY)   |
| Loa loa                 | elegans protein partially confirmed by transcript evidence |  | 0 | P:GO:0006355;<br>F:GO:0003676;<br>C:GO:0016021;<br>F:GO:0008270;<br>C:GO:0005622;<br>P:GO:0007186 |   | IPR007087; IPR013087; IPR015880;<br>PTHR11389 (PANTHER), SSF57667<br>(SUPERFAMILY)   |
| Loa loa                 | elegans protein partially confirmed by transcript evidence |  | 0 | P:GO:0006355;<br>F:GO:0003676;<br>C:GO:0016021;<br>F:GO:0008270;<br>C:GO:0005622;<br>P:GO:0007186 |   | IPR007087; IPR013087; IPR015880;<br>PTHR11389 (PANTHER), SSF57667<br>(SUPERFAMILY)   |
| Loa loa                 | elegans protein partially confirmed by transcript evidence |  | 0 | P:GO:0006355;<br>F:GO:0003676;<br>C:GO:0016021;<br>F:GO:0008270;<br>C:GO:0005622;<br>P:GO:0007186 |   | IPR007087; IPR013087; IPR015880;<br>PTHR11389 (PANTHER), SSF57667<br>(SUPERFAMILY)   |
|                         | -                                                          |  | 0 |                                                                                                   |   | -                                                                                    |
|                         | -                                                          |  | 0 |                                                                                                   |   | SignalP (SIGNALP)                                                                    |
|                         | -                                                          |  | 0 |                                                                                                   |   | -                                                                                    |
| Caenorhabditis elegans  | elegans protein partially confirmed by transcript evidence |  | 0 | P:GO:0008150;<br>C:GO:0005575                                                                     |   | -                                                                                    |
|                         | -                                                          |  | 0 |                                                                                                   |   | -                                                                                    |
| Caenorhabditis briggsae | yw60_caeel ame: full=uncharacterized protein               |  | 0 |                                                                                                   |   | SignalP (SIGNALP)                                                                    |

|                          |                                                            |    |                                                                                                                                                                                        |                                                                 |                            |                                                                                                                                     |
|--------------------------|------------------------------------------------------------|----|----------------------------------------------------------------------------------------------------------------------------------------------------------------------------------------|-----------------------------------------------------------------|----------------------------|-------------------------------------------------------------------------------------------------------------------------------------|
| Rattus norvegicus        | ribosomal protein l27                                      | 4  | C:GO:0005840;<br>C:GO:0005829;<br>F:GO:0003735;<br>P:GO:0006414                                                                                                                        | -                                                               |                            | IPR001141; IPR005824; IPR014722                                                                                                     |
| Caenorhabditis briggsae  | short chain dehydroge-se reductase family protein          | 5  | P:GO:0044237;<br>C:GO:0016021;<br>P:GO:0055114;<br>F:GO:0016491;<br>F:GO:0050662                                                                                                       | -                                                               |                            | IPR002198; PTHR19410:SF98 (PANTHER)                                                                                                 |
| Caenorhabditis briggsae  | wd repeat domain 55                                        | 4  | P:GO:0040035;<br>F:GO:0005515;<br>P:GO:0006898;<br>C:GO:0044424                                                                                                                        | -                                                               |                            | IPR001680; IPR015943; PTHR22840 (PANTHER), PTHR22840:SF2 (PANTHER), SSF101908 (SUPERFAMILY)                                         |
|                          | -                                                          | 0  |                                                                                                                                                                                        |                                                                 |                            | -                                                                                                                                   |
| Caenorhabditis briggsae  | zinc carboxypeptidase family protein                       | 0  |                                                                                                                                                                                        | P:GO:0006508;<br>F:GO:0004181;<br>F:GO:0004180;<br>F:GO:0008270 |                            | -                                                                                                                                   |
| Caenorhabditis briggsae  | novel protein glutamate receptor interacting protein 1     | 1  | F:GO:0005515                                                                                                                                                                           | -                                                               |                            | -                                                                                                                                   |
| Caenorhabditis briggsae  | novel protein glutamate receptor interacting protein 1     | 1  | F:GO:0005515                                                                                                                                                                           |                                                                 |                            |                                                                                                                                     |
| Caenorhabditis briggsae  | briggsae cbr-eya-1 protein                                 | 1  | F:GO:0005515                                                                                                                                                                           | -                                                               |                            | PTHR10190 (PANTHER), PTHR10190:SF3 (PANTHER), SignalP (SIGNALP)                                                                     |
| Branchiostoma floridae   | alkaline phosphatase                                       | 1  | F:GO:0016787                                                                                                                                                                           | -                                                               |                            | IPR001952; IPR017849; IPR017850; PTHR11596 (PANTHER)                                                                                |
| Photobacterium sp. SKA34 | alkaline phosphatase                                       | 1  | F:GO:0016787                                                                                                                                                                           | -                                                               |                            | IPR001952; IPR017849; IPR017850; PTHR11596 (PANTHER)                                                                                |
| Caenorhabditis briggsae  | nitrilase 1                                                | 11 | F:GO:0047427;<br>F:GO:0080109;<br>F:GO:0047558;<br>P:GO:0019762;<br>P:GO:0046686;<br>P:GO:0009970;<br>P:GO:0051410;<br>P:GO:0000003;<br>P:GO:0019499;<br>C:GO:0016020;<br>F:GO:0080061 | -                                                               | EC:3.5.5.4;<br>EC:4.2.1.65 | IPR000132; IPR003010                                                                                                                |
| Caenorhabditis elegans   | zinc-binding dehydroge-se family protein                   | 4  | P:GO:0008152;<br>P:GO:0008340;<br>F:GO:0003824;<br>F:GO:0005488                                                                                                                        | -                                                               |                            | IPR002085; IPR011032; IPR013149; IPR013154; IPR016040; G3DSA:3.90.180.10 (GENE3D), PTHR11695:SF15 (PANTHER), SSF51735 (SUPERFAMILY) |
|                          | -                                                          | 0  |                                                                                                                                                                                        |                                                                 |                            | -                                                                                                                                   |
| Caenorhabditis elegans   | tb2 hva22 family protein                                   | 1  | F:GO:0005515                                                                                                                                                                           | -                                                               |                            | IPR004345; PTHR12300:SF13 (PANTHER)                                                                                                 |
| Caenorhabditis briggsae  | elegans protein partially confirmed by transcript evidence | 5  | C:GO:0016021;<br>P:GO:0006865;<br>C:GO:0009986;<br>F:GO:0015171;<br>P:GO:0055085                                                                                                       | -                                                               |                            | IPR002293; PTHR11785:SF76 (PANTHER)                                                                                                 |
| Caenorhabditis elegans   | briggsae cbr-rack-1 protein                                | 0  |                                                                                                                                                                                        | F:GO:0016301;<br>F:GO:0004872;<br>F:GO:0005515                  |                            | -                                                                                                                                   |

|                         |                              |    |                                                                                                                                                                                                                                           |   |                                                         |
|-------------------------|------------------------------|----|-------------------------------------------------------------------------------------------------------------------------------------------------------------------------------------------------------------------------------------------|---|---------------------------------------------------------|
| Caenorhabditis elegans  | g-protein beta subunit       | 0  | P:GO:0042335;<br>P:GO:0007626;<br>P:GO:0018991;<br>C:GO:0071013;<br>P:GO:0048477;<br>C:GO:0071011;<br>C:GO:0005875;<br>C:GO:0005737;<br>F:GO:0005080;<br>F:GO:0016301;<br>P:GO:0035220;<br>P:GO:0000398;<br>F:GO:0004872;<br>F:GO:0005515 |   | PTHR19868 (PANTHER)                                     |
| Caenorhabditis briggsae | briggsae cbr-rack-1 protein  | 10 | C:GO:0005737;<br>F:GO:0004872;<br>F:GO:0016301;<br>P:GO:0007205;<br>C:GO:0005886;<br>F:GO:0005102;<br>F:GO:0019903;<br>F:GO:0008270;<br>C:GO:0043025;<br>F:GO:0005080                                                                     | - | IPR001680; IPR011046; IPR015943;<br>PTHR19868 (PANTHER) |
| Caenorhabditis briggsae | briggsae cbr-rack-1 protein  | 10 | C:GO:0005737;<br>F:GO:0004872;<br>F:GO:0016301;<br>P:GO:0007205;<br>C:GO:0005886;<br>F:GO:0005102;<br>F:GO:0019903;<br>F:GO:0008270;<br>C:GO:0043025;<br>F:GO:0005080                                                                     | - | IPR001680; IPR011046; IPR015943;<br>PTHR19868 (PANTHER) |
| Caenorhabditis elegans  | activated c ki-se 1 receptor | 13 | F:GO:0005080;<br>C:GO:0005875;<br>P:GO:0035220;<br>P:GO:0042335;<br>P:GO:0018991;<br>C:GO:0071011;<br>F:GO:0004872;<br>P:GO:0007626;<br>P:GO:0000398;<br>F:GO:0016301;<br>C:GO:0071013;<br>P:GO:0048477;<br>C:GO:0005737                  | - | -                                                       |

|                         |                                                                          |    |                                                                                                                                                                                                                          |   |                                                                                                                      |
|-------------------------|--------------------------------------------------------------------------|----|--------------------------------------------------------------------------------------------------------------------------------------------------------------------------------------------------------------------------|---|----------------------------------------------------------------------------------------------------------------------|
| Caenorhabditis elegans  | activated c ki-se 1 receptor                                             | 13 | F:GO:0005080;<br>C:GO:0005875;<br>P:GO:0035220;<br>P:GO:0042335;<br>P:GO:0018991;<br>C:GO:0071011;<br>F:GO:0004872;<br>P:GO:0007626;<br>P:GO:0000398;<br>F:GO:0016301;<br>C:GO:0071013;<br>P:GO:0048477;<br>C:GO:0005737 | - | -                                                                                                                    |
| Caenorhabditis briggsae | guanine nucleotide binding protein (g protein) beta polypeptide 2-like 1 | 12 | C:GO:0005737;<br>F:GO:0004872;<br>P:GO:0008104;<br>P:GO:0023034;<br>F:GO:0016301;<br>P:GO:0007205;<br>C:GO:0005886;<br>P:GO:0007165;<br>F:GO:0005102;<br>F:GO:0019903;<br>C:GO:0043025;<br>F:GO:0005080                  | - | IPR001680; IPR011046; IPR015943;<br>IPR017986; IPR019775; IPR019781;<br>IPR019782; IPR020472; PTHR19868<br>(PANTHER) |
| Caenorhabditis briggsae | guanine nucleotide binding protein (g protein) beta polypeptide 2-like 1 | 12 | C:GO:0005737;<br>F:GO:0004872;<br>P:GO:0008104;<br>P:GO:0023034;<br>F:GO:0016301;<br>P:GO:0007205;<br>C:GO:0005886;<br>P:GO:0007165;<br>F:GO:0005102;<br>F:GO:0019903;<br>C:GO:0043025;<br>F:GO:0005080                  | - | IPR001680; IPR011046; IPR015943;<br>IPR017986; IPR019775; IPR019781;<br>IPR019782; IPR020472; PTHR19868<br>(PANTHER) |
| Haemonchus contortus    | thymus-specific serine protease                                          | 1  | F:GO:0005515                                                                                                                                                                                                             | - | IPR008758; G3DSA:3.40.50.1820<br>(GENE3D), PTHR11010:SF4<br>(PANTHER), SSF53474 (SUPERFAMILY)                        |
| Caenorhabditis elegans  | hypothetical protein K07B1.6 [Caenorhabditis elegans]                    | 1  | P:GO:0002119                                                                                                                                                                                                             | - | -                                                                                                                    |
| -                       | -                                                                        | 0  | -                                                                                                                                                                                                                        | - | -                                                                                                                    |
| -                       | -                                                                        | 0  | -                                                                                                                                                                                                                        | - | -                                                                                                                    |
| -                       | -                                                                        | 0  | -                                                                                                                                                                                                                        | - | -                                                                                                                    |
| Caenorhabditis briggsae | dolichyl-phosphate beta-glucosyltransferase                              | 3  | F:GO:0016740;<br>P:GO:0007379;<br>P:GO:0009880                                                                                                                                                                           | - | IPR001173; G3DSA:3.90.550.10<br>(GENE3D), PTHR10859 (PANTHER),<br>SignalP (SIGNALP), SSF53448<br>(SUPERFAMILY)       |
| Ailuropoda melanoleuca  | polyadenylate-binding protein 1-like                                     | 9  | P:GO:0006378;<br>P:GO:0008380;<br>P:GO:0048255;<br>C:GO:0005681;<br>F:GO:0008494;<br>F:GO:0008022;<br>C:GO:0005829;<br>F:GO:0000166;<br>F:GO:0008143                                                                     | - | IPR000504; IPR012677; PTHR10432<br>(PANTHER), PTHR10432:SF69<br>(PANTHER), SSF54928 (SUPERFAMILY)                    |
| Caenorhabditis briggsae | mterf domain-containing protein 2                                        | 0  | -                                                                                                                                                                                                                        | - | IPR003690; PTHR13068 (PANTHER)                                                                                       |



|                           |                                                         |   |                                                                                                                    |                                                |             |                                                                                                                  |
|---------------------------|---------------------------------------------------------|---|--------------------------------------------------------------------------------------------------------------------|------------------------------------------------|-------------|------------------------------------------------------------------------------------------------------------------|
|                           | -                                                       | 0 |                                                                                                                    |                                                |             | -                                                                                                                |
| Caenorhabditis briggsae   | equilibrative nucleoside transporter                    | 4 | P:GO:0040035;<br>P:GO:0018991;<br>C:GO:0016020;<br>P:GO:0002009                                                    | -                                              |             | IPR002259; PTHR10332:SF6 (PANTHER)                                                                               |
| Caenorhabditis elegans    | hypothetical protein E04F6.6 [Caenorhabditis elegans]   | 0 |                                                                                                                    |                                                |             | SignalP (SIGNALP)                                                                                                |
|                           | -                                                       | 0 |                                                                                                                    |                                                |             | -                                                                                                                |
| Caenorhabditis elegans    | dystrophin-like protein                                 | 7 | P:GO:0007271;<br>F:GO:0005515;<br>P:GO:0040017;<br>C:GO:0016010;<br>F:GO:0005277;<br>P:GO:0015870;<br>P:GO:0046716 | -                                              |             | -                                                                                                                |
| Loa loa                   | suppressor of defective silencing                       | 0 |                                                                                                                    |                                                |             | IPR013907; PTHR21964 (PANTHER), PTHR21964:SF1 (PANTHER)                                                          |
| Caenorhabditis briggsae   | cathepsin b-like cysteine protei-se precursor           | 3 | C:GO:0016021;<br>P:GO:0006508;<br>F:GO:0008234                                                                     | -                                              |             | IPR000668; IPR013128; IPR015643; G3DSA:3.90.70.10 (GENE3D), SSF54001 (SUPERFAMILY)                               |
| Caenorhabditis elegans    | molybdopterin synthase large                            | 4 | F:GO:0030366;<br>P:GO:0006777;<br>F:GO:0016740;<br>C:GO:0005829                                                    | -                                              |             | IPR003448; G3DSA:3.40.50.300 (GENE3D), PTHR23404 (PANTHER), SSF52540 (SUPERFAMILY)                               |
|                           | -                                                       | 0 |                                                                                                                    |                                                |             | -                                                                                                                |
|                           | -                                                       | 0 |                                                                                                                    |                                                |             | -                                                                                                                |
| Leishmania infantum JPCMS | checkpoint with forkhead and ring finger domains        | 0 |                                                                                                                    | F:GO:0046872;<br>F:GO:0008270;<br>F:GO:0005515 |             | IPR001841; IPR013083; IPR017907; IPR018957; PTHR13982 (PANTHER), PTHR13982:SF4 (PANTHER), SSF57850 (SUPERFAMILY) |
|                           | -                                                       | 0 |                                                                                                                    |                                                |             | -                                                                                                                |
| Loa loa                   | replication factor c (activator 1) 37kda                | 6 | F:GO:0017111;<br>C:GO:0005730;<br>P:GO:0006260;<br>F:GO:0003677;<br>F:GO:0005524;<br>C:GO:0005663                  | -                                              | EC:3.6.1.15 | G3DSA:1.10.8.60 (GENE3D), PTHR11669 (PANTHER), SSF52540 (SUPERFAMILY)                                            |
| Caenorhabditis elegans    | i in (lysosomal protein) homolog family member (ctns-1) | 5 | P:GO:0015811;<br>P:GO:0003333;<br>F:GO:0015171;<br>C:GO:0005765;<br>C:GO:0031410                                   | -                                              |             | IPR006603; PTHR13131 (PANTHER), PF04193 (PFAM), SignalP (SIGNALP)                                                |
| Caenorhabditis elegans    | briggsae cbr-pup-2 protein                              | 1 | P:GO:0008340                                                                                                       | -                                              |             | -                                                                                                                |
|                           | -                                                       | 0 |                                                                                                                    |                                                |             | -                                                                                                                |
| Caenorhabditis elegans    | threonyl-tr- synthetase                                 | 5 | C:GO:0005737;<br>F:GO:0004829;<br>F:GO:0005524;<br>P:GO:0006435;<br>P:GO:0007040                                   | -                                              | EC:6.1.1.3  | -                                                                                                                |
|                           | -                                                       | 0 |                                                                                                                    |                                                |             | -                                                                                                                |
| Caenorhabditis brenneri   | purity of essence                                       | 3 | P:GO:0042066;<br>P:GO:0007291;<br>F:GO:0005516                                                                     | -                                              |             | PTHR21725 (PANTHER), SignalP (SIGNALP)                                                                           |
| Caenorhabditis elegans    | briggsae cbr-qui-1 protein                              | 0 |                                                                                                                    | F:GO:0005524;<br>F:GO:0000166;<br>F:GO:0017111 |             | IPR001680; IPR011047; IPR015943; IPR017986; IPR019775; IPR019781; IPR019782; IPR020472; PTHR19871 (PANTHER)      |
| Caenorhabditis briggsae   | neuro-l symmetry protein isoform a                      | 0 |                                                                                                                    |                                                |             | -                                                                                                                |

|                         |                                                            |    |                                                                                                                                                                                                                                                                                                               |                                                                                  |                            |                                                                                                          |
|-------------------------|------------------------------------------------------------|----|---------------------------------------------------------------------------------------------------------------------------------------------------------------------------------------------------------------------------------------------------------------------------------------------------------------|----------------------------------------------------------------------------------|----------------------------|----------------------------------------------------------------------------------------------------------|
| Caenorhabditis elegans  | prostaglandin e synthase 2                                 | 0  |                                                                                                                                                                                                                                                                                                               | P:GO:0045454;<br>F:GO:0009055;<br>F:GO:0015035                                   |                            | IPR010987; PTHR12782 (PANTHER)                                                                           |
| Caenorhabditis briggsae | lambda 1                                                   | 6  | F:GO:0070403;<br>P:GO:0044281;<br>P:GO:0044237;<br>F:GO:0050104;<br>C:GO:0005829;<br>P:GO:0044238                                                                                                                                                                                                             | -                                                                                | EC:1.1.1.45                | IPR006108; IPR006176; IPR008927;<br>IPR013328; IPR016040; PTHR23309<br>(PANTHER), SSF51735 (SUPERFAMILY) |
| -                       | -                                                          | 0  |                                                                                                                                                                                                                                                                                                               |                                                                                  |                            | -                                                                                                        |
| Caenorhabditis elegans  | briggsae cbr-mppa-1 protein                                | 0  |                                                                                                                                                                                                                                                                                                               | F:GO:0046872;<br>P:GO:0006508;<br>F:GO:0003824;<br>F:GO:0004222;<br>F:GO:0008270 |                            | -                                                                                                        |
| Caenorhabditis elegans  | briggsae cbr-aap-1 protein                                 | 5  | P:GO:0008340;<br>P:GO:0008286;<br>F:GO:0019901;<br>C:GO:0044464;<br>P:GO:0040024                                                                                                                                                                                                                              | -                                                                                |                            | IPR000980; IPR001720; SSF55550<br>(SUPERFAMILY)                                                          |
| -                       | -                                                          | 0  |                                                                                                                                                                                                                                                                                                               |                                                                                  |                            | -                                                                                                        |
| Rattus norvegicus       | rr- promoter binding protein                               | 4  | F:GO:0003700;<br>F:GO:0008134;<br>P:GO:0009303;<br>P:GO:0008283                                                                                                                                                                                                                                               | -                                                                                |                            | -                                                                                                        |
| -                       | -                                                          | 0  |                                                                                                                                                                                                                                                                                                               |                                                                                  |                            | -                                                                                                        |
| Caenorhabditis briggsae | dual oxidase                                               | 18 | P:GO:0018149;<br>P:GO:0006979;<br>P:GO:0006952;<br>F:GO:0016174;<br>P:GO:0040032;<br>F:GO:0005509;<br>C:GO:0016021;<br>P:GO:0042338;<br>P:GO:0055114;<br>P:GO:0040007;<br>F:GO:0004601;<br>F:GO:0009055;<br>P:GO:0002119;<br>P:GO:0040011;<br>F:GO:0020037;<br>F:GO:0050660;<br>P:GO:0009792;<br>C:GO:0005882 | -                                                                                | EC:1.6.3.1;<br>EC:1.11.1.7 | IPR002007; IPR010255; IPR019791;<br>PTHR11475 (PANTHER)                                                  |
| -                       | -                                                          | 0  |                                                                                                                                                                                                                                                                                                               |                                                                                  |                            | -                                                                                                        |
| -                       | -                                                          | 0  |                                                                                                                                                                                                                                                                                                               |                                                                                  |                            | SignalP (SIGNALP)                                                                                        |
| -                       | -                                                          | 0  |                                                                                                                                                                                                                                                                                                               |                                                                                  |                            | SignalP (SIGNALP)                                                                                        |
| -                       | -                                                          | 0  |                                                                                                                                                                                                                                                                                                               |                                                                                  |                            | -                                                                                                        |
| Caenorhabditis elegans  | elegans protein confirmed by transcript evidence           | 0  |                                                                                                                                                                                                                                                                                                               |                                                                                  |                            | -                                                                                                        |
| Caenorhabditis elegans  | elegans protein partially confirmed by transcript evidence | 2  | P:GO:0009792;<br>P:GO:0000003                                                                                                                                                                                                                                                                                 | -                                                                                |                            | -                                                                                                        |
| -                       | -                                                          | 0  |                                                                                                                                                                                                                                                                                                               |                                                                                  |                            | -                                                                                                        |
| Loa loa                 | longevity assurance factor 1                               | 1  | C:GO:0016021                                                                                                                                                                                                                                                                                                  |                                                                                  |                            | -                                                                                                        |

|                         |                                                       |   |                                                                                                                                     |                                                                                                                                                      |              |                                                                                                                                                 |
|-------------------------|-------------------------------------------------------|---|-------------------------------------------------------------------------------------------------------------------------------------|------------------------------------------------------------------------------------------------------------------------------------------------------|--------------|-------------------------------------------------------------------------------------------------------------------------------------------------|
| Caenorhabditis elegans  | protein tyrosine receptor d                           | 8 | P:GO:0018996;<br>P:GO:0009792;<br>P:GO:0008340;<br>P:GO:0000003;<br>F:GO:0005515;<br>P:GO:0006898;<br>P:GO:0002119;<br>P:GO:0040011 | -                                                                                                                                                    |              | IPR003961; IPR008957; IPR013783;<br>PTHR10489 (PANTHER)                                                                                         |
| Caenorhabditis elegans  | map ki-se-activated protein ki-se 3                   | 6 | C:GO:0005737;<br>F:GO:0004683;<br>P:GO:0006468;<br>F:GO:0005515;<br>F:GO:0005524;<br>C:GO:0005634                                   | -                                                                                                                                                    | EC:2.7.11.17 | IPR000719; IPR008271; IPR011009;<br>IPR017441; IPR017442; IPR020636;<br>IPR020646; G3DSA:1.10.510.10<br>(GENE3D), G3DSA:3.30.200.20<br>(GENE3D) |
|                         |                                                       | 0 |                                                                                                                                     |                                                                                                                                                      |              |                                                                                                                                                 |
| Acyrtosiphon pisum      | endonuclease-reverse transcriptase                    | 0 |                                                                                                                                     | F:GO:0003723;<br>P:GO:0006278;<br>F:GO:0004519;<br>F:GO:0003964                                                                                      |              |                                                                                                                                                 |
| Bombyx mori             | endonuclease-reverse transcriptase                    | 1 | F:GO:0003824                                                                                                                        |                                                                                                                                                      |              |                                                                                                                                                 |
| Caenorhabditis briggsae | ras-related protein rab-30                            | 8 | C:GO:0005737;<br>F:GO:0005525;<br>F:GO:0005515;<br>P:GO:0006913;<br>F:GO:0004767;<br>P:GO:0006886;<br>C:GO:0005634;<br>P:GO:0007264 | -                                                                                                                                                    | EC:3.1.4.12  |                                                                                                                                                 |
|                         |                                                       | 0 |                                                                                                                                     |                                                                                                                                                      |              |                                                                                                                                                 |
| Haemochus contortus     | briggsae cbr-gst- protein                             | 3 | F:GO:0005515;<br>F:GO:0004364;<br>P:GO:0008340                                                                                      | -                                                                                                                                                    | EC:2.5.1.18  | IPR004045; IPR012335; IPR012336;<br>PTHR11571 (PANTHER),<br>PTHR11571:SF6 (PANTHER)                                                             |
|                         |                                                       | 0 |                                                                                                                                     |                                                                                                                                                      |              |                                                                                                                                                 |
| Caenorhabditis elegans  | eb module family protein                              | 0 |                                                                                                                                     | F:GO:0004674;<br>F:GO:0016810;<br>F:GO:0004672;<br>P:GO:0006468;<br>F:GO:0000166;<br>F:GO:0005524;<br>P:GO:0005975;<br>F:GO:0003824;<br>F:GO:0005488 |              |                                                                                                                                                 |
|                         |                                                       | 0 |                                                                                                                                     |                                                                                                                                                      |              |                                                                                                                                                 |
| Ancylostoma caninum     | secreted protein asp-2                                | 0 |                                                                                                                                     | F:GO:0009055;<br>P:GO:0019646;<br>C:GO:0005576                                                                                                       |              | IPR001283; IPR014044                                                                                                                            |
| Ancylostoma caninum     | secreted protein asp-2                                | 0 |                                                                                                                                     | F:GO:0009055;<br>P:GO:0019646;<br>C:GO:0005576                                                                                                       |              | IPR001283; IPR014044                                                                                                                            |
| Caenorhabditis briggsae | temporarily assigned gene -me family member (tag-163) | 1 | F:GO:0005515                                                                                                                        | -                                                                                                                                                    |              |                                                                                                                                                 |
| Loa loa                 | zinc finger protein dhhc domain containing            | 1 | F:GO:0046872                                                                                                                        | -                                                                                                                                                    |              | SignalP (SIGNALP)                                                                                                                               |
| Loa loa                 | zinc finger dhhc domain containing protein 5          | 0 |                                                                                                                                     | F:GO:0046872;<br>F:GO:0008270                                                                                                                        |              |                                                                                                                                                 |
|                         |                                                       | 0 |                                                                                                                                     |                                                                                                                                                      |              | SignalP (SIGNALP)                                                                                                                               |

|                         |                                                   |    |                                                                                                                                                                                                                          |              |                                            |                                                                                                                                                                        |
|-------------------------|---------------------------------------------------|----|--------------------------------------------------------------------------------------------------------------------------------------------------------------------------------------------------------------------------|--------------|--------------------------------------------|------------------------------------------------------------------------------------------------------------------------------------------------------------------------|
| Pan troglodytes         | complement 1 subcomponent q polypeptide gamma     | 7  | C:GO:0005730;<br>P:GO:0006958;<br>P:GO:0030853;<br>P:GO:0045650;<br>P:GO:0045087;<br>C:GO:0005576;<br>C:GO:0005737                                                                                                       | -            | -                                          |                                                                                                                                                                        |
| Caenorhabditis briggsae | briggsae cbr-sax-3 protein                        | 13 | P:GO:0007411;<br>P:GO:0001656;<br>P:GO:0001657;<br>P:GO:0050925;<br>P:GO:0001554;<br>P:GO:0050772;<br>F:GO:0046982;<br>C:GO:0009986;<br>P:GO:0007420;<br>P:GO:0007156;<br>F:GO:0042802;<br>P:GO:0032870;<br>C:GO:0030673 | -            |                                            | IPR003598; IPR003961; IPR007110;<br>IPR008957; IPR013098; IPR013783;<br>PTHR10489 (PANTHER),<br>PTHR10489:SF27 (PANTHER), SignalP<br>(SIGNALP), SSF48726 (SUPERFAMILY) |
| Caenorhabditis briggsae | loc733382 protein                                 | 0  |                                                                                                                                                                                                                          | F:GO:0005529 |                                            | IPR000922; PTHR12011 (PANTHER),<br>PTHR12011:SF1 (PANTHER)                                                                                                             |
| Pan troglodytes         | interferon induced transmembrane protein 3 (1-8u) | 8  | F:GO:0005057;<br>P:GO:0045087;<br>P:GO:0008285;<br>C:GO:0005886;<br>P:GO:0007166;<br>F:GO:0005515;<br>C:GO:0016021;<br>P:GO:0009615                                                                                      | -            |                                            | IPR007593; PTHR13999 (PANTHER)                                                                                                                                         |
| synthetic construct     | interferon induced transmembrane protein 3 (1-8u) | 8  | F:GO:0005057;<br>P:GO:0045087;<br>P:GO:0008285;<br>C:GO:0005886;<br>P:GO:0007166;<br>F:GO:0005515;<br>C:GO:0016021;<br>P:GO:0009615                                                                                      | -            |                                            | IPR007593; PTHR13999 (PANTHER)                                                                                                                                         |
| synthetic construct     | interferon induced transmembrane protein 3 (1-8u) | 5  | C:GO:0016021;<br>P:GO:0045087;<br>P:GO:0009615;<br>F:GO:0005515;<br>C:GO:0005886                                                                                                                                         | -            |                                            | -                                                                                                                                                                      |
| Pan troglodytes         | interferon induced transmembrane protein 3 (1-8u) | 5  | C:GO:0016021;<br>P:GO:0045087;<br>P:GO:0009615;<br>F:GO:0005515;<br>C:GO:0005886                                                                                                                                         | -            |                                            | IPR007593; PTHR13999 (PANTHER)                                                                                                                                         |
| Caenorhabditis elegans  | #NAME?                                            | 3  | F:GO:0016757;<br>F:GO:0005515;<br>C:GO:0016020                                                                                                                                                                           | -            |                                            | IPR001503; IPR010916;<br>PTHR11929:SF7 (PANTHER), SignalP<br>(SIGNALP)                                                                                                 |
| Caenorhabditis briggsae | bifunctio-l aminoacyl-tr- synthetase              | 6  | P:GO:0006412;<br>C:GO:0005829;<br>F:GO:0004827;<br>F:GO:0005515;<br>P:GO:0043039;<br>F:GO:0004818                                                                                                                        | -            | EC:3.6.5.3;<br>EC:6.1.1.15;<br>EC:6.1.1.17 | IPR000738; IPR009068                                                                                                                                                   |

|                         |                                                                                |    |                                                                                                                                                                                                                          |   |                                                                                                                  |
|-------------------------|--------------------------------------------------------------------------------|----|--------------------------------------------------------------------------------------------------------------------------------------------------------------------------------------------------------------------------|---|------------------------------------------------------------------------------------------------------------------|
| Caenorhabditis briggsae | r- binding identical                                                           | 4  | C:GO:0005622;<br>P:GO:0009792;<br>F:GO:0000166;<br>F:GO:0003723                                                                                                                                                          | - | IPR000504; IPR012677; IPR015465;<br>PTHR10432 (PANTHER), SSF54928<br>(SUPERFAMILY)                               |
| Caenorhabditis briggsae | r- binding identical                                                           | 4  | C:GO:0005622;<br>P:GO:0009792;<br>F:GO:0000166;<br>F:GO:0003723                                                                                                                                                          | - | IPR000504; IPR012677; IPR015465;<br>PTHR10432 (PANTHER), SSF54928<br>(SUPERFAMILY)                               |
| Caenorhabditis elegans  | solute carrier family 36 (proton amino acid symporter)<br>member isoform cra_a | 13 | P:GO:0055085;<br>F:GO:0015078;<br>C:GO:0005764;<br>F:GO:0005302;<br>C:GO:0016021;<br>F:GO:0015193;<br>F:GO:0005280;<br>F:GO:0015180;<br>P:GO:0015824;<br>P:GO:0015808;<br>P:GO:0015816;<br>P:GO:0015992;<br>C:GO:0005886 | - | IPR013057; PTHR22950 (PANTHER),<br>SignalP (SIGNALP)                                                             |
| Caenorhabditis elegans  | briggsae cbr-taf- protein                                                      | 8  | P:GO:0006367;<br>P:GO:0045944;<br>P:GO:0007517;<br>F:GO:0016251;<br>P:GO:0007283;<br>F:GO:0005515;<br>C:GO:0005669;<br>P:GO:0048813                                                                                      | - | IPR003894; IPR007900; PTHR15138<br>(PANTHER), PTHR15138:SF4<br>(PANTHER)                                         |
| Brugia malayi           | nuclear receptor subfamily group member 2                                      | 9  | P:GO:0007417;<br>P:GO:0007270;<br>F:GO:0004872;<br>P:GO:0001752;<br>P:GO:0042331;<br>F:GO:0005515;<br>C:GO:0005737;<br>P:GO:0006350;<br>P:GO:0007510                                                                     | - | IPR001628; IPR001723; IPR008946;<br>PTHR11865 (PANTHER),<br>PTHR11865:SF190 (PANTHER),<br>SSF57716 (SUPERFAMILY) |
| -                       | -                                                                              | 0  |                                                                                                                                                                                                                          |   | SignalP (SIGNALP)                                                                                                |
| Caenorhabditis elegans  | uncoordi- ted family member (unc-89)                                           | 0  |                                                                                                                                                                                                                          |   | -                                                                                                                |
| Caenorhabditis elegans  | exocyst complex component 8                                                    | 6  | P:GO:0009792;<br>P:GO:0040018;<br>P:GO:0000003;<br>P:GO:0010171;<br>P:GO:0002119;<br>P:GO:0040011                                                                                                                        | - | IPR014812; PTHR21426 (PANTHER),<br>PTHR21426:SF9 (PANTHER)                                                       |
| Caenorhabditis elegans  | exocyst complex component 7                                                    | 1  | C:GO:0044464                                                                                                                                                                                                             | - | -                                                                                                                |
| -                       | -                                                                              | 0  |                                                                                                                                                                                                                          |   | SignalP (SIGNALP)                                                                                                |

|                         |                                                             |    |                                                                                                                                                                                                                          |                                                |                             |                                                                                                                         |
|-------------------------|-------------------------------------------------------------|----|--------------------------------------------------------------------------------------------------------------------------------------------------------------------------------------------------------------------------|------------------------------------------------|-----------------------------|-------------------------------------------------------------------------------------------------------------------------|
| Ailuropoda melanoleuca  | endothelial differentiation-related factor 1                | 13 | P:GO:0019216;<br>P:GO:0043388;<br>F:GO:0005516;<br>P:GO:0006355;<br>F:GO:0043565;<br>F:GO:0003700;<br>P:GO:0045446;<br>P:GO:0007275;<br>F:GO:0004402;<br>F:GO:0003713;<br>C:GO:0005669;<br>C:GO:0005737;<br>F:GO:0008168 | -                                              | EC:2.3.1.48;<br>EC:2.1.1.0  | -                                                                                                                       |
| Caenorhabditis briggsae | briggsae cbr-max-1 protein                                  | 4  | C:GO:0005856;<br>P:GO:0008340;<br>F:GO:0005488;<br>P:GO:0040010                                                                                                                                                          | -                                              |                             | -                                                                                                                       |
| Oryctolagus cuniculus   | non-pou domain octamer-binding                              | 11 | C:GO:0042382;<br>C:GO:0016363;<br>F:GO:0003723;<br>P:GO:0006310;<br>P:GO:0006281;<br>P:GO:0045449;<br>F:GO:0042802;<br>P:GO:0008380;<br>F:GO:0003677;<br>F:GO:0000166;<br>P:GO:0006397                                   | -                                              |                             | IPR000504; IPR012677; PTHR23189 (PANTHER), PTHR23189:SF15 (PANTHER), SSF54928 (SUPERFAMILY)                             |
| -                       | -                                                           | 0  |                                                                                                                                                                                                                          |                                                |                             | -                                                                                                                       |
| Caenorhabditis elegans  | elegans protein partially confirmed by transcript evidence  | 0  |                                                                                                                                                                                                                          | F:GO:0005096;<br>P:GO:0051056;<br>C:GO:0005622 |                             | PTHR21344 (PANTHER)                                                                                                     |
| Loa loa                 | serologically defined colon cancer antigen 1                | 2  | C:GO:0005634;<br>C:GO:0005737                                                                                                                                                                                            | -                                              |                             | IPR008616; PTHR15239 (PANTHER)                                                                                          |
| Brachypodium distachyon | mdr-like abc transporter                                    | 5  | F:GO:0015440;<br>F:GO:0008559;<br>P:GO:0055085;<br>F:GO:0005524;<br>C:GO:0016021                                                                                                                                         | -                                              | EC:3.6.3.43;<br>EC:3.6.3.44 | IPR003439; IPR017871; G3DSA:3.40.50.300 (GENE3D), PTHR19242 (PANTHER), PTHR19242:SF96 (PANTHER), SSF52540 (SUPERFAMILY) |
| Caenorhabditis elegans  | prohibitin protein wph                                      | 3  | P:GO:0009792;<br>P:GO:0000003;<br>C:GO:0016020                                                                                                                                                                           | -                                              |                             | IPR000163; IPR001107; SSF117892 (SUPERFAMILY)                                                                           |
| -                       | -                                                           | 0  |                                                                                                                                                                                                                          |                                                |                             | -                                                                                                                       |
| Caenorhabditis briggsae | -dh-ubiquinone oxidoreductase b12 subunit                   | 9  | P:GO:0040035;<br>P:GO:0009792;<br>P:GO:0002119;<br>P:GO:0040018;<br>F:GO:0008137;<br>P:GO:0040010;<br>P:GO:0008340;<br>P:GO:0006898;<br>C:GO:0005739                                                                     | -                                              | EC:1.6.5.3                  | -                                                                                                                       |
| Caenorhabditis elegans  | small family member (sma-9)                                 | 1  | F:GO:0005515                                                                                                                                                                                                             | -                                              |                             | IPR007087; IPR013087; IPR015880; SSF57667 (SUPERFAMILY)                                                                 |
| Pongo abelii            | PREDICTED: hypothetical protein LOC100438967 [Pongo abelii] | 0  |                                                                                                                                                                                                                          |                                                |                             | IPR019543; PTHR23103 (PANTHER), PTHR23103:SF7 (PANTHER), SignalP (SIGNALP)                                              |
| Caenorhabditis elegans  | hypothetical protein W02H5.2 [Caenorhabditis elegans]       | 0  |                                                                                                                                                                                                                          |                                                |                             | -                                                                                                                       |

|                                      |                                                            |  |    |                                                                                                                                                                       |                                                                                  |             |                                                                                                                                                             |
|--------------------------------------|------------------------------------------------------------|--|----|-----------------------------------------------------------------------------------------------------------------------------------------------------------------------|----------------------------------------------------------------------------------|-------------|-------------------------------------------------------------------------------------------------------------------------------------------------------------|
| Caenorhabditis briggsae              | testis derived transcript                                  |  | 3  | C:GO:0005737;<br>F:GO:0046872;<br>P:GO:0008340                                                                                                                        | -                                                                                |             | IPR001781; IPR010442; PTHR18973 (PANTHER), PTHR18973:SF105 (PANTHER), SSF57716 (SUPERFAMILY)                                                                |
|                                      | -                                                          |  | 0  |                                                                                                                                                                       |                                                                                  |             | PTHR10845 (PANTHER), PTHR10845:SF14 (PANTHER)                                                                                                               |
| Caenorhabditis elegans               | briggsae cbr-wee- protein                                  |  | 9  | C:GO:0019898;<br>C:GO:0043231;<br>F:GO:0004674;<br>P:GO:0051447;<br>P:GO:0002119;<br>C:GO:0044444;<br>P:GO:0048477;<br>P:GO:0051327;<br>P:GO:0009790                  | -                                                                                | EC:2.7.11.0 | IPR000719; IPR008271; IPR011009; IPR017441; IPR017442; G3DSA:1.10.510.10 (GENE3D), G3DSA:3.30.200.20 (GENE3D), PTHR11042 (PANTHER), PTHR11042:SF6 (PANTHER) |
| Caenorhabditis elegans               | briggsae cbr-wee- protein                                  |  | 9  | C:GO:0019898;<br>C:GO:0043231;<br>F:GO:0004674;<br>P:GO:0051447;<br>P:GO:0002119;<br>C:GO:0044444;<br>P:GO:0048477;<br>P:GO:0051327;<br>P:GO:0009790                  | -                                                                                | EC:2.7.11.0 | IPR000719; IPR008271; IPR011009; IPR017441; IPR017442; G3DSA:1.10.510.10 (GENE3D), G3DSA:3.30.200.20 (GENE3D), PTHR11042 (PANTHER), PTHR11042:SF6 (PANTHER) |
|                                      | -                                                          |  | 0  |                                                                                                                                                                       |                                                                                  |             | SignalP (SIGNALP)                                                                                                                                           |
| Caenorhabditis elegans               | cdt1 protein                                               |  | 3  | P:GO:0007369;<br>P:GO:0000003;<br>C:GO:0044424                                                                                                                        | -                                                                                |             | IPR014939; SSF46785 (SUPERFAMILY)                                                                                                                           |
| Caenorhabditis briggsae              | e3 ubiquitin-protein ligase mib2                           |  | 2  | F:GO:0046872;<br>F:GO:0003824                                                                                                                                         | -                                                                                |             | IPR001841; IPR013083; PTHR18958 (PANTHER), PTHR18958:SF268 (PANTHER)                                                                                        |
| Caenorhabditis briggsae              | e3 ubiquitin-protein ligase mib2                           |  | 2  | F:GO:0046872;<br>F:GO:0003824                                                                                                                                         | -                                                                                |             | IPR001841; IPR013083; PTHR18958 (PANTHER), PTHR18958:SF268 (PANTHER)                                                                                        |
| Caenorhabditis elegans               | elegans protein partially confirmed by transcript evidence |  | 0  |                                                                                                                                                                       |                                                                                  |             | -                                                                                                                                                           |
| Phthorimaea operculella granulovirus | ubiquitin                                                  |  | 1  | C:GO:0005737                                                                                                                                                          | -                                                                                |             | -                                                                                                                                                           |
| Anopheles gambiae str. PEST          | ubiquitin                                                  |  | 0  |                                                                                                                                                                       | F:GO:0003735;<br>P:GO:0006412;<br>C:GO:0005737;<br>C:GO:0005840;<br>C:GO:0005622 |             | -                                                                                                                                                           |
| Caenorhabditis elegans               | dead (asp-glu-ala-asp) box polypeptide 18                  |  | 4  | F:GO:0008026;<br>F:GO:0003723;<br>P:GO:0006200;<br>F:GO:0005524                                                                                                       | -                                                                                |             | IPR001650; G3DSA:3.40.50.300 (GENE3D), PTHR10967 (PANTHER), PTHR10967:SF23 (PANTHER), SSF52540 (SUPERFAMILY)                                                |
| Mus musculus                         | small proline-rich protein 3                               |  | 0  |                                                                                                                                                                       | P:GO:0031424;<br>F:GO:0005515                                                    |             | -                                                                                                                                                           |
| Ailuropoda melanoleuca               | heterogeneous nuclear ribonucleoprotein m                  |  | 10 | F:GO:0003823;<br>C:GO:0005730;<br>C:GO:0005887;<br>C:GO:0042382;<br>F:GO:0019904;<br>C:GO:0005681;<br>F:GO:0003723;<br>P:GO:0000380;<br>C:GO:0016363;<br>F:GO:0000166 | -                                                                                |             | IPR000504; IPR012677; PTHR23003 (PANTHER), PTHR23003:SF6 (PANTHER), SSF54928 (SUPERFAMILY)                                                                  |

|                         |                                                                           |  |    |                                                                                                                                                                       |                                                                                                                                                      |                            |                                                                                                                                                           |
|-------------------------|---------------------------------------------------------------------------|--|----|-----------------------------------------------------------------------------------------------------------------------------------------------------------------------|------------------------------------------------------------------------------------------------------------------------------------------------------|----------------------------|-----------------------------------------------------------------------------------------------------------------------------------------------------------|
| Loa loa                 | asparaginyl-tr- synthetase mitochondrial                                  |  | 3  | F:GO:0016874;<br>P:GO:0006412;<br>C:GO:0005739                                                                                                                        | -                                                                                                                                                    | EC:3.6.5.3                 | IPR004364; IPR004365; IPR006195;<br>IPR012340; IPR016027; IPR018150;<br>G3DSA:3.30.930.10 (GENE3D),<br>PTHR22594:SF6 (PANTHER), SSF55681<br>(SUPERFAMILY) |
| Caenorhabditis elegans  | fatty acid elongation protein 3                                           |  | 2  | C:GO:0016021;<br>P:GO:0007283                                                                                                                                         | -                                                                                                                                                    |                            | IPR002076                                                                                                                                                 |
| Caenorhabditis briggsae | 60s ribosomal protein I17                                                 |  | 10 | P:GO:0000022;<br>P:GO:0006412;<br>P:GO:0040010;<br>F:GO:0003735;<br>P:GO:0000003;<br>P:GO:0007413;<br>P:GO:0002119;<br>P:GO:0040011;<br>P:GO:0009792;<br>C:GO:0022625 | -                                                                                                                                                    | EC:3.6.5.3                 | PTHR10010 (PANTHER),<br>PTHR10010:SF4 (PANTHER)                                                                                                           |
| Caenorhabditis elegans  | 60s ribosomal protein I17                                                 |  | 9  | P:GO:0006412;<br>P:GO:0040010;<br>F:GO:0003735;<br>P:GO:0000003;<br>C:GO:0015934;<br>P:GO:0007413;<br>P:GO:0002119;<br>P:GO:0040011;<br>P:GO:0009792                  | -                                                                                                                                                    | EC:3.6.5.3                 | SignalP (SIGNALP)                                                                                                                                         |
| Caenorhabditis briggsae | leukocyte cell-derived chemotaxin 2                                       |  | 0  |                                                                                                                                                                       | F:GO:0004222;<br>P:GO:0030851;<br>P:GO:0001501;<br>C:GO:0005737;<br>C:GO:0005576;<br>P:GO:0006935;<br>P:GO:0006508;<br>P:GO:0030178;<br>C:GO:0005615 |                            | IPR008663; IPR016047;<br>G3DSA:2.70.70.10 (GENE3D)                                                                                                        |
| Brugia malayi           | myotubularin-related family protein                                       |  | 0  |                                                                                                                                                                       | P:GO:0016311;<br>F:GO:0016791                                                                                                                        |                            | -                                                                                                                                                         |
|                         |                                                                           |  | 0  |                                                                                                                                                                       |                                                                                                                                                      |                            | -                                                                                                                                                         |
|                         |                                                                           |  | 0  |                                                                                                                                                                       |                                                                                                                                                      |                            | -                                                                                                                                                         |
|                         |                                                                           |  | 0  |                                                                                                                                                                       |                                                                                                                                                      |                            | -                                                                                                                                                         |
| Loa loa                 | r--binding protein pno1                                                   |  | 4  | C:GO:0005730;<br>P:GO:0040035;<br>P:GO:0009792;<br>F:GO:0003723                                                                                                       | -                                                                                                                                                    |                            | -                                                                                                                                                         |
|                         |                                                                           |  | 0  |                                                                                                                                                                       |                                                                                                                                                      |                            | -                                                                                                                                                         |
|                         |                                                                           |  | 0  |                                                                                                                                                                       |                                                                                                                                                      |                            | -                                                                                                                                                         |
| Caenorhabditis elegans  | yt31_caeel ame: full=uncharacterized protein                              |  | 0  |                                                                                                                                                                       |                                                                                                                                                      |                            | -                                                                                                                                                         |
| Caenorhabditis elegans  | fanci (fanconi anemia complex component i) homolog family member (fnci-1) |  | 0  |                                                                                                                                                                       |                                                                                                                                                      |                            | -                                                                                                                                                         |
| Caenorhabditis briggsae | elegans protein partially confirmed by transcript evidence                |  | 6  | C:GO:0005777;<br>P:GO:0055114;<br>P:GO:0006635;<br>F:GO:0003995;<br>F:GO:0050660;<br>F:GO:0003997                                                                     | -                                                                                                                                                    | EC:1.3.99.3;<br>EC:1.3.3.6 | IPR009100; IPR012258; IPR013786;<br>PTHR10909 (PANTHER)                                                                                                   |



|                            |                                                                          |   |                                                                                                                    |                                                                                                                    |            |                                                      |
|----------------------------|--------------------------------------------------------------------------|---|--------------------------------------------------------------------------------------------------------------------|--------------------------------------------------------------------------------------------------------------------|------------|------------------------------------------------------|
| Caenorhabditis elegans     | vitellogenin structural genes (yolk protein genes) family member (vit-6) | 0 |                                                                                                                    | P:GO:0006869;<br>F:GO:0005319;<br>P:GO:0006886;<br>F:GO:0045735;<br>F:GO:0005515;<br>C:GO:0005576;<br>F:GO:0008565 |            | IPR015816                                            |
| Caenorhabditis elegans     | vitellogenin structural genes (yolk protein genes) family member (vit-6) | 0 |                                                                                                                    | P:GO:0006869;<br>F:GO:0005319;<br>F:GO:0045735;<br>P:GO:0006886;<br>C:GO:0005576;<br>F:GO:0008565                  |            | IPR015819; SignalP (SIGNALP)                         |
| Caenorhabditis elegans     | vitellogenin structural genes (yolk protein genes) family member (vit-6) | 0 |                                                                                                                    | P:GO:0006869;<br>F:GO:0005319;<br>F:GO:0045735;<br>P:GO:0006886;<br>C:GO:0005576;<br>F:GO:0008565                  |            | IPR015819; SignalP (SIGNALP)                         |
| Caenorhabditis briggsae    | vitellogenin structural genes (yolk protein genes) family member (vit-6) | 0 |                                                                                                                    | P:GO:0006869;<br>F:GO:0005319;<br>P:GO:0006886;<br>F:GO:0045735;<br>C:GO:0005576;<br>F:GO:0008565                  |            | IPR015816                                            |
| Oscheius sp. (strain CEW1) | vitellogenin structural genes (yolk protein genes) family member (vit-6) | 5 | P:GO:0006869;<br>F:GO:0005319;<br>P:GO:0006886;<br>F:GO:0008565;<br>F:GO:0005515                                   | -                                                                                                                  |            | IPR001747; IPR015816; PTHR23345 (PANTHER)            |
| Loa loa                    | 40s ribosomal protein s13                                                | 7 | P:GO:0009792;<br>P:GO:0002119;<br>C:GO:0005840;<br>F:GO:0003735;<br>P:GO:0000003;<br>P:GO:0040007;<br>P:GO:0006412 | -                                                                                                                  | EC:3.6.5.3 |                                                      |
| Loa loa                    | 40s ribosomal protein s13                                                | 7 | P:GO:0009792;<br>P:GO:0002119;<br>C:GO:0005840;<br>F:GO:0003735;<br>P:GO:0000003;<br>P:GO:0040007;<br>P:GO:0006412 | -                                                                                                                  | EC:3.6.5.3 |                                                      |
| Oscheius sp. (strain CEW1) | vitellogenin structural genes (yolk protein genes) family member (vit-6) | 5 | F:GO:0005319;<br>F:GO:0005515;<br>P:GO:0006869;<br>F:GO:0008565;<br>P:GO:0006886                                   | -                                                                                                                  |            | IPR001747; IPR015816; IPR015819; PTHR23345 (PANTHER) |

|                     |                                        |    |                                                                                                                                                                                        |                                                                                                                                                                                        |   |                                                                                                                       |
|---------------------|----------------------------------------|----|----------------------------------------------------------------------------------------------------------------------------------------------------------------------------------------|----------------------------------------------------------------------------------------------------------------------------------------------------------------------------------------|---|-----------------------------------------------------------------------------------------------------------------------|
| Loa loa             | ribosomal protein s13                  | 11 | F:GO:0003729;<br>C:GO:0005730;<br>P:GO:0040007;<br>F:GO:0003735;<br>P:GO:0000003;<br>P:GO:0006414;<br>C:GO:0022627;<br>P:GO:0033119;<br>P:GO:0002119;<br>F:GO:0005515;<br>P:GO:0009792 | -                                                                                                                                                                                      |   |                                                                                                                       |
| Loa loa             | ribosomal protein s13                  | 11 | F:GO:0003729;<br>C:GO:0005730;<br>P:GO:0040007;<br>F:GO:0003735;<br>P:GO:0000003;<br>P:GO:0006414;<br>C:GO:0022627;<br>P:GO:0033119;<br>P:GO:0002119;<br>F:GO:0005515;<br>P:GO:0009792 | -                                                                                                                                                                                      |   |                                                                                                                       |
| Ancylostoma caninum | c-type lectin family member (clec-266) | 0  |                                                                                                                                                                                        | F:GO:0004888;<br>C:GO:0016021;<br>C:GO:0016020;<br>F:GO:0005529;<br>F:GO:0003674;<br>C:GO:0009897;<br>C:GO:0005575;<br>C:GO:0005887;<br>P:GO:0008150;<br>F:GO:0005509;<br>F:GO:0005488 | - |                                                                                                                       |
| Ancylostoma caninum | c-type lectin family member (clec-266) | 0  |                                                                                                                                                                                        | F:GO:0004888;<br>C:GO:0016021;<br>C:GO:0016020;<br>F:GO:0005529;<br>F:GO:0003674;<br>C:GO:0009897;<br>C:GO:0005575;<br>C:GO:0005887;<br>P:GO:0008150;<br>F:GO:0005509;<br>F:GO:0005488 |   | IPR001304; IPR013032; IPR016186;<br>IPR016187; PTHR22802 (PANTHER),<br>PTHR22802:SF15 (PANTHER), SignalP<br>(SIGNALP) |
| Ancylostoma caninum | c-type lectin family member (clec-266) | 0  |                                                                                                                                                                                        | F:GO:0004888;<br>C:GO:0016021;<br>C:GO:0016020;<br>F:GO:0005529;<br>F:GO:0003674;<br>C:GO:0009897;<br>C:GO:0005575;<br>C:GO:0005887;<br>P:GO:0008150;<br>F:GO:0005509;<br>F:GO:0005488 |   | IPR001304; IPR013032; IPR016186;<br>IPR016187; PTHR22802 (PANTHER),<br>PTHR22802:SF15 (PANTHER)                       |

|                         |                                                  |    |                                                                                                                                                                       |                                                                                                                    |            |                                                                                                                                       |
|-------------------------|--------------------------------------------------|----|-----------------------------------------------------------------------------------------------------------------------------------------------------------------------|--------------------------------------------------------------------------------------------------------------------|------------|---------------------------------------------------------------------------------------------------------------------------------------|
| Caenorhabditis briggsae | ectonucleoside triphosphate diphosphohydrolase 4 | 5  | C:GO:0000139;<br>P:GO:0030154;<br>P:GO:0007506;<br>F:GO:0017110;<br>C:GO:0016021                                                                                      | -                                                                                                                  | EC:3.6.1.6 | IPR000407; PTHR11782:SF5 (PANTHER)                                                                                                    |
| Caenorhabditis elegans  | histidyl-tr- cytoplasmic                         | 4  | C:GO:0005737;<br>F:GO:0004812;<br>P:GO:0006418;<br>F:GO:0000166                                                                                                       | -                                                                                                                  |            | IPR004154; IPR004516;<br>G3DSA:3.30.930.10 (GENE3D),<br>SSF55681 (SUPERFAMILY)                                                        |
| Brugia malayi           | coiled-coil domain-containing protein 111        | 0  |                                                                                                                                                                       | P:GO:0006260;<br>F:GO:0003674;<br>P:GO:0006269;<br>P:GO:0008150;<br>F:GO:0003896;<br>C:GO:0005575                  |            | -                                                                                                                                     |
| Caenorhabditis briggsae | wd-repeat protein                                | 3  | C:GO:0044444;<br>P:GO:0040011;<br>C:GO:0043229                                                                                                                        | -                                                                                                                  |            | IPR011047; IPR015943; IPR017986;<br>IPR019781; IPR019782; PTHR14221 (PANTHER)                                                         |
| Loa loa                 | hypothetical protein LOAG_06732 [Loa loa]        | 0  |                                                                                                                                                                       |                                                                                                                    |            | -                                                                                                                                     |
| Caenorhabditis briggsae | cdk5 and abl enzyme substrate 1                  | 2  | F:GO:0005515;<br>C:GO:0005829                                                                                                                                         | -                                                                                                                  |            | IPR006670; IPR006671; IPR011028;<br>IPR013763; PTHR22896 (PANTHER)                                                                    |
|                         | -                                                | 0  |                                                                                                                                                                       |                                                                                                                    |            | -                                                                                                                                     |
| Caenorhabditis briggsae | pi-3-ki-se-related ki-se smg-1                   | 3  | F:GO:0005488;<br>P:GO:0009987;<br>F:GO:0016740                                                                                                                        | -                                                                                                                  |            | IPR000403; IPR003152; IPR011009;<br>PTHR11139 (PANTHER),<br>PTHR11139:SF9 (PANTHER)                                                   |
| Caenorhabditis elegans  | chromosome 20 open reading frame 3               | 0  |                                                                                                                                                                       | P:GO:0009058;<br>C:GO:0009986;<br>C:GO:0016021;<br>C:GO:0016020;<br>P:GO:0008150;<br>F:GO:0016844;<br>F:GO:0004064 |            | -                                                                                                                                     |
| Gallus gallus           | mkiaa0236 protein                                | 0  |                                                                                                                                                                       |                                                                                                                    |            | IPR015880                                                                                                                             |
| Caenorhabditis briggsae | briggsae cbr-abf-2 protein                       | 0  |                                                                                                                                                                       |                                                                                                                    |            | SignalP (SIGNALP)                                                                                                                     |
| Homo sapiens            | mhc class i antigen                              | 9  | C:GO:0000139;<br>F:GO:0032393;<br>C:GO:0005887;<br>F:GO:0005515;<br>C:GO:0031901;<br>P:GO:0002474;<br>P:GO:0006955;<br>P:GO:0044419;<br>C:GO:0042612                  | -                                                                                                                  |            | IPR003006; IPR003597; IPR013783;<br>PTHR16675 (PANTHER),<br>PTHR16675:SF53 (PANTHER),<br>SSF48726 (SUPERFAMILY)                       |
| Callithrix jacchus      | mhc class i antigen                              | 10 | F:GO:0032393;<br>C:GO:0005887;<br>C:GO:0005624;<br>P:GO:0006952;<br>F:GO:0005515;<br>P:GO:0002474;<br>C:GO:0005576;<br>P:GO:0006955;<br>P:GO:0044419;<br>C:GO:0042612 | -                                                                                                                  |            | IPR003006; IPR003597; IPR007110;<br>IPR010579; IPR013783; PTHR16675 (PANTHER),<br>PTHR16675:SF53 (PANTHER),<br>SSF48726 (SUPERFAMILY) |

|                |                      |    |                                                                                                                                                                                                         |   |  |                                                                                                                                       |
|----------------|----------------------|----|---------------------------------------------------------------------------------------------------------------------------------------------------------------------------------------------------------|---|--|---------------------------------------------------------------------------------------------------------------------------------------|
| Homo sapiens   | mhc class i antigen  | 12 | C:GO:0000139;<br>F:GO:0032393;<br>C:GO:0005887;<br>C:GO:0005624;<br>P:GO:0006952;<br>F:GO:0005515;<br>C:GO:0031901;<br>P:GO:0002474;<br>C:GO:0005576;<br>P:GO:0006955;<br>P:GO:0044419;<br>C:GO:0042612 | - |  | IPR003006; IPR003597; IPR010579;<br>IPR013783; PTHR16675 (PANTHER),<br>PTHR16675:SF53 (PANTHER),<br>SSF48726 (SUPERFAMILY)            |
| Homo sapiens   | mhc class i antigen  | 9  | C:GO:0000139;<br>F:GO:0032393;<br>C:GO:0005887;<br>F:GO:0005515;<br>C:GO:0031901;<br>P:GO:0002474;<br>P:GO:0006955;<br>P:GO:0044419;<br>C:GO:0042612                                                    | - |  | IPR003006; IPR003597; IPR007110;<br>IPR013783; PTHR16675 (PANTHER),<br>PTHR16675:SF53 (PANTHER),<br>SSF48726 (SUPERFAMILY)            |
| Homo sapiens   | mhc class i antigen  | 9  | C:GO:0000139;<br>F:GO:0032393;<br>C:GO:0005887;<br>F:GO:0005515;<br>C:GO:0031901;<br>P:GO:0002474;<br>P:GO:0006955;<br>P:GO:0044419;<br>C:GO:0042612                                                    | - |  | SignalP (SIGNALP)                                                                                                                     |
| Macaca mulatta | mhc class i antigen  | 10 | F:GO:0032393;<br>C:GO:0005887;<br>C:GO:0005624;<br>P:GO:0006952;<br>F:GO:0005515;<br>P:GO:0002474;<br>C:GO:0005576;<br>P:GO:0006955;<br>P:GO:0044419;<br>C:GO:0042612                                   | - |  | IPR003006; IPR003597; IPR007110;<br>IPR010579; IPR013783; PTHR16675<br>(PANTHER), PTHR16675:SF53<br>(PANTHER), SSF48726 (SUPERFAMILY) |
| Homo sapiens   | mhc class ib antigen | 9  | C:GO:0000139;<br>F:GO:0032393;<br>C:GO:0005887;<br>F:GO:0005515;<br>C:GO:0031901;<br>P:GO:0002474;<br>P:GO:0006955;<br>P:GO:0044419;<br>C:GO:0042612                                                    | - |  | IPR003006; IPR003597; IPR007110;<br>IPR013783; PTHR16675 (PANTHER),<br>PTHR16675:SF53 (PANTHER),<br>SSF48726 (SUPERFAMILY)            |

|                         |                                                        |    |                                                                                                                                                                                        |                                                                                  |                                                                                                                                                       |
|-------------------------|--------------------------------------------------------|----|----------------------------------------------------------------------------------------------------------------------------------------------------------------------------------------|----------------------------------------------------------------------------------|-------------------------------------------------------------------------------------------------------------------------------------------------------|
| Homo sapiens            | mhc class i antigen                                    | 11 | C:GO:0000139;<br>F:GO:0032393;<br>C:GO:0005887;<br>C:GO:0005624;<br>P:GO:0006952;<br>F:GO:0005515;<br>C:GO:0031901;<br>P:GO:0002474;<br>P:GO:0006955;<br>P:GO:0044419;<br>C:GO:0042612 | -                                                                                | IPR003006; IPR003597; IPR007110;<br>IPR010579; IPR013783; PTHR16675<br>(PANTHER), PTHR16675:SF53<br>(PANTHER), SSF48726 (SUPERFAMILY)                 |
| Homo sapiens            | mhc class i antigen                                    | 9  | C:GO:0000139;<br>F:GO:0032393;<br>C:GO:0005887;<br>F:GO:0005515;<br>C:GO:0031901;<br>P:GO:0002474;<br>P:GO:0006955;<br>P:GO:0044419;<br>C:GO:0042612                                   | -                                                                                | SignalP (SIGNALP)                                                                                                                                     |
| Homo sapiens            | major histocompatibility class c                       | 7  | P:GO:0006955;<br>F:GO:0032393;<br>C:GO:0005576;<br>P:GO:0044419;<br>C:GO:0005887;<br>P:GO:0002474;<br>C:GO:0042612                                                                     | -                                                                                | SignalP (SIGNALP)                                                                                                                                     |
|                         | -                                                      | 0  |                                                                                                                                                                                        |                                                                                  | -                                                                                                                                                     |
| Caenorhabditis elegans  | fatty acid desaturase                                  | 3  | P:GO:0055114;<br>F:GO:0016491;<br>P:GO:0006629                                                                                                                                         | -                                                                                | IPR005804                                                                                                                                             |
| Caenorhabditis briggsae | protein flightless-1 homolog                           | 1  | F:GO:0003779                                                                                                                                                                           | -                                                                                | IPR001611; IPR003591;<br>G3DSA:3.80.10.10 (GENE3D),<br>PTHR23155 (PANTHER),<br>PTHR23155:SF37 (PANTHER), PS51450<br>(PROFILE), SSF52047 (SUPERFAMILY) |
| Caenorhabditis elegans  | elegans protein confirmed by transcript evidence       | 0  |                                                                                                                                                                                        | P:GO:0000003;<br>P:GO:0006898;<br>P:GO:0009792;<br>P:GO:0002119;<br>P:GO:0040007 | SignalP (SIGNALP)                                                                                                                                     |
|                         |                                                        |    |                                                                                                                                                                                        |                                                                                  | IPR007110; IPR010939; IPR013098;<br>IPR013783; PTHR19897 (PANTHER),<br>PTHR19897:SF9 (PANTHER), SSF48726<br>(SUPERFAMILY)                             |
| Caenorhabditis elegans  | hypothetical protein Y48G9A.3 [Caenorhabditis elegans] | 1  | P:GO:0000003                                                                                                                                                                           | -                                                                                | IPR011989; PTHR23346 (PANTHER),<br>PTHR23346:SF4 (PANTHER)                                                                                            |

|                         |                                                            |    |                                                                                                                                                                                                                          |                                                |                           |                                                                                                                                          |
|-------------------------|------------------------------------------------------------|----|--------------------------------------------------------------------------------------------------------------------------------------------------------------------------------------------------------------------------|------------------------------------------------|---------------------------|------------------------------------------------------------------------------------------------------------------------------------------|
| Caenorhabditis elegans  | aldehyde dehydroge-se                                      | 13 | F:GO:0004028;<br>C:GO:0005773;<br>F:GO:0004030;<br>P:GO:0009269;<br>F:GO:0004029;<br>P:GO:0008218;<br>P:GO:0055114;<br>P:GO:0009737;<br>C:GO:0016021;<br>P:GO:0006081;<br>C:GO:0005783;<br>C:GO:0009536;<br>P:GO:0009651 | -                                              | EC:1.2.1.5;<br>EC:1.2.1.3 | IPR012394; IPR015590; IPR016161;<br>IPR016163                                                                                            |
| Caenorhabditis briggsae | atg2 autophagy related 2 homolog a                         | 0  |                                                                                                                                                                                                                          | F:GO:0003674;<br>C:GO:0005575                  |                           | PTHR13190 (PANTHER),<br>PTHR13190:SF2 (PANTHER)                                                                                          |
| Brugia pahangi          | nuclear receptor nhr-6                                     | 1  | F:GO:0005515                                                                                                                                                                                                             | -                                              |                           | PTHR11865 (PANTHER),<br>PTHR11865:SF168 (PANTHER)                                                                                        |
| Caenorhabditis elegans  | ht004 protein                                              | 5  | P:GO:0000003;<br>P:GO:0010171;<br>P:GO:0040010;<br>P:GO:0002119;<br>P:GO:0040011                                                                                                                                         | -                                              |                           | PTHR12732 (PANTHER)                                                                                                                      |
| Caenorhabditis briggsae | bicaudal d homolog 1                                       | 2  | C:GO:0043229;<br>P:GO:0051179                                                                                                                                                                                            | -                                              |                           | SignalP (SIGNALP)                                                                                                                        |
| Caenorhabditis briggsae | elegans protein confirmed by transcript evidence           | 1  | F:GO:0003677                                                                                                                                                                                                             | -                                              |                           | IPR001766; IPR011991; SSF46785<br>(SUPERFAMILY)                                                                                          |
| Loa loa                 | transmembrane protein 93                                   | 3  | P:GO:0009792;<br>P:GO:0040007;<br>P:GO:0002119                                                                                                                                                                           | -                                              |                           | -                                                                                                                                        |
| Caenorhabditis briggsae | briggsae cbr-xpc-1 protein                                 | 0  |                                                                                                                                                                                                                          | F:GO:0003684;<br>P:GO:0006289;<br>C:GO:0005634 |                           | -                                                                                                                                        |
|                         | -                                                          | 0  |                                                                                                                                                                                                                          |                                                |                           | -                                                                                                                                        |
| Caenorhabditis elegans  | elegans protein partially confirmed by transcript evidence | 4  | C:GO:0005887;<br>P:GO:0006760;<br>F:GO:0004181;<br>P:GO:0006508                                                                                                                                                          | -                                              | EC:3.4.17.0               | G3DSA:3.40.630.10 (GENE3D),<br>G3DSA:3.50.30.30 (GENE3D),<br>PTHR10404 (PANTHER),<br>PTHR10404:SF15 (PANTHER),<br>SSF52025 (SUPERFAMILY) |
|                         | -                                                          | 0  |                                                                                                                                                                                                                          |                                                |                           | -                                                                                                                                        |
|                         | -                                                          | 0  |                                                                                                                                                                                                                          |                                                |                           | SignalP (SIGNALP)                                                                                                                        |
| Caenorhabditis elegans  | transport and golgi organization-like                      | 1  | F:GO:0005515                                                                                                                                                                                                             | -                                              |                           | IPR000210; IPR011333; IPR013069;<br>IPR013089; PTHR23230:SF183<br>(PANTHER)                                                              |
| Caenorhabditis elegans  | in family member (ttn-1)                                   | 3  | P:GO:0009792;<br>F:GO:0004672;<br>F:GO:0000166                                                                                                                                                                           | -                                              |                           | -                                                                                                                                        |
| Loa loa                 | kiaa1018 protein                                           | 2  | F:GO:0005515;<br>P:GO:0006281                                                                                                                                                                                            | -                                              |                           | -                                                                                                                                        |
|                         | -                                                          | 0  |                                                                                                                                                                                                                          |                                                |                           | -                                                                                                                                        |
|                         | -                                                          | 0  |                                                                                                                                                                                                                          |                                                |                           | -                                                                                                                                        |
|                         | -                                                          | 0  |                                                                                                                                                                                                                          |                                                |                           | -                                                                                                                                        |
|                         | -                                                          | 0  |                                                                                                                                                                                                                          |                                                |                           | -                                                                                                                                        |

|                         |                                                  |    |                                                                                                                                                                                                                                                                                                                                                                                   |            |                                                                                                                                               |
|-------------------------|--------------------------------------------------|----|-----------------------------------------------------------------------------------------------------------------------------------------------------------------------------------------------------------------------------------------------------------------------------------------------------------------------------------------------------------------------------------|------------|-----------------------------------------------------------------------------------------------------------------------------------------------|
| Caenorhabditis elegans  | ubiquitin specific peptidase 24                  | 0  | F:GO:0004221;<br>F:GO:0016787;<br>F:GO:0003674;<br>C:GO:0005575;<br>P:GO:0006511;<br>F:GO:0008234;<br>F:GO:0008233;<br>P:GO:0008150;<br>F:GO:0005488                                                                                                                                                                                                                              |            | PTHR10420 (PANTHER),<br>PTHR10420:SF3 (PANTHER)                                                                                               |
| Caenorhabditis briggsae | elegans protein confirmed by transcript evidence | 0  | C:GO:0016021;<br>F:GO:0005375;<br>P:GO:0006825                                                                                                                                                                                                                                                                                                                                    |            | -                                                                                                                                             |
|                         | -                                                | 0  |                                                                                                                                                                                                                                                                                                                                                                                   |            | IPR000175; PTHR11616:SF15<br>(PANTHER), SignalP (SIGNALP)                                                                                     |
|                         | -                                                | 0  |                                                                                                                                                                                                                                                                                                                                                                                   |            | -                                                                                                                                             |
|                         | -                                                | 0  |                                                                                                                                                                                                                                                                                                                                                                                   |            | -                                                                                                                                             |
| Loa loa                 | fatty acid amide hydrolase                       | 10 | P:GO:0009062;<br>F:GO:0017064;<br>F:GO:0016788;<br>F:GO:0005543;<br>C:GO:0031090;<br>C:GO:0043231;<br>C:GO:0044444;<br>C:GO:0016021;<br>F:GO:0004040;<br>F:GO:0042803                                                                                                                                                                                                             | EC:3.5.1.4 | IPR000120; PTHR11895:SF4<br>(PANTHER)                                                                                                         |
|                         | -                                                | 0  |                                                                                                                                                                                                                                                                                                                                                                                   |            | -                                                                                                                                             |
|                         | -                                                | 0  |                                                                                                                                                                                                                                                                                                                                                                                   |            | -                                                                                                                                             |
|                         | -                                                | 0  |                                                                                                                                                                                                                                                                                                                                                                                   |            | -                                                                                                                                             |
| Caenorhabditis briggsae | atp-binding cassette sub-family e member 1       | 22 | P:GO:0009615;<br>C:GO:0005852;<br>P:GO:0006413;<br>P:GO:0006401;<br>F:GO:0008428;<br>P:GO:0040010;<br>F:GO:0043024;<br>P:GO:0040011;<br>F:GO:0009055;<br>F:GO:0051536;<br>P:GO:0043524;<br>P:GO:0009792;<br>P:GO:0002119;<br>P:GO:0010171;<br>P:GO:0016049;<br>F:GO:0016887;<br>P:GO:0006200;<br>P:GO:0016071;<br>F:GO:0005524;<br>P:GO:0040035;<br>P:GO:0044419;<br>C:GO:0005739 |            | IPR003439; IPR003593; IPR017871;<br>G3DSA:3.40.50.300 (GENE3D),<br>PTHR19248 (PANTHER),<br>PTHR19248:SF5 (PANTHER), SSF52540<br>(SUPERFAMILY) |
| Caenorhabditis briggsae | myosin light polypeptide 1                       | 4  | P:GO:0018991;<br>P:GO:0040010;<br>F:GO:0005509;<br>P:GO:0040011                                                                                                                                                                                                                                                                                                                   |            | IPR011992; IPR018249; PTHR23048<br>(PANTHER), SSF47473 (SUPERFAMILY)                                                                          |
|                         | -                                                | 0  |                                                                                                                                                                                                                                                                                                                                                                                   |            | -                                                                                                                                             |
|                         | -                                                | 0  |                                                                                                                                                                                                                                                                                                                                                                                   |            | -                                                                                                                                             |

|                         |                                                   |   |                                                                                                   |   |             |                                                                                                                                                                               |
|-------------------------|---------------------------------------------------|---|---------------------------------------------------------------------------------------------------|---|-------------|-------------------------------------------------------------------------------------------------------------------------------------------------------------------------------|
| Caenorhabditis briggsae | histidine triad nucleotide-binding protein 3      | 2 | C:GO:0016021;<br>F:GO:0003824                                                                     | - | -           | -                                                                                                                                                                             |
| Caenorhabditis elegans  | bc026590 protein                                  | 1 | P:GO:0040011                                                                                      | - | -           | -                                                                                                                                                                             |
|                         | -                                                 | 0 |                                                                                                   |   |             | -                                                                                                                                                                             |
|                         | -                                                 | 0 |                                                                                                   |   |             | SignalP (SIGNALP)                                                                                                                                                             |
| Caenorhabditis elegans  | calcium atpase                                    | 5 | F:GO:0005388;<br>C:GO:0016021;<br>P:GO:0006754;<br>F:GO:0005524;<br>P:GO:0006816                  | - | EC:3.6.3.8  | IPR001757; IPR008250; IPR018303;<br>G3DSA:1.20.1110.10 (GENE3D),<br>PTHR11939:SF76 (PANTHER),<br>SSF56784 (SUPERFAMILY), SSF81653<br>(SUPERFAMILY), SSF81665<br>(SUPERFAMILY) |
| Caenorhabditis elegans  | calcium atpase                                    | 5 | F:GO:0005388;<br>C:GO:0016021;<br>P:GO:0006754;<br>F:GO:0005524;<br>P:GO:0006816                  | - | EC:3.6.3.8  | IPR001757; IPR008250; IPR018303;<br>G3DSA:1.20.1110.10 (GENE3D),<br>PTHR11939:SF76 (PANTHER),<br>SSF56784 (SUPERFAMILY), SSF81653<br>(SUPERFAMILY), SSF81665<br>(SUPERFAMILY) |
|                         | -                                                 | 0 |                                                                                                   |   |             | -                                                                                                                                                                             |
|                         | -                                                 | 0 |                                                                                                   |   |             | -                                                                                                                                                                             |
| Caenorhabditis briggsae | briggsae cbr-ari-1 protein                        | 1 | F:GO:0005488                                                                                      | - |             | IPR006093; PTHR11685 (PANTHER),<br>PTHR11685:SF16 (PANTHER)                                                                                                                   |
| Caenorhabditis briggsae | briggsae cbr-ari-1 protein                        | 1 | F:GO:0005488                                                                                      | - |             | IPR006093; PTHR11685 (PANTHER),<br>PTHR11685:SF16 (PANTHER)                                                                                                                   |
|                         | -                                                 | 0 |                                                                                                   |   |             | -                                                                                                                                                                             |
| Caenorhabditis elegans  | uncoordi-ted family member (unc-57)               | 6 | F:GO:0042802;<br>P:GO:0007417;<br>C:GO:0005768;<br>P:GO:0007165;<br>F:GO:0016740;<br>C:GO:0016020 | - |             | IPR004148; PTHR10661 (PANTHER),<br>PTHR10661:SF23 (PANTHER),<br>SSF103657 (SUPERFAMILY)                                                                                       |
| Caenorhabditis elegans  | gamma-glutamyltransferase 1-like                  | 1 | F:GO:0003840                                                                                      | - | EC:2.3.2.2  | IPR000101; SignalP (SIGNALP),<br>SSF56235 (SUPERFAMILY)                                                                                                                       |
|                         | -                                                 | 0 |                                                                                                   |   |             | -                                                                                                                                                                             |
|                         | -                                                 | 0 |                                                                                                   |   |             | -                                                                                                                                                                             |
| Caenorhabditis elegans  | carboxypeptidase d                                | 5 | F:GO:0004181;<br>C:GO:0005624;<br>C:GO:0016021;<br>P:GO:0006508;<br>F:GO:0008270                  | - | EC:3.4.17.0 | -                                                                                                                                                                             |
| Brugia malayi           | negative elongation factor b                      | 1 | C:GO:0044424                                                                                      | - |             | IPR010405                                                                                                                                                                     |
| Loa loa                 | uncoordi-ted family member (unc-89)               | 0 |                                                                                                   |   |             | -                                                                                                                                                                             |
| Callithrix jacchus      | eukaryotic translation elongation factor 1 beta 2 | 5 | C:GO:0005829;<br>F:GO:0003746;<br>C:GO:0005853;<br>F:GO:0005515;<br>P:GO:0006414                  | - |             | IPR001326; IPR014038; IPR014717;<br>PTHR11595 (PANTHER),<br>PTHR11595:SF3 (PANTHER)                                                                                           |
| Caenorhabditis briggsae | -d dehydroge-se                                   | 4 | C:GO:0005737;<br>P:GO:0006546;<br>F:GO:0016491;<br>F:GO:0004047                                   | - | EC:2.1.2.10 | IPR013977; PTHR13847 (PANTHER),<br>PTHR13847:SF6 (PANTHER),<br>SSF101790 (SUPERFAMILY)                                                                                        |



|                             |                                                       |    |                                                                                                                                                                                        |                                                                                                                                                                                        |                                                                                            |
|-----------------------------|-------------------------------------------------------|----|----------------------------------------------------------------------------------------------------------------------------------------------------------------------------------------|----------------------------------------------------------------------------------------------------------------------------------------------------------------------------------------|--------------------------------------------------------------------------------------------|
| Loa loa                     | rb1-inducible coiled-coil protein 1                   | 11 | F:GO:0005515;<br>P:GO:0007507;<br>P:GO:0007254;<br>C:GO:0000407;<br>C:GO:0070969;<br>P:GO:0045793;<br>P:GO:0000045;<br>P:GO:0001934;<br>P:GO:0001889;<br>C:GO:0005634;<br>P:GO:0043066 | -                                                                                                                                                                                      | IPR019460; PTHR13222 (PANTHER)                                                             |
| Caenorhabditis elegans      | tar-binding protein                                   | 3  | F:GO:0042802;<br>P:GO:0007528;<br>P:GO:0008344                                                                                                                                         | -                                                                                                                                                                                      | IPR000504; IPR012677; PTHR10432 (PANTHER), PTHR10432:SF6 (PANTHER), SSF54928 (SUPERFAMILY) |
| Caenorhabditis briggsae     | solute carrier family member 37                       | 8  | P:GO:0048250;<br>P:GO:0040010;<br>F:GO:0005488;<br>F:GO:0005381;<br>C:GO:0016021;<br>C:GO:0005743;<br>P:GO:0034755;<br>P:GO:0009792                                                    | -                                                                                                                                                                                      | -                                                                                          |
| Caenorhabditis elegans      | gtp-ase activating protein for arf containing protein | 6  | F:GO:0008060;<br>P:GO:0032312;<br>F:GO:0008270;<br>P:GO:0019915;<br>P:GO:0002119;<br>F:GO:0005515                                                                                      | -                                                                                                                                                                                      | -                                                                                          |
| Loa loa                     | er lipid raft associated 2                            | 4  | C:GO:0005789;<br>F:GO:0005515;<br>C:GO:0016021;<br>P:GO:0030433                                                                                                                        | -                                                                                                                                                                                      | IPR001107; SignalP (SIGNALP)                                                               |
| Brugia malayi               | chromosome 14 open reading frame 106                  | 0  |                                                                                                                                                                                        | C:GO:0005694;<br>C:GO:0005634;<br>F:GO:0003677;<br>P:GO:0007067;<br>C:GO:0000775;<br>P:GO:0051301;<br>F:GO:0003674;<br>C:GO:0005575;<br>P:GO:0007049;<br>P:GO:0008150;<br>P:GO:0045449 | IPR015216                                                                                  |
| Brugia malayi               | chromosome 14 open reading frame 106                  | 0  |                                                                                                                                                                                        | C:GO:0005694;<br>C:GO:0005634;<br>F:GO:0003677;<br>P:GO:0007067;<br>C:GO:0000775;<br>P:GO:0051301;<br>F:GO:0003674;<br>C:GO:0005575;<br>P:GO:0007049;<br>P:GO:0008150;<br>P:GO:0045449 | IPR015216                                                                                  |
| -                           | -                                                     | 0  |                                                                                                                                                                                        |                                                                                                                                                                                        | -                                                                                          |
| Caenorhabditis elegans      | hypothetical protein Y5D5A.4 [Caenorhabditis elegans] | 0  |                                                                                                                                                                                        |                                                                                                                                                                                        | -                                                                                          |
| Angiostrongylus cantonensis | iq calmodulin-binding motif domain protein            | 0  |                                                                                                                                                                                        |                                                                                                                                                                                        | SignalP (SIGNALP)                                                                          |

|                             |                                                      |   |                                                                                                                    |                                                                                                                                                      |                                   |                                                                                                                                          |
|-----------------------------|------------------------------------------------------|---|--------------------------------------------------------------------------------------------------------------------|------------------------------------------------------------------------------------------------------------------------------------------------------|-----------------------------------|------------------------------------------------------------------------------------------------------------------------------------------|
| Caenorhabditis elegans      | tbc (tre-2 bub2 cdc16) domain family member (tbc-20) | 0 |                                                                                                                    | P:GO:0032313;<br>C:GO:0005622;<br>F:GO:0005097                                                                                                       |                                   | IPR000195; G3DSA:1.10.8.270 (GENE3D), PTHR20913 (PANTHER), PTHR20913:SF7 (PANTHER)                                                       |
| Caenorhabditis elegans      | tbc (tre-2 bub2 cdc16) domain family member (tbc-20) | 0 |                                                                                                                    | P:GO:0032313;<br>C:GO:0005622;<br>F:GO:0005097                                                                                                       |                                   | IPR000195; G3DSA:1.10.8.270 (GENE3D), PTHR20913 (PANTHER), PTHR20913:SF7 (PANTHER)                                                       |
| Angiostrongylus cantonensis | tubulin-specific chaperone a                         | 6 | F:GO:0051087;<br>P:GO:0007023;<br>F:GO:0051082;<br>C:GO:0005829;<br>P:GO:0007021;<br>C:GO:0005874                  | -                                                                                                                                                    |                                   | IPR004226; G3DSA:1.20.58.90 (GENE3D)                                                                                                     |
|                             | -                                                    | 0 |                                                                                                                    |                                                                                                                                                      |                                   | -                                                                                                                                        |
| Caenorhabditis elegans      | mannosyl-oligosaccharide alpha -                     | 7 | F:GO:0004569;<br>C:GO:0005788;<br>F:GO:0004571;<br>F:GO:0005509;<br>P:GO:0006516;<br>P:GO:0043161;<br>C:GO:0016020 | -                                                                                                                                                    | EC:3.2.1.130<br>;<br>EC:3.2.1.113 | IPR001382; IPR010916;<br>PTHR11742:SF8 (PANTHER), PSS1257 (PROFILE), SignalP (SIGNALP)                                                   |
| Caenorhabditis elegans      | er degradation-enhancing alpha-mannosidase-like 3    | 7 | F:GO:0004569;<br>C:GO:0005788;<br>F:GO:0004571;<br>F:GO:0005509;<br>P:GO:0006516;<br>P:GO:0043161;<br>C:GO:0016020 | -                                                                                                                                                    | EC:3.2.1.130<br>;<br>EC:3.2.1.113 | IPR001382; IPR010916;<br>PTHR11742:SF8 (PANTHER), PSS1257 (PROFILE), SignalP (SIGNALP)                                                   |
| Brugia malayi               | polymerase (d- directed) delta regulatory subunit    | 7 | F:GO:0016772;<br>P:GO:0040010;<br>C:GO:0043625;<br>P:GO:0006261;<br>P:GO:0040035;<br>P:GO:0040011;<br>P:GO:0009792 | -                                                                                                                                                    |                                   | IPR007185; PTHR10416 (PANTHER)                                                                                                           |
|                             | -                                                    | 0 |                                                                                                                    |                                                                                                                                                      |                                   | IPR019317                                                                                                                                |
|                             | -                                                    | 0 |                                                                                                                    |                                                                                                                                                      |                                   | IPR019317                                                                                                                                |
| Caenorhabditis elegans      | guanyl-nucleotide exchange factor                    | 3 | F:GO:0005085;<br>P:GO:0007520;<br>P:GO:0002121                                                                     | -                                                                                                                                                    |                                   | IPR000048; IPR000904;<br>G3DSA:1.10.1000.11 (GENE3D),<br>G3DSA:1.10.220.20 (GENE3D),<br>PTHR10663 (PANTHER),<br>PTHR10663:SF12 (PANTHER) |
| Trichomonas vaginalis G3    | ankyrin unc44                                        | 0 |                                                                                                                    | F:GO:0005216;<br>P:GO:0006816;<br>C:GO:0016021;<br>C:GO:0016020;<br>P:GO:0006811;<br>P:GO:0006810;<br>F:GO:0005262;<br>C:GO:0000502;<br>P:GO:0055085 |                                   | -                                                                                                                                        |
|                             | -                                                    | 0 |                                                                                                                    |                                                                                                                                                      |                                   | -                                                                                                                                        |
| Caenorhabditis briggsae     | slowpoke potassium channel family member (slo-2)     | 6 | C:GO:0016020;<br>P:GO:0006813;<br>P:GO:0008152;<br>F:GO:0003824;<br>F:GO:0015269;<br>F:GO:0005488                  | -                                                                                                                                                    |                                   | PTHR10027 (PANTHER),<br>PTHR10027:SF6 (PANTHER)                                                                                          |

|                         |                                                         |    |                                                                                                                                                                       |                                                                                  |  |                                                                                                                                                                                        |
|-------------------------|---------------------------------------------------------|----|-----------------------------------------------------------------------------------------------------------------------------------------------------------------------|----------------------------------------------------------------------------------|--|----------------------------------------------------------------------------------------------------------------------------------------------------------------------------------------|
| Caenorhabditis briggsae | spermatogenesis-associated protein 20                   | 0  |                                                                                                                                                                       | F:GO:0003674;<br>F:GO:0004476;<br>P:GO:0006013;<br>F:GO:0003824;<br>C:GO:0005575 |  | IPR008928; IPR012341; PTHR12145 (PANTHER)                                                                                                                                              |
| Ixodes scapularis       | conserved hypothetical protein [Ixodes scapularis]      | 0  |                                                                                                                                                                       |                                                                                  |  | -                                                                                                                                                                                      |
|                         | -                                                       | 0  |                                                                                                                                                                       |                                                                                  |  | -                                                                                                                                                                                      |
|                         |                                                         |    |                                                                                                                                                                       |                                                                                  |  | IPR003598; IPR003961; IPR007110; IPR008957; IPR013098; IPR013783; PR00014 (PRINTS), PTHR19900 (PANTHER), PTHR19900:SF7 (PANTHER), SSF48726 (SUPERFAMILY)                               |
| Loa loa                 | chromosome 7 open reading frame 20                      | 0  |                                                                                                                                                                       | F:GO:0003674;<br>P:GO:0008150;<br>F:GO:0005515;<br>C:GO:0005575                  |  | IPR007317                                                                                                                                                                              |
| Caenorhabditis briggsae | isoform e                                               | 1  | F:GO:0005515                                                                                                                                                          | -                                                                                |  | IPR001849; IPR011993; PTHR17271 (PANTHER), PTHR17271:SF1 (PANTHER), SSF50729 (SUPERFAMILY)                                                                                             |
|                         | -                                                       | 0  |                                                                                                                                                                       |                                                                                  |  | -                                                                                                                                                                                      |
|                         | -                                                       | 0  |                                                                                                                                                                       |                                                                                  |  | -                                                                                                                                                                                      |
| Caenorhabditis briggsae | Hypothetical protein CBG22130 [Caenorhabditis briggsae] | 0  |                                                                                                                                                                       |                                                                                  |  | SignalP (SIGNALP)                                                                                                                                                                      |
| Brugia malayi           | ancient conserved domain protein                        | 0  |                                                                                                                                                                       |                                                                                  |  | IPR000644; G3DSA:3.10.580.10 (GENE3D), PTHR12064 (PANTHER), PTHR12064:SF6 (PANTHER)                                                                                                    |
|                         | -                                                       | 0  |                                                                                                                                                                       |                                                                                  |  | SignalP (SIGNALP)                                                                                                                                                                      |
|                         | -                                                       | 0  |                                                                                                                                                                       |                                                                                  |  | -                                                                                                                                                                                      |
| Caenorhabditis elegans  | zinc finger                                             | 1  | F:GO:0005515                                                                                                                                                          | -                                                                                |  | IPR007087; IPR013087; IPR015880; IPR017956; PTHR23224 (PANTHER), SSF57667 (SUPERFAMILY)                                                                                                |
| Caenorhabditis briggsae | diphosphomevalo-te decarboxylase                        | 9  | P:GO:0009792;<br>P:GO:0002119;<br>P:GO:0006694;<br>P:GO:0044237;<br>P:GO:0000003;<br>P:GO:0040011;<br>P:GO:0040007;<br>F:GO:0016829;<br>F:GO:0000166                  | -                                                                                |  | IPR005935; G3DSA:3.30.70.890 (GENE3D), SSF55060 (SUPERFAMILY)                                                                                                                          |
|                         | -                                                       | 0  |                                                                                                                                                                       |                                                                                  |  | -                                                                                                                                                                                      |
| Caenorhabditis briggsae | r--dependent helicase                                   | 8  | P:GO:0009792;<br>P:GO:0002119;<br>F:GO:0003724;<br>F:GO:0008026;<br>F:GO:0003676;<br>P:GO:0040010;<br>F:GO:0005524;<br>P:GO:0000003                                   | -                                                                                |  | SignalP (SIGNALP)                                                                                                                                                                      |
| Caenorhabditis elegans  | loc556764 protein                                       | 10 | P:GO:0009792;<br>P:GO:0002119;<br>F:GO:0003724;<br>F:GO:0008026;<br>F:GO:0003676;<br>P:GO:0040010;<br>F:GO:0008186;<br>F:GO:0005524;<br>P:GO:0000003;<br>P:GO:0006396 | -                                                                                |  | IPR000629; IPR001650; IPR011545; IPR014001; IPR014014; IPR014021; G3DSA:3.40.50.300 (GENE3D), PTHR10967 (PANTHER), PTHR10967:SF50 (PANTHER), SignalP (SIGNALP), SSF52540 (SUPERFAMILY) |

|                         |                                                            |    |                                                                                                                                                                                        |                                                                                                   |                                                                                                                                                                                                       |
|-------------------------|------------------------------------------------------------|----|----------------------------------------------------------------------------------------------------------------------------------------------------------------------------------------|---------------------------------------------------------------------------------------------------|-------------------------------------------------------------------------------------------------------------------------------------------------------------------------------------------------------|
| Caenorhabditis briggsae | loc556764 protein                                          | 7  | P:GO:0009792;<br>P:GO:0002119;<br>F:GO:0008026;<br>F:GO:0003676;<br>P:GO:0040010;<br>F:GO:0005524;<br>P:GO:0000003                                                                     | -                                                                                                 | IPR000629; IPR001650; IPR011545;<br>IPR014001; IPR014014; IPR014021;<br>G3DSA:3.40.50.300 (GENE3D),<br>PTHR10967 (PANTHER),<br>PTHR10967:SF50 (PANTHER), SignalP<br>(SIGNALP), SSF52540 (SUPERFAMILY) |
| Caenorhabditis elegans  | loc556764 protein                                          | 10 | P:GO:0009792;<br>P:GO:0002119;<br>F:GO:0003724;<br>F:GO:0008026;<br>F:GO:0003676;<br>P:GO:0040010;<br>F:GO:0008186;<br>F:GO:0005524;<br>P:GO:0000003;<br>P:GO:0006396                  | -                                                                                                 | -                                                                                                                                                                                                     |
| Caenorhabditis elegans  | elegans protein partially confirmed by transcript evidence | 0  |                                                                                                                                                                                        |                                                                                                   | -                                                                                                                                                                                                     |
| Caenorhabditis briggsae | Hypothetical protein CBG02647 [Caenorhabditis briggsae]    | 0  |                                                                                                                                                                                        |                                                                                                   | -                                                                                                                                                                                                     |
| -                       | -                                                          | 0  |                                                                                                                                                                                        |                                                                                                   | -                                                                                                                                                                                                     |
| -                       | -                                                          | 0  |                                                                                                                                                                                        |                                                                                                   | SignalP (SIGNALP)                                                                                                                                                                                     |
| -                       | -                                                          | 0  |                                                                                                                                                                                        |                                                                                                   | -                                                                                                                                                                                                     |
| Loa loa                 | hypothetical protein LOAG_10533 [Loa loa]                  | 0  |                                                                                                                                                                                        |                                                                                                   | -                                                                                                                                                                                                     |
| Loa loa                 | hypothetical protein LOAG_10533 [Loa loa]                  | 0  |                                                                                                                                                                                        |                                                                                                   | -                                                                                                                                                                                                     |
| -                       | -                                                          | 0  |                                                                                                                                                                                        |                                                                                                   | SignalP (SIGNALP)                                                                                                                                                                                     |
| Brugia malayi           | elegans protein partially confirmed by transcript evidence | 0  |                                                                                                                                                                                        | F:GO:0003723;<br>F:GO:0003674;<br>P:GO:0007492;<br>P:GO:0008150;<br>C:GO:0005634;<br>C:GO:0005575 | IPR004087; IPR004088; IPR018111;<br>G3DSA:3.30.1370.10 (GENE3D),<br>PTHR10288 (PANTHER), SSF54791<br>(SUPERFAMILY)                                                                                    |
| -                       | -                                                          | 0  |                                                                                                                                                                                        |                                                                                                   | -                                                                                                                                                                                                     |
| Caenorhabditis elegans  | elegans protein partially confirmed by transcript evidence | 1  | F:GO:0016740                                                                                                                                                                           | -                                                                                                 | IPR013783                                                                                                                                                                                             |
| Caenorhabditis briggsae | hypothetical kda protein in chromosome                     | 11 | P:GO:0040010;<br>P:GO:0016079;<br>F:GO:0005488;<br>P:GO:0000910;<br>C:GO:0045202;<br>C:GO:0000299;<br>P:GO:0007602;<br>P:GO:0006898;<br>P:GO:0030100;<br>P:GO:0009792;<br>P:GO:0048488 | -                                                                                                 | PTHR12444 (PANTHER)                                                                                                                                                                                   |
| Caenorhabditis briggsae | splicing factor 3b                                         | 11 | P:GO:0040035;<br>P:GO:0009792;<br>P:GO:0002119;<br>C:GO:0005686;<br>F:GO:0005515;<br>P:GO:0018996;<br>C:GO:0071011;<br>P:GO:0040011;<br>P:GO:0040007;<br>P:GO:0000398;<br>C:GO:0071013 | -                                                                                                 | IPR006568; IPR007180; PTHR12785<br>(PANTHER), PTHR12785:SF6<br>(PANTHER)                                                                                                                              |
| Caenorhabditis elegans  | briggsae cbr-gak-1 protein                                 | 0  |                                                                                                                                                                                        | F:GO:0005515;<br>F:GO:0003677                                                                     | -                                                                                                                                                                                                     |

|                          |                                                       |    |                                                                                                                                                                                                         |                                                |                                                                                                   |
|--------------------------|-------------------------------------------------------|----|---------------------------------------------------------------------------------------------------------------------------------------------------------------------------------------------------------|------------------------------------------------|---------------------------------------------------------------------------------------------------|
| Caenorhabditis elegans   | briggsae cbr-gak-1 protein                            | 0  |                                                                                                                                                                                                         | F:GO:0005515;<br>F:GO:0003677                  | -                                                                                                 |
| -                        | -                                                     | 0  |                                                                                                                                                                                                         |                                                | -                                                                                                 |
| Caenorhabditis elegans   | novel protein vertebrate gamma-aminobutyric acid b 2  | 5  | P:GO:0007186;<br>C:GO:0016021;<br>P:GO:0007165;<br>F:GO:0004965;<br>F:GO:0004930                                                                                                                        | -                                              | IPR002455; IPR017978; PTHR10519 (PANTHER), PTHR10519:SF2 (PANTHER), SignalP (SIGNALP)             |
| Caenorhabditis briggsae  | ykad_caee1 ame: full=uncharacterized protein          | 0  |                                                                                                                                                                                                         | F:GO:0046872;<br>F:GO:0008270;<br>F:GO:0005515 | -                                                                                                 |
| -                        | -                                                     | 0  |                                                                                                                                                                                                         |                                                | -                                                                                                 |
| Caenorhabditis briggsae  | acyl binding protein                                  | 1  | F:GO:0005488                                                                                                                                                                                            | -                                              | IPR000582; IPR014352; PTHR23310:SF5 (PANTHER)                                                     |
| -                        | -                                                     | 0  |                                                                                                                                                                                                         |                                                | -                                                                                                 |
| -                        | -                                                     | 0  |                                                                                                                                                                                                         |                                                | SignalP (SIGNALP)                                                                                 |
| Oesophagostomum dentatum | serine threonine protein phosphatase pp1 isozyme 1    | 4  | P:GO:0006470;<br>F:GO:0046872;<br>F:GO:0004722;<br>P:GO:0000003                                                                                                                                         | -                                              | IPR004843; IPR006186; G3DSA:3.60.21.10 (GENE3D), PTHR11668:SF19 (PANTHER), SSF56300 (SUPERFAMILY) |
| Loa loa                  | pci domain containing 2                               | 5  | P:GO:0000003;<br>P:GO:0010171;<br>P:GO:0040010;<br>P:GO:0002119;<br>P:GO:0040011                                                                                                                        | -                                              | PTHR12732 (PANTHER)                                                                               |
| Caenorhabditis elegans   | bestrophin family protein                             | 2  | P:GO:0040011;<br>P:GO:0040018                                                                                                                                                                           | -                                              | IPR000615; IPR021134                                                                              |
| Caenorhabditis elegans   | hypothetical protein R02F2.7 [Caenorhabditis elegans] | 0  |                                                                                                                                                                                                         |                                                | -                                                                                                 |
| Caenorhabditis briggsae  | d- polymerase gamma                                   | 12 | P:GO:0006470;<br>F:GO:0004383;<br>P:GO:0030421;<br>P:GO:0008340;<br>F:GO:0003887;<br>C:GO:0005760;<br>P:GO:0006264;<br>F:GO:0003677;<br>F:GO:0004725;<br>F:GO:0020037;<br>P:GO:0008406;<br>P:GO:0006182 | -                                              | EC:4.6.1.2;<br>EC:2.7.7.7;<br>EC:3.1.3.48<br>IPR001098; IPR002297                                 |
| -                        | -                                                     | 0  |                                                                                                                                                                                                         |                                                | -                                                                                                 |
| Caenorhabditis elegans   | apolipoprotein h                                      | 7  | P:GO:0031100;<br>P:GO:0034197;<br>P:GO:0030195;<br>C:GO:0034358;<br>F:GO:0008289;<br>P:GO:0048523;<br>P:GO:0008152                                                                                      | -                                              | IPR000436; IPR016060; PTHR19325 (PANTHER), PTHR19325:SF40 (PANTHER)                               |
| Caenorhabditis briggsae  | briggsae cbr-pdr-1 protein                            | 3  | P:GO:0009987;<br>F:GO:0016874;<br>F:GO:0005515                                                                                                                                                          | -                                              | IPR002867; IPR003977; PTHR11685 (PANTHER), PTHR11685:SF4 (PANTHER), SSF57850 (SUPERFAMILY)        |
| Brugia malayi            | wd repeat domain 68                                   | 7  | C:GO:0005737;<br>F:GO:0005515;<br>P:GO:0016567;<br>C:GO:0080008;<br>F:GO:0004402;<br>C:GO:0005634;<br>P:GO:0051216                                                                                      | -                                              | EC:2.3.1.48                                                                                       |

|                               |                                                                 |    |                                                                                                                                                                       |              |             |                                                                                                                              |
|-------------------------------|-----------------------------------------------------------------|----|-----------------------------------------------------------------------------------------------------------------------------------------------------------------------|--------------|-------------|------------------------------------------------------------------------------------------------------------------------------|
| Caenorhabditis briggsae       | vacuolar atp synthase subunit g                                 | 7  | P:GO:0012501;<br>F:GO:0015078;<br>C:GO:0016471;<br>P:GO:0006754;<br>F:GO:0016820;<br>P:GO:0015992;<br>C:GO:0005886                                                    | -            | EC:3.6.3.0  | IPR005124; PTHR12713:SF4 (PANTHER)                                                                                           |
| Caenorhabditis briggsae       | coiled-coil domain containing 132                               | 0  |                                                                                                                                                                       |              |             | PTHR13258 (PANTHER)                                                                                                          |
| Haemonchus contortus          | phosphoenolpyruvate carboxykinase                               | 6  | C:GO:0005737;<br>P:GO:0006094;<br>F:GO:0046872;<br>F:GO:0005525;<br>F:GO:0016301;<br>F:GO:0004613                                                                     | -            | EC:4.1.1.32 | IPR008209; G3DSA:2.170.8.10 (GENE3D), SSF53795 (SUPERFAMILY)                                                                 |
| Caenorhabditis elegans        | translation initiation factor eif-2b epsilon subunit            | 5  | P:GO:0040035;<br>P:GO:0010171;<br>P:GO:0002119;<br>P:GO:0040018;<br>P:GO:0040010                                                                                      | -            |             | G3DSA:3.90.550.10 (GENE3D), PTHR22572 (PANTHER), PTHR22572:SF4 (PANTHER), SSF53448 (SUPERFAMILY)                             |
| Caenorhabditis briggsae       | troponin c                                                      | 7  | P:GO:0055114;<br>P:GO:0000003;<br>P:GO:0040007;<br>F:GO:0005509;<br>F:GO:0005515;<br>F:GO:0032440;<br>P:GO:0002119                                                    | -            | EC:1.3.1.74 | IPR002048; IPR011992; IPR018247; IPR018248; IPR018249; PTHR23050 (PANTHER), PTHR23050:SF16 (PANTHER), SSF47473 (SUPERFAMILY) |
| Caenorhabditis briggsae       | briggsae cbr-lin-9 protein                                      | 0  |                                                                                                                                                                       | C:GO:0070176 |             | -                                                                                                                            |
| Brugia malayi                 | mediator of r- polymerase ii transcription subunit 21           | 6  | P:GO:0045944;<br>P:GO:0007413;<br>P:GO:0001824;<br>P:GO:0040011;<br>C:GO:0016592;<br>F:GO:0003713                                                                     | -            |             | IPR021384; PTHR13381 (PANTHER), SSF140718 (SUPERFAMILY)                                                                      |
| Caenorhabditis elegans        | hypothetical kda protein in chromosome                          | 4  | P:GO:0009792;<br>P:GO:0040010;<br>F:GO:0005515;<br>P:GO:0002119                                                                                                       | -            |             | -                                                                                                                            |
| Angiostrongylus cantonensis   | pre-mr- splicing protein                                        | 10 | P:GO:0007030;<br>P:GO:0002119;<br>P:GO:0018996;<br>C:GO:0071011;<br>P:GO:0000003;<br>P:GO:0040011;<br>P:GO:0040007;<br>C:GO:0005829;<br>P:GO:0000398;<br>C:GO:0071013 | -            |             | IPR001680; IPR011046; IPR015943; IPR017986; IPR019775; IPR019781; IPR019782; IPR020472; PTHR19923 (PANTHER)                  |
| -                             | -                                                               | 0  |                                                                                                                                                                       |              |             | -                                                                                                                            |
| -                             | -                                                               | 0  |                                                                                                                                                                       |              |             | -                                                                                                                            |
| Caenorhabditis briggsae       | elegans protein partially confirmed by transcript evidence      | 0  |                                                                                                                                                                       | C:GO:0016021 |             | -                                                                                                                            |
| Botryotinia fuckeliana B05.10 | hypothetical protein BC1G_06829 [Botryotinia fuckeliana B05.10] | 0  |                                                                                                                                                                       | F:GO:0016787 |             | -                                                                                                                            |

|                             |                                               |    |                                                                                                                                                                                                                                                                                                                                |                                                                 |                                                                                                       |
|-----------------------------|-----------------------------------------------|----|--------------------------------------------------------------------------------------------------------------------------------------------------------------------------------------------------------------------------------------------------------------------------------------------------------------------------------|-----------------------------------------------------------------|-------------------------------------------------------------------------------------------------------|
| Caenorhabditis elegans      | lethal protein isoform d                      | 8  | P:GO:0018996;<br>P:GO:0009792;<br>P:GO:0008340;<br>P:GO:0000003;<br>F:GO:0005515;<br>P:GO:0006898;<br>P:GO:0002119;<br>P:GO:0040011                                                                                                                                                                                            | -                                                               | -                                                                                                     |
| Loa loa                     | organic solute transporter alpha-like protein | 0  |                                                                                                                                                                                                                                                                                                                                | C:GO:0016021;<br>P:GO:0009792;<br>F:GO:0005215;<br>P:GO:0006810 | IPR005178; PTHR23423:SF3 (PANTHER), SignalP (SIGNALP)                                                 |
|                             | -                                             | 0  |                                                                                                                                                                                                                                                                                                                                |                                                                 | -                                                                                                     |
| Angiostrongylus cantonensis | uncoordinated family member (unc-87)          | 1  | F:GO:0005515                                                                                                                                                                                                                                                                                                                   | -                                                               | -                                                                                                     |
|                             | -                                             | 0  |                                                                                                                                                                                                                                                                                                                                |                                                                 | SignalP (SIGNALP)                                                                                     |
|                             | -                                             | 0  |                                                                                                                                                                                                                                                                                                                                |                                                                 | SignalP (SIGNALP)                                                                                     |
|                             | -                                             | 0  |                                                                                                                                                                                                                                                                                                                                |                                                                 | SignalP (SIGNALP)                                                                                     |
| Loa loa                     | briggsae cbr-ced-3 protein                    | 7  | C:GO:0005737;<br>P:GO:0030972;<br>F:GO:0005515;<br>F:GO:0016787;<br>P:GO:0000003;<br>P:GO:0008340;<br>C:GO:0016020                                                                                                                                                                                                             | -                                                               | IPR001315; IPR002398; IPR011029; PTHR10454:SF21 (PANTHER)                                             |
| Brugia malayi               | splicing factor 45                            | 0  |                                                                                                                                                                                                                                                                                                                                | F:GO:0003676;<br>F:GO:0000166;<br>C:GO:0005622                  | IPR000467; IPR000504; IPR012677; PTHR13288 (PANTHER), PTHR13288:SF8 (PANTHER), SSF54928 (SUPERFAMILY) |
| Brugia malayi               | splicing factor 45                            | 0  |                                                                                                                                                                                                                                                                                                                                | F:GO:0003676;<br>F:GO:0000166;<br>C:GO:0005622                  | IPR000467; IPR000504; IPR012677; PTHR13288 (PANTHER), PTHR13288:SF8 (PANTHER), SSF54928 (SUPERFAMILY) |
| Homo sapiens                | prosaposin                                    | 19 | P:GO:0055085;<br>F:GO:0008047;<br>P:GO:0043065;<br>P:GO:0006687;<br>P:GO:0045161;<br>C:GO:0016021;<br>C:GO:0005743;<br>C:GO:0043202;<br>C:GO:0005615;<br>F:GO:0008289;<br>P:GO:0006869;<br>F:GO:0005515;<br>P:GO:0009966;<br>P:GO:0007585;<br>F:GO:0005319;<br>C:GO:0005578;<br>F:GO:0005529;<br>P:GO:0006919;<br>C:GO:0005794 | -                                                               | IPR007856; IPR008138; IPR008139; IPR011001; PTHR11480 (PANTHER), PTHR11480:SF3 (PANTHER)              |

|                             |                                                            |    |                                                                                                                                                                                                                                           |                                                                                                                                     |                                                                                                                     |
|-----------------------------|------------------------------------------------------------|----|-------------------------------------------------------------------------------------------------------------------------------------------------------------------------------------------------------------------------------------------|-------------------------------------------------------------------------------------------------------------------------------------|---------------------------------------------------------------------------------------------------------------------|
| Caenorhabditis elegans      | zeta-coat protein                                          | 14 | C:GO:0030126;<br>P:GO:0008340;<br>C:GO:0000808;<br>P:GO:0048599;<br>P:GO:0006260;<br>P:GO:0032940;<br>P:GO:0018996;<br>P:GO:0006891;<br>P:GO:0002119;<br>F:GO:0005515;<br>P:GO:0006898;<br>P:GO:0006886;<br>P:GO:0009792;<br>C:GO:0005634 | -                                                                                                                                   | IPR011012; IPR022775;<br>G3DSA:3.30.450.60 (GENE3D),<br>PTHR11043 (PANTHER)                                         |
| Caenorhabditis elegans      | ferm domain ( -ezrin-radixin-moesin) family member (frm-1) | 0  |                                                                                                                                                                                                                                           | F:GO:0005488;<br>C:GO:0019898;<br>F:GO:0008092;<br>F:GO:0005515                                                                     | -                                                                                                                   |
| Caenorhabditis elegans      | splicing factor 3a subunit 2                               | 12 | C:GO:0005681;<br>F:GO:0008270;<br>F:GO:0003676;<br>P:GO:0040007;<br>P:GO:0040035;<br>P:GO:0002119;<br>F:GO:0005515;<br>P:GO:0040011;<br>P:GO:0000398;<br>P:GO:0006898;<br>P:GO:0002009;<br>P:GO:0009792                                   | -                                                                                                                                   | IPR000690; IPR003604; IPR015880;<br>PTHR23205 (PANTHER)                                                             |
| Brugia malayi               | ubx domain containing 8                                    | 0  |                                                                                                                                                                                                                                           | C:GO:0005811;<br>F:GO:0003674;<br>C:GO:0005737;<br>P:GO:0006986;<br>C:GO:0005783;<br>P:GO:0008150;<br>F:GO:0005515;<br>C:GO:0005575 | IPR001012; G3DSA:3.10.20.90<br>(GENE3D), PTHR23322 (PANTHER),<br>PTHR23322:SF1 (PANTHER), SSF54236<br>(SUPERFAMILY) |
| Caenorhabditis elegans      | cog5 protein                                               | 3  | P:GO:0009792;<br>P:GO:0040010;<br>P:GO:0040039                                                                                                                                                                                            | -                                                                                                                                   | -                                                                                                                   |
| Angiostrongylus cantonensis | hypothetical protein [Angiostrongylus cantonensis]         | 0  |                                                                                                                                                                                                                                           |                                                                                                                                     | -                                                                                                                   |
|                             | -                                                          | 0  |                                                                                                                                                                                                                                           |                                                                                                                                     | -                                                                                                                   |
| Caenorhabditis elegans      | isocitrate dehydroge-se                                    | 6  | F:GO:0051287;<br>P:GO:0055114;<br>F:GO:0000287;<br>P:GO:0006099;<br>F:GO:0004449;<br>C:GO:0005739                                                                                                                                         | -                                                                                                                                   | EC:1.1.1.41<br>IPR001804; IPR019818;<br>PTHR11835:SF5 (PANTHER), SSF53659<br>(SUPERFAMILY)                          |
|                             | -                                                          | 0  |                                                                                                                                                                                                                                           |                                                                                                                                     | -                                                                                                                   |
| Caenorhabditis elegans      | vacuolar protein sorting-associated protein 53 homolog     | 0  |                                                                                                                                                                                                                                           | C:GO:0010008;<br>C:GO:0016020;<br>C:GO:0005794;<br>C:GO:0005768;<br>P:GO:0015031                                                    | IPR007234; PTHR12820 (PANTHER)                                                                                      |
|                             | -                                                          | 0  |                                                                                                                                                                                                                                           |                                                                                                                                     | -                                                                                                                   |
|                             | -                                                          | 0  |                                                                                                                                                                                                                                           |                                                                                                                                     | -                                                                                                                   |



|                         |                                                                               |   |                                                                                                                    |   |             |                                                                                                                                                               |
|-------------------------|-------------------------------------------------------------------------------|---|--------------------------------------------------------------------------------------------------------------------|---|-------------|---------------------------------------------------------------------------------------------------------------------------------------------------------------|
| Caenorhabditis briggsae | protein                                                                       | 2 | F:GO:0005488;<br>F:GO:0003824                                                                                      | - |             | IPR001841; IPR002867; IPR006058;<br>IPR013083; IPR015880; IPR017907;<br>PTHR11685 (PANTHER), SSF57850<br>(SUPERFAMILY)                                        |
| Caenorhabditis briggsae | thioesterase superfamily member 2                                             | 2 | P:GO:0051289;<br>F:GO:0016291                                                                                      | - |             | IPR003736; IPR006683;<br>G3DSA:3.10.129.10 (GENE3D),<br>PTHR21660 (PANTHER), SSF54637<br>(SUPERFAMILY)                                                        |
| Caenorhabditis elegans  | acyl-protein thioesterase 1                                                   | 1 | F:GO:0016787                                                                                                       | - |             | IPR003140; G3DSA:3.40.50.1820<br>(GENE3D), PTHR10655 (PANTHER),<br>PTHR10655:SF6 (PANTHER), SignalP<br>(SIGNALP), SSF53474 (SUPERFAMILY)                      |
| -                       | -                                                                             | 0 |                                                                                                                    |   |             | -                                                                                                                                                             |
| -                       | -                                                                             | 0 |                                                                                                                    |   |             | -                                                                                                                                                             |
| Loa loa                 | non-smc condensin ii subunit d3                                               | 3 | F:GO:0005488;<br>P:GO:0007049;<br>C:GO:0044424                                                                     | - |             | IPR005829; IPR011989; IPR016024;<br>PTHR14222 (PANTHER)                                                                                                       |
| -                       | -                                                                             | 0 |                                                                                                                    |   |             | SignalP (SIGNALP)                                                                                                                                             |
| Caenorhabditis elegans  | protein ki-se domain containing protein                                       | 4 | P:GO:0006468;<br>F:GO:0005524;<br>P:GO:0040011;<br>F:GO:0004674                                                    | - | EC:2.7.11.0 | IPR000719; IPR008271; IPR011009;<br>IPR017442; G3DSA:1.10.510.10<br>(GENE3D), G3DSA:3.30.200.20<br>(GENE3D), PTHR11909 (PANTHER),<br>PTHR11909:SF19 (PANTHER) |
| Loa loa                 | inositol -trisphosphate receptor                                              | 6 | F:GO:0005488;<br>P:GO:0006816;<br>F:GO:0005220;<br>P:GO:0055085;<br>C:GO:0016021;<br>C:GO:0005783                  | - |             | IPR015925; PTHR13715:SF2<br>(PANTHER)                                                                                                                         |
| Brugia malayi           | adp-specific phosphofructoki-se glucoki-se conserved region<br>family protein | 3 | F:GO:0016301;<br>F:GO:0016773;<br>P:GO:0005975                                                                     | - | EC:2.7.1.0  | IPR001227; IPR016035                                                                                                                                          |
| Caenorhabditis elegans  | briggsae cbr-spd-5 protein                                                    | 1 | F:GO:0005488                                                                                                       | - |             | PD936484 (PRODOM)                                                                                                                                             |
| Loa loa                 | phosphatidylinositide phosphatase sac1                                        | 6 | P:GO:0009792;<br>P:GO:0002119;<br>P:GO:0040018;<br>P:GO:0040010;<br>P:GO:0008340;<br>C:GO:0016021                  | - |             | IPR002013                                                                                                                                                     |
| Caenorhabditis elegans  | elegans protein partially confirmed by transcript evidence                    | 0 |                                                                                                                    |   |             | IPR007515; IPR011057; IPR011323;<br>PTHR13276 (PANTHER)                                                                                                       |
| -                       | -                                                                             | 0 |                                                                                                                    |   |             | SignalP (SIGNALP)                                                                                                                                             |
| -                       | -                                                                             | 0 |                                                                                                                    |   |             | IPR000299; IPR019748                                                                                                                                          |
| Loa loa                 | g-rich sequence factor-                                                       | 7 | C:GO:0043234;<br>P:GO:0007311;<br>P:GO:0006417;<br>P:GO:0051276;<br>P:GO:0045451;<br>F:GO:0005515;<br>P:GO:0007428 | - |             | IPR000504; IPR012677; PTHR13976<br>(PANTHER), PTHR13976:SF3<br>(PANTHER), SSF54928 (SUPERFAMILY)                                                              |
| Caenorhabditis elegans  | elegans protein partially confirmed by transcript evidence                    | 2 | P:GO:0006415;<br>F:GO:0003747                                                                                      | - |             | SignalP (SIGNALP)                                                                                                                                             |
| Caenorhabditis briggsae | gpn-loop gtpase 2                                                             | 2 | F:GO:0005515;<br>F:GO:0000166                                                                                      | - |             | IPR004130; G3DSA:3.40.50.300<br>(GENE3D), PTHR21231 (PANTHER),<br>PTHR21231:SF3 (PANTHER), SSF52540<br>(SUPERFAMILY)                                          |

|                                    |                                                            |   |                                                                                                                                                      |                                                                                                   |             |                                                                                      |
|------------------------------------|------------------------------------------------------------|---|------------------------------------------------------------------------------------------------------------------------------------------------------|---------------------------------------------------------------------------------------------------|-------------|--------------------------------------------------------------------------------------|
|                                    | -                                                          | 0 |                                                                                                                                                      |                                                                                                   |             | -                                                                                    |
| Clostridiales bacterium 1_7_47_FAA | #NAME?                                                     | 0 |                                                                                                                                                      | F:GO:0004553;<br>P:GO:0005978;<br>P:GO:0005975;<br>F:GO:0003824;<br>F:GO:0043169;<br>F:GO:0003844 |             | -                                                                                    |
|                                    | -                                                          | 0 |                                                                                                                                                      |                                                                                                   |             | -                                                                                    |
| Caenorhabditis elegans             | interferon gamma-inducible thiol reductase                 | 0 |                                                                                                                                                      |                                                                                                   |             | IPR004911; PTHR13234:SF2 (PANTHER)                                                   |
| Caenorhabditis briggsae            | membrane protein involved in er to golgi                   | 1 | P:GO:0016192                                                                                                                                         |                                                                                                   |             | SignalP (SIGNALP)                                                                    |
| Caenorhabditis briggsae            | briggsae cbr-npp-15 protein                                | 0 |                                                                                                                                                      | F:GO:0003674;<br>C:GO:0016021;<br>P:GO:0040010                                                    |             | -                                                                                    |
|                                    | -                                                          | 0 |                                                                                                                                                      |                                                                                                   |             | -                                                                                    |
| Caenorhabditis briggsae            | tyrosine sulfotransferase                                  | 1 | F:GO:0008146                                                                                                                                         | -                                                                                                 | EC:2.8.2.0  | G3DSA:3.40.50.300 (GENE3D),<br>PTHR12788 (PANTHER), SSF52540 (SUPERFAMILY)           |
| Angiostrongylus cantonensis        | 26s protease regulatory subunit 4                          | 9 | F:GO:0017111;<br>C:GO:0000502;<br>C:GO:0005730;<br>P:GO:0051436;<br>P:GO:0051437;<br>P:GO:0031145;<br>F:GO:0005524;<br>F:GO:0005515;<br>C:GO:0005737 | -                                                                                                 | EC:3.6.1.15 | PTHR23073 (PANTHER),<br>PTHR23073:SF9 (PANTHER)                                      |
| Caenorhabditis elegans             | briggsae cbr-deps-1 protein                                | 0 |                                                                                                                                                      |                                                                                                   |             | -                                                                                    |
|                                    | -                                                          | 0 |                                                                                                                                                      |                                                                                                   |             | -                                                                                    |
|                                    | -                                                          | 0 |                                                                                                                                                      |                                                                                                   |             | SignalP (SIGNALP)                                                                    |
|                                    | -                                                          | 0 |                                                                                                                                                      |                                                                                                   |             | -                                                                                    |
|                                    | -                                                          | 0 |                                                                                                                                                      |                                                                                                   |             | -                                                                                    |
|                                    | -                                                          | 0 |                                                                                                                                                      |                                                                                                   |             | -                                                                                    |
|                                    | -                                                          | 0 |                                                                                                                                                      |                                                                                                   |             | -                                                                                    |
|                                    | -                                                          | 0 |                                                                                                                                                      |                                                                                                   |             | -                                                                                    |
|                                    | -                                                          | 0 |                                                                                                                                                      |                                                                                                   |             | -                                                                                    |
| Caenorhabditis elegans             | protein sidekick                                           | 2 | P:GO:0007155;<br>C:GO:0016021                                                                                                                        | -                                                                                                 |             | IPR003961; IPR008957; IPR013783;<br>PTHR10489 (PANTHER),<br>PTHR10489:SF57 (PANTHER) |
| Loa loa                            | transcription initiation factor tfiid subunit 7            | 0 |                                                                                                                                                      | C:GO:0005669;<br>P:GO:0006367;<br>F:GO:0016251;<br>F:GO:0003743                                   |             | IPR006751; PTHR12228 (PANTHER)                                                       |
| Caenorhabditis elegans             | elegans protein partially confirmed by transcript evidence | 3 | C:GO:0034703;<br>F:GO:0005261;<br>P:GO:0055080                                                                                                       | -                                                                                                 |             | SignalP (SIGNALP)                                                                    |
| Caenorhabditis briggsae            | queuine tr--ribosyltransferase                             | 2 | F:GO:0008479;<br>P:GO:0008616                                                                                                                        | -                                                                                                 | EC:2.4.2.29 | IPR002616                                                                            |
|                                    | -                                                          | 0 |                                                                                                                                                      |                                                                                                   |             | IPR015880                                                                            |
|                                    | -                                                          | 0 |                                                                                                                                                      |                                                                                                   |             | -                                                                                    |
| Angiostrongylus cantonensis        | elegans protein confirmed by transcript evidence           | 0 |                                                                                                                                                      |                                                                                                   |             | IPR021010; SSF141739 (SUPERFAMILY)                                                   |
| Angiostrongylus cantonensis        | elegans protein confirmed by transcript evidence           | 0 |                                                                                                                                                      |                                                                                                   |             | IPR021010; SSF141739 (SUPERFAMILY)                                                   |
| Angiostrongylus cantonensis        | elegans protein confirmed by transcript evidence           | 0 |                                                                                                                                                      |                                                                                                   |             | IPR021010; SSF141739 (SUPERFAMILY)                                                   |

|                         |                                                            |  |    |                                                                                                                                                                       |   |             |                                                                                                                                                                        |
|-------------------------|------------------------------------------------------------|--|----|-----------------------------------------------------------------------------------------------------------------------------------------------------------------------|---|-------------|------------------------------------------------------------------------------------------------------------------------------------------------------------------------|
| Caenorhabditis elegans  | argo-ute 1                                                 |  | 5  | C:GO:0005737;<br>P:GO:0008340;<br>F:GO:0003743;<br>P:GO:0009790;<br>P:GO:0002119                                                                                      | - | -           |                                                                                                                                                                        |
| Caenorhabditis elegans  | argo-ute 1                                                 |  | 5  | C:GO:0005737;<br>P:GO:0008340;<br>F:GO:0003743;<br>P:GO:0009790;<br>P:GO:0002119                                                                                      | - | -           |                                                                                                                                                                        |
| Caenorhabditis briggsae | latent transforming growth factor beta binding protein 1   |  | 6  | P:GO:0001570;<br>F:GO:0005488;<br>P:GO:0040010;<br>C:GO:0005578;<br>P:GO:0048570;<br>P:GO:0007179                                                                     | - |             | IPR000152; IPR000742; IPR013032;<br>IPR013091; IPR018097;<br>G3DSA:2.10.25.10 (GENE3D),<br>PTHR11201 (PANTHER),<br>PTHR11201:SF84 (PANTHER),<br>SSF57196 (SUPERFAMILY) |
| Loa loa                 | lobulin-like cell adhesion molecule family member (igcm-3) |  | 1  | P:GO:0019915                                                                                                                                                          |   |             | -                                                                                                                                                                      |
| Caenorhabditis elegans  | chromosome 9 open reading frame 114                        |  | 4  | P:GO:0009792;<br>P:GO:0040010;<br>P:GO:0006898;<br>P:GO:0002119                                                                                                       | - |             | SignalP (SIGNALP)                                                                                                                                                      |
|                         | -                                                          |  | 0  |                                                                                                                                                                       |   |             | -                                                                                                                                                                      |
|                         | -                                                          |  | 0  |                                                                                                                                                                       |   |             | -                                                                                                                                                                      |
| Caenorhabditis elegans  | exocyst complex component 1                                |  | 5  | P:GO:0007126;<br>P:GO:0000003;<br>P:GO:0040010;<br>F:GO:0005515;<br>P:GO:0040011                                                                                      | - |             | IPR019160; PTHR16092 (PANTHER),<br>PTHR16092:SF1 (PANTHER)                                                                                                             |
| Caenorhabditis briggsae | elegans protein confirmed by transcript evidence           |  | 0  |                                                                                                                                                                       |   |             | -                                                                                                                                                                      |
| Caenorhabditis elegans  | atpase type 13a1                                           |  | 5  | C:GO:0016021;<br>F:GO:0015662;<br>P:GO:0006754;<br>F:GO:0005524;<br>P:GO:0006812                                                                                      | - |             | IPR001757; G3DSA:3.40.50.1000<br>(GENE3D), PTHR11939:SF48<br>(PANTHER)                                                                                                 |
| Caenorhabditis elegans  | atpase type 13a1                                           |  | 5  | C:GO:0016021;<br>F:GO:0015662;<br>P:GO:0006754;<br>F:GO:0005524;<br>P:GO:0006812                                                                                      | - |             | IPR001757; G3DSA:3.40.50.1000<br>(GENE3D), PTHR11939:SF48<br>(PANTHER)                                                                                                 |
| Loa loa                 | protein mo25                                               |  | 1  | F:GO:0005488                                                                                                                                                          | - |             | IPR002007; IPR013878; IPR016024;<br>PTHR10182 (PANTHER),<br>PTHR10182:SF3 (PANTHER)                                                                                    |
|                         | -                                                          |  | 0  |                                                                                                                                                                       |   |             | SignalP (SIGNALP)                                                                                                                                                      |
| Caenorhabditis elegans  | atp synthase lipid-binding mitochondrial precursor         |  | 10 | F:GO:0046933;<br>C:GO:0000276;<br>C:GO:0016021;<br>P:GO:0045471;<br>P:GO:0015986;<br>P:GO:0040007;<br>F:GO:0008289;<br>P:GO:0002119;<br>P:GO:0006898;<br>P:GO:0009792 | - | EC:3.6.3.14 | IPR000454; IPR002379; IPR020537;<br>PTHR10031 (PANTHER), SignalP<br>(SIGNALP)                                                                                          |

|                         |                                                  |    |                                                                                                                                                                                                                                                                                                                                                                                                                                      |                                                                                  |            |                                                                                                    |
|-------------------------|--------------------------------------------------|----|--------------------------------------------------------------------------------------------------------------------------------------------------------------------------------------------------------------------------------------------------------------------------------------------------------------------------------------------------------------------------------------------------------------------------------------|----------------------------------------------------------------------------------|------------|----------------------------------------------------------------------------------------------------|
| Loa loa                 | polymerase (d- directed) gamma                   | 6  | P:GO:0030421;<br>P:GO:0008340;<br>F:GO:0003676;<br>P:GO:0006264;<br>F:GO:0016791;<br>P:GO:0008406                                                                                                                                                                                                                                                                                                                                    | -                                                                                | EC:3.1.3.0 | -                                                                                                  |
| -                       | -                                                | 0  |                                                                                                                                                                                                                                                                                                                                                                                                                                      |                                                                                  |            | IPR003124                                                                                          |
| Caenorhabditis elegans  | gata transcription factor gatac                  | 3  | F:GO:0046872;<br>P:GO:0045449;<br>F:GO:0003677                                                                                                                                                                                                                                                                                                                                                                                       | -                                                                                |            | IPR000679; IPR013088; PTHR10071 (PANTHER), PTHR10071:SF15 (PANTHER), SSF57716 (SUPERFAMILY)        |
| Caenorhabditis briggsae | pecanex-like 3 isoform 1                         | 0  |                                                                                                                                                                                                                                                                                                                                                                                                                                      | F:GO:0003674;<br>C:GO:0016021;<br>C:GO:0016020;<br>P:GO:0008150;<br>C:GO:0005575 |            | SignalP (SIGNALP)                                                                                  |
| Caenorhabditis briggsae | tpr domain containing protein                    | 0  |                                                                                                                                                                                                                                                                                                                                                                                                                                      | F:GO:0005488                                                                     |            | -                                                                                                  |
| Caenorhabditis elegans  | proteasome ( macropain) 26s non- 10              | 25 | P:GO:0051436;<br>P:GO:0045737;<br>P:GO:0002119;<br>P:GO:0090201;<br>C:GO:0045111;<br>P:GO:0032088;<br>C:GO:0005838;<br>C:GO:0015629;<br>F:GO:0008134;<br>P:GO:0031145;<br>P:GO:0043409;<br>P:GO:0040010;<br>P:GO:0006898;<br>P:GO:0043518;<br>C:GO:0005737;<br>P:GO:0043066;<br>P:GO:0030307;<br>P:GO:0051437;<br>P:GO:0018996;<br>P:GO:0070682;<br>P:GO:0032436;<br>P:GO:0007253;<br>P:GO:0040011;<br>C:GO:0005634;<br>P:GO:0010553 | -                                                                                |            | IPR002110; IPR020683; PR01415 (PRINTS), PTHR18958 (PANTHER), PTHR18958:SF176 (PANTHER)             |
| Caenorhabditis elegans  | elegans protein confirmed by transcript evidence | 0  |                                                                                                                                                                                                                                                                                                                                                                                                                                      |                                                                                  |            | SignalP (SIGNALP)                                                                                  |
| Caenorhabditis elegans  | membrane calcium atpase family member (mca-3)    | 7  | F:GO:0005388;<br>C:GO:0016021;<br>P:GO:0006754;<br>F:GO:0005524;<br>P:GO:0006816;<br>C:GO:0005737;<br>P:GO:0030182                                                                                                                                                                                                                                                                                                                   | -                                                                                | EC:3.6.3.8 | IPR001757; IPR004014; G3DSA:2.70.150.10 (GENE3D), PTHR11939:SF76 (PANTHER), SSF81665 (SUPERFAMILY) |
| Caenorhabditis elegans  | integrator complex subunit 7                     | 0  |                                                                                                                                                                                                                                                                                                                                                                                                                                      | F:GO:0005488;<br>C:GO:0005737;<br>C:GO:0005634                                   |            | PTHR13322 (PANTHER)                                                                                |
| Caenorhabditis elegans  | integrator complex subunit 7                     | 0  |                                                                                                                                                                                                                                                                                                                                                                                                                                      | F:GO:0005488;<br>C:GO:0005737;<br>C:GO:0005634                                   |            | PTHR13322 (PANTHER)                                                                                |
| -                       | -                                                | 0  |                                                                                                                                                                                                                                                                                                                                                                                                                                      |                                                                                  |            | -                                                                                                  |
| Caenorhabditis briggsae | elegans protein confirmed by transcript evidence | 0  |                                                                                                                                                                                                                                                                                                                                                                                                                                      |                                                                                  |            | IPR009432; SignalP (SIGNALP)                                                                       |
| Caenorhabditis briggsae | elegans protein confirmed by transcript evidence | 0  |                                                                                                                                                                                                                                                                                                                                                                                                                                      |                                                                                  |            | IPR009432; SignalP (SIGNALP)                                                                       |

|                        |                                     |   |                                                                                                   |   |                                                                                  |                                                              |
|------------------------|-------------------------------------|---|---------------------------------------------------------------------------------------------------|---|----------------------------------------------------------------------------------|--------------------------------------------------------------|
|                        | -                                   | 0 |                                                                                                   |   |                                                                                  | -                                                            |
|                        | -                                   | 0 |                                                                                                   |   |                                                                                  | -                                                            |
| Caenorhabditis elegans | 39s ribosomal protein mitochondrial | 5 | P:GO:0040035;<br>P:GO:0009792;<br>P:GO:0002119;<br>C:GO:0005840;<br>P:GO:0040010                  | - |                                                                                  | IPR002677                                                    |
| Caenorhabditis elegans | 39s ribosomal protein mitochondrial | 6 | P:GO:0040035;<br>P:GO:0009792;<br>P:GO:0002119;<br>P:GO:0040010;<br>C:GO:0015934;<br>P:GO:0006412 | - | EC:3.6.5.3                                                                       | IPR002677                                                    |
| Caenorhabditis elegans | 39s ribosomal protein mitochondrial | 5 | P:GO:0040035;<br>P:GO:0009792;<br>P:GO:0002119;<br>C:GO:0005840;<br>P:GO:0040010                  | - |                                                                                  | IPR002677                                                    |
| Caenorhabditis elegans | 39s ribosomal protein mitochondrial | 6 | P:GO:0040035;<br>P:GO:0009792;<br>P:GO:0002119;<br>P:GO:0040010;<br>C:GO:0015934;<br>P:GO:0006412 | - | EC:3.6.5.3                                                                       | IPR002677                                                    |
|                        | -                                   | 0 |                                                                                                   |   |                                                                                  | SignalP (SIGNALP)                                            |
|                        | -                                   | 0 |                                                                                                   |   |                                                                                  | -                                                            |
|                        | -                                   | 0 |                                                                                                   |   |                                                                                  | -                                                            |
| Brugia malayi          | bromodomain containing protein      | 0 |                                                                                                   |   | P:GO:0000003;<br>P:GO:0010171;<br>P:GO:0009792;<br>P:GO:0002119;<br>F:GO:0005515 | -                                                            |
| Caenorhabditis elegans | cytochrome oxidase assembly protein | 2 | P:GO:0006461;<br>C:GO:0016020                                                                     | - |                                                                                  | IPR000169; IPR003780; PTHR23289 (PANTHER), SignalP (SIGNALP) |

|                             |                                                       |    |                                                                                                                                                                                                                                                                                                                                                                                                                                                                         |             |                                                                                                      |
|-----------------------------|-------------------------------------------------------|----|-------------------------------------------------------------------------------------------------------------------------------------------------------------------------------------------------------------------------------------------------------------------------------------------------------------------------------------------------------------------------------------------------------------------------------------------------------------------------|-------------|------------------------------------------------------------------------------------------------------|
| Homo sapiens                | cathepsin b                                           | 29 | P:GO:0009749;<br>C:GO:0005764;<br>F:GO:0030984;<br>P:GO:0051789;<br>C:GO:0009897;<br>C:GO:0005625;<br>C:GO:0005739;<br>P:GO:0045471;<br>P:GO:0042981;<br>C:GO:0005901;<br>P:GO:0009611;<br>F:GO:0032403;<br>C:GO:0005615;<br>P:GO:0006508;<br>P:GO:0043434;<br>F:GO:0004197;<br>C:GO:0042470;<br>P:GO:0007519;<br>P:GO:0014070;<br>P:GO:0070670;<br>C:GO:0048471;<br>C:GO:0016324;<br>C:GO:0042383;<br>P:GO:0050790;<br>P:GO:0014075;<br>P:GO:0060548;<br>P:GO:0006914; | EC:3.4.22.0 | IPR000169; IPR000668; IPR013128;<br>IPR015643; G3DSA:3.90.70.10<br>(GENE3D), SSF54001 (SUPERFAMILY)  |
| -                           | -                                                     | 0  | -                                                                                                                                                                                                                                                                                                                                                                                                                                                                       | -           | -                                                                                                    |
| Arthroderma otae CBS 113480 | transferase                                           | 2  | C:GO:0016020;<br>F:GO:0003824                                                                                                                                                                                                                                                                                                                                                                                                                                           | -           | IPR017849; SignalP (SIGNALP)                                                                         |
| Caenorhabditis elegans      | hypothetical protein T04C4.1 [Caenorhabditis elegans] | 0  |                                                                                                                                                                                                                                                                                                                                                                                                                                                                         |             | -                                                                                                    |
| -                           | -                                                     | 0  |                                                                                                                                                                                                                                                                                                                                                                                                                                                                         |             | -                                                                                                    |
| -                           | -                                                     | 0  |                                                                                                                                                                                                                                                                                                                                                                                                                                                                         |             | IPR000571                                                                                            |
| -                           | -                                                     | 0  |                                                                                                                                                                                                                                                                                                                                                                                                                                                                         |             | IPR000571                                                                                            |
| -                           | -                                                     | 0  |                                                                                                                                                                                                                                                                                                                                                                                                                                                                         |             | -                                                                                                    |
| Caenorhabditis elegans      | replication factor c (activator 1) 145kda             | 19 | C:GO:0005654;<br>P:GO:0000003;<br>F:GO:0005515;<br>P:GO:0006261;<br>P:GO:0040010;<br>P:GO:0006898;<br>C:GO:0005624;<br>P:GO:0006297;<br>F:GO:0008047;<br>P:GO:0009792;<br>F:GO:0008517;<br>F:GO:0003689;<br>P:GO:0002119;<br>C:GO:0005663;<br>P:GO:0015884;<br>F:GO:0015350;<br>P:GO:0007004;<br>C:GO:0005887;<br>F:GO:0005524                                                                                                                                          | -           | IPR008921; IPR013725;<br>G3DSA:1.10.8.60 (GENE3D),<br>PTHR23389 (PANTHER), SSF52540<br>(SUPERFAMILY) |
| -                           | -                                                     | 0  |                                                                                                                                                                                                                                                                                                                                                                                                                                                                         |             | -                                                                                                    |
| -                           | -                                                     | 0  |                                                                                                                                                                                                                                                                                                                                                                                                                                                                         |             | -                                                                                                    |
| -                           | -                                                     | 0  |                                                                                                                                                                                                                                                                                                                                                                                                                                                                         |             | -                                                                                                    |

|                         |                                                         |    |                                                                                                                                                                                                                          |              |              |                                                                                                       |
|-------------------------|---------------------------------------------------------|----|--------------------------------------------------------------------------------------------------------------------------------------------------------------------------------------------------------------------------|--------------|--------------|-------------------------------------------------------------------------------------------------------|
| Caenorhabditis elegans  | diacylglycerol ki-se                                    | 7  | F:GO:0003676;<br>P:GO:0007205;<br>F:GO:0005515;<br>P:GO:0007165;<br>F:GO:0008270;<br>F:GO:0004143;<br>F:GO:0000166                                                                                                       | -            | EC:2.7.1.107 | IPR000159; IPR022272; SSF54236 (SUPERFAMILY)                                                          |
| Caenorhabditis briggsae | elegans protein confirmed by transcript evidence        | 0  |                                                                                                                                                                                                                          |              |              | -                                                                                                     |
| Caenorhabditis elegans  | mitochondrial ribosomal protein s31                     | 0  |                                                                                                                                                                                                                          | C:GO:0005840 |              | PTHR13231 (PANTHER)                                                                                   |
|                         | -                                                       | 0  |                                                                                                                                                                                                                          |              |              | -                                                                                                     |
| Homo sapiens            | -dh dehydroge-se subunit 6                              | 0  |                                                                                                                                                                                                                          |              |              | PTHR11435 (PANTHER), SignalP (SIGNALP)                                                                |
|                         | -                                                       | 0  |                                                                                                                                                                                                                          |              |              | -                                                                                                     |
| Caenorhabditis briggsae | rho gtpase-activating protein 21                        | 5  | F:GO:0005100;<br>P:GO:0007266;<br>C:GO:0044444;<br>C:GO:0043229;<br>C:GO:0016020                                                                                                                                         | -            |              | -                                                                                                     |
| Caenorhabditis briggsae | isocitrate dehydroge-se                                 | 10 | P:GO:0006097;<br>P:GO:0006103;<br>C:GO:0005743;<br>P:GO:0055114;<br>P:GO:0006099;<br>F:GO:0051287;<br>F:GO:0004450;<br>F:GO:0000287;<br>P:GO:0006102;<br>P:GO:0006950                                                    | -            | EC:1.1.1.42  | IPR001804; IPR004790; IPR019818; SignalP (SIGNALP), SSF53659 (SUPERFAMILY)                            |
|                         | -                                                       | 0  |                                                                                                                                                                                                                          |              |              | -                                                                                                     |
| Caenorhabditis briggsae | Hypothetical protein CBG14129 [Caenorhabditis briggsae] | 0  |                                                                                                                                                                                                                          |              |              | -                                                                                                     |
| Caenorhabditis elegans  | archain 1                                               | 9  | C:GO:0005829;<br>P:GO:0006890;<br>P:GO:0018996;<br>C:GO:0030131;<br>P:GO:0002119;<br>F:GO:0005515;<br>C:GO:0030663;<br>P:GO:0048205;<br>P:GO:0006886                                                                     | -            |              | IPR008968; G3DSA:2.60.40.1170 (GENE3D), PTHR10121 (PANTHER)                                           |
| Caenorhabditis briggsae | ring finger protein 7                                   | 13 | F:GO:0005507;<br>P:GO:0008631;<br>F:GO:0008270;<br>P:GO:0000003;<br>P:GO:0051775;<br>P:GO:0045116;<br>P:GO:0006916;<br>P:GO:0008637;<br>F:GO:0019788;<br>F:GO:0005515;<br>C:GO:0005737;<br>P:GO:0006919;<br>C:GO:0005634 | -            |              | IPR001841; IPR013083; IPR018363; PTHR11210 (PANTHER), PTHR11210:SF3 (PANTHER), SSF57850 (SUPERFAMILY) |

|                             |                                                            |   |                                                                                  |                                                                                                                                                      |  |                                                                                             |
|-----------------------------|------------------------------------------------------------|---|----------------------------------------------------------------------------------|------------------------------------------------------------------------------------------------------------------------------------------------------|--|---------------------------------------------------------------------------------------------|
| Caenorhabditis elegans      | hypothetical protein F55F10.1 [Caenorhabditis elegans]     | 0 |                                                                                  | C:GO:0005634;<br>F:GO:0000166;<br>F:GO:0008134;<br>F:GO:0017111;<br>F:GO:0005524;<br>F:GO:0016887;<br>P:GO:0006355;<br>C:GO:0005622;<br>P:GO:0043254 |  | PTHR22908 (PANTHER),<br>PTHR22908:SF13 (PANTHER)                                            |
| -                           | -                                                          | 0 |                                                                                  |                                                                                                                                                      |  | -                                                                                           |
| Caenorhabditis sp. PS1010   | chromatin assembly factor 1 subunit b                      | 5 | P:GO:0009987;<br>P:GO:0000003;<br>F:GO:0005515;<br>C:GO:0044444;<br>C:GO:0044428 | -                                                                                                                                                    |  | IPR001680; IPR011046; IPR015943;<br>IPR017986; IPR019781; IPR019782;<br>PTHR15271 (PANTHER) |
| Brugia malayi               | hypothetical kda protein in chromosome                     | 0 |                                                                                  | C:GO:0016021;<br>C:GO:0016020;<br>F:GO:0005215;<br>P:GO:0006810                                                                                      |  | IPR000425; PTHR21191 (PANTHER),<br>PTHR21191:SF2 (PANTHER), SignalP<br>(SIGNALP)            |
| Caenorhabditis elegans      | f37c4_caeel ame: full=protein                              | 1 | F:GO:0005515                                                                     | -                                                                                                                                                    |  | -                                                                                           |
| -                           | -                                                          | 0 |                                                                                  |                                                                                                                                                      |  | IPR005829                                                                                   |
| Caenorhabditis briggsae     | run domain containing protein                              | 0 |                                                                                  | F:GO:0046872;<br>C:GO:0005737;<br>F:GO:0008270;<br>P:GO:0023034;<br>F:GO:0005515                                                                     |  | IPR004012; PTHR22835 (PANTHER),<br>PTHR22835:SF37 (PANTHER),<br>SSF140741 (SUPERFAMILY)     |
| Caenorhabditis elegans      | polyglutamine-binding protein 1                            | 0 |                                                                                  | F:GO:0005515                                                                                                                                         |  | IPR001202; G3DSA:2.20.70.10<br>(GENE3D), PTHR21737 (PANTHER),<br>PTHR21737:SF3 (PANTHER)    |
| Brugia malayi               | Conserved hypothetical protein [Brugia malayi]             | 0 |                                                                                  | F:GO:0003676;<br>F:GO:0008270                                                                                                                        |  | -                                                                                           |
| Caenorhabditis elegans      | elegans protein confirmed by transcript evidence           | 0 |                                                                                  |                                                                                                                                                      |  | -                                                                                           |
| -                           | -                                                          | 0 |                                                                                  |                                                                                                                                                      |  | -                                                                                           |
| Caenorhabditis elegans      | subfamily member 13                                        | 3 | P:GO:0006457;<br>F:GO:0031072;<br>F:GO:0051082                                   | -                                                                                                                                                    |  | IPR001623; IPR011989; IPR015609;<br>PTHR11821:SF23 (PANTHER)                                |
| Caenorhabditis elegans      | subfamily member 13                                        | 3 | P:GO:0006457;<br>F:GO:0031072;<br>F:GO:0051082                                   | -                                                                                                                                                    |  | IPR001623; IPR015609;<br>PTHR11821:SF23 (PANTHER)                                           |
| Caenorhabditis elegans      | loc446287 protein                                          | 2 | P:GO:0008152;<br>F:GO:0016627                                                    | -                                                                                                                                                    |  | IPR006090; IPR009075; PTHR10909<br>(PANTHER), PTHR10909:SF10<br>(PANTHER)                   |
| Caenorhabditis elegans      | #NAME?                                                     | 3 | F:GO:0008417;<br>F:GO:0005515;<br>C:GO:0016020                                   | -                                                                                                                                                    |  | SignalP (SIGNALP)                                                                           |
| -                           | -                                                          | 0 |                                                                                  |                                                                                                                                                      |  | -                                                                                           |
| Angiostrongylus cantonensis | peroxisomal membrane protein 11c                           | 0 |                                                                                  | C:GO:0005777;<br>F:GO:0003674;<br>C:GO:0016021;<br>C:GO:0016020;<br>P:GO:0008150;<br>C:GO:0005575;<br>C:GO:0005778                                   |  | -                                                                                           |
| Caenorhabditis elegans      | elegans protein partially confirmed by transcript evidence | 1 | F:GO:0005515                                                                     | -                                                                                                                                                    |  | IPR002223; IPR006150; IPR020901;<br>PTHR10083 (PANTHER),<br>PTHR10083:SF39 (PANTHER)        |
| -                           | -                                                          | 0 |                                                                                  |                                                                                                                                                      |  | -                                                                                           |
| -                           | -                                                          | 0 |                                                                                  |                                                                                                                                                      |  | -                                                                                           |



|                             |                                                                       |    |                                                                                                                                                                                                                                           |                                                                                  |             |                                                                     |
|-----------------------------|-----------------------------------------------------------------------|----|-------------------------------------------------------------------------------------------------------------------------------------------------------------------------------------------------------------------------------------------|----------------------------------------------------------------------------------|-------------|---------------------------------------------------------------------|
|                             | -                                                                     | 0  |                                                                                                                                                                                                                                           |                                                                                  |             | -                                                                   |
| Brugia malayi               | collagen-binding adhesin                                              | 0  |                                                                                                                                                                                                                                           | C:GO:0005618;<br>P:GO:0007155;<br>C:GO:0009986;<br>F:GO:0005518;<br>F:GO:0005515 |             | IPR012340; IPR013955; IPR016027                                     |
| Salinispora tropica CNB-440 | collagen-binding adhesin                                              | 0  |                                                                                                                                                                                                                                           | C:GO:0005618;<br>P:GO:0007155;<br>C:GO:0009986;<br>F:GO:0005518;<br>F:GO:0005515 |             | -                                                                   |
| Salinispora tropica CNB-440 | collagen-binding adhesin                                              | 0  |                                                                                                                                                                                                                                           | C:GO:0005618;<br>P:GO:0007155;<br>C:GO:0009986;<br>F:GO:0005518;<br>F:GO:0005515 |             | IPR016027                                                           |
| Caenorhabditis briggsae     | briggsae cbr-prx-14 protein                                           | 4  | P:GO:0009792;<br>P:GO:0002119;<br>P:GO:0040010;<br>C:GO:0044464                                                                                                                                                                           | -                                                                                |             | IPR006785; PTHR23058 (PANTHER)                                      |
| Acyrtosiphon pisum          | ubiquitin-conjugating enzyme e2e 1 (ubc4 5 yeast)                     | 14 | C:GO:0005829;<br>P:GO:0033523;<br>P:GO:0000209;<br>P:GO:0051436;<br>P:GO:0010390;<br>P:GO:0032020;<br>P:GO:0051437;<br>P:GO:0070936;<br>P:GO:0031145;<br>F:GO:0004842;<br>F:GO:0042296;<br>F:GO:0005515;<br>C:GO:0000151;<br>C:GO:0005654 | -                                                                                | EC:6.3.2.19 | IPR000608; IPR016135; PTHR11621 (PANTHER), PTHR11621:SF29 (PANTHER) |
|                             | -                                                                     | 0  |                                                                                                                                                                                                                                           |                                                                                  |             | -                                                                   |
|                             | -                                                                     | 0  |                                                                                                                                                                                                                                           |                                                                                  |             | -                                                                   |
| Caenorhabditis elegans      | elegans protein confirmed by transcript evidence                      | 4  | C:GO:0016021;<br>P:GO:0006814;<br>P:GO:0055085;<br>F:GO:0005215                                                                                                                                                                           | -                                                                                |             | -                                                                   |
|                             | -                                                                     | 0  |                                                                                                                                                                                                                                           |                                                                                  |             | -                                                                   |
| Caenorhabditis elegans      | hypothetical protein F25D7.5 [Caenorhabditis elegans]                 | 0  |                                                                                                                                                                                                                                           |                                                                                  |             | -                                                                   |
| Brugia malayi               | microtubule associated protein                                        | 1  | F:GO:0005488                                                                                                                                                                                                                              | -                                                                                |             | IPR000357; IPR011989; IPR016024; IPR021133; PTHR12609 (PANTHER)     |
| Caenorhabditis elegans      | sterol regulatory element-binding protein cleavage-activating protein | 6  | P:GO:0006629;<br>C:GO:0043231;<br>C:GO:0044444;<br>P:GO:0044281;<br>P:GO:0009792;<br>C:GO:0016020                                                                                                                                         | -                                                                                |             | -                                                                   |
|                             | -                                                                     | 0  |                                                                                                                                                                                                                                           |                                                                                  |             | -                                                                   |
| Caenorhabditis elegans      | hypothetical protein W04B5.3 [Caenorhabditis elegans]                 | 0  |                                                                                                                                                                                                                                           | F:GO:0005529                                                                     |             | PTHR12381 (PANTHER), PTHR12381:SF2 (PANTHER)                        |
| Caenorhabditis elegans      | kiaa1450 partial                                                      | 0  |                                                                                                                                                                                                                                           |                                                                                  |             | PTHR21634 (PANTHER), PTHR21634:SF9 (PANTHER)                        |
|                             | -                                                                     | 0  |                                                                                                                                                                                                                                           |                                                                                  |             | -                                                                   |

|                         |                                                  |    |                                                                                                                                                                                        |                                                                                                                                                                                                                                                                                              |            |                                                                                   |
|-------------------------|--------------------------------------------------|----|----------------------------------------------------------------------------------------------------------------------------------------------------------------------------------------|----------------------------------------------------------------------------------------------------------------------------------------------------------------------------------------------------------------------------------------------------------------------------------------------|------------|-----------------------------------------------------------------------------------|
| Caenorhabditis elegans  | elegans protein confirmed by transcript evidence | 11 | P:GO:0009792;<br>P:GO:0010171;<br>P:GO:0002119;<br>P:GO:0040002;<br>P:GO:0040011;<br>C:GO:0016021;<br>C:GO:0005576;<br>P:GO:0019915;<br>P:GO:0040007;<br>P:GO:0006898;<br>F:GO:0042302 | -                                                                                                                                                                                                                                                                                            |            | IPR002486; PTHR10499 (PANTHER),<br>PTHR10499:SF58 (PANTHER), SignalP<br>(SIGNALP) |
| Loa loa                 | briggsae cbr-smg-1 protein                       | 0  |                                                                                                                                                                                        | F:GO:0016740;<br>P:GO:0016310;<br>F:GO:0004674;<br>P:GO:0006974;<br>C:GO:0005634;<br>F:GO:0000166;<br>C:GO:0005737;<br>F:GO:0003674;<br>F:GO:0005524;<br>F:GO:0016301;<br>P:GO:0006281;<br>C:GO:0005575;<br>P:GO:0000184;<br>F:GO:0016773;<br>F:GO:0046872;<br>P:GO:0008150;<br>F:GO:0005488 | -          |                                                                                   |
| Caenorhabditis elegans  | reticulon protein family member (ret-1)          | 1  | F:GO:0005515                                                                                                                                                                           | -                                                                                                                                                                                                                                                                                            |            | -                                                                                 |
| Caenorhabditis elegans  | reticulon protein family member (ret-1)          | 2  | C:GO:0044464;<br>F:GO:0005515                                                                                                                                                          | -                                                                                                                                                                                                                                                                                            |            | IPR003388; PTHR10994:SF19<br>(PANTHER)                                            |
| Caenorhabditis elegans  | reticulon protein family member (ret-1)          | 2  | C:GO:0044464;<br>F:GO:0005515                                                                                                                                                          | -                                                                                                                                                                                                                                                                                            |            | IPR003388; PTHR10994:SF19<br>(PANTHER), SignalP (SIGNALP)                         |
| Caenorhabditis elegans  | alanine-glyoxylate aminotransferase              | 2  | F:GO:0030170;<br>F:GO:0008483                                                                                                                                                          | -                                                                                                                                                                                                                                                                                            | EC:2.6.1.0 | IPR005814; IPR015421; IPR015424;<br>PTHR11986:SF23 (PANTHER)                      |
| Caenorhabditis elegans  | briggsae cbr-pad-1 protein                       | 2  | P:GO:0015031;<br>P:GO:0007275                                                                                                                                                          | -                                                                                                                                                                                                                                                                                            |            | PTHR14042 (PANTHER)                                                               |
| Caenorhabditis elegans  | bromodomain and wd repeat domain containing 2    | 1  | P:GO:0008286                                                                                                                                                                           | -                                                                                                                                                                                                                                                                                            |            | SignalP (SIGNALP)                                                                 |
|                         | -                                                | 0  |                                                                                                                                                                                        |                                                                                                                                                                                                                                                                                              |            | -                                                                                 |
| Caenorhabditis elegans  | briggsae cbr-ada-2 protein                       | 8  | P:GO:0009792;<br>P:GO:0010171;<br>P:GO:0040027;<br>P:GO:0040010;<br>P:GO:0000003;<br>P:GO:0008340;<br>P:GO:0040011;<br>P:GO:0006898                                                    | -                                                                                                                                                                                                                                                                                            |            | IPR007087; IPR017969; PTHR12374<br>(PANTHER)                                      |
| Branchiostoma floridae  | vacuolar protein sorting 35                      | 0  |                                                                                                                                                                                        |                                                                                                                                                                                                                                                                                              |            | IPR005378; SignalP (SIGNALP)                                                      |
|                         | -                                                | 0  |                                                                                                                                                                                        |                                                                                                                                                                                                                                                                                              |            | -                                                                                 |
| Caenorhabditis briggsae | general transcription factor polypeptide 52kda   | 8  | C:GO:0005654;<br>P:GO:0006366;<br>F:GO:0016874;<br>F:GO:0004672;<br>P:GO:0045449;<br>F:GO:0005488;<br>C:GO:0044444;<br>P:GO:0006281                                                    | -                                                                                                                                                                                                                                                                                            |            | IPR004598; IPR010916                                                              |

|                             |                                                            |  |                                                                                                                                                                                                                                |                                                                                                                                     |             |                                                                                                                                          |
|-----------------------------|------------------------------------------------------------|--|--------------------------------------------------------------------------------------------------------------------------------------------------------------------------------------------------------------------------------|-------------------------------------------------------------------------------------------------------------------------------------|-------------|------------------------------------------------------------------------------------------------------------------------------------------|
| Loa loa                     | bloom s syndrome protein homolog                           |  | 3<br>P:GO:0006259;<br>F:GO:0008026;<br>F:GO:0000166                                                                                                                                                                            | -                                                                                                                                   |             | -                                                                                                                                        |
|                             |                                                            |  | 0                                                                                                                                                                                                                              |                                                                                                                                     |             |                                                                                                                                          |
| Caenorhabditis elegans      | cysteine protease atg4d                                    |  | 0                                                                                                                                                                                                                              | P:GO:0006914;<br>C:GO:0005737;<br>F:GO:0016787;<br>F:GO:0008234;<br>F:GO:0008233;<br>F:GO:0004197;<br>P:GO:0006810;<br>P:GO:0015031 |             | IPR005078; PTHR22624:SF15 (PANTHER)                                                                                                      |
| Caenorhabditis brenneri     | fk506 binding protein 13kda                                |  | 6<br>P:GO:0006457;<br>F:GO:0005528;<br>F:GO:0005515;<br>C:GO:0016020;<br>C:GO:0005783;<br>F:GO:0003755                                                                                                                         | -                                                                                                                                   | EC:5.2.1.8  | IPR001179; G3DSA:3.10.50.40 (GENE3D), PTHR10516:SF20 (PANTHER), SignalP (SIGNALP), SSF54534 (SUPERFAMILY)                                |
|                             |                                                            |  | 0                                                                                                                                                                                                                              |                                                                                                                                     |             |                                                                                                                                          |
| Macaca fascicularis         | proteasome ( macropain) beta 4                             |  | 11<br>P:GO:0051436;<br>P:GO:0051437;<br>F:GO:0004298;<br>C:GO:0045111;<br>C:GO:0005813;<br>P:GO:0031145;<br>F:GO:0001530;<br>P:GO:0002862;<br>P:GO:0044419;<br>C:GO:0005839;<br>C:GO:0005634                                   | -                                                                                                                                   | EC:3.4.25.0 | IPR001353; IPR016050; G3DSA:3.60.20.10 (GENE3D), PTHR11599 (PANTHER), PTHR11599:SF5 (PANTHER), PS51476 (PROFILE), SSF56235 (SUPERFAMILY) |
| Caenorhabditis elegans      | u3 small nucleolar r--associated protein 15 homolog        |  | 2<br>C:GO:0005730;<br>P:GO:0006364                                                                                                                                                                                             | -                                                                                                                                   |             | PTHR19924 (PANTHER), PTHR19924:SF2 (PANTHER)                                                                                             |
| Loa loa                     | hypothetical protein LOAG_00601 [Loa loa]                  |  | 0                                                                                                                                                                                                                              |                                                                                                                                     |             | IPR011991; SSF46785 (SUPERFAMILY)                                                                                                        |
| Loa loa                     | hypothetical protein LOAG_00601 [Loa loa]                  |  | 0                                                                                                                                                                                                                              |                                                                                                                                     |             | IPR011991; SSF46785 (SUPERFAMILY)                                                                                                        |
| Anopheles gambiae str. PEST | phospholipase d3                                           |  | 5<br>F:GO:0008081;<br>F:GO:0004620;<br>P:GO:0008152;<br>C:GO:0005783;<br>C:GO:0044425                                                                                                                                          | -                                                                                                                                   | EC:3.1.4.0  | IPR001736; G3DSA:3.30.870.10 (GENE3D), PTHR10185 (PANTHER), SSF56024 (SUPERFAMILY)                                                       |
|                             |                                                            |  | 0                                                                                                                                                                                                                              |                                                                                                                                     |             | SignalP (SIGNALP)                                                                                                                        |
| Caenorhabditis briggsae     | hd domain containing protein                               |  | 1<br>F:GO:0003824                                                                                                                                                                                                              | -                                                                                                                                   |             | IPR003607; IPR006674; PTHR21262 (PANTHER), SSF109604 (SUPERFAMILY)                                                                       |
| Caenorhabditis elegans      | solute carrier family 27 (fatty acid transporter) member 4 |  | 13<br>F:GO:0005488;<br>P:GO:0042760;<br>C:GO:0016021;<br>P:GO:0007584;<br>C:GO:0031526;<br>P:GO:0043588;<br>F:GO:0004467;<br>P:GO:0001676;<br>P:GO:0001579;<br>C:GO:0005902;<br>C:GO:0005783;<br>P:GO:0015909;<br>F:GO:0031957 | -                                                                                                                                   | EC:6.2.1.3  | IPR000873; G3DSA:3.30.300.30 (GENE3D), PTHR11968 (PANTHER), PTHR11968:SF15 (PANTHER), SSF56801 (SUPERFAMILY)                             |

|                        |                                                            |    |                                                                                                                                                                       |                                                                                                                                                                                                                                                            |                            |                                                                                                                   |
|------------------------|------------------------------------------------------------|----|-----------------------------------------------------------------------------------------------------------------------------------------------------------------------|------------------------------------------------------------------------------------------------------------------------------------------------------------------------------------------------------------------------------------------------------------|----------------------------|-------------------------------------------------------------------------------------------------------------------|
| Caenorhabditis elegans | adp-ribose mitochondrial precursor                         | 1  | F:GO:0005488                                                                                                                                                          | -                                                                                                                                                                                                                                                          |                            | IPR000086; IPR015797; PTHR13030 (PANTHER), PTHR13030:SF8 (PANTHER), PS51462 (PROFILE)                             |
|                        | -                                                          | 0  |                                                                                                                                                                       |                                                                                                                                                                                                                                                            |                            | -                                                                                                                 |
| Caenorhabditis elegans | dynein heavy chain                                         | 5  | P:GO:0007018;<br>C:GO:0030286;<br>F:GO:0016887;<br>F:GO:0005524;<br>F:GO:0003777                                                                                      | -                                                                                                                                                                                                                                                          |                            | IPR013602                                                                                                         |
|                        | -                                                          | 0  |                                                                                                                                                                       |                                                                                                                                                                                                                                                            |                            | -                                                                                                                 |
| Populus trichocarpa    | misshapen-like ki-se 1                                     | 0  |                                                                                                                                                                       | F:GO:0004674;<br>P:GO:0006950;<br>F:GO:0004672;<br>F:GO:0005083;<br>F:GO:0003676;<br>P:GO:0006468;<br>F:GO:0000166;<br>F:GO:0005525;<br>F:GO:0005524;<br>P:GO:0050790;<br>F:GO:0016301;<br>P:GO:0007275;<br>P:GO:0007243;<br>P:GO:0045060;<br>F:GO:0003924 |                            | -                                                                                                                 |
| Caenorhabditis elegans | elegans protein partially confirmed by transcript evidence | 1  | F:GO:0005515                                                                                                                                                          | -                                                                                                                                                                                                                                                          |                            | -                                                                                                                 |
|                        | -                                                          | 0  |                                                                                                                                                                       |                                                                                                                                                                                                                                                            |                            | -                                                                                                                 |
|                        | -                                                          | 0  |                                                                                                                                                                       |                                                                                                                                                                                                                                                            |                            | -                                                                                                                 |
| Caenorhabditis elegans | elegans protein confirmed by transcript evidence           | 0  |                                                                                                                                                                       |                                                                                                                                                                                                                                                            |                            | SignalP (SIGNALP)                                                                                                 |
|                        | -                                                          | 0  |                                                                                                                                                                       |                                                                                                                                                                                                                                                            |                            | -                                                                                                                 |
| Loa loa                | #NAME?                                                     | 9  | P:GO:0009792;<br>P:GO:0010171;<br>F:GO:0004553;<br>P:GO:0005975;<br>F:GO:0043169;<br>F:GO:0003844;<br>F:GO:0031072;<br>P:GO:0040010;<br>P:GO:0000003                  | -                                                                                                                                                                                                                                                          | EC:3.2.1.0;<br>EC:2.4.1.18 | IPR006048; IPR013780; IPR013781; IPR017853; PTHR10357 (PANTHER), PTHR10357:SF27 (PANTHER), SSF51011 (SUPERFAMILY) |
| Homo sapiens           | major histocompatibility class dp alpha 1                  | 9  | C:GO:0005789;<br>C:GO:0005887;<br>C:GO:0042613;<br>C:GO:0005794;<br>P:GO:0002504;<br>C:GO:0005765;<br>F:GO:0032395;<br>C:GO:0010008;<br>P:GO:0006955                  | -                                                                                                                                                                                                                                                          |                            | -                                                                                                                 |
| Caenorhabditis elegans | elegans protein confirmed by transcript evidence           | 10 | C:GO:0005789;<br>P:GO:0006467;<br>P:GO:0002119;<br>F:GO:0016671;<br>F:GO:0005515;<br>P:GO:0055114;<br>P:GO:0000003;<br>P:GO:0008340;<br>F:GO:0050660;<br>P:GO:0040007 | -                                                                                                                                                                                                                                                          | EC:1.8.4.0                 | IPR007266                                                                                                         |

|                         |                                                  |   |                                                                                                                                                      |                                                                                                                    |                                                                                                                                    |
|-------------------------|--------------------------------------------------|---|------------------------------------------------------------------------------------------------------------------------------------------------------|--------------------------------------------------------------------------------------------------------------------|------------------------------------------------------------------------------------------------------------------------------------|
|                         | -                                                | 0 |                                                                                                                                                      |                                                                                                                    | -                                                                                                                                  |
|                         | -                                                | 0 |                                                                                                                                                      |                                                                                                                    | -                                                                                                                                  |
| Caenorhabditis briggsae | briggsae cbr-polk-1 protein                      | 3 | F:GO:0003887;<br>P:GO:0006281;<br>F:GO:0003684                                                                                                       | -                                                                                                                  | EC:2.7.7.7                                                                                                                         |
| Caenorhabditis briggsae | calpain 5                                        | 6 | P:GO:0042004;<br>C:GO:0005622;<br>F:GO:0004198;<br>P:GO:0019099;<br>P:GO:0006508;<br>C:GO:0016020                                                    | -                                                                                                                  | IPR001300; G3DSA:3.90.70.10 (GENE3D), PTHR10183 (PANTHER), PTHR10183:SF32 (PANTHER), SSF54001 (SUPERFAMILY)                        |
| Caenorhabditis briggsae | family protein                                   | 3 | P:GO:0000003;<br>F:GO:0008121;<br>P:GO:0040010                                                                                                       | -                                                                                                                  | EC:1.10.2.2                                                                                                                        |
|                         | -                                                | 0 |                                                                                                                                                      |                                                                                                                    | -                                                                                                                                  |
| Brugia malayi           | aaa family protein                               | 0 |                                                                                                                                                      | P:GO:0006260;<br>F:GO:0005524;<br>F:GO:0000166;<br>C:GO:0005663;<br>F:GO:0017111;<br>F:GO:0003677;<br>F:GO:0003689 | -                                                                                                                                  |
|                         | -                                                | 0 |                                                                                                                                                      |                                                                                                                    | -                                                                                                                                  |
| Caenorhabditis briggsae | peroxisomal biogenesis factor 3                  | 2 | P:GO:0040010;<br>C:GO:0016020                                                                                                                        | -                                                                                                                  | IPR006966; PTHR22950 (PANTHER), PTHR22950:SF8 (PANTHER)                                                                            |
|                         | -                                                | 0 |                                                                                                                                                      |                                                                                                                    | -                                                                                                                                  |
| Caenorhabditis elegans  | high affinity copper uptake protein 1            | 3 | C:GO:0016021;<br>P:GO:0006825;<br>F:GO:0005375                                                                                                       | -                                                                                                                  | IPR007274; PTHR12483:SF7 (PANTHER)                                                                                                 |
| Caenorhabditis elegans  | protein ki-se domain containing protein          | 0 |                                                                                                                                                      | F:GO:0016301;<br>F:GO:0004672;<br>F:GO:0005524;<br>F:GO:0000166;<br>P:GO:0006468;<br>F:GO:0004674                  | -                                                                                                                                  |
| Caenorhabditis elegans  | protein ki-se domain containing protein          | 0 |                                                                                                                                                      | F:GO:0016301;<br>F:GO:0004672;<br>F:GO:0005524;<br>F:GO:0000166;<br>P:GO:0006468;<br>F:GO:0004674                  | -                                                                                                                                  |
| Caenorhabditis briggsae | elegans protein confirmed by transcript evidence | 1 | F:GO:0005515                                                                                                                                         | -                                                                                                                  | -                                                                                                                                  |
|                         | -                                                | 0 |                                                                                                                                                      |                                                                                                                    | -                                                                                                                                  |
| Homo sapiens            | high density lipoprotein binding protein         | 9 | C:GO:0005737;<br>F:GO:0008289;<br>C:GO:0005886;<br>F:GO:0003723;<br>F:GO:0005515;<br>P:GO:0006869;<br>P:GO:0008203;<br>C:GO:0005634;<br>C:GO:0034364 | -                                                                                                                  | IPR004087; IPR004088; IPR018111; G3DSA:3.30.1370.10 (GENE3D), PTHR10627 (PANTHER), PTHR10627:SF9 (PANTHER), SSF54791 (SUPERFAMILY) |
| Caenorhabditis elegans  | elegans protein confirmed by transcript evidence | 0 |                                                                                                                                                      |                                                                                                                    | SignalP (SIGNALP)                                                                                                                  |
|                         | -                                                | 0 |                                                                                                                                                      |                                                                                                                    | -                                                                                                                                  |
|                         | -                                                | 0 |                                                                                                                                                      |                                                                                                                    | SignalP (SIGNALP)                                                                                                                  |
|                         | -                                                | 0 |                                                                                                                                                      |                                                                                                                    | -                                                                                                                                  |

|                         |                                                         |    |                                                                                                                                                                                                                                                                             |   |                                                                 |                                                                                                                                                           |
|-------------------------|---------------------------------------------------------|----|-----------------------------------------------------------------------------------------------------------------------------------------------------------------------------------------------------------------------------------------------------------------------------|---|-----------------------------------------------------------------|-----------------------------------------------------------------------------------------------------------------------------------------------------------|
| Brugia malayi           | receptor accessory protein 1                            | 5  | F:GO:0031849;<br>P:GO:0008219;<br>C:GO:0016021;<br>C:GO:0031966;<br>P:GO:0051205                                                                                                                                                                                            | - |                                                                 | IPR004345; PTHR12300:SF19<br>(PANTHER), SignalP (SIGNALP)                                                                                                 |
| Loa loa                 | serine threonine-protein ki-se smg1                     | 6  | P:GO:0044260;<br>F:GO:0016773;<br>F:GO:0016301;<br>P:GO:0090304;<br>F:GO:0000166;<br>C:GO:0044424                                                                                                                                                                           | - | EC:2.7.1.0                                                      | -                                                                                                                                                         |
| -                       | -                                                       | 0  |                                                                                                                                                                                                                                                                             |   |                                                                 | -                                                                                                                                                         |
| Caenorhabditis elegans  | dihydropyrimidine dehydroge-se                          | 16 | C:GO:0005829;<br>F:GO:0004158;<br>P:GO:0006145;<br>P:GO:0006212;<br>F:GO:0046872;<br>P:GO:0055114;<br>F:GO:0009055;<br>F:GO:0017113;<br>F:GO:0051539;<br>P:GO:0006222;<br>P:GO:0006210;<br>F:GO:0042803;<br>F:GO:0050660;<br>P:GO:0006207;<br>F:GO:0050661;<br>P:GO:0006214 | - | EC:1.3.3.1;<br>EC:1.3.1.2                                       | IPR012135; IPR013785; PTHR11938<br>(PANTHER), PTHR11938:SF7<br>(PANTHER), SSF51395 (SUPERFAMILY)                                                          |
| Caenorhabditis briggsae | briggsae cbr-ers-3 protein                              | 4  | F:GO:0005488;<br>F:GO:0016876;<br>P:GO:0006412;<br>P:GO:0043039                                                                                                                                                                                                             | - | EC:6.1.1.0;<br>EC:3.6.5.3                                       | IPR000924; IPR001412; IPR004527;<br>IPR014729; IPR020058; IPR020061;<br>G3DSA:3.90.800.10 (GENE3D),<br>PTHR10119:SF1 (PANTHER), SSF52374<br>(SUPERFAMILY) |
| Caenorhabditis elegans  | protein crooked neck                                    | 9  | P:GO:0009792;<br>P:GO:0002119;<br>F:GO:0005488;<br>P:GO:0018996;<br>P:GO:0006397;<br>P:GO:0000003;<br>P:GO:0040011;<br>P:GO:0040007;<br>C:GO:0005634                                                                                                                        | - |                                                                 | -                                                                                                                                                         |
| Caenorhabditis elegans  | las1-like ( cerevisiae)                                 | 0  |                                                                                                                                                                                                                                                                             |   | C:GO:0071339;<br>F:GO:0005515;<br>C:GO:0005730;<br>C:GO:0005634 | IPR007174                                                                                                                                                 |
| Caenorhabditis elegans  | dehydrodolichyl diphosphate synthase                    | 2  | F:GO:0000166;<br>F:GO:0016765                                                                                                                                                                                                                                               | - |                                                                 | SignalP (SIGNALP)                                                                                                                                         |
| Caenorhabditis briggsae | Hypothetical protein CBG08142 [Caenorhabditis briggsae] | 0  |                                                                                                                                                                                                                                                                             |   |                                                                 | -                                                                                                                                                         |
| Caenorhabditis elegans  | splicing factor subunit 3                               | 7  | P:GO:0040035;<br>P:GO:0018996;<br>P:GO:0010171;<br>F:GO:0005515;<br>P:GO:0040039;<br>P:GO:0060218;<br>C:GO:0005634                                                                                                                                                          | - |                                                                 | SignalP (SIGNALP)                                                                                                                                         |
| -                       | -                                                       | 0  |                                                                                                                                                                                                                                                                             |   |                                                                 | -                                                                                                                                                         |

|                         |                                                    |    |                                                                                                                                                                                        |   |                             |                                                                                                                                                       |
|-------------------------|----------------------------------------------------|----|----------------------------------------------------------------------------------------------------------------------------------------------------------------------------------------|---|-----------------------------|-------------------------------------------------------------------------------------------------------------------------------------------------------|
| Caenorhabditis briggsae | mbk-1                                              | 11 | P:GO:0040010;<br>P:GO:0018108;<br>F:GO:0004674;<br>C:GO:0016607;<br>F:GO:0043621;<br>F:GO:0005524;<br>P:GO:0007399;<br>P:GO:0040011;<br>P:GO:0001706;<br>P:GO:0046777;<br>F:GO:0004715 | - | EC:2.7.11.0;<br>EC:2.7.10.2 | IPR000719; IPR008271; IPR011009;<br>IPR017442; G3DSA:1.10.510.10<br>(GENE3D), PTHR11295 (PANTHER),<br>PTHR11295:SF116 (PANTHER), SignalP<br>(SIGNALP) |
| -                       | -                                                  | 0  |                                                                                                                                                                                        |   |                             | -                                                                                                                                                     |
| -                       | -                                                  | 0  |                                                                                                                                                                                        |   |                             | -                                                                                                                                                     |
| -                       | -                                                  | 0  |                                                                                                                                                                                        |   |                             | -                                                                                                                                                     |
| Brugia malayi           | deacetylase complex protein family member (dcp-66) | 9  | P:GO:0040010;<br>F:GO:0005488;<br>P:GO:0040027;<br>P:GO:0040035;<br>P:GO:0040026;<br>P:GO:0040011;<br>P:GO:0006898;<br>P:GO:0002009;<br>C:GO:0005634                                   | - |                             | PTHR13455 (PANTHER),<br>PTHR13455:SF1 (PANTHER)                                                                                                       |
| -                       | -                                                  | 0  |                                                                                                                                                                                        |   |                             | -                                                                                                                                                     |
| -                       | -                                                  | 0  |                                                                                                                                                                                        |   |                             | -                                                                                                                                                     |
| Caenorhabditis elegans  | uncoordinated family member (unc-104)              | 4  | P:GO:0007018;<br>F:GO:0005524;<br>F:GO:0003777;<br>C:GO:0005874                                                                                                                        | - |                             | IPR001849; IPR011993; PTHR16012<br>(PANTHER), PTHR16012:SF201<br>(PANTHER), SSF50729 (SUPERFAMILY)                                                    |
| -                       | -                                                  | 0  |                                                                                                                                                                                        |   |                             | SignalP (SIGNALP)                                                                                                                                     |
| Caenorhabditis briggsae | jumonji domain containing 2c                       | 3  | F:GO:0005488;<br>F:GO:0051864;<br>P:GO:0016577                                                                                                                                         | - | EC:1.14.11.2<br>7           | IPR001965; IPR011011; IPR013083;<br>IPR019786; PTHR13793 (PANTHER)                                                                                    |
| Caenorhabditis briggsae | zinc-finger protein zpr1                           | 4  | C:GO:0005737;<br>C:GO:0005634;<br>F:GO:0008270;<br>F:GO:0005515                                                                                                                        | - |                             | -                                                                                                                                                     |
| Caenorhabditis briggsae | jumonji domain containing 2c                       | 4  | F:GO:0005488;<br>F:GO:0051864;<br>F:GO:0032454;<br>P:GO:0033169                                                                                                                        | - | EC:1.14.11.2<br>7           | IPR003347; IPR003349; IPR013129;<br>PTHR10694 (PANTHER),<br>PTHR10694:SF7 (PANTHER), SSF51197<br>(SUPERFAMILY)                                        |
| Caenorhabditis elegans  | malic enzyme                                       | 8  | F:GO:0004471;<br>F:GO:0046872;<br>F:GO:0051287;<br>F:GO:0009055;<br>C:GO:0005759;<br>F:GO:0016619;<br>P:GO:0006108;<br>P:GO:0055114                                                    | - | EC:1.1.1.39;<br>EC:1.1.1.38 | IPR001891; IPR012301;<br>G3DSA:3.40.50.10380 (GENE3D),<br>PTHR23406 (PANTHER),<br>PTHR23406:SF2 (PANTHER), SSF53223<br>(SUPERFAMILY)                  |
| -                       | -                                                  | 0  |                                                                                                                                                                                        |   |                             | -                                                                                                                                                     |
| -                       | -                                                  | 0  |                                                                                                                                                                                        |   |                             | SignalP (SIGNALP)                                                                                                                                     |

|                         |                                                                     |    |                                                                                                                                                                                        |                                                                                                                                     |                             |                                                                                                                                     |
|-------------------------|---------------------------------------------------------------------|----|----------------------------------------------------------------------------------------------------------------------------------------------------------------------------------------|-------------------------------------------------------------------------------------------------------------------------------------|-----------------------------|-------------------------------------------------------------------------------------------------------------------------------------|
| Caenorhabditis briggsae | large subunit ribosomal protein 27                                  | 9  | P:GO:0009792;<br>P:GO:0002119;<br>C:GO:0005840;<br>F:GO:0005525;<br>F:GO:0003735;<br>P:GO:0018996;<br>P:GO:0000003;<br>P:GO:0040007;<br>P:GO:0006412                                   | -                                                                                                                                   | EC:3.6.5.3                  | IPR001141; IPR005824; IPR014722;<br>IPR018262                                                                                       |
| Loa loa                 | briggsae cbr-pqn-38 protein                                         | 0  |                                                                                                                                                                                        |                                                                                                                                     |                             | -                                                                                                                                   |
| Caenorhabditis elegans  | temporarily assigned gene -me family member (tag-308)               | 0  |                                                                                                                                                                                        |                                                                                                                                     |                             | -                                                                                                                                   |
| Heliconius melpomene    | endonuclease-reverse transcriptase                                  | 0  |                                                                                                                                                                                        | F:GO:0003723;<br>P:GO:0006508;<br>P:GO:0006278;<br>F:GO:0008270;<br>F:GO:0004519;<br>F:GO:0004197;<br>C:GO:0005622;<br>F:GO:0003964 |                             | IPR000477; IPR015706;<br>PTHR19446:SF100 (PANTHER),<br>SSF56672 (SUPERFAMILY)                                                       |
| Caenorhabditis elegans  | glutamate carboxypeptidase                                          | 3  | F:GO:0008237;<br>P:GO:0006508;<br>F:GO:0005515                                                                                                                                         | -                                                                                                                                   |                             | IPR001261; IPR002933;<br>G3DSA:3.40.630.10 (GENE3D),<br>PTHR11014 (PANTHER),<br>PTHR11014:SF15 (PANTHER),<br>SSF53187 (SUPERFAMILY) |
|                         | -                                                                   | 0  |                                                                                                                                                                                        |                                                                                                                                     |                             | PRO1217 (PRINTS)                                                                                                                    |
|                         | -                                                                   | 0  |                                                                                                                                                                                        |                                                                                                                                     |                             | PRO1217 (PRINTS)                                                                                                                    |
|                         | -                                                                   | 0  |                                                                                                                                                                                        |                                                                                                                                     |                             | -                                                                                                                                   |
| Caenorhabditis elegans  | hematopoietic sig-I peptide-containing membrane domain-containing 1 | 0  |                                                                                                                                                                                        |                                                                                                                                     |                             | -                                                                                                                                   |
| Caenorhabditis elegans  | mov34 mpn pad-1 family protein                                      | 11 | F:GO:0003743;<br>P:GO:0006413;<br>C:GO:0005829;<br>P:GO:0040010;<br>P:GO:0008340;<br>P:GO:0040035;<br>C:GO:0005852;<br>P:GO:0010171;<br>P:GO:0002119;<br>F:GO:0005515;<br>P:GO:0006898 | -                                                                                                                                   |                             | IPR000555; PTHR10540 (PANTHER),<br>PTHR10540:SF6 (PANTHER)                                                                          |
| Caenorhabditis briggsae | neutral alpha-glucosidase ab-like                                   | 1  | F:GO:0005515                                                                                                                                                                           | -                                                                                                                                   |                             | IPR000322; PTHR22762:SF7<br>(PANTHER)                                                                                               |
| Caenorhabditis briggsae | f-box domain containing protein                                     | 0  |                                                                                                                                                                                        |                                                                                                                                     |                             | IPR001810; G3DSA:3.80.10.10<br>(GENE3D)                                                                                             |
| Caenorhabditis elegans  | aldo keto reductase family protein                                  | 9  | F:GO:0047939;<br>C:GO:0005829;<br>F:GO:0004032;<br>P:GO:0042840;<br>P:GO:0046185;<br>P:GO:0043050;<br>P:GO:0040011;<br>C:GO:0016324;<br>P:GO:0019853                                   | -                                                                                                                                   | EC:1.1.1.19;<br>EC:1.1.1.21 | IPR001395; IPR018170; IPR020471;<br>IPR023210; PTHR11732:SF34<br>(PANTHER)                                                          |



|                         |                                                            |   |                                                                                                                    |                                                |            |                                                                                                                  |
|-------------------------|------------------------------------------------------------|---|--------------------------------------------------------------------------------------------------------------------|------------------------------------------------|------------|------------------------------------------------------------------------------------------------------------------|
| Caenorhabditis elegans  | aldo keto reductase family protein                         | 6 | P:GO:0019752;<br>P:GO:0044248;<br>P:GO:0043050;<br>F:GO:0004033;<br>P:GO:0040011;<br>C:GO:0044464                  | -                                              |            | IPR001395; IPR018170; IPR020471;<br>IPR023210; PTHR11732:SF34<br>(PANTHER)                                       |
| Caenorhabditis elegans  | aldo keto reductase family protein                         | 2 | P:GO:0043050;<br>P:GO:0040011                                                                                      | -                                              |            | IPR001395; IPR018170; IPR020471;<br>IPR023210; PTHR11732:SF34<br>(PANTHER)                                       |
| Caenorhabditis elegans  | aldo keto reductase family protein                         | 2 | P:GO:0043050;<br>P:GO:0040011                                                                                      | -                                              |            | IPR001395; IPR018170; IPR020471;<br>IPR023210; PTHR11732:SF34<br>(PANTHER)                                       |
| Caenorhabditis elegans  | aldo keto reductase family protein                         | 2 | P:GO:0043050;<br>P:GO:0040011                                                                                      | -                                              |            | IPR001395; IPR018170; IPR020471;<br>IPR023210; PTHR11732:SF34<br>(PANTHER)                                       |
| Caenorhabditis elegans  | aldo keto reductase family protein                         | 2 | P:GO:0043050;<br>P:GO:0040011                                                                                      | -                                              |            | IPR001395; IPR018170; IPR020471;<br>IPR023210; PTHR11732:SF34<br>(PANTHER)                                       |
| Caenorhabditis elegans  | briggsae cbr-ttl-5 protein                                 | 1 | F:GO:0003824                                                                                                       | -                                              |            | IPR004344; PTHR12241:SF8<br>(PANTHER), SSF56059 (SUPERFAMILY)                                                    |
|                         | -                                                          | 0 |                                                                                                                    |                                                |            | -                                                                                                                |
| Caenorhabditis briggsae | kiaa0020 protein                                           | 2 | F:GO:0003723;<br>P:GO:0018991                                                                                      | -                                              |            | IPR011989; IPR012959; IPR016024;<br>PTHR13389 (PANTHER)                                                          |
| Caenorhabditis briggsae | kiaa0020 protein                                           | 2 | F:GO:0003723;<br>P:GO:0018991                                                                                      | -                                              |            | IPR011989; IPR012959; IPR016024;<br>PTHR13389 (PANTHER)                                                          |
| Loa loa                 | zinc c2h2 type family protein                              | 0 |                                                                                                                    | F:GO:0003676;<br>F:GO:0008270;<br>C:GO:0005622 |            | IPR007087; IPR013087; IPR015880;<br>PTHR23224 (PANTHER),<br>PTHR23224:SF473 (PANTHER),<br>SSF57667 (SUPERFAMILY) |
|                         | -                                                          | 0 |                                                                                                                    |                                                |            | PD133063 (PRODOM), SignalP<br>(SIGNALP)                                                                          |
|                         | -                                                          | 0 |                                                                                                                    |                                                |            | -                                                                                                                |
|                         | -                                                          | 0 |                                                                                                                    |                                                |            | -                                                                                                                |
| Caenorhabditis briggsae | mitochondrial ribosomal protein l48                        | 7 | P:GO:0006412;<br>P:GO:0040010;<br>C:GO:0005840;<br>F:GO:0003735;<br>P:GO:0002119;<br>P:GO:0006898;<br>P:GO:0009792 | -                                              | EC:3.6.5.3 | IPR001848; PTHR13473 (PANTHER)                                                                                   |
|                         | -                                                          | 0 |                                                                                                                    |                                                |            | -                                                                                                                |
| Caenorhabditis elegans  | uncharacterized methyltransferase wbscr22                  | 2 | F:GO:0008168;<br>P:GO:0008152                                                                                      | -                                              | EC:2.1.1.0 | IPR013216; IPR022238;<br>G3DSA:3.40.50.150 (GENE3D),<br>PTHR12734 (PANTHER), SSF53335<br>(SUPERFAMILY)           |
|                         | -                                                          | 0 |                                                                                                                    |                                                |            | -                                                                                                                |
|                         | -                                                          | 0 |                                                                                                                    |                                                |            | -                                                                                                                |
| Loa loa                 | hypothetical protein LOAG_10513 [Loa loa]                  | 2 | P:GO:0007186;<br>C:GO:0016021                                                                                      | -                                              |            | SignalP (SIGNALP)                                                                                                |
| Caenorhabditis briggsae | elegans protein partially confirmed by transcript evidence | 0 |                                                                                                                    |                                                |            | -                                                                                                                |
| Epinephelus coioides    | 40s ribosomal protein s23                                  | 5 | F:GO:0045182;<br>F:GO:0003735;<br>F:GO:0005515;<br>C:GO:0022627;<br>P:GO:0006414                                   | -                                              |            | IPR005680; IPR006032; IPR012340;<br>IPR016027                                                                    |

|                         |                                                                                                       |    |                                                                                                                                                                       |                                                                                                                    |                              |                                                                                                        |
|-------------------------|-------------------------------------------------------------------------------------------------------|----|-----------------------------------------------------------------------------------------------------------------------------------------------------------------------|--------------------------------------------------------------------------------------------------------------------|------------------------------|--------------------------------------------------------------------------------------------------------|
| Loa loa                 | ccr4-not transcription subunit 1                                                                      | 0  |                                                                                                                                                                       | P:GO:0006350;<br>P:GO:0045449;<br>F:GO:0005515                                                                     | -                            |                                                                                                        |
| Caenorhabditis elegans  | coenzyme q biosynthesis family member (coq-2)                                                         | 9  | F:GO:0003899;<br>F:GO:0008412;<br>P:GO:0008340;<br>P:GO:0016094;<br>C:GO:0016021;<br>C:GO:0005743;<br>P:GO:0006383;<br>P:GO:0006744;<br>C:GO:0005666                  | -                                                                                                                  | EC:2.7.7.6                   | IPR000537; IPR006370; PTHR11048 (PANTHER), PTHR11048:SF2 (PANTHER)                                     |
| Caenorhabditis briggsae | slowpoke potassium channel family member (slo-2)                                                      | 6  | C:GO:0016020;<br>P:GO:0006813;<br>P:GO:0008152;<br>F:GO:0003824;<br>F:GO:0015269;<br>F:GO:0005488                                                                     | -                                                                                                                  |                              | -                                                                                                      |
|                         | -                                                                                                     | 0  |                                                                                                                                                                       |                                                                                                                    |                              | -                                                                                                      |
| Caenorhabditis elegans  | a chain golgi alpha-mannosidase ii in complex with 5-substituted swainsonine a-log: -5- - swainsonine | 10 | C:GO:0000139;<br>F:GO:0004559;<br>C:GO:0005795;<br>F:GO:0030246;<br>P:GO:0006487;<br>P:GO:0006013;<br>F:GO:0004572;<br>C:GO:0016021;<br>F:GO:0008270;<br>C:GO:0005783 | -                                                                                                                  | EC:3.2.1.24;<br>EC:3.2.1.114 | IPR011013; IPR011682;<br>G3DSA:2.70.98.30 (GENE3D),<br>PTHR11607 (PANTHER),<br>PTHR11607:SF4 (PANTHER) |
| Caenorhabditis elegans  | hypothetical protein Y20F4.2 [Caenorhabditis elegans]                                                 | 0  |                                                                                                                                                                       |                                                                                                                    |                              | PTHR13589 (PANTHER),<br>PTHR13589:SF2 (PANTHER)                                                        |
| Loa loa                 | rap ran-gap family protein                                                                            | 5  | P:GO:0050896;<br>P:GO:0023052;<br>P:GO:0016043;<br>P:GO:0048523;<br>F:GO:0005488                                                                                      | -                                                                                                                  |                              | PF11864 (PFAM)                                                                                         |
|                         | -                                                                                                     | 0  |                                                                                                                                                                       |                                                                                                                    |                              | -                                                                                                      |
|                         | -                                                                                                     | 0  |                                                                                                                                                                       |                                                                                                                    |                              | SignalP (SIGNALP)                                                                                      |
|                         | -                                                                                                     | 0  |                                                                                                                                                                       |                                                                                                                    |                              | -                                                                                                      |
| Caenorhabditis elegans  | transmembrane and coiled-coil domain family 2                                                         | 1  | F:GO:0005515                                                                                                                                                          | -                                                                                                                  |                              | IPR019394; PTHR17613 (PANTHER)                                                                         |
| Caenorhabditis briggsae | transmembrane and coiled-coil domain family 2                                                         | 1  | F:GO:0005515                                                                                                                                                          | -                                                                                                                  |                              | IPR019394; PTHR17613 (PANTHER)                                                                         |
| Caenorhabditis elegans  | hypothetical protein ZK622.1 [Caenorhabditis elegans]                                                 | 0  |                                                                                                                                                                       | F:GO:0004672;<br>F:GO:0005524;<br>P:GO:0006468;<br>F:GO:0004713;<br>F:GO:0004674                                   |                              | -                                                                                                      |
| Caenorhabditis elegans  | elegans protein partially confirmed by transcript evidence                                            | 0  |                                                                                                                                                                       | P:GO:0055085                                                                                                       |                              | -                                                                                                      |
| Caenorhabditis elegans  | briggsae cbr-snf-12 protein                                                                           | 0  |                                                                                                                                                                       | F:GO:0015293;<br>F:GO:0005328;<br>C:GO:0016021;<br>C:GO:0016020;<br>P:GO:0006836;<br>C:GO:0005887;<br>P:GO:0006810 |                              | -                                                                                                      |
| Caenorhabditis briggsae | phosphoribosylformylglyci-midine synthase                                                             | 2  | P:GO:0040010;<br>F:GO:0003824                                                                                                                                         | -                                                                                                                  |                              | -                                                                                                      |

|                         |                                                         |   |                                                                                                                                     |                                                                                  |             |                                                                                                                                                                                                |
|-------------------------|---------------------------------------------------------|---|-------------------------------------------------------------------------------------------------------------------------------------|----------------------------------------------------------------------------------|-------------|------------------------------------------------------------------------------------------------------------------------------------------------------------------------------------------------|
| Caenorhabditis elegans  | leucine-rich repeat ki-se                               | 3 | P:GO:0006468;<br>F:GO:0004672;<br>F:GO:0005524                                                                                      | -                                                                                |             | IPR000719; IPR011009; IPR011042;<br>IPR017442; G3DSA:1.10.510.10<br>(GENE3D), PTHR23257 (PANTHER),<br>PTHR23257:SF88 (PANTHER),<br>SSF101898 (SUPERFAMILY)                                     |
| Caenorhabditis elegans  | amp-binding enzyme family protein                       | 8 | P:GO:0016358;<br>P:GO:0060136;<br>P:GO:0007611;<br>C:GO:0031966;<br>C:GO:0005777;<br>F:GO:0004467;<br>C:GO:0005783;<br>P:GO:0019217 | -                                                                                | EC:6.2.1.3  | IPR000873; IPR020459; IPR020845;<br>G3DSA:2.30.38.10 (GENE3D),<br>G3DSA:3.40.50.980 (GENE3D),<br>PTHR11968 (PANTHER),<br>PTHR11968:SF8 (PANTHER), SignalP<br>(SIGNALP), SSF56801 (SUPERFAMILY) |
| Caenorhabditis elegans  | rwd domain containing protein                           | 0 |                                                                                                                                     | F:GO:0046872;<br>F:GO:0008270;<br>F:GO:0005515                                   |             | IPR001841; IPR006575; IPR013083;<br>IPR016135; IPR018957                                                                                                                                       |
| Brugia malayi           | hypothetical protein Bm1_32955 [Brugia malayi]          | 0 |                                                                                                                                     | P:GO:0006260;<br>F:GO:0003896                                                    |             | -                                                                                                                                                                                              |
| -                       | -                                                       | 0 |                                                                                                                                     |                                                                                  |             | -                                                                                                                                                                                              |
| -                       | -                                                       | 0 |                                                                                                                                     |                                                                                  |             | -                                                                                                                                                                                              |
| -                       | -                                                       | 0 |                                                                                                                                     |                                                                                  |             | -                                                                                                                                                                                              |
| -                       | -                                                       | 0 |                                                                                                                                     |                                                                                  |             | -                                                                                                                                                                                              |
| -                       | -                                                       | 0 |                                                                                                                                     |                                                                                  |             | -                                                                                                                                                                                              |
| Caenorhabditis elegans  | major allergen                                          | 0 |                                                                                                                                     | P:GO:0055114;<br>F:GO:0009055;<br>F:GO:0016491;<br>P:GO:0006099;<br>F:GO:0051536 |             | SignalP (SIGNALP)                                                                                                                                                                              |
| Caenorhabditis briggsae | elegans protein confirmed by transcript evidence        | 0 |                                                                                                                                     | F:GO:0003674;<br>P:GO:0008150                                                    |             | IPR002110; IPR020683                                                                                                                                                                           |
| Caenorhabditis briggsae | Hypothetical protein CBG16019 [Caenorhabditis briggsae] | 0 |                                                                                                                                     |                                                                                  |             | SignalP (SIGNALP)                                                                                                                                                                              |
| -                       | -                                                       | 0 |                                                                                                                                     |                                                                                  |             | -                                                                                                                                                                                              |
| Caenorhabditis elegans  | queuine tr--ribosyltransferase                          | 4 | C:GO:0005739;<br>F:GO:0046872;<br>F:GO:0008479;<br>P:GO:0008616                                                                     | -                                                                                | EC:2.4.2.29 | IPR002616                                                                                                                                                                                      |
| Caenorhabditis briggsae | uncoordi--ted family member (unc-87)                    | 1 | F:GO:0005515                                                                                                                        | -                                                                                |             | -                                                                                                                                                                                              |
| Brugia malayi           | coiled-coil domain-containing                           | 0 |                                                                                                                                     |                                                                                  |             | -                                                                                                                                                                                              |
| Caenorhabditis elegans  | hypothetical protein F57C9.6 [Caenorhabditis elegans]   | 0 |                                                                                                                                     | C:GO:0016021;<br>P:GO:0007186                                                    |             | G3DSA:1.20.1070.10 (GENE3D)                                                                                                                                                                    |
| Caenorhabditis elegans  | sensory axon guidance family member (sax-1)             | 0 |                                                                                                                                     |                                                                                  |             | -                                                                                                                                                                                              |
| Caenorhabditis elegans  | cg9153- isoform a                                       | 1 | P:GO:0000003                                                                                                                        | -                                                                                |             | PTHR11254 (PANTHER),<br>PTHR11254:SF8 (PANTHER)                                                                                                                                                |
| -                       | -                                                       | 0 |                                                                                                                                     |                                                                                  |             | -                                                                                                                                                                                              |
| Caenorhabditis briggsae | probable r--binding protein 19                          | 6 | C:GO:0005737;<br>C:GO:0005730;<br>C:GO:0005654;<br>F:GO:0003676;<br>P:GO:0040019;<br>F:GO:0000166                                   | -                                                                                |             | IPR000504; IPR012677; PTHR10432<br>(PANTHER), PTHR10432:SF64<br>(PANTHER), SSF54928 (SUPERFAMILY)                                                                                              |
| -                       | -                                                       | 0 |                                                                                                                                     |                                                                                  |             | -                                                                                                                                                                                              |
| Caenorhabditis elegans  | loc402804 protein                                       | 0 |                                                                                                                                     | C:GO:0005739;<br>F:GO:0003674;<br>P:GO:0008152;<br>F:GO:0016787;<br>P:GO:0008150 |             | G3DSA:3.40.50.1820 (GENE3D),<br>SSF53474 (SUPERFAMILY)                                                                                                                                         |

|                             |                                                       |    |                                                                                                                                                                                        |   |                           |                                                                                                                                                    |
|-----------------------------|-------------------------------------------------------|----|----------------------------------------------------------------------------------------------------------------------------------------------------------------------------------------|---|---------------------------|----------------------------------------------------------------------------------------------------------------------------------------------------|
| Caenorhabditis elegans      | alp enigma encoding family member (alp-1)             | 1  | F:GO:0042802                                                                                                                                                                           | - |                           | IPR001478; G3DSA:2.30.42.10 (GENE3D), PTHR18973 (PANTHER), PTHR18973:SF57 (PANTHER)                                                                |
| Caenorhabditis elegans      | peptidase family m3 containing protein                | 6  | F:GO:0004222;<br>P:GO:0045449;<br>F:GO:0003702;<br>P:GO:0006367;<br>P:GO:0006508;<br>F:GO:0008270                                                                                      | - | EC:3.4.24.0               | IPR001567; G3DSA:1.10.1370.10 (GENE3D), PTHR11804 (PANTHER), PTHR11804:SF4 (PANTHER), SSF55486 (SUPERFAMILY)                                       |
| Loa loa                     | 3 -phosphoadenosine 5 -phosphosulfate synthase 1      | 7  | P:GO:0006790;<br>P:GO:0001501;<br>F:GO:0016301;<br>F:GO:0004781;<br>F:GO:0005524;<br>P:GO:0000003;<br>P:GO:0008340                                                                     | - | EC:2.7.7.4                | IPR002891; IPR015947; G3DSA:3.10.400.10 (GENE3D), G3DSA:3.40.50.300 (GENE3D), PTHR11055 (PANTHER), PTHR11055:SF1 (PANTHER), SSF52540 (SUPERFAMILY) |
|                             | -                                                     | 0  |                                                                                                                                                                                        |   |                           | -                                                                                                                                                  |
| Brugia malayi               | aryl hydrocarbon receptor interacting protein         | 11 | P:GO:0045862;<br>F:GO:0003712;<br>F:GO:0004871;<br>P:GO:0022417;<br>P:GO:0006626;<br>P:GO:0019915;<br>C:GO:0044444;<br>F:GO:0016853;<br>F:GO:0051082;<br>P:GO:0009792;<br>C:GO:0005634 | - |                           | PTHR11242 (PANTHER)                                                                                                                                |
| Caenorhabditis briggsae     | mr- turnover protein 4 homolog                        | 1  | C:GO:0043229                                                                                                                                                                           | - |                           | PTHR21141 (PANTHER), PTHR21141:SF1 (PANTHER)                                                                                                       |
| Loa loa                     | btb poz domain containing protein                     | 2  | F:GO:0005515;<br>C:GO:0016021                                                                                                                                                          | - |                           | IPR000210; IPR011333; IPR013069; PTHR22744 (PANTHER)                                                                                               |
|                             | -                                                     | 0  |                                                                                                                                                                                        |   |                           | -                                                                                                                                                  |
|                             | -                                                     | 0  |                                                                                                                                                                                        |   |                           | IPR011009; G3DSA:1.10.510.10 (GENE3D)                                                                                                              |
| Caenorhabditis briggsae     | conserved atpase domain protein                       | 7  | P:GO:0006541;<br>F:GO:0016812;<br>F:GO:0016597;<br>F:GO:0004086;<br>F:GO:0005524;<br>P:GO:0006207;<br>F:GO:0004070                                                                     | - | EC:3.5.2.0;<br>EC:2.1.3.2 | IPR005480; IPR013816; PTHR11405 (PANTHER), PTHR11405:SF3 (PANTHER), SSF56059 (SUPERFAMILY)                                                         |
| Angiostrongylus cantonensis | hypothetical protein [Angiostrongylus cantonensis]    | 0  |                                                                                                                                                                                        |   |                           | -                                                                                                                                                  |
| Caenorhabditis elegans      | briggsae cbr-gck-4 protein                            | 9  | P:GO:0040010;<br>P:GO:0000910;<br>F:GO:0004674;<br>P:GO:0010171;<br>P:GO:0032879;<br>P:GO:0002119;<br>P:GO:0040011;<br>P:GO:0010800;<br>P:GO:0008283                                   | - | EC:2.7.11.0               | IPR022165; PD936484 (PRODOM), PTHR22986 (PANTHER), PTHR22986:SF67 (PANTHER)                                                                        |
|                             | -                                                     | 0  |                                                                                                                                                                                        |   |                           | -                                                                                                                                                  |
| Caenorhabditis elegans      | gcn1 general control of amino-acid synthesis 1-like 1 | 1  | P:GO:0000003                                                                                                                                                                           | - |                           | IPR011989; PTHR23346 (PANTHER), PTHR23346:SF7 (PANTHER)                                                                                            |

|                                    |                                                                |    |                                                                                                                                                                                                                                                                             |   |             |                                                                                                                                           |
|------------------------------------|----------------------------------------------------------------|----|-----------------------------------------------------------------------------------------------------------------------------------------------------------------------------------------------------------------------------------------------------------------------------|---|-------------|-------------------------------------------------------------------------------------------------------------------------------------------|
| Caenorhabditis briggsae            | adp-ribosylation factor 4                                      | 16 | P:GO:0016192;<br>P:GO:0040010;<br>P:GO:0007264;<br>P:GO:0007186;<br>P:GO:0040035;<br>P:GO:0018996;<br>P:GO:0010171;<br>P:GO:0002119;<br>F:GO:0005215;<br>P:GO:0040039;<br>P:GO:0006886;<br>P:GO:0009792;<br>C:GO:0005794;<br>C:GO:0005634;<br>F:GO:0005525;<br>C:GO:0005886 | - |             | IPR005225; IPR006688; IPR006689;<br>G3DSA:3.40.50.300 (GENE3D),<br>PTHR11711:SF30 (PANTHER), PSS1417<br>(PROFILE), SSF52540 (SUPERFAMILY) |
| -                                  | -                                                              | 0  |                                                                                                                                                                                                                                                                             |   |             | -                                                                                                                                         |
| Caenorhabditis elegans             | ubiquitin-protein ligase e3b                                   | 3  | C:GO:0005622;<br>F:GO:0016881;<br>P:GO:0006464                                                                                                                                                                                                                              | - | EC:6.3.2.0  | IPR000569; PTHR11254 (PANTHER),<br>PTHR11254:SF70 (PANTHER)                                                                               |
| Dictyocaulus viviparus             | mediator of r- polymerase ii transcription subunit 18          | 12 | P:GO:0007411;<br>P:GO:0040010;<br>P:GO:0006357;<br>F:GO:0016455;<br>P:GO:0010171;<br>P:GO:0007413;<br>P:GO:0002119;<br>F:GO:0005515;<br>P:GO:0040011;<br>C:GO:0016592;<br>P:GO:0002009;<br>P:GO:0009792                                                                     | - |             | IPR019095; PTHR13321 (PANTHER)                                                                                                            |
| -                                  | -                                                              | 0  |                                                                                                                                                                                                                                                                             |   |             | -                                                                                                                                         |
| -                                  | -                                                              | 0  |                                                                                                                                                                                                                                                                             |   |             | -                                                                                                                                         |
| Caenorhabditis briggsae            | uncoordinated protein isoform confirmed by transcript evidence | 4  | F:GO:0005089;<br>C:GO:0005622;<br>P:GO:0035023;<br>F:GO:0016740                                                                                                                                                                                                             | - |             | IPR000219; IPR001331; IPR001849;<br>IPR011993; PTHR22826 (PANTHER),<br>PTHR22826:SF47 (PANTHER),<br>SSF50729 (SUPERFAMILY)                |
| Angiostrongylus cantonensis        | briggsae cbr-fos-1 protein                                     | 5  | F:GO:0003700;<br>F:GO:0043565;<br>F:GO:0046983;<br>C:GO:0005634;<br>P:GO:0006355                                                                                                                                                                                            | - |             | -                                                                                                                                         |
| Loa loa                            | stromal antigen                                                | 2  | F:GO:0005515;<br>P:GO:0009987                                                                                                                                                                                                                                               | - |             | PTHR11199 (PANTHER)                                                                                                                       |
| Trypanosoma cruzi strain CL Brener | cb090_human ame: full= uncharacterized protein c2orf90         | 0  |                                                                                                                                                                                                                                                                             |   |             | -                                                                                                                                         |
| Caenorhabditis elegans             | gtp binding protein bms1                                       | 2  | F:GO:0032555;<br>F:GO:0017111                                                                                                                                                                                                                                               | - | EC:3.6.1.15 | IPR007034; IPR012948; PTHR12858<br>(PANTHER), PTHR12858:SF2<br>(PANTHER)                                                                  |
| -                                  | -                                                              | 0  |                                                                                                                                                                                                                                                                             |   |             | -                                                                                                                                         |
| Brugia malayi                      | peptidyl-prolyl cis-trans isomerase h                          | 5  | P:GO:0006457;<br>C:GO:0030532;<br>C:GO:0071011;<br>P:GO:0000398;<br>F:GO:0003755                                                                                                                                                                                            | - | EC:5.2.1.8  | IPR002130; IPR015891; IPR020892;<br>PTHR11071 (PANTHER),<br>PTHR11071:SF58 (PANTHER)                                                      |
| -                                  | -                                                              | 0  |                                                                                                                                                                                                                                                                             |   |             | -                                                                                                                                         |
| Caenorhabditis elegans             | elegans protein partially confirmed by transcript evidence     | 1  | F:GO:0005515                                                                                                                                                                                                                                                                | - |             | -                                                                                                                                         |

|                         |                                                                           |    |                                                                                                                                                                                                                          |                                                                                                                                     |             |                                                                                                           |
|-------------------------|---------------------------------------------------------------------------|----|--------------------------------------------------------------------------------------------------------------------------------------------------------------------------------------------------------------------------|-------------------------------------------------------------------------------------------------------------------------------------|-------------|-----------------------------------------------------------------------------------------------------------|
| Loa loa                 | chain crystal structure of the d1d2 sub-complex from the human snrnp core | 13 | C:GO:0030532;<br>F:GO:0003676;<br>C:GO:0071011;<br>P:GO:0040007;<br>P:GO:0040027;<br>P:GO:0032940;<br>P:GO:0007052;<br>F:GO:0005515;<br>P:GO:0040011;<br>P:GO:0000398;<br>P:GO:0006898;<br>C:GO:0071013;<br>P:GO:0009792 | -                                                                                                                                   |             | IPR001163; IPR006649; IPR010920;<br>G3DSA:2.30.30.100 (GENE3D),<br>PTHR12777 (PANTHER)                    |
| Caenorhabditis briggsae | survival of motor neuron protein-interacting protein 1                    | 2  | P:GO:0006396;<br>P:GO:0048676                                                                                                                                                                                            | -                                                                                                                                   |             | IPR007022; PF04938 (PFAM)                                                                                 |
| Caenorhabditis elegans  | briggsae cbr-polq-1 protein                                               | 0  |                                                                                                                                                                                                                          | F:GO:0003676;<br>F:GO:0004386;<br>P:GO:0006260;<br>F:GO:0005524;<br>F:GO:0003887;<br>F:GO:0016787;<br>F:GO:0008026;<br>F:GO:0003677 |             | PTHR11752 (PANTHER),<br>PTHR11752:SF3 (PANTHER)                                                           |
| Caenorhabditis briggsae | Hypothetical protein CBG11342 [Caenorhabditis briggsae]                   | 0  |                                                                                                                                                                                                                          | C:GO:0016021;<br>P:GO:0007186                                                                                                       |             | IPR017452; PTHR22751 (PANTHER),<br>PTHR22751:SF8 (PANTHER), SignalP<br>(SIGNALP)                          |
| Caenorhabditis briggsae | ribosomal r- processing 12 homolog ( cerevisiae)                          | 0  |                                                                                                                                                                                                                          | F:GO:0003674;<br>F:GO:0005488;<br>C:GO:0016021;<br>C:GO:0016020;<br>P:GO:0008150;<br>C:GO:0005575                                   |             | IPR011989; IPR012978; IPR016024;<br>PTHR21576 (PANTHER),<br>PTHR21576:SF2 (PANTHER)                       |
| Loa loa                 | protein-tyrosine phosphatase containing protein                           | 1  | F:GO:0004721                                                                                                                                                                                                             | -                                                                                                                                   | EC:3.1.3.16 | SignalP (SIGNALP)                                                                                         |
| Caenorhabditis elegans  | elegans protein confirmed by transcript evidence                          | 1  | F:GO:0005488                                                                                                                                                                                                             |                                                                                                                                     |             | IPR000949                                                                                                 |
| Brugia malayi           | conserved oligomeric golgi complex subunit 4                              | 3  | N:GO:0071842;<br>P:GO:0048193;<br>C:GO:0044431                                                                                                                                                                           | -                                                                                                                                   |             | IPR013167; PTHR10483 (PANTHER),<br>PTHR10483:SF7 (PANTHER)                                                |
| Caenorhabditis elegans  | briggsae cbr-kin-29 protein                                               | 1  | F:GO:0016740                                                                                                                                                                                                             | -                                                                                                                                   |             | -                                                                                                         |
| Brugia malayi           | phosphoinositide-3- regulatory subunit 4                                  | 5  | F:GO:0005515;<br>F:GO:0004672;<br>P:GO:0019915;<br>C:GO:0005829;<br>F:GO:0000166                                                                                                                                         | -                                                                                                                                   |             | SignalP (SIGNALP)                                                                                         |
| Caenorhabditis elegans  | major facilitator superfamily protein                                     | 2  | P:GO:0055085;<br>C:GO:0016021                                                                                                                                                                                            | -                                                                                                                                   |             | IPR005828; IPR016196;<br>G3DSA:1.20.1250.20 (GENE3D),<br>PTHR11662 (PANTHER),<br>PTHR11662:SF24 (PANTHER) |
|                         | -                                                                         | 0  |                                                                                                                                                                                                                          |                                                                                                                                     |             | -                                                                                                         |
| Caenorhabditis elegans  | zn finger motif protein                                                   | 1  | F:GO:0046872                                                                                                                                                                                                             | -                                                                                                                                   |             | -                                                                                                         |
|                         | -                                                                         | 0  |                                                                                                                                                                                                                          |                                                                                                                                     |             | -                                                                                                         |
| Caenorhabditis elegans  | carbonic anhydrase xiii                                                   | 0  |                                                                                                                                                                                                                          | F:GO:0046872;<br>P:GO:0006730;<br>F:GO:0008270;<br>F:GO:0004089                                                                     |             | IPR001148; IPR018338;<br>PTHR18952:SF34 (PANTHER)                                                         |
|                         | -                                                                         | 0  |                                                                                                                                                                                                                          |                                                                                                                                     |             | -                                                                                                         |
|                         | -                                                                         | 0  |                                                                                                                                                                                                                          |                                                                                                                                     |             | -                                                                                                         |
|                         | -                                                                         | 0  |                                                                                                                                                                                                                          |                                                                                                                                     |             | -                                                                                                         |

|                         |                                                          |    |                                                                                                                                                                                                                                                                             |   |                                                                 |                                                                                                          |
|-------------------------|----------------------------------------------------------|----|-----------------------------------------------------------------------------------------------------------------------------------------------------------------------------------------------------------------------------------------------------------------------------|---|-----------------------------------------------------------------|----------------------------------------------------------------------------------------------------------|
| Loa loa                 | set and mynd domain containing 3                         | 1  | F:GO:0005488                                                                                                                                                                                                                                                                | - |                                                                 | IPR002893; PTHR12197 (PANTHER), PTHR12197:SF9 (PANTHER), SSF144232 (SUPERFAMILY), SSF82199 (SUPERFAMILY) |
|                         |                                                          | 0  |                                                                                                                                                                                                                                                                             |   |                                                                 |                                                                                                          |
|                         |                                                          | 0  |                                                                                                                                                                                                                                                                             |   |                                                                 |                                                                                                          |
|                         |                                                          | 0  |                                                                                                                                                                                                                                                                             |   |                                                                 |                                                                                                          |
| Brugia malayi           | death-associated protein ki-se 1                         | 7  | P:GO:0006917;<br>F:GO:0004674;<br>F:GO:0005524;<br>F:GO:0005515;<br>P:GO:0007165;<br>C:GO:0044424;<br>P:GO:0006468                                                                                                                                                          | - | EC:2.7.11.0                                                     | IPR000488; IPR011029; IPR020675; IPR020680                                                               |
| Haemonchus contortus    | aspartyl protease family member (asp-2)                  | 2  | P:GO:0008219;<br>F:GO:0005515                                                                                                                                                                                                                                               | - |                                                                 | IPR001461; IPR001969; IPR009007; IPR012848; IPR021109; PTHR13683:SF53 (PANTHER), SignalIP (SIGNALP)      |
| Caenorhabditis elegans  | clathrin coat assembly protein ap17                      | 16 | P:GO:0030100;<br>C:GO:0030122;<br>P:GO:0000003;<br>P:GO:0048268;<br>P:GO:0040007;<br>P:GO:0007269;<br>F:GO:0008565;<br>P:GO:0006886;<br>C:GO:0005829;<br>F:GO:0030276;<br>P:GO:0050690;<br>P:GO:0009792;<br>P:GO:0002119;<br>C:GO:0008021;<br>C:GO:0030121;<br>P:GO:0010171 | - |                                                                 | SignalIP (SIGNALP)                                                                                       |
| Caenorhabditis briggsae | cold-shock d--binding domain-containing protein          | 7  | F:GO:0008270;<br>P:GO:0006355;<br>F:GO:0003677;<br>F:GO:0000166;<br>P:GO:0001708;<br>P:GO:0007275;<br>C:GO:0005737                                                                                                                                                          | - |                                                                 | IPR002059; IPR011129; IPR012340; IPR016027; IPR019844; PTHR11544 (PANTHER), PTHR11544:SF3 (PANTHER)      |
| Caenorhabditis elegans  | ykaa_caeel ame: full=uncharacterized amino-acid permease | 0  |                                                                                                                                                                                                                                                                             |   | C:GO:0016021;<br>C:GO:0016020;<br>P:GO:0055085;<br>P:GO:0006810 | PTHR11827 (PANTHER), PTHR11827:SF7 (PANTHER)                                                             |
| Loa loa                 | mediator of r- polymerase ii subunit 12 homolog          | 13 | F:GO:0030528;<br>P:GO:0018991;<br>P:GO:0006366;<br>P:GO:0040010;<br>P:GO:0040018;<br>P:GO:0040026;<br>P:GO:0040011;<br>P:GO:0009792;<br>C:GO:0044446;<br>P:GO:0045449;<br>P:GO:0010171;<br>C:GO:0005634;<br>P:GO:0040035                                                    | - |                                                                 | PTHR12796 (PANTHER)                                                                                      |

|                           |                                                                            |    |                                                                                                                                                                                                                                                                                                               |   |                                                                                                                                                        |
|---------------------------|----------------------------------------------------------------------------|----|---------------------------------------------------------------------------------------------------------------------------------------------------------------------------------------------------------------------------------------------------------------------------------------------------------------|---|--------------------------------------------------------------------------------------------------------------------------------------------------------|
|                           | -                                                                          | 0  |                                                                                                                                                                                                                                                                                                               |   | -                                                                                                                                                      |
| Caenorhabditis elegans    | fatty acid amide hydrolase 2                                               | 3  | C:GO:0016020;<br>F:GO:0003824;<br>C:GO:0005811                                                                                                                                                                                                                                                                | - | IPR000120; IPR020556;<br>PTHR11895:SF5 (PANTHER), SignalP (SIGNALP)                                                                                    |
|                           | -                                                                          | 0  |                                                                                                                                                                                                                                                                                                               |   | -                                                                                                                                                      |
| Caenorhabditis elegans    | elegans protein partially confirmed by transcript evidence                 | 4  | F:GO:0017111;<br>P:GO:0044238;<br>C:GO:0005739;<br>P:GO:0044237                                                                                                                                                                                                                                               | - | EC:3.6.1.15<br>IPR011704; G3DSA:3.40.50.300 (GENE3D), PTHR21610 (PANTHER), SignalP (SIGNALP), SSF52540 (SUPERFAMILY)                                   |
|                           | -                                                                          | 0  |                                                                                                                                                                                                                                                                                                               |   | PRO0021 (PRINTS), PR00211 (PRINTS), SignalP (SIGNALP)                                                                                                  |
|                           | -                                                                          | 0  |                                                                                                                                                                                                                                                                                                               |   | PRO0021 (PRINTS), PR00211 (PRINTS), SignalP (SIGNALP)                                                                                                  |
| Caenorhabditis briggsae   | probable 2-oxoglutarate dehydrogenase e1 component mitochondrial precursor | 2  | F:GO:0016624;<br>P:GO:0008152                                                                                                                                                                                                                                                                                 | - | EC:1.2.4.0<br>G3DSA:3.40.50.970 (GENE3D), SSF52518 (SUPERFAMILY)                                                                                       |
|                           | -                                                                          | 0  |                                                                                                                                                                                                                                                                                                               |   | IPR012879; SignalP (SIGNALP)                                                                                                                           |
| Trichostrongylus vitrinus | rio1 family protein                                                        | 2  | F:GO:0005524;<br>F:GO:0004674                                                                                                                                                                                                                                                                                 | - | EC:2.7.11.0<br>IPR000687; IPR011009; IPR018934;<br>IPR018935; G3DSA:3.90.1200.10 (GENE3D), PTHR10593 (PANTHER), PTHR10593:SF5 (PANTHER)                |
| Caenorhabditis elegans    | adp-ribosylation factor-like protein 3                                     | 14 | P:GO:0007049;<br>F:GO:0004871;<br>P:GO:0007264;<br>C:GO:0000139;<br>P:GO:0007186;<br>F:GO:0046872;<br>P:GO:0051301;<br>F:GO:0019003;<br>F:GO:0005515;<br>P:GO:0034608;<br>C:GO:0005819;<br>P:GO:0006886;<br>C:GO:0005634;<br>F:GO:0005525                                                                     | - | IPR006689; G3DSA:3.40.50.300 (GENE3D), PTHR11711:SF27 (PANTHER), PS51417 (PROFILE), SSF52540 (SUPERFAMILY)                                             |
| Caenorhabditis briggsae   | briggsae cbr-hot-5 protein                                                 | 0  |                                                                                                                                                                                                                                                                                                               |   | IPR010558                                                                                                                                              |
| Brugia malayi             | actin                                                                      | 18 | P:GO:0007126;<br>P:GO:0007108;<br>P:GO:0040007;<br>P:GO:0007517;<br>P:GO:0000281;<br>P:GO:0040035;<br>P:GO:0030036;<br>C:GO:0005865;<br>F:GO:0005524;<br>C:GO:0005938;<br>P:GO:0002119;<br>F:GO:0016887;<br>F:GO:0005515;<br>C:GO:0005884;<br>F:GO:0005200;<br>P:GO:0040039;<br>P:GO:0006898;<br>P:GO:0009792 | - | IPR004000; IPR004001; IPR020902;<br>G3DSA:2.30.36.70 (GENE3D),<br>G3DSA:3.30.420.40 (GENE3D),<br>G3DSA:3.90.640.10 (GENE3D),<br>SSF53067 (SUPERFAMILY) |
| Caenorhabditis elegans    | beta like 1                                                                | 3  | F:GO:0042802;<br>C:GO:0005634;<br>P:GO:0006917                                                                                                                                                                                                                                                                | - | PTHR14978 (PANTHER)                                                                                                                                    |
| Caenorhabditis elegans    | hypothetical protein C50E3.5 [Caenorhabditis elegans]                      | 0  |                                                                                                                                                                                                                                                                                                               |   | -                                                                                                                                                      |



|                         |                                                            |    |                                                                                                                                                                                                                                                                                                               |   |                                                                                                                    |                                                                                                                     |
|-------------------------|------------------------------------------------------------|----|---------------------------------------------------------------------------------------------------------------------------------------------------------------------------------------------------------------------------------------------------------------------------------------------------------------|---|--------------------------------------------------------------------------------------------------------------------|---------------------------------------------------------------------------------------------------------------------|
| Caenorhabditis elegans  | hypothetical protein C50E3.5 [Caenorhabditis elegans]      | 0  |                                                                                                                                                                                                                                                                                                               |   |                                                                                                                    | -                                                                                                                   |
|                         | -                                                          | 0  |                                                                                                                                                                                                                                                                                                               |   |                                                                                                                    | -                                                                                                                   |
| synthetic construct     | 60s ribosomal protein I29-like                             | 7  | F:GO:0008201;<br>F:GO:0003735;<br>F:GO:0003723;<br>F:GO:0005515;<br>C:GO:0022625;<br>P:GO:0007566;<br>P:GO:0006414                                                                                                                                                                                            | - |                                                                                                                    | IPR002673                                                                                                           |
| Acyrtosiphon pisum      | pre-mr- splicing factor                                    | 0  |                                                                                                                                                                                                                                                                                                               |   | P:GO:0000003;<br>P:GO:0032968;<br>P:GO:0040035;<br>P:GO:0009792;<br>P:GO:0002119;<br>P:GO:0006357;<br>P:GO:0040007 | -                                                                                                                   |
|                         | -                                                          | 0  |                                                                                                                                                                                                                                                                                                               |   |                                                                                                                    | IPR018221                                                                                                           |
|                         | -                                                          | 0  |                                                                                                                                                                                                                                                                                                               |   |                                                                                                                    | -                                                                                                                   |
| Gallus gallus           | chromosome 5 open reading frame 35                         | 0  |                                                                                                                                                                                                                                                                                                               |   |                                                                                                                    | -                                                                                                                   |
| Caenorhabditis elegans  | ctdSpl2a protein                                           | 1  | F:GO:0004721                                                                                                                                                                                                                                                                                                  | - | EC:3.1.3.16                                                                                                        | IPR004274; G3DSA:3.40.50.1000 (GENE3D), PTHR12210 (PANTHER), PTHR12210:SF12 (PANTHER), SSF56784 (SUPERFAMILY)       |
| Caenorhabditis elegans  | briggsae cbr-pcp- protein                                  | 3  | P:GO:0009792;<br>P:GO:0006508;<br>F:GO:0008236                                                                                                                                                                                                                                                                | - |                                                                                                                    | IPR008758; G3DSA:3.40.50.1820 (GENE3D), PTHR11010:SF6 (PANTHER), SSF53474 (SUPERFAMILY)                             |
| Caenorhabditis elegans  | elegans protein confirmed by transcript evidence           | 0  |                                                                                                                                                                                                                                                                                                               |   |                                                                                                                    | IPR008574                                                                                                           |
|                         | -                                                          | 0  |                                                                                                                                                                                                                                                                                                               |   |                                                                                                                    | SignalP (SIGNALP)                                                                                                   |
|                         | -                                                          | 0  |                                                                                                                                                                                                                                                                                                               |   |                                                                                                                    | -                                                                                                                   |
| Brugia malayi           | r- guanylyltransferase and 5 -phosphatase                  | 18 | P:GO:0008340;<br>C:GO:0005654;<br>P:GO:0000003;<br>F:GO:0000166;<br>F:GO:0004484;<br>P:GO:0040010;<br>P:GO:0006898;<br>P:GO:0040017;<br>F:GO:0016791;<br>P:GO:0006259;<br>P:GO:0018996;<br>P:GO:0019915;<br>F:GO:0008186;<br>P:GO:0009792;<br>P:GO:0002009;<br>P:GO:0002119;<br>P:GO:0010171;<br>P:GO:0006370 | - | EC:2.7.7.50;<br>EC:3.1.3.0                                                                                         | IPR001339; IPR012340; IPR013846; IPR016027; G3DSA:3.30.470.30 (GENE3D), PTHR10367 (PANTHER), SSF56091 (SUPERFAMILY) |
|                         | -                                                          | 0  |                                                                                                                                                                                                                                                                                                               |   |                                                                                                                    | -                                                                                                                   |
| Caenorhabditis briggsae | fan1_caebr ame: full=fanconi-associated nuclease 1 homolog | 2  | F:GO:0005488;<br>P:GO:0006974                                                                                                                                                                                                                                                                                 | - |                                                                                                                    | -                                                                                                                   |
| Caenorhabditis elegans  | mh2 domain containing protein                              | 3  | C:GO:0005622;<br>F:GO:0005515;<br>P:GO:0006350                                                                                                                                                                                                                                                                | - |                                                                                                                    | IPR001132; IPR008984; IPR013790; IPR017855; PTHR13703:SF12 (PANTHER)                                                |
| Brugia malayi           | n-alpha-acetyltransferase auxiliary subunit-like           | 0  |                                                                                                                                                                                                                                                                                                               |   | F:GO:0005488;<br>C:GO:0005737;<br>F:GO:0005515                                                                     | IPR019183; PTHR22767 (PANTHER), PTHR22767:SF3 (PANTHER)                                                             |
| Brugia malayi           | briggsae cbr-kup-1 protein                                 | 0  |                                                                                                                                                                                                                                                                                                               |   | F:GO:0000166                                                                                                       | -                                                                                                                   |
|                         | -                                                          | 0  |                                                                                                                                                                                                                                                                                                               |   |                                                                                                                    | SignalP (SIGNALP)                                                                                                   |

|                         |                                                                |   |                                                                                                                                     |                                                                                                                                                                                                                                                            |            |                                                                                                                      |
|-------------------------|----------------------------------------------------------------|---|-------------------------------------------------------------------------------------------------------------------------------------|------------------------------------------------------------------------------------------------------------------------------------------------------------------------------------------------------------------------------------------------------------|------------|----------------------------------------------------------------------------------------------------------------------|
|                         | -                                                              | 0 |                                                                                                                                     |                                                                                                                                                                                                                                                            |            | -                                                                                                                    |
| Caenorhabditis briggsae | e3 ubiquitin-protein ligase march8                             | 0 |                                                                                                                                     | F:GO:0016874;<br>C:GO:0016021;<br>C:GO:0016020;<br>C:GO:0005768;<br>C:GO:0030659;<br>F:GO:0008270;<br>C:GO:0005794;<br>C:GO:0005765;<br>C:GO:0005764;<br>C:GO:0031410;<br>P:GO:0008152;<br>F:GO:0046872;<br>C:GO:0031902;<br>C:GO:0031901;<br>C:GO:0005886 |            | IPR011016; IPR013083; IPR018957;<br>PTHR23012 (PANTHER),<br>PTHR23012:SF3 (PANTHER), SSF57850<br>(SUPERFAMILY)       |
|                         | -                                                              | 0 |                                                                                                                                     |                                                                                                                                                                                                                                                            |            | -                                                                                                                    |
| Caenorhabditis elegans  | plexin a1                                                      | 1 | C:GO:0016020                                                                                                                        | -                                                                                                                                                                                                                                                          |            | IPR002165; IPR003659;<br>G3DSA:3.30.1680.10 (GENE3D),<br>PTHR22625 (PANTHER),<br>PTHR22625:SF11 (PANTHER)            |
| Caenorhabditis elegans  | plexin a1                                                      | 1 | C:GO:0016020                                                                                                                        | -                                                                                                                                                                                                                                                          |            | IPR002165; IPR003659;<br>G3DSA:3.30.1680.10 (GENE3D),<br>PTHR22625 (PANTHER),<br>PTHR22625:SF11 (PANTHER)            |
| Caenorhabditis briggsae | intraflagellar transport protein 140                           | 0 |                                                                                                                                     | F:GO:0003674;<br>F:GO:0005488;<br>F:GO:0003824;<br>P:GO:0008150;<br>C:GO:0005575                                                                                                                                                                           |            | PTHR15722 (PANTHER)                                                                                                  |
| Rattus norvegicus       | coiled-coil domain-containing protein 93                       | 0 |                                                                                                                                     |                                                                                                                                                                                                                                                            |            | IPR019159; PTHR16441 (PANTHER)                                                                                       |
| Caenorhabditis briggsae | elegans protein partially confirmed by transcript evidence     | 0 |                                                                                                                                     | C:GO:0016021;<br>P:GO:0008152;<br>F:GO:0003824                                                                                                                                                                                                             |            | IPR004245; IPR017849;<br>PTHR10974:SF5 (PANTHER)                                                                     |
| Brugia malayi           | zinc c2h2 type family protein                                  | 0 |                                                                                                                                     | F:GO:0003676;<br>F:GO:0046872;<br>F:GO:0008270;<br>F:GO:0005515;<br>C:GO:0005622                                                                                                                                                                           |            | IPR007087; IPR013087; IPR015880;<br>PTHR23224 (PANTHER), SSF57667<br>(SUPERFAMILY)                                   |
| Brugia malayi           | taf1 r- polymerase tata box binding protein -associated factor | 8 | P:GO:0006351;<br>P:GO:0080090;<br>F:GO:0005515;<br>P:GO:0031323;<br>F:GO:0016740;<br>P:GO:0043687;<br>C:GO:0005634;<br>P:GO:0060255 | -                                                                                                                                                                                                                                                          |            | -                                                                                                                    |
|                         | -                                                              | 0 |                                                                                                                                     |                                                                                                                                                                                                                                                            |            | -                                                                                                                    |
| Caenorhabditis elegans  | heparan sulfate n-deacetylase n-sulfotransferase               | 3 | C:GO:0016020;<br>C:GO:0005794;<br>F:GO:0008146                                                                                      | -                                                                                                                                                                                                                                                          | EC:2.8.2.0 | IPR000863; G3DSA:3.40.50.300<br>(GENE3D), PTHR10605 (PANTHER),<br>PTHR10605:SF2 (PANTHER), SSF52540<br>(SUPERFAMILY) |
| Caenorhabditis briggsae | elegans protein confirmed by transcript evidence               | 0 |                                                                                                                                     | P:GO:0008152;<br>F:GO:0008080                                                                                                                                                                                                                              |            | -                                                                                                                    |
|                         | -                                                              | 0 |                                                                                                                                     |                                                                                                                                                                                                                                                            |            | -                                                                                                                    |
|                         | -                                                              | 0 |                                                                                                                                     |                                                                                                                                                                                                                                                            |            | SignalP (SIGNALP)                                                                                                    |
|                         | -                                                              | 0 |                                                                                                                                     |                                                                                                                                                                                                                                                            |            | -                                                                                                                    |

|                           |                                                         |    |                                                                                                                                                                                                                                           |                                                                                                                                                      |                                                                                                                                                                         |
|---------------------------|---------------------------------------------------------|----|-------------------------------------------------------------------------------------------------------------------------------------------------------------------------------------------------------------------------------------------|------------------------------------------------------------------------------------------------------------------------------------------------------|-------------------------------------------------------------------------------------------------------------------------------------------------------------------------|
| Caenorhabditis briggsae   | trehalase family protein                                | 4  | P:GO:0009792;<br>F:GO:0003824;<br>P:GO:0040007;<br>P:GO:0002119                                                                                                                                                                           | -                                                                                                                                                    | IPR001661; IPR008928; IPR018232;<br>PTHR23403:SF1 (PANTHER)                                                                                                             |
| Caenorhabditis briggsae   | briggsae cbr-nlp-18 protein                             | 0  |                                                                                                                                                                                                                                           |                                                                                                                                                      | -                                                                                                                                                                       |
|                           | -                                                       | 0  |                                                                                                                                                                                                                                           |                                                                                                                                                      | -                                                                                                                                                                       |
|                           | -                                                       | 0  |                                                                                                                                                                                                                                           |                                                                                                                                                      | -                                                                                                                                                                       |
| Loa loa                   | ring zinc finger-containing protein                     | 8  | P:GO:0009792;<br>P:GO:0010171;<br>F:GO:0005488;<br>P:GO:0040018;<br>P:GO:0018996;<br>P:GO:0040010;<br>P:GO:0000003;<br>P:GO:0008219                                                                                                       | -                                                                                                                                                    | -                                                                                                                                                                       |
| Loa loa                   | ring zinc finger-containing protein                     | 8  | P:GO:0009792;<br>P:GO:0010171;<br>F:GO:0005488;<br>P:GO:0040018;<br>P:GO:0018996;<br>P:GO:0040010;<br>P:GO:0000003;<br>P:GO:0008219                                                                                                       | -                                                                                                                                                    | -                                                                                                                                                                       |
|                           | -                                                       | 0  |                                                                                                                                                                                                                                           |                                                                                                                                                      | -                                                                                                                                                                       |
| Caenorhabditis briggsae   | Hypothetical protein CBG02451 [Caenorhabditis briggsae] | 0  |                                                                                                                                                                                                                                           | P:GO:0006898;<br>P:GO:0000003;<br>P:GO:0040018;<br>P:GO:0002119;<br>P:GO:0009792;<br>P:GO:0040011;<br>P:GO:0040010;<br>P:GO:0040035;<br>F:GO:0005488 | -                                                                                                                                                                       |
|                           | -                                                       | 0  |                                                                                                                                                                                                                                           |                                                                                                                                                      | -                                                                                                                                                                       |
| Caenorhabditis sp. PS1010 | 6720455i24rik homolog                                   | 5  | P:GO:0007163;<br>P:GO:0007411;<br>P:GO:0007155;<br>C:GO:0016020;<br>P:GO:0007413                                                                                                                                                          | -                                                                                                                                                    | IPR000742; IPR006209; IPR006210;<br>IPR013032; IPR013320;<br>G3DSA:2.10.25.10 (GENE3D),<br>PTHR11201 (PANTHER),<br>PTHR11201:SF220 (PANTHER),<br>SSF57196 (SUPERFAMILY) |
| Caenorhabditis elegans    | u6 snr--associated sm-like protein lsm6                 | 14 | C:GO:0030532;<br>P:GO:0040010;<br>F:GO:0003723;<br>P:GO:0040002;<br>P:GO:0006364;<br>P:GO:0008033;<br>P:GO:0008380;<br>P:GO:0010171;<br>P:GO:0006402;<br>P:GO:0002119;<br>P:GO:0040011;<br>F:GO:0046982;<br>P:GO:0006397;<br>C:GO:0005737 | -                                                                                                                                                    | IPR001163; IPR006649; IPR010920;<br>G3DSA:2.30.30.100 (GENE3D),<br>PTHR11021 (PANTHER)                                                                                  |

|                             |                                                         |    |                                                                                                                                                                                                         |                                                                                                                                                                                                                                           |                                                         |                                                                                                                                             |
|-----------------------------|---------------------------------------------------------|----|---------------------------------------------------------------------------------------------------------------------------------------------------------------------------------------------------------|-------------------------------------------------------------------------------------------------------------------------------------------------------------------------------------------------------------------------------------------|---------------------------------------------------------|---------------------------------------------------------------------------------------------------------------------------------------------|
| Caenorhabditis elegans      | briggsae cbr-zyg-1 protein                              | 0  |                                                                                                                                                                                                         | F:GO:0016740;<br>F:GO:0004674;<br>F:GO:0004672;<br>P:GO:0006468;<br>F:GO:0000166;<br>C:GO:0005737;<br>F:GO:0005524;<br>C:GO:0005814;<br>P:GO:0007275;<br>F:GO:0016301;<br>F:GO:0004713;<br>F:GO:0005515;<br>P:GO:0007049;<br>C:GO:0005856 | -                                                       |                                                                                                                                             |
| Caenorhabditis elegans      | bromodomain containing protein                          | 1  | P:GO:0040011                                                                                                                                                                                            | -                                                                                                                                                                                                                                         |                                                         | IPR001965; IPR011011; IPR013083;<br>IPR019786; IPR019787; PTHR22880<br>(PANTHER), PTHR22880:SF4<br>(PANTHER)                                |
| Caenorhabditis briggsae     | patched family protein                                  | 5  | P:GO:0040018;<br>P:GO:0018996;<br>P:GO:0007275;<br>P:GO:0040011;<br>C:GO:0016020                                                                                                                        | -                                                                                                                                                                                                                                         |                                                         | IPR003392; PTHR10796 (PANTHER),<br>PTHR10796:SF14 (PANTHER)                                                                                 |
| Caenorhabditis briggsae     | cytochrome c oxidase subunit via polypeptide 1          | 6  | P:GO:0040010;<br>P:GO:0008340;<br>C:GO:0005743;<br>P:GO:0006091;<br>P:GO:0000003;<br>C:GO:0044425                                                                                                       | -                                                                                                                                                                                                                                         |                                                         | IPR001349; IPR018507                                                                                                                        |
| Cyathostominae sp. JM-2007a | mgc84409 protein                                        | 1  | F:GO:0008270                                                                                                                                                                                            | -                                                                                                                                                                                                                                         |                                                         | IPR001781; PTHR18973 (PANTHER),<br>PTHR18973:SF106 (PANTHER),<br>SSF57716 (SUPERFAMILY)                                                     |
|                             | -                                                       | 0  |                                                                                                                                                                                                         |                                                                                                                                                                                                                                           |                                                         | SignalP (SIGNALP)                                                                                                                           |
|                             | -                                                       | 0  |                                                                                                                                                                                                         |                                                                                                                                                                                                                                           |                                                         | -                                                                                                                                           |
| Caenorhabditis elegans      | cytochrome p450 2g1-like                                | 1  | F:GO:0046872                                                                                                                                                                                            | -                                                                                                                                                                                                                                         |                                                         | IPR001128; IPR002401                                                                                                                        |
| Caenorhabditis briggsae     | myosin heavy chain                                      | 6  | C:GO:0032982;<br>P:GO:0055114;<br>F:GO:0005524;<br>F:GO:0051015;<br>F:GO:0003774;<br>F:GO:0032440                                                                                                       | -                                                                                                                                                                                                                                         | EC:1.3.1.74                                             | SignalP (SIGNALP)                                                                                                                           |
| Caenorhabditis elegans      | hypothetical protein Y47G6A.29 [Caenorhabditis elegans] | 0  |                                                                                                                                                                                                         |                                                                                                                                                                                                                                           |                                                         | -                                                                                                                                           |
|                             | -                                                       | 0  |                                                                                                                                                                                                         |                                                                                                                                                                                                                                           |                                                         | -                                                                                                                                           |
|                             | -                                                       | 0  |                                                                                                                                                                                                         |                                                                                                                                                                                                                                           |                                                         | -                                                                                                                                           |
| Angiostrongylus cantonensis | elongation factor 2                                     | 12 | F:GO:0003746;<br>P:GO:0040007;<br>P:GO:0040035;<br>P:GO:0006414;<br>P:GO:0006184;<br>P:GO:0002119;<br>F:GO:0005515;<br>F:GO:0003924;<br>C:GO:0030529;<br>P:GO:0009792;<br>C:GO:0005737;<br>F:GO:0005525 | -                                                                                                                                                                                                                                         | EC:3.6.5.1;<br>EC:3.6.5.2;<br>EC:3.6.5.3;<br>EC:3.6.5.4 | IPR000640; IPR005517; IPR009022;<br>IPR014721; IPR020568;<br>G3DSA:3.30.70.870 (GENE3D),<br>PTHR23115 (PANTHER),<br>PTHR23115:SF4 (PANTHER) |

|                         |                                                       |    |                                                                                                                                                                                                         |                               |                                                         |                                                                                                                                                                                                                                                                                                         |
|-------------------------|-------------------------------------------------------|----|---------------------------------------------------------------------------------------------------------------------------------------------------------------------------------------------------------|-------------------------------|---------------------------------------------------------|---------------------------------------------------------------------------------------------------------------------------------------------------------------------------------------------------------------------------------------------------------------------------------------------------------|
| Caenorhabditis elegans  | uncoordi-ated family member (unc-44)                  | 3  | P:GO:0007165;<br>F:GO:0004623;<br>F:GO:0005515                                                                                                                                                          | -                             | EC:3.1.1.4                                              | IPR000906; PTHR12582 (PANTHER)                                                                                                                                                                                                                                                                          |
| Caenorhabditis elegans  | uncoordi-ated family member (unc-44)                  | 1  | F:GO:0005515                                                                                                                                                                                            | -                             |                                                         | IPR000488; IPR000906; IPR011029;<br>PTHR18958 (PANTHER),<br>PTHR18958:SF20 (PANTHER)                                                                                                                                                                                                                    |
| Caenorhabditis elegans  | ankyrin-related unc-44                                | 1  | F:GO:0005515                                                                                                                                                                                            | -                             |                                                         | -                                                                                                                                                                                                                                                                                                       |
| Caenorhabditis elegans  | uncoordi-ated family member (unc-44)                  | 1  | F:GO:0005515                                                                                                                                                                                            | -                             |                                                         | IPR000488; IPR000906; IPR011029;<br>PTHR18958 (PANTHER),<br>PTHR18958:SF20 (PANTHER)                                                                                                                                                                                                                    |
| Caenorhabditis elegans  | eukaryotic translation elongation factor              | 12 | P:GO:0000022;<br>C:GO:0005829;<br>F:GO:0003746;<br>C:GO:0005875;<br>P:GO:0040007;<br>P:GO:0040035;<br>P:GO:0006414;<br>P:GO:0002119;<br>F:GO:0003924;<br>P:GO:0009792;<br>C:GO:0005811;<br>F:GO:0005525 | -                             | EC:3.6.5.1;<br>EC:3.6.5.2;<br>EC:3.6.5.3;<br>EC:3.6.5.4 | IPR000640; IPR000795; IPR004161;<br>IPR005517; IPR009000; IPR009022;<br>IPR014721; IPR020568;<br>G3DSA:2.40.30.10 (GENE3D),<br>G3DSA:3.30.70.870 (GENE3D),<br>G3DSA:3.40.50.300 (GENE3D),<br>G3DSA:3.90.1430.10 (GENE3D),<br>PTHR23115 (PANTHER),<br>PTHR23115:SF4 (PANTHER), SSF52540<br>(SUPERFAMILY) |
| Caenorhabditis briggsae | briggsae cbr-tam-1 protein                            | 0  |                                                                                                                                                                                                         | F:GO:0008270;<br>F:GO:0005515 |                                                         | -                                                                                                                                                                                                                                                                                                       |
| Caenorhabditis briggsae | briggsae cbr-tam-1 protein                            | 0  |                                                                                                                                                                                                         | F:GO:0008270;<br>F:GO:0005515 |                                                         | -                                                                                                                                                                                                                                                                                                       |
| Caenorhabditis briggsae | briggsae cbr-tam-1 protein                            | 0  |                                                                                                                                                                                                         | F:GO:0008270;<br>F:GO:0005515 |                                                         | -                                                                                                                                                                                                                                                                                                       |
| Caenorhabditis briggsae | ap-3 complex subunit delta-1                          | 8  | P:GO:0009987;<br>P:GO:0006810;<br>P:GO:0040007;<br>P:GO:0002376;<br>P:GO:0010171;<br>P:GO:0002119;<br>C:GO:0044444;<br>P:GO:0009792                                                                     | -                             |                                                         | IPR010474; PTHR22781 (PANTHER),<br>PTHR22781:SF9 (PANTHER)                                                                                                                                                                                                                                              |
| Caenorhabditis briggsae | ap-3 complex subunit delta-1                          | 8  | P:GO:0009987;<br>P:GO:0006810;<br>P:GO:0040007;<br>P:GO:0002376;<br>P:GO:0010171;<br>P:GO:0002119;<br>C:GO:0044444;<br>P:GO:0009792                                                                     | -                             |                                                         | IPR010474; PTHR22781 (PANTHER),<br>PTHR22781:SF9 (PANTHER)                                                                                                                                                                                                                                              |
| Caenorhabditis elegans  | hypothetical protein F25F8.1 [Caenorhabditis elegans] | 0  |                                                                                                                                                                                                         | F:GO:0003677                  |                                                         | -                                                                                                                                                                                                                                                                                                       |
| Caenorhabditis elegans  | mevalo-te ki-se                                       | 10 | C:GO:0005737;<br>P:GO:0009792;<br>P:GO:0002119;<br>P:GO:0016310;<br>P:GO:0008299;<br>F:GO:0004496;<br>F:GO:0005524;<br>P:GO:0008340;<br>P:GO:0040011;<br>P:GO:0040007                                   | -                             | EC:2.7.1.36                                             | IPR006204; IPR006205; IPR014721;<br>IPR020568; PTHR10457 (PANTHER)                                                                                                                                                                                                                                      |

|                        |                                                                                                                             |    |                                                                                                                                                                                                                                                                                                                                                                  |                                                                 |                             |                                                                                            |
|------------------------|-----------------------------------------------------------------------------------------------------------------------------|----|------------------------------------------------------------------------------------------------------------------------------------------------------------------------------------------------------------------------------------------------------------------------------------------------------------------------------------------------------------------|-----------------------------------------------------------------|-----------------------------|--------------------------------------------------------------------------------------------|
| Caenorhabditis elegans | mevalo-te ki-se                                                                                                             | 11 | C:GO:0005737;<br>F:GO:0042802;<br>P:GO:0009792;<br>P:GO:0002119;<br>P:GO:0016310;<br>P:GO:0008299;<br>F:GO:0004496;<br>F:GO:0005524;<br>P:GO:0008340;<br>P:GO:0040011;<br>P:GO:0040007                                                                                                                                                                           | -                                                               | EC:2.7.1.36                 | IPR006204; IPR006205; IPR006206;<br>IPR014721; IPR020568; PTHR10457<br>(PANTHER)           |
| Caenorhabditis elegans | a chain a high resolution crystal structure of human glutamate carboxypeptidase ii in a complex with a urea-based inhibitor | 2  | F:GO:0070011;<br>C:GO:0016020                                                                                                                                                                                                                                                                                                                                    | -                                                               |                             | IPR007365; G3DSA:1.20.930.40<br>(GENE3D), PTHR10404 (PANTHER),<br>PTHR10404:SF15 (PANTHER) |
| Drosophila ananassae   | gastric mucin                                                                                                               | 0  |                                                                                                                                                                                                                                                                                                                                                                  | F:GO:0008061;<br>P:GO:0006030;<br>F:GO:0016787;<br>C:GO:0005576 |                             | -                                                                                          |
| Caenorhabditis elegans | hypothetical protein T06D8.1 [Caenorhabditis elegans]                                                                       | 0  |                                                                                                                                                                                                                                                                                                                                                                  | F:GO:0008061;<br>P:GO:0006030;<br>F:GO:0016787;<br>C:GO:0005576 |                             | -                                                                                          |
|                        | -                                                                                                                           | 0  |                                                                                                                                                                                                                                                                                                                                                                  |                                                                 |                             | -                                                                                          |
| Caenorhabditis elegans | hypothetical protein T06D8.1 [Caenorhabditis elegans]                                                                       | 0  |                                                                                                                                                                                                                                                                                                                                                                  | P:GO:0006629;<br>F:GO:0008970                                   |                             | -                                                                                          |
|                        | -                                                                                                                           | 0  |                                                                                                                                                                                                                                                                                                                                                                  |                                                                 |                             | -                                                                                          |
| Ailuropoda melanoleuca | casein ki-se beta polypeptide                                                                                               | 21 | C:GO:0005956;<br>P:GO:0033211;<br>P:GO:0006956;<br>F:GO:0004674;<br>P:GO:0042325;<br>P:GO:0030177;<br>F:GO:0042802;<br>P:GO:0043623;<br>P:GO:0008285;<br>P:GO:0006508;<br>F:GO:0005102;<br>P:GO:0051101;<br>F:GO:0019904;<br>P:GO:0007249;<br>F:GO:0008134;<br>F:GO:0004252;<br>C:GO:0005576;<br>P:GO:0050790;<br>C:GO:0005737;<br>C:GO:0005886;<br>F:GO:0019887 | -                                                               | EC:2.7.11.0;<br>EC:3.4.21.0 | IPR000704; IPR016149; IPR016150                                                            |

|                                |                                                                 |    |                                                                                                                                                                                                         |                                                                                                                                                      |            |                                                                                                                                                                                                                                     |
|--------------------------------|-----------------------------------------------------------------|----|---------------------------------------------------------------------------------------------------------------------------------------------------------------------------------------------------------|------------------------------------------------------------------------------------------------------------------------------------------------------|------------|-------------------------------------------------------------------------------------------------------------------------------------------------------------------------------------------------------------------------------------|
| Drosophila melanogaster        | katanin 60                                                      | 12 | P:GO:0051179;<br>P:GO:0051329;<br>F:GO:0008017;<br>P:GO:0006996;<br>C:GO:0043005;<br>C:GO:0000922;<br>F:GO:0005524;<br>F:GO:0008568;<br>C:GO:0044444;<br>P:GO:0007017;<br>F:GO:0046982;<br>P:GO:0048699 | -                                                                                                                                                    | EC:3.6.4.3 | IPR003959; IPR003960;<br>G3DSA:1.10.8.60 (GENE3D),<br>G3DSA:3.40.50.300 (GENE3D),<br>PTHR23074 (PANTHER),<br>PTHR23074:SF19 (PANTHER),<br>SSF52540 (SUPERFAMILY)                                                                    |
| Trichoplax adhaerens           | ring finger protein 14                                          | 0  |                                                                                                                                                                                                         | F:GO:0046872;<br>C:GO:0005737;<br>F:GO:0019787;<br>F:GO:0008270;<br>P:GO:0032355;<br>P:GO:0016567;<br>F:GO:0005515;<br>C:GO:0005634                  |            | IPR001841; IPR002867; IPR013083;<br>IPR017907; PTHR11685 (PANTHER),<br>PTHR11685:SF7 (PANTHER), SSF57850<br>(SUPERFAMILY)                                                                                                           |
| Polysphondylium pallidum PN500 | hypothetical protein PPL_01926 [Polysphondylium pallidum PN500] | 0  |                                                                                                                                                                                                         | F:GO:0016787                                                                                                                                         |            | -                                                                                                                                                                                                                                   |
| Caenorhabditis briggsae        | d-k protein                                                     | 0  |                                                                                                                                                                                                         | C:GO:0016021;<br>F:GO:0032440;<br>P:GO:0000902;<br>F:GO:0000166;<br>F:GO:0005524;<br>P:GO:0055114;<br>F:GO:0016491;<br>C:GO:0005788;<br>C:GO:0005783 |            | IPR001023; IPR005829; IPR013126;<br>G3DSA:1.20.1270.10 (GENE3D),<br>G3DSA:3.30.420.40 (GENE3D),<br>G3DSA:3.90.640.10 (GENE3D),<br>PTHR19375:SF7 (PANTHER), SignalP<br>(SIGNALP), SSF100934 (SUPERFAMILY),<br>SSF53067 (SUPERFAMILY) |
| Caenorhabditis briggsae        | d-k protein                                                     | 0  |                                                                                                                                                                                                         | C:GO:0016021;<br>F:GO:0032440;<br>P:GO:0000902;<br>F:GO:0000166;<br>F:GO:0005524;<br>P:GO:0055114;<br>F:GO:0016491;<br>C:GO:0005788;<br>C:GO:0005783 |            | IPR001023; IPR005829; IPR013126;<br>G3DSA:1.20.1270.10 (GENE3D),<br>G3DSA:3.30.420.40 (GENE3D),<br>G3DSA:3.90.640.10 (GENE3D),<br>PTHR19375:SF7 (PANTHER), SignalP<br>(SIGNALP), SSF100934 (SUPERFAMILY),<br>SSF53067 (SUPERFAMILY) |
| Caenorhabditis briggsae        | d-k protein                                                     | 0  |                                                                                                                                                                                                         | C:GO:0016021;<br>F:GO:0032440;<br>P:GO:0000902;<br>F:GO:0000166;<br>F:GO:0005524;<br>P:GO:0055114;<br>F:GO:0016491;<br>C:GO:0005788;<br>C:GO:0005783 |            | IPR001023; IPR005829; IPR013126;<br>G3DSA:1.20.1270.10 (GENE3D),<br>G3DSA:3.30.420.40 (GENE3D),<br>G3DSA:3.90.640.10 (GENE3D),<br>PTHR19375:SF7 (PANTHER), SignalP<br>(SIGNALP), SSF100934 (SUPERFAMILY),<br>SSF53067 (SUPERFAMILY) |
| -                              | -                                                               | 0  |                                                                                                                                                                                                         |                                                                                                                                                      |            | -                                                                                                                                                                                                                                   |
| -                              | -                                                               | 0  |                                                                                                                                                                                                         |                                                                                                                                                      |            | -                                                                                                                                                                                                                                   |
| -                              | -                                                               | 0  |                                                                                                                                                                                                         |                                                                                                                                                      |            | -                                                                                                                                                                                                                                   |
| Trichomonas vaginalis G3       | ankyrin repeat protein                                          | 0  |                                                                                                                                                                                                         |                                                                                                                                                      |            | IPR002110; IPR020683; PR01415<br>(PRINTS), PTHR18958 (PANTHER),<br>PTHR18958:SF306 (PANTHER)                                                                                                                                        |
| Trichomonas vaginalis G3       | ankyrin repeat protein                                          | 0  |                                                                                                                                                                                                         |                                                                                                                                                      |            | IPR002110; IPR020683; PR01415<br>(PRINTS), PTHR18958 (PANTHER),<br>PTHR18958:SF306 (PANTHER)                                                                                                                                        |

|                        |                                                              |    |                                                                                                                                                                                                                                                                                                                                                                                                                                                                        |   |                                                                                                                       |
|------------------------|--------------------------------------------------------------|----|------------------------------------------------------------------------------------------------------------------------------------------------------------------------------------------------------------------------------------------------------------------------------------------------------------------------------------------------------------------------------------------------------------------------------------------------------------------------|---|-----------------------------------------------------------------------------------------------------------------------|
| Caenorhabditis elegans | briggsae cbr-elpc-2 protein                                  | 1  | P:GO:0009987                                                                                                                                                                                                                                                                                                                                                                                                                                                           | - | IPR001680; IPR011046; IPR015943; IPR017986; IPR019781; IPR019782; PTHR13729 (PANTHER)                                 |
| -                      | -                                                            | 0  | -                                                                                                                                                                                                                                                                                                                                                                                                                                                                      | - | -                                                                                                                     |
| Loa loa                | 2fe-2s iron-sulfur cluster binding domain containing protein | 1  | F:GO:0005488                                                                                                                                                                                                                                                                                                                                                                                                                                                           | - | IPR001041; IPR012675; PTHR23426 (PANTHER), PTHR23426:SF1 (PANTHER)                                                    |
| Branchiostoma floridae | isoform cra_a                                                | 1  | F:GO:0008415                                                                                                                                                                                                                                                                                                                                                                                                                                                           | - | IPR000182; IPR016181; PTHR23091 (PANTHER)                                                                             |
| Mus musculus           | type alpha isoform cra_a                                     | 31 | P:GO:0060351;<br>P:GO:0001957;<br>P:GO:0071363;<br>P:GO:0007605;<br>P:GO:0034505;<br>P:GO:0042542;<br>P:GO:0001649;<br>P:GO:0009612;<br>P:GO:0001568;<br>P:GO:0060325;<br>F:GO:0005201;<br>C:GO:0005615;<br>P:GO:0048706;<br>P:GO:0015031;<br>F:GO:0048407;<br>C:GO:0005737;<br>P:GO:0043434;<br>P:GO:0071300;<br>P:GO:0007601;<br>P:GO:0010812;<br>C:GO:0005584;<br>F:GO:0042802;<br>P:GO:0060346;<br>P:GO:0032964;<br>P:GO:0030199;<br>P:GO:0051591;<br>P:GO:0031960 | - | IPR008160; PTHR10499 (PANTHER), PTHR10499:SF127 (PANTHER)                                                             |
| -                      | -                                                            | 0  | -                                                                                                                                                                                                                                                                                                                                                                                                                                                                      | - | -                                                                                                                     |
| Haemonchus contortus   | heat shock protein family member (hsp- )                     | 1  | P:GO:0009408                                                                                                                                                                                                                                                                                                                                                                                                                                                           | - | -                                                                                                                     |
| Ostertagia ostertagi   | heat shock protein family member (hsp- )                     | 1  | P:GO:0006950                                                                                                                                                                                                                                                                                                                                                                                                                                                           | - | -                                                                                                                     |
| Ostertagia ostertagi   | heat shock protein family member (hsp- )                     | 1  | P:GO:0006950                                                                                                                                                                                                                                                                                                                                                                                                                                                           | - | IPR001436; IPR002068; IPR008978; G3DSA:2.60.40.790 (GENE3D), PTHR11527 (PANTHER), PTHR11527:SF28 (PANTHER)            |
| Ostertagia ostertagi   | heat shock protein family member (hsp- )                     | 1  | P:GO:0006950                                                                                                                                                                                                                                                                                                                                                                                                                                                           | - | -                                                                                                                     |
| -                      | -                                                            | 0  | -                                                                                                                                                                                                                                                                                                                                                                                                                                                                      | - | -                                                                                                                     |
| -                      | -                                                            | 0  | -                                                                                                                                                                                                                                                                                                                                                                                                                                                                      | - | -                                                                                                                     |
| -                      | -                                                            | 0  | -                                                                                                                                                                                                                                                                                                                                                                                                                                                                      | - | -                                                                                                                     |
| -                      | -                                                            | 0  | -                                                                                                                                                                                                                                                                                                                                                                                                                                                                      | - | IPR008160; PTHR10499 (PANTHER), PTHR10499:SF114 (PANTHER)                                                             |
| Caenorhabditis elegans | ypi7_caeel ame: full=uncharacterized f-box protein           | 0  | -                                                                                                                                                                                                                                                                                                                                                                                                                                                                      | - | -                                                                                                                     |
| Caenorhabditis remanei | spc-1                                                        | 6  | C:GO:0030863;<br>C:GO:0044459;<br>F:GO:0005515;<br>F:GO:0005509;<br>F:GO:0016787;<br>C:GO:0044422                                                                                                                                                                                                                                                                                                                                                                      | - | IPR002017; IPR018159; G3DSA:1.20.58.60 (GENE3D), PTHR11915 (PANTHER), PTHR11915:SF6 (PANTHER), SSF46966 (SUPERFAMILY) |
| -                      | -                                                            | 0  | -                                                                                                                                                                                                                                                                                                                                                                                                                                                                      | - | -                                                                                                                     |



|                            |                                                                        |    |              |                                                                                                                                                                                                                                                            |   |                                                                                  |
|----------------------------|------------------------------------------------------------------------|----|--------------|------------------------------------------------------------------------------------------------------------------------------------------------------------------------------------------------------------------------------------------------------------|---|----------------------------------------------------------------------------------|
| Caenorhabditis briggsae    | ab-hydrolase associated lipase region family protein                   | 0  |              | P:GO:0006629;<br>F:GO:0016787;<br>F:GO:0004806                                                                                                                                                                                                             |   | G3DSA:3.40.50.1820 (GENE3D),<br>PTHR11005 (PANTHER)                              |
|                            | -                                                                      | 0  |              |                                                                                                                                                                                                                                                            |   | SignalP (SIGNALP)                                                                |
| Acetivibrio cellulolyticus | mucin 1                                                                | 1  | C:GO:0044464 | -                                                                                                                                                                                                                                                          |   | IPR000982; PR01217 (PRINTS)                                                      |
|                            | -                                                                      | 0  |              |                                                                                                                                                                                                                                                            |   | -                                                                                |
| Caenorhabditis elegans     | briggsae cbr-dct-11 protein                                            | 0  |              |                                                                                                                                                                                                                                                            |   | SignalP (SIGNALP)                                                                |
| Caenorhabditis elegans     | nuclear pore complex protein family member (npp-22)                    | 0  |              | C:GO:0005643;<br>P:GO:0015031;<br>C:GO:0016021;<br>C:GO:0016020;<br>C:GO:0005634;<br>P:GO:0006810;<br>P:GO:0000003;<br>P:GO:0009792;<br>C:GO:0031965;<br>P:GO:0051028;<br>P:GO:0055085                                                                     |   | -                                                                                |
|                            | -                                                                      | 0  |              |                                                                                                                                                                                                                                                            |   | SignalP (SIGNALP)                                                                |
| Loa loa                    | transcription initiation factor tfiid subunit 6                        | 0  |              | F:GO:0005488;<br>P:GO:0006352;<br>F:GO:0003743;<br>P:GO:0051090;<br>F:GO:0003702;<br>F:GO:0016986;<br>F:GO:0003677;<br>C:GO:0005634                                                                                                                        |   | IPR011442; PTHR10221 (PANTHER),<br>PTHR10221:SF7 (PANTHER), SignalP<br>(SIGNALP) |
|                            | -                                                                      | 0  |              |                                                                                                                                                                                                                                                            |   | -                                                                                |
| Caenorhabditis elegans     | aminoadipate-semialdehyde dehydroge-se-phosphopantetheinyl transferase | 3  |              | P:GO:0009792;<br>P:GO:0040010;<br>P:GO:0040011                                                                                                                                                                                                             | - | -                                                                                |
| Caenorhabditis elegans     | briggsae cbr-clec-1 protein                                            | 7  |              | P:GO:0040035;<br>P:GO:0010171;<br>P:GO:0002119;<br>F:GO:0005488;<br>P:GO:0040018;<br>P:GO:0040011;<br>P:GO:0002009                                                                                                                                         | - | -                                                                                |
| Caenorhabditis elegans     | stress-associated endoplasmic reticulum protein 2                      | 15 |              | P:GO:0001501;<br>F:GO:0005515;<br>P:GO:0009791;<br>P:GO:0015031;<br>C:GO:0016021;<br>C:GO:0005789;<br>P:GO:0010259;<br>P:GO:0045727;<br>P:GO:0048644;<br>P:GO:0046622;<br>P:GO:0006006;<br>P:GO:0055085;<br>P:GO:0060124;<br>P:GO:0030968;<br>P:GO:0032024 | - | -                                                                                |
| Ostertagia ostertagi       | l3 es protein                                                          | 0  |              |                                                                                                                                                                                                                                                            |   | -                                                                                |

|                         |                                                                |   |                                                                                                                    |   |                                                                                                   |                                                                                                                          |
|-------------------------|----------------------------------------------------------------|---|--------------------------------------------------------------------------------------------------------------------|---|---------------------------------------------------------------------------------------------------|--------------------------------------------------------------------------------------------------------------------------|
| Caenorhabditis briggsae | trehalase                                                      | 5 | P:GO:0009792;<br>F:GO:0004135;<br>P:GO:0005978;<br>P:GO:0005991;<br>F:GO:0004555                                   | - | EC:3.2.1.33;<br>EC:3.2.1.28                                                                       | IPR001661; IPR008928;<br>PTHR23403:SF1 (PANTHER)                                                                         |
| Caenorhabditis briggsae | elegans protein partially confirmed by transcript evidence     | 3 | F:GO:0016887;<br>F:GO:0005524;<br>C:GO:0005739                                                                     | - |                                                                                                   | PTHR21610 (PANTHER),<br>PTHR21610:SF4 (PANTHER)                                                                          |
| Caenorhabditis elegans  | r- dependent r- polymerase family protein                      | 2 | F:GO:0005515;<br>P:GO:0009792                                                                                      | - |                                                                                                   | IPR000215; IPR007855                                                                                                     |
| Loa loa                 | briggsae cbr-nmy-1 protein                                     | 4 | F:GO:0003779;<br>C:GO:0016459;<br>F:GO:0005524;<br>F:GO:0003774                                                    | - |                                                                                                   | IPR001609; PTHR13140 (PANTHER),<br>PTHR13140:SF23 (PANTHER),<br>SSF52540 (SUPERFAMILY)                                   |
|                         | -                                                              | 0 |                                                                                                                    |   |                                                                                                   | SignalP (SIGNALP)                                                                                                        |
|                         | -                                                              | 0 |                                                                                                                    |   |                                                                                                   | -                                                                                                                        |
| Loa loa                 | c2orf29 protein                                                | 0 |                                                                                                                    |   | C:GO:0000123;<br>P:GO:0016573;<br>F:GO:0004402;<br>P:GO:0045449;<br>F:GO:0003713;<br>C:GO:0005634 | IPR019312                                                                                                                |
|                         | -                                                              | 0 |                                                                                                                    |   |                                                                                                   | -                                                                                                                        |
| Homo sapiens            | protein nkg7                                                   | 1 | C:GO:0005887                                                                                                       | - |                                                                                                   | IPR004032; PTHR10671:SF1<br>(PANTHER), SignalP (SIGNALP)                                                                 |
|                         | -                                                              | 0 |                                                                                                                    |   |                                                                                                   | -                                                                                                                        |
|                         | -                                                              | 0 |                                                                                                                    |   |                                                                                                   | -                                                                                                                        |
| Caenorhabditis briggsae | probable r--binding protein eif1ad                             | 7 | P:GO:0009792;<br>P:GO:0002119;<br>F:GO:0003676;<br>F:GO:0005515;<br>P:GO:0040010;<br>P:GO:0000003;<br>P:GO:0006898 | - |                                                                                                   | SignalP (SIGNALP)                                                                                                        |
|                         | -                                                              | 0 |                                                                                                                    |   |                                                                                                   | -                                                                                                                        |
| Caenorhabditis elegans  | caax prenyl protease 1 homolog                                 | 4 | P:GO:0006508;<br>C:GO:0044425;<br>F:GO:0008235;<br>C:GO:0005794                                                    | - |                                                                                                   | IPR001915; PTHR10120 (PANTHER),<br>PTHR10120:SF1 (PANTHER), SignalP<br>(SIGNALP)                                         |
| Caenorhabditis briggsae | elongation factor ts                                           | 5 | P:GO:0009792;<br>P:GO:0002119;<br>P:GO:0040010;<br>P:GO:0000003;<br>P:GO:0006898                                   | - |                                                                                                   | IPR000449; IPR001816; IPR006162;<br>IPR009060; IPR014039; IPR018101;<br>G3DSA:1.10.8.10 (GENE3D), SignalP<br>(SIGNALP)   |
|                         | -                                                              | 0 |                                                                                                                    |   |                                                                                                   | SignalP (SIGNALP)                                                                                                        |
|                         | -                                                              | 0 |                                                                                                                    |   |                                                                                                   | PRO1217 (PRINTS)                                                                                                         |
| Caenorhabditis elegans  | 2-oxoglutarate and iron-dependent oxyge-se domain containing 1 | 1 | P:GO:0045132                                                                                                       | - |                                                                                                   | -                                                                                                                        |
| Caenorhabditis elegans  | briggsae cbr-glrx-10 protein                                   | 4 | P:GO:0045454;<br>F:GO:0046872;<br>F:GO:0009055;<br>F:GO:0015035                                                    | - |                                                                                                   | IPR002109; IPR011767; IPR011899;<br>IPR012335; IPR012336; IPR014025;<br>PTHR10168 (PANTHER),<br>PTHR10168:SF16 (PANTHER) |

|                         |                                                   |    |                                                                                                                                                                                                                                                                                                                                                 |                                                                                                                                     |              |                                                                                                                                                    |
|-------------------------|---------------------------------------------------|----|-------------------------------------------------------------------------------------------------------------------------------------------------------------------------------------------------------------------------------------------------------------------------------------------------------------------------------------------------|-------------------------------------------------------------------------------------------------------------------------------------|--------------|----------------------------------------------------------------------------------------------------------------------------------------------------|
| Caenorhabditis briggsae | adenosine ki-se                                   | 11 | F:GO:0004001;<br>C:GO:0005829;<br>P:GO:0006166;<br>P:GO:0040010;<br>P:GO:0006175;<br>P:GO:0000003;<br>P:GO:0042102;<br>P:GO:0046085;<br>F:GO:0005515;<br>P:GO:0016310;<br>C:GO:0005634                                                                                                                                                          | -                                                                                                                                   | EC:2.7.1.20  | IPR001805; IPR002173; IPR011611;<br>G3DSA:3.30.1110.10 (GENE3D),<br>G3DSA:3.40.1190.20 (GENE3D),<br>PTHR10584 (PANTHER), SSF53613<br>(SUPERFAMILY) |
| -                       | -                                                 | 0  |                                                                                                                                                                                                                                                                                                                                                 |                                                                                                                                     |              | -                                                                                                                                                  |
| -                       | -                                                 | 0  |                                                                                                                                                                                                                                                                                                                                                 |                                                                                                                                     |              | -                                                                                                                                                  |
| Caenorhabditis briggsae | protein phosphatase 1d magnesium- delta isoform   | 3  | P:GO:0009617;<br>P:GO:0000086;<br>F:GO:0016787                                                                                                                                                                                                                                                                                                  | -                                                                                                                                   |              | IPR001932; IPR014045; IPR015655;<br>PTHR13832:SF94 (PANTHER)                                                                                       |
| Brugia malayi           | thioester-containing protein                      | 6  | C:GO:0005615;<br>P:GO:0008152;<br>F:GO:0016491;<br>F:GO:0005515;<br>F:GO:0004866;<br>F:GO:0016740                                                                                                                                                                                                                                               | -                                                                                                                                   |              | IPR001599; PTHR11412 (PANTHER),<br>PTHR11412:SF30 (PANTHER)                                                                                        |
| -                       | -                                                 | 0  |                                                                                                                                                                                                                                                                                                                                                 |                                                                                                                                     |              | -                                                                                                                                                  |
| Caenorhabditis elegans  | sushi domain                                      | 0  |                                                                                                                                                                                                                                                                                                                                                 | F:GO:0030414;<br>C:GO:0005576                                                                                                       |              | IPR000436; IPR016060                                                                                                                               |
| Caenorhabditis elegans  | multiple pdz domain protein family member (mpz-1) | 2  | F:GO:0005515;<br>C:GO:0016021                                                                                                                                                                                                                                                                                                                   | -                                                                                                                                   |              | PTHR19964 (PANTHER),<br>PTHR19964:SF5 (PANTHER)                                                                                                    |
| synthetic construct     | ribosomal protein s3                              | 20 | P:GO:0006413;<br>C:GO:0032587;<br>F:GO:0003684;<br>P:GO:0006919;<br>F:GO:0019901;<br>P:GO:0006414;<br>F:GO:0051536;<br>P:GO:0045738;<br>P:GO:0032088;<br>C:GO:0030425;<br>P:GO:0006917;<br>P:GO:0009790;<br>F:GO:0051059;<br>F:GO:0004519;<br>F:GO:0003735;<br>C:GO:0012505;<br>C:GO:0005634;<br>F:GO:0003906;<br>F:GO:0003729;<br>C:GO:0022627 | -                                                                                                                                   | EC:4.2.99.18 | IPR001351; IPR004044; IPR004087;<br>IPR005703; IPR009019; IPR015946;<br>IPR018280; PTHR11760 (PANTHER),<br>PTHR11760:SF9 (PANTHER)                 |
| Caenorhabditis briggsae | briggsae cbr-try-5 protein                        | 0  |                                                                                                                                                                                                                                                                                                                                                 | P:GO:0006508;<br>F:GO:0004252;<br>C:GO:0031410;<br>F:GO:0008236;<br>F:GO:0016787;<br>F:GO:0003824;<br>F:GO:0008233;<br>C:GO:0005576 |              | IPR001254; IPR009003;<br>G3DSA:2.40.10.10 (GENE3D),<br>PTHR19355 (PANTHER),<br>PTHR19355:SF58 (PANTHER)                                            |
| Loa loa                 | structural maintenance of chromosomes protein 6   | 1  | P:GO:0009987                                                                                                                                                                                                                                                                                                                                    | -                                                                                                                                   |              | PTHR19306 (PANTHER),<br>PTHR19306:SF2 (PANTHER)                                                                                                    |

|                                     |                                                                                    |    |                                                                                                                                                                                                                                           |                                                                 |                           |                                                                                                                                                                                                     |
|-------------------------------------|------------------------------------------------------------------------------------|----|-------------------------------------------------------------------------------------------------------------------------------------------------------------------------------------------------------------------------------------------|-----------------------------------------------------------------|---------------------------|-----------------------------------------------------------------------------------------------------------------------------------------------------------------------------------------------------|
|                                     |                                                                                    |    |                                                                                                                                                                                                                                           |                                                                 |                           | IPR002126; IPR015919; PTHR10596 (PANTHER), PTHR10596:SF77 (PANTHER)                                                                                                                                 |
| Loa loa                             | histone acetyltransferase                                                          | 14 | P:GO:0040010;<br>F:GO:0008270;<br>F:GO:0008415;<br>P:GO:0006333;<br>P:GO:0045449;<br>P:GO:0000003;<br>P:GO:0040027;<br>P:GO:0010171;<br>C:GO:0000785;<br>P:GO:0006898;<br>P:GO:0002009;<br>P:GO:0009792;<br>F:GO:0003682;<br>C:GO:0005634 | -                                                               |                           | IPR002717; IPR016181; PTHR10615 (PANTHER), PTHR10615:SF30 (PANTHER)                                                                                                                                 |
|                                     | -                                                                                  | 0  |                                                                                                                                                                                                                                           |                                                                 |                           | -                                                                                                                                                                                                   |
| Caenorhabditis briggsae             | class member 1                                                                     | 4  | F:GO:0004571;<br>F:GO:0005509;<br>P:GO:0030433;<br>C:GO:0016020                                                                                                                                                                           | -                                                               | EC:3.2.1.113              | IPR001382; PTHR11742:SF7 (PANTHER)                                                                                                                                                                  |
| Caenorhabditis elegans              | glyoxalase domain containing 4                                                     | 1  | C:GO:0005739                                                                                                                                                                                                                              | -                                                               |                           | IPR004360; G3DSA:3.10.180.10 (GENE3D), PTHR10374 (PANTHER), SSF54593 (SUPERFAMILY)                                                                                                                  |
| Caenorhabditis elegans              | elegans protein confirmed by transcript evidence                                   | 0  |                                                                                                                                                                                                                                           |                                                                 |                           | -                                                                                                                                                                                                   |
| Caenorhabditis elegans              | elegans protein confirmed by transcript evidence                                   | 0  |                                                                                                                                                                                                                                           |                                                                 |                           | -                                                                                                                                                                                                   |
| Caenorhabditis elegans              | hexamethylene bis-acetamide inducible 1                                            | 4  | F:GO:0005488;<br>F:GO:0016564;<br>P:GO:0016481;<br>C:GO:0044424                                                                                                                                                                           | -                                                               |                           | PTHR13469 (PANTHER), PTHR13469:SF4 (PANTHER)                                                                                                                                                        |
|                                     | -                                                                                  | 0  |                                                                                                                                                                                                                                           |                                                                 |                           | -                                                                                                                                                                                                   |
| Caenorhabditis briggsae             | protein tyrosine phosphatase-like (proline instead of catalytic arginine) member b | 1  | F:GO:0005515                                                                                                                                                                                                                              | -                                                               |                           | IPR007482                                                                                                                                                                                           |
|                                     | -                                                                                  | 0  |                                                                                                                                                                                                                                           |                                                                 |                           | -                                                                                                                                                                                                   |
|                                     | -                                                                                  | 0  |                                                                                                                                                                                                                                           |                                                                 |                           | -                                                                                                                                                                                                   |
| Caenorhabditis elegans              | zinc c2h2 type family protein                                                      | 2  | P:GO:0009987;<br>P:GO:0007275                                                                                                                                                                                                             | -                                                               |                           | IPR007087; IPR013087; IPR015880; IPR020830; PTHR11389 (PANTHER), SSF57667 (SUPERFAMILY)                                                                                                             |
| Caenorhabditis briggsae             | zinc c2h2 type family protein                                                      | 0  |                                                                                                                                                                                                                                           | F:GO:0003676;<br>F:GO:0008270;<br>C:GO:0005634;<br>C:GO:0005622 |                           | IPR007087; IPR013087; IPR015880; IPR020830; PTHR11389 (PANTHER), SSF57667 (SUPERFAMILY)                                                                                                             |
| Caenorhabditis briggsae             | lupus la ribonucleoprotein                                                         | 0  |                                                                                                                                                                                                                                           | F:GO:0003676;<br>F:GO:0005488;<br>C:GO:0030529                  |                           | -                                                                                                                                                                                                   |
|                                     | -                                                                                  | 0  |                                                                                                                                                                                                                                           |                                                                 |                           | -                                                                                                                                                                                                   |
| Caenorhabditis briggsae             | carbamoylphosphate synthetase aspartate transcarbamylase dihydroorotase            | 7  | P:GO:0006541;<br>F:GO:0016812;<br>F:GO:0016597;<br>F:GO:0004086;<br>F:GO:0005524;<br>P:GO:0006207;<br>F:GO:0004070                                                                                                                        | -                                                               | EC:3.5.2.0;<br>EC:2.1.3.2 | IPR000991; IPR001317; IPR005481; IPR005483; IPR006220; IPR011702; IPR013817; IPR016185; IPR017926; G3DSA:3.40.50.880 (GENE3D), PTHR11405 (PANTHER), PTHR11405:SF3 (PANTHER), SSF52317 (SUPERFAMILY) |
| Microcoleus chthonoplastes PCC 7420 | d- sulfur modification protein                                                     | 0  |                                                                                                                                                                                                                                           |                                                                 |                           | -                                                                                                                                                                                                   |
| Danio rerio                         | PREDICTED: cingulin-like [Danio rerio]                                             | 0  |                                                                                                                                                                                                                                           |                                                                 |                           | -                                                                                                                                                                                                   |
|                                     | -                                                                                  | 0  |                                                                                                                                                                                                                                           |                                                                 |                           | -                                                                                                                                                                                                   |

|                                                                                                                                  |                                                  |  |    |                                                                                                                                                                                                                                                                                                                                                                                                    |                                                                                  |                                                                                                                                                  |
|----------------------------------------------------------------------------------------------------------------------------------|--------------------------------------------------|--|----|----------------------------------------------------------------------------------------------------------------------------------------------------------------------------------------------------------------------------------------------------------------------------------------------------------------------------------------------------------------------------------------------------|----------------------------------------------------------------------------------|--------------------------------------------------------------------------------------------------------------------------------------------------|
| Caenorhabditis elegans                                                                                                           | dynein heavy chain                               |  | 5  | P:GO:0007018;<br>C:GO:0030286;<br>F:GO:0016887;<br>F:GO:0005524;<br>F:GO:0003777                                                                                                                                                                                                                                                                                                                   | -                                                                                | IPR004273; PTHR10676 (PANTHER),<br>PTHR10676:SF28 (PANTHER), SignalP<br>(SIGNALP)                                                                |
| Caenorhabditis briggsae                                                                                                          | engulfment and cell                              |  | 0  |                                                                                                                                                                                                                                                                                                                                                                                                    | C:GO:0005856;<br>P:GO:0006909                                                    | IPR006816; PTHR12771 (PANTHER),<br>PTHR12771:SF2 (PANTHER)                                                                                       |
|                                                                                                                                  | -                                                |  | 0  |                                                                                                                                                                                                                                                                                                                                                                                                    |                                                                                  | -                                                                                                                                                |
|                                                                                                                                  | -                                                |  | 0  |                                                                                                                                                                                                                                                                                                                                                                                                    |                                                                                  | -                                                                                                                                                |
|                                                                                                                                  | -                                                |  | 0  |                                                                                                                                                                                                                                                                                                                                                                                                    |                                                                                  | -                                                                                                                                                |
| NADP+; Short=DHPDHase; Short=DPD;<br>AltName: Full=Dihydrothymine<br>dehydrogenase; AltName:<br>Full=Dihydrouracil dehydrogenase | dihydropyrimidine dehydroge-se                   |  | 23 | C:GO:0005829;<br>F:GO:0004158;<br>C:GO:0005625;<br>P:GO:0006145;<br>P:GO:0006212;<br>F:GO:0046872;<br>P:GO:0055114;<br>P:GO:0007584;<br>F:GO:0009055;<br>F:GO:0017113;<br>P:GO:0007623;<br>F:GO:0051539;<br>P:GO:0006222;<br>P:GO:0051384;<br>P:GO:0006210;<br>P:GO:0042493;<br>F:GO:0042803;<br>F:GO:0002058;<br>F:GO:0050660;<br>P:GO:0006207;<br>F:GO:0050661;<br>P:GO:0006214;<br>F:GO:0010181 | -                                                                                | EC:1.3.3.1;<br>EC:1.3.1.2<br>IPR013027; G3DSA:3.50.50.60<br>(GENE3D), PTHR11938 (PANTHER),<br>PTHR11938:SF6 (PANTHER), SSF51905<br>(SUPERFAMILY) |
| Caenorhabditis elegans                                                                                                           | briggsae cbr-ptr-24 protein                      |  | 0  |                                                                                                                                                                                                                                                                                                                                                                                                    | C:GO:0016021;<br>C:GO:0016020;<br>F:GO:0005215;<br>P:GO:0006810;<br>F:GO:0008158 | PTHR10796 (PANTHER),<br>PTHR10796:SF12 (PANTHER), SignalP<br>(SIGNALP)                                                                           |
| Caenorhabditis briggsae                                                                                                          | myosin if                                        |  | 6  | C:GO:0016461;<br>F:GO:0003779;<br>F:GO:0005524;<br>F:GO:0003774;<br>P:GO:0006508;<br>F:GO:0005516                                                                                                                                                                                                                                                                                                  | -                                                                                | PTHR13140 (PANTHER),<br>PTHR13140:SF31 (PANTHER),<br>SSF52540 (SUPERFAMILY)                                                                      |
|                                                                                                                                  | -                                                |  | 0  |                                                                                                                                                                                                                                                                                                                                                                                                    |                                                                                  | SignalP (SIGNALP)                                                                                                                                |
|                                                                                                                                  | -                                                |  | 0  |                                                                                                                                                                                                                                                                                                                                                                                                    |                                                                                  | -                                                                                                                                                |
| Caenorhabditis elegans                                                                                                           | elegans protein confirmed by transcript evidence |  | 0  |                                                                                                                                                                                                                                                                                                                                                                                                    |                                                                                  | SignalP (SIGNALP)                                                                                                                                |
| Caenorhabditis elegans                                                                                                           | elegans protein confirmed by transcript evidence |  | 1  | F:GO:0005488                                                                                                                                                                                                                                                                                                                                                                                       | -                                                                                | -                                                                                                                                                |
|                                                                                                                                  | -                                                |  | 0  |                                                                                                                                                                                                                                                                                                                                                                                                    |                                                                                  | -                                                                                                                                                |
| Caenorhabditis elegans                                                                                                           | gex interacting protein family member (gei-16)   |  | 1  | F:GO:0005515                                                                                                                                                                                                                                                                                                                                                                                       | -                                                                                | -                                                                                                                                                |
| Caenorhabditis briggsae                                                                                                          | transmembrane and coiled-coil domains 4          |  | 0  |                                                                                                                                                                                                                                                                                                                                                                                                    | F:GO:0003674;<br>C:GO:0016021;<br>C:GO:0016020;<br>P:GO:0008150;<br>C:GO:0005575 | IPR007941                                                                                                                                        |

|                         |                                                           |    |                                                                                                                                                                                                         |                                                |                                                                                                            |
|-------------------------|-----------------------------------------------------------|----|---------------------------------------------------------------------------------------------------------------------------------------------------------------------------------------------------------|------------------------------------------------|------------------------------------------------------------------------------------------------------------|
| Caenorhabditis briggsae | mdn1 midasin family protein                               | 6  | P:GO:0043254;<br>P:GO:0006355;<br>F:GO:0005524;<br>F:GO:0016887;<br>F:GO:0008134;<br>C:GO:0005634                                                                                                       | -                                              | G3DSA:3.40.50.300 (GENE3D),<br>PTHR22908 (PANTHER),<br>PTHR22908:SF13 (PANTHER),<br>SSF52540 (SUPERFAMILY) |
| Caenorhabditis briggsae | sig-I peptidase complex subunit 1                         | 12 | F:GO:0008233;<br>C:GO:0005787;<br>P:GO:0006465;<br>C:GO:0030176;<br>P:GO:0040007;<br>P:GO:0000003;<br>P:GO:0006508;<br>C:GO:0005792;<br>P:GO:0002119;<br>P:GO:0040011;<br>P:GO:0006898;<br>P:GO:0009792 | -                                              | IPR009542                                                                                                  |
| Caenorhabditis elegans  | r--binding protein 42                                     | 6  | P:GO:0002088;<br>F:GO:0003723;<br>C:GO:0005737;<br>P:GO:0000003;<br>C:GO:0005634;<br>F:GO:0000166                                                                                                       | -                                              | IPR000504; IPR012677; IPR015464;<br>PTHR10432 (PANTHER), SSF54928<br>(SUPERFAMILY)                         |
| Tribolium castaneum     | vesicular mannose-binding lectin                          | 4  | C:GO:0043231;<br>P:GO:0032501;<br>C:GO:0044444;<br>C:GO:0016020                                                                                                                                         | -                                              | IPR005052; IPR008985; IPR013320;<br>IPR019825; PTHR12223:SF6<br>(PANTHER)                                  |
| -                       | -                                                         | 0  | -                                                                                                                                                                                                       | -                                              | -                                                                                                          |
| -                       | -                                                         | 0  | -                                                                                                                                                                                                       | -                                              | SignalP (SIGNALP)                                                                                          |
| Caenorhabditis briggsae | leucine zipper-ef-hand containing transmembrane protein 1 | 4  | P:GO:0009792;<br>P:GO:0040018;<br>P:GO:0000003;<br>P:GO:0006898                                                                                                                                         | -                                              | IPR018249; PTHR14009 (PANTHER),<br>PTHR14009:SF1 (PANTHER)                                                 |
| Caenorhabditis elegans  | ankyrin repeat domain-containing protein 49               | 0  | -                                                                                                                                                                                                       | F:GO:0004623;<br>F:GO:0016787                  | IPR002110; IPR020683; PR01415<br>(PRINTS), PTHR18958 (PANTHER),<br>PTHR18958:SF218 (PANTHER)               |
| Loa loa                 | cytoplasmic linker associated protein 2                   | 5  | P:GO:0031110;<br>F:GO:0008017;<br>P:GO:0030900;<br>C:GO:0005874;<br>C:GO:0044444                                                                                                                        | -                                              | PTHR21567 (PANTHER),<br>PTHR21567:SF10 (PANTHER), SignalP<br>(SIGNALP)                                     |
| Brugia malayi           | low quality protein: clip-associating protein 1-like      | 5  | P:GO:0006996;<br>F:GO:0005488;<br>C:GO:0015630;<br>C:GO:0044444;<br>C:GO:0044430                                                                                                                        | -                                              | IPR011989; IPR016024; IPR021133;<br>PTHR21567 (PANTHER),<br>PTHR21567:SF10 (PANTHER), PF12348<br>(PFAM)    |
| Mus musculus            | PREDICTED: hypothetical protein [Mus musculus]            | 0  | -                                                                                                                                                                                                       | F:GO:0003674;<br>C:GO:0005575                  | IPR003582                                                                                                  |
| -                       | -                                                         | 0  | -                                                                                                                                                                                                       | -                                              | -                                                                                                          |
| Brugia malayi           | set binding factor 1                                      | 0  | -                                                                                                                                                                                                       | F:GO:0046872;<br>P:GO:0016311;<br>F:GO:0016791 | IPR004182; PTHR10807 (PANTHER),<br>PTHR10807:SF1 (PANTHER)                                                 |
| -                       | -                                                         | 0  | -                                                                                                                                                                                                       | -                                              | -                                                                                                          |

|                         |                                                                |    |                                                                                                                                                                                                                                                                             |                                                                                                   |                                                                                          |
|-------------------------|----------------------------------------------------------------|----|-----------------------------------------------------------------------------------------------------------------------------------------------------------------------------------------------------------------------------------------------------------------------------|---------------------------------------------------------------------------------------------------|------------------------------------------------------------------------------------------|
| Caenorhabditis elegans  | excitatory gaba receptor exp-1a                                | 6  | P:GO:0010171;<br>C:GO:0045211;<br>C:GO:0030054;<br>F:GO:0005230;<br>P:GO:0006811;<br>C:GO:0016021                                                                                                                                                                           | -                                                                                                 | IPR006201; IPR006202;<br>PTHR18945:SF8 (PANTHER)                                         |
| Caenorhabditis elegans  | isoform a                                                      | 2  | P:GO:0006810;<br>C:GO:0016020                                                                                                                                                                                                                                               | -                                                                                                 | IPR013657; PTHR10778 (PANTHER),<br>PTHR10778:SF4 (PANTHER)                               |
| Homo sapiens            | a chain structure of hsp90 with small molecule inhibitor bound | 14 | C:GO:0005829;<br>P:GO:0042026;<br>P:GO:0006839;<br>F:GO:0030235;<br>P:GO:0070096;<br>C:GO:0042470;<br>F:GO:0005524;<br>F:GO:0030911;<br>P:GO:0007165;<br>F:GO:0051082;<br>P:GO:0006986;<br>P:GO:0045429;<br>F:GO:0042803;<br>P:GO:0034619                                   | -                                                                                                 | IPR001404; IPR003594; IPR020575;<br>IPR020576                                            |
| Caenorhabditis elegans  | briggsae cbr-mut-2 protein                                     | 0  |                                                                                                                                                                                                                                                                             | F:GO:0016779                                                                                      | SignalP (SIGNALP)                                                                        |
| Caenorhabditis briggsae | tr--dihydrouridine synthase 2-like                             | 4  | F:GO:0016491;<br>F:GO:0003723;<br>P:GO:0008152;<br>C:GO:0005739                                                                                                                                                                                                             | -                                                                                                 | -                                                                                        |
| Homo sapiens            | complement component 3                                         | 16 | F:GO:0048037;<br>P:GO:0006957;<br>F:GO:0005102;<br>P:GO:0010951;<br>P:GO:0050766;<br>P:GO:0045766;<br>C:GO:0005615;<br>P:GO:0001798;<br>P:GO:0007596;<br>P:GO:0007165;<br>P:GO:0010575;<br>P:GO:0006935;<br>P:GO:0007186;<br>P:GO:0006958;<br>F:GO:0004866;<br>P:GO:0001970 | -                                                                                                 | IPR009048; PTHR11412 (PANTHER),<br>PTHR11412:SF14 (PANTHER)                              |
| Caenorhabditis elegans  | abnormal cell lineage family member (lin-29)                   | 6  | F:GO:0008270;<br>F:GO:0003676;<br>F:GO:0003700;<br>P:GO:0016481;<br>P:GO:0048749;<br>C:GO:0005634                                                                                                                                                                           | -                                                                                                 | IPR007087; IPR013087; IPR015880;<br>PTHR11389 (PANTHER), SSF57667<br>(SUPERFAMILY)       |
| Caenorhabditis elegans  | fch domain only protein 2                                      | 0  |                                                                                                                                                                                                                                                                             | C:GO:0030131;<br>F:GO:0003674;<br>P:GO:0016192;<br>P:GO:0008150;<br>P:GO:0006886;<br>F:GO:0005515 | IPR001060; PTHR23065 (PANTHER)                                                           |
| Nasonia vitripennis     | peroxisomal -trans-enoyl- isomerase                            | 2  | F:GO:0003824;<br>F:GO:0005515                                                                                                                                                                                                                                               | -                                                                                                 | IPR001753; G3DSA:3.90.226.10<br>(GENE3D), PTHR11941 (PANTHER),<br>SSF52096 (SUPERFAMILY) |

|                         |                                                         |   |                                                                                                                    |   |             |                                                                                                                                            |
|-------------------------|---------------------------------------------------------|---|--------------------------------------------------------------------------------------------------------------------|---|-------------|--------------------------------------------------------------------------------------------------------------------------------------------|
| Caenorhabditis elegans  | beta-lactamase-like protein 2                           | 2 | F:GO:0016787;<br>C:GO:0005739                                                                                      | - |             | IPR001279; G3DSA:3.60.15.10<br>(GENE3D), PTHR23131 (PANTHER),<br>SSF56281 (SUPERFAMILY)                                                    |
| Loa loa                 | d--directed r- polymerases i and iii subunit rpc2       | 4 | F:GO:0003899;<br>F:GO:0003677;<br>P:GO:0006350;<br>C:GO:0005634                                                    | - | EC:2.7.7.6  | -                                                                                                                                          |
| Caenorhabditis elegans  | isy1 splicing factor homolog ( cerevisiae)              | 4 | P:GO:0040035;<br>P:GO:0002119;<br>P:GO:0018996;<br>C:GO:0044428                                                    | - |             | IPR009360; PTHR13021:SF5<br>(PANTHER)                                                                                                      |
| Caenorhabditis elegans  | isoform a                                               | 2 | F:GO:0030170;<br>F:GO:0008483                                                                                      | - | EC:2.6.1.0  | IPR005814; IPR015421; IPR015422;<br>IPR015424; PTHR11986:SF23<br>(PANTHER)                                                                 |
|                         | -                                                       | 0 |                                                                                                                    |   |             | -                                                                                                                                          |
| Ailuropoda melanoleuca  | histone h2a type 1-like                                 | 0 |                                                                                                                    |   |             | -                                                                                                                                          |
| Caenorhabditis briggsae | Hypothetical protein CBG06646 [Caenorhabditis briggsae] | 0 |                                                                                                                    |   |             | -                                                                                                                                          |
| Gallus gallus           | multidrug resistance protein                            | 4 | F:GO:0042626;<br>P:GO:0055085;<br>F:GO:0005524;<br>C:GO:0016021                                                    | - |             | G3DSA:3.40.50.300 (GENE3D),<br>PTHR19242 (PANTHER),<br>PTHR19242:SF96 (PANTHER),<br>SSF52540 (SUPERFAMILY)                                 |
| Caenorhabditis briggsae | pre-mr--splicing factor atp-dependent r- helicase prp16 | 7 | P:GO:0008380;<br>F:GO:0008026;<br>F:GO:0003676;<br>C:GO:0005681;<br>F:GO:0005515;<br>P:GO:0006397;<br>F:GO:0005524 | - |             | IPR001650; IPR002464; IPR011545;<br>IPR014001; IPR014021;<br>G3DSA:3.40.50.300 (GENE3D),<br>PTHR18934 (PANTHER), SSF52540<br>(SUPERFAMILY) |
| Caenorhabditis elegans  | iron-responsive element-binding protein 1               | 6 | P:GO:0006879;<br>F:GO:0005515;<br>F:GO:0051539;<br>F:GO:0003994;<br>P:GO:0008152;<br>C:GO:0005829                  | - | EC:4.2.1.3  | IPR001030; IPR015928; IPR015931;<br>IPR015932; IPR015934; IPR015937;<br>IPR018136                                                          |
| Caenorhabditis briggsae | fructose-bisphosphate aldolase                          | 3 | F:GO:0042802;<br>P:GO:0006096;<br>F:GO:0004332                                                                     | - | EC:4.1.2.13 | IPR000741; IPR013785; SSF51569<br>(SUPERFAMILY)                                                                                            |
| Caenorhabditis briggsae | fructose-bisphosphate aldolase                          | 3 | F:GO:0042802;<br>P:GO:0006096;<br>F:GO:0004332                                                                     | - | EC:4.1.2.13 | IPR000741; IPR013785; SSF51569<br>(SUPERFAMILY)                                                                                            |
| Caenorhabditis elegans  | ankyrin repeat domain 50                                | 3 | F:GO:0005515;<br>P:GO:0006974;<br>P:GO:0008340                                                                     | - |             | -                                                                                                                                          |
|                         | -                                                       | 0 |                                                                                                                    |   |             | -                                                                                                                                          |
|                         |                                                         |   |                                                                                                                    |   |             | SignalP (SIGNALP)                                                                                                                          |
|                         | -                                                       | 0 |                                                                                                                    |   |             | -                                                                                                                                          |
|                         | -                                                       | 0 |                                                                                                                    |   |             | -                                                                                                                                          |
| Caenorhabditis briggsae | briggsae cbr-fli-1 protein                              | 2 | F:GO:0016787;<br>F:GO:0003779                                                                                      | - |             | IPR007122; IPR007123;<br>G3DSA:3.40.20.10 (GENE3D),<br>PTHR11977:SF6 (PANTHER), SSF55753<br>(SUPERFAMILY)                                  |



|                                   |                                                            |   |                                                                                                                                                      |                                                                                                                                                                                        |             |                                                                                                                |
|-----------------------------------|------------------------------------------------------------|---|------------------------------------------------------------------------------------------------------------------------------------------------------|----------------------------------------------------------------------------------------------------------------------------------------------------------------------------------------|-------------|----------------------------------------------------------------------------------------------------------------|
| Granulibacter thesedensis CGDNIH1 | tr- modification gtpase                                    | 0 |                                                                                                                                                      | P:GO:0008033;<br>C:GO:0005739;<br>F:GO:0016787;<br>F:GO:0000166;<br>C:GO:0005737;<br>F:GO:0005525;<br>C:GO:0005622;<br>P:GO:0006400;<br>F:GO:0003924;<br>F:GO:0046872;<br>P:GO:0007264 | -           |                                                                                                                |
|                                   | -                                                          | 0 |                                                                                                                                                      |                                                                                                                                                                                        | -           |                                                                                                                |
|                                   | -                                                          | 0 |                                                                                                                                                      |                                                                                                                                                                                        | -           |                                                                                                                |
|                                   | -                                                          | 0 |                                                                                                                                                      |                                                                                                                                                                                        | -           |                                                                                                                |
|                                   | -                                                          | 0 |                                                                                                                                                      |                                                                                                                                                                                        | -           |                                                                                                                |
| Caenorhabditis briggsae           | elegans protein partially confirmed by transcript evidence | 0 |                                                                                                                                                      | F:GO:0005509;<br>F:GO:0004571;<br>C:GO:0016020                                                                                                                                         | -           |                                                                                                                |
| Caenorhabditis briggsae           | Hypothetical protein CBG05778 [Caenorhabditis briggsae]    | 0 |                                                                                                                                                      |                                                                                                                                                                                        | -           |                                                                                                                |
| Caenorhabditis elegans            | midasin homolog                                            | 6 | F:GO:0017111;<br>P:GO:0050789;<br>C:GO:0005622;<br>P:GO:0006461;<br>F:GO:0005515;<br>F:GO:0000166                                                    | -                                                                                                                                                                                      | EC:3.6.1.15 | IPR011704; G3DSA:3.40.50.300 (GENE3D), PTHR22908 (PANTHER), SSF52540 (SUPERFAMILY)                             |
|                                   | -                                                          | 0 |                                                                                                                                                      |                                                                                                                                                                                        | -           |                                                                                                                |
| Ciona intestinalis                | PREDICTED: hypothetical protein [Cio- intesti-lis]         | 0 |                                                                                                                                                      | F:GO:0046872;<br>F:GO:0003676;<br>P:GO:0055114;<br>F:GO:0009055;<br>F:GO:0016491;<br>F:GO:0020037;<br>F:GO:0005506;<br>F:GO:0004497                                                    |             | SignalP (SIGNALP)                                                                                              |
|                                   | -                                                          | 0 |                                                                                                                                                      |                                                                                                                                                                                        | -           |                                                                                                                |
| Caenorhabditis briggsae           | atpase type 13a1                                           | 6 | C:GO:0016021;<br>F:GO:0046872;<br>F:GO:0015662;<br>P:GO:0006754;<br>F:GO:0005524;<br>P:GO:0006812                                                    | -                                                                                                                                                                                      |             | IPR001757; IPR008250; G3DSA:2.70.150.10 (GENE3D), PTHR11939:SF48 (PANTHER), SSF81653 (SUPERFAMILY)             |
| Caenorhabditis elegans            | splicing factor 3b subunit 1                               | 9 | P:GO:0040035;<br>P:GO:0009792;<br>P:GO:0002119;<br>F:GO:0003676;<br>P:GO:0040010;<br>P:GO:0008340;<br>P:GO:0040011;<br>P:GO:0006898;<br>C:GO:0030529 | -                                                                                                                                                                                      |             | IPR011989; IPR016024; PTHR12097 (PANTHER)                                                                      |
| Caenorhabditis briggsae           | patched family protein                                     | 6 | P:GO:0040025;<br>P:GO:0040018;<br>P:GO:0018996;<br>P:GO:0000003;<br>P:GO:0008340;<br>P:GO:0040011                                                    | -                                                                                                                                                                                      |             | IPR000731; IPR003392; PTHR10796 (PANTHER), PTHR10796:SF14 (PANTHER), SignalP (SIGNALP), SSF82866 (SUPERFAMILY) |

|                         |                                                         |   |                                                                                                                    |                                                                                                                                                                                                                                           |            |                                                                                             |
|-------------------------|---------------------------------------------------------|---|--------------------------------------------------------------------------------------------------------------------|-------------------------------------------------------------------------------------------------------------------------------------------------------------------------------------------------------------------------------------------|------------|---------------------------------------------------------------------------------------------|
| Caenorhabditis elegans  | patched family protein                                  | 4 | P:GO:0018996;<br>C:GO:0016020;<br>P:GO:0040018;<br>P:GO:0040011                                                    | -                                                                                                                                                                                                                                         | -          | -                                                                                           |
|                         |                                                         | 0 |                                                                                                                    |                                                                                                                                                                                                                                           |            |                                                                                             |
| Loa loa                 | patched family protein                                  | 3 | P:GO:0040018;<br>P:GO:0018996;<br>P:GO:0040011                                                                     | -                                                                                                                                                                                                                                         |            | IPR000731; IPR003392; PTHR10796 (PANTHER), PTHR10796:SF14 (PANTHER), SSF82866 (SUPERFAMILY) |
| Caenorhabditis briggsae | elegans protein confirmed by transcript evidence        | 0 |                                                                                                                    |                                                                                                                                                                                                                                           |            | -                                                                                           |
| Caenorhabditis briggsae | Hypothetical protein CBG15976 [Caenorhabditis briggsae] | 0 |                                                                                                                    | C:GO:0005737;<br>C:GO:0016020                                                                                                                                                                                                             |            | -                                                                                           |
| Caenorhabditis briggsae | af292052_1 5n224                                        | 0 |                                                                                                                    |                                                                                                                                                                                                                                           |            | -                                                                                           |
|                         | -                                                       | 0 |                                                                                                                    |                                                                                                                                                                                                                                           |            | -                                                                                           |
| Caenorhabditis briggsae | briggsae cbr-unc-68 protein                             | 1 | P:GO:0006810                                                                                                       | -                                                                                                                                                                                                                                         |            | -                                                                                           |
| Caenorhabditis elegans  | piwi-like protein 1                                     | 7 | F:GO:0034584;<br>P:GO:0031047;<br>F:GO:0005515;<br>C:GO:0043186;<br>P:GO:0034587;<br>P:GO:0007281;<br>P:GO:0009653 | -                                                                                                                                                                                                                                         |            | IPR003165; IPR012337; PTHR22892 (PANTHER), PTHR22892:SF5 (PANTHER)                          |
| Caenorhabditis elegans  | piwi-like protein 1                                     | 7 | F:GO:0034584;<br>P:GO:0031047;<br>F:GO:0005515;<br>C:GO:0043186;<br>P:GO:0034587;<br>P:GO:0007281;<br>P:GO:0009653 | -                                                                                                                                                                                                                                         |            | IPR003165; IPR012337; PTHR22892 (PANTHER), PTHR22892:SF5 (PANTHER)                          |
|                         | -                                                       | 0 |                                                                                                                    |                                                                                                                                                                                                                                           |            | SignalP (SIGNALP)                                                                           |
| Loa loa                 | methyltransferase like 9                                | 2 | F:GO:0016740;<br>F:GO:0005515                                                                                      | -                                                                                                                                                                                                                                         |            | IPR007884; IPR018357; G3DSA:3.40.50.150 (GENE3D), SSF53335 (SUPERFAMILY)                    |
| Caenorhabditis briggsae | ribosomal protein l18a                                  | 7 | P:GO:0009792;<br>P:GO:0002119;<br>C:GO:0005840;<br>F:GO:0003735;<br>P:GO:0040010;<br>P:GO:0000003;<br>P:GO:0006412 | -                                                                                                                                                                                                                                         | EC:3.6.5.3 | -                                                                                           |
| Brugia malayi           | peptidylprolyl isomerase -like 5                        | 0 |                                                                                                                    | F:GO:0003674;<br>P:GO:0008152;<br>P:GO:0008150;<br>F:GO:0005515;<br>C:GO:0005575                                                                                                                                                          |            | -                                                                                           |
| Brugia malayi           | poly(adp-ribose) glycohydrolase                         | 0 |                                                                                                                    | F:GO:0004649;<br>F:GO:0003735;<br>P:GO:0006342;<br>P:GO:0043484;<br>F:GO:0016787;<br>P:GO:0006412;<br>P:GO:0006911;<br>P:GO:0005975;<br>C:GO:0005840;<br>C:GO:0005654;<br>P:GO:0035065;<br>P:GO:0051457;<br>P:GO:0009408;<br>C:GO:0005622 |            | IPR007724                                                                                   |

|                             |                                                            |    |                                                                                                                                                                                        |   |  |                                                                                                                         |
|-----------------------------|------------------------------------------------------------|----|----------------------------------------------------------------------------------------------------------------------------------------------------------------------------------------|---|--|-------------------------------------------------------------------------------------------------------------------------|
| Caenorhabditis briggsae     | xpa-binding protein 2                                      | 11 | P:GO:0040010;<br>F:GO:0005488;<br>P:GO:0000910;<br>C:GO:0071011;<br>P:GO:0000381;<br>P:GO:0000003;<br>P:GO:0006911;<br>P:GO:0002119;<br>C:GO:0071013;<br>P:GO:0009792;<br>P:GO:0001703 | - |  | PTHR11246 (PANTHER),<br>PTHR11246:SF5 (PANTHER)                                                                         |
| Caenorhabditis briggsae     | xpa-binding protein 2                                      | 11 | P:GO:0040010;<br>F:GO:0005488;<br>P:GO:0000910;<br>C:GO:0071011;<br>P:GO:0000381;<br>P:GO:0000003;<br>P:GO:0006911;<br>P:GO:0002119;<br>C:GO:0071013;<br>P:GO:0009792;<br>P:GO:0001703 | - |  | IPR003107; PTHR11246 (PANTHER),<br>PTHR11246:SF5 (PANTHER)                                                              |
|                             | -                                                          | 0  |                                                                                                                                                                                        |   |  | -                                                                                                                       |
| Caenorhabditis briggsae     | dmx-like 2                                                 | 1  | C:GO:0044464                                                                                                                                                                           | - |  | PTHR13950 (PANTHER),<br>PTHR13950:SF1 (PANTHER)                                                                         |
| Caenorhabditis elegans      | phospholipase d member 4                                   | 4  | C:GO:0016021;<br>P:GO:0008152;<br>F:GO:0003824;<br>F:GO:0005515                                                                                                                        | - |  | -                                                                                                                       |
| Caenorhabditis elegans      | intron-binding protein aquarius                            | 1  | F:GO:0005488                                                                                                                                                                           | - |  | PTHR10887 (PANTHER),<br>PTHR10887:SF5 (PANTHER)                                                                         |
| Caenorhabditis briggsae     | briggsae cbr-sulp-8 protein                                | 3  | C:GO:0016020;<br>P:GO:0006810;<br>F:GO:0005215                                                                                                                                         | - |  | IPR002645; PTHR11814 (PANTHER)                                                                                          |
| Nasonia vitripennis         | PREDICTED: hypothetical protein [Nasonia vitripennis]      | 0  |                                                                                                                                                                                        |   |  | -                                                                                                                       |
| Angiostrongylus cantonensis | hypothetical protein [Angiostrongylus cantonensis]         | 0  |                                                                                                                                                                                        |   |  | -                                                                                                                       |
| Angiostrongylus cantonensis | hypothetical protein [Angiostrongylus cantonensis]         | 0  |                                                                                                                                                                                        |   |  | -                                                                                                                       |
|                             | -                                                          | 0  |                                                                                                                                                                                        |   |  | SignalP (SIGNALP)                                                                                                       |
| Caenorhabditis elegans      | elegans protein confirmed by transcript evidence           | 0  |                                                                                                                                                                                        |   |  | -                                                                                                                       |
| Caenorhabditis elegans      | arid bright d- binding domain containing protein           | 1  | F:GO:0005488                                                                                                                                                                           | - |  | IPR001606; PTHR12656 (PANTHER)                                                                                          |
|                             | -                                                          | 0  |                                                                                                                                                                                        |   |  | SignalP (SIGNALP)                                                                                                       |
| Caenorhabditis elegans      | elegans protein partially confirmed by transcript evidence | 1  | F:GO:0005509                                                                                                                                                                           | - |  | IPR018249; PTHR13025 (PANTHER),<br>SignalP (SIGNALP)                                                                    |
|                             | -                                                          | 0  |                                                                                                                                                                                        |   |  | -                                                                                                                       |
|                             | -                                                          | 0  |                                                                                                                                                                                        |   |  | -                                                                                                                       |
| Caenorhabditis elegans      | dtdp-glucose 4-6-dehydratase                               | 3  | P:GO:0044237;<br>F:GO:0050662;<br>F:GO:0003824                                                                                                                                         | - |  | IPR001509; IPR016040; PTHR10366<br>(PANTHER), PTHR10366:SF35<br>(PANTHER), SignalP (SIGNALP),<br>SSF51735 (SUPERFAMILY) |
| Caenorhabditis briggsae     | tpr domain containing protein                              | 1  | F:GO:0005488                                                                                                                                                                           | - |  | SignalP (SIGNALP)                                                                                                       |
| Caenorhabditis elegans      | elegans protein confirmed by transcript evidence           | 0  |                                                                                                                                                                                        |   |  | -                                                                                                                       |
| Homo sapiens                | riken cd- 1810037i17 gene                                  | 1  | C:GO:0016021                                                                                                                                                                           | - |  | -                                                                                                                       |
| Caenorhabditis elegans      | hypothetical protein K07C11.8 [Caenorhabditis elegans]     | 0  |                                                                                                                                                                                        |   |  | -                                                                                                                       |
| Caenorhabditis elegans      | hypothetical protein K07C11.8 [Caenorhabditis elegans]     | 0  |                                                                                                                                                                                        |   |  | SignalP (SIGNALP)                                                                                                       |

|                         |                                                      |    |                                                                                                                                                                                                                                                                                                                                                                                                                                      |                                                                                                                                                                                                                                           |                                                                                                                                               |
|-------------------------|------------------------------------------------------|----|--------------------------------------------------------------------------------------------------------------------------------------------------------------------------------------------------------------------------------------------------------------------------------------------------------------------------------------------------------------------------------------------------------------------------------------|-------------------------------------------------------------------------------------------------------------------------------------------------------------------------------------------------------------------------------------------|-----------------------------------------------------------------------------------------------------------------------------------------------|
| Caenorhabditis briggsae | cyclin e                                             | 25 | C:GO:0031981;<br>P:GO:0006468;<br>F:GO:0016301;<br>P:GO:0051597;<br>P:GO:0014074;<br>P:GO:0045597;<br>P:GO:0010243;<br>P:GO:0051412;<br>P:GO:0031100;<br>P:GO:0006270;<br>P:GO:0033197;<br>P:GO:0045471;<br>P:GO:0001547;<br>P:GO:0031670;<br>P:GO:0032570;<br>P:GO:0034097;<br>P:GO:0007088;<br>C:GO:0005813;<br>P:GO:0042493;<br>F:GO:0016538;<br>P:GO:0000082;<br>P:GO:0019222;<br>F:GO:0032403;<br>P:GO:0001889;<br>P:GO:0032355 | -                                                                                                                                                                                                                                         | IPR006670; IPR006671; IPR011028;<br>IPR013763; IPR014400; PTHR10177<br>(PANTHER), PTHR10177:SF15<br>(PANTHER)                                 |
| Caenorhabditis elegans  | u493_caeel ame: full=upf0493 protein                 | 1  | P:GO:0040017                                                                                                                                                                                                                                                                                                                                                                                                                         | -                                                                                                                                                                                                                                         | -                                                                                                                                             |
|                         | -                                                    | 0  |                                                                                                                                                                                                                                                                                                                                                                                                                                      |                                                                                                                                                                                                                                           | -                                                                                                                                             |
|                         | -                                                    | 0  |                                                                                                                                                                                                                                                                                                                                                                                                                                      |                                                                                                                                                                                                                                           | -                                                                                                                                             |
|                         | -                                                    | 0  |                                                                                                                                                                                                                                                                                                                                                                                                                                      |                                                                                                                                                                                                                                           | SignalP (SIGNALP)                                                                                                                             |
|                         | -                                                    | 0  |                                                                                                                                                                                                                                                                                                                                                                                                                                      |                                                                                                                                                                                                                                           | SignalP (SIGNALP)                                                                                                                             |
|                         | -                                                    | 0  |                                                                                                                                                                                                                                                                                                                                                                                                                                      |                                                                                                                                                                                                                                           | -                                                                                                                                             |
| Caenorhabditis elegans  | 60s ribosome subunit biogenesis protein nip7 homolog | 8  | P:GO:0040010;<br>F:GO:0003723;<br>C:GO:0005730;<br>P:GO:0040035;<br>P:GO:0002119;<br>F:GO:0005515;<br>P:GO:0006898;<br>P:GO:0042255                                                                                                                                                                                                                                                                                                  | -                                                                                                                                                                                                                                         | IPR002478; IPR005155; IPR015947;<br>G3DSA:2.30.130.10 (GENE3D),<br>PTHR23415 (PANTHER),<br>PTHR23415:SF4 (PANTHER), SSF88802<br>(SUPERFAMILY) |
|                         |                                                      |    |                                                                                                                                                                                                                                                                                                                                                                                                                                      |                                                                                                                                                                                                                                           | SignalP (SIGNALP)                                                                                                                             |
| Caenorhabditis elegans  | briggsae cbr-tyr-4 protein                           | 0  |                                                                                                                                                                                                                                                                                                                                                                                                                                      | F:GO:0020037;<br>P:GO:0006979;<br>F:GO:0004222;<br>F:GO:0016787;<br>F:GO:0008270;<br>P:GO:0055114;<br>F:GO:0008237;<br>F:GO:0016491;<br>F:GO:0008233;<br>P:GO:0006508;<br>F:GO:0005515;<br>F:GO:0004601;<br>P:GO:0008152;<br>F:GO:0046872 | IPR003582; IPR013090                                                                                                                          |

|                         |                                                                                               |   |                                                                                                   |                                                                                  |             |                                                                                                                                                                       |
|-------------------------|-----------------------------------------------------------------------------------------------|---|---------------------------------------------------------------------------------------------------|----------------------------------------------------------------------------------|-------------|-----------------------------------------------------------------------------------------------------------------------------------------------------------------------|
| Oryctolagus cuniculus   | cytochrome c oxidase subunit 6b1                                                              | 6 | C:GO:0005758;<br>C:GO:0005743;<br>P:GO:0034220;<br>P:GO:0055114;<br>P:GO:0015992;<br>F:GO:0004129 | -                                                                                | EC:1.9.3.1  | SignalP (SIGNALP)                                                                                                                                                     |
| -                       | -                                                                                             | 0 |                                                                                                   |                                                                                  |             | SignalP (SIGNALP)                                                                                                                                                     |
| Caenorhabditis briggsae | elegans protein partially confirmed by transcript evidence                                    | 1 | F:GO:0016791                                                                                      | -                                                                                | EC:3.1.3.0  | IPR000242; IPR000387;<br>G3DSA:3.90.190.10 (GENE3D),<br>PTHR19134 (PANTHER),<br>PTHR19134:SF26 (PANTHER),<br>SSF52799 (SUPERFAMILY)                                   |
| Caenorhabditis elegans  | nuclear vcp-like                                                                              | 3 | C:GO:0005730;<br>F:GO:0005524;<br>F:GO:0017111                                                    | -                                                                                | EC:3.6.1.15 | IPR003959; IPR003960;<br>G3DSA:3.40.50.300 (GENE3D),<br>PTHR23077 (PANTHER),<br>PTHR23077:SF16 (PANTHER),<br>SSF52540 (SUPERFAMILY)                                   |
| Loa loa                 | hypothetical protein LOAG_04493 [Loa loa]                                                     | 0 |                                                                                                   |                                                                                  |             | -                                                                                                                                                                     |
| Caenorhabditis briggsae | briggsae cbr-igcm-1 protein                                                                   | 0 |                                                                                                   | C:GO:0016020                                                                     |             | IPR003598; IPR003599; IPR007110;<br>IPR013098; IPR013162; IPR013783;<br>PTHR11640 (PANTHER),<br>PTHR11640:SF2 (PANTHER), SignalP<br>(SIGNALP), SSF48726 (SUPERFAMILY) |
| Caenorhabditis elegans  | catenin (cadherin-associated protein) delta 2 (neural plakophilin-related arm-repeat protein) | 5 | P:GO:0007612;<br>P:GO:0001763;<br>P:GO:0048167;<br>F:GO:0005515;<br>C:GO:0044424                  | -                                                                                |             | IPR000225; IPR011989; IPR016024;<br>PTHR10372 (PANTHER),<br>PTHR10372:SF4 (PANTHER)                                                                                   |
| Caenorhabditis briggsae | nucleolar protein c7b                                                                         | 1 | F:GO:0005515                                                                                      | -                                                                                |             | IPR004182; PTHR23354 (PANTHER),<br>PTHR23354:SF4 (PANTHER)                                                                                                            |
| Caenorhabditis briggsae | briggsae cbr-pxn-2 protein                                                                    | 2 | F:GO:0005488;<br>P:GO:0000003                                                                     | -                                                                                |             | IPR002007; IPR010255; IPR019791;<br>PTHR11475 (PANTHER),<br>PTHR11475:SF10 (PANTHER)                                                                                  |
| Caenorhabditis elegans  | aldehyde dehydroge-se 7 member a1                                                             | 6 | F:GO:0004029;<br>P:GO:0055114;<br>C:GO:0044444;<br>P:GO:0006081;<br>C:GO:0043231;<br>P:GO:0007605 | -                                                                                | EC:1.2.1.3  | SignalP (SIGNALP)                                                                                                                                                     |
| -                       | -                                                                                             | 0 |                                                                                                   |                                                                                  |             | -                                                                                                                                                                     |
| -                       | -                                                                                             | 0 |                                                                                                   |                                                                                  |             | -                                                                                                                                                                     |
| Caenorhabditis elegans  | elegans protein confirmed by transcript evidence                                              | 0 |                                                                                                   | P:GO:0009792                                                                     |             | PTHR10343 (PANTHER),<br>PTHR10343:SF10 (PANTHER)                                                                                                                      |
| Brugia malayi           | setd8b protein                                                                                | 3 | F:GO:0016740;<br>F:GO:0003714;<br>P:GO:0016481                                                    | -                                                                                |             | SignalP (SIGNALP)                                                                                                                                                     |
| -                       | -                                                                                             | 0 |                                                                                                   |                                                                                  |             | SignalP (SIGNALP)                                                                                                                                                     |
| -                       | -                                                                                             | 0 |                                                                                                   |                                                                                  |             | -                                                                                                                                                                     |
| -                       | -                                                                                             | 0 |                                                                                                   |                                                                                  |             | -                                                                                                                                                                     |
| Loa loa                 | hypothetical protein LOAG_11764 [Loa loa]                                                     | 0 |                                                                                                   |                                                                                  |             | -                                                                                                                                                                     |
| Caenorhabditis briggsae | 5-oxopropi-se (atp-hydrolysing)                                                               | 1 | F:GO:0016787                                                                                      | -                                                                                |             | IPR002821; IPR008040; PTHR11365<br>(PANTHER)                                                                                                                          |
| Caenorhabditis elegans  | briggsae cbr-set-6 protein                                                                    | 0 |                                                                                                   | F:GO:0008168;<br>F:GO:0016740;<br>F:GO:0008270;<br>F:GO:0018024;<br>P:GO:0016568 |             | IPR001214; IPR007728; IPR013032;<br>G3DSA:2.170.270.10 (GENE3D),<br>PTHR22884 (PANTHER),<br>PTHR22884:SF21 (PANTHER), SignalP<br>(SIGNALP), SSF82199 (SUPERFAMILY)    |
| Ciona intestinalis      | novel protein                                                                                 | 0 |                                                                                                   |                                                                                  |             | -                                                                                                                                                                     |

|                         |                                                            |    |                                                                                                                                                                                                                                                                             |                                                                                                                                                                                                                                                                                                                                                                                                                     |                                                                                                                        |
|-------------------------|------------------------------------------------------------|----|-----------------------------------------------------------------------------------------------------------------------------------------------------------------------------------------------------------------------------------------------------------------------------|---------------------------------------------------------------------------------------------------------------------------------------------------------------------------------------------------------------------------------------------------------------------------------------------------------------------------------------------------------------------------------------------------------------------|------------------------------------------------------------------------------------------------------------------------|
|                         | -                                                          | 0  |                                                                                                                                                                                                                                                                             |                                                                                                                                                                                                                                                                                                                                                                                                                     |                                                                                                                        |
| Caenorhabditis elegans  | briggsae cbr-dhs-24 protein                                | 0  |                                                                                                                                                                                                                                                                             | P:GO:0055114;<br>F:GO:0005488;<br>F:GO:0016491;<br>P:GO:0008152;<br>F:GO:0003824                                                                                                                                                                                                                                                                                                                                    | -                                                                                                                      |
| Caenorhabditis briggsae | elegans protein partially confirmed by transcript evidence | 4  | F:GO:0015269;<br>P:GO:0006813;<br>C:GO:0016021;<br>F:GO:0005516                                                                                                                                                                                                             | -                                                                                                                                                                                                                                                                                                                                                                                                                   | IPR015449; PTHR10153:SF6 (PANTHER), SignalP (SIGNALP)                                                                  |
| Caenorhabditis elegans  | probable inner membrane protein oxa1l2                     | 0  |                                                                                                                                                                                                                                                                             | C:GO:0016021;<br>C:GO:0016020;<br>P:GO:0051205                                                                                                                                                                                                                                                                                                                                                                      | SignalP (SIGNALP)                                                                                                      |
| Caenorhabditis briggsae | ect2 protein                                               | 0  |                                                                                                                                                                                                                                                                             | F:GO:0017048;<br>P:GO:0007422;<br>P:GO:0008360;<br>P:GO:0007111;<br>P:GO:0051225;<br>P:GO:0000902;<br>P:GO:0007110;<br>C:GO:0005634;<br>P:GO:0050790;<br>P:GO:0007155;<br>P:GO:0000915;<br>P:GO:0035023;<br>F:GO:0005089;<br>P:GO:0000910;<br>P:GO:0050770;<br>F:GO:0005085;<br>P:GO:0008078;<br>P:GO:0045184;<br>P:GO:0007443;<br>P:GO:0007399;<br>P:GO:0023034;<br>P:GO:0007509;<br>C:GO:0005622;<br>F:GO:0005515 | IPR001357; G3DSA:3.40.50.10190 (GENE3D), PTHR16777 (PANTHER)                                                           |
| Loa loa                 | superkiller viralicidic activity 2-like 2                  | 16 | P:GO:0040010;<br>C:GO:0005681;<br>F:GO:0003676;<br>P:GO:0031101;<br>F:GO:0008026;<br>P:GO:0006200;<br>P:GO:0040035;<br>P:GO:0008380;<br>F:GO:0005524;<br>P:GO:0002119;<br>P:GO:0051781;<br>F:GO:0005515;<br>P:GO:0040011;<br>P:GO:0006397;<br>P:GO:0002009;<br>P:GO:0009792 | -                                                                                                                                                                                                                                                                                                                                                                                                                   | IPR011545; IPR014021; G3DSA:3.40.50.300 (GENE3D), PTHR11752 (PANTHER), PTHR11752:SF2 (PANTHER), SSF52540 (SUPERFAMILY) |
|                         | -                                                          | 0  |                                                                                                                                                                                                                                                                             |                                                                                                                                                                                                                                                                                                                                                                                                                     | SignalP (SIGNALP)                                                                                                      |
|                         | -                                                          | 0  |                                                                                                                                                                                                                                                                             |                                                                                                                                                                                                                                                                                                                                                                                                                     | PTHR14017 (PANTHER), PTHR14017:SF1 (PANTHER)                                                                           |

|                         |                                                         |   |                                                                                                                                     |   |  |                                                                                                                                             |
|-------------------------|---------------------------------------------------------|---|-------------------------------------------------------------------------------------------------------------------------------------|---|--|---------------------------------------------------------------------------------------------------------------------------------------------|
| Loa loa                 | piwi domain-containing protein                          | 1 | P:GO:0007275                                                                                                                        | - |  | IPR003100; IPR003165; IPR012337; G3DSA:2.170.260.10 (GENE3D), PTHR22891 (PANTHER), SSF101690 (SUPERFAMILY)                                  |
| Caenorhabditis briggsae | choline transporter-like family member (chtl-1)         | 6 | P:GO:0002009;<br>C:GO:0016021;<br>P:GO:0040007;<br>P:GO:0040035;<br>P:GO:0040002;<br>P:GO:0002119                                   | - |  | IPR007603; PTHR12385:SF7 (PANTHER)                                                                                                          |
| Caenorhabditis elegans  | briggsae cbr-gska-3 protein                             | 3 | P:GO:0002119;<br>F:GO:0004672;<br>P:GO:0040010                                                                                      | - |  | -                                                                                                                                           |
| Caenorhabditis elegans  | isoform c                                               | 1 | P:GO:0009792                                                                                                                        | - |  | IPR004182; PTHR23319 (PANTHER)                                                                                                              |
|                         |                                                         | 0 |                                                                                                                                     |   |  |                                                                                                                                             |
| Caenorhabditis elegans  | g-protein coupled receptor                              | 1 | P:GO:0007186                                                                                                                        | - |  | IPR017452; IPR019427; G3DSA:1.20.1070.10 (GENE3D), PTHR22751 (PANTHER), PTHR22751:SF12 (PANTHER), SignalP (SIGNALP), SSF81321 (SUPERFAMILY) |
| Dictyocaulus viviparus  | briggsae cbr-ccg-1 protein                              | 0 |                                                                                                                                     |   |  | -                                                                                                                                           |
| Caenorhabditis elegans  | 2-hydroxyphytanoyl-coa lyase                            | 3 | F:GO:0030976;<br>F:GO:0000287;<br>F:GO:0003824                                                                                      | - |  | IPR012001; G3DSA:3.40.50.970 (GENE3D), PTHR18968 (PANTHER), PTHR18968:SF1 (PANTHER), SSF52467 (SUPERFAMILY), SSF52518 (SUPERFAMILY)         |
| Caenorhabditis elegans  | hypothetical protein Y54G2A.52 [Caenorhabditis elegans] | 0 |                                                                                                                                     |   |  | SignalP (SIGNALP)                                                                                                                           |
| Brugia malayi           | mitogen-activated protein ki-se-binding protein 1       | 3 | P:GO:0009792;<br>P:GO:0040035;<br>F:GO:0005515                                                                                      | - |  | IPR001680; IPR015943; PTHR22847 (PANTHER), PTHR22847:SF10 (PANTHER), SSF101908 (SUPERFAMILY)                                                |
| Caenorhabditis briggsae | pantothe-te ki-se 4                                     | 8 | P:GO:0040010;<br>P:GO:0008340;<br>P:GO:0000003;<br>F:GO:0016740;<br>P:GO:0002119;<br>F:GO:0000166;<br>P:GO:0009792;<br>P:GO:0044237 | - |  | -                                                                                                                                           |
| Caenorhabditis elegans  | briggsae cbr-soc-1 protein                              | 0 |                                                                                                                                     |   |  | IPR001849; IPR011993; PTHR12156 (PANTHER), PTHR12156:SF1 (PANTHER), SSF50729 (SUPERFAMILY)                                                  |

|                        |                                      |    |                                                                                                                                                                       |                                                                                                                                                                                                                                                                                                                                |             |                                                                                                                                                                                     |
|------------------------|--------------------------------------|----|-----------------------------------------------------------------------------------------------------------------------------------------------------------------------|--------------------------------------------------------------------------------------------------------------------------------------------------------------------------------------------------------------------------------------------------------------------------------------------------------------------------------|-------------|-------------------------------------------------------------------------------------------------------------------------------------------------------------------------------------|
| Caenorhabditis elegans | briggsae cbr-soc-1 protein           | 0  |                                                                                                                                                                       | P:GO:0008595;<br>F:GO:0042169;<br>C:GO:0005737;<br>P:GO:0019730;<br>P:GO:0008293;<br>F:GO:0005515;<br>F:GO:0005070;<br>P:GO:0046578;<br>C:GO:0005886;<br>P:GO:0045500                                                                                                                                                          |             | IPR001849; IPR011993; PTHR12156 (PANTHER), PTHR12156:SF1 (PANTHER), SSF50729 (SUPERFAMILY)                                                                                          |
| -                      | -                                    | 0  |                                                                                                                                                                       |                                                                                                                                                                                                                                                                                                                                |             | -                                                                                                                                                                                   |
| Caenorhabditis elegans | uncoordinated family member (unc-52) | 2  | P:GO:0030239;<br>C:GO:0005578                                                                                                                                         | -                                                                                                                                                                                                                                                                                                                              |             | -                                                                                                                                                                                   |
| Brugia malayi          | craniofacial development protein 1   | 0  |                                                                                                                                                                       |                                                                                                                                                                                                                                                                                                                                |             | -                                                                                                                                                                                   |
| Brugia malayi          | myosin xviiiia                       | 0  |                                                                                                                                                                       | C:GO:0005634;<br>F:GO:0003677;<br>F:GO:0003674;<br>P:GO:0006916;<br>F:GO:0005524;<br>F:GO:0042802;<br>F:GO:0008094;<br>C:GO:0016459;<br>P:GO:0008152;<br>P:GO:0008150;<br>F:GO:0000166;<br>C:GO:0005737;<br>P:GO:0006259;<br>C:GO:0005794;<br>C:GO:0005793;<br>F:GO:0003774;<br>C:GO:0005730;<br>C:GO:0005856;<br>F:GO:0005515 |             | -                                                                                                                                                                                   |
| -                      | -                                    | 0  |                                                                                                                                                                       |                                                                                                                                                                                                                                                                                                                                |             | -                                                                                                                                                                                   |
| -                      | -                                    | 0  |                                                                                                                                                                       |                                                                                                                                                                                                                                                                                                                                |             | -                                                                                                                                                                                   |
| Homo sapiens           | lactotransferrin precursor           | 10 | F:GO:0008199;<br>P:GO:0042742;<br>P:GO:0006879;<br>P:GO:0006959;<br>P:GO:0006826;<br>F:GO:0005515;<br>F:GO:0004252;<br>F:GO:0008201;<br>C:GO:0030141;<br>C:GO:0005576 | -                                                                                                                                                                                                                                                                                                                              | EC:3.4.21.0 | -                                                                                                                                                                                   |
| Caenorhabditis elegans | yth domain containing 2              | 5  | F:GO:0003676;<br>F:GO:0004672;<br>F:GO:0008026;<br>F:GO:0005524;<br>P:GO:0006468                                                                                      | -                                                                                                                                                                                                                                                                                                                              |             | IPR001374; IPR002464; IPR011545; IPR014001; IPR014021; G3DSA:3.30.1370.50 (GENE3D), G3DSA:3.40.50.300 (GENE3D), PTHR18934 (PANTHER), SSF52540 (SUPERFAMILY), SSF82708 (SUPERFAMILY) |
| Caenorhabditis elegans | briggsae cbr-kin-29 protein          | 2  | F:GO:0005488;<br>F:GO:0016301                                                                                                                                         | -                                                                                                                                                                                                                                                                                                                              |             | IPR020636; IPR020666                                                                                                                                                                |



|                         |                                                            |  |                                                                                                                                                                                           |   |              |                                                                                                    |
|-------------------------|------------------------------------------------------------|--|-------------------------------------------------------------------------------------------------------------------------------------------------------------------------------------------|---|--------------|----------------------------------------------------------------------------------------------------|
| Caenorhabditis briggsae | briggsae cbr-ehbp-1 protein                                |  | F:GO:0008017;<br>C:GO:0016324;<br>5 F:GO:0003779;<br>P:GO:0000910;<br>P:GO:0006897                                                                                                        | - |              | IPR001715; PTHR11915 (PANTHER),<br>PTHR11915:SF47 (PANTHER)                                        |
|                         | -                                                          |  | 0                                                                                                                                                                                         |   |              | -                                                                                                  |
| Taeniopygia guttata     | elmo domain-containing protein 1                           |  | 1 P:GO:0000910                                                                                                                                                                            | - |              | IPR006816; PTHR12771 (PANTHER),<br>PTHR12771:SF1 (PANTHER)                                         |
| Ixodes scapularis       | importin 7                                                 |  | F:GO:0042393;<br>4 P:GO:0006606;<br>F:GO:0005215;<br>C:GO:0005634                                                                                                                         | - |              | IPR011989; IPR016024; PTHR10997<br>(PANTHER), PTHR10997:SF18<br>(PANTHER)                          |
|                         | -                                                          |  | 0                                                                                                                                                                                         |   |              | -                                                                                                  |
|                         | -                                                          |  | 0                                                                                                                                                                                         |   |              | SignalP (SIGNALP)                                                                                  |
| Brugia malayi           | CG3579-PA [Brugia malayi]                                  |  | 0                                                                                                                                                                                         |   | F:GO:0003824 | SignalP (SIGNALP)                                                                                  |
| Brugia malayi           | CG3579-PA [Brugia malayi]                                  |  | 0                                                                                                                                                                                         |   | F:GO:0003824 | SignalP (SIGNALP)                                                                                  |
|                         | -                                                          |  | 0                                                                                                                                                                                         |   |              | -                                                                                                  |
|                         | -                                                          |  | 0                                                                                                                                                                                         |   |              | -                                                                                                  |
| Loa loa                 | male sterility protein                                     |  | P:GO:0008152;<br>3 F:GO:0003824;<br>F:GO:0005515                                                                                                                                          | - |              | IPR013120; IPR016040; PTHR11011<br>(PANTHER), PTHR11011:SF8<br>(PANTHER)                           |
| Brugia malayi           | btb poz domain containing protein                          |  | 2 F:GO:0005515;<br>P:GO:0000003                                                                                                                                                           | - |              | -                                                                                                  |
| Caenorhabditis briggsae | elegans protein confirmed by transcript evidence           |  | P:GO:0009792;<br>5 F:GO:0016491;<br>P:GO:0040010;<br>P:GO:0002119;<br>P:GO:0040011                                                                                                        | - |              | IPR001395; IPR018170; IPR020471;<br>IPR023210; PTHR11732:SF34<br>(PANTHER)                         |
| Brugia malayi           | kinesin-like protein klp10a                                |  | P:GO:0000278;<br>P:GO:0006996;<br>C:GO:0005874;<br>P:GO:0000279;<br>F:GO:0003774;<br>11 F:GO:0005515;<br>C:GO:0044444;<br>P:GO:0007017;<br>F:GO:0000166;<br>C:GO:0005819;<br>P:GO:0007275 | - |              | IPR001752; IPR019821; PTHR16012<br>(PANTHER), PTHR16012:SF186<br>(PANTHER), SSF52540 (SUPERFAMILY) |
|                         | -                                                          |  | 0                                                                                                                                                                                         |   |              | -                                                                                                  |
| Caenorhabditis elegans  | ercc4 domain containing protein                            |  | F:GO:0005488;<br>3 P:GO:0006281;<br>P:GO:0009792                                                                                                                                          | - |              | -                                                                                                  |
| Caenorhabditis elegans  | elegans protein partially confirmed by transcript evidence |  | 0                                                                                                                                                                                         |   |              | IPR016160; PTHR13167 (PANTHER),<br>PTHR13167:SF7 (PANTHER), SignalP<br>(SIGNALP)                   |
|                         | -                                                          |  | 0                                                                                                                                                                                         |   |              | PTHR18929 (PANTHER)                                                                                |
| Caenorhabditis briggsae | elegans protein confirmed by transcript evidence           |  | 0                                                                                                                                                                                         |   |              | SignalP (SIGNALP)                                                                                  |
| Caenorhabditis elegans  | -d-dependent malic mitochondrial precursor                 |  | F:GO:0046872;<br>F:GO:0051287;<br>F:GO:0004470;<br>7 P:GO:0006108;<br>P:GO:0055114;<br>F:GO:0016616;<br>C:GO:0005739                                                                      | - | EC:1.1.1.0   | PTHR23406 (PANTHER),<br>PTHR23406:SF2 (PANTHER)                                                    |

|                         |                                                                  |    |                                                                                                                                                                                                                                                                                              |                                                                                  |            |                                                                                                |
|-------------------------|------------------------------------------------------------------|----|----------------------------------------------------------------------------------------------------------------------------------------------------------------------------------------------------------------------------------------------------------------------------------------------|----------------------------------------------------------------------------------|------------|------------------------------------------------------------------------------------------------|
| Caenorhabditis elegans  | d domain (prokaryotic heat shock protein) family member (dnj-17) | 0  |                                                                                                                                                                                                                                                                                              | F:GO:0003676;<br>P:GO:0000003;<br>F:GO:0008270;<br>C:GO:0005622                  |            | SignalP (SIGNALP)                                                                              |
| Caenorhabditis elegans  | #NAME?                                                           | 0  |                                                                                                                                                                                                                                                                                              | F:GO:0016740;<br>P:GO:0008152;<br>F:GO:0003824;<br>F:GO:0008483;<br>F:GO:0030170 |            | IPR000192; IPR015421; IPR015424;<br>PTHR11601 (PANTHER)                                        |
| Loa loa                 | dy-ctin subunit 6                                                | 0  |                                                                                                                                                                                                                                                                                              | C:GO:0005737;<br>C:GO:0005856;<br>F:GO:0016740;<br>P:GO:0008150;<br>P:GO:0007018 |            | -                                                                                              |
| Loa loa                 | chromosome 9 open reading frame 41-like                          | 0  |                                                                                                                                                                                                                                                                                              |                                                                                  |            | IPR012901                                                                                      |
| Caenorhabditis briggsae | cytochrome c oxidase subunit va                                  | 6  | P:GO:0009792;<br>P:GO:0008340;<br>P:GO:0000003;<br>F:GO:0004129;<br>P:GO:0040007;<br>P:GO:0002119                                                                                                                                                                                            | -                                                                                | EC:1.9.3.1 | -                                                                                              |
|                         | -                                                                | 0  |                                                                                                                                                                                                                                                                                              |                                                                                  |            | -                                                                                              |
| Caenorhabditis elegans  | acetyl- hydrolase transferase family protein                     | 5  | F:GO:0019239;<br>C:GO:0005811;<br>P:GO:0009168;<br>P:GO:0006084;<br>F:GO:0016787                                                                                                                                                                                                             | -                                                                                |            | IPR003702; G3DSA:3.30.750.70<br>(GENE3D), PTHR21432:SF11<br>(PANTHER), SSF100950 (SUPERFAMILY) |
| Caenorhabditis elegans  | polymerase (d- directed) epsilon                                 | 17 | F:GO:0008270;<br>F:GO:0003887;<br>P:GO:0006260;<br>P:GO:0040035;<br>P:GO:0006297;<br>F:GO:0003677;<br>P:GO:0000731;<br>F:GO:0005515;<br>F:GO:0000166;<br>P:GO:0040011;<br>P:GO:0006997;<br>P:GO:0000082;<br>F:GO:0004527;<br>C:GO:0005654;<br>P:GO:0002009;<br>P:GO:0009792;<br>F:GO:0003682 | -                                                                                | EC:2.7.7.7 | PTHR10670 (PANTHER), SSF56672<br>(SUPERFAMILY)                                                 |
| Loa loa                 | cyclin k                                                         | 3  | F:GO:0005515;<br>P:GO:0000079;<br>P:GO:0006366                                                                                                                                                                                                                                               | -                                                                                |            | IPR006670; IPR006671; IPR011028;<br>IPR013763; IPR015429;<br>PTHR10026:SF11 (PANTHER)          |
| Ailuropoda melanoleuca  | pleckstrin homology domain family o member 1                     | 3  | C:GO:0005634;<br>C:GO:0005737;<br>C:GO:0005886                                                                                                                                                                                                                                               | -                                                                                |            | IPR001849; PTHR15871 (PANTHER),<br>PTHR15871:SF1 (PANTHER)                                     |
| Brugia malayi           | trafficking protein particle complex 1                           | 3  | P:GO:0006888;<br>C:GO:0030008;<br>F:GO:0005515                                                                                                                                                                                                                                               | -                                                                                |            | -                                                                                              |

|                             |                                           |    |                                                                                                                                                                                                                                                                                                                                                                                   |   |                                                                                                                                                         |
|-----------------------------|-------------------------------------------|----|-----------------------------------------------------------------------------------------------------------------------------------------------------------------------------------------------------------------------------------------------------------------------------------------------------------------------------------------------------------------------------------|---|---------------------------------------------------------------------------------------------------------------------------------------------------------|
| Taeniopygia guttata         | heterogeneous nuclear ribonucleoprotein k | 12 | C:GO:0005737;<br>C:GO:0005730;<br>P:GO:0008380;<br>C:GO:0030530;<br>C:GO:0005654;<br>C:GO:0005681;<br>F:GO:0003723;<br>F:GO:0005515;<br>F:GO:0003697;<br>P:GO:0006397;<br>P:GO:0007165;<br>P:GO:0044419                                                                                                                                                                           | - | IPR004087; IPR004088; IPR018111;<br>G3DSA:3.30.1370.10 (GENE3D),<br>PTHR10288 (PANTHER),<br>PTHR10288:SF38 (PANTHER),<br>SSF54791 (SUPERFAMILY)         |
| Caenorhabditis elegans      | briggsae cbr-immp-2 protein               | 2  | C:GO:0044464;<br>F:GO:0008234                                                                                                                                                                                                                                                                                                                                                     | - | IPR000223; IPR011056; IPR015927;<br>IPR019756; IPR019759; PTHR12383<br>(PANTHER), PTHR12383:SF3<br>(PANTHER), SignalP (SIGNALP)                         |
| Hyalomma marginatum rufipes | ubiquitin c                               | 2  | C:GO:0005634;<br>C:GO:0005737                                                                                                                                                                                                                                                                                                                                                     | - | IPR000626; IPR019954; IPR019955;<br>IPR019956; G3DSA:3.10.20.90<br>(GENE3D), PTHR10666 (PANTHER),<br>PTHR10666:SF9 (PANTHER), SSF54236<br>(SUPERFAMILY) |
| Loa loa                     | smc c-termi-l domain containing protein   | 9  | F:GO:0005515;<br>P:GO:0006974;<br>P:GO:0006259;<br>P:GO:0010564;<br>C:GO:0000776;<br>P:GO:0007067;<br>P:GO:0048523;<br>P:GO:0007062;<br>C:GO:0005634                                                                                                                                                                                                                              | - | PTHR18937 (PANTHER),<br>PTHR18937:SF12 (PANTHER)                                                                                                        |
| Caenorhabditis sp. PS1010   | ribosomal protein s3                      | 22 | P:GO:0008340;<br>P:GO:0000003;<br>C:GO:0032587;<br>F:GO:0003684;<br>P:GO:0006919;<br>P:GO:0040007;<br>F:GO:0019901;<br>P:GO:0006412;<br>P:GO:0045738;<br>P:GO:0018996;<br>P:GO:0032088;<br>P:GO:0019915;<br>P:GO:0009792;<br>P:GO:0006917;<br>P:GO:0002119;<br>F:GO:0051059;<br>F:GO:0004519;<br>F:GO:0003735;<br>C:GO:0005634;<br>F:GO:0003906;<br>F:GO:0003729;<br>C:GO:0022627 | - | EC:3.6.5.3;<br>EC:4.2.99.18                                                                                                                             |
| Caenorhabditis elegans      | briggsae cbr-pcp- protein                 | 3  | P:GO:0009792;<br>F:GO:0004180;<br>F:GO:0008236                                                                                                                                                                                                                                                                                                                                    | - | IPR008758; PTHR11010:SF6<br>(PANTHER)                                                                                                                   |

|                         |                                                                              |   |                                                                                                                                     |              |            |                                                                                                                                                    |
|-------------------------|------------------------------------------------------------------------------|---|-------------------------------------------------------------------------------------------------------------------------------------|--------------|------------|----------------------------------------------------------------------------------------------------------------------------------------------------|
| Caenorhabditis elegans  | beta-ureidopropio-se                                                         |   | P:GO:0006807;<br>C:GO:0005829;<br>5 F:GO:0046872;<br>P:GO:0000003;<br>F:GO:0003837                                                  | -            | EC:3.5.1.6 | -                                                                                                                                                  |
| Caenorhabditis elegans  | metallophosphoesterase 1                                                     | 0 |                                                                                                                                     | F:GO:0016787 |            | -                                                                                                                                                  |
| Loa loa                 | wapl (drosophila wings apart-like cohesin interactor) family member (wapl-1) | 3 | P:GO:0018991;<br>P:GO:0040010;<br>P:GO:0040011                                                                                      | -            |            | IPR012502; PTHR22100 (PANTHER),<br>PTHR22100:SF7 (PANTHER)                                                                                         |
| Caenorhabditis elegans  | elegans protein partially confirmed by transcript evidence                   | 0 |                                                                                                                                     |              |            | SignalP (SIGNALP)                                                                                                                                  |
| -                       | -                                                                            | 0 |                                                                                                                                     |              |            | -                                                                                                                                                  |
| -                       | -                                                                            | 0 |                                                                                                                                     |              |            | -                                                                                                                                                  |
| Caenorhabditis elegans  | -dph:adrenodoxin mitochondrial                                               | 7 | C:GO:0005739;<br>P:GO:0007552;<br>P:GO:0042048;<br>P:GO:0035073;<br>P:GO:0006694;<br>P:GO:0007591;<br>F:GO:0003824                  | -            |            | IPR013027; PR00419 (PRINTS),<br>G3DSA:3.50.50.60 (GENE3D),<br>PTHR11938 (PANTHER),<br>PTHR11938:SF4 (PANTHER), SSF51971<br>(SUPERFAMILY)           |
| -                       | -                                                                            | 0 |                                                                                                                                     |              |            | -                                                                                                                                                  |
| Caenorhabditis briggsae | monoacylglycerol o-acyltransferase 2                                         | 5 | P:GO:0044238;<br>F:GO:0008415;<br>C:GO:0044425;<br>P:GO:0009792;<br>C:GO:0005783                                                    | -            |            | IPR007130; SignalP (SIGNALP)                                                                                                                       |
| Callithrix jacchus      | ribosomal protein I5                                                         | 8 | C:GO:0005730;<br>P:GO:0006364;<br>P:GO:0042273;<br>F:GO:0003735;<br>P:GO:0006414;<br>F:GO:0005515;<br>C:GO:0022625;<br>F:GO:0008097 | -            |            | IPR005484; IPR005485;<br>G3DSA:3.30.420.100 (GENE3D),<br>SSF53137 (SUPERFAMILY)                                                                    |
| Brugia malayi           | dual specificity catalytic domain containing protein                         | 2 | P:GO:0006796;<br>F:GO:0016791                                                                                                       | -            | EC:3.1.3.0 | IPR000340; IPR000387; IPR016130;<br>IPR020422; G3DSA:3.90.190.10<br>(GENE3D), PTHR10159 (PANTHER),<br>SignalP (SIGNALP), SSF52799<br>(SUPERFAMILY) |
| Brugia malayi           | dual specificity catalytic domain containing protein                         | 2 | P:GO:0006796;<br>F:GO:0016791                                                                                                       | -            | EC:3.1.3.0 | IPR000340; IPR000387; IPR016130;<br>IPR020422; G3DSA:3.90.190.10<br>(GENE3D), PTHR10159 (PANTHER),<br>SignalP (SIGNALP), SSF52799<br>(SUPERFAMILY) |
| Haemonchus contortus    | briggsae cbr-vha-6 protein                                                   | 5 | F:GO:0015078;<br>C:GO:0033177;<br>P:GO:0015986;<br>C:GO:0031410;<br>P:GO:0001845                                                    | -            |            | IPR002490; PTHR11629:SF23<br>(PANTHER)                                                                                                             |
| -                       | -                                                                            | 0 |                                                                                                                                     |              |            | -                                                                                                                                                  |
| -                       | -                                                                            | 0 |                                                                                                                                     |              |            | SignalP (SIGNALP)                                                                                                                                  |
| Caenorhabditis briggsae | briggsae cbr-nhr-97 protein                                                  | 4 | F:GO:0004872;<br>F:GO:0005488;<br>P:GO:0006350;<br>P:GO:0000003                                                                     | -            |            | SignalP (SIGNALP)                                                                                                                                  |
| -                       | -                                                                            | 0 |                                                                                                                                     |              |            | SignalP (SIGNALP)                                                                                                                                  |

|                         |                                                                                    |    |                                                                                                                                                                                                         |                                                                                                                                     |            |                                                                                                                       |
|-------------------------|------------------------------------------------------------------------------------|----|---------------------------------------------------------------------------------------------------------------------------------------------------------------------------------------------------------|-------------------------------------------------------------------------------------------------------------------------------------|------------|-----------------------------------------------------------------------------------------------------------------------|
| Caenorhabditis briggsae | d- polymerase delta catalytic subunit                                              | 12 | C:GO:0005875;<br>P:GO:0000910;<br>F:GO:0003887;<br>P:GO:0006260;<br>F:GO:0003677;<br>P:GO:0035188;<br>P:GO:0002119;<br>F:GO:0008296;<br>F:GO:0000166;<br>P:GO:0006898;<br>P:GO:0009792;<br>P:GO:0006974 | -                                                                                                                                   | EC:2.7.7.7 | IPR006133; IPR012337;<br>G3DSA:3.30.420.10 (GENE3D),<br>PTHR10322 (PANTHER),<br>PTHR10322:SF4 (PANTHER)               |
| Caenorhabditis briggsae | use1_caeel ame: full=vesicle transport protein use1 ame:<br>full=use1-like protein | 0  |                                                                                                                                                                                                         |                                                                                                                                     |            | SignalP (SIGNALP)                                                                                                     |
|                         | -                                                                                  | 0  |                                                                                                                                                                                                         |                                                                                                                                     |            | -                                                                                                                     |
| Caenorhabditis elegans  | variable abnormal morphology family member (vab-8)                                 | 5  | P:GO:0007275;<br>F:GO:0003774;<br>P:GO:0009987;<br>F:GO:0000166;<br>C:GO:0044424                                                                                                                        | -                                                                                                                                   |            | -                                                                                                                     |
| Caenorhabditis elegans  | briggsae cbr-rbc-1 protein                                                         | 0  |                                                                                                                                                                                                         | P:GO:0006355;<br>C:GO:0016021;<br>F:GO:0043565;<br>C:GO:0016020;<br>P:GO:0045449;<br>F:GO:0003677;<br>F:GO:0003700;<br>C:GO:0005634 |            | -                                                                                                                     |
| Caenorhabditis elegans  | related to yeast vacuolar protein sorting factor family<br>member (vps-39)         | 6  | P:GO:0002009;<br>P:GO:0008219;<br>P:GO:0009792;<br>P:GO:0000003;<br>P:GO:0010171;<br>F:GO:0005515                                                                                                       | -                                                                                                                                   |            | IPR001180                                                                                                             |
| Caenorhabditis briggsae | uncoordi-ted family member (unc-89)                                                | 0  |                                                                                                                                                                                                         | F:GO:0004672;<br>F:GO:0005524;<br>F:GO:0000166;<br>F:GO:0005089;<br>P:GO:0006468;<br>P:GO:0035023;<br>C:GO:0005622;<br>F:GO:0004674 |            | IPR000719; IPR011009; IPR017442;<br>IPR020636; G3DSA:1.10.510.10<br>(GENE3D), G3DSA:3.30.200.20<br>(GENE3D)           |
|                         | -                                                                                  | 0  |                                                                                                                                                                                                         |                                                                                                                                     |            | -                                                                                                                     |
|                         | -                                                                                  | 0  |                                                                                                                                                                                                         |                                                                                                                                     |            | -                                                                                                                     |
|                         | -                                                                                  | 0  |                                                                                                                                                                                                         |                                                                                                                                     |            | -                                                                                                                     |
| Caenorhabditis elegans  | elegans protein partially confirmed by transcript evidence                         | 0  |                                                                                                                                                                                                         |                                                                                                                                     |            | -                                                                                                                     |
| Caenorhabditis briggsae | Hypothetical protein CBG09264 [Caenorhabditis briggsae]                            | 0  |                                                                                                                                                                                                         | F:GO:0005515                                                                                                                        |            | PTHR13546 (PANTHER),<br>PTHR13546:SF1 (PANTHER)                                                                       |
| Caenorhabditis elegans  | pre-mr--splicing factor syf2                                                       | 3  | P:GO:0008380;<br>P:GO:0006397;<br>C:GO:0005634                                                                                                                                                          | -                                                                                                                                   |            | IPR013260                                                                                                             |
|                         | -                                                                                  | 0  |                                                                                                                                                                                                         |                                                                                                                                     |            | SignalP (SIGNALP)                                                                                                     |
| Caenorhabditis briggsae | protein tyrosine phosphatase family member (ptp-1)                                 | 5  | F:GO:0004726;<br>C:GO:0005856;<br>F:GO:0008092;<br>P:GO:0006470;<br>F:GO:0016740                                                                                                                        | -                                                                                                                                   |            | IPR000242; G3DSA:3.90.190.10<br>(GENE3D), PTHR19134 (PANTHER),<br>PTHR19134:SF58 (PANTHER),<br>SSF52799 (SUPERFAMILY) |

|                         |                                                  |    |                                                                                                                                                                                                         |                                                                                                                                                                       |                                                         |                                                                                                                                                                          |
|-------------------------|--------------------------------------------------|----|---------------------------------------------------------------------------------------------------------------------------------------------------------------------------------------------------------|-----------------------------------------------------------------------------------------------------------------------------------------------------------------------|---------------------------------------------------------|--------------------------------------------------------------------------------------------------------------------------------------------------------------------------|
| Caenorhabditis elegans  | ras-related protein rap-1b precursor             | 6  | C:GO:0005911;<br>F:GO:0005525;<br>C:GO:0005829;<br>P:GO:0060026;<br>P:GO:0007264;<br>F:GO:0003924                                                                                                       | -                                                                                                                                                                     | EC:3.6.5.1;<br>EC:3.6.5.2;<br>EC:3.6.5.3;<br>EC:3.6.5.4 | IPR001806; IPR003577; IPR005225;<br>IPR013753; IPR020849;<br>G3DSA:3.40.50.300 (GENE3D),<br>PTHR11708 (PANTHER),<br>PTHR11708:SF126 (PANTHER),<br>SSF52540 (SUPERFAMILY) |
| Caenorhabditis elegans  | translocase of outer mitochondrial membrane 34   | 1  | F:GO:0005488                                                                                                                                                                                            | -                                                                                                                                                                     |                                                         | IPR001440; IPR011990; IPR013026;<br>IPR019734; PTHR22904 (PANTHER),<br>PTHR22904:SF32 (PANTHER),<br>SSF48452 (SUPERFAMILY)                                               |
| -                       | -                                                | 0  |                                                                                                                                                                                                         |                                                                                                                                                                       |                                                         | -                                                                                                                                                                        |
| Caenorhabditis elegans  | cg3683                                           | 0  |                                                                                                                                                                                                         | F:GO:0008137;<br>P:GO:0006120;<br>F:GO:0003954                                                                                                                        |                                                         | PTHR13344 (PANTHER)                                                                                                                                                      |
| Caenorhabditis elegans  | cg3683                                           | 0  |                                                                                                                                                                                                         | F:GO:0008137;<br>P:GO:0006120;<br>F:GO:0003954                                                                                                                        |                                                         | PTHR13344 (PANTHER)                                                                                                                                                      |
| -                       | -                                                | 0  |                                                                                                                                                                                                         |                                                                                                                                                                       |                                                         | -                                                                                                                                                                        |
| -                       | -                                                | 0  |                                                                                                                                                                                                         |                                                                                                                                                                       |                                                         | -                                                                                                                                                                        |
| Caenorhabditis briggsae | elegans protein confirmed by transcript evidence | 1  | F:GO:0005515                                                                                                                                                                                            | -                                                                                                                                                                     |                                                         | IPR007967; SSF103107 (SUPERFAMILY)                                                                                                                                       |
| Caenorhabditis briggsae | elegans protein confirmed by transcript evidence | 1  | F:GO:0005515                                                                                                                                                                                            | -                                                                                                                                                                     |                                                         | IPR007967; SSF103107 (SUPERFAMILY)                                                                                                                                       |
| Caenorhabditis briggsae | formin homology 2 domain containing protein      | 1  | F:GO:0005515                                                                                                                                                                                            | -                                                                                                                                                                     |                                                         | IPR010473; IPR016024; PTHR23213<br>(PANTHER), PTHR23213:SF12<br>(PANTHER)                                                                                                |
| Caenorhabditis elegans  | gpi mannosyltransferase 3                        | 12 | P:GO:0006412;<br>C:GO:0031224;<br>P:GO:0040010;<br>P:GO:0008340;<br>P:GO:0000003;<br>P:GO:0016254;<br>P:GO:0010171;<br>P:GO:0002119;<br>F:GO:0004376;<br>P:GO:0040011;<br>P:GO:0009792;<br>C:GO:0005789 | -                                                                                                                                                                     | EC:3.6.5.3                                              | IPR005599                                                                                                                                                                |
| -                       | -                                                | 0  |                                                                                                                                                                                                         |                                                                                                                                                                       |                                                         | IPR006578                                                                                                                                                                |
| -                       | -                                                | 0  |                                                                                                                                                                                                         |                                                                                                                                                                       |                                                         | -                                                                                                                                                                        |
| -                       | -                                                | 0  |                                                                                                                                                                                                         |                                                                                                                                                                       |                                                         | -                                                                                                                                                                        |
| -                       | -                                                | 0  |                                                                                                                                                                                                         |                                                                                                                                                                       |                                                         | SignalP (SIGNALP)                                                                                                                                                        |
| -                       | -                                                | 0  |                                                                                                                                                                                                         |                                                                                                                                                                       |                                                         | -                                                                                                                                                                        |
| Caenorhabditis briggsae | briggsae cbr-zig-7 protein                       | 0  |                                                                                                                                                                                                         | F:GO:0004674;<br>F:GO:0004672;<br>P:GO:0006468;<br>F:GO:0000166;<br>F:GO:0008270;<br>F:GO:0005524;<br>C:GO:0005578;<br>F:GO:0008237;<br>C:GO:0005576;<br>F:GO:0008233 |                                                         | -                                                                                                                                                                        |
| Caenorhabditis briggsae | briggsae cbr-ril-2 protein                       | 1  | P:GO:0007275                                                                                                                                                                                            | -                                                                                                                                                                     |                                                         | -                                                                                                                                                                        |
| -                       | -                                                | 0  |                                                                                                                                                                                                         |                                                                                                                                                                       |                                                         | -                                                                                                                                                                        |

|                         |                                                       |    |                                                                                                                                                                       |                                                                                                                                     |             |                                                                               |
|-------------------------|-------------------------------------------------------|----|-----------------------------------------------------------------------------------------------------------------------------------------------------------------------|-------------------------------------------------------------------------------------------------------------------------------------|-------------|-------------------------------------------------------------------------------|
| Loa loa                 | mkiaa0226 protein                                     | 0  |                                                                                                                                                                       | F:GO:0003674;<br>P:GO:0006914;<br>P:GO:0008150;<br>F:GO:0008270;<br>C:GO:0005768;<br>P:GO:0006897;<br>F:GO:0005515;<br>C:GO:0005575 |             | PTHR12326 (PANTHER)                                                           |
|                         | -                                                     | 0  |                                                                                                                                                                       |                                                                                                                                     |             | IPR013090; SignalP (SIGNALP)                                                  |
| Caenorhabditis briggsae | elegans protein confirmed by transcript evidence      | 0  |                                                                                                                                                                       |                                                                                                                                     |             | SignalP (SIGNALP)                                                             |
| Caenorhabditis elegans  | -tural resistance-associated macrophage protein       | 7  | P:GO:0046688;<br>F:GO:0005381;<br>P:GO:0035162;<br>P:GO:0006810;<br>P:GO:0010039;<br>C:GO:0016021;<br>P:GO:0019725                                                    | -                                                                                                                                   |             | IPR001046; PTHR11706:SF7 (PANTHER), SignalP (SIGNALP)                         |
| Ciona intestinalis      | transposase for is1016                                | 0  |                                                                                                                                                                       | F:GO:0008270;<br>C:GO:0005622                                                                                                       |             | IPR007087; IPR015880                                                          |
| Caenorhabditis elegans  | hypothetical protein F07F6.8 [Caenorhabditis elegans] | 0  |                                                                                                                                                                       | P:GO:0006869;<br>F:GO:0008289;<br>C:GO:0016021;<br>F:GO:0005515;<br>P:GO:0042157                                                    |             | IPR008405                                                                     |
|                         | -                                                     | 0  |                                                                                                                                                                       |                                                                                                                                     |             | -                                                                             |
| Caenorhabditis briggsae | argi-se agmati-se formiminoglutamase                  | 5  | P:GO:0006525;<br>F:GO:0005515;<br>F:GO:0016740;<br>F:GO:0008270;<br>F:GO:0004053                                                                                      | -                                                                                                                                   | EC:3.5.3.1  | IPR006035; IPR014033; SSF52768 (SUPERFAMILY)                                  |
| Brugia malayi           | fyve zinc finger family protein                       | 1  | F:GO:0046872                                                                                                                                                          | -                                                                                                                                   |             | SignalP (SIGNALP)                                                             |
|                         | -                                                     | 0  |                                                                                                                                                                       |                                                                                                                                     |             | -                                                                             |
| Caenorhabditis briggsae | oxt                                                   | 7  | P:GO:0050650;<br>C:GO:0043231;<br>F:GO:0030158;<br>P:GO:0042732;<br>P:GO:0015012;<br>C:GO:0044444;<br>C:GO:0016020                                                    | -                                                                                                                                   | EC:2.4.2.26 | IPR002889; IPR003406; PTHR19297:SF1 (PANTHER), SignalP (SIGNALP)              |
|                         | -                                                     | 0  |                                                                                                                                                                       |                                                                                                                                     |             | SignalP (SIGNALP)                                                             |
|                         | -                                                     | 0  |                                                                                                                                                                       |                                                                                                                                     |             | -                                                                             |
|                         | -                                                     | 0  |                                                                                                                                                                       |                                                                                                                                     |             | -                                                                             |
|                         | -                                                     | 0  |                                                                                                                                                                       |                                                                                                                                     |             | -                                                                             |
| Caenorhabditis elegans  | yam5_caeel ame: full=upf0057 membrane protein         | 0  |                                                                                                                                                                       | C:GO:0016021                                                                                                                        |             | IPR000612; SignalP (SIGNALP)                                                  |
|                         | -                                                     | 0  |                                                                                                                                                                       |                                                                                                                                     |             | -                                                                             |
| Caenorhabditis elegans  | prp38 family protein                                  | 3  | C:GO:0005681;<br>P:GO:0006397;<br>P:GO:0008380                                                                                                                        | -                                                                                                                                   |             | IPR005037                                                                     |
| Caenorhabditis briggsae | alkyldihydroxyacetonephosphate synthase               | 10 | P:GO:0009792;<br>P:GO:0002119;<br>F:GO:0016491;<br>F:GO:0008609;<br>C:GO:0005777;<br>P:GO:0008610;<br>P:GO:0042221;<br>P:GO:0040007;<br>F:GO:0050660;<br>C:GO:0005739 | -                                                                                                                                   | EC:2.5.1.26 | IPR004113; IPR016164; IPR016171; PTHR11748 (PANTHER), PTHR11748:SF3 (PANTHER) |

|                         |                                                                       |    |                                                                                                                                                                                                                          |                                                                                                                    |                                                                                                                                                |
|-------------------------|-----------------------------------------------------------------------|----|--------------------------------------------------------------------------------------------------------------------------------------------------------------------------------------------------------------------------|--------------------------------------------------------------------------------------------------------------------|------------------------------------------------------------------------------------------------------------------------------------------------|
| Caenorhabditis briggsae | briggsae cbr-pqn-45 protein                                           | 0  |                                                                                                                                                                                                                          | P:GO:0009792                                                                                                       | -                                                                                                                                              |
| Caenorhabditis briggsae | briggsae cbr-pqn-45 protein                                           | 0  |                                                                                                                                                                                                                          | P:GO:0009792                                                                                                       | -                                                                                                                                              |
|                         | -                                                                     | 0  |                                                                                                                                                                                                                          |                                                                                                                    | -                                                                                                                                              |
| Caenorhabditis briggsae | atp-binding sub-family b (mdr tap) member 10                          | 4  | F:GO:0042626;<br>P:GO:0055085;<br>F:GO:0005524;<br>C:GO:0032592                                                                                                                                                          | -                                                                                                                  | IPR003439; IPR003593; IPR017871;<br>G3DSA:3.40.50.300 (GENE3D),<br>PTHR19242 (PANTHER),<br>PTHR19242:SF76 (PANTHER),<br>SSF52540 (SUPERFAMILY) |
| Caenorhabditis elegans  | sterol regulatory element-binding protein cleavage-activating protein | 13 | F:GO:0005515;<br>P:GO:0008202;<br>C:GO:0043231;<br>P:GO:0031323;<br>P:GO:0009889;<br>P:GO:0019216;<br>P:GO:0009792;<br>C:GO:0031090;<br>P:GO:0044281;<br>C:GO:0044446;<br>P:GO:0006950;<br>C:GO:0012505;<br>C:GO:0044444 | -                                                                                                                  | -                                                                                                                                              |
|                         | -                                                                     | 0  |                                                                                                                                                                                                                          |                                                                                                                    | -                                                                                                                                              |
|                         | -                                                                     | 0  |                                                                                                                                                                                                                          |                                                                                                                    | -                                                                                                                                              |
|                         | -                                                                     | 0  |                                                                                                                                                                                                                          |                                                                                                                    | -                                                                                                                                              |
| Ostertagia ostertagi    | Il20 15kda ladder antigen                                             | 1  | F:GO:0019841                                                                                                                                                                                                             | -                                                                                                                  | -                                                                                                                                              |
| Caenorhabditis briggsae | briggsae cbr-dgk-4 protein                                            | 0  |                                                                                                                                                                                                                          | P:GO:0007205;<br>F:GO:0004143;<br>P:GO:0023034                                                                     | IPR001660; IPR010993; IPR013761;<br>IPR021129; PTHR11255 (PANTHER),<br>PTHR11255:SF10 (PANTHER)                                                |
| Brugia malayi           | homeobox domain containing protein                                    | 0  |                                                                                                                                                                                                                          | P:GO:0006355;<br>F:GO:0043565;<br>P:GO:0045449;<br>F:GO:0005515;<br>F:GO:0003677;<br>F:GO:0003700;<br>C:GO:0005634 | PTHR15116 (PANTHER),<br>PTHR15116:SF7 (PANTHER)                                                                                                |
| Caenorhabditis elegans  | hypothetical protein C50F2.4 [Caenorhabditis elegans]                 | 0  |                                                                                                                                                                                                                          |                                                                                                                    | -                                                                                                                                              |
|                         | -                                                                     | 0  |                                                                                                                                                                                                                          |                                                                                                                    | -                                                                                                                                              |
| Caenorhabditis elegans  | elegans protein partially confirmed by transcript evidence            | 0  |                                                                                                                                                                                                                          |                                                                                                                    | SignalP (SIGNALP)                                                                                                                              |
| Caenorhabditis briggsae | glutathione s-transferase                                             | 0  |                                                                                                                                                                                                                          | F:GO:0016740                                                                                                       | PTHR12289 (PANTHER),<br>PTHR12289:SF17 (PANTHER)                                                                                               |
| Caenorhabditis briggsae | elegans protein confirmed by transcript evidence                      | 2  | P:GO:0055085;<br>C:GO:0016021                                                                                                                                                                                            | -                                                                                                                  | PTHR11662 (PANTHER),<br>PTHR11662:SF17 (PANTHER), SignalP (SIGNALP)                                                                            |
|                         | -                                                                     | 0  |                                                                                                                                                                                                                          |                                                                                                                    | -                                                                                                                                              |
| Loa loa                 | cleavage stimulation factor subunit 3                                 | 8  | P:GO:0006378;<br>P:GO:0009792;<br>P:GO:0008380;<br>F:GO:0003723;<br>F:GO:0005515;<br>P:GO:0000003;<br>C:GO:0005634;<br>P:GO:0006379                                                                                      | -                                                                                                                  | IPR003107; IPR008847; PTHR19980 (PANTHER)                                                                                                      |
| Caenorhabditis briggsae | mitochondrial translation optimization 1 homolog isoform b            | 5  | C:GO:0005737;<br>F:GO:0016491;<br>F:GO:0009055;<br>F:GO:0050660;<br>P:GO:0002098                                                                                                                                         | -                                                                                                                  | IPR002218; IPR020595;<br>G3DSA:3.50.50.60 (GENE3D),<br>PTHR11806 (PANTHER), SSF51905 (SUPERFAMILY)                                             |



|                         |                                                            |    |                                                                                                                                                                                                         |                                                                                                                    |             |                                                                                                                                                              |
|-------------------------|------------------------------------------------------------|----|---------------------------------------------------------------------------------------------------------------------------------------------------------------------------------------------------------|--------------------------------------------------------------------------------------------------------------------|-------------|--------------------------------------------------------------------------------------------------------------------------------------------------------------|
| Caenorhabditis elegans  | phosphatidylcholine:ceramide cholinephosphotransferase     | 3  | F:GO:0047493;<br>C:GO:0016021;<br>P:GO:0006686                                                                                                                                                          | -                                                                                                                  | EC:2.7.8.3  | PTHR21290 (PANTHER),<br>PTHR21290:SF3 (PANTHER)                                                                                                              |
| Brugia malayi           | thyroid adenoma-associated protein                         | 0  |                                                                                                                                                                                                         | F:GO:0003674;<br>F:GO:0005488;<br>P:GO:0008150;<br>C:GO:0005575                                                    |             | -                                                                                                                                                            |
| Caenorhabditis elegans  | heavy unconvectio-I myosin family member (hum-2)           | 12 | F:GO:0017137;<br>F:GO:0035255;<br>C:GO:0016459;<br>P:GO:0032880;<br>C:GO:0043197;<br>F:GO:0005524;<br>F:GO:0003774;<br>C:GO:0019717;<br>C:GO:0043025;<br>C:GO:0048471;<br>P:GO:0050790;<br>P:GO:0015031 | -                                                                                                                  |             | IPR001609; PTHR13140 (PANTHER),<br>PTHR13140:SF15 (PANTHER),<br>SSF52540 (SUPERFAMILY)                                                                       |
| -                       | -                                                          | 0  |                                                                                                                                                                                                         |                                                                                                                    |             | -                                                                                                                                                            |
| Caenorhabditis elegans  | elegans protein partially confirmed by transcript evidence | 0  |                                                                                                                                                                                                         | F:GO:0008270;<br>C:GO:0005622                                                                                      |             | IPR007087; IPR015880                                                                                                                                         |
| Caenorhabditis elegans  | transgelin 3                                               | 0  |                                                                                                                                                                                                         | P:GO:0031032;<br>P:GO:0007517;<br>F:GO:0003674;<br>F:GO:0003779;<br>P:GO:0007417;<br>P:GO:0008150;<br>C:GO:0005575 |             | IPR000557; IPR001715; IPR003096;<br>PTHR18959 (PANTHER),<br>PTHR18959:SF6 (PANTHER)                                                                          |
| Caenorhabditis elegans  | transgelin 3                                               | 0  |                                                                                                                                                                                                         | P:GO:0031032;<br>P:GO:0007517;<br>F:GO:0003674;<br>F:GO:0003779;<br>P:GO:0007417;<br>P:GO:0008150;<br>C:GO:0005575 |             | IPR000557; IPR001715; IPR003096;<br>PTHR18959 (PANTHER),<br>PTHR18959:SF6 (PANTHER)                                                                          |
| Caenorhabditis briggsae | briggsae cbr-aex-3 protein                                 | 11 | P:GO:0016192;<br>P:GO:0007618;<br>P:GO:0030421;<br>P:GO:0018991;<br>C:GO:0016021;<br>P:GO:0051726;<br>P:GO:0042981;<br>C:GO:0008021;<br>F:GO:0017112;<br>P:GO:0007269;<br>P:GO:0000187                  | -                                                                                                                  |             | PTHR13008 (PANTHER)                                                                                                                                          |
| Taeniopygia guttata     | centrosomal protein of 97 kda                              | 2  | C:GO:0005813;<br>F:GO:0005515                                                                                                                                                                           | -                                                                                                                  |             | IPR001611; PRO0019 (PRINTS),<br>G3DSA:3.80.10.10 (GENE3D),<br>PTHR10588 (PANTHER),<br>PTHR10588:SF10 (PANTHER), PSS1450<br>(PROFILE), SSF52058 (SUPERFAMILY) |
| Caenorhabditis elegans  | trehalose 6-phosphate synthase                             | 1  | F:GO:0004805                                                                                                                                                                                            | -                                                                                                                  | EC:3.1.3.12 | SSF56784 (SUPERFAMILY)                                                                                                                                       |
| Caenorhabditis briggsae | endothelin-converting enzyme                               | 3  | C:GO:0016021;<br>F:GO:0004222;<br>P:GO:0006508                                                                                                                                                          | -                                                                                                                  | EC:3.4.24.0 | -                                                                                                                                                            |

|                         |                                       |    |                                                                                                                                                                       |                                                                 |             |                                                                                                                                                               |
|-------------------------|---------------------------------------|----|-----------------------------------------------------------------------------------------------------------------------------------------------------------------------|-----------------------------------------------------------------|-------------|---------------------------------------------------------------------------------------------------------------------------------------------------------------|
|                         | -                                     | 0  |                                                                                                                                                                       |                                                                 |             | -                                                                                                                                                             |
| Loa loa                 | ctr9 protein                          | 10 | F:GO:0042169;<br>P:GO:0043473;<br>P:GO:0016574;<br>P:GO:0040007;<br>P:GO:0000003;<br>P:GO:0002119;<br>P:GO:0014032;<br>P:GO:0006898;<br>P:GO:0009792;<br>C:GO:0005634 | -                                                               |             | IPR001440; IPR011990; IPR013026;<br>IPR019734; PTHR14027 (PANTHER),<br>PTHR14027:SF2 (PANTHER), SSF48452<br>(SUPERFAMILY)                                     |
|                         | -                                     | 0  |                                                                                                                                                                       |                                                                 |             | -                                                                                                                                                             |
|                         | -                                     | 0  |                                                                                                                                                                       |                                                                 |             | -                                                                                                                                                             |
|                         | -                                     | 0  |                                                                                                                                                                       |                                                                 |             | -                                                                                                                                                             |
| Brugia malayi           | prenyl diphosphate subunit 1          | 8  | P:GO:0040010;<br>P:GO:0008340;<br>P:GO:0018991;<br>P:GO:0006744;<br>F:GO:0000010;<br>P:GO:0040017;<br>F:GO:0046982;<br>P:GO:0008299                                   | -                                                               | EC:2.5.1.30 | IPR000092; IPR008949; IPR017446;<br>PTHR12001:SF22 (PANTHER)                                                                                                  |
| Caenorhabditis elegans  | briggsae cbr-xrn-1 protein            | 0  |                                                                                                                                                                       | F:GO:0003676;<br>F:GO:0004527;<br>C:GO:0005622                  |             | -                                                                                                                                                             |
| synthetic construct     | metalloprote-in inhibitor 1 precursor | 7  | P:GO:0051045;<br>P:GO:0043249;<br>F:GO:0046872;<br>C:GO:0005604;<br>F:GO:0005515;<br>F:GO:0008191;<br>P:GO:0008284                                                    | -                                                               |             | SignalP (SIGNALP)                                                                                                                                             |
| Caenorhabditis elegans  | mitochondrial ribosomal               | 3  | C:GO:0005762;<br>F:GO:0003735;<br>P:GO:0006412                                                                                                                        | -                                                               | EC:3.6.5.3  | PTHR21244 (PANTHER)                                                                                                                                           |
| Caenorhabditis briggsae | pre-rr- processing protein utp22      | 0  |                                                                                                                                                                       | C:GO:0000794;<br>F:GO:0003723;<br>C:GO:0005634;<br>C:GO:0005730 |             | IPR005554                                                                                                                                                     |
|                         | -                                     | 0  |                                                                                                                                                                       |                                                                 |             | -                                                                                                                                                             |
| Brugia malayi           | ki-se suppressor of ras               | 6  | P:GO:0007265;<br>F:GO:0004672;<br>P:GO:0008595;<br>P:GO:0007426;<br>P:GO:0007476;<br>F:GO:0000166                                                                     | -                                                               |             | IPR000719; IPR001245; IPR008266;<br>IPR011009; G3DSA:1.10.510.10<br>(GENE3D), G3DSA:3.30.200.20<br>(GENE3D), PTHR23257 (PANTHER),<br>PTHR23257:SF90 (PANTHER) |
| Caenorhabditis briggsae | briggsae cbr-lig-4 protein            | 7  | P:GO:0006260;<br>F:GO:0003677;<br>C:GO:0005622;<br>F:GO:0005524;<br>F:GO:0003910;<br>P:GO:0006310;<br>P:GO:0006281                                                    | -                                                               | EC:6.5.1.1  | IPR012310; PTHR10459 (PANTHER),<br>PTHR10459:SF7 (PANTHER), SSF56091<br>(SUPERFAMILY)                                                                         |
|                         | -                                     | 0  |                                                                                                                                                                       |                                                                 |             | -                                                                                                                                                             |
| Caenorhabditis elegans  | selenoprotein t                       | 1  | P:GO:0050794                                                                                                                                                          | -                                                               |             | IPR011893; IPR012335; IPR012336;<br>IPR019389                                                                                                                 |
|                         | -                                     | 0  |                                                                                                                                                                       |                                                                 |             | -                                                                                                                                                             |

|                         |                                                            |   |                                                                                                                                     |   |            |                                                                                                                                    |
|-------------------------|------------------------------------------------------------|---|-------------------------------------------------------------------------------------------------------------------------------------|---|------------|------------------------------------------------------------------------------------------------------------------------------------|
| Loa loa                 | eukaryotic translation initiation factor 2                 | 6 | P:GO:0010605;<br>P:GO:0010608;<br>P:GO:0044238;<br>F:GO:0003676;<br>P:GO:0044260;<br>C:GO:0044424                                   | - |            | IPR014811; PTHR22891 (PANTHER)                                                                                                     |
| Caenorhabditis briggsae | isoform c                                                  | 1 | P:GO:0019915                                                                                                                        | - |            | IPR006603; PTHR14856 (PANTHER),<br>PTHR14856:SF8 (PANTHER), PF04193<br>(PFAM)                                                      |
|                         |                                                            | 0 |                                                                                                                                     |   |            | -                                                                                                                                  |
| Caenorhabditis briggsae | elegans protein confirmed by transcript evidence           | 8 | C:GO:0005856;<br>P:GO:0040018;<br>C:GO:0031143;<br>P:GO:0000003;<br>P:GO:0040011;<br>P:GO:0019915;<br>C:GO:0044297;<br>F:GO:0005198 | - |            | IPR000535; IPR008962; PTHR22947<br>(PANTHER)                                                                                       |
|                         |                                                            | 0 |                                                                                                                                     |   |            | -                                                                                                                                  |
|                         |                                                            | 0 |                                                                                                                                     |   |            | -                                                                                                                                  |
| Caenorhabditis elegans  | elegans protein partially confirmed by transcript evidence | 4 | P:GO:0006468;<br>F:GO:0005524;<br>F:GO:0004672;<br>F:GO:0005515                                                                     | - |            | -                                                                                                                                  |
| Caenorhabditis briggsae | yl32_caee1 ame: full=uncharacterized protein               | 0 |                                                                                                                                     |   |            | -                                                                                                                                  |
| Caenorhabditis briggsae | briggsae cbr-kin-29 protein                                | 3 | F:GO:0004672;<br>F:GO:0000166;<br>C:GO:0044424                                                                                      | - |            | -                                                                                                                                  |
|                         |                                                            | 0 |                                                                                                                                     |   |            | -                                                                                                                                  |
|                         |                                                            | 0 |                                                                                                                                     |   |            | -                                                                                                                                  |
| Caenorhabditis elegans  | solute carrier family 35 member c2                         | 4 | C:GO:0016021;<br>F:GO:0016491;<br>F:GO:0008270;<br>P:GO:0055085                                                                     | - |            | PTHR11132 (PANTHER), SignalP<br>(SIGNALP)                                                                                          |
| Caenorhabditis elegans  | nuclear receptor nhr-114                                   | 5 | F:GO:0046872;<br>F:GO:0004879;<br>F:GO:0003677;<br>P:GO:0045449;<br>F:GO:0005515                                                    | - |            | IPR001628; IPR008946; IPR013088;<br>PR00350 (PRINTS), PTHR11865<br>(PANTHER), PTHR11865:SF235<br>(PANTHER), SSF57716 (SUPERFAMILY) |
| Caenorhabditis elegans  | peptidyl-prolyl cis-trans isomerase                        | 4 | P:GO:0006457;<br>P:GO:0009792;<br>F:GO:0003755;<br>C:GO:0005886                                                                     | - | EC:5.2.1.8 | IPR002130; IPR015891; IPR020892;<br>PTHR11071 (PANTHER)                                                                            |

|                         |                                                            |    |                                                                                                                                                                                                                                                                                                               |                                                                 |                            |                                                                                                                                                          |
|-------------------------|------------------------------------------------------------|----|---------------------------------------------------------------------------------------------------------------------------------------------------------------------------------------------------------------------------------------------------------------------------------------------------------------|-----------------------------------------------------------------|----------------------------|----------------------------------------------------------------------------------------------------------------------------------------------------------|
| Caenorhabditis elegans  | -scent polypeptide-associated complex alpha subunit        | 18 | P:GO:0008340;<br>F:GO:0017111;<br>P:GO:0040007;<br>F:GO:0017025;<br>P:GO:0006412;<br>P:GO:0045132;<br>P:GO:0015031;<br>P:GO:0018996;<br>P:GO:0040039;<br>P:GO:0019915;<br>P:GO:0009792;<br>F:GO:0003713;<br>F:GO:0042802;<br>P:GO:0002119;<br>P:GO:0010171;<br>C:GO:0005854;<br>C:GO:0005634;<br>P:GO:0040035 | -                                                               | EC:3.6.1.15;<br>EC:3.6.5.3 | IPR000449; IPR002715; PTHR21713 (PANTHER)                                                                                                                |
| Brugia malayi           | family with sequence similarity member b                   | 3  | C:GO:0005737;<br>F:GO:0005488;<br>C:GO:0043229                                                                                                                                                                                                                                                                | -                                                               |                            | IPR011990; IPR013026; SignalP (SIGNALP), SSF48452 (SUPERFAMILY)                                                                                          |
| Caenorhabditis brenneri | abc transporter atp-binding protein                        | 3  | F:GO:0017111;<br>F:GO:0005488;<br>C:GO:0044464                                                                                                                                                                                                                                                                | -                                                               | EC:3.6.1.15                | IPR003439; IPR017871; G3DSA:3.40.50.300 (GENE3D), PTHR11384 (PANTHER), PTHR11384:SF3 (PANTHER), SSF52540 (SUPERFAMILY)                                   |
|                         | -                                                          | 0  |                                                                                                                                                                                                                                                                                                               |                                                                 |                            | -                                                                                                                                                        |
|                         | -                                                          | 0  |                                                                                                                                                                                                                                                                                                               |                                                                 |                            | -                                                                                                                                                        |
| Caenorhabditis elegans  | g protein-coupled receptor                                 | 2  | P:GO:0007186;<br>C:GO:0016021                                                                                                                                                                                                                                                                                 | -                                                               |                            | IPR017452; IPR019427; G3DSA:1.20.1070.10 (GENE3D), PTHR22751 (PANTHER), PTHR22751:SF8 (PANTHER), SignalP (SIGNALP), SSF81321 (SUPERFAMILY)               |
| Brugia malayi           | dead deah box helicase family protein                      | 1  | F:GO:0005488                                                                                                                                                                                                                                                                                                  | -                                                               |                            | IPR001650; IPR011545; IPR014001; IPR014014; IPR014021; G3DSA:3.40.50.300 (GENE3D), PTHR10967 (PANTHER), PTHR10967:SF57 (PANTHER), SSF52540 (SUPERFAMILY) |
| Caenorhabditis elegans  | hypothetical protein ZC247.1 [Caenorhabditis elegans]      | 0  |                                                                                                                                                                                                                                                                                                               |                                                                 |                            | -                                                                                                                                                        |
| Caenorhabditis elegans  | hypothetical protein Y71F9B.1 [Caenorhabditis elegans]     | 0  |                                                                                                                                                                                                                                                                                                               |                                                                 |                            | SignalP (SIGNALP)                                                                                                                                        |
| Caenorhabditis elegans  | elegans protein partially confirmed by transcript evidence | 0  |                                                                                                                                                                                                                                                                                                               | P:GO:0007600;<br>P:GO:0007165;<br>F:GO:0042802;<br>F:GO:0005515 |                            | PTHR11188 (PANTHER), PTHR11188:SF13 (PANTHER)                                                                                                            |
| Brugia malayi           | hypothetical protein Bm1_19875 [Brugia malayi]             | 0  |                                                                                                                                                                                                                                                                                                               |                                                                 |                            | -                                                                                                                                                        |
|                         | -                                                          | 0  |                                                                                                                                                                                                                                                                                                               |                                                                 |                            | -                                                                                                                                                        |
| Caenorhabditis elegans  | p21                                                        | 3  | F:GO:0005097;<br>C:GO:0005622;<br>P:GO:0032313                                                                                                                                                                                                                                                                | -                                                               |                            | IPR000195; G3DSA:1.10.8.270 (GENE3D), PTHR22957 (PANTHER), PTHR22957:SF44 (PANTHER)                                                                      |
| Caenorhabditis briggsae | elegans protein confirmed by transcript evidence           | 0  |                                                                                                                                                                                                                                                                                                               |                                                                 |                            | -                                                                                                                                                        |
| Caenorhabditis briggsae | elegans protein confirmed by transcript evidence           | 0  |                                                                                                                                                                                                                                                                                                               |                                                                 |                            | -                                                                                                                                                        |
| Caenorhabditis elegans  | nematode astacin protease protein 30                       | 4  | F:GO:0004222;<br>P:GO:0009792;<br>P:GO:0006508;<br>F:GO:0008270                                                                                                                                                                                                                                               | -                                                               | EC:3.4.24.0                | IPR001506; G3DSA:3.40.390.10 (GENE3D), PTHR10127 (PANTHER), PTHR10127:SF65 (PANTHER), SSF55486 (SUPERFAMILY)                                             |
| Caenorhabditis briggsae | mflj00229 protein                                          | 1  | F:GO:0005524                                                                                                                                                                                                                                                                                                  | -                                                               |                            | IPR012860; SignalP (SIGNALP)                                                                                                                             |

|                         |                                                            |    |                                                                                                                                                                                                                                                            |                                                |            |                                                                                                                                                           |
|-------------------------|------------------------------------------------------------|----|------------------------------------------------------------------------------------------------------------------------------------------------------------------------------------------------------------------------------------------------------------|------------------------------------------------|------------|-----------------------------------------------------------------------------------------------------------------------------------------------------------|
| Caenorhabditis elegans  | solute carrier organic anion transporter family member 3a1 | 4  | C:GO:0016021;<br>P:GO:0009792;<br>P:GO:0055085;<br>F:GO:0005215                                                                                                                                                                                            |                                                |            | IPR004156; PTHR11388:SF7<br>(PANTHER), SignalP (SIGNALP)                                                                                                  |
| Ancylostoma ceylanicum  | scp-like extracellular protein                             | 0  |                                                                                                                                                                                                                                                            | P:GO:0040011;<br>P:GO:0006898;<br>C:GO:0005576 |            | -                                                                                                                                                         |
|                         | -                                                          | 0  |                                                                                                                                                                                                                                                            |                                                |            | -                                                                                                                                                         |
| Caenorhabditis elegans  | protein                                                    | 0  |                                                                                                                                                                                                                                                            |                                                |            | -                                                                                                                                                         |
| Caenorhabditis elegans  | elegans protein partially confirmed by transcript evidence | 2  | P:GO:0023052;<br>F:GO:0004872                                                                                                                                                                                                                              |                                                |            | IPR000276; IPR017452;<br>G3DSA:1.20.1070.10 (GENE3D),<br>PTHR19264 (PANTHER),<br>PTHR19264:SF33 (PANTHER), SignalP<br>(SIGNALP), SSF81321 (SUPERFAMILY)   |
|                         | -                                                          | 0  |                                                                                                                                                                                                                                                            |                                                |            | -                                                                                                                                                         |
| Caenorhabditis briggsae | eh domain binding protein 1                                | 0  |                                                                                                                                                                                                                                                            |                                                |            | PTHR11915 (PANTHER),<br>PTHR11915:SF30 (PANTHER)                                                                                                          |
|                         | -                                                          | 0  |                                                                                                                                                                                                                                                            |                                                |            | G3DSA:3.80.10.10 (GENE3D)                                                                                                                                 |
| Caenorhabditis elegans  | glycosyltransferase 25 domain containing 1                 | 6  | P:GO:0040035;<br>P:GO:0009103;<br>F:GO:0005515;<br>P:GO:0040010;<br>P:GO:0040011;<br>P:GO:0002009                                                                                                                                                          |                                                |            | -                                                                                                                                                         |
| Caenorhabditis elegans  | epoxide hydrolase microsomal                               | 4  | F:GO:0016803;<br>P:GO:0040010;<br>P:GO:0042221;<br>C:GO:0016020                                                                                                                                                                                            |                                                | EC:3.3.2.0 | IPR000073; IPR000639; IPR010497;<br>IPR016292; G3DSA:3.40.50.1820<br>(GENE3D), PTHR21661 (PANTHER),<br>PTHR21661:SF2 (PANTHER), SSF53474<br>(SUPERFAMILY) |
|                         | -                                                          | 0  |                                                                                                                                                                                                                                                            |                                                |            | -                                                                                                                                                         |
|                         | -                                                          | 0  |                                                                                                                                                                                                                                                            |                                                |            | -                                                                                                                                                         |
| Haemonchus contortus    | hc38                                                       | 0  |                                                                                                                                                                                                                                                            | C:GO:0005576                                   |            | IPR006994                                                                                                                                                 |
|                         | -                                                          | 0  |                                                                                                                                                                                                                                                            |                                                |            | -                                                                                                                                                         |
| Caenorhabditis elegans  | splicing factor 3a                                         | 15 | F:GO:0008270;<br>F:GO:0003676;<br>C:GO:0071011;<br>C:GO:0005686;<br>P:GO:0040007;<br>P:GO:0040035;<br>P:GO:0007052;<br>P:GO:0002119;<br>F:GO:0005515;<br>P:GO:0040011;<br>P:GO:0000398;<br>P:GO:0006898;<br>C:GO:0071013;<br>P:GO:0002009;<br>P:GO:0009792 |                                                |            | -                                                                                                                                                         |

|                         |                                                            |    |                                                                                                                                                                                                                                           |                                                                                                                                                      |                                                                                                                              |
|-------------------------|------------------------------------------------------------|----|-------------------------------------------------------------------------------------------------------------------------------------------------------------------------------------------------------------------------------------------|------------------------------------------------------------------------------------------------------------------------------------------------------|------------------------------------------------------------------------------------------------------------------------------|
| Caenorhabditis elegans  | general vesicular transport factor p115                    | 14 | C:GO:0005829;<br>F:GO:0008565;<br>P:GO:0045056;<br>C:GO:0000139;<br>P:GO:0048280;<br>F:GO:0042802;<br>P:GO:0032940;<br>P:GO:0006891;<br>P:GO:0019915;<br>C:GO:0005792;<br>C:GO:0048471;<br>P:GO:0040039;<br>P:GO:0006898;<br>P:GO:0006886 | -                                                                                                                                                    | IPR011989; PTHR10013 (PANTHER)                                                                                               |
| Caenorhabditis elegans  | briggsae cbr-mrp-4 protein                                 | 0  |                                                                                                                                                                                                                                           | F:GO:0042626;<br>F:GO:0005215;<br>C:GO:0016021;<br>P:GO:0006810;<br>F:GO:0000166;<br>F:GO:0017111;<br>F:GO:0005524;<br>F:GO:0016887;<br>P:GO:0055085 | PTHR19242 (PANTHER),<br>PTHR19242:SF15 (PANTHER), SignalP (SIGNALP)                                                          |
| Caenorhabditis briggsae | briggsae cbr-tag-320 protein                               | 6  | P:GO:0045454;<br>P:GO:0040007;<br>F:GO:0016853;<br>C:GO:0005811;<br>P:GO:0002119;<br>P:GO:0040011                                                                                                                                         | -                                                                                                                                                    | IPR005746; IPR005788; IPR012335;<br>IPR012336; IPR013766; IPR017936;<br>IPR017937; PTHR18929 (PANTHER),<br>SignalP (SIGNALP) |
| Caenorhabditis briggsae | elegans protein partially confirmed by transcript evidence | 0  |                                                                                                                                                                                                                                           |                                                                                                                                                      | SignalP (SIGNALP)                                                                                                            |
|                         | -                                                          | 0  |                                                                                                                                                                                                                                           |                                                                                                                                                      | -                                                                                                                            |
| Caenorhabditis elegans  | metabotropic glutamate receptor type 3                     | 3  | C:GO:0016020;<br>P:GO:0023052;<br>F:GO:0004872                                                                                                                                                                                            | -                                                                                                                                                    | -                                                                                                                            |
| Caenorhabditis briggsae | udp-galactose transporter                                  | 6  | C:GO:0000139;<br>P:GO:0015785;<br>F:GO:0005351;<br>P:GO:0006012;<br>C:GO:0016021;<br>F:GO:0005459                                                                                                                                         | -                                                                                                                                                    | IPR007271; PTHR10231:SF13<br>(PANTHER), SignalP (SIGNALP),<br>SSF103481 (SUPERFAMILY)                                        |
|                         | -                                                          | 0  |                                                                                                                                                                                                                                           |                                                                                                                                                      | -                                                                                                                            |
| Caenorhabditis briggsae | Hypothetical protein CBG21314 [Caenorhabditis briggsae]    | 0  |                                                                                                                                                                                                                                           |                                                                                                                                                      | SignalP (SIGNALP)                                                                                                            |
| Caenorhabditis elegans  | early endosome antigen 1-like                              | 4  | F:GO:0046872;<br>C:GO:0005769;<br>F:GO:0005515;<br>C:GO:0005969                                                                                                                                                                           | -                                                                                                                                                    | IPR000306; IPR011011; IPR013083;<br>IPR017455; G3DSA:1.20.5.390<br>(GENE3D), PTHR23164 (PANTHER)                             |

|                        |                                      |    |                                                                                                                                                                                                                                                                                                                                                                                                                                                                                                                                    |                                                                                                                                       |                                                         |                                                                                                                                                 |
|------------------------|--------------------------------------|----|------------------------------------------------------------------------------------------------------------------------------------------------------------------------------------------------------------------------------------------------------------------------------------------------------------------------------------------------------------------------------------------------------------------------------------------------------------------------------------------------------------------------------------|---------------------------------------------------------------------------------------------------------------------------------------|---------------------------------------------------------|-------------------------------------------------------------------------------------------------------------------------------------------------|
| Caenorhabditis elegans | loc398457 protein                    | 29 | <p>P:GO:0031991;<br/> P:GO:0046777;<br/> F:GO:0004713;<br/> P:GO:0040011;<br/> F:GO:0019894;<br/> P:GO:0030261;<br/> F:GO:0046872;<br/> F:GO:0008017;<br/> F:GO:0051117;<br/> C:GO:0000775;<br/> P:GO:0009792;<br/> C:GO:0051233;<br/> C:GO:0005813;<br/> P:GO:0007059;<br/> F:GO:0035175;<br/> P:GO:0007126;<br/> P:GO:0045184;<br/> P:GO:0018108;<br/> P:GO:0090307;<br/> C:GO:0000794;<br/> P:GO:0007109;<br/> C:GO:0005876;<br/> C:GO:0032133;<br/> F:GO:0005524;<br/> P:GO:0051256;<br/> C:GO:0000922;<br/> P:GO:0043987;</p> | -                                                                                                                                     | EC:2.7.10.0                                             | IPR000719; IPR008271; IPR011009;<br>IPR017441; IPR017442; IPR020636;<br>IPR020663; G3DSA:1.10.510.10<br>(GENE3D), G3DSA:3.30.200.20<br>(GENE3D) |
| Caenorhabditis elegans | briggsae cbr-cnk-1 protein           | 1  | P:GO:0040026                                                                                                                                                                                                                                                                                                                                                                                                                                                                                                                       | -                                                                                                                                     | -                                                       | -                                                                                                                                               |
| Brugia malayi          | fructosamine-3-ki-se-related protein | 0  |                                                                                                                                                                                                                                                                                                                                                                                                                                                                                                                                    | <p>F:GO:0016301;<br/> F:GO:0003674;<br/> P:GO:0016310;<br/> F:GO:0016740;<br/> P:GO:0008152;<br/> P:GO:0008150;<br/> C:GO:0005575</p> | -                                                       | -                                                                                                                                               |
| Ostertagia ostertagi   | alpha tubulin                        | 15 | <p>P:GO:0040010;<br/> C:GO:0005874;<br/> P:GO:0035046;<br/> P:GO:0051258;<br/> P:GO:0007018;<br/> P:GO:0002119;<br/> F:GO:0005515;<br/> P:GO:0040017;<br/> F:GO:0003924;<br/> P:GO:0040039;<br/> P:GO:0006898;<br/> F:GO:0005198;<br/> P:GO:0002009;<br/> P:GO:0009792;<br/> F:GO:0005525</p>                                                                                                                                                                                                                                      | -                                                                                                                                     | EC:3.6.5.1;<br>EC:3.6.5.2;<br>EC:3.6.5.3;<br>EC:3.6.5.4 | IPR000217; IPR002452; IPR003008;<br>IPR017975                                                                                                   |

|                         |                                                  |    |                                                                                                                                                                                                                                                            |   |                                                         |                                                                                   |
|-------------------------|--------------------------------------------------|----|------------------------------------------------------------------------------------------------------------------------------------------------------------------------------------------------------------------------------------------------------------|---|---------------------------------------------------------|-----------------------------------------------------------------------------------|
| Caenorhabditis briggsae | tubulin alpha chain                              | 15 | P:GO:0040010;<br>C:GO:0005874;<br>P:GO:0035046;<br>P:GO:0051258;<br>P:GO:0007018;<br>P:GO:0002119;<br>F:GO:0005515;<br>P:GO:0040017;<br>F:GO:0003924;<br>P:GO:0040039;<br>P:GO:0006898;<br>F:GO:0005198;<br>P:GO:0002009;<br>P:GO:0009792;<br>F:GO:0005525 | - | EC:3.6.5.1;<br>EC:3.6.5.2;<br>EC:3.6.5.3;<br>EC:3.6.5.4 | IPR000217; IPR002452; IPR003008;<br>IPR008280; IPR017975; IPR018316;<br>IPR023123 |
| Ostertagia ostertagi    | elegans protein confirmed by transcript evidence | 15 | P:GO:0040010;<br>C:GO:0005874;<br>P:GO:0035046;<br>P:GO:0051258;<br>P:GO:0007018;<br>P:GO:0002119;<br>F:GO:0005515;<br>P:GO:0040017;<br>F:GO:0003924;<br>P:GO:0040039;<br>P:GO:0006898;<br>F:GO:0005198;<br>P:GO:0002009;<br>P:GO:0009792;<br>F:GO:0005525 | - | EC:3.6.5.1;<br>EC:3.6.5.2;<br>EC:3.6.5.3;<br>EC:3.6.5.4 | IPR000217; IPR002452; IPR003008;<br>IPR017975                                     |
| Caenorhabditis briggsae | tubulin alpha chain                              | 15 | P:GO:0040010;<br>C:GO:0005874;<br>P:GO:0035046;<br>P:GO:0051258;<br>P:GO:0007018;<br>P:GO:0002119;<br>F:GO:0005515;<br>P:GO:0040017;<br>F:GO:0003924;<br>P:GO:0040039;<br>P:GO:0006898;<br>F:GO:0005198;<br>P:GO:0002009;<br>P:GO:0009792;<br>F:GO:0005525 | - | EC:3.6.5.1;<br>EC:3.6.5.2;<br>EC:3.6.5.3;<br>EC:3.6.5.4 | IPR000217; IPR002452; IPR003008;<br>IPR008280; IPR017975; IPR018316;<br>IPR023123 |



|                         |                                                  |    |                                                                                                                                                                                                                                                            |   |                                                         |                                                                                   |
|-------------------------|--------------------------------------------------|----|------------------------------------------------------------------------------------------------------------------------------------------------------------------------------------------------------------------------------------------------------------|---|---------------------------------------------------------|-----------------------------------------------------------------------------------|
| Caenorhabditis briggsae | tubulin alpha chain                              | 15 | P:GO:0040010;<br>C:GO:0005874;<br>P:GO:0035046;<br>P:GO:0051258;<br>P:GO:0007018;<br>P:GO:0002119;<br>F:GO:0005515;<br>P:GO:0040017;<br>F:GO:0003924;<br>P:GO:0040039;<br>P:GO:0006898;<br>F:GO:0005198;<br>P:GO:0002009;<br>P:GO:0009792;<br>F:GO:0005525 | - | EC:3.6.5.1;<br>EC:3.6.5.2;<br>EC:3.6.5.3;<br>EC:3.6.5.4 | IPR000217; IPR002452; IPR003008;<br>IPR008280; IPR017975; IPR018316;<br>IPR023123 |
| Caenorhabditis elegans  | gdp-fucose transporter                           | 4  | C:GO:0005794;<br>P:GO:0006810;<br>P:GO:0030259;<br>C:GO:0016021                                                                                                                                                                                            | - |                                                         | IPR013657; PTHR11132 (PANTHER),<br>SSF103481 (SUPERFAMILY)                        |
| Caenorhabditis elegans  | gdp-fucose transporter                           | 4  | C:GO:0005794;<br>P:GO:0006810;<br>P:GO:0030259;<br>C:GO:0016021                                                                                                                                                                                            | - |                                                         | IPR013657; PTHR11132 (PANTHER),<br>SSF103481 (SUPERFAMILY)                        |
| Caenorhabditis briggsae | tubulin alpha chain                              | 15 | P:GO:0040010;<br>C:GO:0005874;<br>P:GO:0035046;<br>P:GO:0051258;<br>P:GO:0007018;<br>P:GO:0002119;<br>F:GO:0005515;<br>P:GO:0040017;<br>F:GO:0003924;<br>P:GO:0040039;<br>P:GO:0006898;<br>F:GO:0005198;<br>P:GO:0002009;<br>P:GO:0009792;<br>F:GO:0005525 | - | EC:3.6.5.1;<br>EC:3.6.5.2;<br>EC:3.6.5.3;<br>EC:3.6.5.4 | IPR000217; IPR002452; IPR003008;<br>IPR008280; IPR017975; IPR018316;<br>IPR023123 |
| Caenorhabditis briggsae | elegans protein confirmed by transcript evidence | 15 | P:GO:0040010;<br>C:GO:0005874;<br>P:GO:0035046;<br>P:GO:0051258;<br>P:GO:0007018;<br>P:GO:0002119;<br>F:GO:0005515;<br>P:GO:0040017;<br>F:GO:0003924;<br>P:GO:0040039;<br>P:GO:0006898;<br>F:GO:0005198;<br>P:GO:0002009;<br>P:GO:0009792;<br>F:GO:0005525 | - | EC:3.6.5.1;<br>EC:3.6.5.2;<br>EC:3.6.5.3;<br>EC:3.6.5.4 |                                                                                   |

|                         |                                                  |    |                                                                                                                                                                                                                                                            |   |                                                         |                                                                                                |
|-------------------------|--------------------------------------------------|----|------------------------------------------------------------------------------------------------------------------------------------------------------------------------------------------------------------------------------------------------------------|---|---------------------------------------------------------|------------------------------------------------------------------------------------------------|
| Caenorhabditis briggsae | elegans protein confirmed by transcript evidence | 15 | P:GO:0040010;<br>C:GO:0005874;<br>P:GO:0035046;<br>P:GO:0051258;<br>P:GO:0007018;<br>P:GO:0002119;<br>F:GO:0005515;<br>P:GO:0040017;<br>F:GO:0003924;<br>P:GO:0040039;<br>P:GO:0006898;<br>F:GO:0005198;<br>P:GO:0002009;<br>P:GO:0009792;<br>F:GO:0005525 | - | EC:3.6.5.1;<br>EC:3.6.5.2;<br>EC:3.6.5.3;<br>EC:3.6.5.4 | -                                                                                              |
| Caenorhabditis elegans  | o ant response abnormal family member (odr-4)    | 1  | F:GO:0005488                                                                                                                                                                                                                                               | - |                                                         | IPR002085; PTHR11695:SF3<br>(PANTHER)                                                          |
| Caenorhabditis elegans  | d--directed r- polymerase ii subunit rpb7        | 15 | F:GO:0003899;<br>F:GO:0003723;<br>P:GO:0006915;<br>F:GO:0004672;<br>P:GO:0006367;<br>P:GO:0040007;<br>P:GO:0000003;<br>P:GO:0008380;<br>C:GO:0005665;<br>P:GO:0002119;<br>F:GO:0005515;<br>P:GO:0006368;<br>P:GO:0006898;<br>P:GO:0009792;<br>P:GO:0001703 | - | EC:2.7.7.6                                              | -                                                                                              |
| Caenorhabditis elegans  | d--directed r- polymerase ii subunit rpb7        | 15 | F:GO:0003899;<br>F:GO:0003723;<br>P:GO:0006915;<br>F:GO:0004672;<br>P:GO:0006367;<br>P:GO:0040007;<br>P:GO:0000003;<br>P:GO:0008380;<br>C:GO:0005665;<br>P:GO:0002119;<br>F:GO:0005515;<br>P:GO:0006368;<br>P:GO:0006898;<br>P:GO:0009792;<br>P:GO:0001703 | - | EC:2.7.7.6                                              | IPR003029; IPR005576; IPR012340;<br>IPR016027; PTHR12709 (PANTHER),<br>PTHR12709:SF1 (PANTHER) |

|                                   |                                                         |    |                                                                                                                                                                                                                                                            |                                                                                  |            |                                                                                                                    |
|-----------------------------------|---------------------------------------------------------|----|------------------------------------------------------------------------------------------------------------------------------------------------------------------------------------------------------------------------------------------------------------|----------------------------------------------------------------------------------|------------|--------------------------------------------------------------------------------------------------------------------|
| Caenorhabditis elegans            | d--directed r- polymerase ii subunit rpb7               | 15 | F:GO:0003899;<br>F:GO:0003723;<br>P:GO:0006915;<br>F:GO:0004672;<br>P:GO:0006367;<br>P:GO:0040007;<br>P:GO:0000003;<br>P:GO:0008380;<br>C:GO:0005665;<br>P:GO:0002119;<br>F:GO:0005515;<br>P:GO:0006368;<br>P:GO:0006898;<br>P:GO:0009792;<br>P:GO:0001703 | -                                                                                | EC:2.7.7.6 | IPR003029; IPR005576; IPR012340;<br>IPR016027; IPR022967; PTHR12709<br>(PANTHER), PTHR12709:SF1<br>(PANTHER)       |
| Loa loa                           | btb poz domain containing protein                       | 1  | F:GO:0005488                                                                                                                                                                                                                                               | -                                                                                |            | IPR013089                                                                                                          |
|                                   | -                                                       | 0  |                                                                                                                                                                                                                                                            |                                                                                  |            | IPR010916                                                                                                          |
|                                   | -                                                       | 0  |                                                                                                                                                                                                                                                            |                                                                                  |            | IPR010916                                                                                                          |
|                                   | -                                                       | 0  |                                                                                                                                                                                                                                                            |                                                                                  |            | -                                                                                                                  |
| Caenorhabditis briggsae           | Hypothetical protein CBG02486 [Caenorhabditis briggsae] | 0  |                                                                                                                                                                                                                                                            | C:GO:0016021;<br>C:GO:0016020;<br>P:GO:0055085;<br>P:GO:0030001;<br>F:GO:0046873 |            | IPR003689; PTHR11040 (PANTHER),<br>PTHR11040:SF5 (PANTHER), SignalP<br>(SIGNALP)                                   |
|                                   | -                                                       | 0  |                                                                                                                                                                                                                                                            |                                                                                  |            | SignalP (SIGNALP)                                                                                                  |
|                                   | -                                                       | 0  |                                                                                                                                                                                                                                                            |                                                                                  |            | -                                                                                                                  |
| Caenorhabditis elegans            | ring finger protein 160                                 | 1  | F:GO:0005488                                                                                                                                                                                                                                               | -                                                                                |            | IPR001841; IPR013083; PTHR12389<br>(PANTHER), PF11793 (PFAM),<br>SSF57850 (SUPERFAMILY)                            |
| Caenorhabditis elegans            | cleavage and polyadenylation specificity factor cpsf    | 6  | P:GO:0006378;<br>P:GO:0008380;<br>C:GO:0005847;<br>F:GO:0003730;<br>F:GO:0005515;<br>P:GO:0006379                                                                                                                                                          | -                                                                                |            | IPR004871; PTHR10644 (PANTHER),<br>PTHR10644:SF2 (PANTHER)                                                         |
|                                   | -                                                       | 0  |                                                                                                                                                                                                                                                            |                                                                                  |            | -                                                                                                                  |
| Caenorhabditis elegans            | integral membrane protein gpr180                        | 0  |                                                                                                                                                                                                                                                            |                                                                                  |            | PTHR23252 (PANTHER),<br>PTHR23252:SF3 (PANTHER), SignalP<br>(SIGNALP)                                              |
| Penicillium marneffeii ATCC 18224 | myst histone acetyltransferase (monocytic leukemia) 3   | 13 | C:GO:0000785;<br>C:GO:0032991;<br>F:GO:0030528;<br>F:GO:0005515;<br>F:GO:0016407;<br>P:GO:0051216;<br>P:GO:0007389;<br>P:GO:0048706;<br>C:GO:0044428;<br>P:GO:0045449;<br>P:GO:0048705;<br>P:GO:0048598;<br>P:GO:0016573                                   | -                                                                                |            | IPR007087; IPR015880; IPR016181;<br>G3DSA:3.30.60.60 (GENE3D),<br>PTHR10615 (PANTHER),<br>PTHR10615:SF35 (PANTHER) |
|                                   | -                                                       | 0  |                                                                                                                                                                                                                                                            |                                                                                  |            | -                                                                                                                  |
|                                   | -                                                       | 0  |                                                                                                                                                                                                                                                            |                                                                                  |            | -                                                                                                                  |
| Brugia malayi                     | g protein pathway suppressor 1                          | 3  | P:GO:0000165;<br>P:GO:0000003;<br>F:GO:0005515                                                                                                                                                                                                             | -                                                                                |            | IPR019585; PTHR14145 (PANTHER),<br>PTHR14145:SF2 (PANTHER)                                                         |

|                         |                                             |   |                                                                                                                                                                                                                                                                                                                                                                                                                                                                      |  |                                                                                                       |
|-------------------------|---------------------------------------------|---|----------------------------------------------------------------------------------------------------------------------------------------------------------------------------------------------------------------------------------------------------------------------------------------------------------------------------------------------------------------------------------------------------------------------------------------------------------------------|--|-------------------------------------------------------------------------------------------------------|
| Caenorhabditis briggsae | vascular endothelial growth factor receptor | 0 | P:GO:0070374;<br>P:GO:008283;<br>C:GO:005887;<br>C:GO:005886;<br>F:GO:0004715;<br>F:GO:0004714;<br>F:GO:0004713;<br>P:GO:0045785;<br>C:GO:0016020;<br>P:GO:0001700;<br>P:GO:0007267;<br>F:GO:0004674;<br>F:GO:0004672;<br>F:GO:0019955;<br>P:GO:0007169;<br>F:GO:0005011;<br>P:GO:0007165;<br>F:GO:0042803;<br>F:GO:0005524;<br>P:GO:0016337;<br>P:GO:0007160;<br>P:GO:0030334;<br>F:GO:0016301;<br>F:GO:0000166;<br>C:GO:0043235;<br>P:GO:0042127;<br>P:GO:0006468; |  | IPR000719; IPR001245;<br>G3DSA:1.10.510.10 (GENE3D), SignalP (SIGNALP)                                |
| Caenorhabditis elegans  | vascular endothelial growth factor receptor | 0 | P:GO:0070374;<br>P:GO:008283;<br>C:GO:005887;<br>C:GO:005886;<br>F:GO:0004715;<br>F:GO:0004714;<br>F:GO:0004713;<br>P:GO:0045785;<br>C:GO:0016020;<br>P:GO:0001700;<br>P:GO:0007267;<br>F:GO:0004674;<br>F:GO:0004672;<br>F:GO:0019955;<br>P:GO:0007169;<br>F:GO:0005011;<br>P:GO:0007165;<br>F:GO:0042803;<br>F:GO:0005524;<br>P:GO:0016337;<br>P:GO:0007160;<br>P:GO:0030334;<br>F:GO:0016301;<br>F:GO:0000166;<br>C:GO:0043235;<br>P:GO:0042127;<br>P:GO:0006468; |  | IPR000719; IPR001245; IPR011009;<br>IPR020685; G3DSA:1.10.510.10 (GENE3D), G3DSA:3.30.200.20 (GENE3D) |

|                         |                                   |    |                                                                                                                                                                                                                                                                                                                                |                                                |                                                  |
|-------------------------|-----------------------------------|----|--------------------------------------------------------------------------------------------------------------------------------------------------------------------------------------------------------------------------------------------------------------------------------------------------------------------------------|------------------------------------------------|--------------------------------------------------|
| Caenorhabditis elegans  | briggsae cbr-chk-1 protein        | 14 | P:GO:0000226;<br>P:GO:0000003;<br>F:GO:0016301;<br>P:GO:0000075;<br>P:GO:0006974;<br>P:GO:0040010;<br>P:GO:0040011;<br>C:GO:0044424;<br>P:GO:0000279;<br>P:GO:0009792;<br>P:GO:0007165;<br>P:GO:0002119;<br>P:GO:0010171;<br>P:GO:0007346                                                                                      | -                                              | SignalIP (SIGNALP)                               |
|                         | -                                 | 0  |                                                                                                                                                                                                                                                                                                                                |                                                | -                                                |
|                         | -                                 | 0  |                                                                                                                                                                                                                                                                                                                                |                                                | -                                                |
|                         | -                                 | 0  |                                                                                                                                                                                                                                                                                                                                |                                                | -                                                |
| Caenorhabditis briggsae | atp-binding sub-family a member 1 | 19 | P:GO:0055099;<br>P:GO:0045332;<br>F:GO:0005515;<br>F:GO:0000166;<br>F:GO:0005548;<br>P:GO:0008203;<br>P:GO:0010875;<br>P:GO:0043691;<br>P:GO:0006911;<br>C:GO:0005794;<br>F:GO:0008509;<br>P:GO:0071300;<br>P:GO:0002790;<br>P:GO:0033700;<br>F:GO:0016887;<br>P:GO:0006497;<br>P:GO:0071222;<br>C:GO:0005887;<br>F:GO:0017127 | -                                              | PTHR19229 (PANTHER),<br>PTHR19229:SF25 (PANTHER) |
|                         | -                                 | 0  |                                                                                                                                                                                                                                                                                                                                |                                                | -                                                |
|                         | -                                 | 0  |                                                                                                                                                                                                                                                                                                                                |                                                | SignalIP (SIGNALP)                               |
|                         | -                                 | 0  |                                                                                                                                                                                                                                                                                                                                |                                                | SignalIP (SIGNALP)                               |
|                         | -                                 | 0  |                                                                                                                                                                                                                                                                                                                                |                                                | SignalIP (SIGNALP)                               |
| Caenorhabditis briggsae | transmembrane protein 144         | 2  | P:GO:0009792;<br>P:GO:0000003                                                                                                                                                                                                                                                                                                  | -                                              | IPR012435; SignalIP (SIGNALP)                    |
| Caenorhabditis brenneri | isoform b                         | 1  | P:GO:0000003                                                                                                                                                                                                                                                                                                                   | -                                              | IPR000326; IPR019388; PTHR23129 (PANTHER)        |
| Caenorhabditis brenneri | isoform b                         | 1  | P:GO:0000003                                                                                                                                                                                                                                                                                                                   | -                                              | IPR000326; IPR019388; PTHR23129 (PANTHER)        |
| Caenorhabditis elegans  | u4 tri-snrrp-associated protein 1 | 5  | P:GO:0018996;<br>P:GO:0040007;<br>P:GO:0040035;<br>P:GO:0002119;<br>P:GO:0040011                                                                                                                                                                                                                                               | -                                              | IPR005011                                        |
| Caenorhabditis elegans  | phospholipase b-like 2-like       | 0  |                                                                                                                                                                                                                                                                                                                                | F:GO:0016787;<br>C:GO:0043202;<br>P:GO:0016042 | -                                                |
|                         | -                                 | 0  |                                                                                                                                                                                                                                                                                                                                |                                                | -                                                |

|                           |                                                            |   |                                                                                                                    |                                                |                                                                                                                                                         |
|---------------------------|------------------------------------------------------------|---|--------------------------------------------------------------------------------------------------------------------|------------------------------------------------|---------------------------------------------------------------------------------------------------------------------------------------------------------|
| Caenorhabditis brenneri   | isoleucyl-tr- synthetase                                   | 4 | F:GO:0004812;<br>F:GO:0046872;<br>P:GO:0006418;<br>F:GO:0000166                                                    | -                                              | IPR002300; IPR002301; IPR014729;<br>G3DSA:1.10.730.10 (GENE3D),<br>PTHR11946 (PANTHER), SignalP<br>(SIGNALP), SSF52374 (SUPERFAMILY)                    |
| Caenorhabditis briggsae   | Hypothetical protein CBG04315 [Caenorhabditis briggsae]    | 0 |                                                                                                                    |                                                | -                                                                                                                                                       |
|                           | -                                                          | 0 |                                                                                                                    |                                                | -                                                                                                                                                       |
|                           | -                                                          | 0 |                                                                                                                    |                                                | -                                                                                                                                                       |
|                           | -                                                          | 0 |                                                                                                                    |                                                | SignalP (SIGNALP)                                                                                                                                       |
|                           | -                                                          | 0 |                                                                                                                    |                                                | IPR010916                                                                                                                                               |
| Ostertagia ostertagi      | latrophilin receptor family member (lat-1)                 | 7 | F:GO:0004930;<br>F:GO:0005529;<br>C:GO:0005886;<br>P:GO:0007165;<br>P:GO:0007420;<br>C:GO:0016021;<br>P:GO:0007218 | -                                              | IPR000832; IPR017981; PTHR12011<br>(PANTHER), PTHR12011:SF55<br>(PANTHER), SignalP (SIGNALP)                                                            |
|                           | -                                                          | 0 |                                                                                                                    |                                                | -                                                                                                                                                       |
| Caenorhabditis briggsae   | briggsae cbr-nhr-48 protein                                | 5 | F:GO:0046872;<br>F:GO:0004879;<br>F:GO:0003677;<br>P:GO:0045449;<br>F:GO:0005515                                   | -                                              | -                                                                                                                                                       |
|                           | -                                                          | 0 |                                                                                                                    |                                                | SignalP (SIGNALP)                                                                                                                                       |
| Brugia malayi             | mediator complex subunit rgr-1                             | 1 | P:GO:0007275                                                                                                       | -                                              | -                                                                                                                                                       |
| Caenorhabditis briggsae   | briggsae cbr-cdh-4 protein                                 | 6 | P:GO:0007163;<br>C:GO:0005886;<br>P:GO:0007411;<br>P:GO:0007155;<br>C:GO:0016021;<br>P:GO:0007413                  | -                                              | IPR002126; IPR015919; SignalP<br>(SIGNALP)                                                                                                              |
|                           | -                                                          | 0 |                                                                                                                    |                                                | -                                                                                                                                                       |
|                           | -                                                          | 0 |                                                                                                                    |                                                | SignalP (SIGNALP)                                                                                                                                       |
|                           | -                                                          | 0 |                                                                                                                    |                                                | -                                                                                                                                                       |
|                           | -                                                          | 0 |                                                                                                                    |                                                | -                                                                                                                                                       |
| Ostertagia ostertagi      | calcium-dependent apyrase                                  | 0 |                                                                                                                    | F:GO:0005509;<br>F:GO:0016787;<br>F:GO:0016462 | IPR009283; SignalP (SIGNALP)                                                                                                                            |
| Caenorhabditis elegans    | cytoplasmic protein nck2                                   | 7 | F:GO:0005515;<br>P:GO:0044237;<br>C:GO:0044464;<br>P:GO:0042102;<br>C:GO:0043227;<br>P:GO:0007169;<br>P:GO:0030838 | -                                              | IPR000108; IPR000980; IPR001452;<br>IPR011511; G3DSA:2.30.30.40<br>(GENE3D), PTHR22820 (PANTHER),<br>PTHR22820:SF9 (PANTHER), SSF55550<br>(SUPERFAMILY) |
| Caenorhabditis sp. PS1010 | haspin protein ki-se                                       | 5 | P:GO:0044238;<br>F:GO:0004672;<br>P:GO:0044260;<br>C:GO:0005622;<br>F:GO:0000166                                   | -                                              | IPR017441                                                                                                                                               |
| Caenorhabditis briggsae   | elegans protein partially confirmed by transcript evidence | 2 | P:GO:0023034;<br>C:GO:0016021                                                                                      | -                                              | -                                                                                                                                                       |

|                         |                                                            |    |                                                                                                                                                                                                         |                               |             |                                                                      |
|-------------------------|------------------------------------------------------------|----|---------------------------------------------------------------------------------------------------------------------------------------------------------------------------------------------------------|-------------------------------|-------------|----------------------------------------------------------------------|
| Caenorhabditis briggsae | pten induced ki-se 1                                       | 9  | P:GO:0010646;<br>F:GO:0004672;<br>F:GO:0046872;<br>P:GO:0023060;<br>P:GO:0048522;<br>P:GO:0008219;<br>P:GO:0043687;<br>P:GO:0032501;<br>C:GO:0005739                                                    | -                             |             | PTHR22972 (PANTHER)                                                  |
| Caenorhabditis elegans  | dihydropyrimidi-se                                         | 12 | C:GO:0005829;<br>F:GO:0004157;<br>F:GO:0008270;<br>C:GO:0005625;<br>P:GO:0006212;<br>P:GO:0019482;<br>P:GO:0006210;<br>F:GO:0016597;<br>P:GO:0051289;<br>F:GO:0002058;<br>C:GO:0005634;<br>F:GO:0002059 | -                             | EC:3.5.2.2  | -                                                                    |
| -                       | -                                                          | 0  |                                                                                                                                                                                                         |                               |             | -                                                                    |
| -                       | -                                                          | 0  |                                                                                                                                                                                                         |                               |             | -                                                                    |
| Haemonchus contortus    | glutamate dehydroge-se                                     | 6  | P:GO:0055114;<br>P:GO:0000003;<br>P:GO:0006520;<br>F:GO:0005488;<br>P:GO:0040010;<br>F:GO:0016639                                                                                                       | -                             | EC:1.4.1.0  | G3DSA:1.10.287.140 (GENE3D)                                          |
| -                       | -                                                          | 0  |                                                                                                                                                                                                         |                               |             | -                                                                    |
| Caenorhabditis briggsae | phosphatidylinositide phosphatase sac1                     | 6  | P:GO:0009792;<br>P:GO:0002119;<br>P:GO:0040018;<br>P:GO:0040010;<br>P:GO:0008340;<br>C:GO:0044425                                                                                                       | -                             |             | -                                                                    |
| Brugia malayi           | hypothetical protein Bm1_01480 [Brugia malayi]             | 0  |                                                                                                                                                                                                         | P:GO:0045449;<br>F:GO:0003677 |             | IPR000875; IPR001005                                                 |
| Brugia malayi           | hypothetical protein Bm1_01480 [Brugia malayi]             | 0  |                                                                                                                                                                                                         | P:GO:0045449;<br>F:GO:0003677 |             | IPR000875; IPR001005                                                 |
| Caenorhabditis briggsae | briggsae cbr-pme-5 protein                                 | 0  |                                                                                                                                                                                                         |                               |             | IPR002110; IPR020683; PTHR18958 (PANTHER), PTHR18958:SF255 (PANTHER) |
| Caenorhabditis elegans  | phosphatidyltransferase                                    | 1  | F:GO:0016740                                                                                                                                                                                            | -                             |             | IPR000462; PTHR10414 (PANTHER), PTHR10414:SF18 (PANTHER)             |
| Caenorhabditis briggsae | possible metal-binding domain in r-se l rli family protein | 3  | P:GO:0006468;<br>F:GO:0005524;<br>F:GO:0004713                                                                                                                                                          | -                             | EC:2.7.10.0 | IPR007087; IPR007177; IPR007209; PTHR20426 (PANTHER)                 |
| -                       | -                                                          | 0  |                                                                                                                                                                                                         |                               |             | SignalP (SIGNALP)                                                    |

|                         |                                                            |    |                                                                                                                                                                       |                                                                                                                                                                                                                                                                                                                                                 |            |                                                                                                                                                                          |
|-------------------------|------------------------------------------------------------|----|-----------------------------------------------------------------------------------------------------------------------------------------------------------------------|-------------------------------------------------------------------------------------------------------------------------------------------------------------------------------------------------------------------------------------------------------------------------------------------------------------------------------------------------|------------|--------------------------------------------------------------------------------------------------------------------------------------------------------------------------|
| Caenorhabditis elegans  | exosome component 10                                       | 0  |                                                                                                                                                                       | F:GO:0004527;<br>F:GO:0003723;<br>F:GO:0016787;<br>C:GO:0005634;<br>F:GO:0003676;<br>P:GO:0044237;<br>F:GO:0003674;<br>P:GO:0000184;<br>F:GO:0008408;<br>P:GO:0006139;<br>P:GO:0008150;<br>F:GO:0003824;<br>F:GO:0000166;<br>P:GO:0006396;<br>P:GO:0006364;<br>F:GO:0004518;<br>C:GO:0005730;<br>C:GO:0005622;<br>C:GO:0000178;<br>C:GO:0000176 |            | IPR012588                                                                                                                                                                |
|                         | -                                                          | 0  |                                                                                                                                                                       |                                                                                                                                                                                                                                                                                                                                                 |            | SignalP (SIGNALP)                                                                                                                                                        |
|                         | -                                                          | 0  |                                                                                                                                                                       |                                                                                                                                                                                                                                                                                                                                                 |            | -                                                                                                                                                                        |
|                         | -                                                          | 0  |                                                                                                                                                                       |                                                                                                                                                                                                                                                                                                                                                 |            | -                                                                                                                                                                        |
|                         | -                                                          | 0  |                                                                                                                                                                       |                                                                                                                                                                                                                                                                                                                                                 |            | -                                                                                                                                                                        |
| Caenorhabditis briggsae | coiled-coil domain-containing protein 12                   | 0  |                                                                                                                                                                       | F:GO:0003674;<br>P:GO:0008150                                                                                                                                                                                                                                                                                                                   |            | -                                                                                                                                                                        |
|                         | -                                                          | 0  |                                                                                                                                                                       |                                                                                                                                                                                                                                                                                                                                                 |            | -                                                                                                                                                                        |
| Loa loa                 | geranylgeranyl pyrophosphate synthetase                    | 7  | P:GO:0000022;<br>C:GO:0005840;<br>P:GO:0008354;<br>P:GO:0035050;<br>C:GO:0043025;<br>F:GO:0004659;<br>C:GO:0005811                                                    | -                                                                                                                                                                                                                                                                                                                                               |            | IPR000092; IPR008949; IPR017446;<br>PTHR12001:SF5 (PANTHER)                                                                                                              |
| Caenorhabditis elegans  | elegans protein confirmed by transcript evidence           | 0  |                                                                                                                                                                       | C:GO:0016021;<br>F:GO:0005375;<br>P:GO:0006825                                                                                                                                                                                                                                                                                                  |            | IPR007274; PTHR12483:SF4<br>(PANTHER), SignalP (SIGNALP)                                                                                                                 |
| Caenorhabditis briggsae | elegans protein partially confirmed by transcript evidence | 0  |                                                                                                                                                                       |                                                                                                                                                                                                                                                                                                                                                 |            | PTHR12187 (PANTHER),<br>PTHR12187:SF2 (PANTHER)                                                                                                                          |
| Caenorhabditis elegans  | wd repeat-containing protein 47                            | 2  | F:GO:0016740;<br>F:GO:0005515                                                                                                                                         | -                                                                                                                                                                                                                                                                                                                                               |            | IPR001680; IPR011046; IPR015943;<br>IPR017986; IPR019781; IPR019782;<br>PTHR19863 (PANTHER),<br>PTHR19863:SF2 (PANTHER)                                                  |
| Caenorhabditis briggsae | d- ligase 1                                                | 10 | P:GO:0006260;<br>F:GO:0046872;<br>F:GO:0003677;<br>P:GO:0007049;<br>F:GO:0005524;<br>C:GO:0005634;<br>F:GO:0003910;<br>P:GO:0006310;<br>P:GO:0051301;<br>P:GO:0006281 | -                                                                                                                                                                                                                                                                                                                                               | EC:6.5.1.1 | IPR012309; IPR012310; IPR012340;<br>IPR016027; IPR016059;<br>G3DSA:3.30.1490.70 (GENE3D),<br>PTHR10459 (PANTHER),<br>PTHR10459:SF10 (PANTHER),<br>SSF56091 (SUPERFAMILY) |
| Loa loa                 | androgen induced inhibitor of proliferation pds5           | 0  |                                                                                                                                                                       | F:GO:0005488                                                                                                                                                                                                                                                                                                                                    |            | PTHR12663 (PANTHER)                                                                                                                                                      |



|                         |                                                       |   |                                                                                                   |                                                                                                   |              |                                                                                                                                                           |
|-------------------------|-------------------------------------------------------|---|---------------------------------------------------------------------------------------------------|---------------------------------------------------------------------------------------------------|--------------|-----------------------------------------------------------------------------------------------------------------------------------------------------------|
| Caenorhabditis briggsae | protein-tyrosine phosphatase containing protein       | 4 | P:GO:0016311;<br>F:GO:0004721;<br>P:GO:0009792;<br>P:GO:0000003                                   | -                                                                                                 | EC:3.1.3.16  | IPR000242; IPR000387; IPR003595;<br>IPR016130; G3DSA:3.90.190.10<br>(GENE3D), PTHR19134 (PANTHER),<br>PTHR19134:SF26 (PANTHER),<br>SSF52799 (SUPERFAMILY) |
| Caenorhabditis elegans  | homogentisate -dioxyge-se                             | 5 | F:GO:0042802;<br>F:GO:0004411;<br>P:GO:0055114;<br>P:GO:0006559;<br>P:GO:0006570                  | -                                                                                                 | EC:1.13.11.5 | IPR005708; IPR011051                                                                                                                                      |
| Caenorhabditis briggsae | dead (asp-glu-ala-asp) box polypeptide 52             | 3 | F:GO:0004386;<br>F:GO:0003676;<br>F:GO:0000166                                                    | -                                                                                                 |              | IPR011545; IPR014014;<br>G3DSA:3.40.50.300 (GENE3D),<br>PTHR10967 (PANTHER),<br>PTHR10967:SF21 (PANTHER),<br>SSF52540 (SUPERFAMILY)                       |
|                         | -                                                     | 0 |                                                                                                   |                                                                                                   |              | -                                                                                                                                                         |
|                         | -                                                     | 0 |                                                                                                   |                                                                                                   |              | -                                                                                                                                                         |
| Caenorhabditis elegans  | glucose transporter 1 transcript                      | 3 | C:GO:0016021;<br>F:GO:0022891;<br>P:GO:0055085                                                    | -                                                                                                 |              | IPR005828; PTHR11600 (PANTHER),<br>PTHR11600:SF103 (PANTHER), SignalP<br>(SIGNALP)                                                                        |
| Caenorhabditis briggsae | briggsae cbr-apr-1 protein                            | 6 | C:GO:0044464;<br>P:GO:0051179;<br>P:GO:0048856;<br>P:GO:0009790;<br>P:GO:0050794;<br>F:GO:0005488 | -                                                                                                 |              | PTHR12607 (PANTHER),<br>PTHR12607:SF4 (PANTHER)                                                                                                           |
| Caenorhabditis remanei  | twitchin ki-se                                        | 0 |                                                                                                   | F:GO:0016301;<br>F:GO:0004672;<br>F:GO:0005524;<br>F:GO:0000166;<br>P:GO:0006468;<br>F:GO:0004674 |              | -                                                                                                                                                         |
| Brugia malayi           | r- binding protein                                    | 0 |                                                                                                   | F:GO:0003676;<br>F:GO:0000166                                                                     |              | -                                                                                                                                                         |
| Caenorhabditis briggsae | 3 -5 exonuclease family protein                       | 0 |                                                                                                   | P:GO:0006139;<br>F:GO:0003676;<br>F:GO:0004527;<br>C:GO:0005622;<br>F:GO:0008408                  |              | IPR012337; G3DSA:3.30.420.10<br>(GENE3D)                                                                                                                  |
| Caenorhabditis elegans  | uncharacterized protein kiaa0467                      | 0 |                                                                                                   | P:GO:0009058;<br>C:GO:0016021;<br>C:GO:0005794;<br>F:GO:0001733                                   |              | -                                                                                                                                                         |
| Caenorhabditis briggsae | briggsae cbr-mdt-29 protein                           | 0 |                                                                                                   | P:GO:0006350;<br>P:GO:0045449;<br>F:GO:0005515;<br>C:GO:0005634                                   |              | IPR021018                                                                                                                                                 |
|                         | -                                                     | 0 |                                                                                                   |                                                                                                   |              | SignalP (SIGNALP)                                                                                                                                         |
| Caenorhabditis elegans  | temporarily assigned gene -me family member (tag-261) | 0 |                                                                                                   |                                                                                                   |              | G3DSA:1.10.1660.10 (GENE3D)                                                                                                                               |

|                        |                                      |    |                                                                                                                                                                                                                                                                                                                                                                                                                     |   |             |   |
|------------------------|--------------------------------------|----|---------------------------------------------------------------------------------------------------------------------------------------------------------------------------------------------------------------------------------------------------------------------------------------------------------------------------------------------------------------------------------------------------------------------|---|-------------|---|
| Caenorhabditis elegans | lon protease mitochondrial precursor | 23 | F:GO:0008236;<br>F:GO:0004176;<br>F:GO:0070361;<br>F:GO:0070363;<br>F:GO:0070362;<br>P:GO:0007568;<br>P:GO:0010044;<br>F:GO:0043531;<br>P:GO:0070407;<br>F:GO:0003697;<br>C:GO:0042645;<br>F:GO:0003727;<br>F:GO:0070364;<br>P:GO:0001666;<br>F:GO:0070182;<br>F:GO:0051880;<br>P:GO:0043623;<br>P:GO:0032042;<br>P:GO:0051260;<br>P:GO:0006200;<br>P:GO:0009725;<br>F:GO:0005524;<br>P:GO:0034599                  | - | -           |   |
| Caenorhabditis elegans | lon protease mitochondrial precursor | 24 | P:GO:0034619;<br>F:GO:0004252;<br>F:GO:0004176;<br>F:GO:0070361;<br>F:GO:0070363;<br>F:GO:0070362;<br>P:GO:0007568;<br>P:GO:0010044;<br>F:GO:0043531;<br>P:GO:0070407;<br>F:GO:0003697;<br>C:GO:0042645;<br>F:GO:0003727;<br>P:GO:0006515;<br>F:GO:0070364;<br>P:GO:0001666;<br>F:GO:0070182;<br>F:GO:0051880;<br>P:GO:0032042;<br>P:GO:0051260;<br>P:GO:0006200;<br>P:GO:0009725;<br>F:GO:0005524;<br>P:GO:0034599 | - | EC:3.4.21.0 | - |

|                         |                                               |    |                                                                                                                                                                                                                                                                                                                                                                                                    |   |             |                                                                                                                                    |
|-------------------------|-----------------------------------------------|----|----------------------------------------------------------------------------------------------------------------------------------------------------------------------------------------------------------------------------------------------------------------------------------------------------------------------------------------------------------------------------------------------------|---|-------------|------------------------------------------------------------------------------------------------------------------------------------|
| Caenorhabditis elegans  | lon protease mitochondrial precursor          | 23 | F:GO:0008236;<br>F:GO:0004176;<br>F:GO:0070361;<br>F:GO:0070363;<br>F:GO:0070362;<br>P:GO:0007568;<br>P:GO:0010044;<br>F:GO:0043531;<br>P:GO:0070407;<br>F:GO:0003697;<br>C:GO:0042645;<br>F:GO:0003727;<br>F:GO:0070364;<br>P:GO:0001666;<br>F:GO:0070182;<br>F:GO:0051880;<br>P:GO:0043623;<br>P:GO:0032042;<br>P:GO:0051260;<br>P:GO:0006200;<br>P:GO:0009725;<br>F:GO:0005524;<br>P:GO:0034599 | - | -           |                                                                                                                                    |
| Caenorhabditis briggsae | spastin                                       | 19 | C:GO:0016020;<br>C:GO:0043231;<br>F:GO:0008568;<br>P:GO:0051301;<br>P:GO:0051013;<br>C:GO:0005874;<br>F:GO:0008017;<br>P:GO:0031117;<br>F:GO:0043014;<br>P:GO:0045773;<br>P:GO:0001578;<br>C:GO:0048471;<br>P:GO:0051260;<br>F:GO:0048487;<br>F:GO:0005524;<br>P:GO:0007416;<br>P:GO:0043066;<br>P:GO:0021955;<br>P:GO:0034214                                                                     | - | EC:3.6.4.3  | IPR003959; IPR003960;<br>G3DSA:3.40.50.300 (GENE3D),<br>PTHR23074 (PANTHER),<br>PTHR23074:SF1 (PANTHER), SSF52540<br>(SUPERFAMILY) |
| Caenorhabditis briggsae | snw domain-containing protein 1               | 7  | F:GO:0030528;<br>C:GO:0005681;<br>P:GO:0045449;<br>F:GO:0005102;<br>C:GO:0000785;<br>P:GO:0000398;<br>F:GO:0008134                                                                                                                                                                                                                                                                                 | - |             | IPR017862                                                                                                                          |
| Caenorhabditis briggsae | xenotropic and polytropic retrovirus receptor | 6  | P:GO:0010171;<br>F:GO:0004930;<br>C:GO:0005887;<br>P:GO:0018991;<br>P:GO:0040010;<br>P:GO:0007186                                                                                                                                                                                                                                                                                                  | - |             | IPR004342; PTHR10783 (PANTHER),<br>PTHR10783:SF4 (PANTHER), SignalP<br>(SIGNALP)                                                   |
| Caenorhabditis elegans  | uncoordi-ated family member (unc-22)          | 3  | P:GO:0006468;<br>F:GO:0005524;<br>F:GO:0004674                                                                                                                                                                                                                                                                                                                                                     | - | EC:2.7.11.0 | -                                                                                                                                  |

|                            |                                                       |    |                                                                                                                                                                       |                                                |             |                                                                                                                                                                        |
|----------------------------|-------------------------------------------------------|----|-----------------------------------------------------------------------------------------------------------------------------------------------------------------------|------------------------------------------------|-------------|------------------------------------------------------------------------------------------------------------------------------------------------------------------------|
| Brugia malayi              | zinc c2h2 type family protein                         | 0  |                                                                                                                                                                       | F:GO:0008270;<br>C:GO:0005622                  |             | IPR007087; IPR015880; PTHR23233 (PANTHER), PTHR23233:SF7 (PANTHER)                                                                                                     |
| Caenorhabditis elegans     | ubiquitin carboxyl-termi-l                            | 1  | F:GO:0016787                                                                                                                                                          | -                                              |             | IPR001394; IPR018200; PTHR10420 (PANTHER), PTHR10420:SF62 (PANTHER), SignalP (SIGNALP), SSF54001 (SUPERFAMILY)                                                         |
| Caenorhabditis briggsae    | grip1 associated protein 1                            | 1  | F:GO:0005515                                                                                                                                                          | -                                              |             | PTHR23180 (PANTHER), PTHR23180:SF18 (PANTHER)                                                                                                                          |
|                            | -                                                     | 0  |                                                                                                                                                                       |                                                |             | -                                                                                                                                                                      |
|                            | -                                                     | 0  |                                                                                                                                                                       |                                                |             | -                                                                                                                                                                      |
|                            | -                                                     | 0  |                                                                                                                                                                       |                                                |             | -                                                                                                                                                                      |
| Loa loa                    | phosphoglycerate mutase family protein                | 0  |                                                                                                                                                                       |                                                |             | G3DSA:3.40.50.1240 (GENE3D), SSF53254 (SUPERFAMILY)                                                                                                                    |
|                            | -                                                     | 0  |                                                                                                                                                                       |                                                |             | IPR007889; IPR009057                                                                                                                                                   |
|                            | -                                                     | 0  |                                                                                                                                                                       |                                                |             | -                                                                                                                                                                      |
|                            | -                                                     | 0  |                                                                                                                                                                       |                                                |             | -                                                                                                                                                                      |
| Caenorhabditis elegans     | mixed lineage protein ki-se                           | 8  | P:GO:0006357;<br>F:GO:0004674;<br>P:GO:0023034;<br>F:GO:0005524;<br>F:GO:0005515;<br>P:GO:0046777;<br>P:GO:0001672;<br>C:GO:0005634                                   | -                                              | EC:2.7.11.0 | IPR000719; IPR002290; IPR008271; IPR011009; IPR017441; IPR017442; G3DSA:1.10.510.10 (GENE3D), G3DSA:3.30.200.20 (GENE3D), PTHR22974 (PANTHER), PTHR22974:SF1 (PANTHER) |
| Caenorhabditis elegans     | mixed lineage protein ki-se                           | 8  | P:GO:0006357;<br>F:GO:0004674;<br>P:GO:0023034;<br>F:GO:0005524;<br>F:GO:0005515;<br>P:GO:0046777;<br>P:GO:0001672;<br>C:GO:0005634                                   | -                                              | EC:2.7.11.0 | IPR000719; IPR002290; IPR008271; IPR011009; IPR017441; IPR017442; G3DSA:1.10.510.10 (GENE3D), G3DSA:3.30.200.20 (GENE3D), PTHR22974 (PANTHER), PTHR22974:SF1 (PANTHER) |
|                            | -                                                     | 0  |                                                                                                                                                                       |                                                |             | SignalP (SIGNALP)                                                                                                                                                      |
| Caenorhabditis elegans     | exocyst complex component 2                           | 1  | P:GO:0000003                                                                                                                                                          | -                                              |             | IPR002909; IPR013783; IPR014756; PTHR13043 (PANTHER)                                                                                                                   |
|                            | -                                                     | 0  |                                                                                                                                                                       |                                                |             | -                                                                                                                                                                      |
|                            | -                                                     | 0  |                                                                                                                                                                       |                                                |             | SignalP (SIGNALP)                                                                                                                                                      |
|                            | -                                                     | 0  |                                                                                                                                                                       |                                                |             | -                                                                                                                                                                      |
| Caenorhabditis briggsae    | briggsae cbr-tag-196 protein                          | 2  | F:GO:0016787;<br>F:GO:0005515                                                                                                                                         | -                                              |             | IPR000010; G3DSA:3.10.450.10 (GENE3D), PTHR11413 (PANTHER), SignalP (SIGNALP), SSF54403 (SUPERFAMILY)                                                                  |
| Caenorhabditis elegans     | hypothetical protein C15C7.5 [Caenorhabditis elegans] | 2  | P:GO:0040011;<br>P:GO:0019915                                                                                                                                         | -                                              |             | -                                                                                                                                                                      |
| Caenorhabditis elegans     | heat repeat-containing protein 7a-like                | 0  |                                                                                                                                                                       | F:GO:0003674;<br>F:GO:0005488;<br>P:GO:0008150 |             | IPR011989; IPR016024                                                                                                                                                   |
| Pediculus humanus corporis | lsm2 u6 small nuclear r- associated                   | 10 | C:GO:0071011;<br>P:GO:0000381;<br>C:GO:0005688;<br>P:GO:0006402;<br>F:GO:0017070;<br>F:GO:0019901;<br>C:GO:0046540;<br>C:GO:0071013;<br>C:GO:0005737;<br>P:GO:0000244 | -                                              |             | -                                                                                                                                                                      |

|                         |                                                            |    |                                                                                                                                                                                                                                                                                                                                                                                                                                                                                         |                                                |                                                         |                                                                                 |
|-------------------------|------------------------------------------------------------|----|-----------------------------------------------------------------------------------------------------------------------------------------------------------------------------------------------------------------------------------------------------------------------------------------------------------------------------------------------------------------------------------------------------------------------------------------------------------------------------------------|------------------------------------------------|---------------------------------------------------------|---------------------------------------------------------------------------------|
|                         |                                                            | 0  | P:GO:0001609;<br>P:GO:0001525;<br>C:GO:0045121;<br>F:GO:0030742;<br>P:GO:0007032;<br>C:GO:0019717;<br>P:GO:0016337;<br>C:GO:0042470;<br>F:GO:0005525;<br>P:GO:0001702;<br>P:GO:0015031;<br>P:GO:0006184;<br>C:GO:0030425;<br>C:GO:0001726;<br>C:GO:0030139;<br>P:GO:0031623;<br>P:GO:0007264;<br>C:GO:0043025;<br>F:GO:0051021;<br>C:GO:0043234;<br>C:GO:0030424;<br>C:GO:0008021;<br>P:GO:0048169;<br>C:GO:0048471;<br>F:GO:0019003;<br>F:GO:0003924;<br>C:GO:0005886;<br>C:GO:0031901 |                                                | EC:3.6.5.1;<br>EC:3.6.5.2;<br>EC:3.6.5.3;<br>EC:3.6.5.4 |                                                                                 |
| Caenorhabditis elegans  | ras-related protein rab-5a                                 | 29 |                                                                                                                                                                                                                                                                                                                                                                                                                                                                                         |                                                |                                                         |                                                                                 |
| Ancylostoma caninum     | secreted protein asp-2                                     | 0  |                                                                                                                                                                                                                                                                                                                                                                                                                                                                                         | P:GO:0040011;<br>C:GO:0005576                  |                                                         | IPR001283; IPR014044;<br>PTHR10334:SF11 (PANTHER)                               |
| Ancylostoma caninum     | secreted protein asp-2                                     | 0  |                                                                                                                                                                                                                                                                                                                                                                                                                                                                                         | C:GO:0005576                                   |                                                         | IPR014044                                                                       |
|                         | -                                                          | 0  |                                                                                                                                                                                                                                                                                                                                                                                                                                                                                         |                                                |                                                         | -                                                                               |
|                         | -                                                          | 0  |                                                                                                                                                                                                                                                                                                                                                                                                                                                                                         |                                                |                                                         | SignalP (SIGNALP)                                                               |
| Ancylostoma caninum     | secreted protein asp-2                                     | 0  |                                                                                                                                                                                                                                                                                                                                                                                                                                                                                         | P:GO:0040011;<br>C:GO:0005576                  |                                                         | IPR001283; IPR014044; IPR018244;<br>PTHR10334:SF11 (PANTHER)                    |
| Ancylostoma caninum     | secreted protein asp-2                                     | 0  |                                                                                                                                                                                                                                                                                                                                                                                                                                                                                         | P:GO:0040011;<br>C:GO:0005576                  |                                                         | IPR001283; IPR014044;<br>PTHR10334:SF11 (PANTHER)                               |
| Ancylostoma caninum     | secreted protein asp-2                                     | 0  |                                                                                                                                                                                                                                                                                                                                                                                                                                                                                         | P:GO:0040011;<br>C:GO:0005576                  |                                                         | IPR001283; IPR014044;<br>PTHR10334:SF11 (PANTHER)                               |
| Brugia malayi           | elegans protein confirmed by transcript evidence           | 0  |                                                                                                                                                                                                                                                                                                                                                                                                                                                                                         | F:GO:0005198                                   |                                                         | SignalP (SIGNALP)                                                               |
| Caenorhabditis elegans  | uridine phosphorylase 2                                    | 4  | C:GO:0005737;<br>P:GO:0009166;<br>F:GO:0004850;<br>P:GO:0009116                                                                                                                                                                                                                                                                                                                                                                                                                         |                                                | EC:2.4.2.3                                              | IPR010059; IPR018017;<br>G3DSA:3.40.50.1580 (GENE3D),<br>SSF53167 (SUPERFAMILY) |
| Caenorhabditis briggsae | elegans protein partially confirmed by transcript evidence | 0  |                                                                                                                                                                                                                                                                                                                                                                                                                                                                                         |                                                |                                                         | -                                                                               |
| Loa loa                 | origin recognition complex subunit 5                       | 0  |                                                                                                                                                                                                                                                                                                                                                                                                                                                                                         | P:GO:0006260;<br>C:GO:0000808;<br>C:GO:0005634 |                                                         | IPR020796                                                                       |
|                         | -                                                          | 0  |                                                                                                                                                                                                                                                                                                                                                                                                                                                                                         |                                                |                                                         | -                                                                               |
|                         | -                                                          | 0  |                                                                                                                                                                                                                                                                                                                                                                                                                                                                                         |                                                |                                                         | -                                                                               |
|                         | -                                                          | 0  |                                                                                                                                                                                                                                                                                                                                                                                                                                                                                         |                                                |                                                         | -                                                                               |
|                         | -                                                          | 0  |                                                                                                                                                                                                                                                                                                                                                                                                                                                                                         |                                                |                                                         | -                                                                               |
|                         | -                                                          | 0  |                                                                                                                                                                                                                                                                                                                                                                                                                                                                                         |                                                |                                                         | SignalP (SIGNALP)                                                               |
| Caenorhabditis elegans  | hypothetical protein F42A10.5 [Caenorhabditis elegans]     | 0  |                                                                                                                                                                                                                                                                                                                                                                                                                                                                                         | F:GO:0005515                                   |                                                         | -                                                                               |
| Caenorhabditis elegans  | hypothetical protein F42A10.5 [Caenorhabditis elegans]     | 0  |                                                                                                                                                                                                                                                                                                                                                                                                                                                                                         | F:GO:0005515                                   |                                                         | -                                                                               |
|                         | -                                                          | 0  |                                                                                                                                                                                                                                                                                                                                                                                                                                                                                         |                                                |                                                         | SignalP (SIGNALP)                                                               |

|                         |                                                  |   |                                                                                                                                                      |   |                                                                 |                                                                                                                                                          |
|-------------------------|--------------------------------------------------|---|------------------------------------------------------------------------------------------------------------------------------------------------------|---|-----------------------------------------------------------------|----------------------------------------------------------------------------------------------------------------------------------------------------------|
| Caenorhabditis elegans  | steroid receptor-interacting snf2 domain         | 9 | F:GO:0003712;<br>P:GO:0045449;<br>F:GO:0004872;<br>F:GO:0003677;<br>F:GO:0005524;<br>F:GO:0016740;<br>F:GO:0004386;<br>F:GO:0019901;<br>C:GO:0005634 | - |                                                                 | PTHR10799 (PANTHER),<br>PTHR10799:SF51 (PANTHER)                                                                                                         |
| Loa loa                 | uncharacterized protein kiaa0241                 | 0 |                                                                                                                                                      |   | F:GO:0003674;<br>C:GO:0016020;<br>P:GO:0008150;<br>C:GO:0005575 | IPR018307                                                                                                                                                |
| Caenorhabditis briggsae | elegans protein confirmed by transcript evidence | 6 | F:GO:0008233;<br>P:GO:0019538;<br>F:GO:0022834;<br>P:GO:0007271;<br>P:GO:0000003;<br>P:GO:0040011                                                    | - |                                                                 | -                                                                                                                                                        |
| Caenorhabditis elegans  | phosphoribosylformylglyci-midine synthase        | 5 | P:GO:0040010;<br>C:GO:0009536;<br>F:GO:0005515;<br>P:GO:0006189;<br>F:GO:0004642                                                                     | - | EC:6.3.5.3                                                      | IPR017926; G3DSA:3.40.50.880<br>(GENE3D), PTHR10099 (PANTHER),<br>SSF52317 (SUPERFAMILY)                                                                 |
| -                       | -                                                | 0 |                                                                                                                                                      |   |                                                                 | -                                                                                                                                                        |
| -                       | -                                                | 0 |                                                                                                                                                      |   |                                                                 | -                                                                                                                                                        |
| Caenorhabditis elegans  | elegans protein confirmed by transcript evidence | 3 | P:GO:0040007;<br>P:GO:0006898;<br>P:GO:0002119                                                                                                       | - |                                                                 | -                                                                                                                                                        |
| Caenorhabditis elegans  | elegans protein confirmed by transcript evidence | 3 | P:GO:0040007;<br>P:GO:0006898;<br>P:GO:0002119                                                                                                       | - |                                                                 | -                                                                                                                                                        |
| Callithrix jacchus      | ribosomal protein l35                            | 6 | C:GO:0005730;<br>F:GO:0003729;<br>F:GO:0003735;<br>F:GO:0005515;<br>C:GO:0022625;<br>P:GO:0006414                                                    | - |                                                                 | SignalP (SIGNALP)                                                                                                                                        |
| Caenorhabditis briggsae | briggsae cbr-egg-3 protein                       | 2 | F:GO:0016791;<br>F:GO:0005515                                                                                                                        | - | EC:3.1.3.0                                                      | PTHR19134 (PANTHER),<br>PTHR19134:SF19 (PANTHER), SignalP<br>(SIGNALP)                                                                                   |
| Caenorhabditis elegans  | muscle positioning protein 4                     | 2 | F:GO:0005515;<br>F:GO:0005509                                                                                                                        | - |                                                                 | IPR000152; IPR000742; IPR006209;<br>IPR006210; G3DSA:2.10.25.10<br>(GENE3D), PTHR22992 (PANTHER),<br>PTHR22992:SF12 (PANTHER),<br>SSF57196 (SUPERFAMILY) |
| -                       | -                                                | 0 |                                                                                                                                                      |   |                                                                 | -                                                                                                                                                        |
| -                       | -                                                | 0 |                                                                                                                                                      |   |                                                                 | SignalP (SIGNALP)                                                                                                                                        |
| Caenorhabditis elegans  | c2 domain containing protein                     | 9 | P:GO:0016079;<br>C:GO:0008021;<br>F:GO:0005544;<br>F:GO:0035005;<br>P:GO:0048167;<br>F:GO:0005515;<br>F:GO:0005215;<br>P:GO:0046928;<br>C:GO:0005886 | - | EC:2.7.1.154                                                    | IPR000008; IPR008973; IPR018029;<br>G3DSA:2.60.40.150 (GENE3D),<br>PTHR10024 (PANTHER),<br>PTHR10024:SF31 (PANTHER)                                      |
| -                       | -                                                | 0 |                                                                                                                                                      |   |                                                                 | SignalP (SIGNALP)                                                                                                                                        |

|                         |                                                       |    |                                                                                                                                                                                                                          |                                                                                                   |            |                                                           |
|-------------------------|-------------------------------------------------------|----|--------------------------------------------------------------------------------------------------------------------------------------------------------------------------------------------------------------------------|---------------------------------------------------------------------------------------------------|------------|-----------------------------------------------------------|
| Caenorhabditis briggsae | ysr3_caeel_ame: full=uncharacterized protein          | 0  |                                                                                                                                                                                                                          |                                                                                                   |            | -                                                         |
| Caenorhabditis elegans  | gro-1 operon gene protein 1                           | 0  |                                                                                                                                                                                                                          |                                                                                                   |            | IPR019155; PTHR21481 (PANTHER)                            |
| Caenorhabditis elegans  | vacuolar protein                                      | 0  |                                                                                                                                                                                                                          | F:GO:0005488;<br>F:GO:0008270;<br>F:GO:0005515                                                    |            | PTHR23323 (PANTHER), PF00637 (PFAM)                       |
|                         | -                                                     | 0  |                                                                                                                                                                                                                          |                                                                                                   |            | -                                                         |
| Macaca fascicularis     | small subunit 1                                       | 8  | C:GO:0005737;<br>P:GO:0008284;<br>C:GO:0005886;<br>F:GO:0004198;<br>F:GO:0005509;<br>P:GO:0006508;<br>C:GO:0005634;<br>F:GO:0046982                                                                                      | -                                                                                                 |            | -                                                         |
| Caenorhabditis briggsae | sand family protein                                   | 0  |                                                                                                                                                                                                                          |                                                                                                   |            | IPR004353                                                 |
|                         | -                                                     | 0  |                                                                                                                                                                                                                          |                                                                                                   |            | -                                                         |
|                         | -                                                     | 0  |                                                                                                                                                                                                                          |                                                                                                   |            | -                                                         |
|                         | -                                                     | 0  |                                                                                                                                                                                                                          |                                                                                                   |            | -                                                         |
| Caenorhabditis elegans  | viral a-type inclusion protein                        | 1  | F:GO:0005488                                                                                                                                                                                                             | -                                                                                                 |            | IPR000237; IPR009053; PD968187 (PRODOM)                   |
| Caenorhabditis elegans  | grip domain containing protein                        | 1  | F:GO:0005488                                                                                                                                                                                                             | -                                                                                                 |            | IPR000237; IPR009053; PD936484 (PRODOM)                   |
|                         | -                                                     | 0  |                                                                                                                                                                                                                          |                                                                                                   |            | -                                                         |
| Brugia malayi           | esophageal cancer associated                          | 0  |                                                                                                                                                                                                                          | F:GO:0003674;<br>C:GO:0005575                                                                     |            | PTHR13673 (PANTHER)                                       |
| Callithrix jacchus      | subfamily member 3b                                   | 13 | P:GO:0006924;<br>F:GO:0005083;<br>P:GO:0042102;<br>P:GO:0007569;<br>C:GO:0005829;<br>P:GO:0032088;<br>P:GO:0007264;<br>P:GO:0009790;<br>F:GO:0051082;<br>P:GO:0033077;<br>P:GO:0006264;<br>C:GO:0005634;<br>C:GO:0005739 | -                                                                                                 |            | IPR001623; IPR003095; IPR015609; PTHR11821:SF79 (PANTHER) |
| Caenorhabditis elegans  | hypothetical protein T12B3.3 [Caenorhabditis elegans] | 2  | P:GO:0044238;<br>F:GO:0008081                                                                                                                                                                                            | -                                                                                                 | EC:3.1.4.0 | IPR017946                                                 |
| Caenorhabditis elegans  | briggsae cbr-opt-2 protein                            | 0  |                                                                                                                                                                                                                          | P:GO:0006857;<br>F:GO:0015198;<br>C:GO:0016021;<br>C:GO:0016020;<br>F:GO:0005215;<br>P:GO:0006810 |            | -                                                         |
|                         | -                                                     | 0  |                                                                                                                                                                                                                          |                                                                                                   |            | -                                                         |
| Caenorhabditis elegans  | acid phosphatase-1                                    | 1  | P:GO:0019915                                                                                                                                                                                                             | -                                                                                                 |            | -                                                         |
| Caenorhabditis elegans  | major allergen                                        | 0  |                                                                                                                                                                                                                          |                                                                                                   |            | SignalP (SIGNALP)                                         |
|                         |                                                       | 0  |                                                                                                                                                                                                                          |                                                                                                   |            | SignalP (SIGNALP)                                         |
| Caenorhabditis briggsae | transport and golgi organization-like                 | 0  |                                                                                                                                                                                                                          | F:GO:0005515                                                                                      |            | IPR011705; IPR013089; PTHR23230:SF183 (PANTHER)           |

|                           |                                                            |    |                                                                                                                                                                       |                                                                                  |             |                                                                                                                                          |
|---------------------------|------------------------------------------------------------|----|-----------------------------------------------------------------------------------------------------------------------------------------------------------------------|----------------------------------------------------------------------------------|-------------|------------------------------------------------------------------------------------------------------------------------------------------|
| Caenorhabditis elegans    | merhead embryonic lethal family member (hmr-1)             | 7  | P:GO:0007411;<br>F:GO:0005515;<br>P:GO:0007155;<br>P:GO:0001745;<br>P:GO:0048675;<br>C:GO:0044425;<br>C:GO:0005886                                                    | -                                                                                | -           |                                                                                                                                          |
| Caenorhabditis elegans    | merhead embryonic lethal family member (hmr-1)             | 7  | P:GO:0007411;<br>F:GO:0005515;<br>P:GO:0007155;<br>P:GO:0001745;<br>P:GO:0048675;<br>C:GO:0044425;<br>C:GO:0005886                                                    | -                                                                                | -           |                                                                                                                                          |
|                           | -                                                          | 0  |                                                                                                                                                                       |                                                                                  |             |                                                                                                                                          |
| Brugia malayi             | cleavage and polyadenylation specificity factor subunit 3  | 10 | P:GO:0006378;<br>F:GO:0046872;<br>P:GO:0008380;<br>F:GO:0004521;<br>C:GO:0005847;<br>F:GO:0003729;<br>F:GO:0005515;<br>P:GO:0006398;<br>C:GO:0030529;<br>F:GO:0008409 | -                                                                                |             | IPR001279; IPR022712;<br>G3DSA:3.60.15.10 (GENE3D),<br>PTHR11203 (PANTHER),<br>PTHR11203:SF11 (PANTHER),<br>SSF56281 (SUPERFAMILY)       |
| Caenorhabditis elegans    | elegans protein partially confirmed by transcript evidence | 4  | P:GO:0043652;<br>C:GO:0005886;<br>P:GO:0012501;<br>F:GO:0017111                                                                                                       | -                                                                                | EC:3.6.1.15 | PTHR19229 (PANTHER),<br>PTHR19229:SF18 (PANTHER), SignalP<br>(SIGNALP)                                                                   |
| Homo sapiens              | ribosomal protein l13                                      | 5  | F:GO:0003735;<br>F:GO:0003723;<br>F:GO:0005515;<br>C:GO:0022625;<br>P:GO:0006414                                                                                      | -                                                                                |             | IPR001380; IPR018256                                                                                                                     |
| Caenorhabditis elegans    | cg8129- isoform b                                          | 4  | F:GO:0004794;<br>P:GO:0008152;<br>F:GO:0030170;<br>F:GO:0016597                                                                                                       | -                                                                                | EC:4.3.1.19 | IPR001926; IPR002912;<br>G3DSA:3.30.70.260 (GENE3D),<br>G3DSA:3.40.50.1100 (GENE3D),<br>PTHR10314 (PANTHER),<br>PTHR10314:SF17 (PANTHER) |
|                           | -                                                          | 0  |                                                                                                                                                                       |                                                                                  |             |                                                                                                                                          |
| Caenorhabditis briggsae   | briggsae cbr-asp-5 protein                                 | 6  | C:GO:0016021;<br>P:GO:0008219;<br>P:GO:0006508;<br>F:GO:0004190;<br>F:GO:0005515;<br>P:GO:0040011                                                                     | -                                                                                | EC:3.4.23.0 | IPR001461; IPR009007; IPR021109;<br>PTHR13683:SF53 (PANTHER)                                                                             |
| Chlamydomonas reinhardtii | hypothetical kda protein in faa3-mas3 intergenic           | 0  |                                                                                                                                                                       | F:GO:0003674;<br>C:GO:0005737;<br>P:GO:0008033;<br>P:GO:0008150;<br>C:GO:0005575 |             |                                                                                                                                          |
|                           | -                                                          | 0  |                                                                                                                                                                       |                                                                                  |             |                                                                                                                                          |



|                             |                                                                    |    |                                                                                                                                                                                                                                           |                                                |             |                                                                                                                                      |
|-----------------------------|--------------------------------------------------------------------|----|-------------------------------------------------------------------------------------------------------------------------------------------------------------------------------------------------------------------------------------------|------------------------------------------------|-------------|--------------------------------------------------------------------------------------------------------------------------------------|
| Caenorhabditis elegans      | phosphatidylinositol-3-phosphate phosphatidylinositol 5-type iii   | 14 | P:GO:0042147;<br>C:GO:0005829;<br>C:GO:0031901;<br>P:GO:0044238;<br>F:GO:0008270;<br>P:GO:0023034;<br>P:GO:0034504;<br>C:GO:0032593;<br>F:GO:0016308;<br>F:GO:0005515;<br>C:GO:0045121;<br>C:GO:0012506;<br>P:GO:0006898;<br>P:GO:0044237 | -                                              | EC:2.7.1.68 | IPR002423; G3DSA:3.50.7.10 (GENE3D), PTHR11353:SF14 (PANTHER)                                                                        |
| Loa loa                     | leucine rich repeat family protein                                 | 0  |                                                                                                                                                                                                                                           | F:GO:0005515                                   | -           |                                                                                                                                      |
| Caenorhabditis briggsae     | transcriptio-l regulator atrx                                      | 3  | F:GO:0005524;<br>F:GO:0004386;<br>F:GO:0003677                                                                                                                                                                                            | -                                              |             | IPR000330; IPR014001; IPR014021; G3DSA:3.40.50.300 (GENE3D), PTHR10799 (PANTHER), PTHR10799:SF53 (PANTHER), SSF52540 (SUPERFAMILY)   |
| Caenorhabditis elegans      | zinc finger protein                                                | 0  |                                                                                                                                                                                                                                           | F:GO:0003676;<br>F:GO:0008270;<br>C:GO:0005622 |             | IPR006797; IPR007087; IPR015880                                                                                                      |
| Caenorhabditis elegans      | d- polymerase zeta catalytic subunit                               | 1  | P:GO:0006281                                                                                                                                                                                                                              | -                                              |             | IPR006134; PTHR10322 (PANTHER), PTHR10322:SF5 (PANTHER), SSF56672 (SUPERFAMILY)                                                      |
|                             | -                                                                  | 0  |                                                                                                                                                                                                                                           |                                                |             | SignalP (SIGNALP)                                                                                                                    |
| Caenorhabditis elegans      | ryanodine receptor homologue                                       | 5  | C:GO:0005875;<br>F:GO:0005262;<br>P:GO:0006811;<br>P:GO:0006936;<br>C:GO:0016020                                                                                                                                                          | -                                              |             | IPR001870; IPR003877; IPR015925; PTHR13715:SF11 (PANTHER)                                                                            |
| Brugia malayi               | activating sig-l cointegrator 1 complex subunit 3-like 1 isoform 1 | 12 | P:GO:0018991;<br>C:GO:0005681;<br>F:GO:0008026;<br>P:GO:0040007;<br>F:GO:0003677;<br>F:GO:0005524;<br>P:GO:0007601;<br>P:GO:0002119;<br>F:GO:0005515;<br>P:GO:0000354;<br>C:GO:0005682;<br>P:GO:0009792                                   | -                                              |             | G3DSA:3.40.50.300 (GENE3D), PTHR11752 (PANTHER), PTHR11752:SF7 (PANTHER)                                                             |
| Angiostrongylus cantonensis | poly polymerase cid (cafein-induced death protein)                 | 3  | C:GO:0005622;<br>F:GO:0005515;<br>F:GO:0003725                                                                                                                                                                                            | -                                              |             | IPR002058; G3DSA:3.30.460.10 (GENE3D), PTHR12271 (PANTHER), PTHR12271:SF14 (PANTHER), SSF81301 (SUPERFAMILY), SSF81631 (SUPERFAMILY) |

|                        |                                                    |    |                                                                                                                                                                                                                          |                                                                                                                                                      |                                                                                                                      |
|------------------------|----------------------------------------------------|----|--------------------------------------------------------------------------------------------------------------------------------------------------------------------------------------------------------------------------|------------------------------------------------------------------------------------------------------------------------------------------------------|----------------------------------------------------------------------------------------------------------------------|
| Caenorhabditis elegans | briggsae cbr-gex-2 protein                         | 11 | P:GO:0016477;<br>P:GO:0007411;<br>P:GO:0050807;<br>P:GO:0008360;<br>C:GO:0045202;<br>P:GO:0006911;<br>P:GO:0030866;<br>F:GO:0005515;<br>P:GO:0010172;<br>C:GO:0005737;<br>P:GO:0030031                                   | -                                                                                                                                                    | IPR008081                                                                                                            |
| Caenorhabditis elegans | low-density lipoprotein receptor-related protein 2 | 3  | F:GO:0004872;<br>C:GO:0016021;<br>F:GO:0005509                                                                                                                                                                           | -                                                                                                                                                    | IPR000033; IPR011042; PTHR10529 (PANTHER), SSF63825 (SUPERFAMILY)                                                    |
| Loa loa                | leucine rich repeat family protein                 | 0  |                                                                                                                                                                                                                          | F:GO:0005216;<br>C:GO:0016021;<br>C:GO:0016020;<br>P:GO:0006811;<br>P:GO:0006810;<br>F:GO:0003674;<br>F:GO:0005515;<br>P:GO:0055085;<br>P:GO:0008150 | G3DSA:3.80.10.10 (GENE3D), PTHR23154 (PANTHER), PTHR23154:SF128 (PANTHER), PS51450 (PROFILE), SSF52058 (SUPERFAMILY) |
| Brugia malayi          | lysine-specific histone demethylase 1              | 13 | P:GO:0033169;<br>P:GO:0043433;<br>F:GO:0034648;<br>F:GO:0016491;<br>P:GO:0034720;<br>F:GO:0050660;<br>P:GO:0034339;<br>F:GO:0032454;<br>F:GO:0003682;<br>F:GO:0030374;<br>C:GO:0005634;<br>F:GO:0050681;<br>F:GO:0016564 | -                                                                                                                                                    | IPR007526; IPR009057; IPR011991                                                                                      |
| Brugia malayi          | lysine-specific histone demethylase 1              | 2  | P:GO:0008152;<br>F:GO:0003824                                                                                                                                                                                            | -                                                                                                                                                    | IPR007526; IPR009057; IPR011991                                                                                      |
| Loa loa                | lysine-specific histone demethylase 1              | 13 | P:GO:0033169;<br>P:GO:0043433;<br>F:GO:0034648;<br>F:GO:0016491;<br>P:GO:0034720;<br>F:GO:0050660;<br>P:GO:0034339;<br>F:GO:0032454;<br>F:GO:0003682;<br>F:GO:0030374;<br>C:GO:0005634;<br>F:GO:0050681;<br>F:GO:0016564 | -                                                                                                                                                    | IPR007526; IPR009057; IPR011991                                                                                      |

|                         |                                                            |    |                                                                                                                                                                                                                          |                                                                                                                                                      |             |                                                                                               |
|-------------------------|------------------------------------------------------------|----|--------------------------------------------------------------------------------------------------------------------------------------------------------------------------------------------------------------------------|------------------------------------------------------------------------------------------------------------------------------------------------------|-------------|-----------------------------------------------------------------------------------------------|
| Loa loa                 | lysine-specific histone demethylase 1                      | 13 | P:GO:0033169;<br>P:GO:0043433;<br>F:GO:0034648;<br>F:GO:0016491;<br>P:GO:0034720;<br>F:GO:0050660;<br>P:GO:0034339;<br>F:GO:0032454;<br>F:GO:0003682;<br>F:GO:0030374;<br>C:GO:0005634;<br>F:GO:0050681;<br>F:GO:0016564 | -                                                                                                                                                    |             | IPR007526; IPR009057; IPR011991                                                               |
| Brugia malayi           | wd repeat domain 4                                         | 0  |                                                                                                                                                                                                                          | F:GO:0016740;<br>F:GO:0008168;<br>P:GO:0008033;<br>C:GO:0005634;<br>C:GO:0005737;<br>C:GO:0005654;<br>F:GO:0005515;<br>P:GO:0006400;<br>F:GO:0008176 |             | IPR015943; PTHR16288 (PANTHER),<br>SSF101908 (SUPERFAMILY)                                    |
|                         | -                                                          | 0  |                                                                                                                                                                                                                          |                                                                                                                                                      |             | -                                                                                             |
| Caenorhabditis elegans  | sig-I recognition particle 68                              | 10 | F:GO:0005488;<br>C:GO:0043231;<br>P:GO:0040002;<br>P:GO:0040035;<br>P:GO:0002119;<br>C:GO:0044444;<br>C:GO:0030529;<br>P:GO:0006898;<br>P:GO:0009792;<br>P:GO:0040018                                                    | -                                                                                                                                                    |             | PTHR12860 (PANTHER)                                                                           |
| Caenorhabditis elegans  | myc and mondo-like family member (mml-1)                   | 4  | P:GO:0009792;<br>P:GO:0002119;<br>P:GO:0040010;<br>P:GO:0006898                                                                                                                                                          | -                                                                                                                                                    |             | PTHR15741 (PANTHER),<br>PTHR15741:SF1 (PANTHER)                                               |
| Loa loa                 | sympk protein                                              | 3  | C:GO:0005737;<br>C:GO:0005654;<br>F:GO:0005515                                                                                                                                                                           | -                                                                                                                                                    |             | IPR021850; PTHR15245 (PANTHER),<br>PTHR15245:SF2 (PANTHER)                                    |
|                         | -                                                          | 0  |                                                                                                                                                                                                                          |                                                                                                                                                      |             | -                                                                                             |
|                         | -                                                          | 0  |                                                                                                                                                                                                                          |                                                                                                                                                      |             | -                                                                                             |
| Caenorhabditis briggsae | elegans protein partially confirmed by transcript evidence | 0  |                                                                                                                                                                                                                          | F:GO:0016787                                                                                                                                         |             | IPR002018; G3DSA:3.40.50.1820<br>(GENE3D), PTHR11559:SF6<br>(PANTHER), SSF53474 (SUPERFAMILY) |
| Brugia malayi           | hmg box family protein                                     | 0  |                                                                                                                                                                                                                          | F:GO:0003677;<br>C:GO:0005634                                                                                                                        |             | -                                                                                             |
| Caenorhabditis briggsae | elegans protein partially confirmed by transcript evidence | 0  |                                                                                                                                                                                                                          |                                                                                                                                                      |             | -                                                                                             |
| Nematostella vectensis  | predicted protein [Nematostella vectensis]                 | 0  |                                                                                                                                                                                                                          |                                                                                                                                                      |             | -                                                                                             |
| Caenorhabditis briggsae | atpase aaa domain containing 3a                            | 4  | C:GO:0005743;<br>F:GO:0005524;<br>F:GO:0017111;<br>P:GO:0008152                                                                                                                                                          | -                                                                                                                                                    | EC:3.6.1.15 | PTHR23075 (PANTHER)                                                                           |
|                         | -                                                          | 0  |                                                                                                                                                                                                                          |                                                                                                                                                      |             | -                                                                                             |
| Caenorhabditis briggsae | elegans protein confirmed by transcript evidence           | 1  | F:GO:0005515                                                                                                                                                                                                             | -                                                                                                                                                    |             | PTHR22934 (PANTHER),<br>PTHR22934:SF14 (PANTHER)                                              |
| Caenorhabditis briggsae | elegans protein confirmed by transcript evidence           | 1  | F:GO:0005515                                                                                                                                                                                                             | -                                                                                                                                                    |             | PTHR22934 (PANTHER),<br>PTHR22934:SF14 (PANTHER)                                              |

|                         |                                                               |   |                                                                                                                                                      |   |              |                                                                                                                                                      |
|-------------------------|---------------------------------------------------------------|---|------------------------------------------------------------------------------------------------------------------------------------------------------|---|--------------|------------------------------------------------------------------------------------------------------------------------------------------------------|
| Brugia malayi           | zinc knuckle family protein                                   | 6 | P:GO:0009792;<br>F:GO:0003676;<br>P:GO:0001703;<br>F:GO:0005515;<br>C:GO:0005634;<br>F:GO:0008270                                                    | - |              | IPR001841; IPR001878; IPR013083;<br>IPR013084; IPR014891; IPR017907;<br>PTHR15439 (PANTHER), SSF57756<br>(SUPERFAMILY), SSF57850<br>(SUPERFAMILY)    |
| Ixodes scapularis       | tpr repeat nuclear                                            | 9 | F:GO:0042169;<br>P:GO:0033523;<br>P:GO:0010390;<br>P:GO:0040007;<br>P:GO:0000003;<br>C:GO:0016593;<br>P:GO:0002119;<br>P:GO:0006898;<br>P:GO:0009792 | - |              | PTHR14027 (PANTHER),<br>PTHR14027:SF2 (PANTHER)                                                                                                      |
| Caenorhabditis elegans  | elegans protein partially confirmed by transcript evidence    | 0 |                                                                                                                                                      |   | F:GO:0005488 | -                                                                                                                                                    |
|                         | -                                                             | 0 |                                                                                                                                                      |   |              | -                                                                                                                                                    |
|                         | -                                                             | 0 |                                                                                                                                                      |   |              | -                                                                                                                                                    |
| Caenorhabditis elegans  | acetyl- hydrolase transferase family protein                  | 3 | C:GO:0005811;<br>P:GO:0044237;<br>F:GO:0003824                                                                                                       | - |              | IPR003702; G3DSA:3.40.1080.10<br>(GENE3D), G3DSA:3.40.810.20<br>(GENE3D), PTHR21432:SF11<br>(PANTHER), SignalP (SIGNALP),<br>SSF100950 (SUPERFAMILY) |
| Brugia malayi           | co-chaperone protein mitochondrial                            | 3 | P:GO:0006974;<br>C:GO:0005739;<br>F:GO:0005515                                                                                                       | - |              | IPR001623; IPR015609;<br>PTHR11821:SF53 (PANTHER), SignalP<br>(SIGNALP)                                                                              |
|                         | -                                                             | 0 |                                                                                                                                                      |   |              | -                                                                                                                                                    |
| Caenorhabditis elegans  | 60s ribosomal protein l11                                     | 9 | P:GO:0006412;<br>P:GO:0040010;<br>C:GO:0005840;<br>P:GO:0006917;<br>F:GO:0003735;<br>P:GO:0040035;<br>P:GO:0002119;<br>P:GO:0040039;<br>P:GO:0009792 | - | EC:3.6.5.3   | IPR002132; IPR020929; IPR022803;<br>PTHR11994:SF2 (PANTHER)                                                                                          |
| Caenorhabditis briggsae | uncharacterized protein                                       | 2 | F:GO:0046872;<br>F:GO:0008237                                                                                                                        | - |              | IPR007863; IPR011249; PTHR11851<br>(PANTHER), PTHR11851:SF68<br>(PANTHER)                                                                            |
| Caenorhabditis elegans  | vesicle transport through interaction with t-s-res homolog 1a | 7 | F:GO:0005484;<br>C:GO:0031201;<br>C:GO:0008021;<br>P:GO:0042147;<br>P:GO:0006886;<br>C:GO:0016021;<br>C:GO:0043025                                   | - |              | -                                                                                                                                                    |
| Loa loa                 | brain rptpmam4 isoform ii                                     | 6 | F:GO:0004721;<br>F:GO:0005515;<br>P:GO:0044237;<br>P:GO:0051179;<br>C:GO:0044459;<br>P:GO:0048523                                                    | - | EC:3.1.3.16  | IPR000242; IPR000387; IPR016130;<br>G3DSA:3.90.190.10 (GENE3D),<br>PTHR19134 (PANTHER), SSF52799<br>(SUPERFAMILY)                                    |
| Loa loa                 | potential dual specificity phosphatase                        | 5 | P:GO:0006470;<br>F:GO:0019900;<br>F:GO:0016791;<br>P:GO:0033133;<br>C:GO:0005737                                                                     | - | EC:3.1.3.0   | PTHR10159 (PANTHER),<br>PTHR10159:SF13 (PANTHER)                                                                                                     |

|                         |                                                                                                                                                                                                                    |    |                                                                                                                                                                                        |   |                                                                                                                          |
|-------------------------|--------------------------------------------------------------------------------------------------------------------------------------------------------------------------------------------------------------------|----|----------------------------------------------------------------------------------------------------------------------------------------------------------------------------------------|---|--------------------------------------------------------------------------------------------------------------------------|
|                         | -                                                                                                                                                                                                                  | 0  |                                                                                                                                                                                        |   | -                                                                                                                        |
|                         | -                                                                                                                                                                                                                  | 0  |                                                                                                                                                                                        |   | SignalP (SIGNALP)                                                                                                        |
|                         | -                                                                                                                                                                                                                  | 0  |                                                                                                                                                                                        |   | SignalP (SIGNALP)                                                                                                        |
|                         | -                                                                                                                                                                                                                  | 0  |                                                                                                                                                                                        |   | -                                                                                                                        |
|                         | -                                                                                                                                                                                                                  | 0  |                                                                                                                                                                                        |   | -                                                                                                                        |
|                         | -                                                                                                                                                                                                                  | 0  |                                                                                                                                                                                        |   | -                                                                                                                        |
|                         | -                                                                                                                                                                                                                  | 0  |                                                                                                                                                                                        |   | -                                                                                                                        |
| Caenorhabditis elegans  | cuticular collagen                                                                                                                                                                                                 | 4  | P:GO:0019915;<br>P:GO:0006952;<br>P:GO:0010171;<br>F:GO:0005515                                                                                                                        | - | IPR002486; IPR008160; PTHR10499 (PANTHER), PTHR10499:SF58 (PANTHER), SignalP (SIGNALP)                                   |
| Caenorhabditis elegans  | g patch domain containing 1                                                                                                                                                                                        | 3  | P:GO:0019915;<br>P:GO:0010171;<br>P:GO:0002119                                                                                                                                         | - | PTHR13384 (PANTHER), PTHR13384:SF8 (PANTHER)                                                                             |
|                         | -                                                                                                                                                                                                                  | 0  |                                                                                                                                                                                        |   | SignalP (SIGNALP)                                                                                                        |
|                         | -                                                                                                                                                                                                                  | 0  |                                                                                                                                                                                        |   | SignalP (SIGNALP)                                                                                                        |
|                         | -                                                                                                                                                                                                                  | 0  |                                                                                                                                                                                        |   | -                                                                                                                        |
|                         | -                                                                                                                                                                                                                  | 0  |                                                                                                                                                                                        |   | -                                                                                                                        |
| Loa loa                 | prostaglandin reductase 2                                                                                                                                                                                          | 4  | P:GO:0055114;<br>C:GO:0005737;<br>F:GO:0016491;<br>F:GO:0008270                                                                                                                        | - | IPR002085; IPR013149; IPR016040; PTHR11695:SF5 (PANTHER), SSF51735 (SUPERFAMILY)                                         |
|                         | -                                                                                                                                                                                                                  | 0  |                                                                                                                                                                                        |   | -                                                                                                                        |
| Caenorhabditis elegans  | f26_caeel ame: full=probable 6-phosphofructo-2-ki-se fructose- -biphosphatase short=6pf-2-k fru- -p2ase short=pfk fbpase includes: ame: full=6-phosphofructo-2-ki-se includes: ame: full=fructose- -bisphosphatase | 3  | P:GO:0006003;<br>F:GO:0005524;<br>F:GO:0003873                                                                                                                                         | - | EC:2.7.1.105 IPR003094; PTHR10606:SF11 (PANTHER)                                                                         |
| Caenorhabditis elegans  | yl54_caeel ame: full=uncharacterized protein                                                                                                                                                                       | 0  |                                                                                                                                                                                        |   | -                                                                                                                        |
| Caenorhabditis elegans  | yl54_caeel ame: full=uncharacterized protein                                                                                                                                                                       | 0  |                                                                                                                                                                                        |   | -                                                                                                                        |
| Caenorhabditis elegans  | af316599_1 paracaspase                                                                                                                                                                                             | 11 | P:GO:0000003;<br>F:GO:0005515;<br>P:GO:0046649;<br>P:GO:0050778;<br>P:GO:0044238;<br>P:GO:0050794;<br>P:GO:0043170;<br>F:GO:0008233;<br>P:GO:0035466;<br>C:GO:0044444;<br>P:GO:0032501 | - | -                                                                                                                        |
|                         | -                                                                                                                                                                                                                  | 0  |                                                                                                                                                                                        |   | -                                                                                                                        |
|                         | -                                                                                                                                                                                                                  | 0  |                                                                                                                                                                                        |   | -                                                                                                                        |
|                         | -                                                                                                                                                                                                                  | 0  |                                                                                                                                                                                        |   | -                                                                                                                        |
|                         | -                                                                                                                                                                                                                  | 0  |                                                                                                                                                                                        |   | -                                                                                                                        |
|                         | -                                                                                                                                                                                                                  | 0  |                                                                                                                                                                                        |   | -                                                                                                                        |
|                         | -                                                                                                                                                                                                                  | 0  |                                                                                                                                                                                        |   | -                                                                                                                        |
|                         | -                                                                                                                                                                                                                  | 0  |                                                                                                                                                                                        |   | -                                                                                                                        |
|                         | -                                                                                                                                                                                                                  | 0  |                                                                                                                                                                                        |   | -                                                                                                                        |
| Caenorhabditis elegans  | prion-like-(q n-rich)-domain-bearing protein family member (pqn-22)                                                                                                                                                | 1  | P:GO:0009792                                                                                                                                                                           | - | -                                                                                                                        |
|                         | -                                                                                                                                                                                                                  | 0  |                                                                                                                                                                                        |   | -                                                                                                                        |
|                         | -                                                                                                                                                                                                                  | 0  |                                                                                                                                                                                        |   | -                                                                                                                        |
| Caenorhabditis briggsae | zinc carboxypeptidase                                                                                                                                                                                              | 3  | P:GO:0006508;<br>F:GO:0004181;<br>F:GO:0008270                                                                                                                                         | - | EC:3.4.17.0 IPR000834; G3DSA:3.40.630.10 (GENE3D), PTHR11705 (PANTHER), PTHR11705:SF12 (PANTHER), SSF53187 (SUPERFAMILY) |
| Caenorhabditis briggsae | small                                                                                                                                                                                                              | 2  | F:GO:0032555;<br>P:GO:0050794                                                                                                                                                          | - | -                                                                                                                        |

|                         |                                                         |    |                                                                                                                                                                                                                                                                             |                                                                                                   |                                                                                                                                                                                                                                                                                                              |
|-------------------------|---------------------------------------------------------|----|-----------------------------------------------------------------------------------------------------------------------------------------------------------------------------------------------------------------------------------------------------------------------------|---------------------------------------------------------------------------------------------------|--------------------------------------------------------------------------------------------------------------------------------------------------------------------------------------------------------------------------------------------------------------------------------------------------------------|
| Caenorhabditis briggsae | elegans protein confirmed by transcript evidence        | 0  |                                                                                                                                                                                                                                                                             |                                                                                                   | SignalIP (SIGNALP)                                                                                                                                                                                                                                                                                           |
|                         | -                                                       | 0  |                                                                                                                                                                                                                                                                             |                                                                                                   | -                                                                                                                                                                                                                                                                                                            |
| Loa loa                 | iesterase family member (pde-2)                         | 9  | F:GO:0004118;<br>P:GO:0046069;<br>F:GO:0046872;<br>F:GO:0030552;<br>C:GO:0045121;<br>P:GO:0007165;<br>F:GO:0042803;<br>F:GO:0030553;<br>P:GO:0006198                                                                                                                        | -                                                                                                 | IPR002073; PTHR11347 (PANTHER),<br>PTHR11347:SF17 (PANTHER),<br>SSF109604 (SUPERFAMILY)                                                                                                                                                                                                                      |
| Caenorhabditis briggsae | small subunit processome homolog                        | 0  |                                                                                                                                                                                                                                                                             | F:GO:0003674;<br>P:GO:0008150                                                                     | IPR006984; G3DSA:3.40.50.1010<br>(GENE3D), SSF88723 (SUPERFAMILY)                                                                                                                                                                                                                                            |
| Caenorhabditis elegans  | atp-binding cassette transporter 13-like                | 4  | F:GO:0016887;<br>P:GO:0006810;<br>F:GO:0000166;<br>F:GO:0005215                                                                                                                                                                                                             | -                                                                                                 | SignalIP (SIGNALP)                                                                                                                                                                                                                                                                                           |
| Caenorhabditis briggsae | potential initiation factor 2 subunit family protein    | 0  |                                                                                                                                                                                                                                                                             | F:GO:0046523;<br>F:GO:0003743;<br>P:GO:0044237;<br>P:GO:0044249;<br>F:GO:0016853                  | IPR000649; PTHR10233:SF6<br>(PANTHER), SSF100950 (SUPERFAMILY)                                                                                                                                                                                                                                               |
| Loa loa                 | 116 kda u5 small nuclear ribonucleoprotein component    | 16 | F:GO:0003746;<br>C:GO:0015030;<br>P:GO:0000910;<br>C:GO:0005681;<br>P:GO:0040007;<br>C:GO:0016607;<br>P:GO:0000003;<br>P:GO:0008380;<br>P:GO:0018996;<br>P:GO:0002119;<br>F:GO:0005515;<br>P:GO:0040011;<br>F:GO:0003924;<br>P:GO:0006397;<br>P:GO:0009792;<br>F:GO:0005525 | -                                                                                                 | EC:3.6.5.1;<br>IPR000640; IPR004161; IPR005517;<br>IPR009000; IPR009022; IPR014721;<br>IPR020568; G3DSA:2.40.30.10<br>EC:3.6.5.2; (GENE3D), G3DSA:3.30.70.870<br>EC:3.6.5.3; (GENE3D), G3DSA:3.90.1430.10<br>EC:3.6.5.4 (GENE3D), PTHR23115 (PANTHER),<br>PTHR23115:SF5 (PANTHER), SSF52540<br>(SUPERFAMILY) |
|                         | -                                                       | 0  |                                                                                                                                                                                                                                                                             |                                                                                                   | -                                                                                                                                                                                                                                                                                                            |
|                         | -                                                       | 0  |                                                                                                                                                                                                                                                                             |                                                                                                   | -                                                                                                                                                                                                                                                                                                            |
| Caenorhabditis briggsae | briggsae cbr-abt-2 protein                              | 0  |                                                                                                                                                                                                                                                                             | F:GO:0005524;<br>F:GO:0016887;<br>F:GO:0000166;<br>F:GO:0017111                                   | SignalIP (SIGNALP)                                                                                                                                                                                                                                                                                           |
| Caenorhabditis briggsae | Hypothetical protein CBG23745 [Caenorhabditis briggsae] | 4  | P:GO:0009792;<br>P:GO:0016246;<br>P:GO:0040007;<br>P:GO:0002119                                                                                                                                                                                                             | -                                                                                                 | -                                                                                                                                                                                                                                                                                                            |
| Brugia malayi           | coiled-coil domain containing 49                        | 0  |                                                                                                                                                                                                                                                                             | P:GO:0055114;<br>P:GO:0010171;<br>P:GO:0040010;<br>P:GO:0009792;<br>P:GO:0006979;<br>P:GO:0040019 | -                                                                                                                                                                                                                                                                                                            |
|                         | -                                                       | 0  |                                                                                                                                                                                                                                                                             |                                                                                                   | -                                                                                                                                                                                                                                                                                                            |

|                               |                                                                     |    |                                                                                                                                                                                                                                                                                                                                                 |                                                                 |                                                                                                     |
|-------------------------------|---------------------------------------------------------------------|----|-------------------------------------------------------------------------------------------------------------------------------------------------------------------------------------------------------------------------------------------------------------------------------------------------------------------------------------------------|-----------------------------------------------------------------|-----------------------------------------------------------------------------------------------------|
| Homo sapiens                  | clusterin                                                           | 20 | P:GO:0009615;<br>P:GO:0051788;<br>P:GO:0048812;<br>C:GO:0034366;<br>P:GO:0045597;<br>P:GO:0032463;<br>P:GO:0043691;<br>P:GO:0031018;<br>C:GO:0016235;<br>P:GO:0006916;<br>P:GO:0008284;<br>P:GO:0006629;<br>P:GO:0006958;<br>F:GO:0051787;<br>C:GO:0048471;<br>P:GO:0001836;<br>P:GO:0045087;<br>P:GO:0006979;<br>C:GO:0031012;<br>C:GO:0005739 | -                                                               | IPR000753; IPR016016; PTHR10970 (PANTHER), SignalP (SIGNALP)                                        |
| Caenorhabditis elegans        | Hypothetical protein F49D11.10 [Caenorhabditis elegans]             | 0  |                                                                                                                                                                                                                                                                                                                                                 |                                                                 | -                                                                                                   |
|                               | -                                                                   | 0  |                                                                                                                                                                                                                                                                                                                                                 |                                                                 | SignalP (SIGNALP)                                                                                   |
|                               | -                                                                   | 0  |                                                                                                                                                                                                                                                                                                                                                 |                                                                 | -                                                                                                   |
| Caenorhabditis elegans        | prion-like-(q n-rich)-domain-bearing protein family member (pqn-42) | 0  |                                                                                                                                                                                                                                                                                                                                                 |                                                                 | -                                                                                                   |
| Caenorhabditis elegans        | prion-like-(q n-rich)-domain-bearing protein family member (pqn-42) | 0  |                                                                                                                                                                                                                                                                                                                                                 |                                                                 | -                                                                                                   |
|                               | -                                                                   | 0  |                                                                                                                                                                                                                                                                                                                                                 |                                                                 | SignalP (SIGNALP)                                                                                   |
| Brugia malayi                 | ruvb-like 2                                                         | 6  | F:GO:0003678;<br>C:GO:0071339;<br>P:GO:0006310;<br>F:GO:0005524;<br>F:GO:0016887;<br>P:GO:0016481                                                                                                                                                                                                                                               | -                                                               | -                                                                                                   |
| Xenopus (Silurana) tropicalis | methyltransferase like 9                                            | 0  |                                                                                                                                                                                                                                                                                                                                                 | F:GO:0008168;<br>F:GO:0003674;<br>F:GO:0016740;<br>P:GO:0008150 | IPR007884                                                                                           |
| Caenorhabditis elegans        | elegans protein confirmed by transcript evidence                    | 2  | F:GO:0005488;<br>P:GO:0006810                                                                                                                                                                                                                                                                                                                   | -                                                               | PTHR12965 (PANTHER)                                                                                 |
| Caenorhabditis briggsae       | 6-phosphofructo-2-ki-se fructose- -biphosphatase isoform cra_a      | 12 | P:GO:0006007;<br>F:GO:0003873;<br>C:GO:0005829;<br>P:GO:0009749;<br>F:GO:0019900;<br>P:GO:0006090;<br>F:GO:0004331;<br>P:GO:0006089;<br>F:GO:0005524;<br>P:GO:0033133;<br>P:GO:0006003;<br>P:GO:0032024                                                                                                                                         | -                                                               | EC:2.7.1.105<br>G3DSA:3.40.50.1240 (GENE3D),<br>PTHR10606:SF11 (PANTHER),<br>SSF53254 (SUPERFAMILY) |

|                         |                                                                   |   |                                                                                                                                     |                               |             |                                                                                                                                      |
|-------------------------|-------------------------------------------------------------------|---|-------------------------------------------------------------------------------------------------------------------------------------|-------------------------------|-------------|--------------------------------------------------------------------------------------------------------------------------------------|
| Brugia malayi           | egf-like domain containing protein                                | 8 | P:GO:0048519;<br>P:GO:0007155;<br>P:GO:0032879;<br>C:GO:0016021;<br>P:GO:0050794;<br>C:GO:0044459;<br>F:GO:0005488;<br>P:GO:0032502 | -                             |             | IPR001169; IPR013032; IPR013111;<br>IPR015812; G3DSA:2.10.25.10<br>(GENE3D), PTHR10082:SF5<br>(PANTHER), SSF57196 (SUPERFAMILY)      |
| Bombyx mori             | endonuclease-reverse transcriptase                                | 1 | F:GO:0003824                                                                                                                        | -                             |             | -                                                                                                                                    |
| Caenorhabditis briggsae | briggsae cbr-kin-4 protein                                        | 8 | P:GO:0009792;<br>P:GO:0006468;<br>F:GO:0008415;<br>F:GO:0005515;<br>F:GO:0005524;<br>F:GO:0000287;<br>P:GO:0000003;<br>F:GO:0004674 | -                             | EC:2.7.11.0 | IPR001478; G3DSA:2.30.42.10<br>(GENE3D), PTHR14191 (PANTHER)                                                                         |
| Caenorhabditis elegans  | upf0459 protein cg10681                                           | 0 |                                                                                                                                     | P:GO:0008150;<br>C:GO:0005575 |             | -                                                                                                                                    |
| Caenorhabditis elegans  | briggsae cbr-phat-2 protein                                       | 1 | F:GO:0005515                                                                                                                        | -                             |             | IPR003582; PTHR21724 (PANTHER)                                                                                                       |
| Caenorhabditis briggsae | elegans protein confirmed by transcript evidence                  | 4 | F:GO:0005515;<br>P:GO:0008340;<br>P:GO:0008152;<br>F:GO:0003824                                                                     | -                             |             | IPR013781; IPR017853; PTHR23208<br>(PANTHER), PTHR23208:SF13<br>(PANTHER), SignalP (SIGNALP)                                         |
|                         | -                                                                 | 0 |                                                                                                                                     |                               |             | -                                                                                                                                    |
| Caenorhabditis briggsae | elegans protein confirmed by transcript evidence                  | 4 | F:GO:0005515;<br>P:GO:0008340;<br>P:GO:0008152;<br>F:GO:0003824                                                                     | -                             |             | IPR013781; IPR017853; PTHR23208<br>(PANTHER), PTHR23208:SF13<br>(PANTHER), SignalP (SIGNALP)                                         |
| Caenorhabditis briggsae | elegans protein confirmed by transcript evidence                  | 4 | F:GO:0005515;<br>P:GO:0008340;<br>P:GO:0008152;<br>F:GO:0003824                                                                     | -                             |             | IPR013781; IPR017853; PTHR23208<br>(PANTHER), PTHR23208:SF13<br>(PANTHER), SignalP (SIGNALP)                                         |
| Caenorhabditis briggsae | leucine-ruch repeat hypothetical protein phosphatase 1 regulatory | 4 | P:GO:0009792;<br>P:GO:0040035;<br>P:GO:0006898;<br>P:GO:0040011                                                                     | -                             |             | G3DSA:3.80.10.10 (GENE3D),<br>PTHR10588 (PANTHER), PS51450<br>(PROFILE), SSF52058 (SUPERFAMILY)                                      |
|                         | -                                                                 | 0 |                                                                                                                                     |                               |             | -                                                                                                                                    |
|                         | -                                                                 | 0 |                                                                                                                                     |                               |             | -                                                                                                                                    |
|                         | -                                                                 | 0 |                                                                                                                                     |                               |             | SignalP (SIGNALP)                                                                                                                    |
|                         |                                                                   |   |                                                                                                                                     |                               |             | IPR003598; IPR003599; IPR007110;<br>IPR013098; IPR013783; PTHR19897<br>(PANTHER), PTHR19897:SF5<br>(PANTHER), SSF48726 (SUPERFAMILY) |
|                         |                                                                   |   |                                                                                                                                     |                               |             | IPR003598; IPR003599; IPR007110;<br>IPR013098; IPR013783; PTHR19897<br>(PANTHER), PTHR19897:SF5<br>(PANTHER), SSF48726 (SUPERFAMILY) |
|                         | -                                                                 | 0 |                                                                                                                                     |                               |             | -                                                                                                                                    |



|                        |                                                                            |    |                                                                                                                                                                                                                                                                             |   |            |                                                                                                                                                  |
|------------------------|----------------------------------------------------------------------------|----|-----------------------------------------------------------------------------------------------------------------------------------------------------------------------------------------------------------------------------------------------------------------------------|---|------------|--------------------------------------------------------------------------------------------------------------------------------------------------|
| Caenorhabditis elegans | phospholipase d1                                                           | 13 | P:GO:0007265;<br>F:GO:0004620;<br>P:GO:0016042;<br>P:GO:0006935;<br>C:GO:0005768;<br>F:GO:0008081;<br>F:GO:0005515;<br>C:GO:0031090;<br>P:GO:0007154;<br>F:GO:0035091;<br>C:GO:0044431;<br>P:GO:0008654;<br>P:GO:0050830                                                    | - | EC:3.1.4.0 | IPR001736; IPR001849; IPR015679;<br>G3DSA:3.30.870.10 (GENE3D),<br>PTHR18896:SF6 (PANTHER), SSF50729<br>(SUPERFAMILY), SSF56024<br>(SUPERFAMILY) |
| Caenorhabditis elegans | aquaporin 8                                                                | 7  | C:GO:0005929;<br>P:GO:0006833;<br>C:GO:0005886;<br>C:GO:0045177;<br>F:GO:0015250;<br>C:GO:0043025;<br>C:GO:0044425                                                                                                                                                          | - |            | IPR000425; IPR022357;<br>PTHR19139:SF25 (PANTHER)                                                                                                |
| Caenorhabditis elegans | elegans protein partially confirmed by transcript evidence                 | 6  | C:GO:0016021;<br>P:GO:0040007;<br>F:GO:0005524;<br>P:GO:0010171;<br>P:GO:0002119;<br>F:GO:0016887                                                                                                                                                                           | - |            | IPR013525; PTHR19241 (PANTHER),<br>PTHR19241:SF30 (PANTHER)                                                                                      |
|                        | -                                                                          | 0  |                                                                                                                                                                                                                                                                             |   |            | SignalP (SIGNALP)                                                                                                                                |
| Caenorhabditis elegans | golgi-specific brefeldin a-resistance guanine nucleotide exchange factor 1 | 16 | F:GO:0005515;<br>C:GO:0005788;<br>P:GO:0016044;<br>C:GO:0005777;<br>F:GO:0016563;<br>C:GO:0005829;<br>C:GO:0005801;<br>P:GO:0048193;<br>F:GO:0003677;<br>P:GO:0032012;<br>C:GO:0005795;<br>F:GO:0005086;<br>P:GO:0045449;<br>C:GO:0005634;<br>P:GO:0046903;<br>C:GO:0005739 | - |            | PTHR10663 (PANTHER),<br>PTHR10663:SF8 (PANTHER)                                                                                                  |

|                         |                                                                            |    |                                                                                                                                                                                                                                                                             |                                                                                                   |             |                                                                                                             |
|-------------------------|----------------------------------------------------------------------------|----|-----------------------------------------------------------------------------------------------------------------------------------------------------------------------------------------------------------------------------------------------------------------------------|---------------------------------------------------------------------------------------------------|-------------|-------------------------------------------------------------------------------------------------------------|
| Caenorhabditis elegans  | golgi-specific brefeldin a-resistance guanine nucleotide exchange factor 1 | 16 | F:GO:0005515;<br>C:GO:0005788;<br>P:GO:0016044;<br>C:GO:0005777;<br>F:GO:0016563;<br>C:GO:0005829;<br>C:GO:0005801;<br>P:GO:0048193;<br>F:GO:0003677;<br>P:GO:0032012;<br>C:GO:0005795;<br>F:GO:0005086;<br>P:GO:0045449;<br>C:GO:0005634;<br>P:GO:0046903;<br>C:GO:0005739 | -                                                                                                 |             | PTHR10663 (PANTHER),<br>PTHR10663:SF8 (PANTHER)                                                             |
|                         | -                                                                          | 0  |                                                                                                                                                                                                                                                                             |                                                                                                   |             | -                                                                                                           |
| Caenorhabditis elegans  | hypothetical protein C27A12.9 [Caenorhabditis elegans]                     | 0  |                                                                                                                                                                                                                                                                             | P:GO:0008152;<br>F:GO:0003824                                                                     |             | PTHR23071 (PANTHER)                                                                                         |
| Caenorhabditis elegans  | related to islet cell diabetes autoantigen family member (ida-1)           | 0  |                                                                                                                                                                                                                                                                             |                                                                                                   |             | -                                                                                                           |
|                         | -                                                                          | 0  |                                                                                                                                                                                                                                                                             |                                                                                                   |             | SignalP (SIGNALP)                                                                                           |
| Caenorhabditis elegans  | zinc finger in n-recognin family protein                                   | 0  |                                                                                                                                                                                                                                                                             | F:GO:0046872;<br>F:GO:0051015;<br>F:GO:0030674;<br>F:GO:0008270;<br>F:GO:0005515;<br>F:GO:0004842 |             | PTHR21497 (PANTHER),<br>PTHR21497:SF3 (PANTHER)                                                             |
| Loa loa                 | zinc dhhc domain containing 18                                             | 4  | C:GO:0016020;<br>F:GO:0046872;<br>P:GO:0034613;<br>F:GO:0016409                                                                                                                                                                                                             | -                                                                                                 |             | IPR001594; PTHR22883 (PANTHER)                                                                              |
| Caenorhabditis briggsae | r- lariat debranching                                                      | 7  | P:GO:0009792;<br>F:GO:0016788;<br>P:GO:0040010;<br>P:GO:0000003;<br>P:GO:0040011;<br>P:GO:0006898;<br>P:GO:0006396                                                                                                                                                          | -                                                                                                 |             | IPR007708; PTHR12849 (PANTHER)                                                                              |
| Loa loa                 | met proto-oncogene precursor                                               | 7  | P:GO:0001764;<br>F:GO:0005488;<br>P:GO:0001889;<br>F:GO:0004872;<br>P:GO:0021707;<br>F:GO:0004713;<br>P:GO:0021522                                                                                                                                                          | -                                                                                                 | EC:2.7.10.0 | IPR000719; IPR001245; IPR011009;<br>IPR020685; G3DSA:1.10.510.10<br>(GENE3D), G3DSA:3.30.200.20<br>(GENE3D) |
| Caenorhabditis elegans  | nucleolar complex associated 4 homolog ( cerevisiae)                       | 9  | P:GO:0040010;<br>P:GO:0000003;<br>P:GO:0002119;<br>F:GO:0005515;<br>P:GO:0040011;<br>P:GO:0006898;<br>P:GO:0009792;<br>P:GO:0040018;<br>C:GO:0005634                                                                                                                        | -                                                                                                 |             | IPR005612; PTHR12455 (PANTHER)                                                                              |

|                         |                                                             |   |                                                                                                                                     |                                                                                                                                                                       |             |                                                                                                                                     |
|-------------------------|-------------------------------------------------------------|---|-------------------------------------------------------------------------------------------------------------------------------------|-----------------------------------------------------------------------------------------------------------------------------------------------------------------------|-------------|-------------------------------------------------------------------------------------------------------------------------------------|
| Brugia malayi           | ribonucleases p mrp protein subunit pop1 containing protein | 0 |                                                                                                                                     | P:GO:0010171;<br>P:GO:0006396;<br>P:GO:0006898;<br>P:GO:0000003;<br>P:GO:0009792;<br>P:GO:0002119;<br>F:GO:0004526;<br>P:GO:0001682;<br>P:GO:0040010;<br>P:GO:0040007 |             | IPR012590                                                                                                                           |
| Haemonchus contortus    | hexoki-se                                                   | 5 | P:GO:0060361;<br>F:GO:0005515;<br>F:GO:0005524;<br>P:GO:0006096;<br>F:GO:0004396                                                    | -                                                                                                                                                                     | EC:2.7.1.1  | IPR001312; IPR019807; IPR022672;<br>IPR022673; G3DSA:3.40.367.20<br>(GENE3D), SSF53067 (SUPERFAMILY)                                |
| Haemonchus contortus    | hexoki-se family protein                                    | 5 | P:GO:0060361;<br>F:GO:0005515;<br>F:GO:0005524;<br>P:GO:0006096;<br>F:GO:0004396                                                    | -                                                                                                                                                                     | EC:2.7.1.1  | IPR001312; IPR019807; IPR022672;<br>IPR022673; G3DSA:3.30.420.40<br>(GENE3D), G3DSA:3.40.367.20<br>(GENE3D), SSF53067 (SUPERFAMILY) |
| Haemonchus contortus    | hexoki-se                                                   | 4 | F:GO:0005515;<br>F:GO:0005524;<br>P:GO:0006096;<br>F:GO:0004396                                                                     | -                                                                                                                                                                     | EC:2.7.1.1  | IPR001312; IPR019807; IPR022672;<br>IPR022673; G3DSA:3.40.367.20<br>(GENE3D), SSF53067 (SUPERFAMILY)                                |
|                         | -                                                           | 0 |                                                                                                                                     |                                                                                                                                                                       |             | -                                                                                                                                   |
|                         | -                                                           | 0 |                                                                                                                                     |                                                                                                                                                                       |             | SignalP (SIGNALP)                                                                                                                   |
| Caenorhabditis elegans  | 6-phosphogluconolacto-se                                    | 3 | C:GO:0044464;<br>P:GO:0006098;<br>F:GO:0017057                                                                                      | -                                                                                                                                                                     | EC:3.1.1.31 | IPR005900; G3DSA:3.40.50.1360<br>(GENE3D), SSF100950 (SUPERFAMILY)                                                                  |
| Caenorhabditis elegans  | serpentine class sx family member (srsx-34)                 | 0 |                                                                                                                                     | C:GO:0016021;<br>P:GO:0055085;<br>P:GO:0008340                                                                                                                        |             | IPR011701; IPR016196; PTHR10074<br>(PANTHER), PTHR10074:SF12<br>(PANTHER)                                                           |
| Caenorhabditis briggsae | peptidoglycan- domain containing 2                          | 1 | P:GO:0019915                                                                                                                        | -                                                                                                                                                                     |             | IPR018392; G3DSA:3.10.350.10<br>(GENE3D), PTHR20932 (PANTHER)                                                                       |
| Caenorhabditis briggsae | deoxyribonuclease-2                                         | 1 | F:GO:0004518                                                                                                                        | -                                                                                                                                                                     |             | -                                                                                                                                   |
| Brugia malayi           | f-box and wd repeat domain containing 7                     | 8 | C:GO:0005654;<br>F:GO:0005515;<br>C:GO:0005730;<br>C:GO:0019005;<br>P:GO:0016567;<br>P:GO:0031146;<br>P:GO:0007062;<br>P:GO:0032876 | -                                                                                                                                                                     |             | IPR001810; IPR022364;<br>G3DSA:1.20.1280.50 (GENE3D),<br>PTHR22844 (PANTHER),<br>PTHR22844:SF11 (PANTHER)                           |
|                         | -                                                           | 0 |                                                                                                                                     |                                                                                                                                                                       |             | -                                                                                                                                   |

|                         |                                                  |    |                                                                                                                                                                                                         |                                                                                                                                                                                                                                                            |  |                                                                                                                                                                                      |
|-------------------------|--------------------------------------------------|----|---------------------------------------------------------------------------------------------------------------------------------------------------------------------------------------------------------|------------------------------------------------------------------------------------------------------------------------------------------------------------------------------------------------------------------------------------------------------------|--|--------------------------------------------------------------------------------------------------------------------------------------------------------------------------------------|
| Caenorhabditis briggsae | type iii restriction res subunit family protein  | 0  |                                                                                                                                                                                                         | F:GO:0004386;<br>P:GO:0006974;<br>C:GO:0005634;<br>F:GO:0003677;<br>F:GO:0016787;<br>F:GO:0003676;<br>F:GO:0000166;<br>P:GO:0000003;<br>F:GO:0008270;<br>F:GO:0005524;<br>F:GO:0008026;<br>P:GO:0006281;<br>C:GO:0005575;<br>F:GO:0005515;<br>F:GO:0046872 |  | PTHR14025 (PANTHER),<br>PTHR14025:SF10 (PANTHER), SignalP (SIGNALP)                                                                                                                  |
| Caenorhabditis briggsae | dead (asp-glu-ala-asp) box polypeptide 1         | 9  | F:GO:0003676;<br>P:GO:0044260;<br>C:GO:0010494;<br>F:GO:0005515;<br>F:GO:0000166;<br>P:GO:0006139;<br>P:GO:0007275;<br>P:GO:0010467;<br>F:GO:0003724                                                    | -                                                                                                                                                                                                                                                          |  | IPR001650; IPR001870; IPR003877;<br>IPR008985; IPR011545; IPR014001;<br>IPR014021; G3DSA:3.40.50.300 (GENE3D), PTHR10967 (PANTHER), PTHR10967:SF44 (PANTHER), SSF52540 (SUPERFAMILY) |
| Caenorhabditis elegans  | placental protein 11 related                     | 4  | F:GO:0005488;<br>F:GO:0004519;<br>P:GO:0019538;<br>C:GO:0044424                                                                                                                                         | -                                                                                                                                                                                                                                                          |  | IPR018998; PTHR12439 (PANTHER), SignalP (SIGNALP), SSF142877 (SUPERFAMILY)                                                                                                           |
|                         |                                                  | -  |                                                                                                                                                                                                         |                                                                                                                                                                                                                                                            |  |                                                                                                                                                                                      |
| Caenorhabditis elegans  | transformer-2 alpha                              | 12 | P:GO:0040010;<br>F:GO:0003723;<br>P:GO:0040035;<br>P:GO:0002119;<br>F:GO:0000166;<br>P:GO:0000398;<br>P:GO:0040011;<br>P:GO:0002009;<br>P:GO:0048477;<br>P:GO:0009792;<br>P:GO:0008406;<br>C:GO:0005634 | -                                                                                                                                                                                                                                                          |  | IPR000504; IPR012677; PTHR15241 (PANTHER), SSF54928 (SUPERFAMILY)                                                                                                                    |
|                         |                                                  | -  |                                                                                                                                                                                                         |                                                                                                                                                                                                                                                            |  |                                                                                                                                                                                      |
| Caenorhabditis elegans  | elegans protein confirmed by transcript evidence | 2  | C:GO:0043231;<br>C:GO:0044444                                                                                                                                                                           | -                                                                                                                                                                                                                                                          |  |                                                                                                                                                                                      |
| Loa loa                 | f-box and leucine-rich repeat protein 14b        | 0  |                                                                                                                                                                                                         |                                                                                                                                                                                                                                                            |  | G3DSA:3.80.10.10 (GENE3D), PTHR23125 (PANTHER), PTHR23125:SF64 (PANTHER), SSF52047 (SUPERFAMILY)                                                                                     |
|                         |                                                  | -  |                                                                                                                                                                                                         |                                                                                                                                                                                                                                                            |  |                                                                                                                                                                                      |

|                         |                                                               |    |                                                                                                                                                                       |              |            |                                                                                                             |
|-------------------------|---------------------------------------------------------------|----|-----------------------------------------------------------------------------------------------------------------------------------------------------------------------|--------------|------------|-------------------------------------------------------------------------------------------------------------|
| Macaca mulatta          | eukaryotic initiation factor 4ai                              | 10 | F:GO:0003729;<br>C:GO:0016281;<br>F:GO:0008026;<br>F:GO:0005515;<br>P:GO:0031100;<br>F:GO:0005524;<br>F:GO:0000339;<br>F:GO:0003743;<br>C:GO:0005829;<br>P:GO:0006412 | -            | EC:3.6.5.3 | IPR011545; G3DSA:3.40.50.300 (GENE3D), PTHR10967 (PANTHER), PTHR10967:SF2 (PANTHER), SSF52540 (SUPERFAMILY) |
| Caenorhabditis elegans  | mitochondrial glutamate                                       | 2  | P:GO:0008340;<br>C:GO:0016020                                                                                                                                         | -            |            | IPR001993; IPR018108; G3DSA:1.50.40.10 (GENE3D), PTHR11896:SF23 (PANTHER)                                   |
| Gallus gallus           | ribosomal protein l26                                         | 7  | P:GO:0042273;<br>F:GO:0003735;<br>F:GO:0003723;<br>F:GO:0005515;<br>P:GO:0006364;<br>C:GO:0022625;<br>P:GO:0006414                                                    | -            |            | IPR005756; IPR005824; IPR005825; IPR008991; IPR014723; PTHR11143:SF2 (PANTHER)                              |
|                         | -                                                             | 0  |                                                                                                                                                                       |              |            | -                                                                                                           |
|                         | -                                                             | 0  |                                                                                                                                                                       |              |            | -                                                                                                           |
| Loa loa                 | wd repeat domain isoform cra_a                                | 3  | F:GO:0005488;<br>C:GO:0044428;<br>P:GO:0008152                                                                                                                        | -            |            | IPR001680; IPR015943; IPR019405; IPR019781; PTHR13211 (PANTHER), SSF101908 (SUPERFAMILY)                    |
|                         | -                                                             | 0  |                                                                                                                                                                       |              |            | -                                                                                                           |
|                         | -                                                             | 0  |                                                                                                                                                                       |              |            | -                                                                                                           |
| Caenorhabditis elegans  | type ii inositol- -bisphosphate 4-                            | 0  |                                                                                                                                                                       |              |            | -                                                                                                           |
| Loa loa                 | retinoblastoma-associated protein a domain containing protein | 0  |                                                                                                                                                                       | F:GO:0005515 |            | -                                                                                                           |
| Caenorhabditis elegans  | daf-16 foxo germline tumor affecting family member (dct-10)   | 0  |                                                                                                                                                                       |              |            | IPR021109; SignalP (SIGNALP)                                                                                |
| Caenorhabditis elegans  | daf-16 foxo germline tumor affecting family member (dct-10)   | 0  |                                                                                                                                                                       |              |            | IPR021109; SignalP (SIGNALP)                                                                                |
| Caenorhabditis briggsae | er lumen protein retaining receptor                           | 9  | F:GO:0004872;<br>C:GO:0005789;<br>C:GO:0005794;<br>P:GO:0006621;<br>F:GO:0005515;<br>F:GO:0005046;<br>P:GO:0016192;<br>P:GO:0006886;<br>C:GO:0016021                  | -            |            | IPR000133; PTHR10585:SF10 (PANTHER), SignalP (SIGNALP)                                                      |
| Brugia malayi           | elegans protein confirmed by transcript evidence              | 0  |                                                                                                                                                                       |              |            | -                                                                                                           |
|                         | -                                                             | 0  |                                                                                                                                                                       |              |            | SignalP (SIGNALP)                                                                                           |

|                         |                                               |    |                                                                                                                                                                                                                                                                                              |                                                                                                                                                                                                                                           |                                                                                              |
|-------------------------|-----------------------------------------------|----|----------------------------------------------------------------------------------------------------------------------------------------------------------------------------------------------------------------------------------------------------------------------------------------------|-------------------------------------------------------------------------------------------------------------------------------------------------------------------------------------------------------------------------------------------|----------------------------------------------------------------------------------------------|
| Caenorhabditis briggsae | kinesin-like protein kif3a                    | 17 | F:GO:0003777;<br>C:GO:0035085;<br>P:GO:0007224;<br>P:GO:0048260;<br>C:GO:0005874;<br>C:GO:0008021;<br>P:GO:0007507;<br>F:GO:0005524;<br>P:GO:0007018;<br>F:GO:0005515;<br>P:GO:0021904;<br>C:GO:0032391;<br>P:GO:0001822;<br>P:GO:0007368;<br>P:GO:0042384;<br>P:GO:0001701;<br>P:GO:0009952 | -                                                                                                                                                                                                                                         | IPR001752; IPR019821; PTHR16012 (PANTHER), PTHR16012:SF160 (PANTHER), SSF52540 (SUPERFAMILY) |
|                         | -                                             | 0  |                                                                                                                                                                                                                                                                                              |                                                                                                                                                                                                                                           | -                                                                                            |
| Brugia malayi           | cullin-associated nedd8-dissociated protein 1 | 11 | P:GO:0040010;<br>P:GO:0045899;<br>P:GO:0016567;<br>P:GO:0002119;<br>P:GO:0043086;<br>F:GO:0016563;<br>P:GO:0030154;<br>F:GO:0017025;<br>C:GO:0000151;<br>P:GO:0009792;<br>C:GO:0005634                                                                                                       | -                                                                                                                                                                                                                                         | -                                                                                            |
| Caenorhabditis elegans  | isoform a                                     | 0  |                                                                                                                                                                                                                                                                                              | F:GO:0020037;<br>P:GO:0006919;<br>F:GO:0009055;<br>F:GO:0003964;<br>F:GO:0003723;<br>P:GO:0016567;<br>P:GO:0006278;<br>C:GO:0031463;<br>F:GO:0005515;<br>P:GO:0007291                                                                     | IPR006652; IPR013089; IPR015915; PTHR23230:SF168 (PANTHER)                                   |
| Caenorhabditis elegans  | glutamyl-tr- b subunit                        | 1  | F:GO:0016874                                                                                                                                                                                                                                                                                 | -                                                                                                                                                                                                                                         | IPR006075; IPR017959; SSF55931 (SUPERFAMILY)                                                 |
|                         | -                                             | 0  |                                                                                                                                                                                                                                                                                              |                                                                                                                                                                                                                                           | -                                                                                            |
| Loa loa                 | zinc c2h2 type family protein                 | 0  |                                                                                                                                                                                                                                                                                              | F:GO:0008270;<br>C:GO:0005622                                                                                                                                                                                                             | IPR007087; IPR015880                                                                         |
| Loa loa                 | protein zwilch homolog                        | 0  |                                                                                                                                                                                                                                                                                              | C:GO:0005694;<br>P:GO:0007067;<br>C:GO:0000777;<br>P:GO:0006810;<br>C:GO:0000776;<br>C:GO:0000775;<br>F:GO:0003674;<br>P:GO:0007093;<br>P:GO:0051301;<br>P:GO:0009792;<br>F:GO:0008289;<br>F:GO:0005515;<br>P:GO:0008150;<br>P:GO:0007049 | IPR018630                                                                                    |

|                         |                                                        |   |                                                                                                   |                                                                                                                                                                                                                                           |  |                                                                                                           |
|-------------------------|--------------------------------------------------------|---|---------------------------------------------------------------------------------------------------|-------------------------------------------------------------------------------------------------------------------------------------------------------------------------------------------------------------------------------------------|--|-----------------------------------------------------------------------------------------------------------|
| Loa loa                 | protein zwilch homolog                                 | 0 |                                                                                                   | C:GO:0005694;<br>P:GO:0007067;<br>C:GO:0000777;<br>P:GO:0006810;<br>C:GO:0000776;<br>C:GO:0000775;<br>F:GO:0003674;<br>P:GO:0007093;<br>P:GO:0051301;<br>P:GO:0009792;<br>F:GO:0008289;<br>F:GO:0005515;<br>P:GO:0008150;<br>P:GO:0007049 |  | IPR018630                                                                                                 |
| Caenorhabditis elegans  | sdk2 protein                                           | 1 | C:GO:0016020                                                                                      | -                                                                                                                                                                                                                                         |  | IPR003961; IPR008957; IPR013783;<br>PR00014 (PRINTS), PTHR10489<br>(PANTHER), PTHR10489:SF57<br>(PANTHER) |
| Caenorhabditis elegans  | elegans protein confirmed by transcript evidence       | 0 |                                                                                                   |                                                                                                                                                                                                                                           |  |                                                                                                           |
| Caenorhabditis elegans  | hypothetical protein F55F10.1 [Caenorhabditis elegans] | 0 |                                                                                                   | C:GO:0005634;<br>F:GO:0000166;<br>F:GO:0008134;<br>F:GO:0017111;<br>F:GO:0005524;<br>F:GO:0016887;<br>P:GO:0006355;<br>C:GO:0005622;<br>P:GO:0043254                                                                                      |  | PTHR22908 (PANTHER),<br>PTHR22908:SF13 (PANTHER)                                                          |
|                         | -                                                      | 0 |                                                                                                   |                                                                                                                                                                                                                                           |  | -                                                                                                         |
| Caenorhabditis elegans  | elegans protein confirmed by transcript evidence       | 1 | P:GO:0040010                                                                                      | -                                                                                                                                                                                                                                         |  | IPR002544; SignalP (SIGNALP)                                                                              |
|                         | -                                                      | 0 |                                                                                                   |                                                                                                                                                                                                                                           |  | -                                                                                                         |
|                         | -                                                      | 0 |                                                                                                   |                                                                                                                                                                                                                                           |  | -                                                                                                         |
| Caenorhabditis briggsae | briggsae cbr-sulp-4 protein                            | 0 |                                                                                                   | P:GO:0008272;<br>C:GO:0016021;<br>F:GO:0008271;<br>C:GO:0016020;<br>P:GO:0055085;<br>F:GO:0005215;<br>P:GO:0006810                                                                                                                        |  | IPR002645; IPR011547; PTHR11814<br>(PANTHER), PTHR11814:SF26<br>(PANTHER)                                 |
| Caenorhabditis elegans  | elegans protein confirmed by transcript evidence       | 3 | C:GO:0016020;<br>P:GO:0006810;<br>F:GO:0005215                                                    | -                                                                                                                                                                                                                                         |  | -                                                                                                         |
| Caenorhabditis briggsae | stip                                                   | 6 | P:GO:0040035;<br>P:GO:0009792;<br>P:GO:0002119;<br>F:GO:0005515;<br>P:GO:0040011;<br>P:GO:0040007 | -                                                                                                                                                                                                                                         |  | PTHR23329 (PANTHER),<br>PTHR23329:SF1 (PANTHER)                                                           |
| Caenorhabditis elegans  | protein ki-se domain containing protein                | 1 | P:GO:0040010                                                                                      | -                                                                                                                                                                                                                                         |  | IPR011009; PTHR11909 (PANTHER),<br>PTHR11909:SF19 (PANTHER)                                               |
| Caenorhabditis elegans  | frataxin mitochondrial precursor                       | 2 | C:GO:0005739;<br>P:GO:0006879                                                                     | -                                                                                                                                                                                                                                         |  | IPR001794; IPR002908; SignalP<br>(SIGNALP)                                                                |

|                         |                                                                          |   |                                                                                                                                                      |                                                                                                                                                      |                                                                                                             |
|-------------------------|--------------------------------------------------------------------------|---|------------------------------------------------------------------------------------------------------------------------------------------------------|------------------------------------------------------------------------------------------------------------------------------------------------------|-------------------------------------------------------------------------------------------------------------|
| Caenorhabditis elegans  | solute carrier family 30 (zinc transporter) member 9                     | 8 | P:GO:0055085;<br>C:GO:0005856;<br>P:GO:0044260;<br>P:GO:0090304;<br>F:GO:0008324;<br>P:GO:0006812;<br>C:GO:0016020;<br>C:GO:0005634                  | -                                                                                                                                                    | IPR002524; IPR009061;<br>G3DSA:1.20.1510.10 (GENE3D),<br>G3DSA:3.90.530.10 (GENE3D),<br>PTHR13414 (PANTHER) |
| Caenorhabditis briggsae | briggsae cbr-hum-2 protein                                               | 9 | F:GO:0017137;<br>F:GO:0035255;<br>P:GO:0032880;<br>C:GO:0043197;<br>C:GO:0019717;<br>F:GO:0000166;<br>C:GO:0043025;<br>C:GO:0048471;<br>P:GO:0015031 | -                                                                                                                                                    | IPR001609; PTHR13140 (PANTHER),<br>PTHR13140:SF32 (PANTHER),<br>SSF52540 (SUPERFAMILY)                      |
| Caenorhabditis elegans  | nuclear pore complex protein family member (npp-8)                       | 0 |                                                                                                                                                      | P:GO:0000003;<br>P:GO:0006913;<br>P:GO:0009792;<br>P:GO:0002119;<br>P:GO:0006997;<br>F:GO:0017056;<br>F:GO:0005515;<br>P:GO:0040007;<br>P:GO:0040035 | -                                                                                                           |
| Caenorhabditis briggsae | cdk5 regulatory subunit associated protein 1-like 1                      | 3 | P:GO:0009451;<br>F:GO:0003824;<br>F:GO:0051539                                                                                                       | -                                                                                                                                                    | IPR005839; IPR013848                                                                                        |
|                         | -                                                                        | 0 |                                                                                                                                                      |                                                                                                                                                      | -                                                                                                           |
| Caenorhabditis elegans  | vitellogenin structural genes (yolk protein genes) family member (vit-2) | 6 | P:GO:0009792;<br>F:GO:0005515;<br>P:GO:0006810;<br>P:GO:0040010;<br>P:GO:0033036;<br>P:GO:0008340                                                    | -                                                                                                                                                    | IPR015255; IPR015819; PTHR23345<br>(PANTHER)                                                                |
| Caenorhabditis elegans  | vitellogenin structural genes (yolk protein genes) family member (vit-2) | 4 | P:GO:0009792;<br>F:GO:0005515;<br>P:GO:0040010;<br>P:GO:0008340                                                                                      | -                                                                                                                                                    | IPR015255; IPR015819; PTHR23345<br>(PANTHER)                                                                |
| Caenorhabditis elegans  | vitellogenin structural genes (yolk protein genes) family member (vit-2) | 6 | P:GO:0009792;<br>F:GO:0005515;<br>P:GO:0006810;<br>P:GO:0040010;<br>P:GO:0033036;<br>P:GO:0008340                                                    | -                                                                                                                                                    | IPR015255; IPR015819; PTHR23345<br>(PANTHER)                                                                |
| Caenorhabditis elegans  | briggsae cbr-vit-2 protein                                               | 0 |                                                                                                                                                      | P:GO:0006869;<br>F:GO:0005319                                                                                                                        | -                                                                                                           |
| Caenorhabditis elegans  | briggsae cbr-vit-2 protein                                               | 0 |                                                                                                                                                      | P:GO:0006869;<br>F:GO:0005319;<br>P:GO:0040010;<br>P:GO:0009792;<br>P:GO:0008340;<br>F:GO:0005515                                                    | -                                                                                                           |



|                         |                                                                          |   |                                                                                                                    |                                                                                                                                     |            |                                                                                    |
|-------------------------|--------------------------------------------------------------------------|---|--------------------------------------------------------------------------------------------------------------------|-------------------------------------------------------------------------------------------------------------------------------------|------------|------------------------------------------------------------------------------------|
| Caenorhabditis elegans  | vitellogenin structural genes (yolk protein genes) family member (vit-2) | 7 | P:GO:0006810;<br>P:GO:0040010;<br>P:GO:0008340;<br>F:GO:0022892;<br>F:GO:0005515;<br>P:GO:0033036;<br>P:GO:0009792 | -                                                                                                                                   |            | IPR011700; G3DSA:1.20.5.170 (GENE3D), PTHR23334 (PANTHER), PTHR23334:SF7 (PANTHER) |
| Caenorhabditis elegans  | vitellogenin structural genes (yolk protein genes) family member (vit-2) | 7 | P:GO:0006810;<br>P:GO:0040010;<br>P:GO:0008340;<br>F:GO:0022892;<br>F:GO:0005515;<br>P:GO:0033036;<br>P:GO:0009792 | -                                                                                                                                   |            | IPR011700; G3DSA:1.20.5.170 (GENE3D), PTHR23334 (PANTHER), PTHR23334:SF7 (PANTHER) |
| Caenorhabditis elegans  | vitellogenin structural genes (yolk protein genes) family member (vit-2) | 7 | P:GO:0006810;<br>P:GO:0040010;<br>P:GO:0008340;<br>F:GO:0022892;<br>F:GO:0005515;<br>P:GO:0033036;<br>P:GO:0009792 | -                                                                                                                                   |            | IPR011700; G3DSA:1.20.5.170 (GENE3D), PTHR23334 (PANTHER), PTHR23334:SF7 (PANTHER) |
| Caenorhabditis elegans  | bzip transcription factor family member (zip-4)                          | 0 |                                                                                                                    | P:GO:0006355;<br>C:GO:0045202;<br>C:GO:0005737;<br>F:GO:0043565;<br>F:GO:0046983;<br>F:GO:0005515;<br>F:GO:0003700;<br>C:GO:0005634 |            |                                                                                    |
| Caenorhabditis elegans  | vitellogenin structural genes (yolk protein genes) family member (vit-2) | 4 | P:GO:0009792;<br>F:GO:0005515;<br>P:GO:0040010;<br>P:GO:0008340                                                    | -                                                                                                                                   |            | IPR015255; IPR015819; PTHR23345 (PANTHER)                                          |
| Meloidogyne chitwoodi   | transposase                                                              | 0 |                                                                                                                    | F:GO:0004803;<br>P:GO:0015074;<br>P:GO:0006313;<br>F:GO:0003677                                                                     |            | PTHR23016 (PANTHER)                                                                |
| Meloidogyne chitwoodi   | transposase                                                              | 0 |                                                                                                                    | F:GO:0004803;<br>P:GO:0015074;<br>P:GO:0006313;<br>F:GO:0003677                                                                     |            | IPR001888; PTHR23016 (PANTHER), SignalP (SIGNALP)                                  |
|                         | -                                                                        | 0 |                                                                                                                    |                                                                                                                                     |            | -                                                                                  |
| Caenorhabditis elegans  | gpi mannosyltransferase 1                                                | 5 | P:GO:0000003;<br>P:GO:0016254;<br>F:GO:0016758;<br>C:GO:0005783;<br>C:GO:0044425                                   | -                                                                                                                                   | EC:2.4.1.0 | IPR007704; SignalP (SIGNALP)                                                       |
| Loa loa                 | coiled-coil domain-containing protein mtmr15-like                        | 6 | P:GO:0000724;<br>P:GO:0033683;<br>F:GO:0043130;<br>F:GO:0017108;<br>C:GO:0005634;<br>F:GO:0008409                  | -                                                                                                                                   |            | IPR014883; SignalP (SIGNALP)                                                       |
|                         | -                                                                        | 0 |                                                                                                                    |                                                                                                                                     |            | -                                                                                  |
| Caenorhabditis briggsae | briggsae cbr-aex-1 protein                                               | 3 | F:GO:0004871;<br>C:GO:0005622;<br>P:GO:0030421                                                                     | -                                                                                                                                   |            | -                                                                                  |

|                         |                                                  |    |                                                                                                                                                                                                                                                                                                                                |                                                |            |                                                                                                               |
|-------------------------|--------------------------------------------------|----|--------------------------------------------------------------------------------------------------------------------------------------------------------------------------------------------------------------------------------------------------------------------------------------------------------------------------------|------------------------------------------------|------------|---------------------------------------------------------------------------------------------------------------|
| Caenorhabditis elegans  | polymerase iii (d- directed) polypeptide b       | 6  | F:GO:0003899;<br>P:GO:0032728;<br>P:GO:0045089;<br>F:GO:0003677;<br>F:GO:0032549;<br>P:GO:0006350                                                                                                                                                                                                                              | -                                              | EC:2.7.7.6 | IPR007644; G3DSA:3.90.1100.10 (GENE3D), SSF64484 (SUPERFAMILY)                                                |
| Brugia malayi           | r- dependent r- polymerase family protein        | 0  |                                                                                                                                                                                                                                                                                                                                | P:GO:0009792                                   |            | -                                                                                                             |
|                         | -                                                | 0  |                                                                                                                                                                                                                                                                                                                                |                                                |            | -                                                                                                             |
| Caenorhabditis briggsae | sarcolemmal membrane-associated protein          | 0  |                                                                                                                                                                                                                                                                                                                                | F:GO:0051082;<br>P:GO:0006457;<br>C:GO:0016272 |            | IPR000253; IPR008984; PTHR15715 (PANTHER), PTHR15715:SF4 (PANTHER)                                            |
| Caenorhabditis briggsae | 39s ribosomal protein mitochondrial              | 3  | P:GO:0009792;<br>F:GO:0046872;<br>C:GO:0005622                                                                                                                                                                                                                                                                                 | -                                              |            | IPR001857; PTHR15680:SF3 (PANTHER)                                                                            |
|                         | -                                                | 0  |                                                                                                                                                                                                                                                                                                                                |                                                |            | -                                                                                                             |
| Loa loa                 | ribophorin ii                                    | 1  | C:GO:0044464                                                                                                                                                                                                                                                                                                                   |                                                |            | SignalP (SIGNALP)                                                                                             |
|                         | -                                                | 0  |                                                                                                                                                                                                                                                                                                                                |                                                |            | -                                                                                                             |
|                         | -                                                | 0  |                                                                                                                                                                                                                                                                                                                                |                                                |            | -                                                                                                             |
| Brugia malayi           | briggsae cbr-mig-14 protein                      | 19 | C:GO:0044456;<br>C:GO:0000139;<br>P:GO:0016055;<br>P:GO:0051223;<br>P:GO:0001745;<br>P:GO:0060341;<br>P:GO:0051649;<br>P:GO:0035017;<br>C:GO:0016021;<br>C:GO:0005789;<br>P:GO:0008587;<br>P:GO:0002790;<br>P:GO:0007367;<br>C:GO:0005769;<br>P:GO:0048522;<br>P:GO:0007480;<br>C:GO:0044459;<br>C:GO:0031300;<br>C:GO:0010008 | -                                              |            | -                                                                                                             |
|                         | -                                                | 0  |                                                                                                                                                                                                                                                                                                                                |                                                |            | -                                                                                                             |
| Brugia malayi           | hypothetical protein Bm1_33815 [Brugia malayi]   | 0  |                                                                                                                                                                                                                                                                                                                                |                                                |            | -                                                                                                             |
| Caenorhabditis elegans  | briggsae cbr-met-2 protein                       | 6  | P:GO:0044238;<br>P:GO:0001833;<br>P:GO:0044260;<br>F:GO:0016740;<br>F:GO:0005515;<br>C:GO:0005634                                                                                                                                                                                                                              | -                                              |            | IPR001214; G3DSA:2.170.270.10 (GENE3D), PTHR22884 (PANTHER), PTHR22884:SF24 (PANTHER), SSF82199 (SUPERFAMILY) |
| Caenorhabditis elegans  | elegans protein confirmed by transcript evidence | 7  | P:GO:0009792;<br>P:GO:0010171;<br>F:GO:0005515;<br>P:GO:0040010;<br>F:GO:0003774;<br>P:GO:0045132;<br>F:GO:0000166                                                                                                                                                                                                             | -                                              |            | IPR001752; PTHR16012 (PANTHER), PTHR16012:SF183 (PANTHER), SSF52540 (SUPERFAMILY)                             |
| Caenorhabditis elegans  | elegans protein confirmed by transcript evidence | 5  | P:GO:0009792;<br>P:GO:0010171;<br>F:GO:0005515;<br>P:GO:0040010;<br>P:GO:0045132                                                                                                                                                                                                                                               | -                                              |            | IPR001752; PTHR16012 (PANTHER), PTHR16012:SF170 (PANTHER), SSF52540 (SUPERFAMILY)                             |

|                         |                                                                                  |    |                                                                                                                                                                                        |   |                                                         |                                                                                                                                           |
|-------------------------|----------------------------------------------------------------------------------|----|----------------------------------------------------------------------------------------------------------------------------------------------------------------------------------------|---|---------------------------------------------------------|-------------------------------------------------------------------------------------------------------------------------------------------|
| Caenorhabditis elegans  | briggsae cbr-klp- protein                                                        | 8  | P:GO:0040010;<br>P:GO:0045132;<br>C:GO:0005739;<br>P:GO:0010171;<br>F:GO:0003774;<br>F:GO:0005515;<br>F:GO:0000166;<br>P:GO:0009792                                                    | - |                                                         | IPR001752; PTHR16012 (PANTHER),<br>PTHR16012:SF183 (PANTHER),<br>SSF52540 (SUPERFAMILY)                                                   |
| Caenorhabditis elegans  | nuclear hormone receptor family protein isoform confirmed by transcript evidence | 3  | F:GO:0004872;<br>F:GO:0005488;<br>P:GO:0006350                                                                                                                                         | - |                                                         | IPR000536; IPR008946; PTHR11865 (PANTHER), PTHR11865:SF235 (PANTHER)                                                                      |
| Homo sapiens            | cytochrome b-c1 complex subunit 8                                                | 7  | C:GO:0005743;<br>F:GO:0008121;<br>C:GO:0070469;<br>P:GO:0034220;<br>P:GO:0015992;<br>C:GO:0016021;<br>P:GO:0022900                                                                     | - | EC:1.10.2.2                                             | IPR004205                                                                                                                                 |
| Caenorhabditis elegans  | briggsae cbr-vps-16 protein                                                      | 11 | P:GO:0009792;<br>P:GO:0010171;<br>P:GO:0002119;<br>C:GO:0031902;<br>P:GO:0008340;<br>P:GO:0006886;<br>P:GO:0040011;<br>P:GO:0008219;<br>C:GO:0005765;<br>P:GO:0040007;<br>P:GO:0048565 | - |                                                         | PTHR12811 (PANTHER)                                                                                                                       |
| Caenorhabditis briggsae | guanosine monophosphate reductase                                                | 8  | P:GO:0009792;<br>P:GO:0002119;<br>F:GO:0046872;<br>P:GO:0009409;<br>F:GO:0003920;<br>P:GO:0055114;<br>P:GO:0040007;<br>P:GO:0009117                                                    | - | EC:1.7.1.7                                              | IPR001093; IPR005993; IPR013785;<br>IPR015875; PTHR11911 (PANTHER),<br>PTHR11911:SF7 (PANTHER), SSF51412 (SUPERFAMILY)                    |
|                         | -                                                                                | 0  |                                                                                                                                                                                        |   |                                                         | SignalP (SIGNALP)                                                                                                                         |
| Caenorhabditis elegans  | gtp-binding protein 5                                                            | 6  | F:GO:0005525;<br>C:GO:0005622;<br>F:GO:0005515;<br>C:GO:0016021;<br>P:GO:0015684;<br>F:GO:0015093                                                                                      | - |                                                         | IPR002917; IPR006073; IPR006169;<br>IPR014100; G3DSA:3.40.50.300 (GENE3D), PTHR11702 (PANTHER), SSF52540 (SUPERFAMILY)                    |
|                         | -                                                                                | 0  |                                                                                                                                                                                        |   |                                                         | -                                                                                                                                         |
| Homo sapiens            | elongation factor 2                                                              | 7  | C:GO:0005737;<br>F:GO:0003746;<br>F:GO:0005525;<br>F:GO:0005515;<br>C:GO:0030529;<br>P:GO:0006414;<br>F:GO:0003924                                                                     | - | EC:3.6.5.1;<br>EC:3.6.5.2;<br>EC:3.6.5.3;<br>EC:3.6.5.4 | IPR000795; G3DSA:3.40.50.300 (GENE3D), G3DSA:3.90.1430.10 (GENE3D), PTHR23115 (PANTHER), PTHR23115:SF15 (PANTHER), SSF52540 (SUPERFAMILY) |
| Caenorhabditis briggsae | ladder protein                                                                   | 0  |                                                                                                                                                                                        |   |                                                         | -                                                                                                                                         |
|                         |                                                                                  |    |                                                                                                                                                                                        |   |                                                         | F:GO:0008289;<br>F:GO:0019841;<br>F:GO:0005488                                                                                            |

|                         |                                                             |    |                                                                                                                                                                       |                                                                                  |                            |                                                                                                                                |
|-------------------------|-------------------------------------------------------------|----|-----------------------------------------------------------------------------------------------------------------------------------------------------------------------|----------------------------------------------------------------------------------|----------------------------|--------------------------------------------------------------------------------------------------------------------------------|
| Nematostella vectensis  | multidrug resistance-associated                             | 1  | F:GO:0003824                                                                                                                                                          | -                                                                                |                            | IPR001140; IPR011527; IPR017940; G3DSA:1.20.1560.10 (GENE3D), PTHR19242 (PANTHER), PTHR19242:SF22 (PANTHER), SignalP (SIGNALP) |
| Caenorhabditis briggsae | denn madd domain containing 5a-like                         | 0  |                                                                                                                                                                       | F:GO:0017137;<br>C:GO:0005794;<br>F:GO:0005515                                   |                            | IPR001194; IPR005113; PTHR12296 (PANTHER), PTHR12296:SF3 (PANTHER)                                                             |
|                         | -                                                           | 0  |                                                                                                                                                                       |                                                                                  |                            | -                                                                                                                              |
| Caenorhabditis elegans  | probable e3 ubiquitin-protein ligase mycbp2                 | 10 | C:GO:0015630;<br>C:GO:0030424;<br>F:GO:0008270;<br>P:GO:0021785;<br>P:GO:0051493;<br>P:GO:0032880;<br>P:GO:0021952;<br>P:GO:0030071;<br>F:GO:0042803;<br>C:GO:0005680 | -                                                                                |                            | IPR001841; IPR013083; PTHR12846 (PANTHER), PTHR12846:SF2 (PANTHER), SSF57850 (SUPERFAMILY)                                     |
|                         | -                                                           | 0  |                                                                                                                                                                       |                                                                                  |                            | -                                                                                                                              |
| Caenorhabditis elegans  | lin1-like protein                                           | 1  | F:GO:0005515                                                                                                                                                          | -                                                                                |                            | PTHR13138 (PANTHER)                                                                                                            |
|                         | -                                                           | 0  |                                                                                                                                                                       |                                                                                  |                            | -                                                                                                                              |
|                         | -                                                           | 0  |                                                                                                                                                                       |                                                                                  |                            | -                                                                                                                              |
|                         | -                                                           | 0  |                                                                                                                                                                       |                                                                                  |                            | SignalP (SIGNALP)                                                                                                              |
| Macaca fascicularis     | un-med protein product [Macaca fascicularis]                | 0  |                                                                                                                                                                       |                                                                                  |                            | -                                                                                                                              |
| Caenorhabditis briggsae | leucyl-tr- synthetase                                       | 7  | P:GO:0006423;<br>F:GO:0004823;<br>P:GO:0006429;<br>F:GO:0005515;<br>F:GO:0005524;<br>C:GO:0005829;<br>F:GO:0004817                                                    | -                                                                                | EC:6.1.1.4;<br>EC:6.1.1.16 | IPR001412; IPR002300; IPR014729; PTHR11946 (PANTHER), PTHR11946:SF6 (PANTHER), SSF52374 (SUPERFAMILY)                          |
| Brugia malayi           | ubiquitin-protein ligase e3c                                | 1  | P:GO:0000003                                                                                                                                                          | -                                                                                |                            | IPR000569; PTHR11254 (PANTHER), PTHR11254:SF31 (PANTHER)                                                                       |
| Haemonchus contortus    | ilin (drosophila ecm protein) homolog family member (ppn-1) | 8  | F:GO:0004867;<br>F:GO:0008270;<br>C:GO:0005604;<br>F:GO:0004222;<br>F:GO:0005515;<br>F:GO:0005201;<br>P:GO:0030198;<br>C:GO:0005634                                   | -                                                                                | EC:3.4.24.0                | IPR000884; IPR010294; IPR013273; G3DSA:2.20.100.10 (GENE3D), PTHR13723 (PANTHER), PTHR13723:SF18 (PANTHER), SignalP (SIGNALP)  |
|                         | -                                                           | 0  |                                                                                                                                                                       |                                                                                  |                            | -                                                                                                                              |
| Brugia malayi           | isoform a                                                   | 0  |                                                                                                                                                                       |                                                                                  |                            | IPR012875; IPR018506                                                                                                           |
| Caenorhabditis elegans  | elegans protein partially confirmed by transcript evidence  | 0  |                                                                                                                                                                       |                                                                                  |                            | SignalP (SIGNALP)                                                                                                              |
| Ancylostoma caninum     | secreted protein 5 precursor                                | 0  |                                                                                                                                                                       | F:GO:0009055;<br>P:GO:0019646;<br>P:GO:0040011;<br>P:GO:0006898;<br>C:GO:0005576 |                            | IPR001283; IPR014044; PTHR10334:SF11 (PANTHER), SignalP (SIGNALP)                                                              |
|                         | -                                                           | 0  |                                                                                                                                                                       |                                                                                  |                            | -                                                                                                                              |

|                         |                                                               |    |                                                                                                                                                                       |                                                                                  |             |                                                                                                                                |
|-------------------------|---------------------------------------------------------------|----|-----------------------------------------------------------------------------------------------------------------------------------------------------------------------|----------------------------------------------------------------------------------|-------------|--------------------------------------------------------------------------------------------------------------------------------|
| Caenorhabditis elegans  | rab alpha subunit                                             | 10 | P:GO:0009792;<br>P:GO:0002119;<br>F:GO:0005488;<br>P:GO:0006464;<br>P:GO:0040010;<br>P:GO:0008340;<br>P:GO:0040011;<br>P:GO:0008219;<br>F:GO:0016740;<br>P:GO:0002009 | -                                                                                |             | IPR001611; IPR008940;<br>G3DSA:3.80.10.10 (GENE3D),<br>PTHR10588 (PANTHER), SSF52058<br>(SUPERFAMILY)                          |
| Caenorhabditis briggsae | ring finger protein 13                                        | 6  | C:GO:0043231;<br>F:GO:0008270;<br>C:GO:0044446;<br>F:GO:0005515;<br>C:GO:0044444;<br>C:GO:0031090                                                                     | -                                                                                |             | IPR001841; IPR013032; IPR013083;<br>IPR018957; PTHR22765 (PANTHER),<br>PTHR22765:SF1 (PANTHER), SSF57850<br>(SUPERFAMILY)      |
| Caenorhabditis briggsae | elegans protein confirmed by transcript evidence              | 0  |                                                                                                                                                                       | F:GO:0016765                                                                     |             | IPR001441; PTHR21528 (PANTHER)                                                                                                 |
| -                       | -                                                             | 0  |                                                                                                                                                                       |                                                                                  |             | -                                                                                                                              |
| -                       | -                                                             | 0  |                                                                                                                                                                       |                                                                                  |             | SignalP (SIGNALP)                                                                                                              |
| -                       | -                                                             | 0  |                                                                                                                                                                       |                                                                                  |             | -                                                                                                                              |
| -                       | -                                                             | 0  |                                                                                                                                                                       |                                                                                  |             | SignalP (SIGNALP)                                                                                                              |
| -                       | -                                                             | 0  |                                                                                                                                                                       |                                                                                  |             | SignalP (SIGNALP)                                                                                                              |
| Ancylostoma ceylanicum  | secreted protein 5 precursor                                  | 0  |                                                                                                                                                                       | C:GO:0005576                                                                     |             | -                                                                                                                              |
| Glycine max             | chk1 checkpoint-like protein                                  | 0  |                                                                                                                                                                       |                                                                                  |             | -                                                                                                                              |
| Trichoplax adhaerens    | chk1 checkpoint homolog ( pombe)                              | 3  | P:GO:0006468;<br>F:GO:0005524;<br>F:GO:0004674                                                                                                                        | -                                                                                | EC:2.7.11.0 | -                                                                                                                              |
| Trichoplax adhaerens    | chk1 checkpoint homolog ( pombe)                              | 3  | P:GO:0006468;<br>F:GO:0005524;<br>F:GO:0004674                                                                                                                        | -                                                                                | EC:2.7.11.0 | -                                                                                                                              |
| Loa loa                 | cell cycle checkpoint protein rad17                           | 3  | P:GO:0050789;<br>P:GO:0007049;<br>P:GO:0006974                                                                                                                        | -                                                                                |             | IPR004582; G3DSA:3.40.50.300<br>(GENE3D), PF03215 (PFAM), SSF52540<br>(SUPERFAMILY)                                            |
| -                       | -                                                             | 0  |                                                                                                                                                                       |                                                                                  |             | -                                                                                                                              |
| -                       | -                                                             | 0  |                                                                                                                                                                       |                                                                                  |             | -                                                                                                                              |
| Caenorhabditis elegans  | adam (disintegrin plus metalloprotease) family member (adm-4) | 0  |                                                                                                                                                                       | P:GO:0000003;<br>P:GO:0006508;<br>C:GO:0016021;<br>F:GO:0008270;<br>P:GO:0040010 |             | -                                                                                                                              |
| Brugia malayi           | calcium atpase                                                | 5  | F:GO:0005388;<br>C:GO:0016021;<br>P:GO:0006754;<br>F:GO:0005524;<br>P:GO:0006816                                                                                      | -                                                                                | EC:3.6.3.8  | IPR001757; IPR004014;<br>G3DSA:2.70.150.10 (GENE3D),<br>PTHR11939:SF76 (PANTHER), SignalP<br>(SIGNALP), SSF81665 (SUPERFAMILY) |
| -                       | -                                                             | 0  |                                                                                                                                                                       |                                                                                  |             | -                                                                                                                              |
| -                       | -                                                             | 0  |                                                                                                                                                                       |                                                                                  |             | -                                                                                                                              |
| Caenorhabditis elegans  | grip1 associated protein 1                                    | 0  |                                                                                                                                                                       | F:GO:0003674;<br>P:GO:0008150;<br>C:GO:0005769;<br>C:GO:0005575                  |             | -                                                                                                                              |
| Loa loa                 | ankyrin repeat and zinc finger domain containing 1            | 0  |                                                                                                                                                                       | F:GO:0046872;<br>F:GO:0008270;<br>C:GO:0005622                                   |             | IPR007087; PTHR13182 (PANTHER)                                                                                                 |
| -                       | -                                                             | 0  |                                                                                                                                                                       |                                                                                  |             | -                                                                                                                              |

|                         |                                                          |    |                                                                                                                                                                                                                                                                             |                                                                                                                    |                                                         |                                                                                                                                        |
|-------------------------|----------------------------------------------------------|----|-----------------------------------------------------------------------------------------------------------------------------------------------------------------------------------------------------------------------------------------------------------------------------|--------------------------------------------------------------------------------------------------------------------|---------------------------------------------------------|----------------------------------------------------------------------------------------------------------------------------------------|
| Caenorhabditis briggsae | poly polymerase cid (caffein-induced death protein)      | 0  |                                                                                                                                                                                                                                                                             | F:GO:0005524;<br>F:GO:0016779;<br>C:GO:0005737;<br>F:GO:0003887;<br>F:GO:0016740;<br>F:GO:0000166;<br>P:GO:0006397 |                                                         | IPR002058; G3DSA:3.30.460.10 (GENE3D), PTHR12271 (PANTHER), PTHR12271:SF14 (PANTHER), SSF81301 (SUPERFAMILY), SSF81631 (SUPERFAMILY)   |
| Caenorhabditis briggsae | poly polymerase cid (caffein-induced death protein)      | 0  |                                                                                                                                                                                                                                                                             | F:GO:0005524;<br>F:GO:0016779;<br>C:GO:0005737;<br>F:GO:0003887;<br>F:GO:0016740;<br>F:GO:0000166;<br>P:GO:0006397 |                                                         | IPR002058; G3DSA:3.30.460.10 (GENE3D), PTHR12271 (PANTHER), PTHR12271:SF14 (PANTHER), SSF81301 (SUPERFAMILY), SSF81631 (SUPERFAMILY)   |
| Caenorhabditis briggsae | poly polymerase cid (caffein-induced death protein)      | 0  |                                                                                                                                                                                                                                                                             | F:GO:0005524;<br>F:GO:0016779;<br>C:GO:0005737;<br>F:GO:0003887;<br>F:GO:0016740;<br>F:GO:0000166;<br>P:GO:0006397 |                                                         | IPR002058; G3DSA:3.30.460.10 (GENE3D), PTHR12271 (PANTHER), PTHR12271:SF14 (PANTHER), SSF81301 (SUPERFAMILY), SSF81631 (SUPERFAMILY)   |
|                         | -                                                        | 0  |                                                                                                                                                                                                                                                                             |                                                                                                                    |                                                         | -                                                                                                                                      |
| Caenorhabditis brenneri | 39s ribosomal protein mitochondrial                      | 9  | P:GO:0006412;<br>P:GO:0040010;<br>C:GO:0005739;<br>F:GO:0003735;<br>P:GO:0000002;<br>C:GO:0015934;<br>P:GO:0002119;<br>P:GO:0009792;<br>P:GO:0040019                                                                                                                        | -                                                                                                                  | EC:3.6.5.3                                              | IPR005749; IPR021131;<br>PTHR12934:SF1 (PANTHER)                                                                                       |
| Caenorhabditis elegans  | adp-ribosylation factor-like 2                           | 16 | C:GO:0005829;<br>P:GO:0000910;<br>P:GO:0015870;<br>F:GO:0005095;<br>P:GO:0007049;<br>F:GO:0004871;<br>P:GO:0007264;<br>C:GO:0005813;<br>P:GO:0030540;<br>F:GO:0005515;<br>P:GO:0007021;<br>F:GO:0003924;<br>C:GO:0005794;<br>F:GO:0005525;<br>C:GO:0005886;<br>P:GO:0009790 | -                                                                                                                  | EC:3.6.5.1;<br>EC:3.6.5.2;<br>EC:3.6.5.3;<br>EC:3.6.5.4 | IPR005225; IPR006688; IPR006689;<br>G3DSA:3.40.50.300 (GENE3D),<br>PTHR11711:SF26 (PANTHER), PSS1417 (PROFILE), SSF52540 (SUPERFAMILY) |
| Caenorhabditis elegans  | n-acetylglucosaminyl-phosphatidylinositol de-n-acetylase | 4  | F:GO:0016787;<br>P:GO:0016254;<br>C:GO:0016020;<br>C:GO:0005783                                                                                                                                                                                                             | -                                                                                                                  |                                                         | IPR003737; G3DSA:3.40.50.10320 (GENE3D), PTHR12993:SF2 (PANTHER), SSF102588 (SUPERFAMILY)                                              |

|                             |                                                                |    |                                                                                                                                                                                                                                                                             |                                                |                                   |                                                                                                                                                                                               |
|-----------------------------|----------------------------------------------------------------|----|-----------------------------------------------------------------------------------------------------------------------------------------------------------------------------------------------------------------------------------------------------------------------------|------------------------------------------------|-----------------------------------|-----------------------------------------------------------------------------------------------------------------------------------------------------------------------------------------------|
| Caenorhabditis elegans      | myosin i                                                       | 11 | C:GO:0005737;<br>P:GO:0042742;<br>P:GO:0007368;<br>C:GO:0005903;<br>P:GO:0007498;<br>F:GO:0003779;<br>P:GO:0032528;<br>C:GO:0016459;<br>F:GO:0005524;<br>F:GO:0003774;<br>F:GO:0042623                                                                                      | -                                              |                                   | IPR001609; PTHR13140 (PANTHER),<br>PTHR13140:SF31 (PANTHER),<br>SSF52540 (SUPERFAMILY)                                                                                                        |
| -                           | -                                                              | 0  |                                                                                                                                                                                                                                                                             |                                                |                                   | -                                                                                                                                                                                             |
| -                           | -                                                              | 0  |                                                                                                                                                                                                                                                                             |                                                |                                   | -                                                                                                                                                                                             |
| Caenorhabditis briggsae     | prolyl 4-hydroxylase                                           | 8  | P:GO:0018401;<br>F:GO:0031418;<br>F:GO:0005506;<br>F:GO:0005515;<br>F:GO:0004656;<br>P:GO:0055114;<br>F:GO:0016702;<br>C:GO:0005783                                                                                                                                         | -                                              | EC:1.14.11.2<br>;<br>EC:1.13.11.0 | -                                                                                                                                                                                             |
| -                           | -                                                              | 0  |                                                                                                                                                                                                                                                                             |                                                |                                   | -                                                                                                                                                                                             |
| Aspergillus clavatus NRRL 1 | hypothetical protein ACLA_028940 [Aspergillus clavatus NRRL 1] | 0  |                                                                                                                                                                                                                                                                             |                                                |                                   | -                                                                                                                                                                                             |
| -                           | -                                                              | 0  |                                                                                                                                                                                                                                                                             |                                                |                                   | -                                                                                                                                                                                             |
| Caenorhabditis elegans      | briggsae cbr-taf- protein                                      | 0  |                                                                                                                                                                                                                                                                             | C:GO:0005669;<br>P:GO:0006367;<br>F:GO:0016251 |                                   | SignalP (SIGNALP)                                                                                                                                                                             |
| Caenorhabditis elegans      | 39s ribosomal protein mitochondrial                            | 4  | P:GO:0009792;<br>C:GO:0005840;<br>F:GO:0003735;<br>P:GO:0006412                                                                                                                                                                                                             | -                                              | EC:3.6.5.3                        | IPR005822; IPR005823                                                                                                                                                                          |
| -                           | -                                                              | 0  |                                                                                                                                                                                                                                                                             |                                                |                                   | -                                                                                                                                                                                             |
| Homo sapiens                | heat shock 27kda protein 1                                     | 16 | P:GO:0009615;<br>C:GO:0005626;<br>C:GO:0030018;<br>C:GO:0000502;<br>C:GO:0005625;<br>F:GO:0043130;<br>F:GO:0042802;<br>P:GO:0009408;<br>C:GO:0009986;<br>P:GO:0006916;<br>P:GO:0006928;<br>P:GO:0006446;<br>C:GO:0005819;<br>P:GO:0006986;<br>C:GO:0005634;<br>C:GO:0005886 | -                                              |                                   | IPR001436; IPR002068; IPR008978;<br>G3DSA:1.20.1250.20 (GENE3D),<br>PTHR11527 (PANTHER),<br>PTHR11527:SF33 (PANTHER)                                                                          |
| Caenorhabditis briggsae     | solute carrier organic anion transporter member 4a1            | 2  | P:GO:0055085;<br>C:GO:0016021                                                                                                                                                                                                                                               | -                                              |                                   | IPR004156; IPR016196; IPR020846;<br>G3DSA:1.20.1250.20 (GENE3D),<br>G3DSA:3.30.60.30 (GENE3D),<br>PTHR11388:SF5 (PANTHER), PS1465<br>(PROFILE), SignalP (SIGNALP),<br>SSF100895 (SUPERFAMILY) |
| Caenorhabditis elegans      | solute carrier organic anion transporter member partial        | 2  | P:GO:0055085;<br>C:GO:0016021                                                                                                                                                                                                                                               | -                                              |                                   | IPR004156; IPR016196;<br>PTHR11388:SF5 (PANTHER)                                                                                                                                              |

|                         |                                                            |   |                                                                                                                                                      |                                                |             |                                                                                                 |
|-------------------------|------------------------------------------------------------|---|------------------------------------------------------------------------------------------------------------------------------------------------------|------------------------------------------------|-------------|-------------------------------------------------------------------------------------------------|
| Caenorhabditis elegans  | amin (actin binding protein) alpha family member (fl--1)   | 0 |                                                                                                                                                      | F:GO:0003779;<br>P:GO:0009612                  |             | IPR001298; IPR013783; IPR014756;<br>IPR017868; PTHR11915 (PANTHER),<br>PTHR11915:SF55 (PANTHER) |
| Caenorhabditis elegans  | elegans protein partially confirmed by transcript evidence | 3 | P:GO:0008340;<br>F:GO:0016491;<br>F:GO:0005506                                                                                                       | -                                              |             | IPR001128; PTHR19383:SF59<br>(PANTHER)                                                          |
| Pongo abelii            | stomatin -like 2                                           | 3 | C:GO:0005743;<br>C:GO:0005856;<br>F:GO:0005102                                                                                                       | -                                              |             | IPR001972                                                                                       |
| Yarrowia lipolytica     | chaperone domain protein                                   | 4 | P:GO:0006457;<br>F:GO:0046872;<br>F:GO:0051082;<br>F:GO:0031072                                                                                      | -                                              |             | IPR001623; IPR015609;<br>PTHR11821:SF79 (PANTHER)                                               |
| Loa loa                 | coiled-coil domain containing 101                          | 1 | P:GO:0006350                                                                                                                                         | -                                              |             | IPR010750; PTHR21539 (PANTHER)                                                                  |
| Caenorhabditis briggsae | xnop56 protein                                             | 9 | P:GO:0006364;<br>P:GO:0040035;<br>P:GO:0002119;<br>F:GO:0005515;<br>F:GO:0030515;<br>C:GO:0070761;<br>C:GO:0031428;<br>P:GO:0009792;<br>P:GO:0040018 | -                                              |             | SignalP (SIGNALP)                                                                               |
|                         | -                                                          | 0 |                                                                                                                                                      |                                                |             | -                                                                                               |
| Caenorhabditis elegans  | poly -binding                                              | 2 | F:GO:0003676;<br>F:GO:0000166                                                                                                                        | -                                              |             | IPR015464; PTHR10432 (PANTHER)                                                                  |
|                         | -                                                          | 0 |                                                                                                                                                      |                                                |             | -                                                                                               |
|                         | -                                                          | 0 |                                                                                                                                                      |                                                |             | SignalP (SIGNALP)                                                                               |
| Caenorhabditis briggsae | Hypothetical protein CBG09291 [Caenorhabditis briggsae]    | 0 |                                                                                                                                                      |                                                |             | -                                                                                               |
| Caenorhabditis elegans  | tbc (tre-2 bub2 cdc16) domain family member (tbc-19)       | 0 |                                                                                                                                                      | P:GO:0032313;<br>C:GO:0005622;<br>F:GO:0005097 |             | IPR011047; IPR015943; IPR016160                                                                 |
| Caenorhabditis briggsae | elegans protein partially confirmed by transcript evidence | 0 |                                                                                                                                                      |                                                |             | -                                                                                               |
|                         | -                                                          | 0 |                                                                                                                                                      |                                                |             | -                                                                                               |
|                         | -                                                          | 0 |                                                                                                                                                      |                                                |             | -                                                                                               |
|                         | -                                                          | 0 |                                                                                                                                                      |                                                |             | -                                                                                               |
| Brugia malayi           | slingshot homolog 2                                        | 9 | P:GO:0032268;<br>P:GO:0006470;<br>P:GO:0000902;<br>P:GO:0030036;<br>F:GO:0003779;<br>F:GO:0004721;<br>C:GO:0005737;<br>C:GO:0005886;<br>P:GO:0071318 | -                                              | EC:3.1.3.16 | -                                                                                               |
| Caenorhabditis elegans  | yuqp_caee1: full=cral-trio domain-containing protein       | 1 | P:GO:0040010                                                                                                                                         | -                                              |             | PTHR23324 (PANTHER),<br>PTHR23324:SF3 (PANTHER)                                                 |
| Caenorhabditis elegans  | transmembrane protein 184b                                 | 2 | F:GO:0016301;<br>C:GO:0016021                                                                                                                        | -                                              |             | -                                                                                               |
|                         | -                                                          | 0 |                                                                                                                                                      |                                                |             | -                                                                                               |
| Brugia malayi           | cap-gly domain containing protein                          | 2 | F:GO:0051010;<br>C:GO:0005881                                                                                                                        | -                                              |             | IPR000938; IPR023092; PTHR18916<br>(PANTHER), PTHR18916:SF9<br>(PANTHER)                        |
|                         | -                                                          | 0 |                                                                                                                                                      |                                                |             | -                                                                                               |
|                         | -                                                          | 0 |                                                                                                                                                      |                                                |             | SignalP (SIGNALP)                                                                               |



|                              |                                                         |    |                                                                                                                                                                       |   |             |                                                                                                                                                                                                                         |
|------------------------------|---------------------------------------------------------|----|-----------------------------------------------------------------------------------------------------------------------------------------------------------------------|---|-------------|-------------------------------------------------------------------------------------------------------------------------------------------------------------------------------------------------------------------------|
| Caenorhabditis elegans       | ribosomal protein I35                                   | 10 | C:GO:0005730;<br>P:GO:0009792;<br>P:GO:0002119;<br>F:GO:0003729;<br>F:GO:0003735;<br>F:GO:0005515;<br>P:GO:0000003;<br>C:GO:0022625;<br>P:GO:0040007;<br>P:GO:0006414 | - |             | IPR001854; IPR018254; PTHR13872 (PANTHER), PTHR13872:SF2 (PANTHER)                                                                                                                                                      |
| Caenorhabditis elegans       | leukotriene a4 hydrolase                                | 9  | F:GO:0008233;<br>P:GO:0006954;<br>F:GO:0046872;<br>P:GO:0042221;<br>P:GO:0006691;<br>F:GO:0005515;<br>F:GO:0004301;<br>C:GO:0005737;<br>C:GO:0005634                  | - | EC:3.3.2.10 | IPR001930; IPR014782; PTHR11533:SF4 (PANTHER), SSF55486 (SUPERFAMILY)                                                                                                                                                   |
| Caenorhabditis elegans       | solute carrier family 30 (zinc transporter) member 9    | 7  | P:GO:0006289;<br>C:GO:0005856;<br>F:GO:0003700;<br>P:GO:0006812;<br>P:GO:0006350;<br>C:GO:0016020;<br>C:GO:0005634                                                    | - |             | PTHR13414 (PANTHER)                                                                                                                                                                                                     |
| Caenorhabditis briggsae      | Hypothetical protein CBG14981 [Caenorhabditis briggsae] | 2  | P:GO:0040039;<br>P:GO:0000003                                                                                                                                         | - |             | -                                                                                                                                                                                                                       |
| Dracunculus medinensis       | heat shock protein 70                                   | 5  | F:GO:0005524;<br>P:GO:0055114;<br>P:GO:0006950;<br>F:GO:0005515;<br>F:GO:0032440                                                                                      | - | EC:1.3.1.74 | IPR001023; IPR013126; IPR018181; G3DSA:3.30.30.30 (GENE3D), G3DSA:3.30.420.40 (GENE3D), G3DSA:3.90.640.10 (GENE3D), PTHR19375:SF1 (PANTHER), SSF53067 (SUPERFAMILY)                                                     |
| Dracunculus medinensis       | heat shock protein 70                                   | 5  | F:GO:0005524;<br>P:GO:0055114;<br>P:GO:0006950;<br>F:GO:0005515;<br>F:GO:0032440                                                                                      | - | EC:1.3.1.74 | IPR001023; IPR013126; IPR018181; G3DSA:3.30.30.30 (GENE3D), G3DSA:3.30.420.40 (GENE3D), G3DSA:3.90.640.10 (GENE3D), PTHR19375:SF1 (PANTHER), SSF53067 (SUPERFAMILY)                                                     |
| Nippostrongylus brasiliensis | heat shock protein 70                                   | 3  | F:GO:0005524;<br>F:GO:0005515;<br>P:GO:0006950                                                                                                                        | - |             | IPR019651; SignalP (SIGNALP)                                                                                                                                                                                            |
| Nippostrongylus brasiliensis | heat shock protein 70                                   | 3  | F:GO:0005524;<br>F:GO:0005515;<br>P:GO:0006950                                                                                                                        | - |             | IPR019651; SignalP (SIGNALP)                                                                                                                                                                                            |
| Caenorhabditis briggsae      | heat shock protein 70                                   | 5  | F:GO:0005524;<br>P:GO:0055114;<br>P:GO:0006950;<br>F:GO:0005515;<br>F:GO:0032440                                                                                      | - | EC:1.3.1.74 | IPR001023; IPR013126; IPR018181; G3DSA:2.60.34.10 (GENE3D), G3DSA:3.30.30.30 (GENE3D), G3DSA:3.30.420.40 (GENE3D), G3DSA:3.90.640.10 (GENE3D), PTHR19375:SF1 (PANTHER), SSF100920 (SUPERFAMILY), SSF53067 (SUPERFAMILY) |

|                         |                                                       |  |   |                                                                                  |   |             |                                                                                                                                                                                                                                                                                                          |
|-------------------------|-------------------------------------------------------|--|---|----------------------------------------------------------------------------------|---|-------------|----------------------------------------------------------------------------------------------------------------------------------------------------------------------------------------------------------------------------------------------------------------------------------------------------------|
| Caenorhabditis briggsae | heat shock protein 70                                 |  | 5 | F:GO:0005524;<br>P:GO:0055114;<br>P:GO:0006950;<br>F:GO:0005515;<br>F:GO:0032440 | - | EC:1.3.1.74 | IPR001023; IPR013126; IPR018181;<br>G3DSA:2.60.34.10 (GENE3D),<br>G3DSA:3.30.30.30 (GENE3D),<br>G3DSA:3.30.420.40 (GENE3D),<br>G3DSA:3.90.640.10 (GENE3D),<br>PTHR19375:SF1 (PANTHER),<br>SSF100920 (SUPERFAMILY), SSF53067<br>(SUPERFAMILY)                                                             |
| Caenorhabditis elegans  | heat shock protein 70                                 |  | 5 | F:GO:0005524;<br>P:GO:0055114;<br>P:GO:0006950;<br>F:GO:0005515;<br>F:GO:0032440 | - | EC:1.3.1.74 | IPR001023; IPR013126; IPR018181;<br>G3DSA:2.60.34.10 (GENE3D),<br>G3DSA:3.30.30.30 (GENE3D),<br>G3DSA:3.30.420.40 (GENE3D),<br>G3DSA:3.90.640.10 (GENE3D),<br>PTHR19375:SF1 (PANTHER),<br>SSF100920 (SUPERFAMILY), SSF100934<br>(SUPERFAMILY), SSF53067<br>(SUPERFAMILY)                                 |
| Caenorhabditis elegans  | heat shock protein 70                                 |  | 5 | F:GO:0005524;<br>P:GO:0055114;<br>P:GO:0006950;<br>F:GO:0005515;<br>F:GO:0032440 | - | EC:1.3.1.74 | IPR001023; IPR013126; IPR018181;<br>G3DSA:1.20.1270.10 (GENE3D),<br>G3DSA:2.60.34.10 (GENE3D),<br>G3DSA:3.30.30.30 (GENE3D),<br>G3DSA:3.30.420.40 (GENE3D),<br>G3DSA:3.90.640.10 (GENE3D),<br>PTHR19375:SF1 (PANTHER),<br>SSF100920 (SUPERFAMILY), SSF100934<br>(SUPERFAMILY), SSF53067<br>(SUPERFAMILY) |
| Caenorhabditis briggsae | cell division cycle and apoptosis regulator protein 1 |  | 4 | P:GO:0040027;<br>F:GO:0005515;<br>P:GO:0040017;<br>P:GO:0040010                  | - |             | PTHR14304 (PANTHER),<br>PTHR14304:SF3 (PANTHER)                                                                                                                                                                                                                                                          |
| Brugia malayi           | cell division cycle and apoptosis regulator protein 1 |  | 4 | P:GO:0040027;<br>F:GO:0005515;<br>P:GO:0040017;<br>P:GO:0040010                  | - |             | IPR003034; G3DSA:1.10.720.30<br>(GENE3D), PTHR14304 (PANTHER),<br>PTHR14304:SF3 (PANTHER), SSF68906<br>(SUPERFAMILY)                                                                                                                                                                                     |
| Brugia malayi           | cell division cycle and apoptosis regulator protein 1 |  | 4 | P:GO:0040027;<br>F:GO:0005515;<br>P:GO:0040017;<br>P:GO:0040010                  | - |             | IPR003034; G3DSA:1.10.720.30<br>(GENE3D), PTHR14304 (PANTHER),<br>PTHR14304:SF3 (PANTHER), SSF68906<br>(SUPERFAMILY)                                                                                                                                                                                     |
| Brugia malayi           | cell division cycle and apoptosis regulator protein 1 |  | 4 | P:GO:0040027;<br>F:GO:0005515;<br>P:GO:0040017;<br>P:GO:0040010                  | - |             | IPR003034; G3DSA:1.10.720.30<br>(GENE3D), PTHR14304 (PANTHER),<br>PTHR14304:SF3 (PANTHER), SSF68906<br>(SUPERFAMILY)                                                                                                                                                                                     |
| Caenorhabditis briggsae | adamtsl4 protein                                      |  | 3 | F:GO:0008233;<br>F:GO:0005515;<br>C:GO:0005576                                   | - |             | -                                                                                                                                                                                                                                                                                                        |
|                         |                                                       |  |   | 0                                                                                |   |             | -                                                                                                                                                                                                                                                                                                        |
|                         |                                                       |  |   | 0                                                                                |   |             | -                                                                                                                                                                                                                                                                                                        |
|                         |                                                       |  |   | 0                                                                                |   |             | -                                                                                                                                                                                                                                                                                                        |
| Caenorhabditis briggsae | elegans protein confirmed by transcript evidence      |  | 0 |                                                                                  |   |             | -                                                                                                                                                                                                                                                                                                        |
| Caenorhabditis elegans  | briggsae cbr-oct-2 protein                            |  | 3 | P:GO:0019915;<br>C:GO:0016020;<br>P:GO:0006810                                   | - |             | IPR016196; IPR020846;<br>G3DSA:1.20.1250.20 (GENE3D),<br>PTHR11600 (PANTHER),<br>PTHR11600:SF44 (PANTHER), SignalP<br>(SIGNALP)                                                                                                                                                                          |

|                        |                                                            |    |                                                                                                                                                                                                         |   |                                                                                                                                                   |
|------------------------|------------------------------------------------------------|----|---------------------------------------------------------------------------------------------------------------------------------------------------------------------------------------------------------|---|---------------------------------------------------------------------------------------------------------------------------------------------------|
| Caenorhabditis elegans | elegans protein partially confirmed by transcript evidence | 0  | F:GO:0003723;<br>P:GO:0009451;<br>P:GO:0001522;<br>F:GO:0009982                                                                                                                                         |   | SignalP (SIGNALP)                                                                                                                                 |
| Caenorhabditis elegans | creb binding protein                                       | 8  | F:GO:0005515;<br>P:GO:0048518;<br>P:GO:0006355;<br>C:GO:0044424;<br>P:GO:0048513;<br>P:GO:0009790;<br>P:GO:0002119;<br>P:GO:0022414                                                                     | - | IPR001487; IPR003101; PTHR13808 (PANTHER)                                                                                                         |
| Loa loa                | dual oxidase 1                                             | 12 | P:GO:0018149;<br>P:GO:0006979;<br>P:GO:0006952;<br>P:GO:0040032;<br>P:GO:0042338;<br>F:GO:0046872;<br>P:GO:0040007;<br>F:GO:0016491;<br>P:GO:0002119;<br>P:GO:0040011;<br>P:GO:0009792;<br>C:GO:0005882 | - | IPR011992; PTHR11972 (PANTHER),<br>PTHR11972:SF1 (PANTHER), SSF47473 (SUPERFAMILY)                                                                |
| Loa loa                | dual oxidase 1                                             | 12 | P:GO:0018149;<br>P:GO:0006979;<br>P:GO:0006952;<br>P:GO:0040032;<br>P:GO:0042338;<br>F:GO:0046872;<br>P:GO:0040007;<br>F:GO:0016491;<br>P:GO:0002119;<br>P:GO:0040011;<br>P:GO:0009792;<br>C:GO:0005882 | - | IPR011992; PTHR11972 (PANTHER),<br>PTHR11972:SF1 (PANTHER), SSF47473 (SUPERFAMILY)                                                                |
|                        |                                                            | 0  |                                                                                                                                                                                                         |   |                                                                                                                                                   |
| Caenorhabditis elegans | ki-se ki-se family member (ckk-1)                          | 10 | F:GO:0005516;<br>P:GO:0032147;<br>C:GO:0005625;<br>P:GO:0032793;<br>F:GO:0005524;<br>C:GO:0005737;<br>P:GO:0019722;<br>F:GO:0004683;<br>C:GO:0005634;<br>P:GO:0006468                                   | - | EC:2.7.11.17<br>IPR000719; IPR008271; IPR011009;<br>IPR017442; IPR020636; IPR020657;<br>G3DSA:1.10.510.10 (GENE3D),<br>G3DSA:3.30.200.20 (GENE3D) |
| Aedes aegypti          | brain chiti-se and chia                                    | 1  | F:GO:0003824                                                                                                                                                                                            | - | IPR001223; IPR013781; IPR017853;<br>PTHR11177 (PANTHER),<br>PTHR11177:SF26 (PANTHER)                                                              |
|                        |                                                            | 0  |                                                                                                                                                                                                         |   |                                                                                                                                                   |
|                        |                                                            | 0  |                                                                                                                                                                                                         |   |                                                                                                                                                   |
|                        |                                                            | 0  |                                                                                                                                                                                                         |   |                                                                                                                                                   |

|                         |                             |    |                                                                                                                                                                                                                                                                                                                                |                                                                                  |                                                                                                                                   |
|-------------------------|-----------------------------|----|--------------------------------------------------------------------------------------------------------------------------------------------------------------------------------------------------------------------------------------------------------------------------------------------------------------------------------|----------------------------------------------------------------------------------|-----------------------------------------------------------------------------------------------------------------------------------|
| Caenorhabditis elegans  | briggsae cbr-sec- protein   | 19 | P:GO:0071711;<br>P:GO:0040003;<br>P:GO:0035158;<br>P:GO:0008360;<br>P:GO:0034394;<br>P:GO:0009306;<br>P:GO:0048081;<br>P:GO:0007029;<br>P:GO:0007030;<br>C:GO:0070971;<br>C:GO:0030134;<br>P:GO:0035149;<br>P:GO:0016203;<br>P:GO:0022409;<br>P:GO:0030011;<br>P:GO:0046907;<br>C:GO:0005811;<br>F:GO:0005488;<br>P:GO:0003331 | -                                                                                | IPR006895; IPR006896;<br>G3DSA:3.40.50.410 (GENE3D),<br>PTHR13803 (PANTHER), SSF53300<br>(SUPERFAMILY), SSF81995<br>(SUPERFAMILY) |
| Caenorhabditis elegans  | briggsae cbr-sec- protein   | 19 | P:GO:0071711;<br>P:GO:0040003;<br>P:GO:0035158;<br>P:GO:0008360;<br>P:GO:0034394;<br>P:GO:0009306;<br>P:GO:0048081;<br>P:GO:0007029;<br>P:GO:0007030;<br>C:GO:0070971;<br>C:GO:0030134;<br>P:GO:0035149;<br>P:GO:0016203;<br>P:GO:0022409;<br>P:GO:0030011;<br>P:GO:0046907;<br>C:GO:0005811;<br>F:GO:0005488;<br>P:GO:0003331 | -                                                                                | IPR006895; IPR006896;<br>G3DSA:3.40.50.410 (GENE3D),<br>PTHR13803 (PANTHER), SSF53300<br>(SUPERFAMILY), SSF81995<br>(SUPERFAMILY) |
| Caenorhabditis briggsae | briggsae cbr-pssy-1 protein | 1  | P:GO:0040018                                                                                                                                                                                                                                                                                                                   | -                                                                                | -                                                                                                                                 |
| Caenorhabditis briggsae | briggsae cbr-tsp-17 protein | 0  |                                                                                                                                                                                                                                                                                                                                | C:GO:0016021;<br>C:GO:0016020                                                    | IPR018499; PTHR19282 (PANTHER),<br>PTHR19282:SF34 (PANTHER)                                                                       |
|                         | -                           | 0  |                                                                                                                                                                                                                                                                                                                                |                                                                                  | SignalP (SIGNALP)                                                                                                                 |
|                         | -                           | 0  |                                                                                                                                                                                                                                                                                                                                |                                                                                  | -                                                                                                                                 |
|                         | -                           | 0  |                                                                                                                                                                                                                                                                                                                                |                                                                                  | -                                                                                                                                 |
|                         | -                           | 0  |                                                                                                                                                                                                                                                                                                                                |                                                                                  | -                                                                                                                                 |
| Caenorhabditis elegans  | cytochrome b5               | 3  | C:GO:0005811;<br>F:GO:0020037;<br>C:GO:0005739                                                                                                                                                                                                                                                                                 | -                                                                                | IPR001199; IPR018506; PTHR19359<br>(PANTHER)                                                                                      |
| Caenorhabditis briggsae | zinc finger protein         | 0  |                                                                                                                                                                                                                                                                                                                                | F:GO:0003676;<br>F:GO:0008270;<br>C:GO:0005622                                   | IPR007087                                                                                                                         |
|                         | -                           | 0  |                                                                                                                                                                                                                                                                                                                                |                                                                                  | -                                                                                                                                 |
| Caenorhabditis elegans  | frg1 protein                | 0  |                                                                                                                                                                                                                                                                                                                                | C:GO:0015030;<br>P:GO:0006364;<br>C:GO:0016607;<br>P:GO:0042254;<br>C:GO:0005634 | IPR008999; IPR010414; IPR022272;<br>G3DSA:2.80.10.50 (GENE3D)                                                                     |

|                         |                                                            |    |                                                                                                                                                                                                                          |                                                                                                                                     |              |                                                                                                                                                 |
|-------------------------|------------------------------------------------------------|----|--------------------------------------------------------------------------------------------------------------------------------------------------------------------------------------------------------------------------|-------------------------------------------------------------------------------------------------------------------------------------|--------------|-------------------------------------------------------------------------------------------------------------------------------------------------|
| Caenorhabditis elegans  | uncoordinated family member (unc-43)                       | 13 | P:GO:0006952;<br>F:GO:0005516;<br>F:GO:0046872;<br>C:GO:0005954;<br>P:GO:0051932;<br>P:GO:0000003;<br>F:GO:0005524;<br>P:GO:0040017;<br>P:GO:0007067;<br>C:GO:0005737;<br>P:GO:0040018;<br>F:GO:0004683;<br>P:GO:0006468 | -                                                                                                                                   | EC:2.7.11.17 | IPR000719; IPR008271; IPR011009;<br>IPR015742; IPR017441; IPR017442;<br>IPR020636; G3DSA:1.10.510.10<br>(GENE3D), G3DSA:3.30.200.20<br>(GENE3D) |
| Brugia malayi           | domon domain containing protein                            | 2  | P:GO:0006548;<br>F:GO:0004500                                                                                                                                                                                            | -                                                                                                                                   | EC:1.14.17.1 | -                                                                                                                                               |
| Caenorhabditis elegans  | leishmanolysin-like (metallopeptidase m8 family)           | 8  | C:GO:0005737;<br>F:GO:0004222;<br>P:GO:0007067;<br>P:GO:0007155;<br>P:GO:0006508;<br>C:GO:0016020;<br>F:GO:0008270;<br>P:GO:0051301                                                                                      | -                                                                                                                                   | EC:3.4.24.0  | IPR001577; G3DSA:3.10.170.20<br>(GENE3D), SSF55486 (SUPERFAMILY)                                                                                |
| Caenorhabditis elegans  | nucleolar complex protein 3 homolog                        | 1  | C:GO:0031981                                                                                                                                                                                                             | -                                                                                                                                   |              | IPR005612                                                                                                                                       |
| -                       | -                                                          | 0  |                                                                                                                                                                                                                          |                                                                                                                                     |              | -                                                                                                                                               |
| Caenorhabditis briggsae | yrr5_caeel ame: full=uncharacterized protein               | 0  |                                                                                                                                                                                                                          |                                                                                                                                     |              | -                                                                                                                                               |
| -                       | -                                                          | 0  |                                                                                                                                                                                                                          |                                                                                                                                     |              | -                                                                                                                                               |
| Caenorhabditis brenneri | elegans protein confirmed by transcript evidence           | 1  | P:GO:0016539                                                                                                                                                                                                             | -                                                                                                                                   |              | IPR001534; SignalP (SIGNALP)                                                                                                                    |
| Tribolium castaneum     | serine-type protease inhibitor                             | 0  |                                                                                                                                                                                                                          | F:GO:0008233                                                                                                                        |              | IPR013111                                                                                                                                       |
| Drosophila willistoni   | aromatic amino acid decarboxylase                          | 1  | F:GO:0004837                                                                                                                                                                                                             | -                                                                                                                                   | EC:4.1.1.25  | IPR002129; IPR010977; IPR015421;<br>IPR015424; G3DSA:1.20.1340.10<br>(GENE3D)                                                                   |
| Loa loa                 | ck1 ttbk protein ki-se                                     | 0  |                                                                                                                                                                                                                          |                                                                                                                                     |              | -                                                                                                                                               |
| Caenorhabditis elegans  | elegans protein partially confirmed by transcript evidence | 0  |                                                                                                                                                                                                                          | P:GO:0000003;<br>P:GO:0040011;<br>F:GO:0008270;<br>P:GO:0040010;<br>P:GO:0006898;<br>P:GO:0002119;<br>P:GO:0040007;<br>C:GO:0005622 |              | IPR015880                                                                                                                                       |
| -                       | -                                                          | 0  |                                                                                                                                                                                                                          |                                                                                                                                     |              | -                                                                                                                                               |
| Caenorhabditis elegans  | briggsae cbr-unc- protein                                  | 0  |                                                                                                                                                                                                                          |                                                                                                                                     |              | -                                                                                                                                               |
| Xenopus laevis          | tsc22 domain member 2                                      | 0  |                                                                                                                                                                                                                          | P:GO:0006355;<br>F:GO:0003682;<br>C:GO:0000785;<br>P:GO:0006333;<br>C:GO:0005634;<br>F:GO:0003700                                   |              | IPR000580; PTHR12348:SF2<br>(PANTHER)                                                                                                           |
| Caenorhabditis elegans  | innexin family protein                                     | 9  | P:GO:0040035;<br>P:GO:0009792;<br>P:GO:0007631;<br>P:GO:0040010;<br>P:GO:0030421;<br>P:GO:0040011;<br>C:GO:0016021;<br>P:GO:0019915;<br>P:GO:0002009                                                                     | -                                                                                                                                   |              | IPR000990                                                                                                                                       |

|                         |                                                            |  |    |                                                                                                                                                                                                                                                                                                               |   |                                                                                                                                                                          |
|-------------------------|------------------------------------------------------------|--|----|---------------------------------------------------------------------------------------------------------------------------------------------------------------------------------------------------------------------------------------------------------------------------------------------------------------|---|--------------------------------------------------------------------------------------------------------------------------------------------------------------------------|
|                         | -                                                          |  | 0  |                                                                                                                                                                                                                                                                                                               |   | -                                                                                                                                                                        |
| Caenorhabditis briggsae | elegans protein partially confirmed by transcript evidence |  | 1  | F:GO:0005515                                                                                                                                                                                                                                                                                                  |   | -                                                                                                                                                                        |
| Culex quinquefasciatus  | shc transforming protein                                   |  | 3  | C:GO:0016020;<br>F:GO:0005515;<br>P:GO:0007265                                                                                                                                                                                                                                                                | - | IPR000980; PTHR10337 (PANTHER),<br>SSF55550 (SUPERFAMILY)                                                                                                                |
|                         | -                                                          |  | 0  |                                                                                                                                                                                                                                                                                                               |   | SignalP (SIGNALP)                                                                                                                                                        |
|                         | -                                                          |  | 0  |                                                                                                                                                                                                                                                                                                               |   | -                                                                                                                                                                        |
| Caenorhabditis briggsae | protein gpr107                                             |  | 0  | F:GO:0004872;<br>C:GO:0016021;<br>P:GO:0008150                                                                                                                                                                                                                                                                |   | IPR009637; PTHR21229:SF2<br>(PANTHER)                                                                                                                                    |
| Branchiostoma floridae  | 5 -nucleotidase domain containing 2                        |  | 0  | F:GO:0046872;<br>F:GO:0003674;<br>F:GO:0016787;<br>P:GO:0008150                                                                                                                                                                                                                                               |   | IPR008380; PTHR12103:SF3<br>(PANTHER), SSF56784 (SUPERFAMILY)                                                                                                            |
|                         | -                                                          |  | 0  |                                                                                                                                                                                                                                                                                                               |   | -                                                                                                                                                                        |
| Caenorhabditis briggsae | target of rapamycin                                        |  | 18 | F:GO:0016301;<br>P:GO:0003006;<br>F:GO:0005515;<br>P:GO:0001558;<br>P:GO:0048610;<br>F:GO:0016773;<br>P:GO:0044237;<br>P:GO:0048468;<br>P:GO:0050896;<br>P:GO:0048513;<br>P:GO:0051179;<br>P:GO:0045927;<br>P:GO:0008595;<br>P:GO:0045793;<br>P:GO:0048522;<br>P:GO:0007276;<br>P:GO:0035264;<br>P:GO:0048598 | - | EC:2.7.1.0<br>IPR011989; IPR016024; PTHR11139<br>(PANTHER), PTHR11139:SF9<br>(PANTHER), PF11865 (PFAM)                                                                   |
| Caenorhabditis briggsae | ras and ef-hand domain containing                          |  | 5  | C:GO:0044444;<br>F:GO:0000166;<br>P:GO:0046907;<br>P:GO:0007165;<br>P:GO:0015031                                                                                                                                                                                                                              | - | IPR001806; IPR003579; IPR005225;<br>IPR013753; IPR020851;<br>G3DSA:3.40.50.300 (GENE3D),<br>PTHR11708 (PANTHER),<br>PTHR11708:SF253 (PANTHER),<br>SSF52540 (SUPERFAMILY) |
|                         | -                                                          |  | 0  |                                                                                                                                                                                                                                                                                                               |   | -                                                                                                                                                                        |
| Caenorhabditis elegans  | protein phosphatase 2c                                     |  | 1  | F:GO:0004721                                                                                                                                                                                                                                                                                                  | - | EC:3.1.3.16<br>IPR000222; IPR001932; IPR014045;<br>IPR015655; PTHR13832:SF94<br>(PANTHER)                                                                                |
| Caenorhabditis elegans  | briggsae cbr-ugt-58 protein                                |  | 2  | F:GO:0016758;<br>P:GO:0008152                                                                                                                                                                                                                                                                                 | - | EC:2.4.1.0<br>IPR002213                                                                                                                                                  |
| Caenorhabditis briggsae | junctophilin 3-like                                        |  | 0  |                                                                                                                                                                                                                                                                                                               |   | PTHR23085 (PANTHER),<br>PTHR23085:SF3 (PANTHER)                                                                                                                          |
|                         | -                                                          |  | 0  |                                                                                                                                                                                                                                                                                                               |   | -                                                                                                                                                                        |
|                         | -                                                          |  | 0  |                                                                                                                                                                                                                                                                                                               |   | -                                                                                                                                                                        |
| Caenorhabditis elegans  | solute carrier family 30 (zinc transporter) member 2       |  | 7  | F:GO:0005385;<br>P:GO:0071577;<br>P:GO:0015674;<br>C:GO:0016023;<br>C:GO:0005770;<br>P:GO:0061090;<br>C:GO:0010008                                                                                                                                                                                            | - | IPR002524; G3DSA:1.20.1510.10<br>(GENE3D), SignalP (SIGNALP)                                                                                                             |
|                         | -                                                          |  | 0  |                                                                                                                                                                                                                                                                                                               |   | -                                                                                                                                                                        |

|                         |                                                            |   |                                                                                                                                                      |   |             |                                                                                                                      |
|-------------------------|------------------------------------------------------------|---|------------------------------------------------------------------------------------------------------------------------------------------------------|---|-------------|----------------------------------------------------------------------------------------------------------------------|
| Caenorhabditis briggsae | briggsae cbr-ptp-1 protein                                 | 5 | F:GO:0016791;<br>C:GO:0005886;<br>F:GO:0005515;<br>P:GO:0009987;<br>C:GO:0005829                                                                     | - | EC:3.1.3.0  | IPR000299; IPR011993; IPR014847;<br>IPR018980; PTHR23280 (PANTHER),<br>SSF50729 (SUPERFAMILY)                        |
| Loa loa                 | d--directed r- polymerases and iii subunit rpabc1          | 6 | P:GO:0040035;<br>P:GO:0009792;<br>F:GO:0003899;<br>F:GO:0003677;<br>P:GO:0006350;<br>C:GO:0005634                                                    | - | EC:2.7.7.6  | IPR000783; IPR005571; IPR014381;<br>IPR020608; PTHR10535 (PANTHER)                                                   |
| Loa loa                 | ph domain containing protein                               | 0 |                                                                                                                                                      |   |             | IPR001849; IPR011993; SSF50729<br>(SUPERFAMILY)                                                                      |
| Caenorhabditis briggsae | fad dependent oxidoreductase                               | 4 | C:GO:0005737;<br>P:GO:0006546;<br>F:GO:0016491;<br>F:GO:0004047                                                                                      | - | EC:2.1.2.10 | IPR006076; G3DSA:3.50.50.60<br>(GENE3D), PTHR13847 (PANTHER),<br>PTHR13847:SF16 (PANTHER),<br>SSF51905 (SUPERFAMILY) |
| Loa loa                 | ku p80 d-                                                  | 2 | F:GO:0005488;<br>C:GO:0044424                                                                                                                        | - |             | IPR002035; IPR005161;<br>G3DSA:3.40.50.410 (GENE3D),<br>SSF53300 (SUPERFAMILY)                                       |
|                         | -                                                          | 0 |                                                                                                                                                      |   |             | -                                                                                                                    |
| Loa loa                 | ubx domain-containing protein 6                            | 1 | F:GO:0005515                                                                                                                                         | - |             | -                                                                                                                    |
| Caenorhabditis elegans  | elegans protein partially confirmed by transcript evidence | 0 |                                                                                                                                                      |   |             | -                                                                                                                    |
| Caenorhabditis elegans  | phosphatidylserine receptor                                | 9 | P:GO:0035212;<br>P:GO:0046329;<br>P:GO:0018395;<br>P:GO:0090304;<br>F:GO:0005515;<br>P:GO:0010467;<br>F:GO:0070815;<br>P:GO:0043066;<br>C:GO:0005634 | - |             | IPR003347; IPR013129; PTHR12480<br>(PANTHER), SSF51197 (SUPERFAMILY)                                                 |
|                         | -                                                          | 0 |                                                                                                                                                      |   |             | SignalP (SIGNALP)                                                                                                    |
| Caenorhabditis briggsae | ensangp00000014982 isoform 2                               | 1 | C:GO:0016020                                                                                                                                         | - |             | PTHR21215 (PANTHER), SignalP<br>(SIGNALP)                                                                            |
|                         | -                                                          | 0 |                                                                                                                                                      |   |             | -                                                                                                                    |
| Caenorhabditis briggsae | protein trs85 homolog                                      | 6 | P:GO:0040010;<br>P:GO:0018991;<br>P:GO:0010171;<br>P:GO:0007413;<br>P:GO:0040017;<br>P:GO:0040018                                                    | - |             | -                                                                                                                    |
|                         | -                                                          | 0 |                                                                                                                                                      |   |             | -                                                                                                                    |
| Caenorhabditis briggsae | major facilitator superfamily protein                      | 2 | P:GO:0055085;<br>C:GO:0016021                                                                                                                        | - |             | -                                                                                                                    |

|                         |                                                                    |    |                                                                                                                                                                                                                                                                             |   |             |                                                                                                                                                                         |
|-------------------------|--------------------------------------------------------------------|----|-----------------------------------------------------------------------------------------------------------------------------------------------------------------------------------------------------------------------------------------------------------------------------|---|-------------|-------------------------------------------------------------------------------------------------------------------------------------------------------------------------|
| Brugia malayi           | abnormal embryonic partitioning of cytoplasm family member (par-3) | 16 | P:GO:0007369;<br>F:GO:0005515;<br>P:GO:0007163;<br>P:GO:0007155;<br>C:GO:0043296;<br>C:GO:0005913;<br>P:GO:0045165;<br>P:GO:0051301;<br>C:GO:0016021;<br>P:GO:0008406;<br>C:GO:0005737;<br>P:GO:0008105;<br>P:GO:0040001;<br>P:GO:0030707;<br>N:GO:0071844;<br>P:GO:0009994 | - |             | IPR001478; G3DSA:2.30.42.10 (GENE3D), PTHR16484 (PANTHER), PTHR16484:SF2 (PANTHER)                                                                                      |
| Caenorhabditis briggsae | zinc carboxypeptidase family protein                               | 4  | F:GO:0004181;<br>F:GO:0005515;<br>P:GO:0006508;<br>F:GO:0008270                                                                                                                                                                                                             | - | EC:3.4.17.0 | IPR000834; IPR008969; IPR014766; G3DSA:3.40.630.10 (GENE3D), PTHR11532 (PANTHER), PTHR11532:SF5 (PANTHER), SignalP (SIGNALP), SSF53187 (SUPERFAMILY)                    |
| Caenorhabditis briggsae | zinc carboxypeptidase family protein                               | 4  | F:GO:0004181;<br>F:GO:0005515;<br>P:GO:0006508;<br>F:GO:0008270                                                                                                                                                                                                             | - | EC:3.4.17.0 | IPR000834; IPR008969; IPR014766; G3DSA:3.40.630.10 (GENE3D), PTHR11532 (PANTHER), PTHR11532:SF5 (PANTHER), SignalP (SIGNALP), SSF53187 (SUPERFAMILY)                    |
| Caenorhabditis briggsae | briggsae cbr-dao-5 protein                                         | 3  | C:GO:0044428;<br>P:GO:0009987;<br>F:GO:0005488                                                                                                                                                                                                                              | - |             | IPR007718                                                                                                                                                               |
| Caenorhabditis briggsae | briggsae cbr-dao-5 protein                                         | 3  | P:GO:0009987;<br>F:GO:0005488;<br>C:GO:0005654                                                                                                                                                                                                                              | - |             | -                                                                                                                                                                       |
| -                       | -                                                                  | 0  |                                                                                                                                                                                                                                                                             |   |             | -                                                                                                                                                                       |
| -                       | -                                                                  | 0  |                                                                                                                                                                                                                                                                             |   |             | SignalP (SIGNALP)                                                                                                                                                       |
| Caenorhabditis elegans  | acylamino-acid-releasing enzyme                                    | 1  | F:GO:0008236                                                                                                                                                                                                                                                                | - |             | -                                                                                                                                                                       |
| -                       | -                                                                  | 0  |                                                                                                                                                                                                                                                                             |   |             | -                                                                                                                                                                       |
| Caenorhabditis briggsae | pseudouridylate synthase                                           | 2  | P:GO:0009451;<br>F:GO:0016853                                                                                                                                                                                                                                               | - |             | IPR001406; IPR020094; IPR020097; IPR020103                                                                                                                              |
| Caenorhabditis elegans  | choline ethanolaminephosphotransferase 1                           | 3  | C:GO:0005789;<br>P:GO:0008654;<br>F:GO:0016780                                                                                                                                                                                                                              | - | EC:2.7.8.0  | SignalP (SIGNALP)                                                                                                                                                       |
| Ailuropoda melanoleuca  | r-binding protein 42                                               | 4  | C:GO:0005634;<br>C:GO:0005737;<br>F:GO:0000166;<br>F:GO:0003723                                                                                                                                                                                                             | - |             | -                                                                                                                                                                       |
| -                       | -                                                                  | 0  |                                                                                                                                                                                                                                                                             |   |             | -                                                                                                                                                                       |
| -                       | -                                                                  | 0  |                                                                                                                                                                                                                                                                             |   |             | SignalP (SIGNALP)                                                                                                                                                       |
| Caenorhabditis elegans  | eating: abnormal pharyngeal pumping family member (eat-18)         | 0  |                                                                                                                                                                                                                                                                             |   |             | -                                                                                                                                                                       |
| Caenorhabditis briggsae | protein ki-se domain containing protein                            | 6  | P:GO:0002119;<br>F:GO:0005515;<br>F:GO:0004672;<br>P:GO:0040011;<br>P:GO:0040007;<br>F:GO:0000166                                                                                                                                                                           | - |             | IPR000719; IPR005479; IPR008271; IPR011009; IPR017441; IPR017442; G3DSA:1.10.510.10 (GENE3D), G3DSA:3.30.200.20 (GENE3D), PTHR11909 (PANTHER), PTHR11909:SF19 (PANTHER) |



|                                      |                                                     |   |                                                                 |                                                                                                                                                                                                                                                                                                                                                                                                                                                                                         |            |                                                                                                                        |                                                  |
|--------------------------------------|-----------------------------------------------------|---|-----------------------------------------------------------------|-----------------------------------------------------------------------------------------------------------------------------------------------------------------------------------------------------------------------------------------------------------------------------------------------------------------------------------------------------------------------------------------------------------------------------------------------------------------------------------------|------------|------------------------------------------------------------------------------------------------------------------------|--------------------------------------------------|
| Caenorhabditis briggsae              | u4 u6 small nuclear                                 | 4 | C:GO:0030532;<br>C:GO:0071011;<br>P:GO:0006898;<br>P:GO:0000398 | -                                                                                                                                                                                                                                                                                                                                                                                                                                                                                       |            | IPR013881; PTHR14212 (PANTHER)                                                                                         |                                                  |
|                                      | -                                                   | 0 |                                                                 |                                                                                                                                                                                                                                                                                                                                                                                                                                                                                         |            | -                                                                                                                      |                                                  |
| Caenorhabditis elegans               | mboat family protein                                | 2 | C:GO:0016020;<br>P:GO:0010171                                   | -                                                                                                                                                                                                                                                                                                                                                                                                                                                                                       |            | SignalP (SIGNALP)                                                                                                      |                                                  |
|                                      | -                                                   | 0 |                                                                 |                                                                                                                                                                                                                                                                                                                                                                                                                                                                                         |            | SignalP (SIGNALP)                                                                                                      |                                                  |
| Caenorhabditis briggsae              | smc2                                                | 0 |                                                                 | F:GO:0006898;<br>F:GO:0045502;<br>P:GO:0048477;<br>C:GO:0005694;<br>C:GO:0005828;<br>P:GO:0051276;<br>P:GO:0007018;<br>P:GO:0001709;<br>C:GO:0031616;<br>P:GO:0051726;<br>C:GO:0000785;<br>P:GO:0007076;<br>C:GO:0016021;<br>P:GO:0000819;<br>C:GO:0031224;<br>P:GO:0000070;<br>P:GO:0007422;<br>F:GO:0005525;<br>P:GO:0051299;<br>F:GO:0005524;<br>C:GO:0000776;<br>P:GO:0007067;<br>F:GO:0000166;<br>P:GO:0016330;<br>P:GO:0006886;<br>P:GO:0042127;<br>P:GO:0001754;<br>P:GO:0001751 |            |                                                                                                                        | PTHR18937 (PANTHER),<br>PTHR18937:SF13 (PANTHER) |
|                                      | -                                                   | 0 |                                                                 |                                                                                                                                                                                                                                                                                                                                                                                                                                                                                         |            | SignalP (SIGNALP)                                                                                                      |                                                  |
| Caenorhabditis elegans               | cullin family member (cul-2)                        | 2 | P:GO:0030163;<br>F:GO:0005515                                   | -                                                                                                                                                                                                                                                                                                                                                                                                                                                                                       |            | IPR001373; IPR016159;<br>G3DSA:1.20.1310.10 (GENE3D),<br>PTHR11932 (PANTHER),<br>PTHR11932:SF10 (PANTHER)              |                                                  |
| Caenorhabditis elegans               | aldo keto reductase                                 | 1 | F:GO:0016616                                                    | -                                                                                                                                                                                                                                                                                                                                                                                                                                                                                       | EC:1.1.1.0 | IPR001395; IPR018170; IPR020471;<br>IPR023210; PTHR11732:SF34<br>(PANTHER)                                             |                                                  |
| Caenorhabditis elegans               | connector enhancer of ksr family member (cnk-1)     | 1 | P:GO:0040026                                                    | -                                                                                                                                                                                                                                                                                                                                                                                                                                                                                       |            | IPR001849; IPR011993; SSF50729<br>(SUPERFAMILY)                                                                        |                                                  |
| Loa loa                              | variable abnormal morphology family member (vab-10) | 0 |                                                                 | F:GO:0005509;<br>P:GO:0007050;<br>F:GO:0003779                                                                                                                                                                                                                                                                                                                                                                                                                                          |            | IPR001101; G3DSA:3.90.1290.10<br>(GENE3D), PTHR11915 (PANTHER),<br>PTHR11915:SF49 (PANTHER),<br>SSF75399 (SUPERFAMILY) |                                                  |
|                                      | -                                                   | 0 |                                                                 |                                                                                                                                                                                                                                                                                                                                                                                                                                                                                         |            | -                                                                                                                      |                                                  |
|                                      | -                                                   | 0 |                                                                 |                                                                                                                                                                                                                                                                                                                                                                                                                                                                                         |            | IPR008962                                                                                                              |                                                  |
| Schizosaccharomyces japonicus yFS275 | chromodomain protein                                | 4 | P:GO:0006333;<br>C:GO:0000785;<br>C:GO:0005634;<br>F:GO:0003682 | -                                                                                                                                                                                                                                                                                                                                                                                                                                                                                       |            | IPR000953; IPR016197; IPR017984;<br>G3DSA:2.40.50.40 (GENE3D),<br>PTHR22812 (PANTHER)                                  |                                                  |

|                         |                                                                             |    |                                                                                                                                                                                        |   |                                                                                  |                                                                                                                                                        |
|-------------------------|-----------------------------------------------------------------------------|----|----------------------------------------------------------------------------------------------------------------------------------------------------------------------------------------|---|----------------------------------------------------------------------------------|--------------------------------------------------------------------------------------------------------------------------------------------------------|
| Caenorhabditis elegans  | acetoacetyl- synthetase                                                     | 6  | P:GO:0009987;<br>P:GO:0006629;<br>F:GO:0016878;<br>C:GO:0005737;<br>P:GO:0032502;<br>P:GO:0010033                                                                                      | - | EC:6.2.1.0                                                                       | IPR000873; G3DSA:3.40.50.980 (GENE3D), PTHR11968 (PANTHER), PTHR11968:SF40 (PANTHER), SSF56801 (SUPERFAMILY)                                           |
| Caenorhabditis briggsae | d-3-phosphoglycerate dehydroge-se                                           | 9  | P:GO:0040010;<br>P:GO:0006098;<br>P:GO:0055114;<br>F:GO:0004617;<br>F:GO:0004455;<br>F:GO:0051287;<br>F:GO:0005515;<br>P:GO:0009792;<br>P:GO:0006564                                   | - | EC:1.1.1.95;<br>EC:1.1.1.86                                                      | IPR015508; IPR016040; PTHR10996 (PANTHER)                                                                                                              |
| Caenorhabditis elegans  | neurotransmitter-gated ion-channel ligand binding domain containing protein | 5  | C:GO:0016021;<br>C:GO:0030054;<br>C:GO:0045211;<br>F:GO:0005230;<br>P:GO:0006811                                                                                                       | - |                                                                                  | IPR006201; IPR006202; PTHR18945:SF12 (PANTHER)                                                                                                         |
| Pan troglodytes         | ribosomal protein s20                                                       | 5  | F:GO:0003735;<br>F:GO:0003723;<br>F:GO:0005515;<br>C:GO:0022627;<br>P:GO:0006414                                                                                                       | - |                                                                                  | -                                                                                                                                                      |
| Pongo abelii            | chondroitin sulfate glucuronyltransferase                                   | 3  | C:GO:0032580;<br>F:GO:0050510;<br>C:GO:0016021                                                                                                                                         | - | EC:2.4.1.226                                                                     | IPR008428                                                                                                                                              |
| Caenorhabditis elegans  | low-density lipoprotein receptor-related protein 2                          | 5  | F:GO:0005509;<br>C:GO:0016021;<br>F:GO:0004872;<br>P:GO:0008152;<br>P:GO:0006898                                                                                                       | - |                                                                                  | IPR000152; IPR001881; IPR006210; IPR013091; IPR018097; G3DSA:2.10.25.10 (GENE3D), PTHR10529 (PANTHER), PTHR10529:SF2 (PANTHER), SSF57196 (SUPERFAMILY) |
| -                       | -                                                                           | 0  |                                                                                                                                                                                        |   |                                                                                  | -                                                                                                                                                      |
| -                       | -                                                                           | 0  |                                                                                                                                                                                        |   |                                                                                  | -                                                                                                                                                      |
| -                       | -                                                                           | 0  |                                                                                                                                                                                        |   |                                                                                  | -                                                                                                                                                      |
| Brugia malayi           | wh1 domain containing protein                                               | 11 | P:GO:0065008;<br>P:GO:0007015;<br>P:GO:0007391;<br>F:GO:0005515;<br>P:GO:0007409;<br>P:GO:0051128;<br>P:GO:0006928;<br>P:GO:0046907;<br>P:GO:0050794;<br>P:GO:0048477;<br>C:GO:0044464 | - |                                                                                  | IPR000697; IPR011993; IPR014885; PTHR11202 (PANTHER), PTHR11202:SF1 (PANTHER), SSF50729 (SUPERFAMILY)                                                  |
| Caenorhabditis elegans  | sh2 domain containing protein                                               | 2  | P:GO:0009987;<br>P:GO:0032501                                                                                                                                                          | - |                                                                                  | IPR000980; IPR001452; G3DSA:2.30.30.40 (GENE3D), SSF55550 (SUPERFAMILY)                                                                                |
| Brugia malayi           | btb poz domain-containing protein 9                                         | 0  |                                                                                                                                                                                        |   | F:GO:0003674;<br>P:GO:0007155;<br>P:GO:0008150;<br>F:GO:0005515;<br>C:GO:0005575 | IPR000210; IPR011333; IPR011705; IPR013069; IPR013089; PTHR23230:SF181 (PANTHER)                                                                       |

|                         |                                                            |   |                                                                                                                                     |                                                                                                                                                      |             |                                                                                                                                                |
|-------------------------|------------------------------------------------------------|---|-------------------------------------------------------------------------------------------------------------------------------------|------------------------------------------------------------------------------------------------------------------------------------------------------|-------------|------------------------------------------------------------------------------------------------------------------------------------------------|
| Caenorhabditis briggsae | eb module family protein                                   | 0 |                                                                                                                                     | F:GO:0008061;<br>P:GO:0006030;<br>P:GO:0005975;<br>F:GO:0016810;<br>F:GO:0003824;<br>C:GO:0005576                                                    |             | -                                                                                                                                              |
|                         | -                                                          | 0 |                                                                                                                                     |                                                                                                                                                      |             | SignalP (SIGNALP)                                                                                                                              |
|                         | -                                                          | 0 |                                                                                                                                     |                                                                                                                                                      |             | -                                                                                                                                              |
| Caenorhabditis elegans  | protein phosphatase 2c containing protein                  | 7 | P:GO:0006470;<br>C:GO:0005739;<br>F:GO:0046872;<br>C:GO:0008287;<br>F:GO:0004741;<br>P:GO:0010510;<br>F:GO:0004724                  | -                                                                                                                                                    | EC:3.1.3.43 | IPR000222; IPR001932; IPR015655;<br>PTHR13832:SF98 (PANTHER)                                                                                   |
| Brugia malayi           | arid bright d- binding domain containing protein           | 2 | F:GO:0003676;<br>C:GO:0043229                                                                                                       | -                                                                                                                                                    |             | IPR001606; PTHR13964 (PANTHER)                                                                                                                 |
| Loa loa                 | arid bright d- binding domain containing protein           | 2 | C:GO:0043229;<br>F:GO:0003677                                                                                                       | -                                                                                                                                                    |             | IPR001606; PTHR13964 (PANTHER),<br>PTHR13964:SF2 (PANTHER)                                                                                     |
| Caenorhabditis briggsae | wnt inhibitory factor 1                                    | 0 |                                                                                                                                     | C:GO:0016021;<br>C:GO:0016020;<br>P:GO:0007275;<br>F:GO:0004713;<br>C:GO:0005576;<br>P:GO:0040010;<br>P:GO:0016055;<br>F:GO:0005509;<br>F:GO:0005488 |             | IPR000742; IPR006210; IPR013032;<br>G3DSA:2.10.25.10 (GENE3D),<br>PTHR11201 (PANTHER),<br>PTHR11201:SF167 (PANTHER),<br>SSF57196 (SUPERFAMILY) |
| Caenorhabditis briggsae | zinc carboxypeptidase family protein                       | 1 | F:GO:0004180                                                                                                                        | -                                                                                                                                                    |             | -                                                                                                                                              |
| Monodelphis domestica   | scy1-like 3 ( cerevisiae)                                  | 2 | F:GO:0005488;<br>C:GO:0044464                                                                                                       | -                                                                                                                                                    |             | IPR011989; PTHR12984 (PANTHER),<br>PTHR12984:SF4 (PANTHER)                                                                                     |
| Caenorhabditis elegans  | elegans protein partially confirmed by transcript evidence | 0 |                                                                                                                                     |                                                                                                                                                      |             | -                                                                                                                                              |
|                         | -                                                          | 0 |                                                                                                                                     |                                                                                                                                                      |             | -                                                                                                                                              |
| Caenorhabditis elegans  | briggsae cbr-ppfr-2 protein                                | 0 |                                                                                                                                     |                                                                                                                                                      |             | -                                                                                                                                              |
| Loa loa                 | hypothetical protein LOAG_04772 [Loa loa]                  | 0 |                                                                                                                                     |                                                                                                                                                      |             | -                                                                                                                                              |
|                         | -                                                          | 0 |                                                                                                                                     |                                                                                                                                                      |             | -                                                                                                                                              |
| Caenorhabditis briggsae | multidrug resistance protein family member (mrp-5)         | 8 | P:GO:0002119;<br>F:GO:0016887;<br>P:GO:0040002;<br>P:GO:0040017;<br>P:GO:0006810;<br>P:GO:0040010;<br>C:GO:0044464;<br>F:GO:0000166 | -                                                                                                                                                    |             | PTHR19242 (PANTHER),<br>PTHR19242:SF14 (PANTHER)                                                                                               |
|                         | -                                                          | 0 |                                                                                                                                     |                                                                                                                                                      |             | SignalP (SIGNALP)                                                                                                                              |
| Caenorhabditis elegans  | transferase mitochondrial                                  | 2 | P:GO:0006783;<br>F:GO:0016740                                                                                                       | -                                                                                                                                                    |             | -                                                                                                                                              |

|                             |                                                    |    |                                                                                                                                                                                                                                                                                              |                                                                                                                    |             |                                                                                                                                                                                                                                                                                                                              |
|-----------------------------|----------------------------------------------------|----|----------------------------------------------------------------------------------------------------------------------------------------------------------------------------------------------------------------------------------------------------------------------------------------------|--------------------------------------------------------------------------------------------------------------------|-------------|------------------------------------------------------------------------------------------------------------------------------------------------------------------------------------------------------------------------------------------------------------------------------------------------------------------------------|
| Loa loa                     | briggsae cbr-rib-1 protein                         | 12 | C:GO:0031224;<br>F:GO:0015020;<br>P:GO:0016055;<br>P:GO:0008354;<br>P:GO:0015014;<br>P:GO:0008589;<br>P:GO:0008101;<br>F:GO:0005515;<br>P:GO:0030210;<br>C:GO:0005794;<br>C:GO:0005783;<br>F:GO:0008375                                                                                      | -                                                                                                                  | EC:2.4.1.17 | IPR004263; PTHR11062 (PANTHER),<br>PTHR11062:SF7 (PANTHER)                                                                                                                                                                                                                                                                   |
| Caenorhabditis elegans      | excretory ca-I abnormal family member (exc-5)      | 1  | F:GO:0046872                                                                                                                                                                                                                                                                                 | -                                                                                                                  | -           | -                                                                                                                                                                                                                                                                                                                            |
| Angiostrongylus cantonensis | hypothetical protein [Angiostrongylus cantonensis] | 0  |                                                                                                                                                                                                                                                                                              |                                                                                                                    |             | -                                                                                                                                                                                                                                                                                                                            |
| Caenorhabditis elegans      | moesin ezrin radixin                               | 17 | C:GO:0035003;<br>C:GO:0005884;<br>P:GO:0007318;<br>P:GO:0042048;<br>P:GO:0045197;<br>P:GO:0016336;<br>F:GO:0003779;<br>C:GO:0005819;<br>P:GO:0032956;<br>C:GO:0045169;<br>P:GO:0016057;<br>C:GO:0019898;<br>P:GO:0007368;<br>C:GO:0005912;<br>P:GO:0045313;<br>C:GO:0005634;<br>C:GO:0005938 | -                                                                                                                  |             | IPR000299; IPR000798; IPR008954;<br>IPR011174; IPR011259; IPR011993;<br>IPR014352; IPR018979; IPR018980;<br>IPR019747; IPR019748; IPR019749;<br>IPR019750; G3DSA:1.20.5.450<br>(GENE3D), G3DSA:3.10.20.90<br>(GENE3D), PTHR23281 (PANTHER),<br>PTHR23281:SF3 (PANTHER), SSF50729<br>(SUPERFAMILY), SSF54236<br>(SUPERFAMILY) |
| Caenorhabditis elegans      | glutathione s-transferase                          | 0  |                                                                                                                                                                                                                                                                                              | F:GO:0016740;<br>P:GO:0008150;<br>C:GO:0005575                                                                     |             | IPR004045; IPR010987; IPR012335;<br>IPR012336; IPR017933; PTHR11571<br>(PANTHER), PTHR11571:SF11<br>(PANTHER)                                                                                                                                                                                                                |
|                             |                                                    | 0  |                                                                                                                                                                                                                                                                                              |                                                                                                                    |             | -                                                                                                                                                                                                                                                                                                                            |
| Caenorhabditis briggsae     | briggsae cbr-rhy-1 protein                         | 0  |                                                                                                                                                                                                                                                                                              | F:GO:0008415;<br>F:GO:0016740;<br>C:GO:0016021;<br>P:GO:0040011;<br>P:GO:0040035;<br>F:GO:0016747;<br>P:GO:0018991 |             | -                                                                                                                                                                                                                                                                                                                            |
| Caenorhabditis briggsae     | histidine acid phosphatase family protein          | 4  | P:GO:0009987;<br>C:GO:0043231;<br>C:GO:0044446;<br>C:GO:0044444                                                                                                                                                                                                                              | -                                                                                                                  |             | IPR000560; G3DSA:3.40.50.1240<br>(GENE3D), PTHR11567 (PANTHER),<br>PTHR11567:SF18 (PANTHER),<br>SSF53254 (SUPERFAMILY)                                                                                                                                                                                                       |
| Caenorhabditis briggsae     | histidine acid phosphatase family protein          | 4  | C:GO:0043231;<br>C:GO:0044444;<br>P:GO:0008152;<br>C:GO:0044446                                                                                                                                                                                                                              | -                                                                                                                  |             | IPR000560; G3DSA:3.40.50.1240<br>(GENE3D), PTHR11567 (PANTHER),<br>PTHR11567:SF18 (PANTHER),<br>SSF53254 (SUPERFAMILY)                                                                                                                                                                                                       |
|                             |                                                    | 0  |                                                                                                                                                                                                                                                                                              |                                                                                                                    |             | -                                                                                                                                                                                                                                                                                                                            |
|                             |                                                    | 0  |                                                                                                                                                                                                                                                                                              |                                                                                                                    |             | SignalP (SIGNALP)                                                                                                                                                                                                                                                                                                            |

|                           |                                                         |   |                                                                                                                                       |   |                               |                                                                                                                                    |
|---------------------------|---------------------------------------------------------|---|---------------------------------------------------------------------------------------------------------------------------------------|---|-------------------------------|------------------------------------------------------------------------------------------------------------------------------------|
| Caenorhabditis elegans    | protein tyrosine phosphatase family member (ptp-1)      |   | F:GO:0004726;<br>C:GO:0005856;<br>5 F:GO:0008092;<br>P:GO:0006470;<br>C:GO:0016020                                                    | - |                               | IPR001478; G3DSA:2.30.42.10<br>(GENE3D), PTHR17130 (PANTHER)                                                                       |
| Brugia malayi             | hypothetical protein Bm1_04745 [Brugia malayi]          | 0 |                                                                                                                                       |   |                               | -                                                                                                                                  |
| Loa loa                   | hypothetical protein LOAG_11910 [Loa loa]               | 0 |                                                                                                                                       |   |                               | -                                                                                                                                  |
|                           | -                                                       | 0 |                                                                                                                                       |   |                               | IPR001496; PTHR10385 (PANTHER),<br>PTHR10385:SF17 (PANTHER)                                                                        |
| Caenorhabditis sp. PS1010 | uncoordinated family member (unc-73)                    |   | P:GO:0006915;<br>P:GO:0023033;<br>5 F:GO:0005085;<br>P:GO:0050794;<br>C:GO:0005737                                                    | - |                               | IPR002017; IPR018159;<br>G3DSA:1.20.58.60 (GENE3D),<br>PTHR22826 (PANTHER),<br>PTHR22826:SF47 (PANTHER),<br>SSF46966 (SUPERFAMILY) |
| Macaca fascicularis       | s-phase kinase-associated protein 1-like                |   | C:GO:0005829;<br>P:GO:0051437;<br>C:GO:0019005;<br>7 F:GO:0004842;<br>F:GO:0005515;<br>P:GO:0031146;<br>C:GO:0005654                  | - | EC:6.3.2.19                   | IPR001232; IPR011333; IPR016072;<br>IPR016073; PTHR11165:SF21<br>(PANTHER)                                                         |
| Caenorhabditis elegans    | lethal family member (let-805)                          |   | P:GO:0018996;<br>P:GO:0009792;<br>P:GO:0008340;<br>8 P:GO:0000003;<br>F:GO:0005515;<br>P:GO:0006898;<br>P:GO:0002119;<br>P:GO:0040011 | - |                               | SignalP (SIGNALP)                                                                                                                  |
|                           | -                                                       | 0 |                                                                                                                                       |   |                               | -                                                                                                                                  |
| Loa loa                   | novel protein containing six wd40 domains at c-terminus |   | C:GO:0030425;<br>C:GO:0031931;<br>P:GO:0001938;<br>6 F:GO:0019901;<br>C:GO:0043025;<br>P:GO:0042325                                   | - |                               | IPR004083; IPR016024;<br>PTHR12848:SF6 (PANTHER)                                                                                   |
| Caenorhabditis briggsae   | Hypothetical protein CBG22082 [Caenorhabditis briggsae] | 0 |                                                                                                                                       |   | C:GO:0016021;<br>P:GO:0007186 | -                                                                                                                                  |
|                           | -                                                       | 0 |                                                                                                                                       |   |                               | SignalP (SIGNALP)                                                                                                                  |
|                           | -                                                       | 0 |                                                                                                                                       |   |                               | -                                                                                                                                  |
| Caenorhabditis elegans    | vacuolar protein sorting protein 18                     |   |                                                                                                                                       |   | F:GO:0008270;<br>F:GO:0005515 | PTHR23323 (PANTHER)                                                                                                                |
|                           | -                                                       | 0 |                                                                                                                                       |   |                               | -                                                                                                                                  |
|                           | -                                                       | 0 |                                                                                                                                       |   |                               | -                                                                                                                                  |
| Ancylostoma ceylanicum    | venom-allergen-like protein family member (vap-1)       | 1 | P:GO:0040011                                                                                                                          |   |                               | IPR001283; IPR014044                                                                                                               |
| Caenorhabditis elegans    | translocated promoter region                            |   | P:GO:0000003;<br>C:GO:0016020;<br>P:GO:0040015;<br>8 P:GO:0040011;<br>P:GO:0023060;<br>P:GO:0002119;<br>P:GO:0050794;<br>C:GO:0044446 | - |                               | PD936484 (PRODOM)                                                                                                                  |
|                           | -                                                       | 0 |                                                                                                                                       |   |                               | -                                                                                                                                  |
|                           | -                                                       | 0 |                                                                                                                                       |   |                               | -                                                                                                                                  |
| Loa loa                   | retinoblastoma-associated protein rap140                | 0 |                                                                                                                                       |   |                               | IPR022188                                                                                                                          |

|                         |                                                                             |    |                                                                                                                                                                                                                                                                                                                                                                                   |                               |             |                                                                                                                                                                                                                      |
|-------------------------|-----------------------------------------------------------------------------|----|-----------------------------------------------------------------------------------------------------------------------------------------------------------------------------------------------------------------------------------------------------------------------------------------------------------------------------------------------------------------------------------|-------------------------------|-------------|----------------------------------------------------------------------------------------------------------------------------------------------------------------------------------------------------------------------|
| Caenorhabditis elegans  | prostaglandin e synthase 2                                                  | 7  | C:GO:0005829;<br>C:GO:0005739;<br>P:GO:0046903;<br>P:GO:0045449;<br>F:GO:0003677;<br>F:GO:0003824;<br>C:GO:0005634                                                                                                                                                                                                                                                                | -                             |             | IPR002109; IPR011767; IPR012335;<br>IPR012336; PTHR12782 (PANTHER)                                                                                                                                                   |
| Caenorhabditis briggsae | pctaire protein ki-se 1                                                     | 4  | P:GO:0006468;<br>F:GO:0005515;<br>F:GO:0005524;<br>F:GO:0004674                                                                                                                                                                                                                                                                                                                   | -                             | EC:2.7.11.0 | IPR000719; IPR011009; IPR017442;<br>G3DSA:1.10.510.10 (GENE3D),<br>PTHR11295 (PANTHER),<br>PTHR11295:SF103 (PANTHER)                                                                                                 |
| Caenorhabditis briggsae | briggsae cbr-drr-1 protein                                                  | 3  | F:GO:0005515;<br>C:GO:0016020;<br>P:GO:0008340                                                                                                                                                                                                                                                                                                                                    | -                             |             | SignalP (SIGNALP)                                                                                                                                                                                                    |
| Caenorhabditis elegans  | regulator of g protein sig-ling family member (rgs-5)                       | 0  |                                                                                                                                                                                                                                                                                                                                                                                   | F:GO:0016301;<br>F:GO:0004871 |             | -                                                                                                                                                                                                                    |
|                         | -                                                                           | 0  |                                                                                                                                                                                                                                                                                                                                                                                   |                               |             | -                                                                                                                                                                                                                    |
| Caenorhabditis elegans  | saccharopine dehydroge-se                                                   | 3  | C:GO:0016021;<br>P:GO:0008152;<br>F:GO:0005488                                                                                                                                                                                                                                                                                                                                    | -                             |             | IPR005097; PTHR12286 (PANTHER)                                                                                                                                                                                       |
| Pongo abelii            | type alpha 1 (ehlers-danlos syndrome type autosomal dominant) isoform cra_b | 22 | P:GO:0009314;<br>P:GO:0018149;<br>P:GO:0030168;<br>P:GO:0048565;<br>P:GO:0043206;<br>C:GO:0005586;<br>P:GO:0007229;<br>P:GO:0050777;<br>P:GO:0007507;<br>P:GO:0007160;<br>C:GO:0005615;<br>F:GO:0046332;<br>P:GO:0001501;<br>F:GO:0048407;<br>P:GO:0043588;<br>P:GO:0030199;<br>F:GO:0005178;<br>P:GO:0007179;<br>P:GO:0034097;<br>P:GO:0032964;<br>F:GO:0005201;<br>P:GO:0001568 | -                             |             | SignalP (SIGNALP)                                                                                                                                                                                                    |
| Caenorhabditis elegans  | mixed lineage ki-se 4                                                       | 1  | F:GO:0016740                                                                                                                                                                                                                                                                                                                                                                      | -                             |             | IPR000719; IPR001245; IPR001452;<br>IPR008271; IPR011009; IPR017441;<br>G3DSA:1.10.510.10 (GENE3D),<br>G3DSA:2.30.30.40 (GENE3D),<br>G3DSA:3.30.200.20 (GENE3D),<br>PTHR23257 (PANTHER),<br>PTHR23257:SF49 (PANTHER) |
| Caenorhabditis elegans  | mixed lineage ki-se 4                                                       | 1  | F:GO:0016740                                                                                                                                                                                                                                                                                                                                                                      | -                             |             | IPR000719; IPR001245; IPR001452;<br>IPR008271; IPR011009; IPR017441;<br>G3DSA:1.10.510.10 (GENE3D),<br>G3DSA:2.30.30.40 (GENE3D),<br>G3DSA:3.30.200.20 (GENE3D),<br>PTHR23257 (PANTHER),<br>PTHR23257:SF49 (PANTHER) |
|                         | -                                                                           | 0  |                                                                                                                                                                                                                                                                                                                                                                                   |                               |             | -                                                                                                                                                                                                                    |
| Caenorhabditis briggsae | elegans protein confirmed by transcript evidence                            | 0  |                                                                                                                                                                                                                                                                                                                                                                                   |                               |             | -                                                                                                                                                                                                                    |

|                         |                                                 |    |                                                                                                                                                                                        |                                                                                                                                                                                                                          |                                                   |
|-------------------------|-------------------------------------------------|----|----------------------------------------------------------------------------------------------------------------------------------------------------------------------------------------|--------------------------------------------------------------------------------------------------------------------------------------------------------------------------------------------------------------------------|---------------------------------------------------|
|                         | -                                               | 0  |                                                                                                                                                                                        |                                                                                                                                                                                                                          | PF10961 (PFAM), SignalP (SIGNALP)                 |
|                         | -                                               | 0  |                                                                                                                                                                                        |                                                                                                                                                                                                                          | -                                                 |
| Brugia malayi           | af4 fmr2 family member 1-like                   | 0  |                                                                                                                                                                                        | P:GO:0007366;<br>F:GO:0003700;<br>F:GO:0003677;<br>C:GO:0005634;<br>P:GO:0045893;<br>P:GO:0051493;<br>P:GO:0007275;<br>F:GO:0016563;<br>P:GO:0042051;<br>P:GO:0006350;<br>P:GO:0008361;<br>P:GO:0032368;<br>P:GO:0045449 | IPR007797; PTHR10528:SF2 (PANTHER)                |
| Brugia malayi           | af4 fmr2 family member 1-like                   | 0  |                                                                                                                                                                                        | P:GO:0007366;<br>F:GO:0003700;<br>F:GO:0003677;<br>C:GO:0005634;<br>P:GO:0045893;<br>P:GO:0051493;<br>P:GO:0007275;<br>F:GO:0016563;<br>P:GO:0042051;<br>P:GO:0006350;<br>P:GO:0008361;<br>P:GO:0032368;<br>P:GO:0045449 | IPR007797; PTHR10528:SF2 (PANTHER)                |
| Brugia malayi           | af4 fmr2 family member 1-like                   | 0  |                                                                                                                                                                                        | P:GO:0007366;<br>F:GO:0003700;<br>F:GO:0003677;<br>C:GO:0005634;<br>P:GO:0045893;<br>P:GO:0051493;<br>P:GO:0007275;<br>F:GO:0016563;<br>P:GO:0042051;<br>P:GO:0006350;<br>P:GO:0008361;<br>P:GO:0032368;<br>P:GO:0045449 | IPR007797; PTHR10528:SF2 (PANTHER)                |
|                         | -                                               | 0  |                                                                                                                                                                                        |                                                                                                                                                                                                                          | -                                                 |
|                         | -                                               | 0  |                                                                                                                                                                                        |                                                                                                                                                                                                                          | -                                                 |
| Brugia malayi           | snf2 family n-termi-l domain containing protein | 0  |                                                                                                                                                                                        | F:GO:0003676;<br>F:GO:0004386;<br>F:GO:0005524;<br>F:GO:0003677                                                                                                                                                          | -                                                 |
| Caenorhabditis briggsae | cytoplasmic intermediate filament protein       | 11 | P:GO:0009792;<br>P:GO:0010171;<br>P:GO:0002119;<br>P:GO:0018991;<br>P:GO:0018996;<br>F:GO:0005515;<br>C:GO:0005882;<br>P:GO:0040010;<br>P:GO:0040011;<br>P:GO:0006898;<br>F:GO:0005198 | -                                                                                                                                                                                                                        | IPR001664; IPR016044;<br>PTHR23239:SF13 (PANTHER) |

|                         |                                                       |   |                                                                                                                                     |                                                                                                                                                                                                                                                                                                               |                                                                                                                                               |   |
|-------------------------|-------------------------------------------------------|---|-------------------------------------------------------------------------------------------------------------------------------------|---------------------------------------------------------------------------------------------------------------------------------------------------------------------------------------------------------------------------------------------------------------------------------------------------------------|-----------------------------------------------------------------------------------------------------------------------------------------------|---|
|                         | -                                                     | 0 |                                                                                                                                     |                                                                                                                                                                                                                                                                                                               | -                                                                                                                                             |   |
|                         | -                                                     | 0 |                                                                                                                                     |                                                                                                                                                                                                                                                                                                               | -                                                                                                                                             |   |
|                         | -                                                     | 0 |                                                                                                                                     |                                                                                                                                                                                                                                                                                                               | -                                                                                                                                             |   |
| Caenorhabditis briggsae | briggsae cbr-ain-1 protein                            | 0 |                                                                                                                                     |                                                                                                                                                                                                                                                                                                               | IPR001202                                                                                                                                     |   |
| Caenorhabditis briggsae | briggsae cbr-ain-1 protein                            | 0 |                                                                                                                                     |                                                                                                                                                                                                                                                                                                               | IPR001202                                                                                                                                     |   |
| Caenorhabditis briggsae | small zinc finger-like protein                        | 8 | C:GO:0005743;<br>F:GO:0046872;<br>P:GO:0045039;<br>P:GO:0040035;<br>C:GO:0042719;<br>P:GO:0040011;<br>P:GO:0009792;<br>P:GO:0040018 | -                                                                                                                                                                                                                                                                                                             | SignalIP (SIGNALP)                                                                                                                            |   |
|                         | -                                                     | 0 |                                                                                                                                     |                                                                                                                                                                                                                                                                                                               | -                                                                                                                                             |   |
| Caenorhabditis elegans  | regulator of telomere elongation helicase 1           | 7 | P:GO:0006915;<br>F:GO:0004003;<br>P:GO:0000723;<br>F:GO:0005524;<br>F:GO:0005515;<br>P:GO:0010569;<br>C:GO:0005634                  | -                                                                                                                                                                                                                                                                                                             | IPR006554; IPR010614; IPR014013;<br>G3DSA:3.40.50.300 (GENE3D),<br>PTHR11472 (PANTHER),<br>PTHR11472:SF4 (PANTHER), SSF52540<br>(SUPERFAMILY) |   |
|                         | -                                                     | 0 |                                                                                                                                     |                                                                                                                                                                                                                                                                                                               | -                                                                                                                                             |   |
| Schistosoma mansoni     | tyrosine ki-se                                        | 0 |                                                                                                                                     | P:GO:0006468;<br>P:GO:0040027;<br>F:GO:0005524;<br>F:GO:0016301;<br>F:GO:0042169;<br>P:GO:0018108;<br>F:GO:0004674;<br>P:GO:0009792;<br>F:GO:0004672;<br>P:GO:0042059;<br>F:GO:0000166;<br>C:GO:0005737;<br>F:GO:0000287;<br>F:GO:0004715;<br>F:GO:0005515;<br>F:GO:0004713;<br>F:GO:0016740;<br>C:GO:0005886 | -                                                                                                                                             | - |
|                         | -                                                     | 0 |                                                                                                                                     |                                                                                                                                                                                                                                                                                                               | SignalIP (SIGNALP)                                                                                                                            |   |
|                         | -                                                     | 0 |                                                                                                                                     |                                                                                                                                                                                                                                                                                                               | -                                                                                                                                             |   |
|                         | -                                                     | 0 |                                                                                                                                     |                                                                                                                                                                                                                                                                                                               | -                                                                                                                                             |   |
| Caenorhabditis elegans  | solute carrier family 39 (zinc transporter) member 14 | 5 | F:GO:0015082;<br>F:GO:0046915;<br>P:GO:0055085;<br>C:GO:0016021;<br>P:GO:0000041                                                    | -                                                                                                                                                                                                                                                                                                             | IPR003689; PTHR12191 (PANTHER)                                                                                                                |   |
| Caenorhabditis elegans  | solute carrier family 39 (zinc transporter) member 14 | 5 | F:GO:0015082;<br>F:GO:0046915;<br>P:GO:0055085;<br>C:GO:0016021;<br>P:GO:0000041                                                    | -                                                                                                                                                                                                                                                                                                             | IPR003689; PTHR12191 (PANTHER)                                                                                                                |   |
| Caenorhabditis elegans  | solute carrier family 39 (zinc transporter) member 14 | 5 | F:GO:0015082;<br>F:GO:0046915;<br>P:GO:0055085;<br>C:GO:0016021;<br>P:GO:0000041                                                    | -                                                                                                                                                                                                                                                                                                             | IPR003689; PTHR12191 (PANTHER)                                                                                                                |   |



|                              |                                   |    |                                                                                                                                                                                                                          |                                                |                                                                                                          |
|------------------------------|-----------------------------------|----|--------------------------------------------------------------------------------------------------------------------------------------------------------------------------------------------------------------------------|------------------------------------------------|----------------------------------------------------------------------------------------------------------|
|                              | -                                 | 0  |                                                                                                                                                                                                                          |                                                | -                                                                                                        |
| Dictyocaulus viviparus       | major sperm protein               | 5  | P:GO:0019915;<br>C:GO:0005856;<br>C:GO:0005737;<br>F:GO:0005198;<br>C:GO:0031143                                                                                                                                         | -                                              | IPR000535; IPR008962; PTHR22920 (PANTHER)                                                                |
| Nippostrongylus brasiliensis | major sperm protein               | 5  | P:GO:0019915;<br>C:GO:0005856;<br>C:GO:0005737;<br>F:GO:0005198;<br>C:GO:0031143                                                                                                                                         | -                                              | IPR000535; IPR008962; PTHR22920 (PANTHER), SignalP (SIGNALP)                                             |
| Caenorhabditis briggsae      | protein                           | 1  | C:GO:0005576                                                                                                                                                                                                             | -                                              | IPR001283; IPR014044; PTHR10334:SF8 (PANTHER)                                                            |
| Caenorhabditis briggsae      | myoblast city                     | 10 | P:GO:0048869;<br>P:GO:0043652;<br>F:GO:0005083;<br>P:GO:0007517;<br>F:GO:0032403;<br>F:GO:0019899;<br>P:GO:0040039;<br>P:GO:0009653;<br>C:GO:0005886;<br>F:GO:0017124                                                    | -                                              | IPR010703; PTHR23317 (PANTHER), PTHR23317:SF16 (PANTHER), SignalP (SIGNALP)                              |
| Caenorhabditis briggsae      | tyrosyl-tr- synthetase            | 3  | P:GO:0009792;<br>P:GO:0000003;<br>P:GO:0006412                                                                                                                                                                           | -                                              | EC:3.6.5.3 IPR002305; IPR014729                                                                          |
| Brugia malayi                | coiled-coil domain containing 88a | 0  |                                                                                                                                                                                                                          | C:GO:0005737;<br>P:GO:0000226;<br>F:GO:0008017 | PD936484 (PRODOM), PTHR18947 (PANTHER)                                                                   |
| Saccoglossus kowalevskii     | uroca-te hydratase                | 2  | P:GO:0006548;<br>F:GO:0016153                                                                                                                                                                                            | -                                              | EC:4.2.1.49 IPR000193                                                                                    |
| Brugia malayi                | cullin family protein             | 3  | P:GO:0051533;<br>P:GO:0006511;<br>C:GO:0000151                                                                                                                                                                           | -                                              | IPR001373; IPR016159; G3DSA:1.20.1310.10 (GENE3D), PTHR11932 (PANTHER), PTHR11932:SF8 (PANTHER)          |
| Ailuropoda melanoleuca       | lamin a c                         | 13 | C:GO:0005626;<br>C:GO:0016363;<br>P:GO:0006998;<br>P:GO:0035105;<br>C:GO:0005638;<br>P:GO:0007517;<br>P:GO:0007283;<br>N:GO:0090343;<br>P:GO:0055015;<br>F:GO:0005515;<br>C:GO:0048471;<br>C:GO:0005635;<br>F:GO:0005198 | -                                              | IPR001322; IPR001664; G3DSA:2.60.40.1260 (GENE3D), PTHR23239:SF12 (PANTHER), SSF74853 (SUPERFAMILY)      |
|                              | -                                 | 0  |                                                                                                                                                                                                                          |                                                | -                                                                                                        |
|                              | -                                 | 0  |                                                                                                                                                                                                                          |                                                | SignalP (SIGNALP)                                                                                        |
| Ciona intestinalis           | atp-dependent r- helicase ded1    | 1  | F:GO:0005488                                                                                                                                                                                                             | -                                              | IPR011545; IPR014001; IPR014021; G3DSA:3.40.50.300 (GENE3D), PTHR10967 (PANTHER), SSF52540 (SUPERFAMILY) |

|                         |                                                              |  |    |                                                                                                                                                                                                                                                                                                                                                                                                    |   |            |                                |
|-------------------------|--------------------------------------------------------------|--|----|----------------------------------------------------------------------------------------------------------------------------------------------------------------------------------------------------------------------------------------------------------------------------------------------------------------------------------------------------------------------------------------------------|---|------------|--------------------------------|
| Caenorhabditis elegans  | pyridine nucleotide-disulphide oxidoreductase family protein |  | 5  | P:GO:0009792;<br>P:GO:0010171;<br>P:GO:0002119;<br>P:GO:0040010;<br>P:GO:0000003                                                                                                                                                                                                                                                                                                                   | - |            | SignalP (SIGNALP)              |
|                         | -                                                            |  | 0  |                                                                                                                                                                                                                                                                                                                                                                                                    |   |            | -                              |
| Caenorhabditis briggsae | protein fam91a1-like                                         |  | 6  | P:GO:0018991;<br>F:GO:0003676;<br>C:GO:0005622;<br>F:GO:0008270;<br>F:GO:0005515;<br>P:GO:0040011                                                                                                                                                                                                                                                                                                  | - |            | -                              |
|                         | -                                                            |  | 0  |                                                                                                                                                                                                                                                                                                                                                                                                    |   |            | -                              |
|                         | -                                                            |  | 0  |                                                                                                                                                                                                                                                                                                                                                                                                    |   |            | IPR000010; SignalP (SIGNALP)   |
|                         | -                                                            |  | 0  |                                                                                                                                                                                                                                                                                                                                                                                                    |   |            | -                              |
| Caenorhabditis briggsae | brain protein                                                |  | 0  |                                                                                                                                                                                                                                                                                                                                                                                                    |   |            | -                              |
| Caenorhabditis elegans  | elegans protein confirmed by transcript evidence             |  | 1  | C:GO:0016020                                                                                                                                                                                                                                                                                                                                                                                       | - |            | IPR008253; PTHR22776 (PANTHER) |
| Brugia malayi           | ubiquitin ribosomal protein cep52 fusion                     |  | 4  | C:GO:0005840;<br>F:GO:0003735;<br>C:GO:0005634;<br>P:GO:0006412                                                                                                                                                                                                                                                                                                                                    | - | EC:3.6.5.3 | -                              |
| Apis mellifera          | lysine-specific histone demethylase 1a                       |  | 3  | P:GO:0044238;<br>P:GO:0044260;<br>F:GO:0016491                                                                                                                                                                                                                                                                                                                                                     | - |            | SignalP (SIGNALP)              |
|                         | -                                                            |  | 0  |                                                                                                                                                                                                                                                                                                                                                                                                    |   |            | -                              |
| Caenorhabditis elegans  | hla-b associated transcript 1                                |  | 23 | F:GO:0015184;<br>P:GO:0015804;<br>C:GO:0016607;<br>P:GO:0006461;<br>F:GO:0043008;<br>P:GO:0000245;<br>C:GO:0005681;<br>P:GO:0046784;<br>F:GO:0042802;<br>P:GO:0006520;<br>F:GO:0017070;<br>F:GO:0015175;<br>C:GO:0005688;<br>P:GO:0055085;<br>C:GO:0000346;<br>F:GO:0042605;<br>C:GO:0005687;<br>P:GO:0006200;<br>C:GO:0005887;<br>F:GO:0004004;<br>F:GO:0005524;<br>P:GO:0010501;<br>F:GO:0030621 | - |            | SignalP (SIGNALP)              |

|                               |                                      |           |                                                                                                                                                                                                                                                                                                                                                                                                                                                       |  |  |                          |
|-------------------------------|--------------------------------------|-----------|-------------------------------------------------------------------------------------------------------------------------------------------------------------------------------------------------------------------------------------------------------------------------------------------------------------------------------------------------------------------------------------------------------------------------------------------------------|--|--|--------------------------|
| <p>Caenorhabditis elegans</p> | <p>hla-b associated transcript 1</p> | <p>23</p> | <p>F:GO:0015184;<br/> P:GO:0015804;<br/> C:GO:0016607;<br/> P:GO:0006461;<br/> F:GO:0043008;<br/> P:GO:0000245;<br/> C:GO:0005681;<br/> P:GO:0046784;<br/> F:GO:0042802;<br/> P:GO:0006520;<br/> F:GO:0017070;<br/> F:GO:0015175;<br/> C:GO:0005688;<br/> P:GO:0055085;<br/> C:GO:0000346;<br/> F:GO:0042605;<br/> C:GO:0005687;<br/> P:GO:0006200;<br/> C:GO:0005887;<br/> F:GO:0004004;<br/> F:GO:0005524;<br/> P:GO:0010501;<br/> F:GO:0030621</p> |  |  | <p>SignalP (SIGNALP)</p> |
| <p>Caenorhabditis elegans</p> | <p>hla-b associated transcript 1</p> | <p>23</p> | <p>F:GO:0015184;<br/> P:GO:0015804;<br/> C:GO:0016607;<br/> P:GO:0006461;<br/> F:GO:0043008;<br/> P:GO:0000245;<br/> C:GO:0005681;<br/> P:GO:0046784;<br/> F:GO:0042802;<br/> P:GO:0006520;<br/> F:GO:0017070;<br/> F:GO:0015175;<br/> C:GO:0005688;<br/> P:GO:0055085;<br/> C:GO:0000346;<br/> F:GO:0042605;<br/> C:GO:0005687;<br/> P:GO:0006200;<br/> C:GO:0005887;<br/> F:GO:0004004;<br/> F:GO:0005524;<br/> P:GO:0010501;<br/> F:GO:0030621</p> |  |  | <p>SignalP (SIGNALP)</p> |

|                         |                                                         |    |                                                                                                                                                                                                                                                                                                                                                                                                    |                                                                                                                                                                       |                    |                                                              |
|-------------------------|---------------------------------------------------------|----|----------------------------------------------------------------------------------------------------------------------------------------------------------------------------------------------------------------------------------------------------------------------------------------------------------------------------------------------------------------------------------------------------|-----------------------------------------------------------------------------------------------------------------------------------------------------------------------|--------------------|--------------------------------------------------------------|
| Caenorhabditis elegans  | hla-b associated transcript 1                           | 23 | F:GO:0015184;<br>P:GO:0015804;<br>C:GO:0016607;<br>P:GO:0006461;<br>F:GO:0043008;<br>P:GO:0000245;<br>C:GO:0005681;<br>P:GO:0046784;<br>F:GO:0042802;<br>P:GO:0006520;<br>F:GO:0017070;<br>F:GO:0015175;<br>C:GO:0005688;<br>P:GO:0055085;<br>C:GO:0000346;<br>F:GO:0042605;<br>C:GO:0005687;<br>P:GO:0006200;<br>C:GO:0005887;<br>F:GO:0004004;<br>F:GO:0005524;<br>P:GO:0010501;<br>F:GO:0030621 | -                                                                                                                                                                     | SignalIP (SIGNALP) |                                                              |
| Homo sapiens            | otu domain-containing protein 4-like isoform 1          | 0  |                                                                                                                                                                                                                                                                                                                                                                                                    | F:GO:0030246;<br>F:GO:0016758;<br>F:GO:0003674;<br>P:GO:0005975;<br>P:GO:0030259;<br>C:GO:0005575;<br>F:GO:0005515;<br>C:GO:0005783;<br>F:GO:0004577;<br>P:GO:0008150 | -                  |                                                              |
| Homo sapiens            | otu domain-containing protein 4-like isoform 1          | 0  |                                                                                                                                                                                                                                                                                                                                                                                                    | F:GO:0030246;<br>F:GO:0016758;<br>F:GO:0003674;<br>P:GO:0005975;<br>P:GO:0030259;<br>C:GO:0005575;<br>F:GO:0005515;<br>C:GO:0005783;<br>F:GO:0004577;<br>P:GO:0008150 | -                  |                                                              |
| -                       | -                                                       | 0  |                                                                                                                                                                                                                                                                                                                                                                                                    |                                                                                                                                                                       | -                  |                                                              |
| Caenorhabditis elegans  | ryanodine receptor                                      | 7  | P:GO:0006629;<br>F:GO:0005219;<br>P:GO:0006816;<br>P:GO:0006874;<br>P:GO:0055085;<br>F:GO:0005509;<br>C:GO:0016021                                                                                                                                                                                                                                                                                 | -                                                                                                                                                                     | -                  |                                                              |
| -                       | -                                                       | 0  |                                                                                                                                                                                                                                                                                                                                                                                                    |                                                                                                                                                                       | -                  |                                                              |
| Caenorhabditis briggsae | Hypothetical protein CBG09631 [Caenorhabditis briggsae] | 3  | C:GO:0005576;<br>P:GO:0006954;<br>F:GO:0005125                                                                                                                                                                                                                                                                                                                                                     | -                                                                                                                                                                     |                    | IPR010345; G3DSA:2.10.90.10 (GENE3D), SSF57501 (SUPERFAMILY) |
| Brugia malayi           | small subunit processome component 20 homolog           | 3  | C:GO:0005730;<br>P:GO:0006364;<br>F:GO:0005515                                                                                                                                                                                                                                                                                                                                                     | -                                                                                                                                                                     | -                  |                                                              |

|                         |                                                                          |   |                                                                                                                                                      |                                                |                                                                                                         |
|-------------------------|--------------------------------------------------------------------------|---|------------------------------------------------------------------------------------------------------------------------------------------------------|------------------------------------------------|---------------------------------------------------------------------------------------------------------|
| Caenorhabditis elegans  | elegans protein partially confirmed by transcript evidence               | 0 |                                                                                                                                                      | C:GO:0016021;<br>C:GO:0016020;<br>F:GO:0008375 | -                                                                                                       |
| Loa loa                 | coenzyme q3 methyltransferase ( cerevisiae)                              | 6 | P:GO:0006071;<br>P:GO:0002119;<br>P:GO:0006744;<br>P:GO:0008340;<br>F:GO:0008168;<br>C:GO:0005739                                                    | -                                              | EC:2.1.1.0<br>G3DSA:3.40.50.150 (GENE3D),<br>PTHR23134 (PANTHER), SignalP<br>(SIGNALP)                  |
| Loa loa                 | coenzyme q3 methyltransferase ( cerevisiae)                              | 6 | P:GO:0006071;<br>P:GO:0002119;<br>P:GO:0006744;<br>P:GO:0008340;<br>F:GO:0008168;<br>C:GO:0005739                                                    | -                                              | EC:2.1.1.0<br>-                                                                                         |
| Caenorhabditis elegans  | ribonuclease h2 subunit b                                                | 0 |                                                                                                                                                      | F:GO:0003674;<br>P:GO:0008150;<br>C:GO:0005634 | IPR019024; PTHR13383 (PANTHER),<br>PTHR13383:SF1 (PANTHER)                                              |
| Caenorhabditis elegans  | phosducin-like protein                                                   | 1 | F:GO:0005515                                                                                                                                         | -                                              | IPR001200; IPR012335; IPR012336;<br>PTHR21148 (PANTHER),<br>PTHR21148:SF12 (PANTHER), PF02114<br>(PFAM) |
|                         | -                                                                        | 0 |                                                                                                                                                      |                                                | -                                                                                                       |
| Caenorhabditis elegans  | proliferating cell nuclear antigen                                       | 9 | P:GO:0042276;<br>C:GO:0005730;<br>P:GO:0051726;<br>F:GO:0030337;<br>F:GO:0003677;<br>F:GO:0005515;<br>C:GO:0043626;<br>P:GO:0006275;<br>C:GO:0005737 | -                                              | IPR000730; IPR022648; IPR022649;<br>IPR022659; G3DSA:3.70.10.10<br>(GENE3D), SSF55979 (SUPERFAMILY)     |
| Caenorhabditis elegans  | proliferating cell nuclear antigen                                       | 9 | P:GO:0042276;<br>C:GO:0005730;<br>P:GO:0051726;<br>F:GO:0030337;<br>F:GO:0003677;<br>F:GO:0005515;<br>C:GO:0043626;<br>P:GO:0006275;<br>C:GO:0005737 | -                                              | IPR000730; IPR022648; IPR022649;<br>IPR022659; G3DSA:3.70.10.10<br>(GENE3D), SSF55979 (SUPERFAMILY)     |
| Caenorhabditis briggsae | briggsae cbr-pqn-20 protein                                              | 0 |                                                                                                                                                      |                                                | -                                                                                                       |
|                         | -                                                                        | 0 |                                                                                                                                                      |                                                | -                                                                                                       |
|                         | -                                                                        | 0 |                                                                                                                                                      |                                                | -                                                                                                       |
| Caenorhabditis elegans  | uncoordinated protein isoform partially confirmed by transcript evidence | 8 | F:GO:0004872;<br>P:GO:0006629;<br>F:GO:0005219;<br>P:GO:0006816;<br>P:GO:0006874;<br>P:GO:0055085;<br>F:GO:0005509;<br>C:GO:0016021                  | -                                              | IPR000699; IPR015925;<br>PTHR13715:SF11 (PANTHER)                                                       |
| Caenorhabditis elegans  | hypothetical protein Y54E10A.11 [Caenorhabditis elegans]                 | 0 |                                                                                                                                                      | F:GO:0008270                                   | -                                                                                                       |

|                        |                                                      |   |                                                                                                                                     |                                                                                                                                     |                                                                                                        |
|------------------------|------------------------------------------------------|---|-------------------------------------------------------------------------------------------------------------------------------------|-------------------------------------------------------------------------------------------------------------------------------------|--------------------------------------------------------------------------------------------------------|
| Caenorhabditis elegans | structure-specific endonuclease subunit slx1         | 8 | P:GO:0009792;<br>P:GO:0006259;<br>P:GO:0002119;<br>F:GO:0046872;<br>C:GO:0005622;<br>F:GO:0004518;<br>P:GO:0040007;<br>P:GO:0006974 | -                                                                                                                                   | IPR000305; PTHR20208 (PANTHER),<br>PTHR20208:SF6 (PANTHER)                                             |
| Caenorhabditis elegans | structure-specific endonuclease subunit slx1         | 8 | P:GO:0009792;<br>P:GO:0002119;<br>F:GO:0046872;<br>F:GO:0004519;<br>P:GO:0040007;<br>C:GO:0005634;<br>P:GO:0006310;<br>P:GO:0006281 | -                                                                                                                                   | PTHR20208 (PANTHER),<br>PTHR20208:SF6 (PANTHER)                                                        |
| -                      | -                                                    | 0 |                                                                                                                                     |                                                                                                                                     | -                                                                                                      |
| -                      | -                                                    | 0 |                                                                                                                                     |                                                                                                                                     | SignalP (SIGNALP)                                                                                      |
| Brugia malayi          | ubx domain containing protein                        | 0 |                                                                                                                                     |                                                                                                                                     | -                                                                                                      |
| Caenorhabditis elegans | transmembrane protein 165                            | 1 | C:GO:0016021                                                                                                                        | -                                                                                                                                   | IPR001727; SignalP (SIGNALP)                                                                           |
| -                      | -                                                    | 0 |                                                                                                                                     |                                                                                                                                     | SignalP (SIGNALP)                                                                                      |
| -                      | -                                                    | 0 |                                                                                                                                     |                                                                                                                                     | -                                                                                                      |
| -                      | -                                                    | 0 |                                                                                                                                     |                                                                                                                                     | SignalP (SIGNALP)                                                                                      |
| Caenorhabditis elegans | isoform a                                            | 0 |                                                                                                                                     | F:GO:0016788;<br>P:GO:0006886;<br>C:GO:0031227                                                                                      | IPR007751; G3DSA:3.40.50.1820<br>(GENE3D), PTHR12482 (PANTHER),<br>SSF53474 (SUPERFAMILY)              |
| Caenorhabditis elegans | enoyl- hydratase isomerase domain-containing protein | 2 | F:GO:0016853;<br>P:GO:0008152                                                                                                       | -                                                                                                                                   | IPR001753; IPR018376;<br>G3DSA:3.90.226.10 (GENE3D),<br>PTHR11941 (PANTHER), SSF52096<br>(SUPERFAMILY) |
| Caenorhabditis elegans | general vesicular transport factor p115              | 8 | C:GO:0000139;<br>P:GO:0048280;<br>F:GO:0042802;<br>P:GO:0032940;<br>P:GO:0019915;<br>P:GO:0040039;<br>P:GO:0006898;<br>P:GO:0006886 | -                                                                                                                                   | IPR006953; PTHR10013 (PANTHER)                                                                         |
| Caenorhabditis elegans | briggsae cbr-hum-1 protein                           | 4 | C:GO:0016459;<br>F:GO:0005524;<br>F:GO:0003774;<br>P:GO:0006508                                                                     | -                                                                                                                                   | SignalP (SIGNALP)                                                                                      |
| Brugia malayi          | protein ki-se domain containing protein              | 0 |                                                                                                                                     | P:GO:0007219;<br>F:GO:0016301;<br>F:GO:0004672;<br>F:GO:0005524;<br>P:GO:0006468;<br>P:GO:0001745;<br>F:GO:0031072;<br>F:GO:0004674 | IPR011009; G3DSA:1.10.510.10<br>(GENE3D), PTHR23172 (PANTHER),<br>PTHR23172:SF21 (PANTHER)             |
| -                      | -                                                    | 0 |                                                                                                                                     |                                                                                                                                     | -                                                                                                      |
| -                      | -                                                    | 0 |                                                                                                                                     |                                                                                                                                     | -                                                                                                      |

|                          |                                                               |   |                                                                                                                                     |                                                                                                   |                                                                                                                                                                                                                      |
|--------------------------|---------------------------------------------------------------|---|-------------------------------------------------------------------------------------------------------------------------------------|---------------------------------------------------------------------------------------------------|----------------------------------------------------------------------------------------------------------------------------------------------------------------------------------------------------------------------|
| Caenorhabditis elegans   | lethal family member (let-805)                                | 8 | P:GO:0008340;<br>P:GO:0000003;<br>P:GO:0018996;<br>P:GO:0002119;<br>F:GO:0005515;<br>P:GO:0040011;<br>P:GO:0006898;<br>P:GO:0009792 | -                                                                                                 | IPR003961; IPR008957; IPR013783;<br>PTHR10489 (PANTHER),<br>PTHR10489:SF40 (PANTHER)                                                                                                                                 |
| -                        | -                                                             | 0 | -                                                                                                                                   | -                                                                                                 | -                                                                                                                                                                                                                    |
| Caenorhabditis briggsae  | briggsae cbr-tag-63 protein                                   | 0 | -                                                                                                                                   | -                                                                                                 | -                                                                                                                                                                                                                    |
| -                        | -                                                             | 0 | -                                                                                                                                   | -                                                                                                 | -                                                                                                                                                                                                                    |
| -                        | -                                                             | 0 | -                                                                                                                                   | -                                                                                                 | IPR022398                                                                                                                                                                                                            |
| Caenorhabditis briggsae  | dimethylglycine dehydroge-se                                  | 7 | P:GO:0055085;<br>F:GO:0004047;<br>F:GO:0005488;<br>C:GO:0005739;<br>P:GO:0006546;<br>F:GO:0016491;<br>C:GO:0016020                  | -                                                                                                 | EC:2.1.2.10<br>IPR006076; IPR006222; IPR013977;<br>G3DSA:3.50.50.60 (GENE3D),<br>PTHR13847 (PANTHER),<br>PTHR13847:SF15 (PANTHER),<br>SSF101790 (SUPERFAMILY), SSF103025<br>(SUPERFAMILY), SSF54373<br>(SUPERFAMILY) |
| Pongo abelii             | serine-rich repeat-containing protein                         | 0 | -                                                                                                                                   | F:GO:0003674;<br>C:GO:0005618;<br>F:GO:0005509;<br>C:GO:0009986;<br>C:GO:0016020;<br>C:GO:0005575 | -                                                                                                                                                                                                                    |
| -                        | -                                                             | 0 | -                                                                                                                                   | -                                                                                                 | -                                                                                                                                                                                                                    |
| Caenorhabditis briggsae  | lagen with endostatin domain family member (cle-1)            | 3 | C:GO:0005604;<br>C:GO:0030054;<br>P:GO:0040035                                                                                      | -                                                                                                 | IPR010515; PTHR10499 (PANTHER),<br>PTHR10499:SF51 (PANTHER)                                                                                                                                                          |
| Brugia malayi            | hypothetical protein Bm1_35105 [Brugia malayi]                | 0 | -                                                                                                                                   | -                                                                                                 | IPR008606                                                                                                                                                                                                            |
| Caenorhabditis elegans   | elegans protein partially confirmed by transcript evidence    | 0 | -                                                                                                                                   | C:GO:0016021;<br>P:GO:0055085;<br>F:GO:0005215;<br>P:GO:0006810                                   | IPR005828; SignalP (SIGNALP)                                                                                                                                                                                         |
| Paenibacillus sp. JDR-2  | collagen triple helix repeat protein                          | 0 | -                                                                                                                                   | -                                                                                                 | SignalP (SIGNALP)                                                                                                                                                                                                    |
| Paenibacillus sp. JDR-2  | collagen triple helix repeat protein                          | 0 | -                                                                                                                                   | -                                                                                                 | SignalP (SIGNALP)                                                                                                                                                                                                    |
| -                        | -                                                             | 0 | -                                                                                                                                   | -                                                                                                 | -                                                                                                                                                                                                                    |
| -                        | -                                                             | 0 | -                                                                                                                                   | -                                                                                                 | -                                                                                                                                                                                                                    |
| Brugia malayi            | briggsae cbr-kup-1 protein                                    | 0 | -                                                                                                                                   | F:GO:0000166                                                                                      | -                                                                                                                                                                                                                    |
| Caenorhabditis elegans   | ube2q1 protein                                                | 6 | F:GO:0005515;<br>P:GO:0016567;<br>F:GO:0005524;<br>F:GO:0004842;<br>F:GO:0016740;<br>P:GO:0051246                                   | -                                                                                                 | EC:6.3.2.19<br>IPR000608; IPR016135; PTHR11621<br>(PANTHER), PTHR11621:SF6<br>(PANTHER)                                                                                                                              |
| Brugia malayi            | domon domain containing protein                               | 0 | -                                                                                                                                   | F:GO:0030246;<br>F:GO:0004500;<br>C:GO:0016021;<br>F:GO:0003824;<br>P:GO:0006548;<br>P:GO:0016052 | -                                                                                                                                                                                                                    |
| -                        | -                                                             | 0 | -                                                                                                                                   | -                                                                                                 | -                                                                                                                                                                                                                    |
| Saccoglossus kowalevskii | PREDICTED: selectin, platelet-like [Saccoglossus kowalevskii] | 0 | -                                                                                                                                   | -                                                                                                 | -                                                                                                                                                                                                                    |
| -                        | -                                                             | 0 | -                                                                                                                                   | -                                                                                                 | -                                                                                                                                                                                                                    |
| Caenorhabditis briggsae  | elegans protein partially confirmed by transcript evidence    | 0 | -                                                                                                                                   | -                                                                                                 | -                                                                                                                                                                                                                    |
| -                        | -                                                             | 0 | -                                                                                                                                   | -                                                                                                 | -                                                                                                                                                                                                                    |
| -                        | -                                                             | 0 | -                                                                                                                                   | -                                                                                                 | -                                                                                                                                                                                                                    |

|                               |                                                            |   |                                                                 |                                                                                                                                                                       |                                                                                              |
|-------------------------------|------------------------------------------------------------|---|-----------------------------------------------------------------|-----------------------------------------------------------------------------------------------------------------------------------------------------------------------|----------------------------------------------------------------------------------------------|
| Caenorhabditis briggsae       | coronin family member (cor-1)                              | 1 | P:GO:0000003                                                    | -                                                                                                                                                                     | IPR001680; IPR011046; IPR015048;<br>IPR015505; IPR015943; IPR017986;<br>IPR019781; IPR019782 |
|                               | -                                                          | 0 |                                                                 |                                                                                                                                                                       | -                                                                                            |
| Micromonas sp. RCC299         | spindle pole body component alp6                           | 0 |                                                                 | C:GO:0000922;<br>P:GO:0000226;<br>C:GO:0005815                                                                                                                        | IPR007259                                                                                    |
| Strongylocentrotus purpuratus | high-mobility group 20a                                    | 0 |                                                                 | C:GO:0005694;<br>F:GO:0003700;<br>F:GO:0003677;<br>C:GO:0005634;<br>P:GO:0016568;<br>P:GO:0006355;<br>C:GO:0005730;<br>P:GO:0006325;<br>F:GO:0005515;<br>P:GO:0007049 | -                                                                                            |
| Tribolium castaneum           | xanthine dehydroge-se                                      | 2 | F:GO:0003824;<br>F:GO:0005488                                   | -                                                                                                                                                                     | IPR008274; PTHR11908 (PANTHER)                                                               |
| Caenorhabditis elegans        | elegans protein partially confirmed by transcript evidence | 0 |                                                                 | P:GO:0007165;<br>C:GO:0005622                                                                                                                                         | -                                                                                            |
|                               | -                                                          | 0 |                                                                 |                                                                                                                                                                       | -                                                                                            |
|                               | -                                                          | 0 |                                                                 |                                                                                                                                                                       | -                                                                                            |
|                               | -                                                          | 0 |                                                                 |                                                                                                                                                                       | -                                                                                            |
|                               | -                                                          | 0 |                                                                 |                                                                                                                                                                       | -                                                                                            |
| Caenorhabditis briggsae       | him-three paralog family member (htp-1)                    | 0 |                                                                 | F:GO:0046872;<br>F:GO:0008270;<br>F:GO:0005515;<br>P:GO:0007067                                                                                                       | IPR003511; PTHR21518 (PANTHER),<br>SignalP (SIGNALP)                                         |
| Danio rerio                   | wu:fo94f09 protein                                         | 0 |                                                                 | F:GO:0003700;<br>C:GO:0005634;<br>F:GO:0003677;<br>F:GO:0003676;<br>F:GO:0008270;<br>P:GO:0006355;<br>C:GO:0005622;<br>P:GO:0016032;<br>F:GO:0046872                  | IPR001202; IPR007087; IPR015880;<br>SSF57667 (SUPERFAMILY)                                   |
| Caenorhabditis briggsae       | neogenin homolog 1                                         | 2 | P:GO:0016358;<br>C:GO:0005887                                   | -                                                                                                                                                                     | IPR003961; IPR008957; IPR013783;<br>PTHR10489 (PANTHER),<br>PTHR10489:SF55 (PANTHER)         |
| Caenorhabditis elegans        | elegans protein confirmed by transcript evidence           | 3 | P:GO:0032501;<br>P:GO:0006810;<br>P:GO:0009987                  | -                                                                                                                                                                     | IPR012501; PTHR12965 (PANTHER)                                                               |
| Brugia malayi                 | 60s ribosomal protein l44                                  | 4 | P:GO:0002119;<br>P:GO:0018996;<br>P:GO:0000003;<br>P:GO:0040007 | -                                                                                                                                                                     | IPR000253; IPR008984                                                                         |
| Caenorhabditis briggsae       | elegans protein partially confirmed by transcript evidence | 0 |                                                                 | F:GO:0016301;<br>F:GO:0005524;<br>F:GO:0004672;<br>F:GO:0000166;<br>P:GO:0006468;<br>F:GO:0004674                                                                     | -                                                                                            |
| Caenorhabditis elegans        | hypothetical protein F11A3.2 [Caenorhabditis elegans]      | 0 |                                                                 | P:GO:0044237                                                                                                                                                          | -                                                                                            |



|                         |                                                                 |    |                                                                                                                                                                                                                                                                             |                                                |                                                                                                                 |
|-------------------------|-----------------------------------------------------------------|----|-----------------------------------------------------------------------------------------------------------------------------------------------------------------------------------------------------------------------------------------------------------------------------|------------------------------------------------|-----------------------------------------------------------------------------------------------------------------|
| Caenorhabditis elegans  | delta chain (clathrin associated complex) family member (apd-3) | 10 | P:GO:0009792;<br>P:GO:0010171;<br>P:GO:0002119;<br>F:GO:0005488;<br>C:GO:0005794;<br>C:GO:0030117;<br>F:GO:0008565;<br>P:GO:0016192;<br>P:GO:0006886;<br>P:GO:0040007                                                                                                       | -                                              | IPR002553; IPR011989; IPR016024;<br>PTHR22781 (PANTHER),<br>PTHR22781:SF9 (PANTHER)                             |
| Caenorhabditis briggsae | tar (hiv-1) r- binding protein 1                                | 2  | P:GO:0009987;<br>F:GO:0016740                                                                                                                                                                                                                                               | -                                              | -                                                                                                               |
| Caenorhabditis briggsae | briggsae cbr-dpy-22 protein                                     | 8  | P:GO:0040010;<br>P:GO:0018991;<br>P:GO:0040035;<br>P:GO:0010171;<br>P:GO:0040026;<br>P:GO:0040011;<br>P:GO:0009792;<br>P:GO:0040018                                                                                                                                         | -                                              | SignalP (SIGNALP)                                                                                               |
| Caenorhabditis briggsae | r- binding motif protein 8a                                     | 16 | C:GO:0035145;<br>P:GO:0040022;<br>P:GO:0040010;<br>F:GO:0003729;<br>C:GO:0005730;<br>P:GO:0016071;<br>P:GO:0040035;<br>P:GO:0008380;<br>P:GO:0002119;<br>F:GO:0005515;<br>P:GO:0040011;<br>P:GO:0006898;<br>P:GO:0002009;<br>P:GO:0009792;<br>P:GO:0001703;<br>C:GO:0005737 | -                                              | IPR000504; IPR008111; IPR012677;<br>PTHR10432 (PANTHER),<br>PTHR10432:SF50 (PANTHER),<br>SSF54928 (SUPERFAMILY) |
| Caenorhabditis elegans  | polybromodomain protein                                         | 11 | P:GO:0007306;<br>P:GO:0040010;<br>F:GO:0005488;<br>C:GO:0005622;<br>P:GO:0040035;<br>P:GO:0010171;<br>P:GO:0002119;<br>P:GO:0007305;<br>P:GO:0040011;<br>P:GO:0002009;<br>P:GO:0009792                                                                                      | -                                              | IPR001487; PTHR16062 (PANTHER),<br>PTHR16062:SF2 (PANTHER)                                                      |
| Caenorhabditis elegans  | elegans protein confirmed by transcript evidence                | 0  |                                                                                                                                                                                                                                                                             | F:GO:0008276;<br>C:GO:0005737;<br>P:GO:0006479 | -                                                                                                               |
| Caenorhabditis briggsae | fyve zinc finger family protein                                 | 0  |                                                                                                                                                                                                                                                                             | F:GO:0046872;<br>F:GO:0008270                  | IPR000306; IPR011011; IPR013083;<br>IPR017455; PTHR22835 (PANTHER),<br>PTHR22835:SF12 (PANTHER)                 |
| -                       | -                                                               | 0  |                                                                                                                                                                                                                                                                             |                                                | -                                                                                                               |

|                         |                                                         |    |                                                                                                                                                                                                         |   |                                                         |                                                                                                      |
|-------------------------|---------------------------------------------------------|----|---------------------------------------------------------------------------------------------------------------------------------------------------------------------------------------------------------|---|---------------------------------------------------------|------------------------------------------------------------------------------------------------------|
| Caenorhabditis briggsae | tubulin gamma-1 chain                                   | 12 | P:GO:0010457;<br>F:GO:0051011;<br>P:GO:0051726;<br>C:GO:0005874;<br>P:GO:0051306;<br>C:GO:0008275;<br>P:GO:0007052;<br>P:GO:0051258;<br>C:GO:0008274;<br>F:GO:0003924;<br>P:GO:0007020;<br>F:GO:0005525 | - | EC:3.6.5.1;<br>EC:3.6.5.2;<br>EC:3.6.5.3;<br>EC:3.6.5.4 | SignalP (SIGNALP)                                                                                    |
| -                       | -                                                       | 0  |                                                                                                                                                                                                         |   |                                                         | -                                                                                                    |
| Caenorhabditis briggsae | activating sig-I cointegrator 1 complex subunit 3       | 3  | F:GO:0005524;<br>F:GO:0003677;<br>F:GO:0008026                                                                                                                                                          | - |                                                         | -                                                                                                    |
| -                       | -                                                       | 0  |                                                                                                                                                                                                         |   |                                                         | -                                                                                                    |
| -                       | -                                                       | 0  |                                                                                                                                                                                                         |   |                                                         | -                                                                                                    |
| Caenorhabditis briggsae | Hypothetical protein CBG22251 [Caenorhabditis briggsae] | 0  |                                                                                                                                                                                                         |   |                                                         | -                                                                                                    |
| Caenorhabditis elegans  | zinc finger 1                                           | 2  | F:GO:0005515;<br>C:GO:0043231                                                                                                                                                                           | - |                                                         | IPR001841; IPR013083; PTHR12981 (PANTHER), SSF57850 (SUPERFAMILY)                                    |
| -                       | -                                                       | 0  |                                                                                                                                                                                                         |   |                                                         | SignalP (SIGNALP)                                                                                    |
| Loa loa                 | potassium channel tetramerisation domain containing 10  | 12 | P:GO:0043161;<br>F:GO:0005249;<br>P:GO:0034765;<br>C:GO:0005730;<br>C:GO:0031463;<br>F:GO:0004114;<br>C:GO:0008076;<br>F:GO:0004842;<br>P:GO:0016567;<br>N:GO:0071805;<br>F:GO:0005515;<br>C:GO:0005737 | - | EC:3.1.4.17;<br>EC:6.3.2.19                             | -                                                                                                    |
| -                       | -                                                       | 0  |                                                                                                                                                                                                         |   |                                                         | -                                                                                                    |
| Pongo abelii            | cytochrome c oxidase subunit vic                        | 5  | C:GO:0005751;<br>P:GO:0015992;<br>C:GO:0016021;<br>F:GO:0004129;<br>P:GO:0006091                                                                                                                        | - | EC:1.9.3.1                                              | IPR004204; SignalP (SIGNALP)                                                                         |
| -                       | -                                                       | 0  |                                                                                                                                                                                                         |   |                                                         | -                                                                                                    |
| -                       | -                                                       | 0  |                                                                                                                                                                                                         |   |                                                         | -                                                                                                    |
| -                       | -                                                       | 0  |                                                                                                                                                                                                         |   |                                                         | -                                                                                                    |
| -                       | -                                                       | 0  |                                                                                                                                                                                                         |   |                                                         | -                                                                                                    |
| -                       | -                                                       | 0  |                                                                                                                                                                                                         |   |                                                         | -                                                                                                    |
| -                       | -                                                       | 0  |                                                                                                                                                                                                         |   |                                                         | -                                                                                                    |
| -                       | -                                                       | 0  |                                                                                                                                                                                                         |   |                                                         | -                                                                                                    |
| -                       | -                                                       | 0  |                                                                                                                                                                                                         |   |                                                         | SignalP (SIGNALP)                                                                                    |
| -                       | -                                                       | 0  |                                                                                                                                                                                                         |   |                                                         | -                                                                                                    |
| Loa loa                 | inhibitor of growth protein 3                           | 2  | F:GO:0008270;<br>F:GO:0005515                                                                                                                                                                           | - |                                                         | IPR001965; IPR011011; IPR013083; IPR019786; IPR019787; PTHR10333 (PANTHER), PTHR10333:SF13 (PANTHER) |
| Caenorhabditis briggsae | transmembrane and coiled-coil domains protein 1         | 1  | C:GO:0016021                                                                                                                                                                                            | - |                                                         | IPR002809; IPR008559                                                                                 |
| -                       | -                                                       | 0  |                                                                                                                                                                                                         |   |                                                         | -                                                                                                    |
| Caenorhabditis elegans  | guanylate cyclase 32e                                   | 3  | P:GO:0044238;<br>F:GO:0016829;<br>P:GO:0044237                                                                                                                                                          | - |                                                         | IPR001828; G3DSA:3.40.50.2300 (GENE3D), SSF53822 (SUPERFAMILY)                                       |

|                          |                                                          |   |                                                                                                                    |                                                                                                                    |                                                                                                                                                                                                         |
|--------------------------|----------------------------------------------------------|---|--------------------------------------------------------------------------------------------------------------------|--------------------------------------------------------------------------------------------------------------------|---------------------------------------------------------------------------------------------------------------------------------------------------------------------------------------------------------|
| Trichomonas vaginalis G3 | uncoordinated family member (unc-89)                     | 0 |                                                                                                                    | F:GO:0003676;<br>F:GO:0008168;<br>F:GO:0016740;<br>F:GO:0000166;<br>F:GO:0008270;<br>C:GO:0005634;<br>C:GO:0005622 | -                                                                                                                                                                                                       |
| -                        | -                                                        | 0 |                                                                                                                    |                                                                                                                    | -                                                                                                                                                                                                       |
| Loa loa                  | mitogen-activated protein kinase 1-interacting protein 1 | 1 | F:GO:0005515                                                                                                       | -                                                                                                                  | IPR015019; G3DSA:3.30.450.30 (GENE3D), SSF103196 (SUPERFAMILY)                                                                                                                                          |
| -                        | -                                                        | 0 |                                                                                                                    |                                                                                                                    | -                                                                                                                                                                                                       |
| Pan troglodytes          | prolyl 4- beta subunit isoform 5                         | 0 |                                                                                                                    |                                                                                                                    | SignalP (SIGNALP)                                                                                                                                                                                       |
| Brugia malayi            | uv excision repair protein rad23 homolog a               | 3 | F:GO:0003677;<br>F:GO:0005515;<br>P:GO:0006974                                                                     | -                                                                                                                  | IPR000449; IPR000626; IPR004806;<br>IPR006636; IPR009060; IPR015360;<br>IPR015940; IPR019955;<br>G3DSA:1.10.8.10 (GENE3D),<br>G3DSA:3.10.20.90 (GENE3D),<br>PTHR10621 (PANTHER), SSF54236 (SUPERFAMILY) |
| Loa loa                  | cpg binding protein                                      | 0 |                                                                                                                    | F:GO:0046872;<br>F:GO:0008270;<br>F:GO:0005515;<br>F:GO:0003677                                                    | IPR022056; PTHR12321 (PANTHER)                                                                                                                                                                          |
| Loa loa                  | cpg binding protein                                      | 0 |                                                                                                                    | F:GO:0046872;<br>F:GO:0008270;<br>F:GO:0005515;<br>F:GO:0003677                                                    | IPR022056; PTHR12321 (PANTHER)                                                                                                                                                                          |
| Caenorhabditis briggsae  | elegans protein confirmed by transcript evidence         | 0 |                                                                                                                    |                                                                                                                    | SignalP (SIGNALP)                                                                                                                                                                                       |
| -                        | -                                                        | 0 |                                                                                                                    |                                                                                                                    | -                                                                                                                                                                                                       |
| Brugia malayi            | tho complex subunit 2                                    | 7 | P:GO:0045132;<br>P:GO:0000003;<br>P:GO:0040007;<br>P:GO:0010171;<br>F:GO:0005515;<br>P:GO:0002119;<br>P:GO:0040011 | -                                                                                                                  | IPR021418; PTHR21597 (PANTHER)                                                                                                                                                                          |
| -                        | -                                                        | 0 |                                                                                                                    |                                                                                                                    | -                                                                                                                                                                                                       |
| Caenorhabditis briggsae  | vi related family member (viln-1)                        | 0 |                                                                                                                    | P:GO:0045132;<br>F:GO:0003779;<br>P:GO:0007010                                                                     | -                                                                                                                                                                                                       |
| Caenorhabditis elegans   | alanyl-tRNA synthetase                                   | 3 | P:GO:0009987;<br>F:GO:0005488;<br>F:GO:0016874                                                                     | -                                                                                                                  | IPR002318; IPR018162; IPR018164;<br>IPR018165; PTHR11777 (PANTHER)                                                                                                                                      |

|                                            |                                                          |    |                                                                                                                                                                                                                                                                                                                                                                                                                     |                                                                                                                    |                            |                                                                                                              |
|--------------------------------------------|----------------------------------------------------------|----|---------------------------------------------------------------------------------------------------------------------------------------------------------------------------------------------------------------------------------------------------------------------------------------------------------------------------------------------------------------------------------------------------------------------|--------------------------------------------------------------------------------------------------------------------|----------------------------|--------------------------------------------------------------------------------------------------------------|
| Caenorhabditis briggsae                    | ca++ type member 1                                       | 24 | F:GO:0004871;<br>F:GO:0030145;<br>P:GO:0016339;<br>C:GO:0005802;<br>C:GO:0030133;<br>P:GO:0008544;<br>C:GO:0000139;<br>P:GO:0030026;<br>C:GO:0005792;<br>F:GO:0015410;<br>P:GO:0032468;<br>F:GO:0005509;<br>C:GO:0016021;<br>P:GO:0006754;<br>P:GO:0043123;<br>P:GO:0032472;<br>F:GO:0005388;<br>P:GO:0070588;<br>C:GO:0030141;<br>P:GO:0031532;<br>P:GO:0006200;<br>C:GO:0005886;<br>F:GO:0005524;<br>P:GO:0006828 | -                                                                                                                  | EC:3.6.3.35;<br>EC:3.6.3.8 | IPR001757; IPR006068;<br>G3DSA:1.20.1110.10 (GENE3D),<br>PTHR11939:SF87 (PANTHER),<br>SSF81665 (SUPERFAMILY) |
| Caenorhabditis elegans                     | hypothetical protein Y37E11AL.6 [Caenorhabditis elegans] | 0  |                                                                                                                                                                                                                                                                                                                                                                                                                     |                                                                                                                    |                            | -                                                                                                            |
|                                            | -                                                        | 0  |                                                                                                                                                                                                                                                                                                                                                                                                                     |                                                                                                                    |                            | -                                                                                                            |
| Oryza sativa Japonica Group                | Os04g0654400 [Oryza sativa Japonica Group]               | 0  |                                                                                                                                                                                                                                                                                                                                                                                                                     | P:GO:0009058;<br>F:GO:0016740                                                                                      |                            | -                                                                                                            |
| Mizuhopecten yessoensis                    | oocyte maturation arresting factor                       | 0  |                                                                                                                                                                                                                                                                                                                                                                                                                     | F:GO:0046872;<br>P:GO:0055114;<br>P:GO:0006801                                                                     |                            | -                                                                                                            |
|                                            | -                                                        | 0  |                                                                                                                                                                                                                                                                                                                                                                                                                     |                                                                                                                    |                            | -                                                                                                            |
| Acidovorax avenae subsp. avenae ATCC 19860 | urease accessory domain protein                          | 0  |                                                                                                                                                                                                                                                                                                                                                                                                                     | F:GO:0051082;<br>P:GO:0006461;<br>C:GO:0005737;<br>P:GO:0006457;<br>F:GO:0016151;<br>P:GO:0018307;<br>P:GO:0019627 |                            | -                                                                                                            |
| Brugia malayi                              | nmda receptor regulated 1                                | 8  | C:GO:0005667;<br>F:GO:0043022;<br>F:GO:0008080;<br>F:GO:0005515;<br>P:GO:0045893;<br>C:GO:0005737;<br>P:GO:0032502;<br>P:GO:0006474                                                                                                                                                                                                                                                                                 | -                                                                                                                  |                            | SignalP (SIGNALP)                                                                                            |
| Caenorhabditis briggsae                    | Hypothetical protein CBG08444 [Caenorhabditis briggsae]  | 0  |                                                                                                                                                                                                                                                                                                                                                                                                                     |                                                                                                                    |                            | PTHR23022 (PANTHER),<br>PTHR23022:SF6 (PANTHER)                                                              |
| Caenorhabditis briggsae                    | progesterin and adiponectin receptor family member vii   | 0  |                                                                                                                                                                                                                                                                                                                                                                                                                     | P:GO:0030154;<br>F:GO:0004872;<br>P:GO:0048477;<br>P:GO:0007275;<br>C:GO:0016021;<br>F:GO:0005496;<br>C:GO:0005886 |                            | IPR004254; PTHR20855:SF5<br>(PANTHER)                                                                        |
|                                            | -                                                        | 0  |                                                                                                                                                                                                                                                                                                                                                                                                                     |                                                                                                                    |                            | SignalP (SIGNALP)                                                                                            |
|                                            | -                                                        | 0  |                                                                                                                                                                                                                                                                                                                                                                                                                     |                                                                                                                    |                            | -                                                                                                            |

|                         |                                                                |    |                                                                                                                                                                                                                          |              |                                                                                                                                                                         |                                |
|-------------------------|----------------------------------------------------------------|----|--------------------------------------------------------------------------------------------------------------------------------------------------------------------------------------------------------------------------|--------------|-------------------------------------------------------------------------------------------------------------------------------------------------------------------------|--------------------------------|
|                         | -                                                              | 0  |                                                                                                                                                                                                                          |              | -                                                                                                                                                                       |                                |
| Caenorhabditis elegans  | membrane-associated guanylate ki-se                            | 1  | F:GO:0005515                                                                                                                                                                                                             | -            | IPR001478; G3DSA:2.30.42.10 (GENE3D), PTHR23122 (PANTHER), PTHR23122:SF2 (PANTHER)                                                                                      |                                |
| Caenorhabditis elegans  | dead deah box helicase family protein                          | 7  | P:GO:0040010;<br>P:GO:0040002;<br>P:GO:0040035;<br>P:GO:0002119;<br>F:GO:0000166;<br>F:GO:0004386;<br>P:GO:0006898                                                                                                       | -            | IPR001650; IPR011545; IPR014001;<br>IPR014014; IPR014021;<br>G3DSA:3.40.50.300 (GENE3D),<br>PTHR10967 (PANTHER),<br>PTHR10967:SF20 (PANTHER),<br>SSF52540 (SUPERFAMILY) |                                |
| Brugia malayi           | swi snf matrix actin dependent regulator of subfamily member 1 | 12 | F:GO:0047485;<br>P:GO:0006357;<br>C:GO:0017053;<br>C:GO:0000228;<br>C:GO:0005730;<br>F:GO:0003677;<br>F:GO:0008080;<br>C:GO:0016514;<br>F:GO:0003713;<br>P:GO:0045892;<br>F:GO:0003682;<br>P:GO:0006337                  | -            | IPR000910; IPR009071; PTHR13711 (PANTHER), PTHR13711:SF13 (PANTHER)                                                                                                     |                                |
|                         | -                                                              | 0  |                                                                                                                                                                                                                          |              | IPR013761; IPR021129; PTHR12247 (PANTHER), PTHR12247:SF1 (PANTHER)                                                                                                      |                                |
| Brugia malayi           | mr--decapping enzyme 2                                         | 3  | F:GO:0005515;<br>P:GO:0071044;<br>C:GO:0044424                                                                                                                                                                           | -            | IPR000086; IPR007722; IPR015797;<br>IPR020084; IPR020476; PTHR23114 (PANTHER), PS51462 (PROFILE), SSF140586 (SUPERFAMILY)                                               |                                |
| Caenorhabditis briggsae | briggsae cbr-tag-253 protein                                   | 0  |                                                                                                                                                                                                                          |              | IPR002737                                                                                                                                                               |                                |
| Caenorhabditis briggsae | set domain                                                     | 1  | F:GO:0005488                                                                                                                                                                                                             | -            | IPR001965; IPR011011                                                                                                                                                    |                                |
| Caenorhabditis briggsae | novel protein vertebrate sy-ptophysin                          | 1  | C:GO:0044464                                                                                                                                                                                                             | -            | -                                                                                                                                                                       |                                |
| Caenorhabditis elegans  | elegans protein partially confirmed by transcript evidence     | 0  |                                                                                                                                                                                                                          | F:GO:0005515 | IPR000637; IPR017956                                                                                                                                                    |                                |
| Caenorhabditis briggsae | thioredoxin-like protein                                       | 1  | P:GO:0006974                                                                                                                                                                                                             | -            | IPR005746; IPR008979; IPR010400;<br>IPR012335; IPR012336; IPR013766;<br>IPR017936; IPR017937;<br>G3DSA:2.60.120.470 (GENE3D),<br>PTHR10438:SF18 (PANTHER)               |                                |
| Caenorhabditis briggsae | cbp p300 homolog family member (cbp-1)                         | 13 | F:GO:0008270;<br>F:GO:0004402;<br>P:GO:0040010;<br>F:GO:0003712;<br>P:GO:0040026;<br>P:GO:0007283;<br>P:GO:0018996;<br>C:GO:0005737;<br>P:GO:0040039;<br>P:GO:0009792;<br>P:GO:0045944;<br>C:GO:0005634;<br>P:GO:0040035 | -            | EC:2.3.1.48                                                                                                                                                             | IPR013178; PTHR13808 (PANTHER) |

|                         |                                                            |    |                                                                                                                                                                                                                                           |                                                                                                   |            |                                                                                                                                            |
|-------------------------|------------------------------------------------------------|----|-------------------------------------------------------------------------------------------------------------------------------------------------------------------------------------------------------------------------------------------|---------------------------------------------------------------------------------------------------|------------|--------------------------------------------------------------------------------------------------------------------------------------------|
| Caenorhabditis elegans  | epsin 1                                                    | 14 | C:GO:0005737;<br>P:GO:0009792;<br>P:GO:0002119;<br>C:GO:0005905;<br>F:GO:0008289;<br>C:GO:0005886;<br>P:GO:0040017;<br>P:GO:0040010;<br>P:GO:0000003;<br>P:GO:0019915;<br>F:GO:0008134;<br>P:GO:0006898;<br>C:GO:0005634;<br>P:GO:0051729 | -                                                                                                 |            | IPR001026; IPR008942; IPR013809;<br>PTHR12276 (PANTHER),<br>PTHR12276:SF13 (PANTHER)                                                       |
|                         | -                                                          | 0  |                                                                                                                                                                                                                                           |                                                                                                   |            | -                                                                                                                                          |
|                         | -                                                          | 0  |                                                                                                                                                                                                                                           |                                                                                                   |            | SignalP (SIGNALP)                                                                                                                          |
|                         | -                                                          | 0  |                                                                                                                                                                                                                                           |                                                                                                   |            | -                                                                                                                                          |
| Ailuropoda melanoleuca  | 60s ribosomal protein l17                                  | 3  | F:GO:0003735;<br>C:GO:0015934;<br>P:GO:0006412                                                                                                                                                                                            | -                                                                                                 | EC:3.6.5.3 | IPR001063; IPR005721; IPR018260                                                                                                            |
| Ancylostoma ceylanicum  | tissue factor pathway inhibitor a                          | 0  |                                                                                                                                                                                                                                           | F:GO:0030414;<br>C:GO:0042151;<br>P:GO:0007596;<br>F:GO:0008233;<br>F:GO:0004867;<br>C:GO:0005576 |            | -                                                                                                                                          |
| Caenorhabditis elegans  | elegans protein partially confirmed by transcript evidence | 6  | P:GO:0006810;<br>P:GO:0040010;<br>P:GO:0000003;<br>P:GO:0002119;<br>P:GO:0009792;<br>C:GO:0016020                                                                                                                                         | -                                                                                                 |            | IPR011701; IPR016196; IPR020846;<br>G3DSA:1.20.1250.20 (GENE3D),<br>PTHR10074 (PANTHER),<br>PTHR10074:SF22 (PANTHER), SignalP<br>(SIGNALP) |
| Brugia malayi           | innexin family protein                                     | 5  | P:GO:0040035;<br>C:GO:0005921;<br>P:GO:0040010;<br>P:GO:0040011;<br>P:GO:0002009                                                                                                                                                          | -                                                                                                 |            | IPR000990; SignalP (SIGNALP)                                                                                                               |
|                         | -                                                          | 0  |                                                                                                                                                                                                                                           |                                                                                                   |            | IPR000436; PTHR19325 (PANTHER),<br>PTHR19325:SF25 (PANTHER)                                                                                |
| Caenorhabditis briggsae | d- polymerase delta catalytic subunit                      | 5  | P:GO:0009792;<br>P:GO:0002119;<br>P:GO:0000910;<br>P:GO:0035188;<br>P:GO:0006898                                                                                                                                                          | -                                                                                                 |            | IPR012337; PTHR10322 (PANTHER),<br>PTHR10322:SF4 (PANTHER)                                                                                 |
|                         | -                                                          | 0  |                                                                                                                                                                                                                                           |                                                                                                   |            | SignalP (SIGNALP)                                                                                                                          |
| Caenorhabditis elegans  | phosphatidylinositol transfer protein                      | 9  | P:GO:0000916;<br>C:GO:0070732;<br>P:GO:0007112;<br>C:GO:0032154;<br>P:GO:0000915;<br>P:GO:0048137;<br>P:GO:0043147;<br>P:GO:0007111;<br>P:GO:0007110                                                                                      | -                                                                                                 |            | IPR001666; G3DSA:3.30.530.20<br>(GENE3D), SSF55961 (SUPERFAMILY)                                                                           |
|                         | -                                                          | 0  |                                                                                                                                                                                                                                           |                                                                                                   |            | -                                                                                                                                          |

|                                  |                                                            |   |                                                                                                                                                      |                                                                                                   |                                                                                                                                   |
|----------------------------------|------------------------------------------------------------|---|------------------------------------------------------------------------------------------------------------------------------------------------------|---------------------------------------------------------------------------------------------------|-----------------------------------------------------------------------------------------------------------------------------------|
| Pongo abelii                     | protein sec13 homolog isoform 2                            | 6 | C:GO:0031080;<br>P:GO:0016044;<br>C:GO:0000776;<br>F:GO:0005515;<br>P:GO:0006886;<br>P:GO:0006888                                                    | -                                                                                                 | -                                                                                                                                 |
| Caenorhabditis briggsae          | vacuolar protein sorting-associated protein 18 homolog     | 5 | C:GO:0005768;<br>C:GO:0043234;<br>F:GO:0005515;<br>C:GO:0005774;<br>P:GO:0006996                                                                     | -                                                                                                 | IPR001841; IPR007087; IPR013083;<br>PTHR23323 (PANTHER),<br>PTHR23323:SF25 (PANTHER)                                              |
| Loa loa                          | a-phase promoting complex subunit 11                       | 8 | P:GO:0008054;<br>P:GO:0045132;<br>F:GO:0046872;<br>P:GO:0000003;<br>P:GO:0040027;<br>F:GO:0005515;<br>P:GO:0009792;<br>C:GO:0005634                  | -                                                                                                 | -                                                                                                                                 |
| Loa loa                          | a-phase promoting complex subunit 11                       | 8 | P:GO:0008054;<br>P:GO:0045132;<br>F:GO:0046872;<br>P:GO:0000003;<br>P:GO:0040027;<br>F:GO:0005515;<br>P:GO:0009792;<br>C:GO:0005634                  | -                                                                                                 | -                                                                                                                                 |
| -                                | -                                                          | 0 | -                                                                                                                                                    | -                                                                                                 | -                                                                                                                                 |
| -                                | -                                                          | 0 | -                                                                                                                                                    | -                                                                                                 | -                                                                                                                                 |
| -                                | -                                                          | 0 | -                                                                                                                                                    | -                                                                                                 | -                                                                                                                                 |
| Caenorhabditis briggsae          | bsd domain containing 1                                    | 0 |                                                                                                                                                      | P:GO:0008150;<br>C:GO:0005575                                                                     | IPR005607; PTHR16019 (PANTHER),<br>SSF140383 (SUPERFAMILY)                                                                        |
| -                                | -                                                          | 0 | -                                                                                                                                                    | -                                                                                                 | -                                                                                                                                 |
| -                                | -                                                          | 0 | -                                                                                                                                                    | -                                                                                                 | -                                                                                                                                 |
| -                                | -                                                          | 0 | -                                                                                                                                                    | -                                                                                                 | -                                                                                                                                 |
| -                                | -                                                          | 0 | -                                                                                                                                                    | -                                                                                                 | -                                                                                                                                 |
| Caenorhabditis elegans           | elegans protein partially confirmed by transcript evidence | 0 | -                                                                                                                                                    | -                                                                                                 | -                                                                                                                                 |
| -                                | -                                                          | 0 | -                                                                                                                                                    | -                                                                                                 | -                                                                                                                                 |
| Caenorhabditis briggsae          | Hypothetical protein CBG24039 [Caenorhabditis briggsae]    | 0 | -                                                                                                                                                    | -                                                                                                 | -                                                                                                                                 |
| -                                | -                                                          | 0 | -                                                                                                                                                    | -                                                                                                 | -                                                                                                                                 |
| Brugia malayi                    | polymerase ii (d- directed) polypeptide 33kda              | 9 | F:GO:0003899;<br>F:GO:0004672;<br>P:GO:0006367;<br>P:GO:0008380;<br>C:GO:0005665;<br>F:GO:0003677;<br>F:GO:0046983;<br>P:GO:0006368;<br>C:GO:0005737 | -                                                                                                 | EC:2.7.7.6<br>IPR009025; IPR011262; IPR011263;<br>G3DSA:3.30.1360.10 (GENE3D),<br>PTHR11800 (PANTHER),<br>PTHR11800:SF2 (PANTHER) |
| Methylobacter tundripaludum SV96 | chromosome segregation protein smc                         | 0 |                                                                                                                                                      | C:GO:0005694;<br>F:GO:0005524;<br>P:GO:0051276;<br>F:GO:0005515;<br>F:GO:0003774;<br>C:GO:0016459 | G3DSA:1.20.58.70 (GENE3D)                                                                                                         |

|                         |                                                                                            |    |                                                                                                                                                                                                                                           |                                                                                                   |            |                                                                                                        |
|-------------------------|--------------------------------------------------------------------------------------------|----|-------------------------------------------------------------------------------------------------------------------------------------------------------------------------------------------------------------------------------------------|---------------------------------------------------------------------------------------------------|------------|--------------------------------------------------------------------------------------------------------|
| Caenorhabditis briggsae | briggsae cbr-npp-7 protein                                                                 | 0  |                                                                                                                                                                                                                                           | P:GO:0006997;<br>F:GO:0008270;<br>P:GO:0009792;<br>P:GO:0002119;<br>P:GO:0040007;<br>C:GO:0005622 |            | -                                                                                                      |
|                         | -                                                                                          | 0  |                                                                                                                                                                                                                                           |                                                                                                   |            | -                                                                                                      |
|                         | -                                                                                          | 0  |                                                                                                                                                                                                                                           |                                                                                                   |            | -                                                                                                      |
| Caenorhabditis briggsae | zinc finger transcription factor family protein partially confirmed by transcript evidence | 0  |                                                                                                                                                                                                                                           | F:GO:0003676;<br>C:GO:0016021;<br>F:GO:0008270;<br>P:GO:0009792;<br>C:GO:0005622                  |            | IPR013032                                                                                              |
| Caenorhabditis elegans  | ph domain containing protein                                                               | 4  | P:GO:0009987;<br>P:GO:0048856;<br>F:GO:0035091;<br>C:GO:0016020                                                                                                                                                                           | -                                                                                                 |            | PTHR21630 (PANTHER),<br>PTHR21630:SF6 (PANTHER)                                                        |
| Caenorhabditis elegans  | acetyl- mitochondrial                                                                      | 14 | F:GO:0003985;<br>P:GO:0009725;<br>P:GO:0042594;<br>C:GO:0005743;<br>P:GO:0007420;<br>P:GO:0051260;<br>F:GO:0019899;<br>P:GO:0060612;<br>P:GO:0014070;<br>P:GO:0008152;<br>C:GO:0005759;<br>F:GO:0050662;<br>P:GO:0072229;<br>F:GO:0042803 | -                                                                                                 | EC:2.3.1.9 | -                                                                                                      |
| Callithrix jacchus      | ribosomal protein l10a                                                                     | 7  | F:GO:0003735;<br>F:GO:0003723;<br>P:GO:0009653;<br>C:GO:0022625;<br>C:GO:0005739;<br>P:GO:0006414;<br>P:GO:0006396                                                                                                                        | -                                                                                                 |            | -                                                                                                      |
| Loa loa                 | related to oncogene abl family member (abl-1)                                              | 2  | F:GO:0005488;<br>F:GO:0016740                                                                                                                                                                                                             | -                                                                                                 |            | -                                                                                                      |
| Brugia malayi           | mgc47001-prov protein                                                                      | 3  | P:GO:0006259;<br>F:GO:0004518;<br>P:GO:0006974                                                                                                                                                                                            | -                                                                                                 |            | IPR001680; IPR011046; IPR015943;<br>IPR017986; IPR019775; IPR019781;<br>IPR019782; PTHR14091 (PANTHER) |



|                         |                                                  |    |                                                                                                                                                                                                                                                                                                                                                                                                                                                                                             |   |                                                                                       |
|-------------------------|--------------------------------------------------|----|---------------------------------------------------------------------------------------------------------------------------------------------------------------------------------------------------------------------------------------------------------------------------------------------------------------------------------------------------------------------------------------------------------------------------------------------------------------------------------------------|---|---------------------------------------------------------------------------------------|
| Caenorhabditis elegans  | transcription initiation factor tfiid subunit 12 | 0  | <p>C:GO:0005669;<br/> F:GO:0003677;<br/> C:GO:0005634;<br/> C:GO:0030914;<br/> F:GO:0016986;<br/> C:GO:0000125;<br/> P:GO:0006914;<br/> P:GO:0006352;<br/> P:GO:0006350;<br/> F:GO:0003700;<br/> F:GO:0004222;<br/> F:GO:0004175;<br/> P:GO:0006367;<br/> P:GO:0006508;<br/> C:GO:0005737;<br/> F:GO:0005488;<br/> F:GO:0003713;<br/> P:GO:0045449;<br/> F:GO:0003743;<br/> C:GO:0033276;<br/> F:GO:0008270;<br/> F:GO:0005515;<br/> C:GO:0005886;<br/> F:GO:0004402;<br/> P:GO:0043966</p> |   | IPR003228; IPR009072; PD012998 (PRODOM), PTHR12264 (PANTHER), PTHR12264:SF1 (PANTHER) |
| Caenorhabditis briggsae | briggsae cbr-apa-2 protein                       | 14 | <p>C:GO:0005829;<br/> F:GO:0008565;<br/> P:GO:0040010;<br/> F:GO:0008022;<br/> P:GO:0000003;<br/> C:GO:0030131;<br/> C:GO:0030666;<br/> P:GO:0050690;<br/> P:GO:0040011;<br/> P:GO:0006898;<br/> P:GO:0006886;<br/> C:GO:0030141;<br/> P:GO:0009792;<br/> C:GO:0005886</p>                                                                                                                                                                                                                  | - | SignalP (SIGNALP)                                                                     |
| Caenorhabditis briggsae | briggsae cbr-apa-2 protein                       | 14 | <p>C:GO:0005829;<br/> F:GO:0008565;<br/> P:GO:0040010;<br/> F:GO:0008022;<br/> P:GO:0000003;<br/> C:GO:0030131;<br/> C:GO:0030666;<br/> P:GO:0050690;<br/> P:GO:0040011;<br/> P:GO:0006898;<br/> P:GO:0006886;<br/> C:GO:0030141;<br/> P:GO:0009792;<br/> C:GO:0005886</p>                                                                                                                                                                                                                  | - | SignalP (SIGNALP)                                                                     |

|                         |                                                            |    |                                                                                                                                                                                                                                           |   |             |                                                                                                                       |
|-------------------------|------------------------------------------------------------|----|-------------------------------------------------------------------------------------------------------------------------------------------------------------------------------------------------------------------------------------------|---|-------------|-----------------------------------------------------------------------------------------------------------------------|
| Caenorhabditis briggsae | briggsae cbr-apa-2 protein                                 | 14 | C:GO:0005829;<br>F:GO:0008565;<br>P:GO:0040010;<br>F:GO:0008022;<br>P:GO:0000003;<br>C:GO:0030131;<br>C:GO:0030666;<br>P:GO:0050690;<br>P:GO:0040011;<br>P:GO:0006898;<br>P:GO:0006886;<br>C:GO:0030141;<br>P:GO:0009792;<br>C:GO:0005886 | - |             | SignalP (SIGNALP)                                                                                                     |
| -                       | -                                                          | 0  |                                                                                                                                                                                                                                           |   |             | -                                                                                                                     |
| Caenorhabditis briggsae | elegans protein partially confirmed by transcript evidence | 2  | F:GO:0008270;<br>F:GO:0003676                                                                                                                                                                                                             | - |             | IPR000571; G3DSA:4.10.1000.10 (GENE3D), PTHR12547 (PANTHER), SSF90229 (SUPERFAMILY)                                   |
| Caenorhabditis briggsae | elegans protein partially confirmed by transcript evidence | 2  | F:GO:0008270;<br>F:GO:0003676                                                                                                                                                                                                             | - |             | IPR000571; G3DSA:4.10.1000.10 (GENE3D), PTHR12547 (PANTHER), SSF90229 (SUPERFAMILY)                                   |
| Caenorhabditis elegans  | ethanolamine ki-se 2                                       | 2  | F:GO:0016301;<br>P:GO:0007275                                                                                                                                                                                                             | - |             | IPR002573; IPR011009; G3DSA:3.90.1200.10 (GENE3D), PTHR22603:SF7 (PANTHER)                                            |
| -                       | -                                                          | 0  |                                                                                                                                                                                                                                           |   |             | -                                                                                                                     |
| -                       | -                                                          | 0  |                                                                                                                                                                                                                                           |   |             | -                                                                                                                     |
| -                       | -                                                          | 0  |                                                                                                                                                                                                                                           |   |             | -                                                                                                                     |
| Caenorhabditis elegans  | tbc1 domain family member 9                                | 4  | F:GO:0005097;<br>F:GO:0005509;<br>C:GO:0005622;<br>P:GO:0032313                                                                                                                                                                           | - |             | IPR004182; PTHR23319 (PANTHER), SignalP (SIGNALP)                                                                     |
| -                       | -                                                          | 0  |                                                                                                                                                                                                                                           |   |             | -                                                                                                                     |
| Loa loa                 | protein ki-se domain containing protein                    | 4  | P:GO:0006468;<br>F:GO:0005524;<br>P:GO:0040011;<br>F:GO:0004674                                                                                                                                                                           | - | EC:2.7.11.0 | IPR000719; IPR008271; IPR011009; IPR017442; G3DSA:1.10.510.10 (GENE3D), PTHR11909 (PANTHER), PTHR11909:SF19 (PANTHER) |
| -                       | -                                                          | 0  |                                                                                                                                                                                                                                           |   |             | SignalP (SIGNALP)                                                                                                     |
| -                       | -                                                          | 0  |                                                                                                                                                                                                                                           |   |             | -                                                                                                                     |
| Brugia malayi           | hypothetical protein Bm1_42720 [Brugia malayi]             | 0  |                                                                                                                                                                                                                                           |   |             | -                                                                                                                     |
| -                       | -                                                          | 0  |                                                                                                                                                                                                                                           |   |             | -                                                                                                                     |
| Brugia malayi           | scribbled homolog isoform 4                                | 7  | P:GO:0048731;<br>C:GO:0005911;<br>P:GO:0048489;<br>P:GO:0002009;<br>P:GO:0030154;<br>P:GO:0065007;<br>P:GO:0016477                                                                                                                        | - |             | IPR001478; G3DSA:2.30.42.10 (GENE3D), PTHR23119 (PANTHER)                                                             |
| Caenorhabditis elegans  | 26s proteasome non-atpase regulatory subunit 7             | 9  | P:GO:0008340;<br>P:GO:0051436;<br>P:GO:0051437;<br>P:GO:0040007;<br>C:GO:0005838;<br>P:GO:0000003;<br>P:GO:0031145;<br>P:GO:0002119;<br>F:GO:0005515                                                                                      | - |             | IPR000555; PTHR10540 (PANTHER), PTHR10540:SF7 (PANTHER)                                                               |

|                         |                                                         |   |                                                                                                                                                      |                                                                 |                                                         |                                                                                                                                               |
|-------------------------|---------------------------------------------------------|---|------------------------------------------------------------------------------------------------------------------------------------------------------|-----------------------------------------------------------------|---------------------------------------------------------|-----------------------------------------------------------------------------------------------------------------------------------------------|
| Ixodes scapularis       | factor for adipocyte                                    | 0 |                                                                                                                                                      | P:GO:0008152;<br>F:GO:0016787;<br>F:GO:0016798;<br>F:GO:0016162 |                                                         | IPR008957; IPR013783; PTHR19900 (PANTHER), PTHR19900:SF3 (PANTHER)                                                                            |
| Caenorhabditis elegans  | actin-related protein 2 3 complex subunit 1a            | 9 | P:GO:0030833;<br>P:GO:0040010;<br>P:GO:0000003;<br>P:GO:0002119;<br>F:GO:0003779;<br>C:GO:0015629;<br>P:GO:0040011;<br>P:GO:0009792;<br>P:GO:0040018 | -                                                               |                                                         | PTHR10709 (PANTHER), PTHR10709:SF6 (PANTHER)                                                                                                  |
| -                       | -                                                       | 0 |                                                                                                                                                      |                                                                 |                                                         | -                                                                                                                                             |
| Caenorhabditis briggsae | briggsae cbr-pqn-34 protein                             | 0 |                                                                                                                                                      |                                                                 |                                                         | -                                                                                                                                             |
| Caenorhabditis elegans  | loc496093 protein                                       | 4 | C:GO:0005730;<br>P:GO:0042127;<br>F:GO:0005525;<br>F:GO:0003924                                                                                      | -                                                               | EC:3.6.5.1;<br>EC:3.6.5.2;<br>EC:3.6.5.3;<br>EC:3.6.5.4 | IPR000795; IPR002917; IPR014813; IPR023179; G3DSA:3.40.50.300 (GENE3D), PTHR11089 (PANTHER), PTHR11089:SF13 (PANTHER), SSF52540 (SUPERFAMILY) |
| Caenorhabditis elegans  | loc496093 protein                                       | 4 | C:GO:0005730;<br>P:GO:0042127;<br>F:GO:0005525;<br>F:GO:0003924                                                                                      | -                                                               | EC:3.6.5.1;<br>EC:3.6.5.2;<br>EC:3.6.5.3;<br>EC:3.6.5.4 | IPR000795; IPR002917; IPR014813; IPR023179; G3DSA:3.40.50.300 (GENE3D), PTHR11089 (PANTHER), PTHR11089:SF13 (PANTHER), SSF52540 (SUPERFAMILY) |
| Caenorhabditis elegans  | slowpoke potassium channel family member (slo-2)        | 6 | C:GO:0016020;<br>P:GO:0006813;<br>P:GO:0008152;<br>F:GO:0003824;<br>F:GO:0015269;<br>F:GO:0005488                                                    | -                                                               |                                                         | IPR013099; G3DSA:1.10.287.70 (GENE3D), PTHR10027 (PANTHER), PTHR10027:SF6 (PANTHER), SignalP (SIGNALP), SSF81324 (SUPERFAMILY)                |
| -                       | -                                                       | 0 |                                                                                                                                                      |                                                                 |                                                         | -                                                                                                                                             |
| -                       | -                                                       | 0 |                                                                                                                                                      |                                                                 |                                                         | -                                                                                                                                             |
| Brugia malayi           | tr- modification gtpase family protein                  | 4 | C:GO:0005622;<br>P:GO:0008033;<br>F:GO:0000166;<br>P:GO:0050794                                                                                      | -                                                               |                                                         | IPR021629                                                                                                                                     |
| -                       | -                                                       | 0 |                                                                                                                                                      |                                                                 |                                                         | -                                                                                                                                             |
| Caenorhabditis elegans  | methylmalonic aciduria (cobalamin deficiency) cbla type | 4 | F:GO:0005525;<br>F:GO:0016787;<br>F:GO:0005524;<br>C:GO:0005739                                                                                      | -                                                               |                                                         | IPR005129; G3DSA:1.20.5.170 (GENE3D), G3DSA:3.40.50.300 (GENE3D), PTHR23408 (PANTHER), SSF52540 (SUPERFAMILY)                                 |
| Caenorhabditis elegans  | hypothetical protein Y119C18.5 [Caenorhabditis elegans] | 0 |                                                                                                                                                      | F:GO:0046872;<br>C:GO:0016021;<br>F:GO:0008270;<br>F:GO:0005515 |                                                         | -                                                                                                                                             |
| -                       | -                                                       | 0 |                                                                                                                                                      |                                                                 |                                                         | -                                                                                                                                             |
| Brugia malayi           | retinoblastoma-like protein 2                           | 3 | C:GO:0043229;<br>P:GO:0044238;<br>P:GO:0044237                                                                                                       | -                                                               |                                                         | PTHR13742 (PANTHER), PTHR13742:SF8 (PANTHER), PF11934 (PFAM)                                                                                  |
| -                       | -                                                       | 0 |                                                                                                                                                      |                                                                 |                                                         | -                                                                                                                                             |
| -                       | -                                                       | 0 |                                                                                                                                                      |                                                                 |                                                         | SignalP (SIGNALP)                                                                                                                             |
| Caenorhabditis elegans  | iron zinc purple acid phosphatase-like                  | 3 | F:GO:0046872;<br>P:GO:0009792;<br>F:GO:0003993                                                                                                       | -                                                               | EC:3.1.3.2                                              | -                                                                                                                                             |
| -                       | -                                                       | 0 |                                                                                                                                                      |                                                                 |                                                         | IPR001283; IPR014044; PTHR10334:SF4 (PANTHER)                                                                                                 |
| -                       | -                                                       | 0 |                                                                                                                                                      |                                                                 |                                                         | SignalP (SIGNALP)                                                                                                                             |

|                         |                                |    |                                                                                                                                                                                                                                                                                                                                                                                                                                                                                                                                                                                                                                                                                       |   |                                |
|-------------------------|--------------------------------|----|---------------------------------------------------------------------------------------------------------------------------------------------------------------------------------------------------------------------------------------------------------------------------------------------------------------------------------------------------------------------------------------------------------------------------------------------------------------------------------------------------------------------------------------------------------------------------------------------------------------------------------------------------------------------------------------|---|--------------------------------|
|                         | -                              | 0  |                                                                                                                                                                                                                                                                                                                                                                                                                                                                                                                                                                                                                                                                                       |   | -                              |
|                         | -                              | 0  |                                                                                                                                                                                                                                                                                                                                                                                                                                                                                                                                                                                                                                                                                       |   | -                              |
| Caenorhabditis briggsae | isoform cra_a                  | 55 | <ul style="list-style-type: none"> <li>P:GO:0032755;</li> <li>F:GO:0051087;</li> <li>C:GO:0046696;</li> <li>P:GO:0042026;</li> <li>P:GO:0032735;</li> <li>P:GO:0032729;</li> <li>C:GO:0005791;</li> <li>F:GO:0051082;</li> <li>P:GO:0043032;</li> <li>P:GO:0042542;</li> <li>P:GO:0032733;</li> <li>P:GO:0043065;</li> <li>C:GO:0005829;</li> <li>F:GO:0001530;</li> <li>P:GO:0032727;</li> <li>P:GO:0051085;</li> <li>C:GO:0005759;</li> <li>C:GO:0005615;</li> <li>C:GO:0045121;</li> <li>F:GO:0002039;</li> <li>P:GO:0042100;</li> <li>P:GO:0006986;</li> <li>F:GO:0002020;</li> <li>P:GO:0001666;</li> <li>P:GO:0006919;</li> <li>C:GO:0044459;</li> <li>F:GO:0043559;</li> </ul> | - | SignalP (SIGNALP)              |
|                         | -                              | 0  |                                                                                                                                                                                                                                                                                                                                                                                                                                                                                                                                                                                                                                                                                       |   | -                              |
|                         | -                              | 0  |                                                                                                                                                                                                                                                                                                                                                                                                                                                                                                                                                                                                                                                                                       |   | -                              |
| Caenorhabditis elegans  | protein o-fucosyltransferase 1 | 12 | <ul style="list-style-type: none"> <li>P:GO:0016337;</li> <li>P:GO:0006493;</li> <li>F:GO:0008417;</li> <li>C:GO:0031410;</li> <li>P:GO:0007399;</li> <li>F:GO:0005112;</li> <li>P:GO:0006897;</li> <li>P:GO:0045746;</li> <li>P:GO:0030163;</li> <li>C:GO:0016020;</li> <li>C:GO:0005794;</li> <li>C:GO:0005783</li> </ul>                                                                                                                                                                                                                                                                                                                                                           | - | IPR019378; PTHR21420 (PANTHER) |
| Caenorhabditis elegans  | protein o-fucosyltransferase 1 | 12 | <ul style="list-style-type: none"> <li>P:GO:0016337;</li> <li>P:GO:0006493;</li> <li>F:GO:0008417;</li> <li>C:GO:0031410;</li> <li>P:GO:0007399;</li> <li>F:GO:0005112;</li> <li>P:GO:0006897;</li> <li>P:GO:0045746;</li> <li>P:GO:0030163;</li> <li>C:GO:0016020;</li> <li>C:GO:0005794;</li> <li>C:GO:0005783</li> </ul>                                                                                                                                                                                                                                                                                                                                                           | - | IPR019378; PTHR21420 (PANTHER) |

|                         |                                                 |    |                                                                                                                                                                                                         |                                                |                                                                                                                                          |
|-------------------------|-------------------------------------------------|----|---------------------------------------------------------------------------------------------------------------------------------------------------------------------------------------------------------|------------------------------------------------|------------------------------------------------------------------------------------------------------------------------------------------|
| Caenorhabditis elegans  | protein o-fucosyltransferase 1                  | 12 | P:GO:0016337;<br>P:GO:0006493;<br>F:GO:0008417;<br>C:GO:0031410;<br>P:GO:0007399;<br>F:GO:0005112;<br>P:GO:0006897;<br>P:GO:0045746;<br>P:GO:0030163;<br>C:GO:0016020;<br>C:GO:0005794;<br>C:GO:0005783 | -                                              | IPR019378; PTHR21420 (PANTHER)                                                                                                           |
| -                       | -                                               | 0  |                                                                                                                                                                                                         |                                                | -                                                                                                                                        |
| Caenorhabditis elegans  | nuclear hormone receptor family member (nhr-49) | 7  | F:GO:0003700;<br>F:GO:0043565;<br>P:GO:0008340;<br>F:GO:0003707;<br>C:GO:0005634;<br>F:GO:0008270;<br>P:GO:0006355                                                                                      | -                                              | IPR000536; IPR008946; PTHR11865 (PANTHER), PTHR11865:SF197 (PANTHER)                                                                     |
| Caenorhabditis elegans  | cx module family protein                        | 0  |                                                                                                                                                                                                         | P:GO:0000003;<br>P:GO:0040011;<br>P:GO:0002119 | IPR002619                                                                                                                                |
| -                       | -                                               | 0  |                                                                                                                                                                                                         |                                                | SignalP (SIGNALP)                                                                                                                        |
| -                       | -                                               | 0  |                                                                                                                                                                                                         |                                                | -                                                                                                                                        |
| -                       | -                                               | 0  |                                                                                                                                                                                                         |                                                | -                                                                                                                                        |
| Caenorhabditis briggsae | laminin alpha- 2 chain                          | 5  | C:GO:0005606;<br>P:GO:0030334;<br>P:GO:0045995;<br>P:GO:0030155;<br>F:GO:0005102                                                                                                                        | -                                              | IPR002049; IPR013032; PR00011 (PRINTS), G3DSA:2.10.25.10 (GENE3D), PTHR10574 (PANTHER), PTHR10574:SF36 (PANTHER), SSF57196 (SUPERFAMILY) |
| Caenorhabditis elegans  | phospholipase b-like 2 precursor                | 0  |                                                                                                                                                                                                         | F:GO:0016787;<br>C:GO:0043202;<br>P:GO:0016042 | SignalP (SIGNALP)                                                                                                                        |
| Brugia malayi           | unc-45 homolog b ( elegans)                     | 5  | C:GO:0005737;<br>P:GO:0030154;<br>P:GO:0014706;<br>P:GO:0007517;<br>F:GO:0005488                                                                                                                        | -                                              | -                                                                                                                                        |
| Caenorhabditis elegans  | presenilin family protein                       | 5  | C:GO:0016020;<br>P:GO:0016048;<br>P:GO:0007219;<br>F:GO:0005515;<br>P:GO:0007399                                                                                                                        | -                                              | -                                                                                                                                        |
| Caenorhabditis briggsae | dedicator of cytokinesis 1                      | 8  | P:GO:0043652;<br>F:GO:0005083;<br>F:GO:0032403;<br>P:GO:0023052;<br>F:GO:0019899;<br>P:GO:0040039;<br>C:GO:0005886;<br>F:GO:0017124                                                                     | -                                              | PTHR23317 (PANTHER), PTHR23317:SF16 (PANTHER)                                                                                            |

|                         |                                                            |   |                                                                                                                                     |                                                                                                                                                                                                                                                                                              |                                                                                                        |
|-------------------------|------------------------------------------------------------|---|-------------------------------------------------------------------------------------------------------------------------------------|----------------------------------------------------------------------------------------------------------------------------------------------------------------------------------------------------------------------------------------------------------------------------------------------|--------------------------------------------------------------------------------------------------------|
| Caenorhabditis briggsae | dedicator of cytokinesis 1                                 | 8 | P:GO:0043652;<br>F:GO:0005083;<br>F:GO:0032403;<br>P:GO:0023052;<br>F:GO:0019899;<br>P:GO:0040039;<br>C:GO:0005886;<br>F:GO:0017124 | -                                                                                                                                                                                                                                                                                            | PTHR23317 (PANTHER),<br>PTHR23317:SF16 (PANTHER)                                                       |
| Loa loa                 | elegans protein partially confirmed by transcript evidence | 1 | F:GO:0005515                                                                                                                        | -                                                                                                                                                                                                                                                                                            | -                                                                                                      |
|                         |                                                            | 0 |                                                                                                                                     |                                                                                                                                                                                                                                                                                              |                                                                                                        |
| Branchiostoma floridae  | low density lipoprotein receptor-related protein 10        | 0 |                                                                                                                                     | P:GO:0042733;<br>C:GO:0016021;<br>P:GO:0043113;<br>C:GO:0016020;<br>P:GO:0051124;<br>P:GO:0001822;<br>P:GO:0009954;<br>P:GO:0009953;<br>P:GO:0008104;<br>F:GO:0004872;<br>P:GO:0030178;<br>P:GO:0001942;<br>F:GO:0005515;<br>P:GO:0048856;<br>P:GO:0042475;<br>C:GO:0005886;<br>F:GO:0005509 | IPR002172; PTHR10529 (PANTHER),<br>PTHR10529:SF2 (PANTHER)                                             |
| Ostreococcus tauri      | condensin subunit cut3                                     | 0 |                                                                                                                                     | C:GO:0005694;<br>F:GO:0005524;<br>P:GO:0051276;<br>F:GO:0005515;<br>F:GO:0003677                                                                                                                                                                                                             | IPR010935; PTHR18937 (PANTHER),<br>PTHR18937:SF13 (PANTHER)                                            |
|                         |                                                            | 0 |                                                                                                                                     |                                                                                                                                                                                                                                                                                              |                                                                                                        |
|                         |                                                            | 0 |                                                                                                                                     |                                                                                                                                                                                                                                                                                              |                                                                                                        |
|                         |                                                            | 0 |                                                                                                                                     |                                                                                                                                                                                                                                                                                              |                                                                                                        |
|                         |                                                            | 0 |                                                                                                                                     |                                                                                                                                                                                                                                                                                              |                                                                                                        |
| Caenorhabditis briggsae | elegans protein confirmed by transcript evidence           | 0 |                                                                                                                                     |                                                                                                                                                                                                                                                                                              | IPR007523; G3DSA:3.40.1230.10<br>(GENE3D)                                                              |
|                         |                                                            | 0 |                                                                                                                                     |                                                                                                                                                                                                                                                                                              | SignalP (SIGNALP)                                                                                      |
| Caenorhabditis elegans  | rogdi_caecal_ame: full=protein rogdi homolog               | 0 |                                                                                                                                     | P:GO:0006974;<br>P:GO:0040010                                                                                                                                                                                                                                                                | -                                                                                                      |
| Caenorhabditis elegans  | transmembrane emp24 protein transport domain containing 5  | 2 | C:GO:0016021;<br>P:GO:0006810                                                                                                       | -                                                                                                                                                                                                                                                                                            | IPR000348; IPR009038; IPR015717;<br>PTHR22811 (PANTHER), SignalP<br>(SIGNALP), SSF101576 (SUPERFAMILY) |
| Caenorhabditis elegans  | transmembrane emp24 protein transport domain containing 5  | 2 | C:GO:0016021;<br>P:GO:0006810                                                                                                       | -                                                                                                                                                                                                                                                                                            | IPR000348; IPR009038; IPR015717;<br>PTHR22811 (PANTHER), SignalP<br>(SIGNALP), SSF101576 (SUPERFAMILY) |
| Caenorhabditis elegans  | transmembrane emp24 protein transport domain containing 5  | 2 | C:GO:0016021;<br>P:GO:0006810                                                                                                       | -                                                                                                                                                                                                                                                                                            | IPR000348; IPR009038; IPR015717;<br>PTHR22811 (PANTHER), SignalP<br>(SIGNALP), SSF101576 (SUPERFAMILY) |
| Caenorhabditis elegans  | daf-16 foxo germline tumor affecting family member (dct-6) | 0 |                                                                                                                                     |                                                                                                                                                                                                                                                                                              | -                                                                                                      |
|                         |                                                            | 0 |                                                                                                                                     |                                                                                                                                                                                                                                                                                              |                                                                                                        |
|                         |                                                            | 0 |                                                                                                                                     |                                                                                                                                                                                                                                                                                              |                                                                                                        |
|                         |                                                            | 0 |                                                                                                                                     |                                                                                                                                                                                                                                                                                              |                                                                                                        |

|                         |                                                      |    |                                                                                                                                                                                        |                                                         |                                                                                                                                                                                         |
|-------------------------|------------------------------------------------------|----|----------------------------------------------------------------------------------------------------------------------------------------------------------------------------------------|---------------------------------------------------------|-----------------------------------------------------------------------------------------------------------------------------------------------------------------------------------------|
|                         | -                                                    | 0  |                                                                                                                                                                                        |                                                         | -                                                                                                                                                                                       |
|                         | -                                                    | 0  |                                                                                                                                                                                        |                                                         | -                                                                                                                                                                                       |
| Caenorhabditis briggsae | u327_caeel ame: full=upf0327 protein                 | 0  |                                                                                                                                                                                        |                                                         | IPR007512                                                                                                                                                                               |
|                         | -                                                    | 0  |                                                                                                                                                                                        |                                                         | -                                                                                                                                                                                       |
| Caenorhabditis briggsae | succinyl- ligase                                     | 10 | C:GO:0045244;<br>P:GO:0006105;<br>F:GO:0004777;<br>P:GO:0006104;<br>P:GO:0006099;<br>F:GO:0019003;<br>F:GO:0005524;<br>F:GO:0046982;<br>P:GO:0009792;<br>F:GO:0004776                  | EC:1.2.1.24;<br>EC:6.2.1.4                              | IPR005809; IPR013650; IPR013815;<br>IPR013816; SSF56059 (SUPERFAMILY)                                                                                                                   |
| Ancylostoma ceylanicum  | tpa_inf: eukaryotic translation elongation factor 1a | 8  | C:GO:0005737;<br>P:GO:0009792;<br>P:GO:0002119;<br>P:GO:0007276;<br>F:GO:0003746;<br>F:GO:0005525;<br>P:GO:0006414;<br>F:GO:0003924                                                    | EC:3.6.5.1;<br>EC:3.6.5.2;<br>EC:3.6.5.3;<br>EC:3.6.5.4 | IPR000795; G3DSA:3.40.50.300<br>(GENE3D), PTHR23115 (PANTHER),<br>PTHR23115:SF37 (PANTHER),<br>SSF52540 (SUPERFAMILY)                                                                   |
| Ancylostoma ceylanicum  | tpa_inf: eukaryotic translation elongation factor 1a | 8  | C:GO:0005737;<br>P:GO:0009792;<br>P:GO:0002119;<br>P:GO:0007276;<br>F:GO:0003746;<br>F:GO:0005525;<br>P:GO:0006414;<br>F:GO:0003924                                                    | EC:3.6.5.1;<br>EC:3.6.5.2;<br>EC:3.6.5.3;<br>EC:3.6.5.4 | IPR000795; G3DSA:3.40.50.300<br>(GENE3D), PTHR23115 (PANTHER),<br>PTHR23115:SF37 (PANTHER),<br>SSF52540 (SUPERFAMILY)                                                                   |
| Dictyocaulus viviparus  | tpa_inf: eukaryotic translation elongation factor 1a | 8  | C:GO:0005737;<br>P:GO:0009792;<br>P:GO:0002119;<br>P:GO:0007276;<br>F:GO:0003746;<br>F:GO:0005525;<br>P:GO:0006414;<br>F:GO:0003924                                                    | EC:3.6.5.1;<br>EC:3.6.5.2;<br>EC:3.6.5.3;<br>EC:3.6.5.4 | IPR000795; IPR004160; IPR004161;<br>IPR009000; G3DSA:2.40.30.10<br>(GENE3D), G3DSA:3.40.50.300<br>(GENE3D), PTHR23115 (PANTHER),<br>PTHR23115:SF37 (PANTHER),<br>SSF52540 (SUPERFAMILY) |
| Dictyocaulus viviparus  | tpa_inf: eukaryotic translation elongation factor 1a | 8  | C:GO:0005737;<br>P:GO:0009792;<br>P:GO:0002119;<br>P:GO:0007276;<br>F:GO:0003746;<br>F:GO:0005525;<br>P:GO:0006414;<br>F:GO:0003924                                                    | EC:3.6.5.1;<br>EC:3.6.5.2;<br>EC:3.6.5.3;<br>EC:3.6.5.4 | IPR000795; IPR004160; IPR004161;<br>IPR009000; G3DSA:2.40.30.10<br>(GENE3D), G3DSA:3.40.50.300<br>(GENE3D), PTHR23115 (PANTHER),<br>PTHR23115:SF37 (PANTHER),<br>SSF52540 (SUPERFAMILY) |
| Caenorhabditis elegans  | rain ki-se homolog family member (mbk-2)             | 11 | F:GO:0030145;<br>P:GO:0006468;<br>P:GO:0045725;<br>F:GO:0005515;<br>F:GO:0004713;<br>P:GO:0042771;<br>C:GO:0005737;<br>F:GO:0004674;<br>F:GO:0000287;<br>C:GO:0005634;<br>F:GO:0005524 | EC:2.7.10.0;<br>EC:2.7.11.0                             | PTHR11295 (PANTHER),<br>PTHR11295:SF22 (PANTHER)                                                                                                                                        |
|                         | -                                                    | 0  |                                                                                                                                                                                        |                                                         | -                                                                                                                                                                                       |

|                           |                                                            |   |                                                                                                                                     |                                                                                                                                                                                                                                                                                                                                                                                                                                                       |                                                                                                                     |                   |
|---------------------------|------------------------------------------------------------|---|-------------------------------------------------------------------------------------------------------------------------------------|-------------------------------------------------------------------------------------------------------------------------------------------------------------------------------------------------------------------------------------------------------------------------------------------------------------------------------------------------------------------------------------------------------------------------------------------------------|---------------------------------------------------------------------------------------------------------------------|-------------------|
| Caenorhabditis sp. PS1010 | gex interacting protein family member (gei-16)             | 1 | F:GO:0005515                                                                                                                        | -                                                                                                                                                                                                                                                                                                                                                                                                                                                     | -                                                                                                                   |                   |
| Caenorhabditis elegans    | major intrinsic protein                                    | 8 | C:GO:0016323;<br>P:GO:0045087;<br>P:GO:0055085;<br>P:GO:0008340;<br>P:GO:0050829;<br>C:GO:0016021;<br>P:GO:0015793;<br>F:GO:0022838 | -                                                                                                                                                                                                                                                                                                                                                                                                                                                     | IPR000425; IPR020904; IPR022357;<br>PTHR19139:SF11 (PANTHER)                                                        |                   |
| Caenorhabditis elegans    | hypothetical protein F56C9.8 [Caenorhabditis elegans]      | 0 |                                                                                                                                     | F:GO:0004221;<br>P:GO:0006511                                                                                                                                                                                                                                                                                                                                                                                                                         | -                                                                                                                   |                   |
| Caenorhabditis briggsae   | leucine rich repeat containing 47                          | 1 | F:GO:0005488                                                                                                                        | -                                                                                                                                                                                                                                                                                                                                                                                                                                                     | IPR005146; PTHR10947 (PANTHER)                                                                                      |                   |
|                           | -                                                          | 0 |                                                                                                                                     |                                                                                                                                                                                                                                                                                                                                                                                                                                                       | -                                                                                                                   |                   |
|                           | -                                                          | 0 |                                                                                                                                     |                                                                                                                                                                                                                                                                                                                                                                                                                                                       | -                                                                                                                   |                   |
|                           | -                                                          | 0 |                                                                                                                                     |                                                                                                                                                                                                                                                                                                                                                                                                                                                       | -                                                                                                                   |                   |
| Caenorhabditis remanei    | telomerase reverse transcriptase                           | 0 |                                                                                                                                     | F:GO:0003723;<br>P:GO:0007004;<br>F:GO:0003721;<br>C:GO:0005697;<br>F:GO:0003720;<br>F:GO:0003677;<br>C:GO:0005634;<br>C:GO:0005694;<br>P:GO:0022616;<br>P:GO:0006916;<br>C:GO:0030529;<br>F:GO:0042803;<br>P:GO:0043249;<br>P:GO:0032203;<br>P:GO:0006278;<br>F:GO:0070034;<br>F:GO:0003964;<br>P:GO:0008152;<br>P:GO:0008150;<br>C:GO:0005737;<br>F:GO:0016779;<br>C:GO:0000781;<br>C:GO:0005730;<br>C:GO:0005654;<br>F:GO:0005515;<br>F:GO:0016740 |                                                                                                                     | -                 |
| Echinococcus granulosus   | elegans protein partially confirmed by transcript evidence | 0 |                                                                                                                                     | F:GO:0004222;<br>F:GO:0019870;<br>F:GO:0008270;<br>F:GO:0008237;<br>C:GO:0005578;<br>C:GO:0031012;<br>C:GO:0005576;<br>F:GO:0030414;<br>F:GO:0008233;<br>P:GO:0009405;<br>F:GO:0004867;<br>F:GO:0008200                                                                                                                                                                                                                                               |                                                                                                                     | SignalP (SIGNALP) |
| Caenorhabditis elegans    | vacuolar protein sorting-associated protein 29             | 4 | F:GO:0046872;<br>C:GO:0010008;<br>F:GO:0004647;<br>P:GO:0015031                                                                     | -                                                                                                                                                                                                                                                                                                                                                                                                                                                     | EC:3.1.3.3<br>IPR000979; IPR020935;<br>G3DSA:3.60.21.10 (GENE3D),<br>PTHR11124 (PANTHER), SSF56300<br>(SUPERFAMILY) |                   |



|                         |                                    |    |                                                                                                                                                                                                                                                                                                                                                 |                                                                                                   |                            |                                                                                                                                            |
|-------------------------|------------------------------------|----|-------------------------------------------------------------------------------------------------------------------------------------------------------------------------------------------------------------------------------------------------------------------------------------------------------------------------------------------------|---------------------------------------------------------------------------------------------------|----------------------------|--------------------------------------------------------------------------------------------------------------------------------------------|
| Meloidogyne incognita   | dual oxidase 1                     | 20 | P:GO:0018149;<br>P:GO:0006979;<br>P:GO:0006952;<br>F:GO:0016174;<br>P:GO:0040032;<br>F:GO:0005509;<br>C:GO:0016021;<br>P:GO:0042338;<br>P:GO:0055114;<br>P:GO:0040007;<br>F:GO:0004601;<br>F:GO:0009055;<br>P:GO:0019221;<br>P:GO:0002119;<br>P:GO:0040011;<br>F:GO:0020037;<br>F:GO:0050660;<br>P:GO:0009792;<br>P:GO:0051591;<br>C:GO:0005882 | -                                                                                                 | EC:1.6.3.1;<br>EC:1.11.1.7 | -                                                                                                                                          |
| Brugia malayi           | exonuclease family protein         | 0  |                                                                                                                                                                                                                                                                                                                                                 | F:GO:0003676;<br>F:GO:0004527;<br>F:GO:0008270;<br>C:GO:0005622                                   | -                          | -                                                                                                                                          |
|                         | -                                  | 0  |                                                                                                                                                                                                                                                                                                                                                 |                                                                                                   |                            | SignalP (SIGNALP)                                                                                                                          |
| Caenorhabditis elegans  | briggsae cbr-ntl-2 protein         | 11 | P:GO:0040010;<br>P:GO:0008340;<br>F:GO:0042802;<br>P:GO:0040035;<br>P:GO:0019915;<br>P:GO:0002119;<br>P:GO:0040011;<br>P:GO:0006898;<br>P:GO:0002009;<br>P:GO:0009792;<br>P:GO:0040018                                                                                                                                                          | -                                                                                                 |                            | -                                                                                                                                          |
| Loa loa                 | fatty-acid amide hydrolase 1-like  | 2  | F:GO:0016787;<br>P:GO:0000003                                                                                                                                                                                                                                                                                                                   | -                                                                                                 |                            | IPR000120; PTHR11895:SF4 (PANTHER)                                                                                                         |
| Bombyx mori             | endonuclease-reverse transcriptase | 0  |                                                                                                                                                                                                                                                                                                                                                 | F:GO:0003723;<br>P:GO:0006278;<br>F:GO:0008270;<br>F:GO:0004519;<br>F:GO:0003964;<br>C:GO:0005622 |                            | -                                                                                                                                          |
| Caenorhabditis briggsae | briggsae cbr-cyn-4 protein         | 9  | P:GO:0006457;<br>P:GO:0040022;<br>F:GO:0005515;<br>P:GO:0000209;<br>C:GO:0005796;<br>F:GO:0034450;<br>C:GO:0005634;<br>F:GO:0003755;<br>C:GO:0000151                                                                                                                                                                                            | -                                                                                                 | EC:5.2.1.8                 | IPR002130; IPR013083; IPR015891;<br>IPR020892; PTHR11071 (PANTHER),<br>PTHR11071:SF42 (PANTHER), PF04641<br>(PFAM), SSF57850 (SUPERFAMILY) |

|                         |                                                             |    |                                                                                                                                                                                                                                                                                              |   |                           |                                                                                                                                                                                                          |
|-------------------------|-------------------------------------------------------------|----|----------------------------------------------------------------------------------------------------------------------------------------------------------------------------------------------------------------------------------------------------------------------------------------------|---|---------------------------|----------------------------------------------------------------------------------------------------------------------------------------------------------------------------------------------------------|
| Caenorhabditis briggsae | carbamoyl-phosphate synthetase aspartate and dihydroorotase | 7  | P:GO:0006541;<br>F:GO:0016812;<br>F:GO:0016597;<br>F:GO:0004086;<br>F:GO:0005524;<br>P:GO:0006207;<br>F:GO:0004070                                                                                                                                                                           | - | EC:3.5.2.0;<br>EC:2.1.3.2 | -                                                                                                                                                                                                        |
| Caenorhabditis elegans  | lysocardiolipin acyltransferase 1                           | 4  | F:GO:0008415;<br>F:GO:0005515;<br>C:GO:0016021;<br>P:GO:0008152                                                                                                                                                                                                                              | - |                           | IPR002123; PTHR10983 (PANTHER),<br>PTHR10983:SF1 (PANTHER), SignalP<br>(SIGNALP)                                                                                                                         |
|                         |                                                             | 0  |                                                                                                                                                                                                                                                                                              |   |                           |                                                                                                                                                                                                          |
| Caenorhabditis elegans  | pre-mr-processing-splicing factor 8                         | 17 | P:GO:0050896;<br>F:GO:0003723;<br>C:GO:0005681;<br>P:GO:0045132;<br>P:GO:0040007;<br>C:GO:0016607;<br>P:GO:0040027;<br>P:GO:0040035;<br>P:GO:0018996;<br>P:GO:0007601;<br>F:GO:0005515;<br>P:GO:0040011;<br>P:GO:0000398;<br>C:GO:0005682;<br>P:GO:0006898;<br>P:GO:0002009;<br>P:GO:0009792 | - |                           | IPR012591; PTHR11140 (PANTHER)                                                                                                                                                                           |
|                         |                                                             | 0  |                                                                                                                                                                                                                                                                                              |   |                           |                                                                                                                                                                                                          |
|                         |                                                             | 0  |                                                                                                                                                                                                                                                                                              |   |                           |                                                                                                                                                                                                          |
|                         |                                                             | 0  |                                                                                                                                                                                                                                                                                              |   |                           | SignalP (SIGNALP)                                                                                                                                                                                        |
|                         |                                                             | 0  |                                                                                                                                                                                                                                                                                              |   |                           | IPR002097                                                                                                                                                                                                |
|                         |                                                             | 0  |                                                                                                                                                                                                                                                                                              |   |                           |                                                                                                                                                                                                          |
| Caenorhabditis elegans  | slit homolog 1                                              | 9  | F:GO:0005102;<br>P:GO:0051093;<br>C:GO:0005576;<br>P:GO:0050919;<br>P:GO:0048846;<br>P:GO:0022028;<br>P:GO:0051960;<br>P:GO:0048523;<br>P:GO:0051129                                                                                                                                         | - |                           | IPR000372; IPR001611; IPR003591;<br>PR00019 (PRINTS), G3DSA:3.80.10.10<br>(GENE3D), PTHR23154 (PANTHER),<br>PTHR23154:SF44 (PANTHER), PSS1450<br>(PROFILE), SignalP (SIGNALP),<br>SSF52058 (SUPERFAMILY) |

|                                |                                                            |    |                                                                                                                                                                                                                                                                                                                                                                                                                                                                                          |                               |                                                                                                |
|--------------------------------|------------------------------------------------------------|----|------------------------------------------------------------------------------------------------------------------------------------------------------------------------------------------------------------------------------------------------------------------------------------------------------------------------------------------------------------------------------------------------------------------------------------------------------------------------------------------|-------------------------------|------------------------------------------------------------------------------------------------|
| Caenorhabditis elegans         | rac-beta serine threonine-protein ki-se                    | 33 | F:GO:0009138;<br>F:GO:0004674;<br>P:GO:0010907;<br>P:GO:0014850;<br>P:GO:0043491;<br>P:GO:0045429;<br>C:GO:0032593;<br>C:GO:0005625;<br>P:GO:0043053;<br>P:GO:0046326;<br>P:GO:0010765;<br>C:GO:0030027;<br>C:GO:0005829;<br>P:GO:0031667;<br>C:GO:0005654;<br>P:GO:0009967;<br>P:GO:0046328;<br>P:GO:0006970;<br>C:GO:0005792;<br>P:GO:0040010;<br>P:GO:0043154;<br>P:GO:0008340;<br>P:GO:0045944;<br>C:GO:0005886;<br>P:GO:0019915;<br>P:GO:0043066;<br>C:GO:0005739;<br>F:GO:0005524; | EC:2.7.11.0                   | IPR001849; IPR011993; IPR015744;<br>PTHR22985 (PANTHER), SSF50729<br>(SUPERFAMILY)             |
| Homo sapiens                   | aldolase fructose-bisphosphate                             | 15 | P:GO:0006941;<br>F:GO:0070061;<br>P:GO:0007015;<br>P:GO:0008360;<br>C:GO:0070062;<br>F:GO:0042802;<br>P:GO:0006754;<br>C:GO:0031674;<br>F:GO:0003779;<br>P:GO:0046716;<br>C:GO:0015629;<br>P:GO:0006096;<br>F:GO:0015631;<br>F:GO:0004332;<br>P:GO:0030388                                                                                                                                                                                                                               | EC:4.1.2.13                   | -                                                                                              |
| Polysphondylium pallidum PN500 | ring finger and wd repeat domain 2                         | 3  | C:GO:0005654;<br>F:GO:0004842;<br>C:GO:0005829                                                                                                                                                                                                                                                                                                                                                                                                                                           | EC:6.3.2.19                   | -                                                                                              |
| -                              | -                                                          | 0  |                                                                                                                                                                                                                                                                                                                                                                                                                                                                                          |                               | -                                                                                              |
| Caenorhabditis briggsae        | coiled-coil domain-containing protein 25                   | 0  |                                                                                                                                                                                                                                                                                                                                                                                                                                                                                          | F:GO:0003674;<br>C:GO:0005575 | -                                                                                              |
| Caenorhabditis elegans         | elegans protein partially confirmed by transcript evidence | 0  |                                                                                                                                                                                                                                                                                                                                                                                                                                                                                          |                               | -                                                                                              |
| Caenorhabditis elegans         | n-ethylmaleimide-sensitive factor attachment gamma         | 4  | C:GO:0005783;<br>C:GO:0005794;<br>P:GO:0006886;<br>F:GO:0005488                                                                                                                                                                                                                                                                                                                                                                                                                          |                               | IPR000744; IPR011990;<br>PTHR13768:SF2 (PANTHER), SignalP<br>(SIGNALP), SSF48452 (SUPERFAMILY) |
| -                              | -                                                          | 0  |                                                                                                                                                                                                                                                                                                                                                                                                                                                                                          |                               | -                                                                                              |
| Brugia malayi                  | hypothetical protein Bm1_43950 [Brugia malayi]             | 0  |                                                                                                                                                                                                                                                                                                                                                                                                                                                                                          |                               | -                                                                                              |

|                         |                                                                           |   |                                                                                                                    |   |             |                                                                                                                              |
|-------------------------|---------------------------------------------------------------------------|---|--------------------------------------------------------------------------------------------------------------------|---|-------------|------------------------------------------------------------------------------------------------------------------------------|
| Caenorhabditis elegans  | dehydroge-se reductase sdr family member 4                                | 5 | F:GO:0005488;<br>F:GO:0016491;<br>C:GO:0043231;<br>P:GO:0055114;<br>C:GO:0044444                                   | - |             | SignalP (SIGNALP)                                                                                                            |
|                         | -                                                                         | 0 |                                                                                                                    |   |             | -                                                                                                                            |
|                         | -                                                                         | 0 |                                                                                                                    |   |             | -                                                                                                                            |
|                         | -                                                                         | 0 |                                                                                                                    |   |             | -                                                                                                                            |
| Caenorhabditis briggsae | spectrin beta chain                                                       | 3 | F:GO:0003779;<br>F:GO:0005200;<br>C:GO:0008091                                                                     | - |             | G3DSA:1.20.58.60 (GENE3D),<br>PTHR11915 (PANTHER),<br>PTHR11915:SF48 (PANTHER),<br>SSF46966 (SUPERFAMILY)                    |
| Loa loa                 | cmgc cdk cdk9 protein ki-se                                               | 0 |                                                                                                                    |   |             | G3DSA:3.30.200.20 (GENE3D),<br>PTHR11295 (PANTHER),<br>PTHR11295:SF111 (PANTHER)                                             |
| Caenorhabditis briggsae | germ cell-specific gene 2                                                 | 7 | P:GO:0007243;<br>F:GO:0004674;<br>P:GO:0007049;<br>F:GO:0003677;<br>F:GO:0005524;<br>C:GO:0005634;<br>P:GO:0006468 | - | EC:2.7.11.0 | IPR000719; PF12330 (PFAM)                                                                                                    |
| Caenorhabditis elegans  | fanci (fanconi anemia complex component i) homolog family member (fnci-1) | 0 |                                                                                                                    |   |             | -                                                                                                                            |
|                         | -                                                                         | 0 |                                                                                                                    |   |             | -                                                                                                                            |
| Caenorhabditis briggsae | bcl2 adenovirus e1b 19kda interacting protein 1                           | 6 | P:GO:0006996;<br>P:GO:0042981;<br>C:GO:0044446;<br>C:GO:0044425;<br>C:GO:0012505;<br>C:GO:0005783                  | - |             | IPR005606; PTHR12825 (PANTHER)                                                                                               |
| Caenorhabditis briggsae | bcl2 adenovirus e1b 19kda interacting protein 1                           | 6 | P:GO:0006996;<br>P:GO:0042981;<br>C:GO:0044446;<br>C:GO:0044425;<br>C:GO:0012505;<br>C:GO:0005783                  | - |             | IPR005606; PTHR12825 (PANTHER)                                                                                               |
| Caenorhabditis briggsae | iars2 protein                                                             | 4 | P:GO:0006412;<br>F:GO:0005488;<br>C:GO:0005739;<br>F:GO:0004812                                                    | - | EC:3.6.5.3  | IPR002300; IPR002301; IPR009008;<br>IPR014729; G3DSA:3.90.740.10<br>(GENE3D), PTHR11946 (PANTHER),<br>SSF52374 (SUPERFAMILY) |
| Caenorhabditis briggsae | macro domain-containing protein 1                                         | 0 |                                                                                                                    |   |             | IPR002589; G3DSA:3.40.220.10<br>(GENE3D), PTHR11106 (PANTHER),<br>PTHR11106:SF3 (PANTHER), SSF52949<br>(SUPERFAMILY)         |
|                         |                                                                           | 0 |                                                                                                                    |   |             |                                                                                                                              |

|                         |                                                                          |    |                                                                                                                                                                                                                                           |                                                                                                   |             |                                        |
|-------------------------|--------------------------------------------------------------------------|----|-------------------------------------------------------------------------------------------------------------------------------------------------------------------------------------------------------------------------------------------|---------------------------------------------------------------------------------------------------|-------------|----------------------------------------|
| Caenorhabditis elegans  | cbp p300 homolog family member (cbp-1)                                   | 14 | F:GO:0008270;<br>F:GO:0004402;<br>C:GO:0000123;<br>P:GO:0040010;<br>P:GO:0040026;<br>P:GO:0007283;<br>P:GO:0018996;<br>C:GO:0005737;<br>P:GO:0040039;<br>P:GO:0009792;<br>F:GO:0003713;<br>P:GO:0045944;<br>P:GO:0040035;<br>P:GO:0016573 | -                                                                                                 | EC:2.3.1.48 | IPR013178; PTHR13808 (PANTHER)         |
| Caenorhabditis briggsae | briggsae cbr-ric-3 protein                                               | 3  | C:GO:0005783;<br>C:GO:0044425;<br>F:GO:0005515                                                                                                                                                                                            | -                                                                                                 |             | PTHR21723 (PANTHER), SignalP (SIGNALP) |
|                         | -                                                                        | 0  |                                                                                                                                                                                                                                           |                                                                                                   |             | -                                      |
|                         | -                                                                        | 0  |                                                                                                                                                                                                                                           |                                                                                                   |             | -                                      |
| Caenorhabditis elegans  | vitellogenin structural genes (yolk protein genes) family member (vit-6) | 0  |                                                                                                                                                                                                                                           | P:GO:0006869;<br>F:GO:0005319;<br>F:GO:0045735;<br>P:GO:0006886;<br>C:GO:0005576;<br>F:GO:0008565 |             | IPR015816                              |
| Caenorhabditis elegans  | vitellogenin structural genes (yolk protein genes) family member (vit-6) | 0  |                                                                                                                                                                                                                                           | P:GO:0006869;<br>F:GO:0005319;<br>F:GO:0045735;<br>P:GO:0006886;<br>C:GO:0005576;<br>F:GO:0008565 |             | IPR015816                              |
|                         | -                                                                        | 0  |                                                                                                                                                                                                                                           |                                                                                                   |             | SignalP (SIGNALP)                      |
| Caenorhabditis elegans  | variable abnormal morphology family member (vab-10)                      | 0  |                                                                                                                                                                                                                                           | P:GO:0007050;<br>F:GO:0005509                                                                     |             | -                                      |
| Caenorhabditis briggsae | uncharacterized aarf domain-containing protein ki-se 1                   | 2  | F:GO:0016740;<br>C:GO:0005739                                                                                                                                                                                                             | -                                                                                                 |             | -                                      |
|                         | -                                                                        | 0  |                                                                                                                                                                                                                                           |                                                                                                   |             | -                                      |
| Caenorhabditis elegans  | general transcription factor polypeptide beta 34kda                      | 13 | P:GO:0006367;<br>C:GO:0005673;<br>P:GO:0000003;<br>F:GO:0005515;<br>P:GO:0040010;<br>P:GO:0006898;<br>P:GO:0040011;<br>P:GO:0006259;<br>F:GO:0003676;<br>F:GO:0004386;<br>P:GO:0009792;<br>P:GO:0002119;<br>P:GO:0010171                  | -                                                                                                 |             | SignalP (SIGNALP)                      |
| Caenorhabditis elegans  | briggsae cbr-tgt-1 protein                                               | 2  | F:GO:0016757;<br>P:GO:0006400                                                                                                                                                                                                             | -                                                                                                 |             | -                                      |
| Caenorhabditis briggsae | elegans protein confirmed by transcript evidence                         | 0  |                                                                                                                                                                                                                                           |                                                                                                   |             | -                                      |
| Caenorhabditis briggsae | elegans protein confirmed by transcript evidence                         | 0  |                                                                                                                                                                                                                                           |                                                                                                   |             | -                                      |

|                             |                                                       |   |                                                                                                                                     |                                                                                                                                                                                                                                                                                                                                                                                                                                                                                                                                                                              |            |                                                                                                                     |   |
|-----------------------------|-------------------------------------------------------|---|-------------------------------------------------------------------------------------------------------------------------------------|------------------------------------------------------------------------------------------------------------------------------------------------------------------------------------------------------------------------------------------------------------------------------------------------------------------------------------------------------------------------------------------------------------------------------------------------------------------------------------------------------------------------------------------------------------------------------|------------|---------------------------------------------------------------------------------------------------------------------|---|
| Angiostrongylus cantonensis | briggsae cbr-mdl-1 protein                            | 7 | F:GO:0030528;<br>F:GO:0003677;<br>C:GO:0005634;<br>F:GO:0008270;<br>F:GO:0008168;<br>P:GO:0006355;<br>P:GO:0006281                  | -                                                                                                                                                                                                                                                                                                                                                                                                                                                                                                                                                                            | EC:2.1.1.0 | PTHR11969 (PANTHER),<br>PTHR11969:SF3 (PANTHER)                                                                     |   |
| Caenorhabditis elegans      | adp-ribosylation factor-like protein 5a               | 8 | C:GO:0005737;<br>P:GO:0009792;<br>F:GO:0005525;<br>P:GO:0006886;<br>C:GO:0005634;<br>P:GO:0051729;<br>P:GO:0008406;<br>P:GO:0007264 | -                                                                                                                                                                                                                                                                                                                                                                                                                                                                                                                                                                            |            | IPR006689; G3DSA:3.40.50.300<br>(GENE3D), PTHR11711:SF31<br>(PANTHER), PS51417 (PROFILE),<br>SSF52540 (SUPERFAMILY) |   |
| Brugia malayi               | splicing arginine serine-                             | 0 |                                                                                                                                     | P:GO:0008380;<br>P:GO:0006397;<br>C:GO:0005634                                                                                                                                                                                                                                                                                                                                                                                                                                                                                                                               |            | IPR019147; PTHR13161 (PANTHER),<br>PTHR13161:SF4 (PANTHER)                                                          |   |
| Caenorhabditis briggsae     | r- polymerase domain 2 family protein                 | 2 | F:GO:0005488;<br>F:GO:0016779                                                                                                       | -                                                                                                                                                                                                                                                                                                                                                                                                                                                                                                                                                                            | EC:2.7.7.0 | -                                                                                                                   |   |
| Homo sapiens                | hCG2030753 [Homo sapiens]                             | 0 |                                                                                                                                     |                                                                                                                                                                                                                                                                                                                                                                                                                                                                                                                                                                              |            | -                                                                                                                   |   |
| Loa loa                     | arginine-tr--protein transferase 1                    | 1 | F:GO:0016740                                                                                                                        | -                                                                                                                                                                                                                                                                                                                                                                                                                                                                                                                                                                            |            | PTHR21367 (PANTHER)                                                                                                 |   |
| Brugia malayi               | translocated promoter region                          | 0 |                                                                                                                                     | C:GO:0045211;<br>F:GO:0004872;<br>F:GO:0004871;<br>F:GO:0005216;<br>F:GO:0005215;<br>C:GO:0005886;<br>P:GO:0007018;<br>C:GO:0030054;<br>C:GO:0016021;<br>P:GO:0008150;<br>P:GO:0043278;<br>C:GO:0016020;<br>P:GO:0035249;<br>P:GO:0006412;<br>C:GO:0005624;<br>C:GO:0005654;<br>C:GO:0045202;<br>P:GO:0006606;<br>P:GO:0007165;<br>F:GO:0005524;<br>C:GO:0005874;<br>F:GO:0005234;<br>C:GO:0000776;<br>F:GO:0000166;<br>P:GO:0043523;<br>P:GO:0007094;<br>P:GO:0034770;<br>P:GO:0009058;<br>F:GO:0016847;<br>F:GO:0003824;<br>F:GO:0016829;<br>F:GO:0030170;<br>F:GO:0016769 |            |                                                                                                                     | - |
| Caenorhabditis briggsae     | nematode kynurenine ransferase family member (nkat-3) | 0 |                                                                                                                                     |                                                                                                                                                                                                                                                                                                                                                                                                                                                                                                                                                                              |            | -                                                                                                                   |   |
| Caenorhabditis elegans      | hypothetical protein K07B1.7 [Caenorhabditis elegans] | 0 |                                                                                                                                     |                                                                                                                                                                                                                                                                                                                                                                                                                                                                                                                                                                              |            | -                                                                                                                   |   |

|                         |                                                            |   |                                                                                                                                     |   |                               |                                                                                                                                                           |
|-------------------------|------------------------------------------------------------|---|-------------------------------------------------------------------------------------------------------------------------------------|---|-------------------------------|-----------------------------------------------------------------------------------------------------------------------------------------------------------|
| Ancylostoma caninum     | briggsae cbr-sma-6 protein                                 | 4 | P:GO:0006468;<br>F:GO:0005024;<br>F:GO:0005524;<br>C:GO:0016020                                                                     | - |                               | IPR000472; G3DSA:2.10.60.10<br>(GENE3D), SignalP (SIGNALP),<br>SSF57302 (SUPERFAMILY)                                                                     |
| -                       | -                                                          | 0 |                                                                                                                                     |   |                               | -                                                                                                                                                         |
| Sorghum bicolor         | cytochrome p450 like_tbp                                   | 2 | P:GO:0055114;<br>F:GO:0070330                                                                                                       | - |                               | -                                                                                                                                                         |
| Caenorhabditis elegans  | elegans protein partially confirmed by transcript evidence | 1 | C:GO:0016020                                                                                                                        | - |                               | IPR003406; PTHR19297:SF3<br>(PANTHER)                                                                                                                     |
| -                       | -                                                          | 0 |                                                                                                                                     |   |                               | -                                                                                                                                                         |
| Caenorhabditis briggsae | fatty acid elongation protein 3                            | 3 | P:GO:0018996;<br>P:GO:0008340;<br>P:GO:0040010                                                                                      | - |                               | IPR002076; SignalP (SIGNALP)                                                                                                                              |
| Caenorhabditis elegans  | udp-glucose 4-epimerase                                    | 7 | P:GO:0006694;<br>P:GO:0000003;<br>F:GO:0003854;<br>F:GO:0050662;<br>F:GO:0005515;<br>F:GO:0003978;<br>P:GO:0006012                  | - | EC:1.1.1.145<br>; EC:5.1.3.2  | IPR001509; IPR005886; IPR008089;<br>IPR016040; G3DSA:3.90.25.10<br>(GENE3D), PTHR10366 (PANTHER),<br>SSF51735 (SUPERFAMILY)                               |
| -                       | -                                                          | 0 |                                                                                                                                     |   |                               | SignalP (SIGNALP)                                                                                                                                         |
| -                       | -                                                          | 0 |                                                                                                                                     |   |                               | -                                                                                                                                                         |
| Loa loa                 | fatty acyl- reductase 1                                    | 8 | P:GO:0006694;<br>F:GO:0016620;<br>F:GO:0003854;<br>C:GO:0005777;<br>F:GO:0005515;<br>P:GO:0044237;<br>F:GO:0050662;<br>C:GO:0016020 | - | EC:1.2.1.0;<br>EC:1.1.1.145   | IPR013120; IPR016040; PTHR11011<br>(PANTHER), PTHR11011:SF8<br>(PANTHER), SSF51735 (SUPERFAMILY)                                                          |
| Caenorhabditis briggsae | fragile site-associated protein                            | 0 |                                                                                                                                     |   |                               | -                                                                                                                                                         |
| Caenorhabditis briggsae | protein-tyrosine phosphatase containing protein            | 3 | P:GO:0016311;<br>F:GO:0004721;<br>P:GO:0009792                                                                                      | - | EC:3.1.3.16                   | IPR000242; IPR000387; IPR003595;<br>IPR016130; G3DSA:3.90.190.10<br>(GENE3D), PTHR19134 (PANTHER),<br>PTHR19134:SF26 (PANTHER),<br>SSF52799 (SUPERFAMILY) |
| -                       | -                                                          | 0 |                                                                                                                                     |   |                               | -                                                                                                                                                         |
| -                       | -                                                          | 0 |                                                                                                                                     |   |                               | -                                                                                                                                                         |
| Bacillus cereus AH1273  | lpxtg-motif cell wall anchor domain protein                | 0 |                                                                                                                                     |   | F:GO:0005488;<br>C:GO:0009986 | -                                                                                                                                                         |
| Ciona intestinalis      | phosphatidylinositol glycan anchor class g                 | 0 |                                                                                                                                     |   |                               | -                                                                                                                                                         |
| Caenorhabditis elegans  | R151.8B protein [Caenorhabditis elegans]                   | 0 |                                                                                                                                     |   |                               | -                                                                                                                                                         |
| Brugia malayi           | elegans protein confirmed by transcript evidence           | 2 | F:GO:0005515;<br>P:GO:0009792                                                                                                       | - |                               | IPR000504; IPR012677; PTHR10432<br>(PANTHER), SSF54928 (SUPERFAMILY)                                                                                      |
| Caenorhabditis elegans  | very long-chain specific acyl- mitochondrial               | 5 | F:GO:0016627;<br>P:GO:0006629;<br>P:GO:0040010;<br>P:GO:0044281;<br>P:GO:0009792                                                    | - |                               | -                                                                                                                                                         |
| Caenorhabditis briggsae | alanine-glyoxylate aminotransferase 2-like 2               | 3 | F:GO:0030170;<br>C:GO:0005739;<br>F:GO:0008483                                                                                      | - | EC:2.6.1.0                    | -                                                                                                                                                         |
| Haemonchus contortus    | forkhead transcription factor daf-16                       | 4 | F:GO:0003700;<br>F:GO:0043565;<br>C:GO:0005634;<br>P:GO:0006355                                                                     | - |                               | -                                                                                                                                                         |

|                         |                                                       |  |    |                                                                                                                                                                                                         |                                                                                                                    |                                                                                            |
|-------------------------|-------------------------------------------------------|--|----|---------------------------------------------------------------------------------------------------------------------------------------------------------------------------------------------------------|--------------------------------------------------------------------------------------------------------------------|--------------------------------------------------------------------------------------------|
| Caenorhabditis elegans  | hypothetical protein W05F2.4 [Caenorhabditis elegans] |  | 3  | P:GO:0040018;<br>P:GO:0040035;<br>P:GO:0002119                                                                                                                                                          | -                                                                                                                  | -                                                                                          |
|                         | -                                                     |  | 0  |                                                                                                                                                                                                         |                                                                                                                    | IPR001810; G3DSA:1.20.1280.50 (GENE3D)                                                     |
|                         | -                                                     |  | 0  |                                                                                                                                                                                                         |                                                                                                                    | -                                                                                          |
|                         | -                                                     |  | 0  |                                                                                                                                                                                                         |                                                                                                                    | IPR005819                                                                                  |
|                         | -                                                     |  | 0  |                                                                                                                                                                                                         |                                                                                                                    | -                                                                                          |
| Caenorhabditis elegans  | uba and wwe domain containing 1                       |  | 2  | C:GO:0005622;<br>P:GO:0009987                                                                                                                                                                           | -                                                                                                                  | IPR000449; IPR009060; IPR015940; G3DSA:1.10.8.10 (GENE3D)                                  |
| Caenorhabditis elegans  | uba and wwe domain containing 1                       |  | 2  | C:GO:0005622;<br>P:GO:0009987                                                                                                                                                                           | -                                                                                                                  | IPR000449; IPR009060; IPR015940; G3DSA:1.10.8.10 (GENE3D)                                  |
| Caenorhabditis elegans  | midasin homolog                                       |  | 4  | F:GO:0017111;<br>P:GO:0050789;<br>C:GO:0005622;<br>F:GO:0000166                                                                                                                                         | -                                                                                                                  | EC:3.6.1.15<br>PTHR22908 (PANTHER),<br>PTHR22908:SF13 (PANTHER),<br>SSF53300 (SUPERFAMILY) |
| Caenorhabditis briggsae | replication factor c subunit 1                        |  | 10 | P:GO:0000003;<br>C:GO:0016020;<br>P:GO:0006974;<br>P:GO:0040010;<br>P:GO:0006898;<br>P:GO:0006350;<br>P:GO:0009792;<br>F:GO:0003677;<br>P:GO:0002119;<br>C:GO:0005634                                   | -                                                                                                                  | IPR003959; G3DSA:3.40.50.300 (GENE3D), PTHR23389 (PANTHER),<br>SSF52540 (SUPERFAMILY)      |
|                         | -                                                     |  | 0  |                                                                                                                                                                                                         |                                                                                                                    | -                                                                                          |
| Caenorhabditis briggsae | smad nuclear-interacting protein 1                    |  | 0  |                                                                                                                                                                                                         | P:GO:0000003;<br>P:GO:0040011;<br>P:GO:0010171;<br>P:GO:0006898;<br>P:GO:0009792;<br>P:GO:0002119;<br>P:GO:0040007 | -                                                                                          |
| Caenorhabditis briggsae | smad nuclear-interacting protein 1                    |  | 1  | P:GO:0032502                                                                                                                                                                                            | -                                                                                                                  | -                                                                                          |
| Caenorhabditis elegans  | elegans protein confirmed by transcript evidence      |  | 1  | P:GO:0019915                                                                                                                                                                                            |                                                                                                                    | -                                                                                          |
| Caenorhabditis briggsae | interacting protein 2                                 |  | 6  | P:GO:0009792;<br>P:GO:0002119;<br>P:GO:0000003;<br>P:GO:0040007;<br>P:GO:0006898;<br>P:GO:0002009                                                                                                       | -                                                                                                                  | IPR014810; PTHR21686 (PANTHER),<br>PTHR21686:SF11 (PANTHER)                                |
|                         | -                                                     |  | 0  |                                                                                                                                                                                                         |                                                                                                                    | -                                                                                          |
|                         | -                                                     |  | 0  |                                                                                                                                                                                                         |                                                                                                                    | IPR018276; SignalP (SIGNALP)                                                               |
| Loa loa                 | hypothetical protein LOAG_10948 [Loa loa]             |  | 0  |                                                                                                                                                                                                         |                                                                                                                    | -                                                                                          |
| Onchocerca volvulus     | remodeling and spacing factor 1                       |  | 12 | F:GO:0042393;<br>P:GO:0016584;<br>C:GO:0031213;<br>P:GO:0045892;<br>P:GO:0043392;<br>F:GO:0016563;<br>P:GO:0006338;<br>P:GO:0050434;<br>P:GO:0006352;<br>F:GO:0016887;<br>P:GO:0006334;<br>F:GO:0016564 | -                                                                                                                  | PTHR10615 (PANTHER),<br>PTHR10615:SF2 (PANTHER)                                            |



|                         |                                                                      |    |                                                                                                                                                                                                                                           |                                                                                                   |              |                                                                                                   |
|-------------------------|----------------------------------------------------------------------|----|-------------------------------------------------------------------------------------------------------------------------------------------------------------------------------------------------------------------------------------------|---------------------------------------------------------------------------------------------------|--------------|---------------------------------------------------------------------------------------------------|
| Caenorhabditis elegans  | ph domain containing protein                                         | 0  |                                                                                                                                                                                                                                           |                                                                                                   |              | IPR004012; SSF140741 (SUPERFAMILY)                                                                |
| Caenorhabditis briggsae | nuclear pore complex protein family member (npp-21)                  | 14 | P:GO:0006810;<br>P:GO:0000003;<br>F:GO:0005515;<br>C:GO:0016020;<br>P:GO:0060134;<br>P:GO:0040015;<br>C:GO:0019717;<br>P:GO:0040011;<br>P:GO:0043523;<br>P:GO:0060079;<br>P:GO:0035249;<br>C:GO:0005635;<br>P:GO:0002119;<br>C:GO:0045202 | -                                                                                                 |              | PTHR18898 (PANTHER)                                                                               |
|                         | -                                                                    | 0  |                                                                                                                                                                                                                                           |                                                                                                   |              | -                                                                                                 |
| Loa loa                 | zinc dhc-type containing 6                                           | 0  |                                                                                                                                                                                                                                           | F:GO:0046872;<br>F:GO:0008415;<br>F:GO:0016740;<br>C:GO:0016021;<br>C:GO:0016020;<br>F:GO:0008270 |              | IPR001594; PTHR22883 (PANTHER)                                                                    |
|                         | -                                                                    | 0  |                                                                                                                                                                                                                                           |                                                                                                   |              | -                                                                                                 |
| Caenorhabditis elegans  | elegans protein confirmed by transcript evidence                     | 0  |                                                                                                                                                                                                                                           |                                                                                                   |              | IPR007621; SignalP (SIGNALP)                                                                      |
| Loa loa                 | mannosyl (alpha-)-glycoprotein beta--n-acetylglucosaminyltransferase | 3  | C:GO:0000139;<br>F:GO:0003827;<br>P:GO:0006487                                                                                                                                                                                            | -                                                                                                 | EC:2.4.1.101 | IPR004139; G3DSA:3.90.550.10 (GENE3D)                                                             |
|                         | -                                                                    | 0  |                                                                                                                                                                                                                                           |                                                                                                   |              | -                                                                                                 |
|                         | -                                                                    | 0  |                                                                                                                                                                                                                                           |                                                                                                   |              | -                                                                                                 |
|                         | -                                                                    | 0  |                                                                                                                                                                                                                                           |                                                                                                   |              | -                                                                                                 |
| Branchiostoma floridae  | deltex homolog 3                                                     | 2  | P:GO:0007219;<br>F:GO:0005515                                                                                                                                                                                                             | -                                                                                                 |              | -                                                                                                 |
| Branchiostoma floridae  | deltex homolog 3                                                     | 2  | P:GO:0007219;<br>F:GO:0005515                                                                                                                                                                                                             | -                                                                                                 |              | -                                                                                                 |
| Caenorhabditis briggsae | alkbh protein                                                        | 0  |                                                                                                                                                                                                                                           | F:GO:0003735;<br>P:GO:0055114;<br>P:GO:0006412;<br>F:GO:0016491;<br>C:GO:0005840;<br>C:GO:0005622 |              | G3DSA:2.60.120.590 (GENE3D),<br>SSF51197 (SUPERFAMILY)                                            |
| Caenorhabditis briggsae | briggsae cbr-snf-9 protein                                           | 1  | C:GO:0016020                                                                                                                                                                                                                              | -                                                                                                 |              | IPR000175; SignalP (SIGNALP)                                                                      |
| Caenorhabditis elegans  | t-cell immunomodulatory protein                                      | 4  | P:GO:0009792;<br>P:GO:0000003;<br>P:GO:0040007;<br>P:GO:0002119                                                                                                                                                                           | -                                                                                                 |              | G3DSA:2.130.10.130 (GENE3D),<br>PTHR13412 (PANTHER), SignalP<br>(SIGNALP), SSF69318 (SUPERFAMILY) |
| Caenorhabditis briggsae | pyruvate ki-se                                                       | 6  | P:GO:0009792;<br>F:GO:0004743;<br>F:GO:0005515;<br>F:GO:0030955;<br>F:GO:0000287;<br>P:GO:0006096                                                                                                                                         | -                                                                                                 | EC:2.7.1.40  | IPR001697; IPR011037; IPR015793;<br>IPR015806; IPR015813                                          |
|                         | -                                                                    | 0  |                                                                                                                                                                                                                                           |                                                                                                   |              | -                                                                                                 |
| Brugia malayi           | acyltransferase family protein                                       | 3  | P:GO:0008152;<br>C:GO:0016021;<br>F:GO:0008415                                                                                                                                                                                            | -                                                                                                 |              | -                                                                                                 |

|                         |                                                                   |    |                                                                                                                                                                                                                          |                               |                                                                                                                                   |
|-------------------------|-------------------------------------------------------------------|----|--------------------------------------------------------------------------------------------------------------------------------------------------------------------------------------------------------------------------|-------------------------------|-----------------------------------------------------------------------------------------------------------------------------------|
| Caenorhabditis elegans  | lin-26 related family member (lir-1)                              | 5  | P:GO:0002119;<br>P:GO:0048856;<br>F:GO:0005488;<br>P:GO:0040007;<br>P:GO:0048518                                                                                                                                         | -                             | IPR015880; PTHR14596 (PANTHER),<br>SSF57667 (SUPERFAMILY)                                                                         |
| -                       | -                                                                 | 0  |                                                                                                                                                                                                                          |                               | -                                                                                                                                 |
| Brugia malayi           | general transcription factor polypeptide 102kda                   | 8  | P:GO:0042797;<br>C:GO:0000127;<br>P:GO:0040010;<br>P:GO:0042791;<br>F:GO:0003677;<br>F:GO:0003709;<br>F:GO:0005515;<br>P:GO:0006898                                                                                      | -                             | IPR011990; IPR013026; SSF48452<br>(SUPERFAMILY)                                                                                   |
| -                       | -                                                                 | 0  |                                                                                                                                                                                                                          |                               | -                                                                                                                                 |
| Caenorhabditis briggsae | transmembrane anterior posterior transformation protein 1 homolog | 2  | P:GO:0043009;<br>C:GO:0016020                                                                                                                                                                                            | -                             | IPR008010; SignalP (SIGNALP)                                                                                                      |
| Caenorhabditis briggsae | briggsae cbr-apg-1 protein                                        | 13 | P:GO:0016192;<br>F:GO:0008565;<br>P:GO:0040010;<br>P:GO:0009306;<br>P:GO:0000003;<br>C:GO:0030131;<br>P:GO:0002119;<br>F:GO:0005515;<br>P:GO:0040011;<br>P:GO:0006886;<br>C:GO:0044431;<br>P:GO:0009792;<br>P:GO:0001703 | -                             | IPR002553; IPR011989; IPR016024;<br>PTHR22780 (PANTHER),<br>PTHR22780:SF5 (PANTHER)                                               |
| Loa loa                 | sodium- and chloride-dependent neurotransmitter transporter       | 3  | C:GO:0005887;<br>F:GO:0005328;<br>P:GO:0006836                                                                                                                                                                           | -                             | IPR000175; IPR010916;<br>PTHR11616:SF12 (PANTHER), SignalP<br>(SIGNALP)                                                           |
| -                       | -                                                                 | 0  |                                                                                                                                                                                                                          |                               | -                                                                                                                                 |
| Caenorhabditis elegans  | la ribonucleoprotein domain member 1                              | 0  |                                                                                                                                                                                                                          |                               | IPR006607; PTHR22792 (PANTHER),<br>PTHR22792:SF8 (PANTHER)                                                                        |
| Caenorhabditis elegans  | la ribonucleoprotein domain member 1                              | 0  |                                                                                                                                                                                                                          | F:GO:0003674;<br>P:GO:0008150 | IPR006607; PTHR22792 (PANTHER),<br>PTHR22792:SF8 (PANTHER)                                                                        |
| Caenorhabditis elegans  | la ribonucleoprotein domain member 1                              | 0  |                                                                                                                                                                                                                          |                               | IPR006607; PTHR22792 (PANTHER),<br>PTHR22792:SF8 (PANTHER)                                                                        |
| Caenorhabditis elegans  | protein vac14-like protein                                        | 1  | F:GO:0005515                                                                                                                                                                                                             | -                             | IPR011989; IPR016024; PTHR16023<br>(PANTHER)                                                                                      |
| -                       | -                                                                 | 0  |                                                                                                                                                                                                                          |                               | -                                                                                                                                 |
| Caenorhabditis elegans  | 2-amino-3-carboxymu-co-6-semialdehyde decarboxylase               | 5  | P:GO:0006568;<br>P:GO:0006769;<br>F:GO:0001760;<br>C:GO:0005829;<br>P:GO:0046874                                                                                                                                         | -                             | EC:4.1.1.45<br>IPR006992; G3DSA:3.20.20.140<br>(GENE3D), PTHR21240 (PANTHER),<br>SSF51556 (SUPERFAMILY)                           |
| Caenorhabditis elegans  | peptidase s9 prolyl oligopeptidase active site domain protein     | 1  | F:GO:0008236                                                                                                                                                                                                             | -                             | -                                                                                                                                 |
| Caenorhabditis elegans  | sorbitol dehydroge-se                                             | 3  | F:GO:0046872;<br>F:GO:0016491;<br>P:GO:0008152                                                                                                                                                                           | -                             | IPR002085; IPR011032; IPR013149;<br>IPR016040; G3DSA:3.90.180.10<br>(GENE3D), PTHR11695:SF38<br>(PANTHER), SSF51735 (SUPERFAMILY) |
| -                       | -                                                                 | 0  |                                                                                                                                                                                                                          |                               | -                                                                                                                                 |

|                             |                                                    |    |                                                                                                                                                                                                                                                            |                                                                                                                                     |            |                                                                                                                      |
|-----------------------------|----------------------------------------------------|----|------------------------------------------------------------------------------------------------------------------------------------------------------------------------------------------------------------------------------------------------------------|-------------------------------------------------------------------------------------------------------------------------------------|------------|----------------------------------------------------------------------------------------------------------------------|
| Caenorhabditis elegans      | uncoordi-ted family member (unc-5)                 | 0  |                                                                                                                                                                                                                                                            | F:GO:0004872;<br>P:GO:0007165;<br>F:GO:0005515                                                                                      |            | IPR000906; PTHR12582 (PANTHER),<br>PTHR12582:SF2 (PANTHER)                                                           |
|                             | -                                                  | 0  |                                                                                                                                                                                                                                                            |                                                                                                                                     |            | SignalP (SIGNALP)                                                                                                    |
|                             | -                                                  | 0  |                                                                                                                                                                                                                                                            |                                                                                                                                     |            | SignalP (SIGNALP)                                                                                                    |
| Teladorsagia circumcincta   | cytochrome c oxidase subunit iii                   | 4  | P:GO:0006123;<br>C:GO:0016021;<br>C:GO:0005739;<br>F:GO:0004129                                                                                                                                                                                            | -                                                                                                                                   | EC:1.9.3.1 | -                                                                                                                    |
| Caenorhabditis briggsae     | ankyrin unc44                                      | 1  | C:GO:0044424                                                                                                                                                                                                                                               | -                                                                                                                                   |            | IPR002110; IPR020683; PR01415<br>(PRINTS), PTHR18958 (PANTHER),<br>PTHR18958:SF250 (PANTHER)                         |
| Caenorhabditis briggsae     | chromosome transmission fidelity factor 18 homolog | 1  | P:GO:0009987                                                                                                                                                                                                                                               | -                                                                                                                                   |            | IPR003959; G3DSA:3.40.50.300<br>(GENE3D), PTHR13779 (PANTHER),<br>PTHR13779:SF3 (PANTHER), SSF52540<br>(SUPERFAMILY) |
| Caenorhabditis elegans      | briggsae cbr-dys-1 protein                         | 7  | P:GO:0007271;<br>F:GO:0005515;<br>P:GO:0040017;<br>C:GO:0016010;<br>F:GO:0005277;<br>P:GO:0015870;<br>P:GO:0046716                                                                                                                                         | -                                                                                                                                   |            | -                                                                                                                    |
|                             | -                                                  | 0  |                                                                                                                                                                                                                                                            |                                                                                                                                     |            | SignalP (SIGNALP)                                                                                                    |
| Caenorhabditis briggsae     | adp atp translocase                                | 15 | F:GO:0008233;<br>P:GO:0055085;<br>P:GO:0040010;<br>P:GO:0008340;<br>C:GO:0016021;<br>C:GO:0005743;<br>P:GO:0040002;<br>P:GO:0040035;<br>P:GO:0010171;<br>P:GO:0002119;<br>F:GO:0005515;<br>F:GO:0005215;<br>P:GO:0006898;<br>P:GO:0002009;<br>P:GO:0009792 | -                                                                                                                                   |            | IPR001993; IPR002067; IPR002113;<br>IPR018108; G3DSA:1.50.40.10<br>(GENE3D), PTHR11896:SF35<br>(PANTHER)             |
|                             | -                                                  | 0  |                                                                                                                                                                                                                                                            |                                                                                                                                     |            | -                                                                                                                    |
| Angiostrongylus cantonensis | s- protein                                         | 3  | F:GO:0008270;<br>F:GO:0003676;<br>C:GO:0005622                                                                                                                                                                                                             | -                                                                                                                                   |            | IPR007087; IPR015880                                                                                                 |
| Loa loa                     | spry domain containing protein                     | 0  |                                                                                                                                                                                                                                                            | F:GO:0003676;<br>P:GO:0040011;<br>P:GO:0040010;<br>P:GO:0009792;<br>P:GO:0002119;<br>P:GO:0019915;<br>P:GO:0040007;<br>P:GO:0002009 |            | PTHR12381 (PANTHER),<br>PTHR12381:SF7 (PANTHER)                                                                      |
| Caenorhabditis briggsae     | helix loop helix family member (hlh-30)            | 4  | P:GO:0045449;<br>P:GO:0000003;<br>P:GO:0019915;<br>C:GO:0005634                                                                                                                                                                                            | -                                                                                                                                   |            | IPR001092; IPR011598; PTHR10014<br>(PANTHER), PTHR10014:SF7<br>(PANTHER)                                             |

|                         |                                                            |    |                                                                                                                                                                                                                                                                                                                                                 |                                                                                                                                     |            |                                                                                          |
|-------------------------|------------------------------------------------------------|----|-------------------------------------------------------------------------------------------------------------------------------------------------------------------------------------------------------------------------------------------------------------------------------------------------------------------------------------------------|-------------------------------------------------------------------------------------------------------------------------------------|------------|------------------------------------------------------------------------------------------|
| Caenorhabditis briggsae | helix loop helix family member (hlh-30)                    | 4  | P:GO:0045449;<br>P:GO:0000003;<br>P:GO:0019915;<br>C:GO:0005634                                                                                                                                                                                                                                                                                 | -                                                                                                                                   |            | IPR001092; IPR011598; PTHR10014<br>(PANTHER), PTHR10014:SF7<br>(PANTHER)                 |
|                         | -                                                          | 0  |                                                                                                                                                                                                                                                                                                                                                 |                                                                                                                                     |            | -                                                                                        |
| Caenorhabditis elegans  | membrane calcium atpase family member (mca-3)              | 0  |                                                                                                                                                                                                                                                                                                                                                 |                                                                                                                                     |            | -                                                                                        |
|                         | -                                                          | 0  |                                                                                                                                                                                                                                                                                                                                                 |                                                                                                                                     |            | -                                                                                        |
| Caenorhabditis elegans  | elegans protein partially confirmed by transcript evidence | 0  |                                                                                                                                                                                                                                                                                                                                                 | F:GO:0005515                                                                                                                        |            | IPR006578                                                                                |
| Caenorhabditis elegans  | elegans protein partially confirmed by transcript evidence | 0  |                                                                                                                                                                                                                                                                                                                                                 | F:GO:0005515                                                                                                                        |            | IPR006578                                                                                |
| Caenorhabditis elegans  | guanylate cyclase                                          | 20 | P:GO:0006468;<br>F:GO:0004383;<br>F:GO:0017046;<br>F:GO:0016941;<br>P:GO:0023034;<br>F:GO:0019901;<br>P:GO:0048662;<br>F:GO:0004672;<br>F:GO:0005525;<br>C:GO:0016021;<br>P:GO:0042417;<br>P:GO:0030828;<br>F:GO:0008528;<br>P:GO:0007165;<br>P:GO:0007186;<br>P:GO:0007168;<br>C:GO:0005886;<br>P:GO:0050880;<br>F:GO:0005524;<br>P:GO:0008217 | -                                                                                                                                   | EC:4.6.1.2 | -                                                                                        |
| Caenorhabditis elegans  | thioredoxin family protein                                 | 5  | P:GO:0040035;<br>P:GO:0045454;<br>P:GO:0040010;<br>P:GO:0019915;<br>P:GO:0006898                                                                                                                                                                                                                                                                | -                                                                                                                                   |            | IPR012335; IPR012336; IPR013766;<br>IPR017936; PTHR18929 (PANTHER),<br>SignalP (SIGNALP) |
|                         | -                                                          | 0  |                                                                                                                                                                                                                                                                                                                                                 |                                                                                                                                     |            | -                                                                                        |
| Caenorhabditis briggsae | mov34 mpn pad-1 family protein                             | 8  | C:GO:0005737;<br>P:GO:0009792;<br>P:GO:0002119;<br>P:GO:0040011;<br>F:GO:0003743;<br>P:GO:0006898;<br>P:GO:0006412;<br>P:GO:0007413                                                                                                                                                                                                             | -                                                                                                                                   | EC:3.6.5.3 | PTHR10410 (PANTHER),<br>PTHR10410:SF3 (PANTHER)                                          |
| Caenorhabditis briggsae | uba and wwe domain containing 1                            | 0  |                                                                                                                                                                                                                                                                                                                                                 | P:GO:0030154;<br>F:GO:0016874;<br>F:GO:0005488;<br>F:GO:0016881;<br>C:GO:0005634;<br>F:GO:0003677;<br>C:GO:0005622;<br>P:GO:0006464 |            | IPR010309                                                                                |

|                         |                                                                                                                                 |    |                                                                                                                                                                                                                                           |                               |             |                                                                                                                                                                   |
|-------------------------|---------------------------------------------------------------------------------------------------------------------------------|----|-------------------------------------------------------------------------------------------------------------------------------------------------------------------------------------------------------------------------------------------|-------------------------------|-------------|-------------------------------------------------------------------------------------------------------------------------------------------------------------------|
| Caenorhabditis briggsae | tr--nucleotidyltransferase mitochondrial                                                                                        | 10 | P:GO:0008340;<br>C:GO:0005739;<br>F:GO:0004810;<br>P:GO:0040007;<br>P:GO:0006626;<br>F:GO:0005524;<br>P:GO:0002119;<br>P:GO:0042780;<br>P:GO:0006898;<br>F:GO:0000049                                                                     | -                             | EC:2.7.7.25 | IPR002646; G3DSA:1.10.3090.10 (GENE3D), G3DSA:3.30.460.10 (GENE3D), PTHR13734 (PANTHER), PTHR13734:SF11 (PANTHER), SSF81301 (SUPERFAMILY), SSF81891 (SUPERFAMILY) |
| Pan troglodytes         | keratin 17                                                                                                                      | 11 | C:GO:0005730;<br>P:GO:0045109;<br>P:GO:0031424;<br>P:GO:0051798;<br>P:GO:0045727;<br>F:GO:0005515;<br>C:GO:0045095;<br>P:GO:0030307;<br>F:GO:0005200;<br>P:GO:0002009;<br>C:GO:0005737                                                    | -                             |             | -                                                                                                                                                                 |
| Caenorhabditis briggsae | plbl2_caeel ame: full= phospholipase b-like 2 ame: full=lama-like protein 2 ame: full=lami- ancestor homolog 2 flags: precursor | 0  |                                                                                                                                                                                                                                           |                               |             | -                                                                                                                                                                 |
|                         | -                                                                                                                               | 0  |                                                                                                                                                                                                                                           |                               |             | -                                                                                                                                                                 |
|                         | -                                                                                                                               | 0  |                                                                                                                                                                                                                                           |                               |             | SignalP (SIGNALP)                                                                                                                                                 |
| Caenorhabditis briggsae | glycerol-3-phosphate dehydroge-se                                                                                               | 9  | F:GO:0004368;<br>C:GO:0009331;<br>F:GO:0005509;<br>P:GO:0007629;<br>C:GO:0005743;<br>P:GO:0006127;<br>F:GO:0009055;<br>P:GO:0006072;<br>C:GO:0005811                                                                                      | -                             | EC:1.1.99.5 | SignalP (SIGNALP)                                                                                                                                                 |
| Loa loa                 | hyaluronidase family protein                                                                                                    | 0  |                                                                                                                                                                                                                                           | P:GO:0008152;<br>F:GO:0008080 |             | IPR011496; IPR017853; PTHR13170 (PANTHER), PTHR13170:SF5 (PANTHER)                                                                                                |
| Caenorhabditis elegans  | rap guanine nucleotide exchange factor 4                                                                                        | 14 | P:GO:0048731;<br>P:GO:0007267;<br>F:GO:0005515;<br>P:GO:0032879;<br>F:GO:0000166;<br>P:GO:0010646;<br>P:GO:0006887;<br>C:GO:0005737;<br>P:GO:0051239;<br>C:GO:0030425;<br>C:GO:0043234;<br>C:GO:0044459;<br>N:GO:0035556;<br>F:GO:0005085 | -                             |             | IPR000595; IPR014710; IPR018490; SignalP (SIGNALP)                                                                                                                |
| Caenorhabditis elegans  | briggsae cbr-epac-1 protein                                                                                                     | 2  | P:GO:0050794;<br>P:GO:0023052                                                                                                                                                                                                             | -                             |             | IPR000591; IPR000595; IPR008937; IPR011991; IPR014710; IPR018490; PTHR23113:SF53 (PANTHER), SignalP (SIGNALP), SSF46785 (SUPERFAMILY)                             |
|                         | -                                                                                                                               | 0  |                                                                                                                                                                                                                                           |                               |             | -                                                                                                                                                                 |
|                         | -                                                                                                                               | 0  |                                                                                                                                                                                                                                           |                               |             | -                                                                                                                                                                 |

|                         |                                                         |    |                                                                                                                                                                                                                                                            |                                                                                                                    |                                                                                                                |
|-------------------------|---------------------------------------------------------|----|------------------------------------------------------------------------------------------------------------------------------------------------------------------------------------------------------------------------------------------------------------|--------------------------------------------------------------------------------------------------------------------|----------------------------------------------------------------------------------------------------------------|
| Caenorhabditis elegans  | hypothetical protein Y18H1A.3 [Caenorhabditis elegans]  | 0  |                                                                                                                                                                                                                                                            | F:GO:0005096;<br>P:GO:0051056;<br>C:GO:0005622                                                                     | -                                                                                                              |
| Loa loa                 | ph domain containing protein                            | 0  |                                                                                                                                                                                                                                                            |                                                                                                                    | SignalP (SIGNALP)                                                                                              |
| Loa loa                 | formin homology 2 domain containing protein             | 1  | F:GO:0005515                                                                                                                                                                                                                                               | -                                                                                                                  | IPR001265; IPR003104; IPR015425;<br>PTHR23213 (PANTHER),<br>PTHR23213:SF12 (PANTHER)                           |
|                         | -                                                       | 0  |                                                                                                                                                                                                                                                            |                                                                                                                    | SignalP (SIGNALP)                                                                                              |
| Caenorhabditis briggsae | Hypothetical protein CBG08509 [Caenorhabditis briggsae] | 0  |                                                                                                                                                                                                                                                            |                                                                                                                    | -                                                                                                              |
| Caenorhabditis briggsae | elegans protein confirmed by transcript evidence        | 0  |                                                                                                                                                                                                                                                            |                                                                                                                    | -                                                                                                              |
| Caenorhabditis briggsae | elegans protein confirmed by transcript evidence        | 0  |                                                                                                                                                                                                                                                            | P:GO:0008272;<br>C:GO:0016021;<br>F:GO:0008271;<br>C:GO:0016020;<br>P:GO:0055085;<br>F:GO:0005215;<br>P:GO:0006810 | IPR002645; IPR011547; PTHR11814<br>(PANTHER), PTHR11814:SF26<br>(PANTHER)                                      |
| Caenorhabditis elegans  | elegans protein confirmed by transcript evidence        | 0  |                                                                                                                                                                                                                                                            | P:GO:0008272;<br>C:GO:0016021;<br>F:GO:0008271;<br>C:GO:0016020;<br>P:GO:0055085;<br>F:GO:0005215;<br>P:GO:0006810 | IPR002645; IPR011547; PTHR11814<br>(PANTHER), PTHR11814:SF26<br>(PANTHER)                                      |
| Caenorhabditis briggsae | elegans protein confirmed by transcript evidence        | 0  |                                                                                                                                                                                                                                                            | P:GO:0008272;<br>C:GO:0016021;<br>F:GO:0008271;<br>C:GO:0016020;<br>P:GO:0055085;<br>F:GO:0005215;<br>P:GO:0006810 | IPR002645; IPR011547; PTHR11814<br>(PANTHER), PTHR11814:SF26<br>(PANTHER)                                      |
|                         | -                                                       | 0  |                                                                                                                                                                                                                                                            |                                                                                                                    | -                                                                                                              |
|                         | -                                                       | 0  |                                                                                                                                                                                                                                                            |                                                                                                                    | -                                                                                                              |
| Caenorhabditis briggsae | adenine nucleotide translocator family member (ant- )   | 15 | F:GO:0008233;<br>P:GO:0055085;<br>P:GO:0040010;<br>P:GO:0008340;<br>C:GO:0016021;<br>C:GO:0005743;<br>P:GO:0040002;<br>P:GO:0040035;<br>P:GO:0010171;<br>P:GO:0002119;<br>F:GO:0005515;<br>F:GO:0005215;<br>P:GO:0006898;<br>P:GO:0002009;<br>P:GO:0009792 | -                                                                                                                  | IPR001993; IPR002067; IPR002113;<br>IPR018108; G3DSA:1.50.40.10<br>(GENE3D), PTHR11896:SF35<br>(PANTHER)       |
| Brugia malayi           | la domain containing protein                            | 2  | F:GO:0003676;<br>F:GO:0000166                                                                                                                                                                                                                              | -                                                                                                                  | IPR002344; IPR006630; IPR011991;<br>PTHR22792 (PANTHER),<br>PTHR22792:SF7 (PANTHER), SSF46785<br>(SUPERFAMILY) |
|                         | -                                                       | 0  |                                                                                                                                                                                                                                                            |                                                                                                                    | SignalP (SIGNALP)                                                                                              |
| Caenorhabditis elegans  | exocyst complex component 1                             | 5  | P:GO:0007126;<br>F:GO:0005515;<br>P:GO:0040010;<br>P:GO:0000003;<br>P:GO:0040011                                                                                                                                                                           | -                                                                                                                  | IPR019160; PTHR16092 (PANTHER),<br>PTHR16092:SF1 (PANTHER)                                                     |

|                         |                                                                  |    |                                                                                                                                                                                                                                           |   |             |                                                                                                                    |
|-------------------------|------------------------------------------------------------------|----|-------------------------------------------------------------------------------------------------------------------------------------------------------------------------------------------------------------------------------------------|---|-------------|--------------------------------------------------------------------------------------------------------------------|
| Caenorhabditis elegans  | cleft lip and palate associated transmembrane protein            | 4  | C:GO:0016021;<br>P:GO:0007275;<br>P:GO:0030154;<br>F:GO:0005515                                                                                                                                                                           | - |             | IPR008429                                                                                                          |
| Loa loa                 | set (trithorax polycomb) domain containing family member (set-2) | 6  | P:GO:0016568;<br>F:GO:0003723;<br>P:GO:0045449;<br>C:GO:0016607;<br>F:GO:0018024;<br>F:GO:0000166                                                                                                                                         | - | EC:2.1.1.43 | IPR001214; IPR003616; IPR015722;<br>G3DSA:2.170.270.10 (GENE3D),<br>PTHR22884 (PANTHER), SSF82199<br>(SUPERFAMILY) |
| Canis familiaris        | ribosomal protein x-linked                                       | 8  | F:GO:0019843;<br>F:GO:0003735;<br>P:GO:0006414;<br>C:GO:0022627;<br>P:GO:0045727;<br>C:GO:0005844;<br>P:GO:0008284;<br>P:GO:0007275                                                                                                       | - |             | IPR000876; IPR002942; IPR005824;<br>IPR013843; IPR013845; IPR018199                                                |
| Caenorhabditis briggsae | glutaminy-peptide cyclotransferase                               | 6  | P:GO:0019915;<br>C:GO:0005576;<br>C:GO:0016021;<br>F:GO:0016603;<br>P:GO:0006508;<br>F:GO:0008233                                                                                                                                         | - | EC:2.3.2.5  | IPR007484; G3DSA:3.40.630.10<br>(GENE3D), PTHR12283 (PANTHER),<br>SignalP (SIGNALP), SSF53187<br>(SUPERFAMILY)     |
| Bos taurus              | PREDICTED: hypothetical protein [Bos taurus]                     | 0  |                                                                                                                                                                                                                                           |   |             | -                                                                                                                  |
| Brugia malayi           | protein mothers against                                          | 14 | P:GO:0048514;<br>P:GO:0003146;<br>P:GO:0060030;<br>P:GO:0009880;<br>P:GO:0006355;<br>C:GO:0005667;<br>P:GO:0001947;<br>P:GO:0030509;<br>P:GO:0043049;<br>F:GO:0005515;<br>P:GO:0048264;<br>F:GO:0003700;<br>P:GO:0007179;<br>P:GO:0007368 | - |             | IPR003619; IPR013019; IPR013790;<br>PTHR13703:SF19 (PANTHER)                                                       |
| Caenorhabditis briggsae | abnormal dauer formation family member (daf-12)                  | 6  | F:GO:0003700;<br>F:GO:0043565;<br>F:GO:0003707;<br>C:GO:0005634;<br>F:GO:0008270;<br>P:GO:0006355                                                                                                                                         | - |             | -                                                                                                                  |
| Caenorhabditis elegans  | uncoordinated family member (unc-52)                             | 2  | P:GO:0030239;<br>C:GO:0005578                                                                                                                                                                                                             | - |             | IPR002172; PTHR10529 (PANTHER),<br>PTHR10529:SF2 (PANTHER)                                                         |
| -                       | -                                                                | 0  |                                                                                                                                                                                                                                           |   |             | IPR001969; IPR007087; IPR015880                                                                                    |
| -                       | -                                                                | 0  |                                                                                                                                                                                                                                           |   |             | -                                                                                                                  |
| Caenorhabditis elegans  | testis derived transcript                                        | 2  | F:GO:0008270;<br>P:GO:0008340                                                                                                                                                                                                             | - |             | -                                                                                                                  |

|                        |                                        |    |                                                                                                                                                                                                                                                                                                                                                                                                                                                                                          |                                                                 |                                                                         |                      |
|------------------------|----------------------------------------|----|------------------------------------------------------------------------------------------------------------------------------------------------------------------------------------------------------------------------------------------------------------------------------------------------------------------------------------------------------------------------------------------------------------------------------------------------------------------------------------------|-----------------------------------------------------------------|-------------------------------------------------------------------------|----------------------|
| Caenorhabditis elegans | cdc42 protein                          | 46 | P:GO:0007179;<br>P:GO:0030011;<br>P:GO:0032970;<br>F:GO:0005525;<br>P:GO:0045185;<br>P:GO:0048813;<br>P:GO:0000132;<br>C:GO:0030426;<br>P:GO:0040027;<br>P:GO:0007411;<br>P:GO:0050770;<br>F:GO:0004767;<br>P:GO:0030031;<br>C:GO:0005626;<br>P:GO:0007396;<br>P:GO:0015031;<br>P:GO:0006911;<br>P:GO:0030866;<br>P:GO:0007349;<br>P:GO:0040039;<br>P:GO:0046843;<br>C:GO:0030424;<br>P:GO:0006898;<br>C:GO:0005912;<br>P:GO:0007254;<br>P:GO:0042060;<br>P:GO:0046664;<br>P:GO:0040007; | -                                                               | EC:3.1.4.12;<br>EC:3.6.5.1;<br>EC:3.6.5.2;<br>EC:3.6.5.3;<br>EC:3.6.5.4 | -                    |
| Brugia malayi          | peptidase family m1 containing protein | 0  |                                                                                                                                                                                                                                                                                                                                                                                                                                                                                          | P:GO:0006508;<br>F:GO:0008237;<br>F:GO:0004177;<br>F:GO:0008270 |                                                                         | IPR001930; IPR015568 |
|                        | -                                      | 0  |                                                                                                                                                                                                                                                                                                                                                                                                                                                                                          |                                                                 |                                                                         | -                    |



|                                |                                                                           |   |                                                                                                   |                                                                                                                                                                                                                                                                                                                                                                                                                                                                        |                                                                                                      |
|--------------------------------|---------------------------------------------------------------------------|---|---------------------------------------------------------------------------------------------------|------------------------------------------------------------------------------------------------------------------------------------------------------------------------------------------------------------------------------------------------------------------------------------------------------------------------------------------------------------------------------------------------------------------------------------------------------------------------|------------------------------------------------------------------------------------------------------|
| Caenorhabditis elegans         | glycoprotein 350 220                                                      | 0 |                                                                                                   | P:GO:0032534;<br>P:GO:0043206;<br>C:GO:0043205;<br>C:GO:0019031;<br>P:GO:0050900;<br>C:GO:0016021;<br>P:GO:0007155;<br>C:GO:0016020;<br>C:GO:0005618;<br>C:GO:0031528;<br>F:GO:0005509;<br>C:GO:0030027;<br>P:GO:0007586;<br>P:GO:0030335;<br>C:GO:0045121;<br>P:GO:0072175;<br>P:GO:0019058;<br>C:GO:0005737;<br>P:GO:0033634;<br>C:GO:0001726;<br>P:GO:0007162;<br>C:GO:0030175;<br>F:GO:0005515;<br>C:GO:0005886;<br>C:GO:0016324;<br>C:GO:0005576;<br>F:GO:0005201 | -                                                                                                    |
| Loa loa                        | integrator complex subunit 3                                              | 0 |                                                                                                   | F:GO:0003674;<br>P:GO:0006281;<br>P:GO:0008150;<br>C:GO:0005634;<br>C:GO:0005575                                                                                                                                                                                                                                                                                                                                                                                       | IPR019333; PTHR13587 (PANTHER)                                                                       |
| Loktanella vestfoldensis SKA53 | ribosomal r- large subunit methyltransferase j                            | 0 |                                                                                                   | F:GO:0003676;<br>F:GO:0008168;<br>C:GO:0005737;<br>P:GO:0006364;<br>F:GO:0016740;<br>F:GO:0008173;<br>P:GO:0031167;<br>P:GO:0032259                                                                                                                                                                                                                                                                                                                                    | -                                                                                                    |
| Caenorhabditis briggsae        | asparagine-linked glycosylation 11 homolog ( alpha- -mannosyltransferase) | 6 | P:GO:0002119;<br>P:GO:0000003;<br>P:GO:0040011;<br>P:GO:0040007;<br>P:GO:0006898;<br>C:GO:0016020 | -                                                                                                                                                                                                                                                                                                                                                                                                                                                                      | IPR001296; PTHR12526 (PANTHER), PTHR12526:SF23 (PANTHER), SignalIP (SIGNALP), SSF53756 (SUPERFAMILY) |
|                                | -                                                                         | 0 |                                                                                                   |                                                                                                                                                                                                                                                                                                                                                                                                                                                                        | -                                                                                                    |
|                                | -                                                                         | 0 |                                                                                                   |                                                                                                                                                                                                                                                                                                                                                                                                                                                                        | -                                                                                                    |

|                               |                                            |    |                                                                                                                                                                                                                                                                                                                                                                                                                                                       |                                                                                  |                                                                                                                      |
|-------------------------------|--------------------------------------------|----|-------------------------------------------------------------------------------------------------------------------------------------------------------------------------------------------------------------------------------------------------------------------------------------------------------------------------------------------------------------------------------------------------------------------------------------------------------|----------------------------------------------------------------------------------|----------------------------------------------------------------------------------------------------------------------|
| Caenorhabditis elegans        | mitogen-activated protein ki-se 1          | 26 | F:GO:0004705;<br>P:GO:0006468;<br>P:GO:0007369;<br>F:GO:0005515;<br>P:GO:0050803;<br>P:GO:0048149;<br>P:GO:0006974;<br>P:GO:0007507;<br>P:GO:0006355;<br>P:GO:0034334;<br>P:GO:0046534;<br>P:GO:0007173;<br>C:GO:0005737;<br>P:GO:0006916;<br>P:GO:0045500;<br>P:GO:0007067;<br>P:GO:0008293;<br>P:GO:0008595;<br>P:GO:0007474;<br>P:GO:0050804;<br>C:GO:0030054;<br>P:GO:0045467;<br>C:GO:0005634;<br>F:GO:0005524;<br>P:GO:0040025;<br>P:GO:0000165 | -                                                                                | IPR011009; IPR017441;<br>G3DSA:3.30.200.20 (GENE3D),<br>PTHR11295 (PANTHER),<br>PTHR11295:SF70 (PANTHER)             |
| Brugia malayi                 | d- primase large subunit                   | 5  | P:GO:0040035;<br>P:GO:0009792;<br>P:GO:0006997;<br>P:GO:0000910;<br>P:GO:0006898                                                                                                                                                                                                                                                                                                                                                                      | -                                                                                | IPR007238                                                                                                            |
| Caenorhabditis briggsae       | uncoordinated family member (unc-89)       | 0  |                                                                                                                                                                                                                                                                                                                                                                                                                                                       |                                                                                  | IPR007110; IPR013098; IPR013783;<br>PTHR19897 (PANTHER), SSF48726<br>(SUPERFAMILY)                                   |
| Caenorhabditis elegans        | scy1 protein ki-se                         | 3  | P:GO:0006468;<br>F:GO:0005524;<br>F:GO:0004672                                                                                                                                                                                                                                                                                                                                                                                                        | -                                                                                | IPR011989; IPR016024                                                                                                 |
| Xenopus (Silurana) tropicalis | sestrin 3                                  | 0  |                                                                                                                                                                                                                                                                                                                                                                                                                                                       | P:GO:0007050;<br>C:GO:0005634                                                    | IPR006730                                                                                                            |
| Loa loa                       | phosphatidylinositol glycan anchor class p | 3  | F:GO:0016740;<br>C:GO:0016021;<br>P:GO:0016254                                                                                                                                                                                                                                                                                                                                                                                                        | -                                                                                | IPR013717; PTHR21726 (PANTHER),<br>SignalP (SIGNALP)                                                                 |
| Caenorhabditis elegans        | phospholipase b domain containing 1-like   | 0  |                                                                                                                                                                                                                                                                                                                                                                                                                                                       | F:GO:0016787;<br>P:GO:0008150;<br>C:GO:0043202;<br>P:GO:0016042;<br>C:GO:0005575 | IPR007000                                                                                                            |
| Caenorhabditis elegans        | peptidase m20                              | 3  | F:GO:0005515;<br>F:GO:0008237;<br>P:GO:0006508                                                                                                                                                                                                                                                                                                                                                                                                        | -                                                                                | IPR002933; G3DSA:3.40.630.10<br>(GENE3D), PTHR11014 (PANTHER),<br>PTHR11014:SF5 (PANTHER), SSF53187<br>(SUPERFAMILY) |
| Loa loa                       | mynd finger family protein                 | 6  | C:GO:0030425;<br>C:GO:0030424;<br>P:GO:0030512;<br>P:GO:0040010;<br>F:GO:0005102;<br>F:GO:0008270                                                                                                                                                                                                                                                                                                                                                     | -                                                                                | -                                                                                                                    |
|                               |                                            | 0  |                                                                                                                                                                                                                                                                                                                                                                                                                                                       |                                                                                  |                                                                                                                      |

|                         |                                                               |    |                                                                                                                                                                       |                                                                                                   |             |                                                                                                            |
|-------------------------|---------------------------------------------------------------|----|-----------------------------------------------------------------------------------------------------------------------------------------------------------------------|---------------------------------------------------------------------------------------------------|-------------|------------------------------------------------------------------------------------------------------------|
| Caenorhabditis elegans  | elegans protein confirmed by transcript evidence              | 1  | C:GO:0016020                                                                                                                                                          |                                                                                                   |             | SignalP (SIGNALP)                                                                                          |
|                         | -                                                             | 0  |                                                                                                                                                                       |                                                                                                   |             | -                                                                                                          |
| Caenorhabditis elegans  | hypothetical protein Y34B4A.7 [Caenorhabditis elegans]        | 0  |                                                                                                                                                                       | C:GO:0016021;<br>F:GO:0003824                                                                     |             | SignalP (SIGNALP)                                                                                          |
|                         | -                                                             | 0  |                                                                                                                                                                       |                                                                                                   |             | -                                                                                                          |
| Caenorhabditis briggsae | basic transcription factor 35 kd subunit                      | 6  | P:GO:0040010;<br>P:GO:0044260;<br>C:GO:0005622;<br>P:GO:0090304;<br>P:GO:0000003;<br>P:GO:0009792                                                                     | -                                                                                                 |             | IPR004600; SignalP (SIGNALP)                                                                               |
| Pongo abelii            | lactotransferrin precursor                                    | 10 | F:GO:0008199;<br>P:GO:0042742;<br>P:GO:0006879;<br>P:GO:0006959;<br>P:GO:0006826;<br>F:GO:0005515;<br>F:GO:0004252;<br>F:GO:0008201;<br>C:GO:0030141;<br>C:GO:0005576 | -                                                                                                 | EC:3.4.21.0 | SignalP (SIGNALP)                                                                                          |
| Tribolium castaneum     | bcnt-like protein                                             | 0  |                                                                                                                                                                       |                                                                                                   |             | -                                                                                                          |
| Caenorhabditis elegans  | lbp bpi cetp n-termi-l domain containing protein              | 6  | P:GO:0002119;<br>P:GO:0009792;<br>P:GO:0000003;<br>P:GO:0040007;<br>F:GO:0008289;<br>P:GO:0040011                                                                     | -                                                                                                 |             | IPR001124; G3DSA:3.15.20.10 (GENE3D), PTHR10504 (PANTHER), PTHR10504:SF14 (PANTHER)                        |
| Caenorhabditis elegans  | hypothetical protein Y20F4.2 [Caenorhabditis elegans]         | 0  |                                                                                                                                                                       |                                                                                                   |             | PTHR13589 (PANTHER), PTHR13589:SF2 (PANTHER)                                                               |
| Caenorhabditis elegans  | spectrin alpha chain                                          | 1  | F:GO:0005509                                                                                                                                                          | -                                                                                                 |             | IPR002017; G3DSA:1.20.58.60 (GENE3D), PTHR11915 (PANTHER), PTHR11915:SF6 (PANTHER), SSF46966 (SUPERFAMILY) |
|                         | -                                                             | 0  |                                                                                                                                                                       |                                                                                                   |             | -                                                                                                          |
| Macaca mulatta          | PREDICTED: hypothetical protein LOC100426317 [Macaca mulatta] | 0  |                                                                                                                                                                       |                                                                                                   |             | -                                                                                                          |
|                         | -                                                             | 0  |                                                                                                                                                                       |                                                                                                   |             | -                                                                                                          |
| Loa loa                 | hmg box family protein                                        | 2  | F:GO:0019899;<br>C:GO:0044424                                                                                                                                         | -                                                                                                 |             | IPR000910; IPR009071; PTHR10373 (PANTHER)                                                                  |
| Caenorhabditis elegans  | hexoki-se domain containing 1                                 | 8  | P:GO:0006468;<br>P:GO:0018193;<br>F:GO:0004396;<br>C:GO:0005730;<br>C:GO:0005829;<br>P:GO:0006096;<br>F:GO:0005524;<br>C:GO:0005739                                   | -                                                                                                 | EC:2.7.1.1  | IPR001312; IPR022672; G3DSA:3.30.420.40 (GENE3D), SSF53067 (SUPERFAMILY)                                   |
|                         | -                                                             | 0  |                                                                                                                                                                       |                                                                                                   |             | -                                                                                                          |
| Drosophila melanogaster | salivary glue protein                                         | 0  |                                                                                                                                                                       | F:GO:0004827;<br>F:GO:0005524;<br>P:GO:0006412;<br>F:GO:0004812;<br>C:GO:0005737;<br>P:GO:0006433 |             | -                                                                                                          |

|                             |                                                            |    |                                                                                                                                                                                                                                                                                              |                                                                                  |            |                                                                                                                                 |
|-----------------------------|------------------------------------------------------------|----|----------------------------------------------------------------------------------------------------------------------------------------------------------------------------------------------------------------------------------------------------------------------------------------------|----------------------------------------------------------------------------------|------------|---------------------------------------------------------------------------------------------------------------------------------|
| Brugia malayi               | d--directed r- polymerase ii largest                       | 6  | F:GO:0046872;<br>F:GO:0003899;<br>C:GO:0005665;<br>F:GO:0003677;<br>F:GO:0005515;<br>P:GO:0006366                                                                                                                                                                                            | -                                                                                | EC:2.7.7.6 | IPR007080; PTHR19376 (PANTHER),<br>PTHR19376:SF14 (PANTHER),<br>SSF64484 (SUPERFAMILY)                                          |
| Ailuropoda melanoleuca      | protein unc-13 homolog a                                   | 17 | F:GO:0047485;<br>C:GO:0030054;<br>C:GO:0043234;<br>P:GO:0023034;<br>F:GO:0046872;<br>F:GO:0017075;<br>P:GO:0006887;<br>C:GO:0042734;<br>P:GO:0007269;<br>P:GO:0050435;<br>P:GO:0016188;<br>C:GO:0019717;<br>F:GO:0019992;<br>F:GO:0019904;<br>F:GO:0046982;<br>F:GO:0042803;<br>C:GO:0005737 | -                                                                                |            | PTHR10480 (PANTHER)                                                                                                             |
| Caenorhabditis elegans      | uncoordinated family member (unc-89)                       | 0  |                                                                                                                                                                                                                                                                                              | F:GO:0004672;<br>F:GO:0005524;<br>F:GO:0000166;<br>P:GO:0006468;<br>F:GO:0004674 |            | IPR003599; IPR007110; IPR013098;<br>IPR013783; PTHR19897 (PANTHER),<br>SSF48726 (SUPERFAMILY)                                   |
|                             | -                                                          | 0  |                                                                                                                                                                                                                                                                                              |                                                                                  |            | IPR013032; SignalP (SIGNALP)                                                                                                    |
|                             | -                                                          | 0  |                                                                                                                                                                                                                                                                                              |                                                                                  |            | IPR013032                                                                                                                       |
|                             | -                                                          | 0  |                                                                                                                                                                                                                                                                                              |                                                                                  |            | -                                                                                                                               |
| Caenorhabditis elegans      | alonic aciduria type a protein family member (mmaa-1)      | 2  | F:GO:0016787;<br>F:GO:0032555                                                                                                                                                                                                                                                                | -                                                                                |            | IPR005129; PTHR23408 (PANTHER)                                                                                                  |
| Brugia malayi               | hypothetical protein Bm1_49755 [Brugia malayi]             | 0  |                                                                                                                                                                                                                                                                                              | P:GO:0044237                                                                     |            | -                                                                                                                               |
| Angiostrongylus cantonensis | c2 domain containing protein                               | 1  | P:GO:0009792                                                                                                                                                                                                                                                                                 | -                                                                                |            | IPR008973; G3DSA:2.60.40.150<br>(GENE3D), PTHR10774 (PANTHER)                                                                   |
|                             | -                                                          | 0  |                                                                                                                                                                                                                                                                                              |                                                                                  |            | -                                                                                                                               |
|                             | -                                                          | 0  |                                                                                                                                                                                                                                                                                              |                                                                                  |            | -                                                                                                                               |
|                             | -                                                          | 0  |                                                                                                                                                                                                                                                                                              |                                                                                  |            | -                                                                                                                               |
|                             | -                                                          | 0  |                                                                                                                                                                                                                                                                                              |                                                                                  |            | -                                                                                                                               |
| Caenorhabditis elegans      | nuclear hormone receptor family member (nhr-49)            | 5  | F:GO:0046872;<br>F:GO:0004879;<br>F:GO:0003677;<br>P:GO:0045449;<br>F:GO:0005515                                                                                                                                                                                                             | -                                                                                |            | -                                                                                                                               |
| Caenorhabditis elegans      | elegans protein partially confirmed by transcript evidence | 0  |                                                                                                                                                                                                                                                                                              | C:GO:0016021;<br>P:GO:0055085;<br>P:GO:0008340                                   |            | IPR011701; IPR016196;<br>G3DSA:1.20.1250.20 (GENE3D),<br>PTHR10074 (PANTHER),<br>PTHR10074:SF12 (PANTHER), SignalP<br>(SIGNALP) |
|                             | -                                                          | 0  |                                                                                                                                                                                                                                                                                              |                                                                                  |            | -                                                                                                                               |
|                             | -                                                          | 0  |                                                                                                                                                                                                                                                                                              |                                                                                  |            | -                                                                                                                               |
| Caenorhabditis elegans      | elegans protein partially confirmed by transcript evidence | 0  |                                                                                                                                                                                                                                                                                              |                                                                                  |            | -                                                                                                                               |
|                             | -                                                          | 0  |                                                                                                                                                                                                                                                                                              |                                                                                  |            | -                                                                                                                               |
|                             | -                                                          | 0  |                                                                                                                                                                                                                                                                                              |                                                                                  |            | -                                                                                                                               |
|                             | -                                                          | 0  |                                                                                                                                                                                                                                                                                              |                                                                                  |            | -                                                                                                                               |
|                             | -                                                          | 0  |                                                                                                                                                                                                                                                                                              |                                                                                  |            | -                                                                                                                               |

|                             |                                                            |    |                                                                                                                                                                                                                                                            |                                                                                  |             |                                                                                                                       |
|-----------------------------|------------------------------------------------------------|----|------------------------------------------------------------------------------------------------------------------------------------------------------------------------------------------------------------------------------------------------------------|----------------------------------------------------------------------------------|-------------|-----------------------------------------------------------------------------------------------------------------------|
| Acyrtosiphon pisum          | casein ki-se ii beta subunit                               | 15 | C:GO:0005956;<br>P:GO:0033211;<br>F:GO:0004674;<br>P:GO:0030177;<br>F:GO:0042802;<br>P:GO:0043623;<br>P:GO:0008285;<br>F:GO:0005102;<br>P:GO:0051101;<br>F:GO:0019904;<br>P:GO:0007249;<br>F:GO:0008134;<br>C:GO:0005737;<br>C:GO:0005886;<br>F:GO:0019887 | -                                                                                | EC:2.7.11.0 | -                                                                                                                     |
| Angiostrongylus cantonensis | hypothetical protein [Angiostrongylus cantonensis]         | 1  | P:GO:0019915                                                                                                                                                                                                                                               | -                                                                                |             | -                                                                                                                     |
| Brugia malayi               | major sperm protein                                        | 0  |                                                                                                                                                                                                                                                            | C:GO:0005737;<br>C:GO:0005856;<br>F:GO:0005198;<br>C:GO:0031143;<br>C:GO:0042995 |             | IPR000535; IPR008962                                                                                                  |
| Caenorhabditis elegans      | hypothetical protein F47G3.1 [Caenorhabditis elegans]      | 0  |                                                                                                                                                                                                                                                            |                                                                                  |             | -                                                                                                                     |
|                             | -                                                          | 0  |                                                                                                                                                                                                                                                            |                                                                                  |             | -                                                                                                                     |
|                             | -                                                          | 0  |                                                                                                                                                                                                                                                            |                                                                                  |             | -                                                                                                                     |
| Caenorhabditis briggsae     | cation chloride cotransporter                              | 2  | P:GO:0055085;<br>C:GO:0016021                                                                                                                                                                                                                              | -                                                                                |             | IPR004841; PTHR11827 (PANTHER),<br>PTHR11827:SF2 (PANTHER)                                                            |
|                             | -                                                          | 0  |                                                                                                                                                                                                                                                            |                                                                                  |             | SignalP (SIGNALP)                                                                                                     |
|                             | -                                                          | 0  |                                                                                                                                                                                                                                                            |                                                                                  |             | -                                                                                                                     |
| Caenorhabditis briggsae     | elegans protein partially confirmed by transcript evidence | 0  |                                                                                                                                                                                                                                                            | P:GO:0006508;<br>F:GO:0008236;<br>F:GO:0016787;<br>C:GO:0005576                  |             | IPR000073; G3DSA:3.40.50.1820<br>(GENE3D), PTHR12277 (PANTHER),<br>PTHR12277:SF8 (PANTHER), SSF53474<br>(SUPERFAMILY) |
|                             | -                                                          | 0  |                                                                                                                                                                                                                                                            |                                                                                  |             | -                                                                                                                     |
|                             | -                                                          | 0  |                                                                                                                                                                                                                                                            |                                                                                  |             | -                                                                                                                     |

|                        |                                                 |    |                                                                                                                                                                                                                                                                                                                                                                                                                                                                                                                                  |                                                                                                                |
|------------------------|-------------------------------------------------|----|----------------------------------------------------------------------------------------------------------------------------------------------------------------------------------------------------------------------------------------------------------------------------------------------------------------------------------------------------------------------------------------------------------------------------------------------------------------------------------------------------------------------------------|----------------------------------------------------------------------------------------------------------------|
| Danio rerio            | breast cancer anti-estrogen resistance 1        | 0  | <p>P:GO:001301;<br/> P:GO:0008286;<br/> P:GO:0007173;<br/> F:GO:0019901;<br/> P:GO:0008283;<br/> P:GO:0016477;<br/> P:GO:0048011;<br/> P:GO:0050853;<br/> P:GO:0050852;<br/> P:GO:0007155;<br/> P:GO:0007186;<br/> P:GO:0050851;<br/> P:GO:0007015;<br/> C:GO:0005925;<br/> F:GO:0004871;<br/> P:GO:0030335;<br/> P:GO:0042981;<br/> P:GO:0001558;<br/> C:GO:0030054;<br/> C:GO:0005737;<br/> P:GO:0048008;<br/> C:GO:0001726;<br/> P:GO:0007229;<br/> C:GO:0005829;<br/> C:GO:0005624;<br/> F:GO:0005515;<br/> F:GO:0017124</p> | -                                                                                                              |
| Loa loa                | stat transcription factor family member (sta-1) | 10 | <p>C:GO:0005737;<br/> F:GO:0042802;<br/> F:GO:0003700;<br/> F:GO:0004871;<br/> F:GO:0003677;<br/> P:GO:0007275;<br/> F:GO:0005509;<br/> P:GO:0007165;<br/> C:GO:0005634;<br/> P:GO:0006355</p>                                                                                                                                                                                                                                                                                                                                   | IPR001217; IPR012345;<br>PTHR11801:SF10 (PANTHER)                                                              |
| Brugia malayi          | protein vac14 homolog                           | 8  | <p>C:GO:0005856;<br/> F:GO:0004872;<br/> F:GO:0019209;<br/> F:GO:0005515;<br/> P:GO:0006970;<br/> C:GO:0005774;<br/> P:GO:0007165;<br/> C:GO:0010008</p>                                                                                                                                                                                                                                                                                                                                                                         | IPR000357; IPR011989; IPR016024;<br>PTHR16023 (PANTHER)                                                        |
| Caenorhabditis elegans | malic enzyme                                    | 7  | <p>F:GO:0046872;<br/> F:GO:0051287;<br/> F:GO:0004470;<br/> P:GO:0006108;<br/> P:GO:0055114;<br/> F:GO:0016616;<br/> C:GO:0005739</p>                                                                                                                                                                                                                                                                                                                                                                                            | EC:1.1.1.0<br>IPR012302; IPR016040; PTHR23406<br>(PANTHER), PTHR23406:SF2<br>(PANTHER), SSF51735 (SUPERFAMILY) |
| -                      | -                                               | 0  | -                                                                                                                                                                                                                                                                                                                                                                                                                                                                                                                                | -                                                                                                              |

|                         |                                                         |    |                                                                                                                                                                                                                                                                                                                                                                                   |                                                                 |             |                                                                                                                                                                             |
|-------------------------|---------------------------------------------------------|----|-----------------------------------------------------------------------------------------------------------------------------------------------------------------------------------------------------------------------------------------------------------------------------------------------------------------------------------------------------------------------------------|-----------------------------------------------------------------|-------------|-----------------------------------------------------------------------------------------------------------------------------------------------------------------------------|
| Ancylostoma caninum     | casein ki-se alpha 1                                    | 22 | C:GO:0005815;<br>C:GO:0005829;<br>F:GO:0042277;<br>P:GO:0040010;<br>P:GO:0016055;<br>F:GO:0004674;<br>C:GO:0005625;<br>C:GO:0005730;<br>F:GO:0001948;<br>P:GO:0000902;<br>P:GO:0007507;<br>P:GO:0000003;<br>P:GO:0007052;<br>P:GO:0051301;<br>F:GO:0005524;<br>F:GO:0000287;<br>P:GO:0007067;<br>F:GO:0051219;<br>P:GO:0007165;<br>C:GO:0000777;<br>P:GO:0009792;<br>P:GO:0006468 | -                                                               | EC:2.7.11.0 | IPR000719; IPR008271; IPR011009;<br>IPR017441; IPR017442;<br>G3DSA:1.10.510.10 (GENE3D),<br>G3DSA:3.30.200.20 (GENE3D),<br>PTHR11909 (PANTHER),<br>PTHR11909:SF18 (PANTHER) |
| Ancylostoma caninum     | casein ki-se alpha 1                                    | 22 | C:GO:0005815;<br>C:GO:0005829;<br>F:GO:0042277;<br>P:GO:0040010;<br>P:GO:0016055;<br>F:GO:0004674;<br>C:GO:0005625;<br>C:GO:0005730;<br>F:GO:0001948;<br>P:GO:0000902;<br>P:GO:0007507;<br>P:GO:0000003;<br>P:GO:0007052;<br>P:GO:0051301;<br>F:GO:0005524;<br>F:GO:0000287;<br>P:GO:0007067;<br>F:GO:0051219;<br>P:GO:0007165;<br>C:GO:0000777;<br>P:GO:0009792;<br>P:GO:0006468 | -                                                               | EC:2.7.11.0 | IPR000719; IPR008271; IPR011009;<br>IPR017441; IPR017442;<br>G3DSA:1.10.510.10 (GENE3D),<br>G3DSA:3.30.200.20 (GENE3D),<br>PTHR11909 (PANTHER),<br>PTHR11909:SF18 (PANTHER) |
| Caenorhabditis briggsae | mannose-p-dolichol utilization defect 1 protein         | 0  |                                                                                                                                                                                                                                                                                                                                                                                   | F:GO:0003674;<br>C:GO:0016021;<br>C:GO:0016020;<br>C:GO:0005575 |             | IPR006603; PTHR12226 (PANTHER),<br>PF04193 (PFAM)                                                                                                                           |
| Caenorhabditis briggsae | zinc finger protein 629-like                            | 1  | F:GO:0005515                                                                                                                                                                                                                                                                                                                                                                      | -                                                               |             | IPR007087; IPR013087; IPR015880;<br>PTHR23224 (PANTHER),<br>PTHR23224:SF182 (PANTHER),<br>SSF57667 (SUPERFAMILY)                                                            |
|                         |                                                         | 0  |                                                                                                                                                                                                                                                                                                                                                                                   |                                                                 |             | -                                                                                                                                                                           |
| Caenorhabditis briggsae | briggsae cbr-rbc-1 protein                              | 2  | P:GO:0009987;<br>P:GO:0050789                                                                                                                                                                                                                                                                                                                                                     | -                                                               |             | PTHR13950 (PANTHER),<br>PTHR13950:SF1 (PANTHER)                                                                                                                             |
|                         |                                                         | 0  |                                                                                                                                                                                                                                                                                                                                                                                   |                                                                 |             | -                                                                                                                                                                           |
|                         |                                                         | 0  |                                                                                                                                                                                                                                                                                                                                                                                   |                                                                 |             | -                                                                                                                                                                           |
| Dictyocaulus viviparus  | hypothetical protein isoform a [Dictyocaulus viviparus] | 0  |                                                                                                                                                                                                                                                                                                                                                                                   |                                                                 |             | -                                                                                                                                                                           |

|                         |                                                                          |   |                                                                                                                    |                                                                                  |             |                                                                                                                     |
|-------------------------|--------------------------------------------------------------------------|---|--------------------------------------------------------------------------------------------------------------------|----------------------------------------------------------------------------------|-------------|---------------------------------------------------------------------------------------------------------------------|
| Caenorhabditis elegans  | pwwp domain containing protein                                           | 2 | P:GO:0000003;<br>P:GO:0006898                                                                                      | -                                                                                | -           | -                                                                                                                   |
| Caenorhabditis elegans  | sp1070 cg9138-pa                                                         | 0 |                                                                                                                    | F:GO:0005488;<br>F:GO:0005509;<br>F:GO:0004872;<br>P:GO:0007155;<br>C:GO:0016021 |             | IPR003410                                                                                                           |
|                         | -                                                                        | 0 |                                                                                                                    |                                                                                  |             | SignalP (SIGNALP)                                                                                                   |
| Caenorhabditis elegans  | tnni3 interacting ki-se                                                  | 7 | C:GO:0005737;<br>P:GO:0006468;<br>F:GO:0005524;<br>F:GO:0008022;<br>C:GO:0005634;<br>F:GO:0004674;<br>F:GO:0031013 | -                                                                                | EC:2.7.11.0 | IPR000719; IPR011009; IPR017442;<br>G3DSA:1.10.510.10 (GENE3D),<br>PTHR23257 (PANTHER),<br>PTHR23257:SF63 (PANTHER) |
|                         |                                                                          |   |                                                                                                                    |                                                                                  |             | IPR001298; IPR013783; IPR014756;<br>IPR017868; PTHR11915 (PANTHER),<br>PTHR11915:SF24 (PANTHER)                     |
|                         | -                                                                        | 0 |                                                                                                                    |                                                                                  |             | -                                                                                                                   |
| Streptomyces sp. ACT-1  | lpxtg-motif cell wall anchor domain protein                              | 0 |                                                                                                                    | C:GO:0009986                                                                     |             | -                                                                                                                   |
| Caenorhabditis briggsae | autophagy-related protein 2 homolog a-like                               | 0 |                                                                                                                    |                                                                                  |             | PTHR13190 (PANTHER),<br>PTHR13190:SF2 (PANTHER)                                                                     |
| Caenorhabditis elegans  | palmitoyltransferase zdhhc17                                             | 7 | F:GO:0019706;<br>F:GO:0004871;<br>P:GO:0042953;<br>F:GO:0015095;<br>C:GO:0030660;<br>P:GO:0043123;<br>F:GO:0005515 | -                                                                                |             | IPR002110; IPR020683; PTHR18958<br>(PANTHER), PTHR18958:SF137<br>(PANTHER)                                          |
|                         | -                                                                        | 0 |                                                                                                                    |                                                                                  |             | -                                                                                                                   |
| Caenorhabditis briggsae | Hypothetical protein CBG09214 [Caenorhabditis briggsae]                  | 0 |                                                                                                                    | P:GO:0006270                                                                     |             | SignalP (SIGNALP)                                                                                                   |
|                         | -                                                                        | 0 |                                                                                                                    |                                                                                  |             | SignalP (SIGNALP)                                                                                                   |
| Homo sapiens            | dolichyl-diphosphooligosaccharide--protein glycosyltransferase subunit 4 | 2 | F:GO:0016740;<br>C:GO:0016021                                                                                      | -                                                                                |             | -                                                                                                                   |
| Caenorhabditis briggsae | transport integral membrane protein                                      | 3 | C:GO:0016020;<br>F:GO:0015250;<br>P:GO:0006833                                                                     | -                                                                                |             | IPR000425; PTHR19139:SF11<br>(PANTHER), SignalP (SIGNALP)                                                           |
|                         | -                                                                        | 0 |                                                                                                                    |                                                                                  |             | -                                                                                                                   |
|                         | -                                                                        | 0 |                                                                                                                    |                                                                                  |             | -                                                                                                                   |
|                         | -                                                                        | 0 |                                                                                                                    |                                                                                  |             | -                                                                                                                   |
| Caenorhabditis elegans  | tr--dihydrouridine synthase 2-like                                       | 6 | F:GO:0003725;<br>P:GO:0055114;<br>F:GO:0050660;<br>F:GO:0017150;<br>P:GO:0008033;<br>C:GO:0005739                  | -                                                                                |             | IPR001269; IPR013785; SignalP<br>(SIGNALP), SSF51395 (SUPERFAMILY)                                                  |
|                         | -                                                                        | 0 |                                                                                                                    |                                                                                  |             | -                                                                                                                   |
| Caenorhabditis briggsae | elegans protein confirmed by transcript evidence                         | 0 |                                                                                                                    |                                                                                  |             | PTHR23324 (PANTHER),<br>PTHR23324:SF3 (PANTHER)                                                                     |
| Caenorhabditis elegans  | hypothetical protein VC5.2 [Caenorhabditis elegans]                      | 0 |                                                                                                                    |                                                                                  |             | -                                                                                                                   |
| Caenorhabditis elegans  | transcription factor adf-1 (adh distal factor 1)                         | 0 |                                                                                                                    | F:GO:0046872;<br>F:GO:0008270;<br>F:GO:0005515;<br>F:GO:0003677                  |             | IPR006578                                                                                                           |
| Caenorhabditis elegans  | quinine non-avoider family member (qui-1)                                | 0 |                                                                                                                    |                                                                                  |             | -                                                                                                                   |
|                         | -                                                                        | 0 |                                                                                                                    |                                                                                  |             | SignalP (SIGNALP)                                                                                                   |



|                         |                                                           |    |                                                                                                                                                                                                                                           |                                                |                                                                                                              |
|-------------------------|-----------------------------------------------------------|----|-------------------------------------------------------------------------------------------------------------------------------------------------------------------------------------------------------------------------------------------|------------------------------------------------|--------------------------------------------------------------------------------------------------------------|
|                         | -                                                         | 0  |                                                                                                                                                                                                                                           |                                                | -                                                                                                            |
| Caenorhabditis elegans  | cleavage and polyadenylation specificity factor subunit 5 | 14 | C:GO:0042382;<br>P:GO:0040010;<br>P:GO:0040035;<br>P:GO:0008380;<br>C:GO:0005813;<br>F:GO:0017091;<br>P:GO:0002119;<br>P:GO:0040011;<br>P:GO:0006397;<br>F:GO:0042803;<br>P:GO:0009792;<br>F:GO:0016787;<br>F:GO:0042826;<br>P:GO:0016246 | -                                              | IPR000086; PTHR13047 (PANTHER)                                                                               |
|                         | -                                                         | 0  |                                                                                                                                                                                                                                           |                                                | -                                                                                                            |
| Caenorhabditis elegans  | elegans protein confirmed by transcript evidence          | 1  | P:GO:0040010                                                                                                                                                                                                                              |                                                | IPR002544; SignalP (SIGNALP)                                                                                 |
| Caenorhabditis briggsae | dipeptidyl aminopeptidase                                 | 1  | F:GO:0008236                                                                                                                                                                                                                              |                                                | IPR001375; G3DSA:3.40.50.1820 (GENE3D), PTHR11731 (PANTHER), PTHR11731:SF7 (PANTHER), SSF53474 (SUPERFAMILY) |
| Brugia malayi           | piwi domain containing protein                            | 1  | P:GO:0002119                                                                                                                                                                                                                              |                                                | IPR003165; IPR012337; PTHR22891 (PANTHER)                                                                    |
|                         | -                                                         | 0  |                                                                                                                                                                                                                                           |                                                | -                                                                                                            |
| Brugia malayi           | vesicle-fusing atpase                                     | 10 | P:GO:0009792;<br>P:GO:0002119;<br>F:GO:0005515;<br>P:GO:0032940;<br>F:GO:0005524;<br>P:GO:0000003;<br>P:GO:0040011;<br>F:GO:0017111;<br>P:GO:0040007;<br>P:GO:0006898                                                                     | EC:3.6.1.15                                    | IPR003338; IPR004201; IPR009010; G3DSA:3.10.330.10 (GENE3D), PTHR23078 (PANTHER), SSF54585 (SUPERFAMILY)     |
|                         | -                                                         | 0  |                                                                                                                                                                                                                                           |                                                | -                                                                                                            |
| Loa loa                 | gtp-ase activating protein for arf containing protein     | 0  |                                                                                                                                                                                                                                           | F:GO:0008060;<br>P:GO:0032312;<br>F:GO:0008270 | -                                                                                                            |
|                         | -                                                         | 0  |                                                                                                                                                                                                                                           |                                                | -                                                                                                            |
| Caenorhabditis elegans  | germi-I center ki-se family member (gck-1)                | 8  | F:GO:0042802;<br>P:GO:0006468;<br>F:GO:0046872;<br>P:GO:0006979;<br>C:GO:0005794;<br>F:GO:0005524;<br>P:GO:0007165;<br>F:GO:0004674                                                                                                       | EC:2.7.11.0                                    | IPR000719; IPR011009; IPR017442; G3DSA:1.10.510.10 (GENE3D), PTHR22986 (PANTHER), PTHR22986:SF95 (PANTHER)   |
| Caenorhabditis elegans  | elegans protein confirmed by transcript evidence          | 0  |                                                                                                                                                                                                                                           |                                                | IPR009432                                                                                                    |
| Caenorhabditis elegans  | elegans protein confirmed by transcript evidence          | 0  |                                                                                                                                                                                                                                           |                                                | IPR009432                                                                                                    |
| Caenorhabditis elegans  | elegans protein confirmed by transcript evidence          | 0  |                                                                                                                                                                                                                                           |                                                | IPR009432                                                                                                    |
| Brugia malayi           | upf0558 protein                                           | 0  |                                                                                                                                                                                                                                           |                                                | IPR019410; G3DSA:3.40.50.150 (GENE3D), PTHR21095 (PANTHER), SSF53335 (SUPERFAMILY)                           |
| Caenorhabditis elegans  | wd repeat and fyve domain containing 3 isoform 1          | 1  | F:GO:0005488                                                                                                                                                                                                                              |                                                | -                                                                                                            |
| Caenorhabditis elegans  | transmembrane amino acid transporter protein              | 3  | P:GO:0019915;<br>P:GO:0040010;<br>P:GO:0040011                                                                                                                                                                                            |                                                | IPR013057; PTHR22950 (PANTHER), SignalP (SIGNALP)                                                            |
| Caenorhabditis elegans  | hypothetical protein F29B9.12 [Caenorhabditis elegans]    | 0  |                                                                                                                                                                                                                                           |                                                | SignalP (SIGNALP)                                                                                            |

|                         |                                                  |    |                                                                                                                                                                       |                                                                 |            |                                                                                                                                                     |
|-------------------------|--------------------------------------------------|----|-----------------------------------------------------------------------------------------------------------------------------------------------------------------------|-----------------------------------------------------------------|------------|-----------------------------------------------------------------------------------------------------------------------------------------------------|
| Caenorhabditis elegans  | mitochondrial ribosomal protein l36              | 4  | C:GO:0005840;<br>F:GO:0003735;<br>P:GO:0040010;<br>P:GO:0006412                                                                                                       | -                                                               | EC:3.6.5.3 | IPR000473; PD002101 (PRODOM),<br>PTHR18804:SF5 (PANTHER)                                                                                            |
| -                       | -                                                | 0  | -                                                                                                                                                                     | -                                                               | -          | -                                                                                                                                                   |
| Caenorhabditis elegans  | elegans protein confirmed by transcript evidence | 6  | C:GO:0016021;<br>P:GO:0009792;<br>P:GO:0040018;<br>P:GO:0008340;<br>P:GO:0040010;<br>P:GO:0002119                                                                     | -                                                               | -          | -                                                                                                                                                   |
| -                       | -                                                | 0  | -                                                                                                                                                                     | -                                                               | -          | -                                                                                                                                                   |
| Caenorhabditis briggsae | mboat family protein                             | 2  | C:GO:0016020;<br>P:GO:0010171                                                                                                                                         | -                                                               | -          | PTHR13906 (PANTHER),<br>PTHR13906:SF2 (PANTHER), SignalP<br>(SIGNALP)                                                                               |
| -                       | -                                                | 0  | -                                                                                                                                                                     | -                                                               | -          | SignalP (SIGNALP)                                                                                                                                   |
| Caenorhabditis elegans  | zinc finger fyve domain-containing protein 19    | 0  | -                                                                                                                                                                     | F:GO:0046872;<br>F:GO:0008270;<br>C:GO:0005575                  | -          | IPR000306; IPR011011; IPR013083;<br>IPR017455; PTHR12673 (PANTHER),<br>PTHR12673:SF5 (PANTHER)                                                      |
| Brugia malayi           | xpa-binding protein 2                            | 5  | F:GO:0005488;<br>P:GO:0000381;<br>C:GO:0071011;<br>P:GO:0006911;<br>C:GO:0071013                                                                                      | -                                                               | -          | IPR003107; IPR011990; PTHR11246<br>(PANTHER), PTHR11246:SF5<br>(PANTHER), SSF48452 (SUPERFAMILY)                                                    |
| -                       | -                                                | 0  | -                                                                                                                                                                     | -                                                               | -          | -                                                                                                                                                   |
| -                       | -                                                | 0  | -                                                                                                                                                                     | -                                                               | -          | -                                                                                                                                                   |
| -                       | -                                                | 0  | -                                                                                                                                                                     | -                                                               | -          | -                                                                                                                                                   |
| -                       | -                                                | 0  | -                                                                                                                                                                     | -                                                               | -          | -                                                                                                                                                   |
| Caenorhabditis briggsae | briggsae cbr-tag-264 protein                     | 5  | P:GO:0040035;<br>P:GO:0002119;<br>P:GO:0040039;<br>P:GO:0040018;<br>P:GO:0006974                                                                                      | -                                                               | -          | IPR010793                                                                                                                                           |
| Brugia malayi           | esophageal cancer associated protein             | 0  | -                                                                                                                                                                     | F:GO:0003674;<br>C:GO:0016021;<br>C:GO:0016020;<br>P:GO:0008150 | -          | PTHR13673 (PANTHER)                                                                                                                                 |
| -                       | -                                                | 0  | -                                                                                                                                                                     | -                                                               | -          | -                                                                                                                                                   |
| Caenorhabditis briggsae | leucine-rich repeat-containing protein 68        | 0  | -                                                                                                                                                                     | F:GO:0003674;<br>P:GO:0008150                                   | -          | G3DSA:3.80.10.10 (GENE3D),<br>PTHR13824 (PANTHER),<br>PTHR13824:SF6 (PANTHER), SSF52047<br>(SUPERFAMILY)                                            |
| Caenorhabditis briggsae | leucine-rich repeat-containing protein 68        | 0  | -                                                                                                                                                                     | F:GO:0003674;<br>P:GO:0008150                                   | -          | G3DSA:3.80.10.10 (GENE3D),<br>PTHR13824 (PANTHER),<br>PTHR13824:SF6 (PANTHER), SSF52047<br>(SUPERFAMILY)                                            |
| -                       | -                                                | 0  | -                                                                                                                                                                     | -                                                               | -          | SignalP (SIGNALP)                                                                                                                                   |
| -                       | -                                                | 0  | -                                                                                                                                                                     | -                                                               | -          | -                                                                                                                                                   |
| Caenorhabditis briggsae | 40s ribosomal protein s2                         | 10 | P:GO:0009792;<br>P:GO:0002119;<br>F:GO:0003735;<br>C:GO:0005811;<br>F:GO:0003723;<br>F:GO:0005515;<br>P:GO:0000003;<br>C:GO:0022627;<br>P:GO:0040007;<br>P:GO:0006412 | -                                                               | EC:3.6.5.3 | IPR000851; IPR005324; IPR005711;<br>IPR013810; IPR014720; IPR014721;<br>IPR018192; IPR020568;<br>PTHR13718:SF4 (PANTHER), SSF54768<br>(SUPERFAMILY) |

|                         |                          |    |                                                                                                                                                                       |   |            |                                                                                                                                                     |
|-------------------------|--------------------------|----|-----------------------------------------------------------------------------------------------------------------------------------------------------------------------|---|------------|-----------------------------------------------------------------------------------------------------------------------------------------------------|
| Caenorhabditis briggsae | 40s ribosomal protein s2 | 9  | P:GO:0009792;<br>P:GO:0002119;<br>F:GO:0003735;<br>F:GO:0003723;<br>F:GO:0005515;<br>P:GO:0040010;<br>C:GO:0015935;<br>P:GO:0000003;<br>P:GO:0006412                  | - | EC:3.6.5.3 | IPR001662; PTHR11260 (PANTHER),<br>PTHR11260:SF2 (PANTHER)                                                                                          |
| Caenorhabditis briggsae | 40s ribosomal protein s2 | 10 | P:GO:0009792;<br>P:GO:0002119;<br>F:GO:0003735;<br>C:GO:0005811;<br>F:GO:0003723;<br>F:GO:0005515;<br>P:GO:0000003;<br>C:GO:0022627;<br>P:GO:0040007;<br>P:GO:0006412 | - | EC:3.6.5.3 | IPR000851; IPR005324; IPR005711;<br>IPR013810; IPR014720; IPR014721;<br>IPR018192; IPR020568;<br>PTHR13718:SF4 (PANTHER), SSF54768<br>(SUPERFAMILY) |
| Caenorhabditis briggsae | 40s ribosomal protein s2 | 9  | P:GO:0009792;<br>P:GO:0002119;<br>F:GO:0003735;<br>F:GO:0003723;<br>F:GO:0005515;<br>P:GO:0040010;<br>C:GO:0015935;<br>P:GO:0000003;<br>P:GO:0006412                  | - | EC:3.6.5.3 | IPR001662; PTHR11260 (PANTHER),<br>PTHR11260:SF2 (PANTHER)                                                                                          |
| Caenorhabditis briggsae | 40s ribosomal protein s2 | 10 | P:GO:0009792;<br>P:GO:0002119;<br>F:GO:0003735;<br>C:GO:0005811;<br>F:GO:0003723;<br>F:GO:0005515;<br>P:GO:0000003;<br>C:GO:0022627;<br>P:GO:0040007;<br>P:GO:0006412 | - | EC:3.6.5.3 | IPR000851; IPR005324; IPR005711;<br>IPR013810; IPR014720; IPR014721;<br>IPR018192; IPR020568;<br>PTHR13718:SF4 (PANTHER), SSF54768<br>(SUPERFAMILY) |
| Caenorhabditis briggsae | 40s ribosomal protein s2 | 9  | P:GO:0009792;<br>P:GO:0002119;<br>F:GO:0003735;<br>F:GO:0003723;<br>F:GO:0005515;<br>P:GO:0040010;<br>C:GO:0015935;<br>P:GO:0000003;<br>P:GO:0006412                  | - | EC:3.6.5.3 | IPR001662; PTHR11260 (PANTHER),<br>PTHR11260:SF2 (PANTHER)                                                                                          |
| -                       | -                        | 0  |                                                                                                                                                                       |   |            | -                                                                                                                                                   |
|                         |                          | 0  |                                                                                                                                                                       |   |            |                                                                                                                                                     |

|                           |                                                            |    |                                                                                                                                                                       |                                                |             |                                                                            |
|---------------------------|------------------------------------------------------------|----|-----------------------------------------------------------------------------------------------------------------------------------------------------------------------|------------------------------------------------|-------------|----------------------------------------------------------------------------|
| Homo sapiens              | cathepsin d                                                | 10 | F:GO:0042277;<br>C:GO:0005764;<br>C:GO:0005739;<br>P:GO:0008219;<br>C:GO:0005615;<br>P:GO:0000045;<br>P:GO:0006508;<br>C:GO:0042470;<br>F:GO:0004190;<br>C:GO:0031012 | -                                              | EC:3.4.23.0 | IPR001461; IPR001969; IPR009007;<br>IPR021109; PTHR13683:SF84<br>(PANTHER) |
| -                         | -                                                          | 0  |                                                                                                                                                                       |                                                |             | -                                                                          |
| Caenorhabditis elegans    | briggsae cbr-vab-9 protein                                 | 0  |                                                                                                                                                                       | C:GO:0016021;<br>C:GO:0016020                  |             | IPR015664; SignalP (SIGNALP)                                               |
| Caenorhabditis sp. PS1010 | chromatin assembly factor 1 subunit b                      | 1  | P:GO:0000003                                                                                                                                                          | -                                              |             | PTHR15271 (PANTHER), SignalP (SIGNALP)                                     |
| -                         | -                                                          | 0  |                                                                                                                                                                       |                                                |             | -                                                                          |
| Ostertagia ostertagi      | metalloprotease 1 precursor                                | 3  | F:GO:0004222;<br>P:GO:0006508;<br>F:GO:0008270                                                                                                                        | -                                              | EC:3.4.24.0 | -                                                                          |
| -                         | -                                                          | 0  |                                                                                                                                                                       |                                                |             | -                                                                          |
| Caenorhabditis elegans    | per1-like domain containing 1                              | 4  | F:GO:0005515;<br>C:GO:0043231;<br>C:GO:0044444;<br>C:GO:0016020                                                                                                       | -                                              |             | IPR007217; SignalP (SIGNALP)                                               |
| -                         | -                                                          | 0  |                                                                                                                                                                       |                                                |             | -                                                                          |
| Caenorhabditis briggsae   | elegans protein partially confirmed by transcript evidence | 0  |                                                                                                                                                                       | F:GO:0005524;<br>F:GO:0004672;<br>P:GO:0006468 |             | SignalP (SIGNALP)                                                          |
| -                         | -                                                          | 0  |                                                                                                                                                                       |                                                |             | -                                                                          |
| Caenorhabditis elegans    | briggsae cbr-him-17 protein                                | 0  |                                                                                                                                                                       |                                                |             | -                                                                          |
| -                         | -                                                          | 0  |                                                                                                                                                                       |                                                |             | -                                                                          |
| -                         | -                                                          | 0  |                                                                                                                                                                       |                                                |             | IPR002172; PTHR10529 (PANTHER),<br>PTHR10529:SF2 (PANTHER)                 |
| -                         | -                                                          | 0  |                                                                                                                                                                       |                                                |             | -                                                                          |
| Caenorhabditis briggsae   | Hypothetical protein CBG19064 [Caenorhabditis briggsae]    | 0  |                                                                                                                                                                       | F:GO:0005524                                   |             | -                                                                          |
| -                         | -                                                          | 0  |                                                                                                                                                                       |                                                |             | -                                                                          |
| Pristionchus pacificus    | abnormal dauer formation family member (daf-12)            | 4  | F:GO:0046872;<br>F:GO:0004879;<br>F:GO:0003677;<br>P:GO:0045449                                                                                                       | -                                              |             | IPR008946                                                                  |
| -                         | -                                                          | 0  |                                                                                                                                                                       |                                                |             | -                                                                          |
| -                         | -                                                          | 0  |                                                                                                                                                                       |                                                |             | -                                                                          |
| -                         | -                                                          | 0  |                                                                                                                                                                       |                                                |             | SignalP (SIGNALP)                                                          |
| -                         | -                                                          | 0  |                                                                                                                                                                       |                                                |             | SignalP (SIGNALP)                                                          |
| Caenorhabditis elegans    | g protein-coupled receptor                                 | 0  |                                                                                                                                                                       | F:GO:0004872;<br>C:GO:0016021;<br>P:GO:0007186 |             | SignalP (SIGNALP)                                                          |
| Caenorhabditis briggsae   | briggsae cbr-emb-27 protein                                | 3  | P:GO:0000279;<br>P:GO:0000003;<br>P:GO:0007275                                                                                                                        | -                                              |             | -                                                                          |
| Brugia malayi             | ino80 complex subunit d- partial                           | 0  |                                                                                                                                                                       |                                                |             | -                                                                          |
| -                         | -                                                          | 0  |                                                                                                                                                                       |                                                |             | SignalP (SIGNALP)                                                          |

|                         |                                                          |    |                                                                                                                                                                                                         |   |                                                         |                                                                                                                                                                                |
|-------------------------|----------------------------------------------------------|----|---------------------------------------------------------------------------------------------------------------------------------------------------------------------------------------------------------|---|---------------------------------------------------------|--------------------------------------------------------------------------------------------------------------------------------------------------------------------------------|
| Brugia malayi           | cd151 antigen                                            | 6  | P:GO:0010171;<br>P:GO:0002119;<br>P:GO:0040002;<br>P:GO:0000003;<br>C:GO:0016021;<br>P:GO:0040007                                                                                                       | - |                                                         | IPR018499; PTHR19282 (PANTHER),<br>PTHR19282:SF27 (PANTHER), SignalP<br>(SIGNALP)                                                                                              |
| Caenorhabditis briggsae | abnormal go-d development family member (gon-2)          | 6  | P:GO:0007067;<br>P:GO:0055085;<br>P:GO:0006811;<br>C:GO:0016021;<br>P:GO:0008406;<br>F:GO:0005216                                                                                                       | - |                                                         | PTHR13800 (PANTHER)                                                                                                                                                            |
| -                       | -                                                        | 0  |                                                                                                                                                                                                         |   |                                                         | -                                                                                                                                                                              |
| Caenorhabditis elegans  | glycosyl hydrolases family 31 protein                    | 2  | P:GO:0008152;<br>F:GO:0004553                                                                                                                                                                           | - | EC:3.2.1.0                                              | IPR000322; IPR017853;<br>PTHR22762:SF10 (PANTHER)                                                                                                                              |
| Caenorhabditis briggsae | briggsae cbr-mlt-7 protein                               | 4  | F:GO:0020037;<br>P:GO:0055114;<br>F:GO:0004601;<br>P:GO:0006979                                                                                                                                         | - | EC:1.11.1.7                                             | -                                                                                                                                                                              |
| Caenorhabditis elegans  | tubulin--tyrosine ligase-like protein 12                 | 1  | C:GO:0009507                                                                                                                                                                                            | - |                                                         | -                                                                                                                                                                              |
| Caenorhabditis elegans  | ras-related protein rab-7                                | 3  | P:GO:0015031;<br>F:GO:0005525;<br>P:GO:0007264                                                                                                                                                          | - |                                                         | -                                                                                                                                                                              |
| -                       | -                                                        | 0  |                                                                                                                                                                                                         |   |                                                         | -                                                                                                                                                                              |
| Caenorhabditis elegans  | a-phase promoting complex subunit 10                     | 12 | C:GO:0005654;<br>P:GO:0070979;<br>F:GO:0005515;<br>P:GO:0051437;<br>C:GO:0005680;<br>P:GO:0051436;<br>C:GO:0005829;<br>F:GO:0004842;<br>P:GO:0000090;<br>P:GO:0031145;<br>P:GO:0030071;<br>P:GO:0000086 | - | EC:6.3.2.19                                             | -                                                                                                                                                                              |
| Brugia malayi           | probable molybdopterin binding domain containing protein | 7  | P:GO:0007416;<br>F:GO:0032947;<br>P:GO:0051260;<br>C:GO:0045202;<br>F:GO:0005102;<br>F:GO:0042803;<br>C:GO:0005737                                                                                      | - |                                                         | IPR001453; IPR005110; IPR005111;<br>IPR008284; IPR020817;<br>G3DSA:2.170.190.11 (GENE3D),<br>G3DSA:2.40.340.10 (GENE3D),<br>G3DSA:3.90.105.10 (GENE3D),<br>PTHR10192 (PANTHER) |
| Macaca mulatta          | elongation factor 2                                      | 8  | F:GO:0003746;<br>P:GO:0006414;<br>P:GO:0006184;<br>F:GO:0005515;<br>F:GO:0003924;<br>C:GO:0030529;<br>C:GO:0005737;<br>F:GO:0005525                                                                     | - | EC:3.6.5.1;<br>EC:3.6.5.2;<br>EC:3.6.5.3;<br>EC:3.6.5.4 | IPR000640; IPR005517; IPR009022;<br>IPR014721; IPR020568;<br>G3DSA:3.30.70.870 (GENE3D),<br>PTHR23115 (PANTHER),<br>PTHR23115:SF4 (PANTHER)                                    |
| Sordaria macrospora     | un-med protein product [Sordaria macrospora]             | 0  |                                                                                                                                                                                                         |   |                                                         | -                                                                                                                                                                              |
| -                       | -                                                        | 0  |                                                                                                                                                                                                         |   |                                                         | -                                                                                                                                                                              |

|                                 |                                                               |   |                                                                                                   |                                                                                                                                                                                                                                                                                                                                                                  |            |                                                                                                                                            |
|---------------------------------|---------------------------------------------------------------|---|---------------------------------------------------------------------------------------------------|------------------------------------------------------------------------------------------------------------------------------------------------------------------------------------------------------------------------------------------------------------------------------------------------------------------------------------------------------------------|------------|--------------------------------------------------------------------------------------------------------------------------------------------|
| Thermomicrobium roseum DSM 5159 | kinesin family protein                                        | 0 |                                                                                                   | F:GO:0003723;<br>C:GO:0005634;<br>F:GO:0003674;<br>F:GO:0005524;<br>F:GO:0046872;<br>F:GO:0016301;<br>C:GO:0016020;<br>P:GO:0007018;<br>F:GO:0003700;<br>F:GO:0004222;<br>P:GO:0008150;<br>F:GO:0003824;<br>F:GO:0000166;<br>C:GO:0005874;<br>P:GO:0006508;<br>F:GO:0008663;<br>F:GO:0003777;<br>F:GO:0003774;<br>F:GO:0008270;<br>C:GO:0005886;<br>C:GO:0005575 |            | -                                                                                                                                          |
| Caenorhabditis elegans          | briggsae cbr-nol-9 protein                                    | 0 |                                                                                                   | P:GO:0000003;<br>P:GO:0006974                                                                                                                                                                                                                                                                                                                                    |            | G3DSA:3.40.50.300 (GENE3D),<br>PF03205 (PFAM)                                                                                              |
|                                 | -                                                             | 0 |                                                                                                   |                                                                                                                                                                                                                                                                                                                                                                  |            | SignalP (SIGNALP)                                                                                                                          |
| Loa loa                         | set1 ash2 histone methyltransferase complex subunit ash2-like | 4 | P:GO:0040007;<br>P:GO:0040027;<br>P:GO:0040035;<br>F:GO:0005515                                   |                                                                                                                                                                                                                                                                                                                                                                  |            | -                                                                                                                                          |
| Caenorhabditis briggsae         | mitogen-activated protein ki-se 8 isoform 2                   | 3 | P:GO:0009987;<br>F:GO:0005488;<br>F:GO:0016740                                                    |                                                                                                                                                                                                                                                                                                                                                                  |            | IPR000719; IPR006578; IPR011009;<br>IPR017442; G3DSA:3.30.200.20<br>(GENE3D), PTHR11295 (PANTHER),<br>PTHR11295:SF62 (PANTHER)             |
| Caenorhabditis elegans          | ubiquinone me-quinone biosynthesis methyltransferase          | 3 | P:GO:0006744;<br>P:GO:0008340;<br>F:GO:0008168                                                    |                                                                                                                                                                                                                                                                                                                                                                  | EC:2.1.1.0 | -                                                                                                                                          |
|                                 | -                                                             | 0 |                                                                                                   |                                                                                                                                                                                                                                                                                                                                                                  |            | -                                                                                                                                          |
|                                 | -                                                             | 0 |                                                                                                   |                                                                                                                                                                                                                                                                                                                                                                  |            | -                                                                                                                                          |
|                                 | -                                                             | 0 |                                                                                                   |                                                                                                                                                                                                                                                                                                                                                                  |            | -                                                                                                                                          |
|                                 | -                                                             | 0 |                                                                                                   |                                                                                                                                                                                                                                                                                                                                                                  |            | -                                                                                                                                          |
|                                 | -                                                             | 0 |                                                                                                   |                                                                                                                                                                                                                                                                                                                                                                  |            | -                                                                                                                                          |
|                                 | -                                                             | 0 |                                                                                                   |                                                                                                                                                                                                                                                                                                                                                                  |            | -                                                                                                                                          |
| Caenorhabditis elegans          | valyl-tr- synthetase                                          | 2 | F:GO:0016874;<br>P:GO:0006412                                                                     |                                                                                                                                                                                                                                                                                                                                                                  | EC:3.6.5.3 | IPR002300; IPR002303; IPR009008;<br>IPR014729; G3DSA:3.90.740.10<br>(GENE3D), PTHR11946 (PANTHER),<br>SSF52374 (SUPERFAMILY)               |
|                                 | -                                                             | 0 |                                                                                                   |                                                                                                                                                                                                                                                                                                                                                                  |            | -                                                                                                                                          |
| Loa loa                         | patched family protein                                        | 0 |                                                                                                   | C:GO:0016021;<br>C:GO:0016020;<br>F:GO:0008158                                                                                                                                                                                                                                                                                                                   |            | IPR003392; PTHR10796 (PANTHER),<br>PTHR10796:SF14 (PANTHER), SignalP<br>(SIGNALP)                                                          |
| Caenorhabditis briggsae         | isoleucyl-tr- synthetase                                      | 6 | F:GO:0005515;<br>P:GO:0006428;<br>F:GO:0005524;<br>F:GO:0004822;<br>C:GO:0005829;<br>F:GO:0008270 |                                                                                                                                                                                                                                                                                                                                                                  | EC:6.1.1.5 | IPR001412; IPR002300; IPR002301;<br>IPR009008; IPR014729;<br>G3DSA:3.90.740.10 (GENE3D),<br>PTHR11946 (PANTHER), SSF52374<br>(SUPERFAMILY) |
| Caenorhabditis elegans          | sy-ptophysin sy-ptoporin family protein                       | 1 | C:GO:0016021                                                                                      |                                                                                                                                                                                                                                                                                                                                                                  |            | IPR008253; PTHR22776 (PANTHER),<br>PTHR22776:SF6 (PANTHER), SignalP<br>(SIGNALP)                                                           |

|                        |                                                                                      |    |                                                                                                                                                                                                                                           |                                                                                                                    |                            |                                                                                                                                               |
|------------------------|--------------------------------------------------------------------------------------|----|-------------------------------------------------------------------------------------------------------------------------------------------------------------------------------------------------------------------------------------------|--------------------------------------------------------------------------------------------------------------------|----------------------------|-----------------------------------------------------------------------------------------------------------------------------------------------|
| Magnetococcus sp. MC-1 | elegans protein confirmed by transcript evidence                                     | 0  |                                                                                                                                                                                                                                           | P:GO:0060271;<br>F:GO:0003674;<br>P:GO:0060041;<br>P:GO:0010842;<br>P:GO:0008150;<br>P:GO:0007018;<br>F:GO:0005515 | -                          |                                                                                                                                               |
| -                      | -                                                                                    | 0  |                                                                                                                                                                                                                                           |                                                                                                                    | -                          |                                                                                                                                               |
| Caenorhabditis elegans | udp-n-acetylglucosamine transporter                                                  | 5  | F:GO:0005515;<br>P:GO:0000003;<br>P:GO:0008643;<br>C:GO:0016020;<br>F:GO:0015144                                                                                                                                                          | -                                                                                                                  | -                          |                                                                                                                                               |
| -                      | -                                                                                    | 0  |                                                                                                                                                                                                                                           |                                                                                                                    | -                          |                                                                                                                                               |
| Caenorhabditis elegans | adp-ribosylation factor guanine nucleotide-exchange factor 2 (brefeldin a-inhibited) | 14 | F:GO:0050811;<br>C:GO:0005829;<br>P:GO:0040010;<br>P:GO:0023034;<br>C:GO:0000139;<br>P:GO:0006887;<br>P:GO:0000003;<br>F:GO:0005085;<br>P:GO:0002119;<br>C:GO:0005802;<br>P:GO:0040011;<br>P:GO:0006898;<br>F:GO:0017022;<br>P:GO:0009792 | -                                                                                                                  |                            | PTHR10663 (PANTHER),<br>PTHR10663:SF1 (PANTHER), SignalP<br>(SIGNALP)                                                                         |
| Homo sapiens           | h+ lysosomal v1 subunit f                                                            | 10 | F:GO:0046933;<br>C:GO:0016471;<br>P:GO:0015986;<br>P:GO:0006200;<br>C:GO:0005624;<br>F:GO:0005515;<br>F:GO:0046961;<br>F:GO:0042624;<br>P:GO:0060041;<br>C:GO:0033180                                                                     | -                                                                                                                  | EC:3.6.3.14;<br>EC:3.6.1.3 | IPR005772; IPR008218;<br>G3DSA:3.40.50.10580 (GENE3D)                                                                                         |
| Caenorhabditis elegans | pan domain containing protein                                                        | 0  |                                                                                                                                                                                                                                           |                                                                                                                    |                            | IPR003014; IPR003609                                                                                                                          |
| -                      | -                                                                                    | 0  |                                                                                                                                                                                                                                           |                                                                                                                    | -                          |                                                                                                                                               |
| Brugia malayi          | tk fer protein ki-se                                                                 | 2  | F:GO:0005488;<br>F:GO:0016301                                                                                                                                                                                                             | -                                                                                                                  |                            |                                                                                                                                               |
| Caenorhabditis elegans | d- helicase hel308                                                                   | 4  | F:GO:0003676;<br>F:GO:0008026;<br>F:GO:0000166;<br>P:GO:0006139                                                                                                                                                                           | -                                                                                                                  |                            | IPR001650; IPR011545; IPR014021;<br>G3DSA:3.40.50.300 (GENE3D),<br>PTHR11752 (PANTHER),<br>PTHR11752:SF3 (PANTHER), SSF52540<br>(SUPERFAMILY) |
| Caenorhabditis elegans | steroidogenic acute regulatory protein                                               | 6  | P:GO:0010033;<br>P:GO:0044237;<br>P:GO:0006694;<br>P:GO:00050794;<br>C:GO:0044444;<br>P:GO:0032501                                                                                                                                        | -                                                                                                                  |                            | IPR002913; G3DSA:3.30.530.20<br>(GENE3D), PTHR12136 (PANTHER),<br>PTHR12136:SF11 (PANTHER),<br>SSF55961 (SUPERFAMILY)                         |
| Populus trichocarpa    | retrotransposon protein                                                              | 0  |                                                                                                                                                                                                                                           |                                                                                                                    |                            | -                                                                                                                                             |

|                         |                                                                                    |    |                                                                                                                                                                                                                          |                                                                                                                                                      |                                                                                                                    |
|-------------------------|------------------------------------------------------------------------------------|----|--------------------------------------------------------------------------------------------------------------------------------------------------------------------------------------------------------------------------|------------------------------------------------------------------------------------------------------------------------------------------------------|--------------------------------------------------------------------------------------------------------------------|
| Loa loa                 | tribbles homolog 3                                                                 | 8  | P:GO:0032270;<br>P:GO:0045859;<br>P:GO:0031327;<br>P:GO:0044093;<br>P:GO:0043687;<br>F:GO:0019899;<br>C:GO:0005634;<br>F:GO:0030234                                                                                      | -                                                                                                                                                    | IPR000719; IPR011009; IPR017442;<br>G3DSA:1.10.510.10 (GENE3D),<br>PTHR22961 (PANTHER),<br>PTHR22961:SF3 (PANTHER) |
| -                       | -                                                                                  | 0  |                                                                                                                                                                                                                          |                                                                                                                                                      | -                                                                                                                  |
| Caenorhabditis elegans  | myosin light polypeptide 5 regulatory                                              | 3  | C:GO:0016020;<br>P:GO:0009987;<br>P:GO:0006810                                                                                                                                                                           | -                                                                                                                                                    | IPR011701; IPR016196;<br>G3DSA:1.20.1250.20 (GENE3D),<br>PTHR10924 (PANTHER)                                       |
| Caenorhabditis briggsae | alix (apoptosis-linked gene 2 interacting protein x) homolog family member (alx-1) | 0  |                                                                                                                                                                                                                          |                                                                                                                                                      | IPR004328; G3DSA:1.20.140.50 (GENE3D), G3DSA:1.25.40.280 (GENE3D), PTHR23030 (PANTHER)                             |
| Caenorhabditis elegans  | d- binding protein elf-1                                                           | 13 | P:GO:0008360;<br>P:GO:0007009;<br>P:GO:0007426;<br>P:GO:0040007;<br>P:GO:0000003;<br>F:GO:0003677;<br>P:GO:0007399;<br>P:GO:0002119;<br>P:GO:0042127;<br>F:GO:0003704;<br>P:GO:0035159;<br>P:GO:0008362;<br>C:GO:0005634 | -                                                                                                                                                    | -                                                                                                                  |
| -                       | -                                                                                  | 0  |                                                                                                                                                                                                                          |                                                                                                                                                      | -                                                                                                                  |
| Caenorhabditis elegans  | coiled-coil domain-containing protein 130                                          | 2  | F:GO:0005515;<br>P:GO:0009615                                                                                                                                                                                            | -                                                                                                                                                    | IPR007590                                                                                                          |
| Caenorhabditis elegans  | coiled-coil domain-containing protein 130                                          | 2  | F:GO:0005515;<br>P:GO:0009615                                                                                                                                                                                            | -                                                                                                                                                    | IPR007590                                                                                                          |
| Caenorhabditis elegans  | coiled-coil domain-containing protein 130                                          | 2  | F:GO:0005515;<br>P:GO:0009615                                                                                                                                                                                            | -                                                                                                                                                    | IPR007590                                                                                                          |
| Caenorhabditis briggsae | par-6 at contacts (abnormal early localization of par-6) family member (pac-1)     | 2  | F:GO:0005096;<br>P:GO:0007165                                                                                                                                                                                            | -                                                                                                                                                    | IPR001849; PTHR23175 (PANTHER),<br>PTHR23175:SF3 (PANTHER)                                                         |
| Caenorhabditis briggsae | uff1_caebr ame: full=e3 ufm1-protein ligase 1 homolog                              | 0  |                                                                                                                                                                                                                          | F:GO:0016874                                                                                                                                         | -                                                                                                                  |
| Loa loa                 | repressor of r- polymerase iii transcription maf1-like protein                     | 1  | P:GO:0040010                                                                                                                                                                                                             | -                                                                                                                                                    | IPR015257                                                                                                          |
| Loa loa                 | repressor of r- polymerase iii transcription maf1-like protein                     | 1  | P:GO:0040010                                                                                                                                                                                                             | -                                                                                                                                                    | IPR015257                                                                                                          |
| -                       | -                                                                                  | 0  |                                                                                                                                                                                                                          |                                                                                                                                                      | PR01217 (PRINTS)                                                                                                   |
| Caenorhabditis elegans  | autophagy-related protein 3                                                        | 4  | F:GO:0016879;<br>P:GO:0006810;<br>P:GO:0006996;<br>P:GO:0006914                                                                                                                                                          | -                                                                                                                                                    | IPR007134; IPR018247; PTHR12866 (PANTHER)                                                                          |
| Loa loa                 | ulp1 protease c-term-i catalytic domain containing protein                         | 0  |                                                                                                                                                                                                                          | C:GO:0005634;<br>P:GO:0000003;<br>P:GO:0002119;<br>P:GO:0009792;<br>F:GO:0008234;<br>F:GO:0008233;<br>P:GO:0006508;<br>P:GO:0040010;<br>P:GO:0040007 | -                                                                                                                  |



|                           |                                                             |   |                                                                                                                    |                                                                                                                                                      |            |                                                                                                               |
|---------------------------|-------------------------------------------------------------|---|--------------------------------------------------------------------------------------------------------------------|------------------------------------------------------------------------------------------------------------------------------------------------------|------------|---------------------------------------------------------------------------------------------------------------|
| Loa loa                   | ulp1 protease c-termi-l catalytic domain containing protein | 0 |                                                                                                                    | C:GO:0005634;<br>P:GO:0000003;<br>P:GO:0002119;<br>P:GO:0009792;<br>F:GO:0008234;<br>F:GO:0008233;<br>P:GO:0006508;<br>P:GO:0040010;<br>P:GO:0040007 | -          |                                                                                                               |
| Loa loa                   | dehydrodolichyl diphosphate synthase                        | 2 | F:GO:0000166;<br>F:GO:0016765                                                                                      | -                                                                                                                                                    |            | IPR001441                                                                                                     |
| -                         | -                                                           | 0 |                                                                                                                    |                                                                                                                                                      |            | -                                                                                                             |
| Caenorhabditis briggsae   | ys48_caeel ame: full=uncharacterized protein                | 0 |                                                                                                                    | P:GO:0000003                                                                                                                                         |            | -                                                                                                             |
| Caenorhabditis elegans    | lim domain family member (lim-9)                            | 1 | F:GO:0008270                                                                                                       | -                                                                                                                                                    |            | IPR010442; PTHR18973 (PANTHER),<br>PTHR18973:SF105 (PANTHER)                                                  |
| -                         | -                                                           | 0 |                                                                                                                    |                                                                                                                                                      |            | -                                                                                                             |
| -                         | -                                                           | 0 |                                                                                                                    |                                                                                                                                                      |            | IPR008555                                                                                                     |
| Heligmosomoides polygyrus | glutathione s-transferase                                   | 4 | P:GO:0008340;<br>P:GO:0040010;<br>F:GO:0005515;<br>F:GO:0016740                                                    | -                                                                                                                                                    |            | IPR004046; IPR010987; IPR017933;<br>PTHR11571 (PANTHER),<br>PTHR11571:SF6 (PANTHER)                           |
| Loa loa                   | methyl-cpg binding protein                                  | 2 | C:GO:0043229;<br>F:GO:0005488                                                                                      | -                                                                                                                                                    |            | PTHR12396 (PANTHER)                                                                                           |
| Loa loa                   | laminin a                                                   | 2 | C:GO:0005604;<br>P:GO:0007155                                                                                      | -                                                                                                                                                    |            | IPR001791; IPR008985; IPR010916;<br>IPR012680; IPR013320; PTHR10574<br>(PANTHER), PTHR10574:SF56<br>(PANTHER) |
| Caenorhabditis briggsae   | briggsae cbr-oct-2 protein                                  | 0 |                                                                                                                    | C:GO:0016021;<br>P:GO:0055085;<br>P:GO:0006810;<br>F:GO:0005215                                                                                      |            | -                                                                                                             |
| Caenorhabditis briggsae   | Hypothetical protein CBG06638 [Caenorhabditis briggsae]     | 0 |                                                                                                                    |                                                                                                                                                      |            | -                                                                                                             |
| Loa loa                   | btb poz domain-containing protein 2                         | 3 | F:GO:0005515;<br>P:GO:0040011;<br>C:GO:0000932                                                                     | -                                                                                                                                                    |            | IPR000210; IPR011333; IPR011705;<br>IPR012983; IPR013069; IPR013089;<br>PTHR23230:SF48 (PANTHER)              |
| Loa loa                   | elegans protein partially confirmed by transcript evidence  | 4 | F:GO:0008483;<br>P:GO:0019915;<br>P:GO:0008152;<br>F:GO:0016829                                                    | -                                                                                                                                                    | EC:2.6.1.0 | IPR001176; IPR004839; IPR015421;<br>IPR015424; PTHR11751 (PANTHER),<br>PTHR11751:SF38 (PANTHER)               |
| Loa loa                   | elegans protein partially confirmed by transcript evidence  | 4 | F:GO:0008483;<br>P:GO:0019915;<br>P:GO:0008152;<br>F:GO:0016829                                                    | -                                                                                                                                                    | EC:2.6.1.0 | IPR001176; IPR004839; IPR015421;<br>IPR015424; PTHR11751 (PANTHER),<br>PTHR11751:SF38 (PANTHER)               |
| -                         | -                                                           | 0 |                                                                                                                    |                                                                                                                                                      |            | -                                                                                                             |
| Caenorhabditis elegans    | hypothetical protein Y54H5A.2 [Caenorhabditis elegans]      | 0 |                                                                                                                    |                                                                                                                                                      |            | -                                                                                                             |
| Brugia malayi             | mynd finger family protein                                  | 7 | P:GO:0040010;<br>P:GO:0030514;<br>C:GO:0030424;<br>F:GO:0008270;<br>P:GO:0030512;<br>C:GO:0030425;<br>F:GO:0005102 | -                                                                                                                                                    |            | IPR002893; PTHR13712 (PANTHER),<br>PTHR13712:SF13 (PANTHER),<br>SSF144232 (SUPERFAMILY)                       |
| Caenorhabditis elegans    | protein ki-se domain containing protein                     | 2 | F:GO:0016301;<br>P:GO:0000003                                                                                      | -                                                                                                                                                    |            | PTHR11909 (PANTHER),<br>PTHR11909:SF19 (PANTHER)                                                              |
| -                         | -                                                           | 0 |                                                                                                                    |                                                                                                                                                      |            | -                                                                                                             |

|                         |                                                            |    |                                                                                                                                                                                                                          |   |             |                                                                                                                           |
|-------------------------|------------------------------------------------------------|----|--------------------------------------------------------------------------------------------------------------------------------------------------------------------------------------------------------------------------|---|-------------|---------------------------------------------------------------------------------------------------------------------------|
| Caenorhabditis elegans  | briggsae cbr-itsn-1 protein                                | 5  | C:GO:0005829;<br>F:GO:0005085;<br>F:GO:0005515;<br>P:GO:0008624;<br>C:GO:0005886                                                                                                                                         | - |             | IPR001452; G3DSA:2.30.30.40<br>(GENE3D), PTHR11216 (PANTHER),<br>PTHR11216:SF24 (PANTHER)                                 |
|                         | -                                                          | 0  |                                                                                                                                                                                                                          |   |             | -                                                                                                                         |
| Caenorhabditis briggsae | briggsae cbr-unc-112 protein                               | 4  | F:GO:0050839;<br>C:GO:0005737;<br>P:GO:0007160;<br>P:GO:0007517                                                                                                                                                          | - |             | IPR001849; IPR011993; IPR014352;<br>IPR019748; PTHR16160 (PANTHER),<br>PTHR16160:SF3 (PANTHER), SSF50729<br>(SUPERFAMILY) |
| Caenorhabditis briggsae | iq calmodulin-binding motif family protein                 | 4  | C:GO:0016020;<br>P:GO:0007165;<br>P:GO:0007339;<br>F:GO:0008603                                                                                                                                                          | - |             | -                                                                                                                         |
|                         | -                                                          | 0  |                                                                                                                                                                                                                          |   |             | -                                                                                                                         |
|                         | -                                                          | 0  |                                                                                                                                                                                                                          |   |             | -                                                                                                                         |
| Caenorhabditis elegans  | elegans protein confirmed by transcript evidence           | 8  | P:GO:0009792;<br>P:GO:0010171;<br>P:GO:0002119;<br>P:GO:0040011;<br>P:GO:0019915;<br>P:GO:0040007;<br>P:GO:0006898;<br>F:GO:0042302                                                                                      | - |             | IPR008160; PTHR10499 (PANTHER),<br>PTHR10499:SF58 (PANTHER)                                                               |
| Caenorhabditis elegans  | elegans protein confirmed by transcript evidence           | 8  | P:GO:0009792;<br>P:GO:0010171;<br>P:GO:0002119;<br>P:GO:0040011;<br>P:GO:0019915;<br>P:GO:0040007;<br>P:GO:0006898;<br>F:GO:0042302                                                                                      | - |             | IPR008160; PTHR10499 (PANTHER),<br>PTHR10499:SF58 (PANTHER)                                                               |
| Brugia malayi           | methylenetetrahydrofolate reductase                        | 5  | F:GO:0005515;<br>P:GO:0040010;<br>P:GO:0055114;<br>F:GO:0004489;<br>P:GO:0006555                                                                                                                                         | - | EC:1.5.1.20 | IPR003171; G3DSA:3.20.20.220<br>(GENE3D), PTHR21091 (PANTHER),<br>PTHR21091:SF1 (PANTHER), SSF51730<br>(SUPERFAMILY)      |
|                         | -                                                          | 0  |                                                                                                                                                                                                                          |   |             | -                                                                                                                         |
|                         | -                                                          | 0  |                                                                                                                                                                                                                          |   |             | -                                                                                                                         |
| Caenorhabditis elegans  | elegans protein partially confirmed by transcript evidence | 13 | P:GO:0040035;<br>P:GO:0010171;<br>P:GO:0002119;<br>P:GO:0006915;<br>P:GO:0040018;<br>F:GO:0003676;<br>C:GO:0005622;<br>P:GO:0040010;<br>P:GO:0008340;<br>P:GO:0040011;<br>P:GO:0019915;<br>F:GO:0008270;<br>P:GO:0002009 | - |             | -                                                                                                                         |
| Caenorhabditis elegans  | protein kiaa0286                                           | 1  | F:GO:0005515                                                                                                                                                                                                             | - |             | SignalP (SIGNALP)                                                                                                         |
|                         | -                                                          | 0  |                                                                                                                                                                                                                          |   |             | SignalP (SIGNALP)                                                                                                         |

|                         |                                                                       |    |                                                                                                                                                                                                         |                                                                                                                    |             |                                             |
|-------------------------|-----------------------------------------------------------------------|----|---------------------------------------------------------------------------------------------------------------------------------------------------------------------------------------------------------|--------------------------------------------------------------------------------------------------------------------|-------------|---------------------------------------------|
| Homo sapiens            | -dh dehydroge-se subunit 4                                            | 9  | P:GO:0001666;<br>P:GO:0006810;<br>F:GO:0008137;<br>C:GO:0005747;<br>C:GO:0016021;<br>P:GO:0021549;<br>P:GO:0006120;<br>P:GO:0007568;<br>P:GO:0009790                                                    | -                                                                                                                  | EC:1.6.5.3  | -                                           |
| Loa loa                 | cg31690- isoform b                                                    | 0  |                                                                                                                                                                                                         | F:GO:0005524;<br>F:GO:0005509;<br>C:GO:0016021;<br>F:GO:0042626;<br>P:GO:0055085;<br>F:GO:0005515;<br>P:GO:0006810 |             | -                                           |
| Canis familiaris        | cg31690- isoform b                                                    | 0  |                                                                                                                                                                                                         | F:GO:0005524;<br>C:GO:0016021;<br>F:GO:0042626;<br>P:GO:0055085;<br>P:GO:0006810                                   |             | -                                           |
| Caenorhabditis elegans  | n-acetyl galactosaminyl transferase 6                                 | 7  | C:GO:0000139;<br>F:GO:0004653;<br>F:GO:0005529;<br>F:GO:0046872;<br>C:GO:0005795;<br>P:GO:0009312;<br>C:GO:0016021                                                                                      | -                                                                                                                  | EC:2.4.1.41 | PTHR11675 (PANTHER), SSF53448 (SUPERFAMILY) |
| Caenorhabditis elegans  | briggsae cbr-sec-3 protein                                            | 5  | P:GO:0007126;<br>P:GO:0000003;<br>P:GO:0040010;<br>F:GO:0005515;<br>P:GO:0040011                                                                                                                        | -                                                                                                                  |             | IPR011993                                   |
| Caenorhabditis briggsae | briggsae cbr-toh-1 protein                                            | 3  | F:GO:0004222;<br>P:GO:0006508;<br>F:GO:0008270                                                                                                                                                          | -                                                                                                                  | EC:3.4.24.0 | -                                           |
| Caenorhabditis briggsae | novel protein human and mouse coiled-coil and c2 domain containing 1a | 1  | F:GO:0005515                                                                                                                                                                                            | -                                                                                                                  |             | PTHR13076 (PANTHER)                         |
| Homo sapiens            | subfamily member 1                                                    | 12 | P:GO:0007283;<br>F:GO:0046872;<br>P:GO:0006457;<br>F:GO:0050750;<br>F:GO:0031072;<br>P:GO:0030521;<br>P:GO:0006986;<br>F:GO:0005524;<br>F:GO:0051082;<br>C:GO:0016020;<br>P:GO:0030317;<br>P:GO:0009408 | -                                                                                                                  |             | -                                           |
|                         | -                                                                     | 0  |                                                                                                                                                                                                         |                                                                                                                    |             | SignalP (SIGNALP)                           |
| Caenorhabditis briggsae | ysv3_caeel ame: full=uncharacterized protein                          | 0  |                                                                                                                                                                                                         |                                                                                                                    |             | -                                           |

|                         |                                                         |    |                                                                                                                                                                                                                                                                                                                                                                                                                                      |                                                |              |                                                                                                                       |
|-------------------------|---------------------------------------------------------|----|--------------------------------------------------------------------------------------------------------------------------------------------------------------------------------------------------------------------------------------------------------------------------------------------------------------------------------------------------------------------------------------------------------------------------------------|------------------------------------------------|--------------|-----------------------------------------------------------------------------------------------------------------------|
| Brugia malayi           | rap guanine nucleotide exchange factor 4                | 25 | F:GO:0008603;<br>C:GO:0001750;<br>P:GO:0017157;<br>P:GO:0019933;<br>C:GO:0043197;<br>F:GO:0005088;<br>P:GO:0051056;<br>P:GO:0017156;<br>C:GO:0016323;<br>C:GO:0005829;<br>F:GO:0030552;<br>P:GO:0001932;<br>F:GO:0017016;<br>C:GO:0060076;<br>F:GO:0004692;<br>C:GO:0005952;<br>C:GO:0030424;<br>P:GO:0030073;<br>P:GO:0050790;<br>F:GO:0032403;<br>P:GO:0050805;<br>C:GO:0001917;<br>P:GO:0014911;<br>C:GO:0016324;<br>P:GO:0050773 | -                                              | EC:2.7.11.12 | IPR000595; IPR002373; IPR008937;<br>IPR014710; IPR018490;<br>PTHR23113:SF53 (PANTHER)                                 |
| -                       | -                                                       | 0  |                                                                                                                                                                                                                                                                                                                                                                                                                                      |                                                |              | -                                                                                                                     |
| Caenorhabditis elegans  | protein-tyrosine phosphatase containing protein         | 2  | F:GO:0016791;<br>F:GO:0005515                                                                                                                                                                                                                                                                                                                                                                                                        | -                                              | EC:3.1.3.0   | IPR000242; G3DSA:3.90.190.10<br>(GENE3D), PTHR19134 (PANTHER),<br>PTHR19134:SF19 (PANTHER),<br>SSF52799 (SUPERFAMILY) |
| Ancylostoma ceylanicum  | secreted protein 5 precursor                            | 0  |                                                                                                                                                                                                                                                                                                                                                                                                                                      | P:GO:0040011;<br>P:GO:0006898;<br>C:GO:0005576 |              | IPR014044                                                                                                             |
| Caenorhabditis elegans  | c2 domain containing protein                            | 2  | F:GO:0046872;<br>C:GO:0016021                                                                                                                                                                                                                                                                                                                                                                                                        | -                                              |              | PTHR21119 (PANTHER),<br>PTHR21119:SF1 (PANTHER)                                                                       |
| -                       | -                                                       | 0  |                                                                                                                                                                                                                                                                                                                                                                                                                                      |                                                |              | -                                                                                                                     |
| Caenorhabditis briggsae | briggsae cbr-ptr-8 protein                              | 5  | P:GO:0018996;<br>C:GO:0016021;<br>P:GO:0040018;<br>F:GO:0008158;<br>P:GO:0040011                                                                                                                                                                                                                                                                                                                                                     | -                                              |              | IPR003392; PTHR10796 (PANTHER),<br>PTHR10796:SF14 (PANTHER), SignalP<br>(SIGNALP)                                     |
| Caenorhabditis briggsae | Hypothetical protein CBG05384 [Caenorhabditis briggsae] | 1  | P:GO:0040011                                                                                                                                                                                                                                                                                                                                                                                                                         | -                                              |              | -                                                                                                                     |
| Caenorhabditis elegans  | c2 domain containing protein                            | 0  |                                                                                                                                                                                                                                                                                                                                                                                                                                      | F:GO:0046872;<br>C:GO:0016021;<br>P:GO:0023034 |              | IPR000008; IPR008973; IPR018029;<br>G3DSA:2.60.40.150 (GENE3D),<br>PTHR21119 (PANTHER),<br>PTHR21119:SF1 (PANTHER)    |
| Hydra magnipapillata    | forkhead transcription factor fkh1                      | 4  | P:GO:0010552;<br>F:GO:0010843;<br>P:GO:0042472;<br>F:GO:0016563                                                                                                                                                                                                                                                                                                                                                                      | -                                              |              | IPR001766; IPR011991; IPR018122;<br>SSF46785 (SUPERFAMILY)                                                            |
| Hydra magnipapillata    | forkhead transcription factor fkh1                      | 4  | P:GO:0010552;<br>F:GO:0010843;<br>P:GO:0042472;<br>F:GO:0016563                                                                                                                                                                                                                                                                                                                                                                      | -                                              |              | IPR001766; IPR011991; IPR018122;<br>SSF46785 (SUPERFAMILY)                                                            |

|                         |                                                     |    |                                                                                                                                                                                                         |              |                                                         |                                                                                                                                                         |
|-------------------------|-----------------------------------------------------|----|---------------------------------------------------------------------------------------------------------------------------------------------------------------------------------------------------------|--------------|---------------------------------------------------------|---------------------------------------------------------------------------------------------------------------------------------------------------------|
| Caenorhabditis elegans  | class type 10d                                      | 9  | C:GO:0005739;<br>C:GO:0016021;<br>F:GO:0015662;<br>P:GO:0006811;<br>P:GO:0006754;<br>F:GO:0005524;<br>P:GO:0015914;<br>F:GO:0000287;<br>F:GO:0004012                                                    | -            | EC:3.6.3.1                                              | IPR001757; G3DSA:2.70.150.10<br>(GENE3D), PTHR11939:SF14<br>(PANTHER), SSF81665 (SUPERFAMILY)                                                           |
| -                       | -                                                   | 0  | -                                                                                                                                                                                                       | -            | -                                                       | -                                                                                                                                                       |
| Caenorhabditis elegans  | atlastin gtpase 1                                   | 12 | P:GO:0007029;<br>C:GO:0016021;<br>P:GO:0051260;<br>F:GO:0042802;<br>P:GO:0006184;<br>C:GO:0005792;<br>C:GO:0042995;<br>P:GO:0007409;<br>F:GO:0003924;<br>C:GO:0005789;<br>F:GO:0005525;<br>C:GO:0000137 | -            | EC:3.6.5.1;<br>EC:3.6.5.2;<br>EC:3.6.5.3;<br>EC:3.6.5.4 | IPR015894; G3DSA:3.40.50.300<br>(GENE3D), PTHR10751 (PANTHER),<br>PTHR10751:SF3 (PANTHER), SSF52540<br>(SUPERFAMILY)                                    |
| Caenorhabditis briggsae | mitochondrial 2-oxoglutarate malate carrier protein | 6  | F:GO:0004651;<br>F:GO:0004016;<br>P:GO:0006370;<br>C:GO:0031533;<br>F:GO:0005515;<br>P:GO:0006171                                                                                                       | -            | EC:3.1.3.33;<br>EC:4.6.1.1                              | IPR004206; IPR008172; PD009560<br>(PRODOM), G3DSA:2.40.320.10<br>(GENE3D), PTHR21028 (PANTHER)                                                          |
| Caenorhabditis briggsae | briggsae cbr-brp-1 protein                          | 0  | -                                                                                                                                                                                                       | F:GO:0005515 | -                                                       | -                                                                                                                                                       |
| Caenorhabditis briggsae | briggsae cbr-brp-1 protein                          | 0  | -                                                                                                                                                                                                       | F:GO:0005515 | -                                                       | -                                                                                                                                                       |
| Caenorhabditis briggsae | briggsae cbr-brp-1 protein                          | 0  | -                                                                                                                                                                                                       | F:GO:0005515 | -                                                       | -                                                                                                                                                       |
| Caenorhabditis briggsae | briggsae cbr-brp-1 protein                          | 0  | -                                                                                                                                                                                                       | F:GO:0005515 | -                                                       | -                                                                                                                                                       |
| -                       | -                                                   | 0  | -                                                                                                                                                                                                       | -            | -                                                       | SignalP (SIGNALP)                                                                                                                                       |
| -                       | -                                                   | 0  | -                                                                                                                                                                                                       | -            | -                                                       | -                                                                                                                                                       |
| Brugia malayi           | immunoglobulin i-set domain containing protein      | 0  | -                                                                                                                                                                                                       | -            | -                                                       | -                                                                                                                                                       |
| Caenorhabditis elegans  | elegans protein confirmed by transcript evidence    | 2  | P:GO:0040010;<br>P:GO:0040011                                                                                                                                                                           | -            | -                                                       | IPR004888; PTHR10412 (PANTHER),<br>SignalP (SIGNALP)                                                                                                    |
| Caenorhabditis briggsae | ornithine decarboxylase                             | 2  | P:GO:0006596;<br>F:GO:0004586                                                                                                                                                                           | -            | EC:4.1.1.17                                             | IPR000183; IPR002433; IPR022644;<br>IPR022653; G3DSA:3.20.20.10<br>(GENE3D), PTHR11482 (PANTHER),<br>PTHR11482:SF4 (PANTHER), SSF51419<br>(SUPERFAMILY) |
| Ailuropoda melanoleuca  | ribosomal protein l11                               | 11 | P:GO:0006917;<br>C:GO:0005730;<br>P:GO:0006364;<br>P:GO:0042273;<br>F:GO:0019843;<br>F:GO:0003735;<br>P:GO:0006414;<br>P:GO:0006605;<br>F:GO:0005515;<br>C:GO:0022625;<br>P:GO:0009790                  | -            | -                                                       | IPR002132; IPR020929; IPR022803;<br>PTHR11994:SF2 (PANTHER)                                                                                             |

|                         |                                                                                              |    |                                                                                                                                                                                                                                                                                                                                |                               |                                                                                                 |
|-------------------------|----------------------------------------------------------------------------------------------|----|--------------------------------------------------------------------------------------------------------------------------------------------------------------------------------------------------------------------------------------------------------------------------------------------------------------------------------|-------------------------------|-------------------------------------------------------------------------------------------------|
| Homo sapiens            | annexin a2                                                                                   | 19 | F:GO:0008092;<br>P:GO:0001525;<br>F:GO:0017137;<br>C:GO:0043234;<br>C:GO:0005625;<br>F:GO:0005509;<br>P:GO:0042730;<br>F:GO:0005544;<br>C:GO:0005604;<br>P:GO:0001501;<br>F:GO:0005546;<br>P:GO:0007589;<br>C:GO:0042470;<br>C:GO:0005769;<br>P:GO:0030199;<br>C:GO:0048471;<br>C:GO:0042383;<br>F:GO:0004859;<br>P:GO:0031340 | -                             | IPR001464; IPR002389; IPR018252;<br>IPR018502                                                   |
| -                       | -                                                                                            | 0  |                                                                                                                                                                                                                                                                                                                                |                               | -                                                                                               |
| -                       | -                                                                                            | 0  |                                                                                                                                                                                                                                                                                                                                |                               | -                                                                                               |
| Caenorhabditis briggsae | briggsae cbr-dnj-22 protein                                                                  | 10 | P:GO:0009792;<br>P:GO:0002119;<br>P:GO:0042127;<br>P:GO:0040020;<br>P:GO:0040010;<br>P:GO:0000003;<br>P:GO:0040019;<br>P:GO:0006898;<br>P:GO:0040039;<br>P:GO:0002009                                                                                                                                                          | -                             | -                                                                                               |
| Ixodes scapularis       | divergent aaa domain protein                                                                 | 0  |                                                                                                                                                                                                                                                                                                                                | F:GO:0004386;<br>F:GO:0005524 | IPR007421; PTHR10967 (PANTHER),<br>PTHR10967:SF41 (PANTHER)                                     |
| Caenorhabditis briggsae | briggsae cbr-rnp-7 protein                                                                   | 8  | C:GO:0030532;<br>F:GO:0003729;<br>C:GO:0071011;<br>P:GO:0000381;<br>P:GO:0048025;<br>P:GO:0007052;<br>F:GO:0000166;<br>C:GO:0071013                                                                                                                                                                                            | -                             | IPR000504; IPR012677; IPR022023;<br>PTHR13952 (PANTHER), SSF54928<br>(SUPERFAMILY)              |
| Brugia malayi           | u1 small nuclear ribonucleoprotein 70 kda                                                    | 5  | P:GO:0043484;<br>C:GO:0005681;<br>F:GO:0003723;<br>F:GO:0005515;<br>P:GO:0000398                                                                                                                                                                                                                                               | -                             | -                                                                                               |
| Branchiostoma floridae  | steroid-5-alpha- alpha polypeptide 1 (3-oxo-5 alpha-steroid<br>delta 4-dehydroge-se alpha 1) | 12 | P:GO:0007530;<br>C:GO:0016021;<br>F:GO:0003865;<br>P:GO:0055114;<br>F:GO:0009055;<br>P:GO:0046661;<br>C:GO:0005792;<br>P:GO:0030154;<br>C:GO:0048471;<br>P:GO:0042493;<br>P:GO:0006702;<br>C:GO:0005789                                                                                                                        | -                             | EC:1.3.99.5<br>IPR001104; PTHR10556 (PANTHER),<br>PTHR10556:SF6 (PANTHER), SignalP<br>(SIGNALP) |

|                         |                                                                   |    |                                                                                                                                                                                                         |                                                                                                                                                      |                                                                                  |
|-------------------------|-------------------------------------------------------------------|----|---------------------------------------------------------------------------------------------------------------------------------------------------------------------------------------------------------|------------------------------------------------------------------------------------------------------------------------------------------------------|----------------------------------------------------------------------------------|
|                         |                                                                   | 0  |                                                                                                                                                                                                         |                                                                                                                                                      |                                                                                  |
| Caenorhabditis briggsae | g-patch domain containing protein                                 | 0  |                                                                                                                                                                                                         | F:GO:0003676;<br>F:GO:0003723;<br>F:GO:0003725;<br>C:GO:0005622                                                                                      | PTHR12813 (PANTHER),<br>PTHR12813:SF5 (PANTHER)                                  |
| Caenorhabditis briggsae | Hypothetical protein CBG03866 [Caenorhabditis briggsae]           | 0  |                                                                                                                                                                                                         | F:GO:0005488                                                                                                                                         | SignalP (SIGNALP)                                                                |
| Brugia malayi           | nuclear receptor co-repressor 1                                   | 12 | F:GO:0003714;<br>F:GO:0042826;<br>C:GO:0017053;<br>P:GO:0046329;<br>P:GO:0051225;<br>C:GO:0005737;<br>P:GO:0010553;<br>F:GO:0003677;<br>P:GO:0021549;<br>C:GO:0000118;<br>C:GO:0005876;<br>F:GO:0035257 | -                                                                                                                                                    | IPR001005; IPR009057; IPR017884;<br>PTHR13992 (PANTHER)                          |
| Caenorhabditis briggsae | udp-galactose transporter                                         | 2  | P:GO:0006810;<br>C:GO:0016020                                                                                                                                                                           | -                                                                                                                                                    | IPR013657; PTHR10778 (PANTHER),<br>PTHR10778:SF4 (PANTHER), SignalP<br>(SIGNALP) |
| Xenopus laevis          | phosphatidylinositol-specific phospholipase x domain containing 2 | 0  |                                                                                                                                                                                                         | P:GO:0006629;<br>F:GO:0016787;<br>P:GO:0023034;<br>P:GO:0016042;<br>F:GO:0003674;<br>F:GO:0008081;<br>C:GO:0005575;<br>F:GO:0004629;<br>F:GO:0004871 | -                                                                                |
|                         |                                                                   | 0  |                                                                                                                                                                                                         |                                                                                                                                                      | SignalP (SIGNALP)                                                                |
| Caenorhabditis elegans  | lethal family member (let-805)                                    | 8  | P:GO:0018996;<br>P:GO:0009792;<br>P:GO:0008340;<br>P:GO:0000003;<br>F:GO:0005515;<br>P:GO:0006898;<br>P:GO:0002119;<br>P:GO:0040011                                                                     | -                                                                                                                                                    | IPR003961; IPR008957; IPR013783                                                  |
| Caenorhabditis elegans  | charged multivesicular body protein 2a                            | 3  | P:GO:0015031;<br>P:GO:0009792;<br>C:GO:0031902                                                                                                                                                          | -                                                                                                                                                    | IPR005024; PTHR10476 (PANTHER),<br>PTHR10476:SF4 (PANTHER)                       |
| Caenorhabditis elegans  | suppressor of constitutive dauer formation family member (scd-1)  | 1  | P:GO:0040010                                                                                                                                                                                            | -                                                                                                                                                    | -                                                                                |
| Caenorhabditis elegans  | elegans protein confirmed by transcript evidence                  | 0  |                                                                                                                                                                                                         | C:GO:0005764;<br>F:GO:0003674;<br>P:GO:0040002;<br>C:GO:0016021;<br>P:GO:0046686;<br>P:GO:0040010;<br>P:GO:0002119;<br>P:GO:0040007                  | IPR010987; PTHR12289 (PANTHER),<br>PTHR12289:SF2 (PANTHER)                       |
| Caenorhabditis elegans  | notch homolog scalloped wings                                     | 0  |                                                                                                                                                                                                         | F:GO:0005488;<br>F:GO:0005509;<br>P:GO:0040010                                                                                                       | -                                                                                |

|                          |                                                            |   |                                                                                                                                                                       |   |                             |                                                                                       |
|--------------------------|------------------------------------------------------------|---|-----------------------------------------------------------------------------------------------------------------------------------------------------------------------|---|-----------------------------|---------------------------------------------------------------------------------------|
| Caenorhabditis briggsae  | phosphoenolpyruvate carboxykinase                          | 4 | C:GO:0005737;<br>P:GO:0006094;<br>F:GO:0005525;<br>F:GO:0004613                                                                                                       | - | EC:4.1.1.32                 | -                                                                                     |
| -                        | -                                                          | 0 |                                                                                                                                                                       |   |                             | -                                                                                     |
| Caenorhabditis elegans   | elegans protein partially confirmed by transcript evidence | 2 | P:GO:0009792;<br>C:GO:0016021                                                                                                                                         | - |                             | -                                                                                     |
| Caenorhabditis briggsae  | pseudouridylyl synthase 10                                 | 2 | P:GO:0009451;<br>F:GO:0016853                                                                                                                                         | - |                             | IPR020103; PTHR21568 (PANTHER)                                                        |
| Caenorhabditis briggsae  | pseudouridylyl synthase 10                                 | 2 | P:GO:0009451;<br>F:GO:0016853                                                                                                                                         | - |                             | IPR020103; PTHR21568 (PANTHER)                                                        |
| Caenorhabditis briggsae  | -galactosyltransferase 7                                   | 2 | F:GO:0016757;<br>P:GO:0005975                                                                                                                                         | - |                             | -                                                                                     |
| -                        | -                                                          | 0 |                                                                                                                                                                       |   |                             | -                                                                                     |
| -                        | -                                                          | 0 |                                                                                                                                                                       |   |                             | SignalP (SIGNALP)                                                                     |
| Drosophila willistoni    | GK15899 [Drosophila willistoni]                            | 0 |                                                                                                                                                                       |   |                             | -                                                                                     |
| -                        | -                                                          | 0 |                                                                                                                                                                       |   |                             | IPR017956                                                                             |
| -                        | -                                                          | 0 |                                                                                                                                                                       |   |                             | SignalP (SIGNALP)                                                                     |
| -                        | -                                                          | 0 |                                                                                                                                                                       |   |                             | SignalP (SIGNALP)                                                                     |
| Trichomonas vaginalis G3 | viral a-type inclusion protein                             | 0 | C:GO:0000139;<br>F:GO:0000166;<br>C:GO:0005737;<br>F:GO:0003779;<br>F:GO:0005524;<br>C:GO:0016459;<br>F:GO:0003774;<br>P:GO:0006886;<br>P:GO:0048280;<br>F:GO:0005488 |   |                             | PD968187 (PRODOM)                                                                     |
| Brugia malayi            | hypothetical protein Bm1_33560 [Brugia malayi]             | 0 | P:GO:0007049;<br>C:GO:0000775;<br>P:GO:0007067;<br>C:GO:0005634                                                                                                       |   |                             | -                                                                                     |
| Caenorhabditis elegans   | ankyrin repeat and socs box-containing 8                   | 0 | P:GO:0009116;<br>C:GO:0005737;<br>F:GO:0003824;<br>P:GO:0023034;<br>C:GO:0005634                                                                                      |   |                             | IPR001496; IPR002110; IPR020683;<br>PTHR18958 (PANTHER),<br>PTHR18958:SF263 (PANTHER) |
| Caenorhabditis elegans   | ankyrin repeat and socs box-containing 8                   | 0 | P:GO:0009116;<br>C:GO:0005737;<br>F:GO:0003824;<br>P:GO:0023034;<br>C:GO:0005634                                                                                      |   |                             | IPR001496; IPR002110; IPR020683;<br>PTHR18958 (PANTHER),<br>PTHR18958:SF263 (PANTHER) |
| Caenorhabditis elegans   | r- dependent r- polymerase family protein                  | 2 | F:GO:0005515;<br>P:GO:0009792                                                                                                                                         | - |                             | IPR007855                                                                             |
| -                        | -                                                          | 0 |                                                                                                                                                                       |   |                             | IPR006578                                                                             |
| -                        | -                                                          | 0 |                                                                                                                                                                       |   |                             | IPR006578                                                                             |
| -                        | -                                                          | 0 |                                                                                                                                                                       |   |                             | -                                                                                     |
| Caenorhabditis briggsae  | dipeptidyl aminopeptidase                                  | 3 | P:GO:0006508;<br>F:GO:0004252;<br>F:GO:0004177                                                                                                                        | - | EC:3.4.21.0;<br>EC:3.4.11.0 | -                                                                                     |
| -                        | -                                                          | 0 |                                                                                                                                                                       |   |                             | -                                                                                     |



|                         |                                                                                        |   |                                                                                                                                                      |                                                |              |                                                                                                                                                           |
|-------------------------|----------------------------------------------------------------------------------------|---|------------------------------------------------------------------------------------------------------------------------------------------------------|------------------------------------------------|--------------|-----------------------------------------------------------------------------------------------------------------------------------------------------------|
| Caenorhabditis elegans  | dimethylaniline monooxyge-se                                                           | 7 | F:GO:0004499;<br>F:GO:0050661;<br>P:GO:0055114;<br>P:GO:0000003;<br>C:GO:0031227;<br>C:GO:0016021;<br>F:GO:0050660                                   | -                                              | EC:1.14.13.8 | IPR020946; G3DSA:3.50.50.60 (GENE3D), PTHR23023 (PANTHER), PTHR23023:SF4 (PANTHER)                                                                        |
| Ostertagia ostertagi    | protein disulfide isomerase                                                            | 8 | P:GO:0006457;<br>C:GO:0005875;<br>F:GO:0008415;<br>F:GO:0016757;<br>C:GO:0005811;<br>P:GO:0045454;<br>F:GO:0003756;<br>C:GO:0005783                  | -                                              | EC:5.3.4.1   | -                                                                                                                                                         |
| -                       | -                                                                                      | 0 | -                                                                                                                                                    | -                                              | -            | -                                                                                                                                                         |
| Caenorhabditis briggsae | briggsae cbr-pqn-85 protein                                                            | 0 | -                                                                                                                                                    | F:GO:0005488;<br>P:GO:0034088;<br>C:GO:0032116 | -            | -                                                                                                                                                         |
| Nematostella vectensis  | endonuclease-reverse transcriptase                                                     | 1 | F:GO:0004518                                                                                                                                         | -                                              | -            | PTHR23227 (PANTHER), PTHR23227:SF14 (PANTHER)                                                                                                             |
| Ailuropoda melanoleuca  | poly(adp-ribose) glycohydrolase                                                        | 5 | C:GO:0005829;<br>F:GO:0004649;<br>P:GO:0016045;<br>C:GO:0005634;<br>P:GO:0006974                                                                     | -                                              | EC:3.2.1.143 | IPR007724                                                                                                                                                 |
| Ailuropoda melanoleuca  | poly(adp-ribose) glycohydrolase                                                        | 5 | C:GO:0005829;<br>F:GO:0004649;<br>P:GO:0016045;<br>C:GO:0005634;<br>P:GO:0006974                                                                     | -                                              | EC:3.2.1.143 | IPR007724                                                                                                                                                 |
| Macaca mulatta          | PREDICTED: hypothetical protein LOC100426852 [Macaca mulatta]                          | 0 | -                                                                                                                                                    | -                                              | -            | -                                                                                                                                                         |
| -                       | -                                                                                      | 0 | -                                                                                                                                                    | -                                              | -            | -                                                                                                                                                         |
| Caenorhabditis briggsae | briggsae cbr-rbc-1 protein                                                             | 3 | P:GO:0007424;<br>P:GO:0007035;<br>P:GO:0008593                                                                                                       | -                                              | -            | PTHR13950 (PANTHER), PTHR13950:SF1 (PANTHER)                                                                                                              |
| -                       | -                                                                                      | 0 | -                                                                                                                                                    | -                                              | -            | -                                                                                                                                                         |
| Homo sapiens            | myc-associated zinc finger protein (purine-binding transcription factor) isoform cra_f | 8 | F:GO:0003723;<br>P:GO:0006369;<br>F:GO:0008270;<br>P:GO:0006367;<br>P:GO:0045449;<br>F:GO:0003677;<br>F:GO:0005515;<br>C:GO:0005634                  | -                                              | -            | -                                                                                                                                                         |
| -                       | -                                                                                      | 0 | -                                                                                                                                                    | -                                              | -            | -                                                                                                                                                         |
| Caenorhabditis elegans  | uncoordi-ted family member (unc-51)                                                    | 9 | P:GO:0009888;<br>F:GO:0005488;<br>P:GO:0023060;<br>F:GO:0004672;<br>P:GO:0040007;<br>P:GO:0050808;<br>P:GO:0010646;<br>P:GO:0007275;<br>P:GO:0044237 | -                                              | -            | IPR000719; IPR002290; IPR008271; IPR011009; IPR013336; IPR017441; IPR017442; IPR020636; IPR022708; G3DSA:1.10.510.10 (GENE3D), G3DSA:3.30.200.20 (GENE3D) |

|                         |                                      |    |                                                                                                                                                                                                                                                                                                                                                                  |                                                                                                                                                      |                                                                                                                                                                       |
|-------------------------|--------------------------------------|----|------------------------------------------------------------------------------------------------------------------------------------------------------------------------------------------------------------------------------------------------------------------------------------------------------------------------------------------------------------------|------------------------------------------------------------------------------------------------------------------------------------------------------|-----------------------------------------------------------------------------------------------------------------------------------------------------------------------|
| Caenorhabditis elegans  | uncoordinated family member (unc-51) | 21 | P:GO:0009653;<br>P:GO:0006810;<br>P:GO:0006468;<br>P:GO:0009888;<br>P:GO:0048589;<br>C:GO:0005776;<br>P:GO:0001558;<br>P:GO:0010646;<br>F:GO:0004672;<br>P:GO:0031175;<br>P:GO:0051239;<br>P:GO:0048513;<br>C:GO:0005829;<br>C:GO:0070969;<br>P:GO:0008104;<br>P:GO:0050808;<br>F:GO:0032403;<br>P:GO:0048523;<br>P:GO:0035466;<br>P:GO:0010506;<br>N:GO:0035556 | -                                                                                                                                                    | IPR000719; IPR002290; IPR008271;<br>IPR011009; IPR013336; IPR017441;<br>IPR017442; IPR020636; IPR022708;<br>G3DSA:1.10.510.10 (GENE3D),<br>G3DSA:3.30.200.20 (GENE3D) |
| -                       | -                                    | 0  |                                                                                                                                                                                                                                                                                                                                                                  |                                                                                                                                                      | -                                                                                                                                                                     |
| -                       | -                                    | 0  |                                                                                                                                                                                                                                                                                                                                                                  |                                                                                                                                                      | IPR007246; SignalP (SIGNALP)                                                                                                                                          |
| Caenorhabditis briggsae | serine protease family               | 0  |                                                                                                                                                                                                                                                                                                                                                                  | F:GO:0003824;<br>F:GO:0008233                                                                                                                        | -                                                                                                                                                                     |
| Caenorhabditis briggsae | sideroflexin 3                       | 6  | F:GO:0005371;<br>F:GO:0008324;<br>P:GO:0055085;<br>P:GO:0006812;<br>C:GO:0016021;<br>C:GO:0031966                                                                                                                                                                                                                                                                | -                                                                                                                                                    | IPR004686; PTHR11153:SF9<br>(PANTHER)                                                                                                                                 |
| -                       | -                                    | 0  |                                                                                                                                                                                                                                                                                                                                                                  |                                                                                                                                                      | -                                                                                                                                                                     |
| Caenorhabditis elegans  | novel protein                        | 0  |                                                                                                                                                                                                                                                                                                                                                                  | F:GO:0016874;<br>P:GO:0071569;<br>F:GO:0071568;<br>F:GO:0003674;<br>C:GO:0005575;<br>F:GO:0005515;<br>C:GO:0005783;<br>P:GO:0008152;<br>P:GO:0008150 | -                                                                                                                                                                     |
| Caenorhabditis elegans  | novel protein                        | 0  |                                                                                                                                                                                                                                                                                                                                                                  | F:GO:0016874;<br>P:GO:0071569;<br>F:GO:0071568;<br>F:GO:0003674;<br>C:GO:0005575;<br>F:GO:0005515;<br>C:GO:0005783;<br>P:GO:0008152;<br>P:GO:0008150 | -                                                                                                                                                                     |
| -                       | -                                    | 0  |                                                                                                                                                                                                                                                                                                                                                                  |                                                                                                                                                      | SignalP (SIGNALP)                                                                                                                                                     |
| Caenorhabditis elegans  | briggsae cbr-mvb-12 protein          | 0  |                                                                                                                                                                                                                                                                                                                                                                  | P:GO:0006629;<br>F:GO:0005488;<br>F:GO:0016787;<br>F:GO:0003824;<br>F:GO:0005529;<br>F:GO:0004806                                                    | IPR018798; PSS1498 (PROFILE)                                                                                                                                          |

|                         |                                                                                            |    |                                                                                                                                                                       |                                                                                  |            |                                                                                                               |
|-------------------------|--------------------------------------------------------------------------------------------|----|-----------------------------------------------------------------------------------------------------------------------------------------------------------------------|----------------------------------------------------------------------------------|------------|---------------------------------------------------------------------------------------------------------------|
| Caenorhabditis briggsae | autophagy protein 9                                                                        | 1  | P:GO:0009792                                                                                                                                                          | -                                                                                |            | IPR007241; PTHR13038:SF1 (PANTHER), SignalP (SIGNALP)                                                         |
| -                       | -                                                                                          | 0  |                                                                                                                                                                       |                                                                                  |            | IPR008957; IPR013783                                                                                          |
| Caenorhabditis elegans  | set domain and mariner transposase fusion gene                                             | 4  | F:GO:0005488;<br>F:GO:0004803;<br>F:GO:0016740;<br>P:GO:0006313                                                                                                       | -                                                                                |            | IPR001214; G3DSA:2.170.270.10 (GENE3D), PTHR22884 (PANTHER), PTHR22884:SF24 (PANTHER), SSF82199 (SUPERFAMILY) |
| Caenorhabditis briggsae | afg3(atpase family gene 3)-like 1                                                          | 4  | P:GO:0019538;<br>F:GO:0016787;<br>C:GO:0016020;<br>F:GO:0000166                                                                                                       | -                                                                                |            | IPR011546; PTHR23076 (PANTHER), PTHR23076:SF11 (PANTHER)                                                      |
| Caenorhabditis briggsae | aldo keto reductase family protein                                                         | 4  | P:GO:0009792;<br>P:GO:0040010;<br>P:GO:0002119;<br>P:GO:0040011                                                                                                       | -                                                                                |            | IPR001395; IPR018170; IPR020471; IPR023210; PTHR11732:SF34 (PANTHER)                                          |
| Caenorhabditis elegans  | c-termi-l binding protein                                                                  | 10 | P:GO:0016055;<br>F:GO:0008022;<br>F:GO:0016616;<br>P:GO:0000122;<br>P:GO:0022416;<br>F:GO:0051287;<br>P:GO:0001700;<br>F:GO:0003714;<br>F:GO:0003713;<br>C:GO:0005634 | -                                                                                | EC:1.1.1.0 | IPR006139; IPR016040; PTHR10996 (PANTHER), PTHR10996:SF11 (PANTHER), SSF52283 (SUPERFAMILY)                   |
| -                       | -                                                                                          | 0  |                                                                                                                                                                       |                                                                                  |            | -                                                                                                             |
| -                       | -                                                                                          | 0  |                                                                                                                                                                       |                                                                                  |            | SignalP (SIGNALP)                                                                                             |
| -                       | -                                                                                          | 0  |                                                                                                                                                                       |                                                                                  |            | -                                                                                                             |
| -                       | -                                                                                          | 0  |                                                                                                                                                                       |                                                                                  |            | -                                                                                                             |
| -                       | -                                                                                          | 0  |                                                                                                                                                                       |                                                                                  |            | -                                                                                                             |
| Caenorhabditis elegans  | tpr domain containing protein                                                              | 0  |                                                                                                                                                                       | F:GO:0005488                                                                     |            | IPR011990                                                                                                     |
| Loa loa                 | pre-b cell enhancing factor                                                                | 0  |                                                                                                                                                                       | F:GO:0004514;<br>P:GO:0009435                                                    |            | PTHR11098 (PANTHER), PTHR11098:SF2 (PANTHER)                                                                  |
| -                       | -                                                                                          | 0  |                                                                                                                                                                       |                                                                                  |            | SignalP (SIGNALP)                                                                                             |
| Caenorhabditis briggsae | elegans protein confirmed by transcript evidence                                           | 3  | F:GO:0005515;<br>F:GO:0005529;<br>P:GO:0000003                                                                                                                        | -                                                                                |            | IPR001079; IPR008985; IPR013320; PTHR11346:SF29 (PANTHER), SignalP (SIGNALP)                                  |
| Caenorhabditis briggsae | elegans protein confirmed by transcript evidence                                           | 3  | F:GO:0005515;<br>F:GO:0005529;<br>P:GO:0000003                                                                                                                        | -                                                                                |            | IPR001079; IPR008985; IPR013320; PTHR11346:SF29 (PANTHER), SignalP (SIGNALP)                                  |
| -                       | -                                                                                          | 0  |                                                                                                                                                                       |                                                                                  |            | -                                                                                                             |
| -                       | -                                                                                          | 0  |                                                                                                                                                                       |                                                                                  |            | IPR008160; PTHR10499 (PANTHER), PTHR10499:SF58 (PANTHER)                                                      |
| -                       | -                                                                                          | 0  |                                                                                                                                                                       |                                                                                  |            | -                                                                                                             |
| Caenorhabditis elegans  | slowpoke potassium channel family member (slo-2)                                           | 6  | C:GO:0016020;<br>P:GO:0006813;<br>P:GO:0008152;<br>F:GO:0003824;<br>F:GO:0015269;<br>F:GO:0005488                                                                     | -                                                                                |            | PTHR10027 (PANTHER), PTHR10027:SF6 (PANTHER)                                                                  |
| Loa loa                 | zinc finger transcription factor family protein partially confirmed by transcript evidence | 0  |                                                                                                                                                                       | F:GO:0003676;<br>C:GO:0016021;<br>F:GO:0008270;<br>P:GO:0009792;<br>C:GO:0005622 |            | IPR012337                                                                                                     |
| -                       | -                                                                                          | 0  |                                                                                                                                                                       |                                                                                  |            | -                                                                                                             |
| -                       | -                                                                                          | 0  |                                                                                                                                                                       |                                                                                  |            | -                                                                                                             |

|                         |                                                         |   |                                                                                                                    |                                                                                                                    |            |                                                                                                           |
|-------------------------|---------------------------------------------------------|---|--------------------------------------------------------------------------------------------------------------------|--------------------------------------------------------------------------------------------------------------------|------------|-----------------------------------------------------------------------------------------------------------|
| Caenorhabditis briggsae | Hypothetical protein CBG09655 [Caenorhabditis briggsae] | 4 | P:GO:0019915;<br>C:GO:0016021;<br>P:GO:0006508;<br>F:GO:0008233                                                    | -                                                                                                                  | -          | -                                                                                                         |
| Caenorhabditis briggsae | briggsae cbr-fl1-1 protein                              | 3 | P:GO:0030239;<br>F:GO:0003779;<br>P:GO:0010004                                                                     | -                                                                                                                  | -          | -                                                                                                         |
| Caenorhabditis briggsae | briggsae cbr-flp-19 protein                             | 0 |                                                                                                                    |                                                                                                                    |            | SignalP (SIGNALP)                                                                                         |
| Caenorhabditis briggsae | 40s ribosomal protein s30                               | 6 | P:GO:0002119;<br>C:GO:0005840;<br>F:GO:0003735;<br>P:GO:0040010;<br>P:GO:0000003;<br>P:GO:0006412                  | -                                                                                                                  | EC:3.6.5.3 | IPR000626; IPR006846;<br>G3DSA:3.10.20.90 (GENE3D),<br>PTHR12650:SF3 (PANTHER), SSF54236<br>(SUPERFAMILY) |
| Caenorhabditis briggsae | 40s ribosomal protein s30                               | 6 | P:GO:0002119;<br>C:GO:0005840;<br>F:GO:0003735;<br>P:GO:0040010;<br>P:GO:0000003;<br>P:GO:0006412                  | -                                                                                                                  | EC:3.6.5.3 | IPR000626; IPR006846;<br>G3DSA:3.10.20.90 (GENE3D),<br>PTHR12650:SF3 (PANTHER), SSF54236<br>(SUPERFAMILY) |
| Caenorhabditis briggsae | 40s ribosomal protein s30                               | 6 | P:GO:0002119;<br>C:GO:0005840;<br>F:GO:0003735;<br>P:GO:0040010;<br>P:GO:0000003;<br>P:GO:0006412                  | -                                                                                                                  | EC:3.6.5.3 | IPR000626; IPR006846;<br>G3DSA:3.10.20.90 (GENE3D),<br>PTHR12650:SF3 (PANTHER), SSF54236<br>(SUPERFAMILY) |
| Caenorhabditis elegans  | domain containing protein                               | 0 |                                                                                                                    | P:GO:0051056;<br>P:GO:0007264;<br>F:GO:0005089;<br>P:GO:0035023;<br>F:GO:0003677;<br>F:GO:0005085;<br>C:GO:0005622 |            | -                                                                                                         |
| -                       | -                                                       | 0 |                                                                                                                    |                                                                                                                    |            | SignalP (SIGNALP)                                                                                         |
| Caenorhabditis elegans  | elegans protein confirmed by transcript evidence        | 0 |                                                                                                                    |                                                                                                                    |            | SignalP (SIGNALP)                                                                                         |
| -                       | -                                                       | 0 |                                                                                                                    |                                                                                                                    |            | -                                                                                                         |
| -                       | -                                                       | 0 |                                                                                                                    |                                                                                                                    |            | SignalP (SIGNALP)                                                                                         |
| Caenorhabditis briggsae | briggsae cbr-daf-15 protein                             | 1 | F:GO:0005488                                                                                                       | -                                                                                                                  |            | IPR004083; PTHR12848:SF2<br>(PANTHER)                                                                     |
| Brugia malayi           | atp-dependent d- helicase                               | 6 | P:GO:0006310;<br>F:GO:0003676;<br>F:GO:0004672;<br>C:GO:0005622;<br>F:GO:0008026;<br>F:GO:0005524                  | -                                                                                                                  |            | IPR004589; IPR011545;<br>G3DSA:3.40.50.300 (GENE3D),<br>SSF52540 (SUPERFAMILY)                            |
| Brugia malayi           | atp-dependent d- helicase                               | 7 | P:GO:0006310;<br>F:GO:0003676;<br>F:GO:0004672;<br>F:GO:0004003;<br>C:GO:0005622;<br>P:GO:0033554;<br>F:GO:0005524 | -                                                                                                                  |            | IPR004589; G3DSA:3.40.50.300<br>(GENE3D), SSF52540 (SUPERFAMILY)                                          |
| -                       | -                                                       | 0 |                                                                                                                    |                                                                                                                    |            | -                                                                                                         |
| -                       | -                                                       | 0 |                                                                                                                    |                                                                                                                    |            | -                                                                                                         |
| Loa loa                 | tumor necrosis alpha-induced protein 8-like 3-like      | 0 |                                                                                                                    | F:GO:0009055;<br>F:GO:0020037;<br>F:GO:0005506;<br>F:GO:0004497                                                    |            | IPR008477                                                                                                 |

|                         |                                                             |    |                                                                                                                                                                                                                                                                             |                                                |             |                                                                                                                  |
|-------------------------|-------------------------------------------------------------|----|-----------------------------------------------------------------------------------------------------------------------------------------------------------------------------------------------------------------------------------------------------------------------------|------------------------------------------------|-------------|------------------------------------------------------------------------------------------------------------------|
| Caenorhabditis elegans  | elegans protein confirmed by transcript evidence            | 3  | P:GO:0006915;<br>F:GO:0005515;<br>C:GO:0016020                                                                                                                                                                                                                              | -                                              |             | IPR006214; PTHR23291:SF14 (PANTHER), SignalP (SIGNALP)                                                           |
| Caenorhabditis elegans  | fatty acid elongation protein 3                             | 4  | P:GO:0018996;<br>C:GO:0016021;<br>P:GO:0008340;<br>P:GO:0040010                                                                                                                                                                                                             | -                                              |             | IPR002076; SignalP (SIGNALP)                                                                                     |
| Caenorhabditis elegans  | fatty acid elongation protein 3                             | 4  | P:GO:0018996;<br>C:GO:0016021;<br>P:GO:0008340;<br>P:GO:0040010                                                                                                                                                                                                             | -                                              |             | IPR002076; SignalP (SIGNALP)                                                                                     |
| Caenorhabditis elegans  | o-sialoglycoprotein endopeptidase                           | 4  | F:GO:0004222;<br>P:GO:0006508;<br>F:GO:0008270;<br>F:GO:0005515                                                                                                                                                                                                             | -                                              | EC:3.4.24.0 | IPR000905; IPR017861                                                                                             |
| -                       | -                                                           | 0  |                                                                                                                                                                                                                                                                             |                                                |             | -                                                                                                                |
| -                       | -                                                           | 0  |                                                                                                                                                                                                                                                                             |                                                |             | SignalP (SIGNALP)                                                                                                |
| Caenorhabditis briggsae | briggsae cbr-bam-2 protein                                  | 0  |                                                                                                                                                                                                                                                                             | C:GO:0005887                                   |             | -                                                                                                                |
| Caenorhabditis elegans  | ankyrin-repeat and fibronectin type iii domain containing 1 | 0  |                                                                                                                                                                                                                                                                             | P:GO:0008150;<br>P:GO:0007165;<br>C:GO:0005575 |             | PTHR21437 (PANTHER)                                                                                              |
| Caenorhabditis briggsae | elegans protein partially confirmed by transcript evidence  | 0  |                                                                                                                                                                                                                                                                             | F:GO:0004500;<br>C:GO:0016021;<br>P:GO:0006548 |             | IPR005018; PTHR23130 (PANTHER), PTHR23130:SF3 (PANTHER), SignalP (SIGNALP)                                       |
| -                       | -                                                           | 0  |                                                                                                                                                                                                                                                                             |                                                |             | -                                                                                                                |
| -                       | -                                                           | 0  |                                                                                                                                                                                                                                                                             |                                                |             | SignalP (SIGNALP)                                                                                                |
| -                       | -                                                           | 0  |                                                                                                                                                                                                                                                                             |                                                |             | -                                                                                                                |
| -                       | -                                                           | 0  |                                                                                                                                                                                                                                                                             |                                                |             | -                                                                                                                |
| Caenorhabditis elegans  | thioredoxin domain-containing protein 1                     | 16 | P:GO:0045454;<br>P:GO:0006260;<br>P:GO:0006916;<br>C:GO:0005624;<br>F:GO:0005515;<br>P:GO:0045927;<br>F:GO:0030612;<br>P:GO:0006888;<br>P:GO:0007165;<br>P:GO:0045893;<br>P:GO:0008283;<br>P:GO:0045321;<br>C:GO:0005789;<br>F:GO:0015036;<br>P:GO:0006950;<br>C:GO:0005634 | -                                              |             | IPR012335; IPR012336; IPR013766; IPR017936; IPR017937; PTHR18929 (PANTHER), PS51257 (PROFILE), SignalP (SIGNALP) |
| -                       | -                                                           | 0  |                                                                                                                                                                                                                                                                             |                                                |             | -                                                                                                                |
| Oryctolagus cuniculus   | heterochromatin protein 1-beta-like                         | 4  | P:GO:0009987;<br>C:GO:0045120;<br>C:GO:0000785;<br>F:GO:0005515                                                                                                                                                                                                             | -                                              |             | IPR000953; IPR016197; G3DSA:2.40.50.40 (GENE3D), PTHR22812 (PANTHER), PTHR22812:SF4 (PANTHER)                    |
| -                       | -                                                           | 0  |                                                                                                                                                                                                                                                                             |                                                |             | -                                                                                                                |
| Caenorhabditis elegans  | briggsae cbr-kcc-3 protein                                  | 6  | P:GO:0003333;<br>P:GO:0007638;<br>F:GO:0015171;<br>P:GO:0006811;<br>F:GO:0015379;<br>C:GO:0016021                                                                                                                                                                           | -                                              |             | IPR004841; PTHR11827 (PANTHER), PTHR11827:SF2 (PANTHER)                                                          |

|                         |                                                        |    |                                                                                                                                                                                                                                                                                                                                                                                                                                                       |   |                             |                                                                                                   |
|-------------------------|--------------------------------------------------------|----|-------------------------------------------------------------------------------------------------------------------------------------------------------------------------------------------------------------------------------------------------------------------------------------------------------------------------------------------------------------------------------------------------------------------------------------------------------|---|-----------------------------|---------------------------------------------------------------------------------------------------|
| Caenorhabditis elegans  | briggsae cbr-kcc-3 protein                             | 6  | P:GO:0003333;<br>P:GO:0007638;<br>F:GO:0015171;<br>P:GO:0006811;<br>F:GO:0015379;<br>C:GO:0016021                                                                                                                                                                                                                                                                                                                                                     | - |                             | IPR004841; PTHR11827 (PANTHER),<br>PTHR11827:SF2 (PANTHER)                                        |
| Caenorhabditis elegans  | hypothetical protein Y58G8A.4 [Caenorhabditis elegans] | 1  | P:GO:0000003                                                                                                                                                                                                                                                                                                                                                                                                                                          | - |                             | -                                                                                                 |
|                         | -                                                      | 0  |                                                                                                                                                                                                                                                                                                                                                                                                                                                       |   |                             | SignalP (SIGNALP)                                                                                 |
|                         | -                                                      | 0  |                                                                                                                                                                                                                                                                                                                                                                                                                                                       |   |                             | -                                                                                                 |
| Loa loa                 | dual specificity phosphatase 19                        | 4  | P:GO:0016070;<br>P:GO:0006796;<br>P:GO:0043412;<br>F:GO:0004721                                                                                                                                                                                                                                                                                                                                                                                       | - | EC:3.1.3.16                 | -                                                                                                 |
|                         | -                                                      | 0  |                                                                                                                                                                                                                                                                                                                                                                                                                                                       |   |                             | -                                                                                                 |
| Loa loa                 | peptidylglycine alpha-amidating monooxyge-se           | 26 | P:GO:0007595;<br>P:GO:0060173;<br>F:GO:0004598;<br>P:GO:0007507;<br>C:GO:0005624;<br>P:GO:0009268;<br>C:GO:0015630;<br>P:GO:0051493;<br>C:GO:0005615;<br>P:GO:0006518;<br>C:GO:0005829;<br>P:GO:0051384;<br>P:GO:0032880;<br>P:GO:0046688;<br>C:GO:0030424;<br>P:GO:0042493;<br>F:GO:0004504;<br>P:GO:0021785;<br>P:GO:0006464;<br>F:GO:0042803;<br>P:GO:0021952;<br>C:GO:0030141;<br>C:GO:0005887;<br>F:GO:0005507;<br>P:GO:0032355;<br>C:GO:0043204 | - | EC:4.3.2.5;<br>EC:1.14.17.3 | PTHR10680 (PANTHER), SignalP<br>(SIGNALP)                                                         |
| Loa loa                 | sel-1 suppressor of lin-12-like ( elegans)             | 2  | F:GO:0005488;<br>F:GO:0016787                                                                                                                                                                                                                                                                                                                                                                                                                         | - |                             | IPR006597; IPR011990; PTHR11102<br>(PANTHER), PTHR11102:SF11<br>(PANTHER), SSF81901 (SUPERFAMILY) |
| Loa loa                 | sel-1 suppressor of lin-12-like ( elegans)             | 2  | F:GO:0005488;<br>F:GO:0016787                                                                                                                                                                                                                                                                                                                                                                                                                         | - |                             | IPR006597; IPR011990; PTHR11102<br>(PANTHER), PTHR11102:SF11<br>(PANTHER), SSF81901 (SUPERFAMILY) |
| Caenorhabditis elegans  | hypothetical protein T21F4.1 [Caenorhabditis elegans]  | 2  | F:GO:0046872;<br>F:GO:0016813                                                                                                                                                                                                                                                                                                                                                                                                                         | - | EC:3.5.3.0                  | -                                                                                                 |
| Brugia malayi           | wilms tumor 1 interacting protein                      | 2  | F:GO:0005488;<br>C:GO:0044464                                                                                                                                                                                                                                                                                                                                                                                                                         | - |                             | IPR001781; PTHR18973 (PANTHER),<br>PTHR18973:SF64 (PANTHER),<br>SSF57716 (SUPERFAMILY)            |
| Caenorhabditis briggsae | cadherin domain containing protein                     | 1  | C:GO:0016020                                                                                                                                                                                                                                                                                                                                                                                                                                          | - |                             | -                                                                                                 |
|                         | -                                                      | 0  |                                                                                                                                                                                                                                                                                                                                                                                                                                                       |   |                             | -                                                                                                 |
|                         | -                                                      | 0  |                                                                                                                                                                                                                                                                                                                                                                                                                                                       |   |                             | -                                                                                                 |

|                         |                                                                                                                                                                                                  |    |                                                                                                                                                                                                                                                            |                                                                                                                                                                                                                                                                                                               |                                                         |                                                                                                                                           |
|-------------------------|--------------------------------------------------------------------------------------------------------------------------------------------------------------------------------------------------|----|------------------------------------------------------------------------------------------------------------------------------------------------------------------------------------------------------------------------------------------------------------|---------------------------------------------------------------------------------------------------------------------------------------------------------------------------------------------------------------------------------------------------------------------------------------------------------------|---------------------------------------------------------|-------------------------------------------------------------------------------------------------------------------------------------------|
| Caenorhabditis briggsae | adp-ribosylation arf                                                                                                                                                                             | 15 | P:GO:0007264;<br>P:GO:0007186;<br>P:GO:0000003;<br>P:GO:0006471;<br>P:GO:0007269;<br>F:GO:0003924;<br>P:GO:0006898;<br>P:GO:0006886;<br>P:GO:0016197;<br>P:GO:0009792;<br>C:GO:0005737;<br>P:GO:0048488;<br>C:GO:0005634;<br>F:GO:0005525;<br>P:GO:0033227 | -                                                                                                                                                                                                                                                                                                             | EC:3.6.5.1;<br>EC:3.6.5.2;<br>EC:3.6.5.3;<br>EC:3.6.5.4 | IPR005225; IPR006688; IPR006689;<br>G3DSA:3.40.50.300 (GENE3D),<br>PTHR11711:SF30 (PANTHER), PSS1417<br>(PROFILE), SSF52540 (SUPERFAMILY) |
| Caenorhabditis briggsae | elegans protein confirmed by transcript evidence                                                                                                                                                 | 1  | F:GO:0042302                                                                                                                                                                                                                                               | -                                                                                                                                                                                                                                                                                                             |                                                         | -                                                                                                                                         |
| Caenorhabditis elegans  | fk506 binding protein 12-rapamycin associated protein 1                                                                                                                                          | 3  | F:GO:0016772;<br>P:GO:0048565;<br>F:GO:0005488                                                                                                                                                                                                             | -                                                                                                                                                                                                                                                                                                             |                                                         | IPR011989; IPR016024; PTHR11139<br>(PANTHER), PTHR11139:SF9<br>(PANTHER), PF11865 (PFAM)                                                  |
| Callithrix jacchus      | prefoldin subunit 2                                                                                                                                                                              | 3  | P:GO:0006457;<br>C:GO:0016272;<br>F:GO:0051082                                                                                                                                                                                                             | -                                                                                                                                                                                                                                                                                                             |                                                         | IPR002777; IPR009053;<br>G3DSA:1.10.287.370 (GENE3D),<br>PTHR13303 (PANTHER)                                                              |
| Caenorhabditis elegans  | ndus8_caeel ame: full=probable -dh dehydroge-se iron-sulfur protein mitochondrial ame: full=complex i-23kd short=ci-23kd ame: full=-dh-ubiquinone oxidoreductase 23 kda subunit flags: precursor | 0  |                                                                                                                                                                                                                                                            | F:GO:0051536;<br>P:GO:0019684;<br>F:GO:0009055;<br>P:GO:0042493;<br>P:GO:0002119;<br>F:GO:0046872;<br>P:GO:0006120;<br>C:GO:0016020;<br>P:GO:0008340;<br>P:GO:0009792;<br>P:GO:0040007;<br>F:GO:0005506;<br>C:GO:0005739;<br>F:GO:0016651;<br>P:GO:0055114;<br>F:GO:0016491;<br>P:GO:0040010;<br>F:GO:0051539 | -                                                       | -                                                                                                                                         |
| -                       | -                                                                                                                                                                                                | 0  |                                                                                                                                                                                                                                                            |                                                                                                                                                                                                                                                                                                               |                                                         | -                                                                                                                                         |
| -                       | -                                                                                                                                                                                                | 0  |                                                                                                                                                                                                                                                            |                                                                                                                                                                                                                                                                                                               |                                                         | -                                                                                                                                         |
| Caenorhabditis briggsae | arch_caebr ame: full=protein archease-like                                                                                                                                                       | 3  | P:GO:0040007;<br>P:GO:0040035;<br>P:GO:0002119                                                                                                                                                                                                             | -                                                                                                                                                                                                                                                                                                             |                                                         | IPR002804; PD012969 (PRODOM),<br>PTHR12682:SF8 (PANTHER)                                                                                  |
| Caenorhabditis briggsae | sig-l recognition particle 19 kda protein                                                                                                                                                        | 1  | C:GO:0048500                                                                                                                                                                                                                                               |                                                                                                                                                                                                                                                                                                               |                                                         | IPR002778                                                                                                                                 |
| Brugia malayi           | hypothetical protein Bm1_07015 [Brugia malayi]                                                                                                                                                   | 0  |                                                                                                                                                                                                                                                            |                                                                                                                                                                                                                                                                                                               |                                                         | -                                                                                                                                         |
| Brugia malayi           | briggsae cbr-dys-1 protein                                                                                                                                                                       | 7  | P:GO:0007271;<br>F:GO:0005515;<br>P:GO:0040017;<br>C:GO:0016010;<br>F:GO:0005277;<br>P:GO:0015870;<br>P:GO:0046716                                                                                                                                         | -                                                                                                                                                                                                                                                                                                             |                                                         | -                                                                                                                                         |
| Caenorhabditis elegans  | rio1 family protein                                                                                                                                                                              | 3  | P:GO:0006468;<br>F:GO:0005524;<br>F:GO:0004674                                                                                                                                                                                                             | -                                                                                                                                                                                                                                                                                                             | EC:2.7.11.0                                             | IPR011009; IPR015285; IPR018934;<br>PTHR10593 (PANTHER),<br>PTHR10593:SF1 (PANTHER), SSF46785<br>(SUPERFAMILY)                            |

|                         |                                                                               |    |  |                                                                                                                                                                                                                                                            |                                     |
|-------------------------|-------------------------------------------------------------------------------|----|--|------------------------------------------------------------------------------------------------------------------------------------------------------------------------------------------------------------------------------------------------------------|-------------------------------------|
| Caenorhabditis elegans  | cef (clone eighty-four) protein binding transporter zinc ion binding          | 0  |  | F:GO:0005215;<br>P:GO:0006979;<br>F:GO:0003676;<br>F:GO:0008270;<br>C:GO:0030127;<br>C:GO:0005622;<br>F:GO:0005515;<br>P:GO:0016192;<br>C:GO:0009507                                                                                                       | -                                   |
| Caenorhabditis elegans  | c2h2 finger domain-containing protein                                         | 0  |  | P:GO:0015031;<br>F:GO:0005215;<br>P:GO:0006979;<br>P:GO:0006810;<br>F:GO:0003676;<br>F:GO:0008270;<br>C:GO:0030127;<br>P:GO:0006888;<br>P:GO:0006886;<br>C:GO:0005622;<br>F:GO:0005515;<br>P:GO:0016192;<br>C:GO:0009507                                   | -                                   |
|                         | -                                                                             | 0  |  |                                                                                                                                                                                                                                                            | -                                   |
| Caenorhabditis elegans  | Hypothetical protein T20F7.1 [Caenorhabditis elegans]                         | 0  |  |                                                                                                                                                                                                                                                            | -                                   |
| Caenorhabditis elegans  | sodium- and chloride-dependent neutral and basic amino acid transporter b(0+) | 15 |  | P:GO:0007274;<br>F:GO:0005277;<br>F:GO:0005328;<br>P:GO:0001504;<br>P:GO:0015870;<br>C:GO:0016021;<br>P:GO:0009636;<br>P:GO:0015871;<br>C:GO:0031526;<br>F:GO:0015171;<br>P:GO:0006520;<br>F:GO:0030165;<br>P:GO:0040017;<br>C:GO:0045211;<br>P:GO:0006865 | IPR000175; PTHR11616:SF17 (PANTHER) |
| Caenorhabditis briggsae | transmembrane protein 53-b                                                    | 0  |  | F:GO:0003674;<br>C:GO:0016021;<br>P:GO:0008150                                                                                                                                                                                                             | IPR008547                           |
| Caenorhabditis briggsae | dipeptidyl peptidase iii                                                      | 3  |  | C:GO:0005737;<br>F:GO:0008239;<br>P:GO:0006508                                                                                                                                                                                                             | IPR005317; PTHR23422 (PANTHER)      |
| Caenorhabditis briggsae | dipeptidyl peptidase iii                                                      | 4  |  | C:GO:0016020;<br>C:GO:0005829;<br>P:GO:0006508;<br>F:GO:0008239                                                                                                                                                                                            | IPR005317; PTHR23422 (PANTHER)      |
|                         | -                                                                             | 0  |  |                                                                                                                                                                                                                                                            | -                                   |
|                         | -                                                                             | 0  |  |                                                                                                                                                                                                                                                            | -                                   |
|                         | -                                                                             | 0  |  |                                                                                                                                                                                                                                                            | -                                   |
| Caenorhabditis briggsae | Hypothetical protein CBG12847 [Caenorhabditis briggsae]                       | 0  |  |                                                                                                                                                                                                                                                            | -                                   |



|               |                            |    |                                                                                                                                                                                                                                                                                                                                                                                                                                                                                                                                    |            |                                |
|---------------|----------------------------|----|------------------------------------------------------------------------------------------------------------------------------------------------------------------------------------------------------------------------------------------------------------------------------------------------------------------------------------------------------------------------------------------------------------------------------------------------------------------------------------------------------------------------------------|------------|--------------------------------|
| Brugia malayi | briggsae cbr-scc-3 protein | 28 | <p>F:GO:0005515;<br/> P:GO:0006412;<br/> P:GO:0016045;<br/> P:GO:0007141;<br/> C:GO:0005576;<br/> C:GO:0005730;<br/> P:GO:0007286;<br/> F:GO:0003677;<br/> C:GO:0005875;<br/> F:GO:0003735;<br/> P:GO:0045449;<br/> P:GO:0032494;<br/> P:GO:0008592;<br/> P:GO:0007379;<br/> C:GO:0005811;<br/> F:GO:0032500;<br/> P:GO:0006965;<br/> F:GO:0016019;<br/> C:GO:0005887;<br/> P:GO:0045087;<br/> C:GO:0035327;<br/> C:GO:0000922;<br/> C:GO:0005721;<br/> P:GO:0006260;<br/> C:GO:0008278;<br/> C:GO:0000780;<br/> C:GO:0022627;</p> | EC:3.6.5.3 | IPR013721; PTHR11199 (PANTHER) |
| Brugia malayi | briggsae cbr-scc-3 protein | 28 | <p>F:GO:0005515;<br/> P:GO:0006412;<br/> P:GO:0016045;<br/> P:GO:0007141;<br/> C:GO:0005576;<br/> C:GO:0005730;<br/> P:GO:0007286;<br/> F:GO:0003677;<br/> C:GO:0005875;<br/> F:GO:0003735;<br/> P:GO:0045449;<br/> P:GO:0032494;<br/> P:GO:0008592;<br/> P:GO:0007379;<br/> C:GO:0005811;<br/> F:GO:0032500;<br/> P:GO:0006965;<br/> F:GO:0016019;<br/> C:GO:0005887;<br/> P:GO:0045087;<br/> C:GO:0035327;<br/> C:GO:0000922;<br/> C:GO:0005721;<br/> P:GO:0006260;<br/> C:GO:0008278;<br/> C:GO:0000780;<br/> C:GO:0022627;</p> | EC:3.6.5.3 | IPR013721; PTHR11199 (PANTHER) |
|               | -                          | 0  |                                                                                                                                                                                                                                                                                                                                                                                                                                                                                                                                    |            | -                              |
|               | -                          | 0  |                                                                                                                                                                                                                                                                                                                                                                                                                                                                                                                                    |            | SignalP (SIGNALP)              |

|                             |                                                  |    |                                                                                                                                                                                        |                                                                                                                                                                       |                            |                                                                                                              |
|-----------------------------|--------------------------------------------------|----|----------------------------------------------------------------------------------------------------------------------------------------------------------------------------------------|-----------------------------------------------------------------------------------------------------------------------------------------------------------------------|----------------------------|--------------------------------------------------------------------------------------------------------------|
| Loa loa                     | protein-tyrosine phosphatase containing protein  | 1  | F:GO:0016791                                                                                                                                                                           | -                                                                                                                                                                     | EC:3.1.3.0                 | IPR000242; G3DSA:3.90.190.10 (GENE3D), PTHR19134 (PANTHER), PTHR19134:SF26 (PANTHER), SSF52799 (SUPERFAMILY) |
| Caenorhabditis briggsae     | thyroid hormone receptor interactor 13           | 11 | P:GO:0000239;<br>P:GO:0001556;<br>P:GO:0007141;<br>C:GO:0001673;<br>P:GO:0006302;<br>F:GO:0042802;<br>P:GO:0007286;<br>F:GO:0000166;<br>P:GO:0007131;<br>P:GO:0007144;<br>P:GO:0009792 | -                                                                                                                                                                     |                            | -                                                                                                            |
| Caenorhabditis elegans      | elegans protein confirmed by transcript evidence | 3  | P:GO:0010172;<br>P:GO:0009987;<br>C:GO:0005634                                                                                                                                         | -                                                                                                                                                                     |                            | IPR001699; IPR008967; IPR018186; PTHR11267:SF17 (PANTHER)                                                    |
| Gallus gallus               | tripartite motif-containing protein 71           | 0  |                                                                                                                                                                                        | F:GO:0046872;<br>C:GO:0005737;<br>F:GO:0008270;<br>F:GO:0005515;<br>C:GO:0005622                                                                                      |                            | IPR011042; SSF63829 (SUPERFAMILY)                                                                            |
| Angiostrongylus cantonensis | major allergen                                   | 0  |                                                                                                                                                                                        | P:GO:0010171;<br>F:GO:0009055;<br>P:GO:0006099;<br>P:GO:0002119;<br>P:GO:0055114;<br>F:GO:0016491;<br>F:GO:0051536;<br>P:GO:0040010;<br>P:GO:0040007;<br>P:GO:0018996 |                            | -                                                                                                            |
| -                           | -                                                | 0  |                                                                                                                                                                                        |                                                                                                                                                                       |                            | -                                                                                                            |
| Brugia malayi               | 3-5 exoribonuclease csl4 homolog                 | 3  | C:GO:0005737;<br>C:GO:0043229;<br>C:GO:0000178                                                                                                                                         | -                                                                                                                                                                     |                            | IPR019495; PTHR12686 (PANTHER)                                                                               |
| Caenorhabditis elegans      | thioredoxin domain containing 17                 | 6  | F:GO:0009055;<br>F:GO:0005515;<br>F:GO:0047134;<br>F:GO:0004601;<br>P:GO:0033209;<br>C:GO:0005829                                                                                      | -                                                                                                                                                                     | EC:1.8.1.8;<br>EC:1.11.1.7 | IPR010357; IPR012335; IPR012336                                                                              |
| -                           | -                                                | 0  |                                                                                                                                                                                        |                                                                                                                                                                       |                            | -                                                                                                            |
| Angiostrongylus cantonensis | max interactor 1                                 | 9  | P:GO:0006281;<br>F:GO:0008270;<br>F:GO:0016564;<br>F:GO:0003677;<br>P:GO:0000122;<br>F:GO:0005515;<br>C:GO:0005737;<br>F:GO:0008168;<br>C:GO:0005634                                   | -                                                                                                                                                                     | EC:2.1.1.0                 | -                                                                                                            |
| -                           | -                                                | 0  |                                                                                                                                                                                        |                                                                                                                                                                       |                            | -                                                                                                            |
| Caenorhabditis elegans      | briggsae cbr-rhy-1 protein                       | 2  | C:GO:0016021;<br>F:GO:0016747                                                                                                                                                          | -                                                                                                                                                                     | EC:2.3.1.0                 | IPR002656; SignalP (SIGNALP)                                                                                 |

|                         |                                                              |   |                                                                                                                                     |                                                                                                                                                      |             |                                                                                                                                                                           |
|-------------------------|--------------------------------------------------------------|---|-------------------------------------------------------------------------------------------------------------------------------------|------------------------------------------------------------------------------------------------------------------------------------------------------|-------------|---------------------------------------------------------------------------------------------------------------------------------------------------------------------------|
| Caenorhabditis elegans  | d- ligase                                                    | 1 | P:GO:0009987                                                                                                                        | -                                                                                                                                                    |             | IPR012310; IPR012340; IPR016027; IPR016059; G3DSA:3.30.1490.70 (GENE3D), G3DSA:3.30.470.30 (GENE3D), PTHR10459 (PANTHER), PTHR10459:SF7 (PANTHER), SSF56091 (SUPERFAMILY) |
| Loa loa                 | fh2 domain-containing protein 1                              | 1 | F:GO:0005488                                                                                                                        | -                                                                                                                                                    |             | IPR003104; IPR015425; PTHR23213 (PANTHER)                                                                                                                                 |
| Caenorhabditis elegans  | sedoheptuloki-se                                             | 0 |                                                                                                                                     | F:GO:0016740;<br>P:GO:0016310;<br>F:GO:0000166;<br>C:GO:0005737;<br>F:GO:0005524;<br>F:GO:0016301;<br>P:GO:0005975;<br>F:GO:0050277;<br>F:GO:0016773 |             | IPR000577; IPR018484; G3DSA:3.30.420.40 (GENE3D), PTHR10196:SF11 (PANTHER), SSF53067 (SUPERFAMILY)                                                                        |
| Caenorhabditis elegans  | elegans protein partially confirmed by transcript evidence   | 0 |                                                                                                                                     |                                                                                                                                                      |             | SignalP (SIGNALP)                                                                                                                                                         |
| Caenorhabditis briggsae | uncoordi-ted family member (unc-89)                          | 0 |                                                                                                                                     | F:GO:0004672;<br>F:GO:0005524;<br>F:GO:0005089;<br>P:GO:0006468;<br>P:GO:0035023;<br>F:GO:0004674;<br>C:GO:0005622                                   |             | IPR003598; IPR003961; IPR007110; IPR008957; IPR013098; IPR013783; PTHR19897 (PANTHER), PTHR19897:SF5 (PANTHER), SSF48726 (SUPERFAMILY)                                    |
|                         | -                                                            | 0 |                                                                                                                                     |                                                                                                                                                      |             | -                                                                                                                                                                         |
| Caenorhabditis remanei  | fog-3                                                        | 0 |                                                                                                                                     |                                                                                                                                                      |             | IPR002087; IPR015676; PTHR17537:SF1 (PANTHER)                                                                                                                             |
| Caenorhabditis briggsae | elegans protein confirmed by transcript evidence             | 0 |                                                                                                                                     |                                                                                                                                                      |             | -                                                                                                                                                                         |
| Loa loa                 | splicing factor                                              | 0 |                                                                                                                                     |                                                                                                                                                      |             | IPR004882; PTHR12375:SF5 (PANTHER)                                                                                                                                        |
|                         | -                                                            | 0 |                                                                                                                                     |                                                                                                                                                      |             | -                                                                                                                                                                         |
|                         | -                                                            | 0 |                                                                                                                                     |                                                                                                                                                      |             | SignalP (SIGNALP)                                                                                                                                                         |
|                         | -                                                            | 0 |                                                                                                                                     |                                                                                                                                                      |             | IPR000953; IPR016197; G3DSA:2.40.50.40 (GENE3D)                                                                                                                           |
| Caenorhabditis elegans  | arginine ki-se                                               | 4 | C:GO:0016021;<br>F:GO:0005524;<br>F:GO:0005515;<br>F:GO:0004054                                                                     | -                                                                                                                                                    | EC:2.7.3.3  | IPR000749; IPR014746; IPR022413; IPR022414; IPR022415; PTHR11547:SF13 (PANTHER), SSF55931 (SUPERFAMILY)                                                                   |
| Caenorhabditis elegans  | arginine ki-se                                               | 4 | C:GO:0016021;<br>F:GO:0005524;<br>F:GO:0005515;<br>F:GO:0004054                                                                     | -                                                                                                                                                    | EC:2.7.3.3  | IPR000749; IPR014746; IPR022413; IPR022414; IPR022415; PTHR11547:SF13 (PANTHER), SSF55931 (SUPERFAMILY)                                                                   |
| Caenorhabditis briggsae | uncharacterized conserved protein                            | 1 | P:GO:0008340                                                                                                                        | -                                                                                                                                                    |             | -                                                                                                                                                                         |
| Caenorhabditis briggsae | uncoordi-ted family member (unc-44)                          | 3 | C:GO:0016020;<br>P:GO:0007155;<br>F:GO:0005515                                                                                      | -                                                                                                                                                    |             | -                                                                                                                                                                         |
| Homo sapiens            | lysozyme c precursor                                         | 8 | P:GO:0042742;<br>C:GO:0005615;<br>P:GO:0006954;<br>F:GO:0005515;<br>P:GO:0019835;<br>F:GO:0003796;<br>P:GO:0007586;<br>P:GO:0016998 | -                                                                                                                                                    | EC:3.2.1.17 | IPR000974; IPR001916; IPR019799; G3DSA:1.10.530.10 (GENE3D), PTHR11407 (PANTHER), PTHR11407:SF8 (PANTHER), SignalP (SIGNALP), SSF53955 (SUPERFAMILY)                      |
| Caenorhabditis briggsae | ke (drosophila actin-binding) homolog family member (ketn-1) | 1 | P:GO:0000003                                                                                                                        | -                                                                                                                                                    |             | -                                                                                                                                                                         |

|                         |                                                         |   |                                                                                                                    |                                                                                                                    |             |                                                                                                                                     |
|-------------------------|---------------------------------------------------------|---|--------------------------------------------------------------------------------------------------------------------|--------------------------------------------------------------------------------------------------------------------|-------------|-------------------------------------------------------------------------------------------------------------------------------------|
| Caenorhabditis elegans  | transducin -like 3                                      | 7 | P:GO:0040010;<br>P:GO:0045132;<br>P:GO:0006364;<br>P:GO:0000003;<br>C:GO:0032040;<br>P:GO:0006898;<br>P:GO:0009792 | -                                                                                                                  |             | IPR001680; IPR011046; IPR015943;<br>IPR017986; IPR019775; IPR019781;<br>IPR019782; PTHR19854 (PANTHER),<br>PTHR19854:SF2 (PANTHER)  |
| synthetic construct     | cd59 glycoprotein preproprotein                         | 6 | C:GO:0005624;<br>P:GO:0007166;<br>P:GO:0007596;<br>F:GO:0005515;<br>C:GO:0005576;<br>C:GO:0031362                  | -                                                                                                                  |             | IPR001526; IPR016054; IPR018363;<br>G3DSA:2.10.60.10 (GENE3D),<br>PTHR10036 (PANTHER), SignalP<br>(SIGNALP), SSF57302 (SUPERFAMILY) |
| Caenorhabditis briggsae | Hypothetical protein CBG18604 [Caenorhabditis briggsae] | 0 |                                                                                                                    | F:GO:0046872;<br>P:GO:0055114;<br>F:GO:0009055;<br>F:GO:0016491;<br>F:GO:0020037;<br>F:GO:0005506;<br>F:GO:0004497 | -           |                                                                                                                                     |
| Brugia malayi           | topoisomerase iii beta                                  | 6 | P:GO:0006268;<br>F:GO:0003917;<br>F:GO:0005515;<br>C:GO:0005694;<br>P:GO:0006265;<br>C:GO:0005634                  | -                                                                                                                  | EC:5.99.1.2 | IPR000380; IPR002052; IPR003602;<br>IPR013497; IPR013824; IPR013825                                                                 |
| Brugia malayi           | topoisomerase iii beta                                  | 6 | P:GO:0006268;<br>F:GO:0003917;<br>F:GO:0005515;<br>C:GO:0005694;<br>P:GO:0006265;<br>C:GO:0005634                  | -                                                                                                                  | EC:5.99.1.2 | IPR000380; IPR002052; IPR003602;<br>IPR013497; IPR013824; IPR013825                                                                 |
| Caenorhabditis elegans  | mitogen-activated protein ki-se ki-se ki-se 15          | 4 | P:GO:0006468;<br>F:GO:0005515;<br>F:GO:0005524;<br>F:GO:0004674                                                    | -                                                                                                                  | EC:2.7.11.0 | -                                                                                                                                   |
| Schistosoma japonicum   | protein                                                 | 0 |                                                                                                                    |                                                                                                                    |             | -                                                                                                                                   |
| Nicotiana tabacum       | protein                                                 | 1 | F:GO:0016491                                                                                                       | -                                                                                                                  |             | -                                                                                                                                   |
| -                       | -                                                       | 0 |                                                                                                                    |                                                                                                                    |             | -                                                                                                                                   |
| Caenorhabditis briggsae | wwe domain containing protein                           | 1 | F:GO:0046872                                                                                                       | -                                                                                                                  |             | -                                                                                                                                   |
| Caenorhabditis elegans  | skb1 methyltransferase family protein                   | 1 | F:GO:0016740                                                                                                       | -                                                                                                                  |             | IPR007857; SSF53335 (SUPERFAMILY)                                                                                                   |
| Loa loa                 | helix-loop-helix d-binding domain containing protein    | 1 | P:GO:0006350                                                                                                       | -                                                                                                                  |             | IPR001092; IPR011598; PTHR10985<br>(PANTHER), PTHR10985:SF18<br>(PANTHER)                                                           |
| -                       | -                                                       | 0 |                                                                                                                    |                                                                                                                    |             | -                                                                                                                                   |
| -                       | -                                                       | 0 |                                                                                                                    |                                                                                                                    |             | -                                                                                                                                   |
| Caenorhabditis elegans  | glucosyl glucuronosyl transferases                      | 1 | P:GO:0040010                                                                                                       | -                                                                                                                  |             | IPR002213; G3DSA:3.40.50.2000<br>(GENE3D), PTHR11926:SF3<br>(PANTHER), SSF53756 (SUPERFAMILY)                                       |

|                         |                                                            |   |                                                                                                                                                      |                                                                                                   |                   |                                                                                                             |
|-------------------------|------------------------------------------------------------|---|------------------------------------------------------------------------------------------------------------------------------------------------------|---------------------------------------------------------------------------------------------------|-------------------|-------------------------------------------------------------------------------------------------------------|
| Caenorhabditis elegans  | elegans protein partially confirmed by transcript evidence | 9 | F:GO:0030528;<br>P:GO:0007420;<br>P:GO:0000122;<br>F:GO:0043565;<br>P:GO:0043193;<br>F:GO:0008134;<br>F:GO:0008094;<br>P:GO:0006338;<br>C:GO:0005634 | -                                                                                                 |                   | IPR004022; IPR018501; PTHR22880 (PANTHER), PTHR22880:SF3 (PANTHER)                                          |
| Caenorhabditis briggsae | briggsae cbr-illys-4 protein                               | 3 | P:GO:0009792;<br>P:GO:0042742;<br>F:GO:0003796                                                                                                       | -                                                                                                 | EC:3.2.1.17       | IPR008597; PTHR11195:SF7 (PANTHER)                                                                          |
|                         | -                                                          | 0 |                                                                                                                                                      |                                                                                                   |                   | -                                                                                                           |
| Caenorhabditis elegans  | actin binding                                              | 2 | C:GO:0005739;<br>F:GO:0005515                                                                                                                        | -                                                                                                 |                   | IPR003124; PTHR12902 (PANTHER)                                                                              |
| Caenorhabditis elegans  | lethal g0431 cg14788-pa                                    | 9 | P:GO:0006412;<br>P:GO:0040010;<br>C:GO:0005840;<br>F:GO:0003735;<br>P:GO:0040035;<br>P:GO:0002119;<br>P:GO:0006898;<br>P:GO:0009792;<br>F:GO:0005525 | -                                                                                                 | EC:3.6.5.3        | IPR002917; G3DSA:3.40.50.300 (GENE3D), PTHR11089 (PANTHER), PTHR11089:SF7 (PANTHER), SSF52540 (SUPERFAMILY) |
|                         | -                                                          | 0 |                                                                                                                                                      |                                                                                                   |                   | -                                                                                                           |
| Caenorhabditis elegans  | methyltransferase upf0383                                  | 0 |                                                                                                                                                      | F:GO:0003676;<br>F:GO:0008168;<br>C:GO:0005737;<br>P:GO:0008033;<br>F:GO:0016740;<br>F:GO:0008270 |                   | IPR011671; G3DSA:3.40.50.150 (GENE3D), PTHR21210 (PANTHER), SSF53335 (SUPERFAMILY)                          |
|                         | -                                                          | 0 |                                                                                                                                                      |                                                                                                   |                   | -                                                                                                           |
| Caenorhabditis elegans  | deoxyhypusine hydroxylase                                  | 9 | P:GO:0009792;<br>P:GO:0010171;<br>P:GO:0040018;<br>F:GO:0005515;<br>P:GO:0008612;<br>F:GO:0019135;<br>P:GO:0040010;<br>P:GO:0019915;<br>P:GO:0006898 | -                                                                                                 | EC:1.14.99.2<br>9 | IPR004155; IPR011989; IPR016024; IPR021133; PTHR12697 (PANTHER)                                             |
| Caenorhabditis elegans  | pdz domain containing 8                                    | 1 | C:GO:0016020                                                                                                                                         | -                                                                                                 |                   | -                                                                                                           |
| Caenorhabditis elegans  | secretory carrier membrane protein 2                       | 4 | P:GO:0006810;<br>C:GO:0043231;<br>C:GO:0044444;<br>C:GO:0016020                                                                                      | -                                                                                                 |                   | IPR007273; PTHR10687:SF3 (PANTHER)                                                                          |
|                         | -                                                          | 0 |                                                                                                                                                      |                                                                                                   |                   | -                                                                                                           |
|                         | -                                                          | 0 |                                                                                                                                                      |                                                                                                   |                   | -                                                                                                           |
|                         | -                                                          | 0 |                                                                                                                                                      |                                                                                                   |                   | -                                                                                                           |
|                         | -                                                          | 0 |                                                                                                                                                      |                                                                                                   |                   | -                                                                                                           |
| Caenorhabditis elegans  | acyl-lysophosphatidylglycerol acyltransferase 1            | 1 | P:GO:0019915                                                                                                                                         | -                                                                                                 |                   | IPR002123; PTHR10983 (PANTHER), PTHR10983:SF2 (PANTHER)                                                     |

|                         |                                                            |    |                                                                                                                                                                       |                                                                                  |             |                                                                                                                               |
|-------------------------|------------------------------------------------------------|----|-----------------------------------------------------------------------------------------------------------------------------------------------------------------------|----------------------------------------------------------------------------------|-------------|-------------------------------------------------------------------------------------------------------------------------------|
| Loa loa                 | folylpolyglutamate synthase                                | 10 | F:GO:0004326;<br>P:GO:0006139;<br>P:GO:0044281;<br>P:GO:0009058;<br>P:GO:0031100;<br>P:GO:0007420;<br>P:GO:0042221;<br>C:GO:0005829;<br>C:GO:0005739;<br>F:GO:0000166 | -                                                                                | EC:6.3.2.17 | IPR001645; IPR013221; IPR018109;<br>SignalP (SIGNALP)                                                                         |
| Caenorhabditis elegans  | e2f-associated phosphoprotein                              | 2  | C:GO:0043231;<br>C:GO:0005737                                                                                                                                         | -                                                                                |             | SignalP (SIGNALP)                                                                                                             |
|                         | -                                                          | 0  |                                                                                                                                                                       |                                                                                  |             | -                                                                                                                             |
|                         | -                                                          | 0  |                                                                                                                                                                       |                                                                                  |             | -                                                                                                                             |
| Caenorhabditis elegans  | trifunctio-I purine biosynthetic protein adenosine-3       | 4  | F:GO:0016874;<br>P:GO:0009168;<br>F:GO:0005515;<br>F:GO:0008168                                                                                                       | -                                                                                | EC:2.1.1.0  | IPR002376; IPR010918;<br>G3DSA:3.90.650.10 (GENE3D),<br>PTHR10520 (PANTHER),<br>PTHR10520:SF2 (PANTHER), SignalP<br>(SIGNALP) |
| Caenorhabditis briggsae | briggsae cbr-pqm-1 protein                                 | 6  | P:GO:0006952;<br>P:GO:0000003;<br>C:GO:0005622;<br>F:GO:0008270;<br>F:GO:0005515;<br>P:GO:0006898                                                                     | -                                                                                |             | IPR015880                                                                                                                     |
| Caenorhabditis elegans  | tr- (nuclear export receptor for tr-s) isoform cra_a       | 4  | P:GO:0046907;<br>F:GO:0003723;<br>C:GO:0044428;<br>P:GO:0033036                                                                                                       | -                                                                                |             | PTHR15952 (PANTHER),<br>PTHR15952:SF11 (PANTHER)                                                                              |
| Ancylostoma caninum     | scp-like extracellular protein                             | 0  |                                                                                                                                                                       | P:GO:0040011;<br>P:GO:0006898;<br>C:GO:0005576                                   |             | IPR001283; IPR014044;<br>PTHR10334:SF11 (PANTHER)                                                                             |
| Caenorhabditis elegans  | atp-dependent clp atp-binding subunit                      | 4  | P:GO:0044238;<br>P:GO:0043170;<br>F:GO:0005515;<br>F:GO:0016787                                                                                                       | -                                                                                |             | IPR004487; PTHR11262 (PANTHER)                                                                                                |
|                         | -                                                          | 0  |                                                                                                                                                                       |                                                                                  |             | -                                                                                                                             |
|                         | -                                                          | 0  |                                                                                                                                                                       |                                                                                  |             | -                                                                                                                             |
| Caenorhabditis briggsae | zinc finger protein 214-like                               | 0  |                                                                                                                                                                       | F:GO:0003677                                                                     |             | IPR006578                                                                                                                     |
|                         | -                                                          | 0  |                                                                                                                                                                       |                                                                                  |             | -                                                                                                                             |
| Caenorhabditis elegans  | briggsae cbr-hda-4 protein                                 | 0  |                                                                                                                                                                       | P:GO:0006350;<br>F:GO:0016787;<br>P:GO:0045449;<br>P:GO:0016568;<br>C:GO:0005634 |             | -                                                                                                                             |
| Acyrtosiphon pisum      | dynein heavy chain                                         | 2  | F:GO:0017111;<br>F:GO:0005515                                                                                                                                         | -                                                                                | EC:3.6.1.15 | -                                                                                                                             |
| Caenorhabditis elegans  | briggsae cbr-spp-15 protein                                | 1  | P:GO:0006629                                                                                                                                                          | -                                                                                |             | -                                                                                                                             |
| Caenorhabditis elegans  | briggsae cbr-col-113 protein                               | 0  |                                                                                                                                                                       | C:GO:0016021;<br>F:GO:0042302                                                    |             | IPR002486; IPR008160; PTHR10499<br>(PANTHER), PTHR10499:SF58<br>(PANTHER), SignalP (SIGNALP)                                  |
| Brugia malayi           | hypothetical protein [Brugia malayi]                       | 0  |                                                                                                                                                                       |                                                                                  |             | -                                                                                                                             |
|                         | -                                                          | 0  |                                                                                                                                                                       |                                                                                  |             | -                                                                                                                             |
| Caenorhabditis elegans  | elegans protein partially confirmed by transcript evidence | 0  |                                                                                                                                                                       |                                                                                  |             | -                                                                                                                             |
| Caenorhabditis elegans  | elegans protein partially confirmed by transcript evidence | 0  |                                                                                                                                                                       |                                                                                  |             | -                                                                                                                             |
|                         | -                                                          | 0  |                                                                                                                                                                       |                                                                                  |             | -                                                                                                                             |

|                         |                                                            |    |                                                                                                                                                                                        |   |             |                                                                                                                                                                                                                               |
|-------------------------|------------------------------------------------------------|----|----------------------------------------------------------------------------------------------------------------------------------------------------------------------------------------|---|-------------|-------------------------------------------------------------------------------------------------------------------------------------------------------------------------------------------------------------------------------|
| Caenorhabditis elegans  | elegans protein partially confirmed by transcript evidence | 0  |                                                                                                                                                                                        |   |             | IPR003124                                                                                                                                                                                                                     |
| Caenorhabditis briggsae | mitochondrial atp synthase alpha subunit                   | 11 | C:GO:0045261;<br>P:GO:0040010;<br>P:GO:0042777;<br>P:GO:0008340;<br>F:GO:0046933;<br>P:GO:0000003;<br>F:GO:0005524;<br>P:GO:0002119;<br>F:GO:0005515;<br>F:GO:0046961;<br>P:GO:0009792 | - | EC:3.6.3.14 | IPR000194; IPR000793; IPR004100;<br>IPR005294; IPR017458; IPR018118;<br>IPR020003; G3DSA:1.20.150.20<br>(GENE3D), G3DSA:2.40.30.20<br>(GENE3D), G3DSA:3.40.50.300<br>(GENE3D), PTHR15184 (PANTHER),<br>SSF52540 (SUPERFAMILY) |
| Caenorhabditis briggsae | mitochondrial atp synthase alpha subunit                   | 11 | C:GO:0045261;<br>P:GO:0040010;<br>P:GO:0042777;<br>P:GO:0008340;<br>F:GO:0046933;<br>P:GO:0000003;<br>F:GO:0005524;<br>P:GO:0002119;<br>F:GO:0005515;<br>F:GO:0046961;<br>P:GO:0009792 | - | EC:3.6.3.14 | IPR000194; IPR000793; IPR004100;<br>IPR005294; IPR017458; IPR018118;<br>IPR020003; G3DSA:1.20.150.20<br>(GENE3D), G3DSA:2.40.30.20<br>(GENE3D), G3DSA:3.40.50.300<br>(GENE3D), PTHR15184 (PANTHER),<br>SSF52540 (SUPERFAMILY) |
| Caenorhabditis briggsae | mitochondrial atp synthase alpha subunit                   | 11 | C:GO:0045261;<br>P:GO:0040010;<br>P:GO:0042777;<br>P:GO:0008340;<br>F:GO:0046933;<br>P:GO:0000003;<br>F:GO:0005524;<br>P:GO:0002119;<br>F:GO:0005515;<br>F:GO:0046961;<br>P:GO:0009792 | - | EC:3.6.3.14 | IPR000194; IPR000793; IPR004100;<br>IPR005294; IPR017458; IPR018118;<br>IPR020003; G3DSA:1.20.150.20<br>(GENE3D), G3DSA:2.40.30.20<br>(GENE3D), G3DSA:3.40.50.300<br>(GENE3D), PTHR15184 (PANTHER),<br>SSF52540 (SUPERFAMILY) |
|                         |                                                            | -  |                                                                                                                                                                                        |   |             | -                                                                                                                                                                                                                             |
| Caenorhabditis elegans  | hypothetical protein W09G12.10 [Caenorhabditis elegans]    | 0  |                                                                                                                                                                                        |   |             | SignalP (SIGNALP)                                                                                                                                                                                                             |
|                         |                                                            | -  |                                                                                                                                                                                        |   |             | -                                                                                                                                                                                                                             |
|                         |                                                            | 0  |                                                                                                                                                                                        |   |             | -                                                                                                                                                                                                                             |

|                         |                                                            |    |                                                                                                                                                                                                                                                                                                                                                                                                                                                                         |                                                |              |                                                                                                            |
|-------------------------|------------------------------------------------------------|----|-------------------------------------------------------------------------------------------------------------------------------------------------------------------------------------------------------------------------------------------------------------------------------------------------------------------------------------------------------------------------------------------------------------------------------------------------------------------------|------------------------------------------------|--------------|------------------------------------------------------------------------------------------------------------|
| Homo sapiens            | superoxide dismutase                                       | 43 | P:GO:0048773;<br>F:GO:0030145;<br>P:GO:0048666;<br>P:GO:0007626;<br>F:GO:0005515;<br>P:GO:0010332;<br>P:GO:0042542;<br>P:GO:0051289;<br>P:GO:0001315;<br>P:GO:0006357;<br>C:GO:0005759;<br>P:GO:0014823;<br>P:GO:0007507;<br>P:GO:0001306;<br>P:GO:0042554;<br>P:GO:0003032;<br>P:GO:0009791;<br>P:GO:0003069;<br>C:GO:0005743;<br>P:GO:0019430;<br>P:GO:0055093;<br>P:GO:0006916;<br>P:GO:0043524;<br>P:GO:0045429;<br>P:GO:0055072;<br>P:GO:0050665;<br>F:GO:0019825; | -                                              | EC:1.15.1.1  | -                                                                                                          |
| -                       | -                                                          | 0  | -                                                                                                                                                                                                                                                                                                                                                                                                                                                                       | -                                              | -            | -                                                                                                          |
| Caenorhabditis briggsae | elegans protein partially confirmed by transcript evidence | 1  | F:GO:0005515                                                                                                                                                                                                                                                                                                                                                                                                                                                            | -                                              | -            | PTHR18958 (PANTHER),<br>PTHR18958:SF173 (PANTHER)                                                          |
| -                       | -                                                          | 0  | -                                                                                                                                                                                                                                                                                                                                                                                                                                                                       | -                                              | -            | -                                                                                                          |
| Caenorhabditis elegans  | xaa-pro aminopeptidase                                     | 3  | C:GO:0005829;<br>F:GO:0005515;<br>F:GO:0004177                                                                                                                                                                                                                                                                                                                                                                                                                          | -                                              | EC:3.4.11.0  | IPR000587; IPR000994;<br>G3DSA:3.40.350.10 (GENE3D),<br>PTHR10804:SF4 (PANTHER), SSF53092<br>(SUPERFAMILY) |
| -                       | -                                                          | 0  | -                                                                                                                                                                                                                                                                                                                                                                                                                                                                       | -                                              | -            | -                                                                                                          |
| Caenorhabditis briggsae | pseudouridylylase 3                                        | 2  | F:GO:0009982;<br>P:GO:0009451                                                                                                                                                                                                                                                                                                                                                                                                                                           | -                                              | EC:5.4.99.12 | IPR001406; IPR020094; IPR020095;<br>IPR020097; IPR020103                                                   |
| -                       | -                                                          | 0  | -                                                                                                                                                                                                                                                                                                                                                                                                                                                                       | -                                              | -            | IPR012337                                                                                                  |
| Caenorhabditis elegans  | scavenger receptor                                         | 3  | F:GO:0005044;<br>F:GO:0005488;<br>C:GO:0016020                                                                                                                                                                                                                                                                                                                                                                                                                          | -                                              | -            | IPR006626; IPR016187                                                                                       |
| Caenorhabditis elegans  | hypothetical protein Y69A2AR.28 [Caenorhabditis elegans]   | 0  | -                                                                                                                                                                                                                                                                                                                                                                                                                                                                       | -                                              | -            | -                                                                                                          |
| Brugia malayi           | trypsin family protein                                     | 0  | -                                                                                                                                                                                                                                                                                                                                                                                                                                                                       | P:GO:0006508;<br>F:GO:0004252;<br>F:GO:0003824 | -            | IPR018114; G3DSA:2.40.10.10<br>(GENE3D), SignalP (SIGNALP)                                                 |
| -                       | -                                                          | 0  | -                                                                                                                                                                                                                                                                                                                                                                                                                                                                       | -                                              | -            | SignalP (SIGNALP)                                                                                          |
| -                       | -                                                          | 0  | -                                                                                                                                                                                                                                                                                                                                                                                                                                                                       | -                                              | -            | -                                                                                                          |
| Caenorhabditis elegans  | btb poz domain containing protein                          | 0  | -                                                                                                                                                                                                                                                                                                                                                                                                                                                                       | F:GO:0005515                                   | -            | -                                                                                                          |
| Caenorhabditis elegans  | btb poz domain containing protein                          | 0  | -                                                                                                                                                                                                                                                                                                                                                                                                                                                                       | F:GO:0005515                                   | -            | -                                                                                                          |
| -                       | -                                                          | 0  | -                                                                                                                                                                                                                                                                                                                                                                                                                                                                       | -                                              | -            | -                                                                                                          |



|                                                      |                                             |    |                                                                                                                                                                                                                                                            |                                                |                                                         |                                                                                                                                       |
|------------------------------------------------------|---------------------------------------------|----|------------------------------------------------------------------------------------------------------------------------------------------------------------------------------------------------------------------------------------------------------------|------------------------------------------------|---------------------------------------------------------|---------------------------------------------------------------------------------------------------------------------------------------|
| Caenorhabditis elegans                               | alpha 4 like                                | 15 | P:GO:0040010;<br>C:GO:0005874;<br>P:GO:0035046;<br>P:GO:0051258;<br>P:GO:0007018;<br>P:GO:0002119;<br>F:GO:0005515;<br>P:GO:0040017;<br>F:GO:0003924;<br>P:GO:0040039;<br>P:GO:0006898;<br>F:GO:0005198;<br>P:GO:0002009;<br>P:GO:0009792;<br>F:GO:0005525 | -                                              | EC:3.6.5.1;<br>EC:3.6.5.2;<br>EC:3.6.5.3;<br>EC:3.6.5.4 | -                                                                                                                                     |
| -                                                    | -                                           | 0  |                                                                                                                                                                                                                                                            |                                                |                                                         | -                                                                                                                                     |
| Caenorhabditis brenneri                              | troponin c                                  | 5  | P:GO:0002119;<br>F:GO:0005515;<br>P:GO:0000003;<br>P:GO:0040007;<br>F:GO:0005509                                                                                                                                                                           | -                                              |                                                         | IPR002048; IPR011992; IPR018247;<br>IPR018248; IPR018249; PTHR23050<br>(PANTHER), PTHR23050:SF16<br>(PANTHER), SSF47473 (SUPERFAMILY) |
| -                                                    | -                                           | 0  |                                                                                                                                                                                                                                                            |                                                |                                                         | -                                                                                                                                     |
| -                                                    | -                                           | 0  |                                                                                                                                                                                                                                                            |                                                |                                                         | -                                                                                                                                     |
| Bacillus thuringiensis serovar kurstaki str. T03a001 | lpxtg-motif cell wall anchor domain protein | 0  |                                                                                                                                                                                                                                                            | F:GO:0005488;<br>C:GO:0009986                  |                                                         | -                                                                                                                                     |
| Bacillus thuringiensis serovar kurstaki str. T03a001 | lpxtg-motif cell wall anchor domain protein | 0  |                                                                                                                                                                                                                                                            | F:GO:0005488;<br>C:GO:0009986;<br>F:GO:0005515 |                                                         | -                                                                                                                                     |
| Caenorhabditis elegans                               | glycosyl hydrolases family 31 protein       | 2  | P:GO:0008152;<br>F:GO:0004553                                                                                                                                                                                                                              | -                                              | EC:3.2.1.0                                              | IPR000322; IPR017853;<br>PTHR22762:SF10 (PANTHER),<br>SSF51011 (SUPERFAMILY)                                                          |
| -                                                    | -                                           | 0  |                                                                                                                                                                                                                                                            |                                                |                                                         | -                                                                                                                                     |
| -                                                    | -                                           | 0  |                                                                                                                                                                                                                                                            |                                                |                                                         | -                                                                                                                                     |
| -                                                    | -                                           | 0  |                                                                                                                                                                                                                                                            |                                                |                                                         | -                                                                                                                                     |
| -                                                    | -                                           | 0  |                                                                                                                                                                                                                                                            |                                                |                                                         | -                                                                                                                                     |
| Loa loa                                              | tata-box binding protein                    | 10 | P:GO:0007369;<br>P:GO:0006367;<br>P:GO:0006355;<br>P:GO:0055114;<br>F:GO:0032440;<br>F:GO:0003677;<br>F:GO:0005515;<br>F:GO:0003700;<br>C:GO:0005634;<br>F:GO:0003702                                                                                      | -                                              | EC:1.3.1.74                                             | IPR000814; IPR012294; IPR012295                                                                                                       |
| Caenorhabditis briggsae                              | tata-box binding protein                    | 10 | P:GO:0007369;<br>P:GO:0006367;<br>P:GO:0006355;<br>P:GO:0055114;<br>F:GO:0032440;<br>F:GO:0003677;<br>F:GO:0005515;<br>F:GO:0003700;<br>C:GO:0005634;<br>F:GO:0003702                                                                                      | -                                              | EC:1.3.1.74                                             | IPR000814; IPR012294; IPR012295                                                                                                       |

|                         |                                                            |    |                                                                                                                                                                       |   |                           |                                                                                                   |
|-------------------------|------------------------------------------------------------|----|-----------------------------------------------------------------------------------------------------------------------------------------------------------------------|---|---------------------------|---------------------------------------------------------------------------------------------------|
| Caenorhabditis briggsae | tata-box binding protein                                   | 10 | P:GO:0007369;<br>P:GO:0006367;<br>P:GO:0006355;<br>P:GO:0055114;<br>F:GO:0032440;<br>F:GO:0003677;<br>F:GO:0005515;<br>F:GO:0003700;<br>C:GO:0005634;<br>F:GO:0003702 | - | EC:1.3.1.74               | IPR000814; IPR012294; IPR012295                                                                   |
| Caenorhabditis briggsae | tata-box binding protein                                   | 10 | P:GO:0007369;<br>P:GO:0006367;<br>P:GO:0006355;<br>P:GO:0055114;<br>F:GO:0032440;<br>F:GO:0003677;<br>F:GO:0005515;<br>F:GO:0003700;<br>C:GO:0005634;<br>F:GO:0003702 | - | EC:1.3.1.74               | IPR000814; IPR012294; IPR012295                                                                   |
| Loa loa                 | elegans protein partially confirmed by transcript evidence | 1  | F:GO:0005515                                                                                                                                                          | - | -                         | -                                                                                                 |
| -                       | -                                                          | 0  | -                                                                                                                                                                     | - | -                         | -                                                                                                 |
| -                       | -                                                          | 0  | -                                                                                                                                                                     | - | -                         | SignalP (SIGNALP)                                                                                 |
| -                       | -                                                          | 0  | -                                                                                                                                                                     | - | -                         | -                                                                                                 |
| Loa loa                 | myosin xviii                                               | 0  | F:GO:0005524;<br>F:GO:0000166;<br>F:GO:0042623;<br>F:GO:0003774;<br>F:GO:0005515;<br>C:GO:0016459                                                                     | - | -                         | IPR001609; PTHR13140 (PANTHER),<br>SSF52540 (SUPERFAMILY)                                         |
| -                       | -                                                          | 0  | -                                                                                                                                                                     | - | -                         | SignalP (SIGNALP)                                                                                 |
| Caenorhabditis elegans  | elegans protein confirmed by transcript evidence           | 0  | -                                                                                                                                                                     | - | -                         | IPR021010; SSF141739 (SUPERFAMILY)                                                                |
| Caenorhabditis elegans  | beta-ureidopropio-se                                       | 4  | P:GO:0006807;<br>C:GO:0005829;<br>P:GO:0000003;<br>F:GO:0003837                                                                                                       | - | EC:3.5.1.6                | IPR003010                                                                                         |
| Dictyocaulus viviparus  | acetylcholinesterase 2                                     | 6  | F:GO:0004104;<br>P:GO:0001507;<br>F:GO:0003990;<br>C:GO:0005623;<br>P:GO:0040012;<br>F:GO:0042803                                                                     | - | EC:3.1.1.8;<br>EC:3.1.1.7 | -                                                                                                 |
| Caenorhabditis elegans  | laminin alpha chain                                        | 5  | C:GO:0005606;<br>P:GO:0030334;<br>P:GO:0045995;<br>P:GO:0030155;<br>F:GO:0005102                                                                                      | - | -                         | IPR001791; IPR008985; IPR012680;<br>IPR013320                                                     |
| -                       | -                                                          | 0  | -                                                                                                                                                                     | - | -                         | SignalP (SIGNALP)                                                                                 |
| Caenorhabditis briggsae | patched family protein                                     | 5  | P:GO:0018996;<br>C:GO:0016021;<br>P:GO:0040018;<br>F:GO:0008158;<br>P:GO:0040011                                                                                      | - | -                         | IPR000731; IPR003392; PTHR10796<br>(PANTHER), PTHR10796-SF14<br>(PANTHER), SSF82866 (SUPERFAMILY) |
| -                       | -                                                          | 0  | -                                                                                                                                                                     | - | -                         | SignalP (SIGNALP)                                                                                 |
| -                       | -                                                          | 0  | -                                                                                                                                                                     | - | -                         | -                                                                                                 |
| -                       | -                                                          | 0  | -                                                                                                                                                                     | - | -                         | -                                                                                                 |

|                         |                                                                 |   |                                                                                                                                     |                               |             |                                                                                                                  |
|-------------------------|-----------------------------------------------------------------|---|-------------------------------------------------------------------------------------------------------------------------------------|-------------------------------|-------------|------------------------------------------------------------------------------------------------------------------|
| Caenorhabditis elegans  | phospholipase a-2-activating protein                            | 1 | P:GO:0040010                                                                                                                        | -                             |             | IPR001680; IPR011046; IPR015943; IPR017986; IPR019781; IPR019782; PTHR19849 (PANTHER)                            |
|                         | -                                                               | 0 |                                                                                                                                     |                               |             | -                                                                                                                |
| Caenorhabditis briggsae | briggsae cbr-dhs-27 protein                                     | 7 | F:GO:0018454;<br>F:GO:0045703;<br>F:GO:0005515;<br>P:GO:0042761;<br>C:GO:0016020;<br>C:GO:0005783;<br>P:GO:0009790                  | -                             | EC:1.1.1.36 | IPR002198; IPR016040; PTHR19410:SF38 (PANTHER), SignalP (SIGNALP), SSF51735 (SUPERFAMILY)                        |
| Brugia malayi           | msp domain containing protein                                   | 0 |                                                                                                                                     | C:GO:0005856;<br>F:GO:0005198 |             | IPR000535; IPR008962; PTHR21513 (PANTHER), PTHR21513:SF1 (PANTHER)                                               |
| Homo sapiens            | complement component s subcomponent                             | 8 | F:GO:0005509;<br>P:GO:0006958;<br>P:GO:0045087;<br>P:GO:0010001;<br>P:GO:0006508;<br>F:GO:0004252;<br>C:GO:0005576;<br>P:GO:0051591 | -                             | EC:3.4.21.0 | SignalP (SIGNALP)                                                                                                |
| Caenorhabditis elegans  | myosin regulatory light chain                                   | 7 | C:GO:0005856;<br>F:GO:0005509;<br>C:GO:0030016;<br>P:GO:0055003;<br>F:GO:0005515;<br>P:GO:0042694;<br>P:GO:0060048                  | -                             |             | IPR002048; IPR011992; IPR018247; IPR018249; PTHR23049 (PANTHER), PTHR23049:SF7 (PANTHER), SSF47473 (SUPERFAMILY) |
|                         | -                                                               | 0 |                                                                                                                                     |                               |             | -                                                                                                                |
| Caenorhabditis briggsae | Hypothetical protein CBG02786 [Caenorhabditis briggsae]         | 0 |                                                                                                                                     | F:GO:0005488                  |             | PTHR13298 (PANTHER), PTHR13298:SF1 (PANTHER)                                                                     |
| Caenorhabditis briggsae | briggsae cbr-unc-36 protein                                     | 2 | F:GO:0005216;<br>P:GO:0006810                                                                                                       | -                             |             | PTHR10166 (PANTHER), PTHR10166:SF5 (PANTHER)                                                                     |
| Loa loa                 | hypothetical protein LOAG_05929 [Loa loa]                       | 0 |                                                                                                                                     |                               |             | -                                                                                                                |
| Caenorhabditis elegans  | d domain (prokaryotic heat shock protein) family member (dnj-8) | 3 | P:GO:0018991;<br>P:GO:0040011;<br>P:GO:0006898                                                                                      | -                             |             | -                                                                                                                |
|                         | -                                                               | 0 |                                                                                                                                     |                               |             | -                                                                                                                |
|                         | -                                                               | 0 |                                                                                                                                     |                               |             | IPR006058                                                                                                        |
| Caenorhabditis elegans  | briggsae cbr-zig-7 protein                                      | 0 |                                                                                                                                     |                               |             | PTHR10075 (PANTHER), PTHR10075:SF1 (PANTHER)                                                                     |
| Caenorhabditis elegans  | tgf-beta resistance-associated protein trag                     | 0 |                                                                                                                                     |                               |             | IPR011046; IPR015943; IPR019782; PTHR12816 (PANTHER), PTHR12816:SF1 (PANTHER)                                    |
|                         | -                                                               | 0 |                                                                                                                                     |                               |             | SignalP (SIGNALP)                                                                                                |
| Dictyocaulus viviparus  | hypothetical protein L3ni22 [Dictyocaulus viviparus]            | 0 |                                                                                                                                     |                               |             | -                                                                                                                |
|                         | -                                                               | 0 |                                                                                                                                     |                               |             | -                                                                                                                |
| Caenorhabditis elegans  | cathepsin z                                                     | 2 | F:GO:0008234;<br>P:GO:0006508                                                                                                       | -                             |             | IPR000169; IPR000668; IPR013128; G3DSA:3.90.70.10 (GENE3D), PTHR12411:SF14 (PANTHER), SSF54001 (SUPERFAMILY)     |
| Caenorhabditis briggsae | l-lactate dehydroge-se                                          | 5 | C:GO:0005737;<br>F:GO:0005488;<br>F:GO:0004459;<br>P:GO:0055114;<br>P:GO:0006096                                                    | -                             | EC:1.1.1.27 | IPR015955; IPR018177; IPR022383; PTHR11540 (PANTHER), PTHR11540:SF3 (PANTHER), SignalP (SIGNALP)                 |
|                         | -                                                               | 0 |                                                                                                                                     |                               |             | SignalP (SIGNALP)                                                                                                |

|                         |                                                                          |   |                                                                                                                                                      |                                                                                                                                                      |                                                                                                                          |
|-------------------------|--------------------------------------------------------------------------|---|------------------------------------------------------------------------------------------------------------------------------------------------------|------------------------------------------------------------------------------------------------------------------------------------------------------|--------------------------------------------------------------------------------------------------------------------------|
|                         | -                                                                        | 0 |                                                                                                                                                      |                                                                                                                                                      | SignalP (SIGNALP)                                                                                                        |
| Caenorhabditis briggsae | nhl repeat-containing                                                    | 3 | P:GO:0006915;<br>F:GO:0008270;<br>F:GO:0005515                                                                                                       | -                                                                                                                                                    | IPR001258; IPR011042; IPR013017;<br>PTHR13712 (PANTHER),<br>PTHR13712:SF9 (PANTHER)                                      |
| Brugia malayi           | immunoglobulin i-set domain containing protein                           | 0 |                                                                                                                                                      | F:GO:0004672;<br>F:GO:0005524;<br>F:GO:0000166;<br>P:GO:0006468;<br>F:GO:0004674                                                                     | IPR007110; IPR013098; IPR013783;<br>PTHR19897 (PANTHER),<br>PTHR19897:SF7 (PANTHER), SSF48726<br>(SUPERFAMILY)           |
|                         | -                                                                        | 0 |                                                                                                                                                      |                                                                                                                                                      | -                                                                                                                        |
| Caenorhabditis briggsae | elegans protein confirmed by transcript evidence                         | 0 |                                                                                                                                                      |                                                                                                                                                      | -                                                                                                                        |
|                         | -                                                                        | 0 |                                                                                                                                                      |                                                                                                                                                      | -                                                                                                                        |
|                         | -                                                                        | 0 |                                                                                                                                                      |                                                                                                                                                      | -                                                                                                                        |
| Salmo salar             | sh2 domain containing 4a                                                 | 0 |                                                                                                                                                      | C:GO:0005737;<br>F:GO:0005515                                                                                                                        | PTHR14388 (PANTHER)                                                                                                      |
| Loa loa                 | uncoordinated family member (unc-32)                                     | 5 | F:GO:0015078;<br>C:GO:0033177;<br>C:GO:0016021;<br>P:GO:0015986;<br>P:GO:0040013                                                                     | -                                                                                                                                                    | IPR002490; PTHR11629:SF23<br>(PANTHER), SignalP (SIGNALP)                                                                |
|                         | -                                                                        | 0 |                                                                                                                                                      |                                                                                                                                                      | -                                                                                                                        |
| Caenorhabditis briggsae | elegans protein partially confirmed by transcript evidence               | 0 |                                                                                                                                                      |                                                                                                                                                      | PTHR13417 (PANTHER), SignalP<br>(SIGNALP)                                                                                |
| Caenorhabditis briggsae | pyridine nucleotide-disulfide oxidoreductase domain-containing protein 1 | 0 |                                                                                                                                                      | F:GO:0009055;<br>F:GO:0003674;<br>P:GO:0055114;<br>F:GO:0016491;<br>F:GO:0003824;<br>C:GO:0005575;<br>P:GO:0008152;<br>P:GO:0008150;<br>F:GO:0005488 | IPR013027; G3DSA:3.50.50.60<br>(GENE3D), SSF51905 (SUPERFAMILY)                                                          |
| Caenorhabditis elegans  | elegans protein confirmed by transcript evidence                         | 0 |                                                                                                                                                      |                                                                                                                                                      | SignalP (SIGNALP)                                                                                                        |
|                         | -                                                                        | 0 |                                                                                                                                                      |                                                                                                                                                      | -                                                                                                                        |
|                         | -                                                                        | 0 |                                                                                                                                                      |                                                                                                                                                      | -                                                                                                                        |
|                         | -                                                                        | 0 |                                                                                                                                                      |                                                                                                                                                      | -                                                                                                                        |
|                         | -                                                                        | 0 |                                                                                                                                                      |                                                                                                                                                      | -                                                                                                                        |
|                         | -                                                                        | 0 |                                                                                                                                                      |                                                                                                                                                      | -                                                                                                                        |
| Caenorhabditis elegans  | bromodomain containing protein                                           | 1 | P:GO:0040011                                                                                                                                         |                                                                                                                                                      | -                                                                                                                        |
| Caenorhabditis elegans  | mbk-1                                                                    | 9 | P:GO:0040010;<br>P:GO:0018108;<br>F:GO:0004674;<br>F:GO:0005524;<br>F:GO:0005515;<br>P:GO:0040011;<br>P:GO:0046777;<br>F:GO:0004715;<br>C:GO:0005634 | -                                                                                                                                                    | EC:2.7.11.0;<br>EC:2.7.10.2<br>IPR011009; G3DSA:1.10.510.10<br>(GENE3D), PTHR23122 (PANTHER),<br>PTHR23122:SF2 (PANTHER) |
| Caenorhabditis elegans  | mbk-1                                                                    | 9 | P:GO:0040010;<br>P:GO:0018108;<br>F:GO:0004674;<br>F:GO:0005524;<br>F:GO:0005515;<br>P:GO:0040011;<br>P:GO:0046777;<br>F:GO:0004715;<br>C:GO:0005634 | -                                                                                                                                                    | EC:2.7.11.0;<br>EC:2.7.10.2<br>IPR011009; G3DSA:1.10.510.10<br>(GENE3D), PTHR23122 (PANTHER),<br>PTHR23122:SF2 (PANTHER) |
|                         | -                                                                        | 0 |                                                                                                                                                      |                                                                                                                                                      | -                                                                                                                        |

|                             |                                                            |    |                                                                                                                                                                                                                                                                                                                                                                                                                     |                               |            |                                                                                                                     |
|-----------------------------|------------------------------------------------------------|----|---------------------------------------------------------------------------------------------------------------------------------------------------------------------------------------------------------------------------------------------------------------------------------------------------------------------------------------------------------------------------------------------------------------------|-------------------------------|------------|---------------------------------------------------------------------------------------------------------------------|
| Caenorhabditis briggsae     | major facilitator superfamily protein                      | 0  |                                                                                                                                                                                                                                                                                                                                                                                                                     | C:GO:0016021;<br>P:GO:0055085 |            | IPR011701; IPR016196;<br>G3DSA:1.20.1250.20 (GENE3D),<br>PTHR11662 (PANTHER),<br>PTHR11662:SF24 (PANTHER)           |
|                             | -                                                          | 0  |                                                                                                                                                                                                                                                                                                                                                                                                                     |                               |            | -                                                                                                                   |
| Caenorhabditis briggsae     | engulfment and cell motility protein 1                     | 15 | P:GO:0043652;<br>F:GO:0070064;<br>P:GO:0007015;<br>P:GO:0031532;<br>F:GO:0032403;<br>F:GO:0019899;<br>P:GO:0030334;<br>P:GO:0060097;<br>P:GO:0040025;<br>C:GO:0044444;<br>P:GO:0040039;<br>P:GO:0009792;<br>P:GO:0035262;<br>C:GO:0005886;<br>F:GO:0017124                                                                                                                                                          | -                             |            | PTHR12771 (PANTHER),<br>PTHR12771:SF5 (PANTHER), PF11841<br>(PFAM)                                                  |
|                             | -                                                          | 0  |                                                                                                                                                                                                                                                                                                                                                                                                                     |                               |            | -                                                                                                                   |
| Angiostrongylus cantonensis | suppressor of tau pathology family member (sut-1)          | 0  |                                                                                                                                                                                                                                                                                                                                                                                                                     |                               |            | -                                                                                                                   |
|                             | -                                                          | 0  |                                                                                                                                                                                                                                                                                                                                                                                                                     |                               |            | -                                                                                                                   |
| Caenorhabditis briggsae     | peptidylprolyl isomerase -like 1                           | 5  | P:GO:0006457;<br>P:GO:0008380;<br>C:GO:0005681;<br>P:GO:0006397;<br>F:GO:0003755                                                                                                                                                                                                                                                                                                                                    | -                             | EC:5.2.1.8 | -                                                                                                                   |
| Brugia malayi               | eukaryotic translation initiation factor 2 alpha ki-se pek | 24 | P:GO:0007595;<br>P:GO:0032092;<br>P:GO:0002063;<br>P:GO:0048009;<br>P:GO:0006919;<br>P:GO:0046777;<br>P:GO:0032057;<br>C:GO:0005789;<br>P:GO:0031018;<br>P:GO:0006983;<br>P:GO:0007029;<br>P:GO:0045444;<br>F:GO:0004694;<br>P:GO:0030282;<br>P:GO:0009967;<br>F:GO:0042802;<br>P:GO:0006926;<br>P:GO:0030073;<br>P:GO:0031642;<br>P:GO:0019722;<br>P:GO:0032933;<br>P:GO:0051260;<br>P:GO:0019217;<br>P:GO:0030968 | -                             |            | IPR000719; IPR011009; IPR017442;<br>G3DSA:1.10.510.10 (GENE3D),<br>PTHR11042 (PANTHER),<br>PTHR11042:SF12 (PANTHER) |
| Bos taurus                  | complement factor h precursor                              | 0  |                                                                                                                                                                                                                                                                                                                                                                                                                     | P:GO:0006957;<br>C:GO:0005576 |            | IPR000436; IPR016060                                                                                                |
|                             | -                                                          | 0  |                                                                                                                                                                                                                                                                                                                                                                                                                     |                               |            | -                                                                                                                   |

|                         |                                                  |    |                                                                                                                                                                                                                                                                                                                                                                                                                                                                         |  |  |                                                                                        |
|-------------------------|--------------------------------------------------|----|-------------------------------------------------------------------------------------------------------------------------------------------------------------------------------------------------------------------------------------------------------------------------------------------------------------------------------------------------------------------------------------------------------------------------------------------------------------------------|--|--|----------------------------------------------------------------------------------------|
| Caenorhabditis elegans  | baculoviral iap repeat-containing 5              | 42 | F:GO:0048037;<br>P:GO:0008340;<br>P:GO:0031536;<br>P:GO:0043154;<br>F:GO:0051087;<br>F:GO:0030528;<br>P:GO:0045941;<br>P:GO:0018991;<br>F:GO:0008270;<br>C:GO:0005814;<br>P:GO:0040010;<br>P:GO:0007052;<br>P:GO:0045931;<br>P:GO:0051303;<br>F:GO:0043027;<br>F:GO:0008536;<br>C:GO:0005881;<br>C:GO:0005730;<br>C:GO:0005829;<br>P:GO:0006916;<br>F:GO:0046982;<br>P:GO:0040039;<br>F:GO:0008017;<br>C:GO:0031021;<br>C:GO:0000775;<br>P:GO:0009792;<br>P:GO:0031577; |  |  | IPR001370; PTHR10044 (PANTHER),<br>PTHR10044:SF15 (PANTHER),<br>SSF57924 (SUPERFAMILY) |
| Caenorhabditis elegans  | baculoviral iap repeat-containing 5              | 30 | F:GO:0048037;<br>P:GO:0008340;<br>P:GO:0031536;<br>P:GO:0043154;<br>F:GO:0051087;<br>F:GO:0008270;<br>C:GO:0005814;<br>P:GO:0045931;<br>P:GO:0051303;<br>F:GO:0043027;<br>F:GO:0008536;<br>C:GO:0005881;<br>C:GO:0005730;<br>C:GO:0005829;<br>P:GO:0006916;<br>F:GO:0046982;<br>P:GO:0006996;<br>F:GO:0008017;<br>C:GO:0031021;<br>C:GO:0000775;<br>P:GO:0009792;<br>P:GO:0031577;<br>C:GO:0030496;<br>C:GO:0000228;<br>C:GO:0005876;<br>F:GO:0042803;<br>C:GO:0021133; |  |  | IPR001370; PTHR10044 (PANTHER),<br>PTHR10044:SF15 (PANTHER),<br>SSF57924 (SUPERFAMILY) |
|                         | -                                                | 0  |                                                                                                                                                                                                                                                                                                                                                                                                                                                                         |  |  | -                                                                                      |
| Caenorhabditis briggsae | elegans protein confirmed by transcript evidence | 0  |                                                                                                                                                                                                                                                                                                                                                                                                                                                                         |  |  | -                                                                                      |
| Caenorhabditis briggsae | elegans protein confirmed by transcript evidence | 0  |                                                                                                                                                                                                                                                                                                                                                                                                                                                                         |  |  | -                                                                                      |

|                           |                                                   |   |                                                                                                                    |                                                                                  |                             |                                                                                                                                                                                                  |
|---------------------------|---------------------------------------------------|---|--------------------------------------------------------------------------------------------------------------------|----------------------------------------------------------------------------------|-----------------------------|--------------------------------------------------------------------------------------------------------------------------------------------------------------------------------------------------|
| Caenorhabditis elegans    | activating sig-I cointegrator 1 complex subunit 3 | 4 | F:GO:0008026;<br>F:GO:0003677;<br>C:GO:0005622;<br>F:GO:0005524                                                    | -                                                                                |                             | IPR004179; G3DSA:1.10.3380.10 (GENE3D), PTHR11752 (PANTHER), PTHR11752:SF8 (PANTHER)                                                                                                             |
| Loa loa                   | g-t family protein                                | 0 |                                                                                                                    | P:GO:0006508;<br>F:GO:0016740;<br>P:GO:0008152;<br>F:GO:0008080;<br>F:GO:0008270 |                             | IPR016181                                                                                                                                                                                        |
|                           | -                                                 | 0 |                                                                                                                    |                                                                                  |                             | -                                                                                                                                                                                                |
|                           | -                                                 | 0 |                                                                                                                    |                                                                                  |                             | -                                                                                                                                                                                                |
|                           | -                                                 | 0 |                                                                                                                    |                                                                                  |                             | -                                                                                                                                                                                                |
| Oscheius brevesophaga     | ribosomal protein l27a                            | 4 | P:GO:0009792;<br>C:GO:0005840;<br>F:GO:0003735;<br>P:GO:0006412                                                    | -                                                                                | EC:3.6.5.3                  | IPR021131; G3DSA:3.100.10.10 (GENE3D), PTHR11721 (PANTHER)                                                                                                                                       |
|                           | -                                                 | 0 |                                                                                                                    |                                                                                  |                             | -                                                                                                                                                                                                |
| Caenorhabditis sp. PS1010 | r- binding protein                                | 0 |                                                                                                                    | F:GO:0003676;<br>F:GO:0000166                                                    |                             | -                                                                                                                                                                                                |
|                           | -                                                 | 0 |                                                                                                                    |                                                                                  |                             | -                                                                                                                                                                                                |
|                           | -                                                 | 0 |                                                                                                                    |                                                                                  |                             | SignalP (SIGNALP)                                                                                                                                                                                |
| Danio rerio               | poly(adp-ribose) polymerase                       | 3 | C:GO:0005739;<br>C:GO:0005634;<br>F:GO:0016757                                                                     | -                                                                                |                             | -                                                                                                                                                                                                |
| Caenorhabditis elegans    | -                                                 | 2 | F:GO:0015299;<br>P:GO:0006812                                                                                      | -                                                                                |                             | IPR004709; IPR006153; IPR018413; IPR018422                                                                                                                                                       |
| Caenorhabditis brenneri   | linker histone h1 and h5 family protein           | 4 | C:GO:0000786;<br>F:GO:0003677;<br>P:GO:0006334;<br>C:GO:0005634                                                    | -                                                                                |                             | IPR005818; IPR011991; PTHR11467 (PANTHER), SSF46785 (SUPERFAMILY)                                                                                                                                |
|                           | -                                                 | 0 |                                                                                                                    |                                                                                  |                             | SignalP (SIGNALP)                                                                                                                                                                                |
| Caenorhabditis elegans    | atp-binding sub-family c (cfr mrp) member 4       | 6 | P:GO:0055085;<br>C:GO:0031088;<br>F:GO:0022857;<br>C:GO:0005624;<br>F:GO:0003824;<br>C:GO:0005886                  | -                                                                                |                             | IPR001140; IPR003439; IPR003593; IPR011527; IPR017871; IPR017940; G3DSA:1.20.1560.10 (GENE3D), G3DSA:3.40.50.300 (GENE3D), PTHR19242 (PANTHER), PTHR19242:SF97 (PANTHER), SSF52540 (SUPERFAMILY) |
|                           | -                                                 | 0 |                                                                                                                    |                                                                                  |                             | SignalP (SIGNALP)                                                                                                                                                                                |
| Caenorhabditis briggsae   | dehydroge-se reductase (sdr family) member 4      | 7 | P:GO:0042574;<br>F:GO:0005488;<br>C:GO:0005777;<br>P:GO:0009239;<br>P:GO:0055114;<br>F:GO:0008667;<br>F:GO:0001758 | -                                                                                | EC:1.3.1.28;<br>EC:1.2.1.36 | IPR002198; IPR002347; IPR016040; PTHR19410:SF67 (PANTHER), SSF51735 (SUPERFAMILY)                                                                                                                |
|                           | -                                                 | 0 |                                                                                                                    |                                                                                  |                             | SignalP (SIGNALP)                                                                                                                                                                                |
| Caenorhabditis elegans    | acyl- synthetase long-chain family member 1       | 7 | C:GO:0005829;<br>C:GO:0043231;<br>P:GO:0046320;<br>C:GO:0044446;<br>P:GO:0007586;<br>C:GO:0031090;<br>F:GO:0004467 | -                                                                                | EC:6.2.1.3                  | IPR000873; IPR020459; IPR020845; G3DSA:3.40.50.980 (GENE3D), PTHR11968 (PANTHER), PTHR11968:SF8 (PANTHER), SSF56801 (SUPERFAMILY)                                                                |

|                         |                                                            |    |                                                                                                                                                                                                                                                                                              |                                                |                                   |                                                                                                                                               |
|-------------------------|------------------------------------------------------------|----|----------------------------------------------------------------------------------------------------------------------------------------------------------------------------------------------------------------------------------------------------------------------------------------------|------------------------------------------------|-----------------------------------|-----------------------------------------------------------------------------------------------------------------------------------------------|
| Caenorhabditis elegans  | acyl- synthetase long-chain family member 1                | 7  | C:GO:0005829;<br>C:GO:0043231;<br>P:GO:0046320;<br>C:GO:0044446;<br>P:GO:0007586;<br>C:GO:0031090;<br>F:GO:0004467                                                                                                                                                                           | -                                              | EC:6.2.1.3                        | IPR000873; IPR020459; IPR020845;<br>G3DSA:3.40.50.980 (GENE3D),<br>PTHR11968 (PANTHER),<br>PTHR11968:SF8 (PANTHER), SSF56801<br>(SUPERFAMILY) |
| Caenorhabditis elegans  | elegans protein partially confirmed by transcript evidence | 1  | P:GO:0009792                                                                                                                                                                                                                                                                                 | -                                              |                                   | IPR008574                                                                                                                                     |
| Caenorhabditis briggsae | gex interacting protein family member (gei-16)             | 1  | F:GO:0005515                                                                                                                                                                                                                                                                                 | -                                              |                                   | -                                                                                                                                             |
|                         | -                                                          | 0  |                                                                                                                                                                                                                                                                                              |                                                |                                   | -                                                                                                                                             |
| Caenorhabditis briggsae | glucosamine-6-phosphate isomerase 2                        | 5  | C:GO:0005737;<br>F:GO:0016787;<br>P:GO:0006044;<br>F:GO:0005515;<br>F:GO:0004342                                                                                                                                                                                                             | -                                              | EC:3.5.99.6                       | IPR004547; IPR006148; IPR018321;<br>G3DSA:3.40.50.1360 (GENE3D),<br>SSF100950 (SUPERFAMILY)                                                   |
|                         | -                                                          | 0  |                                                                                                                                                                                                                                                                                              |                                                |                                   | -                                                                                                                                             |
| Caenorhabditis briggsae | r- polymerase ii subunit a c-termi-l domain phosphatase    | 1  | C:GO:0005622                                                                                                                                                                                                                                                                                 | -                                              |                                   | G3DSA:3.40.50.1000 (GENE3D),<br>PTHR23081 (PANTHER)                                                                                           |
| Caenorhabditis briggsae | zinc finger protein                                        | 0  |                                                                                                                                                                                                                                                                                              | F:GO:0003676;<br>F:GO:0008270;<br>C:GO:0005622 |                                   | IPR007087; IPR015880                                                                                                                          |
| Haemonchus contortus    | nicotinic acetylcholine receptor alpha subunit             | 6  | F:GO:0004872;<br>C:GO:0045211;<br>C:GO:0030054;<br>P:GO:0006811;<br>C:GO:0016021;<br>F:GO:0004889                                                                                                                                                                                            | -                                              |                                   | IPR002394; IPR006029; IPR006201;<br>IPR006202; IPR018000;<br>G3DSA:1.20.120.370 (GENE3D),<br>PTHR18945:SF88 (PANTHER), SignalP<br>(SIGNALP)   |
| Caenorhabditis elegans  | phosphatidylinositol 3- alpha polypeptide                  | 17 | P:GO:0008340;<br>P:GO:0043491;<br>C:GO:0005942;<br>F:GO:0043560;<br>F:GO:0046934;<br>P:GO:0007611;<br>P:GO:0000003;<br>P:GO:0050920;<br>P:GO:0043053;<br>P:GO:0006916;<br>F:GO:0016303;<br>F:GO:0000166;<br>P:GO:0006006;<br>P:GO:0009792;<br>C:GO:0030027;<br>P:GO:0040014;<br>P:GO:0006468 | -                                              | EC:2.7.1.153<br>;<br>EC:2.7.1.137 | IPR000403; IPR001263; IPR011009;<br>IPR015433; IPR016024; IPR018936;<br>G3DSA:3.30.1010.10 (GENE3D),<br>PTHR10048:SF14 (PANTHER)              |



|                             |                                                             |    |                                                                                                                                                                                                                                                                                                               |                                                                                                   |                                                                                                                                               |
|-----------------------------|-------------------------------------------------------------|----|---------------------------------------------------------------------------------------------------------------------------------------------------------------------------------------------------------------------------------------------------------------------------------------------------------------|---------------------------------------------------------------------------------------------------|-----------------------------------------------------------------------------------------------------------------------------------------------|
| Caenorhabditis briggsae     | cytochrome c oxidase assembly                               | 18 | P:GO:0006367;<br>P:GO:0045941;<br>P:GO:0040007;<br>P:GO:0006898;<br>C:GO:0016021;<br>F:GO:0003743;<br>F:GO:0016531;<br>F:GO:0016563;<br>F:GO:0003702;<br>P:GO:0045454;<br>P:GO:0008535;<br>P:GO:0009792;<br>F:GO:0003677;<br>P:GO:0002119;<br>F:GO:0003824;<br>C:GO:0005634;<br>P:GO:0040035;<br>C:GO:0005739 | -                                                                                                 | IPR003782; IPR012335; IPR012336                                                                                                               |
| -                           | -                                                           | 0  |                                                                                                                                                                                                                                                                                                               |                                                                                                   | -                                                                                                                                             |
| -                           | -                                                           | 0  |                                                                                                                                                                                                                                                                                                               |                                                                                                   | -                                                                                                                                             |
| -                           | -                                                           | 0  |                                                                                                                                                                                                                                                                                                               |                                                                                                   | -                                                                                                                                             |
| Brugia malayi               | mrg family protein                                          | 0  |                                                                                                                                                                                                                                                                                                               | F:GO:0016740;<br>F:GO:0003682;<br>C:GO:0000785;<br>P:GO:0006333;<br>C:GO:0005634                  | IPR000953; IPR008676; IPR016197;<br>G3DSA:2.30.30.270 (GENE3D),<br>PF11717 (PFAM)                                                             |
| -                           | -                                                           | 0  |                                                                                                                                                                                                                                                                                                               |                                                                                                   | -                                                                                                                                             |
| Caenorhabditis briggsae     | cleavage and polyadenylation specific factor 3-like         | 4  | C:GO:0005737;<br>F:GO:0016787;<br>P:GO:0016180;<br>C:GO:0032039                                                                                                                                                                                                                                               | -                                                                                                 | G3DSA:3.60.15.10 (GENE3D),<br>PTHR11203 (PANTHER),<br>PTHR11203:SF8 (PANTHER), SSF56281<br>(SUPERFAMILY)                                      |
| -                           | -                                                           | 0  |                                                                                                                                                                                                                                                                                                               |                                                                                                   | -                                                                                                                                             |
| -                           | -                                                           | 0  |                                                                                                                                                                                                                                                                                                               |                                                                                                   | -                                                                                                                                             |
| -                           | -                                                           | 0  |                                                                                                                                                                                                                                                                                                               |                                                                                                   | -                                                                                                                                             |
| -                           | -                                                           | 0  |                                                                                                                                                                                                                                                                                                               |                                                                                                   | -                                                                                                                                             |
| Caenorhabditis briggsae     | symplekin                                                   | 0  |                                                                                                                                                                                                                                                                                                               | P:GO:0006629;<br>F:GO:0005488;<br>C:GO:0005737;<br>F:GO:0004629;<br>P:GO:0006397;<br>C:GO:0005634 | IPR022075; PTHR15245 (PANTHER),<br>PTHR15245:SF2 (PANTHER)                                                                                    |
| -                           | -                                                           | 0  |                                                                                                                                                                                                                                                                                                               |                                                                                                   | -                                                                                                                                             |
| Candida tropicalis MYA-3404 | predicted protein [Candida tropicalis MYA-3404]             | 0  |                                                                                                                                                                                                                                                                                                               |                                                                                                   | -                                                                                                                                             |
| -                           | -                                                           | 0  |                                                                                                                                                                                                                                                                                                               |                                                                                                   | -                                                                                                                                             |
| Caenorhabditis elegans      | nuclear nucleolar gtp-binding protein family member (ngp-1) | 6  | P:GO:0040035;<br>P:GO:0009792;<br>P:GO:0002119;<br>F:GO:0005525;<br>C:GO:0005622;<br>P:GO:0040010                                                                                                                                                                                                             | -                                                                                                 | IPR002917; IPR006073; IPR012971;<br>G3DSA:3.40.50.300 (GENE3D),<br>PTHR11089 (PANTHER),<br>PTHR11089:SF9 (PANTHER), SSF52540<br>(SUPERFAMILY) |
| -                           | -                                                           | 0  |                                                                                                                                                                                                                                                                                                               |                                                                                                   | -                                                                                                                                             |
| Caenorhabditis elegans      | hypothetical protein F45E1.1 [Caenorhabditis elegans]       | 0  |                                                                                                                                                                                                                                                                                                               |                                                                                                   | -                                                                                                                                             |
| Loa loa                     | transmembrane protein 129 precursor                         | 0  |                                                                                                                                                                                                                                                                                                               | C:GO:0016021;<br>C:GO:0016020                                                                     | IPR018801                                                                                                                                     |
| -                           | -                                                           | 0  |                                                                                                                                                                                                                                                                                                               |                                                                                                   | -                                                                                                                                             |
| -                           | -                                                           | 0  |                                                                                                                                                                                                                                                                                                               |                                                                                                   | -                                                                                                                                             |

|                         |                                                           |    |                                                                                                                                                                                                                                                                                                                                                                                                                                                                                          |   |              |                                                                                                                                                                                    |
|-------------------------|-----------------------------------------------------------|----|------------------------------------------------------------------------------------------------------------------------------------------------------------------------------------------------------------------------------------------------------------------------------------------------------------------------------------------------------------------------------------------------------------------------------------------------------------------------------------------|---|--------------|------------------------------------------------------------------------------------------------------------------------------------------------------------------------------------|
| Caenorhabditis elegans  | kh domain containing protein                              | 1  | F:GO:0005515                                                                                                                                                                                                                                                                                                                                                                                                                                                                             | - |              | IPR004087; IPR004088; IPR016021; IPR018111; G3DSA:3.30.1370.10 (GENE3D), PTHR20849 (PANTHER), SSF54791 (SUPERFAMILY)                                                               |
| Caenorhabditis elegans  | kh domain containing protein                              | 1  | F:GO:0005515                                                                                                                                                                                                                                                                                                                                                                                                                                                                             | - |              | IPR004087; IPR004088; IPR016021; IPR018111; G3DSA:3.30.1370.10 (GENE3D), PTHR20849 (PANTHER), SSF54791 (SUPERFAMILY)                                                               |
| Caenorhabditis elegans  | kh domain containing protein                              | 1  | F:GO:0005515                                                                                                                                                                                                                                                                                                                                                                                                                                                                             | - |              | IPR004087; IPR004088; IPR016021; IPR018111; G3DSA:3.30.1370.10 (GENE3D), PTHR20849 (PANTHER), SSF54791 (SUPERFAMILY)                                                               |
|                         | -                                                         | 0  |                                                                                                                                                                                                                                                                                                                                                                                                                                                                                          |   |              | SignalP (SIGNALP)                                                                                                                                                                  |
| Caenorhabditis briggsae | scavenger receptor class a- c-type lectin (agap009143-pa) | 2  | F:GO:0004872;<br>F:GO:0005488                                                                                                                                                                                                                                                                                                                                                                                                                                                            | - |              | IPR001190; IPR006626; IPR017448; G3DSA:3.10.250.10 (GENE3D), PTHR19331 (PANTHER), PTHR19331:SF24 (PANTHER)                                                                         |
| Caenorhabditis elegans  | pmr-type golgi atpase family member (pmr-1)               | 0  |                                                                                                                                                                                                                                                                                                                                                                                                                                                                                          |   |              | -                                                                                                                                                                                  |
| Caenorhabditis elegans  | protein ki-se family member (kin-1)                       | 30 | F:GO:0005727;<br>C:GO:0005654;<br>P:GO:0007243;<br>P:GO:0018991;<br>C:GO:0031594;<br>F:GO:0019901;<br>P:GO:0071374;<br>P:GO:0046777;<br>C:GO:0005624;<br>P:GO:0009755;<br>C:GO:0005794;<br>P:GO:0034199;<br>P:GO:0046827;<br>C:GO:0005829;<br>P:GO:0051447;<br>P:GO:0018105;<br>P:GO:0002009;<br>P:GO:0043457;<br>C:GO:0005952;<br>P:GO:0002119;<br>C:GO:0048471;<br>F:GO:0032403;<br>P:GO:0001707;<br>P:GO:0051966;<br>F:GO:0004862;<br>C:GO:0005886;<br>C:GO:0005625;<br>F:GO:0005524; | - | EC:2.7.11.11 | IPR000719; IPR000961; IPR002290; IPR008271; IPR011009; IPR017441; IPR017442; G3DSA:1.10.510.10 (GENE3D), G3DSA:3.30.200.20 (GENE3D), PTHR22985 (PANTHER), PTHR22985:SF84 (PANTHER) |
|                         | -                                                         | 0  |                                                                                                                                                                                                                                                                                                                                                                                                                                                                                          |   |              | -                                                                                                                                                                                  |
|                         | -                                                         | 0  |                                                                                                                                                                                                                                                                                                                                                                                                                                                                                          |   |              | -                                                                                                                                                                                  |

|                               |                                                                  |    |                                                                                                                                                                                                                          |   |                               |                                                                                                                  |
|-------------------------------|------------------------------------------------------------------|----|--------------------------------------------------------------------------------------------------------------------------------------------------------------------------------------------------------------------------|---|-------------------------------|------------------------------------------------------------------------------------------------------------------|
| Caenorhabditis elegans        | myo-inositol oxyge-se                                            | 12 | C:GO:0005737;<br>P:GO:0048016;<br>P:GO:0009992;<br>P:GO:0016044;<br>F:GO:0050661;<br>C:GO:0016234;<br>F:GO:0005506;<br>P:GO:0055114;<br>F:GO:0004033;<br>F:GO:0016651;<br>P:GO:0019310;<br>F:GO:0050113                  | - | EC:1.13.99.1                  | IPR007828; SSF109604 (SUPERFAMILY)                                                                               |
| Dictyostelium discoideum AX4  | hypothetical protein DDB_G0281503 [Dictyostelium discoideum AX4] | 0  |                                                                                                                                                                                                                          |   |                               | SignalP (SIGNALP)                                                                                                |
| Loa loa                       | cajaln 2-like                                                    | 0  |                                                                                                                                                                                                                          |   |                               | -                                                                                                                |
| Brugia malayi                 | proteasome ( macropain) 26s non- 13                              | 6  | C:GO:0000502;<br>P:GO:0051436;<br>P:GO:0051437;<br>P:GO:0031145;<br>P:GO:0007127;<br>F:GO:0005515                                                                                                                        | - |                               | PTHR10539 (PANTHER)                                                                                              |
| Caenorhabditis briggsae       | eukaryotic translation initiation factor 3 subunit g             | 13 | F:GO:0003743;<br>P:GO:0006413;<br>C:GO:0005829;<br>P:GO:0040010;<br>F:GO:0003723;<br>F:GO:0008270;<br>P:GO:0000003;<br>C:GO:0005852;<br>P:GO:0010171;<br>P:GO:0002119;<br>F:GO:0005515;<br>F:GO:0000166;<br>P:GO:0009792 | - |                               | IPR000504; IPR001878; IPR012677;<br>IPR013084; PTHR10352 (PANTHER),<br>PF12353 (PFAM), SSF54928<br>(SUPERFAMILY) |
| Teladorsagia circumcincta     | nicotinic acetylcholine receptor non-alpha subunit               | 6  | F:GO:0004872;<br>C:GO:0045211;<br>C:GO:0030054;<br>P:GO:0006811;<br>C:GO:0016021;<br>F:GO:0004889                                                                                                                        | - |                               | -                                                                                                                |
| Caenorhabditis briggsae       | transcription initiation factor tfiid subunit 1                  | 6  | P:GO:0006357;<br>F:GO:0008270;<br>F:GO:0003676;<br>F:GO:0016563;<br>F:GO:0017025;<br>P:GO:0007140                                                                                                                        | - |                               | PTHR13900 (PANTHER)                                                                                              |
| Angiostrongylus cantonensis   | elegans protein confirmed by transcript evidence                 | 0  |                                                                                                                                                                                                                          |   | C:GO:0016021;<br>F:GO:0042302 | -                                                                                                                |
| -                             | -                                                                | 0  |                                                                                                                                                                                                                          |   |                               | -                                                                                                                |
| Loa loa                       | agc dmpk gek protein ki-se                                       | 0  |                                                                                                                                                                                                                          |   |                               | -                                                                                                                |
| -                             | -                                                                | 0  |                                                                                                                                                                                                                          |   |                               | -                                                                                                                |
| -                             | -                                                                | 0  |                                                                                                                                                                                                                          |   |                               | -                                                                                                                |
| Loa loa                       | twik (kcnk-like) family of potasium alpha subunit 40             | 3  | C:GO:0016021;<br>P:GO:0006813;<br>F:GO:0005267                                                                                                                                                                           | - |                               | -                                                                                                                |
| Xenopus (Silurana) tropicalis | bromodomain containing 3                                         | 0  |                                                                                                                                                                                                                          |   |                               | -                                                                                                                |
| -                             | -                                                                | 0  |                                                                                                                                                                                                                          |   |                               | -                                                                                                                |

|                         |                                                                             |   |                                                                                                                                     |                                                                                                                                                                                        |             |                                                                                                                     |
|-------------------------|-----------------------------------------------------------------------------|---|-------------------------------------------------------------------------------------------------------------------------------------|----------------------------------------------------------------------------------------------------------------------------------------------------------------------------------------|-------------|---------------------------------------------------------------------------------------------------------------------|
|                         | -                                                                           | 0 |                                                                                                                                     |                                                                                                                                                                                        |             | -                                                                                                                   |
|                         | -                                                                           | 0 |                                                                                                                                     |                                                                                                                                                                                        |             | SignalP (SIGNALP)                                                                                                   |
| Caenorhabditis elegans  | cytochrome p450 family member (cyp-13b1)                                    | 2 | F:GO:0016491;<br>F:GO:0005506                                                                                                       | -                                                                                                                                                                                      |             | -                                                                                                                   |
|                         | -                                                                           | 0 |                                                                                                                                     |                                                                                                                                                                                        |             | -                                                                                                                   |
| Caenorhabditis briggsae | uncoordinated family member (unc-22)                                        | 3 | P:GO:0006468;<br>F:GO:0005524;<br>F:GO:0004674                                                                                      | -                                                                                                                                                                                      | EC:2.7.11.0 | IPR007110; IPR013098; IPR013783;<br>PTHR19897 (PANTHER), SSF48726<br>(SUPERFAMILY)                                  |
| Caenorhabditis elegans  | mgc81819 protein                                                            | 1 | F:GO:0016787                                                                                                                        | -                                                                                                                                                                                      |             | SSF56235 (SUPERFAMILY)                                                                                              |
|                         | -                                                                           | 0 |                                                                                                                                     |                                                                                                                                                                                        |             | -                                                                                                                   |
| Brugia malayi           | establishment of cohesion 1 homolog 2 ( cerevisiae)                         | 0 |                                                                                                                                     | F:GO:0016740;<br>F:GO:0003684;<br>C:GO:0005634;<br>F:GO:0003887;<br>F:GO:0003674;<br>P:GO:0006281;<br>C:GO:0005575;<br>F:GO:0008415;<br>F:GO:0046872;<br>P:GO:0007049;<br>P:GO:0008150 |             | IPR001126; PTHR11076:SF5<br>(PANTHER)                                                                               |
|                         | -                                                                           | 0 |                                                                                                                                     |                                                                                                                                                                                        |             | -                                                                                                                   |
| Caenorhabditis elegans  | probable dolichyl pyrophosphate glc1man9 c2 alpha- -<br>glucosyltransferase | 3 | F:GO:0000033;<br>P:GO:0006487;<br>C:GO:0016020                                                                                      | -                                                                                                                                                                                      |             | IPR004856; SignalP (SIGNALP)                                                                                        |
|                         | -                                                                           | 0 |                                                                                                                                     |                                                                                                                                                                                        |             | -                                                                                                                   |
| Caenorhabditis elegans  | uncharacterized protein                                                     | 2 | F:GO:0046872;<br>F:GO:0003824                                                                                                       | -                                                                                                                                                                                      |             | -                                                                                                                   |
| Caenorhabditis elegans  | elegans protein partially confirmed by transcript evidence                  | 1 | P:GO:0000003                                                                                                                        | -                                                                                                                                                                                      |             | IPR013568                                                                                                           |
|                         | -                                                                           | 0 |                                                                                                                                     |                                                                                                                                                                                        |             | SignalP (SIGNALP)                                                                                                   |
|                         | -                                                                           | 0 |                                                                                                                                     |                                                                                                                                                                                        |             | -                                                                                                                   |
| Caenorhabditis elegans  | cationic amino acid transporter                                             | 5 | P:GO:0019915;<br>C:GO:0016021;<br>P:GO:0006865;<br>F:GO:0015171;<br>P:GO:0055085                                                    | -                                                                                                                                                                                      |             | IPR002293; IPR004841; IPR015606;<br>SignalP (SIGNALP)                                                               |
| Loa loa                 | r- polymerase ii associated homolog ( cerevisiae)                           | 8 | C:GO:0016593;<br>P:GO:0010390;<br>F:GO:0005515;<br>P:GO:0007031;<br>P:GO:0033523;<br>P:GO:0065007;<br>C:GO:0005779;<br>P:GO:0044249 | -                                                                                                                                                                                      |             | IPR007133; PTHR23188:SF8<br>(PANTHER)                                                                               |
| Caenorhabditis elegans  | lim domain family member (lim-9)                                            | 4 | F:GO:0003700;<br>C:GO:0005634;<br>F:GO:0008270;<br>F:GO:0016740                                                                     | -                                                                                                                                                                                      |             | IPR001781; PTHR18973 (PANTHER),<br>PTHR18973:SF104 (PANTHER),<br>SSF57716 (SUPERFAMILY)                             |
| Caenorhabditis elegans  | lim domain family member (lim-9)                                            | 4 | F:GO:0003700;<br>C:GO:0005634;<br>F:GO:0008270;<br>F:GO:0016740                                                                     | -                                                                                                                                                                                      |             | IPR001781; PTHR18973 (PANTHER),<br>PTHR18973:SF104 (PANTHER),<br>SSF57716 (SUPERFAMILY)                             |
|                         | -                                                                           | 0 |                                                                                                                                     |                                                                                                                                                                                        |             | -                                                                                                                   |
| Gnathostoma spinigerum  | tryptase alpha beta 1-like                                                  | 1 | F:GO:0016787                                                                                                                        | -                                                                                                                                                                                      |             | IPR001254; IPR009003; IPR018114;<br>G3DSA:2.40.10.10 (GENE3D),<br>PTHR19355 (PANTHER),<br>PTHR19355:SF174 (PANTHER) |

|                         |                                                       |    |                                                                                                                                                                                                                          |   |             |                                                                                                                                                          |
|-------------------------|-------------------------------------------------------|----|--------------------------------------------------------------------------------------------------------------------------------------------------------------------------------------------------------------------------|---|-------------|----------------------------------------------------------------------------------------------------------------------------------------------------------|
| Gnathostoma spinigerum  | trypsin alpha beta 1-like                             | 2  | P:GO:0006811;<br>F:GO:0008236                                                                                                                                                                                            | - |             | IPR001254; IPR009003; IPR018114;<br>G3DSA:2.40.10.10 (GENE3D),<br>PTHR19355 (PANTHER),<br>PTHR19355:SF174 (PANTHER)                                      |
|                         | -                                                     | 0  |                                                                                                                                                                                                                          |   |             | SignalP (SIGNALP)                                                                                                                                        |
|                         | -                                                     | 0  |                                                                                                                                                                                                                          |   |             | -                                                                                                                                                        |
|                         | -                                                     | 0  |                                                                                                                                                                                                                          |   |             | -                                                                                                                                                        |
| Dictyocaulus viviparus  | glyceraldehyde-3-phosphate dehydrogenase              | 12 | F:GO:0004365;<br>P:GO:0008340;<br>P:GO:0055114;<br>F:GO:0051287;<br>P:GO:0019915;<br>P:GO:0002119;<br>F:GO:0005515;<br>P:GO:0006096;<br>P:GO:0009792;<br>P:GO:0008406;<br>C:GO:0005737;<br>P:GO:0040018                  | - | EC:1.2.1.12 | IPR006424; IPR016040; IPR020828;<br>IPR020829; IPR020830; IPR020831;<br>G3DSA:3.30.360.10 (GENE3D),<br>SSF51735 (SUPERFAMILY), SSF55347<br>(SUPERFAMILY) |
| Brugia malayi           | protein hira                                          | 7  | P:GO:0040010;<br>P:GO:0007369;<br>C:GO:0000790;<br>P:GO:0000003;<br>F:GO:0005515;<br>P:GO:0009792;<br>P:GO:0006350                                                                                                       | - |             | IPR001680; IPR011046; IPR015943;<br>IPR017986; IPR019775; IPR019781;<br>IPR019782; PTHR13831 (PANTHER)                                                   |
| Caenorhabditis elegans  | atpase family aaa domain-containing protein 3         | 13 | C:GO:0032133;<br>F:GO:0017111;<br>P:GO:0000910;<br>P:GO:0007423;<br>P:GO:0016572;<br>P:GO:0007052;<br>F:GO:0005524;<br>C:GO:0005938;<br>C:GO:0000785;<br>P:GO:0000236;<br>P:GO:0045448;<br>C:GO:0051233;<br>P:GO:0008104 | - | EC:3.6.1.15 | IPR021911; PTHR23075 (PANTHER)                                                                                                                           |
| Ustilago maydis 521     | hypothetical protein UM02748.1 [Ustilago maydis 521]  | 0  |                                                                                                                                                                                                                          |   |             | IPR001878; IPR013084; SSF57756<br>(SUPERFAMILY)                                                                                                          |
|                         | -                                                     | 0  |                                                                                                                                                                                                                          |   |             | -                                                                                                                                                        |
|                         | -                                                     | 0  |                                                                                                                                                                                                                          |   |             | -                                                                                                                                                        |
|                         | -                                                     | 0  |                                                                                                                                                                                                                          |   |             | SignalP (SIGNALP)                                                                                                                                        |
| Caenorhabditis briggsae | u493_caebr ame: full=upf0493 protein cbg04313         | 1  | P:GO:0040011                                                                                                                                                                                                             | - |             | -                                                                                                                                                        |
| Caenorhabditis elegans  | hypothetical protein T10E9.2 [Caenorhabditis elegans] | 0  |                                                                                                                                                                                                                          |   |             | -                                                                                                                                                        |
|                         | -                                                     | 0  |                                                                                                                                                                                                                          |   |             | -                                                                                                                                                        |

|                         |                                                                                           |    |                                                                                                                                                                                                                                                                                              |                                                                                                                                                                                                                                           |            |                                                                                                                                                       |
|-------------------------|-------------------------------------------------------------------------------------------|----|----------------------------------------------------------------------------------------------------------------------------------------------------------------------------------------------------------------------------------------------------------------------------------------------|-------------------------------------------------------------------------------------------------------------------------------------------------------------------------------------------------------------------------------------------|------------|-------------------------------------------------------------------------------------------------------------------------------------------------------|
| Caenorhabditis elegans  | kynureni-se (l-kynurenine hydrolase)                                                      | 9  | C:GO:0005829;<br>C:GO:0005625;<br>C:GO:0005739;<br>P:GO:0019441;<br>P:GO:0009435;<br>P:GO:0042221;<br>F:GO:0030429;<br>F:GO:0030170;<br>P:GO:0019442                                                                                                                                         | -                                                                                                                                                                                                                                         | EC:3.7.1.3 | IPR000192; IPR010111; IPR015421;<br>IPR015424                                                                                                         |
| -                       | -                                                                                         | 0  |                                                                                                                                                                                                                                                                                              |                                                                                                                                                                                                                                           |            | -                                                                                                                                                     |
| Caenorhabditis briggsae | pre-mr-processing-splicing factor 8                                                       | 17 | P:GO:0050896;<br>F:GO:0003723;<br>C:GO:0005681;<br>P:GO:0045132;<br>P:GO:0040007;<br>C:GO:0016607;<br>P:GO:0040027;<br>P:GO:0040035;<br>P:GO:0018996;<br>P:GO:0007601;<br>F:GO:0005515;<br>P:GO:0040011;<br>P:GO:0000398;<br>C:GO:0005682;<br>P:GO:0006898;<br>P:GO:0002009;<br>P:GO:0009792 | -                                                                                                                                                                                                                                         |            | IPR000555; IPR012984; IPR019580;<br>IPR021983; PTHR11140 (PANTHER)                                                                                    |
| Loa loa                 | hypothetical protein LOAG_00279 [Loa loa]                                                 | 0  |                                                                                                                                                                                                                                                                                              |                                                                                                                                                                                                                                           |            | -                                                                                                                                                     |
| -                       | -                                                                                         | 0  |                                                                                                                                                                                                                                                                                              |                                                                                                                                                                                                                                           |            | -                                                                                                                                                     |
| -                       | -                                                                                         | 0  |                                                                                                                                                                                                                                                                                              |                                                                                                                                                                                                                                           |            | SignalP (SIGNALP)                                                                                                                                     |
| -                       | -                                                                                         | 0  |                                                                                                                                                                                                                                                                                              |                                                                                                                                                                                                                                           |            | SignalP (SIGNALP)                                                                                                                                     |
| Caenorhabditis elegans  | elegans protein partially confirmed by transcript evidence                                | 2  | F:GO:0009055;<br>C:GO:0016020                                                                                                                                                                                                                                                                | -                                                                                                                                                                                                                                         |            | -                                                                                                                                                     |
| -                       | -                                                                                         | 0  |                                                                                                                                                                                                                                                                                              |                                                                                                                                                                                                                                           |            | -                                                                                                                                                     |
| Caenorhabditis elegans  | trrap-like (transcription transformation domain-associated protein) family member (trr-1) | 0  |                                                                                                                                                                                                                                                                                              | F:GO:0005488;<br>F:GO:0016773                                                                                                                                                                                                             |            | -                                                                                                                                                     |
| -                       | -                                                                                         | 0  |                                                                                                                                                                                                                                                                                              |                                                                                                                                                                                                                                           |            | -                                                                                                                                                     |
| Caenorhabditis briggsae | briggsae cbr-gl-1 protein                                                                 | 0  |                                                                                                                                                                                                                                                                                              | F:GO:0004970;<br>F:GO:0005216;<br>F:GO:0005215;<br>C:GO:0016021;<br>C:GO:0016020;<br>C:GO:0045202;<br>P:GO:0006811;<br>P:GO:0006810;<br>C:GO:0030054;<br>F:GO:0005234;<br>C:GO:0030288;<br>F:GO:0004872;<br>C:GO:0005886;<br>C:GO:0045211 |            | -                                                                                                                                                     |
| -                       | -                                                                                         | 0  |                                                                                                                                                                                                                                                                                              |                                                                                                                                                                                                                                           |            | -                                                                                                                                                     |
| Taeniopygia guttata     | rad51-like 3 ( cerevisiae)                                                                | 1  | P:GO:0006139                                                                                                                                                                                                                                                                                 | -                                                                                                                                                                                                                                         |            | IPR013632; IPR020588;<br>G3DSA:3.40.50.300 (GENE3D),<br>PTHR22942 (PANTHER),<br>PTHR22942:SF8 (PANTHER), SignalP<br>(SIGNALP), SSF52540 (SUPERFAMILY) |

|                         |                                                       |    |                                                                                                                                                                                                                          |                               |                                                                                                                |
|-------------------------|-------------------------------------------------------|----|--------------------------------------------------------------------------------------------------------------------------------------------------------------------------------------------------------------------------|-------------------------------|----------------------------------------------------------------------------------------------------------------|
| Caenorhabditis elegans  | elegans protein confirmed by transcript evidence      | 0  |                                                                                                                                                                                                                          | P:GO:0040011;<br>F:GO:0005515 | -                                                                                                              |
| Loa loa                 | exostosin 1                                           | 1  | C:GO:0044464                                                                                                                                                                                                             | -                             | IPR004263; IPR015338;<br>G3DSA:3.90.550.10 (GENE3D),<br>PTHR11062 (PANTHER),<br>PTHR11062:SF7 (PANTHER)        |
| Caenorhabditis briggsae | pecanex-like protein 1                                | 1  | P:GO:0040011                                                                                                                                                                                                             | -                             | PTHR12372 (PANTHER), SignalP<br>(SIGNALP)                                                                      |
| Loa loa                 | cell division cycle 16 homolog                        | 13 | C:GO:0005654;<br>P:GO:0070979;<br>P:GO:0051437;<br>C:GO:0005680;<br>P:GO:0051436;<br>C:GO:0005829;<br>P:GO:0009792;<br>P:GO:0007067;<br>C:GO:0005813;<br>P:GO:0007126;<br>C:GO:0005876;<br>P:GO:0031145;<br>P:GO:0040035 | -                             | IPR011990; IPR013026; IPR019734;<br>PTHR12558 (PANTHER),<br>PTHR12558:SF9 (PANTHER), SSF48452<br>(SUPERFAMILY) |
| Caenorhabditis briggsae | tho complex 2 isoform 1                               | 8  | P:GO:0045132;<br>P:GO:0040007;<br>C:GO:0000445;<br>P:GO:0010171;<br>P:GO:0002119;<br>F:GO:0005515;<br>P:GO:0040011;<br>P:GO:0046784                                                                                      | -                             | PTHR21597 (PANTHER)                                                                                            |
| -                       | -                                                     | 0  |                                                                                                                                                                                                                          |                               | -                                                                                                              |
| -                       | -                                                     | 0  |                                                                                                                                                                                                                          |                               | -                                                                                                              |
| -                       | -                                                     | 0  |                                                                                                                                                                                                                          |                               | IPR002666; PTHR10686:SF6<br>(PANTHER), SignalP (SIGNALP)                                                       |
| -                       | -                                                     | 0  |                                                                                                                                                                                                                          |                               | SignalP (SIGNALP)                                                                                              |
| -                       | -                                                     | 0  |                                                                                                                                                                                                                          |                               | -                                                                                                              |
| Caenorhabditis elegans  | solute carrier family 25 member 3                     | 9  | P:GO:0040035;<br>P:GO:0009792;<br>P:GO:0002119;<br>F:GO:0005488;<br>C:GO:0005743;<br>P:GO:0055085;<br>P:GO:0040010;<br>P:GO:0008340;<br>C:GO:0016021                                                                     | -                             | IPR001993; IPR018108;<br>G3DSA:1.50.40.10 (GENE3D),<br>PTHR11896:SF22 (PANTHER)                                |
| Caenorhabditis elegans  | solute carrier family 25 member 3                     | 9  | P:GO:0040035;<br>P:GO:0009792;<br>P:GO:0002119;<br>F:GO:0005488;<br>C:GO:0005743;<br>P:GO:0055085;<br>P:GO:0040010;<br>P:GO:0008340;<br>C:GO:0016021                                                                     | -                             | IPR001993; IPR018108;<br>G3DSA:1.50.40.10 (GENE3D),<br>PTHR11896:SF22 (PANTHER)                                |
| Ancylostoma ceylanicum  | spindle assembly abnormal protein sas-5               | 0  |                                                                                                                                                                                                                          |                               | -                                                                                                              |
| -                       | -                                                     | 0  |                                                                                                                                                                                                                          |                               | -                                                                                                              |
| -                       | -                                                     | 0  |                                                                                                                                                                                                                          |                               | -                                                                                                              |
| Caenorhabditis elegans  | hypothetical protein F52H2.7 [Caenorhabditis elegans] | 0  |                                                                                                                                                                                                                          |                               | -                                                                                                              |

|                         |                                                                         |    |                                                                                                                                                                                                                                                                             |                               |             |                                                                                                                                          |
|-------------------------|-------------------------------------------------------------------------|----|-----------------------------------------------------------------------------------------------------------------------------------------------------------------------------------------------------------------------------------------------------------------------------|-------------------------------|-------------|------------------------------------------------------------------------------------------------------------------------------------------|
| Caenorhabditis elegans  | suppressor with morphological effect on genitalia family member (smg-1) | 0  |                                                                                                                                                                                                                                                                             |                               |             | SignalP (SIGNALP)                                                                                                                        |
| -                       | -                                                                       | 0  |                                                                                                                                                                                                                                                                             |                               |             | -                                                                                                                                        |
| Caenorhabditis briggsae | briggsae cbr-ugt-54 protein                                             | 0  |                                                                                                                                                                                                                                                                             | P:GO:0008152;<br>F:GO:0016758 |             | -                                                                                                                                        |
| -                       | -                                                                       | 0  |                                                                                                                                                                                                                                                                             |                               |             | -                                                                                                                                        |
| Brugia malayi           | hydroxysteroid (17-beta) dehydroge-se 13                                | 4  | P:GO:0055114;<br>F:GO:0016491;<br>F:GO:0005488;<br>P:GO:0009058                                                                                                                                                                                                             | -                             |             | IPR002198; IPR002347; IPR016040;<br>PTHR19410:SF36 (PANTHER),<br>SSF51735 (SUPERFAMILY)                                                  |
| Caenorhabditis briggsae | tm104_caebr ame: full=transmembrane protein 104 homolog                 | 1  | C:GO:0016020                                                                                                                                                                                                                                                                | -                             |             | IPR013057; PTHR16189 (PANTHER)                                                                                                           |
| -                       | -                                                                       | 0  |                                                                                                                                                                                                                                                                             |                               |             | IPR018544                                                                                                                                |
| Caenorhabditis briggsae | cysteine-rich protein 1                                                 | 4  | F:GO:0008270;<br>F:GO:0005515;<br>C:GO:0005737;<br>P:GO:0008283                                                                                                                                                                                                             | -                             |             | -                                                                                                                                        |
| Caenorhabditis briggsae | histone deacetylase 1                                                   | 16 | P:GO:0008340;<br>F:GO:0004407;<br>F:GO:0003714;<br>P:GO:0048813;<br>P:GO:0016575;<br>C:GO:0035098;<br>C:GO:0016581;<br>P:GO:0007517;<br>P:GO:0006342;<br>P:GO:0006099;<br>C:GO:0005705;<br>C:GO:0016580;<br>P:GO:0007350;<br>P:GO:0048477;<br>C:GO:0031523;<br>P:GO:0022904 | -                             |             | IPR000286; IPR003084; SSF52768<br>(SUPERFAMILY)                                                                                          |
| -                       | -                                                                       | 0  |                                                                                                                                                                                                                                                                             |                               |             | SignalP (SIGNALP)                                                                                                                        |
| -                       | -                                                                       | 0  |                                                                                                                                                                                                                                                                             |                               |             | -                                                                                                                                        |
| Caenorhabditis briggsae | elegans protein partially confirmed by transcript evidence              | 1  | F:GO:0016787                                                                                                                                                                                                                                                                | -                             |             | IPR000073; G3DSA:3.40.50.1820<br>(GENE3D), PTHR12277 (PANTHER),<br>PTHR12277:SF8 (PANTHER), SignalP<br>(SIGNALP), SSF53474 (SUPERFAMILY) |
| Caenorhabditis elegans  | elegans protein confirmed by transcript evidence                        | 0  |                                                                                                                                                                                                                                                                             |                               |             | -                                                                                                                                        |
| -                       | -                                                                       | 0  |                                                                                                                                                                                                                                                                             |                               |             | -                                                                                                                                        |
| -                       | -                                                                       | 0  |                                                                                                                                                                                                                                                                             |                               |             | SignalP (SIGNALP)                                                                                                                        |
| Caenorhabditis elegans  | hypothetical kda protein in chromosome                                  | 2  | P:GO:0000003;<br>P:GO:0006898                                                                                                                                                                                                                                               | -                             |             | IPR007356; PTHR13563:SF4<br>(PANTHER)                                                                                                    |
| Caenorhabditis briggsae | briggsae cbr-acl-6 protein                                              | 6  | P:GO:0042221;<br>C:GO:0016020;<br>C:GO:0005829;<br>P:GO:0019432;<br>P:GO:0050794;<br>F:GO:0004366                                                                                                                                                                           | -                             | EC:2.3.1.15 | IPR002123; PTHR12563 (PANTHER),<br>PTHR12563:SF3 (PANTHER), SSF69593<br>(SUPERFAMILY)                                                    |
| Caenorhabditis briggsae | btb poz domain containing protein                                       | 2  | F:GO:0005515;<br>C:GO:0016021                                                                                                                                                                                                                                               | -                             |             | IPR013069                                                                                                                                |
| -                       | -                                                                       | 0  |                                                                                                                                                                                                                                                                             |                               |             | -                                                                                                                                        |
| -                       | -                                                                       | 0  |                                                                                                                                                                                                                                                                             |                               |             | -                                                                                                                                        |
| -                       | -                                                                       | 0  |                                                                                                                                                                                                                                                                             |                               |             | -                                                                                                                                        |



|                             |                                                               |  |                                                                                    |   |                                                                                                                                     |                                                                                                                                                                                |
|-----------------------------|---------------------------------------------------------------|--|------------------------------------------------------------------------------------|---|-------------------------------------------------------------------------------------------------------------------------------------|--------------------------------------------------------------------------------------------------------------------------------------------------------------------------------|
| Caenorhabditis elegans      | inin receptor homolog family member (ckr-2)                   |  | F:GO:0004983;<br>P:GO:0007165;<br>5 P:GO:0007186;<br>C:GO:0016021;<br>P:GO:0019915 | - |                                                                                                                                     | IPR000276; IPR017452;<br>G3DSA:1.20.1070.10 (GENE3D),<br>PTHR19264 (PANTHER),<br>PTHR19264:SF283 (PANTHER),<br>SSF81321 (SUPERFAMILY)                                          |
|                             | -                                                             |  | 0                                                                                  |   |                                                                                                                                     | -                                                                                                                                                                              |
| Loa loa                     | rad1 homolog                                                  |  | 1 F:GO:0005515                                                                     | - |                                                                                                                                     | IPR003021; G3DSA:3.70.10.10<br>(GENE3D), SSF55979 (SUPERFAMILY)                                                                                                                |
| Angiostrongylus cantonensis | nematode cuticle collagen n-termi-l domain containing protein |  | 1 F:GO:0042302                                                                     | - |                                                                                                                                     | IPR002486; PTHR10499 (PANTHER),<br>PTHR10499:SF58 (PANTHER), SignalP<br>(SIGNALP)                                                                                              |
| Caenorhabditis elegans      | e3 ubiquitin protein ligase                                   |  | 0                                                                                  |   | F:GO:0016874;<br>F:GO:0008270                                                                                                       | IPR011016; IPR013083; PTHR23012<br>(PANTHER), PTHR23012:SF3<br>(PANTHER)                                                                                                       |
| Bos taurus                  | ubiquitin associated and sh3 domain a                         |  | 0                                                                                  |   | P:GO:0050860;<br>C:GO:0005737;<br>C:GO:0005829;<br>P:GO:0001817;<br>C:GO:0005634                                                    | PTHR16469 (PANTHER)                                                                                                                                                            |
| Giardia lamblia ATCC 50803  | te-scin-x precursor                                           |  | 0                                                                                  |   | F:GO:0030414;<br>F:GO:0005509;<br>C:GO:0016021;<br>C:GO:0009279;<br>C:GO:0016020;<br>F:GO:0004867;<br>C:GO:0005576;<br>C:GO:0005886 | PD936484 (PRODOM)                                                                                                                                                              |
| Caenorhabditis briggsae     | atp-binding sub-family b (mdr tap) member 1                   |  | P:GO:0009792;<br>F:GO:0042626;<br>5 P:GO:0055085;<br>F:GO:0005524;<br>C:GO:0016021 | - |                                                                                                                                     | IPR001140; IPR011527; IPR017940;<br>G3DSA:1.20.1560.10 (GENE3D),<br>G3DSA:3.40.50.300 (GENE3D),<br>PTHR19242 (PANTHER),<br>PTHR19242:SF96 (PANTHER),<br>SSF52540 (SUPERFAMILY) |
| Caenorhabditis briggsae     | atp-binding sub-family b (mdr tap) member 1                   |  | P:GO:0009792;<br>F:GO:0042626;<br>5 P:GO:0055085;<br>F:GO:0005524;<br>C:GO:0016021 | - |                                                                                                                                     | IPR001140; IPR011527; IPR017940;<br>G3DSA:1.20.1560.10 (GENE3D),<br>G3DSA:3.40.50.300 (GENE3D),<br>PTHR19242 (PANTHER),<br>PTHR19242:SF96 (PANTHER),<br>SSF52540 (SUPERFAMILY) |

|                        |                                                        |    |                                                                                                                                                                                                                                                                                                                                                                                                                                                                        |             |                                                                                                                                                                            |
|------------------------|--------------------------------------------------------|----|------------------------------------------------------------------------------------------------------------------------------------------------------------------------------------------------------------------------------------------------------------------------------------------------------------------------------------------------------------------------------------------------------------------------------------------------------------------------|-------------|----------------------------------------------------------------------------------------------------------------------------------------------------------------------------|
| Caenorhabditis elegans | neural precursor cell developmentally down-regulated 4 | 27 | F:GO:0043130;<br>P:GO:0019089;<br>C:GO:0016327;<br>P:GO:0031175;<br>P:GO:0006622;<br>F:GO:0019871;<br>F:GO:0031698;<br>P:GO:0051592;<br>F:GO:0070064;<br>P:GO:0010768;<br>F:GO:0004842;<br>P:GO:0042921;<br>F:GO:0045309;<br>C:GO:0048471;<br>P:GO:0044111;<br>F:GO:0019904;<br>P:GO:0050847;<br>P:GO:0031623;<br>P:GO:0014068;<br>P:GO:0042787;<br>C:GO:0000785;<br>F:GO:0070063;<br>P:GO:0032801;<br>P:GO:0010766;<br>P:GO:0046824;<br>C:GO:0005938;<br>P:GO:0045732 | EC:6.3.2.19 | IPR000008; IPR000569; IPR001202;<br>IPR008973; IPR018029;<br>G3DSA:2.20.70.10 (GENE3D),<br>G3DSA:2.60.40.150 (GENE3D),<br>PTHR11254 (PANTHER),<br>PTHR11254:SF78 (PANTHER) |
| Caenorhabditis elegans | nedd4 protein                                          | 36 | F:GO:0005112;<br>F:GO:0043130;<br>F:GO:0050815;<br>P:GO:0019089;<br>C:GO:0016327;<br>P:GO:0006622;<br>C:GO:0005829;<br>F:GO:0019871;<br>P:GO:0002092;<br>F:GO:0031698;<br>P:GO:0030948;<br>P:GO:0051592;<br>P:GO:0016199;<br>P:GO:0070534;<br>F:GO:0070064;<br>P:GO:0051965;<br>P:GO:0010768;<br>F:GO:0004842;<br>P:GO:0042921;<br>C:GO:0048471;<br>P:GO:0044111;<br>F:GO:0019904;<br>P:GO:0050847;<br>C:GO:0000151;<br>P:GO:0014068;<br>P:GO:0042787;<br>C:GO:0000785 | EC:6.3.2.19 | IPR000008; IPR000569; IPR001202;<br>IPR008973; IPR018029;<br>G3DSA:2.20.70.10 (GENE3D),<br>G3DSA:2.60.40.150 (GENE3D),<br>PTHR11254 (PANTHER),<br>PTHR11254:SF78 (PANTHER) |
|                        | -                                                      | 0  |                                                                                                                                                                                                                                                                                                                                                                                                                                                                        |             | IPR000436; IPR016060; SignalP (SIGNALP)                                                                                                                                    |

|                             |                                                                                         |   |                                                                                                                                     |                                                                                                                    |             |                                                                                                                                |
|-----------------------------|-----------------------------------------------------------------------------------------|---|-------------------------------------------------------------------------------------------------------------------------------------|--------------------------------------------------------------------------------------------------------------------|-------------|--------------------------------------------------------------------------------------------------------------------------------|
| Loa loa                     | briggsae cbr-ced-3 protein                                                              | 8 | P:GO:0008340;<br>P:GO:0000003;<br>F:GO:0005515;<br>C:GO:0016020;<br>C:GO:0005737;<br>P:GO:0030972;<br>F:GO:0008233;<br>P:GO:0043065 | -                                                                                                                  |             | IPR001309; IPR002138; IPR002398;<br>IPR011600; IPR015917; IPR016129;<br>G3DSA:3.40.50.1460 (GENE3D),<br>SSF52129 (SUPERFAMILY) |
| Caenorhabditis elegans      | briggsae cbr-mef-2 protein                                                              | 0 |                                                                                                                                     | P:GO:0006355;<br>P:GO:0006350;<br>F:GO:0043565;<br>P:GO:0045449;<br>F:GO:0003677;<br>F:GO:0003700;<br>C:GO:0005634 |             | -                                                                                                                              |
| Caenorhabditis briggsae     | briggsae cbr-ran-5 protein                                                              | 0 |                                                                                                                                     | P:GO:0040011;<br>P:GO:0010171;<br>P:GO:0009792;<br>P:GO:0046907                                                    |             | -                                                                                                                              |
| Caenorhabditis briggsae     | atpase family aaa domain-containing protein 3                                           | 3 | F:GO:0005524;<br>F:GO:0017111;<br>C:GO:0005739                                                                                      | -                                                                                                                  | EC:3.6.1.15 | -                                                                                                                              |
| Caenorhabditis briggsae     | elegans protein partially confirmed by transcript evidence                              | 1 | F:GO:0005515                                                                                                                        | -                                                                                                                  |             | -                                                                                                                              |
| Angiostrongylus cantonensis | elegans protein confirmed by transcript evidence                                        | 0 |                                                                                                                                     |                                                                                                                    |             | SignalP (SIGNALP)                                                                                                              |
|                             | -                                                                                       | 0 |                                                                                                                                     |                                                                                                                    |             | -                                                                                                                              |
| Caenorhabditis elegans      | briggsae cbr-clc-1 protein                                                              | 2 | P:GO:0018996;<br>C:GO:0005911                                                                                                       | -                                                                                                                  |             | SignalP (SIGNALP)                                                                                                              |
|                             | -                                                                                       | 0 |                                                                                                                                     |                                                                                                                    |             | SignalP (SIGNALP)                                                                                                              |
| Caenorhabditis briggsae     | nuclear pore complex protein protein isoform partially confirmed by transcript evidence | 0 |                                                                                                                                     | C:GO:0005643;<br>P:GO:0006810                                                                                      |             | IPR007230; PTHR23198 (PANTHER)                                                                                                 |
| Caenorhabditis briggsae     | briggsae cbr-npp-10 protein                                                             | 0 |                                                                                                                                     | C:GO:0005643;<br>P:GO:0006810                                                                                      |             | -                                                                                                                              |
| Caenorhabditis elegans      | nuclear pore complex protein nup98                                                      | 0 |                                                                                                                                     | C:GO:0005643;<br>P:GO:0006810                                                                                      |             | PTHR23198 (PANTHER)                                                                                                            |
| Caenorhabditis briggsae     | nuclear pore complex protein protein isoform partially confirmed by transcript evidence | 0 |                                                                                                                                     | C:GO:0005643;<br>P:GO:0006810                                                                                      |             | IPR007230; PTHR23198 (PANTHER)                                                                                                 |
| Caenorhabditis briggsae     | nuclear pore complex protein protein isoform partially confirmed by transcript evidence | 0 |                                                                                                                                     | C:GO:0005643;<br>P:GO:0006810                                                                                      |             | IPR007230; PTHR23198 (PANTHER)                                                                                                 |
| Pongo abelii                | ribosomal protein l21-like                                                              | 4 | F:GO:0003735;<br>F:GO:0003723;<br>C:GO:0022625;<br>P:GO:0006414                                                                     | -                                                                                                                  |             | IPR001147                                                                                                                      |
|                             | -                                                                                       | 0 |                                                                                                                                     |                                                                                                                    |             | -                                                                                                                              |
| Caenorhabditis elegans      | hypothetical protein B0238.11 [Caenorhabditis elegans]                                  | 0 |                                                                                                                                     | P:GO:0000003;<br>P:GO:0040035;<br>P:GO:0006898;<br>P:GO:0002119;<br>P:GO:0040007                                   |             | -                                                                                                                              |
| Caenorhabditis elegans      | very low-density lipoprotein receptor                                                   | 8 | C:GO:0005624;<br>C:GO:0044424;<br>P:GO:0030178;<br>C:GO:0044425;<br>F:GO:0032403;<br>P:GO:0043277;<br>P:GO:0008152;<br>F:GO:0034185 | -                                                                                                                  |             | -                                                                                                                              |
| Caenorhabditis briggsae     | briggsae cbr-dys-1 protein                                                              | 0 |                                                                                                                                     |                                                                                                                    |             | -                                                                                                                              |

|                         |                                                         |   |                                                                                                                                                      |   |             |                                                                                                                                                                         |
|-------------------------|---------------------------------------------------------|---|------------------------------------------------------------------------------------------------------------------------------------------------------|---|-------------|-------------------------------------------------------------------------------------------------------------------------------------------------------------------------|
| Caenorhabditis elegans  | alkylglycerone phosphate synthase                       | 9 | P:GO:0009792;<br>P:GO:0002119;<br>F:GO:0016491;<br>F:GO:0008609;<br>C:GO:0005777;<br>P:GO:0008610;<br>P:GO:0040007;<br>F:GO:0050660;<br>C:GO:0016020 | - | EC:2.5.1.26 | IPR006094; IPR016166; IPR016167;<br>IPR016168; PTHR11748 (PANTHER),<br>PTHR11748:SF3 (PANTHER)                                                                          |
| Loa loa                 | phospholipase a-2-activating protein                    | 1 | P:GO:0040010                                                                                                                                         | - |             | IPR001680; IPR011046; IPR015155;<br>IPR015943; IPR017986; IPR019781;<br>IPR019782; PTHR19849 (PANTHER),<br>SignalP (SIGNALP)                                            |
| Caenorhabditis briggsae | dead deah box helicase family protein                   | 5 | F:GO:0004004;<br>F:GO:0003676;<br>P:GO:0040010;<br>F:GO:0005524;<br>P:GO:0000003                                                                     | - |             | IPR000629; IPR001650; IPR011545;<br>IPR014001; IPR014021;<br>G3DSA:3.40.50.300 (GENE3D),<br>PTHR10967 (PANTHER),<br>PTHR10967:SF48 (PANTHER),<br>SSF52540 (SUPERFAMILY) |
| Caenorhabditis briggsae | dead deah box helicase family protein                   | 5 | F:GO:0004004;<br>F:GO:0003676;<br>P:GO:0040010;<br>F:GO:0005524;<br>P:GO:0000003                                                                     | - |             | IPR000629; IPR001650; IPR011545;<br>IPR014001; IPR014021;<br>G3DSA:3.40.50.300 (GENE3D),<br>PTHR10967 (PANTHER),<br>PTHR10967:SF48 (PANTHER),<br>SSF52540 (SUPERFAMILY) |
| Caenorhabditis briggsae | dead deah box helicase family protein                   | 5 | F:GO:0004004;<br>F:GO:0003676;<br>P:GO:0040010;<br>F:GO:0005524;<br>P:GO:0000003                                                                     | - |             | IPR000629; IPR001650; IPR011545;<br>IPR014001; IPR014021;<br>G3DSA:3.40.50.300 (GENE3D),<br>PTHR10967 (PANTHER),<br>PTHR10967:SF48 (PANTHER),<br>SSF52540 (SUPERFAMILY) |
|                         | -                                                       | 0 |                                                                                                                                                      |   |             | -                                                                                                                                                                       |
| Heliconius melpomene    | endonuclease-reverse transcriptase                      | 2 | F:GO:0003676;<br>F:GO:0003824                                                                                                                        | - |             | -                                                                                                                                                                       |
| Caenorhabditis briggsae | Hypothetical protein CBG07023 [Caenorhabditis briggsae] | 0 |                                                                                                                                                      |   |             | -                                                                                                                                                                       |
| Caenorhabditis elegans  | aldolase                                                | 7 | F:GO:0042802;<br>P:GO:0009792;<br>P:GO:0018991;<br>P:GO:0040010;<br>P:GO:0040011;<br>P:GO:0006096;<br>F:GO:0004332                                   | - | EC:4.1.2.13 | IPR000741; IPR013785; SSF51569<br>(SUPERFAMILY)                                                                                                                         |
| Caenorhabditis elegans  | aldolase                                                | 7 | F:GO:0042802;<br>P:GO:0009792;<br>P:GO:0018991;<br>P:GO:0040010;<br>P:GO:0040011;<br>P:GO:0006096;<br>F:GO:0004332                                   | - | EC:4.1.2.13 | IPR000741; IPR013785; SSF51569<br>(SUPERFAMILY)                                                                                                                         |
| Caenorhabditis briggsae | aldolase                                                | 7 | F:GO:0042802;<br>P:GO:0009792;<br>P:GO:0018991;<br>P:GO:0040010;<br>P:GO:0040011;<br>P:GO:0006096;<br>F:GO:0004332                                   | - | EC:4.1.2.13 | IPR000741; IPR013785; SSF51569<br>(SUPERFAMILY)                                                                                                                         |

|                         |                                                     |   |                                                                                                                    |   |             |                                                                                                                                                      |                                                                                           |
|-------------------------|-----------------------------------------------------|---|--------------------------------------------------------------------------------------------------------------------|---|-------------|------------------------------------------------------------------------------------------------------------------------------------------------------|-------------------------------------------------------------------------------------------|
| Caenorhabditis briggsae | aldolase                                            | 7 | F:GO:0042802;<br>P:GO:0009792;<br>P:GO:0018991;<br>P:GO:0040010;<br>P:GO:0040011;<br>P:GO:0006096;<br>F:GO:0004332 | - | EC:4.1.2.13 | IPR000741; IPR013785; SSF51569<br>(SUPERFAMILY)                                                                                                      |                                                                                           |
| Caenorhabditis elegans  | aldolase                                            | 7 | F:GO:0042802;<br>P:GO:0009792;<br>P:GO:0018991;<br>P:GO:0040010;<br>P:GO:0040011;<br>P:GO:0006096;<br>F:GO:0004332 | - | EC:4.1.2.13 | IPR000741; IPR013785; SSF51569<br>(SUPERFAMILY)                                                                                                      |                                                                                           |
| Caenorhabditis elegans  | aldolase                                            | 7 | F:GO:0042802;<br>P:GO:0009792;<br>P:GO:0018991;<br>P:GO:0040010;<br>P:GO:0040011;<br>P:GO:0006096;<br>F:GO:0004332 | - | EC:4.1.2.13 | IPR000741; IPR013785; SSF51569<br>(SUPERFAMILY)                                                                                                      |                                                                                           |
|                         | -                                                   | 0 |                                                                                                                    |   |             | -                                                                                                                                                    |                                                                                           |
|                         | -                                                   | 0 |                                                                                                                    |   |             | SignalP (SIGNALP)                                                                                                                                    |                                                                                           |
| Brugia malayi           | alpha-galactosidase alpha-n-acetylgalactosaminidase | 3 | P:GO:0005975;<br>F:GO:0004553;<br>F:GO:0043169                                                                     | - | EC:3.2.1.0  | IPR000111; IPR002241; IPR013785;<br>IPR017853; PTHR11452 (PANTHER),<br>SignalP (SIGNALP)                                                             |                                                                                           |
|                         | -                                                   | 0 |                                                                                                                    |   |             | -                                                                                                                                                    |                                                                                           |
| Caenorhabditis elegans  | atp-dependent r- helicase                           | 5 | F:GO:0008026;<br>F:GO:0003676;<br>C:GO:0005622;<br>F:GO:0005524;<br>F:GO:0008270                                   | - |             | PTHR18934 (PANTHER)                                                                                                                                  |                                                                                           |
|                         | -                                                   | 0 |                                                                                                                    |   |             | SignalP (SIGNALP)                                                                                                                                    |                                                                                           |
|                         | -                                                   | 0 |                                                                                                                    |   |             | -                                                                                                                                                    |                                                                                           |
| Bacillus cereus AH621   | family protein                                      | 0 |                                                                                                                    |   |             | C:GO:0016021;<br>F:GO:0003677;<br>F:GO:0000166;<br>F:GO:0003674;<br>F:GO:0017111;<br>P:GO:0051301;<br>F:GO:0005524;<br>P:GO:0007059;<br>P:GO:0007049 | SignalP (SIGNALP)                                                                         |
| Loa loa                 | ankyrin repeat containing                           | 0 |                                                                                                                    |   |             | P:GO:0001886;<br>F:GO:0005488;<br>P:GO:0048514;<br>C:GO:0005856;<br>P:GO:0001570;<br>P:GO:0045602;<br>P:GO:0003007                                   | -                                                                                         |
| Heliconius melpomene    | endonuclease-reverse transcriptase                  | 0 |                                                                                                                    |   |             | F:GO:0003723;<br>F:GO:0004527;<br>P:GO:0006278;<br>F:GO:0004519;<br>F:GO:0003964                                                                     | IPR005135; G3DSA:3.60.10.10<br>(GENE3D), PTHR23227 (PANTHER),<br>PTHR23227:SF14 (PANTHER) |



|                         |                                         |    |                                                                                                                                                                                                         |                                                                                                                                                                                                                                                                             |                                                                                                                                                               |
|-------------------------|-----------------------------------------|----|---------------------------------------------------------------------------------------------------------------------------------------------------------------------------------------------------------|-----------------------------------------------------------------------------------------------------------------------------------------------------------------------------------------------------------------------------------------------------------------------------|---------------------------------------------------------------------------------------------------------------------------------------------------------------|
|                         | ap-2 complex subunit mu-1               | 12 | P:GO:0016192;<br>C:GO:0005829;<br>C:GO:0030132;<br>C:GO:0005739;<br>F:GO:0008289;<br>C:GO:0030131;<br>C:GO:0005778;<br>C:GO:0030666;<br>P:GO:0050690;<br>F:GO:0005515;<br>F:GO:0005215;<br>P:GO:0006886 |                                                                                                                                                                                                                                                                             | IPR008968; IPR015629; IPR018240;<br>G3DSA:2.60.40.1170 (GENE3D),<br>PTHR11998 (PANTHER)                                                                       |
|                         | -                                       | 0  |                                                                                                                                                                                                         |                                                                                                                                                                                                                                                                             | SignalP (SIGNALP)                                                                                                                                             |
|                         | -                                       | 0  |                                                                                                                                                                                                         |                                                                                                                                                                                                                                                                             | SignalP (SIGNALP)                                                                                                                                             |
| Caenorhabditis briggsae | atypical abc1 abc1-c protein ki-se      | 0  |                                                                                                                                                                                                         |                                                                                                                                                                                                                                                                             | -                                                                                                                                                             |
| Caenorhabditis briggsae | atypical abc1 abc1-c protein ki-se      | 0  |                                                                                                                                                                                                         |                                                                                                                                                                                                                                                                             | -                                                                                                                                                             |
|                         | -                                       | 0  |                                                                                                                                                                                                         |                                                                                                                                                                                                                                                                             | -                                                                                                                                                             |
|                         | -                                       | 0  |                                                                                                                                                                                                         |                                                                                                                                                                                                                                                                             | -                                                                                                                                                             |
| Caenorhabditis elegans  | phosphatidylinositol 4-ki-se alpha      | 3  | P:GO:0000003;<br>P:GO:0008219;<br>F:GO:0016772                                                                                                                                                          |                                                                                                                                                                                                                                                                             | IPR015433; PTHR10048:SF15<br>(PANTHER)                                                                                                                        |
| Caenorhabditis briggsae | calcitonin receptor                     | 5  | P:GO:0007186;<br>C:GO:0016021;<br>P:GO:0007165;<br>C:GO:0005886;<br>F:GO:0004930                                                                                                                        |                                                                                                                                                                                                                                                                             | IPR000832; IPR017983; PTHR12011<br>(PANTHER), PTHR12011:SF14<br>(PANTHER), SignalP (SIGNALP)                                                                  |
| Loa loa                 | a-phase-promoting complex subunit 7     | 0  |                                                                                                                                                                                                         | F:GO:0005488;<br>P:GO:0007049;<br>P:GO:0051301;<br>P:GO:0008150;<br>F:GO:0005515;<br>C:GO:0005575                                                                                                                                                                           | IPR011990; IPR019734; PTHR12558<br>(PANTHER), PTHR12558:SF7<br>(PANTHER), SSF48452 (SUPERFAMILY)                                                              |
| Danio rerio             | viral a-type inclusion protein          | 0  |                                                                                                                                                                                                         | P:GO:0007018;<br>F:GO:0003700;<br>C:GO:0005634;<br>C:GO:0005874;<br>F:GO:0000166;<br>C:GO:0005737;<br>F:GO:0005524;<br>F:GO:0003777;<br>C:GO:0016459;<br>P:GO:0006886;<br>P:GO:0006355;<br>C:GO:0030016;<br>F:GO:0003774;<br>C:GO:0005622;<br>C:GO:0032982;<br>F:GO:0003899 | -                                                                                                                                                             |
| Caenorhabditis elegans  | map ki-se ki-se                         | 2  | F:GO:0005515;<br>P:GO:0019915                                                                                                                                                                           |                                                                                                                                                                                                                                                                             | IPR000719; IPR008271; IPR011009;<br>IPR017442; G3DSA:1.10.510.10<br>(GENE3D), G3DSA:3.30.200.20<br>(GENE3D), PTHR22986 (PANTHER),<br>PTHR22986:SF20 (PANTHER) |
|                         | -                                       | 0  |                                                                                                                                                                                                         |                                                                                                                                                                                                                                                                             | -                                                                                                                                                             |
| Loa loa                 | peptidase family m13 containing protein | 3  | P:GO:0019538;<br>F:GO:0016787;<br>C:GO:0016020                                                                                                                                                          |                                                                                                                                                                                                                                                                             | IPR000718; IPR018497;<br>G3DSA:3.40.390.10 (GENE3D),<br>SSF55486 (SUPERFAMILY)                                                                                |
|                         | -                                       | 0  |                                                                                                                                                                                                         |                                                                                                                                                                                                                                                                             | -                                                                                                                                                             |

|                             |                                                            |    |                                                                                                                                                                                                                                                                                                                                                                  |              |            |                                                                                                                 |
|-----------------------------|------------------------------------------------------------|----|------------------------------------------------------------------------------------------------------------------------------------------------------------------------------------------------------------------------------------------------------------------------------------------------------------------------------------------------------------------|--------------|------------|-----------------------------------------------------------------------------------------------------------------|
| Loa loa                     | hypothetical protein LOAG_12942 [Loa loa]                  | 0  |                                                                                                                                                                                                                                                                                                                                                                  |              | -          |                                                                                                                 |
| Caenorhabditis elegans      | elegans protein partially confirmed by transcript evidence | 0  |                                                                                                                                                                                                                                                                                                                                                                  | C:GO:0016021 | -          |                                                                                                                 |
| Loa loa                     | d- mismatch repair protein containing protein              | 21 | P:GO:0051257;<br>F:GO:0005515;<br>P:GO:0045950;<br>P:GO:0043060;<br>P:GO:0007283;<br>C:GO:0005712;<br>P:GO:0000712;<br>P:GO:0006303;<br>P:GO:0008630;<br>P:GO:0007060;<br>C:GO:0000795;<br>P:GO:0016446;<br>C:GO:0001673;<br>P:GO:0000239;<br>P:GO:0048477;<br>F:GO:0032137;<br>P:GO:0000289;<br>C:GO:0032389;<br>P:GO:0006298;<br>F:GO:0005524;<br>P:GO:0045190 | -            |            | IPR002099; IPR003594; IPR011186;<br>IPR014762                                                                   |
|                             | -                                                          | 0  |                                                                                                                                                                                                                                                                                                                                                                  |              | IPR004296  |                                                                                                                 |
| Loa loa                     | briggsae cbr-acy-4 protein                                 | 5  | F:GO:0004016;<br>P:GO:0009190;<br>C:GO:0016021;<br>F:GO:0042302;<br>F:GO:0000166                                                                                                                                                                                                                                                                                 | -            | EC:4.6.1.1 | IPR001054; PTHR11920 (PANTHER),<br>PTHR11920:SF14 (PANTHER)                                                     |
| Loa loa                     | plastid acetyl- carboxylase                                | 4  | P:GO:0044249;<br>F:GO:0005488;<br>P:GO:0044238;<br>F:GO:0016874                                                                                                                                                                                                                                                                                                  | -            |            | IPR005481; IPR011764; IPR013817;<br>IPR016185; PTHR18866 (PANTHER),<br>PTHR18866:SF6 (PANTHER)                  |
| Angiostrongylus cantonensis | homeo box d1                                               | 14 | P:GO:0007411;<br>F:GO:0030528;<br>P:GO:0016337;<br>P:GO:0006355;<br>F:GO:0043565;<br>P:GO:0010171;<br>P:GO:0007413;<br>P:GO:0002119;<br>F:GO:0003700;<br>P:GO:0040011;<br>C:GO:0005737;<br>P:GO:0040018;<br>C:GO:0005634;<br>P:GO:0009790                                                                                                                        | -            |            | PTHR19418 (PANTHER),<br>PTHR19418:SF174 (PANTHER)                                                               |
| Caenorhabditis elegans      | elegans protein confirmed by transcript evidence           | 0  |                                                                                                                                                                                                                                                                                                                                                                  |              | -          |                                                                                                                 |
|                             | -                                                          | 0  |                                                                                                                                                                                                                                                                                                                                                                  |              | -          |                                                                                                                 |
| Caenorhabditis briggsae     | lam-2                                                      | 2  | P:GO:0007155;<br>C:GO:0005578                                                                                                                                                                                                                                                                                                                                    | -            |            | IPR000034; IPR002049; IPR013032;<br>PTHR10574 (PANTHER),<br>PTHR10574:SF48 (PANTHER),<br>SSF57196 (SUPERFAMILY) |
|                             | -                                                          | 0  |                                                                                                                                                                                                                                                                                                                                                                  |              | -          |                                                                                                                 |



|                         |                                                            |   |                                                                                  |                                                                                                                                                                                                                                                                                                                                                                                                                                                                         |                                                                                                                                                                                            |
|-------------------------|------------------------------------------------------------|---|----------------------------------------------------------------------------------|-------------------------------------------------------------------------------------------------------------------------------------------------------------------------------------------------------------------------------------------------------------------------------------------------------------------------------------------------------------------------------------------------------------------------------------------------------------------------|--------------------------------------------------------------------------------------------------------------------------------------------------------------------------------------------|
| Caenorhabditis elegans  | lrp1 protein                                               | 0 |                                                                                  | F:GO:0005509;<br>F:GO:0004872;<br>P:GO:0008283;<br>C:GO:0043025;<br>C:GO:0005887;<br>C:GO:0005886;<br>F:GO:0004714;<br>P:GO:0010875;<br>F:GO:0032403;<br>P:GO:0006898;<br>P:GO:0006897;<br>C:GO:0016021;<br>C:GO:0016020;<br>P:GO:0043277;<br>P:GO:0007205;<br>C:GO:0005624;<br>P:GO:0030178;<br>F:GO:0016787;<br>P:GO:0032429;<br>P:GO:0042157;<br>C:GO:0005905;<br>C:GO:0030425;<br>P:GO:0006629;<br>C:GO:0030136;<br>F:GO:0070325;<br>F:GO:0034185;<br>F:GO:0016740; | SignalP (SIGNALP)                                                                                                                                                                          |
| Caenorhabditis briggsae | elegans protein partially confirmed by transcript evidence | 2 | F:GO:0008270;<br>F:GO:0005515                                                    | -                                                                                                                                                                                                                                                                                                                                                                                                                                                                       | -                                                                                                                                                                                          |
| Caenorhabditis briggsae | rrp12-like protein                                         | 0 |                                                                                  | C:GO:0031965;<br>F:GO:0005488;<br>C:GO:0016021;<br>C:GO:0016020;<br>P:GO:0008150;<br>F:GO:0005515;<br>C:GO:0005634;<br>C:GO:0005730                                                                                                                                                                                                                                                                                                                                     | PTHR21576 (PANTHER),<br>PTHR21576:SF2 (PANTHER)                                                                                                                                            |
| -                       | -                                                          | 0 |                                                                                  |                                                                                                                                                                                                                                                                                                                                                                                                                                                                         | -                                                                                                                                                                                          |
| Caenorhabditis briggsae | briggsae cbr-asp-1 protein                                 | 5 | C:GO:0005623;<br>P:GO:0008219;<br>F:GO:0005515;<br>F:GO:0004175;<br>P:GO:0030163 | -                                                                                                                                                                                                                                                                                                                                                                                                                                                                       | IPR001461; IPR001969; IPR009007;<br>IPR021109; PTHR13683:SF53<br>(PANTHER)                                                                                                                 |
| -                       | -                                                          | 0 |                                                                                  |                                                                                                                                                                                                                                                                                                                                                                                                                                                                         | -                                                                                                                                                                                          |
| -                       | -                                                          | 0 |                                                                                  |                                                                                                                                                                                                                                                                                                                                                                                                                                                                         | -                                                                                                                                                                                          |
| Caenorhabditis briggsae | briggsae cbr-glh-1 protein                                 | 2 | F:GO:0016787;<br>F:GO:0042802                                                    | -                                                                                                                                                                                                                                                                                                                                                                                                                                                                       | IPR000629; IPR001650; IPR011545;<br>IPR014001; IPR014021;<br>G3DSA:3.40.50.300 (GENE3D),<br>PTHR10967 (PANTHER),<br>PTHR10967:SF61 (PANTHER), SignalP<br>(SIGNALP), SSF52540 (SUPERFAMILY) |
| Caenorhabditis briggsae | elegans protein confirmed by transcript evidence           | 0 |                                                                                  |                                                                                                                                                                                                                                                                                                                                                                                                                                                                         | IPR008253; SignalP (SIGNALP)                                                                                                                                                               |
| -                       | -                                                          | 0 |                                                                                  |                                                                                                                                                                                                                                                                                                                                                                                                                                                                         | IPR009730                                                                                                                                                                                  |
| Brugia malayi           | hypothetical protein [Brugia malayi]                       | 0 |                                                                                  |                                                                                                                                                                                                                                                                                                                                                                                                                                                                         | -                                                                                                                                                                                          |
| -                       | -                                                          | 0 |                                                                                  |                                                                                                                                                                                                                                                                                                                                                                                                                                                                         | -                                                                                                                                                                                          |
| Caenorhabditis briggsae | Hypothetical protein CBG09291 [Caenorhabditis briggsae]    | 0 |                                                                                  |                                                                                                                                                                                                                                                                                                                                                                                                                                                                         | SignalP (SIGNALP)                                                                                                                                                                          |

|                         |                                                                                                                                                       |   |                                                                                                                                                      |                                                                                  |              |                                                                                                                                            |
|-------------------------|-------------------------------------------------------------------------------------------------------------------------------------------------------|---|------------------------------------------------------------------------------------------------------------------------------------------------------|----------------------------------------------------------------------------------|--------------|--------------------------------------------------------------------------------------------------------------------------------------------|
| Caenorhabditis elegans  | anis1_anisi ame: full=major allergen ani s 1 ame: full=21 kda allergen ame: full=excretory gland allergen ans1 ame: allergen=ani s 1 flags: precursor | 0 |                                                                                                                                                      | P:GO:0006915;<br>F:GO:0030414;<br>F:GO:0004867;<br>C:GO:0005576                  |              | IPR002223; PTHR10083 (PANTHER),<br>PTHR10083:SF17 (PANTHER)                                                                                |
|                         | -                                                                                                                                                     | 0 |                                                                                                                                                      |                                                                                  |              | -                                                                                                                                          |
|                         | -                                                                                                                                                     | 0 |                                                                                                                                                      |                                                                                  |              | -                                                                                                                                          |
| Haemonchus contortus    | acetylcholine regulator unc-                                                                                                                          | 1 | P:GO:0006904                                                                                                                                         | -                                                                                |              | IPR001619; G3DSA:1.25.40.60 (GENE3D), G3DSA:3.40.50.1910 (GENE3D), G3DSA:3.40.50.2060 (GENE3D), PTHR11679:SF7 (PANTHER), SignalP (SIGNALP) |
|                         | -                                                                                                                                                     | 0 |                                                                                                                                                      |                                                                                  |              | SignalP (SIGNALP)                                                                                                                          |
| Caenorhabditis briggsae | briggsae cbr-clc-5 protein                                                                                                                            | 0 |                                                                                                                                                      | F:GO:0003674;<br>C:GO:0016021;<br>C:GO:0016020;<br>P:GO:0008150                  |              | IPR010761; SignalP (SIGNALP)                                                                                                               |
| Caenorhabditis elegans  | gpi ethanolamine phosphate                                                                                                                            | 2 | P:GO:0008152;<br>F:GO:0003824                                                                                                                        | -                                                                                |              | IPR007070; SignalP (SIGNALP)                                                                                                               |
|                         | -                                                                                                                                                     | 0 |                                                                                                                                                      |                                                                                  |              | SignalP (SIGNALP)                                                                                                                          |
|                         | -                                                                                                                                                     | 0 |                                                                                                                                                      |                                                                                  |              | SignalP (SIGNALP)                                                                                                                          |
| Caenorhabditis briggsae | phospholipase d3                                                                                                                                      | 2 | C:GO:0044464;<br>F:GO:0003824                                                                                                                        | -                                                                                |              | G3DSA:3.30.870.10 (GENE3D), SignalP (SIGNALP), SSF56024 (SUPERFAMILY)                                                                      |
|                         | -                                                                                                                                                     | 0 |                                                                                                                                                      |                                                                                  |              | PTHR19897 (PANTHER),<br>PTHR19897:SF9 (PANTHER)                                                                                            |
| Caenorhabditis briggsae | elegans protein partially confirmed by transcript evidence                                                                                            | 0 |                                                                                                                                                      | F:GO:0015078;<br>P:GO:0015986;<br>F:GO:0005488;<br>C:GO:0033177;<br>P:GO:0040010 |              | -                                                                                                                                          |
| Callithrix jacchus      | ribophorin isoform cra_a                                                                                                                              | 9 | C:GO:0008250;<br>C:GO:0019718;<br>P:GO:0018279;<br>C:GO:0016021;<br>C:GO:0042470;<br>P:GO:0015833;<br>C:GO:0030867;<br>F:GO:0005515;<br>F:GO:0004579 | -                                                                                | EC:2.4.1.119 | IPR007676                                                                                                                                  |
|                         | -                                                                                                                                                     | 0 |                                                                                                                                                      |                                                                                  |              | SignalP (SIGNALP)                                                                                                                          |
|                         | -                                                                                                                                                     | 0 |                                                                                                                                                      |                                                                                  |              | SignalP (SIGNALP)                                                                                                                          |
|                         | -                                                                                                                                                     | 0 |                                                                                                                                                      |                                                                                  |              | -                                                                                                                                          |
|                         | -                                                                                                                                                     | 0 |                                                                                                                                                      |                                                                                  |              | -                                                                                                                                          |
|                         | -                                                                                                                                                     | 0 |                                                                                                                                                      |                                                                                  |              | -                                                                                                                                          |
| Caenorhabditis elegans  | splicing arginine serine-rich 1                                                                                                                       | 7 | F:GO:0003723;<br>F:GO:0050733;<br>P:GO:0006376;<br>F:GO:0000166;<br>C:GO:0044428;<br>P:GO:0001701;<br>P:GO:0060048                                   | -                                                                                |              | IPR000504; IPR012677; PTHR10548 (PANTHER), SSF54928 (SUPERFAMILY)                                                                          |
|                         | -                                                                                                                                                     | 0 |                                                                                                                                                      |                                                                                  |              | -                                                                                                                                          |
| Caenorhabditis elegans  | splicing arginine serine-rich 1                                                                                                                       | 5 | P:GO:0009792;<br>P:GO:0008380;<br>F:GO:0003723;<br>F:GO:0005515;<br>F:GO:0000166                                                                     | -                                                                                |              | -                                                                                                                                          |

|                             |                                                               |  |                                                                                                                      |                                                                                                                                                                       |                                                                                                                                              |
|-----------------------------|---------------------------------------------------------------|--|----------------------------------------------------------------------------------------------------------------------|-----------------------------------------------------------------------------------------------------------------------------------------------------------------------|----------------------------------------------------------------------------------------------------------------------------------------------|
| Caenorhabditis elegans      | arginine serine-rich splicing factor                          |  | P:GO:0009792;<br>P:GO:0008380;<br>5 F:GO:0003723;<br>F:GO:0005515;<br>F:GO:0000166                                   | -                                                                                                                                                                     | -                                                                                                                                            |
| Caenorhabditis elegans      | arginine serine-rich splicing factor                          |  | P:GO:0009792;<br>P:GO:0008380;<br>5 F:GO:0003723;<br>F:GO:0005515;<br>F:GO:0000166                                   | -                                                                                                                                                                     | -                                                                                                                                            |
|                             |                                                               |  | 0                                                                                                                    |                                                                                                                                                                       |                                                                                                                                              |
| Brugia malayi               | r- binding motif protein 25                                   |  | C:GO:0005737;<br>F:GO:0003729;<br>P:GO:0006915;<br>7 P:GO:0000381;<br>F:GO:0005515;<br>C:GO:0016607;<br>F:GO:0000166 | -                                                                                                                                                                     | IPR000504; IPR012677; PTHR18806 (PANTHER), SSF54928 (SUPERFAMILY)                                                                            |
| Caenorhabditis elegans      | fibulin 1                                                     |  | F:GO:0016504;<br>4 F:GO:0005515;<br>P:GO:0030198;<br>C:GO:0005604                                                    | -                                                                                                                                                                     | IPR006210; IPR013032; IPR013091; IPR018097; G3DSA:2.10.25.10 (GENE3D), PTHR11201 (PANTHER), PTHR11201:SF89 (PANTHER), SSF57196 (SUPERFAMILY) |
| Caenorhabditis briggsae     | 28s ribosomal protein mitochondrial                           |  | P:GO:0000003;<br>4 P:GO:0040007;<br>P:GO:0006898;<br>P:GO:0002119                                                    | -                                                                                                                                                                     | IPR019266                                                                                                                                    |
|                             |                                                               |  | 0                                                                                                                    |                                                                                                                                                                       |                                                                                                                                              |
| Caenorhabditis elegans      | protein aveugle                                               |  | C:GO:0005737;<br>P:GO:0042675;<br>6 C:GO:0005886;<br>P:GO:0007173;<br>P:GO:0007165;<br>P:GO:0001751                  | -                                                                                                                                                                     | IPR001660; IPR010993; IPR011510; IPR013761; PTHR20843 (PANTHER)                                                                              |
| Loa loa                     | probable 26s proteasome non-atpase regulatory subunit         |  | 0                                                                                                                    | P:GO:0042176;<br>P:GO:0000003;<br>P:GO:0002119;<br>P:GO:0009792;<br>F:GO:0030234;<br>C:GO:0000502;<br>P:GO:0008340;<br>F:GO:0005515;<br>P:GO:0040007;<br>F:GO:0005488 | -                                                                                                                                            |
| Caenorhabditis elegans      | briggsae cbr-dhs-5 protein                                    |  | C:GO:0016021;<br>P:GO:0055114;<br>5 F:GO:0016491;<br>P:GO:0006508;<br>F:GO:0005515                                   | -                                                                                                                                                                     | -                                                                                                                                            |
| Caenorhabditis briggsae     | type-1 corticotropin-releasing hormone receptor alpha isoform |  | F:GO:0004930;<br>C:GO:0005886;<br>5 P:GO:0007165;<br>P:GO:0007186;<br>C:GO:0016021                                   | -                                                                                                                                                                     | IPR000832; IPR001879; IPR017981; IPR017983; PTHR12011 (PANTHER), PTHR12011:SF15 (PANTHER), SSF111418 (SUPERFAMILY)                           |
| Loa loa                     | hypothetical protein LOAG_12354 [Loa loa]                     |  | 0                                                                                                                    |                                                                                                                                                                       | -                                                                                                                                            |
| Angiostrongylus cantonensis | yot9_caee1 ame: full=uncharacterized protein                  |  | 0                                                                                                                    |                                                                                                                                                                       | -                                                                                                                                            |

|                             |                                                  |    |                                                                                                                                                                                                                                                                                                                                                                                                                                                                                          |                                                                 |                                             |                                                                                                                                                          |
|-----------------------------|--------------------------------------------------|----|------------------------------------------------------------------------------------------------------------------------------------------------------------------------------------------------------------------------------------------------------------------------------------------------------------------------------------------------------------------------------------------------------------------------------------------------------------------------------------------|-----------------------------------------------------------------|---------------------------------------------|----------------------------------------------------------------------------------------------------------------------------------------------------------|
| Caenorhabditis briggsae     | elegans protein confirmed by transcript evidence | 0  |                                                                                                                                                                                                                                                                                                                                                                                                                                                                                          | P:GO:0006629;<br>C:GO:0016021;<br>F:GO:0016787;<br>F:GO:0004806 |                                             | IPR002921; G3DSA:3.40.50.1820<br>(GENE3D), SSF53474 (SUPERFAMILY)                                                                                        |
| -                           | -                                                | 0  |                                                                                                                                                                                                                                                                                                                                                                                                                                                                                          |                                                                 |                                             | -                                                                                                                                                        |
| -                           | -                                                | 0  |                                                                                                                                                                                                                                                                                                                                                                                                                                                                                          |                                                                 |                                             | -                                                                                                                                                        |
| -                           | -                                                | 0  |                                                                                                                                                                                                                                                                                                                                                                                                                                                                                          |                                                                 |                                             | -                                                                                                                                                        |
| Aspergillus clavatus NRRL 1 | gas2 domain protein                              | 0  |                                                                                                                                                                                                                                                                                                                                                                                                                                                                                          | P:GO:0007050                                                    |                                             | -                                                                                                                                                        |
| Brugia malayi               | phosphatase and tensin-like                      | 29 | P:GO:0001935;<br>P:GO:0010035;<br>P:GO:0007507;<br>P:GO:0031174;<br>P:GO:0046856;<br>P:GO:0030336;<br>C:GO:0005829;<br>P:GO:0051895;<br>F:GO:0004438;<br>F:GO:0051800;<br>P:GO:0046855;<br>P:GO:0010033;<br>P:GO:0010975;<br>F:GO:0051717;<br>F:GO:0016314;<br>P:GO:0060070;<br>F:GO:0004722;<br>P:GO:0008285;<br>P:GO:0007417;<br>P:GO:0050821;<br>F:GO:0030165;<br>P:GO:0006470;<br>F:GO:0004725;<br>P:GO:0000079;<br>F:GO:0019899;<br>C:GO:0005634;<br>P:GO:0051898;<br>P:GO:0051091; |                                                                 | EC:3.1.3.64;<br>EC:3.1.3.67;<br>EC:3.1.3.48 | IPR000340; IPR014019; IPR014020;<br>IPR016130; G3DSA:3.90.190.10<br>(GENE3D), PTHR12305 (PANTHER),<br>PTHR12305:SF6 (PANTHER), SSF52799<br>(SUPERFAMILY) |

|                         |                                                                                 |    |                                                                                                                                                                                                                                                                                                                                                                                                                                                                         |   |                                             |                                                                                                                                                          |
|-------------------------|---------------------------------------------------------------------------------|----|-------------------------------------------------------------------------------------------------------------------------------------------------------------------------------------------------------------------------------------------------------------------------------------------------------------------------------------------------------------------------------------------------------------------------------------------------------------------------|---|---------------------------------------------|----------------------------------------------------------------------------------------------------------------------------------------------------------|
| Brugia malayi           | phosphatase and tensin-like                                                     | 29 | P:GO:0010035;<br>P:GO:0007507;<br>P:GO:0031174;<br>P:GO:0046856;<br>P:GO:0030336;<br>C:GO:0005829;<br>P:GO:0051895;<br>F:GO:0004438;<br>F:GO:0051800;<br>P:GO:0046855;<br>P:GO:0010033;<br>P:GO:0010975;<br>F:GO:0051717;<br>F:GO:0016314;<br>P:GO:0060070;<br>F:GO:0004722;<br>P:GO:0008285;<br>P:GO:0007417;<br>P:GO:0050821;<br>F:GO:0030165;<br>P:GO:0006470;<br>F:GO:0004725;<br>P:GO:0000079;<br>F:GO:0019899;<br>C:GO:0005634;<br>P:GO:0051898;<br>P:GO:0051091; | - | EC:3.1.3.64;<br>EC:3.1.3.67;<br>EC:3.1.3.48 | IPR000340; IPR014019; IPR014020;<br>IPR016130; G3DSA:3.90.190.10<br>(GENE3D), PTHR12305 (PANTHER),<br>PTHR12305:SF6 (PANTHER), SSF52799<br>(SUPERFAMILY) |
|                         | -                                                                               | 0  |                                                                                                                                                                                                                                                                                                                                                                                                                                                                         |   |                                             | -                                                                                                                                                        |
|                         | -                                                                               | 0  |                                                                                                                                                                                                                                                                                                                                                                                                                                                                         |   |                                             | -                                                                                                                                                        |
| Caenorhabditis elegans  | ibr domain containing protein                                                   | 3  | F:GO:0003676;<br>F:GO:0008270;<br>F:GO:0005515                                                                                                                                                                                                                                                                                                                                                                                                                          | - |                                             | IPR001841; IPR002867; IPR013083;<br>PTHR11685 (PANTHER),<br>PTHR11685:SF5 (PANTHER), SSF57850<br>(SUPERFAMILY)                                           |
| Brugia malayi           | novel protein human ankyrin repeat and sterile alpha motif domain containing 1a | 2  | F:GO:0005515;<br>C:GO:0044424                                                                                                                                                                                                                                                                                                                                                                                                                                           | - |                                             | IPR002110; IPR020683; PTHR18958<br>(PANTHER), PTHR18958:SF116<br>(PANTHER)                                                                               |
|                         | -                                                                               | 0  |                                                                                                                                                                                                                                                                                                                                                                                                                                                                         |   |                                             | -                                                                                                                                                        |
|                         | -                                                                               | 0  |                                                                                                                                                                                                                                                                                                                                                                                                                                                                         |   |                                             | -                                                                                                                                                        |
|                         | -                                                                               | 0  |                                                                                                                                                                                                                                                                                                                                                                                                                                                                         |   |                                             | -                                                                                                                                                        |
| Loa loa                 | f-box only protein 11                                                           | 2  | F:GO:0008270;<br>F:GO:0004842                                                                                                                                                                                                                                                                                                                                                                                                                                           | - | EC:6.3.2.19                                 | SignalP (SIGNALP)                                                                                                                                        |
|                         | -                                                                               | 0  |                                                                                                                                                                                                                                                                                                                                                                                                                                                                         |   |                                             | -                                                                                                                                                        |
|                         | -                                                                               | 0  |                                                                                                                                                                                                                                                                                                                                                                                                                                                                         |   |                                             | SignalP (SIGNALP)                                                                                                                                        |
|                         | -                                                                               | 0  |                                                                                                                                                                                                                                                                                                                                                                                                                                                                         |   |                                             | -                                                                                                                                                        |
| Caenorhabditis elegans  | transmembrane protein 104                                                       | 1  | C:GO:0016021                                                                                                                                                                                                                                                                                                                                                                                                                                                            | - |                                             | IPR013057; PTHR16189 (PANTHER),<br>SignalP (SIGNALP)                                                                                                     |
|                         | -                                                                               | 0  |                                                                                                                                                                                                                                                                                                                                                                                                                                                                         |   |                                             | -                                                                                                                                                        |
|                         | -                                                                               | 0  |                                                                                                                                                                                                                                                                                                                                                                                                                                                                         |   |                                             | -                                                                                                                                                        |
| Caenorhabditis briggsae | elegans protein partially confirmed by transcript evidence                      | 2  | F:GO:0035299;<br>F:GO:0005524                                                                                                                                                                                                                                                                                                                                                                                                                                           | - | EC:2.7.1.158                                | IPR009286                                                                                                                                                |
| Caenorhabditis elegans  | elegans protein partially confirmed by transcript evidence                      | 3  | P:GO:0040007;<br>P:GO:0008340;<br>P:GO:0040011                                                                                                                                                                                                                                                                                                                                                                                                                          | - |                                             | IPR010993; IPR013761; IPR021129                                                                                                                          |

|                         |                                                           |    |                                                                                                                                                                                                                                           |                                                                                                   |             |                                                                                                         |
|-------------------------|-----------------------------------------------------------|----|-------------------------------------------------------------------------------------------------------------------------------------------------------------------------------------------------------------------------------------------|---------------------------------------------------------------------------------------------------|-------------|---------------------------------------------------------------------------------------------------------|
| Caenorhabditis elegans  | s-like r-se                                               | 0  |                                                                                                                                                                                                                                           | F:GO:0003723;<br>F:GO:0033897;<br>F:GO:0016787;<br>F:GO:0004519;<br>F:GO:0004518;<br>C:GO:0005576 |             | IPR001568; IPR018188;<br>PTHR11240:SF1 (PANTHER), SignalP (SIGNALP)                                     |
| Caenorhabditis briggsae | dienelactone hydrolase family protein                     | 1  | F:GO:0016787                                                                                                                                                                                                                              | -                                                                                                 |             | IPR002925; G3DSA:3.40.50.1820 (GENE3D), PTHR22946 (PANTHER), SSF53474 (SUPERFAMILY)                     |
| Caenorhabditis briggsae | tetradicopeptide repeat protein 39b                       | 1  | F:GO:0005488                                                                                                                                                                                                                              | -                                                                                                 |             | IPR019412; SignalP (SIGNALP)                                                                            |
|                         | -                                                         | 0  |                                                                                                                                                                                                                                           |                                                                                                   |             | -                                                                                                       |
|                         | -                                                         | 0  |                                                                                                                                                                                                                                           |                                                                                                   |             | -                                                                                                       |
| Loa loa                 | cyclin-related protein fam58a-like isoform 2              | 0  |                                                                                                                                                                                                                                           | P:GO:0048133;<br>P:GO:0007179;<br>F:GO:0005515                                                    |             | IPR006671; IPR011028; IPR013032;<br>IPR013763; IPR015429                                                |
|                         | -                                                         | 0  |                                                                                                                                                                                                                                           |                                                                                                   |             | -                                                                                                       |
| Brugia malayi           | mediator of r- polymerase ii transcription subunit 7      | 7  | P:GO:0006357;<br>F:GO:0008270;<br>F:GO:0003676;<br>C:GO:0005667;<br>F:GO:0016455;<br>F:GO:0005515;<br>C:GO:0016592                                                                                                                        | -                                                                                                 |             | -                                                                                                       |
| Brugia malayi           | elegans protein confirmed by transcript evidence          | 14 | F:GO:0004197;<br>P:GO:0008340;<br>P:GO:0031638;<br>P:GO:0007417;<br>P:GO:0006919;<br>P:GO:0007291;<br>P:GO:0016540;<br>P:GO:0007516;<br>P:GO:0008258;<br>P:GO:0046672;<br>P:GO:0035071;<br>F:GO:0042803;<br>P:GO:0035081;<br>C:GO:0005739 | -                                                                                                 | EC:3.4.22.0 | IPR015672; IPR022535; SignalP (SIGNALP)                                                                 |
| Caenorhabditis elegans  | ytv2_caeel ame: full=uncharacterized zinc metalloprotease | 0  |                                                                                                                                                                                                                                           | P:GO:0006508;<br>F:GO:0008233                                                                     |             | -                                                                                                       |
|                         | -                                                         | 0  |                                                                                                                                                                                                                                           |                                                                                                   |             | SignalP (SIGNALP)                                                                                       |
| Caenorhabditis briggsae | protein o-fucosyltransferase 2                            | 5  | P:GO:0007283;<br>P:GO:0010171;<br>P:GO:0040025;<br>F:GO:0016757;<br>P:GO:0018991                                                                                                                                                          | -                                                                                                 |             | IPR019378; PTHR13398 (PANTHER)                                                                          |
| Caenorhabditis elegans  | elegans protein confirmed by transcript evidence          | 0  |                                                                                                                                                                                                                                           |                                                                                                   |             | IPR001466; IPR012338;<br>G3DSA:3.40.710.10 (GENE3D),<br>PTHR10566 (PANTHER),<br>PTHR10566:SF6 (PANTHER) |
| Caenorhabditis briggsae | tho complex subunit 7 homolog                             | 3  | P:GO:0009987;<br>P:GO:0006810;<br>C:GO:0044424                                                                                                                                                                                            | -                                                                                                 |             | IPR008501; IPR018018                                                                                    |
| Loa loa                 | protein ki-se                                             | 2  | F:GO:0004713;<br>F:GO:0000166                                                                                                                                                                                                             | -                                                                                                 | EC:2.7.10.0 | SignalP (SIGNALP)                                                                                       |
| Caenorhabditis briggsae | let-2                                                     | 4  | C:GO:0005587;<br>F:GO:0005488;<br>F:GO:0030020;<br>P:GO:0016043                                                                                                                                                                           | -                                                                                                 |             | IPR008160; PTHR10499 (PANTHER),<br>PTHR10499:SF114 (PANTHER)                                            |

|                        |                                                            |  |    |                                                                                                                                                                       |                                                                                                   |                                                         |                                                                                                                                                                  |
|------------------------|------------------------------------------------------------|--|----|-----------------------------------------------------------------------------------------------------------------------------------------------------------------------|---------------------------------------------------------------------------------------------------|---------------------------------------------------------|------------------------------------------------------------------------------------------------------------------------------------------------------------------|
|                        |                                                            |  | 0  |                                                                                                                                                                       |                                                                                                   |                                                         |                                                                                                                                                                  |
| Caenorhabditis elegans | chch domain containing protein                             |  | 0  |                                                                                                                                                                       | C:GO:0005739;<br>C:GO:0005758;<br>P:GO:0005085;<br>F:GO:0005515;<br>P:GO:0015031                  |                                                         |                                                                                                                                                                  |
| Brugia malayi          | member ras oncogene family                                 |  | 10 | P:GO:0006928;<br>F:GO:0005525;<br>C:GO:0016023;<br>C:GO:0005886;<br>P:GO:0007049;<br>P:GO:0007264;<br>C:GO:0005739;<br>F:GO:0019003;<br>F:GO:0003924;<br>P:GO:0015031 |                                                                                                   | EC:3.6.5.1;<br>EC:3.6.5.2;<br>EC:3.6.5.3;<br>EC:3.6.5.4 | IPR001806; IPR002078; IPR003579;<br>IPR005225; IPR013753; IPR015595;<br>IPR020851; G3DSA:3.40.50.300<br>(GENE3D), PTHR11708 (PANTHER),<br>SSF52540 (SUPERFAMILY) |
| Caenorhabditis elegans | islet cell autoantigen 1                                   |  | 3  | C:GO:0005737;<br>P:GO:0046928;<br>P:GO:0042221                                                                                                                        |                                                                                                   |                                                         | IPR010504; PTHR10164 (PANTHER),<br>SSF103657 (SUPERFAMILY)                                                                                                       |
| Caenorhabditis elegans | peroxisomal coenzyme a diphosphatase nudt7                 |  | 0  |                                                                                                                                                                       | F:GO:0000287;<br>F:GO:0016787;<br>C:GO:0016021;<br>F:GO:0016818;<br>P:GO:0009132;<br>F:GO:0030145 |                                                         | IPR000086; IPR015797; IPR020084;<br>PTHR12992 (PANTHER), PS51462<br>(PROFILE)                                                                                    |
|                        |                                                            |  | 0  |                                                                                                                                                                       |                                                                                                   |                                                         |                                                                                                                                                                  |
|                        |                                                            |  | 0  |                                                                                                                                                                       |                                                                                                   |                                                         |                                                                                                                                                                  |
| Ancylostoma ceylanicum | elegans protein partially confirmed by transcript evidence |  | 1  | F:GO:0008233                                                                                                                                                          |                                                                                                   |                                                         | IPR001506; IPR006026;<br>G3DSA:3.40.390.10 (GENE3D),<br>PTHR10127 (PANTHER),<br>PTHR10127:SF65 (PANTHER), SignalP<br>(SIGNALP), SSF55486 (SUPERFAMILY)           |
| Ancylostoma ceylanicum | elegans protein partially confirmed by transcript evidence |  | 1  | F:GO:0008233                                                                                                                                                          |                                                                                                   |                                                         | IPR001506; IPR006026;<br>G3DSA:3.40.390.10 (GENE3D),<br>PTHR10127 (PANTHER),<br>PTHR10127:SF65 (PANTHER), SignalP<br>(SIGNALP), SSF55486 (SUPERFAMILY)           |
| Haemonchus contortus   | beta-tubulin isotype 1                                     |  | 6  | P:GO:0007018;<br>F:GO:0005525;<br>P:GO:0051258;<br>F:GO:0005198;<br>F:GO:0003924;<br>C:GO:0005874                                                                     |                                                                                                   | EC:3.6.5.1;<br>EC:3.6.5.2;<br>EC:3.6.5.3;<br>EC:3.6.5.4 |                                                                                                                                                                  |
| Haemonchus contortus   | beta-tubulin isotype 1                                     |  | 6  | P:GO:0007018;<br>F:GO:0005525;<br>P:GO:0051258;<br>F:GO:0005198;<br>F:GO:0003924;<br>C:GO:0005874                                                                     |                                                                                                   | EC:3.6.5.1;<br>EC:3.6.5.2;<br>EC:3.6.5.3;<br>EC:3.6.5.4 |                                                                                                                                                                  |
| Haemonchus contortus   | beta-tubulin isotype 1                                     |  | 6  | P:GO:0007018;<br>F:GO:0005525;<br>P:GO:0051258;<br>F:GO:0005198;<br>F:GO:0003924;<br>C:GO:0005874                                                                     |                                                                                                   | EC:3.6.5.1;<br>EC:3.6.5.2;<br>EC:3.6.5.3;<br>EC:3.6.5.4 |                                                                                                                                                                  |

|                         |                        |   |                                                                                                   |   |                                                         |                                                                                   |
|-------------------------|------------------------|---|---------------------------------------------------------------------------------------------------|---|---------------------------------------------------------|-----------------------------------------------------------------------------------|
| Haemonchus contortus    | beta-tubulin isotype 1 | 6 | P:GO:0007018;<br>F:GO:0005525;<br>P:GO:0051258;<br>F:GO:0005198;<br>F:GO:0003924;<br>C:GO:0005874 | - | EC:3.6.5.1;<br>EC:3.6.5.2;<br>EC:3.6.5.3;<br>EC:3.6.5.4 | -                                                                                 |
| Haemonchus contortus    | beta-tubulin isotype 1 | 6 | P:GO:0007018;<br>F:GO:0005525;<br>P:GO:0051258;<br>F:GO:0005198;<br>F:GO:0003924;<br>C:GO:0005874 | - | EC:3.6.5.1;<br>EC:3.6.5.2;<br>EC:3.6.5.3;<br>EC:3.6.5.4 | -                                                                                 |
| Haemonchus contortus    | beta-tubulin isotype 1 | 6 | P:GO:0007018;<br>F:GO:0005525;<br>P:GO:0051258;<br>F:GO:0005198;<br>F:GO:0003924;<br>C:GO:0005874 | - | EC:3.6.5.1;<br>EC:3.6.5.2;<br>EC:3.6.5.3;<br>EC:3.6.5.4 | -                                                                                 |
| Cooperia oncophora      | beta-tubulin isotype 1 | 6 | P:GO:0007018;<br>F:GO:0005525;<br>P:GO:0051258;<br>F:GO:0005198;<br>F:GO:0003924;<br>C:GO:0005874 | - | EC:3.6.5.1;<br>EC:3.6.5.2;<br>EC:3.6.5.3;<br>EC:3.6.5.4 | IPR000217; IPR002453; IPR003008;<br>IPR008280; IPR013838; IPR017975;<br>IPR018316 |
| Cooperia oncophora      | beta-tubulin isotype 1 | 6 | P:GO:0007018;<br>F:GO:0005525;<br>P:GO:0051258;<br>F:GO:0005198;<br>F:GO:0003924;<br>C:GO:0005874 | - | EC:3.6.5.1;<br>EC:3.6.5.2;<br>EC:3.6.5.3;<br>EC:3.6.5.4 | IPR000217; IPR002453; IPR003008;<br>IPR008280; IPR013838; IPR017975;<br>IPR018316 |
| Caenorhabditis brenneri | beta-tubulin isotype 1 | 6 | P:GO:0007018;<br>F:GO:0005525;<br>P:GO:0051258;<br>F:GO:0005198;<br>F:GO:0003924;<br>C:GO:0005874 | - | EC:3.6.5.1;<br>EC:3.6.5.2;<br>EC:3.6.5.3;<br>EC:3.6.5.4 | -                                                                                 |
| Haemonchus contortus    | beta-tubulin isotype 1 | 6 | P:GO:0007018;<br>F:GO:0005525;<br>P:GO:0051258;<br>F:GO:0005198;<br>F:GO:0003924;<br>C:GO:0005874 | - | EC:3.6.5.1;<br>EC:3.6.5.2;<br>EC:3.6.5.3;<br>EC:3.6.5.4 | -                                                                                 |
| Haemonchus contortus    | beta-tubulin isotype 1 | 6 | P:GO:0007018;<br>F:GO:0005525;<br>P:GO:0051258;<br>F:GO:0005198;<br>F:GO:0003924;<br>C:GO:0005874 | - | EC:3.6.5.1;<br>EC:3.6.5.2;<br>EC:3.6.5.3;<br>EC:3.6.5.4 | -                                                                                 |
| Haemonchus contortus    | beta-tubulin isotype 1 | 6 | P:GO:0007018;<br>F:GO:0005525;<br>P:GO:0051258;<br>F:GO:0005198;<br>F:GO:0003924;<br>C:GO:0005874 | - | EC:3.6.5.1;<br>EC:3.6.5.2;<br>EC:3.6.5.3;<br>EC:3.6.5.4 | -                                                                                 |



|                         |                                                       |    |                                                                                                                                                                                                         |                                                                                                                    |                                                         |                                                                                                                                 |
|-------------------------|-------------------------------------------------------|----|---------------------------------------------------------------------------------------------------------------------------------------------------------------------------------------------------------|--------------------------------------------------------------------------------------------------------------------|---------------------------------------------------------|---------------------------------------------------------------------------------------------------------------------------------|
| Haemonchus contortus    | beta-tubulin isotype 1                                | 6  | P:GO:0007018;<br>F:GO:0005525;<br>P:GO:0051258;<br>F:GO:0005198;<br>F:GO:0003924;<br>C:GO:0005874                                                                                                       | -                                                                                                                  | EC:3.6.5.1;<br>EC:3.6.5.2;<br>EC:3.6.5.3;<br>EC:3.6.5.4 | -                                                                                                                               |
| Haemonchus contortus    | beta-tubulin isotype 1                                | 6  | P:GO:0007018;<br>F:GO:0005525;<br>P:GO:0051258;<br>F:GO:0005198;<br>F:GO:0003924;<br>C:GO:0005874                                                                                                       | -                                                                                                                  | EC:3.6.5.1;<br>EC:3.6.5.2;<br>EC:3.6.5.3;<br>EC:3.6.5.4 | -                                                                                                                               |
| Caenorhabditis elegans  | abhydrolase domain containing 12                      | 0  |                                                                                                                                                                                                         | P:GO:0008152;<br>F:GO:0016787;<br>C:GO:0016021;<br>F:GO:0047372;<br>C:GO:0016020                                   |                                                         | IPR000073; G3DSA:3.40.50.1820 (GENE3D), PTHR12277 (PANTHER), PTHR12277:SF4 (PANTHER), SignalP (SIGNALP), SSF53474 (SUPERFAMILY) |
| Caenorhabditis elegans  | abhydrolase domain containing 12                      | 0  |                                                                                                                                                                                                         | P:GO:0008152;<br>F:GO:0016787;<br>C:GO:0016021;<br>F:GO:0047372;<br>C:GO:0016020                                   |                                                         | IPR000073; G3DSA:3.40.50.1820 (GENE3D), PTHR12277 (PANTHER), PTHR12277:SF4 (PANTHER), SignalP (SIGNALP), SSF53474 (SUPERFAMILY) |
| -                       | -                                                     | 0  |                                                                                                                                                                                                         |                                                                                                                    |                                                         | -                                                                                                                               |
| -                       | -                                                     | 0  |                                                                                                                                                                                                         |                                                                                                                    |                                                         | -                                                                                                                               |
| -                       | -                                                     | 0  |                                                                                                                                                                                                         |                                                                                                                    |                                                         | -                                                                                                                               |
| Caenorhabditis elegans  | hypothetical protein F45E4.5 [Caenorhabditis elegans] | 0  |                                                                                                                                                                                                         |                                                                                                                    |                                                         | -                                                                                                                               |
| Caenorhabditis briggsae | family with sequence similarity member b1             | 0  |                                                                                                                                                                                                         | P:GO:0006508;<br>F:GO:0003674;<br>F:GO:0008236;<br>F:GO:0016787;<br>P:GO:0008150;<br>C:GO:0005576;<br>C:GO:0005575 |                                                         | -                                                                                                                               |
| Caenorhabditis elegans  | -d-dependent malic mitochondrial precursor            | 9  | F:GO:0046872;<br>P:GO:0006090;<br>F:GO:0051287;<br>C:GO:0005759;<br>F:GO:0016619;<br>F:GO:0030060;<br>P:GO:0006108;<br>P:GO:0055114;<br>F:GO:0004473                                                    | -                                                                                                                  | EC:1.1.1.38;<br>EC:1.1.1.37;<br>EC:1.1.1.40             | IPR012302; IPR016040; PTHR23406 (PANTHER), PTHR23406:SF2 (PANTHER), SSF51735 (SUPERFAMILY)                                      |
| -                       | -                                                     | 0  |                                                                                                                                                                                                         |                                                                                                                    |                                                         | -                                                                                                                               |
| -                       | -                                                     | 0  |                                                                                                                                                                                                         |                                                                                                                    |                                                         | SignalP (SIGNALP)                                                                                                               |
| -                       | -                                                     | 0  |                                                                                                                                                                                                         |                                                                                                                    |                                                         | -                                                                                                                               |
| Caenorhabditis elegans  | isocitrate dehydroge-se                               | 12 | C:GO:0005962;<br>P:GO:0045926;<br>P:GO:0006103;<br>C:GO:0005730;<br>P:GO:0006734;<br>P:GO:0055114;<br>F:GO:0004449;<br>P:GO:0006099;<br>F:GO:0005524;<br>F:GO:0051287;<br>F:GO:0000287;<br>P:GO:0006102 | -                                                                                                                  | EC:1.1.1.41                                             | IPR001804; PTHR11835:SF5 (PANTHER), SSF53659 (SUPERFAMILY)                                                                      |

|                         |                                                            |  |    |                                                                                                                                                                                                                                           |   |                                                                                                                    |                                                                                       |
|-------------------------|------------------------------------------------------------|--|----|-------------------------------------------------------------------------------------------------------------------------------------------------------------------------------------------------------------------------------------------|---|--------------------------------------------------------------------------------------------------------------------|---------------------------------------------------------------------------------------|
| Caenorhabditis briggsae | c6orf153 protein                                           |  | 5  | P:GO:0009792;<br>P:GO:0002119;<br>P:GO:0000003;<br>P:GO:0040007;<br>P:GO:0006898                                                                                                                                                          | - |                                                                                                                    | IPR009292                                                                             |
| Onchocerca volvulus     | peptidyl-prolyl isomerase cwc27                            |  | 2  | F:GO:0003755;<br>P:GO:0006457                                                                                                                                                                                                             | - | EC:5.2.1.8                                                                                                         | IPR002130; IPR015891; PTHR11071 (PANTHER), PTHR11071:SF33 (PANTHER)                   |
|                         | -                                                          |  | 0  |                                                                                                                                                                                                                                           |   |                                                                                                                    | SignalP (SIGNALP)                                                                     |
| Loa loa                 | activated r- polymerase ii transcriptio-l coactivator p15  |  | 5  | C:GO:0031981;<br>P:GO:0006355;<br>P:GO:0000003;<br>F:GO:0003677;<br>F:GO:0005515                                                                                                                                                          | - |                                                                                                                    | IPR003173; IPR009044                                                                  |
|                         | -                                                          |  | 0  |                                                                                                                                                                                                                                           |   |                                                                                                                    | -                                                                                     |
|                         | -                                                          |  | 0  |                                                                                                                                                                                                                                           |   |                                                                                                                    | -                                                                                     |
| Caenorhabditis elegans  | variable abnormal morphology family member (vab-10)        |  | 0  |                                                                                                                                                                                                                                           |   | F:GO:0005509;<br>P:GO:0007050                                                                                      | G3DSA:1.20.58.60 (GENE3D), SSF46966 (SUPERFAMILY)                                     |
| Caenorhabditis elegans  | d- repair protein rad4 containing protein                  |  | 7  | P:GO:0000718;<br>P:GO:0000075;<br>F:GO:0003684;<br>F:GO:0005515;<br>F:GO:0003697;<br>C:GO:0005654;<br>P:GO:0000715                                                                                                                        | - |                                                                                                                    | IPR004583; IPR018327; IPR018328                                                       |
| Caenorhabditis briggsae | tetratricopeptide repeat protein 38                        |  | 0  |                                                                                                                                                                                                                                           |   | F:GO:0005488;<br>P:GO:0008150;<br>C:GO:0005575                                                                     | IPR011990; SSF48452 (SUPERFAMILY)                                                     |
|                         | -                                                          |  | 0  |                                                                                                                                                                                                                                           |   |                                                                                                                    | -                                                                                     |
|                         | -                                                          |  | 0  |                                                                                                                                                                                                                                           |   |                                                                                                                    | -                                                                                     |
| Loa loa                 | microtubule-associated protein rp eb family member 1       |  | 14 | P:GO:0000022;<br>P:GO:0031115;<br>C:GO:0005829;<br>C:GO:0005875;<br>P:GO:0035372;<br>F:GO:0051010;<br>P:GO:0007629;<br>P:GO:0051225;<br>P:GO:0007423;<br>C:GO:0005876;<br>P:GO:0007059;<br>C:GO:0005881;<br>P:GO:0030589;<br>C:GO:0030981 | - |                                                                                                                    | IPR001715; IPR004953; PTHR10623 (PANTHER), SignalP (SIGNALP), SSF140612 (SUPERFAMILY) |
| Camponotus floridanus   | uncharacterized transposase-like protein                   |  | 0  |                                                                                                                                                                                                                                           |   | F:GO:0046872;<br>P:GO:0055114;<br>F:GO:0009055;<br>F:GO:0016491;<br>F:GO:0020037;<br>F:GO:0005506;<br>F:GO:0004497 | IPR007087; IPR015880                                                                  |
|                         | -                                                          |  | 0  |                                                                                                                                                                                                                                           |   |                                                                                                                    | -                                                                                     |
| Caenorhabditis elegans  | elegans protein partially confirmed by transcript evidence |  | 1  | P:GO:0006810                                                                                                                                                                                                                              | - |                                                                                                                    | SignalP (SIGNALP)                                                                     |
|                         | -                                                          |  | 0  |                                                                                                                                                                                                                                           |   |                                                                                                                    | -                                                                                     |

|                             |                                                         |   |                                                                                                                    |                                                                                  |            |                                                                                                                            |
|-----------------------------|---------------------------------------------------------|---|--------------------------------------------------------------------------------------------------------------------|----------------------------------------------------------------------------------|------------|----------------------------------------------------------------------------------------------------------------------------|
| Caenorhabditis briggsae     | briggsae cbr-flp-2 protein                              | 0 |                                                                                                                    | P:GO:0007218;<br>P:GO:0040010;<br>P:GO:0009792;<br>P:GO:0002119;<br>P:GO:0040007 |            | SignalP (SIGNALP)                                                                                                          |
| Caenorhabditis elegans      | bro1 domain-containing protein brox                     | 0 |                                                                                                                    | C:GO:0016020                                                                     |            | G3DSA:1.25.40.280 (GENE3D),<br>PTHR23032 (PANTHER)                                                                         |
|                             | -                                                       | 0 |                                                                                                                    |                                                                                  |            | -                                                                                                                          |
| Caenorhabditis briggsae     | Hypothetical protein CBG06447 [Caenorhabditis briggsae] | 0 |                                                                                                                    |                                                                                  |            | -                                                                                                                          |
|                             | -                                                       | 0 |                                                                                                                    |                                                                                  |            | -                                                                                                                          |
| Caenorhabditis elegans      | immunoglobulin i-set domain containing protein          | 0 |                                                                                                                    | C:GO:0005737;<br>F:GO:0003779;<br>C:GO:0030017;<br>C:GO:0005634                  |            | IPR003599; IPR007110; IPR013098;<br>IPR013783; PTHR19897 (PANTHER),<br>PTHR19897:SF11 (PANTHER),<br>SSF48726 (SUPERFAMILY) |
| Caenorhabditis elegans      | temporarily assigned gene -me family member (tag-333)   | 0 |                                                                                                                    | F:GO:0005488;<br>P:GO:0007165;<br>F:GO:0005515                                   |            | IPR000159; IPR003123; PTHR23101<br>(PANTHER), PTHR23101:SF3<br>(PANTHER), SSF109993 (SUPERFAMILY)                          |
| Caenorhabditis elegans      | tbc domain containing protein                           | 1 | F:GO:0005515                                                                                                       | -                                                                                |            | -                                                                                                                          |
| Caenorhabditis briggsae     | Hypothetical protein CBG15695 [Caenorhabditis briggsae] | 0 |                                                                                                                    |                                                                                  |            | -                                                                                                                          |
|                             | -                                                       | 0 |                                                                                                                    |                                                                                  |            | -                                                                                                                          |
|                             | -                                                       | 0 |                                                                                                                    |                                                                                  |            | SignalP (SIGNALP)                                                                                                          |
| Loa loa                     | hypothetical protein LOAG_07466 [Loa loa]               | 0 |                                                                                                                    |                                                                                  |            | -                                                                                                                          |
|                             | -                                                       | 0 |                                                                                                                    |                                                                                  |            | -                                                                                                                          |
| Caenorhabditis elegans      | briggsae cbr-nlr-1 protein                              | 0 |                                                                                                                    |                                                                                  |            | PTHR10127 (PANTHER),<br>PTHR10127:SF2 (PANTHER)                                                                            |
| Caenorhabditis elegans      | vacuolar proton atpases                                 | 3 | C:GO:0033177;<br>C:GO:0016021;<br>P:GO:0015986                                                                     | -                                                                                |            | IPR002490; PTHR11629:SF23<br>(PANTHER)                                                                                     |
| Caenorhabditis elegans      | small family member (sma-9)                             | 1 | F:GO:0005515                                                                                                       | -                                                                                |            | -                                                                                                                          |
| Macaca mulatta              | sig-l sequence delta                                    | 7 | F:GO:0004872;<br>C:GO:0005784;<br>F:GO:0005515;<br>F:GO:0005509;<br>P:GO:0006886;<br>P:GO:0007165;<br>C:GO:0016021 | -                                                                                |            | IPR008855; SignalP (SIGNALP)                                                                                               |
| Angiostrongylus cantonensis | hypothetical protein [Angiostrongylus cantonensis]      | 0 |                                                                                                                    |                                                                                  |            | IPR018483                                                                                                                  |
| Angiostrongylus cantonensis | hypothetical protein [Angiostrongylus cantonensis]      | 0 |                                                                                                                    |                                                                                  |            | IPR018483                                                                                                                  |
| Caenorhabditis briggsae     | calcium atpase                                          | 5 | F:GO:0005388;<br>C:GO:0016021;<br>P:GO:0006754;<br>F:GO:0005524;<br>P:GO:0006816                                   | -                                                                                | EC:3.6.3.8 | IPR001757; IPR022141;<br>PTHR11939:SF5 (PANTHER), SignalP<br>(SIGNALP)                                                     |
|                             | -                                                       | 0 |                                                                                                                    |                                                                                  |            | -                                                                                                                          |
|                             | -                                                       | 0 |                                                                                                                    |                                                                                  |            | IPR011047; IPR015943                                                                                                       |
|                             | -                                                       | 0 |                                                                                                                    |                                                                                  |            | -                                                                                                                          |
|                             | -                                                       | 0 |                                                                                                                    |                                                                                  |            | -                                                                                                                          |
| Caenorhabditis elegans      | elegans protein confirmed by transcript evidence        | 0 |                                                                                                                    |                                                                                  |            | -                                                                                                                          |

|                             |                                                                   |    |                                                                                                                                                                       |                                                |                            |                                                                                                             |
|-----------------------------|-------------------------------------------------------------------|----|-----------------------------------------------------------------------------------------------------------------------------------------------------------------------|------------------------------------------------|----------------------------|-------------------------------------------------------------------------------------------------------------|
| Taeniopygia guttata         | uridine-cytidine ki-se 2                                          | 10 | C:GO:0005829;<br>P:GO:0071453;<br>F:GO:0004849;<br>F:GO:0016773;<br>P:GO:0006911;<br>F:GO:0005524;<br>C:GO:0005792;<br>P:GO:0016579;<br>P:GO:0048678;<br>P:GO:0007631 |                                                | EC:2.7.1.48;<br>EC:2.7.1.0 | -                                                                                                           |
| -                           | -                                                                 | 0  |                                                                                                                                                                       |                                                |                            | -                                                                                                           |
| -                           | -                                                                 | 0  |                                                                                                                                                                       |                                                |                            | -                                                                                                           |
| -                           | -                                                                 | 0  |                                                                                                                                                                       |                                                |                            | -                                                                                                           |
| -                           | -                                                                 | 0  |                                                                                                                                                                       |                                                |                            | -                                                                                                           |
| Brugia malayi               | gram domain containing protein                                    | 0  |                                                                                                                                                                       |                                                |                            | -                                                                                                           |
| Brugia malayi               | gram domain containing protein                                    | 0  |                                                                                                                                                                       |                                                |                            | -                                                                                                           |
| Brugia malayi               | gram domain containing protein                                    | 0  |                                                                                                                                                                       |                                                |                            | -                                                                                                           |
| Brugia malayi               | gram domain containing protein                                    | 0  |                                                                                                                                                                       |                                                |                            | -                                                                                                           |
| -                           | -                                                                 | 0  |                                                                                                                                                                       |                                                |                            | -                                                                                                           |
| Caenorhabditis elegans      | hypothetical protein T07E3.4 [Caenorhabditis elegans]             | 0  |                                                                                                                                                                       |                                                |                            | -                                                                                                           |
| -                           | -                                                                 | 0  |                                                                                                                                                                       |                                                |                            | -                                                                                                           |
| Caenorhabditis briggsae     | briggsae cbr-jph-1 protein                                        | 0  |                                                                                                                                                                       |                                                |                            | IPR003409; G3DSA:2.20.110.10 (GENE3D), PTHR23085 (PANTHER), PTHR23085:SF3 (PANTHER), SSF82185 (SUPERFAMILY) |
| Caenorhabditis briggsae     | briggsae cbr-jph-1 protein                                        | 0  |                                                                                                                                                                       |                                                |                            | IPR003409; G3DSA:2.20.110.10 (GENE3D), PTHR23085 (PANTHER), PTHR23085:SF3 (PANTHER), SSF82185 (SUPERFAMILY) |
| Caenorhabditis briggsae     | briggsae cbr-jph-1 protein                                        | 0  |                                                                                                                                                                       |                                                |                            | IPR003409; G3DSA:2.20.110.10 (GENE3D), PTHR23085 (PANTHER), PTHR23085:SF3 (PANTHER), SSF82185 (SUPERFAMILY) |
| -                           | -                                                                 | 0  |                                                                                                                                                                       |                                                |                            | -                                                                                                           |
| Caenorhabditis briggsae     | nuclear vcp-like                                                  | 0  |                                                                                                                                                                       | F:GO:0005524;<br>F:GO:0000166;<br>F:GO:0017111 |                            | PTHR23077 (PANTHER), PTHR23077:SF16 (PANTHER)                                                               |
| -                           | -                                                                 | 0  |                                                                                                                                                                       |                                                |                            | SignalP (SIGNALP)                                                                                           |
| Caenorhabditis elegans      | skp1 related (ubiquitin ligase complex component) protein 18-like | 4  | P:GO:0002009;<br>P:GO:0040035;<br>P:GO:0006898;<br>P:GO:0040011                                                                                                       |                                                |                            | -                                                                                                           |
| Caenorhabditis briggsae     | d- ligase i                                                       | 5  | F:GO:0008408;<br>F:GO:0003697;<br>P:GO:0000003;<br>P:GO:0006289;<br>P:GO:0007004                                                                                      |                                                |                            | PTHR23240 (PANTHER), PTHR23240:SF1 (PANTHER)                                                                |
| -                           | -                                                                 | 0  |                                                                                                                                                                       |                                                |                            | -                                                                                                           |
| Angiostrongylus cantonensis | hypothetical protein [Angiostrongylus cantonensis]                | 0  |                                                                                                                                                                       |                                                |                            | -                                                                                                           |
| -                           | -                                                                 | 0  |                                                                                                                                                                       |                                                |                            | -                                                                                                           |
| -                           | -                                                                 | 0  |                                                                                                                                                                       |                                                |                            | -                                                                                                           |

|                             |                                                         |    |                                                                                                                                                                                                                                                                                                               |   |             |                                                                                                              |
|-----------------------------|---------------------------------------------------------|----|---------------------------------------------------------------------------------------------------------------------------------------------------------------------------------------------------------------------------------------------------------------------------------------------------------------|---|-------------|--------------------------------------------------------------------------------------------------------------|
| Loa loa                     | prp6 pre-mr- splicing factor 6 homolog                  | 18 | P:GO:0000003;<br>C:GO:0046540;<br>P:GO:0040010;<br>P:GO:0040015;<br>P:GO:0006898;<br>F:GO:0043021;<br>P:GO:0000244;<br>P:GO:0018996;<br>P:GO:0000245;<br>P:GO:0040039;<br>C:GO:0005681;<br>P:GO:0009792;<br>F:GO:0003713;<br>P:GO:0002119;<br>C:GO:0005682;<br>C:GO:0071001;<br>P:GO:0045944;<br>F:GO:0050681 | - |             | IPR011990; IPR013026; PTHR11246 (PANTHER), PTHR11246:SF1 (PANTHER), SSF48452 (SUPERFAMILY)                   |
| Caenorhabditis briggsae     | cyclopropane-fatty-acyl-phospholipid synthase           | 2  | P:GO:0008610;<br>F:GO:0008825                                                                                                                                                                                                                                                                                 | - | EC:2.1.1.79 | IPR003333; G3DSA:3.40.50.150 (GENE3D), SSF53335 (SUPERFAMILY)                                                |
| Caenorhabditis elegans      | ubiquitin-activating enzyme e1 domain-containing        | 9  | C:GO:0005737;<br>F:GO:0046872;<br>F:GO:0005515;<br>F:GO:0071566;<br>F:GO:0005524;<br>F:GO:0016616;<br>F:GO:0048037;<br>C:GO:0005634;<br>P:GO:0071569                                                                                                                                                          | - | EC:1.1.1.0  | -                                                                                                            |
| Angiostrongylus cantonensis | yy2 transcription factor                                | 1  | F:GO:0005488                                                                                                                                                                                                                                                                                                  | - |             | IPR007087; IPR013087; IPR015880; PTHR14003 (PANTHER), SSF57667 (SUPERFAMILY)                                 |
| Caenorhabditis briggsae     | briggsae cbr-sgn-1 protein                              | 5  | P:GO:0007010;<br>C:GO:0016021;<br>P:GO:0040013;<br>C:GO:0016012;<br>F:GO:0005515                                                                                                                                                                                                                              | - |             | IPR006875; PTHR12939 (PANTHER), PTHR12939:SF1 (PANTHER)                                                      |
| Caenorhabditis briggsae     | ras association domain-containing protein 1             | 12 | P:GO:0007265;<br>F:GO:0008270;<br>P:GO:0006974;<br>C:GO:0044430;<br>P:GO:0071157;<br>C:GO:0015630;<br>P:GO:0031398;<br>F:GO:0047485;<br>P:GO:0050821;<br>F:GO:0042802;<br>C:GO:0044444;<br>C:GO:0005634                                                                                                       | - |             | IPR002219; IPR008937; IPR020454; G3DSA:3.30.60.20 (GENE3D), PTHR23113:SF19 (PANTHER), SSF57889 (SUPERFAMILY) |
| Caenorhabditis elegans      | homeobox family member (ceh-38)                         | 1  | P:GO:0000003                                                                                                                                                                                                                                                                                                  | - |             | -                                                                                                            |
| Caenorhabditis briggsae     | mgc82750 protein                                        | 1  | F:GO:0005488                                                                                                                                                                                                                                                                                                  | - |             | IPR007810; PTHR23323 (PANTHER)                                                                               |
| Caenorhabditis briggsae     | Hypothetical protein CBG22096 [Caenorhabditis briggsae] | 2  | P:GO:0048856;<br>P:GO:0007275                                                                                                                                                                                                                                                                                 | - |             | IPR011989                                                                                                    |
| -                           | -                                                       | 0  |                                                                                                                                                                                                                                                                                                               |   |             | -                                                                                                            |

|                         |                                                              |   |                                                                                                                      |                                                                                                                                                                                        |              |                                                                                                                                                                   |
|-------------------------|--------------------------------------------------------------|---|----------------------------------------------------------------------------------------------------------------------|----------------------------------------------------------------------------------------------------------------------------------------------------------------------------------------|--------------|-------------------------------------------------------------------------------------------------------------------------------------------------------------------|
| Caenorhabditis elegans  | potassium subfamily member 1                                 |   | P:GO:0006811;<br>3 C:GO:0016020;<br>F:GO:0005216                                                                     | -                                                                                                                                                                                      |              | IPR003280; IPR005408; IPR013099;<br>G3DSA:1.10.287.70 (GENE3D),<br>PTHR11003 (PANTHER),<br>PTHR11003:SF26 (PANTHER), SignalP<br>(SIGNALP), SSF81324 (SUPERFAMILY) |
| -                       | -                                                            | 0 |                                                                                                                      |                                                                                                                                                                                        |              | -                                                                                                                                                                 |
| Pongo abelii            | preli domain containing 1                                    |   | P:GO:0006955;<br>4 C:GO:0005730;<br>P:GO:0007275;<br>C:GO:0005739                                                    | -                                                                                                                                                                                      |              | IPR006797; PTHR11158 (PANTHER),<br>PTHR11158:SF16 (PANTHER), SignalP<br>(SIGNALP)                                                                                 |
| Caenorhabditis elegans  | pap-inositol- -phosphatase                                   |   | 1 F:GO:0004437                                                                                                       | -                                                                                                                                                                                      |              | IPR000760; IPR020550;<br>G3DSA:3.30.540.10 (GENE3D),<br>G3DSA:3.40.190.80 (GENE3D),<br>PTHR20854:SF7 (PANTHER), SignalP<br>(SIGNALP), SSF56655 (SUPERFAMILY)      |
| Caenorhabditis elegans  | tfiih basal transcription factor complex helicase subunit    |   | P:GO:0006283;<br>P:GO:0006917;<br>7 F:GO:0043139;<br>F:GO:0004003;<br>F:GO:0003677;<br>F:GO:0005524;<br>C:GO:0005634 | -                                                                                                                                                                                      |              | SignalP (SIGNALP)                                                                                                                                                 |
| -                       | -                                                            | 0 |                                                                                                                      |                                                                                                                                                                                        |              | -                                                                                                                                                                 |
| Caenorhabditis elegans  | elegans protein confirmed by transcript evidence             |   | 2 P:GO:0040010;<br>P:GO:0000003                                                                                      | -                                                                                                                                                                                      |              | IPR015419                                                                                                                                                         |
| Gallus gallus           | non-structural maintenance of chromosome subunit of d-repair |   | 0                                                                                                                    | P:GO:0008150;<br>C:GO:0005575                                                                                                                                                          |              | IPR014854                                                                                                                                                         |
| Caenorhabditis elegans  | hypothetical protein F46F11.7 [Caenorhabditis elegans]       |   | 0                                                                                                                    |                                                                                                                                                                                        |              | -                                                                                                                                                                 |
| -                       | -                                                            | 0 |                                                                                                                      |                                                                                                                                                                                        |              | -                                                                                                                                                                 |
| Caenorhabditis elegans  | elegans protein confirmed by transcript evidence             |   | 2 P:GO:0002119;<br>P:GO:0040010                                                                                      | -                                                                                                                                                                                      |              | -                                                                                                                                                                 |
| -                       | -                                                            | 0 |                                                                                                                      |                                                                                                                                                                                        |              | -                                                                                                                                                                 |
| -                       | -                                                            | 0 |                                                                                                                      |                                                                                                                                                                                        |              | -                                                                                                                                                                 |
| Pongo abelii            | 60s acidic ribosomal protein p2                              |   | 4 F:GO:0003735;<br>F:GO:0003723;<br>C:GO:0022625;<br>P:GO:0006414                                                    | -                                                                                                                                                                                      |              | IPR001813; PTHR21141 (PANTHER),<br>PTHR21141:SF5 (PANTHER)                                                                                                        |
| Caenorhabditis elegans  | dihydroorotate dehydroge-se                                  |   | 5 P:GO:0043065;<br>C:GO:0005743;<br>F:GO:0004152;<br>P:GO:0006221;<br>P:GO:0090140                                   | -                                                                                                                                                                                      | EC:1.3.99.11 | IPR013785; PTHR11938 (PANTHER),<br>PTHR11938:SF7 (PANTHER), SSF51395<br>(SUPERFAMILY)                                                                             |
| Caenorhabditis briggsae | briggsae cbr-elpc-1 protein                                  |   | 0                                                                                                                    | F:GO:0016301;<br>F:GO:0005488                                                                                                                                                          |              | IPR006849                                                                                                                                                         |
| Caenorhabditis briggsae | briggsae cbr-kin-29 protein                                  |   | 0                                                                                                                    | F:GO:0016740;<br>F:GO:0004674;<br>F:GO:0004672;<br>C:GO:0005634;<br>P:GO:0006468;<br>F:GO:0000166;<br>C:GO:0005737;<br>F:GO:0005524;<br>P:GO:0007275;<br>F:GO:0016301;<br>F:GO:0046872 |              | -                                                                                                                                                                 |
| -                       | -                                                            | 0 |                                                                                                                      |                                                                                                                                                                                        |              | -                                                                                                                                                                 |

|                         |                                                             |   |                                                                                                                    |                                                                                                                                                                                                                                                                                              |                                                                                                                                                                             |
|-------------------------|-------------------------------------------------------------|---|--------------------------------------------------------------------------------------------------------------------|----------------------------------------------------------------------------------------------------------------------------------------------------------------------------------------------------------------------------------------------------------------------------------------------|-----------------------------------------------------------------------------------------------------------------------------------------------------------------------------|
| Ancylostoma caninum     | bone morphogenetic protein type ib                          | 6 | P:GO:0048263;<br>P:GO:0006468;<br>F:GO:0005024;<br>P:GO:0030509;<br>F:GO:0005524;<br>C:GO:0016020                  | -                                                                                                                                                                                                                                                                                            | IPR000719; IPR008271; IPR011009;<br>IPR017441; IPR017442;<br>G3DSA:1.10.510.10 (GENE3D),<br>G3DSA:3.30.200.20 (GENE3D),<br>PTHR23255 (PANTHER),<br>PTHR23255:SF14 (PANTHER) |
|                         | -                                                           | 0 |                                                                                                                    |                                                                                                                                                                                                                                                                                              | -                                                                                                                                                                           |
|                         | -                                                           | 0 |                                                                                                                    |                                                                                                                                                                                                                                                                                              | -                                                                                                                                                                           |
| Heliconius melpomene    | endonuclease-reverse transcriptase                          | 0 |                                                                                                                    | F:GO:0003723;<br>P:GO:0006278;<br>F:GO:0004519;<br>F:GO:0003677;<br>F:GO:0003964                                                                                                                                                                                                             | IPR000477; IPR015706;<br>PTHR19446:SF100 (PANTHER), SignalP<br>(SIGNALP), SSF56672 (SUPERFAMILY)                                                                            |
| Caenorhabditis elegans  | laminin see also lmb- protein 1                             | 5 | P:GO:0000003;<br>P:GO:0010171;<br>P:GO:0040010;<br>F:GO:0005515;<br>P:GO:0040011                                   | -                                                                                                                                                                                                                                                                                            | -                                                                                                                                                                           |
| Caenorhabditis briggsae | ykad_caee1 ame: full=uncharacterized protein                | 0 |                                                                                                                    |                                                                                                                                                                                                                                                                                              | -                                                                                                                                                                           |
|                         | -                                                           | 0 |                                                                                                                    |                                                                                                                                                                                                                                                                                              | -                                                                                                                                                                           |
|                         | -                                                           | 0 |                                                                                                                    |                                                                                                                                                                                                                                                                                              | -                                                                                                                                                                           |
| Dictyocaulus viviparus  | nematode polyprotein allergen related family member (npa-1) | 2 | P:GO:0008340;<br>F:GO:0008289                                                                                      | -                                                                                                                                                                                                                                                                                            | PTHR21693 (PANTHER), SignalP<br>(SIGNALP)                                                                                                                                   |
|                         | -                                                           | 0 |                                                                                                                    |                                                                                                                                                                                                                                                                                              | SignalP (SIGNALP)                                                                                                                                                           |
| Caenorhabditis elegans  | transcriptio-I regulating factor 1                          | 0 |                                                                                                                    | F:GO:0008301;<br>P:GO:0006707;<br>F:GO:0003700;<br>F:GO:0003677;<br>C:GO:0005634;<br>F:GO:0030374;<br>P:GO:0045893;<br>P:GO:0046885;<br>F:GO:0008134;<br>F:GO:0008270;<br>P:GO:0007275;<br>P:GO:0042592;<br>C:GO:0005622;<br>F:GO:0016455;<br>F:GO:0046872;<br>P:GO:0006694;<br>P:GO:0045449 | PTHR16089 (PANTHER),<br>PTHR16089:SF9 (PANTHER)                                                                                                                             |
|                         | -                                                           | 0 |                                                                                                                    |                                                                                                                                                                                                                                                                                              | SignalP (SIGNALP)                                                                                                                                                           |
| Caenorhabditis elegans  | unkempt homolog -like                                       | 7 | F:GO:0003676;<br>P:GO:0008152;<br>C:GO:0005737;<br>C:GO:0005634;<br>F:GO:0008270;<br>F:GO:0005515;<br>F:GO:0016874 | -                                                                                                                                                                                                                                                                                            | IPR000571; PTHR14493 (PANTHER),<br>PTHR14493:SF1 (PANTHER)                                                                                                                  |

|                         |                                                         |    |                                                                                                                                                                                        |                                                |              |                                                                                                                          |
|-------------------------|---------------------------------------------------------|----|----------------------------------------------------------------------------------------------------------------------------------------------------------------------------------------|------------------------------------------------|--------------|--------------------------------------------------------------------------------------------------------------------------|
| Loa loa                 | ccr4-not transcription subunit isoform cra_b            | 11 | P:GO:0040010;<br>F:GO:0003676;<br>F:GO:0046872;<br>P:GO:0000003;<br>F:GO:0004842;<br>F:GO:0005515;<br>P:GO:0051865;<br>P:GO:0040017;<br>P:GO:0009792;<br>C:GO:0005737;<br>C:GO:0005634 | -                                              | EC:6.3.2.19  | IPR000504; IPR001841; IPR012677;<br>IPR013083; PTHR12603 (PANTHER),<br>SSF54928 (SUPERFAMILY), SSF57850<br>(SUPERFAMILY) |
| Caenorhabditis elegans  | elegans protein confirmed by transcript evidence        | 1  | F:GO:0005515                                                                                                                                                                           | -                                              |              | IPR005373                                                                                                                |
| Caenorhabditis elegans  | elegans protein confirmed by transcript evidence        | 1  | F:GO:0005515                                                                                                                                                                           | -                                              |              | IPR005373                                                                                                                |
| Pan troglodytes         | ribosomal protein l14                                   | 7  | P:GO:0042273;<br>F:GO:0003735;<br>F:GO:0003723;<br>F:GO:0005515;<br>P:GO:0006364;<br>C:GO:0022625;<br>P:GO:0006414                                                                     | -                                              |              | -                                                                                                                        |
| -                       | -                                                       | 0  |                                                                                                                                                                                        |                                                |              | -                                                                                                                        |
| -                       | -                                                       | 0  |                                                                                                                                                                                        |                                                |              | -                                                                                                                        |
| Caenorhabditis elegans  | cub domain containing protein                           | 0  |                                                                                                                                                                                        |                                                |              | IPR000859; PTHR10127 (PANTHER),<br>PTHR10127:SF33 (PANTHER), SignalP<br>(SIGNALP)                                        |
| -                       | -                                                       | 0  |                                                                                                                                                                                        |                                                |              | -                                                                                                                        |
| -                       | -                                                       | 0  |                                                                                                                                                                                        |                                                |              | -                                                                                                                        |
| Caenorhabditis briggsae | Hypothetical protein CBG22545 [Caenorhabditis briggsae] | 0  |                                                                                                                                                                                        | F:GO:0008270;<br>C:GO:0005622                  |              | IPR007087; IPR015880                                                                                                     |
| Caenorhabditis briggsae | zinc finger protein                                     | 0  |                                                                                                                                                                                        | F:GO:0003676;<br>F:GO:0008270;<br>C:GO:0005622 |              | IPR007087; IPR015880                                                                                                     |
| -                       | -                                                       | 0  |                                                                                                                                                                                        |                                                |              | -                                                                                                                        |
| Caenorhabditis briggsae | Hypothetical protein CBG09291 [Caenorhabditis briggsae] | 0  |                                                                                                                                                                                        |                                                |              | -                                                                                                                        |
| -                       | -                                                       | 0  |                                                                                                                                                                                        |                                                |              | -                                                                                                                        |
| -                       | -                                                       | 0  |                                                                                                                                                                                        |                                                |              | -                                                                                                                        |
| Caenorhabditis elegans  | elegans protein confirmed by transcript evidence        | 0  |                                                                                                                                                                                        |                                                |              | -                                                                                                                        |
| Caenorhabditis elegans  | exodeoxyribonuclease iii family protein                 | 4  | C:GO:0005622;<br>F:GO:0008408;<br>P:GO:0006974;<br>F:GO:0003906                                                                                                                        | -                                              | EC:4.2.99.18 | IPR000097; IPR004808; IPR005135;<br>IPR020848; G3DSA:3.60.10.10<br>(GENE3D)                                              |
| Caenorhabditis briggsae | Hypothetical protein CBG16268 [Caenorhabditis briggsae] | 0  |                                                                                                                                                                                        | F:GO:0016787                                   |              | -                                                                                                                        |
| -                       | -                                                       | 0  |                                                                                                                                                                                        |                                                |              | -                                                                                                                        |
| Caenorhabditis elegans  | hypothetical protein Y61A9LA.3 [Caenorhabditis elegans] | 0  |                                                                                                                                                                                        |                                                |              | -                                                                                                                        |
| Caenorhabditis elegans  | alpha-l- plasma                                         | 3  | P:GO:0006004;<br>F:GO:0004560;<br>F:GO:0043169                                                                                                                                         | -                                              | EC:3.2.1.51  | IPR000933; IPR013781; IPR016286;<br>IPR017853; IPR018526                                                                 |
| Caenorhabditis elegans  | ankyrin repeat and mynd domain containing 2             | 0  |                                                                                                                                                                                        | F:GO:0046872;<br>F:GO:0008270                  |              | IPR002110; IPR020683; PTHR18958<br>(PANTHER), PTHR18958:SF211<br>(PANTHER)                                               |
| -                       | -                                                       | 0  |                                                                                                                                                                                        |                                                |              | SignalP (SIGNALP)                                                                                                        |
| -                       | -                                                       | 0  |                                                                                                                                                                                        |                                                |              | -                                                                                                                        |
| Brugia malayi           | f-box domain containing protein                         | 0  |                                                                                                                                                                                        |                                                |              | -                                                                                                                        |



|                         |                                                                                 |    |                                                                                                                                                                                        |                                                |                              |                                                                                                                                      |
|-------------------------|---------------------------------------------------------------------------------|----|----------------------------------------------------------------------------------------------------------------------------------------------------------------------------------------|------------------------------------------------|------------------------------|--------------------------------------------------------------------------------------------------------------------------------------|
| Caenorhabditis briggsae | clathrin-associated protein                                                     | 7  | P:GO:0016183;<br>C:GO:0008021;<br>P:GO:0007269;<br>C:GO:0030122;<br>F:GO:0005515;<br>P:GO:0006886;<br>P:GO:0033227                                                                     | -                                              |                              | IPR001392; IPR008968; IPR015629;<br>G3DSA:2.60.40.1170 (GENE3D),<br>PTHR11998 (PANTHER)                                              |
| Caenorhabditis elegans  | cytochrome b5 domain containing 2                                               | 2  | C:GO:0016021;<br>F:GO:0016491                                                                                                                                                          | -                                              |                              | PTHR10281 (PANTHER),<br>PTHR10281:SF4 (PANTHER)                                                                                      |
| Caenorhabditis elegans  | cytochrome b5 domain containing 2                                               | 2  | C:GO:0016021;<br>F:GO:0016491                                                                                                                                                          | -                                              |                              | PTHR10281 (PANTHER),<br>PTHR10281:SF4 (PANTHER)                                                                                      |
|                         | -                                                                               | 0  |                                                                                                                                                                                        |                                                |                              | -                                                                                                                                    |
| Caenorhabditis elegans  | vacuolar protein sorting 13d                                                    | 1  | P:GO:0008104                                                                                                                                                                           | -                                              |                              | -                                                                                                                                    |
| Caenorhabditis elegans  | briggsae cbr-eel-1 protein                                                      | 4  | C:GO:0005622;<br>F:GO:0016881;<br>F:GO:0005488;<br>P:GO:0006464                                                                                                                        | -                                              | EC:6.3.2.0                   | SignalP (SIGNALP)                                                                                                                    |
|                         | -                                                                               | 0  |                                                                                                                                                                                        |                                                |                              | PTHR15245 (PANTHER),<br>PTHR15245:SF2 (PANTHER)                                                                                      |
| Caenorhabditis elegans  | diacylglycerol ki-se protein isoform partially confirmed by transcript evidence | 0  |                                                                                                                                                                                        | P:GO:0007205;<br>F:GO:0004143;<br>P:GO:0023034 |                              | IPR002219; G3DSA:3.30.60.20<br>(GENE3D), PTHR11255 (PANTHER),<br>PTHR11255:SF10 (PANTHER),<br>SSF57889 (SUPERFAMILY)                 |
| Caenorhabditis elegans  | malic enzyme -dp(+)- mitochondrial                                              | 8  | F:GO:0046872;<br>P:GO:0006090;<br>F:GO:0051287;<br>C:GO:0005759;<br>F:GO:0016619;<br>P:GO:0006108;<br>P:GO:0055114;<br>F:GO:0004473                                                    | -                                              | EC:1.1.1.38;<br>EC:1.1.1.40  | IPR001891; IPR012301;<br>G3DSA:3.40.50.10380 (GENE3D),<br>PTHR23406 (PANTHER),<br>PTHR23406:SF2 (PANTHER), SSF53223<br>(SUPERFAMILY) |
|                         | -                                                                               | 0  |                                                                                                                                                                                        |                                                |                              | -                                                                                                                                    |
| Caenorhabditis elegans  | protein phosphatase catalytic subunit                                           | 5  | P:GO:0000082;<br>F:GO:0004722;<br>F:GO:0005515;<br>P:GO:0006470;<br>C:GO:0005829                                                                                                       | -                                              |                              | IPR004843; IPR006186;<br>G3DSA:3.60.21.10 (GENE3D),<br>PTHR11668:SF26 (PANTHER),<br>SSF56300 (SUPERFAMILY)                           |
| Apis mellifera          | yippee-like 1                                                                   | 1  | C:GO:0005634                                                                                                                                                                           | -                                              |                              | IPR004910; PTHR13847 (PANTHER)                                                                                                       |
|                         | -                                                                               | 0  |                                                                                                                                                                                        |                                                |                              | -                                                                                                                                    |
|                         | -                                                                               | 0  |                                                                                                                                                                                        |                                                |                              | -                                                                                                                                    |
| Brugia malayi           | haloacid dehaloge-se-like hydrolase domain containing 2                         | 1  | F:GO:0003824                                                                                                                                                                           | -                                              |                              | G3DSA:3.40.50.1000 (GENE3D),<br>PTHR19288 (PANTHER),<br>PTHR19288:SF1 (PANTHER), SSF56784<br>(SUPERFAMILY)                           |
| Homo sapiens            | peroxiredoxin 5                                                                 | 11 | P:GO:0006954;<br>C:GO:0005777;<br>P:GO:0045454;<br>C:GO:0044445;<br>P:GO:0055114;<br>F:GO:0004601;<br>F:GO:0043027;<br>F:GO:0051920;<br>P:GO:0034614;<br>P:GO:0043066;<br>C:GO:0005739 | -                                              | EC:1.11.1.7;<br>EC:1.11.1.15 | IPR012335; IPR012336; IPR013740;<br>PTHR10430 (PANTHER),<br>PTHR10430:SF3 (PANTHER)                                                  |

|                         |                                                        |    |                                                                                                                                                                       |   |                                                                                                   |                                                                                                                                  |
|-------------------------|--------------------------------------------------------|----|-----------------------------------------------------------------------------------------------------------------------------------------------------------------------|---|---------------------------------------------------------------------------------------------------|----------------------------------------------------------------------------------------------------------------------------------|
| Caenorhabditis elegans  | ww domain-containing oxidoreductase                    | 10 | P:GO:0006915;<br>P:GO:0055114;<br>P:GO:0030178;<br>F:GO:0016491;<br>P:GO:0032501;<br>F:GO:0046983;<br>F:GO:0050662;<br>P:GO:0008202;<br>P:GO:0032502;<br>C:GO:0005794 | - |                                                                                                   | IPR001202; G3DSA:2.20.70.10 (GENE3D), PTHR13436 (PANTHER), PTHR13436:SF2 (PANTHER)                                               |
| Caenorhabditis briggsae | adrenoleukodystrophy related protein                   | 9  | P:GO:0055085;<br>C:GO:0005779;<br>P:GO:0007031;<br>F:GO:0005325;<br>F:GO:0042626;<br>P:GO:0033540;<br>F:GO:0042802;<br>F:GO:0005524;<br>P:GO:0015919                  | - | EC:3.6.3.47                                                                                       | IPR010509; PTHR11384 (PANTHER), PTHR11384:SF12 (PANTHER)                                                                         |
| -                       | -                                                      | 0  |                                                                                                                                                                       |   |                                                                                                   | -                                                                                                                                |
| Caenorhabditis briggsae | yrn9_caeel ame: full=uncharacterized protein           | 0  |                                                                                                                                                                       |   |                                                                                                   | -                                                                                                                                |
| Drosophila grimshawi    | zinc finger protein 14                                 | 3  | F:GO:0008270;<br>F:GO:0003676;<br>C:GO:0005622                                                                                                                        | - |                                                                                                   | -                                                                                                                                |
| Brugia malayi           | r- exonuclease 1 homolog                               | 1  | F:GO:0016787                                                                                                                                                          | - |                                                                                                   | IPR006055; IPR012337; IPR013520; G3DSA:3.30.420.10 (GENE3D), PTHR12801 (PANTHER), PTHR12801:SF19 (PANTHER)                       |
| -                       | -                                                      | 0  |                                                                                                                                                                       |   |                                                                                                   | SignalP (SIGNALP)                                                                                                                |
| Homo sapiens            | keratin 7                                              | 10 | P:GO:0006417;<br>C:GO:0005730;<br>P:GO:0051325;<br>P:GO:0007010;<br>P:GO:0006260;<br>F:GO:0005515;<br>C:GO:0045095;<br>P:GO:0044419;<br>F:GO:0005198;<br>C:GO:0005737 | - |                                                                                                   | IPR001664; IPR003054; IPR016044; IPR018039; G3DSA:1.20.5.170 (GENE3D)                                                            |
| -                       | -                                                      | 0  |                                                                                                                                                                       |   |                                                                                                   | -                                                                                                                                |
| -                       | -                                                      | 0  |                                                                                                                                                                       |   |                                                                                                   | -                                                                                                                                |
| -                       | -                                                      | 0  |                                                                                                                                                                       |   |                                                                                                   | -                                                                                                                                |
| Caenorhabditis elegans  | lysosomal acid phosphatase                             | 0  |                                                                                                                                                                       |   | F:GO:0016787;<br>C:GO:0016021;<br>C:GO:0016020;<br>F:GO:0003993;<br>P:GO:0008150;<br>C:GO:0005575 | IPR000560; G3DSA:3.40.50.1240 (GENE3D), PTHR11567 (PANTHER), PTHR11567:SF13 (PANTHER), SignalP (SIGNALP), SSF53254 (SUPERFAMILY) |
| Caenorhabditis elegans  | likely c1-tetrahydrofolate synthase                    | 5  | P:GO:0043581;<br>F:GO:0005524;<br>P:GO:0009396;<br>F:GO:0003824;<br>C:GO:0009536                                                                                      | - |                                                                                                   | IPR000559; G3DSA:3.40.50.300 (GENE3D), PTHR10025 (PANTHER), PTHR10025:SF4 (PANTHER), SSF52540 (SUPERFAMILY)                      |
| Caenorhabditis elegans  | hypothetical protein C25H3.11 [Caenorhabditis elegans] | 0  |                                                                                                                                                                       |   |                                                                                                   | -                                                                                                                                |

|                               |                                                                            |    |                                                                                                                                                                                        |                               |                             |                                                                                                                         |
|-------------------------------|----------------------------------------------------------------------------|----|----------------------------------------------------------------------------------------------------------------------------------------------------------------------------------------|-------------------------------|-----------------------------|-------------------------------------------------------------------------------------------------------------------------|
| Caenorhabditis briggsae       | solute carrier family 22 (organic cation transporter) member isoform cra_a | 11 | P:GO:0055085;<br>P:GO:0015893;<br>F:GO:0015238;<br>C:GO:0016021;<br>F:GO:0031625;<br>P:GO:0006811;<br>F:GO:0015291;<br>C:GO:0044444;<br>C:GO:0016324;<br>C:GO:0005635;<br>F:GO:0015075 | -                             |                             | IPR016196; G3DSA:1.20.1250.20 (GENE3D), PTHR10074 (PANTHER), PTHR10074:SF56 (PANTHER), SignalP (SIGNALP)                |
| -                             | -                                                                          | 0  |                                                                                                                                                                                        |                               |                             | -                                                                                                                       |
| -                             | -                                                                          | 0  |                                                                                                                                                                                        |                               |                             | SignalP (SIGNALP)                                                                                                       |
| -                             | -                                                                          | 0  |                                                                                                                                                                                        |                               |                             | -                                                                                                                       |
| Caenorhabditis elegans        | elegans protein partially confirmed by transcript evidence                 | 0  |                                                                                                                                                                                        |                               |                             | -                                                                                                                       |
| Xenopus (Silurana) tropicalis | macrophage mannose receptor 1-like                                         | 0  |                                                                                                                                                                                        | F:GO:0005488;<br>F:GO:0005529 |                             | IPR001304; IPR013032; IPR016186; IPR016187; PTHR22739 (PANTHER)                                                         |
| Ciona intestinalis            | u6 snr--associated sm-like protein lsm3                                    | 5  | C:GO:0046540;<br>C:GO:0005681;<br>F:GO:0005515;<br>P:GO:0000398;<br>F:GO:0030629                                                                                                       | -                             |                             | IPR001163; IPR006649; IPR010920; G3DSA:2.30.30.100 (GENE3D), PTHR13110 (PANTHER)                                        |
| Ciona intestinalis            | u6 snr--associated sm-like protein lsm3                                    | 5  | C:GO:0046540;<br>C:GO:0005681;<br>F:GO:0005515;<br>P:GO:0000398;<br>F:GO:0030629                                                                                                       | -                             |                             | IPR001163; IPR006649; IPR010920; G3DSA:2.30.30.100 (GENE3D), PTHR13110 (PANTHER)                                        |
| Caenorhabditis briggsae       | e3 ufm1-protein ligase 1                                                   | 1  | F:GO:0016874                                                                                                                                                                           | -                             |                             | IPR018611                                                                                                               |
| Caenorhabditis briggsae       | e3 ufm1-protein ligase 1                                                   | 1  | F:GO:0016874                                                                                                                                                                           | -                             |                             | IPR018611                                                                                                               |
| Caenorhabditis elegans        | uncoordi-ted family member (unc-89)                                        | 1  | F:GO:0008092                                                                                                                                                                           | -                             |                             | IPR003599; IPR007110; IPR013098; IPR013783; PTHR19900 (PANTHER), PTHR19900:SF1 (PANTHER), SSF48726 (SUPERFAMILY)        |
| Saccoglossus kowalevskii      | cell division control protein 2 homolog 2                                  | 2  | P:GO:0009987;<br>F:GO:0004674                                                                                                                                                          | -                             | EC:2.7.11.0                 | -                                                                                                                       |
| -                             | -                                                                          | 0  |                                                                                                                                                                                        |                               |                             | -                                                                                                                       |
| Caenorhabditis elegans        | homogentisate -dioxyge-se                                                  | 5  | F:GO:0042802;<br>P:GO:0006572;<br>F:GO:0004411;<br>P:GO:0055114;<br>P:GO:0006559                                                                                                       | -                             | EC:1.13.11.5                | -                                                                                                                       |
| Caenorhabditis elegans        | briggsae cbr-tol-1 protein                                                 | 1  | F:GO:0005515                                                                                                                                                                           | -                             |                             | IPR001611; G3DSA:3.80.10.10 (GENE3D), PTHR23154 (PANTHER), PSS1450 (PROFILE), SignalP (SIGNALP), SSF52058 (SUPERFAMILY) |
| Caenorhabditis briggsae       | uridine 5 -monophosphate synthase                                          | 6  | C:GO:0005737;<br>F:GO:0004590;<br>P:GO:0006222;<br>F:GO:0005515;<br>F:GO:0004588;<br>C:GO:0005634                                                                                      | -                             | EC:4.1.1.23;<br>EC:2.4.2.10 | IPR001754; IPR011060; IPR013785                                                                                         |
| -                             | -                                                                          | 0  |                                                                                                                                                                                        |                               |                             | SignalP (SIGNALP)                                                                                                       |

|                         |                                                                           |    |                                                                                                                                                                                                                                                                                                                                                 |                                                |   |                                                                                     |
|-------------------------|---------------------------------------------------------------------------|----|-------------------------------------------------------------------------------------------------------------------------------------------------------------------------------------------------------------------------------------------------------------------------------------------------------------------------------------------------|------------------------------------------------|---|-------------------------------------------------------------------------------------|
| Caenorhabditis briggsae | tetratricopeptide repeat protein 35                                       | 6  | F:GO:0005515;<br>P:GO:0040017;<br>P:GO:0040010;<br>P:GO:0000003;<br>P:GO:0006898;<br>C:GO:0005783                                                                                                                                                                                                                                               | -                                              | - | PTHR12760 (PANTHER)                                                                 |
| Brugia malayi           | rab3 gtpase-activating protein catalytic subunit                          | 1  | F:GO:0030695                                                                                                                                                                                                                                                                                                                                    | -                                              | - | -                                                                                   |
| Caenorhabditis briggsae | hypothetical tyrosi-se-like protein in chromosome                         | 1  | F:GO:0005515                                                                                                                                                                                                                                                                                                                                    | -                                              | - | IPR002227; IPR003582; IPR008922;<br>PTHR11474 (PANTHER),<br>PTHR11474:SF1 (PANTHER) |
| Caenorhabditis elegans  | transcription initiation factor tfiid subunit 10                          | 4  | F:GO:0003676;<br>F:GO:0003702;<br>P:GO:0006352;<br>C:GO:0005634                                                                                                                                                                                                                                                                                 | -                                              | - | IPR003923                                                                           |
| Bos taurus              | heat shock protein hsp 90-beta                                            | 13 | C:GO:0005739;<br>P:GO:0006457;<br>F:GO:0030235;<br>P:GO:0060334;<br>P:GO:0001890;<br>C:GO:0042470;<br>F:GO:0005524;<br>P:GO:0032435;<br>F:GO:0030911;<br>P:GO:0060338;<br>F:GO:0051082;<br>P:GO:0006986;<br>P:GO:0045429                                                                                                                        | -                                              | - | SignalP (SIGNALP)                                                                   |
| -                       | -                                                                         | 0  |                                                                                                                                                                                                                                                                                                                                                 |                                                |   | PRO1217 (PRINTS)                                                                    |
| Homo sapiens            | clusterin                                                                 | 20 | P:GO:0009615;<br>P:GO:0051788;<br>P:GO:0048812;<br>C:GO:0034366;<br>P:GO:0045597;<br>P:GO:0032463;<br>P:GO:0043691;<br>P:GO:0031018;<br>C:GO:0016235;<br>P:GO:0006916;<br>P:GO:0008284;<br>P:GO:0006629;<br>P:GO:0006958;<br>F:GO:0051787;<br>C:GO:0048471;<br>P:GO:0001836;<br>P:GO:0045087;<br>P:GO:0006979;<br>C:GO:0031012;<br>C:GO:0005739 | -                                              | - | IPR000753; IPR016014; IPR016015;<br>IPR016016; PTHR10970 (PANTHER)                  |
| -                       | -                                                                         | 0  |                                                                                                                                                                                                                                                                                                                                                 |                                                |   | -                                                                                   |
| -                       | -                                                                         | 0  |                                                                                                                                                                                                                                                                                                                                                 |                                                |   | -                                                                                   |
| Caenorhabditis briggsae | protein mon2-like protein                                                 | 0  |                                                                                                                                                                                                                                                                                                                                                 | F:GO:0005488;<br>P:GO:0006810;<br>P:GO:0015031 |   | -                                                                                   |
| Caenorhabditis elegans  | uncharacterized protein kiaa0892                                          | 3  | P:GO:0007059;<br>C:GO:0044428;<br>P:GO:0007067                                                                                                                                                                                                                                                                                                  | -                                              | - | PTHR21394 (PANTHER)                                                                 |
| Caenorhabditis elegans  | dhx35_caeel ame: full=probable atp-dependent r- helicase<br>dhx35 homolog | 2  | F:GO:0004386;<br>F:GO:0000166                                                                                                                                                                                                                                                                                                                   | -                                              | - | -                                                                                   |

|                         |                                                            |    |                                                                                                                                                                       |                                                                                                                                                      |            |                                                                                                                                     |
|-------------------------|------------------------------------------------------------|----|-----------------------------------------------------------------------------------------------------------------------------------------------------------------------|------------------------------------------------------------------------------------------------------------------------------------------------------|------------|-------------------------------------------------------------------------------------------------------------------------------------|
| Caenorhabditis elegans  | macoilin                                                   | 1  | C:GO:0016021                                                                                                                                                          | -                                                                                                                                                    |            | IPR019130; PTHR13289 (PANTHER), SignalP (SIGNALP)                                                                                   |
|                         | -                                                          | 0  |                                                                                                                                                                       |                                                                                                                                                      |            | -                                                                                                                                   |
| Caenorhabditis elegans  | zinc finger protein c3h homolog                            | 6  | F:GO:0008270;<br>P:GO:0010468;<br>C:GO:0044424;<br>P:GO:0006402;<br>P:GO:0051252;<br>F:GO:0003723                                                                     | -                                                                                                                                                    |            | IPR000571; G3DSA:4.10.1000.10 (GENE3D), PTHR12547 (PANTHER), SSF90229 (SUPERFAMILY)                                                 |
| Caenorhabditis elegans  | zinc finger protein c3h homolog                            | 6  | F:GO:0008270;<br>P:GO:0010468;<br>C:GO:0044424;<br>P:GO:0006402;<br>P:GO:0051252;<br>F:GO:0003723                                                                     | -                                                                                                                                                    |            | IPR000571; G3DSA:4.10.1000.10 (GENE3D), PTHR12547 (PANTHER), SSF90229 (SUPERFAMILY)                                                 |
| Caenorhabditis briggsae | elegans protein partially confirmed by transcript evidence | 0  |                                                                                                                                                                       | F:GO:0005515                                                                                                                                         |            | -                                                                                                                                   |
|                         | -                                                          | 0  |                                                                                                                                                                       |                                                                                                                                                      |            | -                                                                                                                                   |
| Caenorhabditis elegans  | 3 saliva family protein                                    | 2  | C:GO:0016021;<br>P:GO:0019915                                                                                                                                         | -                                                                                                                                                    |            | IPR004316; IPR018179                                                                                                                |
| Caenorhabditis elegans  | pap 25a associated domain containing protein               | 9  | F:GO:0016779;<br>P:GO:0040010;<br>F:GO:0043221;<br>P:GO:0040035;<br>P:GO:0007062;<br>P:GO:0007281;<br>P:GO:0042493;<br>P:GO:0009792;<br>C:GO:0005634                  | -                                                                                                                                                    | EC:2.7.7.0 | IPR002934; G3DSA:3.30.460.10 (GENE3D), PTHR23092 (PANTHER), PTHR23092:SF4 (PANTHER), SSF81301 (SUPERFAMILY), SSF81631 (SUPERFAMILY) |
| Caenorhabditis briggsae | briggsae cbr-vps-41 protein                                | 9  | F:GO:0005488;<br>P:GO:0007034;<br>P:GO:0040007;<br>P:GO:0006624;<br>P:GO:0002119;<br>P:GO:0033036;<br>P:GO:0009792;<br>C:GO:0005773;<br>P:GO:0043066                  | -                                                                                                                                                    |            | IPR001680; IPR011046; IPR015943; PTHR12616 (PANTHER)                                                                                |
|                         | -                                                          | 0  |                                                                                                                                                                       |                                                                                                                                                      |            | SignalP (SIGNALP)                                                                                                                   |
| Caenorhabditis elegans  | fibronectin type-iii domain-containing protein 3a          | 0  |                                                                                                                                                                       | C:GO:0016021;<br>C:GO:0016020;<br>F:GO:0016787;<br>F:GO:0003674;<br>P:GO:0008152;<br>F:GO:0004896;<br>F:GO:0016162;<br>P:GO:0008150;<br>F:GO:0016798 |            | IPR003961; IPR008957; IPR013783; PTHR19900 (PANTHER), PTHR19900:SF3 (PANTHER)                                                       |
|                         | -                                                          | 0  |                                                                                                                                                                       |                                                                                                                                                      |            | -                                                                                                                                   |
| Caenorhabditis briggsae | udp-n-acetylglucosamine transporter                        | 10 | F:GO:0005461;<br>F:GO:0005464;<br>F:GO:0005463;<br>F:GO:0005456;<br>P:GO:0015757;<br>P:GO:0015785;<br>P:GO:0015789;<br>C:GO:0016020;<br>P:GO:0015782;<br>F:GO:0005459 | -                                                                                                                                                    |            | IPR007271; PTHR10231:SF9 (PANTHER), SignalP (SIGNALP)                                                                               |

|                         |                                                         |   |                                                                                                                    |                                                                                  |                              |                                                                          |
|-------------------------|---------------------------------------------------------|---|--------------------------------------------------------------------------------------------------------------------|----------------------------------------------------------------------------------|------------------------------|--------------------------------------------------------------------------|
| Caenorhabditis elegans  | cg4658- isoform a                                       | 1 | P:GO:0008340                                                                                                       | -                                                                                | -                            | -                                                                        |
| -                       | -                                                       | 0 |                                                                                                                    |                                                                                  |                              | -                                                                        |
| -                       | -                                                       | 0 |                                                                                                                    |                                                                                  |                              | -                                                                        |
| Caenorhabditis elegans  | chromosome 1 open reading frame 123                     | 1 | F:GO:0000166                                                                                                       | -                                                                                |                              | IPR008584; SignalP (SIGNALP),<br>SSF141678 (SUPERFAMILY)                 |
| Caenorhabditis elegans  | phosphoenolpyruvate carboxykinase                       | 7 | P:GO:0006107;<br>F:GO:0005488;<br>C:GO:0005625;<br>C:GO:0005739;<br>P:GO:0051384;<br>P:GO:0006094;<br>F:GO:0004613 | -                                                                                | EC:4.1.1.32                  | IPR008209; IPR008210                                                     |
| -                       | -                                                       | 0 |                                                                                                                    |                                                                                  |                              | -                                                                        |
| -                       | -                                                       | 0 |                                                                                                                    |                                                                                  |                              | -                                                                        |
| -                       | -                                                       | 0 |                                                                                                                    |                                                                                  |                              | SignalP (SIGNALP)                                                        |
| Caenorhabditis briggsae | Hypothetical protein CBG17891 [Caenorhabditis briggsae] | 0 |                                                                                                                    |                                                                                  |                              | -                                                                        |
| -                       | -                                                       | 0 |                                                                                                                    |                                                                                  |                              | -                                                                        |
| uncultured organism     | hypothetical protein [uncultured organism]              | 0 |                                                                                                                    |                                                                                  |                              | -                                                                        |
| Loa loa                 | folylpolyglutamate synthase                             | 7 | F:GO:0004326;<br>P:GO:0006139;<br>P:GO:0006730;<br>F:GO:0005524;<br>P:GO:0009396;<br>C:GO:0005829;<br>C:GO:0005739 | -                                                                                | EC:6.3.2.17                  | IPR001645; IPR013221; IPR018109                                          |
| Caenorhabditis briggsae | schlafen-like protein 1-like                            | 0 |                                                                                                                    | F:GO:0003676;<br>F:GO:0005524;<br>F:GO:0005488;<br>F:GO:0000166;<br>F:GO:0008270 |                              | IPR007421; PTHR10967 (PANTHER),<br>PTHR10967:SF41 (PANTHER)              |
| -                       | -                                                       | 0 |                                                                                                                    |                                                                                  |                              | -                                                                        |
| -                       | -                                                       | 0 |                                                                                                                    |                                                                                  |                              | -                                                                        |
| -                       | -                                                       | 0 |                                                                                                                    |                                                                                  |                              | SignalP (SIGNALP)                                                        |
| Caenorhabditis briggsae | class member 2                                          | 7 | C:GO:0000139;<br>F:GO:0004559;<br>F:GO:0030246;<br>P:GO:0006013;<br>F:GO:0004572;<br>C:GO:0016021;<br>F:GO:0008270 | -                                                                                | EC:3.2.1.24;<br>EC:3.2.1.114 | IPR000602; IPR011330; PTHR11607<br>(PANTHER), PTHR11607:SF4<br>(PANTHER) |
| Brugia malayi           | inositol -trisphosphate receptor                        | 4 | F:GO:0004872;<br>F:GO:0005262;<br>P:GO:0006811;<br>C:GO:0016020                                                    | -                                                                                |                              | IPR015925; PTHR13715:SF2<br>(PANTHER), SignalP (SIGNALP)                 |
| -                       | -                                                       | 0 |                                                                                                                    |                                                                                  |                              | -                                                                        |

|                         |                                                            |    |                                                                                                                                                                                                                                                            |                                                |            |                                                                                           |
|-------------------------|------------------------------------------------------------|----|------------------------------------------------------------------------------------------------------------------------------------------------------------------------------------------------------------------------------------------------------------|------------------------------------------------|------------|-------------------------------------------------------------------------------------------|
| Caenorhabditis briggsae | adenylosucce-lyase                                         | 15 | C:GO:0005829;<br>F:GO:0004018;<br>P:GO:0040010;<br>P:GO:0018991;<br>P:GO:0040035;<br>P:GO:0010171;<br>P:GO:0002119;<br>P:GO:0051262;<br>P:GO:0006167;<br>F:GO:0070626;<br>P:GO:0040011;<br>P:GO:0006997;<br>P:GO:0006898;<br>P:GO:0002009;<br>P:GO:0009792 | -                                              | EC:4.3.2.2 | IPR008948; G3DSA:1.10.275.10<br>(GENE3D), PTHR11444 (PANTHER),<br>PTHR11444:SF2 (PANTHER) |
| -                       | -                                                          | 0  | -                                                                                                                                                                                                                                                          | -                                              | -          | -                                                                                         |
| Caenorhabditis elegans  | hypothetical protein R144.11 [Caenorhabditis elegans]      | 6  | P:GO:0040035;<br>P:GO:0009792;<br>P:GO:0010171;<br>P:GO:0002119;<br>P:GO:0040018;<br>P:GO:0002009                                                                                                                                                          | -                                              | -          | SignalP (SIGNALP)                                                                         |
| Caenorhabditis briggsae | protein methyltransferase                                  | 0  | -                                                                                                                                                                                                                                                          | F:GO:0008168;<br>C:GO:0005737;<br>F:GO:0016740 | -          | -                                                                                         |
| Caenorhabditis briggsae | elegans protein partially confirmed by transcript evidence | 4  | P:GO:0048599;<br>F:GO:0003676;<br>F:GO:0008270;<br>F:GO:0005515                                                                                                                                                                                            | -                                              | -          | IPR000571; G3DSA:4.10.1000.10<br>(GENE3D), PTHR12547 (PANTHER),<br>SSF90229 (SUPERFAMILY) |
| Caenorhabditis briggsae | briggsae cbr-mdt-15 protein                                | 14 | P:GO:0030730;<br>P:GO:0040010;<br>P:GO:0008340;<br>P:GO:0000003;<br>P:GO:0002119;<br>P:GO:0019217;<br>P:GO:0040011;<br>P:GO:0006898;<br>F:GO:0035257;<br>F:GO:0003713;<br>P:GO:0045893;<br>P:GO:0009792;<br>P:GO:0040014;<br>C:GO:0005634                  | -                                              | -          | -                                                                                         |
| Brugia malayi           | briggsae cbr-mdt-15 protein                                | 13 | P:GO:0030730;<br>P:GO:0040010;<br>P:GO:0008340;<br>P:GO:0000003;<br>P:GO:0002119;<br>P:GO:0019217;<br>P:GO:0040011;<br>P:GO:0006898;<br>F:GO:0035257;<br>F:GO:0003713;<br>P:GO:0045893;<br>P:GO:0009792;<br>P:GO:0040014                                   | -                                              | -          | IPR019087; PTHR23189 (PANTHER),<br>PTHR23189:SF1 (PANTHER)                                |

|                         |                                              |   |                                                                                  |                                                                                                                    |            |                                                                                                                     |
|-------------------------|----------------------------------------------|---|----------------------------------------------------------------------------------|--------------------------------------------------------------------------------------------------------------------|------------|---------------------------------------------------------------------------------------------------------------------|
| Caenorhabditis elegans  | giy-yig catalytic domain containing protein  | 3 | P:GO:0009792;<br>P:GO:0002119;<br>P:GO:0040007                                   | -                                                                                                                  |            | SignalP (SIGNALP)                                                                                                   |
| Trichoplax adhaerens    | mgc81975 protein                             | 0 |                                                                                  |                                                                                                                    |            | IPR000717; PTHR15350 (PANTHER),<br>PTHR15350:SF2 (PANTHER)                                                          |
| Caenorhabditis briggsae | chromosome 20 open reading frame 7           | 4 | C:GO:0031314;<br>P:GO:0008152;<br>F:GO:0008168;<br>P:GO:0032981                  | -                                                                                                                  | EC:2.1.1.0 | IPR013216; G3DSA:3.40.50.150<br>(GENE3D), PTHR13090 (PANTHER),<br>SignalP (SIGNALP), SSF53335<br>(SUPERFAMILY)      |
| Caenorhabditis briggsae | chromosome 20 open reading frame 7           | 4 | C:GO:0031314;<br>P:GO:0008152;<br>F:GO:0008168;<br>P:GO:0032981                  | -                                                                                                                  | EC:2.1.1.0 | IPR013216; G3DSA:3.40.50.150<br>(GENE3D), PTHR13090 (PANTHER),<br>SignalP (SIGNALP), SSF53335<br>(SUPERFAMILY)      |
|                         |                                              | 0 |                                                                                  |                                                                                                                    |            |                                                                                                                     |
|                         |                                              | 0 |                                                                                  |                                                                                                                    |            |                                                                                                                     |
|                         |                                              | 0 |                                                                                  |                                                                                                                    |            |                                                                                                                     |
| Caenorhabditis briggsae | briggsae cbr-eat-18 protein                  | 0 |                                                                                  |                                                                                                                    |            |                                                                                                                     |
| Caenorhabditis briggsae | briggsae cbr-eat-18 protein                  | 0 |                                                                                  |                                                                                                                    |            | IPR002172; PTHR10127 (PANTHER),<br>PTHR10127:SF33 (PANTHER)                                                         |
| Caenorhabditis elegans  | abnormal cell lineage family member (lin-10) | 1 | F:GO:0005515                                                                     | -                                                                                                                  |            | IPR001478; G3DSA:2.30.42.10<br>(GENE3D), PTHR12345 (PANTHER),<br>PTHR12345:SF2 (PANTHER)                            |
| Caenorhabditis briggsae | briggsae cbr-unc-79 protein                  | 0 |                                                                                  | F:GO:0005488;<br>F:GO:0008270                                                                                      |            | PTHR21696 (PANTHER)                                                                                                 |
|                         |                                              | 0 |                                                                                  |                                                                                                                    |            |                                                                                                                     |
|                         |                                              | 0 |                                                                                  |                                                                                                                    |            |                                                                                                                     |
|                         |                                              | 0 |                                                                                  |                                                                                                                    |            | SignalP (SIGNALP)                                                                                                   |
|                         |                                              | 0 |                                                                                  |                                                                                                                    |            |                                                                                                                     |
| Haemonchus contortus    | heat shock protein family member (hsp- )     | 1 | P:GO:0009408                                                                     | -                                                                                                                  |            | IPR001436; IPR002068; IPR008978;<br>G3DSA:2.60.40.790 (GENE3D),<br>PTHR11527 (PANTHER),<br>PTHR11527:SF28 (PANTHER) |
| Caenorhabditis briggsae | melanin-concentrating hormone receptor 2     | 0 |                                                                                  | F:GO:0004872;<br>F:GO:0004930;<br>F:GO:0004871;<br>C:GO:0016021;<br>P:GO:0007165;<br>F:GO:0005000;<br>P:GO:0007186 |            |                                                                                                                     |
| Caenorhabditis elegans  | protein trs85 homolog                        | 5 | P:GO:0045927;<br>P:GO:0032501;<br>P:GO:0009653;<br>P:GO:0000003;<br>P:GO:0040011 | -                                                                                                                  |            | PTHR12975 (PANTHER)                                                                                                 |
|                         |                                              | 0 |                                                                                  |                                                                                                                    |            |                                                                                                                     |
| Caenorhabditis briggsae | cytoskeletal structural protein              | 0 |                                                                                  | P:GO:0007165                                                                                                       |            | PTHR21437 (PANTHER)                                                                                                 |
|                         |                                              | 0 |                                                                                  |                                                                                                                    |            |                                                                                                                     |
|                         |                                              | 0 |                                                                                  |                                                                                                                    |            | SignalP (SIGNALP)                                                                                                   |
| Caenorhabditis elegans  | scavenger receptor class member 2            | 1 | C:GO:0016020                                                                     | -                                                                                                                  |            | IPR002159; PTHR11923:SF8<br>(PANTHER)                                                                               |
|                         |                                              | 0 |                                                                                  |                                                                                                                    |            |                                                                                                                     |
| Nematostella vectensis  | centromeric protein e                        | 0 |                                                                                  | F:GO:0005524;<br>F:GO:0000166;<br>F:GO:0003777;<br>F:GO:0003774;<br>P:GO:0007018;<br>C:GO:0005874                  |            | IPR001752; IPR019821; PTHR16012<br>(PANTHER), SSF52540 (SUPERFAMILY)                                                |



|                         |                                                        |   |                                                                                                                                                                                                                                                                                                                                |                                                                                  |                                                                                                                                                                                      |
|-------------------------|--------------------------------------------------------|---|--------------------------------------------------------------------------------------------------------------------------------------------------------------------------------------------------------------------------------------------------------------------------------------------------------------------------------|----------------------------------------------------------------------------------|--------------------------------------------------------------------------------------------------------------------------------------------------------------------------------------|
| Brugia malayi           | cbp p300 homolog family member (cbp-1)                 | 0 | P:GO:0000003;<br>P:GO:0002119;<br>C:GO:0005634;<br>P:GO:0040026;<br>P:GO:0006355;<br>P:GO:0009792;<br>P:GO:0009790;<br>P:GO:0040039;<br>P:GO:0040035;<br>P:GO:0045944;<br>C:GO:0005737;<br>P:GO:0045449;<br>F:GO:0003712;<br>F:GO:0008270;<br>P:GO:0018996;<br>F:GO:0005515;<br>F:GO:0004402;<br>P:GO:0007283;<br>P:GO:0040010 |                                                                                  | -                                                                                                                                                                                    |
| Caenorhabditis briggsae | aspartyl-tr- synthetase 2                              | 4 | C:GO:0005739;<br>F:GO:0000166;<br>F:GO:0004812;<br>P:GO:0006418                                                                                                                                                                                                                                                                |                                                                                  | IPR002312; IPR004115; IPR004364;<br>IPR004365; IPR006195; IPR012340;<br>IPR016027; IPR018150; IPR018153;<br>G3DSA:3.30.930.10 (GENE3D), SignalP<br>(SIGNALP), SSF55681 (SUPERFAMILY) |
|                         | -                                                      | 0 |                                                                                                                                                                                                                                                                                                                                |                                                                                  | SignalP (SIGNALP)                                                                                                                                                                    |
|                         | -                                                      | 0 |                                                                                                                                                                                                                                                                                                                                |                                                                                  | -                                                                                                                                                                                    |
| Caenorhabditis briggsae | 60s ribosomal protein l7 l12                           | 5 | P:GO:0002119;<br>C:GO:0005622;<br>F:GO:0005515;<br>P:GO:0040010;<br>P:GO:0008340                                                                                                                                                                                                                                               |                                                                                  | IPR008932; IPR013823; IPR014719;<br>IPR015607; PTHR11809 (PANTHER)                                                                                                                   |
|                         | -                                                      | 0 |                                                                                                                                                                                                                                                                                                                                |                                                                                  | -                                                                                                                                                                                    |
| Caenorhabditis briggsae | serine threonine-protein ki-se 38 (ndr2 protein ki-se) | 8 | P:GO:0007243;<br>F:GO:0046872;<br>F:GO:0005524;<br>P:GO:0050773;<br>F:GO:0004697;<br>C:GO:0005737;<br>C:GO:0005634;<br>P:GO:0006468                                                                                                                                                                                            |                                                                                  | EC:2.7.11.13<br>IPR000719; IPR011009; IPR017442;<br>G3DSA:3.30.200.20 (GENE3D),<br>PTHR22985 (PANTHER),<br>PTHR22985:SF33 (PANTHER)                                                  |
| Caenorhabditis briggsae | intermediate in toll sig-I transduction                | 2 | P:GO:0006952;<br>F:GO:0005515                                                                                                                                                                                                                                                                                                  |                                                                                  | IPR010418                                                                                                                                                                            |
| Caenorhabditis briggsae | intermediate in toll sig-I transduction                | 2 | P:GO:0006952;<br>F:GO:0005515                                                                                                                                                                                                                                                                                                  |                                                                                  | IPR010418                                                                                                                                                                            |
| Ixodes scapularis       | secreted mucin                                         | 0 |                                                                                                                                                                                                                                                                                                                                | F:GO:0016787                                                                     | -                                                                                                                                                                                    |
|                         | -                                                      | 0 |                                                                                                                                                                                                                                                                                                                                |                                                                                  | -                                                                                                                                                                                    |
| Arabidopsis thaliana    | r- recognition motif -containing protein               | 0 |                                                                                                                                                                                                                                                                                                                                | F:GO:0003676;<br>F:GO:0003723;<br>F:GO:0000166;<br>P:GO:0008150;<br>C:GO:0005575 | -                                                                                                                                                                                    |
| Caenorhabditis elegans  | pbx knotted 1 homeobox 1                               | 3 | P:GO:0030154;<br>P:GO:0048513;<br>C:GO:0044424                                                                                                                                                                                                                                                                                 |                                                                                  | -                                                                                                                                                                                    |

|                         |                                                       |   |                                                                                                                                                      |                               |             |                                                                                                                                                                           |
|-------------------------|-------------------------------------------------------|---|------------------------------------------------------------------------------------------------------------------------------------------------------|-------------------------------|-------------|---------------------------------------------------------------------------------------------------------------------------------------------------------------------------|
| Caenorhabditis elegans  | expulsion defective family member (aex-3)             | 6 | P:GO:0007618;<br>P:GO:0007268;<br>P:GO:0018991;<br>C:GO:0005623;<br>P:GO:0030421;<br>F:GO:0017112                                                    | -                             |             | PTHR13008 (PANTHER)                                                                                                                                                       |
| Loa loa                 | replication factor c (activator 1) 37kda              | 9 | F:GO:0017111;<br>P:GO:0006297;<br>F:GO:0003677;<br>F:GO:0005524;<br>P:GO:0006271;<br>F:GO:0005515;<br>C:GO:0005654;<br>P:GO:0048015;<br>C:GO:0005663 | -                             | EC:3.6.1.15 | -                                                                                                                                                                         |
| Caenorhabditis elegans  | hypothetical protein T07D4.1 [Caenorhabditis elegans] | 0 |                                                                                                                                                      | C:GO:0016021;<br>P:GO:0007186 |             | G3DSA:1.20.1070.10 (GENE3D),<br>PTHR19264 (PANTHER),<br>PTHR19264:SF286 (PANTHER), SignalP (SIGNALP)                                                                      |
| Caenorhabditis elegans  | transmembrane protein 144                             | 3 | F:GO:0015144;<br>C:GO:0016021;<br>P:GO:0002119                                                                                                       | -                             |             | IPR012435; SignalP (SIGNALP)                                                                                                                                              |
|                         | -                                                     | 0 |                                                                                                                                                      |                               |             | -                                                                                                                                                                         |
| Caenorhabditis elegans  | briggsae cbr-gon-1 protein                            | 1 | F:GO:0008233                                                                                                                                         | -                             |             | -                                                                                                                                                                         |
|                         | -                                                     | 0 |                                                                                                                                                      |                               |             | -                                                                                                                                                                         |
|                         | -                                                     | 0 |                                                                                                                                                      |                               |             | SignalP (SIGNALP)                                                                                                                                                         |
| Caenorhabditis briggsae | dead deah box helicase family protein                 | 7 | P:GO:0040035;<br>P:GO:0002119;<br>F:GO:0005488;<br>F:GO:0004386;<br>P:GO:0040002;<br>P:GO:0040010;<br>P:GO:0006898                                   | -                             |             | -                                                                                                                                                                         |
| Caenorhabditis elegans  | aminoacylase 1                                        | 4 | C:GO:0005625;<br>F:GO:0005488;<br>P:GO:0030163;<br>F:GO:0016787                                                                                      | -                             |             | IPR002933; IPR010159; IPR011650;<br>G3DSA:3.30.70.360 (GENE3D),<br>G3DSA:3.40.630.10 (GENE3D),<br>PTHR11014 (PANTHER),<br>PTHR11014:SF8 (PANTHER), SSF53187 (SUPERFAMILY) |
|                         | -                                                     | 0 |                                                                                                                                                      |                               |             | -                                                                                                                                                                         |
| Caenorhabditis elegans  | sam domain- and hd domain-containing protein 1        | 3 | P:GO:0006952;<br>P:GO:0000003;<br>P:GO:0006955                                                                                                       | -                             |             | PTHR11373 (PANTHER),<br>PTHR11373:SF9 (PANTHER),<br>SSF109604 (SUPERFAMILY)                                                                                               |
|                         | -                                                     | 0 |                                                                                                                                                      |                               |             | -                                                                                                                                                                         |
| Caenorhabditis briggsae | briggsae cbr-mog-5 protein                            | 4 | F:GO:0003676;<br>F:GO:0004386;<br>F:GO:0000166;<br>F:GO:0005515                                                                                      | -                             |             | -                                                                                                                                                                         |
| Caenorhabditis briggsae | elegans protein confirmed by transcript evidence      | 7 | P:GO:0009792;<br>P:GO:0002119;<br>F:GO:0003735;<br>C:GO:0015935;<br>P:GO:0000003;<br>P:GO:0040007;<br>P:GO:0006412                                   | -                             | EC:3.6.5.3  | SignalP (SIGNALP)                                                                                                                                                         |
|                         | -                                                     | 0 |                                                                                                                                                      |                               |             | -                                                                                                                                                                         |

|                         |                                                     |    |                                                                                                                                                                                                                          |   |   |                                                                                                                                                |
|-------------------------|-----------------------------------------------------|----|--------------------------------------------------------------------------------------------------------------------------------------------------------------------------------------------------------------------------|---|---|------------------------------------------------------------------------------------------------------------------------------------------------|
| Loa loa                 | zinc finger protein                                 | 13 | P:GO:0040010;<br>F:GO:0003723;<br>F:GO:0008270;<br>C:GO:0071011;<br>P:GO:0040035;<br>P:GO:0010171;<br>P:GO:0002119;<br>P:GO:0040011;<br>P:GO:0000398;<br>P:GO:0006898;<br>P:GO:0002121;<br>P:GO:0002009;<br>P:GO:0009792 | - | - | IPR004087; IPR004088; IPR018111;<br>G3DSA:3.30.1370.10 (GENE3D),<br>PTHR11208 (PANTHER),<br>PTHR11208:SF6 (PANTHER), SSF54791<br>(SUPERFAMILY) |
|                         | -                                                   | 0  |                                                                                                                                                                                                                          |   |   | -                                                                                                                                              |
|                         | -                                                   | 0  |                                                                                                                                                                                                                          |   |   | SignalP (SIGNALP)                                                                                                                              |
| Caenorhabditis elegans  | sig-l peptidase complex subunit 3                   | 12 | F:GO:0008233;<br>C:GO:0005787;<br>P:GO:0040010;<br>P:GO:0006465;<br>C:GO:0016021;<br>P:GO:0000003;<br>P:GO:0018996;<br>C:GO:0005792;<br>P:GO:0002119;<br>P:GO:0040011;<br>P:GO:0006898;<br>P:GO:0009792                  | - | - | IPR007653; SignalP (SIGNALP)                                                                                                                   |
| Caenorhabditis elegans  | sig-l peptidase complex subunit 3                   | 12 | F:GO:0008233;<br>C:GO:0005787;<br>P:GO:0040010;<br>P:GO:0006465;<br>C:GO:0016021;<br>P:GO:0000003;<br>P:GO:0018996;<br>C:GO:0005792;<br>P:GO:0002119;<br>P:GO:0040011;<br>P:GO:0006898;<br>P:GO:0009792                  | - | - | -                                                                                                                                              |
| Caenorhabditis briggsae | pab-dependent poly -specific ribonuclease subunit 2 | 2  | F:GO:0016788;<br>C:GO:0005622                                                                                                                                                                                            | - | - | IPR012337; IPR013520;<br>G3DSA:3.30.420.10 (GENE3D),<br>PTHR15728 (PANTHER)                                                                    |
| Caenorhabditis briggsae | pab-dependent poly -specific ribonuclease subunit 2 | 2  | F:GO:0016788;<br>C:GO:0005622                                                                                                                                                                                            | - | - | IPR012337; IPR013520;<br>G3DSA:3.30.420.10 (GENE3D),<br>PTHR15728 (PANTHER)                                                                    |
|                         | -                                                   | 0  |                                                                                                                                                                                                                          |   |   | -                                                                                                                                              |
|                         | -                                                   | 0  |                                                                                                                                                                                                                          |   |   | -                                                                                                                                              |
|                         | -                                                   | 0  |                                                                                                                                                                                                                          |   |   | -                                                                                                                                              |
| Branchiostoma floridae  | tetraspan net-6                                     | 1  | C:GO:0016020                                                                                                                                                                                                             | - | - | -                                                                                                                                              |
| Danio rerio             | briggsae cbr-spe-26 protein                         | 5  | P:GO:0009987;<br>P:GO:0048856;<br>P:GO:0003006;<br>P:GO:0008152;<br>P:GO:0007275                                                                                                                                         | - | - | IPR006652; IPR013089; IPR015915;<br>PRO0501 (PRINTS), PTHR23230:SF184<br>(PANTHER), SSF117281 (SUPERFAMILY)                                    |
|                         | -                                                   | 0  |                                                                                                                                                                                                                          |   |   | -                                                                                                                                              |
| Loa loa                 | briggsae cbr-inx-1 protein                          | 2  | C:GO:0005921;<br>C:GO:0016021                                                                                                                                                                                            | - | - | -                                                                                                                                              |
|                         | -                                                   | 0  |                                                                                                                                                                                                                          |   |   | -                                                                                                                                              |

|                         |                                          |     |                                                                                                                                                                                                                                                                                                                                                                                                                                                                        |   |             |                                                                   |
|-------------------------|------------------------------------------|-----|------------------------------------------------------------------------------------------------------------------------------------------------------------------------------------------------------------------------------------------------------------------------------------------------------------------------------------------------------------------------------------------------------------------------------------------------------------------------|---|-------------|-------------------------------------------------------------------|
| Caenorhabditis briggsae | alkylglycerone phosphate synthase        | 7   | P:GO:0009792;<br>P:GO:0002119;<br>F:GO:0008609;<br>C:GO:0005777;<br>P:GO:0042221;<br>P:GO:0040007;<br>C:GO:0005739                                                                                                                                                                                                                                                                                                                                                     | - | EC:2.5.1.26 | -                                                                 |
| Loa loa                 | hypothetical kda protein in chromosome   | 0   |                                                                                                                                                                                                                                                                                                                                                                                                                                                                        |   |             | -                                                                 |
|                         | -                                        | 0   |                                                                                                                                                                                                                                                                                                                                                                                                                                                                        |   |             | -                                                                 |
| Caenorhabditis elegans  | d--directed r- polymerase i subunit rpa1 | 7   | F:GO:0046872;<br>F:GO:0003899;<br>C:GO:0005654;<br>F:GO:0003677;<br>C:GO:0005736;<br>F:GO:0005515;<br>P:GO:0006350                                                                                                                                                                                                                                                                                                                                                     | - | EC:2.7.7.6  | IPR007083; IPR015699; PTHR19376 (PANTHER), SSF64484 (SUPERFAMILY) |
|                         | -                                        | 0   |                                                                                                                                                                                                                                                                                                                                                                                                                                                                        |   |             | -                                                                 |
| Loa loa                 | ribosome biogenesis protein              | 6   | C:GO:0005730;<br>P:GO:0009792;<br>F:GO:0005515;<br>P:GO:0040010;<br>P:GO:0040011;<br>P:GO:0042255                                                                                                                                                                                                                                                                                                                                                                      | - |             | IPR007034; PTHR12858 (PANTHER), PTHR12858:SF1 (PANTHER)           |
|                         | -                                        | 0   |                                                                                                                                                                                                                                                                                                                                                                                                                                                                        |   |             | -                                                                 |
| Oryctolagus cuniculus   | catenin beta-1                           | 139 | P:GO:0034097;<br>F:GO:0019901;<br>P:GO:0010552;<br>P:GO:0043065;<br>F:GO:0019903;<br>P:GO:0030997;<br>F:GO:0042153;<br>P:GO:0010909;<br>P:GO:0030521;<br>P:GO:0071681;<br>N:GO:0061154;<br>P:GO:0000578;<br>C:GO:0005915;<br>P:GO:0048489;<br>P:GO:0035117;<br>P:GO:0007016;<br>C:GO:0030057;<br>C:GO:0030877;<br>F:GO:0003704;<br>P:GO:0001711;<br>F:GO:0032403;<br>P:GO:0060769;<br>P:GO:0003337;<br>P:GO:0048145;<br>P:GO:0007403;<br>P:GO:0043123;<br>P:GO:0045765 | - |             | IPR000225; PTHR23315 (PANTHER), PTHR23315:SF13 (PANTHER)          |

|                         |                                                            |   |                                                                                                                                                      |   |                                                                                                   |                                                 |
|-------------------------|------------------------------------------------------------|---|------------------------------------------------------------------------------------------------------------------------------------------------------|---|---------------------------------------------------------------------------------------------------|-------------------------------------------------|
| Caenorhabditis elegans  | isoform f                                                  | 9 | P:GO:0009790;<br>P:GO:0006915;<br>F:GO:0003677;<br>P:GO:0007525;<br>P:GO:0045924;<br>P:GO:0001751;<br>P:GO:0007422;<br>C:GO:0005634;<br>F:GO:0008270 | - |                                                                                                   | SignalP (SIGNALP)                               |
| Caenorhabditis elegans  | isoform f                                                  | 9 | P:GO:0009790;<br>P:GO:0006915;<br>F:GO:0003677;<br>P:GO:0007525;<br>P:GO:0045924;<br>P:GO:0001751;<br>P:GO:0007422;<br>C:GO:0005634;<br>F:GO:0008270 | - |                                                                                                   | IPR000571; PTHR12675 (PANTHER)                  |
| Caenorhabditis elegans  | muscleblind-like protein a                                 | 3 | F:GO:0046872;<br>F:GO:0003676;<br>C:GO:0005634                                                                                                       | - |                                                                                                   | SignalP (SIGNALP)                               |
|                         | -                                                          | 0 |                                                                                                                                                      |   |                                                                                                   | -                                               |
| Caenorhabditis briggsae | eps (human endocytosis) related family member (eps-8)      | 1 | F:GO:0005515                                                                                                                                         | - |                                                                                                   | PTHR12287 (PANTHER),<br>PTHR12287:SF6 (PANTHER) |
| Caenorhabditis elegans  | elegans protein partially confirmed by transcript evidence | 0 |                                                                                                                                                      |   |                                                                                                   | PTHR21839 (PANTHER)                             |
| Caenorhabditis elegans  | viral a-type inclusion protein repeat containing protein   | 3 | P:GO:0007126;<br>P:GO:0006898;<br>P:GO:0040039                                                                                                       | - |                                                                                                   | -                                               |
| Caenorhabditis briggsae | viral a-type inclusion protein repeat containing protein   | 3 | P:GO:0007126;<br>P:GO:0006898;<br>P:GO:0040039                                                                                                       | - |                                                                                                   | -                                               |
| Caenorhabditis elegans  | briggsae cbr-rgs-6 protein                                 | 1 | F:GO:0004871                                                                                                                                         | - |                                                                                                   | -                                               |
|                         | -                                                          | 0 |                                                                                                                                                      |   |                                                                                                   | -                                               |
| Brugia malayi           | protein ki-se domain containing protein                    | 0 |                                                                                                                                                      |   | F:GO:0016301;<br>F:GO:0004672;<br>F:GO:0005524;<br>F:GO:0000166;<br>P:GO:0006468;<br>F:GO:0004674 | -                                               |
|                         | -                                                          | 0 |                                                                                                                                                      |   |                                                                                                   | -                                               |
|                         | -                                                          | 0 |                                                                                                                                                      |   |                                                                                                   | -                                               |
| Caenorhabditis briggsae | briggsae cbr-gfi-2 protein                                 | 8 | P:GO:0040035;<br>P:GO:0009792;<br>P:GO:0010171;<br>P:GO:0002119;<br>P:GO:0040018;<br>P:GO:0040010;<br>P:GO:0008340;<br>P:GO:0006898                  | - |                                                                                                   | SignalP (SIGNALP)                               |
|                         | -                                                          | 0 |                                                                                                                                                      |   |                                                                                                   | -                                               |
| Caenorhabditis elegans  | hypothetical protein F41G3.1 [Caenorhabditis elegans]      | 0 |                                                                                                                                                      |   |                                                                                                   | -                                               |

|                         |                                                  |    |                                                                                                                                                                                                                                                                                                                                |   |                                                         |                                                                                     |
|-------------------------|--------------------------------------------------|----|--------------------------------------------------------------------------------------------------------------------------------------------------------------------------------------------------------------------------------------------------------------------------------------------------------------------------------|---|---------------------------------------------------------|-------------------------------------------------------------------------------------|
| Homo sapiens            | lactate dehydroge-se a                           | 8  | P:GO:0031668;<br>C:GO:0019861;<br>F:GO:0005515;<br>F:GO:0004459;<br>P:GO:0055114;<br>P:GO:0006096;<br>C:GO:0005829;<br>C:GO:0005739                                                                                                                                                                                            | - | EC:1.1.1.27                                             | IPR015955; IPR018177; IPR022383;<br>PTHR11540 (PANTHER),<br>PTHR11540:SF3 (PANTHER) |
| Ailuropoda melanoleuca  | low quality protein: tubulin alpha-1c chain-like | 7  | P:GO:0007018;<br>F:GO:0005525;<br>F:GO:0005515;<br>P:GO:0051258;<br>F:GO:0005198;<br>F:GO:0003924;<br>C:GO:0005874                                                                                                                                                                                                             | - | EC:3.6.5.1;<br>EC:3.6.5.2;<br>EC:3.6.5.3;<br>EC:3.6.5.4 | IPR000217; IPR002452; IPR003008;<br>PTHR11588:SF11 (PANTHER)                        |
| Caenorhabditis elegans  | sig-I peptide peptidase                          | 16 | P:GO:0040010;<br>F:GO:0005488;<br>P:GO:0018991;<br>P:GO:0044260;<br>P:GO:0090304;<br>P:GO:0018996;<br>P:GO:0010171;<br>P:GO:0002119;<br>P:GO:0040011;<br>F:GO:0004190;<br>C:GO:0044428;<br>P:GO:0010467;<br>P:GO:0002009;<br>P:GO:0009792;<br>P:GO:0040015;<br>P:GO:0040018                                                    | - | EC:3.4.23.0                                             | -                                                                                   |
| Caenorhabditis elegans  | sig-I peptide peptidase                          | 19 | C:GO:0030532;<br>F:GO:0042500;<br>P:GO:0040010;<br>P:GO:0018991;<br>C:GO:0016021;<br>C:GO:0000790;<br>P:GO:0008380;<br>P:GO:0018996;<br>P:GO:0010171;<br>P:GO:0002119;<br>F:GO:0005515;<br>P:GO:0040011;<br>P:GO:0002009;<br>P:GO:0007424;<br>P:GO:0009792;<br>P:GO:0033619;<br>P:GO:0040015;<br>P:GO:0040018;<br>C:GO:0005783 | - | -                                                       | -                                                                                   |
| -                       | -                                                | 0  | -                                                                                                                                                                                                                                                                                                                              | - | -                                                       | -                                                                                   |
| Caenorhabditis briggsae | elegans protein confirmed by transcript evidence | 0  | -                                                                                                                                                                                                                                                                                                                              | - | -                                                       | -                                                                                   |

|                         |                                             |    |                                                                                                                                                                                                         |                                                                                                                                                                                                                                                                                                                                                                                                                                      |            |                                                                                                                                   |
|-------------------------|---------------------------------------------|----|---------------------------------------------------------------------------------------------------------------------------------------------------------------------------------------------------------|--------------------------------------------------------------------------------------------------------------------------------------------------------------------------------------------------------------------------------------------------------------------------------------------------------------------------------------------------------------------------------------------------------------------------------------|------------|-----------------------------------------------------------------------------------------------------------------------------------|
| Loa loa                 | d- polymerase epsilon                       | 12 | F:GO:0008270;<br>F:GO:0003887;<br>P:GO:0006260;<br>P:GO:0040035;<br>F:GO:0003677;<br>F:GO:0000166;<br>P:GO:0040011;<br>P:GO:0006997;<br>F:GO:0004527;<br>P:GO:0002009;<br>P:GO:0009792;<br>C:GO:0005634 | -                                                                                                                                                                                                                                                                                                                                                                                                                                    | EC:2.7.7.7 | IPR006134; PTHR10670 (PANTHER),<br>SSF56672 (SUPERFAMILY)                                                                         |
| Caenorhabditis elegans  | matrix metalloprotei-se                     | 0  |                                                                                                                                                                                                         | P:GO:0030574;<br>F:GO:0016787;<br>P:GO:0030154;<br>P:GO:0051591;<br>F:GO:0003674;<br>F:GO:0046872;<br>F:GO:0008237;<br>C:GO:0016020;<br>P:GO:0001542;<br>F:GO:0008233;<br>C:GO:0031012;<br>F:GO:0005509;<br>F:GO:0004222;<br>P:GO:0008152;<br>P:GO:0007275;<br>P:GO:0001525;<br>P:GO:0006508;<br>P:GO:0001554;<br>C:GO:0031225;<br>F:GO:0008270;<br>C:GO:0005578;<br>C:GO:0005576;<br>C:GO:0005886;<br>P:GO:0009725;<br>C:GO:0005575 |            | IPR001818; G3DSA:3.40.390.10<br>(GENE3D), PTHR10201 (PANTHER),<br>PTHR10201:SF5 (PANTHER), SSF55486<br>(SUPERFAMILY)              |
|                         | -                                           | 0  |                                                                                                                                                                                                         |                                                                                                                                                                                                                                                                                                                                                                                                                                      |            | -                                                                                                                                 |
|                         | -                                           | 0  |                                                                                                                                                                                                         |                                                                                                                                                                                                                                                                                                                                                                                                                                      |            | SignalP (SIGNALP)                                                                                                                 |
| Caenorhabditis briggsae | protein ki-se domain containing protein     | 8  | C:GO:0005929;<br>C:GO:0030425;<br>F:GO:0016301;<br>F:GO:0005515;<br>P:GO:0034606;<br>C:GO:0030424;<br>P:GO:0034608;<br>C:GO:0043025                                                                     | -                                                                                                                                                                                                                                                                                                                                                                                                                                    |            | IPR000719; IPR001245; IPR008266;<br>IPR011009; IPR020685; IPR020764;<br>G3DSA:1.10.510.10 (GENE3D),<br>G3DSA:3.30.200.20 (GENE3D) |
| Caenorhabditis briggsae | mitochondrial -dh:ubiquinone oxidoreductase | 5  | P:GO:0009792;<br>P:GO:0002119;<br>P:GO:0040010;<br>P:GO:0000003;<br>P:GO:0040019                                                                                                                        | -                                                                                                                                                                                                                                                                                                                                                                                                                                    |            | IPR009346                                                                                                                         |
| Caenorhabditis elegans  | bromodomain containing protein              | 1  | P:GO:0040011                                                                                                                                                                                            | -                                                                                                                                                                                                                                                                                                                                                                                                                                    |            | IPR013136                                                                                                                         |

|                         |                                                            |    |                                                                                                                                                                                                                                                                                                                                |                                                                                                                                                      |             |                                                                                                                                                |
|-------------------------|------------------------------------------------------------|----|--------------------------------------------------------------------------------------------------------------------------------------------------------------------------------------------------------------------------------------------------------------------------------------------------------------------------------|------------------------------------------------------------------------------------------------------------------------------------------------------|-------------|------------------------------------------------------------------------------------------------------------------------------------------------|
| Caenorhabditis elegans  | d--binding protein smubp-2                                 | 0  |                                                                                                                                                                                                                                                                                                                                | F:GO:0003677;<br>F:GO:0016787;<br>F:GO:0000166;<br>F:GO:0017111;<br>F:GO:0003674;<br>F:GO:0005524;<br>C:GO:0005575;<br>P:GO:0008150;<br>C:GO:0009536 |             | IPR003593; IPR007807; IPR014001;<br>G3DSA:3.40.50.300 (GENE3D),<br>PTHR10887 (PANTHER),<br>PTHR10887:SF23 (PANTHER),<br>SSF52540 (SUPERFAMILY) |
| Caenorhabditis elegans  | elegans protein partially confirmed by transcript evidence | 0  |                                                                                                                                                                                                                                                                                                                                |                                                                                                                                                      |             | -                                                                                                                                              |
| Caenorhabditis elegans  | elegans protein partially confirmed by transcript evidence | 0  |                                                                                                                                                                                                                                                                                                                                |                                                                                                                                                      |             | -                                                                                                                                              |
| Caenorhabditis elegans  | elegans protein partially confirmed by transcript evidence | 0  |                                                                                                                                                                                                                                                                                                                                |                                                                                                                                                      |             | -                                                                                                                                              |
|                         | -                                                          | 0  |                                                                                                                                                                                                                                                                                                                                |                                                                                                                                                      |             | -                                                                                                                                              |
|                         | -                                                          | 0  |                                                                                                                                                                                                                                                                                                                                |                                                                                                                                                      |             | SignalP (SIGNALP)                                                                                                                              |
| Caenorhabditis briggsae | protein-tyrosine sulfotransferase a                        | 2  | C:GO:0005794;<br>F:GO:0008476                                                                                                                                                                                                                                                                                                  | -                                                                                                                                                    | EC:2.8.2.20 | G3DSA:3.40.50.300 (GENE3D),<br>PTHR12788 (PANTHER), SignalP<br>(SIGNALP), SSF52540 (SUPERFAMILY)                                               |
|                         | -                                                          | 0  |                                                                                                                                                                                                                                                                                                                                |                                                                                                                                                      |             | -                                                                                                                                              |
| Loa loa                 | srrm2 protein                                              | 4  | P:GO:0040035;<br>P:GO:0040027;<br>P:GO:0008340;<br>P:GO:0040007                                                                                                                                                                                                                                                                | -                                                                                                                                                    |             | IPR013170                                                                                                                                      |
| Caenorhabditis briggsae | homeobox domain containing protein                         | 19 | F:GO:0008270;<br>P:GO:0040010;<br>P:GO:0006898;<br>P:GO:0006355;<br>P:GO:0040011;<br>P:GO:0007050;<br>C:GO:0005667;<br>P:GO:0007420;<br>P:GO:0002009;<br>P:GO:0045664;<br>P:GO:0002119;<br>F:GO:0003700;<br>P:GO:0045662;<br>P:GO:0045663;<br>F:GO:0010843;<br>F:GO:0019899;<br>P:GO:0040035;<br>F:GO:0016564;<br>C:GO:0005739 | -                                                                                                                                                    |             | PTHR18973 (PANTHER),<br>PTHR18973:SF19 (PANTHER)                                                                                               |
| Caenorhabditis elegans  | mgc83087 protein                                           | 0  |                                                                                                                                                                                                                                                                                                                                | F:GO:0008168;<br>F:GO:0016740;<br>P:GO:0008152;<br>C:GO:0016021;<br>F:GO:0003824                                                                     |             | -                                                                                                                                              |
| Loa loa                 | translation initiation factor eif-2b subunit epsilon       | 5  | P:GO:0040035;<br>P:GO:0010171;<br>P:GO:0002119;<br>P:GO:0040018;<br>P:GO:0040010                                                                                                                                                                                                                                               | -                                                                                                                                                    |             | IPR003307; IPR016021; IPR016024;<br>PTHR23001 (PANTHER),<br>PTHR23001:SF1 (PANTHER)                                                            |
|                         | -                                                          | 0  |                                                                                                                                                                                                                                                                                                                                |                                                                                                                                                      |             | -                                                                                                                                              |
| Brugia malayi           | hypothetical protein Bm1_42390 [Brugia malayi]             | 0  |                                                                                                                                                                                                                                                                                                                                | F:GO:0005515                                                                                                                                         |             | -                                                                                                                                              |



|                         |                                   |    |                                                                                                                                                                                                                                                                             |   |                                                                                                                                                        |
|-------------------------|-----------------------------------|----|-----------------------------------------------------------------------------------------------------------------------------------------------------------------------------------------------------------------------------------------------------------------------------|---|--------------------------------------------------------------------------------------------------------------------------------------------------------|
| Caenorhabditis briggsae | clathrin heavy chain              | 14 | C:GO:0030132;<br>P:GO:0035002;<br>F:GO:0005198;<br>F:GO:0005515;<br>P:GO:0035159;<br>P:GO:0030198;<br>P:GO:0007269;<br>P:GO:0033227;<br>P:GO:0016183;<br>C:GO:0030130;<br>P:GO:0006886;<br>P:GO:0007291;<br>C:GO:0030129;<br>C:GO:0005811                                   | - | IPR000547; IPR011990; IPR016024;<br>PTHR10292 (PANTHER),<br>PTHR10292:SF1 (PANTHER), PF00637<br>(PFAM)                                                 |
| Sus scrofa              | cytoplasmic 1                     | 16 | C:GO:0005829;<br>C:GO:0030863;<br>C:GO:0030424;<br>C:GO:0005625;<br>F:GO:0019894;<br>F:GO:0042802;<br>C:GO:0035267;<br>F:GO:0005524;<br>P:GO:0007409;<br>F:GO:0050998;<br>P:GO:0006928;<br>F:GO:0019901;<br>F:GO:0005200;<br>C:GO:0030529;<br>C:GO:0070688;<br>P:GO:0051592 | - | IPR004000; IPR004001; IPR020902;<br>G3DSA:2.30.36.70 (GENE3D),<br>G3DSA:3.30.420.40 (GENE3D),<br>G3DSA:3.90.640.10 (GENE3D),<br>SSF53067 (SUPERFAMILY) |
| -                       | -                                 | 0  |                                                                                                                                                                                                                                                                             |   | SignalP (SIGNALP)                                                                                                                                      |
| Caenorhabditis briggsae | stan                              | 6  | F:GO:0004930;<br>P:GO:0007156;<br>C:GO:0005886;<br>F:GO:0005509;<br>C:GO:0016021;<br>P:GO:0007218                                                                                                                                                                           | - | -                                                                                                                                                      |
| Caenorhabditis briggsae | 26s non-atpase regulatory subunit | 6  | F:GO:0005515;<br>P:GO:0006511;<br>P:GO:0000003;<br>C:GO:0000502;<br>C:GO:0005634;<br>P:GO:0009651                                                                                                                                                                           | - | PTHR10410 (PANTHER),<br>PTHR10410:SF5 (PANTHER)                                                                                                        |

|                         |                                                         |    |                                                                                                                                                                                                                                                                                                                                                                                                    |              |                                                                                            |
|-------------------------|---------------------------------------------------------|----|----------------------------------------------------------------------------------------------------------------------------------------------------------------------------------------------------------------------------------------------------------------------------------------------------------------------------------------------------------------------------------------------------|--------------|--------------------------------------------------------------------------------------------|
| Pan troglodytes         | annexin a2                                              | 23 | P:GO:0001501;<br>P:GO:0001525;<br>F:GO:0005546;<br>C:GO:0005604;<br>P:GO:0007589;<br>F:GO:0017137;<br>C:GO:0005624;<br>C:GO:0042470;<br>F:GO:0005509;<br>P:GO:0031340;<br>F:GO:0008092;<br>C:GO:0042383;<br>P:GO:0042730;<br>C:GO:0043234;<br>P:GO:0030199;<br>C:GO:0005769;<br>F:GO:0005544;<br>P:GO:0050790;<br>C:GO:0001725;<br>C:GO:0030054;<br>C:GO:0048471;<br>F:GO:0004859;<br>C:GO:0005625 | -            | SignalP (SIGNALP)                                                                          |
| -                       | -                                                       | 0  |                                                                                                                                                                                                                                                                                                                                                                                                    |              | -                                                                                          |
| -                       | -                                                       | 0  |                                                                                                                                                                                                                                                                                                                                                                                                    |              | -                                                                                          |
| Caenorhabditis briggsae | Hypothetical protein CBG15266 [Caenorhabditis briggsae] | 0  |                                                                                                                                                                                                                                                                                                                                                                                                    | F:GO:0008289 | -                                                                                          |
| -                       | -                                                       | 0  |                                                                                                                                                                                                                                                                                                                                                                                                    |              | -                                                                                          |
| Brugia malayi           | hypothetical protein Bm1_50385 [Brugia malayi]          | 0  |                                                                                                                                                                                                                                                                                                                                                                                                    |              | -                                                                                          |
| Brugia malayi           | ubiquitously transcribed tetratricopeptide x chromosome | 5  | P:GO:0009792;<br>P:GO:0040018;<br>P:GO:0040010;<br>P:GO:0040035;<br>P:GO:0040011                                                                                                                                                                                                                                                                                                                   | -            | IPR003347; IPR013129; PTHR14017 (PANTHER), PTHR14017:SF5 (PANTHER), SSF51197 (SUPERFAMILY) |
| Loa loa                 | degenerin unc-8                                         | 3  | C:GO:0016021;<br>F:GO:0005272;<br>P:GO:0006814                                                                                                                                                                                                                                                                                                                                                     | -            | IPR001873; G3DSA:1.10.287.770 (GENE3D), PTHR11690:SF17 (PANTHER)                           |
| Caenorhabditis briggsae | bub1 budding uninhibited by benzimidazoles 1 homolog    | 14 | P:GO:0000278;<br>F:GO:0016301;<br>P:GO:0071173;<br>F:GO:0005515;<br>P:GO:0033043;<br>P:GO:0051983;<br>P:GO:0040011;<br>C:GO:0000776;<br>P:GO:0009792;<br>P:GO:0002009;<br>P:GO:0002119;<br>P:GO:0040035;<br>C:GO:0000779;<br>P:GO:0000910                                                                                                                                                          | -            | -                                                                                          |
| -                       | -                                                       | 0  |                                                                                                                                                                                                                                                                                                                                                                                                    |              | SignalP (SIGNALP)                                                                          |
| -                       | -                                                       | 0  |                                                                                                                                                                                                                                                                                                                                                                                                    |              | -                                                                                          |
| -                       | -                                                       | 0  |                                                                                                                                                                                                                                                                                                                                                                                                    |              | -                                                                                          |
| -                       | -                                                       | 0  |                                                                                                                                                                                                                                                                                                                                                                                                    |              | -                                                                                          |

|                             |                                                            |   |                                                                                                                                                      |                               |             |                                                                                                                          |
|-----------------------------|------------------------------------------------------------|---|------------------------------------------------------------------------------------------------------------------------------------------------------|-------------------------------|-------------|--------------------------------------------------------------------------------------------------------------------------|
| Brugia malayi               | cpb-1                                                      | 7 | F:GO:0008187;<br>C:GO:0005737;<br>P:GO:0007275;<br>P:GO:0030154;<br>F:GO:0000166;<br>P:GO:0007283;<br>F:GO:0005515                                   | -                             |             | IPR000504; IPR012677; PTHR12566 (PANTHER), SSF54928 (SUPERFAMILY)                                                        |
|                             | -                                                          | 0 |                                                                                                                                                      |                               |             | -                                                                                                                        |
| Caenorhabditis elegans      | hypothetical protein Y54E10A.11 [Caenorhabditis elegans]   | 0 |                                                                                                                                                      | F:GO:0008270                  |             | -                                                                                                                        |
| Caenorhabditis elegans      | hypothetical protein Y54E10A.11 [Caenorhabditis elegans]   | 0 |                                                                                                                                                      | F:GO:0008270                  |             | -                                                                                                                        |
| Caenorhabditis elegans      | hypothetical protein Y54E10A.11 [Caenorhabditis elegans]   | 0 |                                                                                                                                                      | F:GO:0008270                  |             | -                                                                                                                        |
| Caenorhabditis elegans      | chromosome 6 open reading frame isoform cra_c              | 1 | F:GO:0005515                                                                                                                                         | -                             |             | -                                                                                                                        |
| Anopheles gambiae str. PEST | histone-lysine n-methyltransferase                         | 8 | P:GO:0016568;<br>P:GO:0051038;<br>F:GO:0008270;<br>F:GO:0018024;<br>F:GO:0003677;<br>P:GO:0007275;<br>P:GO:0048477;<br>C:GO:0005634                  | -                             | EC:2.1.1.43 | IPR000167; IPR001214; G3DSA:2.170.270.10 (GENE3D), PTHR22884 (PANTHER), PTHR22884:SF24 (PANTHER), SSF82199 (SUPERFAMILY) |
|                             |                                                            | 0 |                                                                                                                                                      |                               |             |                                                                                                                          |
| Caenorhabditis briggsae     | endonuclease mitochondrial                                 | 4 | F:GO:0016787;<br>F:GO:0003676;<br>F:GO:0005515;<br>F:GO:0046872                                                                                      | -                             |             | IPR001604; IPR018524; IPR020821; PTHR13966 (PANTHER), SSF54060 (SUPERFAMILY)                                             |
| Caenorhabditis elegans      | briggsae cbr-nsy-1 protein                                 | 4 | P:GO:0006468;<br>F:GO:0005515;<br>F:GO:0005524;<br>F:GO:0004674                                                                                      | -                             | EC:2.7.11.0 | IPR001660                                                                                                                |
| Brugia malayi               | c2 domain containing protein                               | 6 | C:GO:0016020;<br>C:GO:0008021;<br>F:GO:0005515;<br>P:GO:0006810;<br>F:GO:0005215;<br>P:GO:0040011                                                    | -                             |             | -                                                                                                                        |
|                             | -                                                          | 0 |                                                                                                                                                      |                               |             | -                                                                                                                        |
| Caenorhabditis elegans      | ef-hand 2                                                  | 9 | C:GO:0005829;<br>P:GO:0006289;<br>P:GO:0032465;<br>P:GO:0007283;<br>C:GO:0005814;<br>C:GO:0032391;<br>P:GO:0007099;<br>F:GO:0031683;<br>C:GO:0005932 | -                             |             | IPR011992; IPR018249; PTHR10891 (PANTHER), PTHR10891:SF41 (PANTHER), SSF47473 (SUPERFAMILY)                              |
| Caenorhabditis elegans      | elegans protein partially confirmed by transcript evidence | 0 |                                                                                                                                                      | C:GO:0016021;<br>P:GO:0007186 |             | -                                                                                                                        |
| Caenorhabditis briggsae     | atp-dependent d- helicase pif1                             | 2 | F:GO:0005488;<br>F:GO:0017111                                                                                                                        | -                             | EC:3.6.1.15 | IPR010285; G3DSA:3.40.50.300 (GENE3D), PTHR23274 (PANTHER), SSF52540 (SUPERFAMILY)                                       |
|                             | -                                                          | 0 |                                                                                                                                                      |                               |             | SignalP (SIGNALP)                                                                                                        |
| Caenorhabditis briggsae     | chloride channel protein 2                                 | 3 | C:GO:0005886;<br>P:GO:0006810;<br>F:GO:0005216                                                                                                       | -                             |             | -                                                                                                                        |
|                             | -                                                          | 0 |                                                                                                                                                      |                               |             | -                                                                                                                        |
|                             | -                                                          | 0 |                                                                                                                                                      |                               |             | -                                                                                                                        |

|                          |                                                         |    |                                                                                                                                                                       |                                                                 |             |                                                                                                           |
|--------------------------|---------------------------------------------------------|----|-----------------------------------------------------------------------------------------------------------------------------------------------------------------------|-----------------------------------------------------------------|-------------|-----------------------------------------------------------------------------------------------------------|
| Caenorhabditis briggsae  | Hypothetical protein CBG18289 [Caenorhabditis briggsae] | 0  |                                                                                                                                                                       | F:GO:0004672;<br>F:GO:0005524;<br>F:GO:0000166;<br>P:GO:0006468 |             | -                                                                                                         |
| -                        | -                                                       | 0  |                                                                                                                                                                       |                                                                 |             | -                                                                                                         |
| -                        | -                                                       | 0  |                                                                                                                                                                       |                                                                 |             | -                                                                                                         |
| Loa loa                  | r--binding protein 16                                   | 6  | P:GO:0009792;<br>F:GO:0003676;<br>P:GO:0010467;<br>C:GO:0016363;<br>P:GO:0016070;<br>F:GO:0043175                                                                     | -                                                               |             | IPR006569; IPR006903; IPR008942;<br>PTHR14124 (PANTHER)                                                   |
| Caenorhabditis briggsae  | ki-se-like protein splice variant 2                     | 1  | F:GO:0005515                                                                                                                                                          | -                                                               |             | IPR000357; IPR011989; IPR016024;<br>IPR021133; PTHR12984 (PANTHER),<br>PTHR12984:SF3 (PANTHER)            |
| Caenorhabditis briggsae  | ki-se-like protein splice variant 2                     | 1  | F:GO:0005515                                                                                                                                                          | -                                                               |             | IPR000357; IPR011989; IPR016024;<br>IPR021133; PTHR12984 (PANTHER),<br>PTHR12984:SF3 (PANTHER)            |
| Caenorhabditis briggsae  | protein rft1 homolog                                    | 5  | P:GO:0040015;<br>P:GO:0040017;<br>P:GO:0006810;<br>P:GO:0040010;<br>C:GO:0016020                                                                                      | -                                                               |             | IPR007594                                                                                                 |
| Loa loa                  | patatin-like phospholipase family protein               | 2  | F:GO:0047499;<br>P:GO:0016042                                                                                                                                         | -                                                               |             | IPR002641; IPR016035;<br>G3DSA:3.40.1090.10 (GENE3D),<br>PTHR18958 (PANTHER),<br>PTHR18958:SF94 (PANTHER) |
| -                        | -                                                       | 0  |                                                                                                                                                                       |                                                                 |             | SignalP (SIGNALP)                                                                                         |
|                          | glutathione s-transferase pi                            | 10 | C:GO:0005737;<br>P:GO:0007417;<br>F:GO:0004364;<br>P:GO:0006805;<br>F:GO:0005515;<br>P:GO:0006749;<br>F:GO:0008144;<br>P:GO:0006916;<br>C:GO:0005634;<br>F:GO:0043295 | -                                                               | EC:2.5.1.18 | IPR004045; IPR012335; IPR012336;<br>PTHR11571 (PANTHER),<br>PTHR11571:SF2 (PANTHER)                       |
| Caenorhabditis briggsae  | acetyl- hydrolase transferase family protein            | 6  | F:GO:0019239;<br>C:GO:0005811;<br>P:GO:0009168;<br>P:GO:0006084;<br>F:GO:0016787;<br>F:GO:0016740                                                                     | -                                                               |             | IPR003702; G3DSA:3.40.1080.10<br>(GENE3D), PTHR21432:SF11<br>(PANTHER), SSF100950 (SUPERFAMILY)           |
| Brugia malayi            | mgc80099 protein                                        | 1  | P:GO:0009792                                                                                                                                                          | -                                                               |             | -                                                                                                         |
| Oesophagostomum dentatum | serine threonine protein phosphatase pp1 isozyme 1      | 2  | P:GO:0000003;<br>F:GO:0004721                                                                                                                                         | -                                                               | EC:3.1.3.16 | IPR004843; IPR006186;<br>G3DSA:3.60.21.10 (GENE3D),<br>SSF56300 (SUPERFAMILY)                             |
| Caenorhabditis elegans   | phospholipid scramblase 1                               | 2  | F:GO:0005515;<br>P:GO:0006955                                                                                                                                         | -                                                               |             | IPR005552; PTHR23248:SF5<br>(PANTHER)                                                                     |
| -                        | -                                                       | 0  |                                                                                                                                                                       |                                                                 |             | -                                                                                                         |

|                          |                                                                   |    |                                                                                                                                                                                                                          |                               |                                                         |                                                                                             |
|--------------------------|-------------------------------------------------------------------|----|--------------------------------------------------------------------------------------------------------------------------------------------------------------------------------------------------------------------------|-------------------------------|---------------------------------------------------------|---------------------------------------------------------------------------------------------|
| Ailuropoda melanoleuca   | guanine nucleotide binding protein (g protein) beta polypeptide 1 | 13 | P:GO:0007603;<br>P:GO:0007265;<br>F:GO:0004871;<br>P:GO:0007213;<br>C:GO:0001750;<br>P:GO:0050909;<br>P:GO:0007200;<br>P:GO:0007204;<br>C:GO:0005834;<br>P:GO:0009755;<br>F:GO:0003924;<br>F:GO:0031702;<br>P:GO:0008283 | -                             | EC:3.6.5.1;<br>EC:3.6.5.2;<br>EC:3.6.5.3;<br>EC:3.6.5.4 | IPR001680; IPR011046; IPR015943;<br>IPR017986; IPR019781; IPR019782;<br>PTHR19850 (PANTHER) |
| -                        | -                                                                 | 0  |                                                                                                                                                                                                                          |                               |                                                         | -                                                                                           |
| Oesophagostomum dentatum | serine threonine phosphatase                                      | 2  | P:GO:0000003;<br>F:GO:0004721                                                                                                                                                                                            | -                             | EC:3.1.3.16                                             | SignalP (SIGNALP)                                                                           |
| Caenorhabditis elegans   | multidrug resistance protein family member (mrp-5)                | 8  | P:GO:0002119;<br>F:GO:0042626;<br>P:GO:0040002;<br>P:GO:0040017;<br>P:GO:0055085;<br>P:GO:0040010;<br>F:GO:0005524;<br>C:GO:0016021                                                                                      | -                             |                                                         | IPR017940; PTHR19242 (PANTHER),<br>PTHR19242:SF14 (PANTHER), SignalP<br>(SIGNALP)           |
| Brugia malayi            | protein ki-se domain containing protein                           | 4  | F:GO:0004672;<br>P:GO:0040010;<br>P:GO:0019915;<br>F:GO:0000166                                                                                                                                                          | -                             |                                                         | -                                                                                           |
| Caenorhabditis briggsae  | briggsae cbr-maoc-1 protein                                       | 4  | P:GO:0019915;<br>P:GO:0006952;<br>P:GO:0008340;<br>F:GO:0042802                                                                                                                                                          | -                             |                                                         | G3DSA:3.10.129.10 (GENE3D)                                                                  |
| Caenorhabditis elegans   | vav 2 guanine nucleotide exchange factor                          | 5  | C:GO:0005829;<br>F:GO:0005085;<br>F:GO:0005515;<br>P:GO:0007165;<br>P:GO:0008624                                                                                                                                         | -                             |                                                         | -                                                                                           |
| Caenorhabditis elegans   | briggsae cbr-taf-2 protein                                        | 0  |                                                                                                                                                                                                                          | F:GO:0008237;<br>F:GO:0008270 |                                                         | -                                                                                           |
| Loa loa                  | ring finger protein 145                                           | 2  | F:GO:0046872;<br>C:GO:0005622                                                                                                                                                                                            | -                             |                                                         | -                                                                                           |
| -                        | -                                                                 | 0  |                                                                                                                                                                                                                          |                               |                                                         | -                                                                                           |
| Brugia malayi            | elegans protein confirmed by transcript evidence                  | 0  |                                                                                                                                                                                                                          | C:GO:0016020                  |                                                         | SignalP (SIGNALP)                                                                           |
| -                        | -                                                                 | 0  |                                                                                                                                                                                                                          |                               |                                                         | -                                                                                           |

|                        |                                                            |    |                                                                                                                                                                                                                                                                                                                                                                                                                                                                         |                                                                                                                                     |              |                                                                                                                                                                                   |
|------------------------|------------------------------------------------------------|----|-------------------------------------------------------------------------------------------------------------------------------------------------------------------------------------------------------------------------------------------------------------------------------------------------------------------------------------------------------------------------------------------------------------------------------------------------------------------------|-------------------------------------------------------------------------------------------------------------------------------------|--------------|-----------------------------------------------------------------------------------------------------------------------------------------------------------------------------------|
| Caenorhabditis elegans | myosin heavy chain                                         | 34 | P:GO:0046664;<br>P:GO:0045200;<br>C:GO:0016461;<br>P:GO:0035159;<br>P:GO:0031036;<br>P:GO:0035072;<br>P:GO:0007443;<br>P:GO:0007395;<br>P:GO:0045214;<br>P:GO:0035017;<br>P:GO:0007297;<br>C:GO:0031672;<br>P:GO:0046663;<br>F:GO:0003779;<br>F:GO:0000146;<br>P:GO:0001736;<br>F:GO:0008307;<br>F:GO:0032027;<br>P:GO:0008258;<br>P:GO:0051259;<br>P:GO:0016203;<br>C:GO:0032154;<br>C:GO:0045179;<br>P:GO:0045184;<br>C:GO:0005863;<br>P:GO:0035317;<br>P:GO:0007427; | -                                                                                                                                   |              | SignalIP (SIGNALP)                                                                                                                                                                |
|                        | -                                                          | 0  |                                                                                                                                                                                                                                                                                                                                                                                                                                                                         |                                                                                                                                     |              | -                                                                                                                                                                                 |
|                        | -                                                          | 0  |                                                                                                                                                                                                                                                                                                                                                                                                                                                                         |                                                                                                                                     |              | -                                                                                                                                                                                 |
| Caenorhabditis elegans | lycerol ki-se family member (dgc-1)                        | 7  | F:GO:0004143;<br>F:GO:0008270;<br>F:GO:0003676;<br>F:GO:0005515;<br>F:GO:0000166;<br>P:GO:0007165;<br>P:GO:0007205                                                                                                                                                                                                                                                                                                                                                      | -                                                                                                                                   | EC:2.7.1.107 | IPR000756; PTHR11255 (PANTHER),<br>PTHR11255:SF8 (PANTHER)                                                                                                                        |
| Caenorhabditis elegans | aspergillus nuclear division related family member (nud-2) | 0  |                                                                                                                                                                                                                                                                                                                                                                                                                                                                         |                                                                                                                                     |              | -                                                                                                                                                                                 |
|                        | -                                                          | 0  |                                                                                                                                                                                                                                                                                                                                                                                                                                                                         |                                                                                                                                     |              | -                                                                                                                                                                                 |
| Hypocrea lixii         | family protein                                             | 0  |                                                                                                                                                                                                                                                                                                                                                                                                                                                                         | F:GO:0005509;<br>F:GO:0030414;<br>C:GO:0016021;<br>C:GO:0009279;<br>C:GO:0016020;<br>F:GO:0004867;<br>C:GO:0005576;<br>C:GO:0005886 |              | -                                                                                                                                                                                 |
| Brugia malayi          | fragile site-associated protein                            | 0  |                                                                                                                                                                                                                                                                                                                                                                                                                                                                         |                                                                                                                                     |              | IPR018863                                                                                                                                                                         |
| Brugia malayi          | notch-like transmembrane receptor lin-12                   | 10 | P:GO:0048468;<br>N:GO:2000026;<br>P:GO:0009888;<br>C:GO:0044464;<br>P:GO:0009653;<br>P:GO:0048513;<br>P:GO:0030182;<br>P:GO:0045595;<br>P:GO:0048523;<br>F:GO:0005488                                                                                                                                                                                                                                                                                                   | -                                                                                                                                   |              | IPR000152; IPR000742; IPR000800;<br>IPR006209; IPR006210; IPR013032;<br>G3DSA:2.10.25.10 (GENE3D),<br>PTHR11201 (PANTHER),<br>PTHR11201:SF13 (PANTHER),<br>SSF57196 (SUPERFAMILY) |

|                             |                                                         |    |                                                                                                                                                                                                                                                                                              |              |                            |                                                                                              |
|-----------------------------|---------------------------------------------------------|----|----------------------------------------------------------------------------------------------------------------------------------------------------------------------------------------------------------------------------------------------------------------------------------------------|--------------|----------------------------|----------------------------------------------------------------------------------------------|
|                             | -                                                       | 0  |                                                                                                                                                                                                                                                                                              |              |                            | -                                                                                            |
| Dictyocaulus viviparus      | hypothetical protein isoform a [Dictyocaulus viviparus] | 0  |                                                                                                                                                                                                                                                                                              |              |                            | -                                                                                            |
| Caenorhabditis briggsae     | briggsae cbr-ego-1 protein                              | 0  |                                                                                                                                                                                                                                                                                              | F:GO:0005515 |                            | -                                                                                            |
| Caenorhabditis elegans      | endoribonuclease dicer                                  | 17 | P:GO:0001525;<br>F:GO:0004525;<br>C:GO:0043005;<br>P:GO:0030324;<br>F:GO:0005515;<br>P:GO:0035116;<br>P:GO:0030422;<br>C:GO:0005737;<br>P:GO:0019827;<br>F:GO:0004386;<br>F:GO:0003677;<br>P:GO:0048754;<br>P:GO:0035196;<br>F:GO:0003725;<br>F:GO:0003993;<br>P:GO:0055013;<br>F:GO:0005524 |              | EC:3.1.26.3;<br>EC:3.1.3.2 | -                                                                                            |
| Caenorhabditis elegans      | uncoordinated family member (unc-89)                    | 0  |                                                                                                                                                                                                                                                                                              |              |                            | PTHR19897 (PANTHER),<br>PTHR19897:SF5 (PANTHER)                                              |
|                             | -                                                       | 0  |                                                                                                                                                                                                                                                                                              |              |                            | -                                                                                            |
| Caenorhabditis briggsae     | adiponectin receptor 2                                  | 4  | F:GO:0004872;<br>P:GO:0007165;<br>C:GO:0016021;<br>P:GO:0006355                                                                                                                                                                                                                              |              |                            | IPR004254; PTHR20855:SF13<br>(PANTHER)                                                       |
|                             | -                                                       | 0  |                                                                                                                                                                                                                                                                                              |              |                            | -                                                                                            |
| Loa loa                     | gtpase activating protein and vps9 domains 1            | 1  | P:GO:0007165                                                                                                                                                                                                                                                                                 |              |                            | -                                                                                            |
| Angiostrongylus cantonensis | 60s ribosomal protein l7                                | 10 | P:GO:0009792;<br>P:GO:0002119;<br>F:GO:0030528;<br>F:GO:0003735;<br>F:GO:0005515;<br>P:GO:0040010;<br>P:GO:0000003;<br>C:GO:0015934;<br>P:GO:0006508;<br>P:GO:0006412                                                                                                                        |              | EC:3.6.5.3                 | IPR005998; IPR012988; IPR016082;<br>IPR018038; PTHR11524 (PANTHER)                           |
| Angiostrongylus cantonensis | 60s ribosomal protein l7                                | 10 | P:GO:0009792;<br>P:GO:0002119;<br>F:GO:0030528;<br>F:GO:0003735;<br>F:GO:0005515;<br>P:GO:0040010;<br>P:GO:0000003;<br>C:GO:0015934;<br>P:GO:0006508;<br>P:GO:0006412                                                                                                                        |              | EC:3.6.5.3                 | IPR005998; IPR012988; IPR016082;<br>IPR018038; PTHR11524 (PANTHER)                           |
| Caenorhabditis briggsae     | phenylethanolamine n-methyltransferase                  | 2  | F:GO:0005515;<br>F:GO:0008168                                                                                                                                                                                                                                                                |              | EC:2.1.1.0                 | IPR000940; G3DSA:3.40.50.150<br>(GENE3D), PTHR10867:SF3<br>(PANTHER), SSF53335 (SUPERFAMILY) |
|                             | -                                                       | 0  |                                                                                                                                                                                                                                                                                              |              |                            | -                                                                                            |
| Caenorhabditis briggsae     | polymerase iii (d- directed) polypeptide g like         | 4  | P:GO:0002009;<br>P:GO:0040010;<br>P:GO:0040035;<br>P:GO:0002119                                                                                                                                                                                                                              |              |                            | -                                                                                            |

|                         |                                                                 |    |                                                                                                                                                                                        |                                                                 |            |                                                                                             |
|-------------------------|-----------------------------------------------------------------|----|----------------------------------------------------------------------------------------------------------------------------------------------------------------------------------------|-----------------------------------------------------------------|------------|---------------------------------------------------------------------------------------------|
| Ailuropoda melanoleuca  | ribosomal protein l23a                                          | 6  | F:GO:0003735;<br>F:GO:0005515;<br>C:GO:0022625;<br>F:GO:0019843;<br>F:GO:0000166;<br>P:GO:0006414                                                                                      | -                                                               |            | IPR001014; IPR005633; IPR012677;<br>IPR012678; IPR013025; IPR019985;<br>PTHR11620 (PANTHER) |
| Caenorhabditis briggsae | -dh-ubiquinone oxidoreductase subunit                           | 9  | P:GO:0040010;<br>P:GO:0008340;<br>F:GO:0008137;<br>C:GO:0016021;<br>C:GO:0005743;<br>P:GO:0006120;<br>P:GO:0002119;<br>P:GO:0006898;<br>P:GO:0009792                                   | -                                                               | EC:1.6.5.3 | IPR009423; SignalP (SIGNALP)                                                                |
|                         | -                                                               | 0  |                                                                                                                                                                                        |                                                                 |            | -                                                                                           |
| Caenorhabditis briggsae | briggsae cbr-lem-3 protein                                      | 0  |                                                                                                                                                                                        | P:GO:0007413;<br>C:GO:0005635                                   |            | IPR003887; IPR011015; PTHR12019<br>(PANTHER)                                                |
|                         | -                                                               | 0  |                                                                                                                                                                                        |                                                                 |            | -                                                                                           |
|                         | -                                                               | 0  |                                                                                                                                                                                        |                                                                 |            | -                                                                                           |
| Caenorhabditis elegans  | srebp cleavage activating protein homolog family member (scp-1) | 1  | P:GO:0009792                                                                                                                                                                           | -                                                               |            | IPR001680; IPR011046; IPR015943;<br>IPR017986; IPR019781; IPR019782                         |
| Melithaea caledonica    | tissue factor pathway inhibitor-like                            | 1  | F:GO:0004867                                                                                                                                                                           | -                                                               |            | IPR010916; SignalP (SIGNALP)                                                                |
| Melithaea caledonica    | tissue factor pathway inhibitor-like                            | 1  | F:GO:0004867                                                                                                                                                                           | -                                                               |            | SignalP (SIGNALP)                                                                           |
| Caenorhabditis briggsae | briggsae cbr-sax-2 protein                                      | 11 | F:GO:0005515;<br>P:GO:0048601;<br>P:GO:0016055;<br>P:GO:0042052;<br>P:GO:0008407;<br>F:GO:0016563;<br>P:GO:0045860;<br>P:GO:0048800;<br>P:GO:0035317;<br>P:GO:0048814;<br>C:GO:0005938 | -                                                               |            | PTHR12295 (PANTHER),<br>PTHR12295:SF6 (PANTHER)                                             |
| Apis mellifera          | kiaa0319 protein                                                | 0  |                                                                                                                                                                                        | C:GO:0016021;<br>C:GO:0005886                                   |            | IPR000601; IPR022409; PTHR10083<br>(PANTHER), PTHR10083:SF14<br>(PANTHER)                   |
| Brugia malayi           | n t family member (cit- )                                       | 0  |                                                                                                                                                                                        |                                                                 |            | IPR006670; IPR006671; IPR011028;<br>IPR013763; IPR015429;<br>PTHR10026:SF9 (PANTHER)        |
| Caenorhabditis elegans  | periodic tryptophan protein 1 homolog                           | 0  |                                                                                                                                                                                        | F:GO:0003674;<br>P:GO:0008150;<br>C:GO:0005634;<br>C:GO:0005575 |            | IPR001680; IPR015943; PTHR14091<br>(PANTHER), SSF101908 (SUPERFAMILY)                       |
| Caenorhabditis elegans  | periodic tryptophan protein 1 homolog                           | 0  |                                                                                                                                                                                        | F:GO:0003674;<br>P:GO:0008150;<br>C:GO:0005634;<br>C:GO:0005575 |            | IPR001680; IPR015943; PTHR14091<br>(PANTHER), SSF101908 (SUPERFAMILY)                       |
| Caenorhabditis briggsae | ribosome production factor 1                                    | 9  | P:GO:0006412;<br>F:GO:0003723;<br>C:GO:0005730;<br>P:GO:0040007;<br>F:GO:0005524;<br>P:GO:0002119;<br>P:GO:0042254;<br>F:GO:0004812;<br>P:GO:0006898                                   | -                                                               | EC:3.6.5.3 | IPR004154; IPR007109;<br>G3DSA:3.40.50.10480 (GENE3D),<br>PTHR22734 (PANTHER)               |



|                         |                                                                |    |                                                                                                                                                                                                                                                                                                                                                                                   |                             |                                                                                                                         |
|-------------------------|----------------------------------------------------------------|----|-----------------------------------------------------------------------------------------------------------------------------------------------------------------------------------------------------------------------------------------------------------------------------------------------------------------------------------------------------------------------------------|-----------------------------|-------------------------------------------------------------------------------------------------------------------------|
|                         | -                                                              | 0  |                                                                                                                                                                                                                                                                                                                                                                                   |                             | -                                                                                                                       |
|                         | -                                                              | 0  |                                                                                                                                                                                                                                                                                                                                                                                   |                             | -                                                                                                                       |
|                         | -                                                              | 0  |                                                                                                                                                                                                                                                                                                                                                                                   |                             | -                                                                                                                       |
|                         | -                                                              | 0  |                                                                                                                                                                                                                                                                                                                                                                                   |                             | -                                                                                                                       |
| Caenorhabditis elegans  | negative regulator of mitosis                                  | 1  | F:GO:0005515                                                                                                                                                                                                                                                                                                                                                                      | -                           | IPR020003                                                                                                               |
| Loa loa                 | taf1 r- polymerase tata box binding protein -associated factor | 22 | F:GO:0002039;<br>P:GO:0006367;<br>P:GO:0000080;<br>F:GO:0008270;<br>F:GO:0004402;<br>P:GO:0018107;<br>F:GO:0017025;<br>P:GO:0046777;<br>P:GO:0010552;<br>C:GO:0005730;<br>P:GO:0032436;<br>P:GO:0018105;<br>F:GO:0004674;<br>F:GO:0003713;<br>P:GO:0006368;<br>F:GO:0003677;<br>C:GO:0045120;<br>P:GO:0042493;<br>C:GO:0005669;<br>F:GO:0070577;<br>P:GO:0016573;<br>C:GO:0071339 | EC:2.3.1.48;<br>EC:2.7.11.0 | IPR022591; PTHR13900 (PANTHER)                                                                                          |
| Homo sapiens            | eukaryotic translation elongation factor 1 gamma               | 6  | F:GO:0003746;<br>C:GO:0005853;<br>F:GO:0005515;<br>C:GO:0005829;<br>P:GO:0009615;<br>P:GO:0006414                                                                                                                                                                                                                                                                                 | -                           | IPR004045; IPR004046; IPR010987;<br>IPR012335; IPR012336; IPR017933;<br>PTHR11260 (PANTHER),<br>PTHR11260:SF7 (PANTHER) |
| Caenorhabditis briggsae | pab-dependent poly -specific ribonuclease subunit 3            | 1  | F:GO:0005515                                                                                                                                                                                                                                                                                                                                                                      | -                           | PTHR12272 (PANTHER),<br>PTHR12272:SF6 (PANTHER)                                                                         |
|                         | -                                                              | 0  |                                                                                                                                                                                                                                                                                                                                                                                   |                             | SignalP (SIGNALP)                                                                                                       |
|                         | -                                                              | 0  |                                                                                                                                                                                                                                                                                                                                                                                   |                             | -                                                                                                                       |
| Caenorhabditis briggsae | huntingtin interacting protein k                               | 0  |                                                                                                                                                                                                                                                                                                                                                                                   |                             | -                                                                                                                       |
| Tetraodon nigroviridis  | malate dehydroge-se                                            | 4  | P:GO:0018991;<br>P:GO:0055114;<br>F:GO:0016491;<br>P:GO:0040011                                                                                                                                                                                                                                                                                                                   | -                           | -                                                                                                                       |
|                         | -                                                              | 0  |                                                                                                                                                                                                                                                                                                                                                                                   |                             | SignalP (SIGNALP)                                                                                                       |
| Caenorhabditis briggsae | serine palmitoyltransferase                                    | 5  | P:GO:0009792;<br>P:GO:0040027;<br>P:GO:0040010;<br>P:GO:0040011;<br>F:GO:0003824                                                                                                                                                                                                                                                                                                  | -                           | PTHR13693 (PANTHER),<br>PTHR13693:SF2 (PANTHER)                                                                         |
|                         | -                                                              | 0  |                                                                                                                                                                                                                                                                                                                                                                                   |                             | -                                                                                                                       |
| Pan troglodytes         | hepatocellular carcinoma-associated antigen 112                | 1  | C:GO:0016021                                                                                                                                                                                                                                                                                                                                                                      | -                           | -                                                                                                                       |
|                         | -                                                              | 0  |                                                                                                                                                                                                                                                                                                                                                                                   |                             | -                                                                                                                       |

|                         |                                                 |   |                                                                                  |                                                                                                                                                      |            |                                                                                                         |
|-------------------------|-------------------------------------------------|---|----------------------------------------------------------------------------------|------------------------------------------------------------------------------------------------------------------------------------------------------|------------|---------------------------------------------------------------------------------------------------------|
| Brugia malayi           | transcription initiation factor tfiid subunit 8 | 0 |                                                                                  | P:GO:0030154;<br>C:GO:0005737;<br>P:GO:0001833;<br>P:GO:0007275;<br>P:GO:0045449;<br>C:GO:0005634;<br>F:GO:0003677                                   |            | IPR006565; IPR009072                                                                                    |
| Caenorhabditis elegans  | sorting nexin-18                                | 5 | P:GO:0009792;<br>P:GO:0040027;<br>F:GO:0035091;<br>F:GO:0005515;<br>P:GO:0007154 | -                                                                                                                                                    |            | IPR001683; IPR019497;<br>G3DSA:2.30.30.40 (GENE3D),<br>PTHR10555 (PANTHER),<br>PTHR10555:SF11 (PANTHER) |
|                         | -                                               | 0 |                                                                                  |                                                                                                                                                      |            | -                                                                                                       |
| Caenorhabditis elegans  | secreted protein                                | 0 |                                                                                  | F:GO:0001848;<br>C:GO:0016021;<br>P:GO:0045916                                                                                                       |            | IPR000436; IPR016060; PTHR19325<br>(PANTHER), PTHR19325:SF25<br>(PANTHER)                               |
|                         | -                                               | 0 |                                                                                  |                                                                                                                                                      |            | -                                                                                                       |
|                         | -                                               | 0 |                                                                                  |                                                                                                                                                      |            | -                                                                                                       |
| Homo sapiens            | -dh dehydroge-se                                | 5 | P:GO:0006810;<br>F:GO:0008137;<br>C:GO:0005747;<br>P:GO:0006120;<br>P:GO:0032981 | -                                                                                                                                                    | EC:1.6.5.3 | -                                                                                                       |
| Danio rerio             | novel protein                                   | 0 |                                                                                  | P:GO:0007154;<br>P:GO:0006816;<br>C:GO:0016021;<br>C:GO:0016020;<br>C:GO:0005575;<br>P:GO:0055085;<br>P:GO:0008150;<br>F:GO:0005432;<br>F:GO:0005488 |            | -                                                                                                       |
|                         | -                                               | 0 |                                                                                  |                                                                                                                                                      |            | SignalP (SIGNALP)                                                                                       |
|                         | -                                               | 0 |                                                                                  |                                                                                                                                                      |            | -                                                                                                       |
|                         | -                                               | 0 |                                                                                  |                                                                                                                                                      |            | -                                                                                                       |
| Caenorhabditis elegans  | isoform 2                                       | 0 |                                                                                  |                                                                                                                                                      |            | -                                                                                                       |
|                         | -                                               | 0 |                                                                                  |                                                                                                                                                      |            | SignalP (SIGNALP)                                                                                       |
| Caenorhabditis briggsae | tp53rk binding protein                          | 3 | C:GO:0005829;<br>F:GO:0019901;<br>C:GO:0005634                                   | -                                                                                                                                                    |            | IPR013926; PTHR15840 (PANTHER),<br>PTHR15840:SF5 (PANTHER),<br>SSF143870 (SUPERFAMILY)                  |
|                         | -                                               | 0 |                                                                                  |                                                                                                                                                      |            | -                                                                                                       |

|                         |                                         |    |                                                                                                                                                                                                                                                                                                                                |                                                                                                                                     |             |                                                                                   |
|-------------------------|-----------------------------------------|----|--------------------------------------------------------------------------------------------------------------------------------------------------------------------------------------------------------------------------------------------------------------------------------------------------------------------------------|-------------------------------------------------------------------------------------------------------------------------------------|-------------|-----------------------------------------------------------------------------------|
| Loa loa                 | shortsighted class 1                    | 19 | P:GO:0035282;<br>P:GO:0030307;<br>P:GO:0045746;<br>P:GO:0001751;<br>P:GO:0046843;<br>P:GO:0006355;<br>P:GO:0008101;<br>P:GO:0009996;<br>P:GO:0007297;<br>C:GO:0005737;<br>F:GO:0003702;<br>P:GO:0008284;<br>P:GO:0007422;<br>P:GO:0035071;<br>P:GO:0001709;<br>F:GO:0003700;<br>F:GO:0042803;<br>C:GO:0005634;<br>P:GO:0043066 | -                                                                                                                                   |             | IPR000580; PTHR12348:SF8 (PANTHER)                                                |
|                         |                                         | 0  |                                                                                                                                                                                                                                                                                                                                |                                                                                                                                     |             |                                                                                   |
| Caenorhabditis elegans  | zinc finger protein 699                 | 0  |                                                                                                                                                                                                                                                                                                                                | P:GO:0006355;<br>F:GO:0046872;<br>F:GO:0003676;<br>P:GO:0045449;<br>F:GO:0008270;<br>F:GO:0003677;<br>C:GO:0005634;<br>C:GO:0005622 |             | IPR007087; IPR013087; IPR015880; PTHR23229 (PANTHER), PTHR23229:SF13 (PANTHER)    |
| Caenorhabditis briggsae | protein ki-se domain containing protein | 9  | C:GO:0030424;<br>C:GO:0030425;<br>F:GO:0004713;<br>C:GO:0005929;<br>F:GO:0005515;<br>F:GO:0000166;<br>C:GO:0043025;<br>P:GO:0034608;<br>P:GO:0034606                                                                                                                                                                           | -                                                                                                                                   | EC:2.7.10.0 | IPR000719; IPR001245; IPR011009; IPR020685; IPR020764; G3DSA:1.10.510.10 (GENE3D) |
| Caenorhabditis briggsae | vacuolar membrane protein pep11         | 9  | P:GO:0009792;<br>P:GO:0010171;<br>P:GO:0040018;<br>P:GO:0018996;<br>F:GO:0005515;<br>P:GO:0040010;<br>P:GO:0000003;<br>P:GO:0008219;<br>F:GO:0008270                                                                                                                                                                           | -                                                                                                                                   |             | PTHR23323 (PANTHER), PTHR23323:SF24 (PANTHER)                                     |
| Caenorhabditis elegans  | pan domain containing protein           | 0  |                                                                                                                                                                                                                                                                                                                                |                                                                                                                                     |             | -                                                                                 |
|                         |                                         | 0  |                                                                                                                                                                                                                                                                                                                                |                                                                                                                                     |             | -                                                                                 |
| Caenorhabditis brenneri | brain protein 44                        | 0  |                                                                                                                                                                                                                                                                                                                                | F:GO:0003674;<br>P:GO:0008150                                                                                                       |             | IPR005336; PTHR14154 (PANTHER), PTHR14154:SF2 (PANTHER)                           |
|                         |                                         | 0  |                                                                                                                                                                                                                                                                                                                                |                                                                                                                                     |             | -                                                                                 |
| Brugia malayi           | interleukin enhancer binding factor 2   | 7  | C:GO:0005730;<br>F:GO:0003677;<br>F:GO:0003725;<br>F:GO:0005515;<br>C:GO:0030529;<br>P:GO:0045893;<br>F:GO:0003702                                                                                                                                                                                                             | -                                                                                                                                   |             | -                                                                                 |

|                         |                                                    |    |                                                                                                                                                                                                                                                                                                               |                                                |             |                                                                                                                                         |
|-------------------------|----------------------------------------------------|----|---------------------------------------------------------------------------------------------------------------------------------------------------------------------------------------------------------------------------------------------------------------------------------------------------------------|------------------------------------------------|-------------|-----------------------------------------------------------------------------------------------------------------------------------------|
| Caenorhabditis briggsae | r- binding motif protein 19                        | 6  | C:GO:0005737;<br>C:GO:0005730;<br>C:GO:0005654;<br>F:GO:0003676;<br>P:GO:0040019;<br>F:GO:0000166                                                                                                                                                                                                             | -                                              |             | IPR000504; IPR012677; PTHR10432 (PANTHER), PTHR10432:SF64 (PANTHER), SSF54928 (SUPERFAMILY)                                             |
|                         |                                                    | 0  |                                                                                                                                                                                                                                                                                                               |                                                |             |                                                                                                                                         |
| Caenorhabditis elegans  | sig-l transducer and activator of transcription    | 18 | F:GO:0003700;<br>F:GO:0004871;<br>P:GO:0003006;<br>P:GO:0006519;<br>P:GO:0048732;<br>P:GO:0019752;<br>P:GO:0042981;<br>P:GO:0007165;<br>C:GO:0005737;<br>F:GO:0042802;<br>F:GO:0003677;<br>P:GO:0048523;<br>P:GO:0065008;<br>P:GO:0045621;<br>F:GO:0005509;<br>C:GO:0005634;<br>P:GO:0009308;<br>P:GO:0006355 | -                                              |             | IPR001217; IPR008967; IPR012345; IPR013800; IPR015988; PTHR11801:SF9 (PANTHER)                                                          |
| Ascaris suum            | serine threonine protein phosphatase pp1 isozyme 1 | 1  | F:GO:0016787                                                                                                                                                                                                                                                                                                  | -                                              |             | -                                                                                                                                       |
|                         |                                                    | 0  |                                                                                                                                                                                                                                                                                                               |                                                |             | SignalP (SIGNALP)                                                                                                                       |
| Caenorhabditis elegans  | trafficking protein particle complex subunit 4     | 5  | C:GO:0044456;<br>C:GO:0030008;<br>F:GO:0005515;<br>P:GO:0006888;<br>C:GO:0016020                                                                                                                                                                                                                              | -                                              |             | IPR007233; IPR011012; G3DSA:3.30.450.70 (GENE3D), PTHR23249:SF2 (PANTHER), SignalP (SIGNALP)                                            |
|                         |                                                    | 0  |                                                                                                                                                                                                                                                                                                               |                                                |             |                                                                                                                                         |
| Caenorhabditis elegans  | transcription initiation factor iif alpha          | 11 | P:GO:0008340;<br>P:GO:0006367;<br>P:GO:0040035;<br>F:GO:0003677;<br>F:GO:0016563;<br>P:GO:0006898;<br>P:GO:0009792;<br>F:GO:0003824;<br>C:GO:0005634;<br>F:GO:0003702;<br>P:GO:0045941                                                                                                                        | -                                              |             | IPR008851; IPR011039; PTHR13011 (PANTHER)                                                                                               |
| Caenorhabditis elegans  | tr- modification gtpase                            | 4  | F:GO:0017111;<br>C:GO:0005622;<br>P:GO:0008033;<br>F:GO:0000166                                                                                                                                                                                                                                               | -                                              | EC:3.6.1.15 | IPR018948; G3DSA:1.20.120.430 (GENE3D), PTHR11649 (PANTHER), PTHR11649:SF14 (PANTHER), SSF103025 (SUPERFAMILY), SSF116878 (SUPERFAMILY) |
|                         |                                                    | 0  |                                                                                                                                                                                                                                                                                                               |                                                |             | SignalP (SIGNALP)                                                                                                                       |
| Caenorhabditis elegans  | elegans protein confirmed by transcript evidence   | 0  |                                                                                                                                                                                                                                                                                                               |                                                |             | -                                                                                                                                       |
| Caenorhabditis elegans  | c4b-binding protein beta                           | 0  |                                                                                                                                                                                                                                                                                                               | F:GO:0030414;<br>F:GO:0016787;<br>C:GO:0005576 |             | IPR000436; IPR016060; PTHR19325 (PANTHER), PTHR19325:SF40 (PANTHER)                                                                     |
|                         |                                                    | 0  |                                                                                                                                                                                                                                                                                                               |                                                |             |                                                                                                                                         |
| Caenorhabditis elegans  | protein                                            | 0  |                                                                                                                                                                                                                                                                                                               | P:GO:0006508;<br>F:GO:0004176                  |             | SignalP (SIGNALP)                                                                                                                       |
|                         |                                                    | 0  |                                                                                                                                                                                                                                                                                                               |                                                |             |                                                                                                                                         |

|                         |                                                       |    |                                                                                                                                                                                                                          |                                                |            |                                                                                                 |
|-------------------------|-------------------------------------------------------|----|--------------------------------------------------------------------------------------------------------------------------------------------------------------------------------------------------------------------------|------------------------------------------------|------------|-------------------------------------------------------------------------------------------------|
| Brugia malayi           | origin recognition complex subunit 1                  | 5  | F:GO:0005488;<br>P:GO:0040007;<br>P:GO:0040035;<br>P:GO:0002119;<br>P:GO:0009792                                                                                                                                         | -                                              | -          | -                                                                                               |
| -                       | -                                                     | 0  |                                                                                                                                                                                                                          |                                                |            | -                                                                                               |
| Caenorhabditis elegans  | kti12 homolog                                         | 0  |                                                                                                                                                                                                                          | F:GO:0005524;<br>F:GO:0000166;<br>P:GO:0008150 |            | IPR013641; G3DSA:3.40.50.300 (GENE3D), PTHR12435 (PANTHER), SSF52540 (SUPERFAMILY)              |
| synthetic construct     | small nuclear ribonucleoprotein sm d2                 | 8  | C:GO:0005654;<br>F:GO:0003676;<br>P:GO:0000387;<br>C:GO:0005681;<br>F:GO:0005515;<br>C:GO:0030532;<br>C:GO:0005829;<br>P:GO:0000245                                                                                      | -                                              |            | SignalIP (SIGNALP)                                                                              |
| Caenorhabditis elegans  | temporarily assigned gene -me family member (tag-308) | 0  |                                                                                                                                                                                                                          |                                                |            | -                                                                                               |
| Loa loa                 | rap ran-gap family protein                            | 13 | P:GO:0008340;<br>P:GO:0006974;<br>P:GO:0046621;<br>P:GO:0006911;<br>C:GO:0005737;<br>P:GO:0008285;<br>P:GO:0051726;<br>P:GO:0006629;<br>P:GO:0030308;<br>P:GO:0007165;<br>P:GO:0046627;<br>F:GO:0019900;<br>P:GO:0007584 | -                                              |            | IPR000331; SSF111347 (SUPERFAMILY)                                                              |
| Caenorhabditis elegans  | o-phosphoseryl-tr- selenium                           | 6  | C:GO:0005737;<br>F:GO:0042802;<br>F:GO:0030170;<br>F:GO:0016740;<br>F:GO:0016829;<br>P:GO:0006412                                                                                                                        | -                                              | EC:3.6.5.3 | IPR008829; IPR019872                                                                            |
| Homo sapiens            | growth hormone inducible transmembrane protein        | 2  | C:GO:0016021;<br>C:GO:0005739                                                                                                                                                                                            | -                                              |            | IPR006214; PTHR23291:SF1 (PANTHER), SignalIP (SIGNALP)                                          |
|                         |                                                       |    |                                                                                                                                                                                                                          |                                                |            | IPR003961; IPR008957; IPR013783; PRO0014 (PRINTS), PTHR19900 (PANTHER), PTHR19900:SF7 (PANTHER) |
| Naegleria gruberi       | missing oocyte                                        | 3  | P:GO:0007294;<br>P:GO:0006302;<br>P:GO:0040020                                                                                                                                                                           | -                                              |            | PTHR16453 (PANTHER), PTHR16453:SF9 (PANTHER)                                                    |
| -                       | -                                                     | 0  |                                                                                                                                                                                                                          |                                                |            | -                                                                                               |
| Caenorhabditis elegans  | hypothetical protein M70.4 [Caenorhabditis elegans]   | 0  |                                                                                                                                                                                                                          |                                                |            | SignalIP (SIGNALP)                                                                              |
| -                       | -                                                     | 0  |                                                                                                                                                                                                                          |                                                |            | -                                                                                               |
| Caenorhabditis briggsae | dopamine transporter                                  | 3  | C:GO:0016021;<br>P:GO:0006810;<br>F:GO:0015293                                                                                                                                                                           | -                                              |            | SignalIP (SIGNALP)                                                                              |
| -                       | -                                                     | 0  |                                                                                                                                                                                                                          |                                                |            | -                                                                                               |
| Caenorhabditis briggsae | zinc finger                                           | 1  | F:GO:0003676                                                                                                                                                                                                             | -                                              |            | IPR008906; IPR012337; PTHR23272 (PANTHER)                                                       |

|                         |                                                            |   |                                                                                                                                                      |                                                                                                                                     |              |                                                                                 |
|-------------------------|------------------------------------------------------------|---|------------------------------------------------------------------------------------------------------------------------------------------------------|-------------------------------------------------------------------------------------------------------------------------------------|--------------|---------------------------------------------------------------------------------|
| Caenorhabditis elegans  | daf-16 foxo germline tumor affecting family member (dct-6) | 0 |                                                                                                                                                      |                                                                                                                                     |              | -                                                                               |
| Caenorhabditis elegans  | briggsae cbr-sec-8 protein                                 | 0 |                                                                                                                                                      | P:GO:0006904;<br>C:GO:0000145;<br>P:GO:0015031                                                                                      |              | IPR007191; PTHR14146 (PANTHER)                                                  |
|                         | -                                                          | 0 |                                                                                                                                                      |                                                                                                                                     |              | -                                                                               |
| Brugia malayi           | wgr domain containing protein                              | 0 |                                                                                                                                                      | F:GO:0003676;<br>F:GO:0003950;<br>P:GO:0006471;<br>F:GO:0008270;<br>F:GO:0051287;<br>C:GO:0005622;<br>F:GO:0003677;<br>C:GO:0005634 |              | -                                                                               |
|                         | -                                                          | 0 |                                                                                                                                                      |                                                                                                                                     |              | -                                                                               |
| Ostertagia ostertagi    | excretory secretory antigen                                | 1 | F:GO:0019841                                                                                                                                         |                                                                                                                                     |              | -                                                                               |
|                         | -                                                          | 0 |                                                                                                                                                      |                                                                                                                                     |              | -                                                                               |
|                         | -                                                          | 0 |                                                                                                                                                      |                                                                                                                                     |              | -                                                                               |
| Caenorhabditis elegans  | placental protein 11 related                               | 8 | C:GO:0005737;<br>F:GO:0046872;<br>F:GO:0004521;<br>F:GO:0003723;<br>P:GO:0007565;<br>C:GO:0005576;<br>F:GO:0008236;<br>P:GO:0006508                  |                                                                                                                                     |              | IPR018998; PTHR12439 (PANTHER),<br>SSF142877 (SUPERFAMILY)                      |
| Loa loa                 | mutator family member (mut-7)                              | 1 | F:GO:0005488                                                                                                                                         |                                                                                                                                     |              | IPR002782                                                                       |
|                         | -                                                          | 0 |                                                                                                                                                      |                                                                                                                                     |              | -                                                                               |
| Caenorhabditis elegans  | phosphatidylinositol class c                               | 1 | F:GO:0016740                                                                                                                                         |                                                                                                                                     |              | IPR009450; SignalP (SIGNALP)                                                    |
| Pan troglodytes         | PREDICTED: hypothetical protein [Pan troglodytes]          | 0 |                                                                                                                                                      |                                                                                                                                     |              | -                                                                               |
| Caenorhabditis elegans  | procollagen- 2-oxoglutarate 5-dioxyge-se 3                 | 9 | P:GO:0055114;<br>F:GO:0008475;<br>F:GO:0031418;<br>F:GO:0005515;<br>P:GO:0032870;<br>P:GO:0008045;<br>F:GO:0005506;<br>C:GO:0005783;<br>P:GO:0006464 |                                                                                                                                     | EC:1.14.11.4 | PTHR10730 (PANTHER),<br>PTHR10730:SF1 (PANTHER)                                 |
| Brugia malayi           | recq-mediated genome instability protein 1                 | 0 |                                                                                                                                                      | P:GO:0006260;<br>C:GO:0005634                                                                                                       |              | PTHR14790 (PANTHER)                                                             |
| Caenorhabditis briggsae | arginine serine-rich coiled-coil protein 2                 | 0 |                                                                                                                                                      |                                                                                                                                     |              | -                                                                               |
| Caenorhabditis elegans  | sy-ptotagmin i                                             | 5 | F:GO:0035005;<br>C:GO:0008021;<br>P:GO:0006810;<br>C:GO:0016020;<br>F:GO:0005215                                                                     |                                                                                                                                     | EC:2.7.1.154 | G3DSA:2.60.40.150 (GENE3D),<br>PTHR10024 (PANTHER),<br>PTHR10024:SF40 (PANTHER) |
|                         | -                                                          | 0 |                                                                                                                                                      |                                                                                                                                     |              | -                                                                               |
|                         | -                                                          | 0 |                                                                                                                                                      |                                                                                                                                     |              | -                                                                               |
|                         | -                                                          | 0 |                                                                                                                                                      |                                                                                                                                     |              | SignalP (SIGNALP)                                                               |
| Caenorhabditis briggsae | briggsae cbr-pro-1 protein                                 | 4 | P:GO:0030154;<br>P:GO:0007506;<br>P:GO:0006364;<br>C:GO:0005634                                                                                      |                                                                                                                                     |              | -                                                                               |
|                         | -                                                          | 0 |                                                                                                                                                      |                                                                                                                                     |              | -                                                                               |
|                         | -                                                          | 0 |                                                                                                                                                      |                                                                                                                                     |              | SignalP (SIGNALP)                                                               |

|                         |                                                             |   |                                                                                                                                                      |                                                                                                   |                                                                                                                             |
|-------------------------|-------------------------------------------------------------|---|------------------------------------------------------------------------------------------------------------------------------------------------------|---------------------------------------------------------------------------------------------------|-----------------------------------------------------------------------------------------------------------------------------|
| Danio rerio             | v-ski sarcoma viral oncogene homolog                        | 8 | P:GO:0048468;<br>P:GO:0090101;<br>P:GO:0007399;<br>F:GO:0005515;<br>P:GO:0043010;<br>P:GO:0008285;<br>C:GO:0044451;<br>P:GO:0009887                  | -                                                                                                 | IPR003380; IPR009061; IPR010919;<br>IPR014890; PTHR10005 (PANTHER)                                                          |
|                         | -                                                           | 0 |                                                                                                                                                      |                                                                                                   | -                                                                                                                           |
|                         | -                                                           | 0 |                                                                                                                                                      |                                                                                                   | -                                                                                                                           |
| Homo sapiens            | PREDICTED: hypothetical protein XP_002343179 [Homo sapiens] | 0 |                                                                                                                                                      |                                                                                                   | -                                                                                                                           |
| Caenorhabditis briggsae | cbf mak21 family protein                                    | 0 |                                                                                                                                                      | P:GO:0000003;<br>F:GO:0005488;<br>P:GO:0006898;<br>P:GO:0002119;<br>P:GO:0009792;<br>P:GO:0040007 | -                                                                                                                           |
|                         | -                                                           | 0 |                                                                                                                                                      |                                                                                                   | -                                                                                                                           |
| Caenorhabditis briggsae | briggsae cbr-mau-8 protein                                  | 1 | F:GO:0005515                                                                                                                                         | -                                                                                                 | SignalP (SIGNALP)                                                                                                           |
| Caenorhabditis elegans  | transmembrane protein 57                                    | 0 |                                                                                                                                                      | C:GO:0016021                                                                                      | PTHR13289 (PANTHER), SignalP (SIGNALP)                                                                                      |
| Caenorhabditis elegans  | tyrosyl-tr- synthetase                                      | 3 | F:GO:0004812;<br>P:GO:0006418;<br>F:GO:0000166                                                                                                       | -                                                                                                 | IPR002305; IPR002307; IPR014729;<br>SSF52374 (SUPERFAMILY)                                                                  |
|                         | -                                                           | 0 |                                                                                                                                                      |                                                                                                   | -                                                                                                                           |
| Caenorhabditis elegans  | briggsae cbr-rev-1 protein                                  | 9 | P:GO:0009411;<br>P:GO:0040010;<br>P:GO:0042276;<br>C:GO:0005622;<br>F:GO:0046872;<br>F:GO:0005515;<br>F:GO:0017125;<br>P:GO:0006898;<br>P:GO:0009792 | -                                                                                                 | IPR001126; IPR017961;<br>PTHR11076:SF13 (PANTHER), PF11799 (PFAM)                                                           |
| Loa loa                 | collagen protein confirmed by transcript evidence           | 3 | P:GO:0032502;<br>F:GO:0005515;<br>C:GO:0060103                                                                                                       | -                                                                                                 | IPR002486; IPR008160; PTHR10499 (PANTHER), PTHR10499:SF58 (PANTHER), SignalP (SIGNALP)                                      |
| Caenorhabditis elegans  | hypothetical protein F07C6.4 [Caenorhabditis elegans]       | 0 |                                                                                                                                                      |                                                                                                   | -                                                                                                                           |
| Loa loa                 | cleavage and polyadenylation specificity factor subunit 2   | 5 | P:GO:0040035;<br>P:GO:0009792;<br>P:GO:0000910;<br>P:GO:0016246;<br>F:GO:0016787                                                                     | -                                                                                                 | IPR022712; PTHR11203 (PANTHER), PTHR11203:SF5 (PANTHER)                                                                     |
| Caenorhabditis briggsae | Hypothetical protein CBG01887 [Caenorhabditis briggsae]     | 0 |                                                                                                                                                      |                                                                                                   | -                                                                                                                           |
| Brugia malayi           | -related lipid transfer domain containing 13                | 0 |                                                                                                                                                      | P:GO:0007165;<br>C:GO:0005622                                                                     | IPR019809                                                                                                                   |
| Caenorhabditis elegans  | homogentisate -dioxyge-se                                   | 6 | F:GO:0042802;<br>F:GO:0046872;<br>F:GO:0004411;<br>P:GO:0055114;<br>P:GO:0006559;<br>P:GO:0006570                                                    | -                                                                                                 | EC:1.13.11.5<br>IPR005708; IPR011051; SignalP (SIGNALP)                                                                     |
| Homo sapiens            | immunoglobulin heavy chain                                  | 0 |                                                                                                                                                      |                                                                                                   | IPR007110; IPR013106; IPR013783;<br>PTHR23266 (PANTHER), PTHR23266:SF7 (PANTHER), SignalP (SIGNALP), SSF48726 (SUPERFAMILY) |

|                         |                                                                                              |    |                                                                                                                                                                                                                                                                                                                                                 |                                                                                                                                                                       |             |                                                                                                                                     |
|-------------------------|----------------------------------------------------------------------------------------------|----|-------------------------------------------------------------------------------------------------------------------------------------------------------------------------------------------------------------------------------------------------------------------------------------------------------------------------------------------------|-----------------------------------------------------------------------------------------------------------------------------------------------------------------------|-------------|-------------------------------------------------------------------------------------------------------------------------------------|
| Caenorhabditis briggsae | Hypothetical protein CBG05143 [Caenorhabditis briggsae]                                      | 3  | C:GO:0016021;<br>P:GO:0006508;<br>F:GO:0008234                                                                                                                                                                                                                                                                                                  | -                                                                                                                                                                     | -           | -                                                                                                                                   |
|                         | -                                                                                            | 0  |                                                                                                                                                                                                                                                                                                                                                 |                                                                                                                                                                       |             | -                                                                                                                                   |
|                         | -                                                                                            | 0  |                                                                                                                                                                                                                                                                                                                                                 |                                                                                                                                                                       |             | -                                                                                                                                   |
| Caenorhabditis briggsae | solute carrier family 41 member 1                                                            | 4  | F:GO:0008324;<br>P:GO:0006812;<br>C:GO:0016021;<br>F:GO:0000166                                                                                                                                                                                                                                                                                 | -                                                                                                                                                                     |             | IPR006667                                                                                                                           |
|                         | -                                                                                            | 0  |                                                                                                                                                                                                                                                                                                                                                 |                                                                                                                                                                       |             | -                                                                                                                                   |
| Caenorhabditis elegans  | guanine deami-se                                                                             | 2  | F:GO:0016787;<br>F:GO:0008270                                                                                                                                                                                                                                                                                                                   | -                                                                                                                                                                     |             | IPR002125; IPR016193;<br>G3DSA:3.40.140.10 (GENE3D),<br>PTHR11079 (PANTHER),<br>PTHR11079:SF9 (PANTHER)                             |
|                         | -                                                                                            | 0  |                                                                                                                                                                                                                                                                                                                                                 |                                                                                                                                                                       |             | -                                                                                                                                   |
|                         | -                                                                                            | 0  |                                                                                                                                                                                                                                                                                                                                                 |                                                                                                                                                                       |             | SignalP (SIGNALP)                                                                                                                   |
| Caenorhabditis briggsae | phosphatidylinositol-glycan biosynthesis class f protein                                     | 1  | C:GO:0044464                                                                                                                                                                                                                                                                                                                                    | -                                                                                                                                                                     |             | IPR009580; SignalP (SIGNALP)                                                                                                        |
| Loa loa                 | hypothetical protein LOAG_01466 [Loa loa]                                                    | 0  |                                                                                                                                                                                                                                                                                                                                                 |                                                                                                                                                                       |             | -                                                                                                                                   |
| Loa loa                 | hypothetical protein LOAG_01466 [Loa loa]                                                    | 0  |                                                                                                                                                                                                                                                                                                                                                 |                                                                                                                                                                       |             | -                                                                                                                                   |
| Caenorhabditis elegans  | elegans protein confirmed by transcript evidence                                             | 0  |                                                                                                                                                                                                                                                                                                                                                 |                                                                                                                                                                       |             | -                                                                                                                                   |
|                         | -                                                                                            | 0  |                                                                                                                                                                                                                                                                                                                                                 |                                                                                                                                                                       |             | -                                                                                                                                   |
|                         | -                                                                                            | 0  |                                                                                                                                                                                                                                                                                                                                                 |                                                                                                                                                                       |             | -                                                                                                                                   |
| Haemonchus contortus    | b chain structure of p-glycoprotein reveals a molecular basis for poly-specific drug binding | 20 | P:GO:0046685;<br>P:GO:0007595;<br>C:GO:0000139;<br>F:GO:0005515;<br>P:GO:0033280;<br>P:GO:0048545;<br>P:GO:0006855;<br>P:GO:0014070;<br>P:GO:0014045;<br>C:GO:0009986;<br>P:GO:0006629;<br>F:GO:0008559;<br>P:GO:0046686;<br>P:GO:0010212;<br>P:GO:0006200;<br>C:GO:0046581;<br>C:GO:0005887;<br>F:GO:0005524;<br>C:GO:0016324;<br>C:GO:0005739 | -                                                                                                                                                                     | EC:3.6.3.44 | IPR003439; IPR017871;<br>G3DSA:3.40.50.300 (GENE3D),<br>PTHR19242 (PANTHER),<br>PTHR19242:SF96 (PANTHER),<br>SSF52540 (SUPERFAMILY) |
| Caenorhabditis briggsae | ankyrin partial                                                                              | 0  |                                                                                                                                                                                                                                                                                                                                                 | F:GO:0004674;<br>F:GO:0004672;<br>P:GO:0006468;<br>F:GO:0000166;<br>F:GO:0005525;<br>F:GO:0005524;<br>F:GO:0016301;<br>F:GO:0005515;<br>C:GO:0005622;<br>P:GO:0007264 |             | IPR002110; IPR020683; PR01415<br>(PRINTS), PTHR18958 (PANTHER)                                                                      |
| Caenorhabditis briggsae | a in (actin filament binding protein) homolog family member (afd-1)                          | 0  |                                                                                                                                                                                                                                                                                                                                                 | P:GO:0040010;<br>P:GO:0007165;<br>F:GO:0005515                                                                                                                        |             | IPR000159                                                                                                                           |



|                           |                                                            |   |                                                                                                                                                      |                                                                                                                                                                                        |             |                                                                                                   |
|---------------------------|------------------------------------------------------------|---|------------------------------------------------------------------------------------------------------------------------------------------------------|----------------------------------------------------------------------------------------------------------------------------------------------------------------------------------------|-------------|---------------------------------------------------------------------------------------------------|
| Caenorhabditis elegans    | cyclin d2                                                  | 9 | P:GO:0040007;<br>F:GO:0019901;<br>P:GO:0006898;<br>P:GO:0045737;<br>P:GO:0040039;<br>P:GO:0001934;<br>C:GO:0000307;<br>P:GO:0009725;<br>P:GO:0032501 | -                                                                                                                                                                                      |             | IPR006670; IPR006671; IPR011028;<br>IPR013763; IPR015451; PTHR10177<br>(PANTHER)                  |
| Caenorhabditis elegans    | protein amp- beta 2 non-catalytic subunit                  | 5 | P:GO:0006631;<br>C:GO:0043234;<br>F:GO:0005515;<br>P:GO:0050794;<br>C:GO:0044424                                                                     | -                                                                                                                                                                                      |             | PTHR10343 (PANTHER),<br>PTHR10343:SF10 (PANTHER)                                                  |
| -                         | -                                                          | 0 |                                                                                                                                                      |                                                                                                                                                                                        |             | SignalP (SIGNALP)                                                                                 |
| -                         | -                                                          | 0 |                                                                                                                                                      |                                                                                                                                                                                        |             | -                                                                                                 |
| Caenorhabditis elegans    | yqt2_caee1 ame: full=uncharacterized protein               | 0 |                                                                                                                                                      | P:GO:0040035                                                                                                                                                                           |             | -                                                                                                 |
| -                         | -                                                          | 0 |                                                                                                                                                      |                                                                                                                                                                                        |             | -                                                                                                 |
| Caenorhabditis elegans    | briggsae cbr-inx- protein                                  | 7 | P:GO:0009792;<br>P:GO:0007631;<br>P:GO:0048856;<br>P:GO:0040010;<br>P:GO:0030421;<br>P:GO:0000003;<br>C:GO:0044425                                   | -                                                                                                                                                                                      |             | IPR000408; IPR000990                                                                              |
| Caenorhabditis briggsae   | box h aca                                                  | 0 |                                                                                                                                                      | P:GO:0042254;<br>P:GO:0010171;<br>P:GO:0006898;<br>C:GO:0030529;<br>P:GO:0006412;<br>P:GO:0000003;<br>P:GO:0009792;<br>P:GO:0002119;<br>C:GO:0005840;<br>C:GO:0005622;<br>P:GO:0040007 |             | -                                                                                                 |
| Heligmosomoides polygyrus | cytosolic glutathione s-transferase 1                      | 4 | P:GO:0008340;<br>P:GO:0040010;<br>F:GO:0005515;<br>F:GO:0016740                                                                                      | -                                                                                                                                                                                      |             | -                                                                                                 |
| -                         | -                                                          | 0 |                                                                                                                                                      |                                                                                                                                                                                        |             | -                                                                                                 |
| Ailuropoda melanoleuca    | polyadenylate-binding protein 1-like                       | 9 | P:GO:0006378;<br>P:GO:0008380;<br>P:GO:0048255;<br>C:GO:0005681;<br>F:GO:0008494;<br>F:GO:0008022;<br>C:GO:0005829;<br>F:GO:0000166;<br>F:GO:0008143 | -                                                                                                                                                                                      |             | IPR000504; IPR012677; PTHR10432<br>(PANTHER), PTHR10432:SF69<br>(PANTHER), SSF54928 (SUPERFAMILY) |
| -                         | -                                                          | 0 |                                                                                                                                                      |                                                                                                                                                                                        |             | -                                                                                                 |
| -                         | -                                                          | 0 |                                                                                                                                                      |                                                                                                                                                                                        |             | -                                                                                                 |
| Brugia malayi             | vacuolar protein-sorting-associated protein 25             | 4 | P:GO:0030488;<br>F:GO:0016429;<br>P:GO:0006810;<br>P:GO:0040010                                                                                      | -                                                                                                                                                                                      | EC:2.1.1.36 | IPR008570; IPR014041; SSF46785<br>(SUPERFAMILY)                                                   |
| Caenorhabditis elegans    | elegans protein partially confirmed by transcript evidence | 1 | F:GO:0005515                                                                                                                                         | -                                                                                                                                                                                      |             | IPR006150; PTHR11201 (PANTHER),<br>PTHR11201:SF241 (PANTHER)                                      |

|                         |                                                                                        |   |                                                                                                                                                      |             |                                                                                                                                 |
|-------------------------|----------------------------------------------------------------------------------------|---|------------------------------------------------------------------------------------------------------------------------------------------------------|-------------|---------------------------------------------------------------------------------------------------------------------------------|
|                         | -                                                                                      | 0 |                                                                                                                                                      |             | -                                                                                                                               |
| Caenorhabditis briggsae | lethal 07882                                                                           | 3 | P:GO:0009792;<br>P:GO:0002119;<br>P:GO:0006898                                                                                                       | -           | IPR007276                                                                                                                       |
|                         | -                                                                                      | 0 |                                                                                                                                                      |             | -                                                                                                                               |
| Caenorhabditis elegans  | elegans protein confirmed by transcript evidence                                       | 5 | P:GO:0040035;<br>P:GO:0018991;<br>P:GO:0008340;<br>C:GO:0016020;<br>P:GO:0002009                                                                     | -           | IPR002259; PTHR10332:SF6 (PANTHER), SignalP (SIGNALP)                                                                           |
|                         | -                                                                                      | 0 |                                                                                                                                                      |             | -                                                                                                                               |
| Caenorhabditis briggsae | sterol regulatory element binding transcription factor 1                               | 3 | F:GO:0030528;<br>F:GO:0005515;<br>C:GO:0005634                                                                                                       | -           | -                                                                                                                               |
|                         | -                                                                                      | 0 |                                                                                                                                                      |             | -                                                                                                                               |
| Branchiostoma floridae  | sorbitol dehydroge-se                                                                  | 9 | C:GO:0005625;<br>F:GO:0051287;<br>C:GO:0005624;<br>P:GO:0051160;<br>P:GO:0046370;<br>P:GO:0055114;<br>F:GO:0003939;<br>F:GO:0008270;<br>P:GO:0006062 | EC:1.1.1.14 | IPR002085; IPR013149; IPR016040;<br>PTHR11695:SF38 (PANTHER),<br>SSF51735 (SUPERFAMILY)                                         |
| Caenorhabditis elegans  | glycyl-tr- synthetase                                                                  | 7 | C:GO:0016021;<br>P:GO:0006426;<br>P:GO:0015966;<br>F:GO:0005524;<br>F:GO:0046983;<br>C:GO:0005737;<br>F:GO:0004820                                   | EC:6.1.1.14 | IPR002314; IPR002315;<br>G3DSA:3.30.90.10 (GENE3D),<br>SSF55681 (SUPERFAMILY)                                                   |
| Caenorhabditis elegans  | transbilayer amphipath transporters (subfamily iv p-type atpase) family member (tat-2) | 7 | C:GO:0016021;<br>F:GO:0015662;<br>P:GO:0006754;<br>F:GO:0005524;<br>P:GO:0015914;<br>F:GO:0000287;<br>F:GO:0004012                                   | EC:3.6.3.1  | IPR001757; IPR018303;<br>G3DSA:3.40.1110.10 (GENE3D),<br>PTHR11939:SF19 (PANTHER), SignalP (SIGNALP),<br>SSF56784 (SUPERFAMILY) |
| Caenorhabditis elegans  | bed-type zinc finger transcription factor family member (bed 2)                        | 2 | F:GO:0005515;<br>F:GO:0003677                                                                                                                        | -           | -                                                                                                                               |
| Ailuropoda melanoleuca  | eukaryotic translation initiation factor 3 subunit c                                   | 6 | C:GO:0005852;<br>F:GO:0005515;<br>P:GO:0045948;<br>F:GO:0003743;<br>C:GO:0005829;<br>F:GO:0043022                                                    | -           | IPR000717; IPR011991; PTHR13937 (PANTHER),<br>SSF46785 (SUPERFAMILY)                                                            |
| Loa loa                 | ribonucleases p mrp protein subunit pop1 containing protein                            | 0 |                                                                                                                                                      |             | -                                                                                                                               |
|                         |                                                                                        |   |                                                                                                                                                      |             |                                                                                                                                 |

|                          |                                                                                                         |    |                                                                                                                                                                                                                                           |                                                                                                                    |            |                                                                            |
|--------------------------|---------------------------------------------------------------------------------------------------------|----|-------------------------------------------------------------------------------------------------------------------------------------------------------------------------------------------------------------------------------------------|--------------------------------------------------------------------------------------------------------------------|------------|----------------------------------------------------------------------------|
| Brugia malayi            | phosphatidylcholine:ceramide cholinephosphotransferase                                                  | 7  | F:GO:0047493;<br>P:GO:0050789;<br>C:GO:0016021;<br>P:GO:0006686;<br>P:GO:0051716;<br>C:GO:0005794;<br>P:GO:0010033                                                                                                                        | -                                                                                                                  | EC:2.7.8.3 | PTHR21290 (PANTHER),<br>PTHR21290:SF3 (PANTHER), SignalP<br>(SIGNALP)      |
| Loa loa                  | fasciclin-1 precursor (fasciclin i) (fas i)                                                             | 0  |                                                                                                                                                                                                                                           | P:GO:0007411;<br>P:GO:0007158;<br>P:GO:0007156;<br>F:GO:0050839;<br>C:GO:0005886;<br>P:GO:0016338;<br>P:GO:0008038 |            | -                                                                          |
| Caenorhabditis elegans   | alkmo_caeel ame: full=alkylglycerol monooxyge-se homolog<br>ame: full=transmembrane protein 195 homolog | 0  |                                                                                                                                                                                                                                           | P:GO:0055114;<br>F:GO:0016491;<br>F:GO:0005506;<br>C:GO:0005783;<br>P:GO:0006633                                   |            | SignalP (SIGNALP)                                                          |
| Caenorhabditis briggsae  | Hypothetical protein CBG13452 [Caenorhabditis briggsae]                                                 | 0  |                                                                                                                                                                                                                                           |                                                                                                                    |            | -                                                                          |
|                          | -                                                                                                       | 0  |                                                                                                                                                                                                                                           |                                                                                                                    |            | -                                                                          |
|                          | -                                                                                                       | 0  |                                                                                                                                                                                                                                           |                                                                                                                    |            | -                                                                          |
| Caenorhabditis elegans   | protein ki-se c and casein ki-se substrate in neurons 2                                                 | 4  | C:GO:0005737;<br>F:GO:0005515;<br>P:GO:0009987;<br>P:GO:0016043                                                                                                                                                                           | -                                                                                                                  |            | IPR001060; IPR001452;<br>G3DSA:2.30.30.40 (GENE3D),<br>PTHR10959 (PANTHER) |
| Ornithorhynchus anatinus | mannosyl (alpha- -)-glycoprotein beta- -n-acetyl-<br>glucosaminyltransferase                            | 2  | F:GO:0016757;<br>C:GO:0016020                                                                                                                                                                                                             | -                                                                                                                  |            | PTHR15075 (PANTHER), SignalP<br>(SIGNALP)                                  |
|                          | -                                                                                                       | 0  |                                                                                                                                                                                                                                           |                                                                                                                    |            | -                                                                          |
| Caenorhabditis elegans   | tr- guanosine-2 -o-methyltransferase trm11 homolog                                                      | 2  | P:GO:0044237;<br>F:GO:0016740                                                                                                                                                                                                             | -                                                                                                                  |            | IPR000241; PTHR13370 (PANTHER)                                             |
|                          | -                                                                                                       | 0  |                                                                                                                                                                                                                                           |                                                                                                                    |            | SignalP (SIGNALP)                                                          |
| Brugia malayi            | elegans protein partially confirmed by transcript evidence                                              | 14 | P:GO:0023033;<br>P:GO:0007424;<br>P:GO:0065008;<br>N:GO:0071842;<br>P:GO:0001700;<br>F:GO:0005096;<br>C:GO:0005622;<br>P:GO:0009887;<br>P:GO:0060562;<br>P:GO:0048565;<br>P:GO:0016331;<br>P:GO:0007399;<br>P:GO:0048523;<br>P:GO:0016477 | -                                                                                                                  |            | PTHR12659 (PANTHER)                                                        |
| Canis familiaris         | syntaxin 18                                                                                             | 2  | P:GO:0006810;<br>C:GO:0044464                                                                                                                                                                                                             | -                                                                                                                  |            | IPR019529; PTHR15959 (PANTHER)                                             |

|                         |                                                            |    |                                                                                                                                                                                        |                                                                 |                                                                                                           |
|-------------------------|------------------------------------------------------------|----|----------------------------------------------------------------------------------------------------------------------------------------------------------------------------------------|-----------------------------------------------------------------|-----------------------------------------------------------------------------------------------------------|
| Mus musculus            | ribosomal protein l24                                      | 11 | F:GO:0003723;<br>P:GO:0000027;<br>F:GO:0003735;<br>P:GO:0010458;<br>P:GO:0006414;<br>F:GO:0005515;<br>P:GO:0060041;<br>P:GO:0031290;<br>P:GO:0031575;<br>P:GO:0021554;<br>C:GO:0022625 | -                                                               | SignalP (SIGNALP)                                                                                         |
| Caenorhabditis elegans  | hypothetical protein ZC487.1 [Caenorhabditis elegans]      | 0  |                                                                                                                                                                                        | F:GO:0005524;<br>F:GO:0003824                                   | -                                                                                                         |
| Loa loa                 | proteasome ( macropain) activator subunit 4                | 0  |                                                                                                                                                                                        | F:GO:0005488;<br>C:GO:0000502                                   | -                                                                                                         |
| Caenorhabditis briggsae | elegans protein partially confirmed by transcript evidence | 0  |                                                                                                                                                                                        |                                                                 | G3DSA:3.40.50.300 (GENE3D),<br>PTHR11089 (PANTHER),<br>PTHR11089:SF1 (PANTHER), SSF52540<br>(SUPERFAMILY) |
| Caenorhabditis briggsae | elegans protein partially confirmed by transcript evidence | 0  |                                                                                                                                                                                        |                                                                 | G3DSA:3.40.50.300 (GENE3D),<br>PTHR11089 (PANTHER),<br>PTHR11089:SF1 (PANTHER), SSF52540<br>(SUPERFAMILY) |
| Caenorhabditis briggsae | elegans protein partially confirmed by transcript evidence | 0  |                                                                                                                                                                                        |                                                                 | G3DSA:3.40.50.300 (GENE3D),<br>PTHR11089 (PANTHER),<br>PTHR11089:SF1 (PANTHER), SSF52540<br>(SUPERFAMILY) |
| Caenorhabditis briggsae | Hypothetical protein CBG22473 [Caenorhabditis briggsae]    | 1  | F:GO:0005515                                                                                                                                                                           | -                                                               | SignalP (SIGNALP)                                                                                         |
| Caenorhabditis briggsae | Hypothetical protein CBG22473 [Caenorhabditis briggsae]    | 1  | F:GO:0005515                                                                                                                                                                           | -                                                               | SignalP (SIGNALP)                                                                                         |
| Caenorhabditis briggsae | protein                                                    | 0  |                                                                                                                                                                                        | P:GO:0006355;<br>F:GO:0043565;<br>F:GO:0003700;<br>P:GO:0015031 | IPR005024; PTHR22761 (PANTHER)                                                                            |
|                         | -                                                          | 0  |                                                                                                                                                                                        |                                                                 | -                                                                                                         |
|                         | -                                                          | 0  |                                                                                                                                                                                        |                                                                 | -                                                                                                         |
|                         | -                                                          | 0  |                                                                                                                                                                                        |                                                                 | -                                                                                                         |
| Caenorhabditis elegans  | hypothetical protein F43D9.1 [Caenorhabditis elegans]      | 0  |                                                                                                                                                                                        | C:GO:0016020;<br>F:GO:0008158                                   | PTHR10796 (PANTHER),<br>PTHR10796:SF13 (PANTHER), SignalP<br>(SIGNALP)                                    |

|              |                          |    |                                                                                                                                                                                                                                                                                                                                                                                                                                                                                                                                    |             |                                                                                                                                                   |
|--------------|--------------------------|----|------------------------------------------------------------------------------------------------------------------------------------------------------------------------------------------------------------------------------------------------------------------------------------------------------------------------------------------------------------------------------------------------------------------------------------------------------------------------------------------------------------------------------------|-------------|---------------------------------------------------------------------------------------------------------------------------------------------------|
| Homo sapiens | cathepsin b              | 29 | <p>P:GO:0009749;<br/> C:GO:0005764;<br/> F:GO:0030984;<br/> P:GO:0051789;<br/> C:GO:0009897;<br/> C:GO:0005625;<br/> C:GO:0005739;<br/> P:GO:0045471;<br/> P:GO:0042981;<br/> C:GO:0005901;<br/> P:GO:0009611;<br/> F:GO:0032403;<br/> C:GO:0005615;<br/> P:GO:0006508;<br/> P:GO:0043434;<br/> F:GO:0004197;<br/> C:GO:0042470;<br/> P:GO:0007519;<br/> P:GO:0014070;<br/> P:GO:0070670;<br/> C:GO:0048471;<br/> C:GO:0016324;<br/> C:GO:0042383;<br/> P:GO:0050790;<br/> P:GO:0014075;<br/> P:GO:0060548;<br/> P:GO:0006914;</p> | EC:3.4.22.0 | <p>IPR000169; IPR000668; IPR012599;<br/> IPR013128; IPR015643;<br/> G3DSA:3.90.70.10 (GENE3D), SignalP<br/> (SIGNALP), SSF54001 (SUPERFAMILY)</p> |
| Homo sapiens | glutathione peroxidase 1 | 41 | <p>P:GO:0006641;<br/> F:GO:0017124;<br/> P:GO:0009609;<br/> P:GO:0018158;<br/> P:GO:0010332;<br/> P:GO:0043403;<br/> P:GO:0010269;<br/> P:GO:0001659;<br/> C:GO:0005829;<br/> P:GO:0001885;<br/> P:GO:0043523;<br/> P:GO:0007605;<br/> P:GO:0042311;<br/> P:GO:0006749;<br/> P:GO:0008631;<br/> P:GO:0014902;<br/> F:GO:0004602;<br/> P:GO:0060055;<br/> P:GO:0033194;<br/> P:GO:0006916;<br/> P:GO:0043154;<br/> P:GO:0043534;<br/> P:GO:0009650;<br/> P:GO:0033599;<br/> P:GO:0045444;<br/> P:GO:0051450;<br/> P:GO:0002862;</p> | EC:1.11.1.9 | <p>IPR000889; IPR012335; IPR012336</p>                                                                                                            |
| -            | -                        | 0  | -                                                                                                                                                                                                                                                                                                                                                                                                                                                                                                                                  | -           | -                                                                                                                                                 |

|                              |                                                       |   |                                                                                                                                                      |                                                                                                                    |            |                                                                                                                      |
|------------------------------|-------------------------------------------------------|---|------------------------------------------------------------------------------------------------------------------------------------------------------|--------------------------------------------------------------------------------------------------------------------|------------|----------------------------------------------------------------------------------------------------------------------|
| Ailuropoda melanoleuca       | rr- 2 -o-methyltransferase fibrillar-like             | 9 | C:GO:0001652;<br>C:GO:0031428;<br>C:GO:0015030;<br>F:GO:0003723;<br>F:GO:0005515;<br>P:GO:0016074;<br>P:GO:0006364;<br>F:GO:0008168;<br>P:GO:0008033 | -                                                                                                                  | EC:2.1.1.0 | IPR000692; IPR020813;<br>G3DSA:3.40.50.150 (GENE3D),<br>SSF53335 (SUPERFAMILY)                                       |
| Candida dubliniensis CD36    | potential histone deacetylase complex component sin3p | 0 |                                                                                                                                                      | P:GO:0006355;<br>F:GO:0005488;<br>C:GO:0005634                                                                     |            | IPR003822; PTHR12346 (PANTHER),<br>PSS1477 (PROFILE)                                                                 |
| Perkinsus marinus ATCC 50983 | dentin matrix acidic phosphoprotein 1                 | 0 |                                                                                                                                                      |                                                                                                                    |            | -                                                                                                                    |
|                              | -                                                     | 0 |                                                                                                                                                      |                                                                                                                    |            | SignalP (SIGNALP)                                                                                                    |
| Caenorhabditis briggsae      | low-density lipoprotein receptor-related protein 2    | 3 | C:GO:0016021;<br>F:GO:0004872;<br>F:GO:0005509                                                                                                       | -                                                                                                                  |            | IPR000033; IPR011042; PTHR10529<br>(PANTHER), PTHR10529:SF2<br>(PANTHER), SSF63825 (SUPERFAMILY)                     |
|                              | -                                                     | 0 |                                                                                                                                                      |                                                                                                                    |            | -                                                                                                                    |
|                              | -                                                     | 0 |                                                                                                                                                      |                                                                                                                    |            | -                                                                                                                    |
|                              | -                                                     | 0 |                                                                                                                                                      |                                                                                                                    |            | -                                                                                                                    |
|                              | -                                                     | 0 |                                                                                                                                                      |                                                                                                                    |            | -                                                                                                                    |
|                              | -                                                     | 0 |                                                                                                                                                      |                                                                                                                    |            | -                                                                                                                    |
|                              | -                                                     | 0 |                                                                                                                                                      |                                                                                                                    |            | -                                                                                                                    |
| Caenorhabditis elegans       | gamma-glutamyltranspeptidase family protein           | 1 | F:GO:0003840                                                                                                                                         | -                                                                                                                  | EC:2.3.2.2 | -                                                                                                                    |
| Caenorhabditis briggsae      | proteasome ( macropain) 26s non- 13                   | 6 | P:GO:0051436;<br>P:GO:0051437;<br>C:GO:0005838;<br>P:GO:0031145;<br>P:GO:0007127;<br>F:GO:0005515                                                    | -                                                                                                                  |            | SignalP (SIGNALP)                                                                                                    |
|                              | -                                                     | 0 |                                                                                                                                                      |                                                                                                                    |            | -                                                                                                                    |
|                              | -                                                     | 0 |                                                                                                                                                      |                                                                                                                    |            | SignalP (SIGNALP)                                                                                                    |
|                              | -                                                     | 0 |                                                                                                                                                      |                                                                                                                    |            | -                                                                                                                    |
|                              | -                                                     | 0 |                                                                                                                                                      |                                                                                                                    |            | SignalP (SIGNALP)                                                                                                    |
| Caenorhabditis briggsae      | mol1 nop2 sun domain member 4                         | 0 |                                                                                                                                                      | F:GO:0008168;<br>F:GO:0003674;<br>F:GO:0016740;<br>P:GO:0008152;<br>P:GO:0008150;<br>P:GO:0032259;<br>C:GO:0005575 |            | IPR001678; G3DSA:3.40.50.150<br>(GENE3D), PTHR22808 (PANTHER),<br>PTHR22808:SF3 (PANTHER), SSF53335<br>(SUPERFAMILY) |
|                              | -                                                     | 0 |                                                                                                                                                      |                                                                                                                    |            | -                                                                                                                    |
|                              | -                                                     | 0 |                                                                                                                                                      |                                                                                                                    |            | -                                                                                                                    |
| Caenorhabditis briggsae      | torsin family member b (torsin b)                     | 3 | F:GO:0005515;<br>C:GO:0005783;<br>F:GO:0000166                                                                                                       | -                                                                                                                  |            | -                                                                                                                    |
| Caenorhabditis elegans       | elegans protein confirmed by transcript evidence      | 0 |                                                                                                                                                      |                                                                                                                    |            | -                                                                                                                    |
|                              | -                                                     | 0 |                                                                                                                                                      |                                                                                                                    |            | -                                                                                                                    |
| Caenorhabditis elegans       | hypothetical protein B0399.1 [Caenorhabditis elegans] | 0 |                                                                                                                                                      | F:GO:0015269;<br>C:GO:0016021;<br>P:GO:0006813;<br>F:GO:0005516                                                    |            | -                                                                                                                    |

|                         |                                                     |    |                                                                                                                                                                                                                                           |              |             |                                                                                                                                                                                                  |
|-------------------------|-----------------------------------------------------|----|-------------------------------------------------------------------------------------------------------------------------------------------------------------------------------------------------------------------------------------------|--------------|-------------|--------------------------------------------------------------------------------------------------------------------------------------------------------------------------------------------------|
| Caenorhabditis elegans  | can cell migration defective family member (cam-1)  | 14 | P:GO:0007411;<br>P:GO:0007166;<br>C:GO:0031594;<br>P:GO:0045200;<br>P:GO:0008285;<br>C:GO:0030425;<br>C:GO:0030424;<br>P:GO:0007165;<br>F:GO:0004714;<br>C:GO:0032809;<br>C:GO:0005887;<br>F:GO:0017147;<br>P:GO:0030335;<br>P:GO:0040035 | -            | EC:2.7.10.1 | IPR000719; IPR001245; IPR008266;<br>IPR011009; IPR017441; IPR020635;<br>IPR020685; G3DSA:1.10.510.10<br>(GENE3D), G3DSA:3.30.200.20<br>(GENE3D), PTHR23256:SF149<br>(PANTHER), SignalP (SIGNALP) |
| Caenorhabditis elegans  | elegans protein confirmed by transcript evidence    | 1  | F:GO:0016787                                                                                                                                                                                                                              | -            |             | -                                                                                                                                                                                                |
|                         | -                                                   | 0  |                                                                                                                                                                                                                                           |              |             | -                                                                                                                                                                                                |
|                         | -                                                   | 0  |                                                                                                                                                                                                                                           |              |             | -                                                                                                                                                                                                |
| Caenorhabditis elegans  | elegans protein confirmed by transcript evidence    | 0  |                                                                                                                                                                                                                                           | F:GO:0016787 |             | PTHR23131 (PANTHER)                                                                                                                                                                              |
| Caenorhabditis briggsae | 3 saliva family protein                             | 5  | F:GO:0004181;<br>C:GO:0016021;<br>P:GO:0007476;<br>P:GO:0006911;<br>P:GO:0019915                                                                                                                                                          | -            | EC:3.4.17.0 | IPR004316; IPR018179; SignalP<br>(SIGNALP)                                                                                                                                                       |
|                         | -                                                   | 0  |                                                                                                                                                                                                                                           |              |             | -                                                                                                                                                                                                |
| Caenorhabditis elegans  | periodic tryptophan protein 2 homolog               | 4  | F:GO:0004871;<br>P:GO:0055085;<br>P:GO:0007165;<br>C:GO:0016021                                                                                                                                                                           | -            |             | IPR001680; IPR011046; IPR015943;<br>IPR017441; IPR017986; IPR019775;<br>IPR019781; IPR019782; IPR020472;<br>PTHR19858 (PANTHER), SignalP<br>(SIGNALP)                                            |
|                         | -                                                   | 0  |                                                                                                                                                                                                                                           |              |             | -                                                                                                                                                                                                |
|                         | -                                                   | 0  |                                                                                                                                                                                                                                           |              |             | -                                                                                                                                                                                                |
|                         | -                                                   | 0  |                                                                                                                                                                                                                                           |              |             | -                                                                                                                                                                                                |
|                         | -                                                   | 0  |                                                                                                                                                                                                                                           |              |             | IPR009311; PTHR16932:SF3<br>(PANTHER)                                                                                                                                                            |
|                         | -                                                   | 0  |                                                                                                                                                                                                                                           |              |             | -                                                                                                                                                                                                |
|                         | -                                                   | 0  |                                                                                                                                                                                                                                           |              |             | -                                                                                                                                                                                                |
| Loa loa                 | transcription elongation factor b                   | 6  | F:GO:0005488;<br>P:GO:0008340;<br>C:GO:0008023;<br>P:GO:0006368;<br>F:GO:0016944;<br>P:GO:0016246                                                                                                                                         | -            |             | IPR010684; PTHR15141 (PANTHER)                                                                                                                                                                   |
| Caenorhabditis elegans  | variable abnormal morphology family member (vab-10) | 14 | P:GO:0016199;<br>P:GO:0007026;<br>P:GO:0016319;<br>C:GO:0030426;<br>P:GO:0048813;<br>P:GO:0035147;<br>P:GO:0030716;<br>C:GO:0000235;<br>F:GO:0008092;<br>P:GO:0035149;<br>P:GO:0016203;<br>C:GO:0045169;<br>C:GO:0005912;<br>P:GO:0030516 | -            |             | IPR002017; IPR018159;<br>G3DSA:1.20.58.60 (GENE3D),<br>SSF46966 (SUPERFAMILY)                                                                                                                    |

|                             |                                                          |    |                                                                                                                                                                       |   |              |                                                                                     |
|-----------------------------|----------------------------------------------------------|----|-----------------------------------------------------------------------------------------------------------------------------------------------------------------------|---|--------------|-------------------------------------------------------------------------------------|
| Caenorhabditis elegans      | hypothetical protein F48E3.2 [Caenorhabditis elegans]    | 3  | C:GO:0016020;<br>P:GO:0009792;<br>P:GO:0006810                                                                                                                        | - |              | PTHR11600 (PANTHER),<br>PTHR11600:SF12 (PANTHER), SignalP<br>(SIGNALP)              |
| Caenorhabditis elegans      | briggsae cbr-cogc-1 protein                              | 1  | F:GO:0005515                                                                                                                                                          | - |              | -                                                                                   |
| Monodelphis domestica       | chromosome 7 open reading frame 25                       | 0  |                                                                                                                                                                       |   |              | IPR010733                                                                           |
|                             | -                                                        | 0  |                                                                                                                                                                       |   |              | -                                                                                   |
|                             | -                                                        | 0  |                                                                                                                                                                       |   |              | SignalP (SIGNALP)                                                                   |
| Caenorhabditis briggsae     | briggsae cbr-tag-184 protein                             | 0  |                                                                                                                                                                       |   | F:GO:0005488 | -                                                                                   |
| Brugia malayi               | selenocysteine lyase                                     | 4  | F:GO:0030170;<br>P:GO:0009792;<br>P:GO:0008152;<br>F:GO:0008483                                                                                                       | - | EC:2.6.1.0   | IPR015422; IPR015424; PTHR11601<br>(PANTHER)                                        |
| Angiostrongylus cantonensis | briggsae cbr-pqn-68 protein                              | 3  | C:GO:0005737;<br>F:GO:0016788;<br>P:GO:0019478                                                                                                                        | - |              | IPR003732; PTHR10472:SF3<br>(PANTHER)                                               |
| Callithrix jacchus          | proteasome ( macropain) 26s 4                            | 10 | C:GO:0000502;<br>C:GO:0005739;<br>P:GO:0051436;<br>P:GO:0051437;<br>P:GO:0031145;<br>F:GO:0005524;<br>F:GO:0016887;<br>F:GO:0005515;<br>P:GO:0001824;<br>C:GO:0005634 | - |              | SignalP (SIGNALP)                                                                   |
|                             | -                                                        | 0  |                                                                                                                                                                       |   |              | -                                                                                   |
| Caenorhabditis briggsae     | nfu1 iron-sulfur cluster scaffold homolog ( cerevisiae)  | 7  | P:GO:0016226;<br>F:GO:0005506;<br>F:GO:0005515;<br>F:GO:0051539;<br>C:GO:0005634;<br>C:GO:0005829;<br>C:GO:0005739                                                    | - |              | IPR001075; IPR014824; IPR017065;<br>PTHR11178 (PANTHER), SSF117916<br>(SUPERFAMILY) |
| Caenorhabditis briggsae     | nfu1 iron-sulfur cluster scaffold homolog ( cerevisiae)  | 7  | P:GO:0016226;<br>F:GO:0005506;<br>F:GO:0005515;<br>F:GO:0051539;<br>C:GO:0005634;<br>C:GO:0005829;<br>C:GO:0005739                                                    | - |              | IPR001075; IPR014824; IPR017065;<br>PTHR11178 (PANTHER), SSF117916<br>(SUPERFAMILY) |
| Caenorhabditis elegans      | hypothetical protein Y37E11AL.3 [Caenorhabditis elegans] | 0  |                                                                                                                                                                       |   |              | -                                                                                   |
| Caenorhabditis elegans      | hypothetical protein Y37E11AL.3 [Caenorhabditis elegans] | 0  |                                                                                                                                                                       |   |              | -                                                                                   |
| Caenorhabditis briggsae     | briggsae cbr-mut-2 protein                               | 0  |                                                                                                                                                                       |   | F:GO:0016779 | IPR002934; G3DSA:3.30.460.10<br>(GENE3D), SSF81301 (SUPERFAMILY)                    |
| Caenorhabditis elegans      | dual oxidase maturation factor 1                         | 2  | P:GO:0008104;<br>C:GO:0016020                                                                                                                                         | - |              | IPR018469                                                                           |
|                             | -                                                        | 0  |                                                                                                                                                                       |   |              | -                                                                                   |
| Homo sapiens                | hCG1648136 [Homo sapiens]                                | 0  |                                                                                                                                                                       |   |              | -                                                                                   |
|                             | -                                                        | 0  |                                                                                                                                                                       |   |              | -                                                                                   |
|                             | -                                                        | 0  |                                                                                                                                                                       |   |              | -                                                                                   |



|                         |                                                            |   |                                                                 |   |             |                                                                                                                                                                                                                                                                          |
|-------------------------|------------------------------------------------------------|---|-----------------------------------------------------------------|---|-------------|--------------------------------------------------------------------------------------------------------------------------------------------------------------------------------------------------------------------------------------------------------------------------|
| Haemonchus contortus    | serine threonine ki-se                                     | 4 | P:GO:0006468;<br>F:GO:0005515;<br>F:GO:0005524;<br>F:GO:0004674 | - | EC:2.7.11.0 | IPR000719; IPR001772; IPR002290;<br>IPR008271; IPR011009; IPR015940;<br>IPR017441; IPR017442; IPR020636;<br>IPR020670; G3DSA:1.10.510.10<br>(GENE3D), G3DSA:1.10.8.10<br>(GENE3D), G3DSA:3.30.200.20<br>(GENE3D), G3DSA:3.30.310.80<br>(GENE3D), SSF103243 (SUPERFAMILY) |
| Haemonchus contortus    | serine threonine ki-se                                     | 4 | P:GO:0006468;<br>F:GO:0005515;<br>F:GO:0005524;<br>F:GO:0004674 | - | EC:2.7.11.0 | IPR000719; IPR001772; IPR002290;<br>IPR008271; IPR011009; IPR015940;<br>IPR017441; IPR017442; IPR020636;<br>IPR020670; G3DSA:1.10.510.10<br>(GENE3D), G3DSA:1.10.8.10<br>(GENE3D), G3DSA:3.30.200.20<br>(GENE3D), G3DSA:3.30.310.80<br>(GENE3D), SSF103243 (SUPERFAMILY) |
| Haemonchus contortus    | serine threonine ki-se                                     | 4 | P:GO:0006468;<br>F:GO:0005515;<br>F:GO:0005524;<br>F:GO:0004674 | - | EC:2.7.11.0 | IPR000719; IPR001772; IPR002290;<br>IPR008271; IPR011009; IPR015940;<br>IPR017441; IPR017442; IPR020636;<br>IPR020670; G3DSA:1.10.510.10<br>(GENE3D), G3DSA:1.10.8.10<br>(GENE3D), G3DSA:3.30.200.20<br>(GENE3D), G3DSA:3.30.310.80<br>(GENE3D), SSF103243 (SUPERFAMILY) |
| Haemonchus contortus    | serine threonine ki-se                                     | 4 | P:GO:0006468;<br>F:GO:0005515;<br>F:GO:0005524;<br>F:GO:0004674 | - | EC:2.7.11.0 | IPR000719; IPR001772; IPR002290;<br>IPR008271; IPR011009; IPR015940;<br>IPR017441; IPR017442; IPR020636;<br>IPR020670; G3DSA:1.10.510.10<br>(GENE3D), G3DSA:1.10.8.10<br>(GENE3D), G3DSA:3.30.200.20<br>(GENE3D), G3DSA:3.30.310.80<br>(GENE3D), SSF103243 (SUPERFAMILY) |
| Caenorhabditis briggsae | elegans protein partially confirmed by transcript evidence | 0 |                                                                 |   |             | -                                                                                                                                                                                                                                                                        |
|                         | -                                                          | 0 |                                                                 |   |             | SignalP (SIGNALP)                                                                                                                                                                                                                                                        |
|                         | -                                                          | 0 |                                                                 |   |             | -                                                                                                                                                                                                                                                                        |
|                         | -                                                          | 0 |                                                                 |   |             | -                                                                                                                                                                                                                                                                        |
| Xenopus laevis          | inhibitor of growth member 2                               | 1 | F:GO:0046872                                                    | - |             | IPR001965; IPR011011; IPR013083;<br>IPR019786; IPR019787; PTHR10333<br>(PANTHER), PTHR10333:SF21<br>(PANTHER)                                                                                                                                                            |
| Caenorhabditis briggsae | calcium-binding atopy-related autoantigen 1                | 2 | C:GO:0016021;<br>F:GO:0005509                                   | - |             | PTHR12294 (PANTHER),<br>PTHR12294:SF1 (PANTHER)                                                                                                                                                                                                                          |
| Caenorhabditis elegans  | quinine non-avoider family member (qui-1)                  | 0 |                                                                 |   |             | -                                                                                                                                                                                                                                                                        |
| Caenorhabditis briggsae | briggsae cbr-eat-18 protein                                | 0 |                                                                 |   |             | IPR000859; PTHR10127 (PANTHER),<br>PTHR10127:SF33 (PANTHER)                                                                                                                                                                                                              |
|                         | -                                                          | 0 |                                                                 |   |             | -                                                                                                                                                                                                                                                                        |
| Brugia malayi           | creb-regulated transcription coactivator 1                 | 0 |                                                                 |   |             | -                                                                                                                                                                                                                                                                        |
|                         | -                                                          | 0 |                                                                 |   |             | -                                                                                                                                                                                                                                                                        |

|                         |                                                  |    |                                                                                                                                                                                                                                                                                                                                                                                   |                                                                                  |                                                                                                                              |
|-------------------------|--------------------------------------------------|----|-----------------------------------------------------------------------------------------------------------------------------------------------------------------------------------------------------------------------------------------------------------------------------------------------------------------------------------------------------------------------------------|----------------------------------------------------------------------------------|------------------------------------------------------------------------------------------------------------------------------|
| Caenorhabditis briggsae | ribosomal protein s6                             | 22 | P:GO:0006924;<br>P:GO:0007369;<br>F:GO:0005515;<br>C:GO:0005844;<br>P:GO:0000028;<br>P:GO:0048821;<br>P:GO:0006414;<br>P:GO:0031929;<br>P:GO:0001890;<br>C:GO:0005730;<br>P:GO:0002309;<br>P:GO:0022605;<br>P:GO:0007067;<br>P:GO:0033077;<br>F:GO:0003735;<br>P:GO:0031575;<br>C:GO:0048471;<br>P:GO:0006364;<br>P:GO:0043066;<br>P:GO:0042593;<br>P:GO:0043065;<br>C:GO:0022627 | -                                                                                | IPR001377; IPR014401; IPR018282;<br>PTHR11502:SF1 (PANTHER)                                                                  |
| Caenorhabditis elegans  | wiskott-aldrich syndrome protein                 | 6  | P:GO:0050789;<br>C:GO:0005856;<br>P:GO:0008154;<br>P:GO:0006461;<br>F:GO:0005515;<br>N:GO:0071844                                                                                                                                                                                                                                                                                 | -                                                                                | IPR000095; IPR000697; IPR011026;<br>IPR011993; G3DSA:3.90.810.10<br>(GENE3D), PTHR12779 (PANTHER),<br>SSF50729 (SUPERFAMILY) |
| Caenorhabditis elegans  | wiskott-aldrich syndrome protein                 | 8  | F:GO:0005515;<br>P:GO:0008154;<br>P:GO:0006461;<br>C:GO:0005737;<br>P:GO:0050896;<br>C:GO:0005856;<br>P:GO:0065007;<br>N:GO:0071844                                                                                                                                                                                                                                               | -                                                                                | IPR000095; IPR000697; IPR011026;<br>IPR011993; G3DSA:3.90.810.10<br>(GENE3D), PTHR12779 (PANTHER),<br>SSF50729 (SUPERFAMILY) |
| -                       | -                                                | 0  |                                                                                                                                                                                                                                                                                                                                                                                   |                                                                                  | -                                                                                                                            |
| -                       | -                                                | 0  |                                                                                                                                                                                                                                                                                                                                                                                   |                                                                                  | SignalP (SIGNALP)                                                                                                            |
| Caenorhabditis elegans  | elegans protein confirmed by transcript evidence | 0  |                                                                                                                                                                                                                                                                                                                                                                                   |                                                                                  | -                                                                                                                            |
| -                       | -                                                | 0  |                                                                                                                                                                                                                                                                                                                                                                                   |                                                                                  | -                                                                                                                            |
| Loa loa                 | lim domain containing protein                    | 0  |                                                                                                                                                                                                                                                                                                                                                                                   | F:GO:0005488;<br>F:GO:0016491;<br>P:GO:0008152;<br>F:GO:0003824;<br>F:GO:0008270 | -                                                                                                                            |
| -                       | -                                                | 0  |                                                                                                                                                                                                                                                                                                                                                                                   |                                                                                  | -                                                                                                                            |

|                           |                                                                           |    |                                                                                                                                                                                                                          |                                                                                                   |            |                                                                                                                     |
|---------------------------|---------------------------------------------------------------------------|----|--------------------------------------------------------------------------------------------------------------------------------------------------------------------------------------------------------------------------|---------------------------------------------------------------------------------------------------|------------|---------------------------------------------------------------------------------------------------------------------|
| Ailuropoda melanoleuca    | melanoma antigen family 1                                                 | 13 | F:GO:0004705;<br>P:GO:0006357;<br>P:GO:0043193;<br>P:GO:0090190;<br>C:GO:0005829;<br>P:GO:0008624;<br>F:GO:0003713;<br>P:GO:0043406;<br>F:GO:0042802;<br>C:GO:0043234;<br>P:GO:0050680;<br>P:GO:0032582;<br>C:GO:0005886 | -                                                                                                 | -          |                                                                                                                     |
|                           | -                                                                         | 0  |                                                                                                                                                                                                                          |                                                                                                   |            | -                                                                                                                   |
|                           | -                                                                         | 0  |                                                                                                                                                                                                                          |                                                                                                   |            | IPR007087; IPR015880; SignalP (SIGNALP), SSF57667 (SUPERFAMILY)                                                     |
| Caenorhabditis elegans    | briggsae cbr-sel-2 protein                                                | 6  | P:GO:0008104;<br>F:GO:0051018;<br>P:GO:0042675;<br>C:GO:0043231;<br>C:GO:0044444;<br>C:GO:0016020                                                                                                                        | -                                                                                                 |            | IPR008985; IPR013320                                                                                                |
| Caenorhabditis elegans    | cytochrome family subfamily polypeptide 2                                 | 3  | F:GO:0016491;<br>F:GO:0005506;<br>C:GO:0016020                                                                                                                                                                           | -                                                                                                 |            | IPR001128; IPR002401; IPR017972; PTHR19383:SF165 (PANTHER)                                                          |
| Brugia malayi             | arp6 actin-related protein 6 homolog                                      | 0  |                                                                                                                                                                                                                          | F:GO:0003674;<br>C:GO:0005737;<br>C:GO:0005856;<br>P:GO:0008150;<br>F:GO:0005515;<br>C:GO:0005575 |            | IPR004000; G3DSA:3.30.420.40 (GENE3D), PTHR11937:SF21 (PANTHER), SSF53067 (SUPERFAMILY)                             |
| Caenorhabditis briggsae   | actin-related protein 6                                                   | 1  | F:GO:0005515                                                                                                                                                                                                             | -                                                                                                 |            | IPR004000; G3DSA:3.30.420.40 (GENE3D), G3DSA:3.90.640.10 (GENE3D), PTHR11937:SF21 (PANTHER), SSF53067 (SUPERFAMILY) |
| Caenorhabditis elegans    | excision repair cross-complementing rodent repair complementation group 4 | 7  | P:GO:0006289;<br>P:GO:0006310;<br>F:GO:0004519;<br>F:GO:0003677;<br>P:GO:0007127;<br>P:GO:0009792;<br>C:GO:0000109                                                                                                       | -                                                                                                 |            | IPR020819; PTHR10150 (PANTHER)                                                                                      |
| Caenorhabditis briggsae   | mitochondrial ribosomal protein l38                                       | 2  | P:GO:0009792;<br>P:GO:0002119                                                                                                                                                                                            | -                                                                                                 |            | IPR008914; PTHR11362 (PANTHER)                                                                                      |
| Caenorhabditis sp. PS1010 | briggsae cbr-cdh-4 protein                                                | 4  | P:GO:0007163;<br>P:GO:0007411;<br>C:GO:0016020;<br>P:GO:0007413                                                                                                                                                          | -                                                                                                 |            | IPR002126; IPR015919; IPR020894; PTHR10596 (PANTHER), PTHR10596:SF74 (PANTHER)                                      |
|                           | -                                                                         | 0  |                                                                                                                                                                                                                          |                                                                                                   |            | SignalP (SIGNALP)                                                                                                   |
|                           | -                                                                         | 0  |                                                                                                                                                                                                                          |                                                                                                   |            | -                                                                                                                   |
|                           | -                                                                         | 0  |                                                                                                                                                                                                                          |                                                                                                   |            | SignalP (SIGNALP)                                                                                                   |
| Caenorhabditis briggsae   | Hypothetical protein CBG04056 [Caenorhabditis briggsae]                   | 0  |                                                                                                                                                                                                                          |                                                                                                   |            | -                                                                                                                   |
|                           | -                                                                         | 0  |                                                                                                                                                                                                                          |                                                                                                   |            | -                                                                                                                   |
|                           | -                                                                         | 0  |                                                                                                                                                                                                                          |                                                                                                   |            | SignalP (SIGNALP)                                                                                                   |
| Caenorhabditis briggsae   | alanine-glyoxylate aminotransferase 2-like 1                              | 2  | F:GO:0008483;<br>P:GO:0008152                                                                                                                                                                                            | -                                                                                                 | EC:2.6.1.0 | IPR005814; IPR015421; PTHR11986:SF23 (PANTHER)                                                                      |
|                           | -                                                                         | 0  |                                                                                                                                                                                                                          |                                                                                                   |            | -                                                                                                                   |
|                           | -                                                                         | 0  |                                                                                                                                                                                                                          |                                                                                                   |            | -                                                                                                                   |

|                         |                                                |    |                                                                                                                                                                                                                                                                                                                                                                                                                                                                         |   |                                                         |                                                                                                                                         |
|-------------------------|------------------------------------------------|----|-------------------------------------------------------------------------------------------------------------------------------------------------------------------------------------------------------------------------------------------------------------------------------------------------------------------------------------------------------------------------------------------------------------------------------------------------------------------------|---|---------------------------------------------------------|-----------------------------------------------------------------------------------------------------------------------------------------|
| Caenorhabditis elegans  | ribosome biogenesis protein                    | 4  | F:GO:0003924;<br>C:GO:0005634;<br>P:GO:0042254;<br>F:GO:0005525                                                                                                                                                                                                                                                                                                                                                                                                         | - | EC:3.6.5.1;<br>EC:3.6.5.2;<br>EC:3.6.5.3;<br>EC:3.6.5.4 | IPR000795; G3DSA:3.40.50.300<br>(GENE3D), PTHR12858 (PANTHER),<br>PTHR12858:SF2 (PANTHER), SignalP<br>(SIGNALP), SSF52540 (SUPERFAMILY) |
|                         | -                                              | 0  |                                                                                                                                                                                                                                                                                                                                                                                                                                                                         |   |                                                         | -                                                                                                                                       |
| Caenorhabditis elegans  | fad synthase                                   | 5  | C:GO:0005829;<br>F:GO:0003919;<br>P:GO:0040010;<br>P:GO:0006747;<br>F:GO:0000166                                                                                                                                                                                                                                                                                                                                                                                        | - | EC:2.7.7.2                                              | IPR002500; IPR014729; PTHR23293<br>(PANTHER), SSF52402 (SUPERFAMILY)                                                                    |
| Caenorhabditis briggsae | heat repeat-containing protein 7a              | 1  | F:GO:0005488                                                                                                                                                                                                                                                                                                                                                                                                                                                            | - |                                                         | IPR000357; IPR011989; IPR016024                                                                                                         |
| Homo sapiens            | apolipoprotein e                               | 69 | P:GO:0007186;<br>P:GO:0010468;<br>P:GO:0050728;<br>F:GO:0042803;<br>C:GO:0031232;<br>C:GO:0034364;<br>C:GO:0042627;<br>P:GO:0006707;<br>F:GO:0016209;<br>P:GO:0007010;<br>P:GO:0019934;<br>F:GO:0008201;<br>P:GO:0010875;<br>P:GO:0007263;<br>P:GO:0043691;<br>C:GO:0034363;<br>F:GO:0005543;<br>P:GO:0051651;<br>P:GO:0010544;<br>F:GO:0046911;<br>P:GO:0042311;<br>P:GO:0046907;<br>P:GO:0002021;<br>P:GO:0045471;<br>P:GO:0034375;<br>F:GO:0001540;<br>P:GO:0006874; | - |                                                         | -                                                                                                                                       |
| Caenorhabditis elegans  | mitochondrial translatio-l initiation factor 2 | 12 | F:GO:0015093;<br>P:GO:0015684;<br>P:GO:0040010;<br>P:GO:0006898;<br>F:GO:0043024;<br>F:GO:0005525;<br>C:GO:0016021;<br>F:GO:0003743;<br>P:GO:0007264;<br>P:GO:0006446;<br>F:GO:0003924;<br>C:GO:0005739                                                                                                                                                                                                                                                                 | - | EC:3.6.5.1;<br>EC:3.6.5.2;<br>EC:3.6.5.3;<br>EC:3.6.5.4 | IPR004161; IPR009000; IPR015760;<br>G3DSA:2.40.30.10 (GENE3D),<br>PTHR23115 (PANTHER)                                                   |
|                         | -                                              | 0  |                                                                                                                                                                                                                                                                                                                                                                                                                                                                         |   |                                                         | -                                                                                                                                       |
|                         | -                                              | 0  |                                                                                                                                                                                                                                                                                                                                                                                                                                                                         |   |                                                         | -                                                                                                                                       |
| Brugia malayi           | probable coatomer beta subunit                 | 0  | C:GO:0030117;<br>P:GO:0016192;<br>F:GO:0005198;<br>P:GO:0006886;<br>F:GO:0005515                                                                                                                                                                                                                                                                                                                                                                                        |   |                                                         | -                                                                                                                                       |

|                         |                                                  |    |                                                                                                                                                                                                                                                                             |                                                                                  |                                                         |                                                                                                                                           |
|-------------------------|--------------------------------------------------|----|-----------------------------------------------------------------------------------------------------------------------------------------------------------------------------------------------------------------------------------------------------------------------------|----------------------------------------------------------------------------------|---------------------------------------------------------|-------------------------------------------------------------------------------------------------------------------------------------------|
| Brugia malayi           | probable coatomer beta subunit                   | 0  |                                                                                                                                                                                                                                                                             | C:GO:0030117;<br>P:GO:0016192;<br>F:GO:0005198;<br>P:GO:0006886;<br>F:GO:0005515 | -                                                       |                                                                                                                                           |
| Caenorhabditis briggsae | cathepsin b                                      | 3  | C:GO:0016021;<br>P:GO:0006508;<br>F:GO:0008234                                                                                                                                                                                                                              | -                                                                                | -                                                       |                                                                                                                                           |
|                         | -                                                | 0  |                                                                                                                                                                                                                                                                             |                                                                                  | -                                                       |                                                                                                                                           |
|                         | -                                                | 0  |                                                                                                                                                                                                                                                                             |                                                                                  | -                                                       |                                                                                                                                           |
| Caenorhabditis elegans  | loc496104 protein                                | 0  |                                                                                                                                                                                                                                                                             |                                                                                  | -                                                       |                                                                                                                                           |
|                         | -                                                | 0  |                                                                                                                                                                                                                                                                             |                                                                                  | -                                                       |                                                                                                                                           |
| Caenorhabditis elegans  | briggsae cbr-abcx-1 protein                      | 0  |                                                                                                                                                                                                                                                                             | F:GO:0005524;<br>F:GO:0016887;<br>F:GO:0005488                                   | -                                                       |                                                                                                                                           |
|                         | -                                                | 0  |                                                                                                                                                                                                                                                                             |                                                                                  | -                                                       |                                                                                                                                           |
| Callithrix jacchus      | poly binding cytoplasmic isoform cra_c           | 9  | P:GO:0006378;<br>P:GO:0008380;<br>P:GO:0048255;<br>C:GO:0005681;<br>F:GO:0008494;<br>F:GO:0008022;<br>C:GO:0005829;<br>F:GO:0000166;<br>F:GO:0008143                                                                                                                        | -                                                                                |                                                         | IPR000504; IPR012677; PTHR10432 (PANTHER), PTHR10432:SF69 (PANTHER), SSF54928 (SUPERFAMILY)                                               |
| Bombyx mori             | protein                                          | 1  | F:GO:0003824                                                                                                                                                                                                                                                                | -                                                                                | -                                                       |                                                                                                                                           |
|                         | -                                                | 0  |                                                                                                                                                                                                                                                                             |                                                                                  | -                                                       |                                                                                                                                           |
|                         | -                                                | 0  |                                                                                                                                                                                                                                                                             |                                                                                  |                                                         | SignalP (SIGNALP)                                                                                                                         |
| Caenorhabditis elegans  | elegans protein confirmed by transcript evidence | 0  |                                                                                                                                                                                                                                                                             | C:GO:0016021;<br>F:GO:0005375;<br>P:GO:0006825                                   |                                                         | IPR007274; PTHR12483:SF4 (PANTHER)                                                                                                        |
|                         | -                                                | 0  |                                                                                                                                                                                                                                                                             |                                                                                  | -                                                       |                                                                                                                                           |
| Caenorhabditis elegans  | gtpase kras-like                                 | 16 | P:GO:0007265;<br>F:GO:0030275;<br>F:GO:0019002;<br>C:GO:0005739;<br>P:GO:0043406;<br>P:GO:0035176;<br>P:GO:0019221;<br>F:GO:0019003;<br>P:GO:0051384;<br>P:GO:0051000;<br>C:GO:0045121;<br>F:GO:0003924;<br>P:GO:0051092;<br>F:GO:0005525;<br>C:GO:0005886;<br>P:GO:0051385 | -                                                                                | EC:3.6.5.1;<br>EC:3.6.5.2;<br>EC:3.6.5.3;<br>EC:3.6.5.4 | IPR001806; IPR003577; IPR005225; IPR013753; IPR015592; IPR020849; G3DSA:3.40.50.300 (GENE3D), PTHR11708 (PANTHER), SSF52540 (SUPERFAMILY) |
| Homo sapiens            | major histocompatibility class dp beta 1         | 8  | C:GO:0005789;<br>C:GO:0042613;<br>C:GO:0005794;<br>P:GO:0002504;<br>C:GO:0005765;<br>C:GO:0016021;<br>C:GO:0010008;<br>P:GO:0006955                                                                                                                                         | -                                                                                |                                                         | IPR003006; IPR003597; IPR007110; IPR013783; PTHR19944 (PANTHER), PTHR19944:SF26 (PANTHER), SSF48726 (SUPERFAMILY)                         |

|                         |                                                            |    |                                                                                                                                                                                                                                                                                                                                                                                                                                      |                                                |                                   |                                                                                                                                                               |
|-------------------------|------------------------------------------------------------|----|--------------------------------------------------------------------------------------------------------------------------------------------------------------------------------------------------------------------------------------------------------------------------------------------------------------------------------------------------------------------------------------------------------------------------------------|------------------------------------------------|-----------------------------------|---------------------------------------------------------------------------------------------------------------------------------------------------------------|
| Homo sapiens            | major histocompatibility class dp beta 1                   | 8  | C:GO:0005789;<br>C:GO:0042613;<br>C:GO:0005794;<br>P:GO:0002504;<br>C:GO:0005765;<br>C:GO:0016021;<br>C:GO:0010008;<br>P:GO:0006955                                                                                                                                                                                                                                                                                                  | -                                              | -                                 |                                                                                                                                                               |
| synthetic construct     | class member 1                                             | 8  | C:GO:0005625;<br>F:GO:0004559;<br>C:GO:0005764;<br>P:GO:0006013;<br>P:GO:0006517;<br>F:GO:0008270;<br>P:GO:0007611;<br>F:GO:0005537                                                                                                                                                                                                                                                                                                  | -                                              | EC:3.2.1.24                       | SignalP (SIGNALP)                                                                                                                                             |
| Loa loa                 | rap ran-gap family protein                                 | 0  |                                                                                                                                                                                                                                                                                                                                                                                                                                      | F:GO:0005096;<br>P:GO:0051056;<br>C:GO:0005622 |                                   | -                                                                                                                                                             |
| Brugia malayi           | cyclin-dependent ki-se 7                                   | 25 | P:GO:0009299;<br>P:GO:0006367;<br>P:GO:0000718;<br>P:GO:0006468;<br>F:GO:0008094;<br>F:GO:0008022;<br>F:GO:0004693;<br>C:GO:0005624;<br>P:GO:0008283;<br>P:GO:0030521;<br>P:GO:0051301;<br>P:GO:0000079;<br>C:GO:0005829;<br>C:GO:0005675;<br>P:GO:0009792;<br>F:GO:0003713;<br>P:GO:0006368;<br>C:GO:0005856;<br>P:GO:0045448;<br>P:GO:0045944;<br>F:GO:0008353;<br>F:GO:0032403;<br>F:GO:0005524;<br>F:GO:0050681;<br>C:GO:0005739 | -                                              | EC:2.7.11.22<br>;<br>EC:2.7.11.23 | IPR000719; IPR008271; IPR011009;<br>IPR017442; G3DSA:1.10.510.10<br>(GENE3D), G3DSA:3.30.200.20<br>(GENE3D), PTHR11295 (PANTHER),<br>PTHR11295:SF93 (PANTHER) |
| Caenorhabditis elegans  | -dh oxidase                                                | 2  | P:GO:0008152;<br>F:GO:0003824                                                                                                                                                                                                                                                                                                                                                                                                        | -                                              |                                   | IPR001155; IPR013785; PTHR22893<br>(PANTHER), PTHR22893:SF6<br>(PANTHER), SSF51395 (SUPERFAMILY)                                                              |
| Caenorhabditis elegans  | elegans protein partially confirmed by transcript evidence | 2  | F:GO:0003824;<br>P:GO:0008152                                                                                                                                                                                                                                                                                                                                                                                                        | -                                              |                                   | IPR002198; IPR002347; IPR016040;<br>PTHR19410:SF18 (PANTHER),<br>SSF51735 (SUPERFAMILY)                                                                       |
| Caenorhabditis elegans  | briggsae cbr-smgl-1 protein                                | 0  |                                                                                                                                                                                                                                                                                                                                                                                                                                      |                                                |                                   | -                                                                                                                                                             |
| Caenorhabditis briggsae | btb poz domain containing protein                          | 1  | F:GO:0042802                                                                                                                                                                                                                                                                                                                                                                                                                         | -                                              |                                   | IPR000210; IPR002083; IPR008974;<br>IPR011333; IPR013069; IPR013089;<br>IPR013322; PTHR23230:SF176<br>(PANTHER)                                               |

|                         |                                                         |    |                                                                                                                                                                       |                                                                                                                                                                                        |            |                                                                                                        |
|-------------------------|---------------------------------------------------------|----|-----------------------------------------------------------------------------------------------------------------------------------------------------------------------|----------------------------------------------------------------------------------------------------------------------------------------------------------------------------------------|------------|--------------------------------------------------------------------------------------------------------|
| Caenorhabditis briggsae | btb poz domain containing protein                       | 1  | F:GO:0042802                                                                                                                                                          | -                                                                                                                                                                                      |            | IPR000210; IPR002083; IPR008974; IPR011333; IPR013069; IPR013089; IPR013322; PTHR23230:SF176 (PANTHER) |
| Caenorhabditis briggsae | myosin heavy chain                                      | 4  | C:GO:0032982;<br>F:GO:0003779;<br>F:GO:0005524;<br>F:GO:0003774                                                                                                       | -                                                                                                                                                                                      |            | -                                                                                                      |
| Caenorhabditis elegans  | ect2 (mammalian rho gef) homolog family member (ect-2)  | 0  |                                                                                                                                                                       | F:GO:0005089;<br>P:GO:0035023;<br>C:GO:0005622                                                                                                                                         |            | -                                                                                                      |
| -                       | -                                                       | 0  |                                                                                                                                                                       |                                                                                                                                                                                        |            | SignalP (SIGNALP)                                                                                      |
| Caenorhabditis elegans  | yl54_caeel ame: full=uncharacterized protein            | 0  |                                                                                                                                                                       |                                                                                                                                                                                        |            | -                                                                                                      |
| -                       | -                                                       | 0  |                                                                                                                                                                       |                                                                                                                                                                                        |            | SignalP (SIGNALP)                                                                                      |
| Caenorhabditis elegans  | erythrocyte membrane protein                            | 0  |                                                                                                                                                                       | F:GO:0016874;<br>C:GO:0016021;<br>P:GO:0006898;<br>F:GO:0008270;<br>P:GO:0019915;<br>P:GO:0009792;<br>P:GO:0002119;<br>P:GO:0040017;<br>P:GO:0016246;<br>P:GO:0040011;<br>P:GO:0040010 |            | -                                                                                                      |
| Caenorhabditis elegans  | leucyl-tr- synthetase                                   | 2  | F:GO:0016874;<br>P:GO:0006412                                                                                                                                         | -                                                                                                                                                                                      | EC:3.6.5.3 | -                                                                                                      |
| -                       | -                                                       | 0  |                                                                                                                                                                       |                                                                                                                                                                                        |            | -                                                                                                      |
| -                       | -                                                       | 0  |                                                                                                                                                                       |                                                                                                                                                                                        |            | -                                                                                                      |
| Caenorhabditis briggsae | ubiquitin specific protease 24                          | 0  |                                                                                                                                                                       | F:GO:0004221;<br>F:GO:0016787;<br>F:GO:0003674;<br>C:GO:0005575;<br>P:GO:0006511;<br>F:GO:0008234;<br>F:GO:0008233;<br>P:GO:0008150;<br>F:GO:0005488                                   |            | -                                                                                                      |
| Caenorhabditis elegans  | hydroxymethylglutaryl- synthase 1                       | 10 | P:GO:0009792;<br>P:GO:0010171;<br>P:GO:0002119;<br>P:GO:0018996;<br>P:GO:0040010;<br>P:GO:0008610;<br>P:GO:0000003;<br>P:GO:0040011;<br>F:GO:0016740;<br>P:GO:0006898 | -                                                                                                                                                                                      |            | SignalP (SIGNALP)                                                                                      |
| Caenorhabditis briggsae | Hypothetical protein CBG06641 [Caenorhabditis briggsae] | 0  |                                                                                                                                                                       |                                                                                                                                                                                        |            | IPR004114                                                                                              |
| -                       | -                                                       | 0  |                                                                                                                                                                       |                                                                                                                                                                                        |            | -                                                                                                      |
| -                       | -                                                       | 0  |                                                                                                                                                                       |                                                                                                                                                                                        |            | -                                                                                                      |
| -                       | -                                                       | 0  |                                                                                                                                                                       |                                                                                                                                                                                        |            | -                                                                                                      |
| Caenorhabditis elegans  | novel protein                                           | 5  | P:GO:0008380;<br>C:GO:0005681;<br>F:GO:0003723;<br>F:GO:0005515;<br>P:GO:0006397                                                                                      | -                                                                                                                                                                                      |            | IPR003890; IPR003891; IPR016021; IPR016024; PTHR18034 (PANTHER), PTHR18034:SF3 (PANTHER)               |

|                         |                                                                         |    |                                                                                                                                                                       |                                                                                                                                                                                                                                                            |             |                                                                                                                    |
|-------------------------|-------------------------------------------------------------------------|----|-----------------------------------------------------------------------------------------------------------------------------------------------------------------------|------------------------------------------------------------------------------------------------------------------------------------------------------------------------------------------------------------------------------------------------------------|-------------|--------------------------------------------------------------------------------------------------------------------|
| Caenorhabditis elegans  | briggsae cbr-pri-1 protein                                              | 8  | P:GO:0000910;<br>P:GO:0040007;<br>P:GO:0040035;<br>F:GO:0016740;<br>P:GO:0002119;<br>C:GO:0044428;<br>P:GO:0002009;<br>P:GO:0009792                                   | -                                                                                                                                                                                                                                                          |             | IPR002755; IPR014052;<br>G3DSA:3.90.920.10 (GENE3D),<br>SSF56747 (SUPERFAMILY)                                     |
| -                       | -                                                                       | 0  |                                                                                                                                                                       |                                                                                                                                                                                                                                                            |             | -                                                                                                                  |
| Caenorhabditis elegans  | muscle positioning protein 4                                            | 4  | C:GO:0016021;<br>F:GO:0004872;<br>F:GO:0005509;<br>F:GO:0005515                                                                                                       | -                                                                                                                                                                                                                                                          |             | IPR000742; IPR006209; IPR006210;<br>G3DSA:2.10.25.10 (GENE3D),<br>PTHR22992 (PANTHER),<br>PTHR22992:SF12 (PANTHER) |
| Caenorhabditis elegans  | elongation factor-2 ki-se                                               | 2  | F:GO:0005488;<br>F:GO:0004674                                                                                                                                         | -                                                                                                                                                                                                                                                          | EC:2.7.11.0 | IPR006597; IPR011990; PTHR14187<br>(PANTHER), PTHR14187:SF2<br>(PANTHER), SSF81901 (SUPERFAMILY)                   |
| -                       | -                                                                       | 0  |                                                                                                                                                                       |                                                                                                                                                                                                                                                            |             | -                                                                                                                  |
| Callithrix jacchus      | glucose phosphate isomerase                                             | 10 | P:GO:0001525;<br>F:GO:0005125;<br>C:GO:0005615;<br>F:GO:0004347;<br>P:GO:0006959;<br>P:GO:0006096;<br>P:GO:0007599;<br>P:GO:0006094;<br>C:GO:0005737;<br>F:GO:0008083 | -                                                                                                                                                                                                                                                          | EC:5.3.1.9  | -                                                                                                                  |
| -                       | -                                                                       | 0  |                                                                                                                                                                       |                                                                                                                                                                                                                                                            |             | -                                                                                                                  |
| -                       | -                                                                       | 0  |                                                                                                                                                                       |                                                                                                                                                                                                                                                            |             | SignalP (SIGNALP)                                                                                                  |
| Caenorhabditis elegans  | briggsae cbr-tag-312 protein                                            | 0  |                                                                                                                                                                       | F:GO:0003735;<br>P:GO:0015031;<br>F:GO:0000166;<br>C:GO:0005737;<br>P:GO:0006412;<br>F:GO:0005525;<br>P:GO:0006913;<br>C:GO:0048471;<br>C:GO:0005840;<br>P:GO:0007165;<br>P:GO:0006886;<br>F:GO:0005515;<br>C:GO:0005622;<br>P:GO:0007264;<br>F:GO:0005509 |             | -                                                                                                                  |
| Caenorhabditis elegans  | probable dolichyl pyrophosphate glc1man9 c2 alpha - glucosyltransferase | 3  | F:GO:0000033;<br>P:GO:0006487;<br>C:GO:0016020                                                                                                                        | -                                                                                                                                                                                                                                                          |             | IPR004856; SignalP (SIGNALP)                                                                                       |
| -                       | -                                                                       | 0  |                                                                                                                                                                       |                                                                                                                                                                                                                                                            |             | -                                                                                                                  |
| Caenorhabditis briggsae | hypothetical tyrosi-se-like protein in chromosome                       | 4  | F:GO:0005515;<br>F:GO:0046872;<br>F:GO:0016491;<br>P:GO:0008152                                                                                                       | -                                                                                                                                                                                                                                                          |             | IPR002227; IPR008922                                                                                               |
| Brugia malayi           | n-glyca-se 1 isoform 2                                                  | 3  | C:GO:0005737;<br>F:GO:0005488;<br>P:GO:0006516                                                                                                                        | -                                                                                                                                                                                                                                                          |             | IPR002931; PTHR12143 (PANTHER),<br>PTHR12143:SF2 (PANTHER), SSF54001<br>(SUPERFAMILY)                              |
| -                       | -                                                                       | 0  |                                                                                                                                                                       |                                                                                                                                                                                                                                                            |             | -                                                                                                                  |



|                         |                                                           |    |                                                                                                                                                                                                         |   |                                                                                                                                     |                                                                                                             |
|-------------------------|-----------------------------------------------------------|----|---------------------------------------------------------------------------------------------------------------------------------------------------------------------------------------------------------|---|-------------------------------------------------------------------------------------------------------------------------------------|-------------------------------------------------------------------------------------------------------------|
| Caenorhabditis elegans  | erv1 alr family protein                                   | 4  | P:GO:0045454;<br>P:GO:0055114;<br>F:GO:0016972;<br>C:GO:0016020                                                                                                                                         | - | EC:1.8.3.2                                                                                                                          | -                                                                                                           |
| Brugia malayi           | d- repair endonuclease xpf                                | 9  | P:GO:0000712;<br>F:GO:0000014;<br>P:GO:0000724;<br>F:GO:0005515;<br>F:GO:0003697;<br>P:GO:0006296;<br>P:GO:0009792;<br>C:GO:0000110;<br>P:GO:0000710                                                    | - |                                                                                                                                     | PTHR10150 (PANTHER)                                                                                         |
| Caenorhabditis briggsae | histone h2b                                               | 11 | P:GO:0040010;<br>C:GO:0000786;<br>P:GO:0018991;<br>P:GO:0040035;<br>F:GO:0043565;<br>C:GO:0035267;<br>P:GO:0002119;<br>P:GO:0040011;<br>P:GO:0006334;<br>P:GO:0009792;<br>C:GO:0005811                  | - |                                                                                                                                     | IPR000558; IPR007125; IPR009072                                                                             |
| Caenorhabditis briggsae | suppressor of 3-like 1                                    | 8  | P:GO:0040010;<br>F:GO:0005488;<br>C:GO:0005739;<br>P:GO:0000003;<br>P:GO:0002119;<br>P:GO:0006898;<br>P:GO:0009792;<br>F:GO:0016787                                                                     | - |                                                                                                                                     | SignalP (SIGNALP)                                                                                           |
| Caenorhabditis briggsae | briggsae cbr-prx-5 protein                                | 12 | F:GO:0005052;<br>P:GO:0048699;<br>C:GO:0016020;<br>F:GO:0008022;<br>P:GO:0016561;<br>F:GO:0047485;<br>P:GO:0030900;<br>C:GO:0005829;<br>P:GO:0006631;<br>P:GO:0051262;<br>C:GO:0005782;<br>P:GO:0016477 | - |                                                                                                                                     | IPR001440; IPR011990; IPR013026;<br>IPR019734; PTHR10130 (PANTHER),<br>SSF48452 (SUPERFAMILY)               |
| Caenorhabditis elegans  | ring finger and transmembrane domain-containing protein 2 | 0  |                                                                                                                                                                                                         |   | F:GO:0046872;<br>F:GO:0003674;<br>C:GO:0016021;<br>C:GO:0016020;<br>P:GO:0008150;<br>F:GO:0008270;<br>F:GO:0005515;<br>C:GO:0005575 | PTHR15860 (PANTHER)                                                                                         |
| -                       | -                                                         | 0  |                                                                                                                                                                                                         |   |                                                                                                                                     | -                                                                                                           |
| -                       | -                                                         | 0  |                                                                                                                                                                                                         |   |                                                                                                                                     | -                                                                                                           |
| Brugia malayi           | odr-3                                                     | 2  | F:GO:0019001;<br>P:GO:0023052                                                                                                                                                                           | - |                                                                                                                                     | IPR001019; IPR011025;<br>G3DSA:3.40.50.300 (GENE3D),<br>PTHR10218:SF60 (PANTHER),<br>SSF52540 (SUPERFAMILY) |

|                         |                                                                                                       |    |                                                                                                                                                                                                                                                            |             |                                                                                                                                                                             |
|-------------------------|-------------------------------------------------------------------------------------------------------|----|------------------------------------------------------------------------------------------------------------------------------------------------------------------------------------------------------------------------------------------------------------|-------------|-----------------------------------------------------------------------------------------------------------------------------------------------------------------------------|
|                         | -                                                                                                     | 0  |                                                                                                                                                                                                                                                            |             | -                                                                                                                                                                           |
|                         | -                                                                                                     | 0  |                                                                                                                                                                                                                                                            |             | -                                                                                                                                                                           |
|                         | -                                                                                                     | 0  |                                                                                                                                                                                                                                                            |             | -                                                                                                                                                                           |
| Caenorhabditis elegans  | -                                                                                                     | 5  | F:GO:0015385;<br>P:GO:0055085;<br>P:GO:0006885;<br>C:GO:0016021;<br>P:GO:0006814                                                                                                                                                                           | -           | IPR018416; IPR018422                                                                                                                                                        |
|                         | -                                                                                                     | 0  |                                                                                                                                                                                                                                                            |             | -                                                                                                                                                                           |
| Brugia malayi           | guanylate cyclase                                                                                     | 10 | F:GO:0004383;<br>F:GO:0004672;<br>F:GO:0004872;<br>F:GO:0005524;<br>P:GO:0016199;<br>P:GO:0007165;<br>P:GO:0008045;<br>C:GO:0005886;<br>P:GO:0006468;<br>P:GO:0006182                                                                                      | EC:4.6.1.2  | IPR000719; IPR001054; IPR001245;<br>IPR011009; IPR018297;<br>G3DSA:1.10.510.10 (GENE3D),<br>G3DSA:3.30.200.20 (GENE3D),<br>PTHR11920 (PANTHER),<br>PTHR11920:SF50 (PANTHER) |
| Caenorhabditis briggsae | monoacylglycerol o-acyltransferase 2                                                                  | 8  | C:GO:0016021;<br>F:GO:0003846;<br>F:GO:0016407;<br>P:GO:0019432;<br>P:GO:0006651;<br>P:GO:0009792;<br>P:GO:0050892;<br>C:GO:0005783                                                                                                                        | EC:2.3.1.22 | -                                                                                                                                                                           |
|                         | -                                                                                                     | 0  |                                                                                                                                                                                                                                                            |             | -                                                                                                                                                                           |
|                         | -                                                                                                     | 0  |                                                                                                                                                                                                                                                            |             | -                                                                                                                                                                           |
| Caenorhabditis elegans  | swi snf-related matrix-associated actin-dependent regulator of chromatin subfamily e member 1-related | 5  | C:GO:0043229;<br>F:GO:0005488;<br>P:GO:0045132;<br>P:GO:0000003;<br>P:GO:0006325                                                                                                                                                                           | -           | IPR000910; IPR009071; PTHR13711 (PANTHER)                                                                                                                                   |
|                         | -                                                                                                     | 0  |                                                                                                                                                                                                                                                            |             | -                                                                                                                                                                           |
|                         | -                                                                                                     | 0  |                                                                                                                                                                                                                                                            |             | -                                                                                                                                                                           |
| Caenorhabditis elegans  | hypothetical protein F45H11.3 [Caenorhabditis elegans]                                                | 0  |                                                                                                                                                                                                                                                            |             | SignalP (SIGNALP)                                                                                                                                                           |
| Caenorhabditis elegans  | hypothetical protein F45H11.3 [Caenorhabditis elegans]                                                | 0  |                                                                                                                                                                                                                                                            |             | SignalP (SIGNALP)                                                                                                                                                           |
| Caenorhabditis elegans  | hypothetical protein F45H11.3 [Caenorhabditis elegans]                                                | 0  |                                                                                                                                                                                                                                                            |             | SignalP (SIGNALP)                                                                                                                                                           |
|                         | -                                                                                                     | 0  |                                                                                                                                                                                                                                                            |             | IPR003582; SignalP (SIGNALP)                                                                                                                                                |
|                         | -                                                                                                     | 0  |                                                                                                                                                                                                                                                            |             | -                                                                                                                                                                           |
| Caenorhabditis elegans  | ccr4-associated factor                                                                                | 15 | P:GO:0006357;<br>F:GO:0003676;<br>P:GO:0000289;<br>C:GO:0000932;<br>P:GO:0007517;<br>F:GO:0016251;<br>P:GO:0040035;<br>P:GO:0010171;<br>P:GO:0002119;<br>C:GO:0043186;<br>P:GO:0048666;<br>P:GO:0009792;<br>F:GO:0016787;<br>P:GO:0051729;<br>C:GO:0005634 | -           | IPR006941; IPR012337;<br>G3DSA:3.30.420.10 (GENE3D),<br>PTHR10797 (PANTHER)                                                                                                 |

|                         |                                                         |    |                                                                                                                                                                                                                                                            |                                                |                                                                                                                                                                                                                    |
|-------------------------|---------------------------------------------------------|----|------------------------------------------------------------------------------------------------------------------------------------------------------------------------------------------------------------------------------------------------------------|------------------------------------------------|--------------------------------------------------------------------------------------------------------------------------------------------------------------------------------------------------------------------|
| Caenorhabditis elegans  | ccr4-associated factor                                  | 15 | P:GO:0006357;<br>F:GO:0003676;<br>P:GO:0000289;<br>C:GO:0000932;<br>P:GO:0007517;<br>F:GO:0016251;<br>P:GO:0040035;<br>P:GO:0010171;<br>P:GO:0002119;<br>C:GO:0043186;<br>P:GO:0048666;<br>P:GO:0009792;<br>F:GO:0016787;<br>P:GO:0051729;<br>C:GO:0005634 | -                                              | IPR006941; IPR012337;<br>G3DSA:3.30.420.10 (GENE3D),<br>PTHR10797 (PANTHER)                                                                                                                                        |
| Caenorhabditis briggsae | Hypothetical protein CBG14902 [Caenorhabditis briggsae] | 6  | P:GO:0010171;<br>P:GO:0040018;<br>P:GO:0018991;<br>P:GO:0040017;<br>P:GO:0040010;<br>P:GO:0007413                                                                                                                                                          | -                                              | -                                                                                                                                                                                                                  |
| Caenorhabditis elegans  | cg9602 protein                                          | 3  | P:GO:0051246;<br>F:GO:0019787;<br>P:GO:0043687                                                                                                                                                                                                             | -                                              | -                                                                                                                                                                                                                  |
| Caenorhabditis elegans  | dad family protein                                      | 8  | P:GO:0040035;<br>P:GO:0002119;<br>P:GO:0040011;<br>P:GO:0040007;<br>P:GO:0006898;<br>P:GO:0045132;<br>C:GO:0071013;<br>P:GO:0002009                                                                                                                        | -                                              | -                                                                                                                                                                                                                  |
| Caenorhabditis briggsae | multidrug resistance protein family member (mrp-1)      | 12 | P:GO:0007427;<br>P:GO:0055085;<br>P:GO:0006941;<br>F:GO:0008307;<br>C:GO:0005863;<br>F:GO:0000146;<br>C:GO:0016021;<br>F:GO:0042626;<br>C:GO:0031672;<br>F:GO:0005524;<br>F:GO:0042803;<br>P:GO:0030241                                                    | -                                              | IPR001140; IPR003439; IPR003593;<br>IPR011527; IPR017871; IPR017940;<br>G3DSA:1.20.1560.10 (GENE3D),<br>G3DSA:3.40.50.300 (GENE3D),<br>PTHR19242 (PANTHER),<br>PTHR19242:SF35 (PANTHER),<br>SSF52540 (SUPERFAMILY) |
| Caenorhabditis briggsae | lbp bpi cetp c-termi-l domain containing protein        | 6  | P:GO:0009792;<br>P:GO:0000003;<br>P:GO:0040007;<br>F:GO:0008289;<br>P:GO:0002119;<br>P:GO:0040011                                                                                                                                                          | -                                              | IPR017942; IPR017943;<br>G3DSA:3.15.10.10 (GENE3D),<br>PTHR10504 (PANTHER),<br>PTHR10504:SF14 (PANTHER)                                                                                                            |
| Loa loa                 | myotubularin-related family protein                     | 0  |                                                                                                                                                                                                                                                            | F:GO:0046872;<br>P:GO:0016311;<br>F:GO:0016791 | IPR022096; PTHR10807 (PANTHER),<br>PTHR10807:SF1 (PANTHER)                                                                                                                                                         |
| Caenorhabditis elegans  | hypothetical protein R09F10.3 [Caenorhabditis elegans]  | 0  |                                                                                                                                                                                                                                                            |                                                | -                                                                                                                                                                                                                  |
|                         | -                                                       | 0  |                                                                                                                                                                                                                                                            |                                                | -                                                                                                                                                                                                                  |
|                         | -                                                       | 0  |                                                                                                                                                                                                                                                            |                                                | -                                                                                                                                                                                                                  |
| Loa loa                 | speckle-type poz protein                                | 2  | F:GO:0005515;<br>P:GO:0000003                                                                                                                                                                                                                              | -                                              | IPR000210; IPR011333; IPR013069                                                                                                                                                                                    |

|                         |                                                            |    |                                                                                                                                                                                                                                                                                              |                                                                                  |                                                                                                                   |
|-------------------------|------------------------------------------------------------|----|----------------------------------------------------------------------------------------------------------------------------------------------------------------------------------------------------------------------------------------------------------------------------------------------|----------------------------------------------------------------------------------|-------------------------------------------------------------------------------------------------------------------|
| Brugia malayi           | actin family protein                                       | 0  |                                                                                                                                                                                                                                                                                              | F:GO:0005515                                                                     | -                                                                                                                 |
| Loa loa                 | pre-mr--processing-splicing factor 8                       | 17 | P:GO:0050896;<br>F:GO:0003723;<br>C:GO:0005681;<br>P:GO:0045132;<br>P:GO:0040007;<br>C:GO:0016607;<br>P:GO:0040027;<br>P:GO:0040035;<br>P:GO:0018996;<br>P:GO:0007601;<br>F:GO:0005515;<br>P:GO:0040011;<br>P:GO:0000398;<br>C:GO:0005682;<br>P:GO:0006898;<br>P:GO:0002009;<br>P:GO:0009792 | -                                                                                | IPR012591; PTHR11140 (PANTHER)                                                                                    |
| Caenorhabditis elegans  | small subunit processome component 20 homolog              | 2  | P:GO:0006364;<br>C:GO:0005634                                                                                                                                                                                                                                                                | -                                                                                | IPR011989; IPR016024                                                                                              |
| Caenorhabditis briggsae | briggsae cbr-sqv-8 protein                                 | 2  | C:GO:0016020;<br>F:GO:0015018                                                                                                                                                                                                                                                                | -                                                                                | EC:2.4.1.135 SignalP (SIGNALP)                                                                                    |
| -                       | -                                                          | 0  |                                                                                                                                                                                                                                                                                              |                                                                                  | -                                                                                                                 |
| -                       | -                                                          | 0  |                                                                                                                                                                                                                                                                                              |                                                                                  | -                                                                                                                 |
| Nasonia vitripennis     | polyribonucleotide nucleotidyltransferase 1                | 6  | P:GO:0006402;<br>C:GO:0005758;<br>F:GO:0000175;<br>F:GO:0003723;<br>F:GO:0004654;<br>P:GO:0006396                                                                                                                                                                                            | -                                                                                | EC:2.7.7.8 IPR012162; IPR015847; SignalP (SIGNALP)                                                                |
| Caenorhabditis elegans  | elegans protein partially confirmed by transcript evidence | 0  |                                                                                                                                                                                                                                                                                              | C:GO:0016021;<br>P:GO:0009792;<br>F:GO:0005515                                   | -                                                                                                                 |
| Caenorhabditis briggsae | phosphatidylinositol glycan anchor class n                 | 4  | C:GO:0005789;<br>F:GO:0008484;<br>F:GO:0016780;<br>P:GO:0016254                                                                                                                                                                                                                              | -                                                                                | EC:3.1.6.0; EC:2.7.8.0 IPR007070; IPR017852; SignalP (SIGNALP)                                                    |
| Caenorhabditis briggsae | tetratricopeptide repeat domain 1                          | 2  | P:GO:0006457;<br>F:GO:0051082                                                                                                                                                                                                                                                                | -                                                                                | IPR011990; IPR013026; IPR019734; IPR023114; PTHR22904 (PANTHER), PTHR22904:SF38 (PANTHER), SSF48452 (SUPERFAMILY) |
| Caenorhabditis briggsae | tetratricopeptide repeat domain 1                          | 2  | P:GO:0006457;<br>F:GO:0051082                                                                                                                                                                                                                                                                | -                                                                                | IPR011990; IPR013026; PTHR22904 (PANTHER), PTHR22904:SF38 (PANTHER), SSF48452 (SUPERFAMILY)                       |
| -                       | -                                                          | 0  |                                                                                                                                                                                                                                                                                              |                                                                                  | -                                                                                                                 |
| Nematostella vectensis  | mucin 1                                                    | 1  | P:GO:0008152                                                                                                                                                                                                                                                                                 | -                                                                                | PR01217 (PRINTS)                                                                                                  |
| -                       | -                                                          | 0  |                                                                                                                                                                                                                                                                                              |                                                                                  | SignalP (SIGNALP)                                                                                                 |
| Heliconius melpomene    | endonuclease-reverse transcriptase                         | 0  |                                                                                                                                                                                                                                                                                              | F:GO:0003723;<br>P:GO:0006278;<br>F:GO:0004519;<br>F:GO:0003677;<br>F:GO:0003964 | IPR000477; IPR015706; PTHR19446:SF100 (PANTHER)                                                                   |
| Caenorhabditis elegans  | aarf domain containing ki-se 2                             | 1  | F:GO:0016740                                                                                                                                                                                                                                                                                 | -                                                                                | SignalP (SIGNALP)                                                                                                 |
| Brugia malayi           | hr1 repeat family protein                                  | 1  | F:GO:0016740                                                                                                                                                                                                                                                                                 | -                                                                                | -                                                                                                                 |
| -                       | -                                                          | 0  |                                                                                                                                                                                                                                                                                              |                                                                                  | -                                                                                                                 |

|                         |                                                            |   |                                                                                                                    |              |             |                                                                                                         |
|-------------------------|------------------------------------------------------------|---|--------------------------------------------------------------------------------------------------------------------|--------------|-------------|---------------------------------------------------------------------------------------------------------|
| Loa loa                 | elegans protein partially confirmed by transcript evidence | 7 | P:GO:0009792;<br>P:GO:0002119;<br>P:GO:0016246;<br>P:GO:0040017;<br>P:GO:0040010;<br>P:GO:0019915;<br>P:GO:0006898 | -            | -           |                                                                                                         |
| Homo sapiens            | lsm7 u6 small nuclear r- associated ( cerevisiae)          | 6 | P:GO:0006402;<br>F:GO:0017070;<br>C:GO:0030529;<br>C:GO:0005634;<br>F:GO:0046982;<br>P:GO:0000398                  | -            |             | IPR001163; IPR010920;<br>G3DSA:2.30.30.100 (GENE3D),<br>PTHR10553 (PANTHER),<br>PTHR10553:SF1 (PANTHER) |
| Caenorhabditis briggsae | Hypothetical protein CBG08374 [Caenorhabditis briggsae]    | 0 |                                                                                                                    | F:GO:0005515 |             | -                                                                                                       |
| Brugia malayi           | transmembrane 9 superfamily protein member 2               | 1 | C:GO:0016021                                                                                                       | -            |             | IPR004240; PTHR10766:SF13<br>(PANTHER), SignalP (SIGNALP)                                               |
|                         | -                                                          | 0 |                                                                                                                    |              |             | -                                                                                                       |
|                         | -                                                          | 0 |                                                                                                                    |              |             | -                                                                                                       |
| Caenorhabditis briggsae | domain-containing protein                                  | 1 | F:GO:0031072                                                                                                       | -            |             | PTHR15606 (PANTHER),<br>PTHR15606:SF1 (PANTHER)                                                         |
| Caenorhabditis elegans  | animal haem peroxidase family protein                      | 4 | F:GO:0020037;<br>P:GO:0055114;<br>F:GO:0004601;<br>P:GO:0006979                                                    | -            | EC:1.11.1.7 | -                                                                                                       |
| Caenorhabditis elegans  | breast carcinoma amplified sequence 2                      | 3 | C:GO:0071011;<br>P:GO:0000398;<br>C:GO:0071013                                                                     | -            |             | IPR008409; PTHR13296 (PANTHER)                                                                          |
| Caenorhabditis elegans  | breast carcinoma amplified sequence 2                      | 3 | C:GO:0071011;<br>P:GO:0000398;<br>C:GO:0071013                                                                     | -            |             | IPR008409; PTHR13296 (PANTHER)                                                                          |
| Loa loa                 | cpsf a subunit region family protein                       | 5 | P:GO:0006378;<br>C:GO:0005847;<br>F:GO:0003730;<br>F:GO:0005515;<br>P:GO:0006379                                   | -            |             | IPR004871; PTHR10644 (PANTHER),<br>PTHR10644:SF2 (PANTHER)                                              |
| Pongo abelii            | matrix metalloprotei-se 11                                 | 7 | F:GO:0004222;<br>P:GO:0007275;<br>C:GO:0005578;<br>P:GO:0006508;<br>F:GO:0005509;<br>F:GO:0008270;<br>P:GO:0030574 | -            | EC:3.4.24.0 | SignalP (SIGNALP)                                                                                       |
| Caenorhabditis briggsae | domain member 1b                                           | 3 | F:GO:0005088;<br>C:GO:0005622;<br>P:GO:0051056                                                                     | -            |             | IPR001895; IPR008937;<br>PTHR23113:SF20 (PANTHER)                                                       |
| Caenorhabditis elegans  | exosome complex exonuclease rrp45                          | 7 | P:GO:0040010;<br>P:GO:0000003;<br>P:GO:0002119;<br>F:GO:0005515;<br>P:GO:0009792;<br>F:GO:0016787;<br>C:GO:0005634 | -            |             | IPR015847; PTHR11097 (PANTHER),<br>PTHR11097:SF8 (PANTHER), SignalP<br>(SIGNALP)                        |
| Caenorhabditis elegans  | elegans protein confirmed by transcript evidence           | 1 | P:GO:0009792                                                                                                       | -            |             | IPR011685                                                                                               |
| Caenorhabditis elegans  | elegans protein confirmed by transcript evidence           | 1 | P:GO:0009792                                                                                                       | -            |             | IPR011685; SignalP (SIGNALP)                                                                            |

|                         |                                                         |    |                                                                                                                                                                                        |                                                                                                                                     |             |                                                                                                                                                        |
|-------------------------|---------------------------------------------------------|----|----------------------------------------------------------------------------------------------------------------------------------------------------------------------------------------|-------------------------------------------------------------------------------------------------------------------------------------|-------------|--------------------------------------------------------------------------------------------------------------------------------------------------------|
| Brugia malayi           | pyruvate ki-se                                          | 11 | P:GO:0009792;<br>F:GO:0004743;<br>F:GO:0016830;<br>C:GO:0005811;<br>P:GO:0006725;<br>P:GO:0016310;<br>F:GO:0005515;<br>F:GO:0030955;<br>F:GO:0000287;<br>P:GO:0006096;<br>C:GO:0005829 | -                                                                                                                                   | EC:2.7.1.40 | IPR001697; IPR015793; IPR015806;<br>IPR015813                                                                                                          |
| -                       | -                                                       | 0  |                                                                                                                                                                                        |                                                                                                                                     |             | P551257 (PROFILE), SignalP (SIGNALP)                                                                                                                   |
| -                       | -                                                       | 0  |                                                                                                                                                                                        |                                                                                                                                     |             | SignalP (SIGNALP)                                                                                                                                      |
| -                       | -                                                       | 0  |                                                                                                                                                                                        |                                                                                                                                     |             | -                                                                                                                                                      |
| -                       | -                                                       | 0  |                                                                                                                                                                                        |                                                                                                                                     |             | -                                                                                                                                                      |
| -                       | -                                                       | 0  |                                                                                                                                                                                        |                                                                                                                                     |             | -                                                                                                                                                      |
| Caenorhabditis briggsae | abhydrolase domain containing 3                         | 0  |                                                                                                                                                                                        | F:GO:0003674;<br>F:GO:0016787;<br>C:GO:0016021;<br>C:GO:0016020;<br>P:GO:0008150;<br>F:GO:0004091;<br>C:GO:0005575                  |             | IPR000073; IPR012020;<br>G3DSA:3.40.50.1820 (GENE3D),<br>PTHR10794 (PANTHER),<br>PTHR10794:SF8 (PANTHER), SSF53474<br>(SUPERFAMILY)                    |
| Caenorhabditis briggsae | abhydrolase domain containing 3                         | 0  |                                                                                                                                                                                        | F:GO:0003674;<br>P:GO:0008152;<br>F:GO:0016787;<br>C:GO:0016021;<br>C:GO:0016020;<br>P:GO:0008150;<br>F:GO:0004091;<br>C:GO:0005575 |             | IPR000073; IPR012020;<br>G3DSA:3.40.50.1820 (GENE3D),<br>PTHR10794 (PANTHER),<br>PTHR10794:SF8 (PANTHER), SignalP<br>(SIGNALP), SSF53474 (SUPERFAMILY) |
| -                       | -                                                       | 0  |                                                                                                                                                                                        |                                                                                                                                     |             | -                                                                                                                                                      |
| -                       | -                                                       | 0  |                                                                                                                                                                                        |                                                                                                                                     |             | IPR013032                                                                                                                                              |
| Caenorhabditis briggsae | histidyl-tr- synthetase                                 | 3  | F:GO:0004812;<br>P:GO:0006418;<br>F:GO:0000166                                                                                                                                         | -                                                                                                                                   |             | IPR004516                                                                                                                                              |
| Caenorhabditis elegans  | calcium activated nucleotidase 1                        | 6  | P:GO:0040010;<br>P:GO:0008340;<br>F:GO:0017110;<br>F:GO:0005515;<br>C:GO:0005789;<br>P:GO:0009191                                                                                      | -                                                                                                                                   | EC:3.6.1.6  | IPR009283; SignalP (SIGNALP)                                                                                                                           |
| Caenorhabditis elegans  | briggsae cbr-pcp- protein                               | 0  |                                                                                                                                                                                        | P:GO:0006508;<br>F:GO:0008236                                                                                                       |             | IPR008758; PTHR11010:SF6<br>(PANTHER)                                                                                                                  |
| -                       | -                                                       | 0  |                                                                                                                                                                                        |                                                                                                                                     |             | IPR003599; IPR007110; IPR013098;<br>IPR013783; PTHR19897 (PANTHER),<br>SSF48726 (SUPERFAMILY)                                                          |
| -                       | -                                                       | 0  |                                                                                                                                                                                        |                                                                                                                                     |             | -                                                                                                                                                      |
| Caenorhabditis elegans  | homeobox protein                                        | 3  | F:GO:0003677;<br>P:GO:0045449;<br>F:GO:0005515                                                                                                                                         | -                                                                                                                                   |             | IPR001356; IPR009057; IPR012287;<br>IPR017970; PTHR19418 (PANTHER),<br>PTHR19418:SF99 (PANTHER)                                                        |
| -                       | -                                                       | 0  |                                                                                                                                                                                        |                                                                                                                                     |             | SignalP (SIGNALP)                                                                                                                                      |
| Caenorhabditis briggsae | Hypothetical protein CBG04746 [Caenorhabditis briggsae] | 0  |                                                                                                                                                                                        | P:GO:0006898;<br>P:GO:0002119;<br>P:GO:0040007                                                                                      |             | -                                                                                                                                                      |

|                        |                                      |    |                                                                                                                                                                                                                                           |   |              |                                                                                                                                                                    |
|------------------------|--------------------------------------|----|-------------------------------------------------------------------------------------------------------------------------------------------------------------------------------------------------------------------------------------------|---|--------------|--------------------------------------------------------------------------------------------------------------------------------------------------------------------|
| Brugia malayi          | protein arginine methyltransferase 8 | 14 | P:GO:0040010;<br>P:GO:0043393;<br>F:GO:0035241;<br>P:GO:0019919;<br>F:GO:0008469;<br>P:GO:0040011;<br>F:GO:0046982;<br>F:GO:0042803;<br>P:GO:0002009;<br>C:GO:0005737;<br>C:GO:0005634;<br>C:GO:0005886;<br>F:GO:0035242;<br>P:GO:0016571 | - | EC:2.1.1.125 | IPR010456; IPR018181;<br>G3DSA:2.70.160.11 (GENE3D),<br>G3DSA:3.40.50.150 (GENE3D),<br>PTHR11006 (PANTHER),<br>PTHR11006:SF19 (PANTHER),<br>SSF53335 (SUPERFAMILY) |
| Brugia malayi          | protein arginine methyltransferase 8 | 14 | P:GO:0040010;<br>P:GO:0043393;<br>F:GO:0035241;<br>P:GO:0019919;<br>F:GO:0008469;<br>P:GO:0040011;<br>F:GO:0046982;<br>F:GO:0042803;<br>P:GO:0002009;<br>C:GO:0005737;<br>C:GO:0005634;<br>C:GO:0005886;<br>F:GO:0035242;<br>P:GO:0016571 | - | EC:2.1.1.125 | -                                                                                                                                                                  |
| Caenorhabditis elegans | cytohesin 3                          | 7  | C:GO:0005737;<br>F:GO:0005085;<br>P:GO:0045785;<br>C:GO:0005886;<br>F:GO:0005515;<br>C:GO:0001726;<br>F:GO:0005547                                                                                                                        | - |              | IPR000904; G3DSA:1.10.1000.11<br>(GENE3D), G3DSA:1.10.220.20<br>(GENE3D), PTHR10663 (PANTHER)                                                                      |
|                        | -                                    | 0  |                                                                                                                                                                                                                                           |   |              | -                                                                                                                                                                  |
|                        | -                                    | 0  |                                                                                                                                                                                                                                           |   |              | -                                                                                                                                                                  |
|                        | -                                    | 0  |                                                                                                                                                                                                                                           |   |              | -                                                                                                                                                                  |
|                        | -                                    | 0  |                                                                                                                                                                                                                                           |   |              | -                                                                                                                                                                  |
| Caenorhabditis elegans | sig-l recognition particle 68        | 11 | F:GO:0003729;<br>P:GO:0040002;<br>F:GO:0008312;<br>P:GO:0040035;<br>P:GO:0010507;<br>P:GO:0002119;<br>P:GO:0006898;<br>P:GO:0009792;<br>P:GO:0006614;<br>P:GO:0040018;<br>P:GO:0007040                                                    | - |              | PTHR12860 (PANTHER)                                                                                                                                                |
|                        | -                                    | 0  |                                                                                                                                                                                                                                           |   |              | SignalP (SIGNALP)                                                                                                                                                  |
| Rana catesbeiana       | rho gdp-dissociation inhibitor 2     | 2  | C:GO:0005737;<br>F:GO:0005094                                                                                                                                                                                                             | - |              | IPR000406; IPR014756;<br>PTHR10980:SF5 (PANTHER)                                                                                                                   |
|                        | -                                    | 0  |                                                                                                                                                                                                                                           |   |              | -                                                                                                                                                                  |

|                         |                                                                         |    |                                                                                                                                                                                                                                                                             |   |  |                                                 |
|-------------------------|-------------------------------------------------------------------------|----|-----------------------------------------------------------------------------------------------------------------------------------------------------------------------------------------------------------------------------------------------------------------------------|---|--|-------------------------------------------------|
| Caenorhabditis briggsae | golgin subfamily a member 5                                             | 5  | C:GO:0031985;<br>P:GO:0007030;<br>P:GO:0048193;<br>F:GO:0042803;<br>C:GO:0016020                                                                                                                                                                                            | - |  | PTHR13815 (PANTHER)                             |
| Caenorhabditis briggsae | golgin subfamily a member 5                                             | 5  | C:GO:0031985;<br>P:GO:0007030;<br>P:GO:0048193;<br>F:GO:0042803;<br>C:GO:0016020                                                                                                                                                                                            | - |  | PTHR13815 (PANTHER)                             |
|                         |                                                                         | 0  |                                                                                                                                                                                                                                                                             |   |  | -                                               |
|                         |                                                                         | 0  |                                                                                                                                                                                                                                                                             |   |  | -                                               |
|                         |                                                                         | 0  |                                                                                                                                                                                                                                                                             |   |  | -                                               |
|                         |                                                                         | 0  |                                                                                                                                                                                                                                                                             |   |  | -                                               |
| Pongo abelii            | insulin-like growth factor binding protein 7                            | 13 | P:GO:0051414;<br>P:GO:0050810;<br>P:GO:0007566;<br>P:GO:0001558;<br>C:GO:0005615;<br>P:GO:0009408;<br>P:GO:0008285;<br>P:GO:0007155;<br>P:GO:0032870;<br>P:GO:0014070;<br>F:GO:0005520;<br>P:GO:0032526;<br>C:GO:0031012                                                    | - |  | SignalP (SIGNALP)                               |
|                         |                                                                         | 0  |                                                                                                                                                                                                                                                                             |   |  | -                                               |
|                         |                                                                         | 0  |                                                                                                                                                                                                                                                                             |   |  | -                                               |
| Loa loa                 | germ cell-less homolog 1                                                | 3  | P:GO:0009987;<br>F:GO:0042802;<br>C:GO:0044428                                                                                                                                                                                                                              | - |  | PTHR23231 (PANTHER),<br>PTHR23231:SF2 (PANTHER) |
|                         |                                                                         | 0  |                                                                                                                                                                                                                                                                             |   |  | -                                               |
|                         |                                                                         | 0  |                                                                                                                                                                                                                                                                             |   |  | -                                               |
|                         |                                                                         | 0  |                                                                                                                                                                                                                                                                             |   |  | -                                               |
| Caenorhabditis briggsae | 2-oxoglutarate and iron-dependent oxygenase domain-containing protein 1 | 3  | P:GO:0045132;<br>F:GO:0016491;<br>F:GO:0005488                                                                                                                                                                                                                              | - |  | IPR006620; PTHR12117 (PANTHER)                  |
| Loa loa                 | par-6 protein                                                           | 16 | F:GO:0005080;<br>P:GO:0007369;<br>C:GO:0043234;<br>C:GO:0005923;<br>P:GO:0045217;<br>C:GO:0016021;<br>P:GO:0040001;<br>C:GO:0005938;<br>P:GO:0007155;<br>F:GO:0030742;<br>P:GO:0030010;<br>F:GO:0008134;<br>P:GO:0016032;<br>P:GO:0008406;<br>F:GO:0017048;<br>C:GO:0005634 | - |  | SignalP (SIGNALP)                               |



|                            |                                                            |    |                                                                                                                                                                                                                                           |                                                                                                                                                      |                                                         |                                                                                                                                                                    |
|----------------------------|------------------------------------------------------------|----|-------------------------------------------------------------------------------------------------------------------------------------------------------------------------------------------------------------------------------------------|------------------------------------------------------------------------------------------------------------------------------------------------------|---------------------------------------------------------|--------------------------------------------------------------------------------------------------------------------------------------------------------------------|
| Caenorhabditis elegans     | c-1-tetrahydrofolate cytoplasmic                           | 14 | P:GO:0046653;<br>P:GO:0009086;<br>P:GO:0006164;<br>C:GO:0005739;<br>P:GO:0006548;<br>F:GO:0004488;<br>P:GO:0055114;<br>F:GO:0004477;<br>F:GO:0016155;<br>P:GO:0006730;<br>F:GO:0005524;<br>F:GO:0005515;<br>F:GO:0004329;<br>P:GO:0009396 | -                                                                                                                                                    | EC:1.5.1.5;<br>EC:3.5.4.9;<br>EC:1.5.1.6;<br>EC:6.3.4.3 | IPR000559; IPR020628;<br>G3DSA:3.30.1510.10 (GENE3D),<br>G3DSA:3.40.50.300 (GENE3D),<br>PTHR10025 (PANTHER),<br>PTHR10025:SF4 (PANTHER), SSF52540<br>(SUPERFAMILY) |
| -                          | -                                                          | 0  |                                                                                                                                                                                                                                           |                                                                                                                                                      |                                                         | -                                                                                                                                                                  |
| Caenorhabditis elegans     | briggsae cbr-ugt-62 protein                                | 0  |                                                                                                                                                                                                                                           | F:GO:0016740;<br>F:GO:0030246;<br>C:GO:0016021;<br>F:GO:0016758;<br>F:GO:0016757;<br>P:GO:0005975;<br>P:GO:0030259;<br>P:GO:0040010;<br>P:GO:0008152 |                                                         | SignalP (SIGNALP)                                                                                                                                                  |
| Caenorhabditis elegans     | d--directed r- polymerase i subunit rpa1                   | 7  | F:GO:0003899;<br>P:GO:0009303;<br>C:GO:0005654;<br>F:GO:0003677;<br>C:GO:0005736;<br>F:GO:0005515;<br>F:GO:0008270                                                                                                                        | -                                                                                                                                                    | EC:2.7.7.6                                              | IPR015699; PTHR19376 (PANTHER),<br>SSF64484 (SUPERFAMILY)                                                                                                          |
| Nematostella vectensis     | n -(beta-n-acetylglucosaminy)-l-asparagi-se                | 1  | F:GO:0016787                                                                                                                                                                                                                              | -                                                                                                                                                    |                                                         | IPR000246; PTHR10188:SF6<br>(PANTHER), SSF56235 (SUPERFAMILY)                                                                                                      |
| Syngamus trachea           | af370722_1intracellular globin                             | 3  | C:GO:0005576;<br>F:GO:0005506;<br>P:GO:0006810                                                                                                                                                                                            | -                                                                                                                                                    |                                                         | IPR000971; IPR009050; IPR012292;<br>SignalP (SIGNALP)                                                                                                              |
| -                          | -                                                          | 0  |                                                                                                                                                                                                                                           |                                                                                                                                                      |                                                         | -                                                                                                                                                                  |
| -                          | -                                                          | 0  |                                                                                                                                                                                                                                           |                                                                                                                                                      |                                                         | -                                                                                                                                                                  |
| Caenorhabditis briggsae    | immunoglobulin i-set domain containing protein             | 0  |                                                                                                                                                                                                                                           | C:GO:0005575                                                                                                                                         |                                                         | IPR003598; IPR003599; IPR007110;<br>IPR013098; IPR013783; PTHR19897<br>(PANTHER), PTHR19897:SF11<br>(PANTHER), SSF48726 (SUPERFAMILY)                              |
| Caenorhabditis briggsae    | elegans protein partially confirmed by transcript evidence | 1  | F:GO:0005515                                                                                                                                                                                                                              | -                                                                                                                                                    |                                                         | SignalP (SIGNALP)                                                                                                                                                  |
| Brugia malayi              | hat family dimerisation domain containing protein          | 0  |                                                                                                                                                                                                                                           | F:GO:0003676;<br>F:GO:0046983                                                                                                                        |                                                         | -                                                                                                                                                                  |
| Caenorhabditis elegans     | hypothetical protein Y54F10AR.2 [Caenorhabditis elegans]   | 0  |                                                                                                                                                                                                                                           |                                                                                                                                                      |                                                         | -                                                                                                                                                                  |
| -                          | -                                                          | 0  |                                                                                                                                                                                                                                           |                                                                                                                                                      |                                                         | -                                                                                                                                                                  |
| -                          | -                                                          | 0  |                                                                                                                                                                                                                                           |                                                                                                                                                      |                                                         | -                                                                                                                                                                  |
| -                          | -                                                          | 0  |                                                                                                                                                                                                                                           |                                                                                                                                                      |                                                         | -                                                                                                                                                                  |
| Caenorhabditis elegans     | elegans protein partially confirmed by transcript evidence | 1  | F:GO:0005515                                                                                                                                                                                                                              | -                                                                                                                                                    |                                                         | -                                                                                                                                                                  |
| Loa loa                    | zo- pellucida-like domain containing protein               | 0  |                                                                                                                                                                                                                                           | F:GO:0005515                                                                                                                                         |                                                         | IPR001507; PTHR22907 (PANTHER)                                                                                                                                     |
| -                          | -                                                          | 0  |                                                                                                                                                                                                                                           |                                                                                                                                                      |                                                         | -                                                                                                                                                                  |
| Pediculus humanus corporis | transportin 2 (importin karyopherin beta 2b)               | 4  | F:GO:0005515;<br>F:GO:0008565;<br>F:GO:0008139;<br>P:GO:0006886                                                                                                                                                                           | -                                                                                                                                                    |                                                         | IPR000357; IPR011989; IPR016024;<br>PTHR10527 (PANTHER),<br>PTHR10527:SF3 (PANTHER)                                                                                |
| -                          | -                                                          | 0  |                                                                                                                                                                                                                                           |                                                                                                                                                      |                                                         | -                                                                                                                                                                  |

|                             |                                                            |    |                                                                                                                                                                                                         |                                                                                                                                                                                                         |                            |                                                                                                               |
|-----------------------------|------------------------------------------------------------|----|---------------------------------------------------------------------------------------------------------------------------------------------------------------------------------------------------------|---------------------------------------------------------------------------------------------------------------------------------------------------------------------------------------------------------|----------------------------|---------------------------------------------------------------------------------------------------------------|
|                             | -                                                          | 0  |                                                                                                                                                                                                         |                                                                                                                                                                                                         |                            |                                                                                                               |
| Caenorhabditis elegans      | elegans protein partially confirmed by transcript evidence | 0  |                                                                                                                                                                                                         | F:GO:0001851;<br>C:GO:0005634;<br>P:GO:0030449;<br>C:GO:0005737;<br>C:GO:0005576;<br>F:GO:0043499;<br>F:GO:0008201;<br>P:GO:0006957;<br>C:GO:0005886;<br>C:GO:0005615;<br>P:GO:0007155;<br>F:GO:0005488 |                            | IPR000436; IPR016060; SignalP (SIGNALP)                                                                       |
|                             | -                                                          | 0  |                                                                                                                                                                                                         |                                                                                                                                                                                                         |                            | IPR000436; IPR016060; SignalP (SIGNALP)                                                                       |
| Caenorhabditis elegans      | -dh-ubiquinone oxidoreductase 42 kda subunit               | 8  | P:GO:0009792;<br>P:GO:0002119;<br>P:GO:0006139;<br>F:GO:0016773;<br>P:GO:0040010;<br>F:GO:0005524;<br>P:GO:0000003;<br>P:GO:0008340                                                                     | -                                                                                                                                                                                                       | EC:2.7.1.0                 | IPR002624; G3DSA:3.40.50.300 (GENE3D), PTHR10513:SF2 (PANTHER), SignalP (SIGNALP), SSF52540 (SUPERFAMILY)     |
| Loa loa                     | tpr repeat nuclear                                         | 5  | P:GO:0009792;<br>P:GO:0000003;<br>P:GO:0040007;<br>P:GO:0006898;<br>P:GO:0002119                                                                                                                        | -                                                                                                                                                                                                       |                            | IPR011990; IPR013026; PTHR14027 (PANTHER), PTHR14027:SF2 (PANTHER), SSF48452 (SUPERFAMILY)                    |
| Caenorhabditis elegans      | elegans protein confirmed by transcript evidence           | 0  |                                                                                                                                                                                                         |                                                                                                                                                                                                         |                            | -                                                                                                             |
| Caenorhabditis elegans      | collagen protein confirmed by transcript evidence          | 0  |                                                                                                                                                                                                         | C:GO:0016021;<br>F:GO:0042302;<br>P:GO:0009792                                                                                                                                                          |                            | PTHR10499 (PANTHER), PTHR10499:SF58 (PANTHER)                                                                 |
| Loa loa                     | elegans protein partially confirmed by transcript evidence | 0  |                                                                                                                                                                                                         |                                                                                                                                                                                                         |                            | IPR019392                                                                                                     |
| Caenorhabditis elegans      | l-3-hydroxyacyl-coenzyme a short chain                     | 12 | P:GO:0006635;<br>F:GO:0003857;<br>F:GO:0005515;<br>P:GO:0032868;<br>P:GO:0014823;<br>C:GO:0005743;<br>P:GO:0046676;<br>C:GO:0042645;<br>F:GO:0050662;<br>P:GO:0042493;<br>F:GO:0016829;<br>F:GO:0003985 | -                                                                                                                                                                                                       | EC:1.1.1.35;<br>EC:2.3.1.9 | IPR006108; IPR006176; IPR006180; IPR008927; IPR013328; IPR016040; PTHR23309 (PANTHER), SSF51735 (SUPERFAMILY) |
| Haemonchus contortus        | galectin                                                   | 2  | F:GO:0005529;<br>P:GO:0009987                                                                                                                                                                           | -                                                                                                                                                                                                       |                            | -                                                                                                             |
|                             | -                                                          | 0  |                                                                                                                                                                                                         |                                                                                                                                                                                                         |                            | -                                                                                                             |
| Caenorhabditis elegans      | 3-oxoacid transferase 1                                    | 3  | P:GO:0046952;<br>C:GO:0005739;<br>F:GO:0008260                                                                                                                                                          | -                                                                                                                                                                                                       | EC:2.8.3.5                 | IPR004163; IPR004165; G3DSA:3.40.1080.10 (GENE3D), PTHR13707:SF1 (PANTHER), SSF100950 (SUPERFAMILY)           |
| Angiostrongylus cantonensis | mida_caee1:ame:full=protein mida mitochondrial             | 0  |                                                                                                                                                                                                         | F:GO:0003674;<br>P:GO:0008150                                                                                                                                                                           |                            | IPR003788; PTHR12049 (PANTHER), SSF53335 (SUPERFAMILY)                                                        |
|                             | -                                                          | 0  |                                                                                                                                                                                                         |                                                                                                                                                                                                         |                            | -                                                                                                             |

|                          |                                                               |    |  |                                                                                                                                                                                                                                                                             |              |                                                                                                                                                          |
|--------------------------|---------------------------------------------------------------|----|--|-----------------------------------------------------------------------------------------------------------------------------------------------------------------------------------------------------------------------------------------------------------------------------|--------------|----------------------------------------------------------------------------------------------------------------------------------------------------------|
| Caenorhabditis briggsae  | wd repeat domain 43                                           | 0  |  | F:GO:0003674;<br>P:GO:0008150;<br>C:GO:0005730;<br>C:GO:0005634;<br>C:GO:0005575                                                                                                                                                                                            |              | IPR007148                                                                                                                                                |
| Caenorhabditis briggsae  | wd repeat domain 43                                           | 0  |  | F:GO:0003674;<br>P:GO:0008150;<br>C:GO:0005730;<br>C:GO:0005634;<br>C:GO:0005575                                                                                                                                                                                            |              | IPR007148                                                                                                                                                |
| Caenorhabditis elegans   | elegans protein confirmed by transcript evidence              | 0  |  |                                                                                                                                                                                                                                                                             |              | -                                                                                                                                                        |
|                          | -                                                             | 0  |  |                                                                                                                                                                                                                                                                             |              | -                                                                                                                                                        |
| Homo sapiens             | immunoglobulin lambda light chain vlj region                  | 0  |  |                                                                                                                                                                                                                                                                             |              | IPR003596; IPR007110; IPR013106;<br>IPR013783; PTHR23267 (PANTHER),<br>PTHR23267:SF10 (PANTHER), SignalP<br>(SIGNALP), SSF48726 (SUPERFAMILY)            |
| Caenorhabditis elegans   | general transcription factor iih subunit 2                    | 16 |  | P:GO:0006367;<br>P:GO:0000718;<br>F:GO:0008094;<br>P:GO:0002031;<br>P:GO:0040010;<br>P:GO:0040011;<br>F:GO:0047485;<br>P:GO:0009411;<br>F:GO:0046872;<br>C:GO:0005675;<br>P:GO:0009792;<br>P:GO:0006368;<br>F:GO:0008135;<br>P:GO:0002119;<br>P:GO:0010171;<br>F:GO:0008353 | EC:2.7.11.23 | IPR000433; IPR004595; IPR007087;<br>IPR015880; G3DSA:3.10.370.10<br>(GENE3D), PTHR12695 (PANTHER),<br>PTHR12695:SF2 (PANTHER), SSF57889<br>(SUPERFAMILY) |
| Caenorhabditis elegans   | microsomal triglyceride transfer protein                      | 1  |  | P:GO:0040011                                                                                                                                                                                                                                                                | -            | PTHR13024 (PANTHER)                                                                                                                                      |
|                          | -                                                             | 0  |  |                                                                                                                                                                                                                                                                             |              | -                                                                                                                                                        |
|                          | -                                                             | 0  |  |                                                                                                                                                                                                                                                                             |              | -                                                                                                                                                        |
| Loa loa                  | nematode cuticle collagen n-termi-I domain containing protein | 4  |  | P:GO:0009792;<br>C:GO:0060107;<br>F:GO:0005515;<br>C:GO:0060111                                                                                                                                                                                                             | -            | IPR002486; SignalP (SIGNALP)                                                                                                                             |
|                          | -                                                             | 0  |  |                                                                                                                                                                                                                                                                             |              | -                                                                                                                                                        |
|                          | -                                                             | 0  |  |                                                                                                                                                                                                                                                                             |              | -                                                                                                                                                        |
| Brugia malayi            | iron-sulfur cluster assembly 1 homolog ( cerevisiae)          | 10 |  | P:GO:0009792;<br>P:GO:0002119;<br>F:GO:0046872;<br>P:GO:0016226;<br>F:GO:0003676;<br>F:GO:0051536;<br>P:GO:0040010;<br>P:GO:0006898;<br>C:GO:0005739;<br>F:GO:0005198                                                                                                       | -            | -                                                                                                                                                        |
|                          | -                                                             | 0  |  |                                                                                                                                                                                                                                                                             |              | -                                                                                                                                                        |
| Saccoglossus kowalevskii | major facilitator superfamily domain-containing protein 5     | 0  |  | C:GO:0016021;<br>C:GO:0016020;<br>P:GO:0006810                                                                                                                                                                                                                              |              | IPR008509; SignalP (SIGNALP)                                                                                                                             |
| Caenorhabditis elegans   | elegans protein confirmed by transcript evidence              | 0  |  |                                                                                                                                                                                                                                                                             |              | -                                                                                                                                                        |

|                         |                                                                                                                   |   |                                                                                                                                     |                                                                                  |             |                                                                               |
|-------------------------|-------------------------------------------------------------------------------------------------------------------|---|-------------------------------------------------------------------------------------------------------------------------------------|----------------------------------------------------------------------------------|-------------|-------------------------------------------------------------------------------|
| Loa loa                 | hypothetical protein LOAG_06899 [Loa loa]                                                                         | 0 |                                                                                                                                     |                                                                                  |             | -                                                                             |
| Loa loa                 | hypothetical protein LOAG_06899 [Loa loa]                                                                         | 0 |                                                                                                                                     |                                                                                  |             | -                                                                             |
| Caenorhabditis briggsae | elegans protein confirmed by transcript evidence                                                                  | 7 | P:GO:0045454;<br>P:GO:0009792;<br>F:GO:0016491;<br>P:GO:0040007;<br>F:GO:0016209;<br>F:GO:0005515;<br>P:GO:0002119                  | -                                                                                |             | -                                                                             |
| Caenorhabditis elegans  | polymerase ii (d- directed) polypeptide 33kda                                                                     | 7 | F:GO:0004672;<br>P:GO:0006367;<br>P:GO:0008380;<br>C:GO:0005665;<br>F:GO:0005515;<br>P:GO:0006368;<br>C:GO:0005737                  | -                                                                                |             | IPR011262; IPR011263; PTHR11800 (PANTHER), PTHR11800:SF2 (PANTHER)            |
| Caenorhabditis briggsae | Hypothetical protein CBG16021 [Caenorhabditis briggsae]                                                           | 0 |                                                                                                                                     |                                                                                  |             | SignalP (SIGNALP)                                                             |
|                         | -                                                                                                                 | 0 |                                                                                                                                     |                                                                                  |             | SignalP (SIGNALP)                                                             |
| Caenorhabditis briggsae | briggsae cbr-col-142 protein                                                                                      | 0 |                                                                                                                                     | C:GO:0016021;<br>P:GO:0040011;<br>F:GO:0042302                                   |             | IPR002486; SignalP (SIGNALP)                                                  |
| Caenorhabditis elegans  | phospholipase b-like 2 precursor (lami- ancestor homolog 2) (lama-like protein 2) (76 kda protein) ( kda protein) | 0 |                                                                                                                                     | F:GO:0016787;<br>P:GO:0008150;<br>C:GO:0043202;<br>P:GO:0016042;<br>C:GO:0005575 |             | IPR007000                                                                     |
| Caenorhabditis elegans  | l-isoaspartyl protein carboxyl methyltransferase                                                                  | 3 | C:GO:0005737;<br>P:GO:0006464;<br>F:GO:0004719                                                                                      | -                                                                                | EC:2.1.1.77 | SignalP (SIGNALP)                                                             |
| Caenorhabditis elegans  | l-isoaspartyl protein carboxyl methyltransferase                                                                  | 3 | C:GO:0005737;<br>P:GO:0006464;<br>F:GO:0004719                                                                                      | -                                                                                | EC:2.1.1.77 | -                                                                             |
| Oryctolagus cuniculus   | n-acetyltransferase 10                                                                                            | 5 | C:GO:0005730;<br>F:GO:0008080;<br>F:GO:0005515;<br>F:GO:0005524;<br>P:GO:0008152                                                    | -                                                                                |             | PTHR10925 (PANTHER), PTHR10925:SF5 (PANTHER)                                  |
|                         | -                                                                                                                 | 0 |                                                                                                                                     |                                                                                  |             | -                                                                             |
|                         | -                                                                                                                 | 0 |                                                                                                                                     |                                                                                  |             | SignalP (SIGNALP)                                                             |
| Loa loa                 | glycosyl hydrolases family 31 protein                                                                             | 8 | P:GO:0009792;<br>P:GO:0002119;<br>P:GO:0005975;<br>C:GO:0005875;<br>F:GO:0030246;<br>F:GO:0005515;<br>F:GO:0004558;<br>P:GO:0040007 | -                                                                                | EC:3.2.1.20 | IPR000322; IPR017853; PTHR22762:SF7 (PANTHER)                                 |
| Caenorhabditis briggsae | elegans protein confirmed by transcript evidence                                                                  | 1 | C:GO:0005576                                                                                                                        | -                                                                                |             | -                                                                             |
|                         | -                                                                                                                 | 0 |                                                                                                                                     |                                                                                  |             | SignalP (SIGNALP)                                                             |
|                         | -                                                                                                                 | 0 |                                                                                                                                     |                                                                                  |             | SignalP (SIGNALP)                                                             |
| Caenorhabditis elegans  | initiation factor 4g family member (ifg-1)                                                                        | 0 |                                                                                                                                     | F:GO:0005488;<br>P:GO:0016070;<br>F:GO:0005515;<br>C:GO:0005575                  |             | IPR003890; IPR016021; IPR016024; PTHR23253 (PANTHER), PTHR23253:SF4 (PANTHER) |
| Caenorhabditis elegans  | initiation factor 4g family member (ifg-1)                                                                        | 0 |                                                                                                                                     | F:GO:0005488;<br>P:GO:0016070;<br>F:GO:0005515;<br>C:GO:0005575                  |             | IPR003890; IPR016021; IPR016024; PTHR23253 (PANTHER), PTHR23253:SF4 (PANTHER) |

|                         |                                                                                                                    |    |                                                                                                                                                                                                                                                                                                                                                 |                               |             |                                                                                                                                                 |
|-------------------------|--------------------------------------------------------------------------------------------------------------------|----|-------------------------------------------------------------------------------------------------------------------------------------------------------------------------------------------------------------------------------------------------------------------------------------------------------------------------------------------------|-------------------------------|-------------|-------------------------------------------------------------------------------------------------------------------------------------------------|
| Caenorhabditis elegans  | utp21 specific wd40 associated domain containing protein                                                           | 0  |                                                                                                                                                                                                                                                                                                                                                 | C:GO:0032040;<br>P:GO:0006364 | -           | -                                                                                                                                               |
| Caenorhabditis elegans  | briggsae cbr-tag-123 protein                                                                                       | 1  | C:GO:0016021                                                                                                                                                                                                                                                                                                                                    | -                             |             | SignalP (SIGNALP)                                                                                                                               |
| Caenorhabditis briggsae | membrane palmitoylated 5 (maguk p55 subfamily member 5)                                                            | 6  | C:GO:0005737;<br>P:GO:0009792;<br>C:GO:0005886;<br>F:GO:0005515;<br>P:GO:0040010;<br>C:GO:0005634                                                                                                                                                                                                                                               | -                             |             | IPR001452; IPR001478; IPR011511;<br>G3DSA:2.30.30.40 (GENE3D),<br>G3DSA:2.30.42.10 (GENE3D),<br>PTHR23122 (PANTHER),<br>PTHR23122:SF5 (PANTHER) |
| Caenorhabditis briggsae | membrane palmitoylated 5 (maguk p55 subfamily member 5)                                                            | 6  | C:GO:0005737;<br>P:GO:0009792;<br>C:GO:0005886;<br>F:GO:0005515;<br>P:GO:0040010;<br>C:GO:0005634                                                                                                                                                                                                                                               | -                             |             | IPR001452; IPR001478; IPR011511;<br>G3DSA:2.30.30.40 (GENE3D),<br>G3DSA:2.30.42.10 (GENE3D),<br>PTHR23122 (PANTHER),<br>PTHR23122:SF5 (PANTHER) |
| Caenorhabditis elegans  | uncharacterized protein                                                                                            | 3  | F:GO:0004222;<br>P:GO:0006508;<br>F:GO:0008270                                                                                                                                                                                                                                                                                                  | -                             | EC:3.4.24.0 | IPR007863; IPR011237; IPR011249;<br>IPR011765; PTHR11851 (PANTHER),<br>PTHR11851:SF68 (PANTHER)                                                 |
| Caenorhabditis elegans  | ryanodine receptor 2                                                                                               | 20 | F:GO:0005219;<br>P:GO:0032026;<br>C:GO:0005792;<br>P:GO:0006816;<br>C:GO:0019717;<br>P:GO:0051592;<br>F:GO:0051018;<br>F:GO:0005509;<br>C:GO:0016021;<br>C:GO:0033017;<br>P:GO:0051480;<br>P:GO:0006629;<br>C:GO:0043234;<br>P:GO:0042493;<br>P:GO:0050794;<br>C:GO:0030018;<br>P:GO:0055085;<br>F:GO:0004872;<br>P:GO:0007584;<br>P:GO:0031000 | -                             |             | IPR001870; IPR003877; IPR008985;<br>IPR015925; PTHR13715:SF11<br>(PANTHER)                                                                      |
| Brugia malayi           | mediator complex subunit rgr-1                                                                                     | 5  | P:GO:0040007;<br>P:GO:0045449;<br>P:GO:0002119;<br>P:GO:0009792;<br>C:GO:0005634                                                                                                                                                                                                                                                                | -                             |             | IPR013947; PTHR12809 (PANTHER)                                                                                                                  |
| Brugia malayi           | mediator complex subunit rgr-1                                                                                     | 5  | P:GO:0040007;<br>P:GO:0045449;<br>P:GO:0002119;<br>P:GO:0009792;<br>C:GO:0005634                                                                                                                                                                                                                                                                | -                             |             | IPR013947; PTHR12809 (PANTHER)                                                                                                                  |
| Brugia malayi           | mediator complex subunit rgr-1                                                                                     | 5  | P:GO:0040007;<br>P:GO:0045449;<br>P:GO:0002119;<br>P:GO:0009792;<br>C:GO:0005634                                                                                                                                                                                                                                                                | -                             |             | IPR013947; PTHR12809 (PANTHER)                                                                                                                  |
| Caenorhabditis briggsae | alanine-glyoxylate aminotransferase (oxalosis i hyperoxaluria i glycolicaciduria serine-pyruvate aminotransferase) | 2  | P:GO:0008152;<br>F:GO:0008483                                                                                                                                                                                                                                                                                                                   | -                             | EC:2.6.1.0  | IPR015421; IPR015424; PTHR21152<br>(PANTHER), PTHR21152:SF5<br>(PANTHER), SignalP (SIGNALP)                                                     |

|                                |                                                                  |  |    |                                                                                                                                                                       |                                                                                                                                     |             |                                                                                                                                     |
|--------------------------------|------------------------------------------------------------------|--|----|-----------------------------------------------------------------------------------------------------------------------------------------------------------------------|-------------------------------------------------------------------------------------------------------------------------------------|-------------|-------------------------------------------------------------------------------------------------------------------------------------|
| Ancylostoma ceylanicum         | metalloprotease 1 precursor                                      |  | 3  | F:GO:0004222;<br>P:GO:0006508;<br>F:GO:0008270                                                                                                                        | -                                                                                                                                   | EC:3.4.24.0 | IPR001506; IPR006026;<br>G3DSA:3.40.390.10 (GENE3D),<br>PTHR10127 (PANTHER),<br>PTHR10127:SF65 (PANTHER),<br>SSF55486 (SUPERFAMILY) |
| Caenorhabditis elegans         | cdc-42 guanine nucleotide exchange factor family member (cgef-1) |  | 0  |                                                                                                                                                                       | F:GO:0003676;<br>P:GO:0015074;<br>F:GO:0005089;<br>P:GO:0035023;<br>P:GO:0023034;<br>F:GO:0003677;<br>F:GO:0005085;<br>C:GO:0005622 |             | -                                                                                                                                   |
| Loa loa                        | fibroblast growth factor receptor substrate 3                    |  | 2  | P:GO:0009792;<br>P:GO:0000003                                                                                                                                         | -                                                                                                                                   |             | IPR002404; IPR011993; PTHR21258 (PANTHER), SSF50729 (SUPERFAMILY)                                                                   |
| Ciona intestinalis             | phospholipid-transporting atpase 1-like protein                  |  | 5  | F:GO:0043492;<br>F:GO:0005488;<br>F:GO:0022892;<br>F:GO:0016820;<br>C:GO:0016020                                                                                      | -                                                                                                                                   | EC:3.6.3.0  | -                                                                                                                                   |
| -                              | -                                                                |  | 0  |                                                                                                                                                                       |                                                                                                                                     |             | -                                                                                                                                   |
| -                              | -                                                                |  | 0  |                                                                                                                                                                       |                                                                                                                                     |             | -                                                                                                                                   |
| Caenorhabditis elegans         | nitrilase                                                        |  | 3  | F:GO:0016810;<br>P:GO:0000003;<br>P:GO:0006807                                                                                                                        | -                                                                                                                                   |             | IPR000132; IPR003010; PTHR23088 (PANTHER)                                                                                           |
| Caenorhabditis elegans         | sand family protein                                              |  | 0  |                                                                                                                                                                       |                                                                                                                                     |             | IPR004353                                                                                                                           |
| Caenorhabditis elegans         | sand family protein                                              |  | 0  |                                                                                                                                                                       |                                                                                                                                     |             | IPR004353                                                                                                                           |
| Drosophila mojavensis          | kek2 precursor                                                   |  | 0  |                                                                                                                                                                       | F:GO:0005515;<br>C:GO:0005886                                                                                                       |             | -                                                                                                                                   |
| Caenorhabditis elegans         | hypothetical protein F54A3.1 [Caenorhabditis elegans]            |  | 0  |                                                                                                                                                                       |                                                                                                                                     |             | IPR021133                                                                                                                           |
| Candidatus Nitrospira defluvii | atp-dependent protease la                                        |  | 10 | C:GO:0009295;<br>P:GO:0006259;<br>F:GO:0004176;<br>F:GO:0043565;<br>F:GO:0005524;<br>F:GO:0004252;<br>P:GO:0016485;<br>C:GO:0005782;<br>P:GO:0006950;<br>P:GO:0006515 | -                                                                                                                                   | EC:3.4.21.0 | IPR001984; IPR008269; IPR020568;<br>PTHR10046 (PANTHER)                                                                             |
| Loa loa                        | protein ki-se domain containing protein                          |  | 4  | P:GO:0040022;<br>F:GO:0016301;<br>F:GO:0005515;<br>P:GO:0051729                                                                                                       | -                                                                                                                                   |             | IPR000719; IPR011009; IPR017442;<br>G3DSA:1.10.510.10 (GENE3D),<br>PTHR11909 (PANTHER),<br>PTHR11909:SF19 (PANTHER)                 |
| Caenorhabditis elegans         | cg16787 cg16787-pa                                               |  | 0  |                                                                                                                                                                       |                                                                                                                                     |             | IPR018790                                                                                                                           |
| -                              | -                                                                |  | 0  |                                                                                                                                                                       |                                                                                                                                     |             | -                                                                                                                                   |
| -                              | -                                                                |  | 0  |                                                                                                                                                                       |                                                                                                                                     |             | -                                                                                                                                   |
| Loa loa                        | proteolipid protein m6-1                                         |  | 0  |                                                                                                                                                                       |                                                                                                                                     |             | SignalP (SIGNALP)                                                                                                                   |
| -                              | -                                                                |  | 0  |                                                                                                                                                                       |                                                                                                                                     |             | SignalP (SIGNALP)                                                                                                                   |
| Ciona intestinalis             | PREDICTED: hypothetical protein [Cio- intesti-lis]               |  | 0  |                                                                                                                                                                       |                                                                                                                                     |             | -                                                                                                                                   |
| Loa loa                        | plasmid maintenance protein containing protein                   |  | 3  | C:GO:0031224;<br>F:GO:0016740;<br>C:GO:0005783                                                                                                                        | -                                                                                                                                   |             | IPR005599; SignalP (SIGNALP)                                                                                                        |
| -                              | -                                                                |  | 0  |                                                                                                                                                                       |                                                                                                                                     |             | -                                                                                                                                   |

|                                     |                                                            |   |                                                                                                                                                      |                                                                                  |              |                                                                                         |
|-------------------------------------|------------------------------------------------------------|---|------------------------------------------------------------------------------------------------------------------------------------------------------|----------------------------------------------------------------------------------|--------------|-----------------------------------------------------------------------------------------|
| Caenorhabditis briggsae             | Hypothetical protein CBG08796 [Caenorhabditis briggsae]    | 4 | P:GO:0040010;<br>P:GO:0040035;<br>P:GO:0002119;<br>P:GO:0006898                                                                                      | -                                                                                | -            | -                                                                                       |
| -                                   | -                                                          | 0 | -                                                                                                                                                    | -                                                                                | -            | -                                                                                       |
| Caenorhabditis briggsae             | prp38 pre-mr- processing factor 38 domain containing b     | 1 | F:GO:0004437                                                                                                                                         | -                                                                                | -            | IPR005037                                                                               |
| Caenorhabditis elegans              | elegans protein partially confirmed by transcript evidence | 2 | P:GO:0044238;<br>P:GO:0006915                                                                                                                        | -                                                                                | -            | IPR002213; G3DSA:3.40.50.2000 (GENE3D), PTHR11926:SF3 (PANTHER), SSF53756 (SUPERFAMILY) |
| -                                   | -                                                          | 0 | -                                                                                                                                                    | -                                                                                | -            | SignalP (SIGNALP)                                                                       |
| -                                   | -                                                          | 0 | -                                                                                                                                                    | -                                                                                | -            | -                                                                                       |
| -                                   | -                                                          | 0 | -                                                                                                                                                    | -                                                                                | -            | -                                                                                       |
| Caenorhabditis elegans              | domain-containing histone demethylation protein 1d         | 9 | F:GO:0032454;<br>F:GO:0071558;<br>F:GO:0046914;<br>P:GO:0071557;<br>P:GO:0030901;<br>F:GO:0016706;<br>P:GO:0033169;<br>F:GO:0005515;<br>P:GO:0045893 | -                                                                                | EC:1.14.11.0 | IPR003347; PTHR23123 (PANTHER), SSF51197 (SUPERFAMILY)                                  |
| -                                   | -                                                          | 0 | -                                                                                                                                                    | -                                                                                | -            | SignalP (SIGNALP)                                                                       |
| Caenorhabditis elegans              | autophagy-related protein 101                              | 0 | -                                                                                                                                                    | C:GO:0000407;<br>P:GO:0006914;<br>C:GO:0005737;<br>P:GO:0000045;<br>F:GO:0032403 | -            | IPR012445                                                                               |
| Caenorhabditis elegans              | elegans protein partially confirmed by transcript evidence | 1 | F:GO:0005515                                                                                                                                         | -                                                                                | -            | -                                                                                       |
| Caenorhabditis elegans              | briggsae cbr-nlp-36 protein                                | 1 | F:GO:0005515                                                                                                                                         | -                                                                                | -            | SignalP (SIGNALP)                                                                       |
| -                                   | -                                                          | 0 | -                                                                                                                                                    | -                                                                                | -            | SignalP (SIGNALP)                                                                       |
| -                                   | -                                                          | 0 | -                                                                                                                                                    | -                                                                                | -            | -                                                                                       |
| Vanderwaltozyma polyspora DSM 70294 | mucin 30e                                                  | 1 | F:GO:0005488                                                                                                                                         | -                                                                                | -            | -                                                                                       |

|                                     |                                               |   |                                                                                                                                                                                                                                                                                                                                                                                                                                                                                                          |   |                                                                                                                                                                         |
|-------------------------------------|-----------------------------------------------|---|----------------------------------------------------------------------------------------------------------------------------------------------------------------------------------------------------------------------------------------------------------------------------------------------------------------------------------------------------------------------------------------------------------------------------------------------------------------------------------------------------------|---|-------------------------------------------------------------------------------------------------------------------------------------------------------------------------|
| Vanderwaltozyma polyspora DSM 70294 | mucin 30e                                     | 0 | P:GO:0006030;<br>P:GO:0000902;<br>F:GO:0016787;<br>P:GO:0006468;<br>F:GO:0004553;<br>P:GO:0005975;<br>F:GO:0008658;<br>C:GO:0030016;<br>F:GO:0005524;<br>F:GO:0016301;<br>F:GO:0008237;<br>C:GO:0016021;<br>C:GO:0016020;<br>F:GO:0031432;<br>F:GO:0004674;<br>F:GO:0008061;<br>C:GO:0005618;<br>F:GO:0004568;<br>F:GO:0008233;<br>F:GO:0004672;<br>F:GO:0016798;<br>F:GO:0043169;<br>F:GO:0004222;<br>P:GO:0008152;<br>F:GO:0003824;<br>F:GO:0000166;<br>P:GO:0007599;<br>F:GO:0008237;<br>F:GO:0008270 | - | -                                                                                                                                                                       |
| Loa loa                             | tata binding protein associated factor        | 0 |                                                                                                                                                                                                                                                                                                                                                                                                                                                                                                          |   | -                                                                                                                                                                       |
|                                     | -                                             | 0 |                                                                                                                                                                                                                                                                                                                                                                                                                                                                                                          |   | SignalP (SIGNALP)                                                                                                                                                       |
| Caenorhabditis elegans              | transmembrane cell adhesion receptor mua-3    | 4 | C:GO:0016021;<br>F:GO:0004872;<br>F:GO:0005509;<br>F:GO:0005515                                                                                                                                                                                                                                                                                                                                                                                                                                          | - | IPR000082; IPR000152; IPR000742;<br>IPR006209; IPR006210;<br>G3DSA:2.10.25.10 (GENE3D),<br>PTHR11201 (PANTHER),<br>PTHR11201:SF245 (PANTHER),<br>SSF57196 (SUPERFAMILY) |
| Caenorhabditis elegans              | d-aspartate oxidase                           | 6 | P:GO:0009792;<br>P:GO:0055114;<br>F:GO:0003884;<br>F:GO:0005488;<br>F:GO:0008445;<br>F:GO:0047821                                                                                                                                                                                                                                                                                                                                                                                                        | - | EC:1.4.3.3;<br>EC:1.4.3.1;<br>EC:1.4.3.7<br>PTHR11530 (PANTHER)                                                                                                         |
| Caenorhabditis briggsae             | mitochondrial r- polymerase                   | 4 | P:GO:0040010;<br>P:GO:0000003;<br>P:GO:0007413;<br>P:GO:0006898                                                                                                                                                                                                                                                                                                                                                                                                                                          | - | IPR002092; G3DSA:1.10.1320.10<br>(GENE3D), SSF56672 (SUPERFAMILY)                                                                                                       |
| Caenorhabditis elegans              | proteasome a-type and b-type family protein   | 9 | P:GO:0009792;<br>P:GO:0002119;<br>F:GO:0004175;<br>C:GO:0005839;<br>P:GO:0000003;<br>P:GO:0008340;<br>P:GO:0040011;<br>P:GO:0040007;<br>P:GO:0051603                                                                                                                                                                                                                                                                                                                                                     | - | -                                                                                                                                                                       |
| Caenorhabditis elegans              | phosphatase regulatory subunit family protein | 0 |                                                                                                                                                                                                                                                                                                                                                                                                                                                                                                          |   | IPR005036; PTHR12307 (PANTHER)                                                                                                                                          |



|                         |                                                   |    |                                                                                                                                                                       |   |                             |                                                                                                                                              |
|-------------------------|---------------------------------------------------|----|-----------------------------------------------------------------------------------------------------------------------------------------------------------------------|---|-----------------------------|----------------------------------------------------------------------------------------------------------------------------------------------|
| Brugia malayi           | d--directed r- polymerases and iii subunit rpabc5 | 10 | F:GO:0003899;<br>F:GO:0008270;<br>P:GO:0006356;<br>F:GO:0004672;<br>P:GO:0006367;<br>P:GO:0008380;<br>C:GO:0005665;<br>F:GO:0003677;<br>P:GO:0006368;<br>P:GO:0009792 | - | EC:2.7.7.6                  | -                                                                                                                                            |
| -                       | -                                                 | 0  |                                                                                                                                                                       |   |                             | -                                                                                                                                            |
| -                       | -                                                 | 0  |                                                                                                                                                                       |   |                             | -                                                                                                                                            |
| -                       | -                                                 | 0  |                                                                                                                                                                       |   |                             | IPR008518                                                                                                                                    |
| Caenorhabditis elegans  | briggsae cbr-dhs-7 protein                        | 3  | P:GO:0008152;<br>F:GO:0016491;<br>F:GO:0005488                                                                                                                        | - |                             | IPR002198; IPR002347; IPR016040;<br>PTHR19410:SF99 (PANTHER),<br>SSF51735 (SUPERFAMILY)                                                      |
| -                       | -                                                 | 0  |                                                                                                                                                                       |   |                             | -                                                                                                                                            |
| -                       | -                                                 | 0  |                                                                                                                                                                       |   |                             | -                                                                                                                                            |
| -                       | -                                                 | 0  |                                                                                                                                                                       |   |                             | -                                                                                                                                            |
| -                       | -                                                 | 0  |                                                                                                                                                                       |   |                             | -                                                                                                                                            |
| Caenorhabditis elegans  | malic enzyme -dp(+)- mitochondrial                | 10 | P:GO:0009060;<br>F:GO:0046872;<br>P:GO:0006090;<br>F:GO:0051287;<br>C:GO:0005759;<br>F:GO:0016619;<br>P:GO:0006108;<br>P:GO:0055114;<br>F:GO:0004473;<br>P:GO:0006800 | - | EC:1.1.1.38;<br>EC:1.1.1.40 | IPR012302; IPR016040; PTHR23406<br>(PANTHER), PTHR23406:SF2<br>(PANTHER), SSF51735 (SUPERFAMILY)                                             |
| Caenorhabditis briggsae | cell cycle control atpase                         | 5  | P:GO:0006357;<br>F:GO:0016455;<br>C:GO:0016592;<br>F:GO:0003824;<br>F:GO:0030170                                                                                      | - |                             | IPR011063; IPR014729; PTHR11807<br>(PANTHER), PTHR11807:SF4<br>(PANTHER), SSF52402 (SUPERFAMILY)                                             |
| Loa loa                 | traf interacting protein                          | 3  | P:GO:0006917;<br>P:GO:0008283;<br>F:GO:0005515                                                                                                                        | - |                             | IPR001841; IPR007087; IPR013083;<br>IPR018957; PTHR22937 (PANTHER),<br>PTHR22937:SF6 (PANTHER), SignalP<br>(SIGNALP), SSF57850 (SUPERFAMILY) |
| -                       | -                                                 | 0  |                                                                                                                                                                       |   |                             | SignalP (SIGNALP)                                                                                                                            |
| Ailuropoda melanoleuca  | ribosomal protein s13                             | 7  | F:GO:0003729;<br>C:GO:0005730;<br>F:GO:0003735;<br>P:GO:0006414;<br>C:GO:0022627;<br>P:GO:0033119;<br>F:GO:0005515                                                    | - |                             | IPR012606; PTHR11885 (PANTHER),<br>PTHR11885:SF1 (PANTHER)                                                                                   |
| -                       | -                                                 | 0  |                                                                                                                                                                       |   |                             | -                                                                                                                                            |
| -                       | -                                                 | 0  |                                                                                                                                                                       |   |                             | -                                                                                                                                            |
| Caenorhabditis elegans  | glutaredoxin 2                                    | 4  | P:GO:0045454;<br>C:GO:0043231;<br>C:GO:0044444;<br>F:GO:0015035                                                                                                       | - |                             | IPR002109; IPR012335; IPR012336;<br>IPR014025; PTHR10168 (PANTHER),<br>PTHR10168:SF19 (PANTHER)                                              |
| -                       | -                                                 | 0  |                                                                                                                                                                       |   |                             | -                                                                                                                                            |

|                         |                                                                         |    |                                                                                                                                                                                                                                                            |              |             |                                                                                                             |
|-------------------------|-------------------------------------------------------------------------|----|------------------------------------------------------------------------------------------------------------------------------------------------------------------------------------------------------------------------------------------------------------|--------------|-------------|-------------------------------------------------------------------------------------------------------------|
| Caenorhabditis elegans  | suppressor of ypt1                                                      | 5  | P:GO:0031101;<br>P:GO:0018996;<br>P:GO:0006904;<br>P:GO:0000003;<br>P:GO:0006898                                                                                                                                                                           | -            |             | IPR001619; G3DSA:3.40.50.2060 (GENE3D), PTHR11679:SF2 (PANTHER)                                             |
|                         | -                                                                       | 0  |                                                                                                                                                                                                                                                            |              |             | -                                                                                                           |
| Pongo abelii            | ubiquitin-like modifier activating enzyme 1                             | 6  | P:GO:0008219;<br>F:GO:0005524;<br>F:GO:0008641;<br>F:GO:0005515;<br>P:GO:0006464;<br>F:GO:0016874                                                                                                                                                          | -            |             | IPR000127; IPR009036; IPR016040; IPR018965; PTHR10953 (PANTHER), PTHR10953:SF1 (PANTHER), SignalP (SIGNALP) |
|                         | -                                                                       | 0  |                                                                                                                                                                                                                                                            |              |             | -                                                                                                           |
|                         | -                                                                       | 0  |                                                                                                                                                                                                                                                            |              |             | SignalP (SIGNALP)                                                                                           |
|                         | -                                                                       | 0  |                                                                                                                                                                                                                                                            |              |             | -                                                                                                           |
| Caenorhabditis elegans  | elegans protein partially confirmed by transcript evidence              | 0  |                                                                                                                                                                                                                                                            | F:GO:0005488 |             | IPR003961; IPR008957; IPR013783; PRO0014 (PRINTS), PTHR19900 (PANTHER), PTHR19900:SF7 (PANTHER)             |
| Caenorhabditis briggsae | fatty acid synthase                                                     | 15 | F:GO:0008144;<br>F:GO:0004312;<br>P:GO:0006633;<br>F:GO:0016788;<br>F:GO:0008270;<br>F:GO:0016829;<br>C:GO:0005625;<br>C:GO:0005739;<br>P:GO:0055114;<br>P:GO:0006084;<br>F:GO:0000036;<br>F:GO:0016491;<br>F:GO:0070402;<br>F:GO:0042803;<br>C:GO:0042587 | -            | EC:2.3.1.85 | -                                                                                                           |
| Caenorhabditis briggsae | briggsae cbr-pad-1 protein                                              | 1  | P:GO:0006810                                                                                                                                                                                                                                               | -            |             | -                                                                                                           |
| Kordia algicida OT-1    | late embryogenesis abundant protein                                     | 0  |                                                                                                                                                                                                                                                            | F:GO:0032934 |             | PTHR23241 (PANTHER), PTHR23241:SF11 (PANTHER)                                                               |
| Kordia algicida OT-1    | conserved domain protein                                                | 0  |                                                                                                                                                                                                                                                            |              |             | PTHR23241 (PANTHER), PTHR23241:SF11 (PANTHER)                                                               |
|                         | -                                                                       | 0  |                                                                                                                                                                                                                                                            |              |             | -                                                                                                           |
|                         | -                                                                       | 0  |                                                                                                                                                                                                                                                            |              |             | -                                                                                                           |
| Caenorhabditis elegans  | mediator complex subunit 4                                              | 9  | P:GO:0018991;<br>P:GO:0006357;<br>P:GO:0007517;<br>F:GO:0016455;<br>C:GO:0016592;<br>F:GO:0003713;<br>P:GO:0002009;<br>P:GO:0009792;<br>P:GO:0048813                                                                                                       | -            |             | IPR019258; PTHR13208 (PANTHER)                                                                              |
| Caenorhabditis elegans  | pdf (arthropod pigment dispersing factor) homolog family member (pdf-1) | 0  |                                                                                                                                                                                                                                                            |              |             | -                                                                                                           |
|                         | -                                                                       | 0  |                                                                                                                                                                                                                                                            |              |             | SignalP (SIGNALP)                                                                                           |
| Caenorhabditis elegans  | domain member 1b                                                        | 3  | F:GO:0005085;<br>C:GO:0005622;<br>P:GO:0051056                                                                                                                                                                                                             | -            |             | IPR000651; IPR008937; G3DSA:1.20.870.10 (GENE3D), PTHR23113:SF20 (PANTHER)                                  |
|                         | -                                                                       | 0  |                                                                                                                                                                                                                                                            |              |             | -                                                                                                           |
|                         | -                                                                       | 0  |                                                                                                                                                                                                                                                            |              |             | -                                                                                                           |

|                         |                                                       |    |                                                                                                                                                                                                                                           |                                                                                                   |            |                                                                                                           |
|-------------------------|-------------------------------------------------------|----|-------------------------------------------------------------------------------------------------------------------------------------------------------------------------------------------------------------------------------------------|---------------------------------------------------------------------------------------------------|------------|-----------------------------------------------------------------------------------------------------------|
| Caenorhabditis elegans  | hypothetical protein T24B8.7 [Caenorhabditis elegans] | 0  |                                                                                                                                                                                                                                           |                                                                                                   |            | -                                                                                                         |
| Caenorhabditis elegans  | hypothetical kda protein in chromosome                | 2  | P:GO:0040010;<br>P:GO:0009792                                                                                                                                                                                                             | -                                                                                                 |            | -                                                                                                         |
| Caenorhabditis elegans  | hypothetical kda protein in chromosome                | 2  | P:GO:0040010;<br>P:GO:0009792                                                                                                                                                                                                             | -                                                                                                 |            | SignalP (SIGNALP)                                                                                         |
| Caenorhabditis briggsae | cd63 antigen                                          | 0  |                                                                                                                                                                                                                                           | C:GO:0016021;<br>C:GO:0016020                                                                     |            | IPR008952; IPR018499;<br>G3DSA:1.10.1450.10 (GENE3D),<br>PTHR19282 (PANTHER),<br>PTHR19282:SF13 (PANTHER) |
| Brugia malayi           | 5'-nucleotidase                                       | 2  | F:GO:0016787;<br>F:GO:0005488                                                                                                                                                                                                             | -                                                                                                 |            | IPR006434; PF05822 (PFAM),<br>SSF56784 (SUPERFAMILY)                                                      |
|                         | -                                                     | 0  |                                                                                                                                                                                                                                           |                                                                                                   |            | -                                                                                                         |
|                         | -                                                     | 0  |                                                                                                                                                                                                                                           |                                                                                                   |            | -                                                                                                         |
| Homo sapiens            | -dh dehydroge-se                                      | 14 | C:GO:0005654;<br>P:GO:0017148;<br>F:GO:0005515;<br>F:GO:0008137;<br>P:GO:0030262;<br>C:GO:0016021;<br>P:GO:0045892;<br>P:GO:0022900;<br>P:GO:0008624;<br>C:GO:0005747;<br>P:GO:0030308;<br>P:GO:0006606;<br>F:GO:0005524;<br>P:GO:0006800 | -                                                                                                 | EC:1.6.5.3 | -                                                                                                         |
| Caenorhabditis briggsae | elegans protein confirmed by transcript evidence      | 0  |                                                                                                                                                                                                                                           |                                                                                                   |            | -                                                                                                         |
| Caenorhabditis briggsae | briggsae cbr-ttr-45 protein                           | 0  |                                                                                                                                                                                                                                           |                                                                                                   |            | IPR001534; SignalP (SIGNALP)                                                                              |
| Caenorhabditis briggsae | elegans protein confirmed by transcript evidence      | 0  |                                                                                                                                                                                                                                           |                                                                                                   |            | IPR001534; SignalP (SIGNALP)                                                                              |
|                         | -                                                     | 0  |                                                                                                                                                                                                                                           |                                                                                                   |            | -                                                                                                         |
|                         | -                                                     | 0  |                                                                                                                                                                                                                                           |                                                                                                   |            | -                                                                                                         |
| Tetraodon nigroviridis  | ca-licular multispecific organic anion transporter 1  | 2  | F:GO:0003824;<br>C:GO:0016020                                                                                                                                                                                                             | -                                                                                                 |            | IPR005291; PTHR19242 (PANTHER)                                                                            |
| Caenorhabditis elegans  | zinc c2h2 type family protein                         | 6  | P:GO:0009792;<br>P:GO:0000003;<br>C:GO:0005622;<br>P:GO:0040007;<br>F:GO:0008270;<br>P:GO:0002119                                                                                                                                         | -                                                                                                 |            | IPR015880; PTHR23224 (PANTHER),<br>PTHR23224:SF469 (PANTHER),<br>SSF57667 (SUPERFAMILY)                   |
| Branchiostoma floridae  | homologous-pairing protein 2 homolog                  | 0  |                                                                                                                                                                                                                                           | F:GO:0004872;<br>P:GO:0008150;<br>P:GO:0006310;<br>P:GO:0007126;<br>C:GO:0005634;<br>C:GO:0005575 |            | IPR010776                                                                                                 |
| Branchiostoma floridae  | homologous-pairing protein 2 homolog                  | 0  |                                                                                                                                                                                                                                           | F:GO:0004872;<br>P:GO:0008150;<br>P:GO:0006310;<br>P:GO:0007126;<br>C:GO:0005634;<br>C:GO:0005575 |            | IPR010776                                                                                                 |

|                         |                                                         |    |                                                                                                                                                                                                                                                                                                                                                                  |              |             |                                                                             |
|-------------------------|---------------------------------------------------------|----|------------------------------------------------------------------------------------------------------------------------------------------------------------------------------------------------------------------------------------------------------------------------------------------------------------------------------------------------------------------|--------------|-------------|-----------------------------------------------------------------------------|
| Medicago truncatula     | gtp-binding protein ypt3                                | 8  | C:GO:0005768;<br>F:GO:0005525;<br>C:GO:0009504;<br>C:GO:0005886;<br>P:GO:0000910;<br>F:GO:0016787;<br>P:GO:0007264;<br>P:GO:0015031                                                                                                                                                                                                                              | -            | -           |                                                                             |
|                         | -                                                       | 0  |                                                                                                                                                                                                                                                                                                                                                                  |              |             | -                                                                           |
|                         | -                                                       | 0  |                                                                                                                                                                                                                                                                                                                                                                  |              |             | -                                                                           |
|                         | -                                                       | 0  |                                                                                                                                                                                                                                                                                                                                                                  |              |             | -                                                                           |
| Caenorhabditis elegans  | isocitrate dehydroge-se                                 | 21 | P:GO:0006979;<br>P:GO:0006097;<br>C:GO:0005829;<br>P:GO:0008340;<br>P:GO:0048545;<br>P:GO:0006103;<br>C:GO:0005777;<br>C:GO:0005625;<br>C:GO:0005739;<br>P:GO:0008585;<br>P:GO:0055114;<br>P:GO:0006749;<br>P:GO:0006099;<br>F:GO:0051287;<br>F:GO:0004450;<br>F:GO:0000287;<br>P:GO:0014070;<br>P:GO:0006740;<br>P:GO:0006102;<br>F:GO:0042803;<br>F:GO:0050661 | -            | EC:1.1.1.42 | -                                                                           |
| Caenorhabditis elegans  | hypothetical protein C34G6.1 [Caenorhabditis elegans]   | 1  | F:GO:0005488                                                                                                                                                                                                                                                                                                                                                     | -            |             | -                                                                           |
| Caenorhabditis elegans  | furry homolog                                           | 1  | F:GO:0005515                                                                                                                                                                                                                                                                                                                                                     | -            |             | PTHR12295 (PANTHER),<br>PTHR12295:SF6 (PANTHER)                             |
|                         | -                                                       | 0  |                                                                                                                                                                                                                                                                                                                                                                  |              |             | -                                                                           |
| Caenorhabditis elegans  | briggsae cbr-tag-281 protein                            | 0  |                                                                                                                                                                                                                                                                                                                                                                  |              |             | IPR019319; PTHR13411 (PANTHER)                                              |
| Caenorhabditis elegans  | protein fam20c                                          | 0  |                                                                                                                                                                                                                                                                                                                                                                  |              |             | IPR009581; PTHR12450:SF8<br>(PANTHER), PF06702 (PFAM), SignalP<br>(SIGNALP) |
| Haemonchus contortus    | microsomal aminopeptidase                               | 5  | C:GO:0016021;<br>F:GO:0008237;<br>P:GO:0006508;<br>F:GO:0008270;<br>F:GO:0004177                                                                                                                                                                                                                                                                                 | -            | EC:3.4.11.0 | IPR001930; PTHR11533:SF29<br>(PANTHER)                                      |
|                         | -                                                       | 0  |                                                                                                                                                                                                                                                                                                                                                                  |              |             | SignalP (SIGNALP)                                                           |
| Caenorhabditis elegans  | btb poz domain containing protein                       | 0  |                                                                                                                                                                                                                                                                                                                                                                  | F:GO:0005515 |             | -                                                                           |
|                         | -                                                       | 0  |                                                                                                                                                                                                                                                                                                                                                                  |              |             | -                                                                           |
| Caenorhabditis briggsae | Hypothetical protein CBG02620 [Caenorhabditis briggsae] | 0  |                                                                                                                                                                                                                                                                                                                                                                  |              |             | -                                                                           |
| Caenorhabditis elegans  | hypothetical protein K12B6.4 [Caenorhabditis elegans]   | 0  |                                                                                                                                                                                                                                                                                                                                                                  |              |             | -                                                                           |
|                         | -                                                       | 0  |                                                                                                                                                                                                                                                                                                                                                                  |              |             | -                                                                           |
|                         | -                                                       | 0  |                                                                                                                                                                                                                                                                                                                                                                  |              |             | -                                                                           |
| Caenorhabditis briggsae | inositol -trisphosphate receptor                        | 5  | P:GO:0006816;<br>F:GO:0005220;<br>P:GO:0055085;<br>C:GO:0016021;<br>C:GO:0005783                                                                                                                                                                                                                                                                                 | -            |             | IPR000699; IPR015925;<br>PTHR13715:SF2 (PANTHER)                            |

|                         |                                                        |    |                                                                                                                                                                                        |                               |                                                                                                                                                                                                             |
|-------------------------|--------------------------------------------------------|----|----------------------------------------------------------------------------------------------------------------------------------------------------------------------------------------|-------------------------------|-------------------------------------------------------------------------------------------------------------------------------------------------------------------------------------------------------------|
|                         | -                                                      | 0  |                                                                                                                                                                                        |                               | SignalP (SIGNALP)                                                                                                                                                                                           |
| Caenorhabditis elegans  | elegans protein confirmed by transcript evidence       | 0  |                                                                                                                                                                                        | F:GO:0005515                  | -                                                                                                                                                                                                           |
|                         | -                                                      | 0  |                                                                                                                                                                                        |                               | -                                                                                                                                                                                                           |
| Caenorhabditis elegans  | elegans protein confirmed by transcript evidence       | 0  |                                                                                                                                                                                        | F:GO:0005515                  | -                                                                                                                                                                                                           |
|                         | -                                                      | 0  |                                                                                                                                                                                        |                               | SignalP (SIGNALP)                                                                                                                                                                                           |
|                         | -                                                      | 0  |                                                                                                                                                                                        |                               | -                                                                                                                                                                                                           |
|                         | -                                                      | 0  |                                                                                                                                                                                        |                               | -                                                                                                                                                                                                           |
|                         | -                                                      | 0  |                                                                                                                                                                                        |                               | -                                                                                                                                                                                                           |
| Caenorhabditis elegans  | briggsae cbr-tw-2 protein                              | 4  | C:GO:0016021;<br>P:GO:0006813;<br>F:GO:0005267;<br>P:GO:0055085                                                                                                                        | -                             | IPR013099; G3DSA:1.10.287.70 (GENE3D), PTHR11003 (PANTHER), PTHR11003:SF7 (PANTHER), SignalP (SIGNALP), SSF81324 (SUPERFAMILY)                                                                              |
| Caenorhabditis elegans  | hypothetical protein F55E10.7 [Caenorhabditis elegans] | 0  |                                                                                                                                                                                        |                               | -                                                                                                                                                                                                           |
| Caenorhabditis briggsae | thioredoxin-like protein 4a                            | 8  | C:GO:0071011;<br>P:GO:0000245;<br>P:GO:0007052;<br>P:GO:0051301;<br>F:GO:0005515;<br>P:GO:0007067;<br>C:GO:0005682;<br>C:GO:0005737                                                    | -                             | IPR004123; IPR012335; IPR012336                                                                                                                                                                             |
|                         | -                                                      | 0  |                                                                                                                                                                                        |                               | -                                                                                                                                                                                                           |
| Caenorhabditis briggsae | protein pelota homolog                                 | 4  | F:GO:0005488;<br>F:GO:0004518;<br>P:GO:0006412;<br>C:GO:0044424                                                                                                                        | -                             | EC:3.6.5.3<br>IPR004405; IPR005142;<br>G3DSA:3.30.1330.30 (GENE3D),<br>SSF55315 (SUPERFAMILY)                                                                                                               |
| Caenorhabditis elegans  | lung seven transmembrane receptor family protein       | 0  |                                                                                                                                                                                        | F:GO:0004872;<br>C:GO:0016021 | -                                                                                                                                                                                                           |
| Caenorhabditis elegans  | lon peptidase peroxisomal                              | 11 | F:GO:0008236;<br>F:GO:0000166;<br>P:GO:0006465;<br>P:GO:0006139;<br>P:GO:0014070;<br>P:GO:0006508;<br>F:GO:0016887;<br>F:GO:0019899;<br>C:GO:0005634;<br>C:GO:0005782;<br>P:GO:0044248 | -                             | IPR001984; IPR003111; IPR003593;<br>IPR003959; IPR008268; IPR008269;<br>IPR015947; IPR020568;<br>G3DSA:1.10.8.60 (GENE3D),<br>G3DSA:3.40.50.300 (GENE3D),<br>PTHR10046 (PANTHER), SSF52540<br>(SUPERFAMILY) |
| Caenorhabditis briggsae | mitochondrial ribosomal protein                        | 8  | P:GO:0009792;<br>P:GO:0002119;<br>C:GO:0005840;<br>F:GO:0003735;<br>P:GO:0040010;<br>P:GO:0000003;<br>P:GO:0006412;<br>C:GO:0005739                                                    | -                             | EC:3.6.5.3<br>SignalP (SIGNALP)                                                                                                                                                                             |
| Caenorhabditis elegans  | toll-interacting protein                               | 5  | F:GO:0035325;<br>P:GO:0016310;<br>C:GO:0044464;<br>P:GO:0007165;<br>F:GO:0019900                                                                                                       | -                             | IPR000008; IPR003892; IPR008973;<br>IPR009060; G3DSA:1.10.8.10<br>(GENE3D), G3DSA:2.60.40.150<br>(GENE3D)                                                                                                   |

|                         |                                                               |    |                                                                                                                                                                                                                          |                                                |            |                                                                                              |
|-------------------------|---------------------------------------------------------------|----|--------------------------------------------------------------------------------------------------------------------------------------------------------------------------------------------------------------------------|------------------------------------------------|------------|----------------------------------------------------------------------------------------------|
| Homo sapiens            | galactoside- 3 binding protein                                | 9  | F:GO:0005044;<br>C:GO:0005615;<br>F:GO:0005515;<br>P:GO:0007155;<br>P:GO:0007165;<br>C:GO:0016020;<br>C:GO:0005634;<br>C:GO:0005578;<br>P:GO:0006968                                                                     | -                                              | -          |                                                                                              |
|                         | -                                                             | 0  |                                                                                                                                                                                                                          |                                                |            |                                                                                              |
| Caligus rogercresseyi   | beta-ureidopropio-se                                          | 5  | P:GO:0006807;<br>C:GO:0005829;<br>F:GO:0046872;<br>P:GO:0000003;<br>F:GO:0003837                                                                                                                                         | -                                              | EC:3.5.1.6 | IPR003010; PTHR23088 (PANTHER)                                                               |
| Caenorhabditis briggsae | Hypothetical protein CBG12788 [Caenorhabditis briggsae]       | 0  |                                                                                                                                                                                                                          | F:GO:0046872;<br>P:GO:0045132;<br>F:GO:0008270 |            | IPR001781; PTHR18973 (PANTHER),<br>PTHR18973:SF98 (PANTHER)                                  |
| Brugia malayi           | lim domain containing protein                                 | 1  | F:GO:0008270                                                                                                                                                                                                             |                                                |            |                                                                                              |
|                         | -                                                             | 0  |                                                                                                                                                                                                                          |                                                |            | SignalP (SIGNALP)                                                                            |
| Caenorhabditis briggsae | briggsae cbr-dnj-1 protein                                    | 4  | P:GO:0006457;<br>P:GO:0040011;<br>F:GO:0031072;<br>F:GO:0051082                                                                                                                                                          | -                                              |            |                                                                                              |
|                         | -                                                             | 0  |                                                                                                                                                                                                                          |                                                |            |                                                                                              |
|                         | -                                                             | 0  |                                                                                                                                                                                                                          |                                                |            |                                                                                              |
|                         | -                                                             | 0  |                                                                                                                                                                                                                          |                                                |            |                                                                                              |
| Caenorhabditis elegans  | elegans protein confirmed by transcript evidence              | 3  | C:GO:0005829;<br>F:GO:0019901;<br>F:GO:0019887                                                                                                                                                                           | -                                              |            | IPR002110; IPR020683; PR01415<br>(PRINTS), PTHR18958 (PANTHER),<br>PTHR18958:SF283 (PANTHER) |
| Loa loa                 | novel protein vertebrate denn madd domain containing 1 family | 0  |                                                                                                                                                                                                                          |                                                |            | IPR005113; PTHR13196 (PANTHER)                                                               |
|                         | -                                                             | 0  |                                                                                                                                                                                                                          |                                                |            |                                                                                              |
|                         | -                                                             | 0  |                                                                                                                                                                                                                          |                                                |            |                                                                                              |
|                         | -                                                             | 0  |                                                                                                                                                                                                                          |                                                |            |                                                                                              |
| Brugia malayi           | rab gtpase activating protein 1-like                          | 6  | F:GO:0005097;<br>P:GO:0032880;<br>C:GO:0005769;<br>P:GO:0032313;<br>C:GO:0005794;<br>C:GO:0005634                                                                                                                        | -                                              |            | IPR000195; G3DSA:1.10.8.270<br>(GENE3D), PTHR22957 (PANTHER),<br>PTHR22957:SF40 (PANTHER)    |
| Homo sapiens            | heat shock protein hsp 90-beta                                | 13 | C:GO:0005739;<br>P:GO:0006457;<br>F:GO:0030235;<br>P:GO:0060334;<br>P:GO:0001890;<br>C:GO:0042470;<br>F:GO:0005524;<br>P:GO:0032435;<br>F:GO:0030911;<br>P:GO:0060338;<br>F:GO:0051082;<br>P:GO:0006986;<br>P:GO:0045429 | -                                              |            | IPR001404; IPR020576; SSF110942<br>(SUPERFAMILY)                                             |
|                         | -                                                             | 0  |                                                                                                                                                                                                                          |                                                |            |                                                                                              |
|                         | -                                                             | 0  |                                                                                                                                                                                                                          |                                                |            |                                                                                              |

|                         |                                                            |    |                                                                                                                                                                       |                               |                             |                                                                                                                                                        |
|-------------------------|------------------------------------------------------------|----|-----------------------------------------------------------------------------------------------------------------------------------------------------------------------|-------------------------------|-----------------------------|--------------------------------------------------------------------------------------------------------------------------------------------------------|
| Loa loa                 | briggsae cbr-let-19 protein                                | 3  | P:GO:0050794;<br>P:GO:0009792;<br>P:GO:0006366                                                                                                                        | -                             |                             | PTHR12950 (PANTHER),<br>PTHR12950:SF3 (PANTHER)                                                                                                        |
| Loa loa                 | briggsae cbr-let-19 protein                                | 3  | P:GO:0050794;<br>P:GO:0009792;<br>P:GO:0006366                                                                                                                        | -                             |                             | PTHR12950 (PANTHER),<br>PTHR12950:SF3 (PANTHER)                                                                                                        |
| Loa loa                 | briggsae cbr-let-19 protein                                | 3  | P:GO:0050794;<br>P:GO:0009792;<br>P:GO:0006366                                                                                                                        | -                             |                             | PTHR12950 (PANTHER),<br>PTHR12950:SF3 (PANTHER)                                                                                                        |
| Caenorhabditis elegans  | uncoordi-ted family member (unc-26)                        | 10 | C:GO:0012506;<br>P:GO:0050803;<br>F:GO:0000166;<br>F:GO:0004445;<br>F:GO:0003723;<br>P:GO:0016311;<br>F:GO:0004439;<br>C:GO:0043195;<br>P:GO:0048790;<br>P:GO:0048488 | -                             | EC:3.1.3.56;<br>EC:3.1.3.36 | IPR005135; G3DSA:3.60.10.10<br>(GENE3D), PTHR11200 (PANTHER),<br>PTHR11200:SF10 (PANTHER)                                                              |
| Caenorhabditis briggsae | glucose-6-phosphate dehydroge-se                           | 4  | P:GO:0006006;<br>F:GO:0004345;<br>P:GO:0055114;<br>F:GO:0005488                                                                                                       | -                             | EC:1.1.1.49                 | IPR001282; IPR022675;<br>G3DSA:3.30.360.10 (GENE3D),<br>SSF55347 (SUPERFAMILY)                                                                         |
| Caenorhabditis briggsae | glucose-6-phosphate dehydroge-se                           | 4  | P:GO:0006006;<br>F:GO:0004345;<br>P:GO:0055114;<br>F:GO:0005488                                                                                                       | -                             | EC:1.1.1.49                 | IPR001282; IPR022675;<br>G3DSA:3.30.360.10 (GENE3D),<br>SSF55347 (SUPERFAMILY)                                                                         |
| -                       | -                                                          | 0  |                                                                                                                                                                       |                               |                             | -                                                                                                                                                      |
| -                       | -                                                          | 0  |                                                                                                                                                                       |                               |                             | -                                                                                                                                                      |
| Ailuropoda melanoleuca  | cyclin-dependent ki-se 2-associated protein 1              | 8  | C:GO:0005737;<br>P:GO:0006261;<br>P:GO:0000084;<br>P:GO:0006468;<br>F:GO:0003677;<br>F:GO:0016301;<br>F:GO:0005515;<br>C:GO:0005634                                   | -                             |                             | IPR019187; PTHR22607 (PANTHER)                                                                                                                         |
| Pongo abelii            | c10                                                        | 0  |                                                                                                                                                                       | F:GO:0003674;<br>P:GO:0008150 |                             | -                                                                                                                                                      |
| Caenorhabditis elegans  | elegans protein partially confirmed by transcript evidence | 6  | P:GO:0009792;<br>F:GO:0042626;<br>C:GO:0005886;<br>P:GO:0055085;<br>F:GO:0005524;<br>C:GO:0016021                                                                     | -                             |                             | IPR003439; IPR017871;<br>G3DSA:3.40.50.300 (GENE3D),<br>PTHR19242 (PANTHER),<br>PTHR19242:SF96 (PANTHER), SignalP<br>(SIGNALP), SSF52540 (SUPERFAMILY) |
| Caenorhabditis elegans  | elegans protein confirmed by transcript evidence           | 3  | P:GO:0019915;<br>P:GO:0040018;<br>P:GO:0040011                                                                                                                        | -                             |                             | IPR000615; IPR021134; SignalP<br>(SIGNALP)                                                                                                             |
| Caenorhabditis briggsae | elegans protein partially confirmed by transcript evidence | 1  | C:GO:0005739                                                                                                                                                          | -                             |                             | PTHR11089 (PANTHER),<br>PTHR11089:SF1 (PANTHER)                                                                                                        |
| Caenorhabditis briggsae | elegans protein partially confirmed by transcript evidence | 1  | C:GO:0005739                                                                                                                                                          | -                             |                             | PTHR11089 (PANTHER),<br>PTHR11089:SF1 (PANTHER)                                                                                                        |
| -                       | -                                                          | 0  |                                                                                                                                                                       |                               |                             | -                                                                                                                                                      |
| -                       | -                                                          | 0  |                                                                                                                                                                       |                               |                             | -                                                                                                                                                      |
| -                       | -                                                          | 0  |                                                                                                                                                                       |                               |                             | -                                                                                                                                                      |

|                         |                                                                |    |                                                                                                                                                                       |   |             |                                                                                                                                   |
|-------------------------|----------------------------------------------------------------|----|-----------------------------------------------------------------------------------------------------------------------------------------------------------------------|---|-------------|-----------------------------------------------------------------------------------------------------------------------------------|
| Takifugu obscurus       | slc26a5 6-like anion exchanger                                 | 4  | C:GO:0016021;<br>F:GO:0008271;<br>P:GO:0008272;<br>P:GO:0055085                                                                                                       | - |             | PTHR11814 (PANTHER),<br>PTHR11814:SF25 (PANTHER)                                                                                  |
| -                       | -                                                              | 0  |                                                                                                                                                                       |   |             | -                                                                                                                                 |
| -                       | -                                                              | 0  |                                                                                                                                                                       |   |             | -                                                                                                                                 |
| Caenorhabditis briggsae | spectrin alpha                                                 | 10 | C:GO:0005829;<br>F:GO:0005516;<br>C:GO:0015630;<br>F:GO:0005509;<br>C:GO:0005624;<br>C:GO:0008091;<br>F:GO:0004725;<br>F:GO:0003779;<br>F:GO:0005200;<br>P:GO:0051693 | - | EC:3.1.3.48 | IPR002017; IPR018159;<br>G3DSA:1.20.58.60 (GENE3D),<br>PTHR11915 (PANTHER),<br>PTHR11915:SF6 (PANTHER), SSF46966<br>(SUPERFAMILY) |
| Loa loa                 | egg laying defective family member (egl-15)                    | 2  | F:GO:0005488;<br>F:GO:0016301                                                                                                                                         | - |             | IPR007110; IPR013098; IPR013783;<br>PTHR19897 (PANTHER),<br>PTHR19897:SF7 (PANTHER), SSF48726<br>(SUPERFAMILY)                    |
| Caenorhabditis elegans  | cytochrome c oxidase assembly protein cox11 containing protein | 4  | F:GO:0005507;<br>C:GO:0005743;<br>F:GO:0016787;<br>F:GO:0008270                                                                                                       | - |             | IPR007533; SignalP (SIGNALP)                                                                                                      |
| Camponotus floridanus   | rcc1 domain-containing protein 1                               | 0  |                                                                                                                                                                       |   |             | IPR000408; IPR009091; PTHR22870<br>(PANTHER), PTHR22870:SF27<br>(PANTHER)                                                         |
| Caenorhabditis elegans  | metallo-beta-lactamase superfamily protein                     | 0  |                                                                                                                                                                       |   |             | -                                                                                                                                 |
| -                       | -                                                              | 0  |                                                                                                                                                                       |   |             | -                                                                                                                                 |
| -                       | -                                                              | 0  |                                                                                                                                                                       |   |             | -                                                                                                                                 |
| -                       | -                                                              | 0  |                                                                                                                                                                       |   |             | -                                                                                                                                 |
| -                       | -                                                              | 0  |                                                                                                                                                                       |   |             | -                                                                                                                                 |



|                         |                                                                   |    |                                                                                                                                                                                                                                                                                                                                                                                                                                                                        |   |            |                                                                                                                                                           |
|-------------------------|-------------------------------------------------------------------|----|------------------------------------------------------------------------------------------------------------------------------------------------------------------------------------------------------------------------------------------------------------------------------------------------------------------------------------------------------------------------------------------------------------------------------------------------------------------------|---|------------|-----------------------------------------------------------------------------------------------------------------------------------------------------------|
| Caenorhabditis briggsae | presenilin 1                                                      | 45 | C:GO:0043198;<br>P:GO:0016048;<br>C:GO:0016324;<br>P:GO:0016485;<br>P:GO:0007268;<br>C:GO:0005783;<br>P:GO:0048534;<br>P:GO:0009790;<br>C:GO:0031594;<br>C:GO:0035253;<br>P:GO:0030900;<br>C:GO:0012505;<br>P:GO:0007220;<br>C:GO:0045121;<br>P:GO:0006509;<br>P:GO:0032469;<br>P:GO:0006916;<br>C:GO:0030424;<br>P:GO:0007165;<br>P:GO:0007219;<br>F:GO:0004175;<br>P:GO:0048518;<br>P:GO:0010646;<br>P:GO:0030182;<br>C:GO:0005887;<br>C:GO:0048471;<br>C:GO:0005794 | - |            | IPR001108; IPR001686; IPR006639                                                                                                                           |
|                         | -                                                                 | 0  |                                                                                                                                                                                                                                                                                                                                                                                                                                                                        |   |            | -                                                                                                                                                         |
|                         | -                                                                 | 0  |                                                                                                                                                                                                                                                                                                                                                                                                                                                                        |   |            | SignalP (SIGNALP)                                                                                                                                         |
|                         |                                                                   |    |                                                                                                                                                                                                                                                                                                                                                                                                                                                                        |   |            | IPR003599; IPR003961; IPR008957;<br>IPR013098; IPR013783; PR00014<br>(PRINTS), PTHR19900 (PANTHER),<br>PTHR19900:SF7 (PANTHER), SSF48726<br>(SUPERFAMILY) |
|                         | -                                                                 | 0  |                                                                                                                                                                                                                                                                                                                                                                                                                                                                        |   |            | SignalP (SIGNALP)                                                                                                                                         |
|                         | -                                                                 | 0  |                                                                                                                                                                                                                                                                                                                                                                                                                                                                        |   |            | -                                                                                                                                                         |
| Caenorhabditis elegans  | homology domain containing protein                                | 0  |                                                                                                                                                                                                                                                                                                                                                                                                                                                                        |   |            | -                                                                                                                                                         |
| Caenorhabditis elegans  | tomosyn sy-ptic protein family member (tom-1)                     | 2  | P:GO:0016079;<br>C:GO:0044464                                                                                                                                                                                                                                                                                                                                                                                                                                          | - |            | IPR001680; IPR011046; IPR015943;<br>PTHR10241 (PANTHER),<br>PTHR10241:SF11 (PANTHER)                                                                      |
| Caenorhabditis briggsae | mitochondrial ribosomal protein l3                                | 3  | C:GO:0005840;<br>F:GO:0003735;<br>P:GO:0006412                                                                                                                                                                                                                                                                                                                                                                                                                         | - | EC:3.6.5.3 | IPR000597; IPR009000;<br>G3DSA:2.40.30.10 (GENE3D),<br>G3DSA:4.10.960.10 (GENE3D),<br>PTHR11229 (PANTHER)                                                 |
|                         | -                                                                 | 0  |                                                                                                                                                                                                                                                                                                                                                                                                                                                                        |   |            | SignalP (SIGNALP)                                                                                                                                         |
|                         | -                                                                 | 0  |                                                                                                                                                                                                                                                                                                                                                                                                                                                                        |   |            | SignalP (SIGNALP)                                                                                                                                         |
|                         | -                                                                 | 0  |                                                                                                                                                                                                                                                                                                                                                                                                                                                                        |   |            | SignalP (SIGNALP)                                                                                                                                         |
| Caenorhabditis briggsae | yl54_caeel_ame: full=uncharacterized protein                      | 0  |                                                                                                                                                                                                                                                                                                                                                                                                                                                                        |   |            | -                                                                                                                                                         |
| Caenorhabditis elegans  | a (sy-ptic dy-min binding protein) homolog family member (sdpn-1) | 1  | F:GO:0005515                                                                                                                                                                                                                                                                                                                                                                                                                                                           | - |            | IPR001060; PTHR10959 (PANTHER)                                                                                                                            |
|                         | -                                                                 | 0  |                                                                                                                                                                                                                                                                                                                                                                                                                                                                        |   |            | SignalP (SIGNALP)                                                                                                                                         |
|                         | -                                                                 | 0  |                                                                                                                                                                                                                                                                                                                                                                                                                                                                        |   |            | -                                                                                                                                                         |

|                                     |                                                |   |                                                                                                                                     |                                                                                                                                                                                                                                                            |             |                                                                                                        |
|-------------------------------------|------------------------------------------------|---|-------------------------------------------------------------------------------------------------------------------------------------|------------------------------------------------------------------------------------------------------------------------------------------------------------------------------------------------------------------------------------------------------------|-------------|--------------------------------------------------------------------------------------------------------|
| Caenorhabditis briggsae             | archain 1                                      | 8 | C:GO:0030126;<br>P:GO:0006890;<br>P:GO:0018996;<br>P:GO:0006891;<br>C:GO:0030131;<br>P:GO:0002119;<br>F:GO:0005515;<br>P:GO:0006886 | -                                                                                                                                                                                                                                                          |             | IPR011012; IPR022775;<br>G3DSA:3.30.450.60 (GENE3D),<br>PTHR10121 (PANTHER)                            |
| Caenorhabditis elegans              | ubiquitin specific peptidase 46                | 7 | F:GO:0004843;<br>P:GO:0016579;<br>F:GO:0005515;<br>P:GO:0032228;<br>P:GO:0006511;<br>F:GO:0004221;<br>P:GO:0007610                  | -                                                                                                                                                                                                                                                          | EC:3.1.2.15 | IPR001394; PTHR10420 (PANTHER),<br>PTHR10420:SF54 (PANTHER),<br>SSF54001 (SUPERFAMILY)                 |
| Trypanosoma brucei gambiense DAL972 | golgin subfamily a member 5                    | 5 | P:GO:0009987;<br>F:GO:0005515;<br>C:GO:0044431;<br>F:GO:0016787;<br>C:GO:0016020                                                    | -                                                                                                                                                                                                                                                          |             | PD936484 (PRODOM)                                                                                      |
|                                     |                                                | 0 |                                                                                                                                     |                                                                                                                                                                                                                                                            |             |                                                                                                        |
| Brugia malayi                       | u6 snr--specific termi-l uridylyltransferase 1 | 0 |                                                                                                                                     | F:GO:0016740;<br>P:GO:0071044;<br>F:GO:0050265;<br>C:GO:0005634;<br>F:GO:0003676;<br>F:GO:0000166;<br>F:GO:0003674;<br>F:GO:0008270;<br>F:GO:0003723;<br>F:GO:0016779;<br>C:GO:0005575;<br>C:GO:0005730;<br>C:GO:0005622;<br>P:GO:0008152;<br>P:GO:0008150 |             | PTHR12271 (PANTHER),<br>PTHR12271:SF11 (PANTHER),<br>SSF81631 (SUPERFAMILY)                            |
| Brugia malayi                       | u6 snr--specific termi-l uridylyltransferase 1 | 0 |                                                                                                                                     | F:GO:0016740;<br>P:GO:0071044;<br>F:GO:0050265;<br>C:GO:0005634;<br>F:GO:0003676;<br>F:GO:0000166;<br>F:GO:0003674;<br>F:GO:0008270;<br>F:GO:0003723;<br>F:GO:0016779;<br>C:GO:0005575;<br>C:GO:0005730;<br>C:GO:0005622;<br>P:GO:0008152;<br>P:GO:0008150 |             | PTHR12271 (PANTHER),<br>PTHR12271:SF11 (PANTHER),<br>SSF81301 (SUPERFAMILY), SSF81631<br>(SUPERFAMILY) |

|                         |                                                                                  |   |                                                                                                                    |                                                                                                                                                                                                                                                            |             |                                                                                                                              |
|-------------------------|----------------------------------------------------------------------------------|---|--------------------------------------------------------------------------------------------------------------------|------------------------------------------------------------------------------------------------------------------------------------------------------------------------------------------------------------------------------------------------------------|-------------|------------------------------------------------------------------------------------------------------------------------------|
| Brugia malayi           | u6 snr--specific termi-l uridylyltransferase 1                                   | 0 |                                                                                                                    | F:GO:0016740;<br>P:GO:0071044;<br>F:GO:0050265;<br>C:GO:0005634;<br>F:GO:0003676;<br>F:GO:0000166;<br>F:GO:0003674;<br>F:GO:0008270;<br>F:GO:0003723;<br>F:GO:0016779;<br>C:GO:0005575;<br>C:GO:0005730;<br>C:GO:0005622;<br>P:GO:0008152;<br>P:GO:0008150 |             | PTHR12271 (PANTHER),<br>PTHR12271:SF11 (PANTHER),<br>SSF81301 (SUPERFAMILY), SSF81631<br>(SUPERFAMILY)                       |
| -                       | -                                                                                | 0 |                                                                                                                    |                                                                                                                                                                                                                                                            |             | -                                                                                                                            |
| Caenorhabditis elegans  | elegans protein confirmed by transcript evidence                                 | 0 |                                                                                                                    |                                                                                                                                                                                                                                                            |             | -                                                                                                                            |
| Caenorhabditis elegans  | dihydropyrimidi-se-like 3                                                        | 5 | C:GO:0030425;<br>F:GO:0016810;<br>P:GO:0009987;<br>P:GO:0008152;<br>C:GO:0043025                                   | -                                                                                                                                                                                                                                                          |             | -                                                                                                                            |
| -                       | -                                                                                | 0 |                                                                                                                    |                                                                                                                                                                                                                                                            |             | -                                                                                                                            |
| -                       | -                                                                                | 0 |                                                                                                                    |                                                                                                                                                                                                                                                            |             | SignalP (SIGNALP)                                                                                                            |
| -                       | -                                                                                | 0 |                                                                                                                    |                                                                                                                                                                                                                                                            |             | SignalP (SIGNALP)                                                                                                            |
| Caenorhabditis elegans  | deoxyribonuclease tatd                                                           | 1 | F:GO:0016888                                                                                                       | -                                                                                                                                                                                                                                                          | EC:3.1.21.0 | IPR001130; IPR012278; IPR015992;<br>IPR018228; G3DSA:3.20.20.140<br>(GENE3D), SSF51556 (SUPERFAMILY)                         |
| -                       | -                                                                                | 0 |                                                                                                                    |                                                                                                                                                                                                                                                            |             | -                                                                                                                            |
| Caenorhabditis briggsae | transposase                                                                      | 0 |                                                                                                                    |                                                                                                                                                                                                                                                            |             | PTHR23022 (PANTHER),<br>PTHR23022:SF6 (PANTHER)                                                                              |
| -                       | -                                                                                | 0 |                                                                                                                    |                                                                                                                                                                                                                                                            |             | -                                                                                                                            |
| Caenorhabditis elegans  | neuroendocrine convertase                                                        | 6 | F:GO:0004252;<br>P:GO:0016486;<br>P:GO:0002165;<br>C:GO:0005576;<br>P:GO:0006508;<br>P:GO:0035187                  | -                                                                                                                                                                                                                                                          | EC:3.4.21.0 | IPR000209; IPR009020; IPR015500;<br>IPR022398; G3DSA:3.30.70.850<br>(GENE3D), PTHR10795:SF11<br>(PANTHER), SignalP (SIGNALP) |
| -                       | -                                                                                | 0 |                                                                                                                    |                                                                                                                                                                                                                                                            |             | PTHR13994 (PANTHER)                                                                                                          |
| Caenorhabditis briggsae | nuclear hormone receptor family protein isoform confirmed by transcript evidence | 7 | F:GO:0042802;<br>F:GO:0043565;<br>P:GO:0000003;<br>F:GO:0003707;<br>C:GO:0005634;<br>F:GO:0008270;<br>P:GO:0006355 | -                                                                                                                                                                                                                                                          |             | -                                                                                                                            |
| -                       | -                                                                                | 0 |                                                                                                                    |                                                                                                                                                                                                                                                            |             | -                                                                                                                            |
| -                       | -                                                                                | 0 |                                                                                                                    |                                                                                                                                                                                                                                                            |             | -                                                                                                                            |
| Trichoplax adhaerens    | transmembrane protein 222                                                        | 2 | F:GO:0005515;<br>C:GO:0016020                                                                                      | -                                                                                                                                                                                                                                                          |             | IPR008496; SignalP (SIGNALP)                                                                                                 |
| -                       | -                                                                                | 0 |                                                                                                                    |                                                                                                                                                                                                                                                            |             | IPR019793; SignalP (SIGNALP)                                                                                                 |
| -                       | -                                                                                | 0 |                                                                                                                    |                                                                                                                                                                                                                                                            |             | -                                                                                                                            |
| Loa loa                 | mlh1                                                                             | 1 | F:GO:0005488                                                                                                       | -                                                                                                                                                                                                                                                          |             | IPR002099; IPR011186; IPR013507;<br>IPR014721; IPR020568                                                                     |
| -                       | -                                                                                | 0 |                                                                                                                    |                                                                                                                                                                                                                                                            |             | -                                                                                                                            |

|                         |                                                 |    |                                                                                                                                                                                        |   |             |                                                                                                                                                   |
|-------------------------|-------------------------------------------------|----|----------------------------------------------------------------------------------------------------------------------------------------------------------------------------------------|---|-------------|---------------------------------------------------------------------------------------------------------------------------------------------------|
| Caenorhabditis elegans  | 3-demethylubiquinone-9 3-methyltransferase      | 4  | P:GO:0002119;<br>P:GO:0006744;<br>P:GO:0008340;<br>F:GO:0008168                                                                                                                        | - | EC:2.1.1.0  | IPR007848; G3DSA:3.40.50.150 (GENE3D), PTHR23134 (PANTHER), SSF53335 (SUPERFAMILY)                                                                |
| Caenorhabditis elegans  | 26s proteasome non-atpase regulatory subunit 14 | 6  | C:GO:0005875;<br>F:GO:0004175;<br>C:GO:0008541;<br>F:GO:0005515;<br>P:GO:0009987;<br>P:GO:0006508                                                                                      | - |             | IPR000555; G3DSA:3.40.140.10 (GENE3D), PTHR10410 (PANTHER), PTHR10410:SF5 (PANTHER), SSF102712 (SUPERFAMILY)                                      |
|                         | -                                               | 0  |                                                                                                                                                                                        |   |             | -                                                                                                                                                 |
| Macaca mulatta          | fas-activated serine threonine ki-se isoform 1  | 7  | F:GO:0033867;<br>P:GO:0006468;<br>F:GO:0005515;<br>F:GO:0005524;<br>P:GO:0008624;<br>P:GO:0007165;<br>C:GO:0005739                                                                     | - | EC:2.7.11.8 | IPR013584; IPR015715; PTHR21228 (PANTHER)                                                                                                         |
| Caenorhabditis briggsae | dihydropyrimidi-se                              | 11 | C:GO:0005829;<br>F:GO:0004157;<br>F:GO:0008270;<br>P:GO:0006212;<br>P:GO:0019482;<br>P:GO:0006210;<br>F:GO:0016597;<br>P:GO:0051289;<br>F:GO:0002058;<br>C:GO:0005634;<br>F:GO:0002059 | - | EC:3.5.2.2  | IPR006680; IPR011059; G3DSA:2.30.40.10 (GENE3D), G3DSA:3.20.20.140 (GENE3D), PTHR11647 (PANTHER), PTHR11647:SF1 (PANTHER), SSF51556 (SUPERFAMILY) |
|                         | -                                               | 0  |                                                                                                                                                                                        |   |             | -                                                                                                                                                 |
|                         | -                                               | 0  |                                                                                                                                                                                        |   |             | SignalP (SIGNALP)                                                                                                                                 |
| Caenorhabditis elegans  | briggsae cbr-abf-2 protein                      | 0  |                                                                                                                                                                                        |   |             | SignalP (SIGNALP)                                                                                                                                 |
| Caenorhabditis elegans  | d- polymerase epsilon                           | 11 | F:GO:0008270;<br>F:GO:0003887;<br>P:GO:0006260;<br>P:GO:0040035;<br>F:GO:0003677;<br>F:GO:0000166;<br>P:GO:0040011;<br>P:GO:0006997;<br>P:GO:0002009;<br>P:GO:0009792;<br>C:GO:0005634 | - | EC:2.7.7.7  | PTHR10670 (PANTHER), SSF56672 (SUPERFAMILY)                                                                                                       |
| Caenorhabditis elegans  | cog2 protein                                    | 9  | P:GO:0040035;<br>P:GO:0009792;<br>P:GO:0030334;<br>P:GO:0002119;<br>F:GO:0005515;<br>P:GO:0040010;<br>P:GO:0035262;<br>P:GO:0040039;<br>P:GO:0048477                                   | - |             | IPR009316                                                                                                                                         |



|                            |                                                            |    |                                                                                                                                                                                                                                                                                                                                                                                                                                                                                          |                               |            |                                                                                                 |
|----------------------------|------------------------------------------------------------|----|------------------------------------------------------------------------------------------------------------------------------------------------------------------------------------------------------------------------------------------------------------------------------------------------------------------------------------------------------------------------------------------------------------------------------------------------------------------------------------------|-------------------------------|------------|-------------------------------------------------------------------------------------------------|
| Loa loa                    | wnt-4 protein                                              | 44 | C:GO:0005201;<br>P:GO:0030237;<br>P:GO:0045892;<br>P:GO:0030501;<br>F:GO:0004871;<br>P:GO:0007223;<br>N:GO:0039018;<br>P:GO:0018345;<br>P:GO:0045669;<br>P:GO:0007507;<br>P:GO:0032349;<br>N:GO:2000066;<br>P:GO:0009880;<br>P:GO:0001889;<br>C:GO:0005615;<br>N:GO:0061205;<br>P:GO:0002009;<br>P:GO:0001837;<br>P:GO:0090002;<br>F:GO:0003714;<br>P:GO:0042074;<br>P:GO:0006702;<br>P:GO:0045941;<br>P:GO:0090263;<br>P:GO:0071560;<br>C:GO:0005737;<br>P:GO:0035239;<br>F:GO:0005201; | -                             | -          |                                                                                                 |
|                            | -                                                          | 0  |                                                                                                                                                                                                                                                                                                                                                                                                                                                                                          |                               |            | -                                                                                               |
|                            | -                                                          | 0  |                                                                                                                                                                                                                                                                                                                                                                                                                                                                                          |                               |            | -                                                                                               |
| Caenorhabditis briggsae    | elegans protein confirmed by transcript evidence           | 0  |                                                                                                                                                                                                                                                                                                                                                                                                                                                                                          |                               |            | -                                                                                               |
| Hypophthalmichthys nobilis | ribosomal protein I27                                      | 4  | C:GO:0005840;<br>C:GO:0005829;<br>F:GO:0003735;<br>P:GO:0006414                                                                                                                                                                                                                                                                                                                                                                                                                          | -                             |            | IPR001141                                                                                       |
|                            | -                                                          | 0  |                                                                                                                                                                                                                                                                                                                                                                                                                                                                                          |                               |            | -                                                                                               |
|                            | -                                                          | 0  |                                                                                                                                                                                                                                                                                                                                                                                                                                                                                          |                               |            | -                                                                                               |
|                            | -                                                          | 0  |                                                                                                                                                                                                                                                                                                                                                                                                                                                                                          |                               |            | SignalP (SIGNALP)                                                                               |
| Caenorhabditis elegans     | tpa: glycoprotein hormone-beta5                            | 0  |                                                                                                                                                                                                                                                                                                                                                                                                                                                                                          | F:GO:0005179;<br>C:GO:0005576 |            | IPR006208; G3DSA:2.10.90.10 (GENE3D), SignalP (SIGNALP), SSF57501 (SUPERFAMILY)                 |
| Loa loa                    | fad synthetase                                             | 5  | F:GO:0016779;<br>P:GO:0040010;<br>P:GO:0044238;<br>P:GO:0009108;<br>P:GO:0044271                                                                                                                                                                                                                                                                                                                                                                                                         | -                             | EC:2.7.7.0 | IPR001453; PTHR23293 (PANTHER)                                                                  |
| Caenorhabditis briggsae    | elegans protein partially confirmed by transcript evidence | 3  | F:GO:0016779;<br>P:GO:0040010;<br>P:GO:0008152                                                                                                                                                                                                                                                                                                                                                                                                                                           | -                             | EC:2.7.7.0 | PTHR23293 (PANTHER)                                                                             |
| Caenorhabditis elegans     | gtpase activating protein family member (gap-2)            | 5  | C:GO:0005737;<br>P:GO:0046580;<br>P:GO:0040010;<br>P:GO:0000003;<br>F:GO:0005099                                                                                                                                                                                                                                                                                                                                                                                                         | -                             |            | IPR000008; IPR001849; G3DSA:2.60.40.150 (GENE3D), PTHR10194 (PANTHER), PTHR10194:SF25 (PANTHER) |

|                          |                                                            |    |                                                                                                                                                                                                                          |                                                                                                                                     |             |                                                                                                                                                                                        |
|--------------------------|------------------------------------------------------------|----|--------------------------------------------------------------------------------------------------------------------------------------------------------------------------------------------------------------------------|-------------------------------------------------------------------------------------------------------------------------------------|-------------|----------------------------------------------------------------------------------------------------------------------------------------------------------------------------------------|
| Caenorhabditis elegans   | choline dehydroge-se                                       | 5  | P:GO:0006066;<br>C:GO:0005743;<br>F:GO:0008812;<br>P:GO:0000003;<br>F:GO:0050660                                                                                                                                         | -                                                                                                                                   | EC:1.1.99.1 | IPR000172; G3DSA:3.30.560.10 (GENE3D), G3DSA:3.50.50.60 (GENE3D), G3DSA:4.10.450.10 (GENE3D), PTHR11552 (PANTHER), PTHR11552:SF11 (PANTHER), PS51257 (PROFILE), SSF51905 (SUPERFAMILY) |
|                          | -                                                          | 0  |                                                                                                                                                                                                                          |                                                                                                                                     |             | IPR010472                                                                                                                                                                              |
|                          | -                                                          | 0  |                                                                                                                                                                                                                          |                                                                                                                                     |             | IPR010472                                                                                                                                                                              |
|                          | -                                                          | 0  |                                                                                                                                                                                                                          |                                                                                                                                     |             | SignalP (SIGNALP)                                                                                                                                                                      |
|                          | -                                                          | 0  |                                                                                                                                                                                                                          |                                                                                                                                     |             | SignalP (SIGNALP)                                                                                                                                                                      |
| Caenorhabditis elegans   | iroquois-class homeodomain protein irx                     | 13 | P:GO:0045941;<br>F:GO:0005515;<br>P:GO:0046843;<br>P:GO:0045317;<br>P:GO:0006355;<br>F:GO:0016563;<br>P:GO:0001700;<br>P:GO:0007422;<br>F:GO:0043565;<br>P:GO:0007224;<br>F:GO:0003700;<br>C:GO:0005634;<br>P:GO:0007476 | -                                                                                                                                   |             | IPR001356; IPR002119; IPR009057; IPR012287; IPR017970; PTHR11211 (PANTHER), PTHR11211:SF2 (PANTHER)                                                                                    |
|                          | -                                                          | 0  |                                                                                                                                                                                                                          |                                                                                                                                     |             | -                                                                                                                                                                                      |
| Saccoglossus kowalevskii | zinc finger protein                                        | 0  |                                                                                                                                                                                                                          | F:GO:0003676;<br>F:GO:0003723;<br>P:GO:0006508;<br>P:GO:0015074;<br>F:GO:0004190;<br>P:GO:0006278;<br>F:GO:0003677;<br>F:GO:0003964 |             | IPR001584; IPR012337; G3DSA:3.30.420.10 (GENE3D), PTHR10178 (PANTHER), PTHR10178:SF14 (PANTHER)                                                                                        |
| Aphelenchus avenae       | trehalose 6-phosphate synthase                             | 3  | F:GO:0003825;<br>P:GO:0034608;<br>P:GO:0005992                                                                                                                                                                           | -                                                                                                                                   | EC:2.4.1.15 | SignalP (SIGNALP)                                                                                                                                                                      |
| Caenorhabditis briggsae  | elegans protein confirmed by transcript evidence           | 0  |                                                                                                                                                                                                                          |                                                                                                                                     |             | -                                                                                                                                                                                      |
| Caenorhabditis elegans   | elegans protein confirmed by transcript evidence           | 5  | P:GO:0040035;<br>P:GO:0009792;<br>P:GO:0002119;<br>P:GO:0040010;<br>P:GO:0008340                                                                                                                                         | -                                                                                                                                   |             | -                                                                                                                                                                                      |
| Caenorhabditis elegans   | elegans protein confirmed by transcript evidence           | 5  | P:GO:0040035;<br>P:GO:0009792;<br>P:GO:0002119;<br>P:GO:0040010;<br>P:GO:0008340                                                                                                                                         | -                                                                                                                                   |             | -                                                                                                                                                                                      |
|                          | -                                                          | 0  |                                                                                                                                                                                                                          |                                                                                                                                     |             | SignalP (SIGNALP)                                                                                                                                                                      |
|                          | -                                                          | 0  |                                                                                                                                                                                                                          |                                                                                                                                     |             | -                                                                                                                                                                                      |
| Caenorhabditis elegans   | elegans protein partially confirmed by transcript evidence | 2  | C:GO:0016021;<br>P:GO:0019915                                                                                                                                                                                            | -                                                                                                                                   |             | IPR010291; IPR016196; G3DSA:1.20.1250.20 (GENE3D), PTHR23294 (PANTHER), SignalP (SIGNALP)                                                                                              |

|                         |                                                            |    |                                                                                                                                                                                                                                                                             |                                                                 |                                                                                                                                     |
|-------------------------|------------------------------------------------------------|----|-----------------------------------------------------------------------------------------------------------------------------------------------------------------------------------------------------------------------------------------------------------------------------|-----------------------------------------------------------------|-------------------------------------------------------------------------------------------------------------------------------------|
| Caenorhabditis briggsae | n-termi-l conserved region family protein                  | 16 | P:GO:0000910;<br>P:GO:0000070;<br>P:GO:0007029;<br>P:GO:0034504;<br>P:GO:0031468;<br>P:GO:0032940;<br>P:GO:0007052;<br>P:GO:0007078;<br>P:GO:0019915;<br>P:GO:0002119;<br>P:GO:0040011;<br>C:GO:0005635;<br>C:GO:0005654;<br>P:GO:0009792;<br>P:GO:0040018;<br>C:GO:0005783 | -                                                               | IPR007651; IPR013209;<br>G3DSA:3.40.50.1000 (GENE3D),<br>PTHR12181 (PANTHER),<br>PTHR12181:SF7 (PANTHER), SSF56784<br>(SUPERFAMILY) |
| Caenorhabditis briggsae | n-termi-l conserved region family protein                  | 16 | P:GO:0000910;<br>P:GO:0000070;<br>P:GO:0007029;<br>P:GO:0034504;<br>P:GO:0031468;<br>P:GO:0032940;<br>P:GO:0007052;<br>P:GO:0007078;<br>P:GO:0019915;<br>P:GO:0002119;<br>P:GO:0040011;<br>C:GO:0005635;<br>C:GO:0005654;<br>P:GO:0009792;<br>P:GO:0040018;<br>C:GO:0005783 | -                                                               | IPR007651; IPR013209;<br>G3DSA:3.40.50.1000 (GENE3D),<br>PTHR12181 (PANTHER),<br>PTHR12181:SF7 (PANTHER), SSF56784<br>(SUPERFAMILY) |
| Caenorhabditis briggsae | n-termi-l conserved region family protein                  | 16 | P:GO:0000910;<br>P:GO:0000070;<br>P:GO:0007029;<br>P:GO:0034504;<br>P:GO:0031468;<br>P:GO:0032940;<br>P:GO:0007052;<br>P:GO:0007078;<br>P:GO:0019915;<br>P:GO:0002119;<br>P:GO:0040011;<br>C:GO:0005635;<br>C:GO:0005654;<br>P:GO:0009792;<br>P:GO:0040018;<br>C:GO:0005783 | -                                                               | IPR007651; IPR013209;<br>G3DSA:3.40.50.1000 (GENE3D),<br>PTHR12181 (PANTHER),<br>PTHR12181:SF7 (PANTHER), SSF56784<br>(SUPERFAMILY) |
| Loa loa                 | dolichyl pyrophosphate man9 c2 alpha- -glucosyltransferase | 5  | P:GO:0006487;<br>F:GO:0046527;<br>P:GO:0000003;<br>C:GO:0005783;<br>C:GO:0044425                                                                                                                                                                                            | -                                                               | IPR004856; SignalP (SIGNALP)                                                                                                        |
| Caenorhabditis elegans  | yc91_caee1: full=uncharacterized mfs-type transporter      | 0  |                                                                                                                                                                                                                                                                             | C:GO:0016021;<br>P:GO:0040011;<br>P:GO:0055085;<br>P:GO:0007413 | -                                                                                                                                   |



|                               |                                     |    |                                                                                                                                                                                        |                               |                             |                                                                                                                                                            |
|-------------------------------|-------------------------------------|----|----------------------------------------------------------------------------------------------------------------------------------------------------------------------------------------|-------------------------------|-----------------------------|------------------------------------------------------------------------------------------------------------------------------------------------------------|
| Caenorhabditis elegans        | nicoti-te phosphoribosyltransferase | 10 | P:GO:0006979;<br>C:GO:0005829;<br>F:GO:0004514;<br>P:GO:0009435;<br>P:GO:0040007;<br>P:GO:0019358;<br>P:GO:0040035;<br>F:GO:0004516;<br>P:GO:0002119;<br>P:GO:0009792                  | -                             | EC:2.4.2.19;<br>EC:2.4.2.11 | IPR007229; G3DSA:3.20.140.10<br>(GENE3D), PTHR11098 (PANTHER),<br>SSF54675 (SUPERFAMILY)                                                                   |
| -                             | -                                   | 0  |                                                                                                                                                                                        |                               |                             | -                                                                                                                                                          |
| Caenorhabditis elegans        | dihydropyrimidine dehydroge-se      | 11 | F:GO:0004158;<br>P:GO:0006212;<br>F:GO:0046872;<br>P:GO:0055114;<br>F:GO:0009055;<br>F:GO:0017113;<br>F:GO:0051539;<br>P:GO:0006222;<br>P:GO:0006207;<br>C:GO:0005737;<br>P:GO:0006214 | -                             | EC:1.3.3.1;<br>EC:1.3.1.2   | IPR009051; IPR012285; PTHR11938<br>(PANTHER), PTHR11938:SF6<br>(PANTHER)                                                                                   |
| Caenorhabditis elegans        | dihydropyrimidine dehydroge-se      | 11 | F:GO:0004158;<br>P:GO:0006212;<br>F:GO:0046872;<br>P:GO:0055114;<br>F:GO:0009055;<br>F:GO:0017113;<br>F:GO:0051539;<br>P:GO:0006222;<br>P:GO:0006207;<br>C:GO:0005737;<br>P:GO:0006214 | -                             | EC:1.3.3.1;<br>EC:1.3.1.2   | IPR009051; IPR012285; PTHR11938<br>(PANTHER), PTHR11938:SF6<br>(PANTHER)                                                                                   |
| -                             | -                                   | 0  |                                                                                                                                                                                        |                               |                             | -                                                                                                                                                          |
| -                             | -                                   | 0  |                                                                                                                                                                                        |                               |                             | -                                                                                                                                                          |
| Caenorhabditis briggsae       | thioredoxin family trp26            | 0  |                                                                                                                                                                                        | P:GO:0008150;<br>C:GO:0005575 |                             | IPR008979; IPR010400;<br>G3DSA:2.60.120.470 (GENE3D),<br>PTHR12175 (PANTHER)                                                                               |
| Caenorhabditis elegans        | pwpp domain containing protein      | 0  |                                                                                                                                                                                        |                               |                             | -                                                                                                                                                          |
| -                             | -                                   | 0  |                                                                                                                                                                                        |                               |                             | -                                                                                                                                                          |
| -                             | -                                   | 0  |                                                                                                                                                                                        |                               |                             | -                                                                                                                                                          |
| Xenopus (Silurana) tropicalis | aurora ki-se a                      | 9  | P:GO:0018105;<br>F:GO:0008017;<br>F:GO:0004674;<br>F:GO:0019894;<br>C:GO:0000922;<br>P:GO:0090307;<br>C:GO:0005876;<br>C:GO:0005813;<br>P:GO:0046777                                   | -                             | EC:2.7.11.0                 | IPR000719; IPR002290; IPR008271;<br>IPR011009; IPR017441; IPR017442;<br>IPR020636; IPR020663;<br>G3DSA:1.10.510.10 (GENE3D),<br>G3DSA:3.30.200.20 (GENE3D) |

|                         |                                                                          |    |                                                                                                                                                                                        |   |             |                                                                                                                                                            |
|-------------------------|--------------------------------------------------------------------------|----|----------------------------------------------------------------------------------------------------------------------------------------------------------------------------------------|---|-------------|------------------------------------------------------------------------------------------------------------------------------------------------------------|
| Xenopus laevis          | aurora ki-se a                                                           | 10 | P:GO:0018105;<br>F:GO:0008017;<br>F:GO:0004674;<br>F:GO:0019894;<br>C:GO:0000922;<br>P:GO:0090307;<br>C:GO:0005876;<br>C:GO:0005813;<br>F:GO:0000166;<br>P:GO:0046777                  | - | EC:2.7.11.0 | IPR000719; IPR002290; IPR008271;<br>IPR011009; IPR017441; IPR017442;<br>IPR020636; IPR020663;<br>G3DSA:1.10.510.10 (GENE3D),<br>G3DSA:3.30.200.20 (GENE3D) |
| Caenorhabditis elegans  | elegans protein confirmed by transcript evidence                         | 0  |                                                                                                                                                                                        |   |             | -                                                                                                                                                          |
|                         |                                                                          | 0  |                                                                                                                                                                                        |   |             | SignalP (SIGNALP)                                                                                                                                          |
| Caenorhabditis elegans  | tgf-beta resistance-associated protein trag                              | 0  |                                                                                                                                                                                        |   |             | -                                                                                                                                                          |
| Caenorhabditis briggsae | hed family member (ptc-3)                                                | 7  | P:GO:0009792;<br>P:GO:0002119;<br>P:GO:0040018;<br>P:GO:0018996;<br>P:GO:0000003;<br>P:GO:0040011;<br>C:GO:0016020                                                                     | - |             | PTHR10796 (PANTHER),<br>PTHR10796:SF34 (PANTHER)                                                                                                           |
| synthetic construct     | lipolysis stimulated lipoprotein receptor                                | 11 | P:GO:0009790;<br>C:GO:0005730;<br>F:GO:0004872;<br>C:GO:0034362;<br>C:GO:0005794;<br>C:GO:0005886;<br>C:GO:0042627;<br>P:GO:0001889;<br>C:GO:0016021;<br>P:GO:0019216;<br>C:GO:0034361 | - |             | -                                                                                                                                                          |
|                         |                                                                          | 0  |                                                                                                                                                                                        |   |             | -                                                                                                                                                          |
|                         |                                                                          | 0  |                                                                                                                                                                                        |   |             | -                                                                                                                                                          |
|                         |                                                                          | 0  |                                                                                                                                                                                        |   |             | -                                                                                                                                                          |
|                         |                                                                          | 0  |                                                                                                                                                                                        |   |             | -                                                                                                                                                          |
|                         |                                                                          | 0  |                                                                                                                                                                                        |   |             | -                                                                                                                                                          |
|                         |                                                                          | 0  |                                                                                                                                                                                        |   |             | -                                                                                                                                                          |
| Caenorhabditis elegans  | uncoordinated protein isoform partially confirmed by transcript evidence | 3  | P:GO:0006468;<br>F:GO:0005524;<br>F:GO:0004674                                                                                                                                         | - | EC:2.7.11.0 | -                                                                                                                                                          |
|                         |                                                                          | 0  |                                                                                                                                                                                        |   |             | -                                                                                                                                                          |
| Caenorhabditis briggsae | d- polymerase i family protein                                           | 5  | P:GO:0006260;<br>P:GO:0000003;<br>P:GO:0007005;<br>P:GO:0007275;<br>F:GO:0003824                                                                                                       | - |             | -                                                                                                                                                          |
| Caenorhabditis elegans  | tomosyn sy-ptic protein family member (tom-1)                            | 2  | F:GO:0005515;<br>C:GO:0016020                                                                                                                                                          | - |             | IPR001388; IPR013905;<br>G3DSA:1.20.5.110 (GENE3D),<br>PTHR10241 (PANTHER),<br>PTHR10241:SF7 (PANTHER)                                                     |
| Caenorhabditis briggsae | briggsae cbr-dep-1 protein                                               | 3  | P:GO:0040026;<br>P:GO:0040027;<br>F:GO:0016791                                                                                                                                         | - | EC:3.1.3.0  | SignalP (SIGNALP)                                                                                                                                          |
|                         |                                                                          | 0  |                                                                                                                                                                                        |   |             | -                                                                                                                                                          |
|                         |                                                                          | 0  |                                                                                                                                                                                        |   |             | -                                                                                                                                                          |
|                         |                                                                          | 0  |                                                                                                                                                                                        |   |             | IPR021662                                                                                                                                                  |

|                         |                                                                                                                              |   |                                                                                                                                                      |              |             |                                                                                                                                                                      |
|-------------------------|------------------------------------------------------------------------------------------------------------------------------|---|------------------------------------------------------------------------------------------------------------------------------------------------------|--------------|-------------|----------------------------------------------------------------------------------------------------------------------------------------------------------------------|
| Caenorhabditis briggsae | endonuclease v                                                                                                               | 1 | F:GO:0003824                                                                                                                                         | -            |             | IPR004856; IPR007581; SignalP (SIGNALP)                                                                                                                              |
| Caenorhabditis briggsae | briggsae cbr-elpc-4 protein                                                                                                  | 1 | C:GO:0044424                                                                                                                                         | -            |             | IPR008728; SignalP (SIGNALP)                                                                                                                                         |
|                         | -                                                                                                                            | 0 |                                                                                                                                                      |              |             | -                                                                                                                                                                    |
|                         | -                                                                                                                            | 0 |                                                                                                                                                      |              |             | -                                                                                                                                                                    |
|                         | -                                                                                                                            | 0 |                                                                                                                                                      |              |             | -                                                                                                                                                                    |
|                         | -                                                                                                                            | 0 |                                                                                                                                                      |              |             | -                                                                                                                                                                    |
| Caenorhabditis elegans  | -dh dehydroge-se                                                                                                             | 8 | P:GO:0006810;<br>F:GO:0008137;<br>C:GO:0005747;<br>F:GO:0046872;<br>F:GO:0051539;<br>F:GO:0051287;<br>P:GO:0006120;<br>F:GO:0010181                  | -            | EC:1.6.5.3  | IPR001949; IPR011537; IPR011538;<br>IPR019554; IPR019575; PTHR11780<br>(PANTHER), SSF140490<br>(SUPERFAMILY), SSF142019<br>(SUPERFAMILY), SSF142984<br>(SUPERFAMILY) |
| Loa loa                 | wd repeat and fyve domain-containing protein 3                                                                               | 1 | F:GO:0008270                                                                                                                                         | -            |             | G3DSA:2.30.29.40 (GENE3D)                                                                                                                                            |
| Caenorhabditis elegans  | btb poz domain-containing protein 7                                                                                          | 0 |                                                                                                                                                      | F:GO:0005515 |             | IPR011333; IPR011705; PTHR16064<br>(PANTHER)                                                                                                                         |
| Haemonchus contortus    | aminopeptidase n                                                                                                             | 5 | C:GO:0016021;<br>F:GO:0008237;<br>P:GO:0006508;<br>F:GO:0008270;<br>F:GO:0004177                                                                     | -            | EC:3.4.11.0 | IPR001930; IPR014782;<br>PTHR11533:SF29 (PANTHER),<br>SSF55486 (SUPERFAMILY), SSF63737<br>(SUPERFAMILY)                                                              |
| Haemonchus contortus    | aminopeptidase n (alanyl aminopeptidase) (microsomal aminopeptidase) (aminopeptidase m) (kidney zn peptidase) (cd13 antigen) | 5 | C:GO:0016021;<br>F:GO:0008237;<br>P:GO:0006508;<br>F:GO:0008270;<br>F:GO:0004177                                                                     | -            | EC:3.4.11.0 | IPR001930; IPR014782;<br>PTHR11533:SF29 (PANTHER),<br>SSF55486 (SUPERFAMILY), SSF63737<br>(SUPERFAMILY)                                                              |
| Caenorhabditis elegans  | uncoordi-ted family member (unc-52)                                                                                          | 2 | P:GO:0030239;<br>C:GO:0005578                                                                                                                        | -            |             | IPR003598; IPR007110; IPR013098;<br>IPR013783; PTHR10574 (PANTHER),<br>PTHR10574:SF20 (PANTHER),<br>SSF48726 (SUPERFAMILY)                                           |
| Loa loa                 | sphingosine ki-se 2                                                                                                          | 6 | P:GO:0006915;<br>P:GO:0000003;<br>P:GO:0032501;<br>P:GO:0016310;<br>F:GO:0016301;<br>P:GO:0007610                                                    | -            |             | SignalP (SIGNALP)                                                                                                                                                    |
|                         | -                                                                                                                            | 0 |                                                                                                                                                      |              |             | SignalP (SIGNALP)                                                                                                                                                    |
|                         | -                                                                                                                            | 0 |                                                                                                                                                      |              |             | -                                                                                                                                                                    |
| Caenorhabditis elegans  | ferm domain ( -ezrin-radixin-moesin) family member (frm-1)                                                                   | 1 | F:GO:0005515                                                                                                                                         | -            |             | -                                                                                                                                                                    |
|                         | -                                                                                                                            | 0 |                                                                                                                                                      |              |             | SignalP (SIGNALP)                                                                                                                                                    |
|                         | -                                                                                                                            | 0 |                                                                                                                                                      |              |             | -                                                                                                                                                                    |
|                         | -                                                                                                                            | 0 |                                                                                                                                                      |              |             | -                                                                                                                                                                    |
| Caenorhabditis elegans  | 85 kda calcium-independent phospholipase                                                                                     | 1 | P:GO:0006629                                                                                                                                         | -            |             | IPR016035; G3DSA:3.40.1090.10<br>(GENE3D), PTHR18958 (PANTHER),<br>PTHR18958:SF94 (PANTHER)                                                                          |
| Caenorhabditis elegans  | phosphatidylinositol 4-ki-se alpha                                                                                           | 9 | P:GO:0008219;<br>P:GO:0000003;<br>C:GO:0030660;<br>P:GO:0006661;<br>P:GO:0007268;<br>F:GO:0005515;<br>P:GO:0016310;<br>P:GO:0007165;<br>F:GO:0004428 | -            |             | -                                                                                                                                                                    |

|                         |                                                               |   |                                                                                                                                                      |                                                |   |                                                                                                                                               |
|-------------------------|---------------------------------------------------------------|---|------------------------------------------------------------------------------------------------------------------------------------------------------|------------------------------------------------|---|-----------------------------------------------------------------------------------------------------------------------------------------------|
| Caenorhabditis briggsae | phosphatidylinositol 4-ki-se type 3 alpha                     | 5 | F:GO:0005488;<br>P:GO:0008219;<br>P:GO:0000003;<br>P:GO:0016310;<br>F:GO:0004428                                                                     | -                                              | - |                                                                                                                                               |
| Caenorhabditis briggsae | phosphatidylinositol 4-ki-se alpha                            | 6 | F:GO:0005488;<br>P:GO:0008219;<br>P:GO:0000003;<br>C:GO:0030660;<br>P:GO:0016310;<br>F:GO:0004428                                                    | -                                              | - |                                                                                                                                               |
| Caenorhabditis elegans  | alp enigma encoding family member (alp-1)                     | 1 | F:GO:0042802                                                                                                                                         | -                                              |   | IPR006643; PTHR18973 (PANTHER),<br>PTHR18973:SF57 (PANTHER)                                                                                   |
|                         | -                                                             | 0 |                                                                                                                                                      |                                                |   | -                                                                                                                                             |
| Caenorhabditis elegans  | briggsae cbr-nex-3 protein                                    | 0 |                                                                                                                                                      | F:GO:0005509;<br>F:GO:0005544;<br>F:GO:0005515 |   | IPR001464; IPR018502;<br>PTHR10502:SF13 (PANTHER)                                                                                             |
|                         | -                                                             | 0 |                                                                                                                                                      |                                                |   | -                                                                                                                                             |
| Caenorhabditis briggsae | briggsae cbr-cln- protein                                     | 4 | C:GO:0016020;<br>C:GO:0005737;<br>P:GO:0008340;<br>P:GO:0046662                                                                                      | -                                              |   | IPR003492                                                                                                                                     |
| Camponotus floridanus   | nuclear factor 1 a-type                                       | 9 | C:GO:0005737;<br>P:GO:0006260;<br>P:GO:0019079;<br>F:GO:0003700;<br>F:GO:0003677;<br>C:GO:0005886;<br>F:GO:0008134;<br>C:GO:0005634;<br>P:GO:0006355 | -                                              |   | IPR000647; IPR019548; IPR020604                                                                                                               |
|                         | -                                                             | 0 |                                                                                                                                                      |                                                |   | -                                                                                                                                             |
|                         | -                                                             | 0 |                                                                                                                                                      |                                                |   | -                                                                                                                                             |
| Brugia malayi           | hypothetical protein Bm1_05795 [Brugia malayi]                | 0 |                                                                                                                                                      |                                                |   | SignalP (SIGNALP)                                                                                                                             |
| Loa loa                 | single stranded d- binding protein 3                          | 3 | F:GO:0003677;<br>P:GO:0045449;<br>C:GO:0005634                                                                                                       | -                                              |   | IPR006594; IPR008116;<br>PTHR12610:SF1 (PANTHER)                                                                                              |
| Caenorhabditis briggsae | mitochondrial translation optimization 1 homolog (cerevisiae) | 4 | F:GO:0050660;<br>F:GO:0003824;<br>P:GO:0002098;<br>C:GO:0005739                                                                                      | -                                              |   | IPR002218; IPR013027; PR00411<br>(PRINTS), G3DSA:3.50.50.60<br>(GENE3D), PTHR11806 (PANTHER),<br>SignalP (SIGNALP), SSF51905<br>(SUPERFAMILY) |
| Caenorhabditis briggsae | c4b-binding protein beta                                      | 0 |                                                                                                                                                      | F:GO:0030414;<br>F:GO:0016787;<br>C:GO:0005576 |   | IPR000436; IPR016060; PTHR19325<br>(PANTHER), PTHR19325:SF40<br>(PANTHER)                                                                     |
|                         | -                                                             | 0 |                                                                                                                                                      |                                                |   | -                                                                                                                                             |
| Loa loa                 | myelodysplasia myeloid leukemia isoform e                     | 2 | C:GO:0005737;<br>C:GO:0043229                                                                                                                        | -                                              |   | IPR019376; PTHR13105 (PANTHER),<br>PTHR13105:SF1 (PANTHER)                                                                                    |
| Caenorhabditis elegans  | elegans protein partially confirmed by transcript evidence    | 4 | P:GO:0044237;<br>F:GO:0003824;<br>P:GO:0048523;<br>F:GO:0005488                                                                                      | -                                              |   | IPR002591; IPR017849; IPR017850;<br>PTHR10151 (PANTHER),<br>PTHR10151:SF28 (PANTHER)                                                          |

|                         |                                                                                      |    |                                                                                                                                                                                                                          |                                                                                                                                     |             |                                                                                |
|-------------------------|--------------------------------------------------------------------------------------|----|--------------------------------------------------------------------------------------------------------------------------------------------------------------------------------------------------------------------------|-------------------------------------------------------------------------------------------------------------------------------------|-------------|--------------------------------------------------------------------------------|
| Caenorhabditis elegans  | galactosyltransferase family protein                                                 | 10 | P:GO:0007293;<br>P:GO:0001744;<br>P:GO:0075015;<br>F:GO:0046981;<br>P:GO:0007298;<br>F:GO:0008376;<br>P:GO:0042248;<br>P:GO:0006688;<br>P:GO:0007166;<br>P:GO:0007299                                                    | -                                                                                                                                   |             | IPR002659; PTHR11214:SF14 (PANTHER)                                            |
| Caenorhabditis elegans  | tetratricopeptide repeat protein 27                                                  | 1  | F:GO:0005515                                                                                                                                                                                                             | -                                                                                                                                   |             | IPR011990; IPR013026; IPR019734; PTHR16193 (PANTHER), SSF48452 (SUPERFAMILY)   |
|                         | -                                                                                    | 0  |                                                                                                                                                                                                                          |                                                                                                                                     |             | -                                                                              |
| Caenorhabditis briggsae | rab6ip1-like protein                                                                 | 0  |                                                                                                                                                                                                                          |                                                                                                                                     |             | IPR001024; IPR008976; PTHR10877 (PANTHER), PTHR10877:SF3 (PANTHER)             |
|                         | -                                                                                    | 0  |                                                                                                                                                                                                                          |                                                                                                                                     |             | -                                                                              |
| Caenorhabditis elegans  | protein phosphatase regulatory subunit 12c                                           | 2  | F:GO:0005515;<br>C:GO:0005737                                                                                                                                                                                            | -                                                                                                                                   |             | IPR022671; PTHR18958 (PANTHER), PTHR18958:SF166 (PANTHER)                      |
| Caenorhabditis elegans  | protein phosphatase regulatory subunit 12c                                           | 2  | F:GO:0005515;<br>C:GO:0005737                                                                                                                                                                                            | -                                                                                                                                   |             | -                                                                              |
|                         | -                                                                                    | 0  |                                                                                                                                                                                                                          |                                                                                                                                     |             | -                                                                              |
|                         | -                                                                                    | 0  |                                                                                                                                                                                                                          |                                                                                                                                     |             | SignalP (SIGNALP)                                                              |
|                         | -                                                                                    | 0  |                                                                                                                                                                                                                          |                                                                                                                                     |             | -                                                                              |
| Loa loa                 | platelet-activating factor acetylhydrolase 2                                         | 0  |                                                                                                                                                                                                                          | P:GO:0006629;<br>P:GO:0006916;<br>C:GO:0005737;<br>P:GO:0008152;<br>F:GO:0016787;<br>F:GO:0005543;<br>F:GO:0003847;<br>P:GO:0016042 |             | IPR005065; G3DSA:3.40.50.1820 (GENE3D), PF03403 (PFAM), SSF53474 (SUPERFAMILY) |
| Brugia malayi           | brf1 subunit of r- polymerase iii transcription initiation factor iiib ( cerevisiae) | 13 | P:GO:0006383;<br>P:GO:0000003;<br>F:GO:0030528;<br>F:GO:0005515;<br>P:GO:0040007;<br>P:GO:0006898;<br>P:GO:0006412;<br>P:GO:0043488;<br>C:GO:0044424;<br>P:GO:0002119;<br>P:GO:0006352;<br>N:GO:2000112;<br>F:GO:0003729 | -                                                                                                                                   | EC:3.6.5.3  | IPR000812; IPR011665; G3DSA:1.20.5.650 (GENE3D), PTHR11618:SF4 (PANTHER)       |
| Caenorhabditis briggsae | briggsae cbr-egg-3 protein                                                           | 3  | P:GO:0016311;<br>F:GO:0004721;<br>F:GO:0005515                                                                                                                                                                           | -                                                                                                                                   | EC:3.1.3.16 | PTHR19134 (PANTHER), PTHR19134:SF19 (PANTHER), SignalP (SIGNALP)               |
|                         | -                                                                                    | 0  |                                                                                                                                                                                                                          |                                                                                                                                     |             | SignalP (SIGNALP)                                                              |
|                         | -                                                                                    | 0  |                                                                                                                                                                                                                          |                                                                                                                                     |             | -                                                                              |
| Caenorhabditis elegans  | #NAME?                                                                               | 2  | P:GO:0008652;<br>F:GO:0016491                                                                                                                                                                                            | -                                                                                                                                   |             | IPR004313; IPR011051; IPR014710                                                |

|                              |                                                 |    |                                                                                                                                                                                                                                                            |                                                                                                                                                                                                                                                            |            |                                                                                                          |
|------------------------------|-------------------------------------------------|----|------------------------------------------------------------------------------------------------------------------------------------------------------------------------------------------------------------------------------------------------------------|------------------------------------------------------------------------------------------------------------------------------------------------------------------------------------------------------------------------------------------------------------|------------|----------------------------------------------------------------------------------------------------------|
| Caenorhabditis briggsae      | -dh:ubiquinone reductase 23kd subunit precursor | 15 | P:GO:0006979;<br>P:GO:0006810;<br>P:GO:0040010;<br>P:GO:0008340;<br>P:GO:0019684;<br>F:GO:0008137;<br>C:GO:0005747;<br>F:GO:0009055;<br>F:GO:0051539;<br>P:GO:0006120;<br>P:GO:0002119;<br>P:GO:0042493;<br>P:GO:0032981;<br>P:GO:0009792;<br>F:GO:0005506 | -                                                                                                                                                                                                                                                          | EC:1.6.5.3 | IPR001450; IPR010226; IPR012285;<br>IPR017896; IPR017900; PTHR10849<br>(PANTHER), SSF54862 (SUPERFAMILY) |
| Loa loa                      | -dh dehydroge-se                                | 15 | P:GO:0006979;<br>P:GO:0006810;<br>P:GO:0040010;<br>P:GO:0008340;<br>P:GO:0019684;<br>F:GO:0008137;<br>C:GO:0005747;<br>F:GO:0009055;<br>F:GO:0051539;<br>P:GO:0006120;<br>P:GO:0002119;<br>P:GO:0042493;<br>P:GO:0032981;<br>P:GO:0009792;<br>F:GO:0005506 | -                                                                                                                                                                                                                                                          | EC:1.6.5.3 | IPR001450; IPR010226; IPR012285;<br>IPR017896; IPR017900; PTHR10849<br>(PANTHER), SSF54862 (SUPERFAMILY) |
| Caenorhabditis elegans       | ras suppressor                                  | 0  |                                                                                                                                                                                                                                                            | F:GO:0005515                                                                                                                                                                                                                                               | -          |                                                                                                          |
| Dictyostelium discoideum AX4 | tpr repeat containing protein                   | 0  |                                                                                                                                                                                                                                                            | P:GO:0007047;<br>P:GO:0008360;<br>C:GO:0009274;<br>P:GO:0009273;<br>F:GO:0016763;<br>P:GO:0046677;<br>F:GO:0003677;<br>P:GO:0006464;<br>F:GO:0003824;<br>F:GO:0008658;<br>F:GO:0008233;<br>C:GO:0005622;<br>F:GO:0016881;<br>P:GO:0009252;<br>F:GO:0005488 |            | SignalP (SIGNALP)                                                                                        |
|                              | -                                               | 0  |                                                                                                                                                                                                                                                            |                                                                                                                                                                                                                                                            |            | SignalP (SIGNALP)                                                                                        |
|                              | -                                               | 0  |                                                                                                                                                                                                                                                            |                                                                                                                                                                                                                                                            |            | SignalP (SIGNALP)                                                                                        |
| Canis familiaris             | small edrk-rich factor 2                        | 0  |                                                                                                                                                                                                                                                            | F:GO:0003674;<br>C:GO:0005575                                                                                                                                                                                                                              |            | -                                                                                                        |
|                              | -                                               | 0  |                                                                                                                                                                                                                                                            |                                                                                                                                                                                                                                                            |            | SignalP (SIGNALP)                                                                                        |
|                              | -                                               | 0  |                                                                                                                                                                                                                                                            |                                                                                                                                                                                                                                                            |            | -                                                                                                        |
| Candida tropicalis MYA-3404  | adp-ribosylation factor                         | 4  | P:GO:0007264;<br>P:GO:0030036;<br>C:GO:0005737;<br>F:GO:0005525                                                                                                                                                                                            | -                                                                                                                                                                                                                                                          |            | -                                                                                                        |

|                         |                                  |   |              |                                                                                                                                                                                                                                                            |                                                                                                                                                                                                |
|-------------------------|----------------------------------|---|--------------|------------------------------------------------------------------------------------------------------------------------------------------------------------------------------------------------------------------------------------------------------------|------------------------------------------------------------------------------------------------------------------------------------------------------------------------------------------------|
| Caenorhabditis elegans  | rab5 gdp gtp exchange factor     | 1 | F:GO:0005488 | -                                                                                                                                                                                                                                                          | IPR002653; PTHR23101 (PANTHER), PTHR23101:SF2 (PANTHER), SSF57716 (SUPERFAMILY)                                                                                                                |
| Caenorhabditis elegans  | rab5 gdp gtp exchange factor     | 1 | F:GO:0005488 | -                                                                                                                                                                                                                                                          | IPR002653; PTHR23101 (PANTHER), PTHR23101:SF2 (PANTHER), SSF57716 (SUPERFAMILY)                                                                                                                |
|                         | -                                | 0 |              |                                                                                                                                                                                                                                                            | -                                                                                                                                                                                              |
|                         | -                                | 0 |              |                                                                                                                                                                                                                                                            | -                                                                                                                                                                                              |
|                         | -                                | 0 |              |                                                                                                                                                                                                                                                            | -                                                                                                                                                                                              |
| Caenorhabditis elegans  | transmembrane protein 41b        | 1 | C:GO:0016020 | -                                                                                                                                                                                                                                                          | IPR015414; PTHR12677 (PANTHER), SignalP (SIGNALP)                                                                                                                                              |
| Caenorhabditis briggsae | flowering locus t                | 0 |              |                                                                                                                                                                                                                                                            | -                                                                                                                                                                                              |
|                         | -                                | 0 |              |                                                                                                                                                                                                                                                            | -                                                                                                                                                                                              |
| Tribolium castaneum     | atp-binding sub-family member 10 | 0 |              | F:GO:0042626;<br>C:GO:0016021;<br>C:GO:0016020;<br>P:GO:0006810;<br>P:GO:0006200;<br>F:GO:0000166;<br>F:GO:0003674;<br>F:GO:0017111;<br>F:GO:0005524;<br>F:GO:0016887;<br>C:GO:0005575;<br>P:GO:0055085;<br>P:GO:0008152;<br>C:GO:0005886;<br>P:GO:0008150 | IPR001140; IPR011527; IPR017940;<br>G3DSA:1.20.1560.10 (GENE3D),<br>G3DSA:3.40.50.300 (GENE3D),<br>PTHR19242 (PANTHER),<br>PTHR19242:SF22 (PANTHER), SignalP (SIGNALP), SSF52540 (SUPERFAMILY) |
| Caenorhabditis briggsae | -dph--cytochrome p450 reductase  | 1 | C:GO:0044464 | -                                                                                                                                                                                                                                                          | IPR008254; IPR015702;<br>G3DSA:3.40.50.360 (GENE3D),<br>PTHR19384 (PANTHER), SignalP (SIGNALP), SSF52218 (SUPERFAMILY)                                                                         |
|                         | -                                | 0 |              |                                                                                                                                                                                                                                                            | -                                                                                                                                                                                              |
| Caenorhabditis briggsae | pan domain containing protein    | 0 |              |                                                                                                                                                                                                                                                            | IPR003014; IPR003609; SSF57414 (SUPERFAMILY)                                                                                                                                                   |

|                         |                                                            |    |                                                                                                                                                                                                                                                                                                                                                                                                                                                                        |   |                                                                                                                  |
|-------------------------|------------------------------------------------------------|----|------------------------------------------------------------------------------------------------------------------------------------------------------------------------------------------------------------------------------------------------------------------------------------------------------------------------------------------------------------------------------------------------------------------------------------------------------------------------|---|------------------------------------------------------------------------------------------------------------------|
| Brugia malayi           | low density lipoprotein receptor-related protein 6         | 27 | P:GO:0030326;<br>P:GO:0048593;<br>P:GO:0007369;<br>P:GO:0001501;<br>P:GO:0030111;<br>P:GO:0007507;<br>P:GO:0016043;<br>P:GO:0016477;<br>P:GO:0050793;<br>P:GO:0009798;<br>P:GO:0042127;<br>P:GO:0010646;<br>P:GO:0048646;<br>P:GO:0009952;<br>F:GO:0005515;<br>P:GO:0060443;<br>P:GO:0048523;<br>P:GO:0021872;<br>P:GO:0045449;<br>P:GO:0048522;<br>P:GO:0065008;<br>P:GO:0021915;<br>C:GO:0043229;<br>P:GO:0051239;<br>C:GO:0044444;<br>C:GO:0016020;<br>P:GO:0060562 | - | IPR006210; IPR011042;<br>G3DSA:2.10.25.10 (GENE3D),<br>PTHR10529 (PANTHER), SSF57196<br>(SUPERFAMILY)            |
| -                       | -                                                          | 0  | -                                                                                                                                                                                                                                                                                                                                                                                                                                                                      | - | -                                                                                                                |
| Caenorhabditis briggsae | Hypothetical protein CBG18221 [Caenorhabditis briggsae]    | 0  | -                                                                                                                                                                                                                                                                                                                                                                                                                                                                      | - | -                                                                                                                |
| -                       | -                                                          | 0  | -                                                                                                                                                                                                                                                                                                                                                                                                                                                                      | - | -                                                                                                                |
| Loa loa                 | nik and ikk binding protein                                | 0  | -                                                                                                                                                                                                                                                                                                                                                                                                                                                                      | - | PTHR21512 (PANTHER),<br>PTHR21512:SF6 (PANTHER)                                                                  |
| Loa loa                 | nik and ikk binding protein                                | 0  | -                                                                                                                                                                                                                                                                                                                                                                                                                                                                      | - | PTHR21512 (PANTHER),<br>PTHR21512:SF6 (PANTHER)                                                                  |
| Loa loa                 | nik and ikk binding protein                                | 0  | -                                                                                                                                                                                                                                                                                                                                                                                                                                                                      | - | PTHR21512 (PANTHER),<br>PTHR21512:SF6 (PANTHER)                                                                  |
| Caenorhabditis elegans  | odd oz protein                                             | 1  | F:GO:0003824                                                                                                                                                                                                                                                                                                                                                                                                                                                           | - | IPR013032; PTHR11219 (PANTHER),<br>PTHR11219:SF4 (PANTHER)                                                       |
| -                       | -                                                          | 0  | -                                                                                                                                                                                                                                                                                                                                                                                                                                                                      | - | -                                                                                                                |
| Caenorhabditis elegans  | uncoordi-ted family member (unc-103)                       | 4  | F:GO:0005249;<br>P:GO:0055085;<br>P:GO:0006813;<br>C:GO:0016021                                                                                                                                                                                                                                                                                                                                                                                                        | - | PTHR10217 (PANTHER),<br>PTHR10217:SF15 (PANTHER)                                                                 |
| -                       | -                                                          | 0  | -                                                                                                                                                                                                                                                                                                                                                                                                                                                                      | - | -                                                                                                                |
| Caenorhabditis briggsae | phosphodiesterase 8a                                       | 7  | P:GO:0007411;<br>P:GO:0000160;<br>F:GO:0004871;<br>F:GO:0046872;<br>F:GO:0004115;<br>P:GO:0007165;<br>P:GO:0008152                                                                                                                                                                                                                                                                                                                                                     | - | IPR002073; IPR023088; IPR023174;<br>PTHR11347 (PANTHER),<br>PTHR11347:SF38 (PANTHER),<br>SSF109604 (SUPERFAMILY) |
| -                       | -                                                          | 0  | -                                                                                                                                                                                                                                                                                                                                                                                                                                                                      | - | -                                                                                                                |
| Caenorhabditis elegans  | protein                                                    | 2  | F:GO:0016787;<br>P:GO:0044262                                                                                                                                                                                                                                                                                                                                                                                                                                          | - | -                                                                                                                |
| -                       | -                                                          | 0  | -                                                                                                                                                                                                                                                                                                                                                                                                                                                                      | - | -                                                                                                                |
| Loa loa                 | elegans protein partially confirmed by transcript evidence | 1  | F:GO:0046872                                                                                                                                                                                                                                                                                                                                                                                                                                                           | - | IPR017907                                                                                                        |
| -                       | -                                                          | 0  | -                                                                                                                                                                                                                                                                                                                                                                                                                                                                      | - | -                                                                                                                |
| -                       | -                                                          | 0  | -                                                                                                                                                                                                                                                                                                                                                                                                                                                                      | - | -                                                                                                                |



|                         |                                                            |    |                                                                                                                                                                                                                                                                             |                                                                 |                                                                                                       |
|-------------------------|------------------------------------------------------------|----|-----------------------------------------------------------------------------------------------------------------------------------------------------------------------------------------------------------------------------------------------------------------------------|-----------------------------------------------------------------|-------------------------------------------------------------------------------------------------------|
| synthetic construct     | vesicle-associated membrane protein 8                      | 10 | P:GO:0006461;<br>P:GO:0006944;<br>C:GO:0005769;<br>P:GO:0006892;<br>C:GO:0012505;<br>C:GO:0005624;<br>C:GO:0031201;<br>F:GO:0005515;<br>C:GO:0016021;<br>C:GO:0005739                                                                                                       | -                                                               | SignalIP (SIGNALP)                                                                                    |
|                         | -                                                          | 0  |                                                                                                                                                                                                                                                                             |                                                                 | -                                                                                                     |
|                         | -                                                          | 0  |                                                                                                                                                                                                                                                                             |                                                                 | -                                                                                                     |
| Homo sapiens            | high mobility group at-hook isoform cra_e                  | 16 | C:GO:0000785;<br>F:GO:0046965;<br>P:GO:0006345;<br>P:GO:0006461;<br>P:GO:0006268;<br>F:GO:0042975;<br>P:GO:0006337;<br>C:GO:0005829;<br>C:GO:0005667;<br>P:GO:0019047;<br>F:GO:0003700;<br>F:GO:0003680;<br>F:GO:0019899;<br>F:GO:0030374;<br>P:GO:0019059;<br>P:GO:0044419 | -                                                               | -                                                                                                     |
| Caenorhabditis elegans  | ngfi-a binding protein 2                                   | 9  | P:GO:0042552;<br>F:GO:0030528;<br>P:GO:0045682;<br>P:GO:0014037;<br>P:GO:0045449;<br>P:GO:0040035;<br>F:GO:0005515;<br>P:GO:0001958;<br>P:GO:0002009                                                                                                                        | -                                                               | IPR006988; IPR013761; PTHR12623 (PANTHER), PTHR12623:SF8 (PANTHER)                                    |
| Caenorhabditis briggsae | elegans protein partially confirmed by transcript evidence | 0  |                                                                                                                                                                                                                                                                             |                                                                 | IPR003378                                                                                             |
|                         | -                                                          | 0  |                                                                                                                                                                                                                                                                             |                                                                 | -                                                                                                     |
|                         | -                                                          | 0  |                                                                                                                                                                                                                                                                             |                                                                 | -                                                                                                     |
| Caenorhabditis elegans  | hypothetical protein F57B10.14 [Caenorhabditis elegans]    | 0  |                                                                                                                                                                                                                                                                             | F:GO:0008121;<br>F:GO:0009055;<br>P:GO:0006122;<br>C:GO:0031966 | -                                                                                                     |
| Caenorhabditis elegans  | immunoglobulin i-set domain containing protein             | 0  |                                                                                                                                                                                                                                                                             | F:GO:0005509                                                    | IPR007110; IPR013098; IPR013783; PTHR10075 (PANTHER), PTHR10075:SF2 (PANTHER), SSF48726 (SUPERFAMILY) |
| Caenorhabditis elegans  | stomatin-like protein 2                                    | 3  | C:GO:0005743;<br>C:GO:0005856;<br>F:GO:0005102                                                                                                                                                                                                                              | -                                                               | -                                                                                                     |

|                        |                                                       |    |                                                                                                                                                                                                                                           |              |              |                                                                                                                                    |
|------------------------|-------------------------------------------------------|----|-------------------------------------------------------------------------------------------------------------------------------------------------------------------------------------------------------------------------------------------|--------------|--------------|------------------------------------------------------------------------------------------------------------------------------------|
| Loa loa                | paxillin                                              | 14 | P:GO:0034614;<br>P:GO:0040010;<br>C:GO:0005875;<br>F:GO:0008013;<br>F:GO:0008270;<br>F:GO:0017166;<br>P:GO:0007155;<br>C:GO:0005925;<br>P:GO:0002119;<br>P:GO:0007172;<br>P:GO:0007165;<br>P:GO:0009792;<br>C:GO:0030027;<br>P:GO:0006936 | -            |              | SignalP (SIGNALP)                                                                                                                  |
| Caenorhabditis elegans | elegans protein confirmed by transcript evidence      | 0  |                                                                                                                                                                                                                                           | F:GO:0005488 | -            |                                                                                                                                    |
| Caenorhabditis elegans | hypothetical protein T08B1.1 [Caenorhabditis elegans] | 6  | C:GO:0016021;<br>P:GO:0009792;<br>P:GO:0040010;<br>P:GO:0055085;<br>F:GO:0005215;<br>P:GO:0002119                                                                                                                                         | -            |              | PTHR11600 (PANTHER),<br>PTHR11600:SF28 (PANTHER)                                                                                   |
|                        | -                                                     | 0  |                                                                                                                                                                                                                                           |              |              | -                                                                                                                                  |
|                        | -                                                     | 0  |                                                                                                                                                                                                                                           |              |              | -                                                                                                                                  |
| Loa loa                | sel-1 suppressor of lin-12-like ( elegans)            | 4  | F:GO:0005515;<br>F:GO:0016787;<br>C:GO:0016021;<br>C:GO:0005783                                                                                                                                                                           | -            |              | IPR006597; IPR011990; PTHR11102 (PANTHER), PTHR11102:SF11 (PANTHER), SSF81901 (SUPERFAMILY)                                        |
| Loa loa                | sel-1 suppressor of lin-12-like ( elegans)            | 4  | F:GO:0005515;<br>F:GO:0016787;<br>C:GO:0016021;<br>C:GO:0005783                                                                                                                                                                           | -            |              | IPR006597; IPR011990; PTHR11102 (PANTHER), PTHR11102:SF11 (PANTHER), SSF81901 (SUPERFAMILY)                                        |
|                        | -                                                     | 0  |                                                                                                                                                                                                                                           |              |              | -                                                                                                                                  |
| Pongo abelii           | keratinocyte associated protein 2                     | 4  | C:GO:0008250;<br>C:GO:0016021;<br>F:GO:0004579;<br>P:GO:0018279                                                                                                                                                                           | -            | EC:2.4.1.119 | SignalP (SIGNALP)                                                                                                                  |
|                        | -                                                     | 0  |                                                                                                                                                                                                                                           |              |              | -                                                                                                                                  |
| Caenorhabditis elegans | hypothetical protein F41B4.1 [Caenorhabditis elegans] | 1  | F:GO:0005515                                                                                                                                                                                                                              | -            |              | -                                                                                                                                  |
| Loa loa                | imp1 inner mitochondrial membrane peptidase-like      | 4  | F:GO:0008236;<br>P:GO:0006508;<br>C:GO:0016020;<br>C:GO:0005739                                                                                                                                                                           | -            |              | IPR000223; IPR011056; IPR015927; IPR019759; PTHR12383 (PANTHER), PTHR12383:SF2 (PANTHER)                                           |
|                        | -                                                     | 0  |                                                                                                                                                                                                                                           |              |              | SignalP (SIGNALP)                                                                                                                  |
|                        | -                                                     | 0  |                                                                                                                                                                                                                                           |              |              | -                                                                                                                                  |
| Loa loa                | protein-tyrosine phosphatase containing protein       | 4  | F:GO:0004725;<br>P:GO:0006470;<br>P:GO:0009792;<br>P:GO:0000003                                                                                                                                                                           | -            | EC:3.1.3.48  | IPR000242; IPR000387; IPR016130; G3DSA:3.90.190.10 (GENE3D), PTHR19134 (PANTHER), PTHR19134:SF26 (PANTHER), SSF52799 (SUPERFAMILY) |
|                        |                                                       |    |                                                                                                                                                                                                                                           |              |              | IPR003598; IPR007110; IPR013098; IPR013783; PTHR19897 (PANTHER), SSF48726 (SUPERFAMILY)                                            |
| Caenorhabditis elegans | briggsae cbr-kcc-3 protein                            | 5  | F:GO:0022891;<br>P:GO:0007638;<br>P:GO:0055085;<br>F:GO:0022804;<br>C:GO:0016020                                                                                                                                                          | -            |              | IPR004841; SignalP (SIGNALP)                                                                                                       |
|                        | -                                                     | 0  |                                                                                                                                                                                                                                           |              |              | -                                                                                                                                  |

|                        |                                                                                 |    |                                                                                                                                                                                                         |                                                                                  |            |                                                                                                                         |
|------------------------|---------------------------------------------------------------------------------|----|---------------------------------------------------------------------------------------------------------------------------------------------------------------------------------------------------------|----------------------------------------------------------------------------------|------------|-------------------------------------------------------------------------------------------------------------------------|
| Caenorhabditis elegans | briggsae cbr-acc-1 protein                                                      | 1  | C:GO:0016020                                                                                                                                                                                            | -                                                                                |            | IPR006201; PTHR18945:SF12 (PANTHER)                                                                                     |
| Caenorhabditis elegans | briggsae cbr-tw-16 protein                                                      | 3  | C:GO:0016021;<br>P:GO:0006813;<br>F:GO:0005267                                                                                                                                                          | -                                                                                |            | -                                                                                                                       |
| Caenorhabditis elegans | dead h (asp-glu-ala-asp his) box polypeptide 11 (chl1-like helicase cerevisiae) | 6  | F:GO:0003676;<br>F:GO:0008026;<br>P:GO:0000003;<br>F:GO:0000166;<br>P:GO:0006139;<br>P:GO:0009792                                                                                                       | -                                                                                |            | -                                                                                                                       |
|                        | -                                                                               | 0  |                                                                                                                                                                                                         |                                                                                  |            | SignalP (SIGNALP)                                                                                                       |
|                        | -                                                                               | 0  |                                                                                                                                                                                                         |                                                                                  |            | SignalP (SIGNALP)                                                                                                       |
| Brugia malayi          | autophagy-related protein 13                                                    | 3  | P:GO:0000045;<br>F:GO:0005515;<br>C:GO:0070969                                                                                                                                                          | -                                                                                |            | IPR018731; PTHR13430 (PANTHER)                                                                                          |
| Caenorhabditis elegans | hypothetical protein C29E4.13 [Caenorhabditis elegans]                          | 0  |                                                                                                                                                                                                         | P:GO:0000003;<br>P:GO:0040010;<br>P:GO:0006898;<br>F:GO:0008270;<br>C:GO:0005622 |            | IPR007087; IPR015880                                                                                                    |
| Caenorhabditis elegans | hypothetical protein C29E4.13 [Caenorhabditis elegans]                          | 0  |                                                                                                                                                                                                         | P:GO:0000003;<br>P:GO:0040010;<br>P:GO:0006898;<br>F:GO:0008270;<br>C:GO:0005622 |            | IPR007087; IPR015880                                                                                                    |
|                        | -                                                                               | 0  |                                                                                                                                                                                                         |                                                                                  |            | -                                                                                                                       |
| Brugia malayi          | rad9 family protein                                                             | 0  |                                                                                                                                                                                                         | P:GO:0006281                                                                     |            | IPR007268                                                                                                               |
|                        | -                                                                               | 0  |                                                                                                                                                                                                         |                                                                                  |            | -                                                                                                                       |
|                        | -                                                                               | 0  |                                                                                                                                                                                                         |                                                                                  |            | SignalP (SIGNALP)                                                                                                       |
|                        | -                                                                               | 0  |                                                                                                                                                                                                         |                                                                                  |            | -                                                                                                                       |
|                        | -                                                                               | 0  |                                                                                                                                                                                                         |                                                                                  |            | SignalP (SIGNALP)                                                                                                       |
|                        | -                                                                               | 0  |                                                                                                                                                                                                         |                                                                                  |            | SignalP (SIGNALP)                                                                                                       |
|                        | -                                                                               | 0  |                                                                                                                                                                                                         |                                                                                  |            | -                                                                                                                       |
| Caenorhabditis elegans | atp-binding domain-containing protein                                           | 12 | P:GO:0006412;<br>C:GO:0005829;<br>P:GO:0034227;<br>P:GO:0048598;<br>P:GO:0048599;<br>P:GO:0007283;<br>F:GO:0005524;<br>F:GO:0016740;<br>P:GO:0040025;<br>P:GO:0002098;<br>F:GO:0000049;<br>P:GO:0006974 | -                                                                                | EC:3.6.5.3 | PTHR11807 (PANTHER),<br>PTHR11807:SF3 (PANTHER)                                                                         |
|                        | -                                                                               | 0  |                                                                                                                                                                                                         |                                                                                  |            | IPR000276                                                                                                               |
| Caenorhabditis elegans | transducin beta-like protein 3                                                  | 8  | P:GO:0040010;<br>P:GO:0045132;<br>P:GO:0006364;<br>P:GO:0000003;<br>C:GO:0032040;<br>P:GO:0006898;<br>P:GO:0009792;<br>C:GO:0005634                                                                     | -                                                                                |            | IPR001680; IPR011047; IPR015943;<br>IPR017986; IPR019781; IPR019782;<br>PTHR19854 (PANTHER),<br>PTHR19854:SF2 (PANTHER) |

|                             |                                                                                    |    |                                                                                                                                                                                                                                                                                                                                                                                                                     |   |             |                                                                                             |
|-----------------------------|------------------------------------------------------------------------------------|----|---------------------------------------------------------------------------------------------------------------------------------------------------------------------------------------------------------------------------------------------------------------------------------------------------------------------------------------------------------------------------------------------------------------------|---|-------------|---------------------------------------------------------------------------------------------|
| Caenorhabditis elegans      | msp-domain protein 1 variant                                                       | 6  | P:GO:0040018;<br>F:GO:0005515;<br>C:GO:0031143;<br>P:GO:0000003;<br>P:GO:0019915;<br>C:GO:0044297                                                                                                                                                                                                                                                                                                                   | - | -           | -                                                                                           |
| Caenorhabditis elegans      | msp-domain protein 1 variant                                                       | 6  | P:GO:0040018;<br>F:GO:0005515;<br>C:GO:0031143;<br>P:GO:0000003;<br>P:GO:0019915;<br>C:GO:0044297                                                                                                                                                                                                                                                                                                                   | - | -           | -                                                                                           |
| -                           | -                                                                                  | 0  | -                                                                                                                                                                                                                                                                                                                                                                                                                   | - | -           | -                                                                                           |
| -                           | -                                                                                  | 0  | -                                                                                                                                                                                                                                                                                                                                                                                                                   | - | -           | -                                                                                           |
| -                           | -                                                                                  | 0  | -                                                                                                                                                                                                                                                                                                                                                                                                                   | - | -           | -                                                                                           |
| -                           | -                                                                                  | 0  | -                                                                                                                                                                                                                                                                                                                                                                                                                   | - | -           | -                                                                                           |
| Caenorhabditis elegans      | alix (apoptosis-linked gene 2 interacting protein x) homolog family member (alx-1) | 0  | -                                                                                                                                                                                                                                                                                                                                                                                                                   | - | -           | IPR004328; G3DSA:1.25.40.280 (GENE3D), PTHR23030 (PANTHER), PTHR23030:SF11 (PANTHER)        |
| -                           | -                                                                                  | 0  | -                                                                                                                                                                                                                                                                                                                                                                                                                   | - | -           | -                                                                                           |
| Angiostrongylus cantonensis | elegans protein partially confirmed by transcript evidence                         | 0  | -                                                                                                                                                                                                                                                                                                                                                                                                                   | - | -           | SignalP (SIGNALP)                                                                           |
| -                           | -                                                                                  | 0  | -                                                                                                                                                                                                                                                                                                                                                                                                                   | - | -           | -                                                                                           |
| -                           | -                                                                                  | 0  | -                                                                                                                                                                                                                                                                                                                                                                                                                   | - | -           | -                                                                                           |
| Ailuropoda melanoleuca      | stip1 homology and u-box containing protein 1                                      | 24 | P:GO:0000209;<br>P:GO:0051865;<br>F:GO:0030544;<br>P:GO:0006457;<br>F:GO:0034450;<br>P:GO:0071218;<br>P:GO:0051604;<br>C:GO:0042405;<br>P:GO:0031398;<br>F:GO:0051879;<br>P:GO:0030579;<br>F:GO:0030911;<br>P:GO:0031943;<br>C:GO:0005737;<br>F:GO:0030674;<br>C:GO:0000151;<br>P:GO:0032436;<br>P:GO:0006515;<br>P:GO:0090035;<br>F:GO:0051787;<br>F:GO:0042803;<br>C:GO:0031371;<br>F:GO:0019900;<br>F:GO:0046332 | - | -           | IPR003613; IPR013083; PTHR22904 (PANTHER), PTHR22904:SF27 (PANTHER), SSF57850 (SUPERFAMILY) |
| Caenorhabditis elegans      | ribonuclease h1                                                                    | 5  | F:GO:0004523;<br>P:GO:0006264;<br>C:GO:0005634;<br>C:GO:0005739;<br>F:GO:0042803                                                                                                                                                                                                                                                                                                                                    | - | EC:3.1.26.4 | IPR002156; IPR011320; IPR012337; G3DSA:3.30.420.10 (GENE3D), PTHR10642 (PANTHER)            |

|                         |                                                            |   |                                                                                                                                                      |                                                |            |                                                                                                                                                   |
|-------------------------|------------------------------------------------------------|---|------------------------------------------------------------------------------------------------------------------------------------------------------|------------------------------------------------|------------|---------------------------------------------------------------------------------------------------------------------------------------------------|
| Caenorhabditis brenneri | c ntenin alcadein homolog family member (casy-1)           | 9 | P:GO:0009792;<br>C:GO:0005615;<br>P:GO:0007156;<br>F:GO:0005515;<br>C:GO:0032809;<br>P:GO:0008355;<br>C:GO:0043231;<br>F:GO:0005509;<br>C:GO:0016021 | -                                              |            | PTHR14139 (PANTHER), SignalP (SIGNALP)                                                                                                            |
| Caenorhabditis elegans  | hypothetical protein Y54H5A.2 [Caenorhabditis elegans]     | 0 |                                                                                                                                                      |                                                |            | -                                                                                                                                                 |
| Caenorhabditis elegans  | beta-lactamase family protein                              | 0 |                                                                                                                                                      |                                                |            | IPR001466; IPR012338;<br>G3DSA:3.40.710.10 (GENE3D),<br>PTHR10566 (PANTHER),<br>PTHR10566:SF6 (PANTHER), SignalP (SIGNALP)                        |
| Loa loa                 | trehalase                                                  | 3 | P:GO:0009792;<br>F:GO:0004553;<br>P:GO:0044262                                                                                                       | -                                              | EC:3.2.1.0 | IPR001661; IPR008928;<br>PTHR23403:SF1 (PANTHER), SignalP (SIGNALP)                                                                               |
| Loa loa                 | elegans protein confirmed by transcript evidence           | 0 |                                                                                                                                                      | P:GO:0055114;<br>F:GO:0016491                  |            | IPR001395; IPR018170; IPR020471;<br>IPR023210; PTHR11732:SF34 (PANTHER)                                                                           |
| Caenorhabditis elegans  | briggsae cbr-ham-1 protein                                 | 0 |                                                                                                                                                      |                                                |            | -                                                                                                                                                 |
| Caenorhabditis briggsae | tata-binding protein-associated factor 172                 | 6 | F:GO:0003677;<br>F:GO:0005524;<br>F:GO:0003700;<br>F:GO:0004386;<br>P:GO:0016481;<br>C:GO:0005634                                                    | -                                              |            | IPR001650; G3DSA:3.40.50.300 (GENE3D), PTHR10799 (PANTHER), PTHR10799:SF72 (PANTHER), SSF52540 (SUPERFAMILY)                                      |
| Caenorhabditis elegans  | briggsae cbr-coq-8 protein                                 | 0 |                                                                                                                                                      |                                                |            | -                                                                                                                                                 |
| Caenorhabditis briggsae | nodal modulator 1                                          | 1 | P:GO:0000003                                                                                                                                         | -                                              |            | IPR008970; IPR013783; PTHR23303 (PANTHER), PTHR23303:SF1 (PANTHER)                                                                                |
|                         | -                                                          | 0 |                                                                                                                                                      |                                                |            | -                                                                                                                                                 |
|                         | -                                                          | 0 |                                                                                                                                                      |                                                |            | -                                                                                                                                                 |
| Caenorhabditis briggsae | leucine rich repeat containing 59                          | 4 | P:GO:0009792;<br>C:GO:0043231;<br>C:GO:0044444;<br>C:GO:0044446                                                                                      | -                                              |            | IPR001611; IPR003591;<br>G3DSA:3.80.10.10 (GENE3D),<br>PTHR23155 (PANTHER),<br>PTHR23155:SF7 (PANTHER), PSS1450 (PROFILE), SSF52058 (SUPERFAMILY) |
| Pongo abelii            | chaperonin containing subunit 5                            | 7 | C:GO:0005730;<br>P:GO:0006457;<br>C:GO:0005815;<br>C:GO:0005832;<br>F:GO:0005524;<br>F:GO:0051082;<br>P:GO:0009615                                   | -                                              |            | SignalP (SIGNALP)                                                                                                                                 |
| Caenorhabditis elegans  | variable abnormal morphology family member (vab-10)        | 0 |                                                                                                                                                      | F:GO:0005509;<br>P:GO:0007050;<br>F:GO:0003779 |            | G3DSA:3.90.1290.10 (GENE3D),<br>PTHR11915 (PANTHER),<br>PTHR11915:SF49 (PANTHER),<br>SSF75399 (SUPERFAMILY)                                       |
|                         | -                                                          | 0 |                                                                                                                                                      |                                                |            | -                                                                                                                                                 |
| Caenorhabditis briggsae | elegans protein partially confirmed by transcript evidence | 0 |                                                                                                                                                      |                                                |            | -                                                                                                                                                 |
|                         | -                                                          | 0 |                                                                                                                                                      |                                                |            | -                                                                                                                                                 |
|                         | -                                                          | 0 |                                                                                                                                                      |                                                |            | -                                                                                                                                                 |
| Loa loa                 | beta-lactamase family protein                              | 0 |                                                                                                                                                      |                                                |            | -                                                                                                                                                 |
| Loa loa                 | hypothetical protein LOAG_04165 [Loa loa]                  | 0 |                                                                                                                                                      |                                                |            | -                                                                                                                                                 |

|                         |                                                            |    |                                                                                                                                                                                                                                                                                                                                                                                                                                                                                                          |   |             |                                                                                                                                                              |
|-------------------------|------------------------------------------------------------|----|----------------------------------------------------------------------------------------------------------------------------------------------------------------------------------------------------------------------------------------------------------------------------------------------------------------------------------------------------------------------------------------------------------------------------------------------------------------------------------------------------------|---|-------------|--------------------------------------------------------------------------------------------------------------------------------------------------------------|
| Loa loa                 | chromodomain helicase d- binding protein 1-like            | 6  | F:GO:0008026;<br>F:GO:0005515;<br>P:GO:0006338;<br>P:GO:0006974;<br>C:GO:0005634;<br>F:GO:0000166                                                                                                                                                                                                                                                                                                                                                                                                        | - |             | IPR000330; PTHR10799 (PANTHER),<br>PTHR10799:SF74 (PANTHER),<br>SSF52540 (SUPERFAMILY)                                                                       |
| Caenorhabditis elegans  | hypothetical protein B0041.5 [Caenorhabditis elegans]      | 3  | P:GO:0007411;<br>P:GO:0019915;<br>P:GO:0007413                                                                                                                                                                                                                                                                                                                                                                                                                                                           | - |             | PTHR23051 (PANTHER), SignalP<br>(SIGNALP)                                                                                                                    |
| Brugia malayi           | elegans protein partially confirmed by transcript evidence | 1  | F:GO:0005515                                                                                                                                                                                                                                                                                                                                                                                                                                                                                             | - |             | SignalP (SIGNALP)                                                                                                                                            |
| Caenorhabditis briggsae | cg4236                                                     | 33 | F:GO:0000122;<br>F:GO:0042393;<br>C:GO:0005700;<br>P:GO:0007307;<br>F:GO:0042826;<br>F:GO:0004402;<br>F:GO:0046974;<br>P:GO:0048813;<br>P:GO:0016571;<br>F:GO:0016251;<br>C:GO:0035098;<br>P:GO:0016584;<br>P:GO:0007517;<br>P:GO:0006335;<br>P:GO:0006342;<br>C:GO:0005737;<br>C:GO:0070176;<br>C:GO:0005667;<br>F:GO:0003676;<br>C:GO:0016589;<br>C:GO:0016590;<br>P:GO:0009792;<br>F:GO:0035035;<br>F:GO:0046976;<br>P:GO:0042766;<br>P:GO:0007346;<br>F:GO:0003682;<br>P:GO:0000789;<br>F:GO:0005515 | - | EC:2.3.1.48 | IPR001680; IPR011046; IPR015943;<br>IPR017986; IPR019775; IPR019781;<br>IPR019782; IPR020472; IPR022052;<br>PTHR22850 (PANTHER),<br>PTHR22850:SF27 (PANTHER) |
| Loa loa                 | elegans protein partially confirmed by transcript evidence | 1  | F:GO:0005515                                                                                                                                                                                                                                                                                                                                                                                                                                                                                             | - |             | SignalP (SIGNALP)                                                                                                                                            |

|                         |                                                                  |    |                                                                                                                                                                                                                                                                                                                                                                                                                                                                        |                                                |                                   |                                                                                                                                                              |
|-------------------------|------------------------------------------------------------------|----|------------------------------------------------------------------------------------------------------------------------------------------------------------------------------------------------------------------------------------------------------------------------------------------------------------------------------------------------------------------------------------------------------------------------------------------------------------------------|------------------------------------------------|-----------------------------------|--------------------------------------------------------------------------------------------------------------------------------------------------------------|
| Caenorhabditis briggsae | cg4236                                                           | 33 | F:GO:0042393;<br>C:GO:0005700;<br>P:GO:0007307;<br>F:GO:0042826;<br>F:GO:0004402;<br>F:GO:0046974;<br>P:GO:0048813;<br>P:GO:0016571;<br>F:GO:0016251;<br>C:GO:0035098;<br>P:GO:0016584;<br>P:GO:0007517;<br>P:GO:0006335;<br>P:GO:0006342;<br>C:GO:0005737;<br>C:GO:0070176;<br>C:GO:0005667;<br>F:GO:0003676;<br>C:GO:0016589;<br>C:GO:0016590;<br>P:GO:0009792;<br>F:GO:0035035;<br>F:GO:0046976;<br>P:GO:0042766;<br>P:GO:0007346;<br>F:GO:0003682;<br>P:GO:0000289 | -                                              | EC:2.3.1.48                       | IPR001680; IPR011046; IPR015943;<br>IPR017986; IPR019775; IPR019781;<br>IPR019782; IPR020472; IPR022052;<br>PTHR22850 (PANTHER),<br>PTHR22850:SF27 (PANTHER) |
|                         | -                                                                | 0  |                                                                                                                                                                                                                                                                                                                                                                                                                                                                        |                                                | -                                 |                                                                                                                                                              |
|                         | -                                                                | 0  |                                                                                                                                                                                                                                                                                                                                                                                                                                                                        |                                                | -                                 |                                                                                                                                                              |
| Caenorhabditis elegans  | elegans protein confirmed by transcript evidence                 | 0  |                                                                                                                                                                                                                                                                                                                                                                                                                                                                        | F:GO:0046872;<br>F:GO:0005488;<br>P:GO:0030001 |                                   | -                                                                                                                                                            |
| Caenorhabditis elegans  | yhb8_caeel ame: full=uncharacterized protein flags:<br>precursor | 0  |                                                                                                                                                                                                                                                                                                                                                                                                                                                                        |                                                |                                   | -                                                                                                                                                            |
| Caenorhabditis elegans  | protein arginine n-methyltransferase                             | 12 | C:GO:0005829;<br>P:GO:0018216;<br>F:GO:0035243;<br>F:GO:0043021;<br>P:GO:0010468;<br>F:GO:0035241;<br>P:GO:0000387;<br>F:GO:0005515;<br>F:GO:0008469;<br>F:GO:0016277;<br>C:GO:0005634;<br>P:GO:0016571                                                                                                                                                                                                                                                                | -                                              | EC:2.1.1.125<br>;<br>EC:2.1.1.126 | IPR010456; G3DSA:3.40.50.150<br>(GENE3D), PTHR11006 (PANTHER),<br>PTHR11006:SF4 (PANTHER), SSF53335<br>(SUPERFAMILY)                                         |
| Caenorhabditis briggsae | unc-82                                                           | 3  | P:GO:0006468;<br>F:GO:0005524;<br>F:GO:0004674                                                                                                                                                                                                                                                                                                                                                                                                                         | -                                              | EC:2.7.11.0                       | -                                                                                                                                                            |
| Caenorhabditis elegans  | briggsae cbr-tgt-2 protein                                       | 2  | F:GO:0016757;<br>P:GO:0006400                                                                                                                                                                                                                                                                                                                                                                                                                                          | -                                              |                                   | -                                                                                                                                                            |
|                         | -                                                                | 0  |                                                                                                                                                                                                                                                                                                                                                                                                                                                                        |                                                |                                   | -                                                                                                                                                            |
| Caenorhabditis elegans  | leucyl-tr- synthetase                                            | 3  | P:GO:0006412;<br>F:GO:0016874;<br>C:GO:0005737                                                                                                                                                                                                                                                                                                                                                                                                                         | -                                              | EC:3.6.5.3                        | IPR002300; IPR002302; IPR014729;<br>G3DSA:3.90.740.10 (GENE3D),<br>PTHR11946 (PANTHER), SSF52374<br>(SUPERFAMILY)                                            |

|                         |                                                     |   |                                                                                                                                                      |                                                                                                                                                                                                                                                                                                                                                                                                                                      |            |                                                                                                    |
|-------------------------|-----------------------------------------------------|---|------------------------------------------------------------------------------------------------------------------------------------------------------|--------------------------------------------------------------------------------------------------------------------------------------------------------------------------------------------------------------------------------------------------------------------------------------------------------------------------------------------------------------------------------------------------------------------------------------|------------|----------------------------------------------------------------------------------------------------|
| Acyrtosiphon pisum      | f-box-like wd repeat-containing protein tbl1xr1     | 0 |                                                                                                                                                      | F:GO:0003677;<br>C:GO:0005634;<br>P:GO:0010553;<br>F:GO:0003674;<br>P:GO:0060070;<br>P:GO:0016568;<br>P:GO:0006350;<br>F:GO:0016563;<br>C:GO:0017053;<br>F:GO:0010843;<br>F:GO:0047485;<br>F:GO:0004872;<br>C:GO:0005876;<br>F:GO:0042393;<br>P:GO:0008150;<br>F:GO:0008013;<br>P:GO:0045944;<br>P:GO:0043161;<br>F:GO:0003714;<br>P:GO:0045449;<br>C:GO:0005730;<br>P:GO:0045892;<br>C:GO:0000118;<br>F:GO:0005515;<br>C:GO:0005575 | -          |                                                                                                    |
| Caenorhabditis elegans  | variable abnormal morphology family member (vab-10) | 0 |                                                                                                                                                      |                                                                                                                                                                                                                                                                                                                                                                                                                                      |            | IPR018114                                                                                          |
| Caenorhabditis elegans  | protein ki-se domain containing protein             | 6 | F:GO:0046872;<br>P:GO:0032502;<br>F:GO:0005515;<br>F:GO:0004672;<br>P:GO:0009987;<br>F:GO:0000166                                                    | -                                                                                                                                                                                                                                                                                                                                                                                                                                    |            | IPR000719; IPR008271; IPR011009;<br>IPR015737; IPR017442; IPR020636;<br>G3DSA:1.10.510.10 (GENE3D) |
| Caenorhabditis elegans  | endoplasmic reticulum metallopeptidase 1            | 1 | C:GO:0044464                                                                                                                                         | -                                                                                                                                                                                                                                                                                                                                                                                                                                    |            | PTHR12147 (PANTHER), SignalP (SIGNALP)                                                             |
| Caenorhabditis briggsae | swib complex baf60b domain-containing protein       | 0 |                                                                                                                                                      | P:GO:0006259;<br>F:GO:0003674;<br>F:GO:0005509;<br>P:GO:0008150;<br>F:GO:0004518;<br>F:GO:0005515;<br>C:GO:0005575;<br>F:GO:0003677                                                                                                                                                                                                                                                                                                  |            | IPR003121; IPR019835; PTHR13844 (PANTHER)                                                          |
| Caenorhabditis elegans  | endonuclease exonuclease phosphatase family protein | 2 | F:GO:0016788;<br>P:GO:0000003                                                                                                                        | -                                                                                                                                                                                                                                                                                                                                                                                                                                    |            | G3DSA:3.60.10.10 (GENE3D)                                                                          |
| Ailuropoda melanoleuca  | fibrillarlin                                        | 9 | C:GO:0001652;<br>C:GO:0031428;<br>C:GO:0015030;<br>F:GO:0003723;<br>F:GO:0005515;<br>P:GO:0016074;<br>P:GO:0006364;<br>F:GO:0008168;<br>P:GO:0008033 | -                                                                                                                                                                                                                                                                                                                                                                                                                                    | EC:2.1.1.0 | -                                                                                                  |
| Caenorhabditis elegans  | acylpeptide hydrolase                               | 0 |                                                                                                                                                      | P:GO:0006508;<br>F:GO:0004252;<br>F:GO:0008236;<br>F:GO:0016787                                                                                                                                                                                                                                                                                                                                                                      |            | SignalP (SIGNALP)                                                                                  |
| Ancylostoma caninum     | secreted protein 6 precursor                        | 0 |                                                                                                                                                      | C:GO:0005576                                                                                                                                                                                                                                                                                                                                                                                                                         |            | IPR014044                                                                                          |



|                         |                                                            |    |                                                                                                                                                                       |   |                                                                                                                        |
|-------------------------|------------------------------------------------------------|----|-----------------------------------------------------------------------------------------------------------------------------------------------------------------------|---|------------------------------------------------------------------------------------------------------------------------|
| Caenorhabditis elegans  | lbp bpi cebp n-termi-l domain containing protein           | 6  | P:GO:0002119;<br>P:GO:0009792;<br>P:GO:0000003;<br>P:GO:0040007;<br>F:GO:0008289;<br>P:GO:0040011                                                                     | - | SignalP (SIGNALP)                                                                                                      |
| Caenorhabditis elegans  | inositol -triphosphate receptor                            | 10 | F:GO:0005515;<br>P:GO:0006816;<br>F:GO:0070679;<br>P:GO:0051592;<br>C:GO:0031095;<br>C:GO:0044428;<br>P:GO:0055085;<br>C:GO:0005783;<br>C:GO:0005887;<br>F:GO:0005220 | - | IPR000493; IPR000699; IPR015925;<br>G3DSA:1.25.10.30 (GENE3D),<br>PTHR13715:SF2 (PANTHER),<br>SSF100909 (SUPERFAMILY)  |
| Caenorhabditis briggsae | zinc c2h2 type family protein                              | 7  | P:GO:0009792;<br>F:GO:0003676;<br>C:GO:0005622;<br>F:GO:0005515;<br>P:GO:0040010;<br>P:GO:0000003;<br>F:GO:0008270                                                    | - | -                                                                                                                      |
| -                       | -                                                          | 0  | -                                                                                                                                                                     | - | -                                                                                                                      |
| Caenorhabditis elegans  | hypothetical protein T28B8.3 [Caenorhabditis elegans]      | 0  | -                                                                                                                                                                     | - | SignalP (SIGNALP)                                                                                                      |
| -                       | -                                                          | 0  | -                                                                                                                                                                     | - | -                                                                                                                      |
| -                       | -                                                          | 0  | -                                                                                                                                                                     | - | SignalP (SIGNALP)                                                                                                      |
| -                       | -                                                          | 0  | -                                                                                                                                                                     | - | -                                                                                                                      |
| -                       | -                                                          | 0  | -                                                                                                                                                                     | - | -                                                                                                                      |
| Caenorhabditis elegans  | elegans protein partially confirmed by transcript evidence | 0  | -                                                                                                                                                                     | - | -                                                                                                                      |
| Caenorhabditis elegans  | histone methyltransferase-like family member (met-1)       | 0  | F:GO:0016740;<br>F:GO:0008168;<br>P:GO:0006259;<br>F:GO:0003677;<br>C:GO:0005634;<br>F:GO:0018024;<br>P:GO:0006281;<br>F:GO:0003824;<br>F:GO:0005515;<br>F:GO:0004518 | - | IPR003616; G3DSA:2.170.270.10<br>(GENE3D), PTHR22884 (PANTHER),<br>PTHR22884:SF36 (PANTHER),<br>SSF82199 (SUPERFAMILY) |
| -                       | -                                                          | 0  | -                                                                                                                                                                     | - | -                                                                                                                      |
| -                       | -                                                          | 0  | -                                                                                                                                                                     | - | -                                                                                                                      |
| Caenorhabditis elegans  | elegans protein confirmed by transcript evidence           | 0  | -                                                                                                                                                                     | - | PTHR10900 (PANTHER),<br>PTHR10900:SF10 (PANTHER)                                                                       |
| Caenorhabditis briggsae | haloacid dehaloge-se-like hydrolase family protein         | 0  | F:GO:0008967;<br>F:GO:0016787;<br>P:GO:0008152;<br>F:GO:0003824                                                                                                       | - | SignalP (SIGNALP), SSF56784<br>(SUPERFAMILY)                                                                           |
| -                       | -                                                          | 0  | -                                                                                                                                                                     | - | -                                                                                                                      |

|                             |                                                            |    |                                                                                                                                                                                                                                                                                                                                                                  |                                                                                                   |            |                                                                                                                 |
|-----------------------------|------------------------------------------------------------|----|------------------------------------------------------------------------------------------------------------------------------------------------------------------------------------------------------------------------------------------------------------------------------------------------------------------------------------------------------------------|---------------------------------------------------------------------------------------------------|------------|-----------------------------------------------------------------------------------------------------------------|
| Homo sapiens                | alpha 4                                                    | 21 | P:GO:0001666;<br>F:GO:0047485;<br>C:GO:0030863;<br>C:GO:0043234;<br>F:GO:0005509;<br>P:GO:0051271;<br>C:GO:0005730;<br>P:GO:0042981;<br>P:GO:0051017;<br>F:GO:0051015;<br>F:GO:0001882;<br>P:GO:0051272;<br>C:GO:0001725;<br>P:GO:0048549;<br>C:GO:0031143;<br>F:GO:0005178;<br>C:GO:0048471;<br>C:GO:0030529;<br>F:GO:0042803;<br>P:GO:0015031;<br>P:GO:0032417 | -                                                                                                 |            | IPR011992; IPR014837; IPR018249;<br>PTHR11915 (PANTHER),<br>PTHR11915:SF47 (PANTHER),<br>SSF47473 (SUPERFAMILY) |
| Caenorhabditis elegans      | daf-16 foxo germline tumor affecting family member (dct-6) | 0  |                                                                                                                                                                                                                                                                                                                                                                  |                                                                                                   |            | -                                                                                                               |
| Caenorhabditis briggsae     | briggsae cbr-nhl-1 protein                                 | 4  | P:GO:0006915;<br>C:GO:0005622;<br>F:GO:0008270;<br>F:GO:0005515                                                                                                                                                                                                                                                                                                  | -                                                                                                 |            | -                                                                                                               |
|                             | -                                                          | 0  |                                                                                                                                                                                                                                                                                                                                                                  |                                                                                                   |            | -                                                                                                               |
| Loa loa                     | solute carrier family member e1                            | 0  |                                                                                                                                                                                                                                                                                                                                                                  | F:GO:0003674;<br>C:GO:0016021;<br>C:GO:0016020;<br>P:GO:0008150;<br>C:GO:0005575;<br>P:GO:0006810 |            | IPR004853; PTHR11132 (PANTHER),<br>SignalP (SIGNALP)                                                            |
| Caenorhabditis elegans      | i uaiaretic acid resistant family member (ndg-4)           | 3  | P:GO:0009792;<br>P:GO:0010171;<br>P:GO:0040010                                                                                                                                                                                                                                                                                                                   | -                                                                                                 |            | -                                                                                                               |
|                             | -                                                          | 0  |                                                                                                                                                                                                                                                                                                                                                                  |                                                                                                   |            | -                                                                                                               |
|                             | -                                                          | 0  |                                                                                                                                                                                                                                                                                                                                                                  |                                                                                                   |            | SignalP (SIGNALP)                                                                                               |
|                             | -                                                          | 0  |                                                                                                                                                                                                                                                                                                                                                                  |                                                                                                   |            | -                                                                                                               |
| Caenorhabditis elegans      | uncharacterized protein                                    | 0  |                                                                                                                                                                                                                                                                                                                                                                  | F:GO:0005488                                                                                      |            | -                                                                                                               |
| Caenorhabditis elegans      | uncharacterized protein                                    | 0  |                                                                                                                                                                                                                                                                                                                                                                  | F:GO:0005488                                                                                      |            | -                                                                                                               |
| Caenorhabditis elegans      | elegans protein confirmed by transcript evidence           | 0  |                                                                                                                                                                                                                                                                                                                                                                  |                                                                                                   |            | -                                                                                                               |
| Brugia malayi               | myotubularin-related family protein                        | 3  | P:GO:0016311;<br>F:GO:0016791;<br>P:GO:0000278                                                                                                                                                                                                                                                                                                                   | -                                                                                                 | EC:3.1.3.0 | -                                                                                                               |
|                             | -                                                          | 0  |                                                                                                                                                                                                                                                                                                                                                                  |                                                                                                   |            | -                                                                                                               |
| Angiostrongylus cantonensis | elegans protein confirmed by transcript evidence           | 7  | P:GO:0009792;<br>P:GO:0010171;<br>P:GO:0002119;<br>P:GO:0040011;<br>P:GO:0019915;<br>P:GO:0040007;<br>P:GO:0006898                                                                                                                                                                                                                                               | -                                                                                                 |            | IPR002486; PTHR10499 (PANTHER),<br>PTHR10499:SF58 (PANTHER), SignalP<br>(SIGNALP)                               |

|                         |                                                  |   |                                                                                                                                     |                                                                                                                    |  |                                                                                                                                                                                                           |
|-------------------------|--------------------------------------------------|---|-------------------------------------------------------------------------------------------------------------------------------------|--------------------------------------------------------------------------------------------------------------------|--|-----------------------------------------------------------------------------------------------------------------------------------------------------------------------------------------------------------|
| Caenorhabditis elegans  | uncoordinated family member (unc-89)             | 0 |                                                                                                                                     | F:GO:0004672;<br>F:GO:0005524;<br>F:GO:0005089;<br>P:GO:0006468;<br>P:GO:0035023;<br>F:GO:0004674;<br>C:GO:0005622 |  | IPR007110; IPR013098; IPR013783;<br>PTHR19897 (PANTHER), SSF48726<br>(SUPERFAMILY)                                                                                                                        |
|                         | -                                                | 0 |                                                                                                                                     |                                                                                                                    |  | -                                                                                                                                                                                                         |
|                         | -                                                | 0 |                                                                                                                                     |                                                                                                                    |  | -                                                                                                                                                                                                         |
|                         | -                                                | 0 |                                                                                                                                     |                                                                                                                    |  | -                                                                                                                                                                                                         |
| Caenorhabditis briggsae | steroid receptor-interacting snf2 domain protein | 5 | F:GO:0004386;<br>F:GO:0003677;<br>F:GO:0005515;<br>F:GO:0005524;<br>C:GO:0016021                                                    | -                                                                                                                  |  | IPR000330; PTHR10799 (PANTHER),<br>PTHR10799:SF51 (PANTHER), SignalP<br>(SIGNALP), SSF52540 (SUPERFAMILY)                                                                                                 |
| Caenorhabditis elegans  | microtubule interacting and domain containing 1  | 1 | C:GO:0044464                                                                                                                        | -                                                                                                                  |  | PTHR21222 (PANTHER)                                                                                                                                                                                       |
| Loa loa                 | transmembrane protein 16c                        | 0 |                                                                                                                                     | C:GO:0016021                                                                                                       |  | IPR007632; SignalP (SIGNALP)                                                                                                                                                                              |
|                         | -                                                | 0 |                                                                                                                                     |                                                                                                                    |  | -                                                                                                                                                                                                         |
|                         | -                                                | 0 |                                                                                                                                     |                                                                                                                    |  | -                                                                                                                                                                                                         |
| Caenorhabditis briggsae | egf-like domain containing protein               | 1 | P:GO:0040010                                                                                                                        | -                                                                                                                  |  | IPR000742; IPR006210; IPR013032;<br>PTHR11201 (PANTHER),<br>PTHR11201:SF162 (PANTHER)                                                                                                                     |
| Caenorhabditis briggsae | transmembrane protein 131                        | 1 | F:GO:0005515                                                                                                                        | -                                                                                                                  |  | IPR000896                                                                                                                                                                                                 |
|                         | -                                                | 0 |                                                                                                                                     |                                                                                                                    |  | -                                                                                                                                                                                                         |
|                         | -                                                | 0 |                                                                                                                                     |                                                                                                                    |  | PS51257 (PROFILE)                                                                                                                                                                                         |
|                         | -                                                | 0 |                                                                                                                                     |                                                                                                                    |  | -                                                                                                                                                                                                         |
| Acyrtosiphon pisum      | galactokinase 1                                  | 4 | P:GO:0005975;<br>F:GO:0005488;<br>P:GO:0044237;<br>F:GO:0016740                                                                     | -                                                                                                                  |  | IPR006203; IPR006204; IPR006206;<br>IPR014721; IPR020568;<br>G3DSA:3.30.70.890 (GENE3D),<br>PTHR10457 (PANTHER),<br>PTHR10457:SF6 (PANTHER), SSF55060<br>(SUPERFAMILY)                                    |
|                         | -                                                | 0 |                                                                                                                                     |                                                                                                                    |  | SignalP (SIGNALP)                                                                                                                                                                                         |
| Caenorhabditis briggsae | frizzled homolog 7b                              | 7 | P:GO:0007186;<br>F:GO:0004926;<br>C:GO:0016021;<br>P:GO:0007165;<br>P:GO:0007275;<br>P:GO:0016055;<br>F:GO:0004930                  | -                                                                                                                  |  | IPR015526; IPR020067;<br>PTHR11309:SF20 (PANTHER), SignalP<br>(SIGNALP)                                                                                                                                   |
|                         | -                                                | 0 |                                                                                                                                     |                                                                                                                    |  | -                                                                                                                                                                                                         |
|                         | -                                                | 0 |                                                                                                                                     |                                                                                                                    |  | -                                                                                                                                                                                                         |
|                         | -                                                | 0 |                                                                                                                                     |                                                                                                                    |  | SignalP (SIGNALP)                                                                                                                                                                                         |
| Caenorhabditis elegans  | t-complex protein 1 subunit theta                | 5 | C:GO:0005737;<br>C:GO:0005856;<br>P:GO:0006457;<br>F:GO:0005524;<br>F:GO:0051082                                                    | -                                                                                                                  |  | IPR001969; IPR002423; IPR012721;<br>G3DSA:1.10.560.10 (GENE3D),<br>G3DSA:3.30.260.10 (GENE3D),<br>G3DSA:3.50.7.10 (GENE3D), SSF52029<br>(SUPERFAMILY), SSF54849<br>(SUPERFAMILY)                          |
| Caenorhabditis elegans  | chaperonin containing subunit 8                  | 8 | C:GO:0005856;<br>P:GO:0006457;<br>P:GO:0035095;<br>F:GO:0005524;<br>F:GO:0051082;<br>F:GO:0042623;<br>C:GO:0005634;<br>C:GO:0005829 | -                                                                                                                  |  | IPR001969; IPR002194; IPR002423;<br>IPR012721; IPR017998;<br>G3DSA:1.10.560.10 (GENE3D),<br>G3DSA:3.30.260.10 (GENE3D),<br>G3DSA:3.50.7.10 (GENE3D), SSF52029<br>(SUPERFAMILY), SSF54849<br>(SUPERFAMILY) |

|                        |                                                        |    |                                                                                                                                                                                                                                                                                                               |                                                |                                                                                                                                                                                                           |
|------------------------|--------------------------------------------------------|----|---------------------------------------------------------------------------------------------------------------------------------------------------------------------------------------------------------------------------------------------------------------------------------------------------------------|------------------------------------------------|-----------------------------------------------------------------------------------------------------------------------------------------------------------------------------------------------------------|
| Caenorhabditis elegans | chaperonin containing subunit 8                        | 8  | C:GO:0005856;<br>P:GO:0006457;<br>P:GO:0035095;<br>F:GO:0005524;<br>F:GO:0051082;<br>F:GO:0042623;<br>C:GO:0005634;<br>C:GO:0005829                                                                                                                                                                           |                                                | IPR001969; IPR002194; IPR002423;<br>IPR012721; IPR017998;<br>G3DSA:1.10.560.10 (GENE3D),<br>G3DSA:3.30.260.10 (GENE3D),<br>G3DSA:3.50.7.10 (GENE3D), SSF52029<br>(SUPERFAMILY), SSF54849<br>(SUPERFAMILY) |
| Caenorhabditis elegans | chaperonin containing subunit 8                        | 8  | C:GO:0005856;<br>P:GO:0006457;<br>P:GO:0035095;<br>F:GO:0005524;<br>F:GO:0051082;<br>F:GO:0042623;<br>C:GO:0005634;<br>C:GO:0005829                                                                                                                                                                           |                                                | IPR001969; IPR002194; IPR002423;<br>IPR012721; IPR017998;<br>G3DSA:1.10.560.10 (GENE3D),<br>G3DSA:3.30.260.10 (GENE3D),<br>G3DSA:3.50.7.10 (GENE3D), SSF52029<br>(SUPERFAMILY), SSF54849<br>(SUPERFAMILY) |
| Brugia malayi          | structural maintenance of chromosomes 2                | 4  | P:GO:0051276;<br>F:GO:0005488;<br>P:GO:0007049;<br>C:GO:0005694                                                                                                                                                                                                                                               |                                                | IPR010935; PD936484 (PRODOM),<br>PTHR18937 (PANTHER),<br>PTHR18937:SF9 (PANTHER)                                                                                                                          |
| Caenorhabditis elegans | chaperonin containing subunit 8                        | 8  | C:GO:0005856;<br>P:GO:0006457;<br>P:GO:0035095;<br>F:GO:0005524;<br>F:GO:0051082;<br>F:GO:0042623;<br>C:GO:0005634;<br>C:GO:0005829                                                                                                                                                                           |                                                | IPR001969; IPR002194; IPR002423;<br>IPR012721; IPR017998;<br>G3DSA:1.10.560.10 (GENE3D),<br>G3DSA:3.30.260.10 (GENE3D),<br>G3DSA:3.50.7.10 (GENE3D), SSF52029<br>(SUPERFAMILY), SSF54849<br>(SUPERFAMILY) |
| Caenorhabditis elegans | actin                                                  | 18 | P:GO:0007126;<br>P:GO:0007108;<br>P:GO:0040007;<br>P:GO:0007517;<br>P:GO:0000281;<br>P:GO:0040035;<br>P:GO:0030036;<br>C:GO:0005865;<br>F:GO:0005524;<br>C:GO:0005938;<br>P:GO:0002119;<br>F:GO:0016887;<br>F:GO:0005515;<br>C:GO:0005884;<br>F:GO:0005200;<br>P:GO:0040039;<br>P:GO:0006898;<br>P:GO:0009792 |                                                | IPR004000; IPR004001; IPR020902;<br>G3DSA:2.30.36.70 (GENE3D),<br>G3DSA:3.30.420.40 (GENE3D),<br>G3DSA:3.90.640.10 (GENE3D),<br>SSF53067 (SUPERFAMILY)                                                    |
| -                      | -                                                      | 0  |                                                                                                                                                                                                                                                                                                               |                                                | SignalP (SIGNALP)                                                                                                                                                                                         |
| -                      | -                                                      | 0  |                                                                                                                                                                                                                                                                                                               |                                                | -                                                                                                                                                                                                         |
| -                      | -                                                      | 0  |                                                                                                                                                                                                                                                                                                               |                                                | -                                                                                                                                                                                                         |
| Brugia malayi          | nli interacting factor-like phosphatase family protein | 0  |                                                                                                                                                                                                                                                                                                               | F:GO:0004721;<br>C:GO:0005622;<br>C:GO:0005634 | PTHR23081 (PANTHER)                                                                                                                                                                                       |
| -                      | -                                                      | 0  |                                                                                                                                                                                                                                                                                                               |                                                | -                                                                                                                                                                                                         |
| -                      | -                                                      | 0  |                                                                                                                                                                                                                                                                                                               |                                                | -                                                                                                                                                                                                         |
| -                      | -                                                      | 0  |                                                                                                                                                                                                                                                                                                               |                                                | -                                                                                                                                                                                                         |
| -                      | -                                                      | 0  |                                                                                                                                                                                                                                                                                                               |                                                | PRO1217 (PRINTS)                                                                                                                                                                                          |
| Loa loa                | ck1 ttbk protein ki-se                                 | 0  |                                                                                                                                                                                                                                                                                                               |                                                | -                                                                                                                                                                                                         |

|                         |                                                |   |                                                                                                                                                      |                                                                                                                                                                                                         |  |                                                                                                                                               |
|-------------------------|------------------------------------------------|---|------------------------------------------------------------------------------------------------------------------------------------------------------|---------------------------------------------------------------------------------------------------------------------------------------------------------------------------------------------------------|--|-----------------------------------------------------------------------------------------------------------------------------------------------|
| Caenorhabditis briggsae | brca1 interacting protein c-termi-l helicase 1 |   | P:GO:0006357;<br>F:GO:0005515;<br>5 C:GO:0044444;<br>F:GO:0004386;<br>C:GO:0005634                                                                   | -                                                                                                                                                                                                       |  | IPR002464; IPR010614; IPR014013;<br>G3DSA:3.40.50.300 (GENE3D),<br>PTHR11472 (PANTHER),<br>PTHR11472:SF6 (PANTHER), SSF52540<br>(SUPERFAMILY) |
| Ascaris suum            | collagen-binding adhesin                       | 1 | F:GO:0005488                                                                                                                                         | -                                                                                                                                                                                                       |  | -                                                                                                                                             |
| Ascaris suum            | collagen-binding adhesin                       | 1 | F:GO:0005488                                                                                                                                         | -                                                                                                                                                                                                       |  | -                                                                                                                                             |
|                         | -                                              | 0 |                                                                                                                                                      |                                                                                                                                                                                                         |  | -                                                                                                                                             |
| Homo sapiens            | gamma-inducible protein 30                     | 7 | F:GO:0016491;<br>P:GO:0019886;<br>C:GO:0005764;<br>P:GO:0048147;<br>P:GO:0055114;<br>P:GO:0050821;<br>C:GO:0005576                                   | -                                                                                                                                                                                                       |  | IPR004911; PTHR13234:SF7<br>(PANTHER), SignalP (SIGNALP)                                                                                      |
| Brugia malayi           | negative elongation factor a homolog           | 0 |                                                                                                                                                      | F:GO:0003746                                                                                                                                                                                            |  | SignalP (SIGNALP)                                                                                                                             |
|                         | -                                              | 0 |                                                                                                                                                      |                                                                                                                                                                                                         |  | -                                                                                                                                             |
| Loa loa                 | zinc finger protein 706                        | 3 | C:GO:0005622;<br>P:GO:0040010;<br>F:GO:0008270                                                                                                       | -                                                                                                                                                                                                       |  | IPR007087; IPR007513; IPR015880;<br>G3DSA:4.10.1050.10 (GENE3D),<br>PTHR21213 (PANTHER), SSF118359<br>(SUPERFAMILY)                           |
| Danio rerio             | briggsae cbr-dao-5 protein                     | 0 |                                                                                                                                                      | P:GO:0015031;<br>F:GO:0005089;<br>P:GO:0035023;<br>F:GO:0004674;<br>C:GO:0016020;<br>F:GO:0008565;<br>F:GO:0004672;<br>P:GO:0006468;<br>F:GO:0005524;<br>C:GO:0030288;<br>F:GO:0005515;<br>C:GO:0005622 |  | -                                                                                                                                             |
|                         | -                                              | 0 |                                                                                                                                                      |                                                                                                                                                                                                         |  | -                                                                                                                                             |
| Monodelphis domestica   | sig-l cub egf-like 1                           | 2 | F:GO:0005488;<br>C:GO:0005886                                                                                                                        | -                                                                                                                                                                                                       |  | IPR001368; IPR009030; IPR011641;<br>PTHR11201 (PANTHER),<br>PTHR11201:SF72 (PANTHER)                                                          |
| Loa loa                 | caf1 family ribonuclease containing protein    | 1 | F:GO:0005515                                                                                                                                         |                                                                                                                                                                                                         |  | -                                                                                                                                             |
| Caenorhabditis elegans  | solute carrier family member 1                 | 9 | P:GO:0048878;<br>P:GO:0015672;<br>F:GO:0015377;<br>C:GO:0016324;<br>P:GO:0001822;<br>F:GO:0005515;<br>P:GO:0055085;<br>P:GO:0030001;<br>P:GO:0007588 | -                                                                                                                                                                                                       |  | IPR004841; PTHR11827 (PANTHER),<br>PTHR11827:SF2 (PANTHER)                                                                                    |
| Caenorhabditis briggsae | clathrin coat assembly protein                 | 4 | F:GO:0005515;<br>P:GO:0006886;<br>C:GO:0030131;<br>P:GO:0006897                                                                                      | -                                                                                                                                                                                                       |  | IPR008968; PTHR11998 (PANTHER),<br>PTHR11998:SF1 (PANTHER)                                                                                    |

|                          |                                                                      |    |                                                                                                                                                                                                         |                               |             |                                                                                                                              |
|--------------------------|----------------------------------------------------------------------|----|---------------------------------------------------------------------------------------------------------------------------------------------------------------------------------------------------------|-------------------------------|-------------|------------------------------------------------------------------------------------------------------------------------------|
| Brugia malayi            | groucho tle n-termi-l q-rich domain containing protein               | 12 | P:GO:0045879;<br>C:GO:0043234;<br>P:GO:0007015;<br>P:GO:0030178;<br>P:GO:0009887;<br>F:GO:0003677;<br>P:GO:0000122;<br>F:GO:0003714;<br>P:GO:0007541;<br>P:GO:0007165;<br>P:GO:0048813;<br>C:GO:0005634 | -                             |             | IPR005617; PTHR10814 (PANTHER)                                                                                               |
| Necator americanus       | venom-allergen-like protein family member (vap-1)                    | 0  |                                                                                                                                                                                                         | P:GO:0040011;<br>C:GO:0005576 |             | IPR014044; SignalP (SIGNALP)                                                                                                 |
| Caenorhabditis elegans   | hypothetical protein Y48G9A.3 [Caenorhabditis elegans]               | 1  | P:GO:0000003                                                                                                                                                                                            | -                             |             | -                                                                                                                            |
|                          | -                                                                    | 0  |                                                                                                                                                                                                         |                               |             | SignalP (SIGNALP)                                                                                                            |
| Caenorhabditis elegans   | f-box and leucine-rich repeat protein 2                              | 4  | C:GO:0005737;<br>F:GO:0004842;<br>P:GO:0006508;<br>P:GO:0006464                                                                                                                                         | -                             | EC:6.3.2.19 | IPR006553; G3DSA:3.80.10.10 (GENE3D), PTHR23125 (PANTHER), PTHR23125:SF69 (PANTHER), SSF52047 (SUPERFAMILY)                  |
| Caenorhabditis briggsae  | bat2d protein                                                        | 0  |                                                                                                                                                                                                         | F:GO:0003674;<br>P:GO:0008150 |             | -                                                                                                                            |
| Caenorhabditis elegans   | hypothetical tyrosi-se-like protein in chromosome                    | 2  | F:GO:0003824;<br>F:GO:0005515                                                                                                                                                                           | -                             |             | -                                                                                                                            |
| Caenorhabditis elegans   | hypothetical tyrosi-se-like protein in chromosome                    | 2  | F:GO:0003824;<br>F:GO:0005515                                                                                                                                                                           | -                             |             | -                                                                                                                            |
| Caenorhabditis elegans   | hypothetical tyrosi-se-like protein in chromosome                    | 2  | F:GO:0003824;<br>F:GO:0005515                                                                                                                                                                           | -                             |             | -                                                                                                                            |
| Caenorhabditis briggsae  | ymm3_caeel ame: full=uncharacterized protein                         | 0  |                                                                                                                                                                                                         |                               |             | -                                                                                                                            |
| Caenorhabditis elegans   | hypothetical protein ZC581.3 [Caenorhabditis elegans]                | 0  |                                                                                                                                                                                                         |                               |             | -                                                                                                                            |
| Caenorhabditis elegans   | hypothetical protein ZK1248.13 [Caenorhabditis elegans]              | 0  |                                                                                                                                                                                                         |                               |             | -                                                                                                                            |
| Cooperia oncophora       | latrophilin-like protein 2                                           | 6  | P:GO:0007218;<br>C:GO:0016021;<br>P:GO:0007165;<br>C:GO:0005886;<br>F:GO:0005529;<br>F:GO:0004930                                                                                                       | -                             |             | IPR000832; PTHR12011 (PANTHER), PTHR12011:SF56 (PANTHER), SignalP (SIGNALP)                                                  |
| Caenorhabditis elegans   | c (cysteine rich motor neuron protein) homolog family member (crm-1) | 6  | P:GO:0000003;<br>F:GO:0042802;<br>P:GO:0018996;<br>P:GO:0040015;<br>P:GO:0040018;<br>C:GO:0016020                                                                                                       | -                             |             | IPR000867; IPR001007; IPR004094; IPR011061; IPR018112; PTHR11339 (PANTHER), PTHR11339:SF39 (PANTHER), SSF57603 (SUPERFAMILY) |
|                          | -                                                                    | 0  |                                                                                                                                                                                                         |                               |             | -                                                                                                                            |
| Caenorhabditis elegans   | cysteine synthase                                                    | 3  | P:GO:0008152;<br>F:GO:0030170;<br>F:GO:0003824                                                                                                                                                          | -                             |             | IPR001926; G3DSA:3.40.50.1100 (GENE3D), PTHR10314 (PANTHER), PTHR10314:SF8 (PANTHER), SignalP (SIGNALP)                      |
| Caenorhabditis elegans   | elegans protein confirmed by transcript evidence                     | 0  |                                                                                                                                                                                                         |                               |             | IPR009673; SignalP (SIGNALP)                                                                                                 |
|                          | -                                                                    | 0  |                                                                                                                                                                                                         |                               |             | -                                                                                                                            |
| Pongo abelii             | heme binding protein 2                                               | 1  | C:GO:0005739                                                                                                                                                                                            | -                             |             | IPR006917; IPR011256; PTHR11220:SF3 (PANTHER)                                                                                |
| Caenorhabditis elegans   | elegans protein confirmed by transcript evidence                     | 3  | P:GO:0040010;<br>P:GO:0009792;<br>P:GO:0000003                                                                                                                                                          | -                             |             | IPR009724; SignalP (SIGNALP)                                                                                                 |
| Loa loa                  | hypothetical protein LOAG_04146 [Loa loa]                            | 0  |                                                                                                                                                                                                         |                               |             | IPR009565                                                                                                                    |
| Saccoglossus kowalevskii | glutathione s-transferase kappa 1                                    | 2  | C:GO:0030288;<br>F:GO:0015035                                                                                                                                                                           | -                             |             | IPR001853; IPR012336; PTHR13887 (PANTHER)                                                                                    |

|                         |                                                         |   |                                                                                                                                                      |                                                                                                                                                                                                                                                                                                                                                                                                                                                                         |             |                                                                                               |
|-------------------------|---------------------------------------------------------|---|------------------------------------------------------------------------------------------------------------------------------------------------------|-------------------------------------------------------------------------------------------------------------------------------------------------------------------------------------------------------------------------------------------------------------------------------------------------------------------------------------------------------------------------------------------------------------------------------------------------------------------------|-------------|-----------------------------------------------------------------------------------------------|
| Caenorhabditis briggsae | Hypothetical protein CBG02786 [Caenorhabditis briggsae] | 0 |                                                                                                                                                      | F:GO:0005488                                                                                                                                                                                                                                                                                                                                                                                                                                                            |             | PTHR13298 (PANTHER),<br>PTHR13298:SF1 (PANTHER)                                               |
| Caenorhabditis briggsae | kettin                                                  | 0 |                                                                                                                                                      | P:GO:0000902;<br>P:GO:0006468;<br>P:GO:0001701;<br>F:GO:0003677;<br>C:GO:0030018;<br>C:GO:0030017;<br>C:GO:0030016;<br>P:GO:0007512;<br>P:GO:0007264;<br>F:GO:0005524;<br>P:GO:0035023;<br>C:GO:0031430;<br>F:GO:0004672;<br>F:GO:0005089;<br>P:GO:0003007;<br>F:GO:0005085;<br>F:GO:0003824;<br>C:GO:0000786;<br>P:GO:0043056;<br>P:GO:0006334;<br>F:GO:0005488;<br>P:GO:0014866;<br>P:GO:0045214;<br>C:GO:0031674;<br>C:GO:0031672;<br>F:GO:0008307;<br>C:GO:0005622; |             | IPR003599; IPR007110; IPR013098;<br>IPR013783; PTHR19897 (PANTHER),<br>SSF48726 (SUPERFAMILY) |
| Caenorhabditis briggsae | insulin-degrading enzyme                                | 9 | P:GO:0010815;<br>F:GO:0008270;<br>C:GO:0005777;<br>F:GO:0004222;<br>P:GO:0050435;<br>P:GO:0006508;<br>P:GO:0065007;<br>F:GO:0042803;<br>F:GO:0005524 | -                                                                                                                                                                                                                                                                                                                                                                                                                                                                       | EC:3.4.24.0 | IPR007863; IPR011237; IPR011249;<br>PTHR11851 (PANTHER),<br>PTHR11851:SF64 (PANTHER)          |
|                         | -                                                       | 0 |                                                                                                                                                      |                                                                                                                                                                                                                                                                                                                                                                                                                                                                         |             | -                                                                                             |
| Hydra magnipapillata    | alkaline phosphatase                                    | 0 |                                                                                                                                                      | P:GO:0033280;<br>C:GO:0016020;<br>P:GO:0046677;<br>F:GO:0004035;<br>F:GO:0016791;<br>F:GO:0016787;<br>C:GO:0031225;<br>F:GO:0003824;<br>F:GO:0046872;<br>P:GO:0008152;<br>C:GO:0005886                                                                                                                                                                                                                                                                                  |             | IPR001952; IPR017849; PTHR11596<br>(PANTHER)                                                  |
|                         | -                                                       | 0 |                                                                                                                                                      |                                                                                                                                                                                                                                                                                                                                                                                                                                                                         |             | -                                                                                             |
| Caenorhabditis elegans  | interferon gamma-inducible thiol reductase              | 0 |                                                                                                                                                      | C:GO:0005576                                                                                                                                                                                                                                                                                                                                                                                                                                                            |             | IPR004911; PTHR13234:SF2<br>(PANTHER)                                                         |
|                         | -                                                       | 0 |                                                                                                                                                      |                                                                                                                                                                                                                                                                                                                                                                                                                                                                         |             | -                                                                                             |
|                         | -                                                       | 0 |                                                                                                                                                      |                                                                                                                                                                                                                                                                                                                                                                                                                                                                         |             | -                                                                                             |

|                            |                                                                                                     |   |                                                                                                                                                      |                                                                                                                                     |  |                                                                                     |
|----------------------------|-----------------------------------------------------------------------------------------------------|---|------------------------------------------------------------------------------------------------------------------------------------------------------|-------------------------------------------------------------------------------------------------------------------------------------|--|-------------------------------------------------------------------------------------|
| Caenorhabditis briggsae    | elegans protein partially confirmed by transcript evidence                                          | 0 |                                                                                                                                                      | P:GO:0006629;<br>F:GO:0016787;<br>F:GO:0008081;<br>C:GO:0016021;<br>P:GO:0040010;<br>P:GO:0006071;<br>F:GO:0008889;<br>C:GO:0005575 |  | IPR017946                                                                           |
| Caenorhabditis elegans     | odd oz ten-m homolog 4                                                                              | 0 |                                                                                                                                                      | C:GO:0016021;<br>C:GO:0009279;<br>C:GO:0016020;<br>C:GO:0005886                                                                     |  | -                                                                                   |
| Caenorhabditis briggsae    | mitochondrial ribosomal protein s35                                                                 | 6 | P:GO:0009792;<br>C:GO:0005763;<br>P:GO:0002119;<br>P:GO:0042769;<br>P:GO:0043043;<br>P:GO:0040007                                                    | -                                                                                                                                   |  | PTHR13490 (PANTHER)                                                                 |
| Caenorhabditis briggsae    | mitochondrial ribosomal protein s35                                                                 | 6 | P:GO:0009792;<br>C:GO:0005763;<br>P:GO:0002119;<br>P:GO:0042769;<br>P:GO:0043043;<br>P:GO:0040007                                                    | -                                                                                                                                   |  | PTHR13490 (PANTHER)                                                                 |
| Selaginella moellendorffii | topoisomerase ii                                                                                    | 4 | P:GO:0044260;<br>F:GO:0003677;<br>P:GO:0090304;<br>F:GO:0016853                                                                                      | -                                                                                                                                   |  | IPR013506; IPR014721; IPR020568;<br>PTHR10169 (PANTHER),<br>PTHR10169:SF2 (PANTHER) |
| Caenorhabditis briggsae    | solute carrier family 35 (udp-glucuronic acid udp-n-acetylgalactosamine dual transporter) member d1 | 7 | F:GO:0005463;<br>C:GO:0030176;<br>P:GO:0015789;<br>P:GO:0006065;<br>P:GO:0030206;<br>C:GO:0005794;<br>F:GO:0005461                                   | -                                                                                                                                   |  | IPR004853; PTHR11132 (PANTHER),<br>SignalP (SIGNALP)                                |
| Caenorhabditis briggsae    | d- primase large subunit                                                                            | 9 | P:GO:0000910;<br>F:GO:0051536;<br>P:GO:0040035;<br>F:GO:0003896;<br>P:GO:0006269;<br>P:GO:0006997;<br>P:GO:0006898;<br>C:GO:0005654;<br>P:GO:0009792 | -                                                                                                                                   |  | IPR007238                                                                           |
| -                          | -                                                                                                   | 0 |                                                                                                                                                      |                                                                                                                                     |  | -                                                                                   |
| -                          | -                                                                                                   | 0 |                                                                                                                                                      |                                                                                                                                     |  | SignalP (SIGNALP)                                                                   |
| -                          | -                                                                                                   | 0 |                                                                                                                                                      |                                                                                                                                     |  | -                                                                                   |
| -                          | -                                                                                                   | 0 |                                                                                                                                                      |                                                                                                                                     |  | -                                                                                   |
| Caenorhabditis elegans     | elegans protein partially confirmed by transcript evidence                                          | 0 |                                                                                                                                                      |                                                                                                                                     |  | SignalP (SIGNALP)                                                                   |
| Caenorhabditis briggsae    | aspartyl aminopeptidase                                                                             | 2 | F:GO:0008233;<br>P:GO:0043581                                                                                                                        | -                                                                                                                                   |  | IPR001948; G3DSA:3.40.630.10<br>(GENE3D), SSF53187 (SUPERFAMILY)                    |
| -                          | -                                                                                                   | 0 |                                                                                                                                                      |                                                                                                                                     |  | -                                                                                   |
| Loa loa                    | elegans protein partially confirmed by transcript evidence                                          | 1 | F:GO:0016740                                                                                                                                         | -                                                                                                                                   |  | IPR005027; PTHR10896:SF2<br>(PANTHER)                                               |
| -                          | -                                                                                                   | 0 |                                                                                                                                                      |                                                                                                                                     |  | -                                                                                   |



|                         |                                                            |    |                                                                                                                                                                                                                                                                                                                                |   |            |                                                                                    |
|-------------------------|------------------------------------------------------------|----|--------------------------------------------------------------------------------------------------------------------------------------------------------------------------------------------------------------------------------------------------------------------------------------------------------------------------------|---|------------|------------------------------------------------------------------------------------|
| Caenorhabditis elegans  | peroxisomal -trans-enoyl- isomerase                        | 5  | C:GO:0005777;<br>F:GO:0016863;<br>C:GO:0005739;<br>P:GO:0006635;<br>F:GO:0005515                                                                                                                                                                                                                                               | - | EC:5.3.3.0 | IPR001753; G3DSA:3.90.226.10 (GENE3D), PTHR11941 (PANTHER), SSF52096 (SUPERFAMILY) |
| Caenorhabditis briggsae | d- polymerase delta catalytic subunit                      | 19 | P:GO:0009411;<br>P:GO:0000084;<br>P:GO:0000910;<br>F:GO:0003887;<br>C:GO:0043625;<br>P:GO:0006297;<br>F:GO:0003677;<br>F:GO:0008408;<br>P:GO:0000731;<br>P:GO:0045004;<br>P:GO:0035188;<br>P:GO:0006287;<br>P:GO:0002119;<br>F:GO:0005515;<br>F:GO:0000166;<br>P:GO:0006898;<br>C:GO:0005654;<br>P:GO:0009792;<br>F:GO:0003682 | - | EC:2.7.7.7 | PTHR10322 (PANTHER), PTHR10322:SF4 (PANTHER)                                       |
| Caenorhabditis briggsae | elegans protein partially confirmed by transcript evidence | 4  | C:GO:0016020;<br>F:GO:0008324;<br>P:GO:0006812;<br>P:GO:0055085                                                                                                                                                                                                                                                                | - | -          | -                                                                                  |
| Caenorhabditis briggsae | dead box atp-dependent r- helicase                         | 7  | C:GO:0005682;<br>F:GO:0004004;<br>F:GO:0003676;<br>C:GO:0071011;<br>F:GO:0005524;<br>P:GO:0000398;<br>C:GO:0071013                                                                                                                                                                                                             | - | -          | PTHR10967 (PANTHER), PTHR10967:SF47 (PANTHER)                                      |
| Branchiostoma floridae  | bita_bitar ame: full=bitiscetin subunit alpha              | 0  | F:GO:0030247;<br>F:GO:0004888;<br>C:GO:0016021;<br>C:GO:0016020;<br>F:GO:0005529;<br>F:GO:0004930;<br>P:GO:0007166;<br>C:GO:0005576;<br>F:GO:0005044;<br>F:GO:0004872;<br>F:GO:0005515;<br>P:GO:0009405;<br>P:GO:0007186;<br>F:GO:0005509;<br>P:GO:0007155;<br>F:GO:0005488;<br>P:GO:0006955                                   | - | -          | IPR001304; IPR016186; IPR016187                                                    |
|                         |                                                            | 0  |                                                                                                                                                                                                                                                                                                                                |   |            |                                                                                    |
| Caenorhabditis elegans  | g protein alpha subunit                                    | 4  | P:GO:0007186;<br>F:GO:0019001;<br>P:GO:0007165;<br>P:GO:0008152                                                                                                                                                                                                                                                                | - | -          | -                                                                                  |

|                             |                                                    |    |                                                                                                                                                                                                                                                            |   |                                                                                                                                            |
|-----------------------------|----------------------------------------------------|----|------------------------------------------------------------------------------------------------------------------------------------------------------------------------------------------------------------------------------------------------------------|---|--------------------------------------------------------------------------------------------------------------------------------------------|
| Caenorhabditis elegans      | ubx domain protein 6                               | 0  | C:GO:0000300;<br>C:GO:0019898;<br>P:GO:0046324;<br>C:GO:0009898;<br>F:GO:0008270;<br>P:GO:0042593;<br>C:GO:0048471;<br>C:GO:0005792;<br>P:GO:0006886;<br>C:GO:0005575;<br>F:GO:0005515;<br>C:GO:0012506;<br>C:GO:0005622;<br>C:GO:0005829;<br>P:GO:0008150 |   | PTHR23153 (PANTHER),<br>PTHR23153:SF14 (PANTHER)                                                                                           |
| Angiostrongylus cantonensis | briggsae cbr-nhl-1 protein                         | 3  | F:GO:0008270;<br>F:GO:0005515;<br>P:GO:0006915                                                                                                                                                                                                             | - | -                                                                                                                                          |
| Caenorhabditis briggsae     | tubulin-specific chaperone d                       | 7  | P:GO:0040035;<br>P:GO:0010171;<br>P:GO:0002119;<br>P:GO:0046785;<br>P:GO:0040011;<br>P:GO:0040007;<br>P:GO:0002009                                                                                                                                         | - | IPR022577; PTHR12658 (PANTHER)                                                                                                             |
| Caenorhabditis elegans      | metabotropic gaba-b receptor subtype 2             | 3  | C:GO:0016020;<br>P:GO:0023052;<br>F:GO:0004888                                                                                                                                                                                                             | - | PTHR10519 (PANTHER),<br>PTHR10519:SF2 (PANTHER), SSF53822<br>(SUPERFAMILY)                                                                 |
| Brugia malayi               | multidrug resistance protein family member (mrp-5) | 11 | P:GO:0055085;<br>P:GO:0040010;<br>F:GO:0042626;<br>P:GO:0040002;<br>F:GO:0008514;<br>C:GO:0005624;<br>F:GO:0005524;<br>P:GO:0002119;<br>P:GO:0040017;<br>C:GO:0005887;<br>P:GO:0010033                                                                     | - | IPR001140; IPR011527; IPR017940;<br>G3DSA:1.20.1560.10 (GENE3D),<br>PTHR19242 (PANTHER),<br>PTHR19242:SF14 (PANTHER), SignalP<br>(SIGNALP) |
| Caenorhabditis briggsae     | extracellular protein                              | 1  | F:GO:0005515                                                                                                                                                                                                                                               | - | -                                                                                                                                          |
| Caenorhabditis briggsae     | extracellular protein                              | 1  | F:GO:0005515                                                                                                                                                                                                                                               | - | IPR006670; IPR006671; IPR011028;<br>IPR013763; PTHR10177 (PANTHER),<br>PTHR10177:SF4 (PANTHER)                                             |
| Caenorhabditis elegans      | sy-ptotagmin 1                                     | 10 | P:GO:0016079;<br>F:GO:0005509;<br>F:GO:0005544;<br>C:GO:0030672;<br>C:GO:0030666;<br>F:GO:0005515;<br>C:GO:0044425;<br>F:GO:0005215;<br>C:GO:0042598;<br>C:GO:0005886                                                                                      | - | IPR000008; IPR008973; IPR018029;<br>G3DSA:2.60.40.150 (GENE3D),<br>PTHR10024 (PANTHER),<br>PTHR10024:SF28 (PANTHER)                        |
|                             | -                                                  | 0  |                                                                                                                                                                                                                                                            |   | -                                                                                                                                          |
| Streptomyces antibioticus   | aldehyde dehydroge-se                              | 2  | F:GO:0016491;<br>P:GO:0008152                                                                                                                                                                                                                              | - | IPR012394; IPR015590; IPR016161;<br>IPR016162; SignalP (SIGNALP)                                                                           |
|                             | -                                                  | 0  |                                                                                                                                                                                                                                                            |   | -                                                                                                                                          |

|                         |                                                         |  |    |                                                                                                                                                                                                                          |   |                                                                                                   |                                                                                                                 |
|-------------------------|---------------------------------------------------------|--|----|--------------------------------------------------------------------------------------------------------------------------------------------------------------------------------------------------------------------------|---|---------------------------------------------------------------------------------------------------|-----------------------------------------------------------------------------------------------------------------|
| Caenorhabditis elegans  | briggsae cbr-exc-7 protein                              |  | 3  | F:GO:0005515;<br>F:GO:0000166;<br>F:GO:0003723                                                                                                                                                                           | - |                                                                                                   | IPR000504; IPR002343; IPR012677;<br>PTHR10432 (PANTHER),<br>PTHR10432:SF55 (PANTHER),<br>SSF54928 (SUPERFAMILY) |
| Caenorhabditis elegans  | receptor mediated endocytosis family member (rme-8)     |  | 1  | F:GO:0031072                                                                                                                                                                                                             | - |                                                                                                   | -                                                                                                               |
|                         | -                                                       |  | 0  |                                                                                                                                                                                                                          |   |                                                                                                   | SignalP (SIGNALP)                                                                                               |
| Caenorhabditis elegans  | pab-dependent poly -specific ribonuclease subunit 3     |  | 1  | F:GO:0005515                                                                                                                                                                                                             | - |                                                                                                   | IPR011009; PTHR12272 (PANTHER),<br>PTHR12272:SF6 (PANTHER)                                                      |
|                         | -                                                       |  | 0  |                                                                                                                                                                                                                          |   |                                                                                                   | -                                                                                                               |
|                         | -                                                       |  | 0  |                                                                                                                                                                                                                          |   |                                                                                                   | SignalP (SIGNALP)                                                                                               |
| Caenorhabditis briggsae | homolog subfamily b member 6                            |  | 0  |                                                                                                                                                                                                                          |   | C:GO:0048471;<br>C:GO:0005737;<br>P:GO:0008150;<br>F:GO:0031072;<br>C:GO:0005634;<br>C:GO:0005575 | IPR001623; IPR015609; IPR018253;<br>PTHR11821:SF63 (PANTHER)                                                    |
| Caenorhabditis briggsae | Hypothetical protein CBG07646 [Caenorhabditis briggsae] |  | 0  |                                                                                                                                                                                                                          |   |                                                                                                   | PTHR10984 (PANTHER),<br>PTHR10984:SF1 (PANTHER)                                                                 |
| Brugia malayi           | prpf39 protein                                          |  | 0  |                                                                                                                                                                                                                          |   | F:GO:0005488;<br>P:GO:0008380;<br>P:GO:0006397;<br>P:GO:0006396;<br>C:GO:0005634;<br>C:GO:0005622 | IPR003107; PTHR17204 (PANTHER),<br>PTHR17204:SF5 (PANTHER), SignalP<br>(SIGNALP)                                |
| Caenorhabditis elegans  | silent information regulator protein sir2               |  | 4  | F:GO:0005488;<br>P:GO:0045449;<br>F:GO:0016787;<br>P:GO:0006974                                                                                                                                                          | - |                                                                                                   | G3DSA:3.40.50.1220 (GENE3D),<br>SSF52467 (SUPERFAMILY)                                                          |
| Camponotus floridanus   | hypothetical protein EAG_09297 [Camponotus floridanus]  |  | 0  |                                                                                                                                                                                                                          |   |                                                                                                   | -                                                                                                               |
|                         | -                                                       |  | 0  |                                                                                                                                                                                                                          |   |                                                                                                   | -                                                                                                               |
| Caenorhabditis briggsae | afg3 atpase family gene 3-like 2                        |  | 13 | F:GO:0008270;<br>F:GO:0017111;<br>P:GO:0048747;<br>C:GO:0016021;<br>F:GO:0004222;<br>F:GO:0051082;<br>P:GO:0016043;<br>P:GO:0030163;<br>P:GO:0006508;<br>P:GO:0007399;<br>P:GO:0065007;<br>F:GO:0005524;<br>C:GO:0005739 | - | EC:3.6.1.15;<br>EC:3.4.24.0                                                                       | IPR000642; PTHR23076 (PANTHER),<br>PTHR23076:SF11 (PANTHER),<br>SSF140990 (SUPERFAMILY)                         |
|                         | -                                                       |  | 0  |                                                                                                                                                                                                                          |   |                                                                                                   | -                                                                                                               |
| Caenorhabditis elegans  | t family of potassium channels family member (twk-39)   |  | 1  | F:GO:0005216                                                                                                                                                                                                             | - |                                                                                                   | -                                                                                                               |
|                         | -                                                       |  | 0  |                                                                                                                                                                                                                          |   |                                                                                                   | -                                                                                                               |
|                         | -                                                       |  | 0  |                                                                                                                                                                                                                          |   |                                                                                                   | SignalP (SIGNALP)                                                                                               |
| Caenorhabditis elegans  | lysophosphatidylcholine acyltransferase 3               |  | 2  | P:GO:0010171;<br>C:GO:0016021                                                                                                                                                                                            | - |                                                                                                   | IPR004299; PTHR13906 (PANTHER),<br>PTHR13906:SF2 (PANTHER), SignalP<br>(SIGNALP)                                |

|                         |                                                  |    |                                                                                                                                                                                                                                                                             |                                                |                                                                         |                                                                                                                                                            |
|-------------------------|--------------------------------------------------|----|-----------------------------------------------------------------------------------------------------------------------------------------------------------------------------------------------------------------------------------------------------------------------------|------------------------------------------------|-------------------------------------------------------------------------|------------------------------------------------------------------------------------------------------------------------------------------------------------|
| Caenorhabditis elegans  | rac gtpase                                       | 16 | P:GO:0007390;<br>P:GO:0007254;<br>P:GO:0035099;<br>P:GO:0030032;<br>P:GO:0008258;<br>P:GO:0007435;<br>P:GO:0007264;<br>C:GO:0005622;<br>P:GO:0051017;<br>F:GO:0004767;<br>P:GO:0051301;<br>F:GO:0003924;<br>P:GO:0007394;<br>C:GO:0016020;<br>F:GO:0005525;<br>P:GO:0006974 | -                                              | EC:3.1.4.12;<br>EC:3.6.5.1;<br>EC:3.6.5.2;<br>EC:3.6.5.3;<br>EC:3.6.5.4 | IPR001806; IPR003578; IPR005225;<br>IPR013753; G3DSA:3.40.50.300<br>(GENE3D), PTHR11708 (PANTHER),<br>PTHR11708:SF285 (PANTHER),<br>SSF52540 (SUPERFAMILY) |
| -                       | -                                                | 0  | -                                                                                                                                                                                                                                                                           | -                                              | -                                                                       | -                                                                                                                                                          |
| Caenorhabditis briggsae | transcription factor tfb2 family protein         | 2  | P:GO:0044260;<br>P:GO:0090304                                                                                                                                                                                                                                               | -                                              | -                                                                       | -                                                                                                                                                          |
| -                       | -                                                | 0  | -                                                                                                                                                                                                                                                                           | -                                              | -                                                                       | -                                                                                                                                                          |
| Caenorhabditis elegans  | ras-gef domain-containing family member 1b       | 3  | F:GO:0005085;<br>C:GO:0005622;<br>P:GO:0051056                                                                                                                                                                                                                              | -                                              | -                                                                       | IPR001895; IPR008937;<br>PTHR23113:SF20 (PANTHER)                                                                                                          |
| -                       | -                                                | 0  | -                                                                                                                                                                                                                                                                           | -                                              | -                                                                       | SignalP (SIGNALP)                                                                                                                                          |
| -                       | -                                                | 0  | -                                                                                                                                                                                                                                                                           | -                                              | -                                                                       | -                                                                                                                                                          |
| -                       | -                                                | 0  | -                                                                                                                                                                                                                                                                           | -                                              | -                                                                       | -                                                                                                                                                          |
| Caenorhabditis briggsae | microfibrillar-associated protein 1              | 9  | P:GO:0040035;<br>P:GO:0009792;<br>P:GO:0002119;<br>P:GO:0001703;<br>P:GO:0018996;<br>P:GO:0016246;<br>P:GO:0040010;<br>C:GO:0005576;<br>P:GO:0006898                                                                                                                        | -                                              | -                                                                       | -                                                                                                                                                          |
| Loa loa                 | hypothetical protein LOAG_08020 [Loa loa]        | 0  | -                                                                                                                                                                                                                                                                           | -                                              | -                                                                       | IPR003492; SignalP (SIGNALP)                                                                                                                               |
| -                       | -                                                | 0  | -                                                                                                                                                                                                                                                                           | -                                              | -                                                                       | -                                                                                                                                                          |
| Caenorhabditis briggsae | small nuclear r- activating polypeptide 190kda   | 9  | P:GO:0040010;<br>P:GO:0006383;<br>P:GO:0040035;<br>P:GO:0002119;<br>P:GO:0040011;<br>P:GO:0009301;<br>P:GO:0009792;<br>C:GO:0005634;<br>P:GO:0006366                                                                                                                        | -                                              | -                                                                       | IPR001005; IPR009057; IPR012287;<br>IPR014778; IPR015495; IPR017877;<br>IPR017930; PTHR10641:SF13<br>(PANTHER)                                             |
| Caenorhabditis elegans  | elegans protein confirmed by transcript evidence | 0  | -                                                                                                                                                                                                                                                                           | P:GO:0000003;<br>F:GO:0008270;<br>P:GO:0009792 | -                                                                       | -                                                                                                                                                          |
| Caenorhabditis briggsae | phosphofurin acidic cluster sorting protein 2    | 0  | -                                                                                                                                                                                                                                                                           | -                                              | -                                                                       | IPR019381; PTHR13280 (PANTHER),<br>PTHR13280:SF4 (PANTHER)                                                                                                 |
| -                       | -                                                | 0  | -                                                                                                                                                                                                                                                                           | -                                              | -                                                                       | IPR021933; PTHR13165 (PANTHER)                                                                                                                             |
| -                       | -                                                | 0  | -                                                                                                                                                                                                                                                                           | -                                              | -                                                                       | SignalP (SIGNALP)                                                                                                                                          |
| Caenorhabditis elegans  | 5 nucleotidase family                            | 4  | P:GO:0009792;<br>P:GO:0000003;<br>P:GO:0040007;<br>P:GO:0002119                                                                                                                                                                                                             | -                                              | -                                                                       | IPR008380; PTHR12103:SF1<br>(PANTHER), SSF56784 (SUPERFAMILY)                                                                                              |

|                         |                                                          |  |   |                                                                                                                    |   |                                                                                                                                     |                                                                                                                                                                             |
|-------------------------|----------------------------------------------------------|--|---|--------------------------------------------------------------------------------------------------------------------|---|-------------------------------------------------------------------------------------------------------------------------------------|-----------------------------------------------------------------------------------------------------------------------------------------------------------------------------|
| Caenorhabditis elegans  | inositol polyphosphate-5- 40kda                          |  | 3 | P:GO:0009987;<br>F:GO:0004437;<br>F:GO:0042731                                                                     | - |                                                                                                                                     | G3DSA:3.60.10.10 (GENE3D),<br>PTHR12997 (PANTHER),<br>PTHR12997:SF2 (PANTHER)                                                                                               |
| Caenorhabditis elegans  | cytochrome c oxidase assembly protein cox19              |  | 1 | C:GO:0005739                                                                                                       | - |                                                                                                                                     | -                                                                                                                                                                           |
|                         | -                                                        |  | 0 |                                                                                                                    |   |                                                                                                                                     | IPR019515                                                                                                                                                                   |
|                         | -                                                        |  | 0 |                                                                                                                    |   |                                                                                                                                     | -                                                                                                                                                                           |
| Caenorhabditis elegans  | phosphomannomutase 2                                     |  | 2 | P:GO:0008152;<br>F:GO:0016853                                                                                      | - |                                                                                                                                     | IPR005002; IPR006379;<br>G3DSA:3.40.50.1000 (GENE3D),<br>SSF56784 (SUPERFAMILY)                                                                                             |
| Brugia malayi           | hypothetical protein Bm1_34635 [Brugia malayi]           |  | 0 |                                                                                                                    |   | F:GO:0003676                                                                                                                        | PTHR13058 (PANTHER),<br>PTHR13058:SF1 (PANTHER)                                                                                                                             |
| Caenorhabditis elegans  | briggsae cbr-acl-9 protein                               |  | 4 | F:GO:0008415;<br>F:GO:0005515;<br>C:GO:0016021;<br>P:GO:0008152                                                    | - |                                                                                                                                     | PTHR13058 (PANTHER),<br>PTHR13058:SF1 (PANTHER)                                                                                                                             |
| Caenorhabditis briggsae | orotidine 5 -phosphate decarboxylase                     |  | 4 | P:GO:0055086;<br>F:GO:0005515;<br>F:GO:0016740;<br>F:GO:0016829                                                    | - |                                                                                                                                     | IPR001754; IPR011060; IPR013785                                                                                                                                             |
| Homo sapiens            | guanylate ki-se 1                                        |  | 3 | F:GO:0004385;<br>F:GO:0005524;<br>P:GO:0006163                                                                     | - | EC:2.7.4.8                                                                                                                          | IPR008144; IPR008145; IPR020590;<br>G3DSA:3.30.63.10 (GENE3D),<br>G3DSA:3.40.50.300 (GENE3D),<br>PTHR23117 (PANTHER),<br>PTHR23117:SF1 (PANTHER), SSF52540<br>(SUPERFAMILY) |
|                         | -                                                        |  | 0 |                                                                                                                    |   |                                                                                                                                     | -                                                                                                                                                                           |
|                         | -                                                        |  | 0 |                                                                                                                    |   |                                                                                                                                     | -                                                                                                                                                                           |
|                         | -                                                        |  | 0 |                                                                                                                    |   |                                                                                                                                     | -                                                                                                                                                                           |
| Caenorhabditis elegans  | kinesin family member 13a                                |  | 7 | P:GO:0007018;<br>F:GO:0005515;<br>F:GO:0005524;<br>P:GO:0008152;<br>F:GO:0003777;<br>P:GO:0015031;<br>C:GO:0005874 | - |                                                                                                                                     | IPR001752; PTHR16012 (PANTHER),<br>PTHR16012:SF65 (PANTHER),<br>SSF52540 (SUPERFAMILY)                                                                                      |
| Caenorhabditis elegans  | viral a-type inclusion protein repeat containing protein |  | 1 | F:GO:0005515                                                                                                       | - |                                                                                                                                     | SignalP (SIGNALP)                                                                                                                                                           |
| Caenorhabditis elegans  | hypothetical protein T14B4.1 [Caenorhabditis elegans]    |  | 0 |                                                                                                                    |   |                                                                                                                                     | -                                                                                                                                                                           |
| Loa loa                 | mgc84124 protein                                         |  | 0 |                                                                                                                    |   | F:GO:0003676;<br>F:GO:0005353;<br>C:GO:0016021;<br>F:GO:0022891;<br>C:GO:0016020;<br>P:GO:0055085;<br>F:GO:0005215;<br>P:GO:0006810 | IPR002775; PTHR13516 (PANTHER),<br>SSF82704 (SUPERFAMILY)                                                                                                                   |

|                         |                                                                                              |   |                                                                                                                                                                                                                                                                                                                                                                                                                                                                                          |   |                                                                                                                                                                                                                                                               |
|-------------------------|----------------------------------------------------------------------------------------------|---|------------------------------------------------------------------------------------------------------------------------------------------------------------------------------------------------------------------------------------------------------------------------------------------------------------------------------------------------------------------------------------------------------------------------------------------------------------------------------------------|---|---------------------------------------------------------------------------------------------------------------------------------------------------------------------------------------------------------------------------------------------------------------|
| Drosophila mojavensis   | receptor protein serine threonine ki-se                                                      | 0 | P:GO:0005027;<br>P:GO:0045887;<br>F:GO:0005024;<br>P:GO:0042078;<br>P:GO:0007179;<br>P:GO:0007178;<br>P:GO:0045595;<br>F:GO:0004872;<br>C:GO:0005886;<br>P:GO:0048636;<br>P:GO:0007304;<br>P:GO:0030509;<br>C:GO:0016020;<br>P:GO:0007391;<br>F:GO:0016566;<br>F:GO:0004675;<br>P:GO:0001763;<br>F:GO:0004674;<br>P:GO:0035215;<br>P:GO:0090254;<br>F:GO:0004672;<br>P:GO:0007424;<br>P:GO:0022407;<br>F:GO:0005524;<br>F:GO:0004702;<br>F:GO:0000166;<br>C:GO:0005771;<br>P:GO:0006468; |   | PTHR23255 (PANTHER),<br>PTHR23255:SF14 (PANTHER)                                                                                                                                                                                                              |
| Caenorhabditis elegans  | tb2 hva22 family protein                                                                     | 2 | P:GO:0019915;<br>P:GO:0009792                                                                                                                                                                                                                                                                                                                                                                                                                                                            | - | IPR004345; SignalP (SIGNALP)                                                                                                                                                                                                                                  |
| Loa loa                 | eukaryotic translation initiation factor 5b (eif-5b)<br>(translation initiation factor if-2) | 9 | P:GO:0009792;<br>P:GO:0002119;<br>F:GO:0003746;<br>F:GO:0005525;<br>F:GO:0004781;<br>P:GO:0000003;<br>F:GO:0003743;<br>P:GO:0040007;<br>F:GO:0003924                                                                                                                                                                                                                                                                                                                                     | - | EC:2.7.7.4;<br>EC:3.6.5.1;<br>EC:3.6.5.2;<br>EC:3.6.5.3;<br>EC:3.6.5.4<br>IPR000795; IPR004161; IPR005225;<br>IPR009000; IPR015760; IPR023115;<br>G3DSA:2.40.30.10 (GENE3D),<br>G3DSA:3.40.50.300 (GENE3D),<br>PTHR23115 (PANTHER), SSF52540<br>(SUPERFAMILY) |
| Caenorhabditis elegans  | related to yeast vacuolar protein sorting factor family<br>member (vps-41)                   | 9 | P:GO:0009792;<br>P:GO:0002119;<br>F:GO:0046872;<br>C:GO:0005773;<br>P:GO:0006624;<br>P:GO:0040007;<br>P:GO:0007034;<br>P:GO:0043066;<br>P:GO:0015031                                                                                                                                                                                                                                                                                                                                     | - | PTHR12616 (PANTHER)                                                                                                                                                                                                                                           |
| Caenorhabditis briggsae | deah (asp-glu-ala-his) box polypeptide 16                                                    | 4 | F:GO:0003676;<br>F:GO:0005524;<br>F:GO:0005515;<br>F:GO:0008026                                                                                                                                                                                                                                                                                                                                                                                                                          | - | PTHR18934 (PANTHER), SSF52540<br>(SUPERFAMILY)                                                                                                                                                                                                                |
| -                       | -                                                                                            | 0 |                                                                                                                                                                                                                                                                                                                                                                                                                                                                                          |   | SignalP (SIGNALP)                                                                                                                                                                                                                                             |
| -                       | -                                                                                            | 0 |                                                                                                                                                                                                                                                                                                                                                                                                                                                                                          |   | SignalP (SIGNALP)                                                                                                                                                                                                                                             |
| -                       | -                                                                                            | 0 |                                                                                                                                                                                                                                                                                                                                                                                                                                                                                          |   | SignalP (SIGNALP)                                                                                                                                                                                                                                             |
| -                       | -                                                                                            | 0 |                                                                                                                                                                                                                                                                                                                                                                                                                                                                                          |   | -                                                                                                                                                                                                                                                             |

|                         |                                                         |    |                                                                                                                                                                                                         |                               |                             |                                                                                                                                                                         |
|-------------------------|---------------------------------------------------------|----|---------------------------------------------------------------------------------------------------------------------------------------------------------------------------------------------------------|-------------------------------|-----------------------------|-------------------------------------------------------------------------------------------------------------------------------------------------------------------------|
| Caenorhabditis briggsae | d- polymerase kappa                                     | 1  | F:GO:0003677                                                                                                                                                                                            | -                             |                             | IPR001126; IPR017963; G3DSA:1.10.150.20 (GENE3D), G3DSA:3.30.70.270 (GENE3D), PTHR11076:SF12 (PANTHER), PF11798 (PFAM), SSF56672 (SUPERFAMILY)                          |
| Caenorhabditis briggsae | Hypothetical protein CBG13916 [Caenorhabditis briggsae] | 0  |                                                                                                                                                                                                         |                               |                             | IPR016017; SSF110035 (SUPERFAMILY)                                                                                                                                      |
| Caenorhabditis briggsae | d- replication licensing factor mcm5                    | 6  | P:GO:0009792;<br>P:GO:0006260;<br>P:GO:0001703;<br>P:GO:0000910;<br>P:GO:0040010;<br>F:GO:0000166                                                                                                       | -                             |                             | -                                                                                                                                                                       |
| -                       | -                                                       | 0  |                                                                                                                                                                                                         |                               |                             | -                                                                                                                                                                       |
| Caenorhabditis briggsae | cdp-alcohol phosphatidyltransferase family protein      | 3  | C:GO:0016020;<br>F:GO:0016780;<br>P:GO:0008654                                                                                                                                                          | -                             | EC:2.7.8.0                  | IPR000462; PTHR10414 (PANTHER), PTHR10414:SF4 (PANTHER), SignalP (SIGNALP)                                                                                              |
| Caenorhabditis briggsae | yl54_caeel ame: full=uncharacterized protein            | 0  |                                                                                                                                                                                                         |                               |                             | -                                                                                                                                                                       |
| -                       | -                                                       | 0  |                                                                                                                                                                                                         |                               |                             | -                                                                                                                                                                       |
| Caenorhabditis briggsae | large tumor suppressor 1                                | 12 | P:GO:0045736;<br>P:GO:0007243;<br>F:GO:0004674;<br>C:GO:0000922;<br>F:GO:0005524;<br>P:GO:0009755;<br>P:GO:0090090;<br>F:GO:0005515;<br>P:GO:0035329;<br>P:GO:0000082;<br>C:GO:0005634;<br>P:GO:0006468 | -                             | EC:2.7.11.0                 | IPR000719; IPR002290; IPR008271; IPR011009; IPR017441; IPR017442; G3DSA:1.10.510.10 (GENE3D), G3DSA:3.30.200.20 (GENE3D), PTHR22985 (PANTHER), PTHR22985:SF91 (PANTHER) |
| Nasonia vitripennis     | beta-arrestin 1                                         | 0  |                                                                                                                                                                                                         | P:GO:0007600;<br>P:GO:0007165 |                             | IPR014753; IPR014756                                                                                                                                                    |
| -                       | -                                                       | 0  |                                                                                                                                                                                                         |                               |                             | -                                                                                                                                                                       |
| -                       | -                                                       | 0  |                                                                                                                                                                                                         |                               |                             | -                                                                                                                                                                       |
| -                       | -                                                       | 0  |                                                                                                                                                                                                         |                               |                             | -                                                                                                                                                                       |
| synthetic construct     | atp synthase subunit mitochondrial-like                 | 5  | F:GO:0015078;<br>C:GO:0000276;<br>P:GO:0042776;<br>F:GO:0016887;<br>F:GO:0005515                                                                                                                        | -                             |                             | IPR006808; PTHR12386 (PANTHER), PTHR12386:SF3 (PANTHER)                                                                                                                 |
| Loa loa                 | briggsae cbr-ppfr-2 protein                             | 0  |                                                                                                                                                                                                         |                               |                             | IPR015267; PTHR16487 (PANTHER)                                                                                                                                          |
| Caenorhabditis briggsae | acyl- dehydroge-se-like protein                         | 8  | P:GO:0006468;<br>F:GO:0004713;<br>P:GO:0055114;<br>F:GO:0016787;<br>F:GO:0005524;<br>F:GO:0003995;<br>F:GO:0050660;<br>P:GO:0006508                                                                     | -                             | EC:2.7.10.0;<br>EC:1.3.99.3 | IPR000169; IPR006090; IPR006091; IPR009075; IPR009100; PTHR10909 (PANTHER), PTHR10909:SF10 (PANTHER)                                                                    |
| -                       | -                                                       | 0  |                                                                                                                                                                                                         |                               |                             | SignalP (SIGNALP)                                                                                                                                                       |
| -                       | -                                                       | 0  |                                                                                                                                                                                                         |                               |                             | -                                                                                                                                                                       |
| -                       | -                                                       | 0  |                                                                                                                                                                                                         |                               |                             | -                                                                                                                                                                       |
| Caenorhabditis elegans  | elegans protein confirmed by transcript evidence        | 1  | F:GO:0005515                                                                                                                                                                                            | -                             |                             | IPR007967; SSF103107 (SUPERFAMILY)                                                                                                                                      |
| -                       | -                                                       | 0  |                                                                                                                                                                                                         |                               |                             | -                                                                                                                                                                       |
| -                       | -                                                       | 0  |                                                                                                                                                                                                         |                               |                             | -                                                                                                                                                                       |

|                               |                                                            |    |  |                                                                                                                                                                                        |              |                                                                                                                  |
|-------------------------------|------------------------------------------------------------|----|--|----------------------------------------------------------------------------------------------------------------------------------------------------------------------------------------|--------------|------------------------------------------------------------------------------------------------------------------|
| Caenorhabditis briggsae       | niemann-pick type c2                                       | 0  |  | C:GO:0005576                                                                                                                                                                           |              | IPR003172; IPR014756; PTHR11306 (PANTHER), SignalP (SIGNALP)                                                     |
|                               | -                                                          | 0  |  |                                                                                                                                                                                        |              | SignalP (SIGNALP)                                                                                                |
|                               | -                                                          | 0  |  |                                                                                                                                                                                        |              | -                                                                                                                |
|                               | -                                                          | 0  |  |                                                                                                                                                                                        |              | -                                                                                                                |
|                               | -                                                          | 0  |  |                                                                                                                                                                                        |              | SignalP (SIGNALP)                                                                                                |
|                               | -                                                          | 0  |  |                                                                                                                                                                                        |              | SignalP (SIGNALP)                                                                                                |
| Strongylocentrotus purpuratus | : shorter than wild-type family member (dpy-23)            | 6  |  | C:GO:0030122;<br>F:GO:0008289;<br>F:GO:0005515;<br>P:GO:0016192;<br>P:GO:0006886;<br>C:GO:0005739                                                                                      | -            | IPR001392; IPR011012; IPR015629;<br>G3DSA:3.30.450.60 (GENE3D),<br>PTHR11998 (PANTHER)                           |
| Brugia malayi                 | schip-1-d241 253                                           | 0  |  | F:GO:0004553;<br>C:GO:0042597                                                                                                                                                          |              | IPR015649                                                                                                        |
|                               | -                                                          | 0  |  |                                                                                                                                                                                        |              | -                                                                                                                |
|                               | -                                                          | 0  |  |                                                                                                                                                                                        |              | -                                                                                                                |
|                               | -                                                          | 0  |  |                                                                                                                                                                                        |              | -                                                                                                                |
|                               | -                                                          | 0  |  |                                                                                                                                                                                        |              | IPR001548; PTHR10514:SF7 (PANTHER)                                                                               |
| Caenorhabditis briggsae       | udp-galactose transporter family protein                   | 5  |  | P:GO:0015785;<br>P:GO:0015788;<br>C:GO:0030173;<br>F:GO:0005462;<br>F:GO:0005459                                                                                                       | -            | -                                                                                                                |
|                               | -                                                          | 0  |  |                                                                                                                                                                                        |              | -                                                                                                                |
|                               | -                                                          | 0  |  |                                                                                                                                                                                        |              | -                                                                                                                |
| Pongo abelii                  | host cell factor 1                                         | 11 |  | C:GO:0071339;<br>P:GO:0045787;<br>P:GO:0043254;<br>P:GO:0045449;<br>F:GO:0042802;<br>P:GO:0019046;<br>F:GO:0003700;<br>C:GO:0070688;<br>F:GO:0003713;<br>C:GO:0005737;<br>P:GO:0006366 | -            | IPR006652; IPR011498; IPR015915;<br>PTHR23244 (PANTHER),<br>PTHR23244:SF36 (PANTHER),<br>SSF117281 (SUPERFAMILY) |
|                               | -                                                          | 0  |  |                                                                                                                                                                                        |              | -                                                                                                                |
| Homo sapiens                  | tr- methyltransferase 112 homolog                          | 4  |  | C:GO:0043234;<br>F:GO:0008276;<br>F:GO:0005515;<br>P:GO:0018364                                                                                                                        | -            | -                                                                                                                |
| Caenorhabditis briggsae       | ww domain-containing protein                               | 0  |  |                                                                                                                                                                                        | F:GO:0005515 | IPR006596; G3DSA:3.40.50.1010 (GENE3D), SSF88723 (SUPERFAMILY)                                                   |
|                               | -                                                          | 0  |  |                                                                                                                                                                                        |              | SignalP (SIGNALP)                                                                                                |
| Caenorhabditis elegans        | dymeclin                                                   | 4  |  | P:GO:0009792;<br>P:GO:0000003;<br>F:GO:0005515;<br>P:GO:0002119                                                                                                                        | -            | IPR019142; PTHR12895 (PANTHER),<br>PTHR12895:SF2 (PANTHER)                                                       |
| Caenorhabditis briggsae       | elegans protein partially confirmed by transcript evidence | 7  |  | F:GO:0005488;<br>P:GO:0030421;<br>P:GO:0008340;<br>P:GO:0006264;<br>F:GO:0016791;<br>F:GO:0016740;<br>P:GO:0008406                                                                     | -            | EC:3.1.3.0                                                                                                       |



|                         |                                                            |    |                                                                                                                                                                                                         |                               |             |                                                                                                                                   |
|-------------------------|------------------------------------------------------------|----|---------------------------------------------------------------------------------------------------------------------------------------------------------------------------------------------------------|-------------------------------|-------------|-----------------------------------------------------------------------------------------------------------------------------------|
| Caenorhabditis elegans  | elegans protein partially confirmed by transcript evidence | 0  |                                                                                                                                                                                                         | C:GO:0016021;<br>P:GO:0007186 |             | IPR017452; PTHR22751 (PANTHER),<br>PTHR22751:SF8 (PANTHER), SignalP<br>(SIGNALP)                                                  |
| Caenorhabditis elegans  | elegans protein confirmed by transcript evidence           | 0  |                                                                                                                                                                                                         |                               |             | SignalP (SIGNALP)                                                                                                                 |
|                         | -                                                          | 0  |                                                                                                                                                                                                         |                               |             | -                                                                                                                                 |
| Caenorhabditis briggsae | small subunit processome component 20 homolog              | 3  | F:GO:0005488;<br>C:GO:0031981;<br>P:GO:0006364                                                                                                                                                          | -                             |             | SignalP (SIGNALP)                                                                                                                 |
| Caenorhabditis elegans  | solute carrier family 41 member 1                          | 2  | F:GO:0008324;<br>P:GO:0006812                                                                                                                                                                           | -                             |             | IPR006667; PTHR16228 (PANTHER),<br>SignalP (SIGNALP)                                                                              |
|                         | -                                                          | 0  |                                                                                                                                                                                                         |                               |             | -                                                                                                                                 |
| Loa loa                 | ring finger protein 185                                    | 1  | F:GO:0005488                                                                                                                                                                                            | -                             |             | IPR001841; IPR013083; IPR017907;<br>IPR018957; PTHR12313 (PANTHER),<br>SSF57850 (SUPERFAMILY)                                     |
| Caenorhabditis elegans  | serine threonine-protein ki-se mrck beta                   | 12 | F:GO:0005083;<br>F:GO:0004674;<br>C:GO:0005856;<br>P:GO:0007163;<br>P:GO:0031532;<br>C:GO:0031252;<br>F:GO:0005524;<br>C:GO:0005911;<br>F:GO:0000287;<br>P:GO:0007165;<br>F:GO:0017048;<br>P:GO:0006468 | -                             | EC:2.7.11.0 | IPR011009; G3DSA:3.30.200.20<br>(GENE3D), PTHR22988 (PANTHER),<br>PTHR22988:SF2 (PANTHER)                                         |
| Caenorhabditis elegans  | briggsae cbr-fhod-1 protein                                | 2  | F:GO:0003779;<br>P:GO:0030036                                                                                                                                                                           | -                             |             | -                                                                                                                                 |
|                         | -                                                          | 0  |                                                                                                                                                                                                         |                               |             | -                                                                                                                                 |
|                         | -                                                          | 0  |                                                                                                                                                                                                         |                               |             | -                                                                                                                                 |
| Caenorhabditis briggsae | atp-dependent r- helicase a                                | 11 | C:GO:0070937;<br>F:GO:0003676;<br>P:GO:0070934;<br>C:GO:0005730;<br>F:GO:0008026;<br>P:GO:0008380;<br>C:GO:0005813;<br>F:GO:0005515;<br>C:GO:0030529;<br>P:GO:0034605;<br>F:GO:0003724                  | -                             |             | IPR001159; IPR014720;<br>G3DSA:3.40.50.300 (GENE3D),<br>PTHR18934 (PANTHER), SSF52540<br>(SUPERFAMILY), SSF54768<br>(SUPERFAMILY) |
| Loa loa                 | acyl- synthetase long-chain family member 5                | 9  | P:GO:0048518;<br>P:GO:0010033;<br>P:GO:0044255;<br>P:GO:0009792;<br>C:GO:0031090;<br>P:GO:0044281;<br>C:GO:0044446;<br>F:GO:0003824;<br>C:GO:0005739                                                    | -                             |             | IPR000873; G3DSA:3.40.50.980<br>(GENE3D), PTHR11968 (PANTHER),<br>PTHR11968:SF8 (PANTHER), SSF56801<br>(SUPERFAMILY)              |
| Brugia malayi           | gem-associated protein 7                                   | 0  |                                                                                                                                                                                                         |                               |             | SignalP (SIGNALP)                                                                                                                 |
| Caenorhabditis elegans  | briggsae cbr-dhs-14 protein                                | 5  | P:GO:0009792;<br>F:GO:0005515;<br>P:GO:0044237;<br>P:GO:0040010;<br>F:GO:0003824                                                                                                                        | -                             |             | IPR002198; IPR002347; IPR016040;<br>PTHR19410:SF76 (PANTHER),<br>SSF51735 (SUPERFAMILY)                                           |

|                         |                                                                                 |   |                                                                                                                                                      |                                                                                                   |              |                                                                                                         |
|-------------------------|---------------------------------------------------------------------------------|---|------------------------------------------------------------------------------------------------------------------------------------------------------|---------------------------------------------------------------------------------------------------|--------------|---------------------------------------------------------------------------------------------------------|
| Caenorhabditis briggsae | tetratricopeptide repeat protein 4                                              | 7 | P:GO:0040035;<br>P:GO:0009792;<br>P:GO:0002119;<br>P:GO:0040018;<br>P:GO:0040010;<br>P:GO:0040011;<br>P:GO:0006898                                   | -                                                                                                 | -            |                                                                                                         |
| -                       | -                                                                               | 0 |                                                                                                                                                      |                                                                                                   |              |                                                                                                         |
| Caenorhabditis elegans  | hypothetical protein F37E3.3 [Caenorhabditis elegans]                           | 0 |                                                                                                                                                      |                                                                                                   |              |                                                                                                         |
| Caenorhabditis briggsae | Hypothetical protein CBG16818 [Caenorhabditis briggsae]                         | 0 |                                                                                                                                                      |                                                                                                   |              |                                                                                                         |
| -                       | -                                                                               | 0 |                                                                                                                                                      |                                                                                                   |              |                                                                                                         |
| -                       | -                                                                               | 0 |                                                                                                                                                      |                                                                                                   |              |                                                                                                         |
| -                       | -                                                                               | 0 |                                                                                                                                                      |                                                                                                   |              | SignalP (SIGNALP)                                                                                       |
| Caenorhabditis briggsae | solute carrier family 25 (mitochondrial carrier oxoglutarate carrier) member 11 | 6 | F:GO:0015367;<br>C:GO:0005887;<br>F:GO:0005488;<br>C:GO:0005743;<br>P:GO:0055085;<br>P:GO:0006839                                                    | -                                                                                                 |              |                                                                                                         |
| Caenorhabditis briggsae | related to yeast vacuolar protein sorting factor family member (vps-34)         | 5 | F:GO:0005488;<br>C:GO:0005942;<br>P:GO:0046854;<br>F:GO:0016303;<br>P:GO:0048015                                                                     | -                                                                                                 | EC:2.7.1.137 | IPR000403; IPR011009; IPR015433;<br>IPR018936; G3DSA:3.30.1010.10<br>(GENE3D), PTHR10048:SF7 (PANTHER)  |
| -                       | -                                                                               | 0 |                                                                                                                                                      |                                                                                                   |              |                                                                                                         |
| Caenorhabditis elegans  | cornichon                                                                       | 9 | P:GO:0008314;<br>P:GO:0046843;<br>P:GO:0023034;<br>P:GO:0045450;<br>P:GO:0030722;<br>P:GO:0045451;<br>P:GO:0008069;<br>P:GO:0006888;<br>C:GO:0005887 | -                                                                                                 |              | IPR003377; PTHR12290 (PANTHER),<br>PTHR12290:SF3 (PANTHER), SignalP<br>(SIGNALP)                        |
| Loa loa                 | protein ki-se domain containing protein                                         | 0 |                                                                                                                                                      | F:GO:0016301;<br>F:GO:0004672;<br>F:GO:0005524;<br>F:GO:0000166;<br>P:GO:0006468;<br>F:GO:0004674 |              | IPR011009; IPR017441;<br>G3DSA:3.30.200.20 (GENE3D),<br>PTHR22974 (PANTHER),<br>PTHR22974:SF5 (PANTHER) |
| -                       | -                                                                               | 0 |                                                                                                                                                      |                                                                                                   |              | IPR000631; G3DSA:3.40.1190.20<br>(GENE3D)                                                               |
| -                       | -                                                                               | 0 |                                                                                                                                                      |                                                                                                   |              |                                                                                                         |
| -                       | -                                                                               | 0 |                                                                                                                                                      |                                                                                                   |              |                                                                                                         |
| -                       | -                                                                               | 0 |                                                                                                                                                      |                                                                                                   |              |                                                                                                         |
| -                       | -                                                                               | 0 |                                                                                                                                                      |                                                                                                   |              | SignalP (SIGNALP)                                                                                       |
| Caenorhabditis briggsae | glutamic acid decarboxylase                                                     | 3 | F:GO:0030170;<br>P:GO:0019752;<br>F:GO:0016831                                                                                                       | -                                                                                                 | EC:4.1.1.0   | IPR002129; IPR015421; IPR015422;<br>IPR015424; PTHR11999:SF13<br>(PANTHER)                              |
| Caenorhabditis elegans  | 1-acylglycerol-3-phosphate acyltransferase                                      | 4 | F:GO:0008415;<br>C:GO:0016021;<br>P:GO:0009792;<br>P:GO:0008152                                                                                      | -                                                                                                 |              | PTHR10983 (PANTHER),<br>PTHR10983:SF2 (PANTHER)                                                         |
| Caenorhabditis elegans  | diacylglycerol acyltransferase family protein                                   | 4 | P:GO:0009792;<br>F:GO:0016747;<br>C:GO:0016021;<br>P:GO:0008152                                                                                      | -                                                                                                 | EC:2.3.1.0   | IPR007130; SignalP (SIGNALP)                                                                            |

|                         |                                 |    |                                                                                                                                                                                                                                                                                              |                                                |             |                                                                           |
|-------------------------|---------------------------------|----|----------------------------------------------------------------------------------------------------------------------------------------------------------------------------------------------------------------------------------------------------------------------------------------------|------------------------------------------------|-------------|---------------------------------------------------------------------------|
| Pongo abelii            | collagen alpha-2 chain-like     | 17 | P:GO:0042476;<br>F:GO:0030674;<br>P:GO:0070208;<br>P:GO:0043589;<br>P:GO:0008217;<br>F:GO:0042802;<br>C:GO:0005615;<br>F:GO:0046332;<br>P:GO:0001501;<br>F:GO:0048407;<br>C:GO:0005584;<br>P:GO:0030199;<br>P:GO:0007179;<br>F:GO:0005201;<br>P:GO:0001568;<br>P:GO:0007266;<br>C:GO:0005886 | -                                              |             | IPR008160; PTHR10499 (PANTHER),<br>PTHR10499:SF123 (PANTHER)              |
| Brugia malayi           | iesterase family member (pde-2) | 9  | F:GO:0004118;<br>P:GO:0046069;<br>F:GO:0046872;<br>F:GO:0030552;<br>C:GO:0045121;<br>P:GO:0007165;<br>F:GO:0042803;<br>F:GO:0030553;<br>P:GO:0006198                                                                                                                                         | -                                              |             | G3DSA:3.30.450.40 (GENE3D),<br>SSF55781 (SUPERFAMILY)                     |
| Pristionchus pacificus  | aldo-keto reductase             | 2  | P:GO:0040010;<br>P:GO:0040011                                                                                                                                                                                                                                                                | -                                              |             | IPR001395; IPR023210;<br>PTHR11732:SF34 (PANTHER)                         |
| Caenorhabditis briggsae | dachsous 1                      | 5  | P:GO:0016337;<br>P:GO:0050794;<br>P:GO:0007275;<br>C:GO:0044464;<br>P:GO:0007166                                                                                                                                                                                                             | -                                              |             | IPR002126; IPR015919; PTHR10596<br>(PANTHER), PTHR10596:SF74<br>(PANTHER) |
| Caenorhabditis briggsae | #NAME?                          | 5  | P:GO:0040010;<br>P:GO:0009086;<br>P:GO:0055114;<br>F:GO:0005515;<br>F:GO:0004489                                                                                                                                                                                                             | -                                              | EC:1.5.1.20 | IPR003171; G3DSA:3.20.20.220<br>(GENE3D), SSF51730 (SUPERFAMILY)          |
| Caenorhabditis briggsae | #NAME?                          | 5  | P:GO:0040010;<br>P:GO:0009086;<br>P:GO:0055114;<br>F:GO:0005515;<br>F:GO:0004489                                                                                                                                                                                                             | -                                              | EC:1.5.1.20 | -                                                                         |
| -                       | -                               | 0  |                                                                                                                                                                                                                                                                                              |                                                |             | SignalP (SIGNALP)                                                         |
| -                       | -                               | 0  |                                                                                                                                                                                                                                                                                              |                                                |             | -                                                                         |
| Caenorhabditis elegans  | reverse transcriptase           | 4  | F:GO:0004519;<br>F:GO:0003723;<br>F:GO:0003964;<br>P:GO:0006278                                                                                                                                                                                                                              | -                                              | EC:2.7.7.49 | -                                                                         |
| Chlorella variabilis    | nuclear protein hcc-1           | 0  |                                                                                                                                                                                                                                                                                              | F:GO:0003676;<br>P:GO:0009792;<br>F:GO:0005515 |             | IPR003034; G3DSA:1.10.720.30<br>(GENE3D)                                  |
| -                       | -                               | 0  |                                                                                                                                                                                                                                                                                              |                                                |             | SignalP (SIGNALP)                                                         |

|                         |                                                                                                |   |                                                                                                                                                      |                                                                                                                    |             |                                                                                              |
|-------------------------|------------------------------------------------------------------------------------------------|---|------------------------------------------------------------------------------------------------------------------------------------------------------|--------------------------------------------------------------------------------------------------------------------|-------------|----------------------------------------------------------------------------------------------|
| Ciona intestinalis      | elegans protein partially confirmed by transcript evidence                                     | 0 |                                                                                                                                                      | F:GO:0004348;<br>C:GO:0005764;<br>P:GO:0006665;<br>P:GO:0007040;<br>P:GO:0005975;<br>F:GO:0003824;<br>F:GO:0043169 |             | IPR001139; SignalP (SIGNALP),<br>SSF51011 (SUPERFAMILY)                                      |
| Loa loa                 | set domain containing protein                                                                  | 0 |                                                                                                                                                      | F:GO:0046872;<br>P:GO:0006355;<br>F:GO:0003676;<br>F:GO:0008270;<br>C:GO:0005634;<br>C:GO:0005622                  |             | IPR001214; G3DSA:2.170.270.10<br>(GENE3D), SSF82199 (SUPERFAMILY)                            |
| Drosophila mojavensis   | partner of drosha                                                                              | 5 | P:GO:0007446;<br>P:GO:0031053;<br>F:GO:0003725;<br>F:GO:0005515;<br>C:GO:0005634                                                                     | -                                                                                                                  |             | IPR001202                                                                                    |
| Brugia malayi           | shq1 homolog ( cerevisiae)                                                                     | 0 |                                                                                                                                                      | P:GO:0006508;<br>F:GO:0003674;<br>F:GO:0008234;<br>C:GO:0005575                                                    |             | IPR007009; PTHR12967 (PANTHER)                                                               |
|                         | -                                                                                              | 0 |                                                                                                                                                      |                                                                                                                    |             | -                                                                                            |
| Caenorhabditis elegans  | briggsae cbr-cln- protein                                                                      | 9 | P:GO:0008340;<br>P:GO:0006665;<br>C:GO:0005794;<br>P:GO:0046662;<br>P:GO:0009792;<br>C:GO:0044425;<br>P:GO:0016043;<br>C:GO:0044446;<br>P:GO:0006873 | -                                                                                                                  |             | -                                                                                            |
| Brugia malayi           | g protein-coupled receptor 107                                                                 | 2 | C:GO:0016021;<br>F:GO:0004872                                                                                                                        | -                                                                                                                  |             | -                                                                                            |
| Loa loa                 | patched family protein                                                                         | 6 | P:GO:0048856;<br>P:GO:0040018;<br>P:GO:0018996;<br>P:GO:0007275;<br>P:GO:0040011;<br>C:GO:0016020                                                    | -                                                                                                                  |             | IPR000731; IPR003392; PTHR10796<br>(PANTHER), PTHR10796:SF14<br>(PANTHER), SignalP (SIGNALP) |
| Loa loa                 | hemimethylated d- binding domain containing protein                                            | 0 |                                                                                                                                                      |                                                                                                                    |             | -                                                                                            |
| Brugia malayi           | ciao1_caeel ame: full=probable cytosolic iron-sulfur protein<br>assembly protein ciao1 homolog | 0 |                                                                                                                                                      | F:GO:0005488;<br>P:GO:0016226;<br>C:GO:0005856                                                                     |             | IPR015943; IPR017986; IPR019781;<br>IPR019782                                                |
| Caenorhabditis elegans  | leucine-rich repeat serine threonine-protein ki-se 1                                           | 7 | P:GO:0006468;<br>F:GO:0005525;<br>C:GO:0005622;<br>F:GO:0005515;<br>F:GO:0005524;<br>F:GO:0004674;<br>P:GO:0007264                                   | -                                                                                                                  | EC:2.7.11.0 | IPR001245; G3DSA:3.30.200.20<br>(GENE3D), PTHR23257 (PANTHER),<br>PTHR23257:SF88 (PANTHER)   |
| Caenorhabditis briggsae | pentatricopeptide repeat domain 3                                                              | 4 | P:GO:0009792;<br>P:GO:0016246;<br>P:GO:0040007;<br>P:GO:0002119                                                                                      | -                                                                                                                  |             | PTHR16276 (PANTHER), SignalP<br>(SIGNALP)                                                    |

|                                   |                                                            |    |                                                                                                                                                                                        |   |                               |                                                                                                 |
|-----------------------------------|------------------------------------------------------------|----|----------------------------------------------------------------------------------------------------------------------------------------------------------------------------------------|---|-------------------------------|-------------------------------------------------------------------------------------------------|
| Caenorhabditis briggsae           | pentatricopeptide repeat domain 3                          | 4  | P:GO:0009792;<br>P:GO:0016246;<br>P:GO:0040007;<br>P:GO:0002119                                                                                                                        | - |                               | PTHR16276 (PANTHER), SignalP (SIGNALP)                                                          |
| Caenorhabditis elegans            | failed axon connections protein                            | 0  |                                                                                                                                                                                        |   |                               | -                                                                                               |
|                                   | -                                                          | 0  |                                                                                                                                                                                        |   |                               | IPR006942                                                                                       |
| Caenorhabditis briggsae           | acyl- thioesterase ii                                      | 1  | P:GO:0019915                                                                                                                                                                           | - |                               | IPR003703; G3DSA:3.10.129.10 (GENE3D), PTHR11066:SF7 (PANTHER), SSF54637 (SUPERFAMILY)          |
| Caenorhabditis briggsae           | elegans protein partially confirmed by transcript evidence | 0  |                                                                                                                                                                                        |   | F:GO:0016787                  | IPR002018; PTHR11559:SF6 (PANTHER), SignalP (SIGNALP)                                           |
|                                   | -                                                          | 0  |                                                                                                                                                                                        |   |                               | -                                                                                               |
|                                   | -                                                          | 0  |                                                                                                                                                                                        |   |                               | -                                                                                               |
|                                   | -                                                          | 0  |                                                                                                                                                                                        |   |                               | -                                                                                               |
| Caenorhabditis elegans            | isovaleryl coenzyme a dehydroge-se                         | 3  | F:GO:0050660;<br>P:GO:0055114;<br>F:GO:0003995                                                                                                                                         | - | EC:1.3.99.3                   | IPR006092; IPR009100; IPR013786; PTHR10909 (PANTHER), PTHR10909:SF10 (PANTHER)                  |
| Caenorhabditis briggsae           | histone deacetylase 6                                      | 11 | F:GO:0016811;<br>C:GO:0005737;<br>P:GO:0006511;<br>F:GO:0008092;<br>P:GO:0006996;<br>P:GO:0006476;<br>C:GO:0043234;<br>P:GO:0050794;<br>C:GO:0043229;<br>F:GO:0033558;<br>P:GO:0043241 | - | EC:3.5.1.0                    | IPR000286; PTHR10625:SF19 (PANTHER), SSF52768 (SUPERFAMILY)                                     |
|                                   | -                                                          | 0  |                                                                                                                                                                                        |   |                               | -                                                                                               |
| Callithrix jacchus                | eukaryotic translation initiation factor subunit e         | 9  | F:GO:0003743;<br>C:GO:0005829;<br>F:GO:0047485;<br>P:GO:0045948;<br>C:GO:0005852;<br>C:GO:0000785;<br>C:GO:0016605;<br>P:GO:0045947;<br>P:GO:0000184                                   | - |                               | SignalP (SIGNALP)                                                                               |
| Clostridium sporogenes ATCC 15579 | collagen triple helix repeat protein                       | 0  |                                                                                                                                                                                        |   |                               | IPR022226; PTHR15606 (PANTHER), PTHR15606:SF2 (PANTHER)                                         |
| Clostridium sporogenes ATCC 15579 | collagen triple helix repeat protein                       | 0  |                                                                                                                                                                                        |   |                               | IPR022226; PTHR15606 (PANTHER), PTHR15606:SF2 (PANTHER)                                         |
| Caenorhabditis briggsae           | udp-glucose 4-epimerase                                    | 7  | P:GO:0006694;<br>F:GO:0003854;<br>F:GO:0005515;<br>F:GO:0003978;<br>P:GO:0000003;<br>P:GO:0006012;<br>F:GO:0050662                                                                     | - | EC:1.1.1.145<br>; EC:5.1.3.2  | IPR001509; IPR005886; IPR016040; PTHR10366 (PANTHER), SignalP (SIGNALP), SSF51735 (SUPERFAMILY) |
|                                   | -                                                          | 0  |                                                                                                                                                                                        |   |                               | -                                                                                               |
|                                   | -                                                          | 0  |                                                                                                                                                                                        |   |                               | -                                                                                               |
| Brugia malayi                     | mgc14327-like protein                                      | 0  |                                                                                                                                                                                        |   | C:GO:0016021;<br>P:GO:0008150 | SignalP (SIGNALP)                                                                               |
| Caenorhabditis elegans            | ubiquitin-fold modifier 1                                  | 4  | C:GO:0005737;<br>C:GO:0005634;<br>F:GO:0005515;<br>P:GO:0071569                                                                                                                        | - |                               | IPR005375; G3DSA:3.10.20.90 (GENE3D), SSF54236 (SUPERFAMILY)                                    |

|                         |                                          |   |                                                                                                                                                      |                                                                                                                    |                             |                                                                                                                                     |
|-------------------------|------------------------------------------|---|------------------------------------------------------------------------------------------------------------------------------------------------------|--------------------------------------------------------------------------------------------------------------------|-----------------------------|-------------------------------------------------------------------------------------------------------------------------------------|
| Caenorhabditis elegans  | ubiquitin-fold modifier 1                | 4 | C:GO:0005737;<br>C:GO:0005634;<br>F:GO:0005515;<br>P:GO:0071569                                                                                      | -                                                                                                                  |                             | IPR005375; G3DSA:3.10.20.90<br>(GENE3D), SSF54236 (SUPERFAMILY)                                                                     |
|                         |                                          | 0 |                                                                                                                                                      |                                                                                                                    |                             |                                                                                                                                     |
| Caenorhabditis elegans  | family with sequence similarity member a | 1 | F:GO:0005515                                                                                                                                         | -                                                                                                                  |                             | PTHR22875 (PANTHER),<br>PTHR22875:SF1 (PANTHER)                                                                                     |
| Caenorhabditis elegans  | family with sequence similarity member a | 1 | F:GO:0005515                                                                                                                                         | -                                                                                                                  |                             | PTHR22875 (PANTHER),<br>PTHR22875:SF1 (PANTHER)                                                                                     |
| Caenorhabditis elegans  | pdz domain containing protein            | 5 | P:GO:0009792;<br>P:GO:0040007;<br>P:GO:0040035;<br>F:GO:0005515;<br>P:GO:0002119                                                                     | -                                                                                                                  |                             | IPR001478; G3DSA:2.30.42.10<br>(GENE3D), PTHR19964 (PANTHER),<br>PTHR19964:SF5 (PANTHER)                                            |
| Pongo abelii            | neudesin precursor                       | 4 | C:GO:0005615;<br>F:GO:0008083;<br>P:GO:0043410;<br>F:GO:0020037                                                                                      | -                                                                                                                  |                             | -                                                                                                                                   |
| Loa loa                 | glutamine-oxaloacetic transami-se        | 6 | F:GO:0030170;<br>P:GO:0006536;<br>P:GO:0006531;<br>P:GO:0006103;<br>P:GO:0009058;<br>F:GO:0004069                                                    | -                                                                                                                  | EC:2.6.1.1                  | IPR000796; IPR015422; IPR015424                                                                                                     |
| Caenorhabditis briggsae | receptor type guanylyl cyclase           | 7 | F:GO:0004383;<br>F:GO:0004672;<br>F:GO:0008528;<br>F:GO:0005524;<br>C:GO:0016020;<br>P:GO:0006468;<br>P:GO:0006182                                   | -                                                                                                                  | EC:4.6.1.2                  | -                                                                                                                                   |
| Caenorhabditis elegans  | amp-binding enzyme family protein        | 6 | P:GO:0010890;<br>F:GO:0004467;<br>C:GO:0005811;<br>P:GO:0007411;<br>P:GO:0008152;<br>C:GO:0005783                                                    | -                                                                                                                  | EC:6.2.1.3                  | -                                                                                                                                   |
| Caenorhabditis elegans  | golgi s-p receptor complex member 1      | 0 |                                                                                                                                                      | F:GO:0004872;<br>F:GO:0005484;<br>C:GO:0016020;<br>P:GO:0042147;<br>C:GO:0000139;<br>P:GO:0006886;<br>C:GO:0005794 |                             | PTHR21094 (PANTHER)                                                                                                                 |
|                         |                                          | 0 |                                                                                                                                                      |                                                                                                                    |                             |                                                                                                                                     |
| Brugia malayi           | exosome complex exonuclease rrp40        | 1 | C:GO:0005737                                                                                                                                         | -                                                                                                                  |                             | IPR022967; PTHR21321 (PANTHER),<br>PTHR21321:SF1 (PANTHER)                                                                          |
|                         |                                          | 0 |                                                                                                                                                      |                                                                                                                    |                             |                                                                                                                                     |
|                         |                                          | 0 |                                                                                                                                                      |                                                                                                                    |                             |                                                                                                                                     |
| Caenorhabditis elegans  | briggsae cbr-spg-7 protein               | 9 | F:GO:0004222;<br>P:GO:0030163;<br>F:GO:0005524;<br>C:GO:0016021;<br>F:GO:0017111;<br>P:GO:0006508;<br>F:GO:0008270;<br>C:GO:0005783;<br>C:GO:0005739 | -                                                                                                                  | EC:3.4.24.0;<br>EC:3.6.1.15 | IPR003593; IPR003959;<br>G3DSA:3.40.50.300 (GENE3D),<br>PTHR23076 (PANTHER),<br>PTHR23076:SF11 (PANTHER),<br>SSF52540 (SUPERFAMILY) |

|                             |                                                           |   |                                                                                                                    |                                                                                                                                                      |                                   |                                                                                  |
|-----------------------------|-----------------------------------------------------------|---|--------------------------------------------------------------------------------------------------------------------|------------------------------------------------------------------------------------------------------------------------------------------------------|-----------------------------------|----------------------------------------------------------------------------------|
| Synechococcus sp. RS9916    | short-chain dehydroge-se reductase superfamily protein    | 0 |                                                                                                                    | P:GO:0055114;<br>F:GO:0005488;<br>F:GO:0016491;<br>P:GO:0008152;<br>F:GO:0016630;<br>F:GO:0003824                                                    | -                                 |                                                                                  |
| Caenorhabditis elegans      | scy1-like 2 protein                                       | 3 | P:GO:0006468;<br>F:GO:0005524;<br>F:GO:0004672                                                                     | -                                                                                                                                                    |                                   | PTHR12984 (PANTHER),<br>PTHR12984:SF3 (PANTHER)                                  |
| Caenorhabditis briggsae     | transmembrane protein 87b                                 | 2 | F:GO:0004872;<br>C:GO:0016021                                                                                      | -                                                                                                                                                    |                                   | -                                                                                |
| Caenorhabditis briggsae     | briggsae cbr-phy-2 protein                                | 7 | P:GO:0018401;<br>F:GO:0031418;<br>F:GO:0005506;<br>F:GO:0004656;<br>P:GO:0055114;<br>F:GO:0016702;<br>C:GO:0005783 | -                                                                                                                                                    | EC:1.14.11.2<br>;<br>EC:1.13.11.0 | IPR011990; IPR013547; PTHR10869<br>(PANTHER), PTHR10869:SF13<br>(PANTHER)        |
| Angiostrongylus cantonensis | hypothetical protein [Angiostrongylus cantonensis]        | 2 | P:GO:0009792;<br>P:GO:0000003                                                                                      | -                                                                                                                                                    |                                   | SignalP (SIGNALP)                                                                |
| -                           | -                                                         | 0 |                                                                                                                    |                                                                                                                                                      |                                   | SignalP (SIGNALP)                                                                |
| -                           | -                                                         | 0 |                                                                                                                    |                                                                                                                                                      |                                   | -                                                                                |
| -                           | -                                                         | 0 |                                                                                                                    |                                                                                                                                                      |                                   | -                                                                                |
| Caenorhabditis briggsae     | briggsae cbr-lam-3 protein                                | 5 | C:GO:0005606;<br>P:GO:0030334;<br>P:GO:0045995;<br>P:GO:0030155;<br>F:GO:0005102                                   | -                                                                                                                                                    |                                   | IPR000034; PTHR10574 (PANTHER),<br>PTHR10574:SF25 (PANTHER)                      |
| -                           | -                                                         | 0 |                                                                                                                    |                                                                                                                                                      |                                   | -                                                                                |
| Caenorhabditis elegans      | protein                                                   | 0 |                                                                                                                    | P:GO:0016998;<br>P:GO:0016042;<br>C:GO:0005576;<br>F:GO:0005179;<br>P:GO:0006644;<br>P:GO:0009253;<br>F:GO:0003796;<br>F:GO:0005509;<br>F:GO:0004623 |                                   | -                                                                                |
| Caenorhabditis briggsae     | alkaline phosphatase specific for p-nitrophenyl phosphate | 0 |                                                                                                                    | F:GO:0016791;<br>P:GO:0008152;<br>F:GO:0016787;<br>F:GO:0003824;<br>F:GO:0003869                                                                     |                                   | G3DSA:3.40.50.1000 (GENE3D),<br>PTHR19288 (PANTHER),<br>PTHR19288:SF11 (PANTHER) |
| Ostertagia ostertagi        | secreted protein asp-2                                    | 1 | P:GO:0040011                                                                                                       | -                                                                                                                                                    |                                   | IPR001283; IPR014044; IPR018244;<br>PTHR10334:SF11 (PANTHER)                     |
| Caenorhabditis briggsae     | slowpoke potassium channel family member (slo-2)          | 6 | C:GO:0016020;<br>P:GO:0006813;<br>P:GO:0008152;<br>F:GO:0003824;<br>F:GO:0015269;<br>F:GO:0005488                  | -                                                                                                                                                    |                                   | IPR003929; IPR016040; PTHR10027<br>(PANTHER), PTHR10027:SF6<br>(PANTHER)         |
| -                           | -                                                         | 0 |                                                                                                                    |                                                                                                                                                      |                                   | SignalP (SIGNALP)                                                                |
| -                           | -                                                         | 0 |                                                                                                                    |                                                                                                                                                      |                                   | -                                                                                |

|                           |                                                            |    |                                                                                                                                                                       |                                                                 |                           |                                                                                                                   |
|---------------------------|------------------------------------------------------------|----|-----------------------------------------------------------------------------------------------------------------------------------------------------------------------|-----------------------------------------------------------------|---------------------------|-------------------------------------------------------------------------------------------------------------------|
| Caenorhabditis elegans    | molybdenum cofactor synthesis 3                            | 10 | P:GO:0018192;<br>F:GO:0016779;<br>C:GO:0005829;<br>P:GO:0034227;<br>P:GO:0006777;<br>F:GO:0004792;<br>P:GO:0040035;<br>F:GO:0042292;<br>F:GO:0005515;<br>P:GO:0002098 | -                                                               | EC:2.7.7.0;<br>EC:2.8.1.1 | IPR000594; IPR007901; IPR009036;<br>IPR016040; PTHR10953 (PANTHER)                                                |
| Brugia malayi             | polycomb protein                                           | 9  | P:GO:0016574;<br>P:GO:0006333;<br>P:GO:0006342;<br>F:GO:0004842;<br>C:GO:0000785;<br>F:GO:0005515;<br>C:GO:0000151;<br>F:GO:0003682;<br>C:GO:0005634                  | -                                                               | EC:6.3.2.19               | IPR000953; IPR016197; IPR017984;<br>G3DSA:2.40.50.40 (GENE3D),<br>PTHR22812 (PANTHER),<br>PTHR22812:SF7 (PANTHER) |
| Caenorhabditis elegans    | i in (lysosomal protein) homolog family member (ctns-1)    | 8  | P:GO:0015811;<br>P:GO:0003333;<br>C:GO:0045335;<br>F:GO:0015171;<br>F:GO:0005515;<br>P:GO:0007165;<br>C:GO:0005765;<br>C:GO:0016021                                   | -                                                               |                           | PTHR13131 (PANTHER)                                                                                               |
| Caenorhabditis briggsae   | adenylyl cyclase family member (acy-3)                     | 0  |                                                                                                                                                                       |                                                                 |                           | -                                                                                                                 |
| Loa loa                   | structural maintenance of chromosomes protein 3            | 1  | F:GO:0005488                                                                                                                                                          | -                                                               |                           | PTHR18937 (PANTHER),<br>PTHR18937:SF8 (PANTHER)                                                                   |
|                           | -                                                          | 0  |                                                                                                                                                                       |                                                                 |                           | -                                                                                                                 |
| Heligmosomoides polygyrus | -tactin precursor                                          | 0  |                                                                                                                                                                       | F:GO:0005488;<br>F:GO:0005509;<br>P:GO:0007155;<br>F:GO:0005529 |                           | IPR001304; IPR016186; IPR016187;<br>PTHR22801 (PANTHER),<br>PTHR22801:SF9 (PANTHER), SignalP<br>(SIGNALP)         |
| Caenorhabditis briggsae   | fgf receptor activating protein isoform cra_c              | 8  | F:GO:0008565;<br>P:GO:0006506;<br>C:GO:0000139;<br>P:GO:0006916;<br>F:GO:0005515;<br>C:GO:0005789;<br>C:GO:0005634;<br>P:GO:0006974                                   | -                                                               |                           | IPR019402; PTHR12892 (PANTHER),<br>SignalP (SIGNALP)                                                              |
|                           | -                                                          | 0  |                                                                                                                                                                       |                                                                 |                           | -                                                                                                                 |
| Caenorhabditis elegans    | elegans protein partially confirmed by transcript evidence | 0  |                                                                                                                                                                       |                                                                 |                           | IPR007087; IPR015880; SSF57667<br>(SUPERFAMILY)                                                                   |
| Caenorhabditis elegans    | elegans protein partially confirmed by transcript evidence | 0  |                                                                                                                                                                       |                                                                 |                           | IPR007087; IPR015880; SSF57667<br>(SUPERFAMILY)                                                                   |
|                           | -                                                          | 0  |                                                                                                                                                                       |                                                                 |                           | -                                                                                                                 |
|                           | -                                                          | 0  |                                                                                                                                                                       |                                                                 |                           | -                                                                                                                 |
| Caenorhabditis elegans    | uncharacterized protein c19orf47                           | 0  |                                                                                                                                                                       |                                                                 |                           | IPR001660; IPR010993; IPR011510;<br>IPR013761; PTHR21359 (PANTHER)                                                |
| Caenorhabditis elegans    | uncharacterized protein c19orf47                           | 0  |                                                                                                                                                                       |                                                                 |                           | IPR001660; IPR010993; IPR011510;<br>IPR013761; PTHR21359 (PANTHER)                                                |



|                         |                                                |   |                                                                                                                                                                                                         |   |                                                            |
|-------------------------|------------------------------------------------|---|---------------------------------------------------------------------------------------------------------------------------------------------------------------------------------------------------------|---|------------------------------------------------------------|
| Caenorhabditis briggsae | eb module family protein                       | 0 | F:GO:0004674;<br>F:GO:0016810;<br>F:GO:0004672;<br>P:GO:0006468;<br>F:GO:0000166;<br>F:GO:0005524;<br>P:GO:0005975;<br>F:GO:0016491;<br>F:GO:0003824;<br>F:GO:0005515;<br>F:GO:0004867;<br>F:GO:0005488 |   | IPR006149; IPR006210                                       |
| -                       | -                                              | 0 |                                                                                                                                                                                                         |   | -                                                          |
| -                       | -                                              | 0 |                                                                                                                                                                                                         |   | -                                                          |
| -                       | -                                              | 0 |                                                                                                                                                                                                         |   | -                                                          |
| Caenorhabditis briggsae | mitochondrial ribosomal                        | 8 | P:GO:0006412;<br>P:GO:0040010;<br>C:GO:0005840;<br>F:GO:0003735;<br>P:GO:0000003;<br>P:GO:0002119;<br>P:GO:0006898;<br>P:GO:0009792                                                                     | - | EC:3.6.5.3<br>SignalP (SIGNALP)                            |
| Loa loa                 | integrator complex subunit 3                   | 7 | C:GO:0070876;<br>F:GO:0005515;<br>P:GO:0010212;<br>P:GO:0016180;<br>P:GO:0031576;<br>P:GO:0006281;<br>C:GO:0032039                                                                                      | - | PTHR13587 (PANTHER)                                        |
| Caenorhabditis briggsae | atp-dependent r- helicase                      | 3 | F:GO:0008026;<br>F:GO:0003676;<br>F:GO:0005524                                                                                                                                                          | - | IPR007502; PTHR18934 (PANTHER),<br>SignalP (SIGNALP)       |
| -                       | -                                              | 0 |                                                                                                                                                                                                         |   | -                                                          |
| Brugia malayi           | protein o-fucosyltransferase 2                 | 5 | P:GO:0007283;<br>P:GO:0010171;<br>P:GO:0040025;<br>F:GO:0016757;<br>P:GO:0018991                                                                                                                        | - | IPR019378; PTHR13398 (PANTHER)                             |
| Caenorhabditis briggsae | briggsae cbr-rbc-1 protein                     | 0 |                                                                                                                                                                                                         |   | PTHR13950 (PANTHER),<br>PTHR13950:SF1 (PANTHER)            |
| -                       | -                                              | 0 |                                                                                                                                                                                                         |   | SignalP (SIGNALP)                                          |
| -                       | -                                              | 0 |                                                                                                                                                                                                         |   | -                                                          |
| Camponotus floridanus   | transposase-like                               | 0 |                                                                                                                                                                                                         |   | IPR005471; IPR009057; IPR011991                            |
| -                       | -                                              | 0 |                                                                                                                                                                                                         |   | SignalP (SIGNALP)                                          |
| Caenorhabditis elegans  | dymeclin                                       | 4 | P:GO:0002119;<br>F:GO:0005515;<br>P:GO:0009792;<br>P:GO:0000003                                                                                                                                         | - | IPR019142; PTHR12895 (PANTHER),<br>PTHR12895:SF2 (PANTHER) |
| Caenorhabditis elegans  | gex interacting protein family member (gei-16) | 1 | F:GO:0005515                                                                                                                                                                                            | - | -                                                          |
| -                       | -                                              | 0 |                                                                                                                                                                                                         |   | -                                                          |

|                         |                                                            |   |                                                                                                   |                                                                                                                    |  |                                                                                                             |
|-------------------------|------------------------------------------------------------|---|---------------------------------------------------------------------------------------------------|--------------------------------------------------------------------------------------------------------------------|--|-------------------------------------------------------------------------------------------------------------|
| Caenorhabditis elegans  | plasma membrane proteolipid 3                              | 0 |                                                                                                   | F:GO:0003674;<br>P:GO:0043581;<br>C:GO:0016021;<br>C:GO:0016020;<br>P:GO:0008150;<br>P:GO:0006810;<br>C:GO:0005886 |  | IPR000612; SignalP (SIGNALP)                                                                                |
| Caenorhabditis elegans  | mitochondrial ribosomal                                    | 6 | P:GO:0040035;<br>P:GO:0009792;<br>P:GO:0002119;<br>P:GO:0040018;<br>P:GO:0008340;<br>P:GO:0006898 | -                                                                                                                  |  | -                                                                                                           |
|                         | -                                                          | 0 |                                                                                                   |                                                                                                                    |  | -                                                                                                           |
| Caenorhabditis elegans  | hypothetical protein F39G3.5 [Caenorhabditis elegans]      | 0 |                                                                                                   | F:GO:0005515                                                                                                       |  | IPR004877; IPR006593; PTHR10106 (PANTHER), SignalP (SIGNALP)                                                |
| Caenorhabditis elegans  | polk (d- polymerase kappa) homolog family member (polk-1)  | 1 | C:GO:0016020                                                                                      | -                                                                                                                  |  | IPR001126; IPR017961; IPR017962; PTHR11076:SF12 (PANTHER), PF11799 (PFAM)                                   |
| Caenorhabditis briggsae | elegans protein partially confirmed by transcript evidence | 2 | C:GO:0005856;<br>F:GO:0000166                                                                     | -                                                                                                                  |  | IPR000857; PTHR13140 (PANTHER), PTHR13140:SF27 (PANTHER)                                                    |
| Caenorhabditis elegans  | dis3 mitotic control homolog ( cerevisiae)                 | 4 | F:GO:0005515;<br>F:GO:0004518;<br>F:GO:0016219;<br>C:GO:0044424                                   | -                                                                                                                  |  | PTHR23355 (PANTHER), PTHR23355:SF13 (PANTHER)                                                               |
| Caenorhabditis elegans  | dis3 mitotic control homolog ( cerevisiae)                 | 3 | F:GO:0005488;<br>F:GO:0004518;<br>C:GO:0044424                                                    | -                                                                                                                  |  | PTHR23355 (PANTHER), PTHR23355:SF13 (PANTHER)                                                               |
|                         | -                                                          | 0 |                                                                                                   |                                                                                                                    |  | -                                                                                                           |
| Caenorhabditis elegans  | type alpha 2                                               | 0 |                                                                                                   | C:GO:0005594;<br>F:GO:0042302                                                                                      |  | IPR008160; PTHR10499 (PANTHER), PTHR10499:SF58 (PANTHER), SignalP (SIGNALP)                                 |
| Loa loa                 | stromal antigen 2                                          | 6 | P:GO:0032876;<br>P:GO:0007062;<br>C:GO:0000785;<br>F:GO:0005515;<br>C:GO:0015629;<br>C:GO:0005634 | -                                                                                                                  |  | PTHR11199 (PANTHER)                                                                                         |
| Loa loa                 | stromal antigen 2                                          | 6 | P:GO:0032876;<br>P:GO:0007062;<br>C:GO:0000785;<br>F:GO:0005515;<br>C:GO:0015629;<br>C:GO:0005634 | -                                                                                                                  |  | PTHR11199 (PANTHER)                                                                                         |
|                         | -                                                          | 0 |                                                                                                   |                                                                                                                    |  | SignalP (SIGNALP)                                                                                           |
| Brugia malayi           | mbt repeat family protein                                  | 0 |                                                                                                   | P:GO:0045449;<br>F:GO:0008270;<br>C:GO:0005634                                                                     |  | IPR004092; G3DSA:2.30.30.160 (GENE3D), PTHR12247 (PANTHER), PTHR12247:SF1 (PANTHER), SSF63748 (SUPERFAMILY) |
|                         | -                                                          | 0 |                                                                                                   |                                                                                                                    |  | -                                                                                                           |
| Caenorhabditis briggsae | Hypothetical protein CBG06766 [Caenorhabditis briggsae]    | 1 | P:GO:0006915                                                                                      | -                                                                                                                  |  | IPR002223; PTHR10083 (PANTHER), PTHR10083:SF38 (PANTHER), SignalP (SIGNALP)                                 |
| Caenorhabditis elegans  | gtp cyclohydrolase 1 feedback regulatory protein           | 5 | P:GO:0050789;<br>F:GO:0005515;<br>P:GO:0008152;<br>F:GO:0003824;<br>C:GO:0044424                  | -                                                                                                                  |  | -                                                                                                           |

|                         |                                                               |    |                                                                                                                                                                                        |                                                                 |             |                                                                    |
|-------------------------|---------------------------------------------------------------|----|----------------------------------------------------------------------------------------------------------------------------------------------------------------------------------------|-----------------------------------------------------------------|-------------|--------------------------------------------------------------------|
| Caenorhabditis briggsae | peptidase s9 prolyl oligopeptidase active site domain protein | 1  | F:GO:0016787                                                                                                                                                                           | -                                                               | -           | -                                                                  |
|                         | -                                                             | 0  |                                                                                                                                                                                        |                                                                 |             | -                                                                  |
|                         | -                                                             | 0  |                                                                                                                                                                                        |                                                                 |             | -                                                                  |
|                         | -                                                             | 0  |                                                                                                                                                                                        |                                                                 |             | -                                                                  |
|                         | -                                                             | 0  |                                                                                                                                                                                        |                                                                 |             | -                                                                  |
| Caenorhabditis elegans  | acyl-coenzyme a oxidase palmitoyl                             | 11 | F:GO:0003995;<br>P:GO:0006693;<br>F:GO:0016401;<br>C:GO:0005739;<br>P:GO:0033540;<br>P:GO:0055114;<br>P:GO:0006091;<br>P:GO:0007283;<br>C:GO:0005778;<br>F:GO:0050660;<br>F:GO:0005504 | -                                                               | EC:1.3.99.3 | IPR006091; IPR009075; IPR009100;<br>IPR012258; PTHR10909 (PANTHER) |
| Brugia malayi           | hypothetical protein Bm1_19575 [Brugia malayi]                | 0  |                                                                                                                                                                                        | F:GO:0005515                                                    |             | -                                                                  |
|                         | -                                                             | 0  |                                                                                                                                                                                        |                                                                 |             | -                                                                  |
|                         | -                                                             | 0  |                                                                                                                                                                                        |                                                                 |             | -                                                                  |
|                         | -                                                             | 0  |                                                                                                                                                                                        |                                                                 |             | SignalP (SIGNALP)                                                  |
| Caenorhabditis elegans  | sodium hydrogen exchanger 3                                   | 5  | F:GO:0015385;<br>P:GO:0055085;<br>P:GO:0006885;<br>C:GO:0016021;<br>P:GO:0006814                                                                                                       | -                                                               |             | IPR006153; IPR018416; IPR018422;<br>SignalP (SIGNALP)              |
|                         | -                                                             | 0  |                                                                                                                                                                                        |                                                                 |             | -                                                                  |
|                         | -                                                             | 0  |                                                                                                                                                                                        |                                                                 |             | -                                                                  |
| Caenorhabditis elegans  | briggsae cbr-vit-4 protein                                    | 4  | P:GO:0009792;<br>F:GO:0005515;<br>P:GO:0040010;<br>P:GO:0008340                                                                                                                        | -                                                               |             | IPR001846; PTHR11339 (PANTHER),<br>PTHR11339:SF43 (PANTHER)        |
| Caenorhabditis elegans  | briggsae cbr-vit-4 protein                                    | 4  | P:GO:0009792;<br>F:GO:0005515;<br>P:GO:0040010;<br>P:GO:0008340                                                                                                                        | -                                                               |             | IPR001846; PTHR11339 (PANTHER),<br>PTHR11339:SF43 (PANTHER)        |
| Caenorhabditis elegans  | elegans protein partially confirmed by transcript evidence    | 0  |                                                                                                                                                                                        | F:GO:0003723;<br>P:GO:0009451;<br>P:GO:0001522;<br>F:GO:0009982 |             | -                                                                  |
| Caenorhabditis briggsae | briggsae cbr-rhy-1 protein                                    | 2  | C:GO:0016021;<br>F:GO:0016747                                                                                                                                                          | -                                                               | EC:2.3.1.0  | PTHR11161 (PANTHER)                                                |
|                         | -                                                             | 0  |                                                                                                                                                                                        |                                                                 |             | -                                                                  |
|                         | -                                                             | 0  |                                                                                                                                                                                        |                                                                 |             | SignalP (SIGNALP)                                                  |
| Caenorhabditis elegans  | tar-binding protein                                           | 1  | F:GO:0042802                                                                                                                                                                           | -                                                               |             | -                                                                  |
|                         | -                                                             | 0  |                                                                                                                                                                                        |                                                                 |             | -                                                                  |
| Caenorhabditis briggsae | d- repair protein rev1                                        | 6  | P:GO:0040010;<br>F:GO:0005488;<br>P:GO:0042276;<br>F:GO:0017125;<br>P:GO:0006898;<br>P:GO:0009792                                                                                      | -                                                               |             | IPR001357; G3DSA:3.40.50.10190<br>(GENE3D)                         |
| Pongo abelii            | prostate tumor-overexpressed gene 1                           | 4  | P:GO:0045449;<br>C:GO:0005886;<br>C:GO:0005634;<br>C:GO:0048471                                                                                                                        | -                                                               |             | IPR021394; PTHR12433 (PANTHER),<br>PTHR12433:SF3 (PANTHER)         |
| Caenorhabditis briggsae | briggsae cbr-rbc-2 protein                                    | 0  |                                                                                                                                                                                        |                                                                 |             | -                                                                  |

|                         |                                                         |    |                                                                                                                                                                                        |                                                                                                                                     |                                                                                               |
|-------------------------|---------------------------------------------------------|----|----------------------------------------------------------------------------------------------------------------------------------------------------------------------------------------|-------------------------------------------------------------------------------------------------------------------------------------|-----------------------------------------------------------------------------------------------|
|                         | -                                                       | 0  |                                                                                                                                                                                        |                                                                                                                                     | -                                                                                             |
|                         | -                                                       | 0  |                                                                                                                                                                                        |                                                                                                                                     | -                                                                                             |
|                         | -                                                       | 0  |                                                                                                                                                                                        |                                                                                                                                     | -                                                                                             |
| Caenorhabditis elegans  | elegans protein confirmed by transcript evidence        | 0  |                                                                                                                                                                                        | P:GO:0000003;<br>P:GO:0010171;<br>P:GO:0040018                                                                                      | -                                                                                             |
|                         | -                                                       | 0  |                                                                                                                                                                                        |                                                                                                                                     | -                                                                                             |
| Caenorhabditis elegans  | tr- isopentenyltransferase                              | 5  | C:GO:0005622;<br>F:GO:0005524;<br>F:GO:0016740;<br>F:GO:0008270;<br>P:GO:0008033                                                                                                       | -                                                                                                                                   | IPR002627; G3DSA:3.40.50.300<br>(GENE3D), PTHR11088:SF21<br>(PANTHER), SSF52540 (SUPERFAMILY) |
| Caenorhabditis briggsae | briggsae cbr-unc-26 protein                             | 11 | P:GO:0048790;<br>F:GO:0003723;<br>F:GO:0004439;<br>P:GO:0016311;<br>C:GO:0043195;<br>C:GO:0012506;<br>F:GO:0000166;<br>F:GO:0004445;<br>F:GO:0004518;<br>P:GO:0050803;<br>P:GO:0048488 | -                                                                                                                                   | EC:3.1.3.36;<br>EC:3.1.3.56                                                                   |
|                         | -                                                       | 0  |                                                                                                                                                                                        |                                                                                                                                     | -                                                                                             |
| Caenorhabditis briggsae | briggsae cbr-pgp-9 protein                              | 0  |                                                                                                                                                                                        | F:GO:0005524;<br>F:GO:0016887;<br>C:GO:0016021;<br>F:GO:0000166;<br>F:GO:0042626;<br>F:GO:0017111;<br>P:GO:0055085;<br>P:GO:0006810 | SignalP (SIGNALP)                                                                             |
| Caenorhabditis elegans  | phe-zine biosynthesis-like domain-containing protein    | 0  |                                                                                                                                                                                        | P:GO:0009058;<br>F:GO:0003674;<br>F:GO:0003824;<br>P:GO:0008150;<br>C:GO:0005575;<br>F:GO:0016853                                   | IPR003719; G3DSA:3.10.310.10<br>(GENE3D), SSF54506 (SUPERFAMILY)                              |
| Caenorhabditis elegans  | wd repeat and sof domain-containing protein 1           | 9  | C:GO:0080008;<br>P:GO:0040010;<br>F:GO:0005488;<br>F:GO:0008415;<br>P:GO:0040035;<br>P:GO:0002119;<br>P:GO:0040039;<br>P:GO:0006898;<br>C:GO:0005634                                   | -                                                                                                                                   | IPR007287; PTHR22851 (PANTHER)                                                                |
|                         | -                                                       | 0  |                                                                                                                                                                                        |                                                                                                                                     | -                                                                                             |
|                         | -                                                       | 0  |                                                                                                                                                                                        |                                                                                                                                     | SignalP (SIGNALP)                                                                             |
| Loa loa                 | fkbp12-rapamycin complex-associated protein             | 1  | F:GO:0016740                                                                                                                                                                           |                                                                                                                                     | SignalP (SIGNALP)                                                                             |
| Caenorhabditis elegans  | hypothetical protein Y38F2AR.3 [Caenorhabditis elegans] | 1  | P:GO:0000003                                                                                                                                                                           | -                                                                                                                                   | -                                                                                             |
| Haemonchus contortus    | lectin galactoside-binding soluble 4                    | 0  |                                                                                                                                                                                        | P:GO:0007155;<br>C:GO:0005829;<br>F:GO:0005529;<br>C:GO:0005886                                                                     | SignalP (SIGNALP)                                                                             |
|                         | -                                                       | 0  |                                                                                                                                                                                        |                                                                                                                                     | -                                                                                             |

|                               |                                                            |    |                                                                                                                                                                       |                               |                                                                                                   |
|-------------------------------|------------------------------------------------------------|----|-----------------------------------------------------------------------------------------------------------------------------------------------------------------------|-------------------------------|---------------------------------------------------------------------------------------------------|
| Xenopus (Silurana) tropicalis | venom c-type lectin mannose binding isoform 4              | 0  | F:GO:0005488;<br>F:GO:0005044;<br>P:GO:0007155;<br>C:GO:0016020;<br>F:GO:0005529;<br>C:GO:0005576;<br>P:GO:0009405                                                    |                               | IPR001304; IPR016186; IPR016187                                                                   |
| Caenorhabditis briggsae       | elegans protein partially confirmed by transcript evidence | 3  | F:GO:0005089;<br>C:GO:0005622;<br>P:GO:0035023                                                                                                                        | -                             | IPR000219; PTHR22826 (PANTHER),<br>PTHR22826:SF50 (PANTHER)                                       |
|                               | -                                                          | 0  |                                                                                                                                                                       |                               | -                                                                                                 |
| Caenorhabditis elegans        | briggsae cbr-nrs-1 protein                                 | 3  | F:GO:0004812;<br>P:GO:0006418;<br>F:GO:0000166                                                                                                                        | -                             | -                                                                                                 |
| Loa loa                       | briggsae cbr-scc-3 protein                                 | 1  | F:GO:0005515                                                                                                                                                          | -                             | -                                                                                                 |
|                               | -                                                          | 0  |                                                                                                                                                                       |                               | IPR022272                                                                                         |
| Caenorhabditis elegans        | erin family member (cdh-6)                                 | 2  | C:GO:0016020;<br>P:GO:0007155                                                                                                                                         | -                             | IPR000832; SignalP (SIGNALP)                                                                      |
|                               | -                                                          | 0  |                                                                                                                                                                       |                               | SignalP (SIGNALP)                                                                                 |
| Caenorhabditis briggsae       | centromere protein b                                       | 2  | F:GO:0003677;<br>C:GO:0043229                                                                                                                                         | -                             | IPR004906; IPR006600; IPR009057;<br>IPR012287; PTHR19303 (PANTHER),<br>PTHR19303:SF11 (PANTHER)   |
|                               | -                                                          | 0  |                                                                                                                                                                       |                               | -                                                                                                 |
|                               | -                                                          | 0  |                                                                                                                                                                       |                               | -                                                                                                 |
|                               | -                                                          | 0  |                                                                                                                                                                       |                               | -                                                                                                 |
| Caenorhabditis elegans        | elegans protein confirmed by transcript evidence           | 1  | F:GO:0005515                                                                                                                                                          | -                             | IPR007967; SSF103107 (SUPERFAMILY)                                                                |
| Loa loa                       | jmjc domain containing protein                             | 7  | F:GO:0051864;<br>F:GO:0008270;<br>C:GO:0005730;<br>F:GO:0016564;<br>F:GO:0005515;<br>P:GO:0016577;<br>C:GO:0005737                                                    | EC:1.14.11.2<br>7             | IPR003347; PTHR10694 (PANTHER),<br>PTHR10694:SF7 (PANTHER)                                        |
|                               | -                                                          | 0  |                                                                                                                                                                       |                               | -                                                                                                 |
| Caenorhabditis briggsae       | ipase c family member (plc-1)                              | 10 | F:GO:0005085;<br>P:GO:0006629;<br>F:GO:0004871;<br>C:GO:0005622;<br>F:GO:0004435;<br>P:GO:0040010;<br>F:GO:0005509;<br>P:GO:0009566;<br>P:GO:0032836;<br>P:GO:0007264 | EC:3.1.4.11                   | PTHR10336 (PANTHER),<br>PTHR10336:SF6 (PANTHER), SignalP<br>(SIGNALP)                             |
| Apis mellifera                | isoform c                                                  | 0  |                                                                                                                                                                       |                               | IPR006573; PTHR12429 (PANTHER)                                                                    |
|                               | -                                                          | 0  |                                                                                                                                                                       |                               | -                                                                                                 |
| Caenorhabditis elegans        | protein ki-se domain containing protein                    | 2  | F:GO:0016301;<br>F:GO:0000166                                                                                                                                         | -                             | IPR001611; G3DSA:3.80.10.10<br>(GENE3D), PSS1450 (PROFILE), SignalP<br>(SIGNALP)                  |
| Loa loa                       | vav 2 oncogene                                             | 3  | F:GO:0005085;<br>C:GO:0005622;<br>F:GO:0005515                                                                                                                        | -                             | IPR000219; IPR011993; PTHR22826<br>(PANTHER), PTHR22826:SF53<br>(PANTHER), SSF50729 (SUPERFAMILY) |
| Ancylostoma caninum           | kunitz-like protease inhibitor precursor                   | 0  |                                                                                                                                                                       | F:GO:0008233;<br>F:GO:0004867 | SignalP (SIGNALP)                                                                                 |
|                               | -                                                          | 0  |                                                                                                                                                                       |                               | IPR001577; IPR016160;<br>G3DSA:2.30.34.10 (GENE3D)                                                |

|                         |                                                  |  |   |                                                                                                                                     |                                                                                                                                                                                                                                                                             |             |                                                                                                                                                                                                                                 |
|-------------------------|--------------------------------------------------|--|---|-------------------------------------------------------------------------------------------------------------------------------------|-----------------------------------------------------------------------------------------------------------------------------------------------------------------------------------------------------------------------------------------------------------------------------|-------------|---------------------------------------------------------------------------------------------------------------------------------------------------------------------------------------------------------------------------------|
| Caenorhabditis elegans  | poly atp -d                                      |  | 3 | F:GO:0016301;<br>F:GO:0016773;<br>F:GO:0005515                                                                                      | -                                                                                                                                                                                                                                                                           | EC:2.7.1.0  | IPR002504; IPR016064; IPR017437                                                                                                                                                                                                 |
| Loa loa                 | briggsae cbr-dpy-26 protein                      |  | 0 |                                                                                                                                     |                                                                                                                                                                                                                                                                             |             | -                                                                                                                                                                                                                               |
| Caenorhabditis elegans  | briggsae cbr-ced-5 protein                       |  | 7 | F:GO:0005083;<br>P:GO:0043652;<br>C:GO:0005886;<br>F:GO:0032403;<br>F:GO:0019899;<br>P:GO:0040039;<br>F:GO:0017124                  | -                                                                                                                                                                                                                                                                           |             | PTHR23317 (PANTHER),<br>PTHR23317:SF16 (PANTHER)                                                                                                                                                                                |
|                         | -                                                |  | 0 |                                                                                                                                     |                                                                                                                                                                                                                                                                             |             | -                                                                                                                                                                                                                               |
|                         | -                                                |  | 0 |                                                                                                                                     |                                                                                                                                                                                                                                                                             |             | SignalP (SIGNALP)                                                                                                                                                                                                               |
|                         | -                                                |  | 0 |                                                                                                                                     |                                                                                                                                                                                                                                                                             |             | SignalP (SIGNALP)                                                                                                                                                                                                               |
| Caenorhabditis elegans  | elegans protein confirmed by transcript evidence |  | 0 |                                                                                                                                     | F:GO:0016740;<br>F:GO:0004648;<br>F:GO:0004965;<br>C:GO:0016021;<br>C:GO:0016020;<br>F:GO:0016757;<br>P:GO:0007010;<br>F:GO:0004930;<br>F:GO:0008483;<br>F:GO:0003779;<br>P:GO:0007165;<br>F:GO:0004872;<br>F:GO:0004871;<br>P:GO:0007186;<br>P:GO:0007050;<br>F:GO:0003843 |             | -                                                                                                                                                                                                                               |
|                         | -                                                |  | 0 |                                                                                                                                     |                                                                                                                                                                                                                                                                             |             | SignalP (SIGNALP)                                                                                                                                                                                                               |
|                         | -                                                |  | 0 |                                                                                                                                     |                                                                                                                                                                                                                                                                             |             | -                                                                                                                                                                                                                               |
|                         | -                                                |  | 0 |                                                                                                                                     |                                                                                                                                                                                                                                                                             |             | -                                                                                                                                                                                                                               |
| Loa loa                 | myotubularin-related protein 2                   |  | 7 | F:GO:0004437;<br>P:GO:0051262;<br>P:GO:0016311;<br>F:GO:0004721;<br>C:GO:0005774;<br>C:GO:0005634;<br>F:GO:0042803                  | -                                                                                                                                                                                                                                                                           | EC:3.1.3.16 | IPR000340; IPR000387; IPR004182;<br>IPR010569; IPR016130; IPR017906;<br>G3DSA:3.90.190.10 (GENE3D),<br>PTHR10807 (PANTHER),<br>PTHR10807:SF7 (PANTHER), SignalP<br>(SIGNALP), SSF50729 (SUPERFAMILY),<br>SSF52799 (SUPERFAMILY) |
|                         | -                                                |  | 0 |                                                                                                                                     |                                                                                                                                                                                                                                                                             |             | -                                                                                                                                                                                                                               |
|                         | -                                                |  | 0 |                                                                                                                                     |                                                                                                                                                                                                                                                                             |             | -                                                                                                                                                                                                                               |
| Homo sapiens            | type alpha 2                                     |  | 8 | F:GO:0005201;<br>F:GO:0030674;<br>C:GO:0005615;<br>P:GO:0016337;<br>C:GO:0005578;<br>P:GO:0009749;<br>P:GO:0030198;<br>C:GO:0042383 | -                                                                                                                                                                                                                                                                           |             | -                                                                                                                                                                                                                               |
|                         | -                                                |  | 0 |                                                                                                                                     |                                                                                                                                                                                                                                                                             |             | -                                                                                                                                                                                                                               |
|                         | -                                                |  | 0 |                                                                                                                                     |                                                                                                                                                                                                                                                                             |             | -                                                                                                                                                                                                                               |
|                         | -                                                |  | 0 |                                                                                                                                     |                                                                                                                                                                                                                                                                             |             | -                                                                                                                                                                                                                               |
|                         | -                                                |  | 0 |                                                                                                                                     |                                                                                                                                                                                                                                                                             |             | -                                                                                                                                                                                                                               |
| Caenorhabditis briggsae | heat repeat family protein                       |  | 0 |                                                                                                                                     | F:GO:0005488                                                                                                                                                                                                                                                                |             | -                                                                                                                                                                                                                               |
|                         | -                                                |  | 0 |                                                                                                                                     |                                                                                                                                                                                                                                                                             |             | -                                                                                                                                                                                                                               |
|                         | -                                                |  | 0 |                                                                                                                                     |                                                                                                                                                                                                                                                                             |             | -                                                                                                                                                                                                                               |
|                         | -                                                |  | 0 |                                                                                                                                     |                                                                                                                                                                                                                                                                             |             | -                                                                                                                                                                                                                               |

|                         |                                                            |   |                                                                                                                                     |   |                                                                                                                                                                                                                          |                                                                                                                 |
|-------------------------|------------------------------------------------------------|---|-------------------------------------------------------------------------------------------------------------------------------------|---|--------------------------------------------------------------------------------------------------------------------------------------------------------------------------------------------------------------------------|-----------------------------------------------------------------------------------------------------------------|
|                         |                                                            | 0 |                                                                                                                                     |   |                                                                                                                                                                                                                          |                                                                                                                 |
|                         |                                                            | 0 |                                                                                                                                     |   |                                                                                                                                                                                                                          |                                                                                                                 |
| Ailuropoda melanoleuca  | cellular retinoic acid-binding protein 1                   | 7 | C:GO:0005737;<br>F:GO:0016918;<br>P:GO:0007165;<br>P:GO:0007275;<br>F:GO:0019841;<br>P:GO:0006810;<br>F:GO:0005215                  | - |                                                                                                                                                                                                                          | IPR000463; IPR000566; IPR011038;<br>IPR012674                                                                   |
|                         |                                                            | 0 |                                                                                                                                     |   |                                                                                                                                                                                                                          | IPR008962; SignalP (SIGNALP)                                                                                    |
| Caenorhabditis briggsae | briggsae cbr-eea-1 protein                                 | 0 |                                                                                                                                     |   | P:GO:0007018;<br>C:GO:0005694;<br>F:GO:0016787;<br>C:GO:0005874;<br>F:GO:0000166;<br>F:GO:0005524;<br>F:GO:0003777;<br>P:GO:0051276;<br>C:GO:0016459;<br>F:GO:0003774;<br>C:GO:0005622;<br>F:GO:0005515;<br>F:GO:0003899 | PD936484 (PRODOM), PTHR23164<br>(PANTHER)                                                                       |
|                         |                                                            | 0 |                                                                                                                                     |   |                                                                                                                                                                                                                          |                                                                                                                 |
|                         |                                                            | 0 |                                                                                                                                     |   |                                                                                                                                                                                                                          | SignalP (SIGNALP)                                                                                               |
| Caenorhabditis briggsae | membrane-associated ring finger 3                          | 1 | C:GO:0044464                                                                                                                        | - |                                                                                                                                                                                                                          | IPR011016; IPR013083; IPR018957;<br>PTHR23012 (PANTHER),<br>PTHR23012:SF2 (PANTHER), SSF57850<br>(SUPERFAMILY)  |
| Brugia malayi           | elegans protein partially confirmed by transcript evidence | 2 | P:GO:0007275;<br>F:GO:0005488                                                                                                       | - |                                                                                                                                                                                                                          | IPR007587                                                                                                       |
|                         |                                                            | 0 |                                                                                                                                     |   |                                                                                                                                                                                                                          |                                                                                                                 |
|                         |                                                            | 0 |                                                                                                                                     |   |                                                                                                                                                                                                                          |                                                                                                                 |
|                         |                                                            | 0 |                                                                                                                                     |   |                                                                                                                                                                                                                          |                                                                                                                 |
|                         |                                                            | 0 |                                                                                                                                     |   |                                                                                                                                                                                                                          | SignalP (SIGNALP)                                                                                               |
| Oryctolagus cuniculus   | thiamin pyrophosphoki-se 1                                 | 2 | F:GO:0004788;<br>P:GO:0006772                                                                                                       | - | EC:2.7.6.2                                                                                                                                                                                                               | IPR007371; PTHR13622 (PANTHER),<br>PTHR13622:SF1 (PANTHER)                                                      |
| Tetraodon nigroviridis  | mitogen-activated protein ki-se ki-se ki-se 2              | 8 | C:GO:0005829;<br>F:GO:0046872;<br>P:GO:0007257;<br>F:GO:0005524;<br>F:GO:0004709;<br>F:GO:0019901;<br>P:GO:0008283;<br>C:GO:0005634 | - | EC:2.7.11.25                                                                                                                                                                                                             | IPR000719; IPR011009; IPR015748;<br>IPR017441; IPR017442;<br>G3DSA:3.30.200.20 (GENE3D),<br>PTHR22986 (PANTHER) |
| Caenorhabditis briggsae | Hypothetical protein CBG14225 [Caenorhabditis briggsae]    | 0 |                                                                                                                                     |   |                                                                                                                                                                                                                          |                                                                                                                 |
|                         |                                                            | 0 |                                                                                                                                     |   |                                                                                                                                                                                                                          |                                                                                                                 |
|                         |                                                            | 0 |                                                                                                                                     |   |                                                                                                                                                                                                                          |                                                                                                                 |
| Caenorhabditis elegans  | elegans protein confirmed by transcript evidence           | 0 |                                                                                                                                     |   | C:GO:0016021;<br>C:GO:0016020                                                                                                                                                                                            |                                                                                                                 |

|                         |                                                  |  |                                                                                                                                                        |   |             |                                                                                     |
|-------------------------|--------------------------------------------------|--|--------------------------------------------------------------------------------------------------------------------------------------------------------|---|-------------|-------------------------------------------------------------------------------------|
| Caenorhabditis briggsae | serine long chain base subunit 1                 |  | P:GO:0040010;<br>P:GO:0009058;<br>F:GO:0004758;<br>F:GO:0016769;<br>9 P:GO:0040027;<br>C:GO:0035339;<br>P:GO:0040011;<br>P:GO:0009792;<br>F:GO:0030170 | - | EC:2.3.1.50 | IPR004839; IPR015421; IPR015424;<br>PTHR13693 (PANTHER),<br>PTHR13693:SF2 (PANTHER) |
| Ailuropoda melanoleuca  | polyadenylate-binding protein 1-like             |  | P:GO:0006378;<br>P:GO:0008380;<br>P:GO:0048255;<br>C:GO:0005681;<br>9 F:GO:0008494;<br>F:GO:0008022;<br>C:GO:0005829;<br>F:GO:0000166;<br>F:GO:0008143 | - |             | PTHR10432 (PANTHER),<br>PTHR10432:SF52 (PANTHER)                                    |
|                         | -                                                |  | 0                                                                                                                                                      |   |             | SignalP (SIGNALP)                                                                   |
| Caenorhabditis elegans  | elegans protein confirmed by transcript evidence |  | 0                                                                                                                                                      |   |             | IPR017907                                                                           |
| Loa loa                 | briggsae cbr-apg-1 protein                       |  | P:GO:0007369;<br>P:GO:0040007;<br>F:GO:0005515;<br>6 P:GO:0015031;<br>P:GO:0051649;<br>C:GO:0005794                                                    | - |             | -                                                                                   |
|                         | -                                                |  | 0                                                                                                                                                      |   |             | -                                                                                   |
|                         | -                                                |  | 0                                                                                                                                                      |   |             | -                                                                                   |
|                         | -                                                |  | 0                                                                                                                                                      |   |             | -                                                                                   |
| Caenorhabditis elegans  | discoidin domain receptor family member (ddr-2)  |  | 1 P:GO:0040010                                                                                                                                         | - |             | -                                                                                   |
| Caenorhabditis elegans  | elegans protein confirmed by transcript evidence |  | 1 F:GO:0005515                                                                                                                                         | - |             | -                                                                                   |
|                         | -                                                |  | 0                                                                                                                                                      |   |             | SignalP (SIGNALP)                                                                   |
| Caenorhabditis elegans  | upf0632 protein c2orf89-like                     |  | 0                                                                                                                                                      |   |             | -                                                                                   |



|                         |                                                                                            |    |                                                                                                                                                                                                                                                                                                                                                                                                                                                                         |  |              |                                                                                                                                                                         |
|-------------------------|--------------------------------------------------------------------------------------------|----|-------------------------------------------------------------------------------------------------------------------------------------------------------------------------------------------------------------------------------------------------------------------------------------------------------------------------------------------------------------------------------------------------------------------------------------------------------------------------|--|--------------|-------------------------------------------------------------------------------------------------------------------------------------------------------------------------|
|                         | f chain crystal structure of g85r als mutant of human superoxide dismutase at a resolution | 60 | F:GO:0051087;<br>F:GO:0042803;<br>P:GO:0032287;<br>P:GO:0006309;<br>C:GO:0005777;<br>F:GO:0005507;<br>P:GO:0001541;<br>P:GO:0042542;<br>P:GO:0002262;<br>P:GO:0060088;<br>C:GO:0043234;<br>P:GO:0043065;<br>P:GO:0042554;<br>C:GO:0005829;<br>P:GO:0001895;<br>P:GO:0051881;<br>P:GO:0007605;<br>P:GO:0040014;<br>P:GO:0031667;<br>P:GO:0006749;<br>P:GO:0043524;<br>C:GO:0005759;<br>P:GO:0008217;<br>C:GO:0005615;<br>P:GO:0007283;<br>P:GO:0060052;<br>P:GO:0060087; |  | EC:1.15.1.1  |                                                                                                                                                                         |
| Caenorhabditis briggsae | calcium atpase                                                                             | 5  | F:GO:0005388;<br>C:GO:0016021;<br>P:GO:0006754;<br>F:GO:0005524;<br>P:GO:0006816                                                                                                                                                                                                                                                                                                                                                                                        |  | EC:3.6.3.8   | IPR001757; IPR005834;<br>G3DSA:3.40.1110.10 (GENE3D),<br>G3DSA:3.40.50.1000 (GENE3D),<br>PTHR11939:SF76 (PANTHER),<br>SSF56784 (SUPERFAMILY), SSF81660<br>(SUPERFAMILY) |
| Pongo abelii            | ribosomal protein l36a-like                                                                | 6  | C:GO:0005840;<br>F:GO:0003735;<br>F:GO:0005515;<br>C:GO:0005829;<br>P:GO:0032526;<br>P:GO:0006414                                                                                                                                                                                                                                                                                                                                                                       |  |              | IPR000552; IPR011332                                                                                                                                                    |
| Caenorhabditis elegans  | rho gtpase activating protein 23                                                           | 3  | C:GO:0005737;<br>F:GO:0005100;<br>P:GO:0007266                                                                                                                                                                                                                                                                                                                                                                                                                          |  |              | IPR000198; IPR008936; PTHR23175<br>(PANTHER), PTHR23175:SF3<br>(PANTHER)                                                                                                |
| Caenorhabditis elegans  | scavenger receptor                                                                         | 3  | F:GO:0005044;<br>F:GO:0005488;<br>C:GO:0016020                                                                                                                                                                                                                                                                                                                                                                                                                          |  |              | PTHR19331 (PANTHER),<br>PTHR19331:SF24 (PANTHER)                                                                                                                        |
| Loa loa                 | eukaryotic elongation factor-2 ki-se                                                       | 8  | P:GO:0006468;<br>F:GO:0003746;<br>F:GO:0005509;<br>F:GO:0005524;<br>F:GO:0004686;<br>C:GO:0005829;<br>F:GO:0005516;<br>P:GO:0006414                                                                                                                                                                                                                                                                                                                                     |  | EC:2.7.11.20 | IPR004166; IPR011009; PTHR14187<br>(PANTHER), PTHR14187:SF2<br>(PANTHER)                                                                                                |
|                         |                                                                                            | 0  |                                                                                                                                                                                                                                                                                                                                                                                                                                                                         |  |              |                                                                                                                                                                         |

|                         |                                                            |   |                                                                                                                                                      |   |             |                                                                                                                              |
|-------------------------|------------------------------------------------------------|---|------------------------------------------------------------------------------------------------------------------------------------------------------|---|-------------|------------------------------------------------------------------------------------------------------------------------------|
| Caenorhabditis briggsae | r-binding motif x-linked 2                                 | 9 | P:GO:0009792;<br>P:GO:0002119;<br>F:GO:0003729;<br>F:GO:0005515;<br>C:GO:0071011;<br>P:GO:0040007;<br>P:GO:0000398;<br>F:GO:0000166;<br>C:GO:0071013 | - |             | IPR000504; IPR012677; PTHR23139 (PANTHER), PTHR23139:SF8 (PANTHER), SSF54928 (SUPERFAMILY)                                   |
| Loa loa                 | serine threonine-protein ki-se tao3                        | 7 | F:GO:0004860;<br>P:GO:0046329;<br>F:GO:0004674;<br>C:GO:0005739;<br>P:GO:0046330;<br>F:GO:0000166;<br>P:GO:0046777                                   | - | EC:2.7.11.0 | PTHR22986 (PANTHER), PTHR22986:SF27 (PANTHER)                                                                                |
|                         | -                                                          | 0 |                                                                                                                                                      |   |             | -                                                                                                                            |
| Caenorhabditis elegans  | briggsae cbr-dys-1 protein                                 | 7 | P:GO:0007271;<br>F:GO:0005515;<br>P:GO:0040017;<br>C:GO:0016010;<br>F:GO:0005277;<br>P:GO:0015870;<br>P:GO:0046716                                   | - |             | -                                                                                                                            |
| Caenorhabditis elegans  | egf lag seven-pass g-type receptor 1 (flamingo drosophila) | 0 |                                                                                                                                                      |   |             | IPR013320; G3DSA:2.10.25.10 (GENE3D)                                                                                         |
| Brugia malayi           | hsp70-interacting protein                                  | 0 |                                                                                                                                                      |   |             | IPR001440; IPR011990; IPR013026; IPR019734; IPR023114; PTHR22904 (PANTHER), PTHR22904:SF27 (PANTHER), SSF48452 (SUPERFAMILY) |
|                         | -                                                          | 0 |                                                                                                                                                      |   |             | -                                                                                                                            |

|                               |                                                            |   |                                                                                                                                                     |   |              |                                                                                                                                                                                        |
|-------------------------------|------------------------------------------------------------|---|-----------------------------------------------------------------------------------------------------------------------------------------------------|---|--------------|----------------------------------------------------------------------------------------------------------------------------------------------------------------------------------------|
| Angiostrongylus cantonensis   | 26s proteasome regulatory chain 4                          | 9 | C:GO:000502;<br>C:GO:0005730;<br>P:GO:0051436;<br>P:GO:0051437;<br>P:GO:0031145;<br>F:GO:0005524;<br>F:GO:0016887;<br>F:GO:0005515;<br>C:GO:0005737 | - |              | IPR003593; IPR003959; IPR003960;<br>G3DSA:1.10.8.60 (GENE3D),<br>G3DSA:3.40.50.300 (GENE3D),<br>PTHR23073 (PANTHER),<br>PTHR23073:SF9 (PANTHER), SSF52540<br>(SUPERFAMILY)             |
|                               | -                                                          | 0 |                                                                                                                                                     |   |              | -                                                                                                                                                                                      |
| Caenorhabditis elegans        | udp-n-acetylglucosamine transporter                        | 5 | C:GO:0000139;<br>P:GO:0015780;<br>F:GO:0005338;<br>F:GO:0005351;<br>C:GO:0016021                                                                    | - |              | IPR004689; IPR007271;<br>PTHR10231:SF15 (PANTHER), SignalP<br>(SIGNALP), SSF103481 (SUPERFAMILY)                                                                                       |
|                               | -                                                          | 0 |                                                                                                                                                     |   |              | -                                                                                                                                                                                      |
|                               | -                                                          | 0 |                                                                                                                                                     |   |              | -                                                                                                                                                                                      |
|                               | -                                                          | 0 |                                                                                                                                                     |   |              | -                                                                                                                                                                                      |
|                               | -                                                          | 0 |                                                                                                                                                     |   |              | -                                                                                                                                                                                      |
|                               | -                                                          | 0 |                                                                                                                                                     |   |              | -                                                                                                                                                                                      |
| Loa loa                       | 3-hydroxyisobutyryl-coenzyme a hydrolase                   | 7 | P:GO:0009792;<br>F:GO:0005515;<br>P:GO:0040010;<br>P:GO:0009083;<br>F:GO:0016853;<br>F:GO:0003860;<br>C:GO:0005739                                  | - | EC:3.1.2.4   | PTHR11941 (PANTHER)                                                                                                                                                                    |
| Xenopus (Silurana) tropicalis | pi-plc x domain-containing protein 3                       | 0 |                                                                                                                                                     |   |              | IPR017946                                                                                                                                                                              |
|                               |                                                            |   |                                                                                                                                                     |   |              | P:GO:0006629;<br>F:GO:0016787;<br>P:GO:0023034;<br>P:GO:0016042;<br>F:GO:0003674;<br>P:GO:0007165;<br>F:GO:0008081;<br>C:GO:0005575;<br>F:GO:0004629;<br>F:GO:0004871;<br>P:GO:0008150 |
| Caenorhabditis elegans        | abnormal dye filling family member (dyf-14)                | 1 | C:GO:0043232                                                                                                                                        | - |              | IPR009053; PD936484 (PRODOM)                                                                                                                                                           |
|                               | -                                                          | 0 |                                                                                                                                                     |   |              | -                                                                                                                                                                                      |
|                               | -                                                          | 0 |                                                                                                                                                     |   |              | -                                                                                                                                                                                      |
| Caenorhabditis elegans        | elegans protein partially confirmed by transcript evidence | 0 |                                                                                                                                                     |   | C:GO:0016021 | PTHR23294 (PANTHER), SignalP<br>(SIGNALP)                                                                                                                                              |
| Caenorhabditis elegans        | haloacid dehaloge-se-like hydrolase family protein         | 1 | F:GO:0003824                                                                                                                                        | - |              | G3DSA:3.40.50.1000 (GENE3D),<br>PTHR18901 (PANTHER), SSF56784<br>(SUPERFAMILY)                                                                                                         |
|                               | -                                                          | 0 |                                                                                                                                                     |   |              | -                                                                                                                                                                                      |
| Caenorhabditis briggsae       | briggsae cbr--s-30 protein                                 | 0 |                                                                                                                                                     |   |              | -                                                                                                                                                                                      |
|                               |                                                            |   |                                                                                                                                                     |   |              | F:GO:0046872;<br>P:GO:0006508;<br>F:GO:0008237;<br>F:GO:0016787;<br>F:GO:0008233;<br>F:GO:0008270;<br>F:GO:0004222                                                                     |
| Caenorhabditis briggsae       | briggsae cbr--s-30 protein                                 | 2 | F:GO:0046872;<br>F:GO:0008237                                                                                                                       | - |              | -                                                                                                                                                                                      |

|                         |                                                              |    |                                                                                                                                                                       |   |                               |                                                                                           |
|-------------------------|--------------------------------------------------------------|----|-----------------------------------------------------------------------------------------------------------------------------------------------------------------------|---|-------------------------------|-------------------------------------------------------------------------------------------|
| Caenorhabditis elegans  | elegans protein partially confirmed by transcript evidence   | 0  |                                                                                                                                                                       |   |                               | -                                                                                         |
|                         | -                                                            | 0  |                                                                                                                                                                       |   |                               | SignalP (SIGNALP)                                                                         |
| Caenorhabditis briggsae | aquaporin 8                                                  | 5  | C:GO:0016020;<br>F:GO:0015250;<br>C:GO:0043025;<br>C:GO:0005929;<br>P:GO:0006833                                                                                      | - |                               | IPR000425; PTHR19139-SF25 (PANTHER), SignalP (SIGNALP)                                    |
|                         | -                                                            | 0  |                                                                                                                                                                       |   |                               | -                                                                                         |
| Caenorhabditis briggsae | large subunit ribosomal protein 2                            | 9  | P:GO:0009792;<br>P:GO:0002119;<br>C:GO:0005840;<br>F:GO:0003735;<br>F:GO:0005515;<br>P:GO:0040010;<br>P:GO:0000003;<br>P:GO:0040011;<br>P:GO:0006412                  | - | EC:3.6.5.3                    | -                                                                                         |
| Caenorhabditis briggsae | large subunit ribosomal protein 2                            | 9  | P:GO:0009792;<br>P:GO:0002119;<br>C:GO:0005840;<br>F:GO:0003735;<br>F:GO:0005515;<br>P:GO:0040010;<br>P:GO:0000003;<br>P:GO:0040011;<br>P:GO:0006412                  | - | EC:3.6.5.3                    | IPR002171; IPR008991; IPR014722; IPR014726; IPR022669; IPR022671; PTHR13691:SF4 (PANTHER) |
| Caenorhabditis briggsae | large subunit ribosomal protein 2                            | 9  | P:GO:0009792;<br>P:GO:0002119;<br>C:GO:0005840;<br>F:GO:0003735;<br>F:GO:0005515;<br>P:GO:0040010;<br>P:GO:0000003;<br>P:GO:0040011;<br>P:GO:0006412                  | - | EC:3.6.5.3                    | IPR002171; IPR008991; IPR014722; IPR014726; IPR022669; IPR022671; PTHR13691:SF4 (PANTHER) |
|                         | -                                                            | 0  |                                                                                                                                                                       |   |                               | -                                                                                         |
|                         | -                                                            | 0  |                                                                                                                                                                       |   |                               | -                                                                                         |
|                         | -                                                            | 0  |                                                                                                                                                                       |   |                               | SignalP (SIGNALP)                                                                         |
|                         | -                                                            | 0  |                                                                                                                                                                       |   |                               | -                                                                                         |
| Caenorhabditis briggsae | grpe_caee1 ame: full= protein mitochondrial flags: precursor | 10 | P:GO:0040010;<br>F:GO:0000774;<br>P:GO:0006457;<br>P:GO:0030150;<br>F:GO:0051087;<br>P:GO:0002119;<br>C:GO:0005759;<br>P:GO:0006898;<br>F:GO:0042803;<br>P:GO:0009792 | - |                               | IPR000740; IPR013805; PTHR21237:SF8 (PANTHER)                                             |
|                         | -                                                            | 0  |                                                                                                                                                                       |   |                               | SignalP (SIGNALP)                                                                         |
| Caenorhabditis briggsae | Hypothetical protein CBG18219 [Caenorhabditis briggsae]      | 0  |                                                                                                                                                                       |   |                               | -                                                                                         |
|                         | -                                                            | 0  |                                                                                                                                                                       |   |                               | SignalP (SIGNALP)                                                                         |
|                         | -                                                            | 0  |                                                                                                                                                                       |   |                               | -                                                                                         |
|                         | -                                                            | 0  |                                                                                                                                                                       |   |                               | -                                                                                         |
| Caenorhabditis briggsae | general transcription factor 3c                              | 0  |                                                                                                                                                                       |   | F:GO:0005515                  | IPR019136; PTHR13230 (PANTHER)                                                            |
| Caenorhabditis elegans  | elegans protein confirmed by transcript evidence             | 0  |                                                                                                                                                                       |   | P:GO:0006364;<br>C:GO:0005575 | IPR000238; IPR015946                                                                      |

|                              |                                                       |   |                                                                                                                                                      |              |             |                                                                                                                                                               |
|------------------------------|-------------------------------------------------------|---|------------------------------------------------------------------------------------------------------------------------------------------------------|--------------|-------------|---------------------------------------------------------------------------------------------------------------------------------------------------------------|
| Caenorhabditis briggsae      | tm2 domain-containing protein                         | 0 |                                                                                                                                                      | C:GO:0016021 |             | IPR007829                                                                                                                                                     |
| Loa loa                      | briggsae cbr-kin-5 protein                            | 9 | C:GO:0005929;<br>C:GO:0030425;<br>F:GO:0005515;<br>P:GO:0034606;<br>F:GO:0004672;<br>C:GO:0030424;<br>P:GO:0034608;<br>C:GO:0043025;<br>F:GO:0000166 | -            |             | IPR000980; IPR020685; IPR020764;<br>SSF55550 (SUPERFAMILY)                                                                                                    |
| Caenorhabditis elegans       | hypothetical protein R05G6.1 [Caenorhabditis elegans] | 0 |                                                                                                                                                      |              |             | -                                                                                                                                                             |
| Caenorhabditis briggsae      | phosphorylase b ki-se                                 | 3 | F:GO:0004339;<br>P:GO:0005977;<br>F:GO:0005516                                                                                                       | -            | EC:3.2.1.3  | IPR008734; IPR011613;<br>PTHR10749:SF2 (PANTHER)                                                                                                              |
| Caenorhabditis elegans       | hypothetical protein M60.6 [Caenorhabditis elegans]   | 1 | C:GO:0016021                                                                                                                                         | -            |             | IPR007237; SignalP (SIGNALP)                                                                                                                                  |
| Caenorhabditis elegans       | hypothetical protein M60.6 [Caenorhabditis elegans]   | 1 | C:GO:0016021                                                                                                                                         | -            |             | SignalP (SIGNALP)                                                                                                                                             |
| -                            | -                                                     | 0 |                                                                                                                                                      |              |             | IPR005645                                                                                                                                                     |
| -                            | -                                                     | 0 |                                                                                                                                                      |              |             | -                                                                                                                                                             |
| -                            | -                                                     | 0 |                                                                                                                                                      |              |             | -                                                                                                                                                             |
| Caenorhabditis elegans       | vinculin                                              | 6 | F:GO:0005200;<br>P:GO:0007016;<br>C:GO:0030054;<br>F:GO:0005515;<br>P:GO:0007155;<br>C:GO:0015629                                                    | -            |             | IPR000633; IPR006077                                                                                                                                          |
| Caenorhabditis elegans       | vinculin                                              | 6 | F:GO:0005200;<br>P:GO:0007016;<br>C:GO:0030054;<br>F:GO:0005515;<br>P:GO:0007155;<br>C:GO:0015629                                                    | -            |             | IPR000633; IPR006077                                                                                                                                          |
| -                            | -                                                     | 0 |                                                                                                                                                      |              |             | -                                                                                                                                                             |
| -                            | -                                                     | 0 |                                                                                                                                                      |              |             | -                                                                                                                                                             |
| Caenorhabditis briggsae      | mitogen-activated protein ki-se ki-se                 | 4 | P:GO:0006468;<br>F:GO:0005515;<br>F:GO:0005524;<br>F:GO:0004674                                                                                      | -            | EC:2.7.11.0 | IPR000719; IPR008271; IPR011009;<br>IPR017442; G3DSA:1.10.510.10<br>(GENE3D), G3DSA:3.30.200.20<br>(GENE3D), PTHR22986 (PANTHER),<br>PTHR22986:SF34 (PANTHER) |
| -                            | -                                                     | 0 |                                                                                                                                                      |              |             | -                                                                                                                                                             |
| Caenorhabditis elegans       | serine threonine-protein ki-se chk2                   | 9 | F:GO:0005488;<br>P:GO:0045132;<br>P:GO:0000077;<br>F:GO:0016301;<br>P:GO:0007281;<br>P:GO:0008630;<br>P:GO:0009792;<br>P:GO:0006919;<br>C:GO:0005634 | -            |             | IPR000719; IPR011009; IPR017442;<br>IPR020636; IPR020648;<br>G3DSA:1.10.510.10 (GENE3D)                                                                       |
| Glossina morsitans morsitans | protein mo25                                          | 2 | P:GO:0001700;<br>F:GO:0005488                                                                                                                        | -            |             | SignalP (SIGNALP)                                                                                                                                             |
| Caenorhabditis elegans       | ribosomal protein s6 polypeptide 1                    | 1 | F:GO:0005488                                                                                                                                         | -            |             | IPR007330; G3DSA:1.20.58.280<br>(GENE3D), PTHR22965 (PANTHER),<br>SSF116846 (SUPERFAMILY)                                                                     |

|                         |                                                    |   |                                                                                                                                     |                                                                                                   |                            |                                                                                                           |
|-------------------------|----------------------------------------------------|---|-------------------------------------------------------------------------------------------------------------------------------------|---------------------------------------------------------------------------------------------------|----------------------------|-----------------------------------------------------------------------------------------------------------|
| Homo sapiens            | type alpha 2                                       | 8 | F:GO:0005201;<br>F:GO:0030674;<br>C:GO:0005615;<br>P:GO:0016337;<br>C:GO:0005578;<br>P:GO:0009749;<br>P:GO:0030198;<br>C:GO:0042383 | -                                                                                                 | -                          |                                                                                                           |
| -                       | -                                                  | 0 |                                                                                                                                     |                                                                                                   |                            |                                                                                                           |
| -                       | -                                                  | 0 |                                                                                                                                     |                                                                                                   |                            |                                                                                                           |
| Caenorhabditis briggsae | multidrug resistance protein family member (mrp-1) | 4 | F:GO:0042626;<br>P:GO:0055085;<br>F:GO:0005524;<br>C:GO:0016021                                                                     | -                                                                                                 |                            | G3DSA:3.40.50.300 (GENE3D),<br>PTHR19242 (PANTHER),<br>PTHR19242:SF35 (PANTHER)                           |
| Brugia malayi           | d- ligase 3                                        | 2 | P:GO:0006259;<br>F:GO:0005488                                                                                                       | -                                                                                                 |                            | IPR001660; IPR012308;<br>G3DSA:1.10.3260.10 (GENE3D),<br>PTHR10459 (PANTHER),<br>PTHR10459:SF11 (PANTHER) |
| Caenorhabditis briggsae | class i chiti-se                                   | 8 | F:GO:0004383;<br>P:GO:0006032;<br>P:GO:0016998;<br>F:GO:0004672;<br>F:GO:0005524;<br>F:GO:0004568;<br>P:GO:0006468;<br>P:GO:0006182 | -                                                                                                 | EC:4.6.1.2;<br>EC:3.2.1.14 | IPR000726; G3DSA:1.10.530.10<br>(GENE3D), PTHR22595:SF6<br>(PANTHER), SSF53955 (SUPERFAMILY)              |
| -                       | -                                                  | 0 |                                                                                                                                     |                                                                                                   |                            |                                                                                                           |
| Brugia malayi           | gpi transamidase subunit pig-u family protein      | 0 |                                                                                                                                     | C:GO:0005789;<br>F:GO:0003674;<br>P:GO:0006506;<br>C:GO:0016021;<br>P:GO:0051301;<br>F:GO:0016758 |                            | IPR009600                                                                                                 |
| Brugia malayi           | gpi transamidase component pig-                    | 0 |                                                                                                                                     | C:GO:0005789;<br>F:GO:0003674;<br>P:GO:0006506;<br>C:GO:0016021;<br>P:GO:0051301;<br>F:GO:0016758 |                            | IPR009600                                                                                                 |
| Caenorhabditis briggsae | gpi inositol deacylase pgap1                       | 5 | P:GO:0009987;<br>P:GO:0006810;<br>P:GO:0007275;<br>C:GO:0044464;<br>F:GO:0016787                                                    | -                                                                                                 |                            | IPR012908; PTHR15495 (PANTHER),<br>PTHR15495:SF2 (PANTHER)                                                |
| -                       | -                                                  | 0 |                                                                                                                                     |                                                                                                   |                            |                                                                                                           |
| -                       | -                                                  | 0 |                                                                                                                                     |                                                                                                   |                            |                                                                                                           |
| -                       | -                                                  | 0 |                                                                                                                                     |                                                                                                   |                            |                                                                                                           |
| Caenorhabditis briggsae | coiled-coil domain-containing protein agap005037   | 2 | F:GO:0005515;<br>P:GO:0008340                                                                                                       | -                                                                                                 |                            | PTHR22741 (PANTHER),<br>PTHR22741:SF2 (PANTHER)                                                           |
| Caenorhabditis briggsae | probable 28s ribosomal protein mitochondrial       | 0 |                                                                                                                                     | C:GO:0005840                                                                                      |                            | IPR007741; IPR012336; PTHR13274<br>(PANTHER)                                                              |

|                        |                                                  |    |                                                                                                                                                                                                                                                                                                                                |   |              |                                                                                                                                                              |
|------------------------|--------------------------------------------------|----|--------------------------------------------------------------------------------------------------------------------------------------------------------------------------------------------------------------------------------------------------------------------------------------------------------------------------------|---|--------------|--------------------------------------------------------------------------------------------------------------------------------------------------------------|
| synthetic construct    | cathepsin d                                      | 9  | P:GO:0000045;<br>C:GO:0005615;<br>C:GO:0031012;<br>C:GO:0005764;<br>F:GO:0004190;<br>C:GO:0042470;<br>P:GO:0008219;<br>P:GO:0006508;<br>C:GO:0005739                                                                                                                                                                           | - | EC:3.4.23.0  | IPR001461; IPR001969; IPR009007;<br>IPR021109; PTHR13683:SF84<br>(PANTHER)                                                                                   |
|                        | -                                                | 0  |                                                                                                                                                                                                                                                                                                                                |   |              | -                                                                                                                                                            |
| Caenorhabditis elegans | elegans protein confirmed by transcript evidence | 0  |                                                                                                                                                                                                                                                                                                                                |   |              | -                                                                                                                                                            |
|                        | -                                                | 0  |                                                                                                                                                                                                                                                                                                                                |   |              | -                                                                                                                                                            |
| Caenorhabditis elegans | lambda-crystallin homolog                        | 5  | F:GO:0070403;<br>F:GO:0050104;<br>P:GO:0008152;<br>C:GO:0005829;<br>F:GO:0042803                                                                                                                                                                                                                                               | - | EC:1.1.1.45  | IPR006176; IPR016040; SignalP<br>(SIGNALP), SSF51735 (SUPERFAMILY)                                                                                           |
|                        | -                                                | 0  |                                                                                                                                                                                                                                                                                                                                |   |              | -                                                                                                                                                            |
| Caenorhabditis elegans | briggsae cbr-lgc-22 protein                      | 3  | C:GO:0016020;<br>F:GO:0005230;<br>P:GO:0006810                                                                                                                                                                                                                                                                                 | - |              | IPR006202                                                                                                                                                    |
|                        | -                                                | 0  |                                                                                                                                                                                                                                                                                                                                |   |              | -                                                                                                                                                            |
|                        | -                                                | 0  |                                                                                                                                                                                                                                                                                                                                |   |              | -                                                                                                                                                            |
| Caenorhabditis elegans | eb module family protein                         | 0  |                                                                                                                                                                                                                                                                                                                                |   | F:GO:0004867 | -                                                                                                                                                            |
| Caenorhabditis elegans | eb module family protein                         | 0  |                                                                                                                                                                                                                                                                                                                                |   | F:GO:0004867 | IPR002223; PTHR10083 (PANTHER),<br>PTHR10083:SF36 (PANTHER)                                                                                                  |
| Caenorhabditis elegans | lethal family member (let-413)                   | 19 | F:GO:0005515;<br>P:GO:0060561;<br>P:GO:0032863;<br>P:GO:0045930;<br>P:GO:0050918;<br>C:GO:0042734;<br>C:GO:0005913;<br>C:GO:0034750;<br>P:GO:0008283;<br>P:GO:0016337;<br>P:GO:0045108;<br>P:GO:0015031;<br>P:GO:0001921;<br>C:GO:0045211;<br>P:GO:0060603;<br>C:GO:0031252;<br>P:GO:0035089;<br>P:GO:0016477;<br>P:GO:0043065 | - |              | IPR001611; PR00019 (PRINTS),<br>G3DSA:3.80.10.10 (GENE3D),<br>PTHR23155 (PANTHER),<br>PTHR23155:SF30 (PANTHER), PS51450<br>(PROFILE), SSF52058 (SUPERFAMILY) |

|                         |                                                             |    |                                                                                                                                                                                                                                                                                                                                                                                   |              |             |                                                             |
|-------------------------|-------------------------------------------------------------|----|-----------------------------------------------------------------------------------------------------------------------------------------------------------------------------------------------------------------------------------------------------------------------------------------------------------------------------------------------------------------------------------|--------------|-------------|-------------------------------------------------------------|
| Ailuropoda melanoleuca  | receptor-type tyrosine-protein phosphatase f                | 22 | P:GO:0050775;<br>P:GO:0001960;<br>P:GO:0007185;<br>P:GO:0042059;<br>P:GO:0050803;<br>C:GO:0030426;<br>F:GO:0005001;<br>F:GO:0030971;<br>C:GO:0005792;<br>P:GO:0043525;<br>F:GO:0042301;<br>P:GO:0008285;<br>C:GO:0043025;<br>P:GO:0007156;<br>C:GO:0060076;<br>P:GO:0051387;<br>C:GO:0005768;<br>P:GO:0006470;<br>P:GO:0046627;<br>C:GO:0005887;<br>P:GO:0031345;<br>F:GO:0005158 | -            | -           | -                                                           |
| -                       | -                                                           | 0  | -                                                                                                                                                                                                                                                                                                                                                                                 | -            | -           | -                                                           |
| Caenorhabditis briggsae | briggsae cbr-nlp-1 protein                                  | 0  | -                                                                                                                                                                                                                                                                                                                                                                                 | -            | -           | SignalP (SIGNALP)                                           |
| -                       | -                                                           | 0  | -                                                                                                                                                                                                                                                                                                                                                                                 | -            | -           | -                                                           |
| -                       | -                                                           | 0  | -                                                                                                                                                                                                                                                                                                                                                                                 | -            | -           | -                                                           |
| -                       | -                                                           | 0  | -                                                                                                                                                                                                                                                                                                                                                                                 | -            | -           | -                                                           |
| -                       | -                                                           | 0  | -                                                                                                                                                                                                                                                                                                                                                                                 | -            | -           | -                                                           |
| Caenorhabditis elegans  | leucine zipper-ef-hand containing transmembrane protein 1   | 8  | P:GO:0009792;<br>P:GO:0042407;<br>C:GO:0005743;<br>P:GO:0040018;<br>F:GO:0005515;<br>F:GO:0005509;<br>P:GO:0000003;<br>P:GO:0006898                                                                                                                                                                                                                                               | -            | -           | IPR011685; PTHR14009 (PANTHER),<br>PTHR14009:SF1 (PANTHER)  |
| -                       | -                                                           | 0  | -                                                                                                                                                                                                                                                                                                                                                                                 | -            | -           | -                                                           |
| Pongo abelii            | PREDICTED: hypothetical protein LOC100439541 [Pongo abelii] | 0  | -                                                                                                                                                                                                                                                                                                                                                                                 | -            | -           | -                                                           |
| Caenorhabditis elegans  | hypothetical protein T25F10.3 [Caenorhabditis elegans]      | 0  | -                                                                                                                                                                                                                                                                                                                                                                                 | -            | -           | -                                                           |
| Stylochus zebra         | transposase [Stylochus zebra]                               | 0  | -                                                                                                                                                                                                                                                                                                                                                                                 | -            | -           | -                                                           |
| -                       | -                                                           | 0  | -                                                                                                                                                                                                                                                                                                                                                                                 | -            | -           | IPR008160; PTHR10499 (PANTHER),<br>PTHR10499:SF58 (PANTHER) |
| Caenorhabditis elegans  | actin-binding homolog 1b                                    | 3  | F:GO:0003779;<br>F:GO:0004713;<br>C:GO:0015629                                                                                                                                                                                                                                                                                                                                    | -            | EC:2.7.10.0 | SignalP (SIGNALP)                                           |
| -                       | -                                                           | 0  | -                                                                                                                                                                                                                                                                                                                                                                                 | -            | -           | -                                                           |
| -                       | -                                                           | 0  | -                                                                                                                                                                                                                                                                                                                                                                                 | -            | -           | -                                                           |
| Caenorhabditis elegans  | leucine rich repeat family protein                          | 0  | -                                                                                                                                                                                                                                                                                                                                                                                 | F:GO:0005515 | -           | -                                                           |



|                         |                                                          |    |                                                                                                                                                                                                                                                                                              |   |              |                                                                                                                                                                  |
|-------------------------|----------------------------------------------------------|----|----------------------------------------------------------------------------------------------------------------------------------------------------------------------------------------------------------------------------------------------------------------------------------------------|---|--------------|------------------------------------------------------------------------------------------------------------------------------------------------------------------|
| Caenorhabditis elegans  | cyclin-dependent ki-se 5                                 | 17 | P:GO:0008340;<br>P:GO:0007049;<br>P:GO:0010468;<br>P:GO:0051932;<br>P:GO:0000003;<br>P:GO:0051301;<br>P:GO:0048489;<br>F:GO:0005524;<br>P:GO:0007269;<br>P:GO:0008045;<br>C:GO:0016533;<br>F:GO:0004693;<br>P:GO:0009792;<br>F:GO:0008083;<br>F:GO:0030332;<br>C:GO:0016020;<br>P:GO:0006468 | - | EC:2.7.11.22 | IPR000719; IPR008271; IPR011009;<br>IPR017442; G3DSA:1.10.510.10<br>(GENE3D), G3DSA:3.30.200.20<br>(GENE3D), PTHR11295 (PANTHER),<br>PTHR11295:SF110 (PANTHER)   |
| Caenorhabditis elegans  | hypothetical protein Y37E11AL.5 [Caenorhabditis elegans] | 1  | C:GO:0016020                                                                                                                                                                                                                                                                                 | - |              | IPR000203                                                                                                                                                        |
| Caenorhabditis briggsae | briggsae cbr-wrs-2 protein                               | 7  | P:GO:0007031;<br>F:GO:0008270;<br>F:GO:0004830;<br>C:GO:0005778;<br>P:GO:0006436;<br>F:GO:0005524;<br>F:GO:0005515                                                                                                                                                                           | - | EC:6.1.1.2   | -                                                                                                                                                                |
|                         | -                                                        | 0  |                                                                                                                                                                                                                                                                                              |   |              | -                                                                                                                                                                |
| Caenorhabditis briggsae | acyl- synthetase long-chain family member 1              | 7  | P:GO:0042221;<br>P:GO:0044255;<br>P:GO:0009792;<br>C:GO:0031090;<br>C:GO:0044446;<br>F:GO:0003824;<br>C:GO:0005739                                                                                                                                                                           | - |              | IPR000873; IPR020845;<br>G3DSA:2.30.38.10 (GENE3D),<br>G3DSA:3.40.50.980 (GENE3D),<br>PTHR11968 (PANTHER),<br>PTHR11968:SF8 (PANTHER), SSF56801<br>(SUPERFAMILY) |
| Caenorhabditis briggsae | variant sh3 domain containing protein                    | 1  | F:GO:0008081                                                                                                                                                                                                                                                                                 | - | EC:3.1.4.0   | PTHR10336 (PANTHER),<br>PTHR10336:SF22 (PANTHER)                                                                                                                 |
| Caenorhabditis elegans  | probable sig-I peptidase complex subunit 2               | 13 | F:GO:0008233;<br>C:GO:0005787;<br>P:GO:0006465;<br>C:GO:0016021;<br>P:GO:0000003;<br>P:GO:0018996;<br>C:GO:0005792;<br>P:GO:0002119;<br>F:GO:0005515;<br>P:GO:0040011;<br>P:GO:0006898;<br>P:GO:0009792;<br>P:GO:0040015                                                                     | - |              | IPR009582; PTHR13085 (PANTHER)                                                                                                                                   |

|                         |                                                               |    |                                                                                                                                                                                                                          |   |                              |                                                                                                                                         |
|-------------------------|---------------------------------------------------------------|----|--------------------------------------------------------------------------------------------------------------------------------------------------------------------------------------------------------------------------|---|------------------------------|-----------------------------------------------------------------------------------------------------------------------------------------|
| Caenorhabditis elegans  | probable sig-I peptidase complex subunit 2                    | 13 | F:GO:0008233;<br>C:GO:0005787;<br>P:GO:0006465;<br>C:GO:0016021;<br>P:GO:0000003;<br>P:GO:0018996;<br>C:GO:0005792;<br>P:GO:0002119;<br>F:GO:0005515;<br>P:GO:0040011;<br>P:GO:0006898;<br>P:GO:0009792;<br>P:GO:0040015 | - |                              | IPR000276; SignalP (SIGNALP)                                                                                                            |
| Caenorhabditis briggsae | hydroxyacid-oxoacid mitochondrial precursor                   | 7  | F:GO:0047988;<br>F:GO:0046872;<br>P:GO:0015993;<br>P:GO:0009073;<br>P:GO:0055114;<br>F:GO:0003856;<br>C:GO:0005739                                                                                                       | - | EC:1.1.99.24<br>; EC:4.2.3.4 | IPR001670; IPR018211;<br>G3DSA:1.20.1090.10 (GENE3D),<br>G3DSA:3.40.50.1970 (GENE3D),<br>PTHR11496 (PANTHER), SSF56796<br>(SUPERFAMILY) |
| Caenorhabditis briggsae | hydroxyacid-oxoacid mitochondrial precursor                   | 7  | F:GO:0047988;<br>F:GO:0046872;<br>P:GO:0015993;<br>P:GO:0009073;<br>P:GO:0055114;<br>F:GO:0003856;<br>C:GO:0005739                                                                                                       | - | EC:1.1.99.24<br>; EC:4.2.3.4 | IPR001670; IPR018211;<br>G3DSA:1.20.1090.10 (GENE3D),<br>G3DSA:3.40.50.1970 (GENE3D),<br>PTHR11496 (PANTHER), SSF56796<br>(SUPERFAMILY) |
| -                       | -                                                             | 0  |                                                                                                                                                                                                                          |   |                              | -                                                                                                                                       |
| -                       | -                                                             | 0  |                                                                                                                                                                                                                          |   |                              | -                                                                                                                                       |
| -                       | -                                                             | 0  |                                                                                                                                                                                                                          |   |                              | -                                                                                                                                       |
| -                       | -                                                             | 0  |                                                                                                                                                                                                                          |   |                              | SignalP (SIGNALP)                                                                                                                       |
| Caenorhabditis briggsae | briggsae cbr-abf-2 protein                                    | 0  |                                                                                                                                                                                                                          |   |                              | SignalP (SIGNALP)                                                                                                                       |
| Caenorhabditis elegans  | elegans protein partially confirmed by transcript evidence    | 1  | P:GO:0008104                                                                                                                                                                                                             | - |                              | PTHR16166 (PANTHER),<br>PTHR16166:SF25 (PANTHER)                                                                                        |
| Caenorhabditis elegans  | peptidase s9 prolyl oligopeptidase active site domain protein | 2  | P:GO:0008152;<br>F:GO:0008236                                                                                                                                                                                            | - |                              | -                                                                                                                                       |
| -                       | -                                                             | 0  |                                                                                                                                                                                                                          |   |                              | PTHR16675 (PANTHER),<br>PTHR16675:SF53 (PANTHER), SignalP<br>(SIGNALP)                                                                  |
| Macaca mulatta          | tumor differentially expressed 2-like                         | 1  | C:GO:0016021                                                                                                                                                                                                             | - |                              | -                                                                                                                                       |
| -                       | -                                                             | 0  |                                                                                                                                                                                                                          |   |                              | SignalP (SIGNALP)                                                                                                                       |

|                         |                                 |    |                                                                                                                                                                                                                                                                                                                                                 |                                                                                                                                                      |            |                                                                                                                                                                         |
|-------------------------|---------------------------------|----|-------------------------------------------------------------------------------------------------------------------------------------------------------------------------------------------------------------------------------------------------------------------------------------------------------------------------------------------------|------------------------------------------------------------------------------------------------------------------------------------------------------|------------|-------------------------------------------------------------------------------------------------------------------------------------------------------------------------|
| Caenorhabditis briggsae | #NAME?                          | 20 | P:GO:0008340;<br>P:GO:0015672;<br>P:GO:0035158;<br>P:GO:0008360;<br>P:GO:0051124;<br>P:GO:0035159;<br>P:GO:0019991;<br>P:GO:0009612;<br>P:GO:0006754;<br>F:GO:0005391;<br>P:GO:0001700;<br>C:GO:0005918;<br>P:GO:0007268;<br>C:GO:0005890;<br>P:GO:0009266;<br>C:GO:0005634;<br>F:GO:0005524;<br>P:GO:0050905;<br>P:GO:0001894;<br>P:GO:0008344 | -                                                                                                                                                    | EC:3.6.3.9 | -                                                                                                                                                                       |
| Caenorhabditis briggsae | briggsae cbr-vit-6 protein      | 0  |                                                                                                                                                                                                                                                                                                                                                 | F:GO:0045735;<br>F:GO:0005319;<br>F:GO:0008565;<br>P:GO:0006869;<br>P:GO:0009792;<br>C:GO:0005576;<br>P:GO:0006886;<br>P:GO:0008340;<br>P:GO:0040010 |            | IPR001747; IPR011030; SSF48431 (SUPERFAMILY)                                                                                                                            |
| Caenorhabditis elegans  | domain containing protein       | 0  |                                                                                                                                                                                                                                                                                                                                                 | C:GO:0005737;<br>P:GO:0007165;<br>F:GO:0005515;<br>C:GO:0005622                                                                                      |            | PTHR14130 (PANTHER),<br>PTHR14130:SF1 (PANTHER)                                                                                                                         |
| -                       | -                               | 0  |                                                                                                                                                                                                                                                                                                                                                 |                                                                                                                                                      |            | -                                                                                                                                                                       |
| -                       | -                               | 0  |                                                                                                                                                                                                                                                                                                                                                 |                                                                                                                                                      |            | -                                                                                                                                                                       |
| Brugia malayi           | patched family protein          | 10 | P:GO:0009792;<br>P:GO:0002119;<br>P:GO:0040018;<br>P:GO:0001703;<br>P:GO:0018996;<br>P:GO:0000910;<br>P:GO:0040010;<br>P:GO:0000003;<br>P:GO:0040011;<br>C:GO:0016020                                                                                                                                                                           | -                                                                                                                                                    |            | IPR003392; PTHR10796 (PANTHER),<br>PTHR10796:SF14 (PANTHER),<br>SSF82866 (SUPERFAMILY)                                                                                  |
| Caenorhabditis elegans  | cysteine-rich pdz-binding       | 5  | P:GO:0009792;<br>P:GO:0040007;<br>P:GO:0002119;<br>P:GO:0040011;<br>P:GO:0001703                                                                                                                                                                                                                                                                | -                                                                                                                                                    |            | -                                                                                                                                                                       |
| -                       | -                               | 0  |                                                                                                                                                                                                                                                                                                                                                 |                                                                                                                                                      |            | -                                                                                                                                                                       |
| Caenorhabditis elegans  | atp-dependent r- helicase ddx18 | 3  | F:GO:0003676;<br>F:GO:0005524;<br>F:GO:0008026                                                                                                                                                                                                                                                                                                  | -                                                                                                                                                    |            | IPR000629; IPR011545; IPR014001;<br>IPR014014; IPR014021;<br>G3DSA:3.40.50.300 (GENE3D),<br>PTHR10967 (PANTHER),<br>PTHR10967:SF23 (PANTHER),<br>SSF52540 (SUPERFAMILY) |

|                         |                                                            |    |                                                                                                                                                                                                                                                                                                                                                 |                                                                 |   |                                                                                                                                   |
|-------------------------|------------------------------------------------------------|----|-------------------------------------------------------------------------------------------------------------------------------------------------------------------------------------------------------------------------------------------------------------------------------------------------------------------------------------------------|-----------------------------------------------------------------|---|-----------------------------------------------------------------------------------------------------------------------------------|
| Homo sapiens            | major histocompatibility class f                           |    | P:GO:0006955;<br>F:GO:0032393;<br>5 C:GO:0016021;<br>P:GO:0002474;<br>C:GO:0042612                                                                                                                                                                                                                                                              | -                                                               | - |                                                                                                                                   |
|                         | -                                                          |    | 0                                                                                                                                                                                                                                                                                                                                               |                                                                 |   |                                                                                                                                   |
|                         |                                                            |    |                                                                                                                                                                                                                                                                                                                                                 |                                                                 |   | IPR003961; IPR008957; IPR013783;<br>PR00014 (PRINTS), PTHR19900<br>(PANTHER), PTHR19900:SF7<br>(PANTHER)                          |
| Loa loa                 | elegans protein partially confirmed by transcript evidence | 0  |                                                                                                                                                                                                                                                                                                                                                 |                                                                 |   | PTHR21512 (PANTHER),<br>PTHR21512:SF6 (PANTHER)                                                                                   |
| Loa loa                 | elegans protein partially confirmed by transcript evidence | 0  |                                                                                                                                                                                                                                                                                                                                                 |                                                                 |   | PTHR21512 (PANTHER),<br>PTHR21512:SF6 (PANTHER)                                                                                   |
| Caenorhabditis briggsae | elegans protein partially confirmed by transcript evidence | 0  |                                                                                                                                                                                                                                                                                                                                                 | F:GO:0003723;<br>P:GO:0009451;<br>P:GO:0001522;<br>F:GO:0009982 |   | -                                                                                                                                 |
|                         | -                                                          |    | 0                                                                                                                                                                                                                                                                                                                                               |                                                                 |   | -                                                                                                                                 |
|                         | -                                                          |    | 0                                                                                                                                                                                                                                                                                                                                               |                                                                 |   | -                                                                                                                                 |
| Caenorhabditis elegans  | elegans protein confirmed by transcript evidence           | 5  | P:GO:0002119;<br>P:GO:0018991;<br>P:GO:0040010;<br>P:GO:0006898;<br>P:GO:0008406                                                                                                                                                                                                                                                                | -                                                               |   | IPR007146                                                                                                                         |
|                         | -                                                          |    | 0                                                                                                                                                                                                                                                                                                                                               |                                                                 |   | -                                                                                                                                 |
| Caenorhabditis elegans  | mgc64464 protein                                           | 1  | F:GO:0005515                                                                                                                                                                                                                                                                                                                                    | -                                                               |   | IPR011990; IPR013026; IPR013105;<br>IPR019734; PTHR16056 (PANTHER),<br>SignalIP (SIGNALP), SSF48452<br>(SUPERFAMILY)              |
| Mus musculus            | cofilin 1 (non-muscle)                                     | 20 | P:GO:0009615;<br>P:GO:0006468;<br>P:GO:0007266;<br>P:GO:0001842;<br>C:GO:0030027;<br>P:GO:0001755;<br>C:GO:0005576;<br>C:GO:0005829;<br>P:GO:0006916;<br>F:GO:0003779;<br>P:GO:0030836;<br>P:GO:0030030;<br>P:GO:0045792;<br>P:GO:0051789;<br>P:GO:0043200;<br>P:GO:0030010;<br>C:GO:0016363;<br>C:GO:0030864;<br>P:GO:0006606;<br>P:GO:0000910 | -                                                               |   | IPR002108; IPR017904;<br>G3DSA:3.40.20.10 (GENE3D),<br>PTHR11913 (PANTHER),<br>PTHR11913:SF2 (PANTHER), SSF55753<br>(SUPERFAMILY) |
|                         | -                                                          |    | 0                                                                                                                                                                                                                                                                                                                                               |                                                                 |   | -                                                                                                                                 |
| Chlamydomonas incerta   | plus agglutinin                                            | 0  |                                                                                                                                                                                                                                                                                                                                                 | F:GO:0005524;<br>F:GO:0003774;<br>C:GO:0016459;<br>C:GO:0019867 |   | SignalIP (SIGNALP)                                                                                                                |
| Caenorhabditis elegans  | cell growth-regulating nucleolar                           | 2  | C:GO:0005730;<br>F:GO:0005515                                                                                                                                                                                                                                                                                                                   | -                                                               |   | IPR014898; PTHR13100 (PANTHER),<br>PTHR13100:SF6 (PANTHER), SSF57667<br>(SUPERFAMILY)                                             |

|                         |                                       |   |                                                                                                                    |   |            |                                                                                                                                                |
|-------------------------|---------------------------------------|---|--------------------------------------------------------------------------------------------------------------------|---|------------|------------------------------------------------------------------------------------------------------------------------------------------------|
| Caenorhabditis elegans  | nucleolar protein with mif4g domain 1 | 4 | C:GO:0005730;<br>P:GO:0002119;<br>P:GO:0040018;<br>F:GO:0005515                                                    | - |            | IPR003891; PTHR18034 (PANTHER),<br>PTHR18034:SF4 (PANTHER)                                                                                     |
| Caenorhabditis elegans  | nucleolar protein with mif4g domain 1 | 4 | C:GO:0005730;<br>P:GO:0002119;<br>P:GO:0040018;<br>F:GO:0005515                                                    | - |            | IPR003891; PTHR18034 (PANTHER),<br>PTHR18034:SF4 (PANTHER)                                                                                     |
|                         | -                                     | 0 |                                                                                                                    |   |            | SignalP (SIGNALP)                                                                                                                              |
|                         | -                                     | 0 |                                                                                                                    |   |            | -                                                                                                                                              |
|                         | -                                     | 0 |                                                                                                                    |   |            | -                                                                                                                                              |
|                         | -                                     | 0 |                                                                                                                    |   |            | -                                                                                                                                              |
| Caenorhabditis elegans  | amop domain containing protein        | 1 | P:GO:0007160                                                                                                       | - |            | SignalP (SIGNALP)                                                                                                                              |
| Caenorhabditis elegans  | zip zinc transporter family protein   | 5 | P:GO:0030001;<br>C:GO:0016021;<br>P:GO:0009792;<br>F:GO:0046873;<br>P:GO:0055085                                   | - |            | IPR003689; PTHR11040 (PANTHER),<br>PTHR11040:SF8 (PANTHER), SignalP<br>(SIGNALP)                                                               |
|                         | -                                     | 0 |                                                                                                                    |   |            | -                                                                                                                                              |
|                         | -                                     | 0 |                                                                                                                    |   |            | -                                                                                                                                              |
|                         | -                                     | 0 |                                                                                                                    |   |            | -                                                                                                                                              |
|                         | -                                     | 0 |                                                                                                                    |   |            | -                                                                                                                                              |
|                         | -                                     | 0 |                                                                                                                    |   |            | SignalP (SIGNALP)                                                                                                                              |
| Caenorhabditis elegans  | propionyl coenzyme a beta polypeptide | 6 | P:GO:0009062;<br>F:GO:0005515;<br>C:GO:0005759;<br>F:GO:0005524;<br>F:GO:0004658;<br>P:GO:0009063                  | - | EC:6.4.1.3 | IPR000022; IPR011762; IPR011763;<br>G3DSA:3.90.226.10 (GENE3D),<br>PTHR22855 (PANTHER),<br>PTHR22855:SF14 (PANTHER),<br>SSF52096 (SUPERFAMILY) |
|                         | -                                     | 0 |                                                                                                                    |   |            | SignalP (SIGNALP)                                                                                                                              |
| Caenorhabditis briggsae | atp-dependent d- helicase q1          | 7 | P:GO:0006310;<br>P:GO:0006281;<br>P:GO:0006260;<br>F:GO:0003677;<br>F:GO:0005524;<br>F:GO:0043140;<br>C:GO:0005634 | - |            | IPR004589; IPR011545; IPR014021;<br>G3DSA:3.40.50.300 (GENE3D),<br>PTHR13710:SF12 (PANTHER),<br>SSF52540 (SUPERFAMILY)                         |
|                         | -                                     | 0 |                                                                                                                    |   |            | -                                                                                                                                              |
| Caenorhabditis briggsae | colon cancer-associated protein mic1  | 1 | F:GO:0005515                                                                                                       | - |            | IPR009755; PTHR12897 (PANTHER)                                                                                                                 |
|                         | -                                     | 0 |                                                                                                                    |   |            | SignalP (SIGNALP)                                                                                                                              |
|                         | -                                     | 0 |                                                                                                                    |   |            | -                                                                                                                                              |
|                         | -                                     | 0 |                                                                                                                    |   |            | -                                                                                                                                              |

|                         |                                                                   |    |                                                                                                                                                                                                                                                                                                                                                                                                                                                                        |   |                             |                                                                                |
|-------------------------|-------------------------------------------------------------------|----|------------------------------------------------------------------------------------------------------------------------------------------------------------------------------------------------------------------------------------------------------------------------------------------------------------------------------------------------------------------------------------------------------------------------------------------------------------------------|---|-----------------------------|--------------------------------------------------------------------------------|
| Loa loa                 | tbp-associated factor 1-like                                      | 27 | F:GO:0002039;<br>P:GO:0000080;<br>P:GO:0051123;<br>F:GO:0008270;<br>F:GO:0004402;<br>P:GO:0018107;<br>P:GO:0006974;<br>F:GO:0000166;<br>F:GO:0017025;<br>P:GO:0046777;<br>P:GO:0010552;<br>P:GO:0060261;<br>C:GO:0005730;<br>P:GO:0000117;<br>P:GO:0032436;<br>P:GO:0018105;<br>F:GO:0004674;<br>F:GO:0003713;<br>P:GO:0006368;<br>C:GO:0045120;<br>P:GO:0042493;<br>C:GO:0005669;<br>F:GO:0016986;<br>F:GO:0010843;<br>F:GO:0070577;<br>P:GO:0016573;<br>C:GO:0071339 | - | EC:2.3.1.48;<br>EC:2.7.11.0 | IPR022591; PTHR13900 (PANTHER)                                                 |
| Caenorhabditis briggsae | briggsae cbr-d--2 protein                                         | 2  | F:GO:0005488;<br>F:GO:0017111                                                                                                                                                                                                                                                                                                                                                                                                                                          | - | EC:3.6.1.15                 | IPR014808; PTHR10887 (PANTHER),<br>PTHR10887:SF14 (PANTHER)                    |
|                         | -                                                                 | 0  |                                                                                                                                                                                                                                                                                                                                                                                                                                                                        |   |                             | -                                                                              |
| Caenorhabditis elegans  | briggsae cbr-dsc-4 protein                                        | 1  | P:GO:0040011                                                                                                                                                                                                                                                                                                                                                                                                                                                           | - |                             | PTHR13024 (PANTHER), SignalP (SIGNALP)                                         |
|                         | -                                                                 | 0  |                                                                                                                                                                                                                                                                                                                                                                                                                                                                        |   |                             | SignalP (SIGNALP)                                                              |
| Caenorhabditis elegans  | endoplasmic reticulum mannosyl-oligosaccharide -alpha-mannosidase | 3  | C:GO:0016020;<br>F:GO:0004571;<br>F:GO:0005509                                                                                                                                                                                                                                                                                                                                                                                                                         | - | EC:3.2.1.113                | IPR001382; PTHR11742:SF7 (PANTHER), SignalP (SIGNALP)                          |
|                         | -                                                                 | 0  |                                                                                                                                                                                                                                                                                                                                                                                                                                                                        |   |                             | -                                                                              |
| Brugia malayi           | briggsae cbr-rpy-1 protein                                        | 7  | C:GO:0005856;<br>C:GO:0045211;<br>P:GO:0007268;<br>C:GO:0030054;<br>F:GO:0033130;<br>P:GO:0019915;<br>F:GO:0008270                                                                                                                                                                                                                                                                                                                                                     | - |                             | IPR019568; PTHR10098 (PANTHER),<br>PTHR10098:SF7 (PANTHER)                     |
|                         | -                                                                 | 0  |                                                                                                                                                                                                                                                                                                                                                                                                                                                                        |   |                             | IPR014044; SignalP (SIGNALP)                                                   |
| Caenorhabditis elegans  | elegans protein partially confirmed by transcript evidence        | 0  |                                                                                                                                                                                                                                                                                                                                                                                                                                                                        |   |                             | -                                                                              |
| Caenorhabditis elegans  | mitochondrial ribosomal protein l11                               | 7  | P:GO:0006412;<br>P:GO:0040010;<br>C:GO:0005840;<br>F:GO:0003735;<br>P:GO:0002119;<br>P:GO:0006898;<br>P:GO:0009792                                                                                                                                                                                                                                                                                                                                                     | - | EC:3.6.5.3                  | IPR000911; IPR020783; IPR020784;<br>PD001367 (PRODOM), PTHR11661:SF1 (PANTHER) |

|                        |                                                              |    |                                                                                                                                                                                                                                                                             |   |             |                                                                                                                                   |
|------------------------|--------------------------------------------------------------|----|-----------------------------------------------------------------------------------------------------------------------------------------------------------------------------------------------------------------------------------------------------------------------------|---|-------------|-----------------------------------------------------------------------------------------------------------------------------------|
| Caenorhabditis elegans | 39s ribosomal protein mitochondrial                          | 7  | P:GO:0006412;<br>C:GO:0005762;<br>P:GO:0040010;<br>F:GO:0003735;<br>P:GO:0002119;<br>P:GO:0006898;<br>P:GO:0009792                                                                                                                                                          | - | EC:3.6.5.3  | IPR000911; IPR020783; IPR020784;<br>PD001367 (PRODOM), PTHR11661:SF1<br>(PANTHER)                                                 |
|                        | -                                                            | 0  |                                                                                                                                                                                                                                                                             |   |             | -                                                                                                                                 |
|                        | -                                                            | 0  |                                                                                                                                                                                                                                                                             |   |             | -                                                                                                                                 |
| Caenorhabditis elegans | acylamino-acid-releasing enzyme                              | 1  | F:GO:0008236                                                                                                                                                                                                                                                                | - |             | -                                                                                                                                 |
| Caenorhabditis elegans | protein                                                      | 8  | P:GO:0006412;<br>P:GO:0048731;<br>P:GO:0040010;<br>C:GO:0005840;<br>F:GO:0003735;<br>P:GO:0000003;<br>P:GO:0002119;<br>P:GO:0009792                                                                                                                                         | - | EC:3.6.5.3  | IPR000988; PTHR10792:SF1<br>(PANTHER)                                                                                             |
| Caenorhabditis elegans | glutamate synthase                                           | 10 | P:GO:0006537;<br>P:GO:0009792;<br>F:GO:0045181;<br>P:GO:0002119;<br>F:GO:0051536;<br>F:GO:0005506;<br>F:GO:0010181;<br>P:GO:0040010;<br>P:GO:0055114;<br>F:GO:0050660                                                                                                       | - |             | IPR000583; IPR017932;<br>G3DSA:3.60.20.10 (GENE3D),<br>PTHR11938 (PANTHER),<br>PTHR11938:SF1 (PANTHER), SSF56235<br>(SUPERFAMILY) |
|                        | -                                                            | 0  |                                                                                                                                                                                                                                                                             |   |             | -                                                                                                                                 |
| Caenorhabditis elegans | pim (mammalian oncogene) related ki-se family member (prk-1) | 3  | F:GO:0004674;<br>F:GO:0005524;<br>P:GO:0006468                                                                                                                                                                                                                              | - | EC:2.7.11.0 | IPR000719; IPR008271; IPR011009;<br>IPR017442; G3DSA:3.30.200.20<br>(GENE3D), PTHR22984 (PANTHER)                                 |
| Caenorhabditis elegans | elegans protein confirmed by transcript evidence             | 4  | C:GO:0016021;<br>F:GO:0008271;<br>P:GO:0008272;<br>P:GO:0055085                                                                                                                                                                                                             | - |             | IPR011547; PTHR11814 (PANTHER),<br>PTHR11814:SF25 (PANTHER), SignalP<br>(SIGNALP)                                                 |
|                        | -                                                            | 0  |                                                                                                                                                                                                                                                                             |   |             | -                                                                                                                                 |
| Loa loa                | elegans protein confirmed by transcript evidence             | 1  | F:GO:0005488                                                                                                                                                                                                                                                                | - |             | IPR001079; IPR008985; IPR013320;<br>PTHR11346:SF29 (PANTHER)                                                                      |
|                        | -                                                            | 0  |                                                                                                                                                                                                                                                                             |   |             | IPR005514; G3DSA:2.40.10.10<br>(GENE3D)                                                                                           |
| Caenorhabditis elegans | -d-dependent malic mitochondrial                             | 16 | P:GO:0060070;<br>P:GO:0000122;<br>F:GO:0003714;<br>F:GO:0004470;<br>F:GO:0016616;<br>P:GO:0006108;<br>C:GO:0005667;<br>F:GO:0046872;<br>P:GO:0030282;<br>F:GO:0051287;<br>P:GO:0045944;<br>F:GO:0003690;<br>P:GO:0055114;<br>P:GO:0048625;<br>P:GO:0045599;<br>C:GO:0005739 | - | EC:1.1.1.0  | IPR012302; IPR016040; PTHR23406<br>(PANTHER), PTHR23406:SF2<br>(PANTHER), SSF51735 (SUPERFAMILY)                                  |

|                         |                                                                        |    |                                                                                                                                                                                                                                                                                                                                |   |                                           |                                                                                                                           |
|-------------------------|------------------------------------------------------------------------|----|--------------------------------------------------------------------------------------------------------------------------------------------------------------------------------------------------------------------------------------------------------------------------------------------------------------------------------|---|-------------------------------------------|---------------------------------------------------------------------------------------------------------------------------|
|                         | -                                                                      | 0  |                                                                                                                                                                                                                                                                                                                                |   |                                           | SignalP (SIGNALP)                                                                                                         |
|                         | -                                                                      | 0  |                                                                                                                                                                                                                                                                                                                                |   |                                           | -                                                                                                                         |
| Brugia malayi           | briggsae cbr-gmn-1 protein                                             | 0  |                                                                                                                                                                                                                                                                                                                                |   |                                           | SignalP (SIGNALP)                                                                                                         |
| Caenorhabditis elegans  | elegans protein confirmed by transcript evidence                       | 2  | P:GO:0006952;<br>C:GO:0016021                                                                                                                                                                                                                                                                                                  | - |                                           | IPR004316; IPR018175; SignalP (SIGNALP)                                                                                   |
| Loa loa                 | asparagine-linked glycosylation 9 homolog ( alpha mannosyltransferase) | 1  | C:GO:0044464                                                                                                                                                                                                                                                                                                                   | - |                                           | IPR005599                                                                                                                 |
|                         | -                                                                      | 0  |                                                                                                                                                                                                                                                                                                                                |   |                                           | IPR022272                                                                                                                 |
| Caenorhabditis briggsae | steroid receptor-interacting snf2 domain                               | 5  | F:GO:0005524;<br>F:GO:0004872;<br>F:GO:0004386;<br>F:GO:0003677;<br>F:GO:0005515                                                                                                                                                                                                                                               | - |                                           | IPR000330; PTHR10799 (PANTHER),<br>PTHR10799:SF51 (PANTHER),<br>SSF52540 (SUPERFAMILY)                                    |
|                         | -                                                                      | 0  |                                                                                                                                                                                                                                                                                                                                |   |                                           | -                                                                                                                         |
| Caenorhabditis elegans  | alanine aminotransferase                                               | 6  | F:GO:0030170;<br>P:GO:0000003;<br>C:GO:0005739;<br>F:GO:0016847;<br>P:GO:0009058;<br>F:GO:0008483                                                                                                                                                                                                                              | - | EC:4.4.1.14;<br>EC:2.6.1.0                | IPR004839; IPR015421; IPR015424;<br>PTHR11751 (PANTHER),<br>PTHR11751:SF29 (PANTHER)                                      |
|                         | -                                                                      | 0  |                                                                                                                                                                                                                                                                                                                                |   |                                           | -                                                                                                                         |
| Brugia malayi           | dual oxidase                                                           | 19 | P:GO:0018149;<br>P:GO:0006979;<br>P:GO:0006952;<br>F:GO:0016174;<br>P:GO:0040032;<br>F:GO:0005509;<br>C:GO:0016021;<br>P:GO:0042338;<br>P:GO:0055114;<br>P:GO:0040007;<br>F:GO:0004601;<br>F:GO:0009055;<br>F:GO:0008484;<br>P:GO:0002119;<br>P:GO:0040011;<br>F:GO:0020037;<br>F:GO:0050660;<br>P:GO:0009792;<br>C:GO:0005882 | - | EC:1.6.3.1;<br>EC:1.11.1.7;<br>EC:3.1.6.0 | IPR002007; IPR010255; PTHR11972<br>(PANTHER), PTHR11972:SF1<br>(PANTHER)                                                  |
| Brugia malayi           | surfeit locus protein 4                                                | 14 | P:GO:0040035;<br>P:GO:0009792;<br>P:GO:0002119;<br>C:GO:0012505;<br>C:GO:0005794;<br>P:GO:0032940;<br>C:GO:0031090;<br>P:GO:0040011;<br>P:GO:0019915;<br>P:GO:0040007;<br>C:GO:0005783;<br>C:GO:0044425;<br>C:GO:0044446;<br>P:GO:0002009                                                                                      | - |                                           | -                                                                                                                         |
|                         |                                                                        |    |                                                                                                                                                                                                                                                                                                                                |   |                                           | IPR007110; IPR010939; IPR013098;<br>IPR013783; PTHR19897 (PANTHER),<br>PTHR19897:SF9 (PANTHER), SSF48726<br>(SUPERFAMILY) |



|                         |                                                            |    |                                                                                                                                                                                        |                                                                                                                                                      |                                                                                                                                    |
|-------------------------|------------------------------------------------------------|----|----------------------------------------------------------------------------------------------------------------------------------------------------------------------------------------|------------------------------------------------------------------------------------------------------------------------------------------------------|------------------------------------------------------------------------------------------------------------------------------------|
|                         | -                                                          | 0  |                                                                                                                                                                                        |                                                                                                                                                      | -                                                                                                                                  |
|                         | -                                                          | 0  |                                                                                                                                                                                        |                                                                                                                                                      | G3DSA:3.15.10.10 (GENE3D), SignalP (SIGNALP)                                                                                       |
| Caenorhabditis elegans  | briggsae cbr-ugt-62 protein                                | 0  |                                                                                                                                                                                        | F:GO:0016740;<br>F:GO:0030246;<br>C:GO:0016021;<br>F:GO:0016758;<br>F:GO:0016757;<br>P:GO:0005975;<br>P:GO:0030259;<br>P:GO:0040010;<br>P:GO:0008152 | -                                                                                                                                  |
| Loa loa                 | integrator complex subunit 9                               | 3  | F:GO:0005515;<br>P:GO:0016180;<br>C:GO:0032039                                                                                                                                         | -                                                                                                                                                    | IPR022712; G3DSA:3.60.15.10 (GENE3D), PTHR11203 (PANTHER), PTHR11203:SF2 (PANTHER), SSF56281 (SUPERFAMILY)                         |
| Caenorhabditis elegans  | nuclear hormone receptor family member (nhr-105)           | 2  | F:GO:0005515;<br>P:GO:0006350                                                                                                                                                          | -                                                                                                                                                    | IPR008946                                                                                                                          |
| Macaca mulatta          | cd63 antigen                                               | 11 | C:GO:0005765;<br>C:GO:0043234;<br>P:GO:0045807;<br>C:GO:0031088;<br>F:GO:0032403;<br>C:GO:0031902;<br>C:GO:0030658;<br>P:GO:0045785;<br>P:GO:0030855;<br>P:GO:0010633;<br>C:GO:0005887 | -                                                                                                                                                    | -                                                                                                                                  |
| Caenorhabditis elegans  | trafficking protein particle complex subunit 2             | 3  | P:GO:0006888;<br>C:GO:0005801;<br>P:GO:0033227                                                                                                                                         | -                                                                                                                                                    | -                                                                                                                                  |
| Caenorhabditis elegans  | elegans protein partially confirmed by transcript evidence | 6  | P:GO:0009792;<br>F:GO:0042626;<br>C:GO:0005886;<br>P:GO:0055085;<br>F:GO:0005524;<br>C:GO:0016021                                                                                      | -                                                                                                                                                    | IPR003439; IPR003593; IPR017871; G3DSA:3.40.50.300 (GENE3D), PTHR19242 (PANTHER), PTHR19242:SF96 (PANTHER), SSF52540 (SUPERFAMILY) |
| Caenorhabditis briggsae | elegans protein partially confirmed by transcript evidence | 1  | P:GO:0019915                                                                                                                                                                           | -                                                                                                                                                    | IPR010291; PTHR23294 (PANTHER), SignalP (SIGNALP)                                                                                  |
| Caenorhabditis elegans  | variable abnormal morphology family member (vab-10)        | 0  |                                                                                                                                                                                        |                                                                                                                                                      | -                                                                                                                                  |
|                         | -                                                          | 0  |                                                                                                                                                                                        |                                                                                                                                                      | -                                                                                                                                  |
|                         | -                                                          | 0  |                                                                                                                                                                                        |                                                                                                                                                      | -                                                                                                                                  |
| Loa loa                 | transcription factor                                       | 0  |                                                                                                                                                                                        | F:GO:0046872;<br>F:GO:0008270;<br>F:GO:0005515;<br>P:GO:0019915;<br>C:GO:0005634;<br>F:GO:0003677                                                    | IPR000253; IPR008984; IPR011011; IPR013083                                                                                         |
|                         | -                                                          | 0  |                                                                                                                                                                                        |                                                                                                                                                      | SignalP (SIGNALP)                                                                                                                  |
|                         | -                                                          | 0  |                                                                                                                                                                                        |                                                                                                                                                      | SignalP (SIGNALP)                                                                                                                  |
| Caenorhabditis briggsae | hspc171 protein                                            | 1  | P:GO:0000003                                                                                                                                                                           | -                                                                                                                                                    | IPR008506; PTHR13505:SF3 (PANTHER), SignalP (SIGNALP)                                                                              |
|                         | -                                                          | 0  |                                                                                                                                                                                        |                                                                                                                                                      | SignalP (SIGNALP)                                                                                                                  |
|                         | -                                                          | 0  |                                                                                                                                                                                        |                                                                                                                                                      | -                                                                                                                                  |
| Caenorhabditis elegans  | hypothetical protein F58H1.7 [Caenorhabditis elegans]      | 0  |                                                                                                                                                                                        |                                                                                                                                                      | -                                                                                                                                  |
|                         | -                                                          | 0  |                                                                                                                                                                                        |                                                                                                                                                      | -                                                                                                                                  |

|                         |                                                       |    |                                                                                                                                                                                                         |   |              |                                                                                            |
|-------------------------|-------------------------------------------------------|----|---------------------------------------------------------------------------------------------------------------------------------------------------------------------------------------------------------|---|--------------|--------------------------------------------------------------------------------------------|
| Brugia malayi           | mediator of r- polymerase ii transcription subunit 22 | 12 | P:GO:0040010;<br>P:GO:0006357;<br>P:GO:0040035;<br>F:GO:0016455;<br>P:GO:0010171;<br>P:GO:0002119;<br>F:GO:0005515;<br>P:GO:0040017;<br>P:GO:0006898;<br>C:GO:0016592;<br>P:GO:0009792;<br>P:GO:0040018 | - |              | IPR009332; PTHR12434:SF2 (PANTHER), PF06179 (PFAM)                                         |
| Pongo abelii            | angiotensin converting enzyme (ec )                   | 8  | C:GO:0030863;<br>P:GO:0030032;<br>C:GO:0071203;<br>F:GO:0003779;<br>C:GO:0008290;<br>C:GO:0030027;<br>P:GO:0051693;<br>C:GO:0016020                                                                     | - |              | IPR001548; PTHR10514:SF2 (PANTHER)                                                         |
| -                       | -                                                     | 0  |                                                                                                                                                                                                         |   |              | -                                                                                          |
| Loa loa                 | membrane-associated ring finger 6                     | 2  | F:GO:0046872;<br>C:GO:0044464                                                                                                                                                                           | - |              | IPR011016; IPR013083; IPR018957; PTHR13145 (PANTHER), SSF57850 (SUPERFAMILY)               |
| -                       | -                                                     | 0  |                                                                                                                                                                                                         |   |              | -                                                                                          |
| -                       | -                                                     | 0  |                                                                                                                                                                                                         |   |              | SignalP (SIGNALP)                                                                          |
| Caenorhabditis elegans  | phosphoethanolamine n-methyltransferase               | 9  | P:GO:0009792;<br>P:GO:0002119;<br>F:GO:0008757;<br>P:GO:0032940;<br>P:GO:0009877;<br>P:GO:0009312;<br>P:GO:0040017;<br>P:GO:0040010;<br>P:GO:0000003                                                    | - |              | G3DSA:3.40.50.150 (GENE3D), PTHR10108 (PANTHER), PTHR10108:SF3 (PANTHER)                   |
| -                       | -                                                     | 0  |                                                                                                                                                                                                         |   |              | -                                                                                          |
| -                       | -                                                     | 0  |                                                                                                                                                                                                         |   |              | -                                                                                          |
| Caenorhabditis briggsae | elegans protein confirmed by transcript evidence      | 5  | C:GO:0016021;<br>P:GO:0040010;<br>F:GO:0004573;<br>P:GO:0009311;<br>P:GO:0040011                                                                                                                        | - | EC:3.2.1.106 | IPR004888; IPR008928; PTHR10412 (PANTHER)                                                  |
| -                       | -                                                     | 0  |                                                                                                                                                                                                         |   |              | SignalP (SIGNALP)                                                                          |
| -                       | -                                                     | 0  |                                                                                                                                                                                                         |   |              | -                                                                                          |
| Caenorhabditis briggsae | phenylalanyl-tr- beta subunit                         | 7  | C:GO:0005625;<br>F:GO:0004826;<br>F:GO:0003723;<br>F:GO:0005524;<br>F:GO:0000287;<br>P:GO:0006432;<br>C:GO:0005829                                                                                      | - | EC:6.1.1.20  | G3DSA:3.30.930.10 (GENE3D), PTHR10947 (PANTHER), PS51483 (PROFILE), SSF55681 (SUPERFAMILY) |
| -                       | -                                                     | 0  |                                                                                                                                                                                                         |   |              | IPR007087; IPR015880; PTHR23224 (PANTHER), PTHR23224:SF222 (PANTHER)                       |
| -                       | -                                                     | 0  |                                                                                                                                                                                                         |   |              | -                                                                                          |
| -                       | -                                                     | 0  |                                                                                                                                                                                                         |   |              | -                                                                                          |
| -                       | -                                                     | 0  |                                                                                                                                                                                                         |   |              | -                                                                                          |

|                              |                                                            |    |                                                                                                                                                                       |   |             |                                                                                                                                                     |
|------------------------------|------------------------------------------------------------|----|-----------------------------------------------------------------------------------------------------------------------------------------------------------------------|---|-------------|-----------------------------------------------------------------------------------------------------------------------------------------------------|
| Loa loa                      | elegans protein partially confirmed by transcript evidence | 3  | P:GO:0006468;<br>F:GO:0005524;<br>F:GO:0004674                                                                                                                        | - | EC:2.7.11.0 | IPR000719; IPR011009; IPR017442;<br>G3DSA:1.10.510.10 (GENE3D),<br>G3DSA:3.30.200.20 (GENE3D),<br>PTHR11295 (PANTHER),<br>PTHR11295:SF112 (PANTHER) |
| -                            | -                                                          | 0  |                                                                                                                                                                       |   |             | SignalP (SIGNALP)                                                                                                                                   |
| -                            | -                                                          | 0  |                                                                                                                                                                       |   |             | -                                                                                                                                                   |
| -                            | -                                                          | 0  |                                                                                                                                                                       |   |             | -                                                                                                                                                   |
| -                            | -                                                          | 0  |                                                                                                                                                                       |   |             | -                                                                                                                                                   |
| -                            | -                                                          | 0  |                                                                                                                                                                       |   |             | -                                                                                                                                                   |
| Nippostrongylus brasiliensis | globin                                                     | 6  | F:GO:0020037;<br>C:GO:0005615;<br>C:GO:0005737;<br>F:GO:0005344;<br>P:GO:0015671;<br>F:GO:0019825                                                                     | - |             | SignalP (SIGNALP)                                                                                                                                   |
| -                            | -                                                          | 0  |                                                                                                                                                                       |   |             | SignalP (SIGNALP)                                                                                                                                   |
| Brugia malayi                | s-p-associated protein                                     | 7  | C:GO:0005829;<br>F:GO:0000149;<br>C:GO:0008021;<br>P:GO:0006887;<br>P:GO:0007269;<br>P:GO:0006886;<br>C:GO:0016020                                                    | - |             | SignalP (SIGNALP)                                                                                                                                   |
| Drosophila willistoni        | viral a-type inclusion                                     | 0  |                                                                                                                                                                       |   |             | -                                                                                                                                                   |
| Caenorhabditis elegans       | ubiquitin carboxyl-terminal hydrolase family protein       | 1  | F:GO:0016787                                                                                                                                                          | - |             | -                                                                                                                                                   |
| -                            | -                                                          | 0  |                                                                                                                                                                       |   |             | -                                                                                                                                                   |
| Caenorhabditis elegans       | atp-binding domain-containing protein 3                    | 10 | P:GO:0006412;<br>C:GO:0005829;<br>P:GO:0034227;<br>P:GO:0048598;<br>P:GO:0048599;<br>P:GO:0007283;<br>P:GO:0040025;<br>P:GO:0002098;<br>F:GO:0000049;<br>P:GO:0006974 | - | EC:3.6.5.3  | PTHR11807 (PANTHER),<br>PTHR11807:SF3 (PANTHER)                                                                                                     |
| -                            | -                                                          | 0  |                                                                                                                                                                       |   |             | -                                                                                                                                                   |
| -                            | -                                                          | 0  |                                                                                                                                                                       |   |             | SignalP (SIGNALP)                                                                                                                                   |
| Caenorhabditis briggsae      | mitochondrial ribosomal protein l28                        | 9  | C:GO:0005840;<br>P:GO:0044238;<br>C:GO:0005739;<br>P:GO:0034645;<br>P:GO:0040007;<br>P:GO:0010171;<br>P:GO:0002119;<br>P:GO:0010467;<br>P:GO:0009792                  | - |             | PTHR13528 (PANTHER)                                                                                                                                 |
| Caenorhabditis elegans       | electron-transfer-flavoprotein beta polypeptide            | 4  | P:GO:0006119;<br>C:GO:0005875;<br>F:GO:0009055;<br>C:GO:0005811                                                                                                       | - |             | IPR012255; IPR014729; IPR014730;<br>SSF52402 (SUPERFAMILY)                                                                                          |
| -                            | -                                                          | 0  |                                                                                                                                                                       |   |             | SignalP (SIGNALP)                                                                                                                                   |
| -                            | -                                                          | 0  |                                                                                                                                                                       |   |             | IPR003677                                                                                                                                           |
| Caenorhabditis elegans       | elegans protein partially confirmed by transcript evidence | 0  |                                                                                                                                                                       |   |             | -                                                                                                                                                   |
| Caenorhabditis briggsae      | briggsae cbr-ppn-1 protein                                 | 3  | F:GO:0008233;<br>F:GO:0005515;<br>C:GO:0005576                                                                                                                        | - |             | IPR002223; IPR020901; PTHR10083<br>(PANTHER), PTHR10083:SF18<br>(PANTHER)                                                                           |

|                         |                                                           |   |                                                                                  |                               |                                                                                                                                       |
|-------------------------|-----------------------------------------------------------|---|----------------------------------------------------------------------------------|-------------------------------|---------------------------------------------------------------------------------------------------------------------------------------|
|                         | -                                                         | 0 |                                                                                  |                               | -                                                                                                                                     |
|                         | -                                                         | 0 |                                                                                  |                               | -                                                                                                                                     |
|                         | -                                                         | 0 |                                                                                  |                               | SignalP (SIGNALP)                                                                                                                     |
|                         | -                                                         | 0 |                                                                                  |                               | IPR000719; IPR011009; IPR017442; G3DSA:1.10.510.10 (GENE3D), PTHR11909 (PANTHER)                                                      |
| Brugia malayi           | protein-tyrosine phosphatase containing protein           | 1 | F:GO:0016791                                                                     | -                             | EC:3.1.3.0<br>IPR000242; IPR000387; G3DSA:3.90.190.10 (GENE3D), PTHR19134 (PANTHER), PTHR19134:SF26 (PANTHER), SSF52799 (SUPERFAMILY) |
| Caenorhabditis elegans  | uncharacterized protein kiaa0174                          | 1 | F:GO:0005515                                                                     | -                             | IPR005061; PTHR12161 (PANTHER), PTHR12161:SF3 (PANTHER)                                                                               |
|                         | -                                                         | 0 |                                                                                  |                               | IPR005828                                                                                                                             |
|                         | -                                                         | 0 |                                                                                  |                               | SignalP (SIGNALP)                                                                                                                     |
|                         | -                                                         | 0 |                                                                                  |                               | -                                                                                                                                     |
|                         |                                                           |   |                                                                                  |                               | IPR003598; IPR007110; IPR013098; IPR013783; PTHR19897 (PANTHER), PTHR19897:SF5 (PANTHER), SSF48726 (SUPERFAMILY)                      |
|                         |                                                           | 0 |                                                                                  |                               |                                                                                                                                       |
| Caenorhabditis elegans  | adenosine deaminase that acts on r- family member (adr-1) | 1 | P:GO:0032501                                                                     | -                             | IPR001159; IPR002466; IPR014720; PTHR10910 (PANTHER), PTHR10910:SF1 (PANTHER), SSF54768 (SUPERFAMILY)                                 |
| Caenorhabditis elegans  | adenosine deaminase that acts on r- family member (adr-1) | 1 | P:GO:0032501                                                                     | -                             | IPR001159; IPR002466; IPR014720; PTHR10910 (PANTHER), PTHR10910:SF1 (PANTHER), SSF54768 (SUPERFAMILY)                                 |
|                         | -                                                         | 0 |                                                                                  |                               | -                                                                                                                                     |
|                         | -                                                         | 0 |                                                                                  |                               | -                                                                                                                                     |
|                         | -                                                         | 0 |                                                                                  |                               | -                                                                                                                                     |
| Caenorhabditis briggsae | dph5 homolog                                              | 2 | P:GO:0017183;<br>F:GO:0004164                                                    | -                             | EC:2.1.1.98                                                                                                                           |
| Caenorhabditis elegans  | dph5 homolog                                              | 2 | P:GO:0008152;<br>F:GO:0008168                                                    | -                             | EC:2.1.1.0                                                                                                                            |
| Caenorhabditis elegans  | nhl repeat-containing                                     | 3 | F:GO:0008270;<br>F:GO:0005515;<br>P:GO:0006915                                   | -                             | -                                                                                                                                     |
|                         | -                                                         | 0 |                                                                                  |                               | SignalP (SIGNALP)                                                                                                                     |
|                         | -                                                         | 0 |                                                                                  |                               | -                                                                                                                                     |
| Caenorhabditis elegans  | acyl-coenzyme a dehydrogenase member 8                    | 5 | F:GO:0003995;<br>P:GO:0006629;<br>P:GO:0055114;<br>P:GO:0034641;<br>F:GO:0050660 | -                             | EC:1.3.99.3<br>IPR006089; IPR006091; IPR006092; IPR009075; IPR009100; IPR013786; PTHR10909 (PANTHER), PTHR10909:SF10 (PANTHER)        |
| Caenorhabditis elegans  | acyl-coenzyme a dehydrogenase member 8                    | 5 | F:GO:0003995;<br>P:GO:0006629;<br>P:GO:0055114;<br>P:GO:0034641;<br>F:GO:0050660 | -                             | EC:1.3.99.3<br>IPR006089; IPR006091; IPR006092; IPR009075; IPR009100; IPR013786; PTHR10909 (PANTHER), PTHR10909:SF10 (PANTHER)        |
| Caenorhabditis elegans  | beta-lactamase-like protein 2                             | 0 |                                                                                  | F:GO:0046872;<br>F:GO:0016787 | G3DSA:3.60.15.10 (GENE3D), PTHR23131 (PANTHER), SSF56281 (SUPERFAMILY)                                                                |
|                         | -                                                         | 0 |                                                                                  |                               | -                                                                                                                                     |
|                         | -                                                         | 0 |                                                                                  |                               | -                                                                                                                                     |

|                             |                                                               |    |                                                                                                                                                                                                                                           |                                                                                                                    |            |                                                                                                                                      |
|-----------------------------|---------------------------------------------------------------|----|-------------------------------------------------------------------------------------------------------------------------------------------------------------------------------------------------------------------------------------------|--------------------------------------------------------------------------------------------------------------------|------------|--------------------------------------------------------------------------------------------------------------------------------------|
| Brugia malayi               | wd-repeat protein                                             | 0  |                                                                                                                                                                                                                                           | F:GO:0008415;<br>F:GO:0016740;<br>F:GO:0004402                                                                     |            | IPR001680; IPR011046; IPR015943;<br>IPR017986; IPR019775; IPR019781;<br>IPR019782; PTHR19856 (PANTHER)                               |
|                             | -                                                             | 0  |                                                                                                                                                                                                                                           |                                                                                                                    |            | -                                                                                                                                    |
|                             | -                                                             | 0  |                                                                                                                                                                                                                                           |                                                                                                                    |            | SignalP (SIGNALP)                                                                                                                    |
| Brugia malayi               | leucyl-tr- synthetase                                         | 5  | F:GO:0004823;<br>P:GO:0006429;<br>F:GO:0005515;<br>F:GO:0005524;<br>C:GO:0005829                                                                                                                                                          | -                                                                                                                  | EC:6.1.1.4 | G3DSA:3.90.740.10 (GENE3D),<br>PTHR11946 (PANTHER),<br>PTHR11946:SF10 (PANTHER),<br>SSF52374 (SUPERFAMILY)                           |
| Loa loa                     | uncoordi-ated family member (unc-13)                          | 3  | P:GO:0046928;<br>C:GO:0005886;<br>C:GO:0045202                                                                                                                                                                                            | -                                                                                                                  |            | IPR014770; PTHR10480 (PANTHER)                                                                                                       |
| Caenorhabditis elegans      | integrin beta pat-3                                           | 6  | F:GO:0005178;<br>C:GO:0031252;<br>C:GO:0005925;<br>P:GO:0007155;<br>C:GO:0016021;<br>P:GO:0023052                                                                                                                                         | -                                                                                                                  |            | IPR002369; IPR003659; IPR015812;<br>IPR016201; SignalP (SIGNALP)                                                                     |
|                             | -                                                             | 0  |                                                                                                                                                                                                                                           |                                                                                                                    |            | -                                                                                                                                    |
|                             | -                                                             | 0  |                                                                                                                                                                                                                                           |                                                                                                                    |            | -                                                                                                                                    |
| Oryza sativa Japonica Group | ring finger-like                                              | 0  |                                                                                                                                                                                                                                           | C:GO:0005739;<br>C:GO:0016023;<br>C:GO:0016020                                                                     |            | -                                                                                                                                    |
|                             | -                                                             | 0  |                                                                                                                                                                                                                                           |                                                                                                                    |            | -                                                                                                                                    |
| Caenorhabditis briggsae     | low density lipoprotein receptor-related protein 4            | 14 | P:GO:0009888;<br>P:GO:0051605;<br>C:GO:0016020;<br>P:GO:0065008;<br>F:GO:0016787;<br>P:GO:0030326;<br>P:GO:0048513;<br>P:GO:0051179;<br>P:GO:0003002;<br>P:GO:0030178;<br>P:GO:0030154;<br>P:GO:0007399;<br>N:GO:0071844;<br>F:GO:0005488 | -                                                                                                                  |            | IPR000033; IPR011042; PTHR10529<br>(PANTHER), SSF63825 (SUPERFAMILY)                                                                 |
| Leishmania infantum JPCM5   | viral a-type inclusion protein                                | 1  | F:GO:0005488                                                                                                                                                                                                                              | -                                                                                                                  |            | IPR009053; PD936484 (PRODOM)                                                                                                         |
| Caenorhabditis elegans      | polarity and osmotic sensitivity defect family member (pod-2) | 0  |                                                                                                                                                                                                                                           | F:GO:0005524;<br>F:GO:0016874;<br>P:GO:0008152;<br>F:GO:0003824;<br>F:GO:0009374;<br>P:GO:0006633;<br>F:GO:0003989 |            | PTHR18866 (PANTHER),<br>PTHR18866:SF6 (PANTHER)                                                                                      |
| Caenorhabditis elegans      | gamma-glutamyltranspeptidase family protein                   | 0  |                                                                                                                                                                                                                                           | F:GO:0003840                                                                                                       |            | IPR000101; SSF56235 (SUPERFAMILY)                                                                                                    |
|                             | -                                                             | 0  |                                                                                                                                                                                                                                           |                                                                                                                    |            | -                                                                                                                                    |
|                             | -                                                             | 0  |                                                                                                                                                                                                                                           |                                                                                                                    |            | -                                                                                                                                    |
| Caenorhabditis briggsae     | huntingtin interacting protein                                | 4  | F:GO:0005488;<br>P:GO:0044260;<br>P:GO:0090304;<br>F:GO:0016740                                                                                                                                                                           | -                                                                                                                  |            | IPR001214; IPR006560;<br>G3DSA:2.170.270.10 (GENE3D),<br>PTHR22884 (PANTHER),<br>PTHR22884:SF36 (PANTHER),<br>SSF82199 (SUPERFAMILY) |
|                             | -                                                             | 0  |                                                                                                                                                                                                                                           |                                                                                                                    |            | -                                                                                                                                    |

|                        |                                                        |    |                                                                                                                                                                                                                          |   |             |                                                                                                            |
|------------------------|--------------------------------------------------------|----|--------------------------------------------------------------------------------------------------------------------------------------------------------------------------------------------------------------------------|---|-------------|------------------------------------------------------------------------------------------------------------|
| Caenorhabditis elegans | subfamily member 21                                    | 5  | C:GO:0005840;<br>P:GO:0006457;<br>F:GO:0031072;<br>P:GO:0000003;<br>F:GO:0008270                                                                                                                                         | - |             | IPR001623; IPR015609; IPR018253;<br>PTHR11821:SF10 (PANTHER)                                               |
| Caenorhabditis elegans | subfamily member 21                                    | 6  | C:GO:0005840;<br>P:GO:0006457;<br>F:GO:0003676;<br>F:GO:0031072;<br>P:GO:0000003;<br>F:GO:0008270                                                                                                                        | - |             | IPR001623; IPR015609; IPR018253;<br>PTHR11821:SF10 (PANTHER)                                               |
| Brugia malayi          | probable atp-dependent r- helicase ddx41               | 9  | F:GO:0046872;<br>P:GO:0006915;<br>F:GO:0004386;<br>F:GO:0003676;<br>F:GO:0005515;<br>P:GO:0007275;<br>C:GO:0005634;<br>F:GO:0000166;<br>P:GO:0006396                                                                     | - |             | G3DSA:3.40.50.300 (GENE3D),<br>PTHR10967 (PANTHER),<br>PTHR10967:SF46 (PANTHER),<br>SSF52540 (SUPERFAMILY) |
| -                      | -                                                      | 0  |                                                                                                                                                                                                                          |   |             | SignalP (SIGNALP)                                                                                          |
| -                      | -                                                      | 0  |                                                                                                                                                                                                                          |   |             | -                                                                                                          |
| -                      | -                                                      | 0  |                                                                                                                                                                                                                          |   |             | -                                                                                                          |
| -                      | -                                                      | 0  |                                                                                                                                                                                                                          |   |             | -                                                                                                          |
| Brugia malayi          | hypothetical protein Bm1_54750 [Brugia malayi]         | 0  |                                                                                                                                                                                                                          |   |             | -                                                                                                          |
| Brugia malayi          | potassium channel tetramerisation domain containing 10 | 11 | P:GO:0043161;<br>F:GO:0005249;<br>C:GO:0005730;<br>C:GO:0031463;<br>P:GO:0006813;<br>C:GO:0008076;<br>F:GO:0004842;<br>P:GO:0016567;<br>F:GO:0005515;<br>P:GO:0034220;<br>C:GO:0005737                                   | - | EC:6.3.2.19 | IPR000210; IPR003131; IPR011333;<br>PTHR11145 (PANTHER)                                                    |
| Brugia malayi          | tetraspanin 18                                         | 1  | C:GO:0016020                                                                                                                                                                                                             | - |             | IPR000301; IPR018499; IPR018503;<br>PTHR19282 (PANTHER),<br>PTHR19282:SF34 (PANTHER), SignalP<br>(SIGNALP) |
| Ailuropoda melanoleuca | lamin a c                                              | 13 | C:GO:0005626;<br>C:GO:0016363;<br>P:GO:0006998;<br>P:GO:0035105;<br>C:GO:0005638;<br>P:GO:0007517;<br>P:GO:0007283;<br>N:GO:0090343;<br>P:GO:0055015;<br>F:GO:0005515;<br>C:GO:0048471;<br>C:GO:0005635;<br>F:GO:0005198 | - |             | -                                                                                                          |
| -                      | -                                                      | 0  |                                                                                                                                                                                                                          |   |             | -                                                                                                          |
| -                      | -                                                      | 0  |                                                                                                                                                                                                                          |   |             | -                                                                                                          |
| -                      | -                                                      | 0  |                                                                                                                                                                                                                          |   |             | -                                                                                                          |

|                         |                                                  |    |                                                                                                                                                                                                                                                                                                                                                                                                                                                                         |                                                                                                   |                                                         |                                                                                                                     |
|-------------------------|--------------------------------------------------|----|-------------------------------------------------------------------------------------------------------------------------------------------------------------------------------------------------------------------------------------------------------------------------------------------------------------------------------------------------------------------------------------------------------------------------------------------------------------------------|---------------------------------------------------------------------------------------------------|---------------------------------------------------------|---------------------------------------------------------------------------------------------------------------------|
| Bos taurus              | heavy chain non-muscle                           | 43 | C:GO:0030863;<br>P:GO:0008360;<br>C:GO:0031594;<br>P:GO:0030048;<br>F:GO:0030898;<br>P:GO:0051295;<br>C:GO:0005913;<br>P:GO:0016337;<br>F:GO:0043531;<br>P:GO:0032796;<br>P:GO:0015031;<br>C:GO:0001772;<br>P:GO:0050900;<br>P:GO:0007229;<br>C:GO:0005829;<br>P:GO:0007520;<br>F:GO:0000146;<br>P:GO:0006509;<br>P:GO:0043534;<br>C:GO:0008305;<br>C:GO:0005819;<br>C:GO:0001726;<br>P:GO:0007132;<br>C:GO:0032154;<br>P:GO:0000904;<br>P:GO:0001768;<br>F:GO:0043495; | -                                                                                                 | -                                                       |                                                                                                                     |
| Caenorhabditis briggsae | elegans protein confirmed by transcript evidence | 7  | C:GO:0005737;<br>P:GO:0040010;<br>P:GO:0055114;<br>P:GO:0006561;<br>P:GO:0006898;<br>F:GO:0004349;<br>F:GO:0004350                                                                                                                                                                                                                                                                                                                                                      | -                                                                                                 | EC:2.7.2.11;<br>EC:1.2.1.41                             | IPR001048; PTHR11063 (PANTHER),<br>PTHR11063:SF2 (PANTHER)                                                          |
|                         |                                                  | 0  |                                                                                                                                                                                                                                                                                                                                                                                                                                                                         |                                                                                                   |                                                         |                                                                                                                     |
| Ostertagia ostertagi    | heat shock protein family member (hsp- )         | 1  | P:GO:0009408                                                                                                                                                                                                                                                                                                                                                                                                                                                            | -                                                                                                 |                                                         | IPR001436; IPR002068; IPR008978;<br>G3DSA:2.60.40.790 (GENE3D),<br>PTHR11527 (PANTHER),<br>PTHR11527:SF28 (PANTHER) |
| Caenorhabditis briggsae | briggsae cbr-opt-2 protein                       | 0  |                                                                                                                                                                                                                                                                                                                                                                                                                                                                         | P:GO:0006857;<br>F:GO:0015198;<br>C:GO:0016021;<br>C:GO:0016020;<br>F:GO:0005215;<br>P:GO:0006810 |                                                         | PTHR11654 (PANTHER),<br>PTHR11654:SF11 (PANTHER), SignalP<br>(SIGNALP)                                              |
|                         |                                                  | 0  |                                                                                                                                                                                                                                                                                                                                                                                                                                                                         |                                                                                                   |                                                         | SignalP (SIGNALP)                                                                                                   |
| Caenorhabditis elegans  | ras family protein                               | 9  | C:GO:0005737;<br>F:GO:0005525;<br>C:GO:0005886;<br>F:GO:0005515;<br>P:GO:0006913;<br>P:GO:0006886;<br>C:GO:0005634;<br>P:GO:0007264;<br>F:GO:0003924                                                                                                                                                                                                                                                                                                                    | -                                                                                                 | EC:3.6.5.1;<br>EC:3.6.5.2;<br>EC:3.6.5.3;<br>EC:3.6.5.4 |                                                                                                                     |

|                         |                                         |    |                                                                                                                                                                                                                                                                                                                                |                                                |                                                                                 |
|-------------------------|-----------------------------------------|----|--------------------------------------------------------------------------------------------------------------------------------------------------------------------------------------------------------------------------------------------------------------------------------------------------------------------------------|------------------------------------------------|---------------------------------------------------------------------------------|
| Loa loa                 | vacuolar protein sorting-associated     | 11 | F:GO:0000149;<br>C:GO:0008021;<br>P:GO:0000003;<br>P:GO:0018996;<br>P:GO:0006605;<br>P:GO:0002119;<br>P:GO:0016082;<br>P:GO:0006898;<br>P:GO:0034058;<br>P:GO:0006904;<br>P:GO:0007040                                                                                                                                         | -                                              | IPR001619; G3DSA:3.40.50.2060<br>(GENE3D), PTHR11679:SF3 (PANTHER)              |
|                         | -                                       | 0  |                                                                                                                                                                                                                                                                                                                                |                                                | -                                                                               |
|                         | -                                       | 0  |                                                                                                                                                                                                                                                                                                                                |                                                | -                                                                               |
| Caenorhabditis briggsae | cytosolic regulator pianissimo          | 0  |                                                                                                                                                                                                                                                                                                                                | F:GO:0005488;<br>P:GO:0007165;<br>C:GO:0005622 | PTHR13298 (PANTHER),<br>PTHR13298:SF2 (PANTHER)                                 |
| Caenorhabditis elegans  | 6-pyruvoyl tetrahydrobiopterin synthase | 10 | F:GO:0046872;<br>C:GO:0005667;<br>P:GO:0006729;<br>F:GO:0042802;<br>F:GO:0003874;<br>P:GO:0007366;<br>F:GO:0043565;<br>F:GO:0016563;<br>F:GO:0003700;<br>P:GO:0045893                                                                                                                                                          | -                                              | EC:4.2.3.12<br>IPR007115; G3DSA:3.30.479.10<br>(GENE3D), SSF55620 (SUPERFAMILY) |
|                         | -                                       | 0  |                                                                                                                                                                                                                                                                                                                                |                                                | SignalP (SIGNALP)                                                               |
|                         | -                                       | 0  |                                                                                                                                                                                                                                                                                                                                |                                                | -                                                                               |
| Caenorhabditis elegans  | fg-gap repeat family protein            | 19 | P:GO:0007279;<br>F:GO:0005515;<br>P:GO:0040007;<br>C:GO:0016442;<br>F:GO:0004521;<br>P:GO:0033227;<br>P:GO:0051607;<br>F:GO:0035197;<br>P:GO:0035087;<br>P:GO:0030422;<br>C:GO:0005737;<br>P:GO:0035071;<br>P:GO:0007367;<br>C:GO:0070578;<br>P:GO:0002119;<br>P:GO:0045071;<br>P:GO:0035195;<br>P:GO:0070868;<br>P:GO:0035190 | -                                              | PTHR13412 (PANTHER)                                                             |
|                         | -                                       | 0  |                                                                                                                                                                                                                                                                                                                                |                                                | -                                                                               |
|                         | -                                       | 0  |                                                                                                                                                                                                                                                                                                                                |                                                | -                                                                               |
| Caenorhabditis briggsae | thap domain containing 4                | 0  |                                                                                                                                                                                                                                                                                                                                | F:GO:0003676                                   | IPR011038; IPR014878; PTHR15854<br>(PANTHER)                                    |



|                         |                                                         |    |                                                                                                                                                                                                         |              |             |                                                                                                                                                           |
|-------------------------|---------------------------------------------------------|----|---------------------------------------------------------------------------------------------------------------------------------------------------------------------------------------------------------|--------------|-------------|-----------------------------------------------------------------------------------------------------------------------------------------------------------|
| Homo sapiens            | -scent polypeptide-associated complex alpha polypeptide | 9  | P:GO:0006412;<br>F:GO:0003677;<br>F:GO:0017025;<br>C:GO:0005854;<br>P:GO:0044419;<br>F:GO:0003713;<br>P:GO:0015031;<br>C:GO:0005634;<br>P:GO:0045941                                                    | -            | EC:3.6.5.3  | -                                                                                                                                                         |
| Caenorhabditis briggsae | Hypothetical protein CBG12993 [Caenorhabditis briggsae] | 0  |                                                                                                                                                                                                         |              |             | -                                                                                                                                                         |
| Caenorhabditis briggsae | vacuolar proton pump subunit f                          | 12 | F:GO:0046933;<br>P:GO:0015986;<br>P:GO:0040007;<br>P:GO:0000003;<br>P:GO:0018996;<br>P:GO:0002119;<br>F:GO:0046961;<br>P:GO:0040011;<br>P:GO:0006898;<br>P:GO:0060041;<br>P:GO:0009792;<br>C:GO:0033180 | -            | EC:3.6.3.14 | IPR005772; IPR008218;<br>G3DSA:3.40.50.10580 (GENE3D)                                                                                                     |
| -                       | -                                                       | 0  |                                                                                                                                                                                                         |              |             | -                                                                                                                                                         |
| -                       | -                                                       | 0  |                                                                                                                                                                                                         |              |             | -                                                                                                                                                         |
| -                       | -                                                       | 0  |                                                                                                                                                                                                         |              |             | SignalP (SIGNALP)                                                                                                                                         |
| Caenorhabditis elegans  | aldehyde dehydroge-se                                   | 2  | P:GO:0008152;<br>F:GO:0016491                                                                                                                                                                           | -            |             | IPR012394; IPR015590; IPR016160;<br>IPR016161; IPR016163                                                                                                  |
| -                       | -                                                       | 0  |                                                                                                                                                                                                         |              |             | SignalP (SIGNALP)                                                                                                                                         |
| -                       | -                                                       | 0  |                                                                                                                                                                                                         |              |             | -                                                                                                                                                         |
| Caenorhabditis elegans  | briggsae cbr-cpg-4 protein                              | 0  |                                                                                                                                                                                                         | P:GO:0040010 |             | SignalP (SIGNALP)                                                                                                                                         |
| -                       | -                                                       | 0  |                                                                                                                                                                                                         |              |             | -                                                                                                                                                         |
| Brugia malayi           | histone acetyltransferase type b catalytic subunit      | 3  | P:GO:0009987;<br>F:GO:0016747;<br>P:GO:0009792                                                                                                                                                          | -            | EC:2.3.1.0  | IPR016181; IPR019467;<br>G3DSA:3.90.360.10 (GENE3D),<br>PTHR12046 (PANTHER)                                                                               |
| Brugia malayi           | hypothetical protein Bm1_53660 [Brugia malayi]          | 0  |                                                                                                                                                                                                         |              |             | SignalP (SIGNALP)                                                                                                                                         |
| -                       | -                                                       | 0  |                                                                                                                                                                                                         |              |             | -                                                                                                                                                         |
| Caenorhabditis elegans  | colony stimulating factor 1 receptor                    | 2  | F:GO:0016301;<br>P:GO:0048518                                                                                                                                                                           | -            |             | IPR003599; IPR007110; IPR013106;<br>IPR013783; SignalP (SIGNALP),<br>SSF48726 (SUPERFAMILY)                                                               |
|                         |                                                         |    |                                                                                                                                                                                                         |              |             | IPR003599; IPR003961; IPR008957;<br>IPR013098; IPR013783; PR00014<br>(PRINTS), PTHR19900 (PANTHER),<br>PTHR19900:SF7 (PANTHER), SSF48726<br>(SUPERFAMILY) |
| -                       | -                                                       | 0  |                                                                                                                                                                                                         |              |             | -                                                                                                                                                         |
| Brugia malayi           | in family member (ttn-1)                                | 10 | P:GO:0014866;<br>F:GO:0004672;<br>P:GO:0016310;<br>F:GO:0008092;<br>C:GO:0031674;<br>P:GO:0048738;<br>P:GO:0009792;<br>P:GO:0050790;<br>C:GO:0044446;<br>C:GO:0005634                                   | -            |             | IPR003598; IPR007110; IPR013098;<br>IPR013783; PTHR19897 (PANTHER),<br>PTHR19897:SF17 (PANTHER),<br>SSF48726 (SUPERFAMILY)                                |

|                                |                                                    |    |                                                                                                                                                                                                                                                            |   |             |                                                                                                                                                                                                                                                                                                                                |
|--------------------------------|----------------------------------------------------|----|------------------------------------------------------------------------------------------------------------------------------------------------------------------------------------------------------------------------------------------------------------|---|-------------|--------------------------------------------------------------------------------------------------------------------------------------------------------------------------------------------------------------------------------------------------------------------------------------------------------------------------------|
| Caenorhabditis briggsae        | isocitrate dehydroge-se                            | 6  | F:GO:0051287;<br>P:GO:0055114;<br>F:GO:0000287;<br>P:GO:0006099;<br>F:GO:0004449;<br>C:GO:0005739                                                                                                                                                          | - | EC:1.1.1.41 | IPR001804; IPR004434; IPR019818;<br>PTHR11835:SF5 (PANTHER), SignalP<br>(SIGNALP), SSF53659 (SUPERFAMILY)                                                                                                                                                                                                                      |
| Caenorhabditis elegans         | atp-dependent r- helicase an3                      | 15 | C:GO:0005875;<br>F:GO:0004004;<br>C:GO:0016442;<br>P:GO:0040007;<br>P:GO:0002168;<br>P:GO:0007286;<br>P:GO:0002119;<br>P:GO:0042006;<br>C:GO:0043186;<br>F:GO:0000166;<br>C:GO:0043025;<br>P:GO:0048477;<br>P:GO:0009792;<br>C:GO:0005811;<br>P:GO:0016246 | - |             | IPR011545; IPR014014;<br>G3DSA:3.40.50.300 (GENE3D),<br>PTHR10967 (PANTHER),<br>PTHR10967:SF56 (PANTHER),<br>SSF52540 (SUPERFAMILY)                                                                                                                                                                                            |
|                                | -                                                  | 0  |                                                                                                                                                                                                                                                            |   |             | -                                                                                                                                                                                                                                                                                                                              |
| Caenorhabditis briggsae        | cdk5 regulatory subunit associated protein 3       | 1  | P:GO:0000079                                                                                                                                                                                                                                               | - |             | IPR008491                                                                                                                                                                                                                                                                                                                      |
| Bos taurus                     | ribosomal protein s14                              | 12 | F:GO:0048027;<br>P:GO:0000122;<br>F:GO:0005515;<br>P:GO:0000028;<br>P:GO:0006414;<br>C:GO:0005730;<br>F:GO:0045182;<br>P:GO:0030490;<br>P:GO:0030218;<br>F:GO:0003735;<br>C:GO:0022627;<br>C:GO:0005739                                                    | - |             | IPR001971; IPR018102;<br>PTHR11759:SF1 (PANTHER), SSF53137<br>(SUPERFAMILY)                                                                                                                                                                                                                                                    |
| Polysphondylium pallidum PN500 | choriogenin h                                      | 0  |                                                                                                                                                                                                                                                            |   |             | -                                                                                                                                                                                                                                                                                                                              |
|                                |                                                    |    |                                                                                                                                                                                                                                                            |   |             | P:GO:0006468;<br>F:GO:0003677;<br>C:GO:0005634;<br>F:GO:0003676;<br>F:GO:0005524;<br>F:GO:0046872;<br>P:GO:0006355;<br>F:GO:0004674;<br>P:GO:0006350;<br>F:GO:0004672;<br>F:GO:0005509;<br>F:GO:0003700;<br>F:GO:0000166;<br>F:GO:0005488;<br>C:GO:0012505;<br>C:GO:0005794;<br>P:GO:0045449;<br>F:GO:0008270;<br>F:GO:0005544 |
| Saccoglossus kowalevskii       | intracistin-l a particle-promoted polypeptide-like | 0  |                                                                                                                                                                                                                                                            |   |             | F:GO:0005515                                                                                                                                                                                                                                                                                                                   |

|                               |                                                                                           |    |                                                                                                                                                                       |   |             |                                                                                     |
|-------------------------------|-------------------------------------------------------------------------------------------|----|-----------------------------------------------------------------------------------------------------------------------------------------------------------------------|---|-------------|-------------------------------------------------------------------------------------|
| Bombyx mori                   | endonuclease-reverse transcriptase                                                        | 1  | F:GO:0003824                                                                                                                                                          | - |             | IPR005135; G3DSA:3.60.10.10 (GENE3D), PTHR23227 (PANTHER), PTHR23227:SF14 (PANTHER) |
| Loa loa                       | hypothetical protein LOAG_08094 [Loa loa]                                                 | 0  |                                                                                                                                                                       |   |             | -                                                                                   |
|                               |                                                                                           | 0  |                                                                                                                                                                       |   |             | -                                                                                   |
| Xenopus (Silurana) tropicalis | inhibitor of kappa light polypeptide gene enhancer in b- ki-se complex-associated protein | 10 | P:GO:0006357;<br>C:GO:0005730;<br>C:GO:0016591;<br>F:GO:0008607;<br>C:GO:0008023;<br>F:GO:0003677;<br>F:GO:0005515;<br>F:GO:0016944;<br>C:GO:0005737;<br>P:GO:0006468 | - |             | -                                                                                   |
| Brugia malayi                 | 1-acylglycerol-3-phosphate o-acyltransferase 9                                            | 10 | P:GO:0007595;<br>P:GO:0002071;<br>C:GO:0016021;<br>C:GO:0005789;<br>P:GO:0032006;<br>P:GO:0046339;<br>P:GO:0019432;<br>P:GO:0006631;<br>F:GO:0004366;<br>P:GO:0040014 | - | EC:2.3.1.15 | PTHR23063 (PANTHER), PTHR23063:SF2 (PANTHER)                                        |
| Rattus norvegicus             | histone h3 type 2                                                                         | 4  | C:GO:0000786;<br>F:GO:0003677;<br>P:GO:0006334;<br>C:GO:0005634                                                                                                       | - |             | IPR000164; IPR007125; IPR009072                                                     |
|                               |                                                                                           | 0  |                                                                                                                                                                       |   |             | -                                                                                   |
|                               |                                                                                           | 0  |                                                                                                                                                                       |   |             | -                                                                                   |
| Ancylostoma caninum           | kunitz-like protease inhibitor precursor                                                  | 0  |                                                                                                                                                                       |   |             | IPR002223; PTHR10083 (PANTHER), PTHR10083:SF39 (PANTHER), SignalP (SIGNALP)         |

|                        |                                                            |    |                                                                                                                                                                                                         |                               |             |                                                                                                                                           |
|------------------------|------------------------------------------------------------|----|---------------------------------------------------------------------------------------------------------------------------------------------------------------------------------------------------------|-------------------------------|-------------|-------------------------------------------------------------------------------------------------------------------------------------------|
| Caenorhabditis elegans | elegans protein partially confirmed by transcript evidence | 0  |                                                                                                                                                                                                         |                               |             | -                                                                                                                                         |
|                        | -                                                          | 0  |                                                                                                                                                                                                         |                               |             | -                                                                                                                                         |
| Caenorhabditis elegans | inorganic pyrophosphatase                                  | 9  | C:GO:0005737;<br>P:GO:0009792;<br>P:GO:0002119;<br>P:GO:0040010;<br>P:GO:0000003;<br>F:GO:0004427;<br>C:GO:0016021;<br>P:GO:0006796;<br>P:GO:0040039                                                    | -                             | EC:3.6.1.1  | IPR008162                                                                                                                                 |
|                        | -                                                          | 0  |                                                                                                                                                                                                         |                               |             | -                                                                                                                                         |
| Loa loa                | novel protein                                              | 4  | P:GO:0008152;<br>F:GO:0008134;<br>F:GO:0003824;<br>C:GO:0005634                                                                                                                                         | -                             |             | G3DSA:3.40.50.980 (GENE3D),<br>PTHR22754 (PANTHER),<br>PTHR22754:SF8 (PANTHER)                                                            |
| Caenorhabditis elegans | dmx-like 1                                                 | 0  |                                                                                                                                                                                                         | F:GO:0003674;<br>P:GO:0008150 |             | PTHR13950 (PANTHER),<br>PTHR13950:SF1 (PANTHER)                                                                                           |
| Loa loa                | cgmp-dependent 3 -cyclic phosphodiesterase                 | 8  | F:GO:0004118;<br>P:GO:0046069;<br>F:GO:0030552;<br>C:GO:0045121;<br>P:GO:0050794;<br>F:GO:0042803;<br>F:GO:0030553;<br>P:GO:0006198                                                                     | -                             |             | IPR003018; G3DSA:3.30.450.40<br>(GENE3D), PTHR11347 (PANTHER),<br>PTHR11347:SF4 (PANTHER), SSF55781<br>(SUPERFAMILY)                      |
|                        | -                                                          | 0  |                                                                                                                                                                                                         |                               |             | -                                                                                                                                         |
| Caenorhabditis elegans | pqq enzyme repeat family protein                           | 12 | P:GO:0006468;<br>P:GO:0000003;<br>F:GO:0005515;<br>C:GO:0030176;<br>P:GO:0010467;<br>P:GO:0090304;<br>F:GO:0004521;<br>P:GO:0040017;<br>F:GO:0004674;<br>P:GO:0006987;<br>F:GO:0000287;<br>F:GO:0005524 | -                             | EC:2.7.11.0 | IPR011047; IPR018391                                                                                                                      |
| Caenorhabditis elegans | lsm4 u6 small nuclear r- associated ( cerevisiae)          | 11 | F:GO:0003723;<br>P:GO:0008340;<br>P:GO:0040027;<br>P:GO:0008380;<br>P:GO:0010171;<br>C:GO:0005688;<br>F:GO:0005515;<br>P:GO:0040011;<br>P:GO:0006898;<br>P:GO:0006397;<br>P:GO:0009792                  | -                             |             | IPR001163; IPR006649; IPR010920;<br>G3DSA:2.30.30.100 (GENE3D),<br>PTHR23338 (PANTHER),<br>PTHR23338:SF16 (PANTHER), SignalP<br>(SIGNALP) |
|                        | -                                                          | 0  |                                                                                                                                                                                                         |                               |             | SignalP (SIGNALP)                                                                                                                         |

|                          |                                                            |    |  |                                                                                                                                                                                                                                                                                                                                                                                                                                                                                         |                                                                                                                |                                                             |
|--------------------------|------------------------------------------------------------|----|--|-----------------------------------------------------------------------------------------------------------------------------------------------------------------------------------------------------------------------------------------------------------------------------------------------------------------------------------------------------------------------------------------------------------------------------------------------------------------------------------------|----------------------------------------------------------------------------------------------------------------|-------------------------------------------------------------|
| Caenorhabditis elegans   | elegans protein partially confirmed by transcript evidence | 0  |  | F:GO:0004134;<br>P:GO:0006508;<br>P:GO:0005978;<br>P:GO:0005975;<br>F:GO:0003824;<br>F:GO:0043169;<br>P:GO:0009792;<br>F:GO:0004135                                                                                                                                                                                                                                                                                                                                                     | -                                                                                                              |                                                             |
| Loa loa                  | yh82_caee1: full=uncharacterized protein                   | 0  |  | F:GO:0005184;<br>C:GO:0005576                                                                                                                                                                                                                                                                                                                                                                                                                                                           | IPR001166; IPR018251                                                                                           |                                                             |
|                          | -                                                          | 0  |  |                                                                                                                                                                                                                                                                                                                                                                                                                                                                                         | -                                                                                                              |                                                             |
|                          | -                                                          | 0  |  |                                                                                                                                                                                                                                                                                                                                                                                                                                                                                         | -                                                                                                              |                                                             |
|                          | -                                                          | 0  |  |                                                                                                                                                                                                                                                                                                                                                                                                                                                                                         | -                                                                                                              |                                                             |
| Caenorhabditis briggsae  | briggsae cbr-tag-293 protein                               | 0  |  |                                                                                                                                                                                                                                                                                                                                                                                                                                                                                         | -                                                                                                              |                                                             |
| Saccoglossus kowalevskii | 5 -nucleotidase domain containing 2                        | 0  |  | F:GO:0046872;<br>F:GO:0003674;<br>F:GO:0016787;<br>C:GO:0005575                                                                                                                                                                                                                                                                                                                                                                                                                         | IPR007087; IPR015880; IPR022755;<br>PTHR20863 (PANTHER),<br>PTHR20863:SF2 (PANTHER), SSF57667<br>(SUPERFAMILY) |                                                             |
| Caenorhabditis elegans   | zinc finger protein 593                                    | 8  |  | P:GO:0009792;<br>P:GO:0002119;<br>F:GO:0003676;<br>C:GO:0005622;<br>P:GO:0040010;<br>P:GO:0000003;<br>P:GO:0006898;<br>F:GO:0008270                                                                                                                                                                                                                                                                                                                                                     | IPR007087; IPR015880; IPR022755;<br>PTHR20863 (PANTHER),<br>PTHR20863:SF2 (PANTHER), SSF57667<br>(SUPERFAMILY) |                                                             |
|                          | -                                                          | 0  |  |                                                                                                                                                                                                                                                                                                                                                                                                                                                                                         | -                                                                                                              |                                                             |
| Caenorhabditis elegans   | elegans protein confirmed by transcript evidence           | 0  |  |                                                                                                                                                                                                                                                                                                                                                                                                                                                                                         | -                                                                                                              |                                                             |
| Caenorhabditis briggsae  | mitochondrial ribosomal protein s25                        | 1  |  | C:GO:0005840                                                                                                                                                                                                                                                                                                                                                                                                                                                                            | SignalP (SIGNALP)                                                                                              |                                                             |
| Caenorhabditis elegans   | hypothetical protein C54D1.7 [Caenorhabditis elegans]      | 0  |  |                                                                                                                                                                                                                                                                                                                                                                                                                                                                                         | -                                                                                                              |                                                             |
| Pongo abelii             | heavy chain non-muscle                                     | 44 |  | P:GO:0001229;<br>C:GO:0030863;<br>P:GO:0008360;<br>C:GO:0031594;<br>P:GO:0030048;<br>F:GO:0030898;<br>P:GO:0051295;<br>C:GO:0005913;<br>P:GO:0016337;<br>F:GO:0043531;<br>P:GO:0032796;<br>P:GO:0015031;<br>C:GO:0001772;<br>P:GO:0050900;<br>P:GO:0007229;<br>C:GO:0005829;<br>P:GO:0007520;<br>F:GO:0000146;<br>P:GO:0006509;<br>P:GO:0043534;<br>C:GO:0008305;<br>C:GO:0005819;<br>C:GO:0001726;<br>P:GO:0007132;<br>F:GO:0005391;<br>C:GO:0032154;<br>P:GO:0000904;<br>P:GO:0001768 | EC:3.6.3.9                                                                                                     | IPR001609; PTHR13140 (PANTHER),<br>PTHR13140:SF23 (PANTHER) |
|                          | -                                                          | 0  |  |                                                                                                                                                                                                                                                                                                                                                                                                                                                                                         | SignalP (SIGNALP)                                                                                              |                                                             |

|                             |                                                            |    |                                                                                                                                                                                                                                                                                                               |              |             |                                                                                                                                              |
|-----------------------------|------------------------------------------------------------|----|---------------------------------------------------------------------------------------------------------------------------------------------------------------------------------------------------------------------------------------------------------------------------------------------------------------|--------------|-------------|----------------------------------------------------------------------------------------------------------------------------------------------|
| Caenorhabditis briggsae     | adipocyte plasma membrane-associated protein               | 2  | C:GO:0044464;<br>F:GO:0003824                                                                                                                                                                                                                                                                                 | -            |             | IPR004141; IPR011042; IPR018119;<br>PTHR10426:SF6 (PANTHER), SignalP<br>(SIGNALP), SSF63829 (SUPERFAMILY)                                    |
| Loa loa                     | hypothetical protein LOAG_05120 [Loa loa]                  | 0  |                                                                                                                                                                                                                                                                                                               |              |             | IPR001863                                                                                                                                    |
|                             | -                                                          | 0  |                                                                                                                                                                                                                                                                                                               |              |             | -                                                                                                                                            |
|                             | -                                                          | 0  |                                                                                                                                                                                                                                                                                                               |              |             | SignalP (SIGNALP)                                                                                                                            |
|                             | -                                                          | 0  |                                                                                                                                                                                                                                                                                                               |              |             | -                                                                                                                                            |
| Angiostrongylus cantonensis | thyroglobulin type-1 repeat family protein                 | 1  | F:GO:0005509                                                                                                                                                                                                                                                                                                  | -            |             | IPR000716; IPR011992; IPR018247;<br>IPR019577; PTHR12036 (PANTHER),<br>PTHR12036:SF1 (PANTHER), SignalP<br>(SIGNALP), SSF47473 (SUPERFAMILY) |
| Angiostrongylus cantonensis | thyroglobulin type-1 repeat family protein                 | 0  |                                                                                                                                                                                                                                                                                                               | F:GO:0005509 |             | SignalP (SIGNALP)                                                                                                                            |
| Caenorhabditis elegans      | cap-gly domain-containing protein                          | 1  | P:GO:0008340                                                                                                                                                                                                                                                                                                  | -            |             | G3DSA:3.80.10.10 (GENE3D), PS51450<br>(PROFILE)                                                                                              |
| Angiostrongylus cantonensis | major allergen                                             | 0  |                                                                                                                                                                                                                                                                                                               |              |             | SignalP (SIGNALP)                                                                                                                            |
|                             | -                                                          | 0  |                                                                                                                                                                                                                                                                                                               |              |             | -                                                                                                                                            |
| Caenorhabditis elegans      | elegans protein partially confirmed by transcript evidence | 0  |                                                                                                                                                                                                                                                                                                               | C:GO:0016021 |             | IPR010291; PTHR23294 (PANTHER),<br>SignalP (SIGNALP)                                                                                         |
| Brugia malayi               | bromodomain containing protein                             | 1  | C:GO:0044424                                                                                                                                                                                                                                                                                                  | -            |             | IPR001680; IPR011046; IPR015943;<br>IPR017986; IPR019775; IPR019781;<br>IPR019782; PTHR16266 (PANTHER)                                       |
| Brugia malayi               | pleckstrin homology domain interacting protein             | 4  | F:GO:0005515;<br>P:GO:0007169;<br>P:GO:0048522;<br>P:GO:0009725                                                                                                                                                                                                                                               | -            |             | IPR001680; IPR011046; IPR015943;<br>IPR017986; IPR019775; IPR019781;<br>IPR019782; PTHR16266 (PANTHER),<br>PTHR16266:SF4 (PANTHER)           |
| Ailuropoda melanoleuca      | triosephosphate isomerase 1                                | 11 | C:GO:0005829;<br>P:GO:0006633;<br>C:GO:0005625;<br>P:GO:0006098;<br>P:GO:0019682;<br>F:GO:0004807;<br>F:GO:0005515;<br>P:GO:0006096;<br>P:GO:0006094;<br>C:GO:0005634;<br>P:GO:0009790                                                                                                                        | -            | EC:5.3.1.1  | -                                                                                                                                            |
| Danio rerio                 | atp-binding sub-family a member 1                          | 18 | P:GO:0002790;<br>P:GO:0010875;<br>P:GO:0043691;<br>P:GO:0006911;<br>F:GO:0005548;<br>P:GO:0008203;<br>P:GO:0006497;<br>P:GO:0045332;<br>F:GO:0008509;<br>P:GO:0071222;<br>P:GO:0071300;<br>F:GO:0017111;<br>C:GO:0005887;<br>C:GO:0005794;<br>F:GO:0005515;<br>P:GO:0055099;<br>F:GO:0017127;<br>P:GO:0033700 | -            | EC:3.6.1.15 | G3DSA:3.40.50.300 (GENE3D),<br>PTHR19229 (PANTHER),<br>PTHR19229:SF34 (PANTHER),<br>SSF52540 (SUPERFAMILY)                                   |
|                             | -                                                          | 0  |                                                                                                                                                                                                                                                                                                               |              |             | -                                                                                                                                            |
|                             | -                                                          | 0  |                                                                                                                                                                                                                                                                                                               |              |             | -                                                                                                                                            |

|                         |                                                         |    |                                                                                                                                                                                        |                               |             |                                                                            |
|-------------------------|---------------------------------------------------------|----|----------------------------------------------------------------------------------------------------------------------------------------------------------------------------------------|-------------------------------|-------------|----------------------------------------------------------------------------|
| Caenorhabditis briggsae | Hypothetical protein CBG20567 [Caenorhabditis briggsae] | 0  |                                                                                                                                                                                        |                               |             | IPR003659; SignalP (SIGNALP)                                               |
| Caenorhabditis elegans  | e3 ubiquitin-protein ligase huwe1-like                  | 4  | C:GO:0005622;<br>F:GO:0016881;<br>F:GO:0005488;<br>P:GO:0006464                                                                                                                        | -                             | EC:6.3.2.0  | -                                                                          |
| Alluropoda melanoleuca  | fibrillarlin                                            | 11 | C:GO:0001651;<br>C:GO:0001652;<br>C:GO:0031428;<br>C:GO:0015030;<br>F:GO:0030515;<br>F:GO:0005515;<br>P:GO:0016074;<br>P:GO:0006364;<br>P:GO:0032259;<br>F:GO:0008168;<br>P:GO:0008033 | -                             | EC:2.1.1.0  | -                                                                          |
| Brugia malayi           | ymp3_caee1 ame: full=uncharacterized protein            | 0  |                                                                                                                                                                                        |                               |             | IPR019335                                                                  |
|                         | -                                                       | 0  |                                                                                                                                                                                        |                               |             | -                                                                          |
|                         | -                                                       | 0  |                                                                                                                                                                                        |                               |             | -                                                                          |
| Brugia malayi           | ago piwi domain protein                                 | 0  |                                                                                                                                                                                        | F:GO:0003676;<br>F:GO:0003743 |             | IPR003165; IPR012337; PTHR22891 (PANTHER)                                  |
| Caenorhabditis elegans  | aar2 protein                                            | 1  | F:GO:0005515                                                                                                                                                                           | -                             |             | IPR007946                                                                  |
| Caenorhabditis elegans  | aar2 protein                                            | 1  | F:GO:0005515                                                                                                                                                                           | -                             |             | IPR007946                                                                  |
|                         | -                                                       | 0  |                                                                                                                                                                                        |                               |             | -                                                                          |
| Caenorhabditis elegans  | lysocardiolipin acyltransferase 1                       | 4  | F:GO:0008415;<br>F:GO:0005515;<br>C:GO:0016021;<br>P:GO:0008152                                                                                                                        | -                             |             | IPR002123; PTHR10983 (PANTHER), PTHR10983:SF1 (PANTHER), SignalP (SIGNALP) |
| Caenorhabditis elegans  | lysocardiolipin acyltransferase 1                       | 4  | F:GO:0008415;<br>F:GO:0005515;<br>C:GO:0016021;<br>P:GO:0008152                                                                                                                        | -                             |             | IPR002123; PTHR10983 (PANTHER), PTHR10983:SF1 (PANTHER), SignalP (SIGNALP) |
|                         | -                                                       | 0  |                                                                                                                                                                                        |                               |             | SignalP (SIGNALP)                                                          |
|                         | -                                                       | 0  |                                                                                                                                                                                        |                               |             | -                                                                          |
|                         | -                                                       | 0  |                                                                                                                                                                                        |                               |             | -                                                                          |
|                         | -                                                       | 0  |                                                                                                                                                                                        |                               |             | SignalP (SIGNALP)                                                          |
| Caenorhabditis elegans  | transmembrane and coiled-coil domains 7                 | 2  | P:GO:0000003;<br>P:GO:0048856                                                                                                                                                          | -                             |             | IPR011989; IPR016024; PTHR20959 (PANTHER)                                  |
|                         | -                                                       | 0  |                                                                                                                                                                                        |                               |             | -                                                                          |
| Caenorhabditis briggsae | Hypothetical protein CBG21482 [Caenorhabditis briggsae] | 0  |                                                                                                                                                                                        |                               |             | -                                                                          |
|                         | -                                                       | 0  |                                                                                                                                                                                        |                               |             | -                                                                          |
| Caenorhabditis elegans  | elegans protein confirmed by transcript evidence        | 6  | P:GO:0006680;<br>C:GO:0005886;<br>P:GO:0018991;<br>F:GO:0004348;<br>P:GO:0040011;<br>C:GO:0016021                                                                                      | -                             | EC:3.2.1.45 | IPR006775; IPR008928; PTHR12654 (PANTHER)                                  |
|                         | -                                                       | 0  |                                                                                                                                                                                        |                               |             | SignalP (SIGNALP)                                                          |
| Caenorhabditis briggsae | helicase conserved c-term-I domain containing protein   | 2  | F:GO:0005488;<br>F:GO:0016787                                                                                                                                                          | -                             |             | IPR017871; PTHR11752 (PANTHER), PTHR11752:SF3 (PANTHER)                    |
|                         | -                                                       | 0  |                                                                                                                                                                                        |                               |             | IPR006058                                                                  |
|                         | -                                                       | 0  |                                                                                                                                                                                        |                               |             | -                                                                          |
|                         | -                                                       | 0  |                                                                                                                                                                                        |                               |             | -                                                                          |

|                         |                                                            |    |                                                                                                                                                                                                                                                                                              |                                                |                                                                                                                                                |
|-------------------------|------------------------------------------------------------|----|----------------------------------------------------------------------------------------------------------------------------------------------------------------------------------------------------------------------------------------------------------------------------------------------|------------------------------------------------|------------------------------------------------------------------------------------------------------------------------------------------------|
| Pongo abelii            | collagen alpha-2 chain-like                                | 17 | P:GO:0042476;<br>F:GO:0030674;<br>P:GO:0070208;<br>P:GO:0043589;<br>P:GO:0008217;<br>F:GO:0042802;<br>C:GO:0005615;<br>F:GO:0046332;<br>P:GO:0001501;<br>F:GO:0048407;<br>C:GO:0005584;<br>P:GO:0030199;<br>P:GO:0007179;<br>F:GO:0005201;<br>P:GO:0001568;<br>P:GO:0007266;<br>C:GO:0005886 | -                                              | IPR000885; PTHR10499 (PANTHER),<br>PTHR10499:SF71 (PANTHER), PSS1461<br>(PROFILE)                                                              |
| Aedes aegypti           | split isoform c                                            | 7  | P:GO:0003002;<br>P:GO:0001709;<br>P:GO:0009887;<br>P:GO:0006928;<br>P:GO:0042063;<br>P:GO:0007166;<br>P:GO:0048699                                                                                                                                                                           | -                                              | IPR010912; IPR016194;<br>G3DSA:2.40.290.10 (GENE3D)                                                                                            |
| Aedes aegypti           | split isoform c                                            | 7  | P:GO:0003002;<br>P:GO:0001709;<br>P:GO:0009887;<br>P:GO:0006928;<br>P:GO:0042063;<br>P:GO:0007166;<br>P:GO:0048699                                                                                                                                                                           | -                                              | IPR010912; IPR016194;<br>G3DSA:2.40.290.10 (GENE3D)                                                                                            |
| Loa loa                 | protein split ends                                         | 3  | F:GO:0005488;<br>P:GO:0007275;<br>P:GO:0050789                                                                                                                                                                                                                                               | -                                              | IPR010912; IPR012921; IPR016194;<br>G3DSA:2.40.290.10 (GENE3D)                                                                                 |
| Aedes aegypti           | split isoform c                                            | 7  | P:GO:0003002;<br>P:GO:0001709;<br>P:GO:0009887;<br>P:GO:0006928;<br>P:GO:0042063;<br>P:GO:0007166;<br>P:GO:0048699                                                                                                                                                                           | -                                              | IPR010912; IPR012921; IPR016194;<br>G3DSA:2.40.290.10 (GENE3D)                                                                                 |
| -                       | -                                                          | 0  |                                                                                                                                                                                                                                                                                              |                                                | SignalP (SIGNALP)                                                                                                                              |
| Caenorhabditis elegans  | nudix family protein                                       | 0  |                                                                                                                                                                                                                                                                                              | F:GO:0016787                                   | IPR000086; PTHR12318 (PANTHER),<br>SignalP (SIGNALP)                                                                                           |
| Caenorhabditis briggsae | elegans protein partially confirmed by transcript evidence | 0  |                                                                                                                                                                                                                                                                                              | F:GO:0004672;<br>F:GO:0005524;<br>P:GO:0006468 | IPR012877                                                                                                                                      |
| Caenorhabditis elegans  | elegans protein confirmed by transcript evidence           | 0  |                                                                                                                                                                                                                                                                                              | P:GO:0006508;<br>F:GO:0004181;<br>F:GO:0008270 | -                                                                                                                                              |
| Loa loa                 | kh domain containing protein                               | 3  | P:GO:0044238;<br>F:GO:0003676;<br>P:GO:0044237                                                                                                                                                                                                                                               | -                                              | IPR004087; IPR004088; IPR018111;<br>G3DSA:3.30.1370.10 (GENE3D),<br>PTHR11208 (PANTHER),<br>PTHR11208:SF8 (PANTHER), SSF54791<br>(SUPERFAMILY) |
| -                       | -                                                          | 0  |                                                                                                                                                                                                                                                                                              |                                                | -                                                                                                                                              |



|                         |                                                                     |    |                                                                                                                                                                                                         |   |                                                         |                                                                                                  |
|-------------------------|---------------------------------------------------------------------|----|---------------------------------------------------------------------------------------------------------------------------------------------------------------------------------------------------------|---|---------------------------------------------------------|--------------------------------------------------------------------------------------------------|
| Trichoplax adhaerens    | eukaryotic translation initiation factor 4h                         | 1  | F:GO:0005488                                                                                                                                                                                            | - |                                                         | IPR000504; IPR012677; PTHR23236 (PANTHER), PTHR23236:SF2 (PANTHER), SSF54928 (SUPERFAMILY)       |
|                         | -                                                                   | 0  |                                                                                                                                                                                                         |   |                                                         | -                                                                                                |
|                         | -                                                                   | 0  |                                                                                                                                                                                                         |   |                                                         | -                                                                                                |
| Homo sapiens            | pancreatic progenitor cell differentiation and proliferation factor | 2  | P:GO:0007275;<br>P:GO:0030154                                                                                                                                                                           | - |                                                         | PD349947 (PRODOM)                                                                                |
| Loa loa                 | peptidylprolyl isomerase -like 3                                    | 6  | P:GO:0006457;<br>P:GO:0008380;<br>C:GO:0005681;<br>F:GO:0005515;<br>P:GO:0006397;<br>F:GO:0003755                                                                                                       | - | EC:5.2.1.8                                              | IPR004394; G3DSA:3.30.460.10 (GENE3D)                                                            |
| Loa loa                 | calmodulin-like protein                                             | 2  | P:GO:0009792;<br>F:GO:0005509                                                                                                                                                                           | - |                                                         | -                                                                                                |
| Pan troglodytes         | elongation factor mitochondrial precursor                           | 7  | F:GO:0003746;<br>C:GO:0005743;<br>F:GO:0005525;<br>F:GO:0005515;<br>C:GO:0042645;<br>P:GO:0006414;<br>F:GO:0003924                                                                                      | - | EC:3.6.5.1;<br>EC:3.6.5.2;<br>EC:3.6.5.3;<br>EC:3.6.5.4 | -                                                                                                |
|                         | -                                                                   | 0  |                                                                                                                                                                                                         |   |                                                         | -                                                                                                |
| Homo sapiens            | apolipoprotein a-i binding protein                                  | 3  | C:GO:0005576;<br>C:GO:0005739;<br>F:GO:0005515                                                                                                                                                          | - |                                                         | IPR004443; G3DSA:3.40.50.10260 (GENE3D), PTHR13232 (PANTHER), PTHR13232:SF8 (PANTHER)            |
| Caenorhabditis briggsae | pin4 protein                                                        | 9  | C:GO:0005730;<br>F:GO:0003681;<br>P:GO:0006457;<br>C:GO:0005759;<br>C:GO:0005819;<br>P:GO:0006364;<br>C:GO:0030684;<br>F:GO:0003755;<br>F:GO:0003690                                                    | - | EC:5.2.1.8                                              | -                                                                                                |
| Caenorhabditis briggsae | type iii restriction res subunit family protein                     | 3  | F:GO:0005524;<br>F:GO:0003677;<br>F:GO:0008026                                                                                                                                                          | - |                                                         | IPR004179; PTHR11752 (PANTHER), PTHR11752:SF8 (PANTHER)                                          |
| Caenorhabditis elegans  | peroxisomal membrane protein related family member (pmp-5)          | 1  | C:GO:0044464                                                                                                                                                                                            | - |                                                         | G3DSA:3.40.50.300 (GENE3D), PTHR11384 (PANTHER), PTHR11384:SF3 (PANTHER), SSF52540 (SUPERFAMILY) |
|                         | -                                                                   | 0  |                                                                                                                                                                                                         |   |                                                         | -                                                                                                |
| Homo sapiens            | prolyl 4- beta polypeptide                                          | 12 | F:GO:0003756;<br>F:GO:0004656;<br>C:GO:0005793;<br>P:GO:0045454;<br>C:GO:0009986;<br>C:GO:0042470;<br>C:GO:0005792;<br>C:GO:0005788;<br>F:GO:0005515;<br>P:GO:0018401;<br>C:GO:0005576;<br>C:GO:0005886 | - | EC:5.3.4.1;<br>EC:1.14.11.2                             | -                                                                                                |

|                          |                                                                                                                                                                 |    |                                                                                                                                                                                                         |                               |                                   |                                                                                                                       |
|--------------------------|-----------------------------------------------------------------------------------------------------------------------------------------------------------------|----|---------------------------------------------------------------------------------------------------------------------------------------------------------------------------------------------------------|-------------------------------|-----------------------------------|-----------------------------------------------------------------------------------------------------------------------|
| Caenorhabditis briggsae  | multiple pdz domain protein                                                                                                                                     | 7  | P:GO:0042552;<br>C:GO:0005923;<br>P:GO:0023034;<br>C:GO:0016021;<br>C:GO:0045202;<br>P:GO:0007155;<br>F:GO:0005515                                                                                      | -                             |                                   | IPR001478; G3DSA:2.30.42.10<br>(GENE3D), PTHR19964 (PANTHER),<br>PTHR19964:SF10 (PANTHER)                             |
| Caenorhabditis briggsae  | zinc finger ran-binding domain-containing protein 2                                                                                                             | 2  | C:GO:0005622;<br>F:GO:0008270                                                                                                                                                                           | -                             |                                   | IPR001876; G3DSA:4.10.1060.10<br>(GENE3D), PTHR12999 (PANTHER),<br>PTHR12999:SF4 (PANTHER), SSF90209<br>(SUPERFAMILY) |
| Caenorhabditis briggsae  | prolyl 4-hydroxylase                                                                                                                                            | 6  | F:GO:0031418;<br>F:GO:0005506;<br>F:GO:0004656;<br>P:GO:0055114;<br>F:GO:0016702;<br>C:GO:0005783                                                                                                       | -                             | EC:1.14.11.2<br>;<br>EC:1.13.11.0 | IPR011990; IPR013547; PTHR10869<br>(PANTHER), PTHR10869:SF13<br>(PANTHER)                                             |
| Saccoglossus kowalevskii | ensangp00000010363                                                                                                                                              | 0  |                                                                                                                                                                                                         |                               |                                   | PTHR22930 (PANTHER)                                                                                                   |
|                          | -                                                                                                                                                               | 0  |                                                                                                                                                                                                         |                               |                                   | -                                                                                                                     |
| Caenorhabditis briggsae  | elegans protein confirmed by transcript evidence                                                                                                                | 6  | P:GO:0040010;<br>P:GO:0010171;<br>P:GO:0040011;<br>P:GO:0006898;<br>P:GO:0002009;<br>P:GO:0009792                                                                                                       | -                             |                                   | -                                                                                                                     |
| Nematostella vectensis   | coagulation factor xiii b chain precursor (protein-glutamine gamma-glutamyltransferase b chain) (transglutami-se b chain) (fibrin-stabilizing factor b subunit) | 0  |                                                                                                                                                                                                         | F:GO:0005488;<br>P:GO:0007155 |                                   | IPR000436; IPR016060; PTHR19325<br>(PANTHER), PTHR19325:SF25<br>(PANTHER), SignalP (SIGNALP)                          |
|                          | -                                                                                                                                                               | 0  |                                                                                                                                                                                                         |                               |                                   | -                                                                                                                     |
| Brugia malayi            | cytoplasmic intermediate filament protein                                                                                                                       | 3  | P:GO:0048856;<br>P:GO:0007275;<br>P:GO:0040007                                                                                                                                                          | -                             |                                   | IPR001664                                                                                                             |
| Caenorhabditis elegans   | beta3 protein                                                                                                                                                   | 12 | P:GO:0009792;<br>P:GO:0010171;<br>P:GO:0002119;<br>C:GO:0005794;<br>F:GO:0005515;<br>C:GO:0030117;<br>F:GO:0008565;<br>P:GO:0006886;<br>P:GO:0007040;<br>P:GO:0019915;<br>P:GO:0040007;<br>P:GO:0006897 | -                             |                                   | IPR002553; IPR011989; IPR016024;<br>PTHR11134 (PANTHER),<br>PTHR11134:SF1 (PANTHER)                                   |
|                          | -                                                                                                                                                               | 0  |                                                                                                                                                                                                         |                               |                                   | -                                                                                                                     |
|                          | -                                                                                                                                                               | 0  |                                                                                                                                                                                                         |                               |                                   | -                                                                                                                     |
| Caenorhabditis briggsae  | briggsae cbr-cpg-2 protein                                                                                                                                      | 2  | P:GO:0032502;<br>P:GO:0032501                                                                                                                                                                           | -                             |                                   | IPR002557; G3DSA:2.170.140.10<br>(GENE3D), PTHR11177 (PANTHER),<br>PTHR11177:SF37 (PANTHER)                           |
| Caenorhabditis briggsae  | briggsae cbr-cpg-2 protein                                                                                                                                      | 3  | P:GO:0009792;<br>P:GO:0000281;<br>F:GO:0008061                                                                                                                                                          | -                             |                                   | IPR002557; G3DSA:2.170.140.10<br>(GENE3D), PTHR11177 (PANTHER),<br>PTHR11177:SF37 (PANTHER)                           |
| Caenorhabditis briggsae  | briggsae cbr-cpg-2 protein                                                                                                                                      | 2  | P:GO:0032502;<br>P:GO:0032501                                                                                                                                                                           | -                             |                                   | IPR002557; G3DSA:2.170.140.10<br>(GENE3D), PTHR11177 (PANTHER),<br>PTHR11177:SF37 (PANTHER)                           |
|                          | -                                                                                                                                                               | 0  |                                                                                                                                                                                                         |                               |                                   | -                                                                                                                     |
|                          | -                                                                                                                                                               | 0  |                                                                                                                                                                                                         |                               |                                   | -                                                                                                                     |

|                         |                                                            |    |                                                                                                                                                                                                                                                                                                                                                                                                                                                                                         |              |             |                                                                                                                                              |
|-------------------------|------------------------------------------------------------|----|-----------------------------------------------------------------------------------------------------------------------------------------------------------------------------------------------------------------------------------------------------------------------------------------------------------------------------------------------------------------------------------------------------------------------------------------------------------------------------------------|--------------|-------------|----------------------------------------------------------------------------------------------------------------------------------------------|
| Caenorhabditis elegans  | coiled-coil domain containing 134-like                     | 0  |                                                                                                                                                                                                                                                                                                                                                                                                                                                                                         | C:GO:0005576 |             | SignalP (SIGNALP)                                                                                                                            |
| Caenorhabditis elegans  | coiled-coil domain containing 134-like                     | 0  |                                                                                                                                                                                                                                                                                                                                                                                                                                                                                         | C:GO:0005576 |             | -                                                                                                                                            |
| Caenorhabditis briggsae | Hypothetical protein CBG04113 [Caenorhabditis briggsae]    | 0  |                                                                                                                                                                                                                                                                                                                                                                                                                                                                                         | F:GO:0031072 |             | -                                                                                                                                            |
| Chlorobaculum tepidum   | AF287482_5Orf122 [Chlorobaculum tepidum]                   | 0  |                                                                                                                                                                                                                                                                                                                                                                                                                                                                                         |              |             | -                                                                                                                                            |
|                         | -                                                          | 0  |                                                                                                                                                                                                                                                                                                                                                                                                                                                                                         |              |             | -                                                                                                                                            |
|                         | -                                                          | 0  |                                                                                                                                                                                                                                                                                                                                                                                                                                                                                         |              |             | SignalP (SIGNALP)                                                                                                                            |
|                         | -                                                          | 0  |                                                                                                                                                                                                                                                                                                                                                                                                                                                                                         |              |             | -                                                                                                                                            |
| Caenorhabditis elegans  | phosphodiesterase cgmp-inhibited                           | 3  | F:GO:0046872;<br>P:GO:0007165;<br>F:GO:0004114                                                                                                                                                                                                                                                                                                                                                                                                                                          | -            | EC:3.1.4.17 | IPR002073; PTHR11347 (PANTHER),<br>PTHR11347:SF28 (PANTHER),<br>SSF109604 (SUPERFAMILY)                                                      |
| Caenorhabditis briggsae | prolyl 4-hydroxylase                                       | 2  | F:GO:0005488;<br>F:GO:0016491                                                                                                                                                                                                                                                                                                                                                                                                                                                           | -            |             | IPR013547; PTHR10869 (PANTHER),<br>PTHR10869:SF13 (PANTHER)                                                                                  |
| Caenorhabditis elegans  | inositol -trisphosphate receptor                           | 5  | P:GO:0006816;<br>F:GO:0005220;<br>P:GO:0055085;<br>C:GO:0016021;<br>C:GO:0005783                                                                                                                                                                                                                                                                                                                                                                                                        | -            |             | IPR013662; IPR015925;<br>PTHR13715:SF2 (PANTHER)                                                                                             |
| Caenorhabditis elegans  | elegans protein partially confirmed by transcript evidence | 0  |                                                                                                                                                                                                                                                                                                                                                                                                                                                                                         |              |             | -                                                                                                                                            |
| Loa loa                 | fk506 binding protein 12-rapamycin associated protein 1    | 41 | F:GO:0046777;<br>F:GO:0004674;<br>P:GO:0030838;<br>P:GO:0032868;<br>P:GO:0032314;<br>P:GO:0007584;<br>C:GO:0070438;<br>P:GO:0045727;<br>C:GO:0005625;<br>P:GO:0043610;<br>P:GO:0016049;<br>C:GO:0031931;<br>P:GO:0005979;<br>P:GO:0032095;<br>C:GO:0005942;<br>F:GO:0008144;<br>C:GO:0000139;<br>P:GO:0043200;<br>P:GO:0018107;<br>P:GO:0031529;<br>P:GO:0050731;<br>P:GO:0045859;<br>P:GO:0031998;<br>P:GO:0051496;<br>F:GO:0005524;<br>P:GO:0007281;<br>P:GO:0018105;<br>C:GO:0031932 | -            | EC:2.7.11.0 | IPR000403; IPR009076; IPR010452;<br>IPR011009; IPR018936;<br>G3DSA:3.30.1010.10 (GENE3D),<br>PTHR11139 (PANTHER),<br>PTHR11139:SF9 (PANTHER) |
| Caenorhabditis briggsae | solute carrier family member b2                            | 4  | P:GO:0006024;<br>P:GO:0051216;<br>P:GO:0001649;<br>C:GO:0016020                                                                                                                                                                                                                                                                                                                                                                                                                         | -            |             | IPR013657; PTHR10778 (PANTHER),<br>PTHR10778:SF12 (PANTHER), SignalP<br>(SIGNALP), SSF103481 (SUPERFAMILY)                                   |
|                         | -                                                          | 0  |                                                                                                                                                                                                                                                                                                                                                                                                                                                                                         |              |             | -                                                                                                                                            |

|                         |                                                  |    |                                                                                                                                                                                                                                                                                                                                                                                   |                                                |                                                                                          |
|-------------------------|--------------------------------------------------|----|-----------------------------------------------------------------------------------------------------------------------------------------------------------------------------------------------------------------------------------------------------------------------------------------------------------------------------------------------------------------------------------|------------------------------------------------|------------------------------------------------------------------------------------------|
| Pongo abelii            | type alpha 1                                     | 22 | P:GO:0009314;<br>P:GO:0018149;<br>P:GO:0030168;<br>P:GO:0048565;<br>P:GO:0043206;<br>C:GO:0005586;<br>P:GO:0007229;<br>P:GO:0050777;<br>P:GO:0007507;<br>P:GO:0007160;<br>C:GO:0005615;<br>F:GO:0046332;<br>P:GO:0001501;<br>F:GO:0048407;<br>P:GO:0043588;<br>P:GO:0030199;<br>F:GO:0005178;<br>P:GO:0007179;<br>P:GO:0034097;<br>P:GO:0032964;<br>F:GO:0005201;<br>P:GO:0001568 | -                                              | IPR008160; PTHR10499 (PANTHER),<br>PTHR10499:SF125 (PANTHER)                             |
| -                       | -                                                | 0  |                                                                                                                                                                                                                                                                                                                                                                                   |                                                | -                                                                                        |
| -                       | -                                                | 0  |                                                                                                                                                                                                                                                                                                                                                                                   |                                                | SignalP (SIGNALP)                                                                        |
| Caenorhabditis briggsae | guanine nucleotide exchange factor mss4          | 0  |                                                                                                                                                                                                                                                                                                                                                                                   | P:GO:0007264;<br>F:GO:0008270;<br>F:GO:0005085 | IPR007515; IPR011057; IPR011323;<br>PTHR13276 (PANTHER)                                  |
| -                       | -                                                | 0  |                                                                                                                                                                                                                                                                                                                                                                                   |                                                | -                                                                                        |
| -                       | -                                                | 0  |                                                                                                                                                                                                                                                                                                                                                                                   |                                                | SignalP (SIGNALP)                                                                        |
| -                       | -                                                | 0  |                                                                                                                                                                                                                                                                                                                                                                                   |                                                | SignalP (SIGNALP)                                                                        |
| Caenorhabditis elegans  | elegans protein confirmed by transcript evidence | 0  |                                                                                                                                                                                                                                                                                                                                                                                   |                                                | SignalP (SIGNALP)                                                                        |
| Loa loa                 | briggsae cbr-pqn-85 protein                      | 11 | P:GO:0070193;<br>P:GO:0007064;<br>C:GO:0034991;<br>P:GO:0006355;<br>P:GO:0051306;<br>C:GO:0000795;<br>C:GO:0005700;<br>C:GO:0034990;<br>F:GO:0016563;<br>P:GO:0010628;<br>C:GO:0035327                                                                                                                                                                                            | -                                              | -                                                                                        |
| -                       | -                                                | 0  |                                                                                                                                                                                                                                                                                                                                                                                   |                                                | -                                                                                        |
| -                       | -                                                | 0  |                                                                                                                                                                                                                                                                                                                                                                                   |                                                | SignalP (SIGNALP)                                                                        |
| Brugia malayi           | calponin homology                                | 1  | F:GO:0005515                                                                                                                                                                                                                                                                                                                                                                      | -                                              | IPR001715; PTHR11915 (PANTHER),<br>PTHR11915:SF47 (PANTHER)                              |
| Loa loa                 | selenocysteine lyase                             | 1  | F:GO:0016740                                                                                                                                                                                                                                                                                                                                                                      | -                                              | IPR000192; IPR015421; IPR015424;<br>PTHR11601 (PANTHER)                                  |
| Caenorhabditis elegans  | acyl-coenzyme a dehydroge-se member 8            | 4  | F:GO:0004085;<br>F:GO:0050660;<br>P:GO:0055114;<br>C:GO:0005739                                                                                                                                                                                                                                                                                                                   | -                                              | EC:1.3.99.2<br>IPR006090; IPR009075; PTHR10909<br>(PANTHER), PTHR10909:SF10<br>(PANTHER) |
| Caenorhabditis elegans  | acyl-coenzyme a dehydroge-se member 8            | 4  | F:GO:0004085;<br>F:GO:0050660;<br>P:GO:0055114;<br>C:GO:0005739                                                                                                                                                                                                                                                                                                                   | -                                              | EC:1.3.99.2<br>IPR006090; IPR009075; PTHR10909<br>(PANTHER), PTHR10909:SF10<br>(PANTHER) |

|                         |                                                                                           |    |                                                                                                                                                                                                                                                                                                               |              |                                                         |                                                                                                                                                           |
|-------------------------|-------------------------------------------------------------------------------------------|----|---------------------------------------------------------------------------------------------------------------------------------------------------------------------------------------------------------------------------------------------------------------------------------------------------------------|--------------|---------------------------------------------------------|-----------------------------------------------------------------------------------------------------------------------------------------------------------|
| Caenorhabditis briggsae | dual specificity catalytic domain containing protein                                      | 4  | F:GO:0004725;<br>P:GO:0006470;<br>P:GO:0008340;<br>F:GO:0008138                                                                                                                                                                                                                                               | -            | EC:3.1.3.48                                             | IPR000340; IPR000387; IPR016130;<br>IPR020422; G3DSA:3.90.190.10<br>(GENE3D), PTHR10159 (PANTHER),<br>PTHR10159:SF21 (PANTHER),<br>SSF52799 (SUPERFAMILY) |
| -                       | -                                                                                         | 0  |                                                                                                                                                                                                                                                                                                               |              |                                                         | -                                                                                                                                                         |
| -                       | -                                                                                         | 0  |                                                                                                                                                                                                                                                                                                               |              |                                                         | -                                                                                                                                                         |
| Caenorhabditis elegans  | rala-binding protein 1                                                                    | 2  | P:GO:0007264;<br>F:GO:0017160                                                                                                                                                                                                                                                                                 | -            |                                                         | IPR000198; IPR008936; PTHR12783<br>(PANTHER), PTHR12783:SF1<br>(PANTHER)                                                                                  |
| Caenorhabditis briggsae | briggsae cbr-dhs-17 protein                                                               | 3  | F:GO:0016491;<br>P:GO:0055114;<br>F:GO:0005488                                                                                                                                                                                                                                                                | -            |                                                         | -                                                                                                                                                         |
| Pongo abelii            | guanine nucleotide binding protein (g protein) alpha<br>inhibiting activity polypeptide 2 | 18 | C:GO:0045121;<br>F:GO:0004871;<br>F:GO:0005515;<br>P:GO:0007193;<br>P:GO:0000186;<br>P:GO:0001973;<br>P:GO:0051927;<br>C:GO:0005624;<br>P:GO:0007213;<br>F:GO:0005525;<br>C:GO:0005829;<br>P:GO:0007214;<br>P:GO:0008284;<br>F:GO:0003924;<br>C:GO:0005886;<br>P:GO:0050805;<br>C:GO:0005634;<br>P:GO:0007584 | -            | EC:3.6.5.1;<br>EC:3.6.5.2;<br>EC:3.6.5.3;<br>EC:3.6.5.4 | -                                                                                                                                                         |
| -                       | -                                                                                         | 0  |                                                                                                                                                                                                                                                                                                               |              |                                                         | IPR001810                                                                                                                                                 |
| -                       | -                                                                                         | 0  |                                                                                                                                                                                                                                                                                                               |              |                                                         | -                                                                                                                                                         |
| -                       | -                                                                                         | 0  |                                                                                                                                                                                                                                                                                                               |              |                                                         | -                                                                                                                                                         |
| Caenorhabditis briggsae | vesicle-fusing atpase                                                                     | 8  | P:GO:0009792;<br>P:GO:0002119;<br>F:GO:0005515;<br>P:GO:0032940;<br>P:GO:0000003;<br>P:GO:0040011;<br>P:GO:0040007;<br>P:GO:0006898                                                                                                                                                                           | -            |                                                         | G3DSA:1.10.8.60 (GENE3D),<br>PTHR23078 (PANTHER), SignalP<br>(SIGNALP)                                                                                    |
| -                       | -                                                                                         | 0  |                                                                                                                                                                                                                                                                                                               |              |                                                         | -                                                                                                                                                         |
| -                       | -                                                                                         | 0  |                                                                                                                                                                                                                                                                                                               |              |                                                         | -                                                                                                                                                         |
| Caenorhabditis briggsae | briggsae cbr-ttr-17 protein                                                               | 0  |                                                                                                                                                                                                                                                                                                               | P:GO:0016539 |                                                         | IPR001534; SignalP (SIGNALP)                                                                                                                              |
| Brugia malayi           | phosphopantothenoylcysteine decarboxylase                                                 | 6  | P:GO:0002119;<br>F:GO:0005515;<br>P:GO:0040010;<br>P:GO:0000003;<br>P:GO:0006898;<br>F:GO:0003824                                                                                                                                                                                                             | -            |                                                         | IPR003382; PTHR14359 (PANTHER),<br>PTHR14359:SF11 (PANTHER)                                                                                               |
| -                       | -                                                                                         | 0  |                                                                                                                                                                                                                                                                                                               |              |                                                         | -                                                                                                                                                         |
| Caenorhabditis elegans  | isoform a                                                                                 | 3  | F:GO:0004872;<br>C:GO:0016021;<br>F:GO:0005509                                                                                                                                                                                                                                                                | -            |                                                         | IPR002172; PTHR10529 (PANTHER),<br>PTHR10529:SF2 (PANTHER)                                                                                                |
| Brugia malayi           | transportin 3                                                                             | 1  | F:GO:0005515                                                                                                                                                                                                                                                                                                  | -            |                                                         | IPR011989; IPR013598; IPR016024;<br>PTHR12363 (PANTHER),<br>PTHR12363:SF5 (PANTHER)                                                                       |

|                         |                                                  |    |                                                                                                                                                                                        |             |                                                                                                                                                                                                       |
|-------------------------|--------------------------------------------------|----|----------------------------------------------------------------------------------------------------------------------------------------------------------------------------------------|-------------|-------------------------------------------------------------------------------------------------------------------------------------------------------------------------------------------------------|
|                         | -                                                | 0  |                                                                                                                                                                                        |             | -                                                                                                                                                                                                     |
|                         | -                                                | 0  |                                                                                                                                                                                        |             | -                                                                                                                                                                                                     |
|                         | -                                                | 0  |                                                                                                                                                                                        |             | -                                                                                                                                                                                                     |
| Loa loa                 | probable tr- pseudouridine synthase 2            | 1  | P:GO:0016070                                                                                                                                                                           |             | -                                                                                                                                                                                                     |
|                         | -                                                | 0  |                                                                                                                                                                                        |             | -                                                                                                                                                                                                     |
| Haemonchus contortus    | glutathione s-transferase                        | 4  | P:GO:0008340;<br>P:GO:0040010;<br>F:GO:0005515;<br>F:GO:0016740                                                                                                                        |             | IPR004045; IPR004046; IPR010987;<br>IPR012335; IPR012336; IPR017933;<br>PTHR11571 (PANTHER),<br>PTHR11571:SF6 (PANTHER)                                                                               |
|                         | -                                                | 0  |                                                                                                                                                                                        |             | -                                                                                                                                                                                                     |
| Caenorhabditis briggsae | elegans protein confirmed by transcript evidence | 0  |                                                                                                                                                                                        |             | -                                                                                                                                                                                                     |
| Callithrix jacchus      | vimentin                                         | 11 | F:GO:0005200;<br>P:GO:0006928;<br>C:GO:0005886;<br>C:GO:0031252;<br>C:GO:0030424;<br>C:GO:0005882;<br>P:GO:0045103;<br>F:GO:0019901;<br>F:GO:0008022;<br>C:GO:0005829;<br>P:GO:0044419 |             | IPR001664; IPR016044; IPR018039;<br>G3DSA:1.20.5.170 (GENE3D),<br>PTHR23239:SF1 (PANTHER)                                                                                                             |
|                         | -                                                | 0  |                                                                                                                                                                                        |             | -                                                                                                                                                                                                     |
| Homo sapiens            | glutathione s-transferase pi                     | 9  | C:GO:0005737;<br>P:GO:0007417;<br>F:GO:0004364;<br>P:GO:0006805;<br>F:GO:0005515;<br>F:GO:0008144;<br>P:GO:0006916;<br>C:GO:0005634;<br>F:GO:0043295                                   | EC:2.5.1.18 | -                                                                                                                                                                                                     |
| Caenorhabditis elegans  | novel protein                                    | 3  | P:GO:0009792;<br>P:GO:0040010;<br>P:GO:0006898                                                                                                                                         |             | IPR016024; PTHR12444 (PANTHER)                                                                                                                                                                        |
|                         | -                                                | 0  |                                                                                                                                                                                        |             | SignalP (SIGNALP)                                                                                                                                                                                     |
|                         | -                                                | 0  |                                                                                                                                                                                        |             | SignalP (SIGNALP)                                                                                                                                                                                     |
|                         | -                                                | 0  |                                                                                                                                                                                        |             | -                                                                                                                                                                                                     |
|                         | -                                                | 0  |                                                                                                                                                                                        |             | SignalP (SIGNALP)                                                                                                                                                                                     |
| Caenorhabditis elegans  | general transcription factor polypeptide 62kda   | 2  | P:GO:0008152;<br>F:GO:0016740                                                                                                                                                          |             | IPR011993; IPR013876; PTHR12856<br>(PANTHER), SSF50729 (SUPERFAMILY)                                                                                                                                  |
|                         | -                                                | 0  |                                                                                                                                                                                        |             | -                                                                                                                                                                                                     |
|                         | -                                                | 0  |                                                                                                                                                                                        |             | -                                                                                                                                                                                                     |
|                         | -                                                | 0  |                                                                                                                                                                                        |             | -                                                                                                                                                                                                     |
|                         | -                                                | 0  |                                                                                                                                                                                        |             | -                                                                                                                                                                                                     |
| Caenorhabditis briggsae | low-density lipoprotein receptor                 | 2  | C:GO:0016021;<br>F:GO:0005509                                                                                                                                                          |             | IPR000033; IPR006210; IPR011042;<br>IPR013032; G3DSA:2.10.25.10<br>(GENE3D), PTHR10529 (PANTHER),<br>PTHR10529:SF2 (PANTHER), SignalP<br>(SIGNALP), SSF57196 (SUPERFAMILY),<br>SSF63825 (SUPERFAMILY) |
|                         | -                                                | 0  |                                                                                                                                                                                        |             | SignalP (SIGNALP)                                                                                                                                                                                     |

|                         |                                 |    |                                                                                                                                                                                                                                                            |   |                                                                                                                                                                 |
|-------------------------|---------------------------------|----|------------------------------------------------------------------------------------------------------------------------------------------------------------------------------------------------------------------------------------------------------------|---|-----------------------------------------------------------------------------------------------------------------------------------------------------------------|
| Caenorhabditis elegans  | briggsae cbr-eat-3 protein      | 0  | C:GO:0030061;<br>C:GO:0016021;<br>C:GO:0016020;<br>C:GO:0005743;<br>C:GO:0030425;<br>C:GO:0005741;<br>C:GO:0005739;<br>P:GO:0006915;<br>P:GO:0007007;<br>F:GO:0000166;<br>F:GO:0005525;<br>C:GO:0005758;<br>F:GO:0003924;<br>P:GO:0007601;<br>P:GO:0045768 |   | PTHR11566 (PANTHER),<br>PTHR11566:SF8 (PANTHER)                                                                                                                 |
| Brugia malayi           | surfeit locus protein 4         | 14 | P:GO:0040035;<br>P:GO:0009792;<br>P:GO:0002119;<br>C:GO:0012505;<br>C:GO:0005794;<br>P:GO:0032940;<br>C:GO:0031090;<br>P:GO:0040011;<br>P:GO:0019915;<br>P:GO:0040007;<br>C:GO:0005783;<br>C:GO:0044425;<br>C:GO:0044446;<br>P:GO:0002009                  | - | SignalP (SIGNALP)                                                                                                                                               |
| Caenorhabditis briggsae | block of proliferation 1        | 11 | P:GO:0040010;<br>P:GO:0051726;<br>C:GO:0070545;<br>P:GO:0040035;<br>P:GO:0000463;<br>P:GO:0002119;<br>F:GO:0005515;<br>P:GO:0006898;<br>C:GO:0005654;<br>P:GO:0008283;<br>P:GO:0009792                                                                     | - | IPR012953; PTHR17605 (PANTHER)                                                                                                                                  |
|                         |                                 | 0  |                                                                                                                                                                                                                                                            |   | SignalP (SIGNALP)                                                                                                                                               |
|                         |                                 | 0  |                                                                                                                                                                                                                                                            |   | -                                                                                                                                                               |
|                         |                                 | 0  |                                                                                                                                                                                                                                                            |   | -                                                                                                                                                               |
| Caenorhabditis elegans  | peroxisomal biogenesis factor 6 | 8  | C:GO:0005829;<br>P:GO:0016561;<br>F:GO:0042623;<br>F:GO:0008022;<br>F:GO:0032403;<br>C:GO:0005778;<br>P:GO:0050821;<br>F:GO:0005524                                                                                                                        | - | IPR003593; IPR003959;<br>G3DSA:1.10.8.60 (GENE3D),<br>G3DSA:3.40.50.300 (GENE3D),<br>PTHR23077 (PANTHER),<br>PTHR23077:SF2 (PANTHER), SSF52540<br>(SUPERFAMILY) |
| Caenorhabditis elegans  | briggsae cbr-lrs-1 protein      | 5  | F:GO:0004823;<br>P:GO:0006429;<br>F:GO:0005515;<br>F:GO:0005524;<br>C:GO:0005829                                                                                                                                                                           | - | EC:6.1.1.4                                                                                                                                                      |

|                         |                                                            |   |                                                                                                                    |                                                                                                                                     |             |                                                                                                                      |
|-------------------------|------------------------------------------------------------|---|--------------------------------------------------------------------------------------------------------------------|-------------------------------------------------------------------------------------------------------------------------------------|-------------|----------------------------------------------------------------------------------------------------------------------|
| Brugia malayi           | d- repair protein rev1                                     | 7 | F:GO:0016779;<br>P:GO:0040010;<br>F:GO:0005488;<br>C:GO:0043231;<br>P:GO:0006898;<br>P:GO:0009792;<br>P:GO:0006974 | -                                                                                                                                   | EC:2.7.7.0  | IPR001126; IPR017963;<br>G3DSA:3.30.70.270 (GENE3D),<br>PTHR11076:SF13 (PANTHER),<br>SSF56672 (SUPERFAMILY)          |
| Caenorhabditis elegans  | deoxyribonuclease ii family protein                        | 0 |                                                                                                                    | P:GO:0006259;<br>F:GO:0004531                                                                                                       |             | IPR004947; PTHR10858:SF10<br>(PANTHER)                                                                               |
|                         | -                                                          | 0 |                                                                                                                    |                                                                                                                                     |             | -                                                                                                                    |
| Caenorhabditis briggsae | multidrug-resistance like protein isoform m                | 3 | F:GO:0016887;<br>P:GO:0006810;<br>F:GO:0000166                                                                     | -                                                                                                                                   |             | PTHR19242 (PANTHER),<br>PTHR19242:SF31 (PANTHER), SignalP<br>(SIGNALP)                                               |
| Caenorhabditis briggsae | acyl-coa dehydroge-se                                      | 6 | C:GO:0005759;<br>P:GO:0055114;<br>F:GO:0003995;<br>P:GO:0006631;<br>P:GO:0019915;<br>F:GO:0050660                  | -                                                                                                                                   | EC:1.3.99.3 | IPR006089; IPR006090; IPR006091;<br>IPR009075; IPR009100; PTHR10909<br>(PANTHER), PTHR10909:SF10<br>(PANTHER)        |
|                         | -                                                          | 0 |                                                                                                                    |                                                                                                                                     |             | -                                                                                                                    |
|                         | -                                                          | 0 |                                                                                                                    |                                                                                                                                     |             | SignalP (SIGNALP)                                                                                                    |
|                         | -                                                          | 0 |                                                                                                                    |                                                                                                                                     |             | -                                                                                                                    |
|                         | -                                                          | 0 |                                                                                                                    |                                                                                                                                     |             | -                                                                                                                    |
|                         | -                                                          | 0 |                                                                                                                    |                                                                                                                                     |             | -                                                                                                                    |
|                         | -                                                          | 0 |                                                                                                                    |                                                                                                                                     |             | -                                                                                                                    |
|                         | -                                                          | 0 |                                                                                                                    |                                                                                                                                     |             | -                                                                                                                    |
| Loa loa                 | cyclin g associated ki-se                                  | 2 | F:GO:0005488;<br>F:GO:0004672                                                                                      | -                                                                                                                                   |             | IPR001623; PTHR23172 (PANTHER),<br>PTHR23172:SF21 (PANTHER)                                                          |
| Caenorhabditis briggsae | briggsae cbr--s-5 protein                                  | 0 |                                                                                                                    | F:GO:0046872;<br>P:GO:0006508;<br>F:GO:0008237;<br>F:GO:0016787;<br>F:GO:0008233;<br>F:GO:0008270;<br>F:GO:0004222;<br>P:GO:0007413 |             | IPR001506; G3DSA:3.40.390.10<br>(GENE3D), PTHR10127 (PANTHER),<br>PTHR10127:SF73 (PANTHER), SignalP<br>(SIGNALP)     |
| Caenorhabditis elegans  | briggsae cbr-smp-2 protein                                 | 0 |                                                                                                                    | P:GO:0007399;<br>P:GO:0030154;<br>F:GO:0004872;<br>P:GO:0007275;<br>C:GO:0016021;<br>C:GO:0016020                                   |             | IPR001627; IPR015943                                                                                                 |
| Caenorhabditis briggsae | elegans protein partially confirmed by transcript evidence | 1 | P:GO:0008340                                                                                                       | -                                                                                                                                   |             | IPR011701; IPR016196; IPR020846;<br>G3DSA:1.20.1250.20 (GENE3D),<br>PTHR10074 (PANTHER),<br>PTHR10074:SF12 (PANTHER) |
|                         | -                                                          | 0 |                                                                                                                    |                                                                                                                                     |             | -                                                                                                                    |
| Loa loa                 | elegans protein partially confirmed by transcript evidence | 2 | P:GO:0040010;<br>F:GO:0005515                                                                                      | -                                                                                                                                   |             | -                                                                                                                    |
| Loa loa                 | elegans protein partially confirmed by transcript evidence | 2 | P:GO:0040010;<br>F:GO:0005515                                                                                      | -                                                                                                                                   |             | -                                                                                                                    |
| Caenorhabditis elegans  | briggsae cbr-ced-5 protein                                 | 6 | P:GO:0043652;<br>F:GO:0032403;<br>F:GO:0030695;<br>F:GO:0019899;<br>P:GO:0040039;<br>F:GO:0017124                  | -                                                                                                                                   |             | PTHR23317 (PANTHER),<br>PTHR23317:SF16 (PANTHER)                                                                     |
|                         | -                                                          | 0 |                                                                                                                    |                                                                                                                                     |             | SignalP (SIGNALP)                                                                                                    |



|                              |                                                                  |   |                                                                                  |                                                                                                                                                                       |            |                                                                                                                               |
|------------------------------|------------------------------------------------------------------|---|----------------------------------------------------------------------------------|-----------------------------------------------------------------------------------------------------------------------------------------------------------------------|------------|-------------------------------------------------------------------------------------------------------------------------------|
| Brugia malayi                | protein-tyrosine phosphatase containing protein                  | 1 | F:GO:0016791                                                                     | -                                                                                                                                                                     | EC:3.1.3.0 | IPR000242; G3DSA:3.90.190.10 (GENE3D), PTHR19134 (PANTHER), PTHR19134:SF18 (PANTHER), SSF52799 (SUPERFAMILY)                  |
| Brugia malayi                | serine threonine protein phosphatase pp1-alpha catalytic subunit | 4 | P:GO:0006470;<br>F:GO:0046872;<br>F:GO:0004722;<br>P:GO:0000003                  | -                                                                                                                                                                     |            | IPR004843; IPR006186; G3DSA:3.60.21.10 (GENE3D), PTHR11668:SF19 (PANTHER), SSF56300 (SUPERFAMILY)                             |
| Caenorhabditis elegans       | briggsae cbr-unc- protein                                        | 0 |                                                                                  | F:GO:0005488;<br>F:GO:0008270                                                                                                                                         |            | -                                                                                                                             |
|                              | -                                                                | 0 |                                                                                  |                                                                                                                                                                       |            | SignalP (SIGNALP)                                                                                                             |
| Loa loa                      | nucleolar protein 10                                             | 5 | C:GO:0005730;<br>P:GO:0009792;<br>P:GO:0002119;<br>P:GO:0018991;<br>P:GO:0040010 | -                                                                                                                                                                     |            | PTHR14927 (PANTHER)                                                                                                           |
| Caenorhabditis elegans       | d- polymerase theta                                              | 3 | F:GO:0008026;<br>F:GO:0003676;<br>F:GO:0005524                                   | -                                                                                                                                                                     |            | PTHR11752 (PANTHER), PTHR11752:SF3 (PANTHER)                                                                                  |
| Caenorhabditis briggsae      | Hypothetical protein CBG24887 [Caenorhabditis briggsae]          | 0 |                                                                                  |                                                                                                                                                                       |            | -                                                                                                                             |
|                              | -                                                                | 0 |                                                                                  |                                                                                                                                                                       |            | SignalP (SIGNALP)                                                                                                             |
| Caenorhabditis briggsae      | Hypothetical protein CBG06557 [Caenorhabditis briggsae]          | 0 |                                                                                  | C:GO:0016020                                                                                                                                                          |            | IPR000494; G3DSA:3.80.20.20 (GENE3D), PTHR21662 (PANTHER), PTHR21662:SF1 (PANTHER), SignalP (SIGNALP), SSF52058 (SUPERFAMILY) |
| Caenorhabditis briggsae      | dedicator of cytokinesis family protein                          | 1 | F:GO:0005488                                                                     | -                                                                                                                                                                     |            | IPR010703; PTHR23317 (PANTHER), PTHR23317:SF26 (PANTHER)                                                                      |
|                              | -                                                                | 0 |                                                                                  |                                                                                                                                                                       |            | -                                                                                                                             |
|                              | -                                                                | 0 |                                                                                  |                                                                                                                                                                       |            | -                                                                                                                             |
| Caenorhabditis briggsae      | briggsae cbr-nrf-6 protein                                       | 5 | F:GO:0016747;<br>P:GO:0009792;<br>P:GO:0010171;<br>P:GO:0040017;<br>P:GO:0006898 | -                                                                                                                                                                     | EC:2.3.1.0 | PTHR11161 (PANTHER), SignalP (SIGNALP)                                                                                        |
|                              | -                                                                | 0 |                                                                                  |                                                                                                                                                                       |            | -                                                                                                                             |
| Caenorhabditis elegans       | elegans protein partially confirmed by transcript evidence       | 0 |                                                                                  | C:GO:0016021;<br>C:GO:0016020;<br>F:GO:0016787;<br>F:GO:0003676;<br>F:GO:0003674;<br>F:GO:0003824;<br>C:GO:0005575;<br>P:GO:0008152;<br>F:GO:0046872;<br>P:GO:0008150 |            | IPR002591; IPR017850; PTHR10151 (PANTHER), PTHR10151:SF28 (PANTHER)                                                           |
|                              | -                                                                | 0 |                                                                                  |                                                                                                                                                                       |            | -                                                                                                                             |
| Nippostrongylus brasiliensis | elegans protein partially confirmed by transcript evidence       | 1 | P:GO:0009792                                                                     |                                                                                                                                                                       |            | IPR003677; PTHR21593 (PANTHER)                                                                                                |
|                              | -                                                                | 0 |                                                                                  |                                                                                                                                                                       |            | -                                                                                                                             |
|                              | -                                                                | 0 |                                                                                  |                                                                                                                                                                       |            | -                                                                                                                             |
|                              | -                                                                | 0 |                                                                                  |                                                                                                                                                                       |            | -                                                                                                                             |

|                         |                                                                     |    |                                                                                                                                                                                        |              |             |                                                                                                                                                                                             |
|-------------------------|---------------------------------------------------------------------|----|----------------------------------------------------------------------------------------------------------------------------------------------------------------------------------------|--------------|-------------|---------------------------------------------------------------------------------------------------------------------------------------------------------------------------------------------|
| Caenorhabditis briggsae | chaperonin containing subunit 6a (zeta 1)                           | 10 | P:GO:0040035;<br>P:GO:0009792;<br>P:GO:0002119;<br>C:GO:0005832;<br>P:GO:0051086;<br>F:GO:0005524;<br>P:GO:0008340;<br>P:GO:0040011;<br>F:GO:0051082;<br>P:GO:0040007                  | -            |             | IPR002194; IPR002423; IPR012722;<br>IPR017998; G3DSA:1.10.560.10<br>(GENE3D), G3DSA:3.30.260.10<br>(GENE3D), G3DSA:3.50.7.10<br>(GENE3D), SSF52029 (SUPERFAMILY),<br>SSF54849 (SUPERFAMILY) |
| Caenorhabditis elegans  | calponin transgelin                                                 | 2  | F:GO:0003779;<br>P:GO:0006939                                                                                                                                                          | -            |             | IPR000557; IPR001715; IPR003096;<br>PTHR18959 (PANTHER),<br>PTHR18959:SF3 (PANTHER)                                                                                                         |
|                         |                                                                     | 0  |                                                                                                                                                                                        |              |             |                                                                                                                                                                                             |
| Brugia malayi           | elegans protein partially confirmed by transcript evidence          | 4  | P:GO:0000003;<br>P:GO:0040010;<br>P:GO:0006898;<br>P:GO:0002119                                                                                                                        | -            |             | -                                                                                                                                                                                           |
| Caenorhabditis brenneri | f-box protein fbl2                                                  | 0  |                                                                                                                                                                                        | F:GO:0016874 |             | G3DSA:3.80.10.10 (GENE3D),<br>PTHR23125 (PANTHER),<br>PTHR23125:SF32 (PANTHER),<br>SSF52047 (SUPERFAMILY)                                                                                   |
| Caenorhabditis elegans  | glucose transporter 1 transcript                                    | 3  | C:GO:0016020;<br>F:GO:0022891;<br>P:GO:0006810                                                                                                                                         | -            |             | -                                                                                                                                                                                           |
|                         |                                                                     | 0  |                                                                                                                                                                                        |              |             | -                                                                                                                                                                                           |
|                         |                                                                     | 0  |                                                                                                                                                                                        |              |             | -                                                                                                                                                                                           |
|                         |                                                                     | 0  |                                                                                                                                                                                        |              |             | SignalIP (SIGNALP)                                                                                                                                                                          |
|                         |                                                                     | 0  |                                                                                                                                                                                        |              |             | -                                                                                                                                                                                           |
| Caenorhabditis elegans  | elegans protein confirmed by transcript evidence                    | 1  | F:GO:0005488                                                                                                                                                                           | -            |             | -                                                                                                                                                                                           |
| Caenorhabditis elegans  | deah (asp-glu-ala-his) box polypeptide partial                      | 6  | F:GO:0003676;<br>P:GO:0000381;<br>F:GO:0008026;<br>F:GO:0005524;<br>F:GO:0005515;<br>P:GO:0002121                                                                                      | -            |             | -                                                                                                                                                                                           |
| Caenorhabditis briggsae | atp synthase h+ transporting mitochondrial f1 complex delta subunit | 11 | F:GO:0046961;<br>P:GO:0000003;<br>P:GO:0040010;<br>F:GO:0046933;<br>C:GO:0005743;<br>P:GO:0042777;<br>C:GO:0045261;<br>P:GO:0009792;<br>P:GO:0002119;<br>C:GO:0005811;<br>F:GO:0005524 | -            | EC:3.6.3.14 | IPR001469; IPR020546;<br>PTHR13822:SF1 (PANTHER)                                                                                                                                            |

|                         |                                        |    |                                                                                                                                                                                                                                                                                                                                                 |                                                                                                                                                                                                                                                                             |                             |                                                                                                                                     |
|-------------------------|----------------------------------------|----|-------------------------------------------------------------------------------------------------------------------------------------------------------------------------------------------------------------------------------------------------------------------------------------------------------------------------------------------------|-----------------------------------------------------------------------------------------------------------------------------------------------------------------------------------------------------------------------------------------------------------------------------|-----------------------------|-------------------------------------------------------------------------------------------------------------------------------------|
| Brugia malayi           | cullin 3                               | 20 | P:GO:0008054;<br>P:GO:0007369;<br>P:GO:0008629;<br>P:GO:0035024;<br>C:GO:0005794;<br>P:GO:0007050;<br>P:GO:0008284;<br>F:GO:0004842;<br>F:GO:0031625;<br>P:GO:0016567;<br>P:GO:0001831;<br>C:GO:0005827;<br>P:GO:0000082;<br>P:GO:0043149;<br>P:GO:0000090;<br>F:GO:0030332;<br>C:GO:0005634;<br>P:GO:0016477;<br>C:GO:0031463;<br>P:GO:0000910 | -                                                                                                                                                                                                                                                                           | EC:6.3.2.19                 | IPR001373; IPR016159;<br>G3DSA:1.20.1310.10 (GENE3D)                                                                                |
| Canis familiaris        | aminoadipate-semialdehyde dehydroge-se | 0  |                                                                                                                                                                                                                                                                                                                                                 | F:GO:0016874;<br>P:GO:0006629;<br>F:GO:0000036;<br>P:GO:0006810;<br>F:GO:0000166;<br>F:GO:0005524;<br>F:GO:0003674;<br>P:GO:0055114;<br>F:GO:0031177;<br>F:GO:0016491;<br>F:GO:0003824;<br>C:GO:0005575;<br>F:GO:0048037;<br>P:GO:0008152;<br>P:GO:0008150;<br>F:GO:0004043 |                             | IPR000873; IPR020845;<br>G3DSA:3.40.50.980 (GENE3D),<br>PTHR11968 (PANTHER),<br>PTHR11968:SF11 (PANTHER),<br>SSF56801 (SUPERFAMILY) |
| Caenorhabditis elegans  | peptidase family m3 containing protein | 6  | F:GO:0004222;<br>P:GO:0045449;<br>F:GO:0003702;<br>P:GO:0006367;<br>P:GO:0006508;<br>F:GO:0008270                                                                                                                                                                                                                                               | -                                                                                                                                                                                                                                                                           | EC:3.4.24.0                 | -                                                                                                                                   |
| Loa loa                 | wd repeat-containing protein 47        | 2  | F:GO:0016740;<br>F:GO:0005515                                                                                                                                                                                                                                                                                                                   | -                                                                                                                                                                                                                                                                           |                             | IPR001680; IPR011046; IPR015943;<br>IPR017986; IPR019781; IPR019782;<br>PTHR19863 (PANTHER),<br>PTHR19863:SF2 (PANTHER)             |
| Caenorhabditis briggsae | tyrosine-protein ki-se pr2             | 8  | F:GO:0004674;<br>P:GO:0042059;<br>P:GO:0040027;<br>F:GO:0004713;<br>F:GO:0005524;<br>F:GO:0005515;<br>P:GO:0009792;<br>P:GO:0006468                                                                                                                                                                                                             | -                                                                                                                                                                                                                                                                           | EC:2.7.11.0;<br>EC:2.7.10.0 | IPR000719; IPR001245; IPR008266;<br>IPR011009; IPR020685;<br>G3DSA:1.10.510.10 (GENE3D),<br>PTHR23256:SF266 (PANTHER)               |
| Caenorhabditis elegans  | alkylation repair homolog 8 ( coli)    | 1  | P:GO:0040010                                                                                                                                                                                                                                                                                                                                    | -                                                                                                                                                                                                                                                                           |                             | -                                                                                                                                   |
| Caenorhabditis briggsae | briggsae cbr-frl-1 protein             | 2  | P:GO:0030036;<br>F:GO:0003779                                                                                                                                                                                                                                                                                                                   | -                                                                                                                                                                                                                                                                           |                             | IPR010472; IPR016024; PTHR23213<br>(PANTHER), PTHR23213:SF24<br>(PANTHER)                                                           |

|                              |                                                                  |   |                                                                                                                                     |                                                                                                                    |  |                                                                                                                                               |
|------------------------------|------------------------------------------------------------------|---|-------------------------------------------------------------------------------------------------------------------------------------|--------------------------------------------------------------------------------------------------------------------|--|-----------------------------------------------------------------------------------------------------------------------------------------------|
| Ancylostoma caninum          | secreted protein asp-2                                           | 0 |                                                                                                                                     | F:GO:0009055;<br>P:GO:0019646;<br>C:GO:0005576                                                                     |  | SignalP (SIGNALP)                                                                                                                             |
| Caenorhabditis elegans       | cdc42p                                                           | 4 | C:GO:0016020;<br>C:GO:0005622;<br>F:GO:0005525;<br>P:GO:0007264                                                                     | -                                                                                                                  |  | IPR001806; IPR013753;<br>G3DSA:3.40.50.300 (GENE3D),<br>PTHR11708 (PANTHER),<br>PTHR11708:SF39 (PANTHER)                                      |
| Caenorhabditis elegans       | yso2_caee1_ame: full=uncharacterized protein flags:<br>precursor | 0 |                                                                                                                                     | P:GO:0000003                                                                                                       |  | IPR013568                                                                                                                                     |
| Caenorhabditis briggsae      | n-6 adenine-specific d- methyltransferase 1                      | 1 | F:GO:0016740                                                                                                                        | -                                                                                                                  |  | IPR002052; IPR004557; IPR007848;<br>G3DSA:3.40.50.150 (GENE3D),<br>PTHR18895 (PANTHER),<br>PTHR18895:SF8 (PANTHER), SSF53335<br>(SUPERFAMILY) |
| Nippostrongylus brasiliensis | keratin-like protein                                             | 1 | P:GO:0009792                                                                                                                        | -                                                                                                                  |  | IPR003677; PTHR21593 (PANTHER)                                                                                                                |
|                              | -                                                                | 0 |                                                                                                                                     |                                                                                                                    |  | -                                                                                                                                             |
|                              | -                                                                | 0 |                                                                                                                                     |                                                                                                                    |  | -                                                                                                                                             |
|                              | -                                                                | 0 |                                                                                                                                     |                                                                                                                    |  | -                                                                                                                                             |
| Callithrix jacchus           | chromosome 11 open reading frame isoform cra_a                   | 0 |                                                                                                                                     | C:GO:0016021;<br>C:GO:0016020                                                                                      |  | SignalP (SIGNALP)                                                                                                                             |
|                              | -                                                                | 0 |                                                                                                                                     |                                                                                                                    |  | SignalP (SIGNALP)                                                                                                                             |
|                              | -                                                                | 0 |                                                                                                                                     |                                                                                                                    |  | -                                                                                                                                             |
| Hydra magnipapillata         | uncharacterized transposase-like protein                         | 0 |                                                                                                                                     | F:GO:0046872;<br>P:GO:0055114;<br>F:GO:0009055;<br>F:GO:0016491;<br>F:GO:0020037;<br>F:GO:0005506;<br>F:GO:0004497 |  | IPR007087; IPR015880                                                                                                                          |
| Brugia malayi                | zinc c2h2 type family protein                                    | 0 |                                                                                                                                     | F:GO:0008270;<br>C:GO:0005622                                                                                      |  | IPR015880                                                                                                                                     |
|                              | -                                                                | 0 |                                                                                                                                     |                                                                                                                    |  | SignalP (SIGNALP)                                                                                                                             |
|                              | -                                                                | 0 |                                                                                                                                     |                                                                                                                    |  | -                                                                                                                                             |
| Caenorhabditis elegans       | elegans protein partially confirmed by transcript evidence       | 2 | F:GO:0003676;<br>F:GO:0000166                                                                                                       | -                                                                                                                  |  | -                                                                                                                                             |
| Caenorhabditis briggsae      | elegans protein partially confirmed by transcript evidence       | 4 | P:GO:0007186;<br>C:GO:0016021;<br>C:GO:0005622;<br>F:GO:0008270                                                                     | -                                                                                                                  |  | -                                                                                                                                             |
| Caenorhabditis elegans       | tubulin polymerization-promoting protein family member 2         | 2 | P:GO:0002119;<br>P:GO:0000003                                                                                                       | -                                                                                                                  |  | -                                                                                                                                             |
| Caenorhabditis briggsae      | dedicator of cytokinesis family protein                          | 1 | F:GO:0005488                                                                                                                        | -                                                                                                                  |  | -                                                                                                                                             |
| Caenorhabditis elegans       | programmed cell death 11                                         | 8 | P:GO:0040010;<br>P:GO:0006396;<br>F:GO:0005488;<br>P:GO:0018991;<br>P:GO:0002119;<br>P:GO:0009792;<br>P:GO:0008406;<br>C:GO:0005634 | -                                                                                                                  |  | IPR003107; IPR008847; IPR011990;<br>IPR013026; PTHR23270 (PANTHER),<br>SSF48452 (SUPERFAMILY)                                                 |

|                         |                                                       |    |                                                                                                                                                                       |   |                                                                                                                               |
|-------------------------|-------------------------------------------------------|----|-----------------------------------------------------------------------------------------------------------------------------------------------------------------------|---|-------------------------------------------------------------------------------------------------------------------------------|
| Caenorhabditis briggsae | briggsae cbr-cdh-1 protein                            | 0  | C:GO:0016021;<br>C:GO:0016020;<br>P:GO:0002119;<br>P:GO:0040011;<br>P:GO:0040010;<br>C:GO:0005886;<br>P:GO:0007156;<br>F:GO:0005509;<br>P:GO:0007155                  |   | SignalP (SIGNALP)                                                                                                             |
| -                       | -                                                     | 0  |                                                                                                                                                                       |   | -                                                                                                                             |
| -                       | -                                                     | 0  |                                                                                                                                                                       |   | -                                                                                                                             |
| -                       | -                                                     | 0  |                                                                                                                                                                       |   | -                                                                                                                             |
| -                       | -                                                     | 0  |                                                                                                                                                                       |   | -                                                                                                                             |
| Caenorhabditis elegans  | ribosomal protein l7a                                 | 2  | C:GO:0005840;<br>P:GO:0042254                                                                                                                                         | - | IPR001921; IPR004037; IPR004038;<br>IPR018492; G3DSA:3.30.1330.30<br>(GENE3D), PTHR23105 (PANTHER),<br>SSF55315 (SUPERFAMILY) |
| Caenorhabditis elegans  | ribosomal protein l7a                                 | 2  | C:GO:0005840;<br>P:GO:0042254                                                                                                                                         | - | IPR001921; IPR004037; IPR004038;<br>IPR018492; G3DSA:3.30.1330.30<br>(GENE3D), PTHR23105 (PANTHER),<br>SSF55315 (SUPERFAMILY) |
| Caenorhabditis elegans  | elegans protein confirmed by transcript evidence      | 0  |                                                                                                                                                                       |   | SignalP (SIGNALP)                                                                                                             |
| Caenorhabditis elegans  | elegans protein confirmed by transcript evidence      | 0  |                                                                                                                                                                       |   | SignalP (SIGNALP)                                                                                                             |
| -                       | -                                                     | 0  |                                                                                                                                                                       |   | -                                                                                                                             |
| Loa loa                 | epidermal growth factor receptor                      | 7  | P:GO:0006468;<br>F:GO:0004714;<br>F:GO:0005515;<br>F:GO:0004716;<br>F:GO:0005524;<br>C:GO:0016021;<br>P:GO:0007169                                                    | - | EC:2.7.10.1 -                                                                                                                 |
| Caenorhabditis elegans  | hypothetical protein B0041.5 [Caenorhabditis elegans] | 3  | P:GO:0007411;<br>P:GO:0019915;<br>P:GO:0007413                                                                                                                        | - | PTHR23051 (PANTHER), SignalP<br>(SIGNALP)                                                                                     |
| Caenorhabditis briggsae | transcription initiation factor tfiib                 | 10 | F:GO:0003743;<br>P:GO:0006413;<br>P:GO:0006357;<br>F:GO:0008270;<br>P:GO:0006367;<br>C:GO:0005667;<br>F:GO:0016251;<br>P:GO:0051101;<br>F:GO:0008134;<br>P:GO:0009792 | - | SignalP (SIGNALP)                                                                                                             |
| Caenorhabditis briggsae | amp-activated protein ki-se gamma2 subunit-like       | 8  | P:GO:0031323;<br>P:GO:0016310;<br>F:GO:0032559;<br>P:GO:0044238;<br>P:GO:0050790;<br>F:GO:0019887;<br>P:GO:0006950;<br>F:GO:0004679                                   | - | IPR000644; IPR013785; PTHR13780<br>(PANTHER), SSF54631 (SUPERFAMILY)                                                          |
| -                       | -                                                     | 0  |                                                                                                                                                                       |   | -                                                                                                                             |

|                         |                                                          |   |                                                                                                                                     |                                                                 |                                                         |                                                                                                                                                                                                                                       |
|-------------------------|----------------------------------------------------------|---|-------------------------------------------------------------------------------------------------------------------------------------|-----------------------------------------------------------------|---------------------------------------------------------|---------------------------------------------------------------------------------------------------------------------------------------------------------------------------------------------------------------------------------------|
| Caenorhabditis elegans  | ras- family 12                                           | 6 | P:GO:0007264;<br>C:GO:0005622;<br>F:GO:0003924;<br>P:GO:0015031;<br>C:GO:0016020;<br>F:GO:0005525                                   | -                                                               | EC:3.6.5.1;<br>EC:3.6.5.2;<br>EC:3.6.5.3;<br>EC:3.6.5.4 | IPR013753; IPR020849;<br>G3DSA:3.40.50.300 (GENE3D),<br>PTHR11708 (PANTHER),<br>PTHR11708:SF81 (PANTHER),<br>SSF52540 (SUPERFAMILY)                                                                                                   |
| -                       | -                                                        | 0 | -                                                                                                                                   | -                                                               | -                                                       | -                                                                                                                                                                                                                                     |
| Loa loa                 | retinol dehydroge-se 14                                  | 5 | C:GO:0005783;<br>P:GO:0008152;<br>F:GO:0003824;<br>C:GO:0005739;<br>F:GO:0005488                                                    | -                                                               | -                                                       | IPR002198; IPR002347; IPR016040;<br>PTHR19410:SF98 (PANTHER),<br>SSF51735 (SUPERFAMILY)                                                                                                                                               |
| Caenorhabditis briggsae | protein                                                  | 1 | P:GO:0040010                                                                                                                        | -                                                               | -                                                       | IPR000449; IPR002833; IPR009060;<br>IPR015940; G3DSA:1.10.8.10<br>(GENE3D), G3DSA:3.40.1490.10<br>(GENE3D), PTHR12649 (PANTHER),<br>SSF102462 (SUPERFAMILY)                                                                           |
| Caenorhabditis elegans  | protein                                                  | 1 | P:GO:0040010                                                                                                                        | -                                                               | -                                                       | IPR000449; IPR002833; IPR009060;<br>IPR015940; G3DSA:1.10.8.10<br>(GENE3D), G3DSA:3.40.1490.10<br>(GENE3D), PTHR12649 (PANTHER),<br>SSF102462 (SUPERFAMILY)                                                                           |
| -                       | -                                                        | 0 | -                                                                                                                                   | -                                                               | -                                                       | SignalP (SIGNALP)                                                                                                                                                                                                                     |
| Caenorhabditis briggsae | probable ribosome biogenesis protein nep1                | 8 | C:GO:0005737;<br>C:GO:0005730;<br>P:GO:0009792;<br>P:GO:0002119;<br>F:GO:0003723;<br>P:GO:0000003;<br>P:GO:0006364;<br>P:GO:0042274 | -                                                               | -                                                       | IPR005304; PTHR12636:SF3<br>(PANTHER)                                                                                                                                                                                                 |
| Caenorhabditis elegans  | hypothetical protein F09G2.1 [Caenorhabditis elegans]    | 0 | -                                                                                                                                   | F:GO:0005524;<br>F:GO:0004672;<br>F:GO:0004713;<br>P:GO:0006468 | -                                                       | -                                                                                                                                                                                                                                     |
| -                       | -                                                        | 0 | -                                                                                                                                   | -                                                               | -                                                       | -                                                                                                                                                                                                                                     |
| -                       | -                                                        | 0 | -                                                                                                                                   | -                                                               | -                                                       | -                                                                                                                                                                                                                                     |
| -                       | -                                                        | 0 | -                                                                                                                                   | -                                                               | -                                                       | SignalP (SIGNALP)                                                                                                                                                                                                                     |
| -                       | -                                                        | 0 | -                                                                                                                                   | -                                                               | -                                                       | -                                                                                                                                                                                                                                     |
| Pongo abelii            | ribosomal protein l10a                                   | 7 | F:GO:0003735;<br>F:GO:0003723;<br>P:GO:0009653;<br>C:GO:0022625;<br>C:GO:0005739;<br>P:GO:0006414;<br>P:GO:0006396                  | -                                                               | -                                                       | IPR002143; IPR016094; PTHR23105<br>(PANTHER), PTHR23105:SF4<br>(PANTHER)                                                                                                                                                              |
| -                       | -                                                        | 0 | -                                                                                                                                   | -                                                               | -                                                       | IPR008139; IPR011001                                                                                                                                                                                                                  |
| Brugia malayi           | a-phase promoting complex subunit 8 cdc23 family protein | 3 | P:GO:0009987;<br>P:GO:0048856;<br>P:GO:0007275                                                                                      | -                                                               | -                                                       | IPR007192                                                                                                                                                                                                                             |
| Caenorhabditis elegans  | atp-binding sub-family c (cfr mrp) member 1              | 5 | F:GO:0042626;<br>C:GO:0005886;<br>P:GO:0006810;<br>C:GO:0016021;<br>F:GO:0000166                                                    | -                                                               | -                                                       | IPR001140; IPR003439; IPR003593;<br>IPR011527; IPR017871; IPR017940;<br>G3DSA:1.20.1560.10 (GENE3D),<br>G3DSA:3.40.50.300 (GENE3D),<br>PTHR19242 (PANTHER),<br>PTHR19242:SF34 (PANTHER), SignalP<br>(SIGNALP), SSF52540 (SUPERFAMILY) |

|                         |                                                                            |    |  |                                                                                                                                                                                                         |                                                                                                                               |
|-------------------------|----------------------------------------------------------------------------|----|--|---------------------------------------------------------------------------------------------------------------------------------------------------------------------------------------------------------|-------------------------------------------------------------------------------------------------------------------------------|
| Brugia malayi           | negative elongation factor b homolog                                       | 0  |  | F:GO:0003746;<br>P:GO:0016481;<br>C:GO:0005634                                                                                                                                                          | -                                                                                                                             |
|                         | -                                                                          | 0  |  |                                                                                                                                                                                                         | -                                                                                                                             |
| Caenorhabditis briggsae | cat eye syndrome chromosome candidate 5                                    | 0  |  | C:GO:0005739;<br>F:GO:0016787;<br>P:GO:0008152;<br>C:GO:0005575                                                                                                                                         | G3DSA:3.40.50.1000 (GENE3D),<br>PTHR14269 (PANTHER),<br>PTHR14269:SF4 (PANTHER), SignalP<br>(SIGNALP), SSF56784 (SUPERFAMILY) |
|                         | -                                                                          | 0  |  |                                                                                                                                                                                                         | -                                                                                                                             |
| Nematostella vectensis  | low-density lipoprotein                                                    | 0  |  | P:GO:0006508;<br>F:GO:0004252;<br>F:GO:0005509;<br>F:GO:0004872;<br>F:GO:0016787;<br>C:GO:0016021;<br>F:GO:0003824;<br>C:GO:0016020                                                                     | IPR002172; PTHR10529 (PANTHER),<br>PTHR10529:SF2 (PANTHER)                                                                    |
| Caenorhabditis briggsae | briggsae cbr-brd-1 protein                                                 | 0  |  | F:GO:0008270;<br>F:GO:0005515;<br>C:GO:0005622                                                                                                                                                          | IPR001841; IPR013083; IPR017907;<br>PTHR12590 (PANTHER)                                                                       |
|                         | -                                                                          | 0  |  |                                                                                                                                                                                                         | -                                                                                                                             |
| Loa loa                 | nurf (nucleosome remodeling factor) complex homolog family member (nurf-1) | 12 |  | P:GO:0030097;<br>P:GO:0000003;<br>P:GO:0040010;<br>P:GO:0035076;<br>P:GO:0006727;<br>P:GO:0048813;<br>P:GO:0035073;<br>F:GO:0046872;<br>C:GO:0016589;<br>F:GO:0016922;<br>P:GO:0042766;<br>P:GO:0045893 | IPR001965; IPR011011; IPR013032;<br>IPR013083; IPR019786; IPR019787;<br>PTHR12321 (PANTHER)                                   |
|                         | -                                                                          | 0  |  |                                                                                                                                                                                                         | SignalP (SIGNALP)                                                                                                             |
| Caenorhabditis elegans  | briggsae cbr-cyn-17 protein                                                | 0  |  | F:GO:0003755;<br>P:GO:0006457;<br>F:GO:0016853                                                                                                                                                          | IPR002130; IPR015891; PTHR11071<br>(PANTHER), PTHR11071:SF72<br>(PANTHER), SignalP (SIGNALP)                                  |
| Caenorhabditis elegans  | phosphoglycerate mutase                                                    | 0  |  |                                                                                                                                                                                                         | IPR013078; G3DSA:3.40.50.1240<br>(GENE3D), PTHR23029 (PANTHER),<br>SSF53254 (SUPERFAMILY)                                     |
| Caenorhabditis briggsae | ain family member (clp-1)                                                  | 6  |  | C:GO:0016021;<br>P:GO:0008219;<br>C:GO:0005622;<br>P:GO:0006508;<br>F:GO:0004198;<br>F:GO:0005509                                                                                                       | IPR001300; IPR022684; PTHR10183<br>(PANTHER), PTHR10183:SF45<br>(PANTHER), SSF54001 (SUPERFAMILY)                             |
|                         | -                                                                          | 0  |  |                                                                                                                                                                                                         | -                                                                                                                             |
|                         | -                                                                          | 0  |  |                                                                                                                                                                                                         | IPR003582                                                                                                                     |

|                         |                                                        |    |                                                                                                                                                                                                                          |   |                                                          |
|-------------------------|--------------------------------------------------------|----|--------------------------------------------------------------------------------------------------------------------------------------------------------------------------------------------------------------------------|---|----------------------------------------------------------|
| Homo sapiens            | b-cell receptor-associated protein 31                  | 13 | P:GO:0016192;<br>C:GO:0005829;<br>P:GO:0006915;<br>C:GO:0000139;<br>F:GO:0004872;<br>P:GO:0007283;<br>P:GO:0006955;<br>F:GO:0005102;<br>C:GO:0033116;<br>P:GO:0007165;<br>P:GO:0006886;<br>C:GO:0005789;<br>C:GO:0005887 | - | IPR008417; PTHR12701:SF4 (PANTHER)                       |
| -                       | -                                                      | 0  |                                                                                                                                                                                                                          | - | -                                                        |
| -                       | -                                                      | 0  |                                                                                                                                                                                                                          | - | -                                                        |
| -                       | -                                                      | 0  |                                                                                                                                                                                                                          | - | -                                                        |
| -                       | -                                                      | 0  |                                                                                                                                                                                                                          | - | -                                                        |
| -                       | -                                                      | 0  |                                                                                                                                                                                                                          | - | -                                                        |
| -                       | -                                                      | 0  |                                                                                                                                                                                                                          | - | -                                                        |
| Caenorhabditis briggsae | mannose- 1                                             | 13 | F:GO:0005509;<br>P:GO:0006457;<br>C:GO:0016021;<br>F:GO:0005537;<br>C:GO:0005793;<br>F:GO:0042802;<br>C:GO:0044422;<br>C:GO:0005792;<br>P:GO:0006888;<br>F:GO:0051082;<br>C:GO:0005783;<br>C:GO:0005794;<br>P:GO:0007596 | - | IPR005052; IPR008985; IPR013320; PTHR12223:SF7 (PANTHER) |
| Caenorhabditis briggsae | sorting nexin 13                                       | 4  | C:GO:0016021;<br>P:GO:0007154;<br>F:GO:0035091;<br>F:GO:0005515                                                                                                                                                          | - | IPR013937; PTHR22775 (PANTHER), PTHR22775:SF8 (PANTHER)  |
| -                       | -                                                      | 0  |                                                                                                                                                                                                                          | - | -                                                        |
| Ailuropoda melanoleuca  | suppressor of ty 5 homolog ( cerevisiae) isoform cra_a | 12 | P:GO:0032968;<br>P:GO:0007049;<br>P:GO:0045944;<br>P:GO:0045090;<br>F:GO:0019899;<br>P:GO:0000122;<br>F:GO:0008159;<br>F:GO:0008148;<br>F:GO:0046982;<br>C:GO:0005654;<br>P:GO:0006338;<br>P:GO:0010033                  | - | PTHR11125 (PANTHER)                                      |



|                         |                                                            |    |                                                                                                                                                                       |                                                                 |              |                                                                                                                                          |
|-------------------------|------------------------------------------------------------|----|-----------------------------------------------------------------------------------------------------------------------------------------------------------------------|-----------------------------------------------------------------|--------------|------------------------------------------------------------------------------------------------------------------------------------------|
| Pongo abelii            | nuclear distribution gene c homolog ( nidulans)            | 10 | P:GO:0007097;<br>P:GO:0008283;<br>C:GO:0005794;<br>P:GO:0043434;<br>F:GO:0005515;<br>P:GO:0007275;<br>P:GO:0007067;<br>C:GO:0005634;<br>P:GO:0051301;<br>C:GO:0005874 | -                                                               | -            |                                                                                                                                          |
| -                       | -                                                          | 0  |                                                                                                                                                                       |                                                                 |              |                                                                                                                                          |
| -                       | -                                                          | 0  |                                                                                                                                                                       |                                                                 |              |                                                                                                                                          |
| -                       | -                                                          | 0  |                                                                                                                                                                       |                                                                 |              |                                                                                                                                          |
| Caenorhabditis elegans  | fog-3                                                      | 0  |                                                                                                                                                                       |                                                                 |              |                                                                                                                                          |
| -                       | -                                                          | 0  |                                                                                                                                                                       |                                                                 |              |                                                                                                                                          |
| -                       | -                                                          | 0  |                                                                                                                                                                       |                                                                 |              |                                                                                                                                          |
| -                       | -                                                          | 0  |                                                                                                                                                                       |                                                                 |              |                                                                                                                                          |
| Loa loa                 | a-macroglobulin complement component family protein        | 1  | C:GO:0005576                                                                                                                                                          | -                                                               |              | IPR008930; IPR009048; IPR011626;<br>G3DSA:1.50.10.20 (GENE3D),<br>PTHR11412 (PANTHER),<br>PTHR11412:SF30 (PANTHER), SignalP<br>(SIGNALP) |
| Caenorhabditis briggsae | elegans protein partially confirmed by transcript evidence | 5  | F:GO:0008536;<br>P:GO:0006611;<br>C:GO:0005643;<br>F:GO:0005049;<br>C:GO:0005737                                                                                      | -                                                               |              | PTHR12596 (PANTHER),<br>PTHR12596:SF2 (PANTHER)                                                                                          |
| Caenorhabditis elegans  | fh2 domain-containing protein 1                            | 2  | F:GO:0005515;<br>P:GO:0040011                                                                                                                                         | -                                                               |              | -                                                                                                                                        |
| -                       | -                                                          | 0  |                                                                                                                                                                       |                                                                 |              |                                                                                                                                          |
| Loa loa                 | hypothetical protein LOAG_09870 [Loa loa]                  | 0  |                                                                                                                                                                       |                                                                 |              |                                                                                                                                          |
| -                       | -                                                          | 0  |                                                                                                                                                                       |                                                                 |              |                                                                                                                                          |
| -                       | -                                                          | 0  |                                                                                                                                                                       |                                                                 |              | SignalP (SIGNALP)                                                                                                                        |
| Caenorhabditis elegans  | r- pseudouridylate synthase domain containing 2            | 3  | F:GO:0009982;<br>F:GO:0003723;<br>P:GO:0001522                                                                                                                        | -                                                               | EC:5.4.99.12 | -                                                                                                                                        |
| -                       | -                                                          | 0  |                                                                                                                                                                       |                                                                 |              | SignalP (SIGNALP)                                                                                                                        |
| -                       | -                                                          | 0  |                                                                                                                                                                       |                                                                 |              | -                                                                                                                                        |
| Caenorhabditis briggsae | elegans protein partially confirmed by transcript evidence | 0  |                                                                                                                                                                       |                                                                 |              |                                                                                                                                          |
| Ancylostoma duodenale   | ancylostoma-secreted protein 1 precursor                   | 0  |                                                                                                                                                                       | C:GO:0005576                                                    |              | SignalP (SIGNALP)                                                                                                                        |
| Ancylostoma ceylanicum  | secreted-protein 1 precursor                               | 0  |                                                                                                                                                                       | C:GO:0005576                                                    |              | -                                                                                                                                        |
| Caenorhabditis elegans  | uncoordi- ted family member (unc-103)                      | 7  | P:GO:0055085;<br>P:GO:0051291;<br>P:GO:0006355;<br>P:GO:0006813;<br>F:GO:0005242;<br>P:GO:0007165;<br>C:GO:0005887                                                    | -                                                               |              | IPR005821; G3DSA:1.10.287.70<br>(GENE3D), PTHR10217 (PANTHER),<br>PTHR10217:SF15 (PANTHER), SignalP<br>(SIGNALP), SSF81324 (SUPERFAMILY) |
| Ancylostoma caninum     | briggsae cbr-vap-1 protein                                 | 1  | P:GO:0009987                                                                                                                                                          | -                                                               |              | IPR001283; IPR014044; IPR018244;<br>PTHR10334:SF11 (PANTHER)                                                                             |
| Ancylostoma caninum     | secreted protein asp-2                                     | 0  |                                                                                                                                                                       | F:GO:0009055;<br>P:GO:0019646;<br>P:GO:0006898;<br>C:GO:0005576 |              | IPR001283; IPR014044; IPR018244;<br>PTHR10334:SF11 (PANTHER)                                                                             |

|                        |                                                  |    |                                                                                                                                                                                                                                                                                                                                                                                                                                                                         |                                                                 |             |                                                                                                                                                              |
|------------------------|--------------------------------------------------|----|-------------------------------------------------------------------------------------------------------------------------------------------------------------------------------------------------------------------------------------------------------------------------------------------------------------------------------------------------------------------------------------------------------------------------------------------------------------------------|-----------------------------------------------------------------|-------------|--------------------------------------------------------------------------------------------------------------------------------------------------------------|
| Ancylostoma caninum    | secreted protein asp-2                           | 0  |                                                                                                                                                                                                                                                                                                                                                                                                                                                                         | F:GO:0009055;<br>P:GO:0019646;<br>P:GO:0006898;<br>C:GO:0005576 |             | IPR001283; IPR014044; IPR018244;<br>PTHR10334:SF11 (PANTHER)                                                                                                 |
| Ancylostoma caninum    | secreted protein asp-2                           | 0  |                                                                                                                                                                                                                                                                                                                                                                                                                                                                         | F:GO:0009055;<br>P:GO:0019646;<br>P:GO:0006898;<br>C:GO:0005576 |             | IPR001283; IPR014044; IPR018244;<br>PTHR10334:SF11 (PANTHER)                                                                                                 |
| Caenorhabditis elegans | paz piwi domain-containing family member (ppw-1) | 0  |                                                                                                                                                                                                                                                                                                                                                                                                                                                                         | F:GO:0003676;<br>P:GO:0000003;<br>P:GO:0016246                  |             | IPR003100; IPR003165; IPR012337;<br>G3DSA:2.170.260.10 (GENE3D),<br>PTHR22891 (PANTHER), SSF101690<br>(SUPERFAMILY)                                          |
| -                      | -                                                | 0  |                                                                                                                                                                                                                                                                                                                                                                                                                                                                         |                                                                 |             | -                                                                                                                                                            |
| Caenorhabditis elegans | fatty acid elongation protein 3                  | 2  | P:GO:0040010;<br>C:GO:0016021                                                                                                                                                                                                                                                                                                                                                                                                                                           | -                                                               |             | IPR002076                                                                                                                                                    |
| -                      | -                                                | 0  |                                                                                                                                                                                                                                                                                                                                                                                                                                                                         |                                                                 |             | -                                                                                                                                                            |
| -                      | -                                                | 0  |                                                                                                                                                                                                                                                                                                                                                                                                                                                                         |                                                                 |             | -                                                                                                                                                            |
| Ancylostoma ceylanicum | metalloprotease 1 precursor                      | 3  | F:GO:0004222;<br>P:GO:0006508;<br>F:GO:0008270                                                                                                                                                                                                                                                                                                                                                                                                                          | -                                                               | EC:3.4.24.0 | IPR001506; IPR006026;<br>G3DSA:3.40.390.10 (GENE3D),<br>PTHR10127 (PANTHER),<br>PTHR10127:SF65 (PANTHER),<br>SSF55486 (SUPERFAMILY)                          |
| -                      | -                                                | 0  |                                                                                                                                                                                                                                                                                                                                                                                                                                                                         |                                                                 |             | IPR001611; PRO0019 (PRINTS),<br>G3DSA:3.80.10.10 (GENE3D),<br>PTHR10588 (PANTHER),<br>PTHR10588:SF23 (PANTHER), PS51450<br>(PROFILE), SSF52058 (SUPERFAMILY) |
| Caenorhabditis elegans | inin family member (atn-1)                       | 32 | F:GO:0005178;<br>P:GO:0007629;<br>F:GO:0030375;<br>C:GO:0031143;<br>C:GO:0043197;<br>C:GO:0005884;<br>P:GO:0051289;<br>P:GO:0040010;<br>P:GO:0051017;<br>C:GO:0030175;<br>P:GO:0007016;<br>F:GO:0070080;<br>P:GO:0030035;<br>F:GO:0005509;<br>P:GO:0006936;<br>P:GO:0048041;<br>F:GO:0046983;<br>C:GO:0005730;<br>C:GO:0005829;<br>F:GO:0051370;<br>F:GO:0008307;<br>P:GO:0009792;<br>P:GO:0007067;<br>F:GO:0042802;<br>F:GO:0031432;<br>C:GO:0055120;<br>F:GO:0051015; | -                                                               |             | IPR001589; IPR001715; IPR002017;<br>G3DSA:1.20.58.60 (GENE3D),<br>PTHR11915 (PANTHER),<br>PTHR11915:SF47 (PANTHER),<br>SSF46966 (SUPERFAMILY)                |

|                                     |                                                            |    |                                                                                                                                                                                        |                                                                                                                                                                                                         |             |                                                                                                  |
|-------------------------------------|------------------------------------------------------------|----|----------------------------------------------------------------------------------------------------------------------------------------------------------------------------------------|---------------------------------------------------------------------------------------------------------------------------------------------------------------------------------------------------------|-------------|--------------------------------------------------------------------------------------------------|
| Strongylocentrotus purpuratus       | brevican                                                   | 1  | C:GO:0044464                                                                                                                                                                           | -                                                                                                                                                                                                       |             | IPR001304; IPR016186; IPR016187; PTHR22801 (PANTHER), PTHR22801:SF9 (PANTHER), SignalP (SIGNALP) |
|                                     | -                                                          | 0  |                                                                                                                                                                                        |                                                                                                                                                                                                         |             | SignalP (SIGNALP)                                                                                |
|                                     | -                                                          | 0  |                                                                                                                                                                                        |                                                                                                                                                                                                         |             | SignalP (SIGNALP)                                                                                |
| Caenorhabditis briggsae             | elegans protein partially confirmed by transcript evidence | 0  |                                                                                                                                                                                        |                                                                                                                                                                                                         |             | SignalP (SIGNALP)                                                                                |
| Loa loa                             | tpr repeat-containing protein                              | 0  |                                                                                                                                                                                        | F:GO:0005488                                                                                                                                                                                            |             | IPR001440; IPR011990; IPR013026; IPR019734; IPR023011; SSF48452 (SUPERFAMILY)                    |
| Caenorhabditis elegans              | alkylated d- repair protein alkb homolog 8                 | 9  | C:GO:0005829;<br>P:GO:0040010;<br>F:GO:0003676;<br>F:GO:0016300;<br>F:GO:0005515;<br>F:GO:0000166;<br>P:GO:0030488;<br>C:GO:0005634;<br>P:GO:0006974                                   | -                                                                                                                                                                                                       |             | IPR005123; G3DSA:2.60.120.590 (GENE3D), SSF51197 (SUPERFAMILY)                                   |
| Loa loa                             | cell division protein ki-se 5                              | 11 | P:GO:0009792;<br>P:GO:0006468;<br>P:GO:0010468;<br>F:GO:0008083;<br>P:GO:0048489;<br>F:GO:0005524;<br>P:GO:0000003;<br>C:GO:0016020;<br>F:GO:0004674;<br>P:GO:0051301;<br>P:GO:0051932 | -                                                                                                                                                                                                       | EC:2.7.11.0 | IPR011009; G3DSA:1.10.510.10 (GENE3D), PTHR11295 (PANTHER), PTHR11295:SF110 (PANTHER)            |
| Physcomitrella patens subsp. patens | c- b domain protein                                        | 0  |                                                                                                                                                                                        | F:GO:0016740;<br>F:GO:0008061;<br>F:GO:0016787;<br>P:GO:0006471;<br>C:GO:0005576;<br>F:GO:0005515;<br>C:GO:0005618;<br>F:GO:0030145;<br>P:GO:0006030;<br>P:GO:0007155;<br>F:GO:0005488;<br>F:GO:0003950 |             | -                                                                                                |
| Brugia malayi                       | gon-4-like ( elegans)                                      | 2  | C:GO:0005737;<br>C:GO:0005634                                                                                                                                                          | -                                                                                                                                                                                                       |             | -                                                                                                |
| Caenorhabditis elegans              | transmembrane protein with metallophosphoesterase domain   | 2  | C:GO:0016021;<br>F:GO:0016787                                                                                                                                                          | -                                                                                                                                                                                                       |             | G3DSA:3.60.21.10 (GENE3D), SSF56300 (SUPERFAMILY)                                                |
| Caenorhabditis elegans              | ankyrin repeat and fyve domain containing 1                | 2  | C:GO:0005737;<br>F:GO:0005488                                                                                                                                                          | -                                                                                                                                                                                                       |             | IPR002110; IPR020683; PTHR18958 (PANTHER), PTHR18958:SF258 (PANTHER)                             |

|                          |                                                            |    |                                                                                                                                                                       |                                                                                                   |             |                                                                                                                                  |
|--------------------------|------------------------------------------------------------|----|-----------------------------------------------------------------------------------------------------------------------------------------------------------------------|---------------------------------------------------------------------------------------------------|-------------|----------------------------------------------------------------------------------------------------------------------------------|
| Caenorhabditis elegans   | cg8844                                                     | 10 | P:GO:0022900;<br>P:GO:0008340;<br>C:GO:0005743;<br>P:GO:0040007;<br>P:GO:0000003;<br>P:GO:0019915;<br>P:GO:0002119;<br>C:GO:0070469;<br>F:GO:0005515;<br>F:GO:0003954 | -                                                                                                 | EC:1.6.99.3 | IPR019377; PTHR13094 (PANTHER)                                                                                                   |
| Caenorhabditis briggsae  | enhancer of ksr-1 lethality family member (ekl-6)          | 2  | P:GO:0000003;<br>P:GO:0048856                                                                                                                                         | -                                                                                                 |             | -                                                                                                                                |
|                          | -                                                          | 0  |                                                                                                                                                                       |                                                                                                   |             | -                                                                                                                                |
| Brugia malayi            | protein binding                                            | 7  | P:GO:0009792;<br>P:GO:0002119;<br>P:GO:0008380;<br>P:GO:0018991;<br>F:GO:0070063;<br>P:GO:0040010;<br>P:GO:0006898                                                    | -                                                                                                 |             | IPR001202; G3DSA:2.20.70.10 (GENE3D), PTHR11864 (PANTHER)                                                                        |
| Caenorhabditis elegans   | ibromatosis homolog family member (nfm-1)                  | 5  | C:GO:0005856;<br>P:GO:0009792;<br>C:GO:0005737;<br>F:GO:0008092;<br>C:GO:0019898                                                                                      | -                                                                                                 |             | IPR000299; IPR011993; IPR018980; G3DSA:1.20.5.450 (GENE3D), PTHR23281 (PANTHER), PTHR23281:SF1 (PANTHER), SSF50729 (SUPERFAMILY) |
|                          | -                                                          | 0  |                                                                                                                                                                       |                                                                                                   |             | SignalP (SIGNALP)                                                                                                                |
| Caenorhabditis briggsae  | elegans protein partially confirmed by transcript evidence | 3  | C:GO:0016021;<br>P:GO:0006813;<br>F:GO:0005267                                                                                                                        | -                                                                                                 |             | IPR013099; G3DSA:1.10.287.70 (GENE3D), PTHR11003 (PANTHER), PTHR11003:SF7 (PANTHER), SignalP (SIGNALP), SSF81324 (SUPERFAMILY)   |
|                          | -                                                          | 0  |                                                                                                                                                                       |                                                                                                   |             | -                                                                                                                                |
|                          | -                                                          | 0  |                                                                                                                                                                       |                                                                                                   |             | -                                                                                                                                |
| Caenorhabditis elegans   | transmembrane protein 1                                    | 0  |                                                                                                                                                                       | F:GO:0005488;<br>P:GO:0016192;<br>C:GO:0016021;<br>P:GO:0006814;<br>C:GO:0005794;<br>F:GO:0015081 |             | -                                                                                                                                |
| Monosiga brevicollis MX1 | 5 -nucleotidase                                            | 0  |                                                                                                                                                                       | F:GO:0008253;<br>C:GO:0005737;<br>F:GO:0000287;<br>F:GO:0016787                                   |             | IPR006434; PF05822 (PFAM)                                                                                                        |
| Loa loa                  | negative elongation factor a homolog                       | 0  |                                                                                                                                                                       | F:GO:0003746                                                                                      |             | SignalP (SIGNALP)                                                                                                                |
| Caenorhabditis briggsae  | briggsae cbr-hda-4 protein                                 | 1  | P:GO:0009987                                                                                                                                                          | -                                                                                                 |             | -                                                                                                                                |
|                          | -                                                          | 0  |                                                                                                                                                                       |                                                                                                   |             | -                                                                                                                                |
| Caenorhabditis briggsae  | kelch domain-containing protein 10                         | 0  |                                                                                                                                                                       | F:GO:0003674;<br>F:GO:0005515;<br>C:GO:0005575                                                    |             | -                                                                                                                                |
|                          | -                                                          | 0  |                                                                                                                                                                       |                                                                                                   |             | IPR001849                                                                                                                        |
| Caenorhabditis elegans   | abnormal cell migration family member (mig-15)             | 2  | F:GO:0005515;<br>F:GO:0004672                                                                                                                                         | -                                                                                                 |             | G3DSA:1.10.510.10 (GENE3D), PTHR22986 (PANTHER), PTHR22986:SF83 (PANTHER)                                                        |
| Loa loa                  | hypothetical protein LOAG_09252 [Loa loa]                  | 0  |                                                                                                                                                                       |                                                                                                   |             | SignalP (SIGNALP)                                                                                                                |
| Caenorhabditis briggsae  | Hypothetical protein CBG03410 [Caenorhabditis briggsae]    | 1  | P:GO:0006898                                                                                                                                                          | -                                                                                                 |             | PTHR21072 (PANTHER), PTHR21072:SF1 (PANTHER)                                                                                     |
|                          | -                                                          | 0  |                                                                                                                                                                       |                                                                                                   |             | -                                                                                                                                |

|                         |                                                            |    |                                                                                                                                                                                        |   |                                                                                                   |                                                                                                                                |
|-------------------------|------------------------------------------------------------|----|----------------------------------------------------------------------------------------------------------------------------------------------------------------------------------------|---|---------------------------------------------------------------------------------------------------|--------------------------------------------------------------------------------------------------------------------------------|
| Loa loa                 | protein ki-se domain containing protein                    | 7  | P:GO:0006468;<br>P:GO:0030154;<br>P:GO:0032501;<br>F:GO:0005515;<br>F:GO:0005524;<br>F:GO:0000287;<br>F:GO:0004674                                                                     | - | EC:2.7.11.0                                                                                       | -                                                                                                                              |
| Brugia malayi           | developmentally regulated gtp binding protein 2            | 5  | F:GO:0005525;<br>C:GO:0005622;<br>C:GO:0016021;<br>P:GO:0015684;<br>F:GO:0015093                                                                                                       | - |                                                                                                   | -                                                                                                                              |
|                         | -                                                          | 0  |                                                                                                                                                                                        |   |                                                                                                   | -                                                                                                                              |
| Caenorhabditis elegans  | proteasome-associated protein ecm29 homolog                | 2  | P:GO:0007067;<br>C:GO:0044424                                                                                                                                                          | - |                                                                                                   | PTHR23346 (PANTHER),<br>PTHR23346:SF2 (PANTHER)                                                                                |
| Caenorhabditis briggsae | cysteine expressed                                         | 6  | F:GO:0030170;<br>F:GO:0004124;<br>F:GO:0005515;<br>P:GO:0006535;<br>F:GO:0016740;<br>C:GO:0005739                                                                                      | - | EC:2.5.1.47                                                                                       | IPR001216; IPR001926; IPR005856;<br>IPR005859; G3DSA:3.40.50.1100<br>(GENE3D), PTHR10314 (PANTHER),<br>PTHR10314:SF8 (PANTHER) |
| Caenorhabditis briggsae | vacuolar protein sorting 13d isoform 2                     | 1  | P:GO:0008104                                                                                                                                                                           | - |                                                                                                   | IPR009543; PTHR16166 (PANTHER),<br>PTHR16166:SF24 (PANTHER)                                                                    |
|                         | -                                                          | 0  |                                                                                                                                                                                        |   |                                                                                                   | -                                                                                                                              |
| Caenorhabditis elegans  | argi-se                                                    | 4  | P:GO:0006525;<br>F:GO:0004053;<br>F:GO:0008270;<br>F:GO:0005515                                                                                                                        | - | EC:3.5.3.1                                                                                        | IPR006035; IPR014033; SSF52768<br>(SUPERFAMILY)                                                                                |
| Caenorhabditis elegans  | elegans protein partially confirmed by transcript evidence | 0  |                                                                                                                                                                                        |   |                                                                                                   | -                                                                                                                              |
|                         | -                                                          | 0  |                                                                                                                                                                                        |   |                                                                                                   | SignalP (SIGNALP)                                                                                                              |
|                         | -                                                          | 0  |                                                                                                                                                                                        |   |                                                                                                   | -                                                                                                                              |
| Macaca mulatta          | eukaryotic initiation factor 4ai                           | 11 | F:GO:0003743;<br>C:GO:0016281;<br>C:GO:0005829;<br>F:GO:0003729;<br>P:GO:0045948;<br>P:GO:0031100;<br>F:GO:0008026;<br>P:GO:0006200;<br>F:GO:0000339;<br>F:GO:0005524;<br>F:GO:0005515 | - |                                                                                                   | IPR001650; G3DSA:3.40.50.300<br>(GENE3D), PTHR10967 (PANTHER),<br>PTHR10967:SF2 (PANTHER), SSF52540<br>(SUPERFAMILY)           |
| Caenorhabditis briggsae | pdz domain containing protein                              | 5  | P:GO:0009792;<br>P:GO:0040007;<br>P:GO:0040035;<br>F:GO:0005515;<br>P:GO:0002119                                                                                                       | - |                                                                                                   | -                                                                                                                              |
| Caenorhabditis elegans  | hypothetical protein F46C8.3 [Caenorhabditis elegans]      | 0  |                                                                                                                                                                                        |   |                                                                                                   | IPR020999                                                                                                                      |
| Caenorhabditis elegans  | hypothetical protein F46C8.3 [Caenorhabditis elegans]      | 0  |                                                                                                                                                                                        |   |                                                                                                   | IPR020999                                                                                                                      |
| Apis mellifera          | zinc finger protein                                        | 0  |                                                                                                                                                                                        |   | F:GO:0003676;<br>P:GO:0060026;<br>F:GO:0008270;<br>F:GO:0005515;<br>P:GO:0019915;<br>C:GO:0005622 | -                                                                                                                              |
|                         | -                                                          | 0  |                                                                                                                                                                                        |   |                                                                                                   | -                                                                                                                              |

|                         |                                                                  |    |                                                                                                                                                                                                                                                                                                                                                                                                                                                                                         |                                                |             |                                                                                                                    |
|-------------------------|------------------------------------------------------------------|----|-----------------------------------------------------------------------------------------------------------------------------------------------------------------------------------------------------------------------------------------------------------------------------------------------------------------------------------------------------------------------------------------------------------------------------------------------------------------------------------------|------------------------------------------------|-------------|--------------------------------------------------------------------------------------------------------------------|
| Caenorhabditis elegans  | ubiquitin ligase                                                 | 6  | P:GO:0001701;<br>F:GO:0005515;<br>P:GO:0006511;<br>F:GO:0004842;<br>P:GO:0007608;<br>P:GO:0042048                                                                                                                                                                                                                                                                                                                                                                                       | -                                              | EC:6.3.2.19 | IPR003126; PTHR21497 (PANTHER),<br>PTHR21497:SF3 (PANTHER)                                                         |
| Caenorhabditis elegans  | folylpolyglutamate synthase                                      | 3  | C:GO:0005737;<br>F:GO:0005488;<br>P:GO:0044237                                                                                                                                                                                                                                                                                                                                                                                                                                          | -                                              |             | -                                                                                                                  |
| Caenorhabditis elegans  | elegans fln-2 isoform partially confirmed by transcript evidence | 0  |                                                                                                                                                                                                                                                                                                                                                                                                                                                                                         | F:GO:0003779;<br>P:GO:0009612                  |             | IPR001298; IPR013783; IPR014756;<br>IPR017868; PTHR11915 (PANTHER),<br>PTHR11915:SF55 (PANTHER)                    |
| Caenorhabditis elegans  | filamin abp280 repeat family protein                             | 0  |                                                                                                                                                                                                                                                                                                                                                                                                                                                                                         | F:GO:0003779                                   |             | IPR001298; IPR013783; IPR014756;<br>IPR017868; PTHR11915 (PANTHER),<br>PTHR11915:SF55 (PANTHER)                    |
| -                       | -                                                                | 0  |                                                                                                                                                                                                                                                                                                                                                                                                                                                                                         |                                                |             | -                                                                                                                  |
| -                       | -                                                                | 0  |                                                                                                                                                                                                                                                                                                                                                                                                                                                                                         |                                                |             | -                                                                                                                  |
| Homo sapiens            | apolipoprotein e                                                 | 69 | P:GO:0000074;<br>P:GO:0007186;<br>P:GO:0010468;<br>P:GO:0050728;<br>F:GO:0042803;<br>C:GO:0031232;<br>C:GO:0034364;<br>C:GO:0042627;<br>P:GO:0006707;<br>F:GO:0016209;<br>P:GO:0007010;<br>P:GO:0019934;<br>F:GO:0008201;<br>P:GO:0010875;<br>P:GO:0007263;<br>P:GO:0043691;<br>C:GO:0034363;<br>F:GO:0005543;<br>P:GO:0051651;<br>P:GO:0010544;<br>F:GO:0046911;<br>P:GO:0042311;<br>P:GO:0046907;<br>P:GO:0002021;<br>P:GO:0045471;<br>P:GO:0034375;<br>F:GO:0001540;<br>P:GO:0006874 | -                                              |             | -                                                                                                                  |
| Caenorhabditis briggsae | elegans protein partially confirmed by transcript evidence       | 0  |                                                                                                                                                                                                                                                                                                                                                                                                                                                                                         | C:GO:0016021                                   |             | PTHR23294 (PANTHER), SignalP<br>(SIGNALP)                                                                          |
| Brugia malayi           | trypsin family protein                                           | 0  |                                                                                                                                                                                                                                                                                                                                                                                                                                                                                         | P:GO:0006508;<br>F:GO:0004252;<br>F:GO:0003824 |             | IPR001254; IPR009003; IPR018114;<br>G3DSA:2.40.10.10 (GENE3D),<br>PTHR19355 (PANTHER),<br>PTHR19355:SF82 (PANTHER) |
| -                       | -                                                                | 0  |                                                                                                                                                                                                                                                                                                                                                                                                                                                                                         |                                                |             | -                                                                                                                  |
| Caenorhabditis elegans  | elegans protein confirmed by transcript evidence                 | 1  | P:GO:0040011                                                                                                                                                                                                                                                                                                                                                                                                                                                                            | -                                              |             | IPR000535; IPR008962; PTHR22947<br>(PANTHER)                                                                       |
| -                       | -                                                                | 0  |                                                                                                                                                                                                                                                                                                                                                                                                                                                                                         |                                                |             | -                                                                                                                  |
| Caenorhabditis briggsae | zinc finger ccch-type containing 10                              | 3  | F:GO:0008270;<br>F:GO:0003676;<br>P:GO:0002009                                                                                                                                                                                                                                                                                                                                                                                                                                          | -                                              |             | IPR000571; G3DSA:4.10.1000.10<br>(GENE3D), PTHR12675 (PANTHER),<br>SSF90229 (SUPERFAMILY)                          |

|                         |                                            |    |                                                                                                                                                                       |   |                                                                                                                                                                                    |
|-------------------------|--------------------------------------------|----|-----------------------------------------------------------------------------------------------------------------------------------------------------------------------|---|------------------------------------------------------------------------------------------------------------------------------------------------------------------------------------|
| Caenorhabditis elegans  | zinc finger ccch-type containing 10        | 2  | P:GO:0002009;<br>F:GO:0005488                                                                                                                                         | - | IPR000571; G3DSA:4.10.1000.10<br>(GENE3D), PTHR12675 (PANTHER),<br>SSF90229 (SUPERFAMILY)                                                                                          |
| Caenorhabditis briggsae | dead (asp-glu-ala-asp) box polypeptide 10  | 7  | P:GO:0040035;<br>P:GO:0009792;<br>P:GO:0002119;<br>F:GO:0008026;<br>F:GO:0003676;<br>P:GO:0040010;<br>F:GO:0005524                                                    | - | IPR000629; IPR001650; IPR011545;<br>IPR014001; IPR014014; IPR014021;<br>G3DSA:3.40.50.300 (GENE3D),<br>PTHR10967 (PANTHER),<br>PTHR10967:SF24 (PANTHER),<br>SSF52540 (SUPERFAMILY) |
| -                       | -                                          | 0  | -                                                                                                                                                                     | - | -                                                                                                                                                                                  |
| -                       | -                                          | 0  | -                                                                                                                                                                     | - | SignalP (SIGNALP)                                                                                                                                                                  |
| -                       | -                                          | 0  | -                                                                                                                                                                     | - | -                                                                                                                                                                                  |
| Caenorhabditis elegans  | briggsae cbr-larp-2 protein                | 0  | -                                                                                                                                                                     | - | -                                                                                                                                                                                  |
| -                       | -                                          | 0  | -                                                                                                                                                                     | - | -                                                                                                                                                                                  |
| Caenorhabditis elegans  | apyrase family member (apy-1)              | 5  | C:GO:0016021;<br>P:GO:0008340;<br>P:GO:0040010;<br>F:GO:0016462;<br>F:GO:0005515                                                                                      | - | IPR009283                                                                                                                                                                          |
| -                       | -                                          | 0  | -                                                                                                                                                                     | - | IPR003961; IPR013783                                                                                                                                                               |
| -                       | -                                          | 0  | -                                                                                                                                                                     | - | -                                                                                                                                                                                  |
| -                       | -                                          | 0  | -                                                                                                                                                                     | - | -                                                                                                                                                                                  |
| Caenorhabditis elegans  | numb-associated ki-se                      | 4  | P:GO:0009792;<br>F:GO:0016301;<br>P:GO:0008340;<br>C:GO:0016020                                                                                                       | - | -                                                                                                                                                                                  |
| Caenorhabditis elegans  | numb-associated ki-se                      | 4  | P:GO:0009792;<br>F:GO:0016301;<br>P:GO:0008340;<br>C:GO:0016020                                                                                                       | - | -                                                                                                                                                                                  |
| Caenorhabditis elegans  | numb-associated ki-se                      | 4  | P:GO:0009792;<br>F:GO:0016301;<br>P:GO:0008340;<br>C:GO:0016020                                                                                                       | - | -                                                                                                                                                                                  |
| Homo sapiens            | mitochondrial inner membrane protein oxa1l | 10 | P:GO:0033615;<br>C:GO:0043234;<br>C:GO:0005746;<br>P:GO:0055114;<br>P:GO:0032780;<br>P:GO:0009060;<br>P:GO:0032981;<br>P:GO:0051354;<br>C:GO:0032592;<br>P:GO:0051205 | - | -                                                                                                                                                                                  |
| -                       | -                                          | 0  | -                                                                                                                                                                     | - | SignalP (SIGNALP)                                                                                                                                                                  |
| -                       | -                                          | 0  | -                                                                                                                                                                     | - | -                                                                                                                                                                                  |
| Ancylostoma caninum     | mater-I embryonic leucine zipper ki-se     | 5  | C:GO:0005737;<br>P:GO:0006468;<br>F:GO:0005515;<br>F:GO:0005524;<br>F:GO:0004674                                                                                      | - | EC:2.7.11.0<br>IPR000719; IPR011009; IPR015739;<br>IPR017442; IPR020636;<br>G3DSA:3.30.200.20 (GENE3D)                                                                             |

|                           |                                                                         |    |                                                                                                                                                                                                                                           |                                                                                                                                                                                                         |                             |                                                                                                                 |
|---------------------------|-------------------------------------------------------------------------|----|-------------------------------------------------------------------------------------------------------------------------------------------------------------------------------------------------------------------------------------------|---------------------------------------------------------------------------------------------------------------------------------------------------------------------------------------------------------|-----------------------------|-----------------------------------------------------------------------------------------------------------------|
| Caenorhabditis elegans    | elegans protein confirmed by transcript evidence                        | 7  | P:GO:0040010;<br>F:GO:0015078;<br>C:GO:0000276;<br>P:GO:0015986;<br>P:GO:0000003;<br>P:GO:0002119;<br>P:GO:0009792                                                                                                                        | -                                                                                                                                                                                                       | -                           |                                                                                                                 |
| Caenorhabditis briggsae   | acyl- dehydroge-se                                                      | 8  | P:GO:0006468;<br>F:GO:0004713;<br>P:GO:0055114;<br>F:GO:0016787;<br>F:GO:0005524;<br>F:GO:0003995;<br>F:GO:0050660;<br>P:GO:0006508                                                                                                       | -                                                                                                                                                                                                       | EC:2.7.10.0;<br>EC:1.3.99.3 |                                                                                                                 |
| Mus musculus              | heterogeneous nuclear ribonucleoprotein a1                              | 14 | C:GO:0005681;<br>F:GO:0003727;<br>C:GO:0005730;<br>P:GO:0000380;<br>P:GO:0006405;<br>C:GO:0030530;<br>F:GO:0005515;<br>P:GO:0051170;<br>F:GO:0000166;<br>F:GO:0003697;<br>P:GO:0044419;<br>C:GO:0005654;<br>C:GO:0005737;<br>P:GO:0051028 | -                                                                                                                                                                                                       |                             | IPR000504; IPR012677; IPR021662;<br>PTHR10432 (PANTHER),<br>PTHR10432:SF13 (PANTHER),<br>SSF54928 (SUPERFAMILY) |
| Caenorhabditis briggsae   | presenilin rhomboid-like                                                | 3  | F:GO:0008233;<br>C:GO:0016020;<br>C:GO:0005739                                                                                                                                                                                            | -                                                                                                                                                                                                       |                             | IPR002610; IPR022764;<br>G3DSA:1.20.1540.10 (GENE3D),<br>SSF144091 (SUPERFAMILY)                                |
| Caenorhabditis briggsae   | elegans protein confirmed by transcript evidence                        | 0  |                                                                                                                                                                                                                                           |                                                                                                                                                                                                         |                             | -                                                                                                               |
| Caenorhabditis elegans    | elegans protein partially confirmed by transcript evidence              | 0  |                                                                                                                                                                                                                                           |                                                                                                                                                                                                         |                             | SignalP (SIGNALP)                                                                                               |
| Caenorhabditis elegans    | mus (drosophila mutagen sensitive) related family member (mus-81)       | 0  |                                                                                                                                                                                                                                           | F:GO:0016740;<br>F:GO:0008168;<br>P:GO:0006259;<br>C:GO:0005634;<br>F:GO:0003677;<br>F:GO:0018024;<br>P:GO:0006281;<br>F:GO:0003824;<br>P:GO:0019725;<br>F:GO:0005515;<br>P:GO:0040010;<br>F:GO:0004518 | -                           |                                                                                                                 |
| Caenorhabditis elegans    | related to yeast vacuolar protein sorting factor family member (vps-34) | 7  | F:GO:0005488;<br>F:GO:0004672;<br>C:GO:0005942;<br>P:GO:0046854;<br>F:GO:0016303;<br>P:GO:0048015;<br>P:GO:0006468                                                                                                                        | -                                                                                                                                                                                                       | EC:2.7.1.137                | IPR001263; IPR015433; IPR016024;<br>PTHR10048:SF7 (PANTHER)                                                     |
| -                         | -                                                                       | 0  |                                                                                                                                                                                                                                           |                                                                                                                                                                                                         |                             | -                                                                                                               |
| -                         | -                                                                       | 0  |                                                                                                                                                                                                                                           |                                                                                                                                                                                                         |                             | IPR008728; PTHR12896 (PANTHER)                                                                                  |
| Trichostrongylus vitrinus | serine or cysteine protease inhibitor                                   | 2  | F:GO:0005515;<br>C:GO:0005634                                                                                                                                                                                                             | -                                                                                                                                                                                                       |                             | IPR000215; G3DSA:2.30.39.10<br>(GENE3D), PTHR11461:SF25<br>(PANTHER)                                            |



|                         |                                                        |   |                                                                                                                                                      |                                                                                                   |             |                                                                                                              |
|-------------------------|--------------------------------------------------------|---|------------------------------------------------------------------------------------------------------------------------------------------------------|---------------------------------------------------------------------------------------------------|-------------|--------------------------------------------------------------------------------------------------------------|
| Harpegnathos saltator   | protein trs85-like protein                             | 0 |                                                                                                                                                      |                                                                                                   |             | PTHR12975 (PANTHER)                                                                                          |
|                         | -                                                      | 0 |                                                                                                                                                      |                                                                                                   |             | -                                                                                                            |
|                         | -                                                      | 0 |                                                                                                                                                      |                                                                                                   |             | -                                                                                                            |
| Caenorhabditis elegans  | ring finger protein 157                                | 9 | P:GO:0009987;<br>P:GO:0040010;<br>P:GO:0008340;<br>F:GO:0046872;<br>P:GO:0040035;<br>P:GO:0018996;<br>P:GO:0010171;<br>P:GO:0040011;<br>C:GO:0044424 | -                                                                                                 |             | PTHR22996 (PANTHER)                                                                                          |
|                         | -                                                      | 0 |                                                                                                                                                      |                                                                                                   |             | -                                                                                                            |
| Loa loa                 | lanthionine synthetase c-like protein                  | 0 |                                                                                                                                                      | F:GO:0003824                                                                                      |             | -                                                                                                            |
| Loa loa                 | splicing arginine serine-rich 15                       | 2 | P:GO:0009792;<br>C:GO:0005634                                                                                                                        | -                                                                                                 |             | IPR000504; IPR012677; PTHR14124 (PANTHER), SSF54928 (SUPERFAMILY)                                            |
| Caenorhabditis briggsae | uroca-se domain containing 1                           | 2 | P:GO:0006548;<br>F:GO:0016153                                                                                                                        | -                                                                                                 | EC:4.2.1.49 | IPR000193                                                                                                    |
|                         | -                                                      | 0 |                                                                                                                                                      |                                                                                                   |             | -                                                                                                            |
|                         | -                                                      | 0 |                                                                                                                                                      |                                                                                                   |             | -                                                                                                            |
|                         | -                                                      | 0 |                                                                                                                                                      |                                                                                                   |             | -                                                                                                            |
|                         | -                                                      | 0 |                                                                                                                                                      |                                                                                                   |             | -                                                                                                            |
|                         | -                                                      | 0 |                                                                                                                                                      |                                                                                                   |             | -                                                                                                            |
| Caenorhabditis elegans  | briggsae cbr-ncx-3 protein                             | 0 |                                                                                                                                                      | P:GO:0006816;<br>C:GO:0016021;<br>P:GO:0007154;<br>C:GO:0016020;<br>P:GO:0055085;<br>F:GO:0005432 |             | PTHR11878 (PANTHER),<br>PTHR11878:SF2 (PANTHER)                                                              |
| Caenorhabditis briggsae | zinc finger c-x8-c-x5-c-x3-h type                      | 3 | F:GO:0003676;<br>F:GO:0008270;<br>F:GO:0005515                                                                                                       | -                                                                                                 |             | IPR000571; G3DSA:4.10.1000.10 (GENE3D), PTHR14493 (PANTHER), PTHR14493:SF1 (PANTHER), SSF90229 (SUPERFAMILY) |
| Caenorhabditis elegans  | hypothetical protein T05A12.3 [Caenorhabditis elegans] | 0 |                                                                                                                                                      |                                                                                                   |             | -                                                                                                            |
|                         | -                                                      | 0 |                                                                                                                                                      |                                                                                                   |             | -                                                                                                            |
|                         | -                                                      | 0 |                                                                                                                                                      |                                                                                                   |             | -                                                                                                            |
| Caenorhabditis elegans  | membrane protein                                       | 0 |                                                                                                                                                      | F:GO:0003674;<br>P:GO:0008150                                                                     |             | IPR019410; G3DSA:3.40.50.150 (GENE3D), PTHR23109 (PANTHER), SSF53335 (SUPERFAMILY)                           |
| Caenorhabditis elegans  | family with sequence similarity member a               | 0 |                                                                                                                                                      | F:GO:0003674;<br>P:GO:0008150                                                                     |             | IPR019410; G3DSA:3.40.50.150 (GENE3D), PTHR23109 (PANTHER), SSF53335 (SUPERFAMILY)                           |
| Caenorhabditis briggsae | family c2 u-ssigned peptidase (c02 family)             | 6 | C:GO:0016021;<br>P:GO:0008219;<br>C:GO:0005622;<br>P:GO:0006508;<br>F:GO:0004198;<br>F:GO:0005509                                                    | -                                                                                                 |             | -                                                                                                            |
|                         | -                                                      | 0 |                                                                                                                                                      |                                                                                                   |             | -                                                                                                            |
|                         | -                                                      | 0 |                                                                                                                                                      |                                                                                                   |             | SignalP (SIGNALP)                                                                                            |
|                         | -                                                      | 0 |                                                                                                                                                      |                                                                                                   |             | -                                                                                                            |

|                             |                                                            |    |                                                                                                                                                                                                                                                                                                                                                                                                                                                                                          |                                                |             |                                                                                            |
|-----------------------------|------------------------------------------------------------|----|------------------------------------------------------------------------------------------------------------------------------------------------------------------------------------------------------------------------------------------------------------------------------------------------------------------------------------------------------------------------------------------------------------------------------------------------------------------------------------------|------------------------------------------------|-------------|--------------------------------------------------------------------------------------------|
| Caenorhabditis briggsae     | low-density lipoprotein receptor-related protein 2         | 30 | P:GO:0010165;<br>P:GO:0010951;<br>P:GO:0006898;<br>C:GO:0031526;<br>P:GO:0046879;<br>P:GO:0031100;<br>P:GO:0033280;<br>C:GO:0005624;<br>P:GO:0032526;<br>P:GO:0006766;<br>P:GO:0007568;<br>P:GO:0008283;<br>C:GO:0005615;<br>F:GO:0005509;<br>C:GO:0016021;<br>P:GO:0030900;<br>P:GO:0020028;<br>C:GO:0005794;<br>F:GO:0030492;<br>C:GO:0005905;<br>C:GO:0030139;<br>P:GO:0016197;<br>P:GO:0042493;<br>C:GO:0005768;<br>P:GO:0045056;<br>F:GO:0004872;<br>C:GO:0005783;<br>P:GO:0008219; | -                                              | -           | IPR000033; IPR011042; PTHR10529 (PANTHER), PTHR10529:SF2 (PANTHER), SSF63825 (SUPERFAMILY) |
| Caenorhabditis briggsae     | briggsae cbr-asp-6 protein                                 | 4  | F:GO:0005515;<br>P:GO:0040011;<br>F:GO:0008233                                                                                                                                                                                                                                                                                                                                                                                                                                           | -                                              | -           | IPR001461; IPR009007; IPR021109; PTHR13683:SF53 (PANTHER)                                  |
| -                           | -                                                          | 0  | -                                                                                                                                                                                                                                                                                                                                                                                                                                                                                        | -                                              | -           | -                                                                                          |
| Angiostrongylus cantonensis | elegans protein partially confirmed by transcript evidence | 0  | -                                                                                                                                                                                                                                                                                                                                                                                                                                                                                        | -                                              | -           | SignalP (SIGNALP)                                                                          |
| Brugia malayi               | aspartyl aminopeptidase                                    | 6  | C:GO:0005737;<br>F:GO:0005515;<br>F:GO:0004177;<br>P:GO:0006508;<br>F:GO:0008270;<br>F:GO:0008237                                                                                                                                                                                                                                                                                                                                                                                        | -                                              | EC:3.4.11.0 | IPR001948; G3DSA:2.30.250.10 (GENE3D), G3DSA:3.40.630.10 (GENE3D), SSF53187 (SUPERFAMILY)  |
| Caenorhabditis elegans      | briggsae cbr-rpy-1 protein                                 | 7  | C:GO:0005856;<br>C:GO:0045211;<br>P:GO:0007268;<br>C:GO:0030054;<br>F:GO:0033130;<br>P:GO:0019915;<br>F:GO:0008270                                                                                                                                                                                                                                                                                                                                                                       | -                                              | -           | IPR019568; PTHR10098 (PANTHER), PTHR10098:SF7 (PANTHER)                                    |
| Caenorhabditis briggsae     | mediator of r- polymerase ii subunit 8 homolog             | 8  | P:GO:0040010;<br>P:GO:0000003;<br>P:GO:0010171;<br>P:GO:0002119;<br>P:GO:0002009;<br>P:GO:0009792;<br>P:GO:0040018;<br>P:GO:0006350                                                                                                                                                                                                                                                                                                                                                      | -                                              | -           | -                                                                                          |
| Macaca mulatta              | upf0587 protein c1orf123 homolog                           | 0  | -                                                                                                                                                                                                                                                                                                                                                                                                                                                                                        | F:GO:0003674;<br>F:GO:0000166;<br>C:GO:0005575 | -           | -                                                                                          |

|                                  |                                          |  |    |                                                                                                                                                                                        |                                                                                                                                                      |                                                                                                                                |
|----------------------------------|------------------------------------------|--|----|----------------------------------------------------------------------------------------------------------------------------------------------------------------------------------------|------------------------------------------------------------------------------------------------------------------------------------------------------|--------------------------------------------------------------------------------------------------------------------------------|
| Caenorhabditis elegans           | trehalose 6-phosphate synthase           |  | 3  | P:GO:0034608;<br>F:GO:0016740;<br>P:GO:0005992                                                                                                                                         | -                                                                                                                                                    | G3DSA:3.40.50.2000 (GENE3D),<br>SSF53756 (SUPERFAMILY)                                                                         |
| Macaca mulatta                   | ciliary rootlet coiled- rootletin        |  | 4  | P:GO:0009987;<br>C:GO:0005856;<br>C:GO:0044446;<br>C:GO:0005737                                                                                                                        | -                                                                                                                                                    | IPR007240; PD936484 (PRODOM)                                                                                                   |
|                                  | -                                        |  | 0  |                                                                                                                                                                                        |                                                                                                                                                      | -                                                                                                                              |
| Pongo abelii                     | cd9 antigen                              |  | 9  | P:GO:0030168;<br>P:GO:0030913;<br>P:GO:0008285;<br>P:GO:0007155;<br>F:GO:0005515;<br>P:GO:0007342;<br>P:GO:0006928;<br>C:GO:0031092;<br>C:GO:0005887                                   | -                                                                                                                                                    | SignalP (SIGNALP)                                                                                                              |
| Caenorhabditis elegans           | uncoordinated family member (unc-79)     |  | 0  |                                                                                                                                                                                        | F:GO:0008270                                                                                                                                         | PTHR21696 (PANTHER)                                                                                                            |
| Ostreococcus lucimarinus CCE9901 | protein kinase domain containing protein |  | 4  | P:GO:0002119;<br>F:GO:0016301;<br>P:GO:0040010;<br>P:GO:0040011                                                                                                                        | -                                                                                                                                                    | IPR000719; IPR008271; IPR011009;<br>IPR017442; G3DSA:1.10.510.10<br>(GENE3D), PTHR11909 (PANTHER),<br>PTHR11909:SF19 (PANTHER) |
| Caenorhabditis elegans           | aphorin related family member (smp-1)    |  | 11 | P:GO:0031987;<br>P:GO:0007416;<br>P:GO:0001964;<br>C:GO:0016021;<br>P:GO:0048854;<br>F:GO:0004872;<br>F:GO:0005515;<br>P:GO:0008039;<br>P:GO:0016199;<br>P:GO:0048813;<br>C:GO:0005886 | -                                                                                                                                                    | IPR001627; IPR015943; PTHR11036<br>(PANTHER), PTHR11036:SF29<br>(PANTHER), SignalP (SIGNALP)                                   |
|                                  | -                                        |  | 0  |                                                                                                                                                                                        |                                                                                                                                                      | -                                                                                                                              |
| Dictyostelium discoideum AX4     | mutt domain                              |  | 0  |                                                                                                                                                                                        | C:GO:0005634;<br>F:GO:0016787;<br>C:GO:0005739;<br>C:GO:0005737;<br>F:GO:0003674;<br>F:GO:0000210;<br>C:GO:0005575;<br>P:GO:0008152;<br>P:GO:0008150 | IPR000086; IPR003293; IPR015797;<br>IPR020084; IPR020476; PTHR13994<br>(PANTHER), PS51462 (PROFILE)                            |

|                         |                                                         |    |                                                                                                                                                                                                                                                                                                                                |                               |             |                                                                                                           |
|-------------------------|---------------------------------------------------------|----|--------------------------------------------------------------------------------------------------------------------------------------------------------------------------------------------------------------------------------------------------------------------------------------------------------------------------------|-------------------------------|-------------|-----------------------------------------------------------------------------------------------------------|
| Caenorhabditis elegans  | sodium-calcium exchanger                                | 19 | P:GO:0002026;<br>P:GO:0055085;<br>F:GO:0005432;<br>C:GO:0005901;<br>P:GO:0051924;<br>F:GO:0015081;<br>P:GO:0000003;<br>P:GO:0002028;<br>F:GO:0015085;<br>P:GO:0007204;<br>P:GO:0060401;<br>F:GO:0005515;<br>C:GO:0042383;<br>P:GO:0007154;<br>P:GO:0009792;<br>P:GO:0006936;<br>P:GO:0006950;<br>P:GO:0010033;<br>C:GO:0005887 | -                             |             | IPR004836; PTHR11878 (PANTHER),<br>PTHR11878:SF4 (PANTHER)                                                |
| Drosophila grimshawi    | dtdp-glucose 4-6-dehydratase                            | 3  | P:GO:0044237;<br>F:GO:0048040;<br>F:GO:0050662                                                                                                                                                                                                                                                                                 | -                             | EC:4.1.1.35 | G3DSA:3.90.25.10 (GENE3D),<br>PTHR10366 (PANTHER),<br>PTHR10366:SF35 (PANTHER),<br>SSF51735 (SUPERFAMILY) |
| Homo sapiens            | cytochrome c oxidase subunit via polypeptide 1          | 3  | C:GO:0005751;<br>F:GO:0004129;<br>P:GO:0006091                                                                                                                                                                                                                                                                                 | -                             | EC:1.9.3.1  | IPR001349; SignalP (SIGNALP)                                                                              |
| -                       | -                                                       | 0  |                                                                                                                                                                                                                                                                                                                                |                               |             | -                                                                                                         |
| Caenorhabditis elegans  | hypothetical protein F54A3.1 [Caenorhabditis elegans]   | 0  |                                                                                                                                                                                                                                                                                                                                |                               |             | -                                                                                                         |
| -                       | -                                                       | 0  |                                                                                                                                                                                                                                                                                                                                |                               |             | -                                                                                                         |
| -                       | -                                                       | 0  |                                                                                                                                                                                                                                                                                                                                |                               |             | -                                                                                                         |
| -                       | -                                                       | 0  |                                                                                                                                                                                                                                                                                                                                |                               |             | -                                                                                                         |
| -                       | -                                                       | 0  |                                                                                                                                                                                                                                                                                                                                |                               |             | -                                                                                                         |
| -                       | -                                                       | 0  |                                                                                                                                                                                                                                                                                                                                |                               |             | SignalP (SIGNALP)                                                                                         |
| Caenorhabditis briggsae | bro1 domain-containing protein brox                     | 0  |                                                                                                                                                                                                                                                                                                                                | C:GO:0016020;<br>P:GO:0008150 |             | IPR004328; G3DSA:1.25.40.280<br>(GENE3D), PTHR23032 (PANTHER)                                             |
| Ostertagia ostertagi    | calcium activated nucleotidase isoform cra_b            | 9  | F:GO:0004871;<br>P:GO:0043123;<br>F:GO:0017110;<br>C:GO:0044446;<br>C:GO:0044425;<br>C:GO:0031090;<br>C:GO:0012505;<br>C:GO:0005783;<br>P:GO:0009191                                                                                                                                                                           | -                             | EC:3.6.1.6  | IPR009283                                                                                                 |
| Ostertagia ostertagi    | calcium activated nucleotidase isoform cra_b            | 9  | F:GO:0004871;<br>P:GO:0043123;<br>F:GO:0017110;<br>C:GO:0044446;<br>C:GO:0044425;<br>C:GO:0031090;<br>C:GO:0012505;<br>C:GO:0005783;<br>P:GO:0009191                                                                                                                                                                           | -                             | EC:3.6.1.6  | IPR009283                                                                                                 |
| Brugia malayi           | hypothetical protein Bm1_46970 [Brugia malayi]          | 0  |                                                                                                                                                                                                                                                                                                                                |                               |             | -                                                                                                         |
| Dictyocaulus viviparus  | briggsae cbr-ccg-1 protein                              | 0  |                                                                                                                                                                                                                                                                                                                                |                               |             | SignalP (SIGNALP)                                                                                         |
| Caenorhabditis briggsae | Hypothetical protein CBG12763 [Caenorhabditis briggsae] | 0  |                                                                                                                                                                                                                                                                                                                                |                               |             | -                                                                                                         |

|                             |                                                         |    |                                                                                                                                                                                                                                                                                                                                                 |              |                                                                                                  |                                                                                                                                                                   |
|-----------------------------|---------------------------------------------------------|----|-------------------------------------------------------------------------------------------------------------------------------------------------------------------------------------------------------------------------------------------------------------------------------------------------------------------------------------------------|--------------|--------------------------------------------------------------------------------------------------|-------------------------------------------------------------------------------------------------------------------------------------------------------------------|
| Loa loa                     | pre-mr- splicing factor atp-dependent r- helicase       | 7  | F:GO:0004004;<br>F:GO:0003676;<br>F:GO:0005515;<br>C:GO:0071011;<br>F:GO:0005524;<br>P:GO:0000398;<br>C:GO:0071013                                                                                                                                                                                                                              | -            |                                                                                                  | IPR001650; G3DSA:3.40.50.300 (GENE3D), PTHR18934 (PANTHER), SSF52540 (SUPERFAMILY)                                                                                |
| Caenorhabditis briggsae     | Hypothetical protein CBG03940 [Caenorhabditis briggsae] | 0  |                                                                                                                                                                                                                                                                                                                                                 |              |                                                                                                  | SignalP (SIGNALP)                                                                                                                                                 |
| Angiostrongylus cantonensis | c2 domain containing protein                            | 1  | P:GO:0009792                                                                                                                                                                                                                                                                                                                                    | -            |                                                                                                  | IPR000008; IPR008973; G3DSA:2.60.40.150 (GENE3D), PTHR10024 (PANTHER)                                                                                             |
|                             | -                                                       | 0  |                                                                                                                                                                                                                                                                                                                                                 |              |                                                                                                  | -                                                                                                                                                                 |
|                             | -                                                       | 0  |                                                                                                                                                                                                                                                                                                                                                 |              |                                                                                                  | -                                                                                                                                                                 |
| Caenorhabditis briggsae     | brix domain-containing protein 1                        | 0  |                                                                                                                                                                                                                                                                                                                                                 | F:GO:0005515 |                                                                                                  | IPR007109; PTHR12728 (PANTHER)                                                                                                                                    |
|                             | -                                                       | 0  |                                                                                                                                                                                                                                                                                                                                                 |              |                                                                                                  | -                                                                                                                                                                 |
| Caenorhabditis elegans      | briggsae cbr-dcr-1 protein                              | 19 | C:GO:0005793;<br>P:GO:0001525;<br>F:GO:0004525;<br>P:GO:0030324;<br>P:GO:0030423;<br>F:GO:0005515;<br>F:GO:0000166;<br>C:GO:0030426;<br>P:GO:0035116;<br>C:GO:0016442;<br>P:GO:0030422;<br>P:GO:0019827;<br>F:GO:0004386;<br>C:GO:0030425;<br>C:GO:0030424;<br>P:GO:0048754;<br>P:GO:0031054;<br>F:GO:0003725;<br>P:GO:0055013                  | -            | EC:3.1.26.3                                                                                      | IPR001650; G3DSA:3.40.50.300 (GENE3D), PTHR14950 (PANTHER), PTHR14950:SF3 (PANTHER), SSF52540 (SUPERFAMILY)                                                       |
|                             | -                                                       | 0  |                                                                                                                                                                                                                                                                                                                                                 |              |                                                                                                  | -                                                                                                                                                                 |
| Caenorhabditis briggsae     | fatty acid synthase                                     | 20 | F:GO:0008144;<br>C:GO:0005829;<br>P:GO:0006633;<br>F:GO:0004319;<br>F:GO:0008270;<br>C:GO:0005625;<br>C:GO:0005739;<br>P:GO:0055114;<br>P:GO:0006084;<br>F:GO:0000036;<br>F:GO:0004314;<br>F:GO:0004320;<br>F:GO:0019171;<br>F:GO:0070402;<br>F:GO:0004316;<br>F:GO:0004315;<br>F:GO:0042803;<br>C:GO:0042587;<br>C:GO:0005794;<br>F:GO:0004313 | -            | EC:1.3.1.10;<br>EC:2.3.1.39;<br>EC:3.1.2.14;<br>EC:1.1.1.100<br>;<br>EC:2.3.1.41;<br>EC:2.3.1.38 | IPR000794; IPR001227; IPR014030; IPR014031; IPR014043; IPR016035; IPR016036; IPR016038; IPR016039; IPR018201; G3DSA:3.30.70.250 (GENE3D), PTHR11712:SF5 (PANTHER) |

|                         |                                                            |    |                                                                                                                                                                                                                                                                             |                               |                                                                                                                                            |
|-------------------------|------------------------------------------------------------|----|-----------------------------------------------------------------------------------------------------------------------------------------------------------------------------------------------------------------------------------------------------------------------------|-------------------------------|--------------------------------------------------------------------------------------------------------------------------------------------|
| Oscheius tipulae        | deformed                                                   | 7  | F:GO:0030528;<br>F:GO:0003700;<br>F:GO:0043565;<br>P:GO:0007275;<br>F:GO:0016787;<br>C:GO:0005634;<br>P:GO:0006355                                                                                                                                                          | -                             | IPR000047; IPR001356; IPR009057;<br>IPR012287; IPR017970; IPR020479;<br>PTHR19418 (PANTHER),<br>PTHR19418:SF166 (PANTHER)                  |
| Caenorhabditis briggsae | major facilitator superfamily protein                      | 2  | C:GO:0016023;<br>C:GO:0016020                                                                                                                                                                                                                                               | -                             | IPR008509; IPR016196;<br>G3DSA:1.20.1250.20 (GENE3D)                                                                                       |
| Onchocerca volvulus     | abc transporter family protein                             | 3  | F:GO:0016887;<br>P:GO:0006810;<br>C:GO:0016020                                                                                                                                                                                                                              | -                             | IPR001140; IPR011527; IPR017940;<br>G3DSA:1.20.1560.10 (GENE3D),<br>PTHR19242 (PANTHER),<br>PTHR19242:SF96 (PANTHER), SignalP<br>(SIGNALP) |
| -                       | -                                                          | 0  |                                                                                                                                                                                                                                                                             |                               | SignalP (SIGNALP)                                                                                                                          |
| -                       | -                                                          | 0  |                                                                                                                                                                                                                                                                             |                               | -                                                                                                                                          |
| Caenorhabditis elegans  | cut-like 1                                                 | 6  | F:GO:0030528;<br>P:GO:0006810;<br>F:GO:0005488;<br>P:GO:0006357;<br>C:GO:0016020;<br>C:GO:0005794                                                                                                                                                                           | -                             | PTHR14043 (PANTHER),<br>PTHR14043:SF3 (PANTHER)                                                                                            |
| -                       | -                                                          | 0  |                                                                                                                                                                                                                                                                             |                               | -                                                                                                                                          |
| -                       | -                                                          | 0  |                                                                                                                                                                                                                                                                             |                               | -                                                                                                                                          |
| Caenorhabditis briggsae | elegans protein partially confirmed by transcript evidence | 0  |                                                                                                                                                                                                                                                                             |                               | -                                                                                                                                          |
| -                       | -                                                          | 0  |                                                                                                                                                                                                                                                                             |                               | -                                                                                                                                          |
| Caenorhabditis briggsae | elegans protein partially confirmed by transcript evidence | 5  | P:GO:0009792;<br>P:GO:0002119;<br>P:GO:0006810;<br>P:GO:0040010;<br>P:GO:0000003                                                                                                                                                                                            | -                             | IPR011701; IPR016196; IPR020846;<br>G3DSA:1.20.1250.20 (GENE3D),<br>PTHR10074 (PANTHER),<br>PTHR10074:SF22 (PANTHER), SignalP<br>(SIGNALP) |
| -                       | -                                                          | 0  |                                                                                                                                                                                                                                                                             |                               | SignalP (SIGNALP)                                                                                                                          |
| Brugia malayi           | sig-I-induced proliferation-associated protein 1           | 16 | C:GO:0043234;<br>P:GO:0030308;<br>F:GO:0046582;<br>C:GO:0030133;<br>F:GO:0008022;<br>P:GO:0007010;<br>P:GO:0007162;<br>P:GO:0042631;<br>P:GO:0051056;<br>C:GO:0012505;<br>C:GO:0048471;<br>P:GO:0050790;<br>P:GO:0045786;<br>P:GO:0008283;<br>C:GO:0016020;<br>C:GO:0005634 | -                             | IPR000331; PTHR15711 (PANTHER),<br>SSF111347 (SUPERFAMILY)                                                                                 |
| Nicotiana tabacum       | conserved protein                                          | 2  | C:GO:0005739;<br>C:GO:0009507                                                                                                                                                                                                                                               | -                             | -                                                                                                                                          |
| Caenorhabditis elegans  | cell death abnormality family member (ced-7)               | 1  | P:GO:0009987                                                                                                                                                                                                                                                                | -                             | PTHR19229 (PANTHER),<br>PTHR19229:SF18 (PANTHER), SignalP<br>(SIGNALP)                                                                     |
| -                       | -                                                          | 0  |                                                                                                                                                                                                                                                                             |                               | -                                                                                                                                          |
| Brugia malayi           | zinc c2h2 type family protein                              | 0  |                                                                                                                                                                                                                                                                             | F:GO:0008270;<br>C:GO:0005622 | IPR015880                                                                                                                                  |
| -                       | -                                                          | 0  |                                                                                                                                                                                                                                                                             |                               | -                                                                                                                                          |

|                         |                                                            |    |                                                                                                                                                                       |                                                                                                                                                      |            |                                                                                                                                   |
|-------------------------|------------------------------------------------------------|----|-----------------------------------------------------------------------------------------------------------------------------------------------------------------------|------------------------------------------------------------------------------------------------------------------------------------------------------|------------|-----------------------------------------------------------------------------------------------------------------------------------|
| Branchiostoma floridae  | tetraspanin 97e                                            | 1  | C:GO:0016020                                                                                                                                                          | -                                                                                                                                                    |            | IPR000301; IPR018499; PTHR19282 (PANTHER), PTHR19282:SF4 (PANTHER), SignalP (SIGNALP)                                             |
|                         | -                                                          | 0  |                                                                                                                                                                       |                                                                                                                                                      |            | -                                                                                                                                 |
|                         |                                                            | 0  |                                                                                                                                                                       |                                                                                                                                                      |            |                                                                                                                                   |
| Caenorhabditis elegans  | class member 2                                             | 2  | F:GO:0004553;<br>F:GO:0005488                                                                                                                                         | -                                                                                                                                                    | EC:3.2.1.0 | IPR011013; IPR011682; G3DSA:2.70.98.30 (GENE3D), PTHR11607 (PANTHER), PTHR11607:SF4 (PANTHER)                                     |
| Caenorhabditis briggsae | elegans protein partially confirmed by transcript evidence | 0  |                                                                                                                                                                       |                                                                                                                                                      |            | PTHR12187 (PANTHER), PTHR12187:SF2 (PANTHER)                                                                                      |
|                         | -                                                          | 0  |                                                                                                                                                                       |                                                                                                                                                      |            | -                                                                                                                                 |
|                         | -                                                          | 0  |                                                                                                                                                                       |                                                                                                                                                      |            | -                                                                                                                                 |
|                         | -                                                          | 0  |                                                                                                                                                                       |                                                                                                                                                      |            | -                                                                                                                                 |
|                         | -                                                          | 0  |                                                                                                                                                                       |                                                                                                                                                      |            | -                                                                                                                                 |
| Caenorhabditis elegans  | hypothetical protein D1043.1 [Caenorhabditis elegans]      | 0  |                                                                                                                                                                       | F:GO:0005488                                                                                                                                         |            | PTHR13322 (PANTHER)                                                                                                               |
| Caenorhabditis elegans  | elegans protein partially confirmed by transcript evidence | 0  |                                                                                                                                                                       | F:GO:0042626;<br>F:GO:0005215;<br>C:GO:0016021;<br>P:GO:0006810;<br>F:GO:0000166;<br>F:GO:0017111;<br>F:GO:0005524;<br>F:GO:0016887;<br>P:GO:0055085 |            | -                                                                                                                                 |
| Caenorhabditis elegans  | elegans protein confirmed by transcript evidence           | 2  | P:GO:0009792;<br>P:GO:0000003                                                                                                                                         | -                                                                                                                                                    |            | -                                                                                                                                 |
| Caenorhabditis elegans  | probable -dh-ubiquinone oxidoreductase 13 kda-a precursor  | 1  | F:GO:0016491                                                                                                                                                          | -                                                                                                                                                    |            | PTHR13156 (PANTHER)                                                                                                               |
|                         | -                                                          | 0  |                                                                                                                                                                       |                                                                                                                                                      |            | -                                                                                                                                 |
| Caenorhabditis elegans  | lin-7 homolog b                                            | 9  | C:GO:0016323;<br>P:GO:0007269;<br>C:GO:0005923;<br>C:GO:0019717;<br>C:GO:0045211;<br>P:GO:0006887;<br>C:GO:0014069;<br>F:GO:0030165;<br>P:GO:0015031                  | -                                                                                                                                                    |            | IPR001478; IPR004172; IPR014775; G3DSA:2.30.42.10 (GENE3D), PTHR14063 (PANTHER), PTHR14063:SF2 (PANTHER), SSF101288 (SUPERFAMILY) |
| Ascaris lumbricoides    | intermediate filament protein                              | 10 | C:GO:0005737;<br>P:GO:0010171;<br>P:GO:0002119;<br>P:GO:0018996;<br>F:GO:0005515;<br>C:GO:0005882;<br>P:GO:0040010;<br>P:GO:0040011;<br>P:GO:0006898;<br>F:GO:0005198 | -                                                                                                                                                    |            | -                                                                                                                                 |
| Caenorhabditis elegans  | thioredoxin family protein                                 | 1  | P:GO:0006974                                                                                                                                                          | -                                                                                                                                                    |            | IPR008979; IPR010400; G3DSA:2.60.120.470 (GENE3D)                                                                                 |
|                         | -                                                          | 0  |                                                                                                                                                                       |                                                                                                                                                      |            | -                                                                                                                                 |
| Caenorhabditis elegans  | briggsae cbr-rpm-1 protein                                 | 4  | P:GO:0030071;<br>F:GO:0005515;<br>F:GO:0008270;<br>C:GO:0005680                                                                                                       | -                                                                                                                                                    |            | PTHR12846 (PANTHER), PTHR12846:SF2 (PANTHER), SignalP (SIGNALP)                                                                   |
|                         | -                                                          | 0  |                                                                                                                                                                       |                                                                                                                                                      |            | SignalP (SIGNALP)                                                                                                                 |
|                         | -                                                          | 0  |                                                                                                                                                                       |                                                                                                                                                      |            | -                                                                                                                                 |

|                         |                                                                               |    |                                                                                                                                                                                        |                                                                 |  |                                                                                                                   |
|-------------------------|-------------------------------------------------------------------------------|----|----------------------------------------------------------------------------------------------------------------------------------------------------------------------------------------|-----------------------------------------------------------------|--|-------------------------------------------------------------------------------------------------------------------|
| Caenorhabditis elegans  | transmembrane protein 67                                                      | 11 | C:GO:0005815;<br>C:GO:0044463;<br>C:GO:0005929;<br>F:GO:0005515;<br>C:GO:0044425;<br>C:GO:0031090;<br>C:GO:0012505;<br>P:GO:0009653;<br>C:GO:0005783;<br>C:GO:0005886;<br>N:GO:0071842 | -                                                               |  | IPR019170                                                                                                         |
| Caenorhabditis briggsae | chromosome 14 open reading frame 153                                          | 1  | P:GO:0008629                                                                                                                                                                           | -                                                               |  | IPR018796                                                                                                         |
|                         | -                                                                             | 0  |                                                                                                                                                                                        |                                                                 |  | -                                                                                                                 |
| Loa loa                 | gtp binding protein 5                                                         | 6  | F:GO:0005515;<br>C:GO:0016021;<br>P:GO:0015684;<br>F:GO:0015093;<br>C:GO:0005739;<br>F:GO:0000166                                                                                      | -                                                               |  | IPR002917; IPR006073; IPR014100;<br>G3DSA:3.40.50.300 (GENE3D),<br>PTHR11702 (PANTHER), SSF52540<br>(SUPERFAMILY) |
| Caenorhabditis briggsae | Hypothetical protein CBG06862 [Caenorhabditis briggsae]                       | 0  |                                                                                                                                                                                        |                                                                 |  | -                                                                                                                 |
| Caenorhabditis briggsae | Hypothetical protein CBG06862 [Caenorhabditis briggsae]                       | 0  |                                                                                                                                                                                        |                                                                 |  | -                                                                                                                 |
|                         | -                                                                             | 0  |                                                                                                                                                                                        |                                                                 |  | -                                                                                                                 |
|                         | -                                                                             | 0  |                                                                                                                                                                                        |                                                                 |  | -                                                                                                                 |
|                         | -                                                                             | 0  |                                                                                                                                                                                        |                                                                 |  | -                                                                                                                 |
| Loa loa                 | elegans protein confirmed by transcript evidence                              | 0  |                                                                                                                                                                                        | P:GO:0000003;<br>P:GO:0040035;<br>P:GO:0002009                  |  | -                                                                                                                 |
| Brugia malayi           | hd phosphohydrolase family protein                                            | 0  |                                                                                                                                                                                        | P:GO:0009058;<br>F:GO:0016779;<br>F:GO:0016787;<br>F:GO:0003824 |  | -                                                                                                                 |
|                         | -                                                                             | 0  |                                                                                                                                                                                        |                                                                 |  | SignalP (SIGNALP)                                                                                                 |
|                         | -                                                                             | 0  |                                                                                                                                                                                        |                                                                 |  | -                                                                                                                 |
| Caenorhabditis elegans  | briggsae cbr-dep-1 protein                                                    | 3  | P:GO:0040026;<br>P:GO:0040027;<br>F:GO:0016787                                                                                                                                         | -                                                               |  | -                                                                                                                 |
| Caenorhabditis briggsae | amiloride-sensitive sodium channel family protein                             | 2  | P:GO:0006810;<br>P:GO:0007413                                                                                                                                                          | -                                                               |  | IPR001873; G3DSA:2.60.470.10<br>(GENE3D), PTHR11690:SF11<br>(PANTHER)                                             |
| Callithrix jacchus      | PREDICTED: hypothetical protein LOC100405620, partial<br>[Callithrix jacchus] | 0  |                                                                                                                                                                                        |                                                                 |  | -                                                                                                                 |
|                         | -                                                                             | 0  |                                                                                                                                                                                        |                                                                 |  | -                                                                                                                 |
| Caenorhabditis briggsae | elegans protein confirmed by transcript evidence                              | 5  | C:GO:0005615;<br>P:GO:0008152;<br>F:GO:0005515;<br>F:GO:0004866;<br>F:GO:0016740                                                                                                       | -                                                               |  | IPR001917; IPR002890; IPR011625;<br>PTHR11412 (PANTHER),<br>PTHR11412:SF4 (PANTHER)                               |
| Caenorhabditis briggsae | elegans protein confirmed by transcript evidence                              | 5  | C:GO:0005615;<br>P:GO:0008152;<br>F:GO:0005515;<br>F:GO:0004866;<br>F:GO:0016740                                                                                                       | -                                                               |  | IPR001917; IPR002890; IPR011625;<br>PTHR11412 (PANTHER),<br>PTHR11412:SF4 (PANTHER)                               |
| Caenorhabditis briggsae | elegans protein confirmed by transcript evidence                              | 5  | C:GO:0005615;<br>P:GO:0008152;<br>F:GO:0005515;<br>F:GO:0004866;<br>F:GO:0016740                                                                                                       | -                                                               |  | IPR001917; IPR002890; IPR011625;<br>PTHR11412 (PANTHER),<br>PTHR11412:SF4 (PANTHER)                               |



|                                     |                                                            |    |                                                                                                                                                                       |                                                                                  |                                                                                           |
|-------------------------------------|------------------------------------------------------------|----|-----------------------------------------------------------------------------------------------------------------------------------------------------------------------|----------------------------------------------------------------------------------|-------------------------------------------------------------------------------------------|
| Caenorhabditis briggsae             | elegans protein confirmed by transcript evidence           | 5  | C:GO:0005615;<br>P:GO:0008152;<br>F:GO:0005515;<br>F:GO:0004866;<br>F:GO:0016740                                                                                      | -                                                                                | IPR001917; IPR002890; IPR011625;<br>PTHR11412 (PANTHER),<br>PTHR11412:SF4 (PANTHER)       |
| Caenorhabditis elegans              | elegans protein partially confirmed by transcript evidence | 5  | F:GO:0004428;<br>P:GO:0046854;<br>P:GO:0000003;<br>P:GO:0008219;<br>P:GO:0048015                                                                                      | -                                                                                | SignalP (SIGNALP)                                                                         |
| Caenorhabditis elegans              | dedicator of cytokinesis 3                                 | 7  | F:GO:0005083;<br>P:GO:0043652;<br>C:GO:0005886;<br>F:GO:0032403;<br>F:GO:0019899;<br>P:GO:0040039;<br>F:GO:0017124                                                    | -                                                                                | PTHR23317 (PANTHER),<br>PTHR23317:SF16 (PANTHER)                                          |
| -                                   | -                                                          | 0  |                                                                                                                                                                       |                                                                                  | -                                                                                         |
| -                                   | -                                                          | 0  |                                                                                                                                                                       |                                                                                  | -                                                                                         |
| -                                   | -                                                          | 0  |                                                                                                                                                                       |                                                                                  | -                                                                                         |
| -                                   | -                                                          | 0  |                                                                                                                                                                       |                                                                                  | -                                                                                         |
| -                                   | -                                                          | 0  |                                                                                                                                                                       |                                                                                  | SignalP (SIGNALP)                                                                         |
| Caenorhabditis briggsae             | elegans protein confirmed by transcript evidence           | 0  |                                                                                                                                                                       |                                                                                  | IPR008574                                                                                 |
| Caenorhabditis briggsae             | deah (asp-glu-ala-his) box polypeptide 37                  | 10 | P:GO:0040010;<br>P:GO:0008340;<br>F:GO:0003676;<br>F:GO:0008026;<br>P:GO:0000003;<br>F:GO:0005524;<br>P:GO:0002119;<br>P:GO:0006898;<br>P:GO:0009792;<br>P:GO:0016246 | -                                                                                | IPR014021; G3DSA:3.40.50.300<br>(GENE3D), PTHR18934 (PANTHER),<br>SSF52540 (SUPERFAMILY)  |
| -                                   | -                                                          | 0  |                                                                                                                                                                       |                                                                                  | -                                                                                         |
| -                                   | -                                                          | 0  |                                                                                                                                                                       |                                                                                  | -                                                                                         |
| -                                   | -                                                          | 0  |                                                                                                                                                                       |                                                                                  | -                                                                                         |
| Physcomitrella patens subsp. patens | histidine-rich protein 2                                   | 0  |                                                                                                                                                                       | F:GO:0005524;<br>C:GO:0016021;<br>F:GO:0042626;<br>P:GO:0055085;<br>P:GO:0006810 | SignalP (SIGNALP)                                                                         |
| Physcomitrella patens subsp. patens | histidine-rich protein 2                                   | 0  |                                                                                                                                                                       | F:GO:0005524;<br>C:GO:0016021;<br>F:GO:0042626;<br>P:GO:0055085;<br>P:GO:0006810 | SignalP (SIGNALP)                                                                         |
| Physcomitrella patens subsp. patens | predicted protein [Physcomitrella patens subsp. patens]    | 0  |                                                                                                                                                                       |                                                                                  | SignalP (SIGNALP)                                                                         |
| Physcomitrella patens subsp. patens | predicted protein [Physcomitrella patens subsp. patens]    | 0  |                                                                                                                                                                       |                                                                                  | SignalP (SIGNALP)                                                                         |
| Physcomitrella patens subsp. patens | predicted protein [Physcomitrella patens subsp. patens]    | 0  |                                                                                                                                                                       |                                                                                  | SignalP (SIGNALP)                                                                         |
| Physcomitrella patens subsp. patens | predicted protein [Physcomitrella patens subsp. patens]    | 0  |                                                                                                                                                                       |                                                                                  | SignalP (SIGNALP)                                                                         |
| Caenorhabditis elegans              | teneurin family member (ten-1)                             | 0  |                                                                                                                                                                       | C:GO:0016020                                                                     | PTHR11219 (PANTHER),<br>PTHR11219:SF4 (PANTHER)                                           |
| Caenorhabditis briggsae             | teneurin family member (ten-1)                             | 1  | P:GO:0048749                                                                                                                                                          |                                                                                  |                                                                                           |
| Caenorhabditis briggsae             | teneurin family member (ten-1)                             | 1  | P:GO:0048749                                                                                                                                                          | -                                                                                | -                                                                                         |
| Saccoglossus kowalevskii            | d-se domain containing 3                                   | 2  | C:GO:0005739;<br>F:GO:0004518                                                                                                                                         | -                                                                                | IPR001130; IPR015992; IPR018228;<br>G3DSA:3.20.20.140 (GENE3D),<br>SSF51556 (SUPERFAMILY) |

|                         |                                                            |    |                                                                                                                                                                                        |                                                                                                                    |             |                                                                                                                                |
|-------------------------|------------------------------------------------------------|----|----------------------------------------------------------------------------------------------------------------------------------------------------------------------------------------|--------------------------------------------------------------------------------------------------------------------|-------------|--------------------------------------------------------------------------------------------------------------------------------|
| Caenorhabditis elegans  | hat family dimerisation domain containing protein          | 0  |                                                                                                                                                                                        | F:GO:0003676;<br>F:GO:0046983                                                                                      |             | SignalP (SIGNALP)                                                                                                              |
| Caenorhabditis elegans  | hat family dimerisation domain containing protein          | 0  |                                                                                                                                                                                        | F:GO:0003676;<br>F:GO:0046983                                                                                      |             | SignalP (SIGNALP)                                                                                                              |
|                         | -                                                          | 0  |                                                                                                                                                                                        |                                                                                                                    |             | -                                                                                                                              |
| Loa loa                 | fibronectin type iii domain containing protein             | 2  | C:GO:0043231;<br>C:GO:0044444                                                                                                                                                          | -                                                                                                                  |             | IPR003961; IPR008957; IPR013783;<br>PRO0014 (PRINTS), PTHR19900<br>(PANTHER), PTHR19900:SF3<br>(PANTHER)                       |
|                         | -                                                          | 0  |                                                                                                                                                                                        |                                                                                                                    |             | -                                                                                                                              |
|                         | -                                                          | 0  |                                                                                                                                                                                        |                                                                                                                    |             | -                                                                                                                              |
|                         | -                                                          | 0  |                                                                                                                                                                                        |                                                                                                                    |             | -                                                                                                                              |
| Loa loa                 | ferredoxin 1                                               | 11 | P:GO:0006694;<br>F:GO:0009055;<br>F:GO:0005506;<br>P:GO:0055114;<br>F:GO:0051537;<br>F:GO:0019899;<br>P:GO:0050790;<br>F:GO:0008022;<br>C:GO:0005739;<br>F:GO:0042803;<br>P:GO:0006091 | -                                                                                                                  |             | IPR001041; IPR012675; PTHR23426<br>(PANTHER), PTHR23426:SF1<br>(PANTHER)                                                       |
| Brugia malayi           | histone 1                                                  | 4  | C:GO:0000786;<br>F:GO:0003677;<br>P:GO:0006334;<br>C:GO:0005634                                                                                                                        | -                                                                                                                  |             | SignalP (SIGNALP)                                                                                                              |
|                         | -                                                          | 0  |                                                                                                                                                                                        |                                                                                                                    |             | -                                                                                                                              |
| Brugia malayi           | elegans protein partially confirmed by transcript evidence | 8  | P:GO:0002119;<br>P:GO:0006468;<br>F:GO:0005515;<br>P:GO:0040010;<br>F:GO:0005524;<br>P:GO:0040011;<br>P:GO:0019915;<br>F:GO:0004674                                                    | -                                                                                                                  | EC:2.7.11.0 | -                                                                                                                              |
| Brugia malayi           | casein ki-se                                               | 5  | P:GO:0006468;<br>P:GO:0040010;<br>F:GO:0005524;<br>P:GO:0019915;<br>F:GO:0004674                                                                                                       | -                                                                                                                  | EC:2.7.11.0 | IPR000719; IPR008271; IPR011009;<br>IPR017442; G3DSA:1.10.510.10<br>(GENE3D), PTHR11909 (PANTHER),<br>PTHR11909:SF19 (PANTHER) |
| Caenorhabditis briggsae | nucleolar protein 6                                        | 0  |                                                                                                                                                                                        | C:GO:0005694;<br>C:GO:0000794;<br>F:GO:0003723;<br>P:GO:0006364;<br>P:GO:0008150;<br>C:GO:0005634;<br>C:GO:0005730 |             | IPR005554                                                                                                                      |
| Caenorhabditis briggsae | briggsae cbr-hyl-1 protein                                 | 1  | C:GO:0016020                                                                                                                                                                           | -                                                                                                                  |             | IPR006634; PTHR12560 (PANTHER),<br>SignalP (SIGNALP)                                                                           |

|                           |                                                                |   |                                                                                                                                                      |                                                                                                                                                                                                                                                                                              |            |                                                                                                                                                                   |
|---------------------------|----------------------------------------------------------------|---|------------------------------------------------------------------------------------------------------------------------------------------------------|----------------------------------------------------------------------------------------------------------------------------------------------------------------------------------------------------------------------------------------------------------------------------------------------|------------|-------------------------------------------------------------------------------------------------------------------------------------------------------------------|
| Loa loa                   | elegans protein confirmed by transcript evidence               | 0 |                                                                                                                                                      | C:GO:0016021;<br>P:GO:0010171;<br>C:GO:0016020;<br>P:GO:0006814;<br>P:GO:0006898;<br>P:GO:0006813;<br>P:GO:0006811;<br>P:GO:0006810;<br>P:GO:0000003;<br>P:GO:0009792;<br>P:GO:0002119;<br>P:GO:0040018;<br>P:GO:0006754;<br>F:GO:0005391;<br>P:GO:0040011;<br>P:GO:0040010;<br>P:GO:0040007 |            | IPR000402; SignalP (SIGNALP)                                                                                                                                      |
| Loa loa                   | pyruvate dehydroge-se beta                                     | 8 | P:GO:0008340;<br>F:GO:0005515;<br>P:GO:0006974;<br>F:GO:0008168;<br>P:GO:0043414;<br>P:GO:0045449;<br>C:GO:0044451;<br>P:GO:0016568                  | -                                                                                                                                                                                                                                                                                            | EC:2.1.1.0 | IPR001214; IPR001965; IPR011011;<br>IPR013083; IPR017956; IPR019786;<br>IPR019787; G3DSA:2.170.270.10<br>(GENE3D), PTHR16286 (PANTHER),<br>SSF82199 (SUPERFAMILY) |
| Caenorhabditis elegans    | heat shock factor binding protein 1                            | 9 | P:GO:0019064;<br>C:GO:0005856;<br>F:GO:0046789;<br>P:GO:0000122;<br>F:GO:0003714;<br>C:GO:0019031;<br>P:GO:0006936;<br>P:GO:0006950;<br>C:GO:0005634 | -                                                                                                                                                                                                                                                                                            |            | -                                                                                                                                                                 |
| Caenorhabditis elegans    | cysteine-rich venom                                            | 1 | F:GO:0005515                                                                                                                                         | -                                                                                                                                                                                                                                                                                            |            | IPR002919; IPR013032;<br>G3DSA:2.10.25.10 (GENE3D),<br>PTHR23259 (PANTHER), SignalP<br>(SIGNALP)                                                                  |
|                           | -                                                              | 0 |                                                                                                                                                      |                                                                                                                                                                                                                                                                                              |            | SignalP (SIGNALP)                                                                                                                                                 |
|                           | -                                                              | 0 |                                                                                                                                                      |                                                                                                                                                                                                                                                                                              |            | -                                                                                                                                                                 |
| Caenorhabditis sp. PS1010 | hypothetical protein Csp3_JD07.001 [Caenorhabditis sp. PS1010] | 0 |                                                                                                                                                      |                                                                                                                                                                                                                                                                                              |            | -                                                                                                                                                                 |
|                           | -                                                              | 0 |                                                                                                                                                      |                                                                                                                                                                                                                                                                                              |            | -                                                                                                                                                                 |
| Homo sapiens              | phospholipase d3                                               | 7 | C:GO:0005789;<br>C:GO:0005624;<br>P:GO:0016042;<br>F:GO:0005515;<br>F:GO:0070290;<br>F:GO:0004630;<br>C:GO:0016021                                   | -                                                                                                                                                                                                                                                                                            | EC:3.1.4.4 | IPR001736; IPR013582;<br>G3DSA:3.30.870.10 (GENE3D),<br>PTHR10185 (PANTHER), SSF56024<br>(SUPERFAMILY)                                                            |

|                             |                                                  |    |                                                                                                                                                                       |                                                                                                                                                                       |             |                                                                                                                                                       |
|-----------------------------|--------------------------------------------------|----|-----------------------------------------------------------------------------------------------------------------------------------------------------------------------|-----------------------------------------------------------------------------------------------------------------------------------------------------------------------|-------------|-------------------------------------------------------------------------------------------------------------------------------------------------------|
| Caenorhabditis elegans      | unc-5 homolog b                                  | 0  |                                                                                                                                                                       | C:GO:0009986;<br>C:GO:0016021;<br>P:GO:0006915;<br>F:GO:0003674;<br>P:GO:0007275;<br>P:GO:0007165;<br>C:GO:0005575;<br>F:GO:0004872;<br>F:GO:0005515;<br>P:GO:0008150 |             | PTHR12582 (PANTHER),<br>PTHR12582:SF2 (PANTHER)                                                                                                       |
| -                           | -                                                | 0  |                                                                                                                                                                       |                                                                                                                                                                       |             | -                                                                                                                                                     |
| Caenorhabditis elegans      | d--directed r- polymerase i subunit rpa2         | 9  | F:GO:0003899;<br>P:GO:0040007;<br>P:GO:0040035;<br>F:GO:0003677;<br>P:GO:0002119;<br>F:GO:0032549;<br>P:GO:0009792;<br>P:GO:0006350;<br>C:GO:0005634                  | -                                                                                                                                                                     | EC:2.7.7.6  | IPR007120; IPR007121; IPR015712;<br>G3DSA:2.40.270.10 (GENE3D),<br>G3DSA:3.90.1100.10 (GENE3D),<br>PTHR20856:SF5 (PANTHER), SSF64484<br>(SUPERFAMILY) |
| Caenorhabditis elegans      | probable r--binding protein 19                   | 2  | C:GO:0005730;<br>F:GO:0003676                                                                                                                                         | -                                                                                                                                                                     |             | IPR000504; IPR012677; PTHR10432<br>(PANTHER), PTHR10432:SF63<br>(PANTHER), SSF54928 (SUPERFAMILY)                                                     |
| Angiostrongylus cantonensis | elegans protein confirmed by transcript evidence | 0  |                                                                                                                                                                       |                                                                                                                                                                       |             | -                                                                                                                                                     |
| -                           | -                                                | 0  |                                                                                                                                                                       |                                                                                                                                                                       |             | SignalP (SIGNALP)                                                                                                                                     |
| -                           | -                                                | 0  |                                                                                                                                                                       |                                                                                                                                                                       |             | IPR000626; G3DSA:3.10.20.90<br>(GENE3D)                                                                                                               |
| Brugia malayi               | hypothetical protein Bm1_35525 [Brugia malayi]   | 0  |                                                                                                                                                                       |                                                                                                                                                                       |             | -                                                                                                                                                     |
| Caenorhabditis briggsae     | solute carrier family member 27                  | 6  | F:GO:0005488;<br>C:GO:0005743;<br>P:GO:0055085;<br>C:GO:0016021;<br>P:GO:0006091;<br>F:GO:0005215                                                                     | -                                                                                                                                                                     |             | SignalP (SIGNALP)                                                                                                                                     |
| -                           | -                                                | 0  |                                                                                                                                                                       |                                                                                                                                                                       |             | -                                                                                                                                                     |
| Caenorhabditis briggsae     | cathepsin I-like cysteine protei-se              | 5  | P:GO:0048102;<br>C:GO:0045169;<br>C:GO:0016021;<br>F:GO:0004197;<br>P:GO:0006508                                                                                      | -                                                                                                                                                                     | EC:3.4.22.0 | IPR000169; IPR000668; IPR013128;<br>G3DSA:3.90.70.10 (GENE3D),<br>PTHR12411:SF26 (PANTHER), SignalP<br>(SIGNALP), SSF54001 (SUPERFAMILY)              |
| Caenorhabditis elegans      | endothelin-converting enzyme                     | 1  | F:GO:0008237                                                                                                                                                          | -                                                                                                                                                                     |             | IPR000718; IPR008753;<br>G3DSA:1.10.1380.10 (GENE3D),<br>PTHR11733:SF24 (PANTHER),<br>SSF55486 (SUPERFAMILY)                                          |
| Caenorhabditis elegans      | kinesin family member 1b                         | 10 | F:GO:0003777;<br>C:GO:0030659;<br>P:GO:0007274;<br>C:GO:0005875;<br>C:GO:0005874;<br>F:GO:0019894;<br>P:GO:0007270;<br>F:GO:0005524;<br>F:GO:0016887;<br>P:GO:0008089 | -                                                                                                                                                                     |             | -                                                                                                                                                     |
| -                           | -                                                | 0  |                                                                                                                                                                       |                                                                                                                                                                       |             | -                                                                                                                                                     |
| -                           | -                                                | 0  |                                                                                                                                                                       |                                                                                                                                                                       |             | -                                                                                                                                                     |
| -                           | -                                                | 0  |                                                                                                                                                                       |                                                                                                                                                                       |             | -                                                                                                                                                     |
| -                           | -                                                | 0  |                                                                                                                                                                       |                                                                                                                                                                       |             | -                                                                                                                                                     |

|                         |                                            |   |                                                                                                   |                                                                 |            |                                                                                                                   |
|-------------------------|--------------------------------------------|---|---------------------------------------------------------------------------------------------------|-----------------------------------------------------------------|------------|-------------------------------------------------------------------------------------------------------------------|
|                         | -                                          | 0 |                                                                                                   |                                                                 |            | -                                                                                                                 |
|                         | -                                          | 0 |                                                                                                   |                                                                 |            | -                                                                                                                 |
| Caenorhabditis briggsae | briggsae cbr-unc-45 protein                | 1 | F:GO:0005488                                                                                      | -                                                               |            | PTHR22904 (PANTHER),<br>PTHR22904:SF28 (PANTHER), PF11701<br>(PFAM), SignalP (SIGNALP)                            |
| Caenorhabditis elegans  | o-linked c transferase                     | 0 |                                                                                                   | C:GO:0005634                                                    |            | -                                                                                                                 |
| Caenorhabditis elegans  | fmr-like peptide family member (flp-22)    | 1 | P:GO:0007218                                                                                      | -                                                               |            | IPR002544; PTHR20986 (PANTHER),<br>SignalP (SIGNALP)                                                              |
| Caenorhabditis elegans  | transmembrane protein 57                   | 0 |                                                                                                   | C:GO:0016021                                                    |            | IPR019130; PTHR13289 (PANTHER),<br>SignalP (SIGNALP)                                                              |
|                         | -                                          | 0 |                                                                                                   |                                                                 |            | IPR008160; PTHR10499 (PANTHER),<br>PTHR10499:SF104 (PANTHER)                                                      |
|                         | -                                          | 0 |                                                                                                   |                                                                 |            | -                                                                                                                 |
|                         | -                                          | 0 |                                                                                                   |                                                                 |            | PTHR22743 (PANTHER),<br>PTHR22743:SF10 (PANTHER)                                                                  |
| Caenorhabditis brenneri | polymerase iii (d- directed) polypeptide b | 6 | P:GO:0009304;<br>F:GO:0003899;<br>F:GO:0003677;<br>P:GO:0031017;<br>F:GO:0032549;<br>P:GO:0048565 | -                                                               | EC:2.7.7.6 | IPR007642; SSF64484 (SUPERFAMILY)                                                                                 |
| Caenorhabditis briggsae | peroxisomal -trans-enoyl- isomerase        | 5 | F:GO:0005488;<br>C:GO:0005777;<br>P:GO:0006635;<br>F:GO:0016863;<br>C:GO:0005739                  | -                                                               | EC:5.3.3.0 | IPR000582; IPR001753; IPR014352;<br>G3DSA:3.90.226.10 (GENE3D),<br>PTHR11941 (PANTHER), SSF52096<br>(SUPERFAMILY) |
| Caenorhabditis briggsae | peroxisomal -trans-enoyl- isomerase        | 5 | F:GO:0005488;<br>C:GO:0005777;<br>P:GO:0006635;<br>F:GO:0016863;<br>C:GO:0005739                  | -                                                               | EC:5.3.3.0 | IPR000582; IPR001753; IPR014352;<br>G3DSA:3.90.226.10 (GENE3D),<br>PTHR11941 (PANTHER), SSF52096<br>(SUPERFAMILY) |
|                         | -                                          | 0 |                                                                                                   |                                                                 |            | -                                                                                                                 |
| Heliconius melpomene    | endonuclease-reverse transcriptase -e01    | 0 |                                                                                                   | F:GO:0003723;<br>P:GO:0006278;<br>F:GO:0004519;<br>F:GO:0003964 |            | IPR000477                                                                                                         |

|                         |                                                                      |    |                                                                                                                                                                                                                                                                                                                                                                                                                                                                        |  |                            |                                                                                                                                         |
|-------------------------|----------------------------------------------------------------------|----|------------------------------------------------------------------------------------------------------------------------------------------------------------------------------------------------------------------------------------------------------------------------------------------------------------------------------------------------------------------------------------------------------------------------------------------------------------------------|--|----------------------------|-----------------------------------------------------------------------------------------------------------------------------------------|
|                         | macrophage migration inhibitory factor                               | 44 | P:GO:0006954;<br>P:GO:0033138;<br>P:GO:0048146;<br>P:GO:0007506;<br>P:GO:0007530;<br>P:GO:0090238;<br>P:GO:0070374;<br>P:GO:0001546;<br>P:GO:0031666;<br>P:GO:0043030;<br>P:GO:0043406;<br>F:GO:0008083;<br>C:GO:0005615;<br>P:GO:0007569;<br>P:GO:0061081;<br>F:GO:0005160;<br>P:GO:0071157;<br>P:GO:0043518;<br>P:GO:0050731;<br>P:GO:0030890;<br>P:GO:0045087;<br>P:GO:0001516;<br>F:GO:0005125;<br>P:GO:0032269;<br>C:GO:0005737;<br>P:GO:0010629;<br>P:GO:0051092 |  | EC:5.3.3.12;<br>EC:5.3.2.1 |                                                                                                                                         |
|                         | -                                                                    | 0  |                                                                                                                                                                                                                                                                                                                                                                                                                                                                        |  |                            | SignalP (SIGNALP)                                                                                                                       |
| Brugia malayi           | beta like 1                                                          | 1  | F:GO:0042802                                                                                                                                                                                                                                                                                                                                                                                                                                                           |  |                            | IPR013180; PTHR14978 (PANTHER)                                                                                                          |
| Caenorhabditis briggsae | solute carrier family 37 (glycerol-3-phosphate transporter) member 3 | 2  | P:GO:0055085;<br>C:GO:0016021                                                                                                                                                                                                                                                                                                                                                                                                                                          |  |                            | SignalP (SIGNALP)                                                                                                                       |
| Caenorhabditis elegans  | 4-coumarate:coenzyme a ligase 3                                      | 1  | F:GO:0003824                                                                                                                                                                                                                                                                                                                                                                                                                                                           |  |                            | IPR000873; G3DSA:2.30.38.10 (GENE3D), G3DSA:3.40.50.980 (GENE3D), PTHR11968 (PANTHER), PTHR11968:SF43 (PANTHER), SSF56801 (SUPERFAMILY) |
| Caenorhabditis briggsae | calpain 5                                                            | 8  | P:GO:0042004;<br>P:GO:0060014;<br>C:GO:0005622;<br>P:GO:0001553;<br>F:GO:0004198;<br>P:GO:0019099;<br>P:GO:0006508;<br>C:GO:0016020                                                                                                                                                                                                                                                                                                                                    |  |                            | -                                                                                                                                       |
| Caenorhabditis briggsae | calpain 5                                                            | 8  | P:GO:0042004;<br>P:GO:0060014;<br>C:GO:0005622;<br>P:GO:0001553;<br>F:GO:0004198;<br>P:GO:0019099;<br>P:GO:0006508;<br>C:GO:0016020                                                                                                                                                                                                                                                                                                                                    |  |                            | IPR022682; IPR022683; IPR022684; G3DSA:2.60.120.380 (GENE3D), PTHR10183 (PANTHER), PTHR10183:SF32 (PANTHER)                             |
|                         | -                                                                    | 0  |                                                                                                                                                                                                                                                                                                                                                                                                                                                                        |  |                            |                                                                                                                                         |
|                         | -                                                                    | 0  |                                                                                                                                                                                                                                                                                                                                                                                                                                                                        |  |                            |                                                                                                                                         |
|                         | -                                                                    | 0  |                                                                                                                                                                                                                                                                                                                                                                                                                                                                        |  |                            |                                                                                                                                         |
|                         | -                                                                    | 0  |                                                                                                                                                                                                                                                                                                                                                                                                                                                                        |  |                            |                                                                                                                                         |

|                           |                                                                      |    |                                                                                                                                                                                        |                                                |              |                                                                                                                |
|---------------------------|----------------------------------------------------------------------|----|----------------------------------------------------------------------------------------------------------------------------------------------------------------------------------------|------------------------------------------------|--------------|----------------------------------------------------------------------------------------------------------------|
| Caenorhabditis elegans    | photosystem i assembly                                               | 0  |                                                                                                                                                                                        | P:GO:0008152;<br>F:GO:0003824;<br>C:GO:0005575 |              | IPR005137; PTHR21381:SF4 (PANTHER)                                                                             |
| Caenorhabditis elegans    | hypothetical protein F23H11.2 [Caenorhabditis elegans]               | 0  |                                                                                                                                                                                        |                                                |              | -                                                                                                              |
| Caenorhabditis elegans    | elegans protein confirmed by transcript evidence                     | 1  | P:GO:0040011                                                                                                                                                                           |                                                |              | SignalP (SIGNALP)                                                                                              |
|                           | -                                                                    | 0  |                                                                                                                                                                                        |                                                |              | -                                                                                                              |
| Ancylostoma ceylanicum    | kunitz type serine protease inhibitor                                | 2  | F:GO:0004867;<br>F:GO:0008233                                                                                                                                                          |                                                |              | IPR002223; PTHR10083 (PANTHER),<br>PTHR10083:SF39 (PANTHER)                                                    |
|                           | -                                                                    | 0  |                                                                                                                                                                                        |                                                |              | -                                                                                                              |
|                           | -                                                                    | 0  |                                                                                                                                                                                        |                                                |              | SignalP (SIGNALP)                                                                                              |
| Caenorhabditis elegans    | Hypothetical protein F49D11.10 [Caenorhabditis elegans]              | 0  |                                                                                                                                                                                        |                                                |              | IPR011042                                                                                                      |
| Ancylostoma ceylanicum    | secreted protein 5 precursor                                         | 0  |                                                                                                                                                                                        | P:GO:0008340;<br>C:GO:0005576                  |              | IPR014044; SignalP (SIGNALP)                                                                                   |
|                           | -                                                                    | 0  |                                                                                                                                                                                        |                                                |              | -                                                                                                              |
| Caenorhabditis briggsae   | alkylation repair homolog 6-like isoform 1                           | 2  | F:GO:0010302;<br>C:GO:0044424                                                                                                                                                          |                                                |              | -                                                                                                              |
|                           | -                                                                    | 0  |                                                                                                                                                                                        |                                                |              | -                                                                                                              |
| Caenorhabditis briggsae   | elegans protein partially confirmed by transcript evidence           | 4  | F:GO:0016491;<br>F:GO:0005515;<br>P:GO:0040010;<br>P:GO:0008152                                                                                                                        |                                                |              | IPR002198; IPR016040;<br>PTHR19410:SF76 (PANTHER),<br>SSF51735 (SUPERFAMILY)                                   |
|                           | -                                                                    | 0  |                                                                                                                                                                                        |                                                |              | SignalP (SIGNALP)                                                                                              |
|                           | -                                                                    | 0  |                                                                                                                                                                                        |                                                |              | -                                                                                                              |
| Caenorhabditis elegans    | alpha- -mannosyl-glycoprotein 2-beta-n-acetylglucosaminyltransferase | 3  | C:GO:0000139;<br>F:GO:0003827;<br>P:GO:0006487                                                                                                                                         |                                                | EC:2.4.1.101 | IPR004139; G3DSA:3.90.550.10 (GENE3D), SignalP (SIGNALP)                                                       |
| Caenorhabditis sp. PS1010 | elegans protein confirmed by transcript evidence                     | 0  |                                                                                                                                                                                        |                                                |              | PTHR14167 (PANTHER),<br>PTHR14167:SF2 (PANTHER)                                                                |
| Caenorhabditis elegans    | 2-acylglycerol o-acyltransferase 1                                   | 5  | P:GO:0006071;<br>C:GO:0005789;<br>P:GO:0008610;<br>C:GO:0016021;<br>F:GO:0003846                                                                                                       |                                                | EC:2.3.1.22  | IPR007130                                                                                                      |
|                           | -                                                                    | 0  |                                                                                                                                                                                        |                                                |              | -                                                                                                              |
| Homo sapiens              | lipolysis stimulated lipoprotein receptor                            | 11 | P:GO:0009790;<br>C:GO:0005730;<br>F:GO:0004872;<br>C:GO:0034362;<br>C:GO:0005794;<br>C:GO:0005886;<br>C:GO:0042627;<br>P:GO:0001889;<br>C:GO:0016021;<br>P:GO:0019216;<br>C:GO:0034361 |                                                |              | -                                                                                                              |
| Apis mellifera            | zinc c2h2 type family protein                                        | 0  |                                                                                                                                                                                        | F:GO:0003676;<br>F:GO:0008270;<br>C:GO:0005622 |              | -                                                                                                              |
| Caenorhabditis briggsae   | activating sig-I cointegrator 1 complex subunit 3                    | 3  | F:GO:0005524;<br>F:GO:0003677;<br>F:GO:0008026                                                                                                                                         |                                                |              | IPR011545; G3DSA:3.40.50.300 (GENE3D), PTHR11752 (PANTHER),<br>PTHR11752:SF8 (PANTHER), SSF52540 (SUPERFAMILY) |
|                           | -                                                                    | 0  |                                                                                                                                                                                        |                                                |              | SignalP (SIGNALP)                                                                                              |

|                         |                                                        |   |                                                                                                                                                        |   |             |                                                                                                                                                       |
|-------------------------|--------------------------------------------------------|---|--------------------------------------------------------------------------------------------------------------------------------------------------------|---|-------------|-------------------------------------------------------------------------------------------------------------------------------------------------------|
| Caenorhabditis briggsae | bone morphogenetic protein                             |   | C:GO:0005576;<br>F:GO:0004222;<br>P:GO:0007275;<br>C:GO:0005622;<br>9 P:GO:0006508;<br>P:GO:0030154;<br>F:GO:0005509;<br>F:GO:0008270;<br>F:GO:0016874 | - | EC:3.4.24.0 | IPR001506; IPR006026;<br>G3DSA:3.40.390.10 (GENE3D),<br>PTHR10127 (PANTHER),<br>PTHR10127:SF70 (PANTHER),<br>SSF55486 (SUPERFAMILY)                   |
|                         | -                                                      | 0 |                                                                                                                                                        |   |             | SignalP (SIGNALP)                                                                                                                                     |
| Caenorhabditis elegans  | organic cation transporter family member (oct-2)       |   | P:GO:0019915;<br>C:GO:0016021;<br>4 P:GO:0055085;<br>F:GO:0005215                                                                                      | - |             | PTHR11600 (PANTHER),<br>PTHR11600:SF44 (PANTHER), SignalP<br>(SIGNALP)                                                                                |
|                         | -                                                      | 0 |                                                                                                                                                        |   |             | SignalP (SIGNALP)                                                                                                                                     |
|                         | -                                                      | 0 |                                                                                                                                                        |   |             | SignalP (SIGNALP)                                                                                                                                     |
| Caenorhabditis briggsae | multidrug resistance protein family member (mrp-1)     |   | F:GO:0042626;<br>P:GO:0055085;<br>4 F:GO:0005524;<br>C:GO:0016021                                                                                      | - |             | IPR001140; IPR011527; IPR017940;<br>IPR018062; G3DSA:1.20.1560.10<br>(GENE3D), PTHR19242 (PANTHER),<br>PTHR19242:SF35 (PANTHER), SignalP<br>(SIGNALP) |
|                         | -                                                      | 0 |                                                                                                                                                        |   |             | -                                                                                                                                                     |
| Brugia malayi           | cpb-3                                                  |   | P:GO:0009987;<br>F:GO:0003723;<br>C:GO:0045202;<br>6 F:GO:0000166;<br>C:GO:0044424;<br>C:GO:0016020                                                    | - |             | IPR000504; IPR012677; PTHR12566<br>(PANTHER), SSF54928 (SUPERFAMILY)                                                                                  |
| Brugia malayi           | cpb-3                                                  |   | P:GO:0009987;<br>F:GO:0003723;<br>C:GO:0045202;<br>6 F:GO:0000166;<br>C:GO:0044424;<br>C:GO:0016020                                                    | - |             | IPR000504; IPR012677; PTHR12566<br>(PANTHER), SSF54928 (SUPERFAMILY)                                                                                  |
| Caenorhabditis elegans  | hypothetical protein Y48G9A.3 [Caenorhabditis elegans] |   | 1 P:GO:0000003                                                                                                                                         | - |             | -                                                                                                                                                     |
|                         | -                                                      | 0 |                                                                                                                                                        |   |             | -                                                                                                                                                     |
| Caenorhabditis briggsae | u6 snr-associated sm-like protein lsm7                 |   | F:GO:0003676;<br>P:GO:0008340;<br>5 C:GO:0030529;<br>P:GO:0040007;<br>P:GO:0002119                                                                     | - |             | -                                                                                                                                                     |
| Caenorhabditis briggsae | briggsae cbr-tmd-2 protein                             |   | C:GO:0045169;<br>C:GO:0005856;<br>4 P:GO:0000003;<br>F:GO:0005523                                                                                      | - |             | IPR004934; G3DSA:3.80.10.10<br>(GENE3D), PTHR10901:SF4<br>(PANTHER), SSF52047 (SUPERFAMILY)                                                           |
|                         | -                                                      | 0 |                                                                                                                                                        |   |             | SignalP (SIGNALP)                                                                                                                                     |
| Caenorhabditis elegans  | briggsae cbr-zig-5 protein                             |   | 0                                                                                                                                                      |   |             | IPR007110; IPR013783                                                                                                                                  |
| Brugia malayi           | laminin alpha chain                                    |   | 0                                                                                                                                                      |   |             | -                                                                                                                                                     |
|                         |                                                        |   |                                                                                                                                                        |   |             | C:GO:0005606;<br>F:GO:0005102;<br>C:GO:0005604;<br>P:GO:0045995;<br>C:GO:0005578;<br>P:GO:0030155;<br>C:GO:0031012;<br>P:GO:0030334;<br>P:GO:0007155  |



|                         |                                                        |   |                                                                                                                                                      |                                                                                  |                                                                                                                                      |
|-------------------------|--------------------------------------------------------|---|------------------------------------------------------------------------------------------------------------------------------------------------------|----------------------------------------------------------------------------------|--------------------------------------------------------------------------------------------------------------------------------------|
| Brugia malayi           | transcription elongation factor spt6-like              | 2 | P:GO:0044260;<br>P:GO:0090304                                                                                                                        | -                                                                                | IPR000980; IPR003029; IPR012340;<br>IPR016027; IPR022967; PTHR10145<br>(PANTHER), PTHR10145:SF1<br>(PANTHER), SSF55550 (SUPERFAMILY) |
| Caenorhabditis elegans  | schip1 protein                                         | 0 |                                                                                                                                                      | F:GO:0004553;<br>C:GO:0042597;<br>F:GO:0003674;<br>P:GO:0008150;<br>C:GO:0005575 | IPR015649                                                                                                                            |
| Monodelphis domestica   | ribosomal protein s21                                  | 5 | F:GO:0003735;<br>F:GO:0047485;<br>C:GO:0022627;<br>F:GO:0043022;<br>P:GO:0006414                                                                     | -                                                                                | IPR001931; IPR018279                                                                                                                 |
|                         | -                                                      | 0 |                                                                                                                                                      |                                                                                  | -                                                                                                                                    |
| Caenorhabditis briggsae | mitochondrial carrier protein                          | 9 | P:GO:0055085;<br>P:GO:0015868;<br>F:GO:0005488;<br>C:GO:0016021;<br>C:GO:0005743;<br>F:GO:0000295;<br>P:GO:0009792;<br>P:GO:0040018;<br>P:GO:0051503 | -                                                                                | IPR001993; IPR018108;<br>G3DSA:1.50.40.10 (GENE3D),<br>PTHR11896:SF34 (PANTHER), SignalP<br>(SIGNALP)                                |
|                         | -                                                      | 0 |                                                                                                                                                      |                                                                                  | -                                                                                                                                    |
|                         | -                                                      | 0 |                                                                                                                                                      |                                                                                  | -                                                                                                                                    |
| Loa loa                 | btb poz domain-containing protein 8                    | 0 |                                                                                                                                                      | F:GO:0005515                                                                     | IPR000210; IPR011333; IPR013069;<br>IPR013089; PTHR23230:SF179<br>(PANTHER)                                                          |
|                         | -                                                      | 0 |                                                                                                                                                      |                                                                                  | -                                                                                                                                    |
| Caenorhabditis elegans  | hypothetical protein F20D6.11 [Caenorhabditis elegans] | 2 | C:GO:0005739;<br>P:GO:0042981                                                                                                                        | -                                                                                | G3DSA:3.50.50.60 (GENE3D),<br>PTHR22912 (PANTHER),<br>PTHR22912:SF7 (PANTHER)                                                        |
|                         | -                                                      | 0 |                                                                                                                                                      |                                                                                  | -                                                                                                                                    |
| Caenorhabditis elegans  | upf0493 protein kiaa1632-like                          | 1 | P:GO:0040017                                                                                                                                         | -                                                                                | -                                                                                                                                    |
| Brugia malayi           | ubiquitin carboxyl-termi-l hydrolase 16                | 5 | P:GO:0016568;<br>F:GO:0008234;<br>P:GO:0044267;<br>P:GO:0045449;<br>F:GO:0005515                                                                     | -                                                                                | IPR001394; IPR018200; PTHR10420<br>(PANTHER), PTHR10420:SF52<br>(PANTHER), SSF54001 (SUPERFAMILY)                                    |
| Brugia malayi           | ubiquitin carboxyl-termi-l hydrolase 16                | 5 | P:GO:0016568;<br>F:GO:0008234;<br>P:GO:0044267;<br>P:GO:0045449;<br>F:GO:0005515                                                                     | -                                                                                | IPR001394; IPR018200; PTHR10420<br>(PANTHER), PTHR10420:SF52<br>(PANTHER), SSF54001 (SUPERFAMILY)                                    |
| Caenorhabditis elegans  | hypothetical protein Y5D5A.4 [Caenorhabditis elegans]  | 0 |                                                                                                                                                      |                                                                                  | -                                                                                                                                    |
| Loa loa                 | amine oxidase (flavin containing) domain 1             | 6 | P:GO:0016568;<br>P:GO:0019219;<br>F:GO:0032453;<br>F:GO:0046872;<br>P:GO:0032501;<br>P:GO:0006306                                                    | -                                                                                | -                                                                                                                                    |

|                         |                                                     |   |                                                                                                                                     |   |             |                                                                                                        |
|-------------------------|-----------------------------------------------------|---|-------------------------------------------------------------------------------------------------------------------------------------|---|-------------|--------------------------------------------------------------------------------------------------------|
| Caenorhabditis elegans  | dead (asp-glu-ala-asp) box polypeptide 58           | 8 | F:GO:0017111;<br>F:GO:0008270;<br>F:GO:0003676;<br>P:GO:0032728;<br>P:GO:0032727;<br>P:GO:0045087;<br>F:GO:0005515;<br>P:GO:0002230 | - | EC:3.6.1.15 | G3DSA:3.40.50.300 (GENE3D),<br>PTHR14074 (PANTHER)                                                     |
| Caenorhabditis briggsae | dead (asp-glu-ala-asp) box polypeptide 58           | 7 | F:GO:0008270;<br>P:GO:0032728;<br>P:GO:0032727;<br>P:GO:0045087;<br>F:GO:0005515;<br>P:GO:0002230;<br>F:GO:0016787                  | - |             | IPR006935; IPR014021;<br>G3DSA:3.40.50.300 (GENE3D),<br>PTHR14074 (PANTHER), SSF52540<br>(SUPERFAMILY) |
| Caenorhabditis elegans  | integrator complex subunit isoform cra_a            | 3 | F:GO:0005515;<br>P:GO:0016180;<br>C:GO:0032039                                                                                      | - |             | PTHR13322 (PANTHER)                                                                                    |
| Caenorhabditis briggsae | hiv tat specific factor 1                           | 2 | P:GO:0040011;<br>P:GO:0010171                                                                                                       | - |             | -                                                                                                      |
|                         | -                                                   | 0 |                                                                                                                                     |   |             | -                                                                                                      |
|                         | -                                                   | 0 |                                                                                                                                     |   |             | -                                                                                                      |
|                         | -                                                   | 0 |                                                                                                                                     |   |             | -                                                                                                      |
| Caenorhabditis elegans  | u3 small nucleolar homolog a                        | 7 | P:GO:0040010;<br>P:GO:0040035;<br>P:GO:0019915;<br>P:GO:0002119;<br>F:GO:0005515;<br>P:GO:0006898;<br>C:GO:0044424                  | - |             | IPR006709; PTHR14150:SF12<br>(PANTHER)                                                                 |
| Caenorhabditis elegans  | u3 small nucleolar homolog a                        | 7 | P:GO:0040010;<br>P:GO:0040035;<br>P:GO:0019915;<br>P:GO:0002119;<br>F:GO:0005515;<br>P:GO:0006898;<br>C:GO:0044424                  | - |             | IPR006709; PTHR14150:SF12<br>(PANTHER)                                                                 |
|                         | -                                                   | 0 |                                                                                                                                     |   |             | PR01217 (PRINTS)                                                                                       |
| Caenorhabditis elegans  | ceramide glucosyl transferase family member (cgt-3) | 1 | F:GO:0016740                                                                                                                        | - |             | G3DSA:3.90.550.10 (GENE3D),<br>PTHR12726 (PANTHER), SSF53448<br>(SUPERFAMILY)                          |
| Caenorhabditis elegans  | briggsae cbr-clk-2 protein                          | 7 | P:GO:0009411;<br>P:GO:0008340;<br>P:GO:0010165;<br>P:GO:0000723;<br>P:GO:0000003;<br>P:GO:0000077;<br>C:GO:0005737                  | - |             | SignalP (SIGNALP)                                                                                      |

|                           |                                              |    |                                                                                                                                                                                                                                                                                                               |   |                            |                                                                                                                                                           |
|---------------------------|----------------------------------------------|----|---------------------------------------------------------------------------------------------------------------------------------------------------------------------------------------------------------------------------------------------------------------------------------------------------------------|---|----------------------------|-----------------------------------------------------------------------------------------------------------------------------------------------------------|
| Caenorhabditis elegans    | small nuclear ribonucleoprotein sm d3        | 11 | C:GO:0030532;<br>P:GO:0007417;<br>F:GO:0003676;<br>C:GO:0071011;<br>P:GO:0007517;<br>P:GO:0007052;<br>P:GO:0048542;<br>P:GO:0007422;<br>P:GO:0000398;<br>C:GO:0071013;<br>P:GO:0030182                                                                                                                        | - |                            | IPR001163; IPR006649; IPR010920;<br>G3DSA:2.30.30.100 (GENE3D),<br>PTHR23338 (PANTHER),<br>PTHR23338:SF17 (PANTHER), SignalP<br>(SIGNALP)                 |
|                           |                                              | 0  |                                                                                                                                                                                                                                                                                                               |   |                            | SignalP (SIGNALP)                                                                                                                                         |
| Teladorsagia circumcincta | class 3 lipase protein                       | 2  | F:GO:0004806;<br>P:GO:0006629                                                                                                                                                                                                                                                                                 | - | EC:3.1.1.3                 | -                                                                                                                                                         |
|                           |                                              | 0  |                                                                                                                                                                                                                                                                                                               |   |                            | -                                                                                                                                                         |
| Caenorhabditis elegans    | cell line derived transforming sequence-like | 5  | F:GO:0005085;<br>C:GO:0005886;<br>P:GO:0008624;<br>C:GO:0005829;<br>C:GO:0005739                                                                                                                                                                                                                              | - |                            | PTHR22826 (PANTHER),<br>PTHR22826:SF3 (PANTHER)                                                                                                           |
|                           |                                              | 0  |                                                                                                                                                                                                                                                                                                               |   |                            | -                                                                                                                                                         |
| Caenorhabditis briggsae   | f-box only protein isoform cra_a             | 3  | F:GO:0005515;<br>P:GO:0043161;<br>C:GO:0044424                                                                                                                                                                                                                                                                | - |                            | IPR007397; IPR008979;<br>G3DSA:2.60.120.260 (GENE3D)                                                                                                      |
| Loa loa                   | dual oxidase                                 | 18 | P:GO:0018149;<br>P:GO:0006979;<br>P:GO:0006952;<br>F:GO:0016174;<br>P:GO:0040032;<br>F:GO:0005509;<br>C:GO:0016021;<br>P:GO:0042338;<br>P:GO:0055114;<br>P:GO:0040007;<br>F:GO:0004601;<br>F:GO:0009055;<br>P:GO:0002119;<br>P:GO:0040011;<br>F:GO:0020037;<br>F:GO:0050660;<br>P:GO:0009792;<br>C:GO:0005882 | - | EC:1.6.3.1;<br>EC:1.11.1.7 | IPR002007; IPR010255; PTHR11475<br>(PANTHER)                                                                                                              |
| Caenorhabditis elegans    | acyl-coenzyme a short branched chain         | 11 | P:GO:0009792;<br>P:GO:0006637;<br>P:GO:0006952;<br>F:GO:0009055;<br>F:GO:0005515;<br>C:GO:0005759;<br>F:GO:0016937;<br>P:GO:0055114;<br>P:GO:0008340;<br>P:GO:0006631;<br>F:GO:0050660                                                                                                                        | - |                            | IPR006089; IPR006090; IPR006091;<br>IPR006092; IPR009075; IPR009100;<br>IPR013786; PTHR10909 (PANTHER),<br>PTHR10909:SF10 (PANTHER), SignalP<br>(SIGNALP) |

|                         |                                                                              |    |                                                                                                                                                                       |                                                                                                                                     |            |                                                                                                                                                                 |
|-------------------------|------------------------------------------------------------------------------|----|-----------------------------------------------------------------------------------------------------------------------------------------------------------------------|-------------------------------------------------------------------------------------------------------------------------------------|------------|-----------------------------------------------------------------------------------------------------------------------------------------------------------------|
| Caenorhabditis elegans  | subfamily member 19                                                          | 10 | P:GO:0009792;<br>P:GO:0002119;<br>C:GO:0005743;<br>F:GO:0031072;<br>P:GO:0055085;<br>P:GO:0000003;<br>C:GO:0016021;<br>P:GO:0040007;<br>P:GO:0006898;<br>P:GO:0015031 | -                                                                                                                                   |            | IPR001623; PTHR12763 (PANTHER),<br>PTHR12763:SF7 (PANTHER), SignalP<br>(SIGNALP)                                                                                |
| Caenorhabditis briggsae | solute carrier family 41 member 1                                            | 3  | C:GO:0016021;<br>F:GO:0008324;<br>P:GO:0006812                                                                                                                        | -                                                                                                                                   |            | IPR006667; PTHR16228 (PANTHER)                                                                                                                                  |
| Caenorhabditis elegans  | thump domain containing 3                                                    | 0  |                                                                                                                                                                       | F:GO:0003723;<br>F:GO:0008168;<br>F:GO:0003674;<br>F:GO:0016740;<br>P:GO:0008152;<br>P:GO:0008150;<br>F:GO:0005515;<br>C:GO:0005575 |            | IPR000241; IPR004114;<br>G3DSA:3.40.50.150 (GENE3D),<br>PTHR10108 (PANTHER),<br>PTHR10108:SF26 (PANTHER),<br>SSF143437 (SUPERFAMILY), SSF53335<br>(SUPERFAMILY) |
|                         | -                                                                            | 0  |                                                                                                                                                                       |                                                                                                                                     |            | -                                                                                                                                                               |
| Caenorhabditis elegans  | elegans protein partially confirmed by transcript evidence                   | 0  |                                                                                                                                                                       |                                                                                                                                     |            | SignalP (SIGNALP)                                                                                                                                               |
|                         |                                                                              |    | C:GO:0005602;<br>P:GO:0045087;<br>P:GO:0007568;<br>P:GO:0051384;<br>P:GO:0006958;<br>P:GO:0007420;<br>F:GO:0042803                                                    | -                                                                                                                                   |            | IPR001073; IPR008983; PTHR10499<br>(PANTHER), PTHR10499:SF34<br>(PANTHER)                                                                                       |
| Caenorhabditis elegans  | 4-nitrophenylphosphatase                                                     | 2  | P:GO:0008152;<br>F:GO:0016791                                                                                                                                         | -                                                                                                                                   | EC:3.1.3.0 | G3DSA:3.40.50.1000 (GENE3D),<br>PTHR19288 (PANTHER),<br>PTHR19288:SF11 (PANTHER),<br>SSF56784 (SUPERFAMILY)                                                     |
|                         | -                                                                            | 0  |                                                                                                                                                                       |                                                                                                                                     |            | -                                                                                                                                                               |
|                         | -                                                                            | 0  |                                                                                                                                                                       |                                                                                                                                     |            | SignalP (SIGNALP)                                                                                                                                               |
|                         | -                                                                            | 0  |                                                                                                                                                                       |                                                                                                                                     |            | -                                                                                                                                                               |
| Caenorhabditis elegans  | hypothetical protein Y37E11AL.5 [Caenorhabditis elegans]                     | 0  |                                                                                                                                                                       | P:GO:0007218;<br>F:GO:0005509;<br>P:GO:0007156;<br>C:GO:0016021;<br>C:GO:0016020;<br>C:GO:0005886                                   |            | -                                                                                                                                                               |
|                         | -                                                                            | 0  |                                                                                                                                                                       |                                                                                                                                     |            | -                                                                                                                                                               |
| Brugia malayi           | excision repair cross-complementing rodent repair<br>complementation group 8 | 3  | P:GO:0044238;<br>P:GO:0044260;<br>P:GO:0006950                                                                                                                        | -                                                                                                                                   |            | -                                                                                                                                                               |
| Brugia malayi           | ribonuclease p protein subunit p29                                           | 7  | P:GO:0040010;<br>P:GO:0006396;<br>F:GO:0005488;<br>P:GO:0040035;<br>C:GO:0030529;<br>F:GO:0016787;<br>C:GO:0005634                                                    | -                                                                                                                                   |            | IPR002730; PTHR13348 (PANTHER)                                                                                                                                  |

|               |                                                                    |   |                                                                                                   |                                                                                                                                                                                                                                                                                                                                                                                                                                                                         |                                                                                             |
|---------------|--------------------------------------------------------------------|---|---------------------------------------------------------------------------------------------------|-------------------------------------------------------------------------------------------------------------------------------------------------------------------------------------------------------------------------------------------------------------------------------------------------------------------------------------------------------------------------------------------------------------------------------------------------------------------------|---------------------------------------------------------------------------------------------|
| Loa loa       | low-density lipoprotein receptor repeat class b containing protein | 6 | C:GO:0005615;<br>P:GO:0019538;<br>F:GO:0005515;<br>P:GO:0045860;<br>F:GO:0003824;<br>C:GO:0016020 | -                                                                                                                                                                                                                                                                                                                                                                                                                                                                       | IPR002172; PTHR10529 (PANTHER),<br>PTHR10529:SF2 (PANTHER)                                  |
| Brugia malayi | wd repeat domain 39                                                | 3 | C:GO:0005856;<br>P:GO:0016226;<br>F:GO:0005488                                                    | -                                                                                                                                                                                                                                                                                                                                                                                                                                                                       | IPR001680; IPR011046; IPR015943;<br>IPR017986; IPR019781; IPR019782;<br>PTHR19920 (PANTHER) |
| Loa loa       | e3 ubiquitin-protein ligase bre1a                                  | 0 |                                                                                                   | F:GO:0031625;<br>P:GO:0000209;<br>P:GO:0006511;<br>P:GO:0006468;<br>C:GO:0005634;<br>C:GO:0005694;<br>F:GO:0005524;<br>F:GO:0002039;<br>F:GO:0046872;<br>P:GO:0016568;<br>F:GO:0016301;<br>P:GO:0006664;<br>F:GO:0004674;<br>F:GO:0016874;<br>C:GO:0000151;<br>F:GO:0004672;<br>F:GO:0004842;<br>P:GO:0010390;<br>P:GO:0030336;<br>F:GO:0042393;<br>F:GO:0000166;<br>P:GO:0045941;<br>P:GO:0032583;<br>F:GO:0003713;<br>C:GO:0005730;<br>P:GO:0033523;<br>F:GO:0008270; | PTHR23163 (PANTHER)                                                                         |

|                        |                                   |   |                                                                                                                                                                                                                                                                                                                                                                                                                                                       |   |                                                                                  |
|------------------------|-----------------------------------|---|-------------------------------------------------------------------------------------------------------------------------------------------------------------------------------------------------------------------------------------------------------------------------------------------------------------------------------------------------------------------------------------------------------------------------------------------------------|---|----------------------------------------------------------------------------------|
| Loa loa                | e3 ubiquitin-protein ligase bre1a | 0 | F:GO:000209;<br>P:GO:0006511;<br>P:GO:0006468;<br>C:GO:0005634;<br>C:GO:0005694;<br>F:GO:0005524;<br>F:GO:0002039;<br>F:GO:0046872;<br>P:GO:0016568;<br>F:GO:0016301;<br>P:GO:0006664;<br>F:GO:0004674;<br>F:GO:0016874;<br>C:GO:0000151;<br>F:GO:0004672;<br>F:GO:0004842;<br>P:GO:0010390;<br>P:GO:0030336;<br>F:GO:0042393;<br>F:GO:0000166;<br>P:GO:0045941;<br>P:GO:0032583;<br>F:GO:0003713;<br>C:GO:0005730;<br>P:GO:0033523;<br>F:GO:0008270; |   | PTHR23163 (PANTHER)                                                              |
| Ectocarpus siliculosus | r- helicase                       | 2 | F:GO:0004386;<br>F:GO:0000166                                                                                                                                                                                                                                                                                                                                                                                                                         | - | G3DSA:3.40.50.300 (GENE3D),<br>PTHR18934 (PANTHER), SSF52540<br>(SUPERFAMILY)    |
|                        | -                                 | 0 |                                                                                                                                                                                                                                                                                                                                                                                                                                                       |   | -                                                                                |
| Brugia malayi          | d- damage-binding protein 1       | 9 | C:GO:0005737;<br>C:GO:0031464;<br>C:GO:0031465;<br>P:GO:0009793;<br>F:GO:0005515;<br>P:GO:0043161;<br>F:GO:0003684;<br>P:GO:0006974;<br>C:GO:0005634                                                                                                                                                                                                                                                                                                  | - | PTHR10644 (PANTHER),<br>PTHR10644:SF3 (PANTHER)                                  |
| Caenorhabditis elegans | briggsae cbr-unc-84 protein       | 5 | P:GO:0090292;<br>C:GO:0031965;<br>C:GO:0034993;<br>P:GO:0090286;<br>F:GO:0005515                                                                                                                                                                                                                                                                                                                                                                      | - | IPR012919; PTHR12911 (PANTHER),<br>PTHR12911:SF7 (PANTHER), PS51469<br>(PROFILE) |

|                         |                                                            |    |                                                                                                                                                                                                                                                                             |                                                                                  |             |                                                                                                                                                                                                                                                     |
|-------------------------|------------------------------------------------------------|----|-----------------------------------------------------------------------------------------------------------------------------------------------------------------------------------------------------------------------------------------------------------------------------|----------------------------------------------------------------------------------|-------------|-----------------------------------------------------------------------------------------------------------------------------------------------------------------------------------------------------------------------------------------------------|
| Caenorhabditis elegans  | s-phase ki-se-associated protein 1                         | 16 | P:GO:0008340;<br>C:GO:0005654;<br>P:GO:0016246;<br>F:GO:0005515;<br>P:GO:0051437;<br>P:GO:0040010;<br>P:GO:0006898;<br>P:GO:0040011;<br>C:GO:0005829;<br>C:GO:0019005;<br>P:GO:0009792;<br>P:GO:0002009;<br>F:GO:0004842;<br>P:GO:0002119;<br>P:GO:0031146;<br>P:GO:0040035 | -                                                                                | EC:6.3.2.19 | IPR001232; IPR011333; IPR016072;<br>IPR016073; IPR016897;<br>PTHR11165:SF21 (PANTHER)                                                                                                                                                               |
| Caenorhabditis elegans  | ariadne ubiquitin-conjugating enzyme e2 binding protein    | 6  | C:GO:0005737;<br>F:GO:0016566;<br>F:GO:0005515;<br>F:GO:0004842;<br>F:GO:0008270;<br>P:GO:0016481                                                                                                                                                                           | -                                                                                | EC:6.3.2.19 | PTHR11685 (PANTHER),<br>PTHR11685:SF16 (PANTHER),<br>SSF57850 (SUPERFAMILY)                                                                                                                                                                         |
| Caenorhabditis elegans  | ariadne ubiquitin-conjugating enzyme e2 binding protein    | 4  | C:GO:0005737;<br>F:GO:0005515;<br>F:GO:0004842;<br>F:GO:0008270                                                                                                                                                                                                             | -                                                                                | EC:6.3.2.19 | -                                                                                                                                                                                                                                                   |
| -                       | -                                                          | 0  |                                                                                                                                                                                                                                                                             |                                                                                  |             | -                                                                                                                                                                                                                                                   |
| -                       | -                                                          | 0  |                                                                                                                                                                                                                                                                             |                                                                                  |             | -                                                                                                                                                                                                                                                   |
| -                       | -                                                          | 0  |                                                                                                                                                                                                                                                                             |                                                                                  |             | -                                                                                                                                                                                                                                                   |
| Cyanotheca sp. PCC 7425 | transposase of insertion sequence isrm10-1                 | 0  |                                                                                                                                                                                                                                                                             |                                                                                  |             | -                                                                                                                                                                                                                                                   |
| -                       | -                                                          | 0  |                                                                                                                                                                                                                                                                             |                                                                                  |             | -                                                                                                                                                                                                                                                   |
| Loa loa                 | set binding factor 2                                       | 4  | P:GO:0016311;<br>P:GO:0007283;<br>F:GO:0016791;<br>C:GO:0044464                                                                                                                                                                                                             | -                                                                                | EC:3.1.3.0  | IPR001194; IPR005112; PTHR10807<br>(PANTHER), PTHR10807:SF1<br>(PANTHER)                                                                                                                                                                            |
| Loa loa                 | calpain 7                                                  | 1  | F:GO:0016787                                                                                                                                                                                                                                                                | -                                                                                |             | IPR007330; G3DSA:1.20.58.280<br>(GENE3D), PTHR23074 (PANTHER),<br>PTHR23074:SF3 (PANTHER),<br>SSF116846 (SUPERFAMILY)                                                                                                                               |
| Loa loa                 | calpain 7                                                  | 3  | P:GO:0019915;<br>C:GO:0005622;<br>F:GO:0008234                                                                                                                                                                                                                              | -                                                                                |             | IPR001300; IPR007330; IPR022682;<br>IPR022684; G3DSA:1.20.58.280<br>(GENE3D), G3DSA:2.60.120.380<br>(GENE3D), G3DSA:3.90.70.10<br>(GENE3D), PTHR10183 (PANTHER),<br>PTHR10183:SF22 (PANTHER),<br>SSF116846 (SUPERFAMILY), SSF54001<br>(SUPERFAMILY) |
| -                       | -                                                          | 0  |                                                                                                                                                                                                                                                                             |                                                                                  |             | -                                                                                                                                                                                                                                                   |
| -                       | -                                                          | 0  |                                                                                                                                                                                                                                                                             |                                                                                  |             | -                                                                                                                                                                                                                                                   |
| Caenorhabditis elegans  | hypothetical protein Y47G6A.29 [Caenorhabditis elegans]    | 0  |                                                                                                                                                                                                                                                                             |                                                                                  |             | -                                                                                                                                                                                                                                                   |
| Mus musculus            | polo-like ki-se 3                                          | 1  | F:GO:0005488                                                                                                                                                                                                                                                                | -                                                                                |             | -                                                                                                                                                                                                                                                   |
| Caenorhabditis elegans  | elegans protein partially confirmed by transcript evidence | 0  |                                                                                                                                                                                                                                                                             | F:GO:0005524;<br>C:GO:0005856;<br>F:GO:0000166;<br>F:GO:0003774;<br>C:GO:0016459 |             | IPR000299; IPR019748                                                                                                                                                                                                                                |

|                         |                                                       |   |                                                                                                                    |                                                                                                                                                                                                                                           |                                                                                                                     |
|-------------------------|-------------------------------------------------------|---|--------------------------------------------------------------------------------------------------------------------|-------------------------------------------------------------------------------------------------------------------------------------------------------------------------------------------------------------------------------------------|---------------------------------------------------------------------------------------------------------------------|
| Brugia malayi           | hypothetical kda protein in chromosome                | 0 |                                                                                                                    | F:GO:0005515                                                                                                                                                                                                                              | -                                                                                                                   |
|                         | -                                                     | 0 |                                                                                                                    |                                                                                                                                                                                                                                           | -                                                                                                                   |
| Caenorhabditis elegans  | hypothetical protein F39B1.1 [Caenorhabditis elegans] | 0 |                                                                                                                    | F:GO:0016740;<br>P:GO:0007154;<br>F:GO:0004428;<br>F:GO:0016303;<br>P:GO:0046854;<br>F:GO:0016301;<br>P:GO:0019915;<br>P:GO:0002119;<br>P:GO:0048015;<br>C:GO:0005942;<br>F:GO:0005515;<br>F:GO:0035091;<br>F:GO:0016773;<br>F:GO:0005488 | -                                                                                                                   |
|                         | -                                                     | 0 |                                                                                                                    |                                                                                                                                                                                                                                           | -                                                                                                                   |
| Brugia malayi           | glucose phosphate dehydroge-se                        | 4 | P:GO:0006006;<br>F:GO:0004345;<br>P:GO:0055114;<br>F:GO:0005488                                                    | -                                                                                                                                                                                                                                         | EC:1.1.1.49<br>IPR001282; IPR019796; IPR022674;<br>IPR022675; G3DSA:3.30.360.10<br>(GENE3D), SSF55347 (SUPERFAMILY) |
| Caenorhabditis elegans  | rrs1 protein                                          | 7 | P:GO:0009792;<br>P:GO:0002119;<br>P:GO:0042254;<br>P:GO:0040010;<br>P:GO:0000003;<br>P:GO:0040019;<br>C:GO:0005634 | -                                                                                                                                                                                                                                         | IPR007023                                                                                                           |
| Caenorhabditis elegans  | rrs1 protein                                          | 7 | P:GO:0009792;<br>P:GO:0002119;<br>P:GO:0042254;<br>P:GO:0040010;<br>P:GO:0000003;<br>P:GO:0040019;<br>C:GO:0005634 | -                                                                                                                                                                                                                                         | IPR007023                                                                                                           |
| Caenorhabditis elegans  | phosphatidylinositol glycan anchor class a            | 6 | P:GO:0045132;<br>C:GO:0016021;<br>P:GO:0016254;<br>F:GO:0005515;<br>C:GO:0005789;<br>F:GO:0016757                  | -                                                                                                                                                                                                                                         | IPR013234; PTHR12526 (PANTHER),<br>PTHR12526:SF37 (PANTHER),<br>SSF53756 (SUPERFAMILY)                              |
|                         | -                                                     | 0 |                                                                                                                    |                                                                                                                                                                                                                                           | -                                                                                                                   |
| Caenorhabditis briggsae | leucine rich repeat family protein                    | 0 |                                                                                                                    | F:GO:0003674;<br>P:GO:0008150                                                                                                                                                                                                             | G3DSA:3.80.10.10 (GENE3D),<br>PTHR13824 (PANTHER),<br>PTHR13824:SF6 (PANTHER), SSF52047<br>(SUPERFAMILY)            |
| Caenorhabditis briggsae | brain tumor protein                                   | 3 | F:GO:0008270;<br>C:GO:0005622;<br>F:GO:0005515                                                                     | -                                                                                                                                                                                                                                         | IPR001258; IPR011042; IPR013017;<br>PTHR13712 (PANTHER),<br>PTHR13712:SF6 (PANTHER),<br>SSF101898 (SUPERFAMILY)     |
| Caenorhabditis elegans  | rab6 interacting protein 1                            | 1 | F:GO:0005515                                                                                                       | -                                                                                                                                                                                                                                         | IPR004012; SSF140741 (SUPERFAMILY)                                                                                  |
| Caenorhabditis elegans  | denn madd domain containing 5a                        | 1 | F:GO:0005515                                                                                                       | -                                                                                                                                                                                                                                         | IPR004012; SSF140741 (SUPERFAMILY)                                                                                  |



|                         |                                                            |    |                                                                                                                                                                                                                          |                                                |             |                                                                                                                             |
|-------------------------|------------------------------------------------------------|----|--------------------------------------------------------------------------------------------------------------------------------------------------------------------------------------------------------------------------|------------------------------------------------|-------------|-----------------------------------------------------------------------------------------------------------------------------|
| Brugia malayi           | bromodomain containing protein                             | 13 | P:GO:0006367;<br>F:GO:0005515;<br>F:GO:0008270;<br>F:GO:0016251;<br>F:GO:0003743;<br>F:GO:0016563;<br>P:GO:0000117;<br>P:GO:0051726;<br>F:GO:0043565;<br>C:GO:0005669;<br>P:GO:0045944;<br>F:GO:0035174;<br>P:GO:0016573 | -                                              |             | IPR022591; PTHR13900 (PANTHER)                                                                                              |
|                         | -                                                          | 0  |                                                                                                                                                                                                                          |                                                |             | -                                                                                                                           |
| Caenorhabditis briggsae | elegans protein confirmed by transcript evidence           | 0  |                                                                                                                                                                                                                          |                                                |             | -                                                                                                                           |
|                         | -                                                          | 0  |                                                                                                                                                                                                                          |                                                |             | -                                                                                                                           |
|                         | -                                                          | 0  |                                                                                                                                                                                                                          |                                                |             | -                                                                                                                           |
| Caenorhabditis briggsae | isoform b                                                  | 4  | F:GO:0004794;<br>P:GO:0008152;<br>F:GO:0030170;<br>F:GO:0016597                                                                                                                                                          | -                                              | EC:4.3.1.19 | IPR001926; G3DSA:3.40.50.1100 (GENE3D), PTHR10314 (PANTHER), PTHR10314:SF17 (PANTHER)                                       |
| Caenorhabditis elegans  | regulator of g protein sig-ling family member (rgs-7)      | 3  | F:GO:0004871;<br>P:GO:0007165;<br>C:GO:0044424                                                                                                                                                                           | -                                              |             | IPR000342; IPR016137; G3DSA:1.10.167.10 (GENE3D), G3DSA:1.10.196.10 (GENE3D), PTHR10845 (PANTHER), PTHR10845:SF30 (PANTHER) |
|                         | -                                                          | 0  |                                                                                                                                                                                                                          |                                                |             | -                                                                                                                           |
| Caenorhabditis elegans  | tr--dihydrouridine synthase 3-like                         | 6  | F:GO:0003676;<br>P:GO:0055114;<br>F:GO:0050660;<br>F:GO:0008270;<br>F:GO:0017150;<br>P:GO:0008033                                                                                                                        | -                                              |             | IPR001269; IPR013785; IPR018517; PTHR11082:SF8 (PANTHER), SSF51395 (SUPERFAMILY)                                            |
|                         | -                                                          | 0  |                                                                                                                                                                                                                          |                                                |             | -                                                                                                                           |
|                         | -                                                          | 0  |                                                                                                                                                                                                                          |                                                |             | -                                                                                                                           |
| Caenorhabditis briggsae | lipase family protein                                      | 2  | F:GO:0016787;<br>P:GO:0006629                                                                                                                                                                                            | -                                              |             | IPR002921; G3DSA:3.40.50.1820 (GENE3D), SSF53474 (SUPERFAMILY)                                                              |
|                         | -                                                          | 0  |                                                                                                                                                                                                                          |                                                |             | -                                                                                                                           |
| Caenorhabditis elegans  | elegans protein partially confirmed by transcript evidence | 0  |                                                                                                                                                                                                                          | F:GO:0003676                                   |             | IPR012337                                                                                                                   |
| Caenorhabditis elegans  | temporarily assigned gene -me family member (tag-234)      | 0  |                                                                                                                                                                                                                          | P:GO:0000003;<br>P:GO:0040011;<br>P:GO:0019915 |             | G3DSA:2.10.60.10 (GENE3D)                                                                                                   |
| Caenorhabditis elegans  | elegans protein partially confirmed by transcript evidence | 0  |                                                                                                                                                                                                                          | P:GO:0040011;<br>P:GO:0006898;<br>C:GO:0005576 |             | -                                                                                                                           |
| Caenorhabditis briggsae | elegans protein partially confirmed by transcript evidence | 2  | C:GO:0030054;<br>C:GO:0015629                                                                                                                                                                                            | -                                              |             | PD968187 (PRODOM)                                                                                                           |
| Caenorhabditis elegans  | elegans protein confirmed by transcript evidence           | 0  |                                                                                                                                                                                                                          |                                                |             | G3DSA:2.30.30.100 (GENE3D)                                                                                                  |
|                         | -                                                          | 0  |                                                                                                                                                                                                                          |                                                |             | -                                                                                                                           |
| Caenorhabditis briggsae | elegans protein confirmed by transcript evidence           | 0  |                                                                                                                                                                                                                          |                                                |             | -                                                                                                                           |
| Brugia malayi           | elegans protein partially confirmed by transcript evidence | 0  |                                                                                                                                                                                                                          | F:GO:0003674;<br>P:GO:0008150                  |             | -                                                                                                                           |
| Caenorhabditis elegans  | acid alpha partial                                         | 5  | F:GO:0004553;<br>C:GO:0005773;<br>C:GO:0009505;<br>P:GO:0008152;<br>C:GO:0048046                                                                                                                                         | -                                              | EC:3.2.1.0  | IPR000322; PTHR22762:SF10 (PANTHER), SSF51011 (SUPERFAMILY)                                                                 |

|                         |                                                                         |   |                                                                                                                                     |                                                                                                                    |                           |                                                                |
|-------------------------|-------------------------------------------------------------------------|---|-------------------------------------------------------------------------------------------------------------------------------------|--------------------------------------------------------------------------------------------------------------------|---------------------------|----------------------------------------------------------------|
| Caenorhabditis elegans  | low quality protein: uncharacterized mfs-type transporter c19orf28-like | 2 | P:GO:0055085;<br>C:GO:0016021                                                                                                       | -                                                                                                                  |                           | SignalP (SIGNALP)                                              |
|                         | -                                                                       | 0 |                                                                                                                                     |                                                                                                                    |                           | -                                                              |
| Caenorhabditis elegans  | briggsae cbr-nlp-15 protein                                             | 0 |                                                                                                                                     | F:GO:0005179;<br>P:GO:0007218;<br>C:GO:0016020;<br>F:GO:0005184;<br>P:GO:0055085;<br>C:GO:0005576;<br>P:GO:0006810 |                           | -                                                              |
|                         | -                                                                       | 0 |                                                                                                                                     |                                                                                                                    |                           | -                                                              |
| Populus trichocarpa     | duf814 family protein                                                   | 8 | F:GO:0008131;<br>F:GO:0005507;<br>F:GO:0003676;<br>P:GO:0009793;<br>F:GO:0048038;<br>P:GO:0009308;<br>P:GO:0055114;<br>F:GO:0008270 | -                                                                                                                  | EC:1.4.3.4;<br>EC:1.4.3.6 | PTHR15239 (PANTHER)                                            |
| Caenorhabditis elegans  | aspartyl aminopeptidase                                                 | 4 | F:GO:0008233;<br>C:GO:0005622;<br>F:GO:0005515;<br>P:GO:0006518                                                                     | -                                                                                                                  |                           | IPR001948; G3DSA:3.40.630.10 (GENE3D), SSF53187 (SUPERFAMILY)  |
| Brugia malayi           | briggsae cbr-lgc-26 protein                                             | 7 | C:GO:0030659;<br>C:GO:0016021;<br>F:GO:0005230;<br>F:GO:0004872;<br>P:GO:0006811;<br>C:GO:0045211;<br>P:GO:0030100                  | -                                                                                                                  |                           | IPR006201; IPR006202;<br>PTHR18945:SF42 (PANTHER)              |
| Caenorhabditis elegans  | cyclin-dependent ki-se inhibitor 1c ( kip2)                             | 6 | P:GO:0050789;<br>P:GO:0007049;<br>P:GO:0048856;<br>P:GO:0040007;<br>P:GO:0007275;<br>P:GO:0022414                                   | -                                                                                                                  |                           | IPR003175; G3DSA:4.10.365.10 (GENE3D), PTHR10265:SF6 (PANTHER) |
|                         | -                                                                       | 0 |                                                                                                                                     |                                                                                                                    |                           | -                                                              |
| Caenorhabditis briggsae | g protein-coupled receptor 177                                          | 4 | P:GO:0023033;<br>C:GO:0031410;<br>F:GO:0005515;<br>P:GO:0007275                                                                     | -                                                                                                                  |                           | IPR009551; SignalP (SIGNALP)                                   |
| Caenorhabditis briggsae | g protein-coupled receptor 177                                          | 4 | P:GO:0023033;<br>C:GO:0031410;<br>F:GO:0005515;<br>P:GO:0007275                                                                     | -                                                                                                                  |                           | IPR009551; SignalP (SIGNALP)                                   |
|                         | -                                                                       | 0 |                                                                                                                                     |                                                                                                                    |                           | -                                                              |
| Caenorhabditis briggsae | general transcription factor 3c polypeptide 1                           | 0 |                                                                                                                                     | F:GO:0003709;<br>P:GO:0006350;<br>C:GO:0000127;<br>C:GO:0030529;<br>F:GO:0005515;<br>F:GO:0003677;<br>C:GO:0005634 |                           | -                                                              |

|                            |                                                         |    |                                                                                                                                                                                        |                                                                 |                                                                                                                 |
|----------------------------|---------------------------------------------------------|----|----------------------------------------------------------------------------------------------------------------------------------------------------------------------------------------|-----------------------------------------------------------------|-----------------------------------------------------------------------------------------------------------------|
| Caenorhabditis elegans     | apical junction molecule family member (ajm-1)          | 7  | P:GO:0009792;<br>C:GO:0043296;<br>P:GO:0045216;<br>F:GO:0005488;<br>C:GO:0005913;<br>P:GO:0040010;<br>P:GO:0040011                                                                     | -                                                               | IPR002893; PTHR21517 (PANTHER),<br>SSF144232 (SUPERFAMILY)                                                      |
| Caenorhabditis briggsae    | apical junction molecule family member (ajm-1)          | 7  | P:GO:0009792;<br>C:GO:0043296;<br>F:GO:0005488;<br>P:GO:0045216;<br>C:GO:0005913;<br>P:GO:0040010;<br>P:GO:0040011                                                                     | -                                                               | IPR002893; PTHR21517 (PANTHER),<br>SSF144232 (SUPERFAMILY)                                                      |
| Caenorhabditis sp. PS1010  | cadherin domain containing protein                      | 1  | P:GO:0007409                                                                                                                                                                           | -                                                               | IPR002126; IPR015919; PTHR10596<br>(PANTHER)                                                                    |
| Pediculus humanus corporis | kruppel-like factor 2                                   | 11 | F:GO:0030528;<br>P:GO:0032715;<br>F:GO:0008270;<br>F:GO:0043565;<br>P:GO:0030218;<br>P:GO:0035188;<br>F:GO:0005515;<br>F:GO:0003700;<br>P:GO:0045893;<br>P:GO:0048785;<br>C:GO:0005634 | -                                                               | IPR007087; IPR013087; IPR015880;<br>PTHR23223 (PANTHER),<br>PTHR23223:SF23 (PANTHER),<br>SSF57667 (SUPERFAMILY) |
| Caenorhabditis elegans     | protein                                                 | 3  | F:GO:0008026;<br>P:GO:0010569;<br>F:GO:0000166                                                                                                                                         | -                                                               | PTHR11472 (PANTHER),<br>PTHR11472:SF4 (PANTHER)                                                                 |
|                            | -                                                       | 0  |                                                                                                                                                                                        |                                                                 | -                                                                                                               |
|                            | -                                                       | 0  |                                                                                                                                                                                        |                                                                 | -                                                                                                               |
|                            | -                                                       | 0  |                                                                                                                                                                                        |                                                                 | -                                                                                                               |
| Brugia malayi              | ensangg00000009686 protein                              | 0  |                                                                                                                                                                                        | F:GO:0003723;<br>F:GO:0003725;<br>F:GO:0005515;<br>C:GO:0005622 | -                                                                                                               |
| Caenorhabditis elegans     | isoform a                                               | 0  |                                                                                                                                                                                        | F:GO:0004984;<br>F:GO:0005549;<br>P:GO:0007608;<br>C:GO:0016020 | IPR019176; PTHR21780 (PANTHER)                                                                                  |
| Caenorhabditis elegans     | isoform a                                               | 0  |                                                                                                                                                                                        | F:GO:0004984;<br>F:GO:0005549;<br>P:GO:0007608;<br>C:GO:0016020 | IPR019176; PTHR21780 (PANTHER)                                                                                  |
| Caenorhabditis briggsae    | r--binding protein 27                                   | 4  | P:GO:0010171;<br>F:GO:0003676;<br>P:GO:0040010;<br>C:GO:0044424                                                                                                                        | -                                                               | G3DSA:1.20.1390.10 (GENE3D)                                                                                     |
| Caenorhabditis briggsae    | briggsae cbr-lin-33 protein                             | 0  |                                                                                                                                                                                        | P:GO:0008219                                                    | -                                                                                                               |
|                            | -                                                       | 0  |                                                                                                                                                                                        |                                                                 | -                                                                                                               |
| Caenorhabditis briggsae    | ylm4_caeel_ame: full=uncharacterized protein            | 4  | P:GO:0009792;<br>P:GO:0040010;<br>F:GO:0005515;<br>P:GO:0002119                                                                                                                        | -                                                               | PTHR12899 (PANTHER)                                                                                             |
| Caenorhabditis briggsae    | Hypothetical protein CBG13570 [Caenorhabditis briggsae] | 3  | P:GO:0018991;<br>P:GO:0040035;<br>P:GO:0006898                                                                                                                                         | -                                                               | -                                                                                                               |

|                         |                                                       |    |                                                                                                                                                                                                                                           |             |                                                                                                                                                                                             |
|-------------------------|-------------------------------------------------------|----|-------------------------------------------------------------------------------------------------------------------------------------------------------------------------------------------------------------------------------------------|-------------|---------------------------------------------------------------------------------------------------------------------------------------------------------------------------------------------|
|                         |                                                       | 0  |                                                                                                                                                                                                                                           |             | SignalP (SIGNALP)                                                                                                                                                                           |
| Caenorhabditis briggsae | uncoordinated family member (unc-103)                 | 0  | F:GO:0005249;<br>C:GO:0016021;<br>C:GO:0016020;<br>P:GO:0006813;<br>P:GO:0055085;<br>P:GO:0006811;<br>F:GO:0005216;<br>P:GO:0006810                                                                                                       |             | -                                                                                                                                                                                           |
|                         |                                                       | 0  |                                                                                                                                                                                                                                           |             | PS51257 (PROFILE)                                                                                                                                                                           |
|                         |                                                       | 0  |                                                                                                                                                                                                                                           |             | -                                                                                                                                                                                           |
| Brugia malayi           | protein kinase domain containing protein              | 5  | P:GO:0006468;<br>F:GO:0005515;<br>P:GO:0016246;<br>F:GO:0005524;<br>F:GO:0004674                                                                                                                                                          | EC:2.7.11.0 | IPR000719; IPR011009; IPR017441;<br>IPR017442; G3DSA:3.30.200.20<br>(GENE3D), PTHR22986 (PANTHER),<br>PTHR22986:SF32 (PANTHER)                                                              |
|                         |                                                       | 0  |                                                                                                                                                                                                                                           |             | -                                                                                                                                                                                           |
| Caenorhabditis briggsae | chaperonin containing subunit 5                       | 14 | C:GO:0005815;<br>P:GO:0009615;<br>P:GO:0040010;<br>P:GO:0008340;<br>P:GO:0006457;<br>C:GO:0005730;<br>C:GO:0005832;<br>P:GO:0040035;<br>F:GO:0005524;<br>P:GO:0002119;<br>P:GO:0040011;<br>P:GO:0006898;<br>F:GO:0051082;<br>P:GO:0009792 |             | IPR002194; IPR002423; IPR012718;<br>IPR017998; G3DSA:1.10.560.10<br>(GENE3D), G3DSA:3.30.260.10<br>(GENE3D), G3DSA:3.50.7.10<br>(GENE3D), SSF52029 (SUPERFAMILY),<br>SSF54849 (SUPERFAMILY) |
|                         |                                                       | 0  |                                                                                                                                                                                                                                           |             | SignalP (SIGNALP)                                                                                                                                                                           |
|                         |                                                       | 0  |                                                                                                                                                                                                                                           |             | -                                                                                                                                                                                           |
| Caenorhabditis elegans  | hypothetical protein C24A3.2 [Caenorhabditis elegans] | 1  | F:GO:0005515                                                                                                                                                                                                                              |             | SignalP (SIGNALP)                                                                                                                                                                           |
| Caenorhabditis elegans  | ryanodine receptor                                    | 8  | F:GO:0004872;<br>P:GO:0006629;<br>F:GO:0005219;<br>P:GO:0006816;<br>P:GO:0006874;<br>P:GO:0055085;<br>F:GO:0005509;<br>C:GO:0016021                                                                                                       |             | IPR002048; IPR011992; IPR015925;<br>IPR018247; IPR018248; IPR018249;<br>PTHR13715:SF11 (PANTHER),<br>SSF47473 (SUPERFAMILY)                                                                 |
| Loa loa                 | elegans protein confirmed by transcript evidence      | 0  |                                                                                                                                                                                                                                           |             | -                                                                                                                                                                                           |
| Caenorhabditis elegans  | ga18470                                               | 0  |                                                                                                                                                                                                                                           |             | -                                                                                                                                                                                           |
| Caenorhabditis elegans  | elegans protein confirmed by transcript evidence      | 1  | F:GO:0005515                                                                                                                                                                                                                              |             | -                                                                                                                                                                                           |
| Caenorhabditis briggsae | briggsae cbr-dct-5 protein                            | 0  | C:GO:0016021;<br>C:GO:0016020                                                                                                                                                                                                             |             | PD031729 (PRODOM)                                                                                                                                                                           |
|                         |                                                       | 0  |                                                                                                                                                                                                                                           |             | -                                                                                                                                                                                           |
|                         |                                                       | 0  |                                                                                                                                                                                                                                           |             | -                                                                                                                                                                                           |

|                              |                                                            |    |                                                                                                                                                                                                                          |              |             |                                                                                                                             |
|------------------------------|------------------------------------------------------------|----|--------------------------------------------------------------------------------------------------------------------------------------------------------------------------------------------------------------------------|--------------|-------------|-----------------------------------------------------------------------------------------------------------------------------|
| Caenorhabditis briggsae      | ubiquinol-cytochrome c reductase binding protein           | 13 | P:GO:0040010;<br>P:GO:0008340;<br>F:GO:0008121;<br>C:GO:0005743;<br>P:GO:0055114;<br>P:GO:0045333;<br>P:GO:0000003;<br>P:GO:0010171;<br>P:GO:0002119;<br>C:GO:0070469;<br>P:GO:0006119;<br>P:GO:0009792;<br>P:GO:0040018 | -            | EC:1.10.2.2 | IPR003197                                                                                                                   |
| -                            | -                                                          | 0  |                                                                                                                                                                                                                          |              |             | SignalP (SIGNALP)                                                                                                           |
| -                            | -                                                          | 0  |                                                                                                                                                                                                                          |              |             | SignalP (SIGNALP)                                                                                                           |
| Caenorhabditis elegans       | hypothetical protein F28B4.3 [Caenorhabditis elegans]      | 1  | P:GO:0040010                                                                                                                                                                                                             | -            |             | -                                                                                                                           |
| Pongo abelii                 | ornithine decarboxylase antizyme 1                         | 4  | P:GO:0006596;<br>F:GO:0008073;<br>P:GO:0050790;<br>F:GO:0005515                                                                                                                                                          | -            |             | SignalP (SIGNALP)                                                                                                           |
| -                            | -                                                          | 0  |                                                                                                                                                                                                                          |              |             | -                                                                                                                           |
| -                            | -                                                          | 0  |                                                                                                                                                                                                                          |              |             | -                                                                                                                           |
| Loa loa                      | fibroblast growth factor receptor 1                        | 13 | P:GO:0043589;<br>F:GO:0000166;<br>P:GO:0042664;<br>C:GO:0016021;<br>P:GO:0048916;<br>P:GO:0060249;<br>P:GO:0031101;<br>P:GO:0048738;<br>F:GO:0005007;<br>P:GO:0009953;<br>P:GO:0035121;<br>P:GO:0008543;<br>P:GO:0001889 | -            |             | IPR000719; IPR001245; IPR011009;<br>IPR017441; IPR020685; IPR020725;<br>G3DSA:3.30.200.20 (GENE3D)                          |
| -                            | -                                                          | 0  |                                                                                                                                                                                                                          |              |             | -                                                                                                                           |
| Phytophthora infestans T30-4 | microtubule -associated protein eb1                        | 0  |                                                                                                                                                                                                                          | F:GO:0008017 |             | -                                                                                                                           |
| -                            | -                                                          | 0  |                                                                                                                                                                                                                          |              |             | -                                                                                                                           |
| Caenorhabditis elegans       | hypothetical protein T20G5.14 [Caenorhabditis elegans]     | 0  |                                                                                                                                                                                                                          |              |             | -                                                                                                                           |
| -                            | -                                                          | 0  |                                                                                                                                                                                                                          |              |             | -                                                                                                                           |
| -                            | -                                                          | 0  |                                                                                                                                                                                                                          |              |             | -                                                                                                                           |
| -                            | -                                                          | 0  |                                                                                                                                                                                                                          |              |             | -                                                                                                                           |
| Pediculus humanus corporis   | probable histone acetyltransferase myst1                   | 7  | F:GO:0004402;<br>P:GO:0030099;<br>P:GO:0016481;<br>P:GO:0045893;<br>P:GO:0043984;<br>F:GO:0008134;<br>C:GO:0071339                                                                                                       | -            | EC:2.3.1.48 | IPR016181; IPR016197;<br>G3DSA:2.30.30.270 (GENE3D),<br>PTHR10615 (PANTHER),<br>PTHR10615:SF34 (PANTHER), PF11717<br>(PFAM) |
| Caenorhabditis briggsae      | briggsae cbr-hmr-1 protein                                 | 3  | F:GO:0005515;<br>P:GO:0009987;<br>P:GO:0023052                                                                                                                                                                           | -            |             | IPR002126; IPR015919; IPR020894;<br>PTHR10596 (PANTHER),<br>PTHR10596:SF114 (PANTHER)                                       |
| Caenorhabditis elegans       | elegans protein partially confirmed by transcript evidence | 1  | F:GO:0016787                                                                                                                                                                                                             | -            |             | IPR006186; G3DSA:3.60.21.10<br>(GENE3D), PTHR11668:SF9<br>(PANTHER), SSF56300 (SUPERFAMILY)                                 |
| -                            | -                                                          | 0  |                                                                                                                                                                                                                          |              |             | -                                                                                                                           |
| -                            | -                                                          | 0  |                                                                                                                                                                                                                          |              |             | -                                                                                                                           |
| -                            | -                                                          | 0  |                                                                                                                                                                                                                          |              |             | -                                                                                                                           |

|                         |                                                 |   |                                                                 |                                                                                                                    |             |                                                                                                                     |
|-------------------------|-------------------------------------------------|---|-----------------------------------------------------------------|--------------------------------------------------------------------------------------------------------------------|-------------|---------------------------------------------------------------------------------------------------------------------|
| Loa loa                 | zinc c2h2 type family protein                   | 0 |                                                                 | F:GO:0046872;<br>P:GO:0000003;<br>F:GO:0003676;<br>F:GO:0008270;<br>P:GO:0009792;<br>C:GO:0005634;<br>C:GO:0005622 |             | IPR007087; IPR013087; IPR015880;<br>PTHR11389 (PANTHER), SignalP<br>(SIGNALP), SSF57667 (SUPERFAMILY)               |
| Loa loa                 | zinc c2h2 type family protein                   | 0 |                                                                 | F:GO:0046872;<br>P:GO:0000003;<br>F:GO:0003676;<br>F:GO:0008270;<br>P:GO:0009792;<br>C:GO:0005634;<br>C:GO:0005622 |             | IPR007087; IPR013087; IPR015880;<br>PTHR11389 (PANTHER), SSF57667<br>(SUPERFAMILY)                                  |
| Caenorhabditis elegans  | methylmalonyl- mutase                           | 4 | F:GO:0046872;<br>F:GO:0004494;<br>P:GO:0008152;<br>F:GO:0031419 | -                                                                                                                  | EC:5.4.99.2 | IPR006158; IPR006159; PTHR23408<br>(PANTHER), PTHR23408:SF1<br>(PANTHER)                                            |
| Caenorhabditis briggsae | lethal essential for life l2efl                 | 2 | P:GO:0009408;<br>F:GO:0005515                                   | -                                                                                                                  |             | IPR001436; IPR002068; IPR008978;<br>G3DSA:2.60.40.790 (GENE3D),<br>PTHR11527 (PANTHER),<br>PTHR11527:SF23 (PANTHER) |
| Caenorhabditis briggsae | lethal essential for life l2efl                 | 2 | P:GO:0009408;<br>F:GO:0005515                                   | -                                                                                                                  |             | IPR001436; IPR002068; IPR008978;<br>G3DSA:2.60.40.790 (GENE3D),<br>PTHR11527 (PANTHER),<br>PTHR11527:SF23 (PANTHER) |
|                         | -                                               | 0 |                                                                 |                                                                                                                    |             | -                                                                                                                   |
|                         | -                                               | 0 |                                                                 |                                                                                                                    |             | -                                                                                                                   |
|                         | -                                               | 0 |                                                                 |                                                                                                                    |             | -                                                                                                                   |
|                         | -                                               | 0 |                                                                 |                                                                                                                    |             | -                                                                                                                   |
| Brugia malayi           | fanconi anemia complementation group d2 isoform | 0 |                                                                 |                                                                                                                    |             | -                                                                                                                   |
| Loa loa                 | fanconi anemia complementation group d2 isoform | 0 |                                                                 |                                                                                                                    |             | SignalP (SIGNALP)                                                                                                   |

|                         |                                                                                                                 |    |                                                                                                                                                                                                                                                                                                                                                                                                                                                                         |                               |                                                                            |
|-------------------------|-----------------------------------------------------------------------------------------------------------------|----|-------------------------------------------------------------------------------------------------------------------------------------------------------------------------------------------------------------------------------------------------------------------------------------------------------------------------------------------------------------------------------------------------------------------------------------------------------------------------|-------------------------------|----------------------------------------------------------------------------|
| Brugia malayi           | mh1 domain containing protein                                                                                   | 40 | P:GO:0045892;<br>F:GO:0042803;<br>P:GO:0032909;<br>P:GO:0001701;<br>P:GO:0072133;<br>F:GO:0070411;<br>P:GO:0007498;<br>P:GO:0060391;<br>P:GO:0042177;<br>P:GO:0010862;<br>C:GO:0005829;<br>P:GO:0030511;<br>P:GO:0032525;<br>P:GO:0072134;<br>P:GO:0010718;<br>P:GO:0001666;<br>P:GO:0060395;<br>P:GO:0030509;<br>P:GO:0045944;<br>F:GO:0010843;<br>P:GO:0001702;<br>P:GO:0007492;<br>C:GO:0032444;<br>P:GO:0048859;<br>F:GO:0030616;<br>P:GO:0051098;<br>F:GO:0016563; |                               | IPR003619; IPR013019; IPR013790;<br>IPR015288; PTHR13703:SF12<br>(PANTHER) |
| -                       | -                                                                                                               | 0  |                                                                                                                                                                                                                                                                                                                                                                                                                                                                         |                               | -                                                                          |
| Caenorhabditis briggsae | uhrf1 binding protein 1                                                                                         | 0  |                                                                                                                                                                                                                                                                                                                                                                                                                                                                         | F:GO:0003674;<br>C:GO:0005575 | PTHR22774 (PANTHER),<br>PTHR22774:SF5 (PANTHER)                            |
| Caenorhabditis elegans  | tr--dihydrouridine synthase 2                                                                                   | 6  | F:GO:0003725;<br>C:GO:0005622;<br>P:GO:0055114;<br>F:GO:0050660;<br>F:GO:0017150;<br>P:GO:0008033                                                                                                                                                                                                                                                                                                                                                                       |                               | IPR001269; IPR013785; IPR018517;<br>PTHR11082:SF4 (PANTHER)                |
| Caenorhabditis elegans  | hypothetical protein C15F1.2 [Caenorhabditis elegans]                                                           | 0  |                                                                                                                                                                                                                                                                                                                                                                                                                                                                         |                               | -                                                                          |
| Caenorhabditis briggsae | elegans protein confirmed by transcript evidence                                                                | 1  | F:GO:0005488                                                                                                                                                                                                                                                                                                                                                                                                                                                            |                               | IPR017853; PTHR23208 (PANTHER),<br>PTHR23208:SF13 (PANTHER)                |
| Caenorhabditis briggsae | elegans protein confirmed by transcript evidence                                                                | 1  | F:GO:0005488                                                                                                                                                                                                                                                                                                                                                                                                                                                            |                               | IPR017853; PTHR23208 (PANTHER),<br>PTHR23208:SF13 (PANTHER)                |
| -                       | -                                                                                                               | 0  |                                                                                                                                                                                                                                                                                                                                                                                                                                                                         |                               | -                                                                          |
| -                       | -                                                                                                               | 0  |                                                                                                                                                                                                                                                                                                                                                                                                                                                                         |                               | -                                                                          |
| -                       | -                                                                                                               | 0  |                                                                                                                                                                                                                                                                                                                                                                                                                                                                         |                               | -                                                                          |
| -                       | -                                                                                                               | 0  |                                                                                                                                                                                                                                                                                                                                                                                                                                                                         |                               | -                                                                          |
| -                       | -                                                                                                               | 0  |                                                                                                                                                                                                                                                                                                                                                                                                                                                                         |                               | -                                                                          |
| -                       | -                                                                                                               | 0  |                                                                                                                                                                                                                                                                                                                                                                                                                                                                         |                               | -                                                                          |
| Caenorhabditis elegans  | u58758_13 transcription elongation regulator homolog protein isoform partially confirmed by transcript evidence | 7  | P:GO:0040035;<br>P:GO:0010171;<br>P:GO:0002119;<br>F:GO:0005515;<br>P:GO:0016246;<br>P:GO:0040011;<br>P:GO:0040007                                                                                                                                                                                                                                                                                                                                                      |                               | IPR002713                                                                  |
| -                       | -                                                                                                               | 0  |                                                                                                                                                                                                                                                                                                                                                                                                                                                                         |                               | -                                                                          |
| -                       | -                                                                                                               | 0  |                                                                                                                                                                                                                                                                                                                                                                                                                                                                         |                               | SignalP (SIGNALP)                                                          |
| -                       | -                                                                                                               | 0  |                                                                                                                                                                                                                                                                                                                                                                                                                                                                         |                               | -                                                                          |

|                         |                                                            |  |                                                                                                                                                                                                                                                                                                 |   |             |                                                                                                                                                                                                                |
|-------------------------|------------------------------------------------------------|--|-------------------------------------------------------------------------------------------------------------------------------------------------------------------------------------------------------------------------------------------------------------------------------------------------|---|-------------|----------------------------------------------------------------------------------------------------------------------------------------------------------------------------------------------------------------|
| Caenorhabditis elegans  | -dh-cytochrome b5 reductase 2                              |  | F:GO:0004128;<br>P:GO:0009792;<br>P:GO:0002119;<br>P:GO:0032940;<br>9 P:GO:0040010;<br>P:GO:0055114;<br>C:GO:0016021;<br>P:GO:0006898;<br>P:GO:0016126                                                                                                                                          | - | EC:1.6.2.2  | IPR001433; IPR001709; IPR001834;<br>IPR008333; IPR017927; IPR017938;<br>G3DSA:2.40.30.10 (GENE3D),<br>G3DSA:3.40.50.80 (GENE3D),<br>PTHR19370 (PANTHER),<br>PTHR19370:SF4 (PANTHER), SSF52343<br>(SUPERFAMILY) |
|                         | -                                                          |  | 0                                                                                                                                                                                                                                                                                               |   |             | SignalP (SIGNALP)                                                                                                                                                                                              |
|                         | -                                                          |  | 0                                                                                                                                                                                                                                                                                               |   |             | -                                                                                                                                                                                                              |
| Caenorhabditis briggsae | briggsae cbr-pes-9 protein                                 |  | F:GO:0008237;<br>F:GO:0016805;<br>P:GO:0006508;<br>F:GO:0005515<br>4                                                                                                                                                                                                                            | - | EC:3.4.13.0 | IPR002933; IPR011650;<br>G3DSA:3.30.70.360 (GENE3D),<br>G3DSA:3.40.630.10 (GENE3D),<br>PTHR11014 (PANTHER),<br>PTHR11014:SF15 (PANTHER),<br>SSF53187 (SUPERFAMILY)                                             |
| Caenorhabditis briggsae | Hypothetical protein CBG01593 [Caenorhabditis briggsae]    |  | P:GO:0007186;<br>C:GO:0016021;<br>P:GO:0007165;<br>F:GO:0004930<br>4                                                                                                                                                                                                                            | - |             | -                                                                                                                                                                                                              |
| Caenorhabditis briggsae | protein vac14 homolog                                      |  | F:GO:0005515;<br>C:GO:0043231;<br>C:GO:0044444;<br>C:GO:0016020<br>4                                                                                                                                                                                                                            | - |             | IPR021841; PTHR16023 (PANTHER)                                                                                                                                                                                 |
|                         | -                                                          |  | 0                                                                                                                                                                                                                                                                                               |   |             | -                                                                                                                                                                                                              |
| Macaca mulatta          | milk fat globule-egf factor 8 isoform cra_b                |  | P:GO:0001525;<br>P:GO:0006910;<br>F:GO:0008429;<br>C:GO:0009897;<br>P:GO:0043627;<br>P:GO:0050766;<br>C:GO:0005615;<br>P:GO:0006911;<br>17 P:GO:0007155;<br>F:GO:0005178;<br>F:GO:0001786;<br>C:GO:0031012;<br>P:GO:0044419;<br>P:GO:0008284;<br>C:GO:0005737;<br>C:GO:0019897;<br>P:GO:0007338 | - |             | SignalP (SIGNALP)                                                                                                                                                                                              |
| Caenorhabditis briggsae | briggsae cbr-nlp-42 protein                                |  | 0                                                                                                                                                                                                                                                                                               |   |             | SignalP (SIGNALP)                                                                                                                                                                                              |
|                         | -                                                          |  | 0                                                                                                                                                                                                                                                                                               |   |             | -                                                                                                                                                                                                              |
| Caenorhabditis elegans  | elegans protein partially confirmed by transcript evidence |  | 1 P:GO:0040010                                                                                                                                                                                                                                                                                  | - |             | IPR002656; PTHR11161 (PANTHER),<br>SignalP (SIGNALP)                                                                                                                                                           |
| Caenorhabditis elegans  | briggsae cbr-hyl-1 protein                                 |  | P:GO:0019216;<br>P:GO:0044249;<br>P:GO:0008610;<br>P:GO:0009889;<br>P:GO:0044255;<br>C:GO:0016020<br>6                                                                                                                                                                                          | - |             | IPR006634; PTHR12560 (PANTHER)                                                                                                                                                                                 |



|                         |                                                             |   |                                                                                                                                     |                                                                                                                                     |             |                                                                      |
|-------------------------|-------------------------------------------------------------|---|-------------------------------------------------------------------------------------------------------------------------------------|-------------------------------------------------------------------------------------------------------------------------------------|-------------|----------------------------------------------------------------------|
| Caenorhabditis elegans  | longevity assurance factor 1                                | 7 | C:GO:0016021;<br>P:GO:0006641;<br>P:GO:0032933;<br>P:GO:0050995;<br>P:GO:0046513;<br>P:GO:0046889;<br>C:GO:0005886                  | -                                                                                                                                   | -           |                                                                      |
| Brugia malayi           | non-structural maintenance of chromosomes element 1 homolog | 0 |                                                                                                                                     | F:GO:0046872;<br>P:GO:0006281;<br>F:GO:0008270;<br>P:GO:0006310;<br>P:GO:0023034;<br>P:GO:0009792;<br>F:GO:0005515;<br>C:GO:0005634 |             | SignalP (SIGNALP)                                                    |
| -                       | -                                                           | 0 |                                                                                                                                     |                                                                                                                                     |             | -                                                                    |
| Caenorhabditis briggsae | Hypothetical protein CBG12142 [Caenorhabditis briggsae]     | 6 | C:GO:0016021;<br>P:GO:0009792;<br>P:GO:0040010;<br>P:GO:0055085;<br>F:GO:0005215;<br>P:GO:0002119                                   | -                                                                                                                                   | -           |                                                                      |
| Caenorhabditis elegans  | hog (hedgehog-like family) family member (wrt-5)            | 1 | F:GO:0005515                                                                                                                        | -                                                                                                                                   |             | PTHR11889 (PANTHER),<br>PTHR11889:SF12 (PANTHER)                     |
| Caenorhabditis briggsae | briggsae cbr-nsy-4 protein                                  | 1 | C:GO:0016021                                                                                                                        | -                                                                                                                                   |             | IPR006187; IPR010761; SignalP (SIGNALP)                              |
| -                       | -                                                           | 0 |                                                                                                                                     |                                                                                                                                     |             | -                                                                    |
| Caenorhabditis briggsae | glycogen synthase                                           | 7 | P:GO:0009792;<br>P:GO:0010171;<br>P:GO:0002119;<br>P:GO:0005978;<br>F:GO:0005515;<br>F:GO:0004373;<br>P:GO:0040011                  | -                                                                                                                                   | EC:2.4.1.11 | IPR008631; SignalP (SIGNALP)                                         |
| Brugia malayi           | cleavage stimulation factor subunit 3 isoform 2             | 2 | P:GO:0006397;<br>C:GO:0005634                                                                                                       | -                                                                                                                                   |             | IPR003107; PTHR19980 (PANTHER)                                       |
| -                       | -                                                           | 0 |                                                                                                                                     |                                                                                                                                     |             | -                                                                    |
| -                       | -                                                           | 0 |                                                                                                                                     |                                                                                                                                     |             | -                                                                    |
| Caenorhabditis elegans  | protein transport protein sec16b                            | 1 | F:GO:0005515                                                                                                                        | -                                                                                                                                   |             | PTHR13402 (PANTHER)                                                  |
| Caenorhabditis elegans  | elegans protein confirmed by transcript evidence            | 3 | P:GO:0019915;<br>P:GO:0040018;<br>P:GO:0040011                                                                                      | -                                                                                                                                   |             | IPR000615; IPR021134; SignalP (SIGNALP)                              |
| Brugia malayi           | protein phosphatase 1 regulatory inhibitor subunit          | 8 | P:GO:0040035;<br>P:GO:0009792;<br>P:GO:0010171;<br>P:GO:0002119;<br>P:GO:0040018;<br>P:GO:0040010;<br>P:GO:0008340;<br>P:GO:0006898 | -                                                                                                                                   |             | IPR002110; IPR020683; PTHR18958 (PANTHER), PTHR18958:SF165 (PANTHER) |
| Brugia malayi           | helix-turn- psq domain containing protein                   | 0 |                                                                                                                                     | P:GO:0019915;<br>F:GO:0003677                                                                                                       |             | -                                                                    |
| Caenorhabditis briggsae | phosphatidylinositol n-acetylglucosaminyltransferase        | 4 | F:GO:0016757;<br>P:GO:0006506;<br>C:GO:0016021;<br>P:GO:0045132                                                                     | -                                                                                                                                   |             | PTHR12526 (PANTHER),<br>PTHR12526:SF37 (PANTHER)                     |

|                         |                                                                           |    |                                                                                                                                                                                                         |                                                                                  |                            |                                                                        |
|-------------------------|---------------------------------------------------------------------------|----|---------------------------------------------------------------------------------------------------------------------------------------------------------------------------------------------------------|----------------------------------------------------------------------------------|----------------------------|------------------------------------------------------------------------|
| Caenorhabditis elegans  | organic cation transporter                                                | 0  |                                                                                                                                                                                                         | C:GO:0016021;<br>C:GO:0016020;<br>P:GO:0055085;<br>F:GO:0005215;<br>P:GO:0006810 |                            | PTHR11600 (PANTHER),<br>PTHR11600:SF35 (PANTHER), SignalP<br>(SIGNALP) |
| Caenorhabditis briggsae | (poly glutamine tract) toxicity enhancer family member (pge-1)            | 0  |                                                                                                                                                                                                         | F:GO:0003676;<br>F:GO:0004527;<br>C:GO:0005622                                   |                            | -                                                                      |
|                         | -                                                                         | 0  |                                                                                                                                                                                                         |                                                                                  |                            | -                                                                      |
| Caenorhabditis elegans  | yhb8_caeel_ame: full=uncharacterized protein flags: precursor             | 0  |                                                                                                                                                                                                         |                                                                                  |                            | -                                                                      |
|                         | -                                                                         | 0  |                                                                                                                                                                                                         |                                                                                  |                            | -                                                                      |
|                         | -                                                                         | 0  |                                                                                                                                                                                                         |                                                                                  |                            | -                                                                      |
| Pan troglodytes         | zinc finger ccch-type containing 13                                       | 0  |                                                                                                                                                                                                         | F:GO:0003676;<br>F:GO:0046872;<br>F:GO:0008270                                   |                            | -                                                                      |
| Caenorhabditis elegans  | quinine non-avoider family member (qui-1)                                 | 0  |                                                                                                                                                                                                         |                                                                                  |                            | -                                                                      |
| Brugia malayi           | topoisomerase iii alpha                                                   | 6  | C:GO:0043229;<br>P:GO:0071103;<br>P:GO:0007276;<br>P:GO:0007126;<br>P:GO:0006259;<br>F:GO:0003916                                                                                                       | -                                                                                |                            | IPR000380; IPR013497; IPR013826                                        |
|                         | -                                                                         | 0  |                                                                                                                                                                                                         |                                                                                  |                            | -                                                                      |
|                         | -                                                                         | 0  |                                                                                                                                                                                                         |                                                                                  |                            | SignalP (SIGNALP)                                                      |
| Caenorhabditis elegans  | shc (src homology domain c-termi-l) adaptor homolog family member (shc-2) | 0  |                                                                                                                                                                                                         | F:GO:0005515                                                                     |                            | PTHR12583 (PANTHER),<br>PTHR12583:SF5 (PANTHER)                        |
|                         | -                                                                         | 0  |                                                                                                                                                                                                         |                                                                                  |                            | -                                                                      |
| Caenorhabditis elegans  | isoform cra_a                                                             | 12 | P:GO:0009987;<br>C:GO:0005764;<br>C:GO:0005903;<br>C:GO:0044459;<br>F:GO:0004872;<br>C:GO:0030139;<br>C:GO:0044437;<br>F:GO:0005515;<br>C:GO:0031090;<br>C:GO:0012505;<br>P:GO:0008152;<br>P:GO:0015031 | -                                                                                |                            | IPR000859; PTHR22991 (PANTHER)                                         |
|                         | -                                                                         | 0  |                                                                                                                                                                                                         |                                                                                  |                            | -                                                                      |
| Ascaris suum            | thymidylate synthase                                                      | 9  | F:GO:0004799;<br>P:GO:0055114;<br>P:GO:0000003;<br>P:GO:0006545;<br>F:GO:0004146;<br>P:GO:0010171;<br>P:GO:0006231;<br>P:GO:0009792;<br>F:GO:0050661                                                    | -                                                                                | EC:2.1.1.45;<br>EC:1.5.1.3 | IPR000398                                                              |

|                         |                                                       |    |                                                                                                                                                                                                                                                                                                                                |                                                                                                                                     |                            |                                                                                                                                                |
|-------------------------|-------------------------------------------------------|----|--------------------------------------------------------------------------------------------------------------------------------------------------------------------------------------------------------------------------------------------------------------------------------------------------------------------------------|-------------------------------------------------------------------------------------------------------------------------------------|----------------------------|------------------------------------------------------------------------------------------------------------------------------------------------|
| Caenorhabditis elegans  | acetoacetyl- synthetase                               | 19 | P:GO:0071394;<br>C:GO:0005829;<br>P:GO:0014074;<br>P:GO:0006629;<br>P:GO:0042594;<br>P:GO:0010243;<br>P:GO:0050872;<br>P:GO:0045471;<br>P:GO:0001889;<br>P:GO:0007584;<br>P:GO:0071333;<br>P:GO:0060612;<br>P:GO:0071397;<br>F:GO:0000166;<br>P:GO:0034201;<br>P:GO:0042493;<br>F:GO:0047760;<br>P:GO:0032024;<br>F:GO:0030729 | -                                                                                                                                   | EC:6.2.1.2;<br>EC:6.2.1.16 | IPR000873; PTHR11968 (PANTHER),<br>PTHR11968:SF40 (PANTHER),<br>SSF56801 (SUPERFAMILY)                                                         |
| Caenorhabditis elegans  | high density lipoprotein binding protein              | 12 | P:GO:0040010;<br>F:GO:0003723;<br>P:GO:0018991;<br>P:GO:0040035;<br>F:GO:0008289;<br>P:GO:0010171;<br>P:GO:0002119;<br>F:GO:0005515;<br>P:GO:0040017;<br>P:GO:0009792;<br>C:GO:0005737;<br>C:GO:0005886                                                                                                                        | -                                                                                                                                   |                            | IPR004087; IPR004088; IPR018111;<br>G3DSA:3.30.1370.10 (GENE3D),<br>PTHR10627 (PANTHER),<br>PTHR10627:SF9 (PANTHER), SSF54791<br>(SUPERFAMILY) |
| Caenorhabditis elegans  | d-glucuronyl c5-epimerase                             | 6  | P:GO:0009950;<br>C:GO:0005794;<br>P:GO:0015012;<br>F:GO:0047464;<br>C:GO:0016020;<br>P:GO:0030210                                                                                                                                                                                                                              | -                                                                                                                                   | EC:5.1.3.17                | IPR010598; PTHR13174 (PANTHER)                                                                                                                 |
|                         | -                                                     | 0  |                                                                                                                                                                                                                                                                                                                                |                                                                                                                                     |                            | -                                                                                                                                              |
| Caenorhabditis elegans  | novel protein containing 10 heat domains              | 3  | C:GO:0043231;<br>C:GO:0044444;<br>P:GO:0007067                                                                                                                                                                                                                                                                                 | -                                                                                                                                   |                            | IPR011989                                                                                                                                      |
|                         | -                                                     | 0  |                                                                                                                                                                                                                                                                                                                                |                                                                                                                                     |                            | -                                                                                                                                              |
|                         | -                                                     | 0  |                                                                                                                                                                                                                                                                                                                                |                                                                                                                                     |                            | -                                                                                                                                              |
| Caenorhabditis elegans  | elegans protein confirmed by transcript evidence      | 0  |                                                                                                                                                                                                                                                                                                                                | C:GO:0016021;<br>P:GO:0055085                                                                                                       |                            | G3DSA:1.20.1250.20 (GENE3D),<br>PTHR11662 (PANTHER),<br>PTHR11662:SF11 (PANTHER)                                                               |
|                         | -                                                     | 0  |                                                                                                                                                                                                                                                                                                                                |                                                                                                                                     |                            | -                                                                                                                                              |
| Caenorhabditis briggsae | general transcription factor polypeptide alpha 220kda | 0  |                                                                                                                                                                                                                                                                                                                                | F:GO:0003709;<br>P:GO:0006350;<br>P:GO:0045449;<br>C:GO:0030529;<br>C:GO:0000127;<br>F:GO:0005515;<br>C:GO:0005634;<br>F:GO:0003677 |                            | PTHR15180 (PANTHER)                                                                                                                            |
|                         | -                                                     | 0  |                                                                                                                                                                                                                                                                                                                                |                                                                                                                                     |                            | -                                                                                                                                              |
| Loa loa                 | hypothetical protein LOAG_02637 [Loa loa]             | 0  |                                                                                                                                                                                                                                                                                                                                |                                                                                                                                     |                            | -                                                                                                                                              |
|                         | -                                                     | 0  |                                                                                                                                                                                                                                                                                                                                |                                                                                                                                     |                            | -                                                                                                                                              |

|                         |                                                            |    |                                                                                                                                                                                                                                                                                              |              |                                                                                                                                                 |
|-------------------------|------------------------------------------------------------|----|----------------------------------------------------------------------------------------------------------------------------------------------------------------------------------------------------------------------------------------------------------------------------------------------|--------------|-------------------------------------------------------------------------------------------------------------------------------------------------|
|                         | -                                                          | 0  |                                                                                                                                                                                                                                                                                              |              | -                                                                                                                                               |
|                         | -                                                          | 0  |                                                                                                                                                                                                                                                                                              |              | -                                                                                                                                               |
| Caenorhabditis briggsae | protein                                                    | 2  | P:GO:0008152;<br>F:GO:0003824                                                                                                                                                                                                                                                                | -            | PTHR11968 (PANTHER),<br>PTHR11968:SF8 (PANTHER)                                                                                                 |
| Caenorhabditis elegans  | clc-type chloride channel family member (clh-2)            | 5  | P:GO:0009792;<br>C:GO:0005886;<br>P:GO:0006810;<br>P:GO:0000003;<br>F:GO:0005216                                                                                                                                                                                                             | -            | IPR000644; IPR001807; IPR013785;<br>IPR014743; PTHR11689:SF5<br>(PANTHER), SSF54631 (SUPERFAMILY)                                               |
|                         | -                                                          | 0  |                                                                                                                                                                                                                                                                                              |              | -                                                                                                                                               |
| Caenorhabditis elegans  | patched homolog 1                                          | 7  | P:GO:0009792;<br>P:GO:0002119;<br>P:GO:0040018;<br>P:GO:0018996;<br>P:GO:0000003;<br>P:GO:0040011;<br>C:GO:0016021                                                                                                                                                                           | -            | -                                                                                                                                               |
| Loa loa                 | vav 3 oncogene                                             | 17 | P:GO:0043087;<br>P:GO:0006909;<br>F:GO:0005154;<br>P:GO:0030032;<br>P:GO:0030217;<br>P:GO:0006955;<br>P:GO:0006906;<br>P:GO:0007229;<br>P:GO:0048468;<br>C:GO:0005829;<br>P:GO:0007264;<br>P:GO:0043552;<br>P:GO:0006915;<br>P:GO:0045785;<br>F:GO:0030676;<br>C:GO:0005886;<br>P:GO:0016477 | -            | IPR001715; IPR003096; PTHR22826<br>(PANTHER), PTHR22826:SF53<br>(PANTHER)                                                                       |
| Callithrix jacchus      | poly binding protein 2                                     | 11 | P:GO:0043161;<br>F:GO:0003723;<br>P:GO:0050687;<br>F:GO:0031625;<br>P:GO:0016071;<br>P:GO:0008380;<br>P:GO:0045087;<br>F:GO:0003677;<br>C:GO:0030529;<br>C:GO:0005737;<br>C:GO:0005634                                                                                                       | -            | IPR004087; IPR004088; IPR018111;<br>G3DSA:3.30.1370.10 (GENE3D),<br>PTHR10288 (PANTHER),<br>PTHR10288:SF48 (PANTHER),<br>SSF54791 (SUPERFAMILY) |
|                         | -                                                          | 0  |                                                                                                                                                                                                                                                                                              |              | -                                                                                                                                               |
|                         | -                                                          | 0  |                                                                                                                                                                                                                                                                                              |              | -                                                                                                                                               |
|                         | -                                                          | 0  |                                                                                                                                                                                                                                                                                              |              | -                                                                                                                                               |
| Caenorhabditis briggsae | vacuolar protein sorting-associated protein 28 homolog     | 2  | P:GO:0015031;<br>C:GO:0005768                                                                                                                                                                                                                                                                | -            | IPR007143; IPR017898; IPR017899;<br>SSF140111 (SUPERFAMILY), SSF140427<br>(SUPERFAMILY)                                                         |
| Caenorhabditis briggsae | elegans protein partially confirmed by transcript evidence | 4  | P:GO:0006633;<br>F:GO:0004768;<br>P:GO:0055114;<br>C:GO:0016021                                                                                                                                                                                                                              | -            | EC:1.14.19.1 SignalIP (SIGNALP)                                                                                                                 |
| Loa loa                 | heat domain-containing                                     | 0  |                                                                                                                                                                                                                                                                                              | F:GO:0005488 | SignalIP (SIGNALP)                                                                                                                              |
|                         | -                                                          | 0  |                                                                                                                                                                                                                                                                                              |              | -                                                                                                                                               |
|                         | -                                                          | 0  |                                                                                                                                                                                                                                                                                              |              | SignalIP (SIGNALP)                                                                                                                              |

|                         |                                                     |   |                                                                                                                                     |                                                                 |              |                                                                                                                                |
|-------------------------|-----------------------------------------------------|---|-------------------------------------------------------------------------------------------------------------------------------------|-----------------------------------------------------------------|--------------|--------------------------------------------------------------------------------------------------------------------------------|
| Caenorhabditis elegans  | elegans protein confirmed by transcript evidence    | 4 | P:GO:0009792;<br>P:GO:0000003;<br>P:GO:0040010;<br>P:GO:0002119                                                                     | -                                                               |              | IPR007087; IPR015880                                                                                                           |
|                         |                                                     | 0 |                                                                                                                                     |                                                                 |              |                                                                                                                                |
| Loa loa                 | mitogen-activated protein ki-se ki-se ki-se ki-se 3 | 7 | P:GO:0006468;<br>F:GO:0005083;<br>F:GO:0005515;<br>P:GO:0007254;<br>F:GO:0005524;<br>P:GO:0050790;<br>F:GO:0004674                  | -                                                               | EC:2.7.11.0  | IPR000719; IPR011009; IPR017441;<br>IPR017442; G3DSA:3.30.200.20<br>(GENE3D), PTHR22986 (PANTHER),<br>PTHR22986:SF75 (PANTHER) |
| Brugia malayi           | protein set-                                        | 1 | F:GO:0016740                                                                                                                        | -                                                               |              | IPR000504; IPR012677; SSF54928<br>(SUPERFAMILY)                                                                                |
| Pristionchus pacificus  | briggsae cbr-tra-1 protein                          | 8 | C:GO:0005737;<br>P:GO:0007283;<br>F:GO:0003676;<br>P:GO:0019101;<br>P:GO:0019099;<br>F:GO:0008022;<br>C:GO:0005634;<br>F:GO:0008270 | -                                                               |              | IPR007087; IPR013087; IPR015880;<br>PTHR19818 (PANTHER),<br>PTHR19818:SF17 (PANTHER)                                           |
| Loa loa                 | i lweq domain containing protein                    | 0 |                                                                                                                                     | F:GO:0003779;<br>F:GO:0005198;<br>P:GO:0007155;<br>C:GO:0015629 |              | -                                                                                                                              |
| Caenorhabditis elegans  | alter-tive splicing type 3                          | 0 |                                                                                                                                     | F:GO:0003674;<br>P:GO:0008150                                   |              | IPR004882; PTHR12375:SF17<br>(PANTHER)                                                                                         |
| Caenorhabditis elegans  | viral a-type inclusion protein                      | 1 | F:GO:0005515                                                                                                                        | -                                                               |              | PD936484 (PRODOM)                                                                                                              |
| Caenorhabditis briggsae | elegans protein confirmed by transcript evidence    | 3 | C:GO:0016021;<br>F:GO:0005272;<br>P:GO:0006814                                                                                      | -                                                               |              | IPR001873; SignalP (SIGNALP)                                                                                                   |
| Caenorhabditis elegans  | nicotinic acetylcholine receptor alpha subunit 63b  | 7 | P:GO:0009792;<br>P:GO:0002119;<br>C:GO:0005887;<br>F:GO:0005230;<br>P:GO:0006810;<br>P:GO:0040007;<br>C:GO:0045202                  | -                                                               |              | IPR002394; IPR006201; IPR006202;<br>IPR018000; PTHR18945:SF62<br>(PANTHER)                                                     |
| Caenorhabditis briggsae | briggsae cbr-sinh-1 protein                         | 0 |                                                                                                                                     |                                                                 |              | -                                                                                                                              |
| Caenorhabditis briggsae | briggsae cbr-sinh-1 protein                         | 0 |                                                                                                                                     |                                                                 |              | -                                                                                                                              |
|                         |                                                     | 0 |                                                                                                                                     |                                                                 |              | -                                                                                                                              |
| Callithrix jacchus      | ribophorin i                                        | 7 | C:GO:0030867;<br>F:GO:0005515;<br>C:GO:0042470;<br>C:GO:0008250;<br>C:GO:0016021;<br>F:GO:0004579;<br>P:GO:0018279                  | -                                                               | EC:2.4.1.119 | SignalP (SIGNALP)                                                                                                              |
|                         |                                                     | 0 |                                                                                                                                     |                                                                 |              | -                                                                                                                              |
|                         |                                                     | 0 |                                                                                                                                     |                                                                 |              | -                                                                                                                              |
| Caenorhabditis elegans  | briggsae cbr-scp-1 protein                          | 2 | P:GO:0009792;<br>C:GO:0016021                                                                                                       | -                                                               |              | -                                                                                                                              |

|                         |                                                            |   |                                                                                                                                     |                                                                                  |                                                                       |
|-------------------------|------------------------------------------------------------|---|-------------------------------------------------------------------------------------------------------------------------------------|----------------------------------------------------------------------------------|-----------------------------------------------------------------------|
| Caenorhabditis briggsae | Hypothetical protein CBG13933 [Caenorhabditis briggsae]    | 0 |                                                                                                                                     | F:GO:0046872;<br>P:GO:0040010;<br>P:GO:0006898;<br>F:GO:0008270;<br>F:GO:0005515 | -                                                                     |
| -                       | -                                                          | 0 |                                                                                                                                     |                                                                                  | -                                                                     |
| -                       | -                                                          | 0 |                                                                                                                                     |                                                                                  | -                                                                     |
| -                       | -                                                          | 0 |                                                                                                                                     |                                                                                  | PTHR11003 (PANTHER),<br>PTHR11003:SF9 (PANTHER), SignalP<br>(SIGNALP) |
| Caenorhabditis elegans  | cyclin I2                                                  | 8 | P:GO:0009792;<br>P:GO:0002119;<br>P:GO:0006350;<br>P:GO:0000003;<br>P:GO:0008340;<br>P:GO:0040011;<br>P:GO:0040007;<br>C:GO:0005634 | -                                                                                | IPR006670; IPR006671; IPR011028;<br>IPR013763; IPR015429; IPR015431   |
| Loa loa                 | ubiquitin protein ligase                                   | 0 |                                                                                                                                     | P:GO:0000003;<br>F:GO:0016874;<br>F:GO:0016881;<br>P:GO:0006464;<br>C:GO:0005622 | IPR000048                                                             |
| Caenorhabditis elegans  | hed family member (ptc-3)                                  | 6 | P:GO:0009792;<br>P:GO:0002119;<br>P:GO:0040018;<br>P:GO:0018996;<br>P:GO:0000003;<br>P:GO:0040011                                   | -                                                                                | PTHR10796 (PANTHER),<br>PTHR10796:SF34 (PANTHER)                      |
| Ostertagia ostertagi    | metalloprotease iii                                        | 3 | F:GO:0004222;<br>P:GO:0006508;<br>F:GO:0008270                                                                                      | -                                                                                | EC:3.4.24.0 -                                                         |
| -                       | -                                                          | 0 |                                                                                                                                     |                                                                                  | SignalP (SIGNALP)                                                     |
| -                       | -                                                          | 0 |                                                                                                                                     |                                                                                  | -                                                                     |
| Brugia malayi           | phospholipase active site motif family protein             | 0 |                                                                                                                                     | F:GO:0016780;<br>P:GO:0008152;<br>P:GO:0008654;<br>F:GO:0003824                  | PTHR12586 (PANTHER)                                                   |
| Caenorhabditis elegans  | ef hand family protein                                     | 0 |                                                                                                                                     | F:GO:0005509                                                                     | IPR018247; IPR018249                                                  |
| -                       | -                                                          | 0 |                                                                                                                                     |                                                                                  | -                                                                     |
| -                       | -                                                          | 0 |                                                                                                                                     |                                                                                  | -                                                                     |
| -                       | -                                                          | 0 |                                                                                                                                     |                                                                                  | SignalP (SIGNALP)                                                     |
| Caenorhabditis elegans  | briggsae cbr-hex-4 protein                                 | 0 |                                                                                                                                     | F:GO:0004553;<br>P:GO:0005975;<br>F:GO:0043169;<br>F:GO:0003824                  | IPR013781; IPR015883                                                  |
| -                       | -                                                          | 0 |                                                                                                                                     |                                                                                  | -                                                                     |
| Loa loa                 | ww domain containing protein                               | 0 |                                                                                                                                     | F:GO:0005515                                                                     | IPR002713; PTHR11864 (PANTHER)                                        |
| Caenorhabditis elegans  | elegans protein confirmed by transcript evidence           | 5 | P:GO:0007156;<br>C:GO:0005886;<br>P:GO:0007411;<br>F:GO:0050839;<br>P:GO:0016338                                                    | -                                                                                | IPR000782; PTHR10900 (PANTHER),<br>PTHR10900:SF10 (PANTHER)           |
| -                       | -                                                          | 0 |                                                                                                                                     |                                                                                  | -                                                                     |
| -                       | -                                                          | 0 |                                                                                                                                     |                                                                                  | -                                                                     |
| Caenorhabditis elegans  | elegans protein partially confirmed by transcript evidence | 0 |                                                                                                                                     |                                                                                  | -                                                                     |

|                         |                                       |    |                                                                                                                                                                                                                                                                                                                                                                                   |   |                   |
|-------------------------|---------------------------------------|----|-----------------------------------------------------------------------------------------------------------------------------------------------------------------------------------------------------------------------------------------------------------------------------------------------------------------------------------------------------------------------------------|---|-------------------|
| Caenorhabditis elegans  | briggsae cbr-unc-40 protein           | 0  | F:GO:0016787;<br>P:GO:0006468;<br>P:GO:0048010;<br>F:GO:0004725;<br>F:GO:0016162;<br>F:GO:0005524;<br>F:GO:0004721;<br>C:GO:0016021;<br>C:GO:0016020;<br>P:GO:0007155;<br>F:GO:0016798;<br>F:GO:0004872;<br>P:GO:0008152;<br>F:GO:0005021;<br>F:GO:0016791;<br>P:GO:0006470;<br>P:GO:0016311;<br>P:GO:0016358;<br>C:GO:0005887;<br>F:GO:0005515;<br>F:GO:0016740;<br>F:GO:0050254 | - |                   |
| -                       | -                                     | 0  |                                                                                                                                                                                                                                                                                                                                                                                   | - |                   |
| -                       | -                                     | 0  |                                                                                                                                                                                                                                                                                                                                                                                   | - |                   |
| -                       | -                                     | 0  |                                                                                                                                                                                                                                                                                                                                                                                   | - | SignalP (SIGNALP) |
| -                       | -                                     | 0  |                                                                                                                                                                                                                                                                                                                                                                                   | - |                   |
| -                       | -                                     | 0  |                                                                                                                                                                                                                                                                                                                                                                                   | - |                   |
| -                       | -                                     | 0  |                                                                                                                                                                                                                                                                                                                                                                                   | - | SignalP (SIGNALP) |
| Homo sapiens            | lysosomal alpha-glucosidase precursor | 18 | F:GO:0032450;<br>P:GO:0007626;<br>P:GO:0005980;<br>P:GO:0055010;<br>P:GO:0043181;<br>P:GO:0060048;<br>P:GO:0007040;<br>P:GO:0000023;<br>C:GO:0005765;<br>P:GO:0050884;<br>P:GO:0005985;<br>F:GO:0005529;<br>P:GO:0046716;<br>P:GO:0050885;<br>P:GO:0002026;<br>C:GO:0005625;<br>P:GO:0002086;<br>P:GO:0043587                                                                     | - |                   |
| -                       | -                                     | 0  |                                                                                                                                                                                                                                                                                                                                                                                   | - |                   |
| Caenorhabditis briggsae | c6orf153 protein                      | 5  | P:GO:0009792;<br>P:GO:0000003;<br>P:GO:0040007;<br>P:GO:0006898;<br>P:GO:0002119                                                                                                                                                                                                                                                                                                  | - | IPR009292         |
| Caenorhabditis briggsae | loc496075 protein                     | 0  |                                                                                                                                                                                                                                                                                                                                                                                   |   | IPR003226         |
| -                       | -                                     | 0  |                                                                                                                                                                                                                                                                                                                                                                                   | - |                   |

|                         |                                                             |    |                                                                                                                                                                                                         |                                                                                                   |             |                                                                                                                                   |
|-------------------------|-------------------------------------------------------------|----|---------------------------------------------------------------------------------------------------------------------------------------------------------------------------------------------------------|---------------------------------------------------------------------------------------------------|-------------|-----------------------------------------------------------------------------------------------------------------------------------|
| Caenorhabditis briggsae | fer (fps fes related) tyrosine ki-se                        | 12 | P:GO:0040010;<br>F:GO:0017137;<br>P:GO:0023034;<br>P:GO:0000003;<br>F:GO:0004713;<br>F:GO:0045296;<br>F:GO:0045295;<br>F:GO:0003779;<br>F:GO:0000166;<br>F:GO:0019901;<br>C:GO:0005737;<br>P:GO:0006468 | -                                                                                                 | EC:2.7.10.0 | IPR000719; IPR001245; IPR008266;<br>IPR011009; IPR020685; IPR020764;<br>G3DSA:1.10.510.10 (GENE3D),<br>G3DSA:3.30.200.20 (GENE3D) |
| -                       | -                                                           | 0  |                                                                                                                                                                                                         |                                                                                                   |             | PF05804 (PFAM)                                                                                                                    |
| -                       | -                                                           | 0  |                                                                                                                                                                                                         |                                                                                                   |             | -                                                                                                                                 |
| Caenorhabditis elegans  | tetratricopeptide repeat domain 17                          | 3  | P:GO:0040010;<br>P:GO:0040017;<br>F:GO:0005488                                                                                                                                                          | -                                                                                                 |             | PTHR16091 (PANTHER)                                                                                                               |
| -                       | -                                                           | 0  |                                                                                                                                                                                                         |                                                                                                   |             | SignalP (SIGNALP)                                                                                                                 |
| Loa loa                 | uncharacterized protein kiaa0329 kiaa0297                   | 0  |                                                                                                                                                                                                         | F:GO:0005488;<br>F:GO:0004512;<br>P:GO:0008152;<br>P:GO:0008654;<br>F:GO:0003824;<br>P:GO:0006021 |             | IPR001680; IPR011046; IPR015943;<br>PTHR23287 (PANTHER)                                                                           |
| -                       | -                                                           | 0  |                                                                                                                                                                                                         |                                                                                                   |             | -                                                                                                                                 |
| -                       | -                                                           | 0  |                                                                                                                                                                                                         |                                                                                                   |             | -                                                                                                                                 |
| -                       | -                                                           | 0  |                                                                                                                                                                                                         |                                                                                                   |             | -                                                                                                                                 |
| -                       | -                                                           | 0  |                                                                                                                                                                                                         |                                                                                                   |             | -                                                                                                                                 |
| Brugia malayi           | hypothetical protein Bm1_40770 [Brugia malayi]              | 0  |                                                                                                                                                                                                         |                                                                                                   |             | -                                                                                                                                 |
| -                       | -                                                           | 0  |                                                                                                                                                                                                         |                                                                                                   |             | -                                                                                                                                 |
| Homo sapiens            | cytochrome c oxidase subunit iv                             | 7  | P:GO:0007584;<br>F:GO:0005515;<br>C:GO:0005751;<br>C:GO:0016021;<br>C:GO:0005634;<br>F:GO:0004129;<br>P:GO:0006091                                                                                      | -                                                                                                 | EC:1.9.3.1  | -                                                                                                                                 |
| -                       | -                                                           | 0  |                                                                                                                                                                                                         |                                                                                                   |             | SignalP (SIGNALP)                                                                                                                 |
| -                       | -                                                           | 0  |                                                                                                                                                                                                         |                                                                                                   |             | -                                                                                                                                 |
| -                       | -                                                           | 0  |                                                                                                                                                                                                         |                                                                                                   |             | SignalP (SIGNALP)                                                                                                                 |
| Caenorhabditis elegans  | polymerase iii (d- directed) polypeptide 39 kda             | 2  | F:GO:0005488;<br>P:GO:0000003                                                                                                                                                                           | -                                                                                                 |             | IPR007832                                                                                                                         |
| Caenorhabditis elegans  | tr- (5-methylaminomethyl-2-thiouridylate)-methyltransferase | 4  | P:GO:0008033;<br>P:GO:0006529;<br>C:GO:0005737;<br>F:GO:0008168                                                                                                                                         | -                                                                                                 | EC:2.1.1.0  | IPR004506; IPR014729; SSF52402 (SUPERFAMILY)                                                                                      |
| Caenorhabditis briggsae | briggsae cbr-ego-1 protein                                  | 1  | F:GO:0005515                                                                                                                                                                                            | -                                                                                                 |             | -                                                                                                                                 |
| Loa loa                 | amp-binding enzyme family protein                           | 1  | F:GO:0005488                                                                                                                                                                                            | -                                                                                                 |             | IPR000873; G3DSA:3.40.50.980 (GENE3D), PTHR11968 (PANTHER), PTHR11968:SF11 (PANTHER), SignalP (SIGNALP), SSF56801 (SUPERFAMILY)   |



|                               |                                                            |    |                                                                                                                                                                                        |   |                            |                                                                                                                      |
|-------------------------------|------------------------------------------------------------|----|----------------------------------------------------------------------------------------------------------------------------------------------------------------------------------------|---|----------------------------|----------------------------------------------------------------------------------------------------------------------|
| Callithrix jacchus            | poly binding protein 2                                     | 11 | P:GO:0043161;<br>F:GO:0003723;<br>P:GO:0050687;<br>F:GO:0031625;<br>P:GO:0016071;<br>P:GO:0008380;<br>P:GO:0045087;<br>F:GO:0003677;<br>C:GO:0030529;<br>C:GO:0005737;<br>C:GO:0005634 | - |                            | PTHR10288 (PANTHER),<br>PTHR10288:SF48 (PANTHER)                                                                     |
| Callithrix jacchus            | glutamine synthetase                                       | 10 | C:GO:0005829;<br>P:GO:0009749;<br>C:GO:0005739;<br>F:GO:0004351;<br>F:GO:0042802;<br>P:GO:0006542;<br>F:GO:0005524;<br>F:GO:0004356;<br>P:GO:0008283;<br>C:GO:0005794                  | - | EC:4.1.1.15;<br>EC:6.3.1.2 | SignalP (SIGNALP)                                                                                                    |
|                               | -                                                          | 0  |                                                                                                                                                                                        |   |                            | SignalP (SIGNALP)                                                                                                    |
| Caenorhabditis elegans        | fh1 fh2 domain-containing protein 3                        | 3  | P:GO:0030036;<br>C:GO:0044424;<br>F:GO:0003779                                                                                                                                         | - |                            | IPR015425; PTHR23213 (PANTHER),<br>PTHR23213:SF3 (PANTHER)                                                           |
|                               | -                                                          | 0  |                                                                                                                                                                                        |   |                            | -                                                                                                                    |
|                               | -                                                          | 0  |                                                                                                                                                                                        |   |                            | -                                                                                                                    |
| Caenorhabditis briggsae       | membrane calcium atpase family member (mca-1)              | 5  | F:GO:0005388;<br>C:GO:0016021;<br>P:GO:0006754;<br>F:GO:0005524;<br>P:GO:0006816                                                                                                       | - | EC:3.6.3.8                 | SignalP (SIGNALP)                                                                                                    |
|                               | -                                                          | 0  |                                                                                                                                                                                        |   |                            | -                                                                                                                    |
| Strongylocentrotus purpuratus | atp-binding cassette protein c4-like                       | 2  | P:GO:0006810;<br>C:GO:0016020                                                                                                                                                          | - |                            | IPR001140; IPR011527; IPR017940;<br>G3DSA:1.20.1560.10 (GENE3D),<br>PTHR19242 (PANTHER),<br>PTHR19242:SF97 (PANTHER) |
|                               | -                                                          | 0  |                                                                                                                                                                                        |   |                            | -                                                                                                                    |
|                               | -                                                          | 0  |                                                                                                                                                                                        |   |                            | SignalP (SIGNALP)                                                                                                    |
|                               | -                                                          | 0  |                                                                                                                                                                                        |   |                            | -                                                                                                                    |
| Caenorhabditis elegans        | elegans protein partially confirmed by transcript evidence | 1  | P:GO:0008104                                                                                                                                                                           | - |                            | IPR009543; PTHR16166 (PANTHER),<br>PTHR16166:SF25 (PANTHER)                                                          |
|                               | -                                                          | 0  |                                                                                                                                                                                        |   |                            | -                                                                                                                    |
|                               | -                                                          | 0  |                                                                                                                                                                                        |   |                            | PTHR10827 (PANTHER),<br>PTHR10827:SF1 (PANTHER), SignalP<br>(SIGNALP)                                                |
| Caenorhabditis briggsae       | uhrf1-binding protein 1-like                               | 0  |                                                                                                                                                                                        |   |                            | PTHR22774 (PANTHER),<br>PTHR22774:SF5 (PANTHER)                                                                      |
| Caenorhabditis briggsae       | atp-dependent clp protease atp-binding subunit clpx        | 8  | P:GO:0006457;<br>P:GO:0006355;<br>C:GO:0005743;<br>F:GO:0051082;<br>F:GO:0016887;<br>F:GO:0008233;<br>F:GO:0008134;<br>F:GO:0005524                                                    | - |                            | -                                                                                                                    |

|                         |                                                            |   |                                                                                                                                     |   |                                                                                                                                                                                                  |
|-------------------------|------------------------------------------------------------|---|-------------------------------------------------------------------------------------------------------------------------------------|---|--------------------------------------------------------------------------------------------------------------------------------------------------------------------------------------------------|
| Caenorhabditis briggsae | atp-dependent clp protease atp-binding subunit clpx        | 8 | P:GO:0006457;<br>P:GO:0006355;<br>C:GO:0005743;<br>F:GO:0051082;<br>F:GO:0016887;<br>F:GO:0008233;<br>F:GO:0008134;<br>F:GO:0005524 | - | IPR003593; IPR004487; IPR013093;<br>IPR019489; G3DSA:1.10.8.60<br>(GENE3D), G3DSA:3.40.50.300<br>(GENE3D), PTHR11262 (PANTHER),<br>SSF52540 (SUPERFAMILY)                                        |
| Caenorhabditis elegans  | g elongation mitochondrial 2                               | 2 | F:GO:0005488;<br>P:GO:0032543                                                                                                       | - | IPR000640; IPR004161; IPR005517;<br>IPR009000; IPR009022; IPR014721;<br>IPR020568; G3DSA:2.40.30.10<br>(GENE3D), G3DSA:3.30.70.870<br>(GENE3D), PTHR23115 (PANTHER),<br>PTHR23115:SF13 (PANTHER) |
| Caenorhabditis briggsae | elegans protein partially confirmed by transcript evidence | 3 | F:GO:0005044;<br>F:GO:0005488;<br>C:GO:0016020                                                                                      | - | -                                                                                                                                                                                                |
| -                       | -                                                          | 0 |                                                                                                                                     |   | -                                                                                                                                                                                                |
| -                       | -                                                          | 0 |                                                                                                                                     |   | -                                                                                                                                                                                                |
| Camponotus floridanus   | cutc copper transporter homolog                            | 7 | C:GO:0005737;<br>F:GO:0042802;<br>P:GO:0006825;<br>P:GO:0051262;<br>F:GO:0005507;<br>P:GO:0055070;<br>C:GO:0005634                  | - | IPR005627                                                                                                                                                                                        |
| Caenorhabditis briggsae | af303259_1 2o16                                            | 0 |                                                                                                                                     |   | -                                                                                                                                                                                                |
| Caenorhabditis briggsae | af303259_1 2o16                                            | 0 |                                                                                                                                     |   | -                                                                                                                                                                                                |
| -                       | -                                                          | 0 |                                                                                                                                     |   | -                                                                                                                                                                                                |
| -                       | -                                                          | 0 |                                                                                                                                     |   | -                                                                                                                                                                                                |
| Caenorhabditis elegans  | kiaa2021 protein                                           | 2 | P:GO:0009792;<br>P:GO:0000003                                                                                                       | - | IPR001313; IPR011989; IPR016024                                                                                                                                                                  |
| Caenorhabditis elegans  | stromal cell derived factor 4                              | 6 | P:GO:0050896;<br>P:GO:0032502;<br>P:GO:0017156;<br>F:GO:0005515;<br>C:GO:0043231;<br>C:GO:0044444                                   | - | IPR002048; IPR011992; IPR018247;<br>IPR018249; PTHR10827 (PANTHER),<br>PTHR10827:SF13 (PANTHER),<br>SSF47473 (SUPERFAMILY)                                                                       |
| -                       | -                                                          | 0 |                                                                                                                                     |   | -                                                                                                                                                                                                |
| -                       | -                                                          | 0 |                                                                                                                                     |   | -                                                                                                                                                                                                |
| -                       | -                                                          | 0 |                                                                                                                                     |   | -                                                                                                                                                                                                |
| -                       | -                                                          | 0 |                                                                                                                                     |   | -                                                                                                                                                                                                |
| -                       | -                                                          | 0 |                                                                                                                                     |   | -                                                                                                                                                                                                |
| -                       | -                                                          | 0 |                                                                                                                                     |   | -                                                                                                                                                                                                |
| Caenorhabditis elegans  | death-associated protein ki-se 1                           | 8 | F:GO:0005516;<br>P:GO:0007243;<br>F:GO:0004672;<br>F:GO:0016491;<br>F:GO:0005524;<br>C:GO:0015629;<br>P:GO:0008624;<br>P:GO:0006468 | - | SignalP (SIGNALP)                                                                                                                                                                                |
| Caenorhabditis briggsae | elegans protein partially confirmed by transcript evidence | 3 | P:GO:0019915;<br>P:GO:0008152;<br>F:GO:0016740                                                                                      | - | IPR002213; PTHR11926:SF3<br>(PANTHER), SignalP (SIGNALP),<br>SSF53756 (SUPERFAMILY)                                                                                                              |

|                         |                                                               |   |                                                                                                                                                      |   |                                                                                                                    |                                                                                            |
|-------------------------|---------------------------------------------------------------|---|------------------------------------------------------------------------------------------------------------------------------------------------------|---|--------------------------------------------------------------------------------------------------------------------|--------------------------------------------------------------------------------------------|
| Caenorhabditis elegans  | cgmp-dependent protein ki-se foraging                         | 4 | P:GO:0006468;<br>F:GO:0005524;<br>P:GO:0000003;<br>F:GO:0004674                                                                                      | - | EC:2.7.11.0                                                                                                        | -                                                                                          |
| Loa loa                 | mitogen-activated protein-binding protein-interacting protein | 3 | C:GO:0005768;<br>F:GO:0005515;<br>C:GO:0016020                                                                                                       | - |                                                                                                                    | IPR004942; G3DSA:3.30.450.30 (GENE3D), PTHR13323 (PANTHER), SSF103196 (SUPERFAMILY)        |
|                         | -                                                             | 0 |                                                                                                                                                      |   |                                                                                                                    | -                                                                                          |
| Ailuropoda melanoleuca  | myosin regulatory light chain 12b                             | 7 | P:GO:0006936;<br>F:GO:0005515;<br>C:GO:0016459;<br>C:GO:0045177;<br>F:GO:0005509;<br>F:GO:0003774;<br>P:GO:0008152                                   | - |                                                                                                                    | IPR011992; IPR018249; PTHR23049 (PANTHER), PTHR23049:SF6 (PANTHER), SSF47473 (SUPERFAMILY) |
|                         | -                                                             | 0 |                                                                                                                                                      |   |                                                                                                                    | -                                                                                          |
|                         | -                                                             | 0 |                                                                                                                                                      |   |                                                                                                                    | -                                                                                          |
| Caenorhabditis briggsae | eukaryotic translation initiation factor x-chromosomal        | 9 | F:GO:0003743;<br>P:GO:0040010;<br>F:GO:0003723;<br>P:GO:0045948;<br>P:GO:0000003;<br>P:GO:0040011;<br>P:GO:0006898;<br>P:GO:0009792;<br>P:GO:0040018 | - |                                                                                                                    | IPR001253; IPR006196; IPR012340; IPR016027; IPR018104                                      |
|                         | -                                                             | 0 |                                                                                                                                                      |   |                                                                                                                    | -                                                                                          |
| Caenorhabditis elegans  | briggsae cbr-btf-1 protein                                    | 1 | F:GO:0005488                                                                                                                                         | - |                                                                                                                    | -                                                                                          |
| Loa loa                 | chitin deacetylase 1                                          | 2 | P:GO:0005975;<br>F:GO:0016810                                                                                                                        | - |                                                                                                                    | IPR002509; IPR011330                                                                       |
| Caenorhabditis briggsae | Hypothetical protein CBG01490 [Caenorhabditis briggsae]       | 0 |                                                                                                                                                      |   | F:GO:0008312;<br>F:GO:0030942;<br>C:GO:0005786;<br>P:GO:0006614;<br>C:GO:0048500;<br>F:GO:0005515;<br>P:GO:0045900 | SignalP (SIGNALP)                                                                          |

|                         |                                                               |    |                                                                                                                                                                                                                                                                                                                                                                                                                                                                        |              |                                                         |                                                                                                                                                                                                                                        |
|-------------------------|---------------------------------------------------------------|----|------------------------------------------------------------------------------------------------------------------------------------------------------------------------------------------------------------------------------------------------------------------------------------------------------------------------------------------------------------------------------------------------------------------------------------------------------------------------|--------------|---------------------------------------------------------|----------------------------------------------------------------------------------------------------------------------------------------------------------------------------------------------------------------------------------------|
| Branchiostoma floridae  | glycosyl hydrolase family catalytic domain containing protein | 27 | P:GO:0001501;<br>C:GO:0001669;<br>P:GO:0006689;<br>P:GO:0007605;<br>P:GO:0007626;<br>C:GO:0016020;<br>P:GO:0006874;<br>P:GO:0007040;<br>P:GO:0031323;<br>F:GO:0016231;<br>P:GO:0044267;<br>C:GO:0005764;<br>P:GO:0006044;<br>P:GO:0008049;<br>F:GO:0046982;<br>P:GO:0019915;<br>F:GO:0005529;<br>P:GO:0030203;<br>F:GO:0043169;<br>P:GO:0050885;<br>P:GO:0048477;<br>F:GO:0042803;<br>P:GO:0042552;<br>P:GO:0009313;<br>P:GO:0008654;<br>P:GO:0007341;<br>C:GO:0005625 | -            |                                                         | IPR001540; IPR013781                                                                                                                                                                                                                   |
| Loa loa                 | hypothetical protein LOAG_05551 [Loa loa]                     | 0  |                                                                                                                                                                                                                                                                                                                                                                                                                                                                        |              |                                                         | -                                                                                                                                                                                                                                      |
| Caenorhabditis briggsae | briggsae cbr-cpg-4 protein                                    | 0  |                                                                                                                                                                                                                                                                                                                                                                                                                                                                        | P:GO:0040010 |                                                         | -                                                                                                                                                                                                                                      |
|                         | -                                                             | 0  |                                                                                                                                                                                                                                                                                                                                                                                                                                                                        |              |                                                         | -                                                                                                                                                                                                                                      |
|                         | -                                                             | 0  |                                                                                                                                                                                                                                                                                                                                                                                                                                                                        |              |                                                         | SignalP (SIGNALP)                                                                                                                                                                                                                      |
|                         | -                                                             | 0  |                                                                                                                                                                                                                                                                                                                                                                                                                                                                        |              |                                                         | -                                                                                                                                                                                                                                      |
| Caenorhabditis briggsae | dy-min                                                        | 3  | F:GO:0003924;<br>F:GO:0005515;<br>F:GO:0005525                                                                                                                                                                                                                                                                                                                                                                                                                         | -            | EC:3.6.5.1;<br>EC:3.6.5.2;<br>EC:3.6.5.3;<br>EC:3.6.5.4 | IPR000375; IPR001401; IPR001849;<br>IPR003130; IPR011993; IPR019762;<br>IPR020850; IPR022812;<br>G3DSA:3.40.50.300 (GENE3D),<br>PTHR11566 (PANTHER),<br>PTHR11566:SF12 (PANTHER),<br>SSF50729 (SUPERFAMILY), SSF52540<br>(SUPERFAMILY) |
| Caenorhabditis elegans  | major intrinsic protein                                       | 9  | C:GO:0016323;<br>P:GO:0045087;<br>P:GO:0006833;<br>P:GO:0000003;<br>P:GO:0008340;<br>P:GO:0050829;<br>C:GO:0016021;<br>F:GO:0015250;<br>P:GO:0015793                                                                                                                                                                                                                                                                                                                   | -            |                                                         | IPR000425; IPR022357;<br>PTHR19139:SF11 (PANTHER), SignalP<br>(SIGNALP)                                                                                                                                                                |
|                         | -                                                             | 0  |                                                                                                                                                                                                                                                                                                                                                                                                                                                                        |              |                                                         | -                                                                                                                                                                                                                                      |
| Caenorhabditis elegans  | splicing factor subunit 2                                     | 7  | P:GO:0040035;<br>P:GO:0009792;<br>P:GO:0002119;<br>P:GO:0018996;<br>F:GO:0005515;<br>P:GO:0040011;<br>P:GO:0040007                                                                                                                                                                                                                                                                                                                                                     | -            |                                                         | -                                                                                                                                                                                                                                      |

|                         |                                                      |   |                                                                                                                    |                                                                                                                                                                                                                                                                                                                                                                                                                                                                                         |                           |                                                                                                                            |                              |
|-------------------------|------------------------------------------------------|---|--------------------------------------------------------------------------------------------------------------------|-----------------------------------------------------------------------------------------------------------------------------------------------------------------------------------------------------------------------------------------------------------------------------------------------------------------------------------------------------------------------------------------------------------------------------------------------------------------------------------------|---------------------------|----------------------------------------------------------------------------------------------------------------------------|------------------------------|
| Caenorhabditis elegans  | succinyl-coa synthetase beta chain                   | 7 | F:GO:0004776;<br>P:GO:0009792;<br>C:GO:0005811;<br>C:GO:0045244;<br>F:GO:0005524;<br>P:GO:0006099;<br>F:GO:0004775 | -                                                                                                                                                                                                                                                                                                                                                                                                                                                                                       | EC:6.2.1.4;<br>EC:6.2.1.5 | IPR005809; IPR005811; IPR013816;<br>IPR016102; IPR017866; SSF56059<br>(SUPERFAMILY)                                        |                              |
| -                       | -                                                    | 0 | -                                                                                                                  | -                                                                                                                                                                                                                                                                                                                                                                                                                                                                                       | -                         | -                                                                                                                          |                              |
| Caenorhabditis briggsae | hydroxysteroid dehydroge-se                          | 2 | P:GO:0009792;<br>P:GO:0000003                                                                                      | -                                                                                                                                                                                                                                                                                                                                                                                                                                                                                       | -                         | -                                                                                                                          |                              |
| -                       | -                                                    | 0 | -                                                                                                                  | -                                                                                                                                                                                                                                                                                                                                                                                                                                                                                       | -                         | -                                                                                                                          |                              |
| -                       | -                                                    | 0 | -                                                                                                                  | -                                                                                                                                                                                                                                                                                                                                                                                                                                                                                       | -                         | -                                                                                                                          |                              |
| -                       | -                                                    | 0 | -                                                                                                                  | -                                                                                                                                                                                                                                                                                                                                                                                                                                                                                       | -                         | SignalP (SIGNALP)                                                                                                          |                              |
| Loa loa                 | briggsae cbr-cln- protein                            | 0 | -                                                                                                                  | C:GO:0008876;<br>C:GO:0005886;<br>P:GO:0006672;<br>P:GO:0043086;<br>P:GO:0001575;<br>P:GO:0006898;<br>P:GO:0006865;<br>C:GO:0016021;<br>P:GO:0008150;<br>C:GO:0016020;<br>P:GO:0007042;<br>P:GO:0007040;<br>P:GO:0042133;<br>C:GO:0005783;<br>C:GO:0008021;<br>P:GO:0000046;<br>P:GO:0008340;<br>P:GO:0016242;<br>C:GO:0005624;<br>P:GO:0046662;<br>C:GO:0030176;<br>P:GO:0001508;<br>P:GO:0015809;<br>F:GO:0048306;<br>C:GO:0000139;<br>P:GO:0016044;<br>P:GO:0043524;<br>P:GO:0008306 | -                         | -                                                                                                                          | IPR003492; SignalP (SIGNALP) |
| -                       | -                                                    | 0 | -                                                                                                                  | -                                                                                                                                                                                                                                                                                                                                                                                                                                                                                       | -                         | -                                                                                                                          |                              |
| Caenorhabditis elegans  | ab-hydrolase associated lipase region family protein | 1 | P:GO:0006629                                                                                                       | -                                                                                                                                                                                                                                                                                                                                                                                                                                                                                       | -                         | IPR000073; IPR006693;<br>G3DSA:3.40.50.1820 (GENE3D),<br>PTHR11005 (PANTHER), SignalP<br>(SIGNALP), SSF53474 (SUPERFAMILY) |                              |
| Caenorhabditis elegans  | ab-hydrolase associated lipase region family protein | 1 | P:GO:0006629                                                                                                       | -                                                                                                                                                                                                                                                                                                                                                                                                                                                                                       | -                         | IPR000073; IPR006693;<br>G3DSA:3.40.50.1820 (GENE3D),<br>PTHR11005 (PANTHER), SignalP<br>(SIGNALP), SSF53474 (SUPERFAMILY) |                              |
| Caenorhabditis elegans  | elegans protein confirmed by transcript evidence     | 1 | P:GO:0006629                                                                                                       | -                                                                                                                                                                                                                                                                                                                                                                                                                                                                                       | -                         | IPR000073; IPR006693;<br>G3DSA:3.40.50.1820 (GENE3D),<br>PTHR11005 (PANTHER), SSF53474<br>(SUPERFAMILY)                    |                              |
| Caenorhabditis elegans  | ab-hydrolase associated lipase region family protein | 1 | P:GO:0006629                                                                                                       | -                                                                                                                                                                                                                                                                                                                                                                                                                                                                                       | -                         | IPR000073; IPR006693;<br>G3DSA:3.40.50.1820 (GENE3D),<br>PTHR11005 (PANTHER), SignalP<br>(SIGNALP), SSF53474 (SUPERFAMILY) |                              |

|                             |                                                                               |    |                                                                                                                                                                                                                                                            |                                                                                                                                                      |                                                                                                                                     |
|-----------------------------|-------------------------------------------------------------------------------|----|------------------------------------------------------------------------------------------------------------------------------------------------------------------------------------------------------------------------------------------------------------|------------------------------------------------------------------------------------------------------------------------------------------------------|-------------------------------------------------------------------------------------------------------------------------------------|
| Caenorhabditis elegans      | ab-hydrolase associated lipase region family protein                          | 1  | P:GO:0006629                                                                                                                                                                                                                                               | -                                                                                                                                                    | IPR000073; IPR006693;<br>G3DSA:3.40.50.1820 (GENE3D),<br>PTHR11005 (PANTHER), SignalP<br>(SIGNALP), SSF53474 (SUPERFAMILY)          |
| Caenorhabditis elegans      | ab-hydrolase associated lipase region family protein                          | 1  | P:GO:0006629                                                                                                                                                                                                                                               | -                                                                                                                                                    | IPR000073; IPR006693;<br>G3DSA:3.40.50.1820 (GENE3D),<br>PTHR11005 (PANTHER), SignalP<br>(SIGNALP), SSF53474 (SUPERFAMILY)          |
| Caenorhabditis briggsae     | briggsae cbr-wht-2 protein                                                    | 4  | C:GO:0016021;<br>F:GO:0016887;<br>F:GO:0005524;<br>P:GO:0010171                                                                                                                                                                                            | -                                                                                                                                                    | IPR003439; IPR017871;<br>G3DSA:3.40.50.300 (GENE3D),<br>PTHR19241 (PANTHER),<br>PTHR19241:SF30 (PANTHER),<br>SSF52540 (SUPERFAMILY) |
| -                           | -                                                                             | 0  | -                                                                                                                                                                                                                                                          | -                                                                                                                                                    | -                                                                                                                                   |
| Caenorhabditis elegans      | hypothetical protein C09F12.3 [Caenorhabditis elegans]                        | 0  | -                                                                                                                                                                                                                                                          | C:GO:0016021;<br>P:GO:0007186                                                                                                                        | G3DSA:1.20.1070.10 (GENE3D),<br>PTHR22751 (PANTHER),<br>PTHR22751:SF8 (PANTHER), SSF81321<br>(SUPERFAMILY)                          |
| Caenorhabditis elegans      | bola-like protein 3-like                                                      | 1  | F:GO:0005515                                                                                                                                                                                                                                               | -                                                                                                                                                    | IPR002634; PTHR12735:SF2<br>(PANTHER)                                                                                               |
| Caenorhabditis briggsae     | elegans protein confirmed by transcript evidence                              | 0  | -                                                                                                                                                                                                                                                          | P:GO:0006898;<br>P:GO:0002119;<br>P:GO:0040007                                                                                                       | -                                                                                                                                   |
| Angiostrongylus cantonensis | hypothetical protein [Angiostrongylus cantonensis]                            | 0  | -                                                                                                                                                                                                                                                          | -                                                                                                                                                    | -                                                                                                                                   |
| Angiostrongylus cantonensis | hypothetical protein [Angiostrongylus cantonensis]                            | 0  | -                                                                                                                                                                                                                                                          | -                                                                                                                                                    | -                                                                                                                                   |
| Loa loa                     | sumo1 sentrin specific peptidase 6                                            | 0  | -                                                                                                                                                                                                                                                          | C:GO:0005634;<br>F:GO:0003676;<br>F:GO:0008270;<br>F:GO:0003674;<br>C:GO:0005575;<br>F:GO:0008234;<br>F:GO:0008233;<br>P:GO:0006508;<br>P:GO:0008150 | IPR003653; PTHR12438 (PANTHER),<br>SSF54001 (SUPERFAMILY)                                                                           |
| Caenorhabditis briggsae     | von willebrand factor type egf and pentraxin domain-containing protein 1-like | 0  | -                                                                                                                                                                                                                                                          | F:GO:0003674;<br>F:GO:0005488;<br>F:GO:0005509;<br>C:GO:0016021;<br>C:GO:0016020;<br>P:GO:0008150;<br>C:GO:0005575                                   | -                                                                                                                                   |
| Caenorhabditis elegans      | dap (death associated protein ki-se) like ki-se family member (dlk-1)         | 15 | P:GO:0018105;<br>C:GO:0005829;<br>P:GO:0007254;<br>F:GO:0004674;<br>F:GO:0046872;<br>P:GO:0016572;<br>P:GO:0018107;<br>C:GO:0033267;<br>C:GO:0005624;<br>F:GO:0000166;<br>F:GO:0019901;<br>C:GO:0030426;<br>F:GO:0042803;<br>P:GO:0046777;<br>C:GO:0005886 | -                                                                                                                                                    | EC:2.7.11.0<br>IPR000719; IPR001245; IPR011009;<br>G3DSA:1.10.510.10 (GENE3D),<br>PTHR23257 (PANTHER),<br>PTHR23257:SF85 (PANTHER)  |

|                         |                                                    |   |                                                                                                                    |                                                                                                                                     |              |                                                                                                                       |
|-------------------------|----------------------------------------------------|---|--------------------------------------------------------------------------------------------------------------------|-------------------------------------------------------------------------------------------------------------------------------------|--------------|-----------------------------------------------------------------------------------------------------------------------|
| Brugia malayi           | coiled-coil domain-containing protein 76           | 0 |                                                                                                                    | F:GO:0008168;<br>F:GO:0016455;<br>P:GO:0045449;<br>C:GO:0016592                                                                     |              | IPR007871; PTHR12998 (PANTHER)                                                                                        |
| Caenorhabditis briggsae | hypothetical kda protein in chromosome             | 3 | P:GO:0040007;<br>P:GO:0006898;<br>P:GO:0002119                                                                     | -                                                                                                                                   |              | -                                                                                                                     |
|                         | -                                                  | 0 |                                                                                                                    |                                                                                                                                     |              | -                                                                                                                     |
| Caenorhabditis elegans  | er degradation mannosidase alpha-like 3            | 4 | F:GO:0004569;<br>P:GO:0006516;<br>C:GO:0044464;<br>P:GO:0043161                                                    | -                                                                                                                                   | EC:3.2.1.130 | IPR001382; IPR003137;<br>G3DSA:3.50.30.30 (GENE3D),<br>PTHR11742:SF8 (PANTHER), SSF52025<br>(SUPERFAMILY)             |
| Caenorhabditis elegans  | elegans protein confirmed by transcript evidence   | 0 |                                                                                                                    |                                                                                                                                     |              | -                                                                                                                     |
| Caenorhabditis briggsae | exosome complex exonuclease rrp44                  | 7 | F:GO:0003723;<br>F:GO:0005515;<br>F:GO:0016219;<br>P:GO:0006364;<br>C:GO:0000178;<br>F:GO:0008859;<br>C:GO:0005634 | -                                                                                                                                   | EC:3.1.13.1  | -                                                                                                                     |
|                         | -                                                  | 0 |                                                                                                                    |                                                                                                                                     |              | -                                                                                                                     |
| Danio rerio             | gap-pol poly                                       | 1 | F:GO:0005488                                                                                                       | -                                                                                                                                   |              | IPR000477; G3DSA:3.30.70.270<br>(GENE3D), PTHR10178 (PANTHER),<br>PTHR10178:SF14 (PANTHER),<br>SSF56672 (SUPERFAMILY) |
|                         | -                                                  | 0 |                                                                                                                    |                                                                                                                                     |              | SignalP (SIGNALP)                                                                                                     |
| Caenorhabditis briggsae | per1-like family protein                           | 1 | F:GO:0005515                                                                                                       | -                                                                                                                                   |              | IPR007217                                                                                                             |
|                         | -                                                  | 0 |                                                                                                                    |                                                                                                                                     |              | -                                                                                                                     |
|                         | -                                                  | 0 |                                                                                                                    |                                                                                                                                     |              | -                                                                                                                     |
| Caenorhabditis briggsae | mitotic control protein dis3                       | 0 |                                                                                                                    | F:GO:0003723;<br>F:GO:0004540;<br>C:GO:0005652;<br>P:GO:0006397;<br>C:GO:0000177;<br>C:GO:0000176;<br>F:GO:0000175;<br>C:GO:0005634 |              | PTHR23355 (PANTHER),<br>PTHR23355:SF13 (PANTHER)                                                                      |
| Caenorhabditis elegans  | briggsae cbr-spp-5 protein                         | 0 |                                                                                                                    |                                                                                                                                     |              | IPR008138; IPR008139; IPR011001;<br>PTHR21579 (PANTHER),<br>PTHR21579:SF6 (PANTHER), SignalP<br>(SIGNALP)             |
|                         | -                                                  | 0 |                                                                                                                    |                                                                                                                                     |              | -                                                                                                                     |
|                         | -                                                  | 0 |                                                                                                                    |                                                                                                                                     |              | -                                                                                                                     |
|                         | -                                                  | 0 |                                                                                                                    |                                                                                                                                     |              | -                                                                                                                     |
| Loa loa                 | type iii restriction res subunit family protein    | 0 |                                                                                                                    | F:GO:0003676;<br>F:GO:0004386;<br>F:GO:0005524;<br>F:GO:0000166;<br>F:GO:0016787;<br>F:GO:0017111;<br>F:GO:0008026                  |              | -                                                                                                                     |
| Caenorhabditis elegans  | leucine-zipper-containing transcription factor lzf | 2 | P:GO:0040010;<br>P:GO:0006974                                                                                      | -                                                                                                                                   |              | IPR019386                                                                                                             |
|                         | -                                                  | 0 |                                                                                                                    |                                                                                                                                     |              | -                                                                                                                     |

|                         |                                                   |    |                                                                                                                                                                                                                                                                                              |   |                                   |                                                                                                          |
|-------------------------|---------------------------------------------------|----|----------------------------------------------------------------------------------------------------------------------------------------------------------------------------------------------------------------------------------------------------------------------------------------------|---|-----------------------------------|----------------------------------------------------------------------------------------------------------|
| Homo sapiens            | complement component 3                            | 16 | F:GO:0048037;<br>P:GO:0006957;<br>F:GO:0005102;<br>P:GO:0010951;<br>P:GO:0050766;<br>P:GO:0045766;<br>C:GO:0005615;<br>P:GO:0001798;<br>P:GO:0007596;<br>P:GO:0007165;<br>P:GO:0010575;<br>P:GO:0006935;<br>P:GO:0007186;<br>P:GO:0006958;<br>F:GO:0004866;<br>P:GO:0001970                  | - |                                   | IPR001134; IPR008993; IPR018933;<br>PTHR11412 (PANTHER),<br>PTHR11412:SF14 (PANTHER)                     |
| Caenorhabditis elegans  | adp atp translocase                               | 11 | P:GO:0040010;<br>P:GO:0008340;<br>P:GO:0040002;<br>P:GO:0040035;<br>P:GO:0010171;<br>P:GO:0002119;<br>F:GO:0005515;<br>P:GO:0006898;<br>P:GO:0002009;<br>P:GO:0009792;<br>C:GO:0016020                                                                                                       | - |                                   | IPR001993; IPR002067; IPR002113;<br>IPR018108; G3DSA:1.50.40.10<br>(GENE3D), PTHR11896:SF35<br>(PANTHER) |
| Caenorhabditis elegans  | tryptophan oxyge-se                               | 8  | P:GO:0040010;<br>P:GO:0019441;<br>P:GO:0055114;<br>F:GO:0042802;<br>P:GO:0006508;<br>F:GO:0004197;<br>F:GO:0004833;<br>F:GO:0020037                                                                                                                                                          | - | EC:3.4.22.0;<br>EC:1.13.11.1<br>1 | IPR004981; SSF140959 (SUPERFAMILY)                                                                       |
| Caenorhabditis briggsae | cystathionine beta-synthase                       | 17 | P:GO:0043506;<br>P:GO:0019448;<br>P:GO:0051593;<br>F:GO:0020037;<br>P:GO:0043418;<br>C:GO:0005730;<br>C:GO:0005829;<br>P:GO:0070814;<br>F:GO:0031625;<br>F:GO:0030170;<br>P:GO:0006565;<br>P:GO:0019344;<br>F:GO:0004122;<br>F:GO:0042803;<br>C:GO:0005625;<br>P:GO:0001958;<br>P:GO:0019346 | - | EC:4.2.1.22                       | IPR001926; G3DSA:3.40.50.1100<br>(GENE3D), PTHR10314 (PANTHER),<br>PTHR10314:SF8 (PANTHER)               |
|                         | -                                                 | 0  |                                                                                                                                                                                                                                                                                              |   |                                   | SignalP (SIGNALP)                                                                                        |
| Caenorhabditis elegans  | armadillo beta-catenin-like repeat family protein | 1  | F:GO:0005515                                                                                                                                                                                                                                                                                 | - |                                   | -                                                                                                        |
| Caenorhabditis elegans  | dehydroge-se reductase sdr family member 4        | 2  | F:GO:0016491;<br>P:GO:0008152                                                                                                                                                                                                                                                                | - |                                   | IPR002198; IPR002347; IPR010916;<br>IPR016040; PTHR19410:SF65<br>(PANTHER), SSF51735 (SUPERFAMILY)       |



|                        |                                                              |    |                                                                                                                                                                                                                                                                                                                                                                                                                     |                               |                                                                                                                                                            |
|------------------------|--------------------------------------------------------------|----|---------------------------------------------------------------------------------------------------------------------------------------------------------------------------------------------------------------------------------------------------------------------------------------------------------------------------------------------------------------------------------------------------------------------|-------------------------------|------------------------------------------------------------------------------------------------------------------------------------------------------------|
|                        | -                                                            | 0  |                                                                                                                                                                                                                                                                                                                                                                                                                     |                               | SignalP (SIGNALP)                                                                                                                                          |
| Brugia malayi          | serine threonine-protein phosphatase 2a regulatory subunit b | 24 | F:GO:0051721;<br>P:GO:0008340;<br>P:GO:0000003;<br>F:GO:0005102;<br>C:GO:0034704;<br>C:GO:0000159;<br>P:GO:0040010;<br>P:GO:0035307;<br>F:GO:0016853;<br>C:GO:0005737;<br>F:GO:0046982;<br>P:GO:0032516;<br>P:GO:0032515;<br>P:GO:0009792;<br>P:GO:0002119;<br>F:GO:0008601;<br>F:GO:0016887;<br>F:GO:0042803;<br>C:GO:0005625;<br>C:GO:0005634;<br>F:GO:0005524;<br>P:GO:0035308;<br>F:GO:0008160;<br>P:GO:0043065 | -                             | IPR004327; SSF140984 (SUPERFAMILY)                                                                                                                         |
| Loa loa                | hypothetical protein LOAG_03154 [Loa loa]                    | 0  |                                                                                                                                                                                                                                                                                                                                                                                                                     | F:GO:0005509;<br>P:GO:0007155 | IPR003410                                                                                                                                                  |
|                        | -                                                            | 0  |                                                                                                                                                                                                                                                                                                                                                                                                                     |                               | -                                                                                                                                                          |
| Caenorhabditis elegans | folliculin isoform 1                                         | 0  |                                                                                                                                                                                                                                                                                                                                                                                                                     |                               | -                                                                                                                                                          |
| Loa loa                | mediator of r- polymerase ii transcription subunit 31        | 5  | P:GO:0009792;<br>C:GO:0016592;<br>P:GO:0045449;<br>F:GO:0016455;<br>P:GO:0000003                                                                                                                                                                                                                                                                                                                                    | -                             | -                                                                                                                                                          |
| Loa loa                | mediator of r- polymerase ii transcription subunit 31        | 5  | P:GO:0009792;<br>C:GO:0016592;<br>P:GO:0045449;<br>F:GO:0016455;<br>P:GO:0000003                                                                                                                                                                                                                                                                                                                                    | -                             | -                                                                                                                                                          |
| Loa loa                | amop domain containing protein                               | 0  |                                                                                                                                                                                                                                                                                                                                                                                                                     | P:GO:0007160;<br>C:GO:0016021 | PTHR13802 (PANTHER),<br>PTHR13802:SF2 (PANTHER)                                                                                                            |
| Caenorhabditis elegans | nfbk inhibitor interacting ras-like 2                        | 4  | F:GO:0005525;<br>C:GO:0005622;<br>P:GO:0007264;<br>P:GO:0015031                                                                                                                                                                                                                                                                                                                                                     | -                             | IPR001806; IPR005225; IPR013684;<br>IPR020851; G3DSA:3.40.50.300<br>(GENE3D), PTHR11708 (PANTHER),<br>PTHR11708:SF275 (PANTHER),<br>SSF52540 (SUPERFAMILY) |
| Caenorhabditis elegans | nfbk inhibitor interacting ras-like 2                        | 4  | F:GO:0005525;<br>C:GO:0005622;<br>P:GO:0007264;<br>P:GO:0015031                                                                                                                                                                                                                                                                                                                                                     | -                             | IPR001806; IPR005225; IPR013684;<br>IPR020851; G3DSA:3.40.50.300<br>(GENE3D), PTHR11708 (PANTHER),<br>PTHR11708:SF275 (PANTHER),<br>SSF52540 (SUPERFAMILY) |
| Caenorhabditis elegans | calpain 5                                                    | 6  | P:GO:0042004;<br>C:GO:0005622;<br>F:GO:0004198;<br>P:GO:0019099;<br>P:GO:0006508;<br>C:GO:0016020                                                                                                                                                                                                                                                                                                                   | -                             | -                                                                                                                                                          |
|                        | -                                                            | 0  |                                                                                                                                                                                                                                                                                                                                                                                                                     |                               | -                                                                                                                                                          |

|                             |                                                                                    |    |                                                                                                                                                                       |                                                |                                                                                                                         |
|-----------------------------|------------------------------------------------------------------------------------|----|-----------------------------------------------------------------------------------------------------------------------------------------------------------------------|------------------------------------------------|-------------------------------------------------------------------------------------------------------------------------|
|                             | -                                                                                  | 0  |                                                                                                                                                                       |                                                | -                                                                                                                       |
| Pongo abelii                | low quality protein: guanine nucleotide-binding protein subunit beta-2-like 1-like | 10 | C:GO:0005737;<br>F:GO:0004872;<br>P:GO:0008104;<br>P:GO:0023034;<br>P:GO:0007205;<br>C:GO:0005886;<br>F:GO:0005102;<br>F:GO:0019903;<br>C:GO:0043025;<br>F:GO:0005080 |                                                | IPR001680; IPR011046; IPR015943;<br>IPR017986; IPR019775; IPR019781;<br>IPR019782; IPR020472; PTHR19868<br>(PANTHER)    |
| Loa loa                     | interferon regulatory factor 2 binding protein 2                                   | 3  | P:GO:0045449;<br>F:GO:0005515;<br>C:GO:0005634                                                                                                                        |                                                | -                                                                                                                       |
| Loa loa                     | membrane-associated guanylate ki-se                                                | 1  | F:GO:0005515                                                                                                                                                          |                                                | IPR001452; G3DSA:2.30.30.40<br>(GENE3D), G3DSA:3.40.50.300<br>(GENE3D), PTHR23122 (PANTHER),<br>PTHR23122:SF4 (PANTHER) |
| Caenorhabditis elegans      | elegans protein confirmed by transcript evidence                                   | 0  |                                                                                                                                                                       |                                                | -                                                                                                                       |
|                             | -                                                                                  | 0  |                                                                                                                                                                       |                                                | -                                                                                                                       |
| Brugia malayi               | bicaudal c homolog 1-like                                                          | 0  |                                                                                                                                                                       | F:GO:0003723;<br>P:GO:0007275;<br>F:GO:0005515 | IPR004087; G3DSA:3.30.1370.10<br>(GENE3D), PTHR10627 (PANTHER),<br>PTHR10627:SF1 (PANTHER), SSF54791<br>(SUPERFAMILY)   |
|                             | -                                                                                  | 0  |                                                                                                                                                                       |                                                | -                                                                                                                       |
| Caenorhabditis elegans      | thyroid hormone receptor interactor 4                                              | 2  | F:GO:0030528;<br>P:GO:0040024                                                                                                                                         |                                                | IPR009349; PTHR12963 (PANTHER)                                                                                          |
| Caenorhabditis elegans      | thyroid hormone receptor interactor 4                                              | 2  | F:GO:0030528;<br>P:GO:0040024                                                                                                                                         |                                                | IPR009349; PTHR12963 (PANTHER)                                                                                          |
| Caenorhabditis briggsae     | tyrosine-protein ki-se transmembrane receptor ror                                  | 4  | F:GO:0004872;<br>F:GO:0004713;<br>C:GO:0016020;<br>F:GO:0000166                                                                                                       |                                                | EC:2.7.10.0<br>IPR000719; IPR001245; IPR008266;<br>IPR011009; IPR020685; IPR020742;<br>G3DSA:1.10.510.10 (GENE3D)       |
| Angiostrongylus cantonensis | protein ki-se domain containing protein                                            | 4  | P:GO:0006468;<br>F:GO:0005524;<br>P:GO:0000003;<br>F:GO:0004674                                                                                                       |                                                | EC:2.7.11.0<br>IPR011009; G3DSA:1.10.510.10<br>(GENE3D), PTHR11909 (PANTHER),<br>PTHR11909:SF19 (PANTHER)               |
| Caenorhabditis briggsae     | serine threonine ki-se 38 like                                                     | 7  | C:GO:0005737;<br>P:GO:0006468;<br>F:GO:0046872;<br>P:GO:0007399;<br>F:GO:0005524;<br>C:GO:0005634;<br>F:GO:0004674                                                    |                                                | EC:2.7.11.0<br>PTHR22985 (PANTHER),<br>PTHR22985:SF33 (PANTHER)                                                         |
|                             | -                                                                                  | 0  |                                                                                                                                                                       |                                                | SignalP (SIGNALP)                                                                                                       |
|                             | -                                                                                  | 0  |                                                                                                                                                                       |                                                | SignalP (SIGNALP)                                                                                                       |
| Loa loa                     | sig-I recognition particle receptor alpha subunit                                  | 1  | F:GO:0005488                                                                                                                                                          |                                                | IPR007222; IPR011012; PTHR11564<br>(PANTHER), PTHR11564:SF1<br>(PANTHER), SignalP (SIGNALP)                             |
|                             | -                                                                                  | 0  |                                                                                                                                                                       |                                                | -                                                                                                                       |
|                             | -                                                                                  | 0  |                                                                                                                                                                       |                                                | -                                                                                                                       |
|                             | -                                                                                  | 0  |                                                                                                                                                                       |                                                | -                                                                                                                       |

|                        |                                                                       |    |                                                                                                                                                                                                                                           |   |             |                                                                                   |
|------------------------|-----------------------------------------------------------------------|----|-------------------------------------------------------------------------------------------------------------------------------------------------------------------------------------------------------------------------------------------|---|-------------|-----------------------------------------------------------------------------------|
| Loa loa                | tho complex 2                                                         | 7  | P:GO:0045132;<br>P:GO:0000003;<br>P:GO:0040007;<br>P:GO:0010171;<br>F:GO:0005515;<br>P:GO:0002119;<br>P:GO:0040011                                                                                                                        | - |             | IPR021726; PTHR21597 (PANTHER)                                                    |
|                        | -                                                                     | 0  |                                                                                                                                                                                                                                           |   |             | -                                                                                 |
| Caenorhabditis elegans | translocase of outer mitochondrial membrane 22 homolog                | 5  | P:GO:0009792;<br>P:GO:0010171;<br>P:GO:0002119;<br>P:GO:0040010;<br>P:GO:0006898                                                                                                                                                          | - |             | IPR005683; PD033325 (PRODOM),<br>PTHR12504 (PANTHER)                              |
|                        | -                                                                     | 0  |                                                                                                                                                                                                                                           |   |             | -                                                                                 |
| Caenorhabditis elegans | trehalase family protein                                              | 3  | C:GO:0016021;<br>P:GO:0005991;<br>F:GO:0004555                                                                                                                                                                                            | - | EC:3.2.1.28 | IPR001661; PTHR23403:SF1<br>(PANTHER)                                             |
|                        | -                                                                     | 0  |                                                                                                                                                                                                                                           |   |             | -                                                                                 |
|                        | -                                                                     | 0  |                                                                                                                                                                                                                                           |   |             | IPR003006                                                                         |
|                        | -                                                                     | 0  |                                                                                                                                                                                                                                           |   |             | -                                                                                 |
| Caenorhabditis remanei | apa-2                                                                 | 13 | C:GO:0005829;<br>F:GO:0008565;<br>P:GO:0040010;<br>P:GO:0048268;<br>F:GO:0008022;<br>P:GO:0000003;<br>F:GO:0008289;<br>P:GO:0050690;<br>C:GO:0030122;<br>P:GO:0040011;<br>P:GO:0006898;<br>P:GO:0006886;<br>P:GO:0009792                  | - |             | IPR002553; IPR011989; PTHR22780<br>(PANTHER), PTHR22780:SF4<br>(PANTHER)          |
| Caenorhabditis elegans | dap (death associated protein ki-se) like ki-se family member (dlk-1) | 1  | F:GO:0005515                                                                                                                                                                                                                              | - |             | -                                                                                 |
|                        | -                                                                     | 0  |                                                                                                                                                                                                                                           |   |             | -                                                                                 |
|                        | -                                                                     | 0  |                                                                                                                                                                                                                                           |   |             | -                                                                                 |
| Caenorhabditis elegans | elegans protein partially confirmed by transcript evidence            | 14 | C:GO:0030054;<br>F:GO:0015464;<br>P:GO:0007274;<br>P:GO:0008340;<br>P:GO:0043050;<br>P:GO:0006811;<br>P:GO:0007271;<br>P:GO:0048609;<br>C:GO:0042995;<br>C:GO:0045203;<br>C:GO:0045211;<br>P:GO:0040011;<br>F:GO:0004889;<br>C:GO:0005892 | - |             | IPR006029; IPR006201;<br>G3DSA:1.20.120.370 (GENE3D),<br>PTHR18945:SF57 (PANTHER) |

|                         |                                                                         |   |                                                                                                                                                                       |   |                                                                                                                   |
|-------------------------|-------------------------------------------------------------------------|---|-----------------------------------------------------------------------------------------------------------------------------------------------------------------------|---|-------------------------------------------------------------------------------------------------------------------|
| Caenorhabditis elegans  | suppressor with morphological effect on genitalia family member (smg-1) | 0 | F:GO:0016740;<br>F:GO:0004674;<br>F:GO:0000166;<br>C:GO:0005737;<br>F:GO:0005524;<br>F:GO:0016301;<br>P:GO:0000184;<br>F:GO:0016773;<br>F:GO:0046872;<br>F:GO:0005488 | - | -                                                                                                                 |
| Ixodes scapularis       | conserved hypothetical protein [Ixodes scapularis]                      | 0 |                                                                                                                                                                       |   | IPR019180                                                                                                         |
|                         |                                                                         | 0 |                                                                                                                                                                       |   | -                                                                                                                 |
| Caenorhabditis briggsae | briggsae cbr-smgl-1 protein                                             | 0 |                                                                                                                                                                       |   | SignalP (SIGNALP)                                                                                                 |
| Loa loa                 | twik (kcnk-like) family of potassium alpha subunit 39a                  | 1 | F:GO:0005216                                                                                                                                                          | - | -                                                                                                                 |
|                         |                                                                         | 0 |                                                                                                                                                                       |   | SignalP (SIGNALP)                                                                                                 |
|                         |                                                                         | 0 |                                                                                                                                                                       |   | -                                                                                                                 |
|                         |                                                                         | 0 |                                                                                                                                                                       |   | SignalP (SIGNALP)                                                                                                 |
| Caenorhabditis elegans  | hexoki-se family protein                                                | 4 | P:GO:0060361;<br>F:GO:0005524;<br>P:GO:0006096;<br>F:GO:0004396                                                                                                       | - | EC:2.7.1.1<br>IPR001312; IPR022673;<br>G3DSA:3.40.367.20 (GENE3D),<br>SSF53067 (SUPERFAMILY)                      |
| Pan troglodytes         | cytochrome c oxidase subunit viic                                       | 4 | C:GO:0005743;<br>C:GO:0016021;<br>F:GO:0004129;<br>P:GO:0006091                                                                                                       | - | EC:1.9.3.1<br>IPR004202; G3DSA:4.10.49.10<br>(GENE3D), SSF81427 (SUPERFAMILY)                                     |
|                         |                                                                         | 0 |                                                                                                                                                                       |   | -                                                                                                                 |
| Brugia malayi           | death-associated protein ki-se 1                                        | 8 | F:GO:0005516;<br>P:GO:0007243;<br>F:GO:0004674;<br>P:GO:0006916;<br>F:GO:0005524;<br>P:GO:0008624;<br>C:GO:0005737;<br>P:GO:0006468                                   | - | EC:2.7.11.0                                                                                                       |
|                         |                                                                         | 0 |                                                                                                                                                                       |   | SignalP (SIGNALP)                                                                                                 |
|                         |                                                                         | 0 |                                                                                                                                                                       |   | SignalP (SIGNALP)                                                                                                 |
| Loa loa                 | epidermal growth factor receptor                                        | 1 | F:GO:0016740                                                                                                                                                          | - | IPR006212; IPR009030; IPR020685;<br>IPR020688; G3DSA:2.10.220.10<br>(GENE3D)                                      |
|                         |                                                                         | 0 |                                                                                                                                                                       |   | -                                                                                                                 |
| Homo sapiens            | gamma-inducible protein 30                                              | 7 | F:GO:0015036;<br>P:GO:0019886;<br>C:GO:0005764;<br>P:GO:0048147;<br>P:GO:0055114;<br>P:GO:0050821;<br>C:GO:0005576                                                    | - | -                                                                                                                 |
|                         |                                                                         | 0 |                                                                                                                                                                       |   | -                                                                                                                 |
|                         |                                                                         | 0 |                                                                                                                                                                       |   | -                                                                                                                 |
| Caenorhabditis elegans  | major facilitator superfamily protein                                   | 2 | P:GO:0006810;<br>C:GO:0016020                                                                                                                                         | - | IPR016196; G3DSA:1.20.1250.20<br>(GENE3D), PTHR11600 (PANTHER),<br>PTHR11600:SF35 (PANTHER), SignalP<br>(SIGNALP) |
|                         |                                                                         | 0 |                                                                                                                                                                       |   | -                                                                                                                 |
| Caenorhabditis elegans  | elegans protein confirmed by transcript evidence                        | 0 | P:GO:0006508;<br>F:GO:0016491;<br>F:GO:0004190;<br>C:GO:0016021                                                                                                       |   | -                                                                                                                 |

|                          |                                                             |   |                                                                                                                    |                                                                                                                                                                                                                                                                             |                                                                                                   |
|--------------------------|-------------------------------------------------------------|---|--------------------------------------------------------------------------------------------------------------------|-----------------------------------------------------------------------------------------------------------------------------------------------------------------------------------------------------------------------------------------------------------------------------|---------------------------------------------------------------------------------------------------|
| Caenorhabditis elegans   | luc7-like protein 3                                         | 6 | P:GO:0008380;<br>F:GO:0003729;<br>P:GO:0006915;<br>F:GO:0005515;<br>P:GO:0006950;<br>C:GO:0005634                  | -                                                                                                                                                                                                                                                                           | IPR004882; PTHR12375:SF17<br>(PANTHER)                                                            |
| -                        | -                                                           | 0 |                                                                                                                    |                                                                                                                                                                                                                                                                             | -                                                                                                 |
| -                        | -                                                           | 0 |                                                                                                                    |                                                                                                                                                                                                                                                                             | -                                                                                                 |
| -                        | -                                                           | 0 |                                                                                                                    |                                                                                                                                                                                                                                                                             | -                                                                                                 |
| Apis mellifera           | ubl carboxyl-termi-l                                        | 0 |                                                                                                                    | P:GO:0090231;<br>P:GO:0016579;<br>F:GO:0004221;<br>P:GO:0007067;<br>C:GO:0005634;<br>F:GO:0016787;<br>P:GO:0051301;<br>F:GO:0008270;<br>P:GO:0006511;<br>F:GO:0008234;<br>F:GO:0004843;<br>P:GO:0051322;<br>F:GO:0008233;<br>P:GO:0060564;<br>F:GO:0046872;<br>P:GO:0007049 | IPR001394; IPR018200; PTHR10420<br>(PANTHER), PTHR10420:SF58<br>(PANTHER), SSF54001 (SUPERFAMILY) |
| Ornithorhynchus anatinus | ribosomal protein l23                                       | 7 | C:GO:0005829;<br>C:GO:0005730;<br>F:GO:0003735;<br>P:GO:0006414;<br>F:GO:0005515;<br>P:GO:0006610;<br>C:GO:0022626 | -                                                                                                                                                                                                                                                                           | IPR000218; IPR019972;<br>PTHR11761:SF4 (PANTHER)                                                  |
| -                        | -                                                           | 0 |                                                                                                                    |                                                                                                                                                                                                                                                                             | -                                                                                                 |
| Caenorhabditis elegans   | variable abnormal morphology family member (vab-10)         | 0 |                                                                                                                    |                                                                                                                                                                                                                                                                             | -                                                                                                 |
| Caenorhabditis elegans   | c-type lectin family member (clec-90)                       | 0 |                                                                                                                    |                                                                                                                                                                                                                                                                             | SignalP (SIGNALP)                                                                                 |
| Caenorhabditis elegans   | c-type lectin family member (clec-90)                       | 0 |                                                                                                                    |                                                                                                                                                                                                                                                                             | SignalP (SIGNALP)                                                                                 |
| -                        | -                                                           | 0 |                                                                                                                    |                                                                                                                                                                                                                                                                             | -                                                                                                 |
| -                        | -                                                           | 0 |                                                                                                                    |                                                                                                                                                                                                                                                                             | -                                                                                                 |
| Caenorhabditis elegans   | elegans protein confirmed by transcript evidence            | 0 |                                                                                                                    |                                                                                                                                                                                                                                                                             | IPR021859; PTHR16148 (PANTHER),<br>SignalP (SIGNALP)                                              |
| -                        | -                                                           | 0 |                                                                                                                    |                                                                                                                                                                                                                                                                             | -                                                                                                 |
| Caenorhabditis elegans   | yp69_caeel ame: full=uncharacterized protein                | 0 |                                                                                                                    |                                                                                                                                                                                                                                                                             | -                                                                                                 |
| -                        | -                                                           | 0 |                                                                                                                    |                                                                                                                                                                                                                                                                             | -                                                                                                 |
| -                        | -                                                           | 0 |                                                                                                                    |                                                                                                                                                                                                                                                                             | -                                                                                                 |
| -                        | -                                                           | 0 |                                                                                                                    |                                                                                                                                                                                                                                                                             | IPR018254                                                                                         |
| Brugia malayi            | ribonucleases p mrp protein subunit pop1 containing protein | 1 | P:GO:0006396                                                                                                       | -                                                                                                                                                                                                                                                                           | IPR009723; PTHR22731 (PANTHER)                                                                    |
| -                        | -                                                           | 0 |                                                                                                                    |                                                                                                                                                                                                                                                                             | -                                                                                                 |

|                                      |                                                       |    |                                                                                                                                                                                        |                                                |             |                                                                                                                                                          |
|--------------------------------------|-------------------------------------------------------|----|----------------------------------------------------------------------------------------------------------------------------------------------------------------------------------------|------------------------------------------------|-------------|----------------------------------------------------------------------------------------------------------------------------------------------------------|
| Brugia malayi                        | protein ki-se family member (kin-20)                  | 10 | P:GO:0009792;<br>P:GO:0010171;<br>P:GO:0002119;<br>P:GO:0006468;<br>P:GO:0040018;<br>P:GO:0040010;<br>F:GO:0005524;<br>P:GO:0000003;<br>P:GO:0040011;<br>F:GO:0004674                  | -                                              | EC:2.7.11.0 | IPR011009; G3DSA:1.10.510.10 (GENE3D), PTHR11909 (PANTHER), PTHR11909:SF18 (PANTHER)                                                                     |
| Brugia malayi                        | probable atp-dependent r- helicase ddx41-like         | 11 | F:GO:0003723;<br>C:GO:0005681;<br>F:GO:0008270;<br>P:GO:0006915;<br>F:GO:0008026;<br>P:GO:0006200;<br>P:GO:0008380;<br>F:GO:0005524;<br>F:GO:0005515;<br>P:GO:0007275;<br>P:GO:0006397 | -                                              |             | IPR000629; IPR001650; IPR011545; IPR014001; IPR014021; G3DSA:3.40.50.300 (GENE3D), PTHR10967 (PANTHER), PTHR10967:SF46 (PANTHER), SSF52540 (SUPERFAMILY) |
| Harpegnathos saltator                | zinc finger protein                                   | 0  |                                                                                                                                                                                        | F:GO:0003676;<br>F:GO:0046983;<br>F:GO:0003677 |             | IPR008906; IPR012337                                                                                                                                     |
|                                      | -                                                     | 0  |                                                                                                                                                                                        |                                                |             | -                                                                                                                                                        |
| Cyathostomum cf. pateratum HM-2009   | gut-associated larval antigen-1                       | 0  |                                                                                                                                                                                        |                                                |             | IPR003677; PTHR21593 (PANTHER), SignalP (SIGNALP)                                                                                                        |
|                                      | -                                                     | 0  |                                                                                                                                                                                        |                                                |             | -                                                                                                                                                        |
|                                      | -                                                     | 0  |                                                                                                                                                                                        |                                                |             | -                                                                                                                                                        |
|                                      | -                                                     | 0  |                                                                                                                                                                                        |                                                |             | -                                                                                                                                                        |
| Caenorhabditis elegans               | glycerophosphoryl diester phosphodiesterase           | 2  | F:GO:0008081;<br>P:GO:0040010                                                                                                                                                          | -                                              | EC:3.1.4.0  | IPR004129; IPR017946                                                                                                                                     |
|                                      | -                                                     | 0  |                                                                                                                                                                                        |                                                |             | -                                                                                                                                                        |
|                                      | -                                                     | 0  |                                                                                                                                                                                        |                                                |             | -                                                                                                                                                        |
| Thermotogales bacterium mesG1.Ag.4.2 | chromosome segregation protein smc                    | 0  |                                                                                                                                                                                        |                                                |             | -                                                                                                                                                        |
| Pongo abelii                         | ornithine decarboxylase                               | 7  | P:GO:0006596;<br>P:GO:0008284;<br>F:GO:0004586;<br>P:GO:0001822;<br>F:GO:0005515;<br>C:GO:0005829;<br>P:GO:0009615                                                                     | -                                              | EC:4.1.1.17 | SignalP (SIGNALP)                                                                                                                                        |
|                                      | -                                                     | 0  |                                                                                                                                                                                        |                                                |             | SignalP (SIGNALP)                                                                                                                                        |
| Caenorhabditis elegans               | abnormal spindle-like microcephaly-associated protein | 1  | F:GO:0005515                                                                                                                                                                           | -                                              |             | -                                                                                                                                                        |
| Caenorhabditis elegans               | dynein heavy chain                                    | 11 | F:GO:0003777;<br>C:GO:0005829;<br>P:GO:0006810;<br>C:GO:0030286;<br>C:GO:0005874;<br>P:GO:0006200;<br>F:GO:0005524;<br>P:GO:0007018;<br>F:GO:0016887;<br>F:GO:0005515;<br>C:GO:0005794 | -                                              |             | PD936484 (PRODOM), G3DSA:3.40.50.300 (GENE3D), PTHR10676 (PANTHER), PTHR10676:SF28 (PANTHER), SSF52540 (SUPERFAMILY)                                     |
|                                      | -                                                     | 0  |                                                                                                                                                                                        |                                                |             | -                                                                                                                                                        |

|                                  |                                                       |    |                                                                                                                                                                                                                          |                                                                 |            |                                                                                                                                                                             |
|----------------------------------|-------------------------------------------------------|----|--------------------------------------------------------------------------------------------------------------------------------------------------------------------------------------------------------------------------|-----------------------------------------------------------------|------------|-----------------------------------------------------------------------------------------------------------------------------------------------------------------------------|
| Caenorhabditis briggsae          | briggsae cbr-gck-4 protein                            | 13 | P:GO:0040010;<br>P:GO:0000910;<br>F:GO:0042802;<br>F:GO:0005524;<br>P:GO:0010171;<br>P:GO:0032879;<br>P:GO:0002119;<br>P:GO:0040011;<br>P:GO:0046777;<br>P:GO:0010800;<br>P:GO:0008283;<br>C:GO:0005737;<br>F:GO:0042801 | -                                                               |            | IPR000719; IPR008271; IPR011009;<br>IPR017441; IPR017442;<br>G3DSA:1.10.510.10 (GENE3D),<br>G3DSA:3.30.200.20 (GENE3D),<br>PTHR22986 (PANTHER),<br>PTHR22986:SF67 (PANTHER) |
| Canis familiaris                 | phosphoribosyl transferase domain containing 1        | 0  |                                                                                                                                                                                                                          | P:GO:0009116;<br>C:GO:0005737;<br>P:GO:0006166;<br>F:GO:0004422 |            | -                                                                                                                                                                           |
|                                  | -                                                     | 0  |                                                                                                                                                                                                                          |                                                                 |            | -                                                                                                                                                                           |
| Brugia malayi                    | leucine rich repeat family protein                    | 0  |                                                                                                                                                                                                                          | F:GO:0005515                                                    |            | IPR001611; G3DSA:3.80.10.10<br>(GENE3D), PTHR11375 (PANTHER),<br>PSS1450 (PROFILE), SSF52047<br>(SUPERFAMILY)                                                               |
|                                  | -                                                     | 0  |                                                                                                                                                                                                                          |                                                                 |            | -                                                                                                                                                                           |
| Caenorhabditis briggsae          | phosphorylase b ki-se                                 | 4  | F:GO:0016301;<br>F:GO:0004339;<br>P:GO:0005977;<br>F:GO:0005516                                                                                                                                                          | -                                                               | EC:3.2.1.3 | IPR008734; IPR008928; IPR011613;<br>PTHR10749:SF2 (PANTHER)                                                                                                                 |
| Loa loa                          | d- repair protein rad4 containing protein             | 1  | P:GO:0006974                                                                                                                                                                                                             | -                                                               |            | IPR004583; IPR018325; SSF54001<br>(SUPERFAMILY)                                                                                                                             |
| Caenorhabditis briggsae          | r- (guanine-9-) methyltransferase domain containing 2 | 0  |                                                                                                                                                                                                                          |                                                                 |            | IPR007356; IPR016009;<br>PTHR13563:SF6 (PANTHER)                                                                                                                            |
| Loa loa                          | gtpase activating protein and vps9 domains 1          | 0  |                                                                                                                                                                                                                          | F:GO:0005096;<br>P:GO:0051056;<br>P:GO:0007165;<br>C:GO:0005622 |            | -                                                                                                                                                                           |
|                                  | -                                                     | 0  |                                                                                                                                                                                                                          |                                                                 |            | -                                                                                                                                                                           |
| Pan troglodytes                  | t- immune regulator 1                                 | 8  | F:GO:0015078;<br>C:GO:0033177;<br>C:GO:0005739;<br>P:GO:0015986;<br>P:GO:0006968;<br>C:GO:0016324;<br>P:GO:0008284;<br>C:GO:0005887                                                                                      | -                                                               |            | -                                                                                                                                                                           |
| Saccharomyces cerevisiae RM11-1a | proteoglycan 4                                        | 0  |                                                                                                                                                                                                                          | F:GO:0016787;<br>C:GO:0016021;<br>C:GO:0016020;<br>F:GO:0008195 |            | -                                                                                                                                                                           |
|                                  | -                                                     | 0  |                                                                                                                                                                                                                          |                                                                 |            | -                                                                                                                                                                           |
|                                  | -                                                     | 0  |                                                                                                                                                                                                                          |                                                                 |            | -                                                                                                                                                                           |
|                                  | -                                                     | 0  |                                                                                                                                                                                                                          |                                                                 |            | -                                                                                                                                                                           |





|                        |                                                                  |   |                                                                                                                                                                                                                                                                                                                                                                                                                                                                                          |                                               |
|------------------------|------------------------------------------------------------------|---|------------------------------------------------------------------------------------------------------------------------------------------------------------------------------------------------------------------------------------------------------------------------------------------------------------------------------------------------------------------------------------------------------------------------------------------------------------------------------------------|-----------------------------------------------|
| Caenorhabditis elegans | eph receptor a2                                                  | 0 | P:GO:0001504;<br>P:GO:0048013;<br>P:GO:0006468;<br>P:GO:0048320;<br>P:GO:0045765;<br>P:GO:0030182;<br>P:GO:0006915;<br>F:GO:0005524;<br>F:GO:0016301;<br>C:GO:0016021;<br>C:GO:0016020;<br>F:GO:0004672;<br>P:GO:0001570;<br>F:GO:0004872;<br>P:GO:0007169;<br>F:GO:0000166;<br>P:GO:0001525;<br>P:GO:0007165;<br>P:GO:0021915;<br>P:GO:0043535;<br>P:GO:0060035;<br>F:GO:0005003;<br>P:GO:0014028;<br>F:GO:0004714;<br>C:GO:0005887;<br>F:GO:0005515;<br>F:GO:0004713;<br>F:GO:0016740; | IPR001245; IPR011009; IPR020685;<br>IPR020725 |
| -                      | -                                                                | 0 | -                                                                                                                                                                                                                                                                                                                                                                                                                                                                                        | -                                             |
| -                      | -                                                                | 0 | -                                                                                                                                                                                                                                                                                                                                                                                                                                                                                        | SignalP (SIGNALP)                             |
| -                      | -                                                                | 0 | -                                                                                                                                                                                                                                                                                                                                                                                                                                                                                        | SignalP (SIGNALP)                             |
| Caenorhabditis elegans | elegans protein partially confirmed by transcript evidence       | 0 | F:GO:0004601;<br>F:GO:0004867;<br>F:GO:0004447;<br>P:GO:0030326;<br>C:GO:0016021;<br>P:GO:0007186;<br>C:GO:0016020;<br>P:GO:0009653;<br>P:GO:0007218;<br>F:GO:0005509;<br>F:GO:0004872;<br>F:GO:0004871;<br>P:GO:0008218;<br>P:GO:0007166;<br>F:GO:0005488;<br>P:GO:0007165;<br>F:GO:0004888;<br>F:GO:0004930;<br>P:GO:0007160;<br>P:GO:0055114;<br>C:GO:0005578;<br>C:GO:0005886;<br>C:GO:0005576;<br>F:GO:0016491;<br>P:GO:0018298;<br>F:GO:0005201;                                   | -                                             |
| Caenorhabditis elegans | yms5_caeel ame: full=uncharacterized protein flags:<br>precursor | 0 | P:GO:0007160;<br>C:GO:0016021;                                                                                                                                                                                                                                                                                                                                                                                                                                                           | IPR001846                                     |

|                               |                                                         |   |                                                                                                   |                                                                                                   |                                                                                                             |
|-------------------------------|---------------------------------------------------------|---|---------------------------------------------------------------------------------------------------|---------------------------------------------------------------------------------------------------|-------------------------------------------------------------------------------------------------------------|
|                               | -                                                       | 0 |                                                                                                   |                                                                                                   | -                                                                                                           |
| Caenorhabditis elegans        | elegans protein confirmed by transcript evidence        | 3 | P:GO:0032012;<br>C:GO:0005622;<br>F:GO:0005086                                                    | -                                                                                                 | -                                                                                                           |
|                               | -                                                       | 0 |                                                                                                   |                                                                                                   | -                                                                                                           |
| Caenorhabditis elegans        | elegans protein confirmed by transcript evidence        | 0 |                                                                                                   |                                                                                                   | SignalP (SIGNALP)                                                                                           |
| Caenorhabditis elegans        | type alpha 1                                            | 2 | F:GO:0005509;<br>F:GO:0003824                                                                     | -                                                                                                 | IPR002035; G3DSA:3.40.50.410 (GENE3D), PTHR22992 (PANTHER), PTHR22992:SF9 (PANTHER), SSF53300 (SUPERFAMILY) |
| Xenopus (Silurana) tropicalis | heat shock cog-te 71 kda                                | 2 | F:GO:0005524;<br>P:GO:0006950                                                                     | -                                                                                                 | IPR001023; IPR013126; G3DSA:2.60.34.10 (GENE3D), PTHR19375:SF1 (PANTHER), SSF100920 (SUPERFAMILY)           |
|                               | -                                                       | 0 |                                                                                                   |                                                                                                   | -                                                                                                           |
| Brugia malayi                 | endonuclease iii-like protein 1                         | 5 | P:GO:0006284;<br>F:GO:0004519;<br>F:GO:0003677;<br>C:GO:0043231;<br>F:GO:0051539                  | -                                                                                                 | IPR003265; IPR011257; G3DSA:1.10.340.30 (GENE3D), PTHR10359 (PANTHER), PTHR10359:SF2 (PANTHER)              |
|                               | -                                                       | 0 |                                                                                                   |                                                                                                   | SignalP (SIGNALP)                                                                                           |
|                               | -                                                       | 0 |                                                                                                   |                                                                                                   | -                                                                                                           |
| Brugia malayi                 | chk1 checkpoint-like protein                            | 0 |                                                                                                   |                                                                                                   | -                                                                                                           |
| Caenorhabditis briggsae       | ubiquitin protein ligase e3 component n-recognin 2      | 5 | F:GO:0005488;<br>P:GO:0044267;<br>F:GO:0016874;<br>P:GO:0030163;<br>C:GO:0044424                  | -                                                                                                 | PTHR21497 (PANTHER), PTHR21497:SF6 (PANTHER)                                                                |
|                               | -                                                       | 0 |                                                                                                   |                                                                                                   | -                                                                                                           |
|                               | -                                                       | 0 |                                                                                                   |                                                                                                   | -                                                                                                           |
| Bombyx mori                   | endonuclease-reverse transcriptase                      | 1 | F:GO:0003824                                                                                      | -                                                                                                 | -                                                                                                           |
|                               | -                                                       | 0 |                                                                                                   |                                                                                                   | -                                                                                                           |
| Caenorhabditis briggsae       | calpain 5                                               | 6 | P:GO:0042004;<br>C:GO:0005622;<br>F:GO:0004198;<br>P:GO:0019099;<br>P:GO:0006508;<br>C:GO:0016020 | -                                                                                                 | IPR000169; IPR001300; IPR022684; PTHR10183 (PANTHER), PTHR10183:SF32 (PANTHER), SSF54001 (SUPERFAMILY)      |
| Loa loa                       | 2700029m09rik protein                                   | 0 |                                                                                                   | F:GO:0003674;<br>P:GO:0008150;<br>C:GO:0005575                                                    | IPR019361; PTHR13386 (PANTHER)                                                                              |
|                               | -                                                       | 0 |                                                                                                   |                                                                                                   | -                                                                                                           |
| Caenorhabditis briggsae       | Hypothetical protein CBG09473 [Caenorhabditis briggsae] | 0 |                                                                                                   | F:GO:0005509;<br>P:GO:0007156;<br>P:GO:0007155;<br>C:GO:0016021;<br>C:GO:0016020;<br>C:GO:0005886 | -                                                                                                           |
| Caenorhabditis briggsae       | tbc (tre-2 bub2 cdc16) domain family member (tbc-19)    | 0 |                                                                                                   | P:GO:0032313;<br>C:GO:0005622;<br>F:GO:0005097                                                    | -                                                                                                           |
|                               | -                                                       | 0 |                                                                                                   |                                                                                                   | -                                                                                                           |
| Caenorhabditis briggsae       | Hypothetical protein CBG11154 [Caenorhabditis briggsae] | 0 |                                                                                                   |                                                                                                   | -                                                                                                           |

|                         |                                                                               |   |                                                |                                                                                                                                     |            |                                                                                                                        |
|-------------------------|-------------------------------------------------------------------------------|---|------------------------------------------------|-------------------------------------------------------------------------------------------------------------------------------------|------------|------------------------------------------------------------------------------------------------------------------------|
| Caenorhabditis elegans  | yo93_caeel ame: full=uncharacterized protein                                  | 0 |                                                | P:GO:0000003;<br>P:GO:0040011;<br>P:GO:0040010;<br>P:GO:0006898;<br>P:GO:0002119;<br>P:GO:0009792;<br>P:GO:0040018                  | -          |                                                                                                                        |
| -                       | -                                                                             | 0 |                                                |                                                                                                                                     | -          |                                                                                                                        |
| Brugia malayi           | elegans protein confirmed by transcript evidence                              | 0 |                                                | P:GO:0000003;<br>F:GO:0005488                                                                                                       |            | IPR011990; PTHR12830 (PANTHER),<br>PTHR12830:SF8 (PANTHER), SSF48452<br>(SUPERFAMILY)                                  |
| -                       | -                                                                             | 0 |                                                |                                                                                                                                     | -          |                                                                                                                        |
| Caenorhabditis elegans  | intesti-l acid phosphatase protein partially confirmed by transcript evidence | 0 |                                                | C:GO:0016021;<br>F:GO:0016787;<br>C:GO:0016020;<br>F:GO:0003993                                                                     |            | IPR000560; G3DSA:3.40.50.1240<br>(GENE3D), PTHR11567 (PANTHER),<br>PTHR11567:SF13 (PANTHER),<br>SSF53254 (SUPERFAMILY) |
| Homo sapiens            | immunoglobulin heavy chain variable region                                    | 0 |                                                |                                                                                                                                     |            | IPR003596; IPR013106; IPR013783;<br>PTHR23266 (PANTHER),<br>PTHR23266:SF7 (PANTHER), SSF48726<br>(SUPERFAMILY)         |
| -                       | -                                                                             | 0 |                                                |                                                                                                                                     | -          |                                                                                                                        |
| -                       | -                                                                             | 0 |                                                |                                                                                                                                     | -          |                                                                                                                        |
| Caenorhabditis elegans  | chromosome 20 open reading frame 54                                           | 0 |                                                | P:GO:0032218;<br>F:GO:0032217;<br>P:GO:0034605;<br>F:GO:0004872;<br>C:GO:0016020;<br>P:GO:0007605;<br>C:GO:0005887;<br>F:GO:0005515 | -          |                                                                                                                        |
| Caenorhabditis elegans  | phosphorylase b ki-se                                                         | 3 | F:GO:0004339;<br>P:GO:0005977;<br>F:GO:0005516 | -                                                                                                                                   | EC:3.2.1.3 | -                                                                                                                      |
| Drosophila ananassae    | GF18021 [Drosophila a--ssae]                                                  | 0 |                                                |                                                                                                                                     |            | IPR019955; G3DSA:3.10.20.90<br>(GENE3D), SSF54236 (SUPERFAMILY)                                                        |
| Caenorhabditis briggsae | Hypothetical protein CBG10792 [Caenorhabditis briggsae]                       | 0 |                                                | P:GO:0008152;<br>F:GO:0003824                                                                                                       |            | IPR004245; PTHR10974:SF5<br>(PANTHER)                                                                                  |
| -                       | -                                                                             | 0 |                                                |                                                                                                                                     | -          |                                                                                                                        |
| Caenorhabditis elegans  | elegans protein confirmed by transcript evidence                              | 0 |                                                | P:GO:0006260;<br>P:GO:0006281;<br>F:GO:0003910;<br>F:GO:0008270;<br>P:GO:0006310                                                    |            | IPR019406                                                                                                              |
| -                       | -                                                                             | 0 |                                                |                                                                                                                                     | -          |                                                                                                                        |
| Loa loa                 | breast cancer antiestrogen resistance 3                                       | 0 |                                                | P:GO:0007264;<br>F:GO:0005515;<br>F:GO:0005085;<br>C:GO:0005622                                                                     | -          |                                                                                                                        |
| -                       | -                                                                             | 0 |                                                |                                                                                                                                     | -          |                                                                                                                        |
| Bacillus cereus AH1273  | lpxtg-motif cell wall anchor domain protein                                   | 0 |                                                | F:GO:0005488;<br>C:GO:0009986                                                                                                       |            | -                                                                                                                      |
| -                       | -                                                                             | 0 |                                                |                                                                                                                                     | -          |                                                                                                                        |
| -                       | -                                                                             | 0 |                                                |                                                                                                                                     | -          |                                                                                                                        |
| Caenorhabditis elegans  | abc transporter family member (abt-2)                                         | 0 |                                                |                                                                                                                                     |            | PTHR19229 (PANTHER),<br>PTHR19229:SF25 (PANTHER)                                                                       |

|                        |                                                                     |    |                                                                                                                                                                                                                                                                                                                                                                                                                                                                        |              |                                                                                      |
|------------------------|---------------------------------------------------------------------|----|------------------------------------------------------------------------------------------------------------------------------------------------------------------------------------------------------------------------------------------------------------------------------------------------------------------------------------------------------------------------------------------------------------------------------------------------------------------------|--------------|--------------------------------------------------------------------------------------|
| Caenorhabditis elegans | elegans protein confirmed by transcript evidence                    | 6  | F:GO:0004181;<br>P:GO:0040003;<br>P:GO:0007476;<br>P:GO:0006911;<br>P:GO:0007431;<br>C:GO:0016020                                                                                                                                                                                                                                                                                                                                                                      | EC:3.4.17.0  | IPR004316; IPR018179                                                                 |
| Homo sapiens           | AF269289_1unknown [Homo sapiens]                                    | 8  | P:GO:0060761;<br>P:GO:0009887;<br>P:GO:0032091;<br>P:GO:0010553;<br>F:GO:0003714;<br>P:GO:0090090;<br>P:GO:0070555;<br>C:GO:0005634                                                                                                                                                                                                                                                                                                                                    |              | SignalP (SIGNALP)                                                                    |
| Homo sapiens           | calreticulin                                                        | 56 | F:GO:0051087;<br>P:GO:0045665;<br>F:GO:0005506;<br>F:GO:0051082;<br>P:GO:0008284;<br>C:GO:0016529;<br>F:GO:0031625;<br>C:GO:0005625;<br>F:GO:0042562;<br>F:GO:0044183;<br>C:GO:0005829;<br>F:GO:0001849;<br>P:GO:0030866;<br>F:GO:0005178;<br>F:GO:0003729;<br>C:GO:0005788;<br>C:GO:0005615;<br>P:GO:0007283;<br>P:GO:0033144;<br>C:GO:0005844;<br>C:GO:0005792;<br>P:GO:0042981;<br>P:GO:0017148;<br>P:GO:0033574;<br>P:GO:0045740;<br>P:GO:0002502;<br>P:GO:0006611 |              | IPR001580; IPR008985; IPR009169;<br>IPR013320; IPR018124                             |
| -                      | -                                                                   | 0  |                                                                                                                                                                                                                                                                                                                                                                                                                                                                        |              | SignalP (SIGNALP)                                                                    |
| -                      | -                                                                   | 0  |                                                                                                                                                                                                                                                                                                                                                                                                                                                                        |              | -                                                                                    |
| Loa loa                | chromosome condensation protein c-termi-l region containing protein | 0  |                                                                                                                                                                                                                                                                                                                                                                                                                                                                        | F:GO:0005488 | IPR011989                                                                            |
| -                      | -                                                                   | 0  |                                                                                                                                                                                                                                                                                                                                                                                                                                                                        |              | -                                                                                    |
| -                      | -                                                                   | 0  |                                                                                                                                                                                                                                                                                                                                                                                                                                                                        |              | -                                                                                    |
| -                      | -                                                                   | 0  |                                                                                                                                                                                                                                                                                                                                                                                                                                                                        |              | -                                                                                    |
| -                      | -                                                                   | 0  |                                                                                                                                                                                                                                                                                                                                                                                                                                                                        |              | -                                                                                    |
| Caenorhabditis elegans | multiple pdz domain protein family member (mpz-1)                   | 3  | C:GO:0016021;<br>C:GO:0048471;<br>F:GO:0005515                                                                                                                                                                                                                                                                                                                                                                                                                         |              | -                                                                                    |
| Caenorhabditis elegans | pleckstrin and sec7 domain containing 4                             | 5  | F:GO:0005086;<br>P:GO:0032012;<br>C:GO:0005622;<br>C:GO:0005886;<br>F:GO:0005515                                                                                                                                                                                                                                                                                                                                                                                       |              | IPR000904; G3DSA:1.10.1000.11 (GENE3D), PTHR10663 (PANTHER), PTHR10663:SF3 (PANTHER) |
| -                      | -                                                                   | 0  |                                                                                                                                                                                                                                                                                                                                                                                                                                                                        |              | -                                                                                    |

|                         |                                                                                   |   |                                                                                                                    |   |                               |                                                                                                                                     |
|-------------------------|-----------------------------------------------------------------------------------|---|--------------------------------------------------------------------------------------------------------------------|---|-------------------------------|-------------------------------------------------------------------------------------------------------------------------------------|
| Caenorhabditis briggsae | copine domain atypical protein isoform partially confirmed by transcript evidence | 0 |                                                                                                                    |   |                               | IPR005479                                                                                                                           |
|                         | -                                                                                 | 0 |                                                                                                                    |   |                               | SignalP (SIGNALP)                                                                                                                   |
|                         | -                                                                                 | 0 |                                                                                                                    |   |                               | -                                                                                                                                   |
| Caenorhabditis elegans  | atp-binding sub-family a member 3                                                 | 7 | F:GO:0042626;<br>C:GO:0005624;<br>P:GO:0042493;<br>C:GO:0005886;<br>P:GO:0006810;<br>C:GO:0042599;<br>F:GO:0000166 | - |                               | IPR003439; IPR017871;<br>G3DSA:3.40.50.300 (GENE3D),<br>PTHR19229 (PANTHER),<br>PTHR19229:SF25 (PANTHER),<br>SSF52540 (SUPERFAMILY) |
| Caenorhabditis elegans  | clathrin coat assembly protein ap-1                                               | 6 | C:GO:0030135;<br>P:GO:0016183;<br>C:GO:0030131;<br>P:GO:0007269;<br>F:GO:0005515;<br>P:GO:0006886                  | - |                               | IPR001392; IPR008968;<br>G3DSA:2.60.40.1170 (GENE3D),<br>PTHR11998 (PANTHER),<br>PTHR11998:SF11 (PANTHER)                           |
| Caenorhabditis elegans  | clathrin coat assembly protein ap-1                                               | 6 | C:GO:0030135;<br>P:GO:0016183;<br>C:GO:0030131;<br>P:GO:0007269;<br>F:GO:0005515;<br>P:GO:0006886                  | - |                               | IPR001392; IPR008968; IPR018240;<br>G3DSA:2.60.40.1170 (GENE3D),<br>PTHR11998 (PANTHER),<br>PTHR11998:SF11 (PANTHER)                |
|                         | -                                                                                 | 0 |                                                                                                                    |   |                               | -                                                                                                                                   |
| Caenorhabditis elegans  | uncoordinated family member (unc-22)                                              | 6 | C:GO:0030018;<br>P:GO:0006468;<br>F:GO:0008307;<br>P:GO:0007498;<br>F:GO:0005524;<br>F:GO:0004674                  | - | EC:2.7.11.0                   | IPR003599; IPR013098; IPR013783;<br>PTHR19900 (PANTHER),<br>PTHR19900:SF7 (PANTHER),<br>SSF48726 (SUPERFAMILY)                      |
|                         | -                                                                                 | 0 |                                                                                                                    |   |                               | -                                                                                                                                   |
|                         | -                                                                                 | 0 |                                                                                                                    |   |                               | SignalP (SIGNALP)                                                                                                                   |
| Caenorhabditis elegans  | carbohydrate thermoresistant glucokinase family                                   | 3 | F:GO:0005488;<br>F:GO:0016301;<br>P:GO:0044238                                                                     | - |                               | IPR000623; G3DSA:3.40.50.300<br>(GENE3D),<br>SSF52540 (SUPERFAMILY)                                                                 |
|                         | -                                                                                 | 0 |                                                                                                                    |   |                               | G3DSA:3.40.50.1240 (GENE3D)                                                                                                         |
| Caenorhabditis elegans  | aspartyl glutamyl-tr-(asn gln) amidotransferase subunit                           | 0 |                                                                                                                    |   | P:GO:0006450;<br>F:GO:0016740 | IPR003837; PTHR15004 (PANTHER),<br>SSF141000 (SUPERFAMILY)                                                                          |
|                         | -                                                                                 | 0 |                                                                                                                    |   |                               | -                                                                                                                                   |
| Caenorhabditis briggsae | elegans protein confirmed by transcript evidence                                  | 0 |                                                                                                                    |   |                               | -                                                                                                                                   |

|                        |                                               |    |                                                                                                                                                                                                                                                                                                                                                 |                                                                                                                    |             |                                                                                                                         |
|------------------------|-----------------------------------------------|----|-------------------------------------------------------------------------------------------------------------------------------------------------------------------------------------------------------------------------------------------------------------------------------------------------------------------------------------------------|--------------------------------------------------------------------------------------------------------------------|-------------|-------------------------------------------------------------------------------------------------------------------------|
| Caenorhabditis elegans | briggsae cbr-nmy-1 protein                    | 20 | F:GO:0005516;<br>F:GO:0008307;<br>F:GO:0043531;<br>F:GO:0000146;<br>P:GO:0008360;<br>P:GO:0048739;<br>C:GO:0030016;<br>C:GO:0030496;<br>P:GO:0048251;<br>F:GO:0051015;<br>P:GO:0000281;<br>C:GO:0001725;<br>F:GO:0005524;<br>C:GO:0032154;<br>C:GO:0005938;<br>P:GO:0006939;<br>F:GO:0030898;<br>P:GO:0030048;<br>P:GO:0030241;<br>C:GO:0032982 | -                                                                                                                  |             | IPR001609; PTHR13140 (PANTHER),<br>PTHR13140:SF23 (PANTHER),<br>SSF52540 (SUPERFAMILY)                                  |
| Homo sapiens           | prosaposin                                    | 19 | P:GO:0055085;<br>F:GO:0008047;<br>P:GO:0043065;<br>P:GO:0006687;<br>P:GO:0045161;<br>C:GO:0016021;<br>C:GO:0005743;<br>C:GO:0043202;<br>C:GO:0005615;<br>F:GO:0008289;<br>P:GO:0006869;<br>F:GO:0005515;<br>P:GO:0009966;<br>P:GO:0007585;<br>F:GO:0005319;<br>C:GO:0005578;<br>F:GO:0005529;<br>P:GO:0006919;<br>C:GO:0005794                  | -                                                                                                                  |             | IPR003119; IPR007856; IPR008138;<br>IPR008139; IPR008373; IPR011001;<br>PTHR11480 (PANTHER),<br>PTHR11480:SF3 (PANTHER) |
|                        | -                                             | 0  |                                                                                                                                                                                                                                                                                                                                                 |                                                                                                                    |             | -                                                                                                                       |
|                        | -                                             | 0  |                                                                                                                                                                                                                                                                                                                                                 |                                                                                                                    |             | SignalP (SIGNALP)                                                                                                       |
| Caenorhabditis elegans | phosphoinositide 3-ki-se regulatory subunit 4 | 4  | F:GO:0005515;<br>F:GO:0016740;<br>P:GO:0019915;<br>C:GO:0005829                                                                                                                                                                                                                                                                                 | -                                                                                                                  |             | IPR011989                                                                                                               |
|                        | -                                             | 0  |                                                                                                                                                                                                                                                                                                                                                 |                                                                                                                    |             | -                                                                                                                       |
| Caenorhabditis elegans | dehydroge-se reductase sdr family member 4    | 4  | F:GO:0008667;<br>P:GO:0009239;<br>P:GO:0055114;<br>F:GO:0005488                                                                                                                                                                                                                                                                                 | -                                                                                                                  | EC:1.3.1.28 | IPR002198; IPR002347; IPR016040;<br>PTHR19410:SF67 (PANTHER),<br>SSF51735 (SUPERFAMILY)                                 |
|                        | -                                             | 0  |                                                                                                                                                                                                                                                                                                                                                 |                                                                                                                    |             | SignalP (SIGNALP)                                                                                                       |
| Camponotus floridanus  | uncharacterized transposase-like protein      | 0  |                                                                                                                                                                                                                                                                                                                                                 | F:GO:0046872;<br>P:GO:0055114;<br>F:GO:0009055;<br>F:GO:0016491;<br>F:GO:0020037;<br>F:GO:0005506;<br>F:GO:0004497 |             | -                                                                                                                       |

|                         |                                                                                       |   |                                                                                                                    |                                                                                  |                                                                                                                                 |
|-------------------------|---------------------------------------------------------------------------------------|---|--------------------------------------------------------------------------------------------------------------------|----------------------------------------------------------------------------------|---------------------------------------------------------------------------------------------------------------------------------|
| Caenorhabditis elegans  | tetratricopeptide repeat protein 35                                                   | 7 | F:GO:0005515;<br>P:GO:0040017;<br>P:GO:0040010;<br>P:GO:0000003;<br>P:GO:0006898;<br>C:GO:0005783;<br>C:GO:0005739 | -                                                                                | IPR011990; IPR013026; PTHR12760 (PANTHER), SSF48452 (SUPERFAMILY)                                                               |
| -                       | -                                                                                     | 0 |                                                                                                                    |                                                                                  | -                                                                                                                               |
| -                       | -                                                                                     | 0 |                                                                                                                    |                                                                                  | -                                                                                                                               |
| -                       | -                                                                                     | 0 |                                                                                                                    |                                                                                  | -                                                                                                                               |
| -                       | -                                                                                     | 0 |                                                                                                                    |                                                                                  | -                                                                                                                               |
| Brugia malayi           | hypothetical protein Bm1_31385 [Brugia malayi]                                        | 0 |                                                                                                                    | F:GO:0005515                                                                     | -                                                                                                                               |
| Homo sapiens            | NM-4 [Homo sapiens]                                                                   | 0 |                                                                                                                    |                                                                                  | -                                                                                                                               |
| -                       | -                                                                                     | 0 |                                                                                                                    |                                                                                  | -                                                                                                                               |
| -                       | -                                                                                     | 0 |                                                                                                                    |                                                                                  | -                                                                                                                               |
| -                       | -                                                                                     | 0 |                                                                                                                    |                                                                                  | SignalP (SIGNALP)                                                                                                               |
| -                       | -                                                                                     | 0 |                                                                                                                    |                                                                                  | -                                                                                                                               |
| Caenorhabditis briggsae | acetyl-coenzyme a carboxylase alpha                                                   | 3 | F:GO:0016874;<br>P:GO:0008152;<br>F:GO:0000166                                                                     | -                                                                                | IPR005482; IPR011053; IPR011054; IPR011764; IPR013816; G3DSA:2.40.50.100 (GENE3D), PTHR18866 (PANTHER), PTHR18866:SF6 (PANTHER) |
| Caenorhabditis briggsae | mitochondrial thiamine pyrophosphate carrier                                          | 7 | P:GO:0009792;<br>F:GO:0005488;<br>C:GO:0005743;<br>P:GO:0040018;<br>P:GO:0055085;<br>C:GO:0016021;<br>F:GO:0005215 | -                                                                                | IPR001993; IPR018108; G3DSA:1.50.40.10 (GENE3D), PTHR11896:SF34 (PANTHER)                                                       |
| -                       | -                                                                                     | 0 |                                                                                                                    |                                                                                  | -                                                                                                                               |
| Caenorhabditis elegans  | hif (hypoxia inducible factor) homolog family member (hif-1)                          | 2 | P:GO:0006350;<br>P:GO:0050794                                                                                      | -                                                                                | G3DSA:3.30.450.20 (GENE3D), PTHR23043 (PANTHER), PTHR23043:SF7 (PANTHER), SignalP (SIGNALP)                                     |
| Loa loa                 | novel protein containing six wd40 domains at c-terminus                               | 3 | F:GO:0005515;<br>P:GO:0050794;<br>C:GO:0044464                                                                     | -                                                                                | IPR001680; IPR004083; IPR011046; IPR015943; IPR017986; IPR019782; PTHR12848:SF2 (PANTHER)                                       |
| Caenorhabditis elegans  | cation transporting atpase protein isoform partially confirmed by transcript evidence | 5 | C:GO:0016021;<br>F:GO:0015662;<br>P:GO:0006754;<br>F:GO:0005524;<br>P:GO:0006812                                   | -                                                                                | IPR000150; IPR000695; IPR001757; G3DSA:3.40.50.1000 (GENE3D), PTHR11939:SF54 (PANTHER), SSF56784 (SUPERFAMILY)                  |
| Caenorhabditis elegans  | cation transporting atpase protein isoform partially confirmed by transcript evidence | 5 | C:GO:0016021;<br>F:GO:0015662;<br>P:GO:0006754;<br>F:GO:0005524;<br>P:GO:0006812                                   | -                                                                                | IPR000150; IPR000695; IPR001757; G3DSA:3.40.50.1000 (GENE3D), PTHR11939:SF54 (PANTHER), SSF56784 (SUPERFAMILY)                  |
| -                       | -                                                                                     | 0 |                                                                                                                    |                                                                                  | -                                                                                                                               |
| -                       | -                                                                                     | 0 |                                                                                                                    |                                                                                  | SignalP (SIGNALP)                                                                                                               |
| Caenorhabditis briggsae | protein phosphatase regulatory subunit 11                                             | 0 |                                                                                                                    | F:GO:0004864;<br>P:GO:0008152;<br>F:GO:0003824;<br>C:GO:0005625;<br>F:GO:0005515 | IPR011107                                                                                                                       |
| -                       | -                                                                                     | 0 |                                                                                                                    |                                                                                  | -                                                                                                                               |
| -                       | -                                                                                     | 0 |                                                                                                                    |                                                                                  | -                                                                                                                               |

|                         |                                                         |    |                                                                                                                                                                       |                                                                                                   |             |                                                                                                                                                                |
|-------------------------|---------------------------------------------------------|----|-----------------------------------------------------------------------------------------------------------------------------------------------------------------------|---------------------------------------------------------------------------------------------------|-------------|----------------------------------------------------------------------------------------------------------------------------------------------------------------|
| Caenorhabditis briggsae | briggsae cbr-pus-1 protein                              | 0  |                                                                                                                                                                       | F:GO:0003723;<br>P:GO:0009451;<br>F:GO:0009982                                                    |             | SignalP (SIGNALP)                                                                                                                                              |
| Caenorhabditis briggsae | briggsae cbr-pus-1 protein                              | 0  |                                                                                                                                                                       | F:GO:0003723;<br>P:GO:0009451;<br>F:GO:0009982                                                    |             | -                                                                                                                                                              |
| Caenorhabditis briggsae | briggsae cbr-pus-1 protein                              | 0  |                                                                                                                                                                       | F:GO:0003723;<br>P:GO:0009451;<br>F:GO:0009982                                                    |             | -                                                                                                                                                              |
| Caligus clemensi        | transcription elongation factor b polypeptide 1         | 5  | F:GO:0003746;<br>P:GO:0006511;<br>C:GO:0008023;<br>F:GO:0005515;<br>P:GO:0048813                                                                                      | -                                                                                                 |             | -                                                                                                                                                              |
| Caenorhabditis elegans  | tetratricopeptide repeat protein 4                      | 7  | P:GO:0040035;<br>P:GO:0009792;<br>P:GO:0002119;<br>P:GO:0040018;<br>P:GO:0040010;<br>P:GO:0040011;<br>P:GO:0006898                                                    | -                                                                                                 |             | PTHR22904 (PANTHER),<br>PTHR22904:SF16 (PANTHER)                                                                                                               |
| Caenorhabditis elegans  | briggsae cbr-chs-1 protein                              | 4  | P:GO:0009792;<br>P:GO:0000003;<br>C:GO:0005887;<br>P:GO:0040010                                                                                                       | -                                                                                                 |             | -                                                                                                                                                              |
| Brugia malayi           | rwd domain containing protein                           | 0  |                                                                                                                                                                       | F:GO:0046872;<br>F:GO:0008270;<br>F:GO:0005515                                                    |             | -                                                                                                                                                              |
| Caenorhabditis elegans  | spermine spermidine synthase family protein             | 2  | F:GO:0016740;<br>F:GO:0005515                                                                                                                                         | -                                                                                                 |             | PTHR12176 (PANTHER)                                                                                                                                            |
| Brugia malayi           | hypothetical protein [Brugia malayi]                    | 0  |                                                                                                                                                                       |                                                                                                   |             | -                                                                                                                                                              |
| Caenorhabditis briggsae | Hypothetical protein CBG04176 [Caenorhabditis briggsae] | 0  |                                                                                                                                                                       |                                                                                                   |             | IPR019128                                                                                                                                                      |
| Brugia malayi           | kinetochore-associated protein 1 (rough deal homolog)   | 4  | P:GO:0000278;<br>C:GO:0005856;<br>P:GO:0022402;<br>C:GO:0044446                                                                                                       | -                                                                                                 |             | -                                                                                                                                                              |
|                         | -                                                       | 0  |                                                                                                                                                                       |                                                                                                   |             | -                                                                                                                                                              |
| Caenorhabditis briggsae | amidophosphoribosyltransferase                          | 10 | P:GO:0007595;<br>P:GO:0031100;<br>P:GO:0032869;<br>P:GO:0006164;<br>C:GO:0005625;<br>P:GO:0009116;<br>P:GO:0060135;<br>P:GO:0051289;<br>F:GO:0004044;<br>P:GO:0009113 | -                                                                                                 | EC:2.4.2.14 | IPR000583; IPR000836; IPR005854;<br>IPR017932; G3DSA:3.40.50.2020<br>(GENE3D), G3DSA:3.60.20.10<br>(GENE3D), SSF53271 (SUPERFAMILY),<br>SSF56235 (SUPERFAMILY) |
| Brugia malayi           | metallo-beta-lactamase superfamily protein              | 0  |                                                                                                                                                                       | F:GO:0046872;<br>F:GO:0003674;<br>P:GO:0008152;<br>F:GO:0016787;<br>P:GO:0008150;<br>C:GO:0005575 |             | IPR001279; G3DSA:3.60.15.10<br>(GENE3D), PTHR23200 (PANTHER),<br>PTHR23200:SF10 (PANTHER),<br>SSF56281 (SUPERFAMILY)                                           |
|                         | -                                                       | 0  |                                                                                                                                                                       |                                                                                                   |             | -                                                                                                                                                              |
|                         | -                                                       | 0  |                                                                                                                                                                       |                                                                                                   |             | -                                                                                                                                                              |
| Caenorhabditis elegans  | gex interacting protein family member (gei-3)           | 0  |                                                                                                                                                                       | C:GO:0005634                                                                                      |             | -                                                                                                                                                              |
|                         | -                                                       | 0  |                                                                                                                                                                       |                                                                                                   |             | -                                                                                                                                                              |



|                         |                                                  |    |                                                                                                                                                                                                                                                                                                                                                                                   |                                                            |                                                                                                                                                                       |
|-------------------------|--------------------------------------------------|----|-----------------------------------------------------------------------------------------------------------------------------------------------------------------------------------------------------------------------------------------------------------------------------------------------------------------------------------------------------------------------------------|------------------------------------------------------------|-----------------------------------------------------------------------------------------------------------------------------------------------------------------------|
|                         | -                                                | 0  |                                                                                                                                                                                                                                                                                                                                                                                   |                                                            | -                                                                                                                                                                     |
| Haemonchus contortus    | glutamate dehydroge-se                           | 22 | C:GO:0009331;<br>P:GO:0007629;<br>F:GO:0004353;<br>P:GO:0046168;<br>P:GO:0040010;<br>C:GO:0005759;<br>P:GO:0006127;<br>P:GO:0046693;<br>C:GO:0005576;<br>F:GO:0050660;<br>P:GO:0006006;<br>F:GO:0051287;<br>F:GO:0004344;<br>P:GO:0008364;<br>P:GO:0009060;<br>F:GO:0004367;<br>P:GO:0006116;<br>F:GO:0004352;<br>P:GO:0006641;<br>F:GO:0042803;<br>C:GO:0005811;<br>P:GO:0019551 | EC:1.4.1.3;<br>EC:1.1.99.10<br>; EC:1.1.1.8;<br>EC:1.4.1.2 | IPR006095; IPR006096; IPR006097;<br>IPR014362; IPR016040;<br>G3DSA:3.40.192.10 (GENE3D),<br>PTHR11606 (PANTHER), SSF51735<br>(SUPERFAMILY), SSF53223<br>(SUPERFAMILY) |
| Caenorhabditis brenneri | syntaxin-18                                      | 8  | P:GO:0002119;<br>F:GO:0005515;<br>P:GO:0006810;<br>P:GO:0040010;<br>P:GO:0000003;<br>P:GO:0040011;<br>P:GO:0009987;<br>C:GO:0016021                                                                                                                                                                                                                                               |                                                            | -                                                                                                                                                                     |
| Caenorhabditis elegans  | elegans protein confirmed by transcript evidence | 2  | P:GO:0007411;<br>P:GO:0007413                                                                                                                                                                                                                                                                                                                                                     |                                                            | IPR001841; IPR013083; PTHR21578<br>(PANTHER)                                                                                                                          |
| Ostertagia ostertagi    | fatty acid and retinol-binding protein 1         | 4  | C:GO:0005576;<br>F:GO:0005504;<br>F:GO:0005515;<br>F:GO:0019841                                                                                                                                                                                                                                                                                                                   |                                                            | IPR008632; SignalP (SIGNALP)                                                                                                                                          |
| Ostertagia ostertagi    | fatty acid and retinol-binding protein 1         | 4  | C:GO:0005576;<br>F:GO:0005504;<br>F:GO:0005515;<br>F:GO:0019841                                                                                                                                                                                                                                                                                                                   |                                                            | IPR008632                                                                                                                                                             |

|                         |                                                         |    |                                                                                                                                                                                                                                                                                                                                                                                                    |   |  |                                                                                                                                            |
|-------------------------|---------------------------------------------------------|----|----------------------------------------------------------------------------------------------------------------------------------------------------------------------------------------------------------------------------------------------------------------------------------------------------------------------------------------------------------------------------------------------------|---|--|--------------------------------------------------------------------------------------------------------------------------------------------|
| Brugia malayi           | protein phosphatase catalytic gamma isoform             | 23 | P:GO:0046822;<br>C:GO:0043197;<br>P:GO:0007275;<br>C:GO:0016607;<br>F:GO:0019901;<br>P:GO:0007084;<br>C:GO:0005624;<br>C:GO:0000777;<br>P:GO:0051301;<br>P:GO:0005977;<br>C:GO:0005730;<br>C:GO:0005829;<br>C:GO:0005741;<br>F:GO:0046872;<br>P:GO:0007067;<br>F:GO:0042802;<br>P:GO:0007126;<br>C:GO:0070688;<br>P:GO:0006470;<br>C:GO:0005625;<br>P:GO:0016568;<br>C:GO:0045202;<br>F:GO:0004722 | - |  | IPR004843; IPR006186;<br>G3DSA:3.60.21.10 (GENE3D),<br>PTHR11668:SF19 (PANTHER),<br>SSF56300 (SUPERFAMILY)                                 |
| Caenorhabditis elegans  | briggsae cbr-bam-2 protein                              | 1  | C:GO:0005887                                                                                                                                                                                                                                                                                                                                                                                       | - |  | -                                                                                                                                          |
|                         |                                                         | 0  |                                                                                                                                                                                                                                                                                                                                                                                                    |   |  | IPR000436                                                                                                                                  |
| Loa loa                 | pre-mr--splicing factor 18                              | 3  | F:GO:0019870;<br>C:GO:0044428;<br>P:GO:0006396                                                                                                                                                                                                                                                                                                                                                     | - |  | IPR004098; IPR014906; PTHR13007<br>(PANTHER), PTHR13007:SF7<br>(PANTHER)                                                                   |
| Caenorhabditis elegans  | ead transcription factor family member (fkh-7)          | 6  | F:GO:0003700;<br>F:GO:0043565;<br>P:GO:0000003;<br>C:GO:0005634;<br>F:GO:0008270;<br>P:GO:0006355                                                                                                                                                                                                                                                                                                  | - |  | IPR001766; IPR011991; IPR018122;<br>SSF46785 (SUPERFAMILY)                                                                                 |
|                         |                                                         | 0  |                                                                                                                                                                                                                                                                                                                                                                                                    |   |  | IPR000477                                                                                                                                  |
| Caenorhabditis elegans  | phospholipase b                                         | 1  | F:GO:0016787                                                                                                                                                                                                                                                                                                                                                                                       | - |  | IPR001087; IPR013830; IPR013831;<br>PTHR21325 (PANTHER)                                                                                    |
|                         |                                                         | 0  |                                                                                                                                                                                                                                                                                                                                                                                                    |   |  | SignalP (SIGNALP)                                                                                                                          |
| Caenorhabditis briggsae | major facilitator superfamily protein                   | 4  | P:GO:0019915;<br>C:GO:0016021;<br>P:GO:0055085;<br>F:GO:0005215                                                                                                                                                                                                                                                                                                                                    | - |  | IPR011701; IPR016196; IPR020846;<br>G3DSA:1.20.1250.20 (GENE3D),<br>PTHR11662 (PANTHER),<br>PTHR11662:SF21 (PANTHER), SignalP<br>(SIGNALP) |
| Caenorhabditis briggsae | Hypothetical protein CBG22271 [Caenorhabditis briggsae] | 0  |                                                                                                                                                                                                                                                                                                                                                                                                    |   |  | -                                                                                                                                          |
|                         |                                                         | 0  |                                                                                                                                                                                                                                                                                                                                                                                                    |   |  | SignalP (SIGNALP)                                                                                                                          |
| Caenorhabditis elegans  | solute carrier family member 1                          | 2  | C:GO:0016020;<br>P:GO:0006865                                                                                                                                                                                                                                                                                                                                                                      | - |  | IPR006047; IPR013781; IPR017853;<br>G3DSA:3.90.400.10 (GENE3D),<br>PTHR10357 (PANTHER),<br>PTHR10357:SF11 (PANTHER)                        |
| Caenorhabditis elegans  | solute carrier family member 1                          | 2  | C:GO:0016020;<br>P:GO:0006865                                                                                                                                                                                                                                                                                                                                                                      | - |  | IPR013032                                                                                                                                  |

|                         |                                 |    |                                                                                                                                                                                                                                                                                                                                                                                                                                                       |   |                                                                                                                        |
|-------------------------|---------------------------------|----|-------------------------------------------------------------------------------------------------------------------------------------------------------------------------------------------------------------------------------------------------------------------------------------------------------------------------------------------------------------------------------------------------------------------------------------------------------|---|------------------------------------------------------------------------------------------------------------------------|
| Brugia malayi           | bloom syndrome protein          | 26 | P:GO:0000085;<br>P:GO:0031572;<br>C:GO:0000781;<br>F:GO:0002039;<br>P:GO:0045910;<br>P:GO:0045941;<br>P:GO:0010165;<br>C:GO:0016605;<br>P:GO:0000724;<br>P:GO:0051276;<br>P:GO:0031297;<br>C:GO:0005737;<br>P:GO:0000079;<br>C:GO:0005730;<br>P:GO:0046631;<br>P:GO:0051259;<br>P:GO:0051782;<br>F:GO:0000739;<br>P:GO:0048478;<br>F:GO:0051880;<br>C:GO:0000800;<br>C:GO:0016363;<br>F:GO:0004003;<br>F:GO:0000405;<br>F:GO:0005524;<br>F:GO:0009378 | - | IPR004589; IPR011545; IPR014021;<br>G3DSA:3.40.50.300 (GENE3D),<br>PTHR13710:SF14 (PANTHER),<br>SSF52540 (SUPERFAMILY) |
| Callithrix jacchus      | ergic and golgi 3               | 6  | C:GO:0005789;<br>C:GO:0005794;<br>F:GO:0005515;<br>P:GO:0016192;<br>C:GO:0016021;<br>C:GO:0033116                                                                                                                                                                                                                                                                                                                                                     | - | -                                                                                                                      |
| -                       | -                               | 0  |                                                                                                                                                                                                                                                                                                                                                                                                                                                       |   | -                                                                                                                      |
| -                       | -                               | 0  |                                                                                                                                                                                                                                                                                                                                                                                                                                                       |   | SignalP (SIGNALP)                                                                                                      |
| Caenorhabditis elegans  | briggsae cbr-ugt-25 protein     | 0  | F:GO:0016740;<br>F:GO:0030246;<br>C:GO:0016021;<br>F:GO:0003700;<br>C:GO:0005634;<br>F:GO:0016758;<br>F:GO:0016757;<br>P:GO:0005975;<br>P:GO:0030259;<br>P:GO:0006355;<br>P:GO:0008152;<br>P:GO:0045449                                                                                                                                                                                                                                               |   | SignalP (SIGNALP)                                                                                                      |
| -                       | -                               | 0  |                                                                                                                                                                                                                                                                                                                                                                                                                                                       |   | -                                                                                                                      |
| -                       | -                               | 0  |                                                                                                                                                                                                                                                                                                                                                                                                                                                       |   | -                                                                                                                      |
| Caenorhabditis briggsae | sphingomyelin phosphodiesterase | 4  | P:GO:0046513;<br>F:GO:0004767;<br>C:GO:0005576;<br>P:GO:0006685                                                                                                                                                                                                                                                                                                                                                                                       | - | EC:3.1.4.12 -                                                                                                          |
| Caenorhabditis briggsae | briggsae cbr-ncl-1 protein      | 2  | F:GO:0005515;<br>F:GO:0046872                                                                                                                                                                                                                                                                                                                                                                                                                         | - | -                                                                                                                      |
| -                       | -                               | 0  |                                                                                                                                                                                                                                                                                                                                                                                                                                                       |   | IPR002870                                                                                                              |
| -                       | -                               | 0  |                                                                                                                                                                                                                                                                                                                                                                                                                                                       |   | -                                                                                                                      |

|                         |                                                             |    |                                                                                                                                                                                                                                                                                                                                                                  |                                                                                                                                     |                                                                                                                                 |
|-------------------------|-------------------------------------------------------------|----|------------------------------------------------------------------------------------------------------------------------------------------------------------------------------------------------------------------------------------------------------------------------------------------------------------------------------------------------------------------|-------------------------------------------------------------------------------------------------------------------------------------|---------------------------------------------------------------------------------------------------------------------------------|
| Caenorhabditis elegans  | dsh homolog 3                                               | 21 | C:GO:0031410;<br>P:GO:0051641;<br>N:GO:2000026;<br>C:GO:0043005;<br>P:GO:0016055;<br>P:GO:0042325;<br>P:GO:0043009;<br>P:GO:0044238;<br>P:GO:0044260;<br>P:GO:0002009;<br>P:GO:0007409;<br>P:GO:0023060;<br>P:GO:0050877;<br>P:GO:0050808;<br>F:GO:0042802;<br>C:GO:0000267;<br>P:GO:0065008;<br>P:GO:0007154;<br>P:GO:0006928;<br>P:GO:0048598;<br>P:GO:0009887 | -                                                                                                                                   | IPR000591; IPR001478; IPR011991;<br>IPR015506; G3DSA:2.30.42.10<br>(GENE3D), PTHR10878:SF1<br>(PANTHER), SSF46785 (SUPERFAMILY) |
| Caenorhabditis briggsae | rnp-1 like r-binding protein                                | 3  | F:GO:0003676;<br>P:GO:0009792;<br>F:GO:0000166                                                                                                                                                                                                                                                                                                                   | -                                                                                                                                   | -                                                                                                                               |
| Homo sapiens            | isoform cra_b                                               | 10 | F:GO:0008270;<br>C:GO:0005739;<br>F:GO:0030145;<br>P:GO:0006355;<br>P:GO:0010815;<br>F:GO:0003677;<br>P:GO:0006508;<br>F:GO:0070006;<br>F:GO:0042803;<br>C:GO:0005634                                                                                                                                                                                            | -                                                                                                                                   | PTHR14360 (PANTHER),<br>PTHR14360:SF2 (PANTHER)                                                                                 |
|                         | -                                                           | 0  |                                                                                                                                                                                                                                                                                                                                                                  |                                                                                                                                     | -                                                                                                                               |
|                         | -                                                           | 0  |                                                                                                                                                                                                                                                                                                                                                                  |                                                                                                                                     | -                                                                                                                               |
|                         | -                                                           | 0  |                                                                                                                                                                                                                                                                                                                                                                  |                                                                                                                                     | -                                                                                                                               |
| Homo sapiens            | PREDICTED: hypothetical protein XP_002343485 [Homo sapiens] | 0  |                                                                                                                                                                                                                                                                                                                                                                  |                                                                                                                                     | -                                                                                                                               |
|                         | -                                                           | 0  |                                                                                                                                                                                                                                                                                                                                                                  |                                                                                                                                     | SignalP (SIGNALP)                                                                                                               |
| Caenorhabditis elegans  | elegans protein partially confirmed by transcript evidence  | 0  |                                                                                                                                                                                                                                                                                                                                                                  |                                                                                                                                     | -                                                                                                                               |
| Caenorhabditis briggsae | tetratricopeptide repeat domain 17                          | 2  | P:GO:0040010;<br>P:GO:0040017                                                                                                                                                                                                                                                                                                                                    | -                                                                                                                                   | -                                                                                                                               |
| Loa loa                 | stat d- binding domain containing protein                   | 0  |                                                                                                                                                                                                                                                                                                                                                                  | P:GO:0006355;<br>F:GO:0005509;<br>F:GO:0004871;<br>P:GO:0045449;<br>P:GO:0007165;<br>F:GO:0005515;<br>F:GO:0003700;<br>C:GO:0005634 | -                                                                                                                               |
| Aedes aegypti           | ubiquitin-conjugating enzyme e2-230k                        | 0  |                                                                                                                                                                                                                                                                                                                                                                  | P:GO:0051246;<br>P:GO:0043687;<br>F:GO:0019787                                                                                      | IPR000608; IPR016135; PTHR11621<br>(PANTHER), PTHR11621:SF13<br>(PANTHER)                                                       |
| Caenorhabditis briggsae | rho gtpase activating protein family member (rga-4)         | 0  |                                                                                                                                                                                                                                                                                                                                                                  | P:GO:0007165;<br>C:GO:0005622                                                                                                       | IPR000198; IPR008936; PTHR15670<br>(PANTHER)                                                                                    |
|                         | -                                                           | 0  |                                                                                                                                                                                                                                                                                                                                                                  |                                                                                                                                     | -                                                                                                                               |

|                             |                                                            |   |                                                                                                                    |                                                                                                                    |                                                                                        |
|-----------------------------|------------------------------------------------------------|---|--------------------------------------------------------------------------------------------------------------------|--------------------------------------------------------------------------------------------------------------------|----------------------------------------------------------------------------------------|
| Caenorhabditis elegans      | ankyrin repeat domain protein                              | 2 | F:GO:0005488;<br>F:GO:0003824                                                                                      | -                                                                                                                  | IPR002110; IPR020683; PR01415 (PRINTS), PTHR18958 (PANTHER), PTHR18958:SF241 (PANTHER) |
| Caenorhabditis elegans      | scy1 protein ki-se                                         | 3 | P:GO:0006468;<br>F:GO:0005524;<br>F:GO:0004672                                                                     | -                                                                                                                  | -                                                                                      |
| -                           | -                                                          | 0 |                                                                                                                    |                                                                                                                    | -                                                                                      |
| Caenorhabditis elegans      | argo-ute protein group                                     | 1 | P:GO:0000003                                                                                                       | -                                                                                                                  | IPR003100; G3DSA:2.170.260.10 (GENE3D), PTHR22891 (PANTHER), SSF101690 (SUPERFAMILY)   |
| Caenorhabditis elegans      | argo-ute protein group                                     | 1 | P:GO:0000003                                                                                                       | -                                                                                                                  | IPR003100; G3DSA:2.170.260.10 (GENE3D), PTHR22891 (PANTHER), SSF101690 (SUPERFAMILY)   |
| -                           | -                                                          | 0 |                                                                                                                    |                                                                                                                    | -                                                                                      |
| Caenorhabditis elegans      | rho gtpase activating protein 29                           | 3 | F:GO:0046872;<br>P:GO:0007165;<br>C:GO:0005622                                                                     | -                                                                                                                  | PTHR15228 (PANTHER), PTHR15228:SF7 (PANTHER)                                           |
| Caenorhabditis elegans      | 3 exoribonuclease domain 2 containing protein              | 0 |                                                                                                                    | F:GO:0003723;<br>P:GO:0006402;<br>C:GO:0005739;<br>F:GO:0004654;<br>P:GO:0006396;<br>F:GO:0000175                  | IPR003029; IPR012162; IPR012340; IPR015847; IPR016027; SSF54791 (SUPERFAMILY)          |
| -                           | -                                                          | 0 |                                                                                                                    |                                                                                                                    | SignalP (SIGNALP)                                                                      |
| -                           | -                                                          | 0 |                                                                                                                    |                                                                                                                    | -                                                                                      |
| Caenorhabditis elegans      | d--repair protein complementing xp-g cells                 | 7 | P:GO:0009411;<br>P:GO:0006289;<br>F:GO:0004519;<br>F:GO:0003677;<br>F:GO:0005515;<br>C:GO:0005654;<br>P:GO:0009792 | -                                                                                                                  | IPR001044; IPR006084; IPR006085; G3DSA:3.40.50.1010 (GENE3D), SSF88723 (SUPERFAMILY)   |
| Caenorhabditis briggsae     | elegans protein confirmed by transcript evidence           | 0 |                                                                                                                    | P:GO:0000003;<br>C:GO:0005856;<br>F:GO:0005198;<br>C:GO:0044297;<br>C:GO:0031143;<br>P:GO:0019915;<br>P:GO:0040018 | SignalP (SIGNALP)                                                                      |
| Caenorhabditis elegans      | elegans protein partially confirmed by transcript evidence | 3 | C:GO:0034703;<br>F:GO:0005261;<br>P:GO:0055080                                                                     | -                                                                                                                  | -                                                                                      |
| -                           | -                                                          | 0 |                                                                                                                    |                                                                                                                    | -                                                                                      |
| Angiostrongylus cantonensis | col-184                                                    | 0 |                                                                                                                    | C:GO:0016021;<br>F:GO:0042302                                                                                      | IPR008160; PTHR10499 (PANTHER), PTHR10499:SF58 (PANTHER)                               |
| -                           | -                                                          | 0 |                                                                                                                    |                                                                                                                    | -                                                                                      |
| -                           | -                                                          | 0 |                                                                                                                    |                                                                                                                    | SignalP (SIGNALP)                                                                      |
| Caenorhabditis elegans      | briggsae cbr-vha-5 protein                                 | 5 | F:GO:0015078;<br>F:GO:0005516;<br>C:GO:0033177;<br>P:GO:0015986;<br>C:GO:0045202                                   | -                                                                                                                  | IPR002490; PTHR11629:SF1 (PANTHER)                                                     |
| -                           | -                                                          | 0 |                                                                                                                    |                                                                                                                    | SignalP (SIGNALP)                                                                      |
| -                           | -                                                          | 0 |                                                                                                                    |                                                                                                                    | -                                                                                      |
| -                           | -                                                          | 0 |                                                                                                                    |                                                                                                                    | -                                                                                      |

|                         |                                                            |    |                                                                                                                                                                                                                          |                                                                                                   |                                                                                                            |
|-------------------------|------------------------------------------------------------|----|--------------------------------------------------------------------------------------------------------------------------------------------------------------------------------------------------------------------------|---------------------------------------------------------------------------------------------------|------------------------------------------------------------------------------------------------------------|
| Caenorhabditis elegans  | solute carrier family 15 (h+ peptide transporter) member 2 | 9  | C:GO:0005887;<br>F:GO:0042936;<br>C:GO:0005624;<br>F:GO:0042895;<br>P:GO:0006855;<br>F:GO:0015334;<br>F:GO:0005515;<br>P:GO:0042938;<br>P:GO:0042891                                                                     | -                                                                                                 | IPR000109; IPR016196; IPR018456;<br>PTHR11654 (PANTHER),<br>PTHR11654:SF12 (PANTHER), SignalP<br>(SIGNALP) |
| Caenorhabditis elegans  | elegans protein confirmed by transcript evidence           | 0  |                                                                                                                                                                                                                          |                                                                                                   | -                                                                                                          |
|                         | -                                                          | 0  |                                                                                                                                                                                                                          |                                                                                                   | -                                                                                                          |
|                         | -                                                          | 0  |                                                                                                                                                                                                                          |                                                                                                   | -                                                                                                          |
|                         | -                                                          | 0  |                                                                                                                                                                                                                          |                                                                                                   | -                                                                                                          |
|                         | -                                                          | 0  |                                                                                                                                                                                                                          |                                                                                                   | -                                                                                                          |
|                         | -                                                          | 0  |                                                                                                                                                                                                                          |                                                                                                   | G3DSA:3.10.20.90 (GENE3D)                                                                                  |
| Caenorhabditis briggsae | g-patch domain containing protein                          | 3  | P:GO:0019915;<br>P:GO:0010171;<br>P:GO:0002119                                                                                                                                                                           | -                                                                                                 | -                                                                                                          |
| Caenorhabditis elegans  | lethal family member (let-2)                               | 3  | C:GO:0005587;<br>F:GO:0030020;<br>P:GO:0016043                                                                                                                                                                           | -                                                                                                 | IPR008160; PTHR10499 (PANTHER),<br>PTHR10499:SF114 (PANTHER)                                               |
|                         | -                                                          | 0  |                                                                                                                                                                                                                          |                                                                                                   | -                                                                                                          |
| Caenorhabditis elegans  | downstream of receptor ki-se                               | 13 | P:GO:0007265;<br>P:GO:0008360;<br>P:GO:0007613;<br>P:GO:0008355;<br>P:GO:0045500;<br>P:GO:0007015;<br>P:GO:0001700;<br>P:GO:0008293;<br>P:GO:0008595;<br>F:GO:0005070;<br>C:GO:0005886;<br>F:GO:0005118;<br>P:GO:0007476 | -                                                                                                 | -                                                                                                          |
|                         | -                                                          | 0  |                                                                                                                                                                                                                          |                                                                                                   | -                                                                                                          |
|                         | -                                                          | 0  |                                                                                                                                                                                                                          |                                                                                                   | -                                                                                                          |
|                         | -                                                          | 0  |                                                                                                                                                                                                                          |                                                                                                   | -                                                                                                          |
|                         | -                                                          | 0  |                                                                                                                                                                                                                          |                                                                                                   | -                                                                                                          |
|                         | -                                                          | 0  |                                                                                                                                                                                                                          |                                                                                                   | -                                                                                                          |
|                         | -                                                          | 0  |                                                                                                                                                                                                                          |                                                                                                   | SignalP (SIGNALP)                                                                                          |
|                         | -                                                          | 0  |                                                                                                                                                                                                                          |                                                                                                   | -                                                                                                          |
| Caenorhabditis elegans  | heparan sulfate 3-o-sulfotransferase isoform cra_a         | 2  | P:GO:0019915;<br>F:GO:0016740                                                                                                                                                                                            | -                                                                                                 | SignalP (SIGNALP)                                                                                          |
|                         | -                                                          | 0  |                                                                                                                                                                                                                          |                                                                                                   | -                                                                                                          |
|                         | -                                                          | 0  |                                                                                                                                                                                                                          |                                                                                                   | -                                                                                                          |
| Caenorhabditis elegans  | elegans protein partially confirmed by transcript evidence | 0  |                                                                                                                                                                                                                          | F:GO:0008107;<br>P:GO:0005975;<br>C:GO:0016021;<br>C:GO:0016020                                   | IPR002516; PTHR22898 (PANTHER)                                                                             |
|                         | -                                                          | 0  |                                                                                                                                                                                                                          |                                                                                                   | -                                                                                                          |
| Brugia malayi           | moz sas family protein                                     | 0  |                                                                                                                                                                                                                          | F:GO:0046872;<br>P:GO:0045449;<br>F:GO:0008270;<br>F:GO:0016747;<br>F:GO:0005515;<br>C:GO:0005634 | IPR001965; IPR013083                                                                                       |

|                             |                                                         |    |                                                                                                                                                                                                                          |                                                                                                                                                                                                                                                                                                               |                             |                                                                                                              |
|-----------------------------|---------------------------------------------------------|----|--------------------------------------------------------------------------------------------------------------------------------------------------------------------------------------------------------------------------|---------------------------------------------------------------------------------------------------------------------------------------------------------------------------------------------------------------------------------------------------------------------------------------------------------------|-----------------------------|--------------------------------------------------------------------------------------------------------------|
| Caenorhabditis briggsae     | moz sas family protein                                  | 0  |                                                                                                                                                                                                                          | C:GO:0000792;<br>C:GO:0000791;<br>C:GO:0005634;<br>F:GO:0003677;<br>F:GO:0003676;<br>P:GO:0048477;<br>F:GO:0046872;<br>F:GO:0030528;<br>P:GO:0016458;<br>F:GO:0003682;<br>P:GO:0045449;<br>F:GO:0016747;<br>C:GO:0005700;<br>P:GO:0045893;<br>P:GO:0045892;<br>F:GO:0008270;<br>C:GO:0005622;<br>F:GO:0005515 |                             | IPR001965; IPR011011; IPR013083;<br>IPR017956; IPR019786                                                     |
|                             | -                                                       | 0  |                                                                                                                                                                                                                          |                                                                                                                                                                                                                                                                                                               |                             | SignalP (SIGNALP)                                                                                            |
| Pongo abelii                | lamin a c                                               | 13 | C:GO:0005626;<br>C:GO:0016363;<br>P:GO:0006998;<br>P:GO:0035105;<br>C:GO:0005638;<br>P:GO:0007517;<br>P:GO:0007283;<br>N:GO:0090343;<br>P:GO:0055015;<br>F:GO:0005515;<br>C:GO:0048471;<br>C:GO:0005635;<br>F:GO:0005198 | -                                                                                                                                                                                                                                                                                                             |                             | IPR001322; IPR001664;<br>G3DSA:2.60.40.1260 (GENE3D),<br>PTHR23239:SF12 (PANTHER),<br>SSF74853 (SUPERFAMILY) |
| Ajellomyces capsulatus H143 | calmodulin-binding coil-coil protein                    | 0  |                                                                                                                                                                                                                          | P:GO:0055114;<br>F:GO:0016491;<br>F:GO:0032440;<br>F:GO:0003774;<br>C:GO:0016459                                                                                                                                                                                                                              |                             | -                                                                                                            |
| Caenorhabditis elegans      | tyrosine-protein ki-se pr2                              | 9  | F:GO:0004674;<br>P:GO:0035071;<br>P:GO:0042059;<br>P:GO:0040027;<br>F:GO:0005524;<br>F:GO:0005515;<br>F:GO:0004715;<br>P:GO:0009792;<br>P:GO:0006468                                                                     | -                                                                                                                                                                                                                                                                                                             | EC:2.7.11.0;<br>EC:2.7.10.2 | IPR000719; IPR001245; IPR011009;<br>IPR020685; G3DSA:1.10.510.10<br>(GENE3D), PTHR23256:SF266<br>(PANTHER)   |
| Caenorhabditis briggsae     | Hypothetical protein CBG01593 [Caenorhabditis briggsae] | 3  | C:GO:0016020;<br>P:GO:0023052;<br>F:GO:0004872                                                                                                                                                                           | -                                                                                                                                                                                                                                                                                                             |                             | -                                                                                                            |

|                         |                                                          |    |                                                                                                                                                                                                                                           |                               |                                   |                                                                                                         |
|-------------------------|----------------------------------------------------------|----|-------------------------------------------------------------------------------------------------------------------------------------------------------------------------------------------------------------------------------------------|-------------------------------|-----------------------------------|---------------------------------------------------------------------------------------------------------|
| Homo sapiens            | enolase 1                                                | 14 | P:GO:0009615;<br>C:GO:0000015;<br>P:GO:0000122;<br>F:GO:0003714;<br>F:GO:0004252;<br>C:GO:0031430;<br>F:GO:0004634;<br>P:GO:0006096;<br>F:GO:0003677;<br>P:GO:0030308;<br>F:GO:0000287;<br>F:GO:0003700;<br>C:GO:0005886;<br>C:GO:0005634 | -                             | EC:3.4.21.0;<br>EC:4.2.1.11       | IPR000941; IPR001354; IPR020809;<br>IPR020810; G3DSA:3.20.20.120<br>(GENE3D), SSF51604 (SUPERFAMILY)    |
| -                       | -                                                        | 0  |                                                                                                                                                                                                                                           |                               |                                   | -                                                                                                       |
| Caenorhabditis briggsae | rhomboid family 1                                        | 7  | F:GO:0008233;<br>C:GO:0012505;<br>C:GO:0005794;<br>C:GO:0031090;<br>C:GO:0016021;<br>C:GO:0005783;<br>C:GO:0044446                                                                                                                        | -                             |                                   | IPR002610; IPR022764;<br>G3DSA:1.20.1540.10 (GENE3D),<br>SSF144091 (SUPERFAMILY)                        |
| -                       | -                                                        | 0  |                                                                                                                                                                                                                                           |                               |                                   | -                                                                                                       |
| Caenorhabditis elegans  | yqk3_caeel ame: full=uncharacterized protein             | 2  | P:GO:0000003;<br>P:GO:0006898                                                                                                                                                                                                             | -                             |                                   | IPR007356; PTHR13563:SF4<br>(PANTHER), SignalP (SIGNALP)                                                |
| -                       | -                                                        | 0  |                                                                                                                                                                                                                                           |                               |                                   | -                                                                                                       |
| Caenorhabditis briggsae | programmed cell death 8                                  | 5  | P:GO:0045454;<br>F:GO:0050660;<br>C:GO:0005737;<br>P:GO:0055114;<br>F:GO:0016491                                                                                                                                                          | -                             |                                   | IPR004099; IPR016156;<br>G3DSA:3.50.50.60 (GENE3D),<br>PTHR22912 (PANTHER),<br>PTHR22912:SF32 (PANTHER) |
| Ostertagia ostertagi    | hypothetical protein jmo23 [Ostertagia ostertagi]        | 0  |                                                                                                                                                                                                                                           |                               |                                   | -                                                                                                       |
| -                       | -                                                        | 0  |                                                                                                                                                                                                                                           |                               |                                   | -                                                                                                       |
| -                       | -                                                        | 0  |                                                                                                                                                                                                                                           |                               |                                   | -                                                                                                       |
| Caenorhabditis elegans  | amin (actin binding protein) alpha family member (fl--1) | 0  |                                                                                                                                                                                                                                           | F:GO:0003676;<br>F:GO:0000166 |                                   | PTHR11915 (PANTHER),<br>PTHR11915:SF55 (PANTHER)                                                        |
| Caenorhabditis elegans  | procollagen-oxoglutarate 5-dioxygenase 3                 | 7  | P:GO:0008045;<br>F:GO:0031418;<br>F:GO:0005506;<br>P:GO:0055114;<br>F:GO:0016702;<br>F:GO:0008475;<br>C:GO:0005783                                                                                                                        | -                             | EC:1.13.11.0<br>;<br>EC:1.14.11.4 | IPR008266                                                                                               |
| Caenorhabditis elegans  | elegans protein confirmed by transcript evidence         | 4  | P:GO:0040035;<br>P:GO:0018991;<br>P:GO:0008340;<br>P:GO:0002009                                                                                                                                                                           | -                             |                                   | IPR002259; PTHR10332:SF6<br>(PANTHER), SignalP (SIGNALP)                                                |
| -                       | -                                                        | 0  |                                                                                                                                                                                                                                           |                               |                                   | -                                                                                                       |
| -                       | -                                                        | 0  |                                                                                                                                                                                                                                           |                               |                                   | -                                                                                                       |
| Caenorhabditis elegans  | elegans protein confirmed by transcript evidence         | 3  | F:GO:0030170;<br>P:GO:0006520;<br>F:GO:0016829                                                                                                                                                                                            | -                             |                                   | IPR001597; IPR015421; IPR015424;<br>PTHR10289 (PANTHER)                                                 |



|                         |                                    |    |                                                                                                                                                                                                                                                            |                                                                                                                                                                                                                                                                                                                                |                                                            |
|-------------------------|------------------------------------|----|------------------------------------------------------------------------------------------------------------------------------------------------------------------------------------------------------------------------------------------------------------|--------------------------------------------------------------------------------------------------------------------------------------------------------------------------------------------------------------------------------------------------------------------------------------------------------------------------------|------------------------------------------------------------|
| Caenorhabditis briggsae | 26s protease regulatory subunit 7  | 15 | F:GO:0008233;<br>P:GO:0008340;<br>C:GO:0000502;<br>P:GO:0051436;<br>P:GO:0051437;<br>P:GO:0000003;<br>P:GO:0031145;<br>F:GO:0005524;<br>P:GO:0002119;<br>F:GO:0016887;<br>F:GO:0005515;<br>P:GO:0044419;<br>P:GO:0009792;<br>C:GO:0005737;<br>C:GO:0005634 | -                                                                                                                                                                                                                                                                                                                              | -                                                          |
| -                       | -                                  | 0  |                                                                                                                                                                                                                                                            |                                                                                                                                                                                                                                                                                                                                | -                                                          |
| Caenorhabditis elegans  | briggsae cbr-set-14 protein        | 0  |                                                                                                                                                                                                                                                            | F:GO:0046872;<br>F:GO:0008270                                                                                                                                                                                                                                                                                                  | -                                                          |
| -                       | -                                  | 0  |                                                                                                                                                                                                                                                            |                                                                                                                                                                                                                                                                                                                                | -                                                          |
| Caenorhabditis elegans  | neuron -vigator 3                  | 0  |                                                                                                                                                                                                                                                            | F:GO:0005216;<br>F:GO:0005244;<br>C:GO:0016021;<br>F:GO:0005272;<br>P:GO:0006814;<br>P:GO:0006811;<br>P:GO:0006810;<br>F:GO:0000166;<br>F:GO:0017111;<br>F:GO:0005524;<br>P:GO:0034765;<br>C:GO:0031012;<br>F:GO:0008201;<br>P:GO:0007049;<br>P:GO:0034220                                                                     | IPR001715; PTHR12784 (PANTHER),<br>PTHR12784:SF1 (PANTHER) |
| Caenorhabditis briggsae | uncoordi-ted family member (unc-2) | 0  |                                                                                                                                                                                                                                                            |                                                                                                                                                                                                                                                                                                                                | -                                                          |
| Hydra magnipapillata    | sumo ligase                        | 0  |                                                                                                                                                                                                                                                            | P:GO:0048589;<br>P:GO:0001701;<br>C:GO:0005634;<br>P:GO:0007296;<br>F:GO:0046872;<br>F:GO:0016874;<br>P:GO:0001570;<br>P:GO:0003007;<br>P:GO:0048844;<br>P:GO:0008150;<br>P:GO:0048146;<br>P:GO:0045944;<br>C:GO:0005737;<br>P:GO:0045449;<br>P:GO:0007569;<br>C:GO:0016607;<br>F:GO:0008270;<br>F:GO:0005515;<br>C:GO:0005575 | -                                                          |

|                         |                                                             |   |                                                                                                   |   |            |                                                                                                                                                                                                                                     |
|-------------------------|-------------------------------------------------------------|---|---------------------------------------------------------------------------------------------------|---|------------|-------------------------------------------------------------------------------------------------------------------------------------------------------------------------------------------------------------------------------------|
| synthetic construct     | cytochrome c oxidase subunit viib                           | 6 | P:GO:0034220;<br>P:GO:0015992;<br>C:GO:0016021;<br>P:GO:0008152;<br>F:GO:0004129;<br>C:GO:0005746 | - | EC:1.9.3.1 | IPR008433; G3DSA:4.10.51.10<br>(GENE3D), SSF81423 (SUPERFAMILY)                                                                                                                                                                     |
|                         | -                                                           | 0 |                                                                                                   |   |            | -                                                                                                                                                                                                                                   |
|                         | -                                                           | 0 |                                                                                                   |   |            | -                                                                                                                                                                                                                                   |
|                         | -                                                           | 0 |                                                                                                   |   |            | -                                                                                                                                                                                                                                   |
| Zea mays                | protein                                                     | 0 |                                                                                                   |   |            | -                                                                                                                                                                                                                                   |
| Sorghum bicolor         | hypothetical protein SORBIDRAFT_01g024221 [Sorghum bicolor] | 0 |                                                                                                   |   |            | -                                                                                                                                                                                                                                   |
| Sorghum bicolor         | hypothetical protein SORBIDRAFT_01g024221 [Sorghum bicolor] | 0 |                                                                                                   |   |            | -                                                                                                                                                                                                                                   |
| Zea mays                | protein                                                     | 0 |                                                                                                   |   |            | -                                                                                                                                                                                                                                   |
| Pisum sativum           | senescence-associated protein                               | 0 |                                                                                                   |   |            | -                                                                                                                                                                                                                                   |
| Pisum sativum           | senescence-associated protein                               | 0 |                                                                                                   |   |            | -                                                                                                                                                                                                                                   |
| Caenorhabditis briggsae | senescence-associated protein                               | 0 |                                                                                                   |   |            | -                                                                                                                                                                                                                                   |
| Tetrahymena thermophila | senescence-associated protein                               | 0 |                                                                                                   |   |            | -                                                                                                                                                                                                                                   |
| Tetrahymena thermophila | senescence-associated protein                               | 0 |                                                                                                   |   |            | -                                                                                                                                                                                                                                   |
| Tetrahymena thermophila | senescence-associated protein                               | 0 |                                                                                                   |   |            | -                                                                                                                                                                                                                                   |
| Tetrahymena thermophila | senescence-associated protein                               | 0 |                                                                                                   |   |            | -                                                                                                                                                                                                                                   |
| Caenorhabditis briggsae | Hypothetical protein CBG11901 [Caenorhabditis briggsae]     | 0 |                                                                                                   |   |            | -                                                                                                                                                                                                                                   |
| Tetrahymena thermophila | senescence-associated protein                               | 0 |                                                                                                   |   |            | -                                                                                                                                                                                                                                   |
| Tetrahymena thermophila | senescence-associated protein                               | 0 |                                                                                                   |   |            | -                                                                                                                                                                                                                                   |
| Ancylostoma caninum     | surface-associated antigen 1                                | 0 |                                                                                                   |   |            | PD031131 (PRODOM), SignalP (SIGNALP)                                                                                                                                                                                                |
| Caenorhabditis elegans  | a-ki-se-anchor-protein 84                                   | 3 | F:GO:0003723;<br>P:GO:0009792;<br>P:GO:0008340                                                    | - |            | IPR002999; IPR004087; IPR004088;<br>IPR008191; IPR018111; IPR018351;<br>G3DSA:2.30.30.140 (GENE3D),<br>G3DSA:3.30.1370.10 (GENE3D),<br>PTHR12727 (PANTHER), SSF54791<br>(SUPERFAMILY), SSF63748<br>(SUPERFAMILY)                    |
| Caenorhabditis elegans  | a-ki-se-anchor-protein 84                                   | 3 | F:GO:0003723;<br>P:GO:0009792;<br>P:GO:0008340                                                    | - |            | IPR002999; IPR004087; IPR004088;<br>IPR008191; IPR018111; IPR018351;<br>G3DSA:2.30.30.140 (GENE3D),<br>G3DSA:3.30.1370.10 (GENE3D),<br>PTHR12727 (PANTHER), SignalP<br>(SIGNALP), SSF54791 (SUPERFAMILY),<br>SSF63748 (SUPERFAMILY) |
| Caenorhabditis elegans  | a-ki-se-anchor-protein 84                                   | 3 | F:GO:0003723;<br>P:GO:0009792;<br>P:GO:0008340                                                    | - |            | IPR002999; IPR004087; IPR004088;<br>IPR008191; IPR018111; IPR018351;<br>G3DSA:2.30.30.140 (GENE3D),<br>G3DSA:3.30.1370.10 (GENE3D),<br>PTHR12727 (PANTHER), SSF54791<br>(SUPERFAMILY), SSF63748<br>(SUPERFAMILY)                    |
| Caenorhabditis brenneri | ubr4 protein                                                | 2 | F:GO:0005488;<br>C:GO:0044464                                                                     | - |            | PTHR21725 (PANTHER)                                                                                                                                                                                                                 |
|                         | -                                                           | 0 |                                                                                                   |   |            | -                                                                                                                                                                                                                                   |
| Caenorhabditis elegans  | subfamily member 5                                          | 2 | F:GO:0046872;<br>P:GO:0000003                                                                     | - |            | IPR007087; IPR015609; IPR015880;<br>IPR022755; PTHR11821:SF10<br>(PANTHER), SSF57667 (SUPERFAMILY)                                                                                                                                  |

|                        |                                                   |   |                                                                                                                    |                                                |                                                         |                                                                                                                                                                                            |
|------------------------|---------------------------------------------------|---|--------------------------------------------------------------------------------------------------------------------|------------------------------------------------|---------------------------------------------------------|--------------------------------------------------------------------------------------------------------------------------------------------------------------------------------------------|
| Caenorhabditis elegans | isoform a                                         | 2 | C:GO:0016021;<br>F:GO:0005509                                                                                      | -                                              |                                                         | IPR000033; IPR000152; IPR001881;<br>IPR011042; IPR013032; IPR013091;<br>IPR018097; G3DSA:2.10.25.10<br>(GENE3D), PTHR10529 (PANTHER),<br>SSF57196 (SUPERFAMILY), SSF63825<br>(SUPERFAMILY) |
|                        | -                                                 | 0 |                                                                                                                    |                                                |                                                         | SignalP (SIGNALP)                                                                                                                                                                          |
| Caenorhabditis elegans | human a1 homolog family member (hrp-1)            | 0 |                                                                                                                    | F:GO:0003676;<br>F:GO:0000166;<br>C:GO:0030529 |                                                         | IPR000504; IPR012677; PTHR10432<br>(PANTHER), SignalP (SIGNALP),<br>SSF54928 (SUPERFAMILY)                                                                                                 |
|                        | -                                                 | 0 |                                                                                                                    |                                                |                                                         | -                                                                                                                                                                                          |
|                        | -                                                 | 0 |                                                                                                                    |                                                |                                                         | -                                                                                                                                                                                          |
|                        | -                                                 | 0 |                                                                                                                    |                                                |                                                         | IPR013090                                                                                                                                                                                  |
| Taeniopygia guttata    | u5 small nuclear ribonucleoprotein 40 kda protein | 4 | P:GO:0008380;<br>F:GO:0005515;<br>C:GO:0044428;<br>C:GO:0030529                                                    | -                                              |                                                         | -                                                                                                                                                                                          |
|                        | -                                                 | 0 |                                                                                                                    |                                                |                                                         | SignalP (SIGNALP)                                                                                                                                                                          |
|                        | -                                                 | 0 |                                                                                                                    |                                                |                                                         | -                                                                                                                                                                                          |
| Caenorhabditis elegans | briggsae cbr-vps- protein                         | 1 | F:GO:0005515                                                                                                       | -                                              |                                                         | IPR001619; PTHR11679:SF1<br>(PANTHER)                                                                                                                                                      |
|                        | -                                                 | 0 |                                                                                                                    |                                                |                                                         | SignalP (SIGNALP)                                                                                                                                                                          |
|                        | -                                                 | 0 |                                                                                                                    |                                                |                                                         | -                                                                                                                                                                                          |
| Canis familiaris       | alpha 1c                                          | 7 | P:GO:0007018;<br>F:GO:0005525;<br>F:GO:0005515;<br>P:GO:0051258;<br>F:GO:0005198;<br>F:GO:0003924;<br>C:GO:0005874 | -                                              | EC:3.6.5.1;<br>EC:3.6.5.2;<br>EC:3.6.5.3;<br>EC:3.6.5.4 | IPR000217; IPR002452; IPR003008;<br>IPR008280; IPR018316; IPR023123;<br>PTHR11588:SF11 (PANTHER)                                                                                           |
| Canis familiaris       | alpha 1c                                          | 7 | P:GO:0007018;<br>F:GO:0005525;<br>F:GO:0005515;<br>P:GO:0051258;<br>F:GO:0005198;<br>F:GO:0003924;<br>C:GO:0005874 | -                                              | EC:3.6.5.1;<br>EC:3.6.5.2;<br>EC:3.6.5.3;<br>EC:3.6.5.4 | IPR000217; IPR002452; IPR003008;<br>IPR008280; IPR018316; IPR023123;<br>PTHR11588:SF11 (PANTHER)                                                                                           |
|                        | -                                                 | 0 |                                                                                                                    |                                                |                                                         | -                                                                                                                                                                                          |

|                         |                                                           |    |                                                                                                                                                                                                                                                                                                                                                                                                    |   |                                                                                        |
|-------------------------|-----------------------------------------------------------|----|----------------------------------------------------------------------------------------------------------------------------------------------------------------------------------------------------------------------------------------------------------------------------------------------------------------------------------------------------------------------------------------------------|---|----------------------------------------------------------------------------------------|
| Loa loa                 | rap ran-gap family protein                                | 23 | P:GO:0032956;<br>C:GO:0043005;<br>P:GO:0043491;<br>P:GO:0007169;<br>C:GO:0043234;<br>P:GO:0035467;<br>P:GO:0044087;<br>P:GO:0021987;<br>C:GO:0005829;<br>C:GO:0045121;<br>C:GO:0043231;<br>P:GO:0006469;<br>P:GO:0045184;<br>P:GO:0006897;<br>P:GO:0042221;<br>P:GO:0009968;<br>N:GO:0071844;<br>P:GO:0008285;<br>P:GO:0014065;<br>P:GO:0051259;<br>F:GO:0046983;<br>F:GO:0005096;<br>C:GO:0005624 | - | IPR018515; SignalP (SIGNALP)                                                           |
| -                       | -                                                         | 0  | -                                                                                                                                                                                                                                                                                                                                                                                                  | - | -                                                                                      |
| -                       | -                                                         | 0  | -                                                                                                                                                                                                                                                                                                                                                                                                  | - | -                                                                                      |
| -                       | -                                                         | 0  | -                                                                                                                                                                                                                                                                                                                                                                                                  | - | -                                                                                      |
| -                       | -                                                         | 0  | -                                                                                                                                                                                                                                                                                                                                                                                                  | - | SignalP (SIGNALP)                                                                      |
| -                       | -                                                         | 0  | -                                                                                                                                                                                                                                                                                                                                                                                                  | - | -                                                                                      |
| -                       | -                                                         | 0  | -                                                                                                                                                                                                                                                                                                                                                                                                  | - | -                                                                                      |
| Caenorhabditis elegans  | briggsae cbr--s-5 protein                                 | 0  | F:GO:0046872;<br>P:GO:0006508;<br>F:GO:0008237;<br>F:GO:0016787;<br>F:GO:0008233;<br>F:GO:0004222;<br>F:GO:0008270;<br>P:GO:0007413                                                                                                                                                                                                                                                                | - | G3DSA:3.40.390.10 (GENE3D),<br>PTHR10127 (PANTHER),<br>PTHR10127:SF73 (PANTHER)        |
| Callithrix jacchus      | transmembrane emp24 protein transport domain containing 9 | 4  | C:GO:0016021;<br>C:GO:0005789;<br>C:GO:0005793;<br>P:GO:0006810                                                                                                                                                                                                                                                                                                                                    | - | -                                                                                      |
| Loa loa                 | phosphoesterase pa-phosphatase related                    | 1  | C:GO:0016020                                                                                                                                                                                                                                                                                                                                                                                       | - | IPR000326; IPR016118; PTHR14969 (PANTHER), PTHR14969:SF3 (PANTHER), SignalP (SIGNALP)  |
| Caenorhabditis elegans  | nop14 nucleolar protein homolog                           | 3  | P:GO:0009792;<br>P:GO:0002119;<br>P:GO:0006898                                                                                                                                                                                                                                                                                                                                                     | - | SignalP (SIGNALP)                                                                      |
| Caenorhabditis brenneri | arv1 homolog ( cerevisiae)                                | 1  | P:GO:0009792                                                                                                                                                                                                                                                                                                                                                                                       | - | IPR007290                                                                              |
| -                       | -                                                         | 0  | -                                                                                                                                                                                                                                                                                                                                                                                                  | - | -                                                                                      |
| Taeniopygia guttata     | an1-type zinc finger protein 1                            | 0  | F:GO:0046872;<br>F:GO:0003674;<br>P:GO:0008150;<br>F:GO:0008270;<br>C:GO:0005575                                                                                                                                                                                                                                                                                                                   | - | IPR000058; PTHR14677 (PANTHER),<br>PTHR14677:SF3 (PANTHER),<br>SSF118310 (SUPERFAMILY) |
| Brugia malayi           | nematode astacin protease protein 30                      | 3  | F:GO:0004222;<br>P:GO:0006508;<br>F:GO:0008270                                                                                                                                                                                                                                                                                                                                                     | - | EC:3.4.24.0 -                                                                          |
| -                       | -                                                         | 0  | -                                                                                                                                                                                                                                                                                                                                                                                                  | - | -                                                                                      |

|                         |                                                      |   |                                                                                                   |                                                                                                                                                                                                         |            |                                                                               |
|-------------------------|------------------------------------------------------|---|---------------------------------------------------------------------------------------------------|---------------------------------------------------------------------------------------------------------------------------------------------------------------------------------------------------------|------------|-------------------------------------------------------------------------------|
|                         | -                                                    | 0 |                                                                                                   |                                                                                                                                                                                                         |            | -                                                                             |
| Caenorhabditis briggsae | briggsae cbr-sfxn-2 protein                          | 4 | F:GO:0008324;<br>P:GO:0055085;<br>P:GO:0006812;<br>C:GO:0016020                                   | -                                                                                                                                                                                                       |            | IPR004686; PTHR11153:SF7 (PANTHER)                                            |
| Caenorhabditis elegans  | eif4e binding protein                                | 5 | P:GO:0006629;<br>P:GO:0040010;<br>P:GO:0000003;<br>P:GO:0006898;<br>C:GO:0042995                  | -                                                                                                                                                                                                       |            | PTHR13237 (PANTHER),<br>PTHR13237:SF3 (PANTHER)                               |
| Brugia malayi           | lim domain containing protein                        | 0 |                                                                                                   | F:GO:0046872;<br>F:GO:0008270                                                                                                                                                                           |            | -                                                                             |
|                         | -                                                    | 0 |                                                                                                   |                                                                                                                                                                                                         |            | -                                                                             |
| Pongo abelii            | adp-ribosylation-like factor 6 interacting protein 4 | 2 | C:GO:0005634;<br>P:GO:0008380                                                                     | -                                                                                                                                                                                                       |            | -                                                                             |
|                         | -                                                    | 0 |                                                                                                   |                                                                                                                                                                                                         |            | -                                                                             |
| Caenorhabditis elegans  | nucleolar atpase                                     | 5 | P:GO:0009792;<br>P:GO:0040007;<br>P:GO:0040035;<br>P:GO:0002119;<br>P:GO:0040011                  | -                                                                                                                                                                                                       |            | -                                                                             |
| Homo sapiens            | -dh dehydroge-se                                     | 6 | P:GO:0006814;<br>F:GO:0008137;<br>C:GO:0005747;<br>P:GO:0006120;<br>F:GO:0005515;<br>C:GO:0005759 | -                                                                                                                                                                                                       | EC:1.6.5.3 | PTHR12126 (PANTHER),<br>PTHR12126:SF1 (PANTHER)                               |
|                         | -                                                    | 0 |                                                                                                   |                                                                                                                                                                                                         |            | -                                                                             |
| Caenorhabditis briggsae | d- polymerase zeta catalytic subunit                 | 0 |                                                                                                   | P:GO:0010224;<br>F:GO:0016740;<br>F:GO:0003677;<br>P:GO:0006260;<br>F:GO:0003676;<br>F:GO:0000166;<br>F:GO:0003887;<br>P:GO:0006281;<br>F:GO:0016779;<br>C:GO:0016035;<br>P:GO:0009411;<br>P:GO:0006139 |            | IPR012337; PTHR10322 (PANTHER),<br>PTHR10322:SF5 (PANTHER), SignalP (SIGNALP) |
| Caenorhabditis elegans  | trio and f-actin binding protein                     | 2 | F:GO:0019899;<br>C:GO:0044424                                                                     | -                                                                                                                                                                                                       |            | -                                                                             |
| Caenorhabditis elegans  | teneurin family member (ten-1)                       | 0 |                                                                                                   |                                                                                                                                                                                                         |            | -                                                                             |
| Loa loa                 | melibiase family protein                             | 1 | F:GO:0016787                                                                                      | -                                                                                                                                                                                                       |            | IPR002241; IPR013785; IPR017853;<br>PTHR11452 (PANTHER)                       |
| Caenorhabditis elegans  | briggsae cbr-opt-2 protein                           | 0 |                                                                                                   | P:GO:0006857;<br>F:GO:0015198;<br>C:GO:0016021;<br>C:GO:0016020;<br>F:GO:0005215;<br>P:GO:0006810                                                                                                       |            | SignalP (SIGNALP)                                                             |
|                         | -                                                    | 0 |                                                                                                   |                                                                                                                                                                                                         |            | IPR016186; IPR016187                                                          |
|                         | -                                                    | 0 |                                                                                                   |                                                                                                                                                                                                         |            | -                                                                             |

|                         |                                                  |    |                                                                                                                                                                                        |                                                |                                                                                                           |
|-------------------------|--------------------------------------------------|----|----------------------------------------------------------------------------------------------------------------------------------------------------------------------------------------|------------------------------------------------|-----------------------------------------------------------------------------------------------------------|
| Caenorhabditis briggsae | flightless i homolog                             | 5  | C:GO:0005730;<br>P:GO:0006936;<br>F:GO:0003779;<br>P:GO:0007275;<br>C:GO:0005813                                                                                                       | -                                              | IPR007122; IPR007123;<br>G3DSA:3.40.20.10 (GENE3D),<br>PTHR11977:SF6 (PANTHER), SSF55753<br>(SUPERFAMILY) |
| -                       | -                                                | 0  |                                                                                                                                                                                        |                                                | -                                                                                                         |
| -                       | -                                                | 0  |                                                                                                                                                                                        |                                                | -                                                                                                         |
| Caenorhabditis elegans  | myosin heavy chain                               | 4  | F:GO:0003779;<br>C:GO:0016459;<br>F:GO:0005524;<br>F:GO:0003774                                                                                                                        | -                                              | IPR002928                                                                                                 |
| -                       | -                                                | 0  |                                                                                                                                                                                        |                                                | -                                                                                                         |
| -                       | -                                                | 0  |                                                                                                                                                                                        |                                                | -                                                                                                         |
| Caenorhabditis elegans  | biotin protein ligase family member (bpl-1)      | 0  |                                                                                                                                                                                        |                                                | -                                                                                                         |
| Caenorhabditis elegans  | biotin protein ligase family member (bpl-1)      | 0  |                                                                                                                                                                                        |                                                | -                                                                                                         |
| -                       | -                                                | 0  |                                                                                                                                                                                        |                                                | -                                                                                                         |
| Caenorhabditis briggsae | elegans protein confirmed by transcript evidence | 10 | P:GO:0009792;<br>P:GO:0010171;<br>P:GO:0002119;<br>P:GO:0040002;<br>P:GO:0040011;<br>C:GO:0005576;<br>P:GO:0019915;<br>P:GO:0040007;<br>P:GO:0006898;<br>F:GO:0042302                  | -                                              | IPR002486; PTHR10499 (PANTHER),<br>PTHR10499:SF58 (PANTHER), SignalP<br>(SIGNALP)                         |
| Xenopus laevis          | lim domain only 4                                | 11 | P:GO:0045665;<br>P:GO:0007369;<br>F:GO:0008270;<br>F:GO:0003712;<br>P:GO:0007498;<br>P:GO:0030900;<br>C:GO:0005667;<br>P:GO:0001843;<br>P:GO:0031076;<br>F:GO:0003700;<br>P:GO:0045944 | -                                              | -                                                                                                         |
| Caenorhabditis briggsae | mitochondrial carrier protein                    | 6  | F:GO:0005488;<br>C:GO:0005743;<br>F:GO:0015226;<br>P:GO:0055085;<br>C:GO:0016021;<br>P:GO:0019915                                                                                      | -                                              | IPR001993; IPR018108;<br>G3DSA:1.50.40.10 (GENE3D),<br>PTHR11896:SF75 (PANTHER), SignalP<br>(SIGNALP)     |
| Caenorhabditis elegans  | briggsae cbr-ing-3 protein                       | 2  | F:GO:0005515;<br>F:GO:0046872                                                                                                                                                          | -                                              | PTHR10333 (PANTHER),<br>PTHR10333:SF12 (PANTHER)                                                          |
| Caenorhabditis briggsae | transmembrane amino acid transporter protein     | 4  | P:GO:0019915;<br>C:GO:0016020;<br>P:GO:0040010;<br>P:GO:0040011                                                                                                                        | -                                              | IPR013057; PTHR22950 (PANTHER)                                                                            |
| -                       | -                                                | 0  |                                                                                                                                                                                        |                                                | -                                                                                                         |
| -                       | -                                                | 0  |                                                                                                                                                                                        |                                                | SignalP (SIGNALP)                                                                                         |
| -                       | -                                                | 0  |                                                                                                                                                                                        |                                                | IPR006849                                                                                                 |
| Tribolium castaneum     | cg31751 cg31751-pa                               | 0  |                                                                                                                                                                                        | F:GO:0016301;<br>C:GO:0005737;<br>F:GO:0016740 | IPR002575; IPR011009;<br>G3DSA:3.90.1200.10 (GENE3D)                                                      |
| -                       | -                                                | 0  |                                                                                                                                                                                        |                                                | -                                                                                                         |

|                         |                                                                                       |   |                                                                                                                                                      |                                                                                                                                                                                        |            |                                                                                                                                                                   |
|-------------------------|---------------------------------------------------------------------------------------|---|------------------------------------------------------------------------------------------------------------------------------------------------------|----------------------------------------------------------------------------------------------------------------------------------------------------------------------------------------|------------|-------------------------------------------------------------------------------------------------------------------------------------------------------------------|
| Caenorhabditis briggsae | cation transporting atpase protein isoform partially confirmed by transcript evidence | 6 | P:GO:0046034;<br>P:GO:0006811;<br>F:GO:0016820;<br>F:GO:0016887;<br>F:GO:0000166;<br>C:GO:0016020                                                    | -                                                                                                                                                                                      | EC:3.6.3.0 | IPR001757; IPR004014; IPR008250;<br>G3DSA:2.70.150.10 (GENE3D),<br>PTHR11939:SF54 (PANTHER), PF12409<br>(PFAM), SSF81653 (SUPERFAMILY),<br>SSF81665 (SUPERFAMILY) |
| Caenorhabditis briggsae | cation-transporting atpase                                                            | 2 | F:GO:0016820;<br>F:GO:0016887                                                                                                                        | -                                                                                                                                                                                      | EC:3.6.3.0 | IPR001757; IPR004014; IPR008250;<br>G3DSA:2.70.150.10 (GENE3D),<br>PTHR11939:SF54 (PANTHER), PF12409<br>(PFAM), SSF81653 (SUPERFAMILY),<br>SSF81665 (SUPERFAMILY) |
| Caenorhabditis briggsae | ophagy (yeast atg homolog) family member (atg-2)                                      | 0 |                                                                                                                                                      |                                                                                                                                                                                        |            | PTHR13190 (PANTHER),<br>PTHR13190:SF2 (PANTHER)                                                                                                                   |
| Caenorhabditis elegans  | hypothetical protein F23F1.9 [Caenorhabditis elegans]                                 | 4 | P:GO:0040035;<br>P:GO:0002119;<br>P:GO:0040007;<br>P:GO:0006898                                                                                      | -                                                                                                                                                                                      |            | IPR009668                                                                                                                                                         |
| Caenorhabditis elegans  | d--directed r- polymerase ii largest subunit                                          | 6 | F:GO:0003899;<br>F:GO:0003677;<br>P:GO:0006350;<br>F:GO:0032549;<br>C:GO:0005634;<br>F:GO:0008270                                                    | -                                                                                                                                                                                      | EC:2.7.7.6 | IPR007081; IPR015700; PTHR19376<br>(PANTHER), SSF64484 (SUPERFAMILY)                                                                                              |
| Caenorhabditis briggsae | variable abnormal morphology family member (vab-10)                                   | 0 |                                                                                                                                                      | F:GO:0005509;<br>P:GO:0007050;<br>F:GO:0003779                                                                                                                                         |            | PTHR11915 (PANTHER),<br>PTHR11915:SF49 (PANTHER),<br>SSF75399 (SUPERFAMILY)                                                                                       |
| Caenorhabditis briggsae | elegans protein confirmed by transcript evidence                                      | 4 | C:GO:0016021;<br>P:GO:0008340;<br>F:GO:0005337;<br>P:GO:0006810                                                                                      | -                                                                                                                                                                                      |            | IPR002259; PTHR10332:SF6<br>(PANTHER)                                                                                                                             |
| Caenorhabditis elegans  | briggsae cbr-cdt-1 protein                                                            | 9 | C:GO:0005737;<br>P:GO:0040035;<br>P:GO:0010171;<br>P:GO:0002119;<br>P:GO:0006260;<br>P:GO:0001703;<br>P:GO:0040011;<br>P:GO:0040007;<br>C:GO:0005634 | -                                                                                                                                                                                      |            | -                                                                                                                                                                 |
|                         | -                                                                                     | 0 |                                                                                                                                                      |                                                                                                                                                                                        |            | -                                                                                                                                                                 |
|                         | -                                                                                     | 0 |                                                                                                                                                      |                                                                                                                                                                                        |            | -                                                                                                                                                                 |
| Caenorhabditis briggsae | solute carrier family member 1                                                        | 0 |                                                                                                                                                      | C:GO:0016021;<br>C:GO:0016020;<br>F:GO:0008324;<br>P:GO:0006812;<br>P:GO:0006811;<br>P:GO:0006810;<br>F:GO:0003674;<br>C:GO:0005575;<br>P:GO:0008150;<br>C:GO:0005886;<br>P:GO:0034220 |            | PTHR16228 (PANTHER), SignalP<br>(SIGNALP)                                                                                                                         |
|                         | -                                                                                     | 0 |                                                                                                                                                      |                                                                                                                                                                                        |            | SignalP (SIGNALP)                                                                                                                                                 |

|                         |                                                            |   |                                                                                  |   |                                                                                                                    |                                                                                                     |
|-------------------------|------------------------------------------------------------|---|----------------------------------------------------------------------------------|---|--------------------------------------------------------------------------------------------------------------------|-----------------------------------------------------------------------------------------------------|
| Caenorhabditis elegans  | mitochondrial ribosomal protein s23                        | 5 | P:GO:0009792;<br>P:GO:0002119;<br>P:GO:0018991;<br>P:GO:0040010;<br>P:GO:0006898 | - |                                                                                                                    | IPR019520; PF10484 (PFAM)                                                                           |
| -                       | -                                                          | 0 |                                                                                  |   |                                                                                                                    | -                                                                                                   |
| Loa loa                 | nucleolar r--associated protein alpha                      | 0 |                                                                                  |   |                                                                                                                    | SignalP (SIGNALP)                                                                                   |
| Caenorhabditis briggsae | carnitine o-acyltransferase                                | 1 | F:GO:0016740                                                                     | - |                                                                                                                    | IPR000542; PTHR22589:SF8 (PANTHER), SSF52777 (SUPERFAMILY)                                          |
| -                       | -                                                          | 0 |                                                                                  |   |                                                                                                                    | IPR014044                                                                                           |
| Caenorhabditis elegans  | ophagy (yeast atg homolog) family member (atg-2)           | 0 |                                                                                  |   |                                                                                                                    | -                                                                                                   |
| -                       | -                                                          | 0 |                                                                                  |   |                                                                                                                    | -                                                                                                   |
| Caenorhabditis briggsae | cytochrome c oxidase copper chaperone                      | 4 | C:GO:0005758;<br>P:GO:0006825;<br>F:GO:0008047;<br>F:GO:0016531                  | - |                                                                                                                    | IPR007745; IPR009069                                                                                |
| Brugia malayi           | myosin heavy nonmuscle or smooth muscle                    | 4 | F:GO:0003779;<br>C:GO:0016459;<br>F:GO:0005524;<br>F:GO:0003774                  | - |                                                                                                                    | IPR001609; PTHR13140 (PANTHER), PTHR13140:SF23 (PANTHER), SSF52540 (SUPERFAMILY)                    |
| -                       | -                                                          | 0 |                                                                                  |   |                                                                                                                    | IPR000436; IPR016060; SignalP (SIGNALP)                                                             |
| Loa loa                 | elegans protein partially confirmed by transcript evidence | 3 | P:GO:0009792;<br>P:GO:0000003;<br>P:GO:0040010                                   | - |                                                                                                                    | PTHR13847 (PANTHER), PTHR13847:SF12 (PANTHER)                                                       |
| -                       | -                                                          | 0 |                                                                                  |   |                                                                                                                    | SignalP (SIGNALP)                                                                                   |
| Caenorhabditis elegans  | tfiih complex helicase                                     | 5 | F:GO:0003677;<br>F:GO:0004003;<br>F:GO:0005524;<br>P:GO:0006289;<br>C:GO:0005634 | - |                                                                                                                    | IPR001945; IPR002464; IPR010614; IPR010643; IPR014013; PTHR11472 (PANTHER), PTHR11472:SF1 (PANTHER) |
| -                       | -                                                          | 0 |                                                                                  |   |                                                                                                                    | -                                                                                                   |
| Caenorhabditis briggsae | Hypothetical protein CBG05033 [Caenorhabditis briggsae]    | 0 |                                                                                  |   | P:GO:0008152;<br>F:GO:0016787                                                                                      | -                                                                                                   |
| -                       | -                                                          | 0 |                                                                                  |   |                                                                                                                    | SignalP (SIGNALP)                                                                                   |
| Loa loa                 | general transcription factor polypeptide 62kda             | 0 |                                                                                  |   | P:GO:0006367;<br>F:GO:0016251;<br>F:GO:0016740;<br>P:GO:0008152;<br>C:GO:0005675;<br>P:GO:0008150;<br>C:GO:0005575 | PTHR12856 (PANTHER)                                                                                 |
| -                       | -                                                          | 0 |                                                                                  |   |                                                                                                                    | -                                                                                                   |
| -                       | -                                                          | 0 |                                                                                  |   |                                                                                                                    | -                                                                                                   |
| -                       | -                                                          | 0 |                                                                                  |   |                                                                                                                    | -                                                                                                   |
| -                       | -                                                          | 0 |                                                                                  |   |                                                                                                                    | -                                                                                                   |
| -                       | -                                                          | 0 |                                                                                  |   |                                                                                                                    | -                                                                                                   |
| -                       | -                                                          | 0 |                                                                                  |   |                                                                                                                    | -                                                                                                   |
| -                       | -                                                          | 0 |                                                                                  |   |                                                                                                                    | -                                                                                                   |
| -                       | -                                                          | 0 |                                                                                  |   |                                                                                                                    | -                                                                                                   |
| Caenorhabditis briggsae | elegans protein partially confirmed by transcript evidence | 2 | P:GO:0006629;<br>F:GO:0004806                                                    | - | EC:3.1.1.3                                                                                                         | -                                                                                                   |
| -                       | -                                                          | 0 |                                                                                  |   |                                                                                                                    | SignalP (SIGNALP)                                                                                   |
| -                       | -                                                          | 0 |                                                                                  |   |                                                                                                                    | -                                                                                                   |
| -                       | -                                                          | 0 |                                                                                  |   |                                                                                                                    | -                                                                                                   |
| -                       | -                                                          | 0 |                                                                                  |   |                                                                                                                    | -                                                                                                   |



|                         |                                                       |    |                                                                                                                                                                                                                                                                                              |                                                                                                                    |                                                                                                                                                                                                           |
|-------------------------|-------------------------------------------------------|----|----------------------------------------------------------------------------------------------------------------------------------------------------------------------------------------------------------------------------------------------------------------------------------------------|--------------------------------------------------------------------------------------------------------------------|-----------------------------------------------------------------------------------------------------------------------------------------------------------------------------------------------------------|
| Brugia malayi           | atp-dependent d- helicase q5                          | 4  | F:GO:0004386;<br>C:GO:0005634;<br>F:GO:0000166;<br>P:GO:0006281                                                                                                                                                                                                                              | -                                                                                                                  | IPR001650; IPR004589;<br>G3DSA:3.40.50.300 (GENE3D),<br>PTHR13710:SF6 (PANTHER), SSF52540<br>(SUPERFAMILY)                                                                                                |
| Caenorhabditis briggsae | briggsae cbr-rcq-5 protein                            | 5  | F:GO:0005525;<br>F:GO:0017116;<br>P:GO:0006974;<br>F:GO:0003924;<br>P:GO:0045930                                                                                                                                                                                                             | -                                                                                                                  | EC:3.6.5.1;<br>IPR002464; IPR004589; IPR011545;<br>IPR014001; IPR014021;<br>EC:3.6.5.2;<br>G3DSA:3.40.50.300 (GENE3D),<br>EC:3.6.5.3;<br>PTHR13710:SF6 (PANTHER), SSF52540<br>EC:3.6.5.4<br>(SUPERFAMILY) |
| Caenorhabditis briggsae | briggsae cbr-rcq-5 protein                            | 5  | F:GO:0005525;<br>F:GO:0017116;<br>P:GO:0006974;<br>F:GO:0003924;<br>P:GO:0045930                                                                                                                                                                                                             | -                                                                                                                  | EC:3.6.5.1;<br>IPR002464; IPR004589; IPR011545;<br>IPR014001; IPR014021;<br>EC:3.6.5.2;<br>G3DSA:3.40.50.300 (GENE3D),<br>EC:3.6.5.3;<br>PTHR13710:SF6 (PANTHER), SSF52540<br>EC:3.6.5.4<br>(SUPERFAMILY) |
| Brugia malayi           | atp-dependent d- helicase q5                          | 4  | F:GO:0004386;<br>C:GO:0005634;<br>F:GO:0000166;<br>P:GO:0006281                                                                                                                                                                                                                              | -                                                                                                                  | IPR001650; IPR004589;<br>G3DSA:3.40.50.300 (GENE3D),<br>PTHR13710:SF6 (PANTHER), SSF52540<br>(SUPERFAMILY)                                                                                                |
| Caenorhabditis briggsae | general transcription factor iih subunit 2            | 17 | P:GO:0006367;<br>P:GO:0000718;<br>F:GO:0008094;<br>P:GO:0002031;<br>F:GO:0008270;<br>P:GO:0040010;<br>P:GO:0040011;<br>F:GO:0047485;<br>P:GO:0009411;<br>C:GO:0005675;<br>P:GO:0009792;<br>P:GO:0006368;<br>F:GO:0008135;<br>P:GO:0002119;<br>P:GO:0045449;<br>P:GO:0010171;<br>F:GO:0008353 | -                                                                                                                  | EC:2.7.11.23<br>IPR002035; IPR007198; PTHR12695<br>(PANTHER), PTHR12695:SF2<br>(PANTHER), SSF53300 (SUPERFAMILY)                                                                                          |
| Brugia malayi           | ubiquitin conjugation factor e4                       | 0  |                                                                                                                                                                                                                                                                                              | F:GO:0034450;<br>C:GO:0000151;<br>F:GO:0004842;<br>F:GO:0005515;<br>P:GO:0016567;<br>P:GO:0006511                  | IPR019474; PTHR13931 (PANTHER),<br>PTHR13931:SF2 (PANTHER)                                                                                                                                                |
| Brugia malayi           | wd-repeat protein 26                                  | 0  |                                                                                                                                                                                                                                                                                              | F:GO:0003674;<br>C:GO:0005737                                                                                      | -                                                                                                                                                                                                         |
|                         | -                                                     | 0  |                                                                                                                                                                                                                                                                                              |                                                                                                                    | -                                                                                                                                                                                                         |
| Caenorhabditis elegans  | williams-beuren syndrome chromosome region 16 protein | 0  |                                                                                                                                                                                                                                                                                              | C:GO:0005739                                                                                                       | IPR000408; IPR009091; PTHR22870<br>(PANTHER), PTHR22870:SF11<br>(PANTHER)                                                                                                                                 |
| Drosophila virilis      | low-density lipoprotein                               | 0  |                                                                                                                                                                                                                                                                                              | C:GO:0005905;<br>F:GO:0005509;<br>F:GO:0004872;<br>C:GO:0016021;<br>F:GO:0005041;<br>C:GO:0016020;<br>P:GO:0006897 | IPR006210; IPR011042;<br>G3DSA:2.10.25.10 (GENE3D),<br>PTHR10529 (PANTHER),<br>PTHR10529:SF6 (PANTHER), SSF75011<br>(SUPERFAMILY)                                                                         |
|                         | -                                                     | 0  |                                                                                                                                                                                                                                                                                              |                                                                                                                    | SignalP (SIGNALP)                                                                                                                                                                                         |
| Caenorhabditis elegans  | briggsae cbr-rbc-1 protein                            | 2  | P:GO:0009987;<br>P:GO:0050789                                                                                                                                                                                                                                                                | -                                                                                                                  | PTHR13950 (PANTHER),<br>PTHR13950:SF1 (PANTHER)                                                                                                                                                           |
|                         | -                                                     | 0  |                                                                                                                                                                                                                                                                                              |                                                                                                                    | -                                                                                                                                                                                                         |

|                         |                                                                                           |   |                                                                                                                    |                                                                                                                                     |                                                                                                                         |
|-------------------------|-------------------------------------------------------------------------------------------|---|--------------------------------------------------------------------------------------------------------------------|-------------------------------------------------------------------------------------------------------------------------------------|-------------------------------------------------------------------------------------------------------------------------|
| Brugia malayi           | structural maintenance of chromosomes protein 4                                           | 4 | P:GO:0007076;<br>F:GO:0005524;<br>C:GO:0005694;<br>F:GO:0046982                                                    | -                                                                                                                                   | IPR003395; G3DSA:3.40.50.300 (GENE3D), PTHR18937 (PANTHER), PTHR18937:SF13 (PANTHER), SSF52540 (SUPERFAMILY)            |
| Bombyx mori             | endonuclease-reverse transcriptase                                                        | 2 | F:GO:0003676;<br>F:GO:0016740                                                                                      | -                                                                                                                                   | -                                                                                                                       |
| Brugia malayi           | briggsae cbr-sgcb-1 protein                                                               | 0 |                                                                                                                    | C:GO:0016012;<br>C:GO:0016021;<br>P:GO:0007010                                                                                      | SignalP (SIGNALP)                                                                                                       |
| Pan troglodytes         | transcription factor ap-2 beta (activating enhancer binding protein 2 beta)               | 7 | P:GO:0045817;<br>F:GO:0043565;<br>P:GO:0007399;<br>F:GO:0046983;<br>F:GO:0003700;<br>F:GO:0003713;<br>C:GO:0005634 | -                                                                                                                                   | IPR004979; IPR013854; PTHR10812:SF6 (PANTHER)                                                                           |
| Loa loa                 | guanine nucleotide-binding protein g alpha subunit                                        | 7 | F:GO:0004871;<br>P:GO:0007213;<br>F:GO:0005515;<br>P:GO:0007193;<br>P:GO:0008283;<br>F:GO:0016787;<br>F:GO:0005525 | -                                                                                                                                   | IPR001019; IPR001408; IPR011025; IPR016059; G3DSA:3.40.50.300 (GENE3D), PTHR10218:SF1 (PANTHER), SSF52540 (SUPERFAMILY) |
| Caenorhabditis elegans  | hypothetical protein T16G12.9 [Caenorhabditis elegans]                                    | 0 |                                                                                                                    |                                                                                                                                     | -                                                                                                                       |
| Caenorhabditis briggsae | vacuolar protein sorting 35                                                               | 3 | F:GO:0005515;<br>C:GO:0044444;<br>C:GO:0016020                                                                     | -                                                                                                                                   | IPR005378; SignalP (SIGNALP)                                                                                            |
|                         | -                                                                                         | 0 |                                                                                                                    |                                                                                                                                     | -                                                                                                                       |
|                         | -                                                                                         | 0 |                                                                                                                    |                                                                                                                                     | -                                                                                                                       |
| Hydra magnipapillata    | acyl-coenzyme a dehydrogenase member 10                                                   | 0 |                                                                                                                    | P:GO:0055114;<br>F:GO:0016491;<br>F:GO:0003995;<br>P:GO:0008152;<br>F:GO:0016787;<br>F:GO:0003824;<br>F:GO:0016627;<br>F:GO:0050660 | PTHR10909 (PANTHER), PTHR10909:SF6 (PANTHER)                                                                            |
| Caenorhabditis elegans  | briggsae cbr-sulp-6 protein                                                               | 0 |                                                                                                                    | C:GO:0016021;<br>C:GO:0016020;<br>P:GO:0055085;<br>P:GO:0006810;<br>F:GO:0005215                                                    | PTHR11814 (PANTHER), PTHR11814:SF10 (PANTHER), SignalP (SIGNALP)                                                        |
| Caenorhabditis elegans  | trrap-like (transcription transformation domain-associated protein) family member (trr-1) | 5 | P:GO:0016570;<br>F:GO:0005515;<br>P:GO:0050794;<br>C:GO:0000123;<br>P:GO:0006350                                   | -                                                                                                                                   | IPR011989; IPR016024                                                                                                    |
| Caenorhabditis briggsae | briggsae cbr-ptb-1 protein                                                                | 0 |                                                                                                                    | F:GO:0003676;<br>F:GO:0003723;<br>F:GO:0000166;<br>P:GO:0006397;<br>F:GO:0005515;<br>C:GO:0005634                                   | -                                                                                                                       |
|                         | -                                                                                         | 0 |                                                                                                                    |                                                                                                                                     | -                                                                                                                       |

|                         |                                                            |    |                                                                                                                                                                                        |                                                                                                                                                                                                         |                                                                                                                                      |
|-------------------------|------------------------------------------------------------|----|----------------------------------------------------------------------------------------------------------------------------------------------------------------------------------------|---------------------------------------------------------------------------------------------------------------------------------------------------------------------------------------------------------|--------------------------------------------------------------------------------------------------------------------------------------|
| Callithrix jacchus      | proteasome ( macropain) 26s_4                              | 11 | F:GO:0008233;<br>C:GO:0000502;<br>C:GO:0005739;<br>P:GO:0051436;<br>P:GO:0051437;<br>P:GO:0031145;<br>F:GO:0005524;<br>F:GO:0016887;<br>F:GO:0005515;<br>P:GO:0001824;<br>C:GO:0005634 | -                                                                                                                                                                                                       | IPR003959; IPR003960;<br>G3DSA:3.40.50.300 (GENE3D),<br>PTHR23073 (PANTHER),<br>PTHR23073:SF8 (PANTHER), SSF52540<br>(SUPERFAMILY)   |
| Brugia malayi           | elegans protein partially confirmed by transcript evidence | 0  |                                                                                                                                                                                        | F:GO:0005515                                                                                                                                                                                            | -                                                                                                                                    |
| Loa loa                 | ring finger protein isoform cra_a                          | 0  |                                                                                                                                                                                        | F:GO:0016874;<br>C:GO:0005634;<br>P:GO:0000003;<br>F:GO:0008270;<br>P:GO:0002119;<br>F:GO:0019787;<br>F:GO:0005515;<br>P:GO:0040010;<br>F:GO:0046872;<br>P:GO:0006350;<br>P:GO:0040007;<br>P:GO:0045449 | IPR001841; IPR002867; IPR006575;<br>IPR016135; IPR017907; PTHR11685<br>(PANTHER), PTHR11685:SF7<br>(PANTHER), SSF57850 (SUPERFAMILY) |
| Caenorhabditis briggsae | patched family protein                                     | 5  | P:GO:0018996;<br>C:GO:0016021;<br>P:GO:0040018;<br>F:GO:0008158;<br>P:GO:0040011                                                                                                       | -                                                                                                                                                                                                       | IPR003392; PTHR10796 (PANTHER),<br>PTHR10796:SF14 (PANTHER)                                                                          |
| Caenorhabditis briggsae | elegans protein confirmed by transcript evidence           | 0  |                                                                                                                                                                                        |                                                                                                                                                                                                         | IPR011021; PTHR11188 (PANTHER),<br>PTHR11188:SF11 (PANTHER)                                                                          |
| Bombyx mori             | endonuclease-reverse transcriptase                         | 0  |                                                                                                                                                                                        | F:GO:0003723;<br>C:GO:0005737;<br>P:GO:0006278;<br>F:GO:0004519;<br>C:GO:0005634;<br>F:GO:0003964                                                                                                       | IPR005135; PTHR23227 (PANTHER),<br>PTHR23227:SF14 (PANTHER)                                                                          |
| Caenorhabditis elegans  | atp-dependent d- helicase                                  | 7  | F:GO:0043140;<br>P:GO:0006260;<br>F:GO:0003676;<br>C:GO:0005622;<br>F:GO:0005524;<br>P:GO:0006310;<br>P:GO:0006281                                                                     | -                                                                                                                                                                                                       | IPR004589; IPR011545;<br>G3DSA:3.40.50.300 (GENE3D),<br>PTHR13710:SF16 (PANTHER),<br>SSF52540 (SUPERFAMILY)                          |
| Caenorhabditis elegans  | alanyl-tr- synthetase                                      | 6  | P:GO:0006412;<br>F:GO:0003676;<br>F:GO:0032555;<br>F:GO:0004812;<br>P:GO:0043039;<br>C:GO:0005737                                                                                      | -                                                                                                                                                                                                       | EC:3.6.5.3<br>IPR018164; IPR018165;<br>G3DSA:3.30.930.10 (GENE3D),<br>PTHR11777 (PANTHER), SSF55681<br>(SUPERFAMILY)                 |
| -                       | -                                                          | 0  |                                                                                                                                                                                        |                                                                                                                                                                                                         | -                                                                                                                                    |
| -                       | -                                                          | 0  |                                                                                                                                                                                        |                                                                                                                                                                                                         |                                                                                                                                      |
| -                       | -                                                          | 0  |                                                                                                                                                                                        |                                                                                                                                                                                                         | SignalP (SIGNALP)                                                                                                                    |
| -                       | -                                                          | 0  |                                                                                                                                                                                        |                                                                                                                                                                                                         | SignalP (SIGNALP)                                                                                                                    |
| -                       | -                                                          | 0  |                                                                                                                                                                                        |                                                                                                                                                                                                         | SignalP (SIGNALP)                                                                                                                    |

|                         |                                                                             |   |                                                                                                                                                      |                                                |                                                                                                                                                                                                                                                                                                                      |
|-------------------------|-----------------------------------------------------------------------------|---|------------------------------------------------------------------------------------------------------------------------------------------------------|------------------------------------------------|----------------------------------------------------------------------------------------------------------------------------------------------------------------------------------------------------------------------------------------------------------------------------------------------------------------------|
| Caenorhabditis briggsae | uncoordinated family member (unc-52)                                        | 4 | P:GO:0048705;<br>P:GO:0009888;<br>P:GO:0030239;<br>C:GO:0005578                                                                                      | -                                              | IPR000034; IPR000742; IPR002049;<br>IPR002172; IPR003006; IPR003598;<br>IPR003599; IPR007110; IPR013032;<br>IPR013098; IPR013783; IPR018031;<br>G3DSA:2.10.25.10 (GENE3D),<br>G3DSA:2.170.300.10 (GENE3D),<br>PTHR10574 (PANTHER),<br>PTHR10574:SF20 (PANTHER),<br>SSF48726 (SUPERFAMILY), SSF57196<br>(SUPERFAMILY) |
| Caenorhabditis briggsae | rh50 glycoprotein                                                           | 9 | P:GO:0009792;<br>P:GO:0015670;<br>C:GO:0005887;<br>P:GO:0055085;<br>F:GO:0051739;<br>P:GO:0015696;<br>P:GO:0006873;<br>F:GO:0008519;<br>F:GO:0030506 | -                                              | -                                                                                                                                                                                                                                                                                                                    |
| -                       | -                                                                           | 0 | -                                                                                                                                                    | -                                              | -                                                                                                                                                                                                                                                                                                                    |
| Caenorhabditis briggsae | briggsae cbr-wrn-1 protein                                                  | 2 | P:GO:0044237;<br>F:GO:0016787                                                                                                                        | -                                              | IPR002121; IPR010997                                                                                                                                                                                                                                                                                                 |
| Ancylostoma caninum     | secreted protein 4 precursor                                                | 0 | -                                                                                                                                                    | C:GO:0005576                                   | IPR001283; IPR014044;<br>PTHR10334:SF2 (PANTHER)                                                                                                                                                                                                                                                                     |
| Ancylostoma ceylanicum  | secreted protein 5 precursor                                                | 0 | -                                                                                                                                                    | C:GO:0005576                                   | IPR001283; IPR014044;<br>PTHR10334:SF2 (PANTHER)                                                                                                                                                                                                                                                                     |
| -                       | -                                                                           | 0 | -                                                                                                                                                    | -                                              | IPR001283; IPR014044;<br>PTHR10334:SF2 (PANTHER)                                                                                                                                                                                                                                                                     |
| -                       | -                                                                           | 0 | -                                                                                                                                                    | -                                              | SignalP (SIGNALP)                                                                                                                                                                                                                                                                                                    |
| Caenorhabditis briggsae | elegans protein partially confirmed by transcript evidence                  | 3 | C:GO:0034703;<br>F:GO:0005261;<br>P:GO:0055080                                                                                                       | -                                              | -                                                                                                                                                                                                                                                                                                                    |
| Caenorhabditis briggsae | briggsae cbr-vps- protein                                                   | 0 | -                                                                                                                                                    | P:GO:0006904;<br>P:GO:0016192;<br>F:GO:0005515 | -                                                                                                                                                                                                                                                                                                                    |
| Loa loa                 | laterally symmetric (defective in lateral asymmetry) family member (lisy-2) | 6 | P:GO:0040035;<br>P:GO:0009792;<br>P:GO:0002119;<br>F:GO:0005488;<br>P:GO:0040010;<br>P:GO:0040011                                                    | -                                              | IPR007087; IPR015880                                                                                                                                                                                                                                                                                                 |
| Loa loa                 | laterally symmetric (defective in lateral asymmetry) family member (lisy-2) | 6 | P:GO:0040035;<br>P:GO:0009792;<br>P:GO:0002119;<br>F:GO:0005488;<br>P:GO:0040010;<br>P:GO:0040011                                                    | -                                              | IPR007087; IPR015880                                                                                                                                                                                                                                                                                                 |
| Loa loa                 | elegans protein confirmed by transcript evidence                            | 1 | P:GO:0019915                                                                                                                                         | -                                              | -                                                                                                                                                                                                                                                                                                                    |

|                         |                                                            |   |                                                                                                                    |                                                                                                                                                                                        |                                                                                                                                |
|-------------------------|------------------------------------------------------------|---|--------------------------------------------------------------------------------------------------------------------|----------------------------------------------------------------------------------------------------------------------------------------------------------------------------------------|--------------------------------------------------------------------------------------------------------------------------------|
| Brugia malayi           | zinc finger ccch-type containing 12a                       | 0 |                                                                                                                    | C:GO:0005634;<br>F:GO:0016787;<br>P:GO:0006915;<br>F:GO:0003676;<br>C:GO:0005737;<br>F:GO:0008270;<br>P:GO:0001525;<br>P:GO:0007275;<br>P:GO:0030154;<br>F:GO:0046872;<br>F:GO:0004519 | -                                                                                                                              |
| Caenorhabditis elegans  | thymidylate ki-se                                          | 7 | C:GO:0005739;<br>P:GO:0009221;<br>P:GO:0040007;<br>P:GO:0002119;<br>F:GO:0016301;<br>C:GO:0005654;<br>P:GO:0009792 | -                                                                                                                                                                                      | IPR018094; IPR018095;<br>G3DSA:3.40.50.300 (GENE3D),<br>SSF52540 (SUPERFAMILY)                                                 |
|                         | -                                                          | 0 |                                                                                                                    |                                                                                                                                                                                        | -                                                                                                                              |
|                         | -                                                          | 0 |                                                                                                                    |                                                                                                                                                                                        | -                                                                                                                              |
| Caenorhabditis briggsae | elegans protein partially confirmed by transcript evidence | 0 |                                                                                                                    | F:GO:0016301;<br>F:GO:0005524;<br>F:GO:0004672;<br>F:GO:0000166;<br>P:GO:0006468;<br>F:GO:0004674                                                                                      | IPR000719; IPR008271; IPR011009;<br>IPR017442; G3DSA:1.10.510.10<br>(GENE3D), PTHR11909 (PANTHER),<br>PTHR11909:SF12 (PANTHER) |
|                         |                                                            |   |                                                                                                                    |                                                                                                                                                                                        | IPR008160; PTHR10499 (PANTHER),<br>PTHR10499:SF114 (PANTHER)                                                                   |
| Caenorhabditis briggsae | Hypothetical protein CBG08700 [Caenorhabditis briggsae]    | 0 |                                                                                                                    |                                                                                                                                                                                        | SignalP (SIGNALP)                                                                                                              |
| Camponotus floridanus   | protein ki-se                                              | 0 |                                                                                                                    | F:GO:0016301;<br>F:GO:0004672;<br>F:GO:0005524;<br>F:GO:0016740;<br>F:GO:0000166;<br>P:GO:0006468;<br>F:GO:0004709;<br>F:GO:0004674                                                    | IPR000719; IPR011009; IPR017441;<br>IPR017442; G3DSA:3.30.200.20<br>(GENE3D), PTHR22986 (PANTHER)                              |
| Caenorhabditis elegans  | hypothetical protein T07D1.3 [Caenorhabditis elegans]      | 0 |                                                                                                                    | P:GO:0055114;<br>F:GO:0016491;<br>C:GO:0016021                                                                                                                                         | SignalP (SIGNALP)                                                                                                              |
|                         | -                                                          | 0 |                                                                                                                    |                                                                                                                                                                                        | -                                                                                                                              |
|                         | -                                                          | 0 |                                                                                                                    |                                                                                                                                                                                        | SignalP (SIGNALP)                                                                                                              |
| Caenorhabditis elegans  | elegans protein partially confirmed by transcript evidence | 0 |                                                                                                                    |                                                                                                                                                                                        | -                                                                                                                              |

|                        |                                                       |    |                                                                                                                                                                                                                                                                                                                                                                  |                                                |              |                                                                                          |
|------------------------|-------------------------------------------------------|----|------------------------------------------------------------------------------------------------------------------------------------------------------------------------------------------------------------------------------------------------------------------------------------------------------------------------------------------------------------------|------------------------------------------------|--------------|------------------------------------------------------------------------------------------|
| Caenorhabditis elegans | mre11 meiotic recombination 11 homolog a              | 21 | C:GO:0000781;<br>P:GO:0033674;<br>C:GO:0005654;<br>P:GO:0032508;<br>P:GO:0007131;<br>F:GO:0008022;<br>P:GO:0007507;<br>C:GO:0030870;<br>F:GO:0004527;<br>P:GO:0006302;<br>C:GO:0005730;<br>F:GO:0003677;<br>P:GO:0000723;<br>F:GO:0004520;<br>P:GO:0031954;<br>C:GO:0000794;<br>C:GO:0000790;<br>C:GO:0048471;<br>F:GO:0004003;<br>P:GO:0007062;<br>P:GO:0032876 | -                                              |              | IPR003701; IPR004843; IPR007281;<br>G3DSA:3.60.21.10 (GENE3D),<br>SSF56300 (SUPERFAMILY) |
| -                      | -                                                     | 0  |                                                                                                                                                                                                                                                                                                                                                                  |                                                |              | -                                                                                        |
| Caenorhabditis elegans | briggsae cbr-ugt-60 protein                           | 4  | P:GO:0005975;<br>P:GO:0030259;<br>F:GO:0030246;<br>F:GO:0016758                                                                                                                                                                                                                                                                                                  | -                                              | EC:2.4.1.0   | SignalP (SIGNALP)                                                                        |
| -                      | -                                                     | 0  |                                                                                                                                                                                                                                                                                                                                                                  |                                                |              | SignalP (SIGNALP)                                                                        |
| Caenorhabditis elegans | sodium hydrogen exchanger 3                           | 6  | P:GO:0009792;<br>F:GO:0015385;<br>P:GO:0055085;<br>P:GO:0006885;<br>C:GO:0016021;<br>P:GO:0006814                                                                                                                                                                                                                                                                | -                                              |              | SignalP (SIGNALP)                                                                        |
| Loa loa                | sepiapterin reductase                                 | 5  | F:GO:0004757;<br>P:GO:0006729;<br>P:GO:0006519;<br>P:GO:0044106;<br>P:GO:0010033                                                                                                                                                                                                                                                                                 | -                                              | EC:1.1.1.153 | IPR002198; IPR002347; IPR016040;<br>PTHR19410:SF116 (PANTHER),<br>SSF51735 (SUPERFAMILY) |
| -                      | -                                                     | 0  |                                                                                                                                                                                                                                                                                                                                                                  |                                                |              | SignalP (SIGNALP)                                                                        |
| Caenorhabditis elegans | atp synthase mitochondrial f1 complex assembly factor | 0  |                                                                                                                                                                                                                                                                                                                                                                  | P:GO:0043461;<br>F:GO:0005515;<br>C:GO:0005575 |              | IPR011419; G3DSA:1.10.3580.10<br>(GENE3D), PTHR21013:SF9<br>(PANTHER), SignalP (SIGNALP) |
| -                      | -                                                     | 0  |                                                                                                                                                                                                                                                                                                                                                                  |                                                |              | -                                                                                        |

|                         |                                                         |    |                                                                                                                                                                                                                                                                                                                                |                                                                                                                                                      |                                                                                                                                                                                                |
|-------------------------|---------------------------------------------------------|----|--------------------------------------------------------------------------------------------------------------------------------------------------------------------------------------------------------------------------------------------------------------------------------------------------------------------------------|------------------------------------------------------------------------------------------------------------------------------------------------------|------------------------------------------------------------------------------------------------------------------------------------------------------------------------------------------------|
| Caenorhabditis briggsae | briggsae cbr-tax-6 protein                              | 19 | P:GO:0043029;<br>P:GO:0030217;<br>P:GO:0001975;<br>F:GO:0004723;<br>C:GO:0005626;<br>P:GO:0007507;<br>P:GO:0010468;<br>F:GO:0046982;<br>F:GO:0046872;<br>P:GO:0034097;<br>C:GO:0043234;<br>P:GO:0001915;<br>C:GO:0030424;<br>P:GO:0046716;<br>P:GO:0006470;<br>F:GO:0019855;<br>F:GO:0005516;<br>C:GO:0005625;<br>C:GO:0043204 | -                                                                                                                                                    | -                                                                                                                                                                                              |
|                         | -                                                       | 0  |                                                                                                                                                                                                                                                                                                                                |                                                                                                                                                      | -                                                                                                                                                                                              |
| Brugia malayi           | zinc c2h2 type family protein                           | 7  | P:GO:0040010;<br>F:GO:0003676;<br>F:GO:0046872;<br>P:GO:0045449;<br>P:GO:0000003;<br>F:GO:0005515;<br>P:GO:0009792                                                                                                                                                                                                             | -                                                                                                                                                    | IPR007087; IPR013087; IPR015880;<br>PTHR23224 (PANTHER),<br>PTHR23224:SF30 (PANTHER),<br>SSF57667 (SUPERFAMILY)                                                                                |
| Caenorhabditis elegans  | elegans protein confirmed by transcript evidence        | 0  |                                                                                                                                                                                                                                                                                                                                | F:GO:0004222;<br>F:GO:0016787;<br>F:GO:0008270;<br>F:GO:0008237;<br>C:GO:0031012;<br>F:GO:0008233;<br>P:GO:0006508;<br>P:GO:0008152;<br>F:GO:0046872 | IPR001818; G3DSA:3.40.390.10<br>(GENE3D), PTHR10201 (PANTHER),<br>PTHR10201:SF5 (PANTHER), SSF55486<br>(SUPERFAMILY)                                                                           |
| Caenorhabditis briggsae | Hypothetical protein CBG22251 [Caenorhabditis briggsae] | 0  |                                                                                                                                                                                                                                                                                                                                |                                                                                                                                                      | -                                                                                                                                                                                              |
|                         | -                                                       | 0  |                                                                                                                                                                                                                                                                                                                                |                                                                                                                                                      | SignalP (SIGNALP)                                                                                                                                                                              |
|                         | -                                                       | 0  |                                                                                                                                                                                                                                                                                                                                |                                                                                                                                                      | -                                                                                                                                                                                              |
| Caenorhabditis elegans  | rr- methyltransferase mitochondrial precursor           | 1  | C:GO:0009536                                                                                                                                                                                                                                                                                                                   | -                                                                                                                                                    | IPR001537; IPR013123;<br>G3DSA:3.30.1330.30 (GENE3D),<br>G3DSA:3.40.1280.10 (GENE3D),<br>PTHR12029 (PANTHER),<br>PTHR12029:SF7 (PANTHER), SSF55315<br>(SUPERFAMILY), SSF75217<br>(SUPERFAMILY) |
| Caenorhabditis elegans  | tr- rr- methyltransferase                               | 2  | F:GO:0016740;<br>C:GO:0009536                                                                                                                                                                                                                                                                                                  | -                                                                                                                                                    | IPR013123; G3DSA:3.30.1330.30<br>(GENE3D), PTHR12029 (PANTHER),<br>PTHR12029:SF7 (PANTHER), SSF55315<br>(SUPERFAMILY)                                                                          |

|                        |                                                 |    |                                                                                                                                                                                                                                                                                                                                                 |                                                |                                                         |                                                                                                                     |
|------------------------|-------------------------------------------------|----|-------------------------------------------------------------------------------------------------------------------------------------------------------------------------------------------------------------------------------------------------------------------------------------------------------------------------------------------------|------------------------------------------------|---------------------------------------------------------|---------------------------------------------------------------------------------------------------------------------|
| Ailuropoda melanoleuca | beta                                            | 20 | C:GO:0042612;<br>P:GO:0019882;<br>P:GO:0042267;<br>C:GO:0045298;<br>P:GO:0006928;<br>F:GO:0005525;<br>F:GO:0042288;<br>C:GO:0016021;<br>P:GO:0006184;<br>P:GO:0051225;<br>C:GO:0005829;<br>C:GO:0005874;<br>P:GO:0051258;<br>P:GO:0007067;<br>F:GO:0042277;<br>F:GO:0032403;<br>F:GO:0003924;<br>P:GO:0007018;<br>F:GO:0005200;<br>P:GO:0030182 | -                                              | EC:3.6.5.1;<br>EC:3.6.5.2;<br>EC:3.6.5.3;<br>EC:3.6.5.4 | IPR000217; IPR003008;<br>PTHR11588:SF11 (PANTHER)                                                                   |
| -                      | -                                               | 0  |                                                                                                                                                                                                                                                                                                                                                 |                                                |                                                         | -                                                                                                                   |
| -                      | -                                               | 0  |                                                                                                                                                                                                                                                                                                                                                 |                                                |                                                         | -                                                                                                                   |
| Brugia malayi          | zinc c2h2 type family protein                   | 0  |                                                                                                                                                                                                                                                                                                                                                 | F:GO:0003676;<br>F:GO:0008270;<br>C:GO:0005622 |                                                         | IPR007087; IPR013087; IPR015880                                                                                     |
| -                      | -                                               | 0  |                                                                                                                                                                                                                                                                                                                                                 |                                                |                                                         | -                                                                                                                   |
| Caenorhabditis elegans | cox15 cytochrome c oxidase assembly protein     | 6  | F:GO:0004129;<br>C:GO:0005746;<br>P:GO:0006784;<br>P:GO:0007585;<br>P:GO:0008535;<br>P:GO:0006123                                                                                                                                                                                                                                               | -                                              | EC:1.9.3.1                                              | IPR003780; PTHR23289 (PANTHER)                                                                                      |
| Caenorhabditis elegans | serine threonine ki-se 38                       | 10 | P:GO:0007243;<br>F:GO:0004674;<br>F:GO:0031435;<br>P:GO:0043407;<br>F:GO:0005524;<br>P:GO:0007399;<br>F:GO:0000287;<br>C:GO:0070688;<br>C:GO:0005737;<br>P:GO:0006468                                                                                                                                                                           | -                                              | EC:2.7.11.0                                             | IPR000719; IPR011009; IPR017442;<br>G3DSA:1.10.510.10 (GENE3D),<br>PTHR22985 (PANTHER),<br>PTHR22985:SF33 (PANTHER) |
| Caenorhabditis elegans | geranylgeranyl transferase type-2 subunit alpha | 11 | F:GO:0004663;<br>P:GO:0009792;<br>P:GO:0002119;<br>F:GO:0005488;<br>P:GO:0018346;<br>P:GO:0018344;<br>P:GO:0040010;<br>P:GO:0008340;<br>P:GO:0040011;<br>P:GO:0008219;<br>P:GO:0002009                                                                                                                                                          | -                                              | EC:2.5.1.60                                             | IPR002088; IPR008940; PTHR11129<br>(PANTHER), PTHR11129:SF2<br>(PANTHER), SSF48439 (SUPERFAMILY)                    |



|                             |                                                               |    |                                                                                                                                                                                                         |                                                                                  |                                    |                                                                                                                                       |
|-----------------------------|---------------------------------------------------------------|----|---------------------------------------------------------------------------------------------------------------------------------------------------------------------------------------------------------|----------------------------------------------------------------------------------|------------------------------------|---------------------------------------------------------------------------------------------------------------------------------------|
| Caenorhabditis elegans      | geranylgeranyl transferase type-2 subunit alpha               | 11 | F:GO:0004663;<br>P:GO:0009792;<br>P:GO:0002119;<br>F:GO:0005488;<br>P:GO:0018346;<br>P:GO:0018344;<br>P:GO:0040010;<br>P:GO:0008340;<br>P:GO:0040011;<br>P:GO:0008219;<br>P:GO:0002009                  | -                                                                                | EC:2.5.1.60                        | IPR002088; IPR008940; PTHR11129 (PANTHER), PTHR11129:SF2 (PANTHER), SSF48439 (SUPERFAMILY)                                            |
| Caenorhabditis elegans      | thrombospondin type 1 domain containing protein               | 0  |                                                                                                                                                                                                         | F:GO:0005044;<br>F:GO:0030247;<br>C:GO:0031012;<br>C:GO:0005576;<br>P:GO:0006955 |                                    | IPR000884; G3DSA:2.20.100.10 (GENE3D)                                                                                                 |
| Caenorhabditis elegans      | lysine-specific demethylase 2b                                | 12 | P:GO:0016568;<br>F:GO:0051864;<br>F:GO:0008270;<br>C:GO:0005730;<br>F:GO:0019843;<br>P:GO:0055114;<br>P:GO:0045449;<br>P:GO:0000003;<br>F:GO:0016702;<br>F:GO:0003677;<br>F:GO:0005515;<br>P:GO:0006974 | -                                                                                | EC:1.14.11.2<br>7;<br>EC:1.13.11.0 | PTHR23123 (PANTHER)                                                                                                                   |
| Caenorhabditis elegans      | ring finger protein 40                                        | 1  | F:GO:0005488                                                                                                                                                                                            | -                                                                                |                                    | PTHR23163 (PANTHER)                                                                                                                   |
|                             | -                                                             | 0  |                                                                                                                                                                                                         |                                                                                  |                                    | SignalIP (SIGNALP)                                                                                                                    |
| Aspergillus clavatus NRRL 1 | sulfur metabolism regulator                                   | 0  |                                                                                                                                                                                                         | F:GO:0016301;<br>P:GO:0008150;<br>F:GO:0005515;<br>C:GO:0005575;<br>P:GO:0006511 |                                    | IPR001232; IPR011333; IPR016072; IPR016073; PTHR11165:SF21 (PANTHER)                                                                  |
| Caenorhabditis briggsae     | elegans protein confirmed by transcript evidence              | 9  | P:GO:0010171;<br>P:GO:0002119;<br>P:GO:0040002;<br>P:GO:0040011;<br>C:GO:0016021;<br>C:GO:0005576;<br>P:GO:0019915;<br>P:GO:0006898;<br>F:GO:0042302                                                    | -                                                                                |                                    | SignalIP (SIGNALP)                                                                                                                    |
| Caenorhabditis elegans      | inosine triphosphate pyrophosphatase                          | 2  | F:GO:0047429;<br>P:GO:0008152                                                                                                                                                                           | -                                                                                | EC:3.6.1.19                        | IPR002637; G3DSA:3.90.950.10 (GENE3D), PTHR11067:SF7 (PANTHER), SSF52972 (SUPERFAMILY)                                                |
|                             | -                                                             | 0  |                                                                                                                                                                                                         |                                                                                  |                                    | -                                                                                                                                     |
| Brugia malayi               | amme syndrome candidate gene 1 protein homolog                | 0  |                                                                                                                                                                                                         | P:GO:0008150;<br>C:GO:0005575                                                    |                                    | IPR002733; G3DSA:3.30.1490.150 (GENE3D), G3DSA:3.30.700.20 (GENE3D), PTHR13016 (PANTHER), SignalIP (SIGNALP), SSF143447 (SUPERFAMILY) |
|                             | -                                                             | 0  |                                                                                                                                                                                                         |                                                                                  |                                    | -                                                                                                                                     |
|                             | -                                                             | 0  |                                                                                                                                                                                                         |                                                                                  |                                    | -                                                                                                                                     |
| Caenorhabditis briggsae     | yo30_caebra: full=gilt-like protein cbg03282 flags: precursor | 0  |                                                                                                                                                                                                         | C:GO:0005576                                                                     |                                    | -                                                                                                                                     |

|                         |                                                      |    |                                                                                                                                                                                                                                                                                                                                                                                                                                                                                                          |   |                                                                                        |
|-------------------------|------------------------------------------------------|----|----------------------------------------------------------------------------------------------------------------------------------------------------------------------------------------------------------------------------------------------------------------------------------------------------------------------------------------------------------------------------------------------------------------------------------------------------------------------------------------------------------|---|----------------------------------------------------------------------------------------|
| Caenorhabditis elegans  | endo-b-n-acetylglucosaminidase family member (eng-1) | 5  | P:GO:0009056;<br>F:GO:0016874;<br>F:GO:0005488;<br>F:GO:0016787;<br>P:GO:0044238                                                                                                                                                                                                                                                                                                                                                                                                                         | - | IPR005201                                                                              |
|                         | -                                                    | 0  |                                                                                                                                                                                                                                                                                                                                                                                                                                                                                                          |   | -                                                                                      |
| Caenorhabditis briggsae | d- repair protein rad50                              | 1  | P:GO:0007126                                                                                                                                                                                                                                                                                                                                                                                                                                                                                             | - | IPR007517; IPR013134; PD968187 (PRODOM), PTHR18867 (PANTHER), PTHR18867:SF11 (PANTHER) |
|                         | -                                                    | 0  |                                                                                                                                                                                                                                                                                                                                                                                                                                                                                                          |   | -                                                                                      |
|                         | -                                                    | 0  |                                                                                                                                                                                                                                                                                                                                                                                                                                                                                                          |   | -                                                                                      |
|                         | -                                                    | 0  |                                                                                                                                                                                                                                                                                                                                                                                                                                                                                                          |   | -                                                                                      |
| Canis familiaris        | eukaryotic translation elongation factor 1 gamma     | 6  | F:GO:0003746;<br>C:GO:0005853;<br>F:GO:0005515;<br>C:GO:0005829;<br>P:GO:0009615;<br>P:GO:0006414                                                                                                                                                                                                                                                                                                                                                                                                        | - | IPR001662; PTHR11260 (PANTHER), PTHR11260:SF4 (PANTHER)                                |
| Caenorhabditis briggsae | briggsae cbr-cln- protein                            | 41 | F:GO:0003746;<br>C:GO:0043005;<br>P:GO:0043086;<br>C:GO:0005802;<br>P:GO:0006457;<br>C:GO:0005776;<br>C:GO:0000139;<br>P:GO:0001508;<br>C:GO:0030176;<br>P:GO:0006898;<br>C:GO:0005624;<br>C:GO:0005764;<br>P:GO:0016242;<br>P:GO:0008306;<br>C:GO:0005770;<br>P:GO:0043524;<br>P:GO:0051480;<br>P:GO:0046662;<br>P:GO:0007042;<br>P:GO:0045861;<br>P:GO:0016485;<br>P:GO:0009792;<br>P:GO:0006681;<br>P:GO:0042133;<br>P:GO:0006520;<br>C:GO:0005795;<br>C:GO:0005769;<br>F:GO:0051082;<br>F:GO:0005515 | - | IPR003492; IPR016196; SignalP (SIGNALP)                                                |
| Loa loa                 | fgfr1 oncogene partner 2                             | 1  | F:GO:0005515                                                                                                                                                                                                                                                                                                                                                                                                                                                                                             | - | IPR008555                                                                              |
|                         | -                                                    | 0  |                                                                                                                                                                                                                                                                                                                                                                                                                                                                                                          |   | -                                                                                      |
| Rattus norvegicus       | isoform cra_a                                        | 0  |                                                                                                                                                                                                                                                                                                                                                                                                                                                                                                          |   | -                                                                                      |
|                         | -                                                    | 0  |                                                                                                                                                                                                                                                                                                                                                                                                                                                                                                          |   | IPR010916                                                                              |
|                         | -                                                    | 0  |                                                                                                                                                                                                                                                                                                                                                                                                                                                                                                          |   | -                                                                                      |
|                         | -                                                    | 0  |                                                                                                                                                                                                                                                                                                                                                                                                                                                                                                          |   | -                                                                                      |
| Caenorhabditis elegans  | riken cd- c330023m02 gene                            | 1  | F:GO:0005515                                                                                                                                                                                                                                                                                                                                                                                                                                                                                             | - | PTHR22767 (PANTHER), PTHR22767:SF3 (PANTHER)                                           |
|                         | -                                                    | 0  |                                                                                                                                                                                                                                                                                                                                                                                                                                                                                                          |   | SignalP (SIGNALP)                                                                      |

|                         |                                                               |    |                                                                                                                                                                       |   |                                                                                                                                                                                                                                           |                                                                                             |           |
|-------------------------|---------------------------------------------------------------|----|-----------------------------------------------------------------------------------------------------------------------------------------------------------------------|---|-------------------------------------------------------------------------------------------------------------------------------------------------------------------------------------------------------------------------------------------|---------------------------------------------------------------------------------------------|-----------|
| Caenorhabditis elegans  | cullin 5                                                      | 10 | C:GO:0005829;<br>P:GO:0006511;<br>F:GO:0031625;<br>C:GO:0005624;<br>C:GO:0031466;<br>F:GO:0004842;<br>P:GO:0006970;<br>F:GO:0016931;<br>P:GO:0051480;<br>C:GO:0005634 | - | EC:6.3.2.19                                                                                                                                                                                                                               | IPR011991; IPR019559; PTHR11932 (PANTHER), PTHR11932:SF16 (PANTHER), SSF46785 (SUPERFAMILY) |           |
| -                       | -                                                             | 0  |                                                                                                                                                                       |   |                                                                                                                                                                                                                                           | -                                                                                           |           |
| -                       | -                                                             | 0  |                                                                                                                                                                       |   |                                                                                                                                                                                                                                           | -                                                                                           |           |
| Caenorhabditis elegans  | elegans protein confirmed by transcript evidence              | 0  |                                                                                                                                                                       |   |                                                                                                                                                                                                                                           | SignalP (SIGNALP)                                                                           |           |
| Caenorhabditis elegans  | rapamycin-insensitive companion of mtor                       | 9  | P:GO:0080090;<br>P:GO:0051056;<br>P:GO:0035468;<br>C:GO:0044424;<br>P:GO:0032956;<br>P:GO:0009967;<br>P:GO:0042325;<br>P:GO:0051896;<br>F:GO:0005488                  | - |                                                                                                                                                                                                                                           | IPR011989; IPR016024; PTHR13298 (PANTHER)                                                   |           |
| -                       | -                                                             | 0  |                                                                                                                                                                       |   |                                                                                                                                                                                                                                           | -                                                                                           |           |
| -                       | -                                                             | 0  |                                                                                                                                                                       |   |                                                                                                                                                                                                                                           | -                                                                                           |           |
| Caenorhabditis elegans  | poly-a polymerase family member (pap-1)                       | 0  |                                                                                                                                                                       |   | P:GO:0010171;<br>C:GO:0005634;<br>P:GO:0000003;<br>F:GO:0003723;<br>P:GO:0002119;<br>P:GO:0009792;<br>P:GO:0002009;<br>P:GO:0043631;<br>P:GO:0040011;<br>P:GO:0040010;<br>P:GO:0006350;<br>P:GO:0040007;<br>P:GO:0040035;<br>F:GO:0004652 |                                                                                             | IPR007012 |
| Caenorhabditis briggsae | methionine synthase reductase                                 | 5  | F:GO:0016491;<br>P:GO:0000003;<br>P:GO:0006520;<br>F:GO:0050662;<br>F:GO:0000166                                                                                      | - |                                                                                                                                                                                                                                           | IPR003097; IPR017938; IPR023173; PTHR19384 (PANTHER), PTHR19384:SF11 (PANTHER)              |           |
| Caenorhabditis elegans  | nuclear receptor nhr-1                                        | 7  | F:GO:0003700;<br>F:GO:0043565;<br>F:GO:0003707;<br>P:GO:0019915;<br>C:GO:0005634;<br>F:GO:0008270;<br>P:GO:0006355                                                    | - |                                                                                                                                                                                                                                           | IPR000536; IPR008946; PTHR11865 (PANTHER), PTHR11865:SF218 (PANTHER)                        |           |
| Brugia malayi           | nematode cuticle collagen n-termi-l domain containing protein | 3  | F:GO:0042302;<br>P:GO:0040011;<br>P:GO:0010171                                                                                                                        | - |                                                                                                                                                                                                                                           | IPR002486; PTHR10499 (PANTHER), PTHR10499:SF58 (PANTHER), SignalP (SIGNALP)                 |           |

|                                  |                                                            |    |                                                                                                                                                                                                                                                                                                                                                                                                                                                                         |                                                |                           |                                                                          |
|----------------------------------|------------------------------------------------------------|----|-------------------------------------------------------------------------------------------------------------------------------------------------------------------------------------------------------------------------------------------------------------------------------------------------------------------------------------------------------------------------------------------------------------------------------------------------------------------------|------------------------------------------------|---------------------------|--------------------------------------------------------------------------|
| Homo sapiens                     | calreticulin                                               | 56 | F:GO:0051087;<br>P:GO:0045665;<br>F:GO:0005506;<br>F:GO:0051082;<br>P:GO:0008284;<br>C:GO:0016529;<br>F:GO:0031625;<br>C:GO:0005625;<br>F:GO:0042562;<br>F:GO:0044183;<br>C:GO:0005829;<br>F:GO:0001849;<br>P:GO:0030866;<br>F:GO:0005178;<br>F:GO:0003729;<br>C:GO:0005788;<br>C:GO:0005615;<br>P:GO:0007283;<br>P:GO:0033144;<br>C:GO:0005844;<br>C:GO:0005792;<br>P:GO:0042981;<br>P:GO:0017148;<br>P:GO:0033574;<br>P:GO:0045740;<br>P:GO:0002502;<br>P:GO:0006611; | -                                              |                           | SignalP (SIGNALP)                                                        |
| -                                | -                                                          | 0  |                                                                                                                                                                                                                                                                                                                                                                                                                                                                         |                                                |                           | -                                                                        |
| -                                | -                                                          | 0  |                                                                                                                                                                                                                                                                                                                                                                                                                                                                         |                                                |                           | -                                                                        |
| Caenorhabditis briggsae          | Hypothetical protein CBG08295 [Caenorhabditis briggsae]    | 0  |                                                                                                                                                                                                                                                                                                                                                                                                                                                                         |                                                |                           | IPR017871                                                                |
| Caenorhabditis elegans           | vacuolar protein sorting 13d                               | 0  |                                                                                                                                                                                                                                                                                                                                                                                                                                                                         | P:GO:0008104                                   |                           | PTHR16166 (PANTHER),<br>PTHR16166:SF24 (PANTHER)                         |
| -                                | -                                                          | 0  |                                                                                                                                                                                                                                                                                                                                                                                                                                                                         |                                                |                           | -                                                                        |
| Onchocerca volvulus              | thioredoxin                                                | 0  |                                                                                                                                                                                                                                                                                                                                                                                                                                                                         | P:GO:0045454;<br>F:GO:0016491;<br>F:GO:0016209 |                           | IPR012335; IPR012336; PTHR13871<br>(PANTHER), PTHR13871:SF5<br>(PANTHER) |
| -                                | -                                                          | 0  |                                                                                                                                                                                                                                                                                                                                                                                                                                                                         |                                                |                           | SignalP (SIGNALP)                                                        |
| Leishmania major strain Friedlin | proteophosphoglycan 5                                      | 0  |                                                                                                                                                                                                                                                                                                                                                                                                                                                                         |                                                |                           | -                                                                        |
| Leishmania major strain Friedlin | proteophosphoglycan 5                                      | 0  |                                                                                                                                                                                                                                                                                                                                                                                                                                                                         |                                                |                           | -                                                                        |
| Caenorhabditis elegans           | elegans protein partially confirmed by transcript evidence | 0  |                                                                                                                                                                                                                                                                                                                                                                                                                                                                         |                                                |                           | -                                                                        |
| Caenorhabditis briggsae          | briggsae cbr-edc-3 protein                                 | 1  | F:GO:0005515                                                                                                                                                                                                                                                                                                                                                                                                                                                            | -                                              |                           | IPR019050                                                                |
| Caenorhabditis elegans           | phospholipase c gamma                                      | 1  | F:GO:0008081                                                                                                                                                                                                                                                                                                                                                                                                                                                            | -                                              | EC:3.1.4.0                | IPR011993; PTHR10336 (PANTHER),<br>PTHR10336:SF22 (PANTHER)              |
| Caenorhabditis elegans           | amp-binding enzyme family protein                          | 11 | P:GO:0006633;<br>F:GO:0005488;<br>C:GO:0043231;<br>P:GO:0007420;<br>P:GO:0007584;<br>C:GO:0044446;<br>C:GO:0044444;<br>C:GO:0031090;<br>P:GO:0014070;<br>F:GO:0004467;<br>F:GO:0003987                                                                                                                                                                                                                                                                                  | -                                              | EC:6.2.1.3;<br>EC:6.2.1.1 | -                                                                        |

|                         |                                                            |    |                                                                                                                                                                                                         |   |            |                                                                                                                                    |
|-------------------------|------------------------------------------------------------|----|---------------------------------------------------------------------------------------------------------------------------------------------------------------------------------------------------------|---|------------|------------------------------------------------------------------------------------------------------------------------------------|
| Caenorhabditis briggsae | elegans protein partially confirmed by transcript evidence | 7  | P:GO:0009792;<br>C:GO:0032040;<br>P:GO:0040010;<br>P:GO:0000003;<br>P:GO:0006364;<br>P:GO:0006898;<br>P:GO:0045132                                                                                      | - | -          | -                                                                                                                                  |
| -                       | -                                                          | 0  |                                                                                                                                                                                                         |   |            | -                                                                                                                                  |
| Loa loa                 | uracil-d- glycosylase                                      | 2  | P:GO:0006281;<br>F:GO:0016799                                                                                                                                                                           | - | EC:3.2.2.0 | IPR002043; IPR005122; IPR018085                                                                                                    |
| Loa loa                 | uracil-d- glycosylase                                      | 2  | P:GO:0006281;<br>F:GO:0016799                                                                                                                                                                           | - | EC:3.2.2.0 | IPR002043; IPR005122; IPR018085                                                                                                    |
| -                       | -                                                          | 0  |                                                                                                                                                                                                         |   |            | -                                                                                                                                  |
| Loa loa                 | elegans protein partially confirmed by transcript evidence | 6  | P:GO:0007160;<br>C:GO:0031012;<br>P:GO:0008218;<br>F:GO:0005509;<br>P:GO:0018298;<br>C:GO:0016020                                                                                                       | - |            | IPR000152; IPR006210; IPR006605;<br>IPR009017; IPR013032                                                                           |
| -                       | -                                                          | 0  |                                                                                                                                                                                                         |   |            | -                                                                                                                                  |
| Caenorhabditis elegans  | briggsae cbr-ttr-6 protein                                 | 0  |                                                                                                                                                                                                         |   |            | IPR001534                                                                                                                          |
| -                       | -                                                          | 0  |                                                                                                                                                                                                         |   |            | -                                                                                                                                  |
| Caenorhabditis briggsae | tyrosyl-tr- synthetase                                     | 6  | P:GO:0000003;<br>F:GO:0000166;<br>F:GO:0004812;<br>P:GO:0006418;<br>P:GO:0009792;<br>C:GO:0044424                                                                                                       | - |            | IPR002305; IPR015624;<br>G3DSA:1.10.240.10 (GENE3D),<br>PTHR11946 (PANTHER), SSF52374<br>(SUPERFAMILY)                             |
| Caenorhabditis elegans  | uncoordinated family member (unc-52)                       | 12 | P:GO:0048704;<br>P:GO:0002062;<br>P:GO:0007420;<br>P:GO:0030239;<br>C:GO:0005605;<br>P:GO:0007155;<br>F:GO:0005515;<br>P:GO:0001958;<br>P:GO:0048738;<br>P:GO:0008104;<br>P:GO:0030198;<br>P:GO:0060351 | - |            | -                                                                                                                                  |
| -                       | -                                                          | 0  |                                                                                                                                                                                                         |   |            | SignalP (SIGNALP)                                                                                                                  |
| -                       | -                                                          | 0  |                                                                                                                                                                                                         |   |            | -                                                                                                                                  |
| Caenorhabditis briggsae | ribosomal protein s6 polypeptide 1-like                    | 2  | F:GO:0005488;<br>P:GO:0009987                                                                                                                                                                           | - |            | IPR011009; G3DSA:3.30.200.20<br>(GENE3D), PTHR22985 (PANTHER)                                                                      |
| Caenorhabditis elegans  | tumor susceptibility gene 101                              | 11 | P:GO:0046755;<br>P:GO:0045926;<br>F:GO:0048306;<br>C:GO:0005730;<br>P:GO:0048513;<br>C:GO:0005770;<br>F:GO:0031625;<br>C:GO:0005769;<br>P:GO:0050794;<br>C:GO:0005886;<br>P:GO:0043162                  | - |            | IPR008883; IPR016135; IPR017916;<br>PTHR23306 (PANTHER),<br>PTHR23306:SF4 (PANTHER), PS51322<br>(PROFILE), SSF140111 (SUPERFAMILY) |
| Caenorhabditis elegans  | chromosome 9 open reading frame 41                         | 0  |                                                                                                                                                                                                         |   |            | -                                                                                                                                  |

|                        |                                                            |    |                                                                                                                                                                                                                                                                                                                                                                                                                                      |   |                                                                                                                                                                         |
|------------------------|------------------------------------------------------------|----|--------------------------------------------------------------------------------------------------------------------------------------------------------------------------------------------------------------------------------------------------------------------------------------------------------------------------------------------------------------------------------------------------------------------------------------|---|-------------------------------------------------------------------------------------------------------------------------------------------------------------------------|
| Ailuropoda melanoleuca | eukaryotic translation initiation factor 3 subunit k       | 8  | C:GO:0005852;<br>F:GO:0003723;<br>F:GO:0005515;<br>P:GO:0045948;<br>F:GO:0003743;<br>C:GO:0005634;<br>C:GO:0005829;<br>F:GO:0043022                                                                                                                                                                                                                                                                                                  | - | IPR005062; IPR009374; IPR016020;<br>IPR016024                                                                                                                           |
| Caenorhabditis elegans | protein phosphatase catalytic alpha isoform                | 25 | P:GO:0046822;<br>P:GO:0005981;<br>P:GO:0030324;<br>P:GO:0000003;<br>C:GO:0043197;<br>F:GO:0043021;<br>P:GO:0051301;<br>C:GO:0005730;<br>C:GO:0005829;<br>C:GO:0005741;<br>F:GO:0046872;<br>P:GO:0009792;<br>P:GO:0007067;<br>F:GO:0042802;<br>P:GO:0005979;<br>P:GO:0007126;<br>P:GO:0002119;<br>P:GO:0048754;<br>C:GO:0070688;<br>P:GO:0006470;<br>P:GO:0016568;<br>C:GO:0043204;<br>F:GO:0008599;<br>F:GO:0004722;<br>C:GO:0042587 | - | IPR004843; IPR006186;<br>G3DSA:3.60.21.10 (GENE3D),<br>PTHR11668:SF19 (PANTHER), SignalP<br>(SIGNALP), SSF56300 (SUPERFAMILY)                                           |
| -                      | -                                                          | 0  |                                                                                                                                                                                                                                                                                                                                                                                                                                      | - | -                                                                                                                                                                       |
| Caenorhabditis elegans | elegans protein partially confirmed by transcript evidence | 3  | C:GO:0034703;<br>F:GO:0005261;<br>P:GO:0055080                                                                                                                                                                                                                                                                                                                                                                                       | - | -                                                                                                                                                                       |
| -                      | -                                                          | 0  |                                                                                                                                                                                                                                                                                                                                                                                                                                      | - | -                                                                                                                                                                       |
| -                      | -                                                          | 0  |                                                                                                                                                                                                                                                                                                                                                                                                                                      | - | SignalP (SIGNALP)                                                                                                                                                       |
| Brugia malayi          | briggsae cbr-let-413 protein                               | 15 | C:GO:0044456;<br>P:GO:0009653;<br>C:GO:0005911;<br>F:GO:0005515;<br>P:GO:0007163;<br>P:GO:0023051;<br>P:GO:0031323;<br>P:GO:0040011;<br>P:GO:0045108;<br>P:GO:0015031;<br>C:GO:0005737;<br>P:GO:0006915;<br>P:GO:0048522;<br>P:GO:0030154;<br>C:GO:0005912                                                                                                                                                                           | - | IPR001611; IPR003591; PR00019<br>(PRINTS), G3DSA:3.80.10.10<br>(GENE3D), PTHR23155 (PANTHER),<br>PTHR23155:SF29 (PANTHER), PSS1450<br>(PROFILE), SSF52058 (SUPERFAMILY) |
| -                      | -                                                          | 0  |                                                                                                                                                                                                                                                                                                                                                                                                                                      | - | -                                                                                                                                                                       |
| -                      | -                                                          | 0  |                                                                                                                                                                                                                                                                                                                                                                                                                                      | - | -                                                                                                                                                                       |

|                         |                                                       |    |                                                                                                                                                                                                                                                                                                                                                                                                                                                       |                                                                                  |             |                                                                                                                                                                                        |
|-------------------------|-------------------------------------------------------|----|-------------------------------------------------------------------------------------------------------------------------------------------------------------------------------------------------------------------------------------------------------------------------------------------------------------------------------------------------------------------------------------------------------------------------------------------------------|----------------------------------------------------------------------------------|-------------|----------------------------------------------------------------------------------------------------------------------------------------------------------------------------------------|
| Caenorhabditis briggsae | briggsae cbr-ssl-1 protein                            | 26 | P:GO:0030097;<br>C:GO:0000785;<br>P:GO:0000381;<br>P:GO:0035207;<br>F:GO:0005515;<br>F:GO:0017111;<br>P:GO:0016458;<br>P:GO:0040010;<br>P:GO:0035222;<br>P:GO:0048813;<br>P:GO:0040011;<br>C:GO:0005701;<br>P:GO:0007517;<br>P:GO:0045747;<br>P:GO:0007400;<br>C:GO:0005730;<br>P:GO:0007391;<br>P:GO:0006350;<br>P:GO:0008105;<br>F:GO:0003677;<br>P:GO:0002119;<br>P:GO:0048749;<br>P:GO:0048477;<br>P:GO:0007476;<br>P:GO:0040035;<br>P:GO:0006325 | -                                                                                | EC:3.6.1.15 | IPR000330; IPR006562; IPR014001;<br>IPR014012; IPR014021;<br>G3DSA:3.40.50.300 (GENE3D),<br>PTHR10799 (PANTHER),<br>PTHR10799:SF75 (PANTHER),<br>SSF52540 (SUPERFAMILY)                |
| -                       | -                                                     | 0  |                                                                                                                                                                                                                                                                                                                                                                                                                                                       |                                                                                  |             | -                                                                                                                                                                                      |
| Caenorhabditis briggsae | ribosomal protein l16 containing protein              | 8  | P:GO:0009792;<br>P:GO:0002119;<br>C:GO:0005840;<br>F:GO:0003735;<br>F:GO:0005515;<br>P:GO:0040010;<br>P:GO:0006412;<br>F:GO:0019843                                                                                                                                                                                                                                                                                                                   | -                                                                                | EC:3.6.5.3  | -                                                                                                                                                                                      |
| -                       | -                                                     | 0  |                                                                                                                                                                                                                                                                                                                                                                                                                                                       |                                                                                  |             | -                                                                                                                                                                                      |
| Caenorhabditis briggsae | temporarily assigned gene -me family member (tag-308) | 0  |                                                                                                                                                                                                                                                                                                                                                                                                                                                       |                                                                                  |             | -                                                                                                                                                                                      |
| Caenorhabditis elegans  | nucleoside diphosphate-linked moiety x motif 19       | 0  |                                                                                                                                                                                                                                                                                                                                                                                                                                                       | C:GO:0005777;<br>F:GO:0046872;<br>C:GO:0005739;<br>P:GO:0006911;<br>F:GO:0016787 |             | IPR000086; IPR015797; PTHR12318 (PANTHER)                                                                                                                                              |
| -                       | -                                                     | 0  |                                                                                                                                                                                                                                                                                                                                                                                                                                                       |                                                                                  |             | -                                                                                                                                                                                      |
| -                       | -                                                     | 0  |                                                                                                                                                                                                                                                                                                                                                                                                                                                       |                                                                                  |             | -                                                                                                                                                                                      |
| Caenorhabditis elegans  | enoyl- hydratase                                      | 1  | F:GO:0003824                                                                                                                                                                                                                                                                                                                                                                                                                                          | -                                                                                |             | IPR001753; G3DSA:3.90.226.10 (GENE3D), PTHR11941 (PANTHER), SSF52096 (SUPERFAMILY)                                                                                                     |
| Caenorhabditis elegans  | ophagy (yeast atg homolog) family member (atg-2)      | 0  |                                                                                                                                                                                                                                                                                                                                                                                                                                                       |                                                                                  |             | IPR005522; PTHR13190 (PANTHER), PTHR13190:SF2 (PANTHER)                                                                                                                                |
| -                       | -                                                     | 0  |                                                                                                                                                                                                                                                                                                                                                                                                                                                       |                                                                                  |             | -                                                                                                                                                                                      |
| Caenorhabditis briggsae | ferm domain-containing                                | 1  | C:GO:0044464                                                                                                                                                                                                                                                                                                                                                                                                                                          | -                                                                                |             | IPR000299; IPR011993; IPR014352; IPR018979; IPR018980; IPR019748; IPR019749; IPR019750; G3DSA:3.10.20.90 (GENE3D), PTHR23280 (PANTHER), SSF50729 (SUPERFAMILY), SSF54236 (SUPERFAMILY) |

|                         |                                                                           |    |                                                                                                                                                                                                                                           |                                                                 |            |                                                                                                                                                                                        |
|-------------------------|---------------------------------------------------------------------------|----|-------------------------------------------------------------------------------------------------------------------------------------------------------------------------------------------------------------------------------------------|-----------------------------------------------------------------|------------|----------------------------------------------------------------------------------------------------------------------------------------------------------------------------------------|
| Caenorhabditis briggsae | ferm domain-containing                                                    | 1  | C:GO:0044464                                                                                                                                                                                                                              | -                                                               |            | IPR000299; IPR011993; IPR014352; IPR018979; IPR018980; IPR019748; IPR019749; IPR019750; G3DSA:3.10.20.90 (GENE3D), PTHR23280 (PANTHER), SSF50729 (SUPERFAMILY), SSF54236 (SUPERFAMILY) |
|                         | -                                                                         | 0  |                                                                                                                                                                                                                                           |                                                                 |            | -                                                                                                                                                                                      |
| Caenorhabditis elegans  | briggsae cbr-rhy-1 protein                                                | 0  |                                                                                                                                                                                                                                           | C:GO:0016021;<br>F:GO:0016747                                   |            | -                                                                                                                                                                                      |
| Caenorhabditis elegans  | elegans protein confirmed by transcript evidence                          | 5  | P:GO:0009792;<br>P:GO:0002119;<br>F:GO:0004553;<br>F:GO:0005515;<br>P:GO:0040007                                                                                                                                                          | -                                                               | EC:3.2.1.0 | SignalP (SIGNALP)                                                                                                                                                                      |
| Caenorhabditis elegans  | briggsae cbr-mbr-1 protein                                                | 14 | C:GO:0005700;<br>P:GO:0007613;<br>P:GO:0006919;<br>P:GO:0008628;<br>P:GO:0035072;<br>P:GO:0035069;<br>P:GO:0006911;<br>P:GO:0019915;<br>F:GO:0043565;<br>P:GO:0006914;<br>F:GO:0003700;<br>P:GO:0045893;<br>F:GO:0042803;<br>C:GO:0005634 | -                                                               |            | -                                                                                                                                                                                      |
| Caenorhabditis briggsae | elegans protein confirmed by transcript evidence                          | 0  |                                                                                                                                                                                                                                           | P:GO:0000003;<br>P:GO:0040035;<br>P:GO:0006898;<br>P:GO:0009792 |            | -                                                                                                                                                                                      |
| Brugia malayi           | fanci (fanconi anemia complex component i) homolog family member (fnci-1) | 0  |                                                                                                                                                                                                                                           |                                                                 |            | -                                                                                                                                                                                      |
| Caenorhabditis elegans  | ched related family member (ptr-23)                                       | 7  | P:GO:0018996;<br>C:GO:0016021;<br>P:GO:0008340;<br>P:GO:0000003;<br>P:GO:0040025;<br>F:GO:0008158;<br>P:GO:0040011                                                                                                                        | -                                                               |            | -                                                                                                                                                                                      |
|                         | -                                                                         | 0  |                                                                                                                                                                                                                                           |                                                                 |            | -                                                                                                                                                                                      |
| Brugia malayi           | elegans protein confirmed by transcript evidence                          | 7  | P:GO:0008340;<br>P:GO:0040007;<br>P:GO:0010171;<br>F:GO:0005488;<br>P:GO:0006898;<br>P:GO:0002119;<br>P:GO:0040011                                                                                                                        | -                                                               |            | -                                                                                                                                                                                      |
| Caenorhabditis elegans  | tomosyn sy-ptic protein family member (tom-1)                             | 3  | P:GO:0006887;<br>F:GO:0017075;<br>C:GO:0005892                                                                                                                                                                                            | -                                                               |            | PTHR10241 (PANTHER), PTHR10241:SF7 (PANTHER)                                                                                                                                           |
| Caenorhabditis elegans  | ral guanine nucleotide dissociation stimulator-like 1                     | 5  | F:GO:0005085;<br>P:GO:0051056;<br>C:GO:0005622;<br>F:GO:0005515;<br>P:GO:0040010                                                                                                                                                          | -                                                               |            | IPR000651; IPR001895; IPR008937; IPR019804; G3DSA:1.20.870.10 (GENE3D), PTHR23113:SF29 (PANTHER)                                                                                       |



|                         |                                                              |    |                                                                                                                                                                                                                                                                                              |                                                |                                                                                                                         |
|-------------------------|--------------------------------------------------------------|----|----------------------------------------------------------------------------------------------------------------------------------------------------------------------------------------------------------------------------------------------------------------------------------------------|------------------------------------------------|-------------------------------------------------------------------------------------------------------------------------|
|                         |                                                              | 0  |                                                                                                                                                                                                                                                                                              |                                                |                                                                                                                         |
| Caenorhabditis briggsae | elegans protein partially confirmed by transcript evidence   | 1  | P:GO:0040010                                                                                                                                                                                                                                                                                 | -                                              | IPR000719; IPR008271; IPR011009; IPR017442; G3DSA:1.10.510.10 (GENE3D), PTHR11909 (PANTHER), PTHR11909:SF12 (PANTHER)   |
| Harpegnathos saltator   | histone                                                      | 17 | P:GO:0040010;<br>C:GO:0000786;<br>P:GO:0008340;<br>P:GO:0009725;<br>P:GO:0008360;<br>P:GO:0007420;<br>F:GO:0003677;<br>C:GO:0005700;<br>P:GO:0010171;<br>P:GO:0007155;<br>P:GO:0002119;<br>F:GO:0005515;<br>P:GO:0006334;<br>P:GO:0009792;<br>P:GO:0007140;<br>C:GO:0005634;<br>P:GO:0006974 | -                                              | IPR010916                                                                                                               |
| Callithrix jacchus      | transmembrane protein 147                                    | 2  | F:GO:0005515;<br>C:GO:0016021                                                                                                                                                                                                                                                                | -                                              | IPR019164; PTHR12869 (PANTHER), SignalP (SIGNALP)                                                                       |
| Caenorhabditis briggsae | tbcl domain member 10b                                       | 3  | F:GO:0005097;<br>C:GO:0005622;<br>P:GO:0032313                                                                                                                                                                                                                                               | -                                              | IPR000195; PTHR22957 (PANTHER), PTHR22957:SF49 (PANTHER)                                                                |
| Homo sapiens            | eukaryotic translation initiation factor 4 gamma 1 isoform 6 | 8  | C:GO:0016281;<br>F:GO:0003723;<br>F:GO:0005515;<br>P:GO:0006446;<br>F:GO:0003743;<br>P:GO:0016070;<br>C:GO:0005829;<br>P:GO:0044419                                                                                                                                                          | -                                              | -                                                                                                                       |
|                         | -                                                            | 0  |                                                                                                                                                                                                                                                                                              |                                                | -                                                                                                                       |
|                         | -                                                            | 0  |                                                                                                                                                                                                                                                                                              |                                                | -                                                                                                                       |
| Caenorhabditis briggsae | Hypothetical protein CBG18919 [Caenorhabditis briggsae]      | 0  |                                                                                                                                                                                                                                                                                              | F:GO:0003676;<br>F:GO:0008270;<br>C:GO:0005622 | -                                                                                                                       |
|                         | -                                                            | 0  |                                                                                                                                                                                                                                                                                              |                                                | -                                                                                                                       |
|                         | -                                                            | 0  |                                                                                                                                                                                                                                                                                              |                                                | -                                                                                                                       |
| Caenorhabditis briggsae | probable exonuclease mut-7 homolog                           | 2  | F:GO:0016787;<br>F:GO:0005515                                                                                                                                                                                                                                                                | -                                              | -                                                                                                                       |
|                         | -                                                            | 0  |                                                                                                                                                                                                                                                                                              |                                                | -                                                                                                                       |
| Ancylostoma ceylanicum  | metalloprotease 1 precursor                                  | 1  | F:GO:0008233                                                                                                                                                                                                                                                                                 | -                                              | IPR001506; IPR006026; G3DSA:3.40.390.10 (GENE3D), PTHR10127 (PANTHER), PTHR10127:SF65 (PANTHER), SSF55486 (SUPERFAMILY) |

|                                                      |                                             |    |                                                                                                                                                                                                                                                                                                                                                                                                    |                                                |            |                                                                                                                          |
|------------------------------------------------------|---------------------------------------------|----|----------------------------------------------------------------------------------------------------------------------------------------------------------------------------------------------------------------------------------------------------------------------------------------------------------------------------------------------------------------------------------------------------|------------------------------------------------|------------|--------------------------------------------------------------------------------------------------------------------------|
| Caenorhabditis briggsae                              | + k+ alpha 1 polypeptide                    | 23 | P:GO:0006940;<br>F:GO:0005515;<br>P:GO:0002087;<br>P:GO:0008542;<br>P:GO:0045822;<br>C:GO:0005792;<br>P:GO:0040011;<br>C:GO:0016021;<br>P:GO:0019229;<br>P:GO:0051481;<br>C:GO:0005737;<br>F:GO:0046872;<br>P:GO:0006754;<br>C:GO:0042383;<br>P:GO:0045988;<br>F:GO:0005391;<br>P:GO:0001504;<br>P:GO:0006813;<br>P:GO:0002026;<br>F:GO:0005524;<br>P:GO:0008217;<br>P:GO:0006814;<br>P:GO:0008344 | -                                              | EC:3.6.3.9 | IPR000695; IPR001757; IPR013200;<br>G3DSA:1.20.1110.10 (GENE3D),<br>PTHR11939:SF100 (PANTHER),<br>SSF56784 (SUPERFAMILY) |
| Bacillus thuringiensis serovar kurstaki str. T03a001 | collagen triple helix repeat domain protein | 0  |                                                                                                                                                                                                                                                                                                                                                                                                    |                                                |            | -                                                                                                                        |
| Homo sapiens                                         | sy-ptotagmin viii                           | 7  | P:GO:0007340;<br>C:GO:0001669;<br>C:GO:0005886;<br>C:GO:0008021;<br>C:GO:0016021;<br>F:GO:0048306;<br>F:GO:0005215                                                                                                                                                                                                                                                                                 | -                                              |            | IPR000008; IPR008973;<br>G3DSA:2.60.40.150 (GENE3D),<br>PTHR10024 (PANTHER),<br>PTHR10024:SF6 (PANTHER)                  |
| Loa loa                                              | negative elongation factor c d              | 0  |                                                                                                                                                                                                                                                                                                                                                                                                    | F:GO:0003746;<br>P:GO:0016481;<br>C:GO:0005634 |            | IPR006942                                                                                                                |
| Caenorhabditis briggsae                              | d- repair exonuclease                       | 23 | C:GO:0000781;<br>P:GO:0033674;<br>F:GO:0030145;<br>C:GO:0005654;<br>P:GO:0032508;<br>P:GO:0007131;<br>F:GO:0008022;<br>P:GO:0007507;<br>C:GO:0030870;<br>F:GO:0004527;<br>P:GO:0006302;<br>C:GO:0005730;<br>F:GO:0003677;<br>P:GO:0000723;<br>P:GO:0031954;<br>F:GO:0004519;<br>C:GO:0000794;<br>C:GO:0000790;<br>C:GO:0048471;<br>F:GO:0004003;<br>P:GO:0007062;<br>P:GO:0032876;<br>F:GO:0004722 | -                                              |            | -                                                                                                                        |

|                         |                                                                  |   |                                                                                                                                                      |                               |             |                                                                                                                        |
|-------------------------|------------------------------------------------------------------|---|------------------------------------------------------------------------------------------------------------------------------------------------------|-------------------------------|-------------|------------------------------------------------------------------------------------------------------------------------|
| Caenorhabditis briggsae | lymphocyte antigen 75                                            | 0 |                                                                                                                                                      | F:GO:0005488;<br>F:GO:0005529 |             | IPR001304; IPR016186; IPR016187;<br>IPR018378; PTHR22801 (PANTHER)                                                     |
| Caenorhabditis elegans  | uroca-se domain containing 1                                     | 2 | P:GO:0006548;<br>F:GO:0016153                                                                                                                        | -                             | EC:4.2.1.49 | IPR000193; SignalP (SIGNALP)                                                                                           |
| Caenorhabditis briggsae | Hypothetical protein CBG05629 [Caenorhabditis briggsae]          | 0 |                                                                                                                                                      |                               |             | -                                                                                                                      |
| Haemonchus contortus    | gata transcription factor                                        | 4 | F:GO:0003700;<br>F:GO:0043565;<br>F:GO:0008270;<br>P:GO:0006355                                                                                      | -                             |             | -                                                                                                                      |
|                         | -                                                                | 0 |                                                                                                                                                      |                               |             | -                                                                                                                      |
|                         | -                                                                | 0 |                                                                                                                                                      |                               |             | IPR015155                                                                                                              |
|                         | -                                                                | 0 |                                                                                                                                                      |                               |             | IPR000436; IPR016060; SignalP (SIGNALP)                                                                                |
| Caenorhabditis elegans  | tetraspanin 5                                                    | 1 | C:GO:0016021                                                                                                                                         | -                             |             | IPR000301; IPR008952; IPR018499;<br>PTHR19282 (PANTHER),<br>PTHR19282:SF57 (PANTHER), SignalP (SIGNALP)                |
| Caenorhabditis briggsae | acid phosphatase family protein confirmed by transcript evidence | 0 |                                                                                                                                                      | F:GO:0003993                  |             | G3DSA:3.40.50.1240 (GENE3D),<br>PTHR11567 (PANTHER),<br>PTHR11567:SF28 (PANTHER)                                       |
| Caenorhabditis elegans  | rr- methylase family                                             | 3 | P:GO:0009987;<br>F:GO:0005488;<br>F:GO:0008168                                                                                                       | -                             | EC:2.1.1.0  | IPR001537; G3DSA:3.40.1280.10 (GENE3D),<br>PTHR12029 (PANTHER),<br>PTHR12029:SF11 (PANTHER),<br>SSF75217 (SUPERFAMILY) |
| Caenorhabditis elegans  | elegans protein partially confirmed by transcript evidence       | 0 |                                                                                                                                                      |                               |             | SignalP (SIGNALP)                                                                                                      |
|                         | -                                                                | 0 |                                                                                                                                                      |                               |             | SignalP (SIGNALP)                                                                                                      |
|                         | -                                                                | 0 |                                                                                                                                                      |                               |             | -                                                                                                                      |
| Macaca mulatta          | class member 1                                                   | 8 | C:GO:0005625;<br>F:GO:0004559;<br>C:GO:0005764;<br>P:GO:0006013;<br>P:GO:0006517;<br>F:GO:0008270;<br>P:GO:0007611;<br>F:GO:0005537                  | -                             | EC:3.2.1.24 | IPR011013; IPR011682;<br>G3DSA:2.70.98.30 (GENE3D),<br>PTHR11607 (PANTHER),<br>PTHR11607:SF3 (PANTHER)                 |
|                         | -                                                                | 0 |                                                                                                                                                      |                               |             | -                                                                                                                      |
| Caenorhabditis briggsae | Hypothetical protein CBG18497 [Caenorhabditis briggsae]          | 0 |                                                                                                                                                      |                               |             | -                                                                                                                      |
|                         | -                                                                | 0 |                                                                                                                                                      |                               |             | SignalP (SIGNALP)                                                                                                      |
| Loa loa                 | eukaryotic translation initiation factor 3                       | 1 | F:GO:0003676                                                                                                                                         | -                             |             | IPR003100; G3DSA:2.170.260.10 (GENE3D),<br>PTHR22891 (PANTHER),<br>SSF101690 (SUPERFAMILY)                             |
|                         | -                                                                | 0 |                                                                                                                                                      |                               |             | -                                                                                                                      |
| Loa loa                 | g protein-coupled receptor 89                                    | 9 | P:GO:0034765;<br>C:GO:0032580;<br>F:GO:0004871;<br>C:GO:0016021;<br>P:GO:0051452;<br>C:GO:0030660;<br>P:GO:0043123;<br>F:GO:0008308;<br>P:GO:0015031 | -                             |             | IPR015672; PF12430 (PFAM), SignalP (SIGNALP)                                                                           |
| Caenorhabditis elegans  | activator of basal transcription 1                               | 5 | P:GO:0040007;<br>P:GO:0040035;<br>P:GO:0006898;<br>P:GO:0002119;<br>P:GO:0040011                                                                     | -                             |             | -                                                                                                                      |
|                         | -                                                                | 0 |                                                                                                                                                      |                               |             | -                                                                                                                      |

|                         |                                                            |    |                                                                                                                                                                                                                                                                                                                                                                                                                                                                        |                               |             |                                                                                                       |
|-------------------------|------------------------------------------------------------|----|------------------------------------------------------------------------------------------------------------------------------------------------------------------------------------------------------------------------------------------------------------------------------------------------------------------------------------------------------------------------------------------------------------------------------------------------------------------------|-------------------------------|-------------|-------------------------------------------------------------------------------------------------------|
| Pongo abelii            | hla-b associated transcript 2                              |    | C:GO:0005634;<br>3 F:GO:0005515;<br>C:GO:0005737                                                                                                                                                                                                                                                                                                                                                                                                                       | -                             |             | -                                                                                                     |
|                         | -                                                          |    | 0                                                                                                                                                                                                                                                                                                                                                                                                                                                                      |                               |             | -                                                                                                     |
|                         | -                                                          |    | 0                                                                                                                                                                                                                                                                                                                                                                                                                                                                      |                               |             | -                                                                                                     |
| Caenorhabditis briggsae | elegans protein partially confirmed by transcript evidence | 0  |                                                                                                                                                                                                                                                                                                                                                                                                                                                                        | F:GO:0008270;<br>C:GO:0005622 |             | IPR007087; IPR013032; IPR015880                                                                       |
| Caenorhabditis briggsae | elegans protein partially confirmed by transcript evidence | 0  |                                                                                                                                                                                                                                                                                                                                                                                                                                                                        | F:GO:0008270;<br>C:GO:0005622 |             | IPR007087; IPR013032; IPR015880                                                                       |
| Caenorhabditis briggsae | elegans protein confirmed by transcript evidence           | 1  | P:GO:0009792                                                                                                                                                                                                                                                                                                                                                                                                                                                           | -                             |             | -                                                                                                     |
| Caenorhabditis briggsae | tafazzin                                                   | 30 | P:GO:0060271;<br>P:GO:0030097;<br>P:GO:0001933;<br>P:GO:0008284;<br>P:GO:0042407;<br>P:GO:0060048;<br>P:GO:0060390;<br>P:GO:0035329;<br>P:GO:0035414;<br>P:GO:0048738;<br>F:GO:0047184;<br>F:GO:0003714;<br>P:GO:0010718;<br>P:GO:0032049;<br>F:GO:0003713;<br>P:GO:0045944;<br>P:GO:0001649;<br>P:GO:0042775;<br>P:GO:0006469;<br>C:GO:0005739;<br>C:GO:0005667;<br>P:GO:0000122;<br>P:GO:0045599;<br>P:GO:0090090;<br>P:GO:0032835;<br>P:GO:0032981;<br>C:GO:0005730 | -                             | EC:2.3.1.23 | IPR000872; IPR002123;<br>G3DSA:3.40.1130.10 (GENE3D),<br>SignalP (SIGNALP), SSF69593<br>(SUPERFAMILY) |

|                         |                                                       |    |                                                                                                                                                                                                                                                                                                                                                                                                                                                                        |                                                                                                   |                             |                                                                                                       |
|-------------------------|-------------------------------------------------------|----|------------------------------------------------------------------------------------------------------------------------------------------------------------------------------------------------------------------------------------------------------------------------------------------------------------------------------------------------------------------------------------------------------------------------------------------------------------------------|---------------------------------------------------------------------------------------------------|-----------------------------|-------------------------------------------------------------------------------------------------------|
| Caenorhabditis briggsae | tafazzin                                              | 30 | P:GO:0060271;<br>P:GO:0030097;<br>P:GO:0001933;<br>P:GO:0008284;<br>P:GO:0042407;<br>P:GO:0060048;<br>P:GO:0060390;<br>P:GO:0035329;<br>P:GO:0035414;<br>P:GO:0048738;<br>F:GO:0047184;<br>F:GO:0003714;<br>P:GO:0010718;<br>P:GO:0032049;<br>F:GO:0003713;<br>P:GO:0045944;<br>P:GO:0001649;<br>P:GO:0042775;<br>P:GO:0006469;<br>C:GO:0005739;<br>C:GO:0005667;<br>P:GO:0000122;<br>P:GO:0045599;<br>P:GO:0090090;<br>P:GO:0032835;<br>P:GO:0032981;<br>C:GO:0005730 | -                                                                                                 | EC:2.3.1.23                 | IPR000872; IPR002123;<br>G3DSA:3.40.1130.10 (GENE3D),<br>SignalP (SIGNALP), SSF69593<br>(SUPERFAMILY) |
| -                       | -                                                     | 0  | -                                                                                                                                                                                                                                                                                                                                                                                                                                                                      | -                                                                                                 | -                           | -                                                                                                     |
| -                       | -                                                     | 0  | -                                                                                                                                                                                                                                                                                                                                                                                                                                                                      | -                                                                                                 | -                           | SignalP (SIGNALP)                                                                                     |
| Loa loa                 | germ cell-less homolog 1                              | 3  | P:GO:0009987;<br>F:GO:0042802;<br>C:GO:0044428                                                                                                                                                                                                                                                                                                                                                                                                                         | -                                                                                                 | -                           | PTHR23231 (PANTHER),<br>PTHR23231:SF2 (PANTHER)                                                       |
| Brugia malayi           | trehalase                                             | 5  | F:GO:0004135;<br>P:GO:0009792;<br>P:GO:0005978;<br>P:GO:0005991;<br>F:GO:0004555                                                                                                                                                                                                                                                                                                                                                                                       | -                                                                                                 | EC:3.2.1.33;<br>EC:3.2.1.28 | IPR001661; IPR008928;<br>PTHR23403:SF1 (PANTHER)                                                      |
| -                       | -                                                     | 0  | -                                                                                                                                                                                                                                                                                                                                                                                                                                                                      | -                                                                                                 | -                           | -                                                                                                     |
| Caenorhabditis briggsae | c2 domain containing protein                          | 2  | F:GO:0046872;<br>C:GO:0016021                                                                                                                                                                                                                                                                                                                                                                                                                                          | -                                                                                                 | -                           | PTHR21119 (PANTHER),<br>PTHR21119:SF1 (PANTHER)                                                       |
| Caenorhabditis elegans  | hypothetical protein F40E3.5 [Caenorhabditis elegans] | 0  | -                                                                                                                                                                                                                                                                                                                                                                                                                                                                      | F:GO:0016787;<br>F:GO:0004721                                                                     | -                           | IPR006186; G3DSA:3.60.21.10<br>(GENE3D), PTHR11668:SF4<br>(PANTHER), SSF56300 (SUPERFAMILY)           |
| -                       | -                                                     | 0  | -                                                                                                                                                                                                                                                                                                                                                                                                                                                                      | -                                                                                                 | -                           | -                                                                                                     |
| Caenorhabditis briggsae | acid ceramidase                                       | 0  | -                                                                                                                                                                                                                                                                                                                                                                                                                                                                      | P:GO:0006629;<br>C:GO:0005764;<br>F:GO:0016787;<br>F:GO:0003824;<br>P:GO:0006672;<br>F:GO:0017040 | -                           | -                                                                                                     |
| Caenorhabditis briggsae | syntaxin 12                                           | 1  | C:GO:0044464                                                                                                                                                                                                                                                                                                                                                                                                                                                           | -                                                                                                 | -                           | -                                                                                                     |
| Caenorhabditis briggsae | glycosyl group 2 family protein                       | 4  | C:GO:0016021;<br>C:GO:0005794;<br>F:GO:0016757;<br>F:GO:0005529                                                                                                                                                                                                                                                                                                                                                                                                        | -                                                                                                 | -                           | -                                                                                                     |

|                         |                                                            |   |                                                                                                   |                                                                                                                                                                       |                                                                                                                                                                                   |
|-------------------------|------------------------------------------------------------|---|---------------------------------------------------------------------------------------------------|-----------------------------------------------------------------------------------------------------------------------------------------------------------------------|-----------------------------------------------------------------------------------------------------------------------------------------------------------------------------------|
| Homo sapiens            | atp h+ mitochondrial f0 subunit b1                         | 6 | F:GO:0015078;<br>C:GO:0000276;<br>P:GO:0042776;<br>F:GO:0016887;<br>F:GO:0005515;<br>C:GO:0005759 | -                                                                                                                                                                     | -                                                                                                                                                                                 |
| Caenorhabditis briggsae | elegans protein confirmed by transcript evidence           | 0 |                                                                                                   | C:GO:0005739                                                                                                                                                          | IPR008381                                                                                                                                                                         |
| Caenorhabditis briggsae | elegans protein partially confirmed by transcript evidence | 4 | P:GO:0000003;<br>P:GO:0040010;<br>P:GO:0006898;<br>P:GO:0002119                                   | -                                                                                                                                                                     | -                                                                                                                                                                                 |
| Caenorhabditis elegans  | viral a-type inclusion protein repeat containing protein   | 0 |                                                                                                   |                                                                                                                                                                       | -                                                                                                                                                                                 |
| Loa loa                 | mitochondrial protein 18 kda                               | 1 | C:GO:0016020                                                                                      | -                                                                                                                                                                     | IPR001765; IPR019560                                                                                                                                                              |
| Caenorhabditis briggsae | Hypothetical protein CBG23277 [Caenorhabditis briggsae]    | 0 |                                                                                                   | P:GO:0009058;<br>F:GO:0016847;<br>F:GO:0003824;<br>F:GO:0030170;<br>F:GO:0016769                                                                                      | -                                                                                                                                                                                 |
| -                       | -                                                          | 0 |                                                                                                   |                                                                                                                                                                       | -                                                                                                                                                                                 |
| -                       | -                                                          | 0 |                                                                                                   |                                                                                                                                                                       | -                                                                                                                                                                                 |
| -                       | -                                                          | 0 |                                                                                                   |                                                                                                                                                                       | -                                                                                                                                                                                 |
| Caenorhabditis elegans  | briggsae cbr-rig-4 protein                                 | 0 |                                                                                                   | P:GO:0046533;<br>P:GO:0007155;<br>C:GO:0016021;<br>P:GO:0042675;<br>C:GO:0016020;<br>C:GO:0005887                                                                     | IPR003598; IPR003599; IPR003961;<br>IPR007110; IPR008957; IPR013098;<br>IPR013783; PTHR10489 (PANTHER),<br>PTHR10489:SF57 (PANTHER), SignalP<br>(SIGNALP), SSF48726 (SUPERFAMILY) |
| -                       | -                                                          | 0 |                                                                                                   |                                                                                                                                                                       | -                                                                                                                                                                                 |
| -                       | -                                                          | 0 |                                                                                                   |                                                                                                                                                                       | IPR006578                                                                                                                                                                         |
| Brugia malayi           | hed family member (ptc-3)                                  | 0 |                                                                                                   | C:GO:0016021;<br>C:GO:0016020;<br>P:GO:0000003;<br>P:GO:0040018;<br>P:GO:0002119;<br>P:GO:0009792;<br>F:GO:0008158;<br>P:GO:0040011;<br>P:GO:0040007;<br>P:GO:0018996 | PD019290 (PRODOM)                                                                                                                                                                 |
| -                       | -                                                          | 0 |                                                                                                   |                                                                                                                                                                       | -                                                                                                                                                                                 |
| Caenorhabditis elegans  | glucose-6-phosphate dehydroge-se                           | 4 | P:GO:0006006;<br>F:GO:0004345;<br>P:GO:0055114;<br>F:GO:0005488                                   | -                                                                                                                                                                     | EC:1.1.1.49<br>IPR016040; IPR022674; SSF51735<br>(SUPERFAMILY)                                                                                                                    |
| -                       | -                                                          | 0 |                                                                                                   |                                                                                                                                                                       | -                                                                                                                                                                                 |
| Loa loa                 | proteasome regulatory non-atpase-like protein              | 5 | C:GO:0005875;<br>C:GO:0008541;<br>P:GO:0006508;<br>F:GO:0005488;<br>F:GO:0004175                  | -                                                                                                                                                                     | IPR000717; IPR011991; PTHR10678<br>(PANTHER), PTHR10678:SF2<br>(PANTHER), SSF46785 (SUPERFAMILY)                                                                                  |
| -                       | -                                                          | 0 |                                                                                                   |                                                                                                                                                                       | PTHR13712 (PANTHER),<br>PTHR13712:SF63 (PANTHER)                                                                                                                                  |

|                             |                                                                     |    |                                                                                                                                                                                                                                                            |                                                                                                                                                                       |  |                                                             |
|-----------------------------|---------------------------------------------------------------------|----|------------------------------------------------------------------------------------------------------------------------------------------------------------------------------------------------------------------------------------------------------------|-----------------------------------------------------------------------------------------------------------------------------------------------------------------------|--|-------------------------------------------------------------|
| Pristionchus pacificus      | armadillo beta-catenin-like repeat family protein                   | 0  |                                                                                                                                                                                                                                                            | C:GO:0016020;<br>C:GO:0005634;<br>C:GO:0030054;<br>C:GO:0005737;<br>P:GO:0001708;<br>P:GO:0007275;<br>P:GO:0006350;<br>P:GO:0016055;<br>P:GO:0045449;<br>F:GO:0005488 |  | PTHR23315 (PANTHER),<br>PTHR23315:SF3 (PANTHER)             |
|                             | -                                                                   | 0  |                                                                                                                                                                                                                                                            |                                                                                                                                                                       |  | -                                                           |
|                             | -                                                                   | 0  |                                                                                                                                                                                                                                                            |                                                                                                                                                                       |  | -                                                           |
|                             | -                                                                   | 0  |                                                                                                                                                                                                                                                            |                                                                                                                                                                       |  | -                                                           |
| Loa loa                     | 2 -phosphodiesterase 12                                             | 1  | F:GO:0016787                                                                                                                                                                                                                                               | -                                                                                                                                                                     |  | IPR005135; PTHR12121 (PANTHER),<br>PTHR12121:SF12 (PANTHER) |
|                             | -                                                                   | 0  |                                                                                                                                                                                                                                                            |                                                                                                                                                                       |  | -                                                           |
|                             | -                                                                   | 0  |                                                                                                                                                                                                                                                            |                                                                                                                                                                       |  | -                                                           |
| Angiostrongylus cantonensis | transcription regulator                                             | 1  | F:GO:0030528                                                                                                                                                                                                                                               | -                                                                                                                                                                     |  | SignalP (SIGNALP)                                           |
| Caenorhabditis briggsae     | nitrogen permease regulator-like 3                                  | 0  |                                                                                                                                                                                                                                                            | F:GO:0003674;<br>C:GO:0005575                                                                                                                                         |  | IPR005365; SignalP (SIGNALP)                                |
| Caenorhabditis sp. PS1010   | serine threonine-protein ki-se                                      | 1  | F:GO:0005488                                                                                                                                                                                                                                               | -                                                                                                                                                                     |  | -                                                           |
|                             | -                                                                   | 0  |                                                                                                                                                                                                                                                            |                                                                                                                                                                       |  | -                                                           |
|                             | -                                                                   | 0  |                                                                                                                                                                                                                                                            |                                                                                                                                                                       |  | -                                                           |
| Loa loa                     | myosin xviii                                                        | 4  | P:GO:0009987;<br>C:GO:0005730;<br>F:GO:0042802;<br>C:GO:0005794                                                                                                                                                                                            | -                                                                                                                                                                     |  | IPR001609; PTHR13140 (PANTHER),<br>SSF52540 (SUPERFAMILY)   |
|                             | -                                                                   | 0  |                                                                                                                                                                                                                                                            |                                                                                                                                                                       |  | -                                                           |
|                             | -                                                                   | 0  |                                                                                                                                                                                                                                                            |                                                                                                                                                                       |  | -                                                           |
|                             | -                                                                   | 0  |                                                                                                                                                                                                                                                            |                                                                                                                                                                       |  | -                                                           |
|                             | -                                                                   | 0  |                                                                                                                                                                                                                                                            |                                                                                                                                                                       |  | -                                                           |
| Caenorhabditis briggsae     | beclin 1                                                            | 15 | P:GO:0035121;<br>P:GO:0012501;<br>P:GO:0040010;<br>P:GO:0008340;<br>P:GO:0009267;<br>P:GO:0040024;<br>P:GO:0040027;<br>P:GO:0040035;<br>C:GO:0031410;<br>P:GO:0040011;<br>P:GO:0030163;<br>P:GO:0009792;<br>P:GO:0040018;<br>P:GO:0006914;<br>C:GO:0005634 | -                                                                                                                                                                     |  | -                                                           |
| Caenorhabditis briggsae     | osta1_caeel ame: full=organic solute transporter alpha-like protein | 4  | C:GO:0016021;<br>P:GO:0009792;<br>P:GO:0006810;<br>F:GO:0005215                                                                                                                                                                                            | -                                                                                                                                                                     |  | IPR005178; PTHR23423:SF3<br>(PANTHER), SignalP (SIGNALP)    |
| Caenorhabditis elegans      | multidrug resistance protein family member (mrp-1)                  | 4  | P:GO:0009987;<br>P:GO:0006810;<br>F:GO:0042626;<br>C:GO:0005887                                                                                                                                                                                            | -                                                                                                                                                                     |  | SignalP (SIGNALP)                                           |

|                         |                                                                     |   |                                                                                                   |                                                                                                                                     |            |                                                                         |
|-------------------------|---------------------------------------------------------------------|---|---------------------------------------------------------------------------------------------------|-------------------------------------------------------------------------------------------------------------------------------------|------------|-------------------------------------------------------------------------|
| Nematostella vectensis  | endonuclease-reverse transcriptase                                  | 0 |                                                                                                   | F:GO:0003723;<br>F:GO:0004527;<br>P:GO:0006278;<br>F:GO:0004519;<br>F:GO:0003964                                                    |            | PTHR23227 (PANTHER),<br>PTHR23227:SF14 (PANTHER)                        |
| Heliconius melpomene    | endonuclease-reverse transcriptase                                  | 1 | F:GO:0005488                                                                                      | -                                                                                                                                   |            | IPR000477; IPR015706;<br>PTHR19446:SF100 (PANTHER)                      |
| Caenorhabditis briggsae | cationic amino acid transporter                                     | 5 | P:GO:0019915;<br>C:GO:0016021;<br>F:GO:0015171;<br>C:GO:0005886;<br>P:GO:0003333                  | -                                                                                                                                   |            | IPR002293; IPR004841;<br>PTHR11785:SF74 (PANTHER), SignalP<br>(SIGNALP) |
| Homo sapiens            | hCG2041804 [Homo sapiens]                                           | 0 |                                                                                                   |                                                                                                                                     |            | SignalP (SIGNALP)                                                       |
|                         | -                                                                   | 0 |                                                                                                   |                                                                                                                                     |            | -                                                                       |
| Caenorhabditis briggsae | brox_caee1 ame: full=bro1 domain-containing protein brox<br>homolog | 0 |                                                                                                   |                                                                                                                                     |            | PTHR23032 (PANTHER)                                                     |
| Caenorhabditis elegans  | pecanex-like protein 1                                              | 2 | C:GO:0016021;<br>P:GO:0040011                                                                     | -                                                                                                                                   |            | PTHR12372 (PANTHER)                                                     |
| Caenorhabditis briggsae | pecanex-like protein 1                                              | 1 | P:GO:0040011                                                                                      | -                                                                                                                                   |            | -                                                                       |
| Caenorhabditis elegans  | pecanex-like protein 1                                              | 2 | C:GO:0016020;<br>P:GO:0040011                                                                     | -                                                                                                                                   |            | -                                                                       |
|                         | -                                                                   | 0 |                                                                                                   |                                                                                                                                     |            | -                                                                       |
| Caenorhabditis elegans  | placental protein 11 related                                        | 6 | F:GO:0003723;<br>P:GO:0044238;<br>P:GO:0044260;<br>F:GO:0046872;<br>F:GO:0004521;<br>C:GO:0005634 | -                                                                                                                                   |            | IPR018998; PTHR12439 (PANTHER),<br>SSF142877 (SUPERFAMILY)              |
| Caenorhabditis briggsae | elegans protein confirmed by transcript evidence                    | 6 | P:GO:0009056;<br>P:GO:0018991;<br>F:GO:0004553;<br>P:GO:0006665;<br>P:GO:0040011;<br>C:GO:0016020 | -                                                                                                                                   | EC:3.2.1.0 | PTHR12654 (PANTHER), PF12215<br>(PFAM)                                  |
| Caenorhabditis elegans  | plasmid maintenance protein containing protein                      | 0 |                                                                                                   | P:GO:0006506;<br>F:GO:0016740;<br>F:GO:0005529;<br>C:GO:0031227;<br>F:GO:0016757                                                    |            | IPR005599; SignalP (SIGNALP)                                            |
|                         | -                                                                   | 0 |                                                                                                   |                                                                                                                                     |            | -                                                                       |
| Loa loa                 | elegans protein confirmed by transcript evidence                    | 0 |                                                                                                   | P:GO:0006952;<br>F:GO:0016787;<br>F:GO:0004415;<br>P:GO:0005975;<br>P:GO:0008152;<br>F:GO:0016798;<br>F:GO:0003824;<br>C:GO:0005576 |            | IPR013785; IPR017853; IPR018155                                         |
| Caenorhabditis briggsae | briggsae cbr-pme-5 protein                                          | 0 |                                                                                                   |                                                                                                                                     |            | IPR002110; IPR020683; PTHR18958<br>(PANTHER)                            |
|                         | -                                                                   | 0 |                                                                                                   |                                                                                                                                     |            | -                                                                       |
| Caenorhabditis elegans  | proteasome component                                                | 1 | P:GO:0007067                                                                                      | -                                                                                                                                   |            | -                                                                       |
|                         | -                                                                   | 0 |                                                                                                   |                                                                                                                                     |            | -                                                                       |



|                             |                                        |    |                                                                                                                                                                                                                                                                                                                                                                                                    |              |                                                                                                         |
|-----------------------------|----------------------------------------|----|----------------------------------------------------------------------------------------------------------------------------------------------------------------------------------------------------------------------------------------------------------------------------------------------------------------------------------------------------------------------------------------------------|--------------|---------------------------------------------------------------------------------------------------------|
| Loa loa                     | bone morphogenic protein 6             | 23 | N:GO:0061138;<br>P:GO:0031325;<br>P:GO:0007178;<br>P:GO:0048699;<br>P:GO:0042325;<br>P:GO:0035295;<br>P:GO:0010941;<br>P:GO:0001822;<br>P:GO:0001654;<br>P:GO:0045597;<br>P:GO:0040007;<br>P:GO:0010646;<br>P:GO:0048646;<br>P:GO:0035466;<br>F:GO:0005515;<br>N:GO:2000027;<br>P:GO:0048523;<br>P:GO:0022612;<br>P:GO:0045449;<br>P:GO:0051093;<br>P:GO:0048598;<br>P:GO:0010604;<br>P:GO:0060284 | -            | IPR001839; IPR002405; IPR015615;<br>IPR017948; G3DSA:2.10.90.10<br>(GENE3D), SSF57501 (SUPERFAMILY)     |
| Angiostrongylus cantonensis | galectin protein 140                   | 0  |                                                                                                                                                                                                                                                                                                                                                                                                    | F:GO:0042302 | -                                                                                                       |
| -                           | -                                      | 0  |                                                                                                                                                                                                                                                                                                                                                                                                    |              | -                                                                                                       |
| -                           | -                                      | 0  |                                                                                                                                                                                                                                                                                                                                                                                                    |              | SignalP (SIGNALP)                                                                                       |
| -                           | -                                      | 0  |                                                                                                                                                                                                                                                                                                                                                                                                    |              | SignalP (SIGNALP)                                                                                       |
| -                           | -                                      | 0  |                                                                                                                                                                                                                                                                                                                                                                                                    |              | -                                                                                                       |
| Caenorhabditis briggsae     | phosphatase and actin regulator 1      | 1  | F:GO:0005488                                                                                                                                                                                                                                                                                                                                                                                       | -            | IPR004018; PTHR12751 (PANTHER),<br>PTHR12751:SF3 (PANTHER)                                              |
| Caenorhabditis elegans      | myosin light chain                     | 4  | P:GO:0009792;<br>C:GO:0016459;<br>F:GO:0032036;<br>P:GO:0000003                                                                                                                                                                                                                                                                                                                                    | -            | SignalP (SIGNALP)                                                                                       |
| -                           | -                                      | 0  |                                                                                                                                                                                                                                                                                                                                                                                                    |              | -                                                                                                       |
| Caenorhabditis elegans      | sorting nexin-2                        | 5  | P:GO:0009792;<br>P:GO:0007126;<br>P:GO:0018991;<br>F:GO:0005515;<br>P:GO:0006810                                                                                                                                                                                                                                                                                                                   | -            | IPR015404; PTHR10555 (PANTHER),<br>PTHR10555:SF28 (PANTHER)                                             |
| Caenorhabditis briggsae     | eri1 exoribonuclease 3 isoform 1       | 3  | F:GO:0016787;<br>F:GO:0005515;<br>C:GO:0005886                                                                                                                                                                                                                                                                                                                                                     | -            | IPR012337; IPR013520;<br>G3DSA:3.30.420.10 (GENE3D),<br>PTHR23044 (PANTHER),<br>PTHR23044:SF8 (PANTHER) |
| Ostertagia ostertagi        | translatio-ly controlled tumor protein | 8  | C:GO:0005737;<br>P:GO:0009792;<br>P:GO:0002119;<br>F:GO:0005515;<br>P:GO:0000003;<br>P:GO:0040011;<br>P:GO:0040007;<br>P:GO:0006898                                                                                                                                                                                                                                                                | -            | -                                                                                                       |
| -                           | -                                      | 0  |                                                                                                                                                                                                                                                                                                                                                                                                    |              | SignalP (SIGNALP)                                                                                       |

|                         |                                                            |   |                                                                                                                                     |                               |              |                                                                                  |
|-------------------------|------------------------------------------------------------|---|-------------------------------------------------------------------------------------------------------------------------------------|-------------------------------|--------------|----------------------------------------------------------------------------------|
| Ostertagia ostertagi    | translatio-ly controlled tumor protein                     | 8 | P:GO:0009792;<br>C:GO:0005737;<br>P:GO:0000003;<br>P:GO:0040007;<br>F:GO:0005515;<br>P:GO:0006898;<br>P:GO:0002119;<br>P:GO:0040011 | -                             |              | IPR001790; IPR011057; IPR011323;<br>IPR018105                                    |
| Ostertagia ostertagi    | translatio-ly controlled tumor protein                     | 8 | P:GO:0009792;<br>C:GO:0005737;<br>P:GO:0000003;<br>P:GO:0040007;<br>F:GO:0005515;<br>P:GO:0006898;<br>P:GO:0002119;<br>P:GO:0040011 | -                             |              | -                                                                                |
| Caenorhabditis briggsae | 60s acidic ribosomal protein p0                            | 6 | C:GO:0005840;<br>F:GO:0003735;<br>F:GO:0005515;<br>P:GO:0042254;<br>F:GO:0003906;<br>P:GO:0006414                                   | -                             | EC:4.2.99.18 | IPR001790; PTHR21141 (PANTHER),<br>PTHR21141:SF3 (PANTHER)                       |
| Caenorhabditis elegans  | hypothetical protein C25H3.11 [Caenorhabditis elegans]     | 0 |                                                                                                                                     | P:GO:0008104                  |              | -                                                                                |
|                         | -                                                          | 0 |                                                                                                                                     |                               |              | -                                                                                |
|                         | -                                                          | 0 |                                                                                                                                     |                               |              | SignalP (SIGNALP)                                                                |
| Caenorhabditis briggsae | elegans protein partially confirmed by transcript evidence | 0 |                                                                                                                                     | C:GO:0016021                  |              | PTHR23294 (PANTHER), SignalP<br>(SIGNALP)                                        |
| Macaca mulatta          | secreted cysteine-rich                                     | 8 | F:GO:0050840;<br>P:GO:0042127;<br>C:GO:0031093;<br>F:GO:0005518;<br>P:GO:0071363;<br>P:GO:0001503;<br>F:GO:0005509;<br>C:GO:0005604 | -                             |              | -                                                                                |
|                         |                                                            | 0 |                                                                                                                                     |                               |              |                                                                                  |
| Caenorhabditis briggsae | udp-xylose and udp-n-acetylglucosamine transporter         | 8 | C:GO:0000139;<br>F:GO:0005464;<br>P:GO:0015790;<br>P:GO:0055085;<br>P:GO:0015788;<br>F:GO:0005351;<br>C:GO:0016021;<br>F:GO:0005462 | -                             |              | IPR013657; PTHR10778 (PANTHER),<br>PTHR10778:SF4 (PANTHER), SignalP<br>(SIGNALP) |
| Caenorhabditis briggsae | udp-xylose and udp-n-acetylglucosamine transporter         | 8 | C:GO:0000139;<br>F:GO:0005464;<br>P:GO:0015790;<br>P:GO:0055085;<br>P:GO:0015788;<br>F:GO:0005351;<br>C:GO:0016021;<br>F:GO:0005462 | -                             |              | IPR013657; PTHR10778 (PANTHER),<br>PTHR10778:SF4 (PANTHER), SignalP<br>(SIGNALP) |
| Caenorhabditis briggsae | arginyl-tr- synthetase                                     | 3 | F:GO:0004812;<br>P:GO:0006418;<br>F:GO:0000166                                                                                      | -                             |              | IPR001278; IPR014729; IPR015945;<br>SSF52374 (SUPERFAMILY)                       |
| Caenorhabditis elegans  | coiled-coil domain containing 132                          | 0 |                                                                                                                                     | F:GO:0003674;<br>P:GO:0008150 |              | IPR019515; PTHR13258 (PANTHER)                                                   |

|                         |                                                            |  |                                                  |                                                                                                                                                                                                                                                                                                                                                                                                                                                                        |             |                                                                                                                                                                                    |
|-------------------------|------------------------------------------------------------|--|--------------------------------------------------|------------------------------------------------------------------------------------------------------------------------------------------------------------------------------------------------------------------------------------------------------------------------------------------------------------------------------------------------------------------------------------------------------------------------------------------------------------------------|-------------|------------------------------------------------------------------------------------------------------------------------------------------------------------------------------------|
| Caenorhabditis elegans  | briggsae cbr-ugt-62 protein                                |  | P:GO:0044238;<br>3 P:GO:0040010;<br>F:GO:0016757 | -                                                                                                                                                                                                                                                                                                                                                                                                                                                                      |             | IPR002213                                                                                                                                                                          |
| Caenorhabditis briggsae | low-density lipoprotein                                    |  | 2 C:GO:0016021;<br>F:GO:0005509                  | -                                                                                                                                                                                                                                                                                                                                                                                                                                                                      |             | IPR000033; IPR002172; IPR006210;<br>IPR011042; G3DSA:2.10.25.10<br>(GENE3D), PTHR10529 (PANTHER),<br>PTHR10529:SF2 (PANTHER), SSF57196<br>(SUPERFAMILY), SSF63825<br>(SUPERFAMILY) |
| Nasonia vitripennis     | tk fer protein ki-se                                       |  | 0                                                | F:GO:0019901;<br>P:GO:0006468;<br>C:GO:0005634;<br>F:GO:0017137;<br>F:GO:0005524;<br>F:GO:0016301;<br>P:GO:0007155;<br>P:GO:0018108;<br>F:GO:0004674;<br>F:GO:0008092;<br>F:GO:0045296;<br>F:GO:0004672;<br>F:GO:0045295;<br>F:GO:0050839;<br>F:GO:0000166;<br>P:GO:0046777;<br>C:GO:0005737;<br>F:GO:0003779;<br>P:GO:0007165;<br>F:GO:0030145;<br>F:GO:0000287;<br>F:GO:0004715;<br>F:GO:0005515;<br>F:GO:0004713;<br>F:GO:0016740;<br>C:GO:0005575;<br>P:GO:0006935 |             | IPR000719; IPR000980; IPR001245;<br>IPR011009; IPR020685;<br>G3DSA:1.10.510.10 (GENE3D),<br>SSF55550 (SUPERFAMILY)                                                                 |
|                         | -                                                          |  | 0                                                |                                                                                                                                                                                                                                                                                                                                                                                                                                                                        |             | SignalP (SIGNALP)                                                                                                                                                                  |
| Caenorhabditis briggsae | elegans protein partially confirmed by transcript evidence |  | 0                                                | F:GO:0005515                                                                                                                                                                                                                                                                                                                                                                                                                                                           |             | -                                                                                                                                                                                  |
|                         | -                                                          |  | 0                                                |                                                                                                                                                                                                                                                                                                                                                                                                                                                                        |             | -                                                                                                                                                                                  |
| Loa loa                 | rdd family protein                                         |  | 0                                                | F:GO:0003674;<br>C:GO:0005575                                                                                                                                                                                                                                                                                                                                                                                                                                          |             | IPR010432; PTHR13659 (PANTHER)                                                                                                                                                     |
|                         | -                                                          |  | 0                                                |                                                                                                                                                                                                                                                                                                                                                                                                                                                                        |             | -                                                                                                                                                                                  |
|                         | -                                                          |  | 0                                                |                                                                                                                                                                                                                                                                                                                                                                                                                                                                        |             | -                                                                                                                                                                                  |
|                         |                                                            |  |                                                  |                                                                                                                                                                                                                                                                                                                                                                                                                                                                        |             | IPR003961; IPR008957; IPR013783;<br>PRO0014 (PRINTS), PTHR19900<br>(PANTHER), PTHR19900:SF7<br>(PANTHER)                                                                           |
|                         | -                                                          |  | 0                                                |                                                                                                                                                                                                                                                                                                                                                                                                                                                                        |             | -                                                                                                                                                                                  |
|                         | -                                                          |  | 0                                                |                                                                                                                                                                                                                                                                                                                                                                                                                                                                        |             | -                                                                                                                                                                                  |
|                         | -                                                          |  | 0                                                |                                                                                                                                                                                                                                                                                                                                                                                                                                                                        |             | -                                                                                                                                                                                  |
| Caenorhabditis elegans  | type i inositol- -trisphosphate 5-phosphatase              |  | 3 P:GO:0046855;<br>F:GO:0004445;<br>F:GO:0005515 | -                                                                                                                                                                                                                                                                                                                                                                                                                                                                      | EC:3.1.3.56 | G3DSA:3.60.10.10 (GENE3D),<br>PTHR12997 (PANTHER),<br>PTHR12997:SF3 (PANTHER)                                                                                                      |
|                         | -                                                          |  | 0                                                |                                                                                                                                                                                                                                                                                                                                                                                                                                                                        |             | -                                                                                                                                                                                  |
|                         | -                                                          |  | 0                                                |                                                                                                                                                                                                                                                                                                                                                                                                                                                                        |             | -                                                                                                                                                                                  |
| Caenorhabditis briggsae | elegans protein confirmed by transcript evidence           |  | 0                                                |                                                                                                                                                                                                                                                                                                                                                                                                                                                                        |             | -                                                                                                                                                                                  |

|                         |                                                  |    |                                                                                                                                                                                        |                                                                                                                                     |             |                                                                                                                |
|-------------------------|--------------------------------------------------|----|----------------------------------------------------------------------------------------------------------------------------------------------------------------------------------------|-------------------------------------------------------------------------------------------------------------------------------------|-------------|----------------------------------------------------------------------------------------------------------------|
| Caenorhabditis briggsae | integrin alpha-ps2                               | 11 | P:GO:0009792;<br>F:GO:0004872;<br>P:GO:0002119;<br>P:GO:0007229;<br>P:GO:0018991;<br>P:GO:0032940;<br>P:GO:0007155;<br>P:GO:0040007;<br>P:GO:0006898;<br>P:GO:0040039;<br>C:GO:0008305 | -                                                                                                                                   |             | G3DSA:2.130.10.130 (GENE3D),<br>PTHR23220 (PANTHER),<br>PTHR23220:SF11 (PANTHER),<br>SSF69318 (SUPERFAMILY)    |
| Caenorhabditis briggsae | briggsae cbr-fut-1 protein                       | 3  | F:GO:0016757;<br>C:GO:0005794;<br>C:GO:0016020                                                                                                                                         | -                                                                                                                                   |             | IPR001503; PTHR1929:SF8<br>(PANTHER)                                                                           |
| Caenorhabditis elegans  | b-box zinc finger family protein                 | 1  | F:GO:0046872                                                                                                                                                                           | -                                                                                                                                   |             | -                                                                                                              |
| Loa loa                 | hypothetical protein LOAG_11558 [Loa loa]        | 0  |                                                                                                                                                                                        |                                                                                                                                     |             | -                                                                                                              |
| Caenorhabditis elegans  | phosphoserine aminotransferase 1                 | 3  | F:GO:0030170;<br>F:GO:0004648;<br>P:GO:0006564                                                                                                                                         | -                                                                                                                                   | EC:2.6.1.52 | IPR000192; IPR015421; IPR015424;<br>PTHR21152 (PANTHER),<br>PTHR21152:SF1 (PANTHER)                            |
| -                       | -                                                | 0  |                                                                                                                                                                                        |                                                                                                                                     |             | -                                                                                                              |
| Caenorhabditis elegans  | pan domain containing protein                    | 0  |                                                                                                                                                                                        |                                                                                                                                     |             | -                                                                                                              |
| Caenorhabditis briggsae | nuclear autoantigenic sperm protein              | 0  |                                                                                                                                                                                        | C:GO:0005694;<br>F:GO:0005488;<br>P:GO:0007275;<br>P:GO:0040011;<br>P:GO:0008150;<br>F:GO:0005515;<br>C:GO:0005634;<br>C:GO:0005575 |             | -                                                                                                              |
| Caenorhabditis briggsae | nuclear autoantigenic sperm protein              | 0  |                                                                                                                                                                                        | C:GO:0005694;<br>F:GO:0005488;<br>P:GO:0007275;<br>P:GO:0040011;<br>P:GO:0008150;<br>F:GO:0005515;<br>C:GO:0005634;<br>C:GO:0005575 |             | IPR011990; IPR019544; IPR019734;<br>PTHR15081 (PANTHER),<br>PTHR15081:SF4 (PANTHER), SSF48452<br>(SUPERFAMILY) |
| Caenorhabditis elegans  | elegans protein confirmed by transcript evidence | 2  | P:GO:0040011;<br>F:GO:0005488                                                                                                                                                          | -                                                                                                                                   |             | PTHR15081 (PANTHER),<br>PTHR15081:SF3 (PANTHER)                                                                |
| Caenorhabditis briggsae | nuclear autoantigenic sperm protein              | 0  |                                                                                                                                                                                        | C:GO:0005694;<br>F:GO:0005488;<br>P:GO:0007275;<br>P:GO:0040011;<br>P:GO:0008150;<br>C:GO:0005634;<br>C:GO:0005575                  |             | -                                                                                                              |
| Caenorhabditis briggsae | nuclear autoantigenic sperm protein              | 0  |                                                                                                                                                                                        | C:GO:0005694;<br>F:GO:0005488;<br>P:GO:0007275;<br>P:GO:0040011;<br>P:GO:0008150;<br>F:GO:0005515;<br>C:GO:0005634;<br>C:GO:0005575 |             | IPR011990; IPR019544; IPR019734;<br>PTHR15081 (PANTHER),<br>PTHR15081:SF4 (PANTHER), SSF48452<br>(SUPERFAMILY) |
| Caenorhabditis elegans  | elegans protein confirmed by transcript evidence | 2  | P:GO:0040011;<br>F:GO:0005488                                                                                                                                                          | -                                                                                                                                   |             | PTHR15081 (PANTHER),<br>PTHR15081:SF3 (PANTHER)                                                                |

|                         |                                                         |    |                                                                                                                                                                                        |                                                                                                                                     |             |                                                                                   |
|-------------------------|---------------------------------------------------------|----|----------------------------------------------------------------------------------------------------------------------------------------------------------------------------------------|-------------------------------------------------------------------------------------------------------------------------------------|-------------|-----------------------------------------------------------------------------------|
| Caenorhabditis elegans  | nuclear autoantigenic sperm                             | 2  | P:GO:0040011;<br>F:GO:0005488                                                                                                                                                          | -                                                                                                                                   |             | PTHR15081 (PANTHER),<br>PTHR15081:SF4 (PANTHER)                                   |
| Caenorhabditis briggsae | nuclear autoantigenic sperm protein                     | 0  |                                                                                                                                                                                        | C:GO:0005694;<br>F:GO:0005488;<br>P:GO:0007275;<br>P:GO:0040011;<br>P:GO:0008150;<br>F:GO:0005515;<br>C:GO:0005634;<br>C:GO:0005575 |             | -                                                                                 |
| Caenorhabditis briggsae | citron (rho- serine threonine ki-se 21)                 | 11 | P:GO:0000278;<br>C:GO:0043231;<br>F:GO:0016740;<br>P:GO:0048468;<br>C:GO:0005737;<br>P:GO:0006996;<br>P:GO:0009792;<br>P:GO:0050794;<br>P:GO:0022403;<br>F:GO:0005488;<br>P:GO:0030182 | -                                                                                                                                   |             | IPR001180; PTHR12894 (PANTHER),<br>PTHR12894:SF10 (PANTHER), PS50219<br>(PROFILE) |
| Caenorhabditis elegans  | ryanodine receptor homologue                            | 11 | P:GO:0055085;<br>P:GO:0006629;<br>C:GO:0005875;<br>F:GO:0005509;<br>C:GO:0016021;<br>F:GO:0004872;<br>P:GO:0006874;<br>P:GO:0006816;<br>C:GO:0005789;<br>F:GO:0005219;<br>P:GO:0006936 | -                                                                                                                                   |             | -                                                                                 |
| Caenorhabditis briggsae | Hypothetical protein CBG15114 [Caenorhabditis briggsae] | 0  |                                                                                                                                                                                        | P:GO:0045454;<br>F:GO:0009055;<br>F:GO:0015035                                                                                      |             | IPR002109; IPR012335; IPR012336                                                   |
| Caenorhabditis briggsae | pyruvate ki-se                                          | 8  | P:GO:0009792;<br>F:GO:0004743;<br>F:GO:0016830;<br>P:GO:0006725;<br>F:GO:0005515;<br>F:GO:0030955;<br>F:GO:0000287;<br>P:GO:0006096                                                    | -                                                                                                                                   | EC:2.7.1.40 | IPR001697; IPR015793; IPR015794;<br>IPR015813                                     |

|                         |                                                             |    |                                                                                                                                                                                                                                                                                                                                                                                                                                      |   |                                          |                                                                                                                                                                                             |
|-------------------------|-------------------------------------------------------------|----|--------------------------------------------------------------------------------------------------------------------------------------------------------------------------------------------------------------------------------------------------------------------------------------------------------------------------------------------------------------------------------------------------------------------------------------|---|------------------------------------------|---------------------------------------------------------------------------------------------------------------------------------------------------------------------------------------------|
| Caenorhabditis elegans  | carbamoyl-phosphate synthetase aspartate and dihydroorotase | 25 | C:GO:0005654;<br>P:GO:0006541;<br>F:GO:0070335;<br>F:GO:0004070;<br>P:GO:0018107;<br>P:GO:0023034;<br>C:GO:0044430;<br>P:GO:0046777;<br>C:GO:0015629;<br>P:GO:0006309;<br>P:GO:0006928;<br>F:GO:0004672;<br>P:GO:0006936;<br>C:GO:0005829;<br>F:GO:0004537;<br>F:GO:0004151;<br>F:GO:0005523;<br>P:GO:0030263;<br>C:GO:0016363;<br>P:GO:0006207;<br>F:GO:0004088;<br>F:GO:0019899;<br>C:GO:0005886;<br>F:GO:0005524;<br>P:GO:0006221 | - | EC:2.1.3.2;<br>EC:3.5.2.3;<br>EC:6.3.5.5 | G3DSA:3.20.20.140 (GENE3D),<br>PTHR11647 (PANTHER),<br>PTHR11647:SF2 (PANTHER), SSF51556<br>(SUPERFAMILY)                                                                                   |
| Caenorhabditis briggsae | amino acid permease family protein                          | 4  | P:GO:0019915;<br>C:GO:0016020;<br>P:GO:0006865;<br>P:GO:0055085                                                                                                                                                                                                                                                                                                                                                                      | - |                                          | IPR002293; IPR004841; IPR015606;<br>SignalP (SIGNALP)                                                                                                                                       |
| Caenorhabditis elegans  | ribosomal r- processing 12 homolog ( cerevisiae)            | 2  | C:GO:0044464;<br>F:GO:0005488                                                                                                                                                                                                                                                                                                                                                                                                        | - |                                          | PTHR21576 (PANTHER),<br>PTHR21576:SF2 (PANTHER)                                                                                                                                             |
| Caenorhabditis briggsae | beige beach domain containing protein                       | 2  | F:GO:0008270;<br>C:GO:0005622                                                                                                                                                                                                                                                                                                                                                                                                        | - |                                          | -                                                                                                                                                                                           |
|                         | -                                                           | 0  |                                                                                                                                                                                                                                                                                                                                                                                                                                      |   |                                          | -                                                                                                                                                                                           |
| Harpegnathos saltator   | cytochrome p450                                             | 6  | F:GO:0009055;<br>F:GO:0004497;<br>F:GO:0020037;<br>P:GO:0055114;<br>C:GO:0016020;<br>C:GO:0005783                                                                                                                                                                                                                                                                                                                                    | - |                                          | IPR001128; IPR002403; IPR017972                                                                                                                                                             |
| Caenorhabditis briggsae | elegans protein confirmed by transcript evidence            | 0  |                                                                                                                                                                                                                                                                                                                                                                                                                                      |   |                                          | IPR017970; IPR018625; SignalP<br>(SIGNALP)                                                                                                                                                  |
| Caenorhabditis briggsae | briggsae cbr-cct-1 protein                                  | 14 | P:GO:0040010;<br>C:GO:0005753;<br>C:GO:0005875;<br>F:GO:0008553;<br>P:GO:0006457;<br>P:GO:0040035;<br>P:GO:0007052;<br>P:GO:0006911;<br>F:GO:0005524;<br>P:GO:0002119;<br>P:GO:0040039;<br>P:GO:0006898;<br>F:GO:0051082;<br>P:GO:0009792                                                                                                                                                                                            | - | EC:3.6.3.6                               | IPR002194; IPR002423; IPR012715;<br>IPR017998; G3DSA:1.10.560.10<br>(GENE3D), G3DSA:3.30.260.10<br>(GENE3D), G3DSA:3.50.7.10<br>(GENE3D), SSF52029 (SUPERFAMILY),<br>SSF54849 (SUPERFAMILY) |
|                         | -                                                           | 0  |                                                                                                                                                                                                                                                                                                                                                                                                                                      |   |                                          | -                                                                                                                                                                                           |

|                         |                                                         |    |                                                                                                                                                                                                                                                                                                                                                                  |                                                                                                                    |                                                                                        |
|-------------------------|---------------------------------------------------------|----|------------------------------------------------------------------------------------------------------------------------------------------------------------------------------------------------------------------------------------------------------------------------------------------------------------------------------------------------------------------|--------------------------------------------------------------------------------------------------------------------|----------------------------------------------------------------------------------------|
| Caenorhabditis elegans  | uncoordinated family member (unc-44)                    | 0  |                                                                                                                                                                                                                                                                                                                                                                  | F:GO:0005509;<br>P:GO:0007156;<br>P:GO:0007155;<br>C:GO:0016021;<br>C:GO:0016020;<br>F:GO:0005515;<br>C:GO:0005886 | -                                                                                      |
| Caenorhabditis elegans  | prkca-binding protein                                   | 21 | F:GO:0005080;<br>P:GO:0015844;<br>P:GO:0006468;<br>F:GO:0005102;<br>C:GO:0030666;<br>F:GO:0008022;<br>P:GO:0007205;<br>C:GO:0042734;<br>P:GO:0006605;<br>C:GO:0005794;<br>P:GO:0043045;<br>P:GO:0023060;<br>P:GO:0043046;<br>P:GO:0006890;<br>C:GO:0048471;<br>F:GO:0016887;<br>P:GO:0051260;<br>P:GO:0045161;<br>C:GO:0005886;<br>P:GO:0043113;<br>C:GO:0005739 | -                                                                                                                  | IPR010504; PTHR12141 (PANTHER),<br>PTHR12141:SF2 (PANTHER),<br>SSF103657 (SUPERFAMILY) |
|                         | -                                                       | 0  |                                                                                                                                                                                                                                                                                                                                                                  |                                                                                                                    | -                                                                                      |
|                         | -                                                       | 0  |                                                                                                                                                                                                                                                                                                                                                                  |                                                                                                                    | -                                                                                      |
|                         | -                                                       | 0  |                                                                                                                                                                                                                                                                                                                                                                  |                                                                                                                    | SignalP (SIGNALP)                                                                      |
| Caenorhabditis elegans  | egf-like domain containing protein                      | 0  |                                                                                                                                                                                                                                                                                                                                                                  | F:GO:0005509                                                                                                       | IPR011038                                                                              |
|                         | -                                                       | 0  |                                                                                                                                                                                                                                                                                                                                                                  |                                                                                                                    | -                                                                                      |
|                         | -                                                       | 0  |                                                                                                                                                                                                                                                                                                                                                                  |                                                                                                                    | -                                                                                      |
| Caenorhabditis briggsae | loc446287 protein                                       | 2  | P:GO:0055114;<br>F:GO:0003995                                                                                                                                                                                                                                                                                                                                    | -                                                                                                                  | EC:1.3.99.3 IPR006091; IPR009100                                                       |
| Caenorhabditis briggsae | Hypothetical protein CBG16936 [Caenorhabditis briggsae] | 0  |                                                                                                                                                                                                                                                                                                                                                                  |                                                                                                                    | IPR000436; IPR016060; PTHR19325<br>(PANTHER), PTHR19325:SF25<br>(PANTHER)              |
|                         | -                                                       | 0  |                                                                                                                                                                                                                                                                                                                                                                  |                                                                                                                    | -                                                                                      |
| Loa loa                 | hypothetical protein LOAG_02167 [Loa loa]               | 0  |                                                                                                                                                                                                                                                                                                                                                                  |                                                                                                                    | IPR013924                                                                              |
| Caenorhabditis elegans  | slo-2                                                   | 6  | C:GO:0016020;<br>P:GO:0006813;<br>P:GO:0008152;<br>F:GO:0003824;<br>F:GO:0015269;<br>F:GO:0005488                                                                                                                                                                                                                                                                | -                                                                                                                  | PTHR10027 (PANTHER),<br>PTHR10027:SF6 (PANTHER)                                        |
|                         |                                                         | 0  |                                                                                                                                                                                                                                                                                                                                                                  |                                                                                                                    |                                                                                        |

|                         |                                                            |    |                                                                                                                                                                                                                                                                                                                                                                                                                                                                                         |  |                      |                                                                                      |
|-------------------------|------------------------------------------------------------|----|-----------------------------------------------------------------------------------------------------------------------------------------------------------------------------------------------------------------------------------------------------------------------------------------------------------------------------------------------------------------------------------------------------------------------------------------------------------------------------------------|--|----------------------|--------------------------------------------------------------------------------------|
| Pongo abelii            | filamin a                                                  | 28 | F:GO:0009366;<br>F:GO:0004871;<br>C:GO:0005802;<br>P:GO:0043433;<br>P:GO:0034394;<br>C:GO:0015629;<br>P:GO:0050821;<br>P:GO:0051220;<br>C:GO:0005576;<br>C:GO:0005829;<br>F:GO:0001948;<br>P:GO:0051764;<br>P:GO:0043123;<br>F:GO:0051015;<br>F:GO:0048365;<br>P:GO:0045022;<br>P:GO:0007195;<br>F:GO:0042803;<br>F:GO:0034989;<br>P:GO:0031532;<br>F:GO:0034988;<br>C:GO:0005886;<br>F:GO:0008134;<br>P:GO:0042177;<br>C:GO:0005634;<br>P:GO:0042993;<br>C:GO:0005938;<br>P:GO:0003113 |  |                      | IPR013783; IPR014756; IPR017868;<br>PTHR11915 (PANTHER),<br>PTHR11915:SF24 (PANTHER) |
| Caenorhabditis briggsae | wd repeat domain 11                                        | 0  |                                                                                                                                                                                                                                                                                                                                                                                                                                                                                         |  | IPR011046; IPR015943 |                                                                                      |
| Caenorhabditis elegans  | cell adhesion molecule                                     | 8  | F:GO:0030506;<br>P:GO:0007417;<br>P:GO:0007409;<br>P:GO:0045162;<br>P:GO:0048513;<br>N:GO:0071842;<br>P:GO:0090066;<br>C:GO:0044459                                                                                                                                                                                                                                                                                                                                                     |  |                      | IPR003961; IPR008957; IPR013783;<br>PTHR10489 (PANTHER),<br>PTHR10489:SF39 (PANTHER) |
| Caenorhabditis briggsae | elegans protein partially confirmed by transcript evidence | 0  |                                                                                                                                                                                                                                                                                                                                                                                                                                                                                         |  | SignalP (SIGNALP)    |                                                                                      |
|                         | -                                                          | 0  |                                                                                                                                                                                                                                                                                                                                                                                                                                                                                         |  | -                    |                                                                                      |
|                         | -                                                          | 0  |                                                                                                                                                                                                                                                                                                                                                                                                                                                                                         |  | -                    |                                                                                      |
|                         | -                                                          | 0  |                                                                                                                                                                                                                                                                                                                                                                                                                                                                                         |  | -                    |                                                                                      |
| Caenorhabditis elegans  | hypothetical protein Y47G6A.29 [Caenorhabditis elegans]    | 0  |                                                                                                                                                                                                                                                                                                                                                                                                                                                                                         |  | -                    |                                                                                      |
| Caenorhabditis briggsae | sodium calcium                                             | 11 | P:GO:0055085;<br>F:GO:0005432;<br>F:GO:0031072;<br>P:GO:0008016;<br>P:GO:0045214;<br>C:GO:0016021;<br>P:GO:0000003;<br>P:GO:0006874;<br>P:GO:0006816;<br>P:GO:0007154;<br>P:GO:0009792                                                                                                                                                                                                                                                                                                  |  |                      | IPR004837; PTHR11878 (PANTHER),<br>PTHR11878:SF4 (PANTHER)                           |



|                         |                                                       |    |                                                                                                                                                                                                                                           |   |             |                                                                                                                              |
|-------------------------|-------------------------------------------------------|----|-------------------------------------------------------------------------------------------------------------------------------------------------------------------------------------------------------------------------------------------|---|-------------|------------------------------------------------------------------------------------------------------------------------------|
| Caenorhabditis elegans  | briggsae cbr-ncx-3 protein                            | 14 | P:GO:0006814;<br>F:GO:0005432;<br>F:GO:0005516;<br>C:GO:0005739;<br>C:GO:0005874;<br>P:GO:0071320;<br>C:GO:0043197;<br>P:GO:0060402;<br>P:GO:0021537;<br>C:GO:0043025;<br>C:GO:0042383;<br>P:GO:0007154;<br>P:GO:0034220;<br>C:GO:0005887 | - |             | IPR004837; PTHR11878 (PANTHER),<br>PTHR11878:SF2 (PANTHER), SignalP<br>(SIGNALP)                                             |
| Ixodes scapularis       | protein-tyrosine non-receptor type nt5                | 7  | C:GO:0005737;<br>F:GO:0004725;<br>C:GO:0005856;<br>F:GO:0004872;<br>C:GO:0019898;<br>F:GO:0008092;<br>P:GO:0006470                                                                                                                        | - | EC:3.1.3.48 | -                                                                                                                            |
| Caenorhabditis elegans  | transcription factor protein                          | 11 | F:GO:0030528;<br>P:GO:0034976;<br>F:GO:0010843;<br>C:GO:0016021;<br>P:GO:0002062;<br>P:GO:0006355;<br>F:GO:0046983;<br>F:GO:0003700;<br>P:GO:0006986;<br>C:GO:0005789;<br>C:GO:0005634                                                    | - |             | IPR004827; IPR008917; IPR011616;<br>G3DSA:1.20.5.170 (GENE3D),<br>PTHR22952 (PANTHER),<br>PTHR22952:SF7 (PANTHER)            |
| -                       | -                                                     | 0  |                                                                                                                                                                                                                                           |   |             | -                                                                                                                            |
| -                       | -                                                     | 0  |                                                                                                                                                                                                                                           |   |             | -                                                                                                                            |
| Caenorhabditis elegans  | hypothetical protein F08F3.1 [Caenorhabditis elegans] | 0  |                                                                                                                                                                                                                                           |   |             | -                                                                                                                            |
| -                       | -                                                     | 0  |                                                                                                                                                                                                                                           |   |             | SignalP (SIGNALP)                                                                                                            |
| -                       | -                                                     | 0  |                                                                                                                                                                                                                                           |   |             | -                                                                                                                            |
| -                       | -                                                     | 0  |                                                                                                                                                                                                                                           |   |             | -                                                                                                                            |
| Loa loa                 | chromosome 14 open reading frame 133                  | 4  | C:GO:0005768;<br>F:GO:0005515;<br>P:GO:0046907;<br>P:GO:0015031                                                                                                                                                                           | - |             | IPR019177; PTHR13364 (PANTHER)                                                                                               |
| Caenorhabditis briggsae | citrate lyase beta like                               | 4  | F:GO:0046872;<br>F:GO:0008815;<br>P:GO:0006725;<br>C:GO:0009346                                                                                                                                                                           | - | EC:4.1.3.6  | IPR005000; IPR011206; IPR015813                                                                                              |
| Pongo abelii            | ribosomal protein l18a                                | 5  | F:GO:0003735;<br>F:GO:0003723;<br>F:GO:0005515;<br>C:GO:0022625;<br>P:GO:0006414                                                                                                                                                          | - |             | -                                                                                                                            |
| Brugia malayi           | arp1 actin-related protein 1 homolog contractin alpha | 6  | C:GO:0005815;<br>C:GO:0005869;<br>F:GO:0005515;<br>P:GO:0016192;<br>F:GO:0005524;<br>C:GO:0005829                                                                                                                                         | - |             | IPR004000; G3DSA:3.30.420.40<br>(GENE3D), G3DSA:3.90.640.10<br>(GENE3D), PTHR11937:SF46<br>(PANTHER), SSF53067 (SUPERFAMILY) |

|                             |                                                                               |    |                                                                                                                                                                                                                                                                                                                                                 |                                                                                  |                                                                                                |
|-----------------------------|-------------------------------------------------------------------------------|----|-------------------------------------------------------------------------------------------------------------------------------------------------------------------------------------------------------------------------------------------------------------------------------------------------------------------------------------------------|----------------------------------------------------------------------------------|------------------------------------------------------------------------------------------------|
| Pongo abelii                | protein phosphatase catalytic alpha isoform                                   | 20 | P:GO:0005981;<br>P:GO:0030324;<br>C:GO:0043197;<br>F:GO:0005515;<br>P:GO:0007143;<br>F:GO:0043021;<br>P:GO:0051301;<br>C:GO:0000164;<br>C:GO:0005730;<br>C:GO:0005829;<br>F:GO:0046872;<br>P:GO:0005979;<br>P:GO:0006417;<br>P:GO:0048754;<br>C:GO:0070688;<br>P:GO:0006470;<br>C:GO:0043204;<br>F:GO:0008599;<br>F:GO:0004722;<br>C:GO:0042587 | -                                                                                | -                                                                                              |
| -                           | -                                                                             | 0  | -                                                                                                                                                                                                                                                                                                                                               | -                                                                                | -                                                                                              |
| Loa loa                     | exostoses 2                                                                   | 1  | F:GO:0016757                                                                                                                                                                                                                                                                                                                                    | -                                                                                | SignalP (SIGNALP)                                                                              |
| Caenorhabditis briggsae     | ypp3_caeel ame: full=uncharacterized serine carboxypeptidase flags: precursor | 0  |                                                                                                                                                                                                                                                                                                                                                 | P:GO:0006508;<br>F:GO:0004185                                                    | IPR001563; G3DSA:3.40.50.1820 (GENE3D), PTHR11802:SF9 (PANTHER)                                |
| Caenorhabditis elegans      | solute carrier family member b3                                               | 3  | C:GO:0000139;<br>C:GO:0016021;<br>P:GO:0055085                                                                                                                                                                                                                                                                                                  | -                                                                                | -                                                                                              |
| -                           | -                                                                             | 0  | -                                                                                                                                                                                                                                                                                                                                               | -                                                                                | -                                                                                              |
| -                           | -                                                                             | 0  | -                                                                                                                                                                                                                                                                                                                                               | -                                                                                | SignalP (SIGNALP)                                                                              |
| -                           | -                                                                             | 0  | -                                                                                                                                                                                                                                                                                                                                               | -                                                                                | -                                                                                              |
| Caenorhabditis briggsae     | Hypothetical protein CBG02118 [Caenorhabditis briggsae]                       | 0  | -                                                                                                                                                                                                                                                                                                                                               | -                                                                                | -                                                                                              |
| -                           | -                                                                             | 0  | -                                                                                                                                                                                                                                                                                                                                               | -                                                                                | -                                                                                              |
| -                           | -                                                                             | 0  | -                                                                                                                                                                                                                                                                                                                                               | -                                                                                | IPR002052                                                                                      |
| -                           | -                                                                             | 0  | -                                                                                                                                                                                                                                                                                                                                               | -                                                                                | -                                                                                              |
| Angiostrongylus cantonensis | hypothetical protein [Angiostrongylus cantonensis]                            | 0  |                                                                                                                                                                                                                                                                                                                                                 | F:GO:0003725;<br>C:GO:0005622                                                    | -                                                                                              |
| Caenorhabditis briggsae     | beta-lactamase family protein                                                 | 0  |                                                                                                                                                                                                                                                                                                                                                 |                                                                                  | IPR001466; IPR012338; G3DSA:3.40.710.10 (GENE3D), PTHR10566 (PANTHER), PTHR10566:SF6 (PANTHER) |
| Caenorhabditis elegans      | epithelial fusion failure family member (eff-1)                               | 0  |                                                                                                                                                                                                                                                                                                                                                 |                                                                                  | -                                                                                              |
| -                           | -                                                                             | 0  | -                                                                                                                                                                                                                                                                                                                                               | -                                                                                | -                                                                                              |
| Caenorhabditis elegans      | low-density lipoprotein receptor related family member (lrp-1)                | 3  | F:GO:0004872;<br>C:GO:0016021;<br>F:GO:0005509                                                                                                                                                                                                                                                                                                  | -                                                                                | -                                                                                              |
| Caenorhabditis elegans      | Hypothetical protein T15B7.1 [Caenorhabditis elegans]                         | 0  |                                                                                                                                                                                                                                                                                                                                                 | F:GO:0005102;<br>C:GO:0005615;<br>P:GO:0007165;<br>P:GO:0009792                  | -                                                                                              |
| Caenorhabditis elegans      | elegans protein confirmed by transcript evidence                              | 0  |                                                                                                                                                                                                                                                                                                                                                 | P:GO:0000003;<br>P:GO:0018996;<br>P:GO:0002119;<br>P:GO:0009792;<br>P:GO:0040007 | -                                                                                              |

|                           |                                                  |    |                                                                                                                                                                                                                                           |                               |                                                                         |                                                                                      |
|---------------------------|--------------------------------------------------|----|-------------------------------------------------------------------------------------------------------------------------------------------------------------------------------------------------------------------------------------------|-------------------------------|-------------------------------------------------------------------------|--------------------------------------------------------------------------------------|
| Caenorhabditis briggsae   | tr--dihydrouridine synthase 1-like               | 4  | F:GO:0050660;<br>P:GO:0055114;<br>F:GO:0017150;<br>P:GO:0008033                                                                                                                                                                           | -                             |                                                                         | IPR001269; PTHR11082:SF5 (PANTHER)                                                   |
| Caenorhabditis briggsae   | nuclear receptor nhr-114                         | 8  | F:GO:0042802;<br>F:GO:0003700;<br>F:GO:0043565;<br>F:GO:0003707;<br>P:GO:0019915;<br>C:GO:0005634;<br>F:GO:0008270;<br>P:GO:0006355                                                                                                       | -                             |                                                                         | IPR008946; PTHR11865 (PANTHER),<br>PTHR11865:SF218 (PANTHER)                         |
| Caenorhabditis elegans    | protocadherin 11 x-linked                        | 4  | P:GO:0002119;<br>P:GO:0040010;<br>P:GO:0040011;<br>C:GO:0016020                                                                                                                                                                           | -                             |                                                                         | IPR002126; IPR015919; IPR020894;<br>PTHR10596 (PANTHER),<br>PTHR10596:SF74 (PANTHER) |
| Caenorhabditis elegans    | rab6ip1-like protein                             | 0  |                                                                                                                                                                                                                                           |                               |                                                                         | IPR004012; SSF140741 (SUPERFAMILY)                                                   |
| Caenorhabditis briggsae   | udp-glucose ceramide glucosyltransferase-like 1  | 5  | F:GO:0003980;<br>P:GO:0051084;<br>P:GO:0006486;<br>F:GO:0051082;<br>C:GO:0005783                                                                                                                                                          | -                             |                                                                         | IPR009448                                                                            |
| Caenorhabditis briggsae   | lung seven transmembrane receptor family protein | 0  |                                                                                                                                                                                                                                           | F:GO:0004872;<br>C:GO:0016021 |                                                                         | -                                                                                    |
| Caenorhabditis briggsae   | ral                                              | 14 | P:GO:0008340;<br>P:GO:0046329;<br>P:GO:0007391;<br>P:GO:0007264;<br>C:GO:0005622;<br>P:GO:0006913;<br>P:GO:0045087;<br>F:GO:0004767;<br>P:GO:0007298;<br>F:GO:0005515;<br>F:GO:0003924;<br>P:GO:0006886;<br>F:GO:0005525;<br>C:GO:0005886 | -                             | EC:3.1.4.12;<br>EC:3.6.5.1;<br>EC:3.6.5.2;<br>EC:3.6.5.3;<br>EC:3.6.5.4 | SignalP (SIGNALP)                                                                    |
| Caenorhabditis briggsae   | d-2-like helicase                                | 11 | P:GO:0045740;<br>F:GO:0016890;<br>P:GO:0006284;<br>C:GO:0005760;<br>P:GO:0006264;<br>P:GO:0043137;<br>F:GO:0017108;<br>F:GO:0016887;<br>F:GO:0000166;<br>F:GO:0004386;<br>C:GO:0005654                                                    | -                             | EC:3.1.25.0                                                             | -                                                                                    |
| Trichostrongylus vitrinus | serine or cysteine protease inhibitor            | 5  | F:GO:0008233;<br>F:GO:0004867;<br>F:GO:0005515;<br>P:GO:0007275;<br>C:GO:0005634                                                                                                                                                          | -                             |                                                                         | IPR000215; G3DSA:3.30.497.10 (GENE3D), PTHR11461:SF25 (PANTHER)                      |

|                           |                                                                           |    |                                                                                                                                                                                                                                           |                                                                 |                                                                                               |
|---------------------------|---------------------------------------------------------------------------|----|-------------------------------------------------------------------------------------------------------------------------------------------------------------------------------------------------------------------------------------------|-----------------------------------------------------------------|-----------------------------------------------------------------------------------------------|
| Trichostrongylus vitrinus | serine or cysteine protease inhibitor                                     | 5  | F:GO:0008233;<br>F:GO:0004867;<br>F:GO:0005515;<br>P:GO:0007275;<br>C:GO:0005634                                                                                                                                                          | -                                                               | IPR000215; G3DSA:3.30.497.10 (GENE3D), PTHR11461:SF25 (PANTHER)                               |
|                           | -                                                                         | 0  |                                                                                                                                                                                                                                           |                                                                 | -                                                                                             |
| Caenorhabditis briggsae   | splicing factor 3a subunit 3 (spliceosome-associated protein 61) (sap 61) | 14 | P:GO:0051533;<br>F:GO:0008270;<br>F:GO:0003676;<br>C:GO:0071011;<br>C:GO:0005686;<br>P:GO:0040035;<br>P:GO:0009566;<br>P:GO:0018996;<br>P:GO:0007052;<br>P:GO:0010171;<br>F:GO:0005515;<br>P:GO:0000398;<br>P:GO:0040039;<br>C:GO:0071013 | -                                                               | IPR000690; IPR015880; PTHR12786 (PANTHER), PTHR12786:SF2 (PANTHER), PF11931 (PFAM)            |
|                           | -                                                                         | 0  |                                                                                                                                                                                                                                           |                                                                 | -                                                                                             |
| Caenorhabditis elegans    | briggsae cbr-ced-5 protein                                                | 7  | F:GO:0005083;<br>P:GO:0043652;<br>C:GO:0005886;<br>F:GO:0032403;<br>F:GO:0019899;<br>P:GO:0040039;<br>F:GO:0017124                                                                                                                        | -                                                               | PTHR23317 (PANTHER), PTHR23317:SF16 (PANTHER)                                                 |
|                           | -                                                                         | 0  |                                                                                                                                                                                                                                           |                                                                 | SignalP (SIGNALP)                                                                             |
| Caenorhabditis elegans    | sp1070 cg9138-pa                                                          | 2  | C:GO:0016021;<br>F:GO:0005509                                                                                                                                                                                                             | -                                                               | IPR000436; IPR016060                                                                          |
|                           | -                                                                         | 0  |                                                                                                                                                                                                                                           |                                                                 | -                                                                                             |
| Caenorhabditis briggsae   | elegans protein partially confirmed by transcript evidence                | 1  | P:GO:0019915                                                                                                                                                                                                                              | -                                                               | -                                                                                             |
| Caenorhabditis elegans    | brain protein 16                                                          | 0  |                                                                                                                                                                                                                                           | F:GO:0003674;<br>F:GO:0005488;<br>P:GO:0008150;<br>C:GO:0005575 | IPR007205; IPR007206                                                                          |
| Caenorhabditis elegans    | inositol polyphosphate-5- 40kda                                           | 1  | F:GO:0004437                                                                                                                                                                                                                              | -                                                               | IPR000300; IPR005135; G3DSA:3.60.10.10 (GENE3D), PTHR12997 (PANTHER), PTHR12997:SF2 (PANTHER) |
| Caenorhabditis elegans    | iron-responsive element-binding protein 1                                 | 6  | P:GO:0006879;<br>F:GO:0005515;<br>F:GO:0051539;<br>F:GO:0003994;<br>P:GO:0008152;<br>C:GO:0005829                                                                                                                                         | -                                                               | EC:4.2.1.3                                                                                    |
|                           | -                                                                         | 0  |                                                                                                                                                                                                                                           |                                                                 | -                                                                                             |
| Brugia malayi             | high mobility group family                                                | 0  |                                                                                                                                                                                                                                           | F:GO:0003677;<br>C:GO:0005634                                   | IPR000910; IPR009071; PTHR10270 (PANTHER), PTHR10270:SF31 (PANTHER)                           |
| Caenorhabditis elegans    | elegans protein partially confirmed by transcript evidence                | 0  |                                                                                                                                                                                                                                           |                                                                 | -                                                                                             |
|                           | -                                                                         | 0  |                                                                                                                                                                                                                                           |                                                                 | -                                                                                             |
|                           | -                                                                         | 0  |                                                                                                                                                                                                                                           |                                                                 | -                                                                                             |
|                           | -                                                                         | 0  |                                                                                                                                                                                                                                           |                                                                 | -                                                                                             |
| Caenorhabditis remanei    | elegans protein confirmed by transcript evidence                          | 0  |                                                                                                                                                                                                                                           | P:GO:0007218;<br>C:GO:0016021                                   | SignalP (SIGNALP)                                                                             |

|                         |                                                                |   |                                                                                                                    |   |              |                                                                                                                                                                                     |
|-------------------------|----------------------------------------------------------------|---|--------------------------------------------------------------------------------------------------------------------|---|--------------|-------------------------------------------------------------------------------------------------------------------------------------------------------------------------------------|
| Caenorhabditis elegans  | r- pseudouridylate synthase domain-containing protein 2-like   | 4 | P:GO:0009451;<br>F:GO:0003723;<br>F:GO:0005515;<br>F:GO:0009982                                                    | - | EC:5.4.99.12 | IPR006145; IPR006224; IPR020103;<br>PTHR10436 (PANTHER)                                                                                                                             |
| Caenorhabditis elegans  | glutaredoxin family protein                                    | 2 | C:GO:0043231;<br>P:GO:0040010                                                                                      | - |              | IPR002109; IPR011767; IPR012335;<br>IPR012336; IPR014025; PTHR10168<br>(PANTHER), PTHR10168:SF19<br>(PANTHER)                                                                       |
| Caenorhabditis briggsae | chromosome 20 open reading frame 54                            | 7 | P:GO:0009792;<br>C:GO:0005887;<br>F:GO:0005515;<br>P:GO:0034605;<br>P:GO:0032218;<br>F:GO:0032217;<br>P:GO:0006898 | - |              | IPR009357; SignalP (SIGNALP)                                                                                                                                                        |
|                         | -                                                              | 0 |                                                                                                                    |   |              | IPR000307; PTHR12919:SF1<br>(PANTHER)                                                                                                                                               |
|                         | -                                                              | 0 |                                                                                                                    |   |              | -                                                                                                                                                                                   |
| Brugia malayi           | protein ki-se domain containing protein                        | 3 | P:GO:0040022;<br>F:GO:0016301;<br>P:GO:0051729                                                                     | - |              | IPR000719; IPR011009; IPR017441;<br>IPR017442; G3DSA:1.10.510.10<br>(GENE3D), G3DSA:3.30.200.20<br>(GENE3D), PTHR11909 (PANTHER),<br>PTHR11909:SF19 (PANTHER), SignalP<br>(SIGNALP) |
| Brugia malayi           | protein ki-se domain containing protein                        | 3 | P:GO:0040022;<br>F:GO:0016301;<br>P:GO:0051729                                                                     | - |              | IPR000719; IPR011009; IPR017441;<br>IPR017442; G3DSA:1.10.510.10<br>(GENE3D), G3DSA:3.30.200.20<br>(GENE3D), PTHR11909 (PANTHER),<br>PTHR11909:SF19 (PANTHER), SignalP<br>(SIGNALP) |
|                         | -                                                              | 0 |                                                                                                                    |   |              | -                                                                                                                                                                                   |
|                         | -                                                              | 0 |                                                                                                                    |   |              | -                                                                                                                                                                                   |
| Caenorhabditis briggsae | iron only hydroge-se large c-termi-l domain containing protein | 2 | F:GO:0005488;<br>P:GO:0044249                                                                                      | - |              | IPR004108; IPR009016;<br>G3DSA:3.40.950.10 (GENE3D),<br>PTHR11615 (PANTHER),<br>PTHR11615:SF31 (PANTHER)                                                                            |
| Caenorhabditis elegans  | ipase c family member (plc-3)                                  | 0 |                                                                                                                    |   |              | -                                                                                                                                                                                   |
| Caenorhabditis elegans  | 5 - cytosolic iii                                              | 5 | F:GO:0008253;<br>P:GO:0055086;<br>F:GO:0008665;<br>F:GO:0005488;<br>C:GO:0005783                                   | - | EC:3.1.3.5   | IPR006434; PF05822 (PFAM)                                                                                                                                                           |
| Caenorhabditis briggsae | briggsae cbr-gei-9 protein                                     | 4 | P:GO:0009792;<br>P:GO:0040010;<br>P:GO:0000003;<br>P:GO:0006898                                                    | - |              | -                                                                                                                                                                                   |
|                         | -                                                              | 0 |                                                                                                                    |   |              | -                                                                                                                                                                                   |
| Danio rerio             | eorge syndrome critical region gene 8                          | 5 | P:GO:0031053;<br>F:GO:0003725;<br>F:GO:0005515;<br>C:GO:0005737;<br>C:GO:0005634                                   | - |              | -                                                                                                                                                                                   |
| Caenorhabditis elegans  | transcription termi-tion                                       | 2 | P:GO:0006264;<br>P:GO:0006390                                                                                      | - |              | IPR003690; PTHR13068 (PANTHER)                                                                                                                                                      |
| Caenorhabditis briggsae | Hypothetical protein CBG07646 [Caenorhabditis briggsae]        | 0 |                                                                                                                    |   |              | PTHR10984 (PANTHER),<br>PTHR10984:SF1 (PANTHER)                                                                                                                                     |

|                         |                                                            |    |                                                                                                                                                                                                                                                                             |                               |             |                                                                                                                            |
|-------------------------|------------------------------------------------------------|----|-----------------------------------------------------------------------------------------------------------------------------------------------------------------------------------------------------------------------------------------------------------------------------|-------------------------------|-------------|----------------------------------------------------------------------------------------------------------------------------|
| Caenorhabditis briggsae | briggsae cbr-evl-14 protein                                | 3  | F:GO:0005488;<br>P:GO:0008283;<br>P:GO:0007049                                                                                                                                                                                                                              | -                             |             | PTHR12663 (PANTHER)                                                                                                        |
| Caenorhabditis briggsae | briggsae cbr-evl-14 protein                                | 3  | F:GO:0005488;<br>P:GO:0008283;<br>P:GO:0007049                                                                                                                                                                                                                              | -                             |             | PTHR12663 (PANTHER)                                                                                                        |
| Caenorhabditis elegans  | tip41-like protein                                         | 1  | P:GO:0018991                                                                                                                                                                                                                                                                | -                             |             | IPR007303; PTHR21021 (PANTHER),<br>PTHR21021:SF16 (PANTHER)                                                                |
|                         | -                                                          | 0  |                                                                                                                                                                                                                                                                             |                               |             | -                                                                                                                          |
| Loa loa                 | cyclin g associated ki-se                                  | 6  | P:GO:0006468;<br>F:GO:0031072;<br>C:GO:0044464;<br>F:GO:0005524;<br>F:GO:0004674;<br>F:GO:0030332                                                                                                                                                                           | -                             | EC:2.7.11.0 | IPR001623; PTHR23172 (PANTHER),<br>PTHR23172:SF19 (PANTHER)                                                                |
| Caenorhabditis briggsae | briggsae cbr-eor-1 protein                                 | 1  | F:GO:0005515                                                                                                                                                                                                                                                                |                               |             | -                                                                                                                          |
| Caenorhabditis briggsae | uncoordinated family member (unc-52)                       | 2  | P:GO:0030239;<br>C:GO:0005578                                                                                                                                                                                                                                               | -                             |             | IPR003598; IPR007110; IPR013098;<br>IPR013783; PTHR10574 (PANTHER),<br>PTHR10574:SF20 (PANTHER),<br>SSF48726 (SUPERFAMILY) |
|                         | -                                                          | 0  |                                                                                                                                                                                                                                                                             |                               |             | -                                                                                                                          |
|                         | -                                                          | 0  |                                                                                                                                                                                                                                                                             |                               |             | SignalP (SIGNALP)                                                                                                          |
|                         | -                                                          | 0  |                                                                                                                                                                                                                                                                             |                               |             | -                                                                                                                          |
| Caenorhabditis elegans  | hypothetical protein K11C4.2 [Caenorhabditis elegans]      | 0  |                                                                                                                                                                                                                                                                             | C:GO:0016021                  |             | -                                                                                                                          |
|                         | -                                                          | 0  |                                                                                                                                                                                                                                                                             |                               |             | -                                                                                                                          |
|                         | -                                                          | 0  |                                                                                                                                                                                                                                                                             |                               |             | -                                                                                                                          |
| Caenorhabditis elegans  | elegans protein partially confirmed by transcript evidence | 0  |                                                                                                                                                                                                                                                                             | F:GO:0008270;<br>C:GO:0005622 |             | -                                                                                                                          |
| Caenorhabditis elegans  | major facilitator superfamily protein                      | 1  | P:GO:0019915                                                                                                                                                                                                                                                                | -                             |             | PTHR11662 (PANTHER),<br>PTHR11662:SF21 (PANTHER)                                                                           |
|                         | -                                                          | 0  |                                                                                                                                                                                                                                                                             |                               |             | -                                                                                                                          |
| Apis mellifera          | coagulation factor x                                       | 2  | F:GO:0008233;<br>F:GO:0005488                                                                                                                                                                                                                                               | -                             |             | IPR001254; IPR009003; IPR018114;<br>G3DSA:2.40.10.10 (GENE3D),<br>PTHR19355 (PANTHER),<br>PTHR19355:SF82 (PANTHER)         |
|                         | -                                                          | 0  |                                                                                                                                                                                                                                                                             |                               |             | -                                                                                                                          |
|                         | -                                                          | 0  |                                                                                                                                                                                                                                                                             |                               |             | -                                                                                                                          |
|                         | -                                                          | 0  |                                                                                                                                                                                                                                                                             |                               |             | -                                                                                                                          |
|                         | -                                                          | 0  |                                                                                                                                                                                                                                                                             |                               |             | -                                                                                                                          |
| Caenorhabditis briggsae | protein tyrosine receptor isoform cra_a                    | 16 | P:GO:0006470;<br>P:GO:0040037;<br>P:GO:0040010;<br>P:GO:0018991;<br>P:GO:0040002;<br>F:GO:0004872;<br>P:GO:0046627;<br>F:GO:0004725;<br>P:GO:0010171;<br>P:GO:0002119;<br>P:GO:0040017;<br>F:GO:0042803;<br>P:GO:0002009;<br>C:GO:0005737;<br>C:GO:0005886;<br>P:GO:0007185 | -                             | EC:3.1.3.48 | IPR000242; G3DSA:3.90.190.10<br>(GENE3D), PTHR19134 (PANTHER),<br>PTHR19134:SF43 (PANTHER),<br>SSF52799 (SUPERFAMILY)      |
|                         | -                                                          | 0  |                                                                                                                                                                                                                                                                             |                               |             | -                                                                                                                          |

|                               |                                                                 |   |                                                                                                                                     |                                                                                                                                                                                                                          |   |                                                                                                                            |
|-------------------------------|-----------------------------------------------------------------|---|-------------------------------------------------------------------------------------------------------------------------------------|--------------------------------------------------------------------------------------------------------------------------------------------------------------------------------------------------------------------------|---|----------------------------------------------------------------------------------------------------------------------------|
| Caenorhabditis elegans        | hypothetical protein F25G6.9 [Caenorhabditis elegans]           | 0 |                                                                                                                                     | F:GO:0008312;<br>F:GO:0030942;<br>C:GO:0005786;<br>P:GO:0006614;<br>C:GO:0048500;<br>F:GO:0005515;<br>P:GO:0045900                                                                                                       | - |                                                                                                                            |
| Caenorhabditis elegans        | sorting nexin 6                                                 | 6 | P:GO:0030512;<br>P:GO:0016481;<br>F:GO:0042803;<br>F:GO:0035091;<br>C:GO:0005737;<br>P:GO:0015031                                   | -                                                                                                                                                                                                                        |   | IPR001683; PTHR10555 (PANTHER),<br>PTHR10555:SF4 (PANTHER)                                                                 |
|                               | -                                                               | 0 |                                                                                                                                     |                                                                                                                                                                                                                          |   | -                                                                                                                          |
|                               | -                                                               | 0 |                                                                                                                                     |                                                                                                                                                                                                                          |   | -                                                                                                                          |
|                               | -                                                               | 0 |                                                                                                                                     |                                                                                                                                                                                                                          |   | -                                                                                                                          |
|                               | -                                                               | 0 |                                                                                                                                     |                                                                                                                                                                                                                          |   | -                                                                                                                          |
| Ajellomyces dermatitidis ER-3 | hypothetical protein BDCG_03388 [Ajellomyces dermatitidis ER-3] | 0 |                                                                                                                                     |                                                                                                                                                                                                                          |   | -                                                                                                                          |
| Loa loa                       | ring finger protein                                             | 1 | F:GO:0005488                                                                                                                        | -                                                                                                                                                                                                                        |   | IPR001841; IPR013083; IPR017907;<br>IPR018957; PTHR10825 (PANTHER),<br>PTHR10825:SF17 (PANTHER),<br>SSF57850 (SUPERFAMILY) |
| Caenorhabditis elegans        | hypothetical protein Y71H2AM.15 [Caenorhabditis elegans]        | 2 | F:GO:0005515;<br>P:GO:0008340                                                                                                       | -                                                                                                                                                                                                                        |   | -                                                                                                                          |
| Caenorhabditis elegans        | hypothetical protein ZK154.4 [Caenorhabditis elegans]           | 0 |                                                                                                                                     |                                                                                                                                                                                                                          |   | -                                                                                                                          |
| Caenorhabditis elegans        | acetyl-coenzyme a carboxylase alpha                             | 8 | P:GO:0008610;<br>F:GO:0016874;<br>P:GO:0042592;<br>P:GO:0042221;<br>P:GO:0032501;<br>F:GO:0000166;<br>C:GO:0005811;<br>P:GO:0044237 | -                                                                                                                                                                                                                        |   | IPR016185; PTHR18866 (PANTHER),<br>PTHR18866:SF6 (PANTHER)                                                                 |
| Ixodes scapularis             | protein tyrosine                                                | 0 |                                                                                                                                     |                                                                                                                                                                                                                          |   | -                                                                                                                          |
|                               | -                                                               | 0 |                                                                                                                                     |                                                                                                                                                                                                                          |   | SignalP (SIGNALP)                                                                                                          |
| Caenorhabditis briggsae       | amidase domain containing                                       | 1 | F:GO:0003824                                                                                                                        | -                                                                                                                                                                                                                        |   | IPR000120; PTHR11895:SF5<br>(PANTHER)                                                                                      |
| Loa loa                       | hypothetical protein LOAG_06054 [Loa loa]                       | 2 | P:GO:0007186;<br>C:GO:0016021                                                                                                       | -                                                                                                                                                                                                                        |   | -                                                                                                                          |
|                               | -                                                               | 0 |                                                                                                                                     |                                                                                                                                                                                                                          |   | -                                                                                                                          |
| Caenorhabditis sp. PS1010     | briggsae cbr-aph-2 protein                                      | 0 |                                                                                                                                     | F:GO:0016874;<br>P:GO:0006418;<br>C:GO:0016021;<br>F:GO:0000166;<br>C:GO:0005737;<br>P:GO:0006412;<br>F:GO:0005524;<br>F:GO:0004818;<br>P:GO:0016485;<br>F:GO:0004812;<br>F:GO:0016876;<br>P:GO:0006424;<br>P:GO:0043039 | - |                                                                                                                            |
| Caenorhabditis elegans        | p40                                                             | 0 |                                                                                                                                     |                                                                                                                                                                                                                          |   | -                                                                                                                          |

|                             |                                                            |  |                                                                                                                                                                                                                                              |                                                                 |            |                                                                                                                                                             |
|-----------------------------|------------------------------------------------------------|--|----------------------------------------------------------------------------------------------------------------------------------------------------------------------------------------------------------------------------------------------|-----------------------------------------------------------------|------------|-------------------------------------------------------------------------------------------------------------------------------------------------------------|
| Caenorhabditis elegans      | elegans protein partially confirmed by transcript evidence |  | C:GO:0016020;<br>3 F:GO:0005216;<br>P:GO:0006811                                                                                                                                                                                             | -                                                               |            | IPR013099; G3DSA:1.10.287.70 (GENE3D), PTHR11003 (PANTHER), PTHR11003:SF7 (PANTHER), SSF81324 (SUPERFAMILY)                                                 |
|                             | -                                                          |  | 0                                                                                                                                                                                                                                            |                                                                 |            | -                                                                                                                                                           |
|                             | -                                                          |  | 0                                                                                                                                                                                                                                            |                                                                 |            | -                                                                                                                                                           |
| Caenorhabditis elegans      | zinc finger protein                                        |  | 14 P:GO:0040035;<br>P:GO:0010171;<br>P:GO:0002119;<br>P:GO:0035152;<br>P:GO:0006915;<br>P:GO:0040018;<br>F:GO:0003676;<br>P:GO:0040010;<br>P:GO:0008340;<br>P:GO:0040011;<br>P:GO:0019915;<br>C:GO:0005634;<br>F:GO:0008270;<br>P:GO:0002009 | -                                                               |            | IPR007087; IPR013087; IPR015880; PTHR23228 (PANTHER), PTHR23228:SF41 (PANTHER), SSF57667 (SUPERFAMILY)                                                      |
| Caenorhabditis elegans      | ubiquitin protein ligase                                   |  | 4 C:GO:0005622;<br>F:GO:0016881;<br>F:GO:0005515;<br>P:GO:0006464                                                                                                                                                                            | -                                                               | EC:6.3.2.0 | IPR000569; IPR001202; G3DSA:2.20.70.10 (GENE3D), PTHR11254 (PANTHER), PTHR11254:SF65 (PANTHER)                                                              |
| Caenorhabditis elegans      | ubiquitin protein ligase                                   |  | 4 C:GO:0005622;<br>F:GO:0016881;<br>F:GO:0005515;<br>P:GO:0006464                                                                                                                                                                            | -                                                               | EC:6.3.2.0 | IPR000008; IPR000569; IPR001202; IPR008973; IPR018029; G3DSA:2.20.70.10 (GENE3D), G3DSA:2.60.40.150 (GENE3D), PTHR11254 (PANTHER), PTHR11254:SF65 (PANTHER) |
|                             | -                                                          |  | 0                                                                                                                                                                                                                                            |                                                                 |            | -                                                                                                                                                           |
|                             | -                                                          |  | 0                                                                                                                                                                                                                                            |                                                                 |            | IPR001394; PTHR10420 (PANTHER), PTHR10420:SF40 (PANTHER), SSF54001 (SUPERFAMILY)                                                                            |
| Angiostrongylus cantonensis | somatostatin receptor                                      |  | 1 F:GO:0004872                                                                                                                                                                                                                               | -                                                               |            | IPR000276; IPR017452; G3DSA:1.20.1070.10 (GENE3D), PTHR22751 (PANTHER), PTHR22751:SF8 (PANTHER), SignalP (SIGNALP), SSF81321 (SUPERFAMILY)                  |
|                             | -                                                          |  | 0                                                                                                                                                                                                                                            |                                                                 |            | -                                                                                                                                                           |
| Caenorhabditis elegans      | sh3-domain grb2-like endophilin b2                         |  | 8 C:GO:0005737;<br>C:GO:0005730;<br>P:GO:0009792;<br>P:GO:0007126;<br>P:GO:0046847;<br>P:GO:0007165;<br>F:GO:0017124;<br>F:GO:0008093                                                                                                        | -                                                               |            | -                                                                                                                                                           |
|                             | -                                                          |  | 0                                                                                                                                                                                                                                            |                                                                 |            | -                                                                                                                                                           |
| Caenorhabditis briggsae     | f37c4_caeel ame: full=protein                              |  | 1 F:GO:0005515                                                                                                                                                                                                                               | -                                                               |            | -                                                                                                                                                           |
|                             | -                                                          |  | 0                                                                                                                                                                                                                                            |                                                                 |            | -                                                                                                                                                           |
| Caenorhabditis elegans      | lethal k05819-like                                         |  | 0                                                                                                                                                                                                                                            | F:GO:0015662;<br>C:GO:0016020;<br>P:GO:0006754;<br>P:GO:0006812 |            | PTHR13219 (PANTHER)                                                                                                                                         |



|                         |                                                                            |    |                                                                                                                                                                                                                                           |   |             |                                                                                                                                    |
|-------------------------|----------------------------------------------------------------------------|----|-------------------------------------------------------------------------------------------------------------------------------------------------------------------------------------------------------------------------------------------|---|-------------|------------------------------------------------------------------------------------------------------------------------------------|
| Caenorhabditis briggsae | udp- c: n-acetylgalactosaminyltransferase                                  | 9  | P:GO:0018243;<br>C:GO:0032580;<br>C:GO:0016021;<br>F:GO:0030145;<br>P:GO:0018242;<br>F:GO:0004653;<br>C:GO:0048471;<br>C:GO:0005576;<br>F:GO:0005529                                                                                      | - | EC:2.4.1.41 | IPR001173; G3DSA:3.90.550.10 (GENE3D), PTHR11675 (PANTHER), SSF53448 (SUPERFAMILY)                                                 |
| Caenorhabditis elegans  | d-k protein                                                                | 14 | P:GO:0051603;<br>P:GO:0030512;<br>P:GO:0021680;<br>P:GO:0021589;<br>C:GO:0005788;<br>P:GO:0031398;<br>F:GO:0043022;<br>P:GO:0006983;<br>C:GO:0005576;<br>C:GO:0009986;<br>P:GO:0006987;<br>P:GO:0040019;<br>F:GO:0051787;<br>F:GO:0005524 | - |             | IPR019651; SignalP (SIGNALP)                                                                                                       |
| Caenorhabditis elegans  | hypothetical protein F55A12.2 [Caenorhabditis elegans]                     | 1  | P:GO:0040010                                                                                                                                                                                                                              | - |             |                                                                                                                                    |
|                         | -                                                                          | 0  |                                                                                                                                                                                                                                           |   |             |                                                                                                                                    |
| Caenorhabditis elegans  | hed family member (ptc-3)                                                  | 6  | P:GO:0009792;<br>P:GO:0002119;<br>P:GO:0040018;<br>P:GO:0018996;<br>P:GO:0000003;<br>P:GO:0040011                                                                                                                                         | - |             |                                                                                                                                    |
| Caenorhabditis elegans  | lipase maturation factor 2                                                 | 1  | C:GO:0044464                                                                                                                                                                                                                              | - |             | SignalP (SIGNALP)                                                                                                                  |
| Haemonchus contortus    | uncoordinated family member (unc-49)                                       | 6  | F:GO:0004890;<br>C:GO:0045211;<br>C:GO:0030054;<br>F:GO:0005230;<br>P:GO:0006811;<br>C:GO:0016021                                                                                                                                         | - |             | IPR006201; IPR006202; IPR018000; PTHR18945:SF95 (PANTHER)                                                                          |
|                         | -                                                                          | 0  |                                                                                                                                                                                                                                           |   |             | SignalP (SIGNALP)                                                                                                                  |
|                         | -                                                                          | 0  |                                                                                                                                                                                                                                           |   |             | SignalP (SIGNALP)                                                                                                                  |
|                         | -                                                                          | 0  |                                                                                                                                                                                                                                           |   |             |                                                                                                                                    |
|                         | -                                                                          | 0  |                                                                                                                                                                                                                                           |   |             | PS51257 (PROFILE), SignalP (SIGNALP)                                                                                               |
| Caenorhabditis elegans  | nurf (nucleosome remodeling factor) complex homolog family member (nurf-1) | 2  | P:GO:0000003;<br>P:GO:0040010                                                                                                                                                                                                             | - |             |                                                                                                                                    |
| Caenorhabditis elegans  | nucleolar protein 120kda                                                   | 12 | P:GO:0040010;<br>F:GO:0003723;<br>P:GO:0008340;<br>P:GO:0006364;<br>P:GO:0000003;<br>P:GO:0002119;<br>F:GO:0005515;<br>F:GO:0008757;<br>P:GO:0040039;<br>P:GO:0009792;<br>P:GO:0040015;<br>P:GO:0040019                                   | - |             | IPR001678; IPR011023; IPR018314; G3DSA:3.40.50.150 (GENE3D), PTHR22807 (PANTHER), PTHR22807:SF11 (PANTHER), SSF53335 (SUPERFAMILY) |

|                         |                                                                  |  |   |                                                                                                                    |                                                                                  |                             |                                                                                                                                               |
|-------------------------|------------------------------------------------------------------|--|---|--------------------------------------------------------------------------------------------------------------------|----------------------------------------------------------------------------------|-----------------------------|-----------------------------------------------------------------------------------------------------------------------------------------------|
| Caenorhabditis elegans  | briggsae cbr-acr-6 protein                                       |  | 3 | P:GO:0009792;<br>P:GO:0002119;<br>P:GO:0040007                                                                     | -                                                                                | -                           | -                                                                                                                                             |
| Caenorhabditis elegans  | type iii restriction res subunit family protein                  |  | 2 | F:GO:0017111;<br>F:GO:0005488                                                                                      | -                                                                                | EC:3.6.1.15                 | -                                                                                                                                             |
|                         | -                                                                |  | 0 |                                                                                                                    |                                                                                  |                             | -                                                                                                                                             |
|                         | -                                                                |  | 0 |                                                                                                                    |                                                                                  |                             | SignalP (SIGNALP)                                                                                                                             |
| Caenorhabditis elegans  | yqk4_caeel ame: full=uncharacterized protein flags:<br>precursor |  | 0 |                                                                                                                    |                                                                                  |                             | -                                                                                                                                             |
| Caenorhabditis briggsae | male sterility protein                                           |  | 3 | P:GO:0008152;<br>F:GO:0016491;<br>F:GO:0005515                                                                     | -                                                                                |                             | IPR004262; PTHR11011 (PANTHER),<br>PTHR11011:SF8 (PANTHER)                                                                                    |
| Caenorhabditis elegans  | briggsae cbr-tag-97 protein                                      |  | 0 |                                                                                                                    | P:GO:0006355;<br>F:GO:0043565;<br>F:GO:0003677;<br>C:GO:0005634;<br>F:GO:0003700 |                             | IPR003118                                                                                                                                     |
| Brugia malayi           | hypothetical protein [Brugia malayi]                             |  | 0 |                                                                                                                    |                                                                                  |                             | IPR009378                                                                                                                                     |
|                         | -                                                                |  | 0 |                                                                                                                    |                                                                                  |                             | -                                                                                                                                             |
|                         | -                                                                |  | 0 |                                                                                                                    |                                                                                  |                             | -                                                                                                                                             |
| Caenorhabditis elegans  | c-type lectin 1                                                  |  | 1 | P:GO:0009792                                                                                                       | -                                                                                |                             | IPR001304; IPR002181; IPR002353;<br>IPR014716; IPR016186; IPR016187;<br>PTHR22801 (PANTHER),<br>PTHR22801:SF9 (PANTHER), SignalP<br>(SIGNALP) |
| Caenorhabditis elegans  | methylmalonyl coenzyme a mutase                                  |  | 7 | F:GO:0046872;<br>F:GO:0004494;<br>F:GO:0031419;<br>C:GO:0005759;<br>P:GO:0009791;<br>P:GO:0008152;<br>F:GO:0047548 | -                                                                                | EC:5.4.99.2;<br>EC:5.4.99.4 | IPR006098; IPR006099; IPR006158;<br>IPR006159; IPR014348; IPR016176;<br>PTHR23408 (PANTHER),<br>PTHR23408:SF1 (PANTHER), SignalP<br>(SIGNALP) |
| Caenorhabditis briggsae | methylmalonyl coenzyme a mutase                                  |  | 7 | F:GO:0046872;<br>F:GO:0004494;<br>F:GO:0031419;<br>C:GO:0005759;<br>P:GO:0009791;<br>P:GO:0008152;<br>F:GO:0047548 | -                                                                                | EC:5.4.99.2;<br>EC:5.4.99.4 | IPR006098; IPR006099; IPR014348;<br>IPR016176; PTHR23408 (PANTHER),<br>PTHR23408:SF1 (PANTHER)                                                |
| Caenorhabditis elegans  | methylmalonyl coenzyme a mutase                                  |  | 6 | F:GO:0046872;<br>F:GO:0004494;<br>F:GO:0031419;<br>C:GO:0005759;<br>P:GO:0009791;<br>P:GO:0008152                  | -                                                                                | EC:5.4.99.2                 | IPR006098; IPR006099; IPR006158;<br>IPR006159; IPR014348; IPR016176;<br>PTHR23408 (PANTHER),<br>PTHR23408:SF1 (PANTHER)                       |
| Caenorhabditis elegans  | methylmalonyl coenzyme a mutase                                  |  | 6 | F:GO:0046872;<br>F:GO:0004494;<br>F:GO:0031419;<br>C:GO:0005759;<br>P:GO:0009791;<br>P:GO:0008152                  | -                                                                                | EC:5.4.99.2                 | IPR006098; IPR006099; IPR006158;<br>IPR006159; IPR014348; IPR016176;<br>PTHR23408 (PANTHER),<br>PTHR23408:SF1 (PANTHER)                       |
| Caenorhabditis elegans  | methylmalonyl coenzyme a mutase                                  |  | 7 | F:GO:0046872;<br>F:GO:0004494;<br>F:GO:0031419;<br>C:GO:0005759;<br>P:GO:0009791;<br>P:GO:0008152;<br>F:GO:0047548 | -                                                                                | EC:5.4.99.2;<br>EC:5.4.99.4 | IPR006098; IPR006099; IPR006158;<br>IPR006159; IPR014348; IPR016176;<br>PTHR23408 (PANTHER),<br>PTHR23408:SF1 (PANTHER)                       |

|                         |                                                   |    |                                                                                                                                                                                                                                                                                              |                                                                                                   |             |                                                                                                                      |
|-------------------------|---------------------------------------------------|----|----------------------------------------------------------------------------------------------------------------------------------------------------------------------------------------------------------------------------------------------------------------------------------------------|---------------------------------------------------------------------------------------------------|-------------|----------------------------------------------------------------------------------------------------------------------|
| Caenorhabditis elegans  | ain family member (clp-1)                         | 6  | C:GO:0016021;<br>P:GO:0008219;<br>C:GO:0005622;<br>P:GO:0006508;<br>F:GO:0004198;<br>F:GO:0005509                                                                                                                                                                                            | -                                                                                                 |             | IPR022682; IPR022683;<br>G3DSA:2.60.120.380 (GENE3D),<br>PTHR10183 (PANTHER),<br>PTHR10183:SF45 (PANTHER)            |
|                         | -                                                 | 0  |                                                                                                                                                                                                                                                                                              |                                                                                                   |             | SignalP (SIGNALP)                                                                                                    |
| Caenorhabditis briggsae | n-acylethanolamine-hydrolyzing acid amidase       | 0  |                                                                                                                                                                                                                                                                                              | P:GO:0006629;<br>C:GO:0005764;<br>F:GO:0003674;<br>C:GO:0005737;<br>F:GO:0016787;<br>P:GO:0008150 |             | -                                                                                                                    |
|                         | -                                                 | 0  |                                                                                                                                                                                                                                                                                              |                                                                                                   |             | -                                                                                                                    |
| Caenorhabditis elegans  | carboxypeptidase d                                | 5  | F:GO:0004181;<br>P:GO:0006508;<br>F:GO:0008270;<br>P:GO:0006911;<br>P:GO:0007476                                                                                                                                                                                                             | -                                                                                                 | EC:3.4.17.0 | IPR000834; G3DSA:3.40.630.10<br>(GENE3D), PTHR11532 (PANTHER),<br>PTHR11532:SF2 (PANTHER), SSF53187<br>(SUPERFAMILY) |
|                         | -                                                 | 0  |                                                                                                                                                                                                                                                                                              |                                                                                                   |             | SignalP (SIGNALP)                                                                                                    |
|                         | -                                                 | 0  |                                                                                                                                                                                                                                                                                              |                                                                                                   |             | -                                                                                                                    |
|                         | -                                                 | 0  |                                                                                                                                                                                                                                                                                              |                                                                                                   |             | -                                                                                                                    |
|                         | -                                                 | 0  |                                                                                                                                                                                                                                                                                              |                                                                                                   |             | -                                                                                                                    |
|                         | -                                                 | 0  |                                                                                                                                                                                                                                                                                              |                                                                                                   |             | -                                                                                                                    |
| Loa loa                 | cell division cycle related family member (cdc- ) | 17 | F:GO:0070011;<br>P:GO:0008103;<br>F:GO:0005515;<br>P:GO:0042052;<br>P:GO:0007317;<br>P:GO:0007029;<br>P:GO:0007030;<br>P:GO:0016320;<br>C:GO:0045169;<br>P:GO:0008104;<br>C:GO:0000502;<br>C:GO:0005875;<br>P:GO:0006508;<br>F:GO:0016887;<br>C:GO:0005783;<br>C:GO:0005811;<br>F:GO:0005524 | -                                                                                                 |             | IPR015415; G3DSA:1.10.8.60<br>(GENE3D), PTHR23077 (PANTHER),<br>PTHR23077:SF18 (PANTHER)                             |
| Loa loa                 | clathrin coat assembly protein ap-1               | 6  | P:GO:0016183;<br>P:GO:0007269;<br>P:GO:0040025;<br>F:GO:0005515;<br>P:GO:0006886;<br>C:GO:0030121                                                                                                                                                                                            | -                                                                                                 |             | -                                                                                                                    |
| Cooperia oncophora      | latrophilin-like protein 2                        | 6  | P:GO:0007218;<br>C:GO:0016021;<br>P:GO:0007165;<br>C:GO:0005886;<br>F:GO:0005529;<br>F:GO:0004930                                                                                                                                                                                            | -                                                                                                 |             | IPR000203; PTHR12011 (PANTHER),<br>PTHR12011:SF56 (PANTHER)                                                          |
| Caenorhabditis elegans  | yl54_caeel ame: full=uncharacterized protein      | 0  |                                                                                                                                                                                                                                                                                              |                                                                                                   |             | -                                                                                                                    |

|                         |                                                  |    |                                                                                                                                                                                                                                                            |   |             |                                                                                     |
|-------------------------|--------------------------------------------------|----|------------------------------------------------------------------------------------------------------------------------------------------------------------------------------------------------------------------------------------------------------------|---|-------------|-------------------------------------------------------------------------------------|
| Phoca largha            | lactate dehydroge-se b                           | 5  | F:GO:0005488;<br>F:GO:0004459;<br>P:GO:0055114;<br>P:GO:0006096;<br>C:GO:0005739                                                                                                                                                                           | - | EC:1.1.1.27 | IPR015955; IPR018177; IPR022383;<br>PTHR11540 (PANTHER),<br>PTHR11540:SF3 (PANTHER) |
| Caenorhabditis elegans  | elegans protein confirmed by transcript evidence | 15 | P:GO:0007605;<br>P:GO:0007588;<br>F:GO:0008553;<br>P:GO:0006885;<br>C:GO:0031526;<br>P:GO:0015991;<br>C:GO:0016021;<br>P:GO:0001503;<br>F:GO:0051117;<br>P:GO:0015986;<br>C:GO:0016471;<br>C:GO:0005768;<br>P:GO:0040013;<br>C:GO:0033177;<br>C:GO:0016324 | - | EC:3.6.3.6  | IPR002490; PTHR11629:SF23<br>(PANTHER)                                              |
| -                       | -                                                | 0  |                                                                                                                                                                                                                                                            |   |             | -                                                                                   |
| Caenorhabditis elegans  | cytoskeleton-associated protein 5                | 1  | F:GO:0005515                                                                                                                                                                                                                                               | - |             | IPR010916; IPR011989; PTHR12609<br>(PANTHER)                                        |
| Caenorhabditis briggsae | d- repair endonuclease xpf                       | 7  | P:GO:0006310;<br>P:GO:0033683;<br>F:GO:0004520;<br>P:GO:0007127;<br>P:GO:0009792;<br>C:GO:0000109;<br>F:GO:0043566                                                                                                                                         | - |             | IPR011335; IPR020819; PTHR10150<br>(PANTHER)                                        |
| Caenorhabditis briggsae | proton-coupled amino acid transporter 1          | 4  | C:GO:0005886;<br>F:GO:0015171;<br>P:GO:0006865;<br>C:GO:0016021                                                                                                                                                                                            | - |             | -                                                                                   |
| -                       | -                                                | 0  |                                                                                                                                                                                                                                                            |   |             | SignalP (SIGNALP)                                                                   |
| Caenorhabditis elegans  | der1-like domain member 2                        | 7  | P:GO:0030433;<br>C:GO:0030176;<br>F:GO:0005515;<br>P:GO:0030968;<br>P:GO:0030970;<br>P:GO:0030307;<br>P:GO:0008284                                                                                                                                         | - |             | -                                                                                   |
| Caenorhabditis elegans  | der1-like domain member 2                        | 7  | P:GO:0030433;<br>C:GO:0030176;<br>F:GO:0005515;<br>P:GO:0030968;<br>P:GO:0030970;<br>P:GO:0030307;<br>P:GO:0008284                                                                                                                                         | - |             | IPR007599; SignalP (SIGNALP)                                                        |
| Caenorhabditis elegans  | der1-like domain member 2                        | 7  | P:GO:0030433;<br>C:GO:0030176;<br>F:GO:0005515;<br>P:GO:0030968;<br>P:GO:0030970;<br>P:GO:0030307;<br>P:GO:0008284                                                                                                                                         | - |             | IPR007599; SignalP (SIGNALP)                                                        |
| -                       | -                                                | 0  |                                                                                                                                                                                                                                                            |   |             | -                                                                                   |
| -                       | -                                                | 0  |                                                                                                                                                                                                                                                            |   |             | -                                                                                   |

|                              |                                                                  |    |                                                                                                                                                                       |                                                         |                                                                                     |
|------------------------------|------------------------------------------------------------------|----|-----------------------------------------------------------------------------------------------------------------------------------------------------------------------|---------------------------------------------------------|-------------------------------------------------------------------------------------|
|                              | -                                                                | 0  |                                                                                                                                                                       |                                                         | -                                                                                   |
|                              | -                                                                | 0  |                                                                                                                                                                       |                                                         | -                                                                                   |
|                              | -                                                                | 0  |                                                                                                                                                                       |                                                         | -                                                                                   |
|                              | -                                                                | 0  |                                                                                                                                                                       |                                                         | SignalP (SIGNALP)                                                                   |
|                              | -                                                                | 0  |                                                                                                                                                                       |                                                         | -                                                                                   |
| Nematostella vectensis       | kiaa1033 protein                                                 | 1  | C:GO:0071203                                                                                                                                                          |                                                         | -                                                                                   |
| Sinorhizobium medicae WSM419 | tr- modification gtpase                                          | 10 | C:GO:0005737;<br>P:GO:0006259;<br>F:GO:0046872;<br>F:GO:0008094;<br>F:GO:0005525;<br>F:GO:0003677;<br>P:GO:0006400;<br>F:GO:0005524;<br>P:GO:0007264;<br>F:GO:0003924 | EC:3.6.5.1;<br>EC:3.6.5.2;<br>EC:3.6.5.3;<br>EC:3.6.5.4 | -                                                                                   |
| Caenorhabditis briggsae      | briggsae cbr-rbc-2 protein                                       | 0  |                                                                                                                                                                       |                                                         | IPR015943; IPR017986; IPR019782;<br>PTHR22847 (PANTHER),<br>PTHR22847:SF4 (PANTHER) |
| Caenorhabditis briggsae      | chondroitin polymerizing factor                                  | 8  | P:GO:0000910;<br>F:GO:0016758;<br>P:GO:0040035;<br>P:GO:0006898;<br>P:GO:0048871;<br>P:GO:0009792;<br>C:GO:0016020;<br>C:GO:0005794                                   | EC:2.4.1.0                                              | IPR008428                                                                           |
| Loa loa                      | akt-interacting protein                                          | 10 | C:GO:0070695;<br>C:GO:0030897;<br>P:GO:0001934;<br>P:GO:0008333;<br>P:GO:0032092;<br>F:GO:0005515;<br>P:GO:0045022;<br>P:GO:0007032;<br>P:GO:0007040;<br>C:GO:0005886 |                                                         | IPR000608; IPR016135; PTHR11621<br>(PANTHER), PTHR11621:SF7<br>(PANTHER)            |
|                              | -                                                                | 0  |                                                                                                                                                                       |                                                         | -                                                                                   |
| Caenorhabditis elegans       | yx7o_caeel ame: full=uncharacterized protein flags:<br>precursor | 0  |                                                                                                                                                                       |                                                         | -                                                                                   |
| Caenorhabditis briggsae      | elegans protein confirmed by transcript evidence                 | 0  |                                                                                                                                                                       | C:GO:0016021                                            | -                                                                                   |
| Caenorhabditis elegans       | protease-associated domain-containing protein of 21              | 0  |                                                                                                                                                                       | F:GO:0008233;<br>P:GO:0007521;<br>C:GO:0005576          | IPR003137; G3DSA:3.50.30.30<br>(GENE3D), PTHR22702 (PANTHER),<br>SignalP (SIGNALP)  |
|                              | -                                                                | 0  |                                                                                                                                                                       |                                                         | -                                                                                   |
|                              | -                                                                | 0  |                                                                                                                                                                       |                                                         | -                                                                                   |

|                             |                                                         |    |                                                                                                                                                                                                                                                                             |                                                                                                   |                             |                                                                                                   |
|-----------------------------|---------------------------------------------------------|----|-----------------------------------------------------------------------------------------------------------------------------------------------------------------------------------------------------------------------------------------------------------------------------|---------------------------------------------------------------------------------------------------|-----------------------------|---------------------------------------------------------------------------------------------------|
| Caenorhabditis elegans      | can cell migration defective family member (cam-1)      | 16 | P:GO:0016477;<br>P:GO:0007411;<br>C:GO:0030424;<br>C:GO:0032809;<br>F:GO:0004674;<br>C:GO:0030425;<br>P:GO:0005975;<br>P:GO:0040035;<br>P:GO:0007169;<br>F:GO:0005524;<br>C:GO:0031594;<br>F:GO:0005515;<br>F:GO:0004714;<br>C:GO:0005887;<br>P:GO:0006468;<br>P:GO:0045200 | -                                                                                                 | EC:2.7.11.0;<br>EC:2.7.10.1 | -                                                                                                 |
| Caenorhabditis elegans      | enhancer of mr--decapping protein 3                     | 0  |                                                                                                                                                                                                                                                                             | F:GO:0003674;<br>C:GO:0005737;<br>C:GO:0000932;<br>P:GO:0008150;<br>F:GO:0005515;<br>C:GO:0005575 |                             | IPR021024                                                                                         |
| Caenorhabditis elegans      | 28s ribosomal protein s5                                | 9  | P:GO:0006412;<br>P:GO:0040010;<br>F:GO:0003723;<br>C:GO:0005840;<br>C:GO:0005739;<br>F:GO:0003735;<br>P:GO:0002119;<br>P:GO:0006898;<br>P:GO:0009792                                                                                                                        | -                                                                                                 | EC:3.6.5.3                  | IPR000851; IPR013810; IPR014720;<br>IPR018192; PTHR13718:SF3<br>(PANTHER), SSF54768 (SUPERFAMILY) |
| -                           | -                                                       | 0  |                                                                                                                                                                                                                                                                             |                                                                                                   |                             | -                                                                                                 |
| -                           | -                                                       | 0  |                                                                                                                                                                                                                                                                             |                                                                                                   |                             | -                                                                                                 |
| -                           | -                                                       | 0  |                                                                                                                                                                                                                                                                             |                                                                                                   |                             | -                                                                                                 |
| -                           | -                                                       | 0  |                                                                                                                                                                                                                                                                             |                                                                                                   |                             | -                                                                                                 |
| -                           | -                                                       | 0  |                                                                                                                                                                                                                                                                             |                                                                                                   |                             | -                                                                                                 |
| Caenorhabditis elegans      | elegans protein confirmed by transcript evidence        | 0  |                                                                                                                                                                                                                                                                             |                                                                                                   |                             | IPR021010; SSF141739 (SUPERFAMILY)                                                                |
| Angiostrongylus cantonensis | hypothetical protein [Angiostrongylus cantonensis]      | 0  |                                                                                                                                                                                                                                                                             |                                                                                                   |                             | -                                                                                                 |
| -                           | -                                                       | 0  |                                                                                                                                                                                                                                                                             |                                                                                                   |                             | -                                                                                                 |
| -                           | -                                                       | 0  |                                                                                                                                                                                                                                                                             |                                                                                                   |                             | -                                                                                                 |
| -                           | -                                                       | 0  |                                                                                                                                                                                                                                                                             |                                                                                                   |                             | -                                                                                                 |
| -                           | -                                                       | 0  |                                                                                                                                                                                                                                                                             |                                                                                                   |                             | -                                                                                                 |
| Caenorhabditis briggsae     | Hypothetical protein CBG11345 [Caenorhabditis briggsae] | 0  |                                                                                                                                                                                                                                                                             |                                                                                                   |                             | -                                                                                                 |
| Caenorhabditis briggsae     | briggsae cbr-pqn-20 protein                             | 0  |                                                                                                                                                                                                                                                                             |                                                                                                   |                             | SignalP (SIGNALP)                                                                                 |
| Caenorhabditis briggsae     | briggsae cbr-pqn-20 protein                             | 0  |                                                                                                                                                                                                                                                                             |                                                                                                   |                             | SignalP (SIGNALP)                                                                                 |
| Caenorhabditis briggsae     | briggsae cbr-pqn-20 protein                             | 0  |                                                                                                                                                                                                                                                                             |                                                                                                   |                             | SignalP (SIGNALP)                                                                                 |
| Caenorhabditis briggsae     | briggsae cbr-pqn-20 protein                             | 0  |                                                                                                                                                                                                                                                                             |                                                                                                   |                             | SignalP (SIGNALP)                                                                                 |
| Caenorhabditis elegans      | in family member (ttn-1)                                | 4  | P:GO:0009987;<br>F:GO:0005488;<br>F:GO:0004674;<br>P:GO:0009792                                                                                                                                                                                                             | -                                                                                                 | EC:2.7.11.0                 | IPR003598; IPR007110; IPR013098;<br>IPR013783; PTHR19897 (PANTHER),<br>SSF48726 (SUPERFAMILY)     |

|                         |                                              |    |                                                                                                                                                                                                                                                                                                                                                                                                                                                                                         |   |            |                                                                                        |
|-------------------------|----------------------------------------------|----|-----------------------------------------------------------------------------------------------------------------------------------------------------------------------------------------------------------------------------------------------------------------------------------------------------------------------------------------------------------------------------------------------------------------------------------------------------------------------------------------|---|------------|----------------------------------------------------------------------------------------|
| Pongo abelii            | filamin alpha (actin binding protein 280)    | 28 | F:GO:0005886;<br>F:GO:0004871;<br>C:GO:0005802;<br>P:GO:0043433;<br>P:GO:0034394;<br>C:GO:0015629;<br>P:GO:0050821;<br>P:GO:0051220;<br>C:GO:0005576;<br>C:GO:0005829;<br>F:GO:0001948;<br>P:GO:0051764;<br>P:GO:0043123;<br>F:GO:0051015;<br>F:GO:0048365;<br>P:GO:0045022;<br>P:GO:0007195;<br>F:GO:0042803;<br>F:GO:0034989;<br>P:GO:0031532;<br>F:GO:0034988;<br>C:GO:0005886;<br>F:GO:0008134;<br>P:GO:0042177;<br>C:GO:0005634;<br>P:GO:0042993;<br>C:GO:0005938;<br>P:GO:0043113 | - | -          | -                                                                                      |
| Caenorhabditis elegans  | ankyrin repeat domain-containing protein 13c | 1  | C:GO:0005783                                                                                                                                                                                                                                                                                                                                                                                                                                                                            | - |            | IPR021832; PTHR12447 (PANTHER)                                                         |
|                         |                                              | 0  |                                                                                                                                                                                                                                                                                                                                                                                                                                                                                         |   |            | SignalP (SIGNALP)                                                                      |
| Ancylostoma ceylanicum  | metalloprotease 1 precursor                  | 1  | F:GO:0008233                                                                                                                                                                                                                                                                                                                                                                                                                                                                            | - |            | IPR000859; PTHR10127 (PANTHER),<br>PTHR10127:SF60 (PANTHER)                            |
| Caenorhabditis briggsae | wu:fc51g12 protein                           | 9  | F:GO:0008017;<br>P:GO:0000910;<br>P:GO:0045132;<br>C:GO:0000922;<br>P:GO:0090307;<br>C:GO:0005813;<br>P:GO:0051299;<br>P:GO:0009792;<br>F:GO:0008574                                                                                                                                                                                                                                                                                                                                    | - | EC:3.6.4.4 | IPR001752; PTHR16012 (PANTHER),<br>PTHR16012:SF82 (PANTHER),<br>SSF52540 (SUPERFAMILY) |
| Caenorhabditis briggsae | erin family member (cdh-6)                   | 2  | C:GO:0016020;<br>P:GO:0007155                                                                                                                                                                                                                                                                                                                                                                                                                                                           | - |            | -                                                                                      |

|                         |                                                            |    |                                                                                                                                                                                                                                                                                                                                                                                                                     |   |                                                                                                                                                              |
|-------------------------|------------------------------------------------------------|----|---------------------------------------------------------------------------------------------------------------------------------------------------------------------------------------------------------------------------------------------------------------------------------------------------------------------------------------------------------------------------------------------------------------------|---|--------------------------------------------------------------------------------------------------------------------------------------------------------------|
| Loa loa                 | lethal family member (let-413)                             | 24 | F:GO:0005515;<br>P:GO:0060561;<br>P:GO:0032863;<br>P:GO:0045930;<br>P:GO:0050918;<br>C:GO:0042734;<br>C:GO:0005913;<br>C:GO:0034750;<br>P:GO:0008283;<br>P:GO:0016337;<br>C:GO:0016323;<br>P:GO:0045108;<br>P:GO:0015031;<br>P:GO:0016080;<br>P:GO:0001921;<br>C:GO:0045211;<br>P:GO:0060603;<br>C:GO:0031252;<br>P:GO:0008105;<br>P:GO:0035089;<br>P:GO:0016331;<br>P:GO:0043615;<br>P:GO:0043065;<br>P:GO:0048488 | - | IPR001611; PR00019 (PRINTS),<br>G3DSA:3.80.10.10 (GENE3D),<br>PTHR23155 (PANTHER),<br>PTHR23155:SF30 (PANTHER), PS51450<br>(PROFILE), SSF52058 (SUPERFAMILY) |
| -                       | -                                                          | 0  | -                                                                                                                                                                                                                                                                                                                                                                                                                   | - | SignalP (SIGNALP)                                                                                                                                            |
| -                       | -                                                          | 0  | -                                                                                                                                                                                                                                                                                                                                                                                                                   | - | -                                                                                                                                                            |
| Caenorhabditis elegans  | briggsae cbr-igcm-1 protein                                | 0  | C:GO:0016020                                                                                                                                                                                                                                                                                                                                                                                                        | - | PTHR11640 (PANTHER),<br>PTHR11640:SF2 (PANTHER)                                                                                                              |
| Caenorhabditis briggsae | ras protein                                                | 0  | F:GO:0005525;<br>F:GO:0003924;<br>P:GO:0007264;<br>F:GO:0000166;<br>C:GO:0016020;<br>P:GO:0007165;<br>C:GO:0005886;<br>C:GO:0005622                                                                                                                                                                                                                                                                                 | - | IPR001806; IPR013753; IPR020849;<br>G3DSA:3.40.50.300 (GENE3D),<br>PTHR11708 (PANTHER),<br>PTHR11708:SF126 (PANTHER),<br>SSF52540 (SUPERFAMILY)              |
| -                       | -                                                          | 0  | -                                                                                                                                                                                                                                                                                                                                                                                                                   | - | -                                                                                                                                                            |
| Caenorhabditis elegans  | multiple pdz domain protein family member (mpz-1)          | 7  | P:GO:0042552;<br>C:GO:0044456;<br>C:GO:0005923;<br>C:GO:0016021;<br>F:GO:0008022;<br>P:GO:0007155;<br>C:GO:0042995                                                                                                                                                                                                                                                                                                  | - | IPR001478; G3DSA:2.30.42.10<br>(GENE3D), PTHR19964 (PANTHER),<br>PTHR19964:SF5 (PANTHER)                                                                     |
| -                       | -                                                          | 0  | -                                                                                                                                                                                                                                                                                                                                                                                                                   | - | SignalP (SIGNALP)                                                                                                                                            |
| Caenorhabditis elegans  | elegans protein partially confirmed by transcript evidence | 9  | P:GO:0009792;<br>F:GO:0016491;<br>P:GO:0040018;<br>P:GO:0019373;<br>F:GO:0005506;<br>P:GO:0040017;<br>P:GO:0040010;<br>P:GO:0000003;<br>P:GO:0008340                                                                                                                                                                                                                                                                | - | IPR001128; PTHR19383:SF176<br>(PANTHER)                                                                                                                      |
| -                       | -                                                          | 0  | -                                                                                                                                                                                                                                                                                                                                                                                                                   | - | -                                                                                                                                                            |



|                         |                                                                                        |   |                                                                                                                                                      |                                                                                                   |             |                                                                                                   |
|-------------------------|----------------------------------------------------------------------------------------|---|------------------------------------------------------------------------------------------------------------------------------------------------------|---------------------------------------------------------------------------------------------------|-------------|---------------------------------------------------------------------------------------------------|
| Caenorhabditis elegans  | r- polymerase i polypeptide b                                                          | 9 | F:GO:0003899;<br>P:GO:0040007;<br>P:GO:0040035;<br>P:GO:0002119;<br>F:GO:0005515;<br>F:GO:0032549;<br>C:GO:0005654;<br>P:GO:0009792;<br>P:GO:0006350 | -                                                                                                 | EC:2.7.7.6  | SSF64484 (SUPERFAMILY)                                                                            |
|                         | -                                                                                      | 0 |                                                                                                                                                      |                                                                                                   |             | SignalP (SIGNALP)                                                                                 |
|                         | -                                                                                      | 0 |                                                                                                                                                      |                                                                                                   |             | SignalP (SIGNALP)                                                                                 |
| Loa loa                 | protein ki-se domain containing protein                                                | 0 |                                                                                                                                                      | F:GO:0016301;<br>F:GO:0004672;<br>F:GO:0005524;<br>F:GO:0000166;<br>P:GO:0006468;<br>F:GO:0004674 |             | -                                                                                                 |
| Caenorhabditis briggsae | tetratricopeptide repeat protein 7a                                                    | 0 |                                                                                                                                                      | F:GO:0005488                                                                                      |             | IPR011990; IPR013026; PTHR23083 (PANTHER), SSF48452 (SUPERFAMILY)                                 |
| Brugia malayi           | calcium atpase                                                                         | 5 | F:GO:0005388;<br>C:GO:0016021;<br>P:GO:0006754;<br>F:GO:0005524;<br>P:GO:0006816                                                                     | -                                                                                                 | EC:3.6.3.8  | IPR001757; G3DSA:1.20.1110.10 (GENE3D), PTHR11939:SF76 (PANTHER), SSF56784 (SUPERFAMILY)          |
| Homo sapiens            | complement c1r subcomponent precursor                                                  | 6 | F:GO:0004252;<br>P:GO:0045087;<br>F:GO:0005509;<br>P:GO:0006958;<br>C:GO:0005576;<br>P:GO:0006508                                                    | -                                                                                                 | EC:3.4.21.0 | -                                                                                                 |
| Caenorhabditis elegans  | elegans protein partially confirmed by transcript evidence                             | 0 |                                                                                                                                                      |                                                                                                   |             | -                                                                                                 |
| Caenorhabditis elegans  | briggsae cbr-asm-1 protein                                                             | 4 | P:GO:0046513;<br>F:GO:0004767;<br>C:GO:0005576;<br>P:GO:0006685                                                                                      | -                                                                                                 | EC:3.1.4.12 | -                                                                                                 |
| Caenorhabditis briggsae | ptk2 protein tyrosine ki-se 2                                                          | 4 | P:GO:0009987;<br>F:GO:0004672;<br>F:GO:0000166;<br>C:GO:0044464                                                                                      | -                                                                                                 |             | IPR001245; IPR011009; IPR017441; IPR020685; G3DSA:3.30.200.20 (GENE3D), PTHR23256:SF267 (PANTHER) |
| Ostertagia ostertagi    | excretory secretory antigen                                                            | 1 | F:GO:0019841                                                                                                                                         | -                                                                                                 |             | -                                                                                                 |
| Caenorhabditis elegans  | uncoordinated family member (unc-89)                                                   | 0 |                                                                                                                                                      |                                                                                                   |             | IPR013783; PTHR19897 (PANTHER), PTHR19897:SF5 (PANTHER)                                           |
| Caenorhabditis briggsae | membrane bound o-acyl mboat protein isoform partially confirmed by transcript evidence | 2 | C:GO:0016021;<br>P:GO:0010171                                                                                                                        | -                                                                                                 |             | IPR004299; PTHR13906 (PANTHER), PTHR13906:SF2 (PANTHER), SignalP (SIGNALP)                        |
|                         | -                                                                                      | 0 |                                                                                                                                                      |                                                                                                   |             | -                                                                                                 |
|                         | -                                                                                      | 0 |                                                                                                                                                      |                                                                                                   |             | -                                                                                                 |
| Homo sapiens            | transmembrane protein 176b                                                             | 4 | C:GO:0031965;<br>P:GO:0030154;<br>P:GO:0009887;<br>C:GO:0016021                                                                                      | -                                                                                                 |             | -                                                                                                 |
|                         | -                                                                                      | 0 |                                                                                                                                                      |                                                                                                   |             | SignalP (SIGNALP)                                                                                 |
| Loa loa                 | lethal family member (let-23)                                                          | 2 | F:GO:0005488;<br>F:GO:0004672                                                                                                                        | -                                                                                                 |             | -                                                                                                 |

|                          |                                                         |    |                                                                                                                                                                                                         |   |                                                         |                                                                                                                                                                                              |
|--------------------------|---------------------------------------------------------|----|---------------------------------------------------------------------------------------------------------------------------------------------------------------------------------------------------------|---|---------------------------------------------------------|----------------------------------------------------------------------------------------------------------------------------------------------------------------------------------------------|
| Macaca mulatta           | elongation factor 2                                     | 7  | C:GO:0005737;<br>F:GO:0003746;<br>F:GO:0005525;<br>F:GO:0005515;<br>C:GO:0030529;<br>P:GO:0006414;<br>F:GO:0003924                                                                                      | - | EC:3.6.5.1;<br>EC:3.6.5.2;<br>EC:3.6.5.3;<br>EC:3.6.5.4 | IPR000795; G3DSA:3.40.50.300<br>(GENE3D), SSF52540 (SUPERFAMILY)                                                                                                                             |
| Caenorhabditis elegans   | hypothetical protein F35H10.10 [Caenorhabditis elegans] | 4  | P:GO:0007186;<br>C:GO:0016021;<br>P:GO:0007165;<br>F:GO:0004930                                                                                                                                         | - |                                                         | IPR017978; PTHR11336 (PANTHER),<br>PTHR11336:SF8 (PANTHER), SignalP<br>(SIGNALP)                                                                                                             |
|                          |                                                         | 0  |                                                                                                                                                                                                         |   |                                                         |                                                                                                                                                                                              |
|                          |                                                         | 0  |                                                                                                                                                                                                         |   |                                                         |                                                                                                                                                                                              |
| Caenorhabditis briggsae  | uncoordi-ted family member (unc-26)                     | 7  | P:GO:0046549;<br>F:GO:0003676;<br>P:GO:0006796;<br>P:GO:0007268;<br>P:GO:0050808;<br>P:GO:0006897;<br>F:GO:0004437                                                                                      | - |                                                         | IPR002013; PTHR11200 (PANTHER),<br>PTHR11200:SF10 (PANTHER)                                                                                                                                  |
| Caenorhabditis briggsae  | 6-phosphofructo-2- isoform a                            | 7  | F:GO:0003873;<br>P:GO:0007420;<br>F:GO:0004331;<br>F:GO:0005524;<br>F:GO:0005515;<br>P:GO:0006110;<br>P:GO:0006003                                                                                      | - | EC:2.7.1.105<br>; EC:3.1.3.46                           | IPR001345; IPR003094; IPR013078;<br>IPR013079; G3DSA:3.40.50.1240<br>(GENE3D), G3DSA:3.40.50.300<br>(GENE3D), PTHR10606:SF11<br>(PANTHER), SSF52540 (SUPERFAMILY),<br>SSF53254 (SUPERFAMILY) |
|                          |                                                         | 0  |                                                                                                                                                                                                         |   |                                                         |                                                                                                                                                                                              |
| Caenorhabditis briggsae  | protein tyrosine receptor q                             | 5  | P:GO:0009987;<br>P:GO:0040027;<br>F:GO:0016791;<br>P:GO:0040026;<br>C:GO:0016020                                                                                                                        | - | EC:3.1.3.0                                              | IPR003961; IPR008957; IPR013783;<br>PTHR19900 (PANTHER),<br>PTHR19900:SF7 (PANTHER)                                                                                                          |
| Caenorhabditis elegans   | elegans protein confirmed by transcript evidence        | 0  |                                                                                                                                                                                                         |   |                                                         |                                                                                                                                                                                              |
|                          |                                                         | 0  |                                                                                                                                                                                                         |   |                                                         |                                                                                                                                                                                              |
|                          |                                                         | 0  |                                                                                                                                                                                                         |   |                                                         |                                                                                                                                                                                              |
|                          |                                                         | 0  |                                                                                                                                                                                                         |   |                                                         |                                                                                                                                                                                              |
|                          |                                                         | 0  |                                                                                                                                                                                                         |   |                                                         | IPR000210; IPR011333; IPR013069                                                                                                                                                              |
| Caenorhabditis briggsae  | peroxisomal carnitine o-octanoyltransferase             | 4  | F:GO:0008415;<br>C:GO:0005777;<br>P:GO:0006810;<br>P:GO:0042221                                                                                                                                         | - |                                                         | IPR000542; PTHR22589:SF9<br>(PANTHER), SSF52777 (SUPERFAMILY)                                                                                                                                |
| Caenorhabditis briggsae  | calcium-binding protein p22                             | 12 | P:GO:0045056;<br>P:GO:0002119;<br>F:GO:0015459;<br>P:GO:0019722;<br>P:GO:0017156;<br>P:GO:0040010;<br>F:GO:0005509;<br>P:GO:0000003;<br>P:GO:0040011;<br>P:GO:0006813;<br>C:GO:0005829;<br>P:GO:0007264 | - |                                                         | IPR002048; IPR011992; IPR018247;<br>IPR018248; IPR018249; PTHR23056<br>(PANTHER), PTHR23056:SF4<br>(PANTHER), SSF47473 (SUPERFAMILY)                                                         |
| Ambystoma tigrinum virus | unknown [Ambystoma tigrinum virus]                      | 0  |                                                                                                                                                                                                         |   | P:GO:0006353;<br>F:GO:0003715                           | IPR017956                                                                                                                                                                                    |
| Caenorhabditis elegans   | variable abnormal morphology family member (vab-19)     | 0  |                                                                                                                                                                                                         |   |                                                         |                                                                                                                                                                                              |

|                         |                                                     |    |                                                                                                                                                                                                                                                                             |   |                                                                                                                                        |
|-------------------------|-----------------------------------------------------|----|-----------------------------------------------------------------------------------------------------------------------------------------------------------------------------------------------------------------------------------------------------------------------------|---|----------------------------------------------------------------------------------------------------------------------------------------|
| Loa loa                 | variable abnormal morphology family member (vab-10) | 0  |                                                                                                                                                                                                                                                                             |   | G3DSA:3.90.1290.10 (GENE3D),<br>SSF75399 (SUPERFAMILY)                                                                                 |
| Caenorhabditis briggsae | briggsae cbr-nhx-2 protein                          | 16 | P:GO:0006814;<br>P:GO:0001101;<br>P:GO:0045768;<br>P:GO:0007243;<br>F:GO:0015385;<br>C:GO:0016021;<br>P:GO:0010447;<br>C:GO:0005624;<br>C:GO:0045121;<br>P:GO:0014070;<br>F:GO:0008134;<br>C:GO:0016323;<br>P:GO:0034220;<br>P:GO:0009792;<br>P:GO:0006885;<br>P:GO:0015992 | - | IPR004709; IPR006153; IPR018407;<br>IPR018422; SignalP (SIGNALP)                                                                       |
| Monodelphis domestica   | ubiquitin specific peptidase 3                      | 8  | P:GO:0000278;<br>F:GO:0004221;<br>P:GO:0006281;<br>F:GO:0042393;<br>C:GO:0000790;<br>P:GO:0016578;<br>P:GO:0031647;<br>F:GO:0004843                                                                                                                                         | - | EC:3.1.2.15<br>IPR001394; IPR018200; PTHR10420<br>(PANTHER), PTHR10420:SF58<br>(PANTHER), SignalP (SIGNALP),<br>SSF54001 (SUPERFAMILY) |
| Trichoplax adhaerens    | ubiquitin specific peptidase 3                      | 1  | F:GO:0016787                                                                                                                                                                                                                                                                | - | IPR001394; IPR018200; PTHR10420<br>(PANTHER), PTHR10420:SF58<br>(PANTHER), SSF54001 (SUPERFAMILY)                                      |
|                         |                                                     | 0  |                                                                                                                                                                                                                                                                             |   | -                                                                                                                                      |
|                         |                                                     | 0  |                                                                                                                                                                                                                                                                             |   | -                                                                                                                                      |
| Loa loa                 | phosphatidylinositol glycan anchor class u          | 2  | P:GO:0034394;<br>F:GO:0003923                                                                                                                                                                                                                                               | - | IPR009600; SignalP (SIGNALP)                                                                                                           |
| Caenorhabditis briggsae | phosphatidylinositol glycan anchor class u          | 2  | P:GO:0034394;<br>F:GO:0003923                                                                                                                                                                                                                                               | - | IPR009600; SignalP (SIGNALP)                                                                                                           |
|                         |                                                     | 0  |                                                                                                                                                                                                                                                                             |   | -                                                                                                                                      |
| Loa loa                 | polymerase ii (d- directed) polypeptide             | 10 | F:GO:0003899;<br>F:GO:0030275;<br>F:GO:0004672;<br>P:GO:0006367;<br>P:GO:0008380;<br>C:GO:0005665;<br>F:GO:0003677;<br>F:GO:0046983;<br>P:GO:0006368;<br>C:GO:0005666                                                                                                       | - | EC:2.7.7.6<br>IPR008193; IPR009025; IPR011261;<br>G3DSA:3.30.1360.10 (GENE3D),<br>PTHR13946 (PANTHER),<br>PTHR13946:SF16 (PANTHER)     |

|                         |                                             |    |                                                                                                                                                                                                                                                                                                                                                 |   |             |                                                                                                                                             |
|-------------------------|---------------------------------------------|----|-------------------------------------------------------------------------------------------------------------------------------------------------------------------------------------------------------------------------------------------------------------------------------------------------------------------------------------------------|---|-------------|---------------------------------------------------------------------------------------------------------------------------------------------|
| Caenorhabditis briggsae | alpha 1                                     | 20 | P:GO:0001764;<br>P:GO:0048514;<br>P:GO:0030155;<br>P:GO:0060441;<br>P:GO:0060445;<br>P:GO:0045198;<br>C:GO:0005608;<br>P:GO:0045995;<br>C:GO:0005606;<br>P:GO:0002011;<br>F:GO:0043208;<br>C:GO:0005615;<br>P:GO:0030334;<br>F:GO:0005102;<br>P:GO:0008045;<br>P:GO:0030903;<br>F:GO:0005201;<br>P:GO:0031290;<br>P:GO:0007166;<br>P:GO:0007634 | - |             | SignalP (SIGNALP)                                                                                                                           |
| Caenorhabditis elegans  | fk506-binding protein family member (fkb-5) | 4  | P:GO:0006457;<br>P:GO:0040010;<br>P:GO:0008340;<br>F:GO:0003755                                                                                                                                                                                                                                                                                 | - | EC:5.2.1.8  | IPR001179; G3DSA:3.10.50.40 (GENE3D), PTHR10516:SF9 (PANTHER), SignalP (SIGNALP), SSF54534 (SUPERFAMILY)                                    |
| Haemonchus contortus    | ornithine decarboxylase 1                   | 7  | P:GO:0009615;<br>C:GO:0005829;<br>P:GO:0009446;<br>F:GO:0005515;<br>P:GO:0048513;<br>P:GO:0008284;<br>F:GO:0004586                                                                                                                                                                                                                              | - | EC:4.1.1.17 | -                                                                                                                                           |
| Ailuropoda melanoleuca  | triosephosphate isomerase 1                 | 11 | C:GO:0005829;<br>P:GO:0006633;<br>C:GO:0005625;<br>P:GO:0006098;<br>P:GO:0019682;<br>F:GO:0004807;<br>F:GO:0005515;<br>P:GO:0006096;<br>P:GO:0006094;<br>C:GO:0005634;<br>P:GO:0009790                                                                                                                                                          | - | EC:5.3.1.1  | -                                                                                                                                           |
| Bos taurus              | upf0608 protein c19orf42 homolog            | 1  | C:GO:0016020                                                                                                                                                                                                                                                                                                                                    | - |             | -                                                                                                                                           |
| Brugia malayi           | polyubiquitin precursor                     | 5  | C:GO:0005737;<br>P:GO:0000003;<br>P:GO:0040007;<br>C:GO:0005634;<br>P:GO:0002119                                                                                                                                                                                                                                                                | - |             | IPR000626; IPR019954; IPR019955; IPR019956; G3DSA:3.10.20.90 (GENE3D), PTHR10666 (PANTHER), PTHR10666:SF9 (PANTHER), SSF54236 (SUPERFAMILY) |
| Brugia malayi           | polyubiquitin precursor                     | 5  | C:GO:0005737;<br>P:GO:0000003;<br>P:GO:0040007;<br>C:GO:0005634;<br>P:GO:0002119                                                                                                                                                                                                                                                                | - |             | IPR000626; IPR019954; IPR019955; IPR019956; G3DSA:3.10.20.90 (GENE3D), PTHR10666 (PANTHER), PTHR10666:SF9 (PANTHER), SSF54236 (SUPERFAMILY) |
| Brugia malayi           | polyubiquitin precursor                     | 5  | C:GO:0005737;<br>P:GO:0000003;<br>P:GO:0040007;<br>C:GO:0005634;<br>P:GO:0002119                                                                                                                                                                                                                                                                | - |             | IPR000626; IPR019954; IPR019955; IPR019956; G3DSA:3.10.20.90 (GENE3D), PTHR10666 (PANTHER), PTHR10666:SF9 (PANTHER), SSF54236 (SUPERFAMILY) |

|                         |                                                 |  |                                                                                                     |   |  |                                                                                                                                                         |
|-------------------------|-------------------------------------------------|--|-----------------------------------------------------------------------------------------------------|---|--|---------------------------------------------------------------------------------------------------------------------------------------------------------|
| Brugia malayi           | polyubiquitin precursor                         |  | C:GO:0005737;<br>P:GO:0000003;<br>5 P:GO:0040007;<br>C:GO:0005634;<br>P:GO:0002119                  | - |  | -                                                                                                                                                       |
| Brugia malayi           | polyubiquitin precursor                         |  | C:GO:0005737;<br>P:GO:0000003;<br>5 P:GO:0040007;<br>C:GO:0005634;<br>P:GO:0002119                  | - |  | IPR000626; IPR019954; IPR019955;<br>IPR019956; G3DSA:3.10.20.90<br>(GENE3D), PTHR10666 (PANTHER),<br>PTHR10666:SF9 (PANTHER), SSF54236<br>(SUPERFAMILY) |
| Brugia malayi           | polyubiquitin precursor                         |  | C:GO:0005737;<br>P:GO:0000003;<br>5 P:GO:0040007;<br>C:GO:0005634;<br>P:GO:0002119                  | - |  | IPR000626; IPR019954; IPR019955;<br>IPR019956; G3DSA:3.10.20.90<br>(GENE3D), PTHR10666 (PANTHER),<br>PTHR10666:SF9 (PANTHER), SSF54236<br>(SUPERFAMILY) |
| Brugia malayi           | polyubiquitin precursor                         |  | C:GO:0005737;<br>P:GO:0000003;<br>5 P:GO:0040007;<br>C:GO:0005634;<br>P:GO:0002119                  | - |  | IPR000626; IPR019954; IPR019955;<br>IPR019956; G3DSA:3.10.20.90<br>(GENE3D), PTHR10666 (PANTHER),<br>PTHR10666:SF9 (PANTHER), SSF54236<br>(SUPERFAMILY) |
| Brugia malayi           | polyubiquitin precursor                         |  | C:GO:0005737;<br>P:GO:0000003;<br>5 P:GO:0040007;<br>C:GO:0005634;<br>P:GO:0002119                  | - |  | IPR000626; IPR019954; IPR019955;<br>IPR019956; G3DSA:3.10.20.90<br>(GENE3D), PTHR10666 (PANTHER),<br>PTHR10666:SF9 (PANTHER), SSF54236<br>(SUPERFAMILY) |
| Brugia malayi           | polyubiquitin precursor                         |  | C:GO:0005737;<br>P:GO:0000003;<br>5 P:GO:0040007;<br>C:GO:0005634;<br>P:GO:0002119                  | - |  | IPR000626; IPR019954; IPR019955;<br>IPR019956; G3DSA:3.10.20.90<br>(GENE3D), PTHR10666 (PANTHER),<br>PTHR10666:SF9 (PANTHER), SSF54236<br>(SUPERFAMILY) |
| Loa loa                 | polyubiquitin precursor                         |  | C:GO:0005737;<br>P:GO:0000003;<br>5 P:GO:0040007;<br>C:GO:0005634;<br>P:GO:0002119                  | - |  |                                                                                                                                                         |
| Caenorhabditis briggsae | abnormal go-d development family member (gon-2) |  | 6 P:GO:0007067;<br>P:GO:0055085;<br>P:GO:0006811;<br>C:GO:0016021;<br>P:GO:0008406;<br>F:GO:0005216 | - |  | PTHR13800 (PANTHER), SignalP<br>(SIGNALP)                                                                                                               |
|                         | -                                               |  | 0                                                                                                   |   |  | -                                                                                                                                                       |

|                         |                                                            |    |                                                                                                                                                                                                                                                                                              |                               |                                                                                                          |
|-------------------------|------------------------------------------------------------|----|----------------------------------------------------------------------------------------------------------------------------------------------------------------------------------------------------------------------------------------------------------------------------------------------|-------------------------------|----------------------------------------------------------------------------------------------------------|
| Pongo abelii            | collagen alpha-2 chain precursor                           | 17 | P:GO:0042476;<br>F:GO:0030674;<br>P:GO:0070208;<br>P:GO:0043589;<br>P:GO:0008217;<br>F:GO:0042802;<br>C:GO:0005615;<br>F:GO:0046332;<br>P:GO:0001501;<br>F:GO:0048407;<br>C:GO:0005584;<br>P:GO:0030199;<br>P:GO:0007179;<br>F:GO:0005201;<br>P:GO:0001568;<br>P:GO:0007266;<br>C:GO:0005886 | -                             | SignalIP (SIGNALP)                                                                                       |
| Brugia malayi           | mkiaa0297 protein                                          | 0  |                                                                                                                                                                                                                                                                                              |                               | SignalIP (SIGNALP)                                                                                       |
| Caenorhabditis briggsae | Hypothetical protein CBG06123 [Caenorhabditis briggsae]    | 0  |                                                                                                                                                                                                                                                                                              |                               | -                                                                                                        |
| Caenorhabditis briggsae | Hypothetical protein CBG06123 [Caenorhabditis briggsae]    | 0  |                                                                                                                                                                                                                                                                                              |                               | -                                                                                                        |
| Caenorhabditis briggsae | elegans protein partially confirmed by transcript evidence | 2  | P:GO:0055085;<br>C:GO:0016021                                                                                                                                                                                                                                                                | -                             | -                                                                                                        |
| -                       | -                                                          | 0  |                                                                                                                                                                                                                                                                                              |                               | -                                                                                                        |
| Dictyocaulus viviparus  | putative protein [Dictyocaulus viviparus]                  | 0  |                                                                                                                                                                                                                                                                                              |                               | -                                                                                                        |
| -                       | -                                                          | 0  |                                                                                                                                                                                                                                                                                              |                               | -                                                                                                        |
| Caenorhabditis briggsae | elegans protein confirmed by transcript evidence           | 0  |                                                                                                                                                                                                                                                                                              |                               | IPR001534                                                                                                |
| -                       | -                                                          | 0  |                                                                                                                                                                                                                                                                                              |                               | -                                                                                                        |
| -                       | -                                                          | 0  |                                                                                                                                                                                                                                                                                              |                               | -                                                                                                        |
| -                       | -                                                          | 0  |                                                                                                                                                                                                                                                                                              |                               | -                                                                                                        |
| -                       | -                                                          | 0  |                                                                                                                                                                                                                                                                                              |                               | -                                                                                                        |
| -                       | -                                                          | 0  |                                                                                                                                                                                                                                                                                              |                               | -                                                                                                        |
| Caenorhabditis briggsae | follicle stimulating hormone receptor                      | 11 | F:GO:0004963;<br>P:GO:0006952;<br>P:GO:0040010;<br>C:GO:0016021;<br>P:GO:0007186;<br>P:GO:0000003;<br>C:GO:0009986;<br>F:GO:0005515;<br>P:GO:0007165;<br>P:GO:0009792;<br>C:GO:0005886                                                                                                       | -                             | PTHR23154 (PANTHER),<br>PTHR23154:SF24 (PANTHER)                                                         |
| -                       | -                                                          | 0  |                                                                                                                                                                                                                                                                                              |                               | -                                                                                                        |
| Caenorhabditis briggsae | metallo-beta-lactamase superfamily protein                 | 1  | F:GO:0016787                                                                                                                                                                                                                                                                                 | -                             | G3DSA:3.60.15.10 (GENE3D),<br>PTHR12553 (PANTHER),<br>PTHR12553:SF3 (PANTHER),<br>SSF56281 (SUPERFAMILY) |
| Caenorhabditis elegans  | briggsae cbr-unc- protein                                  | 0  |                                                                                                                                                                                                                                                                                              | F:GO:0005488;<br>F:GO:0008270 | PTHR21696 (PANTHER)                                                                                      |
| Loa loa                 | AIDA-1b [Loa loa]                                          | 0  |                                                                                                                                                                                                                                                                                              |                               | -                                                                                                        |
| Ixodes scapularis       | vacuolar multi-drug resistance abc transporter             | 6  | F:GO:0042626;<br>P:GO:0055085;<br>P:GO:0055114;<br>F:GO:0005524;<br>C:GO:0016021;<br>F:GO:0032440                                                                                                                                                                                            | -                             | EC:1.3.1.74                                                                                              |
| -                       | -                                                          | 0  |                                                                                                                                                                                                                                                                                              |                               | -                                                                                                        |

|                         |                                                       |    |                                                                                                                                                                                                                                           |                                                |            |                                                                                                                                                           |
|-------------------------|-------------------------------------------------------|----|-------------------------------------------------------------------------------------------------------------------------------------------------------------------------------------------------------------------------------------------|------------------------------------------------|------------|-----------------------------------------------------------------------------------------------------------------------------------------------------------|
| Caenorhabditis elegans  | uncoordinated family member (unc-73)                  | 10 | C:GO:0043005;<br>F:GO:0005515;<br>P:GO:0023034;<br>P:GO:0007409;<br>F:GO:0016740;<br>P:GO:0016192;<br>C:GO:0043025;<br>C:GO:0048471;<br>P:GO:0050773;<br>F:GO:0005085                                                                     | -                                              |            | IPR000219; IPR001849; IPR011993;<br>PTHR22826 (PANTHER),<br>PTHR22826:SF39 (PANTHER),<br>SSF50729 (SUPERFAMILY)                                           |
| Caenorhabditis elegans  | d- replication licensing factor mcm3                  | 14 | F:GO:0016851;<br>P:GO:0006268;<br>P:GO:0000910;<br>P:GO:0015995;<br>C:GO:0042555;<br>P:GO:0040035;<br>F:GO:0003677;<br>F:GO:0005524;<br>C:GO:0000785;<br>F:GO:0016887;<br>F:GO:0005515;<br>P:GO:0030174;<br>P:GO:0009792;<br>F:GO:0003682 | -                                              | EC:6.6.1.1 | IPR001208; IPR003593; IPR008046;<br>IPR018525; G3DSA:3.40.50.300<br>(GENE3D), PTHR11630 (PANTHER),<br>PTHR11630:SF46 (PANTHER),<br>SSF52540 (SUPERFAMILY) |
| Caenorhabditis elegans  | heat repeat containing 1                              | 4  | P:GO:0009792;<br>P:GO:0002119;<br>P:GO:0040010;<br>P:GO:0040011                                                                                                                                                                           | -                                              |            | IPR016024; IPR022125; PTHR13457<br>(PANTHER)                                                                                                              |
|                         |                                                       | 0  |                                                                                                                                                                                                                                           |                                                |            |                                                                                                                                                           |
| Caenorhabditis briggsae | 30s ribosomal protein s12                             | 7  | P:GO:0009792;<br>P:GO:0002119;<br>F:GO:0003735;<br>C:GO:0015935;<br>P:GO:0000003;<br>P:GO:0040007;<br>P:GO:0006412                                                                                                                        | -                                              | EC:3.6.5.3 | IPR005679; IPR006032; IPR012340;<br>IPR016027                                                                                                             |
| Caenorhabditis briggsae | briggsae cbr-gei-11 protein                           | 0  |                                                                                                                                                                                                                                           | P:GO:0045449;<br>C:GO:0005634;<br>F:GO:0003677 |            | -                                                                                                                                                         |
|                         |                                                       | 0  |                                                                                                                                                                                                                                           |                                                |            | -                                                                                                                                                         |
| Caenorhabditis briggsae | large ala glu-rich protein                            | 0  |                                                                                                                                                                                                                                           |                                                |            | PTHR18947 (PANTHER),<br>PTHR18947:SF4 (PANTHER)                                                                                                           |
| Caenorhabditis elegans  | hypothetical protein F31A3.5 [Caenorhabditis elegans] | 0  |                                                                                                                                                                                                                                           |                                                |            | -                                                                                                                                                         |
|                         |                                                       | 0  |                                                                                                                                                                                                                                           |                                                |            | -                                                                                                                                                         |
|                         |                                                       | 0  |                                                                                                                                                                                                                                           |                                                |            | SignalP (SIGNALP)                                                                                                                                         |
| Pongo abelii            | type alpha 2                                          | 8  | F:GO:0005201;<br>F:GO:0030674;<br>C:GO:0005615;<br>P:GO:0016337;<br>C:GO:0005578;<br>P:GO:0009749;<br>P:GO:0030198;<br>C:GO:0042383                                                                                                       | -                                              |            | -                                                                                                                                                         |
| Caenorhabditis briggsae | egg laying defective family member (egl-8)            | 5  | P:GO:0006629;<br>F:GO:0005488;<br>F:GO:0004629;<br>C:GO:0044464;<br>P:GO:0023052                                                                                                                                                          | -                                              |            | IPR011992; IPR015359; PTHR10336<br>(PANTHER), PTHR10336:SF8<br>(PANTHER), SSF47473 (SUPERFAMILY)                                                          |

|                                |                                                         |    |                                                                                                                                                                                                                                                                                                                                                                                                                                                       |                                                                                  |                                                                                                      |
|--------------------------------|---------------------------------------------------------|----|-------------------------------------------------------------------------------------------------------------------------------------------------------------------------------------------------------------------------------------------------------------------------------------------------------------------------------------------------------------------------------------------------------------------------------------------------------|----------------------------------------------------------------------------------|------------------------------------------------------------------------------------------------------|
|                                | -                                                       | 0  |                                                                                                                                                                                                                                                                                                                                                                                                                                                       |                                                                                  | -                                                                                                    |
| Caenorhabditis elegans         | inositol -trisphosphate receptor                        | 26 | F:GO:0035091;<br>P:GO:0051291;<br>C:GO:0005654;<br>F:GO:0005515;<br>P:GO:0050913;<br>C:GO:0005640;<br>P:GO:0050916;<br>P:GO:0007204;<br>C:GO:0005792;<br>F:GO:0070679;<br>P:GO:0051592;<br>C:GO:0031095;<br>C:GO:0043209;<br>C:GO:0005730;<br>C:GO:0043025;<br>F:GO:0000822;<br>P:GO:0007165;<br>P:GO:0007186;<br>P:GO:0070588;<br>P:GO:0050917;<br>P:GO:0051260;<br>C:GO:0005783;<br>F:GO:0043533;<br>C:GO:0005887;<br>F:GO:0015085;<br>F:GO:0005220 | -                                                                                | IPR015925; PTHR13715:SF2 (PANTHER)                                                                   |
|                                | -                                                       | 0  |                                                                                                                                                                                                                                                                                                                                                                                                                                                       |                                                                                  | -                                                                                                    |
| Caenorhabditis briggsae        | Hypothetical protein CBG19004 [Caenorhabditis briggsae] | 2  | F:GO:0005524;<br>F:GO:0003824                                                                                                                                                                                                                                                                                                                                                                                                                         | -                                                                                | -                                                                                                    |
| Caenorhabditis briggsae        | briggsae cbr-lin-13 protein                             | 0  |                                                                                                                                                                                                                                                                                                                                                                                                                                                       | F:GO:0003674;<br>P:GO:0040027;<br>F:GO:0008270;<br>C:GO:0005634;<br>C:GO:0005622 | IPR007087; IPR015880; SignalP (SIGNALP)                                                              |
| Caenorhabditis briggsae        | briggsae cbr-lin-13 protein                             | 0  |                                                                                                                                                                                                                                                                                                                                                                                                                                                       | F:GO:0003674;<br>P:GO:0040027;<br>F:GO:0008270;<br>C:GO:0005634;<br>C:GO:0005622 | IPR007087; IPR015880; SignalP (SIGNALP)                                                              |
| Chthoniobacter flavus Ellin428 | thymidylate ki-se                                       | 6  | P:GO:0007283;<br>P:GO:0030154;<br>F:GO:0016301;<br>F:GO:0005515;<br>P:GO:0007275;<br>C:GO:0005576                                                                                                                                                                                                                                                                                                                                                     | -                                                                                | IPR004879; PTHR12145 (PANTHER)                                                                       |
| Caenorhabditis briggsae        | actin interacting protein 2                             | 2  | F:GO:0050660;<br>F:GO:0016491                                                                                                                                                                                                                                                                                                                                                                                                                         | -                                                                                | IPR006094; IPR016166; IPR016167; IPR016168; PTHR11748 (PANTHER), PTHR11748:SF7 (PANTHER)             |
|                                | -                                                       | 0  |                                                                                                                                                                                                                                                                                                                                                                                                                                                       |                                                                                  | -                                                                                                    |
| Brugia malayi                  | clathrin coat assembly protein                          | 7  | F:GO:0009982;<br>F:GO:0030515;<br>F:GO:0005515;<br>C:GO:0031429;<br>P:GO:0016192;<br>P:GO:0006886;<br>C:GO:0030131                                                                                                                                                                                                                                                                                                                                    | -                                                                                | EC:5.4.99.12<br>IPR008968; G3DSA:2.60.40.1170 (GENE3D), PTHR11998 (PANTHER), PTHR11998:SF4 (PANTHER) |
|                                | -                                                       | 0  |                                                                                                                                                                                                                                                                                                                                                                                                                                                       |                                                                                  | -                                                                                                    |



|                         |                                                            |   |                                                                                                                    |                                                                 |                                                                                                                         |
|-------------------------|------------------------------------------------------------|---|--------------------------------------------------------------------------------------------------------------------|-----------------------------------------------------------------|-------------------------------------------------------------------------------------------------------------------------|
|                         | -                                                          | 0 |                                                                                                                    |                                                                 | SignalP (SIGNALP)                                                                                                       |
| Caenorhabditis briggsae | briggsae cbr-jtr-1 protein                                 | 0 |                                                                                                                    | C:GO:0016021                                                    | -                                                                                                                       |
| Caenorhabditis briggsae | prominin-like protein                                      | 0 |                                                                                                                    | C:GO:0016021                                                    | -                                                                                                                       |
| Loa loa                 | cullin family protein                                      | 7 | P:GO:0006306;<br>F:GO:0031625;<br>F:GO:0003677;<br>C:GO:0031461;<br>P:GO:0006511;<br>F:GO:0008270;<br>F:GO:0008168 | -                                                               | EC:2.1.1.0 -                                                                                                            |
| Caenorhabditis briggsae | alpha neutral c                                            | 7 | F:GO:0004558;<br>P:GO:0005975;<br>P:GO:0009792;<br>F:GO:0030246;<br>P:GO:0040007;<br>F:GO:0005515;<br>P:GO:0002119 | -                                                               | EC:3.2.1.20 IPR000322; IPR017853;<br>PTHR22762:SF7 (PANTHER), SSF51011<br>(SUPERFAMILY)                                 |
|                         | -                                                          | 0 |                                                                                                                    |                                                                 | -                                                                                                                       |
|                         | -                                                          | 0 |                                                                                                                    |                                                                 | -                                                                                                                       |
| Haemonchus contortus    | hemiceitin 1                                               | 5 | F:GO:0008270;<br>F:GO:0004222;<br>P:GO:0006508;<br>P:GO:0009792;<br>C:GO:0016020                                   | -                                                               | EC:3.4.24.0 -                                                                                                           |
|                         | -                                                          | 0 |                                                                                                                    |                                                                 | -                                                                                                                       |
| Caenorhabditis elegans  | elegans protein confirmed by transcript evidence           | 0 |                                                                                                                    |                                                                 | -                                                                                                                       |
|                         | -                                                          | 0 |                                                                                                                    |                                                                 | -                                                                                                                       |
| Brugia malayi           | elegans protein partially confirmed by transcript evidence | 0 |                                                                                                                    |                                                                 | -                                                                                                                       |
| Caenorhabditis elegans  | mitogen-activated protein ki-se ki-se ki-se 5              | 7 | F:GO:0008656;<br>P:GO:0007257;<br>F:GO:0005524;<br>F:GO:0000287;<br>F:GO:0004709;<br>P:GO:0008624;<br>F:GO:0042803 | -                                                               | EC:2.7.11.25 PTHR22986 (PANTHER),<br>PTHR22986:SF54 (PANTHER)                                                           |
| Caenorhabditis elegans  | elegans protein confirmed by transcript evidence           | 0 |                                                                                                                    | F:GO:0003674;<br>F:GO:0016740;<br>F:GO:0016905;<br>C:GO:0005575 | IPR001680; IPR011046; IPR015943;<br>IPR017986; IPR019781; IPR019782;<br>PTHR22841 (PANTHER),<br>PTHR22841:SF1 (PANTHER) |
| Caenorhabditis briggsae | alanyl-tr- synthetase                                      | 2 | F:GO:0005488;<br>C:GO:0005739                                                                                      | -                                                               | IPR012947; IPR018163; PTHR11777<br>(PANTHER)                                                                            |
| Caenorhabditis elegans  | elegans protein confirmed by transcript evidence           | 1 | F:GO:0005515                                                                                                       | -                                                               | -                                                                                                                       |
|                         | -                                                          | 0 |                                                                                                                    |                                                                 | -                                                                                                                       |
|                         | -                                                          | 0 |                                                                                                                    |                                                                 | SignalP (SIGNALP)                                                                                                       |
| Brugia malayi           | lin-52 homolog                                             | 0 |                                                                                                                    | F:GO:0003674;<br>P:GO:0008150;<br>C:GO:0005575                  | IPR018737                                                                                                               |
| Brugia malayi           | lmb1-like conserved region family protein                  | 0 |                                                                                                                    |                                                                 | -                                                                                                                       |
|                         | -                                                          | 0 |                                                                                                                    |                                                                 | -                                                                                                                       |
|                         | -                                                          | 0 |                                                                                                                    |                                                                 | -                                                                                                                       |
|                         | -                                                          | 0 |                                                                                                                    |                                                                 | -                                                                                                                       |
|                         | -                                                          | 0 |                                                                                                                    |                                                                 | -                                                                                                                       |
| Haemonchus contortus    | cuticular collagen                                         | 5 | C:GO:0016021;<br>P:GO:0010171;<br>F:GO:0042302;<br>P:GO:0040010;<br>P:GO:0040011                                   | -                                                               | -                                                                                                                       |

|                                    |                                                            |    |                                                                                                                                                                                                         |                                                                                                                                                                                                                          |                                                                                                             |   |
|------------------------------------|------------------------------------------------------------|----|---------------------------------------------------------------------------------------------------------------------------------------------------------------------------------------------------------|--------------------------------------------------------------------------------------------------------------------------------------------------------------------------------------------------------------------------|-------------------------------------------------------------------------------------------------------------|---|
| Caenorhabditis elegans             | elegans protein partially confirmed by transcript evidence | 0  |                                                                                                                                                                                                         |                                                                                                                                                                                                                          | IPR004988; SignalP (SIGNALP)                                                                                |   |
| Branchiostoma floridae             | atp-binding sub-family a member 2                          | 10 | P:GO:0006810;<br>C:GO:0043231;<br>P:GO:0044238;<br>P:GO:0042221;<br>C:GO:0044446;<br>F:GO:0016887;<br>C:GO:0044425;<br>C:GO:0044444;<br>F:GO:0000166;<br>P:GO:0050794                                   | -                                                                                                                                                                                                                        | PTHR19229 (PANTHER),<br>PTHR19229:SF33 (PANTHER), SignalP (SIGNALP)                                         |   |
|                                    | -                                                          | 0  |                                                                                                                                                                                                         |                                                                                                                                                                                                                          | -                                                                                                           |   |
| Caenorhabditis elegans             | four domain-type voltage-gated ion channel alpha-1 subunit | 5  | C:GO:0016021;<br>F:GO:0005272;<br>F:GO:0005244;<br>P:GO:0006811;<br>P:GO:0055085                                                                                                                        | -                                                                                                                                                                                                                        | PTHR10037 (PANTHER),<br>PTHR10037:SF60 (PANTHER)                                                            |   |
|                                    | -                                                          | 0  |                                                                                                                                                                                                         |                                                                                                                                                                                                                          | SignalP (SIGNALP)                                                                                           |   |
|                                    | -                                                          | 0  |                                                                                                                                                                                                         |                                                                                                                                                                                                                          | -                                                                                                           |   |
|                                    |                                                            |    |                                                                                                                                                                                                         |                                                                                                                                                                                                                          | IPR007110; IPR013098; IPR013783;<br>PTHR19900 (PANTHER),<br>PTHR19900:SF1 (PANTHER), SSF48726 (SUPERFAMILY) |   |
| Caenorhabditis elegans             | non-erythrocytic 1                                         | 12 | P:GO:0007184;<br>C:GO:0005829;<br>F:GO:0005516;<br>C:GO:0043234;<br>C:GO:0005730;<br>F:GO:0032403;<br>C:GO:0008091;<br>F:GO:0003779;<br>P:GO:0007182;<br>C:GO:0032437;<br>F:GO:0005200;<br>C:GO:0005886 | -                                                                                                                                                                                                                        | IPR001589; IPR001715; PTHR11915 (PANTHER), PTHR11915:SF48 (PANTHER)                                         |   |
| Mycobacterium abscessus ATCC 19977 | possible nf-180                                            | 0  |                                                                                                                                                                                                         | P:GO:0000226;<br>P:GO:0031133;<br>C:GO:0005883;<br>C:GO:0005882;<br>P:GO:0060052;<br>C:GO:0030424;<br>P:GO:0008088;<br>P:GO:0045110;<br>F:GO:0005515;<br>C:GO:0031594;<br>C:GO:0012505;<br>F:GO:0005199;<br>F:GO:0005198 | -                                                                                                           | - |
|                                    | -                                                          | 0  |                                                                                                                                                                                                         |                                                                                                                                                                                                                          | -                                                                                                           |   |
| Caenorhabditis briggsae            | unc-50 homolog ( elegans)                                  | 2  | C:GO:0043231;<br>C:GO:0016020                                                                                                                                                                           | -                                                                                                                                                                                                                        | IPR007881; PTHR12841:SF5 (PANTHER)                                                                          |   |
|                                    | -                                                          | 0  |                                                                                                                                                                                                         |                                                                                                                                                                                                                          | -                                                                                                           |   |
|                                    | -                                                          | 0  |                                                                                                                                                                                                         |                                                                                                                                                                                                                          | -                                                                                                           |   |

|                               |                                                                              |   |                                                                                                                                                      |                                                                                                                                                      |                                                                                    |
|-------------------------------|------------------------------------------------------------------------------|---|------------------------------------------------------------------------------------------------------------------------------------------------------|------------------------------------------------------------------------------------------------------------------------------------------------------|------------------------------------------------------------------------------------|
| Andrena erigeniae             | mariner transposase                                                          | 0 |                                                                                                                                                      | F:GO:0046872;<br>P:GO:0015074;<br>F:GO:0016787;<br>F:GO:0004519;<br>P:GO:0006310;<br>F:GO:0004518;<br>F:GO:0003677;<br>C:GO:0005634                  | -                                                                                  |
| Caenorhabditis elegans        | elegans protein confirmed by transcript evidence                             | 0 |                                                                                                                                                      | F:GO:0016888                                                                                                                                         | -                                                                                  |
|                               | -                                                                            | 0 |                                                                                                                                                      |                                                                                                                                                      | -                                                                                  |
|                               | -                                                                            | 0 |                                                                                                                                                      |                                                                                                                                                      | -                                                                                  |
| Caenorhabditis elegans        | hypothetical protein C09F12.3 [Caenorhabditis elegans]                       | 2 | P:GO:0007186;<br>C:GO:0016021                                                                                                                        | -                                                                                                                                                    | IPR000276; G3DSA:1.20.1070.10<br>(GENE3D)                                          |
|                               | -                                                                            | 0 |                                                                                                                                                      |                                                                                                                                                      | IPR001810                                                                          |
| Caenorhabditis briggsae       | zinc finger protein 563                                                      | 1 | F:GO:0005488                                                                                                                                         | -                                                                                                                                                    | IPR007087; IPR013087; IPR015880;<br>PTHR11389 (PANTHER), SSF57667<br>(SUPERFAMILY) |
|                               | -                                                                            | 0 |                                                                                                                                                      |                                                                                                                                                      | -                                                                                  |
| Strongylocentrotus purpuratus | kinesin-like protein kif15                                                   | 0 |                                                                                                                                                      | P:GO:0007018;<br>C:GO:0005819;<br>C:GO:0005874;<br>F:GO:0000166;<br>C:GO:0005737;<br>F:GO:0005524;<br>F:GO:0003777;<br>F:GO:0003774;<br>C:GO:0005856 | PTHR18956 (PANTHER),<br>PTHR18956:SF2 (PANTHER)                                    |
| Ancylostoma ceylanicum        | secreted protein 5 precursor                                                 | 0 |                                                                                                                                                      | P:GO:0006898;<br>C:GO:0005576                                                                                                                        | IPR014044                                                                          |
|                               | -                                                                            | 0 |                                                                                                                                                      |                                                                                                                                                      | -                                                                                  |
| Ailuropoda melanoleuca        | polyadenylate-binding protein 1                                              | 9 | P:GO:0006378;<br>P:GO:0008380;<br>P:GO:0048255;<br>C:GO:0005681;<br>F:GO:0008494;<br>F:GO:0008022;<br>C:GO:0005829;<br>F:GO:0000166;<br>F:GO:0008143 | -                                                                                                                                                    | -                                                                                  |
|                               | -                                                                            | 0 |                                                                                                                                                      |                                                                                                                                                      | -                                                                                  |
| Caenorhabditis elegans        | transthyretin-related family domain protein confirmed by transcript evidence | 0 |                                                                                                                                                      |                                                                                                                                                      | IPR001534                                                                          |
| Caenorhabditis elegans        | Hypothetical protein ZK1127.13 [Caenorhabditis elegans]                      | 0 |                                                                                                                                                      |                                                                                                                                                      | -                                                                                  |

|                         |                                                       |    |                                                                                                                                                                                                                                                                                                                                                                                                                                      |   |              |                                                                                                   |
|-------------------------|-------------------------------------------------------|----|--------------------------------------------------------------------------------------------------------------------------------------------------------------------------------------------------------------------------------------------------------------------------------------------------------------------------------------------------------------------------------------------------------------------------------------|---|--------------|---------------------------------------------------------------------------------------------------|
| Brugia malayi           | profilin                                              | 25 | P:GO:0007411;<br>P:GO:0048133;<br>P:GO:0007296;<br>P:GO:0008286;<br>P:GO:0035159;<br>P:GO:0040018;<br>C:GO:0015629;<br>P:GO:0007568;<br>P:GO:0035193;<br>P:GO:0032507;<br>C:GO:0005737;<br>F:GO:0003779;<br>P:GO:0007420;<br>P:GO:0007285;<br>P:GO:0007015;<br>P:GO:0060250;<br>P:GO:0042594;<br>P:GO:0007295;<br>F:GO:0005159;<br>P:GO:0007488;<br>P:GO:0007300;<br>P:GO:0030717;<br>N:GO:0071844;<br>P:GO:0046620;<br>P:GO:0000910 | - |              | IPR002097; IPR005455;<br>G3DSA:3.30.450.30 (GENE3D)                                               |
| Haemonchus contortus    | microsomal aminopeptidase                             | 3  | C:GO:0016020;<br>F:GO:0046872;<br>F:GO:0070011                                                                                                                                                                                                                                                                                                                                                                                       | - |              | IPR001930; PTHR11533:SF29<br>(PANTHER)                                                            |
| Haemonchus contortus    | microsomal aminopeptidase                             | 5  | C:GO:0016021;<br>F:GO:0008237;<br>P:GO:0006508;<br>F:GO:0008270;<br>F:GO:0004177                                                                                                                                                                                                                                                                                                                                                     | - | EC:3.4.11.0  | IPR001930; PTHR11533:SF29<br>(PANTHER)                                                            |
| Pongo abelii            | cytoplasmic dynein 1 heavy chain 1-like               | 12 | F:GO:0003777;<br>C:GO:0005829;<br>P:GO:0006810;<br>C:GO:0005874;<br>F:GO:0042623;<br>P:GO:0006200;<br>P:GO:0007052;<br>C:GO:0005868;<br>F:GO:0005524;<br>P:GO:0007018;<br>F:GO:0005515;<br>C:GO:0005794                                                                                                                                                                                                                              | - |              | IPR004273; PTHR10676 (PANTHER),<br>PTHR10676:SF28 (PANTHER)                                       |
|                         |                                                       | 0  |                                                                                                                                                                                                                                                                                                                                                                                                                                      |   |              |                                                                                                   |
| Caenorhabditis elegans  | musashi homolog 2                                     | 4  | C:GO:0005737;<br>C:GO:0005844;<br>F:GO:0000166;<br>F:GO:0008266                                                                                                                                                                                                                                                                                                                                                                      | - |              | IPR000504; IPR012677; PTHR10432<br>(PANTHER), PTHR10432:SF17<br>(PANTHER), SSF54928 (SUPERFAMILY) |
| Caenorhabditis elegans  | musashi homolog 2                                     | 4  | C:GO:0005737;<br>C:GO:0005844;<br>F:GO:0000166;<br>F:GO:0008266                                                                                                                                                                                                                                                                                                                                                                      | - |              | SignalP (SIGNALP)                                                                                 |
|                         |                                                       | 0  |                                                                                                                                                                                                                                                                                                                                                                                                                                      |   |              |                                                                                                   |
|                         |                                                       | 0  |                                                                                                                                                                                                                                                                                                                                                                                                                                      |   |              |                                                                                                   |
| Caenorhabditis briggsae | briggsae cbr-rde-1 protein                            | 0  |                                                                                                                                                                                                                                                                                                                                                                                                                                      |   | F:GO:0003676 |                                                                                                   |
| Caenorhabditis elegans  | hypothetical protein F42G8.5 [Caenorhabditis elegans] | 0  |                                                                                                                                                                                                                                                                                                                                                                                                                                      |   |              |                                                                                                   |

|                         |                                                                         |   |                                                                                                   |                                                                 |             |                                                                                                                                                                    |
|-------------------------|-------------------------------------------------------------------------|---|---------------------------------------------------------------------------------------------------|-----------------------------------------------------------------|-------------|--------------------------------------------------------------------------------------------------------------------------------------------------------------------|
| Caenorhabditis elegans  | briggsae cbr-itx-1 protein                                              | 0 |                                                                                                   |                                                                 |             | -                                                                                                                                                                  |
|                         | -                                                                       | 0 |                                                                                                   |                                                                 |             | -                                                                                                                                                                  |
| Caenorhabditis elegans  | nuclear vcp-like                                                        | 2 | F:GO:0016887;<br>F:GO:0005524                                                                     | -                                                               |             | -                                                                                                                                                                  |
| Caenorhabditis briggsae | mboat family protein                                                    | 3 | P:GO:0008354;<br>C:GO:0016020;<br>P:GO:0007291                                                    | -                                                               |             | IPR004299; PTHR13906 (PANTHER),<br>PTHR13906:SF4 (PANTHER)                                                                                                         |
| Caenorhabditis briggsae | Hypothetical protein CBG01142 [Caenorhabditis briggsae]                 | 0 |                                                                                                   |                                                                 |             | IPR000494; G3DSA:3.80.20.20<br>(GENE3D), PTHR21662 (PANTHER),<br>SSF52058 (SUPERFAMILY)                                                                            |
|                         | -                                                                       | 0 |                                                                                                   |                                                                 |             | -                                                                                                                                                                  |
| Loa loa                 | protein tyrosine receptor d                                             | 5 | F:GO:0004725;<br>P:GO:0007391;<br>C:GO:0005912;<br>P:GO:0007399;<br>P:GO:0006470                  | -                                                               | EC:3.1.3.48 | -                                                                                                                                                                  |
|                         | -                                                                       | 0 |                                                                                                   |                                                                 |             | -                                                                                                                                                                  |
|                         | -                                                                       | 0 |                                                                                                   |                                                                 |             | -                                                                                                                                                                  |
| Caenorhabditis elegans  | pdz domain containing protein                                           | 1 | P:GO:0007275                                                                                      | -                                                               |             | IPR001478; G3DSA:2.30.42.10<br>(GENE3D)                                                                                                                            |
| Caenorhabditis elegans  | elegans protein partially confirmed by transcript evidence              | 2 | P:GO:0007186;<br>C:GO:0016021                                                                     | -                                                               |             | IPR007087; IPR017452; IPR019427;<br>G3DSA:1.20.1070.10 (GENE3D),<br>PTHR22751 (PANTHER),<br>PTHR22751:SF12 (PANTHER), SignalP<br>(SIGNALP), SSF81321 (SUPERFAMILY) |
| Caenorhabditis briggsae | chromosome 19 open reading frame isoform cra_a                          | 2 | P:GO:0055085;<br>C:GO:0016021                                                                     | -                                                               |             | IPR016196; G3DSA:1.20.1250.20<br>(GENE3D)                                                                                                                          |
| Brugia malayi           | xap-5 protein                                                           | 6 | P:GO:0009792;<br>P:GO:0002119;<br>P:GO:0008340;<br>P:GO:0040011;<br>P:GO:0040007;<br>C:GO:0005634 | -                                                               |             | IPR007005                                                                                                                                                          |
|                         | -                                                                       | 0 |                                                                                                   |                                                                 |             | -                                                                                                                                                                  |
|                         | -                                                                       | 0 |                                                                                                   |                                                                 |             | -                                                                                                                                                                  |
| Brugia malayi           | related to yeast vacuolar protein sorting factor family member (vps-18) | 0 |                                                                                                   | F:GO:0008270;<br>F:GO:0005515                                   |             | PTHR23323 (PANTHER),<br>PTHR23323:SF25 (PANTHER)                                                                                                                   |
|                         | -                                                                       | 0 |                                                                                                   |                                                                 |             | -                                                                                                                                                                  |
| Caenorhabditis elegans  | negative effector of r- polymerase iii                                  | 1 | P:GO:0040010                                                                                      | -                                                               |             | IPR015257                                                                                                                                                          |
|                         | -                                                                       | 0 |                                                                                                   |                                                                 |             | -                                                                                                                                                                  |
| Caenorhabditis briggsae | pap 25a associated domain containing protein                            | 1 | F:GO:0005515                                                                                      | -                                                               |             | G3DSA:3.30.460.10 (GENE3D),<br>PTHR12271 (PANTHER),<br>PTHR12271:SF14 (PANTHER),<br>SSF81301 (SUPERFAMILY), SSF81631<br>(SUPERFAMILY)                              |
| Caenorhabditis elegans  | elegans protein confirmed by transcript evidence                        | 6 | P:GO:0005975;<br>P:GO:0030259;<br>C:GO:0016021;<br>F:GO:0030246;<br>F:GO:0016758;<br>P:GO:0040010 | -                                                               | EC:2.4.1.0  | IPR002213; G3DSA:3.40.50.2000<br>(GENE3D), PTHR11926:SF3<br>(PANTHER), SSF53756 (SUPERFAMILY)                                                                      |
| Caenorhabditis elegans  | tlc domain containing 1                                                 | 0 |                                                                                                   | F:GO:0003674;<br>C:GO:0016021;<br>C:GO:0016020;<br>P:GO:0008150 |             | IPR006634                                                                                                                                                          |

|                         |                                                        |    |                                                                                                                                                                                                                                                            |                                                                                                                                                                       |                                                                                                                                                         |
|-------------------------|--------------------------------------------------------|----|------------------------------------------------------------------------------------------------------------------------------------------------------------------------------------------------------------------------------------------------------------|-----------------------------------------------------------------------------------------------------------------------------------------------------------------------|---------------------------------------------------------------------------------------------------------------------------------------------------------|
| Caenorhabditis briggsae | slowpoke potassium channel family member (slo-2)       | 6  | F:GO:0005488;<br>F:GO:0015269;<br>P:GO:0006813;<br>P:GO:0008152;<br>C:GO:0016020;<br>F:GO:0003824                                                                                                                                                          | -                                                                                                                                                                     | PTHR10027 (PANTHER),<br>PTHR10027:SF6 (PANTHER)                                                                                                         |
| Caenorhabditis elegans  | amp-binding enzyme family protein                      | 3  | P:GO:0008152;<br>C:GO:0016020;<br>F:GO:0003824                                                                                                                                                                                                             | -                                                                                                                                                                     | IPR000873; G3DSA:3.40.50.980<br>(GENE3D), PTHR11968 (PANTHER),<br>PTHR11968:SF15 (PANTHER),<br>SSF56801 (SUPERFAMILY)                                   |
| Caenorhabditis elegans  | hypothetical protein T05B11.1 [Caenorhabditis elegans] | 0  |                                                                                                                                                                                                                                                            |                                                                                                                                                                       | -                                                                                                                                                       |
| Ciona intestinalis      | novel protein                                          | 0  |                                                                                                                                                                                                                                                            | F:GO:0020037;<br>F:GO:0005506;<br>F:GO:0009055;<br>P:GO:0000003;<br>P:GO:0055114;<br>F:GO:0016491;<br>P:GO:0040039;<br>P:GO:0040011;<br>F:GO:0046872;<br>F:GO:0004497 | -                                                                                                                                                       |
| Caenorhabditis elegans  | sy-ptotagmin i                                         | 6  | P:GO:0016079;<br>F:GO:0005509;<br>F:GO:0000149;<br>P:GO:0045955;<br>C:GO:0030285;<br>F:GO:0005215                                                                                                                                                          | -                                                                                                                                                                     | IPR000008; IPR001565; IPR008973;<br>IPR018029; IPR020477;<br>G3DSA:2.60.40.150 (GENE3D),<br>PTHR10024 (PANTHER),<br>PTHR10024:SF40 (PANTHER)            |
| Loa loa                 | leucine rich repeat family protein                     | 0  |                                                                                                                                                                                                                                                            | C:GO:0016021;<br>F:GO:0005515                                                                                                                                         | IPR001611; G3DSA:3.80.10.10<br>(GENE3D), PTHR23154 (PANTHER),<br>PTHR23154:SF127 (PANTHER),<br>SSF52058 (SUPERFAMILY)                                   |
| Caenorhabditis elegans  | s-adenosylhomocysteine hydrolase                       | 15 | P:GO:0055114;<br>P:GO:0000003;<br>F:GO:0004013;<br>P:GO:0032940;<br>P:GO:0006730;<br>F:GO:0004455;<br>P:GO:0008652;<br>P:GO:0010171;<br>P:GO:0002119;<br>F:GO:0005515;<br>P:GO:0040011;<br>P:GO:0006898;<br>P:GO:0009792;<br>P:GO:0040015;<br>F:GO:0048037 | -                                                                                                                                                                     | EC:3.3.1.1;<br>EC:1.1.1.86<br><br>IPR000043; IPR015878; IPR020082;<br>G3DSA:3.40.50.1480 (GENE3D),<br>SSF51735 (SUPERFAMILY), SSF52283<br>(SUPERFAMILY) |

|                             |                                                    |    |                                                                                                                                                                                                                                                            |                                                |                            |                                                                                                                                     |
|-----------------------------|----------------------------------------------------|----|------------------------------------------------------------------------------------------------------------------------------------------------------------------------------------------------------------------------------------------------------------|------------------------------------------------|----------------------------|-------------------------------------------------------------------------------------------------------------------------------------|
| Caenorhabditis elegans      | s-adenosylhomocysteine hydrolase                   | 15 | P:GO:0055114;<br>P:GO:0000003;<br>F:GO:0004013;<br>P:GO:0032940;<br>P:GO:0006730;<br>F:GO:0004455;<br>P:GO:0008652;<br>P:GO:0010171;<br>P:GO:0002119;<br>F:GO:0005515;<br>P:GO:0040011;<br>P:GO:0006898;<br>P:GO:0009792;<br>P:GO:0040015;<br>F:GO:0048037 | -                                              | EC:3.3.1.1;<br>EC:1.1.1.86 | IPR000043; IPR015878; IPR020082;<br>G3DSA:3.40.50.1480 (GENE3D),<br>SSF51735 (SUPERFAMILY), SSF52283<br>(SUPERFAMILY)               |
| Ciona intestinalis          | chromosome 10 open reading frame 119               | 0  |                                                                                                                                                                                                                                                            | F:GO:0003674;<br>P:GO:0008150;<br>C:GO:0005575 |                            | IPR019140; PTHR13489 (PANTHER)                                                                                                      |
|                             | -                                                  | 0  |                                                                                                                                                                                                                                                            |                                                |                            | SignalP (SIGNALP)                                                                                                                   |
| Caenorhabditis elegans      | h transporter (pgp related) family member (haf-9)  | 6  | F:GO:0015197;<br>F:GO:0042626;<br>P:GO:0015833;<br>P:GO:0055085;<br>F:GO:0005524;<br>C:GO:0016021                                                                                                                                                          | -                                              |                            | G3DSA:1.20.1560.10 (GENE3D),<br>PTHR19242 (PANTHER),<br>PTHR19242:SF82 (PANTHER)                                                    |
|                             | -                                                  | 0  |                                                                                                                                                                                                                                                            |                                                |                            | -                                                                                                                                   |
| Caenorhabditis elegans      | angiotensin isoform 2                              | 1  | F:GO:0005515                                                                                                                                                                                                                                               | -                                              |                            | IPR009114; PTHR14826:SF2<br>(PANTHER)                                                                                               |
| Callithrix jacchus          | glutamine synthetase                               | 10 | C:GO:0005829;<br>P:GO:0009749;<br>C:GO:0005739;<br>F:GO:0004351;<br>F:GO:0042802;<br>P:GO:0006542;<br>F:GO:0005524;<br>F:GO:0004356;<br>P:GO:0008283;<br>C:GO:0005794                                                                                      | -                                              | EC:4.1.1.15;<br>EC:6.3.1.2 | IPR008146; IPR014746; PTHR20852<br>(PANTHER), PTHR20852:SF14<br>(PANTHER), SSF55931 (SUPERFAMILY)                                   |
| Caenorhabditis briggsae     | u729_caebra: full=upf0729 protein cbg02799         | 0  |                                                                                                                                                                                                                                                            |                                                |                            | -                                                                                                                                   |
| Ancylostoma ceylanicum      | metalloprotease 1 precursor                        | 2  | F:GO:0046872;<br>F:GO:0008237                                                                                                                                                                                                                              | -                                              |                            | IPR001506; IPR006026;<br>G3DSA:3.40.390.10 (GENE3D),<br>PTHR10127 (PANTHER),<br>PTHR10127:SF65 (PANTHER),<br>SSF55486 (SUPERFAMILY) |
| Ancylostoma ceylanicum      | metalloprotease 1 precursor                        | 1  | F:GO:0008233                                                                                                                                                                                                                                               | -                                              |                            | IPR001506; IPR006026;<br>G3DSA:3.40.390.10 (GENE3D),<br>PTHR10127 (PANTHER),<br>PTHR10127:SF65 (PANTHER),<br>SSF55486 (SUPERFAMILY) |
|                             | -                                                  | 0  |                                                                                                                                                                                                                                                            |                                                |                            | SignalP (SIGNALP)                                                                                                                   |
| Angiostrongylus cantonensis | hypothetical protein [Angiostrongylus cantonensis] | 0  |                                                                                                                                                                                                                                                            |                                                |                            | -                                                                                                                                   |
| Caenorhabditis elegans      | elegans protein confirmed by transcript evidence   | 0  |                                                                                                                                                                                                                                                            | C:GO:0016021;<br>F:GO:0042302                  |                            | IPR002486; PTHR10499 (PANTHER),<br>PTHR10499:SF58 (PANTHER), SignalP<br>(SIGNALP)                                                   |
|                             | -                                                  | 0  |                                                                                                                                                                                                                                                            |                                                |                            | SignalP (SIGNALP)                                                                                                                   |

|                         |                                                                            |   |                                                                                                                    |   |                             |                                                                                                                                 |
|-------------------------|----------------------------------------------------------------------------|---|--------------------------------------------------------------------------------------------------------------------|---|-----------------------------|---------------------------------------------------------------------------------------------------------------------------------|
| Loa loa                 | tir (toll and interleukin 1 receptor) domain protein family member (tir-1) |   | P:GO:0007165;<br>P:GO:0045087;<br>5 C:GO:0031224;<br>F:GO:0042802;<br>F:GO:0004888                                 | - |                             | IPR011989; PTHR22998 (PANTHER)                                                                                                  |
| Caenorhabditis briggsae | elegans protein confirmed by transcript evidence                           | 1 | C:GO:0005856                                                                                                       | - |                             | IPR011990; PTHR16056 (PANTHER)                                                                                                  |
| Caenorhabditis briggsae | elegans protein confirmed by transcript evidence                           | 1 | C:GO:0005856                                                                                                       | - |                             | IPR011990; PTHR16056 (PANTHER)                                                                                                  |
|                         | -                                                                          | 0 |                                                                                                                    |   |                             | -                                                                                                                               |
|                         | -                                                                          | 0 |                                                                                                                    |   |                             | -                                                                                                                               |
|                         | -                                                                          | 0 |                                                                                                                    |   |                             | SignalP (SIGNALP)                                                                                                               |
|                         | -                                                                          | 0 |                                                                                                                    |   |                             | -                                                                                                                               |
|                         | -                                                                          | 0 |                                                                                                                    |   |                             | SignalP (SIGNALP)                                                                                                               |
|                         | -                                                                          | 0 |                                                                                                                    |   |                             | IPR017849                                                                                                                       |
|                         | -                                                                          | 0 |                                                                                                                    |   |                             | SignalP (SIGNALP)                                                                                                               |
| Mus musculus            | ribosomal protein s8                                                       | 4 | F:GO:0003735;<br>F:GO:0005515;<br>C:GO:0022627;<br>P:GO:0006414                                                    | - |                             | IPR001047; IPR018283; IPR022309;<br>PTHR10394 (PANTHER),<br>PTHR10394:SF1 (PANTHER)                                             |
| Caenorhabditis elegans  | elegans protein confirmed by transcript evidence                           | 0 |                                                                                                                    |   | P:GO:0016539                | IPR001534                                                                                                                       |
|                         | -                                                                          | 0 |                                                                                                                    |   |                             | -                                                                                                                               |
| Caenorhabditis elegans  | amp-activated ki-se family member (aak-2)                                  | 4 | F:GO:0004683;<br>P:GO:0006468;<br>F:GO:0005515;<br>F:GO:0005524                                                    | - | EC:2.7.11.17                | IPR000719; IPR011009; IPR015741;<br>IPR017441; IPR017442; IPR020636;<br>G3DSA:3.30.200.20 (GENE3D)                              |
|                         | -                                                                          | 0 |                                                                                                                    |   |                             | SignalP (SIGNALP)                                                                                                               |
|                         | -                                                                          | 0 |                                                                                                                    |   |                             | -                                                                                                                               |
|                         | -                                                                          | 0 |                                                                                                                    |   |                             | -                                                                                                                               |
| Caenorhabditis elegans  | elegans protein partially confirmed by transcript evidence                 | 0 |                                                                                                                    |   | F:GO:0005515                | PTHR18958 (PANTHER),<br>PTHR18958:SF116 (PANTHER)                                                                               |
| Caenorhabditis elegans  | homolog of hedgehog ransferase family member (hhat-2)                      | 0 |                                                                                                                    |   |                             | -                                                                                                                               |
|                         | -                                                                          | 0 |                                                                                                                    |   |                             | -                                                                                                                               |
| Harpegnathos saltator   | histone-lysine n-methyltransferase setmar                                  | 2 | P:GO:0006313;<br>F:GO:0004803                                                                                      | - |                             | SignalP (SIGNALP)                                                                                                               |
| Caenorhabditis elegans  | briggsae cbr-alh-8 protein                                                 | 7 | F:GO:0004491;<br>F:GO:0018478;<br>P:GO:0055114;<br>F:GO:0000062;<br>P:GO:0019859;<br>P:GO:0006573;<br>C:GO:0005739 | - | EC:1.2.1.27;<br>EC:1.2.1.18 | -                                                                                                                               |
| Loa loa                 | homeodomain interacting protein ki-se family member (hpk-1)                | 5 | P:GO:0006468;<br>F:GO:0003677;<br>F:GO:0005524;<br>P:GO:0008340;<br>F:GO:0004674                                   | - | EC:2.7.11.0                 | IPR000719; IPR011009; IPR017441;<br>IPR017442; G3DSA:3.30.200.20<br>(GENE3D), PTHR11295 (PANTHER),<br>PTHR11295:SF117 (PANTHER) |
|                         | -                                                                          | 0 |                                                                                                                    |   |                             | SignalP (SIGNALP)                                                                                                               |



|                        |                                                        |    |                                                                                                                                                                                                                                                                                                                                                                                   |   |            |                                                                                                                                                                   |
|------------------------|--------------------------------------------------------|----|-----------------------------------------------------------------------------------------------------------------------------------------------------------------------------------------------------------------------------------------------------------------------------------------------------------------------------------------------------------------------------------|---|------------|-------------------------------------------------------------------------------------------------------------------------------------------------------------------|
| Pongo abelii           | decorin                                                | 16 | P:GO:0042060;<br>F:GO:0047485;<br>P:GO:0001890;<br>C:GO:0005615;<br>P:GO:0009887;<br>F:GO:0050840;<br>P:GO:0007519;<br>F:GO:0005518;<br>P:GO:0007568;<br>F:GO:0005539;<br>P:GO:0001822;<br>C:GO:0005578;<br>P:GO:0019800;<br>P:GO:0032496;<br>P:GO:0030198;<br>P:GO:0009612                                                                                                       | - |            | PTHR23154 (PANTHER),<br>PTHR23154:SF71 (PANTHER)                                                                                                                  |
|                        | -                                                      | 0  |                                                                                                                                                                                                                                                                                                                                                                                   |   |            | -                                                                                                                                                                 |
| Eptatretus burgeri     | protein tyrosine receptor f                            | 22 | P:GO:0050775;<br>P:GO:0001960;<br>P:GO:0007185;<br>P:GO:0042059;<br>P:GO:0050803;<br>C:GO:0030426;<br>F:GO:0005001;<br>F:GO:0030971;<br>C:GO:0005792;<br>P:GO:0043525;<br>F:GO:0042301;<br>P:GO:0008285;<br>C:GO:0043025;<br>P:GO:0007156;<br>C:GO:0060076;<br>P:GO:0051387;<br>C:GO:0005768;<br>P:GO:0006470;<br>P:GO:0046627;<br>C:GO:0005887;<br>P:GO:0031345;<br>F:GO:0005158 | - |            | IPR000242; IPR000387; IPR016130;<br>G3DSA:3.90.190.10 (GENE3D),<br>PTHR19134 (PANTHER),<br>PTHR19134:SF26 (PANTHER), SignalP<br>(SIGNALP), SSF52799 (SUPERFAMILY) |
| Caenorhabditis elegans | hydroxymethylglutaryl- lyase                           | 5  | C:GO:0005875;<br>C:GO:0005759;<br>P:GO:0006551;<br>F:GO:0004419;<br>F:GO:0016740                                                                                                                                                                                                                                                                                                  | - | EC:4.1.3.4 | -                                                                                                                                                                 |
|                        | -                                                      | 0  |                                                                                                                                                                                                                                                                                                                                                                                   |   |            | -                                                                                                                                                                 |
| Caenorhabditis elegans | hypothetical protein C17G10.7 [Caenorhabditis elegans] | 1  | P:GO:0019915                                                                                                                                                                                                                                                                                                                                                                      | - |            | SignalP (SIGNALP)                                                                                                                                                 |
| Caenorhabditis elegans | elegans protein confirmed by transcript evidence       | 3  | F:GO:0004437;<br>P:GO:0008299;<br>C:GO:0016021                                                                                                                                                                                                                                                                                                                                    | - |            | IPR000760; IPR020550;<br>G3DSA:3.40.190.80 (GENE3D),<br>PTHR20854:SF8 (PANTHER), SSF56655<br>(SUPERFAMILY)                                                        |

|                         |                                                                   |    |                                                                                                                                                                                        |              |             |                                                                                                                                                                                                           |
|-------------------------|-------------------------------------------------------------------|----|----------------------------------------------------------------------------------------------------------------------------------------------------------------------------------------|--------------|-------------|-----------------------------------------------------------------------------------------------------------------------------------------------------------------------------------------------------------|
| Caenorhabditis elegans  | solute carrier family 30 (zinc transporter) member 5              | 11 | F:GO:0005385;<br>P:GO:0055085;<br>P:GO:0006824;<br>P:GO:0006829;<br>P:GO:0006882;<br>C:GO:0016021;<br>C:GO:0005624;<br>C:GO:0030667;<br>C:GO:0016324;<br>P:GO:0010043;<br>C:GO:0005794 | -            |             | IPR002524; G3DSA:1.20.1510.10 (GENE3D), SignalP (SIGNALP)                                                                                                                                                 |
| Caenorhabditis briggsae | acyl- synthetase short-chain family member 2                      | 10 | P:GO:0019542;<br>P:GO:0006085;<br>C:GO:0005829;<br>P:GO:0019413;<br>P:GO:0008610;<br>C:GO:0005730;<br>P:GO:0019915;<br>F:GO:0005515;<br>F:GO:0016208;<br>F:GO:0003987                  | -            | EC:6.2.1.1  | IPR000873; IPR011904; IPR020845; G3DSA:2.30.38.10 (GENE3D), G3DSA:3.30.300.30 (GENE3D), G3DSA:3.40.50.980 (GENE3D), PTHR11968 (PANTHER), PTHR11968:SF42 (PANTHER), PF11930 (PFAM), SSF56801 (SUPERFAMILY) |
| -                       | -                                                                 | 0  |                                                                                                                                                                                        |              |             | -                                                                                                                                                                                                         |
| Aedes aegypti           | multiple ankyrin repeats single kh domain protein                 | 0  |                                                                                                                                                                                        | F:GO:0003723 |             | IPR002110; IPR020683; PTHR18958 (PANTHER), PTHR18958:SF281 (PANTHER)                                                                                                                                      |
| Caenorhabditis elegans  | glutaminyl-peptide cyclotransferase                               | 6  | P:GO:0019915;<br>C:GO:0005576;<br>C:GO:0016021;<br>F:GO:0016603;<br>P:GO:0006508;<br>F:GO:0008233                                                                                      | -            | EC:2.3.2.5  | IPR007484; G3DSA:3.40.630.10 (GENE3D), PTHR12283 (PANTHER), SSF53187 (SUPERFAMILY)                                                                                                                        |
| Caenorhabditis elegans  | r- polymerase ii subunit a c-termi-l domain phosphatase           | 3  | F:GO:0004721;<br>C:GO:0005634;<br>C:GO:0005700                                                                                                                                         | -            | EC:3.1.3.16 | IPR004274; G3DSA:3.40.50.1000 (GENE3D), PTHR23081 (PANTHER), SSF56784 (SUPERFAMILY)                                                                                                                       |
| Homo sapiens            | atp h+ mitochondrial f1 epsilon subunit                           | 7  | F:GO:0046961;<br>C:GO:0005759;<br>P:GO:0006172;<br>F:GO:0046933;<br>P:GO:0042776;<br>C:GO:0000275;<br>P:GO:0006200                                                                     | -            | EC:3.6.3.14 | -                                                                                                                                                                                                         |
| Nematostella vectensis  | phosphatidylinositol-specific phospholipase x domain containing 3 | 0  |                                                                                                                                                                                        |              |             | IPR017946                                                                                                                                                                                                 |
| -                       | -                                                                 | 0  |                                                                                                                                                                                        |              |             | -                                                                                                                                                                                                         |

|                             |                                                           |  |                                                                                    |                                                                                                                                                                                                                                                                             |                             |                                                                                                          |
|-----------------------------|-----------------------------------------------------------|--|------------------------------------------------------------------------------------|-----------------------------------------------------------------------------------------------------------------------------------------------------------------------------------------------------------------------------------------------------------------------------|-----------------------------|----------------------------------------------------------------------------------------------------------|
| Homo sapiens                | cytochrome c oxidase subunit via polypeptide 1            |  | P:GO:0034220;<br>C:GO:0005751;<br>5 P:GO:0015992;<br>F:GO:0004129;<br>P:GO:0006091 | -                                                                                                                                                                                                                                                                           | EC:1.9.3.1                  | SignalP (SIGNALP)                                                                                        |
| Caenorhabditis briggsae     | oligopeptide transporter                                  |  | F:GO:0015198;<br>3 C:GO:0016021;<br>P:GO:0006857                                   | -                                                                                                                                                                                                                                                                           |                             | SignalP (SIGNALP)                                                                                        |
|                             | -                                                         |  | 0                                                                                  |                                                                                                                                                                                                                                                                             |                             | -                                                                                                        |
| Caenorhabditis elegans      | hypothetical protein Y41D4B.11 [Caenorhabditis elegans]   |  | 0                                                                                  | P:GO:0000003;<br>P:GO:0040035;<br>P:GO:0006898;<br>P:GO:0018991                                                                                                                                                                                                             |                             | -                                                                                                        |
| Caenorhabditis elegans      | briggsae cbr-apt-10 protein                               |  | 4 F:GO:0005515;<br>P:GO:0006886;<br>C:GO:0030131;<br>P:GO:0006897                  | -                                                                                                                                                                                                                                                                           |                             | IPR008968; IPR012320;<br>G3DSA:2.60.40.1170 (GENE3D),<br>PTHR11998 (PANTHER),<br>PTHR11998:SF1 (PANTHER) |
| Caenorhabditis briggsae     | sc blase (phospholipid scramblase) family member (scrm-1) |  | 1 F:GO:0005515                                                                     | -                                                                                                                                                                                                                                                                           |                             | -                                                                                                        |
| Caenorhabditis elegans      | briggsae cbr-rod-1 protein                                |  | 0                                                                                  | C:GO:0000940;<br>P:GO:0000070;<br>C:GO:0005819;<br>C:GO:0005694;<br>C:GO:0005634;<br>P:GO:0007067;<br>C:GO:0000776;<br>P:GO:0007094;<br>C:GO:0005737;<br>P:GO:0051301;<br>F:GO:0003674;<br>C:GO:0005575;<br>C:GO:0005828;<br>P:GO:0007049;<br>P:GO:0008150;<br>C:GO:0005856 |                             | -                                                                                                        |
| Caenorhabditis elegans      | briggsae cbr-sinh-1 protein                               |  | 0                                                                                  | F:GO:0003824;<br>C:GO:0016020                                                                                                                                                                                                                                               |                             | -                                                                                                        |
| Caenorhabditis elegans      | briggsae cbr-tag-208 protein                              |  | 4 C:GO:0005737;<br>C:GO:0043232;<br>F:GO:0005515;<br>F:GO:0005198                  | -                                                                                                                                                                                                                                                                           |                             | IPR001452; G3DSA:2.30.30.40<br>(GENE3D), PTHR10661 (PANTHER),<br>PTHR10661:SF3 (PANTHER)                 |
|                             | -                                                         |  | 0                                                                                  |                                                                                                                                                                                                                                                                             |                             | -                                                                                                        |
| Caenorhabditis elegans      | laminin alpha chain                                       |  | 3 P:GO:0009987;<br>C:GO:0005578;<br>P:GO:0050789                                   | -                                                                                                                                                                                                                                                                           |                             | -                                                                                                        |
| Loa loa                     | peripheral plasma membrane protein cask                   |  | 5 P:GO:0006468;<br>F:GO:0005515;<br>F:GO:0004713;<br>F:GO:0005524;<br>F:GO:0004674 | -                                                                                                                                                                                                                                                                           | EC:2.7.10.0;<br>EC:2.7.11.0 | -                                                                                                        |
| Angiostrongylus cantonensis | elegans protein confirmed by transcript evidence          |  | 1 F:GO:0005488                                                                     | -                                                                                                                                                                                                                                                                           |                             | SSF57850 (SUPERFAMILY)                                                                                   |
| Loa loa                     | briggsae cbr-crn-2 protein                                |  | 1 F:GO:0016888                                                                     |                                                                                                                                                                                                                                                                             | EC:3.1.21.0                 | -                                                                                                        |
| Loa loa                     | ring finger protein 20                                    |  | 0                                                                                  | F:GO:0046872;<br>F:GO:0008270;<br>F:GO:0005515                                                                                                                                                                                                                              |                             | PTHR23163 (PANTHER)                                                                                      |
| Loa loa                     | ring finger protein 20                                    |  | 0                                                                                  | F:GO:0046872;<br>F:GO:0008270;<br>F:GO:0005515                                                                                                                                                                                                                              |                             | PTHR23163 (PANTHER)                                                                                      |
| Caenorhabditis elegans      | bat2 n-terminus family protein                            |  | 0                                                                                  |                                                                                                                                                                                                                                                                             |                             | IPR009738; PTHR14038 (PANTHER)                                                                           |

|                         |                                                          |   |                                                                                                   |                                                                 |                                                                                                                                |
|-------------------------|----------------------------------------------------------|---|---------------------------------------------------------------------------------------------------|-----------------------------------------------------------------|--------------------------------------------------------------------------------------------------------------------------------|
| Caenorhabditis briggsae | von hippel-lindau disease tumor                          | 5 | P:GO:0002119;<br>P:GO:0007411;<br>P:GO:0006950;<br>P:GO:0040010;<br>P:GO:0000003                  | -                                                               | IPR022772; PD035809 (PRODOM),<br>G3DSA:2.60.40.780 (GENE3D),<br>SSF49468 (SUPERFAMILY)                                         |
| -                       | -                                                        | 0 |                                                                                                   |                                                                 | SignalP (SIGNALP)                                                                                                              |
| Caenorhabditis elegans  | hypothetical protein Y18H1A.9 [Caenorhabditis elegans]   | 0 |                                                                                                   | P:GO:0006508;<br>F:GO:0004181;<br>F:GO:0008270                  | IPR003146; IPR009020;<br>G3DSA:3.30.70.340 (GENE3D),<br>PTHR11705 (PANTHER),<br>PTHR11705:SF12 (PANTHER), SignalP<br>(SIGNALP) |
| Caenorhabditis briggsae | briggsae cbr-mog-4 protein                               | 4 | F:GO:0003676;<br>F:GO:0005524;<br>F:GO:0005515;<br>F:GO:0008026                                   | -                                                               | IPR007502; PTHR18934 (PANTHER),<br>SSF52540 (SUPERFAMILY)                                                                      |
| -                       | -                                                        | 0 |                                                                                                   |                                                                 | -                                                                                                                              |
| -                       | -                                                        | 0 |                                                                                                   |                                                                 | -                                                                                                                              |
| -                       | -                                                        | 0 |                                                                                                   |                                                                 | SignalP (SIGNALP)                                                                                                              |
| -                       | -                                                        | 0 |                                                                                                   |                                                                 | SignalP (SIGNALP)                                                                                                              |
| Caenorhabditis elegans  | mitochondrial carrier protein                            | 6 | P:GO:0009792;<br>C:GO:0005743;<br>P:GO:0040018;<br>P:GO:0055085;<br>C:GO:0016021;<br>F:GO:0005215 | -                                                               | IPR001993; IPR018108;<br>G3DSA:1.50.40.10 (GENE3D)                                                                             |
| Brugia malayi           | carbonic anhydrase                                       | 0 |                                                                                                   | F:GO:0046872;<br>P:GO:0006730;<br>F:GO:0008270;<br>F:GO:0004089 | IPR001148; IPR018338; IPR018340;<br>SignalP (SIGNALP)                                                                          |
| Brugia malayi           | arid4a protein                                           | 2 | C:GO:0005622;<br>F:GO:0005488                                                                     | -                                                               | PTHR13964 (PANTHER)                                                                                                            |
| -                       | -                                                        | 0 |                                                                                                   |                                                                 | SignalP (SIGNALP)                                                                                                              |
| -                       | -                                                        | 0 |                                                                                                   |                                                                 | -                                                                                                                              |
| -                       | -                                                        | 0 |                                                                                                   |                                                                 | -                                                                                                                              |
| -                       | -                                                        | 0 |                                                                                                   |                                                                 | -                                                                                                                              |
| Caenorhabditis briggsae | nuclear cap-binding protein subunit 1                    | 2 | F:GO:0005488;<br>P:GO:0006397                                                                     | -                                                               | IPR003890; IPR016021; IPR016024;<br>PTHR12412 (PANTHER),<br>PTHR12412:SF2 (PANTHER)                                            |
| Caenorhabditis elegans  | utp21 specific wd40 associated domain containing protein | 0 |                                                                                                   | C:GO:0032040;<br>P:GO:0006364                                   | IPR001680; IPR007319; IPR015943;<br>IPR017986; IPR019781; IPR019782;<br>PTHR22847 (PANTHER), SSF101908<br>(SUPERFAMILY)        |
| -                       | -                                                        | 0 |                                                                                                   |                                                                 | -                                                                                                                              |

|                             |                                                                                                            |    |                                                                                                                                                                                                                                                                                                                                                                                                                                                                         |   |                                                                                                                                                                                                            |
|-----------------------------|------------------------------------------------------------------------------------------------------------|----|-------------------------------------------------------------------------------------------------------------------------------------------------------------------------------------------------------------------------------------------------------------------------------------------------------------------------------------------------------------------------------------------------------------------------------------------------------------------------|---|------------------------------------------------------------------------------------------------------------------------------------------------------------------------------------------------------------|
| Pongo abelii                | type alpha 1                                                                                               | 31 | P:GO:0060351;<br>P:GO:0001957;<br>P:GO:0071363;<br>P:GO:0007605;<br>P:GO:0034505;<br>P:GO:0042542;<br>P:GO:0001649;<br>P:GO:0009612;<br>P:GO:0001568;<br>P:GO:0060325;<br>F:GO:0005201;<br>C:GO:0005615;<br>P:GO:0048706;<br>P:GO:0015031;<br>F:GO:0048407;<br>C:GO:0005737;<br>P:GO:0043434;<br>P:GO:0071300;<br>P:GO:0007601;<br>P:GO:0010812;<br>C:GO:0005584;<br>F:GO:0042802;<br>P:GO:0060346;<br>P:GO:0032964;<br>P:GO:0030199;<br>P:GO:0051591;<br>P:GO:0031960; | - | IPR001007; PTHR10499 (PANTHER),<br>PTHR10499:SF46 (PANTHER), SignalP<br>(SIGNALP), SSF57603 (SUPERFAMILY)                                                                                                  |
|                             | -                                                                                                          | 0  |                                                                                                                                                                                                                                                                                                                                                                                                                                                                         |   | -                                                                                                                                                                                                          |
|                             | -                                                                                                          | 0  |                                                                                                                                                                                                                                                                                                                                                                                                                                                                         |   | -                                                                                                                                                                                                          |
| Loa loa                     | replication factor c subunit 2                                                                             | 14 | F:GO:0016851;<br>P:GO:0006260;<br>P:GO:0015995;<br>P:GO:0006200;<br>P:GO:0000003;<br>F:GO:0003689;<br>P:GO:0006297;<br>F:GO:0005524;<br>F:GO:0005515;<br>P:GO:0040011;<br>P:GO:0015979;<br>C:GO:0005654;<br>P:GO:0009792;<br>C:GO:0005663                                                                                                                                                                                                                               | - | EC:6.6.1.1<br><br>IPR003593; IPR003959; IPR008921;<br>IPR013748; G3DSA:1.10.8.60<br>(GENE3D), G3DSA:1.20.272.10<br>(GENE3D), G3DSA:3.40.50.300<br>(GENE3D), PTHR11669 (PANTHER),<br>SSF52540 (SUPERFAMILY) |
| Angiostrongylus cantonensis | hypothetical protein [Angiostrongylus cantonensis]                                                         | 1  | P:GO:0019915                                                                                                                                                                                                                                                                                                                                                                                                                                                            | - | -                                                                                                                                                                                                          |
| Caenorhabditis briggsae     | Hypothetical protein CBG07553 [Caenorhabditis briggsae]                                                    | 0  |                                                                                                                                                                                                                                                                                                                                                                                                                                                                         |   | IPR010916                                                                                                                                                                                                  |
|                             | -                                                                                                          | 0  |                                                                                                                                                                                                                                                                                                                                                                                                                                                                         |   | -                                                                                                                                                                                                          |
| Caenorhabditis briggsae     | vacuolar protein sorting 13a isoform cra_a                                                                 | 2  | P:GO:0008104;<br>F:GO:0005515                                                                                                                                                                                                                                                                                                                                                                                                                                           | - | PTHR16166 (PANTHER),<br>PTHR16166:SF25 (PANTHER)                                                                                                                                                           |
| Caenorhabditis elegans      | adamts-9 precursor (a disintegrin and metalloprotease with thrombospondin motifs 9) (adam-ts 9) (adam-ts9) | 5  | F:GO:0004222;<br>P:GO:0006508;<br>F:GO:0008270;<br>C:GO:0005578;<br>P:GO:0048070                                                                                                                                                                                                                                                                                                                                                                                        | - | EC:3.4.24.0<br><br>IPR012314; PTHR13723 (PANTHER),<br>PTHR13723:SF33 (PANTHER)                                                                                                                             |

|                         |                                                            |   |                                                                                                                                                      |                                                                                  |                                                                                                                                 |
|-------------------------|------------------------------------------------------------|---|------------------------------------------------------------------------------------------------------------------------------------------------------|----------------------------------------------------------------------------------|---------------------------------------------------------------------------------------------------------------------------------|
| Brugia malayi           | rad50 family protein                                       | 8 | P:GO:0050896;<br>P:GO:0040010;<br>P:GO:0045132;<br>P:GO:0006915;<br>P:GO:0000003;<br>C:GO:0044464;<br>P:GO:0009792;<br>F:GO:0003824                  | -                                                                                | G3DSA:3.40.50.300 (GENE3D),<br>PTHR18867 (PANTHER),<br>PTHR18867:SF11 (PANTHER),<br>SSF52540 (SUPERFAMILY)                      |
| Caenorhabditis elegans  | 3-5 exonuclease family protein                             | 9 | P:GO:0006139;<br>F:GO:0003676;<br>C:GO:0005622;<br>F:GO:0005515;<br>P:GO:0018996;<br>F:GO:0008408;<br>P:GO:0000003;<br>P:GO:0040011;<br>P:GO:0002009 | -                                                                                | -                                                                                                                               |
| -                       | -                                                          | 0 | -                                                                                                                                                    | -                                                                                | SignalP (SIGNALP)                                                                                                               |
| Brugia malayi           | mitochondrial ribosomal protein l28                        | 7 | P:GO:0009792;<br>P:GO:0010171;<br>P:GO:0002119;<br>C:GO:0044444;<br>C:GO:0043229;<br>P:GO:0040007;<br>C:GO:0030529                                   | -                                                                                | PTHR13528 (PANTHER)                                                                                                             |
| Caenorhabditis elegans  | elegans protein partially confirmed by transcript evidence | 0 | -                                                                                                                                                    | P:GO:0008643;<br>C:GO:0016021;<br>P:GO:0055085;<br>F:GO:0005215;<br>P:GO:0006810 | IPR005828; IPR016196;<br>G3DSA:1.20.1250.20 (GENE3D),<br>PTHR11600 (PANTHER),<br>PTHR11600:SF97 (PANTHER), SignalP<br>(SIGNALP) |
| Caenorhabditis briggsae | riken cd- 2410127117                                       | 0 | -                                                                                                                                                    | F:GO:0003674;<br>P:GO:0008150                                                    | IPR012901                                                                                                                       |
| Caenorhabditis briggsae | Hypothetical protein CBG01544 [Caenorhabditis briggsae]    | 0 | -                                                                                                                                                    | -                                                                                | -                                                                                                                               |
| Caenorhabditis elegans  | olfactory ing defective family member (olrn-1)             | 0 | -                                                                                                                                                    | -                                                                                | -                                                                                                                               |
| -                       | -                                                          | 0 | -                                                                                                                                                    | -                                                                                | -                                                                                                                               |
| -                       | -                                                          | 0 | -                                                                                                                                                    | -                                                                                | -                                                                                                                               |
| -                       | -                                                          | 0 | -                                                                                                                                                    | -                                                                                | IPR001878                                                                                                                       |
| -                       | -                                                          | 0 | -                                                                                                                                                    | -                                                                                | -                                                                                                                               |
| -                       | -                                                          | 0 | -                                                                                                                                                    | -                                                                                | -                                                                                                                               |
| Caenorhabditis elegans  | patched family protein                                     | 5 | P:GO:0018996;<br>C:GO:0016021;<br>P:GO:0040018;<br>F:GO:0008158;<br>P:GO:0040011                                                                     | -                                                                                | IPR003392; PTHR10796 (PANTHER),<br>PTHR10796:SF14 (PANTHER),<br>SSF82866 (SUPERFAMILY)                                          |
| -                       | -                                                          | 0 | -                                                                                                                                                    | -                                                                                | -                                                                                                                               |
| -                       | -                                                          | 0 | -                                                                                                                                                    | -                                                                                | -                                                                                                                               |
| Caenorhabditis elegans  | microfibrillar-associated protein 1                        | 8 | P:GO:0040010;<br>P:GO:0040035;<br>P:GO:0018996;<br>P:GO:0002119;<br>P:GO:0006898;<br>P:GO:0009792;<br>P:GO:0001703;<br>P:GO:0016246                  | -                                                                                | SignalP (SIGNALP)                                                                                                               |

|                              |                                             |   |              |                                                                                                                                                                       |                                                                                                            |
|------------------------------|---------------------------------------------|---|--------------|-----------------------------------------------------------------------------------------------------------------------------------------------------------------------|------------------------------------------------------------------------------------------------------------|
| Nippostrongylus brasiliensis | heat shock protein family member (hsp- )    | 1 | P:GO:0009408 | -                                                                                                                                                                     | IPR001436; IPR002068; IPR008978; G3DSA:2.60.40.790 (GENE3D), PTHR11527 (PANTHER), PTHR11527:SF28 (PANTHER) |
| Ostertagia ostertagi         | heat shock protein family member (hsp- )    | 1 | P:GO:0009408 | -                                                                                                                                                                     | IPR001436; IPR002068; PTHR11527 (PANTHER), PTHR11527:SF28 (PANTHER)                                        |
| Ancylostoma ceylanicum       | kunitz-type protease inhibitor-like protein | 0 |              | F:GO:0004222;<br>F:GO:0008270;<br>P:GO:0007275;<br>C:GO:0005578;<br>F:GO:0008237;<br>C:GO:0031012;<br>C:GO:0005576;<br>F:GO:0030414;<br>F:GO:0008233;<br>F:GO:0004867 | IPR002223; IPR020901; PTHR10083 (PANTHER), PTHR10083:SF39 (PANTHER), SignalP (SIGNALP)                     |
| Ancylostoma ceylanicum       | kunitz-type protease inhibitor-like protein | 0 |              | F:GO:0004222;<br>F:GO:0008270;<br>P:GO:0007275;<br>C:GO:0005578;<br>F:GO:0008237;<br>C:GO:0031012;<br>C:GO:0005576;<br>F:GO:0030414;<br>F:GO:0008233;<br>F:GO:0004867 | IPR002223; IPR020901; PTHR10083 (PANTHER), PTHR10083:SF39 (PANTHER), SignalP (SIGNALP)                     |
| Ancylostoma ceylanicum       | kunitz-type protease inhibitor-like protein | 0 |              | F:GO:0004222;<br>F:GO:0008270;<br>P:GO:0007275;<br>C:GO:0005578;<br>F:GO:0008237;<br>C:GO:0031012;<br>C:GO:0005576;<br>F:GO:0030414;<br>F:GO:0008233;<br>F:GO:0004867 | -                                                                                                          |
| Ancylostoma ceylanicum       | kunitz-type protease inhibitor-like protein | 0 |              | F:GO:0004222;<br>F:GO:0008270;<br>P:GO:0007275;<br>C:GO:0005578;<br>F:GO:0008237;<br>C:GO:0031012;<br>C:GO:0005576;<br>F:GO:0030414;<br>F:GO:0008233;<br>F:GO:0004867 | -                                                                                                          |
| Ancylostoma ceylanicum       | kunitz-type protease inhibitor-like protein | 0 |              | F:GO:0004222;<br>F:GO:0008270;<br>P:GO:0007275;<br>C:GO:0005578;<br>F:GO:0008237;<br>C:GO:0031012;<br>C:GO:0005576;<br>F:GO:0030414;<br>F:GO:0008233;<br>F:GO:0004867 | -                                                                                                          |

|                         |                                                         |    |                                                                                                                                                                       |                                                                                                                                                                       |            |                                                                                          |
|-------------------------|---------------------------------------------------------|----|-----------------------------------------------------------------------------------------------------------------------------------------------------------------------|-----------------------------------------------------------------------------------------------------------------------------------------------------------------------|------------|------------------------------------------------------------------------------------------|
| Ancylostoma ceylanicum  | kunitz-type protease inhibitor-like protein             | 0  |                                                                                                                                                                       | F:GO:0004222;<br>F:GO:0008270;<br>P:GO:0007275;<br>C:GO:0005578;<br>F:GO:0008237;<br>C:GO:0031012;<br>C:GO:0005576;<br>F:GO:0030414;<br>F:GO:0008233;<br>F:GO:0004867 | -          |                                                                                          |
| Caenorhabditis briggsae | briggsae cbr-eat-18 protein                             | 0  |                                                                                                                                                                       |                                                                                                                                                                       |            |                                                                                          |
| Caenorhabditis briggsae | Hypothetical protein CBG04563 [Caenorhabditis briggsae] | 0  |                                                                                                                                                                       |                                                                                                                                                                       |            | SignalP (SIGNALP)                                                                        |
| Ixodes scapularis       | riken cd- 2700097o09                                    | 0  |                                                                                                                                                                       | F:GO:0000062;<br>F:GO:0008176;<br>P:GO:0008150;<br>F:GO:0018024;<br>P:GO:0009792                                                                                      | -          |                                                                                          |
| Caenorhabditis elegans  | laminin alpha chain                                     | 3  | P:GO:0007155;<br>P:GO:0050794;<br>C:GO:0005604                                                                                                                        | -                                                                                                                                                                     |            | IPR001791; IPR008985; IPR012680;<br>IPR013320                                            |
| Caenorhabditis briggsae | kiaa1688 protein                                        | 4  | C:GO:0005856;<br>P:GO:0007165;<br>C:GO:0005634;<br>F:GO:0005515                                                                                                       | -                                                                                                                                                                     |            | IPR001202; G3DSA:2.20.70.10<br>(GENE3D), PTHR23177 (PANTHER),<br>PTHR23177:SF1 (PANTHER) |
| Callithrix jacchus      | ig lambda-chain (v-d-j) precursor                       | 3  | C:GO:0005576;<br>F:GO:0003823;<br>P:GO:0006955                                                                                                                        | -                                                                                                                                                                     |            | IPR013783; PTHR23267 (PANTHER),<br>PTHR23267:SF14 (PANTHER), SignalP<br>(SIGNALP)        |
| Loa loa                 | hypothetical protein LOAG_02385 [Loa loa]               | 0  |                                                                                                                                                                       |                                                                                                                                                                       |            | -                                                                                        |
|                         | -                                                       | 0  |                                                                                                                                                                       |                                                                                                                                                                       |            | -                                                                                        |
| Caenorhabditis briggsae | sorbs2 protein                                          | 2  | P:GO:0023034;<br>C:GO:0044464                                                                                                                                         | -                                                                                                                                                                     |            | -                                                                                        |
|                         | -                                                       | 0  |                                                                                                                                                                       |                                                                                                                                                                       |            | SignalP (SIGNALP)                                                                        |
| Caenorhabditis elegans  | abnormal axis family member (ttx-7)                     | 0  |                                                                                                                                                                       | P:GO:0016311;<br>F:GO:0004437                                                                                                                                         |            | IPR000760; G3DSA:3.40.190.80<br>(GENE3D), PTHR20854:SF4 (PANTHER)                        |
| Caenorhabditis briggsae | u3 small nucleolar ribonucleoprotein protein imp4       | 10 | P:GO:0009792;<br>F:GO:0004812;<br>P:GO:0002119;<br>F:GO:0003676;<br>F:GO:0005524;<br>P:GO:0000003;<br>P:GO:0040007;<br>P:GO:0006898;<br>C:GO:0030529;<br>P:GO:0006412 | -                                                                                                                                                                     | EC:3.6.5.3 | IPR004154; IPR007109;<br>G3DSA:3.40.50.10480 (GENE3D),<br>PTHR22734 (PANTHER)            |
|                         | -                                                       | 0  |                                                                                                                                                                       |                                                                                                                                                                       |            | -                                                                                        |
|                         | -                                                       | 0  |                                                                                                                                                                       |                                                                                                                                                                       |            | IPR015880                                                                                |
|                         | -                                                       | 0  |                                                                                                                                                                       |                                                                                                                                                                       |            | -                                                                                        |
|                         | -                                                       | 0  |                                                                                                                                                                       |                                                                                                                                                                       |            | -                                                                                        |
|                         | -                                                       | 0  |                                                                                                                                                                       |                                                                                                                                                                       |            | -                                                                                        |
|                         | -                                                       | 0  |                                                                                                                                                                       |                                                                                                                                                                       |            | -                                                                                        |
|                         | -                                                       | 0  |                                                                                                                                                                       |                                                                                                                                                                       |            | -                                                                                        |



|                             |                                                            |   |                                                                                                   |                                                                                                                                     |             |                                                                                                                        |
|-----------------------------|------------------------------------------------------------|---|---------------------------------------------------------------------------------------------------|-------------------------------------------------------------------------------------------------------------------------------------|-------------|------------------------------------------------------------------------------------------------------------------------|
| Loa loa                     | erin family member (cdh-6)                                 | 0 |                                                                                                   | P:GO:0007218;<br>F:GO:0005509;<br>P:GO:0007156;<br>F:GO:0004930;<br>P:GO:0007155;<br>C:GO:0016021;<br>C:GO:0016020;<br>C:GO:0005886 | -           |                                                                                                                        |
| Angiostrongylus cantonensis | col-19                                                     | 6 | P:GO:0009792;<br>C:GO:0060107;<br>F:GO:0042302;<br>F:GO:0005515;<br>C:GO:0060111;<br>P:GO:0040002 | -                                                                                                                                   |             | IPR002486; IPR008160; PTHR10499 (PANTHER), PTHR10499:SF58 (PANTHER), SignalP (SIGNALP)                                 |
|                             |                                                            | 0 |                                                                                                   |                                                                                                                                     |             |                                                                                                                        |
| Caenorhabditis briggsae     | activating sig-l cointegrator 1 complex subunit 3          | 3 | F:GO:0005524;<br>F:GO:0003677;<br>F:GO:0008026                                                    | -                                                                                                                                   |             | IPR011545; IPR014021; G3DSA:3.40.50.300 (GENE3D), PTHR11752 (PANTHER), PTHR11752:SF8 (PANTHER), SSF52540 (SUPERFAMILY) |
| Caenorhabditis briggsae     | elegans protein partially confirmed by transcript evidence | 0 |                                                                                                   | F:GO:0005524;<br>P:GO:0006468                                                                                                       |             | IPR011009; IPR012877; G3DSA:3.90.1200.10 (GENE3D)                                                                      |
| Brugia malayi               | ys03_caeel ame: full=uncharacterized protein               | 5 | P:GO:0048856;<br>F:GO:0003677;<br>P:GO:0007275;<br>P:GO:0000003;<br>C:GO:0005634                  | -                                                                                                                                   |             | IPR000910                                                                                                              |
|                             |                                                            | 0 |                                                                                                   |                                                                                                                                     |             |                                                                                                                        |
| Caenorhabditis briggsae     | briggsae cbr-sulp-8 protein                                | 3 | C:GO:0016020;<br>P:GO:0006810;<br>F:GO:0005215                                                    | -                                                                                                                                   |             | IPR002645; PTHR11814 (PANTHER), PTHR11814:SF10 (PANTHER)                                                               |
| Brugia malayi               | riken cd- 2700097o09                                       | 0 |                                                                                                   |                                                                                                                                     |             |                                                                                                                        |
|                             |                                                            | 0 |                                                                                                   |                                                                                                                                     |             |                                                                                                                        |
|                             |                                                            | 0 |                                                                                                   |                                                                                                                                     |             | SignalP (SIGNALP)                                                                                                      |
|                             |                                                            | 0 |                                                                                                   |                                                                                                                                     |             |                                                                                                                        |
|                             |                                                            | 0 |                                                                                                   |                                                                                                                                     |             | SignalP (SIGNALP)                                                                                                      |
| Ornithorhynchus anatinus    | protocadherin 19                                           | 0 |                                                                                                   |                                                                                                                                     |             | IPR002126; IPR015919; PTHR10596 (PANTHER), PTHR10596:SF77 (PANTHER)                                                    |
| Loa loa                     | sig-l recognition particle receptor subunit beta           | 6 | C:GO:0043231;<br>F:GO:0005515;<br>P:GO:0006898;<br>P:GO:0009792;<br>C:GO:0005737;<br>C:GO:0016020 | -                                                                                                                                   |             | IPR019009; G3DSA:3.40.50.300 (GENE3D), PTHR19326 (PANTHER), SignalP (SIGNALP), SSF52540 (SUPERFAMILY)                  |
| Loa loa                     | bcl2-associated athanogene 2                               | 3 | F:GO:0005515;<br>P:GO:0040002;<br>P:GO:0040011                                                    | -                                                                                                                                   |             | PTHR12334 (PANTHER), SignalP (SIGNALP)                                                                                 |
| Loa loa                     | bcl2-associated athanogene 2                               | 3 | F:GO:0005515;<br>P:GO:0040002;<br>P:GO:0040011                                                    | -                                                                                                                                   |             | PTHR12334 (PANTHER), SignalP (SIGNALP)                                                                                 |
|                             |                                                            | 0 |                                                                                                   |                                                                                                                                     |             | SignalP (SIGNALP)                                                                                                      |
| Caenorhabditis elegans      | interleukin-1 receptor-associated ki-se 1                  | 5 | P:GO:0006468;<br>F:GO:0005515;<br>F:GO:0005524;<br>P:GO:0007165;<br>F:GO:0004674                  | -                                                                                                                                   | EC:2.7.11.0 |                                                                                                                        |
| Loa loa                     | small family member (sma-9)                                | 1 | F:GO:0005515                                                                                      | -                                                                                                                                   |             | IPR007087; IPR015880                                                                                                   |

|                         |                                                            |    |                                                                                                                                                                       |                                                |                                                                                                                    |
|-------------------------|------------------------------------------------------------|----|-----------------------------------------------------------------------------------------------------------------------------------------------------------------------|------------------------------------------------|--------------------------------------------------------------------------------------------------------------------|
|                         |                                                            | 0  |                                                                                                                                                                       |                                                | SignalP (SIGNALP)                                                                                                  |
| Caenorhabditis briggsae | low-density lipoprotein receptor-related protein 2         | 3  | F:GO:0004872;<br>F:GO:0005509;<br>C:GO:0016021                                                                                                                        | -                                              | IPR006210; G3DSA:2.10.25.10 (GENE3D), PTHR10529 (PANTHER), PTHR10529:SF2 (PANTHER)                                 |
| Caenorhabditis elegans  | sec14l1 protein                                            | 5  | C:GO:0016020;<br>C:GO:0005794;<br>F:GO:0005488;<br>P:GO:0006810;<br>F:GO:0005215                                                                                      | -                                              | IPR001071; IPR001251; IPR008273; IPR011074; G3DSA:1.10.8.20 (GENE3D), PTHR23324 (PANTHER), PTHR23324:SF8 (PANTHER) |
|                         |                                                            | 0  |                                                                                                                                                                       |                                                | -                                                                                                                  |
| Pan troglodytes         | PREDICTED: hypothetical protein [Pan troglodytes]          | 0  |                                                                                                                                                                       |                                                | SignalP (SIGNALP)                                                                                                  |
|                         |                                                            | 0  |                                                                                                                                                                       |                                                | -                                                                                                                  |
|                         |                                                            | 0  |                                                                                                                                                                       |                                                | -                                                                                                                  |
| Caenorhabditis elegans  | elegans protein partially confirmed by transcript evidence | 0  |                                                                                                                                                                       | P:GO:0032313;<br>C:GO:0005622;<br>F:GO:0005097 | -                                                                                                                  |
| Haemonchus contortus    | heat shock protein family member (hsp- )                   | 0  |                                                                                                                                                                       | P:GO:0006950;<br>P:GO:0009408                  | -                                                                                                                  |
|                         |                                                            | 0  |                                                                                                                                                                       |                                                | -                                                                                                                  |
|                         |                                                            | 0  |                                                                                                                                                                       |                                                | -                                                                                                                  |
|                         |                                                            | 0  |                                                                                                                                                                       |                                                | -                                                                                                                  |
| Caenorhabditis elegans  | briggsae cbr-dnj-9 protein                                 | 1  | F:GO:0031072                                                                                                                                                          | -                                              | IPR001623; IPR015609; IPR018253; PTHR11821:SF82 (PANTHER)                                                          |
| Caenorhabditis briggsae | isoprenylcysteine carboxyl methyltransferase               | 5  | P:GO:0044281;<br>P:GO:0008104;<br>F:GO:0003880;<br>C:GO:0005783;<br>P:GO:0006464                                                                                      | -                                              | IPR007269; PTHR12714 (PANTHER)                                                                                     |
| Caenorhabditis elegans  | elegans protein partially confirmed by transcript evidence | 0  |                                                                                                                                                                       |                                                | IPR002110; IPR020683                                                                                               |
| Caenorhabditis elegans  | ccr4-not transcription subunit 3                           | 10 | C:GO:0005737;<br>P:GO:0040035;<br>P:GO:0009792;<br>P:GO:0002119;<br>F:GO:0030528;<br>P:GO:0045449;<br>F:GO:0005515;<br>P:GO:0008340;<br>P:GO:0040007;<br>C:GO:0005634 | -                                              | IPR007207; PTHR23326 (PANTHER), SignalP (SIGNALP)                                                                  |
| Caenorhabditis briggsae | cadmium-inducible lysosomal protein cdr-5                  | 3  | P:GO:0002119;<br>P:GO:0040007;<br>P:GO:0040002                                                                                                                        | -                                              | PTHR12289 (PANTHER), PTHR12289:SF17 (PANTHER)                                                                      |
|                         |                                                            | 0  |                                                                                                                                                                       |                                                | SignalP (SIGNALP)                                                                                                  |
|                         |                                                            | 0  |                                                                                                                                                                       |                                                | -                                                                                                                  |
| Loa loa                 | otu domain-containing protein 6b                           | 0  |                                                                                                                                                                       | P:GO:0008150;<br>F:GO:0008233;<br>C:GO:0005575 | IPR003323; PTHR12419 (PANTHER), SSF54001 (SUPERFAMILY)                                                             |
|                         |                                                            | 0  |                                                                                                                                                                       |                                                | -                                                                                                                  |
|                         |                                                            | 0  |                                                                                                                                                                       |                                                | -                                                                                                                  |

|                         |                                         |    |                                                                                                                                                                                                                                                                                                                                                                                                                                                                        |   |                            |                                                                                                                                                                                                                                                                                        |
|-------------------------|-----------------------------------------|----|------------------------------------------------------------------------------------------------------------------------------------------------------------------------------------------------------------------------------------------------------------------------------------------------------------------------------------------------------------------------------------------------------------------------------------------------------------------------|---|----------------------------|----------------------------------------------------------------------------------------------------------------------------------------------------------------------------------------------------------------------------------------------------------------------------------------|
| Caenorhabditis elegans  | mitogen-activated protein ki-se ki-se 1 | 38 | P:GO:0034111;<br>P:GO:0032402;<br>C:GO:0033267;<br>P:GO:0060711;<br>F:GO:0004728;<br>C:GO:0005625;<br>F:GO:0004708;<br>P:GO:0032968;<br>P:GO:0051384;<br>C:GO:0005829;<br>C:GO:0032839;<br>P:GO:0003056;<br>P:GO:0006979;<br>P:GO:0045597;<br>P:GO:0032320;<br>P:GO:0006935;<br>C:GO:0005886;<br>C:GO:0043204;<br>C:GO:0048471;<br>P:GO:0030216;<br>C:GO:0005794;<br>P:GO:0048812;<br>P:GO:0007050;<br>F:GO:0005524;<br>P:GO:0030335;<br>P:GO:0048313;<br>P:GO:0008285 | - | EC:2.7.11.0                | IPR000719; IPR011009; IPR017441;<br>IPR017442; G3DSA:3.30.200.20<br>(GENE3D), PTHR22986 (PANTHER),<br>PTHR22986:SF46 (PANTHER)                                                                                                                                                         |
| Caenorhabditis elegans  | coenzyme q4 homolog                     | 1  | C:GO:0005739                                                                                                                                                                                                                                                                                                                                                                                                                                                           | - |                            | IPR007715; PTHR12922 (PANTHER)                                                                                                                                                                                                                                                         |
| Caenorhabditis briggsae | briggsae cbr-aex-3 protein              | 7  | P:GO:0007618;<br>P:GO:0030421;<br>P:GO:0018991;<br>C:GO:0005623;<br>F:GO:0017112;<br>P:GO:0007268;<br>P:GO:0050794                                                                                                                                                                                                                                                                                                                                                     | - |                            | IPR001194; IPR005112; PTHR13008<br>(PANTHER), SignalP (SIGNALP)                                                                                                                                                                                                                        |
|                         |                                         | 0  |                                                                                                                                                                                                                                                                                                                                                                                                                                                                        |   |                            |                                                                                                                                                                                                                                                                                        |
| Caenorhabditis elegans  | farnesyl diphosphate synthase           | 6  | P:GO:0009792;<br>P:GO:0002119;<br>F:GO:0004337;<br>F:GO:0004161;<br>P:GO:0040007;<br>P:GO:0045337                                                                                                                                                                                                                                                                                                                                                                      | - | EC:2.5.1.10;<br>EC:2.5.1.1 | IPR000092; IPR008949; PTHR11525<br>(PANTHER)                                                                                                                                                                                                                                           |
|                         |                                         | 0  |                                                                                                                                                                                                                                                                                                                                                                                                                                                                        |   |                            |                                                                                                                                                                                                                                                                                        |
|                         |                                         | 0  |                                                                                                                                                                                                                                                                                                                                                                                                                                                                        |   |                            |                                                                                                                                                                                                                                                                                        |
|                         |                                         | 0  |                                                                                                                                                                                                                                                                                                                                                                                                                                                                        |   |                            |                                                                                                                                                                                                                                                                                        |
| Caenorhabditis briggsae | integrin alpha-ps1                      | 1  | C:GO:0016021                                                                                                                                                                                                                                                                                                                                                                                                                                                           | - |                            | IPR000413; IPR013517; IPR013519;<br>IPR013649; IPR018184;<br>G3DSA:2.130.10.130 (GENE3D),<br>G3DSA:2.60.40.1510 (GENE3D),<br>G3DSA:2.60.40.1530 (GENE3D),<br>PTHR23220 (PANTHER),<br>PTHR23220:SF11 (PANTHER), PS51470<br>(PROFILE), SSF69179 (SUPERFAMILY),<br>SSF69318 (SUPERFAMILY) |

|                         |                                                         |    |                                                                                                                                                                       |                                                                                  |             |                                                                                                                                                                                                                                                                |
|-------------------------|---------------------------------------------------------|----|-----------------------------------------------------------------------------------------------------------------------------------------------------------------------|----------------------------------------------------------------------------------|-------------|----------------------------------------------------------------------------------------------------------------------------------------------------------------------------------------------------------------------------------------------------------------|
| Caenorhabditis briggsae | integrin alpha-ps1                                      | 1  | C:GO:0016021                                                                                                                                                          | -                                                                                |             | IPR000413; IPR013517; IPR013519; IPR013649; IPR018184; G3DSA:2.130.10.130 (GENE3D), G3DSA:2.60.40.1510 (GENE3D), G3DSA:2.60.40.1530 (GENE3D), PTHR23220 (PANTHER), PTHR23220:SF11 (PANTHER), PS51470 (PROFILE), SSF69179 (SUPERFAMILY), SSF69318 (SUPERFAMILY) |
| Ciona intestinalis      | secreted lectin homolog -1                              | 0  |                                                                                                                                                                       | F:GO:0005488;<br>P:GO:0007155;<br>F:GO:0005529                                   |             | -                                                                                                                                                                                                                                                              |
|                         | -                                                       | 0  |                                                                                                                                                                       |                                                                                  |             | SignalP (SIGNALP)                                                                                                                                                                                                                                              |
| Caenorhabditis briggsae | Hypothetical protein CBG22233 [Caenorhabditis briggsae] | 3  | P:GO:0007411;<br>P:GO:0019915;<br>P:GO:0007413                                                                                                                        | -                                                                                |             | PTHR23051 (PANTHER), SignalP (SIGNALP)                                                                                                                                                                                                                         |
| Caenorhabditis briggsae | sushi domain containing                                 | 2  | C:GO:0016021;<br>P:GO:0007160                                                                                                                                         | -                                                                                |             | IPR001846; PTHR13802 (PANTHER), PTHR13802:SF1 (PANTHER)                                                                                                                                                                                                        |
|                         | -                                                       | 0  |                                                                                                                                                                       |                                                                                  |             | -                                                                                                                                                                                                                                                              |
|                         | -                                                       | 0  |                                                                                                                                                                       |                                                                                  |             | -                                                                                                                                                                                                                                                              |
| Caenorhabditis briggsae | tryptophanyl-tr- synthetase                             | 8  | C:GO:0005625;<br>P:GO:0008285;<br>F:GO:0005515;<br>F:GO:0000166;<br>F:GO:0004812;<br>P:GO:0006418;<br>P:GO:0045765;<br>C:GO:0005737                                   | -                                                                                |             | -                                                                                                                                                                                                                                                              |
| Caenorhabditis elegans  | transmembrane protein 170a                              | 0  |                                                                                                                                                                       | F:GO:0003674;<br>C:GO:0016021;<br>C:GO:0016020;<br>P:GO:0008150;<br>C:GO:0005575 |             | -                                                                                                                                                                                                                                                              |
| Caenorhabditis briggsae | calcium atpase                                          | 7  | F:GO:0005388;<br>C:GO:0016021;<br>P:GO:0006754;<br>F:GO:0005524;<br>P:GO:0006816;<br>C:GO:0005737;<br>P:GO:0030182                                                    | -                                                                                | EC:3.6.3.8  | -                                                                                                                                                                                                                                                              |
| Loa loa                 | headcase protein                                        | 0  |                                                                                                                                                                       |                                                                                  |             | -                                                                                                                                                                                                                                                              |
| Caenorhabditis briggsae | hmg coenzyme asynthase                                  | 10 | P:GO:0009792;<br>P:GO:0010171;<br>P:GO:0002119;<br>F:GO:0004421;<br>P:GO:0018996;<br>P:GO:0040010;<br>P:GO:0000003;<br>P:GO:0040011;<br>P:GO:0008152;<br>P:GO:0006898 | -                                                                                | EC:2.3.3.10 | IPR000590; IPR013528; IPR013746; IPR016038; IPR016039; PTHR11877 (PANTHER)                                                                                                                                                                                     |
|                         | -                                                       | 0  |                                                                                                                                                                       |                                                                                  |             | SignalP (SIGNALP)                                                                                                                                                                                                                                              |
|                         | -                                                       | 0  |                                                                                                                                                                       |                                                                                  |             | SignalP (SIGNALP)                                                                                                                                                                                                                                              |

|                         |                                              |    |                                                                                                                                                                                                         |                                                                                                                                                                                                         |                                                                        |
|-------------------------|----------------------------------------------|----|---------------------------------------------------------------------------------------------------------------------------------------------------------------------------------------------------------|---------------------------------------------------------------------------------------------------------------------------------------------------------------------------------------------------------|------------------------------------------------------------------------|
| Caenorhabditis briggsae | ylx3_caee1 ame: full=uncharacterized protein | 6  | C:GO:0016021;<br>P:GO:0009792;<br>P:GO:0040010;<br>P:GO:0055085;<br>F:GO:0005215;<br>P:GO:0002119                                                                                                       | -                                                                                                                                                                                                       | PTHR11600 (PANTHER),<br>PTHR11600:SF28 (PANTHER)                       |
| Loa loa                 | mynd finger family protein                   | 1  | F:GO:0046872                                                                                                                                                                                            | -                                                                                                                                                                                                       | PTHR12197 (PANTHER),<br>PTHR12197:SF9 (PANTHER)                        |
|                         | -                                            | 0  |                                                                                                                                                                                                         |                                                                                                                                                                                                         | -                                                                      |
|                         | -                                            | 0  |                                                                                                                                                                                                         |                                                                                                                                                                                                         | -                                                                      |
| Caenorhabditis elegans  | short-chain dehydrogenase reductase sdr      | 0  |                                                                                                                                                                                                         | P:GO:0006633;<br>F:GO:0051287;<br>P:GO:0042619;<br>F:GO:0018454;<br>F:GO:0016787;<br>C:GO:0005737;<br>P:GO:0055114;<br>F:GO:0004316;<br>F:GO:0016491;<br>F:GO:0003824;<br>P:GO:0008152;<br>F:GO:0005488 | SignalP (SIGNALP)                                                      |
| Homo sapiens            | alpha-2-macroglobulin precursor              | 12 | F:GO:0004867;<br>F:GO:0043120;<br>F:GO:0019966;<br>P:GO:0001869;<br>P:GO:0007584;<br>C:GO:0005615;<br>C:GO:0031093;<br>F:GO:0019959;<br>F:GO:0019899;<br>P:GO:0010037;<br>P:GO:0051384;<br>P:GO:0006953 | -                                                                                                                                                                                                       | IPR011625                                                              |
| Loa loa                 | hypothetical protein LOAG_05911 [Loa loa]    | 0  |                                                                                                                                                                                                         |                                                                                                                                                                                                         | -                                                                      |
| Brugia malayi           | anion exchange protein                       | 7  | C:GO:0005887;<br>F:GO:0005452;<br>F:GO:0008510;<br>P:GO:0055085;<br>P:GO:0006885;<br>P:GO:0015701;<br>P:GO:0006814                                                                                      | -                                                                                                                                                                                                       | IPR003020; IPR011531;<br>PTHR11453:SF9 (PANTHER), SignalP<br>(SIGNALP) |

|                     |                                        |   |                                                                                                                                                                                                                                                                                                                                                                                                                                                                        |  |                   |
|---------------------|----------------------------------------|---|------------------------------------------------------------------------------------------------------------------------------------------------------------------------------------------------------------------------------------------------------------------------------------------------------------------------------------------------------------------------------------------------------------------------------------------------------------------------|--|-------------------|
| Ancylostoma caninum | c-type lectin family member (clec-266) | 0 | F:GO:0001874;<br>P:GO:0050766;<br>F:GO:0001872;<br>F:GO:0005529;<br>P:GO:0016337;<br>P:GO:0008037;<br>P:GO:0032760;<br>F:GO:0003674;<br>F:GO:0030247;<br>C:GO:0016021;<br>P:GO:0006911;<br>C:GO:0016020;<br>P:GO:0006910;<br>P:GO:0002238;<br>F:GO:0030169;<br>F:GO:0008329;<br>F:GO:0004872;<br>P:GO:0008150;<br>P:GO:0006955;<br>F:GO:0005488;<br>P:GO:0007165;<br>C:GO:0009897;<br>P:GO:0001879;<br>P:GO:0001878;<br>C:GO:0005575;<br>F:GO:0001846;<br>P:GO:0002752 |  | SignalP (SIGNALP) |
| Ancylostoma caninum | collectin sub-family member 12         | 0 | F:GO:0030169;<br>F:GO:0008329;<br>C:GO:0016021;<br>C:GO:0016020;<br>F:GO:0005529;<br>F:GO:0003674;<br>P:GO:0006910;<br>P:GO:0007165;<br>C:GO:0005575;<br>F:GO:0004872;<br>F:GO:0046872;<br>P:GO:0008150;<br>P:GO:0006955;<br>F:GO:0005488                                                                                                                                                                                                                              |  | SignalP (SIGNALP) |

|                         |                                                |   |                                                                                                   |                                                                                                                                                                                                                                                                                                                                                                                                                                                                        |            |                                                                                                             |
|-------------------------|------------------------------------------------|---|---------------------------------------------------------------------------------------------------|------------------------------------------------------------------------------------------------------------------------------------------------------------------------------------------------------------------------------------------------------------------------------------------------------------------------------------------------------------------------------------------------------------------------------------------------------------------------|------------|-------------------------------------------------------------------------------------------------------------|
| Ancylostoma caninum     | c-type lectin family member (clec-266)         | 0 |                                                                                                   | F:GO:0001874;<br>P:GO:0050766;<br>F:GO:0001872;<br>F:GO:0005529;<br>P:GO:0016337;<br>P:GO:0008037;<br>P:GO:0032760;<br>F:GO:0003674;<br>F:GO:0030247;<br>C:GO:0016021;<br>P:GO:0006911;<br>C:GO:0016020;<br>P:GO:0006910;<br>P:GO:0002238;<br>F:GO:0030169;<br>F:GO:0008329;<br>F:GO:0004872;<br>P:GO:0008150;<br>P:GO:0006955;<br>F:GO:0005488;<br>P:GO:0007165;<br>C:GO:0009897;<br>P:GO:0001879;<br>P:GO:0001878;<br>C:GO:0005575;<br>F:GO:0001846;<br>P:GO:0002752 |            | SignalP (SIGNALP)                                                                                           |
| Brugia malayi           | hypothetical protein Bm1_17960 [Brugia malayi] | 0 |                                                                                                   |                                                                                                                                                                                                                                                                                                                                                                                                                                                                        |            | -                                                                                                           |
| Caenorhabditis briggsae | briggsae cbr-msh-5 protein                     | 0 |                                                                                                   | F:GO:0005524;<br>P:GO:0007131;<br>F:GO:0005515;<br>P:GO:0006298;<br>F:GO:0030983;<br>C:GO:0005634                                                                                                                                                                                                                                                                                                                                                                      |            | -                                                                                                           |
| Caenorhabditis briggsae | briggsae cbr-lad-2 protein                     | 0 |                                                                                                   |                                                                                                                                                                                                                                                                                                                                                                                                                                                                        |            | SignalP (SIGNALP)                                                                                           |
| Capsicum annuum         | aromatic amino acid                            | 0 |                                                                                                   | P:GO:0006519;<br>F:GO:0004058;<br>F:GO:0003824;<br>P:GO:0019752;<br>F:GO:0016831;<br>F:GO:0016829;<br>F:GO:0030170                                                                                                                                                                                                                                                                                                                                                     |            | IPR002129; IPR015422; IPR015424;<br>PTHR11999:SF11 (PANTHER)                                                |
| Caenorhabditis briggsae | patched family protein                         | 5 | P:GO:0018996;<br>C:GO:0016021;<br>P:GO:0040018;<br>F:GO:0008158;<br>P:GO:0040011                  |                                                                                                                                                                                                                                                                                                                                                                                                                                                                        |            | -                                                                                                           |
| Caenorhabditis elegans  | d- polymerase eta                              | 6 | P:GO:0006301;<br>F:GO:0003684;<br>F:GO:0003887;<br>P:GO:0006290;<br>F:GO:0000166;<br>C:GO:0005634 |                                                                                                                                                                                                                                                                                                                                                                                                                                                                        | EC:2.7.7.7 | IPR001126; IPR017963;<br>G3DSA:3.30.70.270 (GENE3D),<br>PTHR11076:SF11 (PANTHER),<br>SSF56672 (SUPERFAMILY) |

|                         |                                                                                   |    |                                                                                                                                                                       |                                                |            |                                                                                                                                                    |
|-------------------------|-----------------------------------------------------------------------------------|----|-----------------------------------------------------------------------------------------------------------------------------------------------------------------------|------------------------------------------------|------------|----------------------------------------------------------------------------------------------------------------------------------------------------|
| Caenorhabditis elegans  | phospholipase d3                                                                  | 3  | P:GO:0008152;<br>C:GO:0044425;<br>F:GO:0003824                                                                                                                        | -                                              |            | IPR013582; PTHR10185 (PANTHER),<br>SSF56024 (SUPERFAMILY)                                                                                          |
| Brugia malayi           | valyl-tr- synthetase                                                              | 5  | F:GO:0005515;<br>P:GO:0006418;<br>C:GO:0005829;<br>F:GO:0004832;<br>F:GO:0000166                                                                                      | -                                              | EC:6.1.1.9 | IPR001412; IPR002300; IPR002303;<br>IPR014729; PTHR11946 (PANTHER),<br>SSF52374 (SUPERFAMILY)                                                      |
|                         | -                                                                                 | 0  |                                                                                                                                                                       |                                                |            | -                                                                                                                                                  |
| Ciona intestinalis      | mitogen-activated protein ki-se ki-se 5                                           | 7  | F:GO:0004672;<br>P:GO:0000165;<br>P:GO:0007507;<br>P:GO:0048522;<br>F:GO:0005515;<br>F:GO:0000166;<br>C:GO:0005819                                                    | -                                              |            | IPR000719; IPR011009; IPR017442;<br>G3DSA:1.10.510.10 (GENE3D),<br>G3DSA:3.30.200.20 (GENE3D),<br>PTHR22986 (PANTHER),<br>PTHR22986:SF45 (PANTHER) |
|                         | -                                                                                 | 0  |                                                                                                                                                                       |                                                |            | SignalP (SIGNALP)                                                                                                                                  |
| Caenorhabditis elegans  | copine domain atypical protein isoform partially confirmed by transcript evidence | 0  |                                                                                                                                                                       |                                                |            | -                                                                                                                                                  |
|                         | -                                                                                 | 0  |                                                                                                                                                                       |                                                |            | -                                                                                                                                                  |
|                         | -                                                                                 | 0  |                                                                                                                                                                       |                                                |            | -                                                                                                                                                  |
|                         | -                                                                                 | 0  |                                                                                                                                                                       |                                                |            | -                                                                                                                                                  |
| Caenorhabditis briggsae | n-acetyllactosamine synthase                                                      | 0  |                                                                                                                                                                       | C:GO:0016021;<br>P:GO:0005975;<br>F:GO:0016757 |            | SignalP (SIGNALP)                                                                                                                                  |
| Ailuropoda melanoleuca  | capping protein (actin filament) gelsolin-like                                    | 10 | C:GO:0031965;<br>C:GO:0005730;<br>P:GO:0051016;<br>P:GO:0007076;<br>P:GO:0051301;<br>C:GO:0042470;<br>C:GO:0000796;<br>F:GO:0003779;<br>C:GO:0008290;<br>P:GO:0030031 | -                                              |            | IPR007122; IPR007123;<br>G3DSA:3.40.20.10 (GENE3D),<br>PTHR11977:SF13 (PANTHER),<br>SSF55753 (SUPERFAMILY)                                         |
| Caenorhabditis elegans  | nmd3 homolog                                                                      | 4  | C:GO:0005737;<br>C:GO:0005634;<br>F:GO:0043023;<br>P:GO:0000055                                                                                                       | -                                              |            | IPR007064; PTHR12746 (PANTHER)                                                                                                                     |
| Caenorhabditis briggsae | cysteine mitochondrial                                                            | 10 | C:GO:0005829;<br>P:GO:0006777;<br>P:GO:0018283;<br>P:GO:0006461;<br>F:GO:0031071;<br>C:GO:0005759;<br>F:GO:0042803;<br>F:GO:0030170;<br>C:GO:0005634;<br>P:GO:0006534 | -                                              | EC:2.8.1.7 | IPR000192; IPR015421; IPR015422;<br>IPR015424; PTHR11601 (PANTHER)                                                                                 |



|                         |                                                            |    |                                                                                                                                                                                                         |                                                                                                                                     |            |                                                                                  |
|-------------------------|------------------------------------------------------------|----|---------------------------------------------------------------------------------------------------------------------------------------------------------------------------------------------------------|-------------------------------------------------------------------------------------------------------------------------------------|------------|----------------------------------------------------------------------------------|
| Caenorhabditis briggsae | cysteine mitochondrial                                     | 10 | C:GO:0005829;<br>P:GO:0006777;<br>P:GO:0018283;<br>P:GO:0006461;<br>F:GO:0031071;<br>C:GO:0005759;<br>F:GO:0042803;<br>F:GO:0030170;<br>C:GO:0005634;<br>P:GO:0006534                                   | -                                                                                                                                   | EC:2.8.1.7 | IPR000192; IPR015421; IPR015422;<br>IPR015424; PTHR11601 (PANTHER)               |
| Haemonchus contortus    | peptidase c13 family protein                               | 0  |                                                                                                                                                                                                         | P:GO:0000003;<br>P:GO:0006508;<br>P:GO:0009792;<br>F:GO:0004197;<br>C:GO:0005575                                                    |            | IPR001096; PTHR12000:SF3<br>(PANTHER)                                            |
| Haemonchus contortus    | peptidase c13 family protein                               | 0  |                                                                                                                                                                                                         | P:GO:0000003;<br>P:GO:0006508;<br>P:GO:0009792;<br>F:GO:0004197                                                                     |            | IPR001096; PTHR12000:SF3<br>(PANTHER)                                            |
| Haemonchus contortus    | cysteine mitochondrial                                     | 12 | C:GO:0005829;<br>P:GO:0006777;<br>P:GO:0018283;<br>P:GO:0000003;<br>P:GO:0006461;<br>F:GO:0031071;<br>C:GO:0005759;<br>F:GO:0042803;<br>P:GO:0009792;<br>F:GO:0030170;<br>C:GO:0005634;<br>P:GO:0006534 | -                                                                                                                                   | EC:2.8.1.7 | IPR001096; PTHR12000:SF4<br>(PANTHER), SignalP (SIGNALP)                         |
| Haemonchus contortus    | cysteine mitochondrial                                     | 12 | C:GO:0005829;<br>P:GO:0006777;<br>P:GO:0018283;<br>P:GO:0000003;<br>P:GO:0006461;<br>F:GO:0031071;<br>C:GO:0005759;<br>F:GO:0042803;<br>P:GO:0009792;<br>F:GO:0030170;<br>C:GO:0005634;<br>P:GO:0006534 | -                                                                                                                                   | EC:2.8.1.7 | IPR001096; PTHR12000:SF4<br>(PANTHER), SignalP (SIGNALP)                         |
| Caenorhabditis briggsae | elegans protein partially confirmed by transcript evidence | 3  | C:GO:0016021;<br>F:GO:0005261;<br>P:GO:0015672                                                                                                                                                          | -                                                                                                                                   |            | -                                                                                |
| Caenorhabditis elegans  | r- helicase                                                | 0  |                                                                                                                                                                                                         | F:GO:0004386;<br>F:GO:0003723;<br>P:GO:0006139;<br>C:GO:0005737;<br>P:GO:0006281;<br>P:GO:0006974;<br>F:GO:0016788;<br>P:GO:0006310 |            | IPR003029; IPR012340; IPR016027;<br>IPR022967; IPR023097; PTHR10724<br>(PANTHER) |
| Caenorhabditis elegans  | class v family                                             | 1  | F:GO:0003824                                                                                                                                                                                            | -                                                                                                                                   |            | IPR000192; IPR015421; IPR015424                                                  |

|                         |                                                                   |    |                                                                                                                                                                                                                          |                                                                                                                    |                                                         |                                                                                  |
|-------------------------|-------------------------------------------------------------------|----|--------------------------------------------------------------------------------------------------------------------------------------------------------------------------------------------------------------------------|--------------------------------------------------------------------------------------------------------------------|---------------------------------------------------------|----------------------------------------------------------------------------------|
| Brugia malayi           | probable nucleolar gtp-binding protein                            | 13 | P:GO:0008156;<br>P:GO:0030336;<br>F:GO:0005515;<br>P:GO:0050821;<br>F:GO:0005525;<br>P:GO:0000079;<br>P:GO:0008285;<br>P:GO:0022408;<br>P:GO:0031397;<br>C:GO:0048471;<br>F:GO:0003924;<br>P:GO:0033342;<br>C:GO:0005634 | -                                                                                                                  | EC:3.6.5.1;<br>EC:3.6.5.2;<br>EC:3.6.5.3;<br>EC:3.6.5.4 | IPR012973; PTHR11702 (PANTHER),<br>PTHR11702:SF4 (PANTHER)                       |
| -                       | -                                                                 | 0  | -                                                                                                                                                                                                                        | -                                                                                                                  | -                                                       | SignalP (SIGNALP)                                                                |
| Brugia malayi           | patched family protein                                            | 2  | F:GO:0008158;<br>C:GO:0016021                                                                                                                                                                                            | -                                                                                                                  | -                                                       | -                                                                                |
| Caenorhabditis elegans  | Hypothetical protein Y17G7B.23a [Caenorhabditis elegans]          | 0  | -                                                                                                                                                                                                                        | -                                                                                                                  | -                                                       | -                                                                                |
| Caenorhabditis elegans  | Hypothetical protein Y17G7B.23a [Caenorhabditis elegans]          | 0  | -                                                                                                                                                                                                                        | -                                                                                                                  | -                                                       | -                                                                                |
| Caenorhabditis briggsae | egf-like domain containing protein                                | 0  | -                                                                                                                                                                                                                        | -                                                                                                                  | -                                                       | IPR006210; IPR013032                                                             |
| Caenorhabditis briggsae | polymerase (d- directed) epsilon                                  | 8  | F:GO:0005488;<br>P:GO:0006259;<br>P:GO:0040035;<br>F:GO:0016740;<br>P:GO:0040011;<br>P:GO:0006997;<br>P:GO:0002009;<br>P:GO:0009792                                                                                      | -                                                                                                                  | -                                                       | PTHR10670 (PANTHER)                                                              |
| Caenorhabditis briggsae | uncoordinated family member (unc-89)                              | 0  | -                                                                                                                                                                                                                        | F:GO:0004672;<br>F:GO:0005524;<br>F:GO:0005089;<br>P:GO:0006468;<br>P:GO:0035023;<br>F:GO:0004674;<br>C:GO:0005622 | -                                                       | IPR011009; G3DSA:1.10.510.10<br>(GENE3D)                                         |
| Caenorhabditis elegans  | cytochrome b5-like heme steroid binding domain containing protein | 0  | -                                                                                                                                                                                                                        | F:GO:0020037;<br>C:GO:0016021;<br>C:GO:0005576                                                                     | -                                                       | IPR001199; PTHR10281 (PANTHER),<br>PTHR10281:SF4 (PANTHER), SignalP<br>(SIGNALP) |
| Loa loa                 | solute carrier family member e1                                   | 1  | C:GO:0016020                                                                                                                                                                                                             | -                                                                                                                  | -                                                       | IPR000620; PTHR11132 (PANTHER),<br>SSF103481 (SUPERFAMILY)                       |
| Caenorhabditis elegans  | rho gtpase activating protein 29                                  | 3  | F:GO:0046872;<br>P:GO:0007165;<br>C:GO:0005622                                                                                                                                                                           | -                                                                                                                  | -                                                       | PTHR15228 (PANTHER),<br>PTHR15228:SF7 (PANTHER)                                  |
| -                       | -                                                                 | 0  | -                                                                                                                                                                                                                        | -                                                                                                                  | -                                                       | -                                                                                |
| Caenorhabditis elegans  | gpi ethanolamine phosphate transferase 2                          | 0  | -                                                                                                                                                                                                                        | P:GO:0008152;<br>C:GO:0016021;<br>F:GO:0003824;<br>F:GO:0008484                                                    | -                                                       | PTHR23072 (PANTHER), SignalP<br>(SIGNALP)                                        |
| Caenorhabditis briggsae | ankyrin repeat-containing protein                                 | 0  | -                                                                                                                                                                                                                        | -                                                                                                                  | -                                                       | -                                                                                |
| Caenorhabditis elegans  | briggsae cbr-uvt-3 protein                                        | 0  | -                                                                                                                                                                                                                        | F:GO:0005524;<br>P:GO:0015937;<br>F:GO:0004594                                                                     | -                                                       | PTHR12280 (PANTHER),<br>PTHR12280:SF3 (PANTHER)                                  |
| -                       | -                                                                 | 0  | -                                                                                                                                                                                                                        | -                                                                                                                  | -                                                       | -                                                                                |

|                         |                            |    |                                                                                                                                                                                                                                                                                                                                                                                   |                                                                 |                                                                            |
|-------------------------|----------------------------|----|-----------------------------------------------------------------------------------------------------------------------------------------------------------------------------------------------------------------------------------------------------------------------------------------------------------------------------------------------------------------------------------|-----------------------------------------------------------------|----------------------------------------------------------------------------|
| Lethenteron japonicum   | transcription factor ap-2  | 15 | P:GO:0050935;<br>C:GO:0030135;<br>P:GO:0006355;<br>P:GO:0051216;<br>P:GO:0030902;<br>P:GO:0014036;<br>P:GO:0014032;<br>P:GO:0030318;<br>P:GO:0008104;<br>P:GO:0006897;<br>P:GO:0048522;<br>P:GO:0007480;<br>C:GO:0005886;<br>F:GO:0005488;<br>P:GO:0030182                                                                                                                        | -                                                               | IPR004979; IPR013854;<br>PTHR10812:SF4 (PANTHER)                           |
| Loa loa                 | smad1 5 protein            | 22 | P:GO:0006468;<br>P:GO:0030901;<br>F:GO:0005515;<br>P:GO:0042592;<br>P:GO:0001657;<br>P:GO:0010552;<br>P:GO:0030902;<br>C:GO:0005737;<br>P:GO:0061036;<br>P:GO:0008285;<br>C:GO:0005667;<br>F:GO:0003702;<br>P:GO:0042493;<br>P:GO:0006954;<br>P:GO:0007276;<br>F:GO:0003700;<br>P:GO:0002051;<br>P:GO:0001710;<br>P:GO:0071407;<br>P:GO:0045669;<br>P:GO:0030509;<br>P:GO:0000165 | -                                                               | IPR001132; IPR008984; IPR013790;<br>IPR017855; PTHR13703:SF19<br>(PANTHER) |
|                         | -                          | 0  |                                                                                                                                                                                                                                                                                                                                                                                   |                                                                 | -                                                                          |
| Caenorhabditis briggsae | briggsae cbr-sep-1 protein | 0  |                                                                                                                                                                                                                                                                                                                                                                                   | P:GO:0006508;<br>F:GO:0008233;<br>F:GO:0005515;<br>C:GO:0005634 | -                                                                          |
|                         | -                          | 0  |                                                                                                                                                                                                                                                                                                                                                                                   |                                                                 | -                                                                          |

|                         |                                                            |    |                                                                                                                                                                                                                                                                                                                                                                                                                                                                                         |                                                                 |             |                                                                                                               |
|-------------------------|------------------------------------------------------------|----|-----------------------------------------------------------------------------------------------------------------------------------------------------------------------------------------------------------------------------------------------------------------------------------------------------------------------------------------------------------------------------------------------------------------------------------------------------------------------------------------|-----------------------------------------------------------------|-------------|---------------------------------------------------------------------------------------------------------------|
| Pongo abelii            | filamin a                                                  | 28 | P:GO:0009866;<br>F:GO:0004871;<br>C:GO:0005802;<br>P:GO:0043433;<br>P:GO:0034394;<br>C:GO:0015629;<br>P:GO:0050821;<br>P:GO:0051220;<br>C:GO:0005576;<br>C:GO:0005829;<br>F:GO:0001948;<br>P:GO:0051764;<br>P:GO:0043123;<br>F:GO:0051015;<br>F:GO:0048365;<br>P:GO:0045022;<br>P:GO:0007195;<br>F:GO:0042803;<br>F:GO:0034989;<br>P:GO:0031532;<br>F:GO:0034988;<br>C:GO:0005886;<br>F:GO:0008134;<br>P:GO:0042177;<br>C:GO:0005634;<br>P:GO:0042993;<br>C:GO:0005938;<br>P:GO:0043113 | -                                                               |             | IPR001298; IPR013783; IPR014756;<br>IPR017868; PTHR11915 (PANTHER),<br>PTHR11915:SF24 (PANTHER)               |
| Caenorhabditis elegans  | metallophosphoesterase domain containing 1                 | 0  |                                                                                                                                                                                                                                                                                                                                                                                                                                                                                         | F:GO:0003674;<br>F:GO:0016787;<br>P:GO:0008150;<br>C:GO:0005575 |             | IPR004843; G3DSA:3.60.21.10<br>(GENE3D), PTHR12905 (PANTHER),<br>SignalP (SIGNALP), SSF56300<br>(SUPERFAMILY) |
| Caenorhabditis elegans  | class b secretin-like g-protein coupled receptor           | 3  | P:GO:0007166;<br>C:GO:0016020;<br>F:GO:0004930                                                                                                                                                                                                                                                                                                                                                                                                                                          | -                                                               |             | IPR003287; IPR017983; PTHR12011<br>(PANTHER), SignalP (SIGNALP)                                               |
| Caenorhabditis briggsae | elegans protein confirmed by transcript evidence           | 0  |                                                                                                                                                                                                                                                                                                                                                                                                                                                                                         | P:GO:0008152;<br>F:GO:0003824                                   |             | -                                                                                                             |
| Caenorhabditis briggsae | elegans protein partially confirmed by transcript evidence | 3  | F:GO:0004725;<br>P:GO:0006470;<br>F:GO:0008138                                                                                                                                                                                                                                                                                                                                                                                                                                          | -                                                               | EC:3.1.3.48 | SignalP (SIGNALP)                                                                                             |
| -                       | -                                                          | 0  |                                                                                                                                                                                                                                                                                                                                                                                                                                                                                         |                                                                 |             | -                                                                                                             |
| Macaca fascicularis     | -dh dehydroge-se                                           | 5  | P:GO:0006120;<br>P:GO:0007605;<br>F:GO:0008137;<br>P:GO:0006810;<br>C:GO:0005747                                                                                                                                                                                                                                                                                                                                                                                                        | -                                                               | EC:1.6.5.3  | PTHR12868 (PANTHER)                                                                                           |
| Caenorhabditis elegans  | inner membrane mitochondrial                               | 2  | C:GO:0005743;<br>C:GO:0016021                                                                                                                                                                                                                                                                                                                                                                                                                                                           | -                                                               |             | IPR019133; PTHR15415 (PANTHER)                                                                                |
| -                       | -                                                          | 0  |                                                                                                                                                                                                                                                                                                                                                                                                                                                                                         |                                                                 |             | SignalP (SIGNALP)                                                                                             |
| Caenorhabditis elegans  | in family member (ttn-1)                                   | 1  | P:GO:0009792                                                                                                                                                                                                                                                                                                                                                                                                                                                                            |                                                                 |             | -                                                                                                             |
| Caenorhabditis briggsae | r- polymerase ii subunit a c-termi-l domain phosphatase    | 1  | C:GO:0005622                                                                                                                                                                                                                                                                                                                                                                                                                                                                            | -                                                               |             | IPR001357; G3DSA:3.40.50.10190<br>(GENE3D), PTHR23081 (PANTHER)                                               |
| -                       | -                                                          | 0  |                                                                                                                                                                                                                                                                                                                                                                                                                                                                                         |                                                                 |             | -                                                                                                             |
| -                       | -                                                          | 0  |                                                                                                                                                                                                                                                                                                                                                                                                                                                                                         |                                                                 |             | -                                                                                                             |
| -                       | -                                                          | 0  |                                                                                                                                                                                                                                                                                                                                                                                                                                                                                         |                                                                 |             | -                                                                                                             |
| -                       | -                                                          | 0  |                                                                                                                                                                                                                                                                                                                                                                                                                                                                                         |                                                                 |             | -                                                                                                             |
| -                       | -                                                          | 0  |                                                                                                                                                                                                                                                                                                                                                                                                                                                                                         |                                                                 |             | -                                                                                                             |
| -                       | -                                                          | 0  |                                                                                                                                                                                                                                                                                                                                                                                                                                                                                         |                                                                 |             | SignalP (SIGNALP)                                                                                             |
| -                       | -                                                          | 0  |                                                                                                                                                                                                                                                                                                                                                                                                                                                                                         |                                                                 |             | -                                                                                                             |

|                         |                                                         |    |                                                                                                                                                                       |                                                |            |                                                                                                                          |
|-------------------------|---------------------------------------------------------|----|-----------------------------------------------------------------------------------------------------------------------------------------------------------------------|------------------------------------------------|------------|--------------------------------------------------------------------------------------------------------------------------|
|                         | -                                                       | 0  |                                                                                                                                                                       |                                                |            | -                                                                                                                        |
|                         | -                                                       | 0  |                                                                                                                                                                       |                                                |            | -                                                                                                                        |
| Caenorhabditis elegans  | hypothetical protein F59E12.11 [Caenorhabditis elegans] | 0  |                                                                                                                                                                       | P:GO:0002119;<br>F:GO:0005515;<br>P:GO:0040007 |            | -                                                                                                                        |
|                         | -                                                       | 0  |                                                                                                                                                                       |                                                |            | -                                                                                                                        |
|                         | -                                                       | 0  |                                                                                                                                                                       |                                                |            | -                                                                                                                        |
|                         | -                                                       | 0  |                                                                                                                                                                       |                                                |            | -                                                                                                                        |
|                         | -                                                       | 0  |                                                                                                                                                                       |                                                |            | -                                                                                                                        |
|                         | -                                                       | 0  |                                                                                                                                                                       |                                                |            | -                                                                                                                        |
|                         | -                                                       | 0  |                                                                                                                                                                       |                                                |            | -                                                                                                                        |
|                         | -                                                       | 0  |                                                                                                                                                                       |                                                |            | -                                                                                                                        |
|                         | -                                                       | 0  |                                                                                                                                                                       |                                                |            | -                                                                                                                        |
|                         | -                                                       | 0  |                                                                                                                                                                       |                                                |            | -                                                                                                                        |
|                         | -                                                       | 0  |                                                                                                                                                                       |                                                |            | -                                                                                                                        |
|                         | -                                                       | 0  |                                                                                                                                                                       |                                                |            | IPR021629                                                                                                                |
| Caenorhabditis elegans  | phd finger protein 8                                    | 1  | F:GO:0005488                                                                                                                                                          | -                                              |            | IPR003347; IPR013129; PTHR23123 (PANTHER), SSF51197 (SUPERFAMILY)                                                        |
|                         | -                                                       | 0  |                                                                                                                                                                       |                                                |            | -                                                                                                                        |
| Caenorhabditis elegans  | r- dependent r- polymerase family protein               | 1  | F:GO:0005515                                                                                                                                                          | -                                              |            | IPR007855                                                                                                                |
| Caenorhabditis briggsae | briggsae cbr-ncx-3 protein                              | 3  | P:GO:0006810;<br>P:GO:0009987;<br>C:GO:0016020                                                                                                                        | -                                              |            | IPR004836; PTHR11878 (PANTHER), PTHR11878:SF2 (PANTHER)                                                                  |
| Caenorhabditis elegans  | bromodomain containing protein                          | 10 | F:GO:0030528;<br>P:GO:0000117;<br>F:GO:0008270;<br>P:GO:0006352;<br>P:GO:0045944;<br>F:GO:0035174;<br>F:GO:0043565;<br>F:GO:0005515;<br>P:GO:0016573;<br>C:GO:0005669 | -                                              |            | PTHR13900 (PANTHER)                                                                                                      |
| Caenorhabditis elegans  | elegans protein confirmed by transcript evidence        | 0  |                                                                                                                                                                       | C:GO:0005737                                   |            | IPR010504; PTHR12141 (PANTHER), PTHR12141:SF1 (PANTHER), SSF103657 (SUPERFAMILY)                                         |
| Caenorhabditis briggsae | quinone oxidoreductase                                  | 8  | F:GO:0003960;<br>F:GO:0003730;<br>F:GO:0070402;<br>P:GO:0042178;<br>P:GO:0007601;<br>C:GO:0005829;<br>F:GO:0070404;<br>P:GO:0051289                                   | -                                              | EC:1.6.5.5 | IPR002085; IPR011032; IPR013149; IPR016040; G3DSA:3.90.180.10 (GENE3D), PTHR11695:SF30 (PANTHER), SSF51735 (SUPERFAMILY) |

|                         |                            |    |                                                                                                                                                                                                                                                                                                                                                                                                                                      |                                                                                                                                                                                                                                           |                                                         |                                                                                                                                                                          |
|-------------------------|----------------------------|----|--------------------------------------------------------------------------------------------------------------------------------------------------------------------------------------------------------------------------------------------------------------------------------------------------------------------------------------------------------------------------------------------------------------------------------------|-------------------------------------------------------------------------------------------------------------------------------------------------------------------------------------------------------------------------------------------|---------------------------------------------------------|--------------------------------------------------------------------------------------------------------------------------------------------------------------------------|
| Loa loa                 | member ras oncogene family | 25 | P:GO:0006895;<br>C:GO:0042599;<br>C:GO:0005829;<br>P:GO:0045176;<br>C:GO:0005764;<br>C:GO:0042175;<br>P:GO:0007264;<br>F:GO:0001948;<br>P:GO:0032880;<br>C:GO:0005795;<br>P:GO:0006913;<br>C:GO:0005624;<br>F:GO:0019003;<br>P:GO:0007589;<br>C:GO:0005770;<br>C:GO:0005769;<br>P:GO:0007269;<br>C:GO:0005791;<br>C:GO:0030140;<br>F:GO:0003924;<br>C:GO:0048471;<br>C:GO:0016324;<br>P:GO:0006886;<br>C:GO:0005634;<br>F:GO:0005525 | -                                                                                                                                                                                                                                         | EC:3.6.5.1;<br>EC:3.6.5.2;<br>EC:3.6.5.3;<br>EC:3.6.5.4 | IPR001806; IPR003579; IPR005225;<br>IPR013753; IPR020851;<br>G3DSA:3.40.50.300 (GENE3D),<br>PTHR11708 (PANTHER),<br>PTHR11708:SF248 (PANTHER),<br>SSF52540 (SUPERFAMILY) |
| Caenorhabditis briggsae | te-scin xb                 | 0  |                                                                                                                                                                                                                                                                                                                                                                                                                                      | F:GO:0005044;<br>C:GO:0016020                                                                                                                                                                                                             | -                                                       |                                                                                                                                                                          |
| Ciona intestinalis      | amine oxidase              | 3  | C:GO:0005739;<br>P:GO:0008152;<br>C:GO:0016020                                                                                                                                                                                                                                                                                                                                                                                       | -                                                                                                                                                                                                                                         |                                                         | IPR001613; IPR002937;<br>G3DSA:3.50.50.60 (GENE3D),<br>PTHR10742 (PANTHER),<br>PTHR10742:SF5 (PANTHER)                                                                   |
|                         | -                          | 0  |                                                                                                                                                                                                                                                                                                                                                                                                                                      |                                                                                                                                                                                                                                           |                                                         | -                                                                                                                                                                        |
|                         | -                          | 0  |                                                                                                                                                                                                                                                                                                                                                                                                                                      |                                                                                                                                                                                                                                           |                                                         | -                                                                                                                                                                        |
|                         | -                          | 0  |                                                                                                                                                                                                                                                                                                                                                                                                                                      |                                                                                                                                                                                                                                           |                                                         | -                                                                                                                                                                        |
|                         | -                          | 0  |                                                                                                                                                                                                                                                                                                                                                                                                                                      |                                                                                                                                                                                                                                           |                                                         | IPR013753; G3DSA:3.40.50.300<br>(GENE3D), PTHR11708 (PANTHER),<br>PTHR11708:SF278 (PANTHER),<br>SSF52540 (SUPERFAMILY)                                                   |
| Tribolium castaneum     | ankyrin repeat protein     | 0  |                                                                                                                                                                                                                                                                                                                                                                                                                                      | C:GO:0000785;<br>P:GO:0007517;<br>F:GO:0003682;<br>C:GO:0005634;<br>F:GO:0003677;<br>P:GO:0006306;<br>F:GO:0000166;<br>F:GO:0005524;<br>P:GO:0006333;<br>F:GO:0016887;<br>P:GO:0006936;<br>C:GO:0031674;<br>F:GO:0008307;<br>F:GO:0005198 |                                                         | IPR002110; IPR006034; IPR020683;<br>PTHR11707:SF3 (PANTHER), SignalP<br>(SIGNALP)                                                                                        |

|                         |                                                            |   |                                                                                                   |                                                                                                                                                                                                                                           |  |                                                                                                                     |
|-------------------------|------------------------------------------------------------|---|---------------------------------------------------------------------------------------------------|-------------------------------------------------------------------------------------------------------------------------------------------------------------------------------------------------------------------------------------------|--|---------------------------------------------------------------------------------------------------------------------|
| Tribolium castaneum     | ankyrin repeat protein                                     | 0 |                                                                                                   | C:GO:0000785;<br>P:GO:0007517;<br>F:GO:0003682;<br>C:GO:0005634;<br>F:GO:0003677;<br>P:GO:0006306;<br>F:GO:0000166;<br>F:GO:0005524;<br>P:GO:0006333;<br>F:GO:0016887;<br>P:GO:0006936;<br>C:GO:0031674;<br>F:GO:0008307;<br>F:GO:0005198 |  | IPR002110; IPR006034; IPR020683;<br>PTHR11707:SF3 (PANTHER), SignalP (SIGNALP)                                      |
| Brugia malayi           | lim domain containing protein                              | 4 | F:GO:0008270;<br>P:GO:0008152;<br>F:GO:0016491;<br>F:GO:0009055                                   | -                                                                                                                                                                                                                                         |  | IPR003953; G3DSA:3.50.50.60 (GENE3D), PTHR11915 (PANTHER), PTHR11915:SF45 (PANTHER), SSF51905 (SUPERFAMILY)         |
|                         | -                                                          | 0 |                                                                                                   |                                                                                                                                                                                                                                           |  | -                                                                                                                   |
| Caenorhabditis elegans  | d- polymerase theta                                        | 6 | F:GO:0003684;<br>P:GO:0006259;<br>F:GO:0016740;<br>F:GO:0000166;<br>F:GO:0004386;<br>C:GO:0005654 | -                                                                                                                                                                                                                                         |  | G3DSA:3.40.50.300 (GENE3D), PTHR11752 (PANTHER), PTHR11752:SF3 (PANTHER), SignalP (SIGNALP), SSF52540 (SUPERFAMILY) |
|                         | -                                                          | 0 |                                                                                                   |                                                                                                                                                                                                                                           |  | SignalP (SIGNALP)                                                                                                   |
| Caenorhabditis elegans  | elegans protein partially confirmed by transcript evidence | 0 |                                                                                                   | P:GO:0030259;<br>F:GO:0016740;<br>F:GO:0030246;<br>P:GO:0008152;<br>P:GO:0005975;<br>C:GO:0016021;<br>F:GO:0016758;<br>F:GO:0016757                                                                                                       |  | IPR002213; PTHR11926:SF3 (PANTHER)                                                                                  |
| Caenorhabditis elegans  | briggsae cbr-frm-7 protein                                 | 0 |                                                                                                   | F:GO:0005488;<br>C:GO:0005856                                                                                                                                                                                                             |  | -                                                                                                                   |
| Pan troglodytes         | actin related protein 2 3 complex subunit 1b               | 6 | C:GO:0005737;<br>F:GO:0005200;<br>C:GO:0005885;<br>P:GO:0030833;<br>P:GO:0006928;<br>F:GO:0003779 | -                                                                                                                                                                                                                                         |  | IPR015943; PTHR10709 (PANTHER), PTHR10709:SF10 (PANTHER), SignalP (SIGNALP)                                         |
| Caenorhabditis briggsae | cdk5 regulatory subunit associated protein 3               | 2 | F:GO:0005515;<br>P:GO:0000079                                                                     | -                                                                                                                                                                                                                                         |  | IPR008491                                                                                                           |
|                         | -                                                          | 0 |                                                                                                   |                                                                                                                                                                                                                                           |  | -                                                                                                                   |
| Caenorhabditis elegans  | briggsae cbr-tag-68 protein                                | 5 | F:GO:0003700;<br>F:GO:0005515;<br>C:GO:0005667;<br>P:GO:0006355;<br>P:GO:0007179                  | -                                                                                                                                                                                                                                         |  | -                                                                                                                   |
|                         | -                                                          | 0 |                                                                                                   |                                                                                                                                                                                                                                           |  | -                                                                                                                   |
|                         | -                                                          | 0 |                                                                                                   |                                                                                                                                                                                                                                           |  | SignalP (SIGNALP)                                                                                                   |
| Caenorhabditis elegans  | hypothetical protein Y23H5B.4 [Caenorhabditis elegans]     | 0 |                                                                                                   |                                                                                                                                                                                                                                           |  | -                                                                                                                   |
|                         | -                                                          | 0 |                                                                                                   |                                                                                                                                                                                                                                           |  | -                                                                                                                   |

|                         |                                              |    |                                                                                                                                                                                                                          |                                                                                                                                                                                                                                                                                                                                |            |                                                                                                                 |
|-------------------------|----------------------------------------------|----|--------------------------------------------------------------------------------------------------------------------------------------------------------------------------------------------------------------------------|--------------------------------------------------------------------------------------------------------------------------------------------------------------------------------------------------------------------------------------------------------------------------------------------------------------------------------|------------|-----------------------------------------------------------------------------------------------------------------|
| Caenorhabditis briggsae | fatty acid amide hydrolase                   | 8  | P:GO:0009062;<br>F:GO:0017064;<br>F:GO:0016788;<br>F:GO:0005543;<br>C:GO:0031090;<br>F:GO:0004040;<br>C:GO:0044425;<br>F:GO:0042803                                                                                      | -                                                                                                                                                                                                                                                                                                                              | EC:3.5.1.4 | IPR000120; IPR015830; IPR020556;<br>PTHR11895:SF4 (PANTHER), SignalP (SIGNALP)                                  |
| Caenorhabditis elegans  | cg13690                                      | 2  | F:GO:0004519;<br>F:GO:0003676                                                                                                                                                                                            | -                                                                                                                                                                                                                                                                                                                              |            | IPR001352; IPR012337; IPR023160;<br>G3DSA:3.30.420.10 (GENE3D)                                                  |
| Caenorhabditis elegans  | briggsae cbr-rnh-2 protein                   | 2  | F:GO:0004519;<br>F:GO:0003676                                                                                                                                                                                            | -                                                                                                                                                                                                                                                                                                                              |            | IPR001352; IPR012337; IPR023160;<br>G3DSA:3.30.420.10 (GENE3D)                                                  |
|                         | -                                            | 0  |                                                                                                                                                                                                                          |                                                                                                                                                                                                                                                                                                                                |            | -                                                                                                               |
| Callithrix jacchus      | ribosomal protein s15                        | 0  |                                                                                                                                                                                                                          | F:GO:0003723;<br>F:GO:0003677;<br>C:GO:0005634;<br>C:GO:0030529;<br>P:GO:0042274;<br>F:GO:0003735;<br>C:GO:0015935;<br>P:GO:0009790;<br>P:GO:0006414;<br>C:GO:0022627;<br>P:GO:0006412;<br>P:GO:0000028;<br>P:GO:0006364;<br>C:GO:0005840;<br>P:GO:0000056;<br>C:GO:0005829;<br>C:GO:0005654;<br>C:GO:0005622;<br>F:GO:0005515 |            | -                                                                                                               |
|                         | -                                            | 0  |                                                                                                                                                                                                                          |                                                                                                                                                                                                                                                                                                                                |            | -                                                                                                               |
| Caenorhabditis briggsae | yo22_caeel ame: full=uncharacterized protein | 2  | P:GO:0040011;<br>P:GO:0040018                                                                                                                                                                                            | -                                                                                                                                                                                                                                                                                                                              |            | -                                                                                                               |
| Physarum polycephalum   | cytosolic glycoprotein fp21                  | 13 | P:GO:0040010;<br>P:GO:0006511;<br>P:GO:0008340;<br>F:GO:0016874;<br>P:GO:0040035;<br>P:GO:0002119;<br>F:GO:0005515;<br>P:GO:0040011;<br>F:GO:0016301;<br>P:GO:0006898;<br>P:GO:0002009;<br>P:GO:0009792;<br>P:GO:0016246 | -                                                                                                                                                                                                                                                                                                                              |            | SignalP (SIGNALP)                                                                                               |
|                         | -                                            | 0  |                                                                                                                                                                                                                          |                                                                                                                                                                                                                                                                                                                                |            | -                                                                                                               |
| Brugia malayi           | titin                                        | 1  | P:GO:0009792                                                                                                                                                                                                             | -                                                                                                                                                                                                                                                                                                                              |            | IPR007110; IPR013098; IPR013783;<br>PTHR19897 (PANTHER),<br>PTHR19897:SF13 (PANTHER),<br>SSF48726 (SUPERFAMILY) |
|                         | -                                            | 0  |                                                                                                                                                                                                                          |                                                                                                                                                                                                                                                                                                                                |            | -                                                                                                               |



|                         |                                                                         |    |                                                                                                                                                                                                                                           |              |                             |                                                                                                                                    |
|-------------------------|-------------------------------------------------------------------------|----|-------------------------------------------------------------------------------------------------------------------------------------------------------------------------------------------------------------------------------------------|--------------|-----------------------------|------------------------------------------------------------------------------------------------------------------------------------|
| Pongo abelii            | activating transcription factor 4 (tax-responsive enhancer element b67) | 14 | P:GO:0034976;<br>P:GO:0045944;<br>P:GO:0007214;<br>C:GO:0005667;<br>F:GO:0008022;<br>C:GO:0032590;<br>P:GO:0006520;<br>F:GO:0043565;<br>F:GO:0016563;<br>F:GO:0046983;<br>F:GO:0003700;<br>P:GO:0006094;<br>F:GO:0003704;<br>C:GO:0005737 | -            | -                           |                                                                                                                                    |
| Caenorhabditis briggsae | cg2222-pa                                                               | 4  | P:GO:0040035;<br>P:GO:0010171;<br>P:GO:0040011;<br>P:GO:0006898                                                                                                                                                                           | -            |                             | IPR010492                                                                                                                          |
|                         |                                                                         | 0  |                                                                                                                                                                                                                                           |              |                             |                                                                                                                                    |
|                         |                                                                         | 0  |                                                                                                                                                                                                                                           |              |                             |                                                                                                                                    |
| Caenorhabditis briggsae | glycosyl hydrolases family 31 protein                                   | 3  | F:GO:0004558;<br>P:GO:0005975;<br>F:GO:0030246                                                                                                                                                                                            | -            | EC:3.2.1.20                 | IPR000322; IPR017853;<br>PTHR22762:SF10 (PANTHER)                                                                                  |
|                         |                                                                         | 0  |                                                                                                                                                                                                                                           |              |                             |                                                                                                                                    |
|                         |                                                                         | 0  |                                                                                                                                                                                                                                           |              |                             |                                                                                                                                    |
|                         |                                                                         | 0  |                                                                                                                                                                                                                                           |              |                             |                                                                                                                                    |
|                         |                                                                         | 0  |                                                                                                                                                                                                                                           |              |                             |                                                                                                                                    |
| Caenorhabditis elegans  | hypothetical protein F18E9.3 [Caenorhabditis elegans]                   | 0  |                                                                                                                                                                                                                                           |              |                             |                                                                                                                                    |
| Caenorhabditis briggsae | laminin alpha chain                                                     | 7  | C:GO:0005606;<br>P:GO:0030334;<br>P:GO:0045995;<br>P:GO:0007517;<br>P:GO:0030155;<br>F:GO:0005102;<br>F:GO:0005198                                                                                                                        | -            |                             | IPR002049; IPR013032;<br>G3DSA:2.10.25.10 (GENE3D),<br>PTHR10574 (PANTHER),<br>PTHR10574:SF38 (PANTHER),<br>SSF57196 (SUPERFAMILY) |
|                         |                                                                         | 0  |                                                                                                                                                                                                                                           |              |                             |                                                                                                                                    |
| Caenorhabditis briggsae | sp1070 cg9138-pa                                                        | 3  | P:GO:0035152;<br>C:GO:0016324;<br>F:GO:0005488                                                                                                                                                                                            | -            |                             | IPR009030; IPR011641;<br>G3DSA:2.10.220.10 (GENE3D),<br>PTHR11201 (PANTHER),<br>PTHR11201:SF72 (PANTHER)                           |
| Brugia malayi           | protein ki-se domain containing protein                                 | 5  | P:GO:0001700;<br>P:GO:0006468;<br>F:GO:0004713;<br>F:GO:0005524;<br>F:GO:0004674                                                                                                                                                          | -            | EC:2.7.10.0;<br>EC:2.7.11.0 | IPR000719; IPR011009; IPR017442;<br>G3DSA:1.10.510.10 (GENE3D),<br>PTHR23257 (PANTHER),<br>PTHR23257:SF95 (PANTHER)                |
|                         |                                                                         | 0  |                                                                                                                                                                                                                                           |              |                             |                                                                                                                                    |
|                         |                                                                         | 0  |                                                                                                                                                                                                                                           |              |                             | IPR007222                                                                                                                          |
|                         |                                                                         | 0  |                                                                                                                                                                                                                                           |              |                             |                                                                                                                                    |
| Tribolium castaneum     | rwd domain-containing protein 4a                                        | 0  |                                                                                                                                                                                                                                           | F:GO:0004872 |                             | IPR006575; IPR016135; PTHR21275 (PANTHER)                                                                                          |
| Tribolium castaneum     | rwd domain-containing protein 4a                                        | 0  |                                                                                                                                                                                                                                           | F:GO:0004872 |                             | IPR006575; IPR016135; PTHR21275 (PANTHER)                                                                                          |
| Caenorhabditis briggsae | -dh oxidase                                                             | 1  | F:GO:0003824                                                                                                                                                                                                                              | -            |                             | IPR013785; PTHR22893 (PANTHER),<br>PTHR22893:SF6 (PANTHER)                                                                         |
| Caenorhabditis elegans  | hypothetical protein Y54E10A.11 [Caenorhabditis elegans]                | 0  |                                                                                                                                                                                                                                           | F:GO:0008270 |                             | SignalP (SIGNALP)                                                                                                                  |
| Drosophila mojavensis   | tbc1 domain family member 30-like                                       | 3  | F:GO:0005097;<br>C:GO:0005622;<br>P:GO:0032313                                                                                                                                                                                            | -            |                             |                                                                                                                                    |

|                             |                                                            |    |                                                                                                                                                                                                                                           |                                                                                                                                                                                                         |            |                                                                       |
|-----------------------------|------------------------------------------------------------|----|-------------------------------------------------------------------------------------------------------------------------------------------------------------------------------------------------------------------------------------------|---------------------------------------------------------------------------------------------------------------------------------------------------------------------------------------------------------|------------|-----------------------------------------------------------------------|
| Caenorhabditis briggsae     | cop9 sig-losome complex subunit 2                          | 10 | P:GO:0000910;<br>P:GO:0018991;<br>F:GO:0004871;<br>C:GO:0005730;<br>C:GO:0008180;<br>F:GO:0005515;<br>P:GO:0007165;<br>P:GO:0009792;<br>C:GO:0005737;<br>P:GO:0006366                                                                     | -                                                                                                                                                                                                       |            | PTHR10678 (PANTHER),<br>PTHR10678:SF3 (PANTHER)                       |
|                             | -                                                          | 0  |                                                                                                                                                                                                                                           |                                                                                                                                                                                                         |            | -                                                                     |
|                             | -                                                          | 0  |                                                                                                                                                                                                                                           |                                                                                                                                                                                                         |            | -                                                                     |
| Caenorhabditis elegans      | briggsae cbr-ssq-2 protein                                 | 0  |                                                                                                                                                                                                                                           | F:GO:0008061;<br>P:GO:0006030;<br>C:GO:0005576                                                                                                                                                          |            | -                                                                     |
| Caenorhabditis elegans      | cmc1 protein                                               | 0  |                                                                                                                                                                                                                                           |                                                                                                                                                                                                         |            | SignalP (SIGNALP)                                                     |
|                             | -                                                          | 0  |                                                                                                                                                                                                                                           |                                                                                                                                                                                                         |            | -                                                                     |
|                             | -                                                          | 0  |                                                                                                                                                                                                                                           |                                                                                                                                                                                                         |            | -                                                                     |
| Saccoglossus kowalevskii    | udp- c:beta- -n-acetylgalactosaminyltransferase 1          | 0  |                                                                                                                                                                                                                                           | F:GO:0016740;<br>C:GO:0016021;<br>C:GO:0016020;<br>F:GO:0047273;<br>C:GO:0000139;<br>F:GO:0008378;<br>F:GO:0016757;<br>P:GO:0009312;<br>C:GO:0005794;<br>F:GO:0047915;<br>F:GO:0008499;<br>P:GO:0006486 |            | -                                                                     |
| Loa loa                     | elegans protein partially confirmed by transcript evidence | 3  | P:GO:0006541;<br>F:GO:0004359;<br>F:GO:0005515                                                                                                                                                                                            | -                                                                                                                                                                                                       | EC:3.5.1.2 | IPR012338; IPR015868;<br>PTHR12544:SF3 (PANTHER)                      |
| Angiostrongylus cantonensis | hypothetical protein [Angiostrongylus cantonensis]         | 0  |                                                                                                                                                                                                                                           |                                                                                                                                                                                                         |            | SignalP (SIGNALP)                                                     |
| Caenorhabditis elegans      | laminin alpha chain                                        | 3  | P:GO:0007155;<br>P:GO:0050794;<br>C:GO:0005604                                                                                                                                                                                            | -                                                                                                                                                                                                       |            | -                                                                     |
| Caenorhabditis elegans      | uncoordi-ted family member (unc-5)                         | 0  |                                                                                                                                                                                                                                           | F:GO:0004872;<br>P:GO:0007165;<br>F:GO:0005515                                                                                                                                                          |            | PTHR12582 (PANTHER),<br>PTHR12582:SF2 (PANTHER), SignalP<br>(SIGNALP) |
| Caenorhabditis elegans      | polypyrimidine tract binding protein                       | 14 | P:GO:0007219;<br>P:GO:0008103;<br>F:GO:0005515;<br>P:GO:0008586;<br>F:GO:0000166;<br>F:GO:0000900;<br>F:GO:0003730;<br>C:GO:0005737;<br>P:GO:0000398;<br>P:GO:0008587;<br>P:GO:0007319;<br>F:GO:0008187;<br>C:GO:0005634;<br>C:GO:0030529 | -                                                                                                                                                                                                       |            | -                                                                     |
|                             | -                                                          | 0  |                                                                                                                                                                                                                                           |                                                                                                                                                                                                         |            | -                                                                     |
| Caenorhabditis elegans      | cuticular collagen                                         | 3  | C:GO:0016021;<br>P:GO:0010171;<br>F:GO:0005515                                                                                                                                                                                            | -                                                                                                                                                                                                       |            | -                                                                     |

|                         |                                                       |   |                                                                                                                                                      |                                                                                                                                                                                                                          |                                                                                                                  |
|-------------------------|-------------------------------------------------------|---|------------------------------------------------------------------------------------------------------------------------------------------------------|--------------------------------------------------------------------------------------------------------------------------------------------------------------------------------------------------------------------------|------------------------------------------------------------------------------------------------------------------|
| Caenorhabditis elegans  | isoform cra_a                                         | 2 | F:GO:0005488;<br>P:GO:0006350                                                                                                                        | -                                                                                                                                                                                                                        | IPR007087; IPR013087; IPR015880;<br>PTHR23224 (PANTHER),<br>PTHR23224:SF446 (PANTHER),<br>SSF57667 (SUPERFAMILY) |
| Loa loa                 | hypothetical protein LOAG_02820 [Loa loa]             | 1 | F:GO:0004175                                                                                                                                         | -                                                                                                                                                                                                                        | SignalP (SIGNALP)                                                                                                |
| Caenorhabditis elegans  | transmembrane protein 195                             | 0 | -                                                                                                                                                    | F:GO:0005506;<br>P:GO:0006633;<br>C:GO:0016021;<br>F:GO:0050479;<br>C:GO:0016020;<br>F:GO:0003674;<br>P:GO:0046485;<br>P:GO:0055114;<br>F:GO:0016491;<br>C:GO:0005575;<br>P:GO:0006643;<br>C:GO:0005783;<br>P:GO:0008150 | -                                                                                                                |
| -                       | -                                                     | 0 | -                                                                                                                                                    | -                                                                                                                                                                                                                        | -                                                                                                                |
| -                       | -                                                     | 0 | -                                                                                                                                                    | -                                                                                                                                                                                                                        | -                                                                                                                |
| -                       | -                                                     | 0 | -                                                                                                                                                    | -                                                                                                                                                                                                                        | SignalP (SIGNALP)                                                                                                |
| -                       | -                                                     | 0 | -                                                                                                                                                    | -                                                                                                                                                                                                                        | SignalP (SIGNALP)                                                                                                |
| Loa loa                 | msh-domain protein 1 variant                          | 0 | -                                                                                                                                                    | C:GO:0005856;<br>F:GO:0005198                                                                                                                                                                                            | IPR000535; IPR008962; PTHR22947<br>(PANTHER)                                                                     |
| Caenorhabditis elegans  | nuclear migration protein nudc                        | 0 | -                                                                                                                                                    | -                                                                                                                                                                                                                        | PTHR12356 (PANTHER),<br>PTHR12356:SF3 (PANTHER)                                                                  |
| Caenorhabditis briggsae | glia maturation factor beta                           | 9 | P:GO:0006468;<br>F:GO:0008047;<br>F:GO:0008083;<br>F:GO:0004871;<br>F:GO:0004860;<br>C:GO:0005622;<br>F:GO:0003779;<br>P:GO:0007399;<br>P:GO:0007165 | -                                                                                                                                                                                                                        | IPR002108; IPR011171;<br>G3DSA:3.40.20.10 (GENE3D), SignalP<br>(SIGNALP), SSF55753 (SUPERFAMILY)                 |
| Caenorhabditis briggsae | temporarily assigned gene -me family member (tag-308) | 0 | -                                                                                                                                                    | -                                                                                                                                                                                                                        | -                                                                                                                |
| -                       | -                                                     | 0 | -                                                                                                                                                    | -                                                                                                                                                                                                                        | -                                                                                                                |
| Caenorhabditis elegans  | zinc finger protein                                   | 0 | -                                                                                                                                                    | F:GO:0008270;<br>C:GO:0005622                                                                                                                                                                                            | IPR007087; IPR015880                                                                                             |

|                          |                                                            |   |                                                                                                                                                                                                                                                                                                                                                                                                    |   |                                         |
|--------------------------|------------------------------------------------------------|---|----------------------------------------------------------------------------------------------------------------------------------------------------------------------------------------------------------------------------------------------------------------------------------------------------------------------------------------------------------------------------------------------------|---|-----------------------------------------|
| Saccoglossus kowalevskii | plectin isoform 1hij                                       | 0 | F:GO:0005200;<br>P:GO:0030855;<br>C:GO:0009925;<br>C:GO:0009986;<br>C:GO:0043292;<br>F:GO:0003674;<br>C:GO:0042383;<br>C:GO:0016020;<br>F:GO:0008092;<br>C:GO:0005618;<br>C:GO:0048471;<br>F:GO:0047485;<br>P:GO:0007584;<br>P:GO:0031581;<br>C:GO:0005737;<br>F:GO:0003779;<br>C:GO:0005626;<br>C:GO:0005829;<br>C:GO:0005622;<br>C:GO:0005856;<br>P:GO:0007565;<br>C:GO:0016324;<br>C:GO:0005575 | - | -                                       |
| -                        | -                                                          | 0 | -                                                                                                                                                                                                                                                                                                                                                                                                  | - | -                                       |
| Haemonchus contortus     | elegans protein partially confirmed by transcript evidence | 7 | P:GO:0018996;<br>P:GO:0008340;<br>F:GO:0004867;<br>P:GO:0040002;<br>P:GO:0002119;<br>P:GO:0040011;<br>F:GO:0008233                                                                                                                                                                                                                                                                                 | - | -                                       |
| Haemonchus contortus     | elegans protein partially confirmed by transcript evidence | 7 | P:GO:0018996;<br>P:GO:0008340;<br>F:GO:0004867;<br>P:GO:0040002;<br>P:GO:0002119;<br>P:GO:0040011;<br>F:GO:0008233                                                                                                                                                                                                                                                                                 | - | -                                       |
| -                        | -                                                          | 0 | -                                                                                                                                                                                                                                                                                                                                                                                                  | - | -                                       |
| -                        | -                                                          | 0 | -                                                                                                                                                                                                                                                                                                                                                                                                  | - | -                                       |
| -                        | -                                                          | 0 | -                                                                                                                                                                                                                                                                                                                                                                                                  | - | -                                       |
| Caenorhabditis elegans   | elegans protein confirmed by transcript evidence           | 2 | P:GO:0006810;<br>P:GO:0042221                                                                                                                                                                                                                                                                                                                                                                      | - | -                                       |
| -                        | -                                                          | 0 | -                                                                                                                                                                                                                                                                                                                                                                                                  | - | -                                       |
| -                        | -                                                          | 0 | -                                                                                                                                                                                                                                                                                                                                                                                                  | - | -                                       |
| -                        | -                                                          | 0 | -                                                                                                                                                                                                                                                                                                                                                                                                  | - | -                                       |
| -                        | -                                                          | 0 | -                                                                                                                                                                                                                                                                                                                                                                                                  | - | SignalP (SIGNALP)                       |
| -                        | -                                                          | 0 | -                                                                                                                                                                                                                                                                                                                                                                                                  | - | -                                       |
| -                        | -                                                          | 0 | -                                                                                                                                                                                                                                                                                                                                                                                                  | - | -                                       |
| Ancylostoma caninum      | -dh dehydroge-se subunit i                                 | 4 | C:GO:0016021;<br>P:GO:0055114;<br>C:GO:0005739;<br>F:GO:0008137                                                                                                                                                                                                                                                                                                                                    | - | EC:1.6.5.3 IPR001694; SignalP (SIGNALP) |
| -                        | -                                                          | 0 | -                                                                                                                                                                                                                                                                                                                                                                                                  | - | -                                       |
| -                        | -                                                          | 0 | -                                                                                                                                                                                                                                                                                                                                                                                                  | - | -                                       |
| -                        | -                                                          | 0 | -                                                                                                                                                                                                                                                                                                                                                                                                  | - | -                                       |
| -                        | -                                                          | 0 | -                                                                                                                                                                                                                                                                                                                                                                                                  | - | SignalP (SIGNALP)                       |
| -                        | -                                                          | 0 | -                                                                                                                                                                                                                                                                                                                                                                                                  | - | -                                       |

|                         |                                                  |    |                                                                                                                                                                                                                                                                                                                                                                                                                                                                                          |   |            |                                                                                          |
|-------------------------|--------------------------------------------------|----|------------------------------------------------------------------------------------------------------------------------------------------------------------------------------------------------------------------------------------------------------------------------------------------------------------------------------------------------------------------------------------------------------------------------------------------------------------------------------------------|---|------------|------------------------------------------------------------------------------------------|
| Caenorhabditis briggsae | gamma-glutamyltransferase 7                      | 2  | F:GO:0016746;<br>C:GO:0016020                                                                                                                                                                                                                                                                                                                                                                                                                                                            | - | -          | -                                                                                        |
|                         |                                                  | 0  |                                                                                                                                                                                                                                                                                                                                                                                                                                                                                          |   |            |                                                                                          |
| Caenorhabditis elegans  | nucleoside diphosphate ki-se b                   | 29 | F:GO:0005027;<br>F:GO:0005515;<br>P:GO:0002762;<br>P:GO:0007155;<br>P:GO:0040007;<br>F:GO:0004550;<br>P:GO:0006898;<br>P:GO:0006241;<br>P:GO:0006355;<br>P:GO:0030819;<br>C:GO:0005882;<br>F:GO:0046872;<br>P:GO:0006165;<br>C:GO:0001726;<br>P:GO:0009792;<br>F:GO:0003677;<br>P:GO:0045618;<br>P:GO:0006183;<br>P:GO:0002119;<br>P:GO:0006228;<br>P:GO:0050679;<br>F:GO:0003700;<br>C:GO:0048471;<br>C:GO:0005886;<br>C:GO:0005634;<br>F:GO:0005524;<br>P:GO:0043066;<br>P:GO:0000035; | - | EC:2.7.4.6 | IPR001564; IPR023005; SignalP (SIGNALP)                                                  |
| Caenorhabditis briggsae | briggsae cbr-exc-5 protein                       | 4  | F:GO:0005089;<br>C:GO:0005622;<br>P:GO:0035023;<br>F:GO:0008270                                                                                                                                                                                                                                                                                                                                                                                                                          | - |            | IPR001849; IPR011993; PTHR12673 (PANTHER), PTHR12673:SF8 (PANTHER)                       |
| Caenorhabditis elegans  | elegans protein confirmed by transcript evidence | 3  | P:GO:0006810;<br>F:GO:0015116;<br>C:GO:0016021                                                                                                                                                                                                                                                                                                                                                                                                                                           | - |            | IPR011547; IPR018045; PTHR11814 (PANTHER), PTHR11814:SF25 (PANTHER)                      |
| Caenorhabditis briggsae | briggsae cbr-unc-84 protein                      | 1  | F:GO:0005515                                                                                                                                                                                                                                                                                                                                                                                                                                                                             | - |            | IPR012919; PTHR12911 (PANTHER), PTHR12911:SF7 (PANTHER), PS51469 (PROFILE)               |
|                         |                                                  | 0  |                                                                                                                                                                                                                                                                                                                                                                                                                                                                                          |   |            |                                                                                          |
| Caenorhabditis elegans  | ap-2 complex subunit alpha-2                     | 13 | C:GO:0005829;<br>F:GO:0008565;<br>P:GO:0040010;<br>P:GO:0048268;<br>F:GO:0008022;<br>P:GO:0000003;<br>P:GO:0050690;<br>C:GO:0030122;<br>P:GO:0040011;<br>P:GO:0006898;<br>P:GO:0006886;<br>C:GO:0030141;<br>P:GO:0009792                                                                                                                                                                                                                                                                 | - |            | IPR008152; IPR009028; IPR013038; IPR013041; PTHR22780 (PANTHER), PTHR22780:SF4 (PANTHER) |
|                         |                                                  | 0  |                                                                                                                                                                                                                                                                                                                                                                                                                                                                                          |   |            |                                                                                          |

|                         |                                                                                                                                                                                                       |   |                                                                                                                                     |                                                                 |                                                                                                                           |
|-------------------------|-------------------------------------------------------------------------------------------------------------------------------------------------------------------------------------------------------|---|-------------------------------------------------------------------------------------------------------------------------------------|-----------------------------------------------------------------|---------------------------------------------------------------------------------------------------------------------------|
| Caenorhabditis elegans  | transmembrane anterior posterior transformation protein 1 homolog                                                                                                                                     | 5 | F:GO:0016520;<br>P:GO:0048706;<br>P:GO:0001701;<br>C:GO:0016021;<br>P:GO:0009791                                                    | -                                                               | IPR008010                                                                                                                 |
| Caenorhabditis elegans  | pleckstrin homology domain family g (with ef domain) member 1                                                                                                                                         | 3 | F:GO:0005089;<br>C:GO:0005622;<br>P:GO:0035023                                                                                      | -                                                               | IPR000219; IPR001849; IPR011993;<br>PTHR22826 (PANTHER),<br>PTHR22826:SF50 (PANTHER),<br>SSF50729 (SUPERFAMILY)           |
| Caenorhabditis briggsae | ser thr protein phosphatase                                                                                                                                                                           | 0 |                                                                                                                                     | F:GO:0048037;<br>F:GO:0016787;<br>F:GO:0004724;<br>F:GO:0004721 | IPR006186; G3DSA:3.60.21.10<br>(GENE3D), PTHR11668:SF4<br>(PANTHER), SSF56300 (SUPERFAMILY)                               |
| Caenorhabditis elegans  | hypothetical protein C01B7.5 [Caenorhabditis elegans]                                                                                                                                                 | 1 | F:GO:0005515                                                                                                                        | -                                                               | -                                                                                                                         |
| Caenorhabditis briggsae | ubiquitin protein ligase e3 component n-recognin 3                                                                                                                                                    | 5 | P:GO:0009790;<br>F:GO:0016874;<br>F:GO:0005488;<br>P:GO:0044267;<br>P:GO:0007610                                                    | -                                                               | PTHR21497 (PANTHER),<br>PTHR21497:SF3 (PANTHER)                                                                           |
|                         | -                                                                                                                                                                                                     | 0 |                                                                                                                                     |                                                                 | -                                                                                                                         |
|                         | -                                                                                                                                                                                                     | 0 |                                                                                                                                     |                                                                 | IPR016186                                                                                                                 |
|                         | -                                                                                                                                                                                                     | 0 |                                                                                                                                     |                                                                 | IPR003006                                                                                                                 |
|                         | -                                                                                                                                                                                                     | 0 |                                                                                                                                     |                                                                 | -                                                                                                                         |
| Homo sapiens            | PREDICTED: hypothetical protein XP_002342418 [Homo sapiens]                                                                                                                                           | 0 |                                                                                                                                     |                                                                 | -                                                                                                                         |
| Loa loa                 | trithorax protein ash2                                                                                                                                                                                | 5 | P:GO:0040035;<br>F:GO:0046872;<br>P:GO:0040027;<br>F:GO:0005515;<br>P:GO:0040007                                                    | -                                                               | IPR001965; IPR011011; IPR013083;<br>IPR019786                                                                             |
| Caenorhabditis elegans  | alg12_caeel ame: full=probable dolichyl-p-man:man c -pp-dolichyl-alpha- -mannosyltransferase ame: full=asparagine-linked glycosylation protein 12 homolog ame: full=mannosyltransferase alg12 homolog | 4 | C:GO:0031224;<br>P:GO:0006488;<br>F:GO:0000009;<br>C:GO:0005783                                                                     | -                                                               | IPR005599; SignalP (SIGNALP)                                                                                              |
| Caenorhabditis briggsae | u3 small nucleolar homolog a                                                                                                                                                                          | 8 | P:GO:0040010;<br>P:GO:0040035;<br>P:GO:0007283;<br>P:GO:0019915;<br>P:GO:0002119;<br>F:GO:0005515;<br>P:GO:0006898;<br>C:GO:0044424 | -                                                               | IPR006709; PTHR14150:SF12<br>(PANTHER)                                                                                    |
|                         | -                                                                                                                                                                                                     | 0 |                                                                                                                                     |                                                                 | SignalP (SIGNALP)                                                                                                         |
|                         | -                                                                                                                                                                                                     | 0 |                                                                                                                                     |                                                                 | -                                                                                                                         |
| Loa loa                 | gex interacting protein family member (gei-17)                                                                                                                                                        | 5 | P:GO:0009987;<br>F:GO:0005488;<br>C:GO:0044446;<br>P:GO:0048513;<br>C:GO:0005634                                                    | -                                                               | IPR003034; IPR004181;<br>G3DSA:1.10.720.30 (GENE3D),<br>PTHR10782 (PANTHER), PS51466<br>(PROFILE), SSF68906 (SUPERFAMILY) |
| Brugia malayi           | transportin 1                                                                                                                                                                                         | 7 | C:GO:0005737;<br>F:GO:0005515;<br>P:GO:0000060;<br>F:GO:0008565;<br>F:GO:0008139;<br>C:GO:0005634;<br>P:GO:0044419                  | -                                                               | IPR011989; IPR016024; PTHR10527<br>(PANTHER), PTHR10527:SF3<br>(PANTHER)                                                  |

|                           |                                                                         |  |                                                                                                                                                                          |   |                             |                                                                                                                                      |
|---------------------------|-------------------------------------------------------------------------|--|--------------------------------------------------------------------------------------------------------------------------------------------------------------------------|---|-----------------------------|--------------------------------------------------------------------------------------------------------------------------------------|
| Caenorhabditis elegans    | uncoordi- ted family member (unc-115)                                   |  | P:GO:0007010;<br>3 F:GO:0003779;<br>F:GO:0008270                                                                                                                         | - |                             | IPR003128; IPR007122                                                                                                                 |
|                           | -                                                                       |  | 0                                                                                                                                                                        |   |                             | -                                                                                                                                    |
|                           | -                                                                       |  | 0                                                                                                                                                                        |   |                             | -                                                                                                                                    |
| Caenorhabditis briggsae   | Hypothetical protein CBG09330 [Caenorhabditis briggsae]                 |  | 0                                                                                                                                                                        |   |                             | SignalP (SIGNALP)                                                                                                                    |
| Caenorhabditis briggsae   | Hypothetical protein CBG19874 [Caenorhabditis briggsae]                 |  | P:GO:0002119;<br>P:GO:0040010;<br>5 P:GO:0000003;<br>P:GO:0006898;<br>F:GO:0003824                                                                                       | - |                             | IPR002738; IPR016195;<br>G3DSA:3.20.20.140 (GENE3D)                                                                                  |
|                           | -                                                                       |  | 0                                                                                                                                                                        |   |                             | PTHR12547 (PANTHER),<br>PTHR12547:SF17 (PANTHER)                                                                                     |
|                           | -                                                                       |  | 0                                                                                                                                                                        |   |                             | -                                                                                                                                    |
| Caenorhabditis elegans    | abnormal cell lineage family member (lin-7)                             |  | 1 C:GO:0005622                                                                                                                                                           | - |                             | IPR001684; SignalP (SIGNALP)                                                                                                         |
|                           | -                                                                       |  | 0                                                                                                                                                                        |   |                             | SignalP (SIGNALP)                                                                                                                    |
|                           | -                                                                       |  | 0                                                                                                                                                                        |   |                             | -                                                                                                                                    |
|                           | -                                                                       |  | 0                                                                                                                                                                        |   |                             | -                                                                                                                                    |
| Caenorhabditis elegans    | xanthine dehydroge-se                                                   |  | 10 P:GO:0008340;<br>F:GO:0051537;<br>P:GO:0055114;<br>F:GO:0009055;<br>F:GO:0004855;<br>F:GO:0004854;<br>F:GO:0043546;<br>F:GO:0050660;<br>P:GO:0009115;<br>F:GO:0005506 | - | EC:1.17.3.2;<br>EC:1.17.1.4 | -                                                                                                                                    |
| Caenorhabditis briggsae   | related to yeast vacuolar protein sorting factor family member (vps-34) |  | 4 P:GO:0009987;<br>F:GO:0005488;<br>F:GO:0016773;<br>F:GO:0016301                                                                                                        | - | EC:2.7.1.0                  | IPR002420; IPR008973; IPR015433;<br>G3DSA:2.60.40.150 (GENE3D),<br>PTHR10048:SF7 (PANTHER)                                           |
|                           | -                                                                       |  | 0                                                                                                                                                                        |   |                             | -                                                                                                                                    |
| Teladorsagia circumcincta | fmrfamide-related peptide flp-18 precursor                              |  | 2 C:GO:0005576;<br>P:GO:0007218                                                                                                                                          | - |                             | IPR002544; PTHR20986 (PANTHER)                                                                                                       |
|                           | -                                                                       |  | 0                                                                                                                                                                        |   |                             | SignalP (SIGNALP)                                                                                                                    |
| Caenorhabditis elegans    | riboki-se                                                               |  | 2 P:GO:0044262;<br>F:GO:0016301                                                                                                                                          | - |                             | IPR002139; IPR011611;<br>G3DSA:3.40.1190.20 (GENE3D),<br>PTHR10584 (PANTHER),<br>PTHR10584:SF29 (PANTHER),<br>SSF53613 (SUPERFAMILY) |
|                           | -                                                                       |  | 0                                                                                                                                                                        |   |                             | -                                                                                                                                    |
| Caenorhabditis briggsae   | methyltransferase type 11                                               |  | 4 P:GO:0044238;<br>P:GO:0043412;<br>F:GO:0008168;<br>P:GO:0044260                                                                                                        | - | EC:2.1.1.0                  | -                                                                                                                                    |
|                           | -                                                                       |  | 0                                                                                                                                                                        |   |                             | -                                                                                                                                    |

|                         |                                                      |    |                                                                                                                                                                                        |                                                                                                                                                                                                                                                                                                                                                                                                                                                                                          |                                                                                                                                                                                                                                                                                       |  |
|-------------------------|------------------------------------------------------|----|----------------------------------------------------------------------------------------------------------------------------------------------------------------------------------------|------------------------------------------------------------------------------------------------------------------------------------------------------------------------------------------------------------------------------------------------------------------------------------------------------------------------------------------------------------------------------------------------------------------------------------------------------------------------------------------|---------------------------------------------------------------------------------------------------------------------------------------------------------------------------------------------------------------------------------------------------------------------------------------|--|
| Brugia malayi           | ran-binding protein 7                                | 0  |                                                                                                                                                                                        | P:GO:0016377;<br>P:GO:0006325;<br>P:GO:0008283;<br>P:GO:0016318;<br>C:GO:0048471;<br>P:GO:0007173;<br>P:GO:0051276;<br>P:GO:0045465;<br>P:GO:0031936;<br>P:GO:0035311;<br>F:GO:0004674;<br>F:GO:0004672;<br>F:GO:0008536;<br>P:GO:0042675;<br>F:GO:0008565;<br>P:GO:0007169;<br>P:GO:0006606;<br>F:GO:0035175;<br>F:GO:0005524;<br>P:GO:0043524;<br>P:GO:0006886;<br>F:GO:0005488;<br>C:GO:0005938;<br>P:GO:0006468;<br>P:GO:0048749;<br>C:GO:0005643;<br>P:GO:0008586;<br>C:GO:0016456; |                                                                                                                                                                                                                                                                                       |  |
| Caenorhabditis elegans  | chondroitin sulfate synthase 1                       | 2  | F:GO:0016758;<br>C:GO:0032580                                                                                                                                                          | -                                                                                                                                                                                                                                                                                                                                                                                                                                                                                        | EC:2.4.1.0<br>IPR008428; G3DSA:3.90.550.10 (GENE3D), SignalP (SIGNALP), SSF53448 (SUPERFAMILY)                                                                                                                                                                                        |  |
|                         | -                                                    | 0  |                                                                                                                                                                                        |                                                                                                                                                                                                                                                                                                                                                                                                                                                                                          | -                                                                                                                                                                                                                                                                                     |  |
| Caenorhabditis elegans  | ypt5_caeel ame: full=uncharacterized protein         | 0  |                                                                                                                                                                                        | P:GO:0000003                                                                                                                                                                                                                                                                                                                                                                                                                                                                             | -                                                                                                                                                                                                                                                                                     |  |
|                         | -                                                    | 0  |                                                                                                                                                                                        |                                                                                                                                                                                                                                                                                                                                                                                                                                                                                          | -                                                                                                                                                                                                                                                                                     |  |
|                         | -                                                    | 0  |                                                                                                                                                                                        |                                                                                                                                                                                                                                                                                                                                                                                                                                                                                          | -                                                                                                                                                                                                                                                                                     |  |
|                         | -                                                    | 0  |                                                                                                                                                                                        |                                                                                                                                                                                                                                                                                                                                                                                                                                                                                          | SignalP (SIGNALP)                                                                                                                                                                                                                                                                     |  |
|                         | -                                                    | 0  |                                                                                                                                                                                        |                                                                                                                                                                                                                                                                                                                                                                                                                                                                                          | -                                                                                                                                                                                                                                                                                     |  |
|                         | -                                                    | 0  |                                                                                                                                                                                        |                                                                                                                                                                                                                                                                                                                                                                                                                                                                                          | -                                                                                                                                                                                                                                                                                     |  |
| Caenorhabditis briggsae | briggsae cbr-flp-15 protein                          | 0  |                                                                                                                                                                                        |                                                                                                                                                                                                                                                                                                                                                                                                                                                                                          | SignalP (SIGNALP)                                                                                                                                                                                                                                                                     |  |
|                         | -                                                    | 0  |                                                                                                                                                                                        |                                                                                                                                                                                                                                                                                                                                                                                                                                                                                          | -                                                                                                                                                                                                                                                                                     |  |
| Caenorhabditis elegans  | solute carrier family 39 (zinc transporter) member 9 | 4  | C:GO:0016020;<br>P:GO:0006829;<br>F:GO:0005385;<br>P:GO:0055085                                                                                                                        | -                                                                                                                                                                                                                                                                                                                                                                                                                                                                                        | IPR003689; PTHR16133 (PANTHER), SignalP (SIGNALP)                                                                                                                                                                                                                                     |  |
| Caenorhabditis elegans  | atp-citrate synthase                                 | 11 | P:GO:0015936;<br>C:GO:0005829;<br>F:GO:0003878;<br>C:GO:0009346;<br>P:GO:0006200;<br>F:GO:0008815;<br>P:GO:0044262;<br>F:GO:0004775;<br>F:GO:0005524;<br>F:GO:0005515;<br>P:GO:0006101 | -                                                                                                                                                                                                                                                                                                                                                                                                                                                                                        | EC:2.3.3.8;<br>EC:4.1.3.6;<br>EC:6.2.1.5<br>IPR002020; IPR003781; IPR005810;<br>IPR005811; IPR013650; IPR013816;<br>IPR014608; IPR016040; IPR016102;<br>IPR016141; IPR016142; IPR016143;<br>IPR017440; IPR017866; PTHR23118 (PANTHER), SSF51735 (SUPERFAMILY), SSF56059 (SUPERFAMILY) |  |
|                         | -                                                    | 0  |                                                                                                                                                                                        |                                                                                                                                                                                                                                                                                                                                                                                                                                                                                          | SignalP (SIGNALP)                                                                                                                                                                                                                                                                     |  |
|                         | -                                                    | 0  |                                                                                                                                                                                        |                                                                                                                                                                                                                                                                                                                                                                                                                                                                                          | -                                                                                                                                                                                                                                                                                     |  |
|                         | -                                                    | 0  |                                                                                                                                                                                        |                                                                                                                                                                                                                                                                                                                                                                                                                                                                                          | -                                                                                                                                                                                                                                                                                     |  |



|                         |                                                  |   |                                                                                                                                     |                                                                 |                            |                                                                                                          |
|-------------------------|--------------------------------------------------|---|-------------------------------------------------------------------------------------------------------------------------------------|-----------------------------------------------------------------|----------------------------|----------------------------------------------------------------------------------------------------------|
| Caenorhabditis briggsae | probable e3 ubiquitin-protein ligase mycbp2      | 4 | P:GO:0030071;<br>F:GO:0005515;<br>F:GO:0008270;<br>C:GO:0005680                                                                     | -                                                               |                            | IPR004939; IPR008979;<br>G3DSA:2.60.120.260 (GENE3D),<br>PTHR12846 (PANTHER),<br>PTHR12846:SF2 (PANTHER) |
| Loa loa                 | protein ki-se domain containing protein          | 0 |                                                                                                                                     | F:GO:0016301;<br>F:GO:0004672;<br>F:GO:0005524;<br>P:GO:0006468 |                            | IPR000276; IPR011009;<br>G3DSA:3.30.200.20 (GENE3D)                                                      |
|                         | -                                                | 0 |                                                                                                                                     |                                                                 |                            | -                                                                                                        |
| Caenorhabditis elegans  | elegans protein confirmed by transcript evidence | 1 | C:GO:0005578                                                                                                                        | -                                                               |                            | -                                                                                                        |
| Caenorhabditis briggsae | briggsae cbr-snt-5 protein                       | 3 | C:GO:0016021;<br>C:GO:0008021;<br>P:GO:0006810                                                                                      | -                                                               |                            | IPR008973; G3DSA:2.60.40.150<br>(GENE3D), PTHR10024 (PANTHER),<br>PTHR10024:SF41 (PANTHER)               |
| Caenorhabditis elegans  | ywq1_caeel ame: full=uncharacterized protein     | 0 |                                                                                                                                     |                                                                 |                            | -                                                                                                        |
|                         | -                                                | 0 |                                                                                                                                     |                                                                 |                            | SignalP (SIGNALP)                                                                                        |
| Caenorhabditis briggsae | filamin abp280 repeat family protein             | 8 | P:GO:0009792;<br>P:GO:0010171;<br>C:GO:0005840;<br>F:GO:0003735;<br>F:GO:0003779;<br>P:GO:0007126;<br>P:GO:0000003;<br>P:GO:0006412 | -                                                               | EC:3.6.5.3                 | IPR001298; IPR013783; IPR014756;<br>IPR017868; PTHR11915 (PANTHER),<br>PTHR11915:SF24 (PANTHER)          |
| Caenorhabditis elegans  | nicoti-mide nucleotide adenyltransferase 3       | 8 | C:GO:0005739;<br>P:GO:0009435;<br>F:GO:0004515;<br>P:GO:0000003;<br>P:GO:0019915;<br>F:GO:0000309;<br>P:GO:0043526;<br>P:GO:0009792 | -                                                               | EC:2.7.7.18;<br>EC:2.7.7.1 | IPR004820; IPR005248; IPR014729;<br>SSF52374 (SUPERFAMILY)                                               |
| Caenorhabditis briggsae | briggsae cbr-alh-11 protein                      | 0 |                                                                                                                                     | P:GO:0055114;<br>F:GO:0016491;<br>P:GO:0008152                  |                            | G3DSA:2.30.30.330 (GENE3D),<br>PF05708 (PFAM)                                                            |
| Homo sapiens            | -dh dehydroge-se                                 | 5 | P:GO:0006120;<br>F:GO:0008137;<br>P:GO:0006810;<br>C:GO:0005747;<br>C:GO:0016021                                                    | -                                                               | EC:1.6.5.3                 | SignalP (SIGNALP)                                                                                        |
|                         | -                                                | 0 |                                                                                                                                     |                                                                 |                            | -                                                                                                        |

|                        |                                                            |    |                                                                                                                                                                                                                                                                                                                                                                                                                                                                         |                               |             |                                                                                                   |
|------------------------|------------------------------------------------------------|----|-------------------------------------------------------------------------------------------------------------------------------------------------------------------------------------------------------------------------------------------------------------------------------------------------------------------------------------------------------------------------------------------------------------------------------------------------------------------------|-------------------------------|-------------|---------------------------------------------------------------------------------------------------|
| Caenorhabditis elegans | akt pkb serine threonine ki-se                             | 62 | F:GO:0043325;<br>P:GO:0006954;<br>P:GO:0007186;<br>F:GO:0004674;<br>P:GO:0030334;<br>P:GO:0060709;<br>P:GO:0042640;<br>P:GO:0046329;<br>P:GO:0043491;<br>P:GO:0090004;<br>P:GO:0045429;<br>C:GO:0005625;<br>P:GO:0032094;<br>P:GO:0034405;<br>P:GO:0001893;<br>P:GO:0031999;<br>P:GO:0043053;<br>P:GO:0046326;<br>P:GO:0010765;<br>C:GO:0030027;<br>C:GO:0005829;<br>P:GO:0016567;<br>P:GO:0006924;<br>P:GO:0045884;<br>C:GO:0005654;<br>P:GO:0045725;<br>P:GO:0040010; | -                             | EC:2.7.11.0 | IPR000719; IPR011009; IPR015744;<br>IPR017442; G3DSA:3.30.200.20<br>(GENE3D), PTHR22985 (PANTHER) |
| Brugia malayi          | ankyrin unc44                                              | 4  | P:GO:0044260;<br>F:GO:0004672;<br>P:GO:0044238;<br>F:GO:0000166                                                                                                                                                                                                                                                                                                                                                                                                         | -                             |             | IPR002110; IPR020683; PR01415<br>(PRINTS), PTHR18958 (PANTHER),<br>PTHR18958:SF302 (PANTHER)      |
|                        |                                                            | 0  |                                                                                                                                                                                                                                                                                                                                                                                                                                                                         |                               |             | -                                                                                                 |
|                        |                                                            | 0  |                                                                                                                                                                                                                                                                                                                                                                                                                                                                         |                               |             | SignalP (SIGNALP)                                                                                 |
| Caenorhabditis elegans | trans-sialidase                                            | 1  | C:GO:0044464                                                                                                                                                                                                                                                                                                                                                                                                                                                            | -                             |             | -                                                                                                 |
|                        |                                                            | 0  |                                                                                                                                                                                                                                                                                                                                                                                                                                                                         |                               |             | -                                                                                                 |
|                        |                                                            | 0  |                                                                                                                                                                                                                                                                                                                                                                                                                                                                         |                               |             | -                                                                                                 |
| Caenorhabditis elegans | ferm domain ( -ezrin-radixin-moesin) family member (frm-1) | 1  | F:GO:0005515                                                                                                                                                                                                                                                                                                                                                                                                                                                            | -                             |             | -                                                                                                 |
| Caenorhabditis elegans | udp- ransferase family member (ugt-29)                     | 3  | P:GO:0019915;<br>P:GO:0008152;<br>F:GO:0016740                                                                                                                                                                                                                                                                                                                                                                                                                          | -                             |             | SignalP (SIGNALP)                                                                                 |
|                        |                                                            | 0  |                                                                                                                                                                                                                                                                                                                                                                                                                                                                         |                               |             | -                                                                                                 |
| Ancylostoma duodenale  | secreted protein asp-2                                     | 0  |                                                                                                                                                                                                                                                                                                                                                                                                                                                                         | P:GO:0040011;<br>C:GO:0005576 |             | IPR001283; IPR014044;<br>PTHR10334:SF11 (PANTHER)                                                 |
| Brugia malayi          | r- polymerase domain 1 family protein                      | 6  | F:GO:0003899;<br>F:GO:0003677;<br>P:GO:0006350;<br>F:GO:0032549;<br>C:GO:0005634;<br>F:GO:0008270                                                                                                                                                                                                                                                                                                                                                                       | -                             | EC:2.7.7.6  | IPR007081; IPR015700; PTHR19376<br>(PANTHER), SSF64484 (SUPERFAMILY)                              |
|                        |                                                            | 0  |                                                                                                                                                                                                                                                                                                                                                                                                                                                                         |                               |             | -                                                                                                 |
|                        |                                                            | 0  |                                                                                                                                                                                                                                                                                                                                                                                                                                                                         |                               |             | -                                                                                                 |
|                        |                                                            | 0  |                                                                                                                                                                                                                                                                                                                                                                                                                                                                         |                               |             | -                                                                                                 |

|                               |                                                   |    |                                                                                                                                                                                        |                                                                                                                                     |             |                                                                                                  |
|-------------------------------|---------------------------------------------------|----|----------------------------------------------------------------------------------------------------------------------------------------------------------------------------------------|-------------------------------------------------------------------------------------------------------------------------------------|-------------|--------------------------------------------------------------------------------------------------|
| Caenorhabditis elegans        | eukaryotic translation initiation factor 2        | 11 | C:GO:0005845;<br>F:GO:0000340;<br>P:GO:0035279;<br>C:GO:0016442;<br>F:GO:0070551;<br>P:GO:0035278;<br>C:GO:0035068;<br>F:GO:0005515;<br>F:GO:0035197;<br>P:GO:0045947;<br>P:GO:0031054 | -                                                                                                                                   |             | IPR003165; IPR012337; PTHR22891 (PANTHER)                                                        |
| Caenorhabditis briggsae       | briggsae cbr-prk-2 protein                        | 3  | F:GO:0004674;<br>F:GO:0005524;<br>P:GO:0006468                                                                                                                                         | -                                                                                                                                   | EC:2.7.11.0 | IPR000719; IPR011009; IPR017442; G3DSA:1.10.510.10 (GENE3D), PTHR22984 (PANTHER)                 |
| Caenorhabditis briggsae       | nuclear receptor binding protein                  | 8  | P:GO:0007254;<br>F:GO:0004674;<br>F:GO:0005524;<br>C:GO:0012505;<br>C:GO:0048471;<br>F:GO:0042803;<br>C:GO:0005634;<br>P:GO:0006468                                                    | -                                                                                                                                   | EC:2.7.11.0 | IPR001245; IPR011009; G3DSA:3.30.200.20 (GENE3D), PTHR13902 (PANTHER), PTHR13902:SF9 (PANTHER)   |
| Brugia malayi                 | rhomboid family protein                           | 0  |                                                                                                                                                                                        | F:GO:0004252;<br>F:GO:0005509;<br>C:GO:0016021;<br>C:GO:0016020;<br>F:GO:0008233;<br>P:GO:0007165                                   |             | IPR002610; IPR011992; IPR018249; IPR022764; G3DSA:1.20.1540.10 (GENE3D), SSF144091 (SUPERFAMILY) |
| -                             | -                                                 | 0  |                                                                                                                                                                                        |                                                                                                                                     |             | -                                                                                                |
| -                             | -                                                 | 0  |                                                                                                                                                                                        |                                                                                                                                     |             | -                                                                                                |
| Caenorhabditis briggsae       | briggsae cbr-ncx-3 protein                        | 0  |                                                                                                                                                                                        | P:GO:0006816;<br>C:GO:0016021;<br>P:GO:0007154;<br>C:GO:0016020;<br>P:GO:0055085;<br>F:GO:0005432                                   |             | IPR003644; PTHR11878 (PANTHER), PTHR11878:SF2 (PANTHER), SSF141072 (SUPERFAMILY)                 |
| -                             | -                                                 | 0  |                                                                                                                                                                                        |                                                                                                                                     |             | -                                                                                                |
| Caenorhabditis briggsae       | tumor suppressor candidate 4                      | 0  |                                                                                                                                                                                        | C:GO:0005789;<br>F:GO:0004672;<br>P:GO:0006506;<br>C:GO:0016021;<br>P:GO:0008150;<br>F:GO:0005515;<br>P:GO:0033673;<br>C:GO:0005575 |             | IPR009348                                                                                        |
| Caenorhabditis elegans        | neutral endopeptidase                             | 3  | C:GO:0016021;<br>F:GO:0004222;<br>P:GO:0006508                                                                                                                                         | -                                                                                                                                   | EC:3.4.24.0 | IPR000718; IPR008753; G3DSA:1.10.1380.10 (GENE3D), PTHR11733:SF20 (PANTHER)                      |
| Ailuropoda melanoleuca        | u2 snrnp auxiliary factor small subunit variant 1 | 7  | F:GO:0050733;<br>C:GO:0015030;<br>C:GO:0005681;<br>F:GO:0003723;<br>F:GO:0008270;<br>P:GO:0000398;<br>F:GO:0000166                                                                     | -                                                                                                                                   |             | IPR000504; IPR009145; IPR012677; SSF54928 (SUPERFAMILY)                                          |
| -                             | -                                                 | 0  |                                                                                                                                                                                        |                                                                                                                                     |             | -                                                                                                |
| Strongylocentrotus purpuratus | mflj00229 protein                                 | 0  |                                                                                                                                                                                        | F:GO:0003674;<br>P:GO:0008150                                                                                                       |             | IPR012860; SignalP (SIGNALP)                                                                     |

|                               |                                                            |    |                                                                                                                                                                                                                                                                                                                                                                                                    |                                                |  |                                                                                            |
|-------------------------------|------------------------------------------------------------|----|----------------------------------------------------------------------------------------------------------------------------------------------------------------------------------------------------------------------------------------------------------------------------------------------------------------------------------------------------------------------------------------------------|------------------------------------------------|--|--------------------------------------------------------------------------------------------|
| Strongylocentrotus purpuratus | mflj00229 protein                                          | 0  |                                                                                                                                                                                                                                                                                                                                                                                                    | F:GO:0003674;<br>P:GO:0008150                  |  | IPR012860; SignalP (SIGNALP)                                                               |
| -                             | -                                                          | 0  |                                                                                                                                                                                                                                                                                                                                                                                                    |                                                |  | -                                                                                          |
| Caenorhabditis briggsae       | Hypothetical protein CBG12581 [Caenorhabditis briggsae]    | 1  | F:GO:0005515                                                                                                                                                                                                                                                                                                                                                                                       | -                                              |  | IPR001715                                                                                  |
| -                             | -                                                          | 0  |                                                                                                                                                                                                                                                                                                                                                                                                    |                                                |  | -                                                                                          |
| Caenorhabditis elegans        | briggsae cbr-gtl-2 protein                                 | 1  | P:GO:0006810                                                                                                                                                                                                                                                                                                                                                                                       | -                                              |  | PTHR13800 (PANTHER)                                                                        |
| -                             | -                                                          | 0  |                                                                                                                                                                                                                                                                                                                                                                                                    |                                                |  | -                                                                                          |
| Caenorhabditis elegans        | elegans protein partially confirmed by transcript evidence | 7  | P:GO:0007160;<br>F:GO:0005518;<br>C:GO:0031012;<br>P:GO:0008218;<br>F:GO:0005509;<br>P:GO:0018298;<br>C:GO:0016020                                                                                                                                                                                                                                                                                 | -                                              |  | IPR000033; IPR011042; PTHR10529 (PANTHER), PTHR10529:SF4 (PANTHER), SSF63825 (SUPERFAMILY) |
| Caenorhabditis elegans        | lobulin-like cell adhesion molecule family member (igcm-3) | 1  | P:GO:0019915                                                                                                                                                                                                                                                                                                                                                                                       | -                                              |  | -                                                                                          |
| Loa loa                       | elegans protein partially confirmed by transcript evidence | 0  |                                                                                                                                                                                                                                                                                                                                                                                                    |                                                |  | -                                                                                          |
| Haemonchus contortus          | zinc metallopeptidase                                      | 0  |                                                                                                                                                                                                                                                                                                                                                                                                    | P:GO:0006508;<br>F:GO:0008237;<br>F:GO:0004222 |  | -                                                                                          |
| Caenorhabditis elegans        | phosphatidylinositol glycan anchor class b                 | 12 | P:GO:0040010;<br>P:GO:0008340;<br>P:GO:0044267;<br>P:GO:0034645;<br>P:GO:0000003;<br>P:GO:0010171;<br>P:GO:0002119;<br>C:GO:0044425;<br>P:GO:0040011;<br>P:GO:0009792;<br>F:GO:0016757;<br>C:GO:0005783                                                                                                                                                                                            | -                                              |  | IPR005599; SignalP (SIGNALP)                                                               |
| Mus musculus                  | eukaryotic translation initiation factor 5a                | 23 | P:GO:0006406;<br>F:GO:0003746;<br>P:GO:0007568;<br>F:GO:0047485;<br>P:GO:0006611;<br>C:GO:0005789;<br>F:GO:0003743;<br>P:GO:0006452;<br>F:GO:0043022;<br>C:GO:0005829;<br>C:GO:0005643;<br>C:GO:0030425;<br>P:GO:0008284;<br>P:GO:0008612;<br>C:GO:0043025;<br>P:GO:0006917;<br>F:GO:0017070;<br>C:GO:0005642;<br>P:GO:0055085;<br>P:GO:0045905;<br>P:GO:0051149;<br>P:GO:0045901;<br>P:GO:0043066 | -                                              |  | IPR001884; IPR005824; IPR008991; IPR014722; PTHR11673:SF2 (PANTHER)                        |
| -                             | -                                                          | 0  |                                                                                                                                                                                                                                                                                                                                                                                                    |                                                |  | SignalP (SIGNALP)                                                                          |

|                         |                                                             |    |                                                                                                                                                                                                                                                                                                                                                                                                                                                                                                                                                                                               |                                                                                                   |             |                                                            |
|-------------------------|-------------------------------------------------------------|----|-----------------------------------------------------------------------------------------------------------------------------------------------------------------------------------------------------------------------------------------------------------------------------------------------------------------------------------------------------------------------------------------------------------------------------------------------------------------------------------------------------------------------------------------------------------------------------------------------|---------------------------------------------------------------------------------------------------|-------------|------------------------------------------------------------|
|                         | -                                                           | 0  |                                                                                                                                                                                                                                                                                                                                                                                                                                                                                                                                                                                               |                                                                                                   |             | -                                                          |
| Caenorhabditis elegans  | elegans protein confirmed by transcript evidence            | 0  |                                                                                                                                                                                                                                                                                                                                                                                                                                                                                                                                                                                               | F:GO:0008270;<br>F:GO:0005515                                                                     |             | -                                                          |
|                         | -                                                           | 0  |                                                                                                                                                                                                                                                                                                                                                                                                                                                                                                                                                                                               |                                                                                                   |             | -                                                          |
| Caenorhabditis briggsae | nipped-b homolog                                            | 31 | P:GO:0007655;<br>P:GO:0007605;<br>F:GO:0042826;<br>P:GO:0034613;<br>P:GO:0003151;<br>P:GO:0006974;<br>F:GO:0008022;<br>C:GO:0032116;<br>P:GO:0040018;<br>F:GO:0070087;<br>P:GO:0060325;<br>F:GO:0047485;<br>P:GO:0071481;<br>P:GO:0061010;<br>P:GO:0034088;<br>P:GO:0045444;<br>P:GO:0050890;<br>P:GO:0031065;<br>P:GO:0007420;<br>P:GO:0010553;<br>P:GO:0048703;<br>P:GO:0048592;<br>P:GO:0035261;<br>P:GO:0045995;<br>P:GO:0045778;<br>P:GO:0042471;<br>P:GO:0042634;<br>P:GO:0061038;<br>C:GO:0005737;<br>F:GO:0004808;<br>P:GO:0006529;<br>P:GO:0006400;<br>F:GO:0005524;<br>F:GO:0000049 |                                                                                                   |             | -                                                          |
| Caenorhabditis briggsae | tr- (5-methylaminomethyl-2-thiouridylate)-methyltransferase | 6  |                                                                                                                                                                                                                                                                                                                                                                                                                                                                                                                                                                                               |                                                                                                   | EC:2.1.1.61 | -                                                          |
|                         | -                                                           | 0  |                                                                                                                                                                                                                                                                                                                                                                                                                                                                                                                                                                                               |                                                                                                   |             | -                                                          |
|                         | -                                                           | 0  |                                                                                                                                                                                                                                                                                                                                                                                                                                                                                                                                                                                               |                                                                                                   |             | -                                                          |
| Loa loa                 | protein ki-se domain containing protein                     | 0  |                                                                                                                                                                                                                                                                                                                                                                                                                                                                                                                                                                                               | F:GO:0016301;<br>F:GO:0004672;<br>F:GO:0005524;<br>F:GO:0000166;<br>P:GO:0006468;<br>F:GO:0004674 |             | -                                                          |
| Caenorhabditis elegans  | elegans protein partially confirmed by transcript evidence  | 0  |                                                                                                                                                                                                                                                                                                                                                                                                                                                                                                                                                                                               |                                                                                                   |             | -                                                          |
| Loa loa                 | prefoldin subunit 4                                         | 3  | P:GO:0006457;<br>C:GO:0016272;<br>F:GO:0051082                                                                                                                                                                                                                                                                                                                                                                                                                                                                                                                                                |                                                                                                   |             | IPR002777; PTHR21100 (PANTHER),<br>PTHR21100:SF3 (PANTHER) |
| Brugia malayi           | Alpha-catulin [Brugia malayi]                               | 0  |                                                                                                                                                                                                                                                                                                                                                                                                                                                                                                                                                                                               | F:GO:0005198;<br>P:GO:0007155;<br>C:GO:0015629                                                    |             | -                                                          |
| Ailuropoda melanoleuca  | ribosomal protein s26                                       | 6  | F:GO:0003729;<br>F:GO:0003735;<br>P:GO:0006414;<br>C:GO:0022627;<br>P:GO:0033119;<br>F:GO:0005515                                                                                                                                                                                                                                                                                                                                                                                                                                                                                             |                                                                                                   |             | IPR000892                                                  |

|                         |                                                            |   |                                                                                                   |                                                                                  |             |                                                                                                                        |
|-------------------------|------------------------------------------------------------|---|---------------------------------------------------------------------------------------------------|----------------------------------------------------------------------------------|-------------|------------------------------------------------------------------------------------------------------------------------|
|                         | -                                                          | 0 |                                                                                                   |                                                                                  |             | -                                                                                                                      |
|                         | -                                                          | 0 |                                                                                                   |                                                                                  |             | -                                                                                                                      |
| Acyrtosiphon pisum      | ffa-1 protein                                              | 3 | P:GO:0006259;<br>F:GO:0046872;<br>F:GO:0008026                                                    | -                                                                                |             | IPR004589; IPR011545; IPR014021;<br>G3DSA:3.40.50.300 (GENE3D),<br>SSF52540 (SUPERFAMILY)                              |
| Caenorhabditis elegans  | histone h1 like family member (hil-1)                      | 0 |                                                                                                   | C:GO:0005694;<br>C:GO:0000786;<br>P:GO:0006334;<br>F:GO:0003677;<br>C:GO:0005634 |             | IPR005818; IPR005819; IPR011991;<br>PTHR11467 (PANTHER)                                                                |
| Caenorhabditis briggsae | briggsae cbr-sbp-1 protein                                 | 0 |                                                                                                   | P:GO:0045449;<br>F:GO:0030528;<br>F:GO:0005515;<br>C:GO:0005634                  |             | -                                                                                                                      |
| Caenorhabditis elegans  | udp-glucose glycoprotein:glucosyltransferase               | 3 | F:GO:0003980;<br>P:GO:0006486;<br>C:GO:0005783                                                    | -                                                                                |             | IPR002495; IPR009448;<br>G3DSA:3.90.550.10 (GENE3D),<br>SSF53448 (SUPERFAMILY)                                         |
|                         | -                                                          | 0 |                                                                                                   |                                                                                  |             | -                                                                                                                      |
|                         | -                                                          | 0 |                                                                                                   |                                                                                  |             | -                                                                                                                      |
| Caenorhabditis elegans  | protein ki-se domain containing protein                    | 5 | P:GO:0007283;<br>P:GO:0006468;<br>F:GO:0004672;<br>F:GO:0005524;<br>P:GO:0040011                  | -                                                                                |             | IPR011009; G3DSA:1.10.510.10<br>(GENE3D), PTHR11909 (PANTHER),<br>PTHR11909:SF19 (PANTHER)                             |
| Caenorhabditis elegans  | kiaa1018 protein                                           | 2 | F:GO:0005515;<br>P:GO:0006281                                                                     | -                                                                                |             | -                                                                                                                      |
| Caenorhabditis elegans  | large subunit ribosomal protein 30                         | 3 | C:GO:0005840;<br>F:GO:0003735;<br>P:GO:0006412                                                    | -                                                                                | EC:3.6.5.3  | IPR000231; IPR004038; IPR022991;<br>G3DSA:3.30.1330.30 (GENE3D),<br>PTHR11449:SF1 (PANTHER), SSF55315<br>(SUPERFAMILY) |
|                         | -                                                          | 0 |                                                                                                   |                                                                                  |             | -                                                                                                                      |
| Brugia malayi           | protein furry homolog-like                                 | 1 | F:GO:0005515                                                                                      | -                                                                                |             | PTHR12295 (PANTHER),<br>PTHR12295:SF6 (PANTHER)                                                                        |
| Caenorhabditis elegans  | elegans protein partially confirmed by transcript evidence | 0 |                                                                                                   |                                                                                  |             | IPR000436; IPR016060; SignalP<br>(SIGNALP)                                                                             |
|                         | -                                                          | 0 |                                                                                                   |                                                                                  |             | -                                                                                                                      |
|                         | -                                                          | 0 |                                                                                                   |                                                                                  |             | -                                                                                                                      |
| Loa loa                 | clathrin coat assembly protein ap-1                        | 5 | P:GO:0016192;<br>P:GO:0040025;<br>F:GO:0005515;<br>P:GO:0006886;<br>C:GO:0030121                  | -                                                                                |             | IPR011012; G3DSA:3.30.450.60<br>(GENE3D), PTHR11998 (PANTHER),<br>PTHR11998:SF11 (PANTHER)                             |
| Caenorhabditis elegans  | r- binding protein                                         | 2 | F:GO:0000166;<br>F:GO:0003729                                                                     | -                                                                                |             | IPR000504; IPR012677; PTHR10432<br>(PANTHER), PTHR10432:SF41<br>(PANTHER), SSF54928 (SUPERFAMILY)                      |
|                         | -                                                          | 0 |                                                                                                   |                                                                                  |             | -                                                                                                                      |
|                         | -                                                          | 0 |                                                                                                   |                                                                                  |             | SignalP (SIGNALP)                                                                                                      |
| Caenorhabditis briggsae | methyltransferase domain containing 2                      | 6 | F:GO:0004483;<br>F:GO:0005488;<br>P:GO:0080009;<br>C:GO:0005622;<br>P:GO:0006370;<br>P:GO:0000003 | -                                                                                | EC:2.1.1.57 | IPR002877; G3DSA:3.40.50.150<br>(GENE3D), PTHR16121 (PANTHER),<br>SSF53335 (SUPERFAMILY)                               |

|                             |                                                             |    |                                                                                                                                                                                                                          |                                                                                                                                                                                                                                           |                                                                                                                                            |
|-----------------------------|-------------------------------------------------------------|----|--------------------------------------------------------------------------------------------------------------------------------------------------------------------------------------------------------------------------|-------------------------------------------------------------------------------------------------------------------------------------------------------------------------------------------------------------------------------------------|--------------------------------------------------------------------------------------------------------------------------------------------|
| Caenorhabditis elegans      | solute carrier family 17 (anion sugar transporter) member 5 | 8  | C:GO:0016023;<br>C:GO:0005886;<br>P:GO:0055085;<br>C:GO:0005765;<br>C:GO:0016021;<br>F:GO:0015136;<br>F:GO:0015293;<br>P:GO:0015739                                                                                      | -                                                                                                                                                                                                                                         | IPR011701; IPR016196; IPR020846;<br>G3DSA:1.20.1250.20 (GENE3D),<br>PTHR11662 (PANTHER),<br>PTHR11662:SF30 (PANTHER), SignalP<br>(SIGNALP) |
|                             |                                                             | 0  |                                                                                                                                                                                                                          |                                                                                                                                                                                                                                           |                                                                                                                                            |
| Caenorhabditis briggsae     | elegans protein partially confirmed by transcript evidence  | 0  |                                                                                                                                                                                                                          | P:GO:0000003;<br>P:GO:0006350;<br>P:GO:0045449;<br>F:GO:0005515;<br>F:GO:0003677;<br>C:GO:0005634                                                                                                                                         | IPR000679; IPR000949; IPR001005;<br>IPR009057                                                                                              |
|                             |                                                             | 0  |                                                                                                                                                                                                                          |                                                                                                                                                                                                                                           |                                                                                                                                            |
|                             |                                                             | 0  |                                                                                                                                                                                                                          |                                                                                                                                                                                                                                           |                                                                                                                                            |
| Caenorhabditis elegans      | wh2 motif family protein                                    | 0  |                                                                                                                                                                                                                          |                                                                                                                                                                                                                                           |                                                                                                                                            |
| Caenorhabditis briggsae     | nicotinic acetylcholine receptor non-alpha subunit          | 6  | F:GO:0004872;<br>C:GO:0045211;<br>C:GO:0030054;<br>P:GO:0006811;<br>C:GO:0016021;<br>F:GO:0004889                                                                                                                        | -                                                                                                                                                                                                                                         | IPR006029; IPR006201;<br>G3DSA:1.20.120.370 (GENE3D),<br>PTHR18945:SF72 (PANTHER), SignalP<br>(SIGNALP)                                    |
| Angiostrongylus cantonensis | briggsae cbr-mdt-6 protein                                  | 13 | P:GO:0006357;<br>P:GO:0040007;<br>P:GO:0040027;<br>P:GO:0040035;<br>P:GO:0007283;<br>F:GO:0016455;<br>P:GO:0007281;<br>C:GO:0016592;<br>F:GO:0003713;<br>P:GO:0048477;<br>P:GO:0009792;<br>P:GO:0008406;<br>C:GO:0005737 | -                                                                                                                                                                                                                                         | -                                                                                                                                          |
| Loa loa                     | importin 8                                                  | 0  |                                                                                                                                                                                                                          | F:GO:0042626;<br>P:GO:0015031;<br>F:GO:0008536;<br>F:GO:0008565;<br>C:GO:0005634;<br>P:GO:0006810;<br>C:GO:0005737;<br>P:GO:0007165;<br>P:GO:0006886;<br>F:GO:0008262;<br>F:GO:0005515;<br>C:GO:0005887;<br>P:GO:0008283;<br>F:GO:0005488 | PTHR10997 (PANTHER),<br>PTHR10997:SF18 (PANTHER)                                                                                           |

|                         |                                                 |   |                                                                                                                                                      |                               |             |                                                                                                         |
|-------------------------|-------------------------------------------------|---|------------------------------------------------------------------------------------------------------------------------------------------------------|-------------------------------|-------------|---------------------------------------------------------------------------------------------------------|
| Caenorhabditis briggsae | polymerase iii (d- directed) polypeptide 155kda | 9 | F:GO:0003899;<br>P:GO:0009615;<br>F:GO:0008270;<br>P:GO:0032728;<br>P:GO:0045087;<br>F:GO:0003677;<br>F:GO:0032549;<br>P:GO:0006351;<br>C:GO:0005666 | -                             | EC:2.7.7.6  | IPR007083; IPR015700; PTHR19376 (PANTHER), SSF64484 (SUPERFAMILY)                                       |
| -                       | -                                               | 0 |                                                                                                                                                      |                               |             | -                                                                                                       |
| Caenorhabditis elegans  | in family member (-b-1)                         | 1 | F:GO:0005515                                                                                                                                         | -                             |             | IPR001478; G3DSA:2.30.42.10 (GENE3D), PTHR16154 (PANTHER), PTHR16154:SF3 (PANTHER)                      |
| -                       | -                                               | 0 |                                                                                                                                                      |                               |             | G3DSA:3.40.50.300 (GENE3D), SSF52540 (SUPERFAMILY)                                                      |
| Brugia malayi           | grip domain containing protein                  | 0 |                                                                                                                                                      |                               |             | -                                                                                                       |
| Caenorhabditis elegans  | fatty acid thase family member (fasn-1)         | 0 |                                                                                                                                                      |                               |             | -                                                                                                       |
| Caenorhabditis briggsae | protein ki-se c alpha binding protein           | 1 | F:GO:0005515                                                                                                                                         | -                             |             | IPR001478; IPR010504; G3DSA:2.30.42.10 (GENE3D), PTHR12141 (PANTHER), PTHR12141:SF2 (PANTHER)           |
| -                       | -                                               | 0 |                                                                                                                                                      |                               |             | SignalP (SIGNALP)                                                                                       |
| Apis mellifera          | wd repeat domain 19                             | 0 |                                                                                                                                                      | F:GO:0005488;<br>C:GO:0019861 |             | -                                                                                                       |
| Caenorhabditis briggsae | glutathione peroxidase                          | 2 | F:GO:0004601;<br>C:GO:0005739                                                                                                                        | -                             | EC:1.11.1.7 | IPR000889; IPR012335; IPR012336; SignalP (SIGNALP)                                                      |
| Caenorhabditis briggsae | glutathione peroxidase                          | 2 | F:GO:0004601;<br>C:GO:0005739                                                                                                                        | -                             | EC:1.11.1.7 | SignalP (SIGNALP)                                                                                       |
| -                       | -                                               | 0 |                                                                                                                                                      |                               |             | -                                                                                                       |
| -                       | -                                               | 0 |                                                                                                                                                      |                               |             | -                                                                                                       |
| -                       | -                                               | 0 |                                                                                                                                                      |                               |             | -                                                                                                       |
| Caenorhabditis elegans  | sulfate transporter                             | 4 | P:GO:0006810;<br>P:GO:0009987;<br>C:GO:0044425;<br>F:GO:0005215                                                                                      | -                             |             | IPR011547; PTHR11814 (PANTHER), PTHR11814:SF25 (PANTHER)                                                |
| Loa loa                 | hypothetical protein LOAG_07566 [Loa loa]       | 0 |                                                                                                                                                      | F:GO:0005488                  |             | -                                                                                                       |
| Caenorhabditis briggsae | component of oligomeric golgi complex 8         | 1 | C:GO:0005794                                                                                                                                         | -                             |             | IPR007255; IPR016159                                                                                    |
| Caenorhabditis briggsae | briggsae cbr-prg-1 protein                      | 4 | P:GO:0009987;<br>F:GO:0003676;<br>F:GO:0005515;<br>C:GO:0044424                                                                                      | -                             |             | IPR003100; G3DSA:2.170.260.10 (GENE3D), PTHR22892 (PANTHER), SSF101690 (SUPERFAMILY)                    |
| -                       | -                                               | 0 |                                                                                                                                                      |                               |             | -                                                                                                       |
| -                       | -                                               | 0 |                                                                                                                                                      |                               |             | -                                                                                                       |
| -                       | -                                               | 0 |                                                                                                                                                      |                               |             | -                                                                                                       |
| -                       | -                                               | 0 |                                                                                                                                                      |                               |             | -                                                                                                       |
| Caenorhabditis briggsae | metalloprotei-se inhibitor 2 precursor          | 3 | F:GO:0005515;<br>F:GO:0008191;<br>C:GO:0005578                                                                                                       | -                             |             | IPR001134; IPR001820; IPR008993; G3DSA:2.40.50.120 (GENE3D), PTHR11844:SF1 (PANTHER), SignalP (SIGNALP) |
| Loa loa                 | trehalase family protein                        | 5 | P:GO:0009792;<br>P:GO:0002119;<br>P:GO:0005991;<br>P:GO:0040007;<br>F:GO:0004555                                                                     | -                             | EC:3.2.1.28 | IPR001661; IPR018232; PTHR23403:SF1 (PANTHER)                                                           |
| -                       | -                                               | 0 |                                                                                                                                                      |                               |             | -                                                                                                       |



|                         |                                                        |   |                                                                                                                    |   |             |                                                                                                              |
|-------------------------|--------------------------------------------------------|---|--------------------------------------------------------------------------------------------------------------------|---|-------------|--------------------------------------------------------------------------------------------------------------|
| Caenorhabditis elegans  | platelet-activating factor acetylhydrolase             | 1 | P:GO:0006629                                                                                                       | - |             | IPR005065; G3DSA:3.40.50.1820 (GENE3D), PF03403 (PFAM), SSF53474 (SUPERFAMILY)                               |
| Caenorhabditis elegans  | hypothetical protein F46F11.9 [Caenorhabditis elegans] | 5 | P:GO:0045927;<br>P:GO:0032501;<br>P:GO:0009653;<br>P:GO:0000003;<br>P:GO:0040011                                   | - |             | SignalP (SIGNALP)                                                                                            |
| Caenorhabditis elegans  | elegans protein confirmed by transcript evidence       | 3 | F:GO:0004872;<br>F:GO:0005515;<br>P:GO:0006350                                                                     | - |             | -                                                                                                            |
|                         | -                                                      | 0 |                                                                                                                    |   |             | -                                                                                                            |
|                         | -                                                      | 0 |                                                                                                                    |   |             | IPR000436; IPR016060                                                                                         |
| Caenorhabditis briggsae | 1 protein                                              | 3 | F:GO:0005488;<br>P:GO:0032501;<br>P:GO:0032502                                                                     | - |             | IPR000884; PRO1705 (PRINTS), G3DSA:2.20.100.10 (GENE3D), PTHR22906 (PANTHER)                                 |
|                         | -                                                      | 0 |                                                                                                                    |   |             | SignalP (SIGNALP)                                                                                            |
|                         | -                                                      | 0 |                                                                                                                    |   |             | -                                                                                                            |
| Caenorhabditis briggsae | map kinase-erk ki-se                                   | 7 | C:GO:0005625;<br>F:GO:0004708;<br>P:GO:0006468;<br>F:GO:0005515;<br>C:GO:0005938;<br>F:GO:0005524;<br>C:GO:0005829 | - |             | SignalP (SIGNALP)                                                                                            |
|                         | -                                                      | 0 |                                                                                                                    |   |             | SignalP (SIGNALP)                                                                                            |
| Caenorhabditis briggsae | elegans protein confirmed by transcript evidence       | 0 |                                                                                                                    |   |             | IPR008574; SignalP (SIGNALP)                                                                                 |
|                         | -                                                      | 0 |                                                                                                                    |   |             | -                                                                                                            |
|                         | -                                                      | 0 |                                                                                                                    |   |             | -                                                                                                            |
| Caenorhabditis elegans  | p38 map kinase family member (pmk-2)                   | 5 | C:GO:0005737;<br>F:GO:0005515;<br>P:GO:0006950;<br>P:GO:0007243;<br>F:GO:0008339                                   | - |             | -                                                                                                            |
|                         | -                                                      | 0 |                                                                                                                    |   |             | -                                                                                                            |
| Branchiostoma floridae  | kiaa0979 protein                                       | 5 | C:GO:0000785;<br>F:GO:0042802;<br>P:GO:0008285;<br>C:GO:0005634;<br>P:GO:0007064                                   | - |             | PTHR12663 (PANTHER)                                                                                          |
| Ancylostoma caninum     | metalloprotease 1 precursor                            | 5 | P:GO:0019915;<br>F:GO:0004222;<br>P:GO:0000003;<br>P:GO:0006508;<br>F:GO:0008270                                   | - | EC:3.4.24.0 | IPR001506; G3DSA:3.40.390.10 (GENE3D), PTHR10127 (PANTHER), PTHR10127:SF65 (PANTHER), SSF55486 (SUPERFAMILY) |

|                           |                                               |   |                                                                                  |                                                                                                                                                                                                                                                                                                                                                                                                                                                                                          |                                                                                   |
|---------------------------|-----------------------------------------------|---|----------------------------------------------------------------------------------|------------------------------------------------------------------------------------------------------------------------------------------------------------------------------------------------------------------------------------------------------------------------------------------------------------------------------------------------------------------------------------------------------------------------------------------------------------------------------------------|-----------------------------------------------------------------------------------|
| Cyanothece sp. ATCC 51142 | viral a-type inclusion protein repeat protein | 0 |                                                                                  | C:GO:0005825;<br>C:GO:0001931;<br>C:GO:0005826;<br>P:GO:0000212;<br>C:GO:0005886;<br>F:GO:0000146;<br>P:GO:0043534;<br>P:GO:0001768;<br>F:GO:0043531;<br>F:GO:0016887;<br>P:GO:0050900;<br>P:GO:0001701;<br>P:GO:0000910;<br>P:GO:0007520;<br>C:GO:0005913;<br>F:GO:0051015;<br>C:GO:0005622;<br>P:GO:0006928;<br>F:GO:0043495;<br>C:GO:0031252;<br>C:GO:0005819;<br>P:GO:0007132;<br>F:GO:0042803;<br>F:GO:0005524;<br>P:GO:0030048;<br>P:GO:0016337;<br>P:GO:0006509;<br>P:GO:0015031; | -                                                                                 |
| Caenorhabditis elegans    | sulfite alpha subunit                         | 5 | F:GO:0005488;<br>F:GO:0016491;<br>P:GO:0044237;<br>P:GO:0055114;<br>P:GO:0000003 | -                                                                                                                                                                                                                                                                                                                                                                                                                                                                                        | IPR015702; G3DSA:3.40.50.80 (GENE3D), PTHR19384 (PANTHER), SSF52343 (SUPERFAMILY) |
| Caenorhabditis elegans    | cartilage associated protein                  | 1 | F:GO:0005488                                                                     | -                                                                                                                                                                                                                                                                                                                                                                                                                                                                                        | PTHR13986 (PANTHER), PTHR13986:SF1 (PANTHER), SignalP (SIGNALP)                   |
| Caenorhabditis elegans    | ester hydrolase c11orf54 homolog              | 1 | F:GO:0005488                                                                     | -                                                                                                                                                                                                                                                                                                                                                                                                                                                                                        | IPR015021; SSF117856 (SUPERFAMILY)                                                |
| Caenorhabditis briggsae   | cg9119 cg9119-pa                              | 0 |                                                                                  | F:GO:0016788;<br>F:GO:0008270;<br>C:GO:0005634                                                                                                                                                                                                                                                                                                                                                                                                                                           | IPR015021; SSF117856 (SUPERFAMILY)                                                |
| Caenorhabditis elegans    | briggsae cbr-cdh-1 protein                    | 4 | P:GO:0002119;<br>P:GO:0040010;<br>P:GO:0040011;<br>C:GO:0016020                  | -                                                                                                                                                                                                                                                                                                                                                                                                                                                                                        | IPR002126; IPR015919; PTHR10596 (PANTHER), PTHR10596:SF77 (PANTHER)               |
|                           | -                                             | 0 |                                                                                  |                                                                                                                                                                                                                                                                                                                                                                                                                                                                                          | -                                                                                 |
| Hydra magnipapillata      | tyrosyl-d- phodphodiesterase 1                | 0 |                                                                                  |                                                                                                                                                                                                                                                                                                                                                                                                                                                                                          | G3DSA:3.30.870.20 (GENE3D), SSF56024 (SUPERFAMILY)                                |
|                           | -                                             | 0 |                                                                                  |                                                                                                                                                                                                                                                                                                                                                                                                                                                                                          | -                                                                                 |
| Caenorhabditis briggsae   | protein serine threonine ki-se                | 0 |                                                                                  | F:GO:0016740;<br>F:GO:0004674;<br>F:GO:0004672;<br>F:GO:0016787;<br>P:GO:0006468;<br>F:GO:0000166;<br>F:GO:0005524;<br>F:GO:0016301;<br>F:GO:0004709                                                                                                                                                                                                                                                                                                                                     | -                                                                                 |

|                         |                                                      |    |                                                                                                                                                                                                         |              |   |                                                                                                                            |
|-------------------------|------------------------------------------------------|----|---------------------------------------------------------------------------------------------------------------------------------------------------------------------------------------------------------|--------------|---|----------------------------------------------------------------------------------------------------------------------------|
| Caenorhabditis briggsae | u5 small nuclear ribonucleoprotein 200 kda helicase  | 9  | P:GO:0018991;<br>C:GO:0005681;<br>F:GO:0008026;<br>P:GO:0040007;<br>P:GO:0008380;<br>F:GO:0003677;<br>F:GO:0005524;<br>P:GO:0002119;<br>P:GO:0009792                                                    | -            | - |                                                                                                                            |
| Caenorhabditis elegans  | uncoordinated family member (unc-52)                 | 4  | P:GO:0001525;<br>P:GO:0030239;<br>P:GO:0007519;<br>C:GO:0005578                                                                                                                                         | -            |   | IPR003598; IPR007110; IPR013098;<br>IPR013783; PTHR10489 (PANTHER),<br>PTHR10489:SF27 (PANTHER),<br>SSF48726 (SUPERFAMILY) |
|                         | -                                                    | 0  |                                                                                                                                                                                                         |              |   | -                                                                                                                          |
|                         | -                                                    | 0  |                                                                                                                                                                                                         |              |   | -                                                                                                                          |
| Ostertagia ostertagi    | sxc2 protein                                         | 0  |                                                                                                                                                                                                         |              |   | IPR003582                                                                                                                  |
| Brugia malayi           | ancient conserved domain protein                     | 0  |                                                                                                                                                                                                         | P:GO:0040010 |   | G3DSA:3.10.580.10 (GENE3D),<br>PTHR12064 (PANTHER)                                                                         |
| Ailuropoda melanoleuca  | smt3 suppressor of mif two 3 homolog 2 ( cerevisiae) | 8  | P:GO:0016925;<br>F:GO:0031625;<br>F:GO:0016564;<br>P:GO:0034613;<br>P:GO:0032436;<br>F:GO:0019789;<br>P:GO:0016481;<br>C:GO:0005634                                                                     | -            |   | IPR019955; IPR022617;<br>G3DSA:3.10.20.90 (GENE3D),<br>PTHR10562 (PANTHER), SSF54236<br>(SUPERFAMILY)                      |
|                         | -                                                    | 0  |                                                                                                                                                                                                         |              |   | -                                                                                                                          |
| Caenorhabditis elegans  | nonsense-mediated mr- decay protein                  | 0  |                                                                                                                                                                                                         |              |   | PTHR15696 (PANTHER), SSF48452<br>(SUPERFAMILY)                                                                             |
| Caenorhabditis briggsae | briggsae cbr-ugt-58 protein                          | 1  | F:GO:0016757                                                                                                                                                                                            | -            |   | IPR002213; SignalP (SIGNALP),<br>SSF53756 (SUPERFAMILY)                                                                    |
| Caenorhabditis elegans  | briggsae cbr-npp-14 protein                          | 0  |                                                                                                                                                                                                         |              |   | IPR015943; PTHR23193 (PANTHER),<br>PTHR23193:SF1 (PANTHER)                                                                 |
| Homo sapiens            | alpha-2-macroglobulin precursor                      | 12 | F:GO:0004867;<br>F:GO:0043120;<br>F:GO:0019966;<br>P:GO:0001869;<br>P:GO:0007584;<br>C:GO:0005615;<br>C:GO:0031093;<br>F:GO:0019959;<br>F:GO:0019899;<br>P:GO:0010037;<br>P:GO:0051384;<br>P:GO:0006953 | -            |   | IPR009048; PTHR11412 (PANTHER),<br>PTHR11412:SF36 (PANTHER)                                                                |
|                         | -                                                    | 0  |                                                                                                                                                                                                         |              |   | -                                                                                                                          |
|                         | -                                                    | 0  |                                                                                                                                                                                                         |              |   | -                                                                                                                          |
|                         | -                                                    | 0  |                                                                                                                                                                                                         |              |   | -                                                                                                                          |
| synthetic construct     | keratin 8                                            | 6  | P:GO:0007010;<br>C:GO:0005737;<br>P:GO:0044419;<br>F:GO:0005198;<br>F:GO:0005515;<br>C:GO:0045095                                                                                                       | -            |   | IPR001664; IPR003054; IPR016044                                                                                            |
|                         | -                                                    | 0  |                                                                                                                                                                                                         |              |   | -                                                                                                                          |

|                        |                              |    |  |                                                                                                                                                                       |   |                                                                                                                                                |
|------------------------|------------------------------|----|--|-----------------------------------------------------------------------------------------------------------------------------------------------------------------------|---|------------------------------------------------------------------------------------------------------------------------------------------------|
| Caenorhabditis elegans | ylr106cp-like protein        | 0  |  | C:GO:0005634;<br>F:GO:0000166;<br>F:GO:0008134;<br>F:GO:0017111;<br>F:GO:0005524;<br>F:GO:0016887;<br>P:GO:0006355;<br>C:GO:0005622;<br>P:GO:0043254                  |   | PTHR22908 (PANTHER),<br>PTHR22908:SF13 (PANTHER)                                                                                               |
| Caenorhabditis elegans | exportin 4                   | 0  |  | F:GO:0005488;<br>C:GO:0005737;<br>P:GO:0008150;<br>F:GO:0005515;<br>C:GO:0005575;<br>C:GO:0005634;<br>P:GO:0006810;<br>P:GO:0015031                                   |   | IPR018039                                                                                                                                      |
|                        | -                            | 0  |  |                                                                                                                                                                       |   | -                                                                                                                                              |
| Pan troglodytes        | lysyl hydroxylase isoform 5  | 0  |  |                                                                                                                                                                       |   | -                                                                                                                                              |
|                        | -                            | 0  |  |                                                                                                                                                                       |   | SignalP (SIGNALP)                                                                                                                              |
|                        | -                            | 0  |  |                                                                                                                                                                       |   | SignalP (SIGNALP)                                                                                                                              |
|                        | -                            | 0  |  |                                                                                                                                                                       |   | IPR001664; PTHR23239:SF13<br>(PANTHER)                                                                                                         |
|                        | -                            | 0  |  |                                                                                                                                                                       |   | SignalP (SIGNALP)                                                                                                                              |
|                        | -                            | 0  |  |                                                                                                                                                                       |   | -                                                                                                                                              |
|                        | -                            | 0  |  |                                                                                                                                                                       |   | SignalP (SIGNALP)                                                                                                                              |
|                        | -                            | 0  |  |                                                                                                                                                                       |   | -                                                                                                                                              |
|                        | -                            | 0  |  |                                                                                                                                                                       |   | -                                                                                                                                              |
|                        | -                            | 0  |  |                                                                                                                                                                       |   | -                                                                                                                                              |
|                        | -                            | 0  |  |                                                                                                                                                                       |   | -                                                                                                                                              |
| Brugia malayi          | kh domain containing protein | 10 |  | P:GO:0021905;<br>F:GO:0003723;<br>P:GO:0051216;<br>P:GO:0007420;<br>P:GO:0014036;<br>P:GO:0048812;<br>P:GO:0045947;<br>P:GO:0048755;<br>C:GO:0005737;<br>C:GO:0005634 | - | IPR004087; IPR004088; IPR018111;<br>G3DSA:3.30.1370.10 (GENE3D),<br>PTHR10603 (PANTHER),<br>PTHR10603:SF3 (PANTHER), SSF54791<br>(SUPERFAMILY) |
| Brugia malayi          | kh domain containing protein | 10 |  | P:GO:0021905;<br>F:GO:0003723;<br>P:GO:0051216;<br>P:GO:0007420;<br>P:GO:0014036;<br>P:GO:0048812;<br>P:GO:0045947;<br>P:GO:0048755;<br>C:GO:0005737;<br>C:GO:0005634 | - | IPR004087; IPR004088; IPR018111;<br>G3DSA:3.30.1370.10 (GENE3D),<br>PTHR10603 (PANTHER),<br>PTHR10603:SF3 (PANTHER), SSF54791<br>(SUPERFAMILY) |

|                         |                              |    |                                                                                                                                                                                                         |   |            |                                                                                                                                                |
|-------------------------|------------------------------|----|---------------------------------------------------------------------------------------------------------------------------------------------------------------------------------------------------------|---|------------|------------------------------------------------------------------------------------------------------------------------------------------------|
| Brugia malayi           | kh domain containing protein | 10 | P:GO:0021905;<br>F:GO:0003723;<br>P:GO:0051216;<br>P:GO:0007420;<br>P:GO:0014036;<br>P:GO:0048812;<br>P:GO:0045947;<br>P:GO:0048755;<br>C:GO:0005737;<br>C:GO:0005634                                   | - | -          | IPR004087; IPR004088; IPR018111;<br>G3DSA:3.30.1370.10 (GENE3D),<br>PTHR10603 (PANTHER),<br>PTHR10603:SF3 (PANTHER), SSF54791<br>(SUPERFAMILY) |
| Macaca mulatta          | ribosomal protein s3a        | 9  | P:GO:0006413;<br>F:GO:0003723;<br>P:GO:0006917;<br>C:GO:0005730;<br>F:GO:0003735;<br>P:GO:0006414;<br>C:GO:0022627;<br>P:GO:0030154;<br>F:GO:0005515                                                    | - | -          | -                                                                                                                                              |
| Caenorhabditis elegans  | protein tapt1-like protein   | 1  | P:GO:0009792                                                                                                                                                                                            | - | -          | -                                                                                                                                              |
| -                       | -                            | 0  | -                                                                                                                                                                                                       | - | -          | SignalP (SIGNALP)                                                                                                                              |
| Caenorhabditis briggsae | p- protein                   | 12 | C:GO:0005960;<br>F:GO:0004375;<br>F:GO:0016829;<br>P:GO:0019464;<br>C:GO:0005739;<br>P:GO:0055114;<br>C:GO:0009941;<br>F:GO:0005524;<br>F:GO:0005515;<br>P:GO:0046686;<br>F:GO:0030170;<br>C:GO:0048046 | - | EC:1.4.4.2 | IPR005829; IPR015424; IPR020580;<br>IPR020581                                                                                                  |
| Caenorhabditis elegans  | briggsae cbr-unc-68 protein  | 8  | F:GO:0004872;<br>P:GO:0006629;<br>F:GO:0005219;<br>P:GO:0006816;<br>P:GO:0006874;<br>P:GO:0055085;<br>F:GO:0005509;<br>C:GO:0016021                                                                     | - | -          | -                                                                                                                                              |
| Caenorhabditis elegans  | aquaporin 3                  | 3  | P:GO:0055085;<br>C:GO:0016021;<br>F:GO:0005215                                                                                                                                                          | - | -          | IPR000425; PTHR19139:SF11<br>(PANTHER)                                                                                                         |
| Brugia malayi           | ap-2 complex subunit mu-1    | 9  | P:GO:0016192;<br>C:GO:0005829;<br>F:GO:0008289;<br>C:GO:0005778;<br>P:GO:0050690;<br>C:GO:0030122;<br>F:GO:0005515;<br>F:GO:0005215;<br>P:GO:0006886                                                    | - | -          | -                                                                                                                                              |
| -                       | -                            | 0  | -                                                                                                                                                                                                       | - | -          | -                                                                                                                                              |
| -                       | -                            | 0  | -                                                                                                                                                                                                       | - | -          | -                                                                                                                                              |

|                         |                                                                           |    |                                                                                                                                                                       |                                                                                                                                                      |             |                                                                 |
|-------------------------|---------------------------------------------------------------------------|----|-----------------------------------------------------------------------------------------------------------------------------------------------------------------------|------------------------------------------------------------------------------------------------------------------------------------------------------|-------------|-----------------------------------------------------------------|
| Taeniopygia guttata     | cytochrome b5 reductase 3                                                 | 10 | F:GO:0004128;<br>C:GO:0016021;<br>P:GO:0055114;<br>C:GO:0005741;<br>P:GO:0006636;<br>P:GO:0030497;<br>F:GO:0050660;<br>C:GO:0005789;<br>P:GO:0006695;<br>P:GO:0017144 | -                                                                                                                                                    | EC:1.6.2.2  | -                                                               |
| Loa loa                 | protein-l-isoaspartate o-methyltransferase domain-containing protein 1    | 0  |                                                                                                                                                                       | P:GO:0006479;<br>F:GO:0016740;<br>P:GO:0032259;<br>F:GO:0008168;<br>F:GO:0004719;<br>C:GO:0005737;<br>F:GO:0003674;<br>P:GO:0006464;<br>P:GO:0008150 |             | IPR000682; G3DSA:3.40.50.150 (GENE3D), SSF53335 (SUPERFAMILY)   |
| Haemonchus contortus    | latrophilin-like protein 2                                                | 6  | P:GO:0007218;<br>C:GO:0016021;<br>P:GO:0007165;<br>C:GO:0005886;<br>F:GO:0005529;<br>F:GO:0004930                                                                     | -                                                                                                                                                    |             | IPR020003; IPR022624                                            |
| Caenorhabditis briggsae | briggsae cbr-ooc-3 protein                                                | 0  |                                                                                                                                                                       |                                                                                                                                                      |             | -                                                               |
| Caenorhabditis briggsae | briggsae cbr-ooc-3 protein                                                | 0  |                                                                                                                                                                       |                                                                                                                                                      |             | -                                                               |
| -                       | -                                                                         | 0  |                                                                                                                                                                       |                                                                                                                                                      |             | SignalP (SIGNALP)                                               |
| -                       | -                                                                         | 0  |                                                                                                                                                                       |                                                                                                                                                      |             | -                                                               |
| -                       | -                                                                         | 0  |                                                                                                                                                                       |                                                                                                                                                      |             | -                                                               |
| Caenorhabditis briggsae | sex-determining protein fem-1                                             | 3  | P:GO:0051438;<br>F:GO:0005515;<br>F:GO:0004842                                                                                                                        | -                                                                                                                                                    | EC:6.3.2.19 | PTHR18958 (PANTHER), PTHR18958:SF131 (PANTHER)                  |
| -                       | -                                                                         | 0  |                                                                                                                                                                       |                                                                                                                                                      |             | -                                                               |
| Caenorhabditis elegans  | riken cd- c030006k11 gene                                                 | 1  | C:GO:0005739                                                                                                                                                          | -                                                                                                                                                    |             | -                                                               |
| Caenorhabditis elegans  | yqy2_caeel ame: full=uncharacterized protein                              | 0  |                                                                                                                                                                       | F:GO:0004872;<br>F:GO:0004871;<br>F:GO:0004930;<br>C:GO:0016021;<br>P:GO:0008152;<br>F:GO:0008080;<br>P:GO:0007165;<br>P:GO:0007186                  |             | IPR000182; IPR016181                                            |
| Caenorhabditis elegans  | elegans protein confirmed by transcript evidence                          | 0  |                                                                                                                                                                       | F:GO:0005488                                                                                                                                         |             | -                                                               |
| Caenorhabditis elegans  | alpha- -mannosyl-glycoprotein 2-beta-n-acetylglucosaminyltransferase-like | 6  | C:GO:0005624;<br>C:GO:0044431;<br>P:GO:0006487;<br>F:GO:0008375;<br>C:GO:0016020;<br>P:GO:0009311                                                                     | -                                                                                                                                                    |             | IPR007754; IPR018130; SignalP (SIGNALP), SSF53448 (SUPERFAMILY) |
| Caenorhabditis elegans  | alpha- -mannosyl-glycoprotein 2-beta-n-acetylglucosaminyltransferase-like | 6  | C:GO:0005624;<br>C:GO:0044431;<br>P:GO:0006487;<br>F:GO:0008375;<br>C:GO:0016020;<br>P:GO:0009311                                                                     | -                                                                                                                                                    |             | IPR007754; IPR018130; SignalP (SIGNALP), SSF53448 (SUPERFAMILY) |

|                         |                                                                                                           |   |                                                                                                                                                      |                                                                                                                                                      |                                                                                                            |
|-------------------------|-----------------------------------------------------------------------------------------------------------|---|------------------------------------------------------------------------------------------------------------------------------------------------------|------------------------------------------------------------------------------------------------------------------------------------------------------|------------------------------------------------------------------------------------------------------------|
| Caenorhabditis elegans  | cleavage and polyadenylation specific factor 3-like                                                       | 5 | C:GO:0005737;<br>P:GO:0043484;<br>F:GO:0016787;<br>P:GO:0016180;<br>C:GO:0032039                                                                     | -                                                                                                                                                    | IPR001279; G3DSA:3.60.15.10 (GENE3D), PTHR11203 (PANTHER), PTHR11203:SF8 (PANTHER), SSF56281 (SUPERFAMILY) |
| Caenorhabditis elegans  | inositol -trisphosphate receptor                                                                          | 4 | F:GO:0004872;<br>F:GO:0005262;<br>P:GO:0006811;<br>C:GO:0016020                                                                                      | -                                                                                                                                                    | IPR015925; PTHR13715:SF2 (PANTHER)                                                                         |
| Caenorhabditis elegans  | elegans protein partially confirmed by transcript evidence                                                | 3 | P:GO:0044238;<br>P:GO:0019915;<br>F:GO:0016757                                                                                                       | -                                                                                                                                                    | IPR002213; G3DSA:3.40.50.2000 (GENE3D), PTHR11926:SF3 (PANTHER), SSF53756 (SUPERFAMILY)                    |
| Bos taurus              | cold shock domain-containing protein e1                                                                   | 6 | F:GO:0003723;<br>C:GO:0005743;<br>P:GO:0006355;<br>P:GO:0008584;<br>F:GO:0003677;<br>F:GO:0005515                                                    | -                                                                                                                                                    | IPR002059; PTHR12913 (PANTHER)                                                                             |
| -                       | -                                                                                                         | 0 | -                                                                                                                                                    | -                                                                                                                                                    | SignalP (SIGNALP)                                                                                          |
| Loa loa                 | zinc transporter zip13                                                                                    | 0 | -                                                                                                                                                    | C:GO:0016021;<br>C:GO:0016020;<br>P:GO:0030001;<br>P:GO:0006811;<br>P:GO:0006810;<br>P:GO:0006829;<br>F:GO:0046873;<br>P:GO:0055085;<br>F:GO:0005385 | -                                                                                                          |
| Caenorhabditis elegans  | heat1_caeel ame: full=heat repeat-containing protein 1<br>homolog ame: full=target of erk ki-se protein 1 | 4 | P:GO:0009792;<br>P:GO:0040010;<br>P:GO:0002119;<br>P:GO:0040011                                                                                      | -                                                                                                                                                    | -                                                                                                          |
| -                       | -                                                                                                         | 0 | -                                                                                                                                                    | -                                                                                                                                                    | -                                                                                                          |
| -                       | -                                                                                                         | 0 | -                                                                                                                                                    | -                                                                                                                                                    | -                                                                                                          |
| Caenorhabditis briggsae | t-cell activation ase activating protein                                                                  | 6 | F:GO:0005096;<br>P:GO:0009792;<br>P:GO:0000003;<br>P:GO:0007165;<br>C:GO:0005622;<br>P:GO:0040010                                                    | -                                                                                                                                                    | IPR000198; IPR008936; PTHR23179 (PANTHER), PTHR23179:SF1 (PANTHER)                                         |
| Caenorhabditis briggsae | mitochondrial inner membrane protein                                                                      | 1 | C:GO:0016021                                                                                                                                         | -                                                                                                                                                    | IPR019133; PTHR15415 (PANTHER)                                                                             |
| -                       | -                                                                                                         | 0 | -                                                                                                                                                    | -                                                                                                                                                    | -                                                                                                          |
| -                       | -                                                                                                         | 0 | -                                                                                                                                                    | -                                                                                                                                                    | -                                                                                                          |
| -                       | -                                                                                                         | 0 | -                                                                                                                                                    | -                                                                                                                                                    | SignalP (SIGNALP)                                                                                          |
| Caenorhabditis elegans  | sperm autoantigenic protein 17                                                                            | 1 | P:GO:0009987                                                                                                                                         | -                                                                                                                                                    | IPR000048; IPR003117; G3DSA:1.20.890.10 (GENE3D)                                                           |
| Pan troglodytes         | proteasome ( macropain) activator subunit 1 (pa28 alpha)                                                  | 9 | P:GO:0010950;<br>P:GO:0019884;<br>P:GO:0051436;<br>P:GO:0051437;<br>C:GO:0008537;<br>P:GO:0031145;<br>F:GO:0005515;<br>N:GO:0061133;<br>C:GO:0005737 | -                                                                                                                                                    | IPR003186; IPR009077; PTHR10660:SF5 (PANTHER)                                                              |
| Loa loa                 | hypothetical protein LOAG_04165 [Loa loa]                                                                 | 0 | -                                                                                                                                                    | -                                                                                                                                                    | -                                                                                                          |

|                         |                                                                                 |  |    |                                                                                                                                                                                        |   |                               |                                                                                                                                                    |
|-------------------------|---------------------------------------------------------------------------------|--|----|----------------------------------------------------------------------------------------------------------------------------------------------------------------------------------------|---|-------------------------------|----------------------------------------------------------------------------------------------------------------------------------------------------|
| Caenorhabditis briggsae | glutamine-dependent -d(+) synthetase                                            |  | 3  | F:GO:0016874;<br>F:GO:0005488;<br>P:GO:0006807                                                                                                                                         | - |                               | PTHR23090 (PANTHER),<br>PTHR23090:SF1 (PANTHER)                                                                                                    |
|                         | -                                                                               |  | 0  |                                                                                                                                                                                        |   |                               | -                                                                                                                                                  |
|                         | -                                                                               |  | 0  |                                                                                                                                                                                        |   |                               | -                                                                                                                                                  |
|                         | -                                                                               |  | 0  |                                                                                                                                                                                        |   |                               | -                                                                                                                                                  |
|                         | -                                                                               |  | 0  |                                                                                                                                                                                        |   |                               | -                                                                                                                                                  |
| Caenorhabditis elegans  | scp(small c-termi-l domain phosphatase)-like phosphatase family member (scp1-1) |  | 1  | F:GO:0016791                                                                                                                                                                           | - | EC:3.1.3.0                    | IPR004274; IPR011948;<br>G3DSA:3.40.50.1000 (GENE3D),<br>PTHR12210 (PANTHER),<br>PTHR12210:SF12 (PANTHER),<br>SSF56784 (SUPERFAMILY)               |
|                         | -                                                                               |  | 0  |                                                                                                                                                                                        |   |                               | IPR006849                                                                                                                                          |
| Caenorhabditis elegans  | membrane calcium atpase family member (mca-1)                                   |  | 10 | P:GO:0048840;<br>F:GO:0005388;<br>F:GO:0005516;<br>P:GO:0060119;<br>P:GO:0006754;<br>F:GO:0005524;<br>P:GO:0048919;<br>P:GO:0006816;<br>F:GO:0000287;<br>C:GO:0005887                  | - | EC:3.6.3.8                    | IPR001757; IPR006068; IPR013200;<br>G3DSA:1.20.1110.10 (GENE3D),<br>PTHR11939:SF75 (PANTHER),<br>SSF56784 (SUPERFAMILY), SSF81665<br>(SUPERFAMILY) |
|                         | -                                                                               |  | 0  |                                                                                                                                                                                        |   |                               | -                                                                                                                                                  |
| Caenorhabditis elegans  | briggsae cbr-fozi-1 protein                                                     |  | 4  | P:GO:0030036;<br>F:GO:0003779;<br>C:GO:0005622;<br>F:GO:0008270                                                                                                                        | - |                               | IPR015880                                                                                                                                          |
| Caenorhabditis elegans  | cub domain containing protein                                                   |  | 11 | P:GO:0001885;<br>F:GO:0046872;<br>P:GO:0035162;<br>P:GO:0035124;<br>P:GO:0006508;<br>F:GO:0008237;<br>F:GO:0005515;<br>P:GO:0048264;<br>P:GO:0030513;<br>P:GO:0001568;<br>P:GO:0001707 | - |                               | IPR000859; PTHR10127 (PANTHER),<br>PTHR10127:SF70 (PANTHER)                                                                                        |
|                         | -                                                                               |  | 0  |                                                                                                                                                                                        |   |                               | -                                                                                                                                                  |
|                         | -                                                                               |  | 0  |                                                                                                                                                                                        |   |                               | -                                                                                                                                                  |
| Caenorhabditis briggsae | gut-associated larval antigen-1                                                 |  | 0  |                                                                                                                                                                                        |   | C:GO:0005882;<br>P:GO:0009792 | -                                                                                                                                                  |
| Caenorhabditis briggsae | ffr_ caeel ame: full=protein fat-free homolog                                   |  | 1  | F:GO:0005515                                                                                                                                                                           | - |                               | IPR014812; PTHR15954 (PANTHER)                                                                                                                     |
| Caenorhabditis elegans  | d- polymerase zeta catalytic subunit                                            |  | 7  | F:GO:0003887;<br>P:GO:0006260;<br>C:GO:0016035;<br>P:GO:0019985;<br>F:GO:0003677;<br>F:GO:0008408;<br>F:GO:0000166                                                                     | - | EC:2.7.7.7                    | IPR006134; PTHR10322 (PANTHER),<br>PTHR10322:SF5 (PANTHER), SSF56672<br>(SUPERFAMILY)                                                              |



|                         |                                                                  |    |                                                                                                                                                                       |                                                                                                                                                                                                                                           |                                                                                                                                                                                                                                                                    |   |
|-------------------------|------------------------------------------------------------------|----|-----------------------------------------------------------------------------------------------------------------------------------------------------------------------|-------------------------------------------------------------------------------------------------------------------------------------------------------------------------------------------------------------------------------------------|--------------------------------------------------------------------------------------------------------------------------------------------------------------------------------------------------------------------------------------------------------------------|---|
| Caenorhabditis elegans  | low-density lipoprotein receptor-related protein 2-like          | 2  | P:GO:0050794;<br>C:GO:0044464                                                                                                                                         | -                                                                                                                                                                                                                                         | IPR000033; IPR000152; IPR000742;<br>IPR001881; IPR002172; IPR006210;<br>IPR011042; IPR013032; IPR018097;<br>G3DSA:2.10.25.10 (GENE3D),<br>PTHR10529 (PANTHER),<br>PTHR10529:SF2 (PANTHER), SignalP<br>(SIGNALP), SSF57196 (SUPERFAMILY),<br>SSF63825 (SUPERFAMILY) |   |
| Caenorhabditis elegans  | low-density lipoprotein receptor-related protein 2-like          | 2  | P:GO:0050794;<br>C:GO:0044464                                                                                                                                         | -                                                                                                                                                                                                                                         | IPR000033; IPR000152; IPR000742;<br>IPR001881; IPR002172; IPR006210;<br>IPR011042; IPR013032; IPR018097;<br>G3DSA:2.10.25.10 (GENE3D),<br>PTHR10529 (PANTHER),<br>PTHR10529:SF2 (PANTHER), SignalP<br>(SIGNALP), SSF57196 (SUPERFAMILY),<br>SSF63825 (SUPERFAMILY) |   |
| Caenorhabditis briggsae | mitochondrial import inner membrane translocase subunit<br>tim23 | 6  | F:GO:0008565;<br>C:GO:0005739;<br>P:GO:0040035;<br>P:GO:0009792;<br>P:GO:0015031;<br>C:GO:0016020                                                                     | -                                                                                                                                                                                                                                         | IPR003397; PTHR15371 (PANTHER)                                                                                                                                                                                                                                     |   |
| -                       | -                                                                | 0  | -                                                                                                                                                                     | -                                                                                                                                                                                                                                         | -                                                                                                                                                                                                                                                                  |   |
| Caenorhabditis elegans  | elegans protein confirmed by transcript evidence                 | 0  | -                                                                                                                                                                     | -                                                                                                                                                                                                                                         | IPR001534                                                                                                                                                                                                                                                          |   |
| -                       | -                                                                | 0  | -                                                                                                                                                                     | -                                                                                                                                                                                                                                         | -                                                                                                                                                                                                                                                                  |   |
| Caenorhabditis elegans  | gamma-glutamyltranspeptidase family protein                      | 0  | -                                                                                                                                                                     | F:GO:0003840;<br>C:GO:0016021                                                                                                                                                                                                             | IPR000101                                                                                                                                                                                                                                                          |   |
| -                       | -                                                                | 0  | -                                                                                                                                                                     | -                                                                                                                                                                                                                                         | -                                                                                                                                                                                                                                                                  |   |
| -                       | -                                                                | 0  | -                                                                                                                                                                     | -                                                                                                                                                                                                                                         | -                                                                                                                                                                                                                                                                  |   |
| Apis mellifera          | stretchin-mlck cg18255- isoform a                                | 0  | -                                                                                                                                                                     | -                                                                                                                                                                                                                                         | -                                                                                                                                                                                                                                                                  |   |
| Apis mellifera          | stretchin-mlck cg18255- isoform a                                | 0  | -                                                                                                                                                                     | P:GO:0015031;<br>C:GO:0016021;<br>C:GO:0016020;<br>F:GO:0030348;<br>C:GO:0031201;<br>P:GO:0043312;<br>P:GO:0006904;<br>P:GO:0043304;<br>C:GO:0005829;<br>C:GO:0042582;<br>P:GO:0016192;<br>C:GO:0042581;<br>C:GO:0005886;<br>C:GO:0070820 | -                                                                                                                                                                                                                                                                  | - |
| Ancylostoma caninum     | secreted protein 4 precursor                                     | 0  | -                                                                                                                                                                     | C:GO:0005576                                                                                                                                                                                                                              | IPR014044                                                                                                                                                                                                                                                          |   |
| -                       | -                                                                | 0  | -                                                                                                                                                                     | -                                                                                                                                                                                                                                         | -                                                                                                                                                                                                                                                                  |   |
| Caenorhabditis elegans  | l1p family of ribosomal proteins containing protein              | 10 | P:GO:0006412;<br>P:GO:0040010;<br>F:GO:0003723;<br>P:GO:0006396;<br>C:GO:0005840;<br>P:GO:0008340;<br>F:GO:0003735;<br>P:GO:0002119;<br>P:GO:0006898;<br>P:GO:0009792 | -                                                                                                                                                                                                                                         | EC:3.6.5.3<br>PTHR23105 (PANTHER),<br>PTHR23105:SF8 (PANTHER)                                                                                                                                                                                                      |   |

|                        |                                                     |    |                                                                                                                                                                                                         |                                                                 |             |                                                      |
|------------------------|-----------------------------------------------------|----|---------------------------------------------------------------------------------------------------------------------------------------------------------------------------------------------------------|-----------------------------------------------------------------|-------------|------------------------------------------------------|
| Caenorhabditis elegans | ubiquitin carboxyl-termi-l hydrolase family protein | 1  | F:GO:0016787                                                                                                                                                                                            | -                                                               |             | -                                                    |
| synthetic construct    | cellular retinoic acid binding protein 2            | 12 | F:GO:0001972;<br>P:GO:0006810;<br>P:GO:0035115;<br>F:GO:0019841;<br>P:GO:0006355;<br>P:GO:0008544;<br>P:GO:0042573;<br>P:GO:0007165;<br>F:GO:0005215;<br>F:GO:0016918;<br>C:GO:0005737;<br>C:GO:0005634 | -                                                               |             | IPR000463; IPR000566; IPR011038;<br>IPR012674        |
|                        |                                                     | 0  |                                                                                                                                                                                                         |                                                                 |             | -                                                    |
|                        |                                                     | 0  |                                                                                                                                                                                                         |                                                                 |             | -                                                    |
| Rattus norvegicus      | poly binding protein 1                              | 12 | P:GO:0043161;<br>F:GO:0003723;<br>F:GO:0008494;<br>P:GO:0050687;<br>F:GO:0031625;<br>P:GO:0008380;<br>P:GO:0045087;<br>F:GO:0003697;<br>C:GO:0030529;<br>P:GO:0006397;<br>C:GO:0005737;<br>C:GO:0005634 | -                                                               |             | SignalP (SIGNALP)                                    |
| Caenorhabditis elegans | briggsae cbr-tag-97 protein                         | 0  |                                                                                                                                                                                                         | P:GO:0006355;<br>F:GO:0043565;<br>C:GO:0005634;<br>F:GO:0003700 |             | -                                                    |
|                        |                                                     | 0  |                                                                                                                                                                                                         |                                                                 |             | -                                                    |
|                        |                                                     | 0  |                                                                                                                                                                                                         |                                                                 |             | -                                                    |
| Caenorhabditis elegans | briggsae cbr-unc-71 protein                         | 3  | F:GO:0004222;<br>P:GO:0006508;<br>F:GO:0008270                                                                                                                                                          | -                                                               | EC:3.4.24.0 | SignalP (SIGNALP)                                    |
|                        |                                                     | 0  |                                                                                                                                                                                                         |                                                                 |             | SignalP (SIGNALP)                                    |
| Brugia malayi          | r-se3 domain containing protein                     | 8  | F:GO:0004525;<br>F:GO:0003723;<br>P:GO:0000910;<br>P:GO:0031053;<br>P:GO:0007052;<br>P:GO:0019953;<br>P:GO:0009792;<br>C:GO:0005634                                                                     | -                                                               | EC:3.1.26.3 | IPR000999; PTHR11207 (PANTHER),<br>SignalP (SIGNALP) |
| Hydra magnipapillata   | hat family dimerisation domain containing protein   | 0  |                                                                                                                                                                                                         | C:GO:0009536;<br>F:GO:0005515                                   |             | -                                                    |
| Caenorhabditis elegans | cg32635 cg32635-pa                                  | 0  |                                                                                                                                                                                                         | F:GO:0005488                                                    |             | -                                                    |
| Caenorhabditis elegans | cg32635 cg32635-pa                                  | 0  |                                                                                                                                                                                                         | F:GO:0005488;<br>F:GO:0004872;<br>C:GO:0016021;<br>C:GO:0016020 |             | -                                                    |

|                         |                                                                  |  |                                                  |   |                                                                                                                    |                                                                                                                                                                                                                    |
|-------------------------|------------------------------------------------------------------|--|--------------------------------------------------|---|--------------------------------------------------------------------------------------------------------------------|--------------------------------------------------------------------------------------------------------------------------------------------------------------------------------------------------------------------|
| Loa loa                 | isoform c                                                        |  | P:GO:0035152;<br>3 C:GO:0016324;<br>F:GO:0005112 | - |                                                                                                                    | IPR000152; IPR000742; IPR001881;<br>IPR006209; IPR006210; IPR013032;<br>IPR018097; PR00010 (PRINTS),<br>G3DSA:2.10.25.10 (GENE3D),<br>PTHR11201 (PANTHER),<br>PTHR11201:SF245 (PANTHER),<br>SSF57196 (SUPERFAMILY) |
|                         | -                                                                |  | 0                                                |   |                                                                                                                    | -                                                                                                                                                                                                                  |
| Loa loa                 | dock7 protein                                                    |  |                                                  |   | F:GO:0005525;<br>F:GO:0008168;<br>F:GO:0051020;<br>F:GO:0005488;<br>F:GO:0004872;<br>P:GO:0032259;<br>F:GO:0005085 | IPR021816; PTHR23317 (PANTHER),<br>PTHR23317:SF27 (PANTHER)                                                                                                                                                        |
|                         |                                                                  |  |                                                  |   |                                                                                                                    | IPR008160; PTHR10499 (PANTHER),<br>PTHR10499:SF114 (PANTHER)                                                                                                                                                       |
| Caenorhabditis elegans  | acid phosphatase family protein confirmed by transcript evidence |  | 1 F:GO:0003993                                   | - | EC:3.1.3.2                                                                                                         | IPR000560; G3DSA:3.40.50.1240<br>(GENE3D), PTHR11567 (PANTHER),<br>PTHR11567:SF28 (PANTHER), SignalP<br>(SIGNALP), SSF53254 (SUPERFAMILY)                                                                          |
|                         | -                                                                |  | 0                                                |   |                                                                                                                    | -                                                                                                                                                                                                                  |
| Caenorhabditis briggsae | a-phase promoting complex subunit 1                              |  | 1 F:GO:0005515                                   | - |                                                                                                                    | -                                                                                                                                                                                                                  |
|                         | -                                                                |  | 0                                                |   |                                                                                                                    | SignalP (SIGNALP)                                                                                                                                                                                                  |
| Caenorhabditis elegans  | phosphatidylinositol 4-ki-se                                     |  | P:GO:0000003;<br>3 P:GO:0008219;<br>F:GO:0016740 | - |                                                                                                                    | -                                                                                                                                                                                                                  |
| Caenorhabditis briggsae | elegans protein confirmed by transcript evidence                 |  | 0                                                |   |                                                                                                                    | -                                                                                                                                                                                                                  |
|                         | -                                                                |  | 0                                                |   |                                                                                                                    | -                                                                                                                                                                                                                  |
| Caenorhabditis elegans  | briggsae cbr-inf1 protein                                        |  |                                                  |   | F:GO:0003779;<br>P:GO:0040011;<br>P:GO:0016043;<br>F:GO:0005515;<br>P:GO:0030036                                   | IPR001759                                                                                                                                                                                                          |
|                         | -                                                                |  | 0                                                |   |                                                                                                                    | SignalP (SIGNALP)                                                                                                                                                                                                  |
|                         | -                                                                |  | 0                                                |   |                                                                                                                    | -                                                                                                                                                                                                                  |
|                         | -                                                                |  | 0                                                |   |                                                                                                                    | -                                                                                                                                                                                                                  |
| Brugia malayi           | hypothetical protein Bm1_07015 [Brugia malayi]                   |  | 0                                                |   |                                                                                                                    | -                                                                                                                                                                                                                  |
| Caenorhabditis elegans  | udp-sugar transporter ust74c (fringe connection protein)         |  | 2 P:GO:0008643;<br>C:GO:0016021                  | - |                                                                                                                    | PTHR11132 (PANTHER), SignalP<br>(SIGNALP)                                                                                                                                                                          |
|                         | -                                                                |  | 0                                                |   |                                                                                                                    | SignalP (SIGNALP)                                                                                                                                                                                                  |

|                               |                                                            |    |                                                                                                                                                                                                                                                                                                                                                                                                    |                                                |                                                                                                                           |
|-------------------------------|------------------------------------------------------------|----|----------------------------------------------------------------------------------------------------------------------------------------------------------------------------------------------------------------------------------------------------------------------------------------------------------------------------------------------------------------------------------------------------|------------------------------------------------|---------------------------------------------------------------------------------------------------------------------------|
| synthetic construct           | apolipoprotein c-i                                         | 23 | P:GO:0010873;<br>C:GO:0042627;<br>P:GO:0033344;<br>C:GO:0034361;<br>P:GO:0008203;<br>C:GO:0034364;<br>P:GO:0034379;<br>P:GO:0042157;<br>F:GO:0031210;<br>P:GO:0010900;<br>P:GO:0048261;<br>P:GO:0034375;<br>F:GO:0005504;<br>P:GO:0051005;<br>P:GO:0033700;<br>P:GO:0006641;<br>C:GO:0005783;<br>P:GO:0045717;<br>F:GO:0004859;<br>P:GO:0034382;<br>P:GO:0032375;<br>P:GO:0010916;<br>F:GO:0060228 | -                                              | IPR006781; SignalP (SIGNALP)                                                                                              |
| -                             | -                                                          | 0  |                                                                                                                                                                                                                                                                                                                                                                                                    |                                                | -                                                                                                                         |
| Caenorhabditis elegans        | mgc83251 protein                                           | 0  |                                                                                                                                                                                                                                                                                                                                                                                                    | F:GO:0005488                                   | -                                                                                                                         |
| Cyathostominae sp. JM-2007a   | temporarily assigned gene -me family member (tag-273)      | 2  | F:GO:0008270;<br>P:GO:0000003                                                                                                                                                                                                                                                                                                                                                                      | -                                              | -                                                                                                                         |
| Brugia malayi                 | hypothetical protein Bm1_48510 [Brugia malayi]             | 0  |                                                                                                                                                                                                                                                                                                                                                                                                    |                                                | PTHR13587 (PANTHER),<br>PTHR13587:SF1 (PANTHER)                                                                           |
| -                             | -                                                          | 0  |                                                                                                                                                                                                                                                                                                                                                                                                    |                                                | -                                                                                                                         |
| -                             | -                                                          | 0  |                                                                                                                                                                                                                                                                                                                                                                                                    |                                                | -                                                                                                                         |
| -                             | -                                                          | 0  |                                                                                                                                                                                                                                                                                                                                                                                                    |                                                | SignalP (SIGNALP)                                                                                                         |
| -                             | -                                                          | 0  |                                                                                                                                                                                                                                                                                                                                                                                                    |                                                | SignalP (SIGNALP)                                                                                                         |
| Loa loa                       | arp1 actin-related protein 1 homolog contractin alpha      | 6  | C:GO:0005815;<br>C:GO:0005869;<br>F:GO:0005515;<br>P:GO:0016192;<br>F:GO:0005524;<br>C:GO:0005829                                                                                                                                                                                                                                                                                                  | -                                              | SignalP (SIGNALP)                                                                                                         |
| Caenorhabditis briggsae       | hypothetical transporter                                   | 4  | P:GO:0055085;<br>P:GO:0040011;<br>C:GO:0016021;<br>P:GO:0007413                                                                                                                                                                                                                                                                                                                                    | -                                              | -                                                                                                                         |
| -                             | -                                                          | 0  |                                                                                                                                                                                                                                                                                                                                                                                                    |                                                | -                                                                                                                         |
| Caenorhabditis briggsae       | mr- turnover protein 4 homolog                             | 2  | C:GO:0005840;<br>P:GO:0042254                                                                                                                                                                                                                                                                                                                                                                      | -                                              | -                                                                                                                         |
| -                             | -                                                          | 0  |                                                                                                                                                                                                                                                                                                                                                                                                    |                                                | -                                                                                                                         |
| Caenorhabditis elegans        | cnksr family member 3                                      | 1  | P:GO:0040026                                                                                                                                                                                                                                                                                                                                                                                       | -                                              | IPR001478; IPR001660; IPR010993;<br>IPR013761; IPR017874; IPR021129;<br>G3DSA:2.30.42.10 (GENE3D),<br>PTHR12844 (PANTHER) |
| Caenorhabditis elegans        | nucleolar complex-associated protein                       | 1  | C:GO:0005730                                                                                                                                                                                                                                                                                                                                                                                       | -                                              | SignalP (SIGNALP)                                                                                                         |
| Caenorhabditis briggsae       | elegans protein partially confirmed by transcript evidence | 0  |                                                                                                                                                                                                                                                                                                                                                                                                    | P:GO:0006508;<br>F:GO:0008236;<br>F:GO:0016787 | -                                                                                                                         |
| Strongylocentrotus purpuratus | ensangp00000010363                                         | 0  |                                                                                                                                                                                                                                                                                                                                                                                                    |                                                | -                                                                                                                         |
| -                             | -                                                          | 0  |                                                                                                                                                                                                                                                                                                                                                                                                    |                                                | -                                                                                                                         |

|                             |                                                               |    |                                                                                                                                                                                                                                                                             |                                                                                                                    |                                                                                                                                               |
|-----------------------------|---------------------------------------------------------------|----|-----------------------------------------------------------------------------------------------------------------------------------------------------------------------------------------------------------------------------------------------------------------------------|--------------------------------------------------------------------------------------------------------------------|-----------------------------------------------------------------------------------------------------------------------------------------------|
|                             | -                                                             | 0  |                                                                                                                                                                                                                                                                             |                                                                                                                    | SignalP (SIGNALP)                                                                                                                             |
| Loa loa                     | phosphatidylinositol 3- and 4-ki-se family protein            | 0  |                                                                                                                                                                                                                                                                             | F:GO:0016301;<br>F:GO:0005524;<br>F:GO:0005488;<br>F:GO:0016740;<br>F:GO:0000166;<br>F:GO:0016773;<br>F:GO:0004674 | -                                                                                                                                             |
| Caenorhabditis elegans      | tetratricopeptide repeat protein 27                           | 1  | F:GO:0005515                                                                                                                                                                                                                                                                | -                                                                                                                  | IPR011990; IPR013026; PTHR16193 (PANTHER), SSF48452 (SUPERFAMILY)                                                                             |
|                             | -                                                             | 0  |                                                                                                                                                                                                                                                                             |                                                                                                                    | -                                                                                                                                             |
| Caenorhabditis elegans      | dihydroorotate dehydroge-se                                   | 3  | F:GO:0004152;<br>P:GO:0034404;<br>P:GO:0046483                                                                                                                                                                                                                              | -                                                                                                                  | EC:1.3.99.11 IPR012135; IPR013785                                                                                                             |
| Caenorhabditis elegans      | isoform b                                                     | 2  | P:GO:0008152;<br>F:GO:0016791                                                                                                                                                                                                                                               | -                                                                                                                  | EC:3.1.3.0 -                                                                                                                                  |
| Caenorhabditis elegans      | vhs domain containing protein                                 | 0  |                                                                                                                                                                                                                                                                             | P:GO:0006886;<br>C:GO:0005622                                                                                      | IPR002014; IPR004152; IPR008942; IPR018205; G3DSA:1.20.58.160 (GENE3D), PTHR13856 (PANTHER), PTHR13856:SF30 (PANTHER), SSF89009 (SUPERFAMILY) |
|                             | -                                                             | 0  |                                                                                                                                                                                                                                                                             |                                                                                                                    | SignalP (SIGNALP)                                                                                                                             |
| Caenorhabditis elegans      | polarity and osmotic sensitivity defect family member (pod-2) | 0  |                                                                                                                                                                                                                                                                             | F:GO:0005524;<br>F:GO:0016874;<br>P:GO:0008152;<br>F:GO:0003824;<br>F:GO:0009374;<br>P:GO:0006633;<br>F:GO:0003989 | G3DSA:3.90.226.10 (GENE3D), PTHR18866 (PANTHER), PTHR18866:SF6 (PANTHER), SSF52096 (SUPERFAMILY)                                              |
| Caenorhabditis briggsae     | -dh oxidase                                                   | 2  | F:GO:0003824;<br>P:GO:0043581                                                                                                                                                                                                                                               | -                                                                                                                  | IPR001155; IPR013785; PTHR22893 (PANTHER), PTHR22893:SF6 (PANTHER), SSF51395 (SUPERFAMILY)                                                    |
|                             | -                                                             | 0  |                                                                                                                                                                                                                                                                             |                                                                                                                    | -                                                                                                                                             |
| Angiostrongylus cantonensis | elegans protein confirmed by transcript evidence              | 16 | P:GO:0006468;<br>P:GO:0007595;<br>P:GO:0040018;<br>P:GO:0007409;<br>P:GO:0010033;<br>P:GO:0021983;<br>F:GO:0046983;<br>C:GO:0005667;<br>F:GO:0046872;<br>P:GO:0046887;<br>P:GO:0008361;<br>F:GO:0043565;<br>P:GO:0007165;<br>P:GO:0042493;<br>F:GO:0003700;<br>P:GO:0045944 | -                                                                                                                  | IPR001630; IPR004827; IPR011616; G3DSA:1.20.5.170 (GENE3D), PTHR22952 (PANTHER), PTHR22952:SF11 (PANTHER)                                     |
| Caenorhabditis briggsae     | beta-lactamase family protein                                 | 0  |                                                                                                                                                                                                                                                                             |                                                                                                                    | IPR001466; IPR012338; G3DSA:3.40.710.10 (GENE3D), PTHR10566 (PANTHER), PTHR10566:SF6 (PANTHER), SignalP (SIGNALP)                             |
| Caenorhabditis elegans      | elegans protein partially confirmed by transcript evidence    | 0  |                                                                                                                                                                                                                                                                             | F:GO:0008236;<br>C:GO:0016021;<br>C:GO:0016020                                                                     | IPR002469; G3DSA:2.140.10.30 (GENE3D)                                                                                                         |
|                             | -                                                             | 0  |                                                                                                                                                                                                                                                                             |                                                                                                                    | -                                                                                                                                             |

|                           |                                                                                                        |   |                                                                                                                    |                                                                                                                    |                                                                                                                                                           |
|---------------------------|--------------------------------------------------------------------------------------------------------|---|--------------------------------------------------------------------------------------------------------------------|--------------------------------------------------------------------------------------------------------------------|-----------------------------------------------------------------------------------------------------------------------------------------------------------|
| Trichostrongylus vitrinus | serine or cysteine protease inhibitor                                                                  | 5 | P:GO:0008380;<br>F:GO:0005515;<br>C:GO:0005634;<br>F:GO:0003824;<br>P:GO:0008406                                   | -                                                                                                                  | IPR000215; G3DSA:2.30.39.10 (GENE3D), G3DSA:3.30.497.10 (GENE3D), PTHR11461:SF25 (PANTHER)                                                                |
| Loa loa                   | high incidence of males (increased x chromosome loss) family member (him-4)                            | 0 |                                                                                                                    | P:GO:0007399;<br>F:GO:0005488;<br>F:GO:0005509;<br>P:GO:0007155;<br>C:GO:0031225;<br>F:GO:0005515;<br>C:GO:0005886 | IPR007110; IPR013098; IPR013783; PTHR10489 (PANTHER), PTHR10489:SF27 (PANTHER), SSF48726 (SUPERFAMILY)                                                    |
| Homo sapiens              | anti-hiv-1 immunoglobulin heavy chain gamma-1 precursor                                                | 7 | P:GO:0006955;<br>F:GO:0003823;<br>C:GO:0005576;<br>C:GO:0005624;<br>C:GO:0016021;<br>F:GO:0005515;<br>C:GO:0005886 | -                                                                                                                  | IPR003006; IPR003596; IPR003597; IPR007110; IPR013106; IPR013783; PTHR23266 (PANTHER), PTHR23266:SF4 (PANTHER), SignalP (SIGNALP), SSF48726 (SUPERFAMILY) |
| Homo sapiens              | igh@ protein                                                                                           | 7 | P:GO:0006955;<br>F:GO:0003823;<br>C:GO:0005576;<br>C:GO:0005624;<br>C:GO:0016021;<br>F:GO:0005515;<br>C:GO:0005886 | -                                                                                                                  | IPR003006; IPR003597; IPR007110; IPR013106; IPR013783; PTHR23266 (PANTHER), PTHR23266:SF4 (PANTHER), SSF48726 (SUPERFAMILY)                               |
| Rattus sp.                | immunoglobulin heavy chain                                                                             | 7 | P:GO:0006955;<br>F:GO:0003823;<br>C:GO:0005576;<br>C:GO:0005624;<br>C:GO:0016021;<br>F:GO:0005515;<br>C:GO:0005886 | -                                                                                                                  | IPR003006; IPR003597; IPR007110; IPR013783; PTHR23266 (PANTHER), PTHR23266:SF4 (PANTHER), SSF48726 (SUPERFAMILY)                                          |
| Homo sapiens              | anti-rabies sojb immunoglobulin heavy chain                                                            | 6 | P:GO:0006955;<br>F:GO:0003823;<br>C:GO:0005576;<br>C:GO:0005624;<br>C:GO:0016021;<br>C:GO:0005886                  | -                                                                                                                  | IPR003006; IPR003597; IPR007110; IPR013106; IPR013783; PTHR23266 (PANTHER), PTHR23266:SF4 (PANTHER), SSF48726 (SUPERFAMILY)                               |
| synthetic construct       | b chain crystal structure of a human type iii fc gamma receptor in complex with an fc fragment of igg1 | 7 | P:GO:0006955;<br>F:GO:0003823;<br>C:GO:0005576;<br>C:GO:0005624;<br>C:GO:0016021;<br>F:GO:0005515;<br>C:GO:0005886 | -                                                                                                                  | IPR003006; IPR003597; IPR007110; IPR013783; PTHR23266 (PANTHER), PTHR23266:SF4 (PANTHER), SSF48726 (SUPERFAMILY)                                          |
| Homo sapiens              | igh@ protein                                                                                           | 7 | P:GO:0006955;<br>F:GO:0003823;<br>C:GO:0005576;<br>C:GO:0005624;<br>C:GO:0016021;<br>F:GO:0005515;<br>C:GO:0005886 | -                                                                                                                  | IPR003006; IPR003597; IPR007110; IPR013106; IPR013783; PTHR23266 (PANTHER), PTHR23266:SF4 (PANTHER), SSF48726 (SUPERFAMILY)                               |
| Homo sapiens              | immunoglobulin heavy chain variable region                                                             | 0 |                                                                                                                    |                                                                                                                    |                                                                                                                                                           |
| Homo sapiens              | immunoglobulin heavy chain variable region                                                             | 0 |                                                                                                                    |                                                                                                                    |                                                                                                                                                           |

|                             |                                                            |   |                                                                                                                    |   |                             |                                                                                                                                      |
|-----------------------------|------------------------------------------------------------|---|--------------------------------------------------------------------------------------------------------------------|---|-----------------------------|--------------------------------------------------------------------------------------------------------------------------------------|
| Homo sapiens                | igh@ protein                                               | 7 | P:GO:0006955;<br>F:GO:0003823;<br>C:GO:0005576;<br>C:GO:0005624;<br>C:GO:0016021;<br>F:GO:0005515;<br>C:GO:0005886 | - |                             | IPR003006; IPR003597; IPR007110;<br>IPR013106; IPR013783; PTHR23266<br>(PANTHER), PTHR23266:SF4<br>(PANTHER), SSF48726 (SUPERFAMILY) |
| Homo sapiens                | anti-hiv-1 gp120 immunoglobulin heavy chain                | 7 | P:GO:0006955;<br>F:GO:0003823;<br>C:GO:0005576;<br>C:GO:0005624;<br>C:GO:0016021;<br>F:GO:0005515;<br>C:GO:0005886 | - |                             | IPR003006; IPR003597; IPR007110;<br>IPR013106; IPR013783; PTHR23266<br>(PANTHER), PTHR23266:SF4<br>(PANTHER), SSF48726 (SUPERFAMILY) |
|                             |                                                            | 0 |                                                                                                                    |   |                             | -                                                                                                                                    |
|                             |                                                            | 0 |                                                                                                                    |   |                             | SignalP (SIGNALP)                                                                                                                    |
| Caenorhabditis briggsae     | charged multivesicular body protein 2a                     | 2 | P:GO:0015031;<br>P:GO:0009792                                                                                      | - |                             | IPR005024; PTHR10476 (PANTHER),<br>PTHR10476:SF4 (PANTHER)                                                                           |
|                             |                                                            | 0 |                                                                                                                    |   |                             | SignalP (SIGNALP)                                                                                                                    |
| Caenorhabditis elegans      | entric chromosome binding protein family member (hcp-6)    | 0 |                                                                                                                    |   |                             | -                                                                                                                                    |
|                             |                                                            | 0 |                                                                                                                    |   |                             | -                                                                                                                                    |
|                             |                                                            | 0 |                                                                                                                    |   |                             | -                                                                                                                                    |
| Caenorhabditis elegans      | spermidine synthase                                        | 7 | P:GO:0006468;<br>F:GO:0004715;<br>P:GO:0008295;<br>F:GO:0005515;<br>F:GO:0004766;<br>F:GO:0005524;<br>C:GO:0005829 | - | EC:2.7.10.2;<br>EC:2.5.1.16 | IPR001045; G3DSA:2.30.140.10<br>(GENE3D), G3DSA:3.40.50.150<br>(GENE3D), PTHR11558:SF11<br>(PANTHER), SSF53335 (SUPERFAMILY)         |
|                             |                                                            | 0 |                                                                                                                    |   |                             | -                                                                                                                                    |
|                             |                                                            | 0 |                                                                                                                    |   |                             | -                                                                                                                                    |
| Caenorhabditis elegans      | beta- -galactosyltransferase                               | 4 | P:GO:0045747;<br>P:GO:0009636;<br>P:GO:0075015;<br>F:GO:0008376                                                    | - |                             | IPR003859; G3DSA:3.90.550.10<br>(GENE3D), PTHR19300:SF7<br>(PANTHER), SignalP (SIGNALP),<br>SSF53448 (SUPERFAMILY)                   |
| Caenorhabditis elegans      | multidrug resistance protein family member (mrp-1)         | 6 | F:GO:0042626;<br>C:GO:0044459;<br>P:GO:0055085;<br>F:GO:0005524;<br>F:GO:0008514;<br>C:GO:0016021                  | - |                             | IPR011527; IPR017940;<br>G3DSA:1.20.1560.10 (GENE3D),<br>PTHR19242 (PANTHER),<br>PTHR19242:SF35 (PANTHER), SignalP<br>(SIGNALP)      |
| Macaca mulatta              | complement factor b                                        | 6 | F:GO:0004252;<br>P:GO:0006957;<br>C:GO:0005886;<br>F:GO:0001848;<br>C:GO:0005576;<br>P:GO:0006508                  | - | EC:3.4.21.0                 | PTHR19325 (PANTHER),<br>PTHR19325:SF22 (PANTHER)                                                                                     |
| Angiostrongylus cantonensis | hypothetical protein [Angiostrongylus cantonensis]         | 0 |                                                                                                                    |   |                             | -                                                                                                                                    |
| Caenorhabditis elegans      | elegans protein partially confirmed by transcript evidence | 6 | F:GO:0003899;<br>P:GO:0040010;<br>P:GO:0000003;<br>P:GO:0007413;<br>P:GO:0006898;<br>P:GO:0006350                  | - | EC:2.7.7.6                  | IPR002092; G3DSA:1.10.150.20<br>(GENE3D), G3DSA:1.10.287.280<br>(GENE3D), G3DSA:3.30.70.370<br>(GENE3D), SSF56672 (SUPERFAMILY)      |

|                         |                                          |    |                                                                                                                                                                                                                                                                                                                                                                                                                                                                        |                                                                                                                                                      |                            |                                                                                                            |
|-------------------------|------------------------------------------|----|------------------------------------------------------------------------------------------------------------------------------------------------------------------------------------------------------------------------------------------------------------------------------------------------------------------------------------------------------------------------------------------------------------------------------------------------------------------------|------------------------------------------------------------------------------------------------------------------------------------------------------|----------------------------|------------------------------------------------------------------------------------------------------------|
| Caenorhabditis briggsae | briggsae cbr-ncx-3 protein               | 0  |                                                                                                                                                                                                                                                                                                                                                                                                                                                                        | P:GO:0006816;<br>C:GO:0016021;<br>P:GO:0007154;<br>C:GO:0016020;<br>P:GO:0055085;<br>F:GO:0005432                                                    |                            | PTHR11878 (PANTHER),<br>PTHR11878:SF2 (PANTHER)                                                            |
| Caenorhabditis elegans  | solute carrier family member b1          | 8  | P:GO:0009792;<br>C:GO:0005792;<br>C:GO:0005622;<br>P:GO:0006810;<br>P:GO:0040010;<br>P:GO:0000003;<br>C:GO:0044425;<br>F:GO:0005459                                                                                                                                                                                                                                                                                                                                    | -                                                                                                                                                    |                            | IPR013657; PTHR10778 (PANTHER),<br>PTHR10778:SF10 (PANTHER), SignalP<br>(SIGNALP), SSF103481 (SUPERFAMILY) |
| Caenorhabditis briggsae | briggsae cbr-cdh-1 protein               | 0  |                                                                                                                                                                                                                                                                                                                                                                                                                                                                        | C:GO:0016021;<br>C:GO:0016020;<br>P:GO:0002119;<br>P:GO:0040011;<br>P:GO:0040010;<br>C:GO:0005886;<br>P:GO:0007156;<br>F:GO:0005509;<br>P:GO:0007155 |                            | IPR002126; IPR015919                                                                                       |
|                         | -                                        | 0  |                                                                                                                                                                                                                                                                                                                                                                                                                                                                        |                                                                                                                                                      |                            | -                                                                                                          |
|                         | -                                        | 0  |                                                                                                                                                                                                                                                                                                                                                                                                                                                                        |                                                                                                                                                      |                            | -                                                                                                          |
| Caenorhabditis elegans  | forkhead protein forkhead protein domain | 28 | P:GO:0007423;<br>P:GO:0009888;<br>P:GO:0007495;<br>F:GO:0031624;<br>P:GO:0006309;<br>P:GO:0007389;<br>F:GO:0003704;<br>F:GO:0043028;<br>F:GO:0016563;<br>C:GO:0005667;<br>P:GO:0030111;<br>F:GO:0003705;<br>P:GO:0006917;<br>P:GO:0009790;<br>P:GO:0010551;<br>P:GO:0009887;<br>F:GO:0030331;<br>P:GO:0051090;<br>P:GO:0016481;<br>P:GO:0045944;<br>F:GO:0003690;<br>P:GO:0007399;<br>F:GO:0008301;<br>F:GO:0010843;<br>P:GO:0043280;<br>P:GO:0030166;<br>F:GO:0008134 | -                                                                                                                                                    |                            | IPR001766; IPR011991; IPR018122;<br>SSF46785 (SUPERFAMILY)                                                 |
| Ixodes scapularis       | xylitol dehydroge-se                     | 5  | P:GO:0003939;<br>P:GO:0005975;<br>P:GO:0055114;<br>F:GO:0046526;<br>F:GO:0008270                                                                                                                                                                                                                                                                                                                                                                                       | -                                                                                                                                                    | EC:1.1.1.14;<br>EC:1.1.1.9 | IPR002085; IPR002328; IPR011032;<br>IPR013154; G3DSA:3.90.180.10<br>(GENE3D), PTHR11695:SF38<br>(PANTHER)  |



|                         |                                                            |   |                                                                                                                                     |   |             |                                                                                                             |
|-------------------------|------------------------------------------------------------|---|-------------------------------------------------------------------------------------------------------------------------------------|---|-------------|-------------------------------------------------------------------------------------------------------------|
| Caenorhabditis briggsae | polypeptide n-acetylgalactosaminyltransferase 13           | 4 | F:GO:0004653;<br>C:GO:0005794;<br>P:GO:0006493;<br>C:GO:0016020                                                                     | - | EC:2.4.1.41 | IPR001173; G3DSA:3.90.550.10 (GENE3D), PTHR11675 (PANTHER), SSF53448 (SUPERFAMILY)                          |
| Caenorhabditis elegans  | hcp beta-lactamase-like protein cg13865                    | 4 | P:GO:0043161;<br>F:GO:0003684;<br>P:GO:0006289;<br>C:GO:0005634                                                                     | - |             | IPR006597; IPR011990; PTHR13891 (PANTHER), SSF81901 (SUPERFAMILY)                                           |
| -                       | -                                                          | 0 |                                                                                                                                     |   |             | -                                                                                                           |
| Caenorhabditis briggsae | elegans protein confirmed by transcript evidence           | 2 | P:GO:0006810;<br>C:GO:0016020                                                                                                       | - |             | -                                                                                                           |
| -                       | -                                                          | 0 |                                                                                                                                     |   |             | -                                                                                                           |
| -                       | -                                                          | 0 |                                                                                                                                     |   |             | -                                                                                                           |
| -                       | -                                                          | 0 |                                                                                                                                     |   |             | SignalP (SIGNALP)                                                                                           |
| Caenorhabditis elegans  | apical junction molecule family member (ajm-1)             | 8 | P:GO:0009792;<br>C:GO:0043296;<br>F:GO:0046872;<br>P:GO:0045216;<br>F:GO:0008092;<br>C:GO:0005913;<br>P:GO:0040010;<br>P:GO:0040011 | - |             | IPR001092                                                                                                   |
| -                       | -                                                          | 0 |                                                                                                                                     |   |             | -                                                                                                           |
| Brugia malayi           | #NAME?                                                     | 3 | P:GO:0009451;<br>F:GO:0003824;<br>F:GO:0051539                                                                                      | - |             | IPR002792; IPR005839; G3DSA:3.80.30.20 (GENE3D)                                                             |
| -                       | -                                                          | 0 |                                                                                                                                     |   |             | -                                                                                                           |
| Caenorhabditis briggsae | transport protein sec61 subunit beta                       | 5 | P:GO:0030970;<br>P:GO:0000060;<br>P:GO:0000003;<br>P:GO:0030433;<br>F:GO:0048408                                                    | - |             | IPR005609; PTHR13509 (PANTHER)                                                                              |
| Caenorhabditis elegans  | glycoside hydrolase family 25 protein                      | 4 | F:GO:0005515;<br>P:GO:0008340;<br>P:GO:0008152;<br>F:GO:0003824                                                                     | - |             | IPR013781; IPR017853; PTHR23208 (PANTHER), PTHR23208:SF13 (PANTHER), SignalP (SIGNALP)                      |
| -                       | -                                                          | 0 |                                                                                                                                     |   |             | -                                                                                                           |
| -                       | -                                                          | 0 |                                                                                                                                     |   |             | -                                                                                                           |
| Caenorhabditis briggsae | 2-hydroxyacyl- lyase 1                                     | 3 | F:GO:0030976;<br>F:GO:0000287;<br>F:GO:0003824                                                                                      | - |             | IPR011766; G3DSA:3.40.50.970 (GENE3D), PTHR18968 (PANTHER), PTHR18968:SF6 (PANTHER), SSF52518 (SUPERFAMILY) |
| -                       | -                                                          | 0 |                                                                                                                                     |   |             | -                                                                                                           |
| Caenorhabditis elegans  | isoform a                                                  | 3 | C:GO:0005737;<br>P:GO:0042325;<br>F:GO:0005515                                                                                      | - |             | IPR008025; PTHR16188:SF2 (PANTHER)                                                                          |
| Caenorhabditis elegans  | hypothetical protein Y72A10A.1 [Caenorhabditis elegans]    | 0 |                                                                                                                                     |   |             | IPR001810; IPR022364; G3DSA:3.80.10.10 (GENE3D), SignalP (SIGNALP)                                          |
| Caenorhabditis elegans  | serpentine class ab (class a-like) family member (srab-14) | 3 | C:GO:0016021;<br>P:GO:0007606;<br>F:GO:0004888                                                                                      | - |             | -                                                                                                           |

|                         |                                                            |   |                                                                                                   |                                                                                                                                                                       |             |                                                                                                                                                                              |
|-------------------------|------------------------------------------------------------|---|---------------------------------------------------------------------------------------------------|-----------------------------------------------------------------------------------------------------------------------------------------------------------------------|-------------|------------------------------------------------------------------------------------------------------------------------------------------------------------------------------|
| Caenorhabditis briggsae | nfx1-type zinc finger-containing protein 1                 | 0 |                                                                                                   | F:GO:0008168;<br>F:GO:0003700;<br>C:GO:0005634;<br>F:GO:0003676;<br>F:GO:0003964;<br>F:GO:0008270;<br>F:GO:0003723;<br>P:GO:0006278;<br>P:GO:0006355;<br>P:GO:0006508 | -           |                                                                                                                                                                              |
| Caenorhabditis elegans  | elegans protein partially confirmed by transcript evidence | 3 | P:GO:0040015;<br>P:GO:0040010;<br>P:GO:0040011                                                    | -                                                                                                                                                                     |             | IPR000859; IPR001304; IPR016186;<br>IPR016187; PTHR22991 (PANTHER)                                                                                                           |
|                         | -                                                          | 0 |                                                                                                   |                                                                                                                                                                       |             | -                                                                                                                                                                            |
| Caenorhabditis briggsae | rho-associated protein ki-se 1                             | 5 | F:GO:0005488;<br>P:GO:0023052;<br>F:GO:0016740;<br>P:GO:0050794;<br>C:GO:0005737                  | -                                                                                                                                                                     |             | IPR000961; IPR001849; IPR002219;<br>IPR011993; PD936484 (PRODOM),<br>G3DSA:3.30.60.20 (GENE3D),<br>PTHR22988 (PANTHER), SSF50729<br>(SUPERFAMILY), SSF57889<br>(SUPERFAMILY) |
| Loa loa                 | elegans protein partially confirmed by transcript evidence | 0 |                                                                                                   | P:GO:0000003;<br>P:GO:0040011;<br>P:GO:0009792;<br>P:GO:0002119;<br>P:GO:0040007;<br>F:GO:0005515                                                                     | -           |                                                                                                                                                                              |
| Caenorhabditis briggsae | gcc2 and gcc3 family protein                               | 5 | P:GO:0035152;<br>C:GO:0016324;<br>F:GO:0005515;<br>F:GO:0005509;<br>C:GO:0016021                  | -                                                                                                                                                                     |             | IPR000742; IPR006210; IPR011641;<br>IPR013032; G3DSA:2.10.25.10<br>(GENE3D), PTHR11201 (PANTHER),<br>PTHR11201:SF226 (PANTHER),<br>SSF57196 (SUPERFAMILY)                    |
|                         | -                                                          | 0 |                                                                                                   |                                                                                                                                                                       |             | -                                                                                                                                                                            |
|                         | -                                                          | 0 |                                                                                                   |                                                                                                                                                                       |             | -                                                                                                                                                                            |
| Loa loa                 | asparagine synthetase domain containing 1                  | 1 | P:GO:0006520                                                                                      | -                                                                                                                                                                     |             | -                                                                                                                                                                            |
| Caenorhabditis elegans  | mitogen-activated protein ki-se ki-se ki-se 15             | 4 | P:GO:0006468;<br>F:GO:0005515;<br>F:GO:0005524;<br>F:GO:0004674                                   | -                                                                                                                                                                     | EC:2.7.11.0 | IPR000719; IPR001245; IPR008271;<br>IPR011009; IPR017442;<br>G3DSA:1.10.510.10 (GENE3D),<br>G3DSA:3.30.200.20 (GENE3D),<br>PTHR22986 (PANTHER),<br>PTHR22986:SF54 (PANTHER)  |
| Caenorhabditis elegans  | carbonic anhydrase                                         | 4 | P:GO:0044237;<br>F:GO:0008270;<br>F:GO:0004089;<br>P:GO:0015976                                   | -                                                                                                                                                                     | EC:4.2.1.1  | IPR001765; PTHR11002:SF1<br>(PANTHER)                                                                                                                                        |
|                         | -                                                          | 0 |                                                                                                   |                                                                                                                                                                       |             | -                                                                                                                                                                            |
| Caenorhabditis briggsae | alanine-glyoxylate aminotransferase                        | 2 | F:GO:0030170;<br>F:GO:0008483                                                                     | -                                                                                                                                                                     | EC:2.6.1.0  | IPR005814; IPR015421;<br>PTHR11986:SF23 (PANTHER)                                                                                                                            |
|                         | -                                                          | 0 |                                                                                                   |                                                                                                                                                                       |             | -                                                                                                                                                                            |
| Caenorhabditis elegans  | seryl-tr- synthetase                                       | 6 | F:GO:0005515;<br>F:GO:0005524;<br>C:GO:0005829;<br>P:GO:0006434;<br>C:GO:0005739;<br>F:GO:0004828 | -                                                                                                                                                                     | EC:6.1.1.11 | -                                                                                                                                                                            |

|                        |                                                  |    |                                                                                                                                                                                                         |   |                                                                                  |                                                                                                                                                      |
|------------------------|--------------------------------------------------|----|---------------------------------------------------------------------------------------------------------------------------------------------------------------------------------------------------------|---|----------------------------------------------------------------------------------|------------------------------------------------------------------------------------------------------------------------------------------------------|
| Homo sapiens           | major histocompatibility class dp alpha 1        | 9  | C:GO:0005789;<br>C:GO:0005887;<br>C:GO:0042613;<br>C:GO:0005794;<br>P:GO:0002504;<br>C:GO:0005765;<br>F:GO:0032395;<br>C:GO:0010008;<br>P:GO:0006955                                                    | - |                                                                                  | SignalP (SIGNALP)                                                                                                                                    |
| Caenorhabditis elegans | potential gamma-butyrobetaine hydroxylase        | 3  | F:GO:0005488;<br>F:GO:0016491;<br>P:GO:0008152                                                                                                                                                          | - |                                                                                  | IPR003819; IPR012776;<br>G3DSA:3.60.130.10 (GENE3D),<br>PTHR10696 (PANTHER), SSF51197<br>(SUPERFAMILY)                                               |
| Caenorhabditis elegans | ap-3 complex subunit beta-2                      | 12 | P:GO:0009792;<br>P:GO:0010171;<br>P:GO:0002119;<br>C:GO:0005794;<br>F:GO:0005515;<br>C:GO:0030117;<br>F:GO:0008565;<br>P:GO:0006886;<br>P:GO:0007040;<br>P:GO:0019915;<br>P:GO:0040007;<br>P:GO:0006897 | - |                                                                                  | IPR002553; IPR011989; IPR016024;<br>PTHR11134 (PANTHER),<br>PTHR11134:SF2 (PANTHER)                                                                  |
| Ancylostoma caninum    | metalloprotease 1 precursor                      | 3  | F:GO:0046872;<br>P:GO:0000003;<br>F:GO:0008237                                                                                                                                                          | - |                                                                                  | IPR001506; IPR013032;<br>G3DSA:3.40.390.10 (GENE3D),<br>PTHR10127 (PANTHER),<br>PTHR10127:SF65 (PANTHER)                                             |
| Caenorhabditis elegans | exosome complex exonuclease rrp45                | 8  | P:GO:0009792;<br>P:GO:0002119;<br>F:GO:0000175;<br>F:GO:0003723;<br>P:GO:0040010;<br>P:GO:0000003;<br>F:GO:0016779;<br>P:GO:0006396                                                                     | - | EC:2.7.7.0                                                                       | -                                                                                                                                                    |
|                        | ankyrin repeat protein                           | 0  |                                                                                                                                                                                                         |   |                                                                                  | IPR002110; IPR020683; PTHR18958<br>(PANTHER), PTHR18958:SF241<br>(PANTHER)                                                                           |
|                        | -                                                | 0  |                                                                                                                                                                                                         |   |                                                                                  | -                                                                                                                                                    |
|                        | -                                                | 0  |                                                                                                                                                                                                         |   |                                                                                  | -                                                                                                                                                    |
|                        | -                                                | 0  |                                                                                                                                                                                                         |   |                                                                                  | IPR016059                                                                                                                                            |
| Brugia malayi          | grip and coiled-coil domain-containing protein 1 | 0  |                                                                                                                                                                                                         |   | C:GO:0005737;<br>C:GO:0016020;<br>C:GO:0000139;<br>C:GO:0005794;<br>F:GO:0005515 | -                                                                                                                                                    |
| Brugia malayi          | d--damage inducible protein 2                    | 0  |                                                                                                                                                                                                         |   | P:GO:0006508;<br>F:GO:0004190;<br>C:GO:0005575                                   | IPR000449; IPR009007; IPR009060;<br>IPR015940; IPR019103; IPR021109;<br>G3DSA:1.10.8.10 (GENE3D),<br>PTHR12917 (PANTHER),<br>PTHR12917:SF1 (PANTHER) |

|                         |                                                                  |    |                                                                                                                                                                                        |              |   |                                                                                                                              |
|-------------------------|------------------------------------------------------------------|----|----------------------------------------------------------------------------------------------------------------------------------------------------------------------------------------|--------------|---|------------------------------------------------------------------------------------------------------------------------------|
| Caenorhabditis elegans  | brefeldin a-inhibited guanine nucleotide-exchange protein 2-like | 11 | C:GO:0005829;<br>P:GO:0040010;<br>F:GO:0005488;<br>C:GO:0000139;<br>P:GO:0032012;<br>P:GO:0000003;<br>F:GO:0005085;<br>P:GO:0002119;<br>P:GO:0040011;<br>P:GO:0006898;<br>P:GO:0009792 | -            | - | IPR000904; G3DSA:1.10.220.20 (GENE3D), PTHR10663 (PANTHER), PTHR10663:SF1 (PANTHER)                                          |
| -                       | -                                                                | 0  | -                                                                                                                                                                                      | -            | - | -                                                                                                                            |
| Caenorhabditis briggsae | s1 r- binding domain containing protein                          | 3  | P:GO:0022414;<br>P:GO:0007275;<br>P:GO:0040007                                                                                                                                         | -            | - | -                                                                                                                            |
| Caenorhabditis briggsae | yrn9_caeel ame: full=uncharacterized protein                     | 0  | -                                                                                                                                                                                      | -            | - | SignalP (SIGNALP)                                                                                                            |
| Caenorhabditis elegans  | elegans protein partially confirmed by transcript evidence       | 9  | P:GO:0009792;<br>F:GO:0046872;<br>F:GO:0016491;<br>P:GO:0040018;<br>P:GO:0040017;<br>P:GO:0040010;<br>P:GO:0000003;<br>P:GO:0008340;<br>P:GO:0008152                                   | -            | - | IPR001128; PTHR19383:SF176 (PANTHER), SignalP (SIGNALP)                                                                      |
| -                       | -                                                                | 0  | -                                                                                                                                                                                      | -            | - | -                                                                                                                            |
| Ancylostoma caninum     | secreted protein asp-2                                           | 0  | -                                                                                                                                                                                      | C:GO:0005576 | - | IPR001283; IPR014044; SignalP (SIGNALP)                                                                                      |
| -                       | -                                                                | 0  | -                                                                                                                                                                                      | -            | - | -                                                                                                                            |
| Dictyocaulus viviparus  | elegans protein confirmed by transcript evidence                 | 2  | P:GO:0009792;<br>F:GO:0005509                                                                                                                                                          | -            | - | IPR002048; IPR011992; IPR018247; IPR018248; IPR018249; PTHR23050 (PANTHER), PTHR23050:SF10 (PANTHER), SSF47473 (SUPERFAMILY) |
| Homo sapiens            | major histocompatibility class dp alpha 1                        | 9  | C:GO:0005789;<br>C:GO:0005887;<br>C:GO:0042613;<br>C:GO:0005794;<br>P:GO:0002504;<br>C:GO:0005765;<br>F:GO:0032395;<br>C:GO:0010008;<br>P:GO:0006955                                   | -            | - | SignalP (SIGNALP)                                                                                                            |
| -                       | -                                                                | 0  | -                                                                                                                                                                                      | -            | - | -                                                                                                                            |
| Loa loa                 | rhotekin-like isoform 2                                          | 3  | F:GO:0017049;<br>P:GO:0007165;<br>F:GO:0005095                                                                                                                                         | -            | - | -                                                                                                                            |
| -                       | -                                                                | 0  | -                                                                                                                                                                                      | -            | - | IPR008610                                                                                                                    |
| Caenorhabditis elegans  | type iii restriction res subunit family protein                  | 5  | P:GO:0006259;<br>C:GO:0017117;<br>F:GO:0003677;<br>F:GO:0005524;<br>F:GO:0017116                                                                                                       | -            | - | -                                                                                                                            |
| Caenorhabditis elegans  | elegans protein partially confirmed by transcript evidence       | 0  | -                                                                                                                                                                                      | -            | - | -                                                                                                                            |

|         |                                                                  |    |                                                                                                                                                                                                                                                                                                                                                                                                                                                                         |            |                                                                                              |
|---------|------------------------------------------------------------------|----|-------------------------------------------------------------------------------------------------------------------------------------------------------------------------------------------------------------------------------------------------------------------------------------------------------------------------------------------------------------------------------------------------------------------------------------------------------------------------|------------|----------------------------------------------------------------------------------------------|
| Loa loa | cohesin subunit sa-                                              | 28 | F:GO:000515;<br>P:GO:0006412;<br>P:GO:0016045;<br>P:GO:0007141;<br>C:GO:0005576;<br>C:GO:0005730;<br>P:GO:0007286;<br>F:GO:0003677;<br>C:GO:0005875;<br>F:GO:0003735;<br>P:GO:0045449;<br>P:GO:0032494;<br>P:GO:0008592;<br>P:GO:0007379;<br>C:GO:0005811;<br>F:GO:0032500;<br>P:GO:0006965;<br>F:GO:0016019;<br>C:GO:0005887;<br>P:GO:0045087;<br>C:GO:0035327;<br>C:GO:0000922;<br>C:GO:0005721;<br>P:GO:0006260;<br>C:GO:0008278;<br>C:GO:0000780;<br>C:GO:0022627;  | EC:3.6.5.3 | IPR020839; PTHR11199 (PANTHER)                                                               |
| Loa loa | cohesin subunit sa-                                              | 28 | F:GO:0005515;<br>P:GO:0006412;<br>P:GO:0016045;<br>P:GO:0007141;<br>C:GO:0005576;<br>C:GO:0005730;<br>P:GO:0007286;<br>F:GO:0003677;<br>C:GO:0005875;<br>F:GO:0003735;<br>P:GO:0045449;<br>P:GO:0032494;<br>P:GO:0008592;<br>P:GO:0007379;<br>C:GO:0005811;<br>F:GO:0032500;<br>P:GO:0006965;<br>F:GO:0016019;<br>C:GO:0005887;<br>P:GO:0045087;<br>C:GO:0035327;<br>C:GO:0000922;<br>C:GO:0005721;<br>P:GO:0006260;<br>C:GO:0008278;<br>C:GO:0000780;<br>C:GO:0022627; | EC:3.6.5.3 | IPR020839; PTHR11199 (PANTHER)                                                               |
| Loa loa | ankyrin repeat and sterile alpha motif domain containing partial | 0  |                                                                                                                                                                                                                                                                                                                                                                                                                                                                         |            | IPR006020; IPR011993; PTHR18958 (PANTHER), PTHR18958:SF212 (PANTHER), SSF50729 (SUPERFAMILY) |

|                         |                                                         |    |                                                                                                                                                                                        |                                                                                                                                                                                                                          |            |                                                                                     |
|-------------------------|---------------------------------------------------------|----|----------------------------------------------------------------------------------------------------------------------------------------------------------------------------------------|--------------------------------------------------------------------------------------------------------------------------------------------------------------------------------------------------------------------------|------------|-------------------------------------------------------------------------------------|
| Caenorhabditis elegans  | d--binding protein smubp-2                              | 0  |                                                                                                                                                                                        | F:GO:0008168;<br>F:GO:0003700;<br>C:GO:0005634;<br>F:GO:0003677;<br>F:GO:0003676;<br>F:GO:0000166;<br>F:GO:0017111;<br>F:GO:0008270;<br>F:GO:0005524;<br>P:GO:0006355;<br>P:GO:0006508;<br>C:GO:0005622;<br>F:GO:0046872 |            | PTHR10887 (PANTHER),<br>PTHR10887:SF10 (PANTHER)                                    |
|                         | -                                                       | 0  |                                                                                                                                                                                        |                                                                                                                                                                                                                          |            | -                                                                                   |
|                         | -                                                       | 0  |                                                                                                                                                                                        |                                                                                                                                                                                                                          |            | -                                                                                   |
|                         | -                                                       | 0  |                                                                                                                                                                                        |                                                                                                                                                                                                                          |            | SignalP (SIGNALP)                                                                   |
| Caenorhabditis briggsae | Hypothetical protein CBG20927 [Caenorhabditis briggsae] | 0  |                                                                                                                                                                                        | F:GO:0046872;<br>F:GO:0008270;<br>C:GO:0005622                                                                                                                                                                           |            | -                                                                                   |
| Caenorhabditis briggsae | Hypothetical protein CBG20927 [Caenorhabditis briggsae] | 0  |                                                                                                                                                                                        | F:GO:0046872;<br>F:GO:0008270;<br>C:GO:0005622                                                                                                                                                                           |            | -                                                                                   |
| Caenorhabditis elegans  | ectopic membrane ruffles in embryo protein 1            | 4  | F:GO:0005524;<br>F:GO:0008641;<br>F:GO:0016881;<br>P:GO:0045116                                                                                                                        | -                                                                                                                                                                                                                        | EC:6.3.2.0 | IPR000594; IPR009036; IPR016040;<br>PTHR10953 (PANTHER),<br>PTHR10953:SF6 (PANTHER) |
| Caenorhabditis briggsae | Hypothetical protein CBG21486 [Caenorhabditis briggsae] | 0  |                                                                                                                                                                                        |                                                                                                                                                                                                                          |            | -                                                                                   |
|                         | -                                                       | 0  |                                                                                                                                                                                        |                                                                                                                                                                                                                          |            | -                                                                                   |
|                         | -                                                       | 0  |                                                                                                                                                                                        |                                                                                                                                                                                                                          |            | -                                                                                   |
|                         | -                                                       | 0  |                                                                                                                                                                                        |                                                                                                                                                                                                                          |            | -                                                                                   |
| Caenorhabditis elegans  | actin related protein 2 3 subunit 5-like                | 11 | P:GO:0043652;<br>C:GO:0005856;<br>P:GO:0016331;<br>P:GO:0010631;<br>P:GO:0040007;<br>P:GO:0000003;<br>P:GO:0034314;<br>P:GO:0002119;<br>F:GO:0005515;<br>P:GO:0009792;<br>C:GO:0005737 | -                                                                                                                                                                                                                        |            | -                                                                                   |
| Loa loa                 | d- mismatch repair protein containing protein           | 1  | F:GO:0005515                                                                                                                                                                           | -                                                                                                                                                                                                                        |            | IPR002099; IPR003594; IPR011186                                                     |
| Macaca mulatta          | keratin 8                                               | 6  | P:GO:0007010;<br>C:GO:0005737;<br>P:GO:0044419;<br>F:GO:0005198;<br>F:GO:0005515;<br>C:GO:0045095                                                                                      | -                                                                                                                                                                                                                        |            | -                                                                                   |
| Caenorhabditis briggsae | uncoordinated family member (unc-89)                    | 0  |                                                                                                                                                                                        | F:GO:0004672;<br>F:GO:0005524;<br>F:GO:0005089;<br>P:GO:0006468;<br>P:GO:0035023;<br>F:GO:0004674;<br>C:GO:0005622                                                                                                       |            | IPR003961; IPR008957; IPR013783;<br>PTHR19897 (PANTHER),<br>PTHR19897:SF5 (PANTHER) |
| Caenorhabditis briggsae | glutamate decarboxylase                                 | 3  | F:GO:0030170;<br>P:GO:0019752;<br>F:GO:0016831                                                                                                                                         | -                                                                                                                                                                                                                        | EC:4.1.1.0 | IPR002129; IPR015421; SignalP (SIGNALP)                                             |

|                         |                                                            |   |                                                                                                                                                      |                                                |                                                                                                                   |
|-------------------------|------------------------------------------------------------|---|------------------------------------------------------------------------------------------------------------------------------------------------------|------------------------------------------------|-------------------------------------------------------------------------------------------------------------------|
|                         | -                                                          | 0 |                                                                                                                                                      |                                                | -                                                                                                                 |
| Caenorhabditis briggsae | vacuolar protein sorting-associated protein                | 1 | P:GO:0008104                                                                                                                                         | -                                              | IPR009543; IPR015412; PTHR16166 (PANTHER), PTHR16166:SF25 (PANTHER)                                               |
| Caenorhabditis briggsae | vacuolar protein sorting-associated protein                | 1 | P:GO:0008104                                                                                                                                         | -                                              | IPR009543; IPR015412; PTHR16166 (PANTHER), PTHR16166:SF25 (PANTHER)                                               |
| Caenorhabditis briggsae | vacuolar protein sorting-associated protein                | 1 | P:GO:0008104                                                                                                                                         | -                                              | IPR009543; IPR015412; PTHR16166 (PANTHER), PTHR16166:SF25 (PANTHER)                                               |
|                         | -                                                          | 0 |                                                                                                                                                      |                                                | -                                                                                                                 |
|                         |                                                            |   |                                                                                                                                                      |                                                | IPR008160; PTHR10499 (PANTHER), PTHR10499:SF131 (PANTHER)                                                         |
| Ancylostoma ceylanicum  | tissue factor pathway inhibitor                            | 4 | F:GO:0030414;<br>C:GO:0005615;<br>C:GO:0005886;<br>P:GO:0007598                                                                                      | -                                              | IPR002223; IPR020901; PTHR10083 (PANTHER), PTHR10083:SF39 (PANTHER), SignalP (SIGNALP)                            |
|                         | -                                                          | 0 |                                                                                                                                                      |                                                | -                                                                                                                 |
| Caenorhabditis briggsae | elegans protein confirmed by transcript evidence           | 0 |                                                                                                                                                      |                                                |                                                                                                                   |
| Caenorhabditis elegans  | hypothetical protein Y66H1A.5 [Caenorhabditis elegans]     | 0 |                                                                                                                                                      |                                                | -                                                                                                                 |
|                         | -                                                          | 0 |                                                                                                                                                      |                                                | -                                                                                                                 |
| Caenorhabditis briggsae | elegans protein confirmed by transcript evidence           | 1 | F:GO:0005515                                                                                                                                         | -                                              | PTHR15092 (PANTHER), PTHR15092:SF2 (PANTHER)                                                                      |
| Caenorhabditis briggsae | elegans protein partially confirmed by transcript evidence | 4 | C:GO:0005576;<br>F:GO:0008061;<br>F:GO:0005515;<br>P:GO:0006030                                                                                      | -                                              | PTHR11201 (PANTHER), PTHR11201:SF241 (PANTHER)                                                                    |
|                         | -                                                          | 0 |                                                                                                                                                      |                                                | SignalP (SIGNALP)                                                                                                 |
| Caenorhabditis elegans  | briggsae cbr-cpg-2 protein                                 | 4 | P:GO:0009792;<br>P:GO:0000281;<br>P:GO:0030703;<br>F:GO:0008061                                                                                      | -                                              | -                                                                                                                 |
| Caenorhabditis briggsae | tr- nucleotidyl cca- 1                                     | 4 | P:GO:0002119;<br>P:GO:0008340;<br>P:GO:0040007;<br>P:GO:0006898                                                                                      | -                                              | SSF81891 (SUPERFAMILY)                                                                                            |
| Caenorhabditis elegans  | ipase c family member (plc-1)                              | 9 | F:GO:0005085;<br>P:GO:0006629;<br>F:GO:0004871;<br>C:GO:0005622;<br>F:GO:0004435;<br>P:GO:0040010;<br>F:GO:0005509;<br>P:GO:0009566;<br>P:GO:0007264 | -                                              | EC:3.1.4.11<br>IPR000159; PTHR10336 (PANTHER), PTHR10336:SF6 (PANTHER), SignalP (SIGNALP), SSF54236 (SUPERFAMILY) |
| Caenorhabditis elegans  | hypothetical protein Y48G9A.11 [Caenorhabditis elegans]    | 0 |                                                                                                                                                      | F:GO:0003676;<br>F:GO:0008270;<br>C:GO:0005622 | -                                                                                                                 |
| Caenorhabditis elegans  | atp-binding sub-family a member 4                          | 2 | F:GO:0017111;<br>F:GO:0000166                                                                                                                        | -                                              | EC:3.6.1.15<br>PTHR19229 (PANTHER), PTHR19229:SF20 (PANTHER)                                                      |
|                         | -                                                          | 0 |                                                                                                                                                      |                                                | -                                                                                                                 |
|                         | -                                                          | 0 |                                                                                                                                                      |                                                | -                                                                                                                 |

|                         |                                                  |   |                                                                                                                                     |                                                                                                                    |                                                                                                                                                                     |
|-------------------------|--------------------------------------------------|---|-------------------------------------------------------------------------------------------------------------------------------------|--------------------------------------------------------------------------------------------------------------------|---------------------------------------------------------------------------------------------------------------------------------------------------------------------|
| Caenorhabditis elegans  | xylosyltransferase i                             | 8 | C:GO:0043231;<br>P:GO:0030166;<br>C:GO:0044444;<br>P:GO:0070555;<br>P:GO:0034605;<br>P:GO:0048681;<br>F:GO:0016757;<br>C:GO:0016020 | -                                                                                                                  | IPR003406; PTHR19297:SF1 (PANTHER)                                                                                                                                  |
| -                       | -                                                | 0 | -                                                                                                                                   | -                                                                                                                  | -                                                                                                                                                                   |
| -                       | -                                                | 0 | -                                                                                                                                   | -                                                                                                                  | -                                                                                                                                                                   |
| -                       | -                                                | 0 | -                                                                                                                                   | -                                                                                                                  | -                                                                                                                                                                   |
| Caenorhabditis elegans  | elegans protein confirmed by transcript evidence | 2 | F:GO:0005515;<br>P:GO:0000003                                                                                                       | -                                                                                                                  | IPR018617; SignalP (SIGNALP)                                                                                                                                        |
| Caenorhabditis elegans  | patched family protein                           | 2 | F:GO:0008158;<br>C:GO:0016021                                                                                                       | -                                                                                                                  | -                                                                                                                                                                   |
| Caenorhabditis elegans  | transmembrane protein 195                        | 6 | P:GO:0006643;<br>F:GO:0005506;<br>P:GO:0046485;<br>C:GO:0016020;<br>F:GO:0050479;<br>C:GO:0005783                                   | EC:1.14.16.5                                                                                                       | IPR006694; PTHR21624 (PANTHER)                                                                                                                                      |
| Caenorhabditis elegans  | protein ki-se domain containing protein          | 3 | F:GO:0004672;<br>P:GO:0040010;<br>F:GO:0000166                                                                                      | -                                                                                                                  | -                                                                                                                                                                   |
| Caenorhabditis elegans  | n-acetyltransferase -t13                         | 0 |                                                                                                                                     | C:GO:0005737;<br>F:GO:0008415;<br>F:GO:0016740;<br>P:GO:0008152;<br>F:GO:0008080;<br>F:GO:0008999;<br>F:GO:0005515 | IPR000182; IPR016181; PTHR23091 (PANTHER), PTHR23091:SF2 (PANTHER)                                                                                                  |
| Caenorhabditis elegans  | n-acetyltransferase -t13                         | 0 |                                                                                                                                     | C:GO:0005737;<br>F:GO:0008415;<br>F:GO:0016740;<br>P:GO:0008152;<br>F:GO:0008080;<br>F:GO:0008999;<br>F:GO:0005515 | IPR000182; IPR016181; PTHR23091 (PANTHER), PTHR23091:SF2 (PANTHER)                                                                                                  |
| Caenorhabditis briggsae | briggsae cbr-asp-6 protein                       | 4 | P:GO:0008219;<br>F:GO:0005515;<br>P:GO:0040011;<br>F:GO:0008233                                                                     | -                                                                                                                  | IPR001461; IPR001969; IPR009007; IPR021109; PTHR13683:SF53 (PANTHER), SignalP (SIGNALP)                                                                             |
| -                       | -                                                | 0 | -                                                                                                                                   | -                                                                                                                  | -                                                                                                                                                                   |
| Caenorhabditis elegans  | cytochrome b-c1 complex subunit 9                | 1 | P:GO:0009792                                                                                                                        | -                                                                                                                  | IPR008027; SignalP (SIGNALP)                                                                                                                                        |
| Caenorhabditis briggsae | mcs-c-pending-prov protein                       | 5 | C:GO:0005743;<br>P:GO:0055085;<br>F:GO:0005509;<br>C:GO:0016021;<br>F:GO:0005215                                                    | -                                                                                                                  | IPR001993; IPR002048; IPR002067; IPR002167; IPR011992; IPR018108; IPR018247; IPR018249; G3DSA:1.50.40.10 (GENE3D), PTHR11896:SF34 (PANTHER), SSF47473 (SUPERFAMILY) |
| Caenorhabditis briggsae | briggsae cbr-lev-8 protein                       | 6 | F:GO:0004872;<br>C:GO:0045211;<br>C:GO:0030054;<br>P:GO:0006811;<br>C:GO:0016021;<br>F:GO:0004889                                   | -                                                                                                                  | -                                                                                                                                                                   |
| -                       | -                                                | 0 | -                                                                                                                                   | -                                                                                                                  | -                                                                                                                                                                   |



|                           |                                                                                 |    |                                                                                                                                                                                                                                                                                                                                |                                                                                                                                                      |            |                                                                                   |
|---------------------------|---------------------------------------------------------------------------------|----|--------------------------------------------------------------------------------------------------------------------------------------------------------------------------------------------------------------------------------------------------------------------------------------------------------------------------------|------------------------------------------------------------------------------------------------------------------------------------------------------|------------|-----------------------------------------------------------------------------------|
| Caenorhabditis briggsae   | aspartate mitochondrial                                                         | 19 | P:GO:0006107;<br>P:GO:0015908;<br>P:GO:0006533;<br>C:GO:0043234;<br>P:GO:0019551;<br>P:GO:0006532;<br>F:GO:0004069;<br>C:GO:0005743;<br>P:GO:0045471;<br>F:GO:0005543;<br>C:GO:0009986;<br>F:GO:0019899;<br>P:GO:0019550;<br>C:GO:0005759;<br>F:GO:0016597;<br>F:GO:0042803;<br>F:GO:0030170;<br>C:GO:0005886;<br>C:GO:0043204 | -                                                                                                                                                    | EC:2.6.1.1 | IPR000796; IPR004838; IPR004839;<br>IPR015421; IPR015424                          |
| -                         | -                                                                               | 0  |                                                                                                                                                                                                                                                                                                                                |                                                                                                                                                      |            | -                                                                                 |
| -                         | -                                                                               | 0  |                                                                                                                                                                                                                                                                                                                                |                                                                                                                                                      |            | -                                                                                 |
| -                         | -                                                                               | 0  |                                                                                                                                                                                                                                                                                                                                |                                                                                                                                                      |            | -                                                                                 |
| -                         | -                                                                               | 0  |                                                                                                                                                                                                                                                                                                                                |                                                                                                                                                      |            | -                                                                                 |
| -                         | -                                                                               | 0  |                                                                                                                                                                                                                                                                                                                                |                                                                                                                                                      |            | -                                                                                 |
| Drosophila grimshawi      | restin (reed-steinberg cell-expressed intermediate filament-associated protein) | 8  | F:GO:0008017;<br>C:GO:0005875;<br>C:GO:0005794;<br>C:GO:0045169;<br>F:GO:0003779;<br>C:GO:0005938;<br>P:GO:0007349;<br>C:GO:0005876                                                                                                                                                                                            | -                                                                                                                                                    |            | PTHR18916 (PANTHER),<br>PTHR18916:SF4 (PANTHER)                                   |
| Caenorhabditis elegans    | cingulin                                                                        | 0  |                                                                                                                                                                                                                                                                                                                                | C:GO:0005923;<br>C:GO:0030054;<br>F:GO:0003779;<br>C:GO:0016459;<br>F:GO:0003774;<br>C:GO:0019861;<br>F:GO:0005515;<br>P:GO:0008150;<br>P:GO:0001539 |            | -                                                                                 |
| Teladorsagia circumcincta | l3b25 precursor                                                                 | 0  |                                                                                                                                                                                                                                                                                                                                |                                                                                                                                                      |            | -                                                                                 |
| Caenorhabditis elegans    | hypothetical protein C18B12.6 [Caenorhabditis elegans]                          | 0  |                                                                                                                                                                                                                                                                                                                                |                                                                                                                                                      |            | PTHR10984 (PANTHER),<br>PTHR10984:SF1 (PANTHER)                                   |
| -                         | -                                                                               | 0  |                                                                                                                                                                                                                                                                                                                                |                                                                                                                                                      |            | SignalP (SIGNALP)                                                                 |
| Macaca mulatta            | chromosome 1 open reading frame 43                                              | 3  | F:GO:0016491;<br>C:GO:0016021;<br>F:GO:0050662                                                                                                                                                                                                                                                                                 | -                                                                                                                                                    |            | IPR010876                                                                         |
| Caenorhabditis elegans    | elegans protein confirmed by transcript evidence                                | 1  | P:GO:0006810                                                                                                                                                                                                                                                                                                                   | -                                                                                                                                                    |            | IPR001898; PTHR10283 (PANTHER),<br>PTHR10283:SF15 (PANTHER), SignalP<br>(SIGNALP) |
| -                         | -                                                                               | 0  |                                                                                                                                                                                                                                                                                                                                |                                                                                                                                                      |            |                                                                                   |
| -                         | -                                                                               | 0  |                                                                                                                                                                                                                                                                                                                                |                                                                                                                                                      |            | IPR000436; SignalP (SIGNALP)                                                      |
| -                         | -                                                                               | 0  |                                                                                                                                                                                                                                                                                                                                |                                                                                                                                                      |            | IPR000436; SignalP (SIGNALP)                                                      |
| -                         | -                                                                               | 0  |                                                                                                                                                                                                                                                                                                                                |                                                                                                                                                      |            | IPR000436; SignalP (SIGNALP)                                                      |

|                         |                                                            |    |                                                                                                                                                                                                                                                                             |                                                                                                                                                      |                                                                                                 |
|-------------------------|------------------------------------------------------------|----|-----------------------------------------------------------------------------------------------------------------------------------------------------------------------------------------------------------------------------------------------------------------------------|------------------------------------------------------------------------------------------------------------------------------------------------------|-------------------------------------------------------------------------------------------------|
| Brugia malayi           | nuclear receptor subfamily 2 group c member 2-like         | 7  | C:GO:0031981;<br>F:GO:0046872;<br>P:GO:0006355;<br>F:GO:0003677;<br>F:GO:0004879;<br>F:GO:0005515;<br>C:GO:0005737                                                                                                                                                          | -                                                                                                                                                    | IPR000536; IPR008946; PTHR11865 (PANTHER), PTHR11865:SF147 (PANTHER)                            |
| -                       | -                                                          | 0  |                                                                                                                                                                                                                                                                             |                                                                                                                                                      | -                                                                                               |
| Caenorhabditis briggsae | Hypothetical protein CBG18218 [Caenorhabditis briggsae]    | 0  |                                                                                                                                                                                                                                                                             | P:GO:0006898;<br>F:GO:0003677;<br>F:GO:0003887;<br>P:GO:0000003;<br>P:GO:0002119;<br>P:GO:0009792;<br>P:GO:0040010;<br>P:GO:0006350;<br>P:GO:0040035 | -                                                                                               |
| -                       | -                                                          | 0  |                                                                                                                                                                                                                                                                             |                                                                                                                                                      | -                                                                                               |
| Caenorhabditis elegans  | elegans protein partially confirmed by transcript evidence | 4  | P:GO:0009792;<br>C:GO:0016021;<br>P:GO:0000003;<br>P:GO:0040011                                                                                                                                                                                                             | -                                                                                                                                                    | -                                                                                               |
| Homo sapiens            | decorin                                                    | 16 | P:GO:0042060;<br>F:GO:0047485;<br>P:GO:0001890;<br>C:GO:0005615;<br>P:GO:0009887;<br>F:GO:0050840;<br>P:GO:0007519;<br>F:GO:0005518;<br>P:GO:0007568;<br>F:GO:0005539;<br>P:GO:0001822;<br>C:GO:0005578;<br>P:GO:0019800;<br>P:GO:0032496;<br>P:GO:0030198;<br>P:GO:0009612 | -                                                                                                                                                    | -                                                                                               |
| -                       | -                                                          | 0  |                                                                                                                                                                                                                                                                             |                                                                                                                                                      | IPR003677                                                                                       |
| -                       | -                                                          | 0  |                                                                                                                                                                                                                                                                             |                                                                                                                                                      | IPR003677                                                                                       |
| Caenorhabditis briggsae | briggsae cbr-ptr-3 protein                                 | 0  |                                                                                                                                                                                                                                                                             | C:GO:0016021;<br>C:GO:0016020;<br>F:GO:0008158                                                                                                       | IPR003392; PTHR10796 (PANTHER), PTHR10796:SF14 (PANTHER)                                        |
| Caenorhabditis briggsae | phosphogluco-te mutase                                     | 11 | C:GO:0005829;<br>P:GO:0019388;<br>P:GO:0006874;<br>P:GO:0019255;<br>P:GO:0060361;<br>P:GO:0006011;<br>F:GO:0004619;<br>F:GO:0000287;<br>P:GO:0005992;<br>F:GO:0004614;<br>P:GO:0005978                                                                                      | -                                                                                                                                                    | EC:5.4.2.1;<br>EC:5.4.2.2<br>IPR005844; IPR016055; PTHR22573 (PANTHER), PTHR22573:SF5 (PANTHER) |
| -                       | -                                                          | 0  |                                                                                                                                                                                                                                                                             |                                                                                                                                                      | -                                                                                               |
| -                       | -                                                          | 0  |                                                                                                                                                                                                                                                                             |                                                                                                                                                      | SignalP (SIGNALP)                                                                               |

|                         |                                                  |   |                                                                                                                                                      |                                                                                  |             |                                                                                              |
|-------------------------|--------------------------------------------------|---|------------------------------------------------------------------------------------------------------------------------------------------------------|----------------------------------------------------------------------------------|-------------|----------------------------------------------------------------------------------------------|
| Loa loa                 | hed family member (ptc-3)                        | 8 | P:GO:0009792;<br>F:GO:0004872;<br>P:GO:0002119;<br>P:GO:0040018;<br>P:GO:0018996;<br>P:GO:0000003;<br>P:GO:0040011;<br>C:GO:0016021                  | -                                                                                |             | PTHR10796 (PANTHER),<br>PTHR10796:SF34 (PANTHER)                                             |
| Caenorhabditis elegans  | beta 1                                           | 6 | P:GO:0019388;<br>C:GO:0005625;<br>C:GO:0005764;<br>F:GO:0005515;<br>F:GO:0016936;<br>F:GO:0004565                                                    | -                                                                                | EC:3.2.1.23 | IPR001944; IPR013781; IPR017853;<br>IPR019801; PTHR23421:SF2<br>(PANTHER), SignalP (SIGNALP) |
|                         |                                                  | 0 |                                                                                                                                                      |                                                                                  |             |                                                                                              |
| Caenorhabditis briggsae | clathrin coat assembly protein ap-1              | 9 | P:GO:0006892;<br>C:GO:0005794;<br>P:GO:0016044;<br>F:GO:0005515;<br>P:GO:0006886;<br>C:GO:0005829;<br>C:GO:0030131;<br>C:GO:0030665;<br>P:GO:0044419 | -                                                                                |             | IPR011012; G3DSA:3.30.450.60<br>(GENE3D), PTHR11998 (PANTHER),<br>PTHR11998:SF11 (PANTHER)   |
| Caenorhabditis briggsae | elegans protein confirmed by transcript evidence | 0 |                                                                                                                                                      | F:GO:0005509;<br>C:GO:0016021                                                    |             | PTHR12294 (PANTHER),<br>PTHR12294:SF1 (PANTHER)                                              |
|                         |                                                  | 0 |                                                                                                                                                      |                                                                                  |             |                                                                                              |
|                         |                                                  | 0 |                                                                                                                                                      |                                                                                  |             |                                                                                              |
| Caenorhabditis elegans  | major facilitator superfamily protein            | 5 | C:GO:0016021;<br>P:GO:0000003;<br>P:GO:0040007;<br>P:GO:0055085;<br>P:GO:0002119                                                                     | -                                                                                |             | PTHR11360 (PANTHER),<br>PTHR11360:SF15 (PANTHER), SignalP<br>(SIGNALP)                       |
| Caenorhabditis elegans  | protein yip5 (yip1 family member 5)              | 3 | F:GO:0050660;<br>C:GO:0016021;<br>F:GO:0016491                                                                                                       | -                                                                                |             | IPR006977; PTHR21236 (PANTHER),<br>PTHR21236:SF2 (PANTHER)                                   |
|                         |                                                  | 0 |                                                                                                                                                      |                                                                                  |             |                                                                                              |
|                         |                                                  | 0 |                                                                                                                                                      |                                                                                  |             |                                                                                              |
| Caenorhabditis briggsae | elegans protein confirmed by transcript evidence | 1 | F:GO:0005488                                                                                                                                         | -                                                                                |             | IPR002919; IPR013032;<br>G3DSA:2.10.25.10 (GENE3D)                                           |
| Branchiostoma floridae  | transmembrane protein 77                         | 0 |                                                                                                                                                      | F:GO:0003674;<br>C:GO:0016021;<br>C:GO:0016020;<br>P:GO:0008150;<br>C:GO:0005575 |             | IPR019402; PTHR21324 (PANTHER)                                                               |
|                         |                                                  | 0 |                                                                                                                                                      |                                                                                  |             |                                                                                              |
|                         |                                                  | 0 |                                                                                                                                                      |                                                                                  |             |                                                                                              |
|                         |                                                  | 0 |                                                                                                                                                      |                                                                                  |             | SignalP (SIGNALP)                                                                            |
|                         |                                                  | 0 |                                                                                                                                                      |                                                                                  |             |                                                                                              |
| Caenorhabditis elegans  | briggsae cbr-gex-2 protein                       | 9 | P:GO:0006915;<br>P:GO:0016337;<br>P:GO:0016477;<br>C:GO:0019717;<br>C:GO:0030054;<br>F:GO:0005515;<br>P:GO:0010172;<br>C:GO:0045202;<br>C:GO:0048471 | -                                                                                |             | IPR008081                                                                                    |

|                        |                                                                   |    |                                                                                                                                                                                                                          |                                                                 |                                                                                                                                      |
|------------------------|-------------------------------------------------------------------|----|--------------------------------------------------------------------------------------------------------------------------------------------------------------------------------------------------------------------------|-----------------------------------------------------------------|--------------------------------------------------------------------------------------------------------------------------------------|
|                        | -                                                                 | 0  |                                                                                                                                                                                                                          |                                                                 | -                                                                                                                                    |
| Caenorhabditis elegans | set (trithorax polycomb) domain containing family member (set-18) | 1  | F:GO:0005515                                                                                                                                                                                                             | -                                                               | PTHR12197 (PANTHER),<br>PTHR12197:SF9 (PANTHER)                                                                                      |
| Caenorhabditis elegans | serine threonine-protein phosphatase 4 catalytic subunit          | 13 | P:GO:0001525;<br>P:GO:0007126;<br>P:GO:0018991;<br>F:GO:0004704;<br>F:GO:0046872;<br>P:GO:0040007;<br>P:GO:0007052;<br>C:GO:0005813;<br>F:GO:0004722;<br>P:GO:0002119;<br>F:GO:0005515;<br>P:GO:0009792;<br>C:GO:0005634 | -                                                               | IPR004843; IPR006186;<br>G3DSA:3.60.21.10 (GENE3D),<br>PTHR11668:SF22 (PANTHER),<br>SSF56300 (SUPERFAMILY)                           |
| Caenorhabditis elegans | riboki-se                                                         | 4  | P:GO:0005975;<br>F:GO:0016301;<br>P:GO:0044281;<br>P:GO:0044237                                                                                                                                                          | -                                                               | IPR002139; IPR011611;<br>G3DSA:3.40.1190.20 (GENE3D),<br>PTHR10584 (PANTHER),<br>PTHR10584:SF29 (PANTHER),<br>SSF53613 (SUPERFAMILY) |
|                        | -                                                                 | 0  |                                                                                                                                                                                                                          |                                                                 | -                                                                                                                                    |
| Brugia malayi          | mortality factor 4-like protein 1                                 | 0  |                                                                                                                                                                                                                          | F:GO:0003682;<br>C:GO:0000785;<br>P:GO:0006333;<br>C:GO:0005634 | IPR000953; IPR008676; IPR016197;<br>G3DSA:2.30.30.270 (GENE3D),<br>PF11717 (PFAM)                                                    |
|                        | -                                                                 | 0  |                                                                                                                                                                                                                          |                                                                 | -                                                                                                                                    |
| Tribolium castaneum    | transmembrane protein 14c                                         | 1  | C:GO:0005739                                                                                                                                                                                                             | -                                                               | IPR005349                                                                                                                            |
| Caenorhabditis elegans | elegans protein confirmed by transcript evidence                  | 0  |                                                                                                                                                                                                                          |                                                                 | -                                                                                                                                    |
| Caenorhabditis elegans | taf5 r- polymerase tata box binding protein -associated 100kda    | 12 | F:GO:0016986;<br>P:GO:0006367;<br>C:GO:0005730;<br>F:GO:0010843;<br>C:GO:0033276;<br>F:GO:0046983;<br>C:GO:0015629;<br>P:GO:0006368;<br>F:GO:0003700;<br>F:GO:0004402;<br>C:GO:0005669;<br>C:GO:0005737                  | -                                                               | EC:2.3.1.48<br>IPR001680; IPR011046; IPR015943;<br>IPR017986; IPR019775; IPR019781;<br>IPR019782; PTHR19879 (PANTHER)                |
|                        | -                                                                 | 0  |                                                                                                                                                                                                                          |                                                                 | -                                                                                                                                    |
| Caenorhabditis elegans | laminin alpha chain                                               | 12 | P:GO:0030155;<br>C:GO:0005608;<br>P:GO:0045995;<br>C:GO:0005606;<br>C:GO:0005615;<br>P:GO:0030334;<br>F:GO:0005102;<br>N:GO:0061138;<br>P:GO:0030154;<br>P:GO:0048513;<br>F:GO:0005201;<br>P:GO:0007166                  | -                                                               | -                                                                                                                                    |
|                        | -                                                                 | 0  |                                                                                                                                                                                                                          |                                                                 | SignalP (SIGNALP)                                                                                                                    |
|                        | -                                                                 | 0  |                                                                                                                                                                                                                          |                                                                 | -                                                                                                                                    |
|                        | -                                                                 | 0  |                                                                                                                                                                                                                          |                                                                 | -                                                                                                                                    |
|                        | -                                                                 | 0  |                                                                                                                                                                                                                          |                                                                 | -                                                                                                                                    |

|                             |                                                            |    |                                                                                                                                                                       |                                                                 |             |                                                                              |
|-----------------------------|------------------------------------------------------------|----|-----------------------------------------------------------------------------------------------------------------------------------------------------------------------|-----------------------------------------------------------------|-------------|------------------------------------------------------------------------------|
| Caenorhabditis briggsae     | chromatin assembly factor 1 subunit a                      | 1  | P:GO:0009987                                                                                                                                                          | -                                                               |             | IPR022043; PTHR15272 (PANTHER)                                               |
| Caenorhabditis elegans      | myosin light polypeptide 5 regulatory                      | 2  | P:GO:0055085;<br>C:GO:0016021                                                                                                                                         | -                                                               |             | -                                                                            |
| Caenorhabditis briggsae     | eb module family protein                                   | 2  | F:GO:0016810;<br>P:GO:0005975                                                                                                                                         | -                                                               |             | IPR006149                                                                    |
|                             | -                                                          | 0  |                                                                                                                                                                       |                                                                 |             | -                                                                            |
| Caenorhabditis elegans      | intraflagellar transport protein 140                       | 0  |                                                                                                                                                                       | F:GO:0003674;<br>F:GO:0005488;<br>P:GO:0008150;<br>C:GO:0005575 |             | -                                                                            |
|                             | -                                                          | 0  |                                                                                                                                                                       |                                                                 |             | -                                                                            |
|                             | -                                                          | 0  |                                                                                                                                                                       |                                                                 |             | -                                                                            |
|                             | -                                                          | 0  |                                                                                                                                                                       |                                                                 |             | -                                                                            |
| Loa loa                     | wgr domain containing protein                              | 6  | P:GO:0044260;<br>C:GO:0031981;<br>P:GO:0090304;<br>F:GO:0016740;<br>F:GO:0005515;<br>P:GO:0006974                                                                     | -                                                               |             | IPR001510; PTHR15447 (PANTHER),<br>SSF57716 (SUPERFAMILY)                    |
|                             | -                                                          | 0  |                                                                                                                                                                       |                                                                 |             | -                                                                            |
|                             | -                                                          | 0  |                                                                                                                                                                       |                                                                 |             | -                                                                            |
| Angiostrongylus cantonensis | exostosin family protein                                   | 5  | C:GO:0016021;<br>P:GO:0005975;<br>P:GO:0009059;<br>F:GO:0003824;<br>P:GO:0044237                                                                                      | -                                                               |             | IPR004263; PTHR11062 (PANTHER),<br>PTHR11062:SF6 (PANTHER)                   |
| Angiostrongylus cantonensis | exostosin family protein                                   | 5  | C:GO:0016021;<br>P:GO:0005975;<br>P:GO:0009059;<br>F:GO:0003824;<br>P:GO:0044237                                                                                      | -                                                               |             | IPR012506; SignalP (SIGNALP)                                                 |
|                             | -                                                          | 0  |                                                                                                                                                                       |                                                                 |             | -                                                                            |
|                             | -                                                          | 0  |                                                                                                                                                                       |                                                                 |             | -                                                                            |
| Caenorhabditis elegans      | cell division cycle 2-like 2 (pitslre proteins)            | 10 | P:GO:0006915;<br>F:GO:0004674;<br>P:GO:0050684;<br>P:GO:0006355;<br>P:GO:0001558;<br>F:GO:0005524;<br>F:GO:0005515;<br>P:GO:0007067;<br>C:GO:0005634;<br>P:GO:0006468 | -                                                               | EC:2.7.11.0 | IPR011009; IPR017442; IPR020636;<br>IPR020648; G3DSA:1.10.510.10<br>(GENE3D) |
|                             | -                                                          | 0  |                                                                                                                                                                       |                                                                 |             | IPR010916                                                                    |
| Caenorhabditis briggsae     | Hypothetical protein CBG19878 [Caenorhabditis briggsae]    | 0  |                                                                                                                                                                       | F:GO:0008289                                                    |             | -                                                                            |
| Loa loa                     | polymerase (d- directed) delta regulatory subunit          | 6  | P:GO:0040010;<br>P:GO:0006259;<br>P:GO:0040035;<br>P:GO:0040011;<br>P:GO:0009792;<br>C:GO:0005634                                                                     | -                                                               |             | IPR007185; PTHR10416 (PANTHER)                                               |
| Ipomoea batatas             | retrotransposon polyprotein                                | 3  | P:GO:0006259;<br>F:GO:0003676;<br>F:GO:0003824                                                                                                                        | -                                                               |             | PTHR10178 (PANTHER),<br>PTHR10178:SF14 (PANTHER),<br>SSF56672 (SUPERFAMILY)  |
| Caenorhabditis briggsae     | briggsae cbr-dys-1 protein                                 | 0  |                                                                                                                                                                       |                                                                 |             | -                                                                            |
| Caenorhabditis briggsae     | elegans protein partially confirmed by transcript evidence | 0  |                                                                                                                                                                       |                                                                 |             | IPR019392; PTHR21508 (PANTHER)                                               |
|                             | -                                                          | 0  |                                                                                                                                                                       |                                                                 |             | -                                                                            |

|                               |                                                                 |    |                                                                                                                                                                                                         |                                                                 |   |                                                                                                             |
|-------------------------------|-----------------------------------------------------------------|----|---------------------------------------------------------------------------------------------------------------------------------------------------------------------------------------------------------|-----------------------------------------------------------------|---|-------------------------------------------------------------------------------------------------------------|
| Hyposoter didymator virus     | af479654_1thr-ser protein                                       | 0  |                                                                                                                                                                                                         | F:GO:0008061;<br>P:GO:0006030;<br>C:GO:0005576                  | - |                                                                                                             |
| Hyposoter didymator virus     | af479654_1thr-ser protein                                       | 0  |                                                                                                                                                                                                         | F:GO:0008061;<br>P:GO:0006030;<br>C:GO:0005576                  | - |                                                                                                             |
| Caenorhabditis elegans        | atp-dependent r- helicase dhx8                                  | 2  | F:GO:0016787;<br>F:GO:0005488                                                                                                                                                                           | -                                                               |   | IPR007502; PTHR18934 (PANTHER)                                                                              |
| -                             | -                                                               | 0  |                                                                                                                                                                                                         |                                                                 |   | IPR017907                                                                                                   |
| Caenorhabditis elegans        | transmembrane protein 38a                                       | 3  | C:GO:0016021;<br>F:GO:0005261;<br>P:GO:0015672                                                                                                                                                          | -                                                               |   | IPR007866; PTHR12454:SF2 (PANTHER)                                                                          |
| -                             | -                                                               | 0  |                                                                                                                                                                                                         |                                                                 |   | -                                                                                                           |
| Caenorhabditis elegans        | iq calmodulin-binding motif domain protein                      | 0  |                                                                                                                                                                                                         |                                                                 |   | -                                                                                                           |
| -                             | -                                                               | 0  |                                                                                                                                                                                                         |                                                                 |   | -                                                                                                           |
| -                             | -                                                               | 0  |                                                                                                                                                                                                         |                                                                 |   | -                                                                                                           |
| Caenorhabditis elegans        | rod-like dye-filling defective family member (rdy-2)            | 3  | C:GO:0016021;<br>P:GO:0006468;<br>F:GO:0005524                                                                                                                                                          | -                                                               |   | SignalP (SIGNALP)                                                                                           |
| -                             | -                                                               | 0  |                                                                                                                                                                                                         |                                                                 |   | SignalP (SIGNALP)                                                                                           |
| Caenorhabditis briggsae       | elegans protein confirmed by transcript evidence                | 0  |                                                                                                                                                                                                         |                                                                 |   | IPR001534; SignalP (SIGNALP)                                                                                |
| Caenorhabditis briggsae       | Hypothetical protein CBG16791 [Caenorhabditis briggsae]         | 0  |                                                                                                                                                                                                         |                                                                 |   | -                                                                                                           |
| Caenorhabditis briggsae       | Hypothetical protein CBG16791 [Caenorhabditis briggsae]         | 0  |                                                                                                                                                                                                         |                                                                 |   | SignalP (SIGNALP)                                                                                           |
| Caenorhabditis elegans        | hypothetical protein T07C12.12 [Caenorhabditis elegans]         | 0  |                                                                                                                                                                                                         |                                                                 |   | IPR013894; PTHR14790 (PANTHER),<br>PTHR14790:SF2 (PANTHER)                                                  |
| Caenorhabditis briggsae       | voltage gated chloride channel family protein                   | 6  | P:GO:0009792;<br>F:GO:0005247;<br>P:GO:0055085;<br>P:GO:0000003;<br>C:GO:0016021;<br>P:GO:0006821                                                                                                       | -                                                               |   | IPR001807; PTHR11689:SF5 (PANTHER), SignalP (SIGNALP)                                                       |
| -                             | -                                                               | 0  |                                                                                                                                                                                                         |                                                                 |   | -                                                                                                           |
| -                             | -                                                               | 0  |                                                                                                                                                                                                         |                                                                 |   | -                                                                                                           |
| Botryotinia fuckeliana B05.10 | predicted protein [Botryotinia fuckeliana- B05.10]              | 0  |                                                                                                                                                                                                         |                                                                 |   | -                                                                                                           |
| Caenorhabditis elegans        | nop seven associated protein 1                                  | 0  |                                                                                                                                                                                                         | P:GO:0000003;<br>P:GO:0040035;<br>P:GO:0002119;<br>P:GO:0040007 |   | -                                                                                                           |
| Caenorhabditis briggsae       | uso1 p115 like vesicle tethering head region containing protein | 12 | F:GO:0008565;<br>C:GO:0000139;<br>P:GO:0048280;<br>C:GO:0005795;<br>F:GO:0042802;<br>P:GO:0032940;<br>P:GO:0019915;<br>P:GO:0007030;<br>P:GO:0040039;<br>P:GO:0006898;<br>P:GO:0006886;<br>C:GO:0005783 | -                                                               |   | IPR011989; IPR016024; PTHR10013 (PANTHER)                                                                   |
| Caenorhabditis briggsae       | Hypothetical protein CBG09842 [Caenorhabditis briggsae]         | 2  | F:GO:0005515;<br>F:GO:0016787                                                                                                                                                                           | -                                                               |   | IPR002018; G3DSA:3.40.50.1820 (GENE3D), PTHR11559:SF21 (PANTHER), SignalP (SIGNALP), SSF53474 (SUPERFAMILY) |
| -                             | -                                                               | 0  |                                                                                                                                                                                                         |                                                                 |   | -                                                                                                           |
| -                             | -                                                               | 0  |                                                                                                                                                                                                         |                                                                 |   | PR01217 (PRINTS)                                                                                            |

|                                                  |                                                                                        |    |                                                                                                                                                                                                         |                                                                                                   |  |                                                                                                        |
|--------------------------------------------------|----------------------------------------------------------------------------------------|----|---------------------------------------------------------------------------------------------------------------------------------------------------------------------------------------------------------|---------------------------------------------------------------------------------------------------|--|--------------------------------------------------------------------------------------------------------|
| Caenorhabditis elegans                           | cyclin b3                                                                              | 0  |                                                                                                                                                                                                         | C:GO:0005634                                                                                      |  | IPR004367; IPR006670; IPR006671; IPR011028; IPR013763; IPR014400; IPR015452; PTHR10177 (PANTHER)       |
| Caenorhabditis elegans                           | cyclin b3                                                                              | 0  |                                                                                                                                                                                                         | C:GO:0005634                                                                                      |  | IPR004367; IPR006670; IPR006671; IPR011028; IPR013763; IPR014400; IPR015452; PTHR10177 (PANTHER)       |
|                                                  | -                                                                                      | 0  |                                                                                                                                                                                                         |                                                                                                   |  | -                                                                                                      |
| Caenorhabditis briggsae                          | Hypothetical protein CBG07076 [Caenorhabditis briggsae]                                | 4  | P:GO:0019915;<br>P:GO:0009792;<br>P:GO:0040010;<br>P:GO:0040035                                                                                                                                         | -                                                                                                 |  | -                                                                                                      |
| Caenorhabditis elegans                           | briggsae cbr-ttll-5 protein                                                            | 1  | F:GO:0016874                                                                                                                                                                                            | -                                                                                                 |  | IPR004344; PTHR12241:SF8 (PANTHER), SSF56059 (SUPERFAMILY)                                             |
| Loa loa                                          | hypothetical protein LOAG_09502 [Loa loa]                                              | 0  |                                                                                                                                                                                                         | P:GO:0040010                                                                                      |  | IPR011991                                                                                              |
| Brugia malayi                                    | homeobox domain containing protein                                                     | 12 | F:GO:0030528;<br>P:GO:0040010;<br>F:GO:0008270;<br>P:GO:0006355;<br>P:GO:0040035;<br>F:GO:0043565;<br>P:GO:0002119;<br>F:GO:0003700;<br>P:GO:0040011;<br>P:GO:0006898;<br>P:GO:0002009;<br>C:GO:0005634 | -                                                                                                 |  | IPR001356; IPR009057; IPR012287; PTHR18973 (PANTHER), PTHR18973:SF19 (PANTHER)                         |
|                                                  | -                                                                                      | 0  |                                                                                                                                                                                                         |                                                                                                   |  | -                                                                                                      |
|                                                  | -                                                                                      | 0  |                                                                                                                                                                                                         |                                                                                                   |  | -                                                                                                      |
|                                                  | -                                                                                      | 0  |                                                                                                                                                                                                         |                                                                                                   |  | -                                                                                                      |
| Loa loa                                          | multiple pdz domain protein family member (mpz-1)                                      | 2  | F:GO:0005515;<br>C:GO:0016021                                                                                                                                                                           | -                                                                                                 |  | -                                                                                                      |
|                                                  | -                                                                                      | 0  |                                                                                                                                                                                                         |                                                                                                   |  | -                                                                                                      |
| Caenorhabditis elegans                           | endonuclease-reverse transcriptase                                                     | 0  |                                                                                                                                                                                                         | F:GO:0003723;<br>P:GO:0006278;<br>P:GO:0045449;<br>F:GO:0030528;<br>F:GO:0004519;<br>F:GO:0003964 |  | IPR005135; G3DSA:3.60.10.10 (GENE3D), PTHR23227 (PANTHER), PTHR23227:SF14 (PANTHER), SignalP (SIGNALP) |
| Neisseria elongata subsp. glycolytica ATCC 29315 | hypothetical protein NEIELOOT_01783 [Neisseria elongata subsp. glycolytica ATCC 29315] | 0  |                                                                                                                                                                                                         |                                                                                                   |  | -                                                                                                      |
|                                                  | -                                                                                      | 0  |                                                                                                                                                                                                         |                                                                                                   |  | -                                                                                                      |
| Camponotus floridanus                            | endonuclease-reverse transcriptase                                                     | 0  |                                                                                                                                                                                                         | F:GO:0003723;<br>P:GO:0006278;<br>P:GO:0045449;<br>F:GO:0030528;<br>F:GO:0004519;<br>F:GO:0003964 |  | IPR005135; G3DSA:3.60.10.10 (GENE3D)                                                                   |
|                                                  | -                                                                                      | 0  |                                                                                                                                                                                                         |                                                                                                   |  | -                                                                                                      |
|                                                  | -                                                                                      | 0  |                                                                                                                                                                                                         |                                                                                                   |  | -                                                                                                      |

|                         |                                                                                   |    |                                                                                                                                                                                                                                                                                                                                                                                                    |              |                                           |                                                                                                           |
|-------------------------|-----------------------------------------------------------------------------------|----|----------------------------------------------------------------------------------------------------------------------------------------------------------------------------------------------------------------------------------------------------------------------------------------------------------------------------------------------------------------------------------------------------|--------------|-------------------------------------------|-----------------------------------------------------------------------------------------------------------|
| Homo sapiens            | isoform cra_a                                                                     | 23 | F:GO:0050291;<br>P:GO:0048511;<br>F:GO:0008270;<br>P:GO:0007275;<br>F:GO:0047058;<br>P:GO:0006357;<br>P:GO:0046677;<br>P:GO:0010243;<br>F:GO:0047057;<br>P:GO:0046513;<br>C:GO:0005792;<br>P:GO:0030193;<br>C:GO:0016021;<br>C:GO:0005789;<br>F:GO:0046983;<br>P:GO:0014070;<br>F:GO:0003702;<br>F:GO:0043565;<br>P:GO:0050820;<br>F:GO:0003700;<br>P:GO:0055114;<br>P:GO:0042373;<br>C:GO:0005634 | -            | EC:2.3.1.24;<br>EC:1.1.4.2;<br>EC:1.1.4.1 | PTHR12138 (PANTHER)                                                                                       |
| Caenorhabditis briggsae | elegans protein confirmed by transcript evidence                                  | 0  |                                                                                                                                                                                                                                                                                                                                                                                                    | F:GO:0008270 | -                                         |                                                                                                           |
| Brugia malayi           | set binding factor 2                                                              | 2  | F:GO:0005515;<br>C:GO:0016020                                                                                                                                                                                                                                                                                                                                                                      | -            |                                           | IPR001194; IPR005113; PTHR10807 (PANTHER), PTHR10807:SF1 (PANTHER)                                        |
| Caenorhabditis briggsae | patched family protein                                                            | 4  | P:GO:0040018;<br>P:GO:0018996;<br>P:GO:0007275;<br>P:GO:0040011                                                                                                                                                                                                                                                                                                                                    | -            |                                           | IPR000731; IPR003392; PTHR10796 (PANTHER), PTHR10796:SF14 (PANTHER), SignalP (SIGNALP)                    |
|                         |                                                                                   | 0  |                                                                                                                                                                                                                                                                                                                                                                                                    |              |                                           |                                                                                                           |
|                         |                                                                                   | 0  |                                                                                                                                                                                                                                                                                                                                                                                                    |              |                                           |                                                                                                           |
| Caenorhabditis briggsae | briggsae cbr-mex-3 protein                                                        | 3  | F:GO:0008270;<br>F:GO:0005515;<br>F:GO:0003723                                                                                                                                                                                                                                                                                                                                                     | -            |                                           | IPR004087; IPR004088; IPR018111; G3DSA:3.30.1370.10 (GENE3D), PTHR23285 (PANTHER), SSF54791 (SUPERFAMILY) |
| Caenorhabditis elegans  | paps (adenosine 3 -phosphate 5 -phosphosulfate) transporter family member (pst-1) | 2  | P:GO:0055085;<br>C:GO:0016021                                                                                                                                                                                                                                                                                                                                                                      | -            |                                           | -                                                                                                         |
| Caenorhabditis elegans  | sex determining protein mog-3                                                     | 4  | P:GO:0040019;<br>P:GO:0009792;<br>P:GO:0010171;<br>P:GO:0040010                                                                                                                                                                                                                                                                                                                                    | -            |                                           | IPR022209                                                                                                 |



|                         |                                                         |    |                                                                                                                                                                                                                                                                                                               |                                                |             |                                                                                                                                |
|-------------------------|---------------------------------------------------------|----|---------------------------------------------------------------------------------------------------------------------------------------------------------------------------------------------------------------------------------------------------------------------------------------------------------------|------------------------------------------------|-------------|--------------------------------------------------------------------------------------------------------------------------------|
|                         | fibronectin 1                                           | 18 | P:GO:0042060;<br>P:GO:0018149;<br>P:GO:0016477;<br>P:GO:0001525;<br>P:GO:0008360;<br>C:GO:0005793;<br>C:GO:0005604;<br>P:GO:0007044;<br>P:GO:0007160;<br>C:GO:0031093;<br>P:GO:0034446;<br>F:GO:0005518;<br>C:GO:0005577;<br>C:GO:0016324;<br>F:GO:0008201;<br>F:GO:0005201;<br>F:GO:0016504;<br>P:GO:0006953 | -                                              |             | IPR000562; IPR013806; PR00013 (PRINTS), G3DSA:2.10.10.10 (GENE3D), PTHR22918 (PANTHER)                                         |
|                         | -                                                       | 0  |                                                                                                                                                                                                                                                                                                               |                                                |             | PTHR22898 (PANTHER)                                                                                                            |
|                         | -                                                       | 0  |                                                                                                                                                                                                                                                                                                               |                                                |             | -                                                                                                                              |
| Ciona intestinalis      | zinc finger protein                                     | 0  |                                                                                                                                                                                                                                                                                                               | F:GO:0003676;<br>F:GO:0008270;<br>C:GO:0005622 |             | IPR007087; IPR015880                                                                                                           |
| Caenorhabditis briggsae | b-box zinc finger family protein                        | 4  | C:GO:0043229;<br>F:GO:0005488;<br>P:GO:0048667;<br>P:GO:0050794                                                                                                                                                                                                                                               | -                                              |             | PTHR12846 (PANTHER),<br>PTHR12846:SF2 (PANTHER)                                                                                |
|                         | -                                                       | 0  |                                                                                                                                                                                                                                                                                                               |                                                |             | -                                                                                                                              |
| Caenorhabditis elegans  | briggsae cbr-tre-2 protein                              | 5  | P:GO:0009792;<br>P:GO:0002119;<br>F:GO:0016798;<br>P:GO:0008152;<br>P:GO:0040007                                                                                                                                                                                                                              | -                                              |             | IPR001661; PTHR23403:SF1 (PANTHER), SignalP (SIGNALP)                                                                          |
| Caenorhabditis briggsae | quinone oxidoreductase                                  | 6  | F:GO:0003960;<br>C:GO:0005625;<br>F:GO:0003730;<br>F:GO:0050661;<br>P:GO:0055114;<br>F:GO:0008270                                                                                                                                                                                                             | -                                              | EC:1.6.5.5  | IPR002085; IPR011032; IPR013154; G3DSA:3.90.180.10 (GENE3D), PTHR11695:SF30 (PANTHER)                                          |
|                         | -                                                       | 0  |                                                                                                                                                                                                                                                                                                               |                                                |             | -                                                                                                                              |
| Caenorhabditis elegans  | monocarboxylate transporter                             | 3  | P:GO:0000003;<br>P:GO:0040007;<br>P:GO:0002119                                                                                                                                                                                                                                                                | -                                              |             | IPR011701; IPR016196; IPR020846; G3DSA:1.20.1250.20 (GENE3D), PTHR11360 (PANTHER), PTHR11360:SF15 (PANTHER), SignalP (SIGNALP) |
| Caenorhabditis briggsae | adam metalloproteinase with thrombospondin type 1 9     | 4  | F:GO:0004222;<br>C:GO:0005578;<br>P:GO:0006508;<br>F:GO:0008270                                                                                                                                                                                                                                               | -                                              | EC:3.4.24.0 | IPR012314                                                                                                                      |
| Caenorhabditis briggsae | Hypothetical protein CBG15659 [Caenorhabditis briggsae] | 4  | P:GO:0002119;<br>P:GO:0009792;<br>P:GO:0000003;<br>P:GO:0040007                                                                                                                                                                                                                                               | -                                              |             | PTHR15892 (PANTHER)                                                                                                            |
| Caenorhabditis elegans  | adipokinetic hormone receptor                           | 1  | F:GO:0004930                                                                                                                                                                                                                                                                                                  | -                                              |             | -                                                                                                                              |

|                         |                                                            |    |                                                                                                                                                                       |                                                                                                   |            |                                                                                                                                 |
|-------------------------|------------------------------------------------------------|----|-----------------------------------------------------------------------------------------------------------------------------------------------------------------------|---------------------------------------------------------------------------------------------------|------------|---------------------------------------------------------------------------------------------------------------------------------|
| Caenorhabditis briggsae | vesicular glutamate transporter                            | 2  | P:GO:0055085;<br>C:GO:0016021                                                                                                                                         | -                                                                                                 |            | IPR011701; IPR016196;<br>G3DSA:1.20.1250.20 (GENE3D),<br>PTHR11662 (PANTHER),<br>PTHR11662:SF29 (PANTHER), SignalP<br>(SIGNALP) |
| -                       | -                                                          | 0  |                                                                                                                                                                       |                                                                                                   |            | -                                                                                                                               |
| -                       | -                                                          | 0  |                                                                                                                                                                       |                                                                                                   |            | -                                                                                                                               |
| -                       | -                                                          | 0  |                                                                                                                                                                       |                                                                                                   |            | -                                                                                                                               |
| Caenorhabditis elegans  | lysophospholipid acyltransferase 7                         | 1  | F:GO:0016740                                                                                                                                                          | -                                                                                                 |            | IPR004299; PTHR13906 (PANTHER),<br>PTHR13906:SF5 (PANTHER), SignalP<br>(SIGNALP)                                                |
| Caenorhabditis briggsae | elegans protein confirmed by transcript evidence           | 0  |                                                                                                                                                                       |                                                                                                   |            | -                                                                                                                               |
| Homo sapiens            | hCG1990620 [Homo sapiens]                                  | 0  |                                                                                                                                                                       |                                                                                                   |            | -                                                                                                                               |
| Brugia malayi           | d- pantothe-te metabolism flavoprotein                     | 10 | P:GO:0046843;<br>P:GO:0007303;<br>P:GO:0055091;<br>P:GO:0007297;<br>P:GO:0070328;<br>P:GO:0007476;<br>P:GO:0030036;<br>P:GO:0022416;<br>P:GO:0030713;<br>P:GO:0030708 | -                                                                                                 |            | IPR007085; PTHR12290 (PANTHER),<br>PTHR12290:SF2 (PANTHER)                                                                      |
| Caenorhabditis elegans  | elegans protein partially confirmed by transcript evidence | 0  |                                                                                                                                                                       |                                                                                                   |            | -                                                                                                                               |
| -                       | -                                                          | 0  |                                                                                                                                                                       |                                                                                                   |            | -                                                                                                                               |
| Brugia malayi           | protein ki-se domain containing protein                    | 0  |                                                                                                                                                                       | F:GO:0016301;<br>F:GO:0004672;<br>F:GO:0005524;<br>F:GO:0000166;<br>P:GO:0006468;<br>F:GO:0004674 |            | -                                                                                                                               |
| Caenorhabditis elegans  | zinc finger protein                                        | 0  |                                                                                                                                                                       | F:GO:0008270;<br>C:GO:0005622                                                                     |            | IPR007087; IPR015880                                                                                                            |
| Macaca mulatta          | protein disulfide isomerase family member 6                | 8  | P:GO:0006457;<br>C:GO:0005788;<br>C:GO:0005793;<br>C:GO:0005886;<br>P:GO:0045454;<br>F:GO:0005515;<br>C:GO:0042470;<br>F:GO:0003756                                   | -                                                                                                 | EC:5.3.4.1 | -                                                                                                                               |
| Brugia malayi           | furry homolog                                              | 1  | F:GO:0005515                                                                                                                                                          | -                                                                                                 |            | PTHR12295 (PANTHER),<br>PTHR12295:SF6 (PANTHER)                                                                                 |
| -                       | -                                                          | 0  |                                                                                                                                                                       |                                                                                                   |            | -                                                                                                                               |

|                             |                                                                  |   |                                                                                                   |                                                                                                                                                                                                                                           |              |                                                                                                               |
|-----------------------------|------------------------------------------------------------------|---|---------------------------------------------------------------------------------------------------|-------------------------------------------------------------------------------------------------------------------------------------------------------------------------------------------------------------------------------------------|--------------|---------------------------------------------------------------------------------------------------------------|
| Caenorhabditis briggsae     | briggsae cbr-pri-1 protein                                       | 0 |                                                                                                   | F:GO:0016740;<br>F:GO:0003896;<br>P:GO:0000910;<br>P:GO:0006260;<br>P:GO:0000003;<br>P:GO:0051301;<br>C:GO:0005658;<br>P:GO:0002119;<br>P:GO:0009792;<br>P:GO:0002009;<br>P:GO:0040007;<br>P:GO:0040035;<br>P:GO:0006269;<br>F:GO:0003899 | -            |                                                                                                               |
| -                           | -                                                                | 0 |                                                                                                   |                                                                                                                                                                                                                                           | -            |                                                                                                               |
| -                           | -                                                                | 0 |                                                                                                   |                                                                                                                                                                                                                                           | -            |                                                                                                               |
| -                           | -                                                                | 0 |                                                                                                   |                                                                                                                                                                                                                                           | -            |                                                                                                               |
| -                           | -                                                                | 0 |                                                                                                   |                                                                                                                                                                                                                                           | -            | SignalP (SIGNALP)                                                                                             |
| -                           | -                                                                | 0 |                                                                                                   |                                                                                                                                                                                                                                           | -            |                                                                                                               |
| -                           | -                                                                | 0 |                                                                                                   |                                                                                                                                                                                                                                           | -            |                                                                                                               |
| -                           | -                                                                | 0 |                                                                                                   |                                                                                                                                                                                                                                           | -            |                                                                                                               |
| Angiostrongylus cantonensis | elegans protein partially confirmed by transcript evidence       | 0 |                                                                                                   |                                                                                                                                                                                                                                           | -            |                                                                                                               |
| Caenorhabditis elegans      | set (trithorax polycomb) domain containing family member (set-2) | 3 | F:GO:0005488;<br>F:GO:0016740;<br>C:GO:0044451                                                    | -                                                                                                                                                                                                                                         |              | IPR015722; G3DSA:2.170.270.10 (GENE3D), PTHR22884 (PANTHER), PF11764 (PFAM)                                   |
| Caenorhabditis elegans      | heparan sulfate 2-o-sulfotransferase 1                           | 6 | P:GO:0060676;<br>C:GO:0016021;<br>C:GO:0000139;<br>P:GO:0015014;<br>F:GO:0004394;<br>P:GO:0030202 | -                                                                                                                                                                                                                                         |              | IPR005331; IPR007734;<br>PTHR12129:SF3 (PANTHER), SSF52540 (SUPERFAMILY)                                      |
| -                           | -                                                                | 0 |                                                                                                   |                                                                                                                                                                                                                                           |              | IPR000731; IPR003392; PTHR10796 (PANTHER), PTHR10796:SF14 (PANTHER), SignalP (SIGNALP)                        |
| Caenorhabditis elegans      | tyrosine-protein ki-se transmembrane receptor                    | 4 | P:GO:0006468;<br>F:GO:0005524;<br>F:GO:0004672;<br>F:GO:0005515                                   | -                                                                                                                                                                                                                                         |              | IPR001245; IPR020685;<br>G3DSA:1.10.510.10 (GENE3D), PTHR23256:SF274 (PANTHER), SignalP (SIGNALP)             |
| Caenorhabditis briggsae     | probable e3 ubiquitin-protein ligase mycbp2                      | 1 | F:GO:0005488                                                                                      | -                                                                                                                                                                                                                                         |              | PTHR12846 (PANTHER), PTHR12846:SF2 (PANTHER)                                                                  |
| Caenorhabditis elegans      | acyl- thioesterase ii                                            | 2 | P:GO:0019915;<br>F:GO:0016787                                                                     | -                                                                                                                                                                                                                                         |              | IPR003703; G3DSA:3.10.129.10 (GENE3D), PTHR11066:SF3 (PANTHER), SSF54637 (SUPERFAMILY)                        |
| Caenorhabditis elegans      | hypothetical protein F34D10.9 [Caenorhabditis elegans]           | 0 |                                                                                                   |                                                                                                                                                                                                                                           | P:GO:0006270 | -                                                                                                             |
| Caenorhabditis elegans      | sy-ptotagmin x                                                   | 6 | P:GO:0050803;<br>P:GO:0006950;<br>C:GO:0008021;<br>P:GO:0006810;<br>C:GO:0016021;<br>F:GO:0005215 | -                                                                                                                                                                                                                                         |              | IPR000008; IPR008973; IPR018029;<br>G3DSA:2.60.40.150 (GENE3D), PTHR10024 (PANTHER), PTHR10024:SF41 (PANTHER) |

|                         |                                                         |   |                                                                                                                                                                                                         |   |                                                                                                        |
|-------------------------|---------------------------------------------------------|---|---------------------------------------------------------------------------------------------------------------------------------------------------------------------------------------------------------|---|--------------------------------------------------------------------------------------------------------|
| Caenorhabditis elegans  | unc-13 homolog b ( elegans)                             | 0 | F:GO:0001566;<br>P:GO:0016082;<br>C:GO:0016020;<br>C:GO:0045202;<br>P:GO:0023034;<br>C:GO:0030054;<br>C:GO:0005794;<br>P:GO:0006887;<br>C:GO:0005575;<br>P:GO:0007268;<br>F:GO:0046872;<br>C:GO:0005886 |   | PTHR10480 (PANTHER)                                                                                    |
| Caenorhabditis elegans  | dead (asp-glu-ala-asp) box polypeptide 58               | 1 | F:GO:0005488                                                                                                                                                                                            | - | SignalP (SIGNALP)                                                                                      |
| Caenorhabditis elegans  | yqy2_caeel ame: full=uncharacterized protein            | 0 |                                                                                                                                                                                                         |   | -                                                                                                      |
|                         | -                                                       | 0 |                                                                                                                                                                                                         |   | -                                                                                                      |
|                         | -                                                       | 0 |                                                                                                                                                                                                         |   | -                                                                                                      |
|                         | -                                                       | 0 |                                                                                                                                                                                                         |   | -                                                                                                      |
| Caenorhabditis elegans  | hypothetical tyrosi-se-like protein in chromosome       | 4 | F:GO:0005515;<br>F:GO:0046872;<br>P:GO:0008152;<br>F:GO:0016491                                                                                                                                         | - | -                                                                                                      |
|                         | -                                                       | 0 |                                                                                                                                                                                                         |   | -                                                                                                      |
| Caenorhabditis elegans  | g protein beta subunit-like                             | 9 | P:GO:0032314;<br>F:GO:0005515;<br>P:GO:0040018;<br>C:GO:0005829;<br>P:GO:0019915;<br>P:GO:0032008;<br>P:GO:0050731;<br>P:GO:0002119;<br>P:GO:0030838                                                    | - | IPR001680; IPR011046; IPR015943;<br>IPR017986; IPR019775; IPR019781;<br>IPR019782; PTHR19842 (PANTHER) |
| Steinernema feltiae     | glycogen synthase                                       | 7 | P:GO:0009792;<br>P:GO:0010171;<br>P:GO:0002119;<br>P:GO:0005978;<br>F:GO:0005515;<br>F:GO:0004373;<br>P:GO:0040011                                                                                      | - | EC:2.4.1.11<br>IPR008631; SSF53756 (SUPERFAMILY)                                                       |
|                         | -                                                       | 0 |                                                                                                                                                                                                         |   | -                                                                                                      |
|                         | -                                                       | 0 |                                                                                                                                                                                                         |   | -                                                                                                      |
| Caenorhabditis briggsae | Hypothetical protein CBG14642 [Caenorhabditis briggsae] | 0 | F:GO:0008168;<br>F:GO:0016740;<br>P:GO:0008152;<br>C:GO:0016021;<br>F:GO:0003824                                                                                                                        |   | IPR001045; G3DSA:3.40.50.150<br>(GENE3D), PTHR12176 (PANTHER),<br>SSF53335 (SUPERFAMILY)               |
|                         | -                                                       | 0 |                                                                                                                                                                                                         |   | IPR002013; PTHR11200 (PANTHER),<br>PTHR11200:SF11 (PANTHER)                                            |
| Haemonchus contortus    | elegans protein confirmed by transcript evidence        | 5 | F:GO:0015078;<br>C:GO:0033177;<br>C:GO:0016021;<br>P:GO:0015986;<br>P:GO:0040013                                                                                                                        | - | IPR002490; PTHR11629:SF23<br>(PANTHER), SignalP (SIGNALP)                                              |
|                         | -                                                       | 0 |                                                                                                                                                                                                         |   | -                                                                                                      |

|                         |                                                    |    |                                                                                                                                                                                                                                                                             |                               |              |                                                                                                                                                                                                           |
|-------------------------|----------------------------------------------------|----|-----------------------------------------------------------------------------------------------------------------------------------------------------------------------------------------------------------------------------------------------------------------------------|-------------------------------|--------------|-----------------------------------------------------------------------------------------------------------------------------------------------------------------------------------------------------------|
| Caenorhabditis elegans  | short chain dehydroge-se reductase family member 5 | 5  | P:GO:0009239;<br>P:GO:0055114;<br>C:GO:0016021;<br>F:GO:0008667;<br>F:GO:0050662                                                                                                                                                                                            | -                             | EC:1.3.1.28  | IPR002198; IPR002347; IPR016040;<br>PTHR19410:SF36 (PANTHER),<br>SSF51735 (SUPERFAMILY)                                                                                                                   |
| Caenorhabditis briggsae | egf-like domain containing protein                 | 1  | P:GO:0032502                                                                                                                                                                                                                                                                | -                             |              | IPR000742; IPR006210; IPR013032;<br>G3DSA:2.170.300.10 (GENE3D),<br>PTHR11201 (PANTHER),<br>PTHR11201:SF238 (PANTHER), SignalP<br>(SIGNALP), SSF57196 (SUPERFAMILY)                                       |
| Caenorhabditis briggsae | briggsae cbr-dhs-29 protein                        | 5  | P:GO:0006694;<br>C:GO:0016021;<br>P:GO:0055114;<br>F:GO:0005488;<br>F:GO:0003854                                                                                                                                                                                            | -                             | EC:1.1.1.145 | SignalP (SIGNALP)                                                                                                                                                                                         |
| Caenorhabditis elegans  | elegans protein confirmed by transcript evidence   | 0  |                                                                                                                                                                                                                                                                             |                               |              | -                                                                                                                                                                                                         |
|                         | -                                                  | 0  |                                                                                                                                                                                                                                                                             |                               |              | SignalP (SIGNALP)                                                                                                                                                                                         |
| Caenorhabditis elegans  | isoform a                                          | 1  | P:GO:0000003                                                                                                                                                                                                                                                                | -                             |              | IPR000408; IPR009091; PTHR22870<br>(PANTHER), PTHR22870:SF28<br>(PANTHER)                                                                                                                                 |
| Caenorhabditis briggsae | briggsae cbr-dct-9 protein                         | 1  | P:GO:0009792                                                                                                                                                                                                                                                                | -                             |              | IPR000535; IPR008962                                                                                                                                                                                      |
|                         | -                                                  | 0  |                                                                                                                                                                                                                                                                             |                               |              | -                                                                                                                                                                                                         |
| Caenorhabditis elegans  | ryanodine receptor                                 | 16 | F:GO:0005515;<br>F:GO:0005219;<br>P:GO:0032026;<br>P:GO:0006816;<br>C:GO:0019717;<br>P:GO:0051592;<br>F:GO:0005509;<br>C:GO:0016021;<br>P:GO:0051480;<br>P:GO:0006629;<br>C:GO:0043234;<br>P:GO:0042493;<br>C:GO:0030018;<br>P:GO:0055085;<br>F:GO:0004872;<br>P:GO:0007584 | -                             |              | IPR005821; IPR009460; IPR015925;<br>PTHR13715:SF11 (PANTHER)                                                                                                                                              |
| Caenorhabditis briggsae | like protein                                       | 0  |                                                                                                                                                                                                                                                                             | F:GO:0016779;<br>F:GO:0016740 |              | IPR002876; G3DSA:3.30.70.980<br>(GENE3D)                                                                                                                                                                  |
|                         | -                                                  | 0  |                                                                                                                                                                                                                                                                             |                               |              | -                                                                                                                                                                                                         |
| Caenorhabditis elegans  | olfactomedin-like domain containing protein        | 0  |                                                                                                                                                                                                                                                                             | P:GO:0000003                  |              | IPR003112; PTHR23192 (PANTHER),<br>PTHR23192:SF6 (PANTHER)                                                                                                                                                |
|                         | -                                                  | 0  |                                                                                                                                                                                                                                                                             |                               |              | -                                                                                                                                                                                                         |
|                         | -                                                  | 0  |                                                                                                                                                                                                                                                                             |                               |              | IPR013783                                                                                                                                                                                                 |
|                         | -                                                  | 0  |                                                                                                                                                                                                                                                                             |                               |              | -                                                                                                                                                                                                         |
| Caenorhabditis elegans  | novel protein vertebrate large homolog 5           | 1  | F:GO:0005515                                                                                                                                                                                                                                                                | -                             |              | IPR001452; IPR001478; IPR008144;<br>G3DSA:2.30.30.40 (GENE3D),<br>G3DSA:2.30.42.10 (GENE3D),<br>G3DSA:3.40.50.300 (GENE3D),<br>PTHR13865 (PANTHER),<br>PTHR13865:SF5 (PANTHER), SSF52540<br>(SUPERFAMILY) |
|                         | -                                                  | 0  |                                                                                                                                                                                                                                                                             |                               |              | IPR001412; SignalP (SIGNALP)                                                                                                                                                                              |
|                         | -                                                  | 0  |                                                                                                                                                                                                                                                                             |                               |              | -                                                                                                                                                                                                         |
|                         | -                                                  | 0  |                                                                                                                                                                                                                                                                             |                               |              | -                                                                                                                                                                                                         |

|                         |                                                                                |   |                                                                                                                    |                                                                                  |            |                                                                                                                                                |
|-------------------------|--------------------------------------------------------------------------------|---|--------------------------------------------------------------------------------------------------------------------|----------------------------------------------------------------------------------|------------|------------------------------------------------------------------------------------------------------------------------------------------------|
| Caenorhabditis briggsae | organic cation transporter protein                                             | 7 | P:GO:0009792;<br>P:GO:0002119;<br>P:GO:0006915;<br>P:GO:0006810;<br>P:GO:0040007;<br>C:GO:0016020;<br>F:GO:0005215 | -                                                                                |            | IPR005828; IPR016196; IPR020846;<br>G3DSA:1.20.1250.20 (GENE3D),<br>PTHR11600 (PANTHER),<br>PTHR11600:SF42 (PANTHER)                           |
| Argas monolakensis      | mitochondrial associated endoribonuclease mar1-<br>isochorismatase superfamily | 0 |                                                                                                                    | C:GO:0005739;<br>P:GO:0008152;<br>F:GO:0003824;<br>F:GO:0005515;<br>F:GO:0042802 |            | IPR000868; PTHR14119 (PANTHER)                                                                                                                 |
| Caenorhabditis briggsae | briggsae cbr-sfxn- protein                                                     | 0 |                                                                                                                    | F:GO:0008324;<br>C:GO:0016021;<br>C:GO:0016020;<br>P:GO:0055085;<br>P:GO:0006812 |            | IPR004686; PTHR11153:SF9<br>(PANTHER), SignalP (SIGNALP)                                                                                       |
|                         | -                                                                              | 0 |                                                                                                                    |                                                                                  |            | -                                                                                                                                              |
| Caenorhabditis briggsae | Hypothetical protein CBG13916 [Caenorhabditis briggsae]                        | 0 |                                                                                                                    |                                                                                  |            | -                                                                                                                                              |
| Ostertagia ostertagi    | metalloprotease 1 precursor                                                    | 2 | F:GO:0046872;<br>F:GO:0008237                                                                                      | -                                                                                |            | -                                                                                                                                              |
|                         | -                                                                              | 0 |                                                                                                                    |                                                                                  |            | -                                                                                                                                              |
| Caenorhabditis briggsae | elegans protein confirmed by transcript evidence                               | 0 |                                                                                                                    |                                                                                  |            | IPR001534; SignalP (SIGNALP)                                                                                                                   |
| Caenorhabditis briggsae | elegans protein confirmed by transcript evidence                               | 0 |                                                                                                                    |                                                                                  |            | IPR001534; SignalP (SIGNALP)                                                                                                                   |
| Caenorhabditis briggsae | tbc1 domain member 10a                                                         | 5 | F:GO:0005097;<br>C:GO:0005622;<br>F:GO:0030165;<br>P:GO:0032313;<br>C:GO:0005902                                   | -                                                                                |            | -                                                                                                                                              |
|                         | -                                                                              | 0 |                                                                                                                    |                                                                                  |            | -                                                                                                                                              |
|                         | -                                                                              | 0 |                                                                                                                    |                                                                                  |            | -                                                                                                                                              |
| Caenorhabditis elegans  | beta lysosomal                                                                 | 3 | P:GO:0005975;<br>F:GO:0004553;<br>F:GO:0043169                                                                     | -                                                                                | EC:3.2.1.0 | -                                                                                                                                              |
| Caenorhabditis briggsae | elegans protein partially confirmed by transcript evidence                     | 2 | F:GO:0016791;<br>C:GO:0005737                                                                                      | -                                                                                | EC:3.1.3.0 | IPR000242; IPR000387; IPR016130;<br>G3DSA:3.90.190.10 (GENE3D),<br>PTHR19134 (PANTHER),<br>PTHR19134:SF26 (PANTHER),<br>SSF52799 (SUPERFAMILY) |
| Caenorhabditis briggsae | phosphoinositide-3- delta polypeptide                                          | 6 | P:GO:0009987;<br>P:GO:0050789;<br>P:GO:0040024;<br>P:GO:0007568;<br>F:GO:0016301;<br>P:GO:0007610                  | -                                                                                |            | IPR001263; IPR002420; IPR008973;<br>IPR015433; IPR016024;<br>G3DSA:2.60.40.150 (GENE3D),<br>PTHR10048:SF14 (PANTHER)                           |

|                         |                                                                     |   |                                                                                                                                                          |                                                                                                                                                                                                                                                                                                                                                                                                                                                                                                                                    |  |                                                                            |
|-------------------------|---------------------------------------------------------------------|---|----------------------------------------------------------------------------------------------------------------------------------------------------------|------------------------------------------------------------------------------------------------------------------------------------------------------------------------------------------------------------------------------------------------------------------------------------------------------------------------------------------------------------------------------------------------------------------------------------------------------------------------------------------------------------------------------------|--|----------------------------------------------------------------------------|
| Aedes aegypti           | fringe                                                              | 0 |                                                                                                                                                          | <p>P:GO:0007451;<br/> F:GO:0016757;<br/> P:GO:0007450;<br/> P:GO:0008593;<br/> P:GO:0006493;<br/> P:GO:0048477;<br/> F:GO:0008375;<br/> P:GO:0007293;<br/> C:GO:0016021;<br/> C:GO:0016020;<br/> F:GO:0033829;<br/> P:GO:0007389;<br/> C:GO:0005783;<br/> P:GO:0048190;<br/> P:GO:0001745;<br/> P:GO:0035286;<br/> P:GO:0007219;<br/> P:GO:0045747;<br/> P:GO:0045746;<br/> P:GO:0035111;<br/> P:GO:0007476;<br/> P:GO:0008587;<br/> C:GO:0005795;<br/> C:GO:0005794;<br/> P:GO:0048749;<br/> F:GO:0008194;<br/> C:GO:0030173;</p> |  | IPR003378; PTHR10811 (PANTHER), PTHR10811:SF1 (PANTHER), SignalP (SIGNALP) |
| Caenorhabditis elegans  | ryanodine receptor                                                  | 8 | <p>F:GO:0004872;<br/> P:GO:0006629;<br/> F:GO:0005219;<br/> P:GO:0006816;<br/> P:GO:0006874;<br/> P:GO:0055085;<br/> F:GO:0005509;<br/> C:GO:0016021</p> | -                                                                                                                                                                                                                                                                                                                                                                                                                                                                                                                                  |  | IPR015925; PTHR13715:SF11 (PANTHER), SignalP (SIGNALP)                     |
| Loa loa                 | zinc finger protein                                                 | 2 | <p>F:GO:0008270;<br/> C:GO:0005622</p>                                                                                                                   | -                                                                                                                                                                                                                                                                                                                                                                                                                                                                                                                                  |  | -                                                                          |
| Caenorhabditis elegans  | hypothetical protein T06D8.1 [Caenorhabditis elegans]               | 0 |                                                                                                                                                          |                                                                                                                                                                                                                                                                                                                                                                                                                                                                                                                                    |  | SignalP (SIGNALP)                                                          |
| Caenorhabditis briggsae | prion-like-(q n-rich)-domain-bearing protein family member (pqn-22) | 1 | P:GO:0009792                                                                                                                                             | -                                                                                                                                                                                                                                                                                                                                                                                                                                                                                                                                  |  | -                                                                          |
| -                       | -                                                                   | 0 |                                                                                                                                                          |                                                                                                                                                                                                                                                                                                                                                                                                                                                                                                                                    |  | -                                                                          |
| Brugia malayi           | ctr copper transporter family protein                               | 0 |                                                                                                                                                          | <p>C:GO:0016021;<br/> F:GO:0005375;<br/> P:GO:0006825</p>                                                                                                                                                                                                                                                                                                                                                                                                                                                                          |  | IPR007274; PTHR12483:SF4 (PANTHER)                                         |
| -                       | -                                                                   | 0 |                                                                                                                                                          |                                                                                                                                                                                                                                                                                                                                                                                                                                                                                                                                    |  | SignalP (SIGNALP)                                                          |
| Loa loa                 | yqp1_caeel ame: full=uncharacterized protein                        | 0 |                                                                                                                                                          |                                                                                                                                                                                                                                                                                                                                                                                                                                                                                                                                    |  | SignalP (SIGNALP)                                                          |

|                         |                                                            |    |                                                                                                                                                                                                                                                                                              |              |                                                         |                                                                                                                                                        |
|-------------------------|------------------------------------------------------------|----|----------------------------------------------------------------------------------------------------------------------------------------------------------------------------------------------------------------------------------------------------------------------------------------------|--------------|---------------------------------------------------------|--------------------------------------------------------------------------------------------------------------------------------------------------------|
| Homo sapiens            | adp-ribosylation factor 1                                  | 17 | F:GO:0005057;<br>C:GO:0000139;<br>F:GO:0005515;<br>F:GO:0008270;<br>F:GO:0005525;<br>P:GO:0015031;<br>C:GO:0005829;<br>P:GO:0060872;<br>P:GO:0032312;<br>P:GO:0006892;<br>P:GO:0006890;<br>C:GO:0048471;<br>F:GO:0003924;<br>C:GO:0005886;<br>P:GO:0048205;<br>F:GO:0008060;<br>C:GO:0030017 | -            | EC:3.6.5.1;<br>EC:3.6.5.2;<br>EC:3.6.5.3;<br>EC:3.6.5.4 | -                                                                                                                                                      |
|                         | -                                                          | 0  |                                                                                                                                                                                                                                                                                              |              |                                                         | -                                                                                                                                                      |
|                         | -                                                          | 0  |                                                                                                                                                                                                                                                                                              |              |                                                         | -                                                                                                                                                      |
| Caenorhabditis elegans  | homogentisate -dioxyge-se                                  | 5  | F:GO:0042802;<br>F:GO:0004411;<br>P:GO:0055114;<br>P:GO:0006559;<br>P:GO:0006570                                                                                                                                                                                                             | -            | EC:1.13.11.5                                            | IPR005708; IPR011051                                                                                                                                   |
| Caenorhabditis elegans  | elegans protein partially confirmed by transcript evidence | 1  | C:GO:0044464                                                                                                                                                                                                                                                                                 | -            |                                                         | IPR000276; IPR017452;<br>G3DSA:1.20.1070.10 (GENE3D),<br>PTHR22751 (PANTHER),<br>PTHR22751:SF8 (PANTHER), SignalP<br>(SIGNALP), SSF81321 (SUPERFAMILY) |
| Loa loa                 | polymerase iii (d- directed) polypeptide b                 | 9  | F:GO:0003899;<br>P:GO:0009615;<br>P:GO:0032728;<br>P:GO:0045089;<br>F:GO:0046872;<br>F:GO:0003677;<br>F:GO:0032549;<br>P:GO:0006350;<br>C:GO:0005634                                                                                                                                         | -            | EC:2.7.7.6                                              | -                                                                                                                                                      |
|                         | -                                                          | 0  |                                                                                                                                                                                                                                                                                              |              |                                                         | -                                                                                                                                                      |
|                         | -                                                          | 0  |                                                                                                                                                                                                                                                                                              |              |                                                         | -                                                                                                                                                      |
| Loa loa                 | piwi domain containing protein                             | 0  |                                                                                                                                                                                                                                                                                              | F:GO:0003676 |                                                         | IPR003165; PTHR22891 (PANTHER)                                                                                                                         |
| Caenorhabditis briggsae | serine or cysteine protease inhibitor                      | 13 | P:GO:0033986;<br>P:GO:0046687;<br>F:GO:0030414;<br>P:GO:0006954;<br>P:GO:0034014;<br>C:GO:0005615;<br>F:GO:0005515;<br>P:GO:0014070;<br>P:GO:0034097;<br>P:GO:0010288;<br>P:GO:0032355;<br>P:GO:0032496;<br>C:GO:0005634                                                                     | -            |                                                         | IPR000215; G3DSA:2.30.39.10<br>(GENE3D), G3DSA:3.30.497.10<br>(GENE3D), PTHR11461:SF25<br>(PANTHER)                                                    |
|                         | -                                                          | 0  |                                                                                                                                                                                                                                                                                              |              |                                                         | -                                                                                                                                                      |
|                         | -                                                          | 0  |                                                                                                                                                                                                                                                                                              |              |                                                         | -                                                                                                                                                      |
| Caenorhabditis elegans  | t family of potassium channels family member (twk-39)      | 0  |                                                                                                                                                                                                                                                                                              | F:GO:0005216 |                                                         | -                                                                                                                                                      |



|                           |                                               |    |  |                                                                                                                                                                                                                                                                                                                                                                                   |            |                                                                                                                                       |
|---------------------------|-----------------------------------------------|----|--|-----------------------------------------------------------------------------------------------------------------------------------------------------------------------------------------------------------------------------------------------------------------------------------------------------------------------------------------------------------------------------------|------------|---------------------------------------------------------------------------------------------------------------------------------------|
| Caenorhabditis elegans    | briggsae cbr-ile-2 protein                    | 0  |  | C:GO:0016021;<br>C:GO:0016020;<br>P:GO:0048881;<br>P:GO:0009792;<br>P:GO:0018991                                                                                                                                                                                                                                                                                                  |            | IPR005052; IPR008985; IPR013320;<br>PTHR12223:SF6 (PANTHER)                                                                           |
| -                         | -                                             | 0  |  |                                                                                                                                                                                                                                                                                                                                                                                   |            | -                                                                                                                                     |
| Caenorhabditis elegans    | briggsae cbr-cdt-1 protein                    | 9  |  | C:GO:0005737;<br>P:GO:0040035;<br>P:GO:0010171;<br>P:GO:0002119;<br>P:GO:0006260;<br>P:GO:0001703;<br>P:GO:0040011;<br>P:GO:0040007;<br>C:GO:0005634                                                                                                                                                                                                                              | -          | IPR014939; SSF46785 (SUPERFAMILY)                                                                                                     |
| Homo sapiens              | achain the structure of ca2+ sensor (case-12) | 22 |  | P:GO:0060316;<br>C:GO:0005654;<br>P:GO:0010880;<br>F:GO:0031996;<br>F:GO:0031997;<br>P:GO:0060315;<br>P:GO:0051592;<br>P:GO:0018298;<br>F:GO:0005509;<br>P:GO:0006936;<br>P:GO:0032465;<br>P:GO:0006091;<br>C:GO:0005576;<br>C:GO:0005829;<br>F:GO:0019904;<br>C:GO:0005813;<br>F:GO:0031432;<br>P:GO:0007186;<br>C:GO:0005876;<br>C:GO:0005886;<br>C:GO:0000922;<br>P:GO:0008218 | -          | IPR002048; IPR011992; IPR018247;<br>IPR018248; IPR018249; PTHR23050<br>(PANTHER), PTHR23050:SF20<br>(PANTHER), SSF47473 (SUPERFAMILY) |
| Caenorhabditis briggsae   | briggsae cbr-such-1 protein                   | 0  |  | P:GO:0000003;<br>F:GO:0005488                                                                                                                                                                                                                                                                                                                                                     |            | -                                                                                                                                     |
| -                         | -                                             | 0  |  |                                                                                                                                                                                                                                                                                                                                                                                   |            | -                                                                                                                                     |
| Plasmodium falciparum 3D7 | zinc finger c-x8-c-x5-c-x3-h                  | 0  |  | F:GO:0003676;<br>F:GO:0046872;<br>C:GO:0020011;<br>F:GO:0008270                                                                                                                                                                                                                                                                                                                   |            | -                                                                                                                                     |
| -                         | -                                             | 0  |  |                                                                                                                                                                                                                                                                                                                                                                                   |            | -                                                                                                                                     |
| Caenorhabditis elegans    | 3-phosphoserine phosphatase                   | 4  |  | F:GO:0000287;<br>C:GO:0009507;<br>F:GO:0004647;<br>P:GO:0006564                                                                                                                                                                                                                                                                                                                   | EC:3.1.3.3 | IPR023190; PTHR10000 (PANTHER),<br>SSF56784 (SUPERFAMILY)                                                                             |
| -                         | -                                             | 0  |  |                                                                                                                                                                                                                                                                                                                                                                                   |            | IPR008160; PTHR10499 (PANTHER),<br>PTHR10499:SF58 (PANTHER)                                                                           |
| Ovis aries                | ribosomal protein l34                         | 6  |  | F:GO:0003735;<br>F:GO:0003723;<br>F:GO:0005515;<br>C:GO:0022625;<br>C:GO:0005739;<br>P:GO:0006414                                                                                                                                                                                                                                                                                 | -          | SignalP (SIGNALP)                                                                                                                     |
| -                         | -                                             | 0  |  |                                                                                                                                                                                                                                                                                                                                                                                   |            | -                                                                                                                                     |

|                         |                                                                                                                           |    |                                                                                                                                                                                                                                                            |                                                                                                                                     |                                                                                                                                                                                   |
|-------------------------|---------------------------------------------------------------------------------------------------------------------------|----|------------------------------------------------------------------------------------------------------------------------------------------------------------------------------------------------------------------------------------------------------------|-------------------------------------------------------------------------------------------------------------------------------------|-----------------------------------------------------------------------------------------------------------------------------------------------------------------------------------|
|                         | -                                                                                                                         | 0  |                                                                                                                                                                                                                                                            |                                                                                                                                     | -                                                                                                                                                                                 |
|                         | -                                                                                                                         | 0  |                                                                                                                                                                                                                                                            |                                                                                                                                     | -                                                                                                                                                                                 |
| Caenorhabditis elegans  | annexin a7                                                                                                                | 15 | P:GO:0065008;<br>P:GO:0007109;<br>C:GO:0042582;<br>F:GO:0005509;<br>P:GO:0006909;<br>C:GO:0030496;<br>F:GO:0005544;<br>F:GO:0048155;<br>C:GO:0042581;<br>F:GO:0048306;<br>C:GO:0005819;<br>C:GO:0045335;<br>C:GO:0005635;<br>C:GO:0005654;<br>P:GO:0051592 | -                                                                                                                                   | IPR001464; IPR018252; IPR018502;<br>PTHR10502:SF13 (PANTHER)                                                                                                                      |
|                         | -                                                                                                                         | 0  |                                                                                                                                                                                                                                                            |                                                                                                                                     | SignalP (SIGNALP)                                                                                                                                                                 |
|                         | -                                                                                                                         | 0  |                                                                                                                                                                                                                                                            |                                                                                                                                     | SignalP (SIGNALP)                                                                                                                                                                 |
|                         | -                                                                                                                         | 0  |                                                                                                                                                                                                                                                            |                                                                                                                                     | -                                                                                                                                                                                 |
|                         | -                                                                                                                         | 0  |                                                                                                                                                                                                                                                            |                                                                                                                                     | -                                                                                                                                                                                 |
|                         | -                                                                                                                         | 0  |                                                                                                                                                                                                                                                            |                                                                                                                                     | -                                                                                                                                                                                 |
| Caenorhabditis elegans  | elegans protein confirmed by transcript evidence                                                                          | 0  |                                                                                                                                                                                                                                                            | P:GO:0006629;<br>F:GO:0016787;<br>F:GO:0004806                                                                                      | SignalP (SIGNALP)                                                                                                                                                                 |
|                         | -                                                                                                                         | 0  |                                                                                                                                                                                                                                                            |                                                                                                                                     | -                                                                                                                                                                                 |
|                         | -                                                                                                                         | 0  |                                                                                                                                                                                                                                                            |                                                                                                                                     | -                                                                                                                                                                                 |
|                         | -                                                                                                                         | 0  |                                                                                                                                                                                                                                                            |                                                                                                                                     | SignalP (SIGNALP)                                                                                                                                                                 |
| Homo sapiens            | peptidylprolyl isomerase b (cyclophilin b)                                                                                | 7  | P:GO:0006457;<br>C:GO:0005788;<br>C:GO:0042470;<br>P:GO:0051169;<br>F:GO:0042277;<br>F:GO:0051082;<br>F:GO:0003755                                                                                                                                         | -                                                                                                                                   | EC:5.2.1.8<br>IPR002130; IPR015891; IPR020892;<br>PTHR11071 (PANTHER),<br>PTHR11071:SF63 (PANTHER)                                                                                |
| Caenorhabditis elegans  | ubr1_caeel ame: full=e3 ubiquitin-protein ligase ubr-1 ame: full=n-recognin-1 ame: full=ubiquitin-protein ligase e3-alpha | 0  |                                                                                                                                                                                                                                                            |                                                                                                                                     | -                                                                                                                                                                                 |
| Drosophila yakuba       | GE23539 [Drosophila yakuba]                                                                                               | 0  |                                                                                                                                                                                                                                                            | F:GO:0003676;<br>F:GO:0000166;<br>F:GO:0003682;<br>C:GO:0030529;<br>C:GO:0000785;<br>P:GO:0006333;<br>F:GO:0003677;<br>C:GO:0005634 | -                                                                                                                                                                                 |
| Caenorhabditis briggsae | nidogen 2                                                                                                                 | 6  | F:GO:0005518;<br>C:GO:0031012;<br>P:GO:0044237;<br>P:GO:0007155;<br>P:GO:0040010;<br>C:GO:0016020                                                                                                                                                          | -                                                                                                                                   | IPR000152; IPR000742; IPR001881;<br>IPR013032; IPR013091; IPR018097;<br>G3DSA:2.10.25.10 (GENE3D),<br>PTHR11201 (PANTHER),<br>PTHR11201:SF84 (PANTHER),<br>SSF57196 (SUPERFAMILY) |
| Caenorhabditis elegans  | phosphate transporter family protein                                                                                      | 5  | P:GO:0006810;<br>P:GO:0040027;<br>P:GO:0040035;<br>P:GO:0009792;<br>C:GO:0016020                                                                                                                                                                           | -                                                                                                                                   | IPR001204; PTHR11101:SF12<br>(PANTHER), PSS1257 (PROFILE),<br>SignalP (SIGNALP)                                                                                                   |

|                         |                                                                                   |   |                                                                                                                                     |                                                |                                                                                                                          |
|-------------------------|-----------------------------------------------------------------------------------|---|-------------------------------------------------------------------------------------------------------------------------------------|------------------------------------------------|--------------------------------------------------------------------------------------------------------------------------|
| Caenorhabditis elegans  | phosphate transporter family protein                                              | 6 | P:GO:0009987;<br>P:GO:0006810;<br>P:GO:0040027;<br>P:GO:0040035;<br>C:GO:0044425;<br>P:GO:0009792                                   | -                                              | IPR001204; PTHR11101:SF12 (PANTHER), SignalP (SIGNALP)                                                                   |
| -                       | -                                                                                 | 0 | -                                                                                                                                   | -                                              | -                                                                                                                        |
| -                       | -                                                                                 | 0 | -                                                                                                                                   | -                                              | -                                                                                                                        |
| -                       | -                                                                                 | 0 | -                                                                                                                                   | -                                              | -                                                                                                                        |
| -                       | -                                                                                 | 0 | -                                                                                                                                   | -                                              | SignalP (SIGNALP)                                                                                                        |
| -                       | -                                                                                 | 0 | -                                                                                                                                   | -                                              | -                                                                                                                        |
| -                       | -                                                                                 | 0 | -                                                                                                                                   | -                                              | -                                                                                                                        |
| -                       | -                                                                                 | 0 | -                                                                                                                                   | -                                              | SignalP (SIGNALP)                                                                                                        |
| -                       | -                                                                                 | 0 | -                                                                                                                                   | -                                              | SignalP (SIGNALP)                                                                                                        |
| -                       | -                                                                                 | 0 | -                                                                                                                                   | -                                              | -                                                                                                                        |
| -                       | -                                                                                 | 0 | -                                                                                                                                   | -                                              | -                                                                                                                        |
| -                       | -                                                                                 | 0 | -                                                                                                                                   | -                                              | -                                                                                                                        |
| Caenorhabditis briggsae | fyve zinc finger family protein                                                   | 0 |                                                                                                                                     | F:GO:0046872;<br>F:GO:0008270;<br>C:GO:0005622 | IPR000306; IPR007087; IPR011011;<br>IPR013083; IPR015880; IPR017455;<br>PTHR13510 (PANTHER),<br>PTHR13510:SF10 (PANTHER) |
| -                       | -                                                                                 | 0 | -                                                                                                                                   | -                                              | -                                                                                                                        |
| Caenorhabditis elegans  | n-acetyltransferase 10                                                            | 8 | P:GO:0009792;<br>P:GO:0008152;<br>F:GO:0008080;<br>P:GO:0040007;<br>P:GO:0040035;<br>F:GO:0005515;<br>P:GO:0002119;<br>P:GO:0040011 | -                                              | IPR013562; PTHR10925 (PANTHER),<br>PTHR10925:SF5 (PANTHER)                                                               |
| Ancylostoma duodenale   | ancylostoma-secreted protein 1 precursor                                          | 0 |                                                                                                                                     | C:GO:0005576                                   | IPR014044                                                                                                                |
| Caenorhabditis briggsae | copine domain atypical protein isoform partially confirmed by transcript evidence | 0 |                                                                                                                                     |                                                | -                                                                                                                        |
| Caenorhabditis elegans  | von willebrand factor type egf and pentraxin domain containing 1                  | 2 | P:GO:0040010;<br>F:GO:0005509                                                                                                       | -                                              | SignalP (SIGNALP)                                                                                                        |
| Brugia malayi           | hypothetical protein Bm1_04595 [Brugia malayi]                                    | 0 |                                                                                                                                     | F:GO:0003676                                   | -                                                                                                                        |
| -                       | -                                                                                 | 0 | -                                                                                                                                   | -                                              | -                                                                                                                        |
| -                       | -                                                                                 | 0 | -                                                                                                                                   | -                                              | -                                                                                                                        |
| -                       | -                                                                                 | 0 | -                                                                                                                                   | -                                              | -                                                                                                                        |
| Caenorhabditis elegans  | possible integral membrane efflux protein                                         | 7 | P:GO:0009792;<br>P:GO:0002119;<br>P:GO:0055085;<br>P:GO:0040010;<br>P:GO:0000003;<br>P:GO:0042221;<br>C:GO:0016021                  | -                                              | PTHR10074 (PANTHER),<br>PTHR10074:SF22 (PANTHER), SignalP (SIGNALP)                                                      |
| Brugia malayi           | replication factor a 73 kda subunit                                               | 1 | F:GO:0005515                                                                                                                        | -                                              | IPR012340; IPR013955; IPR016027;<br>PTHR23273 (PANTHER)                                                                  |
| -                       | -                                                                                 | 0 | -                                                                                                                                   | -                                              | -                                                                                                                        |
| Brugia malayi           | low-density lipoprotein receptor                                                  | 3 | C:GO:0016021;<br>F:GO:0004872;<br>F:GO:0005509                                                                                      | -                                              | IPR011042; PTHR10529 (PANTHER),<br>SSF101898 (SUPERFAMILY)                                                               |
| Caenorhabditis elegans  | elegans protein partially confirmed by transcript evidence                        | 5 | P:GO:0018996;<br>P:GO:0009792;<br>P:GO:0040017;<br>P:GO:0040007;<br>P:GO:0002119                                                    | -                                              | -                                                                                                                        |
| -                       | -                                                                                 | 0 | -                                                                                                                                   | -                                              | -                                                                                                                        |

|                         |                                                                       |    |                                                                                                                                                                                                                                                            |                                                                                                                                                                                                                                                            |                                                         |                                                                                                                                  |
|-------------------------|-----------------------------------------------------------------------|----|------------------------------------------------------------------------------------------------------------------------------------------------------------------------------------------------------------------------------------------------------------|------------------------------------------------------------------------------------------------------------------------------------------------------------------------------------------------------------------------------------------------------------|---------------------------------------------------------|----------------------------------------------------------------------------------------------------------------------------------|
| Caenorhabditis elegans  | protein ki-se domain containing protein                               | 0  |                                                                                                                                                                                                                                                            | F:GO:0016740;<br>C:GO:0019028;<br>F:GO:0004674;<br>P:GO:0018108;<br>F:GO:0004672;<br>P:GO:0006468;<br>F:GO:0000166;<br>F:GO:0004715;<br>F:GO:0005524;<br>F:GO:0016301;<br>F:GO:0004713;<br>C:GO:0019012;<br>P:GO:0016032;<br>F:GO:0005515;<br>F:GO:0005198 |                                                         | -                                                                                                                                |
| Caenorhabditis elegans  | voltage-gated calcium channel beta subunit                            | 2  | P:GO:0006816;<br>F:GO:0005245                                                                                                                                                                                                                              | -                                                                                                                                                                                                                                                          |                                                         | IPR000584; IPR001452; IPR008144;<br>G3DSA:2.30.30.40 (GENE3D),<br>G3DSA:3.40.50.300 (GENE3D),<br>SSF52540 (SUPERFAMILY)          |
| Caenorhabditis elegans  | ras-related protein rap-1b precursor                                  | 9  | C:GO:0005911;<br>F:GO:0005525;<br>P:GO:0008283;<br>F:GO:0005515;<br>C:GO:0005829;<br>P:GO:0060026;<br>P:GO:0007264;<br>F:GO:0019003;<br>F:GO:0003924                                                                                                       | -                                                                                                                                                                                                                                                          | EC:3.6.5.1;<br>EC:3.6.5.2;<br>EC:3.6.5.3;<br>EC:3.6.5.4 | -                                                                                                                                |
| Caenorhabditis elegans  | elegans protein confirmed by transcript evidence                      | 0  |                                                                                                                                                                                                                                                            |                                                                                                                                                                                                                                                            |                                                         | -                                                                                                                                |
|                         | -                                                                     | 0  |                                                                                                                                                                                                                                                            |                                                                                                                                                                                                                                                            |                                                         | -                                                                                                                                |
| Ancylostoma caninum     | dual specificity mitogen-activated protein ki-se ki-se 4              | 15 | P:GO:0007257;<br>P:GO:0043525;<br>F:GO:0004713;<br>C:GO:0005829;<br>F:GO:0004674;<br>C:GO:0032839;<br>P:GO:0001934;<br>P:GO:0048263;<br>F:GO:0008545;<br>C:GO:0033267;<br>P:GO:0045740;<br>C:GO:0005634;<br>F:GO:0005524;<br>F:GO:0031435;<br>C:GO:0043204 | -                                                                                                                                                                                                                                                          | EC:2.7.10.0;<br>EC:2.7.11.0                             | IPR000719; IPR011009; IPR017442;<br>G3DSA:1.10.510.10 (GENE3D),<br>PTHR22986 (PANTHER),<br>PTHR22986:SF38 (PANTHER)              |
| Caenorhabditis briggsae | phosphatidylinositol 4-ki-se                                          | 7  | P:GO:0008219;<br>P:GO:0046854;<br>P:GO:0000003;<br>C:GO:0030660;<br>F:GO:0004430;<br>F:GO:0005515;<br>P:GO:0048015                                                                                                                                         | -                                                                                                                                                                                                                                                          | EC:2.7.1.67                                             | IPR000403; IPR001263; IPR011009;<br>IPR015433; IPR016024; IPR018936;<br>G3DSA:3.30.1010.10 (GENE3D),<br>PTHR10048:SF15 (PANTHER) |
| Caenorhabditis elegans  | dap (death associated protein ki-se) like ki-se family member (dlk-1) | 1  | F:GO:0005515                                                                                                                                                                                                                                               | -                                                                                                                                                                                                                                                          |                                                         | -                                                                                                                                |
| Caenorhabditis elegans  | elegans protein confirmed by transcript evidence                      | 1  | C:GO:0016021                                                                                                                                                                                                                                               | -                                                                                                                                                                                                                                                          |                                                         | -                                                                                                                                |
|                         | -                                                                     | 0  |                                                                                                                                                                                                                                                            |                                                                                                                                                                                                                                                            |                                                         | -                                                                                                                                |
|                         | -                                                                     | 0  |                                                                                                                                                                                                                                                            |                                                                                                                                                                                                                                                            |                                                         | -                                                                                                                                |

|                           |                                                                                        |   |                                                                                                                    |                                                                 |             |                                                                                    |
|---------------------------|----------------------------------------------------------------------------------------|---|--------------------------------------------------------------------------------------------------------------------|-----------------------------------------------------------------|-------------|------------------------------------------------------------------------------------|
| Gallus gallus             | chromosome 14 open reading frame 102                                                   | 1 | F:GO:0005488                                                                                                       | -                                                               |             | IPR013633; PTHR13471 (PANTHER)                                                     |
| -                         | -                                                                                      | 0 |                                                                                                                    |                                                                 |             | -                                                                                  |
| -                         | -                                                                                      | 0 |                                                                                                                    |                                                                 |             | -                                                                                  |
| -                         | -                                                                                      | 0 |                                                                                                                    |                                                                 |             | SignalP (SIGNALP)                                                                  |
| -                         | -                                                                                      | 0 |                                                                                                                    |                                                                 |             | -                                                                                  |
| -                         | -                                                                                      | 0 |                                                                                                                    |                                                                 |             | -                                                                                  |
| Caenorhabditis briggsae   | elegans protein confirmed by transcript evidence                                       | 3 | F:GO:0051537;<br>F:GO:0046872;<br>F:GO:0009055                                                                     | -                                                               |             | -                                                                                  |
| Caenorhabditis briggsae   | loc100135354 protein                                                                   | 4 | C:GO:0005764;<br>P:GO:0006810;<br>P:GO:0040010;<br>C:GO:0016020                                                    | -                                                               |             | PTHR13146 (PANTHER), SignalP (SIGNALP)                                             |
| -                         | -                                                                                      | 0 |                                                                                                                    |                                                                 |             | -                                                                                  |
| Brugia malayi             | guanine nucleotide exchange factor for ras-like gtpases n-termi-l motif family protein | 3 | C:GO:0005622;<br>F:GO:0030234;<br>P:GO:0007264                                                                     | -                                                               |             | IPR000651; IPR008937;<br>PTHR23113:SF22 (PANTHER)                                  |
| -                         | -                                                                                      | 0 |                                                                                                                    |                                                                 |             | -                                                                                  |
| -                         | -                                                                                      | 0 |                                                                                                                    |                                                                 |             | SignalP (SIGNALP)                                                                  |
| Caenorhabditis elegans    | briggsae cbr-kgb-1 protein                                                             | 3 | F:GO:0005515;<br>F:GO:0004674;<br>F:GO:0000166                                                                     | -                                                               | EC:2.7.11.0 | PTHR11295 (PANTHER),<br>PTHR11295:SF62 (PANTHER)                                   |
| Caenorhabditis elegans    | endoplasmic reticulum metallopeptidase 1                                               | 5 | P:GO:0001541;<br>F:GO:0008233;<br>P:GO:0040011;<br>C:GO:0005783;<br>C:GO:0044425                                   | -                                                               |             | IPR007484; G3DSA:3.40.630.10 (GENE3D), PTHR12147 (PANTHER), SSF53187 (SUPERFAMILY) |
| -                         | -                                                                                      | 0 |                                                                                                                    |                                                                 |             | -                                                                                  |
| Caenorhabditis sp. PS1010 | galactose ki-se                                                                        | 6 | P:GO:0006810;<br>P:GO:0006012;<br>P:GO:0046835;<br>F:GO:0000166;<br>F:GO:0004335;<br>C:GO:0005737                  | -                                                               | EC:2.7.1.6  | -                                                                                  |
| -                         | -                                                                                      | 0 |                                                                                                                    |                                                                 |             | -                                                                                  |
| -                         | -                                                                                      | 0 |                                                                                                                    |                                                                 |             | -                                                                                  |
| -                         | -                                                                                      | 0 |                                                                                                                    |                                                                 |             | -                                                                                  |
| -                         | -                                                                                      | 0 |                                                                                                                    |                                                                 |             | SignalP (SIGNALP)                                                                  |
| Brugia malayi             | origin recognition complex subunit 5                                                   | 0 |                                                                                                                    | P:GO:0006260;<br>C:GO:0000808;<br>C:GO:0005634                  |             | -                                                                                  |
| Brugia malayi             | #NAME?                                                                                 | 0 |                                                                                                                    | F:GO:0016813;<br>C:GO:0005737;<br>F:GO:0016403;<br>F:GO:0016787 |             | G3DSA:3.75.10.10 (GENE3D), PTHR12737 (PANTHER), PTHR12737:SF4 (PANTHER)            |
| -                         | -                                                                                      | 0 |                                                                                                                    |                                                                 |             | -                                                                                  |
| -                         | -                                                                                      | 0 |                                                                                                                    |                                                                 |             | -                                                                                  |
| Pan troglodytes           | cytochrome c oxidase subunit iv isoform 1                                              | 7 | P:GO:0007584;<br>F:GO:0005515;<br>C:GO:0005751;<br>C:GO:0016021;<br>C:GO:0005634;<br>F:GO:0004129;<br>P:GO:0006091 | -                                                               | EC:1.9.3.1  | IPR004203; PTHR10707 (PANTHER)                                                     |
| Caenorhabditis briggsae   | briggsae cbr-ztf-4 protein                                                             | 1 | F:GO:0005515                                                                                                       | -                                                               |             | PTHR13968 (PANTHER), PTHR13968:SF1 (PANTHER)                                       |

|                         |                                                                    |   |                                                                                                                                                      |                                                                                                                                                                       |             |                                                                                                                           |
|-------------------------|--------------------------------------------------------------------|---|------------------------------------------------------------------------------------------------------------------------------------------------------|-----------------------------------------------------------------------------------------------------------------------------------------------------------------------|-------------|---------------------------------------------------------------------------------------------------------------------------|
|                         | -                                                                  | 0 |                                                                                                                                                      |                                                                                                                                                                       |             | IPR002223; PTHR10083 (PANTHER),<br>PTHR10083:SF39 (PANTHER)                                                               |
|                         | -                                                                  | 0 |                                                                                                                                                      |                                                                                                                                                                       |             | -                                                                                                                         |
|                         | -                                                                  | 0 |                                                                                                                                                      |                                                                                                                                                                       |             | -                                                                                                                         |
| Caenorhabditis briggsae | proline oxidase                                                    | 2 | P:GO:0009064;<br>P:GO:0042331                                                                                                                        | -                                                                                                                                                                     |             | -                                                                                                                         |
| Caenorhabditis briggsae | acetyl-coenzyme a acyltransferase 2                                | 3 | P:GO:0006695;<br>C:GO:0005739;<br>F:GO:0003988                                                                                                       | -                                                                                                                                                                     | EC:2.3.1.16 | IPR002155; IPR016038; IPR016039;<br>IPR020610; IPR020613; IPR020615;<br>IPR020616; IPR020617;<br>PTHR18919:SF10 (PANTHER) |
| Caenorhabditis briggsae | acetyl-coenzyme a acyltransferase 2                                | 3 | P:GO:0006695;<br>C:GO:0005739;<br>F:GO:0003988                                                                                                       | -                                                                                                                                                                     | EC:2.3.1.16 | IPR002155; IPR016038; IPR016039;<br>IPR020610; IPR020613; IPR020615;<br>IPR020616; IPR020617;<br>PTHR18919:SF10 (PANTHER) |
| Caenorhabditis briggsae | calcitonin gene-related peptide-receptor component protein         | 5 | F:GO:0003899;<br>F:GO:0005488;<br>P:GO:0006383;<br>F:GO:0004930;<br>C:GO:0009360                                                                     | -                                                                                                                                                                     | EC:2.7.7.6  | IPR005574; IPR006590; IPR010997;<br>PTHR15561 (PANTHER)                                                                   |
| Caenorhabditis elegans  | pan domain containing protein                                      | 0 |                                                                                                                                                      |                                                                                                                                                                       |             | IPR003014                                                                                                                 |
|                         | -                                                                  | 0 |                                                                                                                                                      |                                                                                                                                                                       |             | -                                                                                                                         |
| Homo sapiens            | AF370417_1PP13850 [Homo sapiens]                                   | 0 |                                                                                                                                                      |                                                                                                                                                                       |             | -                                                                                                                         |
|                         | -                                                                  | 0 |                                                                                                                                                      |                                                                                                                                                                       |             | SignalP (SIGNALP)                                                                                                         |
|                         | -                                                                  | 0 |                                                                                                                                                      |                                                                                                                                                                       |             | -                                                                                                                         |
| Ancylostoma ceylanicum  | secreted protein 5 precursor                                       | 0 |                                                                                                                                                      | P:GO:0006898;<br>C:GO:0005576                                                                                                                                         |             | -                                                                                                                         |
|                         | -                                                                  | 0 |                                                                                                                                                      |                                                                                                                                                                       |             | -                                                                                                                         |
| Caenorhabditis elegans  | elegans protein partially confirmed by transcript evidence         | 0 |                                                                                                                                                      | F:GO:0004888;<br>C:GO:0016021;<br>F:GO:0003676;<br>F:GO:0004930;<br>F:GO:0008270;<br>F:GO:0003674;<br>C:GO:0005575;<br>C:GO:0005622;<br>P:GO:0007606;<br>P:GO:0008150 |             | IPR000344; SignalP (SIGNALP)                                                                                              |
| Danio rerio             | host cell factor 1                                                 | 9 | C:GO:0071339;<br>P:GO:0006013;<br>P:GO:0043254;<br>P:GO:0045449;<br>F:GO:0042802;<br>F:GO:0004476;<br>F:GO:0008080;<br>C:GO:0070688;<br>C:GO:0005737 | -                                                                                                                                                                     | EC:5.3.1.8  | PTHR23244 (PANTHER),<br>PTHR23244:SF36 (PANTHER)                                                                          |
| Caenorhabditis briggsae | low-density lipoprotein receptor domain class a containing protein | 1 | P:GO:0019915                                                                                                                                         | -                                                                                                                                                                     |             | IPR002172; PTHR10529 (PANTHER),<br>PTHR10529:SF2 (PANTHER)                                                                |
| Caenorhabditis briggsae | low-density lipoprotein receptor domain class a containing protein | 1 | P:GO:0019915                                                                                                                                         | -                                                                                                                                                                     |             | IPR002172; PTHR10529 (PANTHER),<br>PTHR10529:SF2 (PANTHER)                                                                |
| Caenorhabditis briggsae | low-density lipoprotein receptor domain class a containing protein | 1 | P:GO:0019915                                                                                                                                         | -                                                                                                                                                                     |             | IPR002172; PTHR10529 (PANTHER),<br>PTHR10529:SF2 (PANTHER)                                                                |
| Caenorhabditis briggsae | briggsae cbr-arr-1 protein                                         | 5 | P:GO:0007600;<br>P:GO:0007165;<br>P:GO:0045746;<br>P:GO:0007610;<br>P:GO:0040010                                                                     | -                                                                                                                                                                     |             | IPR000698; IPR011021; IPR011022;<br>IPR014752; IPR014753; IPR014756;<br>IPR017864; PTHR11792:SF5<br>(PANTHER)             |

|                         |                                                  |    |                                                                                                                                                                                                         |   |             |                                                                                                                               |
|-------------------------|--------------------------------------------------|----|---------------------------------------------------------------------------------------------------------------------------------------------------------------------------------------------------------|---|-------------|-------------------------------------------------------------------------------------------------------------------------------|
| Caenorhabditis elegans  | briggsae cbr-opt-2 protein                       | 3  | P:GO:0006857;<br>C:GO:0005887;<br>F:GO:0005427                                                                                                                                                          | - | -           | -                                                                                                                             |
| -                       | -                                                | 0  |                                                                                                                                                                                                         |   |             | -                                                                                                                             |
| Caenorhabditis elegans  | alpha- -mannosyltransferase                      | 6  | P:GO:0009792;<br>P:GO:0002119;<br>C:GO:0005811;<br>P:GO:0040015;<br>P:GO:0040010;<br>F:GO:0016740                                                                                                       | - |             | PTHR12526 (PANTHER),<br>PTHR12526:SF22 (PANTHER), SignalP<br>(SIGNALP), SSF53756 (SUPERFAMILY)                                |
| -                       | -                                                | 0  |                                                                                                                                                                                                         |   |             | -                                                                                                                             |
| Caenorhabditis briggsae | calcium dependent protein ki-se                  | 7  | C:GO:0005737;<br>C:GO:0005856;<br>C:GO:0005886;<br>F:GO:0005515;<br>F:GO:0004672;<br>P:GO:0009987;<br>F:GO:0000166                                                                                      | - |             | IPR000719; IPR011009; IPR017441;<br>IPR017442; G3DSA:3.30.200.20<br>(GENE3D), PTHR11042 (PANTHER),<br>PTHR11042:SF4 (PANTHER) |
| Caenorhabditis elegans  | elegans protein confirmed by transcript evidence | 0  |                                                                                                                                                                                                         |   |             | SignalP (SIGNALP)                                                                                                             |
| -                       | -                                                | 0  |                                                                                                                                                                                                         |   |             | SignalP (SIGNALP)                                                                                                             |
| -                       | -                                                | 0  |                                                                                                                                                                                                         |   |             | -                                                                                                                             |
| -                       | -                                                | 0  |                                                                                                                                                                                                         |   |             | -                                                                                                                             |
| -                       | -                                                | 0  |                                                                                                                                                                                                         |   |             | -                                                                                                                             |
| Adineta vaga            | transposase [Adineta vaga]                       | 0  |                                                                                                                                                                                                         |   |             | -                                                                                                                             |
| -                       | -                                                | 0  |                                                                                                                                                                                                         |   |             | SignalP (SIGNALP)                                                                                                             |
| -                       | -                                                | 0  |                                                                                                                                                                                                         |   |             | SignalP (SIGNALP)                                                                                                             |
| Caenorhabditis elegans  | esterase d                                       | 2  | C:GO:0016023;<br>F:GO:0018738                                                                                                                                                                           | - | EC:3.1.2.12 | IPR000801; IPR014186;<br>G3DSA:3.40.50.1820 (GENE3D),<br>SSF53474 (SUPERFAMILY)                                               |
| -                       | -                                                | 0  |                                                                                                                                                                                                         |   |             | -                                                                                                                             |
| -                       | -                                                | 0  |                                                                                                                                                                                                         |   |             | -                                                                                                                             |
| -                       | -                                                | 0  |                                                                                                                                                                                                         |   |             | -                                                                                                                             |
| Mus musculus            | ran binding protein 9                            | 9  | F:GO:0008565;<br>C:GO:0005875;<br>F:GO:0008536;<br>F:GO:0042393;<br>P:GO:0006606;<br>C:GO:0005813;<br>P:GO:0006461;<br>P:GO:0007020;<br>C:GO:0005634                                                    | - |             | IPR001870; IPR003877; IPR008985;<br>IPR018355; PTHR12864 (PANTHER),<br>PTHR12864:SF1 (PANTHER)                                |
| -                       | -                                                | 0  |                                                                                                                                                                                                         |   |             | -                                                                                                                             |
| Caenorhabditis elegans  | briggsae cbr-spas-1 protein                      | 12 | P:GO:0051013;<br>F:GO:0008017;<br>P:GO:0031117;<br>P:GO:0001578;<br>C:GO:0015630;<br>P:GO:0034214;<br>P:GO:0051260;<br>F:GO:0005524;<br>F:GO:0008568;<br>C:GO:0048471;<br>C:GO:0044430;<br>C:GO:0016020 | - | EC:3.6.4.3  | -                                                                                                                             |

|                               |                                                    |    |                                                                                                                                                                                                                                                                                                                                                 |                                                |             |                                                                                                                                                                                                         |
|-------------------------------|----------------------------------------------------|----|-------------------------------------------------------------------------------------------------------------------------------------------------------------------------------------------------------------------------------------------------------------------------------------------------------------------------------------------------|------------------------------------------------|-------------|---------------------------------------------------------------------------------------------------------------------------------------------------------------------------------------------------------|
| NADP, mitochondrial isoform 3 | isocitrate dehydroge-se                            | 9  | F:GO:0051287;<br>F:GO:0004450;<br>P:GO:0006103;<br>P:GO:0055114;<br>F:GO:0000287;<br>P:GO:0006099;<br>P:GO:0006102;<br>C:GO:0005739;<br>P:GO:0006097                                                                                                                                                                                            | -                                              | EC:1.1.1.42 | IPR001804; IPR004790; SSF53659<br>(SUPERFAMILY)                                                                                                                                                         |
| Loa loa                       | haloacid dehaloge-se-like hydrolase family protein | 0  |                                                                                                                                                                                                                                                                                                                                                 | P:GO:0008152;<br>F:GO:0016787;<br>F:GO:0003824 |             | G3DSA:3.40.50.1000 (GENE3D)                                                                                                                                                                             |
| Caenorhabditis elegans        | f-box and wd-40 domain protein                     | 20 | P:GO:0030512;<br>P:GO:0008355;<br>P:GO:0030708;<br>P:GO:0030162;<br>P:GO:0045849;<br>F:GO:0051219;<br>P:GO:0046843;<br>P:GO:0030713;<br>C:GO:0005737;<br>C:GO:0019005;<br>P:GO:0008285;<br>P:GO:0045475;<br>P:GO:0007088;<br>P:GO:0030178;<br>F:GO:0004842;<br>P:GO:0008588;<br>P:GO:0030720;<br>P:GO:0030727;<br>P:GO:0007298;<br>P:GO:0045879 | -                                              | EC:6.3.2.19 | IPR001680; IPR001810; IPR011046;<br>IPR015943; IPR017986; IPR019775;<br>IPR019781; IPR019782; IPR020472;<br>IPR022364; G3DSA:1.20.1280.50<br>(GENE3D), PTHR22844 (PANTHER),<br>PTHR22844:SF10 (PANTHER) |



|                               |                                                  |    |                                                                                                                                                                                                                                                                                                                                                                                                                                                                         |   |                    |
|-------------------------------|--------------------------------------------------|----|-------------------------------------------------------------------------------------------------------------------------------------------------------------------------------------------------------------------------------------------------------------------------------------------------------------------------------------------------------------------------------------------------------------------------------------------------------------------------|---|--------------------|
| Caenorhabditis elegans        | heavy polypeptide non- isoform cra_a             | 37 | P:GO:0001764;<br>P:GO:0007097;<br>P:GO:0006930;<br>C:GO:0043197;<br>P:GO:0008360;<br>P:GO:0021680;<br>C:GO:0031594;<br>C:GO:0030426;<br>P:GO:0030048;<br>P:GO:0055015;<br>F:GO:0030898;<br>P:GO:0021592;<br>P:GO:0055003;<br>P:GO:0001778;<br>P:GO:0008283;<br>F:GO:0043531;<br>P:GO:0006887;<br>F:GO:0000146;<br>C:GO:0005819;<br>P:GO:0060041;<br>C:GO:0043025;<br>C:GO:0032154;<br>P:GO:0021670;<br>C:GO:0030424;<br>P:GO:0000281;<br>C:GO:0030496;<br>P:GO:0050885; | - | SignalIP (SIGNALP) |
| -                             | -                                                | 0  | -                                                                                                                                                                                                                                                                                                                                                                                                                                                                       | - | -                  |
| Pongo abelii                  | myosin regulatory light chain mrcl2              | 0  | -                                                                                                                                                                                                                                                                                                                                                                                                                                                                       | - | SignalIP (SIGNALP) |
| Strongylocentrotus purpuratus | zinc finger partial                              | 0  | C:GO:0005618;<br>C:GO:0016021;<br>F:GO:0016787;<br>C:GO:0016020;<br>F:GO:0004222;<br>F:GO:0008233;<br>F:GO:0008270;<br>C:GO:0005576                                                                                                                                                                                                                                                                                                                                     | - | -                  |
| -                             | -                                                | 0  | -                                                                                                                                                                                                                                                                                                                                                                                                                                                                       | - | SignalIP (SIGNALP) |
| -                             | -                                                | 0  | -                                                                                                                                                                                                                                                                                                                                                                                                                                                                       | - | -                  |
| -                             | -                                                | 0  | -                                                                                                                                                                                                                                                                                                                                                                                                                                                                       | - | -                  |
| Caenorhabditis elegans        | elegans protein confirmed by transcript evidence | 3  | F:GO:0003951;<br>P:GO:0008152;<br>F:GO:0005515                                                                                                                                                                                                                                                                                                                                                                                                                          | - | EC:2.7.1.23        |
| -                             | -                                                | 0  | -                                                                                                                                                                                                                                                                                                                                                                                                                                                                       | - | -                  |
| -                             | -                                                | 0  | -                                                                                                                                                                                                                                                                                                                                                                                                                                                                       | - | -                  |
| Loa loa                       | hypothetical protein LOAG_07599 [Loa loa]        | 0  | -                                                                                                                                                                                                                                                                                                                                                                                                                                                                       | - | -                  |
| -                             | -                                                | 0  | -                                                                                                                                                                                                                                                                                                                                                                                                                                                                       | - | SignalIP (SIGNALP) |
| -                             | -                                                | 0  | -                                                                                                                                                                                                                                                                                                                                                                                                                                                                       | - | SignalIP (SIGNALP) |
| -                             | -                                                | 0  | -                                                                                                                                                                                                                                                                                                                                                                                                                                                                       | - | -                  |
| -                             | -                                                | 0  | -                                                                                                                                                                                                                                                                                                                                                                                                                                                                       | - | -                  |
| Caenorhabditis elegans        | ankyrin repeats- partial                         | 1  | C:GO:0016021                                                                                                                                                                                                                                                                                                                                                                                                                                                            | - | -                  |
| -                             | -                                                | 0  | -                                                                                                                                                                                                                                                                                                                                                                                                                                                                       | - | -                  |

|                         |                                                                |    |                                                                                                                                                                                                         |                                                                                                                                                      |                                                         |                                                                              |
|-------------------------|----------------------------------------------------------------|----|---------------------------------------------------------------------------------------------------------------------------------------------------------------------------------------------------------|------------------------------------------------------------------------------------------------------------------------------------------------------|---------------------------------------------------------|------------------------------------------------------------------------------|
| Caenorhabditis briggsae | briggsae cbr-cyn-4 protein                                     | 9  | P:GO:0006457;<br>P:GO:0040022;<br>F:GO:0005515;<br>P:GO:0000209;<br>C:GO:0005796;<br>F:GO:0004842;<br>C:GO:0005634;<br>F:GO:0003755;<br>C:GO:0000151                                                    | -                                                                                                                                                    | EC:6.3.2.19;<br>EC:5.2.1.8                              | IPR002130; IPR015891; PTHR11071<br>(PANTHER), PTHR11071:SF42<br>(PANTHER)    |
|                         | -                                                              | 0  |                                                                                                                                                                                                         |                                                                                                                                                      |                                                         | SignalP (SIGNALP)                                                            |
|                         | -                                                              | 0  |                                                                                                                                                                                                         |                                                                                                                                                      |                                                         | -                                                                            |
| Caenorhabditis elegans  | hemopexin family protein                                       | 0  |                                                                                                                                                                                                         | F:GO:0004222;<br>F:GO:0016787;<br>F:GO:0008270;<br>F:GO:0008237;<br>C:GO:0031012;<br>F:GO:0008233;<br>P:GO:0006508;<br>P:GO:0008152;<br>F:GO:0046872 |                                                         | PTHR10201 (PANTHER),<br>PTHR10201:SF5 (PANTHER)                              |
|                         | -                                                              | 0  |                                                                                                                                                                                                         |                                                                                                                                                      |                                                         | -                                                                            |
| Caenorhabditis elegans  | ras family protein                                             | 12 | P:GO:0050774;<br>P:GO:0032402;<br>C:GO:0043231;<br>P:GO:0009306;<br>P:GO:0007015;<br>P:GO:0008360;<br>P:GO:0007264;<br>P:GO:0007155;<br>P:GO:0006888;<br>F:GO:0003924;<br>C:GO:0005811;<br>F:GO:0005252 | -                                                                                                                                                    | EC:3.6.5.1;<br>EC:3.6.5.2;<br>EC:3.6.5.3;<br>EC:3.6.5.4 | -                                                                            |
| Caenorhabditis elegans  | alpha beta hydrolase                                           | 0  |                                                                                                                                                                                                         | F:GO:0016787                                                                                                                                         |                                                         | IPR000463; G3DSA:3.40.50.1820<br>(GENE3D), SSF53474 (SUPERFAMILY)            |
|                         | -                                                              | 0  |                                                                                                                                                                                                         |                                                                                                                                                      |                                                         | -                                                                            |
| Caenorhabditis elegans  | nucleolar complex protein 2 homolog                            | 10 | P:GO:0000003;<br>P:GO:0016246;<br>F:GO:0005515;<br>P:GO:0040007;<br>P:GO:0006898;<br>P:GO:0019915;<br>P:GO:0009792;<br>P:GO:0002119;<br>P:GO:0051729;<br>C:GO:0005634                                   | -                                                                                                                                                    |                                                         | IPR005343; PTHR12687:SF4<br>(PANTHER)                                        |
| Loa loa                 | briggsae cbr-tag-76 protein                                    | 1  | F:GO:0003676                                                                                                                                                                                            | -                                                                                                                                                    |                                                         | -                                                                            |
| Caenorhabditis briggsae | tubulin folding cofactor e-like protein family member (coel-1) | 0  |                                                                                                                                                                                                         | F:GO:0005515                                                                                                                                         |                                                         | G3DSA:3.80.10.10 (GENE3D),<br>PTHR15140 (PANTHER), SSF52058<br>(SUPERFAMILY) |
| Caenorhabditis briggsae | esterase d                                                     | 1  | F:GO:0016788                                                                                                                                                                                            | -                                                                                                                                                    |                                                         | -                                                                            |
| Caenorhabditis elegans  | cub domain containing protein                                  | 0  |                                                                                                                                                                                                         | F:GO:0004872;<br>F:GO:0016787                                                                                                                        |                                                         | IPR000859                                                                    |
| Caenorhabditis elegans  | parasitic stage specific protein 1                             | 0  |                                                                                                                                                                                                         |                                                                                                                                                      |                                                         | SignalP (SIGNALP)                                                            |
| Caenorhabditis elegans  | elegans protein partially confirmed by transcript evidence     | 0  |                                                                                                                                                                                                         |                                                                                                                                                      |                                                         | IPR003582; PTHR21724 (PANTHER)                                               |

|                         |                                                               |   |                                                                                                                                                      |                                                                                                                                                                                                                                                                                                                                                                                                                                                                        |                                                                                                            |   |
|-------------------------|---------------------------------------------------------------|---|------------------------------------------------------------------------------------------------------------------------------------------------------|------------------------------------------------------------------------------------------------------------------------------------------------------------------------------------------------------------------------------------------------------------------------------------------------------------------------------------------------------------------------------------------------------------------------------------------------------------------------|------------------------------------------------------------------------------------------------------------|---|
| Caenorhabditis briggsae | atp-binding sub-family a member 3                             | 9 | P:GO:0012501;<br>C:GO:0042599;<br>P:GO:0043652;<br>C:GO:0016021;<br>F:GO:0042626;<br>C:GO:0005624;<br>F:GO:0005524;<br>P:GO:0042493;<br>C:GO:0005886 | -                                                                                                                                                                                                                                                                                                                                                                                                                                                                      | G3DSA:3.40.50.300 (GENE3D),<br>PTHR19229 (PANTHER),<br>PTHR19229:SF18 (PANTHER),<br>SSF52540 (SUPERFAMILY) |   |
| Haemonchus contortus    | syntaxin binding protein-                                     | 1 | P:GO:0006904                                                                                                                                         | -                                                                                                                                                                                                                                                                                                                                                                                                                                                                      | -                                                                                                          |   |
| Caenorhabditis elegans  | elegans protein confirmed by transcript evidence              | 0 |                                                                                                                                                      |                                                                                                                                                                                                                                                                                                                                                                                                                                                                        | IPR001534                                                                                                  |   |
| Caenorhabditis elegans  | histone deacetylase 6                                         | 0 |                                                                                                                                                      | P:GO:0048471;<br>C:GO:0000118;<br>P:GO:0006350;<br>P:GO:0090035;<br>P:GO:0006515;<br>C:GO:0005881;<br>P:GO:0010870;<br>P:GO:0051789;<br>P:GO:0051788;<br>P:GO:0006511;<br>P:GO:0016568;<br>P:GO:0043242;<br>P:GO:0043241;<br>P:GO:0009967;<br>F:GO:0042903;<br>P:GO:0006476;<br>P:GO:0000209;<br>F:GO:0016787;<br>C:GO:0031252;<br>P:GO:0010033;<br>P:GO:0070301;<br>F:GO:0051879;<br>F:GO:0008270;<br>F:GO:0043014;<br>P:GO:0070848;<br>C:GO:0005875;<br>P:GO:0070846 |                                                                                                            | - |
|                         | -                                                             | 0 |                                                                                                                                                      |                                                                                                                                                                                                                                                                                                                                                                                                                                                                        | -                                                                                                          |   |
|                         | -                                                             | 0 |                                                                                                                                                      |                                                                                                                                                                                                                                                                                                                                                                                                                                                                        | SignalP (SIGNALP)                                                                                          |   |
| Caenorhabditis elegans  | scp-like extracellular protein                                | 1 | C:GO:0005576                                                                                                                                         | -                                                                                                                                                                                                                                                                                                                                                                                                                                                                      | IPR001283; IPR014044;<br>PTHR10334:SF8 (PANTHER)                                                           |   |
| Caenorhabditis elegans  | acyl-coenzyme a dehydroge-se member 9                         | 7 | P:GO:0009792;<br>F:GO:0016491;<br>P:GO:0040010;<br>P:GO:0055114;<br>P:GO:0000003;<br>P:GO:0006898;<br>F:GO:0050660                                   | -                                                                                                                                                                                                                                                                                                                                                                                                                                                                      | PTHR10909 (PANTHER),<br>PTHR10909:SF9 (PANTHER)                                                            |   |
| Caenorhabditis elegans  | protein ki-se domain containing protein                       | 4 | P:GO:0006468;<br>F:GO:0005524;<br>P:GO:0040011;<br>F:GO:0004674                                                                                      | -                                                                                                                                                                                                                                                                                                                                                                                                                                                                      | EC:2.7.11.0<br>PTHR11909 (PANTHER),<br>PTHR11909:SF19 (PANTHER)                                            |   |
| Caenorhabditis elegans  | nematode cuticle collagen n-termi-l domain containing protein | 0 |                                                                                                                                                      | C:GO:0016021;<br>F:GO:0042302                                                                                                                                                                                                                                                                                                                                                                                                                                          | IPR008160; PTHR10499 (PANTHER),<br>PTHR10499:SF58 (PANTHER)                                                |   |

|                           |                                                     |   |                                                                                                                                                      |                               |             |                                                                                                   |
|---------------------------|-----------------------------------------------------|---|------------------------------------------------------------------------------------------------------------------------------------------------------|-------------------------------|-------------|---------------------------------------------------------------------------------------------------|
| Caenorhabditis elegans    | elegans protein confirmed by transcript evidence    | 9 | C:GO:0016023;<br>C:GO:0005886;<br>P:GO:0010053;<br>P:GO:0040010;<br>F:GO:0004558;<br>P:GO:0040011;<br>C:GO:0016021;<br>C:GO:0005783;<br>P:GO:0009311 | -                             | EC:3.2.1.20 | IPR004888; PTHR10412 (PANTHER)                                                                    |
|                           | -                                                   | 0 |                                                                                                                                                      |                               |             | IPR011547; PTHR11814 (PANTHER),<br>PTHR11814:SF25 (PANTHER)                                       |
| Caenorhabditis elegans    | ubiquitin carboxyl-termi-l hydrolase family protein | 5 | C:GO:0043231;<br>F:GO:0008234;<br>P:GO:0044267;<br>C:GO:0044444;<br>C:GO:0016020                                                                     | -                             |             | IPR001394; IPR018200; PTHR10420<br>(PANTHER), PTHR10420:SF62<br>(PANTHER), SSF54001 (SUPERFAMILY) |
| Caenorhabditis elegans    | set domain containing 3                             | 0 |                                                                                                                                                      | F:GO:0003674                  |             | IPR015353; G3DSA:3.90.1410.10<br>(GENE3D), PTHR13271 (PANTHER),<br>SSF82199 (SUPERFAMILY)         |
|                           | -                                                   | 0 |                                                                                                                                                      |                               |             | -                                                                                                 |
|                           | -                                                   | 0 |                                                                                                                                                      |                               |             | -                                                                                                 |
| Caenorhabditis briggsae   | dead h box polypeptide rig-i                        | 7 | F:GO:0043021;<br>F:GO:0004386;<br>F:GO:0003677;<br>C:GO:0005622;<br>F:GO:0005515;<br>F:GO:0005524;<br>F:GO:0008270                                   | -                             |             | IPR001650; G3DSA:3.40.50.300<br>(GENE3D), PTHR14074 (PANTHER),<br>SSF52540 (SUPERFAMILY)          |
|                           | -                                                   | 0 |                                                                                                                                                      |                               |             | -                                                                                                 |
|                           | -                                                   | 0 |                                                                                                                                                      |                               |             | -                                                                                                 |
| Teladorsagia circumcincta | fmr-like peptide family member (flp-11)             | 1 | P:GO:0007218                                                                                                                                         | -                             |             | -                                                                                                 |
| Caenorhabditis briggsae   | abnormal go-d development family member (gon-2)     | 4 | P:GO:0007067;<br>P:GO:0006810;<br>C:GO:0016020;<br>P:GO:0008406                                                                                      | -                             |             | PTHR13800 (PANTHER), SignalP<br>(SIGNALP)                                                         |
|                           | -                                                   | 0 |                                                                                                                                                      |                               |             | -                                                                                                 |
|                           | -                                                   | 0 |                                                                                                                                                      |                               |             | -                                                                                                 |
|                           | -                                                   | 0 |                                                                                                                                                      |                               |             | -                                                                                                 |
| Caenorhabditis elegans    | nuc173 domain-containing protein                    | 0 |                                                                                                                                                      | F:GO:0005488;<br>P:GO:0008150 |             | IPR012978; PTHR21576 (PANTHER),<br>PTHR21576:SF2 (PANTHER)                                        |
|                           | -                                                   | 0 |                                                                                                                                                      |                               |             | IPR001879                                                                                         |
| Callithrix jacchus        | ribosomal protein l4                                | 5 | F:GO:0003735;<br>F:GO:0003723;<br>F:GO:0005515;<br>C:GO:0022625;<br>P:GO:0006414                                                                     | -                             |             | IPR002136; IPR013000;<br>G3DSA:3.40.1370.10 (GENE3D),<br>PTHR19431 (PANTHER)                      |

|                        |                                      |    |                                                                                                                                                                                                                                                                                                                                                                                                                                                                                         |   |              |                                                                                                                                                |
|------------------------|--------------------------------------|----|-----------------------------------------------------------------------------------------------------------------------------------------------------------------------------------------------------------------------------------------------------------------------------------------------------------------------------------------------------------------------------------------------------------------------------------------------------------------------------------------|---|--------------|------------------------------------------------------------------------------------------------------------------------------------------------|
| Chlorocebus aethiops   | heavy polypeptide non-muscle         | 44 | P:GO:001295;<br>C:GO:0030863;<br>P:GO:0008360;<br>C:GO:0031594;<br>P:GO:0030048;<br>F:GO:0030898;<br>P:GO:0051295;<br>C:GO:0005913;<br>P:GO:0016337;<br>F:GO:0043531;<br>P:GO:0032796;<br>P:GO:0015031;<br>C:GO:0001772;<br>P:GO:0050900;<br>P:GO:0007229;<br>C:GO:0005829;<br>P:GO:0007520;<br>F:GO:0000146;<br>P:GO:0006509;<br>P:GO:0043534;<br>C:GO:0008305;<br>C:GO:0005819;<br>C:GO:0001726;<br>P:GO:0007132;<br>F:GO:0005391;<br>C:GO:0032154;<br>P:GO:0000904;<br>P:GO:0001768; | - | EC:3.6.3.9   | IPR002928                                                                                                                                      |
| -                      | -                                    | 0  |                                                                                                                                                                                                                                                                                                                                                                                                                                                                                         |   |              | -                                                                                                                                              |
| -                      | -                                    | 0  |                                                                                                                                                                                                                                                                                                                                                                                                                                                                                         |   |              | SignalP (SIGNALP)                                                                                                                              |
| -                      | -                                    | 0  |                                                                                                                                                                                                                                                                                                                                                                                                                                                                                         |   |              | -                                                                                                                                              |
| Caenorhabditis elegans | solute carrier family 25 member 5    | 10 | P:GO:0055085;<br>P:GO:0060547;<br>C:GO:0016021;<br>C:GO:0005743;<br>C:GO:0005741;<br>F:GO:0005471;<br>P:GO:0015867;<br>F:GO:0005515;<br>P:GO:0015866;<br>P:GO:0051935                                                                                                                                                                                                                                                                                                                   | - |              | -                                                                                                                                              |
| -                      | -                                    | 0  |                                                                                                                                                                                                                                                                                                                                                                                                                                                                                         |   |              | -                                                                                                                                              |
| Caenorhabditis elegans | fatty acid desaturase family protein | 9  | P:GO:0007283;<br>P:GO:0006633;<br>F:GO:0004768;<br>F:GO:0042284;<br>C:GO:0005886;<br>F:GO:0005515;<br>P:GO:0055114;<br>C:GO:0016021;<br>C:GO:0005739                                                                                                                                                                                                                                                                                                                                    | - | EC:1.14.19.1 | IPR005804; IPR013866; PTHR12879 (PANTHER)                                                                                                      |
| Caenorhabditis elegans | glucose transporter                  | 3  | C:GO:0016020;<br>F:GO:0022891;<br>P:GO:0006810                                                                                                                                                                                                                                                                                                                                                                                                                                          | - |              | IPR003663; IPR005828; IPR005829;<br>IPR016196; IPR020846;<br>G3DSA:1.20.1250.20 (GENE3D),<br>PTHR11600 (PANTHER),<br>PTHR11600:SF107 (PANTHER) |
| -                      | -                                    | 0  |                                                                                                                                                                                                                                                                                                                                                                                                                                                                                         |   |              | -                                                                                                                                              |
| -                      | -                                    | 0  |                                                                                                                                                                                                                                                                                                                                                                                                                                                                                         |   |              | -                                                                                                                                              |
| -                      | -                                    | 0  |                                                                                                                                                                                                                                                                                                                                                                                                                                                                                         |   |              | SignalP (SIGNALP)                                                                                                                              |

|                           |                                             |   |                                                                                                                                     |                                                                                                                                     |             |                                                                                                                                                |
|---------------------------|---------------------------------------------|---|-------------------------------------------------------------------------------------------------------------------------------------|-------------------------------------------------------------------------------------------------------------------------------------|-------------|------------------------------------------------------------------------------------------------------------------------------------------------|
| Caenorhabditis briggsae   | briggsae cbr-ltd-1 protein                  | 1 | F:GO:0008270                                                                                                                        |                                                                                                                                     |             | IPR002931                                                                                                                                      |
| -                         | -                                           | 0 |                                                                                                                                     |                                                                                                                                     |             | SignalP (SIGNALP)                                                                                                                              |
| -                         | -                                           | 0 |                                                                                                                                     |                                                                                                                                     |             | -                                                                                                                                              |
| Caenorhabditis elegans    | erin family member (cdh-6)                  | 0 |                                                                                                                                     | P:GO:0007218;<br>F:GO:0005509;<br>P:GO:0007156;<br>F:GO:0004930;<br>P:GO:0007155;<br>C:GO:0016021;<br>C:GO:0016020;<br>C:GO:0005886 |             | -                                                                                                                                              |
| -                         | -                                           | 0 |                                                                                                                                     |                                                                                                                                     |             | SignalP (SIGNALP)                                                                                                                              |
| -                         | -                                           | 0 |                                                                                                                                     |                                                                                                                                     |             | -                                                                                                                                              |
| Caenorhabditis elegans    | nitric oxide synthase-interacting protein   | 4 | P:GO:0051001;<br>C:GO:0005829;<br>C:GO:0005634;<br>F:GO:0005515                                                                     | -                                                                                                                                   |             | -                                                                                                                                              |
| -                         | -                                           | 0 |                                                                                                                                     |                                                                                                                                     |             | SignalP (SIGNALP)                                                                                                                              |
| Caenorhabditis elegans    | kiaa0999 protein                            | 5 | P:GO:0006468;<br>F:GO:0005515;<br>F:GO:000524;<br>F:GO:0000287;<br>F:GO:0004674                                                     | -                                                                                                                                   | EC:2.7.11.0 | IPR000719; IPR008271; IPR011009;<br>IPR017441; IPR017442;<br>G3DSA:1.10.510.10 (GENE3D),<br>G3DSA:3.30.200.20 (GENE3D),<br>PTHR22971 (PANTHER) |
| -                         | -                                           | 0 |                                                                                                                                     |                                                                                                                                     |             | -                                                                                                                                              |
| -                         | -                                           | 0 |                                                                                                                                     |                                                                                                                                     |             | -                                                                                                                                              |
| -                         | -                                           | 0 |                                                                                                                                     |                                                                                                                                     |             | -                                                                                                                                              |
| -                         | -                                           | 0 |                                                                                                                                     |                                                                                                                                     |             | -                                                                                                                                              |
| -                         | -                                           | 0 |                                                                                                                                     |                                                                                                                                     |             | -                                                                                                                                              |
| Caenorhabditis briggsae   | briggsae cbr-ada-2 protein                  | 8 | P:GO:0009792;<br>P:GO:0010171;<br>P:GO:0040027;<br>P:GO:0040010;<br>P:GO:0000003;<br>P:GO:0008340;<br>P:GO:0040011;<br>P:GO:0006898 | -                                                                                                                                   |             | PTHR12374 (PANTHER)                                                                                                                            |
| -                         | -                                           | 0 |                                                                                                                                     |                                                                                                                                     |             | IPR018610                                                                                                                                      |
| -                         | -                                           | 0 |                                                                                                                                     |                                                                                                                                     |             | -                                                                                                                                              |
| -                         | -                                           | 0 |                                                                                                                                     |                                                                                                                                     |             | -                                                                                                                                              |
| Caenorhabditis elegans    | protein disulfide isomerase family member 4 | 5 | C:GO:0005788;<br>P:GO:0045454;<br>F:GO:0005515;<br>F:GO:0003756;<br>P:GO:0009306                                                    | -                                                                                                                                   | EC:5.3.4.1  | IPR005746; IPR005788; IPR012335;<br>IPR012336; IPR013766; IPR017936;<br>IPR017937; PTHR18929 (PANTHER),<br>SignalP (SIGNALP)                   |
| -                         | -                                           | 0 |                                                                                                                                     |                                                                                                                                     |             | PR01217 (PRINTS)                                                                                                                               |
| Teladorsagia circumcincta | soluble calcium-activated nucleotidase 1    | 5 | P:GO:0040010;<br>P:GO:0008340;<br>F:GO:0005515;<br>F:GO:0016462;<br>C:GO:0005789                                                    | -                                                                                                                                   |             | -                                                                                                                                              |
| Teladorsagia circumcincta | soluble calcium-activated nucleotidase 1    | 5 | P:GO:0040010;<br>P:GO:0008340;<br>F:GO:0005515;<br>F:GO:0016462;<br>C:GO:0005789                                                    | -                                                                                                                                   |             | SignalP (SIGNALP)                                                                                                                              |

|                           |                                              |   |                                                                                                                    |                                                                                                                    |             |                                                                                         |
|---------------------------|----------------------------------------------|---|--------------------------------------------------------------------------------------------------------------------|--------------------------------------------------------------------------------------------------------------------|-------------|-----------------------------------------------------------------------------------------|
| Teladorsagia circumcincta | soluble calcium-activated nucleotidase 1     | 4 | F:GO:0016787;<br>P:GO:0008340;<br>P:GO:0040010;<br>F:GO:0005515                                                    | -                                                                                                                  |             | IPR009283                                                                               |
| Teladorsagia circumcincta | calcium activated nucleotidase 1             | 5 | P:GO:0040010;<br>P:GO:0008340;<br>F:GO:0005515;<br>F:GO:0016462;<br>C:GO:0005789                                   | -                                                                                                                  |             | -                                                                                       |
| Teladorsagia circumcincta | calcium activated nucleotidase isoform cra_b | 6 | P:GO:0040010;<br>P:GO:0008340;<br>F:GO:0017110;<br>F:GO:0005515;<br>C:GO:0005789;<br>P:GO:0009191                  | -                                                                                                                  | EC:3.6.1.6  | -                                                                                       |
| Teladorsagia circumcincta | calcium activated nucleotidase 1             | 5 | P:GO:0040010;<br>P:GO:0008340;<br>F:GO:0005515;<br>F:GO:0016462;<br>C:GO:0005789                                   | -                                                                                                                  |             | -                                                                                       |
| Callithrix jacchus        | calcium-regulated heat stable protein 1      | 5 | F:GO:0019902;<br>P:GO:0019722;<br>F:GO:0003677;<br>C:GO:0005829;<br>P:GO:0006355                                   | -                                                                                                                  |             | -                                                                                       |
| Caenorhabditis briggsae   | uncharacterized transposase-like protein     | 0 |                                                                                                                    | F:GO:0046872;<br>P:GO:0055114;<br>F:GO:0009055;<br>F:GO:0016491;<br>F:GO:0020037;<br>F:GO:0005506;<br>F:GO:0004497 | -           |                                                                                         |
| -                         | -                                            | 0 |                                                                                                                    |                                                                                                                    |             | -                                                                                       |
| Caenorhabditis briggsae   | major facilitator superfamily protein        | 1 | P:GO:0055085                                                                                                       | -                                                                                                                  |             | -                                                                                       |
| -                         | -                                            | 0 |                                                                                                                    |                                                                                                                    |             | -                                                                                       |
| Caenorhabditis briggsae   | protein ki-se domain containing protein      | 7 | P:GO:0006468;<br>P:GO:0040018;<br>F:GO:0005515;<br>F:GO:0004713;<br>P:GO:0040010;<br>F:GO:0005524;<br>P:GO:0000003 | -                                                                                                                  | EC:2.7.10.0 | IPR000719; IPR001245; IPR011009;<br>IPR020685; IPR020764;<br>G3DSA:1.10.510.10 (GENE3D) |
| Caenorhabditis briggsae   | serine threonine phosphatase                 | 3 | P:GO:0019915;<br>P:GO:0000003;<br>F:GO:0004721                                                                     | -                                                                                                                  | EC:3.1.3.16 | IPR006186; G3DSA:3.60.21.10<br>(GENE3D), SSF56300 (SUPERFAMILY)                         |

|                           |                                             |    |                                                                                                                                                                                                                                                                                              |   |                                                                                                                                                                                                              |
|---------------------------|---------------------------------------------|----|----------------------------------------------------------------------------------------------------------------------------------------------------------------------------------------------------------------------------------------------------------------------------------------------|---|--------------------------------------------------------------------------------------------------------------------------------------------------------------------------------------------------------------|
| Kocuria rhizophila DC2201 | subfamily member 6                          | 0  | P:GO:0006950;<br>P:GO:0060710;<br>C:GO:0005634;<br>F:GO:0003677;<br>P:GO:0045892;<br>C:GO:0005737;<br>C:GO:0048471;<br>F:GO:0031072;<br>C:GO:0005575;<br>P:GO:0043154;<br>P:GO:0045109;<br>F:GO:0016564;<br>F:GO:0051087;<br>F:GO:0005515;<br>P:GO:0006457;<br>P:GO:0008150;<br>F:GO:0051082 |   | IPR001623; IPR015609;<br>PTHR11821:SF66 (PANTHER)                                                                                                                                                            |
| Caenorhabditis elegans    | glutami-se                                  | 6  | F:GO:0004359;<br>P:GO:0007268;<br>P:GO:0006543;<br>P:GO:0002087;<br>P:GO:0007610;<br>C:GO:0005739                                                                                                                                                                                            | - | EC:3.5.1.2 -                                                                                                                                                                                                 |
|                           | -                                           | 0  |                                                                                                                                                                                                                                                                                              |   | -                                                                                                                                                                                                            |
| Caenorhabditis briggsae   | ribosomal protein l3                        | 10 | P:GO:0040010;<br>F:GO:0003723;<br>C:GO:0005730;<br>F:GO:0003735;<br>P:GO:0000003;<br>P:GO:0006414;<br>P:GO:0002119;<br>F:GO:0005515;<br>P:GO:0009792;<br>C:GO:0022625                                                                                                                        | - | -                                                                                                                                                                                                            |
| Brugia malayi             | calcium alpha subunit family member (cca-1) | 7  | P:GO:0051899;<br>P:GO:0045760;<br>P:GO:0043051;<br>P:GO:0006816;<br>P:GO:0055085;<br>C:GO:0005891;<br>F:GO:0008332                                                                                                                                                                           | - | IPR005445; IPR005821; PTHR10037<br>(PANTHER), SignalP (SIGNALP)                                                                                                                                              |
| Caenorhabditis elegans    | rab family member (rab-3)                   | 9  | P:GO:0016192;<br>P:GO:0048790;<br>P:GO:0007264;<br>C:GO:0008021;<br>F:GO:0004767;<br>F:GO:0003924;<br>C:GO:0048786;<br>P:GO:0015031;<br>F:GO:0005525                                                                                                                                         | - | EC:3.1.4.12; IPR001806; IPR013753; IPR020851;<br>EC:3.6.5.1; G3DSA:3.40.50.300 (GENE3D),<br>EC:3.6.5.2; PTHR11708 (PANTHER),<br>EC:3.6.5.3; PTHR11708:SF304 (PANTHER),<br>EC:3.6.5.4; SSF52540 (SUPERFAMILY) |



|                         |                                                 |    |                                                                                                                                                                                                                                                                                                                                                                                                                                      |                               |                                                        |                                                                                                                                                |
|-------------------------|-------------------------------------------------|----|--------------------------------------------------------------------------------------------------------------------------------------------------------------------------------------------------------------------------------------------------------------------------------------------------------------------------------------------------------------------------------------------------------------------------------------|-------------------------------|--------------------------------------------------------|------------------------------------------------------------------------------------------------------------------------------------------------|
| Loa loa                 | protein-tyrosine phosphatase                    | 11 | P:GO:0006470;<br>P:GO:0007417;<br>C:GO:0030424;<br>F:GO:0004871;<br>P:GO:0040027;<br>F:GO:0004725;<br>P:GO:0040026;<br>P:GO:0008045;<br>P:GO:0007424;<br>C:GO:0045177;<br>C:GO:0016020                                                                                                                                                                                                                                               | -                             | EC:3.1.3.48                                            | IPR000242; IPR000387; IPR016130;<br>G3DSA:3.90.190.10 (GENE3D),<br>PTHR19134 (PANTHER),<br>PTHR19134:SF75 (PANTHER),<br>SSF52799 (SUPERFAMILY) |
| Caenorhabditis briggsae | cell division protein ki-se 5                   | 25 | C:GO:0030424;<br>P:GO:0007049;<br>F:GO:0043125;<br>C:GO:0030425;<br>F:GO:0008353;<br>P:GO:0010468;<br>P:GO:0051932;<br>P:GO:0031175;<br>P:GO:0043525;<br>P:GO:0000003;<br>P:GO:0051301;<br>F:GO:0005176;<br>P:GO:0048489;<br>F:GO:0005524;<br>F:GO:0030549;<br>C:GO:0031594;<br>F:GO:0050321;<br>C:GO:0043025;<br>C:GO:0030426;<br>F:GO:0004693;<br>P:GO:0009792;<br>C:GO:0005737;<br>C:GO:0016020;<br>C:GO:0005634;<br>P:GO:0006468 | -                             | EC:2.7.11.23<br>;<br>EC:2.7.11.26<br>;<br>EC:2.7.11.22 | IPR000719; IPR011009; IPR017441;<br>IPR017442; G3DSA:3.30.200.20<br>(GENE3D), PTHR1295 (PANTHER),<br>PTHR11295:SF110 (PANTHER)                 |
| Caenorhabditis elegans  | briggsae cbr-smgl-1 protein                     | 0  |                                                                                                                                                                                                                                                                                                                                                                                                                                      |                               |                                                        | -                                                                                                                                              |
| -                       | -                                               | 0  |                                                                                                                                                                                                                                                                                                                                                                                                                                      |                               |                                                        | -                                                                                                                                              |
| Caenorhabditis briggsae | protein-tyrosine phosphatase containing protein | 3  | P:GO:0016311;<br>F:GO:0004721;<br>P:GO:0009792                                                                                                                                                                                                                                                                                                                                                                                       | -                             | EC:3.1.3.16                                            | -                                                                                                                                              |
| -                       | -                                               | 0  |                                                                                                                                                                                                                                                                                                                                                                                                                                      |                               |                                                        | -                                                                                                                                              |
| -                       | -                                               | 0  |                                                                                                                                                                                                                                                                                                                                                                                                                                      |                               |                                                        | -                                                                                                                                              |
| -                       | -                                               | 0  |                                                                                                                                                                                                                                                                                                                                                                                                                                      |                               |                                                        | -                                                                                                                                              |
| Loa loa                 | briggsae cbr-dpy-22 protein                     | 10 | P:GO:0040010;<br>P:GO:0018991;<br>P:GO:0045449;<br>P:GO:0040035;<br>P:GO:0010171;<br>P:GO:0040026;<br>P:GO:0040011;<br>P:GO:0009792;<br>P:GO:0040018;<br>C:GO:0005634                                                                                                                                                                                                                                                                | -                             |                                                        | -                                                                                                                                              |
| Brugia malayi           | hypothetical protein Bm1_05665 [Brugia malayi]  | 0  |                                                                                                                                                                                                                                                                                                                                                                                                                                      |                               |                                                        | SignalP (SIGNALP)                                                                                                                              |
| Caenorhabditis elegans  | disks large-associated protein 1                | 0  |                                                                                                                                                                                                                                                                                                                                                                                                                                      | P:GO:0007267;<br>P:GO:0019915 |                                                        | IPR005026; PTHR12353 (PANTHER),<br>PTHR12353:SF5 (PANTHER)                                                                                     |

|                         |                                                            |    |                                                                                                                                                                                        |                                                                                                                                     |            |                                                                                                                       |
|-------------------------|------------------------------------------------------------|----|----------------------------------------------------------------------------------------------------------------------------------------------------------------------------------------|-------------------------------------------------------------------------------------------------------------------------------------|------------|-----------------------------------------------------------------------------------------------------------------------|
| Caenorhabditis briggsae | disks large-associated protein 1                           | 0  |                                                                                                                                                                                        | P:GO:0006508;<br>P:GO:0007267;<br>F:GO:0008237;<br>P:GO:0007480;<br>P:GO:0008152;<br>F:GO:0016787;<br>F:GO:0005515;<br>P:GO:0019915 |            | IPR005026; PTHR12353 (PANTHER),<br>PTHR12353:SF5 (PANTHER)                                                            |
| Caenorhabditis elegans  | disks large-associated protein 1                           | 0  |                                                                                                                                                                                        | P:GO:0007267;<br>P:GO:0019915                                                                                                       |            | IPR005026; PTHR12353 (PANTHER),<br>PTHR12353:SF5 (PANTHER)                                                            |
|                         | -                                                          | 0  |                                                                                                                                                                                        |                                                                                                                                     |            | SignalP (SIGNALP)                                                                                                     |
|                         | -                                                          | 0  |                                                                                                                                                                                        |                                                                                                                                     |            | -                                                                                                                     |
| Turnip ringspot virus   | polyprotein                                                | 3  | P:GO:0044238;<br>P:GO:0043170;<br>F:GO:0016787                                                                                                                                         | -                                                                                                                                   |            | IPR001205; SSF56672 (SUPERFAMILY)                                                                                     |
|                         | -                                                          | 0  |                                                                                                                                                                                        |                                                                                                                                     |            | -                                                                                                                     |
| Loa loa                 | briggsae cbr-dnc-2 protein                                 | 5  | F:GO:0042802;<br>C:GO:0005856;<br>P:GO:0007017;<br>P:GO:0006996;<br>P:GO:0000279                                                                                                       | -                                                                                                                                   |            | -                                                                                                                     |
| Caenorhabditis briggsae | Hypothetical protein CBG01435 [Caenorhabditis briggsae]    | 0  |                                                                                                                                                                                        |                                                                                                                                     |            | -                                                                                                                     |
|                         | -                                                          | 0  |                                                                                                                                                                                        |                                                                                                                                     |            | -                                                                                                                     |
| Caenorhabditis briggsae | elegans protein partially confirmed by transcript evidence | 0  |                                                                                                                                                                                        |                                                                                                                                     |            | -                                                                                                                     |
|                         | -                                                          | 0  |                                                                                                                                                                                        |                                                                                                                                     |            | -                                                                                                                     |
| Caenorhabditis briggsae | malate dehydroge-se                                        | 4  | P:GO:0018991;<br>P:GO:0008152;<br>F:GO:0016491;<br>P:GO:0040011                                                                                                                        | -                                                                                                                                   |            | IPR003767; G3DSA:1.10.1530.10<br>(GENE3D), G3DSA:3.30.1370.60<br>(GENE3D), SignalP (SIGNALP)                          |
| Caenorhabditis briggsae | c family member (clr-1)                                    | 11 | P:GO:0006470;<br>P:GO:0040037;<br>P:GO:0040010;<br>P:GO:0018991;<br>P:GO:0040002;<br>P:GO:0010171;<br>P:GO:0002119;<br>P:GO:0040017;<br>F:GO:0005001;<br>P:GO:0002009;<br>C:GO:0005886 | -                                                                                                                                   |            | IPR000242; G3DSA:3.90.190.10<br>(GENE3D), PTHR19134 (PANTHER),<br>PTHR19134:SF43 (PANTHER),<br>SSF52799 (SUPERFAMILY) |
|                         | -                                                          | 0  |                                                                                                                                                                                        |                                                                                                                                     |            | -                                                                                                                     |
| Apis mellifera          | dopa decarboxylase                                         | 1  | F:GO:0016831                                                                                                                                                                           | -                                                                                                                                   | EC:4.1.1.0 | IPR002129; IPR015421; IPR015424;<br>PTHR11999:SF11 (PANTHER)                                                          |
|                         | -                                                          | 0  |                                                                                                                                                                                        |                                                                                                                                     |            | -                                                                                                                     |
| Brugia malayi           | notch-like transmembrane receptor                          | 0  |                                                                                                                                                                                        | P:GO:0007219;<br>P:GO:0030154;<br>F:GO:0004872;<br>P:GO:0007275;<br>C:GO:0016021;<br>C:GO:0016020                                   |            | IPR010660; IPR011656; PR01983<br>(PRINTS)                                                                             |
| Caenorhabditis briggsae | briggsae cbr-ego-1 protein                                 | 0  |                                                                                                                                                                                        | F:GO:0003968;<br>P:GO:0009792;<br>F:GO:0005515                                                                                      |            | IPR007855                                                                                                             |
|                         | -                                                          | 0  |                                                                                                                                                                                        |                                                                                                                                     |            | -                                                                                                                     |
| Caenorhabditis elegans  | immune- lectin-like receptor 3                             | 1  | P:GO:0040010                                                                                                                                                                           | -                                                                                                                                   |            | IPR001304; IPR016186; IPR016187;<br>PTHR22802 (PANTHER),<br>PTHR22802:SF6 (PANTHER)                                   |

|                         |                                                                                      |    |                                                                                                                                                                                                                                                                             |                                                                 |                                                                                                     |
|-------------------------|--------------------------------------------------------------------------------------|----|-----------------------------------------------------------------------------------------------------------------------------------------------------------------------------------------------------------------------------------------------------------------------------|-----------------------------------------------------------------|-----------------------------------------------------------------------------------------------------|
| Pongo abelii            | marcks-like 1                                                                        | 4  | P:GO:0008284;<br>F:GO:0005516;<br>P:GO:0016192;<br>C:GO:0005886                                                                                                                                                                                                             | -                                                               | IPR002101                                                                                           |
| Caenorhabditis briggsae | sodium calcium                                                                       | 16 | P:GO:0002026;<br>P:GO:0055085;<br>C:GO:0030315;<br>F:GO:0005432;<br>F:GO:0031072;<br>F:GO:0005516;<br>P:GO:0045214;<br>C:GO:0016021;<br>C:GO:0005901;<br>P:GO:0051924;<br>P:GO:0000003;<br>P:GO:0002028;<br>C:GO:0005624;<br>P:GO:0007204;<br>P:GO:0007154;<br>P:GO:0009792 | -                                                               | IPR004836; IPR004837; PTHR11878<br>(PANTHER), PTHR11878:SF4<br>(PANTHER)                            |
| Caenorhabditis elegans  | pdc1 (mammalian cell death protein) homolog family member (pdc1-2)                   | 8  | C:GO:0005737;<br>P:GO:0040035;<br>P:GO:0009792;<br>P:GO:0002119;<br>P:GO:0040010;<br>C:GO:0016021;<br>P:GO:0006898;<br>F:GO:0008270                                                                                                                                         | -                                                               | IPR019013; SignalP (SIGNALP)                                                                        |
| Caenorhabditis elegans  | elegans protein confirmed by transcript evidence                                     | 1  | F:GO:0005515                                                                                                                                                                                                                                                                | -                                                               | IPR002919; IPR013032;<br>G3DSA:2.10.25.10 (GENE3D),<br>PTHR23259 (PANTHER), SignalP<br>(SIGNALP)    |
| Caenorhabditis briggsae | elegans protein partially confirmed by transcript evidence                           | 0  |                                                                                                                                                                                                                                                                             | F:GO:0003723;<br>P:GO:0009451;<br>P:GO:0001522;<br>F:GO:0009982 | -                                                                                                   |
| Caenorhabditis elegans  | cdk5 regulatory subunit associated protein 1                                         | 7  | P:GO:0045736;<br>P:GO:0009451;<br>F:GO:0051536;<br>P:GO:0009058;<br>F:GO:0016874;<br>P:GO:0007399;<br>F:GO:0019901                                                                                                                                                          | -                                                               | IPR002792; IPR005839;<br>G3DSA:3.80.30.20 (GENE3D)                                                  |
| Caenorhabditis elegans  | hypothetical protein T12D8.9 [Caenorhabditis elegans]                                | 0  |                                                                                                                                                                                                                                                                             |                                                                 | -                                                                                                   |
| Macaca mulatta          | serpin peptidase clade h (heat shock protein 47) member (collagen binding protein 1) | 9  | C:GO:0005788;<br>C:GO:0005793;<br>F:GO:0004867;<br>F:GO:0005518;<br>P:GO:0032964;<br>P:GO:0030199;<br>P:GO:0006986;<br>F:GO:0051082;<br>P:GO:0051604                                                                                                                        | -                                                               | IPR000215; G3DSA:2.30.39.10<br>(GENE3D), G3DSA:3.30.497.10<br>(GENE3D), PTHR11461:SF27<br>(PANTHER) |
| Caenorhabditis elegans  | developmentally-regulated gtp-binding protein 2                                      | 5  | F:GO:0005525;<br>C:GO:0005622;<br>C:GO:0016021;<br>P:GO:0015684;<br>F:GO:0015093                                                                                                                                                                                            | -                                                               | IPR004095; IPR012676; PTHR11702<br>(PANTHER), PTHR11702:SF7<br>(PANTHER)                            |

|                         |                                                             |    |                                                                                                                                                                                        |   |                               |                                                                                                                                                                             |
|-------------------------|-------------------------------------------------------------|----|----------------------------------------------------------------------------------------------------------------------------------------------------------------------------------------|---|-------------------------------|-----------------------------------------------------------------------------------------------------------------------------------------------------------------------------|
| Caenorhabditis briggsae | mitochondrial ornithine transporter 1                       | 5  | P:GO:0000066;<br>F:GO:0000064;<br>P:GO:0006520;<br>P:GO:0000050;<br>C:GO:0016020                                                                                                       | - |                               | IPR001993; IPR018108;<br>G3DSA:1.50.40.10 (GENE3D),<br>PTHR11896:SF53 (PANTHER)                                                                                             |
| Loa loa                 | upf0505 protein c16orf62-like protein                       | 0  |                                                                                                                                                                                        |   | F:GO:0003674;<br>P:GO:0008150 | PTHR13673 (PANTHER)                                                                                                                                                         |
| Caenorhabditis elegans  | elegans protein confirmed by transcript evidence            | 0  |                                                                                                                                                                                        |   |                               | SignalP (SIGNALP)                                                                                                                                                           |
|                         | -                                                           | 0  |                                                                                                                                                                                        |   |                               | -                                                                                                                                                                           |
|                         | -                                                           | 0  |                                                                                                                                                                                        |   |                               | -                                                                                                                                                                           |
|                         | -                                                           | 0  |                                                                                                                                                                                        |   |                               | -                                                                                                                                                                           |
| Caenorhabditis elegans  | clathrin-like protein                                       | 7  | F:GO:0009982;<br>F:GO:0030515;<br>F:GO:0005515;<br>C:GO:0031429;<br>P:GO:0016192;<br>P:GO:0006886;<br>C:GO:0030131                                                                     | - | EC:5.4.99.12                  | IPR001392; IPR008968; IPR011012;<br>IPR018240; IPR022775;<br>G3DSA:2.60.40.1170 (GENE3D),<br>G3DSA:3.30.450.60 (GENE3D),<br>PTHR11998 (PANTHER),<br>PTHR11998:SF4 (PANTHER) |
| Tomato ringspot virus   | r--dependent r- polymerase                                  | 1  | F:GO:0016787                                                                                                                                                                           | - |                               | IPR001205; IPR007094;<br>G3DSA:3.30.70.270 (GENE3D),<br>SSF56672 (SUPERFAMILY)                                                                                              |
| Caenorhabditis elegans  | ubiquitin specific protease 48                              | 2  | F:GO:0016787;<br>C:GO:0044464                                                                                                                                                          | - |                               | IPR001394; IPR018200; PTHR10420<br>(PANTHER), PTHR10420:SF45<br>(PANTHER), SSF54001 (SUPERFAMILY)                                                                           |
| Caenorhabditis elegans  | peptidase family m3 containing protein                      | 6  | F:GO:0004222;<br>P:GO:0045449;<br>F:GO:0003702;<br>P:GO:0006367;<br>P:GO:0006508;<br>F:GO:0008270                                                                                      | - | EC:3.4.24.0                   | SignalP (SIGNALP)                                                                                                                                                           |
|                         | -                                                           | 0  |                                                                                                                                                                                        |   |                               | -                                                                                                                                                                           |
|                         | -                                                           | 0  |                                                                                                                                                                                        |   |                               | -                                                                                                                                                                           |
| Pan troglodytes         | guanine nucleotide-binding protein g g subunit gamma-5-like | 0  |                                                                                                                                                                                        |   |                               | -                                                                                                                                                                           |
|                         | -                                                           | 0  |                                                                                                                                                                                        |   |                               | -                                                                                                                                                                           |
| Caenorhabditis elegans  | dnl-type zinc finger protein                                | 3  | P:GO:0000003;<br>C:GO:0005739;<br>P:GO:0010171                                                                                                                                         | - |                               | -                                                                                                                                                                           |
|                         | -                                                           | 0  |                                                                                                                                                                                        |   |                               | -                                                                                                                                                                           |
|                         | -                                                           | 0  |                                                                                                                                                                                        |   |                               | -                                                                                                                                                                           |
| Loa loa                 | eukaryotic translation initiation factor 2 subunit 2        | 11 | F:GO:0046872;<br>P:GO:0006413;<br>F:GO:0003723;<br>F:GO:0005515;<br>P:GO:0055085;<br>C:GO:0005850;<br>F:GO:0003743;<br>C:GO:0016021;<br>C:GO:0005829;<br>F:GO:0015293;<br>P:GO:0006814 | - |                               | IPR002735; IPR016189; IPR016190;<br>G3DSA:3.30.30.50 (GENE3D),<br>PTHR23001 (PANTHER)                                                                                       |
| Loa loa                 | mitogen-activated protein ki-se ki-se ki-se 2               | 1  | F:GO:0016301                                                                                                                                                                           | - |                               | IPR000719; IPR011009; IPR015748;<br>IPR017442; G3DSA:1.10.510.10<br>(GENE3D), PTHR22986 (PANTHER)                                                                           |
|                         | -                                                           | 0  |                                                                                                                                                                                        |   |                               | SignalP (SIGNALP)                                                                                                                                                           |
| Caenorhabditis elegans  | elegans protein partially confirmed by transcript evidence  | 0  |                                                                                                                                                                                        |   |                               | IPR018486                                                                                                                                                                   |
|                         | -                                                           | 0  |                                                                                                                                                                                        |   |                               | -                                                                                                                                                                           |

|                         |                                               |    |                                                                                                                                                                                                                                           |                               |            |                                                                    |
|-------------------------|-----------------------------------------------|----|-------------------------------------------------------------------------------------------------------------------------------------------------------------------------------------------------------------------------------------------|-------------------------------|------------|--------------------------------------------------------------------|
| Caenorhabditis elegans  | briggsae cbr-npp-12 protein                   | 3  | C:GO:0005643;<br>F:GO:0046983;<br>P:GO:0006810                                                                                                                                                                                            | -                             |            | PTHR23019 (PANTHER), SignalP (SIGNALP)                             |
| Caenorhabditis briggsae | erv1 alr family protein                       | 4  | P:GO:0045454;<br>P:GO:0055114;<br>F:GO:0016972;<br>C:GO:0044464                                                                                                                                                                           | -                             | EC:1.8.3.2 | IPR006863; IPR017905; PTHR22897 (PANTHER), PTHR22897:SF4 (PANTHER) |
| Caenorhabditis briggsae | proteasome regulatory non-atpase-like protein | 0  |                                                                                                                                                                                                                                           | F:GO:0005488;<br>C:GO:0000502 |            | PTHR10678 (PANTHER), PTHR10678:SF2 (PANTHER)                       |
|                         | -                                             | 0  |                                                                                                                                                                                                                                           |                               |            | -                                                                  |
|                         | -                                             | 0  |                                                                                                                                                                                                                                           |                               |            | -                                                                  |
|                         | -                                             | 0  |                                                                                                                                                                                                                                           |                               |            | -                                                                  |
| Brugia malayi           | ribosomal protein l23a-like                   | 14 | P:GO:0006412;<br>P:GO:0040010;<br>C:GO:0005840;<br>P:GO:0051726;<br>P:GO:0040002;<br>F:GO:0019843;<br>F:GO:0003735;<br>P:GO:0040035;<br>P:GO:0002119;<br>F:GO:0000166;<br>P:GO:0006898;<br>P:GO:0009792;<br>P:GO:0040018;<br>P:GO:0016246 | -                             | EC:3.6.5.3 | SignalP (SIGNALP)                                                  |
| Brugia malayi           | ribosomal protein l23a-like                   | 14 | P:GO:0006412;<br>P:GO:0040010;<br>C:GO:0005840;<br>P:GO:0051726;<br>P:GO:0040002;<br>F:GO:0019843;<br>F:GO:0003735;<br>P:GO:0040035;<br>P:GO:0002119;<br>F:GO:0000166;<br>P:GO:0006898;<br>P:GO:0009792;<br>P:GO:0040018;<br>P:GO:0016246 | -                             | EC:3.6.5.3 | -                                                                  |
| Brugia malayi           | ribosomal protein l23a-like                   | 14 | P:GO:0006412;<br>P:GO:0040010;<br>C:GO:0005840;<br>P:GO:0051726;<br>P:GO:0040002;<br>F:GO:0019843;<br>F:GO:0003735;<br>P:GO:0040035;<br>P:GO:0002119;<br>F:GO:0000166;<br>P:GO:0006898;<br>P:GO:0009792;<br>P:GO:0040018;<br>P:GO:0016246 | -                             | EC:3.6.5.3 | -                                                                  |

|                         |                                          |    |                                                                                                                                                                                                                                           |              |                             |                                                      |
|-------------------------|------------------------------------------|----|-------------------------------------------------------------------------------------------------------------------------------------------------------------------------------------------------------------------------------------------|--------------|-----------------------------|------------------------------------------------------|
| Brugia malayi           | ribosomal protein l23a-like              | 14 | P:GO:0006412;<br>P:GO:0040010;<br>C:GO:0005840;<br>P:GO:0051726;<br>P:GO:0040002;<br>F:GO:0019843;<br>F:GO:0003735;<br>P:GO:0040035;<br>P:GO:0002119;<br>F:GO:0000166;<br>P:GO:0006898;<br>P:GO:0009792;<br>P:GO:0040018;<br>P:GO:0016246 | -            | EC:3.6.5.3                  | SignalP (SIGNALP)                                    |
| Brugia malayi           | ribosomal protein l23a-like              | 14 | P:GO:0006412;<br>P:GO:0040010;<br>C:GO:0005840;<br>P:GO:0051726;<br>P:GO:0040002;<br>F:GO:0019843;<br>F:GO:0003735;<br>P:GO:0040035;<br>P:GO:0002119;<br>F:GO:0000166;<br>P:GO:0006898;<br>P:GO:0009792;<br>P:GO:0040018;<br>P:GO:0016246 | -            | EC:3.6.5.3                  | -                                                    |
| Loa loa                 | ras-related protein rab-                 | 3  | P:GO:0015031;<br>F:GO:0005525;<br>P:GO:0007264                                                                                                                                                                                            | -            | -                           | -                                                    |
| -                       | -                                        | 0  | -                                                                                                                                                                                                                                         | -            | -                           | -                                                    |
| Caenorhabditis briggsae | briggsae cbr-fer-1 protein               | 0  | -                                                                                                                                                                                                                                         | C:GO:0016021 | -                           | PTHR12546 (PANTHER),<br>PTHR12546:SF5 (PANTHER)      |
| Brugia malayi           | rho guanine nucleotide exchange factor 7 | 8  | C:GO:0005829;<br>P:GO:0007264;<br>P:GO:0043615;<br>F:GO:0005085;<br>C:GO:0005925;<br>F:GO:0005515;<br>C:GO:0030426;<br>P:GO:0008624                                                                                                       | -            | -                           | PTHR22826 (PANTHER),<br>PTHR22826:SF18 (PANTHER)     |
| -                       | -                                        | 0  | -                                                                                                                                                                                                                                         | -            | -                           | IPR000875                                            |
| Caenorhabditis elegans  | bile acid beta-glucosidase               | 7  | P:GO:0016142;<br>P:GO:0006680;<br>C:GO:0005886;<br>P:GO:0008206;<br>F:GO:0004348;<br>C:GO:0016021;<br>F:GO:0008422                                                                                                                        | -            | EC:3.2.1.45;<br>EC:3.2.1.21 | IPR006775; PTHR12654 (PANTHER)                       |
| Caenorhabditis briggsae | db module family protein                 | 0  | -                                                                                                                                                                                                                                         | -            | -                           | PTHR21679 (PANTHER)                                  |
| -                       | -                                        | 0  | -                                                                                                                                                                                                                                         | -            | -                           | -                                                    |
| -                       | -                                        | 0  | -                                                                                                                                                                                                                                         | -            | -                           | -                                                    |
| Caenorhabditis briggsae | cg10671 cg10671-pa                       | 1  | P:GO:0000003                                                                                                                                                                                                                              | -            | -                           | IPR019388; PTHR23129 (PANTHER),<br>SignalP (SIGNALP) |

|                         |                                                         |    |                                                                                                                                                                                        |   |                                                                                                                           |
|-------------------------|---------------------------------------------------------|----|----------------------------------------------------------------------------------------------------------------------------------------------------------------------------------------|---|---------------------------------------------------------------------------------------------------------------------------|
| Ancylostoma ceylanicum  | cysteine protei-se                                      | 7  | P:GO:0009792;<br>P:GO:0002119;<br>F:GO:0008233;<br>F:GO:0005515;<br>P:GO:0040011;<br>P:GO:0040007;<br>P:GO:0006898                                                                     | - | IPR000169; IPR000668; IPR013128;<br>IPR015643; G3DSA:3.90.70.10<br>(GENE3D), SignalP (SIGNALP),<br>SSF54001 (SUPERFAMILY) |
| Ancylostoma ceylanicum  | cysteine protei-se                                      | 7  | P:GO:0009792;<br>P:GO:0002119;<br>F:GO:0008233;<br>F:GO:0005515;<br>P:GO:0040011;<br>P:GO:0040007;<br>P:GO:0006898                                                                     | - | IPR000169; IPR000668; IPR013128;<br>IPR015643; G3DSA:3.90.70.10<br>(GENE3D), SignalP (SIGNALP),<br>SSF54001 (SUPERFAMILY) |
| -                       | -                                                       | 0  |                                                                                                                                                                                        |   | -                                                                                                                         |
| -                       | -                                                       | 0  |                                                                                                                                                                                        |   | -                                                                                                                         |
| Caenorhabditis briggsae | Hypothetical protein CBG15709 [Caenorhabditis briggsae] | 0  |                                                                                                                                                                                        |   | -                                                                                                                         |
| Caenorhabditis briggsae | briggsae cbr-jph-1 protein                              | 0  |                                                                                                                                                                                        |   | -                                                                                                                         |
| -                       | -                                                       | 0  |                                                                                                                                                                                        |   | -                                                                                                                         |
| -                       | -                                                       | 0  |                                                                                                                                                                                        |   | IPR009311; SignalP (SIGNALP)                                                                                              |
| Homo sapiens            | coatomer protein subunit epsilon                        | 8  | C:GO:0030126;<br>C:GO:0005829;<br>P:GO:0006890;<br>P:GO:0006891;<br>F:GO:0005515;<br>P:GO:0048205;<br>F:GO:0005198;<br>P:GO:0015031                                                    | - | IPR006822                                                                                                                 |
| Brugia malayi           | short-chain dehydroge-se reductase sdr                  | 5  | C:GO:0016021;<br>P:GO:0055114;<br>F:GO:0016491;<br>P:GO:0006508;<br>F:GO:0005515                                                                                                       | - | IPR002198; IPR016040;<br>PTHR19410:SF38 (PANTHER),<br>SSF51735 (SUPERFAMILY)                                              |
| Loa loa                 | hypothetical protein LOAG_04062 [Loa loa]               | 0  |                                                                                                                                                                                        |   | -                                                                                                                         |
| -                       | -                                                       | 0  |                                                                                                                                                                                        |   | -                                                                                                                         |
| Caenorhabditis briggsae | briggsae cbr-atm-1 protein                              | 2  | C:GO:0000785;<br>F:GO:0016740                                                                                                                                                          | - | IPR003152                                                                                                                 |
| -                       | -                                                       | 0  |                                                                                                                                                                                        |   | -                                                                                                                         |
| -                       | -                                                       | 0  |                                                                                                                                                                                        |   | -                                                                                                                         |
| Homo sapiens            | filamin beta (actin binding protein 278) isoform cra_a  | 11 | C:GO:0030018;<br>P:GO:0030154;<br>P:GO:0007517;<br>P:GO:0007016;<br>F:GO:0003779;<br>C:GO:0005886;<br>C:GO:0005938;<br>P:GO:0007165;<br>C:GO:0016021;<br>C:GO:0015629;<br>P:GO:0030036 | - | -                                                                                                                         |
| Caenorhabditis elegans  | histone deacetylase                                     | 8  | P:GO:0016568;<br>P:GO:0006476;<br>P:GO:0006355;<br>F:GO:0033558;<br>F:GO:0016564;<br>F:GO:0019899;<br>C:GO:0005654;<br>P:GO:0014003                                                    | - | IPR000286; PTHR10625:SF23<br>(PANTHER), SSF52768 (SUPERFAMILY)                                                            |

|                               |                                                        |   |                                                                                                                    |                                                                                                                                                                                        |            |                                                                                    |
|-------------------------------|--------------------------------------------------------|---|--------------------------------------------------------------------------------------------------------------------|----------------------------------------------------------------------------------------------------------------------------------------------------------------------------------------|------------|------------------------------------------------------------------------------------|
| Strongylocentrotus purpuratus | aldehyde dehydroge-se 1 member b1                      | 4 | P:GO:0005975;<br>C:GO:0005759;<br>F:GO:0004029;<br>P:GO:0055114                                                    | -                                                                                                                                                                                      | EC:1.2.1.3 | IPR015590; IPR016161; IPR016162;<br>PTHR11699:SF46 (PANTHER), SignalP<br>(SIGNALP) |
| Caenorhabditis elegans        | hypothetical protein F17H10.1 [Caenorhabditis elegans] | 1 | P:GO:0009792                                                                                                       | -                                                                                                                                                                                      |            | -                                                                                  |
| Caenorhabditis briggsae       | nucleoside diphosphate-linked moiety x motif 13        | 0 |                                                                                                                    | F:GO:0046872;<br>C:GO:0005739;<br>F:GO:0003674;<br>P:GO:0008152;<br>F:GO:0016787;<br>P:GO:0008150                                                                                      |            | -                                                                                  |
|                               | -                                                      | 0 |                                                                                                                    |                                                                                                                                                                                        |            | -                                                                                  |
| Loa loa                       | porcupine homolog                                      | 0 |                                                                                                                    | F:GO:0008415;<br>F:GO:0016740;<br>P:GO:0007275;<br>C:GO:0016021;<br>C:GO:0016020;<br>P:GO:0008150;<br>P:GO:0016055;<br>P:GO:0007367                                                    |            | IPR004299; PTHR13906 (PANTHER),<br>PTHR13906:SF1 (PANTHER)                         |
| Caenorhabditis briggsae       | protein of hypothetical function duf28                 | 0 |                                                                                                                    |                                                                                                                                                                                        |            | -                                                                                  |
| Ancylostoma caninum           | secreted protein asp-2                                 | 0 |                                                                                                                    | F:GO:0009055;<br>P:GO:0019646;<br>P:GO:0019915;<br>C:GO:0005576                                                                                                                        |            | IPR001283; IPR002413; IPR014044;<br>PTHR10334:SF11 (PANTHER)                       |
| Loa loa                       | groucho protein                                        | 7 | P:GO:0009792;<br>P:GO:0010171;<br>P:GO:0002119;<br>P:GO:0001703;<br>P:GO:0000003;<br>P:GO:0040011;<br>P:GO:0040007 | -                                                                                                                                                                                      |            | IPR005617                                                                          |
| Loa loa                       | groucho tle n-termi-l q-rich domain containing protein | 0 |                                                                                                                    | P:GO:0010171;<br>C:GO:0005634;<br>P:GO:0000003;<br>P:GO:0009792;<br>P:GO:0002119;<br>P:GO:0009790;<br>P:GO:0001703;<br>P:GO:0040011;<br>P:GO:0007369;<br>P:GO:0040007;<br>P:GO:0045449 |            | IPR005617                                                                          |
| Loa loa                       | groucho tle n-termi-l q-rich domain containing protein | 0 |                                                                                                                    | P:GO:0010171;<br>C:GO:0005634;<br>P:GO:0000003;<br>P:GO:0009792;<br>P:GO:0002119;<br>P:GO:0009790;<br>P:GO:0001703;<br>P:GO:0040011;<br>P:GO:0007369;<br>P:GO:0040007;<br>P:GO:0045449 |            | IPR005617                                                                          |



|                         |                                                                         |    |                                                                                                                                                                       |                                                                                                                                                                                                                                                                                                                                                                                                                                                                        |             |                                                                                                                     |           |
|-------------------------|-------------------------------------------------------------------------|----|-----------------------------------------------------------------------------------------------------------------------------------------------------------------------|------------------------------------------------------------------------------------------------------------------------------------------------------------------------------------------------------------------------------------------------------------------------------------------------------------------------------------------------------------------------------------------------------------------------------------------------------------------------|-------------|---------------------------------------------------------------------------------------------------------------------|-----------|
| Caenorhabditis elegans  | briggsae cbr-gck-4 protein                                              | 10 | P:GO:0040010;<br>P:GO:0000910;<br>F:GO:0005524;<br>P:GO:0010171;<br>P:GO:0032879;<br>P:GO:0002119;<br>P:GO:0040011;<br>P:GO:0010800;<br>P:GO:0008283;<br>F:GO:0042801 | -                                                                                                                                                                                                                                                                                                                                                                                                                                                                      |             | IPR000719; IPR001245; IPR011009;<br>G3DSA:1.10.510.10 (GENE3D),<br>PTHR22986 (PANTHER),<br>PTHR22986:SF67 (PANTHER) |           |
|                         | -                                                                       | 0  |                                                                                                                                                                       |                                                                                                                                                                                                                                                                                                                                                                                                                                                                        |             | -                                                                                                                   |           |
|                         | -                                                                       | 0  |                                                                                                                                                                       |                                                                                                                                                                                                                                                                                                                                                                                                                                                                        |             | -                                                                                                                   |           |
|                         | -                                                                       | 0  |                                                                                                                                                                       |                                                                                                                                                                                                                                                                                                                                                                                                                                                                        |             | SignalP (SIGNALP)                                                                                                   |           |
|                         | -                                                                       | 0  |                                                                                                                                                                       |                                                                                                                                                                                                                                                                                                                                                                                                                                                                        |             | -                                                                                                                   |           |
| Caenorhabditis elegans  | aspartyl-tr- synthetase                                                 | 5  | F:GO:0003676;<br>C:GO:0005739;<br>P:GO:0006422;<br>F:GO:0005524;<br>F:GO:0004815                                                                                      | -                                                                                                                                                                                                                                                                                                                                                                                                                                                                      | EC:6.1.1.12 | SignalP (SIGNALP)                                                                                                   |           |
|                         | -                                                                       | 0  |                                                                                                                                                                       |                                                                                                                                                                                                                                                                                                                                                                                                                                                                        |             | -                                                                                                                   |           |
|                         | -                                                                       | 0  |                                                                                                                                                                       |                                                                                                                                                                                                                                                                                                                                                                                                                                                                        |             | SignalP (SIGNALP)                                                                                                   |           |
| Caenorhabditis briggsae | elegans protein partially confirmed by transcript evidence              | 0  |                                                                                                                                                                       | F:GO:0005515                                                                                                                                                                                                                                                                                                                                                                                                                                                           |             | -                                                                                                                   |           |
| Brugia malayi           | zinc knuckle family protein                                             | 2  | F:GO:0008270;<br>F:GO:0003676                                                                                                                                         | -                                                                                                                                                                                                                                                                                                                                                                                                                                                                      |             | -                                                                                                                   |           |
| Equus caballus          | bub1 budding uninhibited by benzimidazoles 1 homolog                    | 0  |                                                                                                                                                                       | P:GO:0051983;<br>P:GO:0051301;<br>P:GO:0007067;<br>P:GO:0006468;<br>C:GO:0005634;<br>P:GO:0007094;<br>P:GO:0007063;<br>C:GO:0005694;<br>P:GO:0007093;<br>F:GO:0005524;<br>P:GO:0006915;<br>C:GO:0000777;<br>C:GO:0000776;<br>C:GO:0000775;<br>F:GO:0016301;<br>P:GO:0007049;<br>F:GO:0004674;<br>F:GO:0004672;<br>P:GO:0009790;<br>P:GO:0071173;<br>C:GO:0005816;<br>P:GO:0044419;<br>F:GO:0000166;<br>P:GO:0007059;<br>C:GO:0000780;<br>F:GO:0016740;<br>F:GO:0005515 |             |                                                                                                                     | IPR015661 |
| Caenorhabditis elegans  | related to yeast vacuolar protein sorting factor family member (vps-34) | 3  | F:GO:0004428;<br>F:GO:0016773;<br>P:GO:0009987                                                                                                                        | -                                                                                                                                                                                                                                                                                                                                                                                                                                                                      | EC:2.7.1.0  | IPR001263; IPR015433; IPR016024;<br>PTHR10048:SF7 (PANTHER)                                                         |           |

|                         |                                                       |    |                                                                                                                                                                                           |                                                                                                                                                                                                                          |                                                         |                                                                                                           |
|-------------------------|-------------------------------------------------------|----|-------------------------------------------------------------------------------------------------------------------------------------------------------------------------------------------|--------------------------------------------------------------------------------------------------------------------------------------------------------------------------------------------------------------------------|---------------------------------------------------------|-----------------------------------------------------------------------------------------------------------|
| Caenorhabditis elegans  | briggsae cbr-srf-3 protein                            |    | P:GO:0015785;<br>P:GO:0015788;<br>5 C:GO:0030173;<br>F:GO:0005462;<br>F:GO:0005459                                                                                                        | -                                                                                                                                                                                                                        | -                                                       |                                                                                                           |
| Giardia lamblia P15     | Hypothetical protein GLP15_3736 [Giardia lamblia P15] | 0  |                                                                                                                                                                                           | P:GO:0045449;<br>F:GO:0003677                                                                                                                                                                                            |                                                         | IPR009057; IPR011991                                                                                      |
|                         | -                                                     | 0  |                                                                                                                                                                                           |                                                                                                                                                                                                                          |                                                         | -                                                                                                         |
| Caenorhabditis briggsae | af303255_1 guanylate-binding protein                  | 11 | P:GO:0007029;<br>C:GO:0016021;<br>P:GO:0051260;<br>P:GO:0000003;<br>F:GO:0042802;<br>11 C:GO:0005792;<br>P:GO:0007409;<br>F:GO:0003924;<br>C:GO:0044431;<br>C:GO:0005789;<br>F:GO:0005525 | -                                                                                                                                                                                                                        | EC:3.6.5.1;<br>EC:3.6.5.2;<br>EC:3.6.5.3;<br>EC:3.6.5.4 | IPR003191; PTHR10751 (PANTHER),<br>PTHR10751:SF3 (PANTHER)                                                |
|                         | -                                                     | 0  |                                                                                                                                                                                           |                                                                                                                                                                                                                          |                                                         | -                                                                                                         |
|                         | -                                                     | 0  |                                                                                                                                                                                           |                                                                                                                                                                                                                          |                                                         | -                                                                                                         |
|                         | -                                                     | 0  |                                                                                                                                                                                           |                                                                                                                                                                                                                          |                                                         | IPR014044; SignalP (SIGNALP)                                                                              |
|                         | -                                                     | 0  |                                                                                                                                                                                           |                                                                                                                                                                                                                          |                                                         | -                                                                                                         |
|                         | -                                                     | 0  |                                                                                                                                                                                           |                                                                                                                                                                                                                          |                                                         | -                                                                                                         |
| Caenorhabditis elegans  | protein ki-se family member (kin-32)                  | 0  |                                                                                                                                                                                           | F:GO:0016740;<br>F:GO:0004674;<br>F:GO:0004672;<br>C:GO:0005925;<br>F:GO:0000166;<br>P:GO:0006468;<br>P:GO:0007172;<br>F:GO:0005524;<br>F:GO:0016301;<br>F:GO:0004713;<br>F:GO:0005515;<br>F:GO:0004871;<br>C:GO:0005856 |                                                         | SignalP (SIGNALP)                                                                                         |
| Caenorhabditis elegans  | focal adhesion ki-se                                  | 4  | P:GO:0009987;<br>F:GO:0004713;<br>F:GO:0000166;<br>C:GO:0044464                                                                                                                           | -                                                                                                                                                                                                                        | EC:2.7.10.0                                             | -                                                                                                         |
| Caenorhabditis briggsae | d- polymerase theta                                   | 3  | F:GO:0008026;<br>3 F:GO:0003677;<br>F:GO:0005524                                                                                                                                          | -                                                                                                                                                                                                                        |                                                         | G3DSA:3.40.50.300 (GENE3D),<br>PTHR11752 (PANTHER),<br>PTHR11752:SF3 (PANTHER), SSF52540<br>(SUPERFAMILY) |
|                         | -                                                     | 0  |                                                                                                                                                                                           |                                                                                                                                                                                                                          |                                                         | -                                                                                                         |
|                         | -                                                     | 0  |                                                                                                                                                                                           |                                                                                                                                                                                                                          |                                                         | -                                                                                                         |
|                         | -                                                     | 0  |                                                                                                                                                                                           |                                                                                                                                                                                                                          |                                                         | PTHR12309 (PANTHER),<br>PTHR12309:SF4 (PANTHER)                                                           |
|                         | -                                                     | 0  |                                                                                                                                                                                           |                                                                                                                                                                                                                          |                                                         | -                                                                                                         |
| Caenorhabditis elegans  | pantothe-te ki-se 4                                   | 0  |                                                                                                                                                                                           | F:GO:0016301;<br>F:GO:0005524;<br>P:GO:0015937;<br>C:GO:0005737;<br>F:GO:0016740;<br>F:GO:0000166;<br>F:GO:0004594                                                                                                       |                                                         | IPR011602; PTHR12280 (PANTHER),<br>PTHR12280:SF3 (PANTHER)                                                |

|                         |                                                         |    |                                                                                                                                                                                                         |                                                                                                                                                                                                                                                                                                                                                                                                    |                                                             |
|-------------------------|---------------------------------------------------------|----|---------------------------------------------------------------------------------------------------------------------------------------------------------------------------------------------------------|----------------------------------------------------------------------------------------------------------------------------------------------------------------------------------------------------------------------------------------------------------------------------------------------------------------------------------------------------------------------------------------------------|-------------------------------------------------------------|
| Caenorhabditis briggsae | briggsae cbr-dyb-1 protein                              | 12 | F:GO:0008092;<br>F:GO:0005277;<br>P:GO:0015870;<br>C:GO:0016014;<br>F:GO:0008270;<br>F:GO:0005509;<br>C:GO:0045202;<br>P:GO:0007271;<br>P:GO:0007529;<br>P:GO:0046716;<br>P:GO:0040017;<br>C:GO:0005737 | -                                                                                                                                                                                                                                                                                                                                                                                                  | -                                                           |
| Loa loa                 | hypothetical protein LOAG_02637 [Loa loa]               | 0  |                                                                                                                                                                                                         |                                                                                                                                                                                                                                                                                                                                                                                                    | -                                                           |
| Caenorhabditis briggsae | Hypothetical protein CBG00463 [Caenorhabditis briggsae] | 0  |                                                                                                                                                                                                         | F:GO:0008270;<br>C:GO:0005622                                                                                                                                                                                                                                                                                                                                                                      | IPR015880                                                   |
| synthetic construct     | protein ki-se chk2                                      | 0  |                                                                                                                                                                                                         | P:GO:0000003;<br>P:GO:0006468;<br>C:GO:0005634;<br>P:GO:0042770;<br>F:GO:0005524;<br>F:GO:0046872;<br>P:GO:0007126;<br>F:GO:0016301;<br>P:GO:0006974;<br>P:GO:0007049;<br>F:GO:0004674;<br>P:GO:0009792;<br>P:GO:0000077;<br>P:GO:0010332;<br>F:GO:0004672;<br>F:GO:0000166;<br>P:GO:0008630;<br>C:GO:0000781;<br>C:GO:0016605;<br>P:GO:0045132;<br>F:GO:0005515;<br>F:GO:0016740;<br>C:GO:0005575 | IPR000253; IPR008984                                        |
| -                       | -                                                       | 0  |                                                                                                                                                                                                         |                                                                                                                                                                                                                                                                                                                                                                                                    | -                                                           |
| -                       | -                                                       | 0  |                                                                                                                                                                                                         |                                                                                                                                                                                                                                                                                                                                                                                                    | -                                                           |
| Caenorhabditis elegans  | elegans protein confirmed by transcript evidence        | 0  |                                                                                                                                                                                                         |                                                                                                                                                                                                                                                                                                                                                                                                    | -                                                           |
| -                       | -                                                       | 0  |                                                                                                                                                                                                         |                                                                                                                                                                                                                                                                                                                                                                                                    | -                                                           |
| Caenorhabditis briggsae | briggsae cbr-tag-83 protein                             | 0  |                                                                                                                                                                                                         |                                                                                                                                                                                                                                                                                                                                                                                                    | IPR014020; G3DSA:2.60.40.1110 (GENE3D)                      |
| -                       | -                                                       | 0  |                                                                                                                                                                                                         |                                                                                                                                                                                                                                                                                                                                                                                                    | -                                                           |
| Caenorhabditis briggsae | briggsae cbr-lad-2 protein                              | 0  |                                                                                                                                                                                                         |                                                                                                                                                                                                                                                                                                                                                                                                    | SignalP (SIGNALP)                                           |
| -                       | -                                                       | 0  |                                                                                                                                                                                                         |                                                                                                                                                                                                                                                                                                                                                                                                    | -                                                           |
| -                       | -                                                       | 0  |                                                                                                                                                                                                         |                                                                                                                                                                                                                                                                                                                                                                                                    | -                                                           |
| -                       | -                                                       | 0  |                                                                                                                                                                                                         |                                                                                                                                                                                                                                                                                                                                                                                                    | -                                                           |
| Caenorhabditis elegans  | hypothetical protein F43D9.1 [Caenorhabditis elegans]   | 2  | F:GO:0008158;<br>C:GO:0016020                                                                                                                                                                           | -                                                                                                                                                                                                                                                                                                                                                                                                  | IPR003392; PTHR10796 (PANTHER),<br>PTHR10796:SF13 (PANTHER) |

|                         |                                                                             |    |                                                                                                                                                                                                                                                            |   |                                                                                                      |
|-------------------------|-----------------------------------------------------------------------------|----|------------------------------------------------------------------------------------------------------------------------------------------------------------------------------------------------------------------------------------------------------------|---|------------------------------------------------------------------------------------------------------|
| Caenorhabditis briggsae | briggsae cbr-mys-1 protein                                                  | 15 | P:GO:0000003;<br>P:GO:0045941;<br>F:GO:0005515;<br>P:GO:0040027;<br>P:GO:0040010;<br>P:GO:0006898;<br>P:GO:0006355;<br>F:GO:0016740;<br>C:GO:0005737;<br>P:GO:0009792;<br>P:GO:0002009;<br>C:GO:0043234;<br>P:GO:0010171;<br>C:GO:0044451;<br>P:GO:0016568 | - | IPR016197; G3DSA:2.30.30.270 (GENE3D), PTHR10615 (PANTHER), PTHR10615:SF30 (PANTHER), PF11717 (PFAM) |
|                         | -                                                                           | 0  |                                                                                                                                                                                                                                                            |   | SignalP (SIGNALP)                                                                                    |
|                         | -                                                                           | 0  |                                                                                                                                                                                                                                                            |   | SignalP (SIGNALP)                                                                                    |
| Caenorhabditis elegans  | probable tr- (uracil-o -)-methyltransferase-like                            | 0  | F:GO:0016740;<br>P:GO:0032259;<br>F:GO:0008168;<br>P:GO:0008033;<br>F:GO:0003676;<br>C:GO:0005737;<br>F:GO:0008270;<br>F:GO:0003674;<br>C:GO:0005575;<br>P:GO:0008150                                                                                      |   | IPR000571; PTHR21210 (PANTHER)                                                                       |
|                         | -                                                                           | 0  |                                                                                                                                                                                                                                                            |   | IPR000276; SignalP (SIGNALP)                                                                         |
| Brugia malayi           | zinc c2h2 type family protein                                               | 0  | F:GO:0003676;<br>F:GO:0046872;<br>F:GO:0008270;<br>F:GO:0005515;<br>C:GO:0005622                                                                                                                                                                           |   | IPR011333                                                                                            |
| Loa loa                 | hypothetical protein LOAG_09500 [Loa loa]                                   | 0  |                                                                                                                                                                                                                                                            |   | -                                                                                                    |
|                         | -                                                                           | 0  |                                                                                                                                                                                                                                                            |   | SignalP (SIGNALP)                                                                                    |
| Caenorhabditis elegans  | high incidence of males (increased x chromosome loss) family member (him-4) | 0  | F:GO:0005509                                                                                                                                                                                                                                               |   | IPR013783; PTHR19897 (PANTHER), PTHR19897:SF8 (PANTHER)                                              |
|                         | -                                                                           | 0  |                                                                                                                                                                                                                                                            |   | -                                                                                                    |
| Loa loa                 | melibiase family protein                                                    | 7  | C:GO:0000785;<br>F:GO:0004553;<br>P:GO:0005975;<br>F:GO:0043169;<br>P:GO:0006333;<br>F:GO:0003682;<br>C:GO:0005634                                                                                                                                         | - | EC:3.2.1.0<br>IPR002241; IPR013785; IPR017853; PTHR11452 (PANTHER)                                   |
|                         | -                                                                           | 0  |                                                                                                                                                                                                                                                            |   | -                                                                                                    |

|                         |                                                            |    |                                                                                                                                                                                                                                                                                                                                                 |   |  |                                                                                                                                                |
|-------------------------|------------------------------------------------------------|----|-------------------------------------------------------------------------------------------------------------------------------------------------------------------------------------------------------------------------------------------------------------------------------------------------------------------------------------------------|---|--|------------------------------------------------------------------------------------------------------------------------------------------------|
| Caenorhabditis elegans  | elegans protein confirmed by transcript evidence           | 16 | P:GO:0042221;<br>P:GO:0007605;<br>C:GO:0030659;<br>F:GO:0005515;<br>P:GO:0016458;<br>P:GO:0008016;<br>F:GO:0005251;<br>P:GO:0006936;<br>P:GO:0046676;<br>C:GO:0042383;<br>P:GO:0051899;<br>C:GO:0008076;<br>P:GO:0055085;<br>F:GO:0015271;<br>P:GO:0006813;<br>P:GO:0006349                                                                     | - |  | IPR013821; IPR015575; PTHR11537 (PANTHER)                                                                                                      |
| Oryctolagus cuniculus   | prohibitin                                                 | 20 | C:GO:0005654;<br>C:GO:0031315;<br>F:GO:0005515;<br>C:GO:0030061;<br>P:GO:0031100;<br>P:GO:0045471;<br>P:GO:0016575;<br>F:GO:0016563;<br>P:GO:0008285;<br>P:GO:0034097;<br>P:GO:0043434;<br>P:GO:0001552;<br>P:GO:0007165;<br>P:GO:0042493;<br>P:GO:0016481;<br>P:GO:0006950;<br>C:GO:0005887;<br>P:GO:0043066;<br>P:GO:0006260;<br>F:GO:0016564 | - |  | IPR000163                                                                                                                                      |
| -                       | -                                                          | 0  |                                                                                                                                                                                                                                                                                                                                                 |   |  | -                                                                                                                                              |
| Caenorhabditis elegans  | elegans protein partially confirmed by transcript evidence | 0  |                                                                                                                                                                                                                                                                                                                                                 |   |  | -                                                                                                                                              |
| -                       | -                                                          | 0  |                                                                                                                                                                                                                                                                                                                                                 |   |  | -                                                                                                                                              |
| Caenorhabditis elegans  | protein                                                    | 1  | P:GO:0040010                                                                                                                                                                                                                                                                                                                                    | - |  | IPR000742; IPR006210; IPR013032; IPR013111; G3DSA:2.170.300.10 (GENE3D), PTHR11201 (PANTHER), PTHR11201:SF58 (PANTHER), SSF57196 (SUPERFAMILY) |
| Caenorhabditis elegans  | protein                                                    | 1  | P:GO:0040010                                                                                                                                                                                                                                                                                                                                    | - |  | IPR000742; IPR006210; IPR013032; IPR013111; G3DSA:2.170.300.10 (GENE3D), PTHR11201 (PANTHER), PTHR11201:SF58 (PANTHER), SSF57196 (SUPERFAMILY) |
| Caenorhabditis briggsae | transmembrane amino acid transporter protein               | 2  | C:GO:0016021;<br>F:GO:0015171                                                                                                                                                                                                                                                                                                                   | - |  | IPR013057; PTHR22950 (PANTHER), PTHR22950:SF5 (PANTHER), SignalP (SIGNALP)                                                                     |

|                         |                                                            |    |                                                                                                                                                                                                                                                                                              |   |                                                                                                                                         |
|-------------------------|------------------------------------------------------------|----|----------------------------------------------------------------------------------------------------------------------------------------------------------------------------------------------------------------------------------------------------------------------------------------------|---|-----------------------------------------------------------------------------------------------------------------------------------------|
| Caenorhabditis briggsae | downstream of receptor ki-se                               | 14 | P:GO:0007265;<br>P:GO:0007613;<br>P:GO:0007015;<br>P:GO:0008360;<br>F:GO:0005070;<br>P:GO:0008595;<br>P:GO:0007476;<br>F:GO:0004872;<br>F:GO:0005118;<br>P:GO:0001700;<br>P:GO:0045500;<br>P:GO:0008293;<br>P:GO:0008355;<br>C:GO:0005886                                                    | - | IPR001452; G3DSA:2.30.30.40 (GENE3D), PTHR22820 (PANTHER), PTHR22820:SF13 (PANTHER)                                                     |
| Caenorhabditis elegans  | cathepsin I-like cysteine protei-se                        | 1  | F:GO:0008234                                                                                                                                                                                                                                                                                 | - | IPR000169; IPR000668; IPR013128; G3DSA:3.90.70.10 (GENE3D), PTHR12411:SF36 (PANTHER), SSF54001 (SUPERFAMILY)                            |
| -                       | -                                                          | 0  |                                                                                                                                                                                                                                                                                              |   | -                                                                                                                                       |
| Caenorhabditis elegans  | elegans protein partially confirmed by transcript evidence | 0  |                                                                                                                                                                                                                                                                                              |   | -                                                                                                                                       |
| -                       | -                                                          | 0  |                                                                                                                                                                                                                                                                                              |   | -                                                                                                                                       |
| Caenorhabditis briggsae | staphylococcal nuclease domain-containing protein 1        | 7  | C:GO:0043231;<br>F:GO:0016788;<br>F:GO:0003676;<br>C:GO:0016442;<br>C:GO:0044444;<br>F:GO:0003713;<br>P:GO:0016246                                                                                                                                                                           | - | SignalP (SIGNALP)                                                                                                                       |
| -                       | -                                                          | 0  |                                                                                                                                                                                                                                                                                              |   | SignalP (SIGNALP)                                                                                                                       |
| -                       | -                                                          | 0  |                                                                                                                                                                                                                                                                                              |   | -                                                                                                                                       |
| -                       | -                                                          | 0  |                                                                                                                                                                                                                                                                                              |   | SignalP (SIGNALP)                                                                                                                       |
| Caenorhabditis elegans  | intraflagellar transport protein 140                       | 1  | F:GO:0005488                                                                                                                                                                                                                                                                                 | - | PTHR15722 (PANTHER), PTHR15722:SF7 (PANTHER)                                                                                            |
| Caenorhabditis briggsae | elegans protein partially confirmed by transcript evidence | 4  | P:GO:0007186;<br>C:GO:0016021;<br>C:GO:0005622;<br>F:GO:0008270                                                                                                                                                                                                                              | - | IPR019427; G3DSA:1.20.1070.10 (GENE3D), PTHR22751 (PANTHER), PTHR22751:SF8 (PANTHER)                                                    |
| Caenorhabditis elegans  | elegans protein partially confirmed by transcript evidence | 2  | C:GO:0030054;<br>F:GO:0000166                                                                                                                                                                                                                                                                | - | -                                                                                                                                       |
| Caenorhabditis elegans  | inositol triphosphate receptor family member (itr-1)       | 17 | F:GO:0035091;<br>F:GO:0005515;<br>F:GO:0005262;<br>C:GO:0016529;<br>F:GO:0008095;<br>C:GO:0005637;<br>C:GO:0005792;<br>P:GO:0006816;<br>P:GO:0050882;<br>P:GO:0009791;<br>C:GO:0005955;<br>C:GO:0005789;<br>P:GO:0032469;<br>C:GO:0005730;<br>P:GO:0001666;<br>C:GO:0014069;<br>P:GO:0055085 | - | IPR000699; IPR003608; IPR015925; G3DSA:1.25.10.30 (GENE3D), G3DSA:2.80.10.50 (GENE3D), PTHR13715:SF2 (PANTHER), SSF100909 (SUPERFAMILY) |

|                         |                                                             |    |                                                                                                                                                                                                                                           |                               |                                                                               |
|-------------------------|-------------------------------------------------------------|----|-------------------------------------------------------------------------------------------------------------------------------------------------------------------------------------------------------------------------------------------|-------------------------------|-------------------------------------------------------------------------------|
| Caenorhabditis briggsae | elegans protein partially confirmed by transcript evidence  | 4  | P:GO:0007186;<br>C:GO:0016021;<br>P:GO:0007165;<br>F:GO:0004930                                                                                                                                                                           | -                             | PTHR19264 (PANTHER),<br>PTHR19264:SF33 (PANTHER), SignalP (SIGNALP)           |
| Caenorhabditis briggsae | Hypothetical protein CBG06763 [Caenorhabditis briggsae]     | 0  |                                                                                                                                                                                                                                           |                               | -                                                                             |
|                         | -                                                           | 0  |                                                                                                                                                                                                                                           |                               | SignalP (SIGNALP)                                                             |
| Caenorhabditis briggsae | h+ lysosomal v1 subunit a                                   | 14 | F:GO:0046961;<br>P:GO:0000003;<br>P:GO:0040010;<br>P:GO:0006898;<br>C:GO:0033180;<br>F:GO:0046933;<br>P:GO:0040011;<br>C:GO:0005829;<br>P:GO:0009792;<br>P:GO:0015986;<br>P:GO:0002119;<br>C:GO:0005887;<br>F:GO:0005524;<br>C:GO:0005739 | -                             | EC:3.6.3.14 -                                                                 |
|                         | -                                                           | 0  |                                                                                                                                                                                                                                           |                               | -                                                                             |
| Caenorhabditis elegans  | sodium- and chloride-dependent creatine transporter 1       | 8  | P:GO:0055085;<br>P:GO:0006814;<br>P:GO:0015881;<br>F:GO:0005309;<br>F:GO:0015220;<br>P:GO:0006836;<br>P:GO:0006936;<br>C:GO:0005887                                                                                                       | -                             | IPR000175; PTHR11616:SF20 (PANTHER), SignalP (SIGNALP)                        |
|                         | -                                                           | 0  |                                                                                                                                                                                                                                           |                               | -                                                                             |
| Caenorhabditis briggsae | elegans protein confirmed by transcript evidence            | 0  |                                                                                                                                                                                                                                           |                               | IPR001810; G3DSA:1.20.1280.50 (GENE3D)                                        |
|                         | -                                                           | 0  |                                                                                                                                                                                                                                           |                               | -                                                                             |
|                         | -                                                           | 0  |                                                                                                                                                                                                                                           |                               | -                                                                             |
|                         | -                                                           | 0  |                                                                                                                                                                                                                                           |                               | SignalP (SIGNALP)                                                             |
| Caenorhabditis elegans  | src-associated protein saw                                  | 0  |                                                                                                                                                                                                                                           | P:GO:0006364;<br>C:GO:0005730 | IPR018983; PTHR19924 (PANTHER),<br>PTHR19924:SF2 (PANTHER)                    |
| Caenorhabditis elegans  | src-associated protein saw                                  | 0  |                                                                                                                                                                                                                                           | P:GO:0006364;<br>C:GO:0005730 | IPR018983; PTHR19924 (PANTHER),<br>PTHR19924:SF2 (PANTHER)                    |
| Brugia malayi           | beta -galactosyltransferase-like                            | 4  | F:GO:0016757;<br>C:GO:0044444;<br>P:GO:0009987;<br>C:GO:0044425                                                                                                                                                                           | -                             | IPR003378; PTHR10811 (PANTHER),<br>PTHR10811:SF2 (PANTHER)                    |
| Caenorhabditis elegans  | conserved oligomeric golgi component family member (cogc-4) | 5  | P:GO:0048213;<br>P:GO:0007030;<br>P:GO:0006890;<br>F:GO:0005515;<br>C:GO:0017119                                                                                                                                                          | -                             | IPR013167; PTHR10483 (PANTHER),<br>PTHR10483:SF7 (PANTHER), SignalP (SIGNALP) |
| Caenorhabditis elegans  | glycosylation related family member (gly-9)                 | 4  | F:GO:0004653;<br>C:GO:0005794;<br>P:GO:0009312;<br>C:GO:0016020                                                                                                                                                                           | -                             | EC:2.4.1.41 -                                                                 |
|                         | -                                                           | 0  |                                                                                                                                                                                                                                           |                               | SignalP (SIGNALP)                                                             |
|                         | -                                                           | 0  |                                                                                                                                                                                                                                           |                               | -                                                                             |
|                         | -                                                           | 0  |                                                                                                                                                                                                                                           |                               | -                                                                             |
|                         | -                                                           | 0  |                                                                                                                                                                                                                                           |                               | -                                                                             |
| Caenorhabditis briggsae | Hypothetical protein CBG17315 [Caenorhabditis briggsae]     | 0  |                                                                                                                                                                                                                                           | F:GO:0005488                  | -                                                                             |
|                         | -                                                           | 0  |                                                                                                                                                                                                                                           |                               | SignalP (SIGNALP)                                                             |

|                         |                                                       |   |                                                                                                                                     |                                                |                             |                                                                                                              |
|-------------------------|-------------------------------------------------------|---|-------------------------------------------------------------------------------------------------------------------------------------|------------------------------------------------|-----------------------------|--------------------------------------------------------------------------------------------------------------|
| Caenorhabditis briggsae | briggsae cbr-fkb-3 protein                            | 4 | P:GO:0006457;<br>P:GO:0008340;<br>F:GO:0003755;<br>P:GO:0040010                                                                     | -                                              | EC:5.2.1.8                  | -                                                                                                            |
| Caenorhabditis elegans  | tbcl domain member 2b                                 | 3 | F:GO:0005097;<br>C:GO:0005622;<br>P:GO:0032313                                                                                      | -                                              |                             | IPR000195; G3DSA:1.10.8.270 (GENE3D), PTHR22957 (PANTHER), PTHR22957:SF52 (PANTHER)                          |
| Caenorhabditis briggsae | briggsae cbr-ced-5 protein                            | 8 | C:GO:0005737;<br>F:GO:0005083;<br>P:GO:0043652;<br>C:GO:0005886;<br>F:GO:0032403;<br>F:GO:0019899;<br>P:GO:0040039;<br>F:GO:0017124 | -                                              |                             | PTHR23317 (PANTHER), PTHR23317:SF16 (PANTHER)                                                                |
| -                       | -                                                     | 0 |                                                                                                                                     |                                                |                             | -                                                                                                            |
| Brugia malayi           | eukaryotic translation initiation factor 4e           | 8 | F:GO:0003743;<br>P:GO:0006413;<br>C:GO:0016281;<br>F:GO:0003723;<br>C:GO:0005845;<br>P:GO:0048522;<br>P:GO:0009792;<br>F:GO:0031370 | -                                              |                             | IPR001040; IPR019770                                                                                         |
| -                       | -                                                     | 0 |                                                                                                                                     |                                                |                             | -                                                                                                            |
| Caenorhabditis elegans  | dual specificity phosphatase 19                       | 6 | P:GO:0006470;<br>F:GO:0008579;<br>P:GO:0000188;<br>F:GO:0005515;<br>F:GO:0008330;<br>C:GO:0005737                                   | -                                              |                             | IPR020417; G3DSA:3.90.190.10 (GENE3D), PTHR10159 (PANTHER), PTHR10159:SF32 (PANTHER), SSF52799 (SUPERFAMILY) |
| -                       | -                                                     | 0 |                                                                                                                                     |                                                |                             | -                                                                                                            |
| Brugia malayi           | patatin-like phospholipase family protein             | 1 | P:GO:0008152                                                                                                                        | -                                              |                             | -                                                                                                            |
| Caenorhabditis briggsae | copine family protein                                 | 0 |                                                                                                                                     |                                                |                             | IPR010734; PTHR10857 (PANTHER)                                                                               |
| Caenorhabditis elegans  | tryptophanyl-tr- synthetase                           | 3 | F:GO:0004812;<br>P:GO:0006418;<br>F:GO:0000166                                                                                      | -                                              |                             | IPR002306; G3DSA:1.10.240.10 (GENE3D), SSF52374 (SUPERFAMILY)                                                |
| -                       | -                                                     | 0 |                                                                                                                                     |                                                |                             | -                                                                                                            |
| -                       | -                                                     | 0 |                                                                                                                                     |                                                |                             | -                                                                                                            |
| Apis mellifera          | dopa decarboxylase                                    | 1 | F:GO:0016829                                                                                                                        | -                                              |                             | IPR002129; IPR015421; IPR015424                                                                              |
| Caenorhabditis elegans  | subfamily m12a u-ssigned peptidase (m12 family)       | 2 | F:GO:0046872;<br>F:GO:0008233                                                                                                       | -                                              |                             | IPR000859; PTHR10127 (PANTHER), PTHR10127:SF70 (PANTHER)                                                     |
| Caenorhabditis elegans  | n-acetylglucosamine ki-se                             | 5 | C:GO:0005625;<br>F:GO:0009384;<br>F:GO:0005515;<br>P:GO:0006044;<br>F:GO:0045127                                                    | -                                              | EC:2.7.1.60;<br>EC:2.7.1.59 | -                                                                                                            |
| Brugia malayi           | gtp-ase activating protein for arf containing protein | 0 |                                                                                                                                     | F:GO:0008060;<br>P:GO:0032312;<br>F:GO:0008270 |                             | IPR022018                                                                                                    |
| -                       | -                                                     | 0 |                                                                                                                                     |                                                |                             | -                                                                                                            |



|                         |                                                                      |   |                                                                                                                                                      |                                                                                                                                                                                                         |            |                                                                                                                                                        |
|-------------------------|----------------------------------------------------------------------|---|------------------------------------------------------------------------------------------------------------------------------------------------------|---------------------------------------------------------------------------------------------------------------------------------------------------------------------------------------------------------|------------|--------------------------------------------------------------------------------------------------------------------------------------------------------|
| Caenorhabditis briggsae | briggsae cbr-daf-12 protein                                          | 0 |                                                                                                                                                      | F:GO:0043565;<br>F:GO:0003700;<br>F:GO:0003677;<br>C:GO:0005634;<br>F:GO:0004879;<br>F:GO:0008270;<br>P:GO:0006355;<br>F:GO:0004872;<br>F:GO:0046872;<br>P:GO:0006350;<br>F:GO:0003707;<br>P:GO:0045449 | -          |                                                                                                                                                        |
| Caenorhabditis briggsae | abnormal cell migration family member (mig-10)                       | 1 | F:GO:0005515                                                                                                                                         | -                                                                                                                                                                                                       |            | -                                                                                                                                                      |
|                         | -                                                                    | 0 |                                                                                                                                                      |                                                                                                                                                                                                         |            | -                                                                                                                                                      |
|                         | -                                                                    | 0 |                                                                                                                                                      |                                                                                                                                                                                                         |            | -                                                                                                                                                      |
|                         | -                                                                    | 0 |                                                                                                                                                      |                                                                                                                                                                                                         |            | SignalP (SIGNALP)                                                                                                                                      |
| Brugia malayi           | tm2 domain-containing protein 2 precursor                            | 0 |                                                                                                                                                      | F:GO:0003674;<br>C:GO:0016021;<br>C:GO:0016020;<br>P:GO:0008150;<br>C:GO:0005575                                                                                                                        | -          |                                                                                                                                                        |
|                         | -                                                                    | 0 |                                                                                                                                                      |                                                                                                                                                                                                         |            | -                                                                                                                                                      |
|                         | -                                                                    | 0 |                                                                                                                                                      |                                                                                                                                                                                                         |            | -                                                                                                                                                      |
| Trichoplax adhaerens    | 2-oxoglutarate carrier                                               | 5 | F:GO:0005488;<br>C:GO:0005743;<br>P:GO:0055085;<br>C:GO:0016021;<br>F:GO:0005215                                                                     | -                                                                                                                                                                                                       |            | IPR001993; IPR018108;<br>G3DSA:1.50.40.10 (GENE3D),<br>PTHR11896:SF78 (PANTHER)                                                                        |
| Caenorhabditis elegans  | ribosomal protein l18                                                | 9 | P:GO:0009792;<br>P:GO:0002119;<br>C:GO:0005840;<br>F:GO:0003735;<br>P:GO:0018996;<br>P:GO:0000003;<br>P:GO:0040007;<br>P:GO:0006898;<br>P:GO:0006412 | -                                                                                                                                                                                                       | EC:3.6.5.3 | IPR000039; IPR021131; IPR021132;<br>G3DSA:3.100.10.10 (GENE3D)                                                                                         |
| Caenorhabditis elegans  | ribosomal protein l18                                                | 9 | P:GO:0009792;<br>P:GO:0002119;<br>C:GO:0005840;<br>F:GO:0003735;<br>P:GO:0018996;<br>P:GO:0000003;<br>P:GO:0040007;<br>P:GO:0006898;<br>P:GO:0006412 | -                                                                                                                                                                                                       | EC:3.6.5.3 | IPR000039; IPR021131; IPR021132;<br>G3DSA:3.100.10.10 (GENE3D)                                                                                         |
|                         | -                                                                    | 0 |                                                                                                                                                      |                                                                                                                                                                                                         |            | -                                                                                                                                                      |
| Caenorhabditis elegans  | eps (human endocytosis) related family member (eps-8)                | 2 | F:GO:0005515;<br>F:GO:0004872                                                                                                                        | -                                                                                                                                                                                                       |            | -                                                                                                                                                      |
| Caenorhabditis briggsae | elegans protein partially confirmed by transcript evidence           | 0 |                                                                                                                                                      | P:GO:0016311;<br>F:GO:0016791;<br>P:GO:0006470;<br>F:GO:0016787;<br>F:GO:0008138;<br>F:GO:0004725;<br>F:GO:0004721                                                                                      |            | IPR000242; IPR000387;<br>G3DSA:3.90.190.10 (GENE3D),<br>PTHR19134 (PANTHER),<br>PTHR19134:SF26 (PANTHER), SignalP<br>(SIGNALP), SSF52799 (SUPERFAMILY) |
| Loa loa                 | egl-1 suppressor uptake defective raf enhancer family member (eor-2) | 0 |                                                                                                                                                      | F:GO:0003677                                                                                                                                                                                            |            | -                                                                                                                                                      |

|                             |                                                            |   |                                                                                                   |                                                                                                   |             |                                                                                                                                                          |
|-----------------------------|------------------------------------------------------------|---|---------------------------------------------------------------------------------------------------|---------------------------------------------------------------------------------------------------|-------------|----------------------------------------------------------------------------------------------------------------------------------------------------------|
| Caenorhabditis briggsae     | peptidase dimerisation domain containing protein           | 1 | F:GO:0016787                                                                                      | -                                                                                                 |             | IPR011650; G3DSA:3.30.70.360 (GENE3D)                                                                                                                    |
| Angiostrongylus cantonensis | cuticular collagen                                         | 3 | P:GO:0010171;<br>F:GO:0042302;<br>F:GO:0005515                                                    | -                                                                                                 |             | IPR002486; PTHR10499 (PANTHER),<br>PTHR10499:SF58 (PANTHER), SignalP (SIGNALP)                                                                           |
| Caenorhabditis briggsae     | acyl-coenzyme a oxidase pristanoyl                         | 2 | F:GO:0016627;<br>P:GO:0008152                                                                     | -                                                                                                 |             | IPR002655; IPR009075; IPR012258;<br>PTHR10909 (PANTHER)                                                                                                  |
| Branchiostoma floridae      | sam domain and hd domain-containing protein 1              | 0 |                                                                                                   | P:GO:0000003;<br>F:GO:0016787;<br>F:GO:0003824;<br>P:GO:0045088;<br>P:GO:0051607;<br>C:GO:0005634 |             | G3DSA:1.10.3210.10 (GENE3D),<br>PTHR11373 (PANTHER),<br>PTHR11373:SF9 (PANTHER)                                                                          |
| Caenorhabditis elegans      | elegans protein partially confirmed by transcript evidence | 4 | C:GO:0005737;<br>P:GO:0006546;<br>F:GO:0016491;<br>F:GO:0004047                                   | -                                                                                                 | EC:2.1.2.10 | PTHR13847 (PANTHER),<br>PTHR13847:SF16 (PANTHER)                                                                                                         |
| Caenorhabditis elegans      | sushi domain containing                                    | 2 | C:GO:0016021;<br>P:GO:0007160                                                                     | -                                                                                                 |             | -                                                                                                                                                        |
| Brugia malayi               | n terminus of rad21 rec8 like protein                      | 4 | C:GO:0043234;<br>C:GO:0000228;<br>C:GO:0000775;<br>P:GO:0007067                                   | -                                                                                                 |             | IPR006910; PTHR12585 (PANTHER),<br>PTHR12585:SF5 (PANTHER)                                                                                               |
| Homo sapiens                | complement component r subcomponent                        | 6 | F:GO:0004252;<br>P:GO:0045087;<br>F:GO:0005509;<br>P:GO:0006958;<br>C:GO:0005576;<br>P:GO:0006508 | -                                                                                                 | EC:3.4.21.0 | IPR000152; IPR001881; IPR013091;<br>IPR018097; G3DSA:2.10.25.10 (GENE3D),<br>PTHR19355 (PANTHER),<br>PTHR19355:SF12 (PANTHER),<br>SSF57196 (SUPERFAMILY) |
| Ancylostoma ceylanicum      | venom-allergen-like protein family member (vap-1)          | 0 |                                                                                                   | P:GO:0040011;<br>P:GO:0006898;<br>C:GO:0005576                                                    |             | IPR001283; IPR014044                                                                                                                                     |
|                             | -                                                          | 0 |                                                                                                   |                                                                                                   |             | -                                                                                                                                                        |
| Caenorhabditis elegans      | methyltransferase-like protein 5                           | 1 | F:GO:0005515                                                                                      | -                                                                                                 |             | IPR002052; IPR007848;<br>G3DSA:3.40.50.150 (GENE3D),<br>PTHR23290 (PANTHER), SignalP (SIGNALP),<br>SSF53335 (SUPERFAMILY)                                |
|                             | -                                                          | 0 |                                                                                                   |                                                                                                   |             | IPR016187                                                                                                                                                |
| Caenorhabditis briggsae     | patched family protein                                     | 5 | P:GO:0018996;<br>C:GO:0016021;<br>P:GO:0040018;<br>F:GO:0008158;<br>P:GO:0040011                  | -                                                                                                 |             | -                                                                                                                                                        |
| Caenorhabditis briggsae     | alcohol dehydroge-se                                       | 3 | F:GO:0008270;<br>P:GO:0055114;<br>F:GO:0016491                                                    | -                                                                                                 |             | IPR002085; IPR011032;<br>PTHR11695:SF5 (PANTHER)                                                                                                         |
|                             | -                                                          | 0 |                                                                                                   |                                                                                                   |             | -                                                                                                                                                        |
| Caenorhabditis elegans      | low-density lipoprotein receptor-related protein 2         | 3 | C:GO:0016021;<br>F:GO:0004872;<br>F:GO:0005509                                                    | -                                                                                                 |             | IPR011042; PTHR10529 (PANTHER),<br>PTHR10529:SF2 (PANTHER), SSF63825 (SUPERFAMILY)                                                                       |
| Caenorhabditis elegans      | hypothetical protein M05D6.2 [Caenorhabditis elegans]      | 0 |                                                                                                   |                                                                                                   |             | IPR008862; PTHR12832:SF6 (PANTHER)                                                                                                                       |
|                             | -                                                          | 0 |                                                                                                   |                                                                                                   |             | -                                                                                                                                                        |

|                         |                                                 |   |                                                                                                                                                                                                         |                                                                                                                      |
|-------------------------|-------------------------------------------------|---|---------------------------------------------------------------------------------------------------------------------------------------------------------------------------------------------------------|----------------------------------------------------------------------------------------------------------------------|
| Loa loa                 | loc495188 protein                               | 0 | F:GO:0003684;<br>P:GO:0006289;<br>F:GO:0003677;<br>F:GO:0008534;<br>C:GO:0005737;<br>P:GO:0006281;<br>F:GO:0016491;<br>F:GO:0003824;<br>P:GO:0017000;<br>F:GO:0016853;<br>P:GO:0006457;<br>F:GO:0005488 | -                                                                                                                    |
| Loa loa                 | loc495188 protein                               | 0 | F:GO:0003684;<br>P:GO:0006289;<br>F:GO:0003677;<br>F:GO:0008534;<br>C:GO:0005737;<br>P:GO:0006281;<br>F:GO:0016491;<br>F:GO:0003824;<br>P:GO:0017000;<br>F:GO:0016853;<br>P:GO:0006457;<br>F:GO:0005488 | -                                                                                                                    |
|                         | -                                               | 0 |                                                                                                                                                                                                         | SignalP (SIGNALP)                                                                                                    |
| Homo sapiens            | immunoglobulin heavy chain variable region      | 0 |                                                                                                                                                                                                         | IPR013783; PTHR23266 (PANTHER),<br>PTHR23266:SF9 (PANTHER), SSF48726<br>(SUPERFAMILY)                                |
|                         | -                                               | 0 |                                                                                                                                                                                                         | -                                                                                                                    |
|                         | -                                               | 0 |                                                                                                                                                                                                         | -                                                                                                                    |
|                         | -                                               | 0 |                                                                                                                                                                                                         | -                                                                                                                    |
|                         | -                                               | 0 |                                                                                                                                                                                                         | SignalP (SIGNALP)                                                                                                    |
| Caenorhabditis briggsae | briggsae cbr-ddr-2 protein                      | 4 | F:GO:0005488;<br>F:GO:0004672;<br>P:GO:0040010;<br>P:GO:0009987                                                                                                                                         | IPR000421; IPR008979; IPR020685;<br>IPR020742; G3DSA:2.60.120.260<br>(GENE3D)                                        |
|                         | -                                               | 0 |                                                                                                                                                                                                         | -                                                                                                                    |
|                         | -                                               | 0 |                                                                                                                                                                                                         | -                                                                                                                    |
|                         | -                                               | 0 |                                                                                                                                                                                                         | -                                                                                                                    |
| Caenorhabditis elegans  | cleavage and polyadenylation specificity factor | 1 | F:GO:0016787                                                                                                                                                                                            | IPR001279; G3DSA:3.60.15.10<br>(GENE3D), PTHR11203 (PANTHER),<br>PTHR11203:SF11 (PANTHER),<br>SSF56281 (SUPERFAMILY) |
|                         | -                                               | 0 |                                                                                                                                                                                                         | -                                                                                                                    |

|                               |                                                  |    |                                                                                                                                                                                                                                                                                                                                |   |             |                                               |
|-------------------------------|--------------------------------------------------|----|--------------------------------------------------------------------------------------------------------------------------------------------------------------------------------------------------------------------------------------------------------------------------------------------------------------------------------|---|-------------|-----------------------------------------------|
| Strongylocentrotus purpuratus | h4 histone protein                               | 19 | C:GO:0005654;<br>F:GO:0005515;<br>P:GO:0040010;<br>P:GO:0006898;<br>P:GO:0040011;<br>C:GO:0000786;<br>P:GO:0019915;<br>P:GO:0009792;<br>P:GO:0045653;<br>F:GO:0043565;<br>P:GO:0002119;<br>P:GO:0010171;<br>P:GO:0006352;<br>F:GO:0016986;<br>P:GO:0006334;<br>P:GO:0006952;<br>P:GO:0048015;<br>P:GO:0040035;<br>P:GO:0032940 | - |             | IPR001951; IPR007125; IPR009072               |
| Strongylocentrotus purpuratus | h4 histone protein                               | 19 | C:GO:0005654;<br>F:GO:0005515;<br>P:GO:0040010;<br>P:GO:0006898;<br>P:GO:0040011;<br>C:GO:0000786;<br>P:GO:0019915;<br>P:GO:0009792;<br>P:GO:0045653;<br>F:GO:0043565;<br>P:GO:0002119;<br>P:GO:0010171;<br>P:GO:0006352;<br>F:GO:0016986;<br>P:GO:0006334;<br>P:GO:0006952;<br>P:GO:0048015;<br>P:GO:0040035;<br>P:GO:0032940 | - |             | IPR001951; IPR007125; IPR009072;<br>IPR019809 |
|                               | -                                                | 0  |                                                                                                                                                                                                                                                                                                                                |   |             | SignalP (SIGNALP)                             |
| Pan troglodytes               | lysosomal multispinning membrane protein 5       | 3  | C:GO:0005887;<br>C:GO:0005765;<br>P:GO:0006810                                                                                                                                                                                                                                                                                 | - |             | IPR004687; IPR018397; SignalP (SIGNALP)       |
| Caenorhabditis briggsae       | briggsae cbr-csn-3 protein                       | 0  |                                                                                                                                                                                                                                                                                                                                |   |             | -                                             |
|                               | -                                                | 0  |                                                                                                                                                                                                                                                                                                                                |   |             | -                                             |
|                               | -                                                | 0  |                                                                                                                                                                                                                                                                                                                                |   |             | -                                             |
| Caenorhabditis elegans        | elegans protein confirmed by transcript evidence | 0  |                                                                                                                                                                                                                                                                                                                                |   |             | -                                             |
|                               | -                                                | 0  |                                                                                                                                                                                                                                                                                                                                |   |             | SignalP (SIGNALP)                             |
| Homo sapiens                  | pyruvate muscle                                  | 9  | F:GO:0004743;<br>F:GO:0005515;<br>F:GO:0030955;<br>F:GO:0005524;<br>F:GO:0000287;<br>P:GO:0006096;<br>P:GO:0012501;<br>C:GO:0005634;<br>C:GO:0005829                                                                                                                                                                           | - | EC:2.7.1.40 | -                                             |

|                         |                                                            |    |                                                                                                                                                                                                                                                                                                                                                                                                                                                                         |            |                                                                       |
|-------------------------|------------------------------------------------------------|----|-------------------------------------------------------------------------------------------------------------------------------------------------------------------------------------------------------------------------------------------------------------------------------------------------------------------------------------------------------------------------------------------------------------------------------------------------------------------------|------------|-----------------------------------------------------------------------|
| Caenorhabditis elegans  | protein ki-se family member (kin-25)                       | 0  | F:GO:0016740;<br>F:GO:0004674;<br>F:GO:0004672;<br>F:GO:0000166;<br>P:GO:0006468;<br>P:GO:0000003;<br>F:GO:0004715;<br>F:GO:0005524;<br>F:GO:0016301;<br>F:GO:0004713;<br>F:GO:0005515;<br>F:GO:0000287;<br>C:GO:0005886                                                                                                                                                                                                                                                | -          | -                                                                     |
| Caenorhabditis elegans  | myosin heavy chain                                         | 34 | P:GO:0046664;<br>P:GO:0045200;<br>C:GO:0016461;<br>P:GO:0035159;<br>P:GO:0031036;<br>P:GO:0035072;<br>P:GO:0007443;<br>P:GO:0007395;<br>P:GO:0045214;<br>P:GO:0035017;<br>P:GO:0007297;<br>C:GO:0031672;<br>P:GO:0046663;<br>F:GO:0003779;<br>F:GO:0000146;<br>P:GO:0001736;<br>F:GO:0008307;<br>F:GO:0032027;<br>P:GO:0008258;<br>P:GO:0051259;<br>P:GO:0016203;<br>C:GO:0032154;<br>C:GO:0045179;<br>P:GO:0045184;<br>C:GO:0005863;<br>P:GO:0035317;<br>P:GO:0007427; | -          | -                                                                     |
| -                       | -                                                          | 0  |                                                                                                                                                                                                                                                                                                                                                                                                                                                                         |            | SignalP (SIGNALP)                                                     |
| Caenorhabditis elegans  | cdp-alcohol phosphatidyltransferase family protein         | 3  | C:GO:0016020;<br>F:GO:0016780;<br>P:GO:0008654                                                                                                                                                                                                                                                                                                                                                                                                                          | EC:2.7.8.0 | PTHR10414 (PANTHER),<br>PTHR10414:SF4 (PANTHER), SignalP<br>(SIGNALP) |
| -                       | -                                                          | 0  |                                                                                                                                                                                                                                                                                                                                                                                                                                                                         |            | SignalP (SIGNALP)                                                     |
| Brugia malayi           | elegans protein partially confirmed by transcript evidence | 0  |                                                                                                                                                                                                                                                                                                                                                                                                                                                                         |            | -                                                                     |
| -                       | -                                                          | 0  |                                                                                                                                                                                                                                                                                                                                                                                                                                                                         |            | -                                                                     |
| Caenorhabditis briggsae | elegans protein confirmed by transcript evidence           | 0  | P:GO:0019915                                                                                                                                                                                                                                                                                                                                                                                                                                                            |            | IPR000615; IPR021134                                                  |
| -                       | -                                                          | 0  |                                                                                                                                                                                                                                                                                                                                                                                                                                                                         |            | -                                                                     |

|                        |                                      |    |                                                                                                                                                                                                                                                                                                                                                                                                                     |                                                                 |             |                                                                                                                                                                                                                       |
|------------------------|--------------------------------------|----|---------------------------------------------------------------------------------------------------------------------------------------------------------------------------------------------------------------------------------------------------------------------------------------------------------------------------------------------------------------------------------------------------------------------|-----------------------------------------------------------------|-------------|-----------------------------------------------------------------------------------------------------------------------------------------------------------------------------------------------------------------------|
| Macaca mulatta         | nucleoside diphosphate ki-se b       | 24 | C:GO:0030027;<br>F:GO:0005515;<br>P:GO:0002762;<br>P:GO:0007155;<br>F:GO:0004550;<br>P:GO:0006241;<br>P:GO:0006355;<br>P:GO:0030819;<br>C:GO:0005882;<br>F:GO:0046872;<br>P:GO:0006165;<br>C:GO:0001726;<br>P:GO:0045618;<br>F:GO:0003677;<br>P:GO:0006183;<br>P:GO:0006228;<br>P:GO:0050679;<br>F:GO:0003700;<br>C:GO:0048471;<br>C:GO:0005886;<br>C:GO:0005634;<br>F:GO:0005524;<br>P:GO:0043066;<br>C:GO:0005739 | -                                                               | EC:2.7.4.6  | IPR001564; IPR023005                                                                                                                                                                                                  |
|                        | -                                    | 0  |                                                                                                                                                                                                                                                                                                                                                                                                                     |                                                                 |             | -                                                                                                                                                                                                                     |
| Caenorhabditis elegans | tripartite motif-containing 9        | 11 | P:GO:0008340;<br>F:GO:0008270;<br>P:GO:0043161;<br>C:GO:0030425;<br>F:GO:0004842;<br>C:GO:0005856;<br>P:GO:0045955;<br>C:GO:0008021;<br>F:GO:0042803;<br>N:GO:0035544;<br>P:GO:0016079                                                                                                                                                                                                                              | -                                                               | EC:6.3.2.19 | IPR000315; IPR001870; IPR003649;<br>IPR003877; IPR003961; IPR008957;<br>IPR008985; IPR013783; IPR017903;<br>G3DSA:4.10.45.10 (GENE3D),<br>PTHR13712 (PANTHER),<br>PTHR13712:SF62 (PANTHER),<br>SSF57845 (SUPERFAMILY) |
| Caenorhabditis elegans | tripartite motif-containing 9        | 11 | P:GO:0008340;<br>F:GO:0008270;<br>P:GO:0043161;<br>C:GO:0030425;<br>F:GO:0004842;<br>C:GO:0005856;<br>P:GO:0045955;<br>C:GO:0008021;<br>F:GO:0042803;<br>N:GO:0035544;<br>P:GO:0016079                                                                                                                                                                                                                              | -                                                               | EC:6.3.2.19 | IPR000315; IPR001870; IPR003649;<br>IPR003877; IPR003961; IPR008957;<br>IPR008985; IPR013783; IPR017903;<br>G3DSA:4.10.45.10 (GENE3D),<br>PTHR13712 (PANTHER),<br>PTHR13712:SF62 (PANTHER),<br>SSF57845 (SUPERFAMILY) |
|                        | -                                    | 0  |                                                                                                                                                                                                                                                                                                                                                                                                                     |                                                                 |             | -                                                                                                                                                                                                                     |
| Caenorhabditis elegans | intraflagellar transport 140 homolog | 0  |                                                                                                                                                                                                                                                                                                                                                                                                                     | F:GO:0003674;<br>F:GO:0005488;<br>P:GO:0008150;<br>C:GO:0005575 |             | -                                                                                                                                                                                                                     |
|                        | -                                    | 0  |                                                                                                                                                                                                                                                                                                                                                                                                                     |                                                                 |             | -                                                                                                                                                                                                                     |

|                           |                                                            |    |                                                                                                                                                                                                         |   |  |                                                                                     |
|---------------------------|------------------------------------------------------------|----|---------------------------------------------------------------------------------------------------------------------------------------------------------------------------------------------------------|---|--|-------------------------------------------------------------------------------------|
| Caenorhabditis elegans    | elegans protein partially confirmed by transcript evidence | 11 | F:GO:0003678;<br>P:GO:0040010;<br>P:GO:0032508;<br>P:GO:0000003;<br>F:GO:0003677;<br>F:GO:0005524;<br>P:GO:0002119;<br>C:GO:0005759;<br>P:GO:0006898;<br>P:GO:0009792;<br>C:GO:0005634                  | - |  | PTHR12131 (PANTHER)                                                                 |
| Caenorhabditis elegans    | hypothetical protein R12A1.3 [Caenorhabditis elegans]      | 0  |                                                                                                                                                                                                         |   |  | SignalP (SIGNALP)                                                                   |
| Caenorhabditis elegans    | briggsae cbr-oct-2 protein                                 | 3  | P:GO:0019915;<br>C:GO:0016020;<br>P:GO:0006810                                                                                                                                                          | - |  | PTHR11600 (PANTHER),<br>PTHR11600:SF44 (PANTHER)                                    |
|                           | -                                                          | 0  |                                                                                                                                                                                                         |   |  | -                                                                                   |
| Caenorhabditis elegans    | briggsae cbr-inx- protein                                  | 5  | P:GO:0040035;<br>C:GO:0005921;<br>P:GO:0040010;<br>P:GO:0040011;<br>P:GO:0002009                                                                                                                        | - |  | IPR000990                                                                           |
|                           |                                                            | 0  |                                                                                                                                                                                                         |   |  |                                                                                     |
| Caenorhabditis briggsae   | amino acid transporter family member (aat-9)               | 2  | C:GO:0009986;<br>P:GO:0006810                                                                                                                                                                           | - |  | IPR002293; PTHR11785:SF76<br>(PANTHER)                                              |
| Caenorhabditis elegans    | elegans protein partially confirmed by transcript evidence | 1  | P:GO:0007275                                                                                                                                                                                            | - |  | IPR003961; IPR008957; IPR013783;<br>PTHR19143 (PANTHER),<br>PTHR19143:SF3 (PANTHER) |
|                           | -                                                          | 0  |                                                                                                                                                                                                         |   |  | -                                                                                   |
| Caenorhabditis elegans    | cell adhesion                                              | 8  | P:GO:0009792;<br>P:GO:0002119;<br>P:GO:0018996;<br>F:GO:0005515;<br>P:GO:0000003;<br>P:GO:0008340;<br>P:GO:0040011;<br>P:GO:0006898                                                                     | - |  | IPR003961; IPR008957; IPR013783;<br>PR00014 (PRINTS), PTHR10489<br>(PANTHER)        |
| Caenorhabditis briggsae   | elegans protein confirmed by transcript evidence           | 0  |                                                                                                                                                                                                         |   |  | SignalP (SIGNALP)                                                                   |
| Caenorhabditis briggsae   | cytoplasmic intermediate filament protein                  | 12 | P:GO:0009792;<br>P:GO:0010171;<br>P:GO:0002119;<br>P:GO:0018996;<br>F:GO:0005515;<br>P:GO:0040002;<br>C:GO:0005882;<br>P:GO:0008340;<br>P:GO:0040011;<br>P:GO:0040007;<br>P:GO:0006898;<br>F:GO:0005198 | - |  | -                                                                                   |
| Caenorhabditis briggsae   | viral a-type inclusion                                     | 1  | F:GO:0005515                                                                                                                                                                                            | - |  | PD936484 (PRODOM)                                                                   |
|                           | -                                                          | 0  |                                                                                                                                                                                                         |   |  | SignalP (SIGNALP)                                                                   |
|                           | -                                                          | 0  |                                                                                                                                                                                                         |   |  | -                                                                                   |
|                           | -                                                          | 0  |                                                                                                                                                                                                         |   |  | -                                                                                   |
|                           | -                                                          | 0  |                                                                                                                                                                                                         |   |  | -                                                                                   |
| Caenorhabditis sp. PS1010 | uncoordinated family member (unc-73)                       | 2  | P:GO:0009987;<br>C:GO:0005622                                                                                                                                                                           | - |  | IPR000219; PTHR22826 (PANTHER),<br>PTHR22826:SF39 (PANTHER)                         |
| Brugia malayi             | integrator complex subunit 1                               | 2  | P:GO:0009790;<br>P:GO:0009653                                                                                                                                                                           | - |  | PTHR21224 (PANTHER)                                                                 |

|                             |                                                      |   |                                                                                                                                                      |                                                                                                                    |             |                                                                                                                                         |
|-----------------------------|------------------------------------------------------|---|------------------------------------------------------------------------------------------------------------------------------------------------------|--------------------------------------------------------------------------------------------------------------------|-------------|-----------------------------------------------------------------------------------------------------------------------------------------|
| Caenorhabditis briggsae     | elegans protein confirmed by transcript evidence     | 0 |                                                                                                                                                      | P:GO:0016226;<br>P:GO:0040010;<br>P:GO:0006898;<br>P:GO:0009792;<br>P:GO:0002119;<br>P:GO:0040007;<br>F:GO:0051536 | -           |                                                                                                                                         |
| -                           | -                                                    | 0 |                                                                                                                                                      |                                                                                                                    | -           |                                                                                                                                         |
| Ailuropoda melanoleuca      | proteasome ( macropain) alpha 7                      | 9 | P:GO:0051436;<br>P:GO:0051437;<br>F:GO:0042802;<br>F:GO:0004298;<br>P:GO:0031145;<br>C:GO:0019773;<br>P:GO:0044419;<br>C:GO:0005737;<br>C:GO:0005634 | -                                                                                                                  | EC:3.4.25.0 | IPR001353; G3DSA:3.60.20.10<br>(GENE3D), PTHR11599 (PANTHER),<br>PTHR11599:SF15 (PANTHER), PSS1475<br>(PROFILE), SSF56235 (SUPERFAMILY) |
| Caenorhabditis elegans      | vacuolar protein sorting-associated protein 13d-like | 0 |                                                                                                                                                      | P:GO:0008104                                                                                                       | -           |                                                                                                                                         |
| Tetrahymena thermophila     | zinc dhhc-type containing 16                         | 1 | F:GO:0046872                                                                                                                                         | -                                                                                                                  |             | SignalP (SIGNALP)                                                                                                                       |
| -                           | -                                                    | 0 |                                                                                                                                                      |                                                                                                                    |             | -                                                                                                                                       |
| -                           | -                                                    | 0 |                                                                                                                                                      |                                                                                                                    |             | SignalP (SIGNALP)                                                                                                                       |
| -                           | -                                                    | 0 |                                                                                                                                                      |                                                                                                                    |             | -                                                                                                                                       |
| -                           | -                                                    | 0 |                                                                                                                                                      |                                                                                                                    |             | -                                                                                                                                       |
| -                           | -                                                    | 0 |                                                                                                                                                      |                                                                                                                    |             | -                                                                                                                                       |
| Caenorhabditis briggsae     | 40s ribosomal protein s10                            | 2 | C:GO:0005840;<br>F:GO:0005515                                                                                                                        | -                                                                                                                  |             | IPR005326; PTHR12146 (PANTHER)                                                                                                          |
| -                           | -                                                    | 0 |                                                                                                                                                      |                                                                                                                    |             | -                                                                                                                                       |
| -                           | -                                                    | 0 |                                                                                                                                                      |                                                                                                                    |             | -                                                                                                                                       |
| -                           | -                                                    | 0 |                                                                                                                                                      |                                                                                                                    |             | SignalP (SIGNALP)                                                                                                                       |
| -                           | -                                                    | 0 |                                                                                                                                                      |                                                                                                                    |             | SignalP (SIGNALP)                                                                                                                       |
| -                           | -                                                    | 0 |                                                                                                                                                      |                                                                                                                    |             | -                                                                                                                                       |
| Caenorhabditis elegans      | invadolysin cg3953-pa                                | 6 | P:GO:0007155;<br>P:GO:0007049;<br>P:GO:0006508;<br>C:GO:0016020;<br>F:GO:0008270;<br>F:GO:0008237                                                    | -                                                                                                                  |             | IPR001577; G3DSA:2.30.34.10<br>(GENE3D), SSF55486 (SUPERFAMILY)                                                                         |
| -                           | -                                                    | 0 |                                                                                                                                                      |                                                                                                                    |             | SignalP (SIGNALP)                                                                                                                       |
| Caenorhabditis briggsae     | yl54_caee1 ame: full=uncharacterized protein         | 0 |                                                                                                                                                      |                                                                                                                    |             | -                                                                                                                                       |
| Loa loa                     | spfh domain member 1                                 | 5 | C:GO:0005789;<br>F:GO:0042578;<br>F:GO:0005515;<br>C:GO:0016021;<br>P:GO:0030433                                                                     | -                                                                                                                  |             | -                                                                                                                                       |
| -                           | -                                                    | 0 |                                                                                                                                                      |                                                                                                                    |             | IPR012574                                                                                                                               |
| Angiostrongylus cantonensis | tumor endothelial marker 7                           | 0 |                                                                                                                                                      | F:GO:0004872;<br>P:GO:0007275;<br>C:GO:0016021;<br>C:GO:0016020                                                    |             | -                                                                                                                                       |
| Caenorhabditis elegans      | plexin domain containing 2                           | 0 |                                                                                                                                                      | F:GO:0004872;<br>P:GO:0007275;<br>C:GO:0016021;<br>C:GO:0016020                                                    |             | -                                                                                                                                       |



|                         |                                           |   |                                                                                                   |                                                                                                                                     |                                                                                            |
|-------------------------|-------------------------------------------|---|---------------------------------------------------------------------------------------------------|-------------------------------------------------------------------------------------------------------------------------------------|--------------------------------------------------------------------------------------------|
| Caenorhabditis elegans  | briggsae cbr-tin-13 protein               |   | F:GO:0015450;<br>C:GO:0005744;<br>5 F:GO:0046872;<br>P:GO:0045039;<br>C:GO:0042719                | -                                                                                                                                   | -                                                                                          |
|                         | -                                         |   | 0                                                                                                 |                                                                                                                                     | -                                                                                          |
|                         | -                                         |   | 0                                                                                                 |                                                                                                                                     | -                                                                                          |
| Caenorhabditis elegans  | organic cation carnitine                  | 0 |                                                                                                   | P:GO:0055114;<br>F:GO:0016491;<br>C:GO:0016021;<br>C:GO:0016020;<br>F:GO:0032440;<br>P:GO:0055085;<br>F:GO:0005215;<br>P:GO:0006810 | PTHR11600 (PANTHER),<br>PTHR11600:SF28 (PANTHER), SignalP<br>(SIGNALP)                     |
|                         | -                                         |   | 0                                                                                                 |                                                                                                                                     | -                                                                                          |
| Caenorhabditis elegans  | deah (asp-glu-ala-his) box polypeptide 35 | 6 | P:GO:0008380;<br>F:GO:0008026;<br>F:GO:0003676;<br>C:GO:0005681;<br>P:GO:0006397;<br>F:GO:0005524 | -                                                                                                                                   | G3DSA:3.40.50.300 (GENE3D),<br>PTHR18934 (PANTHER), SSF52540<br>(SUPERFAMILY)              |
|                         | -                                         |   | 0                                                                                                 |                                                                                                                                     | -                                                                                          |
| Brugia malayi           | mitochondrial glutamate carrier protein   | 6 | F:GO:0005488;<br>C:GO:0005743;<br>P:GO:0055085;<br>C:GO:0016021;<br>P:GO:0019915;<br>F:GO:0005215 | -                                                                                                                                   | IPR001993; IPR002067; IPR018108;<br>G3DSA:1.50.40.10 (GENE3D),<br>PTHR11896:SF75 (PANTHER) |
| Caenorhabditis briggsae | cadherin domain containing protein        | 4 | P:GO:0007155;<br>P:GO:0007186;<br>C:GO:0016020;<br>F:GO:0004888                                   | -                                                                                                                                   | -                                                                                          |
| Caenorhabditis elegans  | phosphatidylinositol 4-ki-se alpha        | 6 | F:GO:0005488;<br>P:GO:0008219;<br>P:GO:0030384;<br>P:GO:0000003;<br>P:GO:0007165;<br>F:GO:0004428 | -                                                                                                                                   | -                                                                                          |
| Caenorhabditis elegans  | phosphatidylinositol 4- alpha             | 6 | P:GO:0008219;<br>P:GO:0030384;<br>P:GO:0000003;<br>F:GO:0005515;<br>P:GO:0007165;<br>F:GO:0004428 | -                                                                                                                                   | -                                                                                          |
| Caenorhabditis elegans  | atp-dependent helicase                    | 6 | F:GO:0008026;<br>C:GO:0005622;<br>F:GO:0003723;<br>P:GO:0006200;<br>F:GO:0005524;<br>F:GO:0008270 | -                                                                                                                                   | IPR001650; G3DSA:3.40.50.300<br>(GENE3D), PTHR18934 (PANTHER),<br>SSF52540 (SUPERFAMILY)   |
| Caenorhabditis elegans  | folliculin                                | 0 |                                                                                                   | F:GO:0003674;<br>C:GO:0005737;<br>P:GO:0008150;<br>F:GO:0005515                                                                     | IPR021713                                                                                  |
| Caenorhabditis elegans  | briggsae cbr-asp-6 protein                | 2 | P:GO:0008219;<br>F:GO:0005515                                                                     | -                                                                                                                                   | IPR001461; IPR009007; IPR021109;<br>PTHR13683:SF53 (PANTHER)                               |
|                         | -                                         |   | 0                                                                                                 |                                                                                                                                     | -                                                                                          |

|                         |                                                                                    |    |                                                                                                                                                                                                         |                               |            |                                                                                          |
|-------------------------|------------------------------------------------------------------------------------|----|---------------------------------------------------------------------------------------------------------------------------------------------------------------------------------------------------------|-------------------------------|------------|------------------------------------------------------------------------------------------|
| Caenorhabditis briggsae | r- binding identical                                                               | 8  | C:GO:0005730;<br>P:GO:0006378;<br>P:GO:0009792;<br>P:GO:0008380;<br>F:GO:0003676;<br>F:GO:0005515;<br>P:GO:0006379;<br>F:GO:0000166                                                                     | -                             | -          |                                                                                          |
| Caenorhabditis briggsae | r- binding identical                                                               | 8  | C:GO:0005730;<br>P:GO:0006378;<br>P:GO:0009792;<br>P:GO:0008380;<br>F:GO:0003676;<br>F:GO:0005515;<br>P:GO:0006379;<br>F:GO:0000166                                                                     | -                             | -          |                                                                                          |
|                         | -                                                                                  | 0  |                                                                                                                                                                                                         |                               |            |                                                                                          |
| Caenorhabditis briggsae | class type                                                                         | 7  | C:GO:0016021;<br>F:GO:0015662;<br>P:GO:0006754;<br>F:GO:0005524;<br>P:GO:0015914;<br>F:GO:0000287;<br>F:GO:0004012                                                                                      | -                             | EC:3.6.3.1 | IPR001757; G3DSA:3.40.1110.10 (GENE3D), PTHR11939:SF19 (PANTHER), SSF81660 (SUPERFAMILY) |
|                         | -                                                                                  | 0  |                                                                                                                                                                                                         |                               |            |                                                                                          |
| Caenorhabditis elegans  | endonuclease exonuclease phosphatase family protein                                | 1  | F:GO:0003824                                                                                                                                                                                            | -                             |            | G3DSA:3.60.10.10 (GENE3D)                                                                |
| Caenorhabditis elegans  | metabotropic gaba-b receptor subtype 2                                             | 6  | P:GO:0007186;<br>C:GO:0016021;<br>P:GO:0007165;<br>F:GO:0004965;<br>C:GO:0005886;<br>F:GO:0004930                                                                                                       | -                             |            | IPR017978; IPR017979; PTHR10519 (PANTHER), PTHR10519:SF2 (PANTHER), SignalP (SIGNALP)    |
|                         | -                                                                                  | 0  |                                                                                                                                                                                                         |                               |            |                                                                                          |
|                         | -                                                                                  | 0  |                                                                                                                                                                                                         |                               |            |                                                                                          |
| Homo sapiens            | vimentin                                                                           | 12 | F:GO:0005200;<br>P:GO:0006928;<br>C:GO:0005886;<br>C:GO:0031252;<br>C:GO:0030424;<br>C:GO:0016363;<br>C:GO:0045098;<br>P:GO:0045103;<br>F:GO:0019901;<br>F:GO:0008022;<br>C:GO:0005829;<br>P:GO:0044419 | -                             |            | SignalP (SIGNALP)                                                                        |
|                         | -                                                                                  | 0  |                                                                                                                                                                                                         |                               |            |                                                                                          |
|                         | -                                                                                  | 0  |                                                                                                                                                                                                         |                               |            | SignalP (SIGNALP)                                                                        |
|                         | -                                                                                  | 0  |                                                                                                                                                                                                         |                               |            |                                                                                          |
| Danio rerio             | novel protein human major facilitator superfamily domain containing 5 ( zgc:91807) | 0  |                                                                                                                                                                                                         | C:GO:0016020;<br>P:GO:0006810 |            | SignalP (SIGNALP)                                                                        |
|                         | -                                                                                  | 0  |                                                                                                                                                                                                         |                               |            |                                                                                          |
| Caenorhabditis briggsae | activating sig-l cointegrator 1 complex subunit 3                                  | 3  | F:GO:0003676;<br>F:GO:0004386;<br>F:GO:0000166                                                                                                                                                          | -                             |            | PTHR11752 (PANTHER), PTHR11752:SF8 (PANTHER)                                             |
|                         | -                                                                                  | 0  |                                                                                                                                                                                                         |                               |            |                                                                                          |

|                         |                                                            |    |                                                                                                                                                                                                         |                                                                                                                                     |                            |                                                                                                                            |
|-------------------------|------------------------------------------------------------|----|---------------------------------------------------------------------------------------------------------------------------------------------------------------------------------------------------------|-------------------------------------------------------------------------------------------------------------------------------------|----------------------------|----------------------------------------------------------------------------------------------------------------------------|
| Caenorhabditis briggsae | elegans protein partially confirmed by transcript evidence | 0  |                                                                                                                                                                                                         | P:GO:0030259;<br>F:GO:0016740;<br>F:GO:0030246;<br>P:GO:0008152;<br>P:GO:0005975;<br>C:GO:0016021;<br>F:GO:0016758;<br>F:GO:0016757 |                            | IPR002213; G3DSA:3.40.50.2000 (GENE3D), PTHR11926:SF3 (PANTHER), SSF53756 (SUPERFAMILY)                                    |
| Ailuropoda melanoleuca  | suppressor of ty 5 homolog ( cerevisiae) isoform cra_a     | 12 | P:GO:0032968;<br>P:GO:0007049;<br>P:GO:0045944;<br>P:GO:0045090;<br>F:GO:0019899;<br>P:GO:0000122;<br>F:GO:0008159;<br>F:GO:0008148;<br>F:GO:0046982;<br>C:GO:0005654;<br>P:GO:0006338;<br>P:GO:0010033 | -                                                                                                                                   |                            | -                                                                                                                          |
| Caenorhabditis briggsae | immunoglobulin i-set domain containing protein             | 0  |                                                                                                                                                                                                         | F:GO:0005509;<br>F:GO:0003824                                                                                                       |                            | -                                                                                                                          |
| Caenorhabditis briggsae | peptidylprolyl isomerase domain and wd repeat containing 1 | 2  | P:GO:0006457;<br>F:GO:0003755                                                                                                                                                                           | -                                                                                                                                   | EC:5.2.1.8                 | IPR001680; IPR002130; IPR011046; IPR015891; IPR015943; IPR019781; IPR020892; PTHR11071 (PANTHER), PTHR11071:SF40 (PANTHER) |
| Caenorhabditis elegans  | dhhc zinc finger domain containing protein                 | 1  | F:GO:0008270                                                                                                                                                                                            | -                                                                                                                                   |                            | IPR001594; PTHR22883 (PANTHER)                                                                                             |
|                         |                                                            |    |                                                                                                                                                                                                         |                                                                                                                                     |                            | IPR003961; IPR008957; IPR013783; PR00014 (PRINTS), PTHR19900 (PANTHER), PTHR19900:SF7 (PANTHER)                            |
| Branchiostoma floridae  | isocitrate dehydroge-se                                    | 12 | P:GO:0006979;<br>F:GO:0051287;<br>F:GO:0004450;<br>P:GO:0006103;<br>P:GO:0006749;<br>P:GO:0055114;<br>F:GO:0000287;<br>P:GO:0008340;<br>C:GO:0005829;<br>P:GO:0006102;<br>C:GO:0005739;<br>F:GO:0042803 | -                                                                                                                                   | EC:1.1.1.42                | IPR004790                                                                                                                  |
| Caenorhabditis elegans  | msp domain with glu- and lys-rich c-term domain            | 0  |                                                                                                                                                                                                         | C:GO:0005856;<br>F:GO:0005198                                                                                                       |                            | IPR000535; IPR008962; PTHR10809 (PANTHER)                                                                                  |
|                         |                                                            | 0  |                                                                                                                                                                                                         |                                                                                                                                     |                            | -                                                                                                                          |
| Caenorhabditis briggsae | carboxyl transferase domain containing protein             | 9  | C:GO:0005625;<br>P:GO:0006633;<br>P:GO:0006084;<br>F:GO:0005524;<br>F:GO:0016740;<br>F:GO:0004075;<br>C:GO:0005739;<br>F:GO:0009374;<br>F:GO:0003989                                                    | -                                                                                                                                   | EC:6.3.4.14;<br>EC:6.4.1.2 | IPR005479; IPR013816; PTHR18866 (PANTHER), PTHR18866:SF6 (PANTHER), SSF56059 (SUPERFAMILY)                                 |
| Caenorhabditis elegans  | placental protein 11 related                               | 2  | F:GO:0004521;<br>F:GO:0003723                                                                                                                                                                           | -                                                                                                                                   |                            | PTHR12439 (PANTHER), SSF142877 (SUPERFAMILY)                                                                               |

|                        |                                                        |   |                                                                                                                                     |                                                                                  |                                                         |                                                                                     |
|------------------------|--------------------------------------------------------|---|-------------------------------------------------------------------------------------------------------------------------------------|----------------------------------------------------------------------------------|---------------------------------------------------------|-------------------------------------------------------------------------------------|
| Pan troglodytes        | subfamily member 1 isoform 1                           | 0 |                                                                                                                                     |                                                                                  |                                                         | -                                                                                   |
| Caenorhabditis elegans | hypothetical protein F55E10.7 [Caenorhabditis elegans] | 0 |                                                                                                                                     | C:GO:0016021;<br>P:GO:0007186                                                    |                                                         | PTHR19264 (PANTHER),<br>PTHR19264:SF33 (PANTHER)                                    |
| Ailuropoda melanoleuca | elongation factor 2                                    | 8 | F:GO:0003746;<br>P:GO:0006414;<br>P:GO:0006184;<br>F:GO:0005515;<br>F:GO:0003924;<br>C:GO:0030529;<br>C:GO:0005737;<br>F:GO:0005525 | -                                                                                | EC:3.6.5.1;<br>EC:3.6.5.2;<br>EC:3.6.5.3;<br>EC:3.6.5.4 | -                                                                                   |
|                        | -                                                      | 0 |                                                                                                                                     |                                                                                  |                                                         | SignalP (SIGNALP)                                                                   |
| Caenorhabditis elegans | elegans protein confirmed by transcript evidence       | 3 | P:GO:0008152;<br>F:GO:0005515;<br>F:GO:0016757                                                                                      | -                                                                                |                                                         | IPR002213; G3DSA:3.40.50.2000<br>(GENE3D), SSF53756 (SUPERFAMILY)                   |
|                        |                                                        | 0 |                                                                                                                                     |                                                                                  |                                                         |                                                                                     |
| Caenorhabditis elegans | elegans protein confirmed by transcript evidence       | 0 |                                                                                                                                     |                                                                                  |                                                         | IPR021010; SSF141739 (SUPERFAMILY)                                                  |
|                        | -                                                      | 0 |                                                                                                                                     |                                                                                  |                                                         | -                                                                                   |
|                        | -                                                      | 0 |                                                                                                                                     |                                                                                  |                                                         | -                                                                                   |
| Loa loa                | ubiquitin protein ligase e3 component n-recognin 2     | 1 | F:GO:0005488                                                                                                                        | -                                                                                |                                                         | IPR003126; IPR003769; IPR014719;<br>PTHR21497 (PANTHER),<br>PTHR21497:SF6 (PANTHER) |
|                        | -                                                      | 0 |                                                                                                                                     |                                                                                  |                                                         | SignalP (SIGNALP)                                                                   |
|                        | -                                                      | 0 |                                                                                                                                     |                                                                                  |                                                         | -                                                                                   |
| Caenorhabditis elegans | briggsae cbr-exos-2 protein                            | 0 |                                                                                                                                     |                                                                                  |                                                         | SignalP (SIGNALP)                                                                   |
|                        | -                                                      | 0 |                                                                                                                                     |                                                                                  |                                                         | -                                                                                   |
| Brugia malayi          | domain containing protein                              | 0 |                                                                                                                                     | P:GO:0007165;<br>C:GO:0005622                                                    |                                                         | -                                                                                   |
| Brugia malayi          | domain containing protein                              | 0 |                                                                                                                                     | P:GO:0007165;<br>C:GO:0005622                                                    |                                                         | -                                                                                   |
| Brugia malayi          | domain containing protein                              | 0 |                                                                                                                                     | P:GO:0007165;<br>C:GO:0005622                                                    |                                                         | -                                                                                   |
| Brugia malayi          | domain containing protein                              | 0 |                                                                                                                                     | P:GO:0007165;<br>C:GO:0005622                                                    |                                                         | -                                                                                   |
|                        | -                                                      | 0 |                                                                                                                                     |                                                                                  |                                                         | -                                                                                   |
| Loa loa                | krev interaction trapped protein 1                     | 0 |                                                                                                                                     | F:GO:0005083;<br>F:GO:0005488;<br>C:GO:0005856;<br>C:GO:0016020;<br>F:GO:0005515 |                                                         | IPR002110; IPR020683; PTHR13283<br>(PANTHER), PTHR13283:SF2<br>(PANTHER)            |
|                        | -                                                      | 0 |                                                                                                                                     |                                                                                  |                                                         | -                                                                                   |
| Caenorhabditis elegans | g in family member (glb-18)                            | 3 | F:GO:0020037;<br>P:GO:0015671;<br>F:GO:0019825                                                                                      | -                                                                                |                                                         | -                                                                                   |
|                        | -                                                      | 0 |                                                                                                                                     |                                                                                  |                                                         | IPR019473                                                                           |

|                         |                                                            |    |                                                                                                                                                                                                                                                            |                                                                                                                                                                                                         |                            |                                                                                      |
|-------------------------|------------------------------------------------------------|----|------------------------------------------------------------------------------------------------------------------------------------------------------------------------------------------------------------------------------------------------------------|---------------------------------------------------------------------------------------------------------------------------------------------------------------------------------------------------------|----------------------------|--------------------------------------------------------------------------------------|
| Caenorhabditis briggsae | nitrilase 2                                                | 15 | P:GO:0009684;<br>P:GO:0051410;<br>F:GO:0047558;<br>F:GO:0080061;<br>P:GO:0000003;<br>P:GO:0009617;<br>P:GO:0019499;<br>P:GO:0019762;<br>P:GO:0009970;<br>C:GO:0009507;<br>P:GO:0046686;<br>F:GO:0047427;<br>F:GO:0080109;<br>C:GO:0005886;<br>C:GO:0048046 | -                                                                                                                                                                                                       | EC:4.2.1.65;<br>EC:3.5.5.4 | IPR003010; PTHR23088 (PANTHER)                                                       |
| -                       | -                                                          | 0  |                                                                                                                                                                                                                                                            |                                                                                                                                                                                                         |                            | -                                                                                    |
| Caenorhabditis elegans  | elegans protein partially confirmed by transcript evidence | 0  |                                                                                                                                                                                                                                                            | C:GO:0016021;<br>F:GO:0016787;<br>F:GO:0003676;<br>F:GO:0004528;<br>F:GO:0003824;<br>C:GO:0005575;<br>F:GO:0005044;<br>P:GO:0008152;<br>F:GO:0046872;<br>P:GO:0006955                                   |                            | IPR002591; IPR017849; IPR017850;<br>PTHR10151 (PANTHER),<br>PTHR10151:SF28 (PANTHER) |
| -                       | -                                                          | 0  |                                                                                                                                                                                                                                                            |                                                                                                                                                                                                         |                            | IPR017956                                                                            |
| Brugia malayi           | integrin beta 1 binding protein 1                          | 0  |                                                                                                                                                                                                                                                            | P:GO:0016477;<br>P:GO:0007229;<br>C:GO:0016020;<br>C:GO:0030027;<br>C:GO:0005737;<br>P:GO:0030155;<br>P:GO:0007243;<br>F:GO:0005178;<br>F:GO:0005515;<br>C:GO:0001726;<br>P:GO:0007160;<br>C:GO:0005829 |                            | IPR011993; IPR019517                                                                 |
| Loa loa                 | dis3 mitotic control homolog ( cerevisiae)-like 2          | 1  | F:GO:0004518                                                                                                                                                                                                                                               | -                                                                                                                                                                                                       |                            | IPR001900; PTHR23355 (PANTHER),<br>PTHR23355:SF10 (PANTHER)                          |
| Loa loa                 | dis3 mitotic control homolog ( cerevisiae)-like 2          | 1  | F:GO:0016787                                                                                                                                                                                                                                               | -                                                                                                                                                                                                       |                            | IPR001900; PTHR23355 (PANTHER),<br>PTHR23355:SF10 (PANTHER)                          |
| Brugia malayi           | rnb-like protein                                           | 0  |                                                                                                                                                                                                                                                            | F:GO:0003723;<br>F:GO:0004540                                                                                                                                                                           |                            | -                                                                                    |
| Loa loa                 | dis3 mitotic control homolog ( cerevisiae)-like 2          | 1  | F:GO:0004518                                                                                                                                                                                                                                               | -                                                                                                                                                                                                       |                            | IPR001900; PTHR23355 (PANTHER),<br>PTHR23355:SF10 (PANTHER)                          |
| Caenorhabditis elegans  | elegans protein partially confirmed by transcript evidence | 4  | F:GO:0015250;<br>C:GO:0043025;<br>C:GO:0005929;<br>P:GO:0006833                                                                                                                                                                                            | -                                                                                                                                                                                                       |                            | IPR000425; SignalP (SIGNALP)                                                         |
| Caenorhabditis elegans  | tao ki-se 1                                                | 6  | C:GO:0043231;<br>F:GO:0004674;<br>F:GO:0000166;<br>F:GO:0030295;<br>F:GO:0019901;<br>P:GO:0006468                                                                                                                                                          | -                                                                                                                                                                                                       | EC:2.7.11.0                | -                                                                                    |
| -                       | -                                                          | 0  |                                                                                                                                                                                                                                                            |                                                                                                                                                                                                         |                            | -                                                                                    |

|                          |                                                   |    |                                                                                                                                                                                                                                                            |                                                                                  |             |                                                                                                                               |
|--------------------------|---------------------------------------------------|----|------------------------------------------------------------------------------------------------------------------------------------------------------------------------------------------------------------------------------------------------------------|----------------------------------------------------------------------------------|-------------|-------------------------------------------------------------------------------------------------------------------------------|
| Caenorhabditis elegans   | inositol-requiring 1 alpha-like                   | 15 | P:GO:0000003;<br>F:GO:0005515;<br>C:GO:0030176;<br>C:GO:0005637;<br>P:GO:0010467;<br>P:GO:0046777;<br>P:GO:0090304;<br>F:GO:0004521;<br>P:GO:0040017;<br>P:GO:0007050;<br>F:GO:0004674;<br>P:GO:0006987;<br>P:GO:0006917;<br>F:GO:0000287;<br>F:GO:0005524 | -                                                                                | EC:2.7.11.0 | IPR011047; SignalP (SIGNALP)                                                                                                  |
| Monosiga brevicollis MX1 | tr- aspartic acid methyltransferase 1             | 0  |                                                                                                                                                                                                                                                            | P:GO:0006306;<br>F:GO:0008168;<br>F:GO:0016740;<br>C:GO:0005575;<br>F:GO:0003677 |             | IPR001525; G3DSA:3.40.50.150 (GENE3D), PTHR10629:SF8 (PANTHER), SSF53335 (SUPERFAMILY)                                        |
|                          | -                                                 | 0  |                                                                                                                                                                                                                                                            |                                                                                  |             | -                                                                                                                             |
| Loa loa                  | serine threonine protein ki-se                    | 2  | F:GO:0016301;<br>P:GO:0000003                                                                                                                                                                                                                              | -                                                                                |             | IPR000719; IPR011009; IPR017442; G3DSA:1.10.510.10 (GENE3D), PTHR11909 (PANTHER), PTHR11909:SF19 (PANTHER), SignalP (SIGNALP) |
| Brugia malayi            | hypothetical protein Bm1_4555 [Brugia malayi]     | 0  |                                                                                                                                                                                                                                                            |                                                                                  |             | -                                                                                                                             |
| Caenorhabditis elegans   | briggsae cbr-lov-1 protein                        | 6  | C:GO:0016020;<br>P:GO:0007218;<br>P:GO:0034608;<br>P:GO:0034606;<br>C:GO:0005929;<br>F:GO:0005515                                                                                                                                                          | -                                                                                |             | SignalP (SIGNALP)                                                                                                             |
| Caenorhabditis elegans   | briggsae cbr-acy-2 protein                        | 9  | C:GO:0016021;<br>F:GO:0004016;<br>P:GO:0007188;<br>P:GO:0009190;<br>P:GO:0002119;<br>F:GO:0000166;<br>P:GO:0040011;<br>P:GO:0040015;<br>C:GO:0005886                                                                                                       | -                                                                                | EC:4.6.1.1  | IPR001054; PTHR11920 (PANTHER), PTHR11920:SF12 (PANTHER)                                                                      |
|                          | -                                                 | 0  |                                                                                                                                                                                                                                                            |                                                                                  |             | SignalP (SIGNALP)                                                                                                             |
|                          | -                                                 | 0  |                                                                                                                                                                                                                                                            |                                                                                  |             | -                                                                                                                             |
|                          | -                                                 | 0  |                                                                                                                                                                                                                                                            |                                                                                  |             | SignalP (SIGNALP)                                                                                                             |
|                          | -                                                 | 0  |                                                                                                                                                                                                                                                            |                                                                                  |             | -                                                                                                                             |
| Caenorhabditis briggsae  | elegans protein confirmed by transcript evidence  | 0  |                                                                                                                                                                                                                                                            |                                                                                  |             | -                                                                                                                             |
|                          | -                                                 | 0  |                                                                                                                                                                                                                                                            |                                                                                  |             | -                                                                                                                             |
| Caenorhabditis elegans   | h transporter (pgp related) family member (haf-9) | 6  | F:GO:0015197;<br>F:GO:0042626;<br>P:GO:0015833;<br>P:GO:0055085;<br>F:GO:0005524;<br>C:GO:0016021                                                                                                                                                          | -                                                                                |             | -                                                                                                                             |

|                         |                                                                   |    |                                                                                                                                                                                                                                                                                                                                                                                                                                                                                         |   |            |                                                                                                           |
|-------------------------|-------------------------------------------------------------------|----|-----------------------------------------------------------------------------------------------------------------------------------------------------------------------------------------------------------------------------------------------------------------------------------------------------------------------------------------------------------------------------------------------------------------------------------------------------------------------------------------|---|------------|-----------------------------------------------------------------------------------------------------------|
| Caenorhabditis briggsae | phospholipase beta 4                                              | 8  | C:GO:0005829;<br>F:GO:0004629;<br>C:GO:0030425;<br>C:GO:0005792;<br>F:GO:0005515;<br>C:GO:0014069;<br>C:GO:0005634;<br>C:GO:0005790                                                                                                                                                                                                                                                                                                                                                     | - |            | PTHR10336 (PANTHER),<br>PTHR10336:SF8 (PANTHER)                                                           |
|                         | -                                                                 | 0  |                                                                                                                                                                                                                                                                                                                                                                                                                                                                                         |   |            | IPR010916                                                                                                 |
| Caenorhabditis elegans  | mitochondrial ribosomal protein l13                               | 5  | P:GO:0009792;<br>C:GO:0005840;<br>F:GO:0003735;<br>P:GO:0006412;<br>C:GO:0005739                                                                                                                                                                                                                                                                                                                                                                                                        | - | EC:3.6.5.3 | IPR005822; IPR005823                                                                                      |
| Loa loa                 | smc6 structural maintenance of chromosomes 6-like 1 isoform cra_a | 2  | P:GO:0009792;<br>C:GO:0005622                                                                                                                                                                                                                                                                                                                                                                                                                                                           | - |            | G3DSA:3.40.50.300 (GENE3D),<br>PTHR19306 (PANTHER),<br>PTHR19306:SF2 (PANTHER), SSF52540<br>(SUPERFAMILY) |
| Branchiostoma floridae  | histone deacetylase 1                                             | 45 | P:GO:0009792;<br>P:GO:0021766;<br>P:GO:0010870;<br>P:GO:0010552;<br>P:GO:0016055;<br>P:GO:0008284;<br>F:GO:0016566;<br>P:GO:0070933;<br>P:GO:0070932;<br>P:GO:0050769;<br>C:GO:0005829;<br>C:GO:0016581;<br>C:GO:0000792;<br>P:GO:0043524;<br>P:GO:0001889;<br>P:GO:0048709;<br>P:GO:0006916;<br>P:GO:0048565;<br>F:GO:0003714;<br>P:GO:0007492;<br>P:GO:0043922;<br>P:GO:0030182;<br>F:GO:0032403;<br>F:GO:0042802;<br>F:GO:0016563;<br>F:GO:0003677;<br>F:GO:0003682;<br>P:GO:0021903 | - |            | IPR000286; IPR003084; SSF52768<br>(SUPERFAMILY)                                                           |

|                        |                       |    |                                                                                                                                                                                                                                                                                                                                                                                                                                                                         |  |  |                                                 |
|------------------------|-----------------------|----|-------------------------------------------------------------------------------------------------------------------------------------------------------------------------------------------------------------------------------------------------------------------------------------------------------------------------------------------------------------------------------------------------------------------------------------------------------------------------|--|--|-------------------------------------------------|
| Branchiostoma floridae | histone deacetylase 1 | 33 | P:GO:0007492;<br>F:GO:0004407;<br>F:GO:0003714;<br>P:GO:0070932;<br>F:GO:0042826;<br>P:GO:0021766;<br>P:GO:0010552;<br>C:GO:0016581;<br>P:GO:0070933;<br>P:GO:0045786;<br>P:GO:0010832;<br>F:GO:0016563;<br>C:GO:0005829;<br>P:GO:0043922;<br>P:GO:0008285;<br>P:GO:0006916;<br>P:GO:0043524;<br>P:GO:0008284;<br>C:GO:0043025;<br>P:GO:0010553;<br>F:GO:0042802;<br>F:GO:0003677;<br>C:GO:0016580;<br>C:GO:0000792;<br>P:GO:0006338;<br>P:GO:0042493;<br>F:GO:0003700; |  |  | IPR000286; IPR003084; SSF52768<br>(SUPERFAMILY) |
| Branchiostoma floridae | histone deacetylase 1 | 45 | P:GO:0021766;<br>P:GO:0010870;<br>P:GO:0010552;<br>P:GO:0016055;<br>P:GO:0008284;<br>F:GO:0016566;<br>P:GO:0070933;<br>P:GO:0070932;<br>P:GO:0050769;<br>C:GO:0005829;<br>C:GO:0016581;<br>C:GO:0000792;<br>P:GO:0043524;<br>P:GO:0001889;<br>P:GO:0048709;<br>P:GO:0006916;<br>P:GO:0048565;<br>F:GO:0003714;<br>P:GO:0007492;<br>P:GO:0043922;<br>P:GO:0030182;<br>F:GO:0032403;<br>F:GO:0042802;<br>F:GO:0016563;<br>F:GO:0003677;<br>F:GO:0003682;<br>P:GO:0021902; |  |  | IPR000286; IPR003084; SSF52768<br>(SUPERFAMILY) |



|                        |                       |    |                                                                                                                                                                                                                                                                                                                                                                                                                                                                         |  |  |                                                 |
|------------------------|-----------------------|----|-------------------------------------------------------------------------------------------------------------------------------------------------------------------------------------------------------------------------------------------------------------------------------------------------------------------------------------------------------------------------------------------------------------------------------------------------------------------------|--|--|-------------------------------------------------|
| Branchiostoma floridae | histone deacetylase 1 | 33 | P:GO:0007492;<br>F:GO:0004407;<br>F:GO:0003714;<br>P:GO:0070932;<br>F:GO:0042826;<br>P:GO:0021766;<br>P:GO:0010552;<br>C:GO:0016581;<br>P:GO:0070933;<br>P:GO:0045786;<br>P:GO:0010832;<br>F:GO:0016563;<br>C:GO:0005829;<br>P:GO:0043922;<br>P:GO:0008285;<br>P:GO:0006916;<br>P:GO:0043524;<br>P:GO:0008284;<br>C:GO:0043025;<br>P:GO:0010553;<br>F:GO:0042802;<br>F:GO:0003677;<br>C:GO:0016580;<br>C:GO:0000792;<br>P:GO:0006338;<br>P:GO:0042493;<br>F:GO:0003700; |  |  | IPR000286; IPR003084; SSF52768<br>(SUPERFAMILY) |
| Branchiostoma floridae | histone deacetylase 1 | 33 | P:GO:0007492;<br>F:GO:0004407;<br>F:GO:0003714;<br>P:GO:0070932;<br>F:GO:0042826;<br>P:GO:0021766;<br>P:GO:0010552;<br>C:GO:0016581;<br>P:GO:0070933;<br>P:GO:0045786;<br>P:GO:0010832;<br>F:GO:0016563;<br>C:GO:0005829;<br>P:GO:0043922;<br>P:GO:0008285;<br>P:GO:0006916;<br>P:GO:0043524;<br>P:GO:0008284;<br>C:GO:0043025;<br>P:GO:0010553;<br>F:GO:0042802;<br>F:GO:0003677;<br>C:GO:0016580;<br>C:GO:0000792;<br>P:GO:0006338;<br>P:GO:0042493;<br>F:GO:0003700; |  |  | IPR000286; IPR003084; SSF52768<br>(SUPERFAMILY) |

|                        |                       |    |                                                                                                                                                                                                                                                                                                                                                                                                                                                                         |  |  |                                                 |
|------------------------|-----------------------|----|-------------------------------------------------------------------------------------------------------------------------------------------------------------------------------------------------------------------------------------------------------------------------------------------------------------------------------------------------------------------------------------------------------------------------------------------------------------------------|--|--|-------------------------------------------------|
| Branchiostoma floridae | histone deacetylase 1 | 33 | P:GO:0007492;<br>F:GO:0004407;<br>F:GO:0003714;<br>P:GO:0070932;<br>F:GO:0042826;<br>P:GO:0021766;<br>P:GO:0010552;<br>C:GO:0016581;<br>P:GO:0070933;<br>P:GO:0045786;<br>P:GO:0010832;<br>F:GO:0016563;<br>C:GO:0005829;<br>P:GO:0043922;<br>P:GO:0008285;<br>P:GO:0006916;<br>P:GO:0043524;<br>P:GO:0008284;<br>C:GO:0043025;<br>P:GO:0010553;<br>F:GO:0042802;<br>F:GO:0003677;<br>C:GO:0016580;<br>C:GO:0000792;<br>P:GO:0006338;<br>P:GO:0042493;<br>F:GO:0003700; |  |  | IPR000286; IPR003084; SSF52768<br>(SUPERFAMILY) |
| Branchiostoma floridae | histone deacetylase 1 | 33 | P:GO:0007492;<br>F:GO:0004407;<br>F:GO:0003714;<br>P:GO:0070932;<br>F:GO:0042826;<br>P:GO:0021766;<br>P:GO:0010552;<br>C:GO:0016581;<br>P:GO:0070933;<br>P:GO:0045786;<br>P:GO:0010832;<br>F:GO:0016563;<br>C:GO:0005829;<br>P:GO:0043922;<br>P:GO:0008285;<br>P:GO:0006916;<br>P:GO:0043524;<br>P:GO:0008284;<br>C:GO:0043025;<br>P:GO:0010553;<br>F:GO:0042802;<br>F:GO:0003677;<br>C:GO:0016580;<br>C:GO:0000792;<br>P:GO:0006338;<br>P:GO:0042493;<br>F:GO:0003700; |  |  | IPR000286; IPR003084; SSF52768<br>(SUPERFAMILY) |

|                        |                       |    |                                                                                                                                                                                                                                                                                                                                                                                                                                                                         |  |  |                                                 |
|------------------------|-----------------------|----|-------------------------------------------------------------------------------------------------------------------------------------------------------------------------------------------------------------------------------------------------------------------------------------------------------------------------------------------------------------------------------------------------------------------------------------------------------------------------|--|--|-------------------------------------------------|
| Branchiostoma floridae | histone deacetylase 1 | 33 | P:GO:0007492;<br>F:GO:0004407;<br>F:GO:0003714;<br>P:GO:0070932;<br>F:GO:0042826;<br>P:GO:0021766;<br>P:GO:0010552;<br>C:GO:0016581;<br>P:GO:0070933;<br>P:GO:0045786;<br>P:GO:0010832;<br>F:GO:0016563;<br>C:GO:0005829;<br>P:GO:0043922;<br>P:GO:0008285;<br>P:GO:0006916;<br>P:GO:0043524;<br>P:GO:0008284;<br>C:GO:0043025;<br>P:GO:0010553;<br>F:GO:0042802;<br>F:GO:0003677;<br>C:GO:0016580;<br>C:GO:0000792;<br>P:GO:0006338;<br>P:GO:0042493;<br>F:GO:0003700; |  |  | IPR000286; IPR003084; SSF52768<br>(SUPERFAMILY) |
| Branchiostoma floridae | histone deacetylase 1 | 33 | P:GO:0007492;<br>F:GO:0004407;<br>F:GO:0003714;<br>P:GO:0070932;<br>F:GO:0042826;<br>P:GO:0021766;<br>P:GO:0010552;<br>C:GO:0016581;<br>P:GO:0070933;<br>P:GO:0045786;<br>P:GO:0010832;<br>F:GO:0016563;<br>C:GO:0005829;<br>P:GO:0043922;<br>P:GO:0008285;<br>P:GO:0006916;<br>P:GO:0043524;<br>P:GO:0008284;<br>C:GO:0043025;<br>P:GO:0010553;<br>F:GO:0042802;<br>F:GO:0003677;<br>C:GO:0016580;<br>C:GO:0000792;<br>P:GO:0006338;<br>P:GO:0042493;<br>F:GO:0003700; |  |  | IPR000286; IPR003084; SSF52768<br>(SUPERFAMILY) |

|                             |                                         |    |                                                                                                                                                                                                                                                                                                                                                                                                                                                                        |              |                                   |                                                                                                                      |
|-----------------------------|-----------------------------------------|----|------------------------------------------------------------------------------------------------------------------------------------------------------------------------------------------------------------------------------------------------------------------------------------------------------------------------------------------------------------------------------------------------------------------------------------------------------------------------|--------------|-----------------------------------|----------------------------------------------------------------------------------------------------------------------|
| Branchiostoma floridae      | histone deacetylase 1                   | 33 | P:GO:0007492;<br>F:GO:0004407;<br>F:GO:0003714;<br>P:GO:0070932;<br>F:GO:0042826;<br>P:GO:0021766;<br>P:GO:0010552;<br>C:GO:0016581;<br>P:GO:0070933;<br>P:GO:0045786;<br>P:GO:0010832;<br>F:GO:0016563;<br>C:GO:0005829;<br>P:GO:0043922;<br>P:GO:0008285;<br>P:GO:0006916;<br>P:GO:0043524;<br>P:GO:0008284;<br>C:GO:0043025;<br>P:GO:0010553;<br>F:GO:0042802;<br>F:GO:0003677;<br>C:GO:0016580;<br>C:GO:0000792;<br>P:GO:0006338;<br>P:GO:0042493;<br>F:GO:0003700 | -            |                                   | IPR000286; IPR003084; SSF52768<br>(SUPERFAMILY)                                                                      |
|                             | -                                       | 0  |                                                                                                                                                                                                                                                                                                                                                                                                                                                                        |              |                                   | -                                                                                                                    |
| Caenorhabditis briggsae     | nucleolar containing protein            | 10 | C:GO:0005829;<br>P:GO:0040010;<br>C:GO:0005730;<br>P:GO:0006364;<br>C:GO:0030688;<br>P:GO:0000003;<br>P:GO:0002119;<br>F:GO:0005515;<br>P:GO:0006898;<br>P:GO:0009792                                                                                                                                                                                                                                                                                                  | -            |                                   | IPR010301                                                                                                            |
| Caenorhabditis briggsae     | skiv2l partial                          | 1  | F:GO:0016787                                                                                                                                                                                                                                                                                                                                                                                                                                                           | -            |                                   | PTHR11752 (PANTHER),<br>PTHR11752:SF2 (PANTHER)                                                                      |
| Caenorhabditis briggsae     | skiv2l partial                          | 1  | F:GO:0016787                                                                                                                                                                                                                                                                                                                                                                                                                                                           | -            |                                   | PTHR11752 (PANTHER),<br>PTHR11752:SF2 (PANTHER)                                                                      |
| Caenorhabditis briggsae     | skiv2l partial                          | 1  | F:GO:0016787                                                                                                                                                                                                                                                                                                                                                                                                                                                           | -            |                                   | PTHR11752 (PANTHER),<br>PTHR11752:SF2 (PANTHER)                                                                      |
| Loa loa                     | fem-1 homolog a ( elegans)              | 1  | F:GO:0005515                                                                                                                                                                                                                                                                                                                                                                                                                                                           | -            |                                   | -                                                                                                                    |
| Brugia malayi               | beta lysosomal                          | 5  | C:GO:0005625;<br>F:GO:0004567;<br>C:GO:0005764;<br>P:GO:0006516;<br>F:GO:0005537                                                                                                                                                                                                                                                                                                                                                                                       | -            | EC:3.2.1.25                       | PTHR10066 (PANTHER),<br>PTHR10066:SF12 (PANTHER)                                                                     |
|                             | -                                       | 0  |                                                                                                                                                                                                                                                                                                                                                                                                                                                                        |              |                                   | -                                                                                                                    |
| Angiostrongylus cantonensis | gamma-butyrobetaine dioxyge-se          | 5  | F:GO:0005506;<br>P:GO:0055114;<br>F:GO:0016702;<br>F:GO:0008336;<br>P:GO:0045329                                                                                                                                                                                                                                                                                                                                                                                       | -            | EC:1.13.11.0<br>;<br>EC:1.14.11.1 | IPR003819; G3DSA:3.60.130.10<br>(GENE3D), PTHR10696 (PANTHER),<br>PTHR10696:SF3 (PANTHER), SSF51197<br>(SUPERFAMILY) |
| Brugia malayi               | protein ki-se domain containing protein | 0  |                                                                                                                                                                                                                                                                                                                                                                                                                                                                        | F:GO:0016301 |                                   | -                                                                                                                    |

|                             |                                                                       |    |                                                                                                                                                                                                                                                                                                                                                 |                                                                                                   |                                                                                     |
|-----------------------------|-----------------------------------------------------------------------|----|-------------------------------------------------------------------------------------------------------------------------------------------------------------------------------------------------------------------------------------------------------------------------------------------------------------------------------------------------|---------------------------------------------------------------------------------------------------|-------------------------------------------------------------------------------------|
| Caenorhabditis elegans      | d- polymerase epsilon subunit 2                                       | 2  | P:GO:0006259;<br>F:GO:0016740                                                                                                                                                                                                                                                                                                                   | -                                                                                                 | IPR007185; PTHR12708 (PANTHER),<br>PF12213 (PFAM)                                   |
| Caenorhabditis elegans      | trm44_caeel ame: full=probable tr- (uracil-o -)-<br>methyltransferase | 0  |                                                                                                                                                                                                                                                                                                                                                 | F:GO:0003676;<br>F:GO:0008168;<br>C:GO:0005737;<br>P:GO:0008033;<br>F:GO:0016740;<br>F:GO:0008270 | -                                                                                   |
| Angiostrongylus cantonensis | gametocyte specific factor 1                                          | 0  |                                                                                                                                                                                                                                                                                                                                                 | F:GO:0046872;<br>C:GO:0005737                                                                     | IPR007917; IPR022776                                                                |
| Caenorhabditis elegans      | nucleolar mif4g domain-containing protein 1                           | 2  | P:GO:0040018;<br>P:GO:0002119                                                                                                                                                                                                                                                                                                                   | -                                                                                                 | PTHR18034 (PANTHER),<br>PTHR18034:SF4 (PANTHER)                                     |
|                             | -                                                                     | 0  |                                                                                                                                                                                                                                                                                                                                                 |                                                                                                   | SignalP (SIGNALP)                                                                   |
|                             | -                                                                     | 0  |                                                                                                                                                                                                                                                                                                                                                 |                                                                                                   | -                                                                                   |
|                             | -                                                                     | 0  |                                                                                                                                                                                                                                                                                                                                                 |                                                                                                   | IPR018307; SignalP (SIGNALP)                                                        |
| Caenorhabditis elegans      | lethal family member (let-805)                                        | 8  | P:GO:0018996;<br>P:GO:0009792;<br>P:GO:0008340;<br>P:GO:0000003;<br>F:GO:0005515;<br>P:GO:0006898;<br>P:GO:0002119;<br>P:GO:0040011                                                                                                                                                                                                             | -                                                                                                 | IPR003961; IPR008957; IPR013783;<br>PTHR19143 (PANTHER),<br>PTHR19143:SF2 (PANTHER) |
|                             | -                                                                     | 0  |                                                                                                                                                                                                                                                                                                                                                 |                                                                                                   | -                                                                                   |
|                             | -                                                                     | 0  |                                                                                                                                                                                                                                                                                                                                                 |                                                                                                   | -                                                                                   |
|                             | -                                                                     | 0  |                                                                                                                                                                                                                                                                                                                                                 |                                                                                                   | -                                                                                   |
| Brugia malayi               | homolog subfamily c member 8                                          | 1  | F:GO:0031072                                                                                                                                                                                                                                                                                                                                    | -                                                                                                 | PTHR15606 (PANTHER),<br>PTHR15606:SF1 (PANTHER)                                     |
|                             | -                                                                     | 0  |                                                                                                                                                                                                                                                                                                                                                 |                                                                                                   | SignalP (SIGNALP)                                                                   |
| Loa loa                     | sjhgc03786 protein                                                    | 0  |                                                                                                                                                                                                                                                                                                                                                 |                                                                                                   | IPR018801; SignalP (SIGNALP)                                                        |
| Angiostrongylus cantonensis | myosin vi                                                             | 20 | P:GO:0051046;<br>C:GO:0016461;<br>C:GO:0031941;<br>C:GO:0031965;<br>C:GO:0005794;<br>P:GO:0006886;<br>C:GO:0005829;<br>C:GO:0001726;<br>F:GO:0032559;<br>F:GO:0003774;<br>P:GO:0006897;<br>F:GO:0051015;<br>P:GO:0030330;<br>C:GO:0016591;<br>P:GO:0045944;<br>C:GO:0048471;<br>C:GO:0005886;<br>F:GO:0005516;<br>P:GO:0042491;<br>C:GO:0045334 | -                                                                                                 | PTHR13140 (PANTHER),<br>PTHR13140:SF26 (PANTHER)                                    |
|                             | -                                                                     | 0  |                                                                                                                                                                                                                                                                                                                                                 |                                                                                                   | -                                                                                   |
|                             | -                                                                     | 0  |                                                                                                                                                                                                                                                                                                                                                 |                                                                                                   | -                                                                                   |

|                         |                                                                           |    |                                                                                                                                                                                                                                                                                                                                                                                                                                                                         |                                                                                                                                     |                                                                                                                                         |
|-------------------------|---------------------------------------------------------------------------|----|-------------------------------------------------------------------------------------------------------------------------------------------------------------------------------------------------------------------------------------------------------------------------------------------------------------------------------------------------------------------------------------------------------------------------------------------------------------------------|-------------------------------------------------------------------------------------------------------------------------------------|-----------------------------------------------------------------------------------------------------------------------------------------|
| Caenorhabditis briggsae | serum response factor                                                     | 35 | P:GO:0001829;<br>P:GO:0010735;<br>P:GO:0000003;<br>P:GO:0030336;<br>P:GO:0030431;<br>P:GO:0048589;<br>P:GO:0045597;<br>P:GO:0040010;<br>P:GO:0090009;<br>P:GO:0060261;<br>P:GO:0030155;<br>P:GO:0007430;<br>F:GO:0003704;<br>P:GO:0007616;<br>C:GO:0005737;<br>C:GO:0005730;<br>P:GO:0001947;<br>P:GO:0008285;<br>P:GO:0034097;<br>P:GO:0045987;<br>P:GO:0007475;<br>P:GO:0007015;<br>P:GO:0046716;<br>P:GO:0002119;<br>P:GO:0035154;<br>F:GO:0003700;<br>F:GO:0010736; | -                                                                                                                                   | IPR002100; PTHR11945 (PANTHER),<br>PTHR11945:SF32 (PANTHER)                                                                             |
| -                       | -                                                                         | 0  | -                                                                                                                                                                                                                                                                                                                                                                                                                                                                       | -                                                                                                                                   | IPR003195                                                                                                                               |
| Caenorhabditis briggsae | elegans protein partially confirmed by transcript evidence                | 0  | -                                                                                                                                                                                                                                                                                                                                                                                                                                                                       | -                                                                                                                                   | -                                                                                                                                       |
| Caenorhabditis elegans  | briggsae cbr-klf-1 protein                                                | 0  | -                                                                                                                                                                                                                                                                                                                                                                                                                                                                       | F:GO:0003676;<br>F:GO:0008270;<br>C:GO:0005622                                                                                      | -                                                                                                                                       |
| Caenorhabditis briggsae | fanci (fanconi anemia complex component i) homolog family member (fnci-1) | 0  | -                                                                                                                                                                                                                                                                                                                                                                                                                                                                       | -                                                                                                                                   | -                                                                                                                                       |
| -                       | -                                                                         | 0  | -                                                                                                                                                                                                                                                                                                                                                                                                                                                                       | -                                                                                                                                   | -                                                                                                                                       |
| -                       | -                                                                         | 0  | -                                                                                                                                                                                                                                                                                                                                                                                                                                                                       | -                                                                                                                                   | -                                                                                                                                       |
| -                       | -                                                                         | 0  | -                                                                                                                                                                                                                                                                                                                                                                                                                                                                       | -                                                                                                                                   | -                                                                                                                                       |
| Caenorhabditis elegans  | acid sphingomyeli-se-like phosphodiesterase 3b-like                       | 0  | -                                                                                                                                                                                                                                                                                                                                                                                                                                                                       | F:GO:0004767;<br>P:GO:0008152;<br>C:GO:0005615;<br>P:GO:0006685;<br>F:GO:0016787;<br>F:GO:0000166;<br>F:GO:0016798;<br>C:GO:0005576 | IPR004843; G3DSA:3.60.21.10<br>(GENE3D), PTHR10340 (PANTHER),<br>PTHR10340:SF14 (PANTHER), SignalP<br>(SIGNALP), SSF56300 (SUPERFAMILY) |
| Brugia malayi           | hypothetical protein Bm1_57350 [Brugia malayi]                            | 0  | -                                                                                                                                                                                                                                                                                                                                                                                                                                                                       | -                                                                                                                                   | -                                                                                                                                       |
| Brugia malayi           | hypothetical protein Bm1_57350 [Brugia malayi]                            | 0  | -                                                                                                                                                                                                                                                                                                                                                                                                                                                                       | -                                                                                                                                   | -                                                                                                                                       |
| -                       | -                                                                         | 0  | -                                                                                                                                                                                                                                                                                                                                                                                                                                                                       | -                                                                                                                                   | SignalP (SIGNALP)                                                                                                                       |
| Caenorhabditis briggsae | Hypothetical protein CBG12007 [Caenorhabditis briggsae]                   | 0  | -                                                                                                                                                                                                                                                                                                                                                                                                                                                                       | -                                                                                                                                   | G3DSA:3.90.226.10 (GENE3D),<br>SSF52096 (SUPERFAMILY)                                                                                   |
| Brugia malayi           | beta like 1                                                               | 5  | C:GO:0005730;<br>F:GO:0042802;<br>P:GO:0006917;<br>P:GO:0016445;<br>F:GO:0019899                                                                                                                                                                                                                                                                                                                                                                                        | -                                                                                                                                   | PTHR14978 (PANTHER)                                                                                                                     |

|                               |                                                                       |   |                                                                 |                                                                                                                                                                                                                          |  |                                                                                                   |
|-------------------------------|-----------------------------------------------------------------------|---|-----------------------------------------------------------------|--------------------------------------------------------------------------------------------------------------------------------------------------------------------------------------------------------------------------|--|---------------------------------------------------------------------------------------------------|
| Caenorhabditis elegans        | c-type lectin family member (clec-266)                                | 0 |                                                                 | F:GO:0030169;<br>F:GO:0008329;<br>C:GO:0016021;<br>C:GO:0016020;<br>F:GO:0005529;<br>F:GO:0003674;<br>P:GO:0006910;<br>P:GO:0007165;<br>C:GO:0005575;<br>F:GO:0004872;<br>P:GO:0008150;<br>P:GO:0006955;<br>F:GO:0005488 |  | IPR001304; IPR016186; IPR016187                                                                   |
| -                             | -                                                                     | 0 |                                                                 |                                                                                                                                                                                                                          |  | -                                                                                                 |
| -                             | -                                                                     | 0 |                                                                 |                                                                                                                                                                                                                          |  | -                                                                                                 |
| Caenorhabditis elegans        | tetratricopeptide repeat domain 17                                    | 2 | P:GO:0040010;<br>P:GO:0040017                                   | -                                                                                                                                                                                                                        |  | IPR011990; IPR019734; PTHR16091 (PANTHER), SSF48452 (SUPERFAMILY)                                 |
| Caenorhabditis briggsae       | zinc finger protein                                                   | 1 | F:GO:0005488                                                    | -                                                                                                                                                                                                                        |  | IPR001841; IPR013083; IPR017907; SSF57850 (SUPERFAMILY)                                           |
| Caenorhabditis briggsae       | low-density lipoprotein receptor-related protein 2                    | 3 | C:GO:0016021;<br>F:GO:0004872;<br>F:GO:0005509                  | -                                                                                                                                                                                                                        |  | IPR006210; PTHR10529 (PANTHER)                                                                    |
| Caenorhabditis briggsae       | briggsae cbr-unc-115 protein                                          | 3 | P:GO:0007010;<br>F:GO:0003779;<br>F:GO:0008270                  | -                                                                                                                                                                                                                        |  | -                                                                                                 |
| Salmo salar                   | lipopolysaccharide-induced tumor necrosis factor-alpha factor homolog | 4 | P:GO:0009987;<br>C:GO:0043229;<br>F:GO:0005515;<br>C:GO:0005737 | -                                                                                                                                                                                                                        |  | IPR006629; PTHR23292 (PANTHER)                                                                    |
| Loa loa                       | fragile site-associated protein                                       | 0 |                                                                 | F:GO:0005488;<br>F:GO:0003779;<br>P:GO:0016043;<br>P:GO:0030036                                                                                                                                                          |  | -                                                                                                 |
| Caenorhabditis briggsae       | yp69_caee1_ame: full=uncharacterized protein                          | 0 |                                                                 |                                                                                                                                                                                                                          |  | SignalP (SIGNALP)                                                                                 |
| Caenorhabditis elegans        | ccr4-not transcription complex                                        | 0 |                                                                 |                                                                                                                                                                                                                          |  | -                                                                                                 |
| Caenorhabditis elegans        | cd63 antigen                                                          | 3 | P:GO:0030001;<br>F:GO:0046872;<br>C:GO:0016021                  | -                                                                                                                                                                                                                        |  | IPR000301; IPR008952; IPR018499; PTHR19282 (PANTHER), PTHR19282:SF12 (PANTHER), SignalP (SIGNALP) |
| Brugia malayi                 | ubx domain containing protein                                         | 0 |                                                                 |                                                                                                                                                                                                                          |  | -                                                                                                 |
| -                             | -                                                                     | 0 |                                                                 |                                                                                                                                                                                                                          |  | -                                                                                                 |
| Caenorhabditis briggsae       | Hypothetical protein CBG03566 [Caenorhabditis briggsae]               | 0 |                                                                 |                                                                                                                                                                                                                          |  | -                                                                                                 |
| -                             | -                                                                     | 0 |                                                                 |                                                                                                                                                                                                                          |  | -                                                                                                 |
| -                             | -                                                                     | 0 |                                                                 |                                                                                                                                                                                                                          |  | -                                                                                                 |
| Caenorhabditis elegans        | briggsae cbr-dct-18 protein                                           | 0 |                                                                 |                                                                                                                                                                                                                          |  | -                                                                                                 |
| -                             | -                                                                     | 0 |                                                                 |                                                                                                                                                                                                                          |  | SignalP (SIGNALP)                                                                                 |
| Strongylocentrotus purpuratus | ensangp00000010363                                                    | 0 |                                                                 |                                                                                                                                                                                                                          |  | IPR006912; PTHR22930 (PANTHER)                                                                    |
| -                             | -                                                                     | 0 |                                                                 |                                                                                                                                                                                                                          |  | -                                                                                                 |
| Caenorhabditis briggsae       | cytochrome p450 family protein                                        | 3 | P:GO:0008152;<br>F:GO:0016491;<br>F:GO:0005506                  | -                                                                                                                                                                                                                        |  | IPR001128; PTHR19383:SF165 (PANTHER), SignalP (SIGNALP)                                           |
| -                             | -                                                                     | 0 |                                                                 |                                                                                                                                                                                                                          |  | -                                                                                                 |
| Caenorhabditis elegans        | briggsae cbr-cul-5 protein                                            | 4 | F:GO:0004872;<br>F:GO:0031625;<br>C:GO:0031461;<br>P:GO:0006511 | -                                                                                                                                                                                                                        |  | IPR001373; IPR016158; G3DSA:1.20.1310.10 (GENE3D), PTHR11932 (PANTHER), PTHR11932:SF7 (PANTHER)   |

|                         |                                                            |    |                                                                                                                                                                                                         |                                                                 |                                                                                                                |
|-------------------------|------------------------------------------------------------|----|---------------------------------------------------------------------------------------------------------------------------------------------------------------------------------------------------------|-----------------------------------------------------------------|----------------------------------------------------------------------------------------------------------------|
|                         | -                                                          | 0  |                                                                                                                                                                                                         |                                                                 | -                                                                                                              |
| Caenorhabditis elegans  | polymerase (d- directed) gamma                             | 12 | P:GO:0030421;<br>P:GO:0008340;<br>C:GO:0005743;<br>F:GO:0003887;<br>C:GO:0005760;<br>C:GO:0042645;<br>P:GO:0006264;<br>F:GO:0003677;<br>F:GO:0002020;<br>P:GO:0006287;<br>F:GO:0004527;<br>P:GO:0008406 | -                                                               | EC:2.7.7.7<br>IPR001098; IPR002297; SignalP (SIGNALP), SSF56672 (SUPERFAMILY)                                  |
| Caenorhabditis elegans  | carnitine palmitoyl transferase family member (cpt-6)      | 0  |                                                                                                                                                                                                         |                                                                 | -                                                                                                              |
|                         | -                                                          | 0  |                                                                                                                                                                                                         |                                                                 | IPR001810; G3DSA:1.20.1280.50 (GENE3D), SignalP (SIGNALP)                                                      |
| Caenorhabditis elegans  | xyluloki-se homolog                                        | 2  | F:GO:0016773;<br>P:GO:0005975                                                                                                                                                                           | -                                                               | EC:2.7.1.0                                                                                                     |
| Caenorhabditis briggsae | rab gdp-dissociation inhibitor                             | 11 | P:GO:0016192;<br>C:GO:0005875;<br>P:GO:0008340;<br>P:GO:0043087;<br>P:GO:0008219;<br>C:GO:0008021;<br>P:GO:0000003;<br>P:GO:0007269;<br>P:GO:0009792;<br>F:GO:0005093;<br>P:GO:0015031                  | -                                                               | IPR000806; IPR002005; IPR018203; G3DSA:3.30.519.10 (GENE3D), G3DSA:3.50.50.60 (GENE3D), SSF51905 (SUPERFAMILY) |
|                         | -                                                          | 0  |                                                                                                                                                                                                         |                                                                 | -                                                                                                              |
| Caenorhabditis elegans  | mothers against dpp protein                                | 5  | F:GO:0003700;<br>F:GO:0005515;<br>C:GO:0005667;<br>P:GO:0006355;<br>P:GO:0007179                                                                                                                        | -                                                               | IPR003619; IPR013019; IPR013790; PTHR13703:SF19 (PANTHER)                                                      |
| Caenorhabditis briggsae | elegans protein partially confirmed by transcript evidence | 0  |                                                                                                                                                                                                         | F:GO:0003676;<br>P:GO:0006508;<br>F:GO:0008168;<br>F:GO:0008270 | G3DSA:3.40.50.300 (GENE3D), PTHR10887 (PANTHER), PTHR10887:SF10 (PANTHER), SSF52540 (SUPERFAMILY)              |
| Caenorhabditis briggsae | alcohol dehydroge-se                                       | 3  | F:GO:0008270;<br>P:GO:0055114;<br>F:GO:0016491                                                                                                                                                          | -                                                               | IPR002085; IPR013149; IPR016040; PTHR11695:SF38 (PANTHER), SSF51735 (SUPERFAMILY)                              |
|                         | -                                                          | 0  |                                                                                                                                                                                                         |                                                                 | SignalP (SIGNALP)                                                                                              |
| Caenorhabditis elegans  | spermine spermidine synthase family protein                | 2  | F:GO:0016740;<br>F:GO:0005515                                                                                                                                                                           | -                                                               | IPR013216; G3DSA:3.40.50.150 (GENE3D), PTHR12176 (PANTHER), SSF53335 (SUPERFAMILY)                             |
| Caenorhabditis briggsae | briggsae cbr-aex-3 protein                                 | 11 | P:GO:0016192;<br>P:GO:0007618;<br>P:GO:0030421;<br>P:GO:0018991;<br>C:GO:0016021;<br>P:GO:0051726;<br>P:GO:0042981;<br>C:GO:0008021;<br>F:GO:0017112;<br>P:GO:0007269;<br>P:GO:0000187                  | -                                                               | -                                                                                                              |



|                         |                                                            |   |                                                                                                   |                                                |                                                                                                                                                                                     |
|-------------------------|------------------------------------------------------------|---|---------------------------------------------------------------------------------------------------|------------------------------------------------|-------------------------------------------------------------------------------------------------------------------------------------------------------------------------------------|
| Caenorhabditis elegans  | rab gtpase activating protein 1-like                       | 6 | F:GO:0005097;<br>P:GO:0032880;<br>C:GO:0005769;<br>P:GO:0032313;<br>C:GO:0005794;<br>C:GO:0005634 | -                                              | IPR022164; PTHR22957 (PANTHER),<br>PTHR22957:SF4 (PANTHER)                                                                                                                          |
| -                       | -                                                          | 0 | -                                                                                                 | -                                              | -                                                                                                                                                                                   |
| Caenorhabditis elegans  | mgc83645 protein                                           | 0 | -                                                                                                 | F:GO:0005525;<br>F:GO:0000166;<br>C:GO:0005622 | IPR002917; IPR006073;<br>G3DSA:3.40.50.300 (GENE3D),<br>PTHR11649 (PANTHER),<br>PTHR11649:SF9 (PANTHER), SSF52540<br>(SUPERFAMILY)                                                  |
| Caenorhabditis elegans  | subfamily member 5 gamma                                   | 4 | P:GO:0006457;<br>C:GO:0016020;<br>F:GO:0051082;<br>F:GO:0031072                                   | -                                              | IPR001623; IPR015609; IPR018253;<br>PTHR11821:SF22 (PANTHER)                                                                                                                        |
| Caenorhabditis elegans  | subfamily member 5 gamma                                   | 4 | P:GO:0006457;<br>C:GO:0016020;<br>F:GO:0051082;<br>F:GO:0031072                                   | -                                              | IPR001623; IPR015609; IPR018253;<br>PTHR11821:SF22 (PANTHER)                                                                                                                        |
| Loa loa                 | tissue specific transplantation antigen p35b               | 5 | P:GO:0019835;<br>F:GO:0050662;<br>P:GO:0051246;<br>F:GO:0019787;<br>P:GO:0043687                  | -                                              | IPR001509; G3DSA:3.90.25.10<br>(GENE3D), PTHR10366 (PANTHER),<br>PTHR10366:SF25 (PANTHER),<br>SSF51735 (SUPERFAMILY)                                                                |
| Caenorhabditis elegans  | u533_caee1_ame: full=upf0533 protein                       | 0 | -                                                                                                 | F:GO:0005515                                   | IPR010378; PTHR13134:SF2<br>(PANTHER), SignalP (SIGNALP)                                                                                                                            |
| -                       | -                                                          | 0 | -                                                                                                 | -                                              | -                                                                                                                                                                                   |
| -                       | -                                                          | 0 | -                                                                                                 | -                                              | -                                                                                                                                                                                   |
| Ixodes scapularis       | phospholipase d3                                           | 3 | P:GO:0008152;<br>C:GO:0016021;<br>F:GO:0003824                                                    | -                                              | IPR001736; G3DSA:3.30.870.10<br>(GENE3D), PTHR10185 (PANTHER),<br>SSF56024 (SUPERFAMILY)                                                                                            |
| Caenorhabditis briggsae | tight junction protein                                     | 0 | -                                                                                                 | F:GO:0005515                                   | IPR001478; G3DSA:2.30.42.10<br>(GENE3D), PTHR19964 (PANTHER)                                                                                                                        |
| Caenorhabditis elegans  | rab gtpase activating protein 1                            | 3 | C:GO:0015630;<br>C:GO:0044444;<br>C:GO:0044430                                                    | -                                              | IPR006020; IPR011993; PTHR22957<br>(PANTHER), PTHR22957:SF4<br>(PANTHER), SSF50729 (SUPERFAMILY)                                                                                    |
| -                       | -                                                          | 0 | -                                                                                                 | -                                              | -                                                                                                                                                                                   |
| -                       | -                                                          | 0 | -                                                                                                 | -                                              | -                                                                                                                                                                                   |
| -                       | -                                                          | 0 | -                                                                                                 | -                                              | SignalP (SIGNALP)                                                                                                                                                                   |
| Caenorhabditis briggsae | aspartyl-tr- synthetase                                    | 5 | C:GO:0005737;<br>F:GO:0003676;<br>P:GO:0006422;<br>F:GO:0005524;<br>F:GO:0004815                  | -                                              | EC:6.1.1.12<br>IPR002312; IPR004364; IPR004365;<br>IPR006195; IPR012340; IPR016027;<br>IPR018150; G3DSA:3.30.930.10<br>(GENE3D), PTHR22594:SF6<br>(PANTHER), SSF55681 (SUPERFAMILY) |
| -                       | -                                                          | 0 | -                                                                                                 | -                                              | -                                                                                                                                                                                   |
| -                       | -                                                          | 0 | -                                                                                                 | -                                              | SignalP (SIGNALP)                                                                                                                                                                   |
| Caenorhabditis elegans  | hypothetical tyrosi-se-like protein in chromosome          | 4 | F:GO:0005515;<br>F:GO:0046872;<br>P:GO:0008152;<br>F:GO:0016491                                   | -                                              | SignalP (SIGNALP)                                                                                                                                                                   |
| Caenorhabditis elegans  | elegans protein partially confirmed by transcript evidence | 0 | -                                                                                                 | -                                              | IPR012435                                                                                                                                                                           |
| -                       | -                                                          | 0 | -                                                                                                 | -                                              | -                                                                                                                                                                                   |
| -                       | -                                                          | 0 | -                                                                                                 | -                                              | -                                                                                                                                                                                   |
| Caenorhabditis briggsae | gfr receptor alpha 4                                       | 0 | -                                                                                                 | -                                              | -                                                                                                                                                                                   |
| -                       | -                                                          | 0 | -                                                                                                 | -                                              | -                                                                                                                                                                                   |
| Loa loa                 | lim domain containing protein                              | 1 | F:GO:0005488                                                                                      | -                                              | -                                                                                                                                                                                   |
| Brugia malayi           | hypothetical protein Bm1_52770 [Brugia malayi]             | 0 | -                                                                                                 | -                                              | -                                                                                                                                                                                   |

|                         |                                                         |    |                                                                                                                                                                                                                                                                                                                                                                                                                                                                                          |   |                                                                                                                                                                                                                    |
|-------------------------|---------------------------------------------------------|----|------------------------------------------------------------------------------------------------------------------------------------------------------------------------------------------------------------------------------------------------------------------------------------------------------------------------------------------------------------------------------------------------------------------------------------------------------------------------------------------|---|--------------------------------------------------------------------------------------------------------------------------------------------------------------------------------------------------------------------|
| Caenorhabditis briggsae | Hypothetical protein CBG01718 [Caenorhabditis briggsae] | 2  | P:GO:0009792;<br>P:GO:0006898                                                                                                                                                                                                                                                                                                                                                                                                                                                            | - | -                                                                                                                                                                                                                  |
| -                       | -                                                       | 0  | -                                                                                                                                                                                                                                                                                                                                                                                                                                                                                        | - | -                                                                                                                                                                                                                  |
| Caenorhabditis elegans  | uridine phosphorylase                                   | 1  | F:GO:0003824                                                                                                                                                                                                                                                                                                                                                                                                                                                                             | - | IPR000845; IPR010059; IPR018017;<br>G3DSA:3.40.50.1580 (GENE3D),<br>SSF53167 (SUPERFAMILY)                                                                                                                         |
| Caenorhabditis briggsae | protein ki-se domain containing protein                 | 2  | F:GO:0004672;<br>F:GO:0000166                                                                                                                                                                                                                                                                                                                                                                                                                                                            | - | IPR000719; IPR011009; IPR017442;<br>G3DSA:1.10.510.10 (GENE3D),<br>PTHR11909 (PANTHER),<br>PTHR11909:SF19 (PANTHER)                                                                                                |
| -                       | -                                                       | 0  | -                                                                                                                                                                                                                                                                                                                                                                                                                                                                                        | - | -                                                                                                                                                                                                                  |
| Pongo abelii            | c-x-c chemokine receptor 4                              | 38 | P:GO:0001505;<br>P:GO:0009615;<br>P:GO:0001764;<br>P:GO:0008354;<br>C:GO:0016023;<br>C:GO:0030426;<br>P:GO:0008038;<br>P:GO:0001667;<br>F:GO:0015026;<br>P:GO:0060048;<br>P:GO:0007204;<br>P:GO:0030334;<br>P:GO:0050920;<br>F:GO:0016493;<br>P:GO:0043067;<br>F:GO:0016494;<br>C:GO:0016021;<br>P:GO:0051924;<br>F:GO:0043130;<br>P:GO:0022029;<br>C:GO:0009986;<br>C:GO:0031252;<br>F:GO:0003779;<br>F:GO:0032027;<br>P:GO:0008045;<br>F:GO:0031625;<br>P:GO:0001666;<br>P:GO:0006915; | - | SignalP (SIGNALP)                                                                                                                                                                                                  |
| -                       | -                                                       | 0  | -                                                                                                                                                                                                                                                                                                                                                                                                                                                                                        | - | SignalP (SIGNALP)                                                                                                                                                                                                  |
| -                       | -                                                       | 0  | -                                                                                                                                                                                                                                                                                                                                                                                                                                                                                        | - | -                                                                                                                                                                                                                  |
| -                       | -                                                       | 0  | -                                                                                                                                                                                                                                                                                                                                                                                                                                                                                        | - | -                                                                                                                                                                                                                  |
| Loa loa                 | palmitoyltransferase zdhhc17                            | 7  | F:GO:0019706;<br>F:GO:0004871;<br>P:GO:0042953;<br>F:GO:0015095;<br>C:GO:0030660;<br>P:GO:0043123;<br>F:GO:0005515                                                                                                                                                                                                                                                                                                                                                                       | - | IPR002110; IPR020683; PTHR18958<br>(PANTHER), PTHR18958:SF301<br>(PANTHER)                                                                                                                                         |
| Caenorhabditis briggsae | leukocyte cell-derived chemotaxin 2                     | 0  | -                                                                                                                                                                                                                                                                                                                                                                                                                                                                                        | - | -                                                                                                                                                                                                                  |
| Caenorhabditis elegans  | motor axon guidance family member (max-2)               | 6  | P:GO:0007411;<br>P:GO:0008340;<br>F:GO:0004674;<br>F:GO:0005524;<br>F:GO:0017048;<br>P:GO:0006468                                                                                                                                                                                                                                                                                                                                                                                        | - | EC:2.7.11.0<br>IPR000095; IPR000719; IPR008271;<br>IPR011009; IPR015750; IPR017441;<br>IPR017442; G3DSA:1.10.510.10<br>(GENE3D), G3DSA:3.30.200.20<br>(GENE3D), G3DSA:3.90.810.10<br>(GENE3D), PTHR22986 (PANTHER) |

|                         |                                                                             |    |                                                                                                                                                                                                                                                                                                                                                                  |                                                                 |                             |                                                                                                |
|-------------------------|-----------------------------------------------------------------------------|----|------------------------------------------------------------------------------------------------------------------------------------------------------------------------------------------------------------------------------------------------------------------------------------------------------------------------------------------------------------------|-----------------------------------------------------------------|-----------------------------|------------------------------------------------------------------------------------------------|
| Pongo abelii            | spermidine spermine n1-acetyltransferase                                    | 21 | P:GO:0015804;<br>F:GO:0008271;<br>P:GO:0006814;<br>C:GO:0005625;<br>C:GO:0016021;<br>F:GO:0019531;<br>F:GO:0004145;<br>P:GO:0008272;<br>F:GO:0015175;<br>F:GO:0005283;<br>F:GO:0019809;<br>P:GO:0046208;<br>P:GO:0006821;<br>F:GO:0005515;<br>P:GO:0042127;<br>F:GO:0015179;<br>P:GO:0034220;<br>P:GO:0019532;<br>C:GO:0005737;<br>C:GO:0005886;<br>F:GO:0015108 | -                                                               | EC:2.3.1.57                 | IPR016181; PTHR10545 (PANTHER),<br>PTHR10545:SF5 (PANTHER)                                     |
| -                       | -                                                                           | 0  |                                                                                                                                                                                                                                                                                                                                                                  |                                                                 |                             | -                                                                                              |
| -                       | -                                                                           | 0  |                                                                                                                                                                                                                                                                                                                                                                  |                                                                 |                             | -                                                                                              |
| Caenorhabditis briggsae | novel protein vertebrate ptpf interacting binding protein 1 (liprin beta 1) | 0  |                                                                                                                                                                                                                                                                                                                                                                  | F:GO:0008907;<br>P:GO:0015074;<br>F:GO:0003677                  |                             | IPR001660; IPR010993; IPR013761;<br>IPR021129; PTHR12587 (PANTHER),<br>PTHR12587:SF1 (PANTHER) |
| Caenorhabditis elegans  | tiny fragments locus 9c                                                     | 1  | F:GO:0016740                                                                                                                                                                                                                                                                                                                                                     | -                                                               |                             | -                                                                                              |
| Medicago truncatula     | r--directed d- polymerase (reverse transcriptase)                           | 0  |                                                                                                                                                                                                                                                                                                                                                                  | F:GO:0003723;<br>P:GO:0006278;<br>F:GO:0004519;<br>F:GO:0003964 |                             | -                                                                                              |
| -                       | -                                                                           | 0  |                                                                                                                                                                                                                                                                                                                                                                  |                                                                 |                             | -                                                                                              |
| -                       | -                                                                           | 0  |                                                                                                                                                                                                                                                                                                                                                                  |                                                                 |                             | -                                                                                              |
| Loa loa                 | rhomboid family protein                                                     | 4  | C:GO:0016021;<br>P:GO:0007165;<br>F:GO:0005509;<br>F:GO:0004252                                                                                                                                                                                                                                                                                                  | -                                                               | EC:3.4.21.0                 | IPR002610; IPR022764;<br>G3DSA:1.20.1540.10 (GENE3D),<br>SSF144091 (SUPERFAMILY)               |
| Caenorhabditis briggsae | briggsae cbr-tre-1 protein                                                  | 6  | P:GO:0009792;<br>F:GO:0004135;<br>P:GO:0005978;<br>P:GO:0005991;<br>C:GO:0044464;<br>F:GO:0004555                                                                                                                                                                                                                                                                | -                                                               | EC:3.2.1.33;<br>EC:3.2.1.28 | IPR001661; PTHR23403:SF1<br>(PANTHER)                                                          |
| Brugia malayi           | hypothetical protein Bm1_05520 [Brugia malayi]                              | 0  |                                                                                                                                                                                                                                                                                                                                                                  |                                                                 |                             | -                                                                                              |
| Caenorhabditis elegans  | briggsae cbr-opt-3 protein                                                  | 3  | C:GO:0016020;<br>P:GO:0006810;<br>F:GO:0005215                                                                                                                                                                                                                                                                                                                   | -                                                               |                             | PTHR11654 (PANTHER),<br>PTHR11654:SF12 (PANTHER)                                               |

|                         |                                                                   |    |                                                                                                                                                                                                         |                               |             |                                                                                                                             |
|-------------------------|-------------------------------------------------------------------|----|---------------------------------------------------------------------------------------------------------------------------------------------------------------------------------------------------------|-------------------------------|-------------|-----------------------------------------------------------------------------------------------------------------------------|
| Homo sapiens            | matrix metalloproteinase 9 (gelatinase 92kda type iv collagenase) | 12 | P:GO:0043065;<br>F:GO:0008270;<br>C:GO:0005615;<br>P:GO:0001501;<br>F:GO:0004222;<br>P:GO:0006508;<br>F:GO:0005518;<br>P:GO:0030225;<br>P:GO:0051549;<br>C:GO:0005578;<br>P:GO:0030574;<br>P:GO:0030198 | -                             | EC:3.4.24.0 | -                                                                                                                           |
|                         | -                                                                 | 0  |                                                                                                                                                                                                         |                               |             | -                                                                                                                           |
| Brugia malayi           | hypothetical protein Bm1_13445 [Brugia malayi]                    | 0  |                                                                                                                                                                                                         | P:GO:0008152;<br>F:GO:0016787 |             | IPR002018; G3DSA:3.40.50.1820 (GENE3D), PTHR11559:SF30 (PANTHER)                                                            |
| Brugia malayi           | hypothetical protein Bm1_19440 [Brugia malayi]                    | 0  |                                                                                                                                                                                                         |                               |             | PF09808 (PFAM)                                                                                                              |
| Caenorhabditis elegans  | elegans protein partially confirmed by transcript evidence        | 0  |                                                                                                                                                                                                         |                               |             | SignalP (SIGNALP)                                                                                                           |
|                         | -                                                                 | 0  |                                                                                                                                                                                                         |                               |             | -                                                                                                                           |
|                         | -                                                                 | 0  |                                                                                                                                                                                                         |                               |             | -                                                                                                                           |
|                         | -                                                                 | 0  |                                                                                                                                                                                                         |                               |             | SignalP (SIGNALP)                                                                                                           |
| Caenorhabditis briggsae | nucleolar complex associated 4 homolog (cerevisiae)               | 9  | P:GO:0040010;<br>P:GO:0000003;<br>P:GO:0002119;<br>F:GO:0005515;<br>P:GO:0040011;<br>P:GO:0006898;<br>P:GO:0009792;<br>P:GO:0040018;<br>C:GO:0005634                                                    | -                             |             | IPR005612; PTHR12455 (PANTHER)                                                                                              |
|                         |                                                                   |    |                                                                                                                                                                                                         |                               |             | IPR003599; IPR007110; IPR010939; IPR013098; IPR013783; PTHR19897 (PANTHER), PTHR19897:SF9 (PANTHER), SSF48726 (SUPERFAMILY) |

|                         |                                                  |   |                                                                                                                                                                                                                                                                                                                                                                                                                                                       |   |                                                                                            |
|-------------------------|--------------------------------------------------|---|-------------------------------------------------------------------------------------------------------------------------------------------------------------------------------------------------------------------------------------------------------------------------------------------------------------------------------------------------------------------------------------------------------------------------------------------------------|---|--------------------------------------------------------------------------------------------|
| Caenorhabditis elegans  | protein arginine n-methyltransferase             | 0 | F:GO:0016277;<br>F:GO:0035243;<br>C:GO:0005634;<br>P:GO:0030154;<br>F:GO:0035241;<br>P:GO:0018216;<br>P:GO:0043046;<br>P:GO:0016568;<br>P:GO:0000387;<br>F:GO:0008469;<br>P:GO:0034969;<br>P:GO:0006479;<br>F:GO:0042393;<br>C:GO:0005737;<br>F:GO:0008276;<br>F:GO:0043021;<br>P:GO:0043393;<br>P:GO:0045449;<br>F:GO:0008757;<br>F:GO:0008168;<br>P:GO:0016571;<br>C:GO:0005829;<br>P:GO:0006349;<br>F:GO:0044020;<br>F:GO:0016740;<br>C:GO:0005575 | - |                                                                                            |
|                         | -                                                | 0 |                                                                                                                                                                                                                                                                                                                                                                                                                                                       |   | SignalP (SIGNALP)                                                                          |
| Caenorhabditis elegans  | prefoldin subunit 5                              | 9 | P:GO:0040035;<br>P:GO:0009792;<br>P:GO:0002119;<br>P:GO:0006457;<br>P:GO:0035046;<br>P:GO:0040010;<br>P:GO:0040011;<br>F:GO:0051082;<br>C:GO:0016272                                                                                                                                                                                                                                                                                                  | - | IPR004127; IPR009053; IPR011599;<br>PTHR12674 (PANTHER)                                    |
| Caenorhabditis elegans  | elegans protein confirmed by transcript evidence | 0 | F:GO:0003676;<br>P:GO:0000003                                                                                                                                                                                                                                                                                                                                                                                                                         |   | IPR003100; G3DSA:2.170.260.10<br>(GENE3D), PTHR22891 (PANTHER),<br>SSF101690 (SUPERFAMILY) |
|                         | -                                                | 0 |                                                                                                                                                                                                                                                                                                                                                                                                                                                       |   | -                                                                                          |
|                         | -                                                | 0 |                                                                                                                                                                                                                                                                                                                                                                                                                                                       |   | -                                                                                          |
| Caenorhabditis briggsae | uncharacterized transposase-like protein         | 0 | F:GO:0046872;<br>P:GO:0055114;<br>F:GO:0009055;<br>F:GO:0016491;<br>F:GO:0020037;<br>F:GO:0005506;<br>F:GO:0004497                                                                                                                                                                                                                                                                                                                                    | - |                                                                                            |

|                         |                                           |    |                                                                                                                                                                                                                                                                                                               |   |             |                                                                                                           |
|-------------------------|-------------------------------------------|----|---------------------------------------------------------------------------------------------------------------------------------------------------------------------------------------------------------------------------------------------------------------------------------------------------------------|---|-------------|-----------------------------------------------------------------------------------------------------------|
| Caenorhabditis elegans  | stan                                      | 18 | P:GO:0016358;<br>P:GO:0042067;<br>P:GO:0016055;<br>P:GO:0007218;<br>P:GO:0065008;<br>P:GO:0007409;<br>F:GO:0004930;<br>P:GO:0007389;<br>F:GO:0005509;<br>C:GO:0016021;<br>P:GO:0007154;<br>P:GO:0007156;<br>P:GO:0023060;<br>P:GO:0050794;<br>P:GO:0051128;<br>P:GO:0051960;<br>C:GO:0044459;<br>P:GO:0048056 | - |             | IPR002126; IPR015919; IPR020894;<br>PTHR10596 (PANTHER)                                                   |
| Caenorhabditis briggsae | tr- isopentenyltransferase 1              | 2  | F:GO:0005488;<br>C:GO:0043231                                                                                                                                                                                                                                                                                 | - |             | -                                                                                                         |
|                         | -                                         | 0  |                                                                                                                                                                                                                                                                                                               |   |             | -                                                                                                         |
|                         | -                                         | 0  |                                                                                                                                                                                                                                                                                                               |   |             | -                                                                                                         |
| Caenorhabditis briggsae | zinc fyve domain containing 16            | 8  | P:GO:0046008;<br>P:GO:0007343;<br>P:GO:0007143;<br>C:GO:0005769;<br>P:GO:0007616;<br>F:GO:0005515;<br>P:GO:0035039;<br>P:GO:0008355                                                                                                                                                                           | - |             | IPR022557; PTHR22835 (PANTHER),<br>PTHR22835:SF12 (PANTHER)                                               |
| Caenorhabditis elegans  | bile acid beta-                           | 4  | P:GO:0006680;<br>C:GO:0005886;<br>F:GO:0004348;<br>C:GO:0016021                                                                                                                                                                                                                                               | - | EC:3.2.1.45 | PTHR12654 (PANTHER), PF12215<br>(PFAM)                                                                    |
|                         | -                                         | 0  |                                                                                                                                                                                                                                                                                                               |   |             | -                                                                                                         |
|                         | -                                         | 0  |                                                                                                                                                                                                                                                                                                               |   |             | -                                                                                                         |
| Ixodes scapularis       | alcohol dehydroge-se domain protein       | 7  | P:GO:0051164;<br>C:GO:0000267;<br>P:GO:0019405;<br>P:GO:0055114;<br>F:GO:0003939;<br>P:GO:0006060;<br>F:GO:0008270                                                                                                                                                                                            | - | EC:1.1.1.14 | IPR002085; IPR002328; IPR011032;<br>IPR013154; G3DSA:3.90.180.10<br>(GENE3D), PTHR11695:SF38<br>(PANTHER) |
| Caenorhabditis elegans  | and ph domain containing 6                | 4  | F:GO:0005089;<br>C:GO:0005622;<br>P:GO:0035023;<br>F:GO:0008270                                                                                                                                                                                                                                               | - |             | IPR000219; PTHR12673 (PANTHER),<br>PTHR12673:SF8 (PANTHER)                                                |
| Caenorhabditis elegans  | deah (asp-glu-ala-his) box polypeptide 37 | 10 | P:GO:0040010;<br>P:GO:0008340;<br>P:GO:0000003;<br>P:GO:0002119;<br>F:GO:0005515;<br>F:GO:0000166;<br>F:GO:0004386;<br>P:GO:0006898;<br>P:GO:0009792;<br>P:GO:0016246                                                                                                                                         | - |             | IPR007502; PTHR18934 (PANTHER),<br>SSF52540 (SUPERFAMILY)                                                 |
| Loa loa                 | hypothetical protein LOAG_06715 [Loa loa] | 0  |                                                                                                                                                                                                                                                                                                               |   |             | -                                                                                                         |

|                         |                                                                                  |   |                                                                                                                                     |                                                                                                   |            |                                                                            |
|-------------------------|----------------------------------------------------------------------------------|---|-------------------------------------------------------------------------------------------------------------------------------------|---------------------------------------------------------------------------------------------------|------------|----------------------------------------------------------------------------|
|                         | -                                                                                | 0 |                                                                                                                                     |                                                                                                   |            | -                                                                          |
|                         | -                                                                                | 0 |                                                                                                                                     |                                                                                                   |            | -                                                                          |
|                         | -                                                                                | 0 |                                                                                                                                     |                                                                                                   |            | -                                                                          |
| Caenorhabditis elegans  | fibronectin type iii domain containing protein                                   | 0 |                                                                                                                                     |                                                                                                   |            | -                                                                          |
| Caenorhabditis briggsae | nuclear hormone receptor family protein isoform confirmed by transcript evidence | 6 | F:GO:0003700;<br>F:GO:0043565;<br>F:GO:0003707;<br>C:GO:0005634;<br>F:GO:0008270;<br>P:GO:0006355                                   | -                                                                                                 |            | -                                                                          |
| Caenorhabditis briggsae | Hypothetical protein CBG10437 [Caenorhabditis briggsae]                          | 1 | P:GO:0008152                                                                                                                        | -                                                                                                 |            | -                                                                          |
|                         | -                                                                                | 0 |                                                                                                                                     |                                                                                                   |            | SignalP (SIGNALP)                                                          |
|                         | -                                                                                | 0 |                                                                                                                                     |                                                                                                   |            | -                                                                          |
| Caenorhabditis briggsae | xanthine dehydroge-se                                                            | 5 | F:GO:0004031;<br>F:GO:0009055;<br>F:GO:0030151;<br>P:GO:0000003;<br>P:GO:0008152                                                    | -                                                                                                 | EC:1.2.3.1 | IPR008274; PTHR11908 (PANTHER),<br>PTHR11908:SF6 (PANTHER)                 |
| Caenorhabditis elegans  | hypothetical protein F07F6.8 [Caenorhabditis elegans]                            | 0 |                                                                                                                                     | P:GO:0006869;<br>F:GO:0008289;<br>C:GO:0016021;<br>C:GO:0005576;<br>F:GO:0005515;<br>P:GO:0042157 |            | IPR008405                                                                  |
| Caenorhabditis briggsae | elegans protein partially confirmed by transcript evidence                       | 4 | C:GO:0045211;<br>P:GO:0007420;<br>C:GO:0014069;<br>F:GO:0017124                                                                     | -                                                                                                 |            | IPR002110; IPR020683; PTHR18958<br>(PANTHER), PTHR18958:SF173<br>(PANTHER) |
| Caenorhabditis elegans  | briggsae cbr-ins-17 protein                                                      | 5 | P:GO:0040035;<br>P:GO:0009792;<br>P:GO:0002119;<br>P:GO:0018996;<br>P:GO:0040010                                                    | -                                                                                                 |            | -                                                                          |
| Caenorhabditis elegans  | elegans protein confirmed by transcript evidence                                 | 0 |                                                                                                                                     |                                                                                                   |            | SignalP (SIGNALP)                                                          |
| Caenorhabditis briggsae | histone deacetylase 10                                                           | 8 | F:GO:0004407;<br>P:GO:0016575;<br>C:GO:0000118;<br>P:GO:0000122;<br>F:GO:0016566;<br>C:GO:0005737;<br>P:GO:0014003;<br>F:GO:0042826 | -                                                                                                 |            | IPR000286; PTHR10625:SF23<br>(PANTHER), SSF52768 (SUPERFAMILY)             |
|                         | -                                                                                | 0 |                                                                                                                                     |                                                                                                   |            | -                                                                          |
|                         | -                                                                                | 0 |                                                                                                                                     |                                                                                                   |            | -                                                                          |
| Caenorhabditis briggsae | elegans protein confirmed by transcript evidence                                 | 0 |                                                                                                                                     | F:GO:0004872;<br>C:GO:0016021;<br>C:GO:0016020;<br>P:GO:0016998;<br>F:GO:0005515                  |            | IPR006214; PTHR23291:SF14<br>(PANTHER)                                     |
|                         | -                                                                                | 0 |                                                                                                                                     |                                                                                                   |            | SignalP (SIGNALP)                                                          |
| Homo sapiens            | un-med protein product [Homo sapiens]                                            | 5 | C:GO:0016021;<br>P:GO:0045087;<br>P:GO:0009615;<br>F:GO:0005515;<br>C:GO:0005886                                                    | -                                                                                                 |            | -                                                                          |
| Caenorhabditis briggsae | briggsae cbr-acl-5 protein                                                       | 0 |                                                                                                                                     | F:GO:0008415;<br>C:GO:0016021;<br>P:GO:0008152                                                    |            | SignalP (SIGNALP)                                                          |

|                         |                                                            |    |                                                                                                                                                                                                                                           |              |                                                                                                                     |
|-------------------------|------------------------------------------------------------|----|-------------------------------------------------------------------------------------------------------------------------------------------------------------------------------------------------------------------------------------------|--------------|---------------------------------------------------------------------------------------------------------------------|
|                         | -                                                          | 0  |                                                                                                                                                                                                                                           |              | -                                                                                                                   |
| Caenorhabditis elegans  | elegans protein partially confirmed by transcript evidence | 0  |                                                                                                                                                                                                                                           |              | -                                                                                                                   |
| Pan troglodytes         | p antigen member 2b                                        | 0  |                                                                                                                                                                                                                                           |              | IPR001664; IPR003054                                                                                                |
|                         | -                                                          | 0  |                                                                                                                                                                                                                                           |              | -                                                                                                                   |
| Caenorhabditis elegans  | potassium-transporting atpase alpha chain 1                | 9  | P:GO:0010155;<br>P:GO:0045851;<br>P:GO:0046034;<br>F:GO:0000166;<br>F:GO:0046982;<br>N:GO:0071805;<br>F:GO:0008900;<br>P:GO:0042493;<br>C:GO:0005887                                                                                      | EC:3.6.3.10  | IPR001757; IPR018303;<br>G3DSA:3.40.1110.10 (GENE3D),<br>PTHR11939:SF100 (PANTHER),<br>SSF81660 (SUPERFAMILY)       |
|                         | -                                                          | 0  |                                                                                                                                                                                                                                           |              | SignalP (SIGNALP)                                                                                                   |
| Caenorhabditis briggsae | y box protein 1                                            | 14 | F:GO:0002039;<br>F:GO:0003697;<br>C:GO:0071204;<br>C:GO:0030425;<br>P:GO:0008284;<br>P:GO:0006396;<br>F:GO:0043565;<br>P:GO:0046627;<br>P:GO:0045944;<br>C:GO:0048471;<br>P:GO:0016071;<br>P:GO:0043066;<br>P:GO:0001701;<br>F:GO:0003729 |              | IPR002059; IPR011129; IPR012340;<br>IPR016027; IPR019844; PTHR11544<br>(PANTHER), PTHR11544:SF8<br>(PANTHER)        |
| Caenorhabditis elegans  | elegans protein partially confirmed by transcript evidence | 0  |                                                                                                                                                                                                                                           |              | SignalP (SIGNALP)                                                                                                   |
|                         | -                                                          | 0  |                                                                                                                                                                                                                                           |              | -                                                                                                                   |
|                         | -                                                          | 0  |                                                                                                                                                                                                                                           |              | -                                                                                                                   |
| Caenorhabditis briggsae | elegans protein confirmed by transcript evidence           | 0  |                                                                                                                                                                                                                                           |              | IPR001466; IPR012338;<br>G3DSA:3.40.710.10 (GENE3D),<br>PTHR10566 (PANTHER),<br>PTHR10566:SF6 (PANTHER)             |
| Caenorhabditis briggsae | briggsae cbr-kgb-1 protein                                 | 4  | F:GO:0004707;<br>P:GO:0006468;<br>F:GO:0005515;<br>F:GO:0005524                                                                                                                                                                           | EC:2.7.11.24 | IPR000719; IPR011009; IPR017442;<br>G3DSA:3.30.200.20 (GENE3D),<br>PTHR11295 (PANTHER),<br>PTHR11295:SF62 (PANTHER) |
|                         | -                                                          | 0  |                                                                                                                                                                                                                                           |              | -                                                                                                                   |
|                         | -                                                          | 0  |                                                                                                                                                                                                                                           |              | -                                                                                                                   |
|                         | -                                                          | 0  |                                                                                                                                                                                                                                           |              | SignalP (SIGNALP)                                                                                                   |
|                         | -                                                          | 0  |                                                                                                                                                                                                                                           |              | -                                                                                                                   |
|                         | -                                                          | 0  |                                                                                                                                                                                                                                           |              | -                                                                                                                   |
|                         | -                                                          | 0  |                                                                                                                                                                                                                                           |              | -                                                                                                                   |
|                         | -                                                          | 0  |                                                                                                                                                                                                                                           |              | SignalP (SIGNALP)                                                                                                   |
|                         | -                                                          | 0  |                                                                                                                                                                                                                                           |              | -                                                                                                                   |
|                         | -                                                          | 0  |                                                                                                                                                                                                                                           |              | -                                                                                                                   |
|                         | -                                                          | 0  |                                                                                                                                                                                                                                           |              | -                                                                                                                   |
| Loa loa                 | hypothetical protein LOAG_07284 [Loa loa]                  | 0  |                                                                                                                                                                                                                                           |              | IPR013256; PTHR22691 (PANTHER),<br>PTHR22691:SF7 (PANTHER)                                                          |
| Caenorhabditis briggsae | elegans protein confirmed by transcript evidence           | 0  |                                                                                                                                                                                                                                           |              | -                                                                                                                   |
| Caenorhabditis elegans  | egf-like domain containing protein                         | 0  |                                                                                                                                                                                                                                           | F:GO:0005509 | -                                                                                                                   |



|                         |                                                                  |    |                                                                                                                                                                                                                                                                                                                                                                                                                                                                                          |                                                                                                                                                                                        |                                                                                                              |
|-------------------------|------------------------------------------------------------------|----|------------------------------------------------------------------------------------------------------------------------------------------------------------------------------------------------------------------------------------------------------------------------------------------------------------------------------------------------------------------------------------------------------------------------------------------------------------------------------------------|----------------------------------------------------------------------------------------------------------------------------------------------------------------------------------------|--------------------------------------------------------------------------------------------------------------|
| Caenorhabditis briggsae | acid phosphatase family protein confirmed by transcript evidence | 0  | F:GO:0003993                                                                                                                                                                                                                                                                                                                                                                                                                                                                             |                                                                                                                                                                                        | IPR000560; G3DSA:3.40.50.1240 (GENE3D), PTHR11567 (PANTHER), PTHR11567:SF28 (PANTHER), SignalP (SIGNALP)     |
|                         | -                                                                | 0  |                                                                                                                                                                                                                                                                                                                                                                                                                                                                                          |                                                                                                                                                                                        | -                                                                                                            |
| Tribolium castaneum     | pol protein                                                      | 1  | F:GO:0005488                                                                                                                                                                                                                                                                                                                                                                                                                                                                             | -                                                                                                                                                                                      | IPR001584; IPR012337; G3DSA:3.30.420.10 (GENE3D), PTHR10178 (PANTHER), PTHR10178:SF14 (PANTHER)              |
|                         | -                                                                | 0  |                                                                                                                                                                                                                                                                                                                                                                                                                                                                                          |                                                                                                                                                                                        | -                                                                                                            |
| Caenorhabditis elegans  | calmodulin                                                       | 38 | P:GO:0005215;<br>P:GO:0051533;<br>P:GO:0007052;<br>P:GO:0043277;<br>P:GO:0007268;<br>P:GO:0016060;<br>F:GO:0070855;<br>P:GO:0051726;<br>P:GO:0008049;<br>P:GO:0051383;<br>P:GO:0016061;<br>P:GO:0016062;<br>P:GO:0016477;<br>P:GO:0042981;<br>P:GO:0040010;<br>C:GO:0031476;<br>C:GO:0030424;<br>P:GO:0006898;<br>C:GO:0005886;<br>C:GO:0005737;<br>P:GO:0051296;<br>F:GO:0004683;<br>C:GO:0000922;<br>P:GO:0009792;<br>P:GO:0006468;<br>C:GO:0048786;<br>C:GO:0005875;<br>F:GO:0005524; | -                                                                                                                                                                                      | EC:2.7.11.17 -                                                                                               |
| Caenorhabditis briggsae | odd oz protein                                                   | 0  |                                                                                                                                                                                                                                                                                                                                                                                                                                                                                          | P:GO:0007366;<br>P:GO:0048058;<br>P:GO:0008360;<br>P:GO:0022416;<br>P:GO:0001745;<br>C:GO:0016020;<br>P:GO:0045467;<br>C:GO:0005578;<br>P:GO:0042051;<br>C:GO:0005887;<br>P:GO:0007155 | IPR000742; IPR013032                                                                                         |
|                         | -                                                                | 0  |                                                                                                                                                                                                                                                                                                                                                                                                                                                                                          |                                                                                                                                                                                        | -                                                                                                            |
|                         | -                                                                | 0  |                                                                                                                                                                                                                                                                                                                                                                                                                                                                                          |                                                                                                                                                                                        | -                                                                                                            |
|                         | -                                                                | 0  |                                                                                                                                                                                                                                                                                                                                                                                                                                                                                          |                                                                                                                                                                                        | SignalP (SIGNALP)                                                                                            |
|                         | -                                                                | 0  |                                                                                                                                                                                                                                                                                                                                                                                                                                                                                          |                                                                                                                                                                                        | -                                                                                                            |
| Loa loa                 | protein-tyrosine phosphatase containing protein                  | 0  |                                                                                                                                                                                                                                                                                                                                                                                                                                                                                          | P:GO:0016311;<br>F:GO:0016791;<br>P:GO:0006470;<br>F:GO:0016787;<br>F:GO:0004725;<br>F:GO:0004721                                                                                      | IPR000242; G3DSA:3.90.190.10 (GENE3D), PTHR19134 (PANTHER), PTHR19134:SF26 (PANTHER), SSF52799 (SUPERFAMILY) |

|                         |                                                                   |    |                                                                                                                                                                                                                          |                           |                                                                                                                                                                            |
|-------------------------|-------------------------------------------------------------------|----|--------------------------------------------------------------------------------------------------------------------------------------------------------------------------------------------------------------------------|---------------------------|----------------------------------------------------------------------------------------------------------------------------------------------------------------------------|
|                         | -                                                                 | 0  |                                                                                                                                                                                                                          |                           | -                                                                                                                                                                          |
| Caenorhabditis elegans  | patched family protein                                            | 13 | P:GO:0009792;<br>P:GO:0002119;<br>F:GO:0008158;<br>P:GO:0040018;<br>P:GO:0001703;<br>P:GO:0018996;<br>P:GO:0000910;<br>P:GO:0006810;<br>P:GO:0040010;<br>P:GO:0000003;<br>P:GO:0040011;<br>C:GO:0016021;<br>F:GO:0005215 | -                         | -                                                                                                                                                                          |
| Caenorhabditis briggsae | solute carrier family 6 (neurotransmitter betaine gaba) member 12 | 3  | F:GO:0015370;<br>P:GO:0006865;<br>C:GO:0016021                                                                                                                                                                           | -                         | IPR000175; PTHR11616:SF16 (PANTHER), SignalP (SIGNALP)                                                                                                                     |
| Caenorhabditis elegans  | adenylate ki-se 1                                                 | 7  | F:GO:0004017;<br>P:GO:0046034;<br>P:GO:0009165;<br>F:GO:0005524;<br>F:GO:0005515;<br>C:GO:0005737;<br>C:GO:0005634                                                                                                       | EC:2.7.4.3                | -                                                                                                                                                                          |
| Caenorhabditis elegans  | propionyl- carboxylase beta mitochondrial precursor               | 9  | F:GO:0004658;<br>F:GO:0003989;<br>P:GO:0006633;<br>C:GO:0009317;<br>C:GO:0005739;<br>P:GO:0009062;<br>F:GO:0005515;<br>F:GO:0000166;<br>P:GO:0009063                                                                     | EC:6.4.1.3;<br>EC:6.4.1.2 | IPR000022; IPR011762; IPR011763;<br>G3DSA:3.90.226.10 (GENE3D),<br>PTHR22855 (PANTHER),<br>PTHR22855:SF14 (PANTHER),<br>SSF52096 (SUPERFAMILY)                             |
|                         | -                                                                 | 0  |                                                                                                                                                                                                                          |                           | -                                                                                                                                                                          |
|                         | -                                                                 | 0  |                                                                                                                                                                                                                          |                           | -                                                                                                                                                                          |
|                         | -                                                                 | 0  |                                                                                                                                                                                                                          |                           | -                                                                                                                                                                          |
|                         | -                                                                 | 0  |                                                                                                                                                                                                                          |                           | IPR012315                                                                                                                                                                  |
| Loa loa                 | glycosyl transferase                                              | 1  | F:GO:0016740                                                                                                                                                                                                             | -                         | IPR001296; PTHR13036 (PANTHER),<br>SSF53756 (SUPERFAMILY)                                                                                                                  |
| Caenorhabditis elegans  | r- termi-l phosphate cyclase-like 1                               | 3  | C:GO:0005730;<br>P:GO:0006364;<br>F:GO:0003963                                                                                                                                                                           | EC:6.5.1.4                | IPR000228; IPR013792                                                                                                                                                       |
|                         | -                                                                 | 0  |                                                                                                                                                                                                                          |                           | -                                                                                                                                                                          |
|                         | -                                                                 | 0  |                                                                                                                                                                                                                          |                           | -                                                                                                                                                                          |
| Mus musculus            | mCG51545 [Mus musculus]                                           | 0  |                                                                                                                                                                                                                          |                           | SignalP (SIGNALP)                                                                                                                                                          |
|                         | -                                                                 | 0  |                                                                                                                                                                                                                          |                           | -                                                                                                                                                                          |
| Caenorhabditis elegans  | nuclear r- export factor 1                                        | 3  | F:GO:0005488;<br>P:GO:0006406;<br>C:GO:0005634                                                                                                                                                                           | -                         | G3DSA:3.80.10.10 (GENE3D),<br>PTHR10662 (PANTHER),<br>PTHR10662:SF21 (PANTHER), PF09162<br>(PFAM), PSS1450 (PROFILE), SSF52058<br>(SUPERFAMILY), SSF54928<br>(SUPERFAMILY) |
| Caenorhabditis briggsae | l-threonine dehydroge-se                                          | 5  | P:GO:0009058;<br>P:GO:0044237;<br>F:GO:0016616;<br>F:GO:0050662;<br>P:GO:0044238                                                                                                                                         | EC:1.1.1.0                | SignalP (SIGNALP)                                                                                                                                                          |

|                         |                                               |    |                                                                                                                                                                                        |                                                                                                                    |                                                                                                                     |
|-------------------------|-----------------------------------------------|----|----------------------------------------------------------------------------------------------------------------------------------------------------------------------------------------|--------------------------------------------------------------------------------------------------------------------|---------------------------------------------------------------------------------------------------------------------|
| Macaca mulatta          | sentrin-specific protease 3-like isoform 3    | 11 | F:GO:0003743;<br>C:GO:0016281;<br>C:GO:0005829;<br>F:GO:0003729;<br>P:GO:0045948;<br>P:GO:0031100;<br>F:GO:0008026;<br>P:GO:0006200;<br>F:GO:0000339;<br>F:GO:0005524;<br>F:GO:0005515 | -                                                                                                                  | IPR001650; G3DSA:3.40.50.300 (GENE3D), PTHR10967 (PANTHER), PTHR10967:SF2 (PANTHER), SSF52540 (SUPERFAMILY)         |
| Brugia malayi           | lim domain containing protein                 | 0  |                                                                                                                                                                                        | F:GO:0005488;<br>F:GO:0016491;<br>P:GO:0008152;<br>F:GO:0003824;<br>F:GO:0008270                                   | -                                                                                                                   |
| Camponotus floridanus   | uncharacterized transposase-like protein      | 0  |                                                                                                                                                                                        | F:GO:0046872;<br>P:GO:0055114;<br>F:GO:0009055;<br>F:GO:0016491;<br>F:GO:0020037;<br>F:GO:0005506;<br>F:GO:0004497 | -                                                                                                                   |
| Drosophila ananassae    | dehydroge-se reductase (sdr family) member 13 | 0  |                                                                                                                                                                                        | P:GO:0055114;<br>F:GO:0005488;<br>F:GO:0016491;<br>P:GO:0008152;<br>F:GO:0003824;<br>C:GO:0005576                  | IPR002198; IPR016040; PTHR19410:SF98 (PANTHER)                                                                      |
| -                       | -                                             | 0  |                                                                                                                                                                                        |                                                                                                                    | PTHR12064 (PANTHER)                                                                                                 |
| -                       | -                                             | 0  |                                                                                                                                                                                        |                                                                                                                    | -                                                                                                                   |
| Caenorhabditis briggsae | dipeptidyl aminopeptidase                     | 1  | F:GO:0008236                                                                                                                                                                           | -                                                                                                                  | IPR001375; G3DSA:3.40.50.1820 (GENE3D), PTHR11731 (PANTHER), PTHR11731:SF7 (PANTHER), SSF53474 (SUPERFAMILY)        |
| Caenorhabditis briggsae | amop domain containing protein                | 1  | P:GO:0007160                                                                                                                                                                           | -                                                                                                                  | PTHR13802 (PANTHER), PTHR13802:SF2 (PANTHER)                                                                        |
| Caenorhabditis elegans  | riken cd- 6330409n04 gene variant 1           | 0  |                                                                                                                                                                                        | F:GO:0003674;<br>P:GO:0008150                                                                                      | IPR001870; IPR003877; IPR008985; PTHR20951 (PANTHER)                                                                |
| Caenorhabditis briggsae | acetoacetyl- thiolase                         | 9  | C:GO:0005875;<br>P:GO:0006633;<br>C:GO:0005739;<br>P:GO:0006090;<br>P:GO:0007052;<br>P:GO:0010171;<br>P:GO:0040011;<br>F:GO:0004315;<br>C:GO:0005811                                   | -                                                                                                                  | EC:2.3.1.41<br>IPR002155; IPR016038; IPR016039; IPR020610; IPR020613; IPR020616; IPR020617; PTHR18919:SF7 (PANTHER) |
| Caenorhabditis briggsae | acetoacetyl- thiolase                         | 9  | C:GO:0005875;<br>P:GO:0006633;<br>C:GO:0005739;<br>P:GO:0006090;<br>P:GO:0007052;<br>P:GO:0010171;<br>P:GO:0040011;<br>F:GO:0004315;<br>C:GO:0005811                                   | -                                                                                                                  | EC:2.3.1.41<br>IPR002155; IPR016038; IPR016039; IPR020610; IPR020613; IPR020616; IPR020617; PTHR18919:SF7 (PANTHER) |
| -                       | -                                             | 0  |                                                                                                                                                                                        |                                                                                                                    | -                                                                                                                   |

|                         |                                                            |    |                                                                                                                                                                                                                                                                                              |                                                                                                                                                      |             |                                                      |
|-------------------------|------------------------------------------------------------|----|----------------------------------------------------------------------------------------------------------------------------------------------------------------------------------------------------------------------------------------------------------------------------------------------|------------------------------------------------------------------------------------------------------------------------------------------------------|-------------|------------------------------------------------------|
| Caenorhabditis elegans  | uncoordinated family member (unc-5)                        | 0  |                                                                                                                                                                                                                                                                                              | P:GO:0007165;<br>F:GO:0005515                                                                                                                        |             | PTHR12582 (PANTHER),<br>PTHR12582:SF2 (PANTHER)      |
|                         | -                                                          | 0  |                                                                                                                                                                                                                                                                                              |                                                                                                                                                      |             | -                                                    |
| Caenorhabditis briggsae | briggsae cbr-unc-82 protein                                | 3  | P:GO:0006468;<br>F:GO:0005524;<br>F:GO:0004674                                                                                                                                                                                                                                               | -                                                                                                                                                    | EC:2.7.11.0 | PTHR22971 (PANTHER), SignalP (SIGNALP)               |
| Caenorhabditis briggsae | ras and ef-hand domain containing                          | 5  | F:GO:0005509;<br>P:GO:0007264;<br>C:GO:0048471;<br>P:GO:0015031;<br>F:GO:0005525                                                                                                                                                                                                             | -                                                                                                                                                    |             | -                                                    |
| Caenorhabditis elegans  | elegans protein partially confirmed by transcript evidence | 2  | P:GO:0007186;<br>C:GO:0016021                                                                                                                                                                                                                                                                | -                                                                                                                                                    |             | SignalP (SIGNALP)                                    |
| Mus musculus            | stress-associated endoplasmic reticulum protein 1          | 17 | P:GO:0001501;<br>P:GO:0006486;<br>C:GO:0005840;<br>P:GO:0007009;<br>P:GO:0009791;<br>P:GO:0015031;<br>C:GO:0016021;<br>C:GO:0005789;<br>P:GO:0010259;<br>P:GO:0045727;<br>P:GO:0048644;<br>P:GO:0046622;<br>P:GO:0006006;<br>P:GO:0055085;<br>P:GO:0060124;<br>P:GO:0030968;<br>P:GO:0032024 | -                                                                                                                                                    |             | -                                                    |
|                         | -                                                          | 0  |                                                                                                                                                                                                                                                                                              |                                                                                                                                                      |             | SignalP (SIGNALP)                                    |
| Caenorhabditis briggsae | elegans protein partially confirmed by transcript evidence | 0  |                                                                                                                                                                                                                                                                                              |                                                                                                                                                      |             | IPR004988                                            |
| Caenorhabditis elegans  | hypothetical protein F15A8.7 [Caenorhabditis elegans]      | 0  |                                                                                                                                                                                                                                                                                              |                                                                                                                                                      |             | IPR006954                                            |
| Caenorhabditis briggsae | briggsae cbr-wah-1 protein                                 | 0  |                                                                                                                                                                                                                                                                                              | P:GO:0007067;<br>F:GO:0050660;<br>C:GO:0005737;<br>P:GO:0055114;<br>F:GO:0016491;<br>F:GO:0003824;<br>P:GO:0008152;<br>P:GO:0045454;<br>F:GO:0005488 |             | -                                                    |
|                         | -                                                          | 0  |                                                                                                                                                                                                                                                                                              |                                                                                                                                                      |             | -                                                    |
| Caenorhabditis briggsae | briggsae cbr-cpg-4 protein                                 | 0  |                                                                                                                                                                                                                                                                                              |                                                                                                                                                      |             | -                                                    |
| Caenorhabditis briggsae | briggsae cbr-cpg-4 protein                                 | 0  |                                                                                                                                                                                                                                                                                              |                                                                                                                                                      |             | SignalP (SIGNALP)                                    |
| Caenorhabditis briggsae | briggsae cbr-cpg-4 protein                                 | 0  |                                                                                                                                                                                                                                                                                              |                                                                                                                                                      |             | -                                                    |
|                         | -                                                          | 0  |                                                                                                                                                                                                                                                                                              |                                                                                                                                                      |             | -                                                    |
| Caenorhabditis elegans  | tbc (tre-2 bub2 cdc16) domain family member (tbc-1)        | 0  |                                                                                                                                                                                                                                                                                              | P:GO:0032313;<br>C:GO:0005622;<br>F:GO:0005097                                                                                                       |             | IPR000195; PTHR13297 (PANTHER)                       |
|                         | -                                                          | 0  |                                                                                                                                                                                                                                                                                              |                                                                                                                                                      |             | SignalP (SIGNALP)                                    |
|                         | -                                                          | 0  |                                                                                                                                                                                                                                                                                              |                                                                                                                                                      |             | -                                                    |
|                         | -                                                          | 0  |                                                                                                                                                                                                                                                                                              |                                                                                                                                                      |             | SignalP (SIGNALP)                                    |
|                         | -                                                          | 0  |                                                                                                                                                                                                                                                                                              |                                                                                                                                                      |             | -                                                    |
| Caenorhabditis briggsae | cg10671 cg10671-pa                                         | 1  | P:GO:0000003                                                                                                                                                                                                                                                                                 | -                                                                                                                                                    |             | IPR019388; PTHR23129 (PANTHER),<br>SignalP (SIGNALP) |

|                         |                                                                                |   |                                                                                                                                     |                                                                                                   |            |                                                                                                                                                       |
|-------------------------|--------------------------------------------------------------------------------|---|-------------------------------------------------------------------------------------------------------------------------------------|---------------------------------------------------------------------------------------------------|------------|-------------------------------------------------------------------------------------------------------------------------------------------------------|
| Caenorhabditis elegans  | elegans protein confirmed by transcript evidence                               | 0 |                                                                                                                                     | C:GO:0016021;<br>P:GO:0016042;<br>P:GO:0006644                                                    |            | IPR013090; IPR016090                                                                                                                                  |
| Caenorhabditis elegans  | briggsae cbr-dpf-5 protein                                                     | 3 | C:GO:0005773;<br>F:GO:0016787;<br>C:GO:0009507                                                                                      | -                                                                                                 |            | IPR001375; G3DSA:3.40.50.1820 (GENE3D), PTHR11731 (PANTHER), PTHR11731:SF7 (PANTHER), SSF53474 (SUPERFAMILY)                                          |
| Caenorhabditis elegans  | briggsae cbr-pqn-24 protein                                                    | 0 |                                                                                                                                     |                                                                                                   |            | -                                                                                                                                                     |
| Caenorhabditis elegans  | atp-binding cassette sub-family f member 1                                     | 8 | P:GO:0040035;<br>P:GO:0009792;<br>C:GO:0005840;<br>F:GO:0043024;<br>F:GO:0016887;<br>F:GO:0005524;<br>P:GO:0006412;<br>F:GO:0043023 | -                                                                                                 | EC:3.6.5.3 | IPR003439; IPR003593; IPR017871; G3DSA:3.40.50.300 (GENE3D), PTHR19211 (PANTHER), PTHR19211:SF14 (PANTHER), SignalP (SIGNALP), SSF52540 (SUPERFAMILY) |
|                         | -                                                                              | 0 |                                                                                                                                     |                                                                                                   |            | SignalP (SIGNALP)                                                                                                                                     |
| Caenorhabditis elegans  | wd repeat protein 7                                                            | 2 | P:GO:0008593;<br>P:GO:0007035                                                                                                       | -                                                                                                 |            | -                                                                                                                                                     |
|                         | -                                                                              | 0 |                                                                                                                                     |                                                                                                   |            | -                                                                                                                                                     |
| Homo sapiens            | mhc class ib antigen                                                           | 5 | P:GO:0006955;<br>F:GO:0032393;<br>C:GO:0016021;<br>P:GO:0002474;<br>C:GO:0042612                                                    | -                                                                                                 |            | -                                                                                                                                                     |
|                         | -                                                                              | 0 |                                                                                                                                     |                                                                                                   |            | -                                                                                                                                                     |
| Caenorhabditis elegans  | hypothetical protein F40F4.6 [Caenorhabditis elegans]                          | 1 | P:GO:0040010                                                                                                                        | -                                                                                                 |            | SignalP (SIGNALP)                                                                                                                                     |
|                         | -                                                                              | 0 |                                                                                                                                     |                                                                                                   |            | -                                                                                                                                                     |
| Loa loa                 | novel protein vertebrate fibronectin type iii domain containing protein family | 0 |                                                                                                                                     | P:GO:0008152;<br>F:GO:0016787;<br>F:GO:0016798;<br>F:GO:0016162                                   |            | SignalP (SIGNALP)                                                                                                                                     |
|                         | -                                                                              | 0 |                                                                                                                                     |                                                                                                   |            | -                                                                                                                                                     |
|                         | -                                                                              | 0 |                                                                                                                                     |                                                                                                   |            | -                                                                                                                                                     |
| Caenorhabditis briggsae | briggsae cbr-vha-5 protein                                                     | 5 | F:GO:0005516;<br>F:GO:0008553;<br>P:GO:0015986;<br>C:GO:0045202;<br>C:GO:0000220                                                    | -                                                                                                 | EC:3.6.3.6 | IPR002490; PTHR11629:SF23 (PANTHER)                                                                                                                   |
|                         | -                                                                              | 0 |                                                                                                                                     |                                                                                                   |            | SignalP (SIGNALP)                                                                                                                                     |
| Caenorhabditis elegans  | elegans protein confirmed by transcript evidence                               | 0 |                                                                                                                                     | P:GO:0055114;<br>F:GO:0005488;<br>F:GO:0016491;<br>P:GO:0008152;<br>F:GO:0003824                  |            | -                                                                                                                                                     |
| Brugia malayi           | d- primase                                                                     | 0 |                                                                                                                                     | F:GO:0003676;<br>P:GO:0006260;<br>F:GO:0008270;<br>F:GO:0003896;<br>C:GO:0005575;<br>C:GO:0005622 |            | -                                                                                                                                                     |

|                               |                                                                          |   |                                                                                                                                     |                                                                                                                                                                                                                          |             |                                                                        |
|-------------------------------|--------------------------------------------------------------------------|---|-------------------------------------------------------------------------------------------------------------------------------------|--------------------------------------------------------------------------------------------------------------------------------------------------------------------------------------------------------------------------|-------------|------------------------------------------------------------------------|
| Loa loa                       | u3 small nucleolar r- (u3 snor-) associated protein                      | 0 |                                                                                                                                     | P:GO:0042254;<br>P:GO:0006898;<br>C:GO:0030529;<br>C:GO:0005634;<br>P:GO:0000003;<br>F:GO:0003674;<br>P:GO:0002119;<br>C:GO:0005575;<br>P:GO:0040039;<br>P:GO:0040010;<br>P:GO:0040007;<br>P:GO:0008150;<br>P:GO:0040035 |             | SignalP (SIGNALP)                                                      |
| Caenorhabditis briggsae       | briggsae cbr-d--2 protein                                                | 0 |                                                                                                                                     | F:GO:0004386;<br>F:GO:0003677;<br>P:GO:0006260;<br>F:GO:0004003;<br>P:GO:0006200;<br>F:GO:0000166;<br>F:GO:0003674;<br>F:GO:0017111;<br>F:GO:0005524;<br>C:GO:0005575;<br>P:GO:0008150                                   |             | IPR014808; PTHR10887 (PANTHER),<br>PTHR10887:SF14 (PANTHER)            |
| Caenorhabditis elegans        | uncoordinated protein isoform partially confirmed by transcript evidence | 8 | F:GO:0004872;<br>P:GO:0006629;<br>F:GO:0005219;<br>P:GO:0006816;<br>P:GO:0006874;<br>P:GO:0055085;<br>F:GO:0005509;<br>C:GO:0016021 | -                                                                                                                                                                                                                        |             | -                                                                      |
| -                             | -                                                                        | 0 |                                                                                                                                     |                                                                                                                                                                                                                          |             | -                                                                      |
| Caenorhabditis elegans        | trehalose 6-phosphate synthase                                           | 3 | F:GO:0003825;<br>P:GO:0034608;<br>P:GO:0005992                                                                                      | -                                                                                                                                                                                                                        | EC:2.4.1.15 | IPR000418                                                              |
| -                             | -                                                                        | 0 |                                                                                                                                     |                                                                                                                                                                                                                          |             | -                                                                      |
| -                             | -                                                                        | 0 |                                                                                                                                     |                                                                                                                                                                                                                          |             | -                                                                      |
| Caenorhabditis elegans        | elegans protein confirmed by transcript evidence                         | 1 | P:GO:0040010                                                                                                                        | -                                                                                                                                                                                                                        |             | SignalP (SIGNALP)                                                      |
| -                             | -                                                                        | 0 |                                                                                                                                     |                                                                                                                                                                                                                          |             | SignalP (SIGNALP)                                                      |
| -                             | -                                                                        | 0 |                                                                                                                                     |                                                                                                                                                                                                                          |             | -                                                                      |
| -                             | -                                                                        | 0 |                                                                                                                                     |                                                                                                                                                                                                                          |             | -                                                                      |
| Caenorhabditis elegans        | major facilitator superfamily protein                                    | 3 | P:GO:0055085;<br>C:GO:0016021;<br>P:GO:0019915                                                                                      | -                                                                                                                                                                                                                        |             | PTHR11662 (PANTHER),<br>PTHR11662:SF21 (PANTHER), SignalP<br>(SIGNALP) |
| -                             | -                                                                        | 0 |                                                                                                                                     |                                                                                                                                                                                                                          |             | SignalP (SIGNALP)                                                      |
| Strongylocentrotus purpuratus | ensangp00000010363                                                       | 0 |                                                                                                                                     |                                                                                                                                                                                                                          |             | -                                                                      |
| Caenorhabditis briggsae       | briggsae cbr-smp-2 protein                                               | 0 |                                                                                                                                     |                                                                                                                                                                                                                          |             | -                                                                      |
| Caenorhabditis briggsae       | Hypothetical protein CBG11982 [Caenorhabditis briggsae]                  | 0 |                                                                                                                                     |                                                                                                                                                                                                                          |             | -                                                                      |
| -                             | -                                                                        | 0 |                                                                                                                                     |                                                                                                                                                                                                                          |             | -                                                                      |
| Taeniopygia guttata           | eukaryotic translation initiation factor 1                               | 5 | C:GO:0005737;<br>F:GO:0005515;<br>P:GO:0006950;<br>P:GO:0045948;<br>F:GO:0003743                                                    | -                                                                                                                                                                                                                        |             | IPR001950; G3DSA:3.30.780.10<br>(GENE3D), PTHR10388 (PANTHER)          |

|                         |                                                         |    |                                                                                                                                                                                                                                                                                              |   |                              |                                                            |  |
|-------------------------|---------------------------------------------------------|----|----------------------------------------------------------------------------------------------------------------------------------------------------------------------------------------------------------------------------------------------------------------------------------------------|---|------------------------------|------------------------------------------------------------|--|
| Caenorhabditis briggsae | Hypothetical protein CBG08488 [Caenorhabditis briggsae] | 1  | P:GO:0000003                                                                                                                                                                                                                                                                                 | - |                              | PTHR11254 (PANTHER),<br>PTHR11254:SF8 (PANTHER)            |  |
| Loa loa                 | a-phase-promoting complex subunit 2                     | 1  | F:GO:0005515                                                                                                                                                                                                                                                                                 | - |                              | IPR001373; PTHR11932 (PANTHER),<br>PTHR11932:SF5 (PANTHER) |  |
| Caenorhabditis briggsae | alcohol dehydroge-se class-3                            | 17 | P:GO:0003016;<br>F:GO:0008270;<br>P:GO:0006069;<br>F:GO:0018467;<br>P:GO:0001523;<br>C:GO:0005739;<br>F:GO:0051903;<br>P:GO:0055114;<br>P:GO:0051409;<br>P:GO:0051775;<br>P:GO:0046294;<br>P:GO:0045777;<br>F:GO:0004024;<br>F:GO:0042803;<br>P:GO:0032496;<br>P:GO:0018119;<br>F:GO:0005504 | - | EC:1.2.1.46;<br>EC:1.1.1.284 |                                                            |  |
|                         |                                                         | 0  |                                                                                                                                                                                                                                                                                              |   |                              |                                                            |  |
| Loa loa                 | mothers against decapentaplegic homolog 4               | 17 | P:GO:0007179;<br>P:GO:0031325;<br>P:GO:0043009;<br>P:GO:0090100;<br>P:GO:0048513;<br>P:GO:0051128;<br>P:GO:0040007;<br>P:GO:0048646;<br>P:GO:0048729;<br>P:GO:0009952;<br>C:GO:0005667;<br>P:GO:0030154;<br>P:GO:0048523;<br>P:GO:0051239;<br>P:GO:0010604;<br>F:GO:0046332;<br>P:GO:0006355 | - |                              |                                                            |  |
| Brugia malayi           | cation channel family protein                           | 7  | P:GO:0043052;<br>F:GO:0004672;<br>P:GO:0055085;<br>P:GO:0010960;<br>P:GO:0006811;<br>C:GO:0016021;<br>F:GO:0005216                                                                                                                                                                           | - |                              | PTHR13800 (PANTHER)                                        |  |
| Caenorhabditis elegans  | sushi domain containing 2                               | 2  | C:GO:0016021;<br>P:GO:0007160                                                                                                                                                                                                                                                                | - |                              | IPR005533; PTHR13802 (PANTHER),<br>PTHR13802:SF2 (PANTHER) |  |
|                         |                                                         | 0  |                                                                                                                                                                                                                                                                                              |   |                              |                                                            |  |
|                         |                                                         | 0  |                                                                                                                                                                                                                                                                                              |   |                              | SignalP (SIGNALP)                                          |  |
| Caenorhabditis elegans  | eb-1 binding protein 2-like                             | 4  | P:GO:0040007;<br>P:GO:0040035;<br>P:GO:0006898;<br>P:GO:0002119                                                                                                                                                                                                                              | - |                              | IPR008610                                                  |  |
|                         |                                                         | 0  |                                                                                                                                                                                                                                                                                              |   |                              | SignalP (SIGNALP)                                          |  |
| Caenorhabditis elegans  | briggsae cbr-pqn-45 protein                             | 1  | P:GO:0009792                                                                                                                                                                                                                                                                                 | - |                              |                                                            |  |

|                        |                                                                                                         |    |                                                                                                                                                                                                                                                                                                                                                                                                                                                       |                                                                                                                                                                                                                                           |                                                                     |
|------------------------|---------------------------------------------------------------------------------------------------------|----|-------------------------------------------------------------------------------------------------------------------------------------------------------------------------------------------------------------------------------------------------------------------------------------------------------------------------------------------------------------------------------------------------------------------------------------------------------|-------------------------------------------------------------------------------------------------------------------------------------------------------------------------------------------------------------------------------------------|---------------------------------------------------------------------|
| Caenorhabditis elegans | briggsae cbr-pqn-45 protein                                                                             | 1  | P:GO:0009792                                                                                                                                                                                                                                                                                                                                                                                                                                          | -                                                                                                                                                                                                                                         | -                                                                   |
| Caenorhabditis elegans | acetoacetyl- synthetase                                                                                 | 1  | P:GO:0010033                                                                                                                                                                                                                                                                                                                                                                                                                                          | -                                                                                                                                                                                                                                         | PTHR11968 (PANTHER),<br>PTHR11968:SF40 (PANTHER), PF11930<br>(PFAM) |
| Caenorhabditis elegans | caveolin 2                                                                                              | 26 | F:GO:0004871;<br>P:GO:0009888;<br>C:GO:0030133;<br>P:GO:0042127;<br>F:GO:0051219;<br>C:GO:0005624;<br>P:GO:0070836;<br>F:GO:0031748;<br>C:GO:0031234;<br>P:GO:0006906;<br>C:GO:0005794;<br>P:GO:0048513;<br>C:GO:0005829;<br>C:GO:0009986;<br>P:GO:0007088;<br>P:GO:0006629;<br>C:GO:0043234;<br>P:GO:0007268;<br>P:GO:0048278;<br>C:GO:0048471;<br>F:GO:0042803;<br>C:GO:0005811;<br>C:GO:0005901;<br>P:GO:0060161;<br>C:GO:0005887;<br>F:GO:0019905 | -                                                                                                                                                                                                                                         | -                                                                   |
|                        | -                                                                                                       | 0  |                                                                                                                                                                                                                                                                                                                                                                                                                                                       |                                                                                                                                                                                                                                           | -                                                                   |
|                        | -                                                                                                       | 0  |                                                                                                                                                                                                                                                                                                                                                                                                                                                       |                                                                                                                                                                                                                                           | -                                                                   |
|                        | -                                                                                                       | 0  |                                                                                                                                                                                                                                                                                                                                                                                                                                                       |                                                                                                                                                                                                                                           | -                                                                   |
| Loa loa                | prion-like-(q n-rich)-domain-bearing protein family member<br>(pqn-44)                                  | 0  |                                                                                                                                                                                                                                                                                                                                                                                                                                                       |                                                                                                                                                                                                                                           | IPR012937; PTHR12974 (PANTHER)                                      |
|                        | -                                                                                                       | 0  |                                                                                                                                                                                                                                                                                                                                                                                                                                                       |                                                                                                                                                                                                                                           | -                                                                   |
| Caenorhabditis elegans | elegans protein confirmed by transcript evidence                                                        | 3  | P:GO:0040010;<br>P:GO:0009792;<br>P:GO:0000003                                                                                                                                                                                                                                                                                                                                                                                                        | -                                                                                                                                                                                                                                         | -                                                                   |
| Caenorhabditis elegans | ddx55_caeel ame: full=probable atp-dependent r- helicase<br>ddx55 homolog ame: full=dead box protein 55 | 0  |                                                                                                                                                                                                                                                                                                                                                                                                                                                       | F:GO:0004386;<br>C:GO:0016020;<br>P:GO:0017038;<br>F:GO:0003677;<br>F:GO:0016787;<br>F:GO:0003676;<br>F:GO:0000166;<br>P:GO:0000003;<br>F:GO:0003723;<br>F:GO:0005524;<br>F:GO:0008026;<br>P:GO:0002119;<br>P:GO:0040010;<br>P:GO:0040007 | -                                                                   |
| Brugia malayi          | angiomotin                                                                                              | 1  | F:GO:0005515                                                                                                                                                                                                                                                                                                                                                                                                                                          | -                                                                                                                                                                                                                                         | IPR009114; PTHR14826:SF2<br>(PANTHER)                               |



|                         |                                                 |    |                                                                                                                                                                                                                                           |   |             |                                                                                                                                                |
|-------------------------|-------------------------------------------------|----|-------------------------------------------------------------------------------------------------------------------------------------------------------------------------------------------------------------------------------------------|---|-------------|------------------------------------------------------------------------------------------------------------------------------------------------|
| Caenorhabditis briggsae | inorganic p hosphatase family member (pyp-1)    | 14 | P:GO:0040010;<br>C:GO:0016021;<br>P:GO:0042766;<br>P:GO:0006796;<br>P:GO:0000003;<br>P:GO:0035076;<br>P:GO:0002119;<br>F:GO:0000287;<br>F:GO:0004427;<br>P:GO:0040039;<br>P:GO:0009792;<br>C:GO:0005737;<br>P:GO:0006350;<br>C:GO:0016589 | - | EC:3.6.1.1  | IPR008162                                                                                                                                      |
|                         | -                                               | 0  |                                                                                                                                                                                                                                           |   |             | G3DSA:2.60.120.20 (GENE3D)                                                                                                                     |
| Caenorhabditis elegans  | ras-related protein rab-6a                      | 2  | C:GO:0016023;<br>F:GO:0000166                                                                                                                                                                                                             | - |             | IPR001806; IPR005225; IPR013753;<br>IPR015600; IPR020851;<br>G3DSA:3.40.50.300 (GENE3D),<br>PTHR11708 (PANTHER), SSF52540<br>(SUPERFAMILY)     |
|                         | -                                               | 0  |                                                                                                                                                                                                                                           |   |             | -                                                                                                                                              |
| Caenorhabditis elegans  | briggsae cbr-ced-5 protein                      | 7  | F:GO:0005083;<br>P:GO:0043652;<br>C:GO:0005886;<br>F:GO:0032403;<br>F:GO:0019899;<br>P:GO:0040039;<br>F:GO:0017124                                                                                                                        | - |             | PTHR23317 (PANTHER),<br>PTHR23317:SF16 (PANTHER)                                                                                               |
|                         | -                                               | 0  |                                                                                                                                                                                                                                           |   |             | -                                                                                                                                              |
| Caenorhabditis remanei  | tuftelin-interacting protein 11                 | 10 | P:GO:0006396;<br>C:GO:0005681;<br>F:GO:0003676;<br>P:GO:0040007;<br>C:GO:0016607;<br>P:GO:0040035;<br>P:GO:0002119;<br>F:GO:0005515;<br>P:GO:0040011;<br>P:GO:0009792                                                                     | - |             | IPR022783; PTHR23329 (PANTHER),<br>PTHR23329:SF1 (PANTHER), SignalP<br>(SIGNALP)                                                               |
| Caenorhabditis briggsae | briggsae cbr-tat-2 protein                      | 7  | C:GO:0016021;<br>F:GO:0015662;<br>P:GO:0006754;<br>F:GO:0005524;<br>P:GO:0015914;<br>F:GO:0000287;<br>F:GO:0004012                                                                                                                        | - | EC:3.6.3.1  | -                                                                                                                                              |
| Loa loa                 | hypothetical protein LOAG_11376 [Loa loa]       | 0  |                                                                                                                                                                                                                                           |   |             | IPR001781; PTHR18973 (PANTHER),<br>PTHR18973:SF49 (PANTHER),<br>SSF57716 (SUPERFAMILY)                                                         |
|                         | -                                               | 0  |                                                                                                                                                                                                                                           |   |             | -                                                                                                                                              |
| Caenorhabditis briggsae | protein-tyrosine phosphatase containing protein | 3  | F:GO:0004721;<br>P:GO:0009792;<br>P:GO:0000003                                                                                                                                                                                            | - | EC:3.1.3.16 | IPR000242; IPR000387; IPR016130;<br>G3DSA:3.90.190.10 (GENE3D),<br>PTHR19134 (PANTHER),<br>PTHR19134:SF26 (PANTHER),<br>SSF52799 (SUPERFAMILY) |

|                             |                                                         |   |                                                                                                                                                      |                                                                                                   |             |                                                                                                                       |
|-----------------------------|---------------------------------------------------------|---|------------------------------------------------------------------------------------------------------------------------------------------------------|---------------------------------------------------------------------------------------------------|-------------|-----------------------------------------------------------------------------------------------------------------------|
| Caenorhabditis briggsae     | glycogen synthase                                       | 7 | P:GO:0009792;<br>P:GO:0010171;<br>P:GO:0002119;<br>P:GO:0005978;<br>F:GO:0005515;<br>F:GO:0004373;<br>P:GO:0040011                                   | -                                                                                                 | EC:2.4.1.11 | IPR008631                                                                                                             |
| Caenorhabditis briggsae     | Hypothetical protein CBG14225 [Caenorhabditis briggsae] | 0 |                                                                                                                                                      |                                                                                                   |             | IPR010916; SignalP (SIGNALP)                                                                                          |
|                             | -                                                       | 0 |                                                                                                                                                      |                                                                                                   |             | -                                                                                                                     |
|                             | -                                                       | 0 |                                                                                                                                                      |                                                                                                   |             | -                                                                                                                     |
| Ciona intestinalis          | transcription factor protein                            | 4 | F:GO:0003700;<br>F:GO:0003677;<br>C:GO:0016602;<br>P:GO:0006355                                                                                      | -                                                                                                 |             | IPR001289                                                                                                             |
| Caenorhabditis briggsae     | mosc domain-containing protein mitochondrial precursor  | 2 | C:GO:0005743;<br>F:GO:0005515                                                                                                                        | -                                                                                                 |             | IPR005303; PTHR14237 (PANTHER),<br>SignalP (SIGNALP), SSF141673<br>(SUPERFAMILY)                                      |
| Caenorhabditis briggsae     | mosc domain-containing protein mitochondrial precursor  | 2 | C:GO:0005743;<br>F:GO:0005515                                                                                                                        | -                                                                                                 |             | IPR005303; PTHR14237 (PANTHER),<br>SignalP (SIGNALP), SSF141673<br>(SUPERFAMILY)                                      |
| Caenorhabditis elegans      | ryanodine receptor homologue                            | 9 | P:GO:0055085;<br>P:GO:0006629;<br>C:GO:0005875;<br>F:GO:0005509;<br>C:GO:0016021;<br>P:GO:0006874;<br>P:GO:0006816;<br>F:GO:0005219;<br>P:GO:0006936 | -                                                                                                 |             | IPR000699; IPR015925;<br>PTHR13715:SF11 (PANTHER)                                                                     |
|                             | -                                                       | 0 |                                                                                                                                                      |                                                                                                   |             | -                                                                                                                     |
| Brugia malayi               | histone deacetylase family protein                      | 4 | F:GO:0004407;<br>P:GO:0045449;<br>C:GO:0005737;<br>C:GO:0005634                                                                                      | -                                                                                                 |             | SignalP (SIGNALP)                                                                                                     |
|                             | -                                                       | 0 |                                                                                                                                                      |                                                                                                   |             | -                                                                                                                     |
|                             | -                                                       | 0 |                                                                                                                                                      |                                                                                                   |             | SignalP (SIGNALP)                                                                                                     |
| Caenorhabditis briggsae     | suppressor of t-cell receptor sig-ling 1                | 0 |                                                                                                                                                      | F:GO:0004619;<br>F:GO:0004872;<br>P:GO:0016070;<br>F:GO:0003824;<br>C:GO:0005622;<br>F:GO:0016853 |             | IPR013078; G3DSA:3.40.50.1240<br>(GENE3D), PTHR16469 (PANTHER),<br>PTHR16469:SF5 (PANTHER), SSF53254<br>(SUPERFAMILY) |
| Caenorhabditis elegans      | atp-dependent permease mdl2                             | 5 | F:GO:0042626;<br>P:GO:0043581;<br>P:GO:0055085;<br>F:GO:0005524;<br>C:GO:0016021                                                                     | -                                                                                                 |             | IPR011527; IPR017940;<br>G3DSA:1.20.1560.10 (GENE3D),<br>PTHR19242 (PANTHER),<br>PTHR19242:SF76 (PANTHER)             |
| Angiostrongylus cantonensis | hypothetical protein [Angiostrongylus cantonensis]      | 0 |                                                                                                                                                      |                                                                                                   |             | -                                                                                                                     |
| Caenorhabditis briggsae     | bccip_caebr ame: full=protein bccip homolog             | 7 | P:GO:0009792;<br>P:GO:0002119;<br>P:GO:0016246;<br>P:GO:0040011;<br>P:GO:0040007;<br>P:GO:0006898;<br>P:GO:0008406                                   | -                                                                                                 |             | -                                                                                                                     |
| Caenorhabditis elegans      | glutaminyl-tr- synthase (glutamine-hydrolyzing)-like 1  | 2 | F:GO:0016884;<br>P:GO:0019915                                                                                                                        | -                                                                                                 | EC:6.3.5.0  | IPR000120; PTHR11895:SF7<br>(PANTHER)                                                                                 |
| Loa loa                     | ov39 antigen -like                                      | 0 |                                                                                                                                                      |                                                                                                   |             | SignalP (SIGNALP)                                                                                                     |

|                         |                                                            |   |                                                                                                                    |                                                                                                   |                                                         |                                                                                                             |
|-------------------------|------------------------------------------------------------|---|--------------------------------------------------------------------------------------------------------------------|---------------------------------------------------------------------------------------------------|---------------------------------------------------------|-------------------------------------------------------------------------------------------------------------|
| Caenorhabditis briggsae | briggsae cbr-gly-3 protein                                 | 4 | F:GO:0004653;<br>C:GO:0005795;<br>P:GO:0009312;<br>C:GO:0016020                                                    | -                                                                                                 | EC:2.4.1.41                                             | PTHR11675 (PANTHER), SSF53448 (SUPERFAMILY)                                                                 |
| Caenorhabditis briggsae | briggsae cbr-flp-13 protein                                | 3 | C:GO:0005576;<br>P:GO:0007218;<br>P:GO:0019915                                                                     | -                                                                                                 |                                                         | IPR002544; PTHR20986 (PANTHER)                                                                              |
|                         | -                                                          | 0 |                                                                                                                    |                                                                                                   |                                                         | -                                                                                                           |
|                         | -                                                          | 0 |                                                                                                                    |                                                                                                   |                                                         | -                                                                                                           |
| Loa loa                 | fanconi anemia complementation group d2 isoform            | 0 |                                                                                                                    |                                                                                                   |                                                         | -                                                                                                           |
|                         | -                                                          | 0 |                                                                                                                    |                                                                                                   |                                                         | SignalP (SIGNALP)                                                                                           |
| Caenorhabditis briggsae | ain family member (clp-1)                                  | 7 | C:GO:0005737;<br>P:GO:0016540;<br>F:GO:0004198;<br>F:GO:0005509;<br>P:GO:0008219;<br>P:GO:0006508;<br>C:GO:0016020 | -                                                                                                 |                                                         | IPR001300; IPR022684; PTHR10183 (PANTHER), PTHR10183:SF45 (PANTHER), SSF54001 (SUPERFAMILY)                 |
|                         | -                                                          | 0 |                                                                                                                    |                                                                                                   |                                                         | SignalP (SIGNALP)                                                                                           |
|                         | -                                                          | 0 |                                                                                                                    |                                                                                                   |                                                         | -                                                                                                           |
|                         | -                                                          | 0 |                                                                                                                    |                                                                                                   |                                                         | -                                                                                                           |
|                         | -                                                          | 0 |                                                                                                                    |                                                                                                   |                                                         | -                                                                                                           |
| Caenorhabditis elegans  | briggsae cbr-pmk-3 protein                                 | 4 | P:GO:0006950;<br>C:GO:0005634;<br>F:GO:0004674;<br>F:GO:0000166                                                    | -                                                                                                 | EC:2.7.11.0                                             | -                                                                                                           |
|                         | -                                                          | 0 |                                                                                                                    |                                                                                                   |                                                         | -                                                                                                           |
| Caenorhabditis briggsae | elegans protein partially confirmed by transcript evidence | 0 |                                                                                                                    | P:GO:0007160;<br>C:GO:0016021;<br>C:GO:0005575                                                    |                                                         | IPR005533; PTHR13802 (PANTHER), PTHR13802:SF1 (PANTHER)                                                     |
| Caenorhabditis elegans  | briggsae cbr-scp-1 protein                                 | 1 | P:GO:0009792                                                                                                       | -                                                                                                 |                                                         | -                                                                                                           |
|                         | -                                                          | 0 |                                                                                                                    |                                                                                                   |                                                         | -                                                                                                           |
| Caenorhabditis elegans  | af303255_1 guanylate-binding protein                       | 4 | C:GO:0016021;<br>P:GO:0000003;<br>F:GO:0003924;<br>F:GO:0005525                                                    | -                                                                                                 | EC:3.6.5.1;<br>EC:3.6.5.2;<br>EC:3.6.5.3;<br>EC:3.6.5.4 | IPR015894; G3DSA:3.40.50.300 (GENE3D), PTHR10751 (PANTHER), PTHR10751:SF3 (PANTHER), SSF52540 (SUPERFAMILY) |
|                         | -                                                          | 0 |                                                                                                                    |                                                                                                   |                                                         | IPR008139; IPR011001; SignalP (SIGNALP)                                                                     |
| Caenorhabditis elegans  | hypothetical protein C07G1.2 [Caenorhabditis elegans]      | 0 |                                                                                                                    | P:GO:0006508;<br>F:GO:0004252;<br>F:GO:0005488;<br>F:GO:0005044;<br>F:GO:0003824;<br>C:GO:0016020 |                                                         | IPR001190; IPR017448; G3DSA:3.10.250.10 (GENE3D)                                                            |
|                         | -                                                          | 0 |                                                                                                                    |                                                                                                   |                                                         | -                                                                                                           |
| Caenorhabditis elegans  | elegans protein confirmed by transcript evidence           | 1 | F:GO:0005515                                                                                                       | -                                                                                                 |                                                         | -                                                                                                           |
| Caenorhabditis elegans  | elegans protein confirmed by transcript evidence           | 1 | F:GO:0005515                                                                                                       | -                                                                                                 |                                                         | -                                                                                                           |
| Brugia malayi           | sh3 domain-binding protein 5-like                          | 0 |                                                                                                                    | F:GO:0003674;<br>P:GO:0008150;<br>C:GO:0005575                                                    |                                                         | IPR007940                                                                                                   |
|                         | -                                                          | 0 |                                                                                                                    |                                                                                                   |                                                         | SignalP (SIGNALP)                                                                                           |
|                         | -                                                          | 0 |                                                                                                                    |                                                                                                   |                                                         | SignalP (SIGNALP)                                                                                           |

|                         |                                                        |   |                                                                                                   |                                                                                                                                                                                                                          |             |                                                                                                                                |
|-------------------------|--------------------------------------------------------|---|---------------------------------------------------------------------------------------------------|--------------------------------------------------------------------------------------------------------------------------------------------------------------------------------------------------------------------------|-------------|--------------------------------------------------------------------------------------------------------------------------------|
| Homo sapiens            | cathepsin z                                            | 6 | C:GO:0005615;<br>P:GO:0060441;<br>C:GO:0005764;<br>F:GO:0004197;<br>P:GO:0006508;<br>C:GO:0005783 | -                                                                                                                                                                                                                        | EC:3.4.22.0 | SignalP (SIGNALP)                                                                                                              |
| Brugia malayi           | neuroepithelial cell transforming gene 1               | 0 |                                                                                                   | F:GO:0005089;<br>P:GO:0035023;<br>F:GO:0005085;<br>P:GO:0001558;<br>C:GO:0005634;<br>P:GO:0006915;<br>P:GO:0023034;<br>C:GO:0005737;<br>P:GO:0007165;<br>C:GO:0005622;<br>C:GO:0005829;<br>P:GO:0008624;<br>F:GO:0005509 |             | IPR000219                                                                                                                      |
|                         | -                                                      | 0 |                                                                                                   |                                                                                                                                                                                                                          |             | -                                                                                                                              |
|                         | -                                                      | 0 |                                                                                                   |                                                                                                                                                                                                                          |             | SignalP (SIGNALP)                                                                                                              |
| Caenorhabditis briggsae | histone-lysine n-methyltransferase                     | 0 |                                                                                                   | F:GO:0016740;<br>C:GO:0048188;<br>C:GO:0005694;<br>F:GO:0008168;<br>F:GO:0003677;<br>C:GO:0005634;<br>F:GO:0003676;<br>F:GO:0000166;<br>F:GO:0018024;<br>P:GO:0016568;<br>F:GO:0005515                                   |             | IPR001214; G3DSA:2.170.270.10 (GENE3D), PTHR22884 (PANTHER), PTHR22884:SF17 (PANTHER), SSF82199 (SUPERFAMILY)                  |
| Haemonchus contortus    | atp-binding sub-family b (mdr tap) member 1            | 5 | P:GO:0055085;<br>P:GO:0006629;<br>F:GO:0042626;<br>F:GO:0005524;<br>C:GO:0005887                  | -                                                                                                                                                                                                                        |             | IPR001140; IPR011527; IPR017940; G3DSA:1.20.1560.10 (GENE3D), PTHR19242 (PANTHER), PTHR19242:SF96 (PANTHER), SignalP (SIGNALP) |
| Caenorhabditis elegans  | phenylacetyl- ligase                                   | 3 | P:GO:0019915;<br>F:GO:0003824;<br>P:GO:0006629                                                    | -                                                                                                                                                                                                                        |             | IPR000873; IPR020845; G3DSA:3.40.50.980 (GENE3D), PTHR11968 (PANTHER), PTHR11968:SF43 (PANTHER), SSF56801 (SUPERFAMILY)        |
| Caenorhabditis briggsae | nol1 nop2 sun domain family                            | 0 |                                                                                                   | F:GO:0008168;<br>F:GO:0016740;<br>P:GO:0008150;<br>C:GO:0005575                                                                                                                                                          |             | -                                                                                                                              |
| Loa loa                 | hypothetical protein LOAG_08240 [Loa loa]              | 0 |                                                                                                   |                                                                                                                                                                                                                          |             | -                                                                                                                              |
|                         | -                                                      | 0 |                                                                                                   |                                                                                                                                                                                                                          |             | -                                                                                                                              |
|                         | -                                                      | 0 |                                                                                                   |                                                                                                                                                                                                                          |             | -                                                                                                                              |
| Brugia malayi           | wd40 associated region in tfiid subunit family protein | 0 |                                                                                                   | F:GO:0003743;<br>P:GO:0045449;<br>F:GO:0030528;<br>C:GO:0005634                                                                                                                                                          |             | IPR007582; SignalP (SIGNALP)                                                                                                   |
| Caenorhabditis elegans  | carbonic anhydrase                                     | 4 | P:GO:0044237;<br>F:GO:0008270;<br>F:GO:0004089;<br>P:GO:0015976                                   | -                                                                                                                                                                                                                        | EC:4.2.1.1  | IPR001765; PTHR11002:SF1 (PANTHER)                                                                                             |

|                         |                                                                |    |                                                                                                                                                                                                                                           |                               |            |                                                                              |
|-------------------------|----------------------------------------------------------------|----|-------------------------------------------------------------------------------------------------------------------------------------------------------------------------------------------------------------------------------------------|-------------------------------|------------|------------------------------------------------------------------------------|
| Caenorhabditis elegans  | eb module family protein                                       | 2  | F:GO:0005488;<br>F:GO:0003824                                                                                                                                                                                                             | -                             |            | IPR006149; IPR006210; PD936484 (PRODOM)                                      |
|                         | -                                                              | 0  |                                                                                                                                                                                                                                           |                               |            | -                                                                            |
| Mus musculus            | 5-oxoprolinase (atp-hydrolysing)                               | 3  | F:GO:0017168;<br>P:GO:0006749;<br>F:GO:0000166                                                                                                                                                                                            | -                             | EC:3.5.2.9 | IPR002821; IPR003692; PTHR11365 (PANTHER)                                    |
| Homo sapiens            | mhc class i antigen                                            | 0  |                                                                                                                                                                                                                                           |                               |            | -                                                                            |
| Caenorhabditis briggsae | regulator of presynaptic morphology protein                    | 4  | P:GO:0030071;<br>F:GO:0005515;<br>F:GO:0008270;<br>C:GO:0005680                                                                                                                                                                           | -                             |            | SignalP (SIGNALP)                                                            |
|                         | -                                                              | 0  |                                                                                                                                                                                                                                           |                               |            | -                                                                            |
| Caenorhabditis elegans  | isoleucyl-tRNA synthetase                                      | 5  | F:GO:0004822;<br>F:GO:0008270;<br>C:GO:0005739;<br>P:GO:0006428;<br>F:GO:0005524                                                                                                                                                          | -                             | EC:6.1.1.5 | IPR002300; IPR002301; IPR014729; PTHR11946 (PANTHER), SSF52374 (SUPERFAMILY) |
|                         | -                                                              | 0  |                                                                                                                                                                                                                                           |                               |            | -                                                                            |
| Caenorhabditis elegans  | briggsae cbr-pqn-37 protein                                    | 0  |                                                                                                                                                                                                                                           | C:GO:0016021;<br>P:GO:0007186 |            | SSF57501 (SUPERFAMILY)                                                       |
|                         | -                                                              | 0  |                                                                                                                                                                                                                                           |                               |            | -                                                                            |
|                         | -                                                              | 0  |                                                                                                                                                                                                                                           |                               |            | -                                                                            |
|                         | -                                                              | 0  |                                                                                                                                                                                                                                           |                               |            | -                                                                            |
|                         | -                                                              | 0  |                                                                                                                                                                                                                                           |                               |            | -                                                                            |
| Loa loa                 | neurogenic locus notch homolog protein 2-like                  | 0  |                                                                                                                                                                                                                                           | P:GO:0007155;<br>C:GO:0016020 |            | IPR000436; IPR016060; PTHR19325 (PANTHER), PTHR19325:SF25 (PANTHER)          |
| Caenorhabditis elegans  | aldo keto reductase                                            | 2  | F:GO:0016491;<br>P:GO:0055114                                                                                                                                                                                                             | -                             |            | IPR001395; IPR023210; PTHR11732:SF34 (PANTHER)                               |
|                         | -                                                              | 0  |                                                                                                                                                                                                                                           |                               |            | -                                                                            |
| Caenorhabditis elegans  | - calcium exchangers family member (ncx-2)                     | 14 | P:GO:0002026;<br>P:GO:0055085;<br>P:GO:0006814;<br>C:GO:0030315;<br>F:GO:0005432;<br>P:GO:0040010;<br>F:GO:0031072;<br>P:GO:0045214;<br>C:GO:0016021;<br>P:GO:0000003;<br>P:GO:0006874;<br>C:GO:0005624;<br>P:GO:0006816;<br>P:GO:0007154 | -                             |            | IPR004836; PTHR11878 (PANTHER)                                               |
| Caenorhabditis briggsae | nematode cuticle collagen n-terminal domain containing protein | 2  | P:GO:0040011;<br>P:GO:0010171                                                                                                                                                                                                             | -                             |            | PTHR10499 (PANTHER), PTHR10499:SF58 (PANTHER)                                |
| Pongo abelii            | xap-5 protein                                                  | 6  | P:GO:0007283;<br>F:GO:0004872;<br>P:GO:0007275;<br>P:GO:0007165;<br>C:GO:0016021;<br>C:GO:0005634                                                                                                                                         | -                             |            | IPR007005                                                                    |

|                         |                                                          |    |                                                                                                                                                                                                                                                                                                                                                                                                                                                                                         |                                                |                                                                  |
|-------------------------|----------------------------------------------------------|----|-----------------------------------------------------------------------------------------------------------------------------------------------------------------------------------------------------------------------------------------------------------------------------------------------------------------------------------------------------------------------------------------------------------------------------------------------------------------------------------------|------------------------------------------------|------------------------------------------------------------------|
| Caenorhabditis elegans  | hypothetical protein W10D9.5 [Caenorhabditis elegans]    | 7  | P:GO:0009792;<br>P:GO:0010171;<br>P:GO:0002119;<br>P:GO:0040010;<br>P:GO:0006886;<br>C:GO:0005741;<br>P:GO:0006898                                                                                                                                                                                                                                                                                                                                                                      | -                                              | -                                                                |
| Caenorhabditis elegans  | temporarily assigned gene -me family member (tag-124)    | 0  |                                                                                                                                                                                                                                                                                                                                                                                                                                                                                         | F:GO:0003723;<br>P:GO:0009451;<br>F:GO:0009982 | -                                                                |
| Caenorhabditis elegans  | hypothetical protein Y37E11AL.6 [Caenorhabditis elegans] | 0  |                                                                                                                                                                                                                                                                                                                                                                                                                                                                                         |                                                | IPR006210; IPR013032                                             |
| Caenorhabditis elegans  | hypothetical protein F35H10.10 [Caenorhabditis elegans]  | 4  | P:GO:0007186;<br>C:GO:0016021;<br>P:GO:0007165;<br>F:GO:0004930                                                                                                                                                                                                                                                                                                                                                                                                                         | -                                              | IPR017871; PTHR11336 (PANTHER),<br>PTHR11336:SF8 (PANTHER)       |
|                         | -                                                        | 0  |                                                                                                                                                                                                                                                                                                                                                                                                                                                                                         |                                                | -                                                                |
| Homo sapiens            | cytochrome c oxidase subunit i                           | 32 | P:GO:0004129;<br>F:GO:0004129;<br>P:GO:0042127;<br>P:GO:0051602;<br>F:GO:0005515;<br>P:GO:0010243;<br>P:GO:0051412;<br>C:GO:0005792;<br>F:GO:0020037;<br>P:GO:0007568;<br>P:GO:0019371;<br>F:GO:0009055;<br>C:GO:0005743;<br>C:GO:0016021;<br>C:GO:0005789;<br>P:GO:0045907;<br>C:GO:0005794;<br>P:GO:0032811;<br>F:GO:0016702;<br>F:GO:0004601;<br>P:GO:0045987;<br>C:GO:0070469;<br>C:GO:0005635;<br>P:GO:0046688;<br>P:GO:0010700;<br>P:GO:0021549;<br>F:GO:0004666;<br>F:GO:0008280 | -                                              | EC:1.9.3.1;<br>EC:1.13.11.0<br>;<br>EC:1.11.1.7;<br>EC:1.14.99.1 |
|                         | -                                                        | 0  |                                                                                                                                                                                                                                                                                                                                                                                                                                                                                         |                                                | -                                                                |
|                         | -                                                        | 0  |                                                                                                                                                                                                                                                                                                                                                                                                                                                                                         |                                                | -                                                                |
|                         | -                                                        | 0  |                                                                                                                                                                                                                                                                                                                                                                                                                                                                                         |                                                | -                                                                |
| Caenorhabditis elegans  | family with sequence similarity member a                 | 6  | P:GO:0009792;<br>P:GO:0008340;<br>P:GO:0040007;<br>C:GO:0005634;<br>P:GO:0002119;<br>P:GO:0040011                                                                                                                                                                                                                                                                                                                                                                                       | -                                              | IPR007005                                                        |
|                         | -                                                        | 0  |                                                                                                                                                                                                                                                                                                                                                                                                                                                                                         |                                                | -                                                                |
| Caenorhabditis elegans  | leukocyte receptor cluster member 4 protein              | 3  | F:GO:0008415;<br>C:GO:0016021;<br>P:GO:0008654                                                                                                                                                                                                                                                                                                                                                                                                                                          | -                                              | IPR004299; PTHR13906 (PANTHER),<br>PTHR13906:SF5 (PANTHER)       |
| Caenorhabditis briggsae | cuticlin 1                                               | 0  |                                                                                                                                                                                                                                                                                                                                                                                                                                                                                         | P:GO:0010171                                   | IPR001507; PTHR22907 (PANTHER)                                   |
| Caenorhabditis elegans  | hypothetical protein C15H9.9 [Caenorhabditis elegans]    | 1  | F:GO:0005515                                                                                                                                                                                                                                                                                                                                                                                                                                                                            | -                                              | SignalP (SIGNALP)                                                |

|                           |                                                    |    |                                                                                                                                                                                                                                                                                                                                                                                                                                                                                         |   |                                                                                                                                                                                                                               |
|---------------------------|----------------------------------------------------|----|-----------------------------------------------------------------------------------------------------------------------------------------------------------------------------------------------------------------------------------------------------------------------------------------------------------------------------------------------------------------------------------------------------------------------------------------------------------------------------------------|---|-------------------------------------------------------------------------------------------------------------------------------------------------------------------------------------------------------------------------------|
|                           | -                                                  | 0  |                                                                                                                                                                                                                                                                                                                                                                                                                                                                                         |   |                                                                                                                                                                                                                               |
| Caenorhabditis briggsae   | heparan sulfate 3-o-sulfotransferase 4             | 6  | F:GO:0008467;<br>C:GO:0005794;<br>P:GO:0030201;<br>C:GO:0016021;<br>C:GO:0005576;<br>P:GO:0019915                                                                                                                                                                                                                                                                                                                                                                                       | - | EC:2.8.2.23<br>IPR000863; G3DSA:3.40.50.300 (GENE3D), PTHR10605 (PANTHER), SSF52540 (SUPERFAMILY)                                                                                                                             |
| Caenorhabditis elegans    | cu++ alpha polypeptide                             | 58 | F:GO:0028957;<br>C:GO:0031526;<br>P:GO:0010468;<br>P:GO:0015677;<br>P:GO:0031069;<br>C:GO:0005923;<br>P:GO:0048813;<br>C:GO:0043005;<br>C:GO:0005802;<br>F:GO:0004008;<br>C:GO:0030140;<br>P:GO:0043588;<br>P:GO:0010273;<br>P:GO:0051542;<br>C:GO:0005783;<br>P:GO:0042417;<br>P:GO:0051353;<br>C:GO:0000299;<br>C:GO:0030141;<br>P:GO:0030199;<br>C:GO:0016323;<br>P:GO:0002082;<br>F:GO:0032767;<br>P:GO:0006754;<br>P:GO:0042093;<br>P:GO:0018205;<br>P:GO:0006570;<br>P:GO:0019430 | - | EC:3.6.3.4<br>IPR001757; IPR006121; IPR006403; IPR008250; IPR018303; G3DSA:2.70.150.10 (GENE3D), G3DSA:3.30.70.100 (GENE3D), PTHR11939:SF38 (PANTHER), SSF81653 (SUPERFAMILY), SSF81660 (SUPERFAMILY), SSF81665 (SUPERFAMILY) |
| Caenorhabditis elegans    | serine threonine specific                          | 0  |                                                                                                                                                                                                                                                                                                                                                                                                                                                                                         |   |                                                                                                                                                                                                                               |
| Trichostrongylus vitrinus | protein rio1 ki-se                                 | 2  | F:GO:0005524;<br>F:GO:0004674                                                                                                                                                                                                                                                                                                                                                                                                                                                           | - | EC:2.7.11.0<br>SignalP (SIGNALP)                                                                                                                                                                                              |
|                           | -                                                  | 0  |                                                                                                                                                                                                                                                                                                                                                                                                                                                                                         |   | IPR000571; PTHR15092 (PANTHER), PTHR15092:SF2 (PANTHER)                                                                                                                                                                       |
| Bos taurus                | eukaryotic translation initiation factor subunit m | 4  | C:GO:0005852;<br>F:GO:0005515;<br>P:GO:0045948;<br>F:GO:0003743                                                                                                                                                                                                                                                                                                                                                                                                                         | - | PTHR15350 (PANTHER), PTHR15350:SF3 (PANTHER)                                                                                                                                                                                  |
|                           | -                                                  | 0  |                                                                                                                                                                                                                                                                                                                                                                                                                                                                                         |   | SignalP (SIGNALP)                                                                                                                                                                                                             |
|                           | -                                                  | 0  |                                                                                                                                                                                                                                                                                                                                                                                                                                                                                         |   | -                                                                                                                                                                                                                             |
|                           | -                                                  | 0  |                                                                                                                                                                                                                                                                                                                                                                                                                                                                                         |   | -                                                                                                                                                                                                                             |
|                           | -                                                  | 0  |                                                                                                                                                                                                                                                                                                                                                                                                                                                                                         |   | -                                                                                                                                                                                                                             |

|                         |                                               |    |                                                                                                                                                                                                                                                                                              |                                                                 |   |                                           |
|-------------------------|-----------------------------------------------|----|----------------------------------------------------------------------------------------------------------------------------------------------------------------------------------------------------------------------------------------------------------------------------------------------|-----------------------------------------------------------------|---|-------------------------------------------|
| Homo sapiens            | milk fat globule-egf factor 8 protein variant | 17 | P:GO:0001525;<br>P:GO:0006910;<br>F:GO:0008429;<br>C:GO:0009897;<br>P:GO:0043627;<br>P:GO:0050766;<br>C:GO:0005615;<br>P:GO:0006911;<br>P:GO:0007155;<br>F:GO:0005178;<br>F:GO:0001786;<br>C:GO:0031012;<br>P:GO:0044419;<br>P:GO:0008284;<br>C:GO:0005737;<br>C:GO:0019897;<br>P:GO:0007338 | -                                                               | - |                                           |
| Caenorhabditis briggsae | family protein                                | 1  | F:GO:0042802                                                                                                                                                                                                                                                                                 | -                                                               |   | IPR005627                                 |
| Caenorhabditis elegans  | briggsae cbr-daz-1 protein                    | 1  | F:GO:0003676                                                                                                                                                                                                                                                                                 | -                                                               |   | -                                         |
| Caenorhabditis elegans  | briggsae cbr-daz-1 protein                    | 1  | F:GO:0003676                                                                                                                                                                                                                                                                                 | -                                                               |   | -                                         |
| Caenorhabditis elegans  | briggsae cbr-daz-1 protein                    | 1  | F:GO:0003676                                                                                                                                                                                                                                                                                 | -                                                               |   | -                                         |
|                         | -                                             | 0  |                                                                                                                                                                                                                                                                                              |                                                                 |   | -                                         |
| Caenorhabditis briggsae | briggsae cbr-ptr-14 protein                   | 7  | P:GO:0018996;<br>C:GO:0016021;<br>P:GO:0040018;<br>P:GO:0006810;<br>F:GO:0005215;<br>F:GO:0008158;<br>P:GO:0040011                                                                                                                                                                           | -                                                               |   | SignalP (SIGNALP)                         |
|                         | -                                             | 0  |                                                                                                                                                                                                                                                                                              |                                                                 |   | SignalP (SIGNALP)                         |
|                         | -                                             | 0  |                                                                                                                                                                                                                                                                                              |                                                                 |   | SignalP (SIGNALP)                         |
|                         | -                                             | 0  |                                                                                                                                                                                                                                                                                              |                                                                 |   | -                                         |
|                         | -                                             | 0  |                                                                                                                                                                                                                                                                                              |                                                                 |   | -                                         |
| Caenorhabditis briggsae | r- interference and gene silencing protein    | 0  |                                                                                                                                                                                                                                                                                              | F:GO:0003676;<br>F:GO:0003743;<br>P:GO:0008150;<br>C:GO:0005575 |   | IPR003165; IPR012337; PTHR22891 (PANTHER) |
| Pongo abelii            | cysteine- angiogenic 61                       | 13 | P:GO:0060710;<br>P:GO:0051789;<br>P:GO:0002041;<br>P:GO:0001558;<br>P:GO:0006935;<br>P:GO:0060716;<br>F:GO:0050840;<br>P:GO:0010811;<br>F:GO:0005520;<br>F:GO:0008201;<br>C:GO:0005576;<br>P:GO:0008283;<br>P:GO:0030198                                                                     | -                                                               |   | -                                         |
|                         | -                                             | 0  |                                                                                                                                                                                                                                                                                              |                                                                 |   | IPR000436; IPR016060; SignalP (SIGNALP)   |
|                         | -                                             | 0  |                                                                                                                                                                                                                                                                                              |                                                                 |   | -                                         |
|                         | -                                             | 0  |                                                                                                                                                                                                                                                                                              |                                                                 |   | -                                         |



|                         |                                                                         |    |                                                                                                                                                                                                         |                                                |             |                                                                                                                                                          |
|-------------------------|-------------------------------------------------------------------------|----|---------------------------------------------------------------------------------------------------------------------------------------------------------------------------------------------------------|------------------------------------------------|-------------|----------------------------------------------------------------------------------------------------------------------------------------------------------|
| Caenorhabditis elegans  | suppressor with morphological effect on genitalia family member (smg-1) | 2  | F:GO:0005488;<br>F:GO:0016772                                                                                                                                                                           | -                                              |             | IPR013889                                                                                                                                                |
|                         | -                                                                       | 0  |                                                                                                                                                                                                         |                                                |             | -                                                                                                                                                        |
| Caenorhabditis briggsae | elegans protein confirmed by transcript evidence                        | 0  |                                                                                                                                                                                                         | P:GO:0055114;<br>F:GO:0016491                  |             | IPR001534                                                                                                                                                |
|                         | -                                                                       | 0  |                                                                                                                                                                                                         |                                                |             | SignalP (SIGNALP)                                                                                                                                        |
|                         | -                                                                       | 0  |                                                                                                                                                                                                         |                                                |             | -                                                                                                                                                        |
| Caenorhabditis briggsae | briggsae cbr-sax-1 protein                                              | 12 | P:GO:0007243;<br>F:GO:0004674;<br>P:GO:0048814;<br>F:GO:0046872;<br>P:GO:0035317;<br>F:GO:0005524;<br>P:GO:0022416;<br>P:GO:0048800;<br>C:GO:0005938;<br>F:GO:0005515;<br>C:GO:0005634;<br>P:GO:0006468 | -                                              | EC:2.7.11.0 | IPR000719; IPR000961; IPR011009;<br>IPR017442; G3DSA:1.10.510.10<br>(GENE3D), PTHR22985 (PANTHER),<br>PTHR22985:SF33 (PANTHER)                           |
| Caenorhabditis elegans  | transmembrane cell adhesion receptor mua-3                              | 2  | F:GO:0005509;<br>F:GO:0005515                                                                                                                                                                           | -                                              |             | IPR000152; IPR006209; IPR006210;<br>IPR013091; G3DSA:2.10.25.10<br>(GENE3D), PTHR22992 (PANTHER),<br>PTHR22992:SF12 (PANTHER),<br>SSF57196 (SUPERFAMILY) |
|                         | -                                                                       | 0  |                                                                                                                                                                                                         |                                                |             | -                                                                                                                                                        |
|                         | -                                                                       | 0  |                                                                                                                                                                                                         |                                                |             | -                                                                                                                                                        |
| Ancylostoma caninum     | metalloprotease 1 precursor                                             | 1  | F:GO:0008233                                                                                                                                                                                            | -                                              |             | IPR000859; IPR001506; IPR013032;<br>IPR019742; G3DSA:3.40.390.10<br>(GENE3D), PTHR10127 (PANTHER),<br>PTHR10127:SF60 (PANTHER)                           |
| Caenorhabditis elegans  | cmp-sialic acid transporter                                             | 5  | P:GO:0015780;<br>C:GO:0005794;<br>F:GO:0005338;<br>C:GO:0016021;<br>P:GO:0044238                                                                                                                        | -                                              |             | IPR004689; IPR007271; IPR021189;<br>PTHR10231:SF10 (PANTHER),<br>SSF103481 (SUPERFAMILY)                                                                 |
| Caenorhabditis elegans  | cmp-sialic acid transporter                                             | 5  | P:GO:0015780;<br>C:GO:0005794;<br>F:GO:0005338;<br>C:GO:0016021;<br>P:GO:0044238                                                                                                                        | -                                              |             | IPR004689; IPR007271; IPR021189;<br>PTHR10231:SF10 (PANTHER),<br>SSF103481 (SUPERFAMILY)                                                                 |
| Caenorhabditis briggsae | Hypothetical protein CBG09106 [Caenorhabditis briggsae]                 | 0  |                                                                                                                                                                                                         |                                                |             | -                                                                                                                                                        |
| Caenorhabditis elegans  | upf0632 protein c2orf89-like                                            | 0  |                                                                                                                                                                                                         | C:GO:0016021;<br>C:GO:0016020                  |             | -                                                                                                                                                        |
| Caenorhabditis elegans  | glutamyl-tr- amidotransferase a subunit                                 | 2  | F:GO:0016884;<br>P:GO:0019915                                                                                                                                                                           | -                                              | EC:6.3.5.0  | -                                                                                                                                                        |
| Caenorhabditis briggsae | Hypothetical protein CBG18309 [Caenorhabditis briggsae]                 | 0  |                                                                                                                                                                                                         |                                                |             | -                                                                                                                                                        |
|                         | -                                                                       | 0  |                                                                                                                                                                                                         |                                                |             | -                                                                                                                                                        |
|                         | -                                                                       | 0  |                                                                                                                                                                                                         |                                                |             | -                                                                                                                                                        |
|                         | -                                                                       | 0  |                                                                                                                                                                                                         |                                                |             | -                                                                                                                                                        |
|                         | -                                                                       | 0  |                                                                                                                                                                                                         |                                                |             | SignalP (SIGNALP)                                                                                                                                        |
| Caenorhabditis elegans  | elegans protein partially confirmed by transcript evidence              | 0  |                                                                                                                                                                                                         | P:GO:0055114;<br>F:GO:0016491;<br>F:GO:0020037 |             | IPR008333; IPR017938;<br>G3DSA:2.40.30.10 (GENE3D),<br>PTHR19370 (PANTHER),<br>PTHR19370:SF1 (PANTHER)                                                   |
| Caenorhabditis briggsae | upf0487 protein c17orf71-like protein                                   | 1  | P:GO:0000184                                                                                                                                                                                            | -                                              |             | IPR019354; PTHR13091 (PANTHER),<br>SignalP (SIGNALP)                                                                                                     |
|                         | -                                                                       | 0  |                                                                                                                                                                                                         |                                                |             | -                                                                                                                                                        |
| Haemonchus contortus    | hypothetical protein [Haemonchus contortus]                             | 0  |                                                                                                                                                                                                         |                                                |             | -                                                                                                                                                        |

|                         |                                                                               |    |                                                                                                                                                                                        |                                                |              |                                                                                                                     |
|-------------------------|-------------------------------------------------------------------------------|----|----------------------------------------------------------------------------------------------------------------------------------------------------------------------------------------|------------------------------------------------|--------------|---------------------------------------------------------------------------------------------------------------------|
|                         | -                                                                             | 0  |                                                                                                                                                                                        |                                                |              | -                                                                                                                   |
| Caenorhabditis elegans  | iron-sulfur cluster assembly accessory protein                                | 1  | P:GO:0008152                                                                                                                                                                           | -                                              |              | IPR000361; IPR016092; PTHR10072:SF26 (PANTHER), SignalP (SIGNALP)                                                   |
| Caenorhabditis elegans  | hypothetical protein B0252.1 [Caenorhabditis elegans]                         | 3  | F:GO:0005488;<br>F:GO:0004672;<br>P:GO:0040010                                                                                                                                         | -                                              |              | -                                                                                                                   |
| Caenorhabditis elegans  | elegans protein confirmed by transcript evidence                              | 0  |                                                                                                                                                                                        | P:GO:0009792                                   |              | SignalP (SIGNALP)                                                                                                   |
|                         | -                                                                             | 0  |                                                                                                                                                                                        |                                                |              | -                                                                                                                   |
|                         | -                                                                             | 0  |                                                                                                                                                                                        |                                                |              | -                                                                                                                   |
| Caenorhabditis briggsae | briggsae cbr-syd-2 protein                                                    | 1  | F:GO:0005515                                                                                                                                                                           | -                                              |              | PTHR12587 (PANTHER), PTHR12587:SF2 (PANTHER)                                                                        |
|                         | -                                                                             | 0  |                                                                                                                                                                                        |                                                |              | -                                                                                                                   |
| Caenorhabditis elegans  | cg5669                                                                        | 3  | F:GO:0008270;<br>F:GO:0003676;<br>C:GO:0005622                                                                                                                                         | -                                              |              | -                                                                                                                   |
| Caenorhabditis briggsae | #NAME?                                                                        | 11 | P:GO:0040010;<br>P:GO:0008340;<br>P:GO:0018991;<br>F:GO:0030145;<br>F:GO:0046537;<br>P:GO:0010171;<br>P:GO:0002119;<br>P:GO:0006096;<br>P:GO:0040011;<br>P:GO:0009792;<br>C:GO:0005737 | -                                              |              | IPR005995; IPR006124; IPR011258; IPR017849; IPR017850; SignalP (SIGNALP)                                            |
|                         | -                                                                             | 0  |                                                                                                                                                                                        |                                                |              | -                                                                                                                   |
| Brugia malayi           | nuclear pore glycoprotein p62                                                 | 0  |                                                                                                                                                                                        | C:GO:0005643;<br>F:GO:0017056;<br>F:GO:0005515 |              | IPR007758                                                                                                           |
| Caenorhabditis briggsae | cral trio domain containing protein                                           | 1  | P:GO:0040010                                                                                                                                                                           | -                                              |              | IPR011074; G3DSA:1.10.8.20 (GENE3D)                                                                                 |
|                         | -                                                                             | 0  |                                                                                                                                                                                        |                                                |              | -                                                                                                                   |
| Loa loa                 | cyclin-dependent ki-se 9                                                      | 10 | P:GO:0006367;<br>C:GO:0005730;<br>F:GO:0008353;<br>C:GO:0008023;<br>F:GO:0003677;<br>F:GO:0005515;<br>P:GO:0006368;<br>F:GO:0000166;<br>P:GO:0008283;<br>P:GO:0006468                  | -                                              | EC:2.7.11.23 | G3DSA:1.10.510.10 (GENE3D)                                                                                          |
| Caenorhabditis elegans  | elegans protein confirmed by transcript evidence                              | 4  | P:GO:0009792;<br>P:GO:0010171;<br>P:GO:0040017;<br>P:GO:0006898                                                                                                                        | -                                              |              | IPR002656; IPR006621; PTHR11161 (PANTHER)                                                                           |
| Caenorhabditis briggsae | sideroflexin 2                                                                | 4  | C:GO:0016020;<br>F:GO:0008324;<br>P:GO:0006812;<br>P:GO:0055085                                                                                                                        | -                                              |              | IPR004686; PTHR11153:SF7 (PANTHER)                                                                                  |
| Caenorhabditis elegans  | general substrate transporter:major facilitator superfamily mfs_1 transporter | 6  | C:GO:0016021;<br>P:GO:0009792;<br>P:GO:0040010;<br>P:GO:0055085;<br>F:GO:0005215;<br>P:GO:0002119                                                                                      | -                                              |              | IPR016196; IPR020846; G3DSA:1.20.1250.20 (GENE3D), PTHR11600 (PANTHER), PTHR11600:SF28 (PANTHER), SignalP (SIGNALP) |

|                           |                                                            |    |                                                                                                                                                                                                                          |                                                                                                                                                                                                                                                                             |            |                                                                                                                                                      |
|---------------------------|------------------------------------------------------------|----|--------------------------------------------------------------------------------------------------------------------------------------------------------------------------------------------------------------------------|-----------------------------------------------------------------------------------------------------------------------------------------------------------------------------------------------------------------------------------------------------------------------------|------------|------------------------------------------------------------------------------------------------------------------------------------------------------|
| Brugia malayi             | component of oligomeric golgi complex 6                    | 1  | C:GO:0017119                                                                                                                                                                                                             | -                                                                                                                                                                                                                                                                           |            | IPR010490                                                                                                                                            |
|                           | -                                                          | 0  |                                                                                                                                                                                                                          |                                                                                                                                                                                                                                                                             |            | SignalP (SIGNALP)                                                                                                                                    |
|                           | -                                                          | 0  |                                                                                                                                                                                                                          |                                                                                                                                                                                                                                                                             |            | -                                                                                                                                                    |
| Caenorhabditis briggsae   | temporarily assigned gene -me family member (tag-163)      | 3  | C:GO:0030054;<br>F:GO:0005515;<br>P:GO:0009987                                                                                                                                                                           | -                                                                                                                                                                                                                                                                           |            | IPR000980; IPR006020; IPR011993;<br>IPR013625; PTHR12583 (PANTHER),<br>PTHR12583:SF7 (PANTHER), SSF50729<br>(SUPERFAMILY), SSF55550<br>(SUPERFAMILY) |
|                           | -                                                          | 0  |                                                                                                                                                                                                                          |                                                                                                                                                                                                                                                                             |            | -                                                                                                                                                    |
|                           | -                                                          | 0  |                                                                                                                                                                                                                          |                                                                                                                                                                                                                                                                             |            | -                                                                                                                                                    |
| Tribolium castaneum       | histone deacetylase 11                                     | 0  |                                                                                                                                                                                                                          | P:GO:0005975;<br>F:GO:0016787;<br>F:GO:0004650                                                                                                                                                                                                                              |            | -                                                                                                                                                    |
| Loa loa                   | rho gdp-dissociation inhibitor 2                           | 2  | C:GO:0005737;<br>F:GO:0005094                                                                                                                                                                                            | -                                                                                                                                                                                                                                                                           |            | -                                                                                                                                                    |
| Caenorhabditis elegans    | briggsae cbr-gei-6 protein                                 | 0  |                                                                                                                                                                                                                          | F:GO:0016740;<br>C:GO:0009986;<br>F:GO:0004674;<br>C:GO:0016020;<br>F:GO:0004672;<br>F:GO:0005083;<br>F:GO:0003677;<br>C:GO:0015629;<br>F:GO:0000166;<br>P:GO:0006468;<br>F:GO:0005524;<br>F:GO:0016301;<br>P:GO:0006461;<br>F:GO:0005515;<br>P:GO:0008154;<br>C:GO:0005618 |            | -                                                                                                                                                    |
| Homo sapiens              | fibronectin isoform cra_n                                  | 13 | P:GO:0018149;<br>P:GO:0016477;<br>P:GO:0001525;<br>P:GO:0008360;<br>C:GO:0005793;<br>C:GO:0031093;<br>P:GO:0034446;<br>F:GO:0005518;<br>C:GO:0005577;<br>F:GO:0008201;<br>C:GO:0005578;<br>F:GO:0005201;<br>P:GO:0006953 | -                                                                                                                                                                                                                                                                           |            | PTHR19143 (PANTHER),<br>PTHR19143:SF6 (PANTHER)                                                                                                      |
| Caenorhabditis briggsae   | mesoderm development candiate isoform cra_b                | 1  | C:GO:0044464                                                                                                                                                                                                             | -                                                                                                                                                                                                                                                                           |            | IPR019330; PTHR17600 (PANTHER)                                                                                                                       |
| Teladorsagia circumcincta | class 3 lipase protein                                     | 2  | F:GO:0004806;<br>P:GO:0006629                                                                                                                                                                                            | -                                                                                                                                                                                                                                                                           | EC:3.1.1.3 | IPR002921; G3DSA:3.40.50.1820<br>(GENE3D), SSF53474 (SUPERFAMILY)                                                                                    |
| Caenorhabditis elegans    | elegans protein confirmed by transcript evidence           | 0  |                                                                                                                                                                                                                          | F:GO:0046872;<br>P:GO:0008152;<br>F:GO:0043874;<br>P:GO:0019509                                                                                                                                                                                                             |            | -                                                                                                                                                    |
| Caenorhabditis briggsae   | elegans protein confirmed by transcript evidence           | 0  |                                                                                                                                                                                                                          | P:GO:0006508;<br>F:GO:0008270                                                                                                                                                                                                                                               |            | IPR016181                                                                                                                                            |
| Caenorhabditis elegans    | elegans protein partially confirmed by transcript evidence | 0  |                                                                                                                                                                                                                          |                                                                                                                                                                                                                                                                             |            | -                                                                                                                                                    |
|                           | -                                                          | 0  |                                                                                                                                                                                                                          |                                                                                                                                                                                                                                                                             |            | SignalP (SIGNALP)                                                                                                                                    |
|                           | -                                                          | 0  |                                                                                                                                                                                                                          |                                                                                                                                                                                                                                                                             |            | -                                                                                                                                                    |

|                         |                                                                                         |   |                                                                                                                                                      |                                                                                  |  |                                                             |
|-------------------------|-----------------------------------------------------------------------------------------|---|------------------------------------------------------------------------------------------------------------------------------------------------------|----------------------------------------------------------------------------------|--|-------------------------------------------------------------|
| Caenorhabditis elegans  | cmgc cdk protein ki-se                                                                  | 0 |                                                                                                                                                      | F:GO:0004672;<br>F:GO:0005524;<br>F:GO:0000166;<br>P:GO:0006468;<br>F:GO:0004674 |  | PTHR11295 (PANTHER),<br>PTHR11295:SF95 (PANTHER)            |
| -                       | -                                                                                       | 0 |                                                                                                                                                      |                                                                                  |  | SignalP (SIGNALP)                                           |
| -                       | -                                                                                       | 0 |                                                                                                                                                      |                                                                                  |  | -                                                           |
| -                       | -                                                                                       | 0 |                                                                                                                                                      |                                                                                  |  | -                                                           |
| Caenorhabditis elegans  | daf-16-dependent longevity (wt but not daf-16 lifespan increased) family member (ddl-3) | 2 | P:GO:0008340;<br>P:GO:0040010                                                                                                                        | -                                                                                |  | SignalP (SIGNALP)                                           |
| Loa loa                 | hypothetical protein LOAG_07593 [Loa loa]                                               | 0 |                                                                                                                                                      |                                                                                  |  | -                                                           |
| -                       | -                                                                                       | 0 |                                                                                                                                                      |                                                                                  |  | -                                                           |
| -                       | -                                                                                       | 0 |                                                                                                                                                      |                                                                                  |  | -                                                           |
| Caenorhabditis briggsae | proteasome ( macropain) 26s non- 12                                                     | 6 | P:GO:0051436;<br>P:GO:0051437;<br>C:GO:0005838;<br>P:GO:0000003;<br>P:GO:0031145;<br>F:GO:0005515                                                    | -                                                                                |  | -                                                           |
| Tetraodon nigroviridis  | dead (asp-glu-ala-asp) box polypeptide 1                                                | 9 | F:GO:0003723;<br>F:GO:0008026;<br>P:GO:0000245;<br>F:GO:0005524;<br>C:GO:0010494;<br>F:GO:0005515;<br>P:GO:0006446;<br>P:GO:0007275;<br>F:GO:0003724 | -                                                                                |  | IPR003877; PTHR12381 (PANTHER),<br>PTHR12381:SF10 (PANTHER) |
| -                       | -                                                                                       | 0 |                                                                                                                                                      |                                                                                  |  | -                                                           |
| Caenorhabditis elegans  | post-gpi attachment to proteins factor 2                                                | 5 | F:GO:0008565;<br>P:GO:0006506;<br>C:GO:0016021;<br>C:GO:0000139;<br>C:GO:0005789                                                                     | -                                                                                |  | IPR019402; PTHR12892 (PANTHER),<br>SignalP (SIGNALP)        |
| -                       | -                                                                                       | 0 |                                                                                                                                                      |                                                                                  |  | -                                                           |
| -                       | -                                                                                       | 0 |                                                                                                                                                      |                                                                                  |  | -                                                           |
| Caenorhabditis elegans  | elegans protein partially confirmed by transcript evidence                              | 0 |                                                                                                                                                      |                                                                                  |  | PTHR12187 (PANTHER),<br>PTHR12187:SF2 (PANTHER)             |
| -                       | -                                                                                       | 0 |                                                                                                                                                      |                                                                                  |  | -                                                           |
| Caenorhabditis briggsae | Hypothetical protein CBG12630 [Caenorhabditis briggsae]                                 | 0 |                                                                                                                                                      | C:GO:0016020                                                                     |  | -                                                           |
| Caenorhabditis elegans  | abnormal embryogenesis family member (emb-27)                                           | 0 |                                                                                                                                                      | P:GO:0000003;<br>P:GO:0040035;<br>P:GO:0009792;<br>P:GO:0007126;<br>P:GO:0007067 |  | IPR011990; IPR013026                                        |
| Caenorhabditis briggsae | uncoordinated family member (unc-89)                                                    | 0 |                                                                                                                                                      |                                                                                  |  | IPR013098; IPR013783                                        |
| Caenorhabditis elegans  | briggsae cbr-hmg-5 protein                                                              | 0 |                                                                                                                                                      | C:GO:0005694;<br>F:GO:0003677;<br>C:GO:0005634                                   |  | IPR000910; IPR009071; PTHR13711<br>(PANTHER)                |
| -                       | -                                                                                       | 0 |                                                                                                                                                      |                                                                                  |  | -                                                           |

|                         |                                               |    |                                                                                                                                                                                                                                           |   |             |                                                                                                                                |
|-------------------------|-----------------------------------------------|----|-------------------------------------------------------------------------------------------------------------------------------------------------------------------------------------------------------------------------------------------|---|-------------|--------------------------------------------------------------------------------------------------------------------------------|
| Caenorhabditis elegans  | utrophin                                      | 9  | F:GO:0005277;<br>P:GO:0015870;<br>P:GO:0001954;<br>P:GO:0007271;<br>P:GO:0046716;<br>F:GO:0005515;<br>P:GO:0040017;<br>C:GO:0016010;<br>C:GO:0005737                                                                                      | - |             | IPR002017; IPR005829;<br>G3DSA:1.20.58.60 (GENE3D),<br>SSF46966 (SUPERFAMILY)                                                  |
| Caenorhabditis briggsae | briggsae cbr-nsh-1 protein                    | 0  |                                                                                                                                                                                                                                           |   |             | -                                                                                                                              |
|                         | -                                             | 0  |                                                                                                                                                                                                                                           |   |             | -                                                                                                                              |
| Tomato ringspot virus   | polyprotein                                   | 1  | F:GO:0016787                                                                                                                                                                                                                              | - |             | IPR001205; G3DSA:3.30.70.270<br>(GENE3D), SSF56672 (SUPERFAMILY)                                                               |
|                         | -                                             | 0  |                                                                                                                                                                                                                                           |   |             | -                                                                                                                              |
| Brugia malayi           | lethal family member (let-805)                | 8  | P:GO:0018996;<br>P:GO:0009792;<br>P:GO:0008340;<br>P:GO:0000003;<br>F:GO:0005515;<br>P:GO:0006898;<br>P:GO:0002119;<br>P:GO:0040011                                                                                                       | - |             | IPR013783                                                                                                                      |
| Caenorhabditis remanei  | protein ki-se family member (kin-20)          | 14 | P:GO:0040010;<br>P:GO:0016055;<br>F:GO:0004674;<br>P:GO:0000003;<br>F:GO:0005524;<br>P:GO:0010171;<br>P:GO:0002119;<br>P:GO:0040011;<br>P:GO:0032436;<br>P:GO:0009792;<br>C:GO:0005737;<br>P:GO:0040018;<br>C:GO:0005634;<br>P:GO:0006468 | - | EC:2.7.11.0 | IPR000719; IPR011009; IPR017441;<br>IPR017442; G3DSA:3.30.200.20<br>(GENE3D), PTHR11909 (PANTHER),<br>PTHR11909:SF18 (PANTHER) |
| Mus musculus            | transmembrane protein isoform cra_a           | 1  | C:GO:0016021                                                                                                                                                                                                                              | - |             | -                                                                                                                              |
|                         | -                                             | 0  |                                                                                                                                                                                                                                           |   |             | -                                                                                                                              |
| Brugia malayi           | tsc-22 dip bun family protein                 | 2  | P:GO:0006970;<br>F:GO:0005515                                                                                                                                                                                                             | - |             | IPR000580                                                                                                                      |
| Caenorhabditis elegans  | protein ki-se c                               | 4  | P:GO:0006468;<br>F:GO:0046872;<br>F:GO:0005524;<br>F:GO:0004674                                                                                                                                                                           | - | EC:2.7.11.0 | IPR000008; G3DSA:2.60.40.150<br>(GENE3D)                                                                                       |
| Pongo abelii            | complement component 4a (rodgers blood group) | 5  | C:GO:0005615;<br>P:GO:0006957;<br>F:GO:0005515;<br>P:GO:0006958;<br>F:GO:0004866                                                                                                                                                          | - |             | -                                                                                                                              |

|                         |                                                            |    |                                                                                                                                                                                                                                                                                                                                                                  |              |                                                                                         |
|-------------------------|------------------------------------------------------------|----|------------------------------------------------------------------------------------------------------------------------------------------------------------------------------------------------------------------------------------------------------------------------------------------------------------------------------------------------------------------|--------------|-----------------------------------------------------------------------------------------|
| Caenorhabditis briggsae | elegans protein partially confirmed by transcript evidence | 0  | F:GO:0030247;<br>C:GO:0016021;<br>F:GO:0016787;<br>F:GO:0003676;<br>P:GO:0016042;<br>C:GO:0005576;<br>F:GO:0003824;<br>F:GO:0005044;<br>P:GO:0006935;<br>F:GO:0047391;<br>P:GO:0008152;<br>F:GO:0046872;<br>P:GO:0006955                                                                                                                                         |              | IPR002591; IPR017849; IPR017850;<br>PTHR10151 (PANTHER),<br>PTHR10151:SF28 (PANTHER)    |
|                         | -                                                          | 0  |                                                                                                                                                                                                                                                                                                                                                                  |              | -                                                                                       |
| Caenorhabditis briggsae | uncoordinated family member (unc-43)                       | 21 | P:GO:0006468;<br>F:GO:0004683;<br>P:GO:0040018;<br>P:GO:0040017;<br>C:GO:0048786;<br>P:GO:0008049;<br>P:GO:0007616;<br>C:GO:0005737;<br>C:GO:0045211;<br>F:GO:0046872;<br>C:GO:0030425;<br>P:GO:0007528;<br>P:GO:0007067;<br>C:GO:0030424;<br>P:GO:0051932;<br>C:GO:0005886;<br>P:GO:0006952;<br>F:GO:0005516;<br>F:GO:0005524;<br>P:GO:0051489;<br>C:GO:0005954 | EC:2.7.11.17 | IPR000719; IPR011009; IPR015742;<br>IPR017442; IPR020636;<br>G3DSA:1.10.510.10 (GENE3D) |
|                         | -                                                          | 0  |                                                                                                                                                                                                                                                                                                                                                                  |              | -                                                                                       |
| Loa loa                 | briggsae cbr-hyl-2 protein                                 | 0  | C:GO:0016021;<br>C:GO:0016020                                                                                                                                                                                                                                                                                                                                    |              | -                                                                                       |
|                         | -                                                          | 0  |                                                                                                                                                                                                                                                                                                                                                                  |              | SignalP (SIGNALP)                                                                       |
|                         | -                                                          | 0  |                                                                                                                                                                                                                                                                                                                                                                  |              | IPR018801; SignalP (SIGNALP)                                                            |
|                         | -                                                          | 0  |                                                                                                                                                                                                                                                                                                                                                                  |              | SignalP (SIGNALP)                                                                       |
| Caenorhabditis elegans  | vent 1 transcription factor                                | 2  | F:GO:0003677;<br>P:GO:0045449                                                                                                                                                                                                                                                                                                                                    | -            | -                                                                                       |
|                         | -                                                          | 0  |                                                                                                                                                                                                                                                                                                                                                                  |              | SignalP (SIGNALP)                                                                       |

|                         |                                                  |    |                                                                                                                                                                                                                                                                                                                                                                                                                                                       |   |                                                                                          |
|-------------------------|--------------------------------------------------|----|-------------------------------------------------------------------------------------------------------------------------------------------------------------------------------------------------------------------------------------------------------------------------------------------------------------------------------------------------------------------------------------------------------------------------------------------------------|---|------------------------------------------------------------------------------------------|
| Nematostella vectensis  | forkhead box n4                                  | 26 | F:GO:0016566;<br>C:GO:0000785;<br>P:GO:0008016;<br>P:GO:0048813;<br>P:GO:0043193;<br>C:GO:0005701;<br>P:GO:0007389;<br>P:GO:0007517;<br>P:GO:0007400;<br>F:GO:0003704;<br>C:GO:0005730;<br>F:GO:0016563;<br>C:GO:0005667;<br>P:GO:0007391;<br>P:GO:0048663;<br>P:GO:0008105;<br>F:GO:0003705;<br>P:GO:0010551;<br>P:GO:0048749;<br>P:GO:0051090;<br>F:GO:0003690;<br>F:GO:0008301;<br>F:GO:0010843;<br>F:GO:0008134;<br>P:GO:0007476;<br>P:GO:0006325 | - | IPR001766; IPR011991; IPR018122;<br>SSF46785 (SUPERFAMILY)                               |
| -                       | -                                                | 0  |                                                                                                                                                                                                                                                                                                                                                                                                                                                       |   | -                                                                                        |
| -                       | -                                                | 0  |                                                                                                                                                                                                                                                                                                                                                                                                                                                       |   | SignalP (SIGNALP)                                                                        |
| -                       | -                                                | 0  |                                                                                                                                                                                                                                                                                                                                                                                                                                                       |   | -                                                                                        |
| Caenorhabditis elegans  | myosin heavy chain                               | 6  | F:GO:0003779;<br>C:GO:0016459;<br>F:GO:0005524;<br>F:GO:0003774;<br>C:GO:0031672;<br>P:GO:0007626                                                                                                                                                                                                                                                                                                                                                     | - | -                                                                                        |
| Caenorhabditis briggsae | elegans protein confirmed by transcript evidence | 4  | P:GO:0040026;<br>P:GO:0007052;<br>F:GO:0005515;<br>P:GO:0051301                                                                                                                                                                                                                                                                                                                                                                                       | - | -                                                                                        |
| -                       | -                                                | 0  |                                                                                                                                                                                                                                                                                                                                                                                                                                                       |   | -                                                                                        |
| -                       | -                                                | 0  |                                                                                                                                                                                                                                                                                                                                                                                                                                                       |   | SignalP (SIGNALP)                                                                        |
| Caenorhabditis briggsae | briggsae cbr-cdh-1 protein                       | 5  | P:GO:0002119;<br>P:GO:0007155;<br>P:GO:0040010;<br>P:GO:0040011;<br>C:GO:0016020                                                                                                                                                                                                                                                                                                                                                                      | - | -                                                                                        |
| Caenorhabditis elegans  | testis expressed 10                              | 3  | P:GO:0040010;<br>P:GO:0006898;<br>P:GO:0002119                                                                                                                                                                                                                                                                                                                                                                                                        | - | IPR011989; IPR016024; PTHR16056<br>(PANTHER), PTHR16056:SF2<br>(PANTHER), PF12333 (PFAM) |
| -                       | -                                                | 0  |                                                                                                                                                                                                                                                                                                                                                                                                                                                       |   | -                                                                                        |
| Xenopus laevis          | sideroflexin 1                                   | 7  | C:GO:0005743;<br>F:GO:0005515;<br>F:GO:0008324;<br>P:GO:0030218;<br>P:GO:0055085;<br>C:GO:0016021;<br>P:GO:0006826                                                                                                                                                                                                                                                                                                                                    | - | IPR004686; PTHR11153:SF9<br>(PANTHER)                                                    |
| -                       | -                                                | 0  |                                                                                                                                                                                                                                                                                                                                                                                                                                                       |   | SignalP (SIGNALP)                                                                        |

|                         |                                                            |   |                                                                                                                                                      |   |              |                                                                                                                |
|-------------------------|------------------------------------------------------------|---|------------------------------------------------------------------------------------------------------------------------------------------------------|---|--------------|----------------------------------------------------------------------------------------------------------------|
|                         | -                                                          | 0 |                                                                                                                                                      |   |              | SignalP (SIGNALP)                                                                                              |
| Caenorhabditis elegans  | elegans protein partially confirmed by transcript evidence | 1 | F:GO:0005515                                                                                                                                         | - |              | -                                                                                                              |
|                         | -                                                          | 0 |                                                                                                                                                      |   |              | -                                                                                                              |
|                         | -                                                          | 0 |                                                                                                                                                      |   |              | -                                                                                                              |
| Caenorhabditis briggsae | inositol -triphosphate receptor                            | 3 | P:GO:0006810;<br>C:GO:0044464;<br>F:GO:0005216                                                                                                       | - |              | IPR015925; PTHR13715:SF2 (PANTHER)                                                                             |
|                         | -                                                          | 0 |                                                                                                                                                      |   |              | -                                                                                                              |
| Haemonchus contortus    | thioredoxin reductase 2                                    | 8 | P:GO:0009987;<br>C:GO:0005739;<br>F:GO:0005515;<br>F:GO:0000166;<br>P:GO:0008152;<br>F:GO:0050662;<br>P:GO:0000305;<br>F:GO:0004791                  | - | EC:1.8.1.9   | IPR006338; IPR013027; PR00411 (PRINTS), G3DSA:3.50.50.60 (GENE3D), PTHR22912 (PANTHER), SSF51905 (SUPERFAMILY) |
| Loa loa                 | zag-1                                                      | 6 | F:GO:0030528;<br>F:GO:0003700;<br>F:GO:0043565;<br>C:GO:0005634;<br>F:GO:0008270;<br>P:GO:0006355                                                    | - |              | -                                                                                                              |
| Caenorhabditis elegans  | s-adenosylmethionine mitochondrial carrier protein         | 4 | C:GO:0016021;<br>C:GO:0005739;<br>F:GO:0005488;<br>P:GO:0055085                                                                                      | - |              | IPR001993; IPR018108; G3DSA:1.50.40.10 (GENE3D), PTHR11896:SF45 (PANTHER)                                      |
|                         | -                                                          | 0 |                                                                                                                                                      |   |              | -                                                                                                              |
| Caenorhabditis elegans  | protein-tyrosine phosphatase containing protein            | 2 | F:GO:0016791;<br>P:GO:0009792                                                                                                                        | - | EC:3.1.3.0   | IPR000242; G3DSA:3.90.190.10 (GENE3D), PTHR19134 (PANTHER), PTHR19134:SF26 (PANTHER), SSF52799 (SUPERFAMILY)   |
|                         | -                                                          | 0 |                                                                                                                                                      |   |              | SignalP (SIGNALP)                                                                                              |
|                         | -                                                          | 0 |                                                                                                                                                      |   |              | -                                                                                                              |
| Caenorhabditis briggsae | briggsae cbr-lam-3 protein                                 | 5 | C:GO:0005606;<br>P:GO:0030334;<br>P:GO:0045995;<br>P:GO:0030155;<br>F:GO:0005102                                                                     | - |              | -                                                                                                              |
|                         | -                                                          | 0 |                                                                                                                                                      |   |              | -                                                                                                              |
| Caenorhabditis elegans  | -d-dependent malic mitochondrial precursor                 | 9 | P:GO:0009060;<br>F:GO:0046872;<br>P:GO:0006090;<br>F:GO:0051287;<br>P:GO:0006108;<br>P:GO:0055114;<br>F:GO:0004473;<br>C:GO:0005739;<br>P:GO:0006800 | - | EC:1.1.1.40  | IPR016040; PTHR23406 (PANTHER), PTHR23406:SF2 (PANTHER), SSF51735 (SUPERFAMILY)                                |
|                         | -                                                          | 0 |                                                                                                                                                      |   |              | -                                                                                                              |
|                         | -                                                          | 0 |                                                                                                                                                      |   |              | SignalP (SIGNALP)                                                                                              |
| Brugia malayi           | uncharacterized protein c4orf34 homolog                    | 1 | F:GO:0005515                                                                                                                                         | - |              | IPR020309                                                                                                      |
|                         | -                                                          | 0 |                                                                                                                                                      |   |              | -                                                                                                              |
| Homo sapiens            | keratinocyte associated protein 2                          | 4 | C:GO:0008250;<br>C:GO:0016021;<br>F:GO:0004579;<br>P:GO:0018279                                                                                      | - | EC:2.4.1.119 | -                                                                                                              |



|                         |                                                            |   |                                                                                                                                     |   |                                                         |                                                                                                                                                                          |
|-------------------------|------------------------------------------------------------|---|-------------------------------------------------------------------------------------------------------------------------------------|---|---------------------------------------------------------|--------------------------------------------------------------------------------------------------------------------------------------------------------------------------|
| Caenorhabditis briggsae | briggsae cbr-cyp-33a1 protein                              | 2 | F:GO:0046872;<br>P:GO:0040010                                                                                                       | - |                                                         | IPR001128; IPR002401;<br>PTHR19383:SF67 (PANTHER)                                                                                                                        |
| Caenorhabditis elegans  | daf-16 foxo germline tumor affecting family member (dct-6) | 0 |                                                                                                                                     |   |                                                         | -                                                                                                                                                                        |
| Caenorhabditis briggsae | trehalose 6-phosphate synthase                             | 3 | F:GO:0003825;<br>P:GO:0034608;<br>P:GO:0005992                                                                                      | - | EC:2.4.1.15                                             | IPR001830; G3DSA:3.40.50.2000<br>(GENE3D), PTHR10788 (PANTHER),<br>SignalP (SIGNALP), SSF53756<br>(SUPERFAMILY)                                                          |
|                         | -                                                          | 0 |                                                                                                                                     |   |                                                         | -                                                                                                                                                                        |
|                         | -                                                          | 0 |                                                                                                                                     |   |                                                         | SignalP (SIGNALP)                                                                                                                                                        |
|                         | -                                                          | 0 |                                                                                                                                     |   |                                                         | -                                                                                                                                                                        |
|                         | -                                                          | 0 |                                                                                                                                     |   |                                                         | -                                                                                                                                                                        |
| Caenorhabditis elegans  | briggsae cbr-rap-1 protein                                 | 5 | F:GO:0005525;<br>C:GO:0005886;<br>C:GO:0005829;<br>P:GO:0007264;<br>F:GO:0003924                                                    | - | EC:3.6.5.1;<br>EC:3.6.5.2;<br>EC:3.6.5.3;<br>EC:3.6.5.4 | IPR001806; IPR003577; IPR005225;<br>IPR013753; IPR020849;<br>G3DSA:3.40.50.300 (GENE3D),<br>PTHR11708 (PANTHER),<br>PTHR11708:SF126 (PANTHER),<br>SSF52540 (SUPERFAMILY) |
|                         | -                                                          | 0 |                                                                                                                                     |   |                                                         | SignalP (SIGNALP)                                                                                                                                                        |
|                         | -                                                          | 0 |                                                                                                                                     |   |                                                         | SignalP (SIGNALP)                                                                                                                                                        |
| Brugia malayi           | co-repressor protein groucho                               | 4 | P:GO:0045449;<br>P:GO:0009887;<br>F:GO:0005515;<br>P:GO:0007165                                                                     | - |                                                         | IPR001680; IPR009146; IPR011046;<br>IPR015943; IPR017986; IPR019775;<br>IPR019781; IPR019782; IPR020472;<br>PTHR10814 (PANTHER)                                          |
|                         | -                                                          | 0 |                                                                                                                                     |   |                                                         | -                                                                                                                                                                        |
|                         | -                                                          | 0 |                                                                                                                                     |   |                                                         | -                                                                                                                                                                        |
|                         | -                                                          | 0 |                                                                                                                                     |   |                                                         | -                                                                                                                                                                        |
|                         | -                                                          | 0 |                                                                                                                                     |   |                                                         | -                                                                                                                                                                        |
| Caenorhabditis elegans  | peptidase (mitochondrial processing) alpha                 | 5 | F:GO:0046872;<br>C:GO:0005743;<br>F:GO:0004222;<br>C:GO:0005759;<br>P:GO:0006508                                                    | - | EC:3.4.24.0                                             | IPR011237; IPR011249; IPR011765;<br>PTHR11851 (PANTHER),<br>PTHR11851:SF49 (PANTHER)                                                                                     |
| Caenorhabditis elegans  | elegans protein partially confirmed by transcript evidence | 8 | P:GO:0009792;<br>P:GO:0002119;<br>P:GO:0006468;<br>F:GO:0005524;<br>P:GO:0000003;<br>P:GO:0040011;<br>P:GO:0040007;<br>F:GO:0004674 | - | EC:2.7.11.0                                             | IPR011009; G3DSA:1.10.510.10<br>(GENE3D), PTHR11909 (PANTHER),<br>PTHR11909:SF19 (PANTHER)                                                                               |
|                         | -                                                          | 0 |                                                                                                                                     |   |                                                         | -                                                                                                                                                                        |

|                         |                                                                                  |    |                                                                                                                                                                                                                                                                                                              |   |              |                                                                                                                                               |
|-------------------------|----------------------------------------------------------------------------------|----|--------------------------------------------------------------------------------------------------------------------------------------------------------------------------------------------------------------------------------------------------------------------------------------------------------------|---|--------------|-----------------------------------------------------------------------------------------------------------------------------------------------|
| Caenorhabditis elegans  | structural maintenance of chromosomes 1a                                         | 18 | P:GO:000075;<br>P:GO:0007052;<br>P:GO:0042770;<br>C:GO:0000777;<br>P:GO:0051301;<br>C:GO:0005737;<br>F:GO:0046982;<br>F:GO:0003777;<br>P:GO:0008380;<br>P:GO:0007126;<br>C:GO:0008280;<br>C:GO:0000794;<br>P:GO:0007064;<br>P:GO:0009314;<br>F:GO:0003682;<br>P:GO:0032876;<br>F:GO:0005524;<br>P:GO:0006281 | - |              | IPR003395; IPR017871;<br>G3DSA:3.40.50.300 (GENE3D),<br>PTHR18937 (PANTHER),<br>PTHR18937:SF12 (PANTHER),<br>SSF52540 (SUPERFAMILY)           |
| Macaca mulatta          | eukaryotic translation initiation factor isoform 1                               | 11 | F:GO:0003743;<br>C:GO:0016281;<br>C:GO:0005829;<br>F:GO:0003729;<br>P:GO:0045948;<br>P:GO:0031100;<br>F:GO:0008026;<br>P:GO:0006200;<br>F:GO:0000339;<br>F:GO:0005524;<br>F:GO:0005515                                                                                                                       | - |              | IPR000629; IPR011545; IPR014021;<br>G3DSA:3.40.50.300 (GENE3D),<br>PTHR10967 (PANTHER),<br>PTHR10967:SF2 (PANTHER), SSF52540<br>(SUPERFAMILY) |
|                         | -                                                                                | 0  |                                                                                                                                                                                                                                                                                                              |   |              | -                                                                                                                                             |
| Caenorhabditis elegans  | eukaryotic translation initiation factor 3 subunit b                             | 14 | F:GO:0003743;<br>P:GO:0040010;<br>F:GO:0003723;<br>P:GO:0008340;<br>P:GO:0000003;<br>C:GO:0005852;<br>P:GO:0010171;<br>P:GO:0019915;<br>P:GO:0002119;<br>F:GO:0005515;<br>P:GO:0040011;<br>P:GO:0006446;<br>P:GO:0006898;<br>P:GO:0009792                                                                    | - |              | SignalP (SIGNALP)                                                                                                                             |
| Caenorhabditis elegans  | mitochondrial sorting of proteins (yeast msp) in nematode family member (mspn-1) | 10 | P:GO:0010171;<br>P:GO:0002119;<br>F:GO:0016887;<br>F:GO:0005515;<br>F:GO:0005524;<br>C:GO:0016021;<br>P:GO:0040007;<br>P:GO:0006310;<br>F:GO:0009378;<br>P:GO:0006281                                                                                                                                        | - |              | -                                                                                                                                             |
| Caenorhabditis briggsae | pseudouridylyl synthase 10                                                       | 3  | F:GO:0003723;<br>P:GO:0001522;<br>F:GO:0009982                                                                                                                                                                                                                                                               | - | EC:5.4.99.12 | -                                                                                                                                             |

|                         |                                                            |    |                                                                                                                                                                                                                                           |                                                                                                                    |                                                                                                                                                                                  |
|-------------------------|------------------------------------------------------------|----|-------------------------------------------------------------------------------------------------------------------------------------------------------------------------------------------------------------------------------------------|--------------------------------------------------------------------------------------------------------------------|----------------------------------------------------------------------------------------------------------------------------------------------------------------------------------|
| Caenorhabditis briggsae | elegans protein partially confirmed by transcript evidence | 3  | P:GO:0009056;<br>P:GO:0044238;<br>F:GO:0003824                                                                                                                                                                                            | -                                                                                                                  | SignalIP (SIGNALP)                                                                                                                                                               |
| -                       | -                                                          | 0  |                                                                                                                                                                                                                                           |                                                                                                                    | -                                                                                                                                                                                |
| -                       | -                                                          | 0  |                                                                                                                                                                                                                                           |                                                                                                                    | -                                                                                                                                                                                |
| Zea mays                | reverse identical                                          | 0  |                                                                                                                                                                                                                                           | F:GO:0003676;<br>F:GO:0003723;<br>F:GO:0000166;<br>P:GO:0006278;<br>F:GO:0004519;<br>F:GO:0003677;<br>F:GO:0003964 | -                                                                                                                                                                                |
| Caenorhabditis elegans  | uncoordinated family member (unc-103)                      | 4  | F:GO:0005249;<br>P:GO:0055085;<br>P:GO:0006813;<br>C:GO:0016021                                                                                                                                                                           | -                                                                                                                  | IPR003938; IPR003967; IPR018490;<br>G3DSA:1.10.287.630 (GENE3D),<br>PTHR10217 (PANTHER),<br>PTHR10217:SF15 (PANTHER)                                                             |
| Brugia malayi           | phosphatidylinositol 3- and 4-kinase family protein        | 5  | P:GO:0002119;<br>F:GO:0016301;<br>F:GO:0005515;<br>P:GO:0009987;<br>P:GO:0019915                                                                                                                                                          | -                                                                                                                  | IPR000341; IPR015433;<br>G3DSA:3.10.20.90 (GENE3D),<br>PTHR10048:SF9 (PANTHER), SSF54236<br>(SUPERFAMILY)                                                                        |
| -                       | -                                                          | 0  |                                                                                                                                                                                                                                           |                                                                                                                    | -                                                                                                                                                                                |
| -                       | -                                                          | 0  |                                                                                                                                                                                                                                           |                                                                                                                    | -                                                                                                                                                                                |
| Caenorhabditis elegans  | ornithine decarboxylase                                    | 1  | F:GO:0005515                                                                                                                                                                                                                              | -                                                                                                                  | IPR000183; IPR002433; IPR009006;<br>IPR022643; IPR022644; IPR022657;<br>G3DSA:3.20.20.10 (GENE3D),<br>PTHR11482 (PANTHER),<br>PTHR11482:SF4 (PANTHER), SSF51419<br>(SUPERFAMILY) |
| Caenorhabditis elegans  | pyridoxal-5-phosphate-dependent protein beta subunit       | 2  | P:GO:0008152;<br>F:GO:0030170                                                                                                                                                                                                             | -                                                                                                                  | IPR001926; G3DSA:3.40.50.1100<br>(GENE3D), PTHR10314 (PANTHER),<br>PTHR10314:SF8 (PANTHER)                                                                                       |
| -                       | -                                                          | 0  |                                                                                                                                                                                                                                           |                                                                                                                    | -                                                                                                                                                                                |
| -                       | -                                                          | 0  |                                                                                                                                                                                                                                           |                                                                                                                    | -                                                                                                                                                                                |
| Pan troglodytes         | thioredoxin                                                | 14 | C:GO:0005829;<br>P:GO:0022900;<br>P:GO:0007267;<br>C:GO:0005739;<br>F:GO:0015037;<br>P:GO:0045454;<br>P:GO:0000122;<br>F:GO:0005515;<br>P:GO:0006928;<br>P:GO:0007165;<br>C:GO:0005576;<br>P:GO:0046826;<br>P:GO:0008283;<br>C:GO:0005634 | -                                                                                                                  | IPR005746; IPR012335; IPR012336;<br>IPR013766; IPR017936; IPR017937;<br>PTHR10438:SF18 (PANTHER)                                                                                 |
| -                       | -                                                          | 0  |                                                                                                                                                                                                                                           |                                                                                                                    | -                                                                                                                                                                                |
| -                       | -                                                          | 0  |                                                                                                                                                                                                                                           |                                                                                                                    | -                                                                                                                                                                                |
| -                       | -                                                          | 0  |                                                                                                                                                                                                                                           |                                                                                                                    | SignalIP (SIGNALP)                                                                                                                                                               |
| -                       | -                                                          | 0  |                                                                                                                                                                                                                                           |                                                                                                                    | -                                                                                                                                                                                |
| Caenorhabditis elegans  | abnormal cell migration family member (mig-1)              | 2  | P:GO:0023052;<br>F:GO:0004888                                                                                                                                                                                                             | -                                                                                                                  | -                                                                                                                                                                                |

|                         |                                                     |   |                                                                                                                                                      |                                                                                  |             |                                                                                                                                                   |
|-------------------------|-----------------------------------------------------|---|------------------------------------------------------------------------------------------------------------------------------------------------------|----------------------------------------------------------------------------------|-------------|---------------------------------------------------------------------------------------------------------------------------------------------------|
| Caenorhabditis elegans  | titin                                               | 7 | P:GO:0009792;<br>P:GO:0002119;<br>P:GO:0040018;<br>F:GO:0003677;<br>P:GO:0045449;<br>P:GO:0000003;<br>C:GO:0005634                                   | -                                                                                |             | IPR007110; IPR013098; IPR013783;<br>PTHR19897 (PANTHER),<br>PTHR19897:SF11 (PANTHER),<br>SSF48726 (SUPERFAMILY)                                   |
| Homo sapiens            | proteasome ( macropain) beta 1                      | 9 | P:GO:0051436;<br>P:GO:0051437;<br>F:GO:0004298;<br>P:GO:0031145;<br>F:GO:0005515;<br>P:GO:0044419;<br>C:GO:0005737;<br>C:GO:0005839;<br>C:GO:0005634 | -                                                                                | EC:3.4.25.0 | G3DSA:3.60.20.10 (GENE3D),<br>PTHR11599 (PANTHER),<br>PTHR11599:SF8 (PANTHER), PS51476<br>(PROFILE), SignalP (SIGNALP),<br>SSF56235 (SUPERFAMILY) |
|                         | -                                                   | 0 |                                                                                                                                                      |                                                                                  |             | SignalP (SIGNALP)                                                                                                                                 |
|                         | -                                                   | 0 |                                                                                                                                                      |                                                                                  |             | -                                                                                                                                                 |
|                         | -                                                   | 0 |                                                                                                                                                      |                                                                                  |             | -                                                                                                                                                 |
| Loa loa                 | short chain dehydroge-se reductase family protein   | 1 | P:GO:0008152                                                                                                                                         | -                                                                                |             | -                                                                                                                                                 |
| Caenorhabditis elegans  | variable abnormal morphology family member (vab-19) | 0 |                                                                                                                                                      |                                                                                  |             | -                                                                                                                                                 |
| Brugia malayi           | orb2 cg5735-pb                                      | 4 | P:GO:0007616;<br>F:GO:0000166;<br>P:GO:0008049;<br>F:GO:0003729                                                                                      | -                                                                                |             | IPR000504; PTHR12566 (PANTHER),<br>SSF54928 (SUPERFAMILY)                                                                                         |
|                         | -                                                   | 0 |                                                                                                                                                      |                                                                                  |             | -                                                                                                                                                 |
| Caenorhabditis briggsae | zinc finger protein 291                             | 0 |                                                                                                                                                      | F:GO:0046872;<br>C:GO:0005783;<br>F:GO:0008270;<br>C:GO:0005634;<br>C:GO:0005622 |             | -                                                                                                                                                 |
| Caenorhabditis briggsae | zinc finger protein 291                             | 0 |                                                                                                                                                      | F:GO:0046872;<br>C:GO:0005783;<br>F:GO:0008270;<br>C:GO:0005634;<br>C:GO:0005622 |             | -                                                                                                                                                 |
|                         | -                                                   | 0 |                                                                                                                                                      |                                                                                  |             | -                                                                                                                                                 |
|                         | -                                                   | 0 |                                                                                                                                                      |                                                                                  |             | -                                                                                                                                                 |
| Brugia malayi           | lmb1-like conserved region family protein           | 1 | C:GO:0016021                                                                                                                                         | -                                                                                |             | IPR006876; PTHR21355 (PANTHER),<br>SignalP (SIGNALP)                                                                                              |
| Caenorhabditis elegans  | atp-dependent r- helicase ddx54                     | 6 | F:GO:0008026;<br>F:GO:0003723;<br>P:GO:0040010;<br>F:GO:0005524;<br>C:GO:0016021;<br>C:GO:0005634                                                    | -                                                                                |             | IPR001650; G3DSA:3.40.50.300<br>(GENE3D), PTHR10967 (PANTHER),<br>PTHR10967:SF17 (PANTHER),<br>SSF52540 (SUPERFAMILY)                             |

|                         |                                                   |    |                                                                                                                                                                                                                                                            |                                                |             |                                                                                            |
|-------------------------|---------------------------------------------------|----|------------------------------------------------------------------------------------------------------------------------------------------------------------------------------------------------------------------------------------------------------------|------------------------------------------------|-------------|--------------------------------------------------------------------------------------------|
| Caenorhabditis elegans  | -d-dependent malic mitochondrial precursor        | 15 | P:GO:0060070;<br>P:GO:0000122;<br>F:GO:0003714;<br>C:GO:0005759;<br>P:GO:0006108;<br>C:GO:0005667;<br>F:GO:0016619;<br>F:GO:0046872;<br>P:GO:0030282;<br>F:GO:0051287;<br>P:GO:0045944;<br>F:GO:0003690;<br>P:GO:0055114;<br>P:GO:0048625;<br>P:GO:0045599 | -                                              | EC:1.1.1.38 | IPR012302; IPR016040; PTHR23406 (PANTHER), PTHR23406:SF2 (PANTHER), SSF51735 (SUPERFAMILY) |
| -                       | -                                                 | 0  | -                                                                                                                                                                                                                                                          | -                                              | -           | -                                                                                          |
| Brugia malayi           | protein-tyrosine phosphatase containing protein   | 2  | P:GO:0016311;<br>F:GO:0004721                                                                                                                                                                                                                              | -                                              | EC:3.1.3.16 | SignalP (SIGNALP)                                                                          |
| Caenorhabditis elegans  | elegans protein confirmed by transcript evidence  | 3  | P:GO:0006508;<br>F:GO:0004181;<br>F:GO:0008270                                                                                                                                                                                                             | -                                              | EC:3.4.17.0 | PTHR11705 (PANTHER), PTHR11705:SF12 (PANTHER)                                              |
| -                       | -                                                 | 0  | -                                                                                                                                                                                                                                                          | -                                              | -           | -                                                                                          |
| -                       | -                                                 | 0  | -                                                                                                                                                                                                                                                          | -                                              | -           | -                                                                                          |
| -                       | -                                                 | 0  | -                                                                                                                                                                                                                                                          | -                                              | -           | IPR015880                                                                                  |
| Homo sapiens            | heterogeneous nuclear ribonucleoprotein a b       | 11 | F:GO:0003729;<br>P:GO:0001837;<br>F:GO:0003688;<br>F:GO:0005515;<br>P:GO:0043193;<br>F:GO:0003700;<br>F:GO:0000166;<br>C:GO:0030529;<br>P:GO:0045892;<br>C:GO:0005737;<br>C:GO:0005634                                                                     | -                                              | -           | SignalP (SIGNALP)                                                                          |
| Ancylostoma ceylanicum  | venom-allergen-like protein family member (vap-1) | 0  | -                                                                                                                                                                                                                                                          | P:GO:0040011;<br>P:GO:0006898;<br>C:GO:0005576 | -           | -                                                                                          |
| -                       | -                                                 | 0  | -                                                                                                                                                                                                                                                          | -                                              | -           | -                                                                                          |
| Caenorhabditis elegans  | large subunit ribosomal protein 14                | 8  | P:GO:0009792;<br>P:GO:0002119;<br>C:GO:0005840;<br>F:GO:0003735;<br>P:GO:0018996;<br>P:GO:0040010;<br>P:GO:0000003;<br>P:GO:0006412                                                                                                                        | -                                              | EC:3.6.5.3  | -                                                                                          |
| Caenorhabditis briggsae | large subunit ribosomal protein 14                | 8  | P:GO:0009792;<br>P:GO:0002119;<br>C:GO:0005840;<br>F:GO:0003735;<br>P:GO:0018996;<br>P:GO:0040010;<br>P:GO:0000003;<br>P:GO:0006412                                                                                                                        | -                                              | EC:3.6.5.3  | -                                                                                          |
| -                       | -                                                 | 0  | -                                                                                                                                                                                                                                                          | -                                              | -           | -                                                                                          |
| -                       | -                                                 | 0  | -                                                                                                                                                                                                                                                          | -                                              | -           | -                                                                                          |

|                         |                                                                        |  |                                                                                                                                                                             |                                                                 |            |                                                                                        |
|-------------------------|------------------------------------------------------------------------|--|-----------------------------------------------------------------------------------------------------------------------------------------------------------------------------|-----------------------------------------------------------------|------------|----------------------------------------------------------------------------------------|
| Onchocerca volvulus     | cyclophilin-type peptidyl-prolyl cis-trans isomerase- bmcyp-1 fragment |  | P:GO:0006457;<br>C:GO:0071011;<br>5 P:GO:0000398;<br>F:GO:0003755;<br>C:GO:0071013                                                                                          | -                                                               | EC:5.2.1.8 | -                                                                                      |
|                         | -                                                                      |  | 0                                                                                                                                                                           |                                                                 |            | -                                                                                      |
|                         | -                                                                      |  | 0                                                                                                                                                                           |                                                                 |            | -                                                                                      |
| Caenorhabditis elegans  | elegans protein partially confirmed by transcript evidence             |  | F:GO:0005515;<br>3 P:GO:0007600;<br>P:GO:0007165                                                                                                                            | -                                                               |            | IPR014756; PTHR11188 (PANTHER),<br>PTHR11188:SF10 (PANTHER)                            |
| Caenorhabditis elegans  | imprinted and ancient                                                  |  | 0                                                                                                                                                                           | F:GO:0003674;<br>P:GO:0008150;<br>P:GO:0006417;<br>C:GO:0005575 |            | IPR001498; IPR006575; IPR016135;<br>IPR020568; G3DSA:3.30.230.30<br>(GENE3D)           |
|                         | -                                                                      |  | 0                                                                                                                                                                           |                                                                 |            | -                                                                                      |
|                         | -                                                                      |  | 0                                                                                                                                                                           |                                                                 |            | -                                                                                      |
| Caenorhabditis briggsae | uncoordinated family member (unc-13)                                   |  | 10<br>F:GO:0004872;<br>F:GO:0046872;<br>P:GO:0006917;<br>C:GO:0005794;<br>P:GO:0023034;<br>C:GO:0030054;<br>P:GO:0006887;<br>P:GO:0007165;<br>C:GO:0045202;<br>P:GO:0007588 | -                                                               |            | -                                                                                      |
| Caenorhabditis briggsae | uncoordinated family member (unc-13)                                   |  | 10<br>F:GO:0004872;<br>F:GO:0046872;<br>P:GO:0006917;<br>C:GO:0005794;<br>P:GO:0023034;<br>C:GO:0030054;<br>P:GO:0006887;<br>P:GO:0007165;<br>C:GO:0045202;<br>P:GO:0007588 | -                                                               |            | IPR000008; IPR008973; IPR018029;<br>G3DSA:2.60.40.150 (GENE3D),<br>PTHR10480 (PANTHER) |
| Caenorhabditis briggsae | carnitine acetyltransferase                                            |  | 7<br>F:GO:0008415;<br>C:GO:0005777;<br>P:GO:0040011;<br>P:GO:0033540;<br>C:GO:0005783;<br>C:GO:0005739;<br>P:GO:0006091                                                     | -                                                               |            | IPR000542; PTHR22589:SF12<br>(PANTHER), SSF52777 (SUPERFAMILY)                         |
|                         | -                                                                      |  | 0                                                                                                                                                                           |                                                                 |            | -                                                                                      |
| Caenorhabditis briggsae | calcium atpase                                                         |  | 6<br>C:GO:0016021;<br>F:GO:0015662;<br>F:GO:0015085;<br>P:GO:0006754;<br>F:GO:0005524;<br>P:GO:0006812                                                                      | -                                                               |            | IPR001757; IPR004014;<br>PTHR11939:SF76 (PANTHER)                                      |
| Caenorhabditis elegans  | m protein                                                              |  | 0                                                                                                                                                                           | F:GO:0003674;<br>C:GO:0005737;<br>P:GO:0006810;<br>P:GO:0015031 |            | -                                                                                      |

|                         |                                                         |    |                                                                                                                                                                       |                                                                                                                                     |             |                                                                                                                                                               |
|-------------------------|---------------------------------------------------------|----|-----------------------------------------------------------------------------------------------------------------------------------------------------------------------|-------------------------------------------------------------------------------------------------------------------------------------|-------------|---------------------------------------------------------------------------------------------------------------------------------------------------------------|
| Caenorhabditis briggsae | actin-related protein 2 3 complex subunit 5             | 10 | P:GO:0043652;<br>C:GO:0005856;<br>P:GO:0016331;<br>P:GO:0010631;<br>P:GO:0040007;<br>P:GO:0000003;<br>P:GO:0034314;<br>P:GO:0002119;<br>P:GO:0009792;<br>C:GO:0005737 | -                                                                                                                                   | -           |                                                                                                                                                               |
| -                       | -                                                       | 0  |                                                                                                                                                                       |                                                                                                                                     |             |                                                                                                                                                               |
| Caenorhabditis elegans  | tm2 domain containing protein                           | 1  | P:GO:0044237                                                                                                                                                          | -                                                                                                                                   | -           |                                                                                                                                                               |
| Caenorhabditis briggsae | abnormal go-d development family member (gon-2)         | 0  |                                                                                                                                                                       | P:GO:0008406;<br>C:GO:0016021;<br>C:GO:0016020;<br>P:GO:0055085;<br>P:GO:0007067;<br>P:GO:0006811;<br>F:GO:0005216;<br>P:GO:0006810 |             | PTHR13800 (PANTHER)                                                                                                                                           |
| Caenorhabditis elegans  | 1-acyl-sn-glycerol-3-phosphate acyltransferase          | 3  | F:GO:0008415;<br>C:GO:0016020;<br>P:GO:0008152                                                                                                                        | -                                                                                                                                   | -           |                                                                                                                                                               |
| Pan troglodytes         | ephrin a1                                               | 0  |                                                                                                                                                                       |                                                                                                                                     |             |                                                                                                                                                               |
| Caenorhabditis elegans  | tao ki-se 1                                             | 8  | C:GO:0043231;<br>F:GO:0004674;<br>F:GO:0005524;<br>P:GO:0042327;<br>F:GO:0030295;<br>F:GO:0019901;<br>P:GO:0050790;<br>P:GO:0006468                                   | -                                                                                                                                   | EC:2.7.11.0 | IPR000719; IPR011009; IPR017441;<br>IPR017442; G3DSA:1.10.510.10<br>(GENE3D), G3DSA:3.30.200.20<br>(GENE3D), PTHR22986 (PANTHER),<br>PTHR22986:SF27 (PANTHER) |
| Caenorhabditis elegans  | amin (actin binding protein) alpha family member (fl-1) | 0  |                                                                                                                                                                       | P:GO:0006857;<br>C:GO:0016021;<br>C:GO:0016020;<br>F:GO:0005215;<br>P:GO:0006810                                                    |             | IPR013783; IPR014756; IPR017868;<br>PTHR11915 (PANTHER),<br>PTHR11915:SF55 (PANTHER)                                                                          |
| -                       | -                                                       | 0  |                                                                                                                                                                       |                                                                                                                                     |             |                                                                                                                                                               |
| Caenorhabditis briggsae | low-density lipoprotein receptor-related protein 2      | 0  |                                                                                                                                                                       | F:GO:0005509;<br>F:GO:0004872;<br>C:GO:0016021;<br>C:GO:0016020;<br>P:GO:0006898                                                    |             | G3DSA:2.10.25.10 (GENE3D),<br>PTHR10529 (PANTHER)                                                                                                             |
| Caenorhabditis elegans  | isoform e                                               | 2  | F:GO:0008324;<br>P:GO:0006812                                                                                                                                         | -                                                                                                                                   | -           |                                                                                                                                                               |
| -                       | -                                                       | 0  |                                                                                                                                                                       |                                                                                                                                     |             |                                                                                                                                                               |
| Caenorhabditis briggsae | malonyl -acyl carrier protein transacylase              | 5  | P:GO:0005975;<br>F:GO:0016773;<br>F:GO:0016301;<br>P:GO:0008610;<br>C:GO:0005739                                                                                      | -                                                                                                                                   | EC:2.7.1.0  | IPR001227; IPR014043; IPR016035;<br>PTHR10982 (PANTHER),<br>PTHR10982:SF4 (PANTHER)                                                                           |
| Caenorhabditis briggsae | malonyl -acyl carrier protein transacylase              | 5  | P:GO:0005975;<br>F:GO:0016773;<br>F:GO:0016301;<br>P:GO:0008610;<br>C:GO:0005739                                                                                      | -                                                                                                                                   | EC:2.7.1.0  | IPR001227; IPR014043; IPR016035;<br>PTHR10982 (PANTHER),<br>PTHR10982:SF4 (PANTHER)                                                                           |

|                              |                                    |   |                                                                                                                                     |                                                                                                                                                                                                         |             |                                                                                                            |
|------------------------------|------------------------------------|---|-------------------------------------------------------------------------------------------------------------------------------------|---------------------------------------------------------------------------------------------------------------------------------------------------------------------------------------------------------|-------------|------------------------------------------------------------------------------------------------------------|
| Acyrtosiphon pisum           | cg8213 cg8213-pa                   | 0 |                                                                                                                                     |                                                                                                                                                                                                         |             | IPR001254; IPR009003; IPR018114; G3DSA:2.40.10.10 (GENE3D), PTHR19355 (PANTHER), PTHR19355:SF171 (PANTHER) |
|                              | -                                  | 0 |                                                                                                                                     |                                                                                                                                                                                                         |             | -                                                                                                          |
| Aphid lethal paralysis virus | nonstructural polyprotein          | 1 | F:GO:0016787                                                                                                                        | -                                                                                                                                                                                                       |             | IPR000199; IPR009003; G3DSA:2.40.10.10 (GENE3D)                                                            |
| Caenorhabditis elegans       | glycogen synthase                  | 7 | P:GO:0009792;<br>P:GO:0010171;<br>P:GO:0002119;<br>P:GO:0005978;<br>F:GO:0005515;<br>F:GO:0004373;<br>P:GO:0040011                  | -                                                                                                                                                                                                       | EC:2.4.1.11 | IPR008631                                                                                                  |
| Oncorhynchus keta            | chromosome assembly factor caf-1   | 0 |                                                                                                                                     | F:GO:0043565;<br>F:GO:0003700;<br>F:GO:0003677;<br>C:GO:0005634;<br>F:GO:0004879;<br>F:GO:0008270;<br>P:GO:0006355;<br>F:GO:0004872;<br>F:GO:0046872;<br>P:GO:0006350;<br>F:GO:0003707;<br>P:GO:0045449 | -           | -                                                                                                          |
| Caenorhabditis elegans       | large subunit ribosomal protein 26 | 7 | P:GO:0009792;<br>P:GO:0002119;<br>F:GO:0003735;<br>P:GO:0040010;<br>P:GO:0000003;<br>C:GO:0015934;<br>P:GO:0006412                  | -                                                                                                                                                                                                       | EC:3.6.5.3  | IPR005756; IPR005824; IPR005825; IPR008991; IPR014723; PTHR11143:SF2 (PANTHER)                             |
| Caenorhabditis elegans       | large subunit ribosomal protein 26 | 8 | P:GO:0009792;<br>P:GO:0002119;<br>F:GO:0003735;<br>P:GO:0040010;<br>P:GO:0000003;<br>C:GO:0015934;<br>C:GO:0005829;<br>P:GO:0006414 | -                                                                                                                                                                                                       |             | IPR005756; IPR005824; IPR005825; IPR008991; IPR014723; PTHR11143:SF2 (PANTHER)                             |
| Caenorhabditis briggsae      | large subunit ribosomal protein 26 | 7 | P:GO:0009792;<br>P:GO:0002119;<br>F:GO:0003735;<br>P:GO:0040010;<br>P:GO:0000003;<br>C:GO:0015934;<br>P:GO:0006412                  | -                                                                                                                                                                                                       | EC:3.6.5.3  | -                                                                                                          |
| Caenorhabditis briggsae      | large subunit ribosomal protein 26 | 7 | P:GO:0009792;<br>P:GO:0002119;<br>F:GO:0003735;<br>P:GO:0040010;<br>P:GO:0000003;<br>C:GO:0015934;<br>P:GO:0006412                  | -                                                                                                                                                                                                       | EC:3.6.5.3  | -                                                                                                          |
|                              | -                                  | 0 |                                                                                                                                     |                                                                                                                                                                                                         |             | SignalP (SIGNALP)                                                                                          |
|                              | -                                  | 0 |                                                                                                                                     |                                                                                                                                                                                                         |             | SignalP (SIGNALP)                                                                                          |



|                         |                                                            |    |                                                                                                                                                                                        |   |              |                                                                                  |
|-------------------------|------------------------------------------------------------|----|----------------------------------------------------------------------------------------------------------------------------------------------------------------------------------------|---|--------------|----------------------------------------------------------------------------------|
|                         | -                                                          | 0  |                                                                                                                                                                                        |   |              | IPR007807; PTHR10925 (PANTHER), PTHR10925:SF5 (PANTHER), SignalP (SIGNALP)       |
|                         | -                                                          | 0  |                                                                                                                                                                                        |   |              | -                                                                                |
|                         | -                                                          | 0  |                                                                                                                                                                                        |   |              | -                                                                                |
|                         | -                                                          | 0  |                                                                                                                                                                                        |   |              | SignalP (SIGNALP)                                                                |
| Caenorhabditis elegans  | elegans protein confirmed by transcript evidence           | 1  | P:GO:0000003                                                                                                                                                                           | - |              | -                                                                                |
| Loa loa                 | tnni3 interacting ki-se                                    | 4  | F:GO:0005515;<br>F:GO:0004672;<br>F:GO:0000166;<br>C:GO:0044424                                                                                                                        | - |              | -                                                                                |
|                         | -                                                          | 0  |                                                                                                                                                                                        |   |              | -                                                                                |
|                         | -                                                          | 0  |                                                                                                                                                                                        |   |              | -                                                                                |
| Brugia malayi           | niemann-pick c1                                            | 11 | P:GO:0033344;<br>F:GO:0005515;<br>C:GO:0016021;<br>P:GO:0016242;<br>P:GO:0008206;<br>P:GO:0007041;<br>P:GO:0006897;<br>P:GO:0046686;<br>C:GO:0005768;<br>C:GO:0044446;<br>P:GO:0042632 | - |              | IPR003392; PTHR10796 (PANTHER), PTHR10796:SF35 (PANTHER), SSF82866 (SUPERFAMILY) |
| Caenorhabditis elegans  | elegans protein partially confirmed by transcript evidence | 0  |                                                                                                                                                                                        |   |              | -                                                                                |
| Rattus norvegicus       | beta 2                                                     | 3  | F:GO:0046872;<br>F:GO:0016787;<br>C:GO:0005739                                                                                                                                         | - |              | G3DSA:3.60.15.10 (GENE3D), PTHR23131 (PANTHER)                                   |
| Brugia malayi           | utp--ammonia ligase                                        | 4  | P:GO:0002119;<br>P:GO:0040010;<br>F:GO:0003883;<br>P:GO:0006221                                                                                                                        | - | EC:6.3.4.2   | -                                                                                |
| Caenorhabditis elegans  | rho guanine nucleotide exchange factor 17                  | 2  | P:GO:0009987;<br>P:GO:0050789                                                                                                                                                          | - |              | PTHR12877 (PANTHER), PTHR12877:SF7 (PANTHER)                                     |
| Caenorhabditis briggsae | cysteinyI-tr- cytoplasmic                                  | 3  | F:GO:0004812;<br>P:GO:0006418;<br>F:GO:0000166                                                                                                                                         | - |              | -                                                                                |
| Caenorhabditis elegans  | hypothetical protein H28G03.2 [Caenorhabditis elegans]     | 0  |                                                                                                                                                                                        |   | F:GO:0005515 | -                                                                                |
|                         | -                                                          | 0  |                                                                                                                                                                                        |   |              | -                                                                                |

|                         |                                                  |    |                                                                                                                                                                                                                                                                                                                                                                                                                                                                        |              |            |                                                                                                                          |
|-------------------------|--------------------------------------------------|----|------------------------------------------------------------------------------------------------------------------------------------------------------------------------------------------------------------------------------------------------------------------------------------------------------------------------------------------------------------------------------------------------------------------------------------------------------------------------|--------------|------------|--------------------------------------------------------------------------------------------------------------------------|
| Homo sapiens            | alpha isoform cra_a                              | 36 | P:GO:006457;<br>P:GO:0042542;<br>P:GO:0060561;<br>C:GO:0032432;<br>C:GO:0005626;<br>P:GO:0010629;<br>C:GO:0015630;<br>P:GO:0007568;<br>P:GO:0007517;<br>P:GO:0002088;<br>P:GO:0006936;<br>C:GO:0005794;<br>C:GO:0005829;<br>P:GO:0006916;<br>C:GO:0009986;<br>P:GO:0031109;<br>F:GO:0008017;<br>P:GO:0001666;<br>P:GO:0030308;<br>P:GO:0006006;<br>F:GO:0051082;<br>P:GO:0009408;<br>P:GO:0032387;<br>C:GO:0030018;<br>F:GO:0042803;<br>P:GO:0051260;<br>C:GO:0005886; | -            | -          | -                                                                                                                        |
| Caenorhabditis elegans  | malate dehydroge-se                              | 2  | P:GO:0008152;<br>F:GO:0016491                                                                                                                                                                                                                                                                                                                                                                                                                                          | -            | -          | IPR003767; G3DSA:1.10.1530.10 (GENE3D)                                                                                   |
| -                       | -                                                | 0  |                                                                                                                                                                                                                                                                                                                                                                                                                                                                        |              |            | -                                                                                                                        |
| -                       | -                                                | 0  |                                                                                                                                                                                                                                                                                                                                                                                                                                                                        |              |            | -                                                                                                                        |
| Caenorhabditis briggsae | ykd6_caeel ame: full=uncharacterized protein     | 0  |                                                                                                                                                                                                                                                                                                                                                                                                                                                                        |              |            | -                                                                                                                        |
| Caenorhabditis briggsae | threonyl-tr- synthetase                          | 3  | F:GO:0016874;<br>P:GO:0044260;<br>P:GO:0044238                                                                                                                                                                                                                                                                                                                                                                                                                         | -            | -          | IPR002314; G3DSA:3.30.930.10 (GENE3D), PTHR11451 (PANTHER), PTHR11451:SF5 (PANTHER), SSF55681 (SUPERFAMILY)              |
| Caenorhabditis briggsae | phosphatidylinositide phosphatase sac1           | 9  | P:GO:0040010;<br>P:GO:0008340;<br>C:GO:0016021;<br>F:GO:0016791;<br>P:GO:0002119;<br>P:GO:0009792;<br>C:GO:0005789;<br>P:GO:0040018;<br>C:GO:0005794                                                                                                                                                                                                                                                                                                                   | -            | EC:3.1.3.0 | IPR002013; PTHR11200 (PANTHER), PTHR11200:SF11 (PANTHER)                                                                 |
| Caenorhabditis briggsae | elegans protein confirmed by transcript evidence | 0  |                                                                                                                                                                                                                                                                                                                                                                                                                                                                        | F:GO:0016888 |            | -                                                                                                                        |
| Homo sapiens            | poly binding protein 2                           | 11 | P:GO:0043161;<br>F:GO:0003723;<br>P:GO:0050687;<br>F:GO:0031625;<br>P:GO:0016071;<br>P:GO:0008380;<br>P:GO:0045087;<br>F:GO:0003677;<br>C:GO:0030529;<br>C:GO:0005737;<br>C:GO:0005634                                                                                                                                                                                                                                                                                 | -            | -          | IPR004088; IPR018111; G3DSA:3.30.1370.10 (GENE3D), PTHR10288 (PANTHER), PTHR10288:SF48 (PANTHER), SSF54791 (SUPERFAMILY) |
| -                       | -                                                | 0  |                                                                                                                                                                                                                                                                                                                                                                                                                                                                        |              |            | -                                                                                                                        |

|                         |                                                   |    |                                                                                                                                                                                                                          |                                                                                                                                     |                                                                                                                                                                               |
|-------------------------|---------------------------------------------------|----|--------------------------------------------------------------------------------------------------------------------------------------------------------------------------------------------------------------------------|-------------------------------------------------------------------------------------------------------------------------------------|-------------------------------------------------------------------------------------------------------------------------------------------------------------------------------|
|                         | -                                                 | 0  |                                                                                                                                                                                                                          |                                                                                                                                     | -                                                                                                                                                                             |
| Caenorhabditis briggsae | dm (doublesex mab-3) domain family member (dmd-7) | 5  | F:GO:0003700;<br>F:GO:0005515;<br>P:GO:0007548;<br>C:GO:0005634;<br>P:GO:0006355                                                                                                                                         | -                                                                                                                                   | IPR001275; PTHR12322 (PANTHER),<br>PTHR12322:SF9 (PANTHER)                                                                                                                    |
| Caenorhabditis briggsae | zinc c2h2 type family protein                     | 6  | P:GO:0006952;<br>P:GO:0000003;<br>C:GO:0005622;<br>F:GO:0008270;<br>F:GO:0005515;<br>P:GO:0006898                                                                                                                        | -                                                                                                                                   | IPR007087; IPR015880                                                                                                                                                          |
|                         | -                                                 | 0  |                                                                                                                                                                                                                          |                                                                                                                                     | SignalP (SIGNALP)                                                                                                                                                             |
| Loa loa                 | briggsae cbr-hyl-2 protein                        | 0  |                                                                                                                                                                                                                          | P:GO:0006355;<br>F:GO:0043565;<br>C:GO:0016021;<br>P:GO:0045449;<br>C:GO:0016020;<br>F:GO:0003677;<br>F:GO:0003700;<br>C:GO:0005634 | PTHR12560 (PANTHER), SignalP<br>(SIGNALP)                                                                                                                                     |
| Caenorhabditis elegans  | trehalose 6-phosphate synthase                    | 2  | F:GO:0016757;<br>P:GO:0034608                                                                                                                                                                                            | -                                                                                                                                   | IPR013200; G3DSA:3.40.50.1000<br>(GENE3D)                                                                                                                                     |
|                         | -                                                 | 0  |                                                                                                                                                                                                                          |                                                                                                                                     | SignalP (SIGNALP)                                                                                                                                                             |
| Caenorhabditis brenneri | sjogren syndrome antigen b                        | 13 | P:GO:0040010;<br>F:GO:0003723;<br>P:GO:0018991;<br>C:GO:0005730;<br>P:GO:0008033;<br>P:GO:0040027;<br>F:GO:0005515;<br>F:GO:0000166;<br>P:GO:0006898;<br>C:GO:0030529;<br>P:GO:0009792;<br>P:GO:0008406;<br>C:GO:0005737 | -                                                                                                                                   | IPR000504; IPR002344; IPR006630;<br>IPR011991; IPR012677; IPR014886;<br>PTHR22792 (PANTHER),<br>PTHR22792:SF2 (PANTHER), SSF46785<br>(SUPERFAMILY), SSF54928<br>(SUPERFAMILY) |
|                         | -                                                 | 0  |                                                                                                                                                                                                                          |                                                                                                                                     | -                                                                                                                                                                             |
|                         | -                                                 | 0  |                                                                                                                                                                                                                          |                                                                                                                                     | -                                                                                                                                                                             |
| Caenorhabditis briggsae | fatty acid elongation protein 3                   | 5  | P:GO:0018996;<br>C:GO:0016021;<br>P:GO:0008340;<br>P:GO:0040010;<br>P:GO:0007283                                                                                                                                         | -                                                                                                                                   | IPR002076                                                                                                                                                                     |
| Brugia malayi           | xpa-binding protein 2                             | 11 | P:GO:0040010;<br>F:GO:0005488;<br>P:GO:0000910;<br>C:GO:0071011;<br>P:GO:0000381;<br>P:GO:0000003;<br>P:GO:0006911;<br>P:GO:0002119;<br>C:GO:0071013;<br>P:GO:0009792;<br>P:GO:0001703                                   | -                                                                                                                                   | PTHR11246 (PANTHER),<br>PTHR11246:SF5 (PANTHER)                                                                                                                               |
|                         | -                                                 | 0  |                                                                                                                                                                                                                          |                                                                                                                                     | -                                                                                                                                                                             |

|                         |                                                                                                              |  |   |                                                                                                                                                                                                                                                                                                                                                                                                                     |   |                                                                                                          |
|-------------------------|--------------------------------------------------------------------------------------------------------------|--|---|---------------------------------------------------------------------------------------------------------------------------------------------------------------------------------------------------------------------------------------------------------------------------------------------------------------------------------------------------------------------------------------------------------------------|---|----------------------------------------------------------------------------------------------------------|
| Homo sapiens            | apolipoprotein a-i binding protein                                                                           |  | 3 | C:GO:0005576;<br>C:GO:0005739;<br>F:GO:0005515                                                                                                                                                                                                                                                                                                                                                                      | - | -                                                                                                        |
| Caenorhabditis elegans  | zinc finger ccch-type containing 14                                                                          |  | 2 | P:GO:0006911;<br>F:GO:0005488                                                                                                                                                                                                                                                                                                                                                                                       | - | IPR002483; G3DSA:1.20.1390.10 (GENE3D)                                                                   |
|                         | -                                                                                                            |  | 0 |                                                                                                                                                                                                                                                                                                                                                                                                                     |   | -                                                                                                        |
|                         | -                                                                                                            |  | 0 |                                                                                                                                                                                                                                                                                                                                                                                                                     |   | -                                                                                                        |
|                         | -                                                                                                            |  | 0 |                                                                                                                                                                                                                                                                                                                                                                                                                     |   | -                                                                                                        |
| Caenorhabditis briggsae | amp-dependent synthetase and ligase                                                                          |  | 4 | P:GO:0009792;<br>P:GO:0000003;<br>P:GO:0008152;<br>F:GO:0003824                                                                                                                                                                                                                                                                                                                                                     | - | -                                                                                                        |
| Caenorhabditis elegans  | elegans protein partially confirmed by transcript evidence                                                   |  | 1 | F:GO:0005515                                                                                                                                                                                                                                                                                                                                                                                                        | - | -                                                                                                        |
| Caenorhabditis elegans  | nucleolar complex protein 3 homolog                                                                          |  | 1 | C:GO:0005730                                                                                                                                                                                                                                                                                                                                                                                                        | - | PTHR14428 (PANTHER)                                                                                      |
| Loa loa                 | briggsae cbr-xpg-1 protein                                                                                   |  | 0 | P:GO:0009411;<br>P:GO:0006295;<br>F:GO:0003677;<br>C:GO:0005634;<br>F:GO:0004520;<br>F:GO:0000405;<br>F:GO:0042803;<br>P:GO:0008340;<br>P:GO:0009792;<br>P:GO:0010225;<br>C:GO:0016591;<br>C:GO:0005675;<br>F:GO:0047485;<br>P:GO:0009650;<br>F:GO:0003824;<br>F:GO:0004519;<br>F:GO:0004518;<br>P:GO:0006289;<br>P:GO:0035264;<br>P:GO:0006283;<br>F:GO:0003697;<br>P:GO:0006281;<br>P:GO:0043066;<br>F:GO:0003690 |   | IPR001044; IPR006084                                                                                     |
| Caenorhabditis briggsae | elegans protein partially confirmed by transcript evidence                                                   |  | 0 | P:GO:0006508;<br>F:GO:0004185                                                                                                                                                                                                                                                                                                                                                                                       |   | IPR001563; IPR018202;<br>G3DSA:3.40.50.1820 (GENE3D),<br>PTHR11802:SF9 (PANTHER), SSF53474 (SUPERFAMILY) |
| Caenorhabditis elegans  | statb_caehl ame: full=sig-l transducer and activator of transcription b ame: full=zinc finger protein stat-b |  | 7 | F:GO:0003700;<br>F:GO:0004871;<br>F:GO:0005515;<br>F:GO:0005509;<br>P:GO:0007165;<br>C:GO:0005634;<br>P:GO:0006355                                                                                                                                                                                                                                                                                                  | - | -                                                                                                        |
|                         | -                                                                                                            |  | 0 |                                                                                                                                                                                                                                                                                                                                                                                                                     |   | -                                                                                                        |
| Caenorhabditis elegans  | beta chain spectrin                                                                                          |  | 1 | F:GO:0003779                                                                                                                                                                                                                                                                                                                                                                                                        |   | -                                                                                                        |
| Danio rerio             | mitochondrial protein 18 kda                                                                                 |  | 6 | P:GO:0006915;<br>C:GO:0005743;<br>F:GO:0004089;<br>P:GO:0015976;<br>C:GO:0016021;<br>F:GO:0008270                                                                                                                                                                                                                                                                                                                   | - | EC:4.2.1.1                                                                                               |
|                         | -                                                                                                            |  | 0 |                                                                                                                                                                                                                                                                                                                                                                                                                     |   | -                                                                                                        |

|                                    |                                                                          |   |                                                                                                                                     |   |                                                                                                                                  |
|------------------------------------|--------------------------------------------------------------------------|---|-------------------------------------------------------------------------------------------------------------------------------------|---|----------------------------------------------------------------------------------------------------------------------------------|
|                                    | -                                                                        | 0 |                                                                                                                                     |   | SignalP (SIGNALP)                                                                                                                |
| Caenorhabditis briggsae            | si:ch211- protein                                                        | 3 | F:GO:0005524;<br>F:GO:0004835;<br>P:GO:0006464                                                                                      | - | EC:6.3.2.25<br>IPR004344; IPR013816;<br>PTHR12241:SF9 (PANTHER), SSF56059<br>(SUPERFAMILY)                                       |
|                                    | -                                                                        | 0 |                                                                                                                                     |   | -                                                                                                                                |
| Caenorhabditis briggsae            | Hypothetical protein CBG19972 [Caenorhabditis briggsae]                  | 0 |                                                                                                                                     |   | -                                                                                                                                |
| Caenorhabditis elegans             | mgc53303 protein                                                         | 0 |                                                                                                                                     |   | -                                                                                                                                |
| Caenorhabditis elegans             | briggsae cbr-dpf-5 protein                                               | 2 | C:GO:0044444;<br>C:GO:0043231                                                                                                       | - | -                                                                                                                                |
| Caenorhabditis elegans             | px domain containing protein                                             | 3 | F:GO:0035091;<br>F:GO:0005515;<br>P:GO:0007154                                                                                      | - | -                                                                                                                                |
|                                    | -                                                                        | 0 |                                                                                                                                     |   | -                                                                                                                                |
|                                    | -                                                                        | 0 |                                                                                                                                     |   | -                                                                                                                                |
|                                    | -                                                                        | 0 |                                                                                                                                     |   | -                                                                                                                                |
|                                    | -                                                                        | 0 |                                                                                                                                     |   | -                                                                                                                                |
| Loa loa                            | kelch motif family protein                                               | 2 | P:GO:0046529;<br>C:GO:0031463                                                                                                       | - | -                                                                                                                                |
| Caenorhabditis elegans             | apg4a protein                                                            | 2 | F:GO:0005515;<br>F:GO:0008233                                                                                                       | - | IPR000318; SignalP (SIGNALP)                                                                                                     |
| Rhodobacter sphaeroides ATCC 17029 | hypothetical protein Rsph17029_3116 [Rhodobacter sphaeroides ATCC 17029] | 0 |                                                                                                                                     |   | -                                                                                                                                |
|                                    | -                                                                        | 0 |                                                                                                                                     |   | -                                                                                                                                |
| Callithrix jacchus                 | ribosomal protein s7                                                     | 8 | C:GO:0005730;<br>F:GO:0003735;<br>F:GO:0003723;<br>F:GO:0005515;<br>P:GO:0006364;<br>C:GO:0022627;<br>P:GO:0042274;<br>P:GO:0006414 | - | IPR000554                                                                                                                        |
|                                    | -                                                                        | 0 |                                                                                                                                     |   | -                                                                                                                                |
| Caenorhabditis elegans             | acid phosphatase lysosomal                                               | 1 | C:GO:0005764                                                                                                                        | - | IPR000560; G3DSA:3.40.50.1240<br>(GENE3D), PTHR11567 (PANTHER),<br>PTHR11567:SF20 (PANTHER),<br>SSF53254 (SUPERFAMILY)           |
| Caenorhabditis briggsae            | Hypothetical protein CBG16766 [Caenorhabditis briggsae]                  | 0 |                                                                                                                                     |   | PTHR21579 (PANTHER),<br>PTHR21579:SF2 (PANTHER)                                                                                  |
|                                    | -                                                                        | 0 |                                                                                                                                     |   | SignalP (SIGNALP)                                                                                                                |
| Caenorhabditis elegans             | sodium potassium adenosine triphosphatase                                | 6 | C:GO:0016021;<br>P:GO:0015672;<br>F:GO:0015077;<br>F:GO:0015662;<br>P:GO:0006754;<br>F:GO:0005524                                   | - | IPR001757; IPR008250;<br>G3DSA:1.20.1110.10 (GENE3D),<br>PTHR11939:SF100 (PANTHER), SignalP<br>(SIGNALP), SSF81665 (SUPERFAMILY) |
|                                    | -                                                                        | 0 |                                                                                                                                     |   | -                                                                                                                                |
|                                    | -                                                                        | 0 |                                                                                                                                     |   | -                                                                                                                                |

|                         |                                                            |    |                                                                                                                                                                                                         |                                                                 |                                                                                                                                                                                                                              |
|-------------------------|------------------------------------------------------------|----|---------------------------------------------------------------------------------------------------------------------------------------------------------------------------------------------------------|-----------------------------------------------------------------|------------------------------------------------------------------------------------------------------------------------------------------------------------------------------------------------------------------------------|
| Caenorhabditis briggsae | serine threonine protein ki-se                             | 12 | P:GO:0043268;<br>C:GO:0005856;<br>C:GO:0005624;<br>F:GO:0005524;<br>F:GO:0005515;<br>C:GO:0016324;<br>C:GO:0016323;<br>C:GO:0005737;<br>P:GO:0006950;<br>C:GO:0005634;<br>F:GO:0004702;<br>P:GO:0006468 | -                                                               | IPR000719; IPR002290; IPR011009;<br>IPR017441; IPR017442;<br>G3DSA:1.10.510.10 (GENE3D),<br>G3DSA:3.10.20.90 (GENE3D),<br>G3DSA:3.30.200.20 (GENE3D),<br>PTHR22986 (PANTHER),<br>PTHR22986:SF71 (PANTHER), PF12202<br>(PFAM) |
| Caenorhabditis briggsae | elegans protein partially confirmed by transcript evidence | 0  |                                                                                                                                                                                                         |                                                                 | IPR000742; IPR006210; IPR007110;<br>IPR013032; IPR013783;<br>G3DSA:2.10.25.10 (GENE3D),<br>SSF57196 (SUPERFAMILY)                                                                                                            |
|                         | -                                                          | 0  |                                                                                                                                                                                                         |                                                                 | -                                                                                                                                                                                                                            |
| Caenorhabditis briggsae | Hypothetical protein CBG17944 [Caenorhabditis briggsae]    | 0  |                                                                                                                                                                                                         |                                                                 | -                                                                                                                                                                                                                            |
|                         | -                                                          | 0  |                                                                                                                                                                                                         |                                                                 | -                                                                                                                                                                                                                            |
|                         | -                                                          | 0  |                                                                                                                                                                                                         |                                                                 | -                                                                                                                                                                                                                            |
| Ancylostoma caninum     | secreted protein 5 precursor                               | 0  |                                                                                                                                                                                                         | C:GO:0005576                                                    | IPR014044; SignalP (SIGNALP)                                                                                                                                                                                                 |
|                         | -                                                          | 0  |                                                                                                                                                                                                         |                                                                 | -                                                                                                                                                                                                                            |
| Caenorhabditis elegans  | hypothetical protein R144.11 [Caenorhabditis elegans]      | 6  | P:GO:0040035;<br>P:GO:0009792;<br>P:GO:0010171;<br>P:GO:0002119;<br>P:GO:0040018;<br>P:GO:0002009                                                                                                       | -                                                               | -                                                                                                                                                                                                                            |
|                         | -                                                          | 0  |                                                                                                                                                                                                         |                                                                 | -                                                                                                                                                                                                                            |
| Caenorhabditis elegans  | metabotropic gaba-b receptor subtype 2                     | 4  | P:GO:0042048;<br>P:GO:0031631;<br>F:GO:0004888;<br>C:GO:0016020                                                                                                                                         | -                                                               | IPR001828; IPR002455;<br>G3DSA:3.40.50.2300 (GENE3D),<br>PTHR10519 (PANTHER),<br>PTHR10519:SF4 (PANTHER), SSF53822<br>(SUPERFAMILY)                                                                                          |
| Caenorhabditis briggsae | Hypothetical protein CBG22133 [Caenorhabditis briggsae]    | 0  |                                                                                                                                                                                                         |                                                                 | SignalP (SIGNALP)                                                                                                                                                                                                            |
| Caenorhabditis elegans  | ga19517- partial                                           | 4  | P:GO:0019915;<br>C:GO:0016021;<br>P:GO:0055085;<br>F:GO:0005215                                                                                                                                         | -                                                               | IPR005828; IPR016196;<br>G3DSA:1.20.1250.20 (GENE3D),<br>PTHR11600 (PANTHER),<br>PTHR11600:SF44 (PANTHER), SignalP<br>(SIGNALP)                                                                                              |
|                         | -                                                          | 0  |                                                                                                                                                                                                         |                                                                 | G3DSA:2.40.50.40 (GENE3D)                                                                                                                                                                                                    |
|                         | -                                                          | 0  |                                                                                                                                                                                                         |                                                                 | -                                                                                                                                                                                                                            |
|                         | -                                                          | 0  |                                                                                                                                                                                                         |                                                                 | -                                                                                                                                                                                                                            |
|                         | -                                                          | 0  |                                                                                                                                                                                                         |                                                                 | SignalP (SIGNALP)                                                                                                                                                                                                            |
|                         | -                                                          | 0  |                                                                                                                                                                                                         |                                                                 | -                                                                                                                                                                                                                            |
| Caenorhabditis briggsae | elegans protein partially confirmed by transcript evidence | 1  | F:GO:0005488                                                                                                                                                                                            | -                                                               | IPR020683; PTHR18958 (PANTHER),<br>PTHR18958:SF37 (PANTHER)                                                                                                                                                                  |
|                         | -                                                          | 0  |                                                                                                                                                                                                         |                                                                 | -                                                                                                                                                                                                                            |
| Caenorhabditis briggsae | Hypothetical protein CBG13938 [Caenorhabditis briggsae]    | 0  |                                                                                                                                                                                                         | P:GO:0019752;<br>F:GO:0003824;<br>F:GO:0016831;<br>F:GO:0030170 | SignalP (SIGNALP)                                                                                                                                                                                                            |
| Brugia malayi           | exportin partial                                           | 0  |                                                                                                                                                                                                         | F:GO:0005488;<br>F:GO:0008536;<br>P:GO:0006886;<br>F:GO:0008565 | IPR013598; PTHR11223 (PANTHER),<br>PTHR11223:SF3 (PANTHER)                                                                                                                                                                   |
|                         | -                                                          | 0  |                                                                                                                                                                                                         |                                                                 | -                                                                                                                                                                                                                            |
|                         | -                                                          | 0  |                                                                                                                                                                                                         |                                                                 | -                                                                                                                                                                                                                            |

|                         |                                                            |    |                                                                                                                                                                                                         |                                                |                             |                                                                                               |
|-------------------------|------------------------------------------------------------|----|---------------------------------------------------------------------------------------------------------------------------------------------------------------------------------------------------------|------------------------------------------------|-----------------------------|-----------------------------------------------------------------------------------------------|
| Caenorhabditis elegans  | hypothetical protein Y54E5A.8 [Caenorhabditis elegans]     | 0  |                                                                                                                                                                                                         |                                                |                             | SignalP (SIGNALP)                                                                             |
|                         | -                                                          | 0  |                                                                                                                                                                                                         |                                                |                             | -                                                                                             |
| Caenorhabditis elegans  | elegans protein partially confirmed by transcript evidence | 0  |                                                                                                                                                                                                         | F:GO:0016787                                   |                             | -                                                                                             |
|                         | -                                                          | 0  |                                                                                                                                                                                                         |                                                |                             | -                                                                                             |
|                         | -                                                          | 0  |                                                                                                                                                                                                         |                                                |                             | -                                                                                             |
| Caenorhabditis elegans  | pantothe-te ki-se 4                                        | 2  | F:GO:0016301;<br>F:GO:0000166                                                                                                                                                                           | -                                              |                             | IPR002791; PTHR12280 (PANTHER),<br>PTHR12280:SF3 (PANTHER)                                    |
| Loa loa                 | actin family protein                                       | 0  |                                                                                                                                                                                                         | C:GO:0005884;<br>P:GO:0007010;<br>F:GO:0005515 |                             | IPR004000; G3DSA:3.30.420.40<br>(GENE3D), PTHR11937:SF21<br>(PANTHER), SSF53067 (SUPERFAMILY) |
|                         | -                                                          | 0  |                                                                                                                                                                                                         |                                                |                             | -                                                                                             |
| Caenorhabditis elegans  | : shorter than wild-type family member (dpy-10)            | 3  | C:GO:0005576;<br>F:GO:0042302;<br>P:GO:0040002                                                                                                                                                          | -                                              |                             | IPR002486; PTHR10499 (PANTHER),<br>PTHR10499:SF58 (PANTHER), SignalP<br>(SIGNALP)             |
| Caenorhabditis briggsae | map ki-se-interacting serine threonine-protein ki-se 1     | 9  | P:GO:0040008;<br>P:GO:0044267;<br>F:GO:0004674;<br>C:GO:0005874;<br>C:GO:0005813;<br>P:GO:0007017;<br>F:GO:0000166;<br>P:GO:0050794;<br>C:GO:0005635                                                    | -                                              | EC:2.7.11.0                 | -                                                                                             |
|                         | -                                                          | 0  |                                                                                                                                                                                                         |                                                |                             | IPR007087; IPR015880                                                                          |
|                         | -                                                          | 0  |                                                                                                                                                                                                         |                                                |                             | -                                                                                             |
|                         | -                                                          | 0  |                                                                                                                                                                                                         |                                                |                             | SignalP (SIGNALP)                                                                             |
| Homo sapiens            | ok sw-                                                     | 12 | F:GO:0003756;<br>F:GO:0004656;<br>C:GO:0005793;<br>P:GO:0045454;<br>C:GO:0009986;<br>C:GO:0042470;<br>C:GO:0005792;<br>C:GO:0005788;<br>F:GO:0005515;<br>P:GO:0018401;<br>C:GO:0005576;<br>C:GO:0005886 | -                                              | EC:5.3.4.1;<br>EC:1.14.11.2 | -                                                                                             |
| Caenorhabditis briggsae | elegans protein partially confirmed by transcript evidence | 8  | C:GO:0005737;<br>F:GO:0005525;<br>F:GO:0005515;<br>P:GO:0006913;<br>F:GO:0005509;<br>P:GO:0006886;<br>C:GO:0005634;<br>P:GO:0007264                                                                     | -                                              |                             | -                                                                                             |
| Ancylostoma ceylanicum  | metalloprotease 1 precursor                                | 4  | F:GO:0004222;<br>P:GO:0000003;<br>P:GO:0006508;<br>F:GO:0008270                                                                                                                                         | -                                              | EC:3.4.24.0                 | -                                                                                             |
|                         | -                                                          | 0  |                                                                                                                                                                                                         |                                                |                             | -                                                                                             |
|                         | -                                                          | 0  |                                                                                                                                                                                                         |                                                |                             | -                                                                                             |

|                         |                                                       |    |                                                                                                                                                                                                                                                                                                                                                                                                                                      |   |                                                                                                                                                                                                   |
|-------------------------|-------------------------------------------------------|----|--------------------------------------------------------------------------------------------------------------------------------------------------------------------------------------------------------------------------------------------------------------------------------------------------------------------------------------------------------------------------------------------------------------------------------------|---|---------------------------------------------------------------------------------------------------------------------------------------------------------------------------------------------------|
| Homo sapiens            | polyubiquitin with 3 ub domains                       | 6  | P:GO:0006464;<br>F:GO:0003735;<br>F:GO:0005515;<br>C:GO:0022627;<br>C:GO:0005634;<br>P:GO:0006414                                                                                                                                                                                                                                                                                                                                    | - | IPR000626; IPR019955;<br>G3DSA:3.10.20.90 (GENE3D),<br>PTHR10666 (PANTHER),<br>PTHR10666:SF12 (PANTHER),<br>SSF54236 (SUPERFAMILY)                                                                |
| -                       | -                                                     | 0  | -                                                                                                                                                                                                                                                                                                                                                                                                                                    | - | -                                                                                                                                                                                                 |
| -                       | -                                                     | 0  | -                                                                                                                                                                                                                                                                                                                                                                                                                                    | - | -                                                                                                                                                                                                 |
| -                       | -                                                     | 0  | -                                                                                                                                                                                                                                                                                                                                                                                                                                    | - | -                                                                                                                                                                                                 |
| Caenorhabditis elegans  | hypothetical protein F47G3.1 [Caenorhabditis elegans] | 0  | -                                                                                                                                                                                                                                                                                                                                                                                                                                    | - | -                                                                                                                                                                                                 |
| Caenorhabditis briggsae | tpr domain containing protein                         | 3  | P:GO:0040010;<br>P:GO:0040017;<br>F:GO:0005488                                                                                                                                                                                                                                                                                                                                                                                       | - | PTHR16091 (PANTHER)                                                                                                                                                                               |
| -                       | -                                                     | 0  | -                                                                                                                                                                                                                                                                                                                                                                                                                                    | - | -                                                                                                                                                                                                 |
| Caenorhabditis briggsae | 2-hydroxyphytanoyl-coa lyase                          | 3  | F:GO:0030976;<br>F:GO:0000287;<br>F:GO:0003824                                                                                                                                                                                                                                                                                                                                                                                       | - | G3DSA:3.40.50.970 (GENE3D),<br>PTHR18968 (PANTHER),<br>PTHR18968:SF6 (PANTHER),<br>SSF52518 (SUPERFAMILY)                                                                                         |
| -                       | -                                                     | 0  | -                                                                                                                                                                                                                                                                                                                                                                                                                                    | - | -                                                                                                                                                                                                 |
| -                       | -                                                     | 0  | -                                                                                                                                                                                                                                                                                                                                                                                                                                    | - | -                                                                                                                                                                                                 |
| -                       | -                                                     | 0  | -                                                                                                                                                                                                                                                                                                                                                                                                                                    | - | IPR015157                                                                                                                                                                                         |
| -                       | -                                                     | 0  | -                                                                                                                                                                                                                                                                                                                                                                                                                                    | - | -                                                                                                                                                                                                 |
| Brugia malayi           | d--directed r- polymerase iii subunit rpc1            | 2  | F:GO:0046872;<br>F:GO:0016779                                                                                                                                                                                                                                                                                                                                                                                                        | - | EC:2.7.7.0<br>IPR007081; IPR015700; PTHR19376<br>(PANTHER), SSF64484 (SUPERFAMILY)                                                                                                                |
| -                       | -                                                     | 0  | -                                                                                                                                                                                                                                                                                                                                                                                                                                    | - | SignalP (SIGNALP)                                                                                                                                                                                 |
| Caenorhabditis elegans  | mitogen-activated protein ki-se 14                    | 25 | P:GO:0001525;<br>C:GO:0005654;<br>P:GO:0009749;<br>P:GO:0007265;<br>F:GO:0004708;<br>P:GO:0002062;<br>F:GO:0008022;<br>F:GO:0008339;<br>P:GO:0046777;<br>P:GO:0006928;<br>P:GO:0000902;<br>P:GO:0031663;<br>C:GO:0044445;<br>P:GO:0000077;<br>P:GO:0007519;<br>P:GO:0019395;<br>P:GO:0006006;<br>P:GO:0006935;<br>P:GO:0045648;<br>P:GO:0032495;<br>P:GO:0045944;<br>C:GO:0005625;<br>F:GO:0005524;<br>C:GO:0000922;<br>P:GO:0051403 | - | IPR000719; IPR002290; IPR003527;<br>IPR008352; IPR011009; IPR017441;<br>IPR017442; G3DSA:1.10.510.10<br>(GENE3D), G3DSA:3.30.200.20<br>(GENE3D), PTHR11295 (PANTHER),<br>PTHR11295:SF61 (PANTHER) |
| Caenorhabditis elegans  | hypothetical protein B0252.1 [Caenorhabditis elegans] | 1  | P:GO:0040010                                                                                                                                                                                                                                                                                                                                                                                                                         | - | -                                                                                                                                                                                                 |
| -                       | -                                                     | 0  | -                                                                                                                                                                                                                                                                                                                                                                                                                                    | - | -                                                                                                                                                                                                 |
| -                       | -                                                     | 0  | -                                                                                                                                                                                                                                                                                                                                                                                                                                    | - | -                                                                                                                                                                                                 |
| -                       | -                                                     | 0  | -                                                                                                                                                                                                                                                                                                                                                                                                                                    | - | -                                                                                                                                                                                                 |



|                         |                                                                                         |    |                                                                                                                                                                                        |                                                                                  |                             |                                                                                                            |
|-------------------------|-----------------------------------------------------------------------------------------|----|----------------------------------------------------------------------------------------------------------------------------------------------------------------------------------------|----------------------------------------------------------------------------------|-----------------------------|------------------------------------------------------------------------------------------------------------|
| Caenorhabditis elegans  | solute carrier family 23 (nucleobase transporters) member 2                             | 7  | P:GO:0055085;<br>P:GO:0015882;<br>F:GO:0015229;<br>C:GO:0016021;<br>F:GO:0015370;<br>P:GO:0048513;<br>C:GO:0016323                                                                     | -                                                                                |                             | IPR006043; PTHR11119:SF8 (PANTHER)                                                                         |
| Caenorhabditis elegans  | asparagine-linked glycosylation 12 homolog ( alpha- -mannosyltransferase) isoform cra_a | 4  | P:GO:0006488;<br>F:GO:0000009;<br>C:GO:0016020;<br>C:GO:0005783                                                                                                                        | -                                                                                |                             | -                                                                                                          |
|                         | -                                                                                       | 0  |                                                                                                                                                                                        |                                                                                  |                             | -                                                                                                          |
| Caenorhabditis elegans  | protein                                                                                 | 1  | P:GO:0009886                                                                                                                                                                           | -                                                                                |                             | -                                                                                                          |
| Caenorhabditis elegans  | Hypothetical protein F44A2.3 [Caenorhabditis elegans]                                   | 0  |                                                                                                                                                                                        | F:GO:0008289                                                                     |                             | PTHR10504 (PANTHER),<br>PTHR10504:SF10 (PANTHER)                                                           |
| Caenorhabditis elegans  | phosphorylase ki-se                                                                     | 9  | C:GO:0005964;<br>C:GO:0005886;<br>F:GO:0004339;<br>P:GO:0006508;<br>F:GO:0008270;<br>F:GO:0008237;<br>P:GO:0005977;<br>F:GO:0005516;<br>F:GO:0004689                                   | -                                                                                | EC:3.2.1.3;<br>EC:2.7.11.19 | IPR008734; IPR008928; IPR011613;<br>PTHR10749:SF2 (PANTHER)                                                |
| Caenorhabditis briggsae | g-patch domain containing protein                                                       | 3  | P:GO:0019915;<br>P:GO:0010171;<br>P:GO:0002119                                                                                                                                         | -                                                                                |                             | PTHR13384 (PANTHER),<br>PTHR13384:SF8 (PANTHER)                                                            |
| Caenorhabditis elegans  | elegans protein partially confirmed by transcript evidence                              | 0  |                                                                                                                                                                                        | C:GO:0016021;<br>C:GO:0016020;<br>F:GO:0008375                                   |                             | IPR003406; PTHR19297:SF3 (PANTHER)                                                                         |
|                         | -                                                                                       | 0  |                                                                                                                                                                                        |                                                                                  |                             | -                                                                                                          |
| Tribolium castaneum     | oligopeptide transporter                                                                | 0  |                                                                                                                                                                                        | P:GO:0006857;<br>C:GO:0016021;<br>C:GO:0016020;<br>F:GO:0005215;<br>P:GO:0006810 |                             | PTHR11654 (PANTHER),<br>PTHR11654:SF13 (PANTHER), SignalP (SIGNALP)                                        |
| Pongo abelii            | capping protein (actin filament) gelsolin-like                                          | 11 | C:GO:0031965;<br>C:GO:0005730;<br>P:GO:0051016;<br>P:GO:0007076;<br>P:GO:0051301;<br>C:GO:0042470;<br>C:GO:0000796;<br>F:GO:0003779;<br>C:GO:0008290;<br>C:GO:0005576;<br>P:GO:0030031 | -                                                                                |                             | IPR007122; IPR007123;<br>G3DSA:3.40.20.10 (GENE3D),<br>PTHR11977:SF13 (PANTHER),<br>SSF55753 (SUPERFAMILY) |
|                         | -                                                                                       | 0  |                                                                                                                                                                                        |                                                                                  |                             | -                                                                                                          |
| Caenorhabditis elegans  | dystrophin-like phenotype and capon related family member (dyc-1)                       | 6  | P:GO:0046662;<br>F:GO:0030235;<br>F:GO:0005515;<br>P:GO:0040017;<br>C:GO:0016010;<br>P:GO:0046716                                                                                      | -                                                                                |                             | -                                                                                                          |

|                         |                                                                            |    |                                                                                                                                                                                                         |                                                                                  |              |                                                                                                     |
|-------------------------|----------------------------------------------------------------------------|----|---------------------------------------------------------------------------------------------------------------------------------------------------------------------------------------------------------|----------------------------------------------------------------------------------|--------------|-----------------------------------------------------------------------------------------------------|
| Caenorhabditis elegans  | clc-type chloride channel family member (clh-3)                            | 12 | F:GO:0004872;<br>F:GO:0005247;<br>C:GO:0005902;<br>C:GO:0005886;<br>F:GO:0005515;<br>P:GO:0055085;<br>C:GO:0016021;<br>C:GO:0005626;<br>P:GO:0008152;<br>F:GO:0003824;<br>C:GO:0015629;<br>P:GO:0006821 | -                                                                                | -            |                                                                                                     |
| Caenorhabditis briggsae | elegans protein confirmed by transcript evidence                           | 0  |                                                                                                                                                                                                         |                                                                                  |              | -                                                                                                   |
|                         | -                                                                          | 0  |                                                                                                                                                                                                         |                                                                                  |              | -                                                                                                   |
| Caenorhabditis elegans  | protein ki-se domain containing protein                                    | 3  | P:GO:0006468;<br>F:GO:0004687;<br>F:GO:0005524                                                                                                                                                          | -                                                                                | EC:2.7.11.18 | IPR000719; IPR008271; IPR011009;<br>IPR015730; IPR017442; IPR020636;<br>G3DSA:3.30.200.20 (GENE3D)  |
| Caenorhabditis elegans  | tir (toll and interleukin 1 receptor) domain protein family member (tir-1) | 5  | P:GO:0007165;<br>P:GO:0045087;<br>C:GO:0031224;<br>F:GO:0042802;<br>F:GO:0004888                                                                                                                        | -                                                                                |              | IPR000157; IPR001660; IPR010993;<br>IPR011510; G3DSA:3.40.50.10140<br>(GENE3D), PTHR22998 (PANTHER) |
|                         | -                                                                          | 0  |                                                                                                                                                                                                         |                                                                                  |              | SignalP (SIGNALP)                                                                                   |
|                         | -                                                                          | 0  |                                                                                                                                                                                                         |                                                                                  |              | -                                                                                                   |
|                         | -                                                                          | 0  |                                                                                                                                                                                                         |                                                                                  |              | -                                                                                                   |
|                         | -                                                                          | 0  |                                                                                                                                                                                                         |                                                                                  |              | -                                                                                                   |
| Caenorhabditis briggsae | hypothetical kda protein in chromosome                                     | 1  | P:GO:0040010                                                                                                                                                                                            | -                                                                                |              | SignalP (SIGNALP)                                                                                   |
| Caenorhabditis briggsae | d- polymerase gamma                                                        | 11 | P:GO:0008340;<br>F:GO:0016772;<br>P:GO:0007424;<br>P:GO:0008406;<br>F:GO:0003676;<br>P:GO:0002009;<br>P:GO:0006264;<br>C:GO:0005912;<br>P:GO:0030421;<br>F:GO:0016788;<br>C:GO:0005739                  | -                                                                                |              | -                                                                                                   |
| Ciona intestinalis      | thrombospondin type 1 domain containing protein                            | 0  |                                                                                                                                                                                                         | P:GO:0006508;<br>F:GO:0008237;<br>F:GO:0004222;<br>F:GO:0008233;<br>C:GO:0005576 |              | -                                                                                                   |
| Caenorhabditis elegans  | elongation factor-2 ki-se                                                  | 5  | F:GO:0008135;<br>C:GO:0005829;<br>F:GO:0004674;<br>F:GO:0000166;<br>P:GO:0006414                                                                                                                        | -                                                                                | EC:2.7.11.0  | IPR004166; IPR011009; PTHR14187<br>(PANTHER), PTHR14187:SF2<br>(PANTHER)                            |
|                         | -                                                                          | 0  |                                                                                                                                                                                                         |                                                                                  |              | -                                                                                                   |
|                         | -                                                                          | 0  |                                                                                                                                                                                                         |                                                                                  |              | -                                                                                                   |
| Caenorhabditis elegans  | conserved oligomeric golgi component family member (cogc-3)                | 2  | P:GO:0046907;<br>C:GO:0044431                                                                                                                                                                           | -                                                                                |              | IPR007265; SignalP (SIGNALP)                                                                        |
|                         | -                                                                          | 0  |                                                                                                                                                                                                         |                                                                                  |              | -                                                                                                   |
|                         | -                                                                          | 0  |                                                                                                                                                                                                         |                                                                                  |              | SignalP (SIGNALP)                                                                                   |
|                         | -                                                                          | 0  |                                                                                                                                                                                                         |                                                                                  |              | -                                                                                                   |
|                         | -                                                                          | 0  |                                                                                                                                                                                                         |                                                                                  |              | -                                                                                                   |
|                         | -                                                                          | 0  |                                                                                                                                                                                                         |                                                                                  |              | -                                                                                                   |
| Caenorhabditis elegans  | yt6j_caeel ame: full=upf0027 protein                                       | 1  | P:GO:0009886                                                                                                                                                                                            | -                                                                                |              | IPR001233                                                                                           |

|                         |                                                               |   |                                                                                                                    |                                                                                                                                     |                                                                                        |
|-------------------------|---------------------------------------------------------------|---|--------------------------------------------------------------------------------------------------------------------|-------------------------------------------------------------------------------------------------------------------------------------|----------------------------------------------------------------------------------------|
| Caenorhabditis elegans  | organic cation transporter                                    | 4 | C:GO:0016020;<br>P:GO:0009987;<br>P:GO:0006810;<br>F:GO:0005215                                                    | -                                                                                                                                   | IPR005828; IPR016196; PTHR11600 (PANTHER), PTHR11600:SF42 (PANTHER), SignalP (SIGNALP) |
| -                       | -                                                             | 0 | -                                                                                                                  | -                                                                                                                                   | -                                                                                      |
| Caenorhabditis briggsae | cy561_caeel ame: full= cytochrome b561 short=cytochrome b-561 | 0 | -                                                                                                                  | -                                                                                                                                   | -                                                                                      |
| Caenorhabditis elegans  | n-6 adenine-specific d- methyltransferase 2                   | 0 | -                                                                                                                  | F:GO:0003676;<br>P:GO:0006508;<br>F:GO:0008168;<br>F:GO:0003674;<br>F:GO:0016740;<br>P:GO:0008150;<br>P:GO:0032259;<br>C:GO:0005575 | IPR002052; IPR019369; PTHR13200 (PANTHER)                                              |
| -                       | -                                                             | 0 | -                                                                                                                  | -                                                                                                                                   | -                                                                                      |
| -                       | -                                                             | 0 | -                                                                                                                  | -                                                                                                                                   | -                                                                                      |
| -                       | -                                                             | 0 | -                                                                                                                  | -                                                                                                                                   | -                                                                                      |
| Caenorhabditis elegans  | i uaiaretic acid resistant family member (ndg-4)              | 3 | P:GO:0009792;<br>P:GO:0010171;<br>P:GO:0040010                                                                     | -                                                                                                                                   | -                                                                                      |
| -                       | -                                                             | 0 | -                                                                                                                  | -                                                                                                                                   | -                                                                                      |
| -                       | -                                                             | 0 | -                                                                                                                  | -                                                                                                                                   | SignalP (SIGNALP)                                                                      |
| Caenorhabditis elegans  | guanine-nucleotide exchange factor c3g                        | 3 | F:GO:0005085;<br>C:GO:0005622;<br>P:GO:0051056                                                                     | -                                                                                                                                   | IPR001895; IPR008937; PTHR23113:SF40 (PANTHER), SignalP (SIGNALP)                      |
| -                       | -                                                             | 0 | -                                                                                                                  | -                                                                                                                                   | -                                                                                      |
| -                       | -                                                             | 0 | -                                                                                                                  | -                                                                                                                                   | -                                                                                      |
| -                       | -                                                             | 0 | -                                                                                                                  | -                                                                                                                                   | -                                                                                      |
| -                       | -                                                             | 0 | -                                                                                                                  | -                                                                                                                                   | -                                                                                      |
| -                       | -                                                             | 0 | -                                                                                                                  | -                                                                                                                                   | -                                                                                      |
| Caenorhabditis elegans  | hypothetical protein C17H12.2 [Caenorhabditis elegans]        | 0 | -                                                                                                                  | -                                                                                                                                   | IPR018795                                                                              |
| -                       | -                                                             | 0 | -                                                                                                                  | -                                                                                                                                   | -                                                                                      |
| -                       | -                                                             | 0 | -                                                                                                                  | -                                                                                                                                   | -                                                                                      |
| -                       | -                                                             | 0 | -                                                                                                                  | -                                                                                                                                   | -                                                                                      |
| Caenorhabditis briggsae | briggsae cbr-ptr-14 protein                                   | 7 | P:GO:0018996;<br>C:GO:0016021;<br>P:GO:0040018;<br>P:GO:0006810;<br>F:GO:0005215;<br>F:GO:0008158;<br>P:GO:0040011 | -                                                                                                                                   | IPR003392; PTHR10796 (PANTHER), PTHR10796:SF14 (PANTHER)                               |
| Pongo abelii            | mannose-binding 2                                             | 6 | C:GO:0000139;<br>C:GO:0005789;<br>F:GO:0005529;<br>C:GO:0016021;<br>C:GO:0033116;<br>P:GO:0015031                  | -                                                                                                                                   | -                                                                                      |

|                         |                                                         |    |                                                                                                                                                                                        |   |              |                                                                                                                                                       |
|-------------------------|---------------------------------------------------------|----|----------------------------------------------------------------------------------------------------------------------------------------------------------------------------------------|---|--------------|-------------------------------------------------------------------------------------------------------------------------------------------------------|
| Caenorhabditis elegans  | briggsae cbr-acy-1 protein                              | 11 | P:GO:0006952;<br>P:GO:0008219;<br>C:GO:0016021;<br>F:GO:0004016;<br>P:GO:0007188;<br>P:GO:0009190;<br>P:GO:0042221;<br>P:GO:0002119;<br>P:GO:0040017;<br>C:GO:0005886;<br>P:GO:0030431 | - | EC:4.6.1.1   | IPR001054; PTHR11920 (PANTHER),<br>PTHR11920:SF10 (PANTHER)                                                                                           |
| Caenorhabditis elegans  | malate dehydroge-se                                     | 6  | F:GO:0046872;<br>F:GO:0051287;<br>C:GO:0005759;<br>F:GO:0016619;<br>P:GO:0006108;<br>P:GO:0055114                                                                                      | - | EC:1.1.1.38  | IPR012302; IPR016040; PTHR23406<br>(PANTHER), PTHR23406:SF2<br>(PANTHER), SSF51735 (SUPERFAMILY)                                                      |
| Caenorhabditis elegans  | briggsae cbr-vab-2 protein                              | 1  | C:GO:0016020                                                                                                                                                                           | - |              | IPR001799; IPR008972;<br>PTHR11304:SF23 (PANTHER)                                                                                                     |
| Caenorhabditis elegans  | briggsae cbr-smgl-1 protein                             | 0  |                                                                                                                                                                                        |   |              | -                                                                                                                                                     |
| -                       | -                                                       | 0  |                                                                                                                                                                                        |   |              | SignalP (SIGNALP)                                                                                                                                     |
| -                       | -                                                       | 0  |                                                                                                                                                                                        |   |              | -                                                                                                                                                     |
| Caenorhabditis briggsae | Hypothetical protein CBG01673 [Caenorhabditis briggsae] | 1  | F:GO:0005488                                                                                                                                                                           | - |              | -                                                                                                                                                     |
| -                       | -                                                       | 0  |                                                                                                                                                                                        |   |              | -                                                                                                                                                     |
| -                       | -                                                       | 0  |                                                                                                                                                                                        |   |              | -                                                                                                                                                     |
| Caenorhabditis elegans  | briggsae cbr-lmn-1 protein                              | 2  | C:GO:0005635;<br>F:GO:0005515                                                                                                                                                          | - |              | IPR001322; IPR001664; IPR016044;<br>G3DSA:1.20.5.170 (GENE3D),<br>G3DSA:2.60.40.1260 (GENE3D),<br>PTHR23239:SF11 (PANTHER),<br>SSF74853 (SUPERFAMILY) |
| Caenorhabditis elegans  | elegans protein confirmed by transcript evidence        | 3  | P:GO:0019915;<br>P:GO:0040018;<br>P:GO:0040011                                                                                                                                         | - |              | -                                                                                                                                                     |
| Caenorhabditis elegans  | tyrosyl-tr- synthetase                                  | 3  | F:GO:0004812;<br>P:GO:0006418;<br>F:GO:0000166                                                                                                                                         | - |              | IPR002307; G3DSA:1.10.240.10<br>(GENE3D), SSF52374 (SUPERFAMILY)                                                                                      |
| -                       | -                                                       | 0  |                                                                                                                                                                                        |   |              | -                                                                                                                                                     |
| -                       | -                                                       | 0  |                                                                                                                                                                                        |   |              | -                                                                                                                                                     |
| Ciona intestinalis      | epidermal retinol dehydroge-se 2                        | 6  | P:GO:0042572;<br>P:GO:0042574;<br>C:GO:0000299;<br>F:GO:0004745;<br>P:GO:0043616;<br>C:GO:0005789                                                                                      | - | EC:1.1.1.105 | IPR002198; IPR002347; IPR016040;<br>PTHR19410:SF36 (PANTHER),<br>SSF51735 (SUPERFAMILY)                                                               |
| -                       | -                                                       | 0  |                                                                                                                                                                                        |   |              | -                                                                                                                                                     |
| -                       | -                                                       | 0  |                                                                                                                                                                                        |   |              | -                                                                                                                                                     |
| -                       | -                                                       | 0  |                                                                                                                                                                                        |   |              | -                                                                                                                                                     |
| -                       | -                                                       | 0  |                                                                                                                                                                                        |   |              | -                                                                                                                                                     |

|                         |                                                            |    |                                                                                                                                                                       |                                                                                                   |             |                                                                                                                                                                        |
|-------------------------|------------------------------------------------------------|----|-----------------------------------------------------------------------------------------------------------------------------------------------------------------------|---------------------------------------------------------------------------------------------------|-------------|------------------------------------------------------------------------------------------------------------------------------------------------------------------------|
| Caenorhabditis briggsae | briggsae cbr-snr-5 protein                                 | 10 | P:GO:0040027;<br>F:GO:0003676;<br>P:GO:0018996;<br>F:GO:0005515;<br>P:GO:0032940;<br>P:GO:0000003;<br>P:GO:0040007;<br>P:GO:0006898;<br>C:GO:0030529;<br>P:GO:0040039 | -                                                                                                 |             | IPR001163; IPR006649; IPR010920;<br>G3DSA:2.30.30.100 (GENE3D),<br>PTHR11021 (PANTHER)                                                                                 |
|                         | -                                                          | 0  |                                                                                                                                                                       |                                                                                                   |             | -                                                                                                                                                                      |
| Caenorhabditis elegans  | cysteine synthase a                                        | 5  | F:GO:0030170;<br>F:GO:0004124;<br>F:GO:0005515;<br>P:GO:0006535;<br>F:GO:0016740                                                                                      | -                                                                                                 | EC:2.5.1.47 | -                                                                                                                                                                      |
|                         | -                                                          | 0  |                                                                                                                                                                       |                                                                                                   |             | -                                                                                                                                                                      |
|                         | -                                                          | 0  |                                                                                                                                                                       |                                                                                                   |             | -                                                                                                                                                                      |
|                         | -                                                          | 0  |                                                                                                                                                                       |                                                                                                   |             | -                                                                                                                                                                      |
|                         | -                                                          | 0  |                                                                                                                                                                       |                                                                                                   |             | -                                                                                                                                                                      |
| Caenorhabditis elegans  | elegans protein partially confirmed by transcript evidence | 5  | C:GO:0005622;<br>F:GO:0005515;<br>P:GO:0007155;<br>P:GO:0006895;<br>P:GO:0015031                                                                                      | -                                                                                                 |             | -                                                                                                                                                                      |
|                         | -                                                          | 0  |                                                                                                                                                                       |                                                                                                   |             | -                                                                                                                                                                      |
|                         | -                                                          | 0  |                                                                                                                                                                       |                                                                                                   |             | SignalP (SIGNALP)                                                                                                                                                      |
| Caenorhabditis briggsae | briggsae cbr-coq-8 protein                                 | 0  |                                                                                                                                                                       | F:GO:0016301;<br>F:GO:0005524;<br>C:GO:0005739;<br>F:GO:0016740;<br>F:GO:0000166;<br>P:GO:0008219 |             | -                                                                                                                                                                      |
| Brugia malayi           | r- binding motif protein 15b                               | 7  | F:GO:0003676;<br>C:GO:0005730;<br>P:GO:0000381;<br>P:GO:0006913;<br>F:GO:0005515;<br>P:GO:0016481;<br>C:GO:0005654                                                    | -                                                                                                 |             | IPR000504; IPR010912; IPR012677;<br>IPR012921; IPR016194;<br>G3DSA:2.40.290.10 (GENE3D),<br>PTHR23189 (PANTHER),<br>PTHR23189:SF9 (PANTHER), SSF54928<br>(SUPERFAMILY) |
| Caenorhabditis elegans  | nuclear hormone receptor family member (nhr-66)            | 3  | P:GO:0050789;<br>F:GO:0005515;<br>P:GO:0007275                                                                                                                        | -                                                                                                 |             | IPR000536; IPR008946; PTHR11865<br>(PANTHER), PTHR11865:SF235<br>(PANTHER)                                                                                             |
|                         | -                                                          | 0  |                                                                                                                                                                       |                                                                                                   |             | -                                                                                                                                                                      |
|                         | -                                                          | 0  |                                                                                                                                                                       |                                                                                                   |             | -                                                                                                                                                                      |
| Caenorhabditis elegans  | phosphatidylinositol-glycan biosynthesis class w protein   | 4  | F:GO:0008415;<br>P:GO:0006506;<br>C:GO:0005783;<br>C:GO:0044425                                                                                                       | -                                                                                                 |             | IPR009447                                                                                                                                                              |
|                         | -                                                          | 0  |                                                                                                                                                                       |                                                                                                   |             | -                                                                                                                                                                      |
|                         | -                                                          | 0  |                                                                                                                                                                       |                                                                                                   |             | -                                                                                                                                                                      |
|                         | -                                                          | 0  |                                                                                                                                                                       |                                                                                                   |             | G3DSA:2.60.120.20 (GENE3D)                                                                                                                                             |
| Caenorhabditis briggsae | n-acetyl galactosaminyl transferase 6                      | 5  | C:GO:0000139;<br>F:GO:0004653;<br>F:GO:0005529;<br>F:GO:0046872;<br>C:GO:0016021                                                                                      | -                                                                                                 | EC:2.4.1.41 | PTHR11675 (PANTHER), SSF53448<br>(SUPERFAMILY)                                                                                                                         |

|                         |                                                    |   |                                                                                                                      |                                                                                  |             |                                                                                             |
|-------------------------|----------------------------------------------------|---|----------------------------------------------------------------------------------------------------------------------|----------------------------------------------------------------------------------|-------------|---------------------------------------------------------------------------------------------|
| Caenorhabditis briggsae | n-acetyl galactosaminyl transferase 6              |   | C:GO:0000139;<br>F:GO:0004653;<br>5 F:GO:0005529;<br>F:GO:0046872;<br>C:GO:0016021                                   | -                                                                                | EC:2.4.1.41 | PTHR11675 (PANTHER), SSF53448 (SUPERFAMILY)                                                 |
| Caenorhabditis briggsae | briggsae cbr-nsy-4 protein                         | 1 | C:GO:0016021                                                                                                         | -                                                                                |             | IPR010761; SignalP (SIGNALP)                                                                |
|                         | -                                                  | 0 |                                                                                                                      |                                                                                  |             | SignalP (SIGNALP)                                                                           |
|                         | -                                                  | 0 |                                                                                                                      |                                                                                  |             | -                                                                                           |
|                         | -                                                  | 0 |                                                                                                                      |                                                                                  |             | SignalP (SIGNALP)                                                                           |
| Ostertagia ostertagi    | sxc1 protein                                       | 0 |                                                                                                                      | P:GO:0006508;<br>F:GO:0008237;<br>F:GO:0004222;<br>F:GO:0008233                  |             | IPR003582; SignalP (SIGNALP)                                                                |
| Caenorhabditis elegans  | hda6_caeel ame: full=histone deacetylase 6         | 0 |                                                                                                                      | F:GO:0016787;<br>F:GO:0033558;<br>F:GO:0008270                                   |             | IPR000286; PTHR10625:SF19 (PANTHER)                                                         |
|                         | -                                                  | 0 |                                                                                                                      |                                                                                  |             | -                                                                                           |
|                         | -                                                  | 0 |                                                                                                                      |                                                                                  |             | -                                                                                           |
| Caenorhabditis briggsae | protein-tyrosine phosphatase containing protein    | 2 | F:GO:0004725;<br>P:GO:0006470                                                                                        | -                                                                                | EC:3.1.3.48 | -                                                                                           |
| Brugia malayi           | rab5 gdp gtp exchange factor                       | 2 | F:GO:0046872;<br>F:GO:0005515                                                                                        | -                                                                                |             | IPR003123; IPR013995; PTHR23101 (PANTHER), PTHR23101:SF2 (PANTHER), SSF109993 (SUPERFAMILY) |
|                         | -                                                  | 0 |                                                                                                                      |                                                                                  |             | -                                                                                           |
|                         | -                                                  | 0 |                                                                                                                      |                                                                                  |             | -                                                                                           |
|                         | -                                                  | 0 |                                                                                                                      |                                                                                  |             | -                                                                                           |
|                         | -                                                  | 0 |                                                                                                                      |                                                                                  |             | -                                                                                           |
| Caenorhabditis elegans  | haloacid dehaloge-se-like hydrolase family protein | 0 |                                                                                                                      | F:GO:0016787;<br>P:GO:0008152;<br>F:GO:0003824;<br>F:GO:0016614;<br>F:GO:0050660 |             | -                                                                                           |
|                         | -                                                  | 0 |                                                                                                                      |                                                                                  |             | IPR008160; PTHR10499 (PANTHER), PTHR10499:SF115 (PANTHER)                                   |
|                         | -                                                  | 0 |                                                                                                                      |                                                                                  |             | -                                                                                           |
| Caenorhabditis briggsae | 3 saliva family protein                            | 2 | P:GO:0019915;<br>C:GO:0016020                                                                                        | -                                                                                |             | IPR004316; IPR018179; SignalP (SIGNALP)                                                     |
|                         | -                                                  | 0 |                                                                                                                      |                                                                                  |             | -                                                                                           |
|                         | -                                                  | 0 |                                                                                                                      |                                                                                  |             | -                                                                                           |
|                         | -                                                  | 0 |                                                                                                                      |                                                                                  |             | -                                                                                           |
|                         | -                                                  | 0 |                                                                                                                      |                                                                                  |             | -                                                                                           |
|                         | -                                                  | 0 |                                                                                                                      |                                                                                  |             | -                                                                                           |
|                         | -                                                  | 0 |                                                                                                                      |                                                                                  |             | -                                                                                           |
| Caenorhabditis elegans  | ecotropic viral integration site                   | 1 | F:GO:0005515                                                                                                         | -                                                                                |             | PTHR22957 (PANTHER), PTHR22957:SF44 (PANTHER)                                               |
| Caenorhabditis elegans  | kinesin-like protein family member (klp-4)         | 7 | C:GO:0000235;<br>F:GO:0008017;<br>P:GO:0007018;<br>7 F:GO:0005524;<br>P:GO:0051294;<br>C:GO:0005871;<br>F:GO:0003777 | -                                                                                |             | IPR001752; PTHR16012 (PANTHER), PTHR16012:SF65 (PANTHER), SSF52540 (SUPERFAMILY)            |

|                         |                                                                        |    |                                                                                                                                                                       |                                                                                                                    |             |                                                                                                                               |
|-------------------------|------------------------------------------------------------------------|----|-----------------------------------------------------------------------------------------------------------------------------------------------------------------------|--------------------------------------------------------------------------------------------------------------------|-------------|-------------------------------------------------------------------------------------------------------------------------------|
| Caenorhabditis briggsae | cullin 5                                                               | 10 | C:GO:0005829;<br>P:GO:0006511;<br>F:GO:0031625;<br>C:GO:0005624;<br>C:GO:0031466;<br>F:GO:0004842;<br>P:GO:0006970;<br>F:GO:0016931;<br>P:GO:0051480;<br>C:GO:0005634 | -                                                                                                                  | EC:6.3.2.19 | -                                                                                                                             |
| Caenorhabditis briggsae | tetratricopeptide repeat protein 39b                                   | 0  |                                                                                                                                                                       | F:GO:0003674;<br>F:GO:0005488;<br>P:GO:0008150                                                                     |             | IPR019412; SignalP (SIGNALP)                                                                                                  |
|                         | -                                                                      | 0  |                                                                                                                                                                       |                                                                                                                    |             | -                                                                                                                             |
| Caenorhabditis briggsae | galnt11 protein                                                        | 3  | F:GO:0016757;<br>C:GO:0005794;<br>C:GO:0016020                                                                                                                        | -                                                                                                                  |             | IPR001173; G3DSA:3.90.550.10 (GENE3D), PTHR11675 (PANTHER), SSF53448 (SUPERFAMILY)                                            |
| Nematostella vectensis  | activin a receptor type ii-like 1                                      | 2  | F:GO:0004871;<br>F:GO:0004674                                                                                                                                         | -                                                                                                                  | EC:2.7.11.0 | IPR000719; IPR011009; IPR017442; G3DSA:1.10.510.10 (GENE3D), PTHR23255 (PANTHER), PTHR23255:SF14 (PANTHER), SignalP (SIGNALP) |
|                         | -                                                                      | 0  |                                                                                                                                                                       |                                                                                                                    |             | -                                                                                                                             |
|                         | -                                                                      | 0  |                                                                                                                                                                       |                                                                                                                    |             | -                                                                                                                             |
| Caenorhabditis briggsae | kiaa0528 protein                                                       | 0  |                                                                                                                                                                       | F:GO:0003674;<br>C:GO:0008021;<br>C:GO:0016020;<br>P:GO:0008150;<br>F:GO:0005515;<br>F:GO:0005215;<br>P:GO:0006810 |             | -                                                                                                                             |
|                         | -                                                                      | 0  |                                                                                                                                                                       |                                                                                                                    |             | -                                                                                                                             |
|                         | -                                                                      | 0  |                                                                                                                                                                       |                                                                                                                    |             | -                                                                                                                             |
| Loa loa                 | hypothetical protein LOAG_14520 [Loa loa]                              | 0  |                                                                                                                                                                       |                                                                                                                    |             | -                                                                                                                             |
|                         | -                                                                      | 0  |                                                                                                                                                                       |                                                                                                                    |             | -                                                                                                                             |
| Caenorhabditis briggsae | n-deacetylase n-sulfotransferase                                       | 5  | C:GO:0000139;<br>F:GO:0015016;<br>F:GO:0016787;<br>P:GO:0009987;<br>C:GO:0016021                                                                                      | -                                                                                                                  | EC:2.8.2.8  | PTHR10605 (PANTHER), PTHR10605:SF2 (PANTHER)                                                                                  |
| Caenorhabditis elegans  | methylmalonic aciduria (cobalamin deficiency) cblD with homocystinuria | 1  | F:GO:0005515                                                                                                                                                          | -                                                                                                                  |             | IPR019362; PTHR13192 (PANTHER)                                                                                                |
|                         | -                                                                      | 0  |                                                                                                                                                                       |                                                                                                                    |             | -                                                                                                                             |
|                         | -                                                                      | 0  |                                                                                                                                                                       |                                                                                                                    |             | -                                                                                                                             |
|                         | -                                                                      | 0  |                                                                                                                                                                       |                                                                                                                    |             | SignalP (SIGNALP)                                                                                                             |
| Caenorhabditis elegans  | udp- ransferase family member (ugt-49)                                 | 0  |                                                                                                                                                                       |                                                                                                                    |             | -                                                                                                                             |
| Caenorhabditis elegans  | elegans protein confirmed by transcript evidence                       | 1  | C:GO:0016021                                                                                                                                                          | -                                                                                                                  |             | -                                                                                                                             |
|                         | -                                                                      | 0  |                                                                                                                                                                       |                                                                                                                    |             | -                                                                                                                             |
| Schistosoma mansoni     | nuclear transcription factor y subunit beta                            | 4  | F:GO:0043565;<br>F:GO:0005515;<br>C:GO:0005634;<br>P:GO:0006355                                                                                                       | -                                                                                                                  |             | IPR003957; IPR009072; PTHR11064 (PANTHER)                                                                                     |

|                          |                                                  |    |                                                                                                                                                                                        |                                                                                                                                                                                                                                                                                                                                                                                                    |                                                                                                                         |                                                          |
|--------------------------|--------------------------------------------------|----|----------------------------------------------------------------------------------------------------------------------------------------------------------------------------------------|----------------------------------------------------------------------------------------------------------------------------------------------------------------------------------------------------------------------------------------------------------------------------------------------------------------------------------------------------------------------------------------------------|-------------------------------------------------------------------------------------------------------------------------|----------------------------------------------------------|
| Caenorhabditis briggsae  | briggsae cbr-uaf-2 protein                       | 11 | P:GO:0040035;<br>P:GO:0009792;<br>P:GO:0002119;<br>F:GO:0003723;<br>P:GO:0018996;<br>F:GO:0005515;<br>P:GO:0040011;<br>P:GO:0040007;<br>C:GO:0005634;<br>F:GO:0008270;<br>F:GO:0000166 | -                                                                                                                                                                                                                                                                                                                                                                                                  | -                                                                                                                       |                                                          |
| Caenorhabditis elegans   | elegans protein confirmed by transcript evidence | 0  |                                                                                                                                                                                        | F:GO:0017057;<br>P:GO:0005975;<br>F:GO:0016787;<br>P:GO:0006098                                                                                                                                                                                                                                                                                                                                    | IPR005900; G3DSA:3.40.50.1360 (GENE3D), SSF100950 (SUPERFAMILY)                                                         |                                                          |
| Caenorhabditis briggsae  | neurexin iv                                      | 0  |                                                                                                                                                                                        | P:GO:0009059;<br>C:GO:0005919;<br>C:GO:0005918;<br>P:GO:0019991;<br>P:GO:0008065;<br>C:GO:0016021;<br>P:GO:0007155;<br>C:GO:0016020;<br>P:GO:0016081;<br>P:GO:0016080;<br>P:GO:0021682;<br>F:GO:0008897;<br>P:GO:0045216;<br>P:GO:0007163;<br>F:GO:0004888;<br>P:GO:0008104;<br>F:GO:0000287;<br>P:GO:0060857;<br>C:GO:0005887;<br>P:GO:0007391;<br>P:GO:0008366;<br>C:GO:0005886;<br>P:GO:0035151 |                                                                                                                         | IPR013320; PTHR10127 (PANTHER), PTHR10127:SF11 (PANTHER) |
| Loa loa                  | hypothetical protein LOAG_01835 [Loa loa]        | 0  |                                                                                                                                                                                        |                                                                                                                                                                                                                                                                                                                                                                                                    | -                                                                                                                       |                                                          |
| -                        | -                                                | 0  |                                                                                                                                                                                        |                                                                                                                                                                                                                                                                                                                                                                                                    | -                                                                                                                       |                                                          |
| -                        | -                                                | 0  |                                                                                                                                                                                        |                                                                                                                                                                                                                                                                                                                                                                                                    | -                                                                                                                       |                                                          |
| -                        | -                                                | 0  |                                                                                                                                                                                        |                                                                                                                                                                                                                                                                                                                                                                                                    | -                                                                                                                       |                                                          |
| -                        | -                                                | 0  |                                                                                                                                                                                        |                                                                                                                                                                                                                                                                                                                                                                                                    | -                                                                                                                       |                                                          |
| Monosiga brevicollis MX1 | snf2 family d--dependent atpase                  | 5  | P:GO:0009987;<br>C:GO:0043229;<br>P:GO:0044238;<br>F:GO:0003676;<br>F:GO:0004386                                                                                                       | -                                                                                                                                                                                                                                                                                                                                                                                                  | IPR000330; IPR014021; G3DSA:3.40.50.300 (GENE3D), PTHR10799 (PANTHER), PTHR10799:SF74 (PANTHER), SSF52540 (SUPERFAMILY) |                                                          |
| -                        | -                                                | 0  |                                                                                                                                                                                        |                                                                                                                                                                                                                                                                                                                                                                                                    | -                                                                                                                       |                                                          |
| -                        | -                                                | 0  |                                                                                                                                                                                        |                                                                                                                                                                                                                                                                                                                                                                                                    | -                                                                                                                       |                                                          |
| Caenorhabditis briggsae  | ifa-1                                            | 3  | C:GO:0005882;<br>F:GO:0005198;<br>F:GO:0005515                                                                                                                                         | -                                                                                                                                                                                                                                                                                                                                                                                                  | -                                                                                                                       |                                                          |
| -                        | -                                                | 0  |                                                                                                                                                                                        |                                                                                                                                                                                                                                                                                                                                                                                                    | SignalP (SIGNALP)                                                                                                       |                                                          |
| -                        | -                                                | 0  |                                                                                                                                                                                        |                                                                                                                                                                                                                                                                                                                                                                                                    | -                                                                                                                       |                                                          |
| Caenorhabditis elegans   | g patch domain containing 3                      | 3  | F:GO:0003676;<br>C:GO:0005622;<br>F:GO:0000166                                                                                                                                         | -                                                                                                                                                                                                                                                                                                                                                                                                  | PTHR14390 (PANTHER)                                                                                                     |                                                          |



|                         |                                                         |   |                                                                                                                                                      |                                                                 |              |                                                                                                                 |
|-------------------------|---------------------------------------------------------|---|------------------------------------------------------------------------------------------------------------------------------------------------------|-----------------------------------------------------------------|--------------|-----------------------------------------------------------------------------------------------------------------|
| Caenorhabditis briggsae | thyroid adenoma-associated protein homolog              | 0 |                                                                                                                                                      | F:GO:0003674;<br>F:GO:0005488;<br>P:GO:0008150;<br>C:GO:0005575 |              | IPR019442; PTHR14387 (PANTHER)                                                                                  |
| Caenorhabditis elegans  | tyrosine ki-se receptor                                 | 4 | P:GO:0006468;<br>F:GO:0004713;<br>P:GO:0040010;<br>F:GO:0005524                                                                                      | -                                                               | EC:2.7.10.0  | IPR000719; IPR001245; IPR011009;<br>IPR020685; G3DSA:3.30.200.20<br>(GENE3D), PTHR23256:SF243<br>(PANTHER)      |
| -                       | -                                                       | 0 |                                                                                                                                                      |                                                                 |              | -                                                                                                               |
| Caenorhabditis elegans  | in family member (ttn-1)                                | 1 | P:GO:0009792                                                                                                                                         | -                                                               |              | IPR007110; IPR013098; IPR013783;<br>PTHR19897 (PANTHER),<br>PTHR19897:SF17 (PANTHER),<br>SSF48726 (SUPERFAMILY) |
| -                       | -                                                       | 0 |                                                                                                                                                      |                                                                 |              | SignalP (SIGNALP)                                                                                               |
| -                       | -                                                       | 0 |                                                                                                                                                      |                                                                 |              | -                                                                                                               |
| Pongo abelii            | family with sequence similarity member b                | 5 | C:GO:0005737;<br>C:GO:0005634;<br>F:GO:0005515;<br>N:GO:0071817;<br>P:GO:0007059                                                                     | -                                                               |              | IPR002744; PTHR12377 (PANTHER),<br>SSF117916 (SUPERFAMILY)                                                      |
| Homo sapiens            | loc23117 protein                                        | 1 | C:GO:0016021                                                                                                                                         |                                                                 |              | SignalP (SIGNALP)                                                                                               |
| -                       | -                                                       | 0 |                                                                                                                                                      |                                                                 |              | -                                                                                                               |
| -                       | -                                                       | 0 |                                                                                                                                                      |                                                                 |              | -                                                                                                               |
| -                       | -                                                       | 0 |                                                                                                                                                      |                                                                 |              | -                                                                                                               |
| Caenorhabditis elegans  | vacuolar protein sorting-associated protein             | 0 |                                                                                                                                                      | P:GO:0008104                                                    |              | PTHR16166 (PANTHER),<br>PTHR16166:SF25 (PANTHER)                                                                |
| -                       | -                                                       | 0 |                                                                                                                                                      |                                                                 |              | -                                                                                                               |
| Caenorhabditis briggsae | myo-inositol oxyge-se                                   | 5 | C:GO:0005737;<br>F:GO:0005506;<br>P:GO:0055114;<br>P:GO:0019310;<br>F:GO:0050113                                                                     | -                                                               | EC:1.13.99.1 | IPR007828; SSF109604 (SUPERFAMILY)                                                                              |
| Brugia malayi           | importin beta-2                                         | 9 | P:GO:0009792;<br>P:GO:0010171;<br>P:GO:0002119;<br>F:GO:0005515;<br>P:GO:0016246;<br>P:GO:0040010;<br>P:GO:0000003;<br>P:GO:0040011;<br>P:GO:0006898 | -                                                               |              | IPR011989                                                                                                       |
| -                       | -                                                       | 0 |                                                                                                                                                      |                                                                 |              | -                                                                                                               |
| -                       | -                                                       | 0 |                                                                                                                                                      |                                                                 |              | -                                                                                                               |
| Caenorhabditis briggsae | Hypothetical protein CBG02784 [Caenorhabditis briggsae] | 0 |                                                                                                                                                      |                                                                 |              | PTHR13298 (PANTHER),<br>PTHR13298:SF2 (PANTHER)                                                                 |
| Caenorhabditis elegans  | furry homolog                                           | 1 | F:GO:0005515                                                                                                                                         | -                                                               |              | PTHR12295 (PANTHER),<br>PTHR12295:SF6 (PANTHER)                                                                 |
| -                       | -                                                       | 0 |                                                                                                                                                      |                                                                 |              | -                                                                                                               |
| Caenorhabditis elegans  | cation efflux family protein                            | 4 | C:GO:0016021;<br>F:GO:0008324;<br>P:GO:0006812;<br>P:GO:0055085                                                                                      | -                                                               |              | IPR002524; G3DSA:3.30.70.1350<br>(GENE3D)                                                                       |
| -                       | -                                                       | 0 |                                                                                                                                                      |                                                                 |              | -                                                                                                               |
| -                       | -                                                       | 0 |                                                                                                                                                      |                                                                 |              | SignalP (SIGNALP)                                                                                               |
| Brugia malayi           | hypothetical protein Bm1_04780 [Brugia malayi]          | 0 |                                                                                                                                                      |                                                                 |              | -                                                                                                               |
| -                       | -                                                       | 0 |                                                                                                                                                      |                                                                 |              | -                                                                                                               |

|                         |                                                                                    |    |  |                                                                                                                                                                                        |             |                                                                            |
|-------------------------|------------------------------------------------------------------------------------|----|--|----------------------------------------------------------------------------------------------------------------------------------------------------------------------------------------|-------------|----------------------------------------------------------------------------|
| Loa loa                 | transmembrane protein 186                                                          | 0  |  | C:GO:0005739;<br>F:GO:0003674;<br>C:GO:0016021;<br>C:GO:0016020;<br>P:GO:0008150                                                                                                       | -           |                                                                            |
|                         | -                                                                                  | 0  |  |                                                                                                                                                                                        |             |                                                                            |
| Loa loa                 | hypothetical protein LOAG_00907 [Loa loa]                                          | 0  |  | P:GO:0008104                                                                                                                                                                           |             | PTHR16166 (PANTHER),<br>PTHR16166:SF24 (PANTHER)                           |
| Caenorhabditis briggsae | gex interacting protein family member (gei-18)                                     | 0  |  | P:GO:0009792;<br>F:GO:0005515                                                                                                                                                          |             | PTHR22834 (PANTHER),<br>PTHR22834:SF1 (PANTHER), SignalP<br>(SIGNALP)      |
| Caenorhabditis elegans  | p21-activated ki-se family member (pak-2)                                          | 6  |  | P:GO:0006468;<br>F:GO:0005515;<br>F:GO:0005524;<br>P:GO:0006916;<br>F:GO:0004674;<br>C:GO:0005739                                                                                      | EC:2.7.11.0 | -                                                                          |
| Caenorhabditis elegans  | osta1_caeel ame: full=organic solute transporter alpha-like protein                | 4  |  | C:GO:0016021;<br>P:GO:0009792;<br>P:GO:0006810;<br>F:GO:0005215                                                                                                                        |             |                                                                            |
|                         | -                                                                                  | 0  |  |                                                                                                                                                                                        |             |                                                                            |
|                         | -                                                                                  | 0  |  |                                                                                                                                                                                        |             |                                                                            |
| Caenorhabditis elegans  | briggsae cbr-zip-2 protein                                                         | 0  |  | P:GO:0006355;<br>F:GO:0043565;<br>F:GO:0046983;<br>F:GO:0003700;<br>C:GO:0005634;<br>F:GO:0003677                                                                                      |             | IPR004827; IPR011700;<br>G3DSA:1.20.5.170 (GENE3D),<br>PTHR23334 (PANTHER) |
|                         | -                                                                                  | 0  |  |                                                                                                                                                                                        |             |                                                                            |
| Caenorhabditis briggsae | myosin heavy chain                                                                 | 6  |  | C:GO:0032982;<br>F:GO:0003779;<br>F:GO:0005524;<br>F:GO:0003774;<br>C:GO:0031672;<br>P:GO:0007626                                                                                      |             |                                                                            |
| Caenorhabditis elegans  | nitrilase 1                                                                        | 11 |  | P:GO:0009684;<br>F:GO:0080061;<br>P:GO:0000003;<br>P:GO:0009617;<br>P:GO:0019762;<br>P:GO:0009970;<br>C:GO:0009507;<br>P:GO:0046686;<br>F:GO:0080109;<br>C:GO:0005886;<br>C:GO:0048046 |             | IPR000132; IPR003010                                                       |
| Homo sapiens            | low quality protein: guanine nucleotide-binding protein subunit beta-2-like 1-like | 5  |  | F:GO:0019903;<br>C:GO:0005737;<br>C:GO:0043025;<br>F:GO:0005102;<br>C:GO:0005886                                                                                                       |             |                                                                            |
|                         | -                                                                                  | 0  |  |                                                                                                                                                                                        |             | SignalP (SIGNALP)                                                          |
|                         | -                                                                                  | 0  |  |                                                                                                                                                                                        |             |                                                                            |
|                         | -                                                                                  | 0  |  |                                                                                                                                                                                        |             | SignalP (SIGNALP)                                                          |
| Caenorhabditis elegans  | briggsae cbr-tnt-3 protein                                                         | 2  |  | P:GO:0043050;<br>P:GO:0006952                                                                                                                                                          |             |                                                                            |
|                         | -                                                                                  | 0  |  |                                                                                                                                                                                        |             | SignalP (SIGNALP)                                                          |

|                         |                                                         |    |                                                                                                                                                                                                                                           |   |              |                                                                                                                                              |
|-------------------------|---------------------------------------------------------|----|-------------------------------------------------------------------------------------------------------------------------------------------------------------------------------------------------------------------------------------------|---|--------------|----------------------------------------------------------------------------------------------------------------------------------------------|
|                         | -                                                       | 0  |                                                                                                                                                                                                                                           |   |              |                                                                                                                                              |
| Caenorhabditis briggsae | adenylosucci-te synthetase                              | 11 | P:GO:0040010;<br>F:GO:0004019;<br>P:GO:0006164;<br>P:GO:0040027;<br>P:GO:0040035;<br>F:GO:0000287;<br>P:GO:0040011;<br>P:GO:0006898;<br>P:GO:0009792;<br>C:GO:0005737;<br>F:GO:0005525                                                    | - | EC:6.3.4.4   | IPR001114; IPR018220;<br>G3DSA:1.10.300.10 (GENE3D),<br>G3DSA:3.40.440.10 (GENE3D),<br>G3DSA:3.90.170.10 (GENE3D),<br>SSF52540 (SUPERFAMILY) |
| Caenorhabditis briggsae | Hypothetical protein CBG16529 [Caenorhabditis briggsae] | 0  |                                                                                                                                                                                                                                           |   |              |                                                                                                                                              |
| Caenorhabditis briggsae | pecanex-like protein 1                                  | 1  | P:GO:0040011                                                                                                                                                                                                                              | - |              | PTHR12372 (PANTHER), SignalP (SIGNALP)                                                                                                       |
| Caenorhabditis elegans  | major facilitator superfamily protein                   | 1  | P:GO:0007275                                                                                                                                                                                                                              | - |              | IPR005828; IPR016196;<br>G3DSA:1.20.1250.20 (GENE3D),<br>PTHR11600 (PANTHER),<br>PTHR11600:SF42 (PANTHER), SignalP (SIGNALP)                 |
| Loa loa                 | egg laying defective family member (egl-44)             | 1  | P:GO:0048675                                                                                                                                                                                                                              | - |              | IPR000818                                                                                                                                    |
| Caenorhabditis briggsae | mitochondrial ribosomal protein l49                     | 2  | C:GO:0030529;<br>C:GO:0005739                                                                                                                                                                                                             | - |              | IPR007740                                                                                                                                    |
| Caenorhabditis briggsae | cdk5 regulatory subunit associated protein 1-like 1     | 5  | P:GO:0009451;<br>F:GO:0046872;<br>C:GO:0016021;<br>F:GO:0003824;<br>F:GO:0051539                                                                                                                                                          | - |              | IPR005839; G3DSA:3.80.30.20 (GENE3D), SSF102114 (SUPERFAMILY)                                                                                |
| Caenorhabditis elegans  | hypothetical protein F10E7.6 [Caenorhabditis elegans]   | 2  | P:GO:0040010;<br>P:GO:0006898                                                                                                                                                                                                             | - |              | -                                                                                                                                            |
|                         | -                                                       | 0  |                                                                                                                                                                                                                                           |   |              | SignalP (SIGNALP)                                                                                                                            |
| Loa loa                 | tetratricopeptide repeat domain 21b                     | 0  |                                                                                                                                                                                                                                           |   | F:GO:0005488 | IPR011990; PTHR14699 (PANTHER)                                                                                                               |
|                         | -                                                       | 0  |                                                                                                                                                                                                                                           |   |              | -                                                                                                                                            |
|                         | -                                                       | 0  |                                                                                                                                                                                                                                           |   |              | -                                                                                                                                            |
|                         | -                                                       | 0  |                                                                                                                                                                                                                                           |   |              | -                                                                                                                                            |
| Caenorhabditis elegans  | arp2 actin-related protein 2 homolog                    | 14 | C:GO:0005885;<br>P:GO:0043652;<br>P:GO:0040010;<br>P:GO:0007126;<br>P:GO:0016331;<br>P:GO:0010631;<br>P:GO:0034314;<br>F:GO:0005524;<br>C:GO:0042995;<br>P:GO:0002119;<br>F:GO:0003779;<br>P:GO:0006898;<br>P:GO:0009792;<br>C:GO:0005737 | - |              | -                                                                                                                                            |

|                         |                                                            |    |                                                                                                                                                                                                                                           |                                                |                              |                                                                                                              |
|-------------------------|------------------------------------------------------------|----|-------------------------------------------------------------------------------------------------------------------------------------------------------------------------------------------------------------------------------------------|------------------------------------------------|------------------------------|--------------------------------------------------------------------------------------------------------------|
| Caenorhabditis elegans  | arp2 actin-related protein 2 homolog                       | 14 | C:GO:0005885;<br>P:GO:0043652;<br>P:GO:0040010;<br>P:GO:0007126;<br>P:GO:0016331;<br>P:GO:0010631;<br>P:GO:0034314;<br>F:GO:0005524;<br>C:GO:0042995;<br>P:GO:0002119;<br>F:GO:0003779;<br>P:GO:0006898;<br>P:GO:0009792;<br>C:GO:0005737 | -                                              | -                            |                                                                                                              |
| -                       | -                                                          | 0  |                                                                                                                                                                                                                                           |                                                |                              | -                                                                                                            |
| Caenorhabditis elegans  | elegans protein confirmed by transcript evidence           | 0  |                                                                                                                                                                                                                                           | F:GO:0016765                                   |                              | -                                                                                                            |
| Caenorhabditis briggsae | protein-tyrosine phosphatase containing protein            | 5  | F:GO:0004725;<br>P:GO:0006470;<br>P:GO:0009792;<br>P:GO:0000003;<br>F:GO:0008138                                                                                                                                                          | -                                              | EC:3.1.3.48                  | IPR000242; G3DSA:3.90.190.10 (GENE3D), PTHR19134 (PANTHER), PTHR19134:SF26 (PANTHER), SSF52799 (SUPERFAMILY) |
| -                       | -                                                          | 0  |                                                                                                                                                                                                                                           |                                                |                              | -                                                                                                            |
| Pongo abelii            | small nuclear ribonucleoprotein polypeptide g              | 8  | C:GO:0005683;<br>C:GO:0005654;<br>P:GO:0000387;<br>C:GO:0005681;<br>F:GO:0003723;<br>F:GO:0005515;<br>C:GO:0005829;<br>P:GO:0000245                                                                                                       | -                                              |                              | IPR001163; IPR006649; IPR010920; G3DSA:2.30.30.100 (GENE3D), PTHR10553 (PANTHER), PTHR10553:SF2 (PANTHER)    |
| -                       | -                                                          | 0  |                                                                                                                                                                                                                                           |                                                |                              | -                                                                                                            |
| -                       | -                                                          | 0  |                                                                                                                                                                                                                                           |                                                |                              | -                                                                                                            |
| Loa loa                 | aldehyde dehydroge-se                                      | 2  | P:GO:0008152;<br>F:GO:0016491                                                                                                                                                                                                             | -                                              |                              | IPR012394; IPR015590; IPR016161; IPR016163; SignalP (SIGNALP)                                                |
| Macaca mulatta          | prolyl 4- beta polypeptide                                 | 12 | F:GO:0003756;<br>F:GO:0004656;<br>C:GO:0005793;<br>P:GO:0045454;<br>C:GO:0009986;<br>C:GO:0042470;<br>C:GO:0005792;<br>C:GO:0005788;<br>F:GO:0005515;<br>P:GO:0018401;<br>C:GO:0005576;<br>C:GO:0005886                                   | -                                              | EC:5.3.4.1;<br>EC:1.14.1.1.2 | IPR012335; IPR012336; IPR013766; PTHR18929 (PANTHER)                                                         |
| Caenorhabditis briggsae | in family member (ttn-1)                                   | 3  | P:GO:0009792;<br>F:GO:0004672;<br>F:GO:0000166                                                                                                                                                                                            | -                                              |                              | IPR013783                                                                                                    |
| Caenorhabditis briggsae | elegans protein partially confirmed by transcript evidence | 0  |                                                                                                                                                                                                                                           | P:GO:0000003;<br>F:GO:0008270;<br>P:GO:0040010 |                              | PTHR22880 (PANTHER), PTHR22880:SF1 (PANTHER)                                                                 |
| Caenorhabditis elegans  | ribose-phosphate pyrophosphoki-se                          | 4  | F:GO:0016301;<br>P:GO:0009165;<br>F:GO:0004749;<br>F:GO:0000287                                                                                                                                                                           | -                                              | EC:2.7.6.1                   | IPR005946; G3DSA:3.40.50.2020 (GENE3D), PTHR10210 (PANTHER), SSF53271 (SUPERFAMILY)                          |

|                            |                                                              |   |                                                                                                                                     |                                                |                                                         |                                                                                                                          |
|----------------------------|--------------------------------------------------------------|---|-------------------------------------------------------------------------------------------------------------------------------------|------------------------------------------------|---------------------------------------------------------|--------------------------------------------------------------------------------------------------------------------------|
| Caenorhabditis elegans     | ribose-phosphate pyrophosphoki-se                            | 4 | F:GO:0016301;<br>P:GO:0009165;<br>F:GO:0004749;<br>F:GO:0000287                                                                     | -                                              | EC:2.7.6.1                                              | IPR005946; G3DSA:3.40.50.2020 (GENE3D), PTHR10210 (PANTHER), SignalP (SIGNALP), SSF53271 (SUPERFAMILY)                   |
| Caenorhabditis elegans     | ribose-phosphate pyrophosphoki-se                            | 5 | F:GO:0016301;<br>P:GO:0009165;<br>C:GO:0043234;<br>F:GO:0004749;<br>F:GO:0000287                                                    | -                                              | EC:2.7.6.1                                              | IPR005946; G3DSA:3.40.50.2020 (GENE3D), PTHR10210 (PANTHER), SSF53271 (SUPERFAMILY)                                      |
|                            | -                                                            | 0 |                                                                                                                                     |                                                |                                                         | SignalP (SIGNALP)                                                                                                        |
|                            | -                                                            | 0 |                                                                                                                                     |                                                |                                                         | -                                                                                                                        |
|                            | -                                                            | 0 |                                                                                                                                     |                                                |                                                         | -                                                                                                                        |
| Caenorhabditis elegans     | immunoglobulin i-set domain containing protein               | 0 |                                                                                                                                     | F:GO:0005509;<br>F:GO:0003824                  |                                                         | -                                                                                                                        |
| Pediculus humanus corporis | gtp-binding protein di-                                      | 5 | C:GO:0016020;<br>C:GO:0005622;<br>F:GO:0003924;<br>F:GO:0005525;<br>P:GO:0007264                                                    | -                                              | EC:3.6.5.1;<br>EC:3.6.5.2;<br>EC:3.6.5.3;<br>EC:3.6.5.4 | IPR013753; IPR020849; G3DSA:3.40.50.300 (GENE3D), PTHR11708 (PANTHER), PTHR11708:SF117 (PANTHER), SSF52540 (SUPERFAMILY) |
| Caenorhabditis elegans     | olfactory ing defective family member (olrn-1)               | 0 |                                                                                                                                     |                                                |                                                         | -                                                                                                                        |
|                            | -                                                            | 0 |                                                                                                                                     |                                                |                                                         | -                                                                                                                        |
| Caenorhabditis elegans     | rap ran-gap family protein                                   | 0 |                                                                                                                                     | F:GO:0005096;<br>P:GO:0051056;<br>C:GO:0005622 |                                                         | -                                                                                                                        |
|                            | -                                                            | 0 |                                                                                                                                     |                                                |                                                         | -                                                                                                                        |
| Caenorhabditis briggsae    | elegans protein partially confirmed by transcript evidence   | 0 |                                                                                                                                     |                                                |                                                         | -                                                                                                                        |
| Gallus gallus              | multiple ankyrin repeats single kh domain protein            | 0 |                                                                                                                                     | F:GO:0003723                                   |                                                         | IPR002110; IPR018201; IPR020683; PR01415 (PRINTS), PTHR18958 (PANTHER), PTHR18958:SF281 (PANTHER)                        |
| Gallus gallus              | multiple ankyrin repeats single kh domain protein            | 0 |                                                                                                                                     | F:GO:0003723                                   |                                                         | IPR002110; IPR018201; IPR020683; PR01415 (PRINTS), PTHR18958 (PANTHER), PTHR18958:SF281 (PANTHER)                        |
|                            | -                                                            | 0 |                                                                                                                                     |                                                |                                                         | -                                                                                                                        |
| Populus trichocarpa        | predicted protein [Populus trichocarpa]                      | 4 | F:GO:0020037;<br>P:GO:0055114;<br>F:GO:0004497;<br>F:GO:0009055                                                                     | -                                              |                                                         | -                                                                                                                        |
| Caenorhabditis briggsae    | briggsae cbr-unc-68 protein                                  | 8 | F:GO:0004872;<br>P:GO:0006629;<br>F:GO:0005219;<br>P:GO:0006816;<br>P:GO:0006874;<br>P:GO:0055085;<br>F:GO:0005509;<br>C:GO:0016021 | -                                              |                                                         | -                                                                                                                        |
|                            | -                                                            | 0 |                                                                                                                                     |                                                |                                                         | -                                                                                                                        |
| Caenorhabditis elegans     | ke (drosophila actin-binding) homolog family member (ketn-1) | 1 | P:GO:0000003                                                                                                                        | -                                              |                                                         | IPR007110; IPR013098; IPR013783; PTHR19897 (PANTHER), SSF48726 (SUPERFAMILY)                                             |

|                         |                                                                          |    |                                                                                                                                                                                                                                                                                                                                                                                                                                                                         |                                                                                  |              |                                                                                       |
|-------------------------|--------------------------------------------------------------------------|----|-------------------------------------------------------------------------------------------------------------------------------------------------------------------------------------------------------------------------------------------------------------------------------------------------------------------------------------------------------------------------------------------------------------------------------------------------------------------------|----------------------------------------------------------------------------------|--------------|---------------------------------------------------------------------------------------|
| Homo sapiens            | heavy polypeptide non- isoform cra_b                                     | 43 | C:GO:0030863;<br>P:GO:0008360;<br>C:GO:0031594;<br>P:GO:0030048;<br>F:GO:0030898;<br>P:GO:0051295;<br>C:GO:0005913;<br>P:GO:0016337;<br>F:GO:0043531;<br>P:GO:0032796;<br>P:GO:0015031;<br>C:GO:0001772;<br>P:GO:0050900;<br>P:GO:0007229;<br>C:GO:0005829;<br>P:GO:0007520;<br>F:GO:0000146;<br>P:GO:0006509;<br>P:GO:0043534;<br>C:GO:0008305;<br>C:GO:0005819;<br>C:GO:0001726;<br>P:GO:0007132;<br>C:GO:0032154;<br>P:GO:0000904;<br>P:GO:0001768;<br>F:GO:0043495; | -                                                                                |              | IPR000897                                                                             |
| Caenorhabditis briggsae | briggsae cbr-ego-1 protein                                               | 1  | F:GO:0005515                                                                                                                                                                                                                                                                                                                                                                                                                                                            | -                                                                                |              | -                                                                                     |
| Caenorhabditis elegans  | zinc finger transcription factor family member (ztf-27)                  | 1  | F:GO:0005515                                                                                                                                                                                                                                                                                                                                                                                                                                                            | -                                                                                |              | -                                                                                     |
|                         | -                                                                        | 0  |                                                                                                                                                                                                                                                                                                                                                                                                                                                                         |                                                                                  |              | SignalP (SIGNALP)                                                                     |
| Alluropoda melanoleuca  | dolichyl-diphosphooligosaccharide--protein glycosyltransferase subunit 1 | 9  | C:GO:0008250;<br>C:GO:0019718;<br>P:GO:0018279;<br>C:GO:0016021;<br>C:GO:0042470;<br>P:GO:0015833;<br>C:GO:0030867;<br>F:GO:0005515;<br>F:GO:0004579                                                                                                                                                                                                                                                                                                                    | -                                                                                | EC:2.4.1.119 | -                                                                                     |
| Caenorhabditis briggsae | sap30-binding protein                                                    | 1  | P:GO:0009987                                                                                                                                                                                                                                                                                                                                                                                                                                                            | -                                                                                |              | IPR012479                                                                             |
| Caenorhabditis briggsae | sap30-binding protein                                                    | 0  |                                                                                                                                                                                                                                                                                                                                                                                                                                                                         | P:GO:0006915;<br>P:GO:0006350;<br>F:GO:0005515;<br>P:GO:0006917;<br>C:GO:0005634 |              | IPR012479                                                                             |
|                         | -                                                                        | 0  |                                                                                                                                                                                                                                                                                                                                                                                                                                                                         |                                                                                  |              | -                                                                                     |
|                         | -                                                                        | 0  |                                                                                                                                                                                                                                                                                                                                                                                                                                                                         |                                                                                  |              | SignalP (SIGNALP)                                                                     |
|                         | -                                                                        | 0  |                                                                                                                                                                                                                                                                                                                                                                                                                                                                         |                                                                                  |              | -                                                                                     |
| Caenorhabditis elegans  | expulsion defective family member (aex-1)                                | 2  | P:GO:0003008;<br>P:GO:0046903                                                                                                                                                                                                                                                                                                                                                                                                                                           | -                                                                                |              | -                                                                                     |
| Caenorhabditis elegans  | threonine dehydratase deami-se                                           | 6  | P:GO:0040035;<br>F:GO:0005488;<br>P:GO:0040010;<br>P:GO:0040011;<br>F:GO:0003824;<br>P:GO:0002009                                                                                                                                                                                                                                                                                                                                                                       | -                                                                                |              | IPR001926; G3DSA:3.40.50.1100 (GENE3D), PTHR10314 (PANTHER), PTHR10314:SF17 (PANTHER) |
| Caenorhabditis briggsae | Hypothetical protein CBG03729 [Caenorhabditis briggsae]                  | 0  |                                                                                                                                                                                                                                                                                                                                                                                                                                                                         |                                                                                  |              | -                                                                                     |

|                              |                                                                                                             |    |                                                                                                                                                                       |                                                |                                    |                                                                                                                                    |
|------------------------------|-------------------------------------------------------------------------------------------------------------|----|-----------------------------------------------------------------------------------------------------------------------------------------------------------------------|------------------------------------------------|------------------------------------|------------------------------------------------------------------------------------------------------------------------------------|
| Haemonchus contortus         | briggsae cbr-trxr-2 protein                                                                                 | 10 | P:GO:0001666;<br>C:GO:0005875;<br>P:GO:0008340;<br>C:GO:0005739;<br>P:GO:0045454;<br>F:GO:0004362;<br>P:GO:0008152;<br>F:GO:0042803;<br>F:GO:0004791;<br>P:GO:0006974 | -                                              | EC:1.8.1.7;<br>EC:1.8.1.9          | IPR001327; IPR006338; IPR013027;<br>PR00411 (PRINTS), G3DSA:3.50.50.60<br>(GENE3D), PTHR22912 (PANTHER),<br>SSF51905 (SUPERFAMILY) |
| -                            | -                                                                                                           | 0  | -                                                                                                                                                                     | -                                              | -                                  | -                                                                                                                                  |
| Cyathostominae sp. JM-2007a  | briggsae cbr-tag-273 protein                                                                                | 2  | F:GO:0008270;<br>P:GO:0000003                                                                                                                                         | -                                              | -                                  | SignalP (SIGNALP)                                                                                                                  |
| -                            | -                                                                                                           | 0  | -                                                                                                                                                                     | -                                              | -                                  | -                                                                                                                                  |
| Nippostrongylus brasiliensis | globin                                                                                                      | 6  | F:GO:0020037;<br>C:GO:0005576;<br>C:GO:0005737;<br>F:GO:0005344;<br>P:GO:0015671;<br>F:GO:0019825                                                                     | -                                              | -                                  | IPR000971; IPR009050; IPR012085;<br>IPR012292; SignalP (SIGNALP)                                                                   |
| -                            | -                                                                                                           | 0  | -                                                                                                                                                                     | -                                              | -                                  | -                                                                                                                                  |
| -                            | -                                                                                                           | 0  | -                                                                                                                                                                     | -                                              | -                                  | -                                                                                                                                  |
| Caenorhabditis briggsae      | elegans protein partially confirmed by transcript evidence                                                  | 0  | -                                                                                                                                                                     | P:GO:0008152;<br>F:GO:0003824                  | -                                  | IPR004245; PTHR10974:SF5<br>(PANTHER)                                                                                              |
| -                            | -                                                                                                           | 0  | -                                                                                                                                                                     | -                                              | -                                  | SignalP (SIGNALP)                                                                                                                  |
| Caenorhabditis briggsae      | estradiol 17-beta-dehydroge-se 12-b                                                                         | 9  | P:GO:0009790;<br>F:GO:0018454;<br>F:GO:0005515;<br>P:GO:0055114;<br>F:GO:0045703;<br>P:GO:0042761;<br>C:GO:0016021;<br>P:GO:0006508;<br>C:GO:0005783                  | -                                              | EC:1.1.1.36                        | IPR002198; IPR016040;<br>PTHR19410:SF38 (PANTHER), SignalP<br>(SIGNALP), SSF51735 (SUPERFAMILY)                                    |
| -                            | -                                                                                                           | 0  | -                                                                                                                                                                     | -                                              | -                                  | SignalP (SIGNALP)                                                                                                                  |
| Caenorhabditis briggsae      | jhd1_caebr ame: full= domain-containing histone demethylation protein 1 ame: full= -lysine-36 demethylase 1 | 9  | P:GO:0016568;<br>F:GO:0051864;<br>F:GO:0046872;<br>P:GO:0055114;<br>P:GO:0045449;<br>P:GO:0000003;<br>F:GO:0016702;<br>C:GO:0005634;<br>P:GO:0006974                  | -                                              | EC:1.14.11.2<br>7;<br>EC:1.13.11.0 | -                                                                                                                                  |
| Caenorhabditis briggsae      | elegans protein confirmed by transcript evidence                                                            | 0  | -                                                                                                                                                                     | F:GO:0017176;<br>P:GO:0006506;<br>C:GO:0016021 | -                                  | IPR009450; SignalP (SIGNALP)                                                                                                       |
| -                            | -                                                                                                           | 0  | -                                                                                                                                                                     | -                                              | -                                  | -                                                                                                                                  |
| Caenorhabditis sp. PS1010    | briggsae cbr-cdh-4 protein                                                                                  | 7  | P:GO:0007156;<br>P:GO:0007163;<br>C:GO:0005886;<br>P:GO:0007411;<br>F:GO:0005509;<br>C:GO:0016021;<br>P:GO:0007413                                                    | -                                              | -                                  | IPR002126; IPR015919; PTHR10596<br>(PANTHER), PTHR10596:SF74<br>(PANTHER)                                                          |

|                         |                                                                              |    |                                                                                                                                                                                                                                                            |                                                                                                                                                      |             |                                                                                                                                                            |
|-------------------------|------------------------------------------------------------------------------|----|------------------------------------------------------------------------------------------------------------------------------------------------------------------------------------------------------------------------------------------------------------|------------------------------------------------------------------------------------------------------------------------------------------------------|-------------|------------------------------------------------------------------------------------------------------------------------------------------------------------|
| Caenorhabditis briggsae | elegans protein confirmed by transcript evidence                             | 11 | P:GO:0009103;<br>C:GO:0005829;<br>P:GO:0007265;<br>F:GO:0004674;<br>F:GO:0004871;<br>C:GO:0016021;<br>P:GO:0000165;<br>F:GO:0005524;<br>F:GO:0005515;<br>P:GO:0009792;<br>P:GO:0006468                                                                     | -                                                                                                                                                    | EC:2.7.11.0 | IPR000719; IPR002290; IPR008271;<br>IPR011009; IPR017441; IPR017442;<br>IPR020636; IPR020646;<br>G3DSA:1.10.510.10 (GENE3D),<br>G3DSA:3.30.200.20 (GENE3D) |
| Caenorhabditis elegans  | elegans protein confirmed by transcript evidence                             | 11 | P:GO:0009103;<br>C:GO:0005829;<br>P:GO:0007265;<br>F:GO:0004674;<br>F:GO:0004871;<br>C:GO:0016021;<br>P:GO:0000165;<br>F:GO:0005524;<br>F:GO:0005515;<br>P:GO:0009792;<br>P:GO:0006468                                                                     | -                                                                                                                                                    | EC:2.7.11.0 | -                                                                                                                                                          |
| -                       | -                                                                            | 0  |                                                                                                                                                                                                                                                            |                                                                                                                                                      |             | -                                                                                                                                                          |
| -                       | -                                                                            | 0  |                                                                                                                                                                                                                                                            |                                                                                                                                                      |             | -                                                                                                                                                          |
| Caenorhabditis elegans  | yaf2_caeel ame: full=uncharacterized protein flags:<br>precursor             | 0  |                                                                                                                                                                                                                                                            |                                                                                                                                                      |             | -                                                                                                                                                          |
| Schistosoma mansoni     | nonsense-mediated mr- decay protein 1                                        | 0  |                                                                                                                                                                                                                                                            | F:GO:0004386;<br>F:GO:0003677;<br>F:GO:0016787;<br>F:GO:0000166;<br>C:GO:0005737;<br>F:GO:0008270;<br>F:GO:0005524;<br>P:GO:0000184;<br>F:GO:0046872 |             | -                                                                                                                                                          |
| Caenorhabditis briggsae | phosphatidylinositol-3-phosphate phosphatidylinositol 5-<br>type iii         | 15 | P:GO:0042147;<br>C:GO:0005829;<br>C:GO:0031901;<br>P:GO:0046488;<br>P:GO:0044267;<br>F:GO:0008270;<br>P:GO:0023034;<br>P:GO:0034504;<br>C:GO:0032593;<br>F:GO:0016308;<br>F:GO:0005524;<br>F:GO:0005515;<br>C:GO:0045121;<br>C:GO:0012506;<br>P:GO:0006898 | -                                                                                                                                                    | EC:2.7.1.68 | IPR002498; G3DSA:3.30.800.10<br>(GENE3D), SSF56104 (SUPERFAMILY)                                                                                           |
| Caenorhabditis elegans  | fanci (fanconi anemia complex component i) homolog family<br>member (fnci-1) | 0  |                                                                                                                                                                                                                                                            |                                                                                                                                                      |             | -                                                                                                                                                          |
| -                       | -                                                                            | 0  |                                                                                                                                                                                                                                                            |                                                                                                                                                      |             | -                                                                                                                                                          |
| Caenorhabditis elegans  | sulfate transporter                                                          | 3  | C:GO:0016021;<br>P:GO:0055085;<br>F:GO:0005215                                                                                                                                                                                                             | -                                                                                                                                                    |             | -                                                                                                                                                          |



|                         |                                             |    |                                                                                                                                                                                                                                                                                                                                                 |                                                                                                                                                                                                                                                                             |                            |                                                                                                                                           |
|-------------------------|---------------------------------------------|----|-------------------------------------------------------------------------------------------------------------------------------------------------------------------------------------------------------------------------------------------------------------------------------------------------------------------------------------------------|-----------------------------------------------------------------------------------------------------------------------------------------------------------------------------------------------------------------------------------------------------------------------------|----------------------------|-------------------------------------------------------------------------------------------------------------------------------------------|
| Macaca mulatta          | + k+ alpha 1 polypeptide                    | 20 | F:GO:0005515;<br>P:GO:0045989;<br>P:GO:0045822;<br>F:GO:0003869;<br>C:GO:0005792;<br>C:GO:0016323;<br>C:GO:0042470;<br>F:GO:0046872;<br>P:GO:0006754;<br>C:GO:0042383;<br>F:GO:0005391;<br>P:GO:0045823;<br>P:GO:0042493;<br>P:GO:0031947;<br>C:GO:0005890;<br>P:GO:0006813;<br>P:GO:0002026;<br>F:GO:0005524;<br>P:GO:0008217;<br>P:GO:0006814 | -                                                                                                                                                                                                                                                                           | EC:3.1.3.41;<br>EC:3.6.3.9 | IPR001757; G3DSA:3.40.1110.10<br>(GENE3D), PTHR11939:SF100<br>(PANTHER), SSF81660 (SUPERFAMILY)                                           |
| Caenorhabditis elegans  | melt_caee1 ame: full=protein melted homolog | 0  |                                                                                                                                                                                                                                                                                                                                                 | F:GO:0005488;<br>C:GO:0016020;<br>C:GO:0005886                                                                                                                                                                                                                              |                            | -                                                                                                                                         |
| Caenorhabditis elegans  | sex peptide receptor                        | 0  |                                                                                                                                                                                                                                                                                                                                                 | F:GO:0016740;<br>C:GO:0016021;<br>P:GO:0006729;<br>P:GO:0055114;<br>P:GO:0045434;<br>F:GO:0008188;<br>F:GO:0016491;<br>P:GO:0048042;<br>F:GO:0003824;<br>F:GO:0050254;<br>F:GO:0004872;<br>P:GO:0008152;<br>P:GO:0007186;<br>C:GO:0005886;<br>F:GO:0005488;<br>F:GO:0004757 |                            | IPR017452; G3DSA:1.20.1070.10<br>(GENE3D), PTHR22751 (PANTHER),<br>PTHR22751:SF12 (PANTHER), SignalP<br>(SIGNALP), SSF81321 (SUPERFAMILY) |
| -                       | -                                           | 0  |                                                                                                                                                                                                                                                                                                                                                 |                                                                                                                                                                                                                                                                             |                            | SignalP (SIGNALP)                                                                                                                         |
| -                       | -                                           | 0  |                                                                                                                                                                                                                                                                                                                                                 |                                                                                                                                                                                                                                                                             |                            | -                                                                                                                                         |
| -                       | -                                           | 0  |                                                                                                                                                                                                                                                                                                                                                 |                                                                                                                                                                                                                                                                             |                            | -                                                                                                                                         |
| Loa loa                 | zinc c2h2 type family protein               | 0  |                                                                                                                                                                                                                                                                                                                                                 | F:GO:0008270;<br>C:GO:0005622                                                                                                                                                                                                                                               |                            | IPR015880                                                                                                                                 |
| -                       | -                                           | 0  |                                                                                                                                                                                                                                                                                                                                                 |                                                                                                                                                                                                                                                                             |                            | -                                                                                                                                         |
| Caenorhabditis briggsae | kank1 protein                               | 1  | P:GO:0030837                                                                                                                                                                                                                                                                                                                                    | -                                                                                                                                                                                                                                                                           |                            | IPR002110; IPR020683; PTHR18958<br>(PANTHER), PTHR18958:SF169<br>(PANTHER)                                                                |
| Mus musculus            | atp-binding sub-family a member 2           | 7  | F:GO:0017111;<br>C:GO:0016020;<br>P:GO:0044238;<br>C:GO:0043229;<br>P:GO:0009987;<br>P:GO:0065007;<br>C:GO:0044444                                                                                                                                                                                                                              | -                                                                                                                                                                                                                                                                           | EC:3.6.1.15                | PTHR19229 (PANTHER),<br>PTHR19229:SF31 (PANTHER)                                                                                          |

|                        |                                                                 |    |                                                                                                                                                                                                                                                                             |                                                                                                                                                                                                                                                            |             |                                                                                                                                                              |
|------------------------|-----------------------------------------------------------------|----|-----------------------------------------------------------------------------------------------------------------------------------------------------------------------------------------------------------------------------------------------------------------------------|------------------------------------------------------------------------------------------------------------------------------------------------------------------------------------------------------------------------------------------------------------|-------------|--------------------------------------------------------------------------------------------------------------------------------------------------------------|
| Caenorhabditis elegans | yf26_caeel ame: full=protein                                    | 0  |                                                                                                                                                                                                                                                                             | P:GO:0000003;<br>P:GO:0040035;<br>P:GO:0006898;<br>P:GO:0002119;<br>P:GO:0040007                                                                                                                                                                           |             | PF10175 (PFAM)                                                                                                                                               |
| Gallus gallus          | extensin-like protein                                           | 0  |                                                                                                                                                                                                                                                                             | F:GO:0016740;<br>F:GO:0003677;<br>P:GO:0006260;<br>F:GO:0003887;<br>F:GO:0005524;<br>F:GO:0008270;<br>P:GO:0055114;<br>P:GO:0030261;<br>F:GO:0016491;<br>F:GO:0016779;<br>C:GO:0016459;<br>F:GO:0003824;<br>F:GO:0003774;<br>P:GO:0008152;<br>F:GO:0005488 |             | -                                                                                                                                                            |
| Brugia malayi          | protein-tyrosine phosphatase containing protein                 | 2  | P:GO:0016311;<br>F:GO:0004721                                                                                                                                                                                                                                               | -                                                                                                                                                                                                                                                          | EC:3.1.3.16 | IPR000242; G3DSA:3.90.190.10 (GENE3D), PTHR19134 (PANTHER), PTHR19134:SF20 (PANTHER), SSF52799 (SUPERFAMILY)                                                 |
| Caenorhabditis elegans | egl nine homolog 1                                              | 16 | P:GO:0007411;<br>P:GO:0060412;<br>P:GO:0060347;<br>F:GO:0005515;<br>F:GO:0008270;<br>P:GO:0043433;<br>P:GO:0060711;<br>C:GO:0005829;<br>F:GO:0031543;<br>P:GO:0055008;<br>P:GO:0001666;<br>F:GO:0005506;<br>P:GO:0032364;<br>P:GO:0030163;<br>P:GO:0055114;<br>F:GO:0031418 | -                                                                                                                                                                                                                                                          |             | IPR002893; IPR005123; IPR006620; PTHR12907 (PANTHER), PSS1471 (PROFILE), SSF144232 (SUPERFAMILY)                                                             |
| Caenorhabditis elegans | leucine-rich repeat serine threonine-protein ki-se 1            | 1  | F:GO:0004672                                                                                                                                                                                                                                                                | -                                                                                                                                                                                                                                                          |             | IPR001611; IPR003591; PR00019 (PRINTS), G3DSA:3.80.10.10 (GENE3D), PTHR23154 (PANTHER), PTHR23154:SF107 (PANTHER), PSS1450 (PROFILE), SSF52058 (SUPERFAMILY) |
| Caenorhabditis elegans | briggsae cbr-sos-1 protein                                      | 0  |                                                                                                                                                                                                                                                                             | P:GO:0051056;<br>P:GO:0007264;<br>F:GO:0005089;<br>P:GO:0035023;<br>F:GO:0003677;<br>F:GO:0005085;<br>C:GO:0005622                                                                                                                                         |             | -                                                                                                                                                            |
|                        | -                                                               | 0  |                                                                                                                                                                                                                                                                             |                                                                                                                                                                                                                                                            |             | -                                                                                                                                                            |
|                        | -                                                               | 0  |                                                                                                                                                                                                                                                                             |                                                                                                                                                                                                                                                            |             | SignalP (SIGNALP)                                                                                                                                            |
| Caenorhabditis elegans | r- polymerase rpb3 rpb11 dimerisation domain containing protein | 1  | F:GO:0016740                                                                                                                                                                                                                                                                | -                                                                                                                                                                                                                                                          |             | IPR009025; G3DSA:3.30.1360.10 (GENE3D), PTHR11800 (PANTHER), PTHR11800:SF13 (PANTHER)                                                                        |

|                            |                                                         |    |                                                                                                                                                                                        |                                                                                                                                     |             |                                                                                                                         |
|----------------------------|---------------------------------------------------------|----|----------------------------------------------------------------------------------------------------------------------------------------------------------------------------------------|-------------------------------------------------------------------------------------------------------------------------------------|-------------|-------------------------------------------------------------------------------------------------------------------------|
| Caenorhabditis elegans     | egf-like domain containing protein                      | 0  |                                                                                                                                                                                        |                                                                                                                                     |             | IPR000742; IPR013032;<br>G3DSA:2.10.25.10 (GENE3D)                                                                      |
|                            | -                                                       | 0  |                                                                                                                                                                                        |                                                                                                                                     |             | -                                                                                                                       |
|                            | -                                                       | 0  |                                                                                                                                                                                        |                                                                                                                                     |             | -                                                                                                                       |
|                            | -                                                       | 0  |                                                                                                                                                                                        |                                                                                                                                     |             | -                                                                                                                       |
| Caenorhabditis briggsae    | briggsae cbr-cat-4 protein                              | 11 | P:GO:0046654;<br>F:GO:0003934;<br>F:GO:0046872;<br>P:GO:0042438;<br>P:GO:0006729;<br>P:GO:0006730;<br>F:GO:0005515;<br>P:GO:0034607;<br>C:GO:0005737;<br>F:GO:0005525;<br>P:GO:0042416 | -                                                                                                                                   | EC:3.5.4.16 | IPR018247                                                                                                               |
| Caenorhabditis elegans     | hypothetical wd-repeat protein in chromosome            | 0  |                                                                                                                                                                                        |                                                                                                                                     |             | IPR011046; IPR015943; IPR017986;<br>IPR019775; IPR019781; IPR019782;<br>PTHR12816 (PANTHER),<br>PTHR12816:SF6 (PANTHER) |
|                            | -                                                       | 0  |                                                                                                                                                                                        |                                                                                                                                     |             | -                                                                                                                       |
|                            | -                                                       | 0  |                                                                                                                                                                                        |                                                                                                                                     |             | -                                                                                                                       |
|                            | -                                                       | 0  |                                                                                                                                                                                        |                                                                                                                                     |             | -                                                                                                                       |
| Homo sapiens               | optineurin                                              | 9  | P:GO:0043001;<br>C:GO:0016023;<br>P:GO:0007165;<br>P:GO:0008219;<br>P:GO:0000042;<br>F:GO:0008022;<br>C:GO:0005802;<br>C:GO:0048471;<br>P:GO:0090161                                   | -                                                                                                                                   |             | -                                                                                                                       |
| Pediculus humanus corporis | histone h1                                              | 0  |                                                                                                                                                                                        | C:GO:0005694;<br>F:GO:0005524;<br>C:GO:0000786;<br>P:GO:0006334;<br>C:GO:0016459;<br>F:GO:0003774;<br>F:GO:0003677;<br>C:GO:0005634 |             | -                                                                                                                       |
| Caenorhabditis briggsae    | thrombospondin type 1 domain containing protein         | 3  | F:GO:0005044;<br>F:GO:0030247;<br>P:GO:0006955                                                                                                                                         | -                                                                                                                                   |             | -                                                                                                                       |
| Brugia malayi              | rad9 family protein                                     | 0  |                                                                                                                                                                                        | P:GO:0006260;<br>P:GO:0006281;<br>F:GO:0005515                                                                                      |             | IPR007268; G3DSA:3.70.10.10<br>(GENE3D), SSF55979 (SUPERFAMILY)                                                         |
| Caenorhabditis briggsae    | p-type atpase                                           | 5  | C:GO:0016021;<br>F:GO:0015662;<br>P:GO:0006754;<br>F:GO:0005524;<br>P:GO:0006812                                                                                                       | -                                                                                                                                   |             | -                                                                                                                       |
|                            | -                                                       | 0  |                                                                                                                                                                                        |                                                                                                                                     |             | -                                                                                                                       |
| Caenorhabditis briggsae    | Hypothetical protein CBG20437 [Caenorhabditis briggsae] | 0  |                                                                                                                                                                                        |                                                                                                                                     |             | -                                                                                                                       |
| Caenorhabditis briggsae    | briggsae cbr-pqn- protein                               | 1  | F:GO:0005488                                                                                                                                                                           | -                                                                                                                                   |             | IPR009060; PTHR16308 (PANTHER)                                                                                          |
| Caenorhabditis briggsae    | briggsae cbr-pqn- protein                               | 1  | F:GO:0005488                                                                                                                                                                           | -                                                                                                                                   |             | IPR009060; PTHR16308 (PANTHER)                                                                                          |
|                            | -                                                       | 0  |                                                                                                                                                                                        |                                                                                                                                     |             | -                                                                                                                       |
|                            | -                                                       | 0  |                                                                                                                                                                                        |                                                                                                                                     |             | -                                                                                                                       |
|                            | -                                                       | 0  |                                                                                                                                                                                        |                                                                                                                                     |             | -                                                                                                                       |

|                         |                                                                          |    |                                                                                                                                                                                                                                                                                              |   |                                                                                                                      |
|-------------------------|--------------------------------------------------------------------------|----|----------------------------------------------------------------------------------------------------------------------------------------------------------------------------------------------------------------------------------------------------------------------------------------------|---|----------------------------------------------------------------------------------------------------------------------|
| Haemonchus contortus    | multidrug resistance protein 1                                           | 17 | P:GO:0055085;<br>P:GO:0015893;<br>P:GO:0007595;<br>P:GO:0048545;<br>P:GO:0014045;<br>F:GO:0015238;<br>P:GO:0010212;<br>C:GO:0005739;<br>C:GO:0016021;<br>F:GO:0042626;<br>C:GO:0046581;<br>C:GO:0009986;<br>F:GO:0005524;<br>P:GO:0046685;<br>F:GO:0005515;<br>P:GO:0014070;<br>C:GO:0016324 | - | IPR001140; IPR011527; IPR017940;<br>G3DSA:1.20.1560.10 (GENE3D),<br>PTHR19242 (PANTHER),<br>PTHR19242:SF96 (PANTHER) |
| -                       | -                                                                        | 0  |                                                                                                                                                                                                                                                                                              |   | -                                                                                                                    |
| Caenorhabditis elegans  | uncoordinated protein isoform partially confirmed by transcript evidence | 8  | F:GO:0004872;<br>P:GO:0006629;<br>F:GO:0005219;<br>P:GO:0006816;<br>P:GO:0006874;<br>P:GO:0055085;<br>F:GO:0005509;<br>C:GO:0016021                                                                                                                                                          | - | IPR020830                                                                                                            |
| Caenorhabditis briggsae | -dh oxidase                                                              | 3  | P:GO:0008152;<br>P:GO:0051301;<br>F:GO:0003824                                                                                                                                                                                                                                               | - | -                                                                                                                    |
| -                       | -                                                                        | 0  |                                                                                                                                                                                                                                                                                              |   | -                                                                                                                    |
| -                       | -                                                                        | 0  |                                                                                                                                                                                                                                                                                              |   | -                                                                                                                    |
| -                       | -                                                                        | 0  |                                                                                                                                                                                                                                                                                              |   | -                                                                                                                    |
| Caenorhabditis elegans  | thymus-specific serine protease                                          | 0  | P:GO:0006508;<br>F:GO:0008236;<br>C:GO:0016021;<br>F:GO:0008233;<br>P:GO:0008150;<br>F:GO:0005515;<br>C:GO:0005575                                                                                                                                                                           |   | IPR008758; G3DSA:3.40.50.1820<br>(GENE3D), PTHR11010:SF4<br>(PANTHER), SignalP (SIGNALP),<br>SSF53474 (SUPERFAMILY)  |
| -                       | -                                                                        | 0  |                                                                                                                                                                                                                                                                                              |   | -                                                                                                                    |
| -                       | -                                                                        | 0  |                                                                                                                                                                                                                                                                                              |   | -                                                                                                                    |
| -                       | -                                                                        | 0  |                                                                                                                                                                                                                                                                                              |   | -                                                                                                                    |
| Loa loa                 | cttnbp2 n-terminal like                                                  | 0  | C:GO:0015629;<br>F:GO:0005515                                                                                                                                                                                                                                                                |   | -                                                                                                                    |
| Caenorhabditis elegans  | hed family member (ptc-3)                                                | 10 | P:GO:0007283;<br>P:GO:0006461;<br>P:GO:0009792;<br>P:GO:0002119;<br>C:GO:0005887;<br>F:GO:0008158;<br>P:GO:0040018;<br>P:GO:0008544;<br>P:GO:0018996;<br>P:GO:0040011                                                                                                                        | - | IPR000731; PTHR10796 (PANTHER),<br>PTHR10796:SF34 (PANTHER), PF12349<br>(PFAM)                                       |

|                         |                                                  |   |                                                                                                                                     |                                                                                                                                                                                                                          |                                                                                                                                   |   |
|-------------------------|--------------------------------------------------|---|-------------------------------------------------------------------------------------------------------------------------------------|--------------------------------------------------------------------------------------------------------------------------------------------------------------------------------------------------------------------------|-----------------------------------------------------------------------------------------------------------------------------------|---|
| Caenorhabditis briggsae | protein ki-se domain containing protein          | 8 | C:GO:0005929;<br>C:GO:0030425;<br>F:GO:0005515;<br>P:GO:0034606;<br>F:GO:0004672;<br>C:GO:0030424;<br>P:GO:0034608;<br>C:GO:0043025 | -                                                                                                                                                                                                                        | IPR000719; IPR001245; IPR008266;<br>IPR011009; IPR020685; IPR020764;<br>G3DSA:1.10.510.10 (GENE3D),<br>G3DSA:3.30.200.20 (GENE3D) |   |
| Caenorhabditis elegans  | rab3il1 protein                                  | 7 | C:GO:0005829;<br>P:GO:0006810;<br>P:GO:0033365;<br>C:GO:0005813;<br>F:GO:0005515;<br>P:GO:0042384;<br>C:GO:0005634                  | -                                                                                                                                                                                                                        | IPR009449; PTHR14430 (PANTHER)                                                                                                    |   |
| -                       | -                                                | 0 | -                                                                                                                                   | -                                                                                                                                                                                                                        | -                                                                                                                                 |   |
| Caenorhabditis elegans  | elegans protein confirmed by transcript evidence | 0 | -                                                                                                                                   | F:GO:0005515                                                                                                                                                                                                             | SignalP (SIGNALP)                                                                                                                 |   |
| -                       | -                                                | 0 | -                                                                                                                                   | -                                                                                                                                                                                                                        | SignalP (SIGNALP)                                                                                                                 |   |
| Caenorhabditis elegans  | briggsae cbr-hcp-4 protein                       | 0 | -                                                                                                                                   | F:GO:0030247;<br>C:GO:0016021;<br>C:GO:0016020;<br>F:GO:0008195;<br>F:GO:0016787;<br>P:GO:0007165;<br>C:GO:0005576;<br>F:GO:0005044;<br>C:GO:0005622;<br>F:GO:0005515;<br>P:GO:0007050;<br>P:GO:0008283;<br>P:GO:0006955 | -                                                                                                                                 | - |
| Caenorhabditis briggsae | glutaredoxin-related protein                     | 4 | C:GO:0030018;<br>P:GO:0002026;<br>F:GO:0005515;<br>P:GO:0010614                                                                     | -                                                                                                                                                                                                                        | IPR002109; IPR004480; IPR012335;<br>IPR012336; IPR013766                                                                          |   |
| -                       | -                                                | 0 | -                                                                                                                                   | -                                                                                                                                                                                                                        | -                                                                                                                                 |   |
| -                       | -                                                | 0 | -                                                                                                                                   | -                                                                                                                                                                                                                        | -                                                                                                                                 |   |
| Caenorhabditis elegans  | e430025e21rik protein                            | 0 | -                                                                                                                                   | F:GO:0008289;<br>P:GO:0000003;<br>P:GO:0008150;<br>C:GO:0005575;<br>P:GO:0006810                                                                                                                                         | IPR019393                                                                                                                         |   |
| Brugia malayi           | hypothetical kda protein in chromosome           | 0 | -                                                                                                                                   | C:GO:0016021;<br>C:GO:0016020                                                                                                                                                                                            | PTHR22746 (PANTHER),<br>PTHR22746:SF6 (PANTHER)                                                                                   |   |
| -                       | -                                                | 0 | -                                                                                                                                   | -                                                                                                                                                                                                                        | -                                                                                                                                 |   |
| -                       | -                                                | 0 | -                                                                                                                                   | -                                                                                                                                                                                                                        | -                                                                                                                                 |   |
| -                       | -                                                | 0 | -                                                                                                                                   | -                                                                                                                                                                                                                        | -                                                                                                                                 |   |
| Caenorhabditis elegans  | excretory ca-I abnormal family member (exc-5)    | 4 | F:GO:0005089;<br>C:GO:0005622;<br>P:GO:0035023;<br>F:GO:0008270                                                                     | -                                                                                                                                                                                                                        | IPR000219; PTHR12673 (PANTHER),<br>PTHR12673:SF8 (PANTHER)                                                                        |   |
| Caenorhabditis elegans  | yka7_caee1 ame: full=uncharacterized protein     | 0 | -                                                                                                                                   | -                                                                                                                                                                                                                        | -                                                                                                                                 |   |
| -                       | -                                                | 0 | -                                                                                                                                   | -                                                                                                                                                                                                                        | -                                                                                                                                 |   |
| Loa loa                 | hypothetical protein LOAG_07907 [Loa loa]        | 1 | F:GO:0005515                                                                                                                        | -                                                                                                                                                                                                                        | IPR001715                                                                                                                         |   |
| -                       | -                                                | 0 | -                                                                                                                                   | -                                                                                                                                                                                                                        | -                                                                                                                                 |   |
| Caenorhabditis elegans  | elegans protein confirmed by transcript evidence | 0 | -                                                                                                                                   | -                                                                                                                                                                                                                        | -                                                                                                                                 |   |
| -                       | -                                                | 0 | -                                                                                                                                   | -                                                                                                                                                                                                                        | -                                                                                                                                 |   |

|                         |                                                     |    |                                                                                                                                                                       |                                                                                                                                                      |             |                                                                                                                                         |
|-------------------------|-----------------------------------------------------|----|-----------------------------------------------------------------------------------------------------------------------------------------------------------------------|------------------------------------------------------------------------------------------------------------------------------------------------------|-------------|-----------------------------------------------------------------------------------------------------------------------------------------|
| Callithrix jacchus      | proteasome ( macropain) beta 10                     | 9  | P:GO:0051436;<br>P:GO:0051437;<br>F:GO:0004298;<br>P:GO:0031145;<br>P:GO:0006959;<br>P:GO:0044419;<br>C:GO:0005737;<br>C:GO:0005839;<br>C:GO:0005634                  | -                                                                                                                                                    | EC:3.4.25.0 | -                                                                                                                                       |
| Caenorhabditis elegans  | o-phosphoseryl-tr- selenium transferase             | 6  | C:GO:0005737;<br>F:GO:0042802;<br>F:GO:0030170;<br>F:GO:0016740;<br>F:GO:0016829;<br>P:GO:0006412                                                                     | -                                                                                                                                                    | EC:3.6.5.3  | IPR008829; IPR019872                                                                                                                    |
| Caenorhabditis briggsae | uncoordinated family member (unc-22)                | 5  | C:GO:0030018;<br>F:GO:0008307;<br>P:GO:0007498;<br>F:GO:0004674;<br>F:GO:0000166                                                                                      | -                                                                                                                                                    | EC:2.7.11.0 | IPR003599; IPR007110; IPR013098;<br>IPR013783; PTHR19900 (PANTHER),<br>PTHR19900:SF7 (PANTHER), SSF48726<br>(SUPERFAMILY)               |
| Brugia malayi           | cell cycle protein                                  | 0  |                                                                                                                                                                       | F:GO:0016740;<br>F:GO:0004674;<br>F:GO:0004672;<br>P:GO:0006468;<br>F:GO:0000166;<br>P:GO:0051301;<br>F:GO:0005524;<br>F:GO:0016301;<br>C:GO:0005575 |             | IPR000719; IPR008271; IPR011009;<br>IPR017442; G3DSA:1.10.510.10<br>(GENE3D), PTHR11909 (PANTHER),<br>PTHR11909:SF7 (PANTHER)           |
| Caenorhabditis briggsae | briggsae cbr-qui-1 protein                          | 0  |                                                                                                                                                                       | F:GO:0005524;<br>F:GO:0000166                                                                                                                        |             | SignalP (SIGNALP)                                                                                                                       |
| Ancylostoma caninum     | venom allergen-like protein                         | 0  |                                                                                                                                                                       | F:GO:0009055;<br>P:GO:0019646;<br>P:GO:0040011;<br>C:GO:0005576                                                                                      |             | IPR001283; IPR014044; IPR018244;<br>PTHR10334:SF11 (PANTHER)                                                                            |
| Homo sapiens            | biglycan                                            | 10 | C:GO:0009986;<br>F:GO:0050840;<br>P:GO:0001974;<br>P:GO:0019800;<br>C:GO:0042383;<br>F:GO:0005201;<br>F:GO:0005515;<br>F:GO:0005539;<br>C:GO:0005578;<br>C:GO:0030133 | -                                                                                                                                                    |             | IPR001611; G3DSA:3.80.10.10<br>(GENE3D), PTHR23154 (PANTHER),<br>PTHR23154:SF71 (PANTHER), PSS1450<br>(PROFILE), SSF52058 (SUPERFAMILY) |
| Caenorhabditis elegans  | phosphatidylinositol transfer membrane-associated 2 | 5  | C:GO:0016021;<br>P:GO:0008152;<br>F:GO:0005509;<br>C:GO:0005625;<br>C:GO:0043231                                                                                      | -                                                                                                                                                    |             | IPR001666; G3DSA:3.30.530.20<br>(GENE3D), PTHR10658:SF6<br>(PANTHER), SSF55961 (SUPERFAMILY)                                            |
| -                       | -                                                   | 0  |                                                                                                                                                                       |                                                                                                                                                      |             | -                                                                                                                                       |

|                         |                                                                                                             |   |                                                                                                                                                      |                                                                                                                                     |             |                                                                  |
|-------------------------|-------------------------------------------------------------------------------------------------------------|---|------------------------------------------------------------------------------------------------------------------------------------------------------|-------------------------------------------------------------------------------------------------------------------------------------|-------------|------------------------------------------------------------------|
| Caenorhabditis elegans  | ribosomal r- processing homolog                                                                             | 9 | P:GO:0040010;<br>P:GO:0008340;<br>C:GO:0005730;<br>P:GO:0000183;<br>F:GO:0035064;<br>N:GO:0071840;<br>C:GO:0005677;<br>C:GO:0033553;<br>F:GO:0008168 | -                                                                                                                                   | EC:2.1.1.0  | IPR007823; G3DSA:3.40.50.150 (GENE3D), SSF53335 (SUPERFAMILY)    |
| Caenorhabditis elegans  | rophin family member (stn-1)                                                                                | 8 | P:GO:0007528;<br>F:GO:0005515;<br>P:GO:0040017;<br>C:GO:0016010;<br>F:GO:0005277;<br>F:GO:0005246;<br>P:GO:0015870;<br>P:GO:0046716                  | -                                                                                                                                   |             | IPR015482; PTHR10554:SF5 (PANTHER)                               |
| Loa loa                 | briggsae cbr-cki- protein                                                                                   | 0 |                                                                                                                                                      | F:GO:0016301;<br>P:GO:0045132;<br>F:GO:0004861;<br>P:GO:0007050;<br>P:GO:0009792;<br>P:GO:0007067;<br>C:GO:0005634                  |             | IPR003175; G3DSA:4.10.365.10 (GENE3D), PTHR10265:SF6 (PANTHER)   |
|                         | -                                                                                                           | 0 |                                                                                                                                                      |                                                                                                                                     |             | -                                                                |
| Ailuropoda melanoleuca  | sec61-like protein                                                                                          | 6 | C:GO:0030176;<br>F:GO:0015450;<br>P:GO:0045047;<br>F:GO:0005515;<br>P:GO:0055085;<br>F:GO:0043022                                                    | -                                                                                                                                   |             | -                                                                |
| Caenorhabditis briggsae | protein ki-se domain containing protein                                                                     | 2 | F:GO:0005488;<br>F:GO:0004672                                                                                                                        | -                                                                                                                                   |             | IPR000980; SSF55550 (SUPERFAMILY)                                |
| Caenorhabditis briggsae | briggsae cbr-hmt-1 protein                                                                                  | 0 |                                                                                                                                                      | F:GO:0005524;<br>F:GO:0016887;<br>F:GO:0000166;<br>C:GO:0016021;<br>F:GO:0042626;<br>F:GO:0017111;<br>P:GO:0055085;<br>P:GO:0006810 |             | PTHR19242 (PANTHER), PTHR19242:SF69 (PANTHER), SignalP (SIGNALP) |
| Caenorhabditis briggsae | n -(beta-n-acetylglucosaminy)-l-asparagi-se precursor (n4-(n-acetyl-beta-glucosaminy)-l-asparagine amidase) | 5 | F:GO:0043621;<br>C:GO:0005764;<br>F:GO:0003948;<br>P:GO:0006517;<br>C:GO:0005783                                                                     | -                                                                                                                                   | EC:3.5.1.26 | IPR000246; PTHR10188:SF6 (PANTHER), SSF56235 (SUPERFAMILY)       |
|                         | -                                                                                                           | 0 |                                                                                                                                                      |                                                                                                                                     |             | -                                                                |
|                         | -                                                                                                           | 0 |                                                                                                                                                      |                                                                                                                                     |             | IPR007465                                                        |
| Caenorhabditis elegans  | elegans protein confirmed by transcript evidence                                                            | 0 |                                                                                                                                                      |                                                                                                                                     |             | IPR000782; PTHR10900 (PANTHER), PTHR10900:SF10 (PANTHER)         |
|                         | -                                                                                                           | 0 |                                                                                                                                                      |                                                                                                                                     |             | -                                                                |
| Caenorhabditis elegans  | beta like 1                                                                                                 | 1 | F:GO:0042802                                                                                                                                         | -                                                                                                                                   |             | PTHR14978 (PANTHER)                                              |

|                         |                                                        |   |                                                                                                                                                      |                                                                                                   |             |                                                                                                        |
|-------------------------|--------------------------------------------------------|---|------------------------------------------------------------------------------------------------------------------------------------------------------|---------------------------------------------------------------------------------------------------|-------------|--------------------------------------------------------------------------------------------------------|
| Caenorhabditis elegans  | cathepsin b-like cysteine protei-se                    | 9 | P:GO:0009792;<br>P:GO:0002119;<br>F:GO:0005515;<br>P:GO:0040011;<br>F:GO:0004197;<br>P:GO:0040007;<br>P:GO:0006898;<br>P:GO:0006508;<br>P:GO:0050790 | -                                                                                                 | EC:3.4.22.0 | -                                                                                                      |
| Caenorhabditis elegans  | spectrin beta chain                                    | 0 |                                                                                                                                                      | F:GO:0005200;<br>F:GO:0003779;<br>F:GO:0016787;<br>F:GO:0004725;<br>C:GO:0008091                  |             | PTHR11915 (PANTHER),<br>PTHR11915:SF48 (PANTHER)                                                       |
| Caenorhabditis briggsae | acid ceramidase-like                                   | 2 | C:GO:0005764;<br>P:GO:0006629                                                                                                                        | -                                                                                                 |             | -                                                                                                      |
| Caenorhabditis briggsae | uncoordi-ated family member (unc-53)                   | 0 |                                                                                                                                                      | F:GO:0005524;<br>F:GO:0003674;<br>P:GO:0007049;<br>F:GO:0000166;<br>F:GO:0017111;<br>C:GO:0005575 |             | PTHR12784 (PANTHER),<br>PTHR12784:SF5 (PANTHER)                                                        |
| Caenorhabditis briggsae | uncoordi-ated family member (unc-53)                   | 0 |                                                                                                                                                      | F:GO:0005524;<br>F:GO:0003674;<br>P:GO:0007049;<br>F:GO:0000166;<br>F:GO:0017111;<br>C:GO:0005575 |             | PTHR12784 (PANTHER),<br>PTHR12784:SF5 (PANTHER)                                                        |
| Caenorhabditis elegans  | elegans protein confirmed by transcript evidence       | 0 |                                                                                                                                                      |                                                                                                   |             | -                                                                                                      |
| Brugia malayi           | uridine-cytidine ki-se 2                               | 2 | F:GO:0016301;<br>P:GO:0006911                                                                                                                        | -                                                                                                 |             | IPR000764; IPR006083;<br>G3DSA:3.40.50.300 (GENE3D),<br>PTHR10285 (PANTHER), SSF52540<br>(SUPERFAMILY) |
| Brugia malayi           | hypothetical protein Bm1_25600 [Brugia malayi]         | 0 |                                                                                                                                                      | F:GO:0051082;<br>P:GO:0006457;<br>C:GO:0016272                                                    |             | -                                                                                                      |
| Caenorhabditis briggsae | translocon-associated protein subunit alpha            | 1 | P:GO:0009792                                                                                                                                         | -                                                                                                 |             | IPR005595; PTHR12924 (PANTHER)                                                                         |
|                         | -                                                      | 0 |                                                                                                                                                      |                                                                                                   |             | -                                                                                                      |
| Caenorhabditis elegans  | hypothetical protein H01M10.1 [Caenorhabditis elegans] | 0 |                                                                                                                                                      |                                                                                                   |             | -                                                                                                      |
|                         | -                                                      | 0 |                                                                                                                                                      |                                                                                                   |             | -                                                                                                      |
|                         | -                                                      | 0 |                                                                                                                                                      |                                                                                                   |             | SignalP (SIGNALP)                                                                                      |
|                         | -                                                      | 0 |                                                                                                                                                      |                                                                                                   |             | -                                                                                                      |
|                         | -                                                      | 0 |                                                                                                                                                      |                                                                                                   |             | SignalP (SIGNALP)                                                                                      |
|                         | -                                                      | 0 |                                                                                                                                                      |                                                                                                   |             | -                                                                                                      |
| Brugia malayi           | c-termi-l binding protein 1                            | 7 | P:GO:0009987;<br>C:GO:0043234;<br>P:GO:0055114;<br>F:GO:0004617;<br>F:GO:0051287;<br>F:GO:0005515;<br>C:GO:0044451                                   | -                                                                                                 | EC:1.1.1.95 | PTHR10996 (PANTHER),<br>PTHR10996:SF11 (PANTHER)                                                       |



|                         |                                                       |    |                                                                                                                                                                                                         |                                                                                                   |             |                                                                                                           |
|-------------------------|-------------------------------------------------------|----|---------------------------------------------------------------------------------------------------------------------------------------------------------------------------------------------------------|---------------------------------------------------------------------------------------------------|-------------|-----------------------------------------------------------------------------------------------------------|
| Caenorhabditis elegans  | tho complex 2                                         | 8  | P:GO:0045132;<br>P:GO:0040007;<br>P:GO:0000003;<br>P:GO:0010171;<br>P:GO:0002119;<br>F:GO:0005515;<br>P:GO:0040011;<br>P:GO:0051028                                                                     | -                                                                                                 |             | IPR021726; PTHR21597 (PANTHER)                                                                            |
| Caenorhabditis briggsae | briggsae cbr-unc-95 protein                           | 1  | F:GO:0046872                                                                                                                                                                                            | -                                                                                                 |             | -                                                                                                         |
| Caenorhabditis elegans  | glycerol ki-se 5                                      | 2  | P:GO:0005975;<br>F:GO:0016773                                                                                                                                                                           | -                                                                                                 | EC:2.7.1.0  | -                                                                                                         |
| Caenorhabditis elegans  | glycerol ki-se 5                                      | 2  | P:GO:0005975;<br>F:GO:0016772                                                                                                                                                                           | -                                                                                                 |             | IPR000577; IPR005999; IPR018484;<br>IPR018485; G3DSA:3.30.420.40<br>(GENE3D), SSF53067 (SUPERFAMILY)      |
| -                       | -                                                     | 0  |                                                                                                                                                                                                         |                                                                                                   |             | SignalP (SIGNALP)                                                                                         |
| -                       | -                                                     | 0  |                                                                                                                                                                                                         |                                                                                                   |             | -                                                                                                         |
| -                       | -                                                     | 0  |                                                                                                                                                                                                         |                                                                                                   |             | -                                                                                                         |
| Caenorhabditis elegans  | haloacid dehaloge-se-like hydrolase family protein    | 1  | F:GO:0016787                                                                                                                                                                                            | -                                                                                                 |             | -                                                                                                         |
| -                       | -                                                     | 0  |                                                                                                                                                                                                         |                                                                                                   |             | -                                                                                                         |
| -                       | -                                                     | 0  |                                                                                                                                                                                                         |                                                                                                   |             | -                                                                                                         |
| Caenorhabditis elegans  | elegans protein confirmed by transcript evidence      | 0  |                                                                                                                                                                                                         |                                                                                                   |             | -                                                                                                         |
| -                       | -                                                     | 0  |                                                                                                                                                                                                         |                                                                                                   |             | -                                                                                                         |
| -                       | -                                                     | 0  |                                                                                                                                                                                                         |                                                                                                   |             | IPR001304; IPR016186; IPR016187;<br>PTHR22801 (PANTHER),<br>PTHR22801:SF9 (PANTHER), SignalP<br>(SIGNALP) |
| -                       | -                                                     | 0  |                                                                                                                                                                                                         |                                                                                                   |             | -                                                                                                         |
| Ancylostoma ceylanicum  | secreted protein 5 precursor                          | 0  |                                                                                                                                                                                                         | C:GO:0005576                                                                                      |             | IPR014044                                                                                                 |
| -                       | -                                                     | 0  |                                                                                                                                                                                                         |                                                                                                   |             | -                                                                                                         |
| -                       | -                                                     | 0  |                                                                                                                                                                                                         |                                                                                                   |             | -                                                                                                         |
| Caenorhabditis elegans  | alpha-l- tissue                                       | 7  | C:GO:0005625;<br>F:GO:0005529;<br>P:GO:0016142;<br>F:GO:0043169;<br>P:GO:0006004;<br>C:GO:0005764;<br>F:GO:0004560                                                                                      | -                                                                                                 | EC:3.2.1.51 | IPR000933; IPR013781; IPR017853                                                                           |
| -                       | -                                                     | 0  |                                                                                                                                                                                                         |                                                                                                   |             | -                                                                                                         |
| Pristionchus pacificus  | briggsae cbr-egl-20 protein                           | 12 | F:GO:0005109;<br>C:GO:0005615;<br>P:GO:0007409;<br>F:GO:0004871;<br>C:GO:0005886;<br>P:GO:0042074;<br>P:GO:0007507;<br>P:GO:0009952;<br>C:GO:0005578;<br>P:GO:0009798;<br>P:GO:0060070;<br>P:GO:0007223 | -                                                                                                 |             | IPR005817; PTHR12027:SF9<br>(PANTHER)                                                                     |
| Caenorhabditis elegans  | oate ligase family member (lpl-1)                     | 0  |                                                                                                                                                                                                         | P:GO:0000003;<br>P:GO:0040010;<br>P:GO:0006898;<br>P:GO:0002119;<br>P:GO:0040007;<br>P:GO:0040018 |             | IPR019346; SignalP (SIGNALP)                                                                              |
| Caenorhabditis elegans  | hypothetical protein R07D5.2 [Caenorhabditis elegans] | 0  |                                                                                                                                                                                                         |                                                                                                   |             | SignalP (SIGNALP)                                                                                         |

|                         |                                                            |    |                                                                                                                                                                                                         |                                                                                                   |                                                         |                                                                                                                                                            |
|-------------------------|------------------------------------------------------------|----|---------------------------------------------------------------------------------------------------------------------------------------------------------------------------------------------------------|---------------------------------------------------------------------------------------------------|---------------------------------------------------------|------------------------------------------------------------------------------------------------------------------------------------------------------------|
| Caenorhabditis briggsae | atp-binding sub-family a member 7                          | 2  | F:GO:0016887;<br>F:GO:0005524                                                                                                                                                                           | -                                                                                                 | -                                                       | -                                                                                                                                                          |
| Caenorhabditis elegans  | tubulin beta-2c chain                                      | 8  | P:GO:0009792;<br>P:GO:0007018;<br>F:GO:0005525;<br>P:GO:0007067;<br>P:GO:0051258;<br>F:GO:0005198;<br>F:GO:0003924;<br>C:GO:0005874                                                                     | -                                                                                                 | EC:3.6.5.1;<br>EC:3.6.5.2;<br>EC:3.6.5.3;<br>EC:3.6.5.4 | IPR000217; IPR002453; IPR003008;<br>IPR008280; IPR018316                                                                                                   |
| -                       | -                                                          | 0  |                                                                                                                                                                                                         |                                                                                                   |                                                         | IPR001128; PTHR19383:SF66<br>(PANTHER), SignalP (SIGNALP)                                                                                                  |
| Caenorhabditis elegans  | secreted frizzled-related protein 2                        | 12 | P:GO:0001501;<br>P:GO:0009888;<br>F:GO:0004930;<br>C:GO:0016021;<br>P:GO:0030178;<br>P:GO:0009790;<br>P:GO:0006915;<br>P:GO:0007165;<br>F:GO:0004926;<br>P:GO:0009887;<br>P:GO:0030154;<br>P:GO:0007186 | -                                                                                                 |                                                         | IPR015526; IPR020067;<br>PTHR11309:SF18 (PANTHER)                                                                                                          |
| Caenorhabditis briggsae | taln 2                                                     | 6  | F:GO:0005200;<br>C:GO:0005856;<br>P:GO:0007016;<br>C:GO:0005925;<br>C:GO:0001726;<br>F:GO:0005158                                                                                                       | -                                                                                                 |                                                         | IPR000299; IPR002404; IPR002558;<br>IPR011993; IPR015224; IPR015710;<br>G3DSA:1.20.1490.10 (GENE3D),<br>SSF109885 (SUPERFAMILY), SSF50729<br>(SUPERFAMILY) |
| Caenorhabditis briggsae | Hypothetical protein CBG05684 [Caenorhabditis briggsae]    | 0  |                                                                                                                                                                                                         |                                                                                                   |                                                         | SignalP (SIGNALP)                                                                                                                                          |
| Caenorhabditis briggsae | protein ki-se domain containing protein                    | 0  |                                                                                                                                                                                                         | F:GO:0016301;<br>F:GO:0004672;<br>F:GO:0005524;<br>F:GO:0000166;<br>P:GO:0006468;<br>F:GO:0004674 |                                                         | G3DSA:1.10.510.10 (GENE3D),<br>PTHR22984 (PANTHER)                                                                                                         |
| Caenorhabditis elegans  | daf-16 foxo germline tumor affecting family member (dct-6) | 0  |                                                                                                                                                                                                         |                                                                                                   |                                                         | -                                                                                                                                                          |
| -                       | -                                                          | 0  |                                                                                                                                                                                                         |                                                                                                   |                                                         | -                                                                                                                                                          |
| -                       | -                                                          | 0  |                                                                                                                                                                                                         |                                                                                                   |                                                         | -                                                                                                                                                          |
| Caenorhabditis briggsae | islet cell autoantigen 1                                   | 10 | C:GO:0030425;<br>C:GO:0000139;<br>C:GO:0045202;<br>P:GO:0043496;<br>C:GO:0005795;<br>P:GO:0042221;<br>C:GO:0030667;<br>F:GO:0019904;<br>C:GO:0048471;<br>P:GO:0046928                                   | -                                                                                                 |                                                         | IPR010504; PTHR10164 (PANTHER),<br>SSF103657 (SUPERFAMILY)                                                                                                 |
| -                       | -                                                          | 0  |                                                                                                                                                                                                         |                                                                                                   |                                                         | SignalP (SIGNALP)                                                                                                                                          |
| -                       | -                                                          | 0  |                                                                                                                                                                                                         |                                                                                                   |                                                         | -                                                                                                                                                          |

|                         |                                                                          |    |                                                                                                                                                                                                                                                                             |   |             |                                                                                                                                                             |
|-------------------------|--------------------------------------------------------------------------|----|-----------------------------------------------------------------------------------------------------------------------------------------------------------------------------------------------------------------------------------------------------------------------------|---|-------------|-------------------------------------------------------------------------------------------------------------------------------------------------------------|
| Caenorhabditis elegans  | leucine-rich repeat-containing protein 47                                | 1  | F:GO:0005488                                                                                                                                                                                                                                                                | - |             | IPR001611; IPR007666; PR00019 (PRINTS), G3DSA:3.80.10.10 (GENE3D), PTHR23155 (PANTHER), PTHR23155:SF37 (PANTHER), PSS1450 (PROFILE), SSF52058 (SUPERFAMILY) |
|                         |                                                                          |    | 0                                                                                                                                                                                                                                                                           |   |             | -                                                                                                                                                           |
| Caenorhabditis elegans  | protein phosphatase 2a (two a) regulatory subunit family member (pptr-2) | 8  | F:GO:0008601;<br>P:GO:0009792;<br>P:GO:0002119;<br>C:GO:0000159;<br>F:GO:0005515;<br>P:GO:0007165;<br>P:GO:0040007;<br>C:GO:0005634                                                                                                                                         | - |             | IPR002554; IPR016024                                                                                                                                        |
|                         |                                                                          |    | 0                                                                                                                                                                                                                                                                           |   |             | -                                                                                                                                                           |
|                         |                                                                          |    | 0                                                                                                                                                                                                                                                                           |   |             | -                                                                                                                                                           |
|                         |                                                                          |    | 0                                                                                                                                                                                                                                                                           |   |             | -                                                                                                                                                           |
|                         |                                                                          |    | 0                                                                                                                                                                                                                                                                           |   |             | SignalP (SIGNALP)                                                                                                                                           |
| Caenorhabditis briggsae | elegans protein confirmed by transcript evidence                         | 0  |                                                                                                                                                                                                                                                                             |   |             | -                                                                                                                                                           |
|                         |                                                                          |    | 0                                                                                                                                                                                                                                                                           |   |             | -                                                                                                                                                           |
| Caenorhabditis briggsae | udp-glucose dehydroge-se                                                 | 16 | P:GO:0007427;<br>F:GO:0003979;<br>P:GO:0007224;<br>P:GO:0016055;<br>P:GO:0016319;<br>P:GO:0055114;<br>P:GO:0007507;<br>F:GO:0042802;<br>P:GO:0042048;<br>P:GO:0015014;<br>P:GO:0008543;<br>F:GO:0051287;<br>P:GO:0002121;<br>P:GO:0007509;<br>P:GO:0007428;<br>P:GO:0030206 | - | EC:1.1.1.22 | IPR001732; IPR014028; IPR016040;<br>PTHR11374:SF1 (PANTHER), SSF51735 (SUPERFAMILY)                                                                         |

|                            |                                                       |   |                                                                                                                                                                                                                                                                                                                                                                                                                                                                         |                                                                                                   |                                                                                                         |
|----------------------------|-------------------------------------------------------|---|-------------------------------------------------------------------------------------------------------------------------------------------------------------------------------------------------------------------------------------------------------------------------------------------------------------------------------------------------------------------------------------------------------------------------------------------------------------------------|---------------------------------------------------------------------------------------------------|---------------------------------------------------------------------------------------------------------|
| Pediculus humanus corporis | luteinizing hormone receptor                          | 0 | C:GO:0004872;<br>F:GO:0004871;<br>C:GO:0005887;<br>C:GO:0005886;<br>P:GO:0010524;<br>C:GO:0016021;<br>F:GO:0051117;<br>C:GO:0016020;<br>P:GO:0050482;<br>C:GO:0005783;<br>F:GO:0004963;<br>F:GO:0016500;<br>F:GO:0004930;<br>P:GO:0007200;<br>P:GO:0007165;<br>P:GO:0046886;<br>F:GO:0042803;<br>F:GO:0042802;<br>P:GO:0007190;<br>C:GO:0043235;<br>P:GO:0042700;<br>F:GO:0008528;<br>C:GO:0005615;<br>P:GO:0007188;<br>P:GO:0050850;<br>P:GO:0007186;<br>F:GO:0005515; |                                                                                                   | PTHR23154 (PANTHER),<br>PTHR23154:SF30 (PANTHER), SignalP<br>(SIGNALP)                                  |
| -                          | -                                                     | 0 |                                                                                                                                                                                                                                                                                                                                                                                                                                                                         |                                                                                                   | SignalP (SIGNALP)                                                                                       |
| -                          | -                                                     | 0 |                                                                                                                                                                                                                                                                                                                                                                                                                                                                         |                                                                                                   | -                                                                                                       |
| Caenorhabditis briggsae    | 2-amino-3-carboxymuco-te-6-semialdehyde decarboxylase | 5 | P:GO:0006568;<br>P:GO:0006769;<br>F:GO:0001760;<br>C:GO:0005829;<br>P:GO:0046874                                                                                                                                                                                                                                                                                                                                                                                        | -                                                                                                 | EC:4.1.1.45<br>IPR006992; G3DSA:3.20.20.140<br>(GENE3D), PTHR21240 (PANTHER),<br>SSF51556 (SUPERFAMILY) |
| -                          | -                                                     | 0 |                                                                                                                                                                                                                                                                                                                                                                                                                                                                         |                                                                                                   | SignalP (SIGNALP)                                                                                       |
| Caenorhabditis elegans     | malic enzyme                                          | 6 | F:GO:0046872;<br>F:GO:0051287;<br>C:GO:0005759;<br>F:GO:0016619;<br>P:GO:0006108;<br>P:GO:0055114                                                                                                                                                                                                                                                                                                                                                                       | -                                                                                                 | EC:1.1.1.38 -                                                                                           |
| Caenorhabditis briggsae    | briggsae cbr-ser-1 protein                            | 0 |                                                                                                                                                                                                                                                                                                                                                                                                                                                                         | F:GO:0004872;<br>F:GO:0004871;<br>F:GO:0004930;<br>C:GO:0016021;<br>P:GO:0007165;<br>P:GO:0007186 | -                                                                                                       |
| Caenorhabditis elegans     | wd-repeat protein                                     | 7 | P:GO:0030334;<br>C:GO:0005794;<br>C:GO:0005829;<br>C:GO:0010008;<br>F:GO:0017137;<br>C:GO:0048471;<br>C:GO:0005874                                                                                                                                                                                                                                                                                                                                                      | -                                                                                                 | IPR001680; IPR011046; IPR015943;<br>IPR017986; IPR019781; IPR019782;<br>PTHR14221 (PANTHER)             |
| -                          | -                                                     | 0 |                                                                                                                                                                                                                                                                                                                                                                                                                                                                         |                                                                                                   | -                                                                                                       |
| -                          | -                                                     | 0 |                                                                                                                                                                                                                                                                                                                                                                                                                                                                         |                                                                                                   | -                                                                                                       |
| Caenorhabditis elegans     | cadherin domain containing protein                    | 1 | C:GO:0016020                                                                                                                                                                                                                                                                                                                                                                                                                                                            | -                                                                                                 | -                                                                                                       |
| -                          | -                                                     | 0 |                                                                                                                                                                                                                                                                                                                                                                                                                                                                         |                                                                                                   | -                                                                                                       |

|                           |                                                          |    |                                                                                                                                                                                                                                                                                                                                                                                                                                                                        |             |                                                                                                             |
|---------------------------|----------------------------------------------------------|----|------------------------------------------------------------------------------------------------------------------------------------------------------------------------------------------------------------------------------------------------------------------------------------------------------------------------------------------------------------------------------------------------------------------------------------------------------------------------|-------------|-------------------------------------------------------------------------------------------------------------|
|                           | -                                                        | 0  |                                                                                                                                                                                                                                                                                                                                                                                                                                                                        |             | -                                                                                                           |
| Caenorhabditis elegans    | leucyl tr- synthetase family member (Irs-2)              | 4  | C:GO:0005737;<br>F:GO:0004823;<br>P:GO:0006429;<br>F:GO:0005524                                                                                                                                                                                                                                                                                                                                                                                                        | EC:6.1.1.4  | G3DSA:1.10.730.10 (GENE3D)                                                                                  |
| Caenorhabditis elegans    | ribosomal protein l20                                    | 4  | P:GO:0009792;<br>F:GO:0003723;<br>P:GO:0009987;<br>C:GO:0030529                                                                                                                                                                                                                                                                                                                                                                                                        |             | IPR005813; G3DSA:1.10.1900.20 (GENE3D), SSF74731 (SUPERFAMILY)                                              |
|                           | -                                                        | 0  |                                                                                                                                                                                                                                                                                                                                                                                                                                                                        |             | -                                                                                                           |
| Brugia malayi             | smr domain containing protein                            | 0  |                                                                                                                                                                                                                                                                                                                                                                                                                                                                        |             | -                                                                                                           |
| Caenorhabditis briggsae   | mpp10 protein                                            | 4  | P:GO:0040035;<br>P:GO:0002119;<br>P:GO:0040010;<br>P:GO:0006898                                                                                                                                                                                                                                                                                                                                                                                                        |             | IPR007151                                                                                                   |
| Homo sapiens              | cytochrome b- alpha polypeptide                          | 33 | P:GO:0001938;<br>P:GO:0006810;<br>P:GO:0071333;<br>P:GO:0045730;<br>P:GO:0071356;<br>F:GO:0020037;<br>P:GO:0042554;<br>F:GO:0009055;<br>C:GO:0005794;<br>P:GO:0022900;<br>P:GO:0003106;<br>F:GO:0046982;<br>P:GO:0071260;<br>C:GO:0030425;<br>P:GO:0048661;<br>C:GO:0043025;<br>P:GO:0050665;<br>P:GO:0071480;<br>P:GO:0006954;<br>P:GO:0070555;<br>P:GO:0071407;<br>C:GO:0043020;<br>C:GO:0030141;<br>P:GO:0017004;<br>P:GO:0014895;<br>F:GO:0017124;<br>P:GO:0045087 |             | IPR007732; SignalP (SIGNALP)                                                                                |
| Caenorhabditis sp. PS1010 | d- polymerase eta                                        | 4  | P:GO:0044260;<br>P:GO:0044238;<br>F:GO:0016772;<br>F:GO:0000166                                                                                                                                                                                                                                                                                                                                                                                                        |             | IPR001126; IPR017963;<br>G3DSA:3.30.70.270 (GENE3D),<br>PTHR11076:SF11 (PANTHER),<br>SSF56672 (SUPERFAMILY) |
|                           | -                                                        | 0  |                                                                                                                                                                                                                                                                                                                                                                                                                                                                        |             | -                                                                                                           |
|                           | -                                                        | 0  |                                                                                                                                                                                                                                                                                                                                                                                                                                                                        |             | -                                                                                                           |
| Brugia malayi             | yemanuclein alpha                                        | 3  | C:GO:0005634;<br>F:GO:0003677;<br>P:GO:0048477                                                                                                                                                                                                                                                                                                                                                                                                                         |             | -                                                                                                           |
| Caenorhabditis briggsae   | briggsae cbr-apt-10 protein                              | 1  | P:GO:0016192                                                                                                                                                                                                                                                                                                                                                                                                                                                           |             | -                                                                                                           |
| Brugia malayi             | viral a-type inclusion protein repeat containing protein | 0  |                                                                                                                                                                                                                                                                                                                                                                                                                                                                        |             | -                                                                                                           |
| Ostertagia ostertagi      | metalloprotease 1 precursor                              | 3  | F:GO:0004222;<br>P:GO:0006508;<br>F:GO:0008270                                                                                                                                                                                                                                                                                                                                                                                                                         | EC:3.4.24.0 | -                                                                                                           |

|                           |                                                      |    |                                                                                                                                                                       |             |                                                                                    |
|---------------------------|------------------------------------------------------|----|-----------------------------------------------------------------------------------------------------------------------------------------------------------------------|-------------|------------------------------------------------------------------------------------|
| Caenorhabditis briggsae   | phospholipase d3                                     | 0  | C:GO:0016021;<br>C:GO:0016020;<br>F:GO:0070290;<br>F:GO:0016787;<br>P:GO:0016042;<br>C:GO:0005789;<br>F:GO:0003824;<br>F:GO:0004630;<br>C:GO:0005783;<br>P:GO:0008152 |             | IPR013582; G3DSA:3.30.870.10 (GENE3D), PTHR10185 (PANTHER)                         |
| Brugia malayi             | roquin isoform 2                                     | 4  | P:GO:0008340;<br>P:GO:0009408;<br>F:GO:0004842;<br>F:GO:0005515                                                                                                       | EC:6.3.2.19 | IPR001841; IPR013083; IPR017907; PTHR13139 (PANTHER), SSF57850 (SUPERFAMILY)       |
| Caenorhabditis elegans    | elegans protein confirmed by transcript evidence     | 9  | C:GO:0005887;<br>P:GO:0015724;<br>F:GO:0015108;<br>F:GO:0015499;<br>C:GO:0005624;<br>P:GO:0009987;<br>F:GO:0015380;<br>P:GO:0015701;<br>P:GO:0006821                  |             | IPR011547; PTHR11814 (PANTHER), PTHR11814:SF26 (PANTHER), SignalP (SIGNALP)        |
| Caenorhabditis briggsae   | cerevisiae sec31-like 2                              | 0  |                                                                                                                                                                       |             | -                                                                                  |
| Caenorhabditis briggsae   | translocon-associated protein subunit beta precursor | 2  | C:GO:0044464;<br>P:GO:0009792                                                                                                                                         |             | IPR008856                                                                          |
|                           | -                                                    | 0  |                                                                                                                                                                       |             | -                                                                                  |
| Caenorhabditis briggsae   | glutaredoxin-like protein                            | 7  | P:GO:0009792;<br>F:GO:0009055;<br>P:GO:0040015;<br>P:GO:0045454;<br>P:GO:0040010;<br>P:GO:0000003;<br>F:GO:0015035                                                    |             | IPR002109; IPR004480; IPR012335; IPR012336; IPR014434                              |
| Trichostrongylus vitrinus | serine threonine phosphatase                         | 2  | P:GO:0000003;<br>F:GO:0004721                                                                                                                                         | EC:3.1.3.16 | IPR004843; IPR006186; G3DSA:3.60.21.10 (GENE3D), SSF56300 (SUPERFAMILY)            |
|                           | -                                                    | 0  |                                                                                                                                                                       |             | -                                                                                  |
| Caenorhabditis elegans    | erv1 alr family protein                              | 8  | P:GO:0045454;<br>P:GO:0040017;<br>C:GO:0043231;<br>P:GO:0040010;<br>P:GO:0055114;<br>F:GO:0016972;<br>C:GO:0044444;<br>C:GO:0016020                                   | EC:1.8.3.2  | IPR012335; IPR012336; IPR013766; IPR017937; PTHR18929 (PANTHER), SignalP (SIGNALP) |
| Caenorhabditis elegans    | dedicator of cytokinesis protein 1                   | 10 | F:GO:0005085;<br>F:GO:0005083;<br>P:GO:0043652;<br>F:GO:0005525;<br>P:GO:0007520;<br>C:GO:0005886;<br>F:GO:0032403;<br>F:GO:0051020;<br>P:GO:0040039;<br>F:GO:0017124 |             | PTHR23317 (PANTHER), PTHR23317:SF16 (PANTHER)                                      |

|                                       |                                                |    |                                                                                                                                                                                                         |                                                                                                                                                                                                                                                                                                               |            |                                                                             |                                                             |
|---------------------------------------|------------------------------------------------|----|---------------------------------------------------------------------------------------------------------------------------------------------------------------------------------------------------------|---------------------------------------------------------------------------------------------------------------------------------------------------------------------------------------------------------------------------------------------------------------------------------------------------------------|------------|-----------------------------------------------------------------------------|-------------------------------------------------------------|
| Brugia malayi                         | high mobility group protein                    | 10 | P:GO:0040010;<br>F:GO:0031492;<br>P:GO:0040035;<br>F:GO:0043621;<br>P:GO:0002119;<br>P:GO:0051101;<br>C:GO:0035101;<br>P:GO:0040011;<br>P:GO:0009792;<br>P:GO:0001672                                   | -                                                                                                                                                                                                                                                                                                             | -          |                                                                             |                                                             |
| -                                     | -                                              | 0  |                                                                                                                                                                                                         |                                                                                                                                                                                                                                                                                                               |            | IPR018062; SignalP (SIGNALP)                                                |                                                             |
| Phaeodactylum tricornutum CCAP 1055/1 | chromodomain-helicase-d-binding protein 1-like | 0  |                                                                                                                                                                                                         | F:GO:0004386;<br>C:GO:0016585;<br>F:GO:0016787;<br>C:GO:0005634;<br>F:GO:0003677;<br>F:GO:0003676;<br>F:GO:0016818;<br>F:GO:0005524;<br>P:GO:0006974;<br>P:GO:0043044;<br>F:GO:0031491;<br>P:GO:0006338;<br>F:GO:0000166;<br>F:GO:0016887;<br>F:GO:0004003;<br>P:GO:0006281;<br>F:GO:0005515;<br>F:GO:0008026 |            |                                                                             | IPR000330; PTHR10799 (PANTHER),<br>PTHR10799:SF74 (PANTHER) |
| Loa loa                               | d-dependent r- polymerase family protein       | 0  |                                                                                                                                                                                                         | F:GO:0016779;<br>F:GO:0003899;<br>F:GO:0016740;<br>P:GO:0006350;<br>F:GO:0003677                                                                                                                                                                                                                              |            | -                                                                           |                                                             |
| Caenorhabditis elegans                | r- polymerase 1-2                              | 12 | F:GO:0003899;<br>P:GO:0009303;<br>P:GO:0017126;<br>P:GO:0007566;<br>C:GO:0005736;<br>P:GO:0040007;<br>P:GO:0040035;<br>F:GO:0003677;<br>P:GO:0002119;<br>F:GO:0005515;<br>F:GO:0032549;<br>P:GO:0009792 | -                                                                                                                                                                                                                                                                                                             | EC:2.7.7.6 | IPR007644; IPR015712;<br>PTHR20856:SF1 (PANTHER), SSF64484<br>(SUPERFAMILY) |                                                             |
| -                                     | -                                              | 0  |                                                                                                                                                                                                         |                                                                                                                                                                                                                                                                                                               |            | -                                                                           |                                                             |
| -                                     | -                                              | 0  |                                                                                                                                                                                                         |                                                                                                                                                                                                                                                                                                               |            | -                                                                           |                                                             |
| -                                     | -                                              | 0  |                                                                                                                                                                                                         |                                                                                                                                                                                                                                                                                                               |            | -                                                                           |                                                             |
| -                                     | -                                              | 0  |                                                                                                                                                                                                         |                                                                                                                                                                                                                                                                                                               |            | -                                                                           |                                                             |
| -                                     | -                                              | 0  |                                                                                                                                                                                                         |                                                                                                                                                                                                                                                                                                               |            | SignalP (SIGNALP)                                                           |                                                             |

|                         |                                                         |    |                                                                                                                                                                                                                                           |              |             |                                                                                                      |
|-------------------------|---------------------------------------------------------|----|-------------------------------------------------------------------------------------------------------------------------------------------------------------------------------------------------------------------------------------------|--------------|-------------|------------------------------------------------------------------------------------------------------|
| Loa loa                 | adenylate cyclase 6                                     | 14 | C:GO:0045121;<br>F:GO:0005102;<br>P:GO:0007193;<br>F:GO:0008294;<br>C:GO:0005624;<br>P:GO:0009755;<br>C:GO:0031528;<br>C:GO:0016021;<br>P:GO:0034199;<br>F:GO:0046872;<br>C:GO:0042383;<br>C:GO:0005768;<br>P:GO:0007189;<br>F:GO:0005524 | -            |             | IPR001054; IPR018297; PTHR11920 (PANTHER), PTHR11920:SF14 (PANTHER)                                  |
| -                       | -                                                       | 0  |                                                                                                                                                                                                                                           |              |             | -                                                                                                    |
| Brugia malayi           | cpyc type                                               | 1  | F:GO:0016740                                                                                                                                                                                                                              | -            |             | IPR002109; IPR011767; IPR012335; IPR012336; IPR014025; PTHR10168 (PANTHER), PTHR10168:SF16 (PANTHER) |
| Caenorhabditis elegans  | tubulointerstitial nephritis antigen-like               | 2  | P:GO:0006508;<br>F:GO:0004197                                                                                                                                                                                                             | -            | EC:3.4.22.0 | -                                                                                                    |
| -                       | -                                                       | 0  |                                                                                                                                                                                                                                           |              |             | SignalP (SIGNALP)                                                                                    |
| Caenorhabditis briggsae | Hypothetical protein CBG02477 [Caenorhabditis briggsae] | 0  |                                                                                                                                                                                                                                           | P:GO:0008104 |             | -                                                                                                    |
| -                       | -                                                       | 0  |                                                                                                                                                                                                                                           |              |             | SignalP (SIGNALP)                                                                                    |
| -                       | -                                                       | 0  |                                                                                                                                                                                                                                           |              |             | -                                                                                                    |
| -                       | -                                                       | 0  |                                                                                                                                                                                                                                           |              |             | SignalP (SIGNALP)                                                                                    |
| Macaca mulatta          | elongin b                                               | 10 | C:GO:0005829;<br>F:GO:0003746;<br>P:GO:0045944;<br>C:GO:0005667;<br>F:GO:0016251;<br>P:GO:0006461;<br>F:GO:0004842;<br>F:GO:0005515;<br>P:GO:0006368;<br>C:GO:0030891                                                                     | -            | EC:6.3.2.19 | SignalP (SIGNALP)                                                                                    |
| -                       | -                                                       | 0  |                                                                                                                                                                                                                                           |              |             | -                                                                                                    |
| Caenorhabditis briggsae | abnormal go-d development family member (gon-2)         | 7  | P:GO:0071482;<br>P:GO:0006810;<br>F:GO:0005262;<br>P:GO:0007601;<br>P:GO:0007067;<br>P:GO:0008406;<br>C:GO:0005887                                                                                                                        | -            |             | PTHR13800 (PANTHER)                                                                                  |
| -                       | -                                                       | 0  |                                                                                                                                                                                                                                           |              |             | SignalP (SIGNALP)                                                                                    |
| Caenorhabditis briggsae | numb related family member (num-1)                      | 1  | F:GO:0005515                                                                                                                                                                                                                              | -            |             | -                                                                                                    |
| -                       | -                                                       | 0  |                                                                                                                                                                                                                                           |              |             | SignalP (SIGNALP)                                                                                    |
| -                       | -                                                       | 0  |                                                                                                                                                                                                                                           |              |             | -                                                                                                    |
| -                       | -                                                       | 0  |                                                                                                                                                                                                                                           |              |             | -                                                                                                    |
| Schistosoma mansoni     | hypothetical protein [Schistosoma mansoni]              | 0  |                                                                                                                                                                                                                                           |              |             | -                                                                                                    |



|                         |                                                            |    |                                                                                                                                                                                                                                                                                                               |   |                                                         |                                                                                                                                                                                                    |
|-------------------------|------------------------------------------------------------|----|---------------------------------------------------------------------------------------------------------------------------------------------------------------------------------------------------------------------------------------------------------------------------------------------------------------|---|---------------------------------------------------------|----------------------------------------------------------------------------------------------------------------------------------------------------------------------------------------------------|
| Caenorhabditis elegans  | variant sh3 domain containing protein                      | 18 | P:GO:0090130;<br>P:GO:0007166;<br>F:GO:0004871;<br>F:GO:0005515;<br>F:GO:0004435;<br>P:GO:0048729;<br>P:GO:0016319;<br>P:GO:0007424;<br>F:GO:0016491;<br>P:GO:0042048;<br>P:GO:0009395;<br>P:GO:0006024;<br>P:GO:0007367;<br>P:GO:0015012;<br>P:GO:0007165;<br>P:GO:0002121;<br>P:GO:0042331;<br>P:GO:0007298 | - | EC:3.1.4.11                                             | IPR000980; IPR020685; IPR020700;<br>SSF55550 (SUPERFAMILY)                                                                                                                                         |
| Caenorhabditis briggsae | briggsae cbr-tw-33 protein                                 | 3  | C:GO:0016020;<br>F:GO:0005216;<br>P:GO:0006811                                                                                                                                                                                                                                                                | - |                                                         | IPR013099; G3DSA:1.10.287.70<br>(GENE3D), PTHR11003 (PANTHER),<br>PTHR11003:SF7 (PANTHER), SignalP<br>(SIGNALP), SSF81324 (SUPERFAMILY)                                                            |
|                         | -                                                          | 0  |                                                                                                                                                                                                                                                                                                               |   |                                                         | -                                                                                                                                                                                                  |
|                         | -                                                          | 0  |                                                                                                                                                                                                                                                                                                               |   |                                                         | -                                                                                                                                                                                                  |
| Caenorhabditis briggsae | elegans protein partially confirmed by transcript evidence | 3  | F:GO:0005515;<br>P:GO:0006974;<br>P:GO:0008340                                                                                                                                                                                                                                                                | - |                                                         | IPR007087                                                                                                                                                                                          |
| Homo sapiens            | un-med protein product [Homo sapiens]                      | 9  | F:GO:0005525;<br>C:GO:0005794;<br>C:GO:0005886;<br>F:GO:0005515;<br>P:GO:0016192;<br>P:GO:0007264;<br>C:GO:0048471;<br>F:GO:0003924;<br>P:GO:0015031                                                                                                                                                          | - | EC:3.6.5.1;<br>EC:3.6.5.2;<br>EC:3.6.5.3;<br>EC:3.6.5.4 | -                                                                                                                                                                                                  |
| Loa loa                 | poly polymerase gamma                                      | 11 | F:GO:0016779;<br>P:GO:0040010;<br>C:GO:0043231;<br>P:GO:0031123;<br>P:GO:0040035;<br>P:GO:0010171;<br>P:GO:0002119;<br>F:GO:0000166;<br>P:GO:0040011;<br>P:GO:0002009;<br>P:GO:0009792                                                                                                                        | - | EC:2.7.7.0                                              | IPR002934; IPR007010; IPR007012;<br>IPR011068; IPR014492;<br>G3DSA:1.10.1410.10 (GENE3D),<br>PTHR10682 (PANTHER),<br>PTHR10682:SF8 (PANTHER), SSF81301<br>(SUPERFAMILY), SSF81631<br>(SUPERFAMILY) |
|                         | -                                                          | 0  |                                                                                                                                                                                                                                                                                                               |   |                                                         | -                                                                                                                                                                                                  |
|                         | -                                                          | 0  |                                                                                                                                                                                                                                                                                                               |   |                                                         | -                                                                                                                                                                                                  |
| Danio rerio             | novel protein containing sea domains                       | 0  |                                                                                                                                                                                                                                                                                                               |   | P:GO:0006950                                            | -                                                                                                                                                                                                  |
| Caenorhabditis elegans  | hypothetical protein F54H5.3 [Caenorhabditis elegans]      | 0  |                                                                                                                                                                                                                                                                                                               |   | P:GO:0000003;<br>P:GO:0019915                           | SignalP (SIGNALP)                                                                                                                                                                                  |
|                         | -                                                          | 0  |                                                                                                                                                                                                                                                                                                               |   |                                                         | SignalP (SIGNALP)                                                                                                                                                                                  |

|                                  |                                                                    |    |                                                                                                                                                                                        |                                                                                  |             |                                                                                    |
|----------------------------------|--------------------------------------------------------------------|----|----------------------------------------------------------------------------------------------------------------------------------------------------------------------------------------|----------------------------------------------------------------------------------|-------------|------------------------------------------------------------------------------------|
| Caenorhabditis briggsae          | wingless-related mmtv integration site isoform cra_a               | 11 | F:GO:0005102;<br>P:GO:0060026;<br>P:GO:0090090;<br>P:GO:0007389;<br>P:GO:0048513;<br>C:GO:0009986;<br>P:GO:0042060;<br>P:GO:0016477;<br>P:GO:0048598;<br>P:GO:0045600;<br>C:GO:0031012 | -                                                                                | -           |                                                                                    |
| Caenorhabditis elegans           | elegans protein partially confirmed by transcript evidence         | 0  |                                                                                                                                                                                        | C:GO:0016021                                                                     |             | SignalP (SIGNALP)                                                                  |
| Clostridium bartlettii DSM 16795 | hep_hag family protein                                             | 0  |                                                                                                                                                                                        | F:GO:0005515                                                                     |             | -                                                                                  |
| Caenorhabditis elegans           | tr- (guanine-n -)-methyltransferase                                | 5  | P:GO:0030488;<br>P:GO:0009792;<br>F:GO:0008176;<br>C:GO:0005634;<br>F:GO:0000049                                                                                                       | -                                                                                | EC:2.1.1.33 | IPR003358; G3DSA:3.40.50.150 (GENE3D), PTHR23417 (PANTHER), SSF53335 (SUPERFAMILY) |
| Brugia malayi                    | hypothetical protein [Brugia malayi]                               | 0  |                                                                                                                                                                                        |                                                                                  |             | IPR002550; PTHR12064 (PANTHER)                                                     |
| Brugia malayi                    | molybdenum cofactor synthesis protein 2 small subunit              | 2  | C:GO:0005737;<br>P:GO:0044237                                                                                                                                                          | -                                                                                |             | IPR003749; IPR012675; IPR016155                                                    |
| Caenorhabditis elegans           | hypothetical protein ZK1307.7 [Caenorhabditis elegans]             | 0  |                                                                                                                                                                                        |                                                                                  |             |                                                                                    |
| Caenorhabditis briggsae          | annexin a6                                                         | 4  | F:GO:0005515;<br>C:GO:0044444;<br>P:GO:0051239;<br>F:GO:0005544                                                                                                                        | -                                                                                |             | IPR001464; IPR018252; IPR018502; PTHR10502:SF30 (PANTHER)                          |
|                                  | -                                                                  | 0  |                                                                                                                                                                                        |                                                                                  |             | -                                                                                  |
|                                  | -                                                                  | 0  |                                                                                                                                                                                        |                                                                                  |             | -                                                                                  |
| Homo sapiens                     | transgelin 2                                                       | 4  | C:GO:0031965;<br>F:GO:0005515;<br>C:GO:0005886;<br>P:GO:0007517                                                                                                                        | -                                                                                |             | -                                                                                  |
|                                  | -                                                                  | 0  |                                                                                                                                                                                        |                                                                                  |             | -                                                                                  |
|                                  | -                                                                  | 0  |                                                                                                                                                                                        |                                                                                  |             | -                                                                                  |
| Angiostrongylus cantonensis      | tnf receptor-associated protein 1                                  | 6  | P:GO:0006457;<br>P:GO:0006950;<br>P:GO:0040010;<br>F:GO:0005524;<br>F:GO:0051082;<br>C:GO:0005739                                                                                      | -                                                                                |             | IPR001404; IPR020568; IPR020576; PTHR11528:SF24 (PANTHER), SSF110942 (SUPERFAMILY) |
| Caenorhabditis briggsae          | abnormal cell migration family member (mig-15)                     | 8  | F:GO:0005083;<br>P:GO:0006468;<br>F:GO:0000155;<br>F:GO:0005515;<br>F:GO:0005524;<br>P:GO:0007165;<br>C:GO:0016020;<br>F:GO:0004674                                                    | -                                                                                | EC:2.7.11.0 | IPR001180; PTHR22986 (PANTHER), PTHR22986:SF5 (PANTHER)                            |
|                                  | -                                                                  | 0  |                                                                                                                                                                                        |                                                                                  |             | -                                                                                  |
| Caenorhabditis elegans           | protein phosphatase four regulatory subunit family member (ppfr-1) | 0  |                                                                                                                                                                                        | P:GO:0000003;<br>F:GO:0003674;<br>F:GO:0005488;<br>C:GO:0016021;<br>C:GO:0005575 |             | IPR011989; IPR016024; IPR021133; PTHR10648 (PANTHER), SignalP (SIGNALP)            |
| Caenorhabditis briggsae          | cg32809 cg32809-pd                                                 | 2  | F:GO:0005515;<br>P:GO:0008340                                                                                                                                                          | -                                                                                |             | IPR022782; PTHR22741 (PANTHER), PTHR22741:SF2 (PANTHER)                            |
| Caenorhabditis elegans           | briggsae cbr-npp-12 protein                                        | 0  |                                                                                                                                                                                        |                                                                                  |             | PTHR23019 (PANTHER)                                                                |

|                         |                                                                   |    |                                                                                                                                                                                                                                                                                                                                |                                                                 |             |                                                                                                         |
|-------------------------|-------------------------------------------------------------------|----|--------------------------------------------------------------------------------------------------------------------------------------------------------------------------------------------------------------------------------------------------------------------------------------------------------------------------------|-----------------------------------------------------------------|-------------|---------------------------------------------------------------------------------------------------------|
| Canis familiaris        | poly                                                              | 19 | F:GO:0047485;<br>F:GO:0008270;<br>P:GO:0042769;<br>P:GO:0032869;<br>C:GO:0005730;<br>P:GO:0006284;<br>P:GO:0000723;<br>C:GO:0005667;<br>P:GO:0045449;<br>F:GO:0042802;<br>P:GO:0016540;<br>F:GO:0003677;<br>F:GO:0051287;<br>P:GO:0006471;<br>P:GO:0040009;<br>F:GO:0008134;<br>C:GO:0005635;<br>P:GO:0006366;<br>F:GO:0003950 | -                                                               | EC:2.4.2.30 | IPR004102; PTHR15447 (PANTHER)                                                                          |
| -                       | -                                                                 | 0  |                                                                                                                                                                                                                                                                                                                                |                                                                 |             | IPR012394; IPR015590                                                                                    |
| -                       | -                                                                 | 0  |                                                                                                                                                                                                                                                                                                                                |                                                                 |             | -                                                                                                       |
| -                       | -                                                                 | 0  |                                                                                                                                                                                                                                                                                                                                |                                                                 |             | -                                                                                                       |
| Caenorhabditis briggsae | elegans protein partially confirmed by transcript evidence        | 0  |                                                                                                                                                                                                                                                                                                                                | F:GO:0003674;<br>C:GO:0016020;<br>P:GO:0008150;<br>C:GO:0005575 |             | SignalP (SIGNALP)                                                                                       |
| Caenorhabditis briggsae | bactericidal permeability increasing protein                      | 0  |                                                                                                                                                                                                                                                                                                                                | F:GO:0008289                                                    |             | IPR001124; IPR017943;<br>G3DSA:3.15.20.10 (GENE3D),<br>PTHR10504 (PANTHER),<br>PTHR10504:SF14 (PANTHER) |
| Caenorhabditis elegans  | kynu_caeel ame: full=kynureni-se ame: full=l-kynurenine hydrolase | 0  |                                                                                                                                                                                                                                                                                                                                |                                                                 |             | -                                                                                                       |
| Caenorhabditis elegans  | d--directed r- beta subunit family protein                        | 6  | P:GO:0040035;<br>P:GO:0009792;<br>P:GO:0002119;<br>F:GO:0005488;<br>F:GO:0016779;<br>P:GO:0040007                                                                                                                                                                                                                              | -                                                               | EC:2.7.7.0  | IPR007644                                                                                               |
| Caenorhabditis briggsae | hspc154 protein                                                   | 0  |                                                                                                                                                                                                                                                                                                                                |                                                                 |             | IPR013261; PTHR13032 (PANTHER),<br>PTHR13032:SF4 (PANTHER)                                              |
| Caenorhabditis briggsae | briggsae cbr-max-1 protein                                        | 0  |                                                                                                                                                                                                                                                                                                                                | F:GO:0005488;<br>C:GO:0005856;<br>P:GO:0040010;<br>P:GO:0008340 |             | PTHR22903 (PANTHER),<br>PTHR22903:SF2 (PANTHER)                                                         |
| -                       | -                                                                 | 0  |                                                                                                                                                                                                                                                                                                                                |                                                                 |             | IPR015940; G3DSA:1.10.8.10 (GENE3D)                                                                     |
| -                       | -                                                                 | 0  |                                                                                                                                                                                                                                                                                                                                |                                                                 |             | -                                                                                                       |
| -                       | -                                                                 | 0  |                                                                                                                                                                                                                                                                                                                                |                                                                 |             | -                                                                                                       |
| Loa loa                 | sister chromatid cohesion protein dcc1                            | 5  | C:GO:0000785;<br>C:GO:0005654;<br>F:GO:0005515;<br>P:GO:0034088;<br>C:GO:0000775                                                                                                                                                                                                                                               | -                                                               |             | -                                                                                                       |
| Caenorhabditis elegans  | briggsae cbr-mup-4 protein                                        | 2  | F:GO:0005509;<br>F:GO:0005515                                                                                                                                                                                                                                                                                                  | -                                                               |             | IPR000742; IPR006210; IPR013032;<br>SignalP (SIGNALP)                                                   |
| -                       | -                                                                 | 0  |                                                                                                                                                                                                                                                                                                                                |                                                                 |             | -                                                                                                       |
| -                       | -                                                                 | 0  |                                                                                                                                                                                                                                                                                                                                |                                                                 |             | -                                                                                                       |
| -                       | -                                                                 | 0  |                                                                                                                                                                                                                                                                                                                                |                                                                 |             | -                                                                                                       |

|                                   |                                                            |   |                                                                                  |                                                |            |                                                                                                                                                                                          |
|-----------------------------------|------------------------------------------------------------|---|----------------------------------------------------------------------------------|------------------------------------------------|------------|------------------------------------------------------------------------------------------------------------------------------------------------------------------------------------------|
| Caenorhabditis briggsae           | briggsae cbr-mup-4 protein                                 | 1 | F:GO:0005515                                                                     | -                                              |            | PTHR22992 (PANTHER),<br>PTHR22992:SF12 (PANTHER)                                                                                                                                         |
| Caenorhabditis elegans            | hypothetical protein T12D8.9 [Caenorhabditis elegans]      | 0 |                                                                                  |                                                |            | -                                                                                                                                                                                        |
|                                   |                                                            |   |                                                                                  |                                                |            | IPR003961; IPR008957; IPR011009;<br>IPR013098; IPR013783; PR00014<br>(PRINTS), G3DSA:3.30.200.20<br>(GENE3D), PTHR19900 (PANTHER),<br>PTHR19900:SF7 (PANTHER), SSF48726<br>(SUPERFAMILY) |
|                                   | -                                                          | 0 |                                                                                  |                                                |            | -                                                                                                                                                                                        |
|                                   | -                                                          | 0 |                                                                                  |                                                |            | SignalP (SIGNALP)                                                                                                                                                                        |
|                                   | -                                                          | 0 |                                                                                  |                                                |            | -                                                                                                                                                                                        |
|                                   | -                                                          | 0 |                                                                                  |                                                |            | -                                                                                                                                                                                        |
|                                   | -                                                          | 0 |                                                                                  |                                                |            | SignalP (SIGNALP)                                                                                                                                                                        |
| Brugia malayi                     | rab3 gtpase-activating protein catalytic subunit           | 4 | F:GO:0005097;<br>F:GO:0017137;<br>C:GO:0005625;<br>P:GO:0043087                  | -                                              |            | PTHR21422 (PANTHER),<br>PTHR21422:SF5 (PANTHER)                                                                                                                                          |
| Caenorhabditis briggsae           | briggsae cbr-sgcb-1 protein                                | 0 |                                                                                  | C:GO:0016012;<br>C:GO:0016021;<br>P:GO:0007010 |            | -                                                                                                                                                                                        |
| Caenorhabditis briggsae           | elegans protein partially confirmed by transcript evidence | 0 |                                                                                  | C:GO:0016021;<br>C:GO:0016020;<br>F:GO:0008375 |            | -                                                                                                                                                                                        |
| Caenorhabditis elegans            | phosphodiesterase i                                        | 1 | F:GO:0016787                                                                     | -                                              |            | IPR002591; IPR017849; IPR017850;<br>PTHR10151 (PANTHER)                                                                                                                                  |
| Talaromyces stipitatus ATCC 10500 | rr- promoter binding protein                               | 0 |                                                                                  |                                                |            | -                                                                                                                                                                                        |
| Talaromyces stipitatus ATCC 10500 | rr- promoter binding protein                               | 0 |                                                                                  |                                                |            | -                                                                                                                                                                                        |
| Talaromyces stipitatus ATCC 10500 | phosphatidylinositol glycan anchor class partial           | 0 |                                                                                  |                                                |            | -                                                                                                                                                                                        |
| Talaromyces stipitatus ATCC 10500 | rr- promoter binding protein                               | 0 |                                                                                  |                                                |            | -                                                                                                                                                                                        |
|                                   | -                                                          | 0 |                                                                                  |                                                |            | -                                                                                                                                                                                        |
|                                   | -                                                          | 0 |                                                                                  |                                                |            | -                                                                                                                                                                                        |
| Caenorhabditis elegans            | hypothetical protein Y119C1B.9 [Caenorhabditis elegans]    | 0 |                                                                                  |                                                |            | SignalP (SIGNALP)                                                                                                                                                                        |
|                                   | -                                                          | 0 |                                                                                  |                                                |            | -                                                                                                                                                                                        |
|                                   | -                                                          | 0 |                                                                                  |                                                |            | -                                                                                                                                                                                        |
| Caenorhabditis briggsae           | Hypothetical protein CBG08295 [Caenorhabditis briggsae]    | 0 |                                                                                  | C:GO:0016021;<br>P:GO:0007186                  |            | -                                                                                                                                                                                        |
| Pan troglodytes                   | -dh dehydroge-se                                           | 4 | P:GO:0006120;<br>F:GO:0008137;<br>P:GO:0006810;<br>C:GO:0005747                  | -                                              | EC:1.6.5.3 | -                                                                                                                                                                                        |
| Brugia malayi                     | malate dehydroge-se                                        | 2 | P:GO:0008152;<br>F:GO:0016491                                                    | -                                              |            | IPR003767                                                                                                                                                                                |
| Haemonchus contortus              | multidrug resistance protein 3-like                        | 5 | F:GO:0042626;<br>C:GO:0005886;<br>P:GO:0055085;<br>F:GO:0005524;<br>C:GO:0016021 | -                                              |            | -                                                                                                                                                                                        |
|                                   | -                                                          | 0 |                                                                                  |                                                |            | -                                                                                                                                                                                        |
| Caenorhabditis elegans            | briggsae cbr-adm-4 protein                                 | 3 | P:GO:0040010;<br>F:GO:0016787;<br>P:GO:0000003                                   | -                                              |            | IPR001590; IPR001762;<br>G3DSA:3.40.390.10 (GENE3D),<br>PTHR11905 (PANTHER),<br>PTHR11905:SF3 (PANTHER), SSF55486<br>(SUPERFAMILY)                                                       |
|                                   | -                                                          | 0 |                                                                                  |                                                |            | -                                                                                                                                                                                        |
| Gallus gallus                     | c4b-binding protein alpha chain precursor                  | 0 |                                                                                  |                                                |            | IPR000436; IPR016060; PTHR19325<br>(PANTHER), PTHR19325:SF51<br>(PANTHER), SignalP (SIGNALP)                                                                                             |

|                             |                                                               |   |                                                                                                                                     |                                                                 |                                                                                                        |
|-----------------------------|---------------------------------------------------------------|---|-------------------------------------------------------------------------------------------------------------------------------------|-----------------------------------------------------------------|--------------------------------------------------------------------------------------------------------|
|                             | -                                                             | 0 |                                                                                                                                     |                                                                 | -                                                                                                      |
| Caenorhabditis elegans      | briggsae cbr-lin-25 protein                                   | 5 | P:GO:0018991;<br>C:GO:0005737;<br>C:GO:0005634;<br>P:GO:0007618;<br>P:GO:0001708                                                    |                                                                 | -                                                                                                      |
| Angiostrongylus cantonensis | bcl2-associated athanogene 2                                  | 3 | F:GO:0005515;<br>P:GO:0040002;<br>P:GO:0040011                                                                                      |                                                                 | PTHR12334 (PANTHER)                                                                                    |
| Caenorhabditis briggsae     | atpase type 13a1                                              | 5 | C:GO:0016021;<br>F:GO:0015662;<br>P:GO:0006754;<br>F:GO:0005524;<br>P:GO:0006812                                                    |                                                                 | IPR001757; PTHR11939:SF48 (PANTHER), SignalP (SIGNALP), SSF81665 (SUPERFAMILY)                         |
|                             | -                                                             | 0 |                                                                                                                                     |                                                                 | SignalP (SIGNALP)                                                                                      |
|                             | -                                                             | 0 |                                                                                                                                     |                                                                 | -                                                                                                      |
|                             | -                                                             | 0 |                                                                                                                                     |                                                                 | SignalP (SIGNALP)                                                                                      |
| Caenorhabditis briggsae     | biogenesis of lysosome-related organelles complex-1 subunit 2 | 0 |                                                                                                                                     | F:GO:0003674;<br>C:GO:0005737;<br>C:GO:0005856;<br>C:GO:0005815 | -                                                                                                      |
|                             | -                                                             | 0 |                                                                                                                                     |                                                                 | -                                                                                                      |
|                             | -                                                             | 0 |                                                                                                                                     |                                                                 | -                                                                                                      |
| Caenorhabditis elegans      | flightless-                                                   | 3 | P:GO:0030239;<br>F:GO:0003779;<br>P:GO:0010004                                                                                      |                                                                 | IPR007122; IPR007123;<br>G3DSA:3.40.20.10 (GENE3D),<br>PTHR11977:SF6 (PANTHER), SSF55753 (SUPERFAMILY) |
|                             | -                                                             | 0 |                                                                                                                                     |                                                                 | -                                                                                                      |
| Brugia malayi               | exonuclease family protein                                    | 0 |                                                                                                                                     | F:GO:0003676;<br>F:GO:0004527;<br>C:GO:0005622                  | G3DSA:3.30.420.10 (GENE3D),<br>PTHR23044 (PANTHER),<br>PTHR23044:SF8 (PANTHER)                         |
| Caenorhabditis elegans      | briggsae cbr-s--2 protein                                     | 3 | P:GO:0000003;<br>P:GO:0007275;<br>P:GO:0040007                                                                                      |                                                                 | -                                                                                                      |
| Caenorhabditis briggsae     | protein ki-se domain containing protein                       | 4 | P:GO:0006468;<br>F:GO:0005524;<br>P:GO:0040011;<br>F:GO:0004674                                                                     | EC:2.7.11.0                                                     | G3DSA:3.30.200.20 (GENE3D),<br>PTHR11909 (PANTHER),<br>PTHR11909:SF19 (PANTHER)                        |
|                             | -                                                             | 0 |                                                                                                                                     |                                                                 | -                                                                                                      |
| Caenorhabditis elegans      | lobulin-like cell adhesion molecule family member (igcm-3)    | 1 | P:GO:0019915                                                                                                                        |                                                                 | -                                                                                                      |
|                             | -                                                             | 0 |                                                                                                                                     |                                                                 | -                                                                                                      |
|                             | -                                                             | 0 |                                                                                                                                     |                                                                 | -                                                                                                      |
| Homo sapiens                | isoform cra_a                                                 | 8 | C:GO:0005615;<br>P:GO:0050679;<br>F:GO:0008083;<br>F:GO:0005125;<br>P:GO:0007165;<br>C:GO:0005739;<br>P:GO:0007566;<br>P:GO:0001835 |                                                                 | -                                                                                                      |
|                             | -                                                             | 0 |                                                                                                                                     |                                                                 | -                                                                                                      |
| Caenorhabditis elegans      | transmembrane emp24 domain-containing protein 7               | 3 | C:GO:0016021;<br>C:GO:0005783;<br>P:GO:0006810                                                                                      |                                                                 | IPR000348; IPR009038; IPR015718;<br>PTHR22811 (PANTHER), SignalP (SIGNALP), SSF101576 (SUPERFAMILY)    |

|                         |                                                                        |    |                                                                                                                                                                                        |                                                                                                                                     |            |                                                                                                          |
|-------------------------|------------------------------------------------------------------------|----|----------------------------------------------------------------------------------------------------------------------------------------------------------------------------------------|-------------------------------------------------------------------------------------------------------------------------------------|------------|----------------------------------------------------------------------------------------------------------|
| Caenorhabditis briggsae | isoform a                                                              | 0  |                                                                                                                                                                                        | C:GO:0005739;<br>F:GO:0004540;<br>P:GO:0008033;<br>C:GO:0005758;<br>P:GO:0055085;<br>P:GO:0008150;<br>P:GO:0015031;<br>C:GO:0005575 |            | PTHR21622 (PANTHER)                                                                                      |
| Loa loa                 | exonuclease family protein                                             | 1  | F:GO:0004527                                                                                                                                                                           | -                                                                                                                                   |            | IPR012337; G3DSA:3.30.420.10 (GENE3D), PTHR12801 (PANTHER), PTHR12801:SF19 (PANTHER)                     |
| Ailuropoda melanoleuca  | triosephosphate isomerase                                              | 11 | C:GO:0005829;<br>P:GO:0006633;<br>C:GO:0005625;<br>P:GO:0006098;<br>P:GO:0019682;<br>F:GO:0004807;<br>F:GO:0005515;<br>P:GO:0006096;<br>P:GO:0006094;<br>C:GO:0005634;<br>P:GO:0009790 | -                                                                                                                                   | EC:5.3.1.1 | IPR000652; IPR013785; IPR020861                                                                          |
|                         | -                                                                      | 0  |                                                                                                                                                                                        |                                                                                                                                     |            | -                                                                                                        |
|                         | -                                                                      | 0  |                                                                                                                                                                                        |                                                                                                                                     |            | IPR013753; IPR015600; IPR020851; G3DSA:3.40.50.300 (GENE3D), PTHR11708 (PANTHER), SSF52540 (SUPERFAMILY) |
| Loa loa                 | was protein member 3                                                   | 1  | F:GO:0005515                                                                                                                                                                           | -                                                                                                                                   |            | -                                                                                                        |
|                         | -                                                                      | 0  |                                                                                                                                                                                        |                                                                                                                                     |            | SignalP (SIGNALP)                                                                                        |
| Loa loa                 | ww domain containing adaptor with coiled- isoform cra_a                | 2  | C:GO:0005681;<br>F:GO:0005515                                                                                                                                                          | -                                                                                                                                   |            | IPR001202; G3DSA:2.20.70.10 (GENE3D), PTHR15911 (PANTHER), PTHR15911:SF4 (PANTHER), SignalP (SIGNALP)    |
| Caenorhabditis briggsae | msp domain protein                                                     | 0  |                                                                                                                                                                                        | C:GO:0005856;<br>C:GO:0016021;<br>F:GO:0005198;<br>P:GO:0040011                                                                     |            | -                                                                                                        |
|                         | -                                                                      | 0  |                                                                                                                                                                                        |                                                                                                                                     |            | -                                                                                                        |
| Loa loa                 | notch gene homolog 4                                                   | 6  | F:GO:0005488;<br>P:GO:0050789;<br>P:GO:0060429;<br>P:GO:0030154;<br>P:GO:0007275;<br>C:GO:0044464                                                                                      | -                                                                                                                                   |            | IPR002110; IPR020683; PTHR18958 (PANTHER), PTHR18958:SF37 (PANTHER)                                      |
|                         | -                                                                      | 0  |                                                                                                                                                                                        |                                                                                                                                     |            | -                                                                                                        |
| Caenorhabditis briggsae | isoleucyl-tr- synthetase                                               | 5  | C:GO:0005737;<br>P:GO:0006428;<br>F:GO:0005524;<br>F:GO:0004822;<br>F:GO:0008270                                                                                                       | -                                                                                                                                   | EC:6.1.1.5 | -                                                                                                        |
| Ailuropoda melanoleuca  | eukaryotic translation initiation factor subunit 6 interacting protein | 6  | F:GO:0003743;<br>P:GO:0045948;<br>C:GO:0005852;<br>F:GO:0005515;<br>C:GO:0005654;<br>C:GO:0001650                                                                                      | -                                                                                                                                   |            | IPR019382; PTHR13242 (PANTHER)                                                                           |
|                         | -                                                                      | 0  |                                                                                                                                                                                        |                                                                                                                                     |            | SignalP (SIGNALP)                                                                                        |
|                         | -                                                                      | 0  |                                                                                                                                                                                        |                                                                                                                                     |            | -                                                                                                        |

|                         |                                                                   |   |                                                                                                                    |                                                |                              |                                                                                                                                     |
|-------------------------|-------------------------------------------------------------------|---|--------------------------------------------------------------------------------------------------------------------|------------------------------------------------|------------------------------|-------------------------------------------------------------------------------------------------------------------------------------|
| Caenorhabditis briggsae | Hypothetical protein CBG10829 [Caenorhabditis briggsae]           | 0 |                                                                                                                    | P:GO:0006629;<br>F:GO:0016787;<br>F:GO:0004806 |                              | SignalP (SIGNALP)                                                                                                                   |
| -                       | -                                                                 | 0 |                                                                                                                    |                                                |                              | -                                                                                                                                   |
| -                       | -                                                                 | 0 |                                                                                                                    |                                                |                              | SignalP (SIGNALP)                                                                                                                   |
| -                       | -                                                                 | 0 |                                                                                                                    |                                                |                              | SignalP (SIGNALP)                                                                                                                   |
| -                       | -                                                                 | 0 |                                                                                                                    |                                                |                              | -                                                                                                                                   |
| Caenorhabditis briggsae | zinc c2h2 type family protein                                     | 4 | P:GO:0009792;<br>P:GO:0000003;<br>P:GO:0040007;<br>P:GO:0002119                                                    | -                                              |                              | IPR015880                                                                                                                           |
| -                       | -                                                                 | 0 |                                                                                                                    |                                                |                              | -                                                                                                                                   |
| -                       | -                                                                 | 0 |                                                                                                                    |                                                |                              | -                                                                                                                                   |
| -                       | -                                                                 | 0 |                                                                                                                    |                                                |                              | -                                                                                                                                   |
| -                       | -                                                                 | 0 |                                                                                                                    |                                                |                              | -                                                                                                                                   |
| -                       | -                                                                 | 0 |                                                                                                                    |                                                |                              | SignalP (SIGNALP)                                                                                                                   |
| Caenorhabditis elegans  | iesterase family member (pde-4)                                   | 3 | F:GO:0046872;<br>P:GO:0007165;<br>F:GO:0004114                                                                     | -                                              | EC:3.1.4.17                  | IPR002073; PTHR11347 (PANTHER),<br>PTHR11347:SF37 (PANTHER),<br>SSF109604 (SUPERFAMILY)                                             |
| -                       | -                                                                 | 0 |                                                                                                                    |                                                |                              | -                                                                                                                                   |
| Caenorhabditis elegans  | scy1-like 2                                                       | 5 | P:GO:0006468;<br>F:GO:0004672;<br>C:GO:0043231;<br>C:GO:0044444;<br>F:GO:0005524                                   | -                                              |                              | IPR000719; IPR001245; IPR011009;<br>G3DSA:1.10.510.10 (GENE3D),<br>PTHR12984 (PANTHER),<br>PTHR12984:SF3 (PANTHER)                  |
| -                       | -                                                                 | 0 |                                                                                                                    |                                                |                              | SignalP (SIGNALP)                                                                                                                   |
| Ancylostoma caninum     | metalloprotease 1 precursor                                       | 1 | F:GO:0016787                                                                                                       | -                                              |                              | IPR001506; IPR006026;<br>G3DSA:3.40.390.10 (GENE3D),<br>PTHR10127 (PANTHER),<br>PTHR10127:SF65 (PANTHER),<br>SSF55486 (SUPERFAMILY) |
| -                       | -                                                                 | 0 |                                                                                                                    |                                                |                              | SSF52058 (SUPERFAMILY)                                                                                                              |
| -                       | -                                                                 | 0 |                                                                                                                    |                                                |                              | -                                                                                                                                   |
| Caenorhabditis elegans  | endoplasmic reticulum mannosyl-oligosaccharide -alpha-mannosidase | 7 | F:GO:0004559;<br>C:GO:0005794;<br>F:GO:0004571;<br>P:GO:0048364;<br>F:GO:0005509;<br>P:GO:0006491;<br>C:GO:0016020 | -                                              | EC:3.2.1.24;<br>EC:3.2.1.113 | SignalP (SIGNALP)                                                                                                                   |
| -                       | -                                                                 | 0 |                                                                                                                    |                                                |                              | -                                                                                                                                   |

|                           |                                                            |   |                                                                                                                    |                                                                                                                                                                                                                                                                                                                                                                                                    |   |                                                                                        |
|---------------------------|------------------------------------------------------------|---|--------------------------------------------------------------------------------------------------------------------|----------------------------------------------------------------------------------------------------------------------------------------------------------------------------------------------------------------------------------------------------------------------------------------------------------------------------------------------------------------------------------------------------|---|----------------------------------------------------------------------------------------|
| Chlamydomonas reinhardtii | flagellar associated protein                               | 0 |                                                                                                                    | F:GO:0005262;<br>F:GO:0004386;<br>F:GO:0016787;<br>F:GO:0003676;<br>F:GO:0005216;<br>F:GO:0005524;<br>C:GO:0016021;<br>C:GO:0016020;<br>C:GO:0019861;<br>P:GO:0055085;<br>F:GO:0000166;<br>F:GO:0005488;<br>P:GO:0017038;<br>F:GO:0004623;<br>P:GO:0006816;<br>P:GO:0055114;<br>P:GO:0006811;<br>P:GO:0006810;<br>C:GO:0000502;<br>F:GO:0032440;<br>F:GO:0005515;<br>F:GO:0016740;<br>F:GO:0016491 |   | IPR002110; IPR020683; PTHR18958 (PANTHER), PTHR18958:SF306 (PANTHER)                   |
| Caenorhabditis elegans    | briggsae cbr-dys-1 protein                                 | 7 | P:GO:0007271;<br>F:GO:0005515;<br>P:GO:0040017;<br>C:GO:0016010;<br>F:GO:0005277;<br>P:GO:0015870;<br>P:GO:0046716 | -                                                                                                                                                                                                                                                                                                                                                                                                  | - |                                                                                        |
|                           | -                                                          | 0 |                                                                                                                    |                                                                                                                                                                                                                                                                                                                                                                                                    |   | -                                                                                      |
|                           | -                                                          | 0 |                                                                                                                    |                                                                                                                                                                                                                                                                                                                                                                                                    |   | -                                                                                      |
|                           | -                                                          | 0 |                                                                                                                    |                                                                                                                                                                                                                                                                                                                                                                                                    |   | -                                                                                      |
| Caenorhabditis briggsae   | briggsae cbr-sqv-8 protein                                 | 1 | F:GO:0016757                                                                                                       | -                                                                                                                                                                                                                                                                                                                                                                                                  |   | IPR005027; G3DSA:3.90.550.10 (GENE3D), PTHR10896:SF5 (PANTHER), SSF53448 (SUPERFAMILY) |
|                           | -                                                          | 0 |                                                                                                                    |                                                                                                                                                                                                                                                                                                                                                                                                    |   | -                                                                                      |
|                           | -                                                          | 0 |                                                                                                                    |                                                                                                                                                                                                                                                                                                                                                                                                    |   | PRO1503 (PRINTS)                                                                       |
| Caenorhabditis elegans    | elegans protein partially confirmed by transcript evidence | 1 | F:GO:0005515                                                                                                       | -                                                                                                                                                                                                                                                                                                                                                                                                  |   | SignalP (SIGNALP)                                                                      |
|                           | -                                                          | 0 |                                                                                                                    |                                                                                                                                                                                                                                                                                                                                                                                                    |   | -                                                                                      |
| Caenorhabditis elegans    | elegans protein partially confirmed by transcript evidence | 4 | C:GO:0005576;<br>F:GO:0008061;<br>F:GO:0005515;<br>P:GO:0006030                                                    | -                                                                                                                                                                                                                                                                                                                                                                                                  |   | IPR006150; IPR007026; PTHR11201 (PANTHER), PTHR11201:SF241 (PANTHER)                   |
| Caenorhabditis elegans    | gamma-tubulin interacting protein family member (gip-1)    | 0 |                                                                                                                    |                                                                                                                                                                                                                                                                                                                                                                                                    |   | IPR007259                                                                              |
|                           |                                                            |   |                                                                                                                    | C:GO:0000922;<br>P:GO:0000226;<br>C:GO:0016021;<br>C:GO:0005815;<br>P:GO:0009792;<br>P:GO:0007020;<br>F:GO:0005515                                                                                                                                                                                                                                                                                 |   |                                                                                        |



|                             |                                                            |    |                                                                                                                                                                                                                                                                             |                                                |             |                                                                                                                                   |
|-----------------------------|------------------------------------------------------------|----|-----------------------------------------------------------------------------------------------------------------------------------------------------------------------------------------------------------------------------------------------------------------------------|------------------------------------------------|-------------|-----------------------------------------------------------------------------------------------------------------------------------|
| Caenorhabditis elegans      | elegans protein partially confirmed by transcript evidence | 8  | C:GO:0005737;<br>C:GO:0005625;<br>F:GO:0005515;<br>P:GO:0030163;<br>F:GO:0004046;<br>P:GO:0006520;<br>P:GO:0006508;<br>F:GO:0008237                                                                                                                                         | -                                              | EC:3.5.1.14 | IPR002933; G3DSA:3.40.630.10 (GENE3D), PTHR11014 (PANTHER), PTHR11014:SF8 (PANTHER), SSF53187 (SUPERFAMILY)                       |
|                             | -                                                          | 0  |                                                                                                                                                                                                                                                                             |                                                |             | -                                                                                                                                 |
|                             | -                                                          | 0  |                                                                                                                                                                                                                                                                             |                                                |             | -                                                                                                                                 |
| Caenorhabditis briggsae     | blooms syndrome d- helicase                                | 7  | F:GO:0043140;<br>P:GO:0006260;<br>F:GO:0003676;<br>C:GO:0005622;<br>F:GO:0005524;<br>P:GO:0006310;<br>P:GO:0006281                                                                                                                                                          | -                                              |             | IPR004589; PTHR13710:SF14 (PANTHER)                                                                                               |
|                             | -                                                          | 0  |                                                                                                                                                                                                                                                                             |                                                |             | -                                                                                                                                 |
| Ornithorhynchus anatinus    | phospholipase a2 receptor 1                                | 0  |                                                                                                                                                                                                                                                                             |                                                |             | IPR001304; IPR016186; IPR016187; PTHR22802 (PANTHER), PTHR22802:SF10 (PANTHER)                                                    |
| Caenorhabditis elegans      | elegans protein partially confirmed by transcript evidence | 3  | C:GO:0034703;<br>F:GO:0005261;<br>P:GO:0055080                                                                                                                                                                                                                              | -                                              |             | -                                                                                                                                 |
| Angiostrongylus cantonensis | gtp-binding protein era homolog                            | 3  | F:GO:0005525;<br>C:GO:0005622;<br>F:GO:0003723                                                                                                                                                                                                                              | -                                              |             | IPR009019; IPR011619; IPR015946; G3DSA:3.40.50.300 (GENE3D), PTHR11649 (PANTHER), PTHR11649:SF3 (PANTHER), SSF52540 (SUPERFAMILY) |
| Caenorhabditis elegans      | phosphopantothe-te-cysteine ligase                         | 1  | F:GO:0016874                                                                                                                                                                                                                                                                | -                                              |             | IPR007085; PTHR12290 (PANTHER), PTHR12290:SF2 (PANTHER)                                                                           |
| Drosophila simulans         | exonuclease nef-sp                                         | 0  |                                                                                                                                                                                                                                                                             | F:GO:0003676;<br>F:GO:0004527;<br>C:GO:0005622 |             | IPR012337; IPR013520; G3DSA:3.30.420.10 (GENE3D), PTHR12801 (PANTHER), PTHR12801:SF11 (PANTHER)                                   |
| Caenorhabditis elegans      | polymerase (d- directed) epsilon                           | 16 | F:GO:0008270;<br>F:GO:0003887;<br>P:GO:0006260;<br>P:GO:0040035;<br>P:GO:0006297;<br>F:GO:0003677;<br>P:GO:0000731;<br>F:GO:0005515;<br>F:GO:0000166;<br>P:GO:0040011;<br>P:GO:0006997;<br>P:GO:0000082;<br>C:GO:0005654;<br>P:GO:0002009;<br>P:GO:0009792;<br>F:GO:0003682 | -                                              | EC:2.7.7.7  | -                                                                                                                                 |
|                             | -                                                          | 0  |                                                                                                                                                                                                                                                                             |                                                |             | SignalP (SIGNALP)                                                                                                                 |
|                             | -                                                          | 0  |                                                                                                                                                                                                                                                                             |                                                |             | -                                                                                                                                 |
|                             | -                                                          | 0  |                                                                                                                                                                                                                                                                             |                                                |             | -                                                                                                                                 |
|                             | -                                                          | 0  |                                                                                                                                                                                                                                                                             |                                                |             | -                                                                                                                                 |
|                             | -                                                          | 0  |                                                                                                                                                                                                                                                                             |                                                |             | -                                                                                                                                 |
| Brugia malayi               | hypothetical protein Bm1_19685 [Brugia malayi]             | 0  |                                                                                                                                                                                                                                                                             | P:GO:0008202                                   |             | IPR000648; PTHR10972:SF11 (PANTHER)                                                                                               |

|                         |                                                                    |  |    |                                                                                                                                                                                                                                           |                           |                                                                                          |
|-------------------------|--------------------------------------------------------------------|--|----|-------------------------------------------------------------------------------------------------------------------------------------------------------------------------------------------------------------------------------------------|---------------------------|------------------------------------------------------------------------------------------|
|                         | -                                                                  |  | 0  |                                                                                                                                                                                                                                           |                           | -                                                                                        |
| Loa loa                 | u4 tri-snrnp-associated protein 3                                  |  | 1  | P:GO:0018991                                                                                                                                                                                                                              |                           | -                                                                                        |
| Loa loa                 | briggsae cbr-vps- protein                                          |  | 2  | P:GO:0016192;<br>F:GO:0005515                                                                                                                                                                                                             |                           | IPR000169; IPR001619;<br>G3DSA:3.40.50.1910 (GENE3D),<br>PTHR11679:SF1 (PANTHER)         |
| Caenorhabditis elegans  | abnormal embryonic partitioning of cytoplasm family member (par-3) |  | 8  | C:GO:0005737;<br>P:GO:0007163;<br>P:GO:0040001;<br>F:GO:0005515;<br>P:GO:0007155;<br>P:GO:0007369;<br>C:GO:0016021;<br>P:GO:0008406                                                                                                       |                           | -                                                                                        |
|                         | -                                                                  |  | 0  |                                                                                                                                                                                                                                           |                           | -                                                                                        |
| Caenorhabditis briggsae | carbamoyl-phosphate synthetase aspartate and dihydroorotase        |  | 8  | F:GO:0004086;<br>P:GO:0034404;<br>P:GO:0046483;<br>F:GO:0016743;<br>F:GO:0016812;<br>P:GO:0006520;<br>F:GO:0000166;<br>P:GO:0060041                                                                                                       | EC:2.1.3.0;<br>EC:3.5.2.0 | IPR002474; G3DSA:3.50.30.20<br>(GENE3D), PTHR11405 (PANTHER),<br>PTHR11405:SF3 (PANTHER) |
|                         | -                                                                  |  | 0  |                                                                                                                                                                                                                                           |                           | -                                                                                        |
| Caenorhabditis elegans  | yqp1_caeel ame: full=uncharacterized protein                       |  | 0  |                                                                                                                                                                                                                                           |                           | -                                                                                        |
|                         | -                                                                  |  | 0  |                                                                                                                                                                                                                                           |                           | -                                                                                        |
| Pongo abelii            | d--binding protein b                                               |  | 14 | F:GO:0003723;<br>F:GO:0003690;<br>C:GO:0070937;<br>P:GO:0070934;<br>P:GO:0006355;<br>P:GO:0008380;<br>F:GO:0016564;<br>C:GO:0071204;<br>C:GO:0010494;<br>F:GO:0005515;<br>F:GO:0003700;<br>F:GO:0003697;<br>P:GO:0006397;<br>P:GO:0006366 |                           | -                                                                                        |
|                         | -                                                                  |  | 0  |                                                                                                                                                                                                                                           |                           | SignalIP (SIGNALP)                                                                       |
|                         | -                                                                  |  | 0  |                                                                                                                                                                                                                                           |                           | -                                                                                        |
|                         | -                                                                  |  | 0  |                                                                                                                                                                                                                                           |                           | -                                                                                        |
| Caenorhabditis elegans  | briggsae cbr-vit-5 protein                                         |  | 3  | P:GO:0009792;<br>P:GO:0008340;<br>P:GO:0040010                                                                                                                                                                                            |                           | -                                                                                        |
| Caenorhabditis briggsae | briggsae cbr-vit-5 protein                                         |  | 3  | P:GO:0009792;<br>P:GO:0008340;<br>P:GO:0040010                                                                                                                                                                                            |                           | -                                                                                        |
| Caenorhabditis elegans  | briggsae cbr-vit-5 protein                                         |  | 4  | P:GO:0009792;<br>P:GO:0008340;<br>P:GO:0040010;<br>F:GO:0005515                                                                                                                                                                           |                           | SignalIP (SIGNALP)                                                                       |
|                         | -                                                                  |  | 0  |                                                                                                                                                                                                                                           |                           | -                                                                                        |
| Caenorhabditis elegans  | briggsae cbr-vit-5 protein                                         |  | 4  | P:GO:0009792;<br>P:GO:0008340;<br>P:GO:0040010;<br>F:GO:0005515                                                                                                                                                                           |                           | SignalIP (SIGNALP)                                                                       |

|                         |                                                                          |   |                                                                                                                    |                               |             |                                                                                                                                        |
|-------------------------|--------------------------------------------------------------------------|---|--------------------------------------------------------------------------------------------------------------------|-------------------------------|-------------|----------------------------------------------------------------------------------------------------------------------------------------|
| Caenorhabditis elegans  | briggsae cbr-vit-5 protein                                               | 4 | P:GO:0009792;<br>F:GO:0005515;<br>P:GO:0040010;<br>P:GO:0008340                                                    | -                             | -           |                                                                                                                                        |
| Caenorhabditis elegans  | briggsae cbr-vit-5 protein                                               | 4 | P:GO:0009792;<br>F:GO:0005515;<br>P:GO:0040010;<br>P:GO:0008340                                                    | -                             |             | PTHR23345 (PANTHER)                                                                                                                    |
| Caenorhabditis elegans  | vitellogenin structural genes (yolk protein genes) family member (vit-2) | 0 |                                                                                                                    | P:GO:0006869;<br>F:GO:0005515 |             | -                                                                                                                                      |
| Caenorhabditis elegans  | vit-2                                                                    | 1 | F:GO:0005515                                                                                                       | -                             |             | -                                                                                                                                      |
| Caenorhabditis elegans  | briggsae cbr-vit-5 protein                                               | 4 | P:GO:0009792;<br>P:GO:0008340;<br>P:GO:0040010;<br>F:GO:0005515                                                    | -                             |             | SignalP (SIGNALP)                                                                                                                      |
|                         | -                                                                        | 0 |                                                                                                                    |                               |             | -                                                                                                                                      |
|                         | -                                                                        | 0 |                                                                                                                    |                               |             | -                                                                                                                                      |
|                         | -                                                                        | 0 |                                                                                                                    |                               |             | -                                                                                                                                      |
| Brugia malayi           | amine oxidase (flavin containing) domain 1                               | 7 | P:GO:0016568;<br>F:GO:0005488;<br>P:GO:0019219;<br>F:GO:0032453;<br>P:GO:0055114;<br>F:GO:0016491;<br>P:GO:0006306 | -                             |             | IPR002937; G3DSA:3.50.50.60 (GENE3D), PTHR10742 (PANTHER), PTHR10742:SF31 (PANTHER), SSF54373 (SUPERFAMILY)                            |
|                         | -                                                                        | 0 |                                                                                                                    |                               |             | -                                                                                                                                      |
| Caenorhabditis elegans  | elegans protein confirmed by transcript evidence                         | 3 | P:GO:0006508;<br>F:GO:0004181;<br>F:GO:0008270                                                                     | -                             | EC:3.4.17.0 | IPR000834; G3DSA:3.40.630.10 (GENE3D), PTHR11705 (PANTHER), PTHR11705:SF12 (PANTHER), SSF53187 (SUPERFAMILY)                           |
|                         | -                                                                        | 0 |                                                                                                                    |                               |             | -                                                                                                                                      |
| Caenorhabditis elegans  | hypothetical protein R02D3.7 [Caenorhabditis elegans]                    | 0 |                                                                                                                    | F:GO:0008270;<br>C:GO:0005622 |             | IPR007087; IPR015880                                                                                                                   |
|                         | -                                                                        | 0 |                                                                                                                    |                               |             | SignalP (SIGNALP)                                                                                                                      |
|                         | -                                                                        | 0 |                                                                                                                    |                               |             | -                                                                                                                                      |
|                         | -                                                                        | 0 |                                                                                                                    |                               |             | -                                                                                                                                      |
| Caenorhabditis elegans  | glycine dehydroge-se                                                     | 4 | F:GO:0016491;<br>F:GO:0046983;<br>P:GO:0006544;<br>C:GO:0005739                                                    | -                             |             | IPR015424; IPR020580; IPR020581                                                                                                        |
|                         | -                                                                        | 0 |                                                                                                                    |                               |             | SignalP (SIGNALP)                                                                                                                      |
|                         | -                                                                        | 0 |                                                                                                                    |                               |             | -                                                                                                                                      |
| Caenorhabditis briggsae | p-type atpase                                                            | 5 | C:GO:0016021;<br>F:GO:0015662;<br>P:GO:0006754;<br>F:GO:0005524;<br>P:GO:0006812                                   | -                             |             | IPR000695; IPR001757; IPR005834; G3DSA:1.20.1110.10 (GENE3D), PTHR11939:SF63 (PANTHER), SSF56784 (SUPERFAMILY), SSF81665 (SUPERFAMILY) |
| Caenorhabditis briggsae | moco sulphurase c-termi-l domain containing 2                            | 2 | C:GO:0005743;<br>F:GO:0005515                                                                                      | -                             |             | IPR005302; IPR005303; IPR011037; PTHR14237 (PANTHER), SSF141673 (SUPERFAMILY)                                                          |
| Caenorhabditis briggsae | moco sulphurase c-termi-l domain containing 2                            | 2 | C:GO:0005743;<br>F:GO:0005515                                                                                      | -                             |             | IPR005302; IPR005303; IPR011037; PTHR14237 (PANTHER), SignalP (SIGNALP), SSF141673 (SUPERFAMILY)                                       |
| Caenorhabditis briggsae | tyrosine sulfotransferase                                                | 1 | F:GO:0008146                                                                                                       |                               | EC:2.8.2.0  | PTHR12788 (PANTHER)                                                                                                                    |
| Loa loa                 | hypothetical protein LOAG_09341 [Loa loa]                                | 0 |                                                                                                                    |                               |             | IPR000210; IPR011333; IPR013069                                                                                                        |
|                         | -                                                                        | 0 |                                                                                                                    |                               |             | -                                                                                                                                      |

|                           |                                                                |    |                                                                                                                                                                                                         |                               |                                                                                                                     |
|---------------------------|----------------------------------------------------------------|----|---------------------------------------------------------------------------------------------------------------------------------------------------------------------------------------------------------|-------------------------------|---------------------------------------------------------------------------------------------------------------------|
|                           | -                                                              | 0  |                                                                                                                                                                                                         |                               | -                                                                                                                   |
|                           | -                                                              | 0  |                                                                                                                                                                                                         |                               | -                                                                                                                   |
|                           | -                                                              | 0  |                                                                                                                                                                                                         |                               | -                                                                                                                   |
|                           | -                                                              | 0  |                                                                                                                                                                                                         |                               | -                                                                                                                   |
|                           | -                                                              | 0  |                                                                                                                                                                                                         |                               | SignalP (SIGNALP)                                                                                                   |
|                           | -                                                              | 0  |                                                                                                                                                                                                         |                               | IPR007356; PTHR13563:SF4 (PANTHER)                                                                                  |
|                           | -                                                              | 0  |                                                                                                                                                                                                         |                               | SignalP (SIGNALP)                                                                                                   |
| Caenorhabditis briggsae   | l-3-hydroxyacyl-coenzyme a short chain                         | 5  | P:GO:0055114;<br>P:GO:0006098;<br>F:GO:0004616;<br>P:GO:0006631;<br>F:GO:0050662                                                                                                                        | EC:1.1.1.44                   | IPR006108; IPR006176; IPR006180;<br>IPR008927; IPR013328; IPR016040;<br>PTHR23309 (PANTHER), SSF51735 (SUPERFAMILY) |
| Caenorhabditis briggsae   | briggsae cbr-lin-24 protein                                    | 1  | F:GO:0005515                                                                                                                                                                                            | -                             | IPR004991; G3DSA:2.170.15.10 (GENE3D), SSF56973 (SUPERFAMILY)                                                       |
|                           | -                                                              | 0  |                                                                                                                                                                                                         |                               | -                                                                                                                   |
| Caenorhabditis briggsae   | sodium-independent organic anion transporter family protein    | 3  | C:GO:0016020;<br>P:GO:0009792;<br>P:GO:0006810                                                                                                                                                          | -                             | IPR004156; PTHR11388:SF7 (PANTHER)                                                                                  |
|                           | -                                                              | 0  |                                                                                                                                                                                                         |                               | IPR018271                                                                                                           |
|                           | -                                                              | 0  |                                                                                                                                                                                                         |                               | -                                                                                                                   |
| Caenorhabditis elegans    | yng2_caeel ame: full=uncharacterized protein                   | 0  |                                                                                                                                                                                                         |                               | SignalP (SIGNALP)                                                                                                   |
| Caenorhabditis elegans    | ytv2_caeel ame: full=uncharacterized zinc metalloprotease      | 0  |                                                                                                                                                                                                         | P:GO:0006508;<br>F:GO:0008233 | -                                                                                                                   |
| Caenorhabditis elegans    | atp-dependent r-                                               | 5  | F:GO:0008026;<br>F:GO:0003676;<br>F:GO:0005515;<br>P:GO:0006397;<br>F:GO:0005524                                                                                                                        | -                             | -                                                                                                                   |
|                           | -                                                              | 0  |                                                                                                                                                                                                         |                               | SignalP (SIGNALP)                                                                                                   |
|                           | -                                                              | 0  |                                                                                                                                                                                                         |                               | -                                                                                                                   |
|                           | -                                                              | 0  |                                                                                                                                                                                                         |                               | -                                                                                                                   |
| Caenorhabditis elegans    | swi snf matrix actin dependent regulator of subfamily member 1 | 12 | F:GO:0030528;<br>P:GO:0043044;<br>P:GO:0007420;<br>C:GO:0016585;<br>F:GO:0003677;<br>F:GO:0005524;<br>F:GO:0031491;<br>F:GO:0005515;<br>P:GO:0043193;<br>F:GO:0004386;<br>F:GO:0008094;<br>P:GO:0030182 | -                             | IPR006118; IPR010916                                                                                                |
|                           | -                                                              | 0  |                                                                                                                                                                                                         |                               | SignalP (SIGNALP)                                                                                                   |
|                           | -                                                              | 0  |                                                                                                                                                                                                         |                               | -                                                                                                                   |
| Caenorhabditis sp. PS1010 | briggsae cbr-cdh-4 protein                                     | 3  | P:GO:0007163;<br>P:GO:0007411;<br>P:GO:0007413                                                                                                                                                          | -                             | -                                                                                                                   |
|                           | -                                                              | 0  |                                                                                                                                                                                                         |                               | -                                                                                                                   |
|                           | -                                                              | 0  |                                                                                                                                                                                                         |                               | -                                                                                                                   |
|                           | -                                                              | 0  |                                                                                                                                                                                                         |                               | SignalP (SIGNALP)                                                                                                   |
| Caenorhabditis elegans    | meiosis-specific homolog                                       | 4  | P:GO:0000239;<br>P:GO:0000712;<br>F:GO:0005515;<br>C:GO:0005634                                                                                                                                         | -                             | IPR000432; G3DSA:3.40.50.300 (GENE3D), PTHR11361:SF18 (PANTHER), SSF52540 (SUPERFAMILY)                             |
|                           | -                                                              | 0  |                                                                                                                                                                                                         |                               | -                                                                                                                   |
|                           | -                                                              | 0  |                                                                                                                                                                                                         |                               | -                                                                                                                   |

|                         |                                                            |   |                                                                                                                                                      |                                                                 |             |                                                                                                                                  |
|-------------------------|------------------------------------------------------------|---|------------------------------------------------------------------------------------------------------------------------------------------------------|-----------------------------------------------------------------|-------------|----------------------------------------------------------------------------------------------------------------------------------|
| Caenorhabditis elegans  | in family member (ttn-1)                                   | 0 |                                                                                                                                                      | F:GO:0005524;<br>F:GO:0004672;<br>P:GO:0006468;<br>P:GO:0009792 |             | IPR013783                                                                                                                        |
| Loa loa                 | mitogen-activated protein ki-se ki-se ki-se 3              | 6 | F:GO:0004674;<br>P:GO:0000165;<br>P:GO:0043123;<br>F:GO:0005515;<br>F:GO:0000166;<br>P:GO:0046777                                                    | -                                                               | EC:2.7.11.0 | IPR000719; IPR011009; IPR015748;<br>IPR017442; G3DSA:1.10.510.10<br>(GENE3D), G3DSA:3.30.200.20<br>(GENE3D), PTHR22986 (PANTHER) |
| Caenorhabditis elegans  | cyclin y                                                   | 9 | P:GO:0045737;<br>P:GO:0000086;<br>F:GO:0016538;<br>C:GO:0000308;<br>P:GO:0051301;<br>P:GO:0060828;<br>F:GO:0005515;<br>C:GO:0005634;<br>C:GO:0005886 | -                                                               |             | IPR006670; IPR011028; IPR013922                                                                                                  |
|                         | -                                                          | 0 |                                                                                                                                                      |                                                                 |             | -                                                                                                                                |
|                         | -                                                          | 0 |                                                                                                                                                      |                                                                 |             | -                                                                                                                                |
|                         | -                                                          | 0 |                                                                                                                                                      |                                                                 |             | -                                                                                                                                |
|                         | -                                                          | 0 |                                                                                                                                                      |                                                                 |             | -                                                                                                                                |
| Loa loa                 | cleavage and polyadenylation specificity factor subunit 2  | 7 | P:GO:0040035;<br>P:GO:0009792;<br>F:GO:0005488;<br>P:GO:0000910;<br>P:GO:0016246;<br>F:GO:0016787;<br>P:GO:0006397                                   | -                                                               |             | G3DSA:3.60.15.10 (GENE3D),<br>PTHR11203 (PANTHER),<br>PTHR11203:SF5 (PANTHER), SSF56281<br>(SUPERFAMILY)                         |
| Caenorhabditis briggsae | elegans protein partially confirmed by transcript evidence | 6 | P:GO:0002119;<br>P:GO:0009792;<br>P:GO:0000003;<br>P:GO:0040007;<br>F:GO:0008289;<br>P:GO:0040011                                                    | -                                                               |             | IPR001124; IPR017943;<br>G3DSA:3.15.20.10 (GENE3D),<br>PTHR10504 (PANTHER),<br>PTHR10504:SF14 (PANTHER), SignalP<br>(SIGNALP)    |
|                         | -                                                          | 0 |                                                                                                                                                      |                                                                 |             | -                                                                                                                                |
|                         | -                                                          | 0 |                                                                                                                                                      |                                                                 |             | -                                                                                                                                |
| Caenorhabditis briggsae | exocyst complex component 2                                | 5 | P:GO:0045921;<br>F:GO:0017160;<br>F:GO:0047485;<br>P:GO:0000003;<br>C:GO:0000145                                                                     | -                                                               |             | PTHR13043 (PANTHER)                                                                                                              |
|                         | -                                                          | 0 |                                                                                                                                                      |                                                                 |             | SignalP (SIGNALP)                                                                                                                |
|                         | -                                                          | 0 |                                                                                                                                                      |                                                                 |             | -                                                                                                                                |
|                         | -                                                          | 0 |                                                                                                                                                      |                                                                 |             | -                                                                                                                                |
| Caenorhabditis briggsae | receptor protein tyrosine                                  | 2 | F:GO:0004725;<br>P:GO:0006470                                                                                                                        | -                                                               | EC:3.1.3.48 | -                                                                                                                                |
| Caenorhabditis elegans  | elegans protein partially confirmed by transcript evidence | 1 | P:GO:0006915                                                                                                                                         | -                                                               |             | IPR002213; G3DSA:3.40.50.2000<br>(GENE3D), PTHR11926:SF3<br>(PANTHER), SSF53756 (SUPERFAMILY)                                    |

|                         |                                                               |    |                                                                                                                                                                                                                                                                             |                               |                                                                         |                                                                                                         |
|-------------------------|---------------------------------------------------------------|----|-----------------------------------------------------------------------------------------------------------------------------------------------------------------------------------------------------------------------------------------------------------------------------|-------------------------------|-------------------------------------------------------------------------|---------------------------------------------------------------------------------------------------------|
| Caenorhabditis briggsae | rac gtpase                                                    | 16 | P:GO:0007265;<br>P:GO:0030032;<br>P:GO:0007390;<br>C:GO:0016020;<br>P:GO:0006974;<br>P:GO:0051017;<br>P:GO:0007394;<br>F:GO:0005525;<br>P:GO:0051301;<br>F:GO:0004767;<br>P:GO:0035099;<br>P:GO:0007254;<br>P:GO:0008258;<br>C:GO:0005622;<br>F:GO:0003924;<br>P:GO:0007435 | -                             | EC:3.1.4.12;<br>EC:3.6.5.1;<br>EC:3.6.5.2;<br>EC:3.6.5.3;<br>EC:3.6.5.4 | -                                                                                                       |
| -                       | -                                                             | 0  |                                                                                                                                                                                                                                                                             |                               |                                                                         | SignalP (SIGNALP)                                                                                       |
| Vitis vinifera          | hypothetical protein [Vitis vinifera]                         | 1  | C:GO:0009507                                                                                                                                                                                                                                                                |                               |                                                                         | -                                                                                                       |
| Caenorhabditis briggsae | phosphatidylcholine:ceramide cholinephosphotransferase 1-like | 6  | F:GO:0033188;<br>F:GO:0047493;<br>P:GO:0016049;<br>C:GO:0000138;<br>C:GO:0030173;<br>P:GO:0006686                                                                                                                                                                           | -                             | EC:2.7.8.27;<br>EC:2.7.8.3                                              | IPR000326; PTHR21290 (PANTHER),<br>PTHR21290:SF4 (PANTHER)                                              |
| Caenorhabditis elegans  | phosphoribosylglyci-mide formyltransferase                    | 3  | F:GO:0016879;<br>F:GO:0004644;<br>P:GO:0006189                                                                                                                                                                                                                              | -                             | EC:2.1.2.2                                                              | IPR001555; IPR002376; PTHR10520<br>(PANTHER), PTHR10520:SF9<br>(PANTHER)                                |
| -                       | -                                                             | 0  |                                                                                                                                                                                                                                                                             |                               |                                                                         | -                                                                                                       |
| Callithrix jacchus      | heterogeneous nuclear ribonucleoprotein I                     | 9  | C:GO:0005737;<br>P:GO:0008380;<br>C:GO:0030530;<br>C:GO:0005654;<br>C:GO:0045120;<br>F:GO:0003723;<br>F:GO:0005515;<br>P:GO:0006397;<br>F:GO:0000166                                                                                                                        | -                             |                                                                         | IPR012677; PTHR11546 (PANTHER),<br>PTHR11546:SF5 (PANTHER)                                              |
| Loa loa                 | hypothetical protein LOAG_01771 [Loa loa]                     | 0  |                                                                                                                                                                                                                                                                             | P:GO:0008150;<br>C:GO:0005575 |                                                                         | IPR006578                                                                                               |
| Caenorhabditis elegans  | degeneration of certain neurons protein 1                     | 1  | P:GO:0006810                                                                                                                                                                                                                                                                | -                             |                                                                         | -                                                                                                       |
| Loa loa                 | elegans protein partially confirmed by transcript evidence    | 0  |                                                                                                                                                                                                                                                                             |                               |                                                                         | IPR002861                                                                                               |
| Caenorhabditis briggsae | phosphatidylinositol polyphosphate 5-phosphatase              | 3  | F:GO:0016788;<br>P:GO:0000003;<br>P:GO:0040013                                                                                                                                                                                                                              | -                             |                                                                         | IPR005135; IPR008962;<br>G3DSA:3.60.10.10 (GENE3D),<br>PTHR11200 (PANTHER),<br>PTHR11200:SF26 (PANTHER) |
| Caenorhabditis briggsae | huntingtin-associated protein 1-like                          | 9  | F:GO:0050811;<br>P:GO:0006493;<br>P:GO:0006357;<br>P:GO:0006836;<br>F:GO:0019899;<br>P:GO:0006605;<br>C:GO:0005769;<br>C:GO:0005634;<br>C:GO:0005886                                                                                                                        | -                             |                                                                         | -                                                                                                       |

|                         |                                                            |    |                                                                                                                                                                                        |   |   |                                                                                             |
|-------------------------|------------------------------------------------------------|----|----------------------------------------------------------------------------------------------------------------------------------------------------------------------------------------|---|---|---------------------------------------------------------------------------------------------|
| Caenorhabditis briggsae | elegans protein partially confirmed by transcript evidence | 6  | F:GO:0003700;<br>F:GO:0043565;<br>F:GO:0003707;<br>C:GO:0005634;<br>F:GO:0008270;<br>P:GO:0006355                                                                                      | - | - |                                                                                             |
| Caenorhabditis elegans  | ferm domain ( -ezrin-radixin-moesin) family member (frm-1) | 1  | F:GO:0005515                                                                                                                                                                           | - | - |                                                                                             |
| Ascaris suum            | thioredoxin                                                | 3  | P:GO:0045454;<br>F:GO:0016491;<br>F:GO:0016209                                                                                                                                         | - | - |                                                                                             |
|                         | -                                                          | 0  |                                                                                                                                                                                        |   |   |                                                                                             |
| Brugia malayi           | hypothetical protein Bm1_03880 [Brugia malayi]             | 0  |                                                                                                                                                                                        |   |   |                                                                                             |
|                         | -                                                          | 0  |                                                                                                                                                                                        |   |   | SignalP (SIGNALP)                                                                           |
| Caenorhabditis elegans  | elegans protein confirmed by transcript evidence           | 3  | C:GO:0005794;<br>F:GO:0005515;<br>F:GO:0000062                                                                                                                                         | - |   | IPR009038; IPR018234; PTHR22973 (PANTHER), PTHR22973:SF4 (PANTHER), SSF101576 (SUPERFAMILY) |
|                         | -                                                          | 0  |                                                                                                                                                                                        |   |   | SignalP (SIGNALP)                                                                           |
|                         | -                                                          | 0  |                                                                                                                                                                                        |   |   | -                                                                                           |
| Loa loa                 | tsc1 cg6147-pa                                             | 6  | P:GO:0040008;<br>P:GO:0048523;<br>P:GO:0023033;<br>P:GO:0042221;<br>P:GO:0008361;<br>P:GO:0007275                                                                                      | - |   | IPR007483                                                                                   |
|                         | -                                                          | 0  |                                                                                                                                                                                        |   |   | -                                                                                           |
|                         | -                                                          | 0  |                                                                                                                                                                                        |   |   | -                                                                                           |
| Rattus norvegicus       | ribosomal protein l8                                       | 4  | F:GO:0003735;<br>C:GO:0022625;<br>F:GO:0019843;<br>P:GO:0006414                                                                                                                        | - |   | IPR002171; IPR012340; IPR016027; IPR022666; PTHR13691:SF3 (PANTHER)                         |
| Caenorhabditis elegans  | briggsae cbr-rhgf-1 protein                                | 1  | F:GO:0005488                                                                                                                                                                           |   |   | SignalP (SIGNALP)                                                                           |
| Tribolium castaneum     | dynein light chain cytoplasmic                             | 11 | P:GO:0046907;<br>C:GO:0030286;<br>P:GO:0008039;<br>F:GO:0008092;<br>C:GO:0005886;<br>C:GO:0043186;<br>C:GO:0016459;<br>P:GO:0007017;<br>C:GO:0005634;<br>C:GO:0005829;<br>F:GO:0003777 | - |   | IPR001372                                                                                   |
| Caenorhabditis elegans  | elegans protein confirmed by transcript evidence           | 1  | C:GO:0016021                                                                                                                                                                           | - |   | -                                                                                           |
| Caenorhabditis briggsae | elegans protein partially confirmed by transcript evidence | 0  |                                                                                                                                                                                        |   |   | SignalP (SIGNALP)                                                                           |

|                         |                                                            |    |                                                                                                                                                                                                                                                                                              |              |                                                                                                                                                                  |
|-------------------------|------------------------------------------------------------|----|----------------------------------------------------------------------------------------------------------------------------------------------------------------------------------------------------------------------------------------------------------------------------------------------|--------------|------------------------------------------------------------------------------------------------------------------------------------------------------------------|
| Caenorhabditis briggsae | clathrin heavy chain 1                                     | 17 | C:GO:0030315;<br>F:GO:0042277;<br>F:GO:0031072;<br>C:GO:0030132;<br>C:GO:0005739;<br>C:GO:0030130;<br>P:GO:0006892;<br>P:GO:0031623;<br>F:GO:0030506;<br>C:GO:0005624;<br>C:GO:0042470;<br>P:GO:0033572;<br>P:GO:0007067;<br>P:GO:0007030;<br>C:GO:0005819;<br>P:GO:0006886;<br>F:GO:0005198 | -            | IPR000547; IPR001473; IPR011990;<br>IPR015348; IPR016024; IPR016025;<br>IPR016341; IPR022365; PTHR10292<br>(PANTHER), PTHR10292:SF1<br>(PANTHER), PF00637 (PFAM) |
| -                       | -                                                          | 0  |                                                                                                                                                                                                                                                                                              |              | -                                                                                                                                                                |
| Caenorhabditis elegans  | elegans protein partially confirmed by transcript evidence | 0  |                                                                                                                                                                                                                                                                                              |              | -                                                                                                                                                                |
| Loa loa                 | abnormal cell migration family member (mig-5)              | 4  | C:GO:0005622;<br>P:GO:0007275;<br>F:GO:0004871;<br>F:GO:0042802                                                                                                                                                                                                                              | -            | IPR001158; IPR015506                                                                                                                                             |
| -                       | -                                                          | 0  |                                                                                                                                                                                                                                                                                              |              | SignalP (SIGNALP)                                                                                                                                                |
| -                       | -                                                          | 0  |                                                                                                                                                                                                                                                                                              |              | -                                                                                                                                                                |
| -                       | -                                                          | 0  |                                                                                                                                                                                                                                                                                              |              | SignalP (SIGNALP)                                                                                                                                                |
| Caenorhabditis elegans  | vacuolar proton atpase                                     | 4  | F:GO:0015078;<br>C:GO:0033177;<br>C:GO:0016021;<br>P:GO:0015986                                                                                                                                                                                                                              | -            | IPR002490; PTHR11629:SF23<br>(PANTHER), SignalP (SIGNALP)                                                                                                        |
| Caenorhabditis elegans  | cg10914 cg10914-pa                                         | 0  |                                                                                                                                                                                                                                                                                              | F:GO:0005525 | G3DSA:3.40.50.300 (GENE3D),<br>PTHR11089 (PANTHER),<br>PTHR11089:SF1 (PANTHER)                                                                                   |
| -                       | -                                                          | 0  |                                                                                                                                                                                                                                                                                              |              | -                                                                                                                                                                |
| -                       | -                                                          | 0  |                                                                                                                                                                                                                                                                                              |              | IPR008840                                                                                                                                                        |
| Caenorhabditis elegans  | heterogeneous nuclear ribonucleoprotein k                  | 3  | F:GO:0003676;<br>F:GO:0005515;<br>C:GO:0044424                                                                                                                                                                                                                                               | -            | IPR004087; IPR004088; IPR018111;<br>G3DSA:3.30.1370.10 (GENE3D),<br>PTHR10288 (PANTHER),<br>PTHR10288:SF38 (PANTHER),<br>SSF54791 (SUPERFAMILY)                  |
| Caenorhabditis briggsae | heterogeneous nuclear ribonucleoprotein k                  | 3  | F:GO:0003676;<br>F:GO:0005515;<br>C:GO:0044424                                                                                                                                                                                                                                               | -            | IPR004087; IPR004088; IPR018111;<br>G3DSA:3.30.1370.10 (GENE3D),<br>PTHR10288 (PANTHER),<br>PTHR10288:SF38 (PANTHER),<br>SSF54791 (SUPERFAMILY)                  |
| Caenorhabditis elegans  | kh domain containing protein                               | 2  | F:GO:0005515;<br>F:GO:0003723                                                                                                                                                                                                                                                                | -            | -                                                                                                                                                                |
| Caenorhabditis briggsae | heterogeneous nuclear ribonucleoprotein                    | 6  | F:GO:0003723;<br>F:GO:0005515;<br>F:GO:0003697;<br>C:GO:0030529;<br>C:GO:0005634;<br>P:GO:0006396                                                                                                                                                                                            | -            | SignalP (SIGNALP)                                                                                                                                                |



|                               |                                                                |   |                                                                                                                    |                                                |             |                                                                                                                                                 |
|-------------------------------|----------------------------------------------------------------|---|--------------------------------------------------------------------------------------------------------------------|------------------------------------------------|-------------|-------------------------------------------------------------------------------------------------------------------------------------------------|
| Caenorhabditis elegans        | heterogeneous nuclear ribonucleoprotein k                      | 3 | F:GO:0003676;<br>F:GO:0005515;<br>C:GO:0044424                                                                     | -                                              |             | IPR004087; IPR004088; IPR018111;<br>G3DSA:3.30.1370.10 (GENE3D),<br>PTHR10288 (PANTHER),<br>PTHR10288:SF38 (PANTHER),<br>SSF54791 (SUPERFAMILY) |
|                               | -                                                              | 0 |                                                                                                                    |                                                |             | -                                                                                                                                               |
|                               | -                                                              | 0 |                                                                                                                    |                                                |             | -                                                                                                                                               |
| Caenorhabditis sp. PS1010     | elegans protein confirmed by transcript evidence               | 0 |                                                                                                                    |                                                |             | -                                                                                                                                               |
| Angiostrongylus cantonensis   | hypothetical protein [Angiostrongylus cantonensis]             | 2 | F:GO:0008270;<br>F:GO:0005515                                                                                      | -                                              |             | -                                                                                                                                               |
| Nematostella vectensis        | glutathione s-transferase kappa 1                              | 1 | F:GO:0016740                                                                                                       | -                                              |             | IPR001853; IPR012336; PTHR13887<br>(PANTHER)                                                                                                    |
| Caenorhabditis elegans        | hypothetical protein T14B4.1 [Caenorhabditis elegans]          | 0 |                                                                                                                    | F:GO:0003723;<br>P:GO:0006396;<br>F:GO:0008173 |             | -                                                                                                                                               |
|                               | -                                                              | 0 |                                                                                                                    |                                                |             | -                                                                                                                                               |
| Caenorhabditis briggsae       | sy-ptotagmin xi                                                | 1 | F:GO:0005515                                                                                                       | -                                              |             | -                                                                                                                                               |
| Caenorhabditis elegans        | fertilization defective (abnormal sperm) family member (fer-1) | 0 |                                                                                                                    | C:GO:0016021                                   |             | -                                                                                                                                               |
|                               | -                                                              | 0 |                                                                                                                    |                                                |             | SignalP (SIGNALP)                                                                                                                               |
| Caenorhabditis elegans        | spectrin alpha chain                                           | 2 | F:GO:0004725;<br>F:GO:0005509                                                                                      | -                                              | EC:3.1.3.48 | IPR002017; IPR018159;<br>G3DSA:1.20.58.60 (GENE3D),<br>PTHR11915 (PANTHER),<br>PTHR11915:SF6 (PANTHER),<br>SSF46966 (SUPERFAMILY)               |
| Caenorhabditis briggsae       | briggsae cbr-rsr-1 protein                                     | 4 | C:GO:0035145;<br>C:GO:0071011;<br>P:GO:0000398;<br>C:GO:0071013                                                    | -                                              |             | IPR002483; G3DSA:1.20.1390.10<br>(GENE3D), PTHR23148 (PANTHER),<br>SSF101233 (SUPERFAMILY)                                                      |
| Caenorhabditis elegans        | probable 60s ribosomal protein mitochondrial                   | 7 | P:GO:0009792;<br>P:GO:0002119;<br>C:GO:0005840;<br>F:GO:0003735;<br>P:GO:0040010;<br>P:GO:0006898;<br>P:GO:0006412 | -                                              | EC:3.6.5.3  | IPR000911; IPR020783;<br>PTHR11661:SF1 (PANTHER)                                                                                                |
| Caenorhabditis briggsae       | briggsae cbr-btf-1 protein                                     | 1 | F:GO:0005488                                                                                                       | -                                              |             | IPR022707; SignalP (SIGNALP)                                                                                                                    |
| Loa loa                       | amp-activated protein ki-se gamma2 subunit-like                | 2 | P:GO:0040035;<br>P:GO:0040011                                                                                      | -                                              |             | PTHR13780 (PANTHER)                                                                                                                             |
| Methanocella paludicola SANAE | d- repair and recombination protein                            | 3 | P:GO:0006259;<br>F:GO:0005488;<br>F:GO:0017111                                                                     | -                                              | EC:3.6.1.15 | IPR014774; IPR020588;<br>G3DSA:3.40.50.300 (GENE3D),<br>PTHR22942 (PANTHER),<br>PTHR22942:SF15 (PANTHER),<br>SSF52540 (SUPERFAMILY)             |
| Brugia malayi                 | dedicator of cytokinesis family protein                        | 0 |                                                                                                                    | F:GO:0005525;<br>F:GO:0051020;<br>F:GO:0005085 |             | PTHR23317 (PANTHER),<br>PTHR23317:SF26 (PANTHER)                                                                                                |
| Caenorhabditis elegans        | lysocardiolipin acyltransferase 1                              | 5 | P:GO:0001885;<br>P:GO:0035162;<br>F:GO:0016740;<br>F:GO:0005515;<br>C:GO:0016020                                   | -                                              |             | IPR002052; PTHR10983 (PANTHER),<br>PTHR10983:SF1 (PANTHER),<br>SignalP (SIGNALP)                                                                |

|                           |                                                   |    |                                                                                                                                                                                                                                                                             |                                                |                                                                                        |
|---------------------------|---------------------------------------------------|----|-----------------------------------------------------------------------------------------------------------------------------------------------------------------------------------------------------------------------------------------------------------------------------|------------------------------------------------|----------------------------------------------------------------------------------------|
| Loa loa                   | cleavage stimulation 3 pre- subunit 77kda         | 8  | P:GO:0006378;<br>P:GO:0009792;<br>P:GO:0008380;<br>F:GO:0003723;<br>F:GO:0005515;<br>P:GO:0000003;<br>C:GO:0005634;<br>P:GO:0006379                                                                                                                                         | -                                              | PTHR19980 (PANTHER)                                                                    |
| -                         | -                                                 | 0  |                                                                                                                                                                                                                                                                             |                                                | -                                                                                      |
| Caenorhabditis briggsae   | msp domain protein                                | 0  |                                                                                                                                                                                                                                                                             | P:GO:0040017;<br>C:GO:0005856;<br>F:GO:0005198 | IPR000535; IPR008962; PTHR22947 (PANTHER)                                              |
| Caenorhabditis elegans    | cdc45 cell division cycle 45-like ( cerevisiae)   | 6  | P:GO:0007049;<br>C:GO:0005813;<br>F:GO:0005515;<br>P:GO:0006270;<br>C:GO:0005654;<br>F:GO:0003682                                                                                                                                                                           | -                                              | IPR003874                                                                              |
| -                         | -                                                 | 0  |                                                                                                                                                                                                                                                                             |                                                | -                                                                                      |
| Homo sapiens              | basigin                                           | 16 | P:GO:0046689;<br>C:GO:0005739;<br>P:GO:0007566;<br>C:GO:0016021;<br>C:GO:0000139;<br>P:GO:0042475;<br>F:GO:0005537;<br>P:GO:0043434;<br>F:GO:0015129;<br>C:GO:0042470;<br>P:GO:0046697;<br>F:GO:0005515;<br>C:GO:0045121;<br>C:GO:0042383;<br>P:GO:0007166;<br>P:GO:0051591 | -                                              | IPR009151; PTHR10075 (PANTHER),<br>PTHR10075:SF6 (PANTHER)                             |
| -                         | -                                                 | 0  |                                                                                                                                                                                                                                                                             |                                                | -                                                                                      |
| -                         | -                                                 | 0  |                                                                                                                                                                                                                                                                             |                                                | -                                                                                      |
| -                         | -                                                 | 0  |                                                                                                                                                                                                                                                                             |                                                | -                                                                                      |
| Caenorhabditis briggsae   | patched family protein                            | 4  | P:GO:0040018;<br>P:GO:0018996;<br>P:GO:0007275;<br>P:GO:0040011                                                                                                                                                                                                             | -                                              | IPR003392; PTHR10796 (PANTHER),<br>PTHR10796:SF14 (PANTHER),<br>SSF82866 (SUPERFAMILY) |
| Brugia malayi             | eukaryotic elongation selenocysteine-tr--specific | 1  | F:GO:0000166                                                                                                                                                                                                                                                                | -                                              | -                                                                                      |
| Loa loa                   | uncoordi-ted family member (unc-89)               | 0  |                                                                                                                                                                                                                                                                             |                                                | -                                                                                      |
| Caenorhabditis sp. PS1010 | protocadherin alpha 8                             | 5  | P:GO:0007163;<br>P:GO:0007411;<br>P:GO:0007155;<br>C:GO:0016020;<br>P:GO:0007413                                                                                                                                                                                            | -                                              | IPR002126; IPR015919; IPR020894;<br>PTHR10596 (PANTHER),<br>PTHR10596:SF76 (PANTHER)   |
| -                         | -                                                 | 0  |                                                                                                                                                                                                                                                                             |                                                | -                                                                                      |
| Caenorhabditis briggsae   | clc-type chloride channel family member (clh-2)   | 6  | P:GO:0009792;<br>F:GO:0005247;<br>P:GO:0055085;<br>P:GO:0000003;<br>C:GO:0016021;<br>P:GO:0006821                                                                                                                                                                           | -                                              | IPR001807; PTHR11689:SF5 (PANTHER),<br>SignalP (SIGNALP),<br>SSF54631 (SUPERFAMILY)    |
| -                         | -                                                 | 0  |                                                                                                                                                                                                                                                                             |                                                | SignalP (SIGNALP)                                                                      |

|                         |                                                                       |    |                                                                                                                                                                                                                                                                                                                                                                                   |            |                                                                                                                                                                                               |
|-------------------------|-----------------------------------------------------------------------|----|-----------------------------------------------------------------------------------------------------------------------------------------------------------------------------------------------------------------------------------------------------------------------------------------------------------------------------------------------------------------------------------|------------|-----------------------------------------------------------------------------------------------------------------------------------------------------------------------------------------------|
|                         | -                                                                     | 0  |                                                                                                                                                                                                                                                                                                                                                                                   |            | SignalP (SIGNALP)                                                                                                                                                                             |
|                         | -                                                                     | 0  |                                                                                                                                                                                                                                                                                                                                                                                   |            | -                                                                                                                                                                                             |
| Caenorhabditis briggsae | lor sdh bifunctio-l protein conserved domain protein                  | 1  | F:GO:0003824                                                                                                                                                                                                                                                                                                                                                                      |            |                                                                                                                                                                                               |
|                         | -                                                                     | 0  |                                                                                                                                                                                                                                                                                                                                                                                   |            | -                                                                                                                                                                                             |
| Loa loa                 | nidogen 1                                                             | 3  | F:GO:0005488;<br>P:GO:0044237;<br>C:GO:0016020                                                                                                                                                                                                                                                                                                                                    |            |                                                                                                                                                                                               |
| Homo sapiens            | elastin (supravalvular aortic williams-beuren syndrome) isoform cra_b | 6  | P:GO:0008015;<br>F:GO:0030023;<br>P:GO:0009887;<br>C:GO:0005578;<br>P:GO:0007585;<br>P:GO:0008283                                                                                                                                                                                                                                                                                 |            |                                                                                                                                                                                               |
|                         | -                                                                     | 0  |                                                                                                                                                                                                                                                                                                                                                                                   |            | -                                                                                                                                                                                             |
| Caenorhabditis briggsae | integrin alpha-ps                                                     | 22 | P:GO:0048468;<br>P:GO:0002119;<br>P:GO:0048699;<br>F:GO:0030528;<br>P:GO:0007424;<br>P:GO:0032989;<br>P:GO:0050789;<br>F:GO:0004872;<br>P:GO:0018991;<br>P:GO:0040039;<br>P:GO:0048513;<br>P:GO:0006898;<br>P:GO:0040007;<br>P:GO:0032940;<br>P:GO:0009792;<br>P:GO:0065008;<br>P:GO:0007155;<br>P:GO:0007229;<br>P:GO:0061061;<br>C:GO:0005622;<br>F:GO:0005488;<br>C:GO:0008305 |            | IPR000413; IPR013517; IPR013649;<br>G3DSA:2.60.40.1460 (GENE3D),<br>PTHR23220 (PANTHER),<br>PTHR23220:SF11 (PANTHER), PSS1470<br>(PROFILE), SSF69179 (SUPERFAMILY),<br>SSF69318 (SUPERFAMILY) |
| Caenorhabditis briggsae | briggsae cbr-vap-1 protein                                            | 3  | C:GO:0005576;<br>P:GO:0040011;<br>P:GO:0006898                                                                                                                                                                                                                                                                                                                                    |            |                                                                                                                                                                                               |
|                         | -                                                                     | 0  |                                                                                                                                                                                                                                                                                                                                                                                   |            | -                                                                                                                                                                                             |
| Caenorhabditis elegans  | phosphoserine phosphatase                                             | 4  | C:GO:0005737;<br>F:GO:0000287;<br>F:GO:0004647;<br>P:GO:0006564                                                                                                                                                                                                                                                                                                                   | EC:3.1.3.3 | G3DSA:3.40.50.1000 (GENE3D),<br>PTHR10000 (PANTHER), SignalP<br>(SIGNALP), SSF56784 (SUPERFAMILY)                                                                                             |
| Caenorhabditis briggsae | glycolate oxidase                                                     | 10 | P:GO:0006979;<br>C:GO:0005777;<br>P:GO:0032787;<br>F:GO:0008891;<br>C:GO:0009570;<br>C:GO:0005773;<br>C:GO:0022626;<br>C:GO:0016020;<br>C:GO:0005634;<br>C:GO:0048046                                                                                                                                                                                                             |            | IPR000262; IPR008259; IPR012133;<br>IPR013785; PTHR10578 (PANTHER),<br>PTHR10578:SF9 (PANTHER), SSF51395<br>(SUPERFAMILY)                                                                     |

|                         |                                                          |    |                                                                                                                                                                                                         |                                                |                                                                                                                           |
|-------------------------|----------------------------------------------------------|----|---------------------------------------------------------------------------------------------------------------------------------------------------------------------------------------------------------|------------------------------------------------|---------------------------------------------------------------------------------------------------------------------------|
| Caenorhabditis briggsae | hydroxyacid oxidase 1                                    | 12 | P:GO:0006979;<br>P:GO:0046487;<br>C:GO:0005777;<br>F:GO:0008891;<br>P:GO:0001561;<br>P:GO:0046296;<br>C:GO:0009570;<br>C:GO:0022626;<br>F:GO:0010181;<br>C:GO:0016020;<br>C:GO:0005634;<br>C:GO:0048046 | -                                              | IPR000262; IPR008259; IPR012133;<br>IPR013785; PTHR10578 (PANTHER),<br>PTHR10578:SF9 (PANTHER), SSF51395<br>(SUPERFAMILY) |
| Caenorhabditis briggsae | glycolate oxidase                                        | 10 | P:GO:0006979;<br>C:GO:0005777;<br>P:GO:0032787;<br>F:GO:0008891;<br>C:GO:0009570;<br>C:GO:0005773;<br>C:GO:0022626;<br>C:GO:0016020;<br>C:GO:0005634;<br>C:GO:0048046                                   | -                                              | IPR000262; IPR008259; IPR012133;<br>IPR013785; PTHR10578 (PANTHER),<br>PTHR10578:SF9 (PANTHER), SSF51395<br>(SUPERFAMILY) |
| Caenorhabditis elegans  | hypothetical protein Y51F10.10 [Caenorhabditis elegans]  | 0  |                                                                                                                                                                                                         |                                                | -                                                                                                                         |
|                         | -                                                        | 0  |                                                                                                                                                                                                         |                                                | -                                                                                                                         |
| Brugia malayi           | origin recognition complex subunit 5                     | 0  |                                                                                                                                                                                                         | P:GO:0006260;<br>C:GO:0000808;<br>C:GO:0005634 | SignalP (SIGNALP)                                                                                                         |
|                         | -                                                        | 0  |                                                                                                                                                                                                         |                                                | -                                                                                                                         |
|                         | -                                                        | 0  |                                                                                                                                                                                                         |                                                | -                                                                                                                         |
|                         | -                                                        | 0  |                                                                                                                                                                                                         |                                                | IPR013032                                                                                                                 |
| Loa loa                 | protein phosphatase regulatory subunit b epsilon isoform | 7  | C:GO:0005737;<br>C:GO:0000159;<br>P:GO:0007165;<br>P:GO:0050790;<br>F:GO:0005515;<br>C:GO:0043231;<br>F:GO:0008601                                                                                      | -                                              | IPR002554; IPR016024                                                                                                      |
| Caenorhabditis elegans  | elegans protein confirmed by transcript evidence         | 0  |                                                                                                                                                                                                         |                                                | IPR001534; SignalP (SIGNALP)                                                                                              |
|                         | -                                                        | 0  |                                                                                                                                                                                                         |                                                | -                                                                                                                         |
| Caenorhabditis briggsae | protein disulfide isomerase family member 6              | 12 | P:GO:0002119;<br>P:GO:0006457;<br>C:GO:0005788;<br>C:GO:0005793;<br>C:GO:0005886;<br>P:GO:0045454;<br>F:GO:0005515;<br>C:GO:0042470;<br>F:GO:0005509;<br>P:GO:0040011;<br>F:GO:0003756;<br>P:GO:0040007 | -                                              | EC:5.3.4.1 -                                                                                                              |
| Caenorhabditis elegans  | tripeptidyl peptidase ii                                 | 2  | P:GO:0019915;<br>F:GO:0070011                                                                                                                                                                           | -                                              | -                                                                                                                         |
|                         | -                                                        | 0  |                                                                                                                                                                                                         |                                                | -                                                                                                                         |
|                         | -                                                        | 0  |                                                                                                                                                                                                         |                                                | -                                                                                                                         |
|                         | -                                                        | 0  |                                                                                                                                                                                                         |                                                | SignalP (SIGNALP)                                                                                                         |

|                          |                                                                   |   |                                                                                                   |                                                                                                                                     |             |                                                                                   |
|--------------------------|-------------------------------------------------------------------|---|---------------------------------------------------------------------------------------------------|-------------------------------------------------------------------------------------------------------------------------------------|-------------|-----------------------------------------------------------------------------------|
| Caenorhabditis briggsae  | ynv9_caeeel ame: full=uncharacterized protein flags:<br>precursor | 1 | F:GO:0005488                                                                                      | -                                                                                                                                   |             | SignalP (SIGNALP)                                                                 |
|                          | -                                                                 | 0 |                                                                                                   |                                                                                                                                     |             | -                                                                                 |
| Caenorhabditis briggsae  | briggsae cbr-tsp-13 protein                                       | 2 | P:GO:0030001;<br>F:GO:0046872                                                                     | -                                                                                                                                   |             | IPR017969; PTHR19282 (PANTHER),<br>PTHR19282:SF12 (PANTHER), SignalP<br>(SIGNALP) |
|                          | -                                                                 | 0 |                                                                                                   |                                                                                                                                     |             | -                                                                                 |
| Caenorhabditis elegans   | choline transporter-like family member (cht1-1)                   | 6 | P:GO:0002009;<br>C:GO:0016021;<br>P:GO:0040007;<br>P:GO:0040035;<br>P:GO:0040002;<br>P:GO:0002119 | -                                                                                                                                   |             | -                                                                                 |
|                          | -                                                                 | 0 |                                                                                                   |                                                                                                                                     |             | IPR003511                                                                         |
|                          | -                                                                 | 0 |                                                                                                   |                                                                                                                                     |             | -                                                                                 |
| Caenorhabditis elegans   | dymeclin                                                          | 4 | P:GO:0009792;<br>P:GO:0000003;<br>F:GO:0005515;<br>P:GO:0002119                                   | -                                                                                                                                   |             | IPR019142; PTHR12895 (PANTHER),<br>PTHR12895:SF2 (PANTHER)                        |
|                          | -                                                                 | 0 |                                                                                                   |                                                                                                                                     |             | -                                                                                 |
| Caenorhabditis elegans   | run domain containing protein                                     | 0 |                                                                                                   |                                                                                                                                     |             | -                                                                                 |
| Caenorhabditis elegans   | protein ki-se domain containing protein                           | 3 | P:GO:0006468;<br>F:GO:0005524;<br>F:GO:0004674                                                    | -                                                                                                                                   | EC:2.7.11.0 | PTHR22984 (PANTHER)                                                               |
| Loa loa                  | tafi55 protein conserved region containing protein                | 0 |                                                                                                   | C:GO:0005669;<br>P:GO:0006367;<br>F:GO:0016251                                                                                      |             | -                                                                                 |
| Caenorhabditis elegans   | elegans protein partially confirmed by transcript evidence        | 0 |                                                                                                   |                                                                                                                                     |             | SignalP (SIGNALP)                                                                 |
|                          | -                                                                 | 0 |                                                                                                   |                                                                                                                                     |             | -                                                                                 |
|                          | -                                                                 | 0 |                                                                                                   |                                                                                                                                     |             | -                                                                                 |
| Caenorhabditis elegans   | tyrosi-se                                                         | 0 |                                                                                                   | F:GO:0046872;<br>F:GO:0004503;<br>P:GO:0055114;<br>P:GO:0042438;<br>F:GO:0016491;<br>P:GO:0008152;<br>F:GO:0004497;<br>F:GO:0005515 |             | SignalP (SIGNALP)                                                                 |
|                          | -                                                                 | 0 |                                                                                                   |                                                                                                                                     |             | -                                                                                 |
|                          | -                                                                 | 0 |                                                                                                   |                                                                                                                                     |             | PTHR12846 (PANTHER),<br>PTHR12846:SF2 (PANTHER)                                   |
| Saccoglossus kowalevskii | protein c20orf11 homolog                                          | 1 | F:GO:0005515                                                                                      | -                                                                                                                                   |             | IPR006594; IPR006595; IPR013144;<br>IPR013720; IPR019589; PTHR12864<br>(PANTHER)  |
| Caenorhabditis briggsae  | Hypothetical protein CBG08123 [Caenorhabditis briggsae]           | 2 | P:GO:0007186;<br>C:GO:0016021                                                                     | -                                                                                                                                   |             | PTHR22718 (PANTHER),<br>PTHR22718:SF8 (PANTHER), SignalP<br>(SIGNALP)             |
|                          | -                                                                 | 0 |                                                                                                   |                                                                                                                                     |             | SignalP (SIGNALP)                                                                 |
| Caenorhabditis briggsae  | elegans protein partially confirmed by transcript evidence        | 0 |                                                                                                   |                                                                                                                                     |             | -                                                                                 |

|                         |                                                                                           |    |                                                                                                                                                                                        |                             |                                                                                                                                  |
|-------------------------|-------------------------------------------------------------------------------------------|----|----------------------------------------------------------------------------------------------------------------------------------------------------------------------------------------|-----------------------------|----------------------------------------------------------------------------------------------------------------------------------|
| Caenorhabditis briggsae | elegans protein partially confirmed by transcript evidence                                | 0  | F:GO:0030247;<br>C:GO:0016021;<br>F:GO:0016787;<br>F:GO:0003676;<br>F:GO:0003824;<br>C:GO:0005575;<br>F:GO:0005044;<br>P:GO:0008152;<br>F:GO:0046872;<br>P:GO:0006955                  |                             | PTHR10151 (PANTHER),<br>PTHR10151:SF28 (PANTHER)                                                                                 |
| Caenorhabditis briggsae | d- repair and recombi-tion protein rad54-like                                             | 8  | P:GO:0006915;<br>P:GO:0000003;<br>F:GO:0003677;<br>F:GO:0005524;<br>F:GO:0005515;<br>F:GO:0004386;<br>F:GO:0008094;<br>P:GO:0006974                                                    |                             | PTHR10799 (PANTHER),<br>PTHR10799:SF66 (PANTHER)                                                                                 |
| -                       | -                                                                                         | 0  |                                                                                                                                                                                        |                             | -                                                                                                                                |
| -                       | -                                                                                         | 0  |                                                                                                                                                                                        |                             | -                                                                                                                                |
| -                       | -                                                                                         | 0  |                                                                                                                                                                                        |                             | -                                                                                                                                |
| -                       | -                                                                                         | 0  |                                                                                                                                                                                        |                             | -                                                                                                                                |
| Caenorhabditis briggsae | elegans protein partially confirmed by transcript evidence                                | 0  |                                                                                                                                                                                        |                             | SignalP (SIGNALP)                                                                                                                |
| Caenorhabditis elegans  | asparaginyI-tr- cytoplasmic                                                               | 8  | F:GO:0003676;<br>P:GO:0006422;<br>F:GO:0005515;<br>F:GO:0004816;<br>F:GO:0005524;<br>P:GO:0006421;<br>F:GO:0004815;<br>C:GO:0005739                                                    | EC:6.1.1.22;<br>EC:6.1.1.12 | IPR002312; IPR004364; IPR006195;<br>IPR018150; G3DSA:3.30.930.10<br>(GENE3D), PTHR22594:SF6<br>(PANTHER), SSF55681 (SUPERFAMILY) |
| Caenorhabditis elegans  | trrap-like (transcription transformation domain-associated protein) family member (trr-1) | 4  | P:GO:0044238;<br>C:GO:0043234;<br>P:GO:0044260;<br>C:GO:0044451                                                                                                                        |                             | -                                                                                                                                |
| Loa loa                 | trrap-like (transcription transformation domain-associated protein) family member (trr-1) | 4  | P:GO:0044238;<br>C:GO:0043234;<br>P:GO:0044260;<br>C:GO:0044451                                                                                                                        |                             | -                                                                                                                                |
| -                       | -                                                                                         | 0  |                                                                                                                                                                                        |                             | -                                                                                                                                |
| -                       | -                                                                                         | 0  |                                                                                                                                                                                        |                             | -                                                                                                                                |
| -                       | -                                                                                         | 0  |                                                                                                                                                                                        |                             | -                                                                                                                                |
| Loa loa                 | bm8 interacting protein 2d-2                                                              | 0  | P:GO:0008150;<br>F:GO:0005515;<br>C:GO:0005575;<br>F:GO:0003677                                                                                                                        |                             | IPR006578                                                                                                                        |
| Caenorhabditis briggsae | adamts family member (adt-2)                                                              | 11 | F:GO:0008270;<br>P:GO:0040007;<br>P:GO:0000003;<br>P:GO:0018996;<br>F:GO:0004222;<br>P:GO:0006508;<br>P:GO:0010171;<br>P:GO:0002119;<br>F:GO:0005515;<br>P:GO:0040011;<br>C:GO:0016020 |                             | EC:3.4.24.0 -                                                                                                                    |
| -                       | -                                                                                         | 0  |                                                                                                                                                                                        |                             | -                                                                                                                                |

|                         |                                                            |   |                                                                                                                                     |                                                                                                   |            |                                                                                                                 |
|-------------------------|------------------------------------------------------------|---|-------------------------------------------------------------------------------------------------------------------------------------|---------------------------------------------------------------------------------------------------|------------|-----------------------------------------------------------------------------------------------------------------|
|                         | -                                                          | 0 |                                                                                                                                     |                                                                                                   |            | SignalP (SIGNALP)                                                                                               |
|                         | -                                                          | 0 |                                                                                                                                     |                                                                                                   |            | -                                                                                                               |
| Caenorhabditis briggsae | ribosomal protein l16 containing protein                   | 8 | P:GO:0009792;<br>P:GO:0002119;<br>C:GO:0005840;<br>F:GO:0003735;<br>F:GO:0005515;<br>P:GO:0040010;<br>P:GO:0006412;<br>F:GO:0019843 | -                                                                                                 | EC:3.6.5.3 | IPR000114; PTHR12220:SF12 (PANTHER)                                                                             |
| Danio rerio             | wolfram syndrome 1                                         | 5 | C:GO:0016020;<br>P:GO:0048878;<br>P:GO:0050789;<br>P:GO:0009987;<br>P:GO:0003008                                                    | -                                                                                                 |            | -                                                                                                               |
| Danio rerio             | wolfram syndrome 1                                         | 5 | C:GO:0016020;<br>P:GO:0048878;<br>P:GO:0050789;<br>P:GO:0009987;<br>P:GO:0003008                                                    | -                                                                                                 |            | -                                                                                                               |
|                         | -                                                          | 0 |                                                                                                                                     |                                                                                                   |            | -                                                                                                               |
| Brugia malayi           | atp-dependent helicase ddx1                                | 7 | F:GO:0003676;<br>F:GO:0008026;<br>P:GO:0000245;<br>F:GO:0005524;<br>P:GO:0001700;<br>P:GO:0042254;<br>P:GO:0006446                  | -                                                                                                 |            | -                                                                                                               |
|                         | -                                                          | 0 |                                                                                                                                     |                                                                                                   |            | -                                                                                                               |
| Loa loa                 | r- recognition motif domain containing protein             | 2 | F:GO:0003676;<br>F:GO:0000166                                                                                                       | -                                                                                                 |            | -                                                                                                               |
| Ascaris lumbricoides    | gmp reductase                                              | 4 | P:GO:0009117;<br>F:GO:0046872;<br>P:GO:0055114;<br>F:GO:0003920                                                                     | -                                                                                                 | EC:1.7.1.7 | -                                                                                                               |
| Caenorhabditis elegans  | ubiquitin specific peptidase 24                            | 0 |                                                                                                                                     | F:GO:0005488;<br>F:GO:0016787;<br>F:GO:0008234;<br>F:GO:0008233;<br>F:GO:0004221;<br>P:GO:0006511 |            | IPR000169; IPR001394; IPR018200;<br>PTHR10420 (PANTHER),<br>PTHR10420:SF47 (PANTHER),<br>SSF54001 (SUPERFAMILY) |
| Caenorhabditis elegans  | amin (actin binding protein) alpha family member (fl-1)    | 0 |                                                                                                                                     | F:GO:0003779                                                                                      |            | -                                                                                                               |
|                         | -                                                          | 0 |                                                                                                                                     |                                                                                                   |            | -                                                                                                               |
| Loa loa                 | expressed sequence                                         | 0 |                                                                                                                                     |                                                                                                   |            | IPR010733                                                                                                       |
|                         | -                                                          | 0 |                                                                                                                                     |                                                                                                   |            | -                                                                                                               |
| Caenorhabditis elegans  | elegans protein confirmed by transcript evidence           | 0 |                                                                                                                                     |                                                                                                   |            | IPR011009; IPR012877;<br>G3DSA:3.90.1200.10 (GENE3D)                                                            |
| Caenorhabditis elegans  | elegans protein partially confirmed by transcript evidence | 0 |                                                                                                                                     |                                                                                                   |            | IPR011009; IPR012877;<br>G3DSA:3.90.1200.10 (GENE3D)                                                            |
| Caenorhabditis briggsae | briggsae cbr-dhs-27 protein                                | 0 |                                                                                                                                     | P:GO:0055114;<br>F:GO:0005488;<br>F:GO:0016491;<br>P:GO:0008152;<br>F:GO:0003824                  |            | IPR011009; IPR012877;<br>G3DSA:3.90.1200.10 (GENE3D)                                                            |

|                         |                                                |    |                                                                                                                                                                                                                                                                                                                                                                                                    |   |                                                                                                                                                                                                                                                                |
|-------------------------|------------------------------------------------|----|----------------------------------------------------------------------------------------------------------------------------------------------------------------------------------------------------------------------------------------------------------------------------------------------------------------------------------------------------------------------------------------------------|---|----------------------------------------------------------------------------------------------------------------------------------------------------------------------------------------------------------------------------------------------------------------|
| Caenorhabditis briggsae | briggsae cbr-dhs-27 protein                    | 0  | F:GO:0004672;<br>F:GO:0005524;<br>P:GO:0055114;<br>F:GO:0005488;<br>F:GO:0016491;<br>P:GO:0008152;<br>P:GO:0006468;<br>F:GO:0003824                                                                                                                                                                                                                                                                |   | IPR011009; IPR012877;<br>G3DSA:3.90.1200.10 (GENE3D)                                                                                                                                                                                                           |
|                         | -                                              | 0  |                                                                                                                                                                                                                                                                                                                                                                                                    |   | -                                                                                                                                                                                                                                                              |
| Mus musculus            | mCG14133 [Mus musculus]                        | 0  |                                                                                                                                                                                                                                                                                                                                                                                                    |   | -                                                                                                                                                                                                                                                              |
|                         | -                                              | 0  |                                                                                                                                                                                                                                                                                                                                                                                                    |   | -                                                                                                                                                                                                                                                              |
|                         | -                                              | 0  |                                                                                                                                                                                                                                                                                                                                                                                                    |   | -                                                                                                                                                                                                                                                              |
| Caenorhabditis elegans  | briggsae cbr-elpc-2 protein                    | 7  | P:GO:0006357;<br>C:GO:0005730;<br>C:GO:0016591;<br>C:GO:0008023;<br>F:GO:0003677;<br>F:GO:0016944;<br>C:GO:0005737                                                                                                                                                                                                                                                                                 | - | PTHR13729 (PANTHER)                                                                                                                                                                                                                                            |
|                         | -                                              | 0  |                                                                                                                                                                                                                                                                                                                                                                                                    |   | -                                                                                                                                                                                                                                                              |
| Loa loa                 | importin 8                                     | 0  | F:GO:0005488;<br>F:GO:0005509;<br>C:GO:0005737;<br>F:GO:0008262;<br>P:GO:0008283;<br>P:GO:0006886;<br>C:GO:0005634;<br>F:GO:0008565                                                                                                                                                                                                                                                                |   | -                                                                                                                                                                                                                                                              |
|                         | -                                              | 0  |                                                                                                                                                                                                                                                                                                                                                                                                    |   | -                                                                                                                                                                                                                                                              |
|                         | -                                              | 0  |                                                                                                                                                                                                                                                                                                                                                                                                    |   | -                                                                                                                                                                                                                                                              |
| Caenorhabditis elegans  | anion bicarbo-te porter family member (abts-3) | 5  | F:GO:0005452;<br>P:GO:0006820;<br>P:GO:0009401;<br>F:GO:0005351;<br>C:GO:0016021                                                                                                                                                                                                                                                                                                                   | - | IPR003020; PTHR11453:SF16<br>(PANTHER)                                                                                                                                                                                                                         |
| Caenorhabditis elegans  | vacuolar protein sorting-associated protein 4a | 23 | P:GO:0033993;<br>C:GO:0005829;<br>C:GO:0005764;<br>P:GO:0000910;<br>P:GO:0007049;<br>C:GO:0030496;<br>F:GO:0042623;<br>P:GO:0006813;<br>P:GO:0032367;<br>F:GO:0008022;<br>C:GO:0031902;<br>C:GO:0005774;<br>C:GO:0005769;<br>F:GO:0005524;<br>C:GO:0000815;<br>F:GO:0019904;<br>C:GO:0048471;<br>P:GO:0008152;<br>P:GO:0007032;<br>F:GO:0017048;<br>P:GO:0015031;<br>C:GO:0005634;<br>P:GO:0032510 | - | IPR003593; IPR003959; IPR003960;<br>IPR007330; IPR015415;<br>G3DSA:1.10.8.60 (GENE3D),<br>G3DSA:1.20.58.280 (GENE3D),<br>G3DSA:3.40.50.300 (GENE3D),<br>PTHR23074 (PANTHER),<br>PTHR23074:SF3 (PANTHER),<br>SSF116846 (SUPERFAMILY), SSF52540<br>(SUPERFAMILY) |



|                         |                                                                   |   |                                                                                                                    |                                                                 |             |                                                                 |
|-------------------------|-------------------------------------------------------------------|---|--------------------------------------------------------------------------------------------------------------------|-----------------------------------------------------------------|-------------|-----------------------------------------------------------------|
| Caenorhabditis elegans  | transmembrane cell surface protein homolog family member (ttyh-1) | 0 |                                                                                                                    |                                                                 |             | IPR006990; PTHR12424:SF2 (PANTHER), SignalP (SIGNALP)           |
| -                       | -                                                                 | 0 |                                                                                                                    |                                                                 |             | -                                                               |
| -                       | -                                                                 | 0 |                                                                                                                    |                                                                 |             | -                                                               |
| -                       | -                                                                 | 0 |                                                                                                                    |                                                                 |             | -                                                               |
| Homo sapiens            | ga-b protein                                                      | 7 | F:GO:0033919;<br>P:GO:0005975;<br>C:GO:0042470;<br>C:GO:0005783;<br>F:GO:0030246;<br>C:GO:0005794;<br>F:GO:0005515 | -                                                               | EC:3.2.1.84 | -                                                               |
| -                       | -                                                                 | 0 |                                                                                                                    |                                                                 |             | -                                                               |
| -                       | -                                                                 | 0 |                                                                                                                    |                                                                 |             | IPR013632; PTHR22942 (PANTHER), PTHR22942:SF10 (PANTHER)        |
| -                       | -                                                                 | 0 |                                                                                                                    |                                                                 |             | SignalP (SIGNALP)                                               |
| Caenorhabditis briggsae | Hypothetical protein CBG14951 [Caenorhabditis briggsae]           | 3 | P:GO:0040018;<br>P:GO:0040035;<br>P:GO:0002119                                                                     | -                                                               |             | -                                                               |
| Caenorhabditis elegans  | glycerol-3-phosphate acyltransferase 3                            | 5 | C:GO:0016021;<br>P:GO:0019432;<br>F:GO:0004366;<br>C:GO:0005789;<br>P:GO:0032006                                   | -                                                               | EC:2.3.1.15 | PTHR23063 (PANTHER), PTHR23063:SF2 (PANTHER), SignalP (SIGNALP) |
| -                       | -                                                                 | 0 |                                                                                                                    |                                                                 |             | -                                                               |
| Caenorhabditis briggsae | Hypothetical protein CBG13872 [Caenorhabditis briggsae]           | 0 |                                                                                                                    | C:GO:0016021;<br>P:GO:0006814;<br>F:GO:0008508;<br>C:GO:0016020 |             | -                                                               |
| Caenorhabditis briggsae | ryanodine receptor                                                | 7 | P:GO:0006629;<br>F:GO:0005219;<br>P:GO:0006816;<br>P:GO:0006874;<br>P:GO:0055085;<br>F:GO:0005509;<br>C:GO:0016021 | -                                                               |             | IPR015925; PTHR13715:SF3 (PANTHER)                              |
| Caenorhabditis elegans  | elegans protein partially confirmed by transcript evidence        | 0 |                                                                                                                    |                                                                 |             | IPR003582; PTHR21724 (PANTHER)                                  |
| -                       | -                                                                 | 0 |                                                                                                                    |                                                                 |             | -                                                               |
| -                       | -                                                                 | 0 |                                                                                                                    |                                                                 |             | -                                                               |
| Caenorhabditis briggsae | elegans protein partially confirmed by transcript evidence        | 3 | C:GO:0034703;<br>F:GO:0005261;<br>P:GO:0055080                                                                     | -                                                               |             | SignalP (SIGNALP)                                               |
| -                       | -                                                                 | 0 |                                                                                                                    |                                                                 |             | -                                                               |
| -                       | -                                                                 | 0 |                                                                                                                    |                                                                 |             | SignalP (SIGNALP)                                               |
| -                       | -                                                                 | 0 |                                                                                                                    |                                                                 |             | SignalP (SIGNALP)                                               |
| -                       | -                                                                 | 0 |                                                                                                                    |                                                                 |             | -                                                               |
| -                       | -                                                                 | 0 |                                                                                                                    |                                                                 |             | -                                                               |
| Caenorhabditis briggsae | short coiled-coil protein                                         | 1 | F:GO:0005515                                                                                                       | -                                                               |             | -                                                               |
| -                       | -                                                                 | 0 |                                                                                                                    |                                                                 |             | -                                                               |
| -                       | -                                                                 | 0 |                                                                                                                    |                                                                 |             | IPR000436; IPR016060                                            |
| -                       | -                                                                 | 0 |                                                                                                                    |                                                                 |             | SignalP (SIGNALP)                                               |
| -                       | -                                                                 | 0 |                                                                                                                    |                                                                 |             | SignalP (SIGNALP)                                               |
| -                       | -                                                                 | 0 |                                                                                                                    |                                                                 |             | IPR001412                                                       |

|                        |                                                            |   |                                                                                                                                     |                                                                                  |                                                                                                    |
|------------------------|------------------------------------------------------------|---|-------------------------------------------------------------------------------------------------------------------------------------|----------------------------------------------------------------------------------|----------------------------------------------------------------------------------------------------|
| Caenorhabditis elegans | r- binding motif protein 19                                | 7 | C:GO:0005737;<br>C:GO:0005730;<br>C:GO:0005654;<br>P:GO:0048546;<br>F:GO:0003723;<br>P:GO:0040019;<br>F:GO:0000166                  | -                                                                                | IPR000504; IPR012677; PTHR10432 (PANTHER), PTHR10432:SF63 (PANTHER), SSF54928 (SUPERFAMILY)        |
| -                      | -                                                          | 0 |                                                                                                                                     |                                                                                  | -                                                                                                  |
| -                      | -                                                          | 0 |                                                                                                                                     |                                                                                  | -                                                                                                  |
| -                      | -                                                          | 0 |                                                                                                                                     |                                                                                  | -                                                                                                  |
| -                      | -                                                          | 0 |                                                                                                                                     |                                                                                  | -                                                                                                  |
| Caenorhabditis elegans | briggsae cbr-pqn-70 protein                                | 1 | P:GO:0000003                                                                                                                        | -                                                                                | PTHR21806 (PANTHER)                                                                                |
| Caenorhabditis elegans | briggsae cbr-pqn-70 protein                                | 1 | P:GO:0000003                                                                                                                        | -                                                                                | -                                                                                                  |
| Brugia malayi          | mutS homolog 5 ( coli)                                     | 8 | C:GO:0000795;<br>P:GO:0007292;<br>F:GO:0003677;<br>P:GO:0007129;<br>F:GO:0005515;<br>P:GO:0007131;<br>P:GO:0007136;<br>P:GO:0006950 | -                                                                                | IPR000432; IPR007696; G3DSA:3.40.50.300 (GENE3D), PTHR11361:SF20 (PANTHER), SSF52540 (SUPERFAMILY) |
| -                      | -                                                          | 0 |                                                                                                                                     |                                                                                  | SignalP (SIGNALP)                                                                                  |
| -                      | -                                                          | 0 |                                                                                                                                     |                                                                                  | -                                                                                                  |
| -                      | -                                                          | 0 |                                                                                                                                     |                                                                                  | SignalP (SIGNALP)                                                                                  |
| -                      | -                                                          | 0 |                                                                                                                                     |                                                                                  | -                                                                                                  |
| -                      | -                                                          | 0 |                                                                                                                                     |                                                                                  | -                                                                                                  |
| Brugia malayi          | hepatocellular carcinoma-associated antigen 66             | 0 |                                                                                                                                     |                                                                                  | IPR013949; PTHR23271 (PANTHER), PTHR23271:SF1 (PANTHER)                                            |
| Caenorhabditis elegans | multidrug resistance                                       | 7 | P:GO:0000917;<br>F:GO:0042626;<br>F:GO:0005525;<br>C:GO:0005622;<br>P:GO:0055085;<br>F:GO:0005524;<br>C:GO:0016021                  | -                                                                                | G3DSA:3.40.50.300 (GENE3D), PTHR19242 (PANTHER), PTHR19242:SF62 (PANTHER), SSF52540 (SUPERFAMILY)  |
| Caenorhabditis elegans | low quality protein: collagen alpha-3 chain-like           | 1 | P:GO:0040010                                                                                                                        | -                                                                                | IPR002035; G3DSA:3.40.50.410 (GENE3D), SSF53300 (SUPERFAMILY)                                      |
| Caenorhabditis elegans | low quality protein: collagen alpha-3 chain-like           | 1 | P:GO:0040010                                                                                                                        | -                                                                                | IPR002035; G3DSA:3.40.50.410 (GENE3D), SSF53300 (SUPERFAMILY)                                      |
| -                      | -                                                          | 0 |                                                                                                                                     |                                                                                  | -                                                                                                  |
| -                      | -                                                          | 0 |                                                                                                                                     |                                                                                  | -                                                                                                  |
| Caenorhabditis elegans | y0q5_caeel_ame: full=uncharacterized protein               | 0 |                                                                                                                                     | F:GO:0005515                                                                     | -                                                                                                  |
| -                      | -                                                          | 0 |                                                                                                                                     |                                                                                  | -                                                                                                  |
| -                      | -                                                          | 0 |                                                                                                                                     |                                                                                  | -                                                                                                  |
| -                      | -                                                          | 0 |                                                                                                                                     |                                                                                  | -                                                                                                  |
| -                      | -                                                          | 0 |                                                                                                                                     |                                                                                  | -                                                                                                  |
| -                      | -                                                          | 0 |                                                                                                                                     |                                                                                  | IPR011989                                                                                          |
| Caenorhabditis elegans | elegans protein partially confirmed by transcript evidence | 0 |                                                                                                                                     | F:GO:0003674;<br>P:GO:0045449;<br>P:GO:0008150;<br>C:GO:0005575;<br>F:GO:0003700 | PTHR13029 (PANTHER), PTHR13029:SF7 (PANTHER)                                                       |

|                         |                                                            |    |                                                                                                                                                                                                                                                                             |                                                                                  |             |                                                                                                                       |
|-------------------------|------------------------------------------------------------|----|-----------------------------------------------------------------------------------------------------------------------------------------------------------------------------------------------------------------------------------------------------------------------------|----------------------------------------------------------------------------------|-------------|-----------------------------------------------------------------------------------------------------------------------|
| Caenorhabditis briggsae | briggsae cbr--s-39 protein                                 | 12 | F:GO:0008270;<br>F:GO:0005509;<br>P:GO:0001885;<br>P:GO:0035162;<br>P:GO:0035124;<br>F:GO:0004222;<br>P:GO:0006508;<br>F:GO:0005515;<br>P:GO:0048264;<br>P:GO:0030513;<br>P:GO:0001568;<br>P:GO:0001707                                                                     | -                                                                                | EC:3.4.24.0 | IPR000859; PTHR10127 (PANTHER),<br>PTHR10127:SF70 (PANTHER)                                                           |
| -                       | -                                                          | 0  | -                                                                                                                                                                                                                                                                           | -                                                                                | -           | -                                                                                                                     |
| -                       | -                                                          | 0  | -                                                                                                                                                                                                                                                                           | -                                                                                | -           | -                                                                                                                     |
| Caenorhabditis elegans  | briggsae cbr-far-8 protein                                 | 0  | -                                                                                                                                                                                                                                                                           | F:GO:0008289                                                                     | -           | IPR008632                                                                                                             |
| Haemonchus contortus    | gata transcription factor                                  | 4  | F:GO:0003700;<br>F:GO:0043565;<br>F:GO:0008270;<br>P:GO:0006355                                                                                                                                                                                                             | -                                                                                | -           | -                                                                                                                     |
| Caenorhabditis elegans  | elegans protein confirmed by transcript evidence           | 0  | -                                                                                                                                                                                                                                                                           | P:GO:0055114;<br>F:GO:0009055;<br>F:GO:0020037;<br>F:GO:0005506;<br>F:GO:0004497 | -           | IPR013078; G3DSA:3.40.50.1240<br>(GENE3D), PTHR16469 (PANTHER),<br>PTHR16469:SF4 (PANTHER), SSF53254<br>(SUPERFAMILY) |
| Caenorhabditis briggsae | small calcium-binding mitochondrial carrier 2              | 4  | C:GO:0005743;<br>P:GO:0055085;<br>F:GO:0005509;<br>C:GO:0016021                                                                                                                                                                                                             | -                                                                                | -           | IPR001993; IPR002067; IPR018108;<br>G3DSA:1.50.40.10 (GENE3D),<br>PTHR11896:SF34 (PANTHER)                            |
| -                       | -                                                          | 0  | -                                                                                                                                                                                                                                                                           | -                                                                                | -           | -                                                                                                                     |
| -                       | -                                                          | 0  | -                                                                                                                                                                                                                                                                           | -                                                                                | -           | -                                                                                                                     |
| Caenorhabditis elegans  | sda1 domain containing 1                                   | 6  | C:GO:0005730;<br>P:GO:0002119;<br>F:GO:0005488;<br>P:GO:0006898;<br>P:GO:0040007;<br>P:GO:0051729                                                                                                                                                                           | -                                                                                | -           | IPR012977; PTHR12730 (PANTHER)                                                                                        |
| Caenorhabditis elegans  | elegans protein partially confirmed by transcript evidence | 2  | P:GO:0023034;<br>C:GO:0016021                                                                                                                                                                                                                                               | -                                                                                | -           | -                                                                                                                     |
| Homo sapiens            | basigin (ok blood group) isoform cra_d                     | 16 | P:GO:0046689;<br>C:GO:0005739;<br>P:GO:0007566;<br>C:GO:0016021;<br>C:GO:0000139;<br>P:GO:0042475;<br>F:GO:0005537;<br>P:GO:0043434;<br>F:GO:0015129;<br>C:GO:0042470;<br>P:GO:0046697;<br>F:GO:0005515;<br>C:GO:0045121;<br>C:GO:0042383;<br>P:GO:0007166;<br>P:GO:0051591 | -                                                                                | -           | -                                                                                                                     |
| -                       | -                                                          | 0  | -                                                                                                                                                                                                                                                                           | -                                                                                | -           | -                                                                                                                     |

|                               |                                                            |    |                                                                                                                                                                                                                                                                                                                                |                               |            |                                                                                                                     |
|-------------------------------|------------------------------------------------------------|----|--------------------------------------------------------------------------------------------------------------------------------------------------------------------------------------------------------------------------------------------------------------------------------------------------------------------------------|-------------------------------|------------|---------------------------------------------------------------------------------------------------------------------|
| Loa loa                       | isoform a                                                  | 19 | C:GO:0000139;<br>F:GO:0005458;<br>F:GO:0005461;<br>P:GO:0015784;<br>F:GO:0005464;<br>P:GO:0015787;<br>F:GO:0005456;<br>P:GO:0015790;<br>P:GO:0055085;<br>F:GO:0005460;<br>F:GO:0005457;<br>P:GO:0015788;<br>F:GO:0005351;<br>P:GO:0015783;<br>C:GO:0016021;<br>C:GO:0005783;<br>F:GO:0005462;<br>P:GO:0015782;<br>P:GO:0015786 | -                             |            | IPR013657; PTHR10778 (PANTHER),<br>PTHR10778:SF4 (PANTHER), SignalP<br>(SIGNALP)                                    |
|                               | -                                                          | 0  |                                                                                                                                                                                                                                                                                                                                |                               |            | -                                                                                                                   |
| Caenorhabditis elegans        | elegans protein partially confirmed by transcript evidence | 0  |                                                                                                                                                                                                                                                                                                                                | P:GO:0008152;<br>F:GO:0003824 |            | IPR010770                                                                                                           |
|                               | -                                                          | 0  |                                                                                                                                                                                                                                                                                                                                |                               |            | SignalP (SIGNALP)                                                                                                   |
| Caenorhabditis briggsae       | elegans protein confirmed by transcript evidence           | 4  | P:GO:0009792;<br>P:GO:0000003;<br>P:GO:0040010;<br>P:GO:0002119                                                                                                                                                                                                                                                                | -                             |            | -                                                                                                                   |
|                               | -                                                          | 0  |                                                                                                                                                                                                                                                                                                                                |                               |            | SignalP (SIGNALP)                                                                                                   |
|                               | -                                                          | 0  |                                                                                                                                                                                                                                                                                                                                |                               |            | -                                                                                                                   |
| Caenorhabditis elegans        | carboxylase:pyruvate acetyl-coa propionyl-coa              | 8  | P:GO:0044249;<br>C:GO:0005875;<br>F:GO:0005488;<br>P:GO:0006090;<br>F:GO:0016874;<br>P:GO:0016051;<br>C:GO:0005759;<br>C:GO:0005811                                                                                                                                                                                            | -                             |            | IPR000089; IPR001882; IPR011053;<br>G3DSA:2.40.50.100 (GENE3D),<br>PTHR18866 (PANTHER),<br>PTHR18866:SF10 (PANTHER) |
| Strongylocentrotus purpuratus | mgc82686 protein                                           | 5  | F:GO:0003919;<br>P:GO:0040010;<br>P:GO:0006777;<br>F:GO:0005524;<br>P:GO:0006747                                                                                                                                                                                                                                               | -                             | EC:2.7.7.2 | IPR001453; PTHR23293 (PANTHER)                                                                                      |
| Caenorhabditis elegans        | protein son-like                                           | 4  | C:GO:0005622;<br>F:GO:0003723;<br>F:GO:0005515;<br>P:GO:0006916                                                                                                                                                                                                                                                                | -                             |            | -                                                                                                                   |
|                               | -                                                          | 0  |                                                                                                                                                                                                                                                                                                                                |                               |            | -                                                                                                                   |
| Caenorhabditis briggsae       | cdk5 regulatory subunit associated protein 1-like 1        | 5  | P:GO:0009451;<br>F:GO:0046872;<br>C:GO:0016021;<br>F:GO:0003824;<br>F:GO:0051539                                                                                                                                                                                                                                               | -                             |            | IPR005839                                                                                                           |
| Caenorhabditis elegans        | metabotropic gaba-b receptor subtype 2                     | 3  | C:GO:0016020;<br>P:GO:0023052;<br>F:GO:0004888                                                                                                                                                                                                                                                                                 | -                             |            | PTHR10519 (PANTHER),<br>PTHR10519:SF4 (PANTHER), SignalP<br>(SIGNALP)                                               |

|                         |                                                                          |    |                                                                                                                                                                                        |                                                                                                                                                                       |                                                                                                                                                                                                              |
|-------------------------|--------------------------------------------------------------------------|----|----------------------------------------------------------------------------------------------------------------------------------------------------------------------------------------|-----------------------------------------------------------------------------------------------------------------------------------------------------------------------|--------------------------------------------------------------------------------------------------------------------------------------------------------------------------------------------------------------|
| Loa loa                 | novel protein (zgc:158710)                                               | 6  | F:GO:0005097;<br>F:GO:0004672;<br>C:GO:0005622;<br>F:GO:0005524;<br>P:GO:0032313;<br>P:GO:0006468                                                                                      | -                                                                                                                                                                     | IPR000195; G3DSA:1.10.8.270 (GENE3D), PTHR22957 (PANTHER), PTHR22957:SF22 (PANTHER)                                                                                                                          |
| Caenorhabditis elegans  | rsk-pninety (rsk-p90 ki-se) homolog family member (rskn-1)               | 8  | C:GO:0005829;<br>P:GO:0007243;<br>F:GO:0004674;<br>F:GO:0005524;<br>F:GO:0005515;<br>F:GO:0000287;<br>C:GO:0005654;<br>P:GO:0006468                                                    | -                                                                                                                                                                     | EC:2.7.11.0<br>IPR000719; IPR000961; IPR002290; IPR008271; IPR011009; IPR017441; IPR017442; IPR017892; G3DSA:1.10.510.10 (GENE3D), G3DSA:3.30.200.20 (GENE3D), PTHR22985 (PANTHER), PTHR22985:SF67 (PANTHER) |
|                         | -                                                                        | 0  |                                                                                                                                                                                        |                                                                                                                                                                       | -                                                                                                                                                                                                            |
|                         | -                                                                        | 0  |                                                                                                                                                                                        |                                                                                                                                                                       | -                                                                                                                                                                                                            |
| Caenorhabditis elegans  | cation transport regulator-like protein 1                                | 0  |                                                                                                                                                                                        | F:GO:0003723;<br>P:GO:0070059;<br>F:GO:0016740;<br>C:GO:0005829;<br>F:GO:0005515;<br>F:GO:0008146                                                                     | IPR006840                                                                                                                                                                                                    |
| Caenorhabditis brenneri | elegans protein partially confirmed by transcript evidence               | 5  | P:GO:0009792;<br>F:GO:0004672;<br>P:GO:0040010;<br>P:GO:0000003;<br>F:GO:0000166                                                                                                       | -                                                                                                                                                                     | IPR000719; IPR011009; IPR017441; IPR017442; G3DSA:1.10.510.10 (GENE3D), G3DSA:3.30.200.20 (GENE3D), PTHR11909 (PANTHER), PTHR11909:SF19 (PANTHER)                                                            |
|                         | -                                                                        | 0  |                                                                                                                                                                                        |                                                                                                                                                                       | -                                                                                                                                                                                                            |
|                         | -                                                                        | 0  |                                                                                                                                                                                        |                                                                                                                                                                       | -                                                                                                                                                                                                            |
| Caenorhabditis elegans  | uncoordinated protein isoform partially confirmed by transcript evidence | 11 | P:GO:0055085;<br>P:GO:0006629;<br>C:GO:0005875;<br>F:GO:0005509;<br>C:GO:0016021;<br>F:GO:0004872;<br>P:GO:0006874;<br>P:GO:0006816;<br>C:GO:0005789;<br>F:GO:0005219;<br>P:GO:0006936 | -                                                                                                                                                                     | IPR000699; IPR015925; PTHR13715:SF11 (PANTHER)                                                                                                                                                               |
| Caenorhabditis elegans  | rgm domain family member b-like                                          | 0  |                                                                                                                                                                                        | F:GO:0042802;<br>C:GO:0045121;<br>P:GO:0045941;<br>C:GO:0005793;<br>C:GO:0031225;<br>P:GO:0007165;<br>C:GO:0046658;<br>C:GO:0005886;<br>P:GO:0030509;<br>P:GO:0007155 | IPR009496                                                                                                                                                                                                    |
|                         | -                                                                        | 0  |                                                                                                                                                                                        |                                                                                                                                                                       | IPR009072                                                                                                                                                                                                    |
|                         | -                                                                        | 0  |                                                                                                                                                                                        |                                                                                                                                                                       | -                                                                                                                                                                                                            |

|                         |                                                            |   |                                                                                                                                                      |   |             |                                                                                                    |
|-------------------------|------------------------------------------------------------|---|------------------------------------------------------------------------------------------------------------------------------------------------------|---|-------------|----------------------------------------------------------------------------------------------------|
| Caenorhabditis elegans  | cytochrome c oxidase polypeptide vb                        | 9 | P:GO:0009792;<br>P:GO:0002119;<br>P:GO:0006629;<br>C:GO:0005740;<br>P:GO:0040010;<br>P:GO:0000003;<br>P:GO:0008340;<br>P:GO:0019915;<br>F:GO:0004129 | - | EC:1.9.3.1  | IPR002124; SignalP (SIGNALP),<br>SSF57802 (SUPERFAMILY)                                            |
| Loa loa                 | hypothetical protein LOAG_10859 [Loa loa]                  | 0 |                                                                                                                                                      |   |             | PTHR10117 (PANTHER),<br>PTHR10117:SF10 (PANTHER), SignalP<br>(SIGNALP)                             |
|                         | -                                                          | 0 |                                                                                                                                                      |   |             | -                                                                                                  |
| Caenorhabditis elegans  | nuclear vcp-like                                           | 2 | F:GO:0005524;<br>F:GO:0017111                                                                                                                        | - | EC:3.6.1.15 | -                                                                                                  |
|                         | -                                                          | 0 |                                                                                                                                                      |   |             | -                                                                                                  |
| Caenorhabditis elegans  | monocarboxylate transporter                                | 5 | C:GO:0016021;<br>P:GO:0000003;<br>P:GO:0040007;<br>P:GO:0055085;<br>P:GO:0002119                                                                     | - |             | -                                                                                                  |
| Caenorhabditis briggsae | nuclear receptor                                           | 7 | F:GO:0003700;<br>F:GO:0043565;<br>P:GO:0008340;<br>F:GO:0003707;<br>C:GO:0005634;<br>F:GO:0008270;<br>P:GO:0006355                                   | - |             | IPR001628; IPR008946; PTHR11865<br>(PANTHER), PTHR11865:SF197<br>(PANTHER), SSF57716 (SUPERFAMILY) |
| Caenorhabditis elegans  | elegans protein partially confirmed by transcript evidence | 3 | C:GO:0034703;<br>F:GO:0005261;<br>P:GO:0055080                                                                                                       | - |             | SignalP (SIGNALP)                                                                                  |
|                         | -                                                          | 0 |                                                                                                                                                      |   |             | SignalP (SIGNALP)                                                                                  |

|                               |                                                         |    |                                                                                                                                                                                                                                                                                                                                                                                                                                                                                         |                             |                                                                                                           |
|-------------------------------|---------------------------------------------------------|----|-----------------------------------------------------------------------------------------------------------------------------------------------------------------------------------------------------------------------------------------------------------------------------------------------------------------------------------------------------------------------------------------------------------------------------------------------------------------------------------------|-----------------------------|-----------------------------------------------------------------------------------------------------------|
| Caenorhabditis elegans        | caveolin 1                                              | 66 | C:GO:0009269;<br>P:GO:0006641;<br>P:GO:0010524;<br>F:GO:0016504;<br>C:GO:0005925;<br>P:GO:0033344;<br>F:GO:0050998;<br>C:GO:0005901;<br>P:GO:0007584;<br>P:GO:0033484;<br>C:GO:0009925;<br>P:GO:0010332;<br>C:GO:0005625;<br>P:GO:0009612;<br>P:GO:0031116;<br>P:GO:0051899;<br>P:GO:0045807;<br>P:GO:0051384;<br>C:GO:0043234;<br>C:GO:0000299;<br>P:GO:0060056;<br>P:GO:0007126;<br>C:GO:0030141;<br>C:GO:0005829;<br>P:GO:0009967;<br>P:GO:0006940;<br>P:GO:0043409;<br>F:GO:0019900 | -                           | IPR001612; PTHR10844:SF2 (PANTHER)                                                                        |
| Xenopus (Silurana) tropicalis | collagen alpha-6 chain- partial                         | 0  |                                                                                                                                                                                                                                                                                                                                                                                                                                                                                         |                             | SignalP (SIGNALP)                                                                                         |
| Caenorhabditis elegans        | briggsae cbr-cpg-3 protein                              | 0  |                                                                                                                                                                                                                                                                                                                                                                                                                                                                                         |                             | SignalP (SIGNALP)                                                                                         |
| Caenorhabditis elegans        | briggsae cbr-cpg-3 protein                              | 0  |                                                                                                                                                                                                                                                                                                                                                                                                                                                                                         |                             | -                                                                                                         |
| -                             | -                                                       | 0  |                                                                                                                                                                                                                                                                                                                                                                                                                                                                                         |                             | -                                                                                                         |
| -                             | -                                                       | 0  |                                                                                                                                                                                                                                                                                                                                                                                                                                                                                         |                             | -                                                                                                         |
| -                             | -                                                       | 0  |                                                                                                                                                                                                                                                                                                                                                                                                                                                                                         |                             | SignalP (SIGNALP)                                                                                         |
| -                             | -                                                       | 0  |                                                                                                                                                                                                                                                                                                                                                                                                                                                                                         |                             | -                                                                                                         |
| -                             | -                                                       | 0  |                                                                                                                                                                                                                                                                                                                                                                                                                                                                                         |                             | SignalP (SIGNALP)                                                                                         |
| -                             | -                                                       | 0  |                                                                                                                                                                                                                                                                                                                                                                                                                                                                                         |                             | SignalP (SIGNALP)                                                                                         |
| -                             | -                                                       | 0  |                                                                                                                                                                                                                                                                                                                                                                                                                                                                                         |                             | SignalP (SIGNALP)                                                                                         |
| Caenorhabditis briggsae       | Hypothetical protein CBG02118 [Caenorhabditis briggsae] | 0  |                                                                                                                                                                                                                                                                                                                                                                                                                                                                                         |                             | SignalP (SIGNALP)                                                                                         |
| Caenorhabditis briggsae       | elegans protein confirmed by transcript evidence        | 7  | C:GO:0005737;<br>P:GO:0040010;<br>P:GO:0055114;<br>P:GO:0006561;<br>P:GO:0006898;<br>F:GO:0004349;<br>F:GO:0004350                                                                                                                                                                                                                                                                                                                                                                      | EC:2.7.2.11;<br>EC:1.2.1.41 | IPR001048; IPR001057; IPR019797;<br>PTHR11063 (PANTHER),<br>PTHR11063:SF2 (PANTHER), SignalP<br>(SIGNALP) |
| Caenorhabditis elegans        | exoribonuclease 1                                       | 6  | F:GO:0003676;<br>C:GO:0005730;<br>F:GO:0008408;<br>F:GO:0005515;<br>P:GO:0071044;<br>C:GO:0005737                                                                                                                                                                                                                                                                                                                                                                                       | -                           | IPR012337; IPR013520;<br>G3DSA:3.30.420.10 (GENE3D),<br>PTHR23044 (PANTHER),<br>PTHR23044:SF7 (PANTHER)   |

|                           |                                          |    |                                                                                                                                                                                                                                                                                              |   |                                                                                                                                                                                                |
|---------------------------|------------------------------------------|----|----------------------------------------------------------------------------------------------------------------------------------------------------------------------------------------------------------------------------------------------------------------------------------------------|---|------------------------------------------------------------------------------------------------------------------------------------------------------------------------------------------------|
| Loa loa                   | nucleolar protein 10                     | 5  | P:GO:0009792;<br>P:GO:0002119;<br>P:GO:0018991;<br>P:GO:0040010;<br>C:GO:0005634                                                                                                                                                                                                             | - | IPR001680; IPR015943; PTHR14927 (PANTHER)                                                                                                                                                      |
| Caenorhabditis elegans    | zinc-binding dehydroge-se family protein | 4  | F:GO:0008270;<br>P:GO:0055114;<br>F:GO:0005515;<br>F:GO:0016491                                                                                                                                                                                                                              | - | IPR002085; IPR011032; IPR013149;<br>IPR013154; IPR016040;<br>G3DSA:3.90.180.10 (GENE3D),<br>PTHR11695:SF38 (PANTHER),<br>SSF51735 (SUPERFAMILY)                                                |
| Teladorsagia circumcincta | parasitic stage specific protein 1       | 0  |                                                                                                                                                                                                                                                                                              |   | -                                                                                                                                                                                              |
| Caenorhabditis briggsae   | glycoside hydrolase family 25 protein    | 1  | F:GO:0005515                                                                                                                                                                                                                                                                                 | - | IPR013781; IPR017853; PTHR23208 (PANTHER), PTHR23208:SF13 (PANTHER), SignalP (SIGNALP)                                                                                                         |
| Teladorsagia circumcincta | parasitic stage specific protein 1       | 0  |                                                                                                                                                                                                                                                                                              |   | -                                                                                                                                                                                              |
| Caenorhabditis elegans    | coatomer protein subunit alpha           | 17 | P:GO:0030157;<br>C:GO:0030126;<br>C:GO:0005829;<br>P:GO:0040010;<br>C:GO:0005625;<br>P:GO:0006890;<br>P:GO:0000003;<br>C:GO:0005615;<br>P:GO:0032940;<br>C:GO:0005792;<br>P:GO:0002119;<br>F:GO:0005515;<br>P:GO:0040011;<br>P:GO:0048205;<br>P:GO:0006886;<br>F:GO:0005198;<br>P:GO:0009792 | - | IPR001680; IPR006692; IPR010714;<br>IPR011046; IPR015943; IPR017986;<br>IPR019775; IPR019781; IPR019782;<br>IPR020472; PTHR19876 (PANTHER),<br>PTHR19876:SF1 (PANTHER), SSF82171 (SUPERFAMILY) |
| Caenorhabditis elegans    | coatomer protein subunit alpha           | 17 | P:GO:0030157;<br>C:GO:0030126;<br>C:GO:0005829;<br>P:GO:0040010;<br>C:GO:0005625;<br>P:GO:0006890;<br>P:GO:0000003;<br>C:GO:0005615;<br>P:GO:0032940;<br>C:GO:0005792;<br>P:GO:0002119;<br>F:GO:0005515;<br>P:GO:0040011;<br>P:GO:0048205;<br>P:GO:0006886;<br>F:GO:0005198;<br>P:GO:0009792 | - | IPR001680; IPR006692; IPR010714;<br>IPR011046; IPR015943; IPR017986;<br>IPR019775; IPR019781; IPR019782;<br>IPR020472; PTHR19876 (PANTHER),<br>PTHR19876:SF1 (PANTHER), SSF82171 (SUPERFAMILY) |



|                        |                                |    |                                                                                                                                                                                                                                                                                              |   |                                                                                                                                                                                                   |
|------------------------|--------------------------------|----|----------------------------------------------------------------------------------------------------------------------------------------------------------------------------------------------------------------------------------------------------------------------------------------------|---|---------------------------------------------------------------------------------------------------------------------------------------------------------------------------------------------------|
| Caenorhabditis elegans | coatomer protein subunit alpha | 17 | P:GO:0030157;<br>C:GO:0030126;<br>C:GO:0005829;<br>P:GO:0040010;<br>C:GO:0005625;<br>P:GO:0006890;<br>P:GO:0000003;<br>C:GO:0005615;<br>P:GO:0032940;<br>C:GO:0005792;<br>P:GO:0002119;<br>F:GO:0005515;<br>P:GO:0040011;<br>P:GO:0048205;<br>P:GO:0006886;<br>F:GO:0005198;<br>P:GO:0009792 | - | IPR001680; IPR006692; IPR010714;<br>IPR011046; IPR015943; IPR017986;<br>IPR019775; IPR019781; IPR019782;<br>IPR020472; PTHR19876 (PANTHER),<br>PTHR19876:SF1 (PANTHER), SSF82171<br>(SUPERFAMILY) |
| Caenorhabditis elegans | coatomer protein subunit alpha | 17 | P:GO:0030157;<br>C:GO:0030126;<br>C:GO:0005829;<br>P:GO:0040010;<br>C:GO:0005625;<br>P:GO:0006890;<br>P:GO:0000003;<br>C:GO:0005615;<br>P:GO:0032940;<br>C:GO:0005792;<br>P:GO:0002119;<br>F:GO:0005515;<br>P:GO:0040011;<br>P:GO:0048205;<br>P:GO:0006886;<br>F:GO:0005198;<br>P:GO:0009792 | - | IPR001680; IPR006692; IPR010714;<br>IPR011046; IPR015943; IPR017986;<br>IPR019775; IPR019781; IPR019782;<br>IPR020472; PTHR19876 (PANTHER),<br>PTHR19876:SF1 (PANTHER), SSF82171<br>(SUPERFAMILY) |
| Caenorhabditis elegans | coatomer protein subunit alpha | 17 | P:GO:0030157;<br>C:GO:0030126;<br>C:GO:0005829;<br>P:GO:0040010;<br>C:GO:0005625;<br>P:GO:0006890;<br>P:GO:0000003;<br>C:GO:0005615;<br>P:GO:0032940;<br>C:GO:0005792;<br>P:GO:0002119;<br>F:GO:0005515;<br>P:GO:0040011;<br>P:GO:0048205;<br>P:GO:0006886;<br>F:GO:0005198;<br>P:GO:0009792 | - | IPR001680; IPR006692; IPR010714;<br>IPR011046; IPR015943; IPR017986;<br>IPR019775; IPR019781; IPR019782;<br>IPR020472; PTHR19876 (PANTHER),<br>PTHR19876:SF1 (PANTHER), SSF82171<br>(SUPERFAMILY) |

|                        |                                |    |                                                                                                                                                                                                                                                                                              |   |                                                                                                                                                                                                   |
|------------------------|--------------------------------|----|----------------------------------------------------------------------------------------------------------------------------------------------------------------------------------------------------------------------------------------------------------------------------------------------|---|---------------------------------------------------------------------------------------------------------------------------------------------------------------------------------------------------|
| Caenorhabditis elegans | coatomer protein subunit alpha | 17 | P:GO:0030157;<br>C:GO:0030126;<br>C:GO:0005829;<br>P:GO:0040010;<br>C:GO:0005625;<br>P:GO:0006890;<br>P:GO:0000003;<br>C:GO:0005615;<br>P:GO:0032940;<br>C:GO:0005792;<br>P:GO:0002119;<br>F:GO:0005515;<br>P:GO:0040011;<br>P:GO:0048205;<br>P:GO:0006886;<br>F:GO:0005198;<br>P:GO:0009792 | - | IPR001680; IPR006692; IPR010714;<br>IPR011046; IPR015943; IPR017986;<br>IPR019775; IPR019781; IPR019782;<br>IPR020472; PTHR19876 (PANTHER),<br>PTHR19876:SF1 (PANTHER), SSF82171<br>(SUPERFAMILY) |
| Caenorhabditis elegans | coatomer protein subunit alpha | 17 | P:GO:0030157;<br>C:GO:0030126;<br>C:GO:0005829;<br>P:GO:0040010;<br>C:GO:0005625;<br>P:GO:0006890;<br>P:GO:0000003;<br>C:GO:0005615;<br>P:GO:0032940;<br>C:GO:0005792;<br>P:GO:0002119;<br>F:GO:0005515;<br>P:GO:0040011;<br>P:GO:0048205;<br>P:GO:0006886;<br>F:GO:0005198;<br>P:GO:0009792 | - | IPR001680; IPR006692; IPR010714;<br>IPR011046; IPR015943; IPR017986;<br>IPR019775; IPR019781; IPR019782;<br>IPR020472; PTHR19876 (PANTHER),<br>PTHR19876:SF1 (PANTHER), SSF82171<br>(SUPERFAMILY) |
| Caenorhabditis elegans | coatomer protein subunit alpha | 17 | P:GO:0030157;<br>C:GO:0030126;<br>C:GO:0005829;<br>P:GO:0040010;<br>C:GO:0005625;<br>P:GO:0006890;<br>P:GO:0000003;<br>C:GO:0005615;<br>P:GO:0032940;<br>C:GO:0005792;<br>P:GO:0002119;<br>F:GO:0005515;<br>P:GO:0040011;<br>P:GO:0048205;<br>P:GO:0006886;<br>F:GO:0005198;<br>P:GO:0009792 | - | IPR001680; IPR006692; IPR010714;<br>IPR011046; IPR015943; IPR017986;<br>IPR019775; IPR019781; IPR019782;<br>IPR020472; PTHR19876 (PANTHER),<br>PTHR19876:SF1 (PANTHER), SSF82171<br>(SUPERFAMILY) |

|                         |                                                  |    |                                                                                                                                                                                                                                                                                              |   |             |                                                                                                                                                                                                   |
|-------------------------|--------------------------------------------------|----|----------------------------------------------------------------------------------------------------------------------------------------------------------------------------------------------------------------------------------------------------------------------------------------------|---|-------------|---------------------------------------------------------------------------------------------------------------------------------------------------------------------------------------------------|
| Caenorhabditis elegans  | coatomer protein subunit alpha                   | 17 | P:GO:0030157;<br>C:GO:0030126;<br>C:GO:0005829;<br>P:GO:0040010;<br>C:GO:0005625;<br>P:GO:0006890;<br>P:GO:0000003;<br>C:GO:0005615;<br>P:GO:0032940;<br>C:GO:0005792;<br>P:GO:0002119;<br>F:GO:0005515;<br>P:GO:0040011;<br>P:GO:0048205;<br>P:GO:0006886;<br>F:GO:0005198;<br>P:GO:0009792 | - |             | IPR001680; IPR006692; IPR010714;<br>IPR011046; IPR015943; IPR017986;<br>IPR019775; IPR019781; IPR019782;<br>IPR020472; PTHR19876 (PANTHER),<br>PTHR19876:SF1 (PANTHER), SSF82171<br>(SUPERFAMILY) |
| Caenorhabditis elegans  | phospholipase b-like 2-like                      | 1  | C:GO:0005764                                                                                                                                                                                                                                                                                 | - |             | IPR007000                                                                                                                                                                                         |
|                         | -                                                | 0  |                                                                                                                                                                                                                                                                                              |   |             | -                                                                                                                                                                                                 |
|                         | -                                                | 0  |                                                                                                                                                                                                                                                                                              |   |             | -                                                                                                                                                                                                 |
|                         | -                                                | 0  |                                                                                                                                                                                                                                                                                              |   |             | -                                                                                                                                                                                                 |
| Caenorhabditis elegans  | erin family member (cdh-10)                      | 1  | C:GO:0016020                                                                                                                                                                                                                                                                                 |   |             |                                                                                                                                                                                                   |
|                         | -                                                | 0  |                                                                                                                                                                                                                                                                                              |   |             | SignalP (SIGNALP)                                                                                                                                                                                 |
| Caenorhabditis briggsae | elegans protein confirmed by transcript evidence | 4  | P:GO:0000003;<br>P:GO:0040010;<br>P:GO:0006898;<br>P:GO:0002119                                                                                                                                                                                                                              | - |             | -                                                                                                                                                                                                 |
|                         | -                                                | 0  |                                                                                                                                                                                                                                                                                              |   |             | -                                                                                                                                                                                                 |
|                         | -                                                | 0  |                                                                                                                                                                                                                                                                                              |   |             | -                                                                                                                                                                                                 |
|                         | -                                                | 0  |                                                                                                                                                                                                                                                                                              |   |             | -                                                                                                                                                                                                 |
| Loa loa                 | n-myristoyltransferase 1                         | 10 | C:GO:0005829;<br>P:GO:0040010;<br>F:GO:0004379;<br>P:GO:0000003;<br>P:GO:0018008;<br>P:GO:0009249;<br>P:GO:0002119;<br>P:GO:0040011;<br>P:GO:0006898;<br>P:GO:0001701                                                                                                                        | - | EC:2.3.1.97 | IPR000903; IPR016181; IPR022676;<br>IPR022677; IPR022678                                                                                                                                          |
| Loa loa                 | n-myristoyltransferase 1                         | 10 | C:GO:0005829;<br>P:GO:0040010;<br>F:GO:0004379;<br>P:GO:0000003;<br>P:GO:0018008;<br>P:GO:0009249;<br>P:GO:0002119;<br>P:GO:0040011;<br>P:GO:0006898;<br>P:GO:0001701                                                                                                                        | - | EC:2.3.1.97 | IPR000903; IPR016181; IPR022676;<br>IPR022677; IPR022678                                                                                                                                          |
|                         | -                                                | 0  |                                                                                                                                                                                                                                                                                              |   |             | SignalP (SIGNALP)                                                                                                                                                                                 |
| Loa loa                 | hypothetical protein LOAG_12000 [Loa loa]        | 0  |                                                                                                                                                                                                                                                                                              |   |             | -                                                                                                                                                                                                 |
| Caenorhabditis elegans  | methylmalonyl coenzyme a mutase                  | 6  | F:GO:0046872;<br>F:GO:0004494;<br>F:GO:0031419;<br>C:GO:0005759;<br>P:GO:0009791;<br>P:GO:0008152                                                                                                                                                                                            | - | EC:5.4.99.2 | IPR006158; PTHR23408 (PANTHER),<br>PTHR23408:SF1 (PANTHER)                                                                                                                                        |

|                         |                                                                                 |    |                                                                                                                                                                       |                                                                                                                                                                       |            |                                                                                                        |
|-------------------------|---------------------------------------------------------------------------------|----|-----------------------------------------------------------------------------------------------------------------------------------------------------------------------|-----------------------------------------------------------------------------------------------------------------------------------------------------------------------|------------|--------------------------------------------------------------------------------------------------------|
|                         | -                                                                               | 0  |                                                                                                                                                                       |                                                                                                                                                                       |            | SignalP (SIGNALP)                                                                                      |
| Streptomyces sp. ACT-1  | lpxtg-motif cell wall anchor domain protein                                     | 0  |                                                                                                                                                                       | C:GO:0009986                                                                                                                                                          |            | -                                                                                                      |
| Hydra magnipapillata    | scy1-like 3 ( cerevisiae)                                                       | 0  |                                                                                                                                                                       | C:GO:0042995;<br>F:GO:0004672;<br>P:GO:0006468;<br>F:GO:0003674;<br>C:GO:0005794;<br>F:GO:0005524;<br>F:GO:0016301;<br>C:GO:0005575;<br>P:GO:0008150;<br>F:GO:0005488 |            | IPR000719; G3DSA:1.10.510.10 (GENE3D), PTHR12984 (PANTHER), PTHR12984:SF4 (PANTHER), SignalP (SIGNALP) |
| Caenorhabditis elegans  | elegans protein partially confirmed by transcript evidence                      | 3  | P:GO:0002119;<br>P:GO:0040011;<br>P:GO:0040007                                                                                                                        | -                                                                                                                                                                     |            | -                                                                                                      |
| Caenorhabditis briggsae | Hypothetical protein CBG00040 [Caenorhabditis briggsae]                         | 0  |                                                                                                                                                                       |                                                                                                                                                                       |            | -                                                                                                      |
| Caenorhabditis elegans  | scp(small c-termi-l domain phosphatase)-like phosphatase family member (scpl-1) | 0  |                                                                                                                                                                       |                                                                                                                                                                       |            | -                                                                                                      |
|                         | -                                                                               | 0  |                                                                                                                                                                       |                                                                                                                                                                       |            | -                                                                                                      |
| Caenorhabditis briggsae | briggsae cbr-pqn-87 protein                                                     | 0  |                                                                                                                                                                       |                                                                                                                                                                       |            | -                                                                                                      |
|                         | -                                                                               | 0  |                                                                                                                                                                       |                                                                                                                                                                       |            | -                                                                                                      |
| Caenorhabditis elegans  | laminin alpha chain                                                             | 5  | C:GO:0005606;<br>P:GO:0030334;<br>P:GO:0045995;<br>P:GO:0030155;<br>F:GO:0005102                                                                                      | -                                                                                                                                                                     |            | IPR009254                                                                                              |
|                         | -                                                                               | 0  |                                                                                                                                                                       |                                                                                                                                                                       |            | -                                                                                                      |
|                         | -                                                                               | 0  |                                                                                                                                                                       |                                                                                                                                                                       |            | -                                                                                                      |
|                         | -                                                                               | 0  |                                                                                                                                                                       |                                                                                                                                                                       |            | -                                                                                                      |
|                         | -                                                                               | 0  |                                                                                                                                                                       |                                                                                                                                                                       |            | SignalP (SIGNALP)                                                                                      |
|                         | -                                                                               | 0  |                                                                                                                                                                       |                                                                                                                                                                       |            | -                                                                                                      |
| Caenorhabditis elegans  | hypothetical protein F32B5.7 [Caenorhabditis elegans]                           | 0  |                                                                                                                                                                       |                                                                                                                                                                       |            | -                                                                                                      |
|                         | -                                                                               | 0  |                                                                                                                                                                       |                                                                                                                                                                       |            | SignalP (SIGNALP)                                                                                      |
| Homo sapiens            | mhc class ii antigen                                                            | 10 | C:GO:0005789;<br>C:GO:0005887;<br>C:GO:0042613;<br>C:GO:0005794;<br>P:GO:0002504;<br>C:GO:0031902;<br>P:GO:0007165;<br>C:GO:0005765;<br>F:GO:0032395;<br>P:GO:0006955 | -                                                                                                                                                                     |            | -                                                                                                      |
| Loa loa                 | gem-associated protein 6                                                        | 3  | P:GO:0008380;<br>C:GO:0044428;<br>P:GO:0006397                                                                                                                        | -                                                                                                                                                                     |            | IPR009422                                                                                              |
| Caenorhabditis elegans  | endonuclease exonuclease phosphatase family protein                             | 1  | F:GO:0004437                                                                                                                                                          | -                                                                                                                                                                     |            | -                                                                                                      |
| Caenorhabditis briggsae | mboat family protein                                                            | 2  | C:GO:0016020;<br>F:GO:0016747                                                                                                                                         | -                                                                                                                                                                     | EC:2.3.1.0 | IPR004299; PTHR13906 (PANTHER), PTHR13906:SF5 (PANTHER), SignalP (SIGNALP)                             |
|                         | -                                                                               | 0  |                                                                                                                                                                       |                                                                                                                                                                       |            | SignalP (SIGNALP)                                                                                      |
| Caenorhabditis elegans  | zinc-binding dehydroge-se family protein                                        | 1  | P:GO:0008340                                                                                                                                                          | -                                                                                                                                                                     |            | IPR002085; IPR011032; IPR013154; G3DSA:3.90.180.10 (GENE3D), PTHR11695:SF15 (PANTHER)                  |

|                         |                                                                                                              |    |                                                                                                                                                                                                                                           |                               |                             |                                                                                                                         |
|-------------------------|--------------------------------------------------------------------------------------------------------------|----|-------------------------------------------------------------------------------------------------------------------------------------------------------------------------------------------------------------------------------------------|-------------------------------|-----------------------------|-------------------------------------------------------------------------------------------------------------------------|
| Caenorhabditis elegans  | atpase                                                                                                       | 7  | F:GO:0004222;<br>P:GO:0030163;<br>F:GO:0005524;<br>C:GO:0016021;<br>F:GO:0017111;<br>P:GO:0006508;<br>F:GO:0008270                                                                                                                        | -                             | EC:3.4.24.0;<br>EC:3.6.1.15 | G3DSA:3.40.50.300 (GENE3D),<br>PTHR23076 (PANTHER),<br>PTHR23076:SF11 (PANTHER)                                         |
| Caenorhabditis elegans  | hypothetical protein Y51F10.10 [Caenorhabditis elegans]                                                      | 0  |                                                                                                                                                                                                                                           |                               |                             | -                                                                                                                       |
| Caenorhabditis briggsae | serine threonine-protein ki-se prp4 homolog                                                                  | 14 | P:GO:0040010;<br>F:GO:0004674;<br>P:GO:0008360;<br>C:GO:0071011;<br>P:GO:0040035;<br>F:GO:0005524;<br>P:GO:0007155;<br>P:GO:0002119;<br>P:GO:0040011;<br>P:GO:0000398;<br>C:GO:0071013;<br>P:GO:0002009;<br>P:GO:0009792;<br>P:GO:0006468 | -                             | EC:2.7.11.0                 | IPR000719; IPR011009; IPR017442;<br>G3DSA:1.10.510.10 (GENE3D),<br>PTHR11295 (PANTHER),<br>PTHR11295:SF17 (PANTHER)     |
|                         | -                                                                                                            | 0  |                                                                                                                                                                                                                                           |                               |                             | -                                                                                                                       |
|                         | -                                                                                                            | 0  |                                                                                                                                                                                                                                           |                               |                             | -                                                                                                                       |
|                         | -                                                                                                            | 0  |                                                                                                                                                                                                                                           |                               |                             | -                                                                                                                       |
| Caenorhabditis elegans  | elegans protein partially confirmed by transcript evidence                                                   | 0  |                                                                                                                                                                                                                                           | C:GO:0016021;<br>C:GO:0016020 |                             | IPR021999; PTHR13167 (PANTHER),<br>PTHR13167:SF6 (PANTHER)                                                              |
| Brugia malayi           | nuclear receptor subfamily group member 2                                                                    | 1  | F:GO:0070016                                                                                                                                                                                                                              | -                             |                             | PTHR11865 (PANTHER),<br>PTHR11865:SF205 (PANTHER)                                                                       |
|                         | -                                                                                                            | 0  |                                                                                                                                                                                                                                           |                               |                             | -                                                                                                                       |
| Caenorhabditis briggsae | acetoacetyl- synthetase                                                                                      | 1  | F:GO:0003824                                                                                                                                                                                                                              | -                             |                             | PTHR11968 (PANTHER),<br>PTHR11968:SF40 (PANTHER)                                                                        |
|                         | -                                                                                                            | 0  |                                                                                                                                                                                                                                           |                               |                             | -                                                                                                                       |
| Caenorhabditis elegans  | 6-phosphofructo-2-ki-se fructose- -biphosphatase 2 (6pf-2-k fru- -p2ase heart-type isozyme) (pfk-2 fbpase-2) | 3  | F:GO:0003873;<br>P:GO:0006003;<br>F:GO:0005524                                                                                                                                                                                            | -                             | EC:2.7.1.105                | IPR001345; IPR003094; IPR013078;<br>G3DSA:3.40.50.1240 (GENE3D),<br>PTHR10606:SF11 (PANTHER),<br>SSF53254 (SUPERFAMILY) |
|                         | -                                                                                                            | 0  |                                                                                                                                                                                                                                           |                               |                             | -                                                                                                                       |
| Brugia malayi           | hypothetical protein Bm1_07015 [Brugia malayi]                                                               | 0  |                                                                                                                                                                                                                                           |                               |                             | -                                                                                                                       |
|                         | -                                                                                                            | 0  |                                                                                                                                                                                                                                           |                               |                             | -                                                                                                                       |
| Caenorhabditis elegans  | brca1 interacting protein c-termi-l helicase 1                                                               | 11 | P:GO:0006412;<br>C:GO:0005762;<br>P:GO:0006357;<br>F:GO:0004003;<br>P:GO:0006302;<br>F:GO:0003735;<br>F:GO:0003677;<br>F:GO:0005524;<br>F:GO:0005515;<br>P:GO:0000077;<br>C:GO:0005634                                                    | -                             | EC:3.6.5.3                  | PTHR11472 (PANTHER),<br>PTHR11472:SF6 (PANTHER)                                                                         |
| Caenorhabditis elegans  | briggsae cbr-rpy-1 protein                                                                                   | 7  | C:GO:0005856;<br>C:GO:0045211;<br>P:GO:0007268;<br>C:GO:0030054;<br>F:GO:0033130;<br>P:GO:0019915;<br>F:GO:0008270                                                                                                                        | -                             |                             | PTHR10098 (PANTHER),<br>PTHR10098:SF7 (PANTHER)                                                                         |

|                            |                                                                       |   |                                                                                                                                                      |   |                                                         |                                                                                                             |
|----------------------------|-----------------------------------------------------------------------|---|------------------------------------------------------------------------------------------------------------------------------------------------------|---|---------------------------------------------------------|-------------------------------------------------------------------------------------------------------------|
| Caenorhabditis briggsae    | pol ii c-termi-l interaction domain suppressor family member (cids-2) | 1 | F:GO:0005515                                                                                                                                         | - |                                                         | IPR006569                                                                                                   |
|                            |                                                                       | 0 |                                                                                                                                                      |   |                                                         |                                                                                                             |
| Caenorhabditis elegans     | elegans protein partially confirmed by transcript evidence            | 6 | F:GO:0042802;<br>F:GO:0016286;<br>C:GO:0005886;<br>N:GO:0071805;<br>C:GO:0016021;<br>F:GO:0005516                                                    | - |                                                         | -                                                                                                           |
|                            |                                                                       | 0 |                                                                                                                                                      |   |                                                         |                                                                                                             |
| Caenorhabditis elegans     | xanthine dehydroge-se                                                 | 9 | F:GO:0004855;<br>F:GO:0009055;<br>F:GO:0005506;<br>F:GO:0030151;<br>F:GO:0004854;<br>P:GO:0055114;<br>P:GO:0008340;<br>F:GO:0051537;<br>F:GO:0050660 | - | EC:1.17.3.2;<br>EC:1.17.1.4                             | IPR008274; PTHR11908 (PANTHER),<br>PTHR11908:SF9 (PANTHER)                                                  |
|                            |                                                                       | 0 |                                                                                                                                                      |   |                                                         |                                                                                                             |
|                            |                                                                       | 0 |                                                                                                                                                      |   |                                                         | SignalP (SIGNALP)                                                                                           |
|                            |                                                                       | 0 |                                                                                                                                                      |   |                                                         | -                                                                                                           |
| Loa loa                    | patched family protein                                                | 2 | F:GO:0008158;<br>C:GO:0016021                                                                                                                        | - |                                                         | -                                                                                                           |
| Brugia malayi              | lim domain containing protein                                         | 3 | F:GO:0046872;<br>F:GO:0016491;<br>P:GO:0008152                                                                                                       | - |                                                         | G3DSA:3.50.50.60 (GENE3D),<br>PTHR11915 (PANTHER),<br>PTHR11915:SF1 (PANTHER)                               |
| Bursaphelenchus xylophilus | 60s ribosomal protein l5                                              | 9 | P:GO:0040035;<br>P:GO:0009792;<br>P:GO:0010171;<br>P:GO:0002119;<br>C:GO:0005840;<br>F:GO:0008097;<br>F:GO:0003735;<br>P:GO:0040010;<br>P:GO:0006412 | - | EC:3.6.5.3                                              | IPR005484; IPR005485;<br>G3DSA:3.30.420.100 (GENE3D),<br>PTHR23410:SF1 (PANTHER), SSF53137<br>(SUPERFAMILY) |
| Caenorhabditis briggsae    | uncoordi-ated family member (unc-61)                                  | 9 | C:GO:0005875;<br>F:GO:0005525;<br>C:GO:0045172;<br>F:GO:0005515;<br>P:GO:0000910;<br>P:GO:0007049;<br>P:GO:0007349;<br>C:GO:0005940;<br>F:GO:0003924 | - | EC:3.6.5.1;<br>EC:3.6.5.2;<br>EC:3.6.5.3;<br>EC:3.6.5.4 | IPR000038; IPR016491;<br>G3DSA:3.40.50.300 (GENE3D),<br>PTHR18884:SF28 (PANTHER),<br>SSF52540 (SUPERFAMILY) |
| Caenorhabditis briggsae    | uncoordi-ated family member (unc-61)                                  | 9 | C:GO:0005875;<br>F:GO:0005525;<br>C:GO:0045172;<br>F:GO:0005515;<br>P:GO:0000910;<br>P:GO:0007049;<br>P:GO:0007349;<br>C:GO:0005940;<br>F:GO:0003924 | - | EC:3.6.5.1;<br>EC:3.6.5.2;<br>EC:3.6.5.3;<br>EC:3.6.5.4 | IPR000038; IPR016491;<br>G3DSA:3.40.50.300 (GENE3D),<br>PTHR18884:SF28 (PANTHER),<br>SSF52540 (SUPERFAMILY) |

|                         |                                                            |   |                                                                                                                                                      |                                                                                                   |                                                         |                                                                                                             |
|-------------------------|------------------------------------------------------------|---|------------------------------------------------------------------------------------------------------------------------------------------------------|---------------------------------------------------------------------------------------------------|---------------------------------------------------------|-------------------------------------------------------------------------------------------------------------|
| Caenorhabditis briggsae | uncoordi- ted family member (unc-61)                       | 9 | C:GO:0005875;<br>F:GO:0005525;<br>C:GO:0045172;<br>F:GO:0005515;<br>P:GO:0000910;<br>P:GO:0007049;<br>P:GO:0007349;<br>C:GO:0005940;<br>F:GO:0003924 | -                                                                                                 | EC:3.6.5.1;<br>EC:3.6.5.2;<br>EC:3.6.5.3;<br>EC:3.6.5.4 | IPR000038; IPR016491;<br>G3DSA:3.40.50.300 (GENE3D),<br>PTHR18884:SF28 (PANTHER),<br>SSF52540 (SUPERFAMILY) |
| Caenorhabditis briggsae | uncoordi- ted family member (unc-61)                       | 9 | C:GO:0005875;<br>F:GO:0005525;<br>C:GO:0045172;<br>F:GO:0005515;<br>P:GO:0000910;<br>P:GO:0007049;<br>P:GO:0007349;<br>C:GO:0005940;<br>F:GO:0003924 | -                                                                                                 | EC:3.6.5.1;<br>EC:3.6.5.2;<br>EC:3.6.5.3;<br>EC:3.6.5.4 | IPR000038; IPR016491;<br>G3DSA:3.40.50.300 (GENE3D),<br>PTHR18884:SF28 (PANTHER),<br>SSF52540 (SUPERFAMILY) |
| -                       | -                                                          | 0 |                                                                                                                                                      |                                                                                                   |                                                         | SignalP (SIGNALP)                                                                                           |
| Caenorhabditis elegans  | ketosteroid isomerase                                      | 0 |                                                                                                                                                      | F:GO:0016853                                                                                      |                                                         | G3DSA:3.10.450.50 (GENE3D),<br>SSF54427 (SUPERFAMILY)                                                       |
| -                       | -                                                          | 0 |                                                                                                                                                      |                                                                                                   |                                                         | -                                                                                                           |
| -                       | -                                                          | 0 |                                                                                                                                                      |                                                                                                   |                                                         | SignalP (SIGNALP)                                                                                           |
| Caenorhabditis elegans  | dedicator of cytokinesis 7                                 | 0 |                                                                                                                                                      | F:GO:0005525;<br>F:GO:0008168;<br>F:GO:0051020;<br>F:GO:0005488;<br>P:GO:0032259;<br>F:GO:0005085 |                                                         | PTHR23317 (PANTHER),<br>PTHR23317:SF27 (PANTHER)                                                            |
| Caenorhabditis briggsae | elegans protein partially confirmed by transcript evidence | 3 | P:GO:0040010;<br>F:GO:0000166;<br>P:GO:0006898                                                                                                       | -                                                                                                 |                                                         | -                                                                                                           |
| Macaca mulatta          | galactoside- 3 binding protein                             | 9 | F:GO:0005044;<br>C:GO:0005615;<br>F:GO:0005515;<br>P:GO:0007155;<br>P:GO:0007165;<br>C:GO:0016020;<br>C:GO:0005634;<br>C:GO:0005578;<br>P:GO:0006968 | -                                                                                                 |                                                         | -                                                                                                           |
| Caenorhabditis briggsae | elegans protein partially confirmed by transcript evidence | 0 |                                                                                                                                                      | F:GO:0005089;<br>P:GO:0035023;<br>C:GO:0005622;<br>F:GO:0005085                                   |                                                         | -                                                                                                           |
| Caenorhabditis briggsae | prefoldin subunit 2                                        | 9 | P:GO:0009792;<br>P:GO:0010171;<br>P:GO:0002119;<br>P:GO:0006457;<br>P:GO:0035046;<br>P:GO:0040011;<br>F:GO:0051082;<br>P:GO:0040007;<br>C:GO:0016272 | -                                                                                                 |                                                         | SignalP (SIGNALP)                                                                                           |

|                         |                                                            |    |                                                                                                                                                                                        |   |             |                                                                                                                         |
|-------------------------|------------------------------------------------------------|----|----------------------------------------------------------------------------------------------------------------------------------------------------------------------------------------|---|-------------|-------------------------------------------------------------------------------------------------------------------------|
| Loa loa                 | protein tyrosine receptor u                                | 11 | P:GO:0060070;<br>C:GO:0005911;<br>P:GO:0030336;<br>F:GO:0004725;<br>P:GO:0034109;<br>P:GO:0034394;<br>P:GO:0001757;<br>P:GO:0008285;<br>P:GO:0006470;<br>P:GO:0016481;<br>F:GO:0008013 | - | EC:3.1.3.48 | IPR000242; G3DSA:3.90.190.10 (GENE3D), PTHR19134 (PANTHER), SSF52799 (SUPERFAMILY)                                      |
| Brugia malayi           | replication factor c subunit 3                             | 6  | P:GO:0006260;<br>C:GO:0005875;<br>F:GO:0003689;<br>C:GO:0005663;<br>F:GO:0005515;<br>F:GO:0005524                                                                                      | - |             | IPR003593; IPR003959; G3DSA:1.10.8.60 (GENE3D), G3DSA:3.40.50.300 (GENE3D), PTHR11669 (PANTHER), SSF52540 (SUPERFAMILY) |
| Caenorhabditis elegans  | hypothetical protein T12B3.3 [Caenorhabditis elegans]      | 3  | P:GO:0006071;<br>F:GO:0008889;<br>P:GO:0006629                                                                                                                                         | - | EC:3.1.4.46 | -                                                                                                                       |
|                         |                                                            | 0  |                                                                                                                                                                                        |   |             |                                                                                                                         |
|                         |                                                            | 0  |                                                                                                                                                                                        |   |             |                                                                                                                         |
| Caenorhabditis briggsae | briggsae cbr-ttr-37 protein                                | 0  |                                                                                                                                                                                        |   |             | IPR001534; SignalP (SIGNALP)                                                                                            |
|                         |                                                            | 0  |                                                                                                                                                                                        |   |             |                                                                                                                         |
|                         |                                                            | 0  |                                                                                                                                                                                        |   |             |                                                                                                                         |
| Caenorhabditis briggsae | briggsae cbr-bch-1 protein                                 | 5  | F:GO:0003676;<br>F:GO:0004003;<br>F:GO:0005524;<br>P:GO:0010569;<br>C:GO:0005634                                                                                                       | - |             | IPR006555; PTHR11472 (PANTHER), PTHR11472:SF4 (PANTHER)                                                                 |
| Caenorhabditis elegans  | protein unc-80 homolog isoform 2                           | 3  | C:GO:0034703;<br>F:GO:0005261;<br>P:GO:0055080                                                                                                                                         | - |             | SignalP (SIGNALP)                                                                                                       |
| Caenorhabditis elegans  | elegans protein partially confirmed by transcript evidence | 3  | P:GO:0009792;<br>C:GO:0005886;<br>F:GO:0005216                                                                                                                                         | - |             | PTHR14499 (PANTHER), PTHR14499:SF6 (PANTHER)                                                                            |
| Caenorhabditis briggsae | briggsae cbr-tag-198 protein                               | 2  | P:GO:0006259;<br>F:GO:0004531                                                                                                                                                          | - | EC:3.1.22.1 | -                                                                                                                       |
|                         |                                                            | 0  |                                                                                                                                                                                        |   |             |                                                                                                                         |
| Caenorhabditis briggsae | ribosomal protein                                          | 7  | P:GO:0009792;<br>P:GO:0002119;<br>F:GO:0003735;<br>P:GO:0040010;<br>P:GO:0040019;<br>C:GO:0015934;<br>P:GO:0006412                                                                     | - | EC:3.6.5.3  | IPR005749; PTHR12934:SF1 (PANTHER)                                                                                      |
| Xenopus laevis          | u3 small nucleolar homolog a                               | 0  |                                                                                                                                                                                        |   |             | IPR006709; PTHR14150:SF12 (PANTHER)                                                                                     |



|                            |                                                            |    |                                                                                                                                                                                                                          |                                                                                  |                                                                                                                                                               |
|----------------------------|------------------------------------------------------------|----|--------------------------------------------------------------------------------------------------------------------------------------------------------------------------------------------------------------------------|----------------------------------------------------------------------------------|---------------------------------------------------------------------------------------------------------------------------------------------------------------|
| Caenorhabditis briggsae    | - ca exchangers family member (ncx-1)                      | 13 | P:GO:0055085;<br>F:GO:0005432;<br>P:GO:0008016;<br>P:GO:0045214;<br>C:GO:0016021;<br>P:GO:0001947;<br>P:GO:0000003;<br>P:GO:0006816;<br>P:GO:0007368;<br>P:GO:0007154;<br>P:GO:0009792;<br>P:GO:0051480;<br>P:GO:0042044 | -                                                                                | IPR003644; PTHR11878 (PANTHER),<br>PTHR11878:SF4 (PANTHER),<br>SSF141072 (SUPERFAMILY)                                                                        |
| Caenorhabditis elegans     | hypothetical protein Y22D7AL.6 [Caenorhabditis elegans]    | 0  |                                                                                                                                                                                                                          |                                                                                  | SignalP (SIGNALP)                                                                                                                                             |
| Caenorhabditis briggsae    | 4-nitrophenylphosphatase                                   | 1  | F:GO:0016787                                                                                                                                                                                                             | -                                                                                | G3DSA:3.40.50.1000 (GENE3D),<br>PTHR19288 (PANTHER),<br>PTHR19288:SF11 (PANTHER),<br>SSF56784 (SUPERFAMILY)                                                   |
| Pediculus humanus corporis | palmitoyltransferase zdhhc17                               | 8  | F:GO:0019706;<br>F:GO:0004871;<br>P:GO:0042953;<br>F:GO:0015095;<br>C:GO:0030660;<br>P:GO:0043123;<br>P:GO:0018345;<br>F:GO:0005515                                                                                      | -                                                                                | IPR001594; PTHR22883 (PANTHER),<br>SignalP (SIGNALP)                                                                                                          |
| Caenorhabditis briggsae    | elegans protein partially confirmed by transcript evidence | 0  |                                                                                                                                                                                                                          | F:GO:0005524;<br>C:GO:0005856;<br>F:GO:0000166;<br>C:GO:0016459;<br>F:GO:0003774 | IPR000857; PTHR22692 (PANTHER),<br>PTHR22692:SF2 (PANTHER), SignalP<br>(SIGNALP)                                                                              |
| -                          | -                                                          | 0  |                                                                                                                                                                                                                          |                                                                                  | -                                                                                                                                                             |
| -                          | -                                                          | 0  |                                                                                                                                                                                                                          |                                                                                  | SignalP (SIGNALP)                                                                                                                                             |
| -                          | -                                                          | 0  |                                                                                                                                                                                                                          |                                                                                  | -                                                                                                                                                             |
| -                          | -                                                          | 0  |                                                                                                                                                                                                                          |                                                                                  | -                                                                                                                                                             |
| Caenorhabditis briggsae    | polybromodomain protein                                    | 11 | P:GO:0040010;<br>P:GO:0006996;<br>F:GO:0005488;<br>P:GO:0040035;<br>P:GO:0010171;<br>P:GO:0002119;<br>C:GO:0044446;<br>P:GO:0040011;<br>C:GO:0005694;<br>P:GO:0002009;<br>P:GO:0009792                                   | -                                                                                | IPR000910; IPR001025; IPR001487;<br>IPR007087; IPR009071; IPR015880;<br>IPR018359; PTHR16062 (PANTHER),<br>PTHR16062:SF2 (PANTHER), SSF57667<br>(SUPERFAMILY) |
| -                          | -                                                          | 0  |                                                                                                                                                                                                                          |                                                                                  | SignalP (SIGNALP)                                                                                                                                             |
| Caenorhabditis elegans     | chloride channel protein 2                                 | 1  | C:GO:0005886                                                                                                                                                                                                             | -                                                                                | IPR000644; IPR001807;<br>PTHR11689:SF5 (PANTHER), SSF54631<br>(SUPERFAMILY)                                                                                   |
| -                          | -                                                          | 0  |                                                                                                                                                                                                                          |                                                                                  | IPR018111                                                                                                                                                     |
| Caenorhabditis briggsae    | r--binding protein pno1                                    | 4  | C:GO:0005730;<br>P:GO:0040035;<br>P:GO:0009792;<br>F:GO:0003723                                                                                                                                                          | -                                                                                | PTHR12826 (PANTHER),<br>PTHR12826:SF4 (PANTHER)                                                                                                               |
| Brugia malayi              | bromodomain containing protein                             | 1  | F:GO:0005488                                                                                                                                                                                                             |                                                                                  | -                                                                                                                                                             |
| -                          | -                                                          | 0  |                                                                                                                                                                                                                          |                                                                                  | -                                                                                                                                                             |
| -                          | -                                                          | 0  |                                                                                                                                                                                                                          |                                                                                  | SignalP (SIGNALP)                                                                                                                                             |

|                             |                                                                          |   |                                                                                                                    |                                                                 |  |                                                                                                                |
|-----------------------------|--------------------------------------------------------------------------|---|--------------------------------------------------------------------------------------------------------------------|-----------------------------------------------------------------|--|----------------------------------------------------------------------------------------------------------------|
| Caenorhabditis elegans      | briggsae cbr-smgl-1 protein                                              | 0 |                                                                                                                    |                                                                 |  | -                                                                                                              |
|                             | -                                                                        | 0 |                                                                                                                    |                                                                 |  | IPR007087; IPR015880                                                                                           |
| Caenorhabditis elegans      | briggsae cbr-snt-5 protein                                               | 0 |                                                                                                                    | C:GO:0008021;<br>C:GO:0016021;<br>C:GO:0016020;<br>P:GO:0006810 |  | SignalP (SIGNALP)                                                                                              |
| Oscheius sp. (strain CEW1)  | vitellogenin structural genes (yolk protein genes) family member (vit-6) | 7 | P:GO:0009792;<br>F:GO:0005515;<br>F:GO:0022892;<br>P:GO:0006810;<br>P:GO:0040010;<br>P:GO:0033036;<br>P:GO:0008340 | -                                                               |  | -                                                                                                              |
| Oscheius sp. (strain CEW1)  | vitellogenin structural genes (yolk protein genes) family member (vit-6) | 6 | P:GO:0009792;<br>F:GO:0005319;<br>F:GO:0005515;<br>P:GO:0040010;<br>P:GO:0006869;<br>P:GO:0008340                  | -                                                               |  | -                                                                                                              |
| Caenorhabditis elegans      | vitellogenin structural genes (yolk protein genes) family member (vit-6) | 6 | P:GO:0009792;<br>F:GO:0005319;<br>F:GO:0005515;<br>P:GO:0040010;<br>P:GO:0006869;<br>P:GO:0008340                  | -                                                               |  | -                                                                                                              |
| Oscheius sp. (strain CEW1)  | vitellogenin structural genes (yolk protein genes) family member (vit-6) | 6 | P:GO:0009792;<br>F:GO:0005319;<br>F:GO:0005515;<br>P:GO:0040010;<br>P:GO:0006869;<br>P:GO:0008340                  | -                                                               |  | -                                                                                                              |
| Oscheius sp. (strain CEW1)  | vitellogenin structural genes (yolk protein genes) family member (vit-6) | 6 | P:GO:0009792;<br>F:GO:0005319;<br>F:GO:0005515;<br>P:GO:0040010;<br>P:GO:0006869;<br>P:GO:0008340                  | -                                                               |  | -                                                                                                              |
| Caenorhabditis elegans      | zinc finger                                                              | 6 | F:GO:0008270;<br>F:GO:0003676;<br>C:GO:0005622;<br>P:GO:0046672;<br>P:GO:0006099;<br>P:GO:0030536                  | -                                                               |  | IPR007087; IPR013087; IPR015880;<br>PTHR10042 (PANTHER),<br>PTHR10042:SF3 (PANTHER), SSF57667<br>(SUPERFAMILY) |
| Homo sapiens                | AF258561_1PP3686 [Homo sapiens]                                          | 4 | C:GO:0016021;<br>F:GO:0004872;<br>P:GO:0030154;<br>P:GO:0007399                                                    | -                                                               |  | -                                                                                                              |
| Caenorhabditis briggsae     | kinesin family member 3a                                                 | 5 | P:GO:0007018;<br>F:GO:0005524;<br>C:GO:0030529;<br>F:GO:0003777;<br>C:GO:0005874                                   | -                                                               |  | IPR001752; PTHR16012 (PANTHER),<br>PTHR16012:SF160 (PANTHER),<br>SSF52540 (SUPERFAMILY)                        |
|                             | -                                                                        | 0 |                                                                                                                    |                                                                 |  | -                                                                                                              |
| Angiostrongylus cantonensis | elegans protein confirmed by transcript evidence                         | 0 |                                                                                                                    | C:GO:0005737;<br>P:GO:0007275                                   |  | IPR007917; IPR022776                                                                                           |
|                             | -                                                                        | 0 |                                                                                                                    |                                                                 |  | -                                                                                                              |
|                             | -                                                                        | 0 |                                                                                                                    |                                                                 |  | -                                                                                                              |

|                         |                                                  |    |                                                                                                                                                                                                                                                                                                                                                 |                               |                            |                                                                                                                         |
|-------------------------|--------------------------------------------------|----|-------------------------------------------------------------------------------------------------------------------------------------------------------------------------------------------------------------------------------------------------------------------------------------------------------------------------------------------------|-------------------------------|----------------------------|-------------------------------------------------------------------------------------------------------------------------|
|                         | -                                                | 0  |                                                                                                                                                                                                                                                                                                                                                 |                               |                            | -                                                                                                                       |
| Caenorhabditis briggsae | peroxisome biogenesis factor 13                  | 7  | P:GO:0016477;<br>C:GO:0016021;<br>C:GO:0005778;<br>P:GO:0007399;<br>P:GO:0007610;<br>P:GO:0051641;<br>P:GO:0015031                                                                                                                                                                                                                              | -                             |                            | IPR001452; G3DSA:2.30.30.40 (GENE3D), PTHR19332 (PANTHER), SignalP (SIGNALP)                                            |
|                         | -                                                | 0  |                                                                                                                                                                                                                                                                                                                                                 |                               |                            | -                                                                                                                       |
|                         | -                                                | 0  |                                                                                                                                                                                                                                                                                                                                                 |                               |                            | -                                                                                                                       |
| Solanum demissum        | endonuclease-reverse transcriptase               | 2  | F:GO:0003677;<br>F:GO:0008168                                                                                                                                                                                                                                                                                                                   | -                             | EC:2.1.1.0                 | -                                                                                                                       |
| Medicago truncatula     | endonuclease-reverse transcriptase               | 3  | F:GO:0003677;<br>F:GO:0008168;<br>F:GO:0000166                                                                                                                                                                                                                                                                                                  | -                             | EC:2.1.1.0                 | -                                                                                                                       |
| Caenorhabditis elegans  | trehalase family member (tre-4)                  | 0  |                                                                                                                                                                                                                                                                                                                                                 | P:GO:0005991;<br>C:GO:0016021 |                            | IPR001661; PTHR23403:SF1 (PANTHER)<br>SignalP (SIGNALP)                                                                 |
|                         | -                                                | 0  |                                                                                                                                                                                                                                                                                                                                                 |                               |                            | -                                                                                                                       |
|                         | -                                                | 0  |                                                                                                                                                                                                                                                                                                                                                 |                               |                            | -                                                                                                                       |
|                         | -                                                | 0  |                                                                                                                                                                                                                                                                                                                                                 |                               |                            | -                                                                                                                       |
| Caenorhabditis briggsae | cytochrome b5 reductase 4                        | 10 | F:GO:0016174;<br>F:GO:0004128;<br>P:GO:0006739;<br>P:GO:0006801;<br>P:GO:0055114;<br>P:GO:0006091;<br>F:GO:0020037;<br>C:GO:0048471;<br>F:GO:0050660;<br>C:GO:0005783                                                                                                                                                                           | -                             | EC:1.6.3.1;<br>EC:1.6.2.2  | SignalP (SIGNALP)                                                                                                       |
|                         | -                                                | 0  |                                                                                                                                                                                                                                                                                                                                                 |                               |                            | -                                                                                                                       |
| Caenorhabditis briggsae | elegans protein confirmed by transcript evidence | 0  |                                                                                                                                                                                                                                                                                                                                                 |                               |                            | -                                                                                                                       |
| Macaca mulatta          | --+ k+ alpha 1 polypeptide                       | 20 | F:GO:0005515;<br>P:GO:0045989;<br>P:GO:0045822;<br>F:GO:0003869;<br>C:GO:0005792;<br>C:GO:0016323;<br>C:GO:0042470;<br>F:GO:0046872;<br>P:GO:0006754;<br>C:GO:0042383;<br>F:GO:0005391;<br>P:GO:0045823;<br>P:GO:0042493;<br>P:GO:0031947;<br>C:GO:0005890;<br>P:GO:0006813;<br>P:GO:0002026;<br>F:GO:0005524;<br>P:GO:0008217;<br>P:GO:0006814 | -                             | EC:3.1.3.41;<br>EC:3.6.3.9 | IPR001757; IPR006068; IPR006069;<br>G3DSA:1.20.1110.10 (GENE3D),<br>PTHR11939:SF23 (PANTHER),<br>SSF81665 (SUPERFAMILY) |
|                         | -                                                | 0  |                                                                                                                                                                                                                                                                                                                                                 |                               |                            | -                                                                                                                       |
|                         | -                                                | 0  |                                                                                                                                                                                                                                                                                                                                                 |                               |                            | IPR003582; SignalP (SIGNALP)                                                                                            |

|             |                                          |    |                                                                                                                                                                                                                                                                                                                                                                                                                                                                         |   |             |                                                                                                   |
|-------------|------------------------------------------|----|-------------------------------------------------------------------------------------------------------------------------------------------------------------------------------------------------------------------------------------------------------------------------------------------------------------------------------------------------------------------------------------------------------------------------------------------------------------------------|---|-------------|---------------------------------------------------------------------------------------------------|
| Loa loa     | ets domain-containing protein elk-3-like |    | F:GO:0003700;<br>F:GO:0043565;<br>5 F:GO:0005515;<br>C:GO:0005634;<br>P:GO:0006355                                                                                                                                                                                                                                                                                                                                                                                      | - |             | IPR000418; IPR011991; PTHR11849<br>(PANTHER), PTHR11849:SF12<br>(PANTHER), SSF46785 (SUPERFAMILY) |
| Loa loa     | ets-domain containing protein            |    | F:GO:0003700;<br>F:GO:0043565;<br>5 F:GO:0005515;<br>C:GO:0005634;<br>P:GO:0006355                                                                                                                                                                                                                                                                                                                                                                                      | - |             | IPR000418; IPR011991; PTHR11849<br>(PANTHER), PTHR11849:SF12<br>(PANTHER), SSF46785 (SUPERFAMILY) |
| Danio rerio | atp-binding sub-family member 1          | 40 | P:GO:0046685;<br>P:GO:0032496;<br>F:GO:0005324;<br>F:GO:0000166;<br>P:GO:0010243;<br>P:GO:0070327;<br>C:GO:0005624;<br>F:GO:0015432;<br>F:GO:0046624;<br>C:GO:0016323;<br>F:GO:0015562;<br>P:GO:0015911;<br>P:GO:0043526;<br>P:GO:0006855;<br>C:GO:0005737;<br>P:GO:0034775;<br>F:GO:0019904;<br>P:GO:0015711;<br>P:GO:0060326;<br>F:GO:0034634;<br>P:GO:0030644;<br>F:GO:0008559;<br>F:GO:0015431;<br>P:GO:0015722;<br>P:GO:0009408;<br>P:GO:0031427;<br>P:GO:0033700; | - | EC:3.6.3.44 | -                                                                                                 |
|             | -                                        | 0  |                                                                                                                                                                                                                                                                                                                                                                                                                                                                         |   |             | -                                                                                                 |
|             | -                                        | 0  |                                                                                                                                                                                                                                                                                                                                                                                                                                                                         |   |             | -                                                                                                 |

|                         |                                                  |   |                                                                                                                                                                                                                                                                                                                                                                                                                     |   |                                                                                                       |
|-------------------------|--------------------------------------------------|---|---------------------------------------------------------------------------------------------------------------------------------------------------------------------------------------------------------------------------------------------------------------------------------------------------------------------------------------------------------------------------------------------------------------------|---|-------------------------------------------------------------------------------------------------------|
| Brugia malayi           | timeless homolog                                 | 0 | P:GO:0042127;<br>P:GO:0051301;<br>C:GO:0000790;<br>P:GO:0007067;<br>P:GO:0007623;<br>P:GO:0001658;<br>C:GO:0005634;<br>F:GO:0046982;<br>P:GO:0010553;<br>P:GO:0002009;<br>P:GO:0030324;<br>F:GO:0042803;<br>P:GO:0048754;<br>P:GO:0009628;<br>P:GO:0006974;<br>P:GO:0007049;<br>P:GO:0001822;<br>P:GO:0042753;<br>P:GO:0009790;<br>P:GO:0007275;<br>P:GO:0033261;<br>P:GO:0016481;<br>F:GO:0005515;<br>P:GO:0009582 |   | IPR006906; PTHR22940 (PANTHER),<br>PTHR22940:SF7 (PANTHER)                                            |
|                         | -                                                | 0 |                                                                                                                                                                                                                                                                                                                                                                                                                     |   | SignalP (SIGNALP)                                                                                     |
| Caenorhabditis briggsae | tetratricopeptide repeat domain 4                | 8 | P:GO:0040035;<br>P:GO:0009792;<br>P:GO:0002119;<br>F:GO:0005488;<br>P:GO:0040018;<br>P:GO:0040010;<br>P:GO:0040011;<br>P:GO:0006898                                                                                                                                                                                                                                                                                 | - | IPR011990; IPR019734; PTHR22904<br>(PANTHER), PTHR22904:SF16<br>(PANTHER), SSF48452 (SUPERFAMILY)     |
|                         | -                                                | 0 |                                                                                                                                                                                                                                                                                                                                                                                                                     |   | PTHR14043 (PANTHER),<br>PTHR14043:SF3 (PANTHER)                                                       |
|                         | -                                                | 0 |                                                                                                                                                                                                                                                                                                                                                                                                                     |   | -                                                                                                     |
| Caenorhabditis elegans  | dicarbonyl l-xylulose reductase                  | 7 | P:GO:0006739;<br>C:GO:0005903;<br>C:GO:0005902;<br>F:GO:0005515;<br>P:GO:0005997;<br>F:GO:0016616;<br>C:GO:0016020                                                                                                                                                                                                                                                                                                  | - | EC:1.1.1.0<br>IPR002198; IPR002347; IPR016040;<br>PTHR19410:SF59 (PANTHER),<br>SSF51735 (SUPERFAMILY) |
| Caenorhabditis elegans  | protein ki-se domain containing protein          | 1 | P:GO:0007283                                                                                                                                                                                                                                                                                                                                                                                                        | - | PTHR11909 (PANTHER),<br>PTHR11909:SF19 (PANTHER)                                                      |
| Caenorhabditis briggsae | elegans protein confirmed by transcript evidence | 0 |                                                                                                                                                                                                                                                                                                                                                                                                                     |   | -                                                                                                     |
| Caenorhabditis briggsae | elegans protein confirmed by transcript evidence | 0 |                                                                                                                                                                                                                                                                                                                                                                                                                     |   | IPR013640                                                                                             |
|                         | -                                                | 0 |                                                                                                                                                                                                                                                                                                                                                                                                                     |   | PTHR11375 (PANTHER)                                                                                   |
|                         |                                                  | 0 |                                                                                                                                                                                                                                                                                                                                                                                                                     |   |                                                                                                       |

|                           |                                                  |    |                                                                                                                                                                                                                                                                                                                                                                  |   |                             |                                                                                                          |
|---------------------------|--------------------------------------------------|----|------------------------------------------------------------------------------------------------------------------------------------------------------------------------------------------------------------------------------------------------------------------------------------------------------------------------------------------------------------------|---|-----------------------------|----------------------------------------------------------------------------------------------------------|
| Macaca mulatta            | glucose phosphate isomerase                      | 21 | P:GO:0001525;<br>P:GO:0006094;<br>P:GO:0043154;<br>P:GO:0007599;<br>F:GO:0004347;<br>F:GO:0008083;<br>F:GO:0005125;<br>P:GO:0006959;<br>C:GO:0019717;<br>P:GO:0051156;<br>C:GO:0005615;<br>C:GO:0016021;<br>F:GO:0017176;<br>P:GO:0046185;<br>C:GO:0005829;<br>P:GO:0043524;<br>P:GO:0006506;<br>P:GO:0006096;<br>P:GO:0019242;<br>F:GO:0048029;<br>F:GO:0016866 | - | EC:5.3.1.9;<br>EC:2.4.1.198 | IPR001672; G3DSA:3.40.50.10490<br>(GENE3D), PS51463 (PROFILE),<br>SSF53697 (SUPERFAMILY)                 |
| -                         | -                                                | 0  | -                                                                                                                                                                                                                                                                                                                                                                | - | -                           | -                                                                                                        |
| Caenorhabditis elegans    | major facilitator superfamily protein            | 2  | P:GO:0055085;<br>C:GO:0016021                                                                                                                                                                                                                                                                                                                                    | - | -                           | PTHR11662 (PANTHER),<br>PTHR11662:SF24 (PANTHER), SignalP<br>(SIGNALP)                                   |
| -                         | -                                                | 0  | -                                                                                                                                                                                                                                                                                                                                                                | - | -                           | -                                                                                                        |
| Loa loa                   | hypothetical protein LOAG_01867 [Loa loa]        | 0  | -                                                                                                                                                                                                                                                                                                                                                                | - | -                           | -                                                                                                        |
| Caenorhabditis sp. PS1010 | briggsae cbr-hum-7 protein                       | 5  | F:GO:0046872;<br>C:GO:0016459;<br>F:GO:0005524;<br>P:GO:0007165;<br>F:GO:0003774                                                                                                                                                                                                                                                                                 | - | -                           | -                                                                                                        |
| -                         | -                                                | 0  | -                                                                                                                                                                                                                                                                                                                                                                | - | -                           | -                                                                                                        |
| -                         | -                                                | 0  | -                                                                                                                                                                                                                                                                                                                                                                | - | -                           | SignalP (SIGNALP)                                                                                        |
| Caenorhabditis briggsae   | elegans protein confirmed by transcript evidence | 1  | P:GO:0002119                                                                                                                                                                                                                                                                                                                                                     | - | -                           | -                                                                                                        |
| -                         | -                                                | 0  | -                                                                                                                                                                                                                                                                                                                                                                | - | -                           | -                                                                                                        |
| -                         | -                                                | 0  | -                                                                                                                                                                                                                                                                                                                                                                | - | -                           | -                                                                                                        |
| -                         | -                                                | 0  | -                                                                                                                                                                                                                                                                                                                                                                | - | -                           | -                                                                                                        |
| -                         | -                                                | 0  | -                                                                                                                                                                                                                                                                                                                                                                | - | -                           | SignalP (SIGNALP)                                                                                        |
| -                         | -                                                | 0  | -                                                                                                                                                                                                                                                                                                                                                                | - | -                           | -                                                                                                        |
| -                         | -                                                | 0  | -                                                                                                                                                                                                                                                                                                                                                                | - | -                           | -                                                                                                        |
| Homo sapiens              | microsomal glutathione s-transferase 3           | 8  | C:GO:0005789;<br>C:GO:0005792;<br>P:GO:0006629;<br>F:GO:0004364;<br>P:GO:0010243;<br>P:GO:0007165;<br>C:GO:0016021;<br>F:GO:0004602                                                                                                                                                                                                                              | - | EC:2.5.1.18;<br>EC:1.11.1.9 | IPR001129; IPR010916;<br>G3DSA:1.20.120.550 (GENE3D),<br>PTHR10250 (PANTHER),<br>PTHR10250:SF1 (PANTHER) |
| Drosophila simulans       | vacuolar protein sorting 45                      | 8  | F:GO:0000149;<br>C:GO:0008021;<br>P:GO:0006605;<br>P:GO:0016082;<br>P:GO:0006897;<br>P:GO:0034058;<br>P:GO:0006904;<br>P:GO:0007040                                                                                                                                                                                                                              | - | -                           | IPR001619; G3DSA:3.40.50.2060<br>(GENE3D), PTHR11679:SF3 (PANTHER)                                       |
| -                         | -                                                | 0  | -                                                                                                                                                                                                                                                                                                                                                                | - | -                           | -                                                                                                        |

|                         |                                                                           |   |                                                                                                   |                                                                 |                                                                                    |
|-------------------------|---------------------------------------------------------------------------|---|---------------------------------------------------------------------------------------------------|-----------------------------------------------------------------|------------------------------------------------------------------------------------|
|                         | -                                                                         | 0 |                                                                                                   |                                                                 | -                                                                                  |
| Caenorhabditis elegans  | discs large                                                               | 3 | P:GO:0009987;<br>F:GO:0005515;<br>C:GO:0044464                                                    | -                                                               | IPR001478; G3DSA:2.30.42.10 (GENE3D), PTHR23116 (PANTHER), PTHR23116:SF1 (PANTHER) |
|                         | -                                                                         | 0 |                                                                                                   |                                                                 | -                                                                                  |
| Caenorhabditis elegans  | hypothetical protein W03B1.9 [Caenorhabditis elegans]                     | 0 |                                                                                                   |                                                                 | -                                                                                  |
| Caenorhabditis brenneri | shc (src homology domain c-termi-) adaptor homolog family member (shc-2)  | 1 | F:GO:0005515                                                                                      | -                                                               | IPR000980; PTHR12583 (PANTHER), PTHR12583:SF5 (PANTHER), SSF55550 (SUPERFAMILY)    |
|                         | -                                                                         | 0 |                                                                                                   |                                                                 | -                                                                                  |
| Caenorhabditis elegans  | cytochrome p450 family protein partially confirmed by transcript evidence | 6 | F:GO:0020037;<br>C:GO:0016021;<br>P:GO:0055114;<br>F:GO:0004497;<br>F:GO:0009055;<br>P:GO:0040010 | -                                                               | -                                                                                  |
|                         | -                                                                         | 0 |                                                                                                   |                                                                 | -                                                                                  |
| Caenorhabditis elegans  | elegans protein confirmed by transcript evidence                          | 0 |                                                                                                   |                                                                 | -                                                                                  |
|                         | -                                                                         | 0 |                                                                                                   |                                                                 | SignalP (SIGNALP)                                                                  |
| Loa loa                 | briggsae cbr-snf-1 protein                                                | 3 | C:GO:0016021;<br>P:GO:0006810;<br>F:GO:0015293                                                    | -                                                               | IPR000175; PTHR11616:SF12 (PANTHER), SignalP (SIGNALP)                             |
|                         | -                                                                         | 0 |                                                                                                   |                                                                 | -                                                                                  |
|                         | -                                                                         | 0 |                                                                                                   |                                                                 | -                                                                                  |
|                         | -                                                                         | 0 |                                                                                                   |                                                                 | -                                                                                  |
| Caenorhabditis elegans  | hypothetical protein Y119C1B.5 [Caenorhabditis elegans]                   | 3 | F:GO:0008270;<br>F:GO:0005515;<br>C:GO:0016021                                                    | -                                                               | SignalP (SIGNALP)                                                                  |
| Caenorhabditis elegans  | achain cekdm7a from complex with h3k4me3 peptide and nog                  | 0 |                                                                                                   | F:GO:0046872;<br>F:GO:0008270;<br>F:GO:0005515;<br>C:GO:0005634 | -                                                                                  |
|                         | -                                                                         | 0 |                                                                                                   |                                                                 | -                                                                                  |
|                         | -                                                                         | 0 |                                                                                                   |                                                                 | -                                                                                  |
|                         | -                                                                         | 0 |                                                                                                   |                                                                 | -                                                                                  |
| Caenorhabditis elegans  | te-scin isoform h                                                         | 3 | P:GO:0000003;<br>P:GO:0040039;<br>P:GO:0007275                                                    | -                                                               | IPR013032; IPR013111; PTHR11201 (PANTHER), PTHR11201:SF148 (PANTHER)               |
|                         | -                                                                         | 0 |                                                                                                   |                                                                 | -                                                                                  |
| Homo sapiens            | protein tyrosine receptor c-associated protein                            | 3 | P:GO:0006952;<br>C:GO:0005886;<br>C:GO:0016021                                                    | -                                                               | -                                                                                  |
|                         | -                                                                         | 0 |                                                                                                   |                                                                 | SignalP (SIGNALP)                                                                  |
| Caenorhabditis elegans  | serologically defined colon cancer antigen 1                              | 0 |                                                                                                   | P:GO:0008150;<br>C:GO:0005575                                   | IPR008532; PTHR15239 (PANTHER)                                                     |
|                         | -                                                                         | 0 |                                                                                                   |                                                                 | -                                                                                  |
|                         | -                                                                         | 0 |                                                                                                   |                                                                 | -                                                                                  |
| Caenorhabditis elegans  | regulator of g protein sig-ling family member (rgs-5)                     | 0 |                                                                                                   | F:GO:0016301;<br>F:GO:0004871                                   | IPR000342; IPR016137; PTHR13155 (PANTHER)                                          |
| Branchiostoma floridae  | elegans protein confirmed by transcript evidence                          | 0 |                                                                                                   |                                                                 | PTHR12496 (PANTHER)                                                                |
|                         | -                                                                         | 0 |                                                                                                   |                                                                 | SignalP (SIGNALP)                                                                  |
|                         | -                                                                         | 0 |                                                                                                   |                                                                 | -                                                                                  |
| Homo sapiens            | low density lipoprotein receptor-related protein 3                        | 4 | C:GO:0016021;<br>F:GO:0004872;<br>P:GO:0006898;<br>C:GO:0005905                                   | -                                                               | -                                                                                  |
| Brugia malayi           | zinc c2h2 type family protein                                             | 2 | C:GO:0005622;<br>F:GO:0008270                                                                     | -                                                               | IPR015880                                                                          |

|                                           |                                                         |   |                                                                                                                    |                                                                                                   |  |                                                                                          |
|-------------------------------------------|---------------------------------------------------------|---|--------------------------------------------------------------------------------------------------------------------|---------------------------------------------------------------------------------------------------|--|------------------------------------------------------------------------------------------|
| Brugia malayi                             | zinc c2h2 type family protein                           | 2 | C:GO:0005622;<br>F:GO:0008270                                                                                      | -                                                                                                 |  | IPR015880                                                                                |
| Caenorhabditis briggsae                   | dhx33 protein                                           | 2 | F:GO:0004386;<br>F:GO:0000166                                                                                      | -                                                                                                 |  | IPR001650; G3DSA:3.40.50.300<br>(GENE3D), PTHR18934 (PANTHER),<br>SSF52540 (SUPERFAMILY) |
|                                           | -                                                       | 0 |                                                                                                                    |                                                                                                   |  | -                                                                                        |
| Caenorhabditis elegans                    | briggsae cbr-bub-1 protein                              | 3 | P:GO:0009987;<br>F:GO:0005488;<br>P:GO:0007275                                                                     | -                                                                                                 |  | -                                                                                        |
| Arabidopsis lyrata subsp. lyrata          | eukaryotic translation initiation factor                | 0 |                                                                                                                    | F:GO:0003676;<br>F:GO:0003743                                                                     |  | PTHR22891 (PANTHER)                                                                      |
| Caenorhabditis briggsae                   | elegans protein confirmed by transcript evidence        | 0 |                                                                                                                    |                                                                                                   |  | -                                                                                        |
|                                           | -                                                       | 0 |                                                                                                                    |                                                                                                   |  | -                                                                                        |
| Caenorhabditis briggsae                   | dedicator of cytokinesis protein 9                      | 0 |                                                                                                                    | F:GO:0005525;<br>F:GO:0051020;<br>F:GO:0005085                                                    |  | IPR021816                                                                                |
| Brugia malayi                             | ets-domain containing protein                           | 4 | F:GO:0003700;<br>F:GO:0043565;<br>C:GO:0005634;<br>P:GO:0006355                                                    | -                                                                                                 |  | -                                                                                        |
| Caenorhabditis briggsae                   | Hypothetical protein CBG17893 [Caenorhabditis briggsae] | 0 |                                                                                                                    | F:GO:0046872;<br>F:GO:0003676;<br>F:GO:0000166;<br>F:GO:0008270;<br>P:GO:0006396;<br>F:GO:0008173 |  | IPR000504; IPR012677; SSF54928<br>(SUPERFAMILY)                                          |
|                                           | -                                                       | 0 |                                                                                                                    |                                                                                                   |  | SignalP (SIGNALP)                                                                        |
| Caenorhabditis briggsae                   | ynpi_caeel_ame: full=uncharacterized protein            | 0 |                                                                                                                    |                                                                                                   |  | IPR006627                                                                                |
|                                           | -                                                       | 0 |                                                                                                                    |                                                                                                   |  | SignalP (SIGNALP)                                                                        |
| Ixodes scapularis                         | sentrin-specific protease 8 isoform a                   | 1 | F:GO:0008233                                                                                                       | -                                                                                                 |  | IPR003653; PTHR22875 (PANTHER),<br>PTHR22875:SF2 (PANTHER), SSF54001<br>(SUPERFAMILY)    |
| Loa loa                                   | domon domain containing protein                         | 3 | P:GO:0009056;<br>P:GO:0044238;<br>F:GO:0003824                                                                     | -                                                                                                 |  | IPR005018                                                                                |
|                                           | -                                                       | 0 |                                                                                                                    |                                                                                                   |  | -                                                                                        |
|                                           | -                                                       | 0 |                                                                                                                    |                                                                                                   |  | -                                                                                        |
| Caenorhabditis elegans                    | pih1 domain-containing protein 1                        | 5 | F:GO:0016491;<br>P:GO:0000492;<br>F:GO:0050660;<br>C:GO:0016020;<br>C:GO:0070761                                   | -                                                                                                 |  | SignalP (SIGNALP)                                                                        |
|                                           | -                                                       | 0 |                                                                                                                    |                                                                                                   |  | -                                                                                        |
|                                           | -                                                       | 0 |                                                                                                                    |                                                                                                   |  | -                                                                                        |
| Loa loa                                   | ccaat-binding protein nf-y:subunit=                     | 6 | P:GO:0045944;<br>F:GO:0003677;<br>F:GO:0016563;<br>C:GO:0016602;<br>F:GO:0005515;<br>F:GO:0003700                  | -                                                                                                 |  | IPR001289; PTHR12632:SF6<br>(PANTHER)                                                    |
|                                           |                                                         |   |                                                                                                                    |                                                                                                   |  | IPR011042                                                                                |
| Drosophila pseudoobscura<br>pseudoobscura | tubulin-specific chaperone d                            | 7 | P:GO:0040035;<br>P:GO:0010171;<br>P:GO:0002119;<br>P:GO:0046785;<br>P:GO:0040011;<br>P:GO:0040007;<br>P:GO:0002009 | -                                                                                                 |  | PTHR12658 (PANTHER)                                                                      |



|                        |                                                                            |    |                                                                                                                                                                                                         |                                                                                                   |                                                                                                                       |
|------------------------|----------------------------------------------------------------------------|----|---------------------------------------------------------------------------------------------------------------------------------------------------------------------------------------------------------|---------------------------------------------------------------------------------------------------|-----------------------------------------------------------------------------------------------------------------------|
|                        | -                                                                          | 0  |                                                                                                                                                                                                         |                                                                                                   | -                                                                                                                     |
|                        | -                                                                          | 0  |                                                                                                                                                                                                         |                                                                                                   | IPR003006; SignalP (SIGNALP)                                                                                          |
| Brugia malayi          | tk fer protein ki-se                                                       | 6  | P:GO:0023052;<br>F:GO:0004713;<br>F:GO:0005515;<br>C:GO:0005737;<br>P:GO:0040018;<br>P:GO:0006468                                                                                                       | -                                                                                                 | EC:2.7.10.0<br><br>IPR000719; IPR001245; IPR008266;<br>IPR011009; IPR020685; IPR020764;<br>G3DSA:1.10.510.10 (GENE3D) |
| Caenorhabditis elegans | met-10+ like-protein                                                       | 1  | F:GO:0016740                                                                                                                                                                                            | -                                                                                                 | IPR003402; G3DSA:3.40.50.150<br>(GENE3D), PTHR23245 (PANTHER),<br>PTHR23245:SF25 (PANTHER),<br>SSF53335 (SUPERFAMILY) |
| Brugia malayi          | kiaa1688 protein                                                           | 1  | C:GO:0005622                                                                                                                                                                                            | -                                                                                                 | IPR000857; PTHR22692 (PANTHER),<br>PTHR22692:SF2 (PANTHER)                                                            |
|                        |                                                                            |    |                                                                                                                                                                                                         |                                                                                                   | IPR008160; PTHR10499 (PANTHER),<br>PTHR10499:SF114 (PANTHER)                                                          |
| Caenorhabditis elegans | -galactosyltransferase 7                                                   | 7  | C:GO:0005794;<br>P:GO:0006029;<br>P:GO:0048147;<br>F:GO:0046525;<br>P:GO:0043206;<br>C:GO:0016021;<br>P:GO:0006024                                                                                      | -                                                                                                 | EC:2.4.1.133<br><br>IPR003859; G3DSA:3.90.550.10<br>(GENE3D), PTHR19300:SF1<br>(PANTHER), SSF53448 (SUPERFAMILY)      |
|                        | -                                                                          | 0  |                                                                                                                                                                                                         |                                                                                                   | -                                                                                                                     |
|                        | -                                                                          | 0  |                                                                                                                                                                                                         |                                                                                                   | -                                                                                                                     |
| Loa loa                | cadherin domain containing protein                                         | 5  | C:GO:0016021;<br>P:GO:0007156;<br>F:GO:0005509;<br>C:GO:0005886;<br>F:GO:0004930                                                                                                                        | -                                                                                                 | IPR002126; IPR015919; IPR020894;<br>PTHR10596 (PANTHER),<br>PTHR10596:SF73 (PANTHER)                                  |
|                        | -                                                                          | 0  |                                                                                                                                                                                                         |                                                                                                   | -                                                                                                                     |
|                        | -                                                                          | 0  |                                                                                                                                                                                                         |                                                                                                   | -                                                                                                                     |
|                        | -                                                                          | 0  |                                                                                                                                                                                                         |                                                                                                   | -                                                                                                                     |
|                        | -                                                                          | 0  |                                                                                                                                                                                                         |                                                                                                   | SignalP (SIGNALP)                                                                                                     |
| Caenorhabditis elegans | membrane-associated tyrosine- and threonine-specific cdc2-inhibitory ki-se | 12 | C:GO:0019898;<br>F:GO:0004674;<br>P:GO:0051447;<br>P:GO:0002119;<br>F:GO:0005515;<br>C:GO:0044444;<br>P:GO:0007067;<br>P:GO:0016310;<br>C:GO:0005654;<br>P:GO:0048477;<br>P:GO:0051327;<br>P:GO:0009790 | -                                                                                                 | EC:2.7.11.0<br><br>-                                                                                                  |
|                        | -                                                                          | 0  |                                                                                                                                                                                                         |                                                                                                   | -                                                                                                                     |
|                        | -                                                                          | 0  |                                                                                                                                                                                                         |                                                                                                   | SignalP (SIGNALP)                                                                                                     |
|                        | -                                                                          | 0  |                                                                                                                                                                                                         |                                                                                                   | -                                                                                                                     |
|                        | -                                                                          | 0  |                                                                                                                                                                                                         |                                                                                                   | SignalP (SIGNALP)                                                                                                     |
| Caenorhabditis elegans | threonine ammonia-lyase                                                    | 0  |                                                                                                                                                                                                         | P:GO:0006520;<br>P:GO:0008152;<br>F:GO:0003824;<br>F:GO:0016829;<br>F:GO:0030170;<br>F:GO:0004794 | G3DSA:3.40.50.1100 (GENE3D)                                                                                           |

|                         |                                                                                               |    |                                                                                                                                                                                                                                           |   |              |                                                                                                                            |
|-------------------------|-----------------------------------------------------------------------------------------------|----|-------------------------------------------------------------------------------------------------------------------------------------------------------------------------------------------------------------------------------------------|---|--------------|----------------------------------------------------------------------------------------------------------------------------|
| Brugia malayi           | receptor protein tyrosine                                                                     | 1  | F:GO:0016787                                                                                                                                                                                                                              | - |              | IPR000242; G3DSA:3.90.190.10 (GENE3D), PTHR19134 (PANTHER), PTHR19134:SF80 (PANTHER), SSF52799 (SUPERFAMILY)               |
| Homo sapiens            | cd9 antigen                                                                                   | 14 | P:GO:0030168;<br>P:GO:0009414;<br>P:GO:0030913;<br>P:GO:0007420;<br>C:GO:0009986;<br>P:GO:0008285;<br>P:GO:0007155;<br>F:GO:0005515;<br>P:GO:0007342;<br>P:GO:0006928;<br>C:GO:0016324;<br>P:GO:0014003;<br>C:GO:0031092;<br>C:GO:0005887 | - |              | IPR008952; G3DSA:1.10.1450.10 (GENE3D), PTHR19282 (PANTHER), PTHR19282:SF18 (PANTHER)                                      |
|                         | -                                                                                             | 0  |                                                                                                                                                                                                                                           |   |              | SignalP (SIGNALP)                                                                                                          |
| Caenorhabditis briggsae | elegans protein confirmed by transcript evidence                                              | 3  | P:GO:0040010;<br>P:GO:0006898;<br>P:GO:0002119                                                                                                                                                                                            | - |              | -                                                                                                                          |
|                         | -                                                                                             | 0  |                                                                                                                                                                                                                                           |   |              | IPR011990; IPR013026; SSF48452 (SUPERFAMILY)                                                                               |
| Caenorhabditis elegans  | phosphoribosylaminoimidazole<br>phosphoribosylaminoimidazole succinocarboxamide<br>synthetase | 6  | F:GO:0042802;<br>F:GO:0016874;<br>P:GO:0002119;<br>P:GO:0009168;<br>P:GO:0040007;<br>F:GO:0016829                                                                                                                                         | - |              | IPR000031; IPR001636; IPR013816;<br>IPR018236; G3DSA:3.30.200.20 (GENE3D), PTHR11609:SF2 (PANTHER), SSF56104 (SUPERFAMILY) |
| Caenorhabditis elegans  | elegans protein confirmed by transcript evidence                                              | 3  | P:GO:0040007;<br>P:GO:0006898;<br>P:GO:0002119                                                                                                                                                                                            | - |              | -                                                                                                                          |
| Caenorhabditis elegans  | briggsae cbr-cyc- protein                                                                     | 11 | P:GO:0009792;<br>P:GO:0002119;<br>P:GO:0040018;<br>C:GO:0070469;<br>F:GO:0009055;<br>C:GO:0005759;<br>F:GO:0020037;<br>P:GO:0006810;<br>P:GO:0040010;<br>P:GO:0008340;<br>P:GO:0022900                                                    | - |              | -                                                                                                                          |
|                         | -                                                                                             | 0  |                                                                                                                                                                                                                                           |   |              | -                                                                                                                          |
| Caenorhabditis briggsae | pftaire protein ki-se 1                                                                       | 11 | C:GO:0005829;<br>P:GO:0000086;<br>C:GO:0000308;<br>P:GO:0051301;<br>F:GO:0005524;<br>P:GO:0060828;<br>F:GO:0004693;<br>F:GO:0030332;<br>C:GO:0005634;<br>C:GO:0005886;<br>P:GO:0006468                                                    | - | EC:2.7.11.22 | IPR000719; IPR011009; IPR017441;<br>IPR017442; G3DSA:3.30.200.20 (GENE3D), PTHR11295 (PANTHER), PTHR11295:SF95 (PANTHER)   |
|                         | -                                                                                             | 0  |                                                                                                                                                                                                                                           |   |              | -                                                                                                                          |

|                             |                                                    |    |                                                                                                                                                                                                                                                                                                                                                                                                                                      |   |                                                                                                   |
|-----------------------------|----------------------------------------------------|----|--------------------------------------------------------------------------------------------------------------------------------------------------------------------------------------------------------------------------------------------------------------------------------------------------------------------------------------------------------------------------------------------------------------------------------------|---|---------------------------------------------------------------------------------------------------|
| Caenorhabditis elegans      | tr--dihydrouridine synthase 3-like                 | 5  | F:GO:0046872;<br>F:GO:0003676;<br>P:GO:0055114;<br>F:GO:0050660;<br>F:GO:0017150                                                                                                                                                                                                                                                                                                                                                     | - | IPR000571; IPR001269;<br>PTHR11082:SF1 (PANTHER)                                                  |
| Caenorhabditis elegans      | ubiquitin protein ligase e3 component n-recognin 3 | 4  | P:GO:0009790;<br>F:GO:0016874;<br>F:GO:0005488;<br>P:GO:0044267                                                                                                                                                                                                                                                                                                                                                                      | - | PTHR21497 (PANTHER),<br>PTHR21497:SF3 (PANTHER)                                                   |
| -                           | -                                                  | 0  |                                                                                                                                                                                                                                                                                                                                                                                                                                      |   | -                                                                                                 |
| Angiostrongylus cantonensis | c2 domain containing protein                       | 1  | P:GO:0009792                                                                                                                                                                                                                                                                                                                                                                                                                         | - | IPR000008; IPR008973;<br>G3DSA:2.60.40.150 (GENE3D),<br>PTHR10024 (PANTHER)                       |
| Caenorhabditis briggsae     | intraflagellar transport 57 homolog                | 8  | C:GO:0035085;<br>P:GO:0007635;<br>F:GO:0005515;<br>P:GO:0042384;<br>F:GO:0005198;<br>C:GO:0005932;<br>P:GO:0008104;<br>P:GO:0006919                                                                                                                                                                                                                                                                                                  | - | IPR019530                                                                                         |
| Caenorhabditis briggsae     | polyadenylate-binding protein                      | 3  | P:GO:0009792;<br>F:GO:0000166;<br>F:GO:0003723                                                                                                                                                                                                                                                                                                                                                                                       | - | IPR000504; IPR012677; PTHR10432<br>(PANTHER), PTHR10432:SF69<br>(PANTHER), SSF54928 (SUPERFAMILY) |
| -                           | -                                                  | 0  |                                                                                                                                                                                                                                                                                                                                                                                                                                      |   | -                                                                                                 |
| Ancylostoma Ceylanicum      | macrophage migration inhibitory factor             | 25 | P:GO:0006954;<br>P:GO:0031325;<br>P:GO:0009628;<br>P:GO:0006955;<br>P:GO:0048519;<br>P:GO:0016043;<br>P:GO:0002684;<br>P:GO:0008544;<br>P:GO:0044281;<br>P:GO:0042127;<br>P:GO:0007568;<br>P:GO:0080090;<br>P:GO:0007399;<br>P:GO:0030330;<br>F:GO:0005515;<br>C:GO:0044424;<br>P:GO:0048545;<br>F:GO:0016860;<br>P:GO:0032103;<br>P:GO:0080135;<br>P:GO:0033273;<br>P:GO:0051239;<br>P:GO:0051050;<br>P:GO:0010604;<br>C:GO:0005576 | - | IPR001398; IPR014347;<br>PTHR11954:SF5 (PANTHER), SSF55331<br>(SUPERFAMILY)                       |
| -                           | -                                                  | 0  |                                                                                                                                                                                                                                                                                                                                                                                                                                      |   | SignalP (SIGNALP)                                                                                 |

|                         |                                                         |    |                                                                                                                                                                                                                                                                                                                                                 |                                                                                                   |             |                                                                                                                 |
|-------------------------|---------------------------------------------------------|----|-------------------------------------------------------------------------------------------------------------------------------------------------------------------------------------------------------------------------------------------------------------------------------------------------------------------------------------------------|---------------------------------------------------------------------------------------------------|-------------|-----------------------------------------------------------------------------------------------------------------|
| Caenorhabditis elegans  | cdc23 (cell division cycle homolog)                     | 20 | C:GO:0005654;<br>P:GO:0070979;<br>P:GO:0000080;<br>F:GO:0005515;<br>P:GO:0051437;<br>P:GO:0007080;<br>P:GO:0006898;<br>C:GO:0005680;<br>P:GO:0051436;<br>C:GO:0005829;<br>P:GO:0007096;<br>P:GO:0009792;<br>P:GO:0002009;<br>F:GO:0004842;<br>P:GO:0007126;<br>P:GO:0002119;<br>P:GO:0010171;<br>P:GO:0031145;<br>P:GO:0030071;<br>P:GO:0040035 | -                                                                                                 | EC:6.3.2.19 | IPR011990; IPR013026; IPR019734;<br>PTHR12558 (PANTHER),<br>PTHR12558:SF10 (PANTHER),<br>SSF48452 (SUPERFAMILY) |
| -                       | -                                                       | 0  |                                                                                                                                                                                                                                                                                                                                                 |                                                                                                   |             | SignalP (SIGNALP)                                                                                               |
| Caenorhabditis elegans  | r- polymerase i large subunit                           | 7  | F:GO:0003899;<br>C:GO:0005654;<br>F:GO:0003677;<br>C:GO:0005736;<br>F:GO:0005515;<br>P:GO:0006350;<br>F:GO:0008270                                                                                                                                                                                                                              | -                                                                                                 | EC:2.7.7.6  | -                                                                                                               |
| -                       | -                                                       | 0  |                                                                                                                                                                                                                                                                                                                                                 |                                                                                                   |             | -                                                                                                               |
| -                       | -                                                       | 0  |                                                                                                                                                                                                                                                                                                                                                 |                                                                                                   |             | -                                                                                                               |
| Brugia malayi           | protein ki-se domain containing protein                 | 10 | P:GO:0006468;<br>C:GO:0005929;<br>C:GO:0030425;<br>F:GO:0005515;<br>P:GO:0034606;<br>F:GO:0004713;<br>C:GO:0030424;<br>P:GO:0034608;<br>F:GO:0005524;<br>C:GO:0043025                                                                                                                                                                           | -                                                                                                 | EC:2.7.10.0 | IPR000719; IPR001245; IPR011009;<br>IPR020685; IPR020764;<br>G3DSA:3.30.200.20 (GENE3D)                         |
| -                       | -                                                       | 0  |                                                                                                                                                                                                                                                                                                                                                 |                                                                                                   |             | -                                                                                                               |
| -                       | -                                                       | 0  |                                                                                                                                                                                                                                                                                                                                                 |                                                                                                   |             | SignalP (SIGNALP)                                                                                               |
| -                       | -                                                       | 0  |                                                                                                                                                                                                                                                                                                                                                 |                                                                                                   |             | -                                                                                                               |
| -                       | -                                                       | 0  |                                                                                                                                                                                                                                                                                                                                                 |                                                                                                   |             | -                                                                                                               |
| Caenorhabditis briggsae | Hypothetical protein CBG02738 [Caenorhabditis briggsae] | 0  |                                                                                                                                                                                                                                                                                                                                                 | P:GO:0006355;<br>F:GO:0043565;<br>P:GO:0045449;<br>F:GO:0003700;<br>C:GO:0005634;<br>F:GO:0003677 |             | -                                                                                                               |
| Caenorhabditis elegans  | tetratricopeptide repeat domain 17                      | 3  | P:GO:0040010;<br>P:GO:0040017;<br>F:GO:0005488                                                                                                                                                                                                                                                                                                  | -                                                                                                 |             | -                                                                                                               |
| Caenorhabditis elegans  | o-glycosyl hydrolase family 30 protein                  | 3  | F:GO:0016787;<br>P:GO:0009987;<br>P:GO:0044238                                                                                                                                                                                                                                                                                                  | -                                                                                                 |             | IPR001139; IPR013781; IPR017853                                                                                 |
| -                       | -                                                       | 0  |                                                                                                                                                                                                                                                                                                                                                 |                                                                                                   |             | -                                                                                                               |
| -                       | -                                                       | 0  |                                                                                                                                                                                                                                                                                                                                                 |                                                                                                   |             | -                                                                                                               |

|                         |                                                         |   |                                                                                                                                     |                                                                                                                                                                                                                                                                                                                                                                                                                                                                                          |                                                                                                                                                      |
|-------------------------|---------------------------------------------------------|---|-------------------------------------------------------------------------------------------------------------------------------------|------------------------------------------------------------------------------------------------------------------------------------------------------------------------------------------------------------------------------------------------------------------------------------------------------------------------------------------------------------------------------------------------------------------------------------------------------------------------------------------|------------------------------------------------------------------------------------------------------------------------------------------------------|
|                         | -                                                       | 0 |                                                                                                                                     |                                                                                                                                                                                                                                                                                                                                                                                                                                                                                          | SignalP (SIGNALP)                                                                                                                                    |
|                         | -                                                       | 0 |                                                                                                                                     |                                                                                                                                                                                                                                                                                                                                                                                                                                                                                          | -                                                                                                                                                    |
|                         | -                                                       | 0 |                                                                                                                                     |                                                                                                                                                                                                                                                                                                                                                                                                                                                                                          | -                                                                                                                                                    |
| Caenorhabditis briggsae | Hypothetical protein CBG18472 [Caenorhabditis briggsae] | 0 |                                                                                                                                     |                                                                                                                                                                                                                                                                                                                                                                                                                                                                                          | SignalP (SIGNALP)                                                                                                                                    |
| Caenorhabditis elegans  | hypothetical protein T26A8.1 [Caenorhabditis elegans]   | 0 |                                                                                                                                     |                                                                                                                                                                                                                                                                                                                                                                                                                                                                                          | SignalP (SIGNALP)                                                                                                                                    |
| Caenorhabditis elegans  | hypothetical protein T26A8.1 [Caenorhabditis elegans]   | 0 |                                                                                                                                     |                                                                                                                                                                                                                                                                                                                                                                                                                                                                                          | SignalP (SIGNALP)                                                                                                                                    |
| Pan troglodytes         | phd finger protein 15                                   | 0 |                                                                                                                                     | P:GO:0043029;<br>P:GO:0043029;<br>F:GO:0003700;<br>P:GO:0006355;<br>C:GO:0016605;<br>C:GO:0005886;<br>F:GO:0032403;<br>P:GO:0008152;<br>C:GO:0016021;<br>C:GO:0016020;<br>P:GO:0048538;<br>P:GO:0048536;<br>P:GO:0008633;<br>P:GO:0001701;<br>P:GO:0006281;<br>F:GO:0003824;<br>P:GO:0002262;<br>P:GO:0048563;<br>C:GO:0000300;<br>C:GO:0005624;<br>C:GO:0005622;<br>P:GO:0006606;<br>P:GO:0035148;<br>F:GO:0004222;<br>F:GO:0008270;<br>F:GO:0016491;<br>P:GO:0006310;<br>P:GO:0007160; | PTHR12138 (PANTHER)                                                                                                                                  |
|                         | -                                                       | 0 |                                                                                                                                     |                                                                                                                                                                                                                                                                                                                                                                                                                                                                                          | SignalP (SIGNALP)                                                                                                                                    |
|                         | -                                                       | 0 |                                                                                                                                     |                                                                                                                                                                                                                                                                                                                                                                                                                                                                                          | -                                                                                                                                                    |
| Ancylostoma caninum     | secreted protein 5 precursor                            | 0 |                                                                                                                                     | P:GO:0040011;<br>C:GO:0005576                                                                                                                                                                                                                                                                                                                                                                                                                                                            | IPR001283; IPR002413; IPR014044;<br>PTHR10334:SF11 (PANTHER)                                                                                         |
| Loa loa                 | cyclin g associated ki-se                               | 5 | C:GO:0005737;<br>F:GO:0004672;<br>P:GO:0009987;<br>F:GO:0030332;<br>F:GO:0000166                                                    | -                                                                                                                                                                                                                                                                                                                                                                                                                                                                                        | IPR000719; IPR008271; IPR011009;<br>IPR017442; G3DSA:1.10.510.10<br>(GENE3D), PTHR23172 (PANTHER),<br>PTHR23172:SF21 (PANTHER), SignalP<br>(SIGNALP) |
|                         | -                                                       | 0 |                                                                                                                                     |                                                                                                                                                                                                                                                                                                                                                                                                                                                                                          | -                                                                                                                                                    |
|                         | -                                                       | 0 |                                                                                                                                     |                                                                                                                                                                                                                                                                                                                                                                                                                                                                                          | SignalP (SIGNALP)                                                                                                                                    |
|                         | -                                                       | 0 |                                                                                                                                     |                                                                                                                                                                                                                                                                                                                                                                                                                                                                                          | G3DSA:1.10.720.30 (GENE3D)                                                                                                                           |
| Caenorhabditis briggsae | calcitonin receptor                                     | 8 | F:GO:0004948;<br>P:GO:0007202;<br>P:GO:0045762;<br>C:GO:0016021;<br>F:GO:0032841;<br>P:GO:0007165;<br>P:GO:0007186;<br>C:GO:0005886 | -                                                                                                                                                                                                                                                                                                                                                                                                                                                                                        | IPR000832; IPR017981; PTHR12011<br>(PANTHER), PTHR12011:SF15<br>(PANTHER), SignalP (SIGNALP)                                                         |
| Caenorhabditis elegans  | s enesis abnormal family member (syg-1)                 | 1 | C:GO:0016020                                                                                                                        | -                                                                                                                                                                                                                                                                                                                                                                                                                                                                                        | IPR003598; IPR007110; IPR013098;<br>IPR013783; PTHR11640 (PANTHER),<br>PTHR11640:SF3 (PANTHER), SSF48726<br>(SUPERFAMILY)                            |

|                         |                                                            |    |                                                                                                                                                                                                                                                                                                                                |   |                             |                                                                                                                |
|-------------------------|------------------------------------------------------------|----|--------------------------------------------------------------------------------------------------------------------------------------------------------------------------------------------------------------------------------------------------------------------------------------------------------------------------------|---|-----------------------------|----------------------------------------------------------------------------------------------------------------|
| Loa loa                 | briggsae cbr-ncr-1 protein                                 | 6  | C:GO:0016020;<br>P:GO:0044237;<br>P:GO:0050896;<br>P:GO:0030301;<br>C:GO:0005768;<br>P:GO:0050794                                                                                                                                                                                                                              | - |                             | IPR000731; IPR003392; PTHR10796 (PANTHER), PTHR10796:SF35 (PANTHER), SignalP (SIGNALP), SSF82866 (SUPERFAMILY) |
| Haemonchus contortus    | zinc metalloprotei-se toh-2 precursor                      | 4  | F:GO:0004222;<br>P:GO:0009792;<br>P:GO:0006508;<br>F:GO:0008270                                                                                                                                                                                                                                                                | - | EC:3.4.24.0                 | IPR000859                                                                                                      |
|                         | -                                                          | 0  |                                                                                                                                                                                                                                                                                                                                |   |                             | -                                                                                                              |
| Caenorhabditis briggsae | elegans protein partially confirmed by transcript evidence | 1  | F:GO:0005515                                                                                                                                                                                                                                                                                                                   | - |                             | IPR011021; IPR014756; PTHR11188 (PANTHER), PTHR11188:SF13 (PANTHER)                                            |
|                         | -                                                          | 0  |                                                                                                                                                                                                                                                                                                                                |   |                             | -                                                                                                              |
| Caenorhabditis elegans  | diacylglycerol acyltransferase                             | 11 | C:GO:0005829;<br>F:GO:0004144;<br>P:GO:0034379;<br>C:GO:0016021;<br>F:GO:0003846;<br>C:GO:0005792;<br>P:GO:0030073;<br>P:GO:0019432;<br>F:GO:0019992;<br>C:GO:0005789;<br>F:GO:0005504                                                                                                                                         | - | EC:2.3.1.20;<br>EC:2.3.1.22 | PTHR10408 (PANTHER), SignalP (SIGNALP)                                                                         |
| Pongo abelii            | transporter atp-binding sub-family b (mdr tap)             | 19 | F:GO:0046979;<br>C:GO:0042825;<br>P:GO:0019060;<br>F:GO:0015197;<br>C:GO:0005792;<br>P:GO:0042270;<br>F:GO:0043531;<br>C:GO:0005829;<br>F:GO:0046982;<br>F:GO:0046978;<br>P:GO:0046967;<br>P:GO:0015833;<br>F:GO:0042626;<br>P:GO:0019885;<br>P:GO:0055085;<br>F:GO:0042605;<br>F:GO:0042803;<br>F:GO:0005524;<br>C:GO:0005739 | - |                             | -                                                                                                              |
| Caenorhabditis elegans  | elegans protein partially confirmed by transcript evidence | 0  |                                                                                                                                                                                                                                                                                                                                |   |                             | -                                                                                                              |
| Caenorhabditis elegans  | briggsae cbr-hum-5 protein                                 | 8  | F:GO:0000146;<br>F:GO:0030898;<br>F:GO:0003779;<br>C:GO:0016459;<br>F:GO:0005524;<br>C:GO:0030673;<br>F:GO:0005516;<br>C:GO:0005790                                                                                                                                                                                            | - |                             | IPR001609; PTHR13140 (PANTHER), PTHR13140:SF31 (PANTHER), SSF52540 (SUPERFAMILY)                               |

|                        |                                           |    |                                                                                                                                                                                                                                                                                                                                                                                                                                                                        |                               |                                                                                                            |
|------------------------|-------------------------------------------|----|------------------------------------------------------------------------------------------------------------------------------------------------------------------------------------------------------------------------------------------------------------------------------------------------------------------------------------------------------------------------------------------------------------------------------------------------------------------------|-------------------------------|------------------------------------------------------------------------------------------------------------|
| Caenorhabditis elegans | transcription factor mitochondrial        | 10 | P:GO:0006519;<br>P:GO:0044106;<br>F:GO:0003712;<br>C:GO:0042645;<br>F:GO:0004497;<br>P:GO:0006390;<br>P:GO:0009056;<br>P:GO:0006417;<br>P:GO:0000154;<br>F:GO:0000179                                                                                                                                                                                                                                                                                                  | -                             | IPR001737; G3DSA:3.40.50.150 (GENE3D), SSF53335 (SUPERFAMILY)                                              |
| Loa loa                | hypothetical protein LOAG_04713 [Loa loa] | 0  |                                                                                                                                                                                                                                                                                                                                                                                                                                                                        | F:GO:0004500;<br>P:GO:0006548 | -                                                                                                          |
|                        | -                                         | 0  |                                                                                                                                                                                                                                                                                                                                                                                                                                                                        |                               | PTHR10504 (PANTHER),<br>PTHR10504:SF11 (PANTHER)                                                           |
|                        | -                                         | 0  |                                                                                                                                                                                                                                                                                                                                                                                                                                                                        |                               | -                                                                                                          |
|                        | -                                         | 0  |                                                                                                                                                                                                                                                                                                                                                                                                                                                                        |                               | -                                                                                                          |
| Macaca mulatta         | cathepsin b                               | 29 | P:GO:0009749;<br>C:GO:0005764;<br>F:GO:0030984;<br>P:GO:0051789;<br>C:GO:0009897;<br>C:GO:0005625;<br>C:GO:0005739;<br>P:GO:0045471;<br>P:GO:0042981;<br>C:GO:0005901;<br>P:GO:0009611;<br>F:GO:0032403;<br>C:GO:0005615;<br>P:GO:0006508;<br>P:GO:0043434;<br>F:GO:0004197;<br>C:GO:0042470;<br>P:GO:0007519;<br>P:GO:0014070;<br>P:GO:0070670;<br>C:GO:0048471;<br>C:GO:0016324;<br>C:GO:0042383;<br>P:GO:0050790;<br>P:GO:0014075;<br>P:GO:0060548;<br>P:GO:0006914 | -                             | EC:3.4.22.0                                                                                                |
|                        | -                                         | 0  |                                                                                                                                                                                                                                                                                                                                                                                                                                                                        |                               | -                                                                                                          |
|                        | -                                         | 0  |                                                                                                                                                                                                                                                                                                                                                                                                                                                                        |                               | SignalP (SIGNALP)                                                                                          |
| Caenorhabditis elegans | midasin homolog                           | 6  | P:GO:0043254;<br>P:GO:0006355;<br>F:GO:0005524;<br>F:GO:0016887;<br>F:GO:0008134;<br>C:GO:0005634                                                                                                                                                                                                                                                                                                                                                                      | -                             | G3DSA:3.40.50.300 (GENE3D),<br>PTHR22908 (PANTHER),<br>PTHR22908:SF13 (PANTHER),<br>SSF52540 (SUPERFAMILY) |
| Caenorhabditis elegans | camp-dependent protein ki-se catalytic    | 5  | P:GO:0006468;<br>F:GO:0004871;<br>F:GO:0005524;<br>P:GO:0007165;<br>F:GO:0004703                                                                                                                                                                                                                                                                                                                                                                                       | -                             | EC:2.7.11.16<br>SignalP (SIGNALP)                                                                          |
|                        | -                                         | 0  |                                                                                                                                                                                                                                                                                                                                                                                                                                                                        |                               | -                                                                                                          |

|                         |                                                                                           |    |                                                                                                                                                                                                                                           |                                                |                             |                                                            |
|-------------------------|-------------------------------------------------------------------------------------------|----|-------------------------------------------------------------------------------------------------------------------------------------------------------------------------------------------------------------------------------------------|------------------------------------------------|-----------------------------|------------------------------------------------------------|
| Caenorhabditis elegans  | cation transporting atpase family member (catp-1)                                         | 5  | P:GO:0006811;<br>F:GO:0016820;<br>F:GO:0000166;<br>P:GO:0008152;<br>C:GO:0016020                                                                                                                                                          | -                                              | EC:3.6.3.0                  | SignalP (SIGNALP)                                          |
| Caenorhabditis elegans  | xanthine dehydroge-se                                                                     | 14 | C:GO:0005829;<br>P:GO:0007595;<br>F:GO:0051537;<br>P:GO:0055114;<br>F:GO:0009055;<br>P:GO:0010044;<br>F:GO:0004855;<br>F:GO:0004854;<br>F:GO:0043546;<br>P:GO:0030856;<br>F:GO:0050660;<br>P:GO:0009115;<br>F:GO:0005506;<br>P:GO:0045453 | -                                              | EC:1.17.3.2;<br>EC:1.17.1.4 | -                                                          |
| Caenorhabditis briggsae | intracellular ipase a family member (ipla-1)                                              | 2  | F:GO:0046872;<br>P:GO:0008356                                                                                                                                                                                                             | -                                              | -                           | -                                                          |
| Caenorhabditis briggsae | intracellular ipase a family member (ipla-1)                                              | 1  | P:GO:0008356                                                                                                                                                                                                                              | -                                              | -                           | -                                                          |
| Caenorhabditis briggsae | ddhd domain containing 1                                                                  | 1  | P:GO:0008356                                                                                                                                                                                                                              | -                                              | -                           | IPR004177; PTHR15457 (PANTHER),<br>PTHR15457:SF4 (PANTHER) |
| Caenorhabditis briggsae | ddhd domain containing 1                                                                  | 1  | P:GO:0008356                                                                                                                                                                                                                              | -                                              | -                           | -                                                          |
| -                       | -                                                                                         | 0  | -                                                                                                                                                                                                                                         | -                                              | -                           | -                                                          |
| Caenorhabditis elegans  | hypothetical protein C09G4.2 [Caenorhabditis elegans]                                     | 1  | P:GO:0000003                                                                                                                                                                                                                              | -                                              | -                           | -                                                          |
| Loa loa                 | adducin 1                                                                                 | 0  | -                                                                                                                                                                                                                                         | F:GO:0046872;<br>P:GO:0008150;<br>C:GO:0005575 | -                           | IPR001303; PTHR10672 (PANTHER),<br>PTHR10672:SF3 (PANTHER) |
| Caenorhabditis elegans  | hypothetical protein Y94H6A.5 [Caenorhabditis elegans]                                    | 3  | F:GO:0016818;<br>F:GO:0005488;<br>P:GO:0040010                                                                                                                                                                                            | -                                              | EC:3.6.1.0                  | -                                                          |
| -                       | -                                                                                         | 0  | -                                                                                                                                                                                                                                         | -                                              | -                           | -                                                          |
| Caenorhabditis elegans  | gl actin (drosophila neuroligin-like) homolog family member (nrx-1)                       | 0  | -                                                                                                                                                                                                                                         | -                                              | -                           | -                                                          |
| Brugia malayi           | trrap-like (transcription transformation domain-associated protein) family member (trr-1) | 0  | -                                                                                                                                                                                                                                         | F:GO:0005488;<br>F:GO:0016773                  | -                           | -                                                          |
| Brugia malayi           | mkiaa0368 protein                                                                         | 0  | -                                                                                                                                                                                                                                         | F:GO:0005488                                   | -                           | -                                                          |
| Caenorhabditis elegans  | elegans protein confirmed by transcript evidence                                          | 1  | F:GO:0005515                                                                                                                                                                                                                              | -                                              | -                           | -                                                          |
| -                       | -                                                                                         | 0  | -                                                                                                                                                                                                                                         | -                                              | -                           | -                                                          |



|                         |                                                          |    |                                                                                                                                                                                                                                                                                                                                |   |   |                                                                                                                                |
|-------------------------|----------------------------------------------------------|----|--------------------------------------------------------------------------------------------------------------------------------------------------------------------------------------------------------------------------------------------------------------------------------------------------------------------------------|---|---|--------------------------------------------------------------------------------------------------------------------------------|
| Pan troglodytes         | peroxiredoxin 1                                          | 19 | P:GO:0001501;<br>P:GO:0032872;<br>P:GO:0042744;<br>P:GO:0034101;<br>C:GO:0005759;<br>P:GO:0042267;<br>C:GO:0005719;<br>F:GO:0020037;<br>P:GO:0008283;<br>C:GO:0042470;<br>P:GO:0019430;<br>F:GO:0008379;<br>C:GO:0005730;<br>C:GO:0005829;<br>P:GO:0045454;<br>P:GO:0042345;<br>P:GO:0055114;<br>F:GO:0042803;<br>C:GO:0005782 | - | - | IPR000866; IPR012335; IPR012336;<br>IPR019479; G3DSA:3.30.1020.10<br>(GENE3D), PTHR10681 (PANTHER),<br>PTHR10681:SF8 (PANTHER) |
| -                       | -                                                        | 0  |                                                                                                                                                                                                                                                                                                                                |   |   | -                                                                                                                              |
| Caenorhabditis briggsae | mucoidy inhibitor a                                      | 1  | F:GO:0005515                                                                                                                                                                                                                                                                                                                   |   |   |                                                                                                                                |
| -                       | -                                                        | 0  |                                                                                                                                                                                                                                                                                                                                |   |   | -                                                                                                                              |
| -                       | -                                                        | 0  |                                                                                                                                                                                                                                                                                                                                |   |   | -                                                                                                                              |
| -                       | -                                                        | 0  |                                                                                                                                                                                                                                                                                                                                |   |   | -                                                                                                                              |
| Caenorhabditis briggsae | dhhc zinc finger domain containing protein               | 1  | F:GO:0046872                                                                                                                                                                                                                                                                                                                   | - |   | IPR001594; PTHR22883 (PANTHER)                                                                                                 |
| -                       | -                                                        | 0  |                                                                                                                                                                                                                                                                                                                                |   |   | -                                                                                                                              |
| Loa loa                 | briggsae cbr-dpy-22 protein                              | 8  | P:GO:0040010;<br>P:GO:0018991;<br>P:GO:0040035;<br>P:GO:0010171;<br>P:GO:0040026;<br>P:GO:0040011;<br>P:GO:0009792;<br>P:GO:0040018                                                                                                                                                                                            | - |   | IPR021990; PTHR12796 (PANTHER)                                                                                                 |
| Caenorhabditis elegans  | hypothetical protein Y54E10A.16 [Caenorhabditis elegans] | 2  | P:GO:0040039;<br>P:GO:0000003                                                                                                                                                                                                                                                                                                  | - |   | -                                                                                                                              |
| -                       | -                                                        | 0  |                                                                                                                                                                                                                                                                                                                                |   |   | -                                                                                                                              |
| Caenorhabditis briggsae | cold-shock d--binding domain containing protein          | 5  | F:GO:0003723;<br>F:GO:0043565;<br>F:GO:0005515;<br>C:GO:0030529;<br>P:GO:0045893                                                                                                                                                                                                                                               | - |   | IPR002059; IPR011129; IPR012340;<br>IPR016027; IPR019844; PTHR11544<br>(PANTHER), PTHR11544:SF4<br>(PANTHER)                   |
| Caenorhabditis briggsae | cold-shock d--binding domain containing protein          | 5  | F:GO:0003723;<br>F:GO:0043565;<br>F:GO:0005515;<br>C:GO:0030529;<br>P:GO:0045893                                                                                                                                                                                                                                               | - |   | IPR002059; IPR011129; IPR012340;<br>IPR016027; IPR019844; PTHR11544<br>(PANTHER), PTHR11544:SF4<br>(PANTHER)                   |
| Caenorhabditis briggsae | cold-shock d--binding domain containing protein          | 9  | F:GO:0005515;<br>P:GO:0006357;<br>F:GO:0003697;<br>C:GO:0005737;<br>C:GO:0071204;<br>P:GO:0048522;<br>F:GO:0003723;<br>P:GO:0048523;<br>P:GO:0001701                                                                                                                                                                           | - |   | -                                                                                                                              |

|                         |                                                 |    |                                                                                                                                                                                                                                                                             |   |              |                                                                                                             |
|-------------------------|-------------------------------------------------|----|-----------------------------------------------------------------------------------------------------------------------------------------------------------------------------------------------------------------------------------------------------------------------------|---|--------------|-------------------------------------------------------------------------------------------------------------|
| Caenorhabditis briggsae | cold-shock d--binding domain containing protein | 9  | F:GO:0005515;<br>P:GO:0006357;<br>F:GO:0003697;<br>C:GO:0005737;<br>C:GO:0071204;<br>P:GO:0048522;<br>F:GO:0003723;<br>P:GO:0048523;<br>P:GO:0001701                                                                                                                        | - | -            |                                                                                                             |
| Caenorhabditis briggsae | cold-shock d--binding domain containing protein | 9  | F:GO:0005515;<br>P:GO:0006357;<br>F:GO:0003697;<br>C:GO:0005737;<br>C:GO:0071204;<br>P:GO:0048522;<br>F:GO:0003723;<br>P:GO:0048523;<br>P:GO:0001701                                                                                                                        | - | -            | SignalP (SIGNALP)                                                                                           |
| Caenorhabditis briggsae | cold-shock d--binding domain containing protein | 9  | F:GO:0005515;<br>P:GO:0006357;<br>F:GO:0003697;<br>C:GO:0005737;<br>C:GO:0071204;<br>P:GO:0048522;<br>F:GO:0003723;<br>P:GO:0048523;<br>P:GO:0001701                                                                                                                        | - | -            | SignalP (SIGNALP)                                                                                           |
| Caenorhabditis briggsae | r- helicase                                     | 1  | F:GO:0005488                                                                                                                                                                                                                                                                | - | -            | -                                                                                                           |
|                         | -                                               | 0  |                                                                                                                                                                                                                                                                             | - | -            | -                                                                                                           |
| Caenorhabditis elegans  | glioma tumor suppressor candidate region gene 2 | 4  | P:GO:0000003;<br>P:GO:0040007;<br>P:GO:0006898;<br>P:GO:0002119                                                                                                                                                                                                             | - | -            | IPR011687; PTHR14211:SF6 (PANTHER)                                                                          |
|                         | -                                               | 0  |                                                                                                                                                                                                                                                                             | - | -            | -                                                                                                           |
| Ancylostoma ceylanicum  | metalloprotease 1 precursor                     | 2  | F:GO:0046872;<br>F:GO:0008237                                                                                                                                                                                                                                               | - | -            | IPR000859; IPR013032; PTHR10127 (PANTHER), PTHR10127:SF60 (PANTHER)                                         |
| Pongo abelii            | parkinson disease (autosomal early onset) 7     | 16 | P:GO:0060765;<br>C:GO:0005829;<br>P:GO:0008344;<br>C:GO:0030424;<br>C:GO:0005739;<br>P:GO:0008219;<br>P:GO:0051899;<br>P:GO:0060081;<br>P:GO:0032091;<br>P:GO:0051583;<br>F:GO:0005515;<br>P:GO:0042743;<br>P:GO:0042493;<br>F:GO:0051920;<br>P:GO:0042542;<br>C:GO:0005634 | - | EC:1.11.1.15 | IPR002818; G3DSA:3.40.50.880 (GENE3D), PTHR11019 (PANTHER), PTHR11019:SF5 (PANTHER), SSF52317 (SUPERFAMILY) |
|                         | -                                               | 0  |                                                                                                                                                                                                                                                                             | - | -            | -                                                                                                           |
|                         | -                                               | 0  |                                                                                                                                                                                                                                                                             | - | -            | -                                                                                                           |
|                         | -                                               | 0  |                                                                                                                                                                                                                                                                             | - | -            | -                                                                                                           |

|                         |                                                     |    |                                                                                                                                                                                        |              |             |                                                                                                              |
|-------------------------|-----------------------------------------------------|----|----------------------------------------------------------------------------------------------------------------------------------------------------------------------------------------|--------------|-------------|--------------------------------------------------------------------------------------------------------------|
| Caenorhabditis elegans  | iesterase family member (pde-4)                     | 3  | F:GO:0046872;<br>P:GO:0007165;<br>F:GO:0004114                                                                                                                                         | -            | EC:3.1.4.17 | -                                                                                                            |
| Brugia malayi           | ubiquitin carboxyl-termi-l hydrolase family protein | 1  | F:GO:0016787                                                                                                                                                                           | -            |             | -                                                                                                            |
| Cooperia oncophora      | latrophilin-like protein 2                          | 6  | P:GO:0007218;<br>C:GO:0016021;<br>P:GO:0007165;<br>C:GO:0005886;<br>F:GO:0005529;<br>F:GO:0004930                                                                                      | -            |             | IPR000922; IPR001304; IPR013032;<br>IPR016186; IPR016187; PTHR10690<br>(PANTHER), PTHR10690:SF4<br>(PANTHER) |
| Caenorhabditis briggsae | arginyl-tr- synthetase mitochondrial                | 4  | C:GO:0005737;<br>F:GO:0004814;<br>P:GO:0006420;<br>F:GO:0005524                                                                                                                        | -            | EC:6.1.1.19 | IPR001278; IPR001412; IPR014729;<br>IPR015945; SSF52374 (SUPERFAMILY)                                        |
| Caenorhabditis briggsae | sideroflexin 3                                      | 4  | F:GO:0005371;<br>P:GO:0055085;<br>P:GO:0006812;<br>C:GO:0031966                                                                                                                        | -            |             | IPR004686; PTHR11153:SF9<br>(PANTHER)                                                                        |
| Caenorhabditis elegans  | camk protein ki-se                                  | 1  | F:GO:0005515                                                                                                                                                                           | -            |             | IPR020636; IPR020659;<br>G3DSA:1.10.510.10 (GENE3D)                                                          |
| -                       | -                                                   | 0  |                                                                                                                                                                                        |              |             | -                                                                                                            |
| -                       | -                                                   | 0  |                                                                                                                                                                                        |              |             | -                                                                                                            |
| Brugia malayi           | patched family protein                              | 11 | P:GO:0009792;<br>P:GO:0002119;<br>F:GO:0008158;<br>P:GO:0040018;<br>P:GO:0001703;<br>P:GO:0018996;<br>P:GO:0000910;<br>P:GO:0040010;<br>P:GO:0000003;<br>P:GO:0040011;<br>C:GO:0016021 | -            |             | -                                                                                                            |
| -                       | -                                                   | 0  |                                                                                                                                                                                        |              |             | SignalP (SIGNALP)                                                                                            |
| -                       | -                                                   | 0  |                                                                                                                                                                                        |              |             | -                                                                                                            |
| -                       | -                                                   | 0  |                                                                                                                                                                                        |              |             | SignalP (SIGNALP)                                                                                            |
| -                       | -                                                   | 0  |                                                                                                                                                                                        |              |             | -                                                                                                            |
| Loa loa                 | polymerase iii (d- directed) polypeptide b          | 9  | F:GO:0003899;<br>P:GO:0009615;<br>P:GO:0032728;<br>P:GO:0045089;<br>F:GO:0046872;<br>F:GO:0003677;<br>F:GO:0032549;<br>P:GO:0006350;<br>C:GO:0005634                                   | -            | EC:2.7.7.6  | IPR015712; G3DSA:3.90.1100.10<br>(GENE3D), PTHR20856:SF8<br>(PANTHER), SSF64484 (SUPERFAMILY)                |
| -                       | -                                                   | 0  |                                                                                                                                                                                        |              |             | -                                                                                                            |
| -                       | -                                                   | 0  |                                                                                                                                                                                        |              |             | -                                                                                                            |
| Ancylostoma caninum     | transforming growth factor beta                     | 2  | P:GO:0040007;<br>F:GO:0008083                                                                                                                                                          | -            |             | IPR001111; IPR015615;<br>PTHR11848:SF36 (PANTHER)                                                            |
| Caenorhabditis elegans  | elegans protein confirmed by transcript evidence    | 0  |                                                                                                                                                                                        | F:GO:0005524 |             | IPR007588                                                                                                    |

|                         |                                                  |    |                                                                                                                                                                                                         |   |                                                                                                                      |
|-------------------------|--------------------------------------------------|----|---------------------------------------------------------------------------------------------------------------------------------------------------------------------------------------------------------|---|----------------------------------------------------------------------------------------------------------------------|
| Caenorhabditis elegans  | d- polymerase theta                              | 8  | C:GO:0043231;<br>P:GO:0006310;<br>P:GO:0010468;<br>P:GO:0006260;<br>P:GO:0009640;<br>F:GO:0003677;<br>F:GO:0016740;<br>F:GO:0016787                                                                     | - | IPR001650; G3DSA:3.40.50.300<br>(GENE3D), PTHR11752 (PANTHER),<br>PTHR11752:SF3 (PANTHER), SSF52540<br>(SUPERFAMILY) |
|                         | -                                                | 0  |                                                                                                                                                                                                         |   | -                                                                                                                    |
|                         | -                                                | 0  |                                                                                                                                                                                                         |   | -                                                                                                                    |
|                         | -                                                | 0  |                                                                                                                                                                                                         |   | IPR000242; G3DSA:3.90.190.10<br>(GENE3D), SignalP (SIGNALP)                                                          |
| Ailuropoda melanoleuca  | tropomyosin 4                                    | 11 | C:GO:0002102;<br>F:GO:0008307;<br>C:GO:0030863;<br>P:GO:0006928;<br>P:GO:0006979;<br>P:GO:0006936;<br>F:GO:0003779;<br>C:GO:0005862;<br>C:GO:0031941;<br>F:GO:0005509;<br>C:GO:0001725                  | - | IPR000533; PTHR19269 (PANTHER),<br>PTHR19269:SF13 (PANTHER)                                                          |
| Homo sapiens            | AF370418_1PP14214 [Homo sapiens]                 | 12 | C:GO:0016942;<br>P:GO:0048662;<br>P:GO:0001558;<br>P:GO:0009968;<br>F:GO:0046872;<br>P:GO:0014912;<br>F:GO:0031994;<br>P:GO:0001933;<br>P:GO:0045663;<br>C:GO:0005634;<br>F:GO:0008160;<br>P:GO:0043065 | - | -                                                                                                                    |
| Caenorhabditis briggsae | enoyl coenzyme a hydratase domain containing 3   | 3  | P:GO:0008152;<br>C:GO:0005739;<br>F:GO:0003824                                                                                                                                                          | - | IPR001753; G3DSA:3.90.226.10<br>(GENE3D), PTHR11941 (PANTHER),<br>SSF52096 (SUPERFAMILY)                             |
| Caenorhabditis briggsae | enoyl coenzyme a hydratase domain containing 3   | 3  | P:GO:0008152;<br>C:GO:0005739;<br>F:GO:0003824                                                                                                                                                          | - | IPR001753; G3DSA:3.90.226.10<br>(GENE3D), PTHR11941 (PANTHER),<br>SSF52096 (SUPERFAMILY)                             |
|                         | -                                                | 0  |                                                                                                                                                                                                         |   | -                                                                                                                    |
|                         | -                                                | 0  |                                                                                                                                                                                                         |   | -                                                                                                                    |
| Caenorhabditis elegans  | elegans protein confirmed by transcript evidence | 2  | P:GO:0009792;<br>C:GO:0016021                                                                                                                                                                           | - | IPR010761; SignalP (SIGNALP)                                                                                         |
|                         | -                                                | 0  |                                                                                                                                                                                                         |   | SignalP (SIGNALP)                                                                                                    |
|                         | -                                                | 0  |                                                                                                                                                                                                         |   | -                                                                                                                    |
| Caenorhabditis elegans  | glycogen synthase ki-se 3                        | 0  | F:GO:0016740;<br>F:GO:0004674;<br>F:GO:0004672;<br>P:GO:0006468;<br>F:GO:0000166;<br>F:GO:0005524;<br>P:GO:0002119;<br>F:GO:0016301;<br>P:GO:0040010                                                    |   | IPR011009; G3DSA:1.10.510.10<br>(GENE3D)                                                                             |
|                         | -                                                | 0  |                                                                                                                                                                                                         |   | -                                                                                                                    |
| Caenorhabditis elegans  | elegans protein confirmed by transcript evidence | 0  |                                                                                                                                                                                                         |   | SignalP (SIGNALP)                                                                                                    |

|                           |                                                            |    |                                                                                                                                                                                        |                                                                                                                                     |                                                                                             |
|---------------------------|------------------------------------------------------------|----|----------------------------------------------------------------------------------------------------------------------------------------------------------------------------------------|-------------------------------------------------------------------------------------------------------------------------------------|---------------------------------------------------------------------------------------------|
|                           | -                                                          | 0  |                                                                                                                                                                                        |                                                                                                                                     | -                                                                                           |
|                           | -                                                          | 0  |                                                                                                                                                                                        |                                                                                                                                     | -                                                                                           |
| Nematostella vectensis    | predicted protein [Nematostella vectensis]                 | 0  |                                                                                                                                                                                        | F:GO:0005488;<br>P:GO:0007155                                                                                                       | IPR000436; IPR016060; SignalP (SIGNALP)                                                     |
| Callithrix jacchus        | heterogeneous nuclear ribonucleoprotein a2 b1              | 11 | C:GO:0005737;<br>C:GO:0005730;<br>P:GO:0050658;<br>C:GO:0030530;<br>C:GO:0005654;<br>C:GO:0005681;<br>F:GO:0003723;<br>F:GO:0005515;<br>F:GO:0043047;<br>P:GO:0000398;<br>F:GO:0000166 | -                                                                                                                                   | IPR000504; IPR012677; PTHR10432 (PANTHER), PTHR10432:SF13 (PANTHER), SSF54928 (SUPERFAMILY) |
| Mus musculus              | multiple coagulation factor deficiency protein 2 homolog   | 0  |                                                                                                                                                                                        | F:GO:0003674;<br>P:GO:0016192;<br>F:GO:0005509;<br>C:GO:0005783;<br>P:GO:0019752;<br>C:GO:0005794;<br>C:GO:0005576;<br>P:GO:0006810 | IPR011992; IPR018247; IPR018249; PTHR23104 (PANTHER)                                        |
| Mus musculus              | multiple coagulation factor deficiency protein 2 homolog   | 0  |                                                                                                                                                                                        | F:GO:0003674;<br>P:GO:0016192;<br>F:GO:0005509;<br>C:GO:0005783;<br>P:GO:0019752;<br>C:GO:0005794;<br>C:GO:0005576;<br>P:GO:0006810 | -                                                                                           |
|                           | -                                                          | 0  |                                                                                                                                                                                        |                                                                                                                                     | -                                                                                           |
| Caenorhabditis briggsae   | mitochondrial glutamate                                    | 3  | C:GO:0016020;<br>P:GO:0008340;<br>P:GO:0006810                                                                                                                                         | -                                                                                                                                   | IPR001993; PTHR11896:SF23 (PANTHER)                                                         |
| Heligmosomoides polygyrus | transforming growth protein 2-like protein                 | 2  | P:GO:0040007;<br>F:GO:0008083                                                                                                                                                          | -                                                                                                                                   | -                                                                                           |
| Caenorhabditis briggsae   | Hypothetical protein CBG08397 [Caenorhabditis briggsae]    | 0  |                                                                                                                                                                                        |                                                                                                                                     | -                                                                                           |
| Ailuropoda melanoleuca    | general transcription factor                               | 6  | P:GO:0045449;<br>F:GO:0003702;<br>F:GO:0005515;<br>C:GO:0016021;<br>C:GO:0005634;<br>P:GO:0006366                                                                                      | -                                                                                                                                   | IPR002715; PTHR10351 (PANTHER)                                                              |
| Ixodes scapularis         | elegans protein partially confirmed by transcript evidence | 0  |                                                                                                                                                                                        | F:GO:0003676;<br>F:GO:0004528;<br>F:GO:0046872;<br>C:GO:0016021;<br>P:GO:0008152;<br>F:GO:0016787;<br>F:GO:0003824                  | PTHR10151 (PANTHER), PTHR10151:SF28 (PANTHER)                                               |
|                           | -                                                          | 0  |                                                                                                                                                                                        |                                                                                                                                     | -                                                                                           |
| Pongo abelii              | d--damage-inducible transcript 4                           | 4  | P:GO:0009968;<br>P:GO:0006915;<br>C:GO:0005737;<br>P:GO:0001666                                                                                                                        | -                                                                                                                                   | -                                                                                           |

|                         |                                                         |    |                                                                                                                                                                                                                                                                                                                                |              |             |                                                                                                                                   |                                                                                     |
|-------------------------|---------------------------------------------------------|----|--------------------------------------------------------------------------------------------------------------------------------------------------------------------------------------------------------------------------------------------------------------------------------------------------------------------------------|--------------|-------------|-----------------------------------------------------------------------------------------------------------------------------------|-------------------------------------------------------------------------------------|
| Caenorhabditis elegans  | ribosomal protein l11                                   | 15 | P:GO:0040010;<br>P:GO:0006917;<br>C:GO:0005730;<br>P:GO:0006364;<br>P:GO:0042273;<br>F:GO:0019843;<br>F:GO:0003735;<br>P:GO:0040035;<br>P:GO:0006414;<br>P:GO:0006605;<br>P:GO:0002119;<br>F:GO:0005515;<br>P:GO:0040039;<br>P:GO:0009792;<br>C:GO:0022625                                                                     | -            |             | -                                                                                                                                 |                                                                                     |
| Brugia malayi           | elongator subunit iki3                                  | 0  |                                                                                                                                                                                                                                                                                                                                | F:GO:0005488 |             | IPR006849                                                                                                                         |                                                                                     |
|                         | -                                                       | 0  |                                                                                                                                                                                                                                                                                                                                |              |             | -                                                                                                                                 |                                                                                     |
|                         | -                                                       | 0  |                                                                                                                                                                                                                                                                                                                                |              |             | -                                                                                                                                 |                                                                                     |
|                         | -                                                       | 0  |                                                                                                                                                                                                                                                                                                                                |              |             | -                                                                                                                                 |                                                                                     |
| Caenorhabditis elegans  | elegans protein confirmed by transcript evidence        | 0  |                                                                                                                                                                                                                                                                                                                                |              |             | IPR001534                                                                                                                         |                                                                                     |
| Caenorhabditis briggsae | uroca-se domain containing 1                            | 2  | P:GO:0006548;<br>F:GO:0016153                                                                                                                                                                                                                                                                                                  | -            | EC:4.2.1.49 | IPR000193                                                                                                                         |                                                                                     |
|                         | -                                                       | 0  |                                                                                                                                                                                                                                                                                                                                |              |             | -                                                                                                                                 |                                                                                     |
| Caenorhabditis briggsae | Hypothetical protein CBG11167 [Caenorhabditis briggsae] | 0  |                                                                                                                                                                                                                                                                                                                                |              |             | SignalP (SIGNALP)                                                                                                                 |                                                                                     |
|                         | -                                                       | 0  |                                                                                                                                                                                                                                                                                                                                |              |             | -                                                                                                                                 |                                                                                     |
| Caenorhabditis elegans  | protein ki-se chk2                                      | 11 | P:GO:0006468;<br>P:GO:0006919;<br>P:GO:0045132;<br>P:GO:0008630;<br>P:GO:0009792;<br>F:GO:0004674;<br>P:GO:0000077;<br>P:GO:0007281;<br>C:GO:0044446;<br>F:GO:0005488;<br>C:GO:0005634                                                                                                                                         | -            | EC:2.7.11.0 | IPR000719; IPR008271; IPR011009;<br>IPR017442; IPR020636; IPR020648;<br>G3DSA:1.10.510.10 (GENE3D),<br>G3DSA:3.30.200.20 (GENE3D) |                                                                                     |
| Caenorhabditis elegans  | exportin crm1 homolog                                   | 19 | P:GO:0042176;<br>P:GO:0009615;<br>C:GO:0005654;<br>F:GO:0005515;<br>P:GO:0046825;<br>P:GO:0040010;<br>F:GO:0008565;<br>P:GO:0040011;<br>P:GO:0051301;<br>C:GO:0005829;<br>C:GO:0000776;<br>C:GO:0005635;<br>P:GO:0009792;<br>P:GO:0002119;<br>C:GO:0005642;<br>P:GO:0010171;<br>P:GO:0010824;<br>P:GO:0034504;<br>C:GO:0030529 | -            |             |                                                                                                                                   | IPR011989; IPR014877; IPR016024;<br>PTHR11223 (PANTHER),<br>PTHR11223:SF2 (PANTHER) |
|                         | -                                                       | 0  |                                                                                                                                                                                                                                                                                                                                |              |             | SignalP (SIGNALP)                                                                                                                 |                                                                                     |

|                         |                                             |    |                                                                                                                                                                                                                          |                                                |                                                                                               |
|-------------------------|---------------------------------------------|----|--------------------------------------------------------------------------------------------------------------------------------------------------------------------------------------------------------------------------|------------------------------------------------|-----------------------------------------------------------------------------------------------|
| Brugia malayi           | lethal family member (let-23)               | 0  | F:GO:0016740;<br>C:GO:0016020;<br>F:GO:0004672;<br>P:GO:0006468;<br>F:GO:0000166;<br>P:GO:0007169;<br>F:GO:0005524;<br>F:GO:0004714;<br>F:GO:0016301;<br>C:GO:0005578;<br>F:GO:0004713;<br>F:GO:0004872;<br>F:GO:0005515 |                                                | G3DSA:2.10.220.10 (GENE3D)                                                                    |
| Caenorhabditis elegans  | protein yipf3                               | 3  | C:GO:0016021;<br>C:GO:0005794;<br>C:GO:0030133                                                                                                                                                                           | -                                              | IPR006977; PTHR15627 (PANTHER),<br>PTHR15627:SF9 (PANTHER)                                    |
|                         | -                                           | 0  |                                                                                                                                                                                                                          |                                                | -                                                                                             |
| Caenorhabditis elegans  | mtk1 mekk4 homolog family member (mtk-1)    | 2  | P:GO:0009792;<br>P:GO:0016246                                                                                                                                                                                            | -                                              | -                                                                                             |
| Caenorhabditis briggsae | rho gtpase activating protein 5             | 11 | F:GO:0005100;<br>F:GO:0042169;<br>C:GO:0005622;<br>P:GO:0030879;<br>P:GO:0002053;<br>P:GO:0008361;<br>P:GO:0019915;<br>P:GO:0007155;<br>P:GO:0030335;<br>F:GO:0003924;<br>P:GO:0007266                                   | -                                              | EC:3.6.5.1;<br>EC:3.6.5.2;<br>EC:3.6.5.3;<br>EC:3.6.5.4                                       |
|                         | -                                           | 0  |                                                                                                                                                                                                                          |                                                | -                                                                                             |
|                         | -                                           | 0  |                                                                                                                                                                                                                          |                                                | -                                                                                             |
|                         | -                                           | 0  |                                                                                                                                                                                                                          |                                                | -                                                                                             |
|                         | -                                           | 0  |                                                                                                                                                                                                                          |                                                | SignalP (SIGNALP)                                                                             |
| Brugia malayi           | n-alpha-acetyltransferase auxiliary subunit | 0  |                                                                                                                                                                                                                          | P:GO:0048659;<br>C:GO:0005737;<br>F:GO:0005515 | PTHR21373 (PANTHER)                                                                           |
| Caenorhabditis briggsae | r- binding identical                        | 5  | F:GO:0003723;<br>P:GO:0009792;<br>C:GO:0005622;<br>P:GO:0006378;<br>F:GO:0000166                                                                                                                                         | -                                              | IPR000504; IPR012677; IPR015465;<br>PTHR10432 (PANTHER), SSF54928<br>(SUPERFAMILY)            |
| Loa loa                 | d- helicase                                 | 9  | F:GO:0043140;<br>P:GO:0006260;<br>F:GO:0003676;<br>F:GO:0005515;<br>F:GO:0005524;<br>C:GO:0005634;<br>P:GO:0006310;<br>F:GO:0009378;<br>P:GO:0006281                                                                     | -                                              | IPR004589; G3DSA:3.40.50.300<br>(GENE3D), PTHR13710:SF12<br>(PANTHER), SSF52540 (SUPERFAMILY) |
|                         | -                                           | 0  |                                                                                                                                                                                                                          |                                                | -                                                                                             |
|                         | -                                           | 0  |                                                                                                                                                                                                                          |                                                | SignalP (SIGNALP)                                                                             |
|                         | -                                           | 0  |                                                                                                                                                                                                                          |                                                | -                                                                                             |
|                         | -                                           | 0  |                                                                                                                                                                                                                          |                                                | -                                                                                             |

|                         |                                                         |    |                                                                                                                                                                                        |                                                                                                                                                                                                                          |  |                                                                                                                |
|-------------------------|---------------------------------------------------------|----|----------------------------------------------------------------------------------------------------------------------------------------------------------------------------------------|--------------------------------------------------------------------------------------------------------------------------------------------------------------------------------------------------------------------------|--|----------------------------------------------------------------------------------------------------------------|
| Caenorhabditis briggsae | Hypothetical protein CBG07097 [Caenorhabditis briggsae] | 0  |                                                                                                                                                                                        | F:GO:0005096;<br>P:GO:0051056;<br>P:GO:0007165;<br>C:GO:0005622                                                                                                                                                          |  | -                                                                                                              |
|                         | -                                                       | 0  |                                                                                                                                                                                        |                                                                                                                                                                                                                          |  | -                                                                                                              |
| Caenorhabditis elegans  | elegans protein confirmed by transcript evidence        | 7  | F:GO:0003700;<br>F:GO:0043565;<br>F:GO:0005515;<br>F:GO:0003707;<br>C:GO:0005634;<br>F:GO:0008270;<br>P:GO:0006355                                                                     |                                                                                                                                                                                                                          |  | IPR001628; IPR013088; PR00350 (PRINTS), PTHR11865 (PANTHER), PTHR11865:SF158 (PANTHER), SSF57716 (SUPERFAMILY) |
| Loa loa                 | wd repeat-containing protein 36                         | 3  | F:GO:0003824;<br>C:GO:0032991;<br>C:GO:0044424                                                                                                                                         |                                                                                                                                                                                                                          |  | IPR001680; IPR011046; IPR015943; IPR017986; IPR019781; IPR019782; PTHR13889 (PANTHER), PTHR13889:SF2 (PANTHER) |
| Ancylostoma ceylanicum  | glutamate-cysteine ligase modifier subunit              | 5  | P:GO:0009987;<br>P:GO:0055114;<br>F:GO:0016874;<br>F:GO:0016491;<br>F:GO:0005515                                                                                                       |                                                                                                                                                                                                                          |  | IPR023210; PTHR13295 (PANTHER)                                                                                 |
| Caenorhabditis briggsae | elegans protein confirmed by transcript evidence        | 0  |                                                                                                                                                                                        |                                                                                                                                                                                                                          |  | IPR001534                                                                                                      |
| Caenorhabditis elegans  | elegans protein confirmed by transcript evidence        | 0  |                                                                                                                                                                                        |                                                                                                                                                                                                                          |  | IPR001534; SignalP (SIGNALP)                                                                                   |
|                         | -                                                       | 0  |                                                                                                                                                                                        |                                                                                                                                                                                                                          |  | -                                                                                                              |
|                         | -                                                       | 0  |                                                                                                                                                                                        |                                                                                                                                                                                                                          |  | -                                                                                                              |
| Caenorhabditis elegans  | briggsae cbr-ugt-21 protein                             | 0  |                                                                                                                                                                                        | F:GO:0016740;<br>F:GO:0030246;<br>C:GO:0016021;<br>F:GO:0003700;<br>C:GO:0005634;<br>F:GO:0016758;<br>F:GO:0016757;<br>P:GO:0005975;<br>P:GO:0030259;<br>P:GO:0006355;<br>F:GO:0005515;<br>P:GO:0008152;<br>P:GO:0045449 |  | IPR002213; PTHR11926:SF3 (PANTHER), SignalP (SIGNALP)                                                          |
|                         | -                                                       | 0  |                                                                                                                                                                                        |                                                                                                                                                                                                                          |  | -                                                                                                              |
| Caenorhabditis elegans  | peptide chain release factor 1                          | 0  |                                                                                                                                                                                        | F:GO:0003747;<br>P:GO:0006412;<br>C:GO:0005737;<br>F:GO:0016787;<br>F:GO:0016149;<br>P:GO:0006415                                                                                                                        |  | IPR005139; PTHR11075 (PANTHER), PTHR11075:SF11 (PANTHER), SSF75620 (SUPERFAMILY)                               |
| Loa loa                 | e2f transcription factor 4                              | 11 | P:GO:0051726;<br>P:GO:0006355;<br>P:GO:0009887;<br>F:GO:0003677;<br>F:GO:0003700;<br>F:GO:0019904;<br>F:GO:0008134;<br>P:GO:0000082;<br>C:GO:0005635;<br>C:GO:0005654;<br>C:GO:0005737 |                                                                                                                                                                                                                          |  | IPR003316; IPR011991; IPR015633; PTHR12081:SF24 (PANTHER), SSF144074 (SUPERFAMILY), SSF46785 (SUPERFAMILY)     |



|                         |                                                  |    |                                                                                                                                                                                                                          |                                                                                                                    |             |                                                                                                                     |
|-------------------------|--------------------------------------------------|----|--------------------------------------------------------------------------------------------------------------------------------------------------------------------------------------------------------------------------|--------------------------------------------------------------------------------------------------------------------|-------------|---------------------------------------------------------------------------------------------------------------------|
| Loa loa                 | e2f transcription factor 4                       | 13 | P:GO:0000083;<br>P:GO:0009887;<br>F:GO:0003677;<br>P:GO:0008361;<br>F:GO:0003700;<br>P:GO:0042127;<br>F:GO:0019904;<br>F:GO:0008134;<br>P:GO:0042384;<br>C:GO:0005654;<br>P:GO:0008015;<br>P:GO:0002064;<br>P:GO:0006884 | -                                                                                                                  |             | IPR003316; IPR011991; IPR015633;<br>PTHR12081:SF24 (PANTHER),<br>SSF144074 (SUPERFAMILY), SSF46785<br>(SUPERFAMILY) |
| Caenorhabditis briggsae | elegans protein confirmed by transcript evidence | 3  | P:GO:0019915;<br>P:GO:0040018;<br>P:GO:0040011                                                                                                                                                                           | -                                                                                                                  |             | IPR000615; IPR021134                                                                                                |
| Brugia malayi           | in family member (ttn-1)                         | 1  | P:GO:0009792                                                                                                                                                                                                             | -                                                                                                                  |             | IPR007110; IPR013783; PTHR19897<br>(PANTHER), PTHR19897:SF17<br>(PANTHER), SSF48726 (SUPERFAMILY)                   |
| Caenorhabditis elegans  | cell death abnormality family member (ced-7)     | 4  | P:GO:0043652;<br>C:GO:0005886;<br>P:GO:0012501;<br>F:GO:0017111                                                                                                                                                          | -                                                                                                                  | EC:3.6.1.15 | -                                                                                                                   |
| -                       | -                                                | 0  |                                                                                                                                                                                                                          |                                                                                                                    |             | -                                                                                                                   |
| Caenorhabditis briggsae | family protein                                   | 3  | P:GO:0000003;<br>F:GO:0008121;<br>P:GO:0040010                                                                                                                                                                           | -                                                                                                                  | EC:1.10.2.2 | SignalP (SIGNALP)                                                                                                   |
| Caenorhabditis briggsae | alpha-adaptin                                    | 13 | F:GO:0008565;<br>P:GO:0040010;<br>F:GO:0008022;<br>P:GO:0000003;<br>C:GO:0030139;<br>C:GO:0030131;<br>C:GO:0005905;<br>P:GO:0040011;<br>P:GO:0006898;<br>P:GO:0006886;<br>P:GO:0009792;<br>P:GO:0048488;<br>C:GO:0005886 | -                                                                                                                  |             | IPR002553; IPR011989; IPR016024;<br>PTHR22780 (PANTHER),<br>PTHR22780:SF4 (PANTHER)                                 |
| Caenorhabditis briggsae | dimethyladenosine transferase                    | 5  | C:GO:0005737;<br>P:GO:0032259;<br>P:GO:0000154;<br>C:GO:0005634;<br>F:GO:0000179                                                                                                                                         | -                                                                                                                  |             | -                                                                                                                   |
| -                       | -                                                | 0  |                                                                                                                                                                                                                          |                                                                                                                    |             | -                                                                                                                   |
| Caenorhabditis briggsae | elegans protein confirmed by transcript evidence | 0  |                                                                                                                                                                                                                          | F:GO:0046872;<br>F:GO:0008270;<br>P:GO:0019915                                                                     |             | PTHR10634 (PANTHER),<br>PTHR10634:SF1 (PANTHER)                                                                     |
| Branchiostoma floridae  | deubiquiti-ting enzyme 3-like                    | 0  |                                                                                                                                                                                                                          | F:GO:0046872;<br>F:GO:0016787;<br>F:GO:0008234;<br>F:GO:0008270;<br>F:GO:0008233;<br>F:GO:0004221;<br>P:GO:0006511 |             | IPR001394; PTHR10420 (PANTHER),<br>PTHR10420:SF51 (PANTHER), SignalP<br>(SIGNALP), SSF54001 (SUPERFAMILY)           |
| -                       | -                                                | 0  |                                                                                                                                                                                                                          |                                                                                                                    |             | -                                                                                                                   |
| -                       | -                                                | 0  |                                                                                                                                                                                                                          |                                                                                                                    |             | -                                                                                                                   |

|                         |                                                        |    |                                                                                                                                                                                                                                                                                                                                                                                                                                                                                          |                               |                                                                                                     |
|-------------------------|--------------------------------------------------------|----|------------------------------------------------------------------------------------------------------------------------------------------------------------------------------------------------------------------------------------------------------------------------------------------------------------------------------------------------------------------------------------------------------------------------------------------------------------------------------------------|-------------------------------|-----------------------------------------------------------------------------------------------------|
|                         | -                                                      | 0  |                                                                                                                                                                                                                                                                                                                                                                                                                                                                                          |                               | -                                                                                                   |
|                         | -                                                      | 0  |                                                                                                                                                                                                                                                                                                                                                                                                                                                                                          |                               | -                                                                                                   |
|                         | -                                                      | 0  |                                                                                                                                                                                                                                                                                                                                                                                                                                                                                          |                               | -                                                                                                   |
| Brugia malayi           | spry domain-containing socs box protein ssb-4          | 0  |                                                                                                                                                                                                                                                                                                                                                                                                                                                                                          |                               | IPR001496; IPR001870; IPR003877; IPR008985; IPR019775; PTHR12245 (PANTHER)                          |
| Caenorhabditis elegans  | hed family member (ptc-3)                              | 30 | P:GO:0060644;<br>P:GO:0000003;<br>P:GO:0008544;<br>F:GO:0005113;<br>P:GO:0010157;<br>P:GO:0040015;<br>P:GO:0009612;<br>P:GO:0040018;<br>P:GO:0032526;<br>P:GO:0043616;<br>P:GO:0040011;<br>P:GO:0030326;<br>P:GO:0014070;<br>P:GO:0018996;<br>P:GO:0060603;<br>F:GO:0008201;<br>P:GO:0016485;<br>F:GO:0008158;<br>P:GO:0001843;<br>P:GO:0007165;<br>P:GO:0002119;<br>P:GO:0050680;<br>P:GO:0042493;<br>P:GO:0008589;<br>P:GO:0035137;<br>C:GO:0005887;<br>P:GO:0021904;<br>P:GO:0009792; |                               | IPR003392; PTHR10796 (PANTHER), PTHR10796:SF34 (PANTHER), SignalP (SIGNALP), SSF82866 (SUPERFAMILY) |
| Caenorhabditis briggsae | protein ki-se domain containing protein                | 4  | F:GO:0004672;<br>P:GO:0040010;<br>F:GO:0000166                                                                                                                                                                                                                                                                                                                                                                                                                                           |                               | IPR011009; PTHR11909 (PANTHER), PTHR11909:SF19 (PANTHER)                                            |
| Caenorhabditis elegans  | hypothetical protein F43D9.1 [Caenorhabditis elegans]  | 0  |                                                                                                                                                                                                                                                                                                                                                                                                                                                                                          | C:GO:0016020;<br>F:GO:0008158 | PTHR10796 (PANTHER), PTHR10796:SF13 (PANTHER), SignalP (SIGNALP)                                    |
| Caenorhabditis elegans  | hypothetical protein F26F12.3 [Caenorhabditis elegans] | 0  |                                                                                                                                                                                                                                                                                                                                                                                                                                                                                          |                               | -                                                                                                   |
|                         | -                                                      | 0  |                                                                                                                                                                                                                                                                                                                                                                                                                                                                                          |                               | -                                                                                                   |
| Caenorhabditis briggsae | briggsae cbr-asp-6 protein                             | 5  | P:GO:0008219;<br>P:GO:0006508;<br>F:GO:0004190;<br>F:GO:0005515;<br>P:GO:0040011                                                                                                                                                                                                                                                                                                                                                                                                         | EC:3.4.23.0                   | IPR001461; IPR001969; IPR009007; IPR021109; PTHR13683:SF53 (PANTHER), SignalP (SIGNALP)             |
|                         | -                                                      | 0  |                                                                                                                                                                                                                                                                                                                                                                                                                                                                                          |                               | -                                                                                                   |
| Caenorhabditis elegans  | yl59_caeel ame: full=uncharacterized protein           | 0  |                                                                                                                                                                                                                                                                                                                                                                                                                                                                                          |                               | SignalP (SIGNALP)                                                                                   |
| Caenorhabditis elegans  | periodic tryptophan protein 2 homolog                  | 1  | C:GO:0044464                                                                                                                                                                                                                                                                                                                                                                                                                                                                             |                               | IPR000408; IPR001680; IPR011046; IPR015943; IPR017986; IPR019781; PTHR19858 (PANTHER)               |
| Caenorhabditis elegans  | hypothetical protein R04B3.3 [Caenorhabditis elegans]  | 0  |                                                                                                                                                                                                                                                                                                                                                                                                                                                                                          |                               | -                                                                                                   |
|                         | -                                                      | 0  |                                                                                                                                                                                                                                                                                                                                                                                                                                                                                          |                               | -                                                                                                   |
|                         | -                                                      | 0  |                                                                                                                                                                                                                                                                                                                                                                                                                                                                                          |                               | SignalP (SIGNALP)                                                                                   |

|                         |                                                                             |    |                                                                                                                                                                                                                                                                                                                                                                                   |                                                                                                                                                                       |                                                                                                                                                                     |
|-------------------------|-----------------------------------------------------------------------------|----|-----------------------------------------------------------------------------------------------------------------------------------------------------------------------------------------------------------------------------------------------------------------------------------------------------------------------------------------------------------------------------------|-----------------------------------------------------------------------------------------------------------------------------------------------------------------------|---------------------------------------------------------------------------------------------------------------------------------------------------------------------|
| Homo sapiens            | type alpha 1 (ehlers-danlos syndrome type autosomal dominant) isoform cra_b | 22 | P:GO:0009314;<br>P:GO:0018149;<br>P:GO:0030168;<br>P:GO:0048565;<br>P:GO:0043206;<br>C:GO:0005586;<br>P:GO:0007229;<br>P:GO:0050777;<br>P:GO:0007507;<br>P:GO:0007160;<br>C:GO:0005615;<br>F:GO:0046332;<br>P:GO:0001501;<br>F:GO:0048407;<br>P:GO:0043588;<br>P:GO:0030199;<br>F:GO:0005178;<br>P:GO:0007179;<br>P:GO:0034097;<br>P:GO:0032964;<br>F:GO:0005201;<br>P:GO:0001568 |                                                                                                                                                                       | IPR000885; PTHR10499 (PANTHER), PTHR10499:SF71 (PANTHER), PSS1461 (PROFILE)                                                                                         |
| -                       | -                                                                           | 0  |                                                                                                                                                                                                                                                                                                                                                                                   |                                                                                                                                                                       | -                                                                                                                                                                   |
| -                       | -                                                                           | 0  |                                                                                                                                                                                                                                                                                                                                                                                   |                                                                                                                                                                       | -                                                                                                                                                                   |
| Caenorhabditis briggsae | elegans protein partially confirmed by transcript evidence                  | 0  |                                                                                                                                                                                                                                                                                                                                                                                   | F:GO:0003676;<br>F:GO:0004523                                                                                                                                         | G3DSA:3.30.420.10 (GENE3D), PTHR10642 (PANTHER)                                                                                                                     |
| -                       | -                                                                           | 0  |                                                                                                                                                                                                                                                                                                                                                                                   |                                                                                                                                                                       | SignalP (SIGNALP)                                                                                                                                                   |
| -                       | -                                                                           | 0  |                                                                                                                                                                                                                                                                                                                                                                                   |                                                                                                                                                                       | SignalP (SIGNALP)                                                                                                                                                   |
| -                       | -                                                                           | 0  |                                                                                                                                                                                                                                                                                                                                                                                   |                                                                                                                                                                       | -                                                                                                                                                                   |
| -                       | -                                                                           | 0  |                                                                                                                                                                                                                                                                                                                                                                                   |                                                                                                                                                                       | -                                                                                                                                                                   |
| -                       | -                                                                           | 0  |                                                                                                                                                                                                                                                                                                                                                                                   |                                                                                                                                                                       | -                                                                                                                                                                   |
| Necator americanus      | venom-allergen-like protein family member (vap-1)                           | 0  |                                                                                                                                                                                                                                                                                                                                                                                   | P:GO:0040011;<br>C:GO:0005576                                                                                                                                         | IPR001283; IPR002413; IPR013032; IPR014044; PTHR10334:SF11 (PANTHER), SignalP (SIGNALP)                                                                             |
| Ancylostoma duodenale   | ancylostoma-secreted protein 1 precursor                                    | 0  |                                                                                                                                                                                                                                                                                                                                                                                   | C:GO:0005576                                                                                                                                                          | IPR014044; SignalP (SIGNALP)                                                                                                                                        |
| Caenorhabditis elegans  | elegans protein confirmed by transcript evidence                            | 0  |                                                                                                                                                                                                                                                                                                                                                                                   | F:GO:0004500;<br>P:GO:0009792;<br>C:GO:0005576;<br>P:GO:0006548                                                                                                       | IPR005018                                                                                                                                                           |
| -                       | -                                                                           | 0  |                                                                                                                                                                                                                                                                                                                                                                                   |                                                                                                                                                                       | -                                                                                                                                                                   |
| -                       | -                                                                           | 0  |                                                                                                                                                                                                                                                                                                                                                                                   |                                                                                                                                                                       | -                                                                                                                                                                   |
| Caenorhabditis elegans  | serine protease                                                             | 0  |                                                                                                                                                                                                                                                                                                                                                                                   | F:GO:0004252;<br>C:GO:0016020;<br>F:GO:0008061;<br>C:GO:0005576;<br>F:GO:0003824;<br>F:GO:0005044;<br>F:GO:0008233;<br>P:GO:0006508;<br>P:GO:0006030;<br>F:GO:0005488 | IPR001190; IPR002172; PTHR10529 (PANTHER), PTHR10529:SF2 (PANTHER)                                                                                                  |
| Caenorhabditis briggsae | bro1 domain-containing protein brox                                         | 0  |                                                                                                                                                                                                                                                                                                                                                                                   | C:GO:0016020                                                                                                                                                          | PTHR23032 (PANTHER)                                                                                                                                                 |
| Caenorhabditis elegans  | mitochondrial solute carrier                                                | 6  | C:GO:0005743;<br>F:GO:0022857;<br>C:GO:0005811;<br>P:GO:0006839;<br>F:GO:0005509;<br>C:GO:0016021                                                                                                                                                                                                                                                                                 |                                                                                                                                                                       | IPR001993; IPR002048; IPR002067; IPR002113; IPR011992; IPR018108; IPR018247; IPR018249; G3DSA:1.50.40.10 (GENE3D), PTHR11896:SF74 (PANTHER), SSF47473 (SUPERFAMILY) |

|                         |                                                         |   |                                                                                                                                                      |                                                                                                                                     |             |                                                                                                            |
|-------------------------|---------------------------------------------------------|---|------------------------------------------------------------------------------------------------------------------------------------------------------|-------------------------------------------------------------------------------------------------------------------------------------|-------------|------------------------------------------------------------------------------------------------------------|
|                         |                                                         | 0 |                                                                                                                                                      |                                                                                                                                     |             |                                                                                                            |
| Caenorhabditis briggsae | Hypothetical protein CBG11187 [Caenorhabditis briggsae] | 2 | F:GO:0004672;<br>P:GO:0040010                                                                                                                        | -                                                                                                                                   |             | SignalP (SIGNALP)                                                                                          |
| Caenorhabditis elegans  | protein ki-se domain containing protein                 | 7 | P:GO:0006935;<br>F:GO:0005524;<br>F:GO:0004713;<br>P:GO:0007155;<br>F:GO:0005515;<br>P:GO:0007165;<br>P:GO:0046777                                   | -                                                                                                                                   | EC:2.7.10.0 | IPR000719; IPR001245; IPR008266;<br>IPR011009; IPR020685; IPR020764;<br>G3DSA:1.10.510.10 (GENE3D)         |
| Caenorhabditis elegans  | uncoordi-ted family member (unc-44)                     | 2 | C:GO:0016020;<br>F:GO:0005515                                                                                                                        | -                                                                                                                                   |             | -                                                                                                          |
| Loa loa                 | uncoordi-ted family member (unc-44)                     | 2 | F:GO:0005515;<br>P:GO:0007165                                                                                                                        | -                                                                                                                                   |             | IPR002110; IPR018120; IPR020683;<br>PRO1415 (PRINTS), PTHR18958<br>(PANTHER), PTHR18958:SF296<br>(PANTHER) |
| Haemonchus contortus    | heat shock protein family member (hsp- )                | 0 |                                                                                                                                                      | P:GO:0006950;<br>P:GO:0009408                                                                                                       |             | -                                                                                                          |
|                         | -                                                       | 0 |                                                                                                                                                      |                                                                                                                                     |             | SignalP (SIGNALP)                                                                                          |
|                         | -                                                       | 0 |                                                                                                                                                      |                                                                                                                                     |             | -                                                                                                          |
|                         | -                                                       | 0 |                                                                                                                                                      |                                                                                                                                     |             | -                                                                                                          |
| Homo sapiens            | sbf1 protein                                            | 4 | P:GO:0007283;<br>P:GO:0016311;<br>F:GO:0016791;<br>C:GO:0044464                                                                                      | -                                                                                                                                   | EC:3.1.3.0  | IPR017906; PTHR10807 (PANTHER),<br>PTHR10807:SF4 (PANTHER), SSF52799<br>(SUPERFAMILY)                      |
| Homo sapiens            | mhc class ii antigen                                    | 9 | C:GO:0005789;<br>C:GO:0005887;<br>C:GO:0042613;<br>C:GO:0005794;<br>P:GO:0002504;<br>C:GO:0031902;<br>C:GO:0005765;<br>F:GO:0032395;<br>P:GO:0006955 | -                                                                                                                                   |             | SignalP (SIGNALP)                                                                                          |
|                         | -                                                       | 0 |                                                                                                                                                      |                                                                                                                                     |             | -                                                                                                          |
| Caenorhabditis elegans  | uncoordi-ted family member (unc-103)                    | 0 |                                                                                                                                                      | F:GO:0005249;<br>C:GO:0016021;<br>C:GO:0016020;<br>P:GO:0006813;<br>P:GO:0055085;<br>P:GO:0006811;<br>F:GO:0005216;<br>P:GO:0006810 |             | -                                                                                                          |
| Brugia malayi           | clathrin-associated protein                             | 7 | P:GO:0016183;<br>C:GO:0008021;<br>P:GO:0007269;<br>C:GO:0030122;<br>F:GO:0005515;<br>P:GO:0006886;<br>P:GO:0033227                                   | -                                                                                                                                   |             | IPR011012; IPR015629; IPR022775;<br>G3DSA:3.30.450.60 (GENE3D),<br>PTHR11998 (PANTHER)                     |

|                     |                                     |    |                                                                                                                                                                                                                                           |             |                                                                                                                                        |
|---------------------|-------------------------------------|----|-------------------------------------------------------------------------------------------------------------------------------------------------------------------------------------------------------------------------------------------|-------------|----------------------------------------------------------------------------------------------------------------------------------------|
| synthetic construct | proteasome ( macropain) beta 3      | 9  | P:GO:0051436;<br>P:GO:0051437;<br>F:GO:0004298;<br>P:GO:0031145;<br>F:GO:0005515;<br>P:GO:0044419;<br>C:GO:0005737;<br>C:GO:0005839;<br>C:GO:0005634                                                                                      | EC:3.4.25.0 | IPR001353; G3DSA:3.60.20.10<br>(GENE3D), PTHR11599 (PANTHER),<br>PTHR11599:SF7 (PANTHER), PS51476<br>(PROFILE), SSF56235 (SUPERFAMILY) |
| Loa loa             | splicing factor u2af 26 kda subunit | 14 | F:GO:0003723;<br>C:GO:0015030;<br>C:GO:0005681;<br>F:GO:0008270;<br>P:GO:0040007;<br>F:GO:0050733;<br>C:GO:0016607;<br>P:GO:0040035;<br>P:GO:0018996;<br>P:GO:0002119;<br>F:GO:0000166;<br>P:GO:0040011;<br>P:GO:0000398;<br>P:GO:0009792 |             | IPR022272                                                                                                                              |
| Loa loa             | splicing factor u2af 26 kda subunit | 14 | F:GO:0003723;<br>C:GO:0015030;<br>C:GO:0005681;<br>F:GO:0008270;<br>P:GO:0040007;<br>F:GO:0050733;<br>C:GO:0016607;<br>P:GO:0040035;<br>P:GO:0018996;<br>P:GO:0002119;<br>F:GO:0000166;<br>P:GO:0040011;<br>P:GO:0000398;<br>P:GO:0009792 |             | IPR000504; IPR000571; IPR009145;<br>IPR012677; SSF54928 (SUPERFAMILY),<br>SSF90229 (SUPERFAMILY)                                       |
| Loa loa             | splicing factor u2af 26 kda subunit | 14 | F:GO:0003723;<br>C:GO:0015030;<br>C:GO:0005681;<br>F:GO:0008270;<br>P:GO:0040007;<br>F:GO:0050733;<br>C:GO:0016607;<br>P:GO:0040035;<br>P:GO:0018996;<br>P:GO:0002119;<br>F:GO:0000166;<br>P:GO:0040011;<br>P:GO:0000398;<br>P:GO:0009792 |             | IPR022272                                                                                                                              |
| Homo sapiens        | gamma-inducible protein 30          | 7  | F:GO:0016491;<br>P:GO:0019886;<br>C:GO:0005764;<br>P:GO:0048147;<br>P:GO:0055114;<br>P:GO:0050821;<br>C:GO:0005576                                                                                                                        |             | IPR004911; PTHR13234:SF7<br>(PANTHER)                                                                                                  |

|                        |                                    |   |                                                                                                                                                                                                                                                                                                                                                                                                                                                       |                                                                                |
|------------------------|------------------------------------|---|-------------------------------------------------------------------------------------------------------------------------------------------------------------------------------------------------------------------------------------------------------------------------------------------------------------------------------------------------------------------------------------------------------------------------------------------------------|--------------------------------------------------------------------------------|
| Trichoplax adhaerens   | d- polymerase partial              | 0 | F:GO:0004385;<br>P:GO:0007005;<br>P:GO:0000003;<br>P:GO:0006264;<br>C:GO:0005913;<br>F:GO:0003677;<br>C:GO:0005912;<br>F:GO:0003676;<br>P:GO:0006261;<br>P:GO:0006260;<br>P:GO:0016337;<br>P:GO:0008340;<br>F:GO:0008296;<br>P:GO:0008406;<br>P:GO:0035147;<br>C:GO:0005739;<br>F:GO:0003887;<br>P:GO:0046328;<br>P:GO:0007163;<br>C:GO:0005760;<br>P:GO:0035156;<br>P:GO:0030421;<br>P:GO:0007391;<br>F:GO:0005515;<br>P:GO:0007254;<br>P:GO:0007562 | -                                                                              |
| -                      | -                                  | 0 | -                                                                                                                                                                                                                                                                                                                                                                                                                                                     | -                                                                              |
| -                      | -                                  | 0 | -                                                                                                                                                                                                                                                                                                                                                                                                                                                     | -                                                                              |
| -                      | -                                  | 0 | -                                                                                                                                                                                                                                                                                                                                                                                                                                                     | -                                                                              |
| -                      | -                                  | 0 | -                                                                                                                                                                                                                                                                                                                                                                                                                                                     | -                                                                              |
| -                      | -                                  | 0 | -                                                                                                                                                                                                                                                                                                                                                                                                                                                     | -                                                                              |
| Xenopus laevis         | d-se domain containing 3 variant 5 | 1 | C:GO:0005739                                                                                                                                                                                                                                                                                                                                                                                                                                          | IPR001130; IPR015992;<br>G3DSA:3.20.20.140 (GENE3D),<br>SSF51556 (SUPERFAMILY) |
| Macaca mulatta         | cd82 molecule                      | 0 | C:GO:0005887;<br>F:GO:0005515;<br>C:GO:0005886                                                                                                                                                                                                                                                                                                                                                                                                        | SignalP (SIGNALP)                                                              |
| -                      | -                                  | 0 | -                                                                                                                                                                                                                                                                                                                                                                                                                                                     | -                                                                              |
| -                      | -                                  | 0 | -                                                                                                                                                                                                                                                                                                                                                                                                                                                     | -                                                                              |
| -                      | -                                  | 0 | -                                                                                                                                                                                                                                                                                                                                                                                                                                                     | -                                                                              |
| -                      | -                                  | 0 | -                                                                                                                                                                                                                                                                                                                                                                                                                                                     | -                                                                              |
| Caenorhabditis elegans | briggsae cbr-mup-4 protein         | 1 | F:GO:0005515                                                                                                                                                                                                                                                                                                                                                                                                                                          | -                                                                              |

|                         |                                                            |    |                                                                                                                                                                                                                                                                                             |                                                                                                                    |                                                                                        |
|-------------------------|------------------------------------------------------------|----|---------------------------------------------------------------------------------------------------------------------------------------------------------------------------------------------------------------------------------------------------------------------------------------------|--------------------------------------------------------------------------------------------------------------------|----------------------------------------------------------------------------------------|
| Brugia malayi           | structural maintenance of chromosomes 1a                   | 17 | P:GO:000075;<br>P:GO:0007052;<br>P:GO:0042770;<br>C:GO:0005737;<br>F:GO:0046982;<br>F:GO:0003777;<br>C:GO:0000776;<br>P:GO:0008380;<br>P:GO:0007126;<br>C:GO:0008280;<br>C:GO:0000794;<br>P:GO:0007064;<br>P:GO:0009314;<br>F:GO:0003682;<br>P:GO:0032876;<br>F:GO:0005524;<br>P:GO:0006281 | -                                                                                                                  | IPR010935; PTHR18937 (PANTHER),<br>PTHR18937:SF12 (PANTHER)                            |
| Tetrahymena thermophila | lim domain containing protein                              | 0  |                                                                                                                                                                                                                                                                                             | F:GO:0046872;<br>F:GO:0008270;<br>C:GO:0005575                                                                     | IPR001781; PTHR18973 (PANTHER),<br>PTHR18973:SF49 (PANTHER),<br>SSF57716 (SUPERFAMILY) |
| Caenorhabditis elegans  | elegans protein partially confirmed by transcript evidence | 0  |                                                                                                                                                                                                                                                                                             | C:GO:0016021;<br>C:GO:0016020;<br>F:GO:0016772                                                                     | PTHR13205 (PANTHER), SignalP<br>(SIGNALP)                                              |
|                         | -                                                          | 0  |                                                                                                                                                                                                                                                                                             |                                                                                                                    | SignalP (SIGNALP)                                                                      |
| Cooperia oncophora      | latrophilin-like protein 2                                 | 6  | P:GO:0007218;<br>C:GO:0016021;<br>P:GO:0007165;<br>C:GO:0005886;<br>F:GO:0005529;<br>F:GO:0004930                                                                                                                                                                                           | -                                                                                                                  | -                                                                                      |
|                         | -                                                          | 0  |                                                                                                                                                                                                                                                                                             |                                                                                                                    | -                                                                                      |
| Caenorhabditis briggsae | uncoordinated family member (unc-52)                       | 2  | P:GO:0030239;<br>C:GO:0005578                                                                                                                                                                                                                                                               | -                                                                                                                  | IPR003599; IPR007110; IPR013783;<br>SSF48726 (SUPERFAMILY)                             |
| Brugia malayi           | tumor protein p53 binding protein 1                        | 7  | F:GO:0005488;<br>C:GO:0044427;<br>P:GO:0040007;<br>P:GO:0040035;<br>P:GO:0019915;<br>P:GO:0002119;<br>P:GO:0002009                                                                                                                                                                          | -                                                                                                                  | IPR001357; G3DSA:3.40.50.10190<br>(GENE3D), PTHR15321 (PANTHER)                        |
|                         | -                                                          | 0  |                                                                                                                                                                                                                                                                                             |                                                                                                                    | -                                                                                      |
|                         | -                                                          | 0  |                                                                                                                                                                                                                                                                                             |                                                                                                                    | SignalP (SIGNALP)                                                                      |
| Caenorhabditis briggsae | Hypothetical protein CBG16818 [Caenorhabditis briggsae]    | 0  |                                                                                                                                                                                                                                                                                             |                                                                                                                    | PTHR15180 (PANTHER)                                                                    |
|                         | -                                                          | 0  |                                                                                                                                                                                                                                                                                             |                                                                                                                    | -                                                                                      |
| Loa loa                 | hypothetical protein LOAG_05263 [Loa loa]                  | 0  |                                                                                                                                                                                                                                                                                             |                                                                                                                    | -                                                                                      |
|                         | -                                                          | 0  |                                                                                                                                                                                                                                                                                             |                                                                                                                    | -                                                                                      |
|                         | -                                                          | 0  |                                                                                                                                                                                                                                                                                             |                                                                                                                    | -                                                                                      |
| Brugia malayi           | proteasome (macropain) activator subunit 4                 | 0  |                                                                                                                                                                                                                                                                                             | P:GO:0030154;<br>F:GO:0005488;<br>C:GO:0000502;<br>C:GO:0016607;<br>P:GO:0007275;<br>P:GO:0007283;<br>C:GO:0005634 | -                                                                                      |

|                         |                                                           |   |                                                                                  |                                                                                                                    |                                                                                                             |
|-------------------------|-----------------------------------------------------------|---|----------------------------------------------------------------------------------|--------------------------------------------------------------------------------------------------------------------|-------------------------------------------------------------------------------------------------------------|
| Caenorhabditis elegans  | elegans protein confirmed by transcript evidence          | 0 |                                                                                  | P:GO:0006629;<br>P:GO:0008152;<br>F:GO:0016787;<br>P:GO:0016042;<br>F:GO:0005215;<br>P:GO:0006810;<br>C:GO:0030288 | -                                                                                                           |
| -                       | -                                                         | 0 |                                                                                  |                                                                                                                    | SignalP (SIGNALP)                                                                                           |
| -                       | -                                                         | 0 |                                                                                  |                                                                                                                    | -                                                                                                           |
| -                       | -                                                         | 0 |                                                                                  |                                                                                                                    | -                                                                                                           |
| Caenorhabditis briggsae | elegans protein confirmed by transcript evidence          | 1 | P:GO:0000003                                                                     | -                                                                                                                  | SignalP (SIGNALP)                                                                                           |
| -                       | -                                                         | 0 |                                                                                  |                                                                                                                    | -                                                                                                           |
| -                       | -                                                         | 0 |                                                                                  |                                                                                                                    | IPR005018                                                                                                   |
| -                       | -                                                         | 0 |                                                                                  |                                                                                                                    | -                                                                                                           |
| Caenorhabditis briggsae | probable complex i intermediate-associated protein        | 0 |                                                                                  | F:GO:0003676;<br>C:GO:0005739;<br>F:GO:0000166                                                                     | PTHR13194 (PANTHER),<br>PTHR13194:SF8 (PANTHER)                                                             |
| -                       | -                                                         | 0 |                                                                                  |                                                                                                                    | -                                                                                                           |
| Caenorhabditis elegans  | hypothetical protein B0207.7 [Caenorhabditis elegans]     | 0 |                                                                                  | F:GO:0004672;<br>F:GO:0005524;<br>F:GO:0000166;<br>P:GO:0006468;<br>F:GO:0004674                                   | G3DSA:3.30.200.20 (GENE3D)                                                                                  |
| -                       | -                                                         | 0 |                                                                                  |                                                                                                                    | -                                                                                                           |
| -                       | -                                                         | 0 |                                                                                  |                                                                                                                    | -                                                                                                           |
| -                       | -                                                         | 0 |                                                                                  |                                                                                                                    | SignalP (SIGNALP)                                                                                           |
| Caenorhabditis elegans  | e3 ubiquitin protein ligase                               | 0 |                                                                                  | F:GO:0016874;<br>F:GO:0008270                                                                                      | -                                                                                                           |
| Brugia malayi           | plasmid maintenance protein containing protein            | 1 | C:GO:0016020                                                                     | -                                                                                                                  | IPR005599                                                                                                   |
| -                       | -                                                         | 0 |                                                                                  |                                                                                                                    | -                                                                                                           |
| -                       | -                                                         | 0 |                                                                                  |                                                                                                                    | -                                                                                                           |
| Caenorhabditis elegans  | phenylalanine biosynthesis-like protein domain containing | 1 | F:GO:0003824                                                                     | -                                                                                                                  | IPR003719; G3DSA:3.10.310.10<br>(GENE3D), SSF54506 (SUPERFAMILY)                                            |
| Caenorhabditis briggsae | domain iii family protein                                 | 5 | P:GO:0000712;<br>P:GO:0000239;<br>F:GO:0003677;<br>F:GO:0005515;<br>C:GO:0005634 | -                                                                                                                  | IPR000432; IPR007696;<br>G3DSA:3.40.50.300 (GENE3D),<br>PTHR11361:SF18 (PANTHER),<br>SSF52540 (SUPERFAMILY) |
| -                       | -                                                         | 0 |                                                                                  |                                                                                                                    | SignalP (SIGNALP)                                                                                           |
| Caenorhabditis elegans  | hypothetical protein F12F6.1 [Caenorhabditis elegans]     | 0 |                                                                                  |                                                                                                                    | -                                                                                                           |
| -                       | -                                                         | 0 |                                                                                  |                                                                                                                    | -                                                                                                           |
| Homo sapiens            | d-loop d- fusion protein                                  | 0 |                                                                                  |                                                                                                                    | -                                                                                                           |



|                             |                                                            |    |                                                                                                                                                                                                                                                                                                               |   |                                                                                            |
|-----------------------------|------------------------------------------------------------|----|---------------------------------------------------------------------------------------------------------------------------------------------------------------------------------------------------------------------------------------------------------------------------------------------------------------|---|--------------------------------------------------------------------------------------------|
| Homo sapiens                | fibronectin 1                                              | 18 | P:GO:0042060;<br>P:GO:0018149;<br>P:GO:0016477;<br>P:GO:0001525;<br>P:GO:0008360;<br>C:GO:0005793;<br>C:GO:0005604;<br>P:GO:0007044;<br>P:GO:0007160;<br>C:GO:0031093;<br>P:GO:0034446;<br>F:GO:0005518;<br>C:GO:0005577;<br>C:GO:0016324;<br>F:GO:0008201;<br>F:GO:0005201;<br>F:GO:0016504;<br>P:GO:0006953 | - | IPR000083; IPR016060; PTHR19143 (PANTHER), PTHR19143:SF6 (PANTHER), SSF57603 (SUPERFAMILY) |
| Caenorhabditis elegans      | elegans protein confirmed by transcript evidence           | 0  |                                                                                                                                                                                                                                                                                                               |   | -                                                                                          |
| Caenorhabditis elegans      | hypothetical protein Y34D9A.8 [Caenorhabditis elegans]     | 0  |                                                                                                                                                                                                                                                                                                               |   | -                                                                                          |
| Caenorhabditis elegans      | briggsae cbr-hmr-1 protein                                 | 15 | C:GO:0005911;<br>P:GO:0016339;<br>F:GO:0005515;<br>P:GO:0007412;<br>F:GO:0005509;<br>C:GO:0016021;<br>P:GO:0050774;<br>P:GO:0007156;<br>P:GO:0048676;<br>P:GO:0007413;<br>P:GO:0031290;<br>P:GO:0045467;<br>P:GO:0016318;<br>P:GO:0045463;<br>P:GO:0048841                                                    | - | IPR002126; IPR020894; PTHR10596 (PANTHER), PTHR10596:SF114 (PANTHER)                       |
|                             | -                                                          | 0  |                                                                                                                                                                                                                                                                                                               |   | -                                                                                          |
|                             | -                                                          | 0  |                                                                                                                                                                                                                                                                                                               |   | SignalP (SIGNALP)                                                                          |
| Caenorhabditis elegans      | elegans protein partially confirmed by transcript evidence | 0  |                                                                                                                                                                                                                                                                                                               |   | SSF141739 (SUPERFAMILY)                                                                    |
|                             | -                                                          | 0  |                                                                                                                                                                                                                                                                                                               |   | -                                                                                          |
|                             | -                                                          | 0  |                                                                                                                                                                                                                                                                                                               |   | -                                                                                          |
| Caenorhabditis elegans      | briggsae cbr-nhr-76 protein                                | 1  | F:GO:0005515                                                                                                                                                                                                                                                                                                  | - | IPR008946                                                                                  |
|                             | -                                                          | 0  |                                                                                                                                                                                                                                                                                                               |   | -                                                                                          |
|                             | -                                                          | 0  |                                                                                                                                                                                                                                                                                                               |   | SignalP (SIGNALP)                                                                          |
| Angiostrongylus cantonensis | fatty acid-binding protein homolog                         | 1  | F:GO:0005515                                                                                                                                                                                                                                                                                                  | - | IPR000463; IPR011038; IPR012674; PTHR22725 (PANTHER), SignalP (SIGNALP)                    |
| Angiostrongylus cantonensis | fatty acid-binding protein homolog                         | 4  | P:GO:0006810;<br>F:GO:0005515;<br>F:GO:0008289;<br>F:GO:0005215                                                                                                                                                                                                                                               | - | -                                                                                          |
| Caenorhabditis elegans      | sig-I recognition particle 72 kda protein                  | 2  | F:GO:0005488;<br>C:GO:0048500                                                                                                                                                                                                                                                                                 | - | IPR008940; PTHR14094 (PANTHER), PTHR14094:SF9 (PANTHER), SSF48452 (SUPERFAMILY)            |
|                             | -                                                          | 0  |                                                                                                                                                                                                                                                                                                               |   | -                                                                                          |
|                             | -                                                          | 0  |                                                                                                                                                                                                                                                                                                               |   | IPR015848                                                                                  |
|                             | -                                                          | 0  |                                                                                                                                                                                                                                                                                                               |   | -                                                                                          |

|                         |                                                            |    |                                                                                                                                                                                                                                           |   |                                                                                  |                                                                                                                                                          |
|-------------------------|------------------------------------------------------------|----|-------------------------------------------------------------------------------------------------------------------------------------------------------------------------------------------------------------------------------------------|---|----------------------------------------------------------------------------------|----------------------------------------------------------------------------------------------------------------------------------------------------------|
| Caenorhabditis elegans  | protein ki-se domain containing protein                    |    | P:GO:0044260;<br>F:GO:0005488;<br>5 F:GO:0004672;<br>P:GO:0019915;<br>P:GO:0044238                                                                                                                                                        | - |                                                                                  | IPR011009; G3DSA:3.30.200.20<br>(GENE3D)                                                                                                                 |
| Caenorhabditis elegans  | elegans protein partially confirmed by transcript evidence | 0  |                                                                                                                                                                                                                                           |   |                                                                                  | -                                                                                                                                                        |
|                         | -                                                          | 0  |                                                                                                                                                                                                                                           |   |                                                                                  | -                                                                                                                                                        |
| Caenorhabditis briggsae | briggsae cbr-hex-2 protein                                 | 0  |                                                                                                                                                                                                                                           |   | F:GO:0004553;<br>F:GO:0016787;<br>P:GO:0005975;<br>F:GO:0003824;<br>F:GO:0043169 | -                                                                                                                                                        |
|                         | -                                                          | 0  |                                                                                                                                                                                                                                           |   |                                                                                  | -                                                                                                                                                        |
|                         | -                                                          | 0  |                                                                                                                                                                                                                                           |   |                                                                                  | IPR000463; IPR011038; IPR012674                                                                                                                          |
|                         | -                                                          | 0  |                                                                                                                                                                                                                                           |   |                                                                                  | -                                                                                                                                                        |
| Caenorhabditis briggsae | 3-hydroxyacyl-coa dehydroge-se                             | 14 | C:GO:0005875;<br>P:GO:0055114;<br>P:GO:0040007;<br>C:GO:0016507;<br>P:GO:0019915;<br>F:GO:0003857;<br>P:GO:0002119;<br>P:GO:0006635;<br>F:GO:0050662;<br>P:GO:0006898;<br>F:GO:0016509;<br>P:GO:0009792;<br>C:GO:0005811;<br>F:GO:0004300 | - | EC:1.1.1.35;<br>EC:1.1.1.211<br>; EC:4.2.1.17                                    | IPR001753; G3DSA:3.90.226.10<br>(GENE3D), PTHR11941 (PANTHER),<br>SignalP (SIGNALP), SSF52096<br>(SUPERFAMILY)                                           |
|                         | -                                                          | 0  |                                                                                                                                                                                                                                           |   |                                                                                  | -                                                                                                                                                        |
|                         | -                                                          | 0  |                                                                                                                                                                                                                                           |   |                                                                                  | -                                                                                                                                                        |
|                         | -                                                          | 0  |                                                                                                                                                                                                                                           |   |                                                                                  | -                                                                                                                                                        |
|                         | -                                                          | 0  |                                                                                                                                                                                                                                           |   |                                                                                  | IPR016186; IPR016187; PTHR22802<br>(PANTHER), PTHR22802:SF15<br>(PANTHER)                                                                                |
| Caenorhabditis elegans  | kelch-repeat containing protein family member (kel-3)      | 1  | F:GO:0005515                                                                                                                                                                                                                              | - |                                                                                  | IPR006652; IPR013089; IPR015915;<br>PRO0501 (PRINTS), PTHR23230:SF164<br>(PANTHER), SSF117281 (SUPERFAMILY)                                              |
|                         | -                                                          | 0  |                                                                                                                                                                                                                                           |   |                                                                                  | -                                                                                                                                                        |
|                         | -                                                          | 0  |                                                                                                                                                                                                                                           |   |                                                                                  | -                                                                                                                                                        |
|                         | -                                                          | 0  |                                                                                                                                                                                                                                           |   |                                                                                  | -                                                                                                                                                        |
| Caenorhabditis elegans  | gex interacting protein family member (gei-4)              | 1  | F:GO:0005515                                                                                                                                                                                                                              | - |                                                                                  | SignalP (SIGNALP)                                                                                                                                        |
| Caenorhabditis elegans  | briggsae cbr-sax-2 protein                                 | 1  | F:GO:0005515                                                                                                                                                                                                                              | - |                                                                                  | PTHR12295 (PANTHER),<br>PTHR12295:SF6 (PANTHER)                                                                                                          |
| Caenorhabditis elegans  | dead deah box helicase family protein                      | 2  | F:GO:0004386;<br>F:GO:0003676                                                                                                                                                                                                             | - |                                                                                  | IPR001650; IPR011545; IPR014001;<br>IPR014021; G3DSA:3.40.50.300<br>(GENE3D), PTHR11752 (PANTHER),<br>PTHR11752:SF2 (PANTHER), SSF52540<br>(SUPERFAMILY) |
|                         | -                                                          | 0  |                                                                                                                                                                                                                                           |   |                                                                                  | -                                                                                                                                                        |
|                         | -                                                          | 0  |                                                                                                                                                                                                                                           |   |                                                                                  | -                                                                                                                                                        |
|                         | -                                                          | 0  |                                                                                                                                                                                                                                           |   |                                                                                  | -                                                                                                                                                        |

|                         |                                                                          |    |                                                                                                                                                                                                                                                                                                                                                 |                                                                 |                                   |                                                                                                                                                           |
|-------------------------|--------------------------------------------------------------------------|----|-------------------------------------------------------------------------------------------------------------------------------------------------------------------------------------------------------------------------------------------------------------------------------------------------------------------------------------------------|-----------------------------------------------------------------|-----------------------------------|-----------------------------------------------------------------------------------------------------------------------------------------------------------|
| Loa loa                 | cell division protein ki-se 7                                            | 20 | P:GO:0009299;<br>P:GO:0006367;<br>P:GO:0000718;<br>P:GO:0006468;<br>F:GO:0008094;<br>F:GO:0008022;<br>F:GO:0004693;<br>C:GO:0005624;<br>C:GO:0005829;<br>C:GO:0005675;<br>P:GO:0009792;<br>P:GO:0006368;<br>C:GO:0005856;<br>P:GO:0045448;<br>P:GO:0045944;<br>F:GO:0008353;<br>F:GO:0032403;<br>C:GO:0000307;<br>F:GO:0005524;<br>C:GO:0005739 | -                                                               | EC:2.7.11.22<br>;<br>EC:2.7.11.23 | -                                                                                                                                                         |
| Caenorhabditis elegans  | polyketide synthase                                                      | 3  | P:GO:0008152;<br>F:GO:0003824;<br>F:GO:0048037                                                                                                                                                                                                                                                                                                  | -                                                               |                                   | G3DSA:3.40.50.1820 (GENE3D)                                                                                                                               |
| Brugia malayi           | protein-tyrosine phosphatase containing protein                          | 1  | F:GO:0004721                                                                                                                                                                                                                                                                                                                                    | -                                                               | EC:3.1.3.16                       | IPR000242; IPR000387; IPR003595;<br>IPR016130; G3DSA:3.90.190.10<br>(GENE3D), PTHR19134 (PANTHER),<br>PTHR19134:SF26 (PANTHER),<br>SSF52799 (SUPERFAMILY) |
|                         |                                                                          | 0  |                                                                                                                                                                                                                                                                                                                                                 |                                                                 |                                   |                                                                                                                                                           |
| Caenorhabditis elegans  | uncoordinated protein isoform partially confirmed by transcript evidence | 8  | F:GO:0004872;<br>P:GO:0006629;<br>F:GO:0005219;<br>P:GO:0006816;<br>P:GO:0006874;<br>P:GO:0055085;<br>F:GO:0005509;<br>C:GO:0016021                                                                                                                                                                                                             | -                                                               |                                   | -                                                                                                                                                         |
|                         |                                                                          | 0  |                                                                                                                                                                                                                                                                                                                                                 |                                                                 |                                   |                                                                                                                                                           |
|                         |                                                                          | 0  |                                                                                                                                                                                                                                                                                                                                                 |                                                                 |                                   |                                                                                                                                                           |
|                         |                                                                          | 0  |                                                                                                                                                                                                                                                                                                                                                 |                                                                 |                                   |                                                                                                                                                           |
| Brugia malayi           | d- excision repair protein ercc-6                                        | 0  |                                                                                                                                                                                                                                                                                                                                                 | F:GO:0003676;<br>F:GO:0004386;<br>F:GO:0005524;<br>F:GO:0003677 |                                   | -                                                                                                                                                         |
|                         |                                                                          | 0  |                                                                                                                                                                                                                                                                                                                                                 |                                                                 |                                   |                                                                                                                                                           |
|                         |                                                                          | 0  |                                                                                                                                                                                                                                                                                                                                                 |                                                                 |                                   |                                                                                                                                                           |
|                         |                                                                          | 0  |                                                                                                                                                                                                                                                                                                                                                 |                                                                 |                                   |                                                                                                                                                           |
|                         |                                                                          | 0  |                                                                                                                                                                                                                                                                                                                                                 |                                                                 |                                   |                                                                                                                                                           |
| Loa loa                 | hypothetical protein LOAG_09252 [Loa loa]                                | 0  |                                                                                                                                                                                                                                                                                                                                                 |                                                                 |                                   | SignalP (SIGNALP)                                                                                                                                         |
|                         |                                                                          | 0  |                                                                                                                                                                                                                                                                                                                                                 |                                                                 |                                   |                                                                                                                                                           |
| Caenorhabditis briggsae | briggsae cbr-elt-3 protein                                               | 4  | F:GO:0003700;<br>F:GO:0043565;<br>F:GO:0008270;<br>P:GO:0006355                                                                                                                                                                                                                                                                                 | -                                                               |                                   | IPR000679; IPR013088; PTHR10071<br>(PANTHER), PTHR10071:SF15<br>(PANTHER), SSF57716 (SUPERFAMILY)                                                         |

|                         |                                                                   |    |                                                                                                                                                                                                                          |                                                                                                                                     |            |                                                                                                                                         |
|-------------------------|-------------------------------------------------------------------|----|--------------------------------------------------------------------------------------------------------------------------------------------------------------------------------------------------------------------------|-------------------------------------------------------------------------------------------------------------------------------------|------------|-----------------------------------------------------------------------------------------------------------------------------------------|
| Bombyx mori             | elegans protein partially confirmed by transcript evidence        | 0  |                                                                                                                                                                                                                          | F:GO:0005201;<br>F:GO:0048407;<br>F:GO:0005488;<br>C:GO:0016021;<br>C:GO:0005581;<br>F:GO:0042302;<br>F:GO:0005515;<br>C:GO:0005587 | -          |                                                                                                                                         |
| Caenorhabditis briggsae | multiple coagulation factor deficiency isoform cra_b              | 1  | P:GO:0009792                                                                                                                                                                                                             | -                                                                                                                                   |            | -                                                                                                                                       |
| Loa loa                 | bromodomain containing protein                                    | 3  | F:GO:0008270;<br>F:GO:0003676;<br>F:GO:0005515                                                                                                                                                                           | -                                                                                                                                   |            | IPR001878; PTHR13900 (PANTHER)                                                                                                          |
| Caenorhabditis elegans  | not-like (yeast ccr4 not complex component) family member (ntl-2) | 13 | F:GO:0030528;<br>P:GO:0040010;<br>P:GO:0008340;<br>P:GO:0045449;<br>F:GO:0042802;<br>P:GO:0040035;<br>P:GO:0019915;<br>P:GO:0002119;<br>P:GO:0040011;<br>P:GO:0006898;<br>P:GO:0002009;<br>P:GO:0009792;<br>P:GO:0040018 | -                                                                                                                                   |            | IPR007282; PTHR23326 (PANTHER)                                                                                                          |
| Trichoplax adhaerens    | long-chain-fatty-acid-- ligase                                    | 2  | F:GO:0016877;<br>P:GO:0008152                                                                                                                                                                                            | -                                                                                                                                   |            | IPR000873; G3DSA:2.30.38.10 (GENE3D), G3DSA:3.30.300.30 (GENE3D), PTHR11968 (PANTHER), PTHR11968:SF44 (PANTHER), SSF56801 (SUPERFAMILY) |
|                         | -                                                                 | 0  |                                                                                                                                                                                                                          |                                                                                                                                     |            | -                                                                                                                                       |
| Caenorhabditis briggsae | briggsae cbr-srb-17 protein                                       | 0  |                                                                                                                                                                                                                          | F:GO:0004888;<br>C:GO:0016021;<br>P:GO:0007606                                                                                      |            | IPR019408; SignalP (SIGNALP)                                                                                                            |
| Caenorhabditis briggsae | Hypothetical protein CBG12496 [Caenorhabditis briggsae]           | 0  |                                                                                                                                                                                                                          |                                                                                                                                     |            | -                                                                                                                                       |
| Caenorhabditis elegans  | prolyl oligopeptidase family protein                              | 0  |                                                                                                                                                                                                                          | P:GO:0006508;<br>F:GO:0004252;<br>C:GO:0005737;<br>F:GO:0008236;<br>F:GO:0016787                                                    |            | G3DSA:3.40.50.1820 (GENE3D), PTHR11731 (PANTHER), PTHR11731:SF7 (PANTHER), SSF53474 (SUPERFAMILY)                                       |
| Brugia malayi           | nedd4 binding protein 2-like 1                                    | 0  |                                                                                                                                                                                                                          | F:GO:0005524;<br>F:GO:0003674;<br>P:GO:0001906;<br>P:GO:0008150;<br>C:GO:0005575                                                    |            | G3DSA:3.40.50.300 (GENE3D), PTHR13308 (PANTHER)                                                                                         |
| Macaca mulatta          | pyrophosphatase 1                                                 | 4  | F:GO:0004427;<br>P:GO:0071344;<br>C:GO:0005737;<br>F:GO:0000287                                                                                                                                                          | -                                                                                                                                   | EC:3.6.1.1 | IPR008162                                                                                                                               |
|                         | -                                                                 | 0  |                                                                                                                                                                                                                          |                                                                                                                                     |            | -                                                                                                                                       |
| Caenorhabditis briggsae | peptidylprolyl isomerase                                          | 2  | P:GO:0019915;<br>P:GO:0009792                                                                                                                                                                                            | -                                                                                                                                   |            | -                                                                                                                                       |
|                         | -                                                                 | 0  |                                                                                                                                                                                                                          |                                                                                                                                     |            | -                                                                                                                                       |
|                         | -                                                                 | 0  |                                                                                                                                                                                                                          |                                                                                                                                     |            | -                                                                                                                                       |
|                         | -                                                                 | 0  |                                                                                                                                                                                                                          |                                                                                                                                     |            | -                                                                                                                                       |
| Caenorhabditis briggsae | elegans protein confirmed by transcript evidence                  | 0  |                                                                                                                                                                                                                          |                                                                                                                                     |            | -                                                                                                                                       |
|                         | -                                                                 | 0  |                                                                                                                                                                                                                          |                                                                                                                                     |            | -                                                                                                                                       |
|                         | -                                                                 | 0  |                                                                                                                                                                                                                          |                                                                                                                                     |            | -                                                                                                                                       |

|                         |                                                         |    |                                                                                                                                                                                                         |                                                                                  |              |                                                                                                                            |
|-------------------------|---------------------------------------------------------|----|---------------------------------------------------------------------------------------------------------------------------------------------------------------------------------------------------------|----------------------------------------------------------------------------------|--------------|----------------------------------------------------------------------------------------------------------------------------|
|                         | -                                                       | 0  |                                                                                                                                                                                                         |                                                                                  |              | -                                                                                                                          |
| Caenorhabditis briggsae | udp- ransferase family member (ugt-26)                  | 0  |                                                                                                                                                                                                         | P:GO:0030259;<br>F:GO:0030246;<br>P:GO:0005975;<br>C:GO:0016021;<br>F:GO:0016758 |              | IPR002213; PTHR11926:SF3 (PANTHER)                                                                                         |
|                         | -                                                       | 0  |                                                                                                                                                                                                         |                                                                                  |              | -                                                                                                                          |
| Brugia malayi           | galactoki-se 2                                          | 2  | P:GO:0008152;<br>F:GO:0016772                                                                                                                                                                           | -                                                                                |              | IPR006203; IPR006204; IPR014721;<br>IPR020568; PTHR10457 (PANTHER),<br>PTHR10457:SF7 (PANTHER)                             |
|                         | -                                                       | 0  |                                                                                                                                                                                                         |                                                                                  |              | -                                                                                                                          |
| Caenorhabditis briggsae | elegans protein confirmed by transcript evidence        | 5  | P:GO:0006633;<br>F:GO:0016717;<br>F:GO:0005515;<br>F:GO:0020037;<br>P:GO:0055114                                                                                                                        | -                                                                                | EC:1.14.19.0 | IPR005804; PTHR19353 (PANTHER),<br>SignalP (SIGNALP)                                                                       |
|                         | -                                                       | 0  |                                                                                                                                                                                                         |                                                                                  |              | -                                                                                                                          |
| Caenorhabditis briggsae | zinc finger protein 296-like                            | 1  | F:GO:0005515                                                                                                                                                                                            | -                                                                                |              | IPR000504; IPR007087; IPR012677;<br>IPR015880; PTHR10432 (PANTHER),<br>PTHR10432:SF56 (PANTHER),<br>SSF54928 (SUPERFAMILY) |
|                         | -                                                       | 0  |                                                                                                                                                                                                         |                                                                                  |              | -                                                                                                                          |
|                         | -                                                       | 0  |                                                                                                                                                                                                         |                                                                                  |              | -                                                                                                                          |
|                         | -                                                       | 0  |                                                                                                                                                                                                         |                                                                                  |              | -                                                                                                                          |
|                         | -                                                       | 0  |                                                                                                                                                                                                         |                                                                                  |              | -                                                                                                                          |
| Brugia malayi           | fyve finger-containing phosphoinositide ki-se           | 12 | P:GO:0042147;<br>C:GO:0031901;<br>P:GO:0046488;<br>P:GO:0044267;<br>F:GO:0008270;<br>P:GO:0034504;<br>C:GO:0031982;<br>F:GO:0016308;<br>F:GO:0005524;<br>F:GO:0005515;<br>C:GO:0045121;<br>P:GO:0006898 | -                                                                                | EC:2.7.1.68  | IPR002498; G3DSA:3.30.810.10<br>(GENE3D), SSF56104 (SUPERFAMILY)                                                           |
|                         | -                                                       | 0  |                                                                                                                                                                                                         |                                                                                  |              | -                                                                                                                          |
|                         | -                                                       | 0  |                                                                                                                                                                                                         |                                                                                  |              | -                                                                                                                          |
|                         | -                                                       | 0  |                                                                                                                                                                                                         |                                                                                  |              | -                                                                                                                          |
|                         | -                                                       | 0  |                                                                                                                                                                                                         |                                                                                  |              | SignalP (SIGNALP)                                                                                                          |
|                         | -                                                       | 0  |                                                                                                                                                                                                         |                                                                                  |              | SignalP (SIGNALP)                                                                                                          |
| Caenorhabditis briggsae | briggsae cbr-tag-168 protein                            | 3  | P:GO:0001539;<br>F:GO:0003774;<br>C:GO:0009288                                                                                                                                                          | -                                                                                |              | IPR001452; IPR011511;<br>G3DSA:2.30.30.40 (GENE3D),<br>PTHR14234 (PANTHER),<br>PTHR14234:SF1 (PANTHER)                     |
| Caenorhabditis briggsae | Hypothetical protein CBG01705 [Caenorhabditis briggsae] | 0  |                                                                                                                                                                                                         | F:GO:0008324;<br>P:GO:0006812                                                    |              | -                                                                                                                          |
| Caenorhabditis elegans  | transmembrane protein 39b                               | 5  | P:GO:0019915;<br>P:GO:0040018;<br>P:GO:0040017;<br>P:GO:0010171;<br>P:GO:0040010                                                                                                                        | -                                                                                |              | IPR019397; PTHR12995 (PANTHER)                                                                                             |
| Caenorhabditis elegans  | transmembrane protein 39b                               | 5  | P:GO:0019915;<br>P:GO:0040018;<br>P:GO:0040017;<br>P:GO:0010171;<br>P:GO:0040010                                                                                                                        | -                                                                                |              | IPR019397; PTHR12995 (PANTHER)                                                                                             |

|                         |                                                            |    |                                                                                                                                                                                                                                           |                                                                                                                                                                                                                          |              |                                                                                                             |
|-------------------------|------------------------------------------------------------|----|-------------------------------------------------------------------------------------------------------------------------------------------------------------------------------------------------------------------------------------------|--------------------------------------------------------------------------------------------------------------------------------------------------------------------------------------------------------------------------|--------------|-------------------------------------------------------------------------------------------------------------|
| Loa loa                 | nedd4 binding protein 2                                    | 0  |                                                                                                                                                                                                                                           | P:GO:0009214;<br>C:GO:0016020;<br>F:GO:0004113;<br>F:GO:0046404;<br>P:GO:0016070;<br>F:GO:0005524;<br>F:GO:0003824;<br>C:GO:0005575;<br>C:GO:0005622;<br>F:GO:0005515;<br>F:GO:0004519;<br>P:GO:0040010;<br>P:GO:0001906 |              | IPR010488; G3DSA:3.40.50.300 (GENE3D), PTHR13308 (PANTHER), PTHR13308:SF4 (PANTHER), SSF52540 (SUPERFAMILY) |
| Caenorhabditis briggsae | alcohol dehydroge-se                                       | 3  | F:GO:0008270;<br>P:GO:0055114;<br>F:GO:0003939                                                                                                                                                                                            | -                                                                                                                                                                                                                        | EC:1.1.1.14  | IPR002085; IPR013149; IPR016040; PTHR11695:SF38 (PANTHER), SignalP (SIGNALP), SSF51735 (SUPERFAMILY)        |
|                         | -                                                          | 0  |                                                                                                                                                                                                                                           |                                                                                                                                                                                                                          |              | -                                                                                                           |
|                         | -                                                          | 0  |                                                                                                                                                                                                                                           |                                                                                                                                                                                                                          |              | -                                                                                                           |
| Caenorhabditis elegans  | elegans protein partially confirmed by transcript evidence | 5  | P:GO:0006548;<br>P:GO:0016052;<br>F:GO:0030246;<br>F:GO:0004500;<br>C:GO:0016021                                                                                                                                                          | -                                                                                                                                                                                                                        | EC:1.14.17.1 | IPR000082                                                                                                   |
|                         | -                                                          | 0  |                                                                                                                                                                                                                                           |                                                                                                                                                                                                                          |              | -                                                                                                           |
|                         | -                                                          | 0  |                                                                                                                                                                                                                                           |                                                                                                                                                                                                                          |              | -                                                                                                           |
|                         | -                                                          | 0  |                                                                                                                                                                                                                                           |                                                                                                                                                                                                                          |              | -                                                                                                           |
| Ailuropoda melanoleuca  | lipolysis stimulated lipoprotein receptor                  | 14 | P:GO:0019216;<br>C:GO:0034362;<br>C:GO:0042627;<br>F:GO:0030228;<br>P:GO:0042953;<br>C:GO:0005730;<br>C:GO:0016021;<br>P:GO:0001889;<br>F:GO:0030169;<br>P:GO:0007165;<br>C:GO:0034361;<br>C:GO:0005794;<br>C:GO:0005886;<br>P:GO:0009790 | -                                                                                                                                                                                                                        |              | -                                                                                                           |
| Caenorhabditis elegans  | rnp-1 like r--binding protein                              | 4  | C:GO:0005622;<br>P:GO:0009792;<br>F:GO:0000166;<br>F:GO:0003723                                                                                                                                                                           | -                                                                                                                                                                                                                        |              | -                                                                                                           |
| Caenorhabditis briggsae | elegans protein partially confirmed by transcript evidence | 0  |                                                                                                                                                                                                                                           | F:GO:0004563;<br>P:GO:0005975                                                                                                                                                                                            |              | -                                                                                                           |
| Caenorhabditis briggsae | elegans protein partially confirmed by transcript evidence | 0  |                                                                                                                                                                                                                                           | F:GO:0004563;<br>P:GO:0005975                                                                                                                                                                                            |              | -                                                                                                           |
|                         | -                                                          | 0  |                                                                                                                                                                                                                                           |                                                                                                                                                                                                                          |              | -                                                                                                           |
|                         | -                                                          | 0  |                                                                                                                                                                                                                                           |                                                                                                                                                                                                                          |              | SignalP (SIGNALP)                                                                                           |
| Caenorhabditis elegans  | protein disulfide                                          | 1  | C:GO:0005622                                                                                                                                                                                                                              | -                                                                                                                                                                                                                        |              | IPR012335; IPR012336; IPR013766; PTHR18929 (PANTHER)                                                        |
| Tribolium castaneum     | ubx6 -related                                              | 0  |                                                                                                                                                                                                                                           | F:GO:0008270;<br>C:GO:0005622                                                                                                                                                                                            |              | IPR000449; IPR009060; IPR015940; G3DSA:1.10.8.10 (GENE3D), PTHR13020 (PANTHER), PTHR13020:SF4 (PANTHER)     |
| Caenorhabditis briggsae | amop domain containing protein                             | 2  | C:GO:0016021;<br>P:GO:0007160                                                                                                                                                                                                             | -                                                                                                                                                                                                                        |              | IPR005533; PTHR13802 (PANTHER), PTHR13802:SF2 (PANTHER)                                                     |

|                         |                                                                         |    |                                                                                                                                                                                                                                           |                                                                                                                                                                                        |                             |                                                                                                               |
|-------------------------|-------------------------------------------------------------------------|----|-------------------------------------------------------------------------------------------------------------------------------------------------------------------------------------------------------------------------------------------|----------------------------------------------------------------------------------------------------------------------------------------------------------------------------------------|-----------------------------|---------------------------------------------------------------------------------------------------------------|
|                         | -                                                                       | 0  |                                                                                                                                                                                                                                           |                                                                                                                                                                                        |                             | -                                                                                                             |
| Caenorhabditis briggsae | lactation elevated 1                                                    | 1  | F:GO:0000166                                                                                                                                                                                                                              | -                                                                                                                                                                                      |                             | IPR005654; G3DSA:3.40.50.300 (GENE3D)                                                                         |
|                         | -                                                                       | 0  |                                                                                                                                                                                                                                           |                                                                                                                                                                                        |                             | -                                                                                                             |
| Caenorhabditis briggsae | Hypothetical protein CBG20463 [Caenorhabditis briggsae]                 | 0  |                                                                                                                                                                                                                                           |                                                                                                                                                                                        |                             | -                                                                                                             |
| Homo sapiens            | activating transcription factor 4 (tax-responsive enhancer element b67) | 14 | P:GO:0034976;<br>P:GO:0045944;<br>P:GO:0007214;<br>C:GO:0005667;<br>F:GO:0008022;<br>C:GO:0032590;<br>P:GO:0006520;<br>F:GO:0043565;<br>F:GO:0016563;<br>F:GO:0046983;<br>F:GO:0003700;<br>P:GO:0006094;<br>F:GO:0003704;<br>C:GO:0005737 | -                                                                                                                                                                                      |                             | PTHR13044 (PANTHER),<br>PTHR13044:SF2 (PANTHER)                                                               |
| Caenorhabditis briggsae | briggsae cbr-rde-1 protein                                              | 0  |                                                                                                                                                                                                                                           | P:GO:0055046;<br>P:GO:0009561;<br>P:GO:0033169;<br>C:GO:0005739;<br>F:GO:0003676;<br>P:GO:0007143;<br>C:GO:0005737;<br>P:GO:0007140;<br>C:GO:0005731;<br>C:GO:0005730;<br>F:GO:0035197 |                             | G3DSA:2.170.260.10 (GENE3D),<br>PTHR22891 (PANTHER), SSF101690 (SUPERFAMILY)                                  |
| Caenorhabditis elegans  | hypothetical protein H41C03.1 [Caenorhabditis elegans]                  | 1  | P:GO:0040010                                                                                                                                                                                                                              | -                                                                                                                                                                                      |                             | PTHR23324 (PANTHER),<br>PTHR23324:SF3 (PANTHER)                                                               |
|                         | -                                                                       | 0  |                                                                                                                                                                                                                                           |                                                                                                                                                                                        |                             | -                                                                                                             |
| Caenorhabditis elegans  | protein ki-se domain containing protein                                 | 6  | P:GO:0006468;<br>F:GO:0005515;<br>F:GO:0004713;<br>F:GO:0005524;<br>P:GO:0000003;<br>F:GO:0004674                                                                                                                                         | -                                                                                                                                                                                      | EC:2.7.10.0;<br>EC:2.7.11.0 | IPR000719; IPR001245; IPR008266;<br>IPR011009; IPR018271; IPR020685;<br>IPR020764; G3DSA:1.10.510.10 (GENE3D) |
|                         | -                                                                       | 0  |                                                                                                                                                                                                                                           |                                                                                                                                                                                        |                             | -                                                                                                             |
|                         | -                                                                       | 0  |                                                                                                                                                                                                                                           |                                                                                                                                                                                        |                             | -                                                                                                             |
|                         | -                                                                       | 0  |                                                                                                                                                                                                                                           |                                                                                                                                                                                        |                             | -                                                                                                             |
| Equus caballus          | alpha-2-glycoprotein zinc-binding                                       | 0  |                                                                                                                                                                                                                                           |                                                                                                                                                                                        |                             | -                                                                                                             |
| Caenorhabditis elegans  | zinc finger protein                                                     | 2  | F:GO:0008270;<br>F:GO:0005515                                                                                                                                                                                                             | -                                                                                                                                                                                      |                             | IPR004457; PTHR10876 (PANTHER)                                                                                |
| Homo sapiens            | transcription factor-like 1                                             | 7  | P:GO:0016568;<br>C:GO:0043234;<br>F:GO:0003677;<br>P:GO:0000122;<br>F:GO:0003700;<br>C:GO:0005634;<br>F:GO:0003702                                                                                                                        | -                                                                                                                                                                                      |                             | -                                                                                                             |
|                         | -                                                                       | 0  |                                                                                                                                                                                                                                           |                                                                                                                                                                                        |                             | -                                                                                                             |

|                         |                                                                            |    |                                                                                                                                                                                                         |              |             |                                                                                                                  |
|-------------------------|----------------------------------------------------------------------------|----|---------------------------------------------------------------------------------------------------------------------------------------------------------------------------------------------------------|--------------|-------------|------------------------------------------------------------------------------------------------------------------|
| Caenorhabditis briggsae | zinc finger rad18 domain-containing protein c1orf124 homolog               | 6  | P:GO:0002119;<br>F:GO:0003677;<br>C:GO:0016607;<br>P:GO:0000003;<br>P:GO:0040007;<br>P:GO:0006281                                                                                                       | -            |             | IPR006640; PTHR21220 (PANTHER)                                                                                   |
| Caenorhabditis elegans  | interferon gamma-inducible thiol reductase                                 | 0  |                                                                                                                                                                                                         | C:GO:0005576 |             | IPR004911; PTHR13234:SF2 (PANTHER)                                                                               |
|                         | -                                                                          | 0  |                                                                                                                                                                                                         |              |             | SignalP (SIGNALP)                                                                                                |
| Caenorhabditis elegans  | 2-amino-3-ketobutyrate coenzyme a mitochondrial                            | 7  | F:GO:0016874;<br>F:GO:0030170;<br>P:GO:0009058;<br>F:GO:0016769;<br>P:GO:0006520;<br>F:GO:0008890;<br>C:GO:0005739                                                                                      | -            | EC:2.3.1.29 | IPR004839; IPR011282; IPR015421;<br>IPR015424; PTHR13693 (PANTHER)                                               |
|                         | -                                                                          | 0  |                                                                                                                                                                                                         |              |             | -                                                                                                                |
| Caenorhabditis briggsae | Hypothetical protein CBG22805 [Caenorhabditis briggsae]                    | 0  |                                                                                                                                                                                                         |              |             | -                                                                                                                |
|                         | -                                                                          | 0  |                                                                                                                                                                                                         |              |             | SignalP (SIGNALP)                                                                                                |
| Caenorhabditis elegans  | zinc finger protein 136                                                    | 12 | P:GO:0040032;<br>C:GO:0031430;<br>F:GO:0008270;<br>P:GO:0007517;<br>P:GO:0045449;<br>P:GO:0030239;<br>P:GO:0007626;<br>F:GO:0003677;<br>P:GO:0040011;<br>F:GO:0017022;<br>C:GO:0032982;<br>C:GO:0005634 | -            |             | IPR007087; IPR013087; IPR015880;<br>PTHR23224 (PANTHER),<br>PTHR23224:SF184 (PANTHER),<br>SSF57667 (SUPERFAMILY) |
| Caenorhabditis briggsae | amop domain containing protein                                             | 1  | P:GO:0007160                                                                                                                                                                                            | -            |             | PTHR13802 (PANTHER),<br>PTHR13802:SF2 (PANTHER)                                                                  |
| Caenorhabditis elegans  | ctd (carboxy-termi-l r- polymerase polypeptide a) small phosphatase like 2 | 2  | P:GO:0016311;<br>F:GO:0004721                                                                                                                                                                           | -            | EC:3.1.3.16 | -                                                                                                                |
| Caenorhabditis elegans  | peroxisomal acyl-coenzyme a oxidase 3                                      | 8  | F:GO:0003995;<br>C:GO:0005739;<br>P:GO:0033540;<br>P:GO:0055114;<br>F:GO:0050660;<br>C:GO:0005782;<br>F:GO:0016402;<br>F:GO:0005504                                                                     | -            | EC:1.3.99.3 | IPR006091; IPR009100; IPR012258;<br>PTHR10909 (PANTHER)                                                          |
| Caenorhabditis briggsae | elegans protein confirmed by transcript evidence                           | 5  | F:GO:0030170;<br>F:GO:0004124;<br>F:GO:0005515;<br>P:GO:0006535;<br>F:GO:0016740                                                                                                                        | -            | EC:2.5.1.47 | IPR001926; G3DSA:3.40.50.1100 (GENE3D), PTHR10314 (PANTHER),<br>PTHR10314:SF8 (PANTHER)                          |



|                             |                                                                                |   |                                                                                                                                                                                                                                                                                                                                                 |            |                                                                                            |
|-----------------------------|--------------------------------------------------------------------------------|---|-------------------------------------------------------------------------------------------------------------------------------------------------------------------------------------------------------------------------------------------------------------------------------------------------------------------------------------------------|------------|--------------------------------------------------------------------------------------------|
| Plesiocystis pacifica SIR-1 | b-box zinc finger                                                              | 0 | P:GO:0051301;<br>C:GO:0005634;<br>P:GO:0006464;<br>P:GO:0009590;<br>P:GO:0046907;<br>P:GO:0007049;<br>F:GO:0016905;<br>P:GO:0042254;<br>C:GO:0005737;<br>F:GO:0005488;<br>P:GO:0006364;<br>C:GO:0020011;<br>P:GO:0007059;<br>P:GO:0045449;<br>F:GO:0043565;<br>F:GO:0016881;<br>F:GO:0008270;<br>C:GO:0005622;<br>F:GO:0016740;<br>C:GO:0005576 |            | PTHR11071 (PANTHER),<br>PTHR11071:SF54 (PANTHER)                                           |
| Taeniopygia guttata         | retrotransposon-like 1                                                         | 0 | C:GO:0016020;<br>P:GO:0046907;<br>P:GO:0006412;<br>F:GO:0005524;<br>P:GO:0007275;<br>C:GO:0005575;<br>F:GO:0004812;<br>P:GO:0008150;<br>C:GO:0020011                                                                                                                                                                                            |            | PTHR11071 (PANTHER),<br>PTHR11071:SF54 (PANTHER)                                           |
| -                           | -                                                                              | 0 |                                                                                                                                                                                                                                                                                                                                                 |            | -                                                                                          |
| -                           | -                                                                              | 0 |                                                                                                                                                                                                                                                                                                                                                 |            | SignalP (SIGNALP)                                                                          |
| -                           | -                                                                              | 0 |                                                                                                                                                                                                                                                                                                                                                 |            | -                                                                                          |
| Brugia malayi               | d-3-phosphoglycerate dehydroge-se                                              | 4 | P:GO:0044238;<br>F:GO:0016616;<br>F:GO:0051287;<br>F:GO:0016787                                                                                                                                                                                                                                                                                 | EC:1.1.1.0 | -                                                                                          |
| Caenorhabditis elegans      | elegans protein partially confirmed by transcript evidence                     | 0 |                                                                                                                                                                                                                                                                                                                                                 |            | SSF57501 (SUPERFAMILY)                                                                     |
| Caenorhabditis elegans      | briggsae cbr-gon-1 protein                                                     | 3 | F:GO:0046872;<br>F:GO:0008237;<br>C:GO:0031012                                                                                                                                                                                                                                                                                                  |            | IPR000884; G3DSA:2.20.100.10<br>(GENE3D), PTHR13723 (PANTHER),<br>PTHR13723:SF30 (PANTHER) |
| Caenorhabditis elegans      | clc-type chloride channel family member (clh-2)                                | 6 | P:GO:0009792;<br>F:GO:0005247;<br>P:GO:0055085;<br>P:GO:0000003;<br>C:GO:0016021;<br>P:GO:0006821                                                                                                                                                                                                                                               |            | IPR001807; PTHR11689:SF5<br>(PANTHER)                                                      |
| Caenorhabditis elegans      | zo-1 (zonula occludens tight junctio-l protein) ortholog family member (zoo-1) | 0 |                                                                                                                                                                                                                                                                                                                                                 |            | -                                                                                          |
| Loa loa                     | pou domain protein isoform b                                                   | 5 | F:GO:0030528;<br>F:GO:0003700;<br>F:GO:0043565;<br>C:GO:0005634;<br>P:GO:0006355                                                                                                                                                                                                                                                                |            | -                                                                                          |
| Caenorhabditis elegans      | hypothetical protein W05F2.4 [Caenorhabditis elegans]                          | 3 | P:GO:0040018;<br>P:GO:0040035;<br>P:GO:0002119                                                                                                                                                                                                                                                                                                  |            | -                                                                                          |

|                         |                                                          |   |                                                                                                                                                      |   |                             |                                                                                       |
|-------------------------|----------------------------------------------------------|---|------------------------------------------------------------------------------------------------------------------------------------------------------|---|-----------------------------|---------------------------------------------------------------------------------------|
| Caenorhabditis elegans  | transmembrane protein 48                                 | 6 | P:GO:0006810;<br>C:GO:0016021;<br>P:GO:0000003;<br>P:GO:0006997;<br>C:GO:0005635;<br>P:GO:0009792                                                    | - |                             | IPR019049; PTHR13269 (PANTHER),<br>SignalP (SIGNALP)                                  |
|                         | -                                                        | 0 |                                                                                                                                                      |   |                             | SignalP (SIGNALP)                                                                     |
|                         | -                                                        | 0 |                                                                                                                                                      |   |                             | -                                                                                     |
| Loa loa                 | breast cancer anti-estrogen resistance 3                 | 4 | P:GO:0006468;<br>F:GO:0005515;<br>F:GO:0004713;<br>F:GO:0005524                                                                                      | - | EC:2.7.10.0                 | IPR000980; PTHR14247 (PANTHER),<br>PTHR14247:SF3 (PANTHER), SSF55550<br>(SUPERFAMILY) |
| Caenorhabditis briggsae | briggsae cbr-kin-32 protein                              | 9 | F:GO:0004674;<br>C:GO:0005856;<br>F:GO:0004871;<br>F:GO:0005524;<br>F:GO:0004713;<br>C:GO:0005925;<br>F:GO:0005515;<br>P:GO:0007172;<br>P:GO:0006468 | - | EC:2.7.11.0;<br>EC:2.7.10.0 | -                                                                                     |
|                         | -                                                        | 0 |                                                                                                                                                      |   |                             | -                                                                                     |
|                         | -                                                        | 0 |                                                                                                                                                      |   |                             | -                                                                                     |
| Caenorhabditis briggsae | threonine dehydratase deami-se                           | 4 | F:GO:0004794;<br>P:GO:0008152;<br>F:GO:0030170;<br>F:GO:0016597                                                                                      | - | EC:4.3.1.19                 | -                                                                                     |
|                         | -                                                        | 0 |                                                                                                                                                      |   |                             | -                                                                                     |
| Caenorhabditis elegans  | hypothetical protein Y110A7A.21 [Caenorhabditis elegans] | 0 |                                                                                                                                                      |   |                             | SignalP (SIGNALP)                                                                     |
| Caenorhabditis briggsae | briggsae cbr-nol-1 protein                               | 8 | P:GO:0040010;<br>P:GO:0008340;<br>P:GO:0000003;<br>P:GO:0002119;<br>P:GO:0040039;<br>P:GO:0009792;<br>P:GO:0040015;<br>P:GO:0040019                  | - |                             | -                                                                                     |
|                         | -                                                        | 0 |                                                                                                                                                      |   |                             | SignalP (SIGNALP)                                                                     |
| Caenorhabditis briggsae | briggsae cbr-ech-9 protein                               | 3 | P:GO:0006631;<br>F:GO:0016491;<br>F:GO:0050662                                                                                                       | - |                             | -                                                                                     |
|                         | -                                                        | 0 |                                                                                                                                                      |   |                             | PD035033 (PRODOM)                                                                     |
| Caenorhabditis elegans  | hypothetical protein Y20F4.2 [Caenorhabditis elegans]    | 0 |                                                                                                                                                      |   |                             | PTHR13589 (PANTHER),<br>PTHR13589:SF2 (PANTHER)                                       |
| Homo sapiens            | ubx domain-containing protein 1                          | 0 |                                                                                                                                                      |   |                             | SignalP (SIGNALP)                                                                     |
|                         | -                                                        | 0 |                                                                                                                                                      |   |                             | -                                                                                     |
|                         | -                                                        | 0 |                                                                                                                                                      |   |                             | -                                                                                     |

|                         |                                                                                  |   |                                                                                                                    |   |  |                                                                                            |
|-------------------------|----------------------------------------------------------------------------------|---|--------------------------------------------------------------------------------------------------------------------|---|--|--------------------------------------------------------------------------------------------|
| Caenorhabditis briggsae | nuclear hormone receptor family protein isoform confirmed by transcript evidence | 4 | F:GO:0046872;<br>F:GO:0004879;<br>F:GO:0003677;<br>P:GO:0045449                                                    | - |  | IPR000536; IPR008946                                                                       |
|                         | -                                                                                | 0 |                                                                                                                    |   |  | SignalP (SIGNALP)                                                                          |
| Pongo abelii            | cytoskeleton associated protein 1                                                | 6 | P:GO:0030154;<br>F:GO:0005515;<br>P:GO:0007399;<br>P:GO:0007023;<br>C:GO:0005829;<br>C:GO:0005874                  | - |  | IPR000938; PTHR18916 (PANTHER),<br>PTHR18916:SF6 (PANTHER)                                 |
| Caenorhabditis briggsae | elegans protein confirmed by transcript evidence                                 | 2 | C:GO:0016021;<br>P:GO:0006810                                                                                      | - |  | -                                                                                          |
|                         | -                                                                                | 0 |                                                                                                                    |   |  | -                                                                                          |
|                         | -                                                                                | 0 |                                                                                                                    |   |  | -                                                                                          |
|                         | -                                                                                | 0 |                                                                                                                    |   |  | -                                                                                          |
| Loa loa                 | calcium alpha subunit family member (cca-1)                                      | 7 | P:GO:0051899;<br>P:GO:0045760;<br>P:GO:0043051;<br>P:GO:0006816;<br>P:GO:0055085;<br>C:GO:0005891;<br>F:GO:0008332 | - |  | IPR005445; IPR005821; PTHR10037<br>(PANTHER), SignalP (SIGNALP),<br>SSF81324 (SUPERFAMILY) |
| Ciona intestinalis      | tpa: extracellular serine-rich (afu_orthologue afua_3g07870)                     | 0 |                                                                                                                    |   |  | -                                                                                          |
|                         | -                                                                                | 0 |                                                                                                                    |   |  | -                                                                                          |
|                         | -                                                                                | 0 |                                                                                                                    |   |  | -                                                                                          |
|                         | -                                                                                | 0 |                                                                                                                    |   |  | -                                                                                          |
| Caenorhabditis elegans  | ync9_caeel ame: full=uncharacterized protein flags:<br>precursor                 | 0 |                                                                                                                    |   |  | -                                                                                          |
| Bos taurus              | ribosomal protein l9                                                             | 6 | C:GO:0005730;<br>C:GO:0005840;<br>F:GO:0003735;<br>C:GO:0005829;<br>F:GO:0019843;<br>P:GO:0006414                  | - |  | IPR000702; IPR002359; IPR020040;<br>PTHR11655:SF2 (PANTHER)                                |

|                         |                                    |   |                                                                                  |                                                                                                                                                                                                                                                                                                                                                                                                                                      |             |                                                                                                                       |
|-------------------------|------------------------------------|---|----------------------------------------------------------------------------------|--------------------------------------------------------------------------------------------------------------------------------------------------------------------------------------------------------------------------------------------------------------------------------------------------------------------------------------------------------------------------------------------------------------------------------------|-------------|-----------------------------------------------------------------------------------------------------------------------|
| Nematostella vectensis  | leishmanolysin-like peptidase      | 0 |                                                                                  | P:GO:0051301;<br>P:GO:0051225;<br>P:GO:0007420;<br>P:GO:0007067;<br>F:GO:0016787;<br>P:GO:0045842;<br>F:GO:0046872;<br>F:GO:0008237;<br>P:GO:0007155;<br>C:GO:0016020;<br>P:GO:0007049;<br>P:GO:0051298;<br>F:GO:0008233;<br>P:GO:0008406;<br>P:GO:0007076;<br>F:GO:0004222;<br>P:GO:0006338;<br>P:GO:0008354;<br>P:GO:0006508;<br>C:GO:0005737;<br>P:GO:0007444;<br>P:GO:0007100;<br>F:GO:0008270;<br>P:GO:0007052;<br>C:GO:0031252 |             | IPR001577; SSF55486 (SUPERFAMILY)                                                                                     |
| Caenorhabditis briggsae | oxidized-ldl responsive gene 2     | 2 | P:GO:0006508;<br>F:GO:0004197                                                    | -                                                                                                                                                                                                                                                                                                                                                                                                                                    | EC:3.4.22.0 | IPR000169; IPR000668; IPR013128;<br>G3DSA:3.90.70.10 (GENE3D),<br>PTHR12411:SF15 (PANTHER),<br>SSF54001 (SUPERFAMILY) |
| Caenorhabditis elegans  | 4-aminobutyrate aminotransferase   | 3 | C:GO:0005759;<br>P:GO:0006520;<br>F:GO:0008483                                   | -                                                                                                                                                                                                                                                                                                                                                                                                                                    | EC:2.6.1.0  | IPR004631; IPR005814; IPR015422;<br>IPR015424                                                                         |
| Caenorhabditis elegans  | 4-aminobutyrate aminotransferase   | 5 | F:GO:0030170;<br>C:GO:0005759;<br>P:GO:0006520;<br>F:GO:0003867;<br>P:GO:0009448 | -                                                                                                                                                                                                                                                                                                                                                                                                                                    | EC:2.6.1.19 | IPR004631; IPR005814; IPR015421;<br>IPR015422; IPR015424                                                              |
| -                       | -                                  | 0 |                                                                                  |                                                                                                                                                                                                                                                                                                                                                                                                                                      |             | SignalP (SIGNALP)                                                                                                     |
| -                       | -                                  | 0 |                                                                                  |                                                                                                                                                                                                                                                                                                                                                                                                                                      |             | SignalP (SIGNALP)                                                                                                     |
| -                       | -                                  | 0 |                                                                                  |                                                                                                                                                                                                                                                                                                                                                                                                                                      |             | SignalP (SIGNALP)                                                                                                     |
| -                       | -                                  | 0 |                                                                                  |                                                                                                                                                                                                                                                                                                                                                                                                                                      |             | -                                                                                                                     |
| Solanum demissum        | endonuclease-reverse transcriptase | 0 |                                                                                  | F:GO:0003723;<br>F:GO:0008168;<br>F:GO:0016740;<br>P:GO:0006278;<br>F:GO:0004519;<br>F:GO:0003677;<br>F:GO:0003964                                                                                                                                                                                                                                                                                                                   |             | -                                                                                                                     |
| Solanum demissum        | endonuclease-reverse transcriptase | 0 |                                                                                  | F:GO:0003723;<br>F:GO:0008168;<br>F:GO:0016740;<br>P:GO:0006278;<br>F:GO:0004519;<br>F:GO:0003677;<br>F:GO:0003964                                                                                                                                                                                                                                                                                                                   |             | -                                                                                                                     |
| -                       | -                                  | 0 |                                                                                  |                                                                                                                                                                                                                                                                                                                                                                                                                                      |             | -                                                                                                                     |

|                         |                                                            |   |                                                                                                                                                      |                                                |                                                                                                                                                             |
|-------------------------|------------------------------------------------------------|---|------------------------------------------------------------------------------------------------------------------------------------------------------|------------------------------------------------|-------------------------------------------------------------------------------------------------------------------------------------------------------------|
| Caenorhabditis elegans  | variable abnormal morphology family member (vab-10)        | 0 |                                                                                                                                                      | F:GO:0005509;<br>P:GO:0007050;<br>F:GO:0003779 | -                                                                                                                                                           |
|                         | -                                                          | 0 |                                                                                                                                                      |                                                | -                                                                                                                                                           |
|                         |                                                            |   |                                                                                                                                                      |                                                | IPR003598; IPR007110; IPR013098;<br>IPR013783; PTHR19897 (PANTHER),<br>SSF48726 (SUPERFAMILY)                                                               |
|                         | -                                                          | 0 |                                                                                                                                                      |                                                | -                                                                                                                                                           |
| Caenorhabditis briggsae | elegans protein partially confirmed by transcript evidence | 0 |                                                                                                                                                      |                                                | -                                                                                                                                                           |
|                         | -                                                          | 0 |                                                                                                                                                      |                                                | -                                                                                                                                                           |
|                         | -                                                          | 0 |                                                                                                                                                      |                                                | -                                                                                                                                                           |
|                         | -                                                          | 0 |                                                                                                                                                      |                                                | -                                                                                                                                                           |
| Caenorhabditis briggsae | udp- ransferase family member (ugt-26)                     | 2 | P:GO:0008152;<br>F:GO:0016740                                                                                                                        | -                                              | IPR002213; PTHR11926:SF3<br>(PANTHER)                                                                                                                       |
| Loa loa                 | dead (asp-glu-ala-asp) box polypeptide 58                  | 3 | P:GO:0050896;<br>F:GO:0005488;<br>P:GO:0050789                                                                                                       | -                                              | IPR001650; IPR011545; IPR014001;<br>IPR014021; G3DSA:3.40.50.300<br>(GENE3D), PTHR14074 (PANTHER),<br>SignalP (SIGNALP), SSF52540<br>(SUPERFAMILY)          |
|                         | -                                                          | 0 |                                                                                                                                                      |                                                | IPR001757; G3DSA:3.40.50.1000<br>(GENE3D), PTHR11939:SF14<br>(PANTHER)                                                                                      |
| Caenorhabditis briggsae | elegans protein confirmed by transcript evidence           | 9 | P:GO:0040010;<br>F:GO:0046872;<br>P:GO:0045449;<br>F:GO:0003677;<br>F:GO:0004879;<br>P:GO:0002119;<br>F:GO:0005515;<br>P:GO:0009792;<br>P:GO:0040018 | -                                              | IPR000536; IPR001628; IPR001723;<br>IPR008946; IPR013088; PR00350<br>(PRINTS), PTHR11865 (PANTHER),<br>PTHR11865:SF238 (PANTHER),<br>SSF57716 (SUPERFAMILY) |
|                         | -                                                          | 0 |                                                                                                                                                      |                                                | IPR000283                                                                                                                                                   |
|                         | -                                                          | 0 |                                                                                                                                                      |                                                | -                                                                                                                                                           |
| Caenorhabditis elegans  | scy1 protein ki-se                                         | 3 | P:GO:0006468;<br>F:GO:0005524;<br>F:GO:0004672                                                                                                       | -                                              | -                                                                                                                                                           |
| Loa loa                 | tr- selenocysteine 1-associated protein 1                  | 3 | P:GO:0001514;<br>F:GO:0005515;<br>C:GO:0005634                                                                                                       | -                                              | IPR000504; IPR012677; PTHR10432<br>(PANTHER), PTHR10432:SF68<br>(PANTHER), SSF54928 (SUPERFAMILY)                                                           |

|                         |                                                |    |                                                                                                                                                                                                                                                                                                                                                 |   |                            |                                                                                                  |
|-------------------------|------------------------------------------------|----|-------------------------------------------------------------------------------------------------------------------------------------------------------------------------------------------------------------------------------------------------------------------------------------------------------------------------------------------------|---|----------------------------|--------------------------------------------------------------------------------------------------|
| Ailuropoda melanoleuca  | --+ k+ alpha 1 polypeptide                     | 20 | F:GO:0005515;<br>P:GO:0045989;<br>P:GO:0045822;<br>F:GO:0003869;<br>C:GO:0005792;<br>C:GO:0016323;<br>C:GO:0042470;<br>F:GO:0046872;<br>P:GO:0006754;<br>C:GO:0042383;<br>F:GO:0005391;<br>P:GO:0045823;<br>P:GO:0042493;<br>P:GO:0031947;<br>C:GO:0005890;<br>P:GO:0006813;<br>P:GO:0002026;<br>F:GO:0005524;<br>P:GO:0008217;<br>P:GO:0006814 | - | EC:3.1.3.41;<br>EC:3.6.3.9 | IPR001757; PTHR11939:SF100<br>(PANTHER)                                                          |
| -                       | -                                              | 0  |                                                                                                                                                                                                                                                                                                                                                 |   |                            | -                                                                                                |
| -                       | -                                              | 0  |                                                                                                                                                                                                                                                                                                                                                 |   |                            | -                                                                                                |
| -                       | -                                              | 0  |                                                                                                                                                                                                                                                                                                                                                 |   |                            | SignalP (SIGNALP)                                                                                |
| Caenorhabditis brenneri | guanosine monophosphate reductase 2            | 7  | P:GO:0009117;<br>F:GO:0046872;<br>P:GO:0009792;<br>P:GO:0055114;<br>F:GO:0003920;<br>P:GO:0040007;<br>P:GO:0002119                                                                                                                                                                                                                              | - | EC:1.7.1.7                 | IPR001093; IPR013785; PTHR11911<br>(PANTHER), PTHR11911:SF7<br>(PANTHER), SSF51412 (SUPERFAMILY) |
| -                       | -                                              | 0  |                                                                                                                                                                                                                                                                                                                                                 |   |                            | -                                                                                                |
| Caenorhabditis elegans  | briggsae cbr-tag-68 protein                    | 5  | F:GO:0003700;<br>F:GO:0005515;<br>C:GO:0005667;<br>P:GO:0006355;<br>P:GO:0007179                                                                                                                                                                                                                                                                | - |                            | -                                                                                                |
| -                       | -                                              | 0  |                                                                                                                                                                                                                                                                                                                                                 |   |                            | SignalP (SIGNALP)                                                                                |
| Caenorhabditis elegans  | dicer ribonuclease type iii                    | 9  | P:GO:0009653;<br>C:GO:0043005;<br>P:GO:0016246;<br>F:GO:0005515;<br>P:GO:0007275;<br>C:GO:0005737;<br>F:GO:0004519;<br>F:GO:0003723;<br>P:GO:0035196                                                                                                                                                                                            | - |                            | -                                                                                                |
| -                       | -                                              | 0  |                                                                                                                                                                                                                                                                                                                                                 |   |                            | -                                                                                                |
| -                       | -                                              | 0  |                                                                                                                                                                                                                                                                                                                                                 |   |                            | -                                                                                                |
| Caenorhabditis briggsae | immunoglobulin i-set domain containing protein | 6  | C:GO:0005887;<br>F:GO:0005114;<br>F:GO:0034713;<br>P:GO:0030511;<br>P:GO:0040018;<br>P:GO:0000003                                                                                                                                                                                                                                               | - |                            | -                                                                                                |
| -                       | -                                              | 0  |                                                                                                                                                                                                                                                                                                                                                 |   |                            | -                                                                                                |
| Caenorhabditis elegans  | briggsae cbr-ttr-54 protein                    | 0  |                                                                                                                                                                                                                                                                                                                                                 |   |                            | IPR001534                                                                                        |

|                         |                                                 |    |                                                                                                                                                                                                                          |   |             |                                                                                                                          |
|-------------------------|-------------------------------------------------|----|--------------------------------------------------------------------------------------------------------------------------------------------------------------------------------------------------------------------------|---|-------------|--------------------------------------------------------------------------------------------------------------------------|
| Loa loa                 | heat shock transcription factor 1               | 5  | F:GO:0003700;<br>F:GO:0043565;<br>C:GO:0005634;<br>P:GO:0009408;<br>P:GO:0006355                                                                                                                                         | - |             | IPR000232; IPR011991; PTHR10015 (PANTHER), PTHR10015-SF17 (PANTHER), SSF46785 (SUPERFAMILY)                              |
| Pan troglodytes         | isolog of yeast sui1 and rice gos2              | 0  |                                                                                                                                                                                                                          |   |             | -                                                                                                                        |
| Loa loa                 | tk fer protein ki-se                            | 12 | P:GO:0030098;<br>P:GO:0048523;<br>F:GO:0004674;<br>F:GO:0005021;<br>P:GO:0002320;<br>P:GO:0023052;<br>F:GO:0005524;<br>F:GO:0005515;<br>P:GO:0008284;<br>P:GO:0040018;<br>C:GO:0005887;<br>P:GO:0006468                  | - | EC:2.7.11.0 | IPR000719; IPR001245; IPR011009; IPR020685; IPR020764; G3DSA:1.10.510.10 (GENE3D)                                        |
| synthetic construct     | transcription elongation factor b polypeptide 2 | 10 | C:GO:0005829;<br>F:GO:0003746;<br>P:GO:0045944;<br>C:GO:0005667;<br>F:GO:0016251;<br>P:GO:0006461;<br>F:GO:0004842;<br>F:GO:0005515;<br>P:GO:0006368;<br>C:GO:0030891                                                    | - | EC:6.3.2.19 | IPR000626; IPR019955; G3DSA:3.10.20.90 (GENE3D), PTHR13248 (PANTHER), SSF54236 (SUPERFAMILY)                             |
|                         | -                                               | 0  |                                                                                                                                                                                                                          |   |             | -                                                                                                                        |
| Caenorhabditis briggsae | ched related family member (ptr-2)-like         | 13 | P:GO:0009792;<br>P:GO:0002119;<br>F:GO:0008158;<br>P:GO:0040018;<br>P:GO:0001703;<br>P:GO:0018996;<br>P:GO:0000910;<br>P:GO:0006810;<br>P:GO:0040010;<br>P:GO:0000003;<br>P:GO:0040011;<br>C:GO:0016021;<br>F:GO:0005215 | - |             | -                                                                                                                        |
| Brugia malayi           | protein ki-se domain containing protein         | 4  | F:GO:0005488;<br>F:GO:0004672;<br>P:GO:0040010;<br>P:GO:0000003                                                                                                                                                          | - |             | IPR000719; IPR001245; IPR008266; IPR011009; IPR020685; IPR020764; G3DSA:1.10.510.10 (GENE3D), G3DSA:3.30.200.20 (GENE3D) |
| Caenorhabditis briggsae | briggsae cbr-zyg-9 protein                      | 1  | F:GO:0005515                                                                                                                                                                                                             | - |             | IPR000357; IPR011989; IPR016024; IPR021133; PTHR12609 (PANTHER)                                                          |
|                         | -                                               | 0  |                                                                                                                                                                                                                          |   |             | -                                                                                                                        |
| Brugia malayi           | zinc finger protein 709-like                    | 8  | P:GO:0018991;<br>F:GO:0008270;<br>F:GO:0003676;<br>P:GO:0006796;<br>F:GO:0005515;<br>F:GO:0000287;<br>F:GO:0004427;<br>C:GO:0005737                                                                                      | - | EC:3.6.1.1  | IPR007087; IPR013087; IPR015880; PTHR11389 (PANTHER), SSF57667 (SUPERFAMILY)                                             |

|                            |                                                             |  |    |                                                                                                                                                                                                                                                            |                                                                                                   |                             |                                                                                                                                                                                                  |
|----------------------------|-------------------------------------------------------------|--|----|------------------------------------------------------------------------------------------------------------------------------------------------------------------------------------------------------------------------------------------------------------|---------------------------------------------------------------------------------------------------|-----------------------------|--------------------------------------------------------------------------------------------------------------------------------------------------------------------------------------------------|
| Caenorhabditis elegans     | briggsae cbr-dhs-7 protein                                  |  | 3  | F:GO:0016491;<br>P:GO:0008152;<br>F:GO:0005488                                                                                                                                                                                                             | -                                                                                                 | -                           | -                                                                                                                                                                                                |
| Callithrix jacchus         | enolase 1                                                   |  | 15 | P:GO:0009615;<br>C:GO:0000015;<br>P:GO:0000122;<br>F:GO:0003714;<br>F:GO:0004252;<br>C:GO:0031430;<br>C:GO:0009986;<br>F:GO:0004634;<br>P:GO:0006096;<br>F:GO:0003677;<br>P:GO:0030308;<br>F:GO:0000287;<br>F:GO:0003700;<br>C:GO:0005886;<br>C:GO:0005634 | -                                                                                                 | EC:3.4.21.0;<br>EC:4.2.1.11 | IPR020811; G3DSA:3.30.390.10<br>(GENE3D), PTHR11902 (PANTHER),<br>SSF54826 (SUPERFAMILY)                                                                                                         |
|                            | -                                                           |  | 0  |                                                                                                                                                                                                                                                            |                                                                                                   |                             | -                                                                                                                                                                                                |
| Caenorhabditis elegans     | cyclopropane-fatty-acyl-phospholipid synthase               |  | 1  | F:GO:0008168                                                                                                                                                                                                                                               | -                                                                                                 | EC:2.1.1.0                  | -                                                                                                                                                                                                |
|                            | -                                                           |  | 0  |                                                                                                                                                                                                                                                            |                                                                                                   |                             | -                                                                                                                                                                                                |
|                            | -                                                           |  | 0  |                                                                                                                                                                                                                                                            |                                                                                                   |                             | -                                                                                                                                                                                                |
| Caenorhabditis briggsae    | bwf1-like protein                                           |  | 0  |                                                                                                                                                                                                                                                            | F:GO:0004672;<br>F:GO:0005524;<br>F:GO:0003755;<br>P:GO:0006457;<br>P:GO:0006468;<br>F:GO:0016853 |                             | IPR000409; PTHR13743 (PANTHER)                                                                                                                                                                   |
| Caenorhabditis briggsae    | retinol reti-ldehyde reductase                              |  | 10 | P:GO:0016477;<br>F:GO:0005488;<br>P:GO:0006710;<br>C:GO:0043231;<br>P:GO:0055114;<br>F:GO:0009055;<br>F:GO:0016491;<br>C:GO:0044425;<br>C:GO:0044444;<br>P:GO:0008406                                                                                      | -                                                                                                 |                             | -                                                                                                                                                                                                |
| Pediculus humanus corporis | conserved hypothetical protein [Pediculus humanus corporis] |  | 0  |                                                                                                                                                                                                                                                            |                                                                                                   |                             | -                                                                                                                                                                                                |
| Pediculus humanus corporis | conserved hypothetical protein [Pediculus humanus corporis] |  | 0  |                                                                                                                                                                                                                                                            |                                                                                                   |                             | -                                                                                                                                                                                                |
|                            | -                                                           |  | 0  |                                                                                                                                                                                                                                                            |                                                                                                   |                             | -                                                                                                                                                                                                |
|                            | -                                                           |  | 0  |                                                                                                                                                                                                                                                            |                                                                                                   |                             | SignalP (SIGNALP)                                                                                                                                                                                |
| Caenorhabditis briggsae    | elegans protein confirmed by transcript evidence            |  | 1  | F:GO:0003840                                                                                                                                                                                                                                               | -                                                                                                 | EC:2.3.2.2                  | IPR000101; SSF56235 (SUPERFAMILY)                                                                                                                                                                |
| Caenorhabditis briggsae    | low density lipid receptor-related                          |  | 4  | C:GO:0016021;<br>F:GO:0004872;<br>F:GO:0003824;<br>F:GO:0005509                                                                                                                                                                                            | -                                                                                                 |                             | IPR000033; IPR001917; IPR006209;<br>IPR006210; IPR011042;<br>G3DSA:2.10.25.10 (GENE3D),<br>PTHR10529 (PANTHER),<br>PTHR10529-SF2 (PANTHER), SSF57196<br>(SUPERFAMILY), SSF63825<br>(SUPERFAMILY) |
|                            | -                                                           |  | 0  |                                                                                                                                                                                                                                                            |                                                                                                   |                             | SignalP (SIGNALP)                                                                                                                                                                                |
| Caenorhabditis briggsae    | briggsae cbr-asm-1 protein                                  |  | 4  | P:GO:0046513;<br>F:GO:0004767;<br>C:GO:0005576;<br>P:GO:0006685                                                                                                                                                                                            | -                                                                                                 | EC:3.1.4.12                 | G3DSA:3.60.21.10 (GENE3D),<br>PTHR10340 (PANTHER),<br>PTHR10340-SF13 (PANTHER)                                                                                                                   |
|                            | -                                                           |  | 0  |                                                                                                                                                                                                                                                            |                                                                                                   |                             | -                                                                                                                                                                                                |



|                                 |                                                            |    |  |                                                                                                                                                                                                                                                                                                                                                 |                                     |
|---------------------------------|------------------------------------------------------------|----|--|-------------------------------------------------------------------------------------------------------------------------------------------------------------------------------------------------------------------------------------------------------------------------------------------------------------------------------------------------|-------------------------------------|
|                                 | -                                                          | 0  |  |                                                                                                                                                                                                                                                                                                                                                 | -                                   |
|                                 | -                                                          | 0  |  |                                                                                                                                                                                                                                                                                                                                                 | -                                   |
|                                 | -                                                          | 0  |  |                                                                                                                                                                                                                                                                                                                                                 | SignalP (SIGNALP)                   |
| Asticcacaulis excentricus CB 48 | gamma-glutamyltranspeptidase                               | 0  |  | F:GO:0003840;<br>F:GO:0008415;<br>F:GO:0016740                                                                                                                                                                                                                                                                                                  | IPR000101; SSF56235 (SUPERFAMILY)   |
| Saccoglossus kowalevskii        | sestrin 2                                                  | 0  |  | C:GO:0005737;<br>P:GO:0007050;<br>C:GO:0005634                                                                                                                                                                                                                                                                                                  | IPR006730; SSF69118 (SUPERFAMILY)   |
| Brugia malayi                   | hypothetical protein Bm1_49115 [Brugia malayi]             | 0  |  |                                                                                                                                                                                                                                                                                                                                                 | -                                   |
|                                 | -                                                          | 0  |  |                                                                                                                                                                                                                                                                                                                                                 | IPR004245; PTHR10974:SF17 (PANTHER) |
| Macaca mulatta                  | type alpha 2                                               | 8  |  | F:GO:0005201;<br>F:GO:0030674;<br>C:GO:0005615;<br>P:GO:0016337;<br>C:GO:0005578;<br>P:GO:0009749;<br>P:GO:0030198;<br>C:GO:0042383                                                                                                                                                                                                             | -                                   |
| Caenorhabditis elegans          | elegans protein partially confirmed by transcript evidence | 0  |  |                                                                                                                                                                                                                                                                                                                                                 | -                                   |
| Caenorhabditis elegans          | #NAME?                                                     | 20 |  | P:GO:0008340;<br>P:GO:0015672;<br>P:GO:0035158;<br>P:GO:0008360;<br>P:GO:0051124;<br>P:GO:0035159;<br>P:GO:0019991;<br>P:GO:0009612;<br>P:GO:0006754;<br>F:GO:0005391;<br>P:GO:0001700;<br>C:GO:0005918;<br>P:GO:0007268;<br>C:GO:0005890;<br>P:GO:0009266;<br>C:GO:0005634;<br>F:GO:0005524;<br>P:GO:0050905;<br>P:GO:0001894;<br>P:GO:0008344 | EC:3.6.3.9                          |
|                                 | -                                                          | 0  |  |                                                                                                                                                                                                                                                                                                                                                 | SignalP (SIGNALP)                   |
|                                 | -                                                          | 0  |  |                                                                                                                                                                                                                                                                                                                                                 | -                                   |
| Caenorhabditis briggsae         | rt05_caebr ame: full= 28s ribosomal protein mitochondrial  | 9  |  | P:GO:0009792;<br>P:GO:0002119;<br>C:GO:0005840;<br>F:GO:0003735;<br>F:GO:0003723;<br>P:GO:0040010;<br>P:GO:0006898;<br>P:GO:0006412;<br>C:GO:0005739                                                                                                                                                                                            | EC:3.6.5.3                          |
| Caenorhabditis briggsae         | elegans protein partially confirmed by transcript evidence | 4  |  | P:GO:0040015;<br>P:GO:0000003;<br>P:GO:0040010;<br>P:GO:0040011                                                                                                                                                                                                                                                                                 | PTHR22991 (PANTHER)                 |
|                                 | -                                                          | 0  |  |                                                                                                                                                                                                                                                                                                                                                 | SignalP (SIGNALP)                   |

|                         |                                                            |    |                                                                                                                                                                                                                                                                                                               |                               |                                                         |                                                                                          |
|-------------------------|------------------------------------------------------------|----|---------------------------------------------------------------------------------------------------------------------------------------------------------------------------------------------------------------------------------------------------------------------------------------------------------------|-------------------------------|---------------------------------------------------------|------------------------------------------------------------------------------------------|
| synthetic construct     | eukaryotic translation elongation factor 1 alpha 1         | 10 | C:GO:0005829;<br>F:GO:0003746;<br>C:GO:0005853;<br>P:GO:0006414;<br>P:GO:0006184;<br>F:GO:0005515;<br>C:GO:0043025;<br>F:GO:0003924;<br>F:GO:0005525;<br>C:GO:0005634                                                                                                                                         | -                             | EC:3.6.5.1;<br>EC:3.6.5.2;<br>EC:3.6.5.3;<br>EC:3.6.5.4 | -                                                                                        |
|                         | -                                                          | 0  |                                                                                                                                                                                                                                                                                                               |                               |                                                         | -                                                                                        |
| Brugia malayi           | baculoviral iap repeat-containing 6                        | 4  | P:GO:0006916;<br>P:GO:0019538;<br>F:GO:0005515;<br>F:GO:0019787                                                                                                                                                                                                                                               | -                             |                                                         | -                                                                                        |
|                         | -                                                          | 0  |                                                                                                                                                                                                                                                                                                               |                               |                                                         | -                                                                                        |
| Caenorhabditis elegans  | elegans protein confirmed by transcript evidence           | 0  |                                                                                                                                                                                                                                                                                                               |                               |                                                         | IPR009432                                                                                |
|                         | -                                                          | 0  |                                                                                                                                                                                                                                                                                                               |                               |                                                         | -                                                                                        |
|                         | -                                                          | 0  |                                                                                                                                                                                                                                                                                                               |                               |                                                         | -                                                                                        |
|                         | -                                                          | 0  |                                                                                                                                                                                                                                                                                                               |                               |                                                         | -                                                                                        |
| Pongo abelii            | eukaryotic translation initiation factor subunit 5 47kda   | 5  | C:GO:0005852;<br>F:GO:0005515;<br>P:GO:0045948;<br>F:GO:0003743;<br>C:GO:0005829                                                                                                                                                                                                                              | -                             |                                                         | PTHR10540 (PANTHER),<br>PTHR10540:SF6 (PANTHER)                                          |
| Caenorhabditis elegans  | elegans protein partially confirmed by transcript evidence | 0  |                                                                                                                                                                                                                                                                                                               | C:GO:0016021;<br>P:GO:0019915 |                                                         | PTHR23294 (PANTHER), SignalP<br>(SIGNALP)                                                |
| Caenorhabditis briggsae | gem-interacting protein                                    | 3  | F:GO:0005488;<br>P:GO:0023052;<br>P:GO:0050794                                                                                                                                                                                                                                                                | -                             |                                                         | IPR000198; IPR008936; PTHR15228<br>(PANTHER), PTHR15228:SF1<br>(PANTHER)                 |
| Caenorhabditis elegans  | ribosomal protein s27a                                     | 18 | P:GO:0006412;<br>C:GO:0005875;<br>P:GO:0006511;<br>F:GO:0008270;<br>P:GO:0006355;<br>F:GO:0003735;<br>P:GO:0000003;<br>P:GO:0018996;<br>C:GO:0022627;<br>P:GO:0010171;<br>P:GO:0002119;<br>P:GO:0042254;<br>F:GO:0005515;<br>P:GO:0006325;<br>P:GO:0009792;<br>P:GO:0040015;<br>P:GO:0006950;<br>C:GO:0005634 | -                             | EC:3.6.5.3                                              | IPR002906; G3DSA:3.10.20.90<br>(GENE3D), PTHR10666 (PANTHER),<br>PTHR10666:SF2 (PANTHER) |
|                         | -                                                          | 0  |                                                                                                                                                                                                                                                                                                               |                               |                                                         | IPR000626; G3DSA:3.10.20.90<br>(GENE3D), PTHR10666 (PANTHER),<br>PTHR10666:SF7 (PANTHER) |
|                         | -                                                          | 0  |                                                                                                                                                                                                                                                                                                               |                               |                                                         | -                                                                                        |

|                         |                                              |   |                                                                                                                                                      |  |                                                                                 |
|-------------------------|----------------------------------------------|---|------------------------------------------------------------------------------------------------------------------------------------------------------|--|---------------------------------------------------------------------------------|
| Caenorhabditis briggsae | briggsae cbr-pgp-9 protein                   | 0 | F:GO:0005524;<br>F:GO:0016887;<br>C:GO:0016021;<br>F:GO:0000166;<br>F:GO:0042626;<br>F:GO:0017111;<br>P:GO:0055085;<br>P:GO:0006810                  |  | SignalP (SIGNALP)                                                               |
|                         | -                                            | 0 |                                                                                                                                                      |  | -                                                                               |
|                         | -                                            | 0 |                                                                                                                                                      |  | -                                                                               |
|                         | -                                            | 0 |                                                                                                                                                      |  | -                                                                               |
| Caenorhabditis briggsae | dhx33 protein                                | 2 | F:GO:0004386;<br>F:GO:0000166                                                                                                                        |  | -                                                                               |
|                         | -                                            | 0 |                                                                                                                                                      |  | -                                                                               |
| Caenorhabditis elegans  | vacuolar protein sorting 13d                 | 3 | P:GO:0040010;<br>P:GO:0002119;<br>P:GO:0040011                                                                                                       |  | -                                                                               |
|                         | -                                            | 0 |                                                                                                                                                      |  | -                                                                               |
| Caenorhabditis briggsae | briggsae cbr-dhs-15 protein                  | 5 | P:GO:0009792;<br>F:GO:0016491;<br>F:GO:0005515;<br>P:GO:0040010;<br>P:GO:0055114                                                                     |  | IPR002198; IPR016040;<br>PTHR19410:SF76 (PANTHER),<br>SSF51735 (SUPERFAMILY)    |
| Caenorhabditis elegans  | midasin homolog                              | 7 | P:GO:0043254;<br>P:GO:0006355;<br>F:GO:0005524;<br>F:GO:0016887;<br>F:GO:0008134;<br>F:GO:0051082;<br>C:GO:0005634                                   |  | G3DSA:3.40.50.300 (GENE3D),<br>PTHR22908 (PANTHER),<br>PTHR22908:SF13 (PANTHER) |
| Caenorhabditis briggsae | malate l-lactate dehydroge-se family protein | 4 | P:GO:0018991;<br>P:GO:0055114;<br>F:GO:0016491;<br>P:GO:0040011                                                                                      |  | IPR003767; G3DSA:1.10.1530.10<br>(GENE3D), G3DSA:3.30.1370.60<br>(GENE3D)       |
| Caenorhabditis briggsae | trp channel protein -nchung                  | 9 | P:GO:0055085;<br>P:GO:0050974;<br>C:GO:0016021;<br>P:GO:0006811;<br>P:GO:0045450;<br>P:GO:0045451;<br>F:GO:0005216;<br>P:GO:0007605;<br>P:GO:0009270 |  | IPR020683; PTHR10582 (PANTHER),<br>PTHR10582:SF2 (PANTHER)                      |
| Caenorhabditis elegans  | abnormal dye filling family member (dyf-14)  | 0 |                                                                                                                                                      |  | -                                                                               |
|                         | -                                            | 0 |                                                                                                                                                      |  | -                                                                               |
|                         | -                                            | 0 |                                                                                                                                                      |  | -                                                                               |
| Brugia malayi           | mgc88946 protein                             | 0 |                                                                                                                                                      |  | -                                                                               |
|                         |                                              | 0 |                                                                                                                                                      |  |                                                                                 |

|                         |                                                                |    |                                                                                                                                                                                        |   |                                                                                                                                                                    |
|-------------------------|----------------------------------------------------------------|----|----------------------------------------------------------------------------------------------------------------------------------------------------------------------------------------|---|--------------------------------------------------------------------------------------------------------------------------------------------------------------------|
| Caenorhabditis elegans  | hypothetical protein R05D3.12 [Caenorhabditis elegans]         | 0  | F:GO:0003918;<br>F:GO:0003916;<br>P:GO:0006265;<br>C:GO:0005694;<br>F:GO:0003700;<br>P:GO:0006259;<br>F:GO:0003677;<br>F:GO:0000166;<br>F:GO:0005524;<br>P:GO:0006355;<br>F:GO:0016853 | - | -                                                                                                                                                                  |
| -                       | -                                                              | 0  |                                                                                                                                                                                        |   | -                                                                                                                                                                  |
| -                       | -                                                              | 0  |                                                                                                                                                                                        |   | -                                                                                                                                                                  |
| -                       | -                                                              | 0  |                                                                                                                                                                                        |   | -                                                                                                                                                                  |
| Haemonchus contortus    | thioredoxin reductase 3 isoform 1                              | 11 | C:GO:0005829;<br>C:GO:0043231;<br>P:GO:0055114;<br>P:GO:0006749;<br>P:GO:0032501;<br>C:GO:0005792;<br>F:GO:0000166;<br>F:GO:0050662;<br>F:GO:0015036;<br>P:GO:0032502;<br>F:GO:0004791 | - | EC:1.8.1.9<br><br>IPR006338; IPR012335; IPR012999;<br>IPR013027; PRO0411 (PRINTS),<br>G3DSA:3.50.50.60 (GENE3D),<br>PTHR22912 (PANTHER), SSF51905<br>(SUPERFAMILY) |
| -                       | -                                                              | 0  |                                                                                                                                                                                        |   | -                                                                                                                                                                  |
| -                       | -                                                              | 0  |                                                                                                                                                                                        |   | -                                                                                                                                                                  |
| -                       | -                                                              | 0  |                                                                                                                                                                                        |   | -                                                                                                                                                                  |
| Pongo abelii            | marcks-like 1                                                  | 4  | P:GO:0008284;<br>F:GO:0005516;<br>P:GO:0016192;<br>C:GO:0005886                                                                                                                        | - | -                                                                                                                                                                  |
| -                       | -                                                              | 0  |                                                                                                                                                                                        |   | -                                                                                                                                                                  |
| -                       | -                                                              | 0  |                                                                                                                                                                                        |   | -                                                                                                                                                                  |
| -                       | -                                                              | 0  |                                                                                                                                                                                        |   | -                                                                                                                                                                  |
| -                       | -                                                              | 0  |                                                                                                                                                                                        |   | -                                                                                                                                                                  |
| Caenorhabditis elegans  | low-density lipoprotein receptor related family member (Lrp-1) | 3  | F:GO:0004872;<br>C:GO:0016021;<br>F:GO:0005509                                                                                                                                         | - | IPR000152; IPR011042                                                                                                                                               |
| Caenorhabditis briggsae | xanthine dehydroge-se                                          | 8  | F:GO:0004855;<br>F:GO:0009055;<br>F:GO:0005506;<br>F:GO:0004854;<br>P:GO:0055114;<br>P:GO:0008340;<br>F:GO:0051537;<br>F:GO:0050660                                                    | - | EC:1.17.3.2;<br>EC:1.17.1.4<br><br>IPR002346; IPR016166; IPR016169;<br>PTHR11908 (PANTHER),<br>PTHR11908:SF9 (PANTHER)                                             |
| Caenorhabditis elegans  | trehalose 6-phosphate synthase                                 | 3  | F:GO:0003825;<br>P:GO:0034608;<br>P:GO:0005992                                                                                                                                         | - | EC:2.4.1.15<br><br>IPR001830; G3DSA:3.40.50.2000<br>(GENE3D), PTHR10788 (PANTHER),<br>SSF53756 (SUPERFAMILY)                                                       |
| -                       | -                                                              | 0  |                                                                                                                                                                                        |   | -                                                                                                                                                                  |
| Caenorhabditis elegans  | williams-beuren syndrome chromosome region 16 protein          | 0  |                                                                                                                                                                                        |   | IPR000408; IPR009091; PTHR22870<br>(PANTHER), PTHR22870:SF11<br>(PANTHER)                                                                                          |
| -                       | -                                                              | 0  |                                                                                                                                                                                        |   | -                                                                                                                                                                  |

|                         |                                                            |    |                                                                                                                                                                                                                          |                                                                                                                                     |                            |                                                                                                                                       |
|-------------------------|------------------------------------------------------------|----|--------------------------------------------------------------------------------------------------------------------------------------------------------------------------------------------------------------------------|-------------------------------------------------------------------------------------------------------------------------------------|----------------------------|---------------------------------------------------------------------------------------------------------------------------------------|
| Caenorhabditis elegans  | troponin c                                                 | 6  | P:GO:0000003;<br>P:GO:0040007;<br>F:GO:0005509;<br>F:GO:0005515;<br>C:GO:0009536;<br>P:GO:0002119                                                                                                                        | -                                                                                                                                   |                            | IPR002048; IPR011992; IPR018247;<br>IPR018248; IPR018249; PTHR23050<br>(PANTHER), PTHR23050:SF16<br>(PANTHER), SSF47473 (SUPERFAMILY) |
| Caenorhabditis elegans  | failed axon connections protein                            | 1  | P:GO:0007409                                                                                                                                                                                                             | -                                                                                                                                   |                            | PTHR12289 (PANTHER),<br>PTHR12289:SF17 (PANTHER)                                                                                      |
|                         | -                                                          | 0  |                                                                                                                                                                                                                          |                                                                                                                                     |                            | -                                                                                                                                     |
| Caenorhabditis elegans  | elegans protein partially confirmed by transcript evidence | 1  | C:GO:0016021                                                                                                                                                                                                             | -                                                                                                                                   |                            | IPR010761; SignalP (SIGNALP)                                                                                                          |
| Caenorhabditis briggsae | msp-domain protein 1 variant                               | 5  | C:GO:0044297;<br>P:GO:0019915;<br>P:GO:0040018;<br>P:GO:0000003;<br>C:GO:0031143                                                                                                                                         | -                                                                                                                                   |                            | -                                                                                                                                     |
| Tribolium castaneum     | required for meiotic nuclear division 5 homolog a          | 0  |                                                                                                                                                                                                                          | P:GO:0008150;<br>C:GO:0005575                                                                                                       |                            | IPR013083; PTHR12170 (PANTHER),<br>PTHR12170:SF3 (PANTHER)                                                                            |
| Loa loa                 | #NAME?                                                     | 1  | F:GO:0016813                                                                                                                                                                                                             | -                                                                                                                                   | EC:3.5.3.0                 | G3DSA:3.75.10.10 (GENE3D),<br>PTHR12737 (PANTHER),<br>PTHR12737:SF5 (PANTHER)                                                         |
| Caenorhabditis briggsae | pdz domain                                                 | 0  |                                                                                                                                                                                                                          | F:GO:0005515                                                                                                                        |                            | IPR001478; G3DSA:2.30.42.10<br>(GENE3D), PTHR10910 (PANTHER),<br>PTHR10910:SF10 (PANTHER)                                             |
| Caenorhabditis briggsae | briggsae cbr-pph-5 protein                                 | 0  |                                                                                                                                                                                                                          | F:GO:0046872;<br>F:GO:0005488;<br>C:GO:0005737;<br>P:GO:0006470;<br>F:GO:0016787;<br>F:GO:0004722;<br>F:GO:0004721;<br>C:GO:0005634 |                            | IPR013235                                                                                                                             |
| Caenorhabditis elegans  | vacuolar protein sorting 13d                               | 1  | P:GO:0008104                                                                                                                                                                                                             | -                                                                                                                                   |                            | PTHR16166 (PANTHER),<br>PTHR16166:SF24 (PANTHER)                                                                                      |
|                         | -                                                          | 0  |                                                                                                                                                                                                                          |                                                                                                                                     |                            | -                                                                                                                                     |
| Bos taurus              | endothelial differentiation-related factor 1               | 13 | P:GO:0019216;<br>P:GO:0043388;<br>F:GO:0005516;<br>P:GO:0006355;<br>F:GO:0043565;<br>F:GO:0003700;<br>P:GO:0045446;<br>P:GO:0007275;<br>F:GO:0004402;<br>F:GO:0003713;<br>C:GO:0005669;<br>C:GO:0005737;<br>F:GO:0008168 | -                                                                                                                                   | EC:2.3.1.48;<br>EC:2.1.1.0 | IPR013729; PTHR10245 (PANTHER),<br>PTHR10245:SF1 (PANTHER)                                                                            |
| Caenorhabditis elegans  | hypothetical protein C05E11.6 [Caenorhabditis elegans]     | 0  |                                                                                                                                                                                                                          |                                                                                                                                     |                            | -                                                                                                                                     |
|                         | -                                                          | 0  |                                                                                                                                                                                                                          |                                                                                                                                     |                            | SignalP (SIGNALP)                                                                                                                     |
|                         | -                                                          | 0  |                                                                                                                                                                                                                          |                                                                                                                                     |                            | SignalP (SIGNALP)                                                                                                                     |
|                         | -                                                          | 0  |                                                                                                                                                                                                                          |                                                                                                                                     |                            | SignalP (SIGNALP)                                                                                                                     |
|                         | -                                                          | 0  |                                                                                                                                                                                                                          |                                                                                                                                     |                            | -                                                                                                                                     |
|                         | -                                                          | 0  |                                                                                                                                                                                                                          |                                                                                                                                     |                            | -                                                                                                                                     |
| Caenorhabditis briggsae | betaine aldehyde dehydroge-se                              | 2  | F:GO:0016491;<br>P:GO:0006350                                                                                                                                                                                            | -                                                                                                                                   |                            | IPR015590; IPR016161; IPR016162;<br>G3DSA:2.30.30.330 (GENE3D),<br>PTHR11699:SF47 (PANTHER), PF05708<br>(PFAM)                        |

|                         |                                                              |   |                                                                                                                    |                                                                                                                                                                                                         |                                                            |
|-------------------------|--------------------------------------------------------------|---|--------------------------------------------------------------------------------------------------------------------|---------------------------------------------------------------------------------------------------------------------------------------------------------------------------------------------------------|------------------------------------------------------------|
| Caenorhabditis elegans  | briggsae cbr-nhr-45 protein                                  | 0 |                                                                                                                    | F:GO:0043565;<br>F:GO:0003700;<br>F:GO:0003677;<br>C:GO:0005634;<br>F:GO:0008270;<br>P:GO:0006355;<br>F:GO:0004872;<br>F:GO:0005515;<br>F:GO:0046872;<br>P:GO:0006350;<br>F:GO:0003707;<br>P:GO:0045449 | -                                                          |
| -                       | -                                                            | 0 |                                                                                                                    |                                                                                                                                                                                                         | -                                                          |
| -                       | -                                                            | 0 |                                                                                                                    |                                                                                                                                                                                                         | -                                                          |
| -                       | -                                                            | 0 |                                                                                                                    |                                                                                                                                                                                                         | -                                                          |
| -                       | -                                                            | 0 |                                                                                                                    |                                                                                                                                                                                                         | IPR000990; SignalP (SIGNALP)                               |
| Danio rerio             | serine threonine-protein ki-se pak 4                         | 0 |                                                                                                                    | F:GO:0016301;<br>F:GO:0005524;<br>F:GO:0016740;<br>F:GO:0000166;<br>P:GO:0006468;<br>F:GO:0004674;<br>C:GO:0005575                                                                                      | PTHR22986 (PANTHER),<br>PTHR22986:SF88 (PANTHER)           |
| -                       | -                                                            | 0 |                                                                                                                    |                                                                                                                                                                                                         | SignalP (SIGNALP)                                          |
| -                       | -                                                            | 0 |                                                                                                                    |                                                                                                                                                                                                         | -                                                          |
| -                       | -                                                            | 0 |                                                                                                                    |                                                                                                                                                                                                         | -                                                          |
| Caenorhabditis elegans  | hypothetical protein H20J04.9 [Caenorhabditis elegans]       | 0 |                                                                                                                    | F:GO:0008168;<br>P:GO:0008152                                                                                                                                                                           | -                                                          |
| Caenorhabditis briggsae | elegans protein confirmed by transcript evidence             | 7 | P:GO:0040035;<br>C:GO:0005921;<br>P:GO:0040010;<br>P:GO:0040011;<br>C:GO:0016021;<br>P:GO:0019915;<br>P:GO:0002009 | -                                                                                                                                                                                                       | -                                                          |
| -                       | -                                                            | 0 |                                                                                                                    |                                                                                                                                                                                                         | -                                                          |
| Caenorhabditis elegans  | yeast mon (monensin-resistant) homolog family member (mon-2) | 1 | P:GO:0006810                                                                                                       | -                                                                                                                                                                                                       | -                                                          |
| Caenorhabditis elegans  | protein mon2-like protein                                    | 1 | P:GO:0006810                                                                                                       | -                                                                                                                                                                                                       | IPR016024; PTHR10663 (PANTHER),<br>PTHR10663:SF5 (PANTHER) |
| Caenorhabditis elegans  | elegans protein partially confirmed by transcript evidence   | 0 |                                                                                                                    |                                                                                                                                                                                                         | -                                                          |
| -                       | -                                                            | 0 |                                                                                                                    |                                                                                                                                                                                                         | -                                                          |
| -                       | -                                                            | 0 |                                                                                                                    |                                                                                                                                                                                                         | -                                                          |
| -                       | -                                                            | 0 |                                                                                                                    |                                                                                                                                                                                                         | -                                                          |

|                        |                                                   |    |                                                                                                                                                                                                                                                                                                                                                                                                                                                                                          |   |   |                                                                                      |
|------------------------|---------------------------------------------------|----|------------------------------------------------------------------------------------------------------------------------------------------------------------------------------------------------------------------------------------------------------------------------------------------------------------------------------------------------------------------------------------------------------------------------------------------------------------------------------------------|---|---|--------------------------------------------------------------------------------------|
| Ailuropoda melanoleuca | sig-l transducer and activator of transcription 1 | 30 | F:GO:0005127;<br>F:GO:0005515;<br>P:GO:0007260;<br>P:GO:0042542;<br>P:GO:0032869;<br>P:GO:0006366;<br>P:GO:0006919;<br>P:GO:0009612;<br>P:GO:0006355;<br>P:GO:0008015;<br>P:GO:0031663;<br>F:GO:0005509;<br>P:GO:0014070;<br>C:GO:0005737;<br>C:GO:0005730;<br>P:GO:0019221;<br>C:GO:0030425;<br>P:GO:0034097;<br>P:GO:0048661;<br>P:GO:0007249;<br>F:GO:0043565;<br>P:GO:0006917;<br>C:GO:0030424;<br>F:GO:0005062;<br>P:GO:0042493;<br>P:GO:0051591;<br>F:GO:0003700;<br>P:GO:0007584; | - | - | -                                                                                    |
|                        | -                                                 | 0  |                                                                                                                                                                                                                                                                                                                                                                                                                                                                                          |   |   | -                                                                                    |
|                        | -                                                 | 0  |                                                                                                                                                                                                                                                                                                                                                                                                                                                                                          |   |   | -                                                                                    |
| Caenorhabditis elegans | exosome component 8                               | 1  | F:GO:0005515                                                                                                                                                                                                                                                                                                                                                                                                                                                                             | - |   | -                                                                                    |
|                        | -                                                 | 0  |                                                                                                                                                                                                                                                                                                                                                                                                                                                                                          |   |   | SignalP (SIGNALP)                                                                    |
|                        | -                                                 | 0  |                                                                                                                                                                                                                                                                                                                                                                                                                                                                                          |   |   | -                                                                                    |
|                        | -                                                 | 0  |                                                                                                                                                                                                                                                                                                                                                                                                                                                                                          |   |   | -                                                                                    |
| Loa loa                | pumilio homolog 2                                 | 2  | F:GO:0003723;<br>F:GO:0005515                                                                                                                                                                                                                                                                                                                                                                                                                                                            | - |   | IPR001313; IPR011989; IPR016024;<br>PTHR12537 (PANTHER),<br>PTHR12537:SF12 (PANTHER) |
| Loa loa                | pumilio homolog 2                                 | 2  | F:GO:0003723;<br>F:GO:0005515                                                                                                                                                                                                                                                                                                                                                                                                                                                            | - |   | IPR001313; IPR011989; IPR016024;<br>PTHR12537 (PANTHER),<br>PTHR12537:SF12 (PANTHER) |
|                        | -                                                 | 0  |                                                                                                                                                                                                                                                                                                                                                                                                                                                                                          |   |   | -                                                                                    |
|                        | -                                                 | 0  |                                                                                                                                                                                                                                                                                                                                                                                                                                                                                          |   |   | -                                                                                    |
|                        | -                                                 | 0  |                                                                                                                                                                                                                                                                                                                                                                                                                                                                                          |   |   | -                                                                                    |
| Caenorhabditis elegans | erin family member (cdh-12)                       | 0  |                                                                                                                                                                                                                                                                                                                                                                                                                                                                                          |   |   | -                                                                                    |

|                         |                                                                     |    |                                                                                                                                                                                                                                                            |                                                |             |                                                                                       |
|-------------------------|---------------------------------------------------------------------|----|------------------------------------------------------------------------------------------------------------------------------------------------------------------------------------------------------------------------------------------------------------|------------------------------------------------|-------------|---------------------------------------------------------------------------------------|
| Caenorhabditis briggsae | briggsae cbr-hmr-1 protein                                          | 15 | C:GO:0005911;<br>P:GO:0016339;<br>F:GO:0005515;<br>P:GO:0007412;<br>F:GO:0005509;<br>C:GO:0016021;<br>P:GO:0050774;<br>P:GO:0007156;<br>P:GO:0048676;<br>P:GO:0007413;<br>P:GO:0031290;<br>P:GO:0045467;<br>P:GO:0016318;<br>P:GO:0045463;<br>P:GO:0048841 | -                                              |             | IPR002126; IPR015919; IPR020894;<br>PTHR10596 (PANTHER),<br>PTHR10596:SF113 (PANTHER) |
|                         | -                                                                   | 0  |                                                                                                                                                                                                                                                            |                                                |             | -                                                                                     |
| Loa loa                 | cpb-2                                                               | 1  | F:GO:0003676                                                                                                                                                                                                                                               | -                                              |             | PTHR12566 (PANTHER)                                                                   |
| Loa loa                 | hypothetical protein LOAG_07811 [Loa loa]                           | 0  |                                                                                                                                                                                                                                                            | P:GO:0009792                                   |             | -                                                                                     |
| Caenorhabditis briggsae | prion-like-(q n-rich)-domain-bearing protein family member (pqn-83) | 0  |                                                                                                                                                                                                                                                            | P:GO:0000003;<br>P:GO:0040011;<br>P:GO:0002119 |             | -                                                                                     |
|                         | -                                                                   | 0  |                                                                                                                                                                                                                                                            |                                                |             | SignalP (SIGNALP)                                                                     |
|                         | -                                                                   | 0  |                                                                                                                                                                                                                                                            |                                                |             | -                                                                                     |
|                         | -                                                                   | 0  |                                                                                                                                                                                                                                                            |                                                |             | -                                                                                     |
|                         | -                                                                   | 0  |                                                                                                                                                                                                                                                            |                                                |             | -                                                                                     |
|                         | -                                                                   | 0  |                                                                                                                                                                                                                                                            |                                                |             | PTHR13190 (PANTHER),<br>PTHR13190:SF2 (PANTHER)                                       |
| Caenorhabditis briggsae | exs family protein                                                  | 3  | P:GO:0018991;<br>P:GO:0010171;<br>P:GO:0040010                                                                                                                                                                                                             | -                                              |             | -                                                                                     |
| Culex quinquefasciatus  | phosphatidylethanolamine-binding protein                            | 0  |                                                                                                                                                                                                                                                            |                                                |             | IPR001858; IPR008914; PTHR11362 (PANTHER)                                             |
|                         | -                                                                   | 0  |                                                                                                                                                                                                                                                            |                                                |             | -                                                                                     |
| Bunostomum phlebotomum  | -dh dehydroge-se subunit 1                                          | 4  | C:GO:0016021;<br>P:GO:0055114;<br>C:GO:0005739;<br>F:GO:0008137                                                                                                                                                                                            | -                                              | EC:1.6.5.3  | IPR001694; IPR018086                                                                  |
|                         | -                                                                   | 0  |                                                                                                                                                                                                                                                            |                                                |             | -                                                                                     |
| Brugia malayi           | cytochrome p450                                                     | 1  | F:GO:0046872                                                                                                                                                                                                                                               | -                                              |             | -                                                                                     |
| Brugia malayi           | lung seven transmembrane receptor family protein                    | 0  |                                                                                                                                                                                                                                                            | F:GO:0004872;<br>C:GO:0016021                  |             | -                                                                                     |
| Caenorhabditis elegans  | gata zinc finger family protein                                     | 1  | F:GO:0005488                                                                                                                                                                                                                                               | -                                              |             | -                                                                                     |
|                         | -                                                                   | 0  |                                                                                                                                                                                                                                                            |                                                |             | -                                                                                     |
| Caenorhabditis briggsae | proline oxidase                                                     | 6  | P:GO:0055114;<br>F:GO:0004657;<br>P:GO:0006537;<br>P:GO:0042331;<br>C:GO:0005759;<br>P:GO:0006562                                                                                                                                                          | -                                              | EC:1.5.99.8 | IPR002872; IPR015659;<br>G3DSA:3.20.20.220 (GENE3D),<br>SSF51730 (SUPERFAMILY)        |
| Caenorhabditis briggsae | briggsae cbr-unc-8 protein                                          | 3  | C:GO:0016021;<br>F:GO:0005272;<br>P:GO:0006814                                                                                                                                                                                                             | -                                              |             | IPR001873; IPR020903;<br>G3DSA:1.10.287.820 (GENE3D),<br>PTHR11690:SF17 (PANTHER)     |
| Caenorhabditis briggsae | elegans protein partially confirmed by transcript evidence          | 0  |                                                                                                                                                                                                                                                            | C:GO:0016021;<br>C:GO:0016020                  |             | IPR013057; PTHR22950 (PANTHER),<br>SignalP (SIGNALP)                                  |
|                         | -                                                                   | 0  |                                                                                                                                                                                                                                                            |                                                |             | -                                                                                     |



|                        |                                               |    |                                                                                                                                                                                                                                                                                                                                                                                                    |   |             |                                                                                                                                            |
|------------------------|-----------------------------------------------|----|----------------------------------------------------------------------------------------------------------------------------------------------------------------------------------------------------------------------------------------------------------------------------------------------------------------------------------------------------------------------------------------------------|---|-------------|--------------------------------------------------------------------------------------------------------------------------------------------|
| Caenorhabditis elegans | mrp-4                                         | 23 | F:GO:0034040;<br>F:GO:0005324;<br>F:GO:0046624;<br>C:GO:0016323;<br>F:GO:0015562;<br>P:GO:0015911;<br>P:GO:0043526;<br>P:GO:0006855;<br>C:GO:0005737;<br>P:GO:0034775;<br>P:GO:0060326;<br>F:GO:0034634;<br>F:GO:0008559;<br>F:GO:0015431;<br>P:GO:0033700;<br>P:GO:0046618;<br>P:GO:0006200;<br>C:GO:0005887;<br>P:GO:0030335;<br>F:GO:0005524;<br>P:GO:0043215;<br>P:GO:0006979;<br>P:GO:0042908 | - | EC:3.6.3.44 | IPR001140; IPR011527; IPR017940;<br>G3DSA:1.20.1560.10 (GENE3D),<br>PTHR19242 (PANTHER),<br>PTHR19242:SF15 (PANTHER), SignalP<br>(SIGNALP) |
|                        | -                                             | 0  |                                                                                                                                                                                                                                                                                                                                                                                                    |   |             | -                                                                                                                                          |
| Caenorhabditis elegans | cell adhesion                                 | 8  | P:GO:0018996;<br>P:GO:0009792;<br>P:GO:0008340;<br>P:GO:0000003;<br>F:GO:0005515;<br>P:GO:0006898;<br>P:GO:0002119;<br>P:GO:0040011                                                                                                                                                                                                                                                                | - |             | IPR003961; IPR008957; IPR013783;<br>PRO0014 (PRINTS)                                                                                       |
| Homo sapiens           | giy-yig domain containing 2                   | 7  | C:GO:0033557;<br>F:GO:0008821;<br>F:GO:0046872;<br>P:GO:0000724;<br>F:GO:0017108;<br>F:GO:0005515;<br>P:GO:0010792                                                                                                                                                                                                                                                                                 | - | EC:3.1.22.4 | PTHR20208 (PANTHER),<br>PTHR20208:SF7 (PANTHER)                                                                                            |
|                        | -                                             | 0  |                                                                                                                                                                                                                                                                                                                                                                                                    |   |             | SignalP (SIGNALP)                                                                                                                          |
| Caenorhabditis elegans | membrane calcium atpase family member (mca-1) | 0  |                                                                                                                                                                                                                                                                                                                                                                                                    |   |             | -                                                                                                                                          |
| Ancylostoma ceylanicum | kunitz type serine protease inhibitor         | 1  | F:GO:0030414                                                                                                                                                                                                                                                                                                                                                                                       | - |             | IPR002223; IPR020901; PTHR10083<br>(PANTHER), PTHR10083:SF39<br>(PANTHER), SignalP (SIGNALP)                                               |
| Loa loa                | d- topoisomerase ii                           | 3  | P:GO:0006259;<br>F:GO:0003916;<br>F:GO:0000166                                                                                                                                                                                                                                                                                                                                                     | - |             | IPR002205; IPR013757; IPR013760;<br>PTHR10169 (PANTHER),<br>PTHR10169:SF2 (PANTHER)                                                        |
| Caenorhabditis elegans | dephospho- ki-se                              | 3  | F:GO:0016301;<br>C:GO:0044464;<br>F:GO:0000166                                                                                                                                                                                                                                                                                                                                                     | - |             | IPR001977; G3DSA:3.40.50.300<br>(GENE3D), PTHR10695 (PANTHER),<br>SSF52540 (SUPERFAMILY)                                                   |
| Caenorhabditis elegans | alkylation repair homolog 6                   | 1  | F:GO:0003824                                                                                                                                                                                                                                                                                                                                                                                       | - |             | IPR005123; G3DSA:2.60.120.590<br>(GENE3D), PS51471 (PROFILE),<br>SSF51197 (SUPERFAMILY)                                                    |
|                        | -                                             | 0  |                                                                                                                                                                                                                                                                                                                                                                                                    |   |             | SignalP (SIGNALP)                                                                                                                          |

|                        |                                                              |    |                                                                                                                                                                                        |                                                                                                                    |             |                                                                                                                                                               |
|------------------------|--------------------------------------------------------------|----|----------------------------------------------------------------------------------------------------------------------------------------------------------------------------------------|--------------------------------------------------------------------------------------------------------------------|-------------|---------------------------------------------------------------------------------------------------------------------------------------------------------------|
| Loa loa                | thiamin pyrophosphoki-se 1                                   | 0  |                                                                                                                                                                                        | C:GO:0009536;<br>F:GO:0016301;<br>F:GO:0005524;<br>P:GO:0006772;<br>F:GO:0016740;<br>F:GO:0004788;<br>P:GO:0009229 |             | IPR007373; G3DSA:2.60.120.320 (GENE3D), PTHR13622 (PANTHER), PTHR13622:SF1 (PANTHER), PF04265 (PFAM)                                                          |
| Caenorhabditis elegans | yxd2_caeel ame: full=uncharacterized serine carboxypeptidase | 0  |                                                                                                                                                                                        | P:GO:0006508;<br>F:GO:0004185                                                                                      |             | -                                                                                                                                                             |
|                        |                                                              | 0  |                                                                                                                                                                                        |                                                                                                                    |             | SignalP (SIGNALP)                                                                                                                                             |
| Caenorhabditis elegans | elegans protein confirmed by transcript evidence             | 0  |                                                                                                                                                                                        |                                                                                                                    |             | SignalP (SIGNALP)                                                                                                                                             |
| Caenorhabditis elegans | atp-binding cassette sub-family a member                     | 3  | C:GO:0016021;<br>F:GO:0016887;<br>F:GO:0000166                                                                                                                                         | -                                                                                                                  |             | -                                                                                                                                                             |
|                        |                                                              | 0  |                                                                                                                                                                                        |                                                                                                                    |             | -                                                                                                                                                             |
|                        |                                                              | 0  |                                                                                                                                                                                        |                                                                                                                    |             | -                                                                                                                                                             |
|                        |                                                              | 0  |                                                                                                                                                                                        |                                                                                                                    |             | -                                                                                                                                                             |
| Caenorhabditis elegans | endoplasmic reticulum metallopeptidase 1                     | 4  | P:GO:0001541;<br>F:GO:0008233;<br>C:GO:0016020;<br>C:GO:0005783                                                                                                                        | -                                                                                                                  |             | IPR007484; G3DSA:3.40.630.10 (GENE3D), PTHR12147 (PANTHER), SSF53187 (SUPERFAMILY)                                                                            |
| Caenorhabditis elegans | enolase-phosphatase e1                                       | 3  | P:GO:0019509;<br>F:GO:0043874;<br>C:GO:0044424                                                                                                                                         | -                                                                                                                  | EC:3.1.3.77 | IPR010041; G3DSA:3.40.50.1000 (GENE3D), SSF56784 (SUPERFAMILY)                                                                                                |
| Caenorhabditis elegans | hypothetical protein C15F1.5 [Caenorhabditis elegans]        | 0  |                                                                                                                                                                                        | F:GO:0008270                                                                                                       |             | IPR013083; IPR017907                                                                                                                                          |
| Caenorhabditis elegans | briggsae cbr-ltd-1 protein                                   | 1  | F:GO:0008270                                                                                                                                                                           | -                                                                                                                  |             | IPR001781; SSF57716 (SUPERFAMILY)                                                                                                                             |
|                        |                                                              | 0  |                                                                                                                                                                                        |                                                                                                                    |             | -                                                                                                                                                             |
|                        |                                                              | 0  |                                                                                                                                                                                        |                                                                                                                    |             | -                                                                                                                                                             |
|                        |                                                              | 0  |                                                                                                                                                                                        |                                                                                                                    |             | -                                                                                                                                                             |
|                        |                                                              | 0  |                                                                                                                                                                                        |                                                                                                                    |             | SignalP (SIGNALP)                                                                                                                                             |
|                        |                                                              | 0  |                                                                                                                                                                                        |                                                                                                                    |             | -                                                                                                                                                             |
| Caenorhabditis elegans | sfrs protein ki-se 3                                         | 11 | P:GO:0007276;<br>P:GO:0000910;<br>F:GO:0004674;<br>P:GO:0040035;<br>P:GO:0007519;<br>P:GO:0002119;<br>F:GO:0005515;<br>F:GO:0000166;<br>P:GO:0009792;<br>P:GO:0051729;<br>P:GO:0006468 | -                                                                                                                  | EC:2.7.11.0 | IPR000719; IPR008271; IPR011009; IPR017441; IPR017442; G3DSA:1.10.510.10 (GENE3D), G3DSA:3.30.200.20 (GENE3D), PTHR11295 (PANTHER), PTHR11295:SF118 (PANTHER) |
| Caenorhabditis elegans | serine threonine-protein ki-se srpk3                         | 11 | P:GO:0007276;<br>P:GO:0000910;<br>F:GO:0004674;<br>P:GO:0040035;<br>P:GO:0007519;<br>P:GO:0002119;<br>F:GO:0005515;<br>F:GO:0000166;<br>P:GO:0009792;<br>P:GO:0051729;<br>P:GO:0006468 | -                                                                                                                  | EC:2.7.11.0 | IPR000719; IPR008271; IPR011009; IPR017441; IPR017442; G3DSA:1.10.510.10 (GENE3D), G3DSA:3.30.200.20 (GENE3D), PTHR11295 (PANTHER), PTHR11295:SF118 (PANTHER) |

|                          |                                                  |    |                                                                                                                                                                                                                                                                             |                               |             |                                                                                                                                                                              |
|--------------------------|--------------------------------------------------|----|-----------------------------------------------------------------------------------------------------------------------------------------------------------------------------------------------------------------------------------------------------------------------------|-------------------------------|-------------|------------------------------------------------------------------------------------------------------------------------------------------------------------------------------|
| Caenorhabditis elegans   | serine arginine-rich protein specific ki-se 1    | 16 | P:GO:0007276;<br>P:GO:0000910;<br>P:GO:0007243;<br>F:GO:0004674;<br>P:GO:0050684;<br>P:GO:0000245;<br>P:GO:0040035;<br>F:GO:0005524;<br>P:GO:0002119;<br>F:GO:0005515;<br>F:GO:0000287;<br>P:GO:0009792;<br>P:GO:0051729;<br>C:GO:0016020;<br>C:GO:0005634;<br>P:GO:0006468 | -                             | EC:2.7.11.0 | IPR000719; IPR008271; IPR011009;<br>IPR017441; IPR017442;<br>G3DSA:1.10.510.10 (GENE3D),<br>G3DSA:3.30.200.20 (GENE3D),<br>PTHR11295 (PANTHER),<br>PTHR11295:SF118 (PANTHER) |
| Caenorhabditis elegans   | sfrs protein ki-se 3                             | 11 | P:GO:0007276;<br>P:GO:0000910;<br>F:GO:0004674;<br>P:GO:0040035;<br>P:GO:0007519;<br>P:GO:0002119;<br>F:GO:0005515;<br>F:GO:0000166;<br>P:GO:0009792;<br>P:GO:0051729;<br>P:GO:0006468                                                                                      | -                             | EC:2.7.11.0 | IPR000719; IPR008271; IPR011009;<br>IPR017441; IPR017442;<br>G3DSA:1.10.510.10 (GENE3D),<br>G3DSA:3.30.200.20 (GENE3D),<br>PTHR11295 (PANTHER),<br>PTHR11295:SF118 (PANTHER) |
|                          |                                                  | 0  |                                                                                                                                                                                                                                                                             |                               |             |                                                                                                                                                                              |
| Ornithorhynchus anatinus | upf0420 protein c16orf58                         | 1  | C:GO:0016021                                                                                                                                                                                                                                                                | -                             |             | IPR006968; PTHR12770:SF10<br>(PANTHER), SignalP (SIGNALP)                                                                                                                    |
|                          |                                                  | 0  |                                                                                                                                                                                                                                                                             |                               |             |                                                                                                                                                                              |
| Caenorhabditis elegans   | elegans protein confirmed by transcript evidence | 0  |                                                                                                                                                                                                                                                                             | F:GO:0000166;<br>C:GO:0005634 |             | PTHR12202 (PANTHER)                                                                                                                                                          |
|                          |                                                  | 0  |                                                                                                                                                                                                                                                                             |                               |             |                                                                                                                                                                              |
|                          |                                                  | 0  |                                                                                                                                                                                                                                                                             |                               |             |                                                                                                                                                                              |
| Caenorhabditis elegans   | mkiaa1517 protein                                | 10 | P:GO:0040010;<br>P:GO:0008340;<br>P:GO:0000003;<br>P:GO:0002119;<br>F:GO:0005515;<br>F:GO:0000166;<br>F:GO:0004386;<br>P:GO:0006898;<br>P:GO:0009792;<br>P:GO:0016246                                                                                                       | -                             |             | IPR011709; PTHR18934 (PANTHER)                                                                                                                                               |
|                          |                                                  | 0  |                                                                                                                                                                                                                                                                             |                               |             |                                                                                                                                                                              |
|                          |                                                  | 0  |                                                                                                                                                                                                                                                                             |                               |             |                                                                                                                                                                              |
|                          |                                                  | 0  |                                                                                                                                                                                                                                                                             |                               |             |                                                                                                                                                                              |
|                          |                                                  | 0  |                                                                                                                                                                                                                                                                             |                               |             | SignalP (SIGNALP)                                                                                                                                                            |
|                          |                                                  | 0  |                                                                                                                                                                                                                                                                             |                               |             |                                                                                                                                                                              |
|                          |                                                  | 0  |                                                                                                                                                                                                                                                                             |                               |             |                                                                                                                                                                              |
|                          |                                                  | 0  |                                                                                                                                                                                                                                                                             |                               |             | SignalP (SIGNALP)                                                                                                                                                            |
| Loa loa                  | hypothetical protein LOAG_09182 [Loa loa]        | 0  |                                                                                                                                                                                                                                                                             |                               |             |                                                                                                                                                                              |
|                          |                                                  | 0  |                                                                                                                                                                                                                                                                             |                               |             |                                                                                                                                                                              |
|                          |                                                  | 0  |                                                                                                                                                                                                                                                                             |                               |             |                                                                                                                                                                              |
|                          |                                                  | 0  |                                                                                                                                                                                                                                                                             |                               |             |                                                                                                                                                                              |

|                         |                                                         |    |                                                                                                                                                                                                                                                                                                                                                                                                                                                                                         |   |              |                                                                                                               |
|-------------------------|---------------------------------------------------------|----|-----------------------------------------------------------------------------------------------------------------------------------------------------------------------------------------------------------------------------------------------------------------------------------------------------------------------------------------------------------------------------------------------------------------------------------------------------------------------------------------|---|--------------|---------------------------------------------------------------------------------------------------------------|
| Caenorhabditis elegans  | d- excision repair protein rad2                         | 1  | F:GO:0004518                                                                                                                                                                                                                                                                                                                                                                                                                                                                            | - |              | IPR001044; IPR006084; IPR006085; G3DSA:3.40.50.1010 (GENE3D), PTHR11081:SF4 (PANTHER), SSF88723 (SUPERFAMILY) |
| Caenorhabditis elegans  | sirtuin 1                                               | 31 | P:GO:0006269;<br>P:GO:0006471;<br>P:GO:0006343;<br>C:GO:0033553;<br>P:GO:0006281;<br>F:GO:0008022;<br>P:GO:0006344;<br>C:GO:0005677;<br>C:GO:0016605;<br>P:GO:0031937;<br>P:GO:0033158;<br>F:GO:0003950;<br>P:GO:0043433;<br>F:GO:0002039;<br>P:GO:0007569;<br>P:GO:0051097;<br>P:GO:0043518;<br>P:GO:0045444;<br>P:GO:0042127;<br>C:GO:0005737;<br>P:GO:0016575;<br>F:GO:0016564;<br>F:GO:0042802;<br>F:GO:0042393;<br>C:GO:0005635;<br>P:GO:0006260;<br>P:GO:0045768;<br>P:GO:0034983 | - | EC:2.4.2.30  | IPR003000; G3DSA:3.30.1600.10 (GENE3D), G3DSA:3.40.50.1220 (GENE3D), SSF52467 (SUPERFAMILY)                   |
|                         | -                                                       | 0  |                                                                                                                                                                                                                                                                                                                                                                                                                                                                                         |   |              | -                                                                                                             |
| Caenorhabditis elegans  | rio ki-se 2                                             | 2  | F:GO:0016301;<br>F:GO:0000166                                                                                                                                                                                                                                                                                                                                                                                                                                                           | - |              | IPR011009; IPR018934; IPR018935; G3DSA:3.90.1200.10 (GENE3D), PTHR10593 (PANTHER), PTHR10593:SF1 (PANTHER)    |
| Caenorhabditis briggsae | atg2 autophagy related 2 homolog b ( cerevisiae)        | 0  |                                                                                                                                                                                                                                                                                                                                                                                                                                                                                         |   |              | PTHR13190 (PANTHER), PTHR13190:SF8 (PANTHER)                                                                  |
|                         | -                                                       | 0  |                                                                                                                                                                                                                                                                                                                                                                                                                                                                                         |   |              | SignalP (SIGNALP)                                                                                             |
| Loa loa                 | myosin light chain ki-se                                | 4  | C:GO:0005737;<br>F:GO:0005515;<br>F:GO:0004674;<br>F:GO:0000166                                                                                                                                                                                                                                                                                                                                                                                                                         | - | EC:2.7.11.0  | IPR007110; IPR013098; IPR013783; PTHR19897 (PANTHER), SSF48726 (SUPERFAMILY)                                  |
| Caenorhabditis briggsae | Hypothetical protein CBG22082 [Caenorhabditis briggsae] | 2  | P:GO:0007186;<br>C:GO:0016021                                                                                                                                                                                                                                                                                                                                                                                                                                                           | - |              | -                                                                                                             |
|                         | -                                                       | 0  |                                                                                                                                                                                                                                                                                                                                                                                                                                                                                         |   |              | IPR017985; PD968187 (PRODOM)                                                                                  |
| Caenorhabditis elegans  | guanine nucleotide exchange factor                      | 3  | F:GO:0005085;<br>C:GO:0005622;<br>P:GO:0051056                                                                                                                                                                                                                                                                                                                                                                                                                                          | - |              | IPR001895; IPR008937; PTHR23113:SF20 (PANTHER), SignalP (SIGNALP)                                             |
|                         | -                                                       | 0  |                                                                                                                                                                                                                                                                                                                                                                                                                                                                                         |   |              | -                                                                                                             |
| Caenorhabditis elegans  | stress-activated protein ki-se jnk                      | 4  | F:GO:0004707;<br>P:GO:0006468;<br>F:GO:0005515;<br>F:GO:0005524                                                                                                                                                                                                                                                                                                                                                                                                                         | - | EC:2.7.11.24 | IPR011009; IPR020636; IPR020648; G3DSA:1.10.510.10 (GENE3D)                                                   |
|                         | -                                                       | 0  |                                                                                                                                                                                                                                                                                                                                                                                                                                                                                         |   |              | -                                                                                                             |
|                         | -                                                       | 0  |                                                                                                                                                                                                                                                                                                                                                                                                                                                                                         |   |              | -                                                                                                             |

|                         |                                                         |   |                                                                                                                    |   |             |                                                                                                                                                             |
|-------------------------|---------------------------------------------------------|---|--------------------------------------------------------------------------------------------------------------------|---|-------------|-------------------------------------------------------------------------------------------------------------------------------------------------------------|
| Caenorhabditis briggsae | elegans protein confirmed by transcript evidence        | 3 | P:GO:0040010;<br>P:GO:0008152;<br>F:GO:0003824                                                                     | - | -           | -                                                                                                                                                           |
| Caenorhabditis briggsae | elegans protein confirmed by transcript evidence        | 3 | P:GO:0040010;<br>P:GO:0008152;<br>F:GO:0003824                                                                     | - | -           | IPR002114; IPR002198; IPR002347;<br>IPR016040; PTHR19410:SF76<br>(PANTHER), SSF51735 (SUPERFAMILY)                                                          |
| Caenorhabditis briggsae | elegans protein confirmed by transcript evidence        | 3 | P:GO:0040010;<br>P:GO:0008152;<br>F:GO:0003824                                                                     | - | -           | IPR002114; IPR002198; IPR002347;<br>IPR016040; PTHR19410:SF76<br>(PANTHER), SSF51735 (SUPERFAMILY)                                                          |
| -                       | -                                                       | 0 | -                                                                                                                  | - | -           | -                                                                                                                                                           |
| -                       | -                                                       | 0 | -                                                                                                                  | - | -           | -                                                                                                                                                           |
| -                       | -                                                       | 0 | -                                                                                                                  | - | -           | -                                                                                                                                                           |
| -                       | -                                                       | 0 | -                                                                                                                  | - | -           | SignalP (SIGNALP)                                                                                                                                           |
| -                       | -                                                       | 0 | -                                                                                                                  | - | -           | -                                                                                                                                                           |
| Brugia malayi           | short-chain dehydroge-se reductase sdr                  | 2 | F:GO:0003824;<br>P:GO:0008152                                                                                      | - | -           | IPR002198; IPR016040;<br>PTHR19410:SF98 (PANTHER),<br>SSF51735 (SUPERFAMILY)                                                                                |
| -                       | -                                                       | 0 | -                                                                                                                  | - | -           | -                                                                                                                                                           |
| -                       | -                                                       | 0 | -                                                                                                                  | - | -           | -                                                                                                                                                           |
| -                       | -                                                       | 0 | -                                                                                                                  | - | -           | -                                                                                                                                                           |
| -                       | -                                                       | 0 | -                                                                                                                  | - | -           | SignalP (SIGNALP)                                                                                                                                           |
| Ostertagia ostertagi    | aspartyl protease inhibitor 1                           | 3 | C:GO:0005576;<br>F:GO:0008233;<br>F:GO:0019828                                                                     | - | -           | IPR010480; SignalP (SIGNALP),<br>SSF55149 (SUPERFAMILY)                                                                                                     |
| Ostertagia ostertagi    | aspartyl protease inhibitor 1                           | 3 | C:GO:0005576;<br>F:GO:0008233;<br>F:GO:0019828                                                                     | - | -           | IPR010480; SignalP (SIGNALP),<br>SSF55149 (SUPERFAMILY)                                                                                                     |
| -                       | -                                                       | 0 | -                                                                                                                  | - | -           | -                                                                                                                                                           |
| -                       | -                                                       | 0 | -                                                                                                                  | - | -           | -                                                                                                                                                           |
| Caenorhabditis briggsae | Hypothetical protein CBG05491 [Caenorhabditis briggsae] | 2 | F:GO:0016627;<br>P:GO:0008152                                                                                      | - | -           | -                                                                                                                                                           |
| -                       | -                                                       | 0 | -                                                                                                                  | - | -           | -                                                                                                                                                           |
| -                       | -                                                       | 0 | -                                                                                                                  | - | -           | -                                                                                                                                                           |
| Caenorhabditis briggsae | protein-tyrosine phosphatase containing protein         | 3 | F:GO:0004721;<br>P:GO:0009792;<br>P:GO:0000003                                                                     | - | EC:3.1.3.16 | IPR000242; G3DSA:3.90.190.10<br>(GENE3D), PTHR19134 (PANTHER),<br>PTHR19134:SF26 (PANTHER),<br>SSF52799 (SUPERFAMILY)                                       |
| -                       | -                                                       | 0 | -                                                                                                                  | - | -           | -                                                                                                                                                           |
| -                       | -                                                       | 0 | -                                                                                                                  | - | -           | -                                                                                                                                                           |
| -                       | -                                                       | 0 | -                                                                                                                  | - | -           | IPR003961; SignalP (SIGNALP)                                                                                                                                |
| Callithrix jacchus      | atp h+ mitochondrial f1 gamma polypeptide 1             | 5 | F:GO:0046933;<br>C:GO:0000275;<br>P:GO:0042776;<br>F:GO:0046961;<br>C:GO:0005759                                   | - | EC:3.6.3.14 | IPR000131; G3DSA:3.40.1380.10<br>(GENE3D), PTHR11693:SF5 (PANTHER)                                                                                          |
| -                       | -                                                       | 0 | -                                                                                                                  | - | -           | -                                                                                                                                                           |
| Caenorhabditis briggsae | attractin                                               | 4 | P:GO:0018991;<br>C:GO:0016021;<br>P:GO:0040010;<br>P:GO:0040011                                                    | - | -           | IPR002049; G3DSA:2.10.25.10<br>(GENE3D), PTHR10574 (PANTHER),<br>PTHR10574:SF3 (PANTHER), SSF57196<br>(SUPERFAMILY)                                         |
| Caenorhabditis briggsae | briggsae cbr-nhr-69 protein                             | 7 | F:GO:0008270;<br>F:GO:0003707;<br>P:GO:0006355;<br>F:GO:0042802;<br>F:GO:0043565;<br>F:GO:0003700;<br>C:GO:0005634 | - | -           | IPR000536; IPR001628; IPR001723;<br>IPR008946; IPR013088; PR00545<br>(PRINTS), PTHR11865 (PANTHER),<br>PTHR11865:SF196 (PANTHER),<br>SSF57716 (SUPERFAMILY) |

|                             |                                                            |    |                                                                                                                                                                                                                          |                                                                                                                                     |                             |                                                                                                                                                             |
|-----------------------------|------------------------------------------------------------|----|--------------------------------------------------------------------------------------------------------------------------------------------------------------------------------------------------------------------------|-------------------------------------------------------------------------------------------------------------------------------------|-----------------------------|-------------------------------------------------------------------------------------------------------------------------------------------------------------|
| Caenorhabditis briggsae     | briggsae cbr-nhr-69 protein                                | 7  | F:GO:0008270;<br>F:GO:0003707;<br>P:GO:0006355;<br>F:GO:0042802;<br>F:GO:0043565;<br>F:GO:0003700;<br>C:GO:0005634                                                                                                       | -                                                                                                                                   |                             | IPR000536; IPR001628; IPR001723;<br>IPR008946; IPR013088; PR00545<br>(PRINTS), PTHR11865 (PANTHER),<br>PTHR11865:SF196 (PANTHER),<br>SSF57716 (SUPERFAMILY) |
| Caenorhabditis briggsae     | dnpep_caee1 ame: full= aspartyl aminopeptidase             | 0  |                                                                                                                                                                                                                          | F:GO:0046872;<br>P:GO:0006508;<br>F:GO:0008237;<br>C:GO:0005773;<br>F:GO:0004177;<br>F:GO:0016787;<br>F:GO:0008233;<br>F:GO:0008270 |                             | -                                                                                                                                                           |
| Loa loa                     | dy-ctin subunit 1                                          | 0  |                                                                                                                                                                                                                          | C:GO:0030286;<br>C:GO:0005737;<br>C:GO:0005856;<br>F:GO:0003774;<br>C:GO:0005874                                                    |                             | IPR000938; IPR023092; PTHR18916<br>(PANTHER), PTHR18916:SF2<br>(PANTHER)                                                                                    |
| Caenorhabditis remanei      | membrane calcium atpase family member (mca-1)              | 5  | F:GO:0005388;<br>C:GO:0016021;<br>P:GO:0006754;<br>F:GO:0005524;<br>P:GO:0006816                                                                                                                                         | -                                                                                                                                   | EC:3.6.3.8                  | IPR001757; PTHR11939:SF75<br>(PANTHER)                                                                                                                      |
| Angiostrongylus cantonensis | briggsae cbr-lec-8 protein                                 | 0  |                                                                                                                                                                                                                          | F:GO:0005529                                                                                                                        |                             | -                                                                                                                                                           |
|                             | -                                                          | 0  |                                                                                                                                                                                                                          |                                                                                                                                     |                             | -                                                                                                                                                           |
|                             | -                                                          | 0  |                                                                                                                                                                                                                          |                                                                                                                                     |                             | IPR000276                                                                                                                                                   |
| Camponotus floridanus       | probable phospholipid-transporting atpase id               | 0  |                                                                                                                                                                                                                          |                                                                                                                                     |                             | IPR001757; PTHR11939:SF19<br>(PANTHER)                                                                                                                      |
| Caenorhabditis sp. PS1010   | elegans protein partially confirmed by transcript evidence | 0  |                                                                                                                                                                                                                          | P:GO:0006508;<br>F:GO:0004181;<br>F:GO:0008270                                                                                      |                             | -                                                                                                                                                           |
| Camponotus floridanus       | peroxisome biogenesis factor 1                             | 13 | P:GO:0040010;<br>P:GO:0007031;<br>C:GO:0005777;<br>C:GO:0016021;<br>F:GO:0004872;<br>P:GO:0000003;<br>F:GO:0004176;<br>P:GO:0006508;<br>F:GO:0004713;<br>F:GO:0005524;<br>F:GO:0005515;<br>F:GO:0004252;<br>P:GO:0006468 | -                                                                                                                                   | EC:2.7.10.0;<br>EC:3.4.21.0 | IPR003959; G3DSA:3.40.50.300<br>(GENE3D), PTHR23077 (PANTHER),<br>PTHR23077:SF12 (PANTHER),<br>SSF52540 (SUPERFAMILY)                                       |
|                             | -                                                          | 0  |                                                                                                                                                                                                                          |                                                                                                                                     |                             | -                                                                                                                                                           |
| Caenorhabditis briggsae     | sidekick homolog 2                                         | 1  | C:GO:0016020                                                                                                                                                                                                             | -                                                                                                                                   |                             | IPR003961; IPR008957; IPR013783;<br>PR00014 (PRINTS), PTHR10489<br>(PANTHER)                                                                                |
|                             | -                                                          | 0  |                                                                                                                                                                                                                          |                                                                                                                                     |                             | -                                                                                                                                                           |
|                             | -                                                          | 0  |                                                                                                                                                                                                                          |                                                                                                                                     |                             | SignalP (SIGNALP)                                                                                                                                           |
|                             | -                                                          | 0  |                                                                                                                                                                                                                          |                                                                                                                                     |                             | SignalP (SIGNALP)                                                                                                                                           |
|                             | -                                                          | 0  |                                                                                                                                                                                                                          |                                                                                                                                     |                             | -                                                                                                                                                           |
|                             | -                                                          | 0  |                                                                                                                                                                                                                          |                                                                                                                                     |                             | -                                                                                                                                                           |
| Teladorsagia circumcincta   | long family member (lon-1)                                 | 2  | F:GO:0005515;<br>C:GO:0005576                                                                                                                                                                                            | -                                                                                                                                   |                             | -                                                                                                                                                           |
|                             | -                                                          | 0  |                                                                                                                                                                                                                          |                                                                                                                                     |                             | -                                                                                                                                                           |

|                         |                                                        |    |                                                                                                                                                                                                                          |   |                                                                                                                                                      |                                                                     |
|-------------------------|--------------------------------------------------------|----|--------------------------------------------------------------------------------------------------------------------------------------------------------------------------------------------------------------------------|---|------------------------------------------------------------------------------------------------------------------------------------------------------|---------------------------------------------------------------------|
| Caenorhabditis elegans  | hypothetical protein T25B9.10 [Caenorhabditis elegans] | 0  |                                                                                                                                                                                                                          |   |                                                                                                                                                      | -                                                                   |
| Caenorhabditis briggsae | kynureni-se (l-kynurenine hydrolase)                   | 13 | C:GO:0005829;<br>P:GO:0019805;<br>C:GO:0005625;<br>C:GO:0005739;<br>P:GO:0019441;<br>P:GO:0009435;<br>P:GO:0034516;<br>P:GO:0043420;<br>F:GO:0030429;<br>P:GO:0034341;<br>F:GO:0042803;<br>F:GO:0030170;<br>P:GO:0019442 | - | EC:3.7.1.3                                                                                                                                           | IPR010111; IPR015422; IPR015424                                     |
| Caenorhabditis elegans  | briggsae cbr-phy-3 protein                             | 0  |                                                                                                                                                                                                                          |   | F:GO:0005506;<br>F:GO:0031418;<br>F:GO:0016705;<br>F:GO:0016702;<br>P:GO:0055114;<br>F:GO:0016491;<br>F:GO:0004656;<br>C:GO:0005783;<br>F:GO:0005488 | -                                                                   |
| Caenorhabditis elegans  | profilin                                               | 9  | C:GO:0005737;<br>P:GO:0009792;<br>F:GO:0003779;<br>P:GO:0000910;<br>P:GO:0000003;<br>P:GO:0008340;<br>P:GO:0040011;<br>C:GO:0015629;<br>P:GO:0030036                                                                     | - |                                                                                                                                                      | -                                                                   |
| Caenorhabditis elegans  | nedd8-activating enzyme e1 regulatory subunit          | 3  | F:GO:0003824;<br>P:GO:0008152;<br>F:GO:0005488                                                                                                                                                                           | - |                                                                                                                                                      | IPR009036; IPR016040; PTHR10953 (PANTHER), PTHR10953:SF29 (PANTHER) |
| -                       | -                                                      | 0  |                                                                                                                                                                                                                          |   |                                                                                                                                                      | -                                                                   |
| -                       | -                                                      | 0  |                                                                                                                                                                                                                          |   |                                                                                                                                                      | PTHR22986 (PANTHER), PTHR22986:SF67 (PANTHER)                       |
| -                       | -                                                      | 0  |                                                                                                                                                                                                                          |   |                                                                                                                                                      | -                                                                   |
| Caenorhabditis elegans  | c2 domain containing protein                           | 0  |                                                                                                                                                                                                                          |   |                                                                                                                                                      | -                                                                   |
| Caenorhabditis elegans  | hypothetical protein D1007.15 [Caenorhabditis elegans] | 0  |                                                                                                                                                                                                                          |   |                                                                                                                                                      | SignalP (SIGNALP)                                                   |
| Caenorhabditis elegans  | hypothetical protein D1007.15 [Caenorhabditis elegans] | 0  |                                                                                                                                                                                                                          |   |                                                                                                                                                      | SignalP (SIGNALP)                                                   |
| -                       | -                                                      | 0  |                                                                                                                                                                                                                          |   |                                                                                                                                                      | -                                                                   |
| -                       | -                                                      | 0  |                                                                                                                                                                                                                          |   |                                                                                                                                                      | -                                                                   |
| Brugia malayi           | hypothetical wd-repeat protein in chromosome           | 0  |                                                                                                                                                                                                                          |   |                                                                                                                                                      | PTHR12816 (PANTHER), PTHR12816:SF6 (PANTHER)                        |
| -                       | -                                                      | 0  |                                                                                                                                                                                                                          |   |                                                                                                                                                      | -                                                                   |
| -                       | -                                                      | 0  |                                                                                                                                                                                                                          |   |                                                                                                                                                      | SignalP (SIGNALP)                                                   |
| Caenorhabditis elegans  | tropomodulin                                           | 3  | C:GO:0005856;<br>P:GO:0000003;<br>F:GO:0005523                                                                                                                                                                           | - |                                                                                                                                                      | IPR004934; PTHR10901:SF7 (PANTHER)                                  |
| -                       | -                                                      | 0  |                                                                                                                                                                                                                          |   |                                                                                                                                                      | SignalP (SIGNALP)                                                   |
| -                       | -                                                      | 0  |                                                                                                                                                                                                                          |   |                                                                                                                                                      | -                                                                   |
| Caenorhabditis briggsae | xanthine molybdopterin binding subunit                 | 4  | F:GO:0046872;<br>F:GO:0016725;<br>F:GO:0051536;<br>P:GO:0008340                                                                                                                                                          | - |                                                                                                                                                      | IPR000674; IPR008274; PTHR11908 (PANTHER), PTHR11908:SF9 (PANTHER)  |

|                         |                                                            |    |                                                                                                                                                                                                                                                                                                               |                               |                                                                                                                           |
|-------------------------|------------------------------------------------------------|----|---------------------------------------------------------------------------------------------------------------------------------------------------------------------------------------------------------------------------------------------------------------------------------------------------------------|-------------------------------|---------------------------------------------------------------------------------------------------------------------------|
| Caenorhabditis briggsae | polybromodomain protein                                    | 7  | P:GO:0040035;<br>P:GO:0009792;<br>P:GO:0010171;<br>P:GO:0002119;<br>P:GO:0040010;<br>P:GO:0040011;<br>P:GO:0002009                                                                                                                                                                                            | -                             | IPR001487; PTHR16062 (PANTHER),<br>PTHR16062:SF2 (PANTHER)                                                                |
| Caenorhabditis elegans  | ribonuclease I inhibitor homolog                           | 17 | P:GO:0006413;<br>P:GO:0040010;<br>P:GO:0016049;<br>F:GO:0051536;<br>C:GO:0005739;<br>F:GO:0043024;<br>P:GO:0016071;<br>P:GO:0040035;<br>F:GO:0009055;<br>C:GO:0005852;<br>F:GO:0005524;<br>P:GO:0010171;<br>P:GO:0002119;<br>F:GO:0016887;<br>P:GO:0040011;<br>P:GO:0009792;<br>P:GO:0043524                  | -                             | -                                                                                                                         |
| Caenorhabditis briggsae | elegans protein partially confirmed by transcript evidence | 0  |                                                                                                                                                                                                                                                                                                               | F:GO:0005488;<br>P:GO:0007067 | -                                                                                                                         |
|                         | -                                                          | 0  |                                                                                                                                                                                                                                                                                                               |                               | -                                                                                                                         |
|                         | -                                                          | 0  |                                                                                                                                                                                                                                                                                                               |                               | -                                                                                                                         |
|                         | -                                                          | 0  |                                                                                                                                                                                                                                                                                                               |                               | -                                                                                                                         |
|                         | -                                                          | 0  |                                                                                                                                                                                                                                                                                                               |                               | -                                                                                                                         |
| Caenorhabditis elegans  | elegans protein confirmed by transcript evidence           | 0  |                                                                                                                                                                                                                                                                                                               |                               | -                                                                                                                         |
|                         | -                                                          | 0  |                                                                                                                                                                                                                                                                                                               |                               | -                                                                                                                         |
|                         | -                                                          | 0  |                                                                                                                                                                                                                                                                                                               |                               | SignalP (SIGNALP)                                                                                                         |
|                         | -                                                          | 0  |                                                                                                                                                                                                                                                                                                               |                               | -                                                                                                                         |
| Caenorhabditis briggsae | zinc carboxypeptidase family protein                       | 3  | P:GO:0006508;<br>F:GO:0004181;<br>F:GO:0008270                                                                                                                                                                                                                                                                | -                             | EC:3.4.17.0<br>G3DSA:3.40.630.10 (GENE3D),<br>PTHR11705 (PANTHER),<br>PTHR11705:SF12 (PANTHER),<br>SSF53187 (SUPERFAMILY) |
| Caenorhabditis remanei  | aha-1                                                      | 18 | F:GO:0030528;<br>P:GO:0009056;<br>P:GO:0040010;<br>P:GO:0030522;<br>F:GO:0016788;<br>F:GO:0008270;<br>P:GO:0006355;<br>F:GO:0004872;<br>F:GO:0043565;<br>P:GO:0010171;<br>P:GO:0009410;<br>P:GO:0002119;<br>F:GO:0005515;<br>P:GO:0040017;<br>F:GO:0003700;<br>P:GO:0007165;<br>C:GO:0005634;<br>P:GO:0045941 | -                             | IPR001067; IPR011598; PTHR23042<br>(PANTHER), PTHR23042:SF7<br>(PANTHER)                                                  |



|                         |                                                                              |  |                                                                                                        |   |                                                                                                                                                                       |                                                                                                                       |
|-------------------------|------------------------------------------------------------------------------|--|--------------------------------------------------------------------------------------------------------|---|-----------------------------------------------------------------------------------------------------------------------------------------------------------------------|-----------------------------------------------------------------------------------------------------------------------|
| Brugia malayi           | short chain dehydroge-se reductase family protein                            |  | 3<br>P:GO:0055114;<br>F:GO:0016491;<br>F:GO:0005488                                                    | - |                                                                                                                                                                       | IPR002198; IPR016040;<br>PTHR19410:SF85 (PANTHER), SignalP<br>(SIGNALP), SSF51735 (SUPERFAMILY)                       |
|                         |                                                                              |  | 0                                                                                                      |   |                                                                                                                                                                       | -                                                                                                                     |
| Loa loa                 | intermediate filament protein                                                |  | 6<br>P:GO:0009792;<br>P:GO:0010171;<br>P:GO:0002119;<br>P:GO:0018991;<br>P:GO:0040011;<br>P:GO:0040007 | - |                                                                                                                                                                       | IPR001322; IPR001664;<br>G3DSA:2.60.40.1260 (GENE3D),<br>PTHR23239:SF12 (PANTHER),<br>SSF74853 (SUPERFAMILY)          |
|                         |                                                                              |  | 0                                                                                                      |   |                                                                                                                                                                       | -                                                                                                                     |
| Caenorhabditis briggsae | ferm domain containing 6                                                     |  | 3<br>C:GO:0005856;<br>C:GO:0005737;<br>F:GO:0005488                                                    | - |                                                                                                                                                                       | IPR000299; IPR014352; IPR018979;<br>IPR019748; IPR019749;<br>G3DSA:3.10.20.90 (GENE3D),<br>SSF54236 (SUPERFAMILY)     |
|                         |                                                                              |  | 0                                                                                                      |   |                                                                                                                                                                       | -                                                                                                                     |
|                         |                                                                              |  | 0                                                                                                      |   |                                                                                                                                                                       | -                                                                                                                     |
| Caenorhabditis elegans  | dead box atp-dependent r-                                                    |  | 3<br>F:GO:0003676;<br>F:GO:0005524;<br>F:GO:0008026                                                    | - |                                                                                                                                                                       | IPR001650; G3DSA:3.40.50.300<br>(GENE3D), PTHR10967 (PANTHER),<br>PTHR10967:SF45 (PANTHER),<br>SSF52540 (SUPERFAMILY) |
|                         |                                                                              |  | 0                                                                                                      |   |                                                                                                                                                                       | -                                                                                                                     |
|                         |                                                                              |  | 0                                                                                                      |   |                                                                                                                                                                       | -                                                                                                                     |
|                         |                                                                              |  | 0                                                                                                      |   |                                                                                                                                                                       | -                                                                                                                     |
| Caenorhabditis elegans  | low-density lipoprotein                                                      |  | 0                                                                                                      |   | P:GO:0015031;<br>C:GO:0016021;<br>C:GO:0016020;<br>P:GO:0006898;<br>C:GO:0005624;<br>F:GO:0004872;<br>F:GO:0005515;<br>F:GO:0005041;<br>F:GO:0050750;<br>F:GO:0005509 | IPR002172; PTHR10529 (PANTHER),<br>PTHR10529:SF2 (PANTHER)                                                            |
|                         |                                                                              |  | 0                                                                                                      |   |                                                                                                                                                                       | SignalP (SIGNALP)                                                                                                     |
| Caenorhabditis elegans  | fancm (fanconi anemia complex component m) homolog<br>family member (fncm-1) |  | 0                                                                                                      |   | P:GO:0000003                                                                                                                                                          | -                                                                                                                     |
| Culex quinquefasciatus  | plasma glutamate carboxypeptidase                                            |  | 0                                                                                                      |   | P:GO:0006508;<br>F:GO:0004180;<br>F:GO:0008233                                                                                                                        | G3DSA:3.40.630.10 (GENE3D),<br>PTHR12053 (PANTHER),<br>PTHR12053:SF2 (PANTHER)                                        |
|                         |                                                                              |  | 0                                                                                                      |   |                                                                                                                                                                       | -                                                                                                                     |
| Loa loa                 | arsenite-resistance protein                                                  |  | 3<br>P:GO:0008340;<br>P:GO:0031053;<br>C:GO:0005654                                                    | - |                                                                                                                                                                       | IPR007042; IPR021933; PTHR13165<br>(PANTHER)                                                                          |
| Loa loa                 | arsenite-resistance protein                                                  |  | 3<br>P:GO:0008340;<br>P:GO:0031053;<br>C:GO:0005654                                                    | - |                                                                                                                                                                       | IPR007042; IPR021933; PTHR13165<br>(PANTHER)                                                                          |
|                         |                                                                              |  | 0                                                                                                      |   |                                                                                                                                                                       | -                                                                                                                     |
| Callithrix jacchus      | PREDICTED: stathmin-like [Callithrix jacchus]                                |  | 0                                                                                                      |   |                                                                                                                                                                       | -                                                                                                                     |
| Caenorhabditis briggsae | briggsae cbr-gly-8 protein                                                   |  | 0                                                                                                      |   | F:GO:0016740;<br>F:GO:0016757                                                                                                                                         | -                                                                                                                     |
| Homo sapiens            | isoform cra_b                                                                |  | 0                                                                                                      |   |                                                                                                                                                                       | -                                                                                                                     |
|                         |                                                                              |  | 0                                                                                                      |   |                                                                                                                                                                       | -                                                                                                                     |
|                         |                                                                              |  | 0                                                                                                      |   |                                                                                                                                                                       | -                                                                                                                     |
|                         |                                                                              |  | 0                                                                                                      |   |                                                                                                                                                                       | -                                                                                                                     |
|                         |                                                                              |  | 0                                                                                                      |   |                                                                                                                                                                       | -                                                                                                                     |

|                         |                                                                            |   |                                                                                                                                                        |                                                                 |            |                                                                                                                      |
|-------------------------|----------------------------------------------------------------------------|---|--------------------------------------------------------------------------------------------------------------------------------------------------------|-----------------------------------------------------------------|------------|----------------------------------------------------------------------------------------------------------------------|
| Caenorhabditis elegans  | phosphoethanolamine ransferase family member (pmt-1)                       |   | P:GO:0009792;<br>P:GO:0002119;<br>F:GO:0008757;<br>P:GO:0032940;<br>9 P:GO:0009877;<br>P:GO:0009312;<br>P:GO:0040017;<br>P:GO:0040010;<br>P:GO:0000003 | -                                                               | -          |                                                                                                                      |
|                         | -                                                                          | 0 |                                                                                                                                                        |                                                                 |            | SignalP (SIGNALP)                                                                                                    |
| Caenorhabditis elegans  | smu-1 suppressor of mec-8 and unc-52 homolog ( elegans)                    | 1 | C:GO:0044424                                                                                                                                           | -                                                               |            | IPR001680; IPR011046; IPR015943;<br>IPR017986; IPR019775; IPR019781;<br>IPR019782; IPR020472; PTHR22848<br>(PANTHER) |
| Loa loa                 | pdz domain containing protein                                              | 4 | P:GO:0009792;<br>P:GO:0040007;<br>P:GO:0040035;<br>P:GO:0002119                                                                                        | -                                                               | -          |                                                                                                                      |
|                         | -                                                                          | 0 |                                                                                                                                                        |                                                                 |            |                                                                                                                      |
| Caenorhabditis elegans  | hypothetical protein H41C03.1 [Caenorhabditis elegans]                     | 1 | P:GO:0040010                                                                                                                                           | -                                                               | -          |                                                                                                                      |
| Caenorhabditis elegans  | briggsae cbr-acy-3 protein                                                 | 0 |                                                                                                                                                        | P:GO:0009190;<br>F:GO:0016849                                   | -          |                                                                                                                      |
| Caenorhabditis elegans  | diphthamide biosynthesis protein 2                                         | 1 | P:GO:0040002                                                                                                                                           | -                                                               |            | IPR002728; IPR010014                                                                                                 |
| Caenorhabditis briggsae | protein                                                                    | 5 | F:GO:0005432;<br>P:GO:0006816;<br>P:GO:0055085;<br>C:GO:0016021;<br>P:GO:0007154                                                                       | -                                                               | -          |                                                                                                                      |
| Caenorhabditis briggsae | briggsae cbr-tag-280 protein                                               | 0 |                                                                                                                                                        |                                                                 |            | IPR019319; PTHR13411 (PANTHER)                                                                                       |
|                         | -                                                                          | 0 |                                                                                                                                                        |                                                                 |            |                                                                                                                      |
|                         | -                                                                          | 0 |                                                                                                                                                        |                                                                 |            |                                                                                                                      |
|                         | -                                                                          | 0 |                                                                                                                                                        |                                                                 |            |                                                                                                                      |
| Loa loa                 | dis3-like exonuclease 2                                                    | 1 | F:GO:0004518                                                                                                                                           | -                                                               | -          |                                                                                                                      |
| Loa loa                 | dis3-like exonuclease 2                                                    | 1 | F:GO:0004518                                                                                                                                           | -                                                               | -          |                                                                                                                      |
|                         | -                                                                          | 0 |                                                                                                                                                        |                                                                 |            |                                                                                                                      |
| Caenorhabditis elegans  | transformation transcription domain-associated protein                     | 1 | F:GO:0016772                                                                                                                                           | -                                                               |            | SignalP (SIGNALP)                                                                                                    |
|                         | -                                                                          | 0 |                                                                                                                                                        |                                                                 |            | SignalP (SIGNALP)                                                                                                    |
| Caenorhabditis elegans  | briggsae cbr-dpf-5 protein                                                 | 0 |                                                                                                                                                        |                                                                 |            |                                                                                                                      |
| Brugia malayi           | mucosa associated lymphoid tissue lymphoma translocation protein isoform b | 0 |                                                                                                                                                        | P:GO:0000003;<br>P:GO:0006508;<br>F:GO:0004197;<br>F:GO:0005515 |            | PTHR22576 (PANTHER),<br>PTHR22576:SF1 (PANTHER)                                                                      |
|                         | -                                                                          | 0 |                                                                                                                                                        |                                                                 |            |                                                                                                                      |
| Caenorhabditis briggsae | Hypothetical protein CBG07070 [Caenorhabditis briggsae]                    | 0 |                                                                                                                                                        |                                                                 |            |                                                                                                                      |
| Caenorhabditis briggsae | elegans protein partially confirmed by transcript evidence                 | 0 |                                                                                                                                                        |                                                                 |            |                                                                                                                      |
|                         | -                                                                          | 0 |                                                                                                                                                        |                                                                 |            |                                                                                                                      |
|                         | -                                                                          | 0 |                                                                                                                                                        |                                                                 |            |                                                                                                                      |
| Caenorhabditis elegans  | udp-n-acetylglucosamine pyrophosphorylase                                  | 4 | F:GO:0016779;<br>P:GO:0009792;<br>P:GO:0000003;<br>P:GO:0040010                                                                                        | -                                                               | EC:2.7.7.0 | IPR002618; G3DSA:3.90.550.10<br>(GENE3D), PTHR11952:SF2<br>(PANTHER), SSF53448 (SUPERFAMILY)                         |
| Caenorhabditis elegans  | utp--glucose-1-phosphate uridylyltransferase family protein                | 4 | P:GO:0009792;<br>P:GO:0000003;<br>P:GO:0040010;<br>F:GO:0016740                                                                                        | -                                                               |            | IPR002618; G3DSA:3.90.550.10<br>(GENE3D), PTHR11952:SF2<br>(PANTHER), SSF53448 (SUPERFAMILY)                         |

|                         |                                                             |    |                                                                                                                                                                                                                          |   |            |                                                                                                                         |
|-------------------------|-------------------------------------------------------------|----|--------------------------------------------------------------------------------------------------------------------------------------------------------------------------------------------------------------------------|---|------------|-------------------------------------------------------------------------------------------------------------------------|
| Caenorhabditis elegans  | udp-n-acetylglucosamine pyrophosphorylase                   | 6  | F:GO:0016779;<br>P:GO:0009792;<br>P:GO:0008152;<br>P:GO:0000003;<br>P:GO:0040010;<br>P:GO:0009847                                                                                                                        | - | EC:2.7.7.0 | IPR002618; G3DSA:3.90.550.10<br>(GENE3D), PTHR11952:SF2<br>(PANTHER), SSF53448 (SUPERFAMILY)                            |
| Caenorhabditis elegans  | utp--glucose-1-phosphate uridylyltransferase family protein | 4  | P:GO:0009792;<br>P:GO:0000003;<br>P:GO:0040010;<br>F:GO:0016740                                                                                                                                                          | - |            | IPR002618; G3DSA:3.90.550.10<br>(GENE3D), PTHR11952:SF2<br>(PANTHER), SSF53448 (SUPERFAMILY)                            |
| Caenorhabditis elegans  | udp-n-acetylglucosamine pyrophosphorylase                   | 6  | F:GO:0016779;<br>P:GO:0009792;<br>P:GO:0008152;<br>P:GO:0000003;<br>P:GO:0040010;<br>P:GO:0009847                                                                                                                        | - | EC:2.7.7.0 | IPR002618; G3DSA:3.90.550.10<br>(GENE3D), PTHR11952:SF2<br>(PANTHER), SSF53448 (SUPERFAMILY)                            |
| Caenorhabditis elegans  | udp-n-acetylglucosamine pyrophosphorylase                   | 6  | F:GO:0016779;<br>P:GO:0009792;<br>P:GO:0008152;<br>P:GO:0000003;<br>P:GO:0040010;<br>P:GO:0009847                                                                                                                        | - | EC:2.7.7.0 | IPR002618; G3DSA:3.90.550.10<br>(GENE3D), PTHR11952:SF2<br>(PANTHER), SSF53448 (SUPERFAMILY)                            |
| -                       | -                                                           | 0  |                                                                                                                                                                                                                          |   |            | -                                                                                                                       |
| -                       | -                                                           | 0  |                                                                                                                                                                                                                          |   |            | -                                                                                                                       |
| Brugia malayi           | death-associated protein ki-se 1                            | 7  | F:GO:0005516;<br>P:GO:0007243;<br>F:GO:0005524;<br>C:GO:0015629;<br>F:GO:0016301;<br>P:GO:0008624;<br>P:GO:0006468                                                                                                       | - |            | IPR002110; IPR020683; PR01415<br>(PRINTS), PTHR18958 (PANTHER)                                                          |
| -                       | -                                                           | 0  |                                                                                                                                                                                                                          |   |            | -                                                                                                                       |
| Caenorhabditis briggsae | dead (asp-glu-ala-asp) box polypeptide partial              | 4  | F:GO:0003676;<br>F:GO:0005524;<br>F:GO:0008270;<br>F:GO:0008026                                                                                                                                                          | - |            | SignalP (SIGNALP)                                                                                                       |
| -                       | -                                                           | 0  |                                                                                                                                                                                                                          |   |            | -                                                                                                                       |
| Caenorhabditis brenneri | isoleucyl-tr- synthetase                                    | 5  | F:GO:0004822;<br>F:GO:0008270;<br>P:GO:0006428;<br>F:GO:0005524;<br>C:GO:0005759                                                                                                                                         | - | EC:6.1.1.5 | IPR002300; IPR002301; IPR014729;<br>PTHR11946 (PANTHER)                                                                 |
| Caenorhabditis elegans  | nuclear receptor subfamily group member 6                   | 13 | F:GO:0008270;<br>P:GO:0009628;<br>F:GO:0004887;<br>P:GO:0000122;<br>F:GO:0043565;<br>P:GO:0019915;<br>P:GO:0032501;<br>F:GO:0005515;<br>F:GO:0003700;<br>P:GO:0007165;<br>F:GO:0003707;<br>C:GO:0005634;<br>P:GO:0009605 | - |            | IPR001628; IPR013088; PR00350<br>(PRINTS), PTHR11865 (PANTHER),<br>PTHR11865:SF218 (PANTHER),<br>SSF57716 (SUPERFAMILY) |
| -                       | -                                                           | 0  |                                                                                                                                                                                                                          |   |            | -                                                                                                                       |

|                           |                                                                |   |                                                                                                                                     |                                                                                                                                                                                                                                                                                                                                                                                                                                                                        |             |                                                                                                  |
|---------------------------|----------------------------------------------------------------|---|-------------------------------------------------------------------------------------------------------------------------------------|------------------------------------------------------------------------------------------------------------------------------------------------------------------------------------------------------------------------------------------------------------------------------------------------------------------------------------------------------------------------------------------------------------------------------------------------------------------------|-------------|--------------------------------------------------------------------------------------------------|
| Caenorhabditis sp. PS1010 | hypothetical protein Csp3_JD06.005 [Caenorhabditis sp. PS1010] | 0 |                                                                                                                                     | C:GO:0016020;<br>F:GO:0005337;<br>P:GO:0006810                                                                                                                                                                                                                                                                                                                                                                                                                         |             | IPR002259; PTHR10332:SF6 (PANTHER)                                                               |
| Xenopus laevis            | alpha cardiac myosin heavy chain                               | 0 |                                                                                                                                     | P:GO:0055010;<br>P:GO:0006936;<br>C:GO:0005859;<br>C:GO:0048471;<br>P:GO:0008152;<br>F:GO:0000146;<br>F:GO:0016887;<br>P:GO:0055009;<br>P:GO:0001701;<br>P:GO:0007522;<br>P:GO:0008217;<br>P:GO:0043462;<br>F:GO:0046982;<br>F:GO:0008270;<br>F:GO:0042803;<br>F:GO:0005524;<br>C:GO:0030017;<br>P:GO:0030049;<br>C:GO:0030016;<br>P:GO:0030048;<br>F:GO:0008307;<br>F:GO:0000166;<br>P:GO:0030239;<br>P:GO:0008016;<br>C:GO:0043292;<br>P:GO:0007512;<br>C:GO:0016459 |             | -                                                                                                |
| Haemonchus contortus      | legumain                                                       | 8 | C:GO:0005737;<br>P:GO:0009792;<br>F:GO:0008233;<br>P:GO:0040015;<br>C:GO:0045177;<br>C:GO:0043231;<br>P:GO:0000003;<br>P:GO:0006508 | -                                                                                                                                                                                                                                                                                                                                                                                                                                                                      |             | IPR001096; PTHR12000:SF4 (PANTHER), SignalP (SIGNALP)                                            |
| Caenorhabditis briggsae   | legumain                                                       | 8 | C:GO:0005737;<br>P:GO:0009792;<br>F:GO:0008233;<br>P:GO:0040015;<br>C:GO:0045177;<br>C:GO:0043231;<br>P:GO:0000003;<br>P:GO:0006508 | -                                                                                                                                                                                                                                                                                                                                                                                                                                                                      |             | IPR001096; PTHR12000:SF4 (PANTHER), SignalP (SIGNALP)                                            |
| Caenorhabditis elegans    | spastic paraplegia 7                                           | 6 | P:GO:0030163;<br>F:GO:0005524;<br>C:GO:0016021;<br>F:GO:0017111;<br>P:GO:0006508;<br>F:GO:0008270                                   | -                                                                                                                                                                                                                                                                                                                                                                                                                                                                      | EC:3.6.1.15 | G3DSA:3.40.50.300 (GENE3D), PTHR23076 (PANTHER), PTHR23076:SF2 (PANTHER), SSF52540 (SUPERFAMILY) |
| Caenorhabditis elegans    | spastic paraplegia 7                                           | 6 | P:GO:0030163;<br>F:GO:0005524;<br>C:GO:0016021;<br>F:GO:0017111;<br>P:GO:0006508;<br>F:GO:0008270                                   | -                                                                                                                                                                                                                                                                                                                                                                                                                                                                      | EC:3.6.1.15 | G3DSA:3.40.50.300 (GENE3D), PTHR23076 (PANTHER), PTHR23076:SF2 (PANTHER), SSF52540 (SUPERFAMILY) |

|                             |                                                    |    |                                                                                                                                                                                                                          |                                                                                                                                                                                                         |             |                                                                                        |
|-----------------------------|----------------------------------------------------|----|--------------------------------------------------------------------------------------------------------------------------------------------------------------------------------------------------------------------------|---------------------------------------------------------------------------------------------------------------------------------------------------------------------------------------------------------|-------------|----------------------------------------------------------------------------------------|
| Angiostrongylus cantonensis | hypothetical protein [Angiostrongylus cantonensis] | 0  |                                                                                                                                                                                                                          |                                                                                                                                                                                                         |             | -                                                                                      |
|                             | -                                                  | 0  |                                                                                                                                                                                                                          |                                                                                                                                                                                                         |             | -                                                                                      |
| Loa loa                     | ras-related gtp binding a                          | 10 | P:GO:0006915;<br>F:GO:0005525;<br>C:GO:0005794;<br>P:GO:0045919;<br>F:GO:0051219;<br>P:GO:0019048;<br>C:GO:0005634;<br>F:GO:0046982;<br>P:GO:0007264;<br>F:GO:0042803                                                    | -                                                                                                                                                                                                       |             | IPR006762; G3DSA:3.40.50.300 (GENE3D), PTHR11259:SF1 (PANTHER), SSF52540 (SUPERFAMILY) |
| Caenorhabditis elegans      | af221132_1diacylglycerol acyltransferase           | 1  | C:GO:0016020                                                                                                                                                                                                             | -                                                                                                                                                                                                       |             | -                                                                                      |
| Caenorhabditis briggsae     | briggsae cbr-pmt-2 protein                         | 0  |                                                                                                                                                                                                                          | F:GO:0008168;<br>P:GO:0008152                                                                                                                                                                           |             | -                                                                                      |
|                             | -                                                  | 0  |                                                                                                                                                                                                                          |                                                                                                                                                                                                         |             | SignalP (SIGNALP)                                                                      |
| Camponotus floridanus       | serine threonine protein ki-se                     | 0  |                                                                                                                                                                                                                          | F:GO:0004674;<br>F:GO:0042302;<br>F:GO:0004672;<br>F:GO:0016787;<br>P:GO:0006468;<br>F:GO:0000166;<br>F:GO:0003674;<br>F:GO:0005524;<br>F:GO:0016301;<br>C:GO:0005575;<br>P:GO:0008152;<br>P:GO:0008150 |             | IPR008160; PTHR10499 (PANTHER), PTHR10499:SF114 (PANTHER)                              |
|                             | -                                                  | 0  |                                                                                                                                                                                                                          |                                                                                                                                                                                                         |             | -                                                                                      |
|                             | -                                                  | 0  |                                                                                                                                                                                                                          |                                                                                                                                                                                                         |             | -                                                                                      |
|                             | -                                                  | 0  |                                                                                                                                                                                                                          |                                                                                                                                                                                                         |             | SignalP (SIGNALP)                                                                      |
|                             | -                                                  | 0  |                                                                                                                                                                                                                          |                                                                                                                                                                                                         |             | -                                                                                      |
| Ailuropoda melanoleuca      | transmembrane protein                              | 8  | C:GO:0030663;<br>C:GO:0005792;<br>C:GO:0005793;<br>F:GO:0005515;<br>P:GO:0016192;<br>C:GO:0016021;<br>C:GO:0042589;<br>P:GO:0015031                                                                                      | -                                                                                                                                                                                                       |             | SignalP (SIGNALP)                                                                      |
| Brugia malayi               | k acetyltransferase 2b                             | 13 | F:GO:0004402;<br>C:GO:0000123;<br>F:GO:0019901;<br>C:GO:0031672;<br>P:GO:0045736;<br>C:GO:0031674;<br>C:GO:0000776;<br>P:GO:0042326;<br>F:GO:0003713;<br>F:GO:0004861;<br>P:GO:0045944;<br>C:GO:0042641;<br>P:GO:0016573 | -                                                                                                                                                                                                       | EC:2.3.1.48 | IPR016181; PTHR22880 (PANTHER), PTHR22880:SF2 (PANTHER)                                |
|                             | -                                                  | 0  |                                                                                                                                                                                                                          |                                                                                                                                                                                                         |             | -                                                                                      |
| Caenorhabditis elegans      | glycoprotein hormone alpha 2                       | 4  | P:GO:0006952;<br>C:GO:0016021;<br>C:GO:0005615;<br>F:GO:0005179                                                                                                                                                          | -                                                                                                                                                                                                       |             | IPR004133; IPR018245                                                                   |

|                        |                                                 |    |                                                                                                                                                                                                                                                                                                                                                                                   |            |                                                                 |
|------------------------|-------------------------------------------------|----|-----------------------------------------------------------------------------------------------------------------------------------------------------------------------------------------------------------------------------------------------------------------------------------------------------------------------------------------------------------------------------------|------------|-----------------------------------------------------------------|
|                        |                                                 | 0  |                                                                                                                                                                                                                                                                                                                                                                                   |            |                                                                 |
|                        |                                                 | 0  |                                                                                                                                                                                                                                                                                                                                                                                   |            |                                                                 |
| Haemonchus contortus   | ligand-gated ion channel family member (lgc-41) | 6  | C:GO:0045211;<br>C:GO:0030054;<br>F:GO:0005515;<br>F:GO:0005230;<br>P:GO:0006811;<br>C:GO:0016021                                                                                                                                                                                                                                                                                 |            | IPR006201; IPR006202; IPR018000;<br>PTHR18945:SF16 (PANTHER)    |
|                        |                                                 | 0  |                                                                                                                                                                                                                                                                                                                                                                                   |            |                                                                 |
|                        |                                                 | 0  |                                                                                                                                                                                                                                                                                                                                                                                   |            |                                                                 |
| Homo sapiens           | argininosuccinate synthetase 1                  | 22 | C:GO:0005764;<br>P:GO:0006526;<br>C:GO:0070852;<br>P:GO:0001889;<br>P:GO:0007584;<br>C:GO:0005741;<br>P:GO:0000050;<br>P:GO:0043434;<br>F:GO:0005524;<br>P:GO:0051384;<br>F:GO:0005515;<br>P:GO:0042493;<br>P:GO:0001822;<br>P:GO:0010043;<br>P:GO:0032496;<br>P:GO:0006953;<br>F:GO:0004055;<br>C:GO:0005783;<br>P:GO:0000053;<br>F:GO:0015643;<br>C:GO:0005634;<br>C:GO:0043204 | EC:6.3.4.5 | IPR001518; G3DSA:1.20.5.470<br>(GENE3D), SSF69864 (SUPERFAMILY) |
|                        |                                                 | 0  |                                                                                                                                                                                                                                                                                                                                                                                   |            |                                                                 |
|                        |                                                 | 0  |                                                                                                                                                                                                                                                                                                                                                                                   |            |                                                                 |
| Caenorhabditis elegans | phospholipid-transporting atpase                | 6  | F:GO:0043492;<br>F:GO:0022892;<br>F:GO:0016820;<br>F:GO:0000166;<br>P:GO:0008152;<br>C:GO:0016020                                                                                                                                                                                                                                                                                 | EC:3.6.3.0 |                                                                 |
| Ancylostoma caninum    | metalloprotease 1 precursor                     | 2  | F:GO:0046872;<br>F:GO:0008237                                                                                                                                                                                                                                                                                                                                                     |            | IPR013032; PTHR10127 (PANTHER),<br>PTHR10127:SF60 (PANTHER)     |
|                        |                                                 | 0  |                                                                                                                                                                                                                                                                                                                                                                                   |            |                                                                 |
| Caenorhabditis elegans | nucleolar complex-associated protein            | 1  | C:GO:0005730                                                                                                                                                                                                                                                                                                                                                                      |            | IPR011501                                                       |
| Brugia malayi          | calcium atpase                                  | 6  | F:GO:0005388;<br>C:GO:0016021;<br>P:GO:0006754;<br>F:GO:0005524;<br>P:GO:0006816;<br>C:GO:0005576                                                                                                                                                                                                                                                                                 | EC:3.6.3.8 |                                                                 |
| Caenorhabditis elegans | uncoordinated family member (unc-44)            | 5  | C:GO:0016021;<br>P:GO:0007156;<br>F:GO:0005509;<br>F:GO:0005515;<br>C:GO:0005886                                                                                                                                                                                                                                                                                                  |            |                                                                 |

|                         |                                                                                                                |    |                                                                                                                                                                                                                                                            |   |             |                                                                                  |
|-------------------------|----------------------------------------------------------------------------------------------------------------|----|------------------------------------------------------------------------------------------------------------------------------------------------------------------------------------------------------------------------------------------------------------|---|-------------|----------------------------------------------------------------------------------|
| Caenorhabditis briggsae | pat2_caebr ame: full=integrin alpha pat-2 ame:<br>full=paralyzed arrest at two-fold protein 2 flags: precursor | 11 | P:GO:0009792;<br>F:GO:0004872;<br>P:GO:0002119;<br>P:GO:0007229;<br>P:GO:0018991;<br>P:GO:0032940;<br>P:GO:0007155;<br>P:GO:0040007;<br>P:GO:0006898;<br>P:GO:0040039;<br>C:GO:0008305                                                                     | - | -           |                                                                                  |
|                         | -                                                                                                              | 0  |                                                                                                                                                                                                                                                            |   |             | -                                                                                |
| Caenorhabditis elegans  | ubiquinone biosynthesis protein                                                                                | 15 | P:GO:0040010;<br>P:GO:0008340;<br>P:GO:0051094;<br>C:GO:0005739;<br>F:GO:0046914;<br>P:GO:0055114;<br>P:GO:0006744;<br>P:GO:0045333;<br>P:GO:0000003;<br>F:GO:0016491;<br>P:GO:0019538;<br>P:GO:0042493;<br>P:GO:0006119;<br>P:GO:0030534;<br>P:GO:0048520 | - |             | IPR009078; IPR011566; IPR012347                                                  |
| Caenorhabditis briggsae | transmembrane protein 68                                                                                       | 6  | F:GO:0008415;<br>P:GO:0045454;<br>C:GO:0016020;<br>P:GO:0008152;<br>F:GO:0016491;<br>F:GO:0016209                                                                                                                                                          | - |             | IPR002123; PTHR22753 (PANTHER),<br>PTHR22753:SF2 (PANTHER), SignalP<br>(SIGNALP) |
|                         | -                                                                                                              | 0  |                                                                                                                                                                                                                                                            |   |             | -                                                                                |
| Macaca mulatta          | small subunit 1                                                                                                | 8  | C:GO:0005737;<br>P:GO:0008284;<br>C:GO:0005886;<br>F:GO:0004198;<br>F:GO:0005509;<br>P:GO:0006508;<br>C:GO:0005634;<br>F:GO:0046982                                                                                                                        | - |             | -                                                                                |
|                         | -                                                                                                              | 0  |                                                                                                                                                                                                                                                            |   |             | -                                                                                |
| Loa loa                 | fh1 fh2 domain-containing protein 3                                                                            | 4  | P:GO:0030036;<br>C:GO:0005856;<br>C:GO:0005737;<br>F:GO:0003779                                                                                                                                                                                            | - |             | SignalP (SIGNALP)                                                                |
| Macaca mulatta          | b chain activator-bound structure of human pyruvate ki-se<br>m2                                                | 9  | F:GO:0004743;<br>F:GO:0005515;<br>F:GO:0030955;<br>F:GO:0005524;<br>F:GO:0000287;<br>P:GO:0006096;<br>P:GO:0012501;<br>C:GO:0005634;<br>C:GO:0005829                                                                                                       | - | EC:2.7.1.40 | IPR001697; IPR011037; IPR015793;<br>IPR015806                                    |

|                             |                                                       |   |                                                                                                                                                      |                                                                                                   |            |                                                                                                                                    |
|-----------------------------|-------------------------------------------------------|---|------------------------------------------------------------------------------------------------------------------------------------------------------|---------------------------------------------------------------------------------------------------|------------|------------------------------------------------------------------------------------------------------------------------------------|
| Loa loa                     | polymerase iii (d- directed) polypeptide 155kda       | 9 | F:GO:0003899;<br>P:GO:0009615;<br>F:GO:0008270;<br>P:GO:0032728;<br>P:GO:0045087;<br>F:GO:0003677;<br>F:GO:0032549;<br>P:GO:0006351;<br>C:GO:0005666 | -                                                                                                 | EC:2.7.7.6 | IPR015700; PTHR19376 (PANTHER),<br>SSF64484 (SUPERFAMILY)                                                                          |
| -                           | -                                                     | 0 |                                                                                                                                                      |                                                                                                   |            | -                                                                                                                                  |
| Caenorhabditis elegans      | elegans protein confirmed by transcript evidence      | 0 |                                                                                                                                                      |                                                                                                   |            | SignalP (SIGNALP)                                                                                                                  |
| Caenorhabditis elegans      | lethal essential for life l2efl                       | 2 | P:GO:0009408;<br>F:GO:0042802                                                                                                                        | -                                                                                                 |            | -                                                                                                                                  |
| -                           | -                                                     | 0 |                                                                                                                                                      |                                                                                                   |            | -                                                                                                                                  |
| Loa loa                     | nuclear hormone receptor family member (nhr-23)       | 6 | F:GO:0003700;<br>F:GO:0043565;<br>F:GO:0003707;<br>C:GO:0005634;<br>F:GO:0008270;<br>P:GO:0006355                                                    | -                                                                                                 |            | IPR001628; IPR008946; IPR013088;<br>PRO0350 (PRINTS), PTHR11865<br>(PANTHER), PTHR11865:SF178<br>(PANTHER), SSF57716 (SUPERFAMILY) |
| Loa loa                     | hypothetical protein LOAG_12429 [Loa loa]             | 0 |                                                                                                                                                      |                                                                                                   |            | -                                                                                                                                  |
| -                           | -                                                     | 0 |                                                                                                                                                      |                                                                                                   |            | SignalP (SIGNALP)                                                                                                                  |
| Caenorhabditis elegans      | hypothetical tyrosi-se-like protein in chromosome     | 4 | F:GO:0005515;<br>F:GO:0046872;<br>P:GO:0008152;<br>F:GO:0016491                                                                                      | -                                                                                                 |            | IPR002227; IPR008922; PTHR11474<br>(PANTHER), PTHR11474:SF1<br>(PANTHER)                                                           |
| -                           | -                                                     | 0 |                                                                                                                                                      |                                                                                                   |            | IPR000436; IPR016060; SignalP<br>(SIGNALP)                                                                                         |
| -                           | -                                                     | 0 |                                                                                                                                                      |                                                                                                   |            | -                                                                                                                                  |
| -                           | -                                                     | 0 |                                                                                                                                                      |                                                                                                   |            | -                                                                                                                                  |
| -                           | -                                                     | 0 |                                                                                                                                                      |                                                                                                   |            | SignalP (SIGNALP)                                                                                                                  |
| Caenorhabditis elegans      | hypothetical protein T09B4.7 [Caenorhabditis elegans] | 0 |                                                                                                                                                      | F:GO:0005524;<br>F:GO:0004672;<br>F:GO:0000166;<br>P:GO:0006468                                   |            | -                                                                                                                                  |
| Loa loa                     | tpr domain containing protein                         | 0 |                                                                                                                                                      | F:GO:0005488                                                                                      |            | IPR011990; SSF48452 (SUPERFAMILY)                                                                                                  |
| Angiostrongylus cantonensis | homeobox family member                                | 5 | F:GO:0003700;<br>F:GO:0030528;<br>F:GO:0043565;<br>C:GO:0005634;<br>P:GO:0006355                                                                     | -                                                                                                 |            | -                                                                                                                                  |
| Caenorhabditis elegans      | elegans protein confirmed by transcript evidence      | 0 |                                                                                                                                                      |                                                                                                   |            | PTHR12751 (PANTHER),<br>PTHR12751:SF3 (PANTHER)                                                                                    |
| -                           | -                                                     | 0 |                                                                                                                                                      |                                                                                                   |            | -                                                                                                                                  |
| Sordaria macrospora         | un-med protein product [Sordaria macrospora]          | 0 |                                                                                                                                                      |                                                                                                   |            | -                                                                                                                                  |
| Loa loa                     | hypothetical protein LOAG_01266 [Loa loa]             | 0 |                                                                                                                                                      |                                                                                                   |            | IPR015943; IPR017986; IPR019781;<br>PTHR22847 (PANTHER),<br>PTHR22847:SF48 (PANTHER)                                               |
| Brugia malayi               | zinc c2h2 type family protein                         | 1 | F:GO:0005488                                                                                                                                         | -                                                                                                 |            | IPR007087; IPR013087; IPR015880;<br>PTHR11389 (PANTHER), SSF57667<br>(SUPERFAMILY)                                                 |
| Loa loa                     | zinc finger protein                                   | 0 |                                                                                                                                                      | F:GO:0003676;<br>C:GO:0005783;<br>C:GO:0005794;<br>P:GO:0006886;<br>F:GO:0008270;<br>C:GO:0005622 |            | -                                                                                                                                  |
| -                           | -                                                     | 0 |                                                                                                                                                      |                                                                                                   |            | IPR012335; PTHR18929 (PANTHER)                                                                                                     |



|                           |                                                        |    |                                                                                                                                                                                                                                           |   |             |                                                                                                                                 |
|---------------------------|--------------------------------------------------------|----|-------------------------------------------------------------------------------------------------------------------------------------------------------------------------------------------------------------------------------------------|---|-------------|---------------------------------------------------------------------------------------------------------------------------------|
| Caenorhabditis briggsae   | cg7840-pa                                              | 6  | F:GO:0016491;<br>P:GO:0016095;<br>C:GO:0044425;<br>P:GO:0006488;<br>C:GO:0005783;<br>P:GO:0019348                                                                                                                                         | - | -           |                                                                                                                                 |
| -                         | -                                                      | 0  |                                                                                                                                                                                                                                           |   |             | SignalP (SIGNALP)                                                                                                               |
| -                         | -                                                      | 0  |                                                                                                                                                                                                                                           |   |             | -                                                                                                                               |
| -                         | -                                                      | 0  |                                                                                                                                                                                                                                           |   |             | IPR018114                                                                                                                       |
| Caenorhabditis briggsae   | briggsae cbr-unc-104 protein                           | 10 | F:GO:0003777;<br>P:GO:0007411;<br>P:GO:0048490;<br>P:GO:0007528;<br>C:GO:0005874;<br>P:GO:0008345;<br>P:GO:0047496;<br>F:GO:0005524;<br>P:GO:0016188;<br>C:GO:0005871                                                                     | - | -           |                                                                                                                                 |
| -                         | -                                                      | 0  |                                                                                                                                                                                                                                           |   |             | -                                                                                                                               |
| -                         | -                                                      | 0  |                                                                                                                                                                                                                                           |   |             | -                                                                                                                               |
| Caenorhabditis elegans    | -dh oxidase                                            | 2  | P:GO:0008152;<br>F:GO:0003824                                                                                                                                                                                                             | - | -           | IPR001155; IPR013785; PTHR22893 (PANTHER), PTHR22893:SF6 (PANTHER), SSF51395 (SUPERFAMILY)                                      |
| -                         | -                                                      | 0  |                                                                                                                                                                                                                                           |   |             | -                                                                                                                               |
| -                         | -                                                      | 0  |                                                                                                                                                                                                                                           |   |             | -                                                                                                                               |
| -                         | -                                                      | 0  |                                                                                                                                                                                                                                           |   |             | -                                                                                                                               |
| Caenorhabditis elegans    | hypothetical protein Y41D4A.7 [Caenorhabditis elegans] | 0  |                                                                                                                                                                                                                                           |   |             | -                                                                                                                               |
| Schizosaccharomyces pombe | histone acetyltransferase mst2                         | 14 | P:GO:0009880;<br>P:GO:0045941;<br>F:GO:0004402;<br>P:GO:0006323;<br>P:GO:0009952;<br>P:GO:0001502;<br>C:GO:0070776;<br>P:GO:0048703;<br>F:GO:0003713;<br>P:GO:0030099;<br>P:GO:0043966;<br>P:GO:0016481;<br>C:GO:0000790;<br>P:GO:0010172 | - | EC:2.3.1.48 | IPR002717; IPR016181; PTHR10615 (PANTHER), PTHR10615:SF29 (PANTHER)                                                             |
| -                         | -                                                      | 0  |                                                                                                                                                                                                                                           |   |             | -                                                                                                                               |
| Caenorhabditis elegans    | pdxp protein                                           | 1  | F:GO:0003824                                                                                                                                                                                                                              | - | -           | G3DSA:3.40.50.1000 (GENE3D), PTHR19288 (PANTHER), PTHR19288:SF11 (PANTHER), SSF56784 (SUPERFAMILY)                              |
| Caenorhabditis elegans    | gex interacting protein family member (gei-11)         | 1  | P:GO:0007275                                                                                                                                                                                                                              | - | -           | IPR015495; PTHR10641:SF13 (PANTHER)                                                                                             |
| Caenorhabditis elegans    | gex interacting protein family member (gei-11)         | 1  | P:GO:0007275                                                                                                                                                                                                                              | - | -           | -                                                                                                                               |
| Caenorhabditis briggsae   | phosphoglycolate phosphatase                           | 1  | F:GO:0003824                                                                                                                                                                                                                              | - | -           | IPR005834; G3DSA:3.40.50.1000 (GENE3D), PTHR12725 (PANTHER), PTHR12725:SF4 (PANTHER), SignalP (SIGNALP), SSF56784 (SUPERFAMILY) |
| -                         | -                                                      | 0  |                                                                                                                                                                                                                                           |   |             | -                                                                                                                               |
| -                         | -                                                      | 0  |                                                                                                                                                                                                                                           |   |             | -                                                                                                                               |
| -                         | -                                                      | 0  |                                                                                                                                                                                                                                           |   |             | -                                                                                                                               |

|                         |                                                          |    |                                                                                                                                                                                                                                                                                                                                                                                                                                                                        |                                                                                                   |                   |                                                                                       |
|-------------------------|----------------------------------------------------------|----|------------------------------------------------------------------------------------------------------------------------------------------------------------------------------------------------------------------------------------------------------------------------------------------------------------------------------------------------------------------------------------------------------------------------------------------------------------------------|---------------------------------------------------------------------------------------------------|-------------------|---------------------------------------------------------------------------------------|
|                         | -                                                        | 0  |                                                                                                                                                                                                                                                                                                                                                                                                                                                                        |                                                                                                   |                   | -                                                                                     |
| Caenorhabditis elegans  | carbonic anhydrase                                       | 0  |                                                                                                                                                                                                                                                                                                                                                                                                                                                                        | F:GO:0046872;<br>P:GO:0006730;<br>F:GO:0008270;<br>F:GO:0016829;<br>F:GO:0004089;<br>C:GO:0005575 |                   | IPR001148; PTHR18952:SF34 (PANTHER)                                                   |
| Caenorhabditis briggsae | briggsae cbr-coq-8 protein                               | 0  |                                                                                                                                                                                                                                                                                                                                                                                                                                                                        |                                                                                                   |                   | -                                                                                     |
| Caenorhabditis briggsae | ubiquinol-cytochrome c reductase hinge protein variant 1 | 2  | P:GO:0055114;<br>F:GO:0016491                                                                                                                                                                                                                                                                                                                                                                                                                                          | -                                                                                                 |                   | IPR003422; IPR023184                                                                  |
| Caenorhabditis elegans  | ankyrin repeat and fyve domain containing 1              | 4  | P:GO:0009792;<br>F:GO:0005488;<br>P:GO:0040010;<br>C:GO:0010008                                                                                                                                                                                                                                                                                                                                                                                                        | -                                                                                                 |                   | IPR002110; IPR020683; PTHR18958 (PANTHER), PTHR18958:SF248 (PANTHER)                  |
| Caenorhabditis briggsae | oligopeptide transporter                                 | 3  | C:GO:0016021;<br>P:GO:0006857;<br>F:GO:0042936                                                                                                                                                                                                                                                                                                                                                                                                                         | -                                                                                                 |                   | -                                                                                     |
| Caenorhabditis elegans  | lfi-1                                                    | 4  | F:GO:0005515;<br>C:GO:0044430;<br>C:GO:0005694;<br>P:GO:0009987                                                                                                                                                                                                                                                                                                                                                                                                        | -                                                                                                 |                   | IPR006829; IPR009053; PD936484 (PRODOM), PTHR23159 (PANTHER), PTHR23159:SF6 (PANTHER) |
| Caenorhabditis elegans  | lfi-1                                                    | 4  | F:GO:0005515;<br>C:GO:0044430;<br>C:GO:0005694;<br>P:GO:0009987                                                                                                                                                                                                                                                                                                                                                                                                        | -                                                                                                 |                   | IPR006829; IPR009053; PD936484 (PRODOM), PTHR23159 (PANTHER), PTHR23159:SF6 (PANTHER) |
| Caenorhabditis briggsae | Hypothetical protein CBG11012 [Caenorhabditis briggsae]  | 0  |                                                                                                                                                                                                                                                                                                                                                                                                                                                                        | F:GO:0004623;<br>C:GO:0016021;<br>P:GO:0016042;<br>P:GO:0006644;<br>F:GO:0005515                  |                   | -                                                                                     |
| Caenorhabditis elegans  | vermilion                                                | 35 | P:GO:0001752;<br>P:GO:0035071;<br>P:GO:0048069;<br>P:GO:0035224;<br>P:GO:0050770;<br>P:GO:0019441;<br>P:GO:0008348;<br>P:GO:0006911;<br>P:GO:0007418;<br>F:GO:0020037;<br>P:GO:0007377;<br>P:GO:0046843;<br>P:GO:0040010;<br>P:GO:0007254;<br>C:GO:0005737;<br>F:GO:0004833;<br>P:GO:0007386;<br>P:GO:0009997;<br>F:GO:0016564;<br>P:GO:0035277;<br>F:GO:0042802;<br>P:GO:0007376;<br>P:GO:0001736;<br>P:GO:0046844;<br>F:GO:0043565;<br>P:GO:0007484;<br>P:GO:0007365 | -                                                                                                 | EC:1.13.11.1<br>1 | IPR004981                                                                             |
|                         | -                                                        | 0  |                                                                                                                                                                                                                                                                                                                                                                                                                                                                        |                                                                                                   |                   | SignalP (SIGNALP)                                                                     |

|                                           |                                                       |   |                                                                                                                    |                                                |            |                                                                                                                                                                                                   |
|-------------------------------------------|-------------------------------------------------------|---|--------------------------------------------------------------------------------------------------------------------|------------------------------------------------|------------|---------------------------------------------------------------------------------------------------------------------------------------------------------------------------------------------------|
| Caenorhabditis elegans                    | hypothetical protein T27E4.7 [Caenorhabditis elegans] | 0 |                                                                                                                    |                                                |            | -                                                                                                                                                                                                 |
|                                           | -                                                     | 0 |                                                                                                                    |                                                |            | PTHR19229 (PANTHER),<br>PTHR19229:SF18 (PANTHER)                                                                                                                                                  |
|                                           | -                                                     | 0 |                                                                                                                    |                                                |            | SignalP (SIGNALP)                                                                                                                                                                                 |
| Caenorhabditis briggsae                   | tailless                                              | 7 | F:GO:0003700;<br>F:GO:0043565;<br>F:GO:0005515;<br>F:GO:0003707;<br>C:GO:0005634;<br>F:GO:0008270;<br>P:GO:0006355 | -                                              |            | -                                                                                                                                                                                                 |
| Caenorhabditis elegans                    | dihydrouridine synthase domain containing protein     | 6 | F:GO:0003677;<br>P:GO:0055114;<br>F:GO:0050660;<br>F:GO:0008270;<br>F:GO:0017150;<br>P:GO:0008033                  | -                                              |            | -                                                                                                                                                                                                 |
|                                           | -                                                     | 0 |                                                                                                                    |                                                |            | -                                                                                                                                                                                                 |
| Drosophila pseudoobscura<br>pseudoobscura | chromosome 9 open reading frame 4                     | 0 |                                                                                                                    | F:GO:0004500;<br>C:GO:0016021;<br>P:GO:0006548 |            | IPR005018; PTHR23130 (PANTHER),<br>PTHR23130:SF3 (PANTHER)                                                                                                                                        |
| Caenorhabditis briggsae                   | actin binding                                         | 2 | P:GO:0009792;<br>P:GO:0040010                                                                                      | -                                              |            | IPR013784; IPR019008; PTHR13605<br>(PANTHER), SignalP (SIGNALP)                                                                                                                                   |
| Caenorhabditis briggsae                   | ufm1-conjugating enzyme 1                             | 3 | F:GO:0071568;<br>F:GO:0005515;<br>P:GO:0071569                                                                     | -                                              |            | -                                                                                                                                                                                                 |
| Caenorhabditis elegans                    | carrier protein                                       | 4 | F:GO:0005488;<br>C:GO:0005743;<br>P:GO:0055085;<br>C:GO:0016021                                                    | -                                              |            | IPR001993; IPR018108;<br>G3DSA:1.50.40.10 (GENE3D),<br>PTHR11896:SF38 (PANTHER)                                                                                                                   |
|                                           | -                                                     | 0 |                                                                                                                    |                                                |            | -                                                                                                                                                                                                 |
|                                           | -                                                     | 0 |                                                                                                                    |                                                |            | -                                                                                                                                                                                                 |
|                                           | -                                                     | 0 |                                                                                                                    |                                                |            | -                                                                                                                                                                                                 |
|                                           | -                                                     | 0 |                                                                                                                    |                                                |            | -                                                                                                                                                                                                 |
|                                           | -                                                     | 0 |                                                                                                                    |                                                |            | -                                                                                                                                                                                                 |
|                                           | -                                                     | 0 |                                                                                                                    |                                                |            | -                                                                                                                                                                                                 |
|                                           | -                                                     | 0 |                                                                                                                    |                                                |            | -                                                                                                                                                                                                 |
|                                           | -                                                     | 0 |                                                                                                                    |                                                |            | -                                                                                                                                                                                                 |
| Loa loa                                   | hypothetical protein LOAG_12576 [Loa loa]             | 0 |                                                                                                                    |                                                |            | -                                                                                                                                                                                                 |
| Loa loa                                   | hypothetical protein LOAG_12576 [Loa loa]             | 0 |                                                                                                                    |                                                |            | -                                                                                                                                                                                                 |
| Loa loa                                   | nucleoredoxin                                         | 2 | F:GO:0004791;<br>C:GO:0005634                                                                                      | -                                              | EC:1.8.1.9 | IPR000866; IPR012335; IPR012336;<br>PTHR13871 (PANTHER),<br>PTHR13871:SF6 (PANTHER)                                                                                                               |
| Caenorhabditis briggsae                   | beta chain spectrin                                   | 3 | C:GO:0044459;<br>P:GO:0016044;<br>F:GO:0003779                                                                     | -                                              |            | IPR001605; IPR001849; IPR002017;<br>IPR011993; IPR018159;<br>G3DSA:1.20.58.60 (GENE3D),<br>PTHR11915 (PANTHER),<br>PTHR11915:SF48 (PANTHER),<br>SSF46966 (SUPERFAMILY), SSF50729<br>(SUPERFAMILY) |
| Caenorhabditis briggsae                   | beta chain spectrin                                   | 3 | C:GO:0044459;<br>P:GO:0016044;<br>F:GO:0003779                                                                     | -                                              |            | IPR001605; IPR001849; IPR002017;<br>IPR011993; IPR018159;<br>G3DSA:1.20.58.60 (GENE3D),<br>PTHR11915 (PANTHER),<br>PTHR11915:SF48 (PANTHER),<br>SSF46966 (SUPERFAMILY), SSF50729<br>(SUPERFAMILY) |

|                         |                                                       |    |                                                                                                                                                                                                                                                            |                                                                                                                                                                                                                                                                                                                                                                                   |                                                                                                                                                                                                   |                     |
|-------------------------|-------------------------------------------------------|----|------------------------------------------------------------------------------------------------------------------------------------------------------------------------------------------------------------------------------------------------------------|-----------------------------------------------------------------------------------------------------------------------------------------------------------------------------------------------------------------------------------------------------------------------------------------------------------------------------------------------------------------------------------|---------------------------------------------------------------------------------------------------------------------------------------------------------------------------------------------------|---------------------|
| Caenorhabditis briggsae | beta chain spectrin                                   | 3  | C:GO:0044459;<br>P:GO:0016044;<br>F:GO:0003779                                                                                                                                                                                                             | -                                                                                                                                                                                                                                                                                                                                                                                 | IPR001605; IPR001849; IPR002017;<br>IPR011993; IPR018159;<br>G3DSA:1.20.58.60 (GENE3D),<br>PTHR11915 (PANTHER),<br>PTHR11915:SF48 (PANTHER),<br>SSF46966 (SUPERFAMILY), SSF50729<br>(SUPERFAMILY) |                     |
| -                       | -                                                     | 0  | -                                                                                                                                                                                                                                                          | -                                                                                                                                                                                                                                                                                                                                                                                 | -                                                                                                                                                                                                 |                     |
| -                       | -                                                     | 0  | -                                                                                                                                                                                                                                                          | -                                                                                                                                                                                                                                                                                                                                                                                 | SignalP (SIGNALP)                                                                                                                                                                                 |                     |
| Ailuropoda melanoleuca  | protein phosphatase catalytic alpha-like isoform 2    | 15 | P:GO:0006470;<br>P:GO:0030324;<br>C:GO:0005829;<br>P:GO:0007049;<br>C:GO:0005730;<br>F:GO:0046872;<br>F:GO:0042802;<br>P:GO:0051301;<br>C:GO:0005741;<br>F:GO:0004722;<br>P:GO:0046822;<br>C:GO:0070688;<br>P:GO:0005977;<br>P:GO:0048754;<br>F:GO:0008599 | -                                                                                                                                                                                                                                                                                                                                                                                 | -                                                                                                                                                                                                 |                     |
| -                       | -                                                     | 0  | -                                                                                                                                                                                                                                                          | -                                                                                                                                                                                                                                                                                                                                                                                 | -                                                                                                                                                                                                 |                     |
| -                       | -                                                     | 0  | -                                                                                                                                                                                                                                                          | -                                                                                                                                                                                                                                                                                                                                                                                 | -                                                                                                                                                                                                 |                     |
| Brugia malayi           | transcription factor cp2-like 1                       | 0  |                                                                                                                                                                                                                                                            | P:GO:0000902;<br>F:GO:0003677;<br>C:GO:0005634;<br>P:GO:0006357;<br>P:GO:0019079;<br>F:GO:0016566;<br>P:GO:0000122;<br>P:GO:0006694;<br>C:GO:0016020;<br>P:GO:0008340;<br>F:GO:0016565;<br>P:GO:0007431;<br>F:GO:0003700;<br>P:GO:0016481;<br>P:GO:0001525;<br>C:GO:0005737;<br>P:GO:0007028;<br>F:GO:0003714;<br>P:GO:0045449;<br>P:GO:0002070;<br>P:GO:0045927;<br>P:GO:0007565 |                                                                                                                                                                                                   | PTHR11037 (PANTHER) |
| -                       | -                                                     | 0  | -                                                                                                                                                                                                                                                          | -                                                                                                                                                                                                                                                                                                                                                                                 | -                                                                                                                                                                                                 |                     |
| Caenorhabditis elegans  | moz sas family protein                                | 1  | F:GO:0005488                                                                                                                                                                                                                                               | -                                                                                                                                                                                                                                                                                                                                                                                 | PTHR10615 (PANTHER),<br>PTHR10615:SF25 (PANTHER)                                                                                                                                                  |                     |
| Caenorhabditis briggsae | u632_caeel ame: full=upf0632 protein flags: precursor | 0  |                                                                                                                                                                                                                                                            |                                                                                                                                                                                                                                                                                                                                                                                   | -                                                                                                                                                                                                 |                     |
| -                       | -                                                     | 0  | -                                                                                                                                                                                                                                                          | -                                                                                                                                                                                                                                                                                                                                                                                 | -                                                                                                                                                                                                 |                     |
| Caenorhabditis elegans  | briggsae cbr-rsr-2 protein                            | 4  | P:GO:0040035;<br>P:GO:0040027;<br>P:GO:0008340;<br>P:GO:0040007                                                                                                                                                                                            | -                                                                                                                                                                                                                                                                                                                                                                                 | -                                                                                                                                                                                                 |                     |
| -                       | -                                                     | 0  | -                                                                                                                                                                                                                                                          | -                                                                                                                                                                                                                                                                                                                                                                                 | -                                                                                                                                                                                                 |                     |

|                         |                                                                       |    |                                                                                                                                                                                                         |                                                |             |                                                                                                                                   |
|-------------------------|-----------------------------------------------------------------------|----|---------------------------------------------------------------------------------------------------------------------------------------------------------------------------------------------------------|------------------------------------------------|-------------|-----------------------------------------------------------------------------------------------------------------------------------|
| Loa loa                 | innexin protein 13                                                    | 5  | P:GO:0040035;<br>C:GO:0005921;<br>P:GO:0040010;<br>P:GO:0040011;<br>P:GO:0002009                                                                                                                        | -                                              |             | IPR000990; SignalP (SIGNALP)                                                                                                      |
| Caenorhabditis briggsae | briggsae cbr-taf-5 protein                                            | 0  |                                                                                                                                                                                                         | P:GO:0045449;<br>F:GO:0030528;<br>C:GO:0005634 |             | -                                                                                                                                 |
| Ciona intestinalis      | riboflavin ki-se                                                      | 4  | F:GO:0008531;<br>F:GO:0005488;<br>P:GO:0009231;<br>C:GO:0005829                                                                                                                                         | -                                              | EC:2.7.1.26 | IPR015865                                                                                                                         |
| Caenorhabditis briggsae | briggsae cbr-ptr-14 protein                                           | 4  | P:GO:0018996;<br>C:GO:0016020;<br>P:GO:0040018;<br>P:GO:0040011                                                                                                                                         | -                                              |             | IPR003392                                                                                                                         |
| Caenorhabditis elegans  | gamma-glutamyltranspeptidase family protein                           | 1  | F:GO:0003840                                                                                                                                                                                            | -                                              | EC:2.3.2.2  | IPR000101; SSF56235 (SUPERFAMILY)                                                                                                 |
|                         | -                                                                     | 0  |                                                                                                                                                                                                         |                                                |             | -                                                                                                                                 |
|                         | -                                                                     | 0  |                                                                                                                                                                                                         |                                                |             | -                                                                                                                                 |
| Caenorhabditis briggsae | sterol regulatory element-binding protein cleavage-activating protein | 12 | P:GO:0045540;<br>P:GO:0006994;<br>C:GO:0016021;<br>C:GO:0005794;<br>P:GO:0009792;<br>C:GO:0031090;<br>P:GO:0007165;<br>C:GO:0044446;<br>F:GO:0005070;<br>C:GO:0012505;<br>C:GO:0005783;<br>C:GO:0005625 | -                                              |             | IPR000731; PF12349 (PFAM), SignalP (SIGNALP)                                                                                      |
|                         | -                                                                     | 0  |                                                                                                                                                                                                         |                                                |             | -                                                                                                                                 |
| Caenorhabditis elegans  | lethal giant discs 1                                                  | 1  | F:GO:0005515                                                                                                                                                                                            | -                                              |             | IPR006608                                                                                                                         |
|                         | -                                                                     | 0  |                                                                                                                                                                                                         |                                                |             | -                                                                                                                                 |
| Caenorhabditis elegans  | molybdenum cofactor synthesis domain protein                          | 2  | P:GO:0006777;<br>F:GO:0003824                                                                                                                                                                           | -                                              |             | IPR001453; IPR008284; IPR020817;<br>PTHR10192 (PANTHER), SignalP (SIGNALP)                                                        |
|                         | -                                                                     | 0  |                                                                                                                                                                                                         |                                                |             | -                                                                                                                                 |
|                         | -                                                                     | 0  |                                                                                                                                                                                                         |                                                |             | -                                                                                                                                 |
| Loa loa                 | tr- modification gtpase family protein                                | 2  | F:GO:0005488;<br>P:GO:0009987                                                                                                                                                                           | -                                              |             | IPR021629; PTHR12691 (PANTHER),<br>PTHR12691:SF3 (PANTHER), SignalP (SIGNALP)                                                     |
|                         | -                                                                     | 0  |                                                                                                                                                                                                         |                                                |             | -                                                                                                                                 |
|                         |                                                                       | 6  | F:GO:0046872;<br>F:GO:0051287;<br>C:GO:0005759;<br>F:GO:0016619;<br>P:GO:0006108;<br>P:GO:0055114                                                                                                       | -                                              | EC:1.1.1.38 | IPR001891; IPR012301;<br>G3DSA:3.40.50.10380 (GENE3D),<br>PTHR23406 (PANTHER),<br>PTHR23406:SF2 (PANTHER), SSF53223 (SUPERFAMILY) |
|                         | -                                                                     | 0  |                                                                                                                                                                                                         |                                                |             | SignalP (SIGNALP)                                                                                                                 |
|                         | -                                                                     | 0  |                                                                                                                                                                                                         |                                                |             | SignalP (SIGNALP)                                                                                                                 |
| Caenorhabditis briggsae | briggsae cbr-ego-1 protein                                            | 1  | F:GO:0005515                                                                                                                                                                                            | -                                              |             | SignalP (SIGNALP)                                                                                                                 |

|                                   |                                                            |   |                                                                                                                    |                                                                                                                                                      |            |                                                                           |
|-----------------------------------|------------------------------------------------------------|---|--------------------------------------------------------------------------------------------------------------------|------------------------------------------------------------------------------------------------------------------------------------------------------|------------|---------------------------------------------------------------------------|
| Caenorhabditis briggsae           | ns1 binding protein                                        | 0 |                                                                                                                    | C:GO:0005634;<br>F:GO:0003674;<br>P:GO:0055114;<br>F:GO:0016491;<br>C:GO:0005575;<br>F:GO:0005515;<br>P:GO:0008150;<br>C:GO:0005856;<br>F:GO:0045480 | -          |                                                                           |
| Parvibaculum lavamentivorans DS-1 | fad linked oxidase domain protein                          | 1 | F:GO:0016491                                                                                                       | -                                                                                                                                                    |            | PTHR11748 (PANTHER),<br>PTHR11748:SF6 (PANTHER)                           |
| Caenorhabditis elegans            | dachsous 1                                                 | 7 | P:GO:0002119;<br>P:GO:0007156;<br>C:GO:0005886;<br>P:GO:0040010;<br>F:GO:0005509;<br>P:GO:0040011;<br>C:GO:0016021 | -                                                                                                                                                    |            | IPR002126; IPR015919; PTHR10596<br>(PANTHER), PTHR10596:SF80<br>(PANTHER) |
|                                   | -                                                          | 0 |                                                                                                                    |                                                                                                                                                      |            | -                                                                         |
| Loa loa                           | hypothetical protein LOAG_03210 [Loa loa]                  | 0 |                                                                                                                    |                                                                                                                                                      |            | IPR011333; IPR013069                                                      |
|                                   | -                                                          | 0 |                                                                                                                    |                                                                                                                                                      |            | -                                                                         |
| Caenorhabditis elegans            | vacuolar protein sorting-associated protein 45             | 7 | C:GO:0043231;<br>P:GO:0000003;<br>P:GO:0018996;<br>P:GO:0002119;<br>C:GO:0044444;<br>P:GO:0006898;<br>P:GO:0051649 | -                                                                                                                                                    |            | IPR001619; G3DSA:3.40.50.1910<br>(GENE3D), PTHR11679:SF3 (PANTHER)        |
|                                   | -                                                          | 0 |                                                                                                                    |                                                                                                                                                      |            | SignalP (SIGNALP)                                                         |
|                                   | -                                                          | 0 |                                                                                                                    |                                                                                                                                                      |            | -                                                                         |
|                                   | -                                                          | 0 |                                                                                                                    |                                                                                                                                                      |            | -                                                                         |
| Saccoglossus kowalevskii          | PREDICTED: hypothetical protein [Saccoglossus kowalevskii] | 0 |                                                                                                                    | F:GO:0046872;<br>C:GO:0016020;<br>F:GO:0008270;<br>F:GO:0005515;<br>F:GO:0005215;<br>P:GO:0006810                                                    |            | -                                                                         |
| Loa loa                           | dep domain-containing                                      | 0 |                                                                                                                    | P:GO:0040010                                                                                                                                         |            | PTHR13179 (PANTHER)                                                       |
| Loa loa                           | dep domain-containing                                      | 0 |                                                                                                                    | P:GO:0040010                                                                                                                                         |            | PTHR13179 (PANTHER)                                                       |
| Caenorhabditis elegans            | hypothetical protein F54C1.1 [Caenorhabditis elegans]      | 5 | P:GO:0005975;<br>P:GO:0030259;<br>C:GO:0016021;<br>F:GO:0030246;<br>F:GO:0016758                                   | -                                                                                                                                                    | EC:2.4.1.0 | -                                                                         |
|                                   | -                                                          | 0 |                                                                                                                    |                                                                                                                                                      |            | -                                                                         |
|                                   | -                                                          | 0 |                                                                                                                    |                                                                                                                                                      |            | IPR013032                                                                 |
|                                   | -                                                          | 0 |                                                                                                                    |                                                                                                                                                      |            | -                                                                         |
| Caenorhabditis elegans            | hypothetical protein Y73C8B.1 [Caenorhabditis elegans]     | 0 |                                                                                                                    |                                                                                                                                                      |            | IPR010463                                                                 |
|                                   | -                                                          | 0 |                                                                                                                    |                                                                                                                                                      |            | IPR001283; IPR014044;<br>PTHR10334:SF11 (PANTHER)                         |
|                                   | -                                                          | 0 |                                                                                                                    |                                                                                                                                                      |            | -                                                                         |
|                                   | -                                                          | 0 |                                                                                                                    |                                                                                                                                                      |            | -                                                                         |
| Caenorhabditis elegans            | helicase srcap-like                                        | 1 | P:GO:0000003                                                                                                       | -                                                                                                                                                    |            | SignalP (SIGNALP)                                                         |
| Caenorhabditis elegans            | hypothetical protein T07F8.4 [Caenorhabditis elegans]      | 1 | P:GO:0000003                                                                                                       | -                                                                                                                                                    |            | SignalP (SIGNALP)                                                         |

|                          |                                                                                           |   |                                                                                                                                     |              |             |                                                                                                                                    |
|--------------------------|-------------------------------------------------------------------------------------------|---|-------------------------------------------------------------------------------------------------------------------------------------|--------------|-------------|------------------------------------------------------------------------------------------------------------------------------------|
| Homo sapiens             | translocase of outer mitochondrial membrane 7 homolog                                     | 5 | F:GO:0015450;<br>C:GO:0016021;<br>C:GO:0005742;<br>F:GO:0004872;<br>P:GO:0006626                                                    | -            |             | IPR012621; PTHR16463 (PANTHER)                                                                                                     |
| Monosiga brevicollis MX1 | hypothetical protein [Monosiga brevicollis MX1]                                           | 0 |                                                                                                                                     |              |             | -                                                                                                                                  |
| Monosiga brevicollis MX1 | fibrillin 2- partial                                                                      | 0 |                                                                                                                                     |              |             | -                                                                                                                                  |
| Caenorhabditis elegans   | elegans protein partially confirmed by transcript evidence                                | 4 | P:GO:0009792;<br>P:GO:0005975;<br>F:GO:0004133;<br>P:GO:0043170                                                                     | -            |             | -                                                                                                                                  |
|                          | -                                                                                         | 0 |                                                                                                                                     |              |             | SignalP (SIGNALP)                                                                                                                  |
| Pongo abelii             | solute carrier family 25 (mitochondrial carrier adenine nucleotide translocator) member 6 | 8 | P:GO:0006915;<br>F:GO:0005515;<br>P:GO:0055085;<br>F:GO:0005471;<br>C:GO:0005744;<br>C:GO:0016021;<br>C:GO:0042645;<br>P:GO:0044419 | -            |             | IPR001993; IPR002113; IPR018108;<br>G3DSA:1.50.40.10 (GENE3D),<br>PTHR11896:SF35 (PANTHER)                                         |
| Caenorhabditis elegans   | hypothetical protein C18C4.7 [Caenorhabditis elegans]                                     | 0 |                                                                                                                                     |              |             | -                                                                                                                                  |
| Caenorhabditis briggsae  | briggsae cbr-pif-1 protein                                                                | 0 |                                                                                                                                     | F:GO:0016887 |             | -                                                                                                                                  |
| Caenorhabditis briggsae  | briggsae cbr-pgp-3 protein                                                                | 8 | C:GO:0009986;<br>C:GO:0005624;<br>P:GO:0042493;<br>F:GO:0005515;<br>F:GO:0008559;<br>P:GO:0055085;<br>F:GO:0005524;<br>C:GO:0016021 | -            | EC:3.6.3.44 | -                                                                                                                                  |
| Caenorhabditis briggsae  | - h exchanger family member (nhx-9)                                                       | 3 | P:GO:0009792;<br>F:GO:0015299;<br>P:GO:0006812                                                                                      | -            |             | IPR006153; SignalP (SIGNALP)                                                                                                       |
|                          | -                                                                                         | 0 |                                                                                                                                     |              |             | -                                                                                                                                  |
|                          | -                                                                                         | 0 |                                                                                                                                     |              |             | SignalP (SIGNALP)                                                                                                                  |
| Caenorhabditis elegans   | elegans protein partially confirmed by transcript evidence                                | 8 | P:GO:0006810;<br>C:GO:0016021;<br>P:GO:0040007;<br>P:GO:0045449;<br>F:GO:0005524;<br>P:GO:0010171;<br>P:GO:0002119;<br>F:GO:0016887 | -            |             | IPR003495; G3DSA:3.40.50.300<br>(GENE3D), PTHR19241 (PANTHER),<br>PTHR19241:SF30 (PANTHER),<br>SSF52540 (SUPERFAMILY)              |
| Caenorhabditis elegans   | briggsae cbr-hrd-1 protein                                                                | 8 | F:GO:0008270;<br>P:GO:0030433;<br>C:GO:0005730;<br>C:GO:0016021;<br>F:GO:0016881;<br>P:GO:0006916;<br>F:GO:0005515;<br>C:GO:0005789 | -            | EC:6.3.2.0  | IPR001841; IPR013083; IPR018957;<br>PTHR12477 (PANTHER),<br>PTHR12477:SF11 (PANTHER), SignalP<br>(SIGNALP), SSF57850 (SUPERFAMILY) |

|                           |                                                          |    |                                                                                                                                                                                                                                                            |   |            |                                                                                                                                    |
|---------------------------|----------------------------------------------------------|----|------------------------------------------------------------------------------------------------------------------------------------------------------------------------------------------------------------------------------------------------------------|---|------------|------------------------------------------------------------------------------------------------------------------------------------|
| Caenorhabditis elegans    | briggsae cbr-hrd-1 protein                               | 8  | F:GO:0008270;<br>P:GO:0030433;<br>C:GO:0005730;<br>C:GO:0016021;<br>F:GO:0016881;<br>P:GO:0006916;<br>F:GO:0005515;<br>C:GO:0005789                                                                                                                        | - | EC:6.3.2.0 | IPR001841; IPR013083; IPR018957;<br>PTHR12477 (PANTHER),<br>PTHR12477:SF11 (PANTHER), SignalP<br>(SIGNALP), SSF57850 (SUPERFAMILY) |
| Caenorhabditis elegans    | hypothetical protein C50B8.5 [Caenorhabditis elegans]    | 0  |                                                                                                                                                                                                                                                            |   |            | -                                                                                                                                  |
|                           | -                                                        | 0  |                                                                                                                                                                                                                                                            |   |            | -                                                                                                                                  |
|                           | -                                                        | 0  |                                                                                                                                                                                                                                                            |   |            | -                                                                                                                                  |
| Brugia malayi             | receptor family ligand binding region containing protein | 4  | F:GO:0004872;<br>P:GO:0009190;<br>F:GO:0016849;<br>F:GO:0000166                                                                                                                                                                                            | - |            | IPR001828; G3DSA:3.40.50.2300<br>(GENE3D), SSF53822 (SUPERFAMILY)                                                                  |
|                           | -                                                        | 0  |                                                                                                                                                                                                                                                            |   |            | SignalP (SIGNALP)                                                                                                                  |
| Macaca mulatta            | ribosomal protein l5                                     | 8  | C:GO:0005730;<br>P:GO:0006364;<br>P:GO:0042273;<br>F:GO:0003735;<br>P:GO:0006414;<br>F:GO:0005515;<br>C:GO:002625;<br>F:GO:0008097                                                                                                                         | - |            | SignalP (SIGNALP)                                                                                                                  |
|                           | -                                                        | 0  |                                                                                                                                                                                                                                                            |   |            | -                                                                                                                                  |
|                           | -                                                        | 0  |                                                                                                                                                                                                                                                            |   |            | -                                                                                                                                  |
|                           | -                                                        | 0  |                                                                                                                                                                                                                                                            |   |            | PTHR13190 (PANTHER),<br>PTHR13190:SF2 (PANTHER)                                                                                    |
| Leishmania infantum JPCM5 | heavy chain non-muscle                                   | 15 | P:GO:0051234;<br>P:GO:0007010;<br>F:GO:0005515;<br>P:GO:0007275;<br>F:GO:0000166;<br>C:GO:0044430;<br>C:GO:0015629;<br>P:GO:0006928;<br>F:GO:0003774;<br>C:GO:0043234;<br>P:GO:0030154;<br>P:GO:0002376;<br>P:GO:0048646;<br>C:GO:0044459;<br>C:GO:0005938 | - |            | PD936484 (PRODOM)                                                                                                                  |
| Caenorhabditis elegans    | vacuolar protein sorting vps16                           | 11 | P:GO:0009792;<br>P:GO:0010171;<br>P:GO:0002119;<br>P:GO:0008340;<br>C:GO:0031902;<br>P:GO:0006886;<br>P:GO:0040011;<br>P:GO:0008219;<br>C:GO:0005765;<br>P:GO:0040007;<br>P:GO:0048565                                                                     | - |            | IPR006925; PTHR12811 (PANTHER)                                                                                                     |
|                           | -                                                        | 0  |                                                                                                                                                                                                                                                            |   |            | SignalP (SIGNALP)                                                                                                                  |



|                               |                                                            |   |                                                                                                                                     |   |             |                                                                                                                         |
|-------------------------------|------------------------------------------------------------|---|-------------------------------------------------------------------------------------------------------------------------------------|---|-------------|-------------------------------------------------------------------------------------------------------------------------|
| Caenorhabditis briggsae       | myosin heavy nonmuscle or smooth muscle                    | 4 | C:GO:0016459;<br>F:GO:0005524;<br>F:GO:0051015;<br>F:GO:0003774                                                                     | - |             | IPR001609; PTHR13140 (PANTHER),<br>PTHR13140:SF23 (PANTHER), SignalP<br>(SIGNALP), SSF52540 (SUPERFAMILY)               |
| Caenorhabditis elegans        | elegans protein partially confirmed by transcript evidence | 6 | F:GO:0046872;<br>F:GO:0051287;<br>C:GO:0005759;<br>F:GO:0016619;<br>P:GO:0006108;<br>P:GO:0055114                                   | - | EC:1.1.1.38 | -                                                                                                                       |
| -                             | -                                                          | 0 |                                                                                                                                     |   |             | -                                                                                                                       |
| Caenorhabditis elegans        | d- polymerase i                                            | 4 | P:GO:0006259;<br>F:GO:0004527;<br>F:GO:0003676;<br>F:GO:0016779                                                                     | - | EC:2.7.7.0  | IPR001098; G3DSA:1.10.150.20<br>(GENE3D), G3DSA:3.30.70.370<br>(GENE3D), PTHR10133 (PANTHER),<br>SSF56672 (SUPERFAMILY) |
| Loa loa                       | isy1-like splicing family protein                          | 3 | P:GO:0018996;<br>P:GO:0040035;<br>P:GO:0002119                                                                                      | - |             | IPR009360; PTHR13021:SF7<br>(PANTHER)                                                                                   |
| Caenorhabditis briggsae       | myosin heavy chain                                         | 6 | C:GO:0032982;<br>F:GO:0003779;<br>F:GO:0005524;<br>F:GO:0003774;<br>C:GO:0031672;<br>P:GO:0007626                                   | - |             | IPR015650; PTHR13140 (PANTHER)                                                                                          |
| Caenorhabditis briggsae       | elegans protein partially confirmed by transcript evidence | 0 |                                                                                                                                     |   |             | -                                                                                                                       |
| Angiostrongylus cantonensis   | ttk protein ki-se                                          | 8 | P:GO:0000278;<br>P:GO:0006468;<br>P:GO:0007051;<br>P:GO:0023052;<br>F:GO:0004674;<br>F:GO:0042802;<br>P:GO:0048522;<br>F:GO:0005524 | - | EC:2.7.11.0 | IPR000719; IPR008271; IPR011009;<br>IPR017442; G3DSA:1.10.510.10<br>(GENE3D), PTHR22974 (PANTHER)                       |
| -                             | -                                                          | 0 |                                                                                                                                     |   |             | -                                                                                                                       |
| -                             | -                                                          | 0 |                                                                                                                                     |   |             | -                                                                                                                       |
| -                             | -                                                          | 0 |                                                                                                                                     |   |             | -                                                                                                                       |
| -                             | -                                                          | 0 |                                                                                                                                     |   |             | -                                                                                                                       |
| -                             | -                                                          | 0 |                                                                                                                                     |   |             | -                                                                                                                       |
| Caenorhabditis briggsae       | f-box spry domain-containing protein 1-like                | 6 | C:GO:0030054;<br>P:GO:0007274;<br>C:GO:0042734;<br>C:GO:0031594;<br>C:GO:0045211;<br>P:GO:0045886                                   | - |             | IPR001870; IPR003877; IPR008985;<br>PTHR12245 (PANTHER)                                                                 |
| Caenorhabditis briggsae       | g in family member (glb-29)                                | 3 | F:GO:0020037;<br>P:GO:0015671;<br>F:GO:0019825                                                                                      | - |             | IPR009050; IPR012292                                                                                                    |
| Caenorhabditis elegans        | transmembrane protein 144                                  | 1 | P:GO:0002119                                                                                                                        | - |             | IPR012435; SignalP (SIGNALP)                                                                                            |
| Strongylocentrotus purpuratus | pdc6ip protein                                             | 0 |                                                                                                                                     |   |             | G3DSA:1.20.120.560 (GENE3D),<br>PTHR23030 (PANTHER),<br>PTHR23030:SF11 (PANTHER)                                        |
| Caenorhabditis elegans        | briggsae cbr-tnt-3 protein                                 | 2 | P:GO:0043050;<br>P:GO:0006952                                                                                                       | - |             | -                                                                                                                       |
| -                             | -                                                          | 0 |                                                                                                                                     |   |             | -                                                                                                                       |
| -                             | -                                                          | 0 |                                                                                                                                     |   |             | -                                                                                                                       |
| -                             | -                                                          | 0 |                                                                                                                                     |   |             | -                                                                                                                       |
| Caenorhabditis elegans        | briggsae cbr-coq-8 protein                                 | 2 | F:GO:0004672;<br>C:GO:0005739                                                                                                       | - |             | IPR004147; PTHR10566 (PANTHER),<br>PTHR10566:SF7 (PANTHER)                                                              |

|                         |                                         |   |                                                                                                                                                      |                                                                                  |             |                                                                                                                                                                                                             |
|-------------------------|-----------------------------------------|---|------------------------------------------------------------------------------------------------------------------------------------------------------|----------------------------------------------------------------------------------|-------------|-------------------------------------------------------------------------------------------------------------------------------------------------------------------------------------------------------------|
| Caenorhabditis briggsae | dedicator of cytokinesis                | 7 | F:GO:0005083;<br>P:GO:0043652;<br>C:GO:0005886;<br>F:GO:0032403;<br>F:GO:0019899;<br>P:GO:0040039;<br>F:GO:0017124                                   | -                                                                                | -           |                                                                                                                                                                                                             |
|                         | -                                       | 0 |                                                                                                                                                      |                                                                                  |             | -                                                                                                                                                                                                           |
|                         | -                                       | 0 |                                                                                                                                                      |                                                                                  |             | -                                                                                                                                                                                                           |
| Homo sapiens            | dipeptidyl-peptidase 7                  | 9 | F:GO:0008239;<br>C:GO:0016023;<br>C:GO:0005764;<br>F:GO:0005515;<br>F:GO:0004177;<br>C:GO:0005576;<br>F:GO:0008236;<br>P:GO:0006508;<br>C:GO:0005829 | -                                                                                | EC:3.4.11.0 | IPR008758; PTHR11010:SF10 (PANTHER)                                                                                                                                                                         |
| Macrovipera lebetina    | c-type lectin                           | 0 |                                                                                                                                                      | F:GO:0005488;<br>F:GO:0005529;<br>C:GO:0005576                                   |             | IPR001304; IPR016186; IPR016187; PTHR22801 (PANTHER), PTHR22801:SF9 (PANTHER), SignalP (SIGNALP)                                                                                                            |
|                         | -                                       | 0 |                                                                                                                                                      |                                                                                  |             | -                                                                                                                                                                                                           |
| Brugia malayi           | hexoki-se family protein                | 5 | P:GO:0060361;<br>F:GO:0005515;<br>F:GO:0005524;<br>P:GO:0006096;<br>F:GO:0004396                                                                     | -                                                                                | EC:2.7.1.1  | IPR001312; IPR022673; G3DSA:3.40.367.20 (GENE3D), SSF53067 (SUPERFAMILY)                                                                                                                                    |
| Heliconius melpomene    | endonuclease-reverse transcriptase -e01 | 0 |                                                                                                                                                      | F:GO:0003723;<br>P:GO:0006278;<br>F:GO:0004519;<br>F:GO:0003677;<br>F:GO:0003964 |             | -                                                                                                                                                                                                           |
|                         | -                                       | 0 |                                                                                                                                                      |                                                                                  |             | -                                                                                                                                                                                                           |
| Caenorhabditis elegans  | briggsae cbr-yml-1 protein              | 6 | F:GO:0016887;<br>P:GO:0030163;<br>F:GO:0005524;<br>C:GO:0016021;<br>P:GO:0006508;<br>F:GO:0008237                                                    | -                                                                                |             | IPR003593; IPR003959; IPR003960; G3DSA:3.40.50.300 (GENE3D), PTHR23076 (PANTHER), PTHR23076:SF10 (PANTHER), SSF52540 (SUPERFAMILY)                                                                          |
| Caenorhabditis elegans  | briggsae cbr-yml-1 protein              | 7 | C:GO:0005743;<br>F:GO:0016887;<br>F:GO:0004222;<br>P:GO:0030163;<br>F:GO:0005524;<br>C:GO:0016021;<br>P:GO:0006508                                   | -                                                                                | EC:3.4.24.0 | IPR000642; IPR003593; IPR003959; IPR003960; IPR005936; G3DSA:1.10.8.60 (GENE3D), G3DSA:3.40.50.300 (GENE3D), PTHR23076 (PANTHER), PTHR23076:SF10 (PANTHER), SSF140990 (SUPERFAMILY), SSF52540 (SUPERFAMILY) |
| Caenorhabditis elegans  | briggsae cbr-yml-1 protein              | 7 | C:GO:0005743;<br>F:GO:0016887;<br>F:GO:0004222;<br>P:GO:0030163;<br>F:GO:0005524;<br>C:GO:0016021;<br>P:GO:0006508                                   | -                                                                                | EC:3.4.24.0 | IPR000642; IPR003593; IPR003959; IPR003960; IPR005936; G3DSA:1.10.8.60 (GENE3D), G3DSA:3.40.50.300 (GENE3D), PTHR23076 (PANTHER), PTHR23076:SF10 (PANTHER), SSF140990 (SUPERFAMILY), SSF52540 (SUPERFAMILY) |

|                         |                                                       |    |                                                                                                                                                                                                                                                                                                                                |   |                                                                                                                                   |
|-------------------------|-------------------------------------------------------|----|--------------------------------------------------------------------------------------------------------------------------------------------------------------------------------------------------------------------------------------------------------------------------------------------------------------------------------|---|-----------------------------------------------------------------------------------------------------------------------------------|
| Caenorhabditis elegans  | briggsae cbr-glr-1 protein                            | 19 | F:GO:0005234;<br>C:GO:0030054;<br>C:GO:0030288;<br>P:GO:0007215;<br>C:GO:0030425;<br>P:GO:0040007;<br>C:GO:0043195;<br>P:GO:0060992;<br>F:GO:0004971;<br>P:GO:0006811;<br>C:GO:0030666;<br>P:GO:0051968;<br>P:GO:0002119;<br>C:GO:0045211;<br>C:GO:0043025;<br>P:GO:0050803;<br>P:GO:0009792;<br>C:GO:0008328;<br>C:GO:0014069 | - | IPR001320; IPR001508; IPR001638;<br>IPR015683; G3DSA:3.40.190.10<br>(GENE3D), PTHR18966:SF29<br>(PANTHER), SSF53850 (SUPERFAMILY) |
| -                       | -                                                     | 0  |                                                                                                                                                                                                                                                                                                                                |   | -                                                                                                                                 |
| Loa loa                 | hypothetical protein LOAG_04165 [Loa loa]             | 0  |                                                                                                                                                                                                                                                                                                                                |   | -                                                                                                                                 |
| -                       | -                                                     | 0  |                                                                                                                                                                                                                                                                                                                                |   | SignalP (SIGNALP)                                                                                                                 |
| Caenorhabditis briggsae | elegans protein confirmed by transcript evidence      | 0  |                                                                                                                                                                                                                                                                                                                                |   | -                                                                                                                                 |
| Caenorhabditis elegans  | clathrin coat assembly protein                        | 19 | F:GO:0004984;<br>F:GO:0008565;<br>P:GO:0048072;<br>P:GO:0016183;<br>C:GO:0016021;<br>C:GO:0008021;<br>P:GO:0040007;<br>P:GO:0000003;<br>P:GO:0007608;<br>P:GO:0006727;<br>P:GO:0010171;<br>P:GO:0002119;<br>P:GO:0007269;<br>C:GO:0030117;<br>F:GO:0005515;<br>P:GO:0006886;<br>P:GO:0009792;<br>P:GO:0007040;<br>F:GO:0005549 | - | -                                                                                                                                 |
| -                       | -                                                     | 0  |                                                                                                                                                                                                                                                                                                                                |   | -                                                                                                                                 |
| -                       | -                                                     | 0  |                                                                                                                                                                                                                                                                                                                                |   | -                                                                                                                                 |
| -                       | -                                                     | 0  |                                                                                                                                                                                                                                                                                                                                |   | -                                                                                                                                 |
| Caenorhabditis briggsae | multiple coagulation factor deficiency 2              | 3  | P:GO:0009792;<br>P:GO:0006810;<br>C:GO:0044444                                                                                                                                                                                                                                                                                 | - | IPR011992; IPR018247; IPR018249;<br>PTHR23104 (PANTHER), SignalP<br>(SIGNALP), SSF47473 (SUPERFAMILY)                             |
| -                       | -                                                     | 0  |                                                                                                                                                                                                                                                                                                                                |   | -                                                                                                                                 |
| -                       | -                                                     | 0  |                                                                                                                                                                                                                                                                                                                                |   | SignalP (SIGNALP)                                                                                                                 |
| synthetic construct     | and pleckstrin domain protein 1 (chondrocyte-derived) | 6  | C:GO:0005737;<br>C:GO:0005856;<br>F:GO:0005089;<br>C:GO:0019898;<br>F:GO:0008092;<br>P:GO:0035023                                                                                                                                                                                                                              | - | -                                                                                                                                 |
| -                       | -                                                     | 0  |                                                                                                                                                                                                                                                                                                                                |   | -                                                                                                                                 |
| -                       | -                                                     | 0  |                                                                                                                                                                                                                                                                                                                                |   | -                                                                                                                                 |

|                         |                                                       |   |                                                                                                                                                      |                                                |                                                                                                                         |
|-------------------------|-------------------------------------------------------|---|------------------------------------------------------------------------------------------------------------------------------------------------------|------------------------------------------------|-------------------------------------------------------------------------------------------------------------------------|
|                         | -                                                     | 0 |                                                                                                                                                      |                                                | -                                                                                                                       |
|                         | -                                                     | 0 |                                                                                                                                                      |                                                | -                                                                                                                       |
| Caenorhabditis elegans  | polymerase iii (d- directed) polypeptide 155kda       | 9 | F:GO:0003899;<br>P:GO:0009615;<br>F:GO:0008270;<br>P:GO:0032728;<br>P:GO:0045087;<br>F:GO:0003677;<br>F:GO:0032549;<br>P:GO:0006351;<br>C:GO:0005666 | -                                              | EC:2.7.7.6<br><br>IPR000722; IPR006592; IPR015700;<br>PTHR19376 (PANTHER), SignalP<br>(SIGNALP), SSF64484 (SUPERFAMILY) |
| Caenorhabditis elegans  | deoxyribose-phosphate aldolase                        | 3 | C:GO:0005737;<br>F:GO:0004139;<br>P:GO:0009264                                                                                                       | -                                              | EC:4.1.2.4<br><br>IPR002915; IPR011343; IPR013785;<br>SSF51569 (SUPERFAMILY)                                            |
| Caenorhabditis elegans  | small nuclear r- activating polypeptide 50kda         | 6 | P:GO:0040007;<br>P:GO:0040035;<br>P:GO:0002119;<br>P:GO:0006898;<br>P:GO:0002009;<br>P:GO:0009792                                                    | -                                              | IPR022042; PTHR13421 (PANTHER),<br>PTHR13421:SF5 (PANTHER)                                                              |
| Brugia malayi           | variant sh3 domain containing protein                 | 4 | P:GO:0050807;<br>F:GO:0005089;<br>C:GO:0005622;<br>P:GO:0035023                                                                                      | -                                              | IPR001452; G3DSA:2.30.30.40<br>(GENE3D), PTHR22826 (PANTHER),<br>PTHR22826:SF16 (PANTHER)                               |
|                         | -                                                     | 0 |                                                                                                                                                      |                                                | -                                                                                                                       |
| Caenorhabditis briggsae | zip zinc transporter family protein                   | 4 | P:GO:0030001;<br>C:GO:0016021;<br>F:GO:0046873;<br>P:GO:0055085                                                                                      | -                                              | PTHR11040 (PANTHER),<br>PTHR11040:SF6 (PANTHER)                                                                         |
| Caenorhabditis briggsae | elegans protein confirmed by transcript evidence      | 4 | P:GO:0030001;<br>C:GO:0016021;<br>F:GO:0046873;<br>P:GO:0055085                                                                                      | -                                              | IPR003689; PTHR11040 (PANTHER),<br>PTHR11040:SF6 (PANTHER), SignalP<br>(SIGNALP)                                        |
| Caenorhabditis elegans  | quinine non-avoider family member (qui-1)             | 0 |                                                                                                                                                      |                                                | -                                                                                                                       |
|                         | -                                                     | 0 |                                                                                                                                                      |                                                | -                                                                                                                       |
|                         | -                                                     | 0 |                                                                                                                                                      |                                                | -                                                                                                                       |
| Brugia malayi           | zinc c2h2 type family protein                         | 0 |                                                                                                                                                      | F:GO:0003676;<br>F:GO:0008270;<br>C:GO:0005622 | PTHR12358 (PANTHER),<br>PTHR12358:SF12 (PANTHER), SignalP<br>(SIGNALP)                                                  |
| Caenorhabditis elegans  | hypothetical protein T07D1.3 [Caenorhabditis elegans] | 0 |                                                                                                                                                      | P:GO:0055114;<br>F:GO:0016491;<br>C:GO:0016021 | -                                                                                                                       |
|                         | -                                                     | 0 |                                                                                                                                                      |                                                | -                                                                                                                       |
|                         | -                                                     | 0 |                                                                                                                                                      |                                                | -                                                                                                                       |
|                         | -                                                     | 0 |                                                                                                                                                      |                                                | -                                                                                                                       |
| Caenorhabditis elegans  | boid related family member (rom-4)                    | 0 |                                                                                                                                                      | C:GO:0016021                                   | -                                                                                                                       |
| Caenorhabditis briggsae | tbc1 domain member 10a                                | 5 | F:GO:0005097;<br>C:GO:0005622;<br>F:GO:0030165;<br>P:GO:0032313;<br>C:GO:0005902                                                                     | -                                              | IPR000195; G3DSA:1.10.8.270<br>(GENE3D), PTHR22957 (PANTHER),<br>PTHR22957:SF49 (PANTHER)                               |
| Caenorhabditis elegans  | carnitine o-acyltransferase                           | 4 | F:GO:0008415;<br>P:GO:0042594;<br>P:GO:0010038;<br>P:GO:0006979                                                                                      | -                                              | IPR000542; PTHR22589:SF8<br>(PANTHER), SignalP (SIGNALP),<br>SSF52777 (SUPERFAMILY)                                     |

|                               |                                                            |   |                                                                                                                                     |                                                                                                                    |  |                                                                                              |
|-------------------------------|------------------------------------------------------------|---|-------------------------------------------------------------------------------------------------------------------------------------|--------------------------------------------------------------------------------------------------------------------|--|----------------------------------------------------------------------------------------------|
| Caenorhabditis elegans        | progesterone and adiponectin receptor family member v      | 1 | C:GO:0016021                                                                                                                        | -                                                                                                                  |  | IPR004254; PTHR20855:SF4 (PANTHER), SignalP (SIGNALP)                                        |
| Homo sapiens                  | mhc class ii antigen                                       | 5 | P:GO:0006955;<br>F:GO:0032393;<br>C:GO:0016021;<br>P:GO:0002474;<br>C:GO:0042612                                                    | -                                                                                                                  |  | IPR001039; IPR011161; IPR011162;<br>PTHR16675 (PANTHER),<br>PTHR16675:SF53 (PANTHER)         |
|                               | -                                                          | 0 |                                                                                                                                     |                                                                                                                    |  | -                                                                                            |
|                               | -                                                          | 0 |                                                                                                                                     |                                                                                                                    |  | -                                                                                            |
| Caenorhabditis elegans        | periodic tryptophan protein 2 homolog                      | 3 | F:GO:0004871;<br>P:GO:0007165;<br>C:GO:0016020                                                                                      | -                                                                                                                  |  | PTHR19858 (PANTHER)                                                                          |
|                               | -                                                          | 0 |                                                                                                                                     |                                                                                                                    |  | -                                                                                            |
|                               | -                                                          | 0 |                                                                                                                                     |                                                                                                                    |  | -                                                                                            |
|                               | -                                                          | 0 |                                                                                                                                     |                                                                                                                    |  | -                                                                                            |
| Caenorhabditis briggsae       | organic cation transporter                                 | 5 | P:GO:0055085;<br>C:GO:0016021;<br>P:GO:0006811;<br>P:GO:0019915;<br>F:GO:0005215                                                    | -                                                                                                                  |  | PTHR11600 (PANTHER),<br>PTHR11600:SF44 (PANTHER)                                             |
| Caenorhabditis elegans        | hypothetical protein F36H9.7 [Caenorhabditis elegans]      | 0 |                                                                                                                                     |                                                                                                                    |  | IPR000472; G3DSA:2.10.60.10 (GENE3D), SignalP (SIGNALP)                                      |
| Caenorhabditis briggsae       | elegans protein partially confirmed by transcript evidence | 0 |                                                                                                                                     | P:GO:0000003;<br>P:GO:0005975;<br>P:GO:0009792;<br>P:GO:0019915                                                    |  | -                                                                                            |
| Caenorhabditis briggsae       | elegans protein partially confirmed by transcript evidence | 0 |                                                                                                                                     | P:GO:0000003;<br>P:GO:0005975;<br>P:GO:0009792;<br>P:GO:0019915                                                    |  | -                                                                                            |
|                               | -                                                          | 0 |                                                                                                                                     |                                                                                                                    |  | IPR002057                                                                                    |
| Xenopus (Silurana) tropicalis | chromosome transmission fidelity protein 8 homolog         | 0 |                                                                                                                                     | P:GO:0006260;<br>F:GO:0003674;<br>P:GO:0007049;<br>P:GO:0008150;<br>C:GO:0005575;<br>C:GO:0005634;<br>F:GO:0003677 |  | IPR018607                                                                                    |
|                               | -                                                          | 0 |                                                                                                                                     |                                                                                                                    |  | -                                                                                            |
| Caenorhabditis elegans        | elegans protein confirmed by transcript evidence           | 2 | P:GO:0006952;<br>F:GO:0005488                                                                                                       | -                                                                                                                  |  | IPR002198; IPR016040;<br>PTHR19410:SF18 (PANTHER), SignalP (SIGNALP), SSF51735 (SUPERFAMILY) |
| Caenorhabditis briggsae       | briggsae cbr-acy-3 protein                                 | 0 |                                                                                                                                     | P:GO:0009190;<br>F:GO:0016849                                                                                      |  | PTHR11920 (PANTHER),<br>PTHR11920:SF6 (PANTHER)                                              |
| Caenorhabditis briggsae       | nuclear receptor nhr-1                                     | 8 | F:GO:0042802;<br>F:GO:0003700;<br>F:GO:0043565;<br>F:GO:0003707;<br>P:GO:0019915;<br>C:GO:0005634;<br>F:GO:0008270;<br>P:GO:0006355 | -                                                                                                                  |  | IPR000536; IPR008946; PTHR11865 (PANTHER), PTHR11865:SF218 (PANTHER)                         |
|                               | -                                                          | 0 |                                                                                                                                     |                                                                                                                    |  | -                                                                                            |
|                               | -                                                          | 0 |                                                                                                                                     |                                                                                                                    |  | -                                                                                            |
|                               | -                                                          | 0 |                                                                                                                                     |                                                                                                                    |  | -                                                                                            |
|                               | -                                                          | 0 |                                                                                                                                     |                                                                                                                    |  | SignalP (SIGNALP)                                                                            |

|                         |                                                           |    |                                                                                                                                                                                                                                                                                                                                                 |                                                                                                   |             |                                                                                                                                                             |
|-------------------------|-----------------------------------------------------------|----|-------------------------------------------------------------------------------------------------------------------------------------------------------------------------------------------------------------------------------------------------------------------------------------------------------------------------------------------------|---------------------------------------------------------------------------------------------------|-------------|-------------------------------------------------------------------------------------------------------------------------------------------------------------|
| Caenorhabditis briggsae | leucine-rich repeat protein shoc-2                        | 7  | C:GO:0000164;<br>P:GO:0008543;<br>P:GO:0040025;<br>P:GO:0046579;<br>F:GO:0019888;<br>F:GO:0019903;<br>C:GO:0005634                                                                                                                                                                                                                              | -                                                                                                 |             | IPR001611; IPR003591; PR00019 (PRINTS), G3DSA:3.80.10.10 (GENE3D), PTHR23155 (PANTHER), PTHR23155:SF38 (PANTHER), PSS1450 (PROFILE), SSF52058 (SUPERFAMILY) |
| Caenorhabditis briggsae | Hypothetical protein CBG22233 [Caenorhabditis briggsae]   | 3  | P:GO:0007411;<br>P:GO:0019915;<br>P:GO:0007413                                                                                                                                                                                                                                                                                                  | -                                                                                                 |             | PTHR23051 (PANTHER)                                                                                                                                         |
| Caenorhabditis briggsae | histidine acid phosphatase family protein                 | 0  |                                                                                                                                                                                                                                                                                                                                                 | F:GO:0016787;<br>C:GO:0016021;<br>C:GO:0016020;<br>F:GO:0003993;<br>P:GO:0008150;<br>C:GO:0005575 |             | IPR000560; G3DSA:3.40.50.1240 (GENE3D), PTHR11567 (PANTHER), PTHR11567:SF13 (PANTHER), SSF53254 (SUPERFAMILY)                                               |
|                         | -                                                         | 0  |                                                                                                                                                                                                                                                                                                                                                 |                                                                                                   |             | -                                                                                                                                                           |
| Pongo abelii            | complement 1 subcomponent q polypeptide gamma             | 7  | C:GO:0005730;<br>P:GO:0006958;<br>P:GO:0030853;<br>P:GO:0045650;<br>P:GO:0045087;<br>C:GO:0005576;<br>C:GO:0005737                                                                                                                                                                                                                              | -                                                                                                 |             | IPR001073; IPR008983; PTHR10499 (PANTHER), PTHR10499:SF33 (PANTHER), SignalP (SIGNALP)                                                                      |
| Caenorhabditis elegans  | receptor protein tyrosine                                 | 2  | F:GO:0004721;<br>P:GO:0006470                                                                                                                                                                                                                                                                                                                   | -                                                                                                 | EC:3.1.3.16 | IPR000242; G3DSA:3.90.190.10 (GENE3D), PTHR19134 (PANTHER), PTHR19134:SF35 (PANTHER)                                                                        |
|                         | -                                                         | 0  |                                                                                                                                                                                                                                                                                                                                                 |                                                                                                   |             | -                                                                                                                                                           |
| Macaca mulatta          | eukaryotic translation initiation factor 3 subunit 2 beta | 5  | C:GO:0005852;<br>F:GO:0005515;<br>P:GO:0045948;<br>F:GO:0003743;<br>C:GO:0005829                                                                                                                                                                                                                                                                | -                                                                                                 |             | -                                                                                                                                                           |
| Ailuropoda melanoleuca  | spectrin alpha brain-like isoform 2                       | 20 | C:GO:0005829;<br>F:GO:0047485;<br>C:GO:0030018;<br>F:GO:0005516;<br>C:GO:0016328;<br>C:GO:0043234;<br>C:GO:0015630;<br>F:GO:0005509;<br>P:GO:0031532;<br>F:GO:0032403;<br>C:GO:0005624;<br>C:GO:0008091;<br>F:GO:0003779;<br>C:GO:0032437;<br>F:GO:0005200;<br>F:GO:0046982;<br>F:GO:0019905;<br>C:GO:0005916;<br>P:GO:0051693;<br>F:GO:0030507 | -                                                                                                 |             | -                                                                                                                                                           |
|                         | -                                                         | 0  |                                                                                                                                                                                                                                                                                                                                                 |                                                                                                   |             | -                                                                                                                                                           |

|                         |                                                                               |   |                                                                                                   |              |                                   |                                                                                                           |
|-------------------------|-------------------------------------------------------------------------------|---|---------------------------------------------------------------------------------------------------|--------------|-----------------------------------|-----------------------------------------------------------------------------------------------------------|
| Homo sapiens            | solute carrier family 25 (mitochondrial carrier citrate transporter) member 1 | 6 | C:GO:0005743;<br>F:GO:0005515;<br>P:GO:0006843;<br>P:GO:0055085;<br>C:GO:0016021;<br>F:GO:0015137 | -            |                                   | IPR001993; IPR018108;<br>G3DSA:1.50.40.10 (GENE3D),<br>PTHR11896:SF62 (PANTHER)                           |
| Brugia malayi           | uncoordinated protein 40                                                      | 0 |                                                                                                   |              |                                   | -                                                                                                         |
|                         | -                                                                             | 0 |                                                                                                   |              |                                   | SignalP (SIGNALP)                                                                                         |
|                         | -                                                                             | 0 |                                                                                                   |              |                                   | -                                                                                                         |
| Caenorhabditis briggsae | f-box leucine rich repeat protein                                             | 0 |                                                                                                   |              |                                   | G3DSA:3.80.10.10 (GENE3D),<br>PTHR23125 (PANTHER),<br>PTHR23125:SF31 (PANTHER),<br>SSF52047 (SUPERFAMILY) |
|                         | -                                                                             | 0 |                                                                                                   |              |                                   | -                                                                                                         |
|                         | -                                                                             | 0 |                                                                                                   |              |                                   | -                                                                                                         |
| Caenorhabditis elegans  | hypothetical protein T04C4.1 [Caenorhabditis elegans]                         | 0 |                                                                                                   |              |                                   | -                                                                                                         |
|                         | -                                                                             | 0 |                                                                                                   |              |                                   | IPR002085; PTHR11695:SF3<br>(PANTHER), SignalP (SIGNALP)                                                  |
| Caenorhabditis briggsae | fatty acid amide hydrolase 2                                                  | 2 | F:GO:0016884;<br>C:GO:0016021                                                                     | -            | EC:6.3.5.0                        | IPR000120; PTHR11895:SF5<br>(PANTHER)                                                                     |
|                         | -                                                                             | 0 |                                                                                                   |              |                                   | SignalP (SIGNALP)                                                                                         |
|                         | -                                                                             | 0 |                                                                                                   |              |                                   | -                                                                                                         |
| Brugia malayi           | collagen col-34                                                               | 1 | F:GO:0042302                                                                                      | -            |                                   | -                                                                                                         |
| Caenorhabditis briggsae | leucine rich repeat family protein                                            | 0 |                                                                                                   | F:GO:0005515 |                                   | G3DSA:3.80.10.10 (GENE3D),<br>PTHR13824 (PANTHER),<br>PTHR13824:SF6 (PANTHER), SSF52047<br>(SUPERFAMILY)  |
| Caenorhabditis briggsae | endonuclease iv                                                               | 4 | P:GO:0009792;<br>F:GO:0046872;<br>F:GO:0004519;<br>P:GO:0006974                                   | -            |                                   | IPR001719; IPR012307; IPR013022;<br>IPR018246                                                             |
| Caenorhabditis briggsae | briggsae cbr-spon-1 protein                                                   | 1 | F:GO:0004867                                                                                      | -            |                                   | IPR000884; IPR002223;<br>G3DSA:2.20.100.10 (GENE3D),<br>PTHR11311 (PANTHER),<br>PTHR11311:SF2 (PANTHER)   |
|                         | -                                                                             | 0 |                                                                                                   |              |                                   | -                                                                                                         |
|                         | -                                                                             | 0 |                                                                                                   |              |                                   | -                                                                                                         |
|                         | -                                                                             | 0 |                                                                                                   |              |                                   | -                                                                                                         |
|                         | -                                                                             | 0 |                                                                                                   |              |                                   | -                                                                                                         |
| Caenorhabditis elegans  | protein kinase domain containing protein                                      | 2 | P:GO:0007283;<br>F:GO:0016301                                                                     | -            |                                   | G3DSA:3.30.200.20 (GENE3D),<br>PTHR11909 (PANTHER),<br>PTHR11909:SF19 (PANTHER)                           |
|                         | -                                                                             | 0 |                                                                                                   |              |                                   | -                                                                                                         |
| Caenorhabditis briggsae | myo-2                                                                         | 4 | C:GO:0032982;<br>F:GO:0003779;<br>F:GO:0005524;<br>F:GO:0003774                                   | -            |                                   | -                                                                                                         |
|                         | -                                                                             | 0 |                                                                                                   |              |                                   | -                                                                                                         |
| Caenorhabditis briggsae | prolyl 4-hydroxylase                                                          | 6 | F:GO:0031418;<br>F:GO:0005506;<br>F:GO:0004656;<br>P:GO:0055114;<br>F:GO:0016702;<br>C:GO:0005783 | -            | EC:1.14.11.2<br>;<br>EC:1.13.11.0 | IPR005123; PTHR10869 (PANTHER),<br>PTHR10869:SF13 (PANTHER)                                               |

|                         |                                                    |   |                                                                                                   |                                                                 |                            |                                                                                                                       |
|-------------------------|----------------------------------------------------|---|---------------------------------------------------------------------------------------------------|-----------------------------------------------------------------|----------------------------|-----------------------------------------------------------------------------------------------------------------------|
| Caenorhabditis elegans  | sucrase- intesti-l                                 | 6 | C:GO:0016324;<br>F:GO:0030246;<br>F:GO:0004339;<br>F:GO:0004558;<br>P:GO:0005983;<br>C:GO:0016021 | -                                                               | EC:3.2.1.3;<br>EC:3.2.1.20 | IPR000322; PTHR22762:SF10<br>(PANTHER)                                                                                |
| -                       | -                                                  | 0 |                                                                                                   |                                                                 |                            | -                                                                                                                     |
| -                       | -                                                  | 0 |                                                                                                   |                                                                 |                            | -                                                                                                                     |
| Caenorhabditis elegans  | briggsae cbr-grk-1 protein                         | 1 | F:GO:0004672                                                                                      | -                                                               |                            | -                                                                                                                     |
| -                       | -                                                  | 0 |                                                                                                   |                                                                 |                            | -                                                                                                                     |
| Loa loa                 | briggsae cbr-snf-1 protein                         | 0 |                                                                                                   | F:GO:0005328;<br>C:GO:0016020;<br>P:GO:0006836;<br>C:GO:0005887 |                            | SignalP (SIGNALP)                                                                                                     |
| Caenorhabditis elegans  | peroxisome biogenesis factor 10                    | 5 | P:GO:0006412;<br>P:GO:0007031;<br>F:GO:0016874;<br>C:GO:0005778;<br>F:GO:0005515                  | -                                                               | EC:3.6.5.3                 | IPR006845; PTHR23350 (PANTHER)                                                                                        |
| -                       | -                                                  | 0 |                                                                                                   |                                                                 |                            | SignalP (SIGNALP)                                                                                                     |
| -                       | -                                                  | 0 |                                                                                                   |                                                                 |                            | -                                                                                                                     |
| Caenorhabditis elegans  | phosphorylase alpha 1 -like isoform 1              | 6 | C:GO:0005737;<br>F:GO:0016301;<br>F:GO:0004339;<br>C:GO:0043231;<br>P:GO:0005977;<br>F:GO:0005516 | -                                                               | EC:3.2.1.3                 | IPR008734; IPR011613;<br>PTHR10749:SF2 (PANTHER)                                                                      |
| Caenorhabditis elegans  | phosphorylase alpha 1 -like isoform 1              | 6 | C:GO:0005737;<br>F:GO:0016301;<br>F:GO:0004339;<br>C:GO:0043231;<br>P:GO:0005977;<br>F:GO:0005516 | -                                                               | EC:3.2.1.3                 | IPR008734; IPR011613;<br>PTHR10749:SF2 (PANTHER)                                                                      |
| -                       | -                                                  | 0 |                                                                                                   |                                                                 |                            | -                                                                                                                     |
| -                       | -                                                  | 0 |                                                                                                   |                                                                 |                            | -                                                                                                                     |
| Caenorhabditis briggsae | cyclin m2                                          | 3 | P:GO:0006811;<br>C:GO:0005886;<br>C:GO:0016021                                                    | -                                                               |                            | IPR000644; PTHR12064 (PANTHER),<br>PTHR12064:SF6 (PANTHER)                                                            |
| Caenorhabditis elegans  | mgc53303 protein                                   | 0 |                                                                                                   |                                                                 |                            | -                                                                                                                     |
| Brugia malayi           | protein-tyrosine phosphatase containing protein    | 1 | F:GO:0004721                                                                                      | -                                                               | EC:3.1.3.16                | IPR000242; G3DSA:3.90.190.10<br>(GENE3D), PTHR19134 (PANTHER),<br>PTHR19134:SF26 (PANTHER),<br>SSF52799 (SUPERFAMILY) |
| -                       | -                                                  | 0 |                                                                                                   |                                                                 |                            | -                                                                                                                     |
| Ailuropoda melanoleuca  | eukaryotic translation initiation factor subunit 8 | 6 | C:GO:0005852;<br>F:GO:0005515;<br>P:GO:0045948;<br>F:GO:0003743;<br>C:GO:0005829;<br>F:GO:0043022 | -                                                               |                            | -                                                                                                                     |
| -                       | -                                                  | 0 |                                                                                                   |                                                                 |                            | -                                                                                                                     |
| -                       | -                                                  | 0 |                                                                                                   |                                                                 |                            | -                                                                                                                     |
| -                       | -                                                  | 0 |                                                                                                   |                                                                 |                            | SignalP (SIGNALP)                                                                                                     |



|                         |                                                                                   |    |                                                                                                                                                                                                                                                                                                                                                                                                                                                                        |   |                                                                                                                                                                        |
|-------------------------|-----------------------------------------------------------------------------------|----|------------------------------------------------------------------------------------------------------------------------------------------------------------------------------------------------------------------------------------------------------------------------------------------------------------------------------------------------------------------------------------------------------------------------------------------------------------------------|---|------------------------------------------------------------------------------------------------------------------------------------------------------------------------|
| Brugia malayi           | serine threonine-protein phosphatase 2a 65 kda regulatory subunit a alpha isoform | 27 | P:GO:0006275;<br>C:GO:0016020;<br>P:GO:0006672;<br>C:GO:0000159;<br>P:GO:0006461;<br>F:GO:0003823;<br>P:GO:0010033;<br>C:GO:0015630;<br>P:GO:0042518;<br>P:GO:0030155;<br>C:GO:0005829;<br>F:GO:0046982;<br>P:GO:0030111;<br>C:GO:0000775;<br>P:GO:0008380;<br>P:GO:0006917;<br>P:GO:0030308;<br>P:GO:0007059;<br>P:GO:0000188;<br>P:GO:0045595;<br>F:GO:0008601;<br>P:GO:0006470;<br>P:GO:0045449;<br>P:GO:0019932;<br>C:GO:0005625;<br>C:GO:0005634;<br>C:GO:0005739 | - | IPR000357; IPR011989; IPR016024;<br>IPR021133; PTHR10648 (PANTHER)                                                                                                     |
| -                       | -                                                                                 | 0  |                                                                                                                                                                                                                                                                                                                                                                                                                                                                        |   | -                                                                                                                                                                      |
| -                       | -                                                                                 | 0  |                                                                                                                                                                                                                                                                                                                                                                                                                                                                        |   | -                                                                                                                                                                      |
| -                       | -                                                                                 | 0  |                                                                                                                                                                                                                                                                                                                                                                                                                                                                        |   | -                                                                                                                                                                      |
| Homo sapiens            | heat shock 70kda protein 1a                                                       | 18 | F:GO:0047485;<br>P:GO:0042026;<br>P:GO:0090084;<br>C:GO:0005739;<br>P:GO:0030308;<br>F:GO:0031625;<br>C:GO:0016607;<br>F:GO:0044183;<br>P:GO:0006916;<br>P:GO:0008285;<br>C:GO:0016234;<br>F:GO:0005524;<br>P:GO:0006402;<br>C:GO:0048471;<br>C:GO:0030529;<br>F:GO:0051082;<br>P:GO:0006986;<br>C:GO:0005783                                                                                                                                                          | - | IPR001023; IPR013126;<br>G3DSA:1.20.1270.10 (GENE3D),<br>G3DSA:2.60.34.10 (GENE3D),<br>PTHR19375:SF1 (PANTHER),<br>SSF100920 (SUPERFAMILY), SSF100934<br>(SUPERFAMILY) |
| Caenorhabditis briggsae | elegans protein confirmed by transcript evidence                                  | 1  | P:GO:0019915                                                                                                                                                                                                                                                                                                                                                                                                                                                           |   | IPR010291; PTHR23294 (PANTHER)                                                                                                                                         |
| -                       | -                                                                                 | 0  |                                                                                                                                                                                                                                                                                                                                                                                                                                                                        |   | -                                                                                                                                                                      |
| -                       | -                                                                                 | 0  |                                                                                                                                                                                                                                                                                                                                                                                                                                                                        |   | SignalP (SIGNALP)                                                                                                                                                      |
| Caenorhabditis elegans  | pyridoxal-phosphate dependent enzyme family protein                               | 2  | P:GO:0008152;<br>F:GO:0030170                                                                                                                                                                                                                                                                                                                                                                                                                                          | - | -                                                                                                                                                                      |
| -                       | -                                                                                 | 0  |                                                                                                                                                                                                                                                                                                                                                                                                                                                                        |   | -                                                                                                                                                                      |

|                             |                                                            |    |                                                                                                                                                                                                                                                                                                               |                                                                                                                                                                                        |                                                                                                                                   |
|-----------------------------|------------------------------------------------------------|----|---------------------------------------------------------------------------------------------------------------------------------------------------------------------------------------------------------------------------------------------------------------------------------------------------------------|----------------------------------------------------------------------------------------------------------------------------------------------------------------------------------------|-----------------------------------------------------------------------------------------------------------------------------------|
| Caenorhabditis elegans      | protein ki-se domain containing protein                    | 8  | C:GO:0005929;<br>C:GO:0030425;<br>F:GO:0005515;<br>P:GO:0034606;<br>F:GO:0004672;<br>C:GO:0030424;<br>P:GO:0034608;<br>C:GO:0043025                                                                                                                                                                           | -                                                                                                                                                                                      | IPR000719; IPR001245; IPR011009;<br>IPR017441; IPR020685; IPR020764;<br>G3DSA:1.10.510.10 (GENE3D),<br>G3DSA:3.30.200.20 (GENE3D) |
| Loa loa                     | hypothetical protein LOAG_04203 [Loa loa]                  | 0  |                                                                                                                                                                                                                                                                                                               |                                                                                                                                                                                        | -                                                                                                                                 |
| Angiostrongylus cantonensis | vacuolar membrane pq loop repeat protein                   | 0  |                                                                                                                                                                                                                                                                                                               |                                                                                                                                                                                        | IPR006603; PF04193 (PFAM), SignalP (SIGNALP)                                                                                      |
| -                           | -                                                          | 0  |                                                                                                                                                                                                                                                                                                               |                                                                                                                                                                                        | -                                                                                                                                 |
| -                           | -                                                          | 0  |                                                                                                                                                                                                                                                                                                               |                                                                                                                                                                                        | -                                                                                                                                 |
| Caenorhabditis briggsae     | briggsae cbr-nhr-43 protein                                | 0  |                                                                                                                                                                                                                                                                                                               | F:GO:0043565;<br>F:GO:0003700;<br>F:GO:0003677;<br>C:GO:0005634;<br>F:GO:0008270;<br>P:GO:0006355;<br>F:GO:0004872;<br>F:GO:0046872;<br>P:GO:0006350;<br>F:GO:0003707;<br>P:GO:0045449 | IPR000536; IPR008946; PTHR11865 (PANTHER), PTHR11865:SF235 (PANTHER)                                                              |
| Caenorhabditis elegans      | phosphate permease                                         | 9  | P:GO:0016192;<br>C:GO:0016021;<br>F:GO:0005315;<br>P:GO:0040027;<br>P:GO:0040035;<br>C:GO:0030117;<br>P:GO:0006886;<br>P:GO:0009792;<br>P:GO:0006817                                                                                                                                                          | -                                                                                                                                                                                      | IPR001204; PTHR11101:SF12 (PANTHER), SignalP (SIGNALP)                                                                            |
| Caenorhabditis briggsae     | briggsae cbr-inf-1 protein                                 | 18 | P:GO:0008340;<br>P:GO:0000003;<br>F:GO:0005515;<br>F:GO:0008026;<br>P:GO:0040010;<br>P:GO:0040011;<br>F:GO:0003743;<br>C:GO:0016281;<br>P:GO:0045948;<br>C:GO:0005829;<br>P:GO:0019915;<br>P:GO:0009792;<br>P:GO:0002119;<br>P:GO:0051789;<br>F:GO:0003723;<br>P:GO:0006200;<br>F:GO:0005524;<br>P:GO:0044419 | -                                                                                                                                                                                      | IPR001650; G3DSA:3.40.50.300 (GENE3D), PTHR10967 (PANTHER), PTHR10967:SF2 (PANTHER), SSF52540 (SUPERFAMILY)                       |
| -                           | -                                                          | 0  |                                                                                                                                                                                                                                                                                                               |                                                                                                                                                                                        | -                                                                                                                                 |
| Caenorhabditis elegans      | elegans protein partially confirmed by transcript evidence | 0  |                                                                                                                                                                                                                                                                                                               |                                                                                                                                                                                        | -                                                                                                                                 |
| Caenorhabditis elegans      | hypothetical protein T05B11.7 [Caenorhabditis elegans]     | 0  |                                                                                                                                                                                                                                                                                                               |                                                                                                                                                                                        | -                                                                                                                                 |
| -                           | -                                                          | 0  |                                                                                                                                                                                                                                                                                                               |                                                                                                                                                                                        | -                                                                                                                                 |
| -                           | -                                                          | 0  |                                                                                                                                                                                                                                                                                                               |                                                                                                                                                                                        | -                                                                                                                                 |
| Caenorhabditis elegans      | hypothetical protein C27H5.2 [Caenorhabditis elegans]      | 1  | F:GO:0005515                                                                                                                                                                                                                                                                                                  | -                                                                                                                                                                                      | -                                                                                                                                 |

|                         |                                                  |    |                                                                                                                                                                                                                                           |                                                                                                                    |                                                                                                                                                     |
|-------------------------|--------------------------------------------------|----|-------------------------------------------------------------------------------------------------------------------------------------------------------------------------------------------------------------------------------------------|--------------------------------------------------------------------------------------------------------------------|-----------------------------------------------------------------------------------------------------------------------------------------------------|
| Caenorhabditis elegans  | atpase inhibitor-like protein                    | 4  | F:GO:0004857;<br>P:GO:0045980;<br>P:GO:0050830;<br>C:GO:0005739                                                                                                                                                                           | -                                                                                                                  | IPR007648; G3DSA:1.20.5.500<br>(GENE3D), PTHR23407 (PANTHER),<br>PTHR23407:SF2 (PANTHER), SignalP<br>(SIGNALP)                                      |
| -                       | -                                                | 0  | -                                                                                                                                                                                                                                         | -                                                                                                                  | -                                                                                                                                                   |
| -                       | -                                                | 0  | -                                                                                                                                                                                                                                         | -                                                                                                                  | -                                                                                                                                                   |
| Homo sapiens            | r- binding motif protein isoform cra_a           | 13 | C:GO:0035145;<br>F:GO:0003729;<br>C:GO:0005681;<br>P:GO:0006417;<br>C:GO:0005730;<br>C:GO:0016607;<br>P:GO:0008380;<br>F:GO:0005515;<br>F:GO:0000166;<br>P:GO:0006397;<br>C:GO:0005737;<br>P:GO:0000184;<br>P:GO:0051028                  | -                                                                                                                  | -                                                                                                                                                   |
| -                       | -                                                | 0  | -                                                                                                                                                                                                                                         | -                                                                                                                  | -                                                                                                                                                   |
| -                       | -                                                | 0  | -                                                                                                                                                                                                                                         | -                                                                                                                  | PF12349 (PFAM), SignalP (SIGNALP)                                                                                                                   |
| -                       | -                                                | 0  | -                                                                                                                                                                                                                                         | -                                                                                                                  | -                                                                                                                                                   |
| -                       | -                                                | 0  | -                                                                                                                                                                                                                                         | -                                                                                                                  | -                                                                                                                                                   |
| Loa loa                 | transducin -like 1 x-linked receptor 1 isoform 1 | 14 | P:GO:0060070;<br>F:GO:0042393;<br>F:GO:0003714;<br>P:GO:0043161;<br>C:GO:0017053;<br>F:GO:0047485;<br>C:GO:0005730;<br>F:GO:0016563;<br>P:GO:0010553;<br>C:GO:0000118;<br>P:GO:0045944;<br>C:GO:0005876;<br>F:GO:0008013;<br>F:GO:0010843 | -                                                                                                                  | IPR001680; IPR015943; IPR017986;<br>IPR019775; IPR019781; IPR019782;<br>PTHR22846 (PANTHER),<br>PTHR22846:SF2 (PANTHER),<br>SSF117289 (SUPERFAMILY) |
| Caenorhabditis briggsae | briggsae cbr-hum-7 protein                       | 0  |                                                                                                                                                                                                                                           | F:GO:0046872;<br>F:GO:0005524;<br>F:GO:0000166;<br>P:GO:0007165;<br>F:GO:0003774;<br>C:GO:0016459;<br>C:GO:0005622 | -                                                                                                                                                   |
| -                       | -                                                | 0  | -                                                                                                                                                                                                                                         | -                                                                                                                  | IPR018247; SignalP (SIGNALP)                                                                                                                        |
| Caenorhabditis elegans  | uncoordi-ted family member (unc-26)              | 12 | P:GO:0048790;<br>F:GO:0003723;<br>F:GO:0004519;<br>F:GO:0004439;<br>P:GO:0016311;<br>C:GO:0043195;<br>C:GO:0012506;<br>F:GO:0000166;<br>F:GO:0004445;<br>F:GO:0004527;<br>P:GO:0050803;<br>P:GO:0048488                                   | -                                                                                                                  | EC:3.1.3.36;<br>EC:3.1.3.56<br>IPR002013; PTHR11200 (PANTHER),<br>PTHR11200:SF10 (PANTHER)                                                          |
| -                       | -                                                | 0  | -                                                                                                                                                                                                                                         | -                                                                                                                  | -                                                                                                                                                   |

|                                |                                                          |   |                                                                                  |                                                                                                   |                                                                                                                                                                                        |
|--------------------------------|----------------------------------------------------------|---|----------------------------------------------------------------------------------|---------------------------------------------------------------------------------------------------|----------------------------------------------------------------------------------------------------------------------------------------------------------------------------------------|
|                                | -                                                        | 0 |                                                                                  |                                                                                                   | SignalP (SIGNALP)                                                                                                                                                                      |
| Caenorhabditis elegans         | gcn5-related n-acetyltransferase                         | 1 | F:GO:0008415                                                                     | -                                                                                                 | IPR000182; IPR016181; PTHR10545 (PANTHER), PTHR10545:SF3 (PANTHER)                                                                                                                     |
| Caenorhabditis elegans         | inositol triphosphate receptor family member (itr-1)     | 5 | P:GO:0006816;<br>F:GO:0005220;<br>P:GO:0055085;<br>C:GO:0016021;<br>C:GO:0005783 | -                                                                                                 | IPR015925; PTHR13715:SF2 (PANTHER)                                                                                                                                                     |
| Caenorhabditis elegans         | r- polymerase domain 2 family protein                    | 4 | F:GO:0003899;<br>F:GO:0003677;<br>P:GO:0006350;<br>C:GO:0005634                  | -                                                                                                 | EC:2.7.7.6<br>IPR007081; IPR015699; PTHR19376 (PANTHER), SSF64484 (SUPERFAMILY)                                                                                                        |
| Caenorhabditis elegans         | calsequestrin family protein                             | 1 | F:GO:0005509                                                                     | -                                                                                                 | IPR001393; SignalP (SIGNALP)                                                                                                                                                           |
| Caenorhabditis elegans         | transmembrane protein with metallophosphoesterase domain | 0 |                                                                                  | F:GO:0004565;<br>F:GO:0046872;<br>F:GO:0016787;<br>C:GO:0016021;<br>C:GO:0016020;<br>P:GO:0008150 | G3DSA:3.60.21.10 (GENE3D), SignalP (SIGNALP), SSF56300 (SUPERFAMILY)                                                                                                                   |
|                                | -                                                        | 0 |                                                                                  |                                                                                                   | -                                                                                                                                                                                      |
|                                | -                                                        | 0 |                                                                                  |                                                                                                   | -                                                                                                                                                                                      |
| Caenorhabditis elegans         | hypothetical protein T23E7.6 [Caenorhabditis elegans]    | 0 |                                                                                  |                                                                                                   | -                                                                                                                                                                                      |
| Caenorhabditis briggsae        | briggsae cbr-lam-1 protein                               | 3 | C:GO:0005578;<br>F:GO:0003824;<br>F:GO:0005515                                   | -                                                                                                 | IPR002049; IPR008211; IPR013015; IPR013032; PRO0011 (PRINTS), G3DSA:2.10.25.10 (GENE3D), PTHR10574 (PANTHER), PTHR10574:SF35 (PANTHER), SignalP (SIGNALP), SSF57196 (SUPERFAMILY)      |
|                                | -                                                        | 0 |                                                                                  |                                                                                                   | IPR003582; SignalP (SIGNALP)                                                                                                                                                           |
|                                | -                                                        | 0 |                                                                                  |                                                                                                   | -                                                                                                                                                                                      |
| Bacillus thuringiensis IBL 200 | protein                                                  | 0 |                                                                                  | F:GO:0003676;<br>C:GO:0016021;<br>C:GO:0016020;<br>P:GO:0008150;<br>C:GO:0005575                  | SignalP (SIGNALP)                                                                                                                                                                      |
|                                | -                                                        | 0 |                                                                                  |                                                                                                   | -                                                                                                                                                                                      |
|                                | -                                                        | 0 |                                                                                  |                                                                                                   | -                                                                                                                                                                                      |
| Caenorhabditis elegans         | hypothetical protein T19E7.6 [Caenorhabditis elegans]    | 0 |                                                                                  |                                                                                                   | -                                                                                                                                                                                      |
| Caenorhabditis elegans         | fatty acid desaturase                                    | 0 |                                                                                  | P:GO:0006629;<br>P:GO:0055114;<br>F:GO:0016491                                                    | IPR021863                                                                                                                                                                              |
|                                | -                                                        | 0 |                                                                                  |                                                                                                   | -                                                                                                                                                                                      |
|                                | -                                                        | 0 |                                                                                  |                                                                                                   | IPR002350                                                                                                                                                                              |
|                                | -                                                        | 0 |                                                                                  |                                                                                                   | -                                                                                                                                                                                      |
| Periplaneta americana          | delta protein                                            | 4 | F:GO:0005515;<br>C:GO:0044464;<br>P:GO:0007389;<br>P:GO:0045665                  | -                                                                                                 | IPR000742; IPR001774; IPR006209; IPR006210; IPR013032; IPR013111; PD936484 (PRODOM), G3DSA:2.10.25.10 (GENE3D), PTHR11201 (PANTHER), PTHR11201:SF220 (PANTHER), SSF57196 (SUPERFAMILY) |
| Caenorhabditis briggsae        | briggsae cbr-pde-6 protein                               | 5 | P:GO:0007411;<br>F:GO:0004871;<br>F:GO:0046872;<br>F:GO:0004114;<br>P:GO:0007165 | -                                                                                                 | EC:3.1.4.17<br>IPR002073; IPR023088; PTHR11347 (PANTHER), PTHR11347:SF38 (PANTHER), SSF109604 (SUPERFAMILY)                                                                            |
|                                | -                                                        | 0 |                                                                                  |                                                                                                   | SignalP (SIGNALP)                                                                                                                                                                      |

|                             |                                                         |   |                                                                                                   |                                                                                                                                                                                                                                                            |            |                                                                                                                     |
|-----------------------------|---------------------------------------------------------|---|---------------------------------------------------------------------------------------------------|------------------------------------------------------------------------------------------------------------------------------------------------------------------------------------------------------------------------------------------------------------|------------|---------------------------------------------------------------------------------------------------------------------|
| Caenorhabditis elegans      | elegans protein confirmed by transcript evidence        | 6 | P:GO:0009056;<br>P:GO:0018991;<br>F:GO:0004553;<br>P:GO:0006665;<br>P:GO:0040011;<br>C:GO:0016020 | -                                                                                                                                                                                                                                                          | EC:3.2.1.0 | IPR006775; PTHR12654 (PANTHER),<br>PF12215 (PFAM)                                                                   |
| -                           | -                                                       | 0 |                                                                                                   |                                                                                                                                                                                                                                                            |            | -                                                                                                                   |
| Caenorhabditis briggsae     | briggsae cbr-gon-1 protein                              | 1 | F:GO:0008233                                                                                      | -                                                                                                                                                                                                                                                          |            | -                                                                                                                   |
| -                           | -                                                       | 0 |                                                                                                   |                                                                                                                                                                                                                                                            |            | SignalP (SIGNALP)                                                                                                   |
| Angiostrongylus cantonensis | heat shock protein family member (hsp- )                | 1 | P:GO:0006950                                                                                      | -                                                                                                                                                                                                                                                          |            | IPR001436; IPR002068; IPR008978;<br>G3DSA:2.60.40.790 (GENE3D),<br>PTHR11527 (PANTHER),<br>PTHR11527:SF28 (PANTHER) |
| Caenorhabditis briggsae     | myg1 protein                                            | 3 | C:GO:0005634;<br>C:GO:0005739;<br>P:GO:0043473                                                    | -                                                                                                                                                                                                                                                          |            | IPR003226                                                                                                           |
| Caenorhabditis briggsae     | Hypothetical protein CBG04590 [Caenorhabditis briggsae] | 0 |                                                                                                   |                                                                                                                                                                                                                                                            |            | -                                                                                                                   |
| Caenorhabditis elegans      | elegans protein confirmed by transcript evidence        | 0 |                                                                                                   |                                                                                                                                                                                                                                                            |            | IPR001810; G3DSA:1.20.1280.50<br>(GENE3D)                                                                           |
| -                           | -                                                       | 0 |                                                                                                   |                                                                                                                                                                                                                                                            |            | -                                                                                                                   |
| -                           | -                                                       | 0 |                                                                                                   |                                                                                                                                                                                                                                                            |            | -                                                                                                                   |
| -                           | -                                                       | 0 |                                                                                                   |                                                                                                                                                                                                                                                            |            | -                                                                                                                   |
| Caenorhabditis briggsae     | activator of 90 kda heat shock protein atpase homolog   | 0 |                                                                                                   | F:GO:0001671;<br>C:GO:0005737;<br>P:GO:0006950;<br>F:GO:0051087                                                                                                                                                                                            |            | -                                                                                                                   |
| -                           | -                                                       | 0 |                                                                                                   |                                                                                                                                                                                                                                                            |            | -                                                                                                                   |
| Brugia malayi               | hypothetical protein Bm1_00020 [Brugia malayi]          | 0 |                                                                                                   | P:GO:0007229;<br>C:GO:0016021;<br>C:GO:0016020;<br>P:GO:0007275;<br>F:GO:0004872;<br>P:GO:0007160;<br>C:GO:0008305;<br>F:GO:0005488;<br>P:GO:0007155                                                                                                       |            | -                                                                                                                   |
| Harpegnathos saltator       | histone-lysine n-methyltransferase setmar               | 0 |                                                                                                   | F:GO:0016740;<br>F:GO:0004803;<br>P:GO:0006313;<br>F:GO:0008168;<br>C:GO:0005634;<br>F:GO:0003677;<br>F:GO:0016787;<br>F:GO:0008270;<br>F:GO:0018024;<br>P:GO:0016568;<br>P:GO:0015074;<br>P:GO:0006281;<br>C:GO:0005575;<br>F:GO:0046872;<br>F:GO:0004519 |            | IPR011991; IPR013196; PTHR23016<br>(PANTHER)                                                                        |
| -                           | -                                                       | 0 |                                                                                                   |                                                                                                                                                                                                                                                            |            | IPR008973; G3DSA:2.60.40.150<br>(GENE3D)                                                                            |
| -                           | -                                                       | 0 |                                                                                                   |                                                                                                                                                                                                                                                            |            | -                                                                                                                   |
| -                           | -                                                       | 0 |                                                                                                   |                                                                                                                                                                                                                                                            |            | PTHR18937 (PANTHER),<br>PTHR18937:SF13 (PANTHER)                                                                    |
| -                           | -                                                       | 0 |                                                                                                   |                                                                                                                                                                                                                                                            |            | SignalP (SIGNALP)                                                                                                   |
| -                           | -                                                       | 0 |                                                                                                   |                                                                                                                                                                                                                                                            |            | -                                                                                                                   |

|                         |                                                              |    |                                                                                                                                                                                                                                                            |                               |             |                                                                                              |
|-------------------------|--------------------------------------------------------------|----|------------------------------------------------------------------------------------------------------------------------------------------------------------------------------------------------------------------------------------------------------------|-------------------------------|-------------|----------------------------------------------------------------------------------------------|
| Caenorhabditis elegans  | acyl hydroge-se family member (acdh-11)                      | 1  | F:GO:0016491                                                                                                                                                                                                                                               | -                             |             | -                                                                                            |
|                         | -                                                            | 0  |                                                                                                                                                                                                                                                            |                               |             | -                                                                                            |
| Caenorhabditis elegans  | yrdc domain containing protein                               | 0  |                                                                                                                                                                                                                                                            | P:GO:0051051;<br>C:GO:0005624 |             | IPR006070; IPR017945; PTHR17490 (PANTHER)                                                    |
| Brugia malayi           | transcription elongation factor 1 homolog                    | 5  | F:GO:0046872;<br>F:GO:0003746;<br>P:GO:0045449;<br>C:GO:0005634;<br>P:GO:0006414                                                                                                                                                                           | -                             |             | -                                                                                            |
| Caenorhabditis elegans  | pwp2_caeel ame: full=periodic tryptophan protein 2 homolog   | 0  |                                                                                                                                                                                                                                                            |                               |             | -                                                                                            |
|                         | -                                                            | 0  |                                                                                                                                                                                                                                                            |                               |             | SignalP (SIGNALP)                                                                            |
| Caenorhabditis elegans  | heavy unconventio-l myosin protein 7                         | 5  | F:GO:0046872;<br>C:GO:0016459;<br>F:GO:0005524;<br>P:GO:0007165;<br>F:GO:0003774                                                                                                                                                                           | -                             |             | SignalP (SIGNALP)                                                                            |
| Caenorhabditis elegans  | elegans protein confirmed by transcript evidence             | 0  |                                                                                                                                                                                                                                                            |                               |             | IPR009959; G3DSA:3.10.450.50 (GENE3D), SSF54427 (SUPERFAMILY)                                |
| Caenorhabditis briggsae | ke (drosophila actin-binding) homolog family member (ketn-1) | 1  | P:GO:0000003                                                                                                                                                                                                                                               | -                             |             | -                                                                                            |
|                         | -                                                            | 0  |                                                                                                                                                                                                                                                            |                               |             | SignalP (SIGNALP)                                                                            |
|                         | -                                                            | 0  |                                                                                                                                                                                                                                                            |                               |             | -                                                                                            |
| Caenorhabditis briggsae | protein sec13 homolog                                        | 15 | P:GO:0051216;<br>P:GO:0040007;<br>P:GO:0000003;<br>P:GO:0010171;<br>P:GO:0070278;<br>C:GO:0000776;<br>P:GO:0002119;<br>F:GO:0005515;<br>P:GO:0006888;<br>P:GO:0040011;<br>P:GO:0006997;<br>P:GO:0006898;<br>P:GO:0006886;<br>P:GO:0009792;<br>C:GO:0031080 | -                             |             | IPR011046; IPR015943; IPR019781; PTHR11024 (PANTHER), PTHR11024:SF2 (PANTHER)                |
|                         | -                                                            | 0  |                                                                                                                                                                                                                                                            |                               |             | IPR016186; SignalP (SIGNALP)                                                                 |
|                         | -                                                            | 0  |                                                                                                                                                                                                                                                            |                               |             | -                                                                                            |
| Caenorhabditis briggsae | wd repeat-containing protein 75                              | 0  |                                                                                                                                                                                                                                                            |                               |             | IPR015943; PTHR10219 (PANTHER), PTHR10219:SF1 (PANTHER)                                      |
| Caenorhabditis elegans  | elegans protein partially confirmed by transcript evidence   | 1  | F:GO:0005515                                                                                                                                                                                                                                               | -                             |             | IPR002223; PTHR10083 (PANTHER), PTHR10083:SF35 (PANTHER)                                     |
|                         | -                                                            | 0  |                                                                                                                                                                                                                                                            |                               |             | SignalP (SIGNALP)                                                                            |
|                         | -                                                            | 0  |                                                                                                                                                                                                                                                            |                               |             | -                                                                                            |
| Caenorhabditis briggsae | fps oncogene isoform c                                       | 8  | P:GO:0007411;<br>F:GO:0005488;<br>P:GO:0008594;<br>C:GO:0005912;<br>P:GO:0051017;<br>P:GO:0046664;<br>F:GO:0004713;<br>P:GO:0007394                                                                                                                        | -                             | EC:2.7.10.0 | IPR000719; IPR001245; IPR008266; IPR011009; IPR020685; IPR020764; G3DSA:1.10.510.10 (GENE3D) |

|                         |                                                  |   |                                                                                                   |                                                                                                                                                                                        |                             |                                                                                                                                                                   |
|-------------------------|--------------------------------------------------|---|---------------------------------------------------------------------------------------------------|----------------------------------------------------------------------------------------------------------------------------------------------------------------------------------------|-----------------------------|-------------------------------------------------------------------------------------------------------------------------------------------------------------------|
| Caenorhabditis brenneri | solute carrier family 35 member b1               | 5 | P:GO:0009792;<br>P:GO:0055085;<br>P:GO:0040010;<br>P:GO:0000003;<br>C:GO:0016021                  | -                                                                                                                                                                                      |                             | IPR013657; PTHR10778 (PANTHER),<br>PTHR10778:SF10 (PANTHER), SignalP<br>(SIGNALP), SSF103481 (SUPERFAMILY)                                                        |
| Caenorhabditis briggsae | briggsae cbr-gcy-28 protein                      | 4 | F:GO:0005488;<br>P:GO:0044238;<br>F:GO:0016829;<br>P:GO:0044237                                   | -                                                                                                                                                                                      |                             | G3DSA:3.40.50.2300 (GENE3D),<br>PTHR11920 (PANTHER),<br>PTHR11920:SF2 (PANTHER)                                                                                   |
|                         | -                                                | 0 |                                                                                                   |                                                                                                                                                                                        |                             | IPR000719; IPR017442;<br>G3DSA:1.10.510.10 (GENE3D),<br>PTHR22971 (PANTHER)                                                                                       |
|                         | -                                                | 0 |                                                                                                   |                                                                                                                                                                                        |                             | SignalP (SIGNALP)                                                                                                                                                 |
|                         | -                                                | 0 |                                                                                                   |                                                                                                                                                                                        |                             | -                                                                                                                                                                 |
| Caenorhabditis elegans  | elegans protein confirmed by transcript evidence | 0 |                                                                                                   |                                                                                                                                                                                        |                             | -                                                                                                                                                                 |
| Brugia malayi           | dead h (asp-glu-ala-asp his) box polypeptide 26b | 0 |                                                                                                   | F:GO:0003674;<br>P:GO:0008150;<br>C:GO:0005634                                                                                                                                         |                             | PTHR12957 (PANTHER),<br>PTHR12957:SF4 (PANTHER), SignalP<br>(SIGNALP)                                                                                             |
|                         | -                                                | 0 |                                                                                                   |                                                                                                                                                                                        |                             | SignalP (SIGNALP)                                                                                                                                                 |
|                         | -                                                | 0 |                                                                                                   |                                                                                                                                                                                        |                             | SignalP (SIGNALP)                                                                                                                                                 |
| Caenorhabditis elegans  | glucose-6-phosphate 1-dehydroge-se               | 4 | P:GO:0006006;<br>F:GO:0004345;<br>P:GO:0055114;<br>F:GO:0005488                                   | -                                                                                                                                                                                      | EC:1.1.1.49                 | IPR001282; IPR016040; IPR022674;<br>SSF51735 (SUPERFAMILY)                                                                                                        |
| Caenorhabditis briggsae | briggsae cbr-dlk-1 protein                       | 0 |                                                                                                   | F:GO:0016740;<br>F:GO:0004674;<br>C:GO:0045202;<br>F:GO:0004672;<br>C:GO:0030054;<br>P:GO:0006468;<br>F:GO:0000166;<br>F:GO:0005524;<br>F:GO:0016301;<br>F:GO:0004709;<br>F:GO:0046872 |                             | -                                                                                                                                                                 |
|                         | -                                                | 0 |                                                                                                   |                                                                                                                                                                                        |                             | -                                                                                                                                                                 |
|                         | -                                                | 0 |                                                                                                   |                                                                                                                                                                                        |                             | -                                                                                                                                                                 |
|                         | -                                                | 0 |                                                                                                   |                                                                                                                                                                                        |                             | -                                                                                                                                                                 |
|                         | -                                                | 0 |                                                                                                   |                                                                                                                                                                                        |                             | -                                                                                                                                                                 |
|                         | -                                                | 0 |                                                                                                   |                                                                                                                                                                                        |                             | SignalP (SIGNALP)                                                                                                                                                 |
|                         | -                                                | 0 |                                                                                                   |                                                                                                                                                                                        |                             | -                                                                                                                                                                 |
|                         | -                                                | 0 |                                                                                                   |                                                                                                                                                                                        |                             | G3DSA:3.40.50.980 (GENE3D), SignalP<br>(SIGNALP)                                                                                                                  |
| Caenorhabditis elegans  | elegans protein confirmed by transcript evidence | 6 | P:GO:0040035;<br>P:GO:0005975;<br>F:GO:0008974;<br>F:GO:0004849;<br>F:GO:0005524;<br>P:GO:0008340 | -                                                                                                                                                                                      | EC:2.7.1.19;<br>EC:2.7.1.48 | IPR000764; IPR006083;<br>G3DSA:3.40.50.2020 (GENE3D),<br>G3DSA:3.40.50.300 (GENE3D),<br>PTHR10285 (PANTHER), SSF52540<br>(SUPERFAMILY), SSF53271<br>(SUPERFAMILY) |
| Caenorhabditis elegans  | elegans protein confirmed by transcript evidence | 6 | P:GO:0040035;<br>P:GO:0005975;<br>F:GO:0008974;<br>F:GO:0004849;<br>F:GO:0005524;<br>P:GO:0008340 | -                                                                                                                                                                                      | EC:2.7.1.19;<br>EC:2.7.1.48 | IPR000764; IPR006083;<br>G3DSA:3.40.50.2020 (GENE3D),<br>G3DSA:3.40.50.300 (GENE3D),<br>PTHR10285 (PANTHER), SSF52540<br>(SUPERFAMILY), SSF53271<br>(SUPERFAMILY) |
|                         | -                                                | 0 |                                                                                                   |                                                                                                                                                                                        |                             | -                                                                                                                                                                 |
|                         | -                                                | 0 |                                                                                                   |                                                                                                                                                                                        |                             | -                                                                                                                                                                 |

|                               |                                                  |   |                                                                                                                                                      |                                                |                                                         |                                                                                                  |
|-------------------------------|--------------------------------------------------|---|------------------------------------------------------------------------------------------------------------------------------------------------------|------------------------------------------------|---------------------------------------------------------|--------------------------------------------------------------------------------------------------|
| Callithrix jacchus            | lactate dehydroge-se b                           | 9 | F:GO:0042802;<br>C:GO:0005625;<br>F:GO:0051287;<br>P:GO:0006089;<br>F:GO:0004459;<br>P:GO:0055114;<br>P:GO:0019674;<br>P:GO:0006096;<br>C:GO:0005739 | -                                              | EC:1.1.1.27                                             | -                                                                                                |
| -                             | -                                                | 0 |                                                                                                                                                      |                                                |                                                         | -                                                                                                |
| Caenorhabditis elegans        | hexosaminidase d                                 | 4 | F:GO:0004553;<br>F:GO:0005488;<br>P:GO:0044238;<br>C:GO:0044424                                                                                      | -                                              | EC:3.2.1.0                                              | IPR013781; IPR017853                                                                             |
| -                             | -                                                | 0 |                                                                                                                                                      |                                                |                                                         | -                                                                                                |
| -                             | -                                                | 0 |                                                                                                                                                      |                                                |                                                         | -                                                                                                |
| -                             | -                                                | 0 |                                                                                                                                                      |                                                |                                                         | -                                                                                                |
| Caenorhabditis briggsae       | briggsae cbr-sand-1 protein                      | 0 |                                                                                                                                                      |                                                |                                                         | -                                                                                                |
| Loa loa                       | hr1 repeat family protein                        | 3 | P:GO:0009987;<br>F:GO:0004674;<br>F:GO:0000166                                                                                                       | -                                              | EC:2.7.11.0                                             | IPR000861; IPR011072                                                                             |
| -                             | -                                                | 0 |                                                                                                                                                      |                                                |                                                         | -                                                                                                |
| -                             | -                                                | 0 |                                                                                                                                                      |                                                |                                                         | -                                                                                                |
| -                             | -                                                | 0 |                                                                                                                                                      |                                                |                                                         | -                                                                                                |
| Strongylocentrotus purpuratus | cytochrome p450                                  | 1 | F:GO:0005515                                                                                                                                         | -                                              |                                                         | IPR001128; IPR002401                                                                             |
| -                             | -                                                | 0 |                                                                                                                                                      |                                                |                                                         | SignalP (SIGNALP)                                                                                |
| Brugia malayi                 | zinc c2h2 type family protein                    | 0 |                                                                                                                                                      | F:GO:0003676;<br>F:GO:0008270;<br>C:GO:0005622 |                                                         | -                                                                                                |
| Caenorhabditis briggsae       | ribosome biogenesis protein                      | 4 | F:GO:0003924;<br>C:GO:0005634;<br>P:GO:0042254;<br>F:GO:0005525                                                                                      | -                                              | EC:3.6.5.1;<br>EC:3.6.5.2;<br>EC:3.6.5.3;<br>EC:3.6.5.4 | IPR012948; PTHR12858 (PANTHER),<br>PTHR12858:SF2 (PANTHER)                                       |
| -                             | -                                                | 0 |                                                                                                                                                      |                                                |                                                         | -                                                                                                |
| Caenorhabditis elegans        | -dh:flavin oxidoreductase -dh oxidase            | 6 | F:GO:0050660;<br>F:GO:0047540;<br>P:GO:0055114;<br>F:GO:0018673;<br>F:GO:0016758;<br>F:GO:0010181                                                    | -                                              | EC:1.3.1.31;<br>EC:1.14.13.4<br>0; EC:2.4.1.0           | IPR001155; IPR013785; PTHR22893<br>(PANTHER), PTHR22893:SF6<br>(PANTHER), SSF51395 (SUPERFAMILY) |
| Caenorhabditis briggsae       | elegans protein confirmed by transcript evidence | 2 | P:GO:0006810;<br>C:GO:0044425                                                                                                                        | -                                              |                                                         | IPR011547; IPR018045; PTHR11814<br>(PANTHER)                                                     |
| -                             | -                                                | 0 |                                                                                                                                                      |                                                |                                                         | -                                                                                                |
| -                             | -                                                | 0 |                                                                                                                                                      |                                                |                                                         | -                                                                                                |
| -                             | -                                                | 0 |                                                                                                                                                      |                                                |                                                         | -                                                                                                |
| Caenorhabditis briggsae       | briggsae cbr-rbc-2 protein                       | 0 |                                                                                                                                                      |                                                |                                                         | SignalP (SIGNALP)                                                                                |
| Caenorhabditis elegans        | briggsae cbr-lam-3 protein                       | 1 | C:GO:0031012                                                                                                                                         | -                                              |                                                         | -                                                                                                |
| -                             | -                                                | 0 |                                                                                                                                                      |                                                |                                                         | -                                                                                                |
| -                             | -                                                | 0 |                                                                                                                                                      |                                                |                                                         | -                                                                                                |
| Loa loa                       | d- polymerase epsilon                            | 7 | F:GO:0005488;<br>P:GO:0040035;<br>F:GO:0016740;<br>P:GO:0040011;<br>P:GO:0006997;<br>P:GO:0002009;<br>P:GO:0009792                                   | -                                              |                                                         | IPR006133; PTHR10670 (PANTHER)                                                                   |
| -                             | -                                                | 0 |                                                                                                                                                      |                                                |                                                         | -                                                                                                |



|                         |                                             |    |                                                                                                                                                                                                                          |                                                |              |                                                                                                             |
|-------------------------|---------------------------------------------|----|--------------------------------------------------------------------------------------------------------------------------------------------------------------------------------------------------------------------------|------------------------------------------------|--------------|-------------------------------------------------------------------------------------------------------------|
|                         | -                                           | 0  |                                                                                                                                                                                                                          |                                                |              | -                                                                                                           |
|                         | -                                           | 0  |                                                                                                                                                                                                                          |                                                |              | SignalP (SIGNALP)                                                                                           |
|                         | -                                           | 0  |                                                                                                                                                                                                                          |                                                |              | -                                                                                                           |
|                         | -                                           | 0  |                                                                                                                                                                                                                          |                                                |              | -                                                                                                           |
| Caenorhabditis elegans  | abnormal cell lineage family member (lin-3) | 0  |                                                                                                                                                                                                                          | F:GO:0008083;<br>P:GO:0040025;<br>C:GO:0016021 |              | -                                                                                                           |
| Caenorhabditis elegans  | abnormal cell lineage family member (lin-3) | 0  |                                                                                                                                                                                                                          | F:GO:0008083;<br>P:GO:0040025;<br>C:GO:0016021 |              | SignalP (SIGNALP)                                                                                           |
| Caenorhabditis elegans  | abnormal cell lineage family member (lin-3) | 0  |                                                                                                                                                                                                                          | F:GO:0008083;<br>P:GO:0040025;<br>C:GO:0016021 |              | SignalP (SIGNALP)                                                                                           |
| Caenorhabditis elegans  | abnormal cell lineage family member (lin-3) | 0  |                                                                                                                                                                                                                          | F:GO:0008083;<br>P:GO:0040025;<br>C:GO:0016021 |              | SignalP (SIGNALP)                                                                                           |
| Ailuropoda melanoleuca  | alpha-actinin-1-like isoform 4              | 13 | C:GO:0005829;<br>C:GO:0030018;<br>F:GO:0017166;<br>F:GO:0005509;<br>P:GO:0051271;<br>C:GO:0005730;<br>P:GO:0042981;<br>P:GO:0048041;<br>C:GO:0031143;<br>C:GO:0005925;<br>F:GO:0003779;<br>C:GO:0015629;<br>F:GO:0005178 | -                                              |              | -                                                                                                           |
|                         | -                                           | 0  |                                                                                                                                                                                                                          |                                                |              | -                                                                                                           |
| Caenorhabditis elegans  | beta- -glucuronosyltransferase              | 2  | C:GO:0016021;<br>F:GO:0015018                                                                                                                                                                                            | -                                              | EC:2.4.1.135 | IPR005027; G3DSA:3.90.550.10 (GENE3D), PTHR10896:SF2 (PANTHER), SSF53448 (SUPERFAMILY)                      |
|                         | -                                           | 0  |                                                                                                                                                                                                                          |                                                |              | -                                                                                                           |
| Loa loa                 | transcription accessory protein             | 1  | P:GO:0009987                                                                                                                                                                                                             | -                                              |              | IPR018974; G3DSA:1.10.3500.10 (GENE3D), PTHR10724 (PANTHER)                                                 |
|                         | -                                           | 0  |                                                                                                                                                                                                                          |                                                |              | IPR003511; PTHR21518 (PANTHER)                                                                              |
|                         | -                                           | 0  |                                                                                                                                                                                                                          |                                                |              | -                                                                                                           |
|                         | -                                           | 0  |                                                                                                                                                                                                                          |                                                |              | -                                                                                                           |
|                         | -                                           | 0  |                                                                                                                                                                                                                          |                                                |              | -                                                                                                           |
|                         | -                                           | 0  |                                                                                                                                                                                                                          |                                                |              | -                                                                                                           |
| Caenorhabditis elegans  | pyruvate dehydroge-se                       | 8  | F:GO:0004739;<br>P:GO:0040010;<br>C:GO:0005739;<br>P:GO:0055114;<br>P:GO:0006096;<br>P:GO:0006898;<br>P:GO:0048477;<br>P:GO:0009792                                                                                      | -                                              | EC:1.2.4.1   | IPR001017; G3DSA:3.40.50.970 (GENE3D), PTHR11516 (PANTHER), PTHR11516:SF3 (PANTHER), SSF52518 (SUPERFAMILY) |
| Caenorhabditis briggsae | kinesin-like protein family member (klp-4)  | 5  | P:GO:0007018;<br>F:GO:0005515;<br>F:GO:0005524;<br>F:GO:0003777;<br>C:GO:0005874                                                                                                                                         | -                                              |              | -                                                                                                           |
| Homo sapiens            | type alpha 1                                | 4  | F:GO:0048407;<br>P:GO:0007155;<br>C:GO:0005589;<br>C:GO:0042383                                                                                                                                                          | -                                              |              | -                                                                                                           |

|                         |                                                        |    |                                                                                                                                                                                                                                                                                                                                                                  |                               |                                                                                                                                               |
|-------------------------|--------------------------------------------------------|----|------------------------------------------------------------------------------------------------------------------------------------------------------------------------------------------------------------------------------------------------------------------------------------------------------------------------------------------------------------------|-------------------------------|-----------------------------------------------------------------------------------------------------------------------------------------------|
|                         | -                                                      | 0  |                                                                                                                                                                                                                                                                                                                                                                  |                               | -                                                                                                                                             |
|                         | -                                                      | 0  |                                                                                                                                                                                                                                                                                                                                                                  |                               | -                                                                                                                                             |
|                         | -                                                      | 0  |                                                                                                                                                                                                                                                                                                                                                                  |                               | -                                                                                                                                             |
|                         | -                                                      | 0  |                                                                                                                                                                                                                                                                                                                                                                  |                               | -                                                                                                                                             |
| Caenorhabditis briggsae | xanthine dehydroge-se                                  | 10 | P:GO:0008340;<br>F:GO:0051537;<br>P:GO:0055114;<br>F:GO:0009055;<br>F:GO:0004855;<br>F:GO:0004854;<br>F:GO:0043546;<br>F:GO:0050660;<br>P:GO:0009115;<br>F:GO:0005506                                                                                                                                                                                            | EC:1.17.3.2;<br>EC:1.17.1.4   | -                                                                                                                                             |
|                         | -                                                      | 0  |                                                                                                                                                                                                                                                                                                                                                                  |                               | -                                                                                                                                             |
| Caenorhabditis elegans  | prolyl-tr- synthetase                                  | 1  | C:GO:0005739                                                                                                                                                                                                                                                                                                                                                     |                               | IPR002314; IPR002316; IPR006195;<br>G3DSA:3.30.930.10 (GENE3D),<br>PTHR11451 (PANTHER),<br>PTHR11451:SF3 (PANTHER), SSF55681<br>(SUPERFAMILY) |
|                         | -                                                      | 0  |                                                                                                                                                                                                                                                                                                                                                                  |                               | -                                                                                                                                             |
| Callithrix jacchus      | aldolase fructose-bisphosphate                         | 21 | P:GO:0006941;<br>F:GO:0070061;<br>P:GO:0007015;<br>P:GO:0008360;<br>C:GO:0005739;<br>P:GO:0043627;<br>C:GO:0070062;<br>F:GO:0042802;<br>P:GO:0009408;<br>P:GO:0006754;<br>C:GO:0031674;<br>P:GO:0035094;<br>F:GO:0003779;<br>P:GO:0046716;<br>C:GO:0015629;<br>P:GO:0006096;<br>C:GO:0019861;<br>F:GO:0015631;<br>F:GO:0004332;<br>P:GO:0032496;<br>P:GO:0030388 | EC:4.1.2.13                   | IPR000741; IPR013785; SSF51569<br>(SUPERFAMILY)                                                                                               |
|                         | -                                                      | 0  |                                                                                                                                                                                                                                                                                                                                                                  |                               | -                                                                                                                                             |
|                         | -                                                      | 0  |                                                                                                                                                                                                                                                                                                                                                                  |                               | IPR000980; PTHR14247 (PANTHER),<br>PTHR14247:SF6 (PANTHER), SSF55550<br>(SUPERFAMILY)                                                         |
|                         | -                                                      | 0  |                                                                                                                                                                                                                                                                                                                                                                  |                               | -                                                                                                                                             |
|                         | -                                                      | 0  |                                                                                                                                                                                                                                                                                                                                                                  |                               | -                                                                                                                                             |
| Caenorhabditis briggsae | probable valyl-tr- synthetase                          | 3  | F:GO:0004812;<br>P:GO:0006418;<br>F:GO:0000166                                                                                                                                                                                                                                                                                                                   |                               | IPR002300; IPR002303; IPR014729;<br>PTHR11946 (PANTHER), SignalP<br>(SIGNALP), SSF52374 (SUPERFAMILY)                                         |
|                         | -                                                      | 0  |                                                                                                                                                                                                                                                                                                                                                                  |                               | SignalP (SIGNALP)                                                                                                                             |
|                         | -                                                      | 0  |                                                                                                                                                                                                                                                                                                                                                                  |                               | -                                                                                                                                             |
| Caenorhabditis elegans  | hypothetical protein Y70D2A.1 [Caenorhabditis elegans] | 0  |                                                                                                                                                                                                                                                                                                                                                                  | C:GO:0016021;<br>P:GO:0007186 | PTHR22751 (PANTHER),<br>PTHR22751:SF8 (PANTHER)                                                                                               |
|                         | -                                                      | 0  |                                                                                                                                                                                                                                                                                                                                                                  |                               | -                                                                                                                                             |
|                         | -                                                      | 0  |                                                                                                                                                                                                                                                                                                                                                                  |                               | -                                                                                                                                             |
|                         | -                                                      | 0  |                                                                                                                                                                                                                                                                                                                                                                  |                               | -                                                                                                                                             |

|                         |                                                           |   |                                                                                                                                                                                                                          |   |                                                                                                                                                                       |
|-------------------------|-----------------------------------------------------------|---|--------------------------------------------------------------------------------------------------------------------------------------------------------------------------------------------------------------------------|---|-----------------------------------------------------------------------------------------------------------------------------------------------------------------------|
| Caenorhabditis elegans  | yeast bub homolog family member (bub-1)                   | 0 | P:GO:0000910;<br>F:GO:0004674;<br>C:GO:0000776;<br>P:GO:0006468;<br>P:GO:0000003;<br>P:GO:0051301;<br>F:GO:0005524;<br>P:GO:0002119;<br>P:GO:0009792;<br>P:GO:0002009;<br>F:GO:0005515;<br>P:GO:0040011;<br>P:GO:0040035 | - | -                                                                                                                                                                     |
| -                       | -                                                         | 0 | -                                                                                                                                                                                                                        | - | -                                                                                                                                                                     |
| Loa loa                 | mediator of r- polymerase ii transcription subunit 19     | 8 | P:GO:0006357;<br>P:GO:0040035;<br>F:GO:0016455;<br>P:GO:0002119;<br>F:GO:0005515;<br>C:GO:0016592;<br>P:GO:0048477;<br>P:GO:0040018                                                                                      | - | IPR019403; PTHR22536 (PANTHER)                                                                                                                                        |
| Caenorhabditis briggsae | programmed cell death 11                                  | 8 | P:GO:0040010;<br>P:GO:0006396;<br>F:GO:0005488;<br>P:GO:0018991;<br>P:GO:0002119;<br>P:GO:0009792;<br>P:GO:0008406;<br>C:GO:0044424                                                                                      | - | IPR003029; IPR012340; IPR016027;<br>IPR022967; PTHR23270 (PANTHER)                                                                                                    |
| -                       | -                                                         | 0 | -                                                                                                                                                                                                                        | - | -                                                                                                                                                                     |
| Caenorhabditis elegans  | Hypothetical protein C01B10.11 [Caenorhabditis elegans]   | 0 | P:GO:0040011                                                                                                                                                                                                             | - | -                                                                                                                                                                     |
| -                       | -                                                         | 0 | -                                                                                                                                                                                                                        | - | -                                                                                                                                                                     |
| -                       | -                                                         | 0 | -                                                                                                                                                                                                                        | - | -                                                                                                                                                                     |
| -                       | -                                                         | 0 | -                                                                                                                                                                                                                        | - | -                                                                                                                                                                     |
| -                       | -                                                         | 0 | -                                                                                                                                                                                                                        | - | -                                                                                                                                                                     |
| Loa loa                 | hypothetical protein LOAG_01892 [Loa loa]                 | 0 | -                                                                                                                                                                                                                        | - | PTHR21191 (PANTHER),<br>PTHR21191:SF3 (PANTHER), SignalP<br>(SIGNALP)                                                                                                 |
| Pan troglodytes         | ubiquitin a-52 residue ribosomal protein fusion product 1 | 8 | F:GO:0030528;<br>F:GO:0003735;<br>P:GO:0006414;<br>C:GO:0022627;<br>P:GO:0016567;<br>F:GO:0005515;<br>C:GO:0005634;<br>P:GO:0045941                                                                                      | - | IPR000626; IPR001975; IPR019954;<br>IPR019955; IPR019956;<br>G3DSA:3.10.20.90 (GENE3D),<br>PTHR10666 (PANTHER),<br>PTHR10666:SF9 (PANTHER), SSF54236<br>(SUPERFAMILY) |
| -                       | -                                                         | 0 | -                                                                                                                                                                                                                        | - | -                                                                                                                                                                     |
| -                       | -                                                         | 0 | -                                                                                                                                                                                                                        | - | -                                                                                                                                                                     |
| -                       | -                                                         | 0 | -                                                                                                                                                                                                                        | - | SignalP (SIGNALP)                                                                                                                                                     |
| -                       | -                                                         | 0 | -                                                                                                                                                                                                                        | - | -                                                                                                                                                                     |
| -                       | -                                                         | 0 | -                                                                                                                                                                                                                        | - | -                                                                                                                                                                     |
| Caenorhabditis elegans  | hypothetical protein C23H3.5 [Caenorhabditis elegans]     | 0 | P:GO:0040017;<br>P:GO:0000003;<br>P:GO:0040035;<br>P:GO:0006898;<br>P:GO:0009792                                                                                                                                         | - | -                                                                                                                                                                     |
| -                       | -                                                         | 0 | -                                                                                                                                                                                                                        | - | -                                                                                                                                                                     |

|                         |                                                |    |                                                                                                                                                                                                                                                                                                               |                                                                                                                                     |                                                                                                                                                                                    |
|-------------------------|------------------------------------------------|----|---------------------------------------------------------------------------------------------------------------------------------------------------------------------------------------------------------------------------------------------------------------------------------------------------------------|-------------------------------------------------------------------------------------------------------------------------------------|------------------------------------------------------------------------------------------------------------------------------------------------------------------------------------|
| Brugia malayi           | hypothetical protein [Brugia malayi]           | 0  |                                                                                                                                                                                                                                                                                                               | F:GO:0005488                                                                                                                        | -                                                                                                                                                                                  |
| Brugia malayi           | poly(adp-ribose) glycohydrolase 63 kda-like    | 0  |                                                                                                                                                                                                                                                                                                               | P:GO:0005975;<br>F:GO:0004649                                                                                                       | IPR007724                                                                                                                                                                          |
|                         | -                                              | 0  |                                                                                                                                                                                                                                                                                                               |                                                                                                                                     | SignalP (SIGNALP)                                                                                                                                                                  |
| Caenorhabditis elegans  | mitofusin 1                                    | 5  | P:GO:0008053;<br>C:GO:0016021;<br>C:GO:0005741;<br>F:GO:0003924;<br>F:GO:0005525                                                                                                                                                                                                                              | -                                                                                                                                   | EC:3.6.5.1;<br>EC:3.6.5.2;<br>EC:3.6.5.3;<br>EC:3.6.5.4                                                                                                                            |
|                         | -                                              | 0  |                                                                                                                                                                                                                                                                                                               |                                                                                                                                     | -                                                                                                                                                                                  |
| Caenorhabditis briggsae | dipeptidyl peptidase                           | 0  |                                                                                                                                                                                                                                                                                                               | P:GO:0006508;<br>F:GO:0008236;<br>F:GO:0016787;<br>C:GO:0016021;<br>C:GO:0016020                                                    | PTHR11731 (PANTHER),<br>PTHR11731:SF23 (PANTHER)                                                                                                                                   |
|                         | -                                              | 0  |                                                                                                                                                                                                                                                                                                               |                                                                                                                                     | -                                                                                                                                                                                  |
|                         | -                                              | 0  |                                                                                                                                                                                                                                                                                                               |                                                                                                                                     | IPR018056; SignalP (SIGNALP)                                                                                                                                                       |
| Caenorhabditis briggsae | briggsae cbr-sptf-3 protein                    | 0  |                                                                                                                                                                                                                                                                                                               |                                                                                                                                     | -                                                                                                                                                                                  |
| Homo sapiens            | glutathione peroxidase 4                       | 18 | C:GO:0005829;<br>P:GO:0006644;<br>P:GO:0042744;<br>C:GO:0005625;<br>C:GO:0005743;<br>F:GO:0004602;<br>P:GO:0055114;<br>P:GO:0007283;<br>P:GO:0006749;<br>P:GO:0007568;<br>F:GO:0043295;<br>P:GO:0032355;<br>P:GO:0006325;<br>P:GO:0007275;<br>C:GO:0005635;<br>F:GO:0008430;<br>P:GO:0050727;<br>F:GO:0047066 | -                                                                                                                                   | EC:1.11.1.9;<br>EC:1.11.1.12                                                                                                                                                       |
|                         | -                                              | 0  |                                                                                                                                                                                                                                                                                                               |                                                                                                                                     | SignalP (SIGNALP)                                                                                                                                                                  |
| Caenorhabditis briggsae | prolyl tr- synthetase family member (prs-2)    | 0  |                                                                                                                                                                                                                                                                                                               | F:GO:0004827;<br>F:GO:0005524;<br>P:GO:0006412;<br>F:GO:0004812;<br>C:GO:0005737;<br>F:GO:0000166;<br>P:GO:0006433;<br>P:GO:0006418 | IPR004154                                                                                                                                                                          |
| Brugia malayi           | hypothetical protein Bm1_45825 [Brugia malayi] | 0  |                                                                                                                                                                                                                                                                                                               |                                                                                                                                     | -                                                                                                                                                                                  |
|                         | -                                              | 0  |                                                                                                                                                                                                                                                                                                               |                                                                                                                                     | -                                                                                                                                                                                  |
| Caenorhabditis elegans  | cg8392                                         | 11 | C:GO:0005737;<br>P:GO:0009792;<br>P:GO:0002119;<br>C:GO:0005839;<br>P:GO:0000003;<br>P:GO:0040011;<br>P:GO:0040007;<br>P:GO:0006974;<br>C:GO:0005634;<br>F:GO:0004298;<br>P:GO:0051603                                                                                                                        | -                                                                                                                                   | EC:3.4.25.0<br><br>IPR000243; IPR001353; IPR016050;<br>G3DSA:3.60.20.10 (GENE3D),<br>PTHR11599 (PANTHER),<br>PTHR11599:SF4 (PANTHER), PSS1476<br>(PROFILE), SSF56235 (SUPERFAMILY) |

|                        |                                                                           |    |                                                                                                                                                                                                                                                                                                               |                                                                                                   |  |                                                                                                                                                |
|------------------------|---------------------------------------------------------------------------|----|---------------------------------------------------------------------------------------------------------------------------------------------------------------------------------------------------------------------------------------------------------------------------------------------------------------|---------------------------------------------------------------------------------------------------|--|------------------------------------------------------------------------------------------------------------------------------------------------|
| Caenorhabditis elegans | elegans protein partially confirmed by transcript evidence                | 0  |                                                                                                                                                                                                                                                                                                               | P:GO:0019915;<br>C:GO:0005576                                                                     |  | IPR001283; IPR014044;<br>PTHR10334:SF11 (PANTHER)                                                                                              |
| -                      | -                                                                         | 0  |                                                                                                                                                                                                                                                                                                               |                                                                                                   |  | -                                                                                                                                              |
| Caenorhabditis elegans | serine threonine-protein ki-se pak                                        | 18 | P:GO:0007010;<br>P:GO:0000122;<br>P:GO:0007347;<br>F:GO:0004702;<br>F:GO:0005515;<br>P:GO:0016319;<br>P:GO:0045315;<br>P:GO:0048813;<br>C:GO:0005913;<br>P:GO:0007517;<br>P:GO:0007405;<br>F:GO:0043565;<br>F:GO:0003700;<br>C:GO:0005634;<br>F:GO:0005524;<br>C:GO:0031523;<br>P:GO:0035190;<br>P:GO:0000187 | -                                                                                                 |  | IPR000719; IPR011009; IPR015750;<br>IPR017441; IPR017442;<br>G3DSA:1.10.510.10 (GENE3D),<br>G3DSA:3.30.200.20 (GENE3D),<br>PTHR22986 (PANTHER) |
| -                      | -                                                                         | 0  |                                                                                                                                                                                                                                                                                                               |                                                                                                   |  | -                                                                                                                                              |
| Pan troglodytes        | chemokine (c-c motif) ligand 19                                           | 9  | P:GO:0006935;<br>C:GO:0005615;<br>P:GO:0006954;<br>F:GO:0008009;<br>P:GO:0006874;<br>P:GO:0007165;<br>P:GO:0006955;<br>P:GO:0009615;<br>P:GO:0007154                                                                                                                                                          | -                                                                                                 |  | IPR000827; IPR001811;<br>G3DSA:2.40.50.40 (GENE3D),<br>PTHR12015 (PANTHER),<br>PTHR12015:SF7 (PANTHER)                                         |
| Caenorhabditis elegans | elegans protein partially confirmed by transcript evidence                | 0  |                                                                                                                                                                                                                                                                                                               | P:GO:0006355;<br>P:GO:0006281;<br>F:GO:0003702;<br>C:GO:0005634                                   |  | IPR004598                                                                                                                                      |
| Caenorhabditis elegans | b-box zinc finger family protein                                          | 0  |                                                                                                                                                                                                                                                                                                               | F:GO:0046872;<br>P:GO:0030071;<br>C:GO:0005680;<br>F:GO:0008270;<br>F:GO:0005515;<br>C:GO:0005622 |  | PTHR12846 (PANTHER),<br>PTHR12846:SF2 (PANTHER)                                                                                                |
| -                      | -                                                                         | 0  |                                                                                                                                                                                                                                                                                                               |                                                                                                   |  | -                                                                                                                                              |
| -                      | -                                                                         | 0  |                                                                                                                                                                                                                                                                                                               |                                                                                                   |  | -                                                                                                                                              |
| -                      | -                                                                         | 0  |                                                                                                                                                                                                                                                                                                               |                                                                                                   |  | SignalP (SIGNALP)                                                                                                                              |
| Caenorhabditis elegans | elegans protein partially confirmed by transcript evidence                | 1  | P:GO:0040011                                                                                                                                                                                                                                                                                                  | -                                                                                                 |  | -                                                                                                                                              |
| -                      | -                                                                         | 0  |                                                                                                                                                                                                                                                                                                               |                                                                                                   |  | -                                                                                                                                              |
| -                      | -                                                                         | 0  |                                                                                                                                                                                                                                                                                                               |                                                                                                   |  | -                                                                                                                                              |
| Caenorhabditis elegans | vps53- n-termi-l family protein                                           | 0  |                                                                                                                                                                                                                                                                                                               |                                                                                                   |  | -                                                                                                                                              |
| -                      | -                                                                         | 0  |                                                                                                                                                                                                                                                                                                               |                                                                                                   |  | -                                                                                                                                              |
| Acyrtosiphon pisum     | PREDICTED: similar to conserved hypothetical protein [Acyrtosiphon pisum] | 0  |                                                                                                                                                                                                                                                                                                               |                                                                                                   |  | IPR004245; PTHR10974:SF17 (PANTHER), SignalP (SIGNALP)                                                                                         |
| -                      | -                                                                         | 0  |                                                                                                                                                                                                                                                                                                               |                                                                                                   |  | -                                                                                                                                              |
| -                      | -                                                                         | 0  |                                                                                                                                                                                                                                                                                                               |                                                                                                   |  | -                                                                                                                                              |

|                         |                                                               |    |                                                                                                                                                                                                                                                                                                               |                                                                                                                                                                                                         |                            |                                                                                                             |
|-------------------------|---------------------------------------------------------------|----|---------------------------------------------------------------------------------------------------------------------------------------------------------------------------------------------------------------------------------------------------------------------------------------------------------------|---------------------------------------------------------------------------------------------------------------------------------------------------------------------------------------------------------|----------------------------|-------------------------------------------------------------------------------------------------------------|
| Caenorhabditis elegans  | elegans protein partially confirmed by transcript evidence    | 8  | F:GO:0004383;<br>F:GO:0004674;<br>C:GO:0016021;<br>P:GO:0019932;<br>F:GO:0008528;<br>F:GO:0005524;<br>P:GO:0006468;<br>P:GO:0006182                                                                                                                                                                           | -                                                                                                                                                                                                       | EC:4.6.1.2;<br>EC:2.7.11.0 | -                                                                                                           |
| -                       | -                                                             | 0  | -                                                                                                                                                                                                                                                                                                             | -                                                                                                                                                                                                       | -                          | -                                                                                                           |
| Caenorhabditis elegans  | poly(adp-ribose) metabolism enzyme family member (pme-3)      | 2  | P:GO:0005975;<br>P:GO:0045132                                                                                                                                                                                                                                                                                 | -                                                                                                                                                                                                       | -                          | IPR007724; SignalP (SIGNALP)                                                                                |
| Caenorhabditis elegans  | frizzled smoothened family membrane region containing protein | 0  | -                                                                                                                                                                                                                                                                                                             | F:GO:0004888;<br>C:GO:0016021;<br>C:GO:0016020;<br>F:GO:0004930;<br>F:GO:0004926;<br>P:GO:0007275;<br>P:GO:0007166;<br>P:GO:0007165;<br>F:GO:0004872;<br>F:GO:0004871;<br>P:GO:0007186;<br>P:GO:0016055 | -                          | -                                                                                                           |
| -                       | -                                                             | 0  | -                                                                                                                                                                                                                                                                                                             | -                                                                                                                                                                                                       | -                          | SignalP (SIGNALP)                                                                                           |
| Caenorhabditis elegans  | briggsae cbr-kel-10 protein                                   | 0  | -                                                                                                                                                                                                                                                                                                             | F:GO:0005515                                                                                                                                                                                            | -                          | IPR006652; IPR013089; IPR015916;<br>PR00501 (PRINTS), PTHR23230:SF184<br>(PANTHER), SSF117281 (SUPERFAMILY) |
| Ailuropoda melanoleuca  | heat shock 70kda protein 1a                                   | 18 | F:GO:0047485;<br>P:GO:0042026;<br>P:GO:0090084;<br>C:GO:0005739;<br>P:GO:0030308;<br>F:GO:0031625;<br>C:GO:0016607;<br>F:GO:0044183;<br>P:GO:0006916;<br>P:GO:0008285;<br>C:GO:0016234;<br>F:GO:0005524;<br>P:GO:0006402;<br>C:GO:0048471;<br>C:GO:0030529;<br>F:GO:0051082;<br>P:GO:0006986;<br>C:GO:0005783 | -                                                                                                                                                                                                       | -                          | IPR019651                                                                                                   |
| -                       | -                                                             | 0  | -                                                                                                                                                                                                                                                                                                             | -                                                                                                                                                                                                       | -                          | -                                                                                                           |
| -                       | -                                                             | 0  | -                                                                                                                                                                                                                                                                                                             | -                                                                                                                                                                                                       | -                          | SignalP (SIGNALP)                                                                                           |
| -                       | -                                                             | 0  | -                                                                                                                                                                                                                                                                                                             | -                                                                                                                                                                                                       | -                          | -                                                                                                           |
| -                       | -                                                             | 0  | -                                                                                                                                                                                                                                                                                                             | -                                                                                                                                                                                                       | -                          | SignalP (SIGNALP)                                                                                           |
| -                       | -                                                             | 0  | -                                                                                                                                                                                                                                                                                                             | -                                                                                                                                                                                                       | -                          | -                                                                                                           |
| -                       | -                                                             | 0  | -                                                                                                                                                                                                                                                                                                             | -                                                                                                                                                                                                       | -                          | -                                                                                                           |
| Caenorhabditis briggsae | briggsae cbr-tsp-8 protein                                    | 1  | C:GO:0016020                                                                                                                                                                                                                                                                                                  | -                                                                                                                                                                                                       | -                          | IPR018499; PTHR19282 (PANTHER),<br>PTHR19282:SF65 (PANTHER)                                                 |
| Caenorhabditis briggsae | Hypothetical protein CBG02143 [Caenorhabditis briggsae]       | 0  | -                                                                                                                                                                                                                                                                                                             | P:GO:0007165;<br>F:GO:0005515                                                                                                                                                                           | -                          | -                                                                                                           |

|                         |                                                  |  |   |                                                                                                   |   |                                                                                                   |                                                                                                             |
|-------------------------|--------------------------------------------------|--|---|---------------------------------------------------------------------------------------------------|---|---------------------------------------------------------------------------------------------------|-------------------------------------------------------------------------------------------------------------|
| Loa loa                 | dynein heavy chain                               |  | 5 | P:GO:0007018;<br>C:GO:0030286;<br>F:GO:0016887;<br>F:GO:0005524;<br>F:GO:0003777                  | - |                                                                                                   | PTHR10676 (PANTHER),<br>PTHR10676:SF4 (PANTHER)                                                             |
| Caenorhabditis elegans  | briggsae cbr-spp-15 protein                      |  | 1 | P:GO:0006629                                                                                      | - |                                                                                                   | -                                                                                                           |
| Caenorhabditis elegans  | elegans protein confirmed by transcript evidence |  | 0 |                                                                                                   |   |                                                                                                   | SignalP (SIGNALP)                                                                                           |
| Caenorhabditis briggsae | briggsae cbr-atm-1 protein                       |  | 0 |                                                                                                   |   | F:GO:0016301;<br>F:GO:0005524;<br>F:GO:0016740;<br>F:GO:0000166;<br>F:GO:0016773;<br>C:GO:0000785 | -                                                                                                           |
| Homo sapiens            | immunoglobulin heavy chain variable region       |  | 0 |                                                                                                   |   |                                                                                                   | IPR013106; IPR013783; PTHR23266<br>(PANTHER), PTHR23266:SF10<br>(PANTHER), SSF48726 (SUPERFAMILY)           |
| Caenorhabditis briggsae | beta esterase (agap005371-pa)                    |  | 1 | F:GO:0005515                                                                                      | - |                                                                                                   | IPR002018; IPR019826;<br>G3DSA:3.40.50.1820 (GENE3D),<br>PTHR11559:SF6 (PANTHER), SSF53474<br>(SUPERFAMILY) |
|                         | -                                                |  | 0 |                                                                                                   |   |                                                                                                   | SignalP (SIGNALP)                                                                                           |
|                         | -                                                |  | 0 |                                                                                                   |   |                                                                                                   | -                                                                                                           |
| Loa loa                 | ser thr protein phosphatase family protein       |  | 1 | F:GO:0004721                                                                                      | - | EC:3.1.3.16                                                                                       | -                                                                                                           |
| Caenorhabditis elegans  | nuclear vcp-like                                 |  | 2 | F:GO:0017111;<br>F:GO:0005524                                                                     | - | EC:3.6.1.15                                                                                       | -                                                                                                           |
|                         | -                                                |  | 0 |                                                                                                   |   |                                                                                                   | SignalP (SIGNALP)                                                                                           |
| Caenorhabditis elegans  | ribose-phosphate 3-epimerase                     |  | 6 | C:GO:0005625;<br>P:GO:0009052;<br>C:GO:0005792;<br>F:GO:0004750;<br>F:GO:0048029;<br>F:GO:0005515 | - | EC:5.1.3.1                                                                                        | IPR000056; IPR011060; IPR013785                                                                             |
| Caenorhabditis elegans  | ribose-phosphate 3-epimerase                     |  | 6 | C:GO:0005625;<br>P:GO:0009052;<br>C:GO:0005792;<br>F:GO:0004750;<br>F:GO:0048029;<br>F:GO:0005515 | - | EC:5.1.3.1                                                                                        | IPR000056; IPR011060; IPR013785                                                                             |
| Brugia malayi           | ubiquitin-conjugating enzyme family protein      |  | 1 | P:GO:0019538                                                                                      | - |                                                                                                   | -                                                                                                           |
|                         | -                                                |  | 0 |                                                                                                   |   |                                                                                                   | -                                                                                                           |
| Caenorhabditis briggsae | tubulin-specific chaperone e                     |  | 3 | P:GO:0009987;<br>P:GO:0008340;<br>P:GO:0016043                                                    | - |                                                                                                   | IPR001611; IPR018087;<br>G3DSA:3.80.10.10 (GENE3D),<br>PTHR23154 (PANTHER), SSF52058<br>(SUPERFAMILY)       |

|                         |                                                                             |    |                                                                                                                                                                                                                                                                                                                                                                                                                                                                        |                                                         |                                                                                                                                     |
|-------------------------|-----------------------------------------------------------------------------|----|------------------------------------------------------------------------------------------------------------------------------------------------------------------------------------------------------------------------------------------------------------------------------------------------------------------------------------------------------------------------------------------------------------------------------------------------------------------------|---------------------------------------------------------|-------------------------------------------------------------------------------------------------------------------------------------|
| Bos taurus              | filamin alpha                                                               | 28 | F:GO:0004871;<br>C:GO:0005802;<br>P:GO:0043433;<br>P:GO:0034394;<br>C:GO:0015629;<br>P:GO:0051220;<br>P:GO:0050821;<br>C:GO:0005576;<br>C:GO:0005829;<br>F:GO:0001948;<br>P:GO:0051764;<br>P:GO:0043123;<br>F:GO:0051015;<br>F:GO:0048365;<br>P:GO:0045022;<br>P:GO:0007195;<br>F:GO:0042803;<br>F:GO:0034989;<br>P:GO:0031532;<br>F:GO:0034988;<br>C:GO:0005886;<br>F:GO:0008134;<br>P:GO:0042177;<br>C:GO:0005634;<br>P:GO:0042993;<br>C:GO:0005938;<br>P:GO:0043113 | -                                                       | -                                                                                                                                   |
|                         | -                                                                           | 0  |                                                                                                                                                                                                                                                                                                                                                                                                                                                                        |                                                         | -                                                                                                                                   |
| Caenorhabditis elegans  | trpa cation channel homolog family member (trpa-1)                          | 0  |                                                                                                                                                                                                                                                                                                                                                                                                                                                                        |                                                         | SignalP (SIGNALP)                                                                                                                   |
|                         | -                                                                           | 0  |                                                                                                                                                                                                                                                                                                                                                                                                                                                                        |                                                         | SignalP (SIGNALP)                                                                                                                   |
| Xenopus laevis          | dolichyl pyrophosphate man9 c2 alpha- -glucosyltransferase                  | 4  | P:GO:0006487;<br>F:GO:0046527;<br>P:GO:0000003;<br>C:GO:0016020                                                                                                                                                                                                                                                                                                                                                                                                        | -                                                       | IPR004856                                                                                                                           |
|                         | -                                                                           | 0  |                                                                                                                                                                                                                                                                                                                                                                                                                                                                        |                                                         | -                                                                                                                                   |
|                         | -                                                                           | 0  |                                                                                                                                                                                                                                                                                                                                                                                                                                                                        |                                                         | -                                                                                                                                   |
| Loa loa                 | yoq5_caee1_ame: full=uncharacterized protein                                | 1  | F:GO:0005515                                                                                                                                                                                                                                                                                                                                                                                                                                                           | -                                                       | -                                                                                                                                   |
|                         | -                                                                           | 0  |                                                                                                                                                                                                                                                                                                                                                                                                                                                                        |                                                         | -                                                                                                                                   |
|                         | -                                                                           | 0  |                                                                                                                                                                                                                                                                                                                                                                                                                                                                        |                                                         | SignalP (SIGNALP)                                                                                                                   |
|                         | -                                                                           | 0  |                                                                                                                                                                                                                                                                                                                                                                                                                                                                        |                                                         | -                                                                                                                                   |
| Caenorhabditis briggsae | briggsae cbr-tag-241 protein                                                | 0  |                                                                                                                                                                                                                                                                                                                                                                                                                                                                        |                                                         | -                                                                                                                                   |
|                         | -                                                                           | 0  |                                                                                                                                                                                                                                                                                                                                                                                                                                                                        |                                                         | -                                                                                                                                   |
| Caenorhabditis briggsae | ras family protein                                                          | 6  | F:GO:0005525;<br>C:GO:0005622;<br>C:GO:0016020;<br>P:GO:0007264;<br>F:GO:0003924;<br>P:GO:0015031                                                                                                                                                                                                                                                                                                                                                                      | EC:3.6.5.1;<br>EC:3.6.5.2;<br>EC:3.6.5.3;<br>EC:3.6.5.4 | IPR013753; IPR020851;<br>G3DSA:3.40.50.300 (GENE3D),<br>PTHR11708 (PANTHER),<br>PTHR11708:SF28 (PANTHER),<br>SSF52540 (SUPERFAMILY) |
|                         | -                                                                           | 0  |                                                                                                                                                                                                                                                                                                                                                                                                                                                                        |                                                         | -                                                                                                                                   |
|                         | -                                                                           | 0  |                                                                                                                                                                                                                                                                                                                                                                                                                                                                        |                                                         | -                                                                                                                                   |
| Caenorhabditis briggsae | innexin family protein                                                      | 3  | C:GO:0016021;<br>C:GO:0005921;<br>F:GO:0008234                                                                                                                                                                                                                                                                                                                                                                                                                         | -                                                       | SignalP (SIGNALP)                                                                                                                   |
| Caenorhabditis elegans  | high incidence of males (increased x chromosome loss) family member (him-6) | 0  |                                                                                                                                                                                                                                                                                                                                                                                                                                                                        |                                                         | -                                                                                                                                   |



|                           |                                                                                                         |   |                                                                                                                                                      |                                                                                  |            |                                                                                                                                |
|---------------------------|---------------------------------------------------------------------------------------------------------|---|------------------------------------------------------------------------------------------------------------------------------------------------------|----------------------------------------------------------------------------------|------------|--------------------------------------------------------------------------------------------------------------------------------|
| Caenorhabditis elegans    | glycerol-3-phosphate dehydroge-se                                                                       | 9 | C:GO:0009331;<br>P:GO:0007629;<br>P:GO:0006641;<br>F:GO:0004367;<br>P:GO:0006127;<br>F:GO:0051287;<br>P:GO:0046168;<br>F:GO:0042803;<br>C:GO:0005811 | -                                                                                | EC:1.1.1.8 | IPR006109; IPR006168; IPR008927;<br>IPR011128; IPR013328; IPR016040;<br>IPR017751; SSF51735 (SUPERFAMILY)                      |
| Caenorhabditis elegans    | briggsae cbr-itx-1 protein                                                                              | 0 |                                                                                                                                                      |                                                                                  |            | -                                                                                                                              |
| Caenorhabditis elegans    | methyltransferase like 5                                                                                | 4 | F:GO:0008649;<br>F:GO:0003676;<br>F:GO:0005515;<br>P:GO:0032259                                                                                      | -                                                                                |            | PTHR23290 (PANTHER)                                                                                                            |
|                           | -                                                                                                       | 0 |                                                                                                                                                      |                                                                                  |            | SignalP (SIGNALP)                                                                                                              |
|                           | -                                                                                                       | 0 |                                                                                                                                                      |                                                                                  |            | -                                                                                                                              |
|                           | -                                                                                                       | 0 |                                                                                                                                                      |                                                                                  |            | -                                                                                                                              |
| Caenorhabditis briggsae   | alkmo_caeel ame: full=alkylglycerol monooxyge-se homolog<br>ame: full=transmembrane protein 195 homolog | 0 |                                                                                                                                                      | P:GO:0055114;<br>F:GO:0016491;<br>F:GO:0005506;<br>C:GO:0005783;<br>P:GO:0006633 |            | -                                                                                                                              |
| Caenorhabditis elegans    | dipeptidyl peptidase four family member (dpf-6)                                                         | 0 |                                                                                                                                                      | F:GO:0008236;<br>F:GO:0016787                                                    |            | -                                                                                                                              |
| Loa loa                   | gpi transamidase subunit pig-u family protein                                                           | 0 |                                                                                                                                                      | C:GO:0005789;<br>P:GO:0006506;<br>C:GO:0016021                                   |            | IPR009600; SignalP (SIGNALP)                                                                                                   |
|                           | -                                                                                                       | 0 |                                                                                                                                                      |                                                                                  |            | -                                                                                                                              |
| Caenorhabditis sp. PS1010 | hypothetical protein Csp3_JD03.001 [Caenorhabditis sp. PS1010]                                          | 0 |                                                                                                                                                      | F:GO:0005089;<br>P:GO:0035023;<br>C:GO:0005622                                   |            | -                                                                                                                              |
| Saccoglossus kowalevskii  | receptor for egg jelly 6-like                                                                           | 0 |                                                                                                                                                      |                                                                                  |            | IPR000436; IPR016060; PTHR19325 (PANTHER), PTHR19325:SF25 (PANTHER)                                                            |
| Caenorhabditis elegans    | elegans protein partially confirmed by transcript evidence                                              | 0 |                                                                                                                                                      | F:GO:0005488;<br>P:GO:0007155                                                    |            | IPR000436; IPR016060; PTHR19325 (PANTHER), PTHR19325:SF25 (PANTHER)                                                            |
| Caenorhabditis elegans    | low-density lipoprotein receptor-related protein 2-like                                                 | 8 | C:GO:0043231;<br>F:GO:0005509;<br>C:GO:0016021;<br>F:GO:0004872;<br>F:GO:0005515;<br>C:GO:0044444;<br>P:GO:0008152;<br>P:GO:0006898                  | -                                                                                |            | IPR002172; IPR006210;<br>G3DSA:2.10.25.10 (GENE3D),<br>PTHR10529 (PANTHER),<br>PTHR10529:SF2 (PANTHER), SSF57196 (SUPERFAMILY) |
|                           | -                                                                                                       | 0 |                                                                                                                                                      |                                                                                  |            | SignalP (SIGNALP)                                                                                                              |
|                           | -                                                                                                       | 0 |                                                                                                                                                      |                                                                                  |            | SignalP (SIGNALP)                                                                                                              |
| Brugia malayi             | t family of potassium channels family member (twk-2)                                                    | 0 |                                                                                                                                                      |                                                                                  |            | -                                                                                                                              |
|                           | -                                                                                                       | 0 |                                                                                                                                                      |                                                                                  |            | SignalP (SIGNALP)                                                                                                              |
|                           | -                                                                                                       | 0 |                                                                                                                                                      |                                                                                  |            | IPR000242; G3DSA:3.90.190.10 (GENE3D), PTHR19134 (PANTHER), PTHR19134:SF26 (PANTHER), SSF52799 (SUPERFAMILY)                   |
| Caenorhabditis briggsae   | Hypothetical protein CBG16316 [Caenorhabditis briggsae]                                                 | 0 |                                                                                                                                                      | C:GO:0016021;<br>C:GO:0016020                                                    |            | -                                                                                                                              |
| Caenorhabditis elegans    | cullin 2                                                                                                | 1 | F:GO:0005515                                                                                                                                         | -                                                                                |            | IPR001373; IPR016159;<br>G3DSA:1.20.1310.10 (GENE3D)                                                                           |

|                         |                                                       |    |                                                                                                                                                                       |                               |             |                                                                                         |
|-------------------------|-------------------------------------------------------|----|-----------------------------------------------------------------------------------------------------------------------------------------------------------------------|-------------------------------|-------------|-----------------------------------------------------------------------------------------|
| Caenorhabditis elegans  | excitatory gaba receptor exp-1a                       | 7  | P:GO:0010171;<br>F:GO:0004872;<br>C:GO:0045211;<br>C:GO:0030054;<br>F:GO:0005230;<br>P:GO:0006811;<br>C:GO:0016021                                                    | -                             |             | IPR006201; IPR006202; IPR018000;<br>PTHR18945:SF8 (PANTHER)                             |
| -                       | -                                                     | 0  |                                                                                                                                                                       |                               |             | -                                                                                       |
| Caenorhabditis elegans  | variable abnormal morphology family member (vab-10)   | 1  | F:GO:0005488                                                                                                                                                          | -                             |             | IPR002017; IPR018159;<br>G3DSA:1.20.58.60 (GENE3D),<br>SSF46966 (SUPERFAMILY)           |
| -                       | -                                                     | 0  |                                                                                                                                                                       |                               |             | -                                                                                       |
| -                       | -                                                     | 0  |                                                                                                                                                                       |                               |             | -                                                                                       |
| -                       | -                                                     | 0  |                                                                                                                                                                       |                               |             | -                                                                                       |
| Caenorhabditis elegans  | rap ran-gap family protein                            | 1  | F:GO:0005515                                                                                                                                                          | -                             |             | -                                                                                       |
| -                       | -                                                     | 0  |                                                                                                                                                                       |                               |             | -                                                                                       |
| -                       | -                                                     | 0  |                                                                                                                                                                       |                               |             | -                                                                                       |
| Caenorhabditis briggsae | sushi domain containing                               | 2  | C:GO:0016021;<br>P:GO:0007160                                                                                                                                         | -                             |             | PTHR13802 (PANTHER),<br>PTHR13802:SF1 (PANTHER)                                         |
| -                       | -                                                     | 0  |                                                                                                                                                                       |                               |             | PTHR12846 (PANTHER),<br>PTHR12846:SF2 (PANTHER)                                         |
| Caenorhabditis elegans  | serine threonine-protein phosphatase dullard          | 10 | P:GO:0006470;<br>F:GO:0043169;<br>F:GO:0004563;<br>P:GO:0006998;<br>C:GO:0009536;<br>P:GO:0005975;<br>F:GO:0004722;<br>P:GO:0007275;<br>C:GO:0005635;<br>C:GO:0005789 | -                             | EC:3.2.1.52 | IPR004274; G3DSA:3.40.50.1000<br>(GENE3D), SignalP (SIGNALP),<br>SSF56784 (SUPERFAMILY) |
| Caenorhabditis elegans  | protein unc-79 homolog                                | 0  |                                                                                                                                                                       | C:GO:0016021;<br>C:GO:0016020 |             | PTHR21696 (PANTHER)                                                                     |
| Haemonchus contortus    | glutathione peroxidase                                | 4  | F:GO:0004602;<br>P:GO:0055114;<br>C:GO:0005739;<br>P:GO:0006979                                                                                                       | -                             | EC:1.11.1.9 | IPR000889; IPR012335; IPR012336                                                         |
| Haemonchus contortus    | glutathione peroxidase                                | 4  | F:GO:0004602;<br>P:GO:0055114;<br>C:GO:0005739;<br>P:GO:0006979                                                                                                       | -                             | EC:1.11.1.9 | IPR000889; IPR012335; IPR012336                                                         |
| Loa loa                 | uncoordinated family member (unc-103)                 | 4  | F:GO:0005249;<br>P:GO:0055085;<br>P:GO:0006813;<br>C:GO:0016021                                                                                                       | -                             |             | -                                                                                       |
| -                       | -                                                     | 0  |                                                                                                                                                                       |                               |             | -                                                                                       |
| -                       | -                                                     | 0  |                                                                                                                                                                       |                               |             | -                                                                                       |
| Oryctolagus cuniculus   | small nuclear ribonucleoprotein polypeptides b and b1 | 8  | F:GO:0042802;<br>F:GO:0071208;<br>C:GO:0005683;<br>C:GO:0005654;<br>P:GO:0000387;<br>C:GO:0005681;<br>C:GO:0005829;<br>C:GO:0071204                                   | -                             |             | SignalP (SIGNALP)                                                                       |
| -                       | -                                                     | 0  |                                                                                                                                                                       |                               |             | -                                                                                       |
| -                       | -                                                     | 0  |                                                                                                                                                                       |                               |             | -                                                                                       |
| Caenorhabditis briggsae | elegans protein confirmed by transcript evidence      | 1  | F:GO:0005509                                                                                                                                                          | -                             |             | -                                                                                       |

|                         |                                                        |   |                                                                                                                    |                                                                                                                                                                                                                                                                                                                                                                                   |                                                                                                                                         |                                                 |
|-------------------------|--------------------------------------------------------|---|--------------------------------------------------------------------------------------------------------------------|-----------------------------------------------------------------------------------------------------------------------------------------------------------------------------------------------------------------------------------------------------------------------------------------------------------------------------------------------------------------------------------|-----------------------------------------------------------------------------------------------------------------------------------------|-------------------------------------------------|
| Loa loa                 | haloacid dehaloge-se-like hydrolase family protein     | 2 | P:GO:0008152;<br>F:GO:0003824                                                                                      | -                                                                                                                                                                                                                                                                                                                                                                                 | -                                                                                                                                       |                                                 |
| Caenorhabditis elegans  | leucine rich repeat family protein                     | 7 | P:GO:0040010;<br>P:GO:0045449;<br>P:GO:0016334;<br>P:GO:0000003;<br>P:GO:0016336;<br>F:GO:0005515;<br>P:GO:0009792 | -                                                                                                                                                                                                                                                                                                                                                                                 | IPR001611; G3DSA:3.80.10.10<br>(GENE3D), PTHR10588 (PANTHER),<br>PTHR10588:SF23 (PANTHER), PSS1450<br>(PROFILE), SSF52058 (SUPERFAMILY) |                                                 |
| Vitis vinifera          | protein                                                | 0 |                                                                                                                    |                                                                                                                                                                                                                                                                                                                                                                                   | -                                                                                                                                       |                                                 |
|                         | -                                                      | 0 |                                                                                                                    |                                                                                                                                                                                                                                                                                                                                                                                   | -                                                                                                                                       |                                                 |
| Homo sapiens            | neural precursor cell developmentally down-regulated 8 | 0 |                                                                                                                    |                                                                                                                                                                                                                                                                                                                                                                                   | -                                                                                                                                       |                                                 |
|                         | -                                                      | 0 |                                                                                                                    |                                                                                                                                                                                                                                                                                                                                                                                   | -                                                                                                                                       |                                                 |
|                         | -                                                      | 0 |                                                                                                                    |                                                                                                                                                                                                                                                                                                                                                                                   | -                                                                                                                                       |                                                 |
| Caenorhabditis elegans  | contactin associated 2                                 | 0 |                                                                                                                    | P:GO:0021987;<br>P:GO:0007420;<br>P:GO:0008038;<br>P:GO:0034613;<br>C:GO:0016021;<br>P:GO:0007155;<br>C:GO:0016020;<br>P:GO:0021794;<br>F:GO:0005102;<br>P:GO:0021761;<br>C:GO:0070852;<br>C:GO:0008076;<br>C:GO:0030673;<br>P:GO:0007165;<br>P:GO:0019226;<br>C:GO:0030425;<br>P:GO:0007610;<br>P:GO:0045163;<br>C:GO:0005886;<br>C:GO:0044224;<br>P:GO:0071109;<br>P:GO:0021756 |                                                                                                                                         | PTHR10127 (PANTHER),<br>PTHR10127:SF2 (PANTHER) |
|                         | -                                                      | 0 |                                                                                                                    |                                                                                                                                                                                                                                                                                                                                                                                   | -                                                                                                                                       |                                                 |
|                         | -                                                      | 0 |                                                                                                                    |                                                                                                                                                                                                                                                                                                                                                                                   | -                                                                                                                                       |                                                 |
|                         | -                                                      | 0 |                                                                                                                    |                                                                                                                                                                                                                                                                                                                                                                                   | -                                                                                                                                       |                                                 |
| Loa loa                 | briggsae cbr-pan-1 protein                             | 0 |                                                                                                                    | F:GO:0005515                                                                                                                                                                                                                                                                                                                                                                      | SignalP (SIGNALP)                                                                                                                       |                                                 |
| Caenorhabditis briggsae | briggsae cbr-che-11 protein                            | 0 |                                                                                                                    | F:GO:0005488;<br>F:GO:0003824                                                                                                                                                                                                                                                                                                                                                     | IPR022100; PTHR15722 (PANTHER),<br>PTHR15722:SF7 (PANTHER), SignalP<br>(SIGNALP)                                                        |                                                 |
| Caenorhabditis elegans  | diacylglycerol o-acyltransferase 1                     | 1 | C:GO:0016021                                                                                                       | -                                                                                                                                                                                                                                                                                                                                                                                 | SignalP (SIGNALP)                                                                                                                       |                                                 |
|                         | -                                                      | 0 |                                                                                                                    |                                                                                                                                                                                                                                                                                                                                                                                   | -                                                                                                                                       |                                                 |
| Loa loa                 | r--binding protein 1                                   | 6 | P:GO:0008380;<br>F:GO:0003723;<br>F:GO:0005515;<br>C:GO:0005634;<br>P:GO:0008406;<br>F:GO:0000166                  | -                                                                                                                                                                                                                                                                                                                                                                                 | IPR000504; IPR012677; PTHR10548<br>(PANTHER), SSF54928 (SUPERFAMILY)                                                                    |                                                 |
| Loa loa                 | r--binding protein 1                                   | 6 | P:GO:0008380;<br>F:GO:0003723;<br>F:GO:0005515;<br>C:GO:0005634;<br>P:GO:0008406;<br>F:GO:0000166                  | -                                                                                                                                                                                                                                                                                                                                                                                 | IPR000504; IPR012677; PTHR10548<br>(PANTHER), SSF54928 (SUPERFAMILY)                                                                    |                                                 |

|                                |                                                                            |  |                                                                                                                                       |                                                |             |                                                                                                                   |
|--------------------------------|----------------------------------------------------------------------------|--|---------------------------------------------------------------------------------------------------------------------------------------|------------------------------------------------|-------------|-------------------------------------------------------------------------------------------------------------------|
| Caenorhabditis briggsae        | protein yipf4                                                              |  | F:GO:0005488;<br>3 C:GO:0005622;<br>C:GO:0016021                                                                                      | -                                              |             | -                                                                                                                 |
|                                | -                                                                          |  | 0                                                                                                                                     |                                                |             | -                                                                                                                 |
|                                | -                                                                          |  | 0                                                                                                                                     |                                                |             | -                                                                                                                 |
| Brugia malayi                  | zinc c2h2 type family protein                                              |  | 0                                                                                                                                     | F:GO:0003676;<br>F:GO:0008270;<br>C:GO:0005622 |             | -                                                                                                                 |
| Loa loa                        | sodium bicarbo-te cotransporter                                            |  | 3 C:GO:0016020;<br>F:GO:0015380;<br>P:GO:0006810                                                                                      | -                                              |             | IPR003020; SignalP (SIGNALP)                                                                                      |
| Caenorhabditis elegans         | uncoordi- ted family member (unc-89)                                       |  | 0                                                                                                                                     |                                                |             | -                                                                                                                 |
|                                | -                                                                          |  | 0                                                                                                                                     |                                                |             | SignalP (SIGNALP)                                                                                                 |
|                                | -                                                                          |  | 0                                                                                                                                     |                                                |             | SignalP (SIGNALP)                                                                                                 |
|                                | -                                                                          |  | 0                                                                                                                                     |                                                |             | IPR008160; PTHR10499 (PANTHER),<br>PTHR10499:SF58 (PANTHER)                                                       |
|                                | -                                                                          |  | 0                                                                                                                                     |                                                |             | -                                                                                                                 |
| Trichostrongylus colubriformis | globin                                                                     |  | 6 F:GO:0020037;<br>C:GO:0005615;<br>C:GO:0005737;<br>F:GO:0005344;<br>P:GO:0015671;<br>F:GO:0019825                                   | -                                              |             | -                                                                                                                 |
| Caenorhabditis elegans         | hypothetical protein K11H12.9 [Caenorhabditis elegans]                     |  | 0                                                                                                                                     |                                                |             | SignalP (SIGNALP)                                                                                                 |
| Caenorhabditis elegans         | cadherin domain containing protein                                         |  | 6 P:GO:0007218;<br>C:GO:0016021;<br>P:GO:0007156;<br>F:GO:0005509;<br>C:GO:0005886;<br>F:GO:0004930                                   | -                                              |             | -                                                                                                                 |
| Loa loa                        | hypothetical protein LOAG_04806 [Loa loa]                                  |  | 0                                                                                                                                     |                                                |             | -                                                                                                                 |
| Homo sapiens                   | complement c1s subcomponent precursor                                      |  | 8 F:GO:0005509;<br>P:GO:0006958;<br>P:GO:0045087;<br>P:GO:0010001;<br>P:GO:0006508;<br>F:GO:0004252;<br>C:GO:0005578;<br>P:GO:0051591 | -                                              | EC:3.4.21.0 | IPR001254; IPR009003;<br>G3DSA:2.40.10.10 (GENE3D),<br>PTHR19355 (PANTHER),<br>PTHR19355:SF44 (PANTHER)           |
|                                | -                                                                          |  | 0                                                                                                                                     |                                                |             | -                                                                                                                 |
| Caenorhabditis elegans         | erv1 alr family protein                                                    |  | 2 P:GO:0048518;<br>P:GO:0040011                                                                                                       | -                                              |             | IPR005746; IPR012335; IPR012336;<br>IPR013766; IPR017936; IPR017937;<br>PTHR18929 (PANTHER), SignalP<br>(SIGNALP) |
|                                | -                                                                          |  | 0                                                                                                                                     |                                                |             | -                                                                                                                 |
| Caenorhabditis elegans         | dve (defective proventriculus in drosophila) homolog family member (dve-1) |  | 5 F:GO:0003700;<br>F:GO:0043565;<br>F:GO:0005515;<br>C:GO:0005634;<br>P:GO:0006355                                                    | -                                              |             | IPR001356; IPR009057; IPR012287;<br>PTHR15116 (PANTHER),<br>PTHR15116:SF7 (PANTHER)                               |
| Caenorhabditis elegans         | astacin family metalloendopeptidase farm-1                                 |  | 2 F:GO:0046872;<br>F:GO:0016787                                                                                                       | -                                              |             | IPR003582                                                                                                         |
|                                | -                                                                          |  | 0                                                                                                                                     |                                                |             | -                                                                                                                 |



|                            |                                      |   |                                                                                                                    |                                                                                                                    |              |                                                                                                                       |
|----------------------------|--------------------------------------|---|--------------------------------------------------------------------------------------------------------------------|--------------------------------------------------------------------------------------------------------------------|--------------|-----------------------------------------------------------------------------------------------------------------------|
|                            | -                                    | 0 |                                                                                                                    |                                                                                                                    |              | -                                                                                                                     |
|                            | -                                    | 0 |                                                                                                                    |                                                                                                                    |              | PTHR13373 (PANTHER),<br>PTHR13373:SF2 (PANTHER)                                                                       |
| Branchiostoma floridae     | zinc finger protein 490              | 0 |                                                                                                                    | F:GO:0046872;<br>P:GO:0006355;<br>F:GO:0003676;<br>F:GO:0008270;<br>F:GO:0003677;<br>C:GO:0005634;<br>C:GO:0005622 |              | IPR007087; IPR013087; IPR015880;<br>PTHR11389 (PANTHER), SSF57667<br>(SUPERFAMILY)                                    |
|                            | -                                    | 0 |                                                                                                                    |                                                                                                                    |              | -                                                                                                                     |
|                            | -                                    | 0 |                                                                                                                    |                                                                                                                    |              | SignalP (SIGNALP)                                                                                                     |
| Brugia malayi              | timeless protein                     | 0 |                                                                                                                    |                                                                                                                    |              | -                                                                                                                     |
| Caenorhabditis briggsae    | complexin precursor                  | 4 | C:GO:0005829;<br>F:GO:0019905;<br>P:GO:0006836;<br>P:GO:0006887                                                    | -                                                                                                                  |              | -                                                                                                                     |
|                            | -                                    | 0 |                                                                                                                    |                                                                                                                    |              | SignalP (SIGNALP)                                                                                                     |
| Pediculus humanus corporis | g-protein sig-lling modulator        | 1 | F:GO:0005515                                                                                                       | -                                                                                                                  |              | IPR011990; IPR013026; IPR019734;<br>PTHR10098 (PANTHER),<br>PTHR10098:SF11 (PANTHER),<br>SSF48452 (SUPERFAMILY)       |
|                            | -                                    | 0 |                                                                                                                    |                                                                                                                    |              | -                                                                                                                     |
|                            | -                                    | 0 |                                                                                                                    |                                                                                                                    |              | -                                                                                                                     |
| Caenorhabditis elegans     | briggsae cbr-lpr-2 protein           | 2 | C:GO:0016021;<br>F:GO:0005488                                                                                      | -                                                                                                                  |              | SignalP (SIGNALP)                                                                                                     |
|                            | -                                    | 0 |                                                                                                                    |                                                                                                                    |              | -                                                                                                                     |
| Caenorhabditis elegans     | serine threonine protein ki-se       | 7 | P:GO:0043254;<br>P:GO:0006355;<br>F:GO:0016874;<br>F:GO:0005524;<br>F:GO:0016887;<br>F:GO:0008134;<br>C:GO:0005634 | -                                                                                                                  |              | IPR011704; G3DSA:3.40.50.300<br>(GENE3D), PTHR22908 (PANTHER),<br>PTHR22908:SF13 (PANTHER),<br>SSF52540 (SUPERFAMILY) |
|                            | -                                    | 0 |                                                                                                                    |                                                                                                                    |              | -                                                                                                                     |
| Loa loa                    | serine threonine protein phosphatase | 1 | F:GO:0004721                                                                                                       | -                                                                                                                  | EC:3.1.3.16  | IPR004843; IPR006186;<br>G3DSA:3.60.21.10 (GENE3D),<br>SSF56300 (SUPERFAMILY)                                         |
|                            | -                                    | 0 |                                                                                                                    |                                                                                                                    |              | IPR008160; PTHR10499 (PANTHER),<br>PTHR10499:SF125 (PANTHER)                                                          |
| Caenorhabditis briggsae    | mitogen-activated protein ki-se      | 3 | F:GO:0004707;<br>P:GO:0006468;<br>F:GO:0005524                                                                     | -                                                                                                                  | EC:2.7.11.24 | -                                                                                                                     |
|                            | -                                    | 0 |                                                                                                                    |                                                                                                                    |              | -                                                                                                                     |
| Loa loa                    | trehalose 6-phosphate synthase       | 3 | F:GO:0016757;<br>P:GO:0034608;<br>P:GO:0005992                                                                     | -                                                                                                                  |              | -                                                                                                                     |
| Caenorhabditis briggsae    | dual-specificity protein             | 3 | F:GO:0004725;<br>P:GO:0006470;<br>F:GO:0008138                                                                     | -                                                                                                                  | EC:3.1.3.48  | -                                                                                                                     |
| Brugia malayi              | mgc84124 protein                     | 0 |                                                                                                                    | F:GO:0003676                                                                                                       |              | -                                                                                                                     |
|                            | -                                    | 0 |                                                                                                                    |                                                                                                                    |              | SignalP (SIGNALP)                                                                                                     |

|                         |                                                        |   |                                                                                                                                     |                                                                                                                                                                                                                                                                                                                                                                  |              |                                                                                  |                      |
|-------------------------|--------------------------------------------------------|---|-------------------------------------------------------------------------------------------------------------------------------------|------------------------------------------------------------------------------------------------------------------------------------------------------------------------------------------------------------------------------------------------------------------------------------------------------------------------------------------------------------------|--------------|----------------------------------------------------------------------------------|----------------------|
| Caenorhabditis elegans  | mannosyl-oligosaccharide alpha- -mannosidase           | 7 | C:GO:0000139;<br>F:GO:0004571;<br>P:GO:0006487;<br>F:GO:0005509;<br>P:GO:0008340;<br>P:GO:0042221;<br>C:GO:0016021                  | -                                                                                                                                                                                                                                                                                                                                                                | EC:3.2.1.113 | IPR001382; PTHR11742:SF6 (PANTHER)                                               |                      |
|                         | -                                                      | 0 |                                                                                                                                     |                                                                                                                                                                                                                                                                                                                                                                  |              | PTHR21512 (PANTHER),<br>PTHR21512:SF6 (PANTHER)                                  |                      |
| Caenorhabditis elegans  | ataxia telangiectasia mutated                          | 4 | F:GO:0016301;<br>F:GO:0005524;<br>F:GO:0016773;<br>C:GO:0000785                                                                     | -                                                                                                                                                                                                                                                                                                                                                                | EC:2.7.1.0   | IPR000403; IPR011009; IPR015519;<br>PTHR11139 (PANTHER)                          |                      |
| Caenorhabditis briggsae | receptor tyrosine ki-se-like orphan receptor           | 0 |                                                                                                                                     | F:GO:0016787;<br>P:GO:0006468;<br>F:GO:0005044;<br>F:GO:0005524;<br>F:GO:0016301;<br>C:GO:0016021;<br>F:GO:0008236;<br>C:GO:0016020;<br>F:GO:0008233;<br>F:GO:0004672;<br>F:GO:0004872;<br>F:GO:0004252;<br>F:GO:0000166;<br>F:GO:0003824;<br>P:GO:0006508;<br>F:GO:0005488;<br>F:GO:0016740;<br>F:GO:0005515;<br>F:GO:0004713;<br>P:GO:0007596;<br>C:GO:0005576 |              |                                                                                  | IPR000001; IPR013806 |
|                         | -                                                      | 0 |                                                                                                                                     |                                                                                                                                                                                                                                                                                                                                                                  |              | SignalP (SIGNALP)                                                                |                      |
| Caenorhabditis briggsae | transmembrane protein adipocyte-associated 1 isoform 1 | 1 | C:GO:0016021                                                                                                                        | -                                                                                                                                                                                                                                                                                                                                                                |              | IPR018781; SignalP (SIGNALP)                                                     |                      |
|                         | -                                                      | 0 |                                                                                                                                     |                                                                                                                                                                                                                                                                                                                                                                  |              | -                                                                                |                      |
|                         | -                                                      | 0 |                                                                                                                                     |                                                                                                                                                                                                                                                                                                                                                                  |              | -                                                                                |                      |
|                         | -                                                      | 0 |                                                                                                                                     |                                                                                                                                                                                                                                                                                                                                                                  |              | -                                                                                |                      |
| Caenorhabditis elegans  | lethal family member (let-716)                         | 8 | P:GO:0009792;<br>P:GO:0002119;<br>F:GO:0005488;<br>C:GO:0005622;<br>P:GO:0018991;<br>P:GO:0040010;<br>P:GO:0008406;<br>P:GO:0006396 | -                                                                                                                                                                                                                                                                                                                                                                |              | IPR003029; IPR016027; IPR022967;<br>SignalP (SIGNALP)                            |                      |
| Caenorhabditis briggsae | elegans protein confirmed by transcript evidence       | 0 |                                                                                                                                     | F:GO:0003674;<br>C:GO:0005575                                                                                                                                                                                                                                                                                                                                    |              | IPR019410; G3DSA:3.40.50.150 (GENE3D), PTHR14614 (PANTHER),<br>SignalP (SIGNALP) |                      |
|                         | -                                                      | 0 |                                                                                                                                     |                                                                                                                                                                                                                                                                                                                                                                  |              | SignalP (SIGNALP)                                                                |                      |
|                         | -                                                      | 0 |                                                                                                                                     |                                                                                                                                                                                                                                                                                                                                                                  |              | -                                                                                |                      |
|                         | -                                                      | 0 |                                                                                                                                     |                                                                                                                                                                                                                                                                                                                                                                  |              | -                                                                                |                      |
|                         | -                                                      | 0 |                                                                                                                                     |                                                                                                                                                                                                                                                                                                                                                                  |              | -                                                                                |                      |

|                         |                                                            |    |                                                                                                                                                                                                         |                                                                                                                                                      |             |                                                                                                                       |
|-------------------------|------------------------------------------------------------|----|---------------------------------------------------------------------------------------------------------------------------------------------------------------------------------------------------------|------------------------------------------------------------------------------------------------------------------------------------------------------|-------------|-----------------------------------------------------------------------------------------------------------------------|
| Caenorhabditis elegans  | serine threonine protein                                   | 7  | C:GO:0005737;<br>P:GO:0006468;<br>F:GO:0046872;<br>P:GO:0007275;<br>F:GO:0005524;<br>C:GO:0005634;<br>F:GO:0004674                                                                                      | -                                                                                                                                                    | EC:2.7.11.0 | IPR011009; IPR017442; IPR020636;<br>IPR020666; G3DSA:1.10.510.10<br>(GENE3D)                                          |
|                         | -                                                          | 0  |                                                                                                                                                                                                         |                                                                                                                                                      |             | SignalP (SIGNALP)                                                                                                     |
|                         | -                                                          | 0  |                                                                                                                                                                                                         |                                                                                                                                                      |             | -                                                                                                                     |
| Caenorhabditis elegans  | elegans protein confirmed by transcript evidence           | 0  |                                                                                                                                                                                                         |                                                                                                                                                      |             | PTHR11232 (PANTHER),<br>PTHR11232:SF2 (PANTHER)                                                                       |
|                         | -                                                          | 0  |                                                                                                                                                                                                         |                                                                                                                                                      |             | -                                                                                                                     |
|                         | -                                                          | 0  |                                                                                                                                                                                                         |                                                                                                                                                      |             | -                                                                                                                     |
| Brugia malayi           | tyrosine-protein ki-se fps85d                              | 2  | F:GO:0005488;<br>F:GO:0004672                                                                                                                                                                           | -                                                                                                                                                    |             | IPR000980; IPR020685; IPR020764;<br>SSF55550 (SUPERFAMILY)                                                            |
| Caenorhabditis briggsae | briggsae cbr-grl-4 protein                                 | 0  |                                                                                                                                                                                                         |                                                                                                                                                      |             | SignalP (SIGNALP)                                                                                                     |
| Caenorhabditis elegans  | elegans protein partially confirmed by transcript evidence | 0  |                                                                                                                                                                                                         |                                                                                                                                                      |             | -                                                                                                                     |
| Caenorhabditis elegans  | elegans protein partially confirmed by transcript evidence | 0  |                                                                                                                                                                                                         |                                                                                                                                                      |             | -                                                                                                                     |
|                         | -                                                          | 0  |                                                                                                                                                                                                         |                                                                                                                                                      |             | -                                                                                                                     |
| Loa loa                 | beta like 1                                                | 1  | F:GO:0042802                                                                                                                                                                                            | -                                                                                                                                                    |             | PTHR14978 (PANTHER)                                                                                                   |
|                         | -                                                          | 0  |                                                                                                                                                                                                         |                                                                                                                                                      |             | -                                                                                                                     |
|                         | -                                                          | 0  |                                                                                                                                                                                                         |                                                                                                                                                      |             | IPR018469                                                                                                             |
|                         | -                                                          | 0  |                                                                                                                                                                                                         |                                                                                                                                                      |             | -                                                                                                                     |
| Caenorhabditis elegans  | elegans protein partially confirmed by transcript evidence | 0  |                                                                                                                                                                                                         | C:GO:0016021;<br>F:GO:0005529;<br>C:GO:0005578;<br>F:GO:0005201;<br>P:GO:0040010;<br>P:GO:0007160;<br>F:GO:0005509;<br>P:GO:0007155;<br>F:GO:0005488 |             | -                                                                                                                     |
| Caenorhabditis elegans  | temporarily assigned gene -me family member (tag-344)      | 0  |                                                                                                                                                                                                         | F:GO:0004672;<br>P:GO:0030154;<br>F:GO:0005524;<br>F:GO:0000287;<br>F:GO:0000166;<br>P:GO:0006468;<br>F:GO:0004674                                   |             | -                                                                                                                     |
| Caenorhabditis briggsae | kiaa0999 protein                                           | 7  | C:GO:0005737;<br>P:GO:0006468;<br>F:GO:0046872;<br>P:GO:0007275;<br>F:GO:0005524;<br>C:GO:0005634;<br>F:GO:0004674                                                                                      | -                                                                                                                                                    | EC:2.7.11.0 | IPR000719; IPR011009; IPR017442;<br>IPR020636; IPR020666;<br>G3DSA:1.10.510.10 (GENE3D)                               |
| Caenorhabditis elegans  | briggsae cbr-dep-1 protein                                 | 12 | P:GO:0006470;<br>P:GO:0007417;<br>C:GO:0030424;<br>C:GO:0016021;<br>P:GO:0040027;<br>P:GO:0040026;<br>F:GO:0005001;<br>P:GO:0008045;<br>P:GO:0007424;<br>C:GO:0045177;<br>C:GO:0005886;<br>F:GO:0004728 | -                                                                                                                                                    |             | IPR000242; G3DSA:3.90.190.10<br>(GENE3D), PTHR19134 (PANTHER),<br>PTHR19134:SF75 (PANTHER),<br>SSF52799 (SUPERFAMILY) |



|                               |                                                                    |   |                                                                                  |                                                                                  |                                                                                                                                            |
|-------------------------------|--------------------------------------------------------------------|---|----------------------------------------------------------------------------------|----------------------------------------------------------------------------------|--------------------------------------------------------------------------------------------------------------------------------------------|
|                               | -                                                                  | 0 |                                                                                  |                                                                                  | -                                                                                                                                          |
|                               | -                                                                  | 0 |                                                                                  |                                                                                  | -                                                                                                                                          |
|                               | -                                                                  | 0 |                                                                                  |                                                                                  | -                                                                                                                                          |
|                               | -                                                                  | 0 |                                                                                  |                                                                                  | SignalP (SIGNALP)                                                                                                                          |
|                               | -                                                                  | 0 |                                                                                  |                                                                                  | -                                                                                                                                          |
|                               | -                                                                  | 0 |                                                                                  |                                                                                  | -                                                                                                                                          |
| Caenorhabditis elegans        | atp-binding sub-family member 8                                    | 4 | F:GO:0016887;<br>P:GO:0006810;<br>C:GO:0016020;<br>F:GO:0000166                  | -                                                                                | IPR001140; IPR011527; IPR017940;<br>G3DSA:1.20.1560.10 (GENE3D),<br>PTHR19242 (PANTHER),<br>PTHR19242:SF77 (PANTHER), SignalP<br>(SIGNALP) |
| Caenorhabditis elegans        | briggsae cbr-elks-1 protein                                        | 5 | P:GO:0044260;<br>F:GO:0005515;<br>P:GO:0044238;<br>P:GO:0050794;<br>C:GO:0044444 | -                                                                                | IPR019323; PD968187 (PRODOM),<br>PTHR18861 (PANTHER)                                                                                       |
| Caenorhabditis briggsae       | briggsae cbr-elks-1 protein                                        | 1 | F:GO:0005515                                                                     | -                                                                                | -                                                                                                                                          |
| Caenorhabditis elegans        | briggsae cbr-elks-1 protein                                        | 5 | P:GO:0044260;<br>F:GO:0005515;<br>P:GO:0044238;<br>P:GO:0050794;<br>C:GO:0044444 | -                                                                                | IPR019323; PD968187 (PRODOM),<br>PTHR18861 (PANTHER)                                                                                       |
| Caenorhabditis elegans        | briggsae cbr-elks-1 protein                                        | 5 | P:GO:0044260;<br>F:GO:0005515;<br>P:GO:0044238;<br>P:GO:0050794;<br>C:GO:0044444 | -                                                                                | IPR019323; PD968187 (PRODOM),<br>PTHR18861 (PANTHER)                                                                                       |
|                               | -                                                                  | 0 |                                                                                  |                                                                                  | IPR013032                                                                                                                                  |
| Angiostrongylus cantonensis   | hypothetical protein [Angiostrongylus cantonensis]                 | 0 |                                                                                  |                                                                                  | -                                                                                                                                          |
|                               | -                                                                  | 0 |                                                                                  |                                                                                  | -                                                                                                                                          |
| Caenorhabditis briggsae       | ring finger protein 26                                             | 1 | F:GO:0005488                                                                     | -                                                                                | -                                                                                                                                          |
|                               | -                                                                  | 0 |                                                                                  |                                                                                  | SignalP (SIGNALP)                                                                                                                          |
| Caenorhabditis elegans        | dystrophin-like phenotypic and capon related family member (dyc-1) | 5 | P:GO:0046662;<br>F:GO:0005515;<br>P:GO:0040017;<br>C:GO:0016010;<br>P:GO:0046716 | -                                                                                | -                                                                                                                                          |
|                               | -                                                                  | 0 |                                                                                  |                                                                                  | -                                                                                                                                          |
| Xenopus laevis                | sumo ligase                                                        | 0 |                                                                                  | F:GO:0016874;<br>F:GO:0008270                                                    | -                                                                                                                                          |
| Caenorhabditis elegans        | cg12367 cg12367-pa                                                 | 0 |                                                                                  | F:GO:0003674;<br>P:GO:0006457;<br>P:GO:0008150;<br>F:GO:0003725;<br>C:GO:0005622 | G3DSA:3.40.50.150 (GENE3D)                                                                                                                 |
| Strongylocentrotus purpuratus | contactin associated protein                                       | 0 |                                                                                  |                                                                                  | IPR001304; IPR016186; IPR016187                                                                                                            |
|                               | -                                                                  | 0 |                                                                                  |                                                                                  | -                                                                                                                                          |
| Caenorhabditis elegans        | kinesin-like protein family member (klp-12)                        | 4 | P:GO:0009792;<br>F:GO:0005515;<br>P:GO:0007067;<br>F:GO:0003824                  | -                                                                                | IPR001680; IPR011046; IPR015943;<br>IPR017986; IPR019781; IPR019782;<br>PTHR16012 (PANTHER),<br>PTHR16012:SF173 (PANTHER)                  |

|                             |                                |   |                                                                 |                                                                                                                                                                       |             |                                                                                              |
|-----------------------------|--------------------------------|---|-----------------------------------------------------------------|-----------------------------------------------------------------------------------------------------------------------------------------------------------------------|-------------|----------------------------------------------------------------------------------------------|
| Chlorella variabilis        | succinyl- alpha subunit        | 0 |                                                                 | F:GO:0016874;<br>F:GO:0004776;<br>F:GO:0004775;<br>F:GO:0000166;<br>F:GO:0005524;<br>P:GO:0006099;<br>F:GO:0003824;<br>F:GO:0003878;<br>P:GO:0008152;<br>F:GO:0005488 |             | IPR016102; PTHR11117 (PANTHER)                                                               |
|                             | -                              | 0 |                                                                 |                                                                                                                                                                       |             | -                                                                                            |
| Angiostrongylus cantonensis | -nos3 protein                  | 1 | F:GO:0005488                                                    |                                                                                                                                                                       |             | -                                                                                            |
|                             | -                              | 0 |                                                                 |                                                                                                                                                                       |             | -                                                                                            |
| Pan troglodytes             | copine v                       | 2 | C:GO:0043025;<br>C:GO:0043005                                   |                                                                                                                                                                       |             | IPR000008; IPR008973; IPR018029;<br>G3DSA:2.60.40.150 (GENE3D),<br>PTHR10857 (PANTHER)       |
| Trichoplax adhaerens        | ring finger protein 138        | 0 |                                                                 | F:GO:0016874;<br>F:GO:0019901;<br>F:GO:0008270;<br>C:GO:0005575;<br>C:GO:0005622;<br>F:GO:0005515;<br>F:GO:0046872;<br>P:GO:0016055;<br>P:GO:0008150                  |             | IPR001841; IPR013083; IPR017907;<br>PTHR10825 (PANTHER), SSF57850<br>(SUPERFAMILY)           |
|                             | -                              | 0 |                                                                 |                                                                                                                                                                       |             | -                                                                                            |
| Loa loa                     | leucyl-tr- synthetase          | 4 | C:GO:0005737;<br>F:GO:0004823;<br>P:GO:0006429;<br>F:GO:0005524 |                                                                                                                                                                       | EC:6.1.1.4  | IPR002300; IPR002302; IPR014729;<br>PTHR11946 (PANTHER), SSF52374<br>(SUPERFAMILY)           |
| Caenorhabditis elegans      | ulk protein ki-se              | 4 | P:GO:0006468;<br>F:GO:0005524;<br>P:GO:0000003;<br>F:GO:0004674 |                                                                                                                                                                       | EC:2.7.11.0 | -                                                                                            |
|                             | -                              | 0 |                                                                 |                                                                                                                                                                       |             | -                                                                                            |
| Ancylostoma caninum         | lyr motif-containing protein 4 | 0 |                                                                 | F:GO:0003674;<br>P:GO:0008150;<br>C:GO:0005575;<br>C:GO:0005634                                                                                                       |             | IPR008139; IPR011001; PTHR21579<br>(PANTHER), PTHR21579:SF6<br>(PANTHER), SignalP (SIGNALP)  |
| Ancylostoma caninum         | lyr motif-containing protein 4 | 0 |                                                                 | C:GO:0005739;<br>F:GO:0003674;<br>P:GO:0008150;<br>C:GO:0005575;<br>C:GO:0005634                                                                                      |             | -                                                                                            |
| Caenorhabditis briggsae     | acyl- thioesterase ii          | 1 | P:GO:0019915                                                    |                                                                                                                                                                       |             | IPR003703; G3DSA:3.10.129.10<br>(GENE3D), PTHR11066:SF7<br>(PANTHER), SSF54637 (SUPERFAMILY) |

|                             |                                                         |    |                                                                                                                                                                                                                                                                                                                                                                                                                                                                                         |                                                |   |                                                            |
|-----------------------------|---------------------------------------------------------|----|-----------------------------------------------------------------------------------------------------------------------------------------------------------------------------------------------------------------------------------------------------------------------------------------------------------------------------------------------------------------------------------------------------------------------------------------------------------------------------------------|------------------------------------------------|---|------------------------------------------------------------|
| Macaca mulatta              | amyloid beta a4 protein                                 | 53 | C:GO:0043198;<br>F:GO:0016504;<br>F:GO:0008233;<br>C:GO:0019717;<br>P:GO:0050885;<br>F:GO:0008201;<br>P:GO:0035235;<br>F:GO:0004867;<br>P:GO:0007176;<br>P:GO:0050803;<br>P:GO:0016358;<br>C:GO:0031594;<br>P:GO:0000085;<br>F:GO:0046872;<br>C:GO:0035253;<br>P:GO:0040014;<br>P:GO:0030900;<br>P:GO:0001967;<br>P:GO:0051402;<br>P:GO:0008542;<br>C:GO:0030424;<br>C:GO:0051233;<br>P:GO:0016199;<br>P:GO:0045944;<br>P:GO:0007219;<br>C:GO:0005887;<br>C:GO:0048471;<br>F:GO:0003824 | -                                              | - | -                                                          |
| Brugia malayi               | leucine-rich repeat-containing protein 47               | 1  | F:GO:0003824                                                                                                                                                                                                                                                                                                                                                                                                                                                                            | -                                              | - | -                                                          |
| Angiostrongylus cantonensis | cuticular collagen                                      | 6  | P:GO:0019915;<br>P:GO:0006952;<br>C:GO:0016021;<br>F:GO:0042302;<br>P:GO:0010171;<br>F:GO:0005515                                                                                                                                                                                                                                                                                                                                                                                       | -                                              | - | -                                                          |
| -                           | -                                                       | 0  |                                                                                                                                                                                                                                                                                                                                                                                                                                                                                         |                                                |   | -                                                          |
| -                           | -                                                       | 0  |                                                                                                                                                                                                                                                                                                                                                                                                                                                                                         |                                                |   | -                                                          |
| -                           | -                                                       | 0  |                                                                                                                                                                                                                                                                                                                                                                                                                                                                                         |                                                |   | SignalP (SIGNALP)                                          |
| -                           | -                                                       | 0  |                                                                                                                                                                                                                                                                                                                                                                                                                                                                                         |                                                |   | SignalP (SIGNALP)                                          |
| Caenorhabditis briggsae     | Hypothetical protein CBG04283 [Caenorhabditis briggsae] | 0  |                                                                                                                                                                                                                                                                                                                                                                                                                                                                                         | F:GO:0008270;<br>F:GO:0005515;<br>F:GO:0004842 |   | -                                                          |
| Caenorhabditis elegans      | yrr5_caeel ame: full=uncharacterized protein            | 0  |                                                                                                                                                                                                                                                                                                                                                                                                                                                                                         |                                                |   | -                                                          |
| Danio rerio                 | -nos homolog 1                                          | 2  | C:GO:0005737;<br>F:GO:0046872                                                                                                                                                                                                                                                                                                                                                                                                                                                           | -                                              |   | IPR008705                                                  |
| Caenorhabditis elegans      | atp-binding sub-family d member 4                       | 4  | F:GO:0016887;<br>P:GO:0006810;<br>C:GO:0016020;<br>F:GO:0000166                                                                                                                                                                                                                                                                                                                                                                                                                         | -                                              |   | IPR010509; PTHR11384 (PANTHER),<br>PTHR11384:SF3 (PANTHER) |
| -                           | -                                                       | 0  |                                                                                                                                                                                                                                                                                                                                                                                                                                                                                         |                                                |   | -                                                          |

|                         |                                             |    |                                                                                                                                                                                        |                                                                 |            |                                                                                                                |
|-------------------------|---------------------------------------------|----|----------------------------------------------------------------------------------------------------------------------------------------------------------------------------------------|-----------------------------------------------------------------|------------|----------------------------------------------------------------------------------------------------------------|
| Pongo abelii            | keratin 18                                  | 11 | P:GO:0043000;<br>P:GO:0007049;<br>P:GO:0033209;<br>C:GO:0034451;<br>F:GO:0005515;<br>C:GO:0045095;<br>C:GO:0048471;<br>P:GO:0044419;<br>P:GO:0009653;<br>F:GO:0005198;<br>P:GO:0043066 | -                                                               | -          |                                                                                                                |
| Caenorhabditis elegans  | abc transporter                             | 11 | P:GO:0070574;<br>C:GO:0016021;<br>C:GO:0005743;<br>F:GO:0042626;<br>P:GO:0015886;<br>C:GO:0043190;<br>F:GO:0015232;<br>C:GO:0005774;<br>F:GO:0005524;<br>F:GO:0015086;<br>P:GO:0046686 | -                                                               |            | G3DSA:1.20.1560.10 (GENE3D),<br>PTHR19242 (PANTHER),<br>PTHR19242:SF69 (PANTHER), SignalP<br>(SIGNALP)         |
|                         | -                                           | 0  |                                                                                                                                                                                        |                                                                 |            | -                                                                                                              |
| Loa loa                 | myosin xviiia                               | 0  |                                                                                                                                                                                        | F:GO:0005524;<br>F:GO:0003774;<br>F:GO:0005515;<br>C:GO:0016459 |            | SignalP (SIGNALP)                                                                                              |
|                         | -                                           | 0  |                                                                                                                                                                                        |                                                                 |            | -                                                                                                              |
| Caenorhabditis briggsae | coenzyme q3 methyltransferase ( cerevisiae) | 6  | P:GO:0006071;<br>P:GO:0002119;<br>P:GO:0006744;<br>F:GO:0008171;<br>P:GO:0008340;<br>C:GO:0005739                                                                                      | -                                                               |            | IPR013216; G3DSA:3.40.50.150<br>(GENE3D), PTHR23134 (PANTHER),<br>SSF53335 (SUPERFAMILY)                       |
| Caenorhabditis briggsae | coenzyme q3 methyltransferase ( cerevisiae) | 6  | P:GO:0006071;<br>P:GO:0002119;<br>P:GO:0006744;<br>F:GO:0008171;<br>P:GO:0008340;<br>C:GO:0005739                                                                                      | -                                                               |            | -                                                                                                              |
| Caenorhabditis elegans  | atg2b protein                               | 0  |                                                                                                                                                                                        | F:GO:0003674;<br>P:GO:0008150                                   |            | IPR015412; PTHR13190 (PANTHER),<br>PTHR13190:SF2 (PANTHER)                                                     |
| Brugia malayi           | in family member (ttn-1)                    | 4  | P:GO:0009792;<br>P:GO:0006468;<br>F:GO:0004672;<br>F:GO:0005524                                                                                                                        | -                                                               |            | IPR007110; IPR013098; IPR013783;<br>PTHR19897 (PANTHER),<br>PTHR19897:SF5 (PANTHER), SSF48726<br>(SUPERFAMILY) |
| Brugia malayi           | cop9 sig-losome complex subunit 6           | 1  | P:GO:0050821                                                                                                                                                                           | -                                                               |            | IPR000555; PTHR10540 (PANTHER),<br>PTHR10540:SF8 (PANTHER)                                                     |
|                         | -                                           | 0  |                                                                                                                                                                                        |                                                                 |            | -                                                                                                              |
|                         | -                                           | 0  |                                                                                                                                                                                        |                                                                 |            | SignalP (SIGNALP)                                                                                              |
|                         | -                                           | 0  |                                                                                                                                                                                        |                                                                 |            | SignalP (SIGNALP)                                                                                              |
| Caenorhabditis briggsae | histidine ammonia-lyase                     | 6  | C:GO:0005625;<br>P:GO:0006548;<br>F:GO:0005515;<br>P:GO:0009058;<br>C:GO:0005829;<br>F:GO:0004397                                                                                      | -                                                               | EC:4.3.1.3 | IPR001106; IPR008948;<br>G3DSA:1.20.200.10 (GENE3D)                                                            |
|                         | -                                           | 0  |                                                                                                                                                                                        |                                                                 |            | -                                                                                                              |

|                         |                                                                                                              |   |                                                                                                                                                      |                                                                                  |                                                         |                                                                                                                                                |
|-------------------------|--------------------------------------------------------------------------------------------------------------|---|------------------------------------------------------------------------------------------------------------------------------------------------------|----------------------------------------------------------------------------------|---------------------------------------------------------|------------------------------------------------------------------------------------------------------------------------------------------------|
| Caenorhabditis briggsae | zinc c2h2 type family protein                                                                                | 0 |                                                                                                                                                      | F:GO:0046872;<br>P:GO:0006355;<br>F:GO:0003676;<br>F:GO:0008270;<br>C:GO:0005622 |                                                         | IPR007087; IPR015880                                                                                                                           |
| -                       | -                                                                                                            | 0 |                                                                                                                                                      |                                                                                  |                                                         | IPR016160                                                                                                                                      |
| Caenorhabditis briggsae | briggsae cbr-dyb-1 protein                                                                                   | 9 | F:GO:0005277;<br>P:GO:0015870;<br>F:GO:0046872;<br>P:GO:0007271;<br>F:GO:0005515;<br>P:GO:0007529;<br>P:GO:0046716;<br>P:GO:0040017;<br>C:GO:0016010 | -                                                                                |                                                         | PTHR11915 (PANTHER),<br>PTHR11915:SF16 (PANTHER)                                                                                               |
| -                       | -                                                                                                            | 0 |                                                                                                                                                      |                                                                                  |                                                         | -                                                                                                                                              |
| -                       | -                                                                                                            | 0 |                                                                                                                                                      |                                                                                  |                                                         | -                                                                                                                                              |
| Caenorhabditis briggsae | elegans protein partially confirmed by transcript evidence                                                   | 0 |                                                                                                                                                      | F:GO:0005515                                                                     |                                                         | PTHR10316 (PANTHER),<br>PTHR10316:SF7 (PANTHER)                                                                                                |
| Caenorhabditis briggsae | elegans protein partially confirmed by transcript evidence                                                   | 0 |                                                                                                                                                      | F:GO:0005515                                                                     |                                                         | PTHR10316 (PANTHER),<br>PTHR10316:SF7 (PANTHER)                                                                                                |
| -                       | -                                                                                                            | 0 |                                                                                                                                                      |                                                                                  |                                                         | SignalP (SIGNALP)                                                                                                                              |
| Loa loa                 | protein-tyrosine phosphatase containing protein                                                              | 6 | P:GO:0009987;<br>F:GO:0004725;<br>F:GO:0005515;<br>C:GO:0005737;<br>C:GO:0005634;<br>C:GO:0005886                                                    | -                                                                                | EC:3.1.3.48                                             | IPR000242; IPR000387; IPR003595;<br>G3DSA:3.90.190.10 (GENE3D),<br>PTHR19134 (PANTHER),<br>PTHR19134:SF26 (PANTHER),<br>SSF52799 (SUPERFAMILY) |
| Caenorhabditis elegans  | statb_caee1 ame: full=sig-l transducer and activator of transcription b ame: full=zinc finger protein stat-b | 7 | F:GO:0003700;<br>F:GO:0004871;<br>F:GO:0005515;<br>F:GO:0005509;<br>P:GO:0007165;<br>C:GO:0005634;<br>P:GO:0006355                                   | -                                                                                |                                                         | -                                                                                                                                              |
| -                       | -                                                                                                            | 0 |                                                                                                                                                      |                                                                                  |                                                         | -                                                                                                                                              |
| -                       | -                                                                                                            | 0 |                                                                                                                                                      |                                                                                  |                                                         | SignalP (SIGNALP)                                                                                                                              |
| -                       | -                                                                                                            | 0 |                                                                                                                                                      |                                                                                  |                                                         | -                                                                                                                                              |
| -                       | -                                                                                                            | 0 |                                                                                                                                                      |                                                                                  |                                                         | -                                                                                                                                              |
| -                       | -                                                                                                            | 0 |                                                                                                                                                      |                                                                                  |                                                         | -                                                                                                                                              |
| -                       | -                                                                                                            | 0 |                                                                                                                                                      |                                                                                  |                                                         | -                                                                                                                                              |
| Pongo abelii            | adp-ribosylation factor 5                                                                                    | 9 | F:GO:0005525;<br>C:GO:0005794;<br>C:GO:0005886;<br>F:GO:0005515;<br>P:GO:0016192;<br>P:GO:0007264;<br>C:GO:0048471;<br>F:GO:0003924;<br>P:GO:0015031 | -                                                                                | EC:3.6.5.1;<br>EC:3.6.5.2;<br>EC:3.6.5.3;<br>EC:3.6.5.4 | IPR006689; G3DSA:3.40.50.300<br>(GENE3D), PTHR11711:SF30<br>(PANTHER), SSF52540 (SUPERFAMILY)                                                  |
| Caenorhabditis elegans  | arginine serine-rich splicing factor                                                                         | 4 | P:GO:0009792;<br>P:GO:0008380;<br>F:GO:0003723;<br>F:GO:0005515                                                                                      | -                                                                                |                                                         | -                                                                                                                                              |
| Caenorhabditis elegans  | arginine serine-rich splicing factor                                                                         | 4 | F:GO:0003723;<br>P:GO:0009792;<br>P:GO:0008380;<br>F:GO:0005515                                                                                      | -                                                                                |                                                         | IPR000504; IPR012677; PTHR10548<br>(PANTHER), SSF54928 (SUPERFAMILY)                                                                           |

|                         |                                                       |    |                                                                                                                                                                                                                                                                                                                                                                                                                                                                        |   |              |                                                                                |
|-------------------------|-------------------------------------------------------|----|------------------------------------------------------------------------------------------------------------------------------------------------------------------------------------------------------------------------------------------------------------------------------------------------------------------------------------------------------------------------------------------------------------------------------------------------------------------------|---|--------------|--------------------------------------------------------------------------------|
| Caenorhabditis elegans  | arginine serine-rich splicing factor                  | 4  | P:GO:0009792;<br>P:GO:0008380;<br>F:GO:0003723;<br>F:GO:0005515                                                                                                                                                                                                                                                                                                                                                                                                        | - | -            | -                                                                              |
| -                       | -                                                     | 0  |                                                                                                                                                                                                                                                                                                                                                                                                                                                                        |   |              | -                                                                              |
| Caenorhabditis elegans  | hypothetical protein F19C7.1 [Caenorhabditis elegans] | 0  |                                                                                                                                                                                                                                                                                                                                                                                                                                                                        |   |              | SignalP (SIGNALP)                                                              |
| -                       | -                                                     | 0  |                                                                                                                                                                                                                                                                                                                                                                                                                                                                        |   |              | -                                                                              |
| Caenorhabditis briggsae | ankyrin repeat domain 50                              | 3  | F:GO:0005515;<br>P:GO:0006974;<br>P:GO:0008340                                                                                                                                                                                                                                                                                                                                                                                                                         | - |              | IPR002110; IPR020683; PTHR18958 (PANTHER)                                      |
| Homo sapiens            | af061732_1my029 protein                               | 0  |                                                                                                                                                                                                                                                                                                                                                                                                                                                                        |   |              | SignalP (SIGNALP)                                                              |
| Brugia malayi           | hypothetical protein Bm1_21590 [Brugia malayi]        | 0  |                                                                                                                                                                                                                                                                                                                                                                                                                                                                        |   |              | IPR021752                                                                      |
| -                       | -                                                     | 0  |                                                                                                                                                                                                                                                                                                                                                                                                                                                                        |   |              | -                                                                              |
| Caenorhabditis elegans  | atypical protein ki-se c                              | 27 | P:GO:0007314;<br>P:GO:0007338;<br>P:GO:0045176;<br>P:GO:0006468;<br>C:GO:0035003;<br>P:GO:0007369;<br>F:GO:0008270;<br>P:GO:0046667;<br>P:GO:0007613;<br>P:GO:0045197;<br>P:GO:0045186;<br>P:GO:0007506;<br>F:GO:0019904;<br>C:GO:0045179;<br>P:GO:0016332;<br>P:GO:0030011;<br>P:GO:0002052;<br>P:GO:0045196;<br>P:GO:0001738;<br>C:GO:0030864;<br>F:GO:0005524;<br>P:GO:0007294;<br>P:GO:0045167;<br>P:GO:0007416;<br>P:GO:0055059;<br>F:GO:0004697;<br>C:GO:0016324 | - | EC:2.7.11.13 | IPR000961; IPR015745; IPR017892; PTHR22985 (PANTHER)                           |
| Loa loa                 | hypothetical protein LOAG_07145 [Loa loa]             | 0  |                                                                                                                                                                                                                                                                                                                                                                                                                                                                        |   |              | -                                                                              |
| -                       | -                                                     | 0  |                                                                                                                                                                                                                                                                                                                                                                                                                                                                        |   |              | -                                                                              |
| Caenorhabditis briggsae | briggsae cbr-frl-1 protein                            | 2  | F:GO:0005515;<br>P:GO:0016043                                                                                                                                                                                                                                                                                                                                                                                                                                          | - |              | IPR003104; IPR015425; IPR018247; PTHR23213 (PANTHER), PTHR23213:SF24 (PANTHER) |

|                            |                                                       |    |                                                                                                                                                                                                                                                                                                               |                                                |                                                                                                                                     |
|----------------------------|-------------------------------------------------------|----|---------------------------------------------------------------------------------------------------------------------------------------------------------------------------------------------------------------------------------------------------------------------------------------------------------------|------------------------------------------------|-------------------------------------------------------------------------------------------------------------------------------------|
| Loa loa                    | d- repair and recombination protein rad54-like        | 18 | P:GO:0000003;<br>F:GO:0008094;<br>F:GO:0008270;<br>F:GO:0070087;<br>P:GO:0006355;<br>P:GO:0000724;<br>P:GO:0051276;<br>P:GO:0030900;<br>P:GO:0006306;<br>C:GO:0005720;<br>F:GO:0003677;<br>P:GO:0006915;<br>P:GO:0007126;<br>P:GO:0042493;<br>P:GO:0010212;<br>F:GO:0003682;<br>F:GO:0005524;<br>F:GO:0003678 | -                                              | IPR000330; IPR014021;<br>G3DSA:3.40.50.300 (GENE3D),<br>PTHR10799 (PANTHER),<br>PTHR10799:SF66 (PANTHER),<br>SSF52540 (SUPERFAMILY) |
| -                          | -                                                     | 0  | -                                                                                                                                                                                                                                                                                                             | -                                              | -                                                                                                                                   |
| -                          | -                                                     | 0  | -                                                                                                                                                                                                                                                                                                             | -                                              | -                                                                                                                                   |
| -                          | -                                                     | 0  | -                                                                                                                                                                                                                                                                                                             | -                                              | -                                                                                                                                   |
| Pediculus humanus corporis | mitochondrial 2-oxoglutarate malate carrier protein   | 6  | F:GO:0005488;<br>C:GO:0005743;<br>P:GO:0055085;<br>P:GO:0006839;<br>C:GO:0016021;<br>F:GO:0005215                                                                                                                                                                                                             | -                                              | IPR001993; IPR018108;<br>G3DSA:1.50.40.10 (GENE3D),<br>PTHR11896:SF78 (PANTHER)                                                     |
| Brugia malayi              | rab6                                                  | 6  | P:GO:0009792;<br>P:GO:0046907;<br>P:GO:0007165;<br>F:GO:0000166;<br>P:GO:0015031;<br>C:GO:0044424                                                                                                                                                                                                             | -                                              | IPR013753; G3DSA:3.40.50.300<br>(GENE3D), PTHR11708 (PANTHER),<br>PTHR11708:SF27 (PANTHER)                                          |
| Caenorhabditis elegans     | hypothetical protein C06E7.2 [Caenorhabditis elegans] | 0  | -                                                                                                                                                                                                                                                                                                             | -                                              | SignalP (SIGNALP)                                                                                                                   |
| -                          | -                                                     | 0  | -                                                                                                                                                                                                                                                                                                             | -                                              | -                                                                                                                                   |
| -                          | -                                                     | 0  | -                                                                                                                                                                                                                                                                                                             | -                                              | -                                                                                                                                   |
| Loa loa                    | zinc finger ccch-type containing 12d                  | 10 | C:GO:0005737;<br>P:GO:0030154;<br>F:GO:0004519;<br>P:GO:0006915;<br>F:GO:0003676;<br>F:GO:0005515;<br>P:GO:0007275;<br>P:GO:0008152;<br>C:GO:0005634;<br>F:GO:0008270                                                                                                                                         | -                                              | -                                                                                                                                   |
| -                          | -                                                     | 0  | -                                                                                                                                                                                                                                                                                                             | -                                              | -                                                                                                                                   |
| -                          | -                                                     | 0  | -                                                                                                                                                                                                                                                                                                             | -                                              | -                                                                                                                                   |
| Caenorhabditis elegans     | briggsae cbr-nhr-78 protein                           | 3  | F:GO:0004872;<br>F:GO:0005515;<br>P:GO:0006350                                                                                                                                                                                                                                                                | -                                              | IPR001628; IPR008946; IPR013088;<br>PTHR11865 (PANTHER),<br>PTHR11865:SF235 (PANTHER),<br>SSF57716 (SUPERFAMILY)                    |
| Caenorhabditis elegans     | Hypothetical protein F10E7.9 [Caenorhabditis elegans] | 0  | -                                                                                                                                                                                                                                                                                                             | C:GO:0016021;<br>C:GO:0016020;<br>P:GO:0055085 | -                                                                                                                                   |
| -                          | -                                                     | 0  | -                                                                                                                                                                                                                                                                                                             | -                                              | IPR001664; PTHR23239:SF1<br>(PANTHER)                                                                                               |

|                         |                                                            |   |                                                                                                                                     |   |                                                |                                                                                                                                                                           |
|-------------------------|------------------------------------------------------------|---|-------------------------------------------------------------------------------------------------------------------------------------|---|------------------------------------------------|---------------------------------------------------------------------------------------------------------------------------------------------------------------------------|
|                         | -                                                          | 0 |                                                                                                                                     |   |                                                | PTHR22776 (PANTHER),<br>PTHR22776:SF1 (PANTHER)                                                                                                                           |
| Caenorhabditis elegans  | protein unc-45 homolog a                                   | 5 | C:GO:0030018;<br>F:GO:0005488;<br>P:GO:0048738;<br>P:GO:0030239;<br>P:GO:0007519                                                    | - |                                                | IPR011990; IPR013026; PTHR22904 (PANTHER), PTHR22904:SF28 (PANTHER), SSF48452 (SUPERFAMILY)                                                                               |
| Caenorhabditis briggsae | d--binding protein smubp-                                  | 2 | F:GO:0005488;<br>F:GO:0017111                                                                                                       | - | EC:3.6.1.15                                    | IPR000606; PTHR10887 (PANTHER), SSF52540 (SUPERFAMILY)                                                                                                                    |
|                         | -                                                          | 0 |                                                                                                                                     |   |                                                | -                                                                                                                                                                         |
|                         | -                                                          | 0 |                                                                                                                                     |   |                                                | -                                                                                                                                                                         |
|                         | -                                                          | 0 |                                                                                                                                     |   |                                                | -                                                                                                                                                                         |
|                         | -                                                          | 0 |                                                                                                                                     |   |                                                | -                                                                                                                                                                         |
| Caenorhabditis briggsae | mannose-1-phosphate guanyltransferase                      | 2 | P:GO:0009058;<br>F:GO:0016779                                                                                                       | - | EC:2.7.7.0                                     | IPR001451; IPR005835; IPR011004; IPR018357; G3DSA:2.160.10.10 (GENE3D), G3DSA:3.90.550.10 (GENE3D), PTHR22572 (PANTHER), PTHR22572:SF15 (PANTHER), SSF53448 (SUPERFAMILY) |
|                         | -                                                          | 0 |                                                                                                                                     |   |                                                | -                                                                                                                                                                         |
|                         | -                                                          | 0 |                                                                                                                                     |   |                                                | -                                                                                                                                                                         |
| Caenorhabditis elegans  | elegans protein partially confirmed by transcript evidence | 8 | P:GO:0006810;<br>F:GO:0005083;<br>C:GO:0045202;<br>F:GO:0042802;<br>C:GO:0019717;<br>P:GO:0007289;<br>P:GO:0006914;<br>C:GO:0005886 | - |                                                | -                                                                                                                                                                         |
| Homo sapiens            | preli domain containing 1                                  | 4 | P:GO:0006955;<br>C:GO:0005730;<br>P:GO:0007275;<br>C:GO:0005739                                                                     | - |                                                | IPR006797; PTHR11158 (PANTHER), PTHR11158:SF16 (PANTHER)                                                                                                                  |
|                         | -                                                          | 0 |                                                                                                                                     |   |                                                | SignalP (SIGNALP)                                                                                                                                                         |
| Caenorhabditis elegans  | elegans protein partially confirmed by transcript evidence | 0 |                                                                                                                                     |   | F:GO:0003676;<br>F:GO:0008270;<br>C:GO:0005622 | IPR007087; IPR012317; IPR015880                                                                                                                                           |
|                         | -                                                          | 0 |                                                                                                                                     |   |                                                | -                                                                                                                                                                         |
| Caenorhabditis elegans  | elegans protein partially confirmed by transcript evidence | 5 | P:GO:0002119;<br>P:GO:0040010;<br>P:GO:0000003;<br>P:GO:0040011;<br>P:GO:0006898                                                    | - |                                                | -                                                                                                                                                                         |
| Caenorhabditis briggsae | protein kri1 homolog                                       | 8 | P:GO:0040035;<br>P:GO:0010171;<br>P:GO:0002119;<br>P:GO:0040010;<br>P:GO:0040011;<br>P:GO:0019915;<br>P:GO:0006898;<br>P:GO:0002009 | - |                                                | IPR007851; IPR018034                                                                                                                                                      |
| Caenorhabditis elegans  | elegans protein confirmed by transcript evidence           | 0 |                                                                                                                                     |   |                                                | -                                                                                                                                                                         |
| Caenorhabditis elegans  | monocyte to macrophage differentiation protein             | 1 | C:GO:0016021                                                                                                                        | - |                                                | -                                                                                                                                                                         |
| Caenorhabditis briggsae | puromycin-sensitive aminopeptidase                         | 2 | F:GO:0005488;<br>F:GO:0070011                                                                                                       | - |                                                | IPR001930; IPR014782; IPR015568; SSF55486 (SUPERFAMILY), SSF63737 (SUPERFAMILY)                                                                                           |
|                         | -                                                          | 0 |                                                                                                                                     |   |                                                | -                                                                                                                                                                         |
| Homo sapiens            | immunoglobulin heavy chain variable region                 | 0 |                                                                                                                                     |   |                                                | -                                                                                                                                                                         |



|                         |                                                                           |   |                                                                                  |   |                                                                                                                                                                                                                                                                                                                                |                                                   |
|-------------------------|---------------------------------------------------------------------------|---|----------------------------------------------------------------------------------|---|--------------------------------------------------------------------------------------------------------------------------------------------------------------------------------------------------------------------------------------------------------------------------------------------------------------------------------|---------------------------------------------------|
| Caenorhabditis elegans  | chaperone protein                                                         | 1 | F:GO:0005488                                                                     | - |                                                                                                                                                                                                                                                                                                                                | IPR001623; IPR015609;<br>PTHR11821:SF25 (PANTHER) |
| Loa loa                 | coenzyme q biosynthesis family member (coq-2)                             | 5 | F:GO:0004659;<br>P:GO:0006744;<br>P:GO:0008340;<br>C:GO:0016021;<br>C:GO:0005739 | - |                                                                                                                                                                                                                                                                                                                                | PTHR11048 (PANTHER),<br>PTHR11048:SF2 (PANTHER)   |
| -                       | -                                                                         | 0 |                                                                                  |   |                                                                                                                                                                                                                                                                                                                                | -                                                 |
| -                       | -                                                                         | 0 |                                                                                  |   |                                                                                                                                                                                                                                                                                                                                | SignalP (SIGNALP)                                 |
| Caenorhabditis elegans  | Hypothetical protein Y32H12A.2b [Caenorhabditis elegans]                  | 0 |                                                                                  |   |                                                                                                                                                                                                                                                                                                                                | -                                                 |
| -                       | -                                                                         | 0 |                                                                                  |   |                                                                                                                                                                                                                                                                                                                                | -                                                 |
| -                       | -                                                                         | 0 |                                                                                  |   |                                                                                                                                                                                                                                                                                                                                | -                                                 |
| -                       | -                                                                         | 0 |                                                                                  |   |                                                                                                                                                                                                                                                                                                                                | IPR017441; G3DSA:3.30.200.20<br>(GENE3D)          |
| Caenorhabditis briggsae | liprin alpha (lar-interacting protein alpha) (sy-pse defective protein 2) | 4 | F:GO:0005515;<br>C:GO:0009986;<br>C:GO:0005737;<br>P:GO:0007160                  | - |                                                                                                                                                                                                                                                                                                                                | -                                                 |
| -                       | -                                                                         | 0 |                                                                                  |   |                                                                                                                                                                                                                                                                                                                                | -                                                 |
| Caenorhabditis elegans  | briggsae cbr-mre-11 protein                                               | 0 |                                                                                  |   | P:GO:0006259;<br>C:GO:0005634;<br>F:GO:0016787;<br>P:GO:0006974;<br>P:GO:0006302;<br>P:GO:0006281;<br>F:GO:0004527;<br>F:GO:0004519;<br>F:GO:0030145;<br>F:GO:0004518;<br>P:GO:0007126                                                                                                                                         | -                                                 |
| -                       | -                                                                         | 0 |                                                                                  |   |                                                                                                                                                                                                                                                                                                                                | -                                                 |
| Loa loa                 | camk camkl nuak protein ki-se                                             | 0 |                                                                                  |   |                                                                                                                                                                                                                                                                                                                                | -                                                 |
| -                       | -                                                                         | 0 |                                                                                  |   |                                                                                                                                                                                                                                                                                                                                | -                                                 |
| -                       | -                                                                         | 0 |                                                                                  |   |                                                                                                                                                                                                                                                                                                                                | -                                                 |
| -                       | -                                                                         | 0 |                                                                                  |   |                                                                                                                                                                                                                                                                                                                                | -                                                 |
| Danio rerio             | transmembrane protein 67                                                  | 0 |                                                                                  |   | F:GO:0051082;<br>P:GO:0030433;<br>P:GO:0042384;<br>P:GO:0048754;<br>C:GO:0005789;<br>C:GO:0016021;<br>C:GO:0016020;<br>C:GO:0005929;<br>C:GO:0005783;<br>C:GO:0005813;<br>C:GO:0005737;<br>P:GO:0010826;<br>C:GO:0060170;<br>C:GO:0030659;<br>C:GO:0042995;<br>C:GO:0005932;<br>C:GO:0005856;<br>F:GO:0005515;<br>C:GO:0005886 | -                                                 |
| -                       | -                                                                         | 0 |                                                                                  |   |                                                                                                                                                                                                                                                                                                                                | -                                                 |
| -                       | -                                                                         | 0 |                                                                                  |   |                                                                                                                                                                                                                                                                                                                                | -                                                 |

|                         |                                         |    |                                                                                                                                                                                                                                           |   |             |                                                                                                                         |
|-------------------------|-----------------------------------------|----|-------------------------------------------------------------------------------------------------------------------------------------------------------------------------------------------------------------------------------------------|---|-------------|-------------------------------------------------------------------------------------------------------------------------|
| Haemonchus contortus    | myosin heavy chain                      | 6  | C:GO:0032982;<br>F:GO:0003779;<br>F:GO:0005524;<br>F:GO:0003774;<br>C:GO:0031672;<br>P:GO:0007626                                                                                                                                         | - | -           | -                                                                                                                       |
| Homo sapiens            | protein ki-se c substrate 80k-h         | 14 | F:GO:0004558;<br>F:GO:0005080;<br>F:GO:0003723;<br>P:GO:0051291;<br>P:GO:0007243;<br>F:GO:0005509;<br>C:GO:0017177;<br>C:GO:0005768;<br>P:GO:0016310;<br>F:GO:0016301;<br>P:GO:0007154;<br>F:GO:0035091;<br>C:GO:0005794;<br>P:GO:0050830 | - | EC:3.2.1.20 | SignalP (SIGNALP)                                                                                                       |
| Caenorhabditis elegans  | protein ki-se domain containing protein | 7  | P:GO:0006468;<br>P:GO:0009103;<br>F:GO:0005515;<br>F:GO:0005524;<br>P:GO:0007165;<br>C:GO:0016020;<br>F:GO:0004674                                                                                                                        | - | EC:2.7.11.0 | IPR020675; IPR020680                                                                                                    |
| -                       | -                                       | 0  |                                                                                                                                                                                                                                           |   |             | -                                                                                                                       |
| -                       | -                                       | 0  |                                                                                                                                                                                                                                           |   |             | -                                                                                                                       |
| Caenorhabditis briggsae | vacuolar proton atpases                 | 3  | F:GO:0015078;<br>C:GO:0033177;<br>P:GO:0015986                                                                                                                                                                                            | - |             | IPR002490                                                                                                               |
| -                       | -                                       | 0  |                                                                                                                                                                                                                                           |   |             | -                                                                                                                       |
| -                       | -                                       | 0  |                                                                                                                                                                                                                                           |   |             | -                                                                                                                       |
| Caenorhabditis elegans  | anion transporter                       | 4  | C:GO:0016020;<br>P:GO:0006814;<br>P:GO:0055085;<br>F:GO:0005215                                                                                                                                                                           | - |             | IPR001898; PTHR10283 (PANTHER),<br>PTHR10283:SF15 (PANTHER), SignalP<br>(SIGNALP)                                       |
| Caenorhabditis briggsae | rap ran-gap family protein              | 5  | F:GO:0005096;<br>P:GO:0051056;<br>F:GO:0005515;<br>P:GO:0050790;<br>C:GO:0048471                                                                                                                                                          | - |             | -                                                                                                                       |
| Haemonchus contortus    | thioredoxin reductase 2                 | 10 | P:GO:0030097;<br>P:GO:0010269;<br>F:GO:0004791;<br>P:GO:0000305;<br>P:GO:0042542;<br>P:GO:0007507;<br>F:GO:0050662;<br>C:GO:0005739;<br>F:GO:0042803;<br>F:GO:0000166                                                                     | - | EC:1.8.1.9  | IPR004099; IPR006338; PR00411<br>(PRINTS), G3DSA:3.50.50.60<br>(GENE3D), PTHR22912 (PANTHER),<br>SSF51905 (SUPERFAMILY) |

|                         |                                                              |    |                                                                                                                                                                                                                                                                                                                                                                                                                     |   |                                                                         |                                                                                                                                                                                                                                                        |
|-------------------------|--------------------------------------------------------------|----|---------------------------------------------------------------------------------------------------------------------------------------------------------------------------------------------------------------------------------------------------------------------------------------------------------------------------------------------------------------------------------------------------------------------|---|-------------------------------------------------------------------------|--------------------------------------------------------------------------------------------------------------------------------------------------------------------------------------------------------------------------------------------------------|
| Caenorhabditis briggsae | slc22a5-prov partial                                         | 6  | C:GO:0016021;<br>P:GO:0009792;<br>P:GO:0040010;<br>P:GO:0055085;<br>F:GO:0005215;<br>P:GO:0002119                                                                                                                                                                                                                                                                                                                   | - | -                                                                       | -                                                                                                                                                                                                                                                      |
| Caenorhabditis elegans  | prion protein interacting protein                            | 1  | F:GO:0005488                                                                                                                                                                                                                                                                                                                                                                                                        | - | -                                                                       | -                                                                                                                                                                                                                                                      |
|                         | -                                                            | 0  |                                                                                                                                                                                                                                                                                                                                                                                                                     |   |                                                                         |                                                                                                                                                                                                                                                        |
| Caenorhabditis elegans  | elegans protein partially confirmed by transcript evidence   | 5  | C:GO:0005789;<br>F:GO:0008484;<br>C:GO:0016021;<br>P:GO:0016254;<br>F:GO:0051267                                                                                                                                                                                                                                                                                                                                    | - | EC:3.1.6.0                                                              | IPR017849; IPR017850; PTHR23072 (PANTHER)                                                                                                                                                                                                              |
|                         | -                                                            | 0  |                                                                                                                                                                                                                                                                                                                                                                                                                     |   |                                                                         | SignalP (SIGNALP)                                                                                                                                                                                                                                      |
| Caenorhabditis briggsae | pleckstrin homology domain family h (with 4 domain) member 1 | 4  | C:GO:0005856;<br>P:GO:0008340;<br>F:GO:0005488;<br>P:GO:0040010                                                                                                                                                                                                                                                                                                                                                     | - |                                                                         | IPR000299; IPR000857; IPR014352; IPR019748; IPR019749; PTHR22903 (PANTHER), PTHR22903:SF2 (PANTHER)                                                                                                                                                    |
|                         | -                                                            | 0  |                                                                                                                                                                                                                                                                                                                                                                                                                     |   |                                                                         | -                                                                                                                                                                                                                                                      |
|                         | -                                                            | 0  |                                                                                                                                                                                                                                                                                                                                                                                                                     |   |                                                                         | SignalP (SIGNALP)                                                                                                                                                                                                                                      |
|                         | -                                                            | 0  |                                                                                                                                                                                                                                                                                                                                                                                                                     |   |                                                                         | SignalP (SIGNALP)                                                                                                                                                                                                                                      |
|                         | -                                                            | 0  |                                                                                                                                                                                                                                                                                                                                                                                                                     |   |                                                                         | -                                                                                                                                                                                                                                                      |
|                         | -                                                            | 0  |                                                                                                                                                                                                                                                                                                                                                                                                                     |   |                                                                         | -                                                                                                                                                                                                                                                      |
| Caenorhabditis briggsae | saccharopine dehydroge-se                                    | 3  | F:GO:0016491;<br>P:GO:0055114;<br>F:GO:0005488                                                                                                                                                                                                                                                                                                                                                                      | - |                                                                         | IPR005097; IPR007698; IPR007886; IPR016040; G3DSA:1.10.1870.10 (GENE3D), G3DSA:3.30.360.10 (GENE3D), G3DSA:3.40.50.1770 (GENE3D), PTHR11133 (PANTHER), PTHR11133:SF1 (PANTHER), SSF51735 (SUPERFAMILY), SSF52283 (SUPERFAMILY), SSF55347 (SUPERFAMILY) |
| Brugia malayi           | member ras oncogene family                                   | 24 | C:GO:0000785;<br>C:GO:0005654;<br>P:GO:0007052;<br>C:GO:0042470;<br>F:GO:0005525;<br>P:GO:0030521;<br>P:GO:0006611;<br>P:GO:0051301;<br>P:GO:0006184;<br>P:GO:0006259;<br>F:GO:0004767;<br>C:GO:0005829;<br>C:GO:0005643;<br>P:GO:0007067;<br>F:GO:0003713;<br>P:GO:0007286;<br>P:GO:0007165;<br>P:GO:0045893;<br>F:GO:0003682;<br>F:GO:0003924;<br>P:GO:0006606;<br>F:GO:0050681;<br>P:GO:0006405;<br>P:GO:0044419 | - | EC:3.1.4.12;<br>EC:3.6.5.1;<br>EC:3.6.5.2;<br>EC:3.6.5.3;<br>EC:3.6.5.4 | IPR002041; IPR005225; IPR013753; G3DSA:3.40.50.300 (GENE3D), PTHR11708 (PANTHER), PTHR11708:SF269 (PANTHER), SSF52540 (SUPERFAMILY)                                                                                                                    |

|                          |                                                  |    |                                                                                                                                                                                        |              |                                                                                                                |
|--------------------------|--------------------------------------------------|----|----------------------------------------------------------------------------------------------------------------------------------------------------------------------------------------|--------------|----------------------------------------------------------------------------------------------------------------|
| Caenorhabditis briggsae  | elegans protein confirmed by transcript evidence | 11 | P:GO:0040010;<br>F:GO:0008270;<br>P:GO:0006355;<br>F:GO:0043565;<br>P:GO:0002119;<br>F:GO:0005515;<br>F:GO:0003700;<br>F:GO:0003707;<br>P:GO:0009792;<br>P:GO:0040018;<br>C:GO:0005634 | -            | IPR001628; IPR013088; PR00350 (PRINTS), PTHR11865 (PANTHER), PTHR11865:SF238 (PANTHER), SSF57716 (SUPERFAMILY) |
|                          | -                                                | 0  |                                                                                                                                                                                        |              | IPR015880                                                                                                      |
|                          | -                                                | 0  |                                                                                                                                                                                        |              | SignalP (SIGNALP)                                                                                              |
|                          | -                                                | 0  |                                                                                                                                                                                        |              | -                                                                                                              |
| Macaca mulatta           | cellular nucleic acid binding isoform 2          | 11 | C:GO:0005829;<br>F:GO:0008270;<br>F:GO:0003727;<br>P:GO:0045944;<br>F:GO:0005515;<br>F:GO:0003700;<br>F:GO:0003697;<br>P:GO:0008284;<br>P:GO:0006695;<br>C:GO:0005783;<br>C:GO:0005634 | -            | IPR001878; IPR013084; PTHR23002 (PANTHER), PTHR23002:SF11 (PANTHER), SSF57756 (SUPERFAMILY)                    |
| Loa loa                  | hypothetical protein LOAG_06433 [Loa loa]        | 0  |                                                                                                                                                                                        |              | -                                                                                                              |
| Brugia malayi            | hypothetical protein [Brugia malayi]             | 3  | F:GO:0008173;<br>P:GO:0006396;<br>F:GO:0000166                                                                                                                                         | -            | -                                                                                                              |
|                          | -                                                | 0  |                                                                                                                                                                                        |              | -                                                                                                              |
| Pongo abelii             | s100 calcium binding protein a4                  | 10 | F:GO:0050786;<br>P:GO:0001837;<br>C:GO:0043005;<br>F:GO:0005509;<br>C:GO:0005730;<br>P:GO:0043123;<br>F:GO:0048306;<br>C:GO:0048471;<br>F:GO:0046982;<br>F:GO:0042803                  | -            | SignalP (SIGNALP)                                                                                              |
|                          | -                                                | 0  |                                                                                                                                                                                        |              | -                                                                                                              |
|                          | -                                                | 0  |                                                                                                                                                                                        |              | -                                                                                                              |
| Caenorhabditis elegans   | myb-like d-binding domain containing protein     | 0  |                                                                                                                                                                                        | F:GO:0003677 | -                                                                                                              |
|                          | -                                                | 0  |                                                                                                                                                                                        |              | -                                                                                                              |
|                          | -                                                | 0  |                                                                                                                                                                                        |              | -                                                                                                              |
|                          | -                                                | 0  |                                                                                                                                                                                        |              | SignalP (SIGNALP)                                                                                              |
|                          | -                                                | 0  |                                                                                                                                                                                        |              | -                                                                                                              |
|                          | -                                                | 0  |                                                                                                                                                                                        |              | SignalP (SIGNALP)                                                                                              |
|                          | -                                                | 0  |                                                                                                                                                                                        |              | SignalP (SIGNALP)                                                                                              |
|                          | -                                                | 0  |                                                                                                                                                                                        |              | -                                                                                                              |
| Oesophagostomum dentatum | fmr-like peptide family member (flp-1)           | 1  | P:GO:0007218                                                                                                                                                                           | -            | IPR002544; PTHR20986 (PANTHER)                                                                                 |

|                         |                                                                                        |    |                                                                                                                                                                                                                                           |   |            |                                                                                             |
|-------------------------|----------------------------------------------------------------------------------------|----|-------------------------------------------------------------------------------------------------------------------------------------------------------------------------------------------------------------------------------------------|---|------------|---------------------------------------------------------------------------------------------|
| Caenorhabditis briggsae | briggsae cbr-unc-68 protein                                                            | 11 | P:GO:0055085;<br>P:GO:0006629;<br>C:GO:0005875;<br>F:GO:0005509;<br>C:GO:0016021;<br>F:GO:0004872;<br>P:GO:0006874;<br>P:GO:0006816;<br>C:GO:0005789;<br>F:GO:0005219;<br>P:GO:0006936                                                    | - |            | IPR015925; PTHR13715:SF11 (PANTHER)                                                         |
| Caenorhabditis elegans  | elegans protein confirmed by transcript evidence                                       | 0  |                                                                                                                                                                                                                                           |   |            | -                                                                                           |
|                         | -                                                                                      | 0  |                                                                                                                                                                                                                                           |   |            | -                                                                                           |
|                         | -                                                                                      | 0  |                                                                                                                                                                                                                                           |   |            | -                                                                                           |
|                         | -                                                                                      | 0  |                                                                                                                                                                                                                                           |   |            | -                                                                                           |
| Brugia malayi           | guanine nucleotide exchange factor for ras-like gtpases n-termi-l motif family protein | 5  | F:GO:0005085;<br>F:GO:0008603;<br>P:GO:0051056;<br>P:GO:0001932;<br>C:GO:0005952                                                                                                                                                          | - |            | -                                                                                           |
| Caenorhabditis elegans  | augmenter of liver regeneration                                                        | 6  | F:GO:0016972;<br>P:GO:0055114;<br>C:GO:0005739;<br>P:GO:0007283;<br>F:GO:0005515;<br>P:GO:0008283                                                                                                                                         | - | EC:1.8.3.2 | IPR006863; IPR017905; PTHR12645 (PANTHER)                                                   |
|                         | -                                                                                      | 0  |                                                                                                                                                                                                                                           |   |            | SignalP (SIGNALP)                                                                           |
| Caenorhabditis elegans  | uncoordi-ted family member (unc-89)                                                    | 0  |                                                                                                                                                                                                                                           |   |            | IPR013098; IPR013783; PTHR19897 (PANTHER), PTHR19897:SF17 (PANTHER), SSF48726 (SUPERFAMILY) |
|                         | -                                                                                      | 0  |                                                                                                                                                                                                                                           |   |            | -                                                                                           |
| Caenorhabditis elegans  | hypothetical protein Y69A2AR.31 [Caenorhabditis elegans]                               | 0  |                                                                                                                                                                                                                                           |   |            | -                                                                                           |
| Caenorhabditis briggsae | heat repeat-containing protein 7a-like                                                 | 1  | F:GO:0005488                                                                                                                                                                                                                              | - |            | -                                                                                           |
| Caenorhabditis elegans  | elegans protein confirmed by transcript evidence                                       | 0  |                                                                                                                                                                                                                                           |   |            | IPR001534; SignalP (SIGNALP)                                                                |
| Caenorhabditis elegans  | elegans protein confirmed by transcript evidence                                       | 0  |                                                                                                                                                                                                                                           |   |            | IPR001534                                                                                   |
| Loa loa                 | elegans protein confirmed by transcript evidence                                       | 0  |                                                                                                                                                                                                                                           |   |            | -                                                                                           |
| Caenorhabditis elegans  | elegans protein confirmed by transcript evidence                                       | 0  |                                                                                                                                                                                                                                           |   |            | IPR001534; SignalP (SIGNALP)                                                                |
| Pongo abelii            | apoptosis regulatory protein siva-like                                                 | 14 | P:GO:0006917;<br>F:GO:0001618;<br>F:GO:0008270;<br>C:GO:0005739;<br>F:GO:0008656;<br>P:GO:0032088;<br>P:GO:0008635;<br>F:GO:0005164;<br>P:GO:0019987;<br>P:GO:0007165;<br>F:GO:0005175;<br>P:GO:0044419;<br>C:GO:0005654;<br>P:GO:0006924 | - |            | IPR006058; IPR022773                                                                        |
|                         | -                                                                                      | 0  |                                                                                                                                                                                                                                           |   |            | -                                                                                           |

|                        |                                                            |    |                                                                                                                                                                                                         |                                                                 |                                                              |
|------------------------|------------------------------------------------------------|----|---------------------------------------------------------------------------------------------------------------------------------------------------------------------------------------------------------|-----------------------------------------------------------------|--------------------------------------------------------------|
| Caenorhabditis elegans | clathrin-associated protein                                | 7  | P:GO:0016183;<br>C:GO:0008021;<br>P:GO:0007269;<br>C:GO:0030122;<br>F:GO:0005515;<br>P:GO:0006886;<br>P:GO:0033227                                                                                      | -                                                               | IPR015629; PTHR11998 (PANTHER)                               |
| Caenorhabditis elegans | solute carrier family 27 (fatty acid transporter) member 1 | 0  |                                                                                                                                                                                                         | F:GO:0016874;<br>C:GO:0016021;<br>P:GO:0008152;<br>F:GO:0003824 | -                                                            |
| -                      | -                                                          | 0  |                                                                                                                                                                                                         |                                                                 | -                                                            |
| -                      | -                                                          | 0  |                                                                                                                                                                                                         |                                                                 | -                                                            |
| Caenorhabditis elegans | elegans protein partially confirmed by transcript evidence | 0  |                                                                                                                                                                                                         |                                                                 | -                                                            |
| Caenorhabditis elegans | briggsae cbr-vps-35 protein                                | 2  | P:GO:0006897;<br>C:GO:0005768                                                                                                                                                                           | -                                                               | IPR005378                                                    |
| -                      | -                                                          | 0  |                                                                                                                                                                                                         |                                                                 | -                                                            |
| Haemonchus contortus   | briggsae cbr-asp-2 protein                                 | 3  | P:GO:0008219;<br>F:GO:0005515;<br>F:GO:0008233                                                                                                                                                          | -                                                               | IPR001461; IPR009007; IPR021109;<br>PTHR13683:SF53 (PANTHER) |
| Caenorhabditis elegans | cytoplasmic fmr1 interacting protein 1                     | 12 | P:GO:0016477;<br>F:GO:0048365;<br>P:GO:0048675;<br>C:GO:0001726;<br>P:GO:0030032;<br>C:GO:0005845;<br>F:GO:0051015;<br>C:GO:0019717;<br>C:GO:0048471;<br>P:GO:0010172;<br>C:GO:0030027;<br>P:GO:0031529 | -                                                               | -                                                            |
| -                      | -                                                          | 0  |                                                                                                                                                                                                         |                                                                 | SignalP (SIGNALP)                                            |
| -                      | -                                                          | 0  |                                                                                                                                                                                                         |                                                                 | -                                                            |
| Caenorhabditis elegans | ethanolamine ki-se                                         | 2  | F:GO:0016301;<br>P:GO:0008654                                                                                                                                                                           | -                                                               | IPR011009; IPR020003                                         |
| -                      | -                                                          | 0  |                                                                                                                                                                                                         |                                                                 | -                                                            |
| Caenorhabditis elegans | elegans protein confirmed by transcript evidence           | 1  | F:GO:0005515                                                                                                                                                                                            | -                                                               | PTHR12905 (PANTHER)                                          |
| -                      | -                                                          | 0  |                                                                                                                                                                                                         |                                                                 | -                                                            |
| Caenorhabditis elegans | briggsae cbr-ric-4 protein                                 | 1  | C:GO:0044464                                                                                                                                                                                            | -                                                               | IPR000727; G3DSA:1.20.5.110<br>(GENE3D), PTHR19305 (PANTHER) |
| -                      | -                                                          | 0  |                                                                                                                                                                                                         |                                                                 | -                                                            |
| -                      | -                                                          | 0  |                                                                                                                                                                                                         |                                                                 | -                                                            |
| -                      | -                                                          | 0  |                                                                                                                                                                                                         |                                                                 | IPR000276                                                    |

|         |                                      |    |                                                                                                                                                                                                                                                                                                                                                                                  |  |  |                                                                                                                                                                                       |
|---------|--------------------------------------|----|----------------------------------------------------------------------------------------------------------------------------------------------------------------------------------------------------------------------------------------------------------------------------------------------------------------------------------------------------------------------------------|--|--|---------------------------------------------------------------------------------------------------------------------------------------------------------------------------------------|
| Loa loa | d- replication licensing factor mcm7 | 22 | C:GO:000785;<br>F:GO:0008094;<br>F:GO:0005515;<br>P:GO:0006974;<br>P:GO:0006268;<br>P:GO:0006355;<br>P:GO:0008283;<br>F:GO:0003697;<br>C:GO:0005829;<br>P:GO:0040039;<br>P:GO:0030174;<br>P:GO:0009792;<br>P:GO:0042325;<br>P:GO:0042493;<br>C:GO:0042555;<br>P:GO:0010171;<br>F:GO:0003682;<br>P:GO:0071364;<br>F:GO:0005524;<br>F:GO:0003678;<br>P:GO:0040035;<br>P:GO:0000910 |  |  | IPR001208; IPR003593; IPR008050;<br>IPR012340; IPR016027; IPR018525;<br>G3DSA:3.30.1640.10 (GENE3D),<br>G3DSA:3.40.50.300 (GENE3D),<br>PTHR11630 (PANTHER), SSF52540<br>(SUPERFAMILY) |
| Loa loa | d- replication licensing factor mcm7 | 22 | C:GO:000785;<br>F:GO:0008094;<br>F:GO:0005515;<br>P:GO:0006974;<br>P:GO:0006268;<br>P:GO:0006355;<br>P:GO:0008283;<br>F:GO:0003697;<br>C:GO:0005829;<br>P:GO:0040039;<br>P:GO:0030174;<br>P:GO:0009792;<br>P:GO:0042325;<br>P:GO:0042493;<br>C:GO:0042555;<br>P:GO:0010171;<br>F:GO:0003682;<br>P:GO:0071364;<br>F:GO:0005524;<br>F:GO:0003678;<br>P:GO:0040035;<br>P:GO:0000910 |  |  | IPR001208; IPR003593; IPR008050;<br>IPR012340; IPR016027; IPR018525;<br>G3DSA:3.30.1640.10 (GENE3D),<br>G3DSA:3.40.50.300 (GENE3D),<br>PTHR11630 (PANTHER), SSF52540<br>(SUPERFAMILY) |

|                        |                                                  |    |                                                                                                                                                                                                                                                                                                                                                                                   |              |            |                                                                                                                                                                                       |
|------------------------|--------------------------------------------------|----|-----------------------------------------------------------------------------------------------------------------------------------------------------------------------------------------------------------------------------------------------------------------------------------------------------------------------------------------------------------------------------------|--------------|------------|---------------------------------------------------------------------------------------------------------------------------------------------------------------------------------------|
| Loa loa                | d- replication licensing factor mcm7             | 22 | C:GO:0000785;<br>F:GO:0008094;<br>F:GO:0005515;<br>P:GO:0006974;<br>P:GO:0006268;<br>P:GO:0006355;<br>P:GO:0008283;<br>F:GO:0003697;<br>C:GO:0005829;<br>P:GO:0040039;<br>P:GO:0030174;<br>P:GO:0009792;<br>P:GO:0042325;<br>P:GO:0042493;<br>C:GO:0042555;<br>P:GO:0010171;<br>F:GO:0003682;<br>P:GO:0071364;<br>F:GO:0005524;<br>F:GO:0003678;<br>P:GO:0040035;<br>P:GO:0000910 | -            |            | IPR001208; IPR003593; IPR008050;<br>IPR012340; IPR016027; IPR018525;<br>G3DSA:3.30.1640.10 (GENE3D),<br>G3DSA:3.40.50.300 (GENE3D),<br>PTHR11630 (PANTHER), SSF52540<br>(SUPERFAMILY) |
| Loa loa                | d- replication licensing factor mcm7             | 22 | C:GO:0000785;<br>F:GO:0008094;<br>F:GO:0005515;<br>P:GO:0006974;<br>P:GO:0006268;<br>P:GO:0006355;<br>P:GO:0008283;<br>F:GO:0003697;<br>C:GO:0005829;<br>P:GO:0040039;<br>P:GO:0030174;<br>P:GO:0009792;<br>P:GO:0042325;<br>P:GO:0042493;<br>C:GO:0042555;<br>P:GO:0010171;<br>F:GO:0003682;<br>P:GO:0071364;<br>F:GO:0005524;<br>F:GO:0003678;<br>P:GO:0040035;<br>P:GO:0000910 | -            |            | IPR001208; IPR003593; IPR008050;<br>IPR012340; IPR016027; IPR018525;<br>G3DSA:3.30.1640.10 (GENE3D),<br>G3DSA:3.40.50.300 (GENE3D),<br>PTHR11630 (PANTHER), SSF52540<br>(SUPERFAMILY) |
|                        | -                                                | 0  |                                                                                                                                                                                                                                                                                                                                                                                   |              |            | -                                                                                                                                                                                     |
| Caenorhabditis elegans | udp- ransferase family member (ugt-60)           | 4  | P:GO:0005975;<br>P:GO:0030259;<br>F:GO:0030246;<br>F:GO:0016758                                                                                                                                                                                                                                                                                                                   | -            | EC:2.4.1.0 | -                                                                                                                                                                                     |
|                        | -                                                | 0  |                                                                                                                                                                                                                                                                                                                                                                                   |              |            | -                                                                                                                                                                                     |
|                        | -                                                | 0  |                                                                                                                                                                                                                                                                                                                                                                                   |              |            | -                                                                                                                                                                                     |
|                        | -                                                | 0  |                                                                                                                                                                                                                                                                                                                                                                                   |              |            | -                                                                                                                                                                                     |
|                        | -                                                | 0  |                                                                                                                                                                                                                                                                                                                                                                                   |              |            | SignalP (SIGNALP)                                                                                                                                                                     |
|                        | -                                                | 0  |                                                                                                                                                                                                                                                                                                                                                                                   |              |            | -                                                                                                                                                                                     |
| Homo sapiens           | golgi membrane protein 1                         | 2  | C:GO:0005887;<br>C:GO:0005794                                                                                                                                                                                                                                                                                                                                                     | -            |            | PTHR15896 (PANTHER),<br>PTHR15896:SF5 (PANTHER)                                                                                                                                       |
|                        | -                                                | 0  |                                                                                                                                                                                                                                                                                                                                                                                   |              |            | -                                                                                                                                                                                     |
| Brugia malayi          | paz piwi domain-containing family member (ppw-1) | 0  |                                                                                                                                                                                                                                                                                                                                                                                   | P:GO:0016246 |            | -                                                                                                                                                                                     |



|                         |                                                          |    |                                                                                                                                                                                                                                                                                              |                                                                                  |                            |                                                                                                                                                                                                                                 |
|-------------------------|----------------------------------------------------------|----|----------------------------------------------------------------------------------------------------------------------------------------------------------------------------------------------------------------------------------------------------------------------------------------------|----------------------------------------------------------------------------------|----------------------------|---------------------------------------------------------------------------------------------------------------------------------------------------------------------------------------------------------------------------------|
| Caenorhabditis briggsae | atp synthase beta subunit                                | 17 | P:GO:0001525;<br>F:GO:0046961;<br>C:GO:0005929;<br>F:GO:0005515;<br>F:GO:0008553;<br>P:GO:0006933;<br>P:GO:0006898;<br>P:GO:0006172;<br>F:GO:0046933;<br>F:GO:0030228;<br>F:GO:0005509;<br>P:GO:0042777;<br>P:GO:0006629;<br>P:GO:0007165;<br>C:GO:0000275;<br>P:GO:0006200;<br>F:GO:0005524 | -                                                                                | EC:3.6.3.14;<br>EC:3.6.3.6 | IPR000194; IPR000793; IPR003593;<br>IPR004100; IPR005722; IPR018118;<br>IPR020003; G3DSA:1.10.1140.10<br>(GENE3D), G3DSA:2.40.10.170<br>(GENE3D), G3DSA:3.40.50.300<br>(GENE3D), PTHR15184 (PANTHER),<br>SSF52540 (SUPERFAMILY) |
| Caenorhabditis brenneri | elegans protein confirmed by transcript evidence         | 0  |                                                                                                                                                                                                                                                                                              |                                                                                  |                            | -                                                                                                                                                                                                                               |
| Caenorhabditis elegans  | poly(adp-ribose) metabolism enzyme family member (pme-3) | 2  | P:GO:0005975;<br>P:GO:0045132                                                                                                                                                                                                                                                                | -                                                                                |                            | IPR007724; SignalP (SIGNALP)                                                                                                                                                                                                    |
|                         | -                                                        | 0  |                                                                                                                                                                                                                                                                                              |                                                                                  |                            | SignalP (SIGNALP)                                                                                                                                                                                                               |
| Caenorhabditis elegans  | tk fer protein ki-se                                     | 9  | C:GO:0005929;<br>C:GO:0030425;<br>F:GO:0005515;<br>P:GO:0034606;<br>F:GO:0004672;<br>C:GO:0030424;<br>P:GO:0034608;<br>C:GO:0043025;<br>F:GO:0000166                                                                                                                                         | -                                                                                |                            | IPR000980; IPR020685; IPR020764;<br>SSF55550 (SUPERFAMILY)                                                                                                                                                                      |
| Caenorhabditis elegans  | hypothetical protein Y32H12A.6 [Caenorhabditis elegans]  | 0  |                                                                                                                                                                                                                                                                                              | F:GO:0016491;<br>C:GO:0016021;<br>F:GO:0010181                                   |                            | -                                                                                                                                                                                                                               |
|                         | -                                                        | 0  |                                                                                                                                                                                                                                                                                              |                                                                                  |                            | -                                                                                                                                                                                                                               |
|                         | -                                                        | 0  |                                                                                                                                                                                                                                                                                              |                                                                                  |                            | -                                                                                                                                                                                                                               |
|                         | ubiquitin-like protein 5                                 | 1  | C:GO:0005737                                                                                                                                                                                                                                                                                 | -                                                                                |                            | -                                                                                                                                                                                                                               |
|                         | -                                                        | 0  |                                                                                                                                                                                                                                                                                              |                                                                                  |                            | -                                                                                                                                                                                                                               |
| Pongo abelii            | kelch domain containing 7b                               | 0  |                                                                                                                                                                                                                                                                                              | P:GO:0008150;<br>C:GO:0005575                                                    |                            | -                                                                                                                                                                                                                               |
| Ixodes scapularis       | elmo domain-containing protein 1                         | 0  |                                                                                                                                                                                                                                                                                              | F:GO:0003674;<br>C:GO:0005856;<br>P:GO:0006909;<br>P:GO:0008150;<br>C:GO:0005575 |                            | IPR006816; PTHR12771 (PANTHER),<br>PTHR12771:SF1 (PANTHER)                                                                                                                                                                      |
| Caenorhabditis briggsae | briggsae cbr-ddl-3 protein                               | 3  | P:GO:0008340;<br>F:GO:0005488;<br>P:GO:0040010                                                                                                                                                                                                                                               | -                                                                                |                            | IPR011990; PTHR13143 (PANTHER),<br>SSF48452 (SUPERFAMILY)                                                                                                                                                                       |

|                         |                                                  |    |                                                                                                                                                                                        |                                                                                                                                                                       |                             |                                                                                                                                            |
|-------------------------|--------------------------------------------------|----|----------------------------------------------------------------------------------------------------------------------------------------------------------------------------------------|-----------------------------------------------------------------------------------------------------------------------------------------------------------------------|-----------------------------|--------------------------------------------------------------------------------------------------------------------------------------------|
| Brugia malayi           | integrator complex subunit 4                     | 11 | P:GO:0006810;<br>P:GO:0040010;<br>F:GO:0005488;<br>P:GO:0040035;<br>P:GO:0010171;<br>P:GO:0019915;<br>P:GO:0002119;<br>P:GO:0040011;<br>P:GO:0009792;<br>P:GO:0001703;<br>P:GO:0016246 | -                                                                                                                                                                     |                             | IPR011989; PTHR20938 (PANTHER)                                                                                                             |
| -                       | -                                                | 0  |                                                                                                                                                                                        |                                                                                                                                                                       |                             | -                                                                                                                                          |
| Caenorhabditis elegans  | oligopeptide transporter                         | 6  | F:GO:0016248;<br>C:GO:0005624;<br>F:GO:0015198;<br>P:GO:0051956;<br>F:GO:0015291;<br>C:GO:0016020                                                                                      | -                                                                                                                                                                     |                             | PTHR11654 (PANTHER),<br>PTHR11654:SF11 (PANTHER)                                                                                           |
| -                       | -                                                | 0  |                                                                                                                                                                                        |                                                                                                                                                                       |                             | -                                                                                                                                          |
| Caenorhabditis elegans  | d- polymerase zeta catalytic subunit             | 4  | P:GO:0006261;<br>F:GO:0003887;<br>F:GO:0003677;<br>F:GO:0000166                                                                                                                        | -                                                                                                                                                                     | EC:2.7.7.7                  | IPR006134; PTHR10322 (PANTHER),<br>PTHR10322:SF5 (PANTHER), SSF56672<br>(SUPERFAMILY)                                                      |
| Caenorhabditis remanei  | degeneration of certain neurons protein 1        | 3  | C:GO:0016020;<br>F:GO:0005216;<br>P:GO:0006811                                                                                                                                         | -                                                                                                                                                                     |                             | SignalP (SIGNALP)                                                                                                                          |
| -                       | -                                                | 0  |                                                                                                                                                                                        |                                                                                                                                                                       |                             | -                                                                                                                                          |
| Caenorhabditis elegans  | elegans protein confirmed by transcript evidence | 2  | P:GO:0055085;<br>C:GO:0016021                                                                                                                                                          | -                                                                                                                                                                     |                             | IPR011701; IPR016196; IPR020846;<br>G3DSA:1.20.1250.20 (GENE3D),<br>PTHR11662 (PANTHER),<br>PTHR11662:SF11 (PANTHER), SignalP<br>(SIGNALP) |
| -                       | -                                                | 0  |                                                                                                                                                                                        |                                                                                                                                                                       |                             | -                                                                                                                                          |
| Caenorhabditis elegans  | elegans ada-2 isoform b                          | 0  |                                                                                                                                                                                        | P:GO:0010171;<br>P:GO:0040027;<br>P:GO:0006898;<br>P:GO:0000003;<br>F:GO:0008270;<br>P:GO:0009792;<br>P:GO:0008340;<br>C:GO:0005622;<br>P:GO:0040011;<br>P:GO:0040010 |                             | -                                                                                                                                          |
| -                       | -                                                | 0  |                                                                                                                                                                                        |                                                                                                                                                                       |                             | SignalP (SIGNALP)                                                                                                                          |
| -                       | -                                                | 0  |                                                                                                                                                                                        |                                                                                                                                                                       |                             | -                                                                                                                                          |
| Caenorhabditis briggsae | af067448_1hemoglobi-se-type cysteine protei-se   | 7  | P:GO:0009792;<br>C:GO:0043231;<br>C:GO:0044444;<br>P:GO:0000003;<br>F:GO:0004197;<br>P:GO:0006508;<br>F:GO:0004674                                                                     | -                                                                                                                                                                     | EC:3.4.22.0;<br>EC:2.7.11.0 | IPR001096; PTHR12000:SF4<br>(PANTHER)                                                                                                      |
| -                       | -                                                | 0  |                                                                                                                                                                                        |                                                                                                                                                                       |                             | SignalP (SIGNALP)                                                                                                                          |
| -                       | -                                                | 0  |                                                                                                                                                                                        |                                                                                                                                                                       |                             | -                                                                                                                                          |
| -                       | -                                                | 0  |                                                                                                                                                                                        |                                                                                                                                                                       |                             | -                                                                                                                                          |

|                         |                                                          |    |                                                                                                                                                                                                                                           |                                                |             |                                                                                                                                         |
|-------------------------|----------------------------------------------------------|----|-------------------------------------------------------------------------------------------------------------------------------------------------------------------------------------------------------------------------------------------|------------------------------------------------|-------------|-----------------------------------------------------------------------------------------------------------------------------------------|
| Ailuropoda melanoleuca  | casein ki-se epsilon                                     | 14 | C:GO:0005829;<br>P:GO:0006281;<br>F:GO:0004674;<br>P:GO:0042752;<br>P:GO:0030178;<br>P:GO:0032922;<br>F:GO:0005524;<br>P:GO:0090263;<br>F:GO:0005515;<br>P:GO:0034613;<br>P:GO:0007165;<br>P:GO:0032436;<br>C:GO:0005634;<br>P:GO:0006468 | -                                              | EC:2.7.11.0 | G3DSA:3.30.200.20 (GENE3D),<br>PTHR11909 (PANTHER),<br>PTHR11909:SF18 (PANTHER)                                                         |
| -                       | -                                                        | 0  |                                                                                                                                                                                                                                           |                                                |             | -                                                                                                                                       |
| -                       | -                                                        | 0  |                                                                                                                                                                                                                                           |                                                |             | -                                                                                                                                       |
| -                       | -                                                        | 0  |                                                                                                                                                                                                                                           |                                                |             | SignalP (SIGNALP)                                                                                                                       |
| -                       | -                                                        | 0  |                                                                                                                                                                                                                                           |                                                |             | -                                                                                                                                       |
| Caenorhabditis briggsae | uncoordi-ted family member (unc-22)                      | 5  | C:GO:0030018;<br>F:GO:0008307;<br>P:GO:0007498;<br>F:GO:0004674;<br>F:GO:0000166                                                                                                                                                          | -                                              | EC:2.7.11.0 | IPR003598; IPR007110; IPR013098;<br>IPR013783; G3DSA:1.10.510.10<br>(GENE3D), PTHR19897 (PANTHER),<br>SSF48726 (SUPERFAMILY)            |
| -                       | -                                                        | 0  |                                                                                                                                                                                                                                           |                                                |             | -                                                                                                                                       |
| -                       | -                                                        | 0  |                                                                                                                                                                                                                                           |                                                |             | -                                                                                                                                       |
| Caenorhabditis elegans  | hypothetical protein T06D8.1 [Caenorhabditis elegans]    | 0  |                                                                                                                                                                                                                                           |                                                |             | -                                                                                                                                       |
| -                       | -                                                        | 0  |                                                                                                                                                                                                                                           |                                                |             | SignalP (SIGNALP)                                                                                                                       |
| Caenorhabditis elegans  | hypothetical protein Y73B6BL.35 [Caenorhabditis elegans] | 0  |                                                                                                                                                                                                                                           |                                                |             | -                                                                                                                                       |
| Caenorhabditis elegans  | hypothetical protein T04F3.1 [Caenorhabditis elegans]    | 1  | F:GO:0003824                                                                                                                                                                                                                              | -                                              |             | -                                                                                                                                       |
| -                       | -                                                        | 0  |                                                                                                                                                                                                                                           |                                                |             | -                                                                                                                                       |
| Caenorhabditis briggsae | tbc (tre-2 bub2 cdc16) domain family member (tbc-19)     | 0  |                                                                                                                                                                                                                                           | P:GO:0032313;<br>C:GO:0005622;<br>F:GO:0005097 |             | -                                                                                                                                       |
| -                       | -                                                        | 0  |                                                                                                                                                                                                                                           |                                                |             | -                                                                                                                                       |
| -                       | -                                                        | 0  |                                                                                                                                                                                                                                           |                                                |             | -                                                                                                                                       |
| Caenorhabditis briggsae | exosome complex exonuclease rrp4                         | 5  | F:GO:0000175;<br>F:GO:0005515;<br>C:GO:0000178;<br>C:GO:0005634;<br>F:GO:0008312                                                                                                                                                          | -                                              |             | PTHR21321 (PANTHER),<br>PTHR21321:SF2 (PANTHER)                                                                                         |
| Caenorhabditis briggsae | membrane associated ring finger                          | 0  |                                                                                                                                                                                                                                           | F:GO:0008270                                   |             | IPR011016; IPR013083; IPR018957;<br>PTHR12267 (PANTHER), SignalP<br>(SIGNALP), SSF57850 (SUPERFAMILY)                                   |
| Caenorhabditis briggsae | dimethylglycine dehydroge-se                             | 6  | C:GO:0005737;<br>P:GO:0006546;<br>F:GO:0016491;<br>F:GO:0004047;<br>P:GO:0055085;<br>C:GO:0016020                                                                                                                                         | -                                              | EC:2.1.2.10 | IPR006076; G3DSA:3.50.50.60<br>(GENE3D), PTHR13847 (PANTHER),<br>PTHR13847:SF15 (PANTHER), SignalP<br>(SIGNALP), SSF51905 (SUPERFAMILY) |
| -                       | -                                                        | 0  |                                                                                                                                                                                                                                           |                                                |             | -                                                                                                                                       |
| -                       | -                                                        | 0  |                                                                                                                                                                                                                                           |                                                |             | -                                                                                                                                       |
| Brugia malayi           | hypothetical protein [Brugia malayi]                     | 0  |                                                                                                                                                                                                                                           |                                                |             | IPR022091                                                                                                                               |
| Caenorhabditis briggsae | db module family protein                                 | 0  |                                                                                                                                                                                                                                           |                                                |             | IPR002602; PTHR12974 (PANTHER),<br>PTHR12974:SF2 (PANTHER)                                                                              |
| -                       | -                                                        | 0  |                                                                                                                                                                                                                                           |                                                |             | -                                                                                                                                       |
| Caenorhabditis briggsae | fh1 fh2 domain-containing protein 3                      | 2  | F:GO:0003779;<br>P:GO:0030036                                                                                                                                                                                                             | -                                              |             | PTHR23213 (PANTHER),<br>PTHR23213:SF3 (PANTHER)                                                                                         |

|                         |                                                            |    |                                                                                                                                                                                                                                                                                                                                                                                                                                                       |   |                                   |                                                                                                                |
|-------------------------|------------------------------------------------------------|----|-------------------------------------------------------------------------------------------------------------------------------------------------------------------------------------------------------------------------------------------------------------------------------------------------------------------------------------------------------------------------------------------------------------------------------------------------------|---|-----------------------------------|----------------------------------------------------------------------------------------------------------------|
| Caenorhabditis elegans  | prolyl 4-hydroxylase                                       | 6  | F:GO:0031418;<br>F:GO:0005506;<br>F:GO:0004656;<br>P:GO:0055114;<br>F:GO:0016702;<br>C:GO:0005783                                                                                                                                                                                                                                                                                                                                                     | - | EC:1.14.11.2<br>;<br>EC:1.13.11.0 | PTHR10869 (PANTHER),<br>PTHR10869:SF13 (PANTHER)                                                               |
| Caenorhabditis elegans  | suppressor of cytokine sig-ling 7                          | 7  | F:GO:0005488;<br>P:GO:0044238;<br>P:GO:0050789;<br>P:GO:0044260;<br>P:GO:0023033;<br>C:GO:0044464;<br>P:GO:0043412                                                                                                                                                                                                                                                                                                                                    | - |                                   | IPR000980; PTHR10385 (PANTHER),<br>PTHR10385:SF17 (PANTHER),<br>SSF55550 (SUPERFAMILY)                         |
| Gallus gallus           | phd finger protein                                         | 2  | P:GO:0009987;<br>C:GO:0005622                                                                                                                                                                                                                                                                                                                                                                                                                         | - |                                   | IPR001841; IPR001965; IPR011011;<br>PTHR12420 (PANTHER),<br>PTHR12420:SF3 (PANTHER), SSF57889<br>(SUPERFAMILY) |
| Caenorhabditis briggsae | fk506 binding protein 2 isoform cra_b                      | 5  | P:GO:0006457;<br>P:GO:0040010;<br>C:GO:0044464;<br>P:GO:0008340;<br>F:GO:0003755                                                                                                                                                                                                                                                                                                                                                                      | - | EC:5.2.1.8                        | IPR001179; G3DSA:3.10.50.40<br>(GENE3D), PTHR10516:SF9<br>(PANTHER), SSF54534 (SUPERFAMILY)                    |
| Caenorhabditis briggsae | elegans protein partially confirmed by transcript evidence | 3  | P:GO:0044238;<br>P:GO:0019915;<br>F:GO:0016757                                                                                                                                                                                                                                                                                                                                                                                                        | - |                                   | IPR002213; G3DSA:3.40.50.2000<br>(GENE3D), PTHR11926:SF3<br>(PANTHER), SSF53756 (SUPERFAMILY)                  |
| Caenorhabditis briggsae | Hypothetical protein CBG00897 [Caenorhabditis briggsae]    | 0  |                                                                                                                                                                                                                                                                                                                                                                                                                                                       |   |                                   | PTHR23125 (PANTHER),<br>PTHR23125:SF32 (PANTHER)                                                               |
|                         | -                                                          | 0  |                                                                                                                                                                                                                                                                                                                                                                                                                                                       |   |                                   | IPR015880                                                                                                      |
|                         | -                                                          | 0  |                                                                                                                                                                                                                                                                                                                                                                                                                                                       |   |                                   | SignalP (SIGNALP)                                                                                              |
|                         | -                                                          | 0  |                                                                                                                                                                                                                                                                                                                                                                                                                                                       |   |                                   | -                                                                                                              |
| Caenorhabditis elegans  | briggsae cbr-cln- protein                                  | 26 | P:GO:0008340;<br>C:GO:0043005;<br>C:GO:0005802;<br>C:GO:0000139;<br>C:GO:0030176;<br>P:GO:0016236;<br>P:GO:0006898;<br>C:GO:0005624;<br>C:GO:0005764;<br>P:GO:0046662;<br>P:GO:0007042;<br>P:GO:0009792;<br>P:GO:0006681;<br>C:GO:0005795;<br>C:GO:0005769;<br>P:GO:0050877;<br>C:GO:0008021;<br>P:GO:0019222;<br>P:GO:0042987;<br>P:GO:0001575;<br>C:GO:0005901;<br>P:GO:0006684;<br>P:GO:0015809;<br>C:GO:0005634;<br>P:GO:0043066;<br>P:GO:0006678 | - |                                   | IPR003492; SignalP (SIGNALP)                                                                                   |
| Ancylostoma duodenale   | elegans protein partially confirmed by transcript evidence | 0  |                                                                                                                                                                                                                                                                                                                                                                                                                                                       |   | P:GO:0040011;<br>C:GO:0005576     | IPR001283; IPR014044; SignalP<br>(SIGNALP)                                                                     |

|                                        |                                                                        |   |                                                                                                   |                                                                                                                                                                                                         |             |                                                                                                            |
|----------------------------------------|------------------------------------------------------------------------|---|---------------------------------------------------------------------------------------------------|---------------------------------------------------------------------------------------------------------------------------------------------------------------------------------------------------------|-------------|------------------------------------------------------------------------------------------------------------|
| Caenorhabditis briggsae                | glycine c-acetyltransferase (2-amino-3-ketobutyrate-coenzyme a ligase) | 6 | F:GO:0016874;<br>F:GO:0030170;<br>C:GO:0005743;<br>P:GO:0009058;<br>F:GO:0016769;<br>F:GO:0008890 | -                                                                                                                                                                                                       | EC:2.3.1.29 | IPR011282; IPR015421; IPR015424;<br>PTHR13693 (PANTHER)                                                    |
| -                                      | -                                                                      | 0 | -                                                                                                 | -                                                                                                                                                                                                       | -           | -                                                                                                          |
| Caenorhabditis elegans                 | short chain dehydroge-se reductase family protein                      | 3 | P:GO:0008152;<br>F:GO:0003824;<br>F:GO:0005488                                                    | -                                                                                                                                                                                                       | -           | IPR002198; IPR002347; IPR016040;<br>PTHR19410:SF98 (PANTHER), SignalP<br>(SIGNALP), SSF51735 (SUPERFAMILY) |
| Lodderomyces elongisporus NRRL YB-4239 | n-glycosylase d- lyase                                                 | 0 | -                                                                                                 | F:GO:0003684;<br>C:GO:0016021;<br>F:GO:0005375;<br>P:GO:0006289;<br>F:GO:0003677;<br>F:GO:0008534;<br>F:GO:0003906;<br>P:GO:0006284;<br>F:GO:0016829;<br>P:GO:0006281;<br>F:GO:0003824;<br>P:GO:0006825 | -           | IPR011257; G3DSA:1.10.340.30<br>(GENE3D), PTHR10242 (PANTHER)                                              |
| -                                      | -                                                                      | 0 | -                                                                                                 | -                                                                                                                                                                                                       | -           | -                                                                                                          |
| -                                      | -                                                                      | 0 | -                                                                                                 | -                                                                                                                                                                                                       | -           | SignalP (SIGNALP)                                                                                          |
| -                                      | -                                                                      | 0 | -                                                                                                 | -                                                                                                                                                                                                       | -           | -                                                                                                          |
| -                                      | -                                                                      | 0 | -                                                                                                 | -                                                                                                                                                                                                       | -           | -                                                                                                          |
| -                                      | -                                                                      | 0 | -                                                                                                 | -                                                                                                                                                                                                       | -           | -                                                                                                          |
| -                                      | -                                                                      | 0 | -                                                                                                 | -                                                                                                                                                                                                       | -           | SignalP (SIGNALP)                                                                                          |
| Caenorhabditis briggsae                | bestrophin 2                                                           | 3 | C:GO:0016021;<br>F:GO:0005524;<br>F:GO:0008026                                                    | -                                                                                                                                                                                                       | -           | IPR000615; IPR021134; SignalP<br>(SIGNALP)                                                                 |
| Caenorhabditis elegans                 | hypothetical protein F59C12.3 [Caenorhabditis elegans]                 | 1 | F:GO:0005515                                                                                      | -                                                                                                                                                                                                       | -           | -                                                                                                          |
| -                                      | -                                                                      | 0 | -                                                                                                 | -                                                                                                                                                                                                       | -           | -                                                                                                          |
| Oryza sativa Japonica Group            | surface-anchored protein                                               | 1 | C:GO:0044464                                                                                      | -                                                                                                                                                                                                       | -           | PTHR16469 (PANTHER)                                                                                        |
| Oryza sativa Japonica Group            | surface-anchored protein                                               | 0 | -                                                                                                 | C:GO:0009986;<br>P:GO:0006397;<br>F:GO:0008061;<br>C:GO:0005634;<br>P:GO:0008380;<br>C:GO:0005739;<br>C:GO:0019867;<br>C:GO:0005576;<br>F:GO:0003743;<br>C:GO:0005618;<br>P:GO:0006030                  | -           | -                                                                                                          |
| -                                      | -                                                                      | 0 | -                                                                                                 | -                                                                                                                                                                                                       | -           | -                                                                                                          |
| Macacine herpesvirus 4                 | prb3 protein                                                           | 1 | F:GO:0005488                                                                                      | -                                                                                                                                                                                                       | -           | -                                                                                                          |
| Paramecium tetraurelia strain d4-2     | surface-anchored protein                                               | 0 | -                                                                                                 | C:GO:0009986;<br>C:GO:0005739;<br>F:GO:0008061;<br>C:GO:0019867;<br>C:GO:0005576;<br>F:GO:0004872;<br>F:GO:0003743;<br>C:GO:0005618;<br>P:GO:0006030                                                    | -           | PTHR16469 (PANTHER)                                                                                        |
| Oryza sativa Japonica Group            | surface-anchored protein                                               | 1 | C:GO:0044464                                                                                      | -                                                                                                                                                                                                       | -           | PTHR16469 (PANTHER)                                                                                        |
| -                                      | -                                                                      | 0 | -                                                                                                 | -                                                                                                                                                                                                       | -           | SignalP (SIGNALP)                                                                                          |

|                         |                                                            |   |                                                                                                                                                                                                                                                                                                                                                                                                                                                                                         |                               |                                                                                                                                                                  |
|-------------------------|------------------------------------------------------------|---|-----------------------------------------------------------------------------------------------------------------------------------------------------------------------------------------------------------------------------------------------------------------------------------------------------------------------------------------------------------------------------------------------------------------------------------------------------------------------------------------|-------------------------------|------------------------------------------------------------------------------------------------------------------------------------------------------------------|
|                         | -                                                          | 0 |                                                                                                                                                                                                                                                                                                                                                                                                                                                                                         |                               | SignalP (SIGNALP)                                                                                                                                                |
| Caenorhabditis elegans  | briggsae cbr-rbc-1 protein                                 | 0 |                                                                                                                                                                                                                                                                                                                                                                                                                                                                                         |                               | PTHR13950 (PANTHER),<br>PTHR13950:SF1 (PANTHER)                                                                                                                  |
| Caenorhabditis briggsae | tk fer protein ki-se                                       | 7 | F:GO:0004674;<br>F:GO:0005524;<br>F:GO:0004713;<br>F:GO:0005515;<br>C:GO:0044424;<br>P:GO:0040018;<br>P:GO:0006468                                                                                                                                                                                                                                                                                                                                                                      | -                             | EC:2.7.11.0;<br>EC:2.7.10.0<br>IPR000719; IPR001245; IPR008266;<br>IPR011009; IPR020685; IPR020764;<br>G3DSA:1.10.510.10 (GENE3D),<br>G3DSA:3.30.200.20 (GENE3D) |
| Apis mellifera          | tubulin alpha-1 chain                                      | 6 | P:GO:0007018;<br>F:GO:0005525;<br>P:GO:0051258;<br>F:GO:0005198;<br>F:GO:0003924;<br>C:GO:0005874                                                                                                                                                                                                                                                                                                                                                                                       | -                             | EC:3.6.5.1;<br>EC:3.6.5.2;<br>EC:3.6.5.3;<br>EC:3.6.5.4                                                                                                          |
| Caenorhabditis elegans  | elegans protein confirmed by transcript evidence           | 0 |                                                                                                                                                                                                                                                                                                                                                                                                                                                                                         | F:GO:0017057;<br>P:GO:0006098 | G3DSA:3.40.50.1360 (GENE3D),<br>SSF100950 (SUPERFAMILY)                                                                                                          |
|                         | -                                                          | 0 |                                                                                                                                                                                                                                                                                                                                                                                                                                                                                         |                               | -                                                                                                                                                                |
|                         | -                                                          | 0 |                                                                                                                                                                                                                                                                                                                                                                                                                                                                                         |                               | -                                                                                                                                                                |
|                         | -                                                          | 0 |                                                                                                                                                                                                                                                                                                                                                                                                                                                                                         |                               | -                                                                                                                                                                |
|                         | -                                                          | 0 |                                                                                                                                                                                                                                                                                                                                                                                                                                                                                         |                               | -                                                                                                                                                                |
| Caenorhabditis elegans  | immunoglobulin i-set domain containing protein             | 0 | C:GO:0001607;<br>C:GO:0005604;<br>P:GO:0006468;<br>P:GO:0016338;<br>P:GO:0070593;<br>F:GO:0005524;<br>C:GO:0016021;<br>P:GO:0007156;<br>F:GO:0008237;<br>C:GO:0016020;<br>F:GO:0008233;<br>C:GO:0031012;<br>F:GO:0005509;<br>F:GO:0030414;<br>F:GO:0004222;<br>F:GO:0005021;<br>C:GO:0030054;<br>P:GO:0008218;<br>P:GO:0007399;<br>C:GO:0005938;<br>P:GO:0007162;<br>F:GO:0008270;<br>C:GO:0005578;<br>C:GO:0005887;<br>F:GO:0005515;<br>C:GO:0005886;<br>C:GO:0005576;<br>P:GO:0018298 |                               | -                                                                                                                                                                |
|                         | -                                                          | 0 |                                                                                                                                                                                                                                                                                                                                                                                                                                                                                         |                               | PTHR16193 (PANTHER)                                                                                                                                              |
|                         | -                                                          | 0 |                                                                                                                                                                                                                                                                                                                                                                                                                                                                                         |                               | -                                                                                                                                                                |
| Caenorhabditis elegans  | elegans protein confirmed by transcript evidence           | 0 |                                                                                                                                                                                                                                                                                                                                                                                                                                                                                         |                               | PTHR10201 (PANTHER),<br>PTHR10201:SF5 (PANTHER)                                                                                                                  |
| Caenorhabditis elegans  | elegans protein partially confirmed by transcript evidence | 4 | C:GO:0016021;<br>P:GO:0006865;<br>F:GO:0015171;<br>P:GO:0055085                                                                                                                                                                                                                                                                                                                                                                                                                         | -                             | -                                                                                                                                                                |

|                         |                                                            |   |                                                                                                                                     |                                                                                                                                     |             |                                                                                                         |
|-------------------------|------------------------------------------------------------|---|-------------------------------------------------------------------------------------------------------------------------------------|-------------------------------------------------------------------------------------------------------------------------------------|-------------|---------------------------------------------------------------------------------------------------------|
| Caenorhabditis elegans  | elegans protein partially confirmed by transcript evidence | 4 | C:GO:0005737;<br>P:GO:0006546;<br>F:GO:0016491;<br>F:GO:0004047                                                                     | -                                                                                                                                   | EC:2.1.2.10 | -                                                                                                       |
| Caenorhabditis elegans  | expulsion defective family member (aex-3)                  | 7 | P:GO:0007618;<br>P:GO:0030421;<br>P:GO:0018991;<br>F:GO:0017112;<br>P:GO:0007268;<br>P:GO:0050794;<br>C:GO:0044464                  | -                                                                                                                                   |             | PTHR13008 (PANTHER)                                                                                     |
|                         | -                                                          | 0 |                                                                                                                                     |                                                                                                                                     |             | -                                                                                                       |
| Caenorhabditis briggsae | integrin alpha-ps2                                         | 8 | P:GO:0009792;<br>P:GO:0002119;<br>P:GO:0018991;<br>P:GO:0032940;<br>P:GO:0040007;<br>P:GO:0006898;<br>P:GO:0040039;<br>C:GO:0008305 | -                                                                                                                                   |             | G3DSA:2.130.10.130 (GENE3D),<br>PTHR23220 (PANTHER),<br>PTHR23220:SF11 (PANTHER)                        |
|                         | -                                                          | 0 |                                                                                                                                     |                                                                                                                                     |             | -                                                                                                       |
|                         | -                                                          | 0 |                                                                                                                                     |                                                                                                                                     |             | -                                                                                                       |
| Brugia malayi           | swim zinc finger family protein                            | 0 |                                                                                                                                     | F:GO:0008270                                                                                                                        |             | PTHR22619 (PANTHER)                                                                                     |
| Caenorhabditis elegans  | suppressor of activated let-60 ras family member (sur-2)   | 3 | P:GO:0044260;<br>P:GO:0090304;<br>P:GO:0010467                                                                                      | -                                                                                                                                   |             | IPR021629                                                                                               |
|                         | -                                                          | 0 |                                                                                                                                     |                                                                                                                                     |             | SignalIP (SIGNALP)                                                                                      |
| Caenorhabditis briggsae | briggsae cbr-sec-3 protein                                 | 5 | P:GO:0007126;<br>P:GO:0000003;<br>P:GO:0040010;<br>F:GO:0005515;<br>P:GO:0040011                                                    | -                                                                                                                                   |             | IPR019160                                                                                               |
| Caenorhabditis briggsae | elegans protein confirmed by transcript evidence           | 2 | P:GO:0055085;<br>C:GO:0016021                                                                                                       | -                                                                                                                                   |             | G3DSA:1.20.1250.20 (GENE3D),<br>PTHR11662 (PANTHER),<br>PTHR11662:SF17 (PANTHER), SignalIP<br>(SIGNALP) |
|                         | -                                                          | 0 |                                                                                                                                     |                                                                                                                                     |             | SignalIP (SIGNALP)                                                                                      |
|                         | -                                                          | 0 |                                                                                                                                     |                                                                                                                                     |             | SignalIP (SIGNALP)                                                                                      |
| Caenorhabditis briggsae | briggsae cbr-unc-68 protein                                | 8 | F:GO:0004872;<br>P:GO:0006629;<br>F:GO:0005219;<br>P:GO:0006816;<br>P:GO:0006874;<br>P:GO:0055085;<br>F:GO:0005509;<br>C:GO:0016021 | -                                                                                                                                   |             | IPR001870; IPR003877; IPR008985;<br>IPR015925; PTHR13715:SF11<br>(PANTHER)                              |
|                         | -                                                          | 0 |                                                                                                                                     |                                                                                                                                     |             | -                                                                                                       |
|                         | -                                                          | 0 |                                                                                                                                     |                                                                                                                                     |             | -                                                                                                       |
| Loa loa                 | pinin sdk mema protein conserved region containing protein | 0 |                                                                                                                                     | F:GO:0046872;<br>F:GO:0035091;<br>F:GO:0016788;<br>F:GO:0000166;<br>P:GO:0007154;<br>F:GO:0008270;<br>F:GO:0005515;<br>C:GO:0005634 |             | IPR006786; PTHR12707 (PANTHER)                                                                          |

|                         |                                                            |    |                                                                                                                                                                                                                                           |                                                                                                                                                                       |              |                                                                                                                   |
|-------------------------|------------------------------------------------------------|----|-------------------------------------------------------------------------------------------------------------------------------------------------------------------------------------------------------------------------------------------|-----------------------------------------------------------------------------------------------------------------------------------------------------------------------|--------------|-------------------------------------------------------------------------------------------------------------------|
| Caenorhabditis briggsae | briggsae cbr-gas-1 protein                                 | 14 | F:GO:0048038;<br>P:GO:0006979;<br>P:GO:0008340;<br>F:GO:0008137;<br>C:GO:0005747;<br>F:GO:0046872;<br>P:GO:0040007;<br>F:GO:0051539;<br>F:GO:0051287;<br>P:GO:0006120;<br>P:GO:0002119;<br>F:GO:0005515;<br>P:GO:0006898;<br>P:GO:0009792 | -                                                                                                                                                                     | EC:1.6.5.3   | -                                                                                                                 |
| Brugia malayi           | briggsae cbr-clk-2 protein                                 | 0  |                                                                                                                                                                                                                                           | C:GO:0016020;<br>C:GO:0005694;<br>C:GO:0005634;<br>F:GO:0000166;<br>C:GO:0005737;<br>F:GO:0017111;<br>F:GO:0003674;<br>F:GO:0005524;<br>F:GO:0004872;<br>F:GO:0005488 |              | PTHR15830 (PANTHER)                                                                                               |
| Loa loa                 | calcium homeostasis endoplasmic reticulum protein          | 4  | C:GO:0005737;<br>P:GO:0065007;<br>F:GO:0003676;<br>P:GO:0009987                                                                                                                                                                           | -                                                                                                                                                                     |              | IPR000061; IPR006569; IPR006903;<br>PTHR12323 (PANTHER), SSF109905<br>(SUPERFAMILY)                               |
| -                       | -                                                          | 0  |                                                                                                                                                                                                                                           |                                                                                                                                                                       |              | -                                                                                                                 |
| -                       | -                                                          | 0  |                                                                                                                                                                                                                                           |                                                                                                                                                                       |              | -                                                                                                                 |
| Caenorhabditis briggsae | tetratricopeptide repeat protein 38                        | 0  |                                                                                                                                                                                                                                           | F:GO:0005488;<br>F:GO:0005044;<br>C:GO:0016020                                                                                                                        |              | -                                                                                                                 |
| -                       | -                                                          | 0  |                                                                                                                                                                                                                                           |                                                                                                                                                                       |              | PTHR23317 (PANTHER),<br>PTHR23317:SF16 (PANTHER)                                                                  |
| Caenorhabditis briggsae | beta- -glucuronosyltransferase                             | 2  | C:GO:0016020;<br>F:GO:0015018                                                                                                                                                                                                             | -                                                                                                                                                                     | EC:2.4.1.135 | IPR005027; G3DSA:3.90.550.10<br>(GENE3D), SSF53448 (SUPERFAMILY)                                                  |
| Loa loa                 | rab5-interacting protein                                   | 1  | F:GO:0005515                                                                                                                                                                                                                              | -                                                                                                                                                                     |              | SignalP (SIGNALP)                                                                                                 |
| Caenorhabditis elegans  | elegans protein partially confirmed by transcript evidence | 0  |                                                                                                                                                                                                                                           |                                                                                                                                                                       |              | IPR010742; PF07019 (PFAM)                                                                                         |
| -                       | -                                                          | 0  |                                                                                                                                                                                                                                           |                                                                                                                                                                       |              | -                                                                                                                 |
| Caenorhabditis briggsae | probable e3 ubiquitin-protein ligase mycbp2                | 4  | P:GO:0030071;<br>F:GO:0005515;<br>F:GO:0008270;<br>C:GO:0005680                                                                                                                                                                           | -                                                                                                                                                                     |              | IPR012983; PTHR12846 (PANTHER),<br>PTHR12846:SF2 (PANTHER)                                                        |
| Caenorhabditis elegans  | gcn1 general control of amino-acid synthesis 1-like 1      | 4  | C:GO:0005840;<br>F:GO:0008135;<br>F:GO:0005515;<br>P:GO:0000003                                                                                                                                                                           | -                                                                                                                                                                     |              | IPR000357; IPR011989; IPR016024;<br>IPR021133; PTHR23346 (PANTHER),<br>PTHR23346:SF7 (PANTHER), PF12348<br>(PFAM) |
| Caenorhabditis briggsae | maltase-glucoamylase-like protein                          | 0  |                                                                                                                                                                                                                                           | F:GO:0004553;<br>F:GO:0030246;<br>P:GO:0008152;<br>F:GO:0016787;<br>P:GO:0005975;<br>F:GO:0004558;<br>F:GO:0016798;<br>F:GO:0003824                                   |              | IPR000322; PTHR22762:SF11<br>(PANTHER)                                                                            |
| -                       | -                                                          | 0  |                                                                                                                                                                                                                                           |                                                                                                                                                                       |              | -                                                                                                                 |



|                         |                                                            |    |                                                                                                                                                                                                                                                                                                                                                                                                    |                               |                                                                                                               |   |
|-------------------------|------------------------------------------------------------|----|----------------------------------------------------------------------------------------------------------------------------------------------------------------------------------------------------------------------------------------------------------------------------------------------------------------------------------------------------------------------------------------------------|-------------------------------|---------------------------------------------------------------------------------------------------------------|---|
|                         | -                                                          | 0  |                                                                                                                                                                                                                                                                                                                                                                                                    |                               | SignalP (SIGNALP)                                                                                             |   |
|                         | -                                                          | 0  |                                                                                                                                                                                                                                                                                                                                                                                                    |                               | -                                                                                                             |   |
| Caenorhabditis elegans  | elegans protein partially confirmed by transcript evidence | 0  |                                                                                                                                                                                                                                                                                                                                                                                                    | C:GO:0016021                  | -                                                                                                             |   |
| Caenorhabditis elegans  | btb and math domain containing family member (bath-44)     | 2  | F:GO:0005515;<br>P:GO:0000003                                                                                                                                                                                                                                                                                                                                                                      | -                             | -                                                                                                             |   |
|                         | -                                                          | 0  |                                                                                                                                                                                                                                                                                                                                                                                                    |                               | -                                                                                                             |   |
| Loa loa                 | zinc c2h2 type family protein                              | 3  | F:GO:0008270;<br>F:GO:0003676;<br>C:GO:0005622                                                                                                                                                                                                                                                                                                                                                     | -                             | -                                                                                                             |   |
| Monodelphis domestica   | briggsae cbr-rab-14 protein                                | 23 | C:GO:0005829;<br>C:GO:0042599;<br>P:GO:0045176;<br>C:GO:0005764;<br>C:GO:0042175;<br>P:GO:0007264;<br>F:GO:0001948;<br>P:GO:0032880;<br>C:GO:0005795;<br>P:GO:0006913;<br>F:GO:0004767;<br>C:GO:0005624;<br>P:GO:0007589;<br>C:GO:0005770;<br>C:GO:0005769;<br>C:GO:0005791;<br>C:GO:0030140;<br>F:GO:0003924;<br>C:GO:0048471;<br>C:GO:0016324;<br>P:GO:0006886;<br>C:GO:0005634;<br>F:GO:0005525 | -                             | EC:3.1.4.12;<br>EC:3.6.5.1;<br>EC:3.6.5.2;<br>EC:3.6.5.3;<br>EC:3.6.5.4                                       | - |
|                         | -                                                          | 0  |                                                                                                                                                                                                                                                                                                                                                                                                    |                               | -                                                                                                             |   |
| Caenorhabditis elegans  | trove domain member 2                                      | 3  | F:GO:0005515;<br>P:GO:0040010;<br>C:GO:0030529                                                                                                                                                                                                                                                                                                                                                     | -                             | IPR008858; PTHR14202 (PANTHER),<br>SSF140864 (SUPERFAMILY), SSF53300<br>(SUPERFAMILY)                         |   |
|                         | -                                                          | 0  |                                                                                                                                                                                                                                                                                                                                                                                                    |                               | -                                                                                                             |   |
|                         | -                                                          | 0  |                                                                                                                                                                                                                                                                                                                                                                                                    |                               | -                                                                                                             |   |
|                         | -                                                          | 0  |                                                                                                                                                                                                                                                                                                                                                                                                    |                               | -                                                                                                             |   |
| Loa loa                 | bestrophin family protein                                  | 0  |                                                                                                                                                                                                                                                                                                                                                                                                    | P:GO:0040011;<br>P:GO:0040018 | IPR000615; IPR021134                                                                                          |   |
| Caenorhabditis briggsae | ferm domain ( -ezrin-radixin-moesin) family member (frm-8) | 0  |                                                                                                                                                                                                                                                                                                                                                                                                    | F:GO:0005515                  | PTHR13436 (PANTHER),<br>PTHR13436:SF1 (PANTHER)                                                               |   |
| Loa loa                 | hypothetical protein LOAG_11670 [Loa loa]                  | 0  |                                                                                                                                                                                                                                                                                                                                                                                                    |                               | IPR001810; IPR022364;<br>G3DSA:1.20.1280.50 (GENE3D),<br>G3DSA:3.80.10.10 (GENE3D),<br>SSF52058 (SUPERFAMILY) |   |
| Caenorhabditis elegans  | lethal family member (let-805)                             | 8  | P:GO:0018996;<br>P:GO:0009792;<br>P:GO:0008340;<br>P:GO:0000003;<br>F:GO:0005515;<br>P:GO:0006898;<br>P:GO:0002119;<br>P:GO:0040011                                                                                                                                                                                                                                                                | -                             | PTHR19143 (PANTHER),<br>PTHR19143:SF2 (PANTHER)                                                               |   |

|                                 |                                                             |    |                                                                                                                                                                       |                                                                                                                                                                                                                          |                                                                       |
|---------------------------------|-------------------------------------------------------------|----|-----------------------------------------------------------------------------------------------------------------------------------------------------------------------|--------------------------------------------------------------------------------------------------------------------------------------------------------------------------------------------------------------------------|-----------------------------------------------------------------------|
| Caenorhabditis briggsae         | patched family protein                                      | 10 | P:GO:0040025;<br>F:GO:0008158;<br>P:GO:0040018;<br>P:GO:0018996;<br>P:GO:0040002;<br>P:GO:0006810;<br>P:GO:0040011;<br>C:GO:0016021;<br>P:GO:0019915;<br>F:GO:0005215 | -                                                                                                                                                                                                                        | -                                                                     |
| Enterococcus casseliflavus EC20 | ycf2                                                        | 0  |                                                                                                                                                                       | C:GO:0009986;<br>F:GO:0008061;<br>F:GO:0000166;<br>F:GO:0017111;<br>F:GO:0005524;<br>C:GO:0005576;<br>C:GO:0005618;<br>C:GO:0009570;<br>P:GO:0006030;<br>C:GO:0009507;<br>F:GO:0005488;<br>C:GO:0009536                  | -                                                                     |
| Enterococcus casseliflavus EC20 | protein                                                     | 0  |                                                                                                                                                                       | C:GO:0009986;<br>F:GO:0008061;<br>F:GO:0000166;<br>F:GO:0017111;<br>F:GO:0005524;<br>F:GO:0005179;<br>C:GO:0005576;<br>C:GO:0005618;<br>C:GO:0009570;<br>P:GO:0006030;<br>C:GO:0009507;<br>F:GO:0005488;<br>C:GO:0009536 | -                                                                     |
| -                               | -                                                           | 0  |                                                                                                                                                                       |                                                                                                                                                                                                                          | IPR006162; SignalP (SIGNALP)                                          |
| -                               | -                                                           | 0  |                                                                                                                                                                       |                                                                                                                                                                                                                          | -                                                                     |
| Angiostrongylus cantonensis     | zinc finger c-x8-c-x5-c-x3-h type                           | 1  | F:GO:0046872                                                                                                                                                          | -                                                                                                                                                                                                                        | PTHR14493 (PANTHER),<br>PTHR14493:SF6 (PANTHER)                       |
| Angiostrongylus cantonensis     | briggsae cbr-prx-11 protein                                 | 0  |                                                                                                                                                                       |                                                                                                                                                                                                                          | -                                                                     |
| Caenorhabditis briggsae         | chronic lymphocytic leukemia deletion region gene 6 protein | 0  |                                                                                                                                                                       |                                                                                                                                                                                                                          | PTHR20951 (PANTHER)                                                   |
| -                               | -                                                           | 0  |                                                                                                                                                                       |                                                                                                                                                                                                                          | SignalP (SIGNALP)                                                     |
| Haemonchus contortus            | legumain [Haemonchus contortus]                             | 0  |                                                                                                                                                                       | P:GO:0006508;<br>F:GO:0004197                                                                                                                                                                                            | IPR001096; PTHR12000:SF3<br>(PANTHER)                                 |
| -                               | -                                                           | 0  |                                                                                                                                                                       |                                                                                                                                                                                                                          | -                                                                     |
| -                               | -                                                           | 0  |                                                                                                                                                                       |                                                                                                                                                                                                                          | SignalP (SIGNALP)                                                     |
| Caenorhabditis briggsae         | Hypothetical protein CBG15176 [Caenorhabditis briggsae]     | 0  |                                                                                                                                                                       | F:GO:0003676;<br>F:GO:0008270;<br>C:GO:0005622                                                                                                                                                                           | -                                                                     |
| Loa loa                         | twik (kcnk-like) family of potassium alpha subunit 7        | 4  | C:GO:0016021;<br>P:GO:0006813;<br>F:GO:0005267;<br>P:GO:0055085                                                                                                       | -                                                                                                                                                                                                                        | PTHR11003 (PANTHER),<br>PTHR11003:SF7 (PANTHER), SignalP<br>(SIGNALP) |

|                         |                                                            |    |                                                                                                                                                                                                                                                            |                                                |            |                                                              |
|-------------------------|------------------------------------------------------------|----|------------------------------------------------------------------------------------------------------------------------------------------------------------------------------------------------------------------------------------------------------------|------------------------------------------------|------------|--------------------------------------------------------------|
| Caenorhabditis briggsae | briggsae cbr-cdh-1 protein                                 | 5  | P:GO:0002119;<br>P:GO:0007155;<br>P:GO:0040010;<br>P:GO:0040011;<br>C:GO:0016020                                                                                                                                                                           | -                                              | -          |                                                              |
| -                       | -                                                          | 0  |                                                                                                                                                                                                                                                            |                                                |            | -                                                            |
| -                       | -                                                          | 0  |                                                                                                                                                                                                                                                            |                                                |            | -                                                            |
| Caenorhabditis elegans  | pci domain-containing protein 2                            | 5  | P:GO:0000003;<br>P:GO:0010171;<br>P:GO:0040010;<br>P:GO:0002119;<br>P:GO:0040011                                                                                                                                                                           | -                                              |            | IPR000717; PTHR12732 (PANTHER)                               |
| -                       | -                                                          | 0  |                                                                                                                                                                                                                                                            |                                                |            | -                                                            |
| -                       | -                                                          | 0  |                                                                                                                                                                                                                                                            |                                                |            | -                                                            |
| -                       | -                                                          | 0  |                                                                                                                                                                                                                                                            |                                                |            | -                                                            |
| -                       | -                                                          | 0  |                                                                                                                                                                                                                                                            |                                                |            | -                                                            |
| -                       | -                                                          | 0  |                                                                                                                                                                                                                                                            |                                                |            | -                                                            |
| Caenorhabditis elegans  | protein ki-se domain containing protein                    | 3  | P:GO:0040022;<br>F:GO:0016301;<br>P:GO:0051729                                                                                                                                                                                                             | -                                              |            | PTHR11909 (PANTHER),<br>PTHR11909:SF19 (PANTHER)             |
| Caenorhabditis briggsae | elegans protein partially confirmed by transcript evidence | 0  |                                                                                                                                                                                                                                                            | F:GO:0005515                                   |            | -                                                            |
| -                       | -                                                          | 0  |                                                                                                                                                                                                                                                            |                                                |            | -                                                            |
| -                       | -                                                          | 0  |                                                                                                                                                                                                                                                            |                                                |            | -                                                            |
| Caenorhabditis briggsae | elegans protein confirmed by transcript evidence           | 4  | P:GO:0040018;<br>P:GO:0000003;<br>P:GO:0010171;<br>P:GO:0002119                                                                                                                                                                                            | -                                              |            | -                                                            |
| Caenorhabditis elegans  | elegans protein confirmed by transcript evidence           | 0  |                                                                                                                                                                                                                                                            | F:GO:0005524;<br>C:GO:0016021;<br>F:GO:0008026 |            | IPR000615; IPR021134                                         |
| -                       | -                                                          | 0  |                                                                                                                                                                                                                                                            |                                                |            | SignalP (SIGNALP)                                            |
| -                       | -                                                          | 0  |                                                                                                                                                                                                                                                            |                                                |            | -                                                            |
| -                       | -                                                          | 0  |                                                                                                                                                                                                                                                            |                                                |            | -                                                            |
| -                       | -                                                          | 0  |                                                                                                                                                                                                                                                            |                                                |            | -                                                            |
| -                       | -                                                          | 0  |                                                                                                                                                                                                                                                            |                                                |            | -                                                            |
| Haemonchus contortus    | ligand-gated ion channel family member (lgc-41)            | 5  | C:GO:0016021;<br>C:GO:0030054;<br>C:GO:0045211;<br>F:GO:0005230;<br>P:GO:0006811                                                                                                                                                                           | -                                              |            | -                                                            |
| Oryctolagus cuniculus   | alpha 1 type i collagen                                    | 15 | P:GO:0001957;<br>P:GO:0070208;<br>P:GO:0010812;<br>P:GO:0060325;<br>P:GO:0043588;<br>C:GO:0005584;<br>F:GO:0005515;<br>P:GO:0001649;<br>P:GO:0001958;<br>F:GO:0005201;<br>P:GO:0001568;<br>C:GO:0005737;<br>P:GO:0015031;<br>P:GO:0060351;<br>P:GO:0060346 | -                                              |            | IPR008160; PTHR10499 (PANTHER),<br>PTHR10499:SF122 (PANTHER) |
| -                       | -                                                          | 0  |                                                                                                                                                                                                                                                            |                                                |            | -                                                            |
| Nematostella vectensis  | ornithine aminotransferase                                 | 2  | F:GO:0030170;<br>F:GO:0008483                                                                                                                                                                                                                              | -                                              | EC:2.6.1.0 | IPR005814; IPR010164; IPR015421;<br>IPR015424                |

|                          |                                                                              |    |                                                                                                                                                                                        |                                                                                                                    |             |                                                                                                                       |
|--------------------------|------------------------------------------------------------------------------|----|----------------------------------------------------------------------------------------------------------------------------------------------------------------------------------------|--------------------------------------------------------------------------------------------------------------------|-------------|-----------------------------------------------------------------------------------------------------------------------|
| Caenorhabditis briggsae  | immunoglobulin i-set domain containing protein                               | 0  |                                                                                                                                                                                        | P:GO:0016311;<br>F:GO:0016791;<br>P:GO:0006470;<br>F:GO:0016787;<br>F:GO:0004725;<br>P:GO:0009792;<br>F:GO:0004721 |             | IPR003961; IPR008957; IPR013783;<br>PTHR10489 (PANTHER),<br>PTHR10489:SF4 (PANTHER)                                   |
| Caenorhabditis elegans   | immunoglobulin i-set domain containing protein                               | 0  |                                                                                                                                                                                        |                                                                                                                    |             | IPR002602; IPR003961; IPR006150;<br>IPR008957; IPR013783; PTHR10489<br>(PANTHER), PTHR10489:SF4<br>(PANTHER)          |
| Macaca mulatta           | PREDICTED: hypothetical protein LOC695354 [Macaca mulatta]                   | 0  |                                                                                                                                                                                        |                                                                                                                    |             | -                                                                                                                     |
| Brugia malayi            | f-box only protein 11                                                        | 9  | C:GO:0005737;<br>F:GO:0005515;<br>P:GO:0016567;<br>P:GO:0006511;<br>F:GO:0004842;<br>F:GO:0016274;<br>C:GO:0005634;<br>F:GO:0008270;<br>C:GO:0000151                                   | -                                                                                                                  | EC:6.3.2.19 | IPR006626; IPR011050; IPR012334;<br>PTHR22990 (PANTHER),<br>PTHR22990:SF6 (PANTHER)                                   |
|                          |                                                                              | 0  |                                                                                                                                                                                        |                                                                                                                    |             | -                                                                                                                     |
| Saccoglossus kowalevskii | -d-dependent epimerase dehydratase                                           | 4  | F:GO:0016491;<br>P:GO:0044237;<br>F:GO:0050662;<br>P:GO:0044238                                                                                                                        | -                                                                                                                  |             | IPR000534; IPR016040; SignalP<br>(SIGNALP), SSF51735 (SUPERFAMILY)                                                    |
|                          |                                                                              | 0  |                                                                                                                                                                                        |                                                                                                                    |             | SignalP (SIGNALP)                                                                                                     |
| Brugia malayi            | wapl (drosophila wings apart-like cohesin interactor) family member (wapl-1) | 0  |                                                                                                                                                                                        | P:GO:0000003;<br>P:GO:0040011;<br>P:GO:0040010;<br>P:GO:0018991                                                    |             | IPR012502; PTHR22100 (PANTHER),<br>PTHR22100:SF7 (PANTHER), SignalP<br>(SIGNALP)                                      |
| Caenorhabditis briggsae  | inositol triphosphate receptor family member (itr-1)                         | 11 | P:GO:0055085;<br>P:GO:0000280;<br>P:GO:0006979;<br>P:GO:0051209;<br>P:GO:0007629;<br>C:GO:0016021;<br>P:GO:0016319;<br>F:GO:0005220;<br>P:GO:0007591;<br>P:GO:0030322;<br>C:GO:0005783 | -                                                                                                                  |             | IPR000493; IPR003608; IPR015925;<br>IPR016093; G3DSA:2.80.10.50<br>(GENE3D), PTHR13715:SF2 (PANTHER)                  |
| Danio rerio              | disco-interacting protein 2 homolog b                                        | 4  | P:GO:0008152;<br>F:GO:0008134;<br>C:GO:0005634;<br>F:GO:0050564                                                                                                                        | -                                                                                                                  | EC:6.3.2.26 | IPR010506; PTHR22754 (PANTHER),<br>PTHR22754:SF9 (PANTHER)                                                            |
|                          |                                                                              | 0  |                                                                                                                                                                                        |                                                                                                                    |             | -                                                                                                                     |
| Caenorhabditis briggsae  | briggsae cbr-sfxn-2 protein                                                  | 4  | F:GO:0008324;<br>P:GO:0055085;<br>P:GO:0006812;<br>C:GO:0016020                                                                                                                        | -                                                                                                                  |             | IPR004686; PTHR11153:SF7<br>(PANTHER), SignalP (SIGNALP)                                                              |
| Loa loa                  | cyclic amp-regulated 21-like                                                 | 0  |                                                                                                                                                                                        | F:GO:0003676;<br>P:GO:0034605;<br>F:GO:0003674;<br>C:GO:0005737                                                    |             | IPR001374; G3DSA:3.30.1370.50<br>(GENE3D), PTHR15672 (PANTHER),<br>PTHR15672:SF8 (PANTHER), SSF82708<br>(SUPERFAMILY) |

|                         |                                                         |    |                                                                                                                                                                       |                                                                                                                    |                                                         |                                                                                                                       |
|-------------------------|---------------------------------------------------------|----|-----------------------------------------------------------------------------------------------------------------------------------------------------------------------|--------------------------------------------------------------------------------------------------------------------|---------------------------------------------------------|-----------------------------------------------------------------------------------------------------------------------|
| Brugia malayi           | cyclic amp-regulated 21-like                            | 0  |                                                                                                                                                                       | F:GO:0003676;<br>P:GO:0034605;<br>F:GO:0003674;<br>C:GO:0005737                                                    |                                                         | IPR001374; G3DSA:3.30.1370.50<br>(GENE3D), PTHR15672 (PANTHER),<br>PTHR15672:SF8 (PANTHER), SSF82708<br>(SUPERFAMILY) |
|                         | -                                                       | 0  |                                                                                                                                                                       |                                                                                                                    |                                                         | -                                                                                                                     |
|                         | -                                                       | 0  |                                                                                                                                                                       |                                                                                                                    |                                                         | -                                                                                                                     |
|                         | -                                                       | 0  |                                                                                                                                                                       |                                                                                                                    |                                                         | -                                                                                                                     |
|                         | -                                                       | 0  |                                                                                                                                                                       |                                                                                                                    |                                                         | SignalP (SIGNALP)                                                                                                     |
| Caenorhabditis briggsae | troponin i                                              | 0  |                                                                                                                                                                       | F:GO:0005515                                                                                                       |                                                         | -                                                                                                                     |
| Brugia malayi           | g protein-coupled receptor ki-se-interactor 1           | 8  | F:GO:0008060;<br>P:GO:0008277;<br>F:GO:0046872;<br>C:GO:0005925;<br>P:GO:0050790;<br>F:GO:0031267;<br>C:GO:0005737;<br>P:GO:0044237                                   | -                                                                                                                  |                                                         | IPR013724; PTHR23180 (PANTHER),<br>PTHR23180:SF18 (PANTHER)                                                           |
|                         | -                                                       | 0  |                                                                                                                                                                       |                                                                                                                    |                                                         | -                                                                                                                     |
|                         | -                                                       | 0  |                                                                                                                                                                       |                                                                                                                    |                                                         | -                                                                                                                     |
| Caenorhabditis briggsae | Hypothetical protein CBG22835 [Caenorhabditis briggsae] | 0  |                                                                                                                                                                       | F:GO:0046872;<br>P:GO:0055114;<br>F:GO:0009055;<br>F:GO:0016491;<br>F:GO:0020037;<br>F:GO:0005506;<br>F:GO:0004497 |                                                         | -                                                                                                                     |
|                         | -                                                       | 0  |                                                                                                                                                                       |                                                                                                                    |                                                         | -                                                                                                                     |
| Haemochus contortus     | alpha 1b                                                | 10 | F:GO:0005200;<br>P:GO:0007018;<br>F:GO:0005525;<br>F:GO:0019904;<br>P:GO:0000226;<br>P:GO:0051258;<br>C:GO:0005829;<br>F:GO:0046982;<br>C:GO:0005881;<br>F:GO:0003924 | -                                                                                                                  | EC:3.6.5.1;<br>EC:3.6.5.2;<br>EC:3.6.5.3;<br>EC:3.6.5.4 | IPR000217; IPR002452; IPR003008;<br>IPR008280; IPR017975; IPR018316;<br>IPR023123                                     |
| Mus musculus            | rab3 gtpase-activating protein catalytic subunit        | 0  |                                                                                                                                                                       | F:GO:0005096;<br>P:GO:0050790;<br>C:GO:0005737;<br>F:GO:0017137;<br>P:GO:0043087;<br>C:GO:0005625;<br>F:GO:0005097 |                                                         | PTHR21422 (PANTHER),<br>PTHR21422:SF5 (PANTHER)                                                                       |
|                         | -                                                       | 0  |                                                                                                                                                                       |                                                                                                                    |                                                         | -                                                                                                                     |
|                         | -                                                       | 0  |                                                                                                                                                                       |                                                                                                                    |                                                         | -                                                                                                                     |
|                         | -                                                       | 0  |                                                                                                                                                                       |                                                                                                                    |                                                         | SignalP (SIGNALP)                                                                                                     |
|                         | -                                                       | 0  |                                                                                                                                                                       |                                                                                                                    |                                                         | -                                                                                                                     |
| Caenorhabditis briggsae | alkyldihydroxyacetonephosphate synthase                 | 6  | F:GO:0050660;<br>P:GO:0009792;<br>F:GO:0016491;<br>P:GO:0040007;<br>F:GO:0016740;<br>P:GO:0002119                                                                     | -                                                                                                                  |                                                         | -                                                                                                                     |
|                         | -                                                       | 0  |                                                                                                                                                                       |                                                                                                                    |                                                         | -                                                                                                                     |

|                         |                                                                            |   |                                                                                  |                                                                                                                                                                                                                                           |  |                                                                                                          |
|-------------------------|----------------------------------------------------------------------------|---|----------------------------------------------------------------------------------|-------------------------------------------------------------------------------------------------------------------------------------------------------------------------------------------------------------------------------------------|--|----------------------------------------------------------------------------------------------------------|
| Caenorhabditis elegans  | briggsae cbr-hhat-2 protein                                                | 0 |                                                                                  | C:GO:0016021;<br>C:GO:0016020;<br>P:GO:0055085;<br>P:GO:0015031;<br>F:GO:0015450;<br>P:GO:0006810                                                                                                                                         |  | SignalP (SIGNALP)                                                                                        |
| Brugia malayi           | hypothetical protein Bm1_31875 [Brugia malayi]                             | 0 |                                                                                  | F:GO:0005488                                                                                                                                                                                                                              |  | -                                                                                                        |
| Loa loa                 | tir (toll and interleukin 1 receptor) domain protein family member (tir-1) | 5 | P:GO:0007165;<br>P:GO:0045087;<br>C:GO:0031224;<br>F:GO:0042802;<br>F:GO:0004888 | -                                                                                                                                                                                                                                         |  | -                                                                                                        |
| Caenorhabditis elegans  | membrane-bound transcription factor site 2                                 | 3 | P:GO:0044238;<br>C:GO:0044464;<br>F:GO:0016787                                   | -                                                                                                                                                                                                                                         |  | IPR001193; IPR008915; PTHR13325 (PANTHER), SignalP (SIGNALP)                                             |
|                         | -                                                                          | 0 |                                                                                  |                                                                                                                                                                                                                                           |  | -                                                                                                        |
|                         | -                                                                          | 0 |                                                                                  |                                                                                                                                                                                                                                           |  | -                                                                                                        |
|                         | -                                                                          | 0 |                                                                                  |                                                                                                                                                                                                                                           |  | -                                                                                                        |
| Caenorhabditis elegans  | regulator of g protein sig-ling domain containing protein                  | 0 |                                                                                  | F:GO:0004871                                                                                                                                                                                                                              |  | IPR000342; IPR016137; G3DSA:1.10.196.10 (GENE3D), PTHR10845 (PANTHER), PTHR10845:SF14 (PANTHER)          |
| Caenorhabditis briggsae | Hypothetical protein CBG02636 [Caenorhabditis briggsae]                    | 0 |                                                                                  | P:GO:0010171;<br>P:GO:0044237;<br>F:GO:0050662;<br>P:GO:0000003;<br>P:GO:0002119;<br>P:GO:0009792;<br>P:GO:0055114;<br>F:GO:0016491;<br>F:GO:0003854;<br>F:GO:0003824;<br>P:GO:0040011;<br>P:GO:0008152;<br>P:GO:0006694;<br>F:GO:0005488 |  | PTHR10366 (PANTHER), PTHR10366:SF19 (PANTHER)                                                            |
| Caenorhabditis elegans  | fanci (fanconi anemia complex component i) homolog family member (fnci-1)  | 0 |                                                                                  |                                                                                                                                                                                                                                           |  | -                                                                                                        |
|                         | -                                                                          | 0 |                                                                                  |                                                                                                                                                                                                                                           |  | -                                                                                                        |
| Brugia malayi           | dappu_310999-like protein                                                  | 0 |                                                                                  |                                                                                                                                                                                                                                           |  | -                                                                                                        |
| Caenorhabditis briggsae | elegans protein partially confirmed by transcript evidence                 | 4 | P:GO:0007186;<br>C:GO:0016021;<br>P:GO:0007165;<br>F:GO:0004930                  | -                                                                                                                                                                                                                                         |  | IPR000276; G3DSA:1.20.1070.10 (GENE3D), PTHR19264 (PANTHER), PTHR19264:SF33 (PANTHER), SignalP (SIGNALP) |
|                         | -                                                                          | 0 |                                                                                  |                                                                                                                                                                                                                                           |  | -                                                                                                        |
| Bos taurus              | PREDICTED: hypothetical protein [Bos taurus]                               | 0 |                                                                                  |                                                                                                                                                                                                                                           |  | -                                                                                                        |
| Bos taurus              | PREDICTED: hypothetical protein [Bos taurus]                               | 3 | C:GO:0016020;<br>F:GO:0005272;<br>P:GO:0006814                                   | -                                                                                                                                                                                                                                         |  | -                                                                                                        |

|                         |                                                            |    |                                                                                                                                                                                                                                                                             |                                                                                                                                                                       |   |                                                                                                                       |
|-------------------------|------------------------------------------------------------|----|-----------------------------------------------------------------------------------------------------------------------------------------------------------------------------------------------------------------------------------------------------------------------------|-----------------------------------------------------------------------------------------------------------------------------------------------------------------------|---|-----------------------------------------------------------------------------------------------------------------------|
| Caenorhabditis briggsae | pdf receptor homolog family member (pdfr-1)                | 0  |                                                                                                                                                                                                                                                                             | F:GO:0004888;<br>C:GO:0016021;<br>C:GO:0016020;<br>F:GO:0004930;<br>P:GO:0007166;<br>P:GO:0007165;<br>F:GO:0004872;<br>F:GO:0004871;<br>P:GO:0007186;<br>C:GO:0005886 | - |                                                                                                                       |
| Caenorhabditis briggsae | pdf receptor homolog family member (pdfr-1)                | 1  | F:GO:0004871                                                                                                                                                                                                                                                                | -                                                                                                                                                                     |   | PTHR12011 (PANTHER),<br>PTHR12011:SF14 (PANTHER)                                                                      |
| Caenorhabditis elegans  | pdf receptor homolog family member (pdfr-1)                | 0  |                                                                                                                                                                                                                                                                             | F:GO:0004888;<br>C:GO:0016021;<br>C:GO:0016020;<br>F:GO:0004930;<br>P:GO:0007166;<br>P:GO:0007165;<br>F:GO:0004872;<br>F:GO:0004871;<br>P:GO:0007186;<br>C:GO:0005886 |   | PTHR12011 (PANTHER),<br>PTHR12011:SF14 (PANTHER)                                                                      |
| Caenorhabditis briggsae | pdf receptor homolog family member (pdfr-1)                | 1  | F:GO:0004871                                                                                                                                                                                                                                                                | -                                                                                                                                                                     |   | PTHR12011 (PANTHER),<br>PTHR12011:SF14 (PANTHER)                                                                      |
|                         | -                                                          | 0  |                                                                                                                                                                                                                                                                             |                                                                                                                                                                       |   | -                                                                                                                     |
| Caenorhabditis elegans  | tata-binding protein-associated factor 172                 | 3  | F:GO:0005524;<br>F:GO:0004386;<br>F:GO:0003677                                                                                                                                                                                                                              | -                                                                                                                                                                     |   | IPR000330; PTHR10799 (PANTHER),<br>PTHR10799:SF72 (PANTHER),<br>SSF52540 (SUPERFAMILY)                                |
|                         | -                                                          | 0  |                                                                                                                                                                                                                                                                             |                                                                                                                                                                       |   | -                                                                                                                     |
| Caenorhabditis briggsae | elegans protein partially confirmed by transcript evidence | 0  |                                                                                                                                                                                                                                                                             | P:GO:0000003;<br>P:GO:0040011;<br>P:GO:0040010;<br>P:GO:0006898;<br>F:GO:0008270;<br>P:GO:0002119;<br>P:GO:0040007;<br>C:GO:0005622                                   |   | IPR007087; IPR015880                                                                                                  |
|                         | -                                                          | 0  |                                                                                                                                                                                                                                                                             |                                                                                                                                                                       |   | -                                                                                                                     |
| Caenorhabditis elegans  | blooms syndrome d-                                         | 16 | C:GO:0031981;<br>P:GO:0032508;<br>F:GO:0005515;<br>F:GO:0000403;<br>P:GO:0007131;<br>F:GO:0043140;<br>P:GO:0000731;<br>C:GO:0044427;<br>P:GO:0045003;<br>F:GO:0000739;<br>P:GO:0048523;<br>P:GO:0000732;<br>P:GO:0019219;<br>F:GO:0005524;<br>P:GO:0060255;<br>P:GO:0006260 | -                                                                                                                                                                     |   | IPR004589; G3DSA:3.40.50.300<br>(GENE3D), PTHR13710:SF14<br>(PANTHER), SSF52540 (SUPERFAMILY)                         |
| Caenorhabditis elegans  | lethal family member (let-23)                              | 1  | F:GO:0016301                                                                                                                                                                                                                                                                | -                                                                                                                                                                     |   | IPR006211; IPR006212; IPR009030;<br>IPR020685; IPR020688;<br>G3DSA:2.10.220.10 (GENE3D),<br>G3DSA:3.80.20.20 (GENE3D) |

|                             |                                                                |    |                                                                                                                                                                                                                          |                               |  |                                                                                       |
|-----------------------------|----------------------------------------------------------------|----|--------------------------------------------------------------------------------------------------------------------------------------------------------------------------------------------------------------------------|-------------------------------|--|---------------------------------------------------------------------------------------|
| Angiostrongylus cantonensis | elegans protein confirmed by transcript evidence               | 0  |                                                                                                                                                                                                                          |                               |  | IPR021010; SSF141739 (SUPERFAMILY)                                                    |
| Pongo abelii                | dus1l protein                                                  | 4  | F:GO:0050660;<br>P:GO:0055114;<br>F:GO:0017150;<br>P:GO:0008033                                                                                                                                                          | -                             |  | -                                                                                     |
|                             | -                                                              | 0  |                                                                                                                                                                                                                          |                               |  | -                                                                                     |
| Caenorhabditis elegans      | stem-loop binding protein                                      | 13 | F:GO:0003730;<br>P:GO:0040010;<br>P:GO:0006915;<br>P:GO:0044260;<br>P:GO:0090304;<br>P:GO:0007076;<br>P:GO:0040035;<br>P:GO:0010171;<br>P:GO:0002009;<br>C:GO:0005737;<br>C:GO:0005634;<br>P:GO:0009790;<br>P:GO:0016246 | -                             |  | PTHR17408 (PANTHER)                                                                   |
| Caenorhabditis briggsae     | Hypothetical protein CBG18685 [Caenorhabditis briggsae]        | 0  |                                                                                                                                                                                                                          | F:GO:0003676;<br>F:GO:0000166 |  | -                                                                                     |
| Loa loa                     | hypothetical protein LOAG_10662 [Loa loa]                      | 0  |                                                                                                                                                                                                                          |                               |  | SignalP (SIGNALP)                                                                     |
|                             | -                                                              | 0  |                                                                                                                                                                                                                          |                               |  | -                                                                                     |
|                             | -                                                              | 0  |                                                                                                                                                                                                                          |                               |  | SignalP (SIGNALP)                                                                     |
|                             | -                                                              | 0  |                                                                                                                                                                                                                          |                               |  | -                                                                                     |
| Saccoglossus kowalevskii    | threonine dehydratase                                          | 6  | P:GO:0040035;<br>F:GO:0005488;<br>P:GO:0040010;<br>P:GO:0040011;<br>F:GO:0003824;<br>P:GO:0002009                                                                                                                        | -                             |  | IPR001926; G3DSA:3.40.50.1100 (GENE3D), PTHR10314 (PANTHER), PTHR10314:SF17 (PANTHER) |
|                             | -                                                              | 0  |                                                                                                                                                                                                                          |                               |  | -                                                                                     |
|                             | -                                                              | 0  |                                                                                                                                                                                                                          |                               |  | -                                                                                     |
|                             | -                                                              | 0  |                                                                                                                                                                                                                          |                               |  | -                                                                                     |
| Homo sapiens                | non-structural maintenance of chromosomes element 1 homolog    | 6  | P:GO:0023034;<br>F:GO:0005515;<br>C:GO:0005634;<br>F:GO:0008270;<br>P:GO:0006310;<br>P:GO:0006281                                                                                                                        | -                             |  | -                                                                                     |
| Caenorhabditis briggsae     | eukaryotic translation initiation factor subunit 10 150 170kda | 6  | F:GO:0003743;<br>C:GO:0043229;<br>C:GO:0005829;<br>C:GO:0005852;<br>F:GO:0005515;<br>P:GO:0001732                                                                                                                        | -                             |  | IPR000717; PTHR14005 (PANTHER)                                                        |
| Caenorhabditis briggsae     | eukaryotic translation initiation factor subunit 10 150 170kda | 6  | F:GO:0003743;<br>C:GO:0043229;<br>C:GO:0005829;<br>C:GO:0005852;<br>F:GO:0005515;<br>P:GO:0001732                                                                                                                        | -                             |  | IPR000717; PTHR14005 (PANTHER)                                                        |
|                             | -                                                              | 0  |                                                                                                                                                                                                                          |                               |  | -                                                                                     |
|                             | -                                                              | 0  |                                                                                                                                                                                                                          |                               |  | -                                                                                     |
|                             | -                                                              | 0  |                                                                                                                                                                                                                          |                               |  | -                                                                                     |



|                           |                                                            |   |                                                                                                                    |   |                                                                 |                                                                                                                                                           |
|---------------------------|------------------------------------------------------------|---|--------------------------------------------------------------------------------------------------------------------|---|-----------------------------------------------------------------|-----------------------------------------------------------------------------------------------------------------------------------------------------------|
| Caenorhabditis briggsae   | elegans protein partially confirmed by transcript evidence |   | P:GO:0007160;<br>P:GO:0008218;<br>5 F:GO:0005509;<br>P:GO:0018298;<br>C:GO:0016020                                 | - |                                                                 | IPR011042; PTHR10529 (PANTHER),<br>PTHR10529:SF4 (PANTHER), SSF63825<br>(SUPERFAMILY)                                                                     |
|                           | -                                                          | 0 |                                                                                                                    |   |                                                                 | -                                                                                                                                                         |
| Caenorhabditis elegans    | wgr domain containing protein                              | 1 | F:GO:0016740                                                                                                       | - |                                                                 | IPR008893; PTHR15447 (PANTHER),<br>SSF142921 (SUPERFAMILY)                                                                                                |
| Caenorhabditis briggsae   | Hypothetical protein CBG08489 [Caenorhabditis briggsae]    | 0 |                                                                                                                    |   | C:GO:0016021;<br>C:GO:0016020                                   | SignalP (SIGNALP)                                                                                                                                         |
| Caenorhabditis elegans    | dead (asp-glu-ala-asp) box polypeptide 49                  | 3 | F:GO:0003676;<br>F:GO:0005524;<br>F:GO:0008026                                                                     | - |                                                                 | IPR011545; IPR014001; IPR014014;<br>IPR014021; G3DSA:3.40.50.300<br>(GENE3D), PTHR10967 (PANTHER),<br>PTHR10967:SF12 (PANTHER),<br>SSF52540 (SUPERFAMILY) |
|                           | -                                                          | 0 |                                                                                                                    |   |                                                                 | -                                                                                                                                                         |
| Brugia malayi             | in family member (ttn-1)                                   | 0 |                                                                                                                    |   | F:GO:0005524;<br>F:GO:0004672;<br>P:GO:0006468;<br>P:GO:0009792 | IPR007110; IPR013783; PTHR19900<br>(PANTHER), PTHR19900:SF1<br>(PANTHER), SSF48726 (SUPERFAMILY)                                                          |
| Macaca fascicularis       | ribosomal protein l8                                       | 4 | F:GO:0003735;<br>C:GO:0022625;<br>F:GO:0019843;<br>P:GO:0006414                                                    | - |                                                                 | IPR002171; IPR008991; IPR014722;<br>IPR014726; IPR022669; IPR022671;<br>PTHR13691:SF4 (PANTHER)                                                           |
| Caenorhabditis sp. PS1010 | f-box domain containing protein                            | 3 | P:GO:0006508;<br>F:GO:0004181;<br>F:GO:0008270                                                                     | - | EC:3.4.17.0                                                     | -                                                                                                                                                         |
|                           | -                                                          | 0 |                                                                                                                    |   |                                                                 | -                                                                                                                                                         |
|                           | -                                                          | 0 |                                                                                                                    |   |                                                                 | SignalP (SIGNALP)                                                                                                                                         |
|                           | -                                                          | 0 |                                                                                                                    |   |                                                                 | -                                                                                                                                                         |
| Caenorhabditis briggsae   | Hypothetical protein CBG01711 [Caenorhabditis briggsae]    | 0 |                                                                                                                    |   |                                                                 | -                                                                                                                                                         |
| Pongo abelii              | trafficking protein particle complex subunit 5             | 7 | P:GO:0006182;<br>F:GO:0005515;<br>F:GO:0020037;<br>C:GO:0030008;<br>P:GO:0016192;<br>F:GO:0004383;<br>C:GO:0005783 | - | EC:4.6.1.2                                                      | IPR007194; IPR011644;<br>G3DSA:3.30.1380.20 (GENE3D),<br>PTHR20902 (PANTHER), SignalP<br>(SIGNALP)                                                        |
| Caenorhabditis elegans    | pqq enzyme repeat family protein                           | 1 | P:GO:0006898                                                                                                       | - |                                                                 | PTHR21573 (PANTHER)                                                                                                                                       |
| Caenorhabditis briggsae   | briggsae cbr-abf-2 protein                                 | 0 |                                                                                                                    |   |                                                                 | SignalP (SIGNALP)                                                                                                                                         |
|                           | -                                                          | 0 |                                                                                                                    |   |                                                                 | -                                                                                                                                                         |
|                           | -                                                          | 0 |                                                                                                                    |   |                                                                 | -                                                                                                                                                         |
| Caenorhabditis elegans    | histone-lysine n- h3 lysine-9 specific 3                   | 5 | P:GO:0007127;<br>P:GO:0006357;<br>P:GO:0007281;<br>P:GO:0034968;<br>F:GO:0005488                                   | - |                                                                 | IPR001214; IPR007728;<br>G3DSA:2.170.270.10 (GENE3D),<br>PTHR22884 (PANTHER),<br>PTHR22884:SF22 (PANTHER),<br>SSF82199 (SUPERFAMILY)                      |
|                           | -                                                          | 0 |                                                                                                                    |   |                                                                 | -                                                                                                                                                         |
|                           | -                                                          | 0 |                                                                                                                    |   |                                                                 | -                                                                                                                                                         |
| Brugia malayi             | hypothetical protein Bm1_43305 [Brugia malayi]             | 0 |                                                                                                                    |   |                                                                 | -                                                                                                                                                         |
| Ancylostoma caninum       | forkhead transcription factor daf-16                       | 4 | F:GO:0003700;<br>F:GO:0043565;<br>C:GO:0005634;<br>P:GO:0006355                                                    | - |                                                                 | -                                                                                                                                                         |

|                          |                                           |    |                                                                                                                                                                                                         |   |                                                                 |                                                                                          |
|--------------------------|-------------------------------------------|----|---------------------------------------------------------------------------------------------------------------------------------------------------------------------------------------------------------|---|-----------------------------------------------------------------|------------------------------------------------------------------------------------------|
| Caenorhabditis briggsae  | - h exchanger family member (nhx-9)       | 5  | F:GO:0015385;<br>P:GO:0055085;<br>P:GO:0006885;<br>C:GO:0016021;<br>P:GO:0006814                                                                                                                        | - |                                                                 | IPR006153; SignalP (SIGNALP)                                                             |
|                          | -                                         | 0  |                                                                                                                                                                                                         |   |                                                                 | -                                                                                        |
| Caenorhabditis elegans   | motor axon guidance family member (max-1) | 2  | P:GO:0008340;<br>P:GO:0040010                                                                                                                                                                           | - |                                                                 | PTHR22903 (PANTHER),<br>PTHR22903:SF2 (PANTHER)                                          |
|                          | -                                         | 0  |                                                                                                                                                                                                         |   |                                                                 | SignalP (SIGNALP)                                                                        |
| Caenorhabditis briggsae  | tnni3 interacting ki-se                   | 8  | C:GO:0005737;<br>P:GO:0006468;<br>F:GO:0046872;<br>F:GO:0005524;<br>F:GO:0008022;<br>C:GO:0005634;<br>F:GO:0004674;<br>F:GO:0031013                                                                     | - | EC:2.7.11.0                                                     | -                                                                                        |
|                          | -                                         | 0  |                                                                                                                                                                                                         |   |                                                                 | -                                                                                        |
| Caenorhabditis elegans   | elongator complex protein 3               | 12 | F:GO:0051536;<br>P:GO:0006357;<br>C:GO:0005730;<br>C:GO:0016591;<br>F:GO:0046872;<br>F:GO:0008607;<br>C:GO:0008023;<br>F:GO:0003677;<br>F:GO:0005515;<br>F:GO:0004402;<br>F:GO:0016944;<br>C:GO:0005737 | - | EC:2.3.1.48                                                     | PTHR11135 (PANTHER)                                                                      |
|                          | -                                         | 0  |                                                                                                                                                                                                         |   |                                                                 | -                                                                                        |
| Caenorhabditis briggsae  | briggsae cbr-eel-1 protein                | 0  |                                                                                                                                                                                                         |   | F:GO:0005488;<br>F:GO:0016881;<br>C:GO:0005622;<br>P:GO:0006464 | SignalP (SIGNALP)                                                                        |
|                          | -                                         | 0  |                                                                                                                                                                                                         |   |                                                                 | -                                                                                        |
|                          | -                                         | 0  |                                                                                                                                                                                                         |   |                                                                 | -                                                                                        |
|                          |                                           |    |                                                                                                                                                                                                         |   |                                                                 | IPR008160; PTHR10499 (PANTHER),<br>PTHR10499:SF114 (PANTHER)                             |
|                          |                                           | 0  |                                                                                                                                                                                                         |   |                                                                 | SignalP (SIGNALP)                                                                        |
|                          |                                           | 0  |                                                                                                                                                                                                         |   |                                                                 | -                                                                                        |
| Brugia malayi            | uncoordinated family member (unc-52)      | 2  | P:GO:0030239;<br>C:GO:0005578                                                                                                                                                                           | - |                                                                 | IPR013783; PTHR10574 (PANTHER),<br>PTHR10574:SF20 (PANTHER)                              |
|                          | -                                         | 0  |                                                                                                                                                                                                         |   |                                                                 | -                                                                                        |
|                          | -                                         | 0  |                                                                                                                                                                                                         |   |                                                                 | -                                                                                        |
| Ornithorhynchus anatinus | phosphoenolpyruvate cytosolic             | 12 | P:GO:0006107;<br>C:GO:0005625;<br>F:GO:0030145;<br>P:GO:0042593;<br>P:GO:0014823;<br>F:GO:0019003;<br>P:GO:0046327;<br>F:GO:0031406;<br>P:GO:0006094;<br>F:GO:0004613;<br>C:GO:0005737;<br>F:GO:0005525 | - | EC:4.1.1.32                                                     | IPR008209; IPR008210; IPR013035;<br>G3DSA:2.170.8.10 (GENE3D),<br>SSF53795 (SUPERFAMILY) |

|                         |                                                                                                                              |   |                                                                                                                                                      |                                                                 |                                                         |                                                                                        |
|-------------------------|------------------------------------------------------------------------------------------------------------------------------|---|------------------------------------------------------------------------------------------------------------------------------------------------------|-----------------------------------------------------------------|---------------------------------------------------------|----------------------------------------------------------------------------------------|
| Caenorhabditis elegans  | lethal isoform b                                                                                                             | 0 |                                                                                                                                                      | F:GO:0015662;<br>C:GO:0016020;<br>P:GO:0006754;<br>P:GO:0006812 |                                                         | PTHR13219 (PANTHER)                                                                    |
| Caenorhabditis elegans  | lethal isoform b                                                                                                             | 0 |                                                                                                                                                      | F:GO:0015662;<br>C:GO:0016020;<br>P:GO:0006754;<br>P:GO:0006812 |                                                         | PTHR13219 (PANTHER)                                                                    |
|                         | -                                                                                                                            | 0 |                                                                                                                                                      |                                                                 |                                                         | -                                                                                      |
| Caenorhabditis elegans  | Hypothetical protein C25A1.7a [Caenorhabditis elegans]                                                                       | 0 |                                                                                                                                                      |                                                                 |                                                         | -                                                                                      |
|                         | -                                                                                                                            | 0 |                                                                                                                                                      |                                                                 |                                                         | -                                                                                      |
|                         | -                                                                                                                            | 0 |                                                                                                                                                      |                                                                 |                                                         | -                                                                                      |
|                         | -                                                                                                                            | 0 |                                                                                                                                                      |                                                                 |                                                         | -                                                                                      |
|                         | -                                                                                                                            | 0 |                                                                                                                                                      |                                                                 |                                                         | SignalP (SIGNALP)                                                                      |
|                         | -                                                                                                                            | 0 |                                                                                                                                                      |                                                                 |                                                         | PTHR13436 (PANTHER),<br>PTHR13436:SF1 (PANTHER)                                        |
| Caenorhabditis briggsae | patched family protein                                                                                                       | 5 | P:GO:0018996;<br>C:GO:0016021;<br>P:GO:0040018;<br>F:GO:0008158;<br>P:GO:0040011                                                                     | -                                                               |                                                         | IPR003392; PTHR10796 (PANTHER),<br>PTHR10796:SF14 (PANTHER),<br>SSF82866 (SUPERFAMILY) |
| Loa loa                 | esterase family member (pde-6)                                                                                               | 0 |                                                                                                                                                      | P:GO:0007411;<br>F:GO:0003824;<br>P:GO:0007165                  |                                                         | -                                                                                      |
| Caenorhabditis briggsae | ubr1_caeel ame: full=e3 ubiquitin-protein ligase ubr-1 ame:<br>full=n-recognin-1 ame: full=ubiquitin-protein ligase e3-alpha | 0 |                                                                                                                                                      |                                                                 |                                                         | -                                                                                      |
|                         | -                                                                                                                            | 0 |                                                                                                                                                      |                                                                 |                                                         | SignalP (SIGNALP)                                                                      |
| Caenorhabditis elegans  | ras family protein                                                                                                           | 9 | C:GO:0005737;<br>F:GO:0005525;<br>C:GO:0005886;<br>F:GO:0005515;<br>P:GO:0006913;<br>P:GO:0006886;<br>C:GO:0005634;<br>P:GO:0007264;<br>F:GO:0003924 | -                                                               | EC:3.6.5.1;<br>EC:3.6.5.2;<br>EC:3.6.5.3;<br>EC:3.6.5.4 | -                                                                                      |
|                         | -                                                                                                                            | 0 |                                                                                                                                                      |                                                                 |                                                         | IPR008138; IPR008139; IPR011001                                                        |
|                         | -                                                                                                                            | 0 |                                                                                                                                                      |                                                                 |                                                         | -                                                                                      |
|                         | -                                                                                                                            | 0 |                                                                                                                                                      |                                                                 |                                                         | SignalP (SIGNALP)                                                                      |
|                         | -                                                                                                                            | 0 |                                                                                                                                                      |                                                                 |                                                         | -                                                                                      |
|                         | -                                                                                                                            | 0 |                                                                                                                                                      |                                                                 |                                                         | -                                                                                      |
| Pongo abelii            | plexin d1                                                                                                                    | 8 | P:GO:0001569;<br>F:GO:0017154;<br>C:GO:0005622;<br>C:GO:0005886;<br>F:GO:0005515;<br>P:GO:0007165;<br>P:GO:0060666;<br>C:GO:0016021                  | -                                                               |                                                         | -                                                                                      |

|                         |                                                             |    |                                                                                                                                                                                                         |                                                |             |                                                                                                                              |
|-------------------------|-------------------------------------------------------------|----|---------------------------------------------------------------------------------------------------------------------------------------------------------------------------------------------------------|------------------------------------------------|-------------|------------------------------------------------------------------------------------------------------------------------------|
| Caenorhabditis elegans  | abnormal cell migration family member (mig-15)              | 10 | F:GO:0005083;<br>P:GO:0007243;<br>F:GO:0004674;<br>P:GO:0045060;<br>F:GO:0005524;<br>F:GO:0005515;<br>F:GO:0000155;<br>C:GO:0016020;<br>P:GO:0006950;<br>P:GO:0006468                                   | -                                              | EC:2.7.11.0 | IPR000719; IPR011009; IPR017442;<br>G3DSA:1.10.510.10 (GENE3D),<br>PTHR22986 (PANTHER),<br>PTHR22986:SF82 (PANTHER)          |
| Caenorhabditis briggsae | briggsae cbr-inx- protein                                   | 7  | P:GO:0040035;<br>P:GO:0009792;<br>P:GO:0007631;<br>P:GO:0040010;<br>P:GO:0030421;<br>P:GO:0040011;<br>P:GO:0002009                                                                                      | -                                              |             | IPR000990; SignalP (SIGNALP)                                                                                                 |
| Caenorhabditis elegans  | zinc finger protein                                         | 0  |                                                                                                                                                                                                         | F:GO:0003676;<br>F:GO:0008270;<br>C:GO:0005622 |             | IPR007087; IPR015880; SSF57667<br>(SUPERFAMILY)                                                                              |
| Caenorhabditis elegans  | zinc finger protein                                         | 0  |                                                                                                                                                                                                         | F:GO:0003676;<br>F:GO:0008270;<br>C:GO:0005622 |             | IPR007087; IPR015880; SSF57667<br>(SUPERFAMILY)                                                                              |
| Brugia malayi           | hypothetical protein [Brugia malayi]                        | 4  | P:GO:0000003;<br>P:GO:0040010;<br>P:GO:0006898;<br>P:GO:0002119                                                                                                                                         | -                                              |             | IPR007590                                                                                                                    |
|                         | -                                                           | 0  |                                                                                                                                                                                                         |                                                |             | IPR014044                                                                                                                    |
|                         | -                                                           | 0  |                                                                                                                                                                                                         |                                                |             | SignalP (SIGNALP)                                                                                                            |
| Caenorhabditis briggsae | valyl-tr- synthetase                                        | 3  | F:GO:0004812;<br>P:GO:0006418;<br>F:GO:0000166                                                                                                                                                          | -                                              |             | IPR002303; IPR009080; IPR013155;<br>IPR014729; G3DSA:1.10.730.10<br>(GENE3D), PTHR11946 (PANTHER),<br>SSF52374 (SUPERFAMILY) |
| Caenorhabditis elegans  | hypothetical protein C01B7.5 [Caenorhabditis elegans]       | 0  |                                                                                                                                                                                                         | F:GO:0005515                                   |             | IPR001478; G3DSA:2.30.42.10<br>(GENE3D)                                                                                      |
| Caenorhabditis elegans  | sensory axon guidance family member (sax-2)                 | 1  | F:GO:0005515                                                                                                                                                                                            |                                                |             | SignalP (SIGNALP)                                                                                                            |
|                         | -                                                           | 0  |                                                                                                                                                                                                         |                                                |             | -                                                                                                                            |
|                         | -                                                           | 0  |                                                                                                                                                                                                         |                                                |             | -                                                                                                                            |
|                         | -                                                           | 0  |                                                                                                                                                                                                         |                                                |             | -                                                                                                                            |
|                         | -                                                           | 0  |                                                                                                                                                                                                         |                                                |             | -                                                                                                                            |
| Caenorhabditis elegans  | homeodomain interacting protein ki-se family member (hpk-1) | 1  | P:GO:0008340                                                                                                                                                                                            | -                                              |             | -                                                                                                                            |
|                         | -                                                           | 0  |                                                                                                                                                                                                         |                                                |             | -                                                                                                                            |
| Caenorhabditis elegans  | autophagy-specific gene isoform b                           | 12 | F:GO:0004674;<br>P:GO:0050804;<br>F:GO:0019894;<br>P:GO:0001558;<br>P:GO:0000003;<br>P:GO:0051124;<br>P:GO:0008088;<br>F:GO:0005524;<br>P:GO:0035069;<br>P:GO:0006914;<br>P:GO:0006468;<br>P:GO:0032007 | -                                              | EC:2.7.11.0 | -                                                                                                                            |
|                         | -                                                           | 0  |                                                                                                                                                                                                         |                                                |             | -                                                                                                                            |
| Caenorhabditis briggsae | briggsae cbr-lem-3 protein                                  | 1  | P:GO:0007413                                                                                                                                                                                            | -                                              |             | -                                                                                                                            |

|                         |                                                            |   |                                                                                                                    |                                                                                                                                                                                                                          |   |                                                                                             |
|-------------------------|------------------------------------------------------------|---|--------------------------------------------------------------------------------------------------------------------|--------------------------------------------------------------------------------------------------------------------------------------------------------------------------------------------------------------------------|---|---------------------------------------------------------------------------------------------|
| Caenorhabditis briggsae | phosphatidylethanolamine-binding protein                   | 2 | P:GO:0002119;<br>P:GO:0009792                                                                                      | -                                                                                                                                                                                                                        | - | -                                                                                           |
|                         | -                                                          | 0 |                                                                                                                    |                                                                                                                                                                                                                          |   | -                                                                                           |
| Caenorhabditis elegans  | nephrosis 2-like protein                                   | 2 | F:GO:0032934;<br>C:GO:0016020                                                                                      | -                                                                                                                                                                                                                        |   | IPR001107; IPR001972; SignalP (SIGNALP)                                                     |
|                         | -                                                          | 0 |                                                                                                                    |                                                                                                                                                                                                                          |   | SignalP (SIGNALP)                                                                           |
| Caenorhabditis briggsae | elegans protein partially confirmed by transcript evidence | 0 |                                                                                                                    | F:GO:0004888;<br>C:GO:0016020;<br>P:GO:0007606                                                                                                                                                                           |   | SignalP (SIGNALP)                                                                           |
| Caenorhabditis elegans  | excretory ca-l abnormal family member (exc-5)              | 0 |                                                                                                                    |                                                                                                                                                                                                                          |   | PTHR12673 (PANTHER),<br>PTHR12673:SF8 (PANTHER)                                             |
| Caenorhabditis elegans  | n-alpha-acetyltransferase auxiliary subunit                | 0 |                                                                                                                    | P:GO:0048659;<br>C:GO:0005737;<br>F:GO:0005515                                                                                                                                                                           |   | PTHR21373 (PANTHER)                                                                         |
| Caenorhabditis elegans  | ptb domain-containing engulfment adapter protein 1         | 2 | P:GO:0012501;<br>F:GO:0005515                                                                                      | -                                                                                                                                                                                                                        |   | IPR006020; IPR011993; PTHR11232 (PANTHER), PTHR11232:SF11 (PANTHER), SSF50729 (SUPERFAMILY) |
| Caenorhabditis briggsae | r--dependent r- polymerase                                 | 1 | F:GO:0005515                                                                                                       | -                                                                                                                                                                                                                        |   | -                                                                                           |
| Pongo abelii            | small nuclear ribonucleoprotein f                          | 7 | C:GO:0005683;<br>C:GO:0005654;<br>P:GO:0000387;<br>C:GO:0005681;<br>F:GO:0003723;<br>F:GO:0005515;<br>C:GO:0005829 | -                                                                                                                                                                                                                        |   | IPR001163; IPR006649; IPR010920;<br>G3DSA:2.30.30.100 (GENE3D),<br>PTHR11021 (PANTHER)      |
|                         | -                                                          | 0 |                                                                                                                    |                                                                                                                                                                                                                          |   | -                                                                                           |
|                         | -                                                          | 0 |                                                                                                                    |                                                                                                                                                                                                                          |   | -                                                                                           |
| Caenorhabditis elegans  | hypothetical r--binding protein                            | 0 |                                                                                                                    | F:GO:0003676;<br>F:GO:0000166;<br>P:GO:0009792                                                                                                                                                                           |   | IPR000504; IPR012677; PTHR10432 (PANTHER), PTHR10432:SF57 (PANTHER), SSF54928 (SUPERFAMILY) |
| Caenorhabditis briggsae | in family member (ttn-1)                                   | 1 | P:GO:0009792                                                                                                       | -                                                                                                                                                                                                                        |   | IPR013783                                                                                   |
| Caenorhabditis briggsae | briggsae cbr-ers-2 protein                                 | 0 |                                                                                                                    | F:GO:0016874;<br>C:GO:0016021;<br>P:GO:0006418;<br>F:GO:0000166;<br>C:GO:0005737;<br>P:GO:0006412;<br>F:GO:0005524;<br>F:GO:0004818;<br>P:GO:0016485;<br>F:GO:0004812;<br>F:GO:0016876;<br>P:GO:0006424;<br>P:GO:0043039 |   | IPR000738; IPR009068                                                                        |

|                         |                                                                     |    |                                                                                                                                                                                                                                                            |                                                                 |                                                                               |
|-------------------------|---------------------------------------------------------------------|----|------------------------------------------------------------------------------------------------------------------------------------------------------------------------------------------------------------------------------------------------------------|-----------------------------------------------------------------|-------------------------------------------------------------------------------|
| Harpegnathos saltator   | 26s protease regulatory subunit 8                                   | 15 | P:GO:0051437;<br>P:GO:0006366;<br>F:GO:0003712;<br>F:GO:0031531;<br>P:GO:0043193;<br>P:GO:0051436;<br>P:GO:0043069;<br>C:GO:0005737;<br>C:GO:0005730;<br>C:GO:0000502;<br>P:GO:0016481;<br>F:GO:0016887;<br>F:GO:0008233;<br>P:GO:0031145;<br>F:GO:0005524 | -                                                               | G3DSA:1.10.8.60 (GENE3D),<br>PTHR23073 (PANTHER),<br>PTHR23073:SF12 (PANTHER) |
| -                       | -                                                                   | 0  |                                                                                                                                                                                                                                                            |                                                                 | -                                                                             |
| Caenorhabditis elegans  | elegans protein partially confirmed by transcript evidence          | 0  |                                                                                                                                                                                                                                                            |                                                                 | -                                                                             |
| Caenorhabditis briggsae | briggsae cbr-hid-1 protein                                          | 0  |                                                                                                                                                                                                                                                            | F:GO:0003674;<br>C:GO:0016020;<br>P:GO:0008150;<br>C:GO:0005575 | IPR019142; PTHR21575 (PANTHER),<br>PTHR21575:SF9 (PANTHER)                    |
| Homo sapiens            | transgelin 2                                                        | 4  | C:GO:0031965;<br>F:GO:0005515;<br>C:GO:0005886;<br>P:GO:0007517                                                                                                                                                                                            | -                                                               | -                                                                             |
| Caenorhabditis elegans  | gl actin (drosophila neuroligin-like) homolog family member (nrx-1) | 0  |                                                                                                                                                                                                                                                            |                                                                 | -                                                                             |
| Loa loa                 | hypothetical protein LOAG_01905 [Loa loa]                           | 0  |                                                                                                                                                                                                                                                            |                                                                 | -                                                                             |
| -                       | -                                                                   | 0  |                                                                                                                                                                                                                                                            |                                                                 | -                                                                             |
| -                       | -                                                                   | 0  |                                                                                                                                                                                                                                                            |                                                                 | SignalP (SIGNALP)                                                             |
| Caenorhabditis elegans  | solute carrier family 9 (sodium hydrogen exchanger) member 7        | 5  | F:GO:0015385;<br>P:GO:0055085;<br>P:GO:0006885;<br>C:GO:0016021;<br>P:GO:0006814                                                                                                                                                                           | -                                                               | IPR002090; SignalP (SIGNALP)                                                  |
| -                       | -                                                                   | 0  |                                                                                                                                                                                                                                                            |                                                                 | -                                                                             |
| -                       | -                                                                   | 0  |                                                                                                                                                                                                                                                            |                                                                 | -                                                                             |
| Caenorhabditis elegans  | briggsae cbr-pgp-1 protein                                          | 4  | F:GO:0042626;<br>P:GO:0055085;<br>F:GO:0005524;<br>C:GO:0016021                                                                                                                                                                                            | -                                                               | -                                                                             |
| Homo sapiens            | hCG2041296 [Homo sapiens]                                           | 0  |                                                                                                                                                                                                                                                            |                                                                 | -                                                                             |
| Caenorhabditis elegans  | atp-binding sub-family d member 2                                   | 8  | P:GO:0055085;<br>C:GO:0005739;<br>C:GO:0016021;<br>F:GO:0042626;<br>C:GO:0005778;<br>F:GO:0005524;<br>F:GO:0005515;<br>P:GO:0008152                                                                                                                        | -                                                               | IPR010509; PTHR11384 (PANTHER),<br>PTHR11384:SF12 (PANTHER)                   |
| -                       | -                                                                   | 0  |                                                                                                                                                                                                                                                            |                                                                 | -                                                                             |
| Caenorhabditis briggsae | Hypothetical protein CBG19257 [Caenorhabditis briggsae]             | 0  |                                                                                                                                                                                                                                                            | P:GO:0002119                                                    | -                                                                             |
| -                       | -                                                                   | 0  |                                                                                                                                                                                                                                                            |                                                                 | -                                                                             |
| -                       | -                                                                   | 0  |                                                                                                                                                                                                                                                            |                                                                 | -                                                                             |

|                             |                                                         |   |                                                                                                   |                                                                                                                                                      |                            |                                                                                                  |
|-----------------------------|---------------------------------------------------------|---|---------------------------------------------------------------------------------------------------|------------------------------------------------------------------------------------------------------------------------------------------------------|----------------------------|--------------------------------------------------------------------------------------------------|
| Caenorhabditis elegans      | cysteine synthase                                       | 0 |                                                                                                   | F:GO:0016740;<br>F:GO:0030170;<br>P:GO:0019344;<br>F:GO:0016829;<br>F:GO:0003824;<br>P:GO:0006535;<br>F:GO:0004124;<br>P:GO:0008152;<br>P:GO:0008652 |                            | G3DSA:3.40.50.1100 (GENE3D),<br>PTHR10314 (PANTHER),<br>PTHR10314:SF8 (PANTHER)                  |
| -                           | -                                                       | 0 |                                                                                                   |                                                                                                                                                      |                            | SignalP (SIGNALP)                                                                                |
| Caenorhabditis briggsae     | protein ki-se domain-containing protein                 | 2 | F:GO:0005488;<br>F:GO:0004672                                                                     | -                                                                                                                                                    |                            | -                                                                                                |
| Caenorhabditis briggsae     | Hypothetical protein CBG18604 [Caenorhabditis briggsae] | 0 |                                                                                                   | F:GO:0046872;<br>P:GO:0055114;<br>F:GO:0009055;<br>F:GO:0016491;<br>F:GO:0020037;<br>F:GO:0005506;<br>F:GO:0004497                                   |                            | -                                                                                                |
| Loa loa                     | domon domain-containing protein                         | 2 | P:GO:0009056;<br>P:GO:0044238                                                                     | -                                                                                                                                                    |                            | -                                                                                                |
| Pongo abelii                | phosphatidic acid phosphatase type 2c                   | 6 | P:GO:0016311;<br>F:GO:0004721;<br>C:GO:0016021;<br>F:GO:0008195;<br>F:GO:0042392;<br>C:GO:0005886 | -                                                                                                                                                    | EC:3.1.3.16;<br>EC:3.1.3.4 | -                                                                                                |
| -                           | -                                                       | 0 |                                                                                                   |                                                                                                                                                      |                            | SignalP (SIGNALP)                                                                                |
|                             |                                                         |   |                                                                                                   |                                                                                                                                                      |                            | IPR009443                                                                                        |
| Brugia malayi               | in family member (ttn-1)                                | 1 | P:GO:0009792                                                                                      | -                                                                                                                                                    |                            | -                                                                                                |
| -                           | -                                                       | 0 |                                                                                                   |                                                                                                                                                      |                            | -                                                                                                |
| -                           | -                                                       | 0 |                                                                                                   |                                                                                                                                                      |                            | -                                                                                                |
| Angiostrongylus cantonensis | zinc finger c-x8-c-x5-c-x3-h type                       | 1 | F:GO:0005515                                                                                      | -                                                                                                                                                    |                            | PTHR14493 (PANTHER),<br>PTHR14493:SF1 (PANTHER)                                                  |
| -                           | -                                                       | 0 |                                                                                                   |                                                                                                                                                      |                            | -                                                                                                |
| Caenorhabditis briggsae     | Hypothetical protein CBG08295 [Caenorhabditis briggsae] | 0 |                                                                                                   |                                                                                                                                                      |                            | -                                                                                                |
| -                           | -                                                       | 0 |                                                                                                   |                                                                                                                                                      |                            | -                                                                                                |
| Caenorhabditis elegans      | elegans protein confirmed by transcript evidence        | 3 | P:GO:0019915;<br>P:GO:0040018;<br>P:GO:0040011                                                    | -                                                                                                                                                    |                            | -                                                                                                |
| -                           | -                                                       | 0 |                                                                                                   |                                                                                                                                                      |                            | -                                                                                                |
| Caenorhabditis elegans      | briggsae cbr-swm-1 protein                              | 1 | F:GO:0005515                                                                                      | -                                                                                                                                                    |                            | -                                                                                                |
| Caenorhabditis elegans      | briggsae cbr-swm-1 protein                              | 1 | F:GO:0005515                                                                                      | -                                                                                                                                                    |                            | IPR002919; IPR013032;<br>G3DSA:2.10.25.10 (GENE3D),<br>PTHR23259 (PANTHER), SignalP<br>(SIGNALP) |
| -                           | -                                                       | 0 |                                                                                                   |                                                                                                                                                      |                            | -                                                                                                |
| -                           | -                                                       | 0 |                                                                                                   |                                                                                                                                                      |                            | -                                                                                                |
| -                           | -                                                       | 0 |                                                                                                   |                                                                                                                                                      |                            | SignalP (SIGNALP)                                                                                |
| Loa loa                     | hypothetical protein LOAG_12108 [Loa loa]               | 0 |                                                                                                   | C:GO:0016021                                                                                                                                         |                            | SignalP (SIGNALP)                                                                                |
| Caenorhabditis elegans      | transmembrane protein 38a                               | 3 | C:GO:0016021;<br>F:GO:0005261;<br>P:GO:0015672                                                    | -                                                                                                                                                    |                            | IPR007866; PTHR12454:SF2<br>(PANTHER)                                                            |

|                             |                                                       |    |                                                                                                                                                                                                                                                                             |                                                                                                                                                                                        |            |                                                                                                           |
|-----------------------------|-------------------------------------------------------|----|-----------------------------------------------------------------------------------------------------------------------------------------------------------------------------------------------------------------------------------------------------------------------------|----------------------------------------------------------------------------------------------------------------------------------------------------------------------------------------|------------|-----------------------------------------------------------------------------------------------------------|
| Homo sapiens                | -dh dehydroge-se                                      |    | P:GO:0006120;<br>P:GO:0007605;<br>5 F:GO:0008137;<br>P:GO:0006810;<br>C:GO:0005747                                                                                                                                                                                          | -                                                                                                                                                                                      | EC:1.6.5.3 | SignalP (SIGNALP)                                                                                         |
| Loa loa                     | lycan alpha homolog family member (sgca-1)            | 0  |                                                                                                                                                                                                                                                                             | C:GO:0016012;<br>F:GO:0005509;<br>C:GO:0016020;<br>F:GO:0005515                                                                                                                        |            | IPR008908                                                                                                 |
| Caenorhabditis elegans      | tetratricopeptide repeat domain 39a                   | 0  |                                                                                                                                                                                                                                                                             | F:GO:0003674;<br>F:GO:0005488;<br>P:GO:0008150;<br>C:GO:0005575                                                                                                                        |            | IPR019412; SignalP (SIGNALP)                                                                              |
| Caenorhabditis elegans      | hypothetical protein C29F5.1 [Caenorhabditis elegans] | 0  |                                                                                                                                                                                                                                                                             |                                                                                                                                                                                        |            | -                                                                                                         |
| Caenorhabditis elegans      | nmda receptor glutamate-binding chain                 | 1  | F:GO:0005515                                                                                                                                                                                                                                                                | -                                                                                                                                                                                      |            | IPR006214; PTHR23291:SF14 (PANTHER), SignalP (SIGNALP)                                                    |
| Caenorhabditis elegans      | c2 domain containing protein                          | 2  | P:GO:0009792;<br>C:GO:0016020                                                                                                                                                                                                                                               | -                                                                                                                                                                                      |            | IPR000008; IPR008973; IPR018029; G3DSA:2.60.40.150 (GENE3D), PTHR10774 (PANTHER), PTHR10774:SF1 (PANTHER) |
| Caenorhabditis elegans      | c2 domain containing protein                          | 2  | P:GO:0009792;<br>C:GO:0016020                                                                                                                                                                                                                                               | -                                                                                                                                                                                      |            | IPR000008; IPR008973; IPR018029; G3DSA:2.60.40.150 (GENE3D), PTHR10774 (PANTHER), PTHR10774:SF1 (PANTHER) |
| -                           | -                                                     | 0  |                                                                                                                                                                                                                                                                             |                                                                                                                                                                                        |            | -                                                                                                         |
| -                           | -                                                     | 0  |                                                                                                                                                                                                                                                                             |                                                                                                                                                                                        |            | SignalP (SIGNALP)                                                                                         |
| -                           | -                                                     | 0  |                                                                                                                                                                                                                                                                             |                                                                                                                                                                                        |            | -                                                                                                         |
| -                           | -                                                     | 0  |                                                                                                                                                                                                                                                                             |                                                                                                                                                                                        |            | -                                                                                                         |
| -                           | -                                                     | 0  |                                                                                                                                                                                                                                                                             |                                                                                                                                                                                        |            | -                                                                                                         |
| -                           | -                                                     | 0  |                                                                                                                                                                                                                                                                             |                                                                                                                                                                                        |            | -                                                                                                         |
| Caenorhabditis briggsae     | zinc finger bed domain-containing protein 1           | 0  |                                                                                                                                                                                                                                                                             | F:GO:0004803;<br>F:GO:0003677;<br>C:GO:0005634;<br>F:GO:0003676;<br>C:GO:0005737;<br>F:GO:0003674;<br>F:GO:0046983;<br>F:GO:0005515;<br>F:GO:0046872;<br>C:GO:0000228;<br>P:GO:0008150 |            | IPR012337; PTHR23272 (PANTHER)                                                                            |
| Angiostrongylus cantonensis | homeobox protein 1aa                                  | 16 | P:GO:0007411;<br>F:GO:0030528;<br>P:GO:0021561;<br>P:GO:0016337;<br>P:GO:0006355;<br>P:GO:0021570;<br>F:GO:0043565;<br>P:GO:0010171;<br>P:GO:0007413;<br>P:GO:0002119;<br>F:GO:0003700;<br>P:GO:0040011;<br>C:GO:0005737;<br>P:GO:0040018;<br>C:GO:0005634;<br>P:GO:0009790 | -                                                                                                                                                                                      |            | -                                                                                                         |
| -                           | -                                                     | 0  |                                                                                                                                                                                                                                                                             |                                                                                                                                                                                        |            | -                                                                                                         |



|                           |                                                                |    |                                                                                                                                                                                                                                                                                                                                                                                                    |   |                                                                                              |
|---------------------------|----------------------------------------------------------------|----|----------------------------------------------------------------------------------------------------------------------------------------------------------------------------------------------------------------------------------------------------------------------------------------------------------------------------------------------------------------------------------------------------|---|----------------------------------------------------------------------------------------------|
|                           | -                                                              | 0  |                                                                                                                                                                                                                                                                                                                                                                                                    |   | -                                                                                            |
| Caenorhabditis sp. PS1010 | briggsae cbr-cdh-4 protein                                     | 5  | P:GO:0007409;<br>F:GO:0005515;<br>P:GO:0007155;<br>P:GO:0007420;<br>C:GO:0016020                                                                                                                                                                                                                                                                                                                   | - | IPR002126; IPR015919; PTHR10596 (PANTHER), PTHR10596:SF74 (PANTHER)                          |
|                           | -                                                              | 0  |                                                                                                                                                                                                                                                                                                                                                                                                    |   | -                                                                                            |
|                           | -                                                              | 0  |                                                                                                                                                                                                                                                                                                                                                                                                    |   | -                                                                                            |
|                           | -                                                              | 0  |                                                                                                                                                                                                                                                                                                                                                                                                    |   | IPR000436; IPR016060                                                                         |
| Nematostella vectensis    | leishmanolysin-like (metallopeptidase m8 family) isoform cra_a | 1  | C:GO:0044464                                                                                                                                                                                                                                                                                                                                                                                       | - | IPR001577; G3DSA:3.90.132.10 (GENE3D), SSF55486 (SUPERFAMILY)                                |
| Loa loa                   | short chain dehydroge-se reductase family protein              | 2  | P:GO:0009058;<br>F:GO:0016616                                                                                                                                                                                                                                                                                                                                                                      | - | EC:1.1.1.0<br>IPR002198; IPR016040; PTHR19410:SF36 (PANTHER), SSF51735 (SUPERFAMILY)         |
|                           | -                                                              | 0  |                                                                                                                                                                                                                                                                                                                                                                                                    |   | -                                                                                            |
|                           | -                                                              | 0  |                                                                                                                                                                                                                                                                                                                                                                                                    |   | -                                                                                            |
| Caenorhabditis elegans    | #NAME?                                                         | 5  | P:GO:0055114;<br>F:GO:0016491;<br>P:GO:0040010;<br>P:GO:0002119;<br>P:GO:0040011                                                                                                                                                                                                                                                                                                                   | - | IPR001395; IPR018170; IPR023210; PTHR11732:SF34 (PANTHER)                                    |
| Caenorhabditis briggsae   | protein                                                        | 23 | F:GO:0004674;<br>P:GO:0002119;<br>P:GO:0006325;<br>C:GO:0032991;<br>P:GO:0001751;<br>P:GO:0007169;<br>P:GO:0044238;<br>P:GO:0016246;<br>F:GO:0008565;<br>P:GO:0044260;<br>P:GO:0040039;<br>P:GO:0040010;<br>P:GO:0006898;<br>P:GO:0006606;<br>P:GO:0009792;<br>P:GO:0048523;<br>C:GO:0044428;<br>P:GO:0040035;<br>P:GO:0003002;<br>P:GO:0007476;<br>C:GO:0044444;<br>C:GO:0044427;<br>F:GO:0005488 | - | EC:2.7.11.0<br>IPR001494; IPR011989; IPR016024; PTHR10997 (PANTHER), PTHR10997:SF8 (PANTHER) |
|                           | -                                                              | 0  |                                                                                                                                                                                                                                                                                                                                                                                                    |   | -                                                                                            |
|                           | -                                                              | 0  |                                                                                                                                                                                                                                                                                                                                                                                                    |   | SignalP (SIGNALP)                                                                            |
|                           | -                                                              | 0  |                                                                                                                                                                                                                                                                                                                                                                                                    |   | -                                                                                            |
| synthetic construct       | ribosome binding protein 1 homolog 180kda                      | 7  | F:GO:0004872;<br>C:GO:0030176;<br>C:GO:0005840;<br>P:GO:0055085;<br>P:GO:0007165;<br>P:GO:0006412;<br>P:GO:0015031                                                                                                                                                                                                                                                                                 | - | EC:3.6.5.3<br>PTHR18939 (PANTHER)                                                            |
| Caenorhabditis elegans    | creb homolog family member (crh-1)                             | 0  |                                                                                                                                                                                                                                                                                                                                                                                                    |   | -                                                                                            |
|                           | -                                                              | 0  |                                                                                                                                                                                                                                                                                                                                                                                                    |   | -                                                                                            |
|                           | -                                                              | 0  |                                                                                                                                                                                                                                                                                                                                                                                                    |   | -                                                                                            |
|                           | -                                                              | 0  |                                                                                                                                                                                                                                                                                                                                                                                                    |   | -                                                                                            |

|                             |                                                            |   |                                                                                                                    |                                                                 |             |                                                                                                                       |
|-----------------------------|------------------------------------------------------------|---|--------------------------------------------------------------------------------------------------------------------|-----------------------------------------------------------------|-------------|-----------------------------------------------------------------------------------------------------------------------|
| Caenorhabditis briggsae     | amop domain containing protein                             | 2 | C:GO:0016021;<br>P:GO:0007160                                                                                      | -                                                               |             | IPR005533; PTHR13802 (PANTHER),<br>PTHR13802:SF2 (PANTHER)                                                            |
| Loa loa                     | briggsae cbr-gcy-12 protein                                | 1 | F:GO:0003824                                                                                                       | -                                                               |             | -                                                                                                                     |
|                             | -                                                          | 0 |                                                                                                                    |                                                                 |             | -                                                                                                                     |
| Homo sapiens                | isoform cra_a                                              | 0 |                                                                                                                    | F:GO:0003674;<br>P:GO:0008150                                   |             | -                                                                                                                     |
|                             | -                                                          | 0 |                                                                                                                    |                                                                 |             | -                                                                                                                     |
|                             | -                                                          | 0 |                                                                                                                    |                                                                 |             | -                                                                                                                     |
| Caenorhabditis briggsae     | briggsae cbr-dmd-6 protein                                 | 6 | F:GO:0003700;<br>F:GO:0003677;<br>F:GO:0005515;<br>P:GO:0007548;<br>C:GO:0005634;<br>P:GO:0006355                  | -                                                               |             | SignalP (SIGNALP)                                                                                                     |
|                             | -                                                          | 0 |                                                                                                                    |                                                                 |             | -                                                                                                                     |
|                             | -                                                          | 0 |                                                                                                                    |                                                                 |             | -                                                                                                                     |
| Caenorhabditis briggsae     | Hypothetical protein CBG23067 [Caenorhabditis briggsae]    | 0 |                                                                                                                    | P:GO:0006508;<br>F:GO:0016491;<br>F:GO:0004190;<br>C:GO:0016021 |             | -                                                                                                                     |
|                             | -                                                          | 0 |                                                                                                                    |                                                                 |             | -                                                                                                                     |
|                             | -                                                          | 0 |                                                                                                                    |                                                                 |             | -                                                                                                                     |
| Caenorhabditis elegans      | elegans protein partially confirmed by transcript evidence | 0 |                                                                                                                    |                                                                 |             | -                                                                                                                     |
| Caenorhabditis elegans      | elegans protein partially confirmed by transcript evidence | 0 |                                                                                                                    |                                                                 |             | -                                                                                                                     |
| Caenorhabditis briggsae     | Hypothetical protein CBG01673 [Caenorhabditis briggsae]    | 1 | F:GO:0005488                                                                                                       | -                                                               |             | PTHR22908 (PANTHER),<br>PTHR22908:SF13 (PANTHER)                                                                      |
|                             |                                                            |   | C:GO:0005615;<br>P:GO:0042127;<br>F:GO:0004222;<br>P:GO:0030574;<br>P:GO:0006508;<br>F:GO:0008270;<br>C:GO:0005578 | -                                                               | EC:3.4.24.0 | IPR001818; G3DSA:3.40.390.10<br>(GENE3D), PTHR10201 (PANTHER),<br>PTHR10201:SF34 (PANTHER),<br>SSF55486 (SUPERFAMILY) |
| Brugia malayi               | strictosidine synthase                                     | 1 | F:GO:0003824                                                                                                       | -                                                               |             | IPR004141; IPR011042;<br>PTHR10426:SF6 (PANTHER), SSF63829<br>(SUPERFAMILY)                                           |
| Caenorhabditis briggsae     | briggsae cbr-pro-1 protein                                 | 4 | P:GO:0030154;<br>P:GO:0007506;<br>P:GO:0006364;<br>C:GO:0005634                                                    | -                                                               |             | -                                                                                                                     |
|                             | -                                                          | 0 |                                                                                                                    |                                                                 |             | -                                                                                                                     |
|                             | -                                                          | 0 |                                                                                                                    |                                                                 |             | SignalP (SIGNALP)                                                                                                     |
|                             | -                                                          | 0 |                                                                                                                    |                                                                 |             | -                                                                                                                     |
| Arthroderma otae CBS 113480 | adp-ribosylation factor                                    | 0 |                                                                                                                    | F:GO:0005525;<br>P:GO:0007264;<br>F:GO:0000166;<br>C:GO:0005622 |             | -                                                                                                                     |
| Homo sapiens                | histone h1 transcription factor large subunit 2a           | 0 |                                                                                                                    |                                                                 |             | SignalP (SIGNALP)                                                                                                     |
|                             | -                                                          | 0 |                                                                                                                    |                                                                 |             | SignalP (SIGNALP)                                                                                                     |
|                             | -                                                          | 0 |                                                                                                                    |                                                                 |             | -                                                                                                                     |
|                             | -                                                          | 0 |                                                                                                                    |                                                                 |             | -                                                                                                                     |
|                             | -                                                          | 0 |                                                                                                                    |                                                                 |             | -                                                                                                                     |
|                             | -                                                          | 0 |                                                                                                                    |                                                                 |             | -                                                                                                                     |
| Caenorhabditis briggsae     | briggsae cbr-tag-275 protein                               | 1 | F:GO:0016787                                                                                                       | -                                                               |             | PTHR11905 (PANTHER),<br>PTHR11905:SF6 (PANTHER)                                                                       |
|                             | -                                                          | 0 |                                                                                                                    |                                                                 |             | -                                                                                                                     |
|                             | -                                                          | 0 |                                                                                                                    |                                                                 |             | -                                                                                                                     |

|                           |                                                                     |   |                                                                                                                                     |                                                                                                   |                                                                                                                                                            |
|---------------------------|---------------------------------------------------------------------|---|-------------------------------------------------------------------------------------------------------------------------------------|---------------------------------------------------------------------------------------------------|------------------------------------------------------------------------------------------------------------------------------------------------------------|
|                           | -                                                                   | 0 |                                                                                                                                     |                                                                                                   | -                                                                                                                                                          |
| Caenorhabditis briggsae   | briggsae cbr-tag-308 protein                                        | 0 |                                                                                                                                     |                                                                                                   | -                                                                                                                                                          |
|                           | -                                                                   | 0 |                                                                                                                                     |                                                                                                   | -                                                                                                                                                          |
| Caenorhabditis sp. PS1010 | zinc carboxypeptidase family protein                                | 3 | P:GO:0006508;<br>F:GO:0004181;<br>F:GO:0008270                                                                                      | -                                                                                                 | EC:3.4.17.0<br>IPR000834; G3DSA:3.40.630.10 (GENE3D), PTHR11705 (PANTHER), PTHR11705:SF12 (PANTHER), SSF53187 (SUPERFAMILY)                                |
|                           | -                                                                   | 0 |                                                                                                                                     |                                                                                                   | IPR008160; PTHR10499 (PANTHER), PTHR10499:SF114 (PANTHER)                                                                                                  |
|                           | -                                                                   | 0 |                                                                                                                                     |                                                                                                   | -                                                                                                                                                          |
|                           | -                                                                   | 0 |                                                                                                                                     |                                                                                                   | -                                                                                                                                                          |
|                           | -                                                                   | 0 |                                                                                                                                     |                                                                                                   | -                                                                                                                                                          |
| uncultured archaeon       | conserved hypothetical protein, DUF255 family [uncultured archaeon] | 0 |                                                                                                                                     | F:GO:0003824                                                                                      | PTHR12145 (PANTHER)                                                                                                                                        |
| Caenorhabditis briggsae   | -dh-cytochrome b5 reductase 2                                       | 7 | P:GO:0009792;<br>P:GO:0002119;<br>F:GO:0016491;<br>P:GO:0032940;<br>P:GO:0040010;<br>P:GO:0055114;<br>P:GO:0006898                  | -                                                                                                 | IPR001433; G3DSA:3.40.50.80 (GENE3D), PTHR19370 (PANTHER), PTHR19370:SF3 (PANTHER), SSF52343 (SUPERFAMILY)                                                 |
| Saccoglossus kowalevskii  | lethal giant                                                        | 2 | P:GO:0009987;<br>C:GO:0044424                                                                                                       | -                                                                                                 | IPR000664; IPR011046; IPR013577; IPR015943; PTHR10241 (PANTHER), PTHR10241:SF10 (PANTHER)                                                                  |
|                           | -                                                                   | 0 |                                                                                                                                     |                                                                                                   | -                                                                                                                                                          |
|                           | -                                                                   | 0 |                                                                                                                                     |                                                                                                   | IPR001159; IPR014720                                                                                                                                       |
|                           | -                                                                   | 0 |                                                                                                                                     |                                                                                                   | -                                                                                                                                                          |
| Caenorhabditis briggsae   | Hypothetical protein CBG02103 [Caenorhabditis briggsae]             | 0 |                                                                                                                                     |                                                                                                   | -                                                                                                                                                          |
|                           | -                                                                   | 0 |                                                                                                                                     |                                                                                                   | IPR000436                                                                                                                                                  |
| Caenorhabditis briggsae   | elegans protein confirmed by transcript evidence                    | 0 |                                                                                                                                     |                                                                                                   | -                                                                                                                                                          |
| Caenorhabditis elegans    | uncharacterized protein kiaa1409                                    | 0 |                                                                                                                                     | F:GO:0005488                                                                                      | PTHR21696 (PANTHER)                                                                                                                                        |
| Brugia malayi             | set domain containing protein                                       | 0 |                                                                                                                                     | F:GO:0046872;<br>P:GO:0006355;<br>F:GO:0003676;<br>F:GO:0008270;<br>C:GO:0005634;<br>C:GO:0005622 | -                                                                                                                                                          |
| Loa loa                   | hypothetical protein LOAG_14239 [Loa loa]                           | 0 |                                                                                                                                     |                                                                                                   | -                                                                                                                                                          |
|                           | -                                                                   | 0 |                                                                                                                                     |                                                                                                   | -                                                                                                                                                          |
| Caenorhabditis briggsae   | malate dehydroge-se mitochondrial variant 1                         | 7 | F:GO:0030060;<br>F:GO:0005488;<br>C:GO:0005739;<br>P:GO:0055114;<br>P:GO:0006108;<br>P:GO:0006099;<br>P:GO:0006096                  | -                                                                                                 | EC:1.1.1.37<br>IPR001236; IPR001252; IPR001557; IPR010097; IPR015955; IPR016040; IPR022383; PTHR11540 (PANTHER), SignalP (SIGNALP), SSF51735 (SUPERFAMILY) |
|                           | -                                                                   | 0 |                                                                                                                                     |                                                                                                   | -                                                                                                                                                          |
|                           | -                                                                   | 0 |                                                                                                                                     |                                                                                                   | -                                                                                                                                                          |
|                           | -                                                                   | 0 |                                                                                                                                     |                                                                                                   | -                                                                                                                                                          |
| Caenorhabditis elegans    | elegans protein partially confirmed by transcript evidence          | 8 | F:GO:0004383;<br>F:GO:0004674;<br>P:GO:0023034;<br>C:GO:0016021;<br>F:GO:0008528;<br>F:GO:0005524;<br>P:GO:0006468;<br>P:GO:0006182 | -                                                                                                 | EC:4.6.1.2;<br>EC:2.7.11.0<br>IPR001054; IPR018297; PTHR11920 (PANTHER), PTHR11920:SF40 (PANTHER)                                                          |
|                           | -                                                                   | 0 |                                                                                                                                     |                                                                                                   | IPR006564; IPR007527                                                                                                                                       |

|                         |                                                            |    |                                                                                                                                                                       |                                                                 |             |                                                                                                        |
|-------------------------|------------------------------------------------------------|----|-----------------------------------------------------------------------------------------------------------------------------------------------------------------------|-----------------------------------------------------------------|-------------|--------------------------------------------------------------------------------------------------------|
| Caenorhabditis elegans  | hypothetical protein W03F11.5 [Caenorhabditis elegans]     | 0  |                                                                                                                                                                       |                                                                 |             | SignalP (SIGNALP)                                                                                      |
|                         | -                                                          | 0  |                                                                                                                                                                       |                                                                 |             | -                                                                                                      |
|                         | -                                                          | 0  |                                                                                                                                                                       |                                                                 |             | -                                                                                                      |
| Harpegnathos saltator   | f-actin-capping protein subunit alpha                      | 6  | C:GO:0030863;<br>P:GO:0030036;<br>C:GO:0071203;<br>F:GO:0003779;<br>C:GO:0008290;<br>C:GO:0016020                                                                     | -                                                               |             | -                                                                                                      |
|                         | -                                                          | 0  |                                                                                                                                                                       |                                                                 |             | -                                                                                                      |
| Caenorhabditis briggsae | cyclin a                                                   | 6  | P:GO:0007283;<br>P:GO:0007141;<br>F:GO:0005515;<br>P:GO:0007275;<br>C:GO:0005829;<br>C:GO:0015630                                                                     | -                                                               |             | IPR004367; IPR006670; IPR006671;<br>IPR011028; IPR013763; IPR014400;<br>IPR015453; PTHR10177 (PANTHER) |
|                         | -                                                          | 0  |                                                                                                                                                                       |                                                                 |             | -                                                                                                      |
| Caenorhabditis elegans  | zinc finger in n-recogin family protein                    | 0  |                                                                                                                                                                       | P:GO:0030163;<br>F:GO:0008270;<br>F:GO:0004842;<br>F:GO:0005515 |             | PTHR21497 (PANTHER),<br>PTHR21497:SF6 (PANTHER)                                                        |
|                         | -                                                          | 0  |                                                                                                                                                                       |                                                                 |             | -                                                                                                      |
|                         | -                                                          | 0  |                                                                                                                                                                       |                                                                 |             | -                                                                                                      |
| Ailuropoda melanoleuca  | lim domain containing isoform cra_a                        | 1  | F:GO:0008270                                                                                                                                                          | -                                                               |             | IPR001781; PTHR18973 (PANTHER),<br>PTHR18973:SF106 (PANTHER),<br>SSF57716 (SUPERFAMILY)                |
|                         | -                                                          | 0  |                                                                                                                                                                       |                                                                 |             | -                                                                                                      |
|                         | -                                                          | 0  |                                                                                                                                                                       |                                                                 |             | -                                                                                                      |
|                         | -                                                          | 0  |                                                                                                                                                                       |                                                                 |             | SignalP (SIGNALP)                                                                                      |
|                         | -                                                          | 0  |                                                                                                                                                                       |                                                                 |             | -                                                                                                      |
| Ailuropoda melanoleuca  | n-acetyltransferase 5                                      | 4  | P:GO:0008152;<br>C:GO:0005737;<br>F:GO:0004596;<br>C:GO:0005634                                                                                                       | -                                                               | EC:2.3.1.88 | IPR016181; PTHR23091 (PANTHER),<br>PTHR23091:SF5 (PANTHER)                                             |
|                         | -                                                          | 0  |                                                                                                                                                                       |                                                                 |             | -                                                                                                      |
| Caenorhabditis elegans  | chaperone protein                                          | 8  | C:GO:0005737;<br>P:GO:0006260;<br>F:GO:0046872;<br>P:GO:0006457;<br>F:GO:0031072;<br>F:GO:0005524;<br>F:GO:0051082;<br>P:GO:0009408                                   | -                                                               |             | IPR001623; IPR015609;<br>PTHR11821:SF88 (PANTHER)                                                      |
| Caenorhabditis elegans  | histone deacetylase                                        | 10 | F:GO:0032129;<br>P:GO:0030466;<br>P:GO:0000183;<br>F:GO:0031078;<br>C:GO:0030874;<br>P:GO:0006348;<br>P:GO:0016575;<br>C:GO:0000118;<br>P:GO:0030702;<br>P:GO:0031060 | -                                                               |             | -                                                                                                      |
|                         | -                                                          | 0  |                                                                                                                                                                       |                                                                 |             | -                                                                                                      |
| Caenorhabditis briggsae | elegans protein partially confirmed by transcript evidence | 0  |                                                                                                                                                                       |                                                                 |             | IPR002485; PTHR22989 (PANTHER)                                                                         |
|                         | -                                                          | 0  |                                                                                                                                                                       |                                                                 |             | -                                                                                                      |

|                        |                                                                          |    |                                                                                                                                                                       |   |             |                                                                                                                       |
|------------------------|--------------------------------------------------------------------------|----|-----------------------------------------------------------------------------------------------------------------------------------------------------------------------|---|-------------|-----------------------------------------------------------------------------------------------------------------------|
| Caenorhabditis elegans | -nchung cg5842-pa                                                        | 4  | C:GO:0016021;<br>F:GO:0005216;<br>P:GO:0006811;<br>P:GO:0055085                                                                                                       | - | -           | -                                                                                                                     |
|                        |                                                                          |    |                                                                                                                                                                       |   |             | IPR007110; IPR013098; IPR013783;<br>PTHR19897 (PANTHER),<br>PTHR19897:SF14 (PANTHER),<br>SSF48726 (SUPERFAMILY)       |
|                        | -                                                                        | 0  |                                                                                                                                                                       |   |             | -                                                                                                                     |
|                        | -                                                                        | 0  |                                                                                                                                                                       |   |             | -                                                                                                                     |
|                        | -                                                                        | 0  |                                                                                                                                                                       |   |             | -                                                                                                                     |
| Brugia malayi          | hypothetical protein Bm1_56075 [Brugia malayi]                           | 0  |                                                                                                                                                                       |   |             | G3DSA:3.80.10.10 (GENE3D),<br>SSF52047 (SUPERFAMILY)                                                                  |
|                        | -                                                                        | 0  |                                                                                                                                                                       |   |             | -                                                                                                                     |
|                        | -                                                                        | 0  |                                                                                                                                                                       |   |             | -                                                                                                                     |
| Caenorhabditis elegans | hypothetical protein F53A9.4 [Caenorhabditis elegans]                    | 0  |                                                                                                                                                                       |   |             | -                                                                                                                     |
| Caenorhabditis elegans | protein                                                                  | 3  | F:GO:0004222;<br>P:GO:0006508;<br>F:GO:0008270                                                                                                                        | - | EC:3.4.24.0 | IPR001506; G3DSA:3.40.390.10<br>(GENE3D), PTHR10127 (PANTHER),<br>PTHR10127:SF80 (PANTHER),<br>SSF55486 (SUPERFAMILY) |
|                        | -                                                                        | 0  |                                                                                                                                                                       |   |             | SignalP (SIGNALP)                                                                                                     |
| Caenorhabditis elegans | uncoordinated protein isoform partially confirmed by transcript evidence | 7  | P:GO:0006629;<br>F:GO:0005219;<br>P:GO:0006816;<br>P:GO:0006874;<br>P:GO:0055085;<br>F:GO:0005509;<br>C:GO:0016021                                                    | - |             | -                                                                                                                     |
| Loa loa                | uncoordinated family member (unc-89)                                     | 0  |                                                                                                                                                                       |   |             | IPR008957; IPR013783; PTHR19897<br>(PANTHER), PTHR19897:SF5<br>(PANTHER)                                              |
|                        | -                                                                        | 0  |                                                                                                                                                                       |   |             | -                                                                                                                     |
| Pongo abelii           | mitochondrial import receptor subunit tom40 homolog                      | 10 | P:GO:0044070;<br>P:GO:0034765;<br>F:GO:0015288;<br>C:GO:0005742;<br>F:GO:0008320;<br>C:GO:0000299;<br>P:GO:0006626;<br>C:GO:0031307;<br>F:GO:0008308;<br>C:GO:0046930 | - |             | IPR001925; PTHR10802 (PANTHER),<br>SignalP (SIGNALP)                                                                  |
|                        | -                                                                        | 0  |                                                                                                                                                                       |   |             | -                                                                                                                     |
|                        | -                                                                        | 0  |                                                                                                                                                                       |   |             | -                                                                                                                     |
|                        | -                                                                        | 0  |                                                                                                                                                                       |   |             | SignalP (SIGNALP)                                                                                                     |

|                         |                                                         |    |                                                                                                                                                                                                                                                                                                                                                                                                                                                                        |                                                |             |                                                                                  |
|-------------------------|---------------------------------------------------------|----|------------------------------------------------------------------------------------------------------------------------------------------------------------------------------------------------------------------------------------------------------------------------------------------------------------------------------------------------------------------------------------------------------------------------------------------------------------------------|------------------------------------------------|-------------|----------------------------------------------------------------------------------|
| Caenorhabditis briggsae | fk506 binding protein 12-rapamycin associated protein 1 | 27 | P:GO:0046777;<br>F:GO:0004674;<br>P:GO:0030838;<br>P:GO:0032868;<br>P:GO:0032314;<br>C:GO:0005829;<br>P:GO:0016049;<br>C:GO:0031931;<br>C:GO:0012505;<br>P:GO:0048565;<br>P:GO:0043200;<br>P:GO:0018107;<br>P:GO:0031529;<br>P:GO:0050731;<br>P:GO:0045859;<br>P:GO:0051496;<br>P:GO:0007281;<br>P:GO:0018105;<br>C:GO:0031932;<br>F:GO:0051219;<br>P:GO:0010592;<br>P:GO:0031929;<br>P:GO:0045792;<br>P:GO:0030163;<br>C:GO:0005634;<br>P:GO:0016242;<br>C:GO:0016020 | -                                              | EC:2.7.11.0 | IPR011989; PTHR11139 (PANTHER),<br>PTHR11139:SF9 (PANTHER), SignalP<br>(SIGNALP) |
| -                       | -                                                       | 0  |                                                                                                                                                                                                                                                                                                                                                                                                                                                                        |                                                |             | -                                                                                |
| -                       | -                                                       | 0  |                                                                                                                                                                                                                                                                                                                                                                                                                                                                        |                                                |             | -                                                                                |
| -                       | -                                                       | 0  |                                                                                                                                                                                                                                                                                                                                                                                                                                                                        |                                                |             | -                                                                                |
| Caenorhabditis briggsae | briggsae cbr-asp-6 protein                              | 4  | P:GO:0008219;<br>F:GO:0005515;<br>P:GO:0040011;<br>F:GO:0008233                                                                                                                                                                                                                                                                                                                                                                                                        | -                                              |             | IPR001461; IPR009007; IPR021109;<br>PTHR13683:SF53 (PANTHER)                     |
| Caenorhabditis elegans  | briggsae cbr-cdh-1 protein                              | 5  | P:GO:0002119;<br>P:GO:0007155;<br>P:GO:0040010;<br>P:GO:0040011;<br>C:GO:0016020                                                                                                                                                                                                                                                                                                                                                                                       | -                                              |             | IPR002126; IPR015919; PTHR10596<br>(PANTHER), PTHR10596:SF77<br>(PANTHER)        |
| Caenorhabditis briggsae | briggsae cbr-sur-2 protein                              | 0  |                                                                                                                                                                                                                                                                                                                                                                                                                                                                        | P:GO:0006350;<br>P:GO:0045449;<br>C:GO:0005634 |             | IPR021629                                                                        |
| -                       | -                                                       | 0  |                                                                                                                                                                                                                                                                                                                                                                                                                                                                        |                                                |             | -                                                                                |
| Brugia malayi           | breast adenocarcinoma marker                            | 5  | P:GO:0009792;<br>F:GO:0019904;<br>C:GO:0031902;<br>C:GO:0005829;<br>P:GO:0015031                                                                                                                                                                                                                                                                                                                                                                                       | -                                              |             | IPR005024; PTHR10476 (PANTHER),<br>PTHR10476:SF4 (PANTHER)                       |
| Caenorhabditis elegans  | lethal family member (let-805)                          | 8  | P:GO:0018996;<br>P:GO:0009792;<br>P:GO:0008340;<br>P:GO:0000003;<br>F:GO:0005515;<br>P:GO:0006898;<br>P:GO:0002119;<br>P:GO:0040011                                                                                                                                                                                                                                                                                                                                    | -                                              |             | -                                                                                |
| Caenorhabditis briggsae | ankyrin repeat domain 13c                               | 1  | C:GO:0005783                                                                                                                                                                                                                                                                                                                                                                                                                                                           | -                                              |             | IPR021832; PTHR12447 (PANTHER)                                                   |
| -                       | -                                                       | 0  |                                                                                                                                                                                                                                                                                                                                                                                                                                                                        |                                                |             | -                                                                                |

|                         |                                                         |    |  |                                                                                                                                                                                                                                                                                              |  |                                                              |
|-------------------------|---------------------------------------------------------|----|--|----------------------------------------------------------------------------------------------------------------------------------------------------------------------------------------------------------------------------------------------------------------------------------------------|--|--------------------------------------------------------------|
|                         | -                                                       | 0  |  |                                                                                                                                                                                                                                                                                              |  | -                                                            |
| Necator americanus      | briggsae cbr-clec-87 protein                            | 0  |  | F:GO:0003674;<br>F:GO:0005488;<br>C:GO:0016021;<br>P:GO:0008150;<br>F:GO:0005529;<br>C:GO:0005575                                                                                                                                                                                            |  | -                                                            |
| Caenorhabditis elegans  | gabab2 receptor subunit                                 | 0  |  |                                                                                                                                                                                                                                                                                              |  | -                                                            |
|                         | -                                                       | 0  |  |                                                                                                                                                                                                                                                                                              |  | -                                                            |
|                         | -                                                       | 0  |  |                                                                                                                                                                                                                                                                                              |  | -                                                            |
|                         | -                                                       | 0  |  |                                                                                                                                                                                                                                                                                              |  | -                                                            |
| Ailuropoda melanoleuca  | collagen alpha-2 chain-like                             | 17 |  | P:GO:0042476;<br>F:GO:0030674;<br>P:GO:0070208;<br>P:GO:0043589;<br>P:GO:0008217;<br>F:GO:0042802;<br>C:GO:0005615;<br>F:GO:0046332;<br>P:GO:0001501;<br>F:GO:0048407;<br>C:GO:0005584;<br>P:GO:0030199;<br>P:GO:0007179;<br>F:GO:0005201;<br>P:GO:0001568;<br>P:GO:0007266;<br>C:GO:0005886 |  | IPR008160; PTHR10499 (PANTHER),<br>PTHR10499:SF123 (PANTHER) |
|                         | -                                                       | 0  |  |                                                                                                                                                                                                                                                                                              |  | SignalP (SIGNALP)                                            |
|                         | -                                                       | 0  |  |                                                                                                                                                                                                                                                                                              |  | -                                                            |
|                         | -                                                       | 0  |  |                                                                                                                                                                                                                                                                                              |  | -                                                            |
|                         | -                                                       | 0  |  |                                                                                                                                                                                                                                                                                              |  | -                                                            |
| Caenorhabditis briggsae | briggsae cbr-set-27 protein                             | 0  |  |                                                                                                                                                                                                                                                                                              |  | -                                                            |
|                         | -                                                       | 0  |  |                                                                                                                                                                                                                                                                                              |  | -                                                            |
|                         | -                                                       | 0  |  |                                                                                                                                                                                                                                                                                              |  | -                                                            |
|                         | -                                                       | 0  |  |                                                                                                                                                                                                                                                                                              |  | -                                                            |
| Ailuropoda melanoleuca  | sub1 homolog ( cerevisiae)                              | 6  |  | P:GO:0006357;<br>C:GO:0005730;<br>C:GO:0005667;<br>F:GO:0003697;<br>F:GO:0003713;<br>P:GO:0045941                                                                                                                                                                                            |  | SignalP (SIGNALP)                                            |
| Caenorhabditis briggsae | Hypothetical protein CBG15947 [Caenorhabditis briggsae] | 0  |  |                                                                                                                                                                                                                                                                                              |  | -                                                            |
|                         | -                                                       | 0  |  |                                                                                                                                                                                                                                                                                              |  | SignalP (SIGNALP)                                            |
|                         | -                                                       | 0  |  |                                                                                                                                                                                                                                                                                              |  | -                                                            |
|                         | -                                                       | 0  |  |                                                                                                                                                                                                                                                                                              |  | -                                                            |
| Caenorhabditis elegans  | d--directed r- polymerase iii subunit                   | 7  |  | P:GO:0009792;<br>P:GO:0002119;<br>P:GO:0016246;<br>P:GO:0040010;<br>P:GO:0000003;<br>P:GO:0040011;<br>P:GO:0006898                                                                                                                                                                           |  | IPR006886                                                    |
| Loa loa                 | apoptosis inhibitor 5                                   | 0  |  | P:GO:0006916;<br>F:GO:0005488;<br>P:GO:0008150;<br>C:GO:0005575                                                                                                                                                                                                                              |  | IPR008383; IPR011989; IPR016024;<br>PTHR12758 (PANTHER)      |
|                         | -                                                       | 0  |  |                                                                                                                                                                                                                                                                                              |  | -                                                            |

|                        |                                                           |   |                                                                                                                                     |                                                                                                                                                                                                                                                                                                                                                                                                                                                                                         |                                                                     |
|------------------------|-----------------------------------------------------------|---|-------------------------------------------------------------------------------------------------------------------------------------|-----------------------------------------------------------------------------------------------------------------------------------------------------------------------------------------------------------------------------------------------------------------------------------------------------------------------------------------------------------------------------------------------------------------------------------------------------------------------------------------|---------------------------------------------------------------------|
|                        | -                                                         | 0 |                                                                                                                                     |                                                                                                                                                                                                                                                                                                                                                                                                                                                                                         | -                                                                   |
|                        | -                                                         | 0 |                                                                                                                                     |                                                                                                                                                                                                                                                                                                                                                                                                                                                                                         | -                                                                   |
|                        | -                                                         | 0 |                                                                                                                                     |                                                                                                                                                                                                                                                                                                                                                                                                                                                                                         | SignalP (SIGNALP)                                                   |
| Caenorhabditis elegans | atp-binding sub-family a member 1                         | 0 |                                                                                                                                     | C:GO:0002527;<br>C:GO:0005887;<br>C:GO:0005886;<br>P:GO:0010875;<br>P:GO:0043691;<br>P:GO:0008152;<br>C:GO:0016021;<br>C:GO:0016020;<br>F:GO:0016887;<br>P:GO:0071222;<br>P:GO:0033700;<br>F:GO:0008509;<br>P:GO:0045332;<br>P:GO:0055099;<br>P:GO:0033344;<br>F:GO:0070653;<br>F:GO:0017127;<br>F:GO:0005524;<br>P:GO:0030301;<br>F:GO:0000166;<br>P:GO:0042158;<br>P:GO:0042157;<br>C:GO:0043231;<br>P:GO:0006497;<br>C:GO:0005901;<br>P:GO:0055085;<br>P:GO:0008203;<br>P:GO:0002790 | PTHR19229 (PANTHER),<br>PTHR19229:SF25 (PANTHER), SignalP (SIGNALP) |
|                        | -                                                         | 0 |                                                                                                                                     |                                                                                                                                                                                                                                                                                                                                                                                                                                                                                         | IPR007087                                                           |
| Caenorhabditis elegans | lbp bpi cetp n-termi-l domain containing protein          | 6 | P:GO:0002119;<br>P:GO:0009792;<br>P:GO:0000003;<br>P:GO:0040007;<br>F:GO:0008289;<br>P:GO:0040011                                   | -                                                                                                                                                                                                                                                                                                                                                                                                                                                                                       | IPR017943; PTHR10504 (PANTHER),<br>PTHR10504:SF10 (PANTHER)         |
|                        | -                                                         | 0 |                                                                                                                                     |                                                                                                                                                                                                                                                                                                                                                                                                                                                                                         | -                                                                   |
|                        | -                                                         | 0 |                                                                                                                                     |                                                                                                                                                                                                                                                                                                                                                                                                                                                                                         | -                                                                   |
| Ailuropoda melanoleuca | eukaryotic translation initiation factor 3 subunit 2 beta | 5 | C:GO:0005852;<br>F:GO:0005515;<br>P:GO:0045948;<br>F:GO:0003743;<br>C:GO:0005829                                                    | -                                                                                                                                                                                                                                                                                                                                                                                                                                                                                       | PTHR19877 (PANTHER),<br>PTHR19877:SF1 (PANTHER)                     |
| Caenorhabditis elegans | egf lag seven-pass g-type receptor 3                      | 8 | F:GO:0004871;<br>P:GO:0048598;<br>P:GO:0023052;<br>P:GO:0007399;<br>P:GO:0007155;<br>P:GO:0048513;<br>P:GO:0008104;<br>C:GO:0016020 | -                                                                                                                                                                                                                                                                                                                                                                                                                                                                                       | SignalP (SIGNALP)                                                   |
| Caenorhabditis elegans | elegans protein confirmed by transcript evidence          | 3 | P:GO:0040013;<br>C:GO:0044297;<br>C:GO:0043005                                                                                      | -                                                                                                                                                                                                                                                                                                                                                                                                                                                                                       | -                                                                   |
|                        | -                                                         | 0 |                                                                                                                                     |                                                                                                                                                                                                                                                                                                                                                                                                                                                                                         | -                                                                   |
|                        | -                                                         | 0 |                                                                                                                                     |                                                                                                                                                                                                                                                                                                                                                                                                                                                                                         | -                                                                   |



|                           |                                        |    |                                                                                                                                                                                                                                                                             |   |                            |                                                                                      |
|---------------------------|----------------------------------------|----|-----------------------------------------------------------------------------------------------------------------------------------------------------------------------------------------------------------------------------------------------------------------------------|---|----------------------------|--------------------------------------------------------------------------------------|
| Caenorhabditis briggsae   | briggsae cbr-hum-7 protein             | 4  | F:GO:0005515;<br>C:GO:0016459;<br>P:GO:0023052;<br>F:GO:0000166                                                                                                                                                                                                             | - | -                          | -                                                                                    |
| Caenorhabditis briggsae   | briggsae cbr-hmr-1 protein             | 1  | F:GO:0005515                                                                                                                                                                                                                                                                | - | -                          | IPR002126; IPR015919; PTHR10596 (PANTHER), PTHR10596:SF73 (PANTHER)                  |
| Caenorhabditis briggsae   | briggsae cbr-teg-1 protein             | 0  |                                                                                                                                                                                                                                                                             |   |                            | -                                                                                    |
|                           | -                                      | 0  |                                                                                                                                                                                                                                                                             |   |                            | -                                                                                    |
|                           | -                                      | 0  |                                                                                                                                                                                                                                                                             |   |                            | -                                                                                    |
|                           | -                                      | 0  |                                                                                                                                                                                                                                                                             |   |                            | -                                                                                    |
|                           | -                                      | 0  |                                                                                                                                                                                                                                                                             |   |                            | -                                                                                    |
| Caenorhabditis briggsae   | briggsae cbr-tat-2 protein             | 7  | C:GO:0016021;<br>F:GO:0015662;<br>P:GO:0006754;<br>F:GO:0005524;<br>P:GO:0015914;<br>F:GO:0000287;<br>F:GO:0004012                                                                                                                                                          | - | EC:3.6.3.1                 | IPR001757; PTHR11939:SF19 (PANTHER)                                                  |
|                           | -                                      | 0  |                                                                                                                                                                                                                                                                             |   |                            | -                                                                                    |
|                           | -                                      | 0  |                                                                                                                                                                                                                                                                             |   |                            | SignalP (SIGNALP)                                                                    |
|                           | -                                      | 0  |                                                                                                                                                                                                                                                                             |   |                            | -                                                                                    |
| Caenorhabditis elegans    | lethal family member (let-805)         | 8  | P:GO:0018996;<br>P:GO:0009792;<br>P:GO:0008340;<br>P:GO:0000003;<br>F:GO:0005515;<br>P:GO:0006898;<br>P:GO:0002119;<br>P:GO:0040011                                                                                                                                         | - |                            | IPR008957; IPR013783                                                                 |
| Heligmosomoides polygyrus | glutathione s-transferase              | 4  | P:GO:0008340;<br>P:GO:0040010;<br>F:GO:0005515;<br>F:GO:0016740                                                                                                                                                                                                             | - |                            | IPR004046; IPR010987; IPR017933; PTHR11571 (PANTHER), PTHR11571:SF6 (PANTHER)        |
| Pongo abelii              | peptidyl-tr- hydrolase 2               | 4  | F:GO:0004045;<br>P:GO:0006915;<br>P:GO:0006412;<br>C:GO:0005739                                                                                                                                                                                                             | - | EC:3.1.1.29;<br>EC:3.6.5.3 | IPR002833; G3DSA:3.40.1490.10 (GENE3D), PTHR12649 (PANTHER), SSF102462 (SUPERFAMILY) |
| Oryctolagus cuniculus     | tissue inhibitor of metalloprotei-se 3 | 16 | P:GO:0051045;<br>P:GO:0007417;<br>P:GO:0006917;<br>P:GO:0043627;<br>F:GO:0046872;<br>C:GO:0005604;<br>P:GO:0007601;<br>F:GO:0005515;<br>P:GO:0051593;<br>P:GO:0007568;<br>P:GO:0014070;<br>F:GO:0008191;<br>C:GO:0005737;<br>P:GO:0043200;<br>P:GO:0042246;<br>P:GO:0009612 | - |                            | IPR001820; IPR008993; IPR015612; G3DSA:3.90.370.10 (GENE3D)                          |
| Caenorhabditis briggsae   | briggsae cbr-mup-4 protein             | 4  | F:GO:0004872;<br>F:GO:0005515;<br>F:GO:0005509;<br>C:GO:0016020                                                                                                                                                                                                             | - |                            | -                                                                                    |

|                         |                                                                           |   |                                                                                  |                                                |             |                                                                                                                            |
|-------------------------|---------------------------------------------------------------------------|---|----------------------------------------------------------------------------------|------------------------------------------------|-------------|----------------------------------------------------------------------------------------------------------------------------|
|                         | -                                                                         | 0 |                                                                                  |                                                |             | -                                                                                                                          |
| Caenorhabditis elegans  | fanci (fanconi anemia complex component i) homolog family member (fnci-1) | 0 |                                                                                  |                                                |             | -                                                                                                                          |
| Caenorhabditis elegans  | rio ki-se 3                                                               | 4 | P:GO:0006468;<br>F:GO:0005515;<br>F:GO:0005524;<br>F:GO:0004674                  | -                                              | EC:2.7.11.0 | IPR011009; IPR018934; IPR018935;<br>G3DSA:3.90.1200.10 (GENE3D),<br>PTHR10593 (PANTHER),<br>PTHR10593:SF6 (PANTHER)        |
| Caenorhabditis briggsae | sig-l sequence beta                                                       | 5 | P:GO:0009792;<br>F:GO:0005048;<br>P:GO:0006613;<br>C:GO:0016021;<br>C:GO:0005783 | -                                              |             | IPR008856; SignalP (SIGNALP)                                                                                               |
|                         | -                                                                         | 0 |                                                                                  |                                                |             | -                                                                                                                          |
| Caenorhabditis briggsae | Hypothetical protein CBG19248 [Caenorhabditis briggsae]                   | 0 |                                                                                  | F:GO:0008289                                   |             | PTHR10504 (PANTHER),<br>PTHR10504:SF10 (PANTHER)                                                                           |
|                         | -                                                                         | 0 |                                                                                  |                                                |             | SignalP (SIGNALP)                                                                                                          |
|                         | -                                                                         | 0 |                                                                                  |                                                |             | SignalP (SIGNALP)                                                                                                          |
|                         | -                                                                         | 0 |                                                                                  |                                                |             | -                                                                                                                          |
| Caenorhabditis elegans  | egg laying defective family member (egl-15)                               | 3 | F:GO:0004672;<br>C:GO:0016020;<br>F:GO:0000166                                   | -                                              |             | -                                                                                                                          |
|                         | -                                                                         | 0 |                                                                                  |                                                |             | -                                                                                                                          |
|                         | -                                                                         | 0 |                                                                                  |                                                |             | SignalP (SIGNALP)                                                                                                          |
|                         | -                                                                         | 0 |                                                                                  |                                                |             | SignalP (SIGNALP)                                                                                                          |
|                         | -                                                                         | 0 |                                                                                  |                                                |             | -                                                                                                                          |
| Caenorhabditis briggsae | riken cd- isoform cra_a                                                   | 0 |                                                                                  | F:GO:0003674;<br>C:GO:0005575                  |             | -                                                                                                                          |
| Caenorhabditis briggsae | novel protein (zgc:100846)                                                | 0 |                                                                                  | F:GO:0003674;<br>P:GO:0008150;<br>C:GO:0005575 |             | -                                                                                                                          |
|                         | -                                                                         | 0 |                                                                                  |                                                |             | SignalP (SIGNALP)                                                                                                          |
| Caenorhabditis briggsae | briggsae cbr-tag-164 protein                                              | 0 |                                                                                  | C:GO:0016021                                   |             | -                                                                                                                          |
|                         | -                                                                         | 0 |                                                                                  |                                                |             | -                                                                                                                          |
|                         | -                                                                         | 0 |                                                                                  |                                                |             | -                                                                                                                          |
| Ostertagia ostertagi    | ladder protein                                                            | 1 | F:GO:0019841                                                                     | -                                              |             | -                                                                                                                          |
|                         | -                                                                         | 0 |                                                                                  |                                                |             | -                                                                                                                          |
| Caenorhabditis briggsae | and ph domain-containing protein 3                                        | 4 | F:GO:0005089;<br>C:GO:0005622;<br>P:GO:0035023;<br>F:GO:0008270                  | -                                              |             | IPR011993; PTHR12673 (PANTHER),<br>PTHR12673:SF8 (PANTHER), SSF50729<br>(SUPERFAMILY)                                      |
|                         | -                                                                         | 0 |                                                                                  |                                                |             | -                                                                                                                          |
| Homo sapiens            | novel protein                                                             | 1 | C:GO:0005737                                                                     | -                                              |             | IPR010630; PTHR14199 (PANTHER)                                                                                             |
| Brugia malayi           | ribosomal r- adenine dimethylase family protein                           | 1 | F:GO:0008649                                                                     | -                                              |             | -                                                                                                                          |
| Caenorhabditis briggsae | ring finger r- polymerase ii elongation                                   | 1 | F:GO:0046872                                                                     | -                                              |             | IPR001841; IPR013083; IPR017907;<br>IPR018957; PTHR13712 (PANTHER),<br>PTHR13712:SF74 (PANTHER),<br>SSF57850 (SUPERFAMILY) |
| Caenorhabditis briggsae | ring finger r- polymerase ii elongation                                   | 1 | F:GO:0046872                                                                     | -                                              |             | IPR001841; IPR013083; IPR017907;<br>IPR018957; PTHR13712 (PANTHER),<br>PTHR13712:SF74 (PANTHER),<br>SSF57850 (SUPERFAMILY) |
| Caenorhabditis briggsae | r- binding identical                                                      | 3 | F:GO:0003676;<br>P:GO:0009792;<br>F:GO:0000166                                   | -                                              |             | SignalP (SIGNALP)                                                                                                          |
|                         | -                                                                         | 0 |                                                                                  |                                                |             | -                                                                                                                          |

|                         |                                                  |   |                                                                 |                                                                                                                                                                       |             |                                                                                                                                                           |
|-------------------------|--------------------------------------------------|---|-----------------------------------------------------------------|-----------------------------------------------------------------------------------------------------------------------------------------------------------------------|-------------|-----------------------------------------------------------------------------------------------------------------------------------------------------------|
|                         | -                                                | 0 |                                                                 |                                                                                                                                                                       |             | SignalP (SIGNALP)                                                                                                                                         |
| Caenorhabditis elegans  | rap ran-gap family protein                       | 3 | F:GO:0005096;<br>C:GO:0005622;<br>P:GO:0051056                  | -                                                                                                                                                                     |             | -                                                                                                                                                         |
| Caenorhabditis briggsae | protein ki-se                                    | 4 | P:GO:0006468;<br>F:GO:0005524;<br>P:GO:0000003;<br>F:GO:0004674 | -                                                                                                                                                                     | EC:2.7.11.0 | IPR000719; IPR011009; IPR017442;<br>G3DSA:1.10.510.10 (GENE3D),<br>PTHR11909 (PANTHER),<br>PTHR11909:SF19 (PANTHER)                                       |
|                         | -                                                | 0 |                                                                 |                                                                                                                                                                       |             | -                                                                                                                                                         |
|                         | -                                                | 0 |                                                                 |                                                                                                                                                                       |             | IPR008162; PTHR12623 (PANTHER),<br>PTHR12623:SF8 (PANTHER)                                                                                                |
|                         | -                                                | 0 |                                                                 |                                                                                                                                                                       |             | -                                                                                                                                                         |
| Homo sapiens            | -dh dehydroge-se                                 | 4 | P:GO:0006120;<br>F:GO:0008137;<br>P:GO:0006810;<br>C:GO:0005747 | -                                                                                                                                                                     | EC:1.6.5.3  | SignalP (SIGNALP)                                                                                                                                         |
|                         | -                                                | 0 |                                                                 |                                                                                                                                                                       |             | -                                                                                                                                                         |
| Caenorhabditis elegans  | w e related abc transporte family member (wht-7) | 3 | F:GO:0017111;<br>C:GO:0016020;<br>F:GO:0000166                  | -                                                                                                                                                                     | EC:3.6.1.15 | IPR003439; IPR003593; IPR013525;<br>IPR017871; G3DSA:3.40.50.300<br>(GENE3D), PTHR19241 (PANTHER),<br>PTHR19241:SF30 (PANTHER),<br>SSF52540 (SUPERFAMILY) |
| Caenorhabditis elegans  | elegans protein confirmed by transcript evidence | 0 |                                                                 |                                                                                                                                                                       |             | -                                                                                                                                                         |
| Caenorhabditis briggsae | g in family member (glb-10)                      | 0 |                                                                 | F:GO:0005344;<br>F:GO:0020037;<br>F:GO:0019825;<br>P:GO:0015671;<br>F:GO:0005506;<br>P:GO:0006810                                                                     |             | -                                                                                                                                                         |
|                         | -                                                | 0 |                                                                 |                                                                                                                                                                       |             | -                                                                                                                                                         |
|                         | -                                                | 0 |                                                                 |                                                                                                                                                                       |             | -                                                                                                                                                         |
|                         | -                                                | 0 |                                                                 |                                                                                                                                                                       |             | SignalP (SIGNALP)                                                                                                                                         |
|                         | -                                                | 0 |                                                                 |                                                                                                                                                                       |             | -                                                                                                                                                         |
| Caenorhabditis elegans  | zinc finger c-x8-c-x5-c-x3-h type                | 2 | F:GO:0005515;<br>F:GO:0046872                                   | -                                                                                                                                                                     |             | PTHR14493 (PANTHER),<br>PTHR14493:SF1 (PANTHER)                                                                                                           |
|                         | -                                                | 0 |                                                                 |                                                                                                                                                                       |             | -                                                                                                                                                         |
|                         | -                                                | 0 |                                                                 |                                                                                                                                                                       |             | -                                                                                                                                                         |
| Loa loa                 | hypothetical protein LOAG_07427 [Loa loa]        | 0 |                                                                 |                                                                                                                                                                       |             | -                                                                                                                                                         |
| Caenorhabditis elegans  | zinc finger protein 423                          | 2 | F:GO:0005488;<br>P:GO:0032502                                   | -                                                                                                                                                                     |             | IPR007087; IPR015880; PTHR11389<br>(PANTHER), SSF57667 (SUPERFAMILY)                                                                                      |
| Caenorhabditis elegans  | zinc finger protein zfp-like                     | 0 |                                                                 | P:GO:0040027;<br>C:GO:0005634;<br>F:GO:0003676;<br>F:GO:0008270;<br>F:GO:0003674;<br>P:GO:0006355;<br>C:GO:0005575;<br>C:GO:0005622;<br>F:GO:0046872;<br>P:GO:0008150 |             | IPR007087; IPR015880; PTHR23224<br>(PANTHER), PTHR23224:SF461<br>(PANTHER), SSF57667 (SUPERFAMILY)                                                        |
|                         | -                                                | 0 |                                                                 |                                                                                                                                                                       |             | -                                                                                                                                                         |
|                         | -                                                | 0 |                                                                 |                                                                                                                                                                       |             | -                                                                                                                                                         |

|                                            |                                                                    |   |                                                                                                                                     |                                                                                                                                     |             |                                                                                                                      |
|--------------------------------------------|--------------------------------------------------------------------|---|-------------------------------------------------------------------------------------------------------------------------------------|-------------------------------------------------------------------------------------------------------------------------------------|-------------|----------------------------------------------------------------------------------------------------------------------|
| Danio rerio                                | galactoki-se 1                                                     | 8 | P:GO:0046835;<br>F:GO:0005534;<br>F:GO:0005515;<br>P:GO:0019402;<br>C:GO:0044464;<br>F:GO:0005524;<br>P:GO:0006012;<br>F:GO:0004335 | -                                                                                                                                   | EC:2.7.1.6  | IPR013750; G3DSA:3.30.70.890<br>(GENE3D), PTHR10457 (PANTHER),<br>PTHR10457:SF6 (PANTHER), SSF55060<br>(SUPERFAMILY) |
| -                                          | -                                                                  | 0 |                                                                                                                                     |                                                                                                                                     |             | -                                                                                                                    |
| -                                          | -                                                                  | 0 |                                                                                                                                     |                                                                                                                                     |             | -                                                                                                                    |
| Meloidogyne incognita                      | briggsae cbr-flp-7 protein                                         | 1 | P:GO:0007218                                                                                                                        | -                                                                                                                                   |             | IPR002544; PTHR20986 (PANTHER),<br>SignalP (SIGNALP)                                                                 |
| -                                          | -                                                                  | 0 |                                                                                                                                     |                                                                                                                                     |             | -                                                                                                                    |
| Brugia malayi                              | comm domain containing 4                                           | 0 |                                                                                                                                     | F:GO:0003674;<br>C:GO:0005737;<br>P:GO:0008150;<br>F:GO:0005515                                                                     |             | IPR009886                                                                                                            |
| -                                          | -                                                                  | 0 |                                                                                                                                     |                                                                                                                                     |             | SignalP (SIGNALP)                                                                                                    |
| Caenorhabditis briggsae                    | ankyrin unc44                                                      | 0 |                                                                                                                                     | P:GO:0006355;<br>F:GO:0005524;<br>P:GO:0006915;<br>F:GO:0005488;<br>F:GO:0000166;<br>F:GO:0043565;<br>F:GO:0017111;<br>F:GO:0003700 |             | IPR002110; IPR020683; PTHR18958<br>(PANTHER), PTHR18958:SF250<br>(PANTHER)                                           |
| Caenorhabditis elegans                     | wd repeat and fyve domain-containing protein 3                     | 3 | C:GO:0005737;<br>F:GO:0005488;<br>F:GO:0003831                                                                                      | -                                                                                                                                   | EC:2.4.1.38 | -                                                                                                                    |
| Branchiostoma floridae                     | hypothetical protein BRAFLDRAFT_118457 [Branchiostoma<br>floridae] | 0 |                                                                                                                                     | F:GO:0005488;<br>F:GO:0005509;<br>F:GO:0005529                                                                                      |             | IPR000436; IPR016060; SignalP<br>(SIGNALP)                                                                           |
| Caenorhabditis briggsae                    | eb module family protein                                           | 4 | P:GO:0018991;<br>P:GO:0040010;<br>P:GO:0040035;<br>P:GO:0040011                                                                     | -                                                                                                                                   |             | IPR006149                                                                                                            |
| Caenorhabditis elegans                     | glycine dehydroge-se                                               | 6 | P:GO:0006546;<br>F:GO:0004375;<br>F:GO:0030170;<br>F:GO:0009055;<br>P:GO:0055114;<br>F:GO:0016829                                   | -                                                                                                                                   | EC:1.4.4.2  | IPR015421; IPR015424; IPR020580;<br>IPR020581                                                                        |
| Lodderomyces elongisporus NRRL YB-<br>4239 | 26s proteasome regulatory subunit rpn6                             | 0 |                                                                                                                                     | F:GO:0005488;<br>C:GO:0000502                                                                                                       |             | -                                                                                                                    |
| -                                          | -                                                                  | 0 |                                                                                                                                     |                                                                                                                                     |             | -                                                                                                                    |
| Brugia malayi                              | protein-tyrosine phosphatase containing protein                    | 0 |                                                                                                                                     | P:GO:0016311;<br>F:GO:0016791;<br>P:GO:0006470;<br>F:GO:0016787;<br>F:GO:0004725;<br>F:GO:0004721                                   |             | -                                                                                                                    |

|                         |                                                                          |   |                                                                                                                                                      |                                                                                  |                                                                                                  |
|-------------------------|--------------------------------------------------------------------------|---|------------------------------------------------------------------------------------------------------------------------------------------------------|----------------------------------------------------------------------------------|--------------------------------------------------------------------------------------------------|
| Ailuropoda melanoleuca  | actin related protein 2 3 complex subunit 2                              | 9 | C:GO:0005885;<br>C:GO:0031252;<br>C:GO:0042995;<br>C:GO:0005925;<br>F:GO:0003779;<br>P:GO:0006928;<br>F:GO:0005200;<br>C:GO:0005794;<br>P:GO:0030838 | -                                                                                | IPR007188; G3DSA:3.30.1460.20<br>(GENE3D), SSF69645 (SUPERFAMILY)                                |
| Caenorhabditis elegans  | xrp2 protein                                                             | 3 | F:GO:0005488;<br>P:GO:0044238;<br>P:GO:0044237                                                                                                       | -                                                                                | IPR006599; IPR012945; IPR017901;<br>PTHR15440 (PANTHER)                                          |
| Caenorhabditis briggsae | briggsae cbr-rpm-1 protein                                               | 1 | F:GO:0005488                                                                                                                                         | -                                                                                | PTHR12846 (PANTHER),<br>PTHR12846:SF2 (PANTHER)                                                  |
|                         | -                                                                        | 0 |                                                                                                                                                      |                                                                                  | -                                                                                                |
| Caenorhabditis briggsae | briggsae cbr-cab-1 protein                                               | 7 | C:GO:0005623;<br>P:GO:0040007;<br>P:GO:0050896;<br>P:GO:0009792;<br>P:GO:0002119;<br>P:GO:0007268;<br>P:GO:0050794                                   | -                                                                                | SignalP (SIGNALP)                                                                                |
| Caenorhabditis briggsae | briggsae cbr-cab-1 protein                                               | 5 | P:GO:0007268;<br>C:GO:0016021;<br>P:GO:0009792;<br>P:GO:0040007;<br>P:GO:0002119                                                                     | -                                                                                | SignalP (SIGNALP)                                                                                |
|                         | -                                                                        | 0 |                                                                                                                                                      |                                                                                  | -                                                                                                |
|                         | -                                                                        | 0 |                                                                                                                                                      |                                                                                  | IPR004827                                                                                        |
| Caenorhabditis elegans  | wap four-disulfide core domain 8                                         | 1 | C:GO:0005737                                                                                                                                         |                                                                                  | -                                                                                                |
|                         | -                                                                        | 0 |                                                                                                                                                      |                                                                                  | -                                                                                                |
| Caenorhabditis briggsae | elegans protein confirmed by transcript evidence                         | 0 |                                                                                                                                                      |                                                                                  | -                                                                                                |
|                         | -                                                                        | 0 |                                                                                                                                                      |                                                                                  | -                                                                                                |
| Brugia malayi           | guanine nucleotide exchange factor                                       | 5 | F:GO:0005086;<br>P:GO:0032012;<br>C:GO:0005622;<br>F:GO:0008060;<br>F:GO:0017022                                                                     | -                                                                                | IPR000904; G3DSA:1.10.1000.11<br>(GENE3D), PTHR10663 (PANTHER),<br>PTHR10663:SF16 (PANTHER)      |
|                         | -                                                                        | 0 |                                                                                                                                                      |                                                                                  | -                                                                                                |
| Caenorhabditis elegans  | elegans protein confirmed by transcript evidence                         | 0 |                                                                                                                                                      | P:GO:0055114;<br>F:GO:0005488;<br>F:GO:0016491;<br>P:GO:0008152;<br>F:GO:0003824 | IPR002198; PTHR19410:SF18<br>(PANTHER)                                                           |
| Caenorhabditis briggsae | Hypothetical protein CBG05033 [Caenorhabditis briggsae]                  | 2 | P:GO:0008152;<br>F:GO:0016787                                                                                                                        | -                                                                                | IPR002018; G3DSA:3.40.50.1820<br>(GENE3D), PTHR11559:SF30<br>(PANTHER)                           |
| Caenorhabditis briggsae | Hypothetical protein CBG12007 [Caenorhabditis briggsae]                  | 0 |                                                                                                                                                      |                                                                                  | -                                                                                                |
| Caenorhabditis elegans  | shc (src homology domain c-term-l) adaptor homolog family member (shc-2) | 0 |                                                                                                                                                      | F:GO:0005515                                                                     | IPR006020; IPR011993; PTHR12583<br>(PANTHER), PTHR12583:SF5<br>(PANTHER), SSF50729 (SUPERFAMILY) |
|                         | -                                                                        | 0 |                                                                                                                                                      |                                                                                  | -                                                                                                |
|                         | -                                                                        | 0 |                                                                                                                                                      |                                                                                  | -                                                                                                |
|                         | -                                                                        | 0 |                                                                                                                                                      |                                                                                  | -                                                                                                |
|                         | -                                                                        | 0 |                                                                                                                                                      |                                                                                  | -                                                                                                |

|                         |                                                            |    |                                                                                                                                                                       |                                                                                                   |                                                                                           |
|-------------------------|------------------------------------------------------------|----|-----------------------------------------------------------------------------------------------------------------------------------------------------------------------|---------------------------------------------------------------------------------------------------|-------------------------------------------------------------------------------------------|
| Caenorhabditis elegans  | patched family protein                                     | 10 | P:GO:0009792;<br>P:GO:0002119;<br>P:GO:0040018;<br>P:GO:0001703;<br>P:GO:0018996;<br>P:GO:0000910;<br>P:GO:0040010;<br>P:GO:0000003;<br>P:GO:0040011;<br>C:GO:0016020 | -                                                                                                 | IPR003392; PTHR10796 (PANTHER),<br>PTHR10796:SF32 (PANTHER)                               |
| Caenorhabditis briggsae | isoform cra_a                                              | 3  | P:GO:0055114;<br>F:GO:0016491;<br>C:GO:0005739                                                                                                                        | -                                                                                                 | IPR015904                                                                                 |
|                         |                                                            | 0  |                                                                                                                                                                       |                                                                                                   | SignalP (SIGNALP)                                                                         |
| Caenorhabditis briggsae | cg3603-pa                                                  | 2  | P:GO:0008152;<br>F:GO:0003824                                                                                                                                         | -                                                                                                 | IPR002198; IPR016040;<br>PTHR19410:SF88 (PANTHER),<br>SSF51735 (SUPERFAMILY)              |
|                         |                                                            | 0  |                                                                                                                                                                       |                                                                                                   | SignalP (SIGNALP)                                                                         |
|                         |                                                            | 0  |                                                                                                                                                                       |                                                                                                   | SignalP (SIGNALP)                                                                         |
| Brugia malayi           | reticulocyte binding-like protein 2b                       | 0  |                                                                                                                                                                       | F:GO:0005525;<br>F:GO:0003676;<br>F:GO:0003924;<br>F:GO:0000166                                   | -                                                                                         |
| Caenorhabditis elegans  | protein ki-se domain containing protein                    | 3  | F:GO:0004672;<br>P:GO:0040011;<br>F:GO:0000166                                                                                                                        | -                                                                                                 | PTHR11909 (PANTHER),<br>PTHR11909:SF19 (PANTHER)                                          |
|                         |                                                            | 0  |                                                                                                                                                                       |                                                                                                   | -                                                                                         |
| Loa loa                 | kelch-like 18                                              | 1  | F:GO:0005515                                                                                                                                                          | -                                                                                                 | IPR006652; IPR013089; IPR015916;<br>PTHR23230:SF164 (PANTHER),<br>SSF117281 (SUPERFAMILY) |
| Caenorhabditis elegans  | elegans protein partially confirmed by transcript evidence | 0  |                                                                                                                                                                       |                                                                                                   | SignalP (SIGNALP)                                                                         |
| Caenorhabditis elegans  | elegans protein partially confirmed by transcript evidence | 0  |                                                                                                                                                                       | F:GO:0004672;<br>F:GO:0005524;<br>F:GO:0005488;<br>P:GO:0006468;<br>P:GO:0019915;<br>F:GO:0004674 | -                                                                                         |
|                         |                                                            | 0  |                                                                                                                                                                       |                                                                                                   | -                                                                                         |
| Caenorhabditis elegans  | briggsae cbr-sbp-1 protein                                 | 1  | F:GO:0005515                                                                                                                                                          | -                                                                                                 | PTHR12565 (PANTHER),<br>PTHR12565:SF3 (PANTHER), SignalP<br>(SIGNALP)                     |
| Pongo abelii            | eukaryotic translation initiation factor 3 subunit k       | 8  | C:GO:0005852;<br>F:GO:0003723;<br>F:GO:0005515;<br>P:GO:0045948;<br>F:GO:0003743;<br>C:GO:0005634;<br>C:GO:0005829;<br>F:GO:0043022                                   | -                                                                                                 | IPR009374; IPR016020; IPR016024;<br>SignalP (SIGNALP)                                     |
|                         |                                                            | 0  |                                                                                                                                                                       |                                                                                                   | -                                                                                         |
|                         |                                                            | 0  |                                                                                                                                                                       |                                                                                                   | -                                                                                         |
|                         |                                                            | 0  |                                                                                                                                                                       |                                                                                                   | -                                                                                         |
| Loa loa                 | cwf19-like protein 1                                       | 1  | F:GO:0003824                                                                                                                                                          |                                                                                                   | PTHR12072 (PANTHER)                                                                       |
| Caenorhabditis elegans  | cral trio domain containing protein                        | 1  | P:GO:0040010                                                                                                                                                          | -                                                                                                 | PTHR23324 (PANTHER),<br>PTHR23324:SF3 (PANTHER)                                           |
|                         |                                                            | 0  |                                                                                                                                                                       |                                                                                                   | SignalP (SIGNALP)                                                                         |
|                         |                                                            | 0  |                                                                                                                                                                       |                                                                                                   | -                                                                                         |

|                         |                                                           |   |                                                                                                                                     |                                                                                  |            |                                                                                                        |
|-------------------------|-----------------------------------------------------------|---|-------------------------------------------------------------------------------------------------------------------------------------|----------------------------------------------------------------------------------|------------|--------------------------------------------------------------------------------------------------------|
| Caenorhabditis elegans  | briggsae cbr-casy-1 protein                               | 6 | P:GO:0009792;<br>C:GO:0005615;<br>F:GO:0005515;<br>C:GO:0032809;<br>P:GO:0008355;<br>C:GO:0043231                                   | -                                                                                | -          |                                                                                                        |
| Caenorhabditis elegans  | cationic amino acid transporter 4                         | 5 | P:GO:0019915;<br>C:GO:0016021;<br>P:GO:0006865;<br>F:GO:0015171;<br>P:GO:0055085                                                    | -                                                                                |            | IPR002293; IPR015606; SignalP (SIGNALP)                                                                |
| Caenorhabditis briggsae | #NAME?                                                    | 4 | F:GO:0046872;<br>P:GO:0019509;<br>P:GO:0055114;<br>F:GO:0051213                                                                     | -                                                                                |            | IPR004313; IPR011051; IPR014710                                                                        |
| -                       | -                                                         | 0 |                                                                                                                                     |                                                                                  |            | SignalP (SIGNALP)                                                                                      |
| -                       | -                                                         | 0 |                                                                                                                                     |                                                                                  |            | -                                                                                                      |
| -                       | -                                                         | 0 |                                                                                                                                     |                                                                                  |            | -                                                                                                      |
| -                       | -                                                         | 0 |                                                                                                                                     |                                                                                  |            | SignalP (SIGNALP)                                                                                      |
| -                       | -                                                         | 0 |                                                                                                                                     |                                                                                  |            | SignalP (SIGNALP)                                                                                      |
| Loa loa                 | hypothetical protein LOAG_04198 [Loa loa]                 | 0 |                                                                                                                                     | F:GO:0003723;<br>F:GO:0003725;<br>C:GO:0005622                                   |            | IPR001159; PTHR12813 (PANTHER),<br>PTHR12813:SF5 (PANTHER), SSF54768<br>(SUPERFAMILY)                  |
| -                       | -                                                         | 0 |                                                                                                                                     |                                                                                  |            | -                                                                                                      |
| Caenorhabditis briggsae | ytv2_caeel ame: full=uncharacterized zinc metalloprotease | 0 |                                                                                                                                     | P:GO:0006508;<br>F:GO:0008233                                                    |            | -                                                                                                      |
| Caenorhabditis briggsae | d--directed r- polymerase iii largest subunit             | 4 | F:GO:0046872;<br>F:GO:0003899;<br>F:GO:0003677;<br>P:GO:0006350                                                                     | -                                                                                | EC:2.7.7.6 | IPR007080; IPR015700; PTHR19376<br>(PANTHER), SignalP (SIGNALP),<br>SSF64484 (SUPERFAMILY)             |
| -                       | -                                                         | 0 |                                                                                                                                     |                                                                                  |            | -                                                                                                      |
| Loa loa                 | sarcoglycan complex subunit protein                       | 0 |                                                                                                                                     | C:GO:0016012;<br>P:GO:0040013;<br>C:GO:0016021;<br>P:GO:0007010;<br>F:GO:0005515 |            | IPR006875; PTHR12939 (PANTHER),<br>PTHR12939:SF1 (PANTHER)                                             |
| Caenorhabditis briggsae | Hypothetical protein CBG24916 [Caenorhabditis briggsae]   | 0 |                                                                                                                                     |                                                                                  |            | SignalP (SIGNALP)                                                                                      |
| -                       | -                                                         | 0 |                                                                                                                                     |                                                                                  |            | -                                                                                                      |
| -                       | -                                                         | 0 |                                                                                                                                     |                                                                                  |            | -                                                                                                      |
| -                       | -                                                         | 0 |                                                                                                                                     |                                                                                  |            | -                                                                                                      |
| Caenorhabditis elegans  | eps (human endocytosis) related family member (eps-8)     | 1 | F:GO:0005515                                                                                                                        | -                                                                                |            | SignalP (SIGNALP)                                                                                      |
| Caenorhabditis elegans  | eps (human endocytosis) related family member (eps-8)     | 0 |                                                                                                                                     | P:GO:0007173;<br>F:GO:0004872;<br>F:GO:0005515                                   |            | IPR001452; IPR011511;<br>G3DSA:2.30.30.40 (GENE3D),<br>PTHR12287 (PANTHER),<br>PTHR12287:SF1 (PANTHER) |
| Caenorhabditis elegans  | eps (human endocytosis) related family member (eps-8)     | 1 | F:GO:0005515                                                                                                                        | -                                                                                |            | SignalP (SIGNALP)                                                                                      |
| Loa loa                 | atp-dependent clp protease atp-binding subunit            | 8 | P:GO:0006457;<br>F:GO:0008233;<br>F:GO:0016887;<br>C:GO:0005622;<br>F:GO:0005524;<br>F:GO:0051082;<br>F:GO:0008134;<br>P:GO:0006355 | -                                                                                |            | IPR004487; IPR013093;<br>G3DSA:3.40.50.300 (GENE3D),<br>PTHR11262 (PANTHER), SSF52540<br>(SUPERFAMILY) |

|                         |                                                                                   |    |                                                                                                                                                                                                                                                                                                                                                                                                                                                                                         |   |                                                            |
|-------------------------|-----------------------------------------------------------------------------------|----|-----------------------------------------------------------------------------------------------------------------------------------------------------------------------------------------------------------------------------------------------------------------------------------------------------------------------------------------------------------------------------------------------------------------------------------------------------------------------------------------|---|------------------------------------------------------------|
| Pongo abelii            | eukaryotic translation initiation factor subunit 5 47kda                          | 5  | C:GO:0005829;<br>C:GO:0005852;<br>F:GO:0005515;<br>P:GO:0006413;<br>F:GO:0003743                                                                                                                                                                                                                                                                                                                                                                                                        | - | PTHR10540 (PANTHER)                                        |
|                         | -                                                                                 | 0  |                                                                                                                                                                                                                                                                                                                                                                                                                                                                                         |   | -                                                          |
| Caenorhabditis briggsae | ankyrin repeats-like                                                              | 8  | F:GO:0008381;<br>F:GO:0015276;<br>P:GO:0055085;<br>P:GO:0050974;<br>P:GO:0006811;<br>P:GO:0050968;<br>C:GO:0016021;<br>P:GO:0050960                                                                                                                                                                                                                                                                                                                                                     | - | SignalP (SIGNALP)                                          |
| Caenorhabditis elegans  | and ph domain containing 2                                                        | 4  | F:GO:0005089;<br>C:GO:0005622;<br>P:GO:0035023;<br>F:GO:0008270                                                                                                                                                                                                                                                                                                                                                                                                                         | - | IPR000219; PTHR12673 (PANTHER),<br>PTHR12673:SF8 (PANTHER) |
| Macaca mulatta          | amyloid beta precursor protein (peptidase nexin- alzheimer disease) isoform cra_c | 53 | C:GO:0005506;<br>C:GO:0043198;<br>F:GO:0016504;<br>F:GO:0008233;<br>C:GO:0019717;<br>P:GO:0050885;<br>F:GO:0008201;<br>P:GO:0035235;<br>F:GO:0004867;<br>P:GO:0007176;<br>P:GO:0050803;<br>P:GO:0016358;<br>C:GO:0031594;<br>P:GO:0000085;<br>F:GO:0046872;<br>C:GO:0035253;<br>P:GO:0040014;<br>P:GO:0030900;<br>P:GO:0001967;<br>P:GO:0051402;<br>P:GO:0008542;<br>C:GO:0030424;<br>C:GO:0051233;<br>P:GO:0016199;<br>P:GO:0045944;<br>P:GO:0007219;<br>C:GO:0005887;<br>C:GO:0048471 | - | PTHR23103 (PANTHER),<br>PTHR23103:SF7 (PANTHER)            |
|                         | -                                                                                 | 0  |                                                                                                                                                                                                                                                                                                                                                                                                                                                                                         |   | -                                                          |
| Caenorhabditis briggsae | bystin-like                                                                       | 8  | P:GO:0040035;<br>P:GO:0009792;<br>P:GO:0002119;<br>P:GO:0007155;<br>P:GO:0040010;<br>P:GO:0007565;<br>P:GO:0006898;<br>C:GO:0044424                                                                                                                                                                                                                                                                                                                                                     | - | IPR007955                                                  |



|                        |                                                            |    |                                                                                                                                                                                                                                                                                                                                                                                                                                                                                         |                                                                 |              |                                                                     |
|------------------------|------------------------------------------------------------|----|-----------------------------------------------------------------------------------------------------------------------------------------------------------------------------------------------------------------------------------------------------------------------------------------------------------------------------------------------------------------------------------------------------------------------------------------------------------------------------------------|-----------------------------------------------------------------|--------------|---------------------------------------------------------------------|
| Ailuropoda melanoleuca | filamin alpha                                              | 28 | F:GO:0003889;<br>F:GO:0004871;<br>C:GO:0005802;<br>P:GO:0043433;<br>P:GO:0034394;<br>C:GO:0015629;<br>P:GO:0050821;<br>P:GO:0051220;<br>C:GO:0005576;<br>C:GO:0005829;<br>F:GO:0001948;<br>P:GO:0051764;<br>P:GO:0043123;<br>F:GO:0051015;<br>F:GO:0048365;<br>P:GO:0045022;<br>P:GO:0007195;<br>F:GO:0042803;<br>F:GO:0034989;<br>P:GO:0031532;<br>F:GO:0034988;<br>C:GO:0005886;<br>F:GO:0008134;<br>P:GO:0042177;<br>C:GO:0005634;<br>P:GO:0042993;<br>C:GO:0005938;<br>P:GO:0043113 | -                                                               |              | IPR013783; IPR017868; PTHR11915 (PANTHER), PTHR11915:SF24 (PANTHER) |
|                        |                                                            |    |                                                                                                                                                                                                                                                                                                                                                                                                                                                                                         |                                                                 |              | SignalP (SIGNALP)                                                   |
| Brugia malayi          | bromodomain containing protein                             | 0  |                                                                                                                                                                                                                                                                                                                                                                                                                                                                                         | F:GO:0003674;<br>P:GO:0008150;<br>F:GO:0005515;<br>C:GO:0005575 |              | IPR001487; IPR018359; PTHR22880 (PANTHER), PTHR22880:SF20 (PANTHER) |
| Caenorhabditis elegans | elegans protein partially confirmed by transcript evidence | 5  | F:GO:0004672;<br>P:GO:0032582;<br>F:GO:0003677;<br>F:GO:0005515;<br>P:GO:0007362                                                                                                                                                                                                                                                                                                                                                                                                        | -                                                               |              | IPR001487; IPR018359; PTHR22880 (PANTHER), PTHR22880:SF20 (PANTHER) |
| Caenorhabditis elegans | elegans protein partially confirmed by transcript evidence | 0  |                                                                                                                                                                                                                                                                                                                                                                                                                                                                                         |                                                                 |              | -                                                                   |
|                        |                                                            | 0  |                                                                                                                                                                                                                                                                                                                                                                                                                                                                                         |                                                                 |              | SignalP (SIGNALP)                                                   |
|                        |                                                            | 0  |                                                                                                                                                                                                                                                                                                                                                                                                                                                                                         |                                                                 |              | -                                                                   |
| Caenorhabditis elegans | elegans protein confirmed by transcript evidence           | 5  | C:GO:0016021;<br>P:GO:0040010;<br>F:GO:0004573;<br>P:GO:0009311;<br>P:GO:0040011                                                                                                                                                                                                                                                                                                                                                                                                        | -                                                               | EC:3.2.1.106 | IPR004888; PTHR10412 (PANTHER)                                      |
|                        |                                                            | 0  |                                                                                                                                                                                                                                                                                                                                                                                                                                                                                         |                                                                 |              | SignalP (SIGNALP)                                                   |
| Loa loa                | zinc c2h2 type family protein                              | 1  | F:GO:0005488                                                                                                                                                                                                                                                                                                                                                                                                                                                                            | -                                                               |              | -                                                                   |
|                        |                                                            | 0  |                                                                                                                                                                                                                                                                                                                                                                                                                                                                                         |                                                                 |              | -                                                                   |
|                        |                                                            | 0  |                                                                                                                                                                                                                                                                                                                                                                                                                                                                                         |                                                                 |              | -                                                                   |
|                        |                                                            | 0  |                                                                                                                                                                                                                                                                                                                                                                                                                                                                                         |                                                                 |              | SignalP (SIGNALP)                                                   |
|                        |                                                            | 0  |                                                                                                                                                                                                                                                                                                                                                                                                                                                                                         |                                                                 |              | -                                                                   |

|                         |                                                            |    |                                                                                                                                                                                                         |                                                                                  |                                                         |                                                                                        |
|-------------------------|------------------------------------------------------------|----|---------------------------------------------------------------------------------------------------------------------------------------------------------------------------------------------------------|----------------------------------------------------------------------------------|---------------------------------------------------------|----------------------------------------------------------------------------------------|
| Caenorhabditis remanei  | tpa_inf: eukaryotic translation elongation factor 1a       | 8  | C:GO:0005737;<br>P:GO:0009792;<br>P:GO:0002119;<br>P:GO:0007276;<br>F:GO:0003746;<br>F:GO:0005525;<br>P:GO:0006414;<br>F:GO:0003924                                                                     | -                                                                                | EC:3.6.5.1;<br>EC:3.6.5.2;<br>EC:3.6.5.3;<br>EC:3.6.5.4 | -                                                                                      |
| Caenorhabditis elegans  | tumor suppressor candidate 4                               | 0  |                                                                                                                                                                                                         | C:GO:0005789;<br>P:GO:0006506;<br>C:GO:0016021;<br>P:GO:0008150;<br>C:GO:0005575 |                                                         | IPR009348; PTHR12991 (PANTHER),<br>PTHR12991:SF10 (PANTHER)                            |
| Brugia malayi           | eph receptor b1                                            | 1  | F:GO:0005515                                                                                                                                                                                            | -                                                                                |                                                         | IPR001660; IPR010993; IPR013761;<br>IPR021129                                          |
| Caenorhabditis briggsae | Hypothetical protein CBG13967 [Caenorhabditis briggsae]    | 0  |                                                                                                                                                                                                         | F:GO:0005488                                                                     |                                                         | IPR018556                                                                              |
| Caenorhabditis elegans  | rad54-like ( cerevisiae)                                   | 12 | P:GO:0000003;<br>P:GO:0006310;<br>F:GO:0070087;<br>P:GO:0006355;<br>P:GO:0006306;<br>C:GO:0005720;<br>F:GO:0003677;<br>P:GO:0006915;<br>P:GO:0007126;<br>F:GO:0005524;<br>F:GO:0003678;<br>P:GO:0006281 | -                                                                                |                                                         | IPR000330; PTHR10799 (PANTHER),<br>PTHR10799:SF66 (PANTHER),<br>SSF52540 (SUPERFAMILY) |
|                         | -                                                          | 0  |                                                                                                                                                                                                         |                                                                                  |                                                         | -                                                                                      |
|                         | -                                                          | 0  |                                                                                                                                                                                                         |                                                                                  |                                                         | -                                                                                      |
|                         | -                                                          | 0  |                                                                                                                                                                                                         |                                                                                  |                                                         | -                                                                                      |
| Caenorhabditis elegans  | uncoordinated family member (unc-44)                       | 3  | C:GO:0016020;<br>P:GO:0007155;<br>F:GO:0005515                                                                                                                                                          | -                                                                                |                                                         | -                                                                                      |
| Caenorhabditis elegans  | elegans protein partially confirmed by transcript evidence | 5  | C:GO:0016021;<br>P:GO:0006865;<br>C:GO:0009986;<br>F:GO:0015171;<br>P:GO:0055085                                                                                                                        | -                                                                                |                                                         | IPR002293; PTHR11785:SF76<br>(PANTHER)                                                 |
| Caenorhabditis elegans  | acyl-coenzyme a oxidase pristanoyl                         | 7  | C:GO:0005777;<br>P:GO:0055114;<br>P:GO:0006635;<br>F:GO:0003995;<br>F:GO:0050660;<br>P:GO:0006911;<br>F:GO:0003997                                                                                      | -                                                                                | EC:1.3.99.3;<br>EC:1.3.3.6                              | IPR012258; PTHR10909 (PANTHER)                                                         |
| Danio rerio             | drebrin- isoform cra_a                                     | 5  | C:GO:0005829;<br>F:GO:0003779;<br>F:GO:0042802;<br>C:GO:0042995;<br>N:GO:0035556                                                                                                                        | -                                                                                |                                                         | -                                                                                      |
| Danio rerio             | drebrin- isoform cra_a                                     | 5  | C:GO:0005829;<br>F:GO:0003779;<br>F:GO:0042802;<br>C:GO:0042995;<br>N:GO:0035556                                                                                                                        | -                                                                                |                                                         | -                                                                                      |

|                                      |                                                         |    |                                                                                                                                                                                                                                                                                                               |   |             |                                                                                                   |
|--------------------------------------|---------------------------------------------------------|----|---------------------------------------------------------------------------------------------------------------------------------------------------------------------------------------------------------------------------------------------------------------------------------------------------------------|---|-------------|---------------------------------------------------------------------------------------------------|
| Danio rerio                          | drebrin- isoform cra_a                                  |    | C:GO:0005829;<br>F:GO:0003779;<br>5 F:GO:0042802;<br>C:GO:0042995;<br>N:GO:0035556                                                                                                                                                                                                                            | - |             | -                                                                                                 |
| Caenorhabditis briggsae              | Hypothetical protein CBG21978 [Caenorhabditis briggsae] | 0  |                                                                                                                                                                                                                                                                                                               |   |             | -                                                                                                 |
| Caenorhabditis briggsae              | yrr5_caeel ame: full=uncharacterized protein            | 0  |                                                                                                                                                                                                                                                                                                               |   |             | -                                                                                                 |
| Caenorhabditis briggsae              | cysteiny l tr- synthetase family member (crs-1)         | 2  | P:GO:0006412;<br>F:GO:0000166                                                                                                                                                                                                                                                                                 | - | EC:3.6.5.3  | SignalP (SIGNALP)                                                                                 |
|                                      | -                                                       | 0  |                                                                                                                                                                                                                                                                                                               |   |             | -                                                                                                 |
| Caenorhabditis briggsae              | briggsae cbr-tag-321 protein                            | 0  |                                                                                                                                                                                                                                                                                                               |   |             | IPR019537; PTHR21706 (PANTHER),<br>PTHR21706:SF7 (PANTHER), SignalP<br>(SIGNALP)                  |
|                                      | -                                                       | 0  |                                                                                                                                                                                                                                                                                                               |   |             | SignalP (SIGNALP)                                                                                 |
| Macaca mulatta                       | heat shock 70 kda protein 1a partial                    | 18 | F:GO:0047485;<br>P:GO:0042026;<br>P:GO:0090084;<br>C:GO:0005739;<br>P:GO:0030308;<br>F:GO:0031625;<br>C:GO:0016607;<br>F:GO:0044183;<br>P:GO:0006916;<br>P:GO:0008285;<br>C:GO:0016234;<br>F:GO:0005524;<br>P:GO:0006402;<br>C:GO:0048471;<br>C:GO:0030529;<br>F:GO:0051082;<br>P:GO:0006986;<br>C:GO:0005783 | - |             | -                                                                                                 |
| Teladorsagia circumcincta            | long family member (lon-1)                              | 2  | F:GO:0005515;<br>C:GO:0005576                                                                                                                                                                                                                                                                                 | - |             | -                                                                                                 |
| Caenorhabditis elegans               | tata-binding protein-associated factor 172              | 1  | F:GO:0005488                                                                                                                                                                                                                                                                                                  | - |             | IPR000330; IPR019825; PTHR10799<br>(PANTHER), PTHR10799:SF72<br>(PANTHER), SSF52540 (SUPERFAMILY) |
|                                      | -                                                       | 0  |                                                                                                                                                                                                                                                                                                               |   |             | -                                                                                                 |
| Brugia malayi                        | suppressor of ty 5 homolog ( cerevisiae)                | 7  | P:GO:0006354;<br>P:GO:0006357;<br>P:GO:0040007;<br>7 P:GO:0040035;<br>P:GO:0002119;<br>F:GO:0003711;<br>P:GO:0009792                                                                                                                                                                                          | - |             | IPR005824; PTHR11125 (PANTHER)                                                                    |
| Caenorhabditis elegans               | elegans protein confirmed by transcript evidence        | 1  | F:GO:0005515                                                                                                                                                                                                                                                                                                  | - |             | IPR011992; PTHR23055 (PANTHER),<br>PTHR23055:SF8 (PANTHER)                                        |
| Schizosaccharomyces japonicus yFS275 | vacuolar atp synthase subunit b                         | 7  | P:GO:0016337;<br>F:GO:0046933;<br>P:GO:0008219;<br>7 P:GO:0015986;<br>P:GO:0015988;<br>F:GO:0046961;<br>C:GO:0033180                                                                                                                                                                                          | - | EC:3.6.3.14 | -                                                                                                 |
| Loa loa                              | ubiquitin-conjugating enzyme family protein             | 3  | P:GO:0051246;<br>F:GO:0019787;<br>P:GO:0043687                                                                                                                                                                                                                                                                | - |             | IPR016135; PTHR11621 (PANTHER),<br>PTHR11621:SF9 (PANTHER)                                        |

|                        |                                                        |    |                                                                                                                                                                                        |                                                |              |                                                                                                                        |
|------------------------|--------------------------------------------------------|----|----------------------------------------------------------------------------------------------------------------------------------------------------------------------------------------|------------------------------------------------|--------------|------------------------------------------------------------------------------------------------------------------------|
| Caenorhabditis elegans | c inesis defect family member (cyk-3)                  | 4  | P:GO:0009792;<br>P:GO:0006511;<br>F:GO:0005509;<br>F:GO:0004221                                                                                                                        | -                                              | EC:3.1.2.15  | -                                                                                                                      |
| -                      | -                                                      | 0  |                                                                                                                                                                                        |                                                |              | -                                                                                                                      |
| -                      | -                                                      | 0  |                                                                                                                                                                                        |                                                |              | SignalP (SIGNALP)                                                                                                      |
| -                      | -                                                      | 0  |                                                                                                                                                                                        |                                                |              | -                                                                                                                      |
| -                      | -                                                      | 0  |                                                                                                                                                                                        |                                                |              | SignalP (SIGNALP)                                                                                                      |
| -                      | -                                                      | 0  |                                                                                                                                                                                        |                                                |              | -                                                                                                                      |
| -                      | -                                                      | 0  |                                                                                                                                                                                        |                                                |              | -                                                                                                                      |
| Caenorhabditis elegans | hypothetical protein F18C5.10 [Caenorhabditis elegans] | 0  |                                                                                                                                                                                        | F:GO:0005515                                   |              | -                                                                                                                      |
| Callithrix jacchus     | cd63 antigen                                           | 11 | C:GO:0005765;<br>C:GO:0043234;<br>P:GO:0045807;<br>C:GO:0031088;<br>F:GO:0032403;<br>C:GO:0031902;<br>C:GO:0030658;<br>P:GO:0045785;<br>P:GO:0030855;<br>P:GO:0010633;<br>C:GO:0005887 | -                                              |              | IPR000301; IPR018499; IPR018503;<br>PTHR19282 (PANTHER),<br>PTHR19282:SF51 (PANTHER), SignalP<br>(SIGNALP)             |
| -                      | -                                                      | 0  |                                                                                                                                                                                        |                                                |              | -                                                                                                                      |
| -                      | -                                                      | 0  |                                                                                                                                                                                        |                                                |              | -                                                                                                                      |
| Homo sapiens           | granulysin isoform 519                                 | 5  | P:GO:0050832;<br>P:GO:0006968;<br>C:GO:0005615;<br>P:GO:0042742;<br>P:GO:0031640                                                                                                       | -                                              |              | IPR011001; PTHR15541 (PANTHER)                                                                                         |
| Caenorhabditis elegans | 6-phosphofructo-2-ki-se fructose- -biphosphate 4       | 3  | P:GO:0006003;<br>F:GO:0005524;<br>F:GO:0003873                                                                                                                                         | -                                              | EC:2.7.1.105 | IPR003094; IPR013079;<br>G3DSA:3.40.50.300 (GENE3D),<br>PTHR10606:SF11 (PANTHER),<br>SSF52540 (SUPERFAMILY)            |
| -                      | -                                                      | 0  |                                                                                                                                                                                        |                                                |              | -                                                                                                                      |
| Loa loa                | d- gyrase topoisomerase a subunit family protein       | 9  | P:GO:0000910;<br>P:GO:0006355;<br>F:GO:0005524;<br>F:GO:0003700;<br>F:GO:0003918;<br>C:GO:0005694;<br>P:GO:0006265;<br>C:GO:0005654;<br>P:GO:0009792                                   | -                                              | EC:5.99.1.3  | IPR001154; IPR002205; IPR013758;<br>IPR013760; PTHR10169 (PANTHER),<br>PTHR10169:SF2 (PANTHER)                         |
| Loa loa                | retinoblastoma binding protein 5                       | 7  | C:GO:0071339;<br>F:GO:0042800;<br>F:GO:0010843;<br>P:GO:0043627;<br>P:GO:0051568;<br>F:GO:0005515;<br>P:GO:0006974                                                                     | -                                              |              | IPR001680; IPR011046; IPR015943;<br>IPR019781; PTHR12816 (PANTHER),<br>PTHR12816:SF6 (PANTHER)                         |
| -                      | -                                                      | 0  |                                                                                                                                                                                        |                                                |              | -                                                                                                                      |
| -                      | -                                                      | 0  |                                                                                                                                                                                        |                                                |              | SignalP (SIGNALP)                                                                                                      |
| Caenorhabditis elegans | ef hand family protein                                 | 0  |                                                                                                                                                                                        | F:GO:0005509;<br>P:GO:0005975;<br>F:GO:0003824 |              | IPR011992; IPR018247; PTHR19237<br>(PANTHER), PTHR19237:SF1<br>(PANTHER), SignalP (SIGNALP),<br>SSF47473 (SUPERFAMILY) |

|                         |                                                               |   |                                                                                                                                                      |                                                |              |                                                                                                                       |
|-------------------------|---------------------------------------------------------------|---|------------------------------------------------------------------------------------------------------------------------------------------------------|------------------------------------------------|--------------|-----------------------------------------------------------------------------------------------------------------------|
| Caenorhabditis briggsae | ef hand family protein                                        | 0 |                                                                                                                                                      | F:GO:0005509;<br>P:GO:0005975;<br>F:GO:0003824 |              | IPR011992; IPR018247; PTHR19237 (PANTHER), PTHR19237:SF1 (PANTHER), SignalP (SIGNALP), SSF47473 (SUPERFAMILY)         |
| Caenorhabditis briggsae | elegans protein partially confirmed by transcript evidence    | 0 |                                                                                                                                                      | F:GO:0005488;<br>F:GO:0005044;<br>C:GO:0016020 |              | SignalP (SIGNALP)                                                                                                     |
|                         | -                                                             | 0 |                                                                                                                                                      |                                                |              | -                                                                                                                     |
|                         | -                                                             | 0 |                                                                                                                                                      |                                                |              | -                                                                                                                     |
|                         | -                                                             | 0 |                                                                                                                                                      |                                                |              | SignalP (SIGNALP)                                                                                                     |
|                         | -                                                             | 0 |                                                                                                                                                      |                                                |              | -                                                                                                                     |
| Pongo abelii            | v-raf murine sarcoma 3611 viral oncogene homolog              | 9 | P:GO:0006468;<br>F:GO:0046872;<br>F:GO:0005515;<br>F:GO:0005524;<br>F:GO:0004709;<br>P:GO:0007243;<br>C:GO:0005626;<br>C:GO:0005829;<br>C:GO:0005739 | -                                              | EC:2.7.11.25 | IPR000719; IPR008271; IPR011009; IPR017442; G3DSA:1.10.510.10 (GENE3D), PTHR23257 (PANTHER), PTHR23257:SF43 (PANTHER) |
|                         | -                                                             | 0 |                                                                                                                                                      |                                                |              | -                                                                                                                     |
|                         | -                                                             | 0 |                                                                                                                                                      |                                                |              | -                                                                                                                     |
|                         | -                                                             | 0 |                                                                                                                                                      |                                                |              | -                                                                                                                     |
| Caenorhabditis briggsae | frizzled smoothened family membrane region containing protein | 8 | P:GO:0007186;<br>F:GO:0004926;<br>C:GO:0016021;<br>P:GO:0007165;<br>P:GO:0007275;<br>F:GO:0042813;<br>P:GO:0016055;<br>F:GO:0004930                  | -                                              |              | IPR000539; IPR015526; IPR017981; PTHR11309:SF18 (PANTHER), SignalP (SIGNALP)                                          |
| Loa loa                 | r- recognition motif domain containing protein                | 1 | F:GO:0005488                                                                                                                                         | -                                              |              | IPR000504; IPR012677; PTHR10432 (PANTHER), PTHR10432:SF30 (PANTHER), SSF54928 (SUPERFAMILY)                           |
| Loa loa                 | r- recognition motif domain containing protein                | 1 | F:GO:0005488                                                                                                                                         | -                                              |              | IPR000504; IPR012677; PTHR10432 (PANTHER), PTHR10432:SF30 (PANTHER), SSF54928 (SUPERFAMILY)                           |
| Loa loa                 | r- recognition motif domain containing protein                | 1 | F:GO:0005488                                                                                                                                         | -                                              |              | IPR000504; IPR012677; PTHR10432 (PANTHER), PTHR10432:SF30 (PANTHER), SSF54928 (SUPERFAMILY)                           |
| Loa loa                 | r- recognition motif domain containing protein                | 1 | F:GO:0005488                                                                                                                                         | -                                              |              | IPR000504; IPR012677; PTHR10432 (PANTHER), PTHR10432:SF30 (PANTHER), SSF54928 (SUPERFAMILY)                           |
| Caenorhabditis elegans  | oligo- -glucosidase                                           | 1 | F:GO:0016787                                                                                                                                         | -                                              |              | IPR006047; IPR013781; IPR017853; PTHR10357 (PANTHER), PTHR10357:SF11 (PANTHER), SignalP (SIGNALP)                     |
| Caenorhabditis elegans  | alpha amylase                                                 | 2 | C:GO:0005886;<br>F:GO:0003824                                                                                                                        | -                                              |              | -                                                                                                                     |
| Caenorhabditis elegans  | alpha catalytic domain containing protein                     | 2 | C:GO:0005886;<br>F:GO:0003824                                                                                                                        | -                                              |              | -                                                                                                                     |
| Caenorhabditis elegans  | alpha catalytic domain containing protein                     | 2 | C:GO:0005886;<br>F:GO:0003824                                                                                                                        | -                                              |              | -                                                                                                                     |
| Loa loa                 | sec14-like protein 5                                          | 3 | C:GO:0005622;<br>P:GO:0006810;<br>F:GO:0005215                                                                                                       | -                                              |              | IPR006797; PTHR11158 (PANTHER)                                                                                        |
|                         | -                                                             | 0 |                                                                                                                                                      |                                                |              | -                                                                                                                     |

|                         |                                                           |   |                                                                                                                                     |                                                                 |                                            |                                                                             |
|-------------------------|-----------------------------------------------------------|---|-------------------------------------------------------------------------------------------------------------------------------------|-----------------------------------------------------------------|--------------------------------------------|-----------------------------------------------------------------------------|
| Caenorhabditis briggsae | protein                                                   | 4 | F:GO:0004725;<br>P:GO:0006470;<br>P:GO:0006412;<br>F:GO:0004045                                                                     | -                                                               | EC:3.1.3.48;<br>EC:3.6.5.3;<br>EC:3.1.1.29 | -                                                                           |
| -                       | -                                                         | 0 | -                                                                                                                                   | -                                                               | -                                          | -                                                                           |
| -                       | -                                                         | 0 | -                                                                                                                                   | -                                                               | -                                          | SignalP (SIGNALP)                                                           |
| -                       | -                                                         | 0 | -                                                                                                                                   | -                                                               | -                                          | -                                                                           |
| -                       | -                                                         | 0 | -                                                                                                                                   | -                                                               | -                                          | SignalP (SIGNALP)                                                           |
| Caenorhabditis briggsae | inositol monophosphatase domain containing 1              | 1 | F:GO:0004437                                                                                                                        | -                                                               | -                                          | -                                                                           |
| Mus musculus            | small nuclear ribonucleoprotein e                         | 8 | C:GO:0005683;<br>C:GO:0005654;<br>P:GO:0000387;<br>C:GO:0005681;<br>F:GO:0003723;<br>F:GO:0005515;<br>C:GO:0005829;<br>P:GO:0000245 | -                                                               | -                                          | IPR010920; G3DSA:2.30.30.100 (GENE3D), PTHR11193 (PANTHER)                  |
| -                       | -                                                         | 0 | -                                                                                                                                   | -                                                               | -                                          | SignalP (SIGNALP)                                                           |
| Caenorhabditis briggsae | exostoses -like 3                                         | 6 | P:GO:0007166;<br>P:GO:0007275;<br>F:GO:0008375;<br>C:GO:0044464;<br>P:GO:0009987;<br>P:GO:0008152                                   | -                                                               | -                                          | IPR004263; PTHR11062 (PANTHER), PTHR11062:SF5 (PANTHER)                     |
| -                       | -                                                         | 0 | -                                                                                                                                   | -                                                               | -                                          | -                                                                           |
| Caenorhabditis briggsae | saccharopine dehydroge-se                                 | 0 | -                                                                                                                                   | F:GO:0005488;<br>P:GO:0008152;<br>C:GO:0016021;<br>F:GO:0003824 | -                                          | IPR005097; IPR016040; PTHR12286 (PANTHER), SSF51735 (SUPERFAMILY)           |
| Caenorhabditis elegans  | protein white                                             | 8 | C:GO:0016021;<br>P:GO:0006355;<br>F:GO:0003677;<br>F:GO:0005524;<br>P:GO:0010171;<br>F:GO:0016887;<br>F:GO:0003700;<br>C:GO:0005634 | -                                                               | -                                          | IPR013525; PTHR19241 (PANTHER), PTHR19241:SF31 (PANTHER), SignalP (SIGNALP) |
| -                       | -                                                         | 0 | -                                                                                                                                   | -                                                               | -                                          | -                                                                           |
| -                       | -                                                         | 0 | -                                                                                                                                   | -                                                               | -                                          | -                                                                           |
| -                       | -                                                         | 0 | -                                                                                                                                   | -                                                               | -                                          | -                                                                           |
| -                       | -                                                         | 0 | -                                                                                                                                   | -                                                               | -                                          | -                                                                           |
| Caenorhabditis elegans  | ligand-gated ion channel family member (lgc-43)           | 5 | C:GO:0016021;<br>C:GO:0030054;<br>C:GO:0045211;<br>F:GO:0005230;<br>P:GO:0006811                                                    | -                                                               | -                                          | IPR006201; PTHR18945:SF9 (PANTHER)                                          |
| Loa loa                 | uncharacterized protein family upf0005 containing protein | 0 | -                                                                                                                                   | F:GO:0004872;<br>C:GO:0016021;<br>C:GO:0016020;<br>F:GO:0005515 | -                                          | IPR006214; PTHR23291:SF14 (PANTHER), SignalP (SIGNALP)                      |
| -                       | -                                                         | 0 | -                                                                                                                                   | -                                                               | -                                          | SignalP (SIGNALP)                                                           |
| Caenorhabditis elegans  | ammd protein                                              | 1 | P:GO:0008152                                                                                                                        | -                                                               | -                                          | IPR013094; G3DSA:3.40.50.1820 (GENE3D), SSF53474 (SUPERFAMILY)              |
| -                       | -                                                         | 0 | -                                                                                                                                   | -                                                               | -                                          | -                                                                           |

|                         |                                              |    |                                                                                                                                                                                                                          |   |             |                                                                                                                                         |
|-------------------------|----------------------------------------------|----|--------------------------------------------------------------------------------------------------------------------------------------------------------------------------------------------------------------------------|---|-------------|-----------------------------------------------------------------------------------------------------------------------------------------|
| Caenorhabditis elegans  | serine or cysteine protease inhibitor        | 7  | F:GO:0008233;<br>P:GO:0008380;<br>F:GO:0004867;<br>F:GO:0003723;<br>F:GO:0005515;<br>C:GO:0005634;<br>P:GO:0008406                                                                                                       | - | -           | -                                                                                                                                       |
| -                       | -                                            | 0  |                                                                                                                                                                                                                          |   |             | -                                                                                                                                       |
| Caenorhabditis elegans  | trehalose 6-phosphate synthase               | 2  | F:GO:0016757;<br>P:GO:0034608                                                                                                                                                                                            | - |             | -                                                                                                                                       |
| Apis mellifera          | set domain and mariner transposase fusion    | 0  |                                                                                                                                                                                                                          |   |             | PTHR23016 (PANTHER)                                                                                                                     |
| Caenorhabditis elegans  | uba and wwe domain containing 1              | 7  | C:GO:0005737;<br>C:GO:0005730;<br>P:GO:0016574;<br>F:GO:0003677;<br>F:GO:0005515;<br>P:GO:0000209;<br>F:GO:0004842                                                                                                       | - | EC:6.3.2.19 | IPR010314                                                                                                                               |
| Caenorhabditis briggsae | yq42_caeel ame: full=uncharacterized protein | 0  |                                                                                                                                                                                                                          |   |             | G3DSA:3.40.50.10180 (GENE3D),<br>PTHR12227 (PANTHER), SSF82544<br>(SUPERFAMILY)                                                         |
| Caenorhabditis elegans  | mofrl family protein                         | 0  |                                                                                                                                                                                                                          |   |             | G3DSA:3.40.50.10180 (GENE3D),<br>PTHR12227 (PANTHER), SSF82544<br>(SUPERFAMILY)                                                         |
| -                       | -                                            | 0  |                                                                                                                                                                                                                          |   |             | -                                                                                                                                       |
| -                       | -                                            | 0  |                                                                                                                                                                                                                          |   |             | -                                                                                                                                       |
| -                       | -                                            | 0  |                                                                                                                                                                                                                          |   |             | -                                                                                                                                       |
| Loa loa                 | nuclear cap-binding protein subunit 1        | 13 | P:GO:0000184;<br>C:GO:0005654;<br>F:GO:0005515;<br>P:GO:0006406;<br>P:GO:0031442;<br>P:GO:0006379;<br>C:GO:0005829;<br>C:GO:0005845;<br>P:GO:0006446;<br>F:GO:0003723;<br>C:GO:0030529;<br>P:GO:0006370;<br>P:GO:0000387 | - |             | IPR015172; IPR015174; IPR016021;<br>IPR016024; PTHR12412 (PANTHER),<br>PTHR12412:SF2 (PANTHER)                                          |
| -                       | -                                            | 0  |                                                                                                                                                                                                                          |   |             | -                                                                                                                                       |
| -                       | -                                            | 0  |                                                                                                                                                                                                                          |   |             | SignalP (SIGNALP)                                                                                                                       |
| Caenorhabditis elegans  | in family member (ttn-1)                     | 4  | P:GO:0009792;<br>P:GO:0006468;<br>F:GO:0005524;<br>F:GO:0004674                                                                                                                                                          | - | EC:2.7.11.0 | IPR013098; IPR013783; PTHR19897<br>(PANTHER), PTHR19897:SF17<br>(PANTHER), SSF48726 (SUPERFAMILY)                                       |
| -                       | -                                            | 0  |                                                                                                                                                                                                                          |   |             | -                                                                                                                                       |
| Caenorhabditis briggsae | long-chain-fatty-acid-- ligase 1             | 6  | C:GO:0005829;<br>C:GO:0043231;<br>P:GO:0046320;<br>C:GO:0044446;<br>C:GO:0031090;<br>F:GO:0004467                                                                                                                        | - | EC:6.2.1.3  | IPR000873; G3DSA:3.40.50.980<br>(GENE3D), PTHR11968 (PANTHER),<br>PTHR11968:SF8 (PANTHER), SignalP<br>(SIGNALP), SSF56801 (SUPERFAMILY) |

|                         |                                                            |    |                                                                                                                                                                                                                                                                                              |                                                                 |             |                                                                                                                                |
|-------------------------|------------------------------------------------------------|----|----------------------------------------------------------------------------------------------------------------------------------------------------------------------------------------------------------------------------------------------------------------------------------------------|-----------------------------------------------------------------|-------------|--------------------------------------------------------------------------------------------------------------------------------|
| Caenorhabditis briggsae | long-chain-fatty-acid-- ligase 1                           | 6  | C:GO:0005829;<br>C:GO:0043231;<br>P:GO:0046320;<br>C:GO:0044446;<br>C:GO:0031090;<br>F:GO:0004467                                                                                                                                                                                            | -                                                               | EC:6.2.1.3  | IPR000873; G3DSA:3.40.50.980 (GENE3D), PTHR11968 (PANTHER), PTHR11968:SF8 (PANTHER), SignalP (SIGNALP), SSF56801 (SUPERFAMILY) |
| Haemonchus contortus    | hexoki-se family protein                                   | 17 | P:GO:0018105;<br>C:GO:0005829;<br>P:GO:0018108;<br>F:GO:0004672;<br>C:GO:0005739;<br>C:GO:0005901;<br>P:GO:0010359;<br>P:GO:0018107;<br>F:GO:0005536;<br>P:GO:0046835;<br>F:GO:0005524;<br>F:GO:0016887;<br>P:GO:0006096;<br>F:GO:0042803;<br>P:GO:0046777;<br>P:GO:0043066;<br>F:GO:0004340 | -                                                               | EC:2.7.1.2  | IPR001312; IPR022672; G3DSA:3.30.420.40 (GENE3D), SSF53067 (SUPERFAMILY)                                                       |
| Caenorhabditis elegans  | elegans protein partially confirmed by transcript evidence | 0  |                                                                                                                                                                                                                                                                                              | P:GO:0009792                                                    |             | IPR003677; PTHR21593 (PANTHER)                                                                                                 |
|                         | -                                                          | 0  |                                                                                                                                                                                                                                                                                              |                                                                 |             | -                                                                                                                              |
| Caenorhabditis briggsae | lipase family protein                                      | 2  | P:GO:0006629;<br>F:GO:0004806                                                                                                                                                                                                                                                                | -                                                               | EC:3.1.1.3  | IPR002921; G3DSA:3.40.50.1820 (GENE3D), SSF53474 (SUPERFAMILY)                                                                 |
| Ailuropoda melanoleuca  | lactate dehydroge-se a                                     | 8  | P:GO:0031668;<br>C:GO:0019861;<br>F:GO:0005515;<br>F:GO:0004459;<br>P:GO:0055114;<br>P:GO:0006096;<br>C:GO:0005829;<br>C:GO:0005739                                                                                                                                                          | -                                                               | EC:1.1.1.27 | IPR001236; IPR001557; IPR016040; PTHR11540 (PANTHER), PTHR11540:SF3 (PANTHER), SSF51735 (SUPERFAMILY)                          |
|                         | -                                                          | 0  |                                                                                                                                                                                                                                                                                              |                                                                 |             | SignalP (SIGNALP)                                                                                                              |
|                         | -                                                          | 0  |                                                                                                                                                                                                                                                                                              |                                                                 |             | -                                                                                                                              |
|                         | -                                                          | 0  |                                                                                                                                                                                                                                                                                              |                                                                 |             | -                                                                                                                              |
| Caenorhabditis elegans  | lethal k05819-like                                         | 0  |                                                                                                                                                                                                                                                                                              | F:GO:0015662;<br>C:GO:0016020;<br>P:GO:0006754;<br>P:GO:0006812 |             | IPR000864; G3DSA:3.40.1110.10 (GENE3D), PTHR13219 (PANTHER)                                                                    |



|                         |                                      |    |                                                                                                                                                                                                                                                                                                                                                                                                                                      |                               |                             |                   |
|-------------------------|--------------------------------------|----|--------------------------------------------------------------------------------------------------------------------------------------------------------------------------------------------------------------------------------------------------------------------------------------------------------------------------------------------------------------------------------------------------------------------------------------|-------------------------------|-----------------------------|-------------------|
| Caenorhabditis briggsae | uncoordinated family member (unc-26) | 25 | P:GO:0016082;<br>C:GO:0012506;<br>P:GO:0046856;<br>P:GO:0050803;<br>F:GO:0008022;<br>P:GO:0016191;<br>P:GO:0032526;<br>P:GO:0007612;<br>C:GO:0019717;<br>P:GO:0046549;<br>F:GO:0017120;<br>F:GO:0003676;<br>P:GO:0034097;<br>F:GO:0004445;<br>P:GO:0007420;<br>P:GO:0048260;<br>P:GO:0014015;<br>P:GO:0050808;<br>F:GO:0004439;<br>F:GO:0032403;<br>C:GO:0043195;<br>C:GO:0030118;<br>P:GO:0048790;<br>F:GO:0017124;<br>P:GO:0048015 | -                             | EC:3.1.3.56;<br>EC:3.1.3.36 | IPR002013         |
| -                       | -                                    | 0  |                                                                                                                                                                                                                                                                                                                                                                                                                                      |                               |                             | -                 |
| Caenorhabditis briggsae | briggsae cbr-nol-9 protein           | 0  |                                                                                                                                                                                                                                                                                                                                                                                                                                      | P:GO:0000003;<br>P:GO:0006974 |                             | SignalP (SIGNALP) |
| Caenorhabditis elegans  | #NAME?                               | 10 | P:GO:0006814;<br>C:GO:0005890;<br>F:GO:0005391;<br>P:GO:0030317;<br>F:GO:0046872;<br>P:GO:0006813;<br>P:GO:0006754;<br>F:GO:0005524;<br>P:GO:0030641;<br>P:GO:0015991                                                                                                                                                                                                                                                                | -                             | EC:3.6.3.9                  | -                 |
| -                       | -                                    | 0  |                                                                                                                                                                                                                                                                                                                                                                                                                                      |                               |                             | SignalP (SIGNALP) |
| Caenorhabditis elegans  | briggsae cbr-let-418 protein         | 14 | C:GO:0005700;<br>F:GO:0031491;<br>F:GO:0008026;<br>P:GO:0040027;<br>P:GO:0048813;<br>C:GO:0016581;<br>P:GO:0007517;<br>P:GO:0046580;<br>F:GO:0046872;<br>F:GO:0003677;<br>P:GO:0001709;<br>P:GO:0042766;<br>F:GO:0003678;<br>F:GO:0016564                                                                                                                                                                                            | -                             |                             | -                 |
| -                       | -                                    | 0  |                                                                                                                                                                                                                                                                                                                                                                                                                                      |                               |                             | -                 |

|                         |                                                                                      |   |                                                                                                                                                      |                                                                                                                                                                                                                                                                             |                                                                                                                                                           |
|-------------------------|--------------------------------------------------------------------------------------|---|------------------------------------------------------------------------------------------------------------------------------------------------------|-----------------------------------------------------------------------------------------------------------------------------------------------------------------------------------------------------------------------------------------------------------------------------|-----------------------------------------------------------------------------------------------------------------------------------------------------------|
| Haemonchus contortus    | metalloprotease 1 precursor                                                          | 2 | F:GO:0046872;<br>F:GO:0008237                                                                                                                        | -                                                                                                                                                                                                                                                                           | IPR000859; IPR001506; IPR006026;<br>IPR013032; G3DSA:3.40.390.10<br>(GENE3D), PTHR10127 (PANTHER),<br>PTHR10127:SF65 (PANTHER),<br>SSF55486 (SUPERFAMILY) |
| -                       | -                                                                                    | 0 |                                                                                                                                                      |                                                                                                                                                                                                                                                                             | SignalP (SIGNALP)                                                                                                                                         |
| -                       | -                                                                                    | 0 |                                                                                                                                                      |                                                                                                                                                                                                                                                                             | -                                                                                                                                                         |
| Caenorhabditis elegans  | r- recognition                                                                       | 9 | P:GO:0002009;<br>F:GO:0003676;<br>P:GO:0009792;<br>P:GO:0000003;<br>P:GO:0040007;<br>P:GO:0010171;<br>F:GO:0000166;<br>P:GO:0002119;<br>P:GO:0040011 | -                                                                                                                                                                                                                                                                           | IPR000504; IPR012677; PTHR10432<br>(PANTHER), PTHR10432:SF54<br>(PANTHER), SSF54928 (SUPERFAMILY)                                                         |
| -                       | -                                                                                    | 0 |                                                                                                                                                      |                                                                                                                                                                                                                                                                             | -                                                                                                                                                         |
| -                       | -                                                                                    | 0 |                                                                                                                                                      |                                                                                                                                                                                                                                                                             | -                                                                                                                                                         |
| Caenorhabditis briggsae | copine domain atypical protein isoform partially confirmed<br>by transcript evidence | 0 |                                                                                                                                                      | F:GO:0046872;<br>F:GO:0008270;<br>F:GO:0005515                                                                                                                                                                                                                              | SignalP (SIGNALP)                                                                                                                                         |
| Brugia malayi           | myosin xviii                                                                         | 0 |                                                                                                                                                      | F:GO:0008094;<br>P:GO:0006259;<br>P:GO:0006916;<br>F:GO:0042802;<br>F:GO:0003677;<br>C:GO:0005634;<br>C:GO:0005737;<br>F:GO:0000166;<br>C:GO:0005794;<br>F:GO:0005524;<br>C:GO:0005793;<br>C:GO:0016459;<br>F:GO:0003774;<br>C:GO:0005730;<br>F:GO:0005515;<br>C:GO:0005856 | IPR001609; PTHR13140 (PANTHER),<br>PTHR13140:SF10 (PANTHER),<br>SSF52540 (SUPERFAMILY)                                                                    |
| Homo sapiens            | complement component 4a (rodgers blood group)                                        | 5 | C:GO:0005615;<br>P:GO:0006957;<br>F:GO:0005515;<br>P:GO:0006958;<br>F:GO:0004866                                                                     | -                                                                                                                                                                                                                                                                           | -                                                                                                                                                         |
| Caenorhabditis briggsae | Hypothetical protein CBG08978 [Caenorhabditis briggsae]                              | 0 |                                                                                                                                                      | F:GO:0046872;<br>F:GO:0008270;<br>F:GO:0005515                                                                                                                                                                                                                              | IPR006575; IPR016135                                                                                                                                      |
| Caenorhabditis elegans  | glycine c-acetyltransferase (2-amino-3-ketobutyrate-<br>coenzyme a ligase)           | 6 | F:GO:0016874;<br>F:GO:0030170;<br>C:GO:0005743;<br>P:GO:0009058;<br>F:GO:0016769;<br>F:GO:0008890                                                    | -                                                                                                                                                                                                                                                                           | EC:2.3.1.29<br>IPR004839; IPR011282; IPR015422;<br>IPR015424; PTHR13693 (PANTHER)                                                                         |
| Brugia malayi           | kiaa1378 protein                                                                     | 1 | F:GO:0005515                                                                                                                                         | -                                                                                                                                                                                                                                                                           | -                                                                                                                                                         |
| Brugia malayi           | kiaa1378 protein                                                                     | 1 | F:GO:0005515                                                                                                                                         | -                                                                                                                                                                                                                                                                           | -                                                                                                                                                         |
| -                       | -                                                                                    | 0 |                                                                                                                                                      |                                                                                                                                                                                                                                                                             | -                                                                                                                                                         |
| Caenorhabditis elegans  | erin family member (cdh-12)                                                          | 0 |                                                                                                                                                      |                                                                                                                                                                                                                                                                             | -                                                                                                                                                         |
| -                       | -                                                                                    | 0 |                                                                                                                                                      |                                                                                                                                                                                                                                                                             | -                                                                                                                                                         |
| -                       | -                                                                                    | 0 |                                                                                                                                                      |                                                                                                                                                                                                                                                                             | -                                                                                                                                                         |
| -                       | -                                                                                    | 0 |                                                                                                                                                      |                                                                                                                                                                                                                                                                             | -                                                                                                                                                         |

|                        |                                                                             |    |                                                                                                                                                                       |                                                                                                                                                                                                         |             |                                                         |
|------------------------|-----------------------------------------------------------------------------|----|-----------------------------------------------------------------------------------------------------------------------------------------------------------------------|---------------------------------------------------------------------------------------------------------------------------------------------------------------------------------------------------------|-------------|---------------------------------------------------------|
| Gallus gallus          | mannose c type 2                                                            | 0  |                                                                                                                                                                       | C:GO:0009986;<br>C:GO:0016021;<br>C:GO:0016020;<br>F:GO:0005529;<br>P:GO:0006897;<br>P:GO:0007165;<br>F:GO:0005518;<br>F:GO:0004872;<br>C:GO:0005886;<br>F:GO:0005488                                   |             | IPR001304; IPR016186; IPR016187;<br>PTHR22803 (PANTHER) |
|                        | -                                                                           | 0  |                                                                                                                                                                       |                                                                                                                                                                                                         |             | -                                                       |
| Caenorhabditis elegans | ymx3_caeel ame: full=uncharacterized protein                                | 0  |                                                                                                                                                                       | F:GO:0008270                                                                                                                                                                                            |             | -                                                       |
|                        | -                                                                           | 0  |                                                                                                                                                                       |                                                                                                                                                                                                         |             | -                                                       |
|                        | -                                                                           | 0  |                                                                                                                                                                       |                                                                                                                                                                                                         |             | -                                                       |
| Dictyocaulus viviparus | Il20 15kda ladder antigen                                                   | 1  | F:GO:0008289                                                                                                                                                          | -                                                                                                                                                                                                       |             | PTHR21693 (PANTHER)                                     |
|                        | -                                                                           | 0  |                                                                                                                                                                       |                                                                                                                                                                                                         |             | -                                                       |
| Caenorhabditis elegans | high incidence of males (increased x chromosome loss) family member (him-6) | 0  |                                                                                                                                                                       |                                                                                                                                                                                                         |             | SignalP (SIGNALP)                                       |
| Homo sapiens           | membrane-associated tyrosine- and threonine-specific cdc2-inhibitory ki-se  | 10 | F:GO:0004674;<br>C:GO:0000139;<br>P:GO:0007088;<br>C:GO:0005624;<br>F:GO:0005524;<br>F:GO:0005515;<br>C:GO:0005654;<br>P:GO:0000079;<br>C:GO:0005789;<br>P:GO:0006468 | -                                                                                                                                                                                                       | EC:2.7.11.0 | -                                                       |
| Brugia malayi          | protein ki-se domain containing protein                                     | 0  |                                                                                                                                                                       | F:GO:0016740;<br>P:GO:0006950;<br>F:GO:0004674;<br>F:GO:0004672;<br>P:GO:0006468;<br>F:GO:0000166;<br>C:GO:0005737;<br>F:GO:0005524;<br>P:GO:0007275;<br>F:GO:0016301;<br>C:GO:0005938;<br>F:GO:0046872 |             | -                                                       |
| Homo sapiens           | lysosomal-associated membrane protein 1                                     | 9  | C:GO:0005887;<br>C:GO:0005624;<br>C:GO:0005771;<br>C:GO:0042383;<br>C:GO:0042470;<br>C:GO:0009897;<br>C:GO:0005765;<br>C:GO:0010008;<br>P:GO:0006914                  | -                                                                                                                                                                                                       |             | -                                                       |
| Caenorhabditis elegans | major sperm protein                                                         | 7  | F:GO:0005515;<br>P:GO:0040017;<br>P:GO:0040010;<br>C:GO:0044464;<br>P:GO:0000003;<br>P:GO:0008340;<br>P:GO:0019915                                                    | -                                                                                                                                                                                                       |             | IPR000535; IPR008962; PTHR22920 (PANTHER)               |

|                         |                                                         |    |                                                                                                                                                                       |              |             |                                                                                                            |
|-------------------------|---------------------------------------------------------|----|-----------------------------------------------------------------------------------------------------------------------------------------------------------------------|--------------|-------------|------------------------------------------------------------------------------------------------------------|
| Caenorhabditis briggsae | briggsae cbr-gtl-2 protein                              | 4  | P:GO:0043052;<br>P:GO:0006810;<br>P:GO:0010960;<br>C:GO:0016020                                                                                                       | -            |             | PTHR13800 (PANTHER)                                                                                        |
| Caenorhabditis elegans  | laminin alpha- 2 chain                                  | 10 | P:GO:0030155;<br>P:GO:0045995;<br>C:GO:0005606;<br>P:GO:0030334;<br>F:GO:0005102;<br>P:GO:0060429;<br>P:GO:0030154;<br>P:GO:0048513;<br>P:GO:0009653;<br>P:GO:0016043 | -            |             | IPR000034; IPR018031; PTHR10574 (PANTHER), PTHR10574:SF25 (PANTHER)                                        |
| Caenorhabditis briggsae | Hypothetical protein CBG08814 [Caenorhabditis briggsae] | 0  |                                                                                                                                                                       |              |             | -                                                                                                          |
|                         | -                                                       | 0  |                                                                                                                                                                       |              |             | -                                                                                                          |
|                         | -                                                       | 0  |                                                                                                                                                                       |              |             | -                                                                                                          |
| Tribolium castaneum     | coiled-coil domain-containing protein 93                | 0  |                                                                                                                                                                       |              |             | IPR019159; PTHR16441 (PANTHER)                                                                             |
|                         | -                                                       | 0  |                                                                                                                                                                       |              |             | -                                                                                                          |
|                         | -                                                       | 0  |                                                                                                                                                                       |              |             | -                                                                                                          |
| Caenorhabditis elegans  | rap gtpase-activating protein                           | 3  | C:GO:0005622;<br>P:GO:0051056;<br>F:GO:0005515                                                                                                                        | -            |             | PTHR15711 (PANTHER)                                                                                        |
|                         | -                                                       | 0  |                                                                                                                                                                       |              |             | -                                                                                                          |
|                         | -                                                       | 0  |                                                                                                                                                                       |              |             | -                                                                                                          |
| Oryctolagus cuniculus   | actin-related protein 2 3 complex subunit 3             | 7  | C:GO:0005737;<br>F:GO:0005200;<br>C:GO:0005885;<br>P:GO:0030833;<br>P:GO:0006928;<br>C:GO:0030027;<br>F:GO:0003779                                                    | -            |             | IPR007204                                                                                                  |
| Caenorhabditis briggsae | serine threonine protein ki-se                          | 6  | P:GO:0006468;<br>F:GO:0030295;<br>F:GO:0019901;<br>F:GO:0004674;<br>F:GO:0000166;<br>C:GO:0044424                                                                     | -            | EC:2.7.11.0 | IPR000719; IPR011009; IPR017442; G3DSA:1.10.510.10 (GENE3D), PTHR22986 (PANTHER), PTHR22986:SF27 (PANTHER) |
| Brugia malayi           | short chain dehydroge-se reductase family protein       | 3  | P:GO:0055114;<br>F:GO:0016491;<br>F:GO:0005488                                                                                                                        | -            |             | IPR002198; IPR016040; PTHR19410:SF36 (PANTHER), SSF51735 (SUPERFAMILY)                                     |
|                         | -                                                       | 0  |                                                                                                                                                                       |              |             | -                                                                                                          |
|                         | -                                                       | 0  |                                                                                                                                                                       |              |             | -                                                                                                          |
| Caenorhabditis briggsae | elegans protein confirmed by transcript evidence        | 0  |                                                                                                                                                                       | F:GO:0005488 |             | -                                                                                                          |
| Caenorhabditis elegans  | elegans protein confirmed by transcript evidence        | 0  |                                                                                                                                                                       | F:GO:0005488 |             | IPR011989                                                                                                  |
|                         | -                                                       | 0  |                                                                                                                                                                       |              |             | -                                                                                                          |
|                         | -                                                       | 0  |                                                                                                                                                                       |              |             | SignalP (SIGNALP)                                                                                          |
|                         | -                                                       | 0  |                                                                                                                                                                       |              |             | -                                                                                                          |
|                         | -                                                       | 0  |                                                                                                                                                                       |              |             | -                                                                                                          |

|                         |                                                                                   |    |                                                                                                                                                                                                                                                                                                                                                                                   |                                                                                                                                                      |                                                               |
|-------------------------|-----------------------------------------------------------------------------------|----|-----------------------------------------------------------------------------------------------------------------------------------------------------------------------------------------------------------------------------------------------------------------------------------------------------------------------------------------------------------------------------------|------------------------------------------------------------------------------------------------------------------------------------------------------|---------------------------------------------------------------|
| Callithrix jacchus      | x-ray repair complementing defective repair in chinese hamster cells 6 (ku 70kda) | 22 | P:GO:0050769;<br>F:GO:0008022;<br>C:GO:0005624;<br>P:GO:0010552;<br>P:GO:0006303;<br>C:GO:0005958;<br>P:GO:0033151;<br>C:GO:0005737;<br>F:GO:0016563;<br>C:GO:0005667;<br>C:GO:0043564;<br>P:GO:0006266;<br>C:GO:0000783;<br>P:GO:0000723;<br>P:GO:0019047;<br>P:GO:0010212;<br>F:GO:0003691;<br>F:GO:0051575;<br>F:GO:0004003;<br>F:GO:0010843;<br>P:GO:0019059;<br>F:GO:0005524 | -                                                                                                                                                    | IPR003034; G3DSA:1.10.720.30 (GENE3D), SSF68906 (SUPERFAMILY) |
|                         | -                                                                                 | 0  |                                                                                                                                                                                                                                                                                                                                                                                   |                                                                                                                                                      | -                                                             |
| Caenorhabditis briggsae | huth_caeel ame: full=probable histidine ammonia-lyase short=histidase             | 0  |                                                                                                                                                                                                                                                                                                                                                                                   | P:GO:0009058;<br>F:GO:0016841;<br>P:GO:0006548;<br>P:GO:0006547;<br>C:GO:0005737;<br>F:GO:0016829;<br>F:GO:0003824;<br>F:GO:0004397;<br>F:GO:0005515 | -                                                             |
| Homo sapiens            | basigin                                                                           | 16 | P:GO:0046689;<br>C:GO:0005739;<br>P:GO:0007566;<br>C:GO:0016021;<br>C:GO:0000139;<br>P:GO:0042475;<br>F:GO:0005537;<br>P:GO:0043434;<br>F:GO:0015129;<br>C:GO:0042470;<br>P:GO:0046697;<br>F:GO:0005515;<br>C:GO:0045121;<br>C:GO:0042383;<br>P:GO:0007166;<br>P:GO:0051591                                                                                                       | -                                                                                                                                                    | -                                                             |
|                         | -                                                                                 | 0  |                                                                                                                                                                                                                                                                                                                                                                                   |                                                                                                                                                      | IPR001304; IPR016186; IPR016187                               |
| Caenorhabditis elegans  | --+ k+ alpha 3a polypeptide                                                       | 7  | P:GO:0006814;<br>F:GO:0005391;<br>C:GO:0016021;<br>F:GO:0046872;<br>P:GO:0006813;<br>P:GO:0006754;<br>F:GO:0005524                                                                                                                                                                                                                                                                | EC:3.6.3.9                                                                                                                                           | -                                                             |

|                                      |                                                                              |    |                                                                                                                                                                                        |                                                                                                                                                                                                                                           |                                                         |                                                                                                 |
|--------------------------------------|------------------------------------------------------------------------------|----|----------------------------------------------------------------------------------------------------------------------------------------------------------------------------------------|-------------------------------------------------------------------------------------------------------------------------------------------------------------------------------------------------------------------------------------------|---------------------------------------------------------|-------------------------------------------------------------------------------------------------|
| Streptococcus pneumoniae CCR1 1974M2 | immunoglobulin a1 protease                                                   | 0  |                                                                                                                                                                                        | C:GO:0009986;<br>F:GO:0004222;<br>C:GO:0016021;<br>C:GO:0016020;<br>F:GO:0016787;<br>F:GO:0008270;<br>F:GO:0008237;<br>F:GO:0016829;<br>F:GO:0004634;<br>C:GO:0005576;<br>F:GO:0008233;<br>P:GO:0009405;<br>F:GO:0046872;<br>C:GO:0005618 |                                                         | -                                                                                               |
| Loa loa                              | related to oncogene abl family member (abl-1)                                | 7  | F:GO:0004715;<br>F:GO:0030145;<br>F:GO:0005515;<br>P:GO:0018108;<br>F:GO:0005524;<br>F:GO:0000287;<br>P:GO:0007165                                                                     | -                                                                                                                                                                                                                                         | EC:2.7.10.2                                             | -                                                                                               |
| Caenorhabditis elegans               | esterase family member (pde-4)                                               | 1  | F:GO:0016787                                                                                                                                                                           | -                                                                                                                                                                                                                                         |                                                         | IPR002073; PTHR11347 (PANTHER),<br>PTHR11347:SF37 (PANTHER),<br>SSF109604 (SUPERFAMILY)         |
| Caenorhabditis briggsae              | elegans protein partially confirmed by transcript evidence                   | 0  |                                                                                                                                                                                        | F:GO:0005096;<br>P:GO:0007165;<br>F:GO:0005515;<br>C:GO:0005622                                                                                                                                                                           |                                                         | -                                                                                               |
| Ailuropoda melanoleuca               | elongation factor 2                                                          | 8  | F:GO:0003746;<br>P:GO:0006414;<br>P:GO:0006184;<br>F:GO:0005515;<br>F:GO:0003924;<br>C:GO:0030529;<br>C:GO:0005737;<br>F:GO:0005525                                                    | -                                                                                                                                                                                                                                         | EC:3.6.5.1;<br>EC:3.6.5.2;<br>EC:3.6.5.3;<br>EC:3.6.5.4 | -                                                                                               |
| Nematostella vectensis               | mannose receptor c type 1-like isoform 1                                     | 0  |                                                                                                                                                                                        | F:GO:0005488;<br>F:GO:0005509;<br>F:GO:0005044;<br>P:GO:0007155;<br>C:GO:0016020;<br>F:GO:0005529                                                                                                                                         |                                                         | IPR001304; IPR016186; IPR016187;<br>IPR018378; PTHR22802 (PANTHER),<br>PTHR22802:SF16 (PANTHER) |
| Caenorhabditis elegans               | protein yippee-like 1                                                        | 0  |                                                                                                                                                                                        |                                                                                                                                                                                                                                           |                                                         | IPR004910; PTHR13847 (PANTHER)                                                                  |
|                                      | -                                                                            | 0  |                                                                                                                                                                                        |                                                                                                                                                                                                                                           |                                                         | SignalP (SIGNALP)                                                                               |
| Caenorhabditis briggsae              | meckelin (meckel syndrome type 3 protein homolog) (transmembrane protein 67) | 0  |                                                                                                                                                                                        |                                                                                                                                                                                                                                           |                                                         | -                                                                                               |
|                                      | -                                                                            | 0  |                                                                                                                                                                                        |                                                                                                                                                                                                                                           |                                                         | -                                                                                               |
| Caenorhabditis elegans               | briggsae cbr-pro-2 protein                                                   | 11 | P:GO:0007506;<br>F:GO:0005488;<br>P:GO:0040007;<br>P:GO:0019915;<br>P:GO:0002119;<br>P:GO:0030154;<br>P:GO:0006898;<br>P:GO:0009792;<br>P:GO:0051729;<br>C:GO:0005634;<br>P:GO:0016246 | -                                                                                                                                                                                                                                         |                                                         | -                                                                                               |

|                         |                                                                              |    |                                                                                                                                                                       |                                                |              |                                                                                                                        |
|-------------------------|------------------------------------------------------------------------------|----|-----------------------------------------------------------------------------------------------------------------------------------------------------------------------|------------------------------------------------|--------------|------------------------------------------------------------------------------------------------------------------------|
| Caenorhabditis elegans  | Hypothetical protein F26G1.2a [Caenorhabditis elegans]                       | 0  |                                                                                                                                                                       |                                                |              | -                                                                                                                      |
| Caenorhabditis briggsae | beta chain spectrin                                                          | 1  | F:GO:0003779                                                                                                                                                          | -                                              |              | IPR002017; IPR018159; G3DSA:1.20.58.60 (GENE3D), PTHR11915 (PANTHER), PTHR11915:SF48 (PANTHER), SSF46966 (SUPERFAMILY) |
| Haemonchus contortus    | cysteine protei-se                                                           | 9  | P:GO:0009792;<br>P:GO:0002119;<br>F:GO:0005515;<br>P:GO:0040011;<br>F:GO:0004197;<br>P:GO:0040007;<br>P:GO:0006898;<br>P:GO:0006508;<br>P:GO:0050790                  | -                                              | EC:3.4.22.0  | IPR000169; IPR000668; IPR013128; IPR015643; G3DSA:3.90.70.10 (GENE3D), SSF54001 (SUPERFAMILY)                          |
|                         | -                                                                            | 0  |                                                                                                                                                                       |                                                |              | -                                                                                                                      |
|                         | -                                                                            | 0  |                                                                                                                                                                       |                                                |              | -                                                                                                                      |
| Caenorhabditis elegans  | stim (mammalian stromal interaction molecule) homolog family member (stim-1) | 0  |                                                                                                                                                                       | F:GO:0005509                                   |              | IPR001660; IPR010993; IPR011510; IPR013761; PTHR15136 (PANTHER), PTHR15136:SF1 (PANTHER)                               |
|                         | -                                                                            | 0  |                                                                                                                                                                       |                                                |              | -                                                                                                                      |
| Loa loa                 | elegans protein partially confirmed by transcript evidence                   | 0  |                                                                                                                                                                       |                                                |              | -                                                                                                                      |
| Caenorhabditis briggsae | briggsae cbr-pme-5 protein                                                   | 0  |                                                                                                                                                                       |                                                |              | -                                                                                                                      |
| Caenorhabditis briggsae | related to yeast vacuolar protein sorting factor family member (vps-39)      | 7  | P:GO:0009792;<br>P:GO:0010171;<br>F:GO:0005515;<br>P:GO:0000003;<br>C:GO:0030897;<br>P:GO:0008219;<br>P:GO:0002009                                                    | -                                              |              | IPR019452; PTHR12894 (PANTHER), PTHR12894:SF10 (PANTHER)                                                               |
| Brugia malayi           | importin-beta n-termi-l domain containing protein                            | 0  |                                                                                                                                                                       | F:GO:0005488;<br>P:GO:0006886;<br>F:GO:0008565 |              | -                                                                                                                      |
| Loa loa                 | glucosyl glucuronosyl transferases                                           | 5  | P:GO:0005975;<br>P:GO:0030259;<br>C:GO:0016021;<br>F:GO:0030246;<br>F:GO:0016758                                                                                      | -                                              | EC:2.4.1.0   | IPR002213; G3DSA:3.40.50.2000 (GENE3D), SSF53756 (SUPERFAMILY)                                                         |
|                         | -                                                                            | 0  |                                                                                                                                                                       |                                                |              | -                                                                                                                      |
| Caenorhabditis briggsae | cation efflux family protein                                                 | 5  | C:GO:0016021;<br>P:GO:0000003;<br>F:GO:0008324;<br>P:GO:0006812;<br>P:GO:0055085                                                                                      | -                                              |              | IPR002524; G3DSA:1.20.1510.10 (GENE3D), SignalP (SIGNALP)                                                              |
| Caenorhabditis briggsae | miz-type zinc finger transcription factor family member (miz-1)              | 0  |                                                                                                                                                                       |                                                |              | -                                                                                                                      |
| Caenorhabditis elegans  | calcium calmodulin-dependent protein ki-se ki-se alpha                       | 10 | C:GO:0005829;<br>F:GO:0005516;<br>P:GO:0032147;<br>C:GO:0005625;<br>P:GO:0032793;<br>F:GO:0005524;<br>P:GO:0019722;<br>F:GO:0004683;<br>C:GO:0005634;<br>P:GO:0006468 | -                                              | EC:2.7.11.17 | -                                                                                                                      |

|                         |                                                            |    |                                                                                                                                                                                                                                                                                                                                                                                                                                                                        |                                                                                                                                     |                              |                                                                                                                                                                          |
|-------------------------|------------------------------------------------------------|----|------------------------------------------------------------------------------------------------------------------------------------------------------------------------------------------------------------------------------------------------------------------------------------------------------------------------------------------------------------------------------------------------------------------------------------------------------------------------|-------------------------------------------------------------------------------------------------------------------------------------|------------------------------|--------------------------------------------------------------------------------------------------------------------------------------------------------------------------|
| Caenorhabditis briggsae | elegans protein partially confirmed by transcript evidence |    | F:GO:0005515;<br>3 P:GO:0007600;<br>P:GO:0007165                                                                                                                                                                                                                                                                                                                                                                                                                       | -                                                                                                                                   |                              | -                                                                                                                                                                        |
| Acyrtosiphon pisum      | briggsae cbr-lig-4 protein                                 | 0  |                                                                                                                                                                                                                                                                                                                                                                                                                                                                        | P:GO:0006260;<br>F:GO:0005524;<br>F:GO:0016874;<br>P:GO:0006281;<br>F:GO:0003910;<br>P:GO:0006310;<br>F:GO:0003677;<br>C:GO:0005622 |                              | IPR001357; G3DSA:3.40.50.10190 (GENE3D), PTHR10459 (PANTHER), PTHR10459:SF7 (PANTHER)                                                                                    |
|                         | -                                                          | 0  |                                                                                                                                                                                                                                                                                                                                                                                                                                                                        |                                                                                                                                     |                              | -                                                                                                                                                                        |
|                         | -                                                          | 0  |                                                                                                                                                                                                                                                                                                                                                                                                                                                                        |                                                                                                                                     |                              | -                                                                                                                                                                        |
|                         | -                                                          | 0  |                                                                                                                                                                                                                                                                                                                                                                                                                                                                        |                                                                                                                                     |                              | -                                                                                                                                                                        |
| Caenorhabditis elegans  | nuclear hormone receptor family member (nhr-105)           | 5  | F:GO:0046872;<br>F:GO:0004879;<br>F:GO:0003677;<br>P:GO:0045449;<br>F:GO:0005515                                                                                                                                                                                                                                                                                                                                                                                       | -                                                                                                                                   |                              | IPR000536; IPR008946; PTHR11865 (PANTHER), PTHR11865:SF197 (PANTHER)                                                                                                     |
| Canis familiaris        | a-phase-promoting complex subunit 11                       | 12 | C:GO:0005829;<br>F:GO:0008270;<br>P:GO:0051436;<br>P:GO:0051437;<br>P:GO:0070979;<br>P:GO:0051301;<br>P:GO:0031145;<br>F:GO:0004842;<br>F:GO:0005515;<br>P:GO:0007067;<br>C:GO:0005654;<br>C:GO:0005680                                                                                                                                                                                                                                                                | -                                                                                                                                   | EC:6.3.2.19                  | SignalP (SIGNALP)                                                                                                                                                        |
| Caenorhabditis elegans  | glycogen synthase ki-se 3 beta                             | 33 | F:GO:0004674;<br>P:GO:0007052;<br>P:GO:0002119;<br>P:GO:0032091;<br>C:GO:0005829;<br>P:GO:0016481;<br>P:GO:0001947;<br>P:GO:0005977;<br>F:GO:0008013;<br>F:GO:0002039;<br>C:GO:0034747;<br>F:GO:0050321;<br>P:GO:0040010;<br>F:GO:0034236;<br>P:GO:0046827;<br>P:GO:0006983;<br>P:GO:0031333;<br>P:GO:0030178;<br>P:GO:0043066;<br>P:GO:0009792;<br>P:GO:0060070;<br>F:GO:0005524;<br>P:GO:0031334;<br>P:GO:0018105;<br>P:GO:0071109;<br>F:GO:0051059;<br>C:GO:0030877 | -                                                                                                                                   | EC:2.7.11.0;<br>EC:2.7.11.26 | IPR000719; IPR002290; IPR008271; IPR011009; IPR017441; IPR017442; G3DSA:1.10.510.10 (GENE3D), G3DSA:3.30.200.20 (GENE3D), PTHR11295 (PANTHER), PTHR11295:SF114 (PANTHER) |



|                          |                                                                          |   |                                                                                                                                     |                                                                                                                                                                                                         |                                                                    |
|--------------------------|--------------------------------------------------------------------------|---|-------------------------------------------------------------------------------------------------------------------------------------|---------------------------------------------------------------------------------------------------------------------------------------------------------------------------------------------------------|--------------------------------------------------------------------|
| Caenorhabditis briggsae  | hypothetical tyrosi-se-like protein in chromosome                        | 4 | F:GO:0005515;<br>F:GO:0046872;<br>P:GO:0008152;<br>F:GO:0016491                                                                     | -                                                                                                                                                                                                       | IPR002227; IPR008922; PTHR11474 (PANTHER), PTHR11474:SF1 (PANTHER) |
| -                        | -                                                                        | 0 |                                                                                                                                     |                                                                                                                                                                                                         | -                                                                  |
| -                        | -                                                                        | 0 |                                                                                                                                     |                                                                                                                                                                                                         | -                                                                  |
| Ailuropoda melanoleuca   | eukaryotic translation initiation factor subunit 6 interacting protein   | 6 | F:GO:0003743;<br>P:GO:0045948;<br>C:GO:0005852;<br>F:GO:0005515;<br>C:GO:0005654;<br>C:GO:0001650                                   | -                                                                                                                                                                                                       | -                                                                  |
| -                        | -                                                                        | 0 |                                                                                                                                     |                                                                                                                                                                                                         | -                                                                  |
| Saccoglossus kowalevskii | scavenger receptor class a- serine protease (agap001979-pa)              | 0 |                                                                                                                                     | F:GO:0004252;<br>C:GO:0016021;<br>C:GO:0016020;<br>P:GO:0009792;<br>C:GO:0031012;<br>F:GO:0003824;<br>F:GO:0005044;<br>F:GO:0008233;<br>F:GO:0004872;<br>P:GO:0006508;<br>F:GO:0005509;<br>P:GO:0007155 | IPR002172; PTHR10529 (PANTHER), PTHR10529:SF2 (PANTHER)            |
| Caenorhabditis briggsae  | tubulin-specific chaperone                                               | 7 | P:GO:0040035;<br>P:GO:0010171;<br>P:GO:0002119;<br>P:GO:0046785;<br>P:GO:0040011;<br>P:GO:0040007;<br>P:GO:0002009                  | -                                                                                                                                                                                                       | PTHR12658 (PANTHER)                                                |
| Caenorhabditis briggsae  | chromosome 1 open reading frame 50                                       | 1 | F:GO:0005515                                                                                                                        |                                                                                                                                                                                                         | IPR019534; PTHR14553 (PANTHER)                                     |
| -                        | -                                                                        | 0 |                                                                                                                                     |                                                                                                                                                                                                         | -                                                                  |
| -                        | -                                                                        | 0 |                                                                                                                                     |                                                                                                                                                                                                         | -                                                                  |
| -                        | -                                                                        | 0 |                                                                                                                                     |                                                                                                                                                                                                         | -                                                                  |
| Caenorhabditis elegans   | mariner transposase                                                      | 2 | P:GO:0006313;<br>F:GO:0004803                                                                                                       | -                                                                                                                                                                                                       | -                                                                  |
| Caenorhabditis elegans   | mariner transposase                                                      | 2 | P:GO:0006313;<br>F:GO:0004803                                                                                                       | -                                                                                                                                                                                                       | -                                                                  |
| -                        | -                                                                        | 0 |                                                                                                                                     |                                                                                                                                                                                                         | SignalP (SIGNALP)                                                  |
| -                        | -                                                                        | 0 |                                                                                                                                     |                                                                                                                                                                                                         | -                                                                  |
| Caenorhabditis elegans   | uncoordinated protein isoform partially confirmed by transcript evidence | 8 | F:GO:0004872;<br>P:GO:0006629;<br>F:GO:0005219;<br>P:GO:0006816;<br>P:GO:0006874;<br>P:GO:0055085;<br>F:GO:0005509;<br>C:GO:0016021 | -                                                                                                                                                                                                       | IPR015925; PTHR13715:SF17 (PANTHER)                                |
| -                        | -                                                                        | 0 |                                                                                                                                     |                                                                                                                                                                                                         | SignalP (SIGNALP)                                                  |

|                        |                                                    |    |                                                                                                                                                                                                                                                                                                                                                                                                                     |   |              |                                                                                      |
|------------------------|----------------------------------------------------|----|---------------------------------------------------------------------------------------------------------------------------------------------------------------------------------------------------------------------------------------------------------------------------------------------------------------------------------------------------------------------------------------------------------------------|---|--------------|--------------------------------------------------------------------------------------|
| Loa loa                | polymerase iii (d- directed) polypeptide 155kda    | 9  | F:GO:0003899;<br>P:GO:0009615;<br>F:GO:0008270;<br>P:GO:0032728;<br>P:GO:0045087;<br>F:GO:0003677;<br>F:GO:0032549;<br>P:GO:0006351;<br>C:GO:0005666                                                                                                                                                                                                                                                                | - | EC:2.7.7.6   | IPR007081; IPR007083; IPR015700;<br>PTHR19376 (PANTHER), SSF64484<br>(SUPERFAMILY)   |
| Ailuropoda melanoleuca | eukaryotic translation initiation factor 5a        | 24 | C:GO:0005840;<br>P:GO:0006406;<br>F:GO:0003746;<br>P:GO:0007568;<br>F:GO:0047485;<br>P:GO:0006611;<br>C:GO:0005789;<br>F:GO:0003743;<br>P:GO:0006452;<br>F:GO:0043022;<br>C:GO:0005829;<br>C:GO:0005643;<br>C:GO:0030425;<br>P:GO:0008284;<br>P:GO:0008612;<br>C:GO:0043025;<br>P:GO:0006917;<br>F:GO:0017070;<br>C:GO:0005642;<br>P:GO:0055085;<br>P:GO:0045905;<br>P:GO:0051149;<br>P:GO:0045901;<br>P:GO:0043066 | - |              | IPR001884; IPR012340; IPR014722;<br>IPR016027; IPR020189;<br>PTHR11673:SF2 (PANTHER) |
| Caenorhabditis elegans | sig-l transducer and activator of transcription 5b | 17 | F:GO:0003700;<br>F:GO:0004871;<br>P:GO:0006519;<br>N:GO:2000026;<br>P:GO:0030098;<br>P:GO:0019752;<br>P:GO:0023033;<br>P:GO:0007165;<br>P:GO:0022414;<br>P:GO:0051251;<br>P:GO:0045595;<br>F:GO:0005515;<br>F:GO:0005509;<br>C:GO:0005634;<br>P:GO:0009725;<br>P:GO:0009308;<br>P:GO:0006355                                                                                                                        | - |              | IPR001217; IPR011992;<br>PTHR11801:SF3 (PANTHER), SSF55550<br>(SUPERFAMILY)          |
| Caenorhabditis elegans | elegans protein confirmed by transcript evidence   | 0  |                                                                                                                                                                                                                                                                                                                                                                                                                     |   | F:GO:0005515 | -                                                                                    |
| Callithrix jacchus     | ribosomal protein s13                              | 7  | F:GO:0003729;<br>C:GO:0005730;<br>F:GO:0003735;<br>P:GO:0006414;<br>C:GO:0022627;<br>P:GO:0033119;<br>F:GO:0005515                                                                                                                                                                                                                                                                                                  | - |              | IPR000589; IPR009068; PTHR11885<br>(PANTHER), PTHR11885:SF1<br>(PANTHER)             |

|                         |                                                            |    |                                                                                                                                                                                        |                                                                 |                                                                                                           |
|-------------------------|------------------------------------------------------------|----|----------------------------------------------------------------------------------------------------------------------------------------------------------------------------------------|-----------------------------------------------------------------|-----------------------------------------------------------------------------------------------------------|
|                         | -                                                          | 0  |                                                                                                                                                                                        |                                                                 | SignalP (SIGNALP)                                                                                         |
| Brugia malayi           | denn madd domain containing 4c                             | 0  |                                                                                                                                                                                        | F:GO:0003674;<br>C:GO:0016021;<br>C:GO:0016020;<br>P:GO:0008150 | IPR001194; IPR002885; IPR005112;<br>PTHR12296 (PANTHER)                                                   |
| Loa loa                 | pan domain containing protein                              | 0  |                                                                                                                                                                                        |                                                                 | -                                                                                                         |
| Caenorhabditis briggsae | briggsae cbr-ndg-4 protein                                 | 3  | P:GO:0009792;<br>P:GO:0010171;<br>P:GO:0040010                                                                                                                                         | -                                                               | PTHR11161 (PANTHER)                                                                                       |
| Caenorhabditis briggsae | solute carrier family 39 (metal ion transporter) member 13 | 4  | C:GO:0016020;<br>P:GO:0006829;<br>F:GO:0005385;<br>P:GO:0055085                                                                                                                        | -                                                               | IPR003689; PTHR16950 (PANTHER),<br>PTHR16950:SF6 (PANTHER)                                                |
| Caenorhabditis elegans  | cationic amino acid transporter                            | 4  | C:GO:0016021;<br>P:GO:0006865;<br>F:GO:0015171;<br>P:GO:0055085                                                                                                                        | -                                                               | -                                                                                                         |
|                         | -                                                          | 0  |                                                                                                                                                                                        |                                                                 | -                                                                                                         |
| Caenorhabditis elegans  | elegans protein confirmed by transcript evidence           | 0  |                                                                                                                                                                                        | P:GO:0006629;<br>C:GO:0016021;<br>F:GO:0016787;<br>F:GO:0004806 | G3DSA:3.40.50.1820 (GENE3D),<br>SSF53474 (SUPERFAMILY)                                                    |
|                         | -                                                          | 0  |                                                                                                                                                                                        |                                                                 | -                                                                                                         |
| Caenorhabditis elegans  | uncoordinated family member (unc-103)                      | 9  | P:GO:0055085;<br>P:GO:0000160;<br>P:GO:0051291;<br>P:GO:0006355;<br>P:GO:0006813;<br>F:GO:0005242;<br>P:GO:0007165;<br>F:GO:0000155;<br>C:GO:0005887                                   | -                                                               | IPR003938; PTHR10217 (PANTHER),<br>PTHR10217:SF15 (PANTHER), SignalP<br>(SIGNALP), SSF81324 (SUPERFAMILY) |
|                         | -                                                          | 0  |                                                                                                                                                                                        |                                                                 | -                                                                                                         |
| Caenorhabditis elegans  | hypothetical protein ZK470.1 [Caenorhabditis elegans]      | 0  |                                                                                                                                                                                        | C:GO:0016021                                                    | -                                                                                                         |
| Caenorhabditis elegans  | transcription factor dp-1-like                             | 11 | P:GO:0006357;<br>P:GO:0006915;<br>P:GO:0007049;<br>C:GO:0005667;<br>P:GO:0008544;<br>F:GO:0003677;<br>F:GO:0003700;<br>F:GO:0019904;<br>F:GO:0003713;<br>P:GO:0045893;<br>P:GO:0008283 | -                                                               | IPR003316; IPR011991; IPR015648;<br>PTHR12548:SF2 (PANTHER)                                               |
| Brugia malayi           | transcription factor dp-1                                  | 6  | P:GO:0006357;<br>P:GO:0007049;<br>F:GO:0019904;<br>F:GO:0003713;<br>C:GO:0005654;<br>P:GO:0008283                                                                                      | -                                                               | IPR003316; IPR011991; IPR014889;<br>IPR015648; SSF144074<br>(SUPERFAMILY), SSF46785<br>(SUPERFAMILY)      |

|                         |                                                          |   |                                                                                                                                                      |   |            |                                                                                                                                                      |
|-------------------------|----------------------------------------------------------|---|------------------------------------------------------------------------------------------------------------------------------------------------------|---|------------|------------------------------------------------------------------------------------------------------------------------------------------------------|
| Brugia malayi           | snf2 family n-termi-l domain containing protein          | 9 | P:GO:0007411;<br>P:GO:0006917;<br>F:GO:0003676;<br>P:GO:0046328;<br>P:GO:0051276;<br>P:GO:0008347;<br>C:GO:0000775;<br>C:GO:0005700;<br>F:GO:0004386 | - | -          | -                                                                                                                                                    |
| -                       | -                                                        | 0 |                                                                                                                                                      |   |            | -                                                                                                                                                    |
| -                       | -                                                        | 0 |                                                                                                                                                      |   |            | -                                                                                                                                                    |
| -                       | -                                                        | 0 |                                                                                                                                                      |   |            | SignalP (SIGNALP)                                                                                                                                    |
| Monodelphis domestica   | haloacid dehaloge-se-like hydrolase domain containing 1a | 2 | F:GO:0005488;<br>F:GO:0003824                                                                                                                        | - |            | -                                                                                                                                                    |
| Caenorhabditis briggsae | tryptophanyl-tr- synthetase                              | 7 | P:GO:0007031;<br>F:GO:0008270;<br>F:GO:0004830;<br>C:GO:0005778;<br>P:GO:0006436;<br>F:GO:0005524;<br>F:GO:0005515                                   | - | EC:6.1.1.2 | IPR001412; IPR002305; IPR002306;<br>IPR014729; SSF52374 (SUPERFAMILY)                                                                                |
| -                       | -                                                        | 0 |                                                                                                                                                      |   |            | -                                                                                                                                                    |
| Caenorhabditis briggsae | briggsae cbr-sma-4 protein                               | 0 |                                                                                                                                                      |   |            | P:GO:0007179;<br>C:GO:0005667;<br>F:GO:0003700;<br>C:GO:0005634;<br>P:GO:0006355;<br>C:GO:0005622;<br>F:GO:0005515;<br>P:GO:0006350;<br>P:GO:0045449 |
| -                       | -                                                        | 0 |                                                                                                                                                      |   |            | -                                                                                                                                                    |

|                         |                                                  |    |                                                                                                                                                                                                                                                                                                                                                                                                                                                                                                                                    |   |                                                                                      |
|-------------------------|--------------------------------------------------|----|------------------------------------------------------------------------------------------------------------------------------------------------------------------------------------------------------------------------------------------------------------------------------------------------------------------------------------------------------------------------------------------------------------------------------------------------------------------------------------------------------------------------------------|---|--------------------------------------------------------------------------------------|
| Caenorhabditis briggsae | histone deacetylase 6                            | 45 | <p>F:GO:0031593;<br/> P:GO:0090035;<br/> P:GO:0010870;<br/> P:GO:0060765;<br/> C:GO:0005901;<br/> F:GO:0016566;<br/> C:GO:0031252;<br/> P:GO:0043065;<br/> P:GO:0060632;<br/> C:GO:0000118;<br/> C:GO:0005829;<br/> P:GO:0045861;<br/> P:GO:0090042;<br/> P:GO:0009967;<br/> P:GO:0070845;<br/> F:GO:0008013;<br/> P:GO:0010469;<br/> P:GO:0016236;<br/> P:GO:0070301;<br/> F:GO:0051879;<br/> C:GO:0030286;<br/> F:GO:0070840;<br/> P:GO:0016575;<br/> P:GO:0070848;<br/> C:GO:0048471;<br/> F:GO:0008270;<br/> P:GO:0006515;</p> | - | IPR000286; PTHR10625:SF19 (PANTHER), SignalP (SIGNALP), SSF52768 (SUPERFAMILY)       |
| -                       | -                                                | 0  | -                                                                                                                                                                                                                                                                                                                                                                                                                                                                                                                                  | - | -                                                                                    |
| Caenorhabditis briggsae | ccaat enhancer-binding protein zeta              | 8  | <p>F:GO:0005488;<br/> P:GO:0040007;<br/> P:GO:0000003;<br/> P:GO:0002119;<br/> P:GO:0006898;<br/> P:GO:0009792;<br/> P:GO:0006350;<br/> C:GO:0005634</p>                                                                                                                                                                                                                                                                                                                                                                           | - | PTHR12048 (PANTHER)                                                                  |
| -                       | -                                                | 0  | -                                                                                                                                                                                                                                                                                                                                                                                                                                                                                                                                  | - | -                                                                                    |
| -                       | -                                                | 0  | -                                                                                                                                                                                                                                                                                                                                                                                                                                                                                                                                  | - | -                                                                                    |
| Caenorhabditis briggsae | mitochondrial ribosomal protein s5               | 10 | <p>P:GO:0009792;<br/> P:GO:0002119;<br/> C:GO:0005840;<br/> F:GO:0003735;<br/> F:GO:0003723;<br/> F:GO:0005515;<br/> P:GO:0040010;<br/> P:GO:0006898;<br/> P:GO:0006412;<br/> C:GO:0005739</p>                                                                                                                                                                                                                                                                                                                                     | - | EC:3.6.5.3<br>IPR000851; IPR005324; IPR014721;<br>IPR020568; PTHR13718:SF3 (PANTHER) |
| -                       | -                                                | 0  | -                                                                                                                                                                                                                                                                                                                                                                                                                                                                                                                                  | - | -                                                                                    |
| Loa loa                 | elegans protein confirmed by transcript evidence | 1  | F:GO:0005488                                                                                                                                                                                                                                                                                                                                                                                                                                                                                                                       | - | -                                                                                    |

|                         |                                                  |    |                                                                                                                                                                                                         |                                                                                                                                                                                                         |            |                                                                                               |
|-------------------------|--------------------------------------------------|----|---------------------------------------------------------------------------------------------------------------------------------------------------------------------------------------------------------|---------------------------------------------------------------------------------------------------------------------------------------------------------------------------------------------------------|------------|-----------------------------------------------------------------------------------------------|
| Caenorhabditis elegans  | eb module family protein                         | 0  |                                                                                                                                                                                                         | F:GO:0016810;<br>F:GO:0008061;<br>P:GO:0005975;<br>F:GO:0016491;<br>C:GO:0005576;<br>F:GO:0003824;<br>F:GO:0005515;<br>F:GO:0004867;<br>P:GO:0006030                                                    | -          |                                                                                               |
| Loa loa                 | exportin 5                                       | 0  |                                                                                                                                                                                                         | P:GO:0015031;<br>C:GO:0005634;<br>P:GO:0031047;<br>P:GO:0006810;<br>C:GO:0005737;<br>F:GO:0003723;<br>C:GO:0005575;<br>C:GO:0005730;<br>F:GO:0005515;<br>F:GO:0000049;<br>P:GO:0006611;<br>F:GO:0005488 |            | SignalP (SIGNALP)                                                                             |
| -                       | -                                                | 0  |                                                                                                                                                                                                         |                                                                                                                                                                                                         |            | SignalP (SIGNALP)                                                                             |
| Caenorhabditis elegans  | tln1 protein                                     | 0  |                                                                                                                                                                                                         | F:GO:0005515                                                                                                                                                                                            |            | -                                                                                             |
| -                       | -                                                | 0  |                                                                                                                                                                                                         |                                                                                                                                                                                                         |            | -                                                                                             |
| Caenorhabditis briggsae | replication protein a 32 kda subunit             | 9  | P:GO:0044260;<br>F:GO:0005515;<br>P:GO:0007275;<br>P:GO:0006974;<br>P:GO:0090304;<br>P:GO:0048856;<br>C:GO:0044428;<br>P:GO:0007126;<br>P:GO:0022414                                                    | -                                                                                                                                                                                                       |            | IPR011991; IPR012340; IPR014892;<br>IPR016027; PTHR13989 (PANTHER),<br>SSF46785 (SUPERFAMILY) |
| Caenorhabditis briggsae | transmembrane protein 195                        | 4  | F:GO:0016491;<br>P:GO:0044255;<br>P:GO:0044281;<br>C:GO:0044464                                                                                                                                         | -                                                                                                                                                                                                       |            | -                                                                                             |
| -                       | -                                                | 0  |                                                                                                                                                                                                         |                                                                                                                                                                                                         |            | SignalP (SIGNALP)                                                                             |
| Caenorhabditis briggsae | phospholipase d3                                 | 3  | P:GO:0008152;<br>C:GO:0016021;<br>F:GO:0003824                                                                                                                                                          | -                                                                                                                                                                                                       |            | IPR001736; G3DSA:3.30.870.10<br>(GENE3D), PTHR10185 (PANTHER)                                 |
| Brugia malayi           | pdz domain containing protein                    | 0  |                                                                                                                                                                                                         | F:GO:0005515                                                                                                                                                                                            |            | -                                                                                             |
| -                       | -                                                | 0  |                                                                                                                                                                                                         |                                                                                                                                                                                                         |            | -                                                                                             |
| -                       | -                                                | 0  |                                                                                                                                                                                                         |                                                                                                                                                                                                         |            | SignalP (SIGNALP)                                                                             |
| Caenorhabditis elegans  | elegans protein confirmed by transcript evidence | 0  |                                                                                                                                                                                                         |                                                                                                                                                                                                         |            | -                                                                                             |
| Caenorhabditis elegans  | polymerase (d- directed) epsilon                 | 12 | P:GO:0006281;<br>F:GO:0008270;<br>F:GO:0003887;<br>P:GO:0006260;<br>P:GO:0040035;<br>F:GO:0003677;<br>F:GO:0000166;<br>P:GO:0040011;<br>P:GO:0006997;<br>P:GO:0002009;<br>P:GO:0001701;<br>C:GO:0005634 | -                                                                                                                                                                                                       | EC:2.7.7.7 | IPR013697; PTHR10670 (PANTHER)                                                                |

|                         |                                                                  |    |                                                                                                                                                                                                                                                            |   |                             |                                                 |
|-------------------------|------------------------------------------------------------------|----|------------------------------------------------------------------------------------------------------------------------------------------------------------------------------------------------------------------------------------------------------------|---|-----------------------------|-------------------------------------------------|
| Caenorhabditis elegans  | elegans protein partially confirmed by transcript evidence       | 15 | P:GO:0006468;<br>P:GO:0045199;<br>F:GO:0005515;<br>P:GO:0046843;<br>F:GO:0004713;<br>P:GO:0007394;<br>C:GO:0016021;<br>P:GO:0042110;<br>P:GO:0007254;<br>F:GO:0004674;<br>P:GO:0048522;<br>P:GO:0043277;<br>P:GO:0042981;<br>F:GO:0005524;<br>C:GO:0005938 | - | EC:2.7.10.0;<br>EC:2.7.11.0 | -                                               |
| -                       | -                                                                | 0  |                                                                                                                                                                                                                                                            |   |                             | -                                               |
| Caenorhabditis elegans  | briggsae cbr-inx-12 protein                                      | 5  | P:GO:0040035;<br>C:GO:0005921;<br>P:GO:0040010;<br>P:GO:0040011;<br>P:GO:0002009                                                                                                                                                                           | - |                             | IPR000990                                       |
| -                       | -                                                                | 0  |                                                                                                                                                                                                                                                            |   |                             | -                                               |
| Homo sapiens            | hematological and neurological expressed 1                       | 1  | C:GO:0005634                                                                                                                                                                                                                                               | - |                             | -                                               |
| -                       | -                                                                | 0  |                                                                                                                                                                                                                                                            |   |                             | -                                               |
| Caenorhabditis elegans  | hypothetical protein K04G7.1 [Caenorhabditis elegans]            | 3  | P:GO:0009792;<br>P:GO:0000003;<br>P:GO:0006898                                                                                                                                                                                                             | - |                             | -                                               |
| -                       | -                                                                | 0  |                                                                                                                                                                                                                                                            |   |                             | SignalP (SIGNALP)                               |
| -                       | -                                                                | 0  |                                                                                                                                                                                                                                                            |   |                             | -                                               |
| Caenorhabditis briggsae | clc-type chloride channel family member (clh-2)                  | 10 | P:GO:0009792;<br>F:GO:0005247;<br>C:GO:0005902;<br>F:GO:0005515;<br>P:GO:0055085;<br>P:GO:0000003;<br>C:GO:0016021;<br>C:GO:0005626;<br>C:GO:0015629;<br>P:GO:0006821                                                                                      | - |                             | -                                               |
| Caenorhabditis briggsae | exportin 7                                                       | 4  | C:GO:0005737;<br>C:GO:0005643;<br>F:GO:0005049;<br>P:GO:0006611                                                                                                                                                                                            | - |                             | PTHR12596 (PANTHER),<br>PTHR12596:SF2 (PANTHER) |
| Caenorhabditis elegans  | phosphatidylinositol-3-phosphate phosphatidylinositol 5-type iii | 6  | P:GO:0046488;<br>F:GO:0005515;<br>F:GO:0005524;<br>P:GO:0044267;<br>F:GO:0008270;<br>F:GO:0016307                                                                                                                                                          | - |                             | IPR002498; G3DSA:3.30.800.10<br>(GENE3D)        |
| -                       | -                                                                | 0  |                                                                                                                                                                                                                                                            |   |                             | -                                               |
| -                       | -                                                                | 0  |                                                                                                                                                                                                                                                            |   |                             | SignalP (SIGNALP)                               |
| -                       | -                                                                | 0  |                                                                                                                                                                                                                                                            |   |                             | -                                               |
| -                       | -                                                                | 0  |                                                                                                                                                                                                                                                            |   |                             | -                                               |
| -                       | -                                                                | 0  |                                                                                                                                                                                                                                                            |   |                             | -                                               |

|                          |                                                          |    |                                                                                                                                                                       |                                                                                  |             |                                                                                                             |
|--------------------------|----------------------------------------------------------|----|-----------------------------------------------------------------------------------------------------------------------------------------------------------------------|----------------------------------------------------------------------------------|-------------|-------------------------------------------------------------------------------------------------------------|
| Saccoglossus kowalevskii | serine threonine-protein phosphatase 4 catalytic subunit | 10 | C:GO:0030289;<br>F:GO:0004704;<br>P:GO:0016311;<br>F:GO:0046872;<br>C:GO:0005813;<br>P:GO:0000226;<br>F:GO:0004722;<br>F:GO:0005515;<br>C:GO:0005634;<br>P:GO:0006468 | -                                                                                | -           |                                                                                                             |
| -                        | -                                                        | 0  |                                                                                                                                                                       |                                                                                  |             |                                                                                                             |
| -                        | -                                                        | 0  |                                                                                                                                                                       |                                                                                  |             |                                                                                                             |
| -                        | -                                                        | 0  |                                                                                                                                                                       |                                                                                  |             |                                                                                                             |
| -                        | -                                                        | 0  |                                                                                                                                                                       |                                                                                  |             | PTHR12565 (PANTHER),<br>PTHR12565:SF3 (PANTHER)                                                             |
| -                        | -                                                        | 0  |                                                                                                                                                                       |                                                                                  |             |                                                                                                             |
| -                        | -                                                        | 0  |                                                                                                                                                                       |                                                                                  |             |                                                                                                             |
| -                        | -                                                        | 0  |                                                                                                                                                                       |                                                                                  |             |                                                                                                             |
| Caenorhabditis elegans   | sentrin sumo-specific protease senp7                     | 5  | P:GO:0040035;<br>P:GO:0009792;<br>P:GO:0010171;<br>P:GO:0018991;<br>P:GO:0040010                                                                                      | -                                                                                |             | IPR003653; PTHR12438 (PANTHER),<br>PTHR12438:SF1 (PANTHER), SSF54001<br>(SUPERFAMILY)                       |
| -                        | -                                                        | 0  |                                                                                                                                                                       |                                                                                  |             |                                                                                                             |
| Caenorhabditis elegans   | g in family member (glb-23)                              | 2  | F:GO:0005488;<br>P:GO:0040011                                                                                                                                         | -                                                                                |             | IPR000971; IPR009050; IPR012292                                                                             |
| -                        | -                                                        | 0  |                                                                                                                                                                       |                                                                                  |             | SignalP (SIGNALP)                                                                                           |
| -                        | -                                                        | 0  |                                                                                                                                                                       |                                                                                  |             |                                                                                                             |
| Caenorhabditis briggsae  | briggsae cbr-bub-1 protein                               | 0  |                                                                                                                                                                       | F:GO:0004672;<br>F:GO:0005524;<br>F:GO:0000166;<br>P:GO:0006468;<br>F:GO:0004674 |             |                                                                                                             |
| -                        | -                                                        | 0  |                                                                                                                                                                       |                                                                                  |             |                                                                                                             |
| -                        | -                                                        | 0  |                                                                                                                                                                       |                                                                                  |             |                                                                                                             |
| -                        | -                                                        | 0  |                                                                                                                                                                       |                                                                                  |             |                                                                                                             |
| -                        | -                                                        | 0  |                                                                                                                                                                       |                                                                                  |             |                                                                                                             |
| Brugia malayi            | briggsae cbr-sax-2 protein                               | 1  | F:GO:0005515                                                                                                                                                          |                                                                                  |             |                                                                                                             |
| Caenorhabditis briggsae  | golgi apparatus protein 1                                | 4  | C:GO:0000139;<br>F:GO:0005515;<br>P:GO:0040010;<br>C:GO:0016021                                                                                                       | -                                                                                |             | SignalP (SIGNALP)                                                                                           |
| Caenorhabditis briggsae  | golgi apparatus protein 1                                | 4  | C:GO:0000139;<br>F:GO:0005515;<br>P:GO:0040010;<br>C:GO:0016021                                                                                                       | -                                                                                |             | SignalP (SIGNALP)                                                                                           |
| Caenorhabditis briggsae  | golgi apparatus protein 1                                | 4  | C:GO:0000139;<br>F:GO:0005515;<br>P:GO:0040010;<br>C:GO:0016021                                                                                                       | -                                                                                |             | SignalP (SIGNALP)                                                                                           |
| Caenorhabditis briggsae  | cathepsin a                                              | 3  | P:GO:0019915;<br>F:GO:0004185;<br>P:GO:0006508                                                                                                                        | -                                                                                | EC:3.4.16.0 | IPR001563; IPR018202;<br>G3DSA:3.40.50.1820 (GENE3D),<br>PTHR11802:SF9 (PANTHER), SSF53474<br>(SUPERFAMILY) |
| Caenorhabditis briggsae  | cysteinyl tr- synthetase family member (crs-1)           | 2  | P:GO:0006412;<br>F:GO:0000166                                                                                                                                         | -                                                                                | EC:3.6.5.3  | IPR015803                                                                                                   |



|                             |                                                            |    |                                                                                                                                                                                                                          |   |             |                                                                                                                               |
|-----------------------------|------------------------------------------------------------|----|--------------------------------------------------------------------------------------------------------------------------------------------------------------------------------------------------------------------------|---|-------------|-------------------------------------------------------------------------------------------------------------------------------|
| Ailuropoda melanoleuca      | proteasome ( macropain) beta 2                             | 10 | P:GO:0010243;<br>P:GO:0051436;<br>P:GO:0051437;<br>F:GO:0004298;<br>P:GO:0031145;<br>P:GO:0014070;<br>P:GO:0044419;<br>C:GO:0005737;<br>C:GO:0005839;<br>C:GO:0005634                                                    | - | EC:3.4.25.0 | IPR001353; G3DSA:3.60.20.10 (GENE3D), PTHR11599 (PANTHER), PTHR11599:SF6 (PANTHER), PS51476 (PROFILE), SSF56235 (SUPERFAMILY) |
| Caenorhabditis briggsae     | elegans protein partially confirmed by transcript evidence | 0  |                                                                                                                                                                                                                          |   |             | -                                                                                                                             |
|                             | -                                                          | 0  |                                                                                                                                                                                                                          |   |             | -                                                                                                                             |
|                             | -                                                          | 0  |                                                                                                                                                                                                                          |   |             | SignalP (SIGNALP)                                                                                                             |
| Angiostrongylus cantonensis | 26s proteasome regulatory chain 4                          | 6  | C:GO:0005737;<br>F:GO:0008233;<br>P:GO:0030163;<br>F:GO:0005524;<br>C:GO:0000502;<br>F:GO:0017111                                                                                                                        | - | EC:3.6.1.15 | IPR003959; G3DSA:3.40.50.300 (GENE3D), PTHR23073 (PANTHER), PTHR23073:SF9 (PANTHER), SSF52540 (SUPERFAMILY)                   |
|                             | -                                                          | 0  |                                                                                                                                                                                                                          |   |             | -                                                                                                                             |
| Caenorhabditis elegans      | domain containing protein                                  | 1  | F:GO:0031072                                                                                                                                                                                                             | - |             | IPR001623; PTHR15606 (PANTHER), PTHR15606:SF1 (PANTHER)                                                                       |
|                             | -                                                          | 0  |                                                                                                                                                                                                                          |   |             | -                                                                                                                             |
| Brugia malayi               | sterol carrier protein 2                                   | 12 | P:GO:0006470;<br>P:GO:0006996;<br>F:GO:0016747;<br>C:GO:0005777;<br>C:GO:0005625;<br>C:GO:0000795;<br>F:GO:0008289;<br>F:GO:0008420;<br>P:GO:0019915;<br>P:GO:0007127;<br>F:GO:0005515;<br>P:GO:0006694                  | - | EC:2.3.1.0  | IPR002198; IPR003033; IPR016038; IPR016039; IPR020613; IPR020617; G3DSA:3.30.1050.10 (GENE3D), PTHR19410:SF115 (PANTHER)      |
| Brugia malayi               | non-specific lipid-transfer protein                        | 13 | P:GO:0006470;<br>P:GO:0007031;<br>C:GO:0005777;<br>C:GO:0005625;<br>C:GO:0005739;<br>P:GO:0006637;<br>C:GO:0000795;<br>F:GO:0004770;<br>F:GO:0008420;<br>F:GO:0016740;<br>P:GO:0007127;<br>F:GO:0005515;<br>P:GO:0006694 | - |             | IPR002198; IPR003033; IPR016038; IPR016039; IPR020613; IPR020617; G3DSA:3.30.1050.10 (GENE3D), PTHR19410:SF115 (PANTHER)      |

|                         |                                                            |    |                                                                                                                                                                                                                                                            |                               |             |                                                                                                                                   |
|-------------------------|------------------------------------------------------------|----|------------------------------------------------------------------------------------------------------------------------------------------------------------------------------------------------------------------------------------------------------------|-------------------------------|-------------|-----------------------------------------------------------------------------------------------------------------------------------|
| Brugia malayi           | sterol carrier protein 2                                   | 12 | P:GO:0006470;<br>P:GO:0006996;<br>F:GO:0016747;<br>C:GO:0005777;<br>C:GO:0005625;<br>C:GO:0000795;<br>F:GO:0008289;<br>F:GO:0008420;<br>P:GO:0019915;<br>P:GO:0007127;<br>F:GO:0005515;<br>P:GO:0006694                                                    | -                             | EC:2.3.1.0  | IPR002198; IPR003033; IPR016038;<br>IPR016039; IPR020613; IPR020617;<br>G3DSA:3.30.1050.10 (GENE3D),<br>PTHR19410:SF115 (PANTHER) |
|                         | -                                                          | 0  |                                                                                                                                                                                                                                                            |                               |             | -                                                                                                                                 |
|                         | -                                                          | 0  |                                                                                                                                                                                                                                                            |                               |             | -                                                                                                                                 |
|                         | -                                                          | 0  |                                                                                                                                                                                                                                                            |                               |             | -                                                                                                                                 |
|                         | -                                                          | 0  |                                                                                                                                                                                                                                                            |                               |             | SignalP (SIGNALP)                                                                                                                 |
|                         | -                                                          | 0  |                                                                                                                                                                                                                                                            |                               |             | -                                                                                                                                 |
| Caenorhabditis elegans  | briggsae cbr-gosr- protein                                 | 4  | P:GO:0015031;<br>C:GO:0000139;<br>C:GO:0016021;<br>F:GO:0005515                                                                                                                                                                                            | -                             |             | -                                                                                                                                 |
| Caenorhabditis briggsae | elegans protein partially confirmed by transcript evidence | 0  |                                                                                                                                                                                                                                                            | C:GO:0016021;<br>F:GO:0004867 |             | SignalP (SIGNALP)                                                                                                                 |
| Caenorhabditis elegans  | c2 domain containing protein                               | 2  | P:GO:0009792;<br>C:GO:0016021                                                                                                                                                                                                                              | -                             |             | IPR000008; IPR008973; IPR018029;<br>IPR020477; G3DSA:2.60.40.150<br>(GENE3D), PTHR10774 (PANTHER),<br>PTHR10774:SF1 (PANTHER)     |
| Caenorhabditis elegans  | myosin-rhogap myr                                          | 5  | F:GO:0046872;<br>C:GO:0016459;<br>F:GO:0005524;<br>P:GO:0007165;<br>F:GO:0003774                                                                                                                                                                           | -                             |             | IPR000198; IPR008936; PTHR13140<br>(PANTHER), PTHR13140:SF30<br>(PANTHER)                                                         |
|                         | -                                                          | 0  |                                                                                                                                                                                                                                                            |                               |             | -                                                                                                                                 |
| Brugia malayi           | ubiquitin-conjugating enzyme e2 a                          | 15 | P:GO:0009411;<br>P:GO:0006301;<br>P:GO:0006511;<br>P:GO:0033522;<br>P:GO:0070936;<br>C:GO:0001741;<br>P:GO:0070979;<br>F:GO:0031625;<br>P:GO:0051246;<br>F:GO:0004842;<br>F:GO:0005524;<br>P:GO:0060135;<br>P:GO:0051865;<br>P:GO:0008284;<br>P:GO:0001701 | -                             | EC:6.3.2.19 | -                                                                                                                                 |

|                                 |                                                  |    |                                                                                                                                                                                                                                                            |                                                                                                                                                                                                                                                                                                                                                                                                                     |             |                                                                     |   |
|---------------------------------|--------------------------------------------------|----|------------------------------------------------------------------------------------------------------------------------------------------------------------------------------------------------------------------------------------------------------------|---------------------------------------------------------------------------------------------------------------------------------------------------------------------------------------------------------------------------------------------------------------------------------------------------------------------------------------------------------------------------------------------------------------------|-------------|---------------------------------------------------------------------|---|
| Caenorhabditis elegans          | ubiquitin-conjugating enzyme e2 a                | 15 | P:GO:0009411;<br>P:GO:0006301;<br>P:GO:0006511;<br>P:GO:0033522;<br>P:GO:0070936;<br>C:GO:0001741;<br>P:GO:0070979;<br>F:GO:0031625;<br>P:GO:0051246;<br>F:GO:0004842;<br>F:GO:0005524;<br>P:GO:0060135;<br>P:GO:0051865;<br>P:GO:0008284;<br>P:GO:0001701 | -                                                                                                                                                                                                                                                                                                                                                                                                                   | EC:6.3.2.19 | IPR000608; IPR016135; PTHR11621 (PANTHER), PTHR11621:SF33 (PANTHER) |   |
| Caenorhabditis elegans          | elegans protein confirmed by transcript evidence | 0  |                                                                                                                                                                                                                                                            | F:GO:0003676;<br>P:GO:0000003;<br>F:GO:0008270;<br>P:GO:0009792;<br>C:GO:0005622                                                                                                                                                                                                                                                                                                                                    |             | IPR007087; IPR013087; IPR015880; PTHR23229 (PANTHER)                |   |
|                                 | -                                                | 0  |                                                                                                                                                                                                                                                            |                                                                                                                                                                                                                                                                                                                                                                                                                     |             | -                                                                   |   |
| Entamoeba histolytica HM-1:IMSS | myosin heavy chain                               | 0  |                                                                                                                                                                                                                                                            | F:GO:0016787;<br>F:GO:0005524;<br>F:GO:0000156;<br>F:GO:0046872;<br>P:GO:0006974;<br>C:GO:0016459;<br>F:GO:0004871;<br>F:GO:0000166;<br>C:GO:0005737;<br>F:GO:0003779;<br>P:GO:0007165;<br>F:GO:0004518;<br>F:GO:0017111;<br>P:GO:0000160;<br>F:GO:0008757;<br>F:GO:0003774;<br>F:GO:0008168;<br>F:GO:0008270;<br>P:GO:0006281;<br>F:GO:0005515;<br>F:GO:0016740;<br>P:GO:0006935;<br>F:GO:0008984;<br>C:GO:0032982 |             |                                                                     | - |
|                                 | -                                                | 0  |                                                                                                                                                                                                                                                            |                                                                                                                                                                                                                                                                                                                                                                                                                     |             | SignalP (SIGNALP)                                                   |   |

|                           |                                                       |    |                                                                                                                                                                                                                                                                                                                                                                                                                                                                                         |   |                                                         |                                                                                                                                                                                   |
|---------------------------|-------------------------------------------------------|----|-----------------------------------------------------------------------------------------------------------------------------------------------------------------------------------------------------------------------------------------------------------------------------------------------------------------------------------------------------------------------------------------------------------------------------------------------------------------------------------------|---|---------------------------------------------------------|-----------------------------------------------------------------------------------------------------------------------------------------------------------------------------------|
| Pongo abelii              | filamin a                                             | 28 | F:GO:0009866;<br>F:GO:0004871;<br>C:GO:0005802;<br>P:GO:0043433;<br>P:GO:0034394;<br>C:GO:0015629;<br>P:GO:0050821;<br>P:GO:0051220;<br>C:GO:0005576;<br>C:GO:0005829;<br>F:GO:0001948;<br>P:GO:0051764;<br>P:GO:0043123;<br>F:GO:0051015;<br>F:GO:0048365;<br>P:GO:0045022;<br>P:GO:0007195;<br>F:GO:0042803;<br>F:GO:0034989;<br>P:GO:0031532;<br>F:GO:0034988;<br>C:GO:0005886;<br>F:GO:0008134;<br>P:GO:0042177;<br>C:GO:0005634;<br>P:GO:0042993;<br>C:GO:0005938;<br>P:GO:0043113 | - | -                                                       |                                                                                                                                                                                   |
| Caenorhabditis briggsae   | fibulin 1                                             | 6  | F:GO:0005201;<br>C:GO:0005615;<br>F:GO:0005509;<br>C:GO:0031012;<br>F:GO:0005515;<br>C:GO:0005625                                                                                                                                                                                                                                                                                                                                                                                       | - |                                                         | IPR000152; IPR000742; IPR001881;<br>IPR013032; IPR013091; IPR018097;<br>G3DSA:2.10.25.10 (GENE3D),<br>PTHR11201 (PANTHER),<br>PTHR11201:SF89 (PANTHER),<br>SSF57196 (SUPERFAMILY) |
| Bos taurus                | sig-l recognition particle receptor subunit alpha     | 10 | C:GO:0005785;<br>C:GO:0016021;<br>F:GO:0004872;<br>P:GO:0006184;<br>F:GO:0005515;<br>P:GO:0007165;<br>F:GO:0003924;<br>P:GO:0006614;<br>F:GO:0005525;<br>F:GO:0005047                                                                                                                                                                                                                                                                                                                   | - | EC:3.6.5.1;<br>EC:3.6.5.2;<br>EC:3.6.5.3;<br>EC:3.6.5.4 | SignalP (SIGNALP)                                                                                                                                                                 |
|                           |                                                       | 0  |                                                                                                                                                                                                                                                                                                                                                                                                                                                                                         |   |                                                         |                                                                                                                                                                                   |
| Teladorsagia circumcincta | nicotinic acetylcholine receptor non-alpha subunit    | 6  | F:GO:0004872;<br>C:GO:0045211;<br>C:GO:0030054;<br>P:GO:0006811;<br>C:GO:0016021;<br>F:GO:0004889                                                                                                                                                                                                                                                                                                                                                                                       | - |                                                         |                                                                                                                                                                                   |
| Caenorhabditis briggsae   | kelch-like 18                                         | 1  | F:GO:0005515                                                                                                                                                                                                                                                                                                                                                                                                                                                                            | - |                                                         |                                                                                                                                                                                   |
| Caenorhabditis elegans    | thioredoxin domain-containing protein 14-like protein | 3  | P:GO:0045454;<br>C:GO:0016021;<br>P:GO:0040010                                                                                                                                                                                                                                                                                                                                                                                                                                          | - |                                                         |                                                                                                                                                                                   |
| Caenorhabditis elegans    | prolyl carboxy peptidase like family member (pcp-2)   | 2  | C:GO:0016021;<br>F:GO:0008236                                                                                                                                                                                                                                                                                                                                                                                                                                                           | - |                                                         | IPR008758; PTHR11010:SF4<br>(PANTHER)                                                                                                                                             |
|                           |                                                       | 0  |                                                                                                                                                                                                                                                                                                                                                                                                                                                                                         |   |                                                         |                                                                                                                                                                                   |
|                           |                                                       | 0  |                                                                                                                                                                                                                                                                                                                                                                                                                                                                                         |   |                                                         |                                                                                                                                                                                   |

|                        |                                                        |   |                                                                                                                                     |   |                                                                                   |
|------------------------|--------------------------------------------------------|---|-------------------------------------------------------------------------------------------------------------------------------------|---|-----------------------------------------------------------------------------------|
|                        | -                                                      | 0 |                                                                                                                                     |   | -                                                                                 |
| Caenorhabditis elegans | polymerase iii (d- directed) polypeptide 155kda        | 8 | F:GO:0003899;<br>F:GO:0008270;<br>P:GO:0032728;<br>P:GO:0045087;<br>F:GO:0003677;<br>F:GO:0032549;<br>P:GO:0006351;<br>C:GO:0005666 | - | EC:2.7.7.6<br>IPR007066; IPR015700; PTHR19376 (PANTHER), SSF64484 (SUPERFAMILY)   |
|                        | -                                                      | 0 |                                                                                                                                     |   | -                                                                                 |
|                        | -                                                      | 0 |                                                                                                                                     |   | -                                                                                 |
|                        | -                                                      | 0 |                                                                                                                                     |   | -                                                                                 |
| Caenorhabditis elegans | peroxidasin homolog                                    | 4 | F:GO:0020037;<br>P:GO:0055114;<br>F:GO:0004601;<br>P:GO:0006979                                                                     | - | EC:1.11.1.7<br>IPR002007; IPR010255; PTHR11475 (PANTHER), PTHR11475:SF9 (PANTHER) |
| Caenorhabditis elegans | hypothetical protein T22B11.2 [Caenorhabditis elegans] | 3 | C:GO:0016021;<br>P:GO:0008340;<br>F:GO:0008378                                                                                      | - | PTHR23033 (PANTHER), PTHR23033:SF1 (PANTHER)                                      |
| Caenorhabditis elegans | leucine-rich repeat serine threonine-protein ki-se 1   | 2 | F:GO:0016301;<br>F:GO:0000166                                                                                                       | - | -                                                                                 |
|                        | -                                                      | 0 |                                                                                                                                     |   | SignalP (SIGNALP)                                                                 |
| Brugia malayi          | hypothetical protein Bm1_40230 [Brugia malayi]         | 0 |                                                                                                                                     |   | -                                                                                 |
|                        | -                                                      | 0 |                                                                                                                                     |   | -                                                                                 |
|                        | -                                                      | 0 |                                                                                                                                     |   | -                                                                                 |
|                        | -                                                      | 0 |                                                                                                                                     |   | PS51257 (PROFILE), SignalP (SIGNALP)                                              |
|                        | -                                                      | 0 |                                                                                                                                     |   | -                                                                                 |
|                        | -                                                      | 0 |                                                                                                                                     |   | -                                                                                 |
|                        | -                                                      | 0 |                                                                                                                                     |   | -                                                                                 |
|                        | -                                                      | 0 |                                                                                                                                     |   | -                                                                                 |
|                        | -                                                      | 0 |                                                                                                                                     |   | -                                                                                 |
|                        | -                                                      | 0 |                                                                                                                                     |   | -                                                                                 |
|                        | -                                                      | 0 |                                                                                                                                     |   | -                                                                                 |
|                        | -                                                      | 0 |                                                                                                                                     |   | -                                                                                 |
|                        | -                                                      | 0 |                                                                                                                                     |   | SignalP (SIGNALP)                                                                 |
| Homo sapiens           | aurora ki-se a-interacting protein                     | 7 | P:GO:0045862;<br>C:GO:0005739;<br>P:GO:0045839;<br>F:GO:0005515;<br>P:GO:0016310;<br>F:GO:0016301;<br>C:GO:0005634                  | - | IPR013177                                                                         |

|                        |                                                           |    |                                                                                                                                                                                                                                                                                                                                                                                                   |   |                                                         |                                                                    |
|------------------------|-----------------------------------------------------------|----|---------------------------------------------------------------------------------------------------------------------------------------------------------------------------------------------------------------------------------------------------------------------------------------------------------------------------------------------------------------------------------------------------|---|---------------------------------------------------------|--------------------------------------------------------------------|
| Ailuropoda melanoleuca | member ras oncogene family                                | 23 | C:GO:000785;<br>C:GO:0005654;<br>P:GO:0007052;<br>C:GO:0042470;<br>F:GO:0005525;<br>P:GO:0030521;<br>P:GO:0006611;<br>P:GO:0051301;<br>P:GO:0006184;<br>P:GO:0006259;<br>C:GO:0005829;<br>C:GO:0005643;<br>P:GO:0007067;<br>F:GO:0003713;<br>P:GO:0007286;<br>P:GO:0007165;<br>P:GO:0045893;<br>F:GO:0003682;<br>F:GO:0003924;<br>P:GO:0006606;<br>F:GO:0050681;<br>P:GO:0006405;<br>P:GO:0044419 | - | EC:3.6.5.1;<br>EC:3.6.5.2;<br>EC:3.6.5.3;<br>EC:3.6.5.4 | -                                                                  |
| -                      | -                                                         | 0  |                                                                                                                                                                                                                                                                                                                                                                                                   |   |                                                         | -                                                                  |
| -                      | -                                                         | 0  |                                                                                                                                                                                                                                                                                                                                                                                                   |   |                                                         | -                                                                  |
| -                      | -                                                         | 0  |                                                                                                                                                                                                                                                                                                                                                                                                   |   |                                                         | SignalP (SIGNALP)                                                  |
| -                      | -                                                         | 0  |                                                                                                                                                                                                                                                                                                                                                                                                   |   |                                                         | -                                                                  |
| -                      | -                                                         | 0  |                                                                                                                                                                                                                                                                                                                                                                                                   |   |                                                         | -                                                                  |
| Caenorhabditis elegans | acetoacetyl- synthetase                                   | 3  | P:GO:0006629;<br>F:GO:0030729;<br>F:GO:0003987                                                                                                                                                                                                                                                                                                                                                    | - | EC:6.2.1.16;<br>EC:6.2.1.1                              | PTHR11968 (PANTHER),<br>PTHR11968:SF40 (PANTHER)                   |
| -                      | -                                                         | 0  |                                                                                                                                                                                                                                                                                                                                                                                                   |   |                                                         | -                                                                  |
| Caenorhabditis elegans | coiled-coil domain containing 109a                        | 1  | C:GO:0005739                                                                                                                                                                                                                                                                                                                                                                                      | - |                                                         | IPR006769; PTHR13462:SF5<br>(PANTHER), SignalP (SIGNALP)           |
| Brugia malayi          | 2-amino-3-ketobutyrate coenzyme a mitochondrial precursor | 5  | F:GO:0030170;<br>F:GO:0016769;<br>F:GO:0008890;<br>P:GO:0009058;<br>F:GO:0016874                                                                                                                                                                                                                                                                                                                  | - | EC:2.3.1.29                                             | IPR004839; IPR011282; IPR015421;<br>IPR015424; PTHR13693 (PANTHER) |
| -                      | -                                                         | 0  |                                                                                                                                                                                                                                                                                                                                                                                                   |   |                                                         | -                                                                  |
| -                      | -                                                         | 0  |                                                                                                                                                                                                                                                                                                                                                                                                   |   |                                                         | SignalP (SIGNALP)                                                  |
| -                      | -                                                         | 0  |                                                                                                                                                                                                                                                                                                                                                                                                   |   |                                                         | -                                                                  |
| -                      | -                                                         | 0  |                                                                                                                                                                                                                                                                                                                                                                                                   |   |                                                         | -                                                                  |
| -                      | -                                                         | 0  |                                                                                                                                                                                                                                                                                                                                                                                                   |   |                                                         | SignalP (SIGNALP)                                                  |
| -                      | -                                                         | 0  |                                                                                                                                                                                                                                                                                                                                                                                                   |   |                                                         | -                                                                  |
| -                      | -                                                         | 0  |                                                                                                                                                                                                                                                                                                                                                                                                   |   |                                                         | -                                                                  |
| Loa loa                | #NAME?                                                    | 0  | F:GO:0016740;<br>P:GO:0032259;<br>P:GO:0006370;<br>F:GO:0008168;<br>F:GO:0003676;<br>P:GO:0000003;<br>F:GO:0004483;<br>P:GO:0080009;<br>C:GO:0005622                                                                                                                                                                                                                                              |   |                                                         | -                                                                  |
| -                      | -                                                         | 0  |                                                                                                                                                                                                                                                                                                                                                                                                   |   |                                                         | SignalP (SIGNALP)                                                  |

|                        |                                                            |   |                                                |                                                                                                                                                                                                                                                                                                                                                 |                                                                                            |
|------------------------|------------------------------------------------------------|---|------------------------------------------------|-------------------------------------------------------------------------------------------------------------------------------------------------------------------------------------------------------------------------------------------------------------------------------------------------------------------------------------------------|--------------------------------------------------------------------------------------------|
| Loa loa                | risc-loading complex subunit tarbp2                        | 0 |                                                | F:GO:0003725;<br>P:GO:0046782;<br>F:GO:0003723;<br>P:GO:0050689;<br>C:GO:0005634;<br>C:GO:0016442;<br>F:GO:0035197;<br>F:GO:0042803;<br>F:GO:0016301;<br>P:GO:0031047;<br>C:GO:0048471;<br>P:GO:0006417;<br>P:GO:0035280;<br>C:GO:0005737;<br>P:GO:0045070;<br>P:GO:0031054;<br>P:GO:0030423;<br>C:GO:0005622;<br>P:GO:0030422;<br>F:GO:0005515 | IPR001159; IPR014720; PTHR10910 (PANTHER), PTHR10910:SF7 (PANTHER), SSF54768 (SUPERFAMILY) |
| Loa loa                | risc-loading complex subunit tarbp2                        | 0 |                                                | F:GO:0003725;<br>P:GO:0046782;<br>F:GO:0003723;<br>P:GO:0050689;<br>C:GO:0005634;<br>C:GO:0016442;<br>F:GO:0035197;<br>F:GO:0042803;<br>F:GO:0016301;<br>P:GO:0031047;<br>C:GO:0048471;<br>P:GO:0006417;<br>P:GO:0035280;<br>C:GO:0005737;<br>P:GO:0045070;<br>P:GO:0031054;<br>P:GO:0030423;<br>C:GO:0005622;<br>P:GO:0030422;<br>F:GO:0005515 | IPR001159; IPR014720; PTHR10910 (PANTHER), PTHR10910:SF7 (PANTHER), SSF54768 (SUPERFAMILY) |
| -                      | -                                                          | 0 |                                                |                                                                                                                                                                                                                                                                                                                                                 | -                                                                                          |
| -                      | -                                                          | 0 |                                                |                                                                                                                                                                                                                                                                                                                                                 | -                                                                                          |
| -                      | -                                                          | 0 |                                                |                                                                                                                                                                                                                                                                                                                                                 | -                                                                                          |
| -                      | -                                                          | 0 |                                                |                                                                                                                                                                                                                                                                                                                                                 | -                                                                                          |
| Pongo abelii           | ornithine decarboxylase antizyme 1                         | 3 | P:GO:0006596;<br>F:GO:0008073;<br>F:GO:0005515 | -                                                                                                                                                                                                                                                                                                                                               | IPR002993; IPR016181; PTHR10279:SF2 (PANTHER)                                              |
| Caenorhabditis elegans | elegans protein partially confirmed by transcript evidence | 0 |                                                | P:GO:0006898;<br>C:GO:0005576                                                                                                                                                                                                                                                                                                                   | IPR001283; IPR014044                                                                       |
| -                      | -                                                          | 0 |                                                |                                                                                                                                                                                                                                                                                                                                                 | -                                                                                          |
| -                      | -                                                          | 0 |                                                |                                                                                                                                                                                                                                                                                                                                                 | -                                                                                          |
| -                      | -                                                          | 0 |                                                |                                                                                                                                                                                                                                                                                                                                                 | SignalP (SIGNALP)                                                                          |

|                         |                                                         |    |                                                                                                                                                                                                                          |              |             |                                                                                                                     |
|-------------------------|---------------------------------------------------------|----|--------------------------------------------------------------------------------------------------------------------------------------------------------------------------------------------------------------------------|--------------|-------------|---------------------------------------------------------------------------------------------------------------------|
| Tetraodon nigroviridis  | with fg repeats 1                                       | 13 | F:GO:0005515;<br>F:GO:0008270;<br>P:GO:0007275;<br>C:GO:0016023;<br>P:GO:0006406;<br>P:GO:0007283;<br>C:GO:0005794;<br>C:GO:0005643;<br>P:GO:0032312;<br>F:GO:0003677;<br>P:GO:0030154;<br>F:GO:0003723;<br>F:GO:0008060 | -            |             | IPR001164; PTHR23180 (PANTHER),<br>PTHR23180:SF12 (PANTHER)                                                         |
|                         | -                                                       | 0  |                                                                                                                                                                                                                          |              |             | SignalP (SIGNALP)                                                                                                   |
| Ostertagia ostertagi    | heat shock protein family member (hsp- )                | 1  | P:GO:0009408                                                                                                                                                                                                             | -            |             | IPR001436; IPR002068; IPR008978;<br>G3DSA:2.60.40.790 (GENE3D),<br>PTHR11527 (PANTHER),<br>PTHR11527:SF28 (PANTHER) |
| Caenorhabditis briggsae | Hypothetical protein CBG21226 [Caenorhabditis briggsae] | 0  |                                                                                                                                                                                                                          | F:GO:0016888 |             | -                                                                                                                   |
| Homo sapiens            | serine or cysteine protease inhibitor clade g member 1  | 8  | F:GO:0004867;<br>P:GO:0001869;<br>P:GO:0006958;<br>C:GO:0005615;<br>C:GO:0031093;<br>F:GO:0005515;<br>P:GO:0008015;<br>P:GO:0007596                                                                                      | -            |             | IPR000215; IPR015553                                                                                                |
| Ailuropoda melanoleuca  | secreted cysteine-rich                                  | 8  | F:GO:0050840;<br>P:GO:0042127;<br>C:GO:0031093;<br>F:GO:0005518;<br>P:GO:0071363;<br>P:GO:0001503;<br>F:GO:0005509;<br>C:GO:0005604                                                                                      | -            |             | -                                                                                                                   |
|                         | -                                                       | 0  |                                                                                                                                                                                                                          |              |             | -                                                                                                                   |
| Pongo abelii            | -rdilysin (n-arginine dibasic convertase)               | 10 | P:GO:0016477;<br>C:GO:0005829;<br>P:GO:0007528;<br>F:GO:0008270;<br>P:GO:0051044;<br>C:GO:0009986;<br>F:GO:0004222;<br>P:GO:0052548;<br>F:GO:0048408;<br>P:GO:0008283                                                    | -            | EC:3.4.24.0 | PTHR11851 (PANTHER),<br>PTHR11851:SF65 (PANTHER)                                                                    |
|                         | -                                                       | 0  |                                                                                                                                                                                                                          |              |             | -                                                                                                                   |
| Caenorhabditis elegans  | rad54 homolog b                                         | 2  | F:GO:0005488;<br>P:GO:0050896                                                                                                                                                                                            | -            |             | IPR018838                                                                                                           |
|                         | -                                                       | 0  |                                                                                                                                                                                                                          |              |             | -                                                                                                                   |
|                         | -                                                       | 0  |                                                                                                                                                                                                                          |              |             | SignalP (SIGNALP)                                                                                                   |
| Caenorhabditis elegans  | elegans protein confirmed by transcript evidence        | 0  |                                                                                                                                                                                                                          |              |             | -                                                                                                                   |



|                         |                                                    |   |                                                                                                                                                      |                                                                                                   |             |                                                                                                                                                                                                                                              |
|-------------------------|----------------------------------------------------|---|------------------------------------------------------------------------------------------------------------------------------------------------------|---------------------------------------------------------------------------------------------------|-------------|----------------------------------------------------------------------------------------------------------------------------------------------------------------------------------------------------------------------------------------------|
| Caenorhabditis elegans  | tubulin-specific chaperone d                       | 7 | P:GO:0040035;<br>P:GO:0010171;<br>P:GO:0002119;<br>P:GO:0046785;<br>P:GO:0040011;<br>P:GO:0040007;<br>P:GO:0002009                                   | -                                                                                                 |             | PTHR12658 (PANTHER)                                                                                                                                                                                                                          |
| -                       | -                                                  | 0 |                                                                                                                                                      |                                                                                                   |             | -                                                                                                                                                                                                                                            |
| Caenorhabditis elegans  | briggsae cbr-unc- protein                          | 0 |                                                                                                                                                      | F:GO:0008270                                                                                      |             | PTHR21696 (PANTHER), SignalP (SIGNALP)                                                                                                                                                                                                       |
| Caenorhabditis elegans  | mgc69166 protein                                   | 0 |                                                                                                                                                      | F:GO:0016740;<br>F:GO:0003677                                                                     |             | IPR017956                                                                                                                                                                                                                                    |
| Caenorhabditis elegans  | briggsae cbr-vhp-1 protein                         | 1 | F:GO:0004721                                                                                                                                         | -                                                                                                 | EC:3.1.3.16 | IPR001763; SignalP (SIGNALP)                                                                                                                                                                                                                 |
| Caenorhabditis elegans  | elegans protein confirmed by transcript evidence   | 0 |                                                                                                                                                      |                                                                                                   |             | SignalP (SIGNALP)                                                                                                                                                                                                                            |
| Pan troglodytes         | fau                                                | 3 | C:GO:0005840;<br>F:GO:0003735;<br>P:GO:0006412                                                                                                       | -                                                                                                 | EC:3.6.5.3  | IPR006846                                                                                                                                                                                                                                    |
| -                       | -                                                  | 0 |                                                                                                                                                      |                                                                                                   |             | -                                                                                                                                                                                                                                            |
| Caenorhabditis elegans  | briggsae cbr-unc-95 protein                        | 1 | F:GO:0008270                                                                                                                                         | -                                                                                                 |             | -                                                                                                                                                                                                                                            |
| Ciona intestinalis      | proclotting enzyme                                 | 0 |                                                                                                                                                      | P:GO:0006508;<br>F:GO:0004252;<br>F:GO:0008236;<br>F:GO:0016787;<br>F:GO:0003824;<br>F:GO:0008233 |             | IPR001254; IPR009003;<br>G3DSA:2.40.10.10 (GENE3D)                                                                                                                                                                                           |
| Caenorhabditis elegans  | proteasome activator complex                       | 0 |                                                                                                                                                      | F:GO:0005488;<br>C:GO:0000502                                                                     |             | -                                                                                                                                                                                                                                            |
| Caenorhabditis briggsae | briggsae cbr-frm-2 protein                         | 8 | C:GO:0005737;<br>C:GO:0005856;<br>P:GO:0007391;<br>P:GO:0008258;<br>C:GO:0019898;<br>P:GO:0046665;<br>F:GO:0008092;<br>P:GO:0007390                  | -                                                                                                 |             | IPR000299; IPR000798; IPR011993;<br>IPR014352; IPR014847; IPR018979;<br>IPR018980; IPR019747; IPR019748;<br>IPR019749; IPR019750;<br>G3DSA:3.10.20.90 (GENE3D),<br>PTHR23280 (PANTHER), SSF50729<br>(SUPERFAMILY), SSF54236<br>(SUPERFAMILY) |
| -                       | -                                                  | 0 |                                                                                                                                                      |                                                                                                   |             | -                                                                                                                                                                                                                                            |
| Caenorhabditis elegans  | cleavage and polyadenylation specific factor 73kda | 9 | P:GO:0006378;<br>P:GO:0008380;<br>C:GO:0005847;<br>F:GO:0004521;<br>F:GO:0003729;<br>F:GO:0005515;<br>P:GO:0006398;<br>P:GO:0006379;<br>F:GO:0008409 | -                                                                                                 |             | IPR011108; IPR021718;<br>G3DSA:3.60.15.10 (GENE3D),<br>PTHR11203 (PANTHER),<br>PTHR11203:SF11 (PANTHER)                                                                                                                                      |
| -                       | -                                                  | 0 |                                                                                                                                                      |                                                                                                   |             | -                                                                                                                                                                                                                                            |
| -                       | -                                                  | 0 |                                                                                                                                                      |                                                                                                   |             | -                                                                                                                                                                                                                                            |
| -                       | -                                                  | 0 |                                                                                                                                                      |                                                                                                   |             | -                                                                                                                                                                                                                                            |
| -                       | -                                                  | 0 |                                                                                                                                                      |                                                                                                   |             | -                                                                                                                                                                                                                                            |
| Caenorhabditis elegans  | methyltransferase 11 domain containing 1           | 3 | P:GO:0009792;<br>P:GO:0000003;<br>F:GO:0016740                                                                                                       | -                                                                                                 |             | IPR015324                                                                                                                                                                                                                                    |
| -                       | -                                                  | 0 |                                                                                                                                                      |                                                                                                   |             | -                                                                                                                                                                                                                                            |
| -                       | -                                                  | 0 |                                                                                                                                                      |                                                                                                   |             | -                                                                                                                                                                                                                                            |

|                         |                                                                                |    |                                                                                                                                                                                                                                           |   |                               |                                                                                                                 |
|-------------------------|--------------------------------------------------------------------------------|----|-------------------------------------------------------------------------------------------------------------------------------------------------------------------------------------------------------------------------------------------|---|-------------------------------|-----------------------------------------------------------------------------------------------------------------|
| Caenorhabditis elegans  | solute carrier family 13 (sodium-dependent dicarboxylate transporter) member 3 | 14 | C:GO:0030054;<br>F:GO:0015141;<br>C:GO:0016021;<br>P:GO:0071422;<br>P:GO:0015810;<br>F:GO:0015362;<br>C:GO:0005813;<br>P:GO:0003333;<br>C:GO:0005624;<br>F:GO:0015137;<br>F:GO:0015183;<br>P:GO:0071436;<br>P:GO:0015746;<br>P:GO:0015807 | - |                               | IPR001898; PTHR10283 (PANTHER),<br>PTHR10283:SF15 (PANTHER), SignalP<br>(SIGNALP)                               |
| Caenorhabditis elegans  | large subunit ribosomal protein 16                                             | 9  | P:GO:0006412;<br>P:GO:0009107;<br>P:GO:0040007;<br>F:GO:0003735;<br>F:GO:0051539;<br>C:GO:0015934;<br>P:GO:0002119;<br>P:GO:0009792;<br>F:GO:0016992                                                                                      | - | EC:3.6.5.3;<br>EC:2.8.1.8     | IPR005755; IPR005822                                                                                            |
| -                       | -                                                                              | 0  |                                                                                                                                                                                                                                           |   |                               | SignalP (SIGNALP)                                                                                               |
| -                       | -                                                                              | 0  |                                                                                                                                                                                                                                           |   |                               | -                                                                                                               |
| -                       | -                                                                              | 0  |                                                                                                                                                                                                                                           |   |                               | -                                                                                                               |
| -                       | -                                                                              | 0  |                                                                                                                                                                                                                                           |   |                               | -                                                                                                               |
| -                       | -                                                                              | 0  |                                                                                                                                                                                                                                           |   |                               | -                                                                                                               |
| -                       | -                                                                              | 0  |                                                                                                                                                                                                                                           |   |                               | -                                                                                                               |
| Loa loa                 | atp-binding cassette sub-family d member 4                                     | 7  | P:GO:0055085;<br>C:GO:0016021;<br>F:GO:0042626;<br>C:GO:0005622;<br>P:GO:0006355;<br>F:GO:0005524;<br>F:GO:0008134                                                                                                                        | - |                               | IPR010509; PTHR11384 (PANTHER),<br>PTHR11384:SF3 (PANTHER)                                                      |
| -                       | -                                                                              | 0  |                                                                                                                                                                                                                                           |   |                               | -                                                                                                               |
| Caenorhabditis briggsae | uncharacterized cog2106 family protein                                         | 4  | P:GO:0009792;<br>P:GO:0040010;<br>P:GO:0006898;<br>P:GO:0002119                                                                                                                                                                           | - |                               | IPR003750; G3DSA:3.40.1280.10<br>(GENE3D), SSF75217 (SUPERFAMILY)                                               |
| Caenorhabditis briggsae | reti-l pigment epithelium 65                                                   | 7  | P:GO:0008286;<br>P:GO:0007468;<br>P:GO:0042574;<br>P:GO:0007601;<br>F:GO:0003834;<br>F:GO:0005515;<br>F:GO:0004744                                                                                                                        | - | EC:1.14.99.3<br>6; EC:5.2.1.3 | IPR004294; PTHR10543:SF4<br>(PANTHER)                                                                           |
| -                       | -                                                                              | 0  |                                                                                                                                                                                                                                           |   |                               | -                                                                                                               |
| -                       | -                                                                              | 0  |                                                                                                                                                                                                                                           |   |                               | -                                                                                                               |
| Caenorhabditis briggsae | immunoglobulin i-set domain containing protein                                 | 0  |                                                                                                                                                                                                                                           |   |                               | IPR007110; IPR013098; IPR013783;<br>PTHR19897 (PANTHER),<br>PTHR19897:SF11 (PANTHER),<br>SSF48726 (SUPERFAMILY) |

|                        |                                                                |    |                                                                                                                                                                                                         |                                                                                                                                                                                                                                                                                                                                                 |                                                                                                                                          |
|------------------------|----------------------------------------------------------------|----|---------------------------------------------------------------------------------------------------------------------------------------------------------------------------------------------------------|-------------------------------------------------------------------------------------------------------------------------------------------------------------------------------------------------------------------------------------------------------------------------------------------------------------------------------------------------|------------------------------------------------------------------------------------------------------------------------------------------|
| Caenorhabditis elegans | beta-adrenergic receptor ki-se                                 | 0  |                                                                                                                                                                                                         | P:GO:0006468;<br>F:GO:0005524;<br>F:GO:0016301;<br>P:GO:0007186;<br>F:GO:0004674;<br>F:GO:0004672;<br>P:GO:0007603;<br>F:GO:0004872;<br>F:GO:0004871;<br>F:GO:0004703;<br>F:GO:0001664;<br>F:GO:0000166;<br>P:GO:0016310;<br>P:GO:0007165;<br>P:GO:0008277;<br>P:GO:0007474;<br>P:GO:0016060;<br>F:GO:0035091;<br>F:GO:0016740;<br>F:GO:0050254 | -                                                                                                                                        |
| -                      | -                                                              | 0  |                                                                                                                                                                                                         |                                                                                                                                                                                                                                                                                                                                                 | -                                                                                                                                        |
| -                      | -                                                              | 0  |                                                                                                                                                                                                         |                                                                                                                                                                                                                                                                                                                                                 | -                                                                                                                                        |
| -                      | -                                                              | 0  |                                                                                                                                                                                                         |                                                                                                                                                                                                                                                                                                                                                 | -                                                                                                                                        |
| -                      | -                                                              | 0  |                                                                                                                                                                                                         |                                                                                                                                                                                                                                                                                                                                                 | -                                                                                                                                        |
| -                      | -                                                              | 0  |                                                                                                                                                                                                         |                                                                                                                                                                                                                                                                                                                                                 | G3DSA:3.80.10.10 (GENE3D)                                                                                                                |
| -                      | -                                                              | 0  |                                                                                                                                                                                                         |                                                                                                                                                                                                                                                                                                                                                 | -                                                                                                                                        |
| -                      | -                                                              | 0  |                                                                                                                                                                                                         |                                                                                                                                                                                                                                                                                                                                                 | -                                                                                                                                        |
| Caenorhabditis elegans | laminin alpha chain                                            | 12 | P:GO:0001764;<br>P:GO:0048514;<br>P:GO:0030155;<br>P:GO:0045995;<br>C:GO:0005606;<br>P:GO:0030334;<br>F:GO:0005102;<br>P:GO:0008045;<br>P:GO:0030903;<br>P:GO:0031290;<br>P:GO:0007634;<br>P:GO:0070831 | -                                                                                                                                                                                                                                                                                                                                               | IPR002049; IPR013032; PR00011 (PRINTS), G3DSA:2.10.25.10 (GENE3D), PTHR10574 (PANTHER), PTHR10574:SF38 (PANTHER), SSF57196 (SUPERFAMILY) |
| Caenorhabditis elegans | hypothetical protein B0041.5 [Caenorhabditis elegans]          | 0  |                                                                                                                                                                                                         | P:GO:0007411;<br>P:GO:0019915;<br>P:GO:0007413                                                                                                                                                                                                                                                                                                  | SignalP (SIGNALP)                                                                                                                        |
| -                      | -                                                              | 0  |                                                                                                                                                                                                         |                                                                                                                                                                                                                                                                                                                                                 | -                                                                                                                                        |
| Caenorhabditis elegans | rn207_caee1 ame: full=probable ring finger protein 207 homolog | 3  | F:GO:0008270;<br>C:GO:0005622;<br>F:GO:0005515                                                                                                                                                          | -                                                                                                                                                                                                                                                                                                                                               | PTHR22635 (PANTHER)                                                                                                                      |
| -                      | -                                                              | 0  |                                                                                                                                                                                                         |                                                                                                                                                                                                                                                                                                                                                 | SignalP (SIGNALP)                                                                                                                        |
| -                      | -                                                              | 0  |                                                                                                                                                                                                         |                                                                                                                                                                                                                                                                                                                                                 | -                                                                                                                                        |
| -                      | -                                                              | 0  |                                                                                                                                                                                                         |                                                                                                                                                                                                                                                                                                                                                 | -                                                                                                                                        |
| Loa loa                | tpr domain containing protein                                  | 0  |                                                                                                                                                                                                         | F:GO:0003723;<br>F:GO:0005488;<br>P:GO:0008150                                                                                                                                                                                                                                                                                                  | IPR001440; IPR011990; IPR013026; IPR019734; PTHR23184 (PANTHER), PTHR23184:SF1 (PANTHER), SSF48452 (SUPERFAMILY)                         |
| -                      | -                                                              | 0  |                                                                                                                                                                                                         |                                                                                                                                                                                                                                                                                                                                                 | SignalP (SIGNALP)                                                                                                                        |
| Caenorhabditis elegans | hypothetical protein F41H10.4 [Caenorhabditis elegans]         | 1  | F:GO:0005515                                                                                                                                                                                            |                                                                                                                                                                                                                                                                                                                                                 | -                                                                                                                                        |
| -                      | -                                                              | 0  |                                                                                                                                                                                                         |                                                                                                                                                                                                                                                                                                                                                 | SignalP (SIGNALP)                                                                                                                        |
| Caenorhabditis elegans | hypothetical protein F54D11.2 [Caenorhabditis elegans]         | 0  |                                                                                                                                                                                                         |                                                                                                                                                                                                                                                                                                                                                 | -                                                                                                                                        |

|                         |                                                  |    |                                                                                                                                                                       |                                                                                                                                                                                                                                                            |            |                                                                                                                                            |
|-------------------------|--------------------------------------------------|----|-----------------------------------------------------------------------------------------------------------------------------------------------------------------------|------------------------------------------------------------------------------------------------------------------------------------------------------------------------------------------------------------------------------------------------------------|------------|--------------------------------------------------------------------------------------------------------------------------------------------|
| Caenorhabditis elegans  | major facilitator superfamily protein            | 2  | C:GO:0016021;<br>P:GO:0055085                                                                                                                                         | -                                                                                                                                                                                                                                                          |            | IPR011701; IPR016196; IPR020846;<br>G3DSA:1.20.1250.20 (GENE3D),<br>PTHR11662 (PANTHER),<br>PTHR11662:SF19 (PANTHER), SignalP<br>(SIGNALP) |
| Loa loa                 | tyrosyl-d- phosphodiesterase 1                   | 0  |                                                                                                                                                                       | P:GO:0000012;<br>P:GO:0008219;<br>C:GO:0005634;<br>F:GO:0016787;<br>P:GO:0006974;<br>F:GO:0017005;<br>C:GO:0005737;<br>P:GO:0006302;<br>P:GO:0006281;<br>F:GO:0004527;<br>F:GO:0003697;<br>F:GO:0008081;<br>F:GO:0005515;<br>F:GO:0004518;<br>F:GO:0003690 |            | IPR010347; G3DSA:3.30.870.10<br>(GENE3D), SSF56024 (SUPERFAMILY)                                                                           |
| Caenorhabditis elegans  | major intrinsic protein                          | 10 | P:GO:0050829;<br>P:GO:0008340;<br>F:GO:0015204;<br>F:GO:0015168;<br>F:GO:0015250;<br>P:GO:0000003;<br>P:GO:0045087;<br>P:GO:0006833;<br>P:GO:0015793;<br>C:GO:0016323 | -                                                                                                                                                                                                                                                          |            | IPR000425; IPR022357;<br>PTHR19139:SF11 (PANTHER)                                                                                          |
| Brugia malayi           | abc transporter family protein                   | 4  | F:GO:0042626;<br>P:GO:0055085;<br>F:GO:0005524;<br>C:GO:0016021                                                                                                       | -                                                                                                                                                                                                                                                          |            | -                                                                                                                                          |
| Homo sapiens            | nfs1 nitrogen fixation 1 homolog ( cerevisiae)   | 9  | C:GO:0005829;<br>P:GO:0018283;<br>F:GO:0046872;<br>P:GO:0000096;<br>P:GO:0006461;<br>F:GO:0031071;<br>C:GO:0005759;<br>F:GO:0042803;<br>C:GO:0005634                  | -                                                                                                                                                                                                                                                          | EC:2.8.1.7 | PTHR14360 (PANTHER),<br>PTHR14360:SF2 (PANTHER)                                                                                            |
| Caenorhabditis briggsae | elegans protein confirmed by transcript evidence | 7  | F:GO:0030528;<br>P:GO:0006355;<br>F:GO:0043565;<br>C:GO:0000776;<br>F:GO:0005515;<br>F:GO:0003700;<br>C:GO:0005634                                                    | -                                                                                                                                                                                                                                                          |            | -                                                                                                                                          |
| -                       | -                                                | 0  |                                                                                                                                                                       |                                                                                                                                                                                                                                                            |            | -                                                                                                                                          |
| -                       | -                                                | 0  |                                                                                                                                                                       |                                                                                                                                                                                                                                                            |            | -                                                                                                                                          |
| -                       | -                                                | 0  |                                                                                                                                                                       |                                                                                                                                                                                                                                                            |            | -                                                                                                                                          |
| -                       | -                                                | 0  |                                                                                                                                                                       |                                                                                                                                                                                                                                                            |            | -                                                                                                                                          |

|                         |                                                                       |    |                                                                                                                                                                                                                                                                                                                                                                                   |                                                |              |                                               |
|-------------------------|-----------------------------------------------------------------------|----|-----------------------------------------------------------------------------------------------------------------------------------------------------------------------------------------------------------------------------------------------------------------------------------------------------------------------------------------------------------------------------------|------------------------------------------------|--------------|-----------------------------------------------|
| Loa loa                 | pim-3 oncogene                                                        | 7  | P:GO:0016572;<br>F:GO:0005515;<br>P:GO:0043066;<br>P:GO:0046777;<br>F:GO:0004674;<br>P:GO:0007346;<br>F:GO:0000166                                                                                                                                                                                                                                                                | -                                              | EC:2.7.11.0  | IPR018378                                     |
| Caenorhabditis elegans  | hypothetical protein H35B03.1 [Caenorhabditis elegans]                | 0  |                                                                                                                                                                                                                                                                                                                                                                                   |                                                |              | -                                             |
|                         | -                                                                     | 0  |                                                                                                                                                                                                                                                                                                                                                                                   |                                                |              | -                                             |
| Caenorhabditis briggsae | Hypothetical protein CBG05433 [Caenorhabditis briggsae]               | 0  |                                                                                                                                                                                                                                                                                                                                                                                   | F:GO:0046872;<br>F:GO:0016491;<br>P:GO:0008152 |              | -                                             |
|                         | -                                                                     | 0  |                                                                                                                                                                                                                                                                                                                                                                                   |                                                |              | -                                             |
| Ailuropoda melanoleuca  | heat shock protein hsp 90-alpha                                       | 22 | P:GO:0001764;<br>P:GO:0034619;<br>C:GO:0016323;<br>C:GO:0042470;<br>F:GO:0030911;<br>C:GO:0005829;<br>P:GO:0070096;<br>C:GO:0009986;<br>F:GO:0030235;<br>P:GO:0045429;<br>P:GO:0007165;<br>F:GO:0051082;<br>P:GO:0042026;<br>P:GO:0010592;<br>F:GO:0042803;<br>C:GO:0005625;<br>F:GO:0005524;<br>P:GO:0045585;<br>P:GO:0006986;<br>P:GO:0006839;<br>C:GO:0016324;<br>C:GO:0031012 | -                                              |              | IPR001404; IPR020576; SSF110942 (SUPERFAMILY) |
| Caenorhabditis briggsae | sterol carrier protein x                                              | 9  | F:GO:0032934;<br>F:GO:0008415;<br>F:GO:0016491;<br>C:GO:0005777;<br>F:GO:0005515;<br>P:GO:0019915;<br>P:GO:0008152;<br>P:GO:0007031;<br>C:GO:0005739                                                                                                                                                                                                                              | -                                              |              | -                                             |
| Brugia malayi           | dap (death associated protein ki-se) like ki-se family member (dlk-1) | 7  | P:GO:0006468;<br>F:GO:0046872;<br>C:GO:0030054;<br>F:GO:0005515;<br>F:GO:0005524;<br>F:GO:0004709;<br>C:GO:0045202                                                                                                                                                                                                                                                                | -                                              | EC:2.7.11.25 | -                                             |

|                                     |                                                                                |    |                                                                                                                                                                                        |                                                                 |                           |                                                                                                                                                                                  |
|-------------------------------------|--------------------------------------------------------------------------------|----|----------------------------------------------------------------------------------------------------------------------------------------------------------------------------------------|-----------------------------------------------------------------|---------------------------|----------------------------------------------------------------------------------------------------------------------------------------------------------------------------------|
| Brugia malayi                       | krr1 family protein                                                            | 8  | P:GO:0040035;<br>P:GO:0010171;<br>P:GO:0002119;<br>P:GO:0040010;<br>P:GO:0040011;<br>P:GO:0019915;<br>P:GO:0006898;<br>P:GO:0002009                                                    | -                                                               |                           | IPR007851; IPR018034                                                                                                                                                             |
| Caenorhabditis briggsae             | glit-1                                                                         | 1  | P:GO:0040010                                                                                                                                                                           | -                                                               |                           | IPR002018; G3DSA:3.40.50.1820 (GENE3D), PTHR11559:SF32 (PANTHER), SSF53474 (SUPERFAMILY)                                                                                         |
| Caenorhabditis elegans              | myosin light chain ki-se                                                       | 3  | P:GO:0006468;<br>F:GO:0005524;<br>F:GO:0004674                                                                                                                                         | -                                                               | EC:2.7.11.0               | IPR000719; IPR000900; IPR011009; IPR017441; IPR017442; IPR020675; IPR020680; G3DSA:3.30.200.20 (GENE3D)                                                                          |
| Ancylostoma ceylanicum              | secreted protein 5 precursor                                                   | 0  |                                                                                                                                                                                        | P:GO:0040011;<br>C:GO:0005576                                   |                           | IPR014044                                                                                                                                                                        |
| Caenorhabditis briggsae             | 3-demethylubiquinone-9 3-methyltransferase                                     | 2  | F:GO:0008168;<br>P:GO:0044238                                                                                                                                                          | -                                                               | EC:2.1.1.0                | -                                                                                                                                                                                |
| Caenorhabditis elegans              | ke (drosophila actin-binding) homolog family member (ketn-1)                   | 1  | P:GO:0000003                                                                                                                                                                           | -                                                               |                           | -                                                                                                                                                                                |
| Rhodospseudomonas palustris BisA53  | amp-dependent synthetase and ligase                                            | 0  |                                                                                                                                                                                        | F:GO:0016874;<br>P:GO:0008152;<br>F:GO:0003824                  |                           | SignalP (SIGNALP)                                                                                                                                                                |
| Loa loa                             | ubiquitously transcribed sex (x y) chromosome tetratricopeptide repeat protein | 5  | P:GO:0040035;<br>P:GO:0009792;<br>P:GO:0040018;<br>P:GO:0040010;<br>P:GO:0040011                                                                                                       | -                                                               |                           | PTHR14017 (PANTHER)                                                                                                                                                              |
|                                     |                                                                                | 0  |                                                                                                                                                                                        |                                                                 |                           | -                                                                                                                                                                                |
| Caenorhabditis briggsae             | elegans protein partially confirmed by transcript evidence                     | 0  |                                                                                                                                                                                        | C:GO:0016021                                                    |                           | IPR016196; PTHR23294 (PANTHER)                                                                                                                                                   |
|                                     |                                                                                | 0  |                                                                                                                                                                                        |                                                                 |                           | -                                                                                                                                                                                |
| Caenorhabditis elegans              | asparagine synthetase domain-containing protein 1                              | 0  |                                                                                                                                                                                        | P:GO:0006529;<br>P:GO:0006541;<br>P:GO:0008652;<br>F:GO:0004066 |                           | G3DSA:3.60.20.10 (GENE3D)                                                                                                                                                        |
|                                     |                                                                                | 0  |                                                                                                                                                                                        |                                                                 |                           | -                                                                                                                                                                                |
|                                     |                                                                                | 0  |                                                                                                                                                                                        |                                                                 |                           | -                                                                                                                                                                                |
| Caenorhabditis briggsae             | nicoti-mide nucleotide transhydroge-se                                         | 11 | F:GO:0031177;<br>C:GO:0005746;<br>F:GO:0008750;<br>C:GO:0016021;<br>P:GO:0055114;<br>P:GO:0006099;<br>F:GO:0051287;<br>F:GO:0003957;<br>P:GO:0010467;<br>F:GO:0050661;<br>P:GO:0015992 | -                                                               | EC:1.6.1.2;<br>EC:1.6.1.1 | IPR004003; IPR006162; IPR007698; IPR008143; IPR016040; G3DSA:3.40.50.1220 (GENE3D), PTHR10160 (PANTHER), PTHR10160:SF2 (PANTHER), SSF51735 (SUPERFAMILY), SSF52467 (SUPERFAMILY) |
|                                     |                                                                                | 0  |                                                                                                                                                                                        |                                                                 |                           | -                                                                                                                                                                                |
|                                     |                                                                                | 0  |                                                                                                                                                                                        |                                                                 |                           | -                                                                                                                                                                                |
| Anaeromyxobacter dehalogenans 2CP-C | threonine ammonia- catabolic                                                   | 4  | F:GO:0030170;<br>P:GO:0009097;<br>F:GO:0016597;<br>F:GO:0004794                                                                                                                        | -                                                               | EC:4.3.1.19               | IPR001926; G3DSA:3.40.50.1100 (GENE3D), PTHR10314 (PANTHER), PTHR10314:SF17 (PANTHER)                                                                                            |

|                         |                                                            |    |                                                                                                                                                                                        |                                                                 |                                                                                                                                                                                                                                              |
|-------------------------|------------------------------------------------------------|----|----------------------------------------------------------------------------------------------------------------------------------------------------------------------------------------|-----------------------------------------------------------------|----------------------------------------------------------------------------------------------------------------------------------------------------------------------------------------------------------------------------------------------|
| Caenorhabditis elegans  | briggsae cbr-asp-1 protein                                 | 0  |                                                                                                                                                                                        | P:GO:0006508;<br>F:GO:0004190;<br>F:GO:0016787;<br>F:GO:0008233 | -                                                                                                                                                                                                                                            |
| Caenorhabditis briggsae | elegans protein partially confirmed by transcript evidence | 3  | F:GO:0005044;<br>F:GO:0005488;<br>C:GO:0016020                                                                                                                                         | -                                                               | SignalP (SIGNALP)                                                                                                                                                                                                                            |
| Caenorhabditis elegans  | nematode astacin protease family member (-s-29)            | 0  |                                                                                                                                                                                        | P:GO:0006508;<br>F:GO:0008237;<br>C:GO:0016021;<br>F:GO:0008270 | SignalP (SIGNALP)                                                                                                                                                                                                                            |
| -                       | -                                                          | 0  |                                                                                                                                                                                        |                                                                 | IPR006130                                                                                                                                                                                                                                    |
| -                       | -                                                          | 0  |                                                                                                                                                                                        |                                                                 | -                                                                                                                                                                                                                                            |
| -                       | -                                                          | 0  |                                                                                                                                                                                        |                                                                 | -                                                                                                                                                                                                                                            |
| -                       | -                                                          | 0  |                                                                                                                                                                                        |                                                                 | SignalP (SIGNALP)                                                                                                                                                                                                                            |
| -                       | -                                                          | 0  |                                                                                                                                                                                        |                                                                 | IPR000436                                                                                                                                                                                                                                    |
| Caenorhabditis elegans  | valosin containing protein                                 | 11 | C:GO:0000785;<br>C:GO:0035101;<br>F:GO:0016887;<br>F:GO:0008289;<br>F:GO:0032403;<br>P:GO:0006810;<br>P:GO:0007049;<br>F:GO:0005524;<br>C:GO:0005829;<br>P:GO:0034214;<br>P:GO:0051301 | -                                                               | IPR003338; IPR003593; IPR003959;<br>IPR003960; IPR004201; IPR009010;<br>G3DSA:3.10.330.10 (GENE3D),<br>G3DSA:3.40.50.300 (GENE3D),<br>PTHR23077 (PANTHER),<br>PTHR23077:SF18 (PANTHER),<br>SSF52540 (SUPERFAMILY), SSF54585<br>(SUPERFAMILY) |
| Caenorhabditis briggsae | succi-te dehydroge-se                                      | 10 | P:GO:0006810;<br>P:GO:0040010;<br>P:GO:0022900;<br>F:GO:0048039;<br>C:GO:0016021;<br>C:GO:0005749;<br>P:GO:0006099;<br>P:GO:0002119;<br>F:GO:0020037;<br>P:GO:0009792                  | -                                                               | -                                                                                                                                                                                                                                            |
| -                       | -                                                          | 0  |                                                                                                                                                                                        |                                                                 | -                                                                                                                                                                                                                                            |
| -                       | -                                                          | 0  |                                                                                                                                                                                        |                                                                 | -                                                                                                                                                                                                                                            |
| -                       | -                                                          | 0  |                                                                                                                                                                                        |                                                                 | SignalP (SIGNALP)                                                                                                                                                                                                                            |
| -                       | -                                                          | 0  |                                                                                                                                                                                        |                                                                 | -                                                                                                                                                                                                                                            |
| -                       | -                                                          | 0  |                                                                                                                                                                                        |                                                                 | -                                                                                                                                                                                                                                            |
| -                       | -                                                          | 0  |                                                                                                                                                                                        |                                                                 | -                                                                                                                                                                                                                                            |
| Caenorhabditis elegans  | briggsae cbr-tkr-1 protein                                 | 8  | P:GO:0048265;<br>C:GO:0005886;<br>F:GO:0004995;<br>F:GO:0005515;<br>P:GO:0007165;<br>P:GO:0007186;<br>C:GO:0016021;<br>P:GO:0019915                                                    | -                                                               | -                                                                                                                                                                                                                                            |
| Caenorhabditis briggsae | protein phosphatase 1 regulatory subunit 7                 | 5  | P:GO:0040035;<br>P:GO:0009792;<br>F:GO:0005515;<br>P:GO:0040011;<br>P:GO:0006898                                                                                                       | -                                                               | IPR003603; G3DSA:3.80.10.10<br>(GENE3D), PTHR10588 (PANTHER),<br>PTHR10588:SF28 (PANTHER), PSS1450<br>(PROFILE), SSF52058 (SUPERFAMILY)                                                                                                      |

|                         |                                                          |   |                                                                                                                                                      |                                                                                                                                                                                                                          |              |                                                                          |
|-------------------------|----------------------------------------------------------|---|------------------------------------------------------------------------------------------------------------------------------------------------------|--------------------------------------------------------------------------------------------------------------------------------------------------------------------------------------------------------------------------|--------------|--------------------------------------------------------------------------|
| Caenorhabditis briggsae | Hypothetical protein CBG13279 [Caenorhabditis briggsae]  | 0 |                                                                                                                                                      | F:GO:0004540;<br>F:GO:0004526;<br>P:GO:0008033;<br>P:GO:0016070;<br>C:GO:0005634                                                                                                                                         |              | -                                                                        |
| -                       | -                                                        | 0 |                                                                                                                                                      |                                                                                                                                                                                                                          |              | SignalP (SIGNALP)                                                        |
| Caenorhabditis elegans  | hypothetical protein Y61A9LA.11 [Caenorhabditis elegans] | 0 |                                                                                                                                                      |                                                                                                                                                                                                                          |              | IPR013869                                                                |
| -                       | -                                                        | 0 |                                                                                                                                                      |                                                                                                                                                                                                                          |              | -                                                                        |
| Loa loa                 | amop domain containing protein                           | 0 |                                                                                                                                                      | P:GO:0007160;<br>C:GO:0016021                                                                                                                                                                                            |              | -                                                                        |
| Brugia malayi           | ancient conserved domain protein                         | 0 |                                                                                                                                                      | F:GO:0004872;<br>F:GO:0004871;<br>F:GO:0004930;<br>C:GO:0016021;<br>P:GO:0007165;<br>P:GO:0007186                                                                                                                        |              | IPR002550; PTHR12064 (PANTHER),<br>PTHR12064:SF6 (PANTHER)               |
| -                       | -                                                        | 0 |                                                                                                                                                      |                                                                                                                                                                                                                          |              | SignalP (SIGNALP)                                                        |
| Caenorhabditis briggsae | elegans protein confirmed by transcript evidence         | 5 | P:GO:0046686;<br>C:GO:0005764;<br>P:GO:0040010;<br>P:GO:0008340;<br>C:GO:0016021                                                                     | -                                                                                                                                                                                                                        |              | IPR012336; PTHR12289 (PANTHER),<br>PTHR12289:SF2 (PANTHER)               |
| Loa loa                 | lycerol ki-se family member (dgc-1)                      | 9 | F:GO:0004143;<br>F:GO:0008270;<br>F:GO:0003676;<br>P:GO:0023034;<br>F:GO:0005515;<br>F:GO:0000166;<br>F:GO:0019992;<br>P:GO:0007165;<br>P:GO:0007205 | -                                                                                                                                                                                                                        | EC:2.7.1.107 | IPR001206; PTHR11255 (PANTHER),<br>PTHR11255:SF8 (PANTHER)               |
| -                       | -                                                        | 0 |                                                                                                                                                      |                                                                                                                                                                                                                          |              | -                                                                        |
| Caenorhabditis elegans  | briggsae cbr-cdh-12 protein                              | 0 |                                                                                                                                                      | F:GO:0005509;<br>P:GO:0007156;<br>P:GO:0007155;<br>C:GO:0016021;<br>C:GO:0016020;<br>C:GO:0005886                                                                                                                        |              | SignalP (SIGNALP)                                                        |
| -                       | -                                                        | 0 |                                                                                                                                                      |                                                                                                                                                                                                                          |              | SignalP (SIGNALP)                                                        |
| -                       | -                                                        | 0 |                                                                                                                                                      |                                                                                                                                                                                                                          |              | -                                                                        |
| Caenorhabditis elegans  | d- gyrase topoisomerase a subunit family protein         | 0 |                                                                                                                                                      | F:GO:0003918;<br>F:GO:0003916;<br>P:GO:0006265;<br>C:GO:0005694;<br>F:GO:0003700;<br>P:GO:0006259;<br>C:GO:0005634;<br>F:GO:0003677;<br>F:GO:0000166;<br>F:GO:0005524;<br>C:GO:0005654;<br>P:GO:0006355;<br>F:GO:0016853 |              | IPR002205; IPR013757; PTHR10169<br>(PANTHER), PTHR10169:SF2<br>(PANTHER) |
| -                       | -                                                        | 0 |                                                                                                                                                      |                                                                                                                                                                                                                          |              | -                                                                        |
| -                       | -                                                        | 0 |                                                                                                                                                      |                                                                                                                                                                                                                          |              | SignalP (SIGNALP)                                                        |



|                         |                                                                                                                              |    |                                                                                                                                                                                                                                                                                                                                                                                                                                                                                         |   |             |                                                                                 |
|-------------------------|------------------------------------------------------------------------------------------------------------------------------|----|-----------------------------------------------------------------------------------------------------------------------------------------------------------------------------------------------------------------------------------------------------------------------------------------------------------------------------------------------------------------------------------------------------------------------------------------------------------------------------------------|---|-------------|---------------------------------------------------------------------------------|
| Caenorhabditis elegans  | atp-binding sub-family a member 3                                                                                            | 6  | F:GO:0016887;<br>F:GO:0003872;<br>C:GO:0005945;<br>F:GO:0005524;<br>P:GO:0006096;<br>C:GO:0016021                                                                                                                                                                                                                                                                                                                                                                                       | - | EC:2.7.1.11 | G3DSA:3.40.50.300 (GENE3D),<br>PTHR19229 (PANTHER),<br>PTHR19229:SF27 (PANTHER) |
| Caenorhabditis elegans  | glucosylceramidase precursor (beta-glucocerebrosidase) (acid beta-glucosidase) (d-glucosyl-n-acylsphingosine glucohydrolase) | 3  | F:GO:0016798;<br>P:GO:0009987;<br>P:GO:0044238                                                                                                                                                                                                                                                                                                                                                                                                                                          | - |             | -                                                                               |
| Homo sapiens            | -dh dehydroge-se                                                                                                             | 5  | P:GO:0006120;<br>F:GO:0008137;<br>P:GO:0006810;<br>C:GO:0005747;<br>C:GO:0016021                                                                                                                                                                                                                                                                                                                                                                                                        | - | EC:1.6.5.3  | PTHR17098 (PANTHER), SignalP (SIGNALP)                                          |
| -                       | -                                                                                                                            | 0  |                                                                                                                                                                                                                                                                                                                                                                                                                                                                                         |   |             | -                                                                               |
| -                       | -                                                                                                                            | 0  |                                                                                                                                                                                                                                                                                                                                                                                                                                                                                         |   |             | -                                                                               |
| Dugesia japonica        | zinc c2h2 type family protein                                                                                                | 28 | F:GO:0005927;<br>C:GO:0005929;<br>P:GO:0007548;<br>P:GO:0021938;<br>F:GO:0008270;<br>P:GO:0001649;<br>F:GO:0008022;<br>P:GO:0021696;<br>P:GO:0007283;<br>P:GO:0021521;<br>P:GO:0009913;<br>P:GO:0060032;<br>F:GO:0016563;<br>C:GO:0005829;<br>P:GO:0050767;<br>F:GO:0008017;<br>P:GO:0021508;<br>P:GO:0019101;<br>F:GO:0003705;<br>P:GO:0019099;<br>P:GO:0045944;<br>P:GO:0031290;<br>P:GO:0009954;<br>F:GO:0003682;<br>P:GO:0045740;<br>P:GO:0048855;<br>C:GO:0005634;<br>C:GO:0035301 | - |             | -                                                                               |
| -                       | -                                                                                                                            | 0  |                                                                                                                                                                                                                                                                                                                                                                                                                                                                                         |   |             | -                                                                               |
| Caenorhabditis elegans  | elegans protein confirmed by transcript evidence                                                                             | 0  |                                                                                                                                                                                                                                                                                                                                                                                                                                                                                         |   |             | PTHR20846 (PANTHER)                                                             |
| Caenorhabditis elegans  | fatty acid desaturase                                                                                                        | 3  | P:GO:0055114;<br>F:GO:0016491;<br>P:GO:0006629                                                                                                                                                                                                                                                                                                                                                                                                                                          | - |             | IPR005804; IPR013032                                                            |
| -                       | -                                                                                                                            | 0  |                                                                                                                                                                                                                                                                                                                                                                                                                                                                                         |   |             | -                                                                               |
| Caenorhabditis briggsae | elegans protein partially confirmed by transcript evidence                                                                   | 3  | F:GO:0022891;<br>C:GO:0016021;<br>P:GO:0055085                                                                                                                                                                                                                                                                                                                                                                                                                                          | - |             | -                                                                               |
| -                       | -                                                                                                                            | 0  |                                                                                                                                                                                                                                                                                                                                                                                                                                                                                         |   |             | -                                                                               |

|                         |                                                                                                         |    |                                                                                                                                                                                                                                           |                                                                                                                                                                                                         |                                          |                                                                                        |
|-------------------------|---------------------------------------------------------------------------------------------------------|----|-------------------------------------------------------------------------------------------------------------------------------------------------------------------------------------------------------------------------------------------|---------------------------------------------------------------------------------------------------------------------------------------------------------------------------------------------------------|------------------------------------------|----------------------------------------------------------------------------------------|
| Caenorhabditis elegans  | hypothetical protein K09H11.1 [Caenorhabditis elegans]                                                  | 0  |                                                                                                                                                                                                                                           | F:GO:0016627;<br>F:GO:0050660;<br>F:GO:0016787;<br>F:GO:0003995;<br>P:GO:0006468;<br>F:GO:0005524;<br>P:GO:0055114;<br>F:GO:0004713;<br>F:GO:0016491;<br>F:GO:0003824;<br>P:GO:0006508;<br>P:GO:0008152 | -                                        |                                                                                        |
|                         | -                                                                                                       | 0  |                                                                                                                                                                                                                                           |                                                                                                                                                                                                         |                                          | PTHR22775 (PANTHER),<br>PTHR22775:SF8 (PANTHER)                                        |
|                         | -                                                                                                       | 0  |                                                                                                                                                                                                                                           |                                                                                                                                                                                                         |                                          | -                                                                                      |
| Caenorhabditis elegans  | statb_caee1.1: full=signal transducer and activator of transcription b; full=zinc finger protein stat-b | 7  | F:GO:0003700;<br>F:GO:0004871;<br>F:GO:0005515;<br>F:GO:0005509;<br>P:GO:0007165;<br>C:GO:0005634;<br>P:GO:0006355                                                                                                                        | -                                                                                                                                                                                                       | -                                        |                                                                                        |
| Homo sapiens            | thymidine phosphorylase                                                                                 | 14 | P:GO:0001525;<br>F:GO:0005161;<br>P:GO:0006220;<br>P:GO:0006213;<br>P:GO:0006260;<br>P:GO:0006935;<br>P:GO:0000002;<br>P:GO:0009887;<br>P:GO:0006206;<br>P:GO:0030154;<br>F:GO:0016154;<br>F:GO:0004645;<br>F:GO:0009032;<br>F:GO:0008083 | -                                                                                                                                                                                                       | EC:2.4.2.2;<br>EC:2.4.1.1;<br>EC:2.4.2.4 | -                                                                                      |
| Ancylostoma caninum     | briggsae cbr-vap-1 protein                                                                              | 0  |                                                                                                                                                                                                                                           | P:GO:0040011;<br>P:GO:0006898;<br>C:GO:0005576                                                                                                                                                          | -                                        | -                                                                                      |
| Caenorhabditis elegans  | hypothetical protein ZC581.9 [Caenorhabditis elegans]                                                   | 1  | F:GO:0005488                                                                                                                                                                                                                              | -                                                                                                                                                                                                       | -                                        | -                                                                                      |
| Caenorhabditis briggsae | transmembrane protein 57                                                                                | 1  | C:GO:0044464                                                                                                                                                                                                                              | -                                                                                                                                                                                                       | -                                        | IPR019130                                                                              |
|                         | -                                                                                                       | 0  |                                                                                                                                                                                                                                           |                                                                                                                                                                                                         |                                          | -                                                                                      |
|                         | -                                                                                                       | 0  |                                                                                                                                                                                                                                           |                                                                                                                                                                                                         |                                          | -                                                                                      |
| Caenorhabditis elegans  | elegans protein confirmed by transcript evidence                                                        | 1  | C:GO:0005737                                                                                                                                                                                                                              | -                                                                                                                                                                                                       | -                                        | IPR010504; PTHR12141 (PANTHER),<br>PTHR12141:SF1 (PANTHER),<br>SSF103657 (SUPERFAMILY) |
|                         | -                                                                                                       | 0  |                                                                                                                                                                                                                                           |                                                                                                                                                                                                         |                                          | -                                                                                      |
|                         | -                                                                                                       | 0  |                                                                                                                                                                                                                                           |                                                                                                                                                                                                         |                                          | -                                                                                      |
| Bombyx mori             | endonuclease-reverse transcriptase                                                                      | 1  | F:GO:0003824                                                                                                                                                                                                                              | -                                                                                                                                                                                                       | -                                        | -                                                                                      |
|                         | -                                                                                                       | 0  |                                                                                                                                                                                                                                           |                                                                                                                                                                                                         |                                          | -                                                                                      |
|                         | -                                                                                                       | 0  |                                                                                                                                                                                                                                           |                                                                                                                                                                                                         |                                          | -                                                                                      |
| Caenorhabditis briggsae | elegans protein partially confirmed by transcript evidence                                              | 3  | P:GO:0008152;<br>F:GO:0005515;<br>F:GO:0016740                                                                                                                                                                                            | -                                                                                                                                                                                                       | -                                        | IPR002213; PTHR11926:SF3<br>(PANTHER), SignalP (SIGNALP)                               |
| Caenorhabditis elegans  | hypothetical protein Y59C2A.1 [Caenorhabditis elegans]                                                  | 0  |                                                                                                                                                                                                                                           |                                                                                                                                                                                                         |                                          | PTHR11705 (PANTHER)                                                                    |
| Ancylostoma caninum     | secreted protein asp-2                                                                                  | 0  |                                                                                                                                                                                                                                           | P:GO:0040011;<br>C:GO:0005576                                                                                                                                                                           | -                                        | IPR001283; IPR002413; IPR014044;<br>PTHR10334:SF11 (PANTHER)                           |

|                                          |                                                                                                                                                                         |   |                                                                                                                                                      |                               |             |                                                            |
|------------------------------------------|-------------------------------------------------------------------------------------------------------------------------------------------------------------------------|---|------------------------------------------------------------------------------------------------------------------------------------------------------|-------------------------------|-------------|------------------------------------------------------------|
| Caenorhabditis elegans                   | elegans protein partially confirmed by transcript evidence                                                                                                              | 0 |                                                                                                                                                      | P:GO:0008340;<br>C:GO:0005576 |             | SignalP (SIGNALP)                                          |
| Ancylostoma caninum                      | elegans protein partially confirmed by transcript evidence                                                                                                              | 0 |                                                                                                                                                      | P:GO:0040011;<br>C:GO:0005576 |             | SignalP (SIGNALP)                                          |
| Ancylostoma caninum                      | secreted protein asp-2                                                                                                                                                  | 0 |                                                                                                                                                      | P:GO:0040011;<br>C:GO:0005576 |             | SignalP (SIGNALP)                                          |
| Streptomyces viridochromogenes DSM 40736 | hypothetical protein SvirD4_18528 [Streptomyces viridochromogenes DSM 40736]                                                                                            | 0 |                                                                                                                                                      |                               |             | -                                                          |
| Caenorhabditis elegans                   | briggsae cbr-dys-1 protein                                                                                                                                              | 7 | P:GO:0007271;<br>F:GO:0005515;<br>P:GO:0040017;<br>C:GO:0016010;<br>F:GO:0005277;<br>P:GO:0015870;<br>P:GO:0046716                                   | -                             |             | -                                                          |
| Caenorhabditis elegans                   | tbc (tre-2 bub2 cdc16) domain family member (tbc-11)                                                                                                                    | 0 |                                                                                                                                                      | P:GO:0032313;<br>C:GO:0005622 |             | -                                                          |
|                                          | -                                                                                                                                                                       | 0 |                                                                                                                                                      |                               |             | -                                                          |
| Caenorhabditis elegans                   | juvenile hormone diol ki-se                                                                                                                                             | 1 | F:GO:0003824                                                                                                                                         | -                             |             | IPR011992; IPR018247; IPR018249;<br>SSF47473 (SUPERFAMILY) |
| Caenorhabditis briggsae                  | galt_caeel ame: full=probable galactose-1-phosphate uridylyltransferase short=gal-1-p uridylyltransferase ame: full=udp-glucose--hexose-1-phosphate uridylyltransferase | 2 | C:GO:0005829;<br>F:GO:0008108                                                                                                                        | -                             | EC:2.7.7.12 | IPR001937; IPR005849; IPR011146;<br>IPR011151              |
|                                          | -                                                                                                                                                                       | 0 |                                                                                                                                                      |                               |             | SignalP (SIGNALP)                                          |
|                                          | -                                                                                                                                                                       | 0 |                                                                                                                                                      |                               |             | -                                                          |
| Caenorhabditis elegans                   | briggsae cbr-nsy-1 protein                                                                                                                                              | 3 | F:GO:0005515;<br>F:GO:0004672;<br>F:GO:0000166                                                                                                       | -                             |             | -                                                          |
|                                          | -                                                                                                                                                                       | 0 |                                                                                                                                                      |                               |             | -                                                          |
| Danio rerio                              | nucleolar and coiled-body phosphoprotein 1-like                                                                                                                         | 0 |                                                                                                                                                      |                               |             | SignalP (SIGNALP)                                          |
| Rhodococcus jostii RHA1                  | nolc1l protein                                                                                                                                                          | 0 |                                                                                                                                                      | P:GO:0030261;<br>F:GO:0003677 |             | SignalP (SIGNALP)                                          |
| Rhodococcus jostii RHA1                  | nucleolar and coiled-body phosphoprotein 1-like                                                                                                                         | 0 |                                                                                                                                                      | P:GO:0030261;<br>F:GO:0003677 |             | SignalP (SIGNALP)                                          |
|                                          | -                                                                                                                                                                       | 0 |                                                                                                                                                      |                               |             | -                                                          |
|                                          | -                                                                                                                                                                       | 0 |                                                                                                                                                      |                               |             | -                                                          |
|                                          | -                                                                                                                                                                       | 0 |                                                                                                                                                      |                               |             | -                                                          |
|                                          | -                                                                                                                                                                       | 0 |                                                                                                                                                      |                               |             | -                                                          |
| Caenorhabditis briggsae                  | briggsae cbr-cln- protein                                                                                                                                               | 9 | P:GO:0008340;<br>C:GO:0016020;<br>P:GO:0006665;<br>C:GO:0005794;<br>P:GO:0046662;<br>P:GO:0009792;<br>P:GO:0016043;<br>C:GO:0044446;<br>P:GO:0006873 | -                             |             | IPR003492; SignalP (SIGNALP)                               |
|                                          | -                                                                                                                                                                       | 0 |                                                                                                                                                      |                               |             | -                                                          |
|                                          | -                                                                                                                                                                       | 0 |                                                                                                                                                      |                               |             | -                                                          |
|                                          | -                                                                                                                                                                       | 0 |                                                                                                                                                      |                               |             | -                                                          |
|                                          | -                                                                                                                                                                       | 0 |                                                                                                                                                      |                               |             | IPR016059                                                  |
|                                          | -                                                                                                                                                                       | 0 |                                                                                                                                                      |                               |             | -                                                          |
|                                          | -                                                                                                                                                                       | 0 |                                                                                                                                                      |                               |             | -                                                          |
| Caenorhabditis elegans                   | component of oligomeric golgi complex 1                                                                                                                                 | 1 | F:GO:0005515                                                                                                                                         | -                             |             | IPR014812                                                  |
| Caenorhabditis elegans                   | elegans protein confirmed by transcript evidence                                                                                                                        | 0 |                                                                                                                                                      | F:GO:0005488;<br>C:GO:0016021 |             | -                                                          |
|                                          | -                                                                                                                                                                       | 0 |                                                                                                                                                      |                               |             | -                                                          |

|                         |                                                                             |   |                                                                                                                                     |             |                                                                                                                                           |
|-------------------------|-----------------------------------------------------------------------------|---|-------------------------------------------------------------------------------------------------------------------------------------|-------------|-------------------------------------------------------------------------------------------------------------------------------------------|
|                         | -                                                                           | 0 |                                                                                                                                     |             | -                                                                                                                                         |
|                         | -                                                                           | 0 |                                                                                                                                     |             | -                                                                                                                                         |
| Caenorhabditis elegans  | cg9125-pa                                                                   | 0 |                                                                                                                                     |             | PTHR12395 (PANTHER)                                                                                                                       |
|                         | -                                                                           | 0 |                                                                                                                                     |             | IPR016135                                                                                                                                 |
| Caenorhabditis briggsae | dihydroorotate dehydroge-se                                                 | 8 | P:GO:0043065;<br>F:GO:0004158;<br>C:GO:0016021;<br>C:GO:0005743;<br>P:GO:0055114;<br>P:GO:0006222;<br>P:GO:0090140;<br>P:GO:0006207 | EC:1.3.3.1  | IPR012135; IPR013785; PTHR11938 (PANTHER), PTHR11938:SF7 (PANTHER)                                                                        |
|                         | -                                                                           | 0 |                                                                                                                                     |             | -                                                                                                                                         |
|                         | -                                                                           | 0 |                                                                                                                                     |             | -                                                                                                                                         |
|                         | -                                                                           | 0 |                                                                                                                                     |             | -                                                                                                                                         |
| Loa loa                 | hypothetical protein LOAG_10773 [Loa loa]                                   | 0 |                                                                                                                                     |             | SignalP (SIGNALP)                                                                                                                         |
|                         | -                                                                           | 0 |                                                                                                                                     |             | SignalP (SIGNALP)                                                                                                                         |
| Caenorhabditis briggsae | Hypothetical protein CBG18219 [Caenorhabditis briggsae]                     | 0 |                                                                                                                                     |             | -                                                                                                                                         |
| Caenorhabditis brenneri | protein ki-se domain containing protein                                     | 2 | F:GO:0016301;<br>P:GO:0040010                                                                                                       | -           | PTHR11909 (PANTHER), PTHR11909:SF19 (PANTHER)                                                                                             |
| Caenorhabditis elegans  | solute carrier family 2 (facilitated glucose fructose transporter) member 5 | 4 | P:GO:0009792;<br>C:GO:0005886;<br>F:GO:0005353;<br>P:GO:0008643                                                                     | -           | IPR005828; IPR005829; IPR016196; IPR020846; G3DSA:1.20.1250.20 (GENE3D), PTHR11600 (PANTHER), PTHR11600:SF12 (PANTHER), SignalP (SIGNALP) |
| Caenorhabditis elegans  | elegans protein confirmed by transcript evidence                            | 0 |                                                                                                                                     |             | -                                                                                                                                         |
| Loa loa                 | neuralized family protein                                                   | 4 | F:GO:0008270;<br>F:GO:0005515;<br>P:GO:0009792;<br>P:GO:0000003                                                                     | -           | IPR006573; PTHR12429 (PANTHER)                                                                                                            |
|                         | -                                                                           | 0 |                                                                                                                                     |             | -                                                                                                                                         |
| Caenorhabditis elegans  | vitellogenin receptor                                                       | 3 | F:GO:0004872;<br>C:GO:0016021;<br>F:GO:0005509                                                                                      | -           | IPR011042; PTHR10529 (PANTHER), PTHR10529:SF2 (PANTHER)                                                                                   |
|                         | -                                                                           | 0 |                                                                                                                                     |             | -                                                                                                                                         |
| Caenorhabditis elegans  | transmembrane 9 superfamily protein member 4                                | 5 | P:GO:0035010;<br>P:GO:0050829;<br>C:GO:0016021;<br>P:GO:0006911;<br>F:GO:0005215                                                    | -           | IPR004240; PTHR10766:SF12 (PANTHER)                                                                                                       |
|                         | -                                                                           | 0 |                                                                                                                                     |             | -                                                                                                                                         |
| Caenorhabditis elegans  | immunoglobulin i-set domain containing protein                              | 0 |                                                                                                                                     |             | -                                                                                                                                         |
|                         | -                                                                           | 0 |                                                                                                                                     |             | -                                                                                                                                         |
|                         | -                                                                           | 0 |                                                                                                                                     |             | -                                                                                                                                         |
|                         | -                                                                           | 0 |                                                                                                                                     |             | -                                                                                                                                         |
|                         | -                                                                           | 0 |                                                                                                                                     |             | SignalP (SIGNALP)                                                                                                                         |
| Branchiostoma floridae  | atp-binding cassette sub-family b member mitochondrial                      | 7 | P:GO:0071585;<br>P:GO:0070574;<br>F:GO:0008559;<br>C:GO:0016021;<br>C:GO:0005774;<br>F:GO:0005524;<br>F:GO:0015086                  | EC:3.6.3.44 | G3DSA:1.20.1560.10 (GENE3D), PTHR19242 (PANTHER), PTHR19242:SF69 (PANTHER), SignalP (SIGNALP)                                             |
|                         | -                                                                           | 0 |                                                                                                                                     |             | IPR008937; PTHR23113:SF22 (PANTHER)                                                                                                       |

|                         |                                                            |    |                                                                                                                                                                                                                                                                                                                                                                                                                                                       |   |                                                                                  |                                                                            |
|-------------------------|------------------------------------------------------------|----|-------------------------------------------------------------------------------------------------------------------------------------------------------------------------------------------------------------------------------------------------------------------------------------------------------------------------------------------------------------------------------------------------------------------------------------------------------|---|----------------------------------------------------------------------------------|----------------------------------------------------------------------------|
| Caenorhabditis elegans  | elegans protein partially confirmed by transcript evidence | 0  |                                                                                                                                                                                                                                                                                                                                                                                                                                                       |   |                                                                                  | IPR019395; PTHR13624 (PANTHER), PTHR13624:SF1 (PANTHER), SignalP (SIGNALP) |
| Caenorhabditis briggsae | ring finger protein 146                                    | 1  | F:GO:0005488                                                                                                                                                                                                                                                                                                                                                                                                                                          | - |                                                                                  | IPR004170; PTHR13417 (PANTHER), SSF117839 (SUPERFAMILY)                    |
| Caenorhabditis elegans  | chondroitin synthase                                       | 7  | P:GO:0040035;<br>P:GO:0009792;<br>P:GO:0000910;<br>P:GO:0048871;<br>P:GO:0006898;<br>C:GO:0016020;<br>F:GO:0016758                                                                                                                                                                                                                                                                                                                                    | - | EC:2.4.1.0                                                                       | IPR003378; IPR008428; SignalP (SIGNALP)                                    |
| Caenorhabditis elegans  | chondroitin synthase                                       | 7  | P:GO:0040035;<br>P:GO:0009792;<br>P:GO:0000910;<br>P:GO:0048871;<br>P:GO:0006898;<br>C:GO:0016020;<br>F:GO:0016758                                                                                                                                                                                                                                                                                                                                    | - | EC:2.4.1.0                                                                       | IPR003378; IPR008428; SignalP (SIGNALP)                                    |
|                         | -                                                          | 0  |                                                                                                                                                                                                                                                                                                                                                                                                                                                       |   |                                                                                  | IPR002857                                                                  |
|                         |                                                            | 0  |                                                                                                                                                                                                                                                                                                                                                                                                                                                       |   |                                                                                  | SignalP (SIGNALP)                                                          |
| Homo sapiens            | actin binding 1a                                           | 26 | C:GO:0030670;<br>P:GO:0043029;<br>F:GO:0043548;<br>P:GO:0030217;<br>C:GO:0030027;<br>P:GO:0008360;<br>P:GO:0048873;<br>F:GO:0008022;<br>C:GO:0031941;<br>C:GO:0001891;<br>P:GO:0050918;<br>P:GO:0006816;<br>P:GO:0051126;<br>P:GO:0032796;<br>P:GO:0001845;<br>P:GO:0042102;<br>C:GO:0001772;<br>P:GO:0034097;<br>P:GO:0031589;<br>F:GO:0051015;<br>F:GO:0042803;<br>C:GO:0030864;<br>P:GO:0030335;<br>P:GO:0045087;<br>C:GO:0005634;<br>P:GO:0030595 | - |                                                                                  | IPR015048; IPR015505                                                       |
|                         | -                                                          | 0  |                                                                                                                                                                                                                                                                                                                                                                                                                                                       |   |                                                                                  | -                                                                          |
|                         | -                                                          | 0  |                                                                                                                                                                                                                                                                                                                                                                                                                                                       |   |                                                                                  | -                                                                          |
| Caenorhabditis elegans  | major facilitator superfamily protein                      | 0  |                                                                                                                                                                                                                                                                                                                                                                                                                                                       |   | C:GO:0016021;<br>C:GO:0016020;<br>P:GO:0055085;<br>F:GO:0005215;<br>P:GO:0006810 | PTHR11600 (PANTHER), PTHR11600:SF28 (PANTHER), SignalP (SIGNALP)           |
|                         | -                                                          | 0  |                                                                                                                                                                                                                                                                                                                                                                                                                                                       |   |                                                                                  | -                                                                          |
|                         | -                                                          | 0  |                                                                                                                                                                                                                                                                                                                                                                                                                                                       |   |                                                                                  | -                                                                          |

|                        |                                                       |    |                                                                                                                                                                                        |                                                                                                                                                                                                         |                                                                                                                        |
|------------------------|-------------------------------------------------------|----|----------------------------------------------------------------------------------------------------------------------------------------------------------------------------------------|---------------------------------------------------------------------------------------------------------------------------------------------------------------------------------------------------------|------------------------------------------------------------------------------------------------------------------------|
| Ailuropoda melanoleuca | squamous cell carcinoma antigen recognized by t cells | 7  | P:GO:0007050;<br>C:GO:0005829;<br>C:GO:0015030;<br>P:GO:0045585;<br>C:GO:0005681;<br>P:GO:0000387;<br>P:GO:0008629                                                                     | -                                                                                                                                                                                                       | IPR005011                                                                                                              |
| Bos taurus             | secreted cysteine-rich                                | 0  |                                                                                                                                                                                        | P:GO:0071363;<br>P:GO:0001503;<br>C:GO:0005604;<br>F:GO:0050840;<br>C:GO:0005578;<br>C:GO:0031012;<br>F:GO:0005518;<br>C:GO:0005576;<br>C:GO:0031093;<br>F:GO:0005515;<br>P:GO:0042127;<br>F:GO:0005509 | -                                                                                                                      |
| Caenorhabditis elegans | transport integral membrane protein                   | 8  | C:GO:0009986;<br>P:GO:0006833;<br>F:GO:0015168;<br>P:GO:0000003;<br>F:GO:0015204;<br>C:GO:0016021;<br>F:GO:0015250;<br>P:GO:0015793                                                    | -                                                                                                                                                                                                       | IPR000425; PTHR19139:SF11<br>(PANTHER), SignalP (SIGNALP)                                                              |
| Brugia malayi          | enhancer of ezh                                       | 0  |                                                                                                                                                                                        | F:GO:0003677                                                                                                                                                                                            | IPR001214; G3DSA:2.170.270.10<br>(GENE3D), PTHR22884 (PANTHER),<br>PTHR22884:SF18 (PANTHER),<br>SSF82199 (SUPERFAMILY) |
| -                      | -                                                     | 0  |                                                                                                                                                                                        |                                                                                                                                                                                                         | -                                                                                                                      |
| -                      | -                                                     | 0  |                                                                                                                                                                                        |                                                                                                                                                                                                         | -                                                                                                                      |
| Caenorhabditis elegans | proto-oncogene serine threonine-protein ki-se pim-1   | 11 | F:GO:0004674;<br>F:GO:0030145;<br>P:GO:0043433;<br>F:GO:0005524;<br>F:GO:0008134;<br>P:GO:0007275;<br>P:GO:0046777;<br>P:GO:0008283;<br>P:GO:0043066;<br>C:GO:0005737;<br>P:GO:0031659 | -                                                                                                                                                                                                       | EC:2.7.11.0<br>IPR000719; IPR011009; IPR017442;<br>G3DSA:1.10.510.10 (GENE3D),<br>PTHR22984 (PANTHER)                  |
|                        |                                                       |    |                                                                                                                                                                                        |                                                                                                                                                                                                         | IPR003961; IPR008957; IPR013783;<br>PR00014 (PRINTS), PTHR19900<br>(PANTHER), PTHR19900:SF7<br>(PANTHER)               |
| -                      | -                                                     | 0  |                                                                                                                                                                                        |                                                                                                                                                                                                         | -                                                                                                                      |
| -                      | -                                                     | 0  |                                                                                                                                                                                        |                                                                                                                                                                                                         | -                                                                                                                      |
| -                      | -                                                     | 0  |                                                                                                                                                                                        |                                                                                                                                                                                                         | -                                                                                                                      |
| -                      | -                                                     | 0  |                                                                                                                                                                                        |                                                                                                                                                                                                         | -                                                                                                                      |

|                         |                                                         |    |                                                                                                                                                                                                                                                                                                                                                                                                                                                                                          |                                                                                                                                                      |             |                                                                 |
|-------------------------|---------------------------------------------------------|----|------------------------------------------------------------------------------------------------------------------------------------------------------------------------------------------------------------------------------------------------------------------------------------------------------------------------------------------------------------------------------------------------------------------------------------------------------------------------------------------|------------------------------------------------------------------------------------------------------------------------------------------------------|-------------|-----------------------------------------------------------------|
| Homo sapiens            | cd44 antigen isoform 5 precursor                        | 30 | P:GO:0000026;<br>F:GO:0005057;<br>P:GO:0007160;<br>P:GO:0070374;<br>P:GO:0033138;<br>P:GO:0001558;<br>P:GO:0033189;<br>F:GO:0051219;<br>P:GO:0016337;<br>C:GO:0016323;<br>F:GO:0005540;<br>P:GO:0043518;<br>P:GO:0031175;<br>P:GO:0001955;<br>P:GO:0014070;<br>P:GO:0001658;<br>P:GO:0033031;<br>P:GO:0060442;<br>C:GO:0043234;<br>C:GO:0009897;<br>P:GO:0050731;<br>F:GO:0004872;<br>F:GO:0005518;<br>C:GO:0005887;<br>C:GO:0005634;<br>P:GO:0002246;<br>P:GO:0016477;<br>P:GO:0043066; | -                                                                                                                                                    |             | IPR001231; PTHR10225 (PANTHER),<br>SignalP (SIGNALP)            |
| Caenorhabditis briggsae | Hypothetical protein CBG12788 [Caenorhabditis briggsae] | 0  |                                                                                                                                                                                                                                                                                                                                                                                                                                                                                          | F:GO:0046872;<br>F:GO:0008270                                                                                                                        | -           |                                                                 |
| Haemonchus contortus    | elegans protein confirmed by transcript evidence        | 3  | F:GO:0005515;<br>F:GO:0005529;<br>P:GO:0000003                                                                                                                                                                                                                                                                                                                                                                                                                                           | -                                                                                                                                                    |             | -                                                               |
|                         | -                                                       | 0  |                                                                                                                                                                                                                                                                                                                                                                                                                                                                                          |                                                                                                                                                      |             | -                                                               |
|                         | -                                                       | 0  |                                                                                                                                                                                                                                                                                                                                                                                                                                                                                          |                                                                                                                                                      |             | -                                                               |
| Caenorhabditis briggsae | Hypothetical protein CBG01673 [Caenorhabditis briggsae] | 0  |                                                                                                                                                                                                                                                                                                                                                                                                                                                                                          | C:GO:0005634;<br>F:GO:0000166;<br>F:GO:0008134;<br>F:GO:0017111;<br>F:GO:0005524;<br>F:GO:0016887;<br>P:GO:0006355;<br>C:GO:0005622;<br>P:GO:0043254 |             | PTHR22908 (PANTHER),<br>PTHR22908:SF13 (PANTHER)                |
| Loa loa                 | fyve finger-containing phosphoinositide                 | 11 | P:GO:0042147;<br>C:GO:0031901;<br>P:GO:0044238;<br>P:GO:0034504;<br>F:GO:0046872;<br>F:GO:0016308;<br>F:GO:0005515;<br>C:GO:0045121;<br>F:GO:0000166;<br>P:GO:0006898;<br>P:GO:0044237                                                                                                                                                                                                                                                                                                   | -                                                                                                                                                    | EC:2.7.1.68 | -                                                               |
| Homo sapiens            | c2orf28 protein                                         | 2  | C:GO:0005886;<br>C:GO:0016021                                                                                                                                                                                                                                                                                                                                                                                                                                                            | -                                                                                                                                                    |             | SignalP (SIGNALP)                                               |
| Brugia malayi           | serine threonine-protein phosphatase pp1                | 1  | F:GO:0004721                                                                                                                                                                                                                                                                                                                                                                                                                                                                             | -                                                                                                                                                    | EC:3.1.3.16 | IPR006186; G3DSA:3.60.21.10<br>(GENE3D), SSF56300 (SUPERFAMILY) |

|                         |                                                                           |    |                                                                                                                                                                                        |                                                                                                                                                                       |            |                                                                                   |
|-------------------------|---------------------------------------------------------------------------|----|----------------------------------------------------------------------------------------------------------------------------------------------------------------------------------------|-----------------------------------------------------------------------------------------------------------------------------------------------------------------------|------------|-----------------------------------------------------------------------------------|
|                         | -                                                                         | 0  |                                                                                                                                                                                        |                                                                                                                                                                       |            | -                                                                                 |
| Caenorhabditis elegans  | cytochrome p450 family protein partially confirmed by transcript evidence | 3  | P:GO:0008340;<br>F:GO:0016491;<br>F:GO:0005506                                                                                                                                         | -                                                                                                                                                                     |            | IPR001128; IPR002401; IPR017972;<br>PTHR19383:SF59 (PANTHER)                      |
| Caenorhabditis briggsae | dual oxidase maturation factor 1                                          | 2  | P:GO:0008104;<br>C:GO:0044425                                                                                                                                                          | -                                                                                                                                                                     |            | IPR018469; SignalP (SIGNALP)                                                      |
| Nematostella vectensis  | d- polymerase catalytic subunit a                                         | 11 | P:GO:0040035;<br>P:GO:0009792;<br>F:GO:0003887;<br>P:GO:0006260;<br>F:GO:0003677;<br>P:GO:0006997;<br>P:GO:0040011;<br>C:GO:0005634;<br>F:GO:0008270;<br>F:GO:0000166;<br>P:GO:0002009 | -                                                                                                                                                                     | EC:2.7.7.7 | -                                                                                 |
|                         | -                                                                         | 0  |                                                                                                                                                                                        |                                                                                                                                                                       |            | -                                                                                 |
| Ancylostoma caninum     | kunitz-like protease inhibitor precursor                                  | 0  |                                                                                                                                                                                        | F:GO:0008233;<br>F:GO:0004867                                                                                                                                         |            | IPR002223; PTHR10083 (PANTHER),<br>PTHR10083:SF17 (PANTHER), SignalP<br>(SIGNALP) |
|                         | -                                                                         | 0  |                                                                                                                                                                                        |                                                                                                                                                                       |            | -                                                                                 |
| Caenorhabditis briggsae | Hypothetical protein CBG03564 [Caenorhabditis briggsae]                   | 0  |                                                                                                                                                                                        |                                                                                                                                                                       |            | -                                                                                 |
| Brugia malayi           | suppressor with morphological effect on genitalia family member (smg-1)   | 0  |                                                                                                                                                                                        | F:GO:0016740;<br>F:GO:0004674;<br>F:GO:0000166;<br>C:GO:0005737;<br>F:GO:0005524;<br>F:GO:0016301;<br>P:GO:0000184;<br>F:GO:0016773;<br>F:GO:0046872;<br>F:GO:0005488 |            | -                                                                                 |
|                         | -                                                                         | 0  |                                                                                                                                                                                        |                                                                                                                                                                       |            | -                                                                                 |
|                         | -                                                                         | 0  |                                                                                                                                                                                        |                                                                                                                                                                       |            | -                                                                                 |
|                         | -                                                                         | 0  |                                                                                                                                                                                        |                                                                                                                                                                       |            | -                                                                                 |
|                         | -                                                                         | 0  |                                                                                                                                                                                        |                                                                                                                                                                       |            | -                                                                                 |
| Caenorhabditis elegans  | elegans protein partially confirmed by transcript evidence                | 0  |                                                                                                                                                                                        |                                                                                                                                                                       |            | -                                                                                 |
| Caenorhabditis elegans  | histone                                                                   | 6  | P:GO:0009792;<br>P:GO:0002119;<br>C:GO:0005694;<br>P:GO:0000003;<br>P:GO:0040007;<br>P:GO:0045132                                                                                      | -                                                                                                                                                                     |            | -                                                                                 |
| Caenorhabditis briggsae | linker histone h1 and h5 family protein                                   | 5  | P:GO:0009792;<br>P:GO:0002119;<br>F:GO:0005515;<br>C:GO:0043229;<br>P:GO:0040007                                                                                                       | -                                                                                                                                                                     |            | PTHR13138 (PANTHER)                                                               |
| Caenorhabditis elegans  | histone 1                                                                 | 5  | P:GO:0009792;<br>P:GO:0002119;<br>P:GO:0000003;<br>C:GO:0043229;<br>P:GO:0040007                                                                                                       | -                                                                                                                                                                     |            | -                                                                                 |



|                               |                                                            |    |                                                                                                                                                                                                                                                                                                                                                                                                                                                                        |   |            |                                                                                                                         |
|-------------------------------|------------------------------------------------------------|----|------------------------------------------------------------------------------------------------------------------------------------------------------------------------------------------------------------------------------------------------------------------------------------------------------------------------------------------------------------------------------------------------------------------------------------------------------------------------|---|------------|-------------------------------------------------------------------------------------------------------------------------|
| Pongo abelii                  | fibrillarlin                                               | 9  | C:GO:0001652;<br>C:GO:0031428;<br>C:GO:0015030;<br>F:GO:0003723;<br>F:GO:0005515;<br>P:GO:0016074;<br>P:GO:0006364;<br>F:GO:0008168;<br>P:GO:0008033                                                                                                                                                                                                                                                                                                                   | - | EC:2.1.1.0 | IPR000692; G3DSA:3.30.200.20<br>(GENE3D)                                                                                |
|                               | -                                                          | 0  |                                                                                                                                                                                                                                                                                                                                                                                                                                                                        |   |            | -                                                                                                                       |
| Caenorhabditis elegans        | protein ki-se epsilon                                      | 14 | F:GO:0008047;<br>P:GO:0006917;<br>P:GO:0023034;<br>F:GO:0004871;<br>F:GO:0046872;<br>F:GO:0005524;<br>P:GO:0050730;<br>P:GO:0007165;<br>F:GO:0019901;<br>F:GO:0004699;<br>C:GO:0005783;<br>C:GO:0005634;<br>C:GO:0005886;<br>F:GO:0017124                                                                                                                                                                                                                              | - |            | IPR000719; IPR011009; IPR015745;<br>IPR017442; G3DSA:1.10.510.10<br>(GENE3D), PTHR22985 (PANTHER),<br>SignalP (SIGNALP) |
| Strongylocentrotus purpuratus | alpha-2-macroglobulin receptor                             | 0  | F:GO:0005509;<br>F:GO:0004872;<br>P:GO:0008283;<br>C:GO:0043025;<br>C:GO:0005887;<br>C:GO:0005886;<br>P:GO:0010875;<br>F:GO:0032403;<br>P:GO:0006898;<br>C:GO:0016021;<br>C:GO:0016020;<br>P:GO:0043277;<br>P:GO:0007205;<br>C:GO:0005624;<br>P:GO:0030178;<br>P:GO:0032429;<br>F:GO:0005230;<br>P:GO:0042157;<br>C:GO:0005905;<br>C:GO:0030425;<br>P:GO:0006629;<br>C:GO:0030136;<br>F:GO:0070325;<br>F:GO:0034185;<br>F:GO:0005515;<br>P:GO:0045768;<br>F:GO:0002020 |   |            | IPR000033; IPR011042; PTHR10529<br>(PANTHER), SSF63825 (SUPERFAMILY)                                                    |
|                               | -                                                          | 0  |                                                                                                                                                                                                                                                                                                                                                                                                                                                                        |   |            | -                                                                                                                       |
| Drosophila grimshawi          | elegans protein partially confirmed by transcript evidence | 1  | F:GO:0016787                                                                                                                                                                                                                                                                                                                                                                                                                                                           | - |            | IPR002018; G3DSA:3.40.50.1820<br>(GENE3D), PTHR11559:SF6<br>(PANTHER), SignalP (SIGNALP),<br>SSF53474 (SUPERFAMILY)     |
|                               | -                                                          | 0  |                                                                                                                                                                                                                                                                                                                                                                                                                                                                        |   |            | -                                                                                                                       |

|                         |                                                 |    |                                                                                                                                                                                                                                                                                                                                                                  |                                                                 |             |                                                                                                                                                           |
|-------------------------|-------------------------------------------------|----|------------------------------------------------------------------------------------------------------------------------------------------------------------------------------------------------------------------------------------------------------------------------------------------------------------------------------------------------------------------|-----------------------------------------------------------------|-------------|-----------------------------------------------------------------------------------------------------------------------------------------------------------|
| Caenorhabditis briggsae | protein-tyrosine phosphatase containing protein | 4  | P:GO:0016311;<br>F:GO:0004721;<br>P:GO:0009792;<br>P:GO:0000003                                                                                                                                                                                                                                                                                                  | -                                                               | EC:3.1.3.16 | IPR000242; IPR000387; IPR003595;<br>IPR016130; G3DSA:3.90.190.10<br>(GENE3D), PTHR19134 (PANTHER),<br>PTHR19134:SF26 (PANTHER),<br>SSF52799 (SUPERFAMILY) |
| -                       | -                                               | 0  |                                                                                                                                                                                                                                                                                                                                                                  |                                                                 |             | -                                                                                                                                                         |
| -                       | -                                               | 0  |                                                                                                                                                                                                                                                                                                                                                                  |                                                                 |             | -                                                                                                                                                         |
| Caenorhabditis briggsae | beta-actin                                      | 21 | C:GO:0005829;<br>P:GO:0045214;<br>F:GO:0019894;<br>C:GO:0030016;<br>P:GO:0035148;<br>P:GO:0040007;<br>P:GO:0040035;<br>F:GO:0042802;<br>C:GO:0035267;<br>F:GO:0005524;<br>P:GO:0002119;<br>C:GO:0045179;<br>F:GO:0050998;<br>P:GO:0006928;<br>C:GO:0031941;<br>F:GO:0005200;<br>P:GO:0006898;<br>C:GO:0030529;<br>C:GO:0070688;<br>P:GO:0009792;<br>P:GO:0051592 | -                                                               |             | IPR004000; IPR004001; IPR020902;<br>G3DSA:2.30.36.70 (GENE3D),<br>G3DSA:3.30.420.40 (GENE3D),<br>G3DSA:3.90.640.10 (GENE3D),<br>SSF53067 (SUPERFAMILY)    |
| Macaca mulatta          | zinc finger protein 706                         | 2  | F:GO:0008270;<br>C:GO:0005622                                                                                                                                                                                                                                                                                                                                    | -                                                               |             | IPR007087; IPR007513; IPR015880;<br>PTHR21213 (PANTHER), SSF118359<br>(SUPERFAMILY)                                                                       |
| -                       | -                                               | 0  |                                                                                                                                                                                                                                                                                                                                                                  |                                                                 |             | -                                                                                                                                                         |
| Ancylostoma ceylanicum  | fasciclin domain containing protein             | 0  |                                                                                                                                                                                                                                                                                                                                                                  |                                                                 |             | SignalP (SIGNALP)                                                                                                                                         |
| -                       | -                                               | 0  |                                                                                                                                                                                                                                                                                                                                                                  |                                                                 |             | -                                                                                                                                                         |
| -                       | -                                               | 0  |                                                                                                                                                                                                                                                                                                                                                                  |                                                                 |             | SignalP (SIGNALP)                                                                                                                                         |
| -                       | -                                               | 0  |                                                                                                                                                                                                                                                                                                                                                                  |                                                                 |             | -                                                                                                                                                         |
| -                       | -                                               | 0  |                                                                                                                                                                                                                                                                                                                                                                  |                                                                 |             | IPR000436; SignalP (SIGNALP)                                                                                                                              |
| Caenorhabditis elegans  | polyphosphoinositide phosphatase                | 11 | P:GO:0043473;<br>P:GO:0030384;<br>P:GO:0007626;<br>F:GO:0017120;<br>C:GO:0055037;<br>F:GO:0005515;<br>P:GO:0010976;<br>P:GO:0007033;<br>C:GO:0010008;<br>C:GO:0005794;<br>C:GO:0005783                                                                                                                                                                           | -                                                               |             | -                                                                                                                                                         |
| -                       | -                                               | 0  |                                                                                                                                                                                                                                                                                                                                                                  |                                                                 |             | -                                                                                                                                                         |
| Caenorhabditis elegans  | -related c-terminus containing protein          | 0  |                                                                                                                                                                                                                                                                                                                                                                  | F:GO:0003674;<br>C:GO:0009507;<br>P:GO:0008150;<br>C:GO:0005575 |             | IPR000631; IPR017953;<br>G3DSA:3.40.1190.20 (GENE3D),<br>PTHR12592 (PANTHER), SSF53613<br>(SUPERFAMILY)                                                   |
| Caenorhabditis elegans  | nuclear inhibitor of protein phosphatase-1      | 5  | F:GO:0005515;<br>P:GO:0008152;<br>P:GO:0008283;<br>C:GO:0044424;<br>F:GO:0008599                                                                                                                                                                                                                                                                                 | -                                                               |             | -                                                                                                                                                         |

|                            |                                       |    |                                                                                                                                                                                                                                                                                                                                                                                                                     |   |                                                                                                                             |
|----------------------------|---------------------------------------|----|---------------------------------------------------------------------------------------------------------------------------------------------------------------------------------------------------------------------------------------------------------------------------------------------------------------------------------------------------------------------------------------------------------------------|---|-----------------------------------------------------------------------------------------------------------------------------|
| Loa loa                    | myst histone                          | 0  | F:GO:0016740;<br>C:GO:0000785;<br>F:GO:0003682;<br>F:GO:0004402;<br>C:GO:0005634;<br>F:GO:0008270;<br>P:GO:0006333;<br>F:GO:0016747;<br>C:GO:0005622;<br>F:GO:0008415;<br>P:GO:0045449                                                                                                                                                                                                                              |   | IPR016181; IPR016197;<br>G3DSA:2.30.30.270 (GENE3D),<br>PTHR10615 (PANTHER),<br>PTHR10615:SF35 (PANTHER), PF11717<br>(PFAM) |
| Caenorhabditis briggsae    | map-ki-se activating death domain     | 14 | P:GO:0007618;<br>P:GO:0030421;<br>P:GO:0018991;<br>P:GO:0051726;<br>C:GO:0016021;<br>F:GO:0005123;<br>P:GO:0042981;<br>F:GO:0017112;<br>P:GO:0007268;<br>F:GO:0030295;<br>P:GO:0007166;<br>P:GO:0000187;<br>C:GO:0005737;<br>C:GO:0005886                                                                                                                                                                           | - | -                                                                                                                           |
|                            | -                                     | 0  |                                                                                                                                                                                                                                                                                                                                                                                                                     |   | -                                                                                                                           |
| Pediculus humanus corporis | very low-density lipoprotein receptor | 24 | P:GO:0010951;<br>P:GO:0006898;<br>P:GO:0007205;<br>C:GO:0005624;<br>P:GO:0007568;<br>P:GO:0008283;<br>P:GO:0010875;<br>F:GO:0070325;<br>P:GO:0045768;<br>P:GO:0042157;<br>F:GO:0046872;<br>C:GO:0030425;<br>P:GO:0030178;<br>F:GO:0005319;<br>C:GO:0043025;<br>P:GO:0006629;<br>C:GO:0005768;<br>F:GO:0002020;<br>P:GO:0032429;<br>F:GO:0032403;<br>P:GO:0043277;<br>C:GO:0030136;<br>C:GO:0005887;<br>F:GO:0034185 | - | IPR000033; IPR011042; PTHR10529<br>(PANTHER), PTHR10529:SF2<br>(PANTHER), SSF63825 (SUPERFAMILY)                            |

|                         |                                                     |    |                                                                                                                                                                                                         |   |                                          |                                                                               |
|-------------------------|-----------------------------------------------------|----|---------------------------------------------------------------------------------------------------------------------------------------------------------------------------------------------------------|---|------------------------------------------|-------------------------------------------------------------------------------|
| Caenorhabditis elegans  | variable abnormal morphology family member (vab-10) | 12 | P:GO:0007050;<br>F:GO:0008017;<br>P:GO:0016055;<br>C:GO:0015630;<br>F:GO:0005509;<br>P:GO:0007163;<br>C:GO:0005938;<br>F:GO:0003779;<br>C:GO:0015629;<br>P:GO:0006928;<br>P:GO:0006620;<br>P:GO:0001707 | - |                                          | IPR001589; IPR001715; PTHR11915 (PANTHER), PTHR11915:SF49 (PANTHER)           |
| -                       | -                                                   | 0  |                                                                                                                                                                                                         |   |                                          | -                                                                             |
| -                       | -                                                   | 0  |                                                                                                                                                                                                         |   |                                          | IPR005552; PTHR23248:SF5 (PANTHER)                                            |
| -                       | -                                                   | 0  |                                                                                                                                                                                                         |   |                                          | -                                                                             |
| -                       | -                                                   | 0  |                                                                                                                                                                                                         |   |                                          | -                                                                             |
| Caenorhabditis briggsae | briggsae cbr-dve-1 protein                          | 5  | F:GO:0003700;<br>F:GO:0043565;<br>F:GO:0005515;<br>C:GO:0005634;<br>P:GO:0006355                                                                                                                        | - |                                          | IPR001356; IPR009057; IPR012287; PTHR15116 (PANTHER), PTHR15116:SF7 (PANTHER) |
| -                       | -                                                   | 0  |                                                                                                                                                                                                         |   |                                          | IPR000436; IPR016060; SignalP (SIGNALP)                                       |
| -                       | -                                                   | 0  |                                                                                                                                                                                                         |   |                                          | IPR000436; IPR016060; SignalP (SIGNALP)                                       |
| -                       | -                                                   | 0  |                                                                                                                                                                                                         |   |                                          | SignalP (SIGNALP)                                                             |
| -                       | -                                                   | 0  |                                                                                                                                                                                                         |   |                                          | -                                                                             |
| -                       | -                                                   | 0  |                                                                                                                                                                                                         |   |                                          | -                                                                             |
| Caenorhabditis briggsae | elegans protein confirmed by transcript evidence    | 0  |                                                                                                                                                                                                         |   |                                          | -                                                                             |
| -                       | -                                                   | 0  |                                                                                                                                                                                                         |   |                                          | -                                                                             |
| -                       | -                                                   | 0  |                                                                                                                                                                                                         |   |                                          | -                                                                             |
| Caenorhabditis briggsae | d-aspartate oxidase                                 | 6  | P:GO:0009792;<br>P:GO:0055114;<br>F:GO:0003884;<br>F:GO:0005488;<br>F:GO:0008445;<br>F:GO:0047821                                                                                                       | - | EC:1.4.3.3;<br>EC:1.4.3.1;<br>EC:1.4.3.7 | G3DSA:3.30.9.10 (GENE3D), PTHR11530 (PANTHER), SSF54373 (SUPERFAMILY)         |
| -                       | -                                                   | 0  |                                                                                                                                                                                                         |   |                                          | -                                                                             |
| Branchiostoma floridae  | hyaluronidase family protein                        | 2  | F:GO:0008080;<br>P:GO:0008152                                                                                                                                                                           | - |                                          | IPR011496; IPR017853; PTHR13170 (PANTHER), PTHR13170:SF7 (PANTHER)            |
| Loa loa                 | hypothetical protein LOAG_09315 [Loa loa]           | 4  | P:GO:0002009;<br>P:GO:0040010;<br>P:GO:0040035;<br>P:GO:0002119                                                                                                                                         | - |                                          | -                                                                             |
| Caenorhabditis elegans  | dachsous 1                                          | 3  | P:GO:0002119;<br>P:GO:0040010;<br>P:GO:0040011                                                                                                                                                          | - |                                          | IPR002126; IPR015919; PTHR10596 (PANTHER), PTHR10596:SF74 (PANTHER)           |

|                         |                                                                             |    |                                                                                                                                                                       |                             |                                                                                                                                |
|-------------------------|-----------------------------------------------------------------------------|----|-----------------------------------------------------------------------------------------------------------------------------------------------------------------------|-----------------------------|--------------------------------------------------------------------------------------------------------------------------------|
| Caenorhabditis elegans  | elegans protein confirmed by transcript evidence                            | 0  | F:GO:0005215;<br>C:GO:0016021;<br>C:GO:0016020;<br>P:GO:0006810;<br>P:GO:0008272;<br>F:GO:0008271;<br>F:GO:0000030;<br>P:GO:0006493;<br>P:GO:0055085;<br>C:GO:0005886 | -                           | -                                                                                                                              |
| -                       | -                                                                           | 0  | -                                                                                                                                                                     | -                           | -                                                                                                                              |
| -                       | -                                                                           | 0  | -                                                                                                                                                                     | -                           | -                                                                                                                              |
| -                       | -                                                                           | 0  | -                                                                                                                                                                     | -                           | -                                                                                                                              |
| -                       | -                                                                           | 0  | -                                                                                                                                                                     | -                           | SignalP (SIGNALP)                                                                                                              |
| Pongo abelii            | bifunctio-l aminoacyl-tr- synthetase                                        | 10 | C:GO:0005829;<br>F:GO:0003723;<br>C:GO:0005625;<br>P:GO:0006424;<br>F:GO:0004827;<br>P:GO:0006461;<br>F:GO:0005524;<br>F:GO:0005515;<br>F:GO:0004818;<br>P:GO:0006433 | EC:6.1.1.15;<br>EC:6.1.1.17 | -                                                                                                                              |
| -                       | -                                                                           | 0  | -                                                                                                                                                                     | -                           | SignalP (SIGNALP)                                                                                                              |
| Caenorhabditis elegans  | elegans protein partially confirmed by transcript evidence                  | 0  | -                                                                                                                                                                     | -                           | -                                                                                                                              |
| -                       | -                                                                           | 0  | -                                                                                                                                                                     | -                           | -                                                                                                                              |
| -                       | -                                                                           | 0  | -                                                                                                                                                                     | -                           | -                                                                                                                              |
| Caenorhabditis briggsae | briggsae cbr-adm-2 protein                                                  | 1  | F:GO:0005488                                                                                                                                                          | -                           | IPR000742; IPR013032; PTHR11905 (PANTHER), PTHR11905:SF15 (PANTHER)                                                            |
| -                       | -                                                                           | 0  | -                                                                                                                                                                     | -                           | -                                                                                                                              |
| Homo sapiens            | cytochrome c oxidase subunit viia polypeptide 2                             | 3  | F:GO:0009055;<br>F:GO:0004129;<br>C:GO:0005746                                                                                                                        | EC:1.9.3.1                  | IPR003177; PTHR10510:SF1 (PANTHER)                                                                                             |
| Caenorhabditis briggsae | tripartite motif protein                                                    | 3  | P:GO:0006915;<br>F:GO:0008270;<br>F:GO:0005515                                                                                                                        | -                           | IPR011042; PTHR13712 (PANTHER), PTHR13712:SF9 (PANTHER)                                                                        |
| -                       | -                                                                           | 0  | -                                                                                                                                                                     | -                           | SignalP (SIGNALP)                                                                                                              |
| Brugia malayi           | cohesin subunit sa-                                                         | 1  | F:GO:0005515                                                                                                                                                          | -                           | PTHR11199 (PANTHER)                                                                                                            |
| -                       | -                                                                           | 0  | -                                                                                                                                                                     | -                           | -                                                                                                                              |
| -                       | -                                                                           | 0  | -                                                                                                                                                                     | -                           | -                                                                                                                              |
| -                       | -                                                                           | 0  | -                                                                                                                                                                     | -                           | SignalP (SIGNALP)                                                                                                              |
| Caenorhabditis elegans  | h transporter (pgp related) family member (haf-9)                           | 6  | F:GO:0015197;<br>F:GO:0042626;<br>P:GO:0015833;<br>P:GO:0055085;<br>F:GO:0005524;<br>C:GO:0016021                                                                     | -                           | IPR001140; IPR011527; IPR017940; G3DSA:1.20.1560.10 (GENE3D), PTHR19242 (PANTHER), PTHR19242:SF82 (PANTHER), SignalP (SIGNALP) |
| Caenorhabditis elegans  | elegans protein confirmed by transcript evidence                            | 0  | F:GO:0016787;<br>F:GO:0004091                                                                                                                                         | -                           | -                                                                                                                              |
| Caenorhabditis elegans  | sys1 golgi-localized integral membrane protein homolog                      | 1  | C:GO:0016020                                                                                                                                                          | -                           | IPR019185; PTHR12952 (PANTHER), SignalP (SIGNALP)                                                                              |
| -                       | -                                                                           | 0  | -                                                                                                                                                                     | -                           | SignalP (SIGNALP)                                                                                                              |
| Caenorhabditis elegans  | high incidence of males (increased x chromosome loss) family member (him-4) | 0  | F:GO:0005509                                                                                                                                                          | -                           | IPR007110; IPR013098; IPR013783; PTHR19897 (PANTHER), PTHR19897:SF8 (PANTHER)                                                  |

|                         |                                                                |    |                                                                                                                                                                                                                                                                                                                                                 |   |                                                                                                                                              |
|-------------------------|----------------------------------------------------------------|----|-------------------------------------------------------------------------------------------------------------------------------------------------------------------------------------------------------------------------------------------------------------------------------------------------------------------------------------------------|---|----------------------------------------------------------------------------------------------------------------------------------------------|
| Loa loa                 | loc733359 protein                                              | 0  | F:GO:0003676;<br>F:GO:0004526;<br>P:GO:0008033;<br>F:GO:0016787;<br>F:GO:0005515;<br>C:GO:0005730;<br>C:GO:0005634                                                                                                                                                                                                                              |   | G3DSA:3.30.110.20 (GENE3D),<br>PTHR15314 (PANTHER), PF12328<br>(PFAM), SignalP (SIGNALP), SSF82704<br>(SUPERFAMILY)                          |
|                         | -                                                              | 0  |                                                                                                                                                                                                                                                                                                                                                 |   | -                                                                                                                                            |
|                         | -                                                              | 0  |                                                                                                                                                                                                                                                                                                                                                 |   | -                                                                                                                                            |
|                         | -                                                              | 0  |                                                                                                                                                                                                                                                                                                                                                 |   | -                                                                                                                                            |
| Caenorhabditis briggsae | leucine-rich repeats and immunoglobulin-like domains 2         | 6  | C:GO:0005887;<br>F:GO:0005114;<br>F:GO:0034713;<br>P:GO:0030511;<br>P:GO:0040018;<br>P:GO:0000003                                                                                                                                                                                                                                               | - | IPR001611; G3DSA:3.80.10.10<br>(GENE3D), PTHR23154 (PANTHER),<br>PTHR23154:SF103 (PANTHER),<br>PSS51450 (PROFILE), SSF52058<br>(SUPERFAMILY) |
|                         | -                                                              | 0  |                                                                                                                                                                                                                                                                                                                                                 |   | -                                                                                                                                            |
| Caenorhabditis briggsae | elegans protein partially confirmed by transcript evidence     | 6  | P:GO:0009792;<br>P:GO:0002119;<br>P:GO:0040010;<br>P:GO:0000003;<br>P:GO:0040011;<br>F:GO:0008168                                                                                                                                                                                                                                               | - | EC:2.1.1.0<br>SignalP (SIGNALP)                                                                                                              |
| Caenorhabditis briggsae | r- recognition                                                 | 2  | F:GO:0003676;<br>F:GO:0000166                                                                                                                                                                                                                                                                                                                   | - | -                                                                                                                                            |
| Caenorhabditis briggsae | briggsae cbr-vab-19 protein                                    | 3  | C:GO:0005886;<br>F:GO:0005515;<br>C:GO:0045177                                                                                                                                                                                                                                                                                                  | - | IPR002110; IPR020683; PTHR18958<br>(PANTHER), PTHR18958:SF169<br>(PANTHER)                                                                   |
| Brugia malayi           | dy-ctin 4                                                      | 4  | C:GO:0005737;<br>C:GO:0005856;<br>P:GO:0035046;<br>F:GO:0005515                                                                                                                                                                                                                                                                                 | - | IPR008603                                                                                                                                    |
| Caenorhabditis briggsae | briggsae cbr-fbl-1 protein                                     | 3  | C:GO:0005576;<br>F:GO:0005509;<br>F:GO:0005515                                                                                                                                                                                                                                                                                                  | - | -                                                                                                                                            |
|                         | -                                                              | 0  |                                                                                                                                                                                                                                                                                                                                                 |   | -                                                                                                                                            |
|                         | -                                                              | 0  |                                                                                                                                                                                                                                                                                                                                                 |   | SignalP (SIGNALP)                                                                                                                            |
|                         | -                                                              | 0  |                                                                                                                                                                                                                                                                                                                                                 |   | -                                                                                                                                            |
| Ailuropoda melanoleuca  | sodium potassium-transporting atpase subunit alpha-1 precursor | 20 | F:GO:0005515;<br>P:GO:0045989;<br>P:GO:0045822;<br>F:GO:0003869;<br>C:GO:0005792;<br>C:GO:0016323;<br>C:GO:0042470;<br>F:GO:0046872;<br>P:GO:0006754;<br>C:GO:0042383;<br>F:GO:0005391;<br>P:GO:0045823;<br>P:GO:0042493;<br>P:GO:0031947;<br>C:GO:0005890;<br>P:GO:0006813;<br>P:GO:0002026;<br>F:GO:0005524;<br>P:GO:0008217;<br>P:GO:0006814 | - | EC:3.1.3.41;<br>EC:3.6.3.9                                                                                                                   |

|                                |                                                           |   |                                                                                                                                                      |                                                                                                                                                                                                                                                                             |                                                         |                                                                                                                      |
|--------------------------------|-----------------------------------------------------------|---|------------------------------------------------------------------------------------------------------------------------------------------------------|-----------------------------------------------------------------------------------------------------------------------------------------------------------------------------------------------------------------------------------------------------------------------------|---------------------------------------------------------|----------------------------------------------------------------------------------------------------------------------|
| Loa loa                        | n-acetylated-alpha-linked acidic dipeptidase-like protein | 0 |                                                                                                                                                      | C:GO:0016021;<br>C:GO:0016020;<br>F:GO:0016787;<br>F:GO:0016805;<br>F:GO:0003674;<br>F:GO:0008237;<br>F:GO:0003824;<br>C:GO:0005575;<br>C:GO:0016324;<br>F:GO:0008233;<br>P:GO:0006508;<br>F:GO:0046872;<br>F:GO:0004181;<br>F:GO:0004180;<br>P:GO:0008150;<br>C:GO:0005886 |                                                         | PTHR10404 (PANTHER),<br>PTHR10404:SF15 (PANTHER)                                                                     |
|                                | -                                                         | 0 |                                                                                                                                                      |                                                                                                                                                                                                                                                                             |                                                         | -                                                                                                                    |
| Mycoplasma arthritidis 158L3-1 | virulence-associated lipoprotein mia                      | 0 |                                                                                                                                                      |                                                                                                                                                                                                                                                                             |                                                         | -                                                                                                                    |
| Ancylostoma caninum            | secreted protein 4 precursor                              | 0 |                                                                                                                                                      | C:GO:0005576                                                                                                                                                                                                                                                                |                                                         | -                                                                                                                    |
| Caenorhabditis briggsae        | briggsae cbr-dep-1 protein                                | 2 | P:GO:0040026;<br>P:GO:0040027                                                                                                                        | -                                                                                                                                                                                                                                                                           |                                                         | -                                                                                                                    |
|                                | -                                                         | 0 |                                                                                                                                                      |                                                                                                                                                                                                                                                                             |                                                         | -                                                                                                                    |
| Caenorhabditis briggsae        | probable e3 ubiquitin-protein ligase mycbp2               | 9 | F:GO:0008270;<br>F:GO:0004842;<br>F:GO:0005515;<br>P:GO:0016198;<br>P:GO:0021986;<br>P:GO:0030071;<br>P:GO:0031290;<br>C:GO:0005737;<br>C:GO:0005680 | -                                                                                                                                                                                                                                                                           | EC:6.3.2.19                                             | IPR000315; PTHR12846 (PANTHER),<br>PTHR12846:SF2 (PANTHER)                                                           |
| Homo sapiens                   | immunoglobulin heavy chain variable region                | 0 |                                                                                                                                                      |                                                                                                                                                                                                                                                                             |                                                         | IPR013106; IPR013783; PTHR23266<br>(PANTHER), PTHR23266:SF11<br>(PANTHER), SSF48726 (SUPERFAMILY)                    |
|                                | -                                                         | 0 |                                                                                                                                                      |                                                                                                                                                                                                                                                                             |                                                         | -                                                                                                                    |
| Caenorhabditis elegans         | briggsae cbr-eat-3 protein                                | 2 | F:GO:0003924;<br>F:GO:0005525                                                                                                                        | -                                                                                                                                                                                                                                                                           | EC:3.6.5.1;<br>EC:3.6.5.2;<br>EC:3.6.5.3;<br>EC:3.6.5.4 | IPR001401; G3DSA:3.40.50.300<br>(GENE3D), PTHR11566 (PANTHER),<br>PTHR11566:SF8 (PANTHER), SSF52540<br>(SUPERFAMILY) |
|                                | -                                                         | 0 |                                                                                                                                                      |                                                                                                                                                                                                                                                                             |                                                         | -                                                                                                                    |
|                                | -                                                         | 0 |                                                                                                                                                      |                                                                                                                                                                                                                                                                             |                                                         | -                                                                                                                    |
| Homo sapiens                   | mhc class ii antigen                                      | 8 | C:GO:0005789;<br>C:GO:0042613;<br>C:GO:0005794;<br>P:GO:0002504;<br>C:GO:0031902;<br>C:GO:0005765;<br>C:GO:0016021;<br>P:GO:0006955                  | -                                                                                                                                                                                                                                                                           |                                                         | IPR000353; IPR011162; IPR014745;<br>PTHR19944 (PANTHER),<br>PTHR19944:SF26 (PANTHER)                                 |
| Caenorhabditis elegans         | glycosyl hydrolases family 31 protein                     | 0 |                                                                                                                                                      | F:GO:0004553;<br>F:GO:0030246;<br>F:GO:0016787;<br>P:GO:0005975;<br>F:GO:0003824                                                                                                                                                                                            |                                                         | -                                                                                                                    |
|                                | -                                                         | 0 |                                                                                                                                                      |                                                                                                                                                                                                                                                                             |                                                         | IPR012877                                                                                                            |
|                                | -                                                         | 0 |                                                                                                                                                      |                                                                                                                                                                                                                                                                             |                                                         | -                                                                                                                    |

|                         |                                                  |   |                                                                                                                                     |                                                |             |                                                                                                                         |
|-------------------------|--------------------------------------------------|---|-------------------------------------------------------------------------------------------------------------------------------------|------------------------------------------------|-------------|-------------------------------------------------------------------------------------------------------------------------|
| Caenorhabditis briggsae | malate cytoplasmic                               | 8 | F:GO:0005488;<br>C:GO:0005811;<br>F:GO:0030060;<br>P:GO:0006108;<br>P:GO:0055114;<br>P:GO:0006099;<br>P:GO:0006096;<br>C:GO:0005829 | -                                              | EC:1.1.1.37 | IPR001236; IPR001252; IPR001557;<br>IPR010945; IPR011274; IPR015955;<br>IPR016040; IPR022383; SSF51735<br>(SUPERFAMILY) |
| Caenorhabditis briggsae | malate cytoplasmic                               | 8 | F:GO:0005488;<br>C:GO:0005811;<br>F:GO:0030060;<br>P:GO:0006108;<br>P:GO:0055114;<br>P:GO:0006099;<br>P:GO:0006096;<br>C:GO:0005829 | -                                              | EC:1.1.1.37 | IPR001236; IPR001252; IPR001557;<br>IPR010945; IPR011274; IPR015955;<br>IPR016040; IPR022383; SSF51735<br>(SUPERFAMILY) |
| Loa loa                 | protein-tyrosine phosphatase containing protein  | 2 | F:GO:0004721;<br>P:GO:0044237                                                                                                       | -                                              | EC:3.1.3.16 | IPR000242; G3DSA:3.90.190.10<br>(GENE3D), PTHR19134 (PANTHER),<br>PTHR19134:SF26 (PANTHER),<br>SSF52799 (SUPERFAMILY)   |
| Caenorhabditis briggsae | briggsae cbr-smg-1 protein                       | 2 | F:GO:0005488;<br>F:GO:0016772                                                                                                       | -                                              |             | -                                                                                                                       |
|                         | -                                                | 0 |                                                                                                                                     |                                                |             | SignalP (SIGNALP)                                                                                                       |
|                         | -                                                | 0 |                                                                                                                                     |                                                |             | -                                                                                                                       |
| Bos taurus              | cold shock domain-containing protein e1          | 6 | F:GO:0003723;<br>C:GO:0005743;<br>P:GO:0006355;<br>P:GO:0008584;<br>F:GO:0003677;<br>F:GO:0005515                                   | -                                              |             | PTHR12913 (PANTHER)                                                                                                     |
|                         | -                                                | 0 |                                                                                                                                     |                                                |             | -                                                                                                                       |
| Caenorhabditis elegans  | esterase fe4                                     | 2 | F:GO:0016787;<br>P:GO:0008152                                                                                                       | -                                              |             | IPR002018; IPR019819;<br>G3DSA:3.40.50.1820 (GENE3D),<br>PTHR11559:SF30 (PANTHER),<br>SSF53474 (SUPERFAMILY)            |
| Caenorhabditis elegans  | cystinosin                                       | 6 | P:GO:0015811;<br>P:GO:0003333;<br>C:GO:0045335;<br>F:GO:0015171;<br>C:GO:0005765;<br>C:GO:0016021                                   | -                                              |             | -                                                                                                                       |
|                         | -                                                | 0 |                                                                                                                                     |                                                |             | -                                                                                                                       |
|                         | -                                                | 0 |                                                                                                                                     |                                                |             | -                                                                                                                       |
| Caenorhabditis elegans  | briggsae cbr-unc-40 protein                      | 2 | P:GO:0016358;<br>P:GO:0001841                                                                                                       | -                                              |             | IPR000408; IPR003961; IPR008957;<br>IPR013783; PRO0014 (PRINTS),<br>PTHR10489 (PANTHER),<br>PTHR10489:SF55 (PANTHER)    |
| Caenorhabditis elegans  | briggsae cbr-unc-40 protein                      | 2 | P:GO:0016358;<br>P:GO:0001841                                                                                                       | -                                              |             | IPR000408; IPR003961; IPR008957;<br>IPR013783; PRO0014 (PRINTS),<br>PTHR10489 (PANTHER),<br>PTHR10489:SF55 (PANTHER)    |
|                         | -                                                | 0 |                                                                                                                                     |                                                |             | -                                                                                                                       |
|                         | -                                                | 0 |                                                                                                                                     |                                                |             | -                                                                                                                       |
| Caenorhabditis elegans  | elegans protein confirmed by transcript evidence | 0 |                                                                                                                                     | P:GO:0006139;<br>F:GO:0005524;<br>F:GO:0019205 |             | -                                                                                                                       |
| Brugia malayi           | domon domain containing protein                  | 0 |                                                                                                                                     | F:GO:0004500;<br>P:GO:0006548                  |             | -                                                                                                                       |



|                         |                                                 |    |                                                                                                                                                                                                                                                                                                                                                                                                                                                                         |             |                   |
|-------------------------|-------------------------------------------------|----|-------------------------------------------------------------------------------------------------------------------------------------------------------------------------------------------------------------------------------------------------------------------------------------------------------------------------------------------------------------------------------------------------------------------------------------------------------------------------|-------------|-------------------|
| Caenorhabditis briggsae | myosin heavy nonmuscle or smooth muscle         | 34 | P:GO:0046664;<br>P:GO:0045200;<br>C:GO:0016461;<br>P:GO:0035159;<br>P:GO:0031036;<br>P:GO:0035072;<br>P:GO:0007443;<br>P:GO:0007395;<br>P:GO:0045214;<br>P:GO:0035017;<br>P:GO:0007297;<br>C:GO:0031672;<br>P:GO:0046663;<br>F:GO:0003779;<br>F:GO:0000146;<br>P:GO:0001736;<br>F:GO:0008307;<br>F:GO:0032027;<br>P:GO:0008258;<br>P:GO:0051259;<br>P:GO:0016203;<br>C:GO:0032154;<br>C:GO:0045179;<br>P:GO:0045184;<br>C:GO:0005863;<br>P:GO:0035317;<br>P:GO:0007427; | -           | SignalP (SIGNALP) |
|                         | -                                               | 0  |                                                                                                                                                                                                                                                                                                                                                                                                                                                                         |             | -                 |
|                         | -                                               | 0  |                                                                                                                                                                                                                                                                                                                                                                                                                                                                         |             | -                 |
| Caenorhabditis elegans  | discoidin domain receptor family member (ddr-2) | 9  | F:GO:0004872;<br>P:GO:0006468;<br>F:GO:0005515;<br>P:GO:0007155;<br>P:GO:0040010;<br>F:GO:0004716;<br>F:GO:0005524;<br>C:GO:0016021;<br>F:GO:0004674                                                                                                                                                                                                                                                                                                                    | EC:2.7.11.0 | -                 |
|                         | -                                               | 0  |                                                                                                                                                                                                                                                                                                                                                                                                                                                                         |             | -                 |
|                         | -                                               | 0  |                                                                                                                                                                                                                                                                                                                                                                                                                                                                         |             | -                 |

|                             |                                                        |    |                                                                                                                                                                                                                                                                                                                                                                                                                                                                        |                                                                 |             |                                                                                                            |
|-----------------------------|--------------------------------------------------------|----|------------------------------------------------------------------------------------------------------------------------------------------------------------------------------------------------------------------------------------------------------------------------------------------------------------------------------------------------------------------------------------------------------------------------------------------------------------------------|-----------------------------------------------------------------|-------------|------------------------------------------------------------------------------------------------------------|
| Caenorhabditis elegans      | tyrosine-protein ki-se fyn                             | 37 | P:GO:001764;<br>P:GO:0060027;<br>P:GO:0071363;<br>P:GO:0050966;<br>F:GO:0043548;<br>P:GO:0007243;<br>P:GO:0008360;<br>F:GO:0004715;<br>P:GO:0046777;<br>P:GO:0045471;<br>P:GO:0007612;<br>C:GO:0005792;<br>P:GO:0006816;<br>P:GO:0001702;<br>P:GO:0030900;<br>P:GO:0050798;<br>C:GO:0005829;<br>F:GO:0042610;<br>F:GO:0001948;<br>P:GO:0051480;<br>F:GO:0042802;<br>P:GO:0050852;<br>P:GO:0018108;<br>P:GO:0042493;<br>C:GO:0005768;<br>C:GO:0005740;<br>F:GO:0015631; | -                                                               | EC:2.7.10.2 | -                                                                                                          |
| Caenorhabditis briggsae     | family with sequence similarity member b1              | 0  |                                                                                                                                                                                                                                                                                                                                                                                                                                                                        | P:GO:0006508;<br>F:GO:0008236;<br>F:GO:0016787;<br>C:GO:0005576 |             | G3DSA:3.40.50.1820 (GENE3D),<br>PTHR12277 (PANTHER),<br>PTHR12277:SF8 (PANTHER), SSF53474<br>(SUPERFAMILY) |
| -                           | -                                                      | 0  |                                                                                                                                                                                                                                                                                                                                                                                                                                                                        |                                                                 |             | -                                                                                                          |
| -                           | -                                                      | 0  |                                                                                                                                                                                                                                                                                                                                                                                                                                                                        |                                                                 |             | -                                                                                                          |
| Caenorhabditis elegans      | briggsae cbr-ltd-1 protein                             | 1  | F:GO:0008270                                                                                                                                                                                                                                                                                                                                                                                                                                                           | -                                                               |             | -                                                                                                          |
| -                           | -                                                      | 0  |                                                                                                                                                                                                                                                                                                                                                                                                                                                                        |                                                                 |             | -                                                                                                          |
| Caenorhabditis briggsae     | briggsae cbr-rhgf-2 protein                            | 0  |                                                                                                                                                                                                                                                                                                                                                                                                                                                                        | P:GO:0035023;<br>P:GO:0009792;<br>C:GO:0005622                  |             | -                                                                                                          |
| -                           | -                                                      | 0  |                                                                                                                                                                                                                                                                                                                                                                                                                                                                        |                                                                 |             | -                                                                                                          |
| -                           | -                                                      | 0  |                                                                                                                                                                                                                                                                                                                                                                                                                                                                        |                                                                 |             | -                                                                                                          |
| Caenorhabditis elegans      | hypothetical protein Y48G1A.3 [Caenorhabditis elegans] | 0  |                                                                                                                                                                                                                                                                                                                                                                                                                                                                        | F:GO:0046872;<br>F:GO:0008270                                   |             | -                                                                                                          |
| Angiostrongylus cantonensis | serine protease inhibitor precursor                    | 0  |                                                                                                                                                                                                                                                                                                                                                                                                                                                                        |                                                                 |             | IPR002919; IPR013032;<br>G3DSA:2.10.25.10 (GENE3D), SignalP<br>(SIGNALP)                                   |
| Loa loa                     | ubiquitin family                                       | 0  |                                                                                                                                                                                                                                                                                                                                                                                                                                                                        | C:GO:0005737                                                    |             | IPR000626; IPR015496; IPR019955;<br>G3DSA:3.10.20.90 (GENE3D),<br>SSF54236 (SUPERFAMILY)                   |
| Caenorhabditis elegans      | mh2 domain containing protein                          | 5  | F:GO:0003700;<br>F:GO:0005515;<br>C:GO:0005667;<br>P:GO:0006355;<br>P:GO:0007179                                                                                                                                                                                                                                                                                                                                                                                       | -                                                               |             | IPR003619; IPR013019; IPR013790;<br>PTHR13703:SF19 (PANTHER)                                               |
| -                           | -                                                      | 0  |                                                                                                                                                                                                                                                                                                                                                                                                                                                                        |                                                                 |             | -                                                                                                          |
| -                           | -                                                      | 0  |                                                                                                                                                                                                                                                                                                                                                                                                                                                                        |                                                                 |             | -                                                                                                          |
| -                           | -                                                      | 0  |                                                                                                                                                                                                                                                                                                                                                                                                                                                                        |                                                                 |             | SignalP (SIGNALP)                                                                                          |
| -                           | -                                                      | 0  |                                                                                                                                                                                                                                                                                                                                                                                                                                                                        |                                                                 |             | -                                                                                                          |

|                         |                                                            |   |                                                                                                                                                      |                                                                                                                                                                                                                          |                                                                                                                |
|-------------------------|------------------------------------------------------------|---|------------------------------------------------------------------------------------------------------------------------------------------------------|--------------------------------------------------------------------------------------------------------------------------------------------------------------------------------------------------------------------------|----------------------------------------------------------------------------------------------------------------|
| Pongo abelii            | -dh dehydroge-se                                           | 4 | P:GO:0006810;<br>C:GO:0005747;<br>C:GO:0016021;<br>P:GO:0022900                                                                                      | -                                                                                                                                                                                                                        | IPR019329; PTHR13327 (PANTHER),<br>SignalP (SIGNALP)                                                           |
| Caenorhabditis elegans  | regulator of g protein sig-ling family member (rgs-5)      | 0 |                                                                                                                                                      | F:GO:0016301;<br>F:GO:0004871                                                                                                                                                                                            | IPR000342; IPR016137;<br>G3DSA:1.10.196.10 (GENE3D)                                                            |
|                         | -                                                          | 0 |                                                                                                                                                      |                                                                                                                                                                                                                          | -                                                                                                              |
|                         | -                                                          | 0 |                                                                                                                                                      |                                                                                                                                                                                                                          | -                                                                                                              |
|                         | -                                                          | 0 |                                                                                                                                                      |                                                                                                                                                                                                                          | -                                                                                                              |
| Loa loa                 | loc445829 protein                                          | 0 |                                                                                                                                                      | F:GO:0046872;<br>F:GO:0008270;<br>F:GO:0005515                                                                                                                                                                           | IPR000108; IPR001452;<br>G3DSA:2.30.30.40 (GENE3D),<br>PTHR10661 (PANTHER),<br>PTHR10661:SF1 (PANTHER)         |
| Loa loa                 | loc445829 protein                                          | 0 |                                                                                                                                                      |                                                                                                                                                                                                                          | IPR000108; IPR001452;<br>G3DSA:2.30.30.40 (GENE3D),<br>PTHR10661 (PANTHER),<br>PTHR10661:SF1 (PANTHER)         |
| Loa loa                 | loc445829 protein                                          | 0 |                                                                                                                                                      |                                                                                                                                                                                                                          | IPR000108; IPR001452;<br>G3DSA:2.30.30.40 (GENE3D),<br>PTHR10661 (PANTHER),<br>PTHR10661:SF1 (PANTHER)         |
| Anguilla japonica       | mannose c type 2                                           | 0 |                                                                                                                                                      | C:GO:0009986;<br>C:GO:0016021;<br>C:GO:0016020;<br>F:GO:0005529;<br>P:GO:0006897;<br>P:GO:0007218;<br>P:GO:0007165;<br>F:GO:0005518;<br>C:GO:0005575;<br>F:GO:0004872;<br>P:GO:0008150;<br>F:GO:0005509;<br>F:GO:0005488 | IPR001304; IPR016186; IPR016187;<br>PTHR22803 (PANTHER)                                                        |
|                         | -                                                          | 0 |                                                                                                                                                      |                                                                                                                                                                                                                          | -                                                                                                              |
| Caenorhabditis briggsae | dedicator of cytokinesis 2                                 | 9 | F:GO:0005085;<br>F:GO:0005083;<br>P:GO:0043652;<br>F:GO:0005525;<br>C:GO:0005886;<br>F:GO:0032403;<br>F:GO:0051020;<br>P:GO:0040039;<br>F:GO:0017124 | -                                                                                                                                                                                                                        | PTHR23317 (PANTHER),<br>PTHR23317:SF16 (PANTHER)                                                               |
|                         | -                                                          | 0 |                                                                                                                                                      |                                                                                                                                                                                                                          | -                                                                                                              |
| Loa loa                 | ef hand family protein                                     | 0 |                                                                                                                                                      | F:GO:0005509                                                                                                                                                                                                             | IPR011992; IPR018247; IPR018249;<br>PTHR23055 (PANTHER),<br>PTHR23055:SF7 (PANTHER), SSF47473<br>(SUPERFAMILY) |
| Caenorhabditis elegans  | elegans protein partially confirmed by transcript evidence | 1 | P:GO:0006810                                                                                                                                         | -                                                                                                                                                                                                                        | -                                                                                                              |

|                         |                                                            |    |                                                                                                                                                                                                         |   |                                                         |                                                                                                                                                      |
|-------------------------|------------------------------------------------------------|----|---------------------------------------------------------------------------------------------------------------------------------------------------------------------------------------------------------|---|---------------------------------------------------------|------------------------------------------------------------------------------------------------------------------------------------------------------|
| Caenorhabditis elegans  | elegans protein partially confirmed by transcript evidence | 12 | P:GO:0009792;<br>P:GO:0040018;<br>P:GO:0019373;<br>F:GO:0009055;<br>F:GO:0004497;<br>F:GO:0020037;<br>P:GO:0040017;<br>P:GO:0040010;<br>P:GO:0055114;<br>P:GO:0000003;<br>P:GO:0008340;<br>C:GO:0016021 | - |                                                         | IPR001128; PTHR19383:SF176 (PANTHER), SignalP (SIGNALP)                                                                                              |
| Caenorhabditis briggsae | ras-related protein rab-                                   | 4  | F:GO:0005525;<br>P:GO:0007264;<br>F:GO:0003924;<br>P:GO:0015031                                                                                                                                         | - | EC:3.6.5.1;<br>EC:3.6.5.2;<br>EC:3.6.5.3;<br>EC:3.6.5.4 | IPR001806; IPR013753; IPR020851; G3DSA:3.40.50.300 (GENE3D), PTHR11708 (PANTHER), PTHR11708:SF250 (PANTHER), SSF52540 (SUPERFAMILY)                  |
|                         | -                                                          | 0  |                                                                                                                                                                                                         |   |                                                         | -                                                                                                                                                    |
|                         | -                                                          | 0  |                                                                                                                                                                                                         |   |                                                         | SignalP (SIGNALP)                                                                                                                                    |
| Caenorhabditis elegans  | dynein light chain                                         | 5  | C:GO:0043229;<br>P:GO:0007049;<br>F:GO:0042802;<br>P:GO:0019060;<br>C:GO:0005737                                                                                                                        | - |                                                         | IPR005334; PTHR21255:SF4 (PANTHER)                                                                                                                   |
| Caenorhabditis elegans  | beta-lactamase family protein                              | 0  |                                                                                                                                                                                                         |   |                                                         | -                                                                                                                                                    |
|                         | -                                                          | 0  |                                                                                                                                                                                                         |   |                                                         | -                                                                                                                                                    |
| Caenorhabditis briggsae | Hypothetical protein CBG05472 [Caenorhabditis briggsae]    | 4  | F:GO:0003723;<br>P:GO:0001522;<br>F:GO:0009982;<br>P:GO:0008033                                                                                                                                         | - | EC:5.4.99.12                                            | -                                                                                                                                                    |
|                         | -                                                          | 0  |                                                                                                                                                                                                         |   |                                                         | -                                                                                                                                                    |
|                         | -                                                          | 0  |                                                                                                                                                                                                         |   |                                                         | -                                                                                                                                                    |
|                         | -                                                          | 0  |                                                                                                                                                                                                         |   |                                                         | -                                                                                                                                                    |
|                         | -                                                          | 0  |                                                                                                                                                                                                         |   |                                                         | SignalP (SIGNALP)                                                                                                                                    |
| Caenorhabditis elegans  | alp enigma encoding family member (alp-1)                  | 1  | F:GO:0042802                                                                                                                                                                                            | - |                                                         | IPR006643; PTHR18973 (PANTHER), PTHR18973:SF57 (PANTHER)                                                                                             |
|                         | -                                                          | 0  |                                                                                                                                                                                                         |   |                                                         | SignalP (SIGNALP)                                                                                                                                    |
|                         | -                                                          | 0  |                                                                                                                                                                                                         |   |                                                         | -                                                                                                                                                    |
| Caenorhabditis elegans  | bridging integrator 2                                      | 2  | F:GO:0005515;<br>C:GO:0005737                                                                                                                                                                           | - |                                                         | IPR001452; IPR003005; IPR004148; PD968187 (PRODOM), G3DSA:2.30.30.40 (GENE3D), PTHR10321 (PANTHER), PTHR10321:SF7 (PANTHER), SSF103657 (SUPERFAMILY) |
| Caenorhabditis briggsae | briggsae cbr-amph-1 protein                                | 2  | F:GO:0005515;<br>C:GO:0005737                                                                                                                                                                           | - |                                                         | -                                                                                                                                                    |
|                         | -                                                          | 0  |                                                                                                                                                                                                         |   |                                                         | -                                                                                                                                                    |
|                         | -                                                          | 0  |                                                                                                                                                                                                         |   |                                                         | -                                                                                                                                                    |
| Caenorhabditis elegans  | dipeptidyl aminopeptidase                                  | 3  | P:GO:0006508;<br>F:GO:0004252;<br>F:GO:0004177                                                                                                                                                          | - | EC:3.4.21.0;<br>EC:3.4.11.0                             | -                                                                                                                                                    |
| Bos taurus              | cold shock domain-containing protein e1                    | 6  | F:GO:0003723;<br>C:GO:0005743;<br>P:GO:0006355;<br>P:GO:0008584;<br>F:GO:0003677;<br>F:GO:0005515                                                                                                       | - |                                                         | PTHR12913 (PANTHER)                                                                                                                                  |

|                        |                                                        |    |                                                                                                                                                                                                                                                                                              |                                                                 |             |                                                                                                                                                                            |
|------------------------|--------------------------------------------------------|----|----------------------------------------------------------------------------------------------------------------------------------------------------------------------------------------------------------------------------------------------------------------------------------------------|-----------------------------------------------------------------|-------------|----------------------------------------------------------------------------------------------------------------------------------------------------------------------------|
| Brugia malayi          | egg laying defective family member (egl-15)            | 3  | P:GO:0009987;<br>F:GO:0005488;<br>F:GO:0004672                                                                                                                                                                                                                                               | -                                                               | -           | -                                                                                                                                                                          |
| -                      | -                                                      | 0  |                                                                                                                                                                                                                                                                                              |                                                                 |             | -                                                                                                                                                                          |
| -                      | -                                                      | 0  |                                                                                                                                                                                                                                                                                              |                                                                 |             | -                                                                                                                                                                          |
| Loa loa                | phosphatidylcholine:ceramide cholinephosphotransferase | 0  |                                                                                                                                                                                                                                                                                              | P:GO:0006686;<br>F:GO:0016740;<br>C:GO:0016021;<br>F:GO:0047493 |             | PTHR21290 (PANTHER),<br>PTHR21290:SF3 (PANTHER), SignalP<br>(SIGNALP)                                                                                                      |
| Danio rerio            | 3-hydroxyisobutyryl- mitochondrial precursor           | 5  | P:GO:0009792;<br>P:GO:0040010;<br>F:GO:0016787;<br>P:GO:0009083;<br>C:GO:0005739                                                                                                                                                                                                             | -                                                               |             | SignalP (SIGNALP)                                                                                                                                                          |
| Caenorhabditis elegans | vacuolar atp synthase subunit b                        | 17 | F:GO:0046961;<br>P:GO:0007605;<br>P:GO:0007588;<br>P:GO:0006885;<br>C:GO:0033180;<br>F:GO:0046933;<br>C:GO:0005624;<br>P:GO:0015988;<br>P:GO:0016337;<br>C:GO:0016323;<br>P:GO:0001503;<br>P:GO:0015986;<br>C:GO:0016471;<br>P:GO:0008219;<br>C:GO:0012505;<br>F:GO:0005524;<br>C:GO:0016324 | -                                                               | EC:3.6.3.14 | IPR004100; G3DSA:3.40.50.300<br>(GENE3D), PTHR15184 (PANTHER),<br>PTHR15184:SF11 (PANTHER),<br>SSF52540 (SUPERFAMILY)                                                      |
| Loa loa                | polyubiquitin precursor                                | 5  | C:GO:0005737;<br>P:GO:0000003;<br>P:GO:0040007;<br>C:GO:0005634;<br>P:GO:0002119                                                                                                                                                                                                             | -                                                               |             | IPR000626; IPR019954; IPR019955;<br>IPR019956; G3DSA:3.10.20.90<br>(GENE3D), PTHR10666 (PANTHER),<br>PTHR10666:SF9 (PANTHER), SignalP<br>(SIGNALP), SSF54236 (SUPERFAMILY) |
| Loa loa                | polyubiquitin precursor                                | 5  | C:GO:0005737;<br>P:GO:0000003;<br>P:GO:0040007;<br>C:GO:0005634;<br>P:GO:0002119                                                                                                                                                                                                             | -                                                               |             | IPR000626; IPR019954; IPR019955;<br>IPR019956; G3DSA:3.10.20.90<br>(GENE3D), PTHR10666 (PANTHER),<br>PTHR10666:SF9 (PANTHER), SSF54236<br>(SUPERFAMILY)                    |
| Mus musculus           | ribosomal protein s18                                  | 7  | F:GO:0003735;<br>P:GO:0007275;<br>P:GO:0051726;<br>C:GO:0022627;<br>P:GO:0006417;<br>F:GO:0019843;<br>P:GO:0006414                                                                                                                                                                           | -                                                               |             | IPR001892; IPR010979; IPR018269;<br>G3DSA:1.10.8.50 (GENE3D),<br>G3DSA:4.10.910.10 (GENE3D),<br>PTHR10871 (PANTHER),<br>PTHR10871:SF2 (PANTHER)                            |
| -                      | -                                                      | 0  |                                                                                                                                                                                                                                                                                              |                                                                 |             | -                                                                                                                                                                          |
| Brugia malayi          | small family member (sma-1)                            | 1  | F:GO:0003779                                                                                                                                                                                                                                                                                 | -                                                               |             | -                                                                                                                                                                          |
| -                      | -                                                      | 0  |                                                                                                                                                                                                                                                                                              |                                                                 |             | -                                                                                                                                                                          |
| -                      | -                                                      | 0  |                                                                                                                                                                                                                                                                                              |                                                                 |             | -                                                                                                                                                                          |

|                            |                                                                                           |    |                                                                                                                                                                       |                                                                 |             |                                                                                                                                            |
|----------------------------|-------------------------------------------------------------------------------------------|----|-----------------------------------------------------------------------------------------------------------------------------------------------------------------------|-----------------------------------------------------------------|-------------|--------------------------------------------------------------------------------------------------------------------------------------------|
| Pediculus humanus corporis | ubiquitin carboxyl-termini hydrolase 3                                                    | 10 | F:GO:0042393;<br>P:GO:0060564;<br>P:GO:0031647;<br>P:GO:0090231;<br>F:GO:0004843;<br>P:GO:0016578;<br>F:GO:0004221;<br>P:GO:0051322;<br>C:GO:0000790;<br>P:GO:0006281 | -                                                               | EC:3.1.2.15 | IPR001607; IPR013083; PTHR10420 (PANTHER), PTHR10420:SF58 (PANTHER)                                                                        |
| -                          | -                                                                                         | 0  |                                                                                                                                                                       |                                                                 |             | -                                                                                                                                          |
| -                          | -                                                                                         | 0  |                                                                                                                                                                       |                                                                 |             | -                                                                                                                                          |
| Brugia malayi              | msh-domain protein 2                                                                      | 2  | C:GO:0005856;<br>F:GO:0005198                                                                                                                                         | -                                                               |             | IPR008962                                                                                                                                  |
| -                          | -                                                                                         | 0  |                                                                                                                                                                       |                                                                 |             | -                                                                                                                                          |
| -                          | -                                                                                         | 0  |                                                                                                                                                                       |                                                                 |             | -                                                                                                                                          |
| Haemonchus contortus       | cathepsin I-like cysteine protease                                                        | 3  | F:GO:0005515;<br>F:GO:0004197;<br>P:GO:0006508                                                                                                                        | -                                                               | EC:3.4.22.0 | IPR000169; IPR000668; IPR013128; IPR013201; G3DSA:3.90.70.10 (GENE3D), PTHR12411:SF57 (PANTHER), SignalP (SIGNALP), SSF54001 (SUPERFAMILY) |
| -                          | -                                                                                         | 0  |                                                                                                                                                                       |                                                                 |             | -                                                                                                                                          |
| -                          | -                                                                                         | 0  |                                                                                                                                                                       |                                                                 |             | SignalP (SIGNALP)                                                                                                                          |
| Caenorhabditis elegans     | elegans protein partially confirmed by transcript evidence                                | 0  |                                                                                                                                                                       | F:GO:0046872;<br>F:GO:0008270;<br>F:GO:0005515;<br>C:GO:0005622 |             | IPR011042; IPR013017; PTHR13712 (PANTHER), PTHR13712:SF9 (PANTHER), SSF101898 (SUPERFAMILY)                                                |
| Caenorhabditis briggsae    | elegans protein partially confirmed by transcript evidence                                | 0  |                                                                                                                                                                       | F:GO:0005509                                                    |             | PTHR12294 (PANTHER), PTHR12294:SF2 (PANTHER)                                                                                               |
| -                          | -                                                                                         | 0  |                                                                                                                                                                       |                                                                 |             | -                                                                                                                                          |
| Caenorhabditis elegans     | lin-12 and glp-1 x-hybridizing protein isoform partially confirmed by transcript evidence | 0  |                                                                                                                                                                       | P:GO:0005975;<br>F:GO:0016810;<br>F:GO:0003824                  |             | -                                                                                                                                          |
| Caenorhabditis briggsae    | r1ap1_caedr ame: full=rag1-activating protein 1 homolog                                   | 5  | F:GO:0004181;<br>P:GO:0007476;<br>P:GO:0006911;<br>P:GO:0019915;<br>C:GO:0016020                                                                                      | -                                                               | EC:3.4.17.0 | IPR004316; IPR018179; SignalP (SIGNALP)                                                                                                    |
| Brugia malayi              | chloride channel protein 7                                                                | 4  | F:GO:0005247;<br>P:GO:0055085;<br>C:GO:0016021;<br>P:GO:0006821                                                                                                       | -                                                               |             | IPR001807; PTHR11689:SF15 (PANTHER), SignalP (SIGNALP)                                                                                     |
| -                          | -                                                                                         | 0  |                                                                                                                                                                       |                                                                 |             | SignalP (SIGNALP)                                                                                                                          |
| Caenorhabditis elegans     | hypothetical protein F52H2.7 [Caenorhabditis elegans]                                     | 0  |                                                                                                                                                                       |                                                                 |             | -                                                                                                                                          |
| Caenorhabditis elegans     | snf related ki-se                                                                         | 2  | F:GO:0004672;<br>F:GO:0000166                                                                                                                                         | -                                                               |             | IPR015940; IPR020636; IPR020661; G3DSA:1.10.510.10 (GENE3D), G3DSA:1.10.8.10 (GENE3D)                                                      |
| Caenorhabditis elegans     | snf related ki-se                                                                         | 2  | F:GO:0004672;<br>F:GO:0000166                                                                                                                                         | -                                                               |             | IPR015940; IPR020636; IPR020661; G3DSA:1.10.510.10 (GENE3D), G3DSA:1.10.8.10 (GENE3D)                                                      |
| Caenorhabditis briggsae    | briggsae cbr-ndg-4 protein                                                                | 3  | P:GO:0009792;<br>P:GO:0010171;<br>P:GO:0040010                                                                                                                        | -                                                               |             | PTHR11161 (PANTHER)                                                                                                                        |

|                         |                                                   |   |                                                                                                                                                                                                                                                                                                                               |              |                                                                                |
|-------------------------|---------------------------------------------------|---|-------------------------------------------------------------------------------------------------------------------------------------------------------------------------------------------------------------------------------------------------------------------------------------------------------------------------------|--------------|--------------------------------------------------------------------------------|
| Caenorhabditis elegans  | uncoordinated family member (unc-89)              | 0 | P:GO:000902;<br>P:GO:0009190;<br>P:GO:0006468;<br>F:GO:0003677;<br>P:GO:0007264;<br>F:GO:0016849;<br>F:GO:0005524;<br>P:GO:0035023;<br>F:GO:0004672;<br>F:GO:0005089;<br>F:GO:0005085;<br>C:GO:0000786;<br>P:GO:0006334;<br>F:GO:0005488;<br>P:GO:0045214;<br>F:GO:0008307;<br>C:GO:0005622;<br>F:GO:0005515;<br>F:GO:0004713 |              | SignalP (SIGNALP)                                                              |
| -                       | -                                                 | 0 |                                                                                                                                                                                                                                                                                                                               |              | -                                                                              |
| -                       | -                                                 | 0 |                                                                                                                                                                                                                                                                                                                               |              | -                                                                              |
| Caenorhabditis elegans  | ophagy (yeast atg homolog) family member (atg-11) | 0 |                                                                                                                                                                                                                                                                                                                               |              | -                                                                              |
| -                       | -                                                 | 0 |                                                                                                                                                                                                                                                                                                                               |              | PTHR10887 (PANTHER)                                                            |
| -                       | -                                                 | 0 |                                                                                                                                                                                                                                                                                                                               |              | -                                                                              |
| -                       | -                                                 | 0 |                                                                                                                                                                                                                                                                                                                               |              | -                                                                              |
| Canis familiaris        | protein phosphatase 1g isoform 3                  | 0 |                                                                                                                                                                                                                                                                                                                               |              | -                                                                              |
| -                       | -                                                 | 0 |                                                                                                                                                                                                                                                                                                                               |              | -                                                                              |
| Branchiostoma floridae  | homolog 1                                         | 3 | P:GO:0031167;<br>F:GO:0003676;<br>F:GO:0008168                                                                                                                                                                                                                                                                                | EC:2.1.1.0   | IPR002877; IPR015507;<br>G3DSA:3.40.50.150 (GENE3D),<br>SSF53335 (SUPERFAMILY) |
| Caenorhabditis elegans  | nuclear receptor nhr-61                           | 0 |                                                                                                                                                                                                                                                                                                                               |              | PTHR11865 (PANTHER),<br>PTHR11865:SF238 (PANTHER), SignalP<br>(SIGNALP)        |
| Caenorhabditis elegans  | multiple pdz domain protein family member (mpz-1) | 0 |                                                                                                                                                                                                                                                                                                                               | C:GO:0016021 | PTHR19964 (PANTHER),<br>PTHR19964:SF5 (PANTHER)                                |
| Caenorhabditis briggsae | briggsae cbr-hum-7 protein                        | 5 | F:GO:0046872;<br>C:GO:0016459;<br>F:GO:0005524;<br>P:GO:0007165;<br>F:GO:0003774                                                                                                                                                                                                                                              |              | -                                                                              |

|                              |                                                            |    |                                                                                                                                                                       |   |             |                                                                                                                                      |
|------------------------------|------------------------------------------------------------|----|-----------------------------------------------------------------------------------------------------------------------------------------------------------------------|---|-------------|--------------------------------------------------------------------------------------------------------------------------------------|
| Loa loa                      | protein serine ki-se h1                                    | 8  | C:GO:0005815;<br>F:GO:0004674;<br>C:GO:0016607;<br>F:GO:0005524;<br>C:GO:0005789;<br>C:GO:0005794;<br>C:GO:0005886;<br>P:GO:0006468                                   | - | EC:2.7.11.0 | IPR000719; IPR008271; IPR011009;<br>IPR017442; IPR020636;<br>G3DSA:1.10.510.10 (GENE3D),<br>PTHR22982:SF12 (PANTHER)                 |
| -                            | -                                                          | 0  | -                                                                                                                                                                     | - | -           | -                                                                                                                                    |
| -                            | -                                                          | 0  | -                                                                                                                                                                     | - | -           | -                                                                                                                                    |
| Caenorhabditis elegans       | sig-l transducer and activator of transcription            | 10 | C:GO:0005737;<br>F:GO:0042802;<br>F:GO:0003700;<br>F:GO:0004871;<br>F:GO:0003677;<br>P:GO:0007275;<br>F:GO:0005509;<br>P:GO:0007165;<br>C:GO:0005634;<br>P:GO:0006355 | - | -           | SignalP (SIGNALP)                                                                                                                    |
| -                            | -                                                          | 0  | -                                                                                                                                                                     | - | -           | -                                                                                                                                    |
| -                            | -                                                          | 0  | -                                                                                                                                                                     | - | -           | -                                                                                                                                    |
| -                            | -                                                          | 0  | -                                                                                                                                                                     | - | -           | -                                                                                                                                    |
| Pongo abelii                 | ribosomal protein l27a                                     | 5  | F:GO:0003735;<br>F:GO:0003723;<br>F:GO:0005515;<br>C:GO:0022625;<br>P:GO:0006414                                                                                      | - | -           | SignalP (SIGNALP)                                                                                                                    |
| Caenorhabditis briggsae      | elegans protein partially confirmed by transcript evidence | 0  | -                                                                                                                                                                     | - | -           | IPR021454                                                                                                                            |
| -                            | -                                                          | 0  | -                                                                                                                                                                     | - | -           | -                                                                                                                                    |
| -                            | -                                                          | 0  | -                                                                                                                                                                     | - | -           | -                                                                                                                                    |
| -                            | -                                                          | 0  | -                                                                                                                                                                     | - | -           | SignalP (SIGNALP)                                                                                                                    |
| -                            | -                                                          | 0  | -                                                                                                                                                                     | - | -           | SignalP (SIGNALP)                                                                                                                    |
| -                            | -                                                          | 0  | -                                                                                                                                                                     | - | -           | -                                                                                                                                    |
| Ailuropoda melanoleuca       | golgi apparatus protein 1                                  | 5  | C:GO:0000139;<br>C:GO:0005797;<br>P:GO:0006886;<br>F:GO:0005102;<br>C:GO:0016021                                                                                      | - | -           | PTHR11884 (PANTHER)                                                                                                                  |
| Cyanothece sp. PCC 7822      | alpha beta hydrolase fold protein                          | 1  | F:GO:0016787                                                                                                                                                          | - | -           | IPR000073; IPR000639;<br>G3DSA:3.40.50.1820 (GENE3D),<br>PTHR10992 (PANTHER),<br>PTHR10992:SF22 (PANTHER),<br>SSF53474 (SUPERFAMILY) |
| -                            | -                                                          | 0  | -                                                                                                                                                                     | - | -           | -                                                                                                                                    |
| -                            | -                                                          | 0  | -                                                                                                                                                                     | - | -           | -                                                                                                                                    |
| -                            | -                                                          | 0  | -                                                                                                                                                                     | - | -           | SignalP (SIGNALP)                                                                                                                    |
| Nippostrongylus brasiliensis | glbc_nipbr ame: full= cuticular isoform flags: precursor   | 1  | F:GO:0046872                                                                                                                                                          | - | -           | SignalP (SIGNALP)                                                                                                                    |
| Caenorhabditis elegans       | lethal family member (let-805)                             | 8  | P:GO:0018996;<br>P:GO:0009792;<br>P:GO:0008340;<br>P:GO:0000003;<br>F:GO:0005515;<br>P:GO:0006898;<br>P:GO:0002119;<br>P:GO:0040011                                   | - | -           | -                                                                                                                                    |
| -                            | -                                                          | 0  | -                                                                                                                                                                     | - | -           | -                                                                                                                                    |



|                         |                                                            |   |                                                                                                                                     |                                                                                                                                     |                                                                                                                                            |
|-------------------------|------------------------------------------------------------|---|-------------------------------------------------------------------------------------------------------------------------------------|-------------------------------------------------------------------------------------------------------------------------------------|--------------------------------------------------------------------------------------------------------------------------------------------|
| Caenorhabditis elegans  | splicing factor subunit 3                                  | 8 | P:GO:0040035;<br>P:GO:0010171;<br>F:GO:0003676;<br>P:GO:0018996;<br>F:GO:0005515;<br>C:GO:0005634;<br>F:GO:0008270;<br>P:GO:0040039 | -                                                                                                                                   | PTHR12786 (PANTHER),<br>PTHR12786:SF2 (PANTHER)                                                                                            |
| Caenorhabditis elegans  | inositol -triphosphate receptor                            | 1 | P:GO:0006810                                                                                                                        | -                                                                                                                                   | IPR015925; PTHR13715:SF2<br>(PANTHER)<br>SignalP (SIGNALP)                                                                                 |
| Caenorhabditis elegans  | elegans protein confirmed by transcript evidence           | 0 |                                                                                                                                     | F:GO:0005488                                                                                                                        | -                                                                                                                                          |
| Caenorhabditis elegans  | in family member (ttn-1)                                   | 4 | P:GO:0009792;<br>P:GO:0006468;<br>F:GO:0004672;<br>F:GO:0005524                                                                     | -                                                                                                                                   | -                                                                                                                                          |
| Caenorhabditis elegans  | temporarily assigned gene -me family member (tag-289)      | 0 |                                                                                                                                     |                                                                                                                                     | PTHR13906 (PANTHER),<br>PTHR13906:SF5 (PANTHER), SignalP<br>(SIGNALP)                                                                      |
|                         | -                                                          | 0 |                                                                                                                                     |                                                                                                                                     | -                                                                                                                                          |
| Caenorhabditis elegans  | elegans protein partially confirmed by transcript evidence | 1 | P:GO:0000003                                                                                                                        | -                                                                                                                                   | PTHR23028 (PANTHER),<br>PTHR23028:SF6 (PANTHER)                                                                                            |
|                         | -                                                          | 0 |                                                                                                                                     |                                                                                                                                     | -                                                                                                                                          |
| Caenorhabditis briggsae | major facilitator superfamily protein                      | 1 | C:GO:0016021                                                                                                                        | -                                                                                                                                   | -                                                                                                                                          |
|                         | -                                                          | 0 |                                                                                                                                     |                                                                                                                                     | SignalP (SIGNALP)                                                                                                                          |
|                         | -                                                          | 0 |                                                                                                                                     |                                                                                                                                     | SignalP (SIGNALP)                                                                                                                          |
|                         | -                                                          | 0 |                                                                                                                                     |                                                                                                                                     | -                                                                                                                                          |
|                         | -                                                          | 0 |                                                                                                                                     |                                                                                                                                     | -                                                                                                                                          |
|                         | -                                                          | 0 |                                                                                                                                     |                                                                                                                                     | -                                                                                                                                          |
| Caenorhabditis elegans  | briggsae cbr-nhr-45 protein                                | 2 | F:GO:0005515;<br>P:GO:0006350                                                                                                       | -                                                                                                                                   | IPR008946; PTHR11865 (PANTHER),<br>PTHR11865:SF235 (PANTHER)                                                                               |
|                         | -                                                          | 0 |                                                                                                                                     |                                                                                                                                     | -                                                                                                                                          |
|                         | -                                                          | 0 |                                                                                                                                     |                                                                                                                                     | -                                                                                                                                          |
|                         | -                                                          | 0 |                                                                                                                                     |                                                                                                                                     | -                                                                                                                                          |
| Loa loa                 | protein tyrosine non-receptor type 23                      | 0 |                                                                                                                                     | P:GO:0016311;<br>F:GO:0016791;<br>C:GO:0016023;<br>C:GO:0031410;<br>P:GO:0006470;<br>F:GO:0016787;<br>F:GO:0004725;<br>F:GO:0004721 | IPR004328; IPR022407;<br>G3DSA:1.20.120.560 (GENE3D),<br>G3DSA:1.20.140.50 (GENE3D),<br>G3DSA:1.25.40.280 (GENE3D),<br>PTHR23030 (PANTHER) |
|                         | -                                                          | 0 |                                                                                                                                     |                                                                                                                                     | -                                                                                                                                          |
|                         | -                                                          | 0 |                                                                                                                                     |                                                                                                                                     | -                                                                                                                                          |
| Caenorhabditis elegans  | hypothetical ring finger protein in chromosome             | 8 | P:GO:0009792;<br>P:GO:0010171;<br>F:GO:0046872;<br>P:GO:0040018;<br>P:GO:0018996;<br>P:GO:0040010;<br>P:GO:0000003;<br>P:GO:0008219 | -                                                                                                                                   | -                                                                                                                                          |
|                         | -                                                          | 0 |                                                                                                                                     |                                                                                                                                     | -                                                                                                                                          |
| Caenorhabditis briggsae | Hypothetical protein CBG12817 [Caenorhabditis briggsae]    | 0 |                                                                                                                                     |                                                                                                                                     | -                                                                                                                                          |
|                         | -                                                          | 0 |                                                                                                                                     |                                                                                                                                     | -                                                                                                                                          |

|                         |                                                         |    |                                                                                                                                                                                                         |                                                                                                                                                                       |                                                                                                        |
|-------------------------|---------------------------------------------------------|----|---------------------------------------------------------------------------------------------------------------------------------------------------------------------------------------------------------|-----------------------------------------------------------------------------------------------------------------------------------------------------------------------|--------------------------------------------------------------------------------------------------------|
| Homo sapiens            | immunoglobulin heavy chain variable region              | 0  |                                                                                                                                                                                                         |                                                                                                                                                                       | IPR003596; IPR013106; IPR013783; PTHR23266 (PANTHER), PTHR23266:SF11 (PANTHER), SSF48726 (SUPERFAMILY) |
| Caenorhabditis briggsae | variable abnormal morphology family member (vab-8)      | 0  |                                                                                                                                                                                                         | P:GO:0007018;<br>C:GO:0005874;<br>F:GO:0000166;<br>C:GO:0005737;<br>F:GO:0005524;<br>P:GO:0007275;<br>F:GO:0003777;<br>P:GO:0030154;<br>F:GO:0003774;<br>P:GO:0007399 | -                                                                                                      |
| -                       | -                                                       | 0  |                                                                                                                                                                                                         |                                                                                                                                                                       | SignalP (SIGNALP)                                                                                      |
| -                       | -                                                       | 0  |                                                                                                                                                                                                         |                                                                                                                                                                       | -                                                                                                      |
| Caenorhabditis briggsae | r- binding motif protein 28                             | 1  | F:GO:0005488                                                                                                                                                                                            | -                                                                                                                                                                     | IPR000504; IPR012677; PTHR10432 (PANTHER), PTHR10432:SF50 (PANTHER), SSF54928 (SUPERFAMILY)            |
| Caenorhabditis briggsae | briggsae cbr-mab- protein                               | 5  | F:GO:0003700;<br>F:GO:0003677;<br>P:GO:0007548;<br>C:GO:0005634;<br>P:GO:0006355                                                                                                                        | -                                                                                                                                                                     | -                                                                                                      |
| -                       | -                                                       | 0  |                                                                                                                                                                                                         |                                                                                                                                                                       | -                                                                                                      |
| Ancylostoma caninum     | c-type lectin family member (clec-266)                  | 0  |                                                                                                                                                                                                         | F:GO:0003674;<br>F:GO:0005488;<br>C:GO:0016021;<br>P:GO:0008150;<br>F:GO:0005529;<br>C:GO:0005575                                                                     | IPR001304; IPR016186; IPR016187; PTHR22802 (PANTHER), PTHR22802:SF15 (PANTHER)                         |
| Loa loa                 | leishmanolysin-like (metallopeptidase m8 family)        | 3  | P:GO:0000278;<br>P:GO:0006996;<br>P:GO:0000279                                                                                                                                                          | -                                                                                                                                                                     | IPR001577; G3DSA:3.10.170.20 (GENE3D), SSF55486 (SUPERFAMILY)                                          |
| Pongo abelii            | heavy polypeptide 1                                     | 12 | F:GO:0003777;<br>C:GO:0005829;<br>P:GO:0006810;<br>C:GO:0005874;<br>F:GO:0042623;<br>P:GO:0006200;<br>P:GO:0007052;<br>C:GO:0005868;<br>F:GO:0005524;<br>P:GO:0007018;<br>F:GO:0005515;<br>C:GO:0005794 | -                                                                                                                                                                     | -                                                                                                      |
| -                       | -                                                       | 0  |                                                                                                                                                                                                         |                                                                                                                                                                       | -                                                                                                      |
| Caenorhabditis elegans  | pdz domain containing 8                                 | 4  | P:GO:0023034;<br>F:GO:0046872;<br>C:GO:0016021;<br>F:GO:0005515                                                                                                                                         | -                                                                                                                                                                     | SignalP (SIGNALP)                                                                                      |
| Caenorhabditis briggsae | pre-mr--splicing factor atp-dependent r- helicase prp16 | 4  | F:GO:0003676;<br>F:GO:0005524;<br>F:GO:0005515;<br>F:GO:0008026                                                                                                                                         | -                                                                                                                                                                     | SignalP (SIGNALP)                                                                                      |
| -                       | -                                                       | 0  |                                                                                                                                                                                                         |                                                                                                                                                                       | -                                                                                                      |
| -                       | -                                                       | 0  |                                                                                                                                                                                                         |                                                                                                                                                                       | -                                                                                                      |
| -                       | -                                                       | 0  |                                                                                                                                                                                                         |                                                                                                                                                                       | -                                                                                                      |

|                         |                              |   |                                                |                               |                                                                                                        |
|-------------------------|------------------------------|---|------------------------------------------------|-------------------------------|--------------------------------------------------------------------------------------------------------|
|                         | -                            | 0 |                                                |                               | -                                                                                                      |
|                         |                              | 0 |                                                |                               |                                                                                                        |
| Caenorhabditis briggsae | briggsae cbr-qui-1 protein   | 0 |                                                |                               | PTHR19871 (PANTHER)                                                                                    |
|                         | -                            | 0 |                                                |                               | SignalP (SIGNALP)                                                                                      |
|                         | -                            | 0 |                                                |                               | SignalP (SIGNALP)                                                                                      |
|                         | -                            | 0 |                                                |                               | -                                                                                                      |
|                         | -                            | 0 |                                                |                               | -                                                                                                      |
| Ciona intestinalis      | protein tyrosine phosphatase | 1 | F:GO:0016791                                   | -                             | EC:3.1.3.0<br>IPR000242; G3DSA:3.90.190.10<br>(GENE3D), PTHR19134 (PANTHER),<br>SSF52799 (SUPERFAMILY) |
|                         | -                            | 0 |                                                |                               | -                                                                                                      |
|                         | -                            | 0 |                                                |                               | -                                                                                                      |
| Caenorhabditis briggsae | fatty-acid amide hydrolase 2 | 1 | C:GO:0005811                                   | -                             | IPR000120; IPR020556;<br>PTHR11895:SF5 (PANTHER), SignalP<br>(SIGNALP)                                 |
| Caenorhabditis briggsae | fatty-acid amide hydrolase 2 | 1 | C:GO:0005811                                   | -                             | IPR000120; IPR020556;<br>PTHR11895:SF5 (PANTHER), SignalP<br>(SIGNALP)                                 |
| Caenorhabditis briggsae | fatty-acid amide hydrolase 2 | 1 | C:GO:0005811                                   | -                             | IPR000120; IPR020556;<br>PTHR11895:SF5 (PANTHER), SignalP<br>(SIGNALP)                                 |
|                         | -                            | 0 |                                                |                               | SignalP (SIGNALP)                                                                                      |
|                         | -                            | 0 |                                                |                               | -                                                                                                      |
|                         | -                            | 0 |                                                |                               | -                                                                                                      |
|                         | -                            | 0 |                                                |                               | -                                                                                                      |
|                         | -                            | 0 |                                                |                               | -                                                                                                      |
|                         | -                            | 0 |                                                |                               | -                                                                                                      |
|                         | -                            | 0 |                                                |                               | SignalP (SIGNALP)                                                                                      |
| Caenorhabditis elegans  | ras family small gtpase      | 3 | F:GO:0008270;<br>F:GO:0005515;<br>P:GO:0008340 | -                             | -                                                                                                      |
| Caenorhabditis briggsae | briggsae cbr-ins-1 protein   | 0 |                                                | F:GO:0005179;<br>C:GO:0005576 | IPR016179                                                                                              |

|                         |                                                    |    |                                                                                                                                                                                                                                                                                                                                                                                                                                                                        |   |             |                                                                                                                     |
|-------------------------|----------------------------------------------------|----|------------------------------------------------------------------------------------------------------------------------------------------------------------------------------------------------------------------------------------------------------------------------------------------------------------------------------------------------------------------------------------------------------------------------------------------------------------------------|---|-------------|---------------------------------------------------------------------------------------------------------------------|
| Loa loa                 | activin receptor-like ki-se 7                      | 28 | P:GO:0006468;<br>P:GO:0009749;<br>P:GO:0001541;<br>P:GO:0030901;<br>P:GO:0007181;<br>P:GO:0032868;<br>P:GO:0021766;<br>P:GO:0001834;<br>P:GO:0046676;<br>P:GO:0014070;<br>C:GO:0005737;<br>F:GO:0016361;<br>P:GO:0019915;<br>C:GO:0009986;<br>F:GO:0046872;<br>P:GO:0021549;<br>P:GO:0007165;<br>P:GO:0002021;<br>P:GO:0042493;<br>P:GO:0030154;<br>F:GO:0070700;<br>C:GO:0048179;<br>P:GO:0007368;<br>P:GO:0033993;<br>F:GO:0005524;<br>P:GO:0043065;<br>F:GO:0046332 | - |             | IPR000719; IPR011009; IPR017442;<br>G3DSA:3.30.200.20 (GENE3D),<br>PTHR23255 (PANTHER),<br>PTHR23255:SF14 (PANTHER) |
|                         | -                                                  | 0  |                                                                                                                                                                                                                                                                                                                                                                                                                                                                        |   |             | -                                                                                                                   |
|                         | -                                                  | 0  |                                                                                                                                                                                                                                                                                                                                                                                                                                                                        |   |             | -                                                                                                                   |
|                         | -                                                  | 0  |                                                                                                                                                                                                                                                                                                                                                                                                                                                                        |   |             | -                                                                                                                   |
|                         | -                                                  | 0  |                                                                                                                                                                                                                                                                                                                                                                                                                                                                        |   |             | -                                                                                                                   |
| Caenorhabditis elegans  | nudix hydrolase                                    | 3  | F:GO:0030145;<br>P:GO:0009132;<br>F:GO:0016818                                                                                                                                                                                                                                                                                                                                                                                                                         | - | EC:3.6.1.0  | IPR000086; IPR015797; IPR020084;<br>PTHR12992 (PANTHER), PS51462<br>(PROFILE)                                       |
|                         | -                                                  | 0  |                                                                                                                                                                                                                                                                                                                                                                                                                                                                        |   |             | -                                                                                                                   |
| Caenorhabditis elegans  | uroca-te hydratase                                 | 2  | P:GO:0006548;<br>F:GO:0016153                                                                                                                                                                                                                                                                                                                                                                                                                                          | - | EC:4.2.1.49 | IPR000193                                                                                                           |
|                         | -                                                  | 0  |                                                                                                                                                                                                                                                                                                                                                                                                                                                                        |   |             | -                                                                                                                   |
|                         | -                                                  | 0  |                                                                                                                                                                                                                                                                                                                                                                                                                                                                        |   |             | -                                                                                                                   |
| Caenorhabditis elegans  | briggsae cbr-dpy-22 protein                        | 10 | P:GO:0040010;<br>P:GO:0018991;<br>P:GO:0040035;<br>P:GO:0010171;<br>P:GO:0040026;<br>P:GO:0040011;<br>P:GO:0009792;<br>P:GO:0040018;<br>P:GO:0006350;<br>C:GO:0005634                                                                                                                                                                                                                                                                                                  | - |             | -                                                                                                                   |
| Caenorhabditis briggsae | ypi7_caeel ame: full=uncharacterized f-box protein | 0  |                                                                                                                                                                                                                                                                                                                                                                                                                                                                        |   |             | IPR001810; G3DSA:1.20.1280.50<br>(GENE3D)                                                                           |
|                         | -                                                  | 0  |                                                                                                                                                                                                                                                                                                                                                                                                                                                                        |   |             | IPR016186                                                                                                           |
| Caenorhabditis elegans  | ribosomal large p2                                 | 5  | P:GO:0009792;<br>C:GO:0005840;<br>F:GO:0003735;<br>P:GO:0040010;<br>P:GO:0006414                                                                                                                                                                                                                                                                                                                                                                                       | - |             | IPR001813; PTHR21141 (PANTHER),<br>PTHR21141:SF5 (PANTHER)                                                          |
|                         | -                                                  | 0  |                                                                                                                                                                                                                                                                                                                                                                                                                                                                        |   |             | -                                                                                                                   |

|                             |                                                                  |  |                                                                                                                                                                          |                               |                                   |                                                                                                            |
|-----------------------------|------------------------------------------------------------------|--|--------------------------------------------------------------------------------------------------------------------------------------------------------------------------|-------------------------------|-----------------------------------|------------------------------------------------------------------------------------------------------------|
| Angiostrongylus cantonensis | elegans protein confirmed by transcript evidence                 |  | F:GO:0046872;<br>3 P:GO:0019509;<br>F:GO:0043874                                                                                                                         | -                             | EC:3.1.3.77                       | -                                                                                                          |
|                             | -                                                                |  | 0                                                                                                                                                                        |                               |                                   | -                                                                                                          |
| Homo sapiens                | mhc class ib antigen                                             |  | P:GO:0006955;<br>F:GO:0032393;<br>5 C:GO:0016021;<br>P:GO:0002474;<br>C:GO:0042612                                                                                       | -                             |                                   | IPR001039; IPR011161; IPR011162;<br>PTHR16675 (PANTHER),<br>PTHR16675:SF53 (PANTHER), SignalP<br>(SIGNALP) |
| Caenorhabditis elegans      | multidrug resistance protein 2 (atp-binding cassette protein c)  |  | 1 F:GO:0017111                                                                                                                                                           | -                             | EC:3.6.1.15                       | -                                                                                                          |
|                             | -                                                                |  | 0                                                                                                                                                                        |                               |                                   | -                                                                                                          |
|                             | -                                                                |  | 0                                                                                                                                                                        |                               |                                   | -                                                                                                          |
|                             | -                                                                |  | 0                                                                                                                                                                        |                               |                                   | -                                                                                                          |
| Caenorhabditis elegans      | prolyl 4-hydroxylase                                             |  | F:GO:0031418;<br>F:GO:0005506;<br>6 F:GO:0004656;<br>P:GO:0055114;<br>F:GO:0016702;<br>C:GO:0005783                                                                      | -                             | EC:1.14.11.2<br>;<br>EC:1.13.11.0 | -                                                                                                          |
| Caenorhabditis elegans      | briggsae cbr-acs-11 protein                                      |  | 0                                                                                                                                                                        | P:GO:0008152;<br>F:GO:0003824 |                                   | G3DSA:3.40.50.980 (GENE3D), SignalP<br>(SIGNALP), SSF56801 (SUPERFAMILY)                                   |
| Caenorhabditis elegans      | yhb8_caee1_ame: full=uncharacterized protein flags:<br>precursor |  | 0                                                                                                                                                                        |                               |                                   | SignalP (SIGNALP)                                                                                          |
| Caenorhabditis briggsae     | Hypothetical protein CBG12661 [Caenorhabditis briggsae]          |  | 0                                                                                                                                                                        |                               |                                   | PTHR21068 (PANTHER),<br>PTHR21068:SF8 (PANTHER)                                                            |
|                             | -                                                                |  | 0                                                                                                                                                                        |                               |                                   | -                                                                                                          |
| Caenorhabditis briggsae     | briggsae cbr-abt-4 protein                                       |  | 2 F:GO:0016887;<br>F:GO:0005524                                                                                                                                          | -                             |                                   | PTHR19229 (PANTHER),<br>PTHR19229:SF27 (PANTHER), SignalP<br>(SIGNALP)                                     |
|                             | -                                                                |  | 0                                                                                                                                                                        |                               |                                   | IPR001859; SignalP (SIGNALP)                                                                               |
|                             | -                                                                |  | 0                                                                                                                                                                        |                               |                                   | SignalP (SIGNALP)                                                                                          |
| Caenorhabditis briggsae     | elegans protein partially confirmed by transcript evidence       |  | 0                                                                                                                                                                        | F:GO:0016787                  |                                   | IPR002018; G3DSA:3.40.50.1820<br>(GENE3D), PTHR11559:SF6<br>(PANTHER), SSF53474 (SUPERFAMILY)              |
| Caenorhabditis elegans      | briggsae cbr-psr-1 protein                                       |  | 10 F:GO:0005515;<br>P:GO:0006397;<br>P:GO:0010468;<br>F:GO:0032452;<br>F:GO:0016491;<br>C:GO:0044464;<br>P:GO:0070077;<br>P:GO:0048513;<br>P:GO:0008380;<br>P:GO:0019219 | -                             |                                   | SSF51197 (SUPERFAMILY)                                                                                     |
|                             | -                                                                |  | 0                                                                                                                                                                        |                               |                                   | -                                                                                                          |
|                             | -                                                                |  | 0                                                                                                                                                                        |                               |                                   | -                                                                                                          |
|                             | -                                                                |  | 0                                                                                                                                                                        |                               |                                   | -                                                                                                          |
| Caenorhabditis briggsae     | Hypothetical protein CBG17703 [Caenorhabditis briggsae]          |  | 0                                                                                                                                                                        | F:GO:0008270;<br>C:GO:0005634 |                                   | IPR012935                                                                                                  |
|                             | -                                                                |  | 0                                                                                                                                                                        |                               |                                   | -                                                                                                          |
|                             | -                                                                |  | 0                                                                                                                                                                        |                               |                                   | -                                                                                                          |
|                             | -                                                                |  | 0                                                                                                                                                                        |                               |                                   | SignalP (SIGNALP)                                                                                          |
| Caenorhabditis briggsae     | protein-s isoprenylcysteine o-methyltransferase                  |  | 4 F:GO:0004671;<br>C:GO:0016021;<br>P:GO:0006481;<br>C:GO:0005783                                                                                                        | -                             | EC:2.1.1.100                      | IPR007269; PTHR12714 (PANTHER),<br>SignalP (SIGNALP)                                                       |

|                         |                                                  |    |                                                                                                                                                                                                                          |                               |                                                         |                                                                                                                                                          |
|-------------------------|--------------------------------------------------|----|--------------------------------------------------------------------------------------------------------------------------------------------------------------------------------------------------------------------------|-------------------------------|---------------------------------------------------------|----------------------------------------------------------------------------------------------------------------------------------------------------------|
| Caenorhabditis elegans  | elegans protein confirmed by transcript evidence | 0  |                                                                                                                                                                                                                          |                               |                                                         | SignalP (SIGNALP)                                                                                                                                        |
| -                       | -                                                | 0  |                                                                                                                                                                                                                          |                               |                                                         | -                                                                                                                                                        |
| Caenorhabditis elegans  | elegans protein confirmed by transcript evidence | 0  |                                                                                                                                                                                                                          | F:GO:0005488                  |                                                         | -                                                                                                                                                        |
| -                       | -                                                | 0  |                                                                                                                                                                                                                          |                               |                                                         | SignalP (SIGNALP)                                                                                                                                        |
| -                       | -                                                | 0  |                                                                                                                                                                                                                          |                               |                                                         | -                                                                                                                                                        |
| -                       | -                                                | 0  |                                                                                                                                                                                                                          |                               |                                                         | SignalP (SIGNALP)                                                                                                                                        |
| Caenorhabditis briggsae | briggsae cbr-cnt-2 protein                       | 11 | C:GO:0005829;<br>P:GO:0006810;<br>F:GO:0008060;<br>P:GO:0032312;<br>F:GO:0008270;<br>P:GO:0000003;<br>F:GO:0005515;<br>F:GO:0003924;<br>P:GO:0009792;<br>C:GO:0005634;<br>F:GO:0005525                                   | -                             | EC:3.6.5.1;<br>EC:3.6.5.2;<br>EC:3.6.5.3;<br>EC:3.6.5.4 | IPR001020; IPR001806; IPR013753;<br>IPR020851; G3DSA:3.40.50.300<br>(GENE3D), PTHR23180 (PANTHER),<br>PTHR23180:SF6 (PANTHER), SSF52540<br>(SUPERFAMILY) |
| -                       | -                                                | 0  |                                                                                                                                                                                                                          |                               |                                                         | -                                                                                                                                                        |
| -                       | -                                                | 0  |                                                                                                                                                                                                                          |                               |                                                         | SignalP (SIGNALP)                                                                                                                                        |
| Caenorhabditis elegans  | protein ki-se c                                  | 13 | F:GO:0008047;<br>P:GO:0006917;<br>P:GO:0023034;<br>F:GO:0004871;<br>F:GO:0046872;<br>F:GO:0019899;<br>F:GO:0005524;<br>P:GO:0050730;<br>P:GO:0007165;<br>F:GO:0004699;<br>C:GO:0005783;<br>C:GO:0005634;<br>C:GO:0005886 | -                             |                                                         | -                                                                                                                                                        |
| Caenorhabditis briggsae | briggsae cbr-afd-3 protein                       | 12 | P:GO:0016192;<br>F:GO:0008565;<br>P:GO:0061088;<br>P:GO:0040007;<br>P:GO:0010171;<br>P:GO:0002119;<br>C:GO:0030117;<br>F:GO:0005515;<br>P:GO:0006886;<br>P:GO:0009792;<br>P:GO:0006726;<br>C:GO:0005794                  | -                             |                                                         | IPR002553; IPR011989; PTHR22781<br>(PANTHER), PTHR22781:SF9<br>(PANTHER)                                                                                 |
| Brugia malayi           | fes cip4 homology domain containing protein      | 0  |                                                                                                                                                                                                                          | P:GO:0007165;<br>C:GO:0005622 |                                                         | -                                                                                                                                                        |
| -                       | -                                                | 0  |                                                                                                                                                                                                                          |                               |                                                         | -                                                                                                                                                        |
| Caenorhabditis elegans  | eb module family protein                         | 2  | F:GO:0016810;<br>P:GO:0005975                                                                                                                                                                                            | -                             |                                                         | -                                                                                                                                                        |
| -                       | -                                                | 0  |                                                                                                                                                                                                                          |                               |                                                         | -                                                                                                                                                        |
| -                       | -                                                | 0  |                                                                                                                                                                                                                          |                               |                                                         | -                                                                                                                                                        |
| -                       | -                                                | 0  |                                                                                                                                                                                                                          |                               |                                                         | -                                                                                                                                                        |
| Caenorhabditis briggsae | e3 ubiquitin-protein ligase ubr7                 | 1  | F:GO:0003824                                                                                                                                                                                                             | -                             |                                                         | SignalP (SIGNALP)                                                                                                                                        |
| Caenorhabditis briggsae | e3 ubiquitin-protein ligase ubr7                 | 1  | F:GO:0003824                                                                                                                                                                                                             | -                             |                                                         | SignalP (SIGNALP)                                                                                                                                        |
| Caenorhabditis briggsae | e3 ubiquitin-protein ligase ubr7                 | 1  | F:GO:0003824                                                                                                                                                                                                             | -                             |                                                         | SignalP (SIGNALP)                                                                                                                                        |
| -                       | -                                                | 0  |                                                                                                                                                                                                                          |                               |                                                         | -                                                                                                                                                        |

|                         |                                                         |  |                                                                                                                                                                          |                                                                 |             |                                                                                                                                 |
|-------------------------|---------------------------------------------------------|--|--------------------------------------------------------------------------------------------------------------------------------------------------------------------------|-----------------------------------------------------------------|-------------|---------------------------------------------------------------------------------------------------------------------------------|
| Loa loa                 | mitogen-activated protein ki-se erk-                    |  | P:GO:0006468;<br>3 F:GO:0005524;<br>F:GO:0004674                                                                                                                         | -                                                               | EC:2.7.11.0 | PTHR11295 (PANTHER),<br>PTHR11295:SF111 (PANTHER)                                                                               |
|                         | -                                                       |  | 0                                                                                                                                                                        |                                                                 |             | -                                                                                                                               |
|                         | -                                                       |  | 0                                                                                                                                                                        |                                                                 |             | -                                                                                                                               |
|                         | -                                                       |  | 0                                                                                                                                                                        |                                                                 |             | -                                                                                                                               |
|                         | -                                                       |  | 0                                                                                                                                                                        |                                                                 |             | -                                                                                                                               |
|                         | -                                                       |  | 0                                                                                                                                                                        |                                                                 |             | -                                                                                                                               |
| Caenorhabditis briggsae | Hypothetical protein CBG21465 [Caenorhabditis briggsae] |  | 0                                                                                                                                                                        |                                                                 |             | G3DSA:3.30.70.340 (GENE3D),<br>PTHR11705 (PANTHER),<br>PTHR11705:SF10 (PANTHER)                                                 |
|                         | -                                                       |  | 0                                                                                                                                                                        |                                                                 |             | -                                                                                                                               |
|                         | -                                                       |  | 0                                                                                                                                                                        |                                                                 |             | -                                                                                                                               |
| Bitis gabonica          | trypsin inhibitor-7 precursor                           |  | 2 C:GO:0005576;<br>F:GO:0008233                                                                                                                                          | -                                                               |             | -                                                                                                                               |
| Homo sapiens            | atp h+ mitochondrial f1 gamma polypeptide 1             |  | 10 F:GO:0046961;<br>F:GO:0005515;<br>F:GO:0008270;<br>C:GO:0005759;<br>P:GO:0006172;<br>F:GO:0046933;<br>P:GO:0042776;<br>F:GO:0003677;<br>C:GO:0000275;<br>P:GO:0006200 | -                                                               | EC:3.6.3.14 | -                                                                                                                               |
| Caenorhabditis elegans  | elegans protein confirmed by transcript evidence        |  | 0                                                                                                                                                                        |                                                                 |             | SignalP (SIGNALP)                                                                                                               |
| Caenorhabditis elegans  | homeobox domain containing protein                      |  | 7 P:GO:0040010;<br>F:GO:0003676;<br>P:GO:0040035;<br>P:GO:0002119;<br>P:GO:0040011;<br>P:GO:0006898;<br>P:GO:0002009                                                     | -                                                               |             | -                                                                                                                               |
|                         | -                                                       |  | 0                                                                                                                                                                        |                                                                 |             | -                                                                                                                               |
| Caenorhabditis remanei  | calcium atpase                                          |  | 5 F:GO:0005388;<br>C:GO:0016021;<br>P:GO:0006754;<br>F:GO:0005524;<br>P:GO:0006816                                                                                       | -                                                               | EC:3.6.3.8  | IPR001757; IPR008250;<br>G3DSA:1.20.1110.10 (GENE3D),<br>PTHR11939:SF75 (PANTHER), SignalP<br>(SIGNALP), SSF81665 (SUPERFAMILY) |
| Caenorhabditis briggsae | isocitrate dehydroge-se                                 |  | 7 F:GO:0051287;<br>F:GO:0005515;<br>P:GO:0055114;<br>F:GO:0000287;<br>P:GO:0006099;<br>F:GO:0004449;<br>C:GO:0005739                                                     | -                                                               | EC:1.1.1.41 | IPR001804; PTHR11835:SF5<br>(PANTHER), SSF53659 (SUPERFAMILY)                                                                   |
| Caenorhabditis elegans  | hypothetical protein B0399.1 [Caenorhabditis elegans]   |  | 0                                                                                                                                                                        | F:GO:0015269;<br>C:GO:0016021;<br>P:GO:0006813;<br>F:GO:0005516 |             | -                                                                                                                               |
|                         | -                                                       |  | 0                                                                                                                                                                        |                                                                 |             | SignalP (SIGNALP)                                                                                                               |
|                         | -                                                       |  | 0                                                                                                                                                                        |                                                                 |             | SignalP (SIGNALP)                                                                                                               |
|                         | -                                                       |  | 0                                                                                                                                                                        |                                                                 |             | SignalP (SIGNALP)                                                                                                               |
| Caenorhabditis elegans  | lamin b1                                                |  | 3 F:GO:0005515;<br>C:GO:0005635;<br>C:GO:0005882                                                                                                                         | -                                                               |             | IPR001664; IPR016044;<br>PTHR23239:SF11 (PANTHER)                                                                               |
|                         | -                                                       |  | 0                                                                                                                                                                        |                                                                 |             | -                                                                                                                               |

|                         |                                                                  |    |                                                                                                                                                                                        |                                                                                                                                                                                                                                                            |             |                                                             |
|-------------------------|------------------------------------------------------------------|----|----------------------------------------------------------------------------------------------------------------------------------------------------------------------------------------|------------------------------------------------------------------------------------------------------------------------------------------------------------------------------------------------------------------------------------------------------------|-------------|-------------------------------------------------------------|
|                         | -                                                                | 0  |                                                                                                                                                                                        |                                                                                                                                                                                                                                                            |             | -                                                           |
| Caenorhabditis elegans  | gamma-glutamyltranspeptidase family protein                      | 0  |                                                                                                                                                                                        | F:GO:0005179;<br>F:GO:0003840;<br>C:GO:0005576                                                                                                                                                                                                             |             | IPR000101                                                   |
| Pongo abelii            | gram domain-containing protein 1a isoform 2                      | 1  | C:GO:0016021                                                                                                                                                                           | -                                                                                                                                                                                                                                                          |             | -                                                           |
| Drosophila ananassae    | vacuolar proton pump                                             | 3  | F:GO:0015078;<br>C:GO:0033177;<br>P:GO:0015986                                                                                                                                         | -                                                                                                                                                                                                                                                          |             | IPR002490; PTHR11629:SF23<br>(PANTHER), SignalP (SIGNALP)   |
|                         | -                                                                | 0  |                                                                                                                                                                                        |                                                                                                                                                                                                                                                            |             | -                                                           |
|                         | -                                                                | 0  |                                                                                                                                                                                        |                                                                                                                                                                                                                                                            |             | SignalP (SIGNALP)                                           |
| Caenorhabditis elegans  | elegans fln-1 isoform partially confirmed by transcript evidence | 1  | F:GO:0003779                                                                                                                                                                           | -                                                                                                                                                                                                                                                          |             | -                                                           |
| Caenorhabditis elegans  | briggsae cbr--s-39 protein                                       | 8  | F:GO:0008270;<br>P:GO:0008586;<br>F:GO:0005509;<br>P:GO:0051605;<br>P:GO:0007415;<br>F:GO:0004222;<br>P:GO:0006508;<br>P:GO:0008045                                                    | -                                                                                                                                                                                                                                                          | EC:3.4.24.0 | IPR000859; PTHR10127 (PANTHER),<br>PTHR10127:SF70 (PANTHER) |
|                         | -                                                                | 0  |                                                                                                                                                                                        |                                                                                                                                                                                                                                                            |             | -                                                           |
| Caenorhabditis elegans  | briggsae cbr-unc-14 protein                                      | 0  |                                                                                                                                                                                        |                                                                                                                                                                                                                                                            |             | -                                                           |
|                         | -                                                                | 0  |                                                                                                                                                                                        |                                                                                                                                                                                                                                                            |             | -                                                           |
| Caenorhabditis briggsae | cytoplasmic intermediate filament protein                        | 11 | P:GO:0009792;<br>P:GO:0010171;<br>P:GO:0002119;<br>P:GO:0018991;<br>P:GO:0018996;<br>F:GO:0005515;<br>C:GO:0005882;<br>P:GO:0040010;<br>P:GO:0040011;<br>P:GO:0006898;<br>F:GO:0005198 | -                                                                                                                                                                                                                                                          |             | G3DSA:1.20.5.170 (GENE3D)                                   |
|                         | -                                                                | 0  |                                                                                                                                                                                        |                                                                                                                                                                                                                                                            |             | -                                                           |
|                         | -                                                                | 0  |                                                                                                                                                                                        |                                                                                                                                                                                                                                                            |             | -                                                           |
| Callithrix jacchus      | src homology 2 domain containing transforming protein d          | 0  |                                                                                                                                                                                        | F:GO:0005085;<br>P:GO:0007254;<br>C:GO:0045202;<br>P:GO:0023034;<br>C:GO:0030054;<br>C:GO:0005575;<br>C:GO:0005622;<br>F:GO:0030971;<br>F:GO:0005515;<br>F:GO:0005070;<br>P:GO:0007264;<br>F:GO:0019904;<br>C:GO:0045211;<br>P:GO:0008150;<br>C:GO:0005886 |             | -                                                           |
|                         | -                                                                | 0  |                                                                                                                                                                                        |                                                                                                                                                                                                                                                            |             | SignalP (SIGNALP)                                           |
| Caenorhabditis elegans  | uncoordinated family member (unc-62)                             | 0  |                                                                                                                                                                                        | F:GO:0005515                                                                                                                                                                                                                                               |             | -                                                           |
|                         | -                                                                | 0  |                                                                                                                                                                                        |                                                                                                                                                                                                                                                            |             | SignalP (SIGNALP)                                           |
|                         | -                                                                | 0  |                                                                                                                                                                                        |                                                                                                                                                                                                                                                            |             | -                                                           |



|                             |                                                                  |   |                                                                                                                                                      |                               |   |                                                                                 |
|-----------------------------|------------------------------------------------------------------|---|------------------------------------------------------------------------------------------------------------------------------------------------------|-------------------------------|---|---------------------------------------------------------------------------------|
| Haemonchus contortus        | ligand-gated ion channel subunit                                 | 5 | C:GO:0016021;<br>C:GO:0030054;<br>C:GO:0045211;<br>F:GO:0005230;<br>P:GO:0006811                                                                     | -                             | - |                                                                                 |
| Angiostrongylus cantonensis | ribosomal protein I13                                            | 9 | P:GO:0009792;<br>P:GO:0002119;<br>F:GO:0003735;<br>F:GO:0003723;<br>F:GO:0005515;<br>P:GO:0000003;<br>C:GO:002625;<br>P:GO:0040007;<br>P:GO:0006414  | -                             | - |                                                                                 |
| Loa loa                     | elegans protein partially confirmed by transcript evidence       | 0 |                                                                                                                                                      | F:GO:0008270;<br>C:GO:0005622 |   | IPR007087; IPR015880                                                            |
|                             | -                                                                | 0 |                                                                                                                                                      |                               |   | -                                                                               |
|                             | -                                                                | 0 |                                                                                                                                                      |                               |   | -                                                                               |
| Caenorhabditis briggsae     | yqy2_caeel_ame: full=uncharacterized protein                     | 0 |                                                                                                                                                      | P:GO:0008152;<br>F:GO:0008080 |   | -                                                                               |
| Caenorhabditis elegans      | atp-binding-cassette protein                                     | 4 | C:GO:0016021;<br>F:GO:0016887;<br>F:GO:0005524;<br>P:GO:0010171                                                                                      | -                             |   | G3DSA:3.40.50.300 (GENE3D),<br>PTHR19241 (PANTHER),<br>PTHR19241:SF30 (PANTHER) |
|                             | -                                                                | 0 |                                                                                                                                                      |                               |   | -                                                                               |
|                             | -                                                                | 0 |                                                                                                                                                      |                               |   | -                                                                               |
| Caenorhabditis elegans      | m-phase phosphoprotein 10 (u3 small nucleolar ribonucleoprotein) | 8 | P:GO:0040010;<br>C:GO:0005730;<br>P:GO:0040035;<br>P:GO:0008380;<br>P:GO:0002119;<br>F:GO:0005515;<br>C:GO:0030529;<br>P:GO:0006898                  | -                             |   | IPR007151                                                                       |
|                             | -                                                                | 0 |                                                                                                                                                      |                               |   | SignalP (SIGNALP)                                                               |
|                             | -                                                                | 0 |                                                                                                                                                      |                               |   | -                                                                               |
| Caenorhabditis briggsae     | pre-mr--processing factor 17                                     | 9 | P:GO:0040007;<br>P:GO:0000003;<br>P:GO:0010171;<br>F:GO:0016740;<br>P:GO:0002119;<br>P:GO:0040039;<br>P:GO:0002009;<br>P:GO:0001703;<br>P:GO:0016246 | -                             |   | PTHR19852 (PANTHER),<br>PTHR19852:SF7 (PANTHER)                                 |
| Caenorhabditis elegans      | briggsae cbr-glo-4 protein                                       | 4 | P:GO:0009987;<br>F:GO:0003824;<br>F:GO:0005488;<br>P:GO:0008152                                                                                      | -                             |   | IPR000408; IPR009091; PTHR22870<br>(PANTHER), PTHR22870:SF14<br>(PANTHER)       |
| Caenorhabditis elegans      | briggsae cbr-glo-4 protein                                       | 4 | P:GO:0009987;<br>F:GO:0003824;<br>F:GO:0005488;<br>P:GO:0008152                                                                                      | -                             |   | IPR000408; IPR009091; PTHR22870<br>(PANTHER), PTHR22870:SF14<br>(PANTHER)       |

|                        |                            |   |                                                                                                                                                                       |                                                                     |
|------------------------|----------------------------|---|-----------------------------------------------------------------------------------------------------------------------------------------------------------------------|---------------------------------------------------------------------|
| Caenorhabditis elegans | briggsae cbr-glo-4 protein | 0 | F:GO:0046872;<br>F:GO:0016874;<br>F:GO:0008270;<br>F:GO:0016881;<br>C:GO:0005622;<br>P:GO:0006464                                                                     | IPR000408; IPR009091; PTHR22870 (PANTHER), PTHR22870:SF14 (PANTHER) |
| Caenorhabditis elegans | briggsae cbr-glo-4 protein | 0 | F:GO:0046872;<br>F:GO:0016874;<br>F:GO:0008270;<br>F:GO:0016881;<br>C:GO:0005622;<br>P:GO:0006464                                                                     | IPR000408; IPR009091; PTHR22870 (PANTHER), PTHR22870:SF14 (PANTHER) |
| Caenorhabditis elegans | briggsae cbr-glo-4 protein | 0 | F:GO:0016874;<br>F:GO:0003682;<br>F:GO:0008536;<br>F:GO:0008270;<br>P:GO:0006464;<br>C:GO:0005575;<br>C:GO:0005622;<br>F:GO:0016881;<br>F:GO:0046872;<br>P:GO:0008150 | IPR000408; IPR009091; PTHR22870 (PANTHER), PTHR22870:SF14 (PANTHER) |
| Caenorhabditis elegans | briggsae cbr-glo-4 protein | 0 | F:GO:0016874;<br>F:GO:0003682;<br>F:GO:0008536;<br>F:GO:0008270;<br>P:GO:0006464;<br>C:GO:0005575;<br>C:GO:0005622;<br>F:GO:0016881;<br>F:GO:0046872;<br>P:GO:0008150 | IPR000408; IPR009091; PTHR22870 (PANTHER), PTHR22870:SF14 (PANTHER) |
| Caenorhabditis elegans | briggsae cbr-glo-4 protein | 0 | F:GO:0016874;<br>F:GO:0003682;<br>F:GO:0008536;<br>F:GO:0008270;<br>P:GO:0006464;<br>C:GO:0005575;<br>C:GO:0005622;<br>F:GO:0016881;<br>F:GO:0046872;<br>P:GO:0008150 | IPR000408; IPR009091; PTHR22870 (PANTHER), PTHR22870:SF14 (PANTHER) |
| Caenorhabditis elegans | briggsae cbr-glo-4 protein | 0 | F:GO:0016874;<br>F:GO:0003682;<br>F:GO:0008536;<br>F:GO:0008270;<br>P:GO:0006464;<br>C:GO:0005575;<br>C:GO:0005622;<br>F:GO:0016881;<br>F:GO:0046872;<br>P:GO:0008150 | IPR000408; IPR009091; PTHR22870 (PANTHER), PTHR22870:SF14 (PANTHER) |
| Caenorhabditis elegans | briggsae cbr-glo-4 protein | 0 | F:GO:0016874;<br>F:GO:0003682;<br>F:GO:0008536;<br>F:GO:0008270;<br>P:GO:0006464;<br>C:GO:0005575;<br>C:GO:0005622;<br>F:GO:0016881;<br>F:GO:0046872;<br>P:GO:0008150 | IPR000408; IPR009091; PTHR22870 (PANTHER), PTHR22870:SF14 (PANTHER) |
|                        |                            | 0 |                                                                                                                                                                       |                                                                     |
|                        | -                          | 0 |                                                                                                                                                                       | -                                                                   |
|                        | -                          | 0 |                                                                                                                                                                       | -                                                                   |
| Caenorhabditis elegans | galaxin-like 2             | 0 |                                                                                                                                                                       | -                                                                   |
|                        | -                          | 0 |                                                                                                                                                                       | SignalP (SIGNALP)                                                   |

|                         |                                                  |  |    |                                                                                                                                                                                        |                                                                                                                                                                                                         |             |                                                                                              |
|-------------------------|--------------------------------------------------|--|----|----------------------------------------------------------------------------------------------------------------------------------------------------------------------------------------|---------------------------------------------------------------------------------------------------------------------------------------------------------------------------------------------------------|-------------|----------------------------------------------------------------------------------------------|
| Vitis vinifera          | serine threonine protein                         |  | 5  | C:GO:0000164;<br>F:GO:0046872;<br>F:GO:0004722;<br>P:GO:0006470;<br>P:GO:0019915                                                                                                       | -                                                                                                                                                                                                       |             | IPR006186; G3DSA:3.60.21.10<br>(GENE3D), PTHR11668:SF19<br>(PANTHER), SSF56300 (SUPERFAMILY) |
| Nematostella vectensis  | elegans protein confirmed by transcript evidence |  | 3  | F:GO:0005488;<br>F:GO:0016491;<br>P:GO:0044237                                                                                                                                         | -                                                                                                                                                                                                       |             | -                                                                                            |
| Caenorhabditis elegans  | drosophila sos homolog family member (sos-1)     |  | 0  |                                                                                                                                                                                        |                                                                                                                                                                                                         |             | -                                                                                            |
| Homo sapiens            | un-med protein product [Homo sapiens]            |  | 7  | P:GO:0006915;<br>C:GO:0031965;<br>F:GO:0004871;<br>C:GO:0016021;<br>P:GO:0043123;<br>F:GO:0050699;<br>C:GO:0005789                                                                     | -                                                                                                                                                                                                       |             | SignalP (SIGNALP)                                                                            |
|                         | -                                                |  | 0  |                                                                                                                                                                                        |                                                                                                                                                                                                         |             | -                                                                                            |
| Caenorhabditis briggsae | mediator complex subunit 26                      |  | 11 | P:GO:0008340;<br>P:GO:0006357;<br>P:GO:0040007;<br>F:GO:0016455;<br>P:GO:0010171;<br>P:GO:0002119;<br>F:GO:0005515;<br>P:GO:0040011;<br>P:GO:0006898;<br>C:GO:0016592;<br>P:GO:0009792 | -                                                                                                                                                                                                       |             | IPR017923; PTHR11477 (PANTHER),<br>SignalP (SIGNALP)                                         |
| Loa loa                 | briggsae cbr-nsy-1 protein                       |  | 4  | P:GO:0006468;<br>F:GO:0005515;<br>F:GO:0005524;<br>F:GO:0004674                                                                                                                        | -                                                                                                                                                                                                       | EC:2.7.11.0 | -                                                                                            |
| Caenorhabditis elegans  | in family member (ttn-1)                         |  | 0  |                                                                                                                                                                                        | F:GO:0005524;<br>F:GO:0004672;<br>F:GO:0000166;<br>P:GO:0006468;<br>P:GO:0009792;<br>F:GO:0004674                                                                                                       |             | IPR013783; PTHR19897 (PANTHER),<br>PTHR19897:SF17 (PANTHER),<br>SSF48726 (SUPERFAMILY)       |
|                         | -                                                |  | 0  |                                                                                                                                                                                        |                                                                                                                                                                                                         |             | -                                                                                            |
| Brugia malayi           | nuclear receptor nhr-67                          |  | 0  |                                                                                                                                                                                        | F:GO:0043565;<br>F:GO:0003700;<br>F:GO:0003677;<br>C:GO:0005634;<br>F:GO:0004879;<br>F:GO:0008270;<br>P:GO:0006355;<br>F:GO:0004872;<br>F:GO:0046872;<br>P:GO:0006350;<br>F:GO:0003707;<br>P:GO:0045449 |             | IPR008946                                                                                    |
|                         | -                                                |  | 0  |                                                                                                                                                                                        |                                                                                                                                                                                                         |             | -                                                                                            |

|                               |                                                  |   |                                                                                                                    |   |                               |                                                                                                                                                            |
|-------------------------------|--------------------------------------------------|---|--------------------------------------------------------------------------------------------------------------------|---|-------------------------------|------------------------------------------------------------------------------------------------------------------------------------------------------------|
| Homo sapiens                  | eukaryotic translation elongation factor 1 delta | 7 | F:GO:0003746;<br>F:GO:0004871;<br>C:GO:0005853;<br>F:GO:0005515;<br>P:GO:0043123;<br>C:GO:0005829;<br>P:GO:0006414 | - |                               | IPR001326; IPR018940; PTHR11595 (PANTHER), PTHR11595:SF3 (PANTHER)                                                                                         |
|                               | -                                                | 0 |                                                                                                                    |   |                               | SignalP (SIGNALP)                                                                                                                                          |
| Caenorhabditis briggsae       | ser thr protein phosphatase family protein       | 0 |                                                                                                                    |   | F:GO:0016787;<br>F:GO:0004721 | IPR006186                                                                                                                                                  |
|                               | -                                                | 0 |                                                                                                                    |   |                               | -                                                                                                                                                          |
|                               | -                                                | 0 |                                                                                                                    |   |                               | -                                                                                                                                                          |
| Caenorhabditis briggsae       | heat shock protein 70-c                          | 3 | F:GO:0005524;<br>P:GO:0006950;<br>C:GO:0005788                                                                     | - |                               | IPR001023; IPR013126; IPR018181; G3DSA:3.30.30.30 (GENE3D), G3DSA:3.30.420.40 (GENE3D), PTHR19375:SF1 (PANTHER), SignalP (SIGNALP), SSF53067 (SUPERFAMILY) |
| Caenorhabditis briggsae       | heat shock protein 70-c                          | 3 | F:GO:0005524;<br>P:GO:0006950;<br>C:GO:0005788                                                                     | - |                               | IPR001023; IPR013126; IPR018181; G3DSA:3.30.30.30 (GENE3D), G3DSA:3.30.420.40 (GENE3D), PTHR19375:SF1 (PANTHER), SignalP (SIGNALP), SSF53067 (SUPERFAMILY) |
|                               | -                                                | 0 |                                                                                                                    |   |                               | -                                                                                                                                                          |
| Loa loa                       | general transcription factor iih subunit 1       | 7 | P:GO:0006367;<br>P:GO:0045944;<br>F:GO:0008353;<br>F:GO:0005515;<br>P:GO:0006368;<br>C:GO:0005675;<br>F:GO:0008094 | - | EC:2.7.11.23                  | IPR005607; PTHR12856 (PANTHER), SSF140383 (SUPERFAMILY)                                                                                                    |
| Xenopus (Silurana) tropicalis | dhx33 protein                                    | 4 | F:GO:0008026;<br>F:GO:0003676;<br>F:GO:0005524;<br>C:GO:0009536                                                    | - |                               | IPR002464; G3DSA:3.40.50.300 (GENE3D), PTHR18934 (PANTHER)                                                                                                 |
|                               | -                                                | 0 |                                                                                                                    |   |                               | -                                                                                                                                                          |
|                               | -                                                | 0 |                                                                                                                    |   |                               | -                                                                                                                                                          |
| Caenorhabditis elegans        | flavin monooxyge-se                              | 7 | F:GO:0004499;<br>F:GO:0050661;<br>P:GO:0055114;<br>P:GO:0000003;<br>C:GO:0031227;<br>C:GO:0016021;<br>F:GO:0050660 | - | EC:1.14.13.8                  | IPR020946; G3DSA:3.50.50.60 (GENE3D), PTHR23023 (PANTHER), PTHR23023:SF4 (PANTHER), SSF51905 (SUPERFAMILY)                                                 |
|                               | -                                                | 0 |                                                                                                                    |   |                               | -                                                                                                                                                          |
|                               | -                                                | 0 |                                                                                                                    |   |                               | -                                                                                                                                                          |
| Caenorhabditis briggsae       | #NAME?                                           | 7 | P:GO:0006814;<br>F:GO:0005391;<br>C:GO:0016021;<br>F:GO:0046872;<br>P:GO:0006813;<br>P:GO:0006754;<br>F:GO:0005524 | - | EC:3.6.3.9                    | IPR001757; G3DSA:3.40.1110.10 (GENE3D), PTHR11939:SF100 (PANTHER), SSF81660 (SUPERFAMILY)                                                                  |
| Caenorhabditis elegans        | retinoblastoma-binding protein 5                 | 0 |                                                                                                                    |   |                               | IPR001680; IPR015943; PTHR12816 (PANTHER), PTHR12816:SF6 (PANTHER), SSF101908 (SUPERFAMILY)                                                                |
| Loa loa                       | u2-associated sr140 protein                      | 1 | F:GO:0003676                                                                                                       | - |                               | IPR000504; IPR012677; PTHR23140 (PANTHER), SSF54928 (SUPERFAMILY)                                                                                          |

|                         |                                                        |   |                                                                                                                                                      |                                                                                                                                                                                                         |                                   |                                                                                                                                                                                                              |
|-------------------------|--------------------------------------------------------|---|------------------------------------------------------------------------------------------------------------------------------------------------------|---------------------------------------------------------------------------------------------------------------------------------------------------------------------------------------------------------|-----------------------------------|--------------------------------------------------------------------------------------------------------------------------------------------------------------------------------------------------------------|
| Caenorhabditis briggsae | ylw1_caeeel ame: full=uncharacterized protein          | 0 |                                                                                                                                                      |                                                                                                                                                                                                         |                                   | -                                                                                                                                                                                                            |
|                         | -                                                      | 0 |                                                                                                                                                      |                                                                                                                                                                                                         |                                   | -                                                                                                                                                                                                            |
| Caenorhabditis briggsae | yl4m_caeeel ame: full=uncharacterized protein          | 0 |                                                                                                                                                      |                                                                                                                                                                                                         |                                   | IPR010463; IPR016059; G3DSA:3.40.50.1820 (GENE3D), SSF53474 (SUPERFAMILY)                                                                                                                                    |
| Caenorhabditis elegans  | unc-13 protein                                         | 4 | P:GO:0016079;<br>F:GO:0005488;<br>C:GO:0043195;<br>C:GO:0045211                                                                                      | -                                                                                                                                                                                                       |                                   | IPR019558; PTHR10480 (PANTHER)                                                                                                                                                                               |
|                         | -                                                      | 0 |                                                                                                                                                      |                                                                                                                                                                                                         |                                   | -                                                                                                                                                                                                            |
| Caenorhabditis elegans  | phosphatidyserine receptor                             | 0 |                                                                                                                                                      | F:GO:0070815;<br>C:GO:0005634;<br>F:GO:0016702;<br>P:GO:0055114;<br>P:GO:0016568;<br>F:GO:0016491;<br>P:GO:0018395;<br>F:GO:0004872;<br>F:GO:0005515;<br>F:GO:0046872;<br>P:GO:0006350;<br>P:GO:0045449 |                                   | -                                                                                                                                                                                                            |
| Loa loa                 | cleavage and polyadenylation specific factor 3-like    | 4 | C:GO:0005737;<br>P:GO:0043484;<br>F:GO:0016787;<br>C:GO:0005634                                                                                      | -                                                                                                                                                                                                       |                                   | IPR022712; PTHR11203 (PANTHER), PTHR11203:SF8 (PANTHER)                                                                                                                                                      |
| Homo sapiens            | txndc5 protein                                         | 6 | P:GO:0006892;<br>C:GO:0005788;<br>P:GO:0016044;<br>P:GO:0045454;<br>P:GO:0006916;<br>F:GO:0016853                                                    | -                                                                                                                                                                                                       |                                   | -                                                                                                                                                                                                            |
|                         | -                                                      | 0 |                                                                                                                                                      |                                                                                                                                                                                                         |                                   | -                                                                                                                                                                                                            |
| Ascaris suum            | dtdp-glucose -dehydratase                              | 9 | P:GO:0002119;<br>P:GO:0006694;<br>F:GO:0003854;<br>P:GO:0018991;<br>P:GO:0045226;<br>P:GO:0040017;<br>F:GO:0050662;<br>P:GO:0040007;<br>F:GO:0008831 | -                                                                                                                                                                                                       | EC:1.1.1.145<br>;<br>EC:1.1.1.133 | IPR001509; IPR016040; PTHR10366 (PANTHER), PTHR10366:SF41 (PANTHER), SSF51735 (SUPERFAMILY)                                                                                                                  |
| Caenorhabditis briggsae | myotonin-protein ki-se                                 | 2 | F:GO:0004672;<br>F:GO:0000166                                                                                                                        | -                                                                                                                                                                                                       |                                   | IPR000095; IPR001180; IPR001849; IPR002219; IPR011993; IPR020454; G3DSA:3.30.60.20 (GENE3D), PTHR22988 (PANTHER), PTHR22988:SF2 (PANTHER), PS50219 (PROFILE), SSF50729 (SUPERFAMILY), SSF57889 (SUPERFAMILY) |
| Caenorhabditis elegans  | hypothetical protein F16H11.1 [Caenorhabditis elegans] | 0 |                                                                                                                                                      | C:GO:0016021;<br>P:GO:0055085                                                                                                                                                                           |                                   | SignalP (SIGNALP)                                                                                                                                                                                            |
| Caenorhabditis elegans  | temporarily assigned gene -me family member (tag-308)  | 0 |                                                                                                                                                      |                                                                                                                                                                                                         |                                   | PTHR10857 (PANTHER)                                                                                                                                                                                          |

|                         |                                                            |    |                                                                                                                                                                                                                                                                                                                                |                                                                                                                                                                                                                                                            |            |                                                                                 |
|-------------------------|------------------------------------------------------------|----|--------------------------------------------------------------------------------------------------------------------------------------------------------------------------------------------------------------------------------------------------------------------------------------------------------------------------------|------------------------------------------------------------------------------------------------------------------------------------------------------------------------------------------------------------------------------------------------------------|------------|---------------------------------------------------------------------------------|
| Homo sapiens            | transporter atp-binding sub-family b (mdr tap)             | 19 | F:GO:0046979;<br>C:GO:0042825;<br>P:GO:0019060;<br>F:GO:0015197;<br>C:GO:0005792;<br>P:GO:0042270;<br>F:GO:0043531;<br>C:GO:0005829;<br>F:GO:0046982;<br>F:GO:0046978;<br>P:GO:0046967;<br>P:GO:0015833;<br>F:GO:0042626;<br>P:GO:0019885;<br>P:GO:0055085;<br>F:GO:0042605;<br>F:GO:0042803;<br>F:GO:0005524;<br>C:GO:0005739 | -                                                                                                                                                                                                                                                          |            | G3DSA:3.40.50.300 (GENE3D),<br>PTHR19242 (PANTHER),<br>PTHR19242:SF79 (PANTHER) |
| Caenorhabditis elegans  | elegans protein confirmed by transcript evidence           | 0  |                                                                                                                                                                                                                                                                                                                                |                                                                                                                                                                                                                                                            |            | -                                                                               |
|                         |                                                            | 0  |                                                                                                                                                                                                                                                                                                                                |                                                                                                                                                                                                                                                            |            | SignalP (SIGNALP)                                                               |
|                         |                                                            | 0  |                                                                                                                                                                                                                                                                                                                                |                                                                                                                                                                                                                                                            |            | -                                                                               |
| Caenorhabditis briggsae | glutamyl-tr- amidotransferase subunit                      | 2  | F:GO:0016884;<br>P:GO:0019915                                                                                                                                                                                                                                                                                                  | -                                                                                                                                                                                                                                                          | EC:6.3.5.0 | IPR000120; PTHR11895:SF7<br>(PANTHER), SignalP (SIGNALP)                        |
|                         |                                                            | 0  |                                                                                                                                                                                                                                                                                                                                |                                                                                                                                                                                                                                                            |            | -                                                                               |
|                         |                                                            | 0  |                                                                                                                                                                                                                                                                                                                                |                                                                                                                                                                                                                                                            |            | -                                                                               |
| Danio rerio             | loc398277 protein                                          | 11 | P:GO:0035121;<br>P:GO:0016055;<br>F:GO:0003676;<br>F:GO:0046872;<br>P:GO:0045449;<br>F:GO:0016881;<br>P:GO:0030902;<br>P:GO:0030903;<br>C:GO:0044424;<br>P:GO:0001707;<br>P:GO:0009952                                                                                                                                         | -                                                                                                                                                                                                                                                          | EC:6.3.2.0 | -                                                                               |
| Drosophila virilis      | isoform b                                                  | 0  |                                                                                                                                                                                                                                                                                                                                | F:GO:0003674;<br>P:GO:0006974;<br>P:GO:0008150;<br>C:GO:0005575                                                                                                                                                                                            |            | PTHR12175 (PANTHER)                                                             |
| Loa loa                 | elegans protein partially confirmed by transcript evidence | 0  |                                                                                                                                                                                                                                                                                                                                | F:GO:0020037;<br>F:GO:0005506;<br>C:GO:0016021;<br>P:GO:0019373;<br>F:GO:0009055;<br>P:GO:0000003;<br>P:GO:0040018;<br>P:GO:0055114;<br>F:GO:0016491;<br>C:GO:0005575;<br>P:GO:0008340;<br>P:GO:0040011;<br>P:GO:0040010;<br>F:GO:0046872;<br>F:GO:0004497 |            | IPR001128; PTHR19383:SF176<br>(PANTHER)                                         |

|                         |                                                         |    |                                                                                                                                                                                                                          |                                                                                                   |                                                                                            |
|-------------------------|---------------------------------------------------------|----|--------------------------------------------------------------------------------------------------------------------------------------------------------------------------------------------------------------------------|---------------------------------------------------------------------------------------------------|--------------------------------------------------------------------------------------------|
| Caenorhabditis elegans  | suppressor of lineage defect family member (sli-1)      | 7  | P:GO:0007166;<br>F:GO:0004871;<br>C:GO:0005634;<br>F:GO:0005509;<br>F:GO:0008270;<br>F:GO:0005515;<br>F:GO:0016874                                                                                                       | -                                                                                                 | IPR003153; PTHR23007 (PANTHER),<br>PTHR23007:SF4 (PANTHER)                                 |
| Homo sapiens            | pyridoxal ki-se                                         | 13 | F:GO:0030170;<br>P:GO:0008283;<br>F:GO:0031403;<br>F:GO:0030955;<br>F:GO:0005524;<br>F:GO:0000287;<br>F:GO:0031402;<br>F:GO:0008478;<br>P:GO:0042823;<br>F:GO:0008270;<br>C:GO:0005829;<br>F:GO:0042803;<br>P:GO:0008615 | -                                                                                                 | EC:2.7.1.35 -                                                                              |
|                         | -                                                       | 0  |                                                                                                                                                                                                                          |                                                                                                   | -                                                                                          |
| Brugia malayi           | protein ki-se domain containing protein                 | 0  |                                                                                                                                                                                                                          | F:GO:0016301;<br>F:GO:0004672;<br>F:GO:0005524;<br>F:GO:0000166;<br>P:GO:0006468;<br>F:GO:0004674 | G3DSA:3.10.20.240 (GENE3D),<br>SSF54277 (SUPERFAMILY)                                      |
| Caenorhabditis briggsae | midasin nuclear aaa atpase                              | 6  | P:GO:0043254;<br>P:GO:0006355;<br>F:GO:0005524;<br>F:GO:0016887;<br>F:GO:0008134;<br>C:GO:0005634                                                                                                                        | -                                                                                                 | IPR011704; G3DSA:3.40.50.300<br>(GENE3D), PTHR22908 (PANTHER),<br>PTHR22908:SF13 (PANTHER) |
| Caenorhabditis elegans  | elegans protein confirmed by transcript evidence        | 0  |                                                                                                                                                                                                                          |                                                                                                   | -                                                                                          |
|                         | -                                                       | 0  |                                                                                                                                                                                                                          |                                                                                                   | -                                                                                          |
|                         | -                                                       | 0  |                                                                                                                                                                                                                          |                                                                                                   | SignalP (SIGNALP)                                                                          |
|                         | -                                                       | 0  |                                                                                                                                                                                                                          |                                                                                                   | -                                                                                          |
| Caenorhabditis elegans  | dead deah box helicase family protein                   | 2  | F:GO:0005488;<br>F:GO:0016462                                                                                                                                                                                            | -                                                                                                 | -                                                                                          |
| Drosophila melanogaster | isoform h                                               | 9  | F:GO:0004872;<br>F:GO:0005247;<br>C:GO:0005902;<br>F:GO:0005515;<br>P:GO:0055085;<br>C:GO:0016021;<br>C:GO:0005626;<br>C:GO:0015629;<br>P:GO:0006821                                                                     | -                                                                                                 | IPR000644; IPR001807;<br>PTHR11689:SF5 (PANTHER), SSF54631<br>(SUPERFAMILY)                |
| Ailuropoda melanoleuca  | transmembrane emp24 protein transport domain containing | 9  | 4<br>C:GO:0016021;<br>C:GO:0005789;<br>C:GO:0005793;<br>P:GO:0006810                                                                                                                                                     | -                                                                                                 | IPR000348; IPR015719; PTHR22811<br>(PANTHER)                                               |
| Loa loa                 | myosin xviii                                            | 0  |                                                                                                                                                                                                                          | F:GO:0005524;<br>F:GO:0003774;<br>F:GO:0005515;<br>C:GO:0016459                                   | SignalP (SIGNALP)                                                                          |
|                         | -                                                       | 0  |                                                                                                                                                                                                                          |                                                                                                   | SignalP (SIGNALP)                                                                          |
|                         | -                                                       | 0  |                                                                                                                                                                                                                          |                                                                                                   | -                                                                                          |

|                                  |                                                            |    |                                                                                                                                                                                        |                                                                                                                                                                                                                                                                                                                                |                                                                                                    |                                                                                             |
|----------------------------------|------------------------------------------------------------|----|----------------------------------------------------------------------------------------------------------------------------------------------------------------------------------------|--------------------------------------------------------------------------------------------------------------------------------------------------------------------------------------------------------------------------------------------------------------------------------------------------------------------------------|----------------------------------------------------------------------------------------------------|---------------------------------------------------------------------------------------------|
|                                  | -                                                          | 0  |                                                                                                                                                                                        |                                                                                                                                                                                                                                                                                                                                | -                                                                                                  |                                                                                             |
|                                  |                                                            | 0  |                                                                                                                                                                                        |                                                                                                                                                                                                                                                                                                                                |                                                                                                    |                                                                                             |
| Caenorhabditis elegans           | expulsion defective family member (aex-3)                  | 11 | P:GO:0016192;<br>P:GO:0007618;<br>P:GO:0030421;<br>P:GO:0018991;<br>C:GO:0016021;<br>P:GO:0051726;<br>P:GO:0042981;<br>C:GO:0008021;<br>F:GO:0017112;<br>P:GO:0007269;<br>P:GO:0000187 | -                                                                                                                                                                                                                                                                                                                              | PTHR13008 (PANTHER)                                                                                |                                                                                             |
| Ancylostoma caninum              | venom-allergen-like protein family member (vap-1)          | 0  |                                                                                                                                                                                        | F:GO:0009055;<br>P:GO:0019646;<br>P:GO:0040011;<br>C:GO:0005576                                                                                                                                                                                                                                                                | -                                                                                                  |                                                                                             |
|                                  | -                                                          | 0  |                                                                                                                                                                                        |                                                                                                                                                                                                                                                                                                                                | -                                                                                                  |                                                                                             |
| Caenorhabditis elegans           | cub domain containing protein                              | 0  |                                                                                                                                                                                        | F:GO:0004872;<br>F:GO:0016787                                                                                                                                                                                                                                                                                                  | SignalP (SIGNALP)                                                                                  |                                                                                             |
|                                  | -                                                          | 0  |                                                                                                                                                                                        |                                                                                                                                                                                                                                                                                                                                | -                                                                                                  |                                                                                             |
| Caenorhabditis briggsae          | isoform b                                                  | 1  | P:GO:0045454                                                                                                                                                                           | -                                                                                                                                                                                                                                                                                                                              | IPR012335; IPR012336; IPR013766;<br>PTHR19991 (PANTHER)                                            |                                                                                             |
|                                  | -                                                          | 0  |                                                                                                                                                                                        |                                                                                                                                                                                                                                                                                                                                | -                                                                                                  |                                                                                             |
|                                  | -                                                          | 0  |                                                                                                                                                                                        |                                                                                                                                                                                                                                                                                                                                | -                                                                                                  |                                                                                             |
| Arabidopsis lyrata subsp. lyrata | sy-ptotagmin cytoplasmic r- interacting protein            | 0  |                                                                                                                                                                                        | P:GO:0016556;<br>F:GO:0003727;<br>F:GO:0003725;<br>F:GO:0003723;<br>C:GO:0005634;<br>F:GO:0003676;<br>F:GO:0004131;<br>P:GO:0050821;<br>C:GO:0030895;<br>C:GO:0005783;<br>C:GO:0005720;<br>P:GO:0008150;<br>F:GO:0000166;<br>P:GO:0006397;<br>C:GO:0005737;<br>C:GO:0005622;<br>F:GO:0005515;<br>C:GO:0005575;<br>F:GO:0003729 |                                                                                                    | IPR000504; IPR012677; PTHR10432 (PANTHER), PTHR10432:SF41 (PANTHER), SSF54928 (SUPERFAMILY) |
| Caenorhabditis elegans           | elegans protein confirmed by transcript evidence           | 0  |                                                                                                                                                                                        |                                                                                                                                                                                                                                                                                                                                | -                                                                                                  |                                                                                             |
| Caenorhabditis briggsae          | elegans protein partially confirmed by transcript evidence | 1  | F:GO:0005515                                                                                                                                                                           | -                                                                                                                                                                                                                                                                                                                              | -                                                                                                  |                                                                                             |
|                                  | -                                                          | 0  |                                                                                                                                                                                        |                                                                                                                                                                                                                                                                                                                                | -                                                                                                  |                                                                                             |
| Brugia malayi                    | expulsion defective family member (exp-2)                  | 5  | C:GO:0008076;<br>F:GO:0005249;<br>F:GO:0005515;<br>P:GO:005085;<br>P:GO:0006813                                                                                                        | -                                                                                                                                                                                                                                                                                                                              | G3DSA:1.10.287.70 (GENE3D),<br>PTHR11537 (PANTHER),<br>PTHR11537:SF50 (PANTHER), SignalP (SIGNALP) |                                                                                             |



|                        |                                                            |    |                                                                                                                                                                                                                                                                                                                                                                                                    |   |                                                         |                                                                                        |
|------------------------|------------------------------------------------------------|----|----------------------------------------------------------------------------------------------------------------------------------------------------------------------------------------------------------------------------------------------------------------------------------------------------------------------------------------------------------------------------------------------------|---|---------------------------------------------------------|----------------------------------------------------------------------------------------|
| Brugia malayi          | gtp-binding protein                                        | 15 | P:GO:0040010;<br>P:GO:0007446;<br>P:GO:0042594;<br>P:GO:0007264;<br>C:GO:0005622;<br>P:GO:0000003;<br>P:GO:0045727;<br>P:GO:0030307;<br>P:GO:0040011;<br>F:GO:0003924;<br>P:GO:0000082;<br>P:GO:0090070;<br>P:GO:0040015;<br>C:GO:0016020;<br>F:GO:0005525                                                                                                                                         | - | EC:3.6.5.1;<br>EC:3.6.5.2;<br>EC:3.6.5.3;<br>EC:3.6.5.4 | -                                                                                      |
| -                      | -                                                          | 0  |                                                                                                                                                                                                                                                                                                                                                                                                    |   |                                                         | -                                                                                      |
| -                      | -                                                          | 0  |                                                                                                                                                                                                                                                                                                                                                                                                    |   |                                                         | -                                                                                      |
| -                      | -                                                          | 0  |                                                                                                                                                                                                                                                                                                                                                                                                    |   |                                                         | SignalP (SIGNALP)                                                                      |
| -                      | -                                                          | 0  |                                                                                                                                                                                                                                                                                                                                                                                                    |   |                                                         | PS51257 (PROFILE), SignalP (SIGNALP)                                                   |
| -                      | -                                                          | 0  |                                                                                                                                                                                                                                                                                                                                                                                                    |   |                                                         | -                                                                                      |
| -                      | -                                                          | 0  |                                                                                                                                                                                                                                                                                                                                                                                                    |   |                                                         | -                                                                                      |
| Caenorhabditis elegans | elegans protein partially confirmed by transcript evidence | 0  |                                                                                                                                                                                                                                                                                                                                                                                                    |   |                                                         | IPR012877                                                                              |
| -                      | -                                                          | 0  |                                                                                                                                                                                                                                                                                                                                                                                                    |   |                                                         | -                                                                                      |
| Haemonchus contortus   | latrophilin-like protein 2                                 | 7  | F:GO:0004930;<br>F:GO:0005529;<br>C:GO:0005886;<br>P:GO:0007165;<br>P:GO:0007420;<br>C:GO:0016021;<br>P:GO:0007218                                                                                                                                                                                                                                                                                 | - |                                                         | IPR000832; IPR017981; PTHR12011 (PANTHER), PTHR12011:SF56 (PANTHER), SignalP (SIGNALP) |
| -                      | -                                                          | 0  |                                                                                                                                                                                                                                                                                                                                                                                                    |   |                                                         | -                                                                                      |
| -                      | -                                                          | 0  |                                                                                                                                                                                                                                                                                                                                                                                                    |   |                                                         | -                                                                                      |
| Caenorhabditis elegans | elegans protein confirmed by transcript evidence           | 23 | F:GO:0003700;<br>P:GO:0051049;<br>F:GO:0008289;<br>P:GO:0051649;<br>P:GO:0032787;<br>F:GO:0004872;<br>P:GO:0044283;<br>P:GO:0009653;<br>P:GO:0045941;<br>P:GO:0023033;<br>P:GO:0007165;<br>P:GO:0010565;<br>P:GO:0051128;<br>P:GO:0010033;<br>P:GO:0010646;<br>P:GO:0060341;<br>F:GO:0005515;<br>P:GO:0065008;<br>F:GO:0043565;<br>P:GO:0019216;<br>P:GO:0050732;<br>C:GO:0005634;<br>P:GO:0006355 | - |                                                         | IPR000536; IPR008946; PTHR11865 (PANTHER), PTHR11865:SF218 (PANTHER)                   |
| -                      | -                                                          | 0  |                                                                                                                                                                                                                                                                                                                                                                                                    |   |                                                         | SignalP (SIGNALP)                                                                      |

|                         |                                                  |    |                                                                                                                                                                                                         |                                                 |              |                                                                                                            |
|-------------------------|--------------------------------------------------|----|---------------------------------------------------------------------------------------------------------------------------------------------------------------------------------------------------------|-------------------------------------------------|--------------|------------------------------------------------------------------------------------------------------------|
| Brugia malayi           | p-loop atpase fused to an acetyltransferase      |    | P:GO:0009792;<br>P:GO:0040007;<br>5 P:GO:0040035;<br>P:GO:0002119;<br>P:GO:0040011                                                                                                                      | -                                               |              | PTHR10925 (PANTHER),<br>PTHR10925:SF5 (PANTHER)                                                            |
| Caenorhabditis briggsae | n-acetylglucosaminyltransferase v                | 0  |                                                                                                                                                                                                         |                                                 |              | PTHR15075 (PANTHER)                                                                                        |
| Loa loa                 | protein phosphatase-5                            | 5  | C:GO:0005737;<br>F:GO:0046872;<br>F:GO:0004722;<br>P:GO:0006470;<br>C:GO:0005634                                                                                                                        | -                                               |              | IPR004843; IPR006186;<br>G3DSA:3.60.21.10 (GENE3D),<br>PTHR11668:SF12 (PANTHER),<br>SSF56300 (SUPERFAMILY) |
| Homo sapiens            | galactoside- 3 binding protein                   | 9  | F:GO:0005044;<br>C:GO:0005615;<br>F:GO:0005515;<br>P:GO:0007155;<br>P:GO:0007165;<br>C:GO:0016020;<br>C:GO:0005634;<br>C:GO:0005578;<br>P:GO:0006968                                                    | -                                               |              | PTHR19331 (PANTHER),<br>PTHR19331:SF8 (PANTHER)                                                            |
|                         | -                                                | 0  |                                                                                                                                                                                                         |                                                 |              | -                                                                                                          |
| synthetic construct     | jumping translocation breakpoint                 | 2  | C:GO:0005887;<br>C:GO:0005624                                                                                                                                                                           | -                                               |              | -                                                                                                          |
| Caenorhabditis briggsae | briggsae cbr-dhs-29 protein                      | 5  | P:GO:0006694;<br>C:GO:0016021;<br>P:GO:00055114;<br>F:GO:0005488;<br>F:GO:0003854                                                                                                                       | -                                               | EC:1.1.1.145 | SignalP (SIGNALP)                                                                                          |
| Caenorhabditis briggsae | elegans protein confirmed by transcript evidence | 0  |                                                                                                                                                                                                         |                                                 |              | IPR001534                                                                                                  |
|                         | -                                                | 0  |                                                                                                                                                                                                         |                                                 |              | -                                                                                                          |
|                         | -                                                | 0  |                                                                                                                                                                                                         |                                                 |              | -                                                                                                          |
| Caenorhabditis briggsae | elegans protein confirmed by transcript evidence | 0  |                                                                                                                                                                                                         | F:GO:0016972;<br>P:GO:00055114;<br>P:GO:0045454 |              | -                                                                                                          |
|                         | -                                                | 0  |                                                                                                                                                                                                         |                                                 |              | SignalP (SIGNALP)                                                                                          |
|                         | -                                                | 0  |                                                                                                                                                                                                         |                                                 |              | -                                                                                                          |
|                         | -                                                | 0  |                                                                                                                                                                                                         |                                                 |              | -                                                                                                          |
| Caenorhabditis elegans  | variant sh3 domain containing protein            | 12 | F:GO:0004435;<br>P:GO:0001525;<br>P:GO:0008016;<br>P:GO:0001570;<br>P:GO:0048844;<br>P:GO:0009395;<br>F:GO:0004871;<br>P:GO:0031101;<br>P:GO:0035477;<br>F:GO:0005515;<br>P:GO:0007165;<br>P:GO:0060218 | -                                               | EC:3.1.4.11  | IPR001192; IPR001711; IPR017946;<br>PTHR10336 (PANTHER),<br>PTHR10336:SF22 (PANTHER)                       |

|                         |                                                            |    |                                                                                                                                                                                                                          |                                                |                           |                                                                                                                                     |
|-------------------------|------------------------------------------------------------|----|--------------------------------------------------------------------------------------------------------------------------------------------------------------------------------------------------------------------------|------------------------------------------------|---------------------------|-------------------------------------------------------------------------------------------------------------------------------------|
| Caenorhabditis elegans  | uncoordinated family member (unc-89)                       | 13 | P:GO:0003007;<br>F:GO:0005198;<br>P:GO:0014866;<br>F:GO:0004672;<br>P:GO:0016310;<br>P:GO:0006936;<br>C:GO:0031672;<br>F:GO:0008092;<br>C:GO:0031674;<br>P:GO:0048738;<br>P:GO:0050790;<br>C:GO:0044446;<br>C:GO:0005634 | -                                              | -                         | -                                                                                                                                   |
| Caenorhabditis briggsae | alanine-tRNA synthetase                                    | 4  | F:GO:0003676;<br>F:GO:0016876;<br>P:GO:0006412;<br>P:GO:0043039                                                                                                                                                          | -                                              | EC:6.1.1.0;<br>EC:3.6.5.3 | IPR018163; IPR018164; PTHR11777 (PANTHER)                                                                                           |
| Brugia malayi           | protein-tyrosine phosphatase containing protein            | 3  | F:GO:0004725;<br>P:GO:0006470;<br>F:GO:0008138                                                                                                                                                                           | -                                              | EC:3.1.3.48               | IPR000242; IPR000387;<br>G3DSA:3.90.190.10 (GENE3D),<br>PTHR19134 (PANTHER),<br>PTHR19134:SF26 (PANTHER),<br>SSF52799 (SUPERFAMILY) |
| -                       | -                                                          | 0  | -                                                                                                                                                                                                                        | -                                              | -                         | -                                                                                                                                   |
| Callithrix jacchus      | hematological and neurological expressed 1                 | 0  | F:GO:0003674;<br>P:GO:0008150;<br>C:GO:0005575;<br>C:GO:0005634                                                                                                                                                          | -                                              | -                         | PTHR21558 (PANTHER),<br>PTHR21558:SF1 (PANTHER)                                                                                     |
| -                       | -                                                          | 0  | -                                                                                                                                                                                                                        | -                                              | -                         | -                                                                                                                                   |
| Adineta vaga            | transposase                                                | 0  | -                                                                                                                                                                                                                        | -                                              | -                         | -                                                                                                                                   |
| Caenorhabditis elegans  | motile sperm domain containing 3                           | 1  | F:GO:0005515                                                                                                                                                                                                             | -                                              | -                         | IPR000535; IPR008962                                                                                                                |
| Caenorhabditis elegans  | elegans protein partially confirmed by transcript evidence | 0  | -                                                                                                                                                                                                                        | C:GO:0016021;<br>P:GO:0008152;<br>F:GO:0003824 | -                         | IPR004245; PTHR10974:SF5 (PANTHER)                                                                                                  |
| -                       | -                                                          | 0  | -                                                                                                                                                                                                                        | -                                              | -                         | -                                                                                                                                   |
| -                       | -                                                          | 0  | -                                                                                                                                                                                                                        | -                                              | -                         | -                                                                                                                                   |
| Caenorhabditis briggsae | Hypothetical protein CBG18218 [Caenorhabditis briggsae]    | 5  | P:GO:0040035;<br>P:GO:0009792;<br>P:GO:0002119;<br>P:GO:0040010;<br>P:GO:0006898                                                                                                                                         | -                                              | -                         | IPR007015; PTHR13213:SF5 (PANTHER)                                                                                                  |
| -                       | -                                                          | 0  | -                                                                                                                                                                                                                        | -                                              | -                         | IPR001820; IPR008993; IPR015613;<br>G3DSA:3.90.370.10 (GENE3D)                                                                      |
| -                       | -                                                          | 0  | -                                                                                                                                                                                                                        | -                                              | -                         | -                                                                                                                                   |
| Homo sapiens            | guanylate kinase 1                                         | 3  | F:GO:0004385;<br>F:GO:0005524;<br>P:GO:0006163                                                                                                                                                                           | -                                              | EC:2.7.4.8                | SignalP (SIGNALP)                                                                                                                   |

|                               |                                                       |   |                                                                                                                                     |                                                                                                                                                                                                                                                            |              |                                                                                                       |
|-------------------------------|-------------------------------------------------------|---|-------------------------------------------------------------------------------------------------------------------------------------|------------------------------------------------------------------------------------------------------------------------------------------------------------------------------------------------------------------------------------------------------------|--------------|-------------------------------------------------------------------------------------------------------|
| Caenorhabditis elegans        | myosin type ii heavy                                  | 0 |                                                                                                                                     | P:GO:0007018;<br>C:GO:0005694;<br>C:GO:0005875;<br>F:GO:0005083;<br>C:GO:0005874;<br>P:GO:0023034;<br>F:GO:0000166;<br>F:GO:0005524;<br>P:GO:0009792;<br>F:GO:0003777;<br>P:GO:0051276;<br>C:GO:0016459;<br>F:GO:0003774;<br>F:GO:0005515;<br>F:GO:0046872 |              | PD936484 (PRODOM)                                                                                     |
| Caenorhabditis elegans        | loc398558 protein                                     | 5 | P:GO:0040035;<br>P:GO:0040027;<br>P:GO:0040010;<br>P:GO:0040019;<br>P:GO:0006898                                                    | -                                                                                                                                                                                                                                                          |              | IPR002687; IPR012974; IPR012976;<br>PTHR10894 (PANTHER), SignalP<br>(SIGNALP), SSF89124 (SUPERFAMILY) |
| Caenorhabditis briggsae       | sec14-like protein 2                                  | 0 |                                                                                                                                     | F:GO:0008289;<br>C:GO:0005737;<br>P:GO:0045449;<br>P:GO:0006810;<br>F:GO:0005215;<br>C:GO:0005622;<br>C:GO:0005634                                                                                                                                         |              | IPR001251; PTHR23324 (PANTHER),<br>PTHR23324:SF6 (PANTHER)                                            |
|                               | -                                                     | 0 |                                                                                                                                     |                                                                                                                                                                                                                                                            |              | -                                                                                                     |
|                               | -                                                     | 0 |                                                                                                                                     |                                                                                                                                                                                                                                                            |              | -                                                                                                     |
| Caenorhabditis elegans        | hypothetical protein F37C4.4 [Caenorhabditis elegans] | 3 | P:GO:0009792;<br>P:GO:0000003;<br>P:GO:0008340                                                                                      | -                                                                                                                                                                                                                                                          |              | -                                                                                                     |
|                               | -                                                     | 0 |                                                                                                                                     |                                                                                                                                                                                                                                                            |              | -                                                                                                     |
| Strongylocentrotus purpuratus | ensangp00000010363                                    | 0 |                                                                                                                                     | F:GO:0003674;<br>C:GO:0005575                                                                                                                                                                                                                              |              | PTHR22930 (PANTHER)                                                                                   |
|                               | -                                                     | 0 |                                                                                                                                     |                                                                                                                                                                                                                                                            |              | -                                                                                                     |
| Caenorhabditis elegans        | elegans protein confirmed by transcript evidence      | 0 |                                                                                                                                     |                                                                                                                                                                                                                                                            |              | -                                                                                                     |
|                               | -                                                     | 0 |                                                                                                                                     |                                                                                                                                                                                                                                                            |              | -                                                                                                     |
| Caenorhabditis briggsae       | protein ki-se mu                                      | 8 | C:GO:0005737;<br>P:GO:0006468;<br>F:GO:0046872;<br>P:GO:0045087;<br>P:GO:0023034;<br>F:GO:0004697;<br>F:GO:0005524;<br>C:GO:0016020 | -                                                                                                                                                                                                                                                          | EC:2.7.11.13 | IPR000719; IPR008271; IPR011009;<br>IPR015727; IPR017442;<br>G3DSA:1.10.510.10 (GENE3D)               |
|                               | -                                                     | 0 |                                                                                                                                     |                                                                                                                                                                                                                                                            |              | -                                                                                                     |
|                               | -                                                     | 0 |                                                                                                                                     |                                                                                                                                                                                                                                                            |              | -                                                                                                     |
|                               | -                                                     | 0 |                                                                                                                                     |                                                                                                                                                                                                                                                            |              | -                                                                                                     |
|                               | -                                                     | 0 |                                                                                                                                     |                                                                                                                                                                                                                                                            |              | -                                                                                                     |

|                                                           |                                                            |   |                                                                                                                                                      |                                                                 |             |                                                                         |
|-----------------------------------------------------------|------------------------------------------------------------|---|------------------------------------------------------------------------------------------------------------------------------------------------------|-----------------------------------------------------------------|-------------|-------------------------------------------------------------------------|
| Caenorhabditis briggsae                                   | u5 small nuclear ribonucleoprotein 200 kda helicase        | 9 | P:GO:0018991;<br>C:GO:0005681;<br>F:GO:0008026;<br>P:GO:0040007;<br>P:GO:0008380;<br>F:GO:0003677;<br>F:GO:0005524;<br>P:GO:0002119;<br>P:GO:0009792 | -                                                               |             | SignalP (SIGNALP)                                                       |
| -                                                         | -                                                          | 0 |                                                                                                                                                      |                                                                 |             | -                                                                       |
| -                                                         | -                                                          | 0 |                                                                                                                                                      |                                                                 |             | -                                                                       |
| Caenorhabditis briggsae                                   | ankyrin repeat domain 50                                   | 3 | F:GO:0005515;<br>P:GO:0006974;<br>P:GO:0008340                                                                                                       | -                                                               |             | IPR002110; IPR020683; PTHR18958 (PANTHER), PTHR18958:SF269 (PANTHER)    |
| -                                                         | -                                                          | 0 |                                                                                                                                                      |                                                                 |             | -                                                                       |
| -                                                         | -                                                          | 0 |                                                                                                                                                      |                                                                 |             | -                                                                       |
| -                                                         | -                                                          | 0 |                                                                                                                                                      |                                                                 |             | -                                                                       |
| Caenorhabditis elegans                                    | coelomocyte uptake defective family member (cup-5)         | 0 |                                                                                                                                                      |                                                                 |             | -                                                                       |
| Caenorhabditis elegans                                    | coelomocyte uptake defective family member (cup-5)         | 3 | P:GO:0006874;<br>C:GO:0005764;<br>P:GO:0006914                                                                                                       | -                                                               |             | -                                                                       |
| Caenorhabditis elegans                                    | coelomocyte uptake defective family member (cup-5)         | 3 | P:GO:0006874;<br>C:GO:0005764;<br>P:GO:0006914                                                                                                       | -                                                               |             | -                                                                       |
| -                                                         | -                                                          | 0 |                                                                                                                                                      |                                                                 |             | -                                                                       |
| -                                                         | -                                                          | 0 |                                                                                                                                                      |                                                                 |             | -                                                                       |
| Caenorhabditis briggsae                                   | elegans protein partially confirmed by transcript evidence | 0 |                                                                                                                                                      |                                                                 |             | -                                                                       |
| Desulfovibrio desulfuricans subsp. desulfuricans str. G20 | atp-dependent clp atp-binding subunit                      | 7 | F:GO:0008233;<br>P:GO:0044267;<br>F:GO:0046872;<br>F:GO:0016887;<br>F:GO:0005515;<br>F:GO:0000166;<br>C:GO:0005759                                   | -                                                               |             | IPR004487; IPR019489; G3DSA:1.10.8.60 (GENE3D), PTHR11262 (PANTHER)     |
| Brugia malayi                                             | ser thr protein phosphatase family protein                 | 1 | F:GO:0004721                                                                                                                                         | -                                                               | EC:3.1.3.16 | IPR004843; IPR006186; G3DSA:3.60.21.10 (GENE3D), SSF56300 (SUPERFAMILY) |
| -                                                         | -                                                          | 0 |                                                                                                                                                      |                                                                 |             | -                                                                       |
| Pan troglodytes                                           | PREDICTED: hypothetical protein [Pan troglodytes]          | 0 |                                                                                                                                                      |                                                                 |             | -                                                                       |
| Caenorhabditis elegans                                    | aldehyde dehydroge-se                                      | 4 | P:GO:0055114;<br>F:GO:0004028;<br>P:GO:0006081;<br>F:GO:0005488                                                                                      | -                                                               |             | IPR015590; IPR016161; IPR016163; PTHR11699:SF46 (PANTHER)               |
| -                                                         | -                                                          | 0 |                                                                                                                                                      |                                                                 |             | -                                                                       |
| Brugia malayi                                             | timeless protein                                           | 0 |                                                                                                                                                      | F:GO:0046872;<br>F:GO:0008270;<br>F:GO:0005515;<br>F:GO:0003677 |             | IPR007725; PTHR22940 (PANTHER), PTHR22940:SF6 (PANTHER)                 |
| Caenorhabditis briggsae                                   | sig-l peptide peptidase family protein                     | 4 | P:GO:0040008;<br>P:GO:0000003;<br>C:GO:0044425;<br>P:GO:0007275                                                                                      | -                                                               |             | IPR007369; PTHR12174:SF4 (PANTHER)                                      |
| Caenorhabditis briggsae                                   | sig-l peptide peptidase family protein                     | 4 | P:GO:0040008;<br>P:GO:0000003;<br>C:GO:0044425;<br>P:GO:0007275                                                                                      | -                                                               |             | IPR007369; PTHR12174:SF4 (PANTHER)                                      |
| -                                                         | -                                                          | 0 |                                                                                                                                                      |                                                                 |             | SignalP (SIGNALP)                                                       |

|                         |                                                        |    |                                                                                                                                                                                                                                           |                                                                 |                                                                                         |
|-------------------------|--------------------------------------------------------|----|-------------------------------------------------------------------------------------------------------------------------------------------------------------------------------------------------------------------------------------------|-----------------------------------------------------------------|-----------------------------------------------------------------------------------------|
|                         | -                                                      | 0  |                                                                                                                                                                                                                                           |                                                                 | -                                                                                       |
| Caenorhabditis elegans  | eif4e binding protein                                  | 7  | P:GO:0006629;<br>P:GO:0040010;<br>C:GO:0043005;<br>P:GO:0010468;<br>P:GO:0000003;<br>P:GO:0006898;<br>C:GO:0044424                                                                                                                        | -                                                               | IPR007146; PTHR13237 (PANTHER),<br>PTHR13237:SF3 (PANTHER)                              |
|                         | -                                                      | 0  |                                                                                                                                                                                                                                           |                                                                 | -                                                                                       |
|                         | -                                                      | 0  |                                                                                                                                                                                                                                           |                                                                 | -                                                                                       |
|                         | -                                                      | 0  |                                                                                                                                                                                                                                           |                                                                 | SignalP (SIGNALP)                                                                       |
| Caenorhabditis briggsae | briggsae cbr-inf1-1 protein                            | 1  | F:GO:0005488                                                                                                                                                                                                                              | -                                                               | IPR015425; PTHR23213 (PANTHER),<br>PTHR23213:SF18 (PANTHER)                             |
| Mus musculus            | eukaryotic translation initiation factor isoform cra_i | 5  | P:GO:0006412;<br>C:GO:0005737;<br>P:GO:0006915;<br>P:GO:0048522;<br>C:GO:0005634                                                                                                                                                          | -                                                               | EC:3.6.5.3                                                                              |
|                         | -                                                      | 0  |                                                                                                                                                                                                                                           |                                                                 | -                                                                                       |
|                         | -                                                      | 0  |                                                                                                                                                                                                                                           |                                                                 | -                                                                                       |
| Homo sapiens            | immunoglobulin j chain                                 | 3  | C:GO:0005576;<br>F:GO:0003823;<br>P:GO:0006959                                                                                                                                                                                            | -                                                               | PD021296 (PRODOM)                                                                       |
| Caenorhabditis briggsae | sarcolemmal membrane-associated protein                | 2  | C:GO:0044444;<br>C:GO:0043229                                                                                                                                                                                                             | -                                                               | -                                                                                       |
| Caenorhabditis briggsae | sarcolemmal membrane-associated protein                | 2  | C:GO:0044444;<br>C:GO:0043229                                                                                                                                                                                                             | -                                                               | -                                                                                       |
| Brugia malayi           | myotubularin-related family protein                    | 0  |                                                                                                                                                                                                                                           | P:GO:0016311;<br>F:GO:0016791                                   | PTHR10807 (PANTHER),<br>PTHR10807:SF4 (PANTHER)                                         |
|                         | -                                                      | 0  |                                                                                                                                                                                                                                           |                                                                 | -                                                                                       |
| Branchiostoma floridae  | domain-containing histone demethylation protein 1d     | 14 | N:GO:0035575;<br>F:GO:0051864;<br>F:GO:0008270;<br>F:GO:0032454;<br>F:GO:0035064;<br>F:GO:0071558;<br>P:GO:0071557;<br>P:GO:0030901;<br>N:GO:0035574;<br>P:GO:0033169;<br>P:GO:0070544;<br>P:GO:0045893;<br>F:GO:0005506;<br>C:GO:0005634 | -                                                               | EC:1.14.11.2<br>7<br>IPR001965; IPR011011; IPR013083;<br>IPR019787; PTHR23123 (PANTHER) |
|                         | -                                                      | 0  |                                                                                                                                                                                                                                           |                                                                 | -                                                                                       |
| Caenorhabditis briggsae | in family member (ttn-1)                               | 0  |                                                                                                                                                                                                                                           | F:GO:0005524;<br>F:GO:0004672;<br>P:GO:0006468;<br>P:GO:0009792 | IPR013783; PTHR19900 (PANTHER),<br>PTHR19900:SF1 (PANTHER)                              |
|                         | -                                                      | 0  |                                                                                                                                                                                                                                           |                                                                 | -                                                                                       |
| Caenorhabditis elegans  | hypothetical transporter                               | 4  | P:GO:0055085;<br>P:GO:0040011;<br>C:GO:0016021;<br>P:GO:0007413                                                                                                                                                                           | -                                                               | SignalP (SIGNALP)                                                                       |
|                         | -                                                      | 0  |                                                                                                                                                                                                                                           |                                                                 | -                                                                                       |
|                         | -                                                      | 0  |                                                                                                                                                                                                                                           |                                                                 | -                                                                                       |
|                         | -                                                      | 0  |                                                                                                                                                                                                                                           |                                                                 | -                                                                                       |
| Loa loa                 | af326938_1 xg314                                       | 0  |                                                                                                                                                                                                                                           |                                                                 | -                                                                                       |

|                        |                                              |   |                                                                                                                                     |                                                                                                                    |  |                                                                                      |
|------------------------|----------------------------------------------|---|-------------------------------------------------------------------------------------------------------------------------------------|--------------------------------------------------------------------------------------------------------------------|--|--------------------------------------------------------------------------------------|
|                        | -                                            | 0 |                                                                                                                                     |                                                                                                                    |  | -                                                                                    |
| Camponotus floridanus  | myosin light chain                           | 0 |                                                                                                                                     | F:GO:0017022;<br>F:GO:0005509;<br>F:GO:0032036;<br>F:GO:0008092;<br>C:GO:0016461;<br>F:GO:0042623;<br>C:GO:0016459 |  | IPR011992; IPR018249; PTHR23048 (PANTHER), SSF47473 (SUPERFAMILY)                    |
|                        | -                                            | 0 |                                                                                                                                     |                                                                                                                    |  | -                                                                                    |
|                        | -                                            | 0 |                                                                                                                                     |                                                                                                                    |  | -                                                                                    |
|                        | -                                            | 0 |                                                                                                                                     |                                                                                                                    |  | -                                                                                    |
|                        | -                                            | 0 |                                                                                                                                     |                                                                                                                    |  | -                                                                                    |
|                        | -                                            | 0 |                                                                                                                                     |                                                                                                                    |  | SignalP (SIGNALP)                                                                    |
|                        | -                                            | 0 |                                                                                                                                     |                                                                                                                    |  | IPR001289; PTHR12632:SF6 (PANTHER)                                                   |
|                        | -                                            | 0 |                                                                                                                                     |                                                                                                                    |  | -                                                                                    |
|                        | -                                            | 0 |                                                                                                                                     |                                                                                                                    |  | -                                                                                    |
|                        | -                                            | 0 |                                                                                                                                     |                                                                                                                    |  | SignalP (SIGNALP)                                                                    |
| Caenorhabditis elegans | wd repeat domain 24                          | 0 |                                                                                                                                     | F:GO:0003674;<br>P:GO:0008150                                                                                      |  | -                                                                                    |
|                        | -                                            | 0 |                                                                                                                                     |                                                                                                                    |  | -                                                                                    |
|                        | -                                            | 0 |                                                                                                                                     |                                                                                                                    |  | -                                                                                    |
| Loa loa                | briggsae cbr-wts-1 protein                   | 2 | F:GO:0016301;<br>F:GO:0005515                                                                                                       | -                                                                                                                  |  | -                                                                                    |
|                        | -                                            | 0 |                                                                                                                                     |                                                                                                                    |  | -                                                                                    |
|                        | -                                            | 0 |                                                                                                                                     |                                                                                                                    |  | -                                                                                    |
| Caenorhabditis elegans | transmembrane 9 superfamily protein member 3 | 1 | C:GO:0016021                                                                                                                        | -                                                                                                                  |  | -                                                                                    |
| Brugia malayi          | serine arginine repetitive matrix protein 1  | 8 | F:GO:0003677;<br>C:GO:0005681;<br>F:GO:0003723;<br>F:GO:0005515;<br>P:GO:0000375;<br>C:GO:0016607;<br>P:GO:0006397;<br>C:GO:0016363 | -                                                                                                                  |  | IPR002483; G3DSA:1.20.1390.10 (GENE3D), PTHR23148 (PANTHER), SSF101233 (SUPERFAMILY) |

|                           |                                                            |    |                                                                                                                                                                                                                                                                                                                                                                                                                                                                        |                                                                                  |                                                                                                                                         |
|---------------------------|------------------------------------------------------------|----|------------------------------------------------------------------------------------------------------------------------------------------------------------------------------------------------------------------------------------------------------------------------------------------------------------------------------------------------------------------------------------------------------------------------------------------------------------------------|----------------------------------------------------------------------------------|-----------------------------------------------------------------------------------------------------------------------------------------|
| Homo sapiens              | achain structural basis of pp2a and sgo interaction        | 27 | P:GO:0006275;<br>C:GO:0016020;<br>P:GO:0006672;<br>C:GO:0000159;<br>P:GO:0006461;<br>F:GO:0003823;<br>P:GO:0010033;<br>C:GO:0015630;<br>P:GO:0042518;<br>P:GO:0030155;<br>C:GO:0005829;<br>F:GO:0046982;<br>P:GO:0030111;<br>C:GO:0000775;<br>P:GO:0008380;<br>P:GO:0006917;<br>P:GO:0030308;<br>P:GO:0007059;<br>P:GO:0000188;<br>P:GO:0045595;<br>F:GO:0008601;<br>P:GO:0006470;<br>P:GO:0045449;<br>P:GO:0019932;<br>C:GO:0005625;<br>C:GO:0005634;<br>C:GO:0005739 | -                                                                                | -                                                                                                                                       |
| Hydra magnipapillata      | low quality protein: protein mon2 homolog                  | 2  | P:GO:0015031;<br>F:GO:0005488                                                                                                                                                                                                                                                                                                                                                                                                                                          | -                                                                                | -                                                                                                                                       |
| Caenorhabditis sp. PS1010 | elegans protein confirmed by transcript evidence           | 3  | P:GO:0009792;<br>P:GO:0040010;<br>P:GO:0040011                                                                                                                                                                                                                                                                                                                                                                                                                         | -                                                                                | IPR000504; IPR002343; IPR012677;<br>PTHR10432 (PANTHER),<br>PTHR10432:SF36 (PANTHER),<br>SSF54928 (SUPERFAMILY)                         |
| Caenorhabditis sp. PS1010 | elegans protein partially confirmed by transcript evidence | 3  | P:GO:0009792;<br>P:GO:0040010;<br>P:GO:0040011                                                                                                                                                                                                                                                                                                                                                                                                                         | -                                                                                | IPR000504; IPR002343; IPR012677;<br>PTHR10432 (PANTHER),<br>PTHR10432:SF36 (PANTHER),<br>SSF54928 (SUPERFAMILY)                         |
| Caenorhabditis sp. PS1010 | elegans protein partially confirmed by transcript evidence | 3  | P:GO:0009792;<br>P:GO:0040010;<br>P:GO:0040011                                                                                                                                                                                                                                                                                                                                                                                                                         | -                                                                                | IPR000504; IPR002343; IPR012677;<br>PTHR10432 (PANTHER),<br>PTHR10432:SF36 (PANTHER),<br>SSF54928 (SUPERFAMILY)                         |
| -                         | -                                                          | 0  |                                                                                                                                                                                                                                                                                                                                                                                                                                                                        |                                                                                  | SignalP (SIGNALP)                                                                                                                       |
| Loa loa                   | tb2 hva22 family protein                                   | 0  |                                                                                                                                                                                                                                                                                                                                                                                                                                                                        | F:GO:0004872                                                                     | IPR004345; PTHR12300:SF13<br>(PANTHER), SignalP (SIGNALP)                                                                               |
| Caenorhabditis briggsae   | elegans protein partially confirmed by transcript evidence | 1  | P:GO:0006810                                                                                                                                                                                                                                                                                                                                                                                                                                                           | -                                                                                | IPR013099; G3DSA:1.10.287.70<br>(GENE3D), PTHR11003 (PANTHER),<br>PTHR11003:SF7 (PANTHER), SignalP<br>(SIGNALP), SSF81324 (SUPERFAMILY) |
| Caenorhabditis elegans    | briggsae cbr-apt-10 protein                                | 0  |                                                                                                                                                                                                                                                                                                                                                                                                                                                                        | C:GO:0030131;<br>P:GO:0016192;<br>P:GO:0006886;<br>P:GO:0006897;<br>F:GO:0005515 | -                                                                                                                                       |
| -                         | -                                                          | 0  |                                                                                                                                                                                                                                                                                                                                                                                                                                                                        |                                                                                  | -                                                                                                                                       |



|                         |                                                            |    |                                                                                                                                                                                                                          |                                                                                                                                                      |             |                                                                                                   |
|-------------------------|------------------------------------------------------------|----|--------------------------------------------------------------------------------------------------------------------------------------------------------------------------------------------------------------------------|------------------------------------------------------------------------------------------------------------------------------------------------------|-------------|---------------------------------------------------------------------------------------------------|
| Caenorhabditis briggsae | Hypothetical protein CBG02628 [Caenorhabditis briggsae]    | 0  |                                                                                                                                                                                                                          | F:GO:0016740;<br>F:GO:0004674;<br>F:GO:0004672;<br>P:GO:0006468;<br>F:GO:0000166;<br>F:GO:0005524;<br>F:GO:0016301;<br>F:GO:0004713;<br>F:GO:0005515 |             | SignalP (SIGNALP)                                                                                 |
| Caenorhabditis elegans  | briggsae cbr-ccb-1 protein                                 | 12 | C:GO:0030315;<br>C:GO:0016529;<br>P:GO:0070588;<br>P:GO:0070978;<br>F:GO:0004872;<br>F:GO:0015270;<br>P:GO:0006612;<br>F:GO:0005515;<br>C:GO:0005891;<br>P:GO:0006936;<br>P:GO:0051925;<br>F:GO:0008331                  | -                                                                                                                                                    |             | IPR000584; IPR008144;<br>G3DSA:3.40.50.300 (GENE3D),<br>SSF52540 (SUPERFAMILY)                    |
| Caenorhabditis briggsae | elegans protein partially confirmed by transcript evidence | 0  |                                                                                                                                                                                                                          |                                                                                                                                                      |             | -                                                                                                 |
| Homo sapiens            | granulin                                                   | 8  | C:GO:0005615;<br>P:GO:0050679;<br>F:GO:0008083;<br>F:GO:0005125;<br>P:GO:0007165;<br>C:GO:0005739;<br>P:GO:0007566;<br>P:GO:0001835                                                                                      | -                                                                                                                                                    |             | PTHR12274 (PANTHER)                                                                               |
|                         | -                                                          | 0  |                                                                                                                                                                                                                          |                                                                                                                                                      |             | -                                                                                                 |
|                         | -                                                          | 0  |                                                                                                                                                                                                                          |                                                                                                                                                      |             | SignalP (SIGNALP)                                                                                 |
| Haemonchus contortus    | superoxide dismutase                                       | 13 | F:GO:0005507;<br>P:GO:0008340;<br>P:GO:0010038;<br>F:GO:0008270;<br>C:GO:0005739;<br>P:GO:0060378;<br>P:GO:0055114;<br>F:GO:0004784;<br>C:GO:0005615;<br>P:GO:0009410;<br>F:GO:0042803;<br>P:GO:0019430;<br>P:GO:0051597 | -                                                                                                                                                    | EC:1.15.1.1 | IPR001424; IPR018152;<br>PTHR10003:SF12 (PANTHER), SignalP<br>(SIGNALP)                           |
|                         | -                                                          | 0  |                                                                                                                                                                                                                          |                                                                                                                                                      |             | -                                                                                                 |
| Gallus gallus           | sy-ptotagmin-like 1                                        | 3  | C:GO:0005886;<br>F:GO:0005515;<br>P:GO:0006887                                                                                                                                                                           | -                                                                                                                                                    |             | IPR000008; IPR008973; IPR018029;<br>G3DSA:2.60.40.150 (GENE3D),<br>PTHR10024 (PANTHER)            |
|                         | -                                                          | 0  |                                                                                                                                                                                                                          |                                                                                                                                                      |             | -                                                                                                 |
| Homo sapiens            | estradiol-specific single chain antibody fragment          | 0  |                                                                                                                                                                                                                          |                                                                                                                                                      |             | IPR013106; IPR013783; PTHR23267<br>(PANTHER), PTHR23267:SF14<br>(PANTHER), SSF48726 (SUPERFAMILY) |
|                         | -                                                          | 0  |                                                                                                                                                                                                                          |                                                                                                                                                      |             | -                                                                                                 |
|                         | -                                                          | 0  |                                                                                                                                                                                                                          |                                                                                                                                                      |             | SignalP (SIGNALP)                                                                                 |
|                         | -                                                          | 0  |                                                                                                                                                                                                                          |                                                                                                                                                      |             | -                                                                                                 |
|                         | -                                                          | 0  |                                                                                                                                                                                                                          |                                                                                                                                                      |             | -                                                                                                 |
|                         | -                                                          | 0  |                                                                                                                                                                                                                          |                                                                                                                                                      |             | -                                                                                                 |

|                         |                                                                  |   |                                                                                                                    |   |                                                                                                                                                                                                                                                                                                                                                                                                                                       |
|-------------------------|------------------------------------------------------------------|---|--------------------------------------------------------------------------------------------------------------------|---|---------------------------------------------------------------------------------------------------------------------------------------------------------------------------------------------------------------------------------------------------------------------------------------------------------------------------------------------------------------------------------------------------------------------------------------|
|                         | -                                                                | 0 |                                                                                                                    |   | -                                                                                                                                                                                                                                                                                                                                                                                                                                     |
| Caenorhabditis briggsae | d- polymerase i family protein                                   | 7 | F:GO:0005488;<br>P:GO:0030421;<br>P:GO:0008340;<br>P:GO:0006264;<br>F:GO:0016791;<br>F:GO:0016740;<br>P:GO:0008406 | - | EC:3.1.3.0<br><br>IPR001098; IPR002297; IPR019760;<br>G3DSA:1.10.150.20 (GENE3D),<br>SSF56672 (SUPERFAMILY)                                                                                                                                                                                                                                                                                                                           |
|                         | -                                                                | 0 |                                                                                                                    |   | -                                                                                                                                                                                                                                                                                                                                                                                                                                     |
| Brugia malayi           | yhb8_caeel ame: full=uncharacterized protein flags:<br>precursor | 0 |                                                                                                                    |   | -                                                                                                                                                                                                                                                                                                                                                                                                                                     |
|                         | -                                                                | 0 |                                                                                                                    |   | -                                                                                                                                                                                                                                                                                                                                                                                                                                     |
| Caenorhabditis elegans  | protein-tyrosine phosphatase containing protein                  | 1 | F:GO:0004721                                                                                                       | - | EC:3.1.3.16<br><br>IPR000242; G3DSA:3.90.190.10<br>(GENE3D), PTHR19134 (PANTHER),<br>PTHR19134:SF26 (PANTHER),<br>SSF52799 (SUPERFAMILY)                                                                                                                                                                                                                                                                                              |
|                         | -                                                                | 0 |                                                                                                                    |   | -                                                                                                                                                                                                                                                                                                                                                                                                                                     |
| Caenorhabditis elegans  | amiloride-sensitive sodium channel family protein                | 4 | P:GO:0006811;<br>C:GO:0016020;<br>F:GO:0005216;<br>P:GO:0007413                                                    | - | IPR001873; G3DSA:1.10.287.820<br>(GENE3D), PTHR11690:SF11<br>(PANTHER)                                                                                                                                                                                                                                                                                                                                                                |
|                         | -                                                                | 0 |                                                                                                                    |   | -                                                                                                                                                                                                                                                                                                                                                                                                                                     |
| Caenorhabditis elegans  | serine threonine protein rio1 family                             | 0 |                                                                                                                    |   | P:GO:0006468;<br>C:GO:0005634;<br>C:GO:0005694;<br>F:GO:0005524;<br>F:GO:0016301;<br>C:GO:0016020;<br>F:GO:0004674;<br>P:GO:0006350;<br>F:GO:0004672;<br>F:GO:0008772;<br>F:GO:0016791;<br>F:GO:0003824;<br>F:GO:0000166;<br>C:GO:0005737;<br>C:GO:0000781;<br>P:GO:0045449;<br>F:GO:0016773;<br>F:GO:0004713;<br>F:GO:0016740;<br>P:GO:0006006;<br>P:GO:0009103<br><br>IPR008266; G3DSA:1.10.510.10<br>(GENE3D), PTHR12209 (PANTHER) |
| Caenorhabditis elegans  | elegans protein partially confirmed by transcript evidence       | 4 | P:GO:0006541;<br>F:GO:0004359;<br>F:GO:0005515;<br>C:GO:0005759                                                    | - | EC:3.5.1.2<br><br>IPR002110; IPR015868; IPR020683;<br>PTHR12544:SF3 (PANTHER)                                                                                                                                                                                                                                                                                                                                                         |

|                         |                                                   |    |                                                                                                                                                                                                                                                                                                                                                                                   |   |                                                                                                                    |                                                                                                                     |
|-------------------------|---------------------------------------------------|----|-----------------------------------------------------------------------------------------------------------------------------------------------------------------------------------------------------------------------------------------------------------------------------------------------------------------------------------------------------------------------------------|---|--------------------------------------------------------------------------------------------------------------------|---------------------------------------------------------------------------------------------------------------------|
| Callithrix jacchus      | vimentin                                          | 12 | F:GO:0005200;<br>P:GO:0006928;<br>C:GO:0005886;<br>C:GO:0031252;<br>C:GO:0030424;<br>C:GO:0016363;<br>C:GO:0045098;<br>P:GO:0045103;<br>F:GO:0019901;<br>F:GO:0008022;<br>C:GO:0005829;<br>P:GO:0044419                                                                                                                                                                           | - |                                                                                                                    | IPR001664; IPR006821; IPR016044;<br>PTHR23239:SF27 (PANTHER)                                                        |
| Caenorhabditis elegans  | briggsae cbr-gck-2 protein                        | 4  | P:GO:0006468;<br>F:GO:0005083;<br>F:GO:0005524;<br>F:GO:0004674                                                                                                                                                                                                                                                                                                                   | - | EC:2.7.11.0                                                                                                        | IPR000719; IPR011009; IPR017442;<br>G3DSA:1.10.510.10 (GENE3D),<br>PTHR22986 (PANTHER),<br>PTHR22986:SF75 (PANTHER) |
| Caenorhabditis briggsae | briggsae cbr-cdh-12 protein                       | 2  | C:GO:0016020;<br>P:GO:0007155                                                                                                                                                                                                                                                                                                                                                     | - |                                                                                                                    | -                                                                                                                   |
| Ancylostoma ceylanicum  | venom-allergen-like protein family member (vap-1) | 1  | P:GO:0040011                                                                                                                                                                                                                                                                                                                                                                      | - |                                                                                                                    | IPR001283; IPR014044; IPR018244;<br>PTHR10334:SF11 (PANTHER)                                                        |
| -                       | -                                                 | 0  |                                                                                                                                                                                                                                                                                                                                                                                   |   |                                                                                                                    | -                                                                                                                   |
| -                       | -                                                 | 0  |                                                                                                                                                                                                                                                                                                                                                                                   |   |                                                                                                                    | SignalP (SIGNALP)                                                                                                   |
| -                       | -                                                 | 0  |                                                                                                                                                                                                                                                                                                                                                                                   |   |                                                                                                                    | -                                                                                                                   |
| Caenorhabditis elegans  | mothers against decapentaplegic homolog 5         | 22 | P:GO:0001525;<br>P:GO:0009880;<br>P:GO:0006468;<br>P:GO:0007179;<br>P:GO:0060048;<br>P:GO:0001657;<br>C:GO:0016021;<br>C:GO:0005829;<br>F:GO:0016563;<br>C:GO:0005667;<br>F:GO:0031625;<br>P:GO:0007165;<br>P:GO:0030218;<br>P:GO:0007281;<br>F:GO:0003700;<br>P:GO:0002051;<br>P:GO:0045944;<br>F:GO:0030618;<br>P:GO:0071407;<br>P:GO:0045669;<br>P:GO:0030509;<br>P:GO:0001880 | - |                                                                                                                    | IPR001132; IPR008984; IPR013790;<br>IPR017855; PTHR13703:SF19<br>(PANTHER)                                          |
| -                       | -                                                 | 0  |                                                                                                                                                                                                                                                                                                                                                                                   |   |                                                                                                                    | -                                                                                                                   |
| Homo sapiens            | immunoglobulin heavy chain variable region        | 0  |                                                                                                                                                                                                                                                                                                                                                                                   |   |                                                                                                                    | IPR013783; PTHR23266 (PANTHER),<br>PTHR23266:SF7 (PANTHER), SignalP<br>(SIGNALP), SSF48726 (SUPERFAMILY)            |
| -                       | -                                                 | 0  |                                                                                                                                                                                                                                                                                                                                                                                   |   |                                                                                                                    | -                                                                                                                   |
| Ixodes scapularis       | rolling pebbles                                   | 0  |                                                                                                                                                                                                                                                                                                                                                                                   |   | F:GO:0046872;<br>P:GO:0055114;<br>F:GO:0005488;<br>F:GO:0016491;<br>F:GO:0008270;<br>F:GO:0032440;<br>F:GO:0005515 | SignalP (SIGNALP)                                                                                                   |

|                         |                                                            |    |                                                                                                                                                                                                                          |   |                                            |                                                                                                                                                    |
|-------------------------|------------------------------------------------------------|----|--------------------------------------------------------------------------------------------------------------------------------------------------------------------------------------------------------------------------|---|--------------------------------------------|----------------------------------------------------------------------------------------------------------------------------------------------------|
| Caenorhabditis elegans  | integrin-linked ki-se                                      | 13 | P:GO:0007016;<br>F:GO:0004674;<br>P:GO:0007229;<br>P:GO:0007160;<br>F:GO:0005524;<br>C:GO:0005925;<br>F:GO:0005515;<br>P:GO:0009966;<br>P:GO:0007475;<br>P:GO:0016203;<br>F:GO:0004623;<br>F:GO:0004715;<br>P:GO:0006468 | - | EC:2.7.11.0;<br>EC:3.1.1.4;<br>EC:2.7.10.2 | IPR000719; IPR001245; IPR011009;<br>G3DSA:1.10.510.10 (GENE3D),<br>G3DSA:3.30.200.20 (GENE3D),<br>PTHR23257 (PANTHER),<br>PTHR23257:SF30 (PANTHER) |
| Caenorhabditis elegans  | 60kd inner membrane protein                                | 2  | C:GO:0016020;<br>C:GO:0005739                                                                                                                                                                                            | - |                                            | IPR001708; PTHR12428:SF3<br>(PANTHER), SignalP (SIGNALP)                                                                                           |
| Caenorhabditis briggsae | protein ki-se domain containing protein                    | 1  | F:GO:0000166                                                                                                                                                                                                             | - |                                            | -                                                                                                                                                  |
|                         |                                                            | 0  |                                                                                                                                                                                                                          |   |                                            | -                                                                                                                                                  |
|                         |                                                            | 0  |                                                                                                                                                                                                                          |   |                                            | SignalP (SIGNALP)                                                                                                                                  |
| Brugia malayi           | lobulin-like cell adhesion molecule family member (igcm-3) | 1  | P:GO:0019915                                                                                                                                                                                                             | - |                                            | SignalP (SIGNALP)                                                                                                                                  |
|                         |                                                            | 0  |                                                                                                                                                                                                                          |   |                                            | -                                                                                                                                                  |
|                         |                                                            | 0  |                                                                                                                                                                                                                          |   |                                            | -                                                                                                                                                  |
|                         |                                                            | 0  |                                                                                                                                                                                                                          |   |                                            | -                                                                                                                                                  |
| Caenorhabditis briggsae | uncoordi-ated family member (unc-62)                       | 6  | P:GO:0001654;<br>P:GO:0045944;<br>F:GO:0043565;<br>F:GO:0005515;<br>F:GO:0003700;<br>C:GO:0005634                                                                                                                        | - |                                            | PTHR11850 (PANTHER),<br>PTHR11850:SF8 (PANTHER)                                                                                                    |
| Caenorhabditis elegans  | tnni3 interacting ki-se                                    | 8  | C:GO:0005737;<br>P:GO:0006468;<br>F:GO:0046872;<br>F:GO:0005524;<br>F:GO:0008022;<br>C:GO:0005634;<br>F:GO:0004674;<br>F:GO:0031013                                                                                      | - | EC:2.7.11.0                                | IPR000719; IPR001245; IPR011009;<br>G3DSA:1.10.510.10 (GENE3D),<br>PTHR23257 (PANTHER),<br>PTHR23257:SF63 (PANTHER)                                |
| Caenorhabditis briggsae | vacuolar membrane protein pep11                            | 8  | P:GO:0009792;<br>P:GO:0010171;<br>F:GO:0005488;<br>P:GO:0040018;<br>P:GO:0018996;<br>P:GO:0040010;<br>P:GO:0000003;<br>P:GO:0008219                                                                                      | - |                                            | PTHR23323 (PANTHER),<br>PTHR23323:SF24 (PANTHER), PF00637<br>(PFAM)                                                                                |
| Caenorhabditis briggsae | tyrosine-protein phosphatase non-receptor type 4           | 8  | C:GO:0005737;<br>F:GO:0004725;<br>C:GO:0005856;<br>F:GO:0004872;<br>C:GO:0019898;<br>F:GO:0050254;<br>F:GO:0008092;<br>P:GO:0006470                                                                                      | - | EC:3.1.3.48;<br>EC:2.7.11.14               | -                                                                                                                                                  |
| Caenorhabditis elegans  | flavin containing monooxyge-se 5                           | 6  | C:GO:0005789;<br>F:GO:0004497;<br>C:GO:0031224;<br>F:GO:0050662;<br>P:GO:0008152;<br>F:GO:0000166                                                                                                                        | - |                                            | IPR002257; IPR020946;<br>G3DSA:3.50.50.60 (GENE3D),<br>PTHR23023 (PANTHER),<br>PTHR23023:SF4 (PANTHER), SSF51905<br>(SUPERFAMILY)                  |

|                         |                                                            |   |                                                                                                                                                      |                               |             |                                                                                                                  |
|-------------------------|------------------------------------------------------------|---|------------------------------------------------------------------------------------------------------------------------------------------------------|-------------------------------|-------------|------------------------------------------------------------------------------------------------------------------|
| Pan troglodytes         | brain protein i3                                           | 9 | P:GO:0012502;<br>C:GO:0005765;<br>C:GO:0016021;<br>F:GO:0001540;<br>C:GO:0005624;<br>F:GO:0005524;<br>C:GO:0048471;<br>P:GO:0010977;<br>C:GO:0005794 | -                             | -           | -                                                                                                                |
| Caenorhabditis elegans  | hypothetical protein Y23B4A.2 [Caenorhabditis elegans]     | 0 |                                                                                                                                                      | P:GO:0007218                  |             | SignalP (SIGNALP)                                                                                                |
| Caenorhabditis elegans  | Hypothetical protein T07H6.4 [Caenorhabditis elegans]      | 0 |                                                                                                                                                      | F:GO:0030414;<br>C:GO:0005576 |             | -                                                                                                                |
| Caenorhabditis elegans  | elegans protein partially confirmed by transcript evidence | 0 |                                                                                                                                                      |                               |             | IPR004988                                                                                                        |
| -                       | -                                                          | 0 |                                                                                                                                                      |                               |             | -                                                                                                                |
| -                       | -                                                          | 0 |                                                                                                                                                      |                               |             | -                                                                                                                |
| Caenorhabditis elegans  | hypothetical protein F09E10.7 [Caenorhabditis elegans]     | 0 |                                                                                                                                                      |                               |             | -                                                                                                                |
| -                       | -                                                          | 0 |                                                                                                                                                      |                               |             | -                                                                                                                |
| Caenorhabditis elegans  | cation chloride cotransporter                              | 2 | P:GO:0055085;<br>C:GO:0016021                                                                                                                        | -                             |             | IPR004841; PTHR11827 (PANTHER),<br>PTHR11827:SF6 (PANTHER)                                                       |
| Caenorhabditis elegans  | cation chloride cotransporter                              | 2 | P:GO:0055085;<br>C:GO:0016021                                                                                                                        | -                             |             | IPR004841; PTHR11827 (PANTHER),<br>PTHR11827:SF6 (PANTHER), SignalP<br>(SIGNALP)                                 |
| -                       | -                                                          | 0 |                                                                                                                                                      |                               |             | -                                                                                                                |
| -                       | -                                                          | 0 |                                                                                                                                                      |                               |             | -                                                                                                                |
| -                       | -                                                          | 0 |                                                                                                                                                      |                               |             | -                                                                                                                |
| -                       | -                                                          | 0 |                                                                                                                                                      |                               |             | -                                                                                                                |
| Caenorhabditis briggsae | solute carrier organic anion transporter member 1c1-like   | 3 | P:GO:0055085;<br>C:GO:0016021;<br>F:GO:0005215                                                                                                       | -                             |             | -                                                                                                                |
| -                       | -                                                          | 0 |                                                                                                                                                      |                               |             | -                                                                                                                |
| -                       | -                                                          | 0 |                                                                                                                                                      |                               |             | -                                                                                                                |
| Caenorhabditis briggsae | briggsae cbr-btf-1 protein                                 | 3 | F:GO:0005524;<br>F:GO:0004386;<br>F:GO:0003677                                                                                                       | -                             |             | IPR000330; PTHR10799 (PANTHER),<br>PTHR10799:SF72 (PANTHER),<br>SSF52540 (SUPERFAMILY)                           |
| -                       | -                                                          | 0 |                                                                                                                                                      |                               |             | SignalP (SIGNALP)                                                                                                |
| Callithrix jacchus      | mitochondrial ribosomal protein s21                        | 4 | C:GO:0005763;<br>C:GO:0005743;<br>F:GO:0003735;<br>P:GO:0006412                                                                                      | -                             | EC:3.6.5.3  | -                                                                                                                |
| Caenorhabditis elegans  | carbonic anhydrase mitochondrial                           | 1 | F:GO:0016829                                                                                                                                         | -                             |             | IPR001148; IPR018338;<br>PTHR18952:SF34 (PANTHER)                                                                |
| Pongo abelii            | n-methylpurine-d- glycosylase                              | 6 | F:GO:0003684;<br>P:GO:0006307;<br>P:GO:0045007;<br>F:GO:0042802;<br>F:GO:0003905;<br>C:GO:0005654                                                    | -                             | EC:3.2.2.21 | IPR003180; IPR011034                                                                                             |
| -                       | -                                                          | 0 |                                                                                                                                                      |                               |             | -                                                                                                                |
| Loa loa                 | organic cation transporter                                 | 4 | P:GO:0006915;<br>C:GO:0016021;<br>F:GO:0015101;<br>P:GO:0006810                                                                                      | -                             |             | PTHR11600 (PANTHER),<br>PTHR11600:SF35 (PANTHER), SignalP<br>(SIGNALP)                                           |
| -                       | -                                                          | 0 |                                                                                                                                                      |                               |             | IPR017452; G3DSA:1.20.1070.10<br>(GENE3D), PTHR22751 (PANTHER),<br>PTHR22751:SF8 (PANTHER), SignalP<br>(SIGNALP) |

|                         |                                                            |   |                                                                                                                                                      |                                                |            |                                                                                               |
|-------------------------|------------------------------------------------------------|---|------------------------------------------------------------------------------------------------------------------------------------------------------|------------------------------------------------|------------|-----------------------------------------------------------------------------------------------|
| Caenorhabditis briggsae | ribosomal protein l4                                       | 4 | C:GO:0005840;<br>F:GO:0003735;<br>P:GO:0006412;<br>F:GO:0005515                                                                                      | -                                              | EC:3.6.5.3 | -                                                                                             |
| -                       | -                                                          | 0 |                                                                                                                                                      |                                                |            | -                                                                                             |
| -                       | -                                                          | 0 |                                                                                                                                                      |                                                |            | -                                                                                             |
| Caenorhabditis briggsae | zinc finger protein                                        | 0 |                                                                                                                                                      | F:GO:0003676;<br>F:GO:0008270;<br>C:GO:0005622 |            | -                                                                                             |
| -                       | -                                                          | 0 |                                                                                                                                                      |                                                |            | -                                                                                             |
| -                       | -                                                          | 0 |                                                                                                                                                      |                                                |            | -                                                                                             |
| Brugia malayi           | squamous cell carcinoma antigen recognized by t-cells 3    | 9 | P:GO:0040010;<br>F:GO:0005488;<br>P:GO:0008340;<br>P:GO:0000910;<br>P:GO:0018991;<br>P:GO:0002119;<br>P:GO:0040011;<br>P:GO:0006898;<br>P:GO:0009792 | -                                              |            | IPR000504; IPR003107; IPR012677;<br>PTHR23269 (PANTHER), SSF54928<br>(SUPERFAMILY)            |
| Brugia malayi           | squamous cell carcinoma antigen recognized by t-cells 3    | 9 | P:GO:0040010;<br>F:GO:0005488;<br>P:GO:0008340;<br>P:GO:0000910;<br>P:GO:0018991;<br>P:GO:0002119;<br>P:GO:0040011;<br>P:GO:0006898;<br>P:GO:0009792 | -                                              |            | IPR000504; IPR003107; IPR012677;<br>PTHR23269 (PANTHER), SSF54928<br>(SUPERFAMILY)            |
| -                       | -                                                          | 0 |                                                                                                                                                      |                                                |            | -                                                                                             |
| -                       | -                                                          | 0 |                                                                                                                                                      |                                                |            | -                                                                                             |
| Caenorhabditis briggsae | atp-dependent d- helicase reqc                             | 7 | F:GO:0043140;<br>P:GO:0006260;<br>F:GO:0003676;<br>C:GO:0005622;<br>F:GO:0005524;<br>P:GO:0006310;<br>P:GO:0006281                                   | -                                              |            | IPR004589; G3DSA:3.40.50.300<br>(GENE3D), PTHR13710:SF14<br>(PANTHER), SSF52540 (SUPERFAMILY) |
| -                       | -                                                          | 0 |                                                                                                                                                      |                                                |            | SignalP (SIGNALP)                                                                             |
| -                       | -                                                          | 0 |                                                                                                                                                      |                                                |            | -                                                                                             |
| Homo sapiens            | tyrosine ki-se binding protein                             | 7 | F:GO:0005057;<br>C:GO:0005887;<br>P:GO:0023034;<br>F:GO:0016301;<br>F:GO:0005515;<br>P:GO:0007165;<br>P:GO:0006968                                   | -                                              |            | -                                                                                             |
| Caenorhabditis elegans  | spermidine synthase                                        | 1 | F:GO:0016740                                                                                                                                         | -                                              |            | IPR001045; G3DSA:3.40.50.150<br>(GENE3D), PTHR11558:SF11<br>(PANTHER)                         |
| -                       | -                                                          | 0 |                                                                                                                                                      |                                                |            | SignalP (SIGNALP)                                                                             |
| Caenorhabditis elegans  | elegans protein partially confirmed by transcript evidence | 0 |                                                                                                                                                      |                                                |            | IPR017907                                                                                     |
| -                       | -                                                          | 0 |                                                                                                                                                      |                                                |            | -                                                                                             |

|                         |                                                                           |    |                                                                                                                                                                       |   |            |                                                                                                                                                                                                                                                |
|-------------------------|---------------------------------------------------------------------------|----|-----------------------------------------------------------------------------------------------------------------------------------------------------------------------|---|------------|------------------------------------------------------------------------------------------------------------------------------------------------------------------------------------------------------------------------------------------------|
| Caenorhabditis elegans  | filamin abp280 repeat family protein                                      | 7  | P:GO:0009792;<br>P:GO:0010171;<br>C:GO:0005840;<br>F:GO:0003735;<br>P:GO:0007126;<br>P:GO:0000003;<br>P:GO:0006412                                                    | - | EC:3.6.5.3 | IPR001298; IPR013783; IPR014756;<br>IPR017868; PTHR11915 (PANTHER),<br>PTHR11915:SF24 (PANTHER)                                                                                                                                                |
| Caenorhabditis elegans  | elegans fln-1 isoform partially confirmed by transcript evidence          | 4  | P:GO:0051179;<br>P:GO:0007293;<br>P:GO:0048610;<br>P:GO:0030725                                                                                                       | - |            | IPR001298; IPR013783; IPR014756;<br>IPR017868; PTHR11915 (PANTHER),<br>PTHR11915:SF24 (PANTHER)                                                                                                                                                |
| Caenorhabditis elegans  | elegans fln-1 isoform partially confirmed by transcript evidence          | 10 | C:GO:0005840;<br>P:GO:0006412;<br>P:GO:0048610;<br>P:GO:0051179;<br>P:GO:0009792;<br>P:GO:0007126;<br>F:GO:0003735;<br>P:GO:0010171;<br>P:GO:0007293;<br>P:GO:0030725 | - | EC:3.6.5.3 | IPR001298; IPR013783; IPR014756;<br>IPR017868; PTHR11915 (PANTHER),<br>PTHR11915:SF24 (PANTHER)                                                                                                                                                |
| Caenorhabditis elegans  | mitochondrial chaperone bcs1                                              | 8  | P:GO:0040010;<br>P:GO:0000003;<br>P:GO:0002119;<br>F:GO:0000166;<br>P:GO:0033108;<br>P:GO:0006898;<br>P:GO:0009792;<br>C:GO:0044464                                   | - |            | PTHR23070 (PANTHER),<br>PTHR23070:SF2 (PANTHER)                                                                                                                                                                                                |
| -                       | -                                                                         | 0  |                                                                                                                                                                       |   |            | -                                                                                                                                                                                                                                              |
| Caenorhabditis elegans  | fanci (fanconi anemia complex component i) homolog family member (fnci-1) | 0  |                                                                                                                                                                       |   |            | -                                                                                                                                                                                                                                              |
| Caenorhabditis briggsae | mitochondrial folate transporter carrier                                  | 7  | F:GO:0005488;<br>C:GO:0005743;<br>P:GO:0055085;<br>P:GO:0040010;<br>P:GO:0008340;<br>C:GO:0016021;<br>F:GO:0005215                                                    | - |            | IPR001993; IPR018108;<br>G3DSA:1.50.40.10 (GENE3D),<br>PTHR11896:SF73 (PANTHER)                                                                                                                                                                |
| -                       | -                                                                         | 0  |                                                                                                                                                                       |   |            | SignalP (SIGNALP)                                                                                                                                                                                                                              |
| -                       | -                                                                         | 0  |                                                                                                                                                                       |   |            | -                                                                                                                                                                                                                                              |
| -                       | -                                                                         | 0  |                                                                                                                                                                       |   |            | -                                                                                                                                                                                                                                              |
| -                       | -                                                                         | 0  |                                                                                                                                                                       |   |            | -                                                                                                                                                                                                                                              |
| -                       | -                                                                         | 0  |                                                                                                                                                                       |   |            | -                                                                                                                                                                                                                                              |
| Caenorhabditis elegans  | ef hand family protein                                                    | 2  | P:GO:0009792;<br>F:GO:0005509                                                                                                                                         | - |            | IPR018247; PTHR23104 (PANTHER)                                                                                                                                                                                                                 |
| Caenorhabditis briggsae | phospholipid-transporting atpase 1 (aminophospholipid flippase 1)         | 7  | C:GO:0016021;<br>F:GO:0015662;<br>P:GO:0006754;<br>F:GO:0005524;<br>P:GO:0015914;<br>F:GO:0000287;<br>F:GO:0004012                                                    | - | EC:3.6.3.1 | IPR001757; IPR005834; IPR006539;<br>IPR018303; G3DSA:3.40.1110.10<br>(GENE3D), G3DSA:3.40.50.1000<br>(GENE3D), PTHR11939:SF18<br>(PANTHER), SignalP (SIGNALP),<br>SSF56784 (SUPERFAMILY), SSF81660<br>(SUPERFAMILY), SSF81665<br>(SUPERFAMILY) |

|                         |                                                                   |   |                                                                                                                    |                                                                                                                                                      |                             |                                                                                                                                                                                                                                                |
|-------------------------|-------------------------------------------------------------------|---|--------------------------------------------------------------------------------------------------------------------|------------------------------------------------------------------------------------------------------------------------------------------------------|-----------------------------|------------------------------------------------------------------------------------------------------------------------------------------------------------------------------------------------------------------------------------------------|
| Caenorhabditis briggsae | phospholipid-transporting atpase 1 (aminophospholipid flippase 1) | 7 | C:GO:0016021;<br>F:GO:0015662;<br>P:GO:0006754;<br>F:GO:0005524;<br>P:GO:0015914;<br>F:GO:0000287;<br>F:GO:0004012 | -                                                                                                                                                    | EC:3.6.3.1                  | IPR001757; IPR005834; IPR006539;<br>IPR018303; G3DSA:3.40.1110.10<br>(GENE3D), G3DSA:3.40.50.1000<br>(GENE3D), PTHR11939:SF18<br>(PANTHER), SignalP (SIGNALP),<br>SSF56784 (SUPERFAMILY), SSF81660<br>(SUPERFAMILY), SSF81665<br>(SUPERFAMILY) |
| Caenorhabditis elegans  | uncoordinated family member (unc-53)                              | 0 |                                                                                                                    | P:GO:0007049                                                                                                                                         |                             | PTHR12784 (PANTHER),<br>PTHR12784:SF1 (PANTHER)                                                                                                                                                                                                |
| Caenorhabditis elegans  | uncoordinated family member (unc-53)                              | 0 |                                                                                                                    | F:GO:0004386;<br>C:GO:0005634;<br>F:GO:0016787;<br>F:GO:0000166;<br>F:GO:0017111;<br>F:GO:0005524;<br>C:GO:0005730;<br>P:GO:0007399;<br>P:GO:0007049 |                             | IPR003593; IPR003959;<br>G3DSA:3.40.50.300 (GENE3D),<br>PTHR12784 (PANTHER),<br>PTHR12784:SF1 (PANTHER), SSF52540<br>(SUPERFAMILY)                                                                                                             |
| Caenorhabditis elegans  | uncoordinated family member (unc-53)                              | 0 |                                                                                                                    | F:GO:0004386;<br>C:GO:0005634;<br>F:GO:0016787;<br>F:GO:0000166;<br>F:GO:0017111;<br>F:GO:0005524;<br>C:GO:0005730;<br>P:GO:0007399;<br>P:GO:0007049 |                             | IPR003593; IPR003959;<br>G3DSA:3.40.50.300 (GENE3D),<br>PTHR12784 (PANTHER),<br>PTHR12784:SF1 (PANTHER), SSF52540<br>(SUPERFAMILY)                                                                                                             |
| Caenorhabditis elegans  | uncoordinated family member (unc-53)                              | 0 |                                                                                                                    | P:GO:0007049                                                                                                                                         |                             | PTHR12784 (PANTHER),<br>PTHR12784:SF1 (PANTHER)                                                                                                                                                                                                |
|                         | -                                                                 | 0 |                                                                                                                    |                                                                                                                                                      |                             | -                                                                                                                                                                                                                                              |
|                         | -                                                                 | 0 |                                                                                                                    |                                                                                                                                                      |                             | SignalP (SIGNALP)                                                                                                                                                                                                                              |
|                         | -                                                                 | 0 |                                                                                                                    |                                                                                                                                                      |                             | -                                                                                                                                                                                                                                              |
|                         | -                                                                 | 0 |                                                                                                                    |                                                                                                                                                      |                             | -                                                                                                                                                                                                                                              |
|                         | -                                                                 | 0 |                                                                                                                    |                                                                                                                                                      |                             | -                                                                                                                                                                                                                                              |
|                         | -                                                                 | 0 |                                                                                                                    |                                                                                                                                                      |                             | SignalP (SIGNALP)                                                                                                                                                                                                                              |
|                         | -                                                                 | 0 |                                                                                                                    |                                                                                                                                                      |                             | -                                                                                                                                                                                                                                              |
| Caenorhabditis elegans  | voltage gated chloride channel family protein                     | 6 | P:GO:0009792;<br>F:GO:0005247;<br>P:GO:0055085;<br>P:GO:0000003;<br>C:GO:0016021;<br>P:GO:0006821                  | -                                                                                                                                                    |                             | IPR001807; PTHR11689:SF5<br>(PANTHER)                                                                                                                                                                                                          |
|                         | -                                                                 | 0 |                                                                                                                    |                                                                                                                                                      |                             | -                                                                                                                                                                                                                                              |
|                         | -                                                                 | 0 |                                                                                                                    |                                                                                                                                                      |                             | -                                                                                                                                                                                                                                              |
|                         | -                                                                 | 0 |                                                                                                                    |                                                                                                                                                      |                             | -                                                                                                                                                                                                                                              |
| Caenorhabditis briggsae | hypothetical tyrosine-like protein in chromosome                  | 1 | F:GO:0005488                                                                                                       | -                                                                                                                                                    |                             | -                                                                                                                                                                                                                                              |
| Homo sapiens            | legumain                                                          | 7 | C:GO:0005770;<br>P:GO:0040015;<br>C:GO:0005764;<br>C:GO:0045177;<br>F:GO:0004197;<br>P:GO:0006508;<br>F:GO:0004674 | -                                                                                                                                                    | EC:3.4.22.0;<br>EC:2.7.11.0 | IPR001096; PTHR12000:SF3<br>(PANTHER)                                                                                                                                                                                                          |
|                         | -                                                                 | 0 |                                                                                                                    |                                                                                                                                                      |                             | -                                                                                                                                                                                                                                              |
| Caenorhabditis briggsae | Hypothetical protein CBG24703 [Caenorhabditis briggsae]           | 0 |                                                                                                                    |                                                                                                                                                      |                             | SignalP (SIGNALP)                                                                                                                                                                                                                              |
|                         | -                                                                 | 0 |                                                                                                                    |                                                                                                                                                      |                             | IPR000953; IPR016197;<br>G3DSA:2.40.50.40 (GENE3D)                                                                                                                                                                                             |



|                         |                                                                                               |    |                                                                                                                                                                                        |                                                                                                   |                                                                                                 |
|-------------------------|-----------------------------------------------------------------------------------------------|----|----------------------------------------------------------------------------------------------------------------------------------------------------------------------------------------|---------------------------------------------------------------------------------------------------|-------------------------------------------------------------------------------------------------|
| Macaca mulatta          | biogenesis of lysosomal organelles complex- subunit 1                                         | 7  | P:GO:0006892;<br>P:GO:0016044;<br>F:GO:0005515;<br>P:GO:0060155;<br>P:GO:0032438;<br>C:GO:0031083;<br>C:GO:0005739                                                                     | -                                                                                                 | IPR009395; PTHR13073 (PANTHER)                                                                  |
|                         | -                                                                                             | 0  |                                                                                                                                                                                        |                                                                                                   | -                                                                                               |
| Caenorhabditis elegans  | briggsae cbr-rpm-1 protein                                                                    | 0  |                                                                                                                                                                                        | F:GO:0046872;<br>P:GO:0030071;<br>C:GO:0005680;<br>F:GO:0008270;<br>F:GO:0005515;<br>C:GO:0005622 | PTHR12846 (PANTHER),<br>PTHR12846:SF2 (PANTHER)                                                 |
| Caenorhabditis elegans  | utp21 specific wd40 associated domain containing protein                                      | 0  |                                                                                                                                                                                        | C:GO:0032040;<br>P:GO:0006364                                                                     | -                                                                                               |
| Caenorhabditis briggsae | briggsae cbr-bub-1 protein                                                                    | 11 | P:GO:0000910;<br>P:GO:0010564;<br>P:GO:0040035;<br>F:GO:0016740;<br>C:GO:0000776;<br>P:GO:0002119;<br>F:GO:0005515;<br>P:GO:0040011;<br>C:GO:0000779;<br>P:GO:0002009;<br>P:GO:0009792 | -                                                                                                 | IPR000719; IPR011009; IPR015661;<br>IPR017442; G3DSA:1.10.510.10<br>(GENE3D), SignalP (SIGNALP) |
| Caenorhabditis elegans  | atp-dependent transporter                                                                     | 2  | F:GO:0016887;<br>F:GO:0000166                                                                                                                                                          | -                                                                                                 | -                                                                                               |
| Homo sapiens            | mhc class i antigen                                                                           | 7  | P:GO:0006955;<br>F:GO:0032393;<br>C:GO:0005576;<br>P:GO:0044419;<br>C:GO:0005887;<br>P:GO:0002474;<br>C:GO:0042612                                                                     | -                                                                                                 | -                                                                                               |
| Caenorhabditis briggsae | rrp1_caee1 ame: full=ribosomal r- processing protein 1<br>homolog ame: full=rrp1-like protein | 5  | P:GO:0009792;<br>P:GO:0002119;<br>P:GO:0040010;<br>P:GO:0000003;<br>P:GO:0006898                                                                                                       | -                                                                                                 | -                                                                                               |
|                         | -                                                                                             | 0  |                                                                                                                                                                                        |                                                                                                   | -                                                                                               |
|                         | -                                                                                             | 0  |                                                                                                                                                                                        |                                                                                                   | -                                                                                               |
|                         | -                                                                                             | 0  |                                                                                                                                                                                        |                                                                                                   | -                                                                                               |
|                         | -                                                                                             | 0  |                                                                                                                                                                                        |                                                                                                   | -                                                                                               |
|                         | -                                                                                             | 0  |                                                                                                                                                                                        |                                                                                                   | -                                                                                               |

|                         |                                                            |    |                                                                                                                                                                                                                                                                                                                                                                                                                                                                        |                                                                 |                                                         |                                                                      |
|-------------------------|------------------------------------------------------------|----|------------------------------------------------------------------------------------------------------------------------------------------------------------------------------------------------------------------------------------------------------------------------------------------------------------------------------------------------------------------------------------------------------------------------------------------------------------------------|-----------------------------------------------------------------|---------------------------------------------------------|----------------------------------------------------------------------|
| Harpegnathos saltator   | ras-like gtp-binding protein rho1                          | 45 | F:GO:0005525;<br>P:GO:0045665;<br>P:GO:0050771;<br>P:GO:0030838;<br>P:GO:0043123;<br>P:GO:0006357;<br>P:GO:0030521;<br>P:GO:0007160;<br>F:GO:0017022;<br>P:GO:0045727;<br>P:GO:0050773;<br>C:GO:0005625;<br>P:GO:0009749;<br>P:GO:0009612;<br>P:GO:0042346;<br>P:GO:0051384;<br>P:GO:0050772;<br>P:GO:0045785;<br>P:GO:0043524;<br>P:GO:0033144;<br>P:GO:0045471;<br>P:GO:0043525;<br>C:GO:0030424;<br>P:GO:0043124;<br>P:GO:0001666;<br>P:GO:0043280;<br>P:GO:0043200 | -                                                               | EC:3.6.5.1;<br>EC:3.6.5.2;<br>EC:3.6.5.3;<br>EC:3.6.5.4 | SignalP (SIGNALP)                                                    |
| -                       | -                                                          | 0  | -                                                                                                                                                                                                                                                                                                                                                                                                                                                                      | -                                                               | -                                                       | -                                                                    |
| -                       | -                                                          | 0  | -                                                                                                                                                                                                                                                                                                                                                                                                                                                                      | -                                                               | -                                                       | -                                                                    |
| -                       | -                                                          | 0  | -                                                                                                                                                                                                                                                                                                                                                                                                                                                                      | -                                                               | -                                                       | -                                                                    |
| -                       | -                                                          | 0  | -                                                                                                                                                                                                                                                                                                                                                                                                                                                                      | -                                                               | -                                                       | -                                                                    |
| -                       | -                                                          | 0  | -                                                                                                                                                                                                                                                                                                                                                                                                                                                                      | -                                                               | -                                                       | -                                                                    |
| -                       | -                                                          | 0  | -                                                                                                                                                                                                                                                                                                                                                                                                                                                                      | -                                                               | -                                                       | -                                                                    |
| Caenorhabditis briggsae | r- polymerase i large subunit                              | 2  | F:GO:0005488;<br>F:GO:0016779                                                                                                                                                                                                                                                                                                                                                                                                                                          | -                                                               | EC:2.7.7.0                                              | IPR007081; IPR015699; PTHR19376 (PANTHER), SSF64484 (SUPERFAMILY)    |
| -                       | -                                                          | 0  | -                                                                                                                                                                                                                                                                                                                                                                                                                                                                      | -                                                               | -                                                       | SignalP (SIGNALP)                                                    |
| Brugia malayi           | ankyrin repeat and zinc finger domain-containing protein 1 | 0  | -                                                                                                                                                                                                                                                                                                                                                                                                                                                                      | F:GO:0046872;<br>P:GO:0008150;<br>F:GO:0008270;<br>C:GO:0005622 | -                                                       | IPR002110; IPR020683; PTHR18958 (PANTHER), PTHR18958:SF206 (PANTHER) |
| Brugia malayi           | f-box domain containing protein                            | 0  | -                                                                                                                                                                                                                                                                                                                                                                                                                                                                      | -                                                               | -                                                       | SignalP (SIGNALP)                                                    |
| -                       | -                                                          | 0  | -                                                                                                                                                                                                                                                                                                                                                                                                                                                                      | -                                                               | -                                                       | -                                                                    |
| Caenorhabditis briggsae | cation transport regulator homolog 2 ( coli)               | 0  | -                                                                                                                                                                                                                                                                                                                                                                                                                                                                      | P:GO:0006915;<br>F:GO:0003674;<br>C:GO:0005737;<br>P:GO:0008150 | -                                                       | -                                                                    |

|                         |                                             |    |                                                                                                                                                                                                                                                                             |   |                                   |                                         |
|-------------------------|---------------------------------------------|----|-----------------------------------------------------------------------------------------------------------------------------------------------------------------------------------------------------------------------------------------------------------------------------|---|-----------------------------------|-----------------------------------------|
| Ectocarpus siliculosus  | regulator of nonsense transcripts 1         | 16 | P:GO:0000184;<br>C:GO:0000785;<br>F:GO:0005515;<br>F:GO:0000166;<br>P:GO:0006406;<br>P:GO:0006449;<br>C:GO:0005737;<br>F:GO:0046872;<br>P:GO:0009790;<br>F:GO:0003723;<br>F:GO:0003682;<br>F:GO:0004004;<br>P:GO:0071044;<br>P:GO:0006260;<br>P:GO:0007049;<br>P:GO:0006281 | - |                                   | PTHR10887 (PANTHER)                     |
| -                       | -                                           | 0  |                                                                                                                                                                                                                                                                             |   |                                   | -                                       |
| Caenorhabditis briggsae | abelson interacting isoform a               | 5  | P:GO:0030030;<br>F:GO:0005515;<br>P:GO:0048513;<br>C:GO:0044464;<br>N:GO:0071842                                                                                                                                                                                            | - |                                   | -                                       |
| -                       | -                                           | 0  |                                                                                                                                                                                                                                                                             |   |                                   | -                                       |
| Sus scrofa              | protein disulfide isomerase family member 3 | 11 | F:GO:0004629;<br>F:GO:0003756;<br>P:GO:0043065;<br>P:GO:0006606;<br>P:GO:0045454;<br>F:GO:0004197;<br>C:GO:0042470;<br>C:GO:0005788;<br>F:GO:0005515;<br>P:GO:0007165;<br>P:GO:0006621                                                                                      | - | EC:5.3.4.1;<br>EC:3.4.22.0        | IPR012336; PTHR18929 (PANTHER)          |
| -                       | -                                           | 0  |                                                                                                                                                                                                                                                                             |   |                                   | SignalP (SIGNALP)                       |
| -                       | -                                           | 0  |                                                                                                                                                                                                                                                                             |   |                                   | SignalP (SIGNALP)                       |
| Caenorhabditis elegans  | phenylalanine hydroxylase                   | 14 | P:GO:0006979;<br>P:GO:0008340;<br>P:GO:0040002;<br>P:GO:0055114;<br>P:GO:0042438;<br>P:GO:0006559;<br>P:GO:0000003;<br>F:GO:0004510;<br>F:GO:0005515;<br>P:GO:0006569;<br>F:GO:0016597;<br>P:GO:0009792;<br>F:GO:0004505;<br>F:GO:0005506                                   | - | EC:1.14.16.4<br>;<br>EC:1.14.16.1 | IPR001273; IPR019774; PS51410 (PROFILE) |
| Loa loa                 | briggsae cbr-dys-1 protein                  | 2  | P:GO:0065007;<br>P:GO:0009987                                                                                                                                                                                                                                               | - |                                   | -                                       |
| -                       | -                                           | 0  |                                                                                                                                                                                                                                                                             |   |                                   | -                                       |

|                               |                                                                                                   |    |                                                                                                                                                                                                                                                                                                               |                                                                                  |              |                                                                                                                                |
|-------------------------------|---------------------------------------------------------------------------------------------------|----|---------------------------------------------------------------------------------------------------------------------------------------------------------------------------------------------------------------------------------------------------------------------------------------------------------------|----------------------------------------------------------------------------------|--------------|--------------------------------------------------------------------------------------------------------------------------------|
| Loa loa                       | bone morphogenetic protein receptor 1                                                             | 18 | P:GO:0007411;<br>F:GO:0048185;<br>P:GO:0006468;<br>P:GO:0016319;<br>P:GO:0007179;<br>P:GO:0040018;<br>F:GO:0004703;<br>P:GO:0048813;<br>P:GO:0007405;<br>P:GO:0009411;<br>F:GO:0016361;<br>P:GO:0007165;<br>P:GO:0007455;<br>C:GO:0048179;<br>P:GO:0007346;<br>P:GO:0032924;<br>F:GO:0005524;<br>P:GO:0007476 | -                                                                                | EC:2.7.11.16 | IPR000719; IPR008271; IPR011009;<br>IPR017442; G3DSA:1.10.510.10<br>(GENE3D), PTHR23255 (PANTHER),<br>PTHR23255:SF14 (PANTHER) |
| -                             | -                                                                                                 | 0  | -                                                                                                                                                                                                                                                                                                             | -                                                                                | -            | SignalP (SIGNALP)                                                                                                              |
| Caenorhabditis elegans        | cytochrome b5 reductase 4                                                                         | 5  | P:GO:0065008;<br>F:GO:0016651;<br>F:GO:0046872;<br>C:GO:0044444;<br>P:GO:0044237                                                                                                                                                                                                                              | -                                                                                | -            | IPR001199; PTHR19370 (PANTHER),<br>PTHR19370:SF1 (PANTHER)                                                                     |
| Xenopus (Silurana) tropicalis | -scent polypeptide-associated complex alpha subunit                                               | 12 | P:GO:0006412;<br>C:GO:0016459;<br>F:GO:0003677;<br>F:GO:0005524;<br>F:GO:0003774;<br>F:GO:0017025;<br>C:GO:0005854;<br>P:GO:0044419;<br>F:GO:0003713;<br>P:GO:0015031;<br>C:GO:0005634;<br>P:GO:0045941                                                                                                       | -                                                                                | EC:3.6.5.3   | IPR000449                                                                                                                      |
| -                             | -                                                                                                 | 0  | -                                                                                                                                                                                                                                                                                                             | -                                                                                | -            | -                                                                                                                              |
| Caenorhabditis briggsae       | briggsae cbr-ocrl-1 protein                                                                       | 0  | -                                                                                                                                                                                                                                                                                                             | P:GO:0000003;<br>P:GO:0040013;<br>P:GO:0007165;<br>F:GO:0004437;<br>C:GO:0005622 | -            | G3DSA:3.60.10.10 (GENE3D),<br>PTHR11200 (PANTHER),<br>PTHR11200:SF26 (PANTHER)                                                 |
| -                             | -                                                                                                 | 0  | -                                                                                                                                                                                                                                                                                                             | -                                                                                | -            | -                                                                                                                              |
| -                             | -                                                                                                 | 0  | -                                                                                                                                                                                                                                                                                                             | -                                                                                | -            | SignalP (SIGNALP)                                                                                                              |
| Caenorhabditis elegans        | p21-activated pak                                                                                 | 2  | F:GO:0004672;<br>F:GO:0000166                                                                                                                                                                                                                                                                                 | -                                                                                | -            | -                                                                                                                              |
| Caenorhabditis elegans        | yc27b_caeel_ame: full=ig-like and fibronectin type-iii domain-containing protein flags: precursor | 0  | -                                                                                                                                                                                                                                                                                                             | -                                                                                | -            | IPR007110; IPR013783                                                                                                           |
| -                             | -                                                                                                 | 0  | -                                                                                                                                                                                                                                                                                                             | -                                                                                | -            | -                                                                                                                              |
| -                             | -                                                                                                 | 0  | -                                                                                                                                                                                                                                                                                                             | -                                                                                | -            | SignalP (SIGNALP)                                                                                                              |
| -                             | -                                                                                                 | 0  | -                                                                                                                                                                                                                                                                                                             | -                                                                                | -            | -                                                                                                                              |
| -                             | -                                                                                                 | 0  | -                                                                                                                                                                                                                                                                                                             | -                                                                                | -            | -                                                                                                                              |
| Loa loa                       | gtpase activating protein and vps9 domains 1                                                      | 0  | -                                                                                                                                                                                                                                                                                                             | F:GO:0005096;<br>P:GO:0051056;<br>P:GO:0007165;<br>C:GO:0005622                  | -            | -                                                                                                                              |
| Caenorhabditis elegans        | elegans protein confirmed by transcript evidence                                                  | 0  | -                                                                                                                                                                                                                                                                                                             | -                                                                                | -            | SignalP (SIGNALP)                                                                                                              |
| -                             | -                                                                                                 | 0  | -                                                                                                                                                                                                                                                                                                             | -                                                                                | -            | -                                                                                                                              |

|                         |                                                                |   |                                                                                                                                                      |                                                                                  |                                                                                                                                                   |
|-------------------------|----------------------------------------------------------------|---|------------------------------------------------------------------------------------------------------------------------------------------------------|----------------------------------------------------------------------------------|---------------------------------------------------------------------------------------------------------------------------------------------------|
|                         | -                                                              | 0 |                                                                                                                                                      |                                                                                  | -                                                                                                                                                 |
|                         | -                                                              | 0 |                                                                                                                                                      |                                                                                  | SignalP (SIGNALP)                                                                                                                                 |
| Pongo abelii            | proteasome ( macropain) alpha 6                                | 9 | F:GO:0003723;<br>C:GO:0005739;<br>P:GO:0051436;<br>P:GO:0051437;<br>F:GO:0004298;<br>P:GO:0031145;<br>F:GO:0005515;<br>C:GO:0019773;<br>C:GO:0005634 | -                                                                                | EC:3.4.25.0<br><br>IPR001353; G3DSA:3.60.20.10 (GENE3D), PTHR11599 (PANTHER), PTHR11599:SF11 (PANTHER), PS51475 (PROFILE), SSF56235 (SUPERFAMILY) |
| Harpegnathos saltator   | methyltransferase-like protein 13                              | 1 | F:GO:0003824                                                                                                                                         | -                                                                                | G3DSA:3.40.50.150 (GENE3D), PTHR12176 (PANTHER), SSF53335 (SUPERFAMILY)                                                                           |
| Ascaris suum            | msp domain protein                                             | 1 | P:GO:0040011                                                                                                                                         | -                                                                                | IPR000535; IPR008962; PTHR22947 (PANTHER)                                                                                                         |
| Caenorhabditis elegans  | hypothetical protein K11H12.9 [Caenorhabditis elegans]         | 0 |                                                                                                                                                      |                                                                                  | IPR000719; IPR011009; G3DSA:1.10.510.10 (GENE3D)                                                                                                  |
| Caenorhabditis elegans  | elegans protein partially confirmed by transcript evidence     | 0 |                                                                                                                                                      | C:GO:0016021;<br>C:GO:0016020;<br>P:GO:0055085;<br>P:GO:0006810                  | -                                                                                                                                                 |
| Caenorhabditis elegans  | eb module family protein                                       | 2 | F:GO:0005488;<br>F:GO:0003824                                                                                                                        | -                                                                                | IPR000742; IPR006149; IPR006210; IPR013032; PTHR11201 (PANTHER), PTHR11201:SF128 (PANTHER)                                                        |
| Caenorhabditis elegans  | immunoglobulin i-set domain containing protein                 | 9 | P:GO:0021940;<br>P:GO:0060749;<br>C:GO:0005615;<br>P:GO:0000186;<br>P:GO:0050730;<br>P:GO:0048754;<br>P:GO:0007173;<br>C:GO:0005886;<br>F:GO:0005154 | -                                                                                | SignalP (SIGNALP)                                                                                                                                 |
| Caenorhabditis briggsae | elegans protein partially confirmed by transcript evidence     | 3 | P:GO:0044237;<br>F:GO:0016740;<br>P:GO:0044238                                                                                                       | -                                                                                | IPR002213; PTHR11926:SF3 (PANTHER)                                                                                                                |
|                         | -                                                              | 0 |                                                                                                                                                      |                                                                                  | -                                                                                                                                                 |
| Caenorhabditis briggsae | laminin gamma-1                                                | 0 |                                                                                                                                                      | F:GO:0016740;<br>F:GO:0004714;<br>P:GO:0007155;<br>C:GO:0005578;<br>C:GO:0031012 | IPR002049; IPR013032; G3DSA:2.10.25.10 (GENE3D), PTHR10574 (PANTHER), PTHR10574:SF12 (PANTHER)                                                    |
| Caenorhabditis briggsae | elegans protein confirmed by transcript evidence               | 0 |                                                                                                                                                      |                                                                                  | -                                                                                                                                                 |
| Caenorhabditis elegans  | briggsae cbr-toh-1 protein                                     | 3 | F:GO:0004222;<br>P:GO:0006508;<br>F:GO:0008270                                                                                                       | -                                                                                | EC:3.4.24.0                                                                                                                                       |
|                         | -                                                              | 0 |                                                                                                                                                      |                                                                                  | -                                                                                                                                                 |
| Caenorhabditis briggsae | glucose inhibited division protein a                           | 1 | P:GO:0008152                                                                                                                                         | -                                                                                | PTHR11806 (PANTHER)                                                                                                                               |
|                         | -                                                              | 0 |                                                                                                                                                      |                                                                                  | -                                                                                                                                                 |
| Loa loa                 | dolichyl pyrophosphate glc1man9 c2 alpha - glucosyltransferase | 2 | C:GO:0044464;<br>F:GO:0003824                                                                                                                        | -                                                                                | IPR004856; SignalP (SIGNALP)                                                                                                                      |
| Caenorhabditis briggsae | briggsae cbr-flp-13 protein                                    | 3 | C:GO:0005576;<br>P:GO:0007218;<br>P:GO:0019915                                                                                                       | -                                                                                | IPR002544                                                                                                                                         |
| Caenorhabditis elegans  | preli domain containing 1                                      | 2 | C:GO:0005730;<br>C:GO:0005739                                                                                                                        | -                                                                                | SignalP (SIGNALP)                                                                                                                                 |

|                        |                                                           |    |                                                                                                                                                                                                                                                                                              |                                                                                  |            |                                                                                                               |
|------------------------|-----------------------------------------------------------|----|----------------------------------------------------------------------------------------------------------------------------------------------------------------------------------------------------------------------------------------------------------------------------------------------|----------------------------------------------------------------------------------|------------|---------------------------------------------------------------------------------------------------------------|
| Caenorhabditis elegans | d- polymerase epsilon catalytic subunit                   | 17 | F:GO:0008270;<br>F:GO:0003887;<br>P:GO:0006260;<br>P:GO:0040035;<br>P:GO:0006297;<br>F:GO:0003677;<br>P:GO:0000731;<br>F:GO:0005515;<br>F:GO:0000166;<br>P:GO:0040011;<br>P:GO:0006997;<br>P:GO:0000082;<br>F:GO:0004527;<br>C:GO:0005654;<br>P:GO:0002009;<br>P:GO:0009792;<br>F:GO:0003682 | -                                                                                | EC:2.7.7.7 | PTHR10670 (PANTHER)                                                                                           |
|                        | -                                                         | 0  |                                                                                                                                                                                                                                                                                              |                                                                                  |            | -                                                                                                             |
|                        | -                                                         | 0  |                                                                                                                                                                                                                                                                                              |                                                                                  |            | -                                                                                                             |
|                        | -                                                         | 0  |                                                                                                                                                                                                                                                                                              |                                                                                  |            | -                                                                                                             |
| Caenorhabditis elegans | elegans protein confirmed by transcript evidence          | 0  |                                                                                                                                                                                                                                                                                              | F:GO:0005525;<br>P:GO:0007264;<br>F:GO:0000166;<br>C:GO:0005622;<br>P:GO:0015031 |            | IPR013684; G3DSA:3.40.50.300 (GENE3D), PTHR11708 (PANTHER), PTHR11708:SF228 (PANTHER), SSF52540 (SUPERFAMILY) |
|                        | -                                                         | 0  |                                                                                                                                                                                                                                                                                              |                                                                                  |            | -                                                                                                             |
|                        | -                                                         | 0  |                                                                                                                                                                                                                                                                                              |                                                                                  |            | -                                                                                                             |
| Caenorhabditis elegans | hypothetical protein T08B1.1 [Caenorhabditis elegans]     | 6  | C:GO:0016021;<br>P:GO:0009792;<br>P:GO:0040010;<br>P:GO:0055085;<br>F:GO:0005215;<br>P:GO:0002119                                                                                                                                                                                            | -                                                                                |            | -                                                                                                             |
|                        | -                                                         | 0  |                                                                                                                                                                                                                                                                                              |                                                                                  |            | -                                                                                                             |
| Brugia malayi          | hypothetical protein Bm1_20905 [Brugia malayi]            | 0  |                                                                                                                                                                                                                                                                                              | F:GO:0005488                                                                     |            | -                                                                                                             |
| Caenorhabditis elegans | metallophosphoesterase domain-containing                  | 1  | F:GO:0016787                                                                                                                                                                                                                                                                                 | -                                                                                |            | PTHR12905 (PANTHER), SSF56300 (SUPERFAMILY)                                                                   |
|                        | -                                                         | 0  |                                                                                                                                                                                                                                                                                              |                                                                                  |            | -                                                                                                             |
| Caenorhabditis elegans | fyve zinc finger family protein                           | 9  | P:GO:0046488;<br>P:GO:0023034;<br>F:GO:0005515;<br>F:GO:0005524;<br>P:GO:0044267;<br>C:GO:0016020;<br>F:GO:0008270;<br>F:GO:0016307;<br>C:GO:0048471                                                                                                                                         | -                                                                                |            | IPR000306; IPR011011; IPR013083; IPR017455; PTHR22835 (PANTHER), PTHR22835:SF42 (PANTHER)                     |
| Caenorhabditis elegans | yc91_caeel ame: full=uncharacterized mfs-type transporter | 2  | P:GO:0040011;<br>P:GO:0007413                                                                                                                                                                                                                                                                | -                                                                                |            | SignalP (SIGNALP)                                                                                             |
| Caenorhabditis elegans | briggsae cbr-rab-39 protein                               | 3  | P:GO:0015031;<br>F:GO:0005525;<br>P:GO:0007264                                                                                                                                                                                                                                               | -                                                                                |            | G3DSA:3.40.50.300 (GENE3D)                                                                                    |
|                        | -                                                         | 0  |                                                                                                                                                                                                                                                                                              |                                                                                  |            | -                                                                                                             |

|                         |                                                            |   |                                                                                                                                     |                                                                                                                                                                                        |                                                                                                             |
|-------------------------|------------------------------------------------------------|---|-------------------------------------------------------------------------------------------------------------------------------------|----------------------------------------------------------------------------------------------------------------------------------------------------------------------------------------|-------------------------------------------------------------------------------------------------------------|
| Caenorhabditis briggsae | alpha 2 ( congenital muscular dystrophy)                   | 8 | P:GO:0035141;<br>P:GO:0008104;<br>P:GO:0007517;<br>P:GO:0016337;<br>P:GO:0035138;<br>P:GO:0050794;<br>C:GO:0005604;<br>F:GO:0005198 | -                                                                                                                                                                                      | IPR002049; G3DSA:2.10.25.10 (GENE3D), PTHR10574 (PANTHER), PTHR10574:SF56 (PANTHER), SSF57196 (SUPERFAMILY) |
| -                       | -                                                          | 0 |                                                                                                                                     |                                                                                                                                                                                        | -                                                                                                           |
| -                       | -                                                          | 0 |                                                                                                                                     |                                                                                                                                                                                        | SignalP (SIGNALP)                                                                                           |
| -                       | -                                                          | 0 |                                                                                                                                     |                                                                                                                                                                                        | -                                                                                                           |
| Caenorhabditis elegans  | fyve finger-containing phosphoinositide                    | 4 | F:GO:0005488;<br>F:GO:0016740;<br>C:GO:0016020;<br>C:GO:0048471                                                                     | -                                                                                                                                                                                      | -                                                                                                           |
| Caenorhabditis briggsae | egg laying defective family member (egl-15)                | 0 |                                                                                                                                     | F:GO:0016740;<br>C:GO:0016021;<br>C:GO:0016020;<br>F:GO:0004672;<br>P:GO:0006468;<br>F:GO:0000166;<br>F:GO:0005524;<br>F:GO:0016301;<br>F:GO:0004713;<br>F:GO:0004872;<br>F:GO:0005515 | -                                                                                                           |
| Caenorhabditis elegans  | elegans protein confirmed by transcript evidence           | 0 |                                                                                                                                     |                                                                                                                                                                                        | IPR009673; SignalP (SIGNALP)                                                                                |
| -                       | -                                                          | 0 |                                                                                                                                     |                                                                                                                                                                                        | -                                                                                                           |
| -                       | -                                                          | 0 |                                                                                                                                     |                                                                                                                                                                                        | PTHR22986 (PANTHER), PTHR22986:SF27 (PANTHER)                                                               |
| Caenorhabditis elegans  | hypothetical protein F46E10.11 [Caenorhabditis elegans]    | 0 |                                                                                                                                     | P:GO:0040011;<br>P:GO:0002119                                                                                                                                                          | -                                                                                                           |
| -                       | -                                                          | 0 |                                                                                                                                     |                                                                                                                                                                                        | -                                                                                                           |
| Caenorhabditis elegans  | elegans protein partially confirmed by transcript evidence | 0 |                                                                                                                                     | P:GO:0032313;<br>C:GO:0005622;<br>F:GO:0005097                                                                                                                                         | -                                                                                                           |
| -                       | -                                                          | 0 |                                                                                                                                     |                                                                                                                                                                                        | SignalP (SIGNALP)                                                                                           |
| -                       | -                                                          | 0 |                                                                                                                                     |                                                                                                                                                                                        | -                                                                                                           |
| Caenorhabditis briggsae | Hypothetical protein CBG12930 [Caenorhabditis briggsae]    | 0 |                                                                                                                                     |                                                                                                                                                                                        | -                                                                                                           |
| -                       | -                                                          | 0 |                                                                                                                                     |                                                                                                                                                                                        | -                                                                                                           |
| Loa loa                 | elegans protein partially confirmed by transcript evidence | 7 | F:GO:0043565;<br>P:GO:0031643;<br>F:GO:0003700;<br>P:GO:0045893;<br>P:GO:0022010;<br>C:GO:0016020;<br>C:GO:0005634                  | -                                                                                                                                                                                      | IPR007888; G3DSA:2.60.40.1390 (GENE3D), PTHR13029 (PANTHER), PTHR13029:SF7 (PANTHER)                        |
| Brugia malayi           | hypothetical protein Bm1_05520 [Brugia malayi]             | 0 |                                                                                                                                     |                                                                                                                                                                                        | -                                                                                                           |

|                         |                                                         |    |                                                                                                                                                                                                                                                                                                                                                                                                                                                                                         |   |             |                     |
|-------------------------|---------------------------------------------------------|----|-----------------------------------------------------------------------------------------------------------------------------------------------------------------------------------------------------------------------------------------------------------------------------------------------------------------------------------------------------------------------------------------------------------------------------------------------------------------------------------------|---|-------------|---------------------|
| Camponotus floridanus   | serine arginine repetitive matrix 2                     | 0  | F:GO:0004180;<br>P:GO:0008284;<br>P:GO:0007000;<br>F:GO:0003674;<br>F:GO:0005198;<br>P:GO:0042306;<br>F:GO:0003700;<br>C:GO:0015030;<br>P:GO:0008150;<br>P:GO:0033979;<br>P:GO:0006397;<br>F:GO:0034513;<br>F:GO:0005488;<br>F:GO:0034512;<br>P:GO:0045941;<br>P:GO:0008380;<br>F:GO:0008139;<br>C:GO:0030532;<br>C:GO:0005730;<br>C:GO:0005654;<br>F:GO:0005515;<br>C:GO:0005681;<br>C:GO:0005575                                                                                      | - |             |                     |
| -                       | -                                                       | 0  |                                                                                                                                                                                                                                                                                                                                                                                                                                                                                         | - |             |                     |
| -                       | -                                                       | 0  |                                                                                                                                                                                                                                                                                                                                                                                                                                                                                         | - |             |                     |
| -                       | -                                                       | 0  |                                                                                                                                                                                                                                                                                                                                                                                                                                                                                         | - |             |                     |
| -                       | -                                                       | 0  |                                                                                                                                                                                                                                                                                                                                                                                                                                                                                         | - |             |                     |
| Caenorhabditis briggsae | Hypothetical protein CBG20503 [Caenorhabditis briggsae] | 0  |                                                                                                                                                                                                                                                                                                                                                                                                                                                                                         | - |             |                     |
| -                       | -                                                       | 0  |                                                                                                                                                                                                                                                                                                                                                                                                                                                                                         | - |             |                     |
| -                       | -                                                       | 0  |                                                                                                                                                                                                                                                                                                                                                                                                                                                                                         | - |             |                     |
| -                       | -                                                       | 0  |                                                                                                                                                                                                                                                                                                                                                                                                                                                                                         | - |             |                     |
| -                       | -                                                       | 0  |                                                                                                                                                                                                                                                                                                                                                                                                                                                                                         | - |             |                     |
| Loa loa                 | cbp p300 homolog family member (cbp-1)                  | 37 | F:GO:0009219;<br>P:GO:0022603;<br>P:GO:0051649;<br>P:GO:0032989;<br>C:GO:0043234;<br>F:GO:0005102;<br>P:GO:0007283;<br>P:GO:0018076;<br>P:GO:0040039;<br>F:GO:0008013;<br>P:GO:0040010;<br>P:GO:0001666;<br>P:GO:0032270;<br>F:GO:0003713;<br>P:GO:0045944;<br>P:GO:0043967;<br>C:GO:0005737;<br>P:GO:0040026;<br>P:GO:0007399;<br>P:GO:0048646;<br>P:GO:0009792;<br>F:GO:0008270;<br>P:GO:0060341;<br>F:GO:0003677;<br>P:GO:0010038;<br>N:GO:0071844;<br>P:GO:0048545;<br>P:GO:0018996 | - | EC:2.3.1.48 | PTHR13808 (PANTHER) |



|                         |                                                     |    |                                                                                                                                                                                                                                                            |                                                                                                                    |                                                                                                                                                                                   |
|-------------------------|-----------------------------------------------------|----|------------------------------------------------------------------------------------------------------------------------------------------------------------------------------------------------------------------------------------------------------------|--------------------------------------------------------------------------------------------------------------------|-----------------------------------------------------------------------------------------------------------------------------------------------------------------------------------|
| Caenorhabditis briggsae | isoform d                                           | 0  |                                                                                                                                                                                                                                                            | F:GO:0005488;<br>P:GO:0040011;<br>P:GO:0006898;<br>P:GO:0002119;<br>P:GO:0040007                                   | -                                                                                                                                                                                 |
| Caenorhabditis briggsae | gtp-binding protein alpha g-o                       | 15 | P:GO:0007419;<br>P:GO:0016055;<br>F:GO:0004871;<br>P:GO:0007186;<br>P:GO:0007507;<br>P:GO:0019991;<br>C:GO:0005834;<br>P:GO:0030866;<br>F:GO:0005515;<br>P:GO:0008356;<br>P:GO:0007165;<br>F:GO:0003924;<br>P:GO:0060857;<br>P:GO:0001737;<br>F:GO:0005525 | -                                                                                                                  | EC:3.6.5.1;<br>EC:3.6.5.2;<br>EC:3.6.5.3;<br>EC:3.6.5.4<br>IPR001019; IPR001408; IPR011025;<br>G3DSA:3.40.50.300 (GENE3D),<br>PTHR10218:SF76 (PANTHER),<br>SSF52540 (SUPERFAMILY) |
| Caenorhabditis briggsae | cdk5 regulatory subunit-associated protein 1-like 1 | 5  | F:GO:0046872;<br>F:GO:0051539;<br>C:GO:0016020;<br>F:GO:0003824;<br>P:GO:0009451                                                                                                                                                                           | -                                                                                                                  | IPR005839                                                                                                                                                                         |
|                         | -                                                   | 0  |                                                                                                                                                                                                                                                            |                                                                                                                    | -                                                                                                                                                                                 |
| Loa loa                 | sec14 and spectrin domains 1                        | 13 | F:GO:0010314;<br>F:GO:0005545;<br>C:GO:0034704;<br>F:GO:0031210;<br>F:GO:0005515;<br>F:GO:0070273;<br>F:GO:0001786;<br>F:GO:0043325;<br>F:GO:0080025;<br>F:GO:0070300;<br>P:GO:0051925;<br>F:GO:0032266;<br>F:GO:0005546                                   | -                                                                                                                  | -                                                                                                                                                                                 |
| Caenorhabditis elegans  | trehalase                                           | 0  |                                                                                                                                                                                                                                                            | P:GO:0005991;<br>C:GO:0016021;<br>F:GO:0003824;<br>P:GO:0009792;<br>P:GO:0002119;<br>P:GO:0040007;<br>F:GO:0004555 | IPR001661; IPR018232;<br>PTHR23403:SF1 (PANTHER)                                                                                                                                  |

|                        |                                                       |    |                                                                                                                                                                                                                                           |              |             |                                                                                                         |
|------------------------|-------------------------------------------------------|----|-------------------------------------------------------------------------------------------------------------------------------------------------------------------------------------------------------------------------------------------|--------------|-------------|---------------------------------------------------------------------------------------------------------|
| Caenorhabditis elegans | frizzled homolog 4                                    | 14 | P:GO:0016055;<br>F:GO:0046983;<br>P:GO:0050896;<br>P:GO:0007154;<br>P:GO:0023060;<br>P:GO:0031589;<br>P:GO:0030154;<br>P:GO:0090047;<br>P:GO:0001553;<br>P:GO:0045449;<br>P:GO:0048514;<br>C:GO:0005886;<br>F:GO:0004888;<br>P:GO:0003008 | -            |             | IPR000539; IPR015526;<br>PTHR11309:SF13 (PANTHER)                                                       |
| Caenorhabditis elegans | briggsae cbr-cdh-1 protein                            | 4  | P:GO:0002119;<br>P:GO:0040010;<br>P:GO:0040011;<br>C:GO:0016020                                                                                                                                                                           | -            |             | PTHR10596 (PANTHER),<br>PTHR10596:SF75 (PANTHER)                                                        |
|                        | -                                                     | 0  |                                                                                                                                                                                                                                           |              |             | SignalP (SIGNALP)                                                                                       |
| Ailuropoda melanoleuca | 26s protease regulatory subunit 6a                    | 13 | F:GO:0008233;<br>F:GO:0017111;<br>C:GO:0000502;<br>P:GO:0051436;<br>P:GO:0051437;<br>P:GO:0031145;<br>F:GO:0005524;<br>F:GO:0003714;<br>P:GO:0001824;<br>C:GO:0048471;<br>P:GO:0044419;<br>F:GO:0003713;<br>C:GO:0005634                  | -            | EC:3.6.1.15 | G3DSA:1.10.8.60 (GENE3D),<br>PTHR23073 (PANTHER),<br>PTHR23073:SF7 (PANTHER), SSF52540<br>(SUPERFAMILY) |
| Loa loa                | protein ki-se domain containing protein               | 4  | P:GO:0006468;<br>F:GO:0005515;<br>F:GO:0004713;<br>F:GO:0005524                                                                                                                                                                           | -            | EC:2.7.10.0 | IPR020685; IPR020764                                                                                    |
|                        | -                                                     | 0  |                                                                                                                                                                                                                                           |              |             | -                                                                                                       |
|                        | -                                                     | 0  |                                                                                                                                                                                                                                           |              |             | SignalP (SIGNALP)                                                                                       |
|                        | -                                                     | 0  |                                                                                                                                                                                                                                           |              |             | -                                                                                                       |
|                        | -                                                     | 0  |                                                                                                                                                                                                                                           |              |             | -                                                                                                       |
| Caenorhabditis elegans | hypothetical protein ZC487.1 [Caenorhabditis elegans] | 2  | F:GO:0005524;<br>F:GO:0003824                                                                                                                                                                                                             | -            |             | -                                                                                                       |
|                        | -                                                     | 0  |                                                                                                                                                                                                                                           |              |             | SignalP (SIGNALP)                                                                                       |
|                        | -                                                     | 0  |                                                                                                                                                                                                                                           |              |             | -                                                                                                       |
|                        | -                                                     | 0  |                                                                                                                                                                                                                                           |              |             | -                                                                                                       |
|                        | -                                                     | 0  |                                                                                                                                                                                                                                           |              |             | -                                                                                                       |
| Caenorhabditis elegans | intraflagellar transport 140 homolog                  | 0  |                                                                                                                                                                                                                                           | F:GO:0005488 |             | PTHR15722 (PANTHER),<br>PTHR15722:SF7 (PANTHER)                                                         |

|                             |                                           |    |                                                                                                                                                                                                                                                                                                                                                                                                                                                                        |                                                                                                                                     |  |                                                                                                          |
|-----------------------------|-------------------------------------------|----|------------------------------------------------------------------------------------------------------------------------------------------------------------------------------------------------------------------------------------------------------------------------------------------------------------------------------------------------------------------------------------------------------------------------------------------------------------------------|-------------------------------------------------------------------------------------------------------------------------------------|--|----------------------------------------------------------------------------------------------------------|
| Anopheles gambiae str. PEST | bmp type ii receptor                      | 29 | P:GO:0048813;<br>C:GO:0005901;<br>P:GO:0045906;<br>P:GO:0010595;<br>P:GO:0045669;<br>P:GO:0048010;<br>P:GO:0030513;<br>P:GO:0010862;<br>P:GO:0001707;<br>P:GO:0048570;<br>P:GO:0001947;<br>P:GO:0007274;<br>P:GO:0007165;<br>F:GO:0000166;<br>P:GO:0014916;<br>C:GO:0005887;<br>P:GO:0009952;<br>F:GO:0005515;<br>P:GO:0009267;<br>P:GO:0007528;<br>F:GO:0005026;<br>P:GO:0006366;<br>P:GO:0003085;<br>P:GO:0010634;<br>P:GO:0048286;<br>P:GO:0030308;<br>P:GO:0007368 |                                                                                                                                     |  | IPR000719; IPR017442;<br>G3DSA:1.10.510.10 (GENE3D),<br>PTHR23255 (PANTHER),<br>PTHR23255:SF13 (PANTHER) |
| -                           | -                                         | 0  |                                                                                                                                                                                                                                                                                                                                                                                                                                                                        |                                                                                                                                     |  | -                                                                                                        |
| Loa loa                     | hypothetical protein LOAG_04618 [Loa loa] | 0  |                                                                                                                                                                                                                                                                                                                                                                                                                                                                        | F:GO:0003676                                                                                                                        |  | -                                                                                                        |
| Caenorhabditis elegans      | briggsae cbr-swm-1 protein                | 1  | F:GO:0005515                                                                                                                                                                                                                                                                                                                                                                                                                                                           | -                                                                                                                                   |  | -                                                                                                        |
| Homo sapiens                | antigen cd18                              | 14 | C:GO:0008305;<br>P:GO:0006915;<br>P:GO:0007267;<br>P:GO:0006954;<br>P:GO:0008360;<br>P:GO:0007229;<br>F:GO:0001948;<br>F:GO:0004872;<br>P:GO:0007160;<br>P:GO:0050730;<br>F:GO:0019901;<br>P:GO:0007159;<br>P:GO:0007275;<br>P:GO:0030593                                                                                                                                                                                                                              |                                                                                                                                     |  | IPR001169; IPR015439; IPR015812;<br>G3DSA:2.10.25.10 (GENE3D)                                            |
| -                           | -                                         | 0  |                                                                                                                                                                                                                                                                                                                                                                                                                                                                        |                                                                                                                                     |  | SignalP (SIGNALP)                                                                                        |
| -                           | -                                         | 0  |                                                                                                                                                                                                                                                                                                                                                                                                                                                                        |                                                                                                                                     |  | SignalP (SIGNALP)                                                                                        |
| -                           | -                                         | 0  |                                                                                                                                                                                                                                                                                                                                                                                                                                                                        |                                                                                                                                     |  | -                                                                                                        |
| Loa loa                     | sh2 domain containing protein             | 0  |                                                                                                                                                                                                                                                                                                                                                                                                                                                                        | F:GO:0016301;<br>F:GO:0004672;<br>F:GO:0005524;<br>F:GO:0016740;<br>F:GO:0000166;<br>F:GO:0004713;<br>P:GO:0006468;<br>F:GO:0005515 |  | IPR000980; IPR020685; IPR020764                                                                          |
| -                           | -                                         | 0  |                                                                                                                                                                                                                                                                                                                                                                                                                                                                        |                                                                                                                                     |  | -                                                                                                        |
| -                           | -                                         | 0  |                                                                                                                                                                                                                                                                                                                                                                                                                                                                        |                                                                                                                                     |  | -                                                                                                        |

|                         |                                                                                    |   |                                                                                                                                                      |                                                                                                   |                             |                                                                      |
|-------------------------|------------------------------------------------------------------------------------|---|------------------------------------------------------------------------------------------------------------------------------------------------------|---------------------------------------------------------------------------------------------------|-----------------------------|----------------------------------------------------------------------|
| Ciona intestinalis      | glucosamine-6-phosphate deami-se 1                                                 | 9 | C:GO:0005737;<br>P:GO:0007340;<br>F:GO:0004342;<br>P:GO:0006002;<br>P:GO:0046370;<br>P:GO:0006044;<br>F:GO:0016787;<br>P:GO:0006043;<br>P:GO:0006091 | -                                                                                                 | EC:3.5.99.6                 | -                                                                    |
| Caenorhabditis briggsae | briggsae cbr-nhr-97 protein                                                        | 4 | F:GO:0004872;<br>F:GO:0005488;<br>P:GO:0006350;<br>P:GO:0000003                                                                                      | -                                                                                                 |                             | IPR000536; IPR008946; PTHR11865 (PANTHER), PTHR11865:SF138 (PANTHER) |
| Caenorhabditis briggsae | briggsae cbr-spd-2 protein                                                         | 0 |                                                                                                                                                      | C:GO:0005737;<br>P:GO:0007049;<br>C:GO:0005856;<br>P:GO:0007275;<br>F:GO:0005515;<br>C:GO:0005814 |                             | IPR008962                                                            |
| Caenorhabditis briggsae | briggsae cbr-spd-2 protein                                                         | 0 |                                                                                                                                                      | C:GO:0005737;<br>P:GO:0007049;<br>C:GO:0005856;<br>P:GO:0007275;<br>F:GO:0005515;<br>C:GO:0005814 |                             | IPR008962                                                            |
| Caenorhabditis briggsae | briggsae cbr-spd-2 protein                                                         | 0 |                                                                                                                                                      | C:GO:0005737;<br>P:GO:0007049;<br>C:GO:0005856;<br>P:GO:0007275;<br>F:GO:0005515;<br>C:GO:0005814 |                             | IPR008962                                                            |
| Pongo abelii            | solute carrier family member 3                                                     | 8 | F:GO:0015333;<br>P:GO:0006857;<br>F:GO:0005427;<br>P:GO:0030163;<br>P:GO:0055085;<br>C:GO:0005765;<br>C:GO:0016021;<br>P:GO:0015031                  | -                                                                                                 |                             | -                                                                    |
| Caenorhabditis elegans  | protein ki-se domain containing protein                                            | 6 | P:GO:0006468;<br>P:GO:0040018;<br>F:GO:0005515;<br>F:GO:0004713;<br>F:GO:0005524;<br>F:GO:0004674                                                    | -                                                                                                 | EC:2.7.10.0;<br>EC:2.7.11.0 | -                                                                    |
| Caenorhabditis briggsae | alix (apoptosis-linked gene 2 interacting protein x) homolog family member (alx-1) | 0 |                                                                                                                                                      |                                                                                                   |                             | G3DSA:1.20.140.50 (GENE3D)                                           |
| -                       | -                                                                                  | 0 |                                                                                                                                                      |                                                                                                   |                             | -                                                                    |
| -                       | -                                                                                  | 0 |                                                                                                                                                      |                                                                                                   |                             | -                                                                    |
| -                       | -                                                                                  | 0 |                                                                                                                                                      |                                                                                                   |                             | -                                                                    |
| -                       | -                                                                                  | 0 |                                                                                                                                                      |                                                                                                   |                             | -                                                                    |
| -                       | -                                                                                  | 0 |                                                                                                                                                      |                                                                                                   |                             | -                                                                    |
| -                       | -                                                                                  | 0 |                                                                                                                                                      |                                                                                                   |                             | -                                                                    |
| -                       | -                                                                                  | 0 |                                                                                                                                                      |                                                                                                   |                             | -                                                                    |
| -                       | -                                                                                  | 0 |                                                                                                                                                      |                                                                                                   |                             | -                                                                    |
| -                       | -                                                                                  | 0 |                                                                                                                                                      |                                                                                                   |                             | -                                                                    |
| Ixodes scapularis       | conserved hypothetical protein [Ixodes scapularis]                                 | 0 |                                                                                                                                                      |                                                                                                   |                             | IPR018307                                                            |

|                         |                                                         |   |                                                                                  |                                                                                                                                                                                        |             |                                                                                                            |
|-------------------------|---------------------------------------------------------|---|----------------------------------------------------------------------------------|----------------------------------------------------------------------------------------------------------------------------------------------------------------------------------------|-------------|------------------------------------------------------------------------------------------------------------|
| Loa loa                 | protein ki-se domain containing protein                 | 4 | P:GO:0006468;<br>F:GO:0005515;<br>F:GO:0004713;<br>F:GO:0005524                  | -                                                                                                                                                                                      | EC:2.7.10.0 | IPR001245; IPR011009; IPR020685;<br>IPR020764; G3DSA:1.10.510.10<br>(GENE3D)                               |
| -                       | -                                                       | 0 | -                                                                                | -                                                                                                                                                                                      | -           | -                                                                                                          |
| Caenorhabditis briggsae | briggsae cbr-pgp-1 protein                              | 4 | F:GO:0042626;<br>P:GO:0055085;<br>F:GO:0005524;<br>C:GO:0016021                  | -                                                                                                                                                                                      | -           | G3DSA:3.40.50.300 (GENE3D),<br>PTHR19242 (PANTHER),<br>PTHR19242:SF96 (PANTHER),<br>SSF52540 (SUPERFAMILY) |
| Caenorhabditis briggsae | briggsae cbr-ars-1 protein                              | 0 | -                                                                                | P:GO:0006419;<br>F:GO:0003676;<br>F:GO:0000166;<br>C:GO:0005737;<br>P:GO:0006412;<br>F:GO:0005524;<br>F:GO:0004813;<br>F:GO:0016876;<br>P:GO:0043039                                   | -           | IPR018164; PTHR11777 (PANTHER)                                                                             |
| -                       | -                                                       | 0 | -                                                                                | -                                                                                                                                                                                      | -           | SignalP (SIGNALP)                                                                                          |
| Caenorhabditis briggsae | Hypothetical protein CBG08614 [Caenorhabditis briggsae] | 0 | -                                                                                | F:GO:0016301;<br>F:GO:0005524;<br>F:GO:0004765;<br>P:GO:0005975                                                                                                                        | -           | -                                                                                                          |
| -                       | -                                                       | 0 | -                                                                                | -                                                                                                                                                                                      | -           | -                                                                                                          |
| -                       | -                                                       | 0 | -                                                                                | -                                                                                                                                                                                      | -           | -                                                                                                          |
| -                       | -                                                       | 0 | -                                                                                | -                                                                                                                                                                                      | -           | PTHR14027 (PANTHER),<br>PTHR14027:SF2 (PANTHER)                                                            |
| -                       | -                                                       | 0 | -                                                                                | -                                                                                                                                                                                      | -           | -                                                                                                          |
| Caenorhabditis briggsae | d--directed r- polymerase i largest                     | 5 | F:GO:0003899;<br>F:GO:0003677;<br>P:GO:0006350;<br>C:GO:0005634;<br>F:GO:0008270 | -                                                                                                                                                                                      | EC:2.7.7.6  | IPR007081; IPR015699; PTHR19376<br>(PANTHER), SSF64484 (SUPERFAMILY)                                       |
| Caenorhabditis elegans  | briggsae cbr-toh-1 protein                              | 3 | F:GO:0004222;<br>P:GO:0006508;<br>F:GO:0008270                                   | -                                                                                                                                                                                      | EC:3.4.24.0 | -                                                                                                          |
| -                       | -                                                       | 0 | -                                                                                | -                                                                                                                                                                                      | -           | SignalP (SIGNALP)                                                                                          |
| -                       | -                                                       | 0 | -                                                                                | -                                                                                                                                                                                      | -           | SignalP (SIGNALP)                                                                                          |
| Loa loa                 | zinc finger                                             | 0 | -                                                                                | F:GO:0005216;<br>C:GO:0016021;<br>C:GO:0016020;<br>P:GO:0006813;<br>P:GO:0006811;<br>P:GO:0006810;<br>F:GO:0003676;<br>F:GO:0008270;<br>C:GO:0005622;<br>P:GO:0055085;<br>F:GO:0005249 | -           | IPR015880; PTHR23224 (PANTHER),<br>PTHR23224:SF401 (PANTHER),<br>SSF57667 (SUPERFAMILY)                    |
| -                       | -                                                       | 0 | -                                                                                | -                                                                                                                                                                                      | -           | SignalP (SIGNALP)                                                                                          |
| -                       | -                                                       | 0 | -                                                                                | -                                                                                                                                                                                      | -           | -                                                                                                          |
| -                       | -                                                       | 0 | -                                                                                | -                                                                                                                                                                                      | -           | -                                                                                                          |
| -                       | -                                                       | 0 | -                                                                                | -                                                                                                                                                                                      | -           | -                                                                                                          |
| -                       | -                                                       | 0 | -                                                                                | -                                                                                                                                                                                      | -           | -                                                                                                          |
| Caenorhabditis elegans  | briggsae cbr-rrf-3 protein                              | 1 | P:GO:0009792                                                                     | -                                                                                                                                                                                      | -           | -                                                                                                          |
| -                       | -                                                       | 0 | -                                                                                | -                                                                                                                                                                                      | -           | -                                                                                                          |

|                         |                                                                   |   |                                                                                                                    |                                                                                                                                     |             |                                                                                                                          |
|-------------------------|-------------------------------------------------------------------|---|--------------------------------------------------------------------------------------------------------------------|-------------------------------------------------------------------------------------------------------------------------------------|-------------|--------------------------------------------------------------------------------------------------------------------------|
| Harpegnathos saltator   | histone                                                           | 4 | C:GO:0000786;<br>F:GO:0003677;<br>P:GO:0006334;<br>C:GO:0005634                                                    | -                                                                                                                                   |             | IPR002119; IPR007125; IPR009072;<br>SignalP (SIGNALP)                                                                    |
| -                       | -                                                                 | 0 |                                                                                                                    |                                                                                                                                     |             | SignalP (SIGNALP)                                                                                                        |
| -                       | -                                                                 | 0 |                                                                                                                    |                                                                                                                                     |             | -                                                                                                                        |
| -                       | -                                                                 | 0 |                                                                                                                    |                                                                                                                                     |             | SignalP (SIGNALP)                                                                                                        |
| -                       | -                                                                 | 0 |                                                                                                                    |                                                                                                                                     |             | -                                                                                                                        |
| -                       | -                                                                 | 0 |                                                                                                                    |                                                                                                                                     |             | -                                                                                                                        |
| -                       | -                                                                 | 0 |                                                                                                                    |                                                                                                                                     |             | SignalP (SIGNALP)                                                                                                        |
| Caenorhabditis elegans  | ankyrin repeat and fyve domain containing 1                       | 7 | P:GO:0009792;<br>F:GO:0005545;<br>F:GO:0046872;<br>F:GO:0016773;<br>F:GO:0016301;<br>P:GO:0040010;<br>F:GO:0016787 | -                                                                                                                                   | EC:2.7.1.0  | IPR000306; IPR002110; IPR011011;<br>IPR013083; IPR017455; IPR020683;<br>PTHR13856 (PANTHER),<br>PTHR13856:SF45 (PANTHER) |
| -                       | -                                                                 | 0 |                                                                                                                    |                                                                                                                                     |             | -                                                                                                                        |
| -                       | -                                                                 | 0 |                                                                                                                    |                                                                                                                                     |             | -                                                                                                                        |
| -                       | -                                                                 | 0 |                                                                                                                    |                                                                                                                                     |             | -                                                                                                                        |
| -                       | -                                                                 | 0 |                                                                                                                    |                                                                                                                                     |             | SignalP (SIGNALP)                                                                                                        |
| Brugia malayi           | trm44_caeel_ame: full=probable tr- (uracil-o -)-methyltransferase | 0 |                                                                                                                    | F:GO:0003676;<br>F:GO:0008168;<br>C:GO:0005737;<br>P:GO:0008033;<br>F:GO:0016740;<br>F:GO:0008270                                   |             | -                                                                                                                        |
| -                       | -                                                                 | 0 |                                                                                                                    |                                                                                                                                     |             | -                                                                                                                        |
| Caenorhabditis elegans  | dead deah box helicase family protein                             | 2 | P:GO:0000003;<br>P:GO:0040010                                                                                      | -                                                                                                                                   |             | SignalP (SIGNALP)                                                                                                        |
| Caenorhabditis briggsae | briggsae cbr-nhr-11 protein                                       | 3 | F:GO:0004872;<br>F:GO:0005515;<br>P:GO:0006350                                                                     | -                                                                                                                                   |             | -                                                                                                                        |
| Nematostella vectensis  | cytochrome family subfamily polypeptide 2                         | 0 |                                                                                                                    | F:GO:0046872;<br>P:GO:0055114;<br>F:GO:0009055;<br>F:GO:0016491;<br>F:GO:0020037;<br>F:GO:0005506;<br>F:GO:0004497;<br>C:GO:0005575 |             | SignalP (SIGNALP)                                                                                                        |
| Caenorhabditis briggsae | intermediate filament protein                                     | 4 | C:GO:0005882;<br>C:GO:0005737;<br>F:GO:0005198;<br>F:GO:0005515                                                    | -                                                                                                                                   |             | IPR001322; IPR001664;<br>G3DSA:2.60.40.1260 (GENE3D),<br>PTHR23239:SF13 (PANTHER),<br>SSF74853 (SUPERFAMILY)             |
| Caenorhabditis elegans  | briggsae cbr-pqn-73 protein                                       | 1 | P:GO:0040035                                                                                                       | -                                                                                                                                   |             | -                                                                                                                        |
| Brugia malayi           | bromodomain adjacent to zinc finger 2b                            | 1 | F:GO:0005488                                                                                                       | -                                                                                                                                   |             | -                                                                                                                        |
| Caenorhabditis elegans  | elegans protein confirmed by transcript evidence                  | 0 |                                                                                                                    | C:GO:0016020                                                                                                                        |             | IPR011646; PTHR18958 (PANTHER),<br>PTHR18958:SF283 (PANTHER)                                                             |
| -                       | -                                                                 | 0 |                                                                                                                    |                                                                                                                                     |             | -                                                                                                                        |
| Caenorhabditis elegans  | protein ki-se domain containing protein                           | 3 | P:GO:0006468;<br>F:GO:0005524;<br>F:GO:0004674                                                                     | -                                                                                                                                   | EC:2.7.11.0 | PTHR11909 (PANTHER),<br>PTHR11909:SF19 (PANTHER)                                                                         |
| -                       | -                                                                 | 0 |                                                                                                                    |                                                                                                                                     |             | -                                                                                                                        |
| -                       | -                                                                 | 0 |                                                                                                                    |                                                                                                                                     |             | -                                                                                                                        |

|                         |                                                        |  |                                                                                                                      |                                                                                                   |   |                                                                                                                                                                                                      |
|-------------------------|--------------------------------------------------------|--|----------------------------------------------------------------------------------------------------------------------|---------------------------------------------------------------------------------------------------|---|------------------------------------------------------------------------------------------------------------------------------------------------------------------------------------------------------|
| Caenorhabditis elegans  | neurogenic locus notch                                 |  | C:GO:0016020;<br>3 P:GO:0009987;<br>P:GO:0032502                                                                     | -                                                                                                 |   | IPR000152; IPR000742; IPR001881;<br>IPR006209; IPR013032; IPR018097;<br>PR00010 (PRINTS), G3DSA:2.10.25.10<br>(GENE3D), PTHR11201 (PANTHER),<br>PTHR11201:SF220 (PANTHER),<br>SSF57196 (SUPERFAMILY) |
| Brugia malayi           | protein-tyrosine phosphatase containing protein        |  | 0                                                                                                                    | P:GO:0016311;<br>F:GO:0016791;<br>P:GO:0006470;<br>F:GO:0016787;<br>F:GO:0004725;<br>F:GO:0004721 | - |                                                                                                                                                                                                      |
| Caenorhabditis elegans  | zinc zz type family protein                            |  | P:GO:0007271;<br>F:GO:0005515;<br>P:GO:0040017;<br>7 C:GO:0016010;<br>F:GO:0005277;<br>P:GO:0015870;<br>P:GO:0046716 | -                                                                                                 |   |                                                                                                                                                                                                      |
|                         |                                                        |  | 0                                                                                                                    |                                                                                                   |   |                                                                                                                                                                                                      |
|                         |                                                        |  | 0                                                                                                                    |                                                                                                   |   |                                                                                                                                                                                                      |
| Caenorhabditis briggsae | gata zinc finger family protein                        |  | F:GO:0003700;<br>F:GO:0043565;<br>F:GO:0005515;<br>6 C:GO:0005634;<br>F:GO:0008270;<br>P:GO:0006355                  | -                                                                                                 |   | IPR000679; IPR013088; PTHR10071<br>(PANTHER), PTHR10071:SF14<br>(PANTHER), SSF57716 (SUPERFAMILY)                                                                                                    |
| Caenorhabditis elegans  | beta-lactamase                                         |  | 0                                                                                                                    | F:GO:0016787;<br>F:GO:0004091                                                                     |   | PTHR10566 (PANTHER),<br>PTHR10566:SF6 (PANTHER), SignalP<br>(SIGNALP)                                                                                                                                |
|                         |                                                        |  | 0                                                                                                                    |                                                                                                   |   | SignalP (SIGNALP)                                                                                                                                                                                    |
|                         |                                                        |  | 0                                                                                                                    |                                                                                                   |   |                                                                                                                                                                                                      |
|                         |                                                        |  | 0                                                                                                                    |                                                                                                   |   |                                                                                                                                                                                                      |
| Caenorhabditis elegans  | hypothetical protein F41G3.21 [Caenorhabditis elegans] |  | 0                                                                                                                    | F:GO:0005515                                                                                      |   |                                                                                                                                                                                                      |
|                         |                                                        |  | 0                                                                                                                    |                                                                                                   |   |                                                                                                                                                                                                      |

|                              |                                              |    |                                                                                                                                                                                                                                                                                                                                                                                                                                      |   |            |                                                                                                                                                                        |
|------------------------------|----------------------------------------------|----|--------------------------------------------------------------------------------------------------------------------------------------------------------------------------------------------------------------------------------------------------------------------------------------------------------------------------------------------------------------------------------------------------------------------------------------|---|------------|------------------------------------------------------------------------------------------------------------------------------------------------------------------------|
| Caenorhabditis elegans       | myosin heavy chain                           | 25 | P:GO:0001525;<br>P:GO:0008360;<br>P:GO:0030048;<br>P:GO:0015031;<br>C:GO:0005829;<br>F:GO:0000146;<br>P:GO:0006509;<br>P:GO:0043534;<br>C:GO:0008305;<br>C:GO:0001726;<br>C:GO:0032154;<br>F:GO:0043495;<br>F:GO:0051015;<br>C:GO:0001725;<br>F:GO:0016887;<br>F:GO:0042803;<br>P:GO:0031532;<br>P:GO:0030224;<br>P:GO:0030220;<br>F:GO:0005516;<br>C:GO:0005634;<br>F:GO:0005524;<br>C:GO:0016459;<br>P:GO:0000910;<br>C:GO:0005826 | - |            | IPR001609; PTHR13140 (PANTHER),<br>PTHR13140:SF23 (PANTHER),<br>SSF52540 (SUPERFAMILY)                                                                                 |
| -                            | -                                            | 0  |                                                                                                                                                                                                                                                                                                                                                                                                                                      |   |            | -                                                                                                                                                                      |
| -                            | -                                            | 0  |                                                                                                                                                                                                                                                                                                                                                                                                                                      |   |            | -                                                                                                                                                                      |
| Caenorhabditis briggsae      | briggsae cbr-mup-4 protein                   | 2  | F:GO:0005509;<br>F:GO:0005515                                                                                                                                                                                                                                                                                                                                                                                                        | - |            | IPR000152; IPR000742; IPR006209;<br>IPR006210; IPR013091;<br>G3DSA:2.10.25.10 (GENE3D),<br>PTHR22992 (PANTHER),<br>PTHR22992:SF12 (PANTHER),<br>SSF57196 (SUPERFAMILY) |
| -                            | -                                            | 0  |                                                                                                                                                                                                                                                                                                                                                                                                                                      |   |            | -                                                                                                                                                                      |
| Macaca mulatta               | poly binding protein 2                       | 11 | P:GO:0043161;<br>F:GO:0003723;<br>P:GO:0050687;<br>F:GO:0031625;<br>P:GO:0016071;<br>P:GO:0008380;<br>P:GO:0045087;<br>F:GO:0003677;<br>C:GO:0030529;<br>C:GO:0005737;<br>C:GO:0005634                                                                                                                                                                                                                                               | - |            | PTHR10288 (PANTHER),<br>PTHR10288:SF48 (PANTHER)                                                                                                                       |
| Caenorhabditis elegans       | phosphatidylinositol 4-ki-se type 2-beta     | 4  | F:GO:0016301;<br>C:GO:0044464;<br>F:GO:0016773;<br>F:GO:0000166                                                                                                                                                                                                                                                                                                                                                                      | - | EC:2.7.1.0 | IPR000403; PTHR12865 (PANTHER)                                                                                                                                         |
| Caenorhabditis elegans       | phosphatidylinositol 4-ki-se type 2-beta     | 1  | F:GO:0016773                                                                                                                                                                                                                                                                                                                                                                                                                         | - | EC:2.7.1.0 | IPR000403; PTHR12865 (PANTHER)                                                                                                                                         |
| Caenorhabditis briggsae      | yqd7_caeel ame: full=uncharacterized protein | 0  |                                                                                                                                                                                                                                                                                                                                                                                                                                      |   |            | -                                                                                                                                                                      |
| -                            | -                                            | 0  |                                                                                                                                                                                                                                                                                                                                                                                                                                      |   |            | -                                                                                                                                                                      |
| -                            | -                                            | 0  |                                                                                                                                                                                                                                                                                                                                                                                                                                      |   |            | -                                                                                                                                                                      |
| Nippostrongylus brasiliensis | fk506 binding protein 9                      | 4  | P:GO:0006457;<br>P:GO:0008340;<br>F:GO:0003755;<br>P:GO:0040010                                                                                                                                                                                                                                                                                                                                                                      | - | EC:5.2.1.8 | SignalP (SIGNALP)                                                                                                                                                      |
| -                            | -                                            | 0  |                                                                                                                                                                                                                                                                                                                                                                                                                                      |   |            | -                                                                                                                                                                      |



|                         |                                                               |   |                                                                                                                    |                                                                                                   |             |                                                                         |
|-------------------------|---------------------------------------------------------------|---|--------------------------------------------------------------------------------------------------------------------|---------------------------------------------------------------------------------------------------|-------------|-------------------------------------------------------------------------|
|                         | -                                                             | 0 |                                                                                                                    |                                                                                                   |             | -                                                                       |
| Caenorhabditis briggsae | neutral alpha-glucosidase ab-like                             | 7 | F:GO:0033919;<br>P:GO:0005975;<br>C:GO:0042470;<br>C:GO:0005783;<br>F:GO:0030246;<br>C:GO:0005794;<br>F:GO:0005515 | -                                                                                                 | EC:3.2.1.84 | IPR000322; PTHR22762:SF7 (PANTHER)                                      |
|                         | -                                                             | 0 |                                                                                                                    |                                                                                                   |             | -                                                                       |
| Caenorhabditis elegans  | rab6 interacting protein 1                                    | 0 |                                                                                                                    | F:GO:0017137;<br>C:GO:0005794;<br>F:GO:0005515                                                    |             | IPR001194; PTHR12296 (PANTHER),<br>PTHR12296:SF3 (PANTHER)              |
|                         | -                                                             | 0 |                                                                                                                    |                                                                                                   |             | -                                                                       |
|                         | -                                                             | 0 |                                                                                                                    |                                                                                                   |             | -                                                                       |
|                         | -                                                             | 0 |                                                                                                                    |                                                                                                   |             | -                                                                       |
|                         | -                                                             | 0 |                                                                                                                    |                                                                                                   |             | -                                                                       |
|                         | -                                                             | 0 |                                                                                                                    |                                                                                                   |             | -                                                                       |
|                         | -                                                             | 0 |                                                                                                                    |                                                                                                   |             | -                                                                       |
|                         | -                                                             | 0 |                                                                                                                    |                                                                                                   |             | PTHR11865 (PANTHER),<br>PTHR11865:SF138 (PANTHER), SignalP (SIGNALP)    |
| Ailuropoda melanoleuca  | dead (asp-glu-ala-asp) box polypeptide 17                     | 7 | F:GO:0003724;<br>F:GO:0008026;<br>F:GO:0003723;<br>F:GO:0008186;<br>F:GO:0005524;<br>C:GO:0005634;<br>P:GO:0006396 | -                                                                                                 |             | -                                                                       |
|                         | -                                                             | 0 |                                                                                                                    |                                                                                                   |             | SignalP (SIGNALP)                                                       |
| Caenorhabditis elegans  | briggsae cbr-pqn-48 protein                                   | 0 |                                                                                                                    |                                                                                                   |             | IPR004911; PTHR13234:SF3 (PANTHER)                                      |
| Loa loa                 | hypothetical protein LOAG_06866 [Loa loa]                     | 2 | P:GO:0040010;<br>F:GO:0005509                                                                                      | -                                                                                                 |             | -                                                                       |
|                         | -                                                             | 0 |                                                                                                                    |                                                                                                   |             | SignalP (SIGNALP)                                                       |
| Caenorhabditis briggsae | glycosyl hydrolase family catalytic domain containing protein | 3 | F:GO:0004553;<br>P:GO:0005975;<br>F:GO:0043169                                                                     | -                                                                                                 | EC:3.2.1.0  | IPR013781; IPR015883; IPR017853;<br>PTHR21040 (PANTHER)                 |
|                         | -                                                             | 0 |                                                                                                                    |                                                                                                   |             | SignalP (SIGNALP)                                                       |
|                         | -                                                             | 0 |                                                                                                                    |                                                                                                   |             | -                                                                       |
|                         | -                                                             | 0 |                                                                                                                    |                                                                                                   |             | -                                                                       |
| Loa loa                 | briggsae cbr-dpy-19 protein                                   | 2 | C:GO:0016020;<br>P:GO:0007275                                                                                      | -                                                                                                 |             | -                                                                       |
|                         | -                                                             | 0 |                                                                                                                    |                                                                                                   |             | -                                                                       |
| Caenorhabditis briggsae | aldehyde dehydroge-se                                         | 4 | F:GO:0004029;<br>P:GO:0055114;<br>C:GO:0005739;<br>F:GO:0042802                                                    | -                                                                                                 | EC:1.2.1.3  | IPR015590; IPR016160; IPR016161;<br>IPR016162; PTHR11699:SF46 (PANTHER) |
| Caenorhabditis elegans  | elegans protein partially confirmed by transcript evidence    | 0 |                                                                                                                    |                                                                                                   |             | -                                                                       |
| Caenorhabditis elegans  | temporarily assigned gene -me family member (tag-308)         | 0 |                                                                                                                    |                                                                                                   |             | -                                                                       |
| Brugia malayi           | protein ki-se domain containing protein                       | 0 |                                                                                                                    | F:GO:0016301;<br>F:GO:0004672;<br>F:GO:0005524;<br>F:GO:0004713;<br>P:GO:0006468;<br>F:GO:0005515 |             | -                                                                       |
|                         | -                                                             | 0 |                                                                                                                    |                                                                                                   |             | -                                                                       |

|                         |                                                  |   |                                                                                                                                                      |                                                                                                                    |                                                                                         |
|-------------------------|--------------------------------------------------|---|------------------------------------------------------------------------------------------------------------------------------------------------------|--------------------------------------------------------------------------------------------------------------------|-----------------------------------------------------------------------------------------|
|                         | -                                                | 0 |                                                                                                                                                      |                                                                                                                    | SignalP (SIGNALP)                                                                       |
|                         | -                                                | 0 |                                                                                                                                                      |                                                                                                                    | -                                                                                       |
|                         | -                                                | 0 |                                                                                                                                                      |                                                                                                                    | -                                                                                       |
|                         | -                                                | 0 |                                                                                                                                                      |                                                                                                                    | -                                                                                       |
| Brugia malayi           | briggsae cbr-nsy-4 protein                       | 1 | C:GO:0016021                                                                                                                                         | -                                                                                                                  | IPR010761; SignalP (SIGNALP)                                                            |
|                         | -                                                | 0 |                                                                                                                                                      |                                                                                                                    | SignalP (SIGNALP)                                                                       |
| Caenorhabditis elegans  | laminin a                                        | 1 | C:GO:0031012                                                                                                                                         | -                                                                                                                  | IPR001791; IPR008985; IPR012680; IPR013320; IPR015447; PTHR10127 (PANTHER)              |
| Caenorhabditis elegans  | axin-like family member (axl-1)                  | 4 | P:GO:0007411;<br>P:GO:0000003;<br>P:GO:0030178;<br>F:GO:0019901                                                                                      | -                                                                                                                  | -                                                                                       |
| Caenorhabditis briggsae | solute carrier family 8 member 3                 | 8 | F:GO:0005432;<br>P:GO:0009792;<br>P:GO:0006816;<br>F:GO:0031072;<br>P:GO:0055085;<br>P:GO:0000003;<br>C:GO:0016021;<br>P:GO:0007154                  | -                                                                                                                  | -                                                                                       |
|                         | -                                                | 0 |                                                                                                                                                      |                                                                                                                    | -                                                                                       |
| Caenorhabditis elegans  | briggsae cbr-mog-1 protein                       | 1 | F:GO:0005515                                                                                                                                         | -                                                                                                                  | -                                                                                       |
|                         | -                                                | 0 |                                                                                                                                                      |                                                                                                                    | -                                                                                       |
|                         | -                                                | 0 |                                                                                                                                                      |                                                                                                                    | -                                                                                       |
|                         | -                                                | 0 |                                                                                                                                                      |                                                                                                                    | -                                                                                       |
| Caenorhabditis briggsae | troponin t                                       | 3 | P:GO:0043050;<br>P:GO:0006952;<br>P:GO:0040017                                                                                                       | -                                                                                                                  | PTHR11521 (PANTHER),<br>PTHR11521:SF1 (PANTHER)                                         |
|                         | -                                                | 0 |                                                                                                                                                      |                                                                                                                    | -                                                                                       |
|                         | -                                                | 0 |                                                                                                                                                      |                                                                                                                    | -                                                                                       |
| Caenorhabditis briggsae | elegans protein confirmed by transcript evidence | 4 | F:GO:0005515;<br>F:GO:0016740;<br>P:GO:0019915;<br>P:GO:0008152                                                                                      | -                                                                                                                  | IPR002213; G3DSA:3.40.50.2000 (GENE3D), PTHR11926:SF3 (PANTHER), SSF53756 (SUPERFAMILY) |
|                         | -                                                | 0 |                                                                                                                                                      |                                                                                                                    | -                                                                                       |
| Oryctolagus cuniculus   | alpha 1 type i collagen                          | 0 |                                                                                                                                                      |                                                                                                                    | -                                                                                       |
|                         | -                                                | 0 |                                                                                                                                                      |                                                                                                                    | -                                                                                       |
| Caenorhabditis briggsae | u2 small nuclear                                 | 9 | P:GO:0040035;<br>P:GO:0009792;<br>P:GO:0002119;<br>F:GO:0003676;<br>P:GO:0040010;<br>P:GO:0008340;<br>P:GO:0040011;<br>P:GO:0006898;<br>C:GO:0030529 | -                                                                                                                  | IPR011989; IPR016024; PTHR12097 (PANTHER)                                               |
| Loa loa                 | ino80 complex subunit d                          | 0 |                                                                                                                                                      | F:GO:0003674;<br>P:GO:0008150                                                                                      | -                                                                                       |
| Caenorhabditis briggsae | venom dipeptidylpeptidase iv                     | 0 |                                                                                                                                                      | F:GO:0005179;<br>P:GO:0006508;<br>F:GO:0004252;<br>F:GO:0008236;<br>C:GO:0016021;<br>C:GO:0016020;<br>C:GO:0005576 | IPR002469; G3DSA:2.140.10.30 (GENE3D), PTHR11731 (PANTHER), PTHR11731:SF17 (PANTHER)    |

|                         |                                                            |  |                                                                                                   |                                                                                                                                                                                                         |                                                                                                                           |
|-------------------------|------------------------------------------------------------|--|---------------------------------------------------------------------------------------------------|---------------------------------------------------------------------------------------------------------------------------------------------------------------------------------------------------------|---------------------------------------------------------------------------------------------------------------------------|
| Ciona intestinalis      | au r- binding protein enoyl-coenzyme a hydratase           |  | C:GO:0005875;<br>3 F:GO:0003824;<br>F:GO:0017091                                                  | -                                                                                                                                                                                                       | IPR001753; G3DSA:3.90.226.10<br>(GENE3D), PTHR11941 (PANTHER),<br>SSF52096 (SUPERFAMILY)                                  |
|                         | -                                                          |  | 0                                                                                                 |                                                                                                                                                                                                         | -                                                                                                                         |
|                         | -                                                          |  | 0                                                                                                 |                                                                                                                                                                                                         | -                                                                                                                         |
| Caenorhabditis briggsae | elegans protein partially confirmed by transcript evidence |  |                                                                                                   | F:GO:0005096;<br>P:GO:0007165;<br>F:GO:0005515;<br>C:GO:0005622                                                                                                                                         | -                                                                                                                         |
|                         | -                                                          |  | 0                                                                                                 |                                                                                                                                                                                                         | -                                                                                                                         |
| Loa loa                 | sec14-like protein 5                                       |  | C:GO:0005622;<br>3 P:GO:0006810;<br>F:GO:0005215                                                  | -                                                                                                                                                                                                       | IPR006797                                                                                                                 |
| Caenorhabditis briggsae | briggsae cbr-set-31 protein                                |  |                                                                                                   | F:GO:0016740;<br>C:GO:0000785;<br>F:GO:0003682;<br>F:GO:0008168;<br>C:GO:0005634;<br>F:GO:0003677;<br>P:GO:0006306;<br>F:GO:0008270;<br>P:GO:0006333;<br>F:GO:0018024;<br>P:GO:0016568;<br>F:GO:0005515 | IPR001214; G3DSA:2.170.270.10<br>(GENE3D), SSF82199 (SUPERFAMILY)                                                         |
|                         | -                                                          |  | 0                                                                                                 |                                                                                                                                                                                                         | -                                                                                                                         |
| Caenorhabditis briggsae | elegans protein partially confirmed by transcript evidence |  |                                                                                                   | F:GO:0003674;<br>C:GO:0016021;<br>C:GO:0016020;<br>P:GO:0008150;<br>C:GO:0005575                                                                                                                        | PTHR13167 (PANTHER),<br>PTHR13167:SF2 (PANTHER)                                                                           |
| Caenorhabditis elegans  | elegans protein partially confirmed by transcript evidence |  |                                                                                                   | F:GO:0003674;<br>P:GO:0008150                                                                                                                                                                           | PTHR13167 (PANTHER),<br>PTHR13167:SF2 (PANTHER), SignalP<br>(SIGNALP)                                                     |
| Caenorhabditis elegans  | elegans protein partially confirmed by transcript evidence |  |                                                                                                   | F:GO:0003674;<br>P:GO:0008150                                                                                                                                                                           | PTHR13167 (PANTHER),<br>PTHR13167:SF2 (PANTHER), SignalP<br>(SIGNALP)                                                     |
| Macaca mulatta          | plexin b2                                                  |  | C:GO:0016021;<br>C:GO:0005622;<br>F:GO:0004872;<br>F:GO:0005515;<br>P:GO:0007165;<br>P:GO:0050772 | -                                                                                                                                                                                                       | PTHR22625 (PANTHER),<br>PTHR22625:SF1 (PANTHER)                                                                           |
|                         | -                                                          |  | 0                                                                                                 |                                                                                                                                                                                                         | -                                                                                                                         |
|                         | -                                                          |  | 0                                                                                                 |                                                                                                                                                                                                         | -                                                                                                                         |
| Caenorhabditis briggsae | elegans protein confirmed by transcript evidence           |  | P:GO:0019915;<br>3 P:GO:0009792;<br>P:GO:0040010                                                  | -                                                                                                                                                                                                       | -                                                                                                                         |
|                         | -                                                          |  | 0                                                                                                 |                                                                                                                                                                                                         | SignalP (SIGNALP)                                                                                                         |
|                         |                                                            |  |                                                                                                   |                                                                                                                                                                                                         | IPR009443                                                                                                                 |
|                         |                                                            |  |                                                                                                   |                                                                                                                                                                                                         | IPR003598; IPR007110; IPR013098;<br>IPR013783; PTHR19897 (PANTHER),<br>PTHR19897:SF8 (PANTHER), SSF48726<br>(SUPERFAMILY) |

|                         |                                                            |   |                                                                                                                                     |                                                                                                                                                                                                                          |             |                                                                                                             |
|-------------------------|------------------------------------------------------------|---|-------------------------------------------------------------------------------------------------------------------------------------|--------------------------------------------------------------------------------------------------------------------------------------------------------------------------------------------------------------------------|-------------|-------------------------------------------------------------------------------------------------------------|
| Caenorhabditis elegans  | myosin ig                                                  | 6 | F:GO:0003779;<br>C:GO:0016459;<br>F:GO:0005524;<br>F:GO:0003774;<br>P:GO:0008152;<br>F:GO:0005516                                   | -                                                                                                                                                                                                                        |             | IPR001609; PTHR13140 (PANTHER),<br>PTHR13140:SF31 (PANTHER),<br>SSF52540 (SUPERFAMILY)                      |
| Loa loa                 | multiple pdz domain protein family member (mpz-1)          | 2 | F:GO:0005515;<br>C:GO:0016021                                                                                                       | -                                                                                                                                                                                                                        |             | -                                                                                                           |
| Caenorhabditis briggsae | topoisomerase iii alpha                                    | 8 | P:GO:0007276;<br>P:GO:0006268;<br>P:GO:0007126;<br>F:GO:0008270;<br>F:GO:0003917;<br>F:GO:0000166;<br>C:GO:0005694;<br>P:GO:0006265 | -                                                                                                                                                                                                                        | EC:5.99.1.2 | IPR000380; IPR003601; IPR013497;<br>IPR013824                                                               |
| Caenorhabditis briggsae | sig-l peptide peptidase-like 2b                            | 3 | C:GO:0016020;<br>F:GO:0004190;<br>F:GO:0005515                                                                                      | -                                                                                                                                                                                                                        | EC:3.4.23.0 | IPR006639; IPR007369;<br>PTHR12174:SF21 (PANTHER), SignalP<br>(SIGNALP)                                     |
| Caenorhabditis briggsae | briggsae cbr-rom-2 protein                                 | 4 | C:GO:0016021;<br>P:GO:0007165;<br>F:GO:0005509;<br>F:GO:0004252                                                                     | -                                                                                                                                                                                                                        | EC:3.4.21.0 | SignalP (SIGNALP)                                                                                           |
| -                       | -                                                          | 0 |                                                                                                                                     |                                                                                                                                                                                                                          |             | -                                                                                                           |
| -                       | -                                                          | 0 |                                                                                                                                     |                                                                                                                                                                                                                          |             | -                                                                                                           |
| Branchiostoma floridae  | tyrosine-protein ki-se btk29a                              | 0 |                                                                                                                                     | C:GO:0016021;<br>C:GO:0016020;<br>F:GO:0005529;<br>P:GO:0006811;<br>P:GO:0006810;<br>F:GO:0008270;<br>P:GO:0007218;<br>F:GO:0005230;<br>F:GO:0005515;<br>F:GO:0046872;<br>F:GO:0005509;<br>P:GO:0007155;<br>F:GO:0005488 |             | IPR001304; IPR016186; IPR016187;<br>PTHR22800 (PANTHER),<br>PTHR22800:SF11 (PANTHER)                        |
| -                       | -                                                          | 0 |                                                                                                                                     |                                                                                                                                                                                                                          |             | -                                                                                                           |
| -                       | -                                                          | 0 |                                                                                                                                     |                                                                                                                                                                                                                          |             | -                                                                                                           |
| Scapharca broughtonii   | serine racemase                                            | 3 | F:GO:0030170;<br>P:GO:0006520;<br>F:GO:0047689                                                                                      | -                                                                                                                                                                                                                        | EC:5.1.1.13 | -                                                                                                           |
| -                       | -                                                          | 0 |                                                                                                                                     |                                                                                                                                                                                                                          |             | -                                                                                                           |
| Loa loa                 | four domain-type voltage-gated ion channel alpha-1 subunit | 4 | C:GO:0016021;<br>F:GO:0005216;<br>P:GO:0006811;<br>P:GO:0055085                                                                     | -                                                                                                                                                                                                                        |             | PTHR10037 (PANTHER),<br>PTHR10037:SF60 (PANTHER), SignalP<br>(SIGNALP)                                      |
| -                       | -                                                          | 0 |                                                                                                                                     |                                                                                                                                                                                                                          |             | -                                                                                                           |
| Caenorhabditis briggsae | plexin a                                                   | 4 | P:GO:0016199;<br>F:GO:0005515;<br>C:GO:0044464;<br>F:GO:0004888                                                                     | -                                                                                                                                                                                                                        |             | IPR001627; IPR015943; PTHR22625<br>(PANTHER), PTHR22625:SF11<br>(PANTHER)                                   |
| Ancylostoma caninum     | elegans protein partially confirmed by transcript evidence | 3 | C:GO:0016021;<br>F:GO:0004222;<br>P:GO:0006508                                                                                      | -                                                                                                                                                                                                                        | EC:3.4.24.0 | IPR000718; IPR018497;<br>G3DSA:3.40.390.10 (GENE3D),<br>PTHR11733:SF15 (PANTHER),<br>SSF55486 (SUPERFAMILY) |
| -                       | -                                                          | 0 |                                                                                                                                     |                                                                                                                                                                                                                          |             | -                                                                                                           |

|                        |                                                 |    |                                                                                                                                                                                                                                           |   |                                                                                                                                                                       |
|------------------------|-------------------------------------------------|----|-------------------------------------------------------------------------------------------------------------------------------------------------------------------------------------------------------------------------------------------|---|-----------------------------------------------------------------------------------------------------------------------------------------------------------------------|
| Caenorhabditis elegans | briggsae cbr-elpc-4 protein                     | 0  | C:GO:0005634;<br>C:GO:0005737;<br>F:GO:0008607;<br>C:GO:0033588;<br>P:GO:0006357;<br>C:GO:0008023;<br>F:GO:0005515;<br>P:GO:0006350;<br>P:GO:0045449                                                                                      | - | -                                                                                                                                                                     |
| -                      | -                                               | 0  | -                                                                                                                                                                                                                                         | - | -                                                                                                                                                                     |
| -                      | -                                               | 0  | -                                                                                                                                                                                                                                         | - | -                                                                                                                                                                     |
| Caenorhabditis elegans | autophagy protein 9                             | 1  | P:GO:0009792                                                                                                                                                                                                                              | - | IPR007241; PTHR13038:SF1 (PANTHER)                                                                                                                                    |
| -                      | -                                               | 0  | -                                                                                                                                                                                                                                         | - | SignalP (SIGNALP)                                                                                                                                                     |
| Loa loa                | abnormal cell migration family member (mig-15)  | 14 | F:GO:0005515;<br>C:GO:0016020;<br>P:GO:0016055;<br>P:GO:0046777;<br>F:GO:0005083;<br>C:GO:0005737;<br>C:GO:0005730;<br>F:GO:0004674;<br>C:GO:0005856;<br>F:GO:0000155;<br>P:GO:0007256;<br>P:GO:0031532;<br>P:GO:0048814;<br>F:GO:0005524 | - | EC:2.7.11.0<br><br>IPR000719; IPR011009; IPR017442;<br>G3DSA:1.10.510.10 (GENE3D),<br>G3DSA:3.30.200.20 (GENE3D),<br>PTHR22986 (PANTHER),<br>PTHR22986:SF83 (PANTHER) |
| -                      | -                                               | 0  | -                                                                                                                                                                                                                                         | - | -                                                                                                                                                                     |
| -                      | -                                               | 0  | -                                                                                                                                                                                                                                         | - | -                                                                                                                                                                     |
| -                      | -                                               | 0  | -                                                                                                                                                                                                                                         | - | -                                                                                                                                                                     |
| Caenorhabditis elegans | mgc83607 protein                                | 5  | P:GO:0030514;<br>P:GO:0008344;<br>C:GO:0016021;<br>C:GO:0043025;<br>P:GO:0045886                                                                                                                                                          | - | IPR008521; SSF103481 (SUPERFAMILY)                                                                                                                                    |
| Caenorhabditis elegans | mgc83607 protein                                | 5  | P:GO:0030514;<br>P:GO:0008344;<br>C:GO:0016021;<br>C:GO:0043025;<br>P:GO:0045886                                                                                                                                                          | - | IPR008521; SSF103481 (SUPERFAMILY)                                                                                                                                    |
| Brugia malayi          | protein-tyrosine phosphatase containing protein | 3  | P:GO:0016311;<br>F:GO:0004721;<br>F:GO:0005515                                                                                                                                                                                            | - | EC:3.1.3.16<br><br>IPR000242; G3DSA:3.90.190.10 (GENE3D), PTHR19134 (PANTHER), PTHR19134:SF26 (PANTHER), SSF52799 (SUPERFAMILY)                                       |
| -                      | -                                               | 0  | -                                                                                                                                                                                                                                         | - | -                                                                                                                                                                     |
| -                      | -                                               | 0  | -                                                                                                                                                                                                                                         | - | -                                                                                                                                                                     |
| -                      | -                                               | 0  | -                                                                                                                                                                                                                                         | - | SignalP (SIGNALP)                                                                                                                                                     |

|                         |                                                          |    |                                                                                                                                                                                                                                                                             |                                                |             |                                                                                                                      |
|-------------------------|----------------------------------------------------------|----|-----------------------------------------------------------------------------------------------------------------------------------------------------------------------------------------------------------------------------------------------------------------------------|------------------------------------------------|-------------|----------------------------------------------------------------------------------------------------------------------|
| Caenorhabditis elegans  | hexosaminidase a                                         | 16 | P:GO:0042552;<br>C:GO:0005764;<br>F:GO:0004563;<br>F:GO:0005488;<br>P:GO:0048667;<br>P:GO:0050885;<br>P:GO:0001501;<br>P:GO:0019953;<br>P:GO:0019915;<br>P:GO:0030203;<br>P:GO:0006689;<br>P:GO:0050884;<br>P:GO:0007605;<br>P:GO:0007628;<br>P:GO:0007040;<br>C:GO:0016020 | -                                              | EC:3.2.1.52 | IPR001540; IPR013781; IPR015883;<br>IPR017853                                                                        |
| Caenorhabditis briggsae | elegans protein confirmed by transcript evidence         | 8  | C:GO:0005606;<br>P:GO:0030334;<br>P:GO:0045995;<br>P:GO:0030155;<br>P:GO:0031581;<br>P:GO:0008544;<br>F:GO:0005102;<br>F:GO:0005198                                                                                                                                         | -                                              |             | IPR002049; G3DSA:2.10.25.10<br>(GENE3D), PTHR10574 (PANTHER),<br>PTHR10574:SF56 (PANTHER),<br>SSF57196 (SUPERFAMILY) |
|                         | -                                                        | 0  |                                                                                                                                                                                                                                                                             |                                                |             | -                                                                                                                    |
|                         | -                                                        | 0  |                                                                                                                                                                                                                                                                             |                                                |             | -                                                                                                                    |
|                         | -                                                        | 0  |                                                                                                                                                                                                                                                                             |                                                |             | -                                                                                                                    |
| Caenorhabditis elegans  | hypothetical protein C49H3.3 [Caenorhabditis elegans]    | 0  |                                                                                                                                                                                                                                                                             |                                                |             | IPR018784                                                                                                            |
| Brugia malayi           | paired amphipathic helix repeat family protein           | 3  | F:GO:0003714;<br>P:GO:0045892;<br>C:GO:0016580                                                                                                                                                                                                                              | -                                              |             | IPR003822; IPR013194; PTHR12346<br>(PANTHER)                                                                         |
|                         | -                                                        | 0  |                                                                                                                                                                                                                                                                             |                                                |             | -                                                                                                                    |
| Caenorhabditis briggsae | elegans protein confirmed by transcript evidence         | 0  |                                                                                                                                                                                                                                                                             | P:GO:0006898;<br>P:GO:0002119;<br>P:GO:0040007 |             | SignalP (SIGNALP)                                                                                                    |
| Brugia malayi           | vacuolar protein sorting protein                         | 1  | F:GO:0005488                                                                                                                                                                                                                                                                | -                                              |             | PTHR23323 (PANTHER)                                                                                                  |
| Harpegnathos saltator   | serine threonine-protein phosphatase 4 catalytic subunit | 10 | C:GO:0030289;<br>F:GO:0004704;<br>P:GO:0016311;<br>F:GO:0046872;<br>C:GO:0005813;<br>P:GO:0000226;<br>F:GO:0004722;<br>F:GO:0005515;<br>C:GO:0005634;<br>P:GO:0006468                                                                                                       | -                                              |             | IPR004843; IPR006186;<br>G3DSA:3.60.21.10 (GENE3D),<br>PTHR11668:SF22 (PANTHER),<br>SSF56300 (SUPERFAMILY)           |
|                         | -                                                        | 0  |                                                                                                                                                                                                                                                                             |                                                |             | -                                                                                                                    |
|                         | -                                                        | 0  |                                                                                                                                                                                                                                                                             |                                                |             | -                                                                                                                    |
|                         | -                                                        | 0  |                                                                                                                                                                                                                                                                             |                                                |             | SignalP (SIGNALP)                                                                                                    |
|                         | -                                                        | 0  |                                                                                                                                                                                                                                                                             |                                                |             | -                                                                                                                    |
|                         | -                                                        | 0  |                                                                                                                                                                                                                                                                             |                                                |             | SignalP (SIGNALP)                                                                                                    |

|                        |                                                            |    |                                                                                                                                                                                                                                                                                                               |   |                                                                         |                                                                                                                      |
|------------------------|------------------------------------------------------------|----|---------------------------------------------------------------------------------------------------------------------------------------------------------------------------------------------------------------------------------------------------------------------------------------------------------------|---|-------------------------------------------------------------------------|----------------------------------------------------------------------------------------------------------------------|
| Caenorhabditis elegans | abnormal cell lineage family member (lin-2)                | 13 | P:GO:0016080;<br>P:GO:0008360;<br>P:GO:0007163;<br>C:GO:0005954;<br>F:GO:0004385;<br>F:GO:0004713;<br>F:GO:0005524;<br>P:GO:0007155;<br>F:GO:0005515;<br>P:GO:0016081;<br>P:GO:0007628;<br>F:GO:0004683;<br>P:GO:0006468                                                                                      | - | EC:2.7.4.8;<br>EC:2.7.10.0;<br>EC:2.7.11.17                             | IPR008144; G3DSA:3.40.50.300<br>(GENE3D), PTHR23122 (PANTHER),<br>PTHR23122:SF7 (PANTHER), SSF52540<br>(SUPERFAMILY) |
| -                      | -                                                          | 0  |                                                                                                                                                                                                                                                                                                               |   |                                                                         | -                                                                                                                    |
| -                      | -                                                          | 0  |                                                                                                                                                                                                                                                                                                               |   |                                                                         | -                                                                                                                    |
| Loa loa                | tnni3 interacting ki-se                                    | 3  | P:GO:0006468;<br>F:GO:0005524;<br>F:GO:0004674                                                                                                                                                                                                                                                                | - | EC:2.7.11.0                                                             | -                                                                                                                    |
| -                      | -                                                          | 0  |                                                                                                                                                                                                                                                                                                               |   |                                                                         | SignalP (SIGNALP)                                                                                                    |
| Callithrix jacchus     | rho-related gtp-binding                                    | 18 | P:GO:0007160;<br>P:GO:0006357;<br>P:GO:0033144;<br>P:GO:0000902;<br>F:GO:0005525;<br>P:GO:0030521;<br>F:GO:0004767;<br>F:GO:0017022;<br>P:GO:0043524;<br>P:GO:0043123;<br>P:GO:0007264;<br>P:GO:0007519;<br>P:GO:0045666;<br>P:GO:0051496;<br>F:GO:0003924;<br>C:GO:0005886;<br>C:GO:0005634;<br>C:GO:0005739 | - | EC:3.1.4.12;<br>EC:3.6.5.1;<br>EC:3.6.5.2;<br>EC:3.6.5.3;<br>EC:3.6.5.4 | -                                                                                                                    |
| -                      | -                                                          | 0  |                                                                                                                                                                                                                                                                                                               |   |                                                                         | PTHR11909 (PANTHER),<br>PTHR11909:SF12 (PANTHER)                                                                     |
| -                      | -                                                          | 0  |                                                                                                                                                                                                                                                                                                               |   |                                                                         | -                                                                                                                    |
| -                      | -                                                          | 0  |                                                                                                                                                                                                                                                                                                               |   |                                                                         | SignalP (SIGNALP)                                                                                                    |
| -                      | -                                                          | 0  |                                                                                                                                                                                                                                                                                                               |   |                                                                         | -                                                                                                                    |
| Loa loa                | elegans protein partially confirmed by transcript evidence | 0  | F:GO:0022891;<br>C:GO:0016021;<br>C:GO:0016020;<br>F:GO:0005351;<br>P:GO:0055085;<br>P:GO:0009792;<br>F:GO:0005215;<br>P:GO:0006810                                                                                                                                                                           |   |                                                                         | IPR005828; IPR016196; IPR020846;<br>PTHR11600 (PANTHER), SignalP<br>(SIGNALP)                                        |
| -                      | -                                                          | 0  |                                                                                                                                                                                                                                                                                                               |   |                                                                         | -                                                                                                                    |
| -                      | -                                                          | 0  |                                                                                                                                                                                                                                                                                                               |   |                                                                         | -                                                                                                                    |
| -                      | -                                                          | 0  |                                                                                                                                                                                                                                                                                                               |   |                                                                         | -                                                                                                                    |
| -                      | -                                                          | 0  |                                                                                                                                                                                                                                                                                                               |   |                                                                         | -                                                                                                                    |

|                         |                                                            |    |                                                                                                                                                                                                                                                                                                                                                                                                                                                                                                           |                                                                                  |             |                                                                                                                   |
|-------------------------|------------------------------------------------------------|----|-----------------------------------------------------------------------------------------------------------------------------------------------------------------------------------------------------------------------------------------------------------------------------------------------------------------------------------------------------------------------------------------------------------------------------------------------------------------------------------------------------------|----------------------------------------------------------------------------------|-------------|-------------------------------------------------------------------------------------------------------------------|
| Caenorhabditis elegans  | ck1 worm6 protein ki-se                                    | 0  |                                                                                                                                                                                                                                                                                                                                                                                                                                                                                                           | F:GO:0016301;<br>F:GO:0005524;<br>F:GO:0004672;<br>F:GO:0000166;<br>P:GO:0006468 |             | IPR000719; IPR017441;<br>G3DSA:3.30.200.20 (GENE3D)                                                               |
| Caenorhabditis elegans  | protein kri1 homolog                                       | 8  | P:GO:0040035;<br>P:GO:0010171;<br>P:GO:0002119;<br>P:GO:0040010;<br>P:GO:0040011;<br>P:GO:0019915;<br>P:GO:0006898;<br>P:GO:0002009                                                                                                                                                                                                                                                                                                                                                                       | -                                                                                |             | -                                                                                                                 |
| Loa loa                 | expulsion defective family member (exp-2)                  | 5  | C:GO:0008076;<br>F:GO:0005249;<br>F:GO:0005515;<br>P:GO:0055085;<br>P:GO:0006813                                                                                                                                                                                                                                                                                                                                                                                                                          | -                                                                                |             | -                                                                                                                 |
|                         |                                                            | 0  |                                                                                                                                                                                                                                                                                                                                                                                                                                                                                                           |                                                                                  |             | -                                                                                                                 |
|                         |                                                            | 0  |                                                                                                                                                                                                                                                                                                                                                                                                                                                                                                           |                                                                                  |             | -                                                                                                                 |
| Macaca mulatta          | beta 1 (fibronectin beta antigen cd29 includes msk12)      | 30 | F:GO:0005524;<br>F:GO:0005178;<br>P:GO:0045596;<br>P:GO:0008354;<br>C:GO:0031594;<br>C:GO:0032587;<br>P:GO:0007160;<br>P:GO:0055007;<br>C:GO:0019717;<br>P:GO:0030183;<br>C:GO:0042470;<br>P:GO:0001708;<br>P:GO:0045214;<br>P:GO:0031175;<br>P:GO:0007229;<br>F:GO:0046982;<br>C:GO:0009986;<br>C:GO:0008305;<br>P:GO:0008284;<br>C:GO:0042383;<br>P:GO:0007156;<br>P:GO:0051726;<br>F:GO:0042802;<br>P:GO:0033631;<br>P:GO:0000082;<br>P:GO:0007159;<br>F:GO:0004872;<br>P:GO:0001701;<br>P:GO:0006468; | -                                                                                |             | IPR001169; IPR013032; IPR013111;<br>IPR015438; IPR015812;<br>G3DSA:2.10.25.10 (GENE3D),<br>SSF57196 (SUPERFAMILY) |
| Caenorhabditis elegans  | uncoordinated family member (unc-22)                       | 3  | F:GO:0005524;<br>F:GO:0004674                                                                                                                                                                                                                                                                                                                                                                                                                                                                             | -                                                                                | EC:2.7.11.0 | IPR013098; IPR013783; PTHR19897<br>(PANTHER), SSF48726 (SUPERFAMILY)                                              |
|                         |                                                            | 0  |                                                                                                                                                                                                                                                                                                                                                                                                                                                                                                           |                                                                                  |             | -                                                                                                                 |
|                         |                                                            | 0  |                                                                                                                                                                                                                                                                                                                                                                                                                                                                                                           |                                                                                  |             | -                                                                                                                 |
| Caenorhabditis briggsae | briggsae cbr-pod-1 protein                                 | 0  |                                                                                                                                                                                                                                                                                                                                                                                                                                                                                                           |                                                                                  |             | IPR001680; IPR011046; IPR015049;<br>IPR015505; IPR015943; IPR019781                                               |
| Caenorhabditis briggsae | elegans protein partially confirmed by transcript evidence | 0  |                                                                                                                                                                                                                                                                                                                                                                                                                                                                                                           |                                                                                  |             | SignalP (SIGNALP)                                                                                                 |
| Caenorhabditis elegans  | protein o-fucosyltransferase 1                             | 0  |                                                                                                                                                                                                                                                                                                                                                                                                                                                                                                           | F:GO:0008417;<br>P:GO:0006493                                                    |             | -                                                                                                                 |
| Caenorhabditis briggsae | Hypothetical protein CBG14320 [Caenorhabditis briggsae]    | 0  |                                                                                                                                                                                                                                                                                                                                                                                                                                                                                                           |                                                                                  |             | -                                                                                                                 |



|                         |                                                                  |   |                                                                                                                                     |                                                |              |                                                                                                              |
|-------------------------|------------------------------------------------------------------|---|-------------------------------------------------------------------------------------------------------------------------------------|------------------------------------------------|--------------|--------------------------------------------------------------------------------------------------------------|
|                         | -                                                                | 0 |                                                                                                                                     |                                                |              | -                                                                                                            |
|                         | -                                                                | 0 |                                                                                                                                     |                                                |              | -                                                                                                            |
| Caenorhabditis briggsae | uncoordinated family member (unc-83)                             | 0 |                                                                                                                                     |                                                |              | -                                                                                                            |
|                         |                                                                  |   |                                                                                                                                     |                                                |              | IPR010939; IPR013098; IPR013783; PTHR19897 (PANTHER), PTHR19897:SF9 (PANTHER), SSF48726 (SUPERFAMILY)        |
| Caenorhabditis briggsae | elegans protein partially confirmed by transcript evidence       | 0 |                                                                                                                                     | P:GO:0008104                                   |              | -                                                                                                            |
| Caenorhabditis elegans  | -dc (++) coupled dicarboxylate transporter) family member (-c-3) | 4 | C:GO:0016020;<br>P:GO:0006814;<br>P:GO:0055085;<br>F:GO:0005215                                                                     | -                                              |              | IPR000215                                                                                                    |
|                         | -                                                                | 0 |                                                                                                                                     |                                                |              | -                                                                                                            |
| Caenorhabditis elegans  | elegans protein partially confirmed by transcript evidence       | 0 |                                                                                                                                     |                                                |              | IPR002542                                                                                                    |
|                         | -                                                                | 0 |                                                                                                                                     |                                                |              | -                                                                                                            |
| Caenorhabditis elegans  | tyrosine-protein phosphatase non-receptor type 4                 | 7 | F:GO:0004726;<br>C:GO:0005856;<br>C:GO:0019898;<br>F:GO:0050254;<br>F:GO:0008092;<br>C:GO:0005886;<br>P:GO:0006470                  | -                                              | EC:2.7.11.14 | IPR000242; G3DSA:3.90.190.10 (GENE3D), PTHR19134 (PANTHER), PTHR19134:SF58 (PANTHER), SSF52799 (SUPERFAMILY) |
| Caenorhabditis briggsae | inositol -trisphosphate receptor                                 | 5 | P:GO:0006816;<br>F:GO:0005220;<br>P:GO:0055085;<br>C:GO:0016021;<br>C:GO:0005783                                                    | -                                              |              | -                                                                                                            |
| Caenorhabditis elegans  | elegans protein partially confirmed by transcript evidence       | 0 |                                                                                                                                     | P:GO:0000003                                   |              | -                                                                                                            |
|                         | -                                                                | 0 |                                                                                                                                     |                                                |              | -                                                                                                            |
| Loa loa                 | elegans protein partially confirmed by transcript evidence       | 0 |                                                                                                                                     |                                                |              | -                                                                                                            |
| Caenorhabditis briggsae | flavodoxin family protein                                        | 0 |                                                                                                                                     | F:GO:0016491;<br>C:GO:0016021;<br>F:GO:0010181 |              | -                                                                                                            |
| Brugia malayi           | trehalase family protein                                         | 2 | C:GO:0016020;<br>F:GO:0016798                                                                                                       | -                                              |              | IPR001661; PTHR23403:SF1 (PANTHER)                                                                           |
| Caenorhabditis elegans  | briggsae cbr-haf-6 protein                                       | 8 | P:GO:0055085;<br>C:GO:0016021;<br>F:GO:0042626;<br>C:GO:0043190;<br>C:GO:0005624;<br>F:GO:0005524;<br>P:GO:0008152;<br>C:GO:0005740 | -                                              |              | IPR003439; G3DSA:3.40.50.300 (GENE3D), PTHR19242 (PANTHER), PTHR19242:SF77 (PANTHER), SSF52540 (SUPERFAMILY) |
| Caenorhabditis elegans  | 54s ribosomal protein I19                                        | 7 | P:GO:0009792;<br>P:GO:0002119;<br>C:GO:0005840;<br>F:GO:0003735;<br>P:GO:0040010;<br>P:GO:0006898;<br>P:GO:0006412                  | -                                              | EC:3.6.5.3   | IPR000911; IPR020783; PTHR11661:SF1 (PANTHER)                                                                |
| Caenorhabditis elegans  | k+ channel tetramerization protein                               | 6 | P:GO:0009792;<br>C:GO:0008076;<br>F:GO:0005249;<br>F:GO:0005515;<br>P:GO:0040011;<br>P:GO:0006813                                   | -                                              |              | IPR000210; IPR011333; PTHR21637 (PANTHER)                                                                    |

|                         |                                                  |   |                                                                                                                                                        |                                                                                                                                                                                                                                                                                                                                                                  |   |                                                                                                  |
|-------------------------|--------------------------------------------------|---|--------------------------------------------------------------------------------------------------------------------------------------------------------|------------------------------------------------------------------------------------------------------------------------------------------------------------------------------------------------------------------------------------------------------------------------------------------------------------------------------------------------------------------|---|--------------------------------------------------------------------------------------------------|
| Pongo abelii            | lymphocyte antigen 6 locus e                     |   | P:GO:0055010;<br>P:GO:0048242;<br>P:GO:0035265;<br>P:GO:0042415;<br>9 C:GO:0031225;<br>P:GO:0007166;<br>P:GO:0001701;<br>P:GO:0030325;<br>C:GO:0005887 | -                                                                                                                                                                                                                                                                                                                                                                |   | IPR001526; IPR016054;<br>G3DSA:2.10.60.10 (GENE3D), SignalP<br>(SIGNALP), SSF57302 (SUPERFAMILY) |
| Homo sapiens            | fk506 binding protein isoform cra_a              | 0 |                                                                                                                                                        | P:GO:0001708;<br>P:GO:0030513;<br>C:GO:0031966;<br>F:GO:0003755;<br>P:GO:0009953;<br>P:GO:0030510;<br>C:GO:0005740;<br>P:GO:0006915;<br>C:GO:0016021;<br>C:GO:0016020;<br>P:GO:0043010;<br>P:GO:0021904;<br>C:GO:0005739;<br>F:GO:0005488;<br>F:GO:0016853;<br>P:GO:0021915;<br>C:GO:0030176;<br>P:GO:0006457;<br>P:GO:0035264;<br>P:GO:0010468;<br>P:GO:0007224 | - |                                                                                                  |
|                         | -                                                | 0 |                                                                                                                                                        |                                                                                                                                                                                                                                                                                                                                                                  |   | -                                                                                                |
|                         | -                                                | 0 |                                                                                                                                                        |                                                                                                                                                                                                                                                                                                                                                                  |   | -                                                                                                |
| Caenorhabditis elegans  | briggsae cbr-mec-5 protein                       | 0 |                                                                                                                                                        |                                                                                                                                                                                                                                                                                                                                                                  |   | SignalP (SIGNALP)                                                                                |
| Caenorhabditis elegans  | elegans protein confirmed by transcript evidence | 3 | F:GO:0003824;<br>F:GO:0005488;<br>P:GO:0040010                                                                                                         | -                                                                                                                                                                                                                                                                                                                                                                |   | SignalP (SIGNALP)                                                                                |
| Caenorhabditis briggsae | epithelial fusion failure family member (eff-1)  | 0 |                                                                                                                                                        |                                                                                                                                                                                                                                                                                                                                                                  |   | -                                                                                                |
|                         | -                                                | 0 |                                                                                                                                                        |                                                                                                                                                                                                                                                                                                                                                                  |   | SignalP (SIGNALP)                                                                                |
| Caenorhabditis briggsae | myosin heavy chain                               | 4 | F:GO:0003779;<br>C:GO:0016459;<br>F:GO:0005524;<br>F:GO:0003774                                                                                        | -                                                                                                                                                                                                                                                                                                                                                                |   | -                                                                                                |
|                         | -                                                | 0 |                                                                                                                                                        |                                                                                                                                                                                                                                                                                                                                                                  |   | -                                                                                                |

|                         |                                                  |    |                                                                                                                                                                                                                                                                                                               |   |                                                                              |
|-------------------------|--------------------------------------------------|----|---------------------------------------------------------------------------------------------------------------------------------------------------------------------------------------------------------------------------------------------------------------------------------------------------------------|---|------------------------------------------------------------------------------|
| Caenorhabditis elegans  | exosome complex exonuclease rrp41                | 18 | F:GO:0005515;<br>C:GO:0016020;<br>P:GO:0040010;<br>P:GO:0040018;<br>F:GO:0016740;<br>P:GO:0008406;<br>F:GO:0004527;<br>P:GO:0006396;<br>P:GO:0009792;<br>C:GO:0043234;<br>P:GO:0002119;<br>C:GO:0005740;<br>C:GO:0031974;<br>F:GO:0003723;<br>P:GO:0010171;<br>P:GO:0071044;<br>C:GO:0005634;<br>P:GO:0006626 | - | IPR001247; IPR015847; IPR020568;<br>PTHR11953 (PANTHER)                      |
| Caenorhabditis elegans  | exosome complex exonuclease rrp41                | 18 | F:GO:0005515;<br>C:GO:0016020;<br>P:GO:0040010;<br>P:GO:0040018;<br>F:GO:0016740;<br>P:GO:0008406;<br>F:GO:0004527;<br>P:GO:0006396;<br>P:GO:0009792;<br>C:GO:0043234;<br>P:GO:0002119;<br>C:GO:0005740;<br>C:GO:0031974;<br>F:GO:0003723;<br>P:GO:0010171;<br>P:GO:0071044;<br>C:GO:0005634;<br>P:GO:0006626 | - | IPR001247; IPR015847; IPR020568;<br>PTHR11953 (PANTHER)                      |
| -                       | -                                                | 0  |                                                                                                                                                                                                                                                                                                               | - | -                                                                            |
|                         | ap-2 complex subunit mu-1                        | 14 | P:GO:0016192;<br>C:GO:0005829;<br>C:GO:0030125;<br>C:GO:0030132;<br>C:GO:0005739;<br>C:GO:0030133;<br>F:GO:0008289;<br>C:GO:0030131;<br>C:GO:0005778;<br>C:GO:0030666;<br>P:GO:0050690;<br>F:GO:0005515;<br>F:GO:0005215;<br>P:GO:0006886                                                                     | - | IPR008968; IPR015629;<br>G3DSA:2.60.40.1170 (GENE3D),<br>PTHR11998 (PANTHER) |
| -                       | -                                                | 0  |                                                                                                                                                                                                                                                                                                               | - | -                                                                            |
| Caenorhabditis briggsae | angiogenic factor with g patch and fha domains 1 | 4  | F:GO:0005488;<br>P:GO:0032502;<br>C:GO:0005622;<br>P:GO:0009987                                                                                                                                                                                                                                               | - | PTHR23106 (PANTHER)                                                          |
| -                       | -                                                | 0  |                                                                                                                                                                                                                                                                                                               | - | SignalP (SIGNALP)                                                            |
| -                       | -                                                | 0  |                                                                                                                                                                                                                                                                                                               | - | -                                                                            |

|                             |                                                         |    |                                                                                                                                                                                                                                                                                                                                                                  |                                                |             |                                                                                        |
|-----------------------------|---------------------------------------------------------|----|------------------------------------------------------------------------------------------------------------------------------------------------------------------------------------------------------------------------------------------------------------------------------------------------------------------------------------------------------------------|------------------------------------------------|-------------|----------------------------------------------------------------------------------------|
| Loa loa                     | nucleolar protein 10                                    | 5  | P:GO:0009792;<br>P:GO:0002119;<br>P:GO:0018991;<br>P:GO:0040010;<br>C:GO:0005634                                                                                                                                                                                                                                                                                 | -                                              |             | PTHR14927 (PANTHER)                                                                    |
| Brugia malayi               | elegans protein confirmed by transcript evidence        | 0  |                                                                                                                                                                                                                                                                                                                                                                  | C:GO:0005737;<br>F:GO:0005515                  |             | -                                                                                      |
| Brugia malayi               | retinoic acid receptor rxr-alpha-like                   | 21 | F:GO:0003700;<br>F:GO:0070644;<br>F:GO:0003708;<br>F:GO:0046872;<br>P:GO:0048738;<br>P:GO:0008203;<br>P:GO:0009653;<br>P:GO:0022414;<br>F:GO:0003713;<br>P:GO:0045944;<br>P:GO:0010033;<br>P:GO:0048384;<br>P:GO:0006766;<br>P:GO:0030154;<br>F:GO:0042809;<br>F:GO:0046982;<br>F:GO:0046966;<br>C:GO:0005634;<br>P:GO:0032526;<br>F:GO:0003706;<br>P:GO:0010553 | -                                              |             | IPR000536; IPR008946; PR00545 (PRINTS), PTHR11865 (PANTHER), PTHR11865:SF190 (PANTHER) |
| -                           | -                                                       | 0  |                                                                                                                                                                                                                                                                                                                                                                  |                                                |             | -                                                                                      |
| -                           | -                                                       | 0  |                                                                                                                                                                                                                                                                                                                                                                  |                                                |             | -                                                                                      |
| -                           | -                                                       | 0  |                                                                                                                                                                                                                                                                                                                                                                  |                                                |             | -                                                                                      |
| -                           | -                                                       | 0  |                                                                                                                                                                                                                                                                                                                                                                  |                                                |             | SignalP (SIGNALP)                                                                      |
| -                           | -                                                       | 0  |                                                                                                                                                                                                                                                                                                                                                                  |                                                |             | -                                                                                      |
| Teladorsagia circumcincta   | class 3 lipase protein                                  | 1  | F:GO:0016787                                                                                                                                                                                                                                                                                                                                                     | -                                              |             | SignalP (SIGNALP)                                                                      |
| -                           | -                                                       | 0  |                                                                                                                                                                                                                                                                                                                                                                  |                                                |             | -                                                                                      |
| -                           | -                                                       | 0  |                                                                                                                                                                                                                                                                                                                                                                  |                                                |             | -                                                                                      |
| -                           | -                                                       | 0  |                                                                                                                                                                                                                                                                                                                                                                  |                                                |             | SignalP (SIGNALP)                                                                      |
| Caenorhabditis briggsae     | Hypothetical protein CBG08295 [Caenorhabditis briggsae] | 0  |                                                                                                                                                                                                                                                                                                                                                                  |                                                |             | -                                                                                      |
| Loa loa                     | r- pseudouridylate synthase domain containing 4         | 1  | F:GO:0003824                                                                                                                                                                                                                                                                                                                                                     | -                                              |             | -                                                                                      |
| -                           | -                                                       | 0  |                                                                                                                                                                                                                                                                                                                                                                  |                                                |             | -                                                                                      |
| Angiostrongylus cantonensis | fyve zinc finger family protein                         | 2  | F:GO:0008270;<br>F:GO:0005515                                                                                                                                                                                                                                                                                                                                    | -                                              |             | IPR000306; IPR011011; IPR013083; IPR015390; IPR017455; PD936484 (PRODOM)               |
| -                           | -                                                       | 0  |                                                                                                                                                                                                                                                                                                                                                                  |                                                |             | -                                                                                      |
| Loa loa                     | lethal family member (let-19)                           | 0  |                                                                                                                                                                                                                                                                                                                                                                  | F:GO:0016455;<br>P:GO:0009792;<br>C:GO:0016592 |             | PTHR12950 (PANTHER), PTHR12950:SF3 (PANTHER)                                           |
| -                           | -                                                       | 0  |                                                                                                                                                                                                                                                                                                                                                                  |                                                |             | -                                                                                      |
| -                           | -                                                       | 0  |                                                                                                                                                                                                                                                                                                                                                                  |                                                |             | -                                                                                      |
| Caenorhabditis briggsae     | protein ki-se domain containing protein                 | 4  | P:GO:0006468;<br>F:GO:0005515;<br>F:GO:0004713;<br>F:GO:0005524                                                                                                                                                                                                                                                                                                  | -                                              | EC:2.7.10.0 | IPR000719; IPR001245; IPR011009; IPR020685; IPR020764; G3DSA:1.10.510.10 (GENE3D)      |

|                         |                                                |    |                                                                                                                                                                                                                                                                                                                                                                  |                               |                                                                         |                                                            |
|-------------------------|------------------------------------------------|----|------------------------------------------------------------------------------------------------------------------------------------------------------------------------------------------------------------------------------------------------------------------------------------------------------------------------------------------------------------------|-------------------------------|-------------------------------------------------------------------------|------------------------------------------------------------|
| Harpegnathos saltator   | ran                                            | 21 | C:GO:0000785;<br>C:GO:0005654;<br>P:GO:0007052;<br>C:GO:0042470;<br>F:GO:0005525;<br>P:GO:0030521;<br>P:GO:0051301;<br>P:GO:0006611;<br>F:GO:0004767;<br>P:GO:0006259;<br>C:GO:0005829;<br>C:GO:0005643;<br>P:GO:0007067;<br>F:GO:0003713;<br>P:GO:0007165;<br>P:GO:0045893;<br>F:GO:0003682;<br>F:GO:0003924;<br>F:GO:0050681;<br>P:GO:0006405;<br>P:GO:0044419 | -                             | EC:3.1.4.12;<br>EC:3.6.5.1;<br>EC:3.6.5.2;<br>EC:3.6.5.3;<br>EC:3.6.5.4 | -                                                          |
| Caenorhabditis elegans  | briggsae cbr-mvb-12 protein                    | 0  |                                                                                                                                                                                                                                                                                                                                                                  |                               |                                                                         | IPR018798; PSS1497 (PROFILE)                               |
|                         | -                                              | 0  |                                                                                                                                                                                                                                                                                                                                                                  |                               |                                                                         | -                                                          |
| Caenorhabditis elegans  | briggsae cbr-orai-1 protein                    | 0  |                                                                                                                                                                                                                                                                                                                                                                  | C:GO:0016021;<br>C:GO:0016020 |                                                                         | -                                                          |
|                         | -                                              | 0  |                                                                                                                                                                                                                                                                                                                                                                  |                               |                                                                         | -                                                          |
| Brugia malayi           | hypothetical protein Bm1_34160 [Brugia malayi] | 0  |                                                                                                                                                                                                                                                                                                                                                                  | C:GO:0005737;<br>C:GO:0016020 |                                                                         | -                                                          |
|                         | -                                              | 0  |                                                                                                                                                                                                                                                                                                                                                                  |                               |                                                                         | SignalP (SIGNALP)                                          |
| Caenorhabditis briggsae | actin-binding rho activating                   | 0  |                                                                                                                                                                                                                                                                                                                                                                  |                               |                                                                         | PTHR22739 (PANTHER)                                        |
|                         | -                                              | 0  |                                                                                                                                                                                                                                                                                                                                                                  |                               |                                                                         | -                                                          |
|                         | -                                              | 0  |                                                                                                                                                                                                                                                                                                                                                                  |                               |                                                                         | SignalP (SIGNALP)                                          |
| Homo sapiens            | tissue inhibitor of metalloprotei-se 1         | 7  | P:GO:0051045;<br>P:GO:0043249;<br>F:GO:0046872;<br>F:GO:0005515;<br>F:GO:0008191;<br>P:GO:0008284;<br>C:GO:0005578                                                                                                                                                                                                                                               | -                             |                                                                         | -                                                          |
| Pongo abelii            | family with sequence similarity member a       | 3  | C:GO:0016021;<br>C:GO:0005789;<br>C:GO:0033116                                                                                                                                                                                                                                                                                                                   | -                             |                                                                         | IPR021999; PTHR13167 (PANTHER),<br>PTHR13167:SF7 (PANTHER) |
|                         | -                                              | 0  |                                                                                                                                                                                                                                                                                                                                                                  |                               |                                                                         | -                                                          |
|                         | -                                              | 0  |                                                                                                                                                                                                                                                                                                                                                                  |                               |                                                                         | -                                                          |
| Caenorhabditis briggsae | acid ceramidase precursor                      | 5  | P:GO:0006629;<br>P:GO:0010033;<br>C:GO:0005764;<br>P:GO:0030324;<br>F:GO:0017040                                                                                                                                                                                                                                                                                 | -                             | EC:3.5.1.23                                                             | SignalP (SIGNALP)                                          |
|                         | -                                              | 0  |                                                                                                                                                                                                                                                                                                                                                                  |                               |                                                                         | -                                                          |

|                        |                                    |    |                                                                                                                                                                                                                                                                                                                                                                                                                                                                                          |                   |
|------------------------|------------------------------------|----|------------------------------------------------------------------------------------------------------------------------------------------------------------------------------------------------------------------------------------------------------------------------------------------------------------------------------------------------------------------------------------------------------------------------------------------------------------------------------------------|-------------------|
| Caenorhabditis elegans | cadherin domain containing protein | 0  | P:GO:0007218;<br>F:GO:0005509;<br>P:GO:0007156;<br>F:GO:0004930;<br>P:GO:0007155;<br>C:GO:0016021;<br>C:GO:0016020;<br>C:GO:0005886                                                                                                                                                                                                                                                                                                                                                      | -                 |
| -                      | -                                  | 0  | -                                                                                                                                                                                                                                                                                                                                                                                                                                                                                        | -                 |
| -                      | -                                  | 0  | -                                                                                                                                                                                                                                                                                                                                                                                                                                                                                        | SignalP (SIGNALP) |
| -                      | -                                  | 0  | -                                                                                                                                                                                                                                                                                                                                                                                                                                                                                        | SignalP (SIGNALP) |
| Caenorhabditis elegans | briggsae cbr-tag-164 protein       | 0  | C:GO:0016021                                                                                                                                                                                                                                                                                                                                                                                                                                                                             | -                 |
| -                      | -                                  | 0  | -                                                                                                                                                                                                                                                                                                                                                                                                                                                                                        | -                 |
| Chlorocebus aethiops   | heavy chain non-muscle             | 43 | P:GO:0001295;<br>C:GO:0030863;<br>P:GO:0008360;<br>C:GO:0031594;<br>P:GO:0030048;<br>F:GO:0030898;<br>P:GO:0051295;<br>C:GO:0005913;<br>P:GO:0016337;<br>F:GO:0043531;<br>P:GO:0032796;<br>P:GO:0015031;<br>C:GO:0001772;<br>P:GO:0050900;<br>P:GO:0007229;<br>C:GO:0005829;<br>P:GO:0007520;<br>F:GO:0000146;<br>P:GO:0006509;<br>P:GO:0043534;<br>C:GO:0008305;<br>C:GO:0005819;<br>C:GO:0001726;<br>P:GO:0007132;<br>C:GO:0032154;<br>P:GO:0000904;<br>P:GO:0001768;<br>F:GO:0043495; | -                 |
| -                      | -                                  | 0  | -                                                                                                                                                                                                                                                                                                                                                                                                                                                                                        | -                 |

|                         |                                                            |    |                                                                                                                                                                                                                                                                                                                                                                                                                     |                                                                                                   |                                                                                                                                                 |
|-------------------------|------------------------------------------------------------|----|---------------------------------------------------------------------------------------------------------------------------------------------------------------------------------------------------------------------------------------------------------------------------------------------------------------------------------------------------------------------------------------------------------------------|---------------------------------------------------------------------------------------------------|-------------------------------------------------------------------------------------------------------------------------------------------------|
| Ailuropoda melanoleuca  | dynein light chain cytoplasmic                             | 24 | P:GO:0009653;<br>P:GO:0006810;<br>F:GO:0008022;<br>C:GO:0005624;<br>P:GO:0045019;<br>C:GO:0005829;<br>C:GO:0005874;<br>F:GO:0003777;<br>P:GO:0030036;<br>P:GO:0042326;<br>F:GO:0019904;<br>F:GO:0030235;<br>P:GO:0042133;<br>P:GO:0007292;<br>P:GO:0045449;<br>F:GO:0042803;<br>P:GO:0008633;<br>C:GO:0005868;<br>F:GO:0019899;<br>P:GO:0007018;<br>C:GO:0005886;<br>F:GO:0004857;<br>C:GO:0005634;<br>C:GO:0005739 | -                                                                                                 | SignalP (SIGNALP)                                                                                                                               |
| Caenorhabditis elegans  | serpentine class ab (class a-like) family member (srab-14) | 4  | P:GO:0007186;<br>C:GO:0016021;<br>P:GO:0007606;<br>F:GO:0004888                                                                                                                                                                                                                                                                                                                                                     | -                                                                                                 | IPR019408; SignalP (SIGNALP)                                                                                                                    |
|                         | -                                                          | 0  |                                                                                                                                                                                                                                                                                                                                                                                                                     |                                                                                                   | -                                                                                                                                               |
|                         | -                                                          | 0  |                                                                                                                                                                                                                                                                                                                                                                                                                     |                                                                                                   | -                                                                                                                                               |
|                         | -                                                          | 0  |                                                                                                                                                                                                                                                                                                                                                                                                                     |                                                                                                   | SignalP (SIGNALP)                                                                                                                               |
| Callithrix jacchus      | nhp2 non-histone chromosome protein 2-like 1 ( cerevisiae) | 8  | P:GO:0008380;<br>C:GO:0031428;<br>F:GO:0030515;<br>C:GO:0005681;<br>F:GO:0005515;<br>P:GO:0042254;<br>P:GO:0006397;<br>P:GO:0007338                                                                                                                                                                                                                                                                                 | -                                                                                                 | IPR004037; IPR004038; IPR018492;<br>G3DSA:3.30.1330.30 (GENE3D),<br>PTHR23105 (PANTHER),<br>PTHR23105:SF11 (PANTHER),<br>SSF55315 (SUPERFAMILY) |
| Caenorhabditis elegans  | Hypothetical protein Y59E9AL.36 [Caenorhabditis elegans]   | 0  |                                                                                                                                                                                                                                                                                                                                                                                                                     | F:GO:0003676;<br>F:GO:0000166;<br>C:GO:0016020;<br>P:GO:0055085;<br>F:GO:0005215;<br>P:GO:0006810 | IPR000504; IPR012677; PTHR10432<br>(PANTHER), SignalP (SIGNALP),<br>SSF54928 (SUPERFAMILY)                                                      |
|                         | -                                                          | 0  |                                                                                                                                                                                                                                                                                                                                                                                                                     |                                                                                                   | -                                                                                                                                               |
|                         | -                                                          | 0  |                                                                                                                                                                                                                                                                                                                                                                                                                     |                                                                                                   | SignalP (SIGNALP)                                                                                                                               |
| Caenorhabditis briggsae | scavenger receptor class a- c-type lectin (agap009143-pa)  | 3  | C:GO:0016020;<br>F:GO:0005044;<br>F:GO:0005488                                                                                                                                                                                                                                                                                                                                                                      | -                                                                                                 | IPR001190; IPR017448;<br>G3DSA:3.10.250.10 (GENE3D),<br>PTHR19331 (PANTHER),<br>PTHR19331:SF24 (PANTHER)                                        |
|                         | -                                                          | 0  |                                                                                                                                                                                                                                                                                                                                                                                                                     |                                                                                                   | -                                                                                                                                               |

|                         |                                                            |    |                                                                                                                                                                       |                                                |                                                                                                                                       |
|-------------------------|------------------------------------------------------------|----|-----------------------------------------------------------------------------------------------------------------------------------------------------------------------|------------------------------------------------|---------------------------------------------------------------------------------------------------------------------------------------|
| Caenorhabditis elegans  | stress-activated protein ki-se jnk                         | 10 | P:GO:0007254;<br>F:GO:0004705;<br>P:GO:0031558;<br>F:GO:0005524;<br>P:GO:0010744;<br>F:GO:0005515;<br>P:GO:0010628;<br>C:GO:0005654;<br>P:GO:0046686;<br>P:GO:0006468 | -                                              | IPR000719; IPR008271; IPR011009;<br>IPR017442; G3DSA:1.10.510.10<br>(GENE3D), PTHR11295 (PANTHER),<br>PTHR11295:SF62 (PANTHER)        |
| Caenorhabditis briggsae | elegans protein partially confirmed by transcript evidence | 0  |                                                                                                                                                                       | C:GO:0034703;<br>P:GO:0055080;<br>F:GO:0005261 | -                                                                                                                                     |
| -                       | -                                                          | 0  |                                                                                                                                                                       |                                                | SignalP (SIGNALP)                                                                                                                     |
| -                       | -                                                          | 0  |                                                                                                                                                                       |                                                | -                                                                                                                                     |
| -                       | -                                                          | 0  |                                                                                                                                                                       |                                                | -                                                                                                                                     |
| -                       | -                                                          | 0  |                                                                                                                                                                       |                                                | -                                                                                                                                     |
| Caenorhabditis elegans  | ran-binding protein                                        | 1  | F:GO:0005488                                                                                                                                                          | -                                              | SignalP (SIGNALP)                                                                                                                     |
| -                       | -                                                          | 0  |                                                                                                                                                                       |                                                | -                                                                                                                                     |
| -                       | -                                                          | 0  |                                                                                                                                                                       |                                                | -                                                                                                                                     |
| -                       | -                                                          | 0  |                                                                                                                                                                       |                                                | -                                                                                                                                     |
| -                       | -                                                          | 0  |                                                                                                                                                                       |                                                | IPR001810; G3DSA:1.20.1280.50<br>(GENE3D)                                                                                             |
| -                       | -                                                          | 0  |                                                                                                                                                                       |                                                | -                                                                                                                                     |
| -                       | -                                                          | 0  |                                                                                                                                                                       |                                                | -                                                                                                                                     |
| Caenorhabditis briggsae | Hypothetical protein CBG15282 [Caenorhabditis briggsae]    | 0  |                                                                                                                                                                       | F:GO:0016491;<br>F:GO:0004867;<br>F:GO:0005515 | -                                                                                                                                     |
| -                       | -                                                          | 0  |                                                                                                                                                                       |                                                | -                                                                                                                                     |
| -                       | -                                                          | 0  |                                                                                                                                                                       |                                                | IPR000909; IPR017946; PTHR10336<br>(PANTHER), PTHR10336:SF7<br>(PANTHER)                                                              |
| -                       | -                                                          | 0  |                                                                                                                                                                       |                                                | -                                                                                                                                     |
| Brugia malayi           | zinc finger r- binding protein                             | 3  | F:GO:0005488;<br>C:GO:0043232;<br>C:GO:0005634                                                                                                                        | -                                              | IPR003604; IPR006561; IPR007087;<br>IPR015880; IPR022755; PTHR10910<br>(PANTHER), PTHR10910:SF26<br>(PANTHER), SSF57667 (SUPERFAMILY) |
| Brugia malayi           | zinc finger r- binding protein                             | 3  | F:GO:0005488;<br>C:GO:0043232;<br>C:GO:0005634                                                                                                                        | -                                              | IPR003604; IPR006561; IPR007087;<br>IPR015880; IPR022755; PTHR10910<br>(PANTHER), PTHR10910:SF26<br>(PANTHER), SSF57667 (SUPERFAMILY) |
| Caenorhabditis elegans  | uncoordinated family member (unc-49)                       | 7  | P:GO:0010171;<br>F:GO:0004872;<br>C:GO:0045211;<br>C:GO:0030054;<br>F:GO:0005230;<br>P:GO:0006811;<br>C:GO:0016021                                                    | -                                              | IPR006029; IPR006201;<br>G3DSA:1.20.120.370 (GENE3D),<br>PTHR18945:SF8 (PANTHER), SignalP<br>(SIGNALP)                                |
| -                       | -                                                          | 0  |                                                                                                                                                                       |                                                | -                                                                                                                                     |
| -                       | -                                                          | 0  |                                                                                                                                                                       |                                                | PTHR13179 (PANTHER)                                                                                                                   |
| -                       | -                                                          | 0  |                                                                                                                                                                       |                                                | -                                                                                                                                     |
| -                       | -                                                          | 0  |                                                                                                                                                                       |                                                | -                                                                                                                                     |
| Caenorhabditis briggsae | briggsae cbr-tag-149 protein                               | 0  |                                                                                                                                                                       |                                                | SignalP (SIGNALP)                                                                                                                     |



|                         |                                                     |   |                                                                                                                                     |   |             |                                                                                                                               |
|-------------------------|-----------------------------------------------------|---|-------------------------------------------------------------------------------------------------------------------------------------|---|-------------|-------------------------------------------------------------------------------------------------------------------------------|
| Caenorhabditis briggsae | briggsae cbr-cht-1 protein                          | 8 | P:GO:0009792;<br>C:GO:0005615;<br>F:GO:0008843;<br>P:GO:0006032;<br>F:GO:0043169;<br>P:GO:0009617;<br>F:GO:0008061;<br>P:GO:0006955 | - | -           | -                                                                                                                             |
| -                       | -                                                   | 0 |                                                                                                                                     |   |             | -                                                                                                                             |
| -                       | -                                                   | 0 |                                                                                                                                     |   |             | -                                                                                                                             |
| Caenorhabditis elegans  | mitochondrial translatio-l release factor 1         | 3 | F:GO:0003747;<br>C:GO:0005739;<br>P:GO:0006415                                                                                      | - |             | PTHR11075 (PANTHER),<br>PTHR11075:SF11 (PANTHER),<br>SSF75620 (SUPERFAMILY)                                                   |
| Caenorhabditis briggsae | solute carrier organic anion transporter member 4c1 | 3 | P:GO:0006810;<br>C:GO:0016020;<br>F:GO:0005215                                                                                      | - |             | IPR001412; IPR004156; IPR016196;<br>IPR020830; G3DSA:1.20.1250.20<br>(GENE3D), PTHR11388:SF10<br>(PANTHER), PSS1465 (PROFILE) |
| -                       | -                                                   | 0 |                                                                                                                                     |   |             | IPR004296                                                                                                                     |
| Loa loa                 | polymerase iii (d- directed) polypeptide 155kda     | 2 | F:GO:0005488;<br>F:GO:0016779                                                                                                       | - | EC:2.7.7.0  | -                                                                                                                             |
| Caenorhabditis elegans  | 3-oxoacyl-                                          | 2 | F:GO:0016747;<br>P:GO:0009058                                                                                                       | - | EC:2.3.1.0  | -                                                                                                                             |
| -                       | -                                                   | 0 |                                                                                                                                     |   |             | SignalP (SIGNALP)                                                                                                             |
| Loa loa                 | hypothetical protein LOAG_10658 [Loa loa]           | 0 |                                                                                                                                     |   |             | IPR007145                                                                                                                     |
| Caenorhabditis elegans  | pyrazi-midase and oti-midase family member (pnc-1)  | 1 | F:GO:0003824                                                                                                                        | - |             | -                                                                                                                             |
| -                       | -                                                   | 0 |                                                                                                                                     |   |             | -                                                                                                                             |
| -                       | -                                                   | 0 |                                                                                                                                     |   |             | -                                                                                                                             |
| -                       | -                                                   | 0 |                                                                                                                                     |   |             | -                                                                                                                             |
| -                       | -                                                   | 0 |                                                                                                                                     |   |             | -                                                                                                                             |
| Caenorhabditis elegans  | frizzled homolog 7b                                 | 6 | P:GO:0048729;<br>P:GO:0007166;<br>F:GO:0005515;<br>P:GO:0007369;<br>C:GO:0016020;<br>F:GO:0004888                                   | - |             | IPR000539; IPR015526; IPR017981;<br>IPR020067; PTHR11309:SF20<br>(PANTHER)                                                    |
| Brugia malayi           | frizzled homolog 7b                                 | 3 | P:GO:0007166;<br>C:GO:0016020;<br>F:GO:0004888                                                                                      | - |             | -                                                                                                                             |
| -                       | -                                                   | 0 |                                                                                                                                     |   |             | -                                                                                                                             |
| Caenorhabditis elegans  | homology domain containing protein                  | 0 |                                                                                                                                     |   |             | -                                                                                                                             |
| -                       | -                                                   | 0 |                                                                                                                                     |   |             | -                                                                                                                             |
| -                       | -                                                   | 0 |                                                                                                                                     |   |             | -                                                                                                                             |
| Caenorhabditis elegans  | briggsae cbr-asp-5 protein                          | 6 | C:GO:0016021;<br>P:GO:0008219;<br>P:GO:0006508;<br>F:GO:0004190;<br>F:GO:0005515;<br>P:GO:0040011                                   | - | EC:3.4.23.0 | -                                                                                                                             |
| Caenorhabditis briggsae | serine threonine protein                            | 3 | P:GO:0006468;<br>F:GO:0005524;<br>F:GO:0004674                                                                                      | - | EC:2.7.11.0 | IPR000719; IPR011009; IPR017442;<br>G3DSA:1.10.510.10 (GENE3D),<br>PTHR22986 (PANTHER),<br>PTHR22986:SF19 (PANTHER)           |
| -                       | -                                                   | 0 |                                                                                                                                     |   |             | -                                                                                                                             |
| -                       | -                                                   | 0 |                                                                                                                                     |   |             | -                                                                                                                             |

|                         |                                                                |   |                                                                                                                |   |             |                                                                                                                         |
|-------------------------|----------------------------------------------------------------|---|----------------------------------------------------------------------------------------------------------------|---|-------------|-------------------------------------------------------------------------------------------------------------------------|
| Caenorhabditis elegans  | protein-tyrosine phosphatase containing protein                | 1 | F:GO:0004721                                                                                                   | - | EC:3.1.3.16 | IPR000242; IPR000387; G3DSA:3.90.190.10 (GENE3D), PTHR19134 (PANTHER), PTHR19134:SF26 (PANTHER), SSF52799 (SUPERFAMILY) |
| -                       | -                                                              | 0 | -                                                                                                              | - | -           | -                                                                                                                       |
| Caenorhabditis elegans  | bypass of response to pheromone in yeast family member (brp-1) | 0 | F:GO:0005515                                                                                                   | - | -           | -                                                                                                                       |
| Caenorhabditis elegans  | bypass of response to pheromone in yeast family member (brp-1) | 0 | F:GO:0005515                                                                                                   | - | -           | -                                                                                                                       |
| -                       | -                                                              | 0 | -                                                                                                              | - | -           | -                                                                                                                       |
| Caenorhabditis briggsae | Hypothetical protein CBG16145 [Caenorhabditis briggsae]        | 0 | -                                                                                                              | - | -           | -                                                                                                                       |
| Caenorhabditis briggsae | kelch-like 18                                                  | 0 | F:GO:0003674; F:GO:0005515; C:GO:0005575                                                                       | - | -           | -                                                                                                                       |
| Brugia malayi           | frizzled homolog 9                                             | 7 | P:GO:0007186; F:GO:0004926; C:GO:0016021; P:GO:0007165; P:GO:0007275; P:GO:0016055; F:GO:0004930               | - | -           | IPR000539; IPR015526; PTHR11309:SF18 (PANTHER), SignalP (SIGNALP)                                                       |
| -                       | -                                                              | 0 | -                                                                                                              | - | -           | SignalP (SIGNALP)                                                                                                       |
| -                       | -                                                              | 0 | -                                                                                                              | - | -           | SignalP (SIGNALP)                                                                                                       |
| -                       | -                                                              | 0 | -                                                                                                              | - | -           | -                                                                                                                       |
| Loa loa                 | cg10889 cg10889-pa                                             | 0 | F:GO:0003676; F:GO:0003674; F:GO:0008270; C:GO:0005575                                                         | - | -           | -                                                                                                                       |
| -                       | -                                                              | 0 | -                                                                                                              | - | -           | -                                                                                                                       |
| Caenorhabditis briggsae | Hypothetical protein CBG01087 [Caenorhabditis briggsae]        | 0 | -                                                                                                              | - | -           | -                                                                                                                       |
| Haemonchus contortus    | aspartyl protease family member (asp-2)                        | 4 | P:GO:0008219; F:GO:0016787; F:GO:0005515; P:GO:0040011                                                         | - | -           | IPR001461; IPR009007; IPR021109; PTHR13683:SF53 (PANTHER)                                                               |
| -                       | -                                                              | 0 | -                                                                                                              | - | -           | -                                                                                                                       |
| -                       | -                                                              | 0 | -                                                                                                              | - | -           | -                                                                                                                       |
| -                       | -                                                              | 0 | -                                                                                                              | - | -           | -                                                                                                                       |
| -                       | -                                                              | 0 | -                                                                                                              | - | -           | -                                                                                                                       |
| Caenorhabditis briggsae | elegans protein confirmed by transcript evidence               | 0 | -                                                                                                              | - | -           | -                                                                                                                       |
| -                       | -                                                              | 0 | -                                                                                                              | - | -           | -                                                                                                                       |
| Caenorhabditis briggsae | coronin family member (cor-1)                                  | 2 | F:GO:0008415; P:GO:0000003                                                                                     | - | -           | IPR015049; IPR015505                                                                                                    |
| -                       | -                                                              | 0 | -                                                                                                              | - | -           | -                                                                                                                       |
| Caenorhabditis elegans  | fibronectin 1b                                                 | 8 | P:GO:0018996; P:GO:0009792; P:GO:0008340; P:GO:0000003; F:GO:0005515; P:GO:0006898; P:GO:0002119; P:GO:0040011 | - | -           | IPR003961; IPR008957; IPR013783                                                                                         |
| Haemonchus contortus    | ornithine decarboxylase                                        | 2 | P:GO:0006596; F:GO:0004586                                                                                     | - | EC:4.1.1.17 | IPR009006; IPR022643; PTHR11482 (PANTHER)                                                                               |
| -                       | -                                                              | 0 | -                                                                                                              | - | -           | -                                                                                                                       |

|                         |                                                            |   |                                                |   |                                                                                                                                                                         |
|-------------------------|------------------------------------------------------------|---|------------------------------------------------|---|-------------------------------------------------------------------------------------------------------------------------------------------------------------------------|
| Ancylostoma ceylanicum  | metalloprotease 1 precursor                                | 2 | F:GO:0046872;<br>F:GO:0008237                  | - | IPR000859; IPR001506; IPR006026;<br>IPR006210; IPR013032;<br>G3DSA:3.40.390.10 (GENE3D),<br>PTHR10127 (PANTHER),<br>PTHR10127:SF65 (PANTHER),<br>SSF55486 (SUPERFAMILY) |
| Ancylostoma ceylanicum  | metalloprotease 1 precursor                                | 2 | F:GO:0046872;<br>F:GO:0008237                  | - |                                                                                                                                                                         |
| Ancylostoma ceylanicum  | metalloprotease 1 precursor                                | 2 | F:GO:0046872;<br>F:GO:0008237                  | - | IPR000859; IPR001506; IPR006026;<br>IPR006210; IPR013032;<br>G3DSA:3.40.390.10 (GENE3D),<br>PTHR10127 (PANTHER),<br>PTHR10127:SF65 (PANTHER),<br>SSF55486 (SUPERFAMILY) |
| Ancylostoma ceylanicum  | metalloprotease 1 precursor                                | 2 | F:GO:0046872;<br>F:GO:0008237                  | - | IPR000859; IPR001506; IPR006026;<br>IPR006210; IPR013032;<br>G3DSA:3.40.390.10 (GENE3D),<br>PTHR10127 (PANTHER),<br>PTHR10127:SF65 (PANTHER),<br>SSF55486 (SUPERFAMILY) |
| Ancylostoma ceylanicum  | metalloprotease 1 precursor                                | 2 | F:GO:0046872;<br>F:GO:0008237                  | - | IPR000859; IPR001506; IPR006026;<br>IPR006210; IPR013032;<br>G3DSA:3.40.390.10 (GENE3D),<br>PTHR10127 (PANTHER),<br>PTHR10127:SF65 (PANTHER),<br>SSF55486 (SUPERFAMILY) |
| Ancylostoma ceylanicum  | metalloprotease 1 precursor                                | 2 | F:GO:0046872;<br>F:GO:0008237                  | - |                                                                                                                                                                         |
| Ancylostoma ceylanicum  | metalloprotease 1 precursor                                | 2 | F:GO:0046872;<br>F:GO:0008237                  | - | IPR000859; IPR001506; IPR006026;<br>IPR006210; IPR013032;<br>G3DSA:3.40.390.10 (GENE3D),<br>PTHR10127 (PANTHER),<br>PTHR10127:SF65 (PANTHER),<br>SSF55486 (SUPERFAMILY) |
| Caenorhabditis briggsae | elegans protein partially confirmed by transcript evidence | 3 | P:GO:0040015;<br>P:GO:0040010;<br>P:GO:0040011 | - | IPR000859; PTHR22991 (PANTHER)                                                                                                                                          |
| -                       | -                                                          | 0 |                                                |   | -                                                                                                                                                                       |
| -                       | -                                                          | 0 |                                                |   | SignalP (SIGNALP)                                                                                                                                                       |
| -                       | -                                                          | 0 |                                                |   | -                                                                                                                                                                       |

|                         |                                                            |    |                                                                                                                                                                                                                                                                                                                                                                                                                                                                        |   |            |                                                                                             |
|-------------------------|------------------------------------------------------------|----|------------------------------------------------------------------------------------------------------------------------------------------------------------------------------------------------------------------------------------------------------------------------------------------------------------------------------------------------------------------------------------------------------------------------------------------------------------------------|---|------------|---------------------------------------------------------------------------------------------|
| Homo sapiens            | nucleoside diphosphate ki-se a                             | 34 | C:GO:0030027;<br>P:GO:0002762;<br>F:GO:0004550;<br>P:GO:0006241;<br>F:GO:0043015;<br>C:GO:0005792;<br>P:GO:0030819;<br>F:GO:0005525;<br>C:GO:0005882;<br>C:GO:0005829;<br>P:GO:0008285;<br>P:GO:0006165;<br>C:GO:0001726;<br>F:GO:0042802;<br>C:GO:0005813;<br>P:GO:0045618;<br>P:GO:0006897;<br>P:GO:0006183;<br>F:GO:0000287;<br>P:GO:0006228;<br>P:GO:0042493;<br>P:GO:0051591;<br>P:GO:0050679;<br>F:GO:0004536;<br>C:GO:0048471;<br>P:GO:0007399;<br>P:GO:0043388 | - | EC:2.7.4.6 | SignalP (SIGNALP)                                                                           |
| -                       | -                                                          | 0  |                                                                                                                                                                                                                                                                                                                                                                                                                                                                        |   | -          |                                                                                             |
| -                       | -                                                          | 0  |                                                                                                                                                                                                                                                                                                                                                                                                                                                                        |   | -          |                                                                                             |
| Caenorhabditis briggsae | elegans protein partially confirmed by transcript evidence | 0  |                                                                                                                                                                                                                                                                                                                                                                                                                                                                        |   | -          |                                                                                             |
| -                       | -                                                          | 0  |                                                                                                                                                                                                                                                                                                                                                                                                                                                                        |   | -          |                                                                                             |
| -                       | -                                                          | 0  |                                                                                                                                                                                                                                                                                                                                                                                                                                                                        |   | -          |                                                                                             |
| Caenorhabditis elegans  | wd repeat-containing protein 70                            | 2  | F:GO:0005515;<br>F:GO:0016740                                                                                                                                                                                                                                                                                                                                                                                                                                          | - |            | IPR001680; IPR011046; IPR015943;<br>IPR017986; IPR019781; IPR019782;<br>PTHR16017 (PANTHER) |
| Haemonchus contortus    | glutamate dehydroge-se                                     | 6  | F:GO:0004353;<br>P:GO:0055114;<br>P:GO:0000003;<br>P:GO:0006520;<br>F:GO:0005488;<br>P:GO:0040010                                                                                                                                                                                                                                                                                                                                                                      | - | EC:1.4.1.3 | SignalP (SIGNALP)                                                                           |
| -                       | -                                                          | 0  |                                                                                                                                                                                                                                                                                                                                                                                                                                                                        |   | -          |                                                                                             |
| -                       | -                                                          | 0  |                                                                                                                                                                                                                                                                                                                                                                                                                                                                        |   | -          |                                                                                             |
| Caenorhabditis elegans  | intracistern-1 a particle-promoted polypeptide-like        | 1  | F:GO:0005515                                                                                                                                                                                                                                                                                                                                                                                                                                                           | - |            | -                                                                                           |
| -                       | -                                                          | 0  |                                                                                                                                                                                                                                                                                                                                                                                                                                                                        |   | -          |                                                                                             |
| -                       | -                                                          | 0  |                                                                                                                                                                                                                                                                                                                                                                                                                                                                        |   | -          |                                                                                             |
| Loa loa                 | d-directed r- beta subunit family protein                  | 9  | P:GO:0040035;<br>P:GO:0009792;<br>P:GO:0002119;<br>F:GO:0003899;<br>F:GO:0003677;<br>P:GO:0006350;<br>F:GO:0032549;<br>P:GO:0040007;<br>C:GO:0005634                                                                                                                                                                                                                                                                                                                   | - | EC:2.7.7.6 | -                                                                                           |
| -                       | -                                                          | 0  |                                                                                                                                                                                                                                                                                                                                                                                                                                                                        |   | -          |                                                                                             |

|                         |                                                         |   |                                                                                                                    |                                                                                                   |             |                                                                                  |
|-------------------------|---------------------------------------------------------|---|--------------------------------------------------------------------------------------------------------------------|---------------------------------------------------------------------------------------------------|-------------|----------------------------------------------------------------------------------|
| Loa loa                 | trehalose 6-phosphate synthase                          | 3 | F:GO:0003825;<br>P:GO:0034608;<br>P:GO:0005992                                                                     | -                                                                                                 | EC:2.4.1.15 | -                                                                                |
|                         | -                                                       | 0 |                                                                                                                    |                                                                                                   |             | SignalP (SIGNALP)                                                                |
|                         | -                                                       | 0 |                                                                                                                    |                                                                                                   |             | -                                                                                |
|                         | -                                                       | 0 |                                                                                                                    |                                                                                                   |             | -                                                                                |
| Bombyx mori             | transposase [Bombyx mori]                               | 0 |                                                                                                                    | P:GO:0045449;<br>F:GO:0003677                                                                     |             | PTHR23022 (PANTHER),<br>PTHR23022:SF6 (PANTHER)                                  |
| Caenorhabditis elegans  | hypothetical protein K02D10.1 [Caenorhabditis elegans]  | 0 |                                                                                                                    |                                                                                                   |             | -                                                                                |
| Caenorhabditis briggsae | briggsae cbr-rpm-1 protein                              | 0 |                                                                                                                    | F:GO:0046872;<br>P:GO:0030071;<br>C:GO:0005680;<br>F:GO:0008270;<br>F:GO:0005515;<br>C:GO:0005622 |             | PTHR12846 (PANTHER),<br>PTHR12846:SF2 (PANTHER)                                  |
|                         | -                                                       | 0 |                                                                                                                    |                                                                                                   |             | -                                                                                |
| Caenorhabditis elegans  | nuclear receptor nhr-1                                  | 6 | F:GO:0003700;<br>F:GO:0043565;<br>F:GO:0003707;<br>C:GO:0005634;<br>F:GO:0008270;<br>P:GO:0006355                  | -                                                                                                 |             | IPR008946; PTHR11865 (PANTHER),<br>PTHR11865:SF218 (PANTHER)                     |
| Callithrix jacchus      | 60s ribosomal protein l21-like                          | 4 | F:GO:0003735;<br>F:GO:0003723;<br>C:GO:0022625;<br>P:GO:0006414                                                    | -                                                                                                 |             | -                                                                                |
|                         | -                                                       | 0 |                                                                                                                    |                                                                                                   |             | -                                                                                |
|                         | -                                                       | 0 |                                                                                                                    |                                                                                                   |             | -                                                                                |
|                         | -                                                       | 0 |                                                                                                                    |                                                                                                   |             | -                                                                                |
|                         | -                                                       | 0 |                                                                                                                    |                                                                                                   |             | SignalP (SIGNALP)                                                                |
| Caenorhabditis briggsae | wd repeat protein 39                                    | 0 |                                                                                                                    | F:GO:0005488;<br>P:GO:0016226;<br>C:GO:0005856;<br>P:GO:0005975                                   |             | IPR001680; IPR011046; IPR015943;<br>IPR017986; IPR019781; PTHR22838<br>(PANTHER) |
| Caenorhabditis briggsae | Hypothetical protein CBG03790 [Caenorhabditis briggsae] | 1 | F:GO:0005515                                                                                                       |                                                                                                   |             | -                                                                                |
|                         | -                                                       | 0 |                                                                                                                    |                                                                                                   |             | -                                                                                |
|                         | -                                                       | 0 |                                                                                                                    |                                                                                                   |             | -                                                                                |
|                         | -                                                       | 0 |                                                                                                                    |                                                                                                   |             | -                                                                                |
|                         | -                                                       | 0 |                                                                                                                    |                                                                                                   |             | -                                                                                |
| Caenorhabditis briggsae | briggsae cbr-rpy-1 protein                              | 7 | C:GO:0005856;<br>C:GO:0045211;<br>P:GO:0007268;<br>C:GO:0030054;<br>F:GO:0033130;<br>P:GO:0019915;<br>F:GO:0008270 | -                                                                                                 |             | PTHR10098 (PANTHER),<br>PTHR10098:SF7 (PANTHER)                                  |
|                         | -                                                       | 0 |                                                                                                                    |                                                                                                   |             | -                                                                                |
| Caenorhabditis elegans  | yqy2_caee1 ame: full=uncharacterized protein            | 0 |                                                                                                                    |                                                                                                   |             | -                                                                                |
|                         | -                                                       | 0 |                                                                                                                    |                                                                                                   |             | -                                                                                |
|                         | -                                                       | 0 |                                                                                                                    |                                                                                                   |             | -                                                                                |

|                              |                                                            |   |                                                                                                                                                                                                         |                                                |                                                                                                                                  |
|------------------------------|------------------------------------------------------------|---|---------------------------------------------------------------------------------------------------------------------------------------------------------------------------------------------------------|------------------------------------------------|----------------------------------------------------------------------------------------------------------------------------------|
| Caenorhabditis elegans       | elegans protein partially confirmed by transcript evidence | 0 | F:GO:0016740;<br>F:GO:0030246;<br>C:GO:0016021;<br>F:GO:0003700;<br>C:GO:0005634;<br>F:GO:0016758;<br>F:GO:0016757;<br>P:GO:0005975;<br>P:GO:0030259;<br>P:GO:0006355;<br>P:GO:0008152;<br>P:GO:0045449 |                                                | SignalP (SIGNALP)                                                                                                                |
|                              |                                                            | 0 |                                                                                                                                                                                                         |                                                |                                                                                                                                  |
| Phytophthora infestans T30-4 | copine-like protein                                        | 0 |                                                                                                                                                                                                         |                                                | G3DSA:2.60.40.150 (GENE3D)                                                                                                       |
|                              | -                                                          | 0 |                                                                                                                                                                                                         |                                                | SignalP (SIGNALP)                                                                                                                |
|                              | -                                                          | 0 |                                                                                                                                                                                                         |                                                | -                                                                                                                                |
|                              | -                                                          | 0 |                                                                                                                                                                                                         |                                                | -                                                                                                                                |
|                              | -                                                          | 0 |                                                                                                                                                                                                         |                                                | -                                                                                                                                |
| Caenorhabditis elegans       | homeobox domain containing protein                         | 4 | F:GO:0003700;<br>F:GO:0043565;<br>C:GO:0005634;<br>P:GO:0006355                                                                                                                                         | -                                              | -                                                                                                                                |
| Caenorhabditis elegans       | elegans protein partially confirmed by transcript evidence | 1 | F:GO:0005515                                                                                                                                                                                            | -                                              | -                                                                                                                                |
|                              | -                                                          | 0 |                                                                                                                                                                                                         |                                                | -                                                                                                                                |
| Loa loa                      | hypothetical protein LOAG_06866 [Loa loa]                  | 1 | P:GO:0040010                                                                                                                                                                                            | -                                              | IPR000436; IPR016060                                                                                                             |
| Caenorhabditis elegans       | protein-tyrosine phosphatase containing protein            | 1 | F:GO:0016791                                                                                                                                                                                            | -                                              | EC:3.1.3.0<br>IPR000242; G3DSA:3.90.190.10 (GENE3D), PTHR19134 (PANTHER), PTHR19134:SF26 (PANTHER), SSF52799 (SUPERFAMILY)       |
| Caenorhabditis briggsae      | elegans protein partially confirmed by transcript evidence | 1 | F:GO:0003824                                                                                                                                                                                            | -                                              | IPR000718; IPR008753; IPR018497; G3DSA:3.40.390.10 (GENE3D), PTHR11733:SF15 (PANTHER), SignalP (SIGNALP), SSF55486 (SUPERFAMILY) |
|                              | -                                                          | 0 |                                                                                                                                                                                                         |                                                | -                                                                                                                                |
|                              | -                                                          | 0 |                                                                                                                                                                                                         |                                                | -                                                                                                                                |
| Caenorhabditis elegans       | malate l-lactate dehydroge-se family protein               | 2 | F:GO:0016491;<br>P:GO:0055114                                                                                                                                                                           | -                                              | IPR003767; G3DSA:3.30.1370.60 (GENE3D)                                                                                           |
| Angiostrongylus cantonensis  | protein mida mitochondrial precursor                       | 0 |                                                                                                                                                                                                         | C:GO:0005739;<br>F:GO:0003674;<br>P:GO:0008150 | IPR003788; PTHR12049 (PANTHER), SSF53335 (SUPERFAMILY)                                                                           |
|                              | -                                                          | 0 |                                                                                                                                                                                                         |                                                | SignalP (SIGNALP)                                                                                                                |
| Loa loa                      | regulatory-associated protein of mtor                      | 1 | F:GO:0005488                                                                                                                                                                                            | -                                              | IPR004083; IPR011989; IPR016024; PTHR12848:SF2 (PANTHER)                                                                         |
| Caenorhabditis elegans       | elegans protein confirmed by transcript evidence           | 0 |                                                                                                                                                                                                         | P:GO:0006629;<br>F:GO:0016787;<br>F:GO:0004806 | -                                                                                                                                |
|                              | -                                                          | 0 |                                                                                                                                                                                                         |                                                | -                                                                                                                                |
| Pan troglodytes              | PREDICTED: hypothetical protein [Pan troglodytes]          | 0 |                                                                                                                                                                                                         |                                                | -                                                                                                                                |
| Homo sapiens                 | eukaryotic translation elongation factor 1 delta           | 7 | F:GO:0003746;<br>F:GO:0004871;<br>C:GO:0005853;<br>F:GO:0005515;<br>P:GO:0043123;<br>C:GO:0005829;<br>P:GO:0006414                                                                                      | -                                              | SignalP (SIGNALP)                                                                                                                |

|                             |                                                                            |   |                                                                                                   |                                                                 |             |                                                                                       |
|-----------------------------|----------------------------------------------------------------------------|---|---------------------------------------------------------------------------------------------------|-----------------------------------------------------------------|-------------|---------------------------------------------------------------------------------------|
| Brugia malayi               | tbp-like factor                                                            | 4 | F:GO:0003677;<br>F:GO:0003702;<br>P:GO:0006367;<br>P:GO:0006355                                   | -                                                               | -           | -                                                                                     |
| -                           | -                                                                          | 0 | -                                                                                                 | -                                                               | -           | -                                                                                     |
| -                           | -                                                                          | 0 | -                                                                                                 | -                                                               | -           | -                                                                                     |
| -                           | -                                                                          | 0 | -                                                                                                 | -                                                               | -           | -                                                                                     |
| -                           | -                                                                          | 0 | -                                                                                                 | -                                                               | -           | SignalP (SIGNALP)                                                                     |
| -                           | -                                                                          | 0 | -                                                                                                 | -                                                               | -           | SignalP (SIGNALP)                                                                     |
| -                           | -                                                                          | 0 | -                                                                                                 | -                                                               | -           | -                                                                                     |
| -                           | -                                                                          | 0 | -                                                                                                 | -                                                               | -           | -                                                                                     |
| -                           | -                                                                          | 0 | -                                                                                                 | -                                                               | -           | -                                                                                     |
| -                           | -                                                                          | 0 | -                                                                                                 | -                                                               | -           | -                                                                                     |
| -                           | -                                                                          | 0 | -                                                                                                 | -                                                               | -           | -                                                                                     |
| Caenorhabditis elegans      | --k-cl cotransporter homolog family member (nkcc-1)                        | 4 | F:GO:0022891;<br>P:GO:0055085;<br>C:GO:0016021;<br>F:GO:0022804                                   | -                                                               | -           | IPR000792; IPR004841; PTHR11827 (PANTHER), PTHR11827-SF8 (PANTHER), SignalP (SIGNALP) |
| Caenorhabditis elegans      | solute carrier family 12 (sodium potassium chloride transporters) member 2 | 3 | P:GO:0055085;<br>P:GO:0006811;<br>C:GO:0016021                                                    | -                                                               | -           | -                                                                                     |
| Caenorhabditis elegans      | --k-cl cotransporter homolog family member (nkcc-1)                        | 4 | F:GO:0022891;<br>P:GO:0055085;<br>C:GO:0016021;<br>F:GO:0022804                                   | -                                                               | -           | IPR000792; IPR004841; PTHR11827 (PANTHER), PTHR11827-SF8 (PANTHER), SignalP (SIGNALP) |
| Caenorhabditis elegans      | tubulointerstitial nephritis antigen                                       | 6 | P:GO:0006955;<br>F:GO:0030247;<br>F:GO:0005044;<br>P:GO:0006508;<br>C:GO:0042600;<br>F:GO:0004197 | -                                                               | EC:3.4.22.0 | -                                                                                     |
| -                           | -                                                                          | 0 | -                                                                                                 | -                                                               | -           | -                                                                                     |
| Caenorhabditis elegans      | prolyl carboxy peptidase like family member (pcp-3)                        | 0 | -                                                                                                 | P:GO:0006508;<br>F:GO:0004180;<br>F:GO:0008236;<br>C:GO:0016021 | -           | IPR008758; PTHR11010-SF4 (PANTHER)                                                    |
| -                           | -                                                                          | 0 | -                                                                                                 | -                                                               | -           | -                                                                                     |
| -                           | -                                                                          | 0 | -                                                                                                 | -                                                               | -           | -                                                                                     |
| Caenorhabditis elegans      | mechanosensory abnormality family member (mec-2)                           | 1 | C:GO:0016020                                                                                      | -                                                               | -           | IPR001107; IPR001972; SignalP (SIGNALP), SSF117892 (SUPERFAMILY)                      |
| Angiostrongylus cantonensis | hypothetical protein [Angiostrongylus cantonensis]                         | 0 | -                                                                                                 | -                                                               | -           | -                                                                                     |
| Heliconius melpomene        | r--directed d- polymerase hmg-i and hmg- d--                               | 4 | F:GO:0004519;<br>F:GO:0003723;<br>F:GO:0003964;<br>P:GO:0006278                                   | -                                                               | EC:2.7.7.49 | -                                                                                     |
| -                           | -                                                                          | 0 | -                                                                                                 | -                                                               | -           | -                                                                                     |
| Caenorhabditis briggsae     | briggsae cbr-tag-180 protein                                               | 1 | C:GO:0016020                                                                                      | -                                                               | -           | PTHR10166 (PANTHER), PTHR10166-SF4 (PANTHER)                                          |

|                                    |                                                            |    |                                                                                                                                                                                                                                                                                                                                                                                   |   |                                                                                                                                                                                        |
|------------------------------------|------------------------------------------------------------|----|-----------------------------------------------------------------------------------------------------------------------------------------------------------------------------------------------------------------------------------------------------------------------------------------------------------------------------------------------------------------------------------|---|----------------------------------------------------------------------------------------------------------------------------------------------------------------------------------------|
| Loa loa                            | 26s protease regulatory subunit 8                          | 22 | P:GO:0008340;<br>P:GO:0051437;<br>P:GO:0040007;<br>P:GO:0006310;<br>F:GO:0031531;<br>P:GO:0040017;<br>P:GO:0051436;<br>P:GO:0007091;<br>C:GO:0005737;<br>C:GO:0005730;<br>P:GO:0009792;<br>C:GO:0000502;<br>P:GO:0002119;<br>P:GO:0016481;<br>F:GO:0016887;<br>F:GO:0008233;<br>P:GO:0031145;<br>F:GO:0008134;<br>F:GO:0005524;<br>F:GO:0009378;<br>P:GO:0040035;<br>P:GO:0006281 | - | IPR003593; IPR003959; IPR003960;<br>IPR005937; G3DSA:1.10.8.60<br>(GENE3D), G3DSA:3.40.50.300<br>(GENE3D), PTHR23073 (PANTHER),<br>PTHR23073:SF12 (PANTHER),<br>SSF52540 (SUPERFAMILY) |
| -                                  | -                                                          | 0  | -                                                                                                                                                                                                                                                                                                                                                                                 | - | -                                                                                                                                                                                      |
| -                                  | -                                                          | 0  | -                                                                                                                                                                                                                                                                                                                                                                                 | - | SignalP (SIGNALP)                                                                                                                                                                      |
| Caenorhabditis elegans             | elegans protein partially confirmed by transcript evidence | 0  | F:GO:0003676;<br>F:GO:0004523                                                                                                                                                                                                                                                                                                                                                     | - | G3DSA:3.30.420.10 (GENE3D)                                                                                                                                                             |
| -                                  | -                                                          | 0  | -                                                                                                                                                                                                                                                                                                                                                                                 | - | -                                                                                                                                                                                      |
| -                                  | -                                                          | 0  | -                                                                                                                                                                                                                                                                                                                                                                                 | - | -                                                                                                                                                                                      |
| -                                  | -                                                          | 0  | -                                                                                                                                                                                                                                                                                                                                                                                 | - | -                                                                                                                                                                                      |
| -                                  | -                                                          | 0  | -                                                                                                                                                                                                                                                                                                                                                                                 | - | SignalP (SIGNALP)                                                                                                                                                                      |
| -                                  | -                                                          | 0  | -                                                                                                                                                                                                                                                                                                                                                                                 | - | -                                                                                                                                                                                      |
| -                                  | -                                                          | 0  | -                                                                                                                                                                                                                                                                                                                                                                                 | - | -                                                                                                                                                                                      |
| -                                  | -                                                          | 0  | -                                                                                                                                                                                                                                                                                                                                                                                 | - | -                                                                                                                                                                                      |
| -                                  | -                                                          | 0  | -                                                                                                                                                                                                                                                                                                                                                                                 | - | IPR001799; IPR008972;<br>PTHR11304:SF23 (PANTHER), SignalP<br>(SIGNALP)                                                                                                                |
| Heligmosomoides polygyrus corsicum | cytochrome b                                               | 8  | F:GO:0046872;<br>F:GO:0016491;<br>C:GO:0070469;<br>F:GO:0009055;<br>P:GO:0006810;<br>C:GO:0016021;<br>P:GO:0022904;<br>C:GO:0005739                                                                                                                                                                                                                                               | - | IPR016174; IPR016175; SignalP<br>(SIGNALP)                                                                                                                                             |
| -                                  | -                                                          | 0  | -                                                                                                                                                                                                                                                                                                                                                                                 | - | -                                                                                                                                                                                      |
| -                                  | -                                                          | 0  | -                                                                                                                                                                                                                                                                                                                                                                                 | - | SignalP (SIGNALP)                                                                                                                                                                      |
| -                                  | -                                                          | 0  | -                                                                                                                                                                                                                                                                                                                                                                                 | - | -                                                                                                                                                                                      |
| -                                  | -                                                          | 0  | -                                                                                                                                                                                                                                                                                                                                                                                 | - | -                                                                                                                                                                                      |
| Loa loa                            | expulsion defective family member (aex-3)                  | 6  | P:GO:0007618;<br>P:GO:0007268;<br>P:GO:0018991;<br>C:GO:0005623;<br>P:GO:0030421;<br>F:GO:0017112                                                                                                                                                                                                                                                                                 | - | PTHR13008 (PANTHER)                                                                                                                                                                    |
| Homo sapiens                       | immunoglobulin heavy chain variable region                 | 0  | -                                                                                                                                                                                                                                                                                                                                                                                 | - | IPR013783; PTHR23266 (PANTHER),<br>PTHR23266:SF9 (PANTHER), SSF48726<br>(SUPERFAMILY)                                                                                                  |
| -                                  | -                                                          | 0  | -                                                                                                                                                                                                                                                                                                                                                                                 | - | -                                                                                                                                                                                      |



|                         |                                                            |    |                                                                                                                                                                       |             |                                                                                                                                |
|-------------------------|------------------------------------------------------------|----|-----------------------------------------------------------------------------------------------------------------------------------------------------------------------|-------------|--------------------------------------------------------------------------------------------------------------------------------|
|                         | -                                                          | 0  |                                                                                                                                                                       |             | -                                                                                                                              |
| Homo sapiens            | immunoglobulin heavy chain variable region                 | 0  |                                                                                                                                                                       |             | -                                                                                                                              |
| Caenorhabditis elegans  | large subunit ribosomal protein 10                         | 10 | P:GO:0006412;<br>P:GO:0040010;<br>C:GO:0005840;<br>P:GO:0006355;<br>F:GO:0003735;<br>P:GO:0000003;<br>F:GO:0043565;<br>P:GO:0002119;<br>F:GO:0003700;<br>P:GO:0009792 | EC:3.6.5.3  | -                                                                                                                              |
| Caenorhabditis elegans  | l-lactate dehydroge-se                                     | 5  | C:GO:0005737;<br>F:GO:0005488;<br>F:GO:0004459;<br>P:GO:0055114;<br>P:GO:0006096                                                                                      | EC:1.1.1.27 | IPR001236; IPR001557; IPR016040;<br>PTHR11540 (PANTHER),<br>PTHR11540:SF3 (PANTHER), SSF51735<br>(SUPERFAMILY)                 |
| Caenorhabditis briggsae | elegans protein partially confirmed by transcript evidence | 3  | F:GO:0010181;<br>P:GO:0008152;<br>F:GO:0016491                                                                                                                        |             | PTHR22893 (PANTHER),<br>PTHR22893:SF6 (PANTHER)                                                                                |
|                         | -                                                          | 0  |                                                                                                                                                                       |             | -                                                                                                                              |
|                         | -                                                          | 0  |                                                                                                                                                                       |             | -                                                                                                                              |
|                         | -                                                          | 0  |                                                                                                                                                                       |             | -                                                                                                                              |
| Loa loa                 | myosin xviiiia                                             | 7  | C:GO:0005730;<br>C:GO:0016459;<br>F:GO:0042802;<br>P:GO:0006916;<br>F:GO:0005524;<br>F:GO:0003774;<br>C:GO:0005794                                                    |             | -                                                                                                                              |
|                         | -                                                          | 0  |                                                                                                                                                                       |             | IPR014044; SignalP (SIGNALP)                                                                                                   |
| Caenorhabditis elegans  | elegans protein partially confirmed by transcript evidence | 4  | P:GO:0009792;<br>F:GO:0016818;<br>F:GO:0005488;<br>P:GO:0000003                                                                                                       | EC:3.6.1.0  | PTHR11472 (PANTHER),<br>PTHR11472:SF5 (PANTHER)                                                                                |
|                         | -                                                          | 0  |                                                                                                                                                                       |             | -                                                                                                                              |
| Caenorhabditis briggsae | elegans protein partially confirmed by transcript evidence | 2  | P:GO:0007186;<br>C:GO:0016021                                                                                                                                         |             | IPR000276; IPR017452;<br>G3DSA:1.20.1070.10 (GENE3D),<br>PTHR22751 (PANTHER),<br>PTHR22751:SF8 (PANTHER), SignalP<br>(SIGNALP) |
|                         | -                                                          | 0  |                                                                                                                                                                       |             | SignalP (SIGNALP)                                                                                                              |
| Caenorhabditis briggsae | elegans protein partially confirmed by transcript evidence | 3  | F:GO:0005488;<br>P:GO:0019915;<br>P:GO:0007165                                                                                                                        |             | IPR000198; IPR008936; PTHR23178<br>(PANTHER), PTHR23178:SF4<br>(PANTHER)                                                       |
| Caenorhabditis briggsae | elegans protein partially confirmed by transcript evidence | 3  | F:GO:0005488;<br>P:GO:0019915;<br>P:GO:0007165                                                                                                                        |             | IPR000198; IPR008936; PTHR23178<br>(PANTHER), PTHR23178:SF4<br>(PANTHER)                                                       |
|                         | -                                                          | 0  |                                                                                                                                                                       |             | -                                                                                                                              |
|                         | -                                                          | 0  |                                                                                                                                                                       |             | -                                                                                                                              |
| Loa loa                 | hypothetical protein LOAG_02385 [Loa loa]                  | 0  |                                                                                                                                                                       |             | -                                                                                                                              |
|                         | -                                                          | 0  |                                                                                                                                                                       |             | -                                                                                                                              |

|                         |                                                                       |    |                                                                                                                                                                       |                                                                                                   |              |                                                                                                                                       |
|-------------------------|-----------------------------------------------------------------------|----|-----------------------------------------------------------------------------------------------------------------------------------------------------------------------|---------------------------------------------------------------------------------------------------|--------------|---------------------------------------------------------------------------------------------------------------------------------------|
| Caenorhabditis briggsae | beta 2                                                                | 0  |                                                                                                                                                                       | F:GO:0046872;<br>C:GO:0005739;<br>F:GO:0003674;<br>P:GO:0008152;<br>F:GO:0016787;<br>P:GO:0008150 |              | G3DSA:3.60.15.10 (GENE3D),<br>PTHR23131 (PANTHER), SSF56281<br>(SUPERFAMILY)                                                          |
| Caenorhabditis briggsae | endoplasmic reticulum metalloproteinase 1                             | 5  | F:GO:0008233;<br>P:GO:0040011;<br>C:GO:0016021;<br>P:GO:0006508;<br>C:GO:0005783                                                                                      | -                                                                                                 |              | IPR007484; PTHR12147 (PANTHER)                                                                                                        |
|                         | -                                                                     | 0  |                                                                                                                                                                       |                                                                                                   |              | -                                                                                                                                     |
| Callithrix jacchus      | transmembrane 4 superfamily member 1                                  | 1  | C:GO:0005887                                                                                                                                                          | -                                                                                                 |              | -                                                                                                                                     |
| Caenorhabditis briggsae | sterol regulatory element-binding protein cleavage-activating protein | 2  | P:GO:0009792;<br>C:GO:0016020                                                                                                                                         | -                                                                                                 |              | IPR000731; PF12349 (PFAM)                                                                                                             |
| Caenorhabditis elegans  | briggsae cbr-hhat-1 protein                                           | 0  |                                                                                                                                                                       |                                                                                                   |              | -                                                                                                                                     |
| Caenorhabditis elegans  | tho complex subunit 1                                                 | 7  | P:GO:0006396;<br>P:GO:0006915;<br>C:GO:0000445;<br>F:GO:0005515;<br>F:GO:0003711;<br>C:GO:0005737;<br>P:GO:0046784                                                    | -                                                                                                 |              | IPR021861; PTHR13265 (PANTHER)                                                                                                        |
|                         | -                                                                     | 0  |                                                                                                                                                                       |                                                                                                   |              | -                                                                                                                                     |
|                         | -                                                                     | 0  |                                                                                                                                                                       |                                                                                                   |              | -                                                                                                                                     |
| Caenorhabditis elegans  | type i phosphodiesterase nucleotide pyrophosphatase family protein    | 3  | P:GO:0008152;<br>C:GO:0031674;<br>C:GO:0055120                                                                                                                        | -                                                                                                 |              | PTHR10151 (PANTHER),<br>PTHR10151:SF10 (PANTHER)                                                                                      |
| Caenorhabditis elegans  | uncoordinated family member (unc-89)                                  | 3  | P:GO:0016310;<br>F:GO:0004674;<br>F:GO:0000166                                                                                                                        | -                                                                                                 | EC:2.7.11.0  | -                                                                                                                                     |
| Caenorhabditis elegans  | elegans protein confirmed by transcript evidence                      | 0  |                                                                                                                                                                       |                                                                                                   |              | -                                                                                                                                     |
|                         | -                                                                     | 0  |                                                                                                                                                                       |                                                                                                   |              | -                                                                                                                                     |
| Caenorhabditis elegans  | elegans protein partially confirmed by transcript evidence            | 0  |                                                                                                                                                                       |                                                                                                   |              | -                                                                                                                                     |
|                         | -                                                                     | 0  |                                                                                                                                                                       |                                                                                                   |              | G3DSA:3.40.50.300 (GENE3D),<br>SSF52540 (SUPERFAMILY)                                                                                 |
|                         | -                                                                     | 0  |                                                                                                                                                                       |                                                                                                   |              | -                                                                                                                                     |
|                         | -                                                                     | 0  |                                                                                                                                                                       |                                                                                                   |              | -                                                                                                                                     |
| Brugia malayi           | haca ribonucleoprotein complex subunit 4                              | 10 | P:GO:0040010;<br>F:GO:0003723;<br>C:GO:0005730;<br>P:GO:0006364;<br>P:GO:0000003;<br>P:GO:0002119;<br>F:GO:0005515;<br>P:GO:0001522;<br>F:GO:0009982;<br>C:GO:0030529 | -                                                                                                 | EC:5.4.99.12 | IPR002478; IPR002501; IPR004521;<br>IPR004802; IPR012960; IPR015947;<br>IPR020103; G3DSA:2.30.130.10<br>(GENE3D), PTHR23127 (PANTHER) |
| Caenorhabditis elegans  | nematode astacin protease protein 30                                  | 3  | F:GO:0004222;<br>P:GO:0006508;<br>F:GO:0008270                                                                                                                        | -                                                                                                 | EC:3.4.24.0  | IPR013032; PTHR10127 (PANTHER),<br>PTHR10127:SF65 (PANTHER)                                                                           |

|                         |                                                            |   |                                                                                                                                                      |                                                                                                                                                                                        |             |                      |
|-------------------------|------------------------------------------------------------|---|------------------------------------------------------------------------------------------------------------------------------------------------------|----------------------------------------------------------------------------------------------------------------------------------------------------------------------------------------|-------------|----------------------|
| Caenorhabditis briggsae | elegans protein partially confirmed by transcript evidence | 6 | P:GO:0002119;<br>P:GO:0006468;<br>F:GO:0005524;<br>P:GO:0040011;<br>P:GO:0040007;<br>F:GO:0004674                                                    | -                                                                                                                                                                                      | EC:2.7.11.0 | SignalP (SIGNALP)    |
| Caenorhabditis elegans  | briggsae cbr-casy-1 protein                                | 9 | P:GO:0009792;<br>C:GO:0005615;<br>P:GO:0007156;<br>F:GO:0005515;<br>C:GO:0032809;<br>P:GO:0008355;<br>C:GO:0043231;<br>F:GO:0005509;<br>C:GO:0016021 | -                                                                                                                                                                                      |             | -                    |
| -                       | -                                                          | 0 |                                                                                                                                                      |                                                                                                                                                                                        |             | -                    |
| -                       | -                                                          | 0 |                                                                                                                                                      |                                                                                                                                                                                        |             | -                    |
| -                       | -                                                          | 0 |                                                                                                                                                      |                                                                                                                                                                                        |             | SignalP (SIGNALP)    |
| -                       | -                                                          | 0 |                                                                                                                                                      |                                                                                                                                                                                        |             | -                    |
| Brugia malayi           | ancient conserved domain protein                           | 0 |                                                                                                                                                      | C:GO:0016021;<br>C:GO:0016020;<br>F:GO:0050660;<br>P:GO:0006811;<br>P:GO:0006810;<br>P:GO:0055114;<br>F:GO:0003824;<br>P:GO:0040010;<br>C:GO:0005886                                   |             | PTHR12064 (PANTHER)  |
| Caenorhabditis elegans  | briggsae cbr-tag-165 protein                               | 1 | P:GO:0000003                                                                                                                                         | -                                                                                                                                                                                      |             | -                    |
| -                       | -                                                          | 0 |                                                                                                                                                      |                                                                                                                                                                                        |             | -                    |
| Brugia malayi           | kelch motif family protein                                 | 0 |                                                                                                                                                      | C:GO:0019031;<br>F:GO:0004252;<br>C:GO:0016021;<br>C:GO:0016020;<br>F:GO:0008061;<br>C:GO:0005576;<br>F:GO:0003824;<br>F:GO:0005044;<br>P:GO:0006508;<br>F:GO:0005515;<br>P:GO:0006030 |             | -                    |
| -                       | -                                                          | 0 |                                                                                                                                                      |                                                                                                                                                                                        |             | -                    |
| -                       | -                                                          | 0 |                                                                                                                                                      |                                                                                                                                                                                        |             | -                    |
| Loa loa                 | hypothetical protein LOAG_09109 [Loa loa]                  | 0 |                                                                                                                                                      |                                                                                                                                                                                        |             | IPR009027; IPR011320 |
| -                       | -                                                          | 0 |                                                                                                                                                      |                                                                                                                                                                                        |             | -                    |
| -                       | -                                                          | 0 |                                                                                                                                                      |                                                                                                                                                                                        |             | IPR019515            |
| Ailuropoda melanoleuca  | translocase of outer mitochondrial membrane 5 homolog      | 4 | P:GO:0006626;<br>F:GO:0008565;<br>C:GO:0005742;<br>C:GO:0016021                                                                                      | -                                                                                                                                                                                      |             | -                    |
| -                       | -                                                          | 0 |                                                                                                                                                      |                                                                                                                                                                                        |             | -                    |
| -                       | -                                                          | 0 |                                                                                                                                                      |                                                                                                                                                                                        |             | -                    |
| -                       | -                                                          | 0 |                                                                                                                                                      |                                                                                                                                                                                        |             | -                    |
| -                       | -                                                          | 0 |                                                                                                                                                      |                                                                                                                                                                                        |             | -                    |

|                         |                                             |    |                                                                                                                                                                                                                                                                                                                                                                                                                                                                        |                                                                 |              |                                                                                        |
|-------------------------|---------------------------------------------|----|------------------------------------------------------------------------------------------------------------------------------------------------------------------------------------------------------------------------------------------------------------------------------------------------------------------------------------------------------------------------------------------------------------------------------------------------------------------------|-----------------------------------------------------------------|--------------|----------------------------------------------------------------------------------------|
| Caenorhabditis elegans  | briggsae cbr-efn-4 protein                  | 0  |                                                                                                                                                                                                                                                                                                                                                                                                                                                                        | P:GO:0007275;<br>C:GO:0016020;<br>C:GO:0031225;<br>C:GO:0005886 |              | SignalP (SIGNALP)                                                                      |
| -                       | -                                           | 0  |                                                                                                                                                                                                                                                                                                                                                                                                                                                                        |                                                                 |              | SignalP (SIGNALP)                                                                      |
| -                       | -                                           | 0  |                                                                                                                                                                                                                                                                                                                                                                                                                                                                        |                                                                 |              | -                                                                                      |
| -                       | -                                           | 0  |                                                                                                                                                                                                                                                                                                                                                                                                                                                                        |                                                                 |              | -                                                                                      |
| Brugia malayi           | rap guanine nucleotide exchange factor 4    | 27 | F:GO:0008603;<br>C:GO:0001750;<br>P:GO:0017157;<br>P:GO:0019933;<br>C:GO:0043197;<br>F:GO:0005088;<br>P:GO:0051056;<br>P:GO:0007507;<br>C:GO:0005624;<br>P:GO:0017156;<br>C:GO:0016323;<br>C:GO:0005829;<br>F:GO:0030552;<br>P:GO:0001932;<br>F:GO:0017016;<br>C:GO:0060076;<br>F:GO:0004692;<br>C:GO:0005952;<br>C:GO:0030424;<br>P:GO:0030073;<br>P:GO:0007186;<br>F:GO:0032403;<br>P:GO:0050805;<br>C:GO:0001917;<br>P:GO:0014911;<br>C:GO:0016324;<br>P:GO:0050773 | -                                                               | EC:2.7.11.12 | IPR001895; IPR008937;<br>PTHR23113:SF25 (PANTHER), SignalP (SIGNALP)                   |
| -                       | -                                           | 0  |                                                                                                                                                                                                                                                                                                                                                                                                                                                                        |                                                                 |              | SignalP (SIGNALP)                                                                      |
| -                       | -                                           | 0  |                                                                                                                                                                                                                                                                                                                                                                                                                                                                        |                                                                 |              | -                                                                                      |
| Caenorhabditis briggsae | serine threonine phosphatase                | 5  | C:GO:0005737;<br>F:GO:0004722;<br>P:GO:0006470;<br>P:GO:0019915;<br>C:GO:0005634                                                                                                                                                                                                                                                                                                                                                                                       | -                                                               |              | IPR006186; G3DSA:3.60.21.10 (GENE3D), PTHR11668:SF19 (PANTHER), SSF56300 (SUPERFAMILY) |
| -                       | -                                           | 0  |                                                                                                                                                                                                                                                                                                                                                                                                                                                                        |                                                                 |              | -                                                                                      |
| Homo sapiens            | complement subcomponent c1s (ec ) precursor | 8  | F:GO:0005509;<br>P:GO:0006958;<br>P:GO:0045087;<br>P:GO:0010001;<br>P:GO:0006508;<br>F:GO:0004252;<br>C:GO:0005576;<br>P:GO:0051591                                                                                                                                                                                                                                                                                                                                    | -                                                               | EC:3.4.21.0  | IPR000859; PTHR19355 (PANTHER), PTHR19355:SF12 (PANTHER)                               |
| Caenorhabditis elegans  | -d(+) adp-ribosyltransferase-3-like protein | 0  |                                                                                                                                                                                                                                                                                                                                                                                                                                                                        | F:GO:0003950;<br>F:GO:0016740;<br>P:GO:0006471                  |              | IPR002110; IPR020683; PTHR18958 (PANTHER), PTHR18958:SF255 (PANTHER)                   |

|                                    |                                                  |    |                                                                                                                                                                                                                          |                                                |             |                                                                             |
|------------------------------------|--------------------------------------------------|----|--------------------------------------------------------------------------------------------------------------------------------------------------------------------------------------------------------------------------|------------------------------------------------|-------------|-----------------------------------------------------------------------------|
| Loa loa                            | briggsae cbr-tag-246 protein                     | 13 | P:GO:0040010;<br>P:GO:0007517;<br>F:GO:0016251;<br>P:GO:0040035;<br>P:GO:0010171;<br>P:GO:0007413;<br>P:GO:0002119;<br>C:GO:0035060;<br>P:GO:0006898;<br>F:GO:0003713;<br>P:GO:0045893;<br>P:GO:0009792;<br>P:GO:0048813 | -                                              |             | IPR006569; IPR006903; IPR008942;<br>PTHR15921 (PANTHER)                     |
| Caenorhabditis elegans             | brg-1 associated factor                          | 7  | P:GO:0040035;<br>P:GO:0009792;<br>P:GO:0010171;<br>P:GO:0002119;<br>P:GO:0040010;<br>P:GO:0006898;<br>P:GO:0007413                                                                                                       | -                                              |             | IPR003121; IPR019835; PTHR13844<br>(PANTHER)                                |
|                                    | -                                                | 0  |                                                                                                                                                                                                                          |                                                |             | -                                                                           |
|                                    | -                                                | 0  |                                                                                                                                                                                                                          |                                                |             | -                                                                           |
|                                    | -                                                | 0  |                                                                                                                                                                                                                          |                                                |             | -                                                                           |
|                                    | -                                                | 0  |                                                                                                                                                                                                                          |                                                |             | -                                                                           |
|                                    | -                                                | 0  |                                                                                                                                                                                                                          |                                                |             | IPR010916                                                                   |
| Caenorhabditis elegans             | tnni3 interacting ki-se                          | 8  | C:GO:0005737;<br>P:GO:0006468;<br>F:GO:0046872;<br>F:GO:0005524;<br>F:GO:0008022;<br>C:GO:0005634;<br>F:GO:0004674;<br>F:GO:0031013                                                                                      | -                                              | EC:2.7.11.0 | -                                                                           |
| Caenorhabditis briggsae            | collagen alpha-5 chain                           | 0  |                                                                                                                                                                                                                          | P:GO:0007155;<br>C:GO:0005578;<br>C:GO:0005576 |             | IPR002035; G3DSA:3.40.50.410<br>(GENE3D), SSF53300 (SUPERFAMILY)            |
| Caenorhabditis briggsae            | elegans protein confirmed by transcript evidence | 2  | F:GO:0003824;<br>P:GO:0008152                                                                                                                                                                                            | -                                              |             | IPR002198; PTHR19410:SF18<br>(PANTHER), SSF51735 (SUPERFAMILY)              |
|                                    | -                                                | 0  |                                                                                                                                                                                                                          |                                                |             | SignalP (SIGNALP)                                                           |
| Paramecium tetraurelia strain d4-2 | poly(adp-ribose) polymerase                      | 9  | C:GO:0005739;<br>C:GO:0031981;<br>F:GO:0046872;<br>P:GO:0090304;<br>P:GO:0006471;<br>F:GO:0005515;<br>P:GO:0065007;<br>P:GO:0006974;<br>F:GO:0003950                                                                     | -                                              | EC:2.4.2.30 | IPR008893; IPR012317;<br>G3DSA:3.90.228.10 (GENE3D),<br>PTHR15447 (PANTHER) |
|                                    |                                                  | 0  |                                                                                                                                                                                                                          |                                                |             |                                                                             |

|                         |                                                              |    |                                                                                                                                                                                                                                                                                                                                                                                                                                                                                         |   |             |                                                                                                                                                         |
|-------------------------|--------------------------------------------------------------|----|-----------------------------------------------------------------------------------------------------------------------------------------------------------------------------------------------------------------------------------------------------------------------------------------------------------------------------------------------------------------------------------------------------------------------------------------------------------------------------------------|---|-------------|---------------------------------------------------------------------------------------------------------------------------------------------------------|
| Caenorhabditis elegans  | histone deacetylase 1                                        | 21 | F:GO:0016566;<br>F:GO:0004407;<br>P:GO:0070932;<br>F:GO:0042826;<br>P:GO:0010552;<br>C:GO:0016581;<br>P:GO:0070933;<br>P:GO:0045786;<br>P:GO:0010832;<br>C:GO:0005829;<br>F:GO:0016563;<br>P:GO:0043922;<br>P:GO:0006916;<br>P:GO:0008284;<br>P:GO:0010553;<br>F:GO:0042802;<br>C:GO:0016580;<br>P:GO:0006338;<br>F:GO:0003700;<br>P:GO:0010870;<br>F:GO:0008134                                                                                                                        | - |             | IPR000286; IPR003084; SSF52768<br>(SUPERFAMILY)                                                                                                         |
| -                       | -                                                            | 0  |                                                                                                                                                                                                                                                                                                                                                                                                                                                                                         |   |             | -                                                                                                                                                       |
| -                       | -                                                            | 0  |                                                                                                                                                                                                                                                                                                                                                                                                                                                                                         |   |             | SignalP (SIGNALP)                                                                                                                                       |
| -                       | -                                                            | 0  |                                                                                                                                                                                                                                                                                                                                                                                                                                                                                         |   |             | -                                                                                                                                                       |
| Caenorhabditis elegans  | alkaline ceramidase 2-like                                   | 3  | P:GO:0006672;<br>C:GO:0016021;<br>F:GO:0017040                                                                                                                                                                                                                                                                                                                                                                                                                                          | - | EC:3.5.1.23 | IPR008901; PTHR12956 (PANTHER),<br>PTHR12956:SF8 (PANTHER), SignalP<br>(SIGNALP)                                                                        |
| Caenorhabditis brenneri | hypothetical protein Cbre_JD20.006 [Caenorhabditis brenneri] | 0  |                                                                                                                                                                                                                                                                                                                                                                                                                                                                                         |   |             | -                                                                                                                                                       |
| Brugia malayi           | low density lipid receptor-related                           | 30 | F:GO:0012933;<br>P:GO:0010165;<br>P:GO:0006898;<br>C:GO:0031526;<br>P:GO:0046879;<br>P:GO:0031100;<br>P:GO:0033280;<br>C:GO:0005624;<br>P:GO:0032526;<br>P:GO:0006766;<br>P:GO:0007568;<br>P:GO:0008283;<br>C:GO:0005615;<br>F:GO:0005509;<br>C:GO:0016021;<br>P:GO:0030900;<br>P:GO:0020028;<br>C:GO:0005794;<br>F:GO:0030492;<br>C:GO:0005905;<br>C:GO:0030139;<br>P:GO:0016197;<br>P:GO:0050789;<br>P:GO:0042493;<br>C:GO:0005768;<br>P:GO:0045056;<br>F:GO:0004872;<br>C:GO:0005783 | - |             | IPR000152; IPR006210; IPR011042;<br>IPR013032; G3DSA:2.10.25.10<br>(GENE3D), PTHR10529 (PANTHER),<br>PTHR10529:SF2 (PANTHER), SSF57196<br>(SUPERFAMILY) |
| -                       | -                                                            | 0  |                                                                                                                                                                                                                                                                                                                                                                                                                                                                                         |   |             | -                                                                                                                                                       |

|                         |                                                                          |   |                                                                                                                                                      |                                                                                                                                                                                                         |                                                                                                                          |
|-------------------------|--------------------------------------------------------------------------|---|------------------------------------------------------------------------------------------------------------------------------------------------------|---------------------------------------------------------------------------------------------------------------------------------------------------------------------------------------------------------|--------------------------------------------------------------------------------------------------------------------------|
| Caenorhabditis elegans  | laminin a                                                                | 1 | C:GO:0005578                                                                                                                                         | -                                                                                                                                                                                                       | IPR001791; IPR008985; IPR013320; PTHR10574 (PANTHER), PTHR10574:SF56 (PANTHER)                                           |
| -                       | -                                                                        | 0 | -                                                                                                                                                    | -                                                                                                                                                                                                       | -                                                                                                                        |
| Caenorhabditis elegans  | and ph domain containing 6                                               | 0 | -                                                                                                                                                    | F:GO:0005089;<br>P:GO:0035023;<br>F:GO:0005085;<br>C:GO:0005737;<br>F:GO:0008270;<br>F:GO:0003674;<br>P:GO:0050790;<br>C:GO:0005575;<br>C:GO:0005622;<br>F:GO:0046872;<br>P:GO:0008150;<br>C:GO:0005856 | IPR000219; IPR000306; IPR001849; IPR011011; IPR011993; IPR013083; IPR017455; PTHR12673 (PANTHER), SSF50729 (SUPERFAMILY) |
| -                       | -                                                                        | 0 | -                                                                                                                                                    | -                                                                                                                                                                                                       | -                                                                                                                        |
| Caenorhabditis elegans  | uncoordinated protein isoform partially confirmed by transcript evidence | 7 | P:GO:0006629;<br>F:GO:0005219;<br>P:GO:0006816;<br>P:GO:0006874;<br>P:GO:0055085;<br>F:GO:0005509;<br>C:GO:0016021                                   | -                                                                                                                                                                                                       | -                                                                                                                        |
| Caenorhabditis elegans  | amop domain containing protein                                           | 0 | -                                                                                                                                                    | P:GO:0007160;<br>C:GO:0016021                                                                                                                                                                           | IPR003886                                                                                                                |
| -                       | -                                                                        | 0 | -                                                                                                                                                    | -                                                                                                                                                                                                       | -                                                                                                                        |
| -                       | -                                                                        | 0 | -                                                                                                                                                    | -                                                                                                                                                                                                       | -                                                                                                                        |
| -                       | -                                                                        | 0 | -                                                                                                                                                    | -                                                                                                                                                                                                       | -                                                                                                                        |
| Caenorhabditis briggsae | calcium-binding atopy-related autoantigen 1                              | 2 | C:GO:0016021;<br>F:GO:0005509                                                                                                                        | -                                                                                                                                                                                                       | -                                                                                                                        |
| Caenorhabditis briggsae | calcium-binding atopy-related autoantigen 1                              | 2 | C:GO:0016021;<br>F:GO:0005509                                                                                                                        | -                                                                                                                                                                                                       | IPR011992; IPR018247; IPR018249; PTHR12294 (PANTHER), PTHR12294:SF1 (PANTHER)                                            |
| Caenorhabditis elegans  | elegans protein confirmed by transcript evidence                         | 2 | P:GO:0008340;<br>P:GO:0040011                                                                                                                        | -                                                                                                                                                                                                       | SignalP (SIGNALP)                                                                                                        |
| Pongo abelii            | cd81 antigen                                                             | 9 | P:GO:0046813;<br>P:GO:0006661;<br>P:GO:0043128;<br>F:GO:0005515;<br>P:GO:0008284;<br>P:GO:0000187;<br>P:GO:0008104;<br>P:GO:0050731;<br>C:GO:0005887 | -                                                                                                                                                                                                       | IPR000301; IPR018499; IPR018503; SignalP (SIGNALP)                                                                       |
| -                       | -                                                                        | 0 | -                                                                                                                                                    | -                                                                                                                                                                                                       | -                                                                                                                        |
| Caenorhabditis briggsae | Hypothetical protein CBG08415 [Caenorhabditis briggsae]                  | 0 | -                                                                                                                                                    | F:GO:0005515                                                                                                                                                                                            | -                                                                                                                        |
| -                       | -                                                                        | 0 | -                                                                                                                                                    | -                                                                                                                                                                                                       | -                                                                                                                        |
| Brugia malayi           | n-acetyltransferase 10                                                   | 2 | F:GO:0008080;<br>P:GO:0008152                                                                                                                        | -                                                                                                                                                                                                       | PTHR10925 (PANTHER), PTHR10925:SF5 (PANTHER)                                                                             |
| -                       | -                                                                        | 0 | -                                                                                                                                                    | -                                                                                                                                                                                                       | -                                                                                                                        |
| -                       | -                                                                        | 0 | -                                                                                                                                                    | -                                                                                                                                                                                                       | -                                                                                                                        |
| -                       | -                                                                        | 0 | -                                                                                                                                                    | -                                                                                                                                                                                                       | -                                                                                                                        |

|                         |                                                                   |    |                                                                                                                                                                       |                                                                                                   |              |                                                                                                                                                                               |
|-------------------------|-------------------------------------------------------------------|----|-----------------------------------------------------------------------------------------------------------------------------------------------------------------------|---------------------------------------------------------------------------------------------------|--------------|-------------------------------------------------------------------------------------------------------------------------------------------------------------------------------|
| Brugia malayi           | pdz domain containing protein                                     | 0  |                                                                                                                                                                       | P:GO:0000003;<br>P:GO:0040035;<br>P:GO:0002119;<br>P:GO:0009792;<br>P:GO:0040007;<br>F:GO:0005515 |              | IPR001478; G3DSA:2.30.42.10 (GENE3D)                                                                                                                                          |
| Caenorhabditis elegans  | asparagine synthase family protein                                | 0  |                                                                                                                                                                       | P:GO:0006529;<br>F:GO:0004066                                                                     |              | IPR014729; SignalP (SIGNALP)                                                                                                                                                  |
| -                       | -                                                                 | 0  |                                                                                                                                                                       |                                                                                                   |              | -                                                                                                                                                                             |
| Caenorhabditis elegans  | elegans protein confirmed by transcript evidence                  | 0  |                                                                                                                                                                       |                                                                                                   |              | -                                                                                                                                                                             |
| Caenorhabditis briggsae | protein-tyrosine phosphatase containing protein                   | 4  | F:GO:0004725;<br>P:GO:0006470;<br>P:GO:0009792;<br>F:GO:0008138                                                                                                       | -                                                                                                 | EC:3.1.3.48  | IPR000242; IPR000387;<br>G3DSA:3.90.190.10 (GENE3D),<br>PTHR19134 (PANTHER),<br>PTHR19134:SF26 (PANTHER),<br>SSF52799 (SUPERFAMILY)                                           |
| Caenorhabditis briggsae | ribophorin i                                                      | 2  | C:GO:0030867;<br>C:GO:0019718                                                                                                                                         | -                                                                                                 |              | IPR007676; SignalP (SIGNALP)                                                                                                                                                  |
| Caenorhabditis elegans  | ribophorin i                                                      | 4  | C:GO:0008250;<br>P:GO:0018279;<br>F:GO:0005515;<br>F:GO:0004579                                                                                                       | -                                                                                                 | EC:2.4.1.119 | IPR007676                                                                                                                                                                     |
| Caenorhabditis elegans  | ribophorin i                                                      | 3  | C:GO:0019718;<br>F:GO:0016740;<br>C:GO:0030867                                                                                                                        | -                                                                                                 |              | IPR007676; SignalP (SIGNALP)                                                                                                                                                  |
| Caenorhabditis elegans  | ribophorin i                                                      | 3  | C:GO:0019718;<br>F:GO:0016740;<br>C:GO:0030867                                                                                                                        | -                                                                                                 |              | IPR007676; SignalP (SIGNALP)                                                                                                                                                  |
| Caenorhabditis elegans  | ribophorin i                                                      | 3  | C:GO:0019718;<br>F:GO:0016740;<br>C:GO:0030867                                                                                                                        | -                                                                                                 |              | IPR007676; SignalP (SIGNALP)                                                                                                                                                  |
| Caenorhabditis elegans  | apoptosis-inducing mitochondrion- 3                               | 10 | C:GO:0005829;<br>P:GO:0006917;<br>C:GO:0005743;<br>F:GO:0008656;<br>P:GO:0008635;<br>P:GO:0051882;<br>F:GO:0005515;<br>C:GO:0005783;<br>C:GO:0005634;<br>C:GO:0005886 | -                                                                                                 |              | IPR001327; IPR004099; IPR013027;<br>IPR016156; PR00411 (PRINTS),<br>G3DSA:3.50.50.60 (GENE3D),<br>PTHR22912 (PANTHER),<br>PTHR22912:SF31 (PANTHER),<br>SSF51905 (SUPERFAMILY) |
| -                       | -                                                                 | 0  |                                                                                                                                                                       |                                                                                                   |              | SignalP (SIGNALP)                                                                                                                                                             |
| Caenorhabditis elegans  | zinc finger protein 534                                           | 3  | F:GO:0008270;<br>F:GO:0003676;<br>C:GO:0005622                                                                                                                        | -                                                                                                 |              | IPR007087; IPR013087; IPR015880;<br>PTHR23223 (PANTHER),<br>PTHR23223:SF25 (PANTHER),<br>SSF57667 (SUPERFAMILY)                                                               |
| -                       | -                                                                 | 0  |                                                                                                                                                                       |                                                                                                   |              | SignalP (SIGNALP)                                                                                                                                                             |
| Homo sapiens            | proteasome ( macropain) beta 8 (large multifunctio-l peptidase 7) | 10 | P:GO:0051436;<br>P:GO:0051437;<br>F:GO:0004298;<br>P:GO:0031145;<br>P:GO:0019882;<br>F:GO:0005515;<br>P:GO:0044419;<br>C:GO:0005737;<br>C:GO:0005839;<br>C:GO:0005634 | -                                                                                                 | EC:3.4.25.0  | -                                                                                                                                                                             |
| Drosophila ananassae    | atpase n2b                                                        | 0  |                                                                                                                                                                       | F:GO:0005524;<br>F:GO:0000166                                                                     |              | IPR005654                                                                                                                                                                     |



|                        |                                                            |    |                                                                                                                                                                                                                                                                                                                                                 |                               |                                                                                                                                            |
|------------------------|------------------------------------------------------------|----|-------------------------------------------------------------------------------------------------------------------------------------------------------------------------------------------------------------------------------------------------------------------------------------------------------------------------------------------------|-------------------------------|--------------------------------------------------------------------------------------------------------------------------------------------|
|                        | -                                                          | 0  |                                                                                                                                                                                                                                                                                                                                                 |                               | -                                                                                                                                          |
|                        | -                                                          | 0  |                                                                                                                                                                                                                                                                                                                                                 |                               | -                                                                                                                                          |
|                        | -                                                          | 0  |                                                                                                                                                                                                                                                                                                                                                 |                               | -                                                                                                                                          |
| Caenorhabditis elegans | matrilin 4                                                 | 3  | F:GO:0030414;<br>F:GO:0005509;<br>F:GO:0005515                                                                                                                                                                                                                                                                                                  | -                             | IPR002035; PR00453 (PRINTS),<br>G3DSA:3.40.50.410 (GENE3D),<br>PTHR22992 (PANTHER),<br>PTHR22992:SF12 (PANTHER),<br>SSF53300 (SUPERFAMILY) |
|                        | -                                                          | 0  |                                                                                                                                                                                                                                                                                                                                                 |                               | -                                                                                                                                          |
|                        | -                                                          | 0  |                                                                                                                                                                                                                                                                                                                                                 |                               | -                                                                                                                                          |
| Brugia malayi          | hypothetical protein Bm1_17960 [Brugia malayi]             | 0  |                                                                                                                                                                                                                                                                                                                                                 |                               | -                                                                                                                                          |
| Pan troglodytes        | atp synthase subunit mitochondrial-like isoform 2          | 5  | C:GO:0005753;<br>F:GO:0022857;<br>C:GO:0045263;<br>P:GO:0042776;<br>F:GO:0016887                                                                                                                                                                                                                                                                | -                             | -                                                                                                                                          |
| Caenorhabditis elegans | briggsae cbr-rrf-3 protein                                 | 1  | P:GO:0009792                                                                                                                                                                                                                                                                                                                                    | -                             | SignalP (SIGNALP)                                                                                                                          |
| Caenorhabditis elegans | laminin a                                                  | 1  | C:GO:0005578                                                                                                                                                                                                                                                                                                                                    | -                             | -                                                                                                                                          |
| Ailuropoda melanoleuca | sodium potassium-transporting atpase subunit alpha-1       | 20 | F:GO:0005515;<br>P:GO:0045989;<br>P:GO:0045822;<br>F:GO:0003869;<br>C:GO:0005792;<br>C:GO:0016323;<br>C:GO:0042470;<br>F:GO:0046872;<br>P:GO:0006754;<br>C:GO:0042383;<br>F:GO:0005391;<br>P:GO:0045823;<br>P:GO:0042493;<br>P:GO:0031947;<br>C:GO:0005890;<br>P:GO:0006813;<br>P:GO:0002026;<br>F:GO:0005524;<br>P:GO:0008217;<br>P:GO:0006814 | -                             | EC:3.1.3.41;<br>EC:3.6.3.9                                                                                                                 |
| Caenorhabditis elegans | hypothetical protein T13H5.6 [Caenorhabditis elegans]      | 3  | P:GO:0040007;<br>P:GO:0006898;<br>P:GO:0002119                                                                                                                                                                                                                                                                                                  | -                             | IPR008516; SignalP (SIGNALP)                                                                                                               |
|                        | -                                                          | 0  |                                                                                                                                                                                                                                                                                                                                                 |                               | SignalP (SIGNALP)                                                                                                                          |
|                        | -                                                          | 0  |                                                                                                                                                                                                                                                                                                                                                 |                               | -                                                                                                                                          |
|                        | -                                                          | 0  |                                                                                                                                                                                                                                                                                                                                                 |                               | -                                                                                                                                          |
| Caenorhabditis elegans | elegans protein partially confirmed by transcript evidence | 0  |                                                                                                                                                                                                                                                                                                                                                 | C:GO:0016021;<br>P:GO:0055085 | -                                                                                                                                          |
|                        | -                                                          | 0  |                                                                                                                                                                                                                                                                                                                                                 |                               | -                                                                                                                                          |
| Loa loa                | lps glycosyltransferase family protein                     | 7  | P:GO:0009103;<br>P:GO:0040010;<br>P:GO:0040035;<br>F:GO:0016740;<br>F:GO:0005515;<br>P:GO:0040011;<br>P:GO:0002009                                                                                                                                                                                                                              | -                             | -                                                                                                                                          |
|                        | -                                                          | 0  |                                                                                                                                                                                                                                                                                                                                                 |                               | -                                                                                                                                          |
|                        | -                                                          | 0  |                                                                                                                                                                                                                                                                                                                                                 |                               | -                                                                                                                                          |

|                        |                                                         |   |                                                                 |                                                                                                                                                                                                                                                                                                                                                                                   |            |                                           |
|------------------------|---------------------------------------------------------|---|-----------------------------------------------------------------|-----------------------------------------------------------------------------------------------------------------------------------------------------------------------------------------------------------------------------------------------------------------------------------------------------------------------------------------------------------------------------------|------------|-------------------------------------------|
|                        | -                                                       | 0 |                                                                 |                                                                                                                                                                                                                                                                                                                                                                                   |            | -                                         |
| Caenorhabditis elegans | variable abnormal morphology family member (vab-10)     | 0 |                                                                 |                                                                                                                                                                                                                                                                                                                                                                                   |            | -                                         |
|                        | -                                                       | 0 |                                                                 |                                                                                                                                                                                                                                                                                                                                                                                   |            | -                                         |
| Bombyx mori            | endonuclease-reverse transcriptase                      | 1 | F:GO:0003824                                                    |                                                                                                                                                                                                                                                                                                                                                                                   |            | -                                         |
|                        | -                                                       | 0 |                                                                 |                                                                                                                                                                                                                                                                                                                                                                                   |            | -                                         |
| Loa loa                | entric chromosome binding protein family member (hcp-6) | 0 |                                                                 | C:GO:0030117;<br>F:GO:0005488;<br>P:GO:0016192;<br>P:GO:0006886;<br>F:GO:0005515                                                                                                                                                                                                                                                                                                  |            | -                                         |
|                        | -                                                       | 0 |                                                                 |                                                                                                                                                                                                                                                                                                                                                                                   |            | -                                         |
|                        | -                                                       | 0 |                                                                 |                                                                                                                                                                                                                                                                                                                                                                                   |            | -                                         |
|                        | -                                                       | 0 |                                                                 |                                                                                                                                                                                                                                                                                                                                                                                   |            | -                                         |
| Brugia malayi          | hypothetical protein [Brugia malayi]                    | 0 |                                                                 |                                                                                                                                                                                                                                                                                                                                                                                   |            | -                                         |
| Caenorhabditis elegans | elegans protein confirmed by transcript evidence        | 0 |                                                                 |                                                                                                                                                                                                                                                                                                                                                                                   |            | -                                         |
|                        | -                                                       | 0 |                                                                 |                                                                                                                                                                                                                                                                                                                                                                                   |            | G3DSA:3.80.20.20 (GENE3D)                 |
| Homo sapiens           | -dh dehydroge-se                                        | 4 | P:GO:0006120;<br>F:GO:0008137;<br>P:GO:0006810;<br>C:GO:0005747 |                                                                                                                                                                                                                                                                                                                                                                                   | EC:1.6.5.3 | IPR007741; IPR012336; PTHR12878 (PANTHER) |
|                        | -                                                       | 0 |                                                                 |                                                                                                                                                                                                                                                                                                                                                                                   |            | -                                         |
|                        | -                                                       | 0 |                                                                 |                                                                                                                                                                                                                                                                                                                                                                                   |            | -                                         |
| Loa loa                | zinc dhhc domain containing 17                          | 0 |                                                                 | P:GO:0043123;<br>F:GO:0046872;<br>C:GO:0016021;<br>C:GO:0016020;<br>C:GO:0030660;<br>F:GO:0015095;<br>F:GO:0004871;<br>P:GO:0042953;<br>C:GO:0000139;<br>P:GO:0008152;<br>C:GO:0005737;<br>F:GO:0016409;<br>C:GO:0031410;<br>C:GO:0005794;<br>F:GO:0008415;<br>P:GO:0006811;<br>P:GO:0006810;<br>F:GO:0008270;<br>F:GO:0019706;<br>P:GO:0018345;<br>F:GO:0016740;<br>F:GO:0005515 |            | SignalP (SIGNALP)                         |
|                        | -                                                       | 0 |                                                                 |                                                                                                                                                                                                                                                                                                                                                                                   |            | -                                         |
|                        | -                                                       | 0 |                                                                 |                                                                                                                                                                                                                                                                                                                                                                                   |            | -                                         |

|                             |                                                      |   |                                                                                  |                                                                                                                                                                                                                          |   |                                                                                                                                                |
|-----------------------------|------------------------------------------------------|---|----------------------------------------------------------------------------------|--------------------------------------------------------------------------------------------------------------------------------------------------------------------------------------------------------------------------|---|------------------------------------------------------------------------------------------------------------------------------------------------|
| Angiostrongylus cantonensis | cg7484                                               | 0 |                                                                                  | F:GO:0004970;<br>F:GO:0005216;<br>C:GO:0016021;<br>C:GO:0016020;<br>C:GO:0045202;<br>P:GO:0006811;<br>P:GO:0006810;<br>C:GO:0030054;<br>F:GO:0005234;<br>F:GO:0004872;<br>P:GO:0045454;<br>C:GO:0005886;<br>C:GO:0045211 | - |                                                                                                                                                |
| Loa loa                     | temporarily assigned gene -me family member (tag-53) | 5 | P:GO:0018991;<br>C:GO:0016021;<br>P:GO:0040010;<br>F:GO:0005515;<br>P:GO:0040011 | -                                                                                                                                                                                                                        |   | PTHR10574 (PANTHER),<br>PTHR10574:SF3 (PANTHER)                                                                                                |
| Homo sapiens                | transmembrane protein isoform cra_c                  | 1 | C:GO:0016020                                                                     | -                                                                                                                                                                                                                        |   | IPR005349; SignalP (SIGNALP)                                                                                                                   |
|                             | -                                                    | 0 |                                                                                  |                                                                                                                                                                                                                          |   | -                                                                                                                                              |
|                             | -                                                    | 0 |                                                                                  |                                                                                                                                                                                                                          |   | -                                                                                                                                              |
|                             | -                                                    | 0 |                                                                                  |                                                                                                                                                                                                                          |   | SignalP (SIGNALP)                                                                                                                              |
| Caenorhabditis elegans      | briggsae cbr-smgl-1 protein                          | 0 |                                                                                  |                                                                                                                                                                                                                          |   | -                                                                                                                                              |
|                             | -                                                    | 0 |                                                                                  |                                                                                                                                                                                                                          |   | -                                                                                                                                              |
|                             | -                                                    | 0 |                                                                                  |                                                                                                                                                                                                                          |   | -                                                                                                                                              |
| Camponotus floridanus       | btb poz domain-containing protein 9                  | 0 |                                                                                  | P:GO:0007155;<br>F:GO:0005515                                                                                                                                                                                            |   | IPR000210; IPR011333; IPR013069;<br>IPR013089; PTHR23230:SF181<br>(PANTHER)                                                                    |
|                             | -                                                    | 0 |                                                                                  |                                                                                                                                                                                                                          |   | -                                                                                                                                              |
| Loa loa                     | malonyl- synthase                                    | 1 | F:GO:0003824                                                                     | -                                                                                                                                                                                                                        |   | IPR000873; IPR020459; IPR020845;<br>G3DSA:3.40.50.980 (GENE3D),<br>PTHR11968 (PANTHER),<br>PTHR11968:SF48 (PANTHER),<br>SSF56801 (SUPERFAMILY) |
|                             | -                                                    | 0 |                                                                                  |                                                                                                                                                                                                                          |   | SignalP (SIGNALP)                                                                                                                              |

|                         |                                                  |    |                                                                                                                                                                                                                                                                                                                                                                                                                                                                                                                           |              |                                                               |   |
|-------------------------|--------------------------------------------------|----|---------------------------------------------------------------------------------------------------------------------------------------------------------------------------------------------------------------------------------------------------------------------------------------------------------------------------------------------------------------------------------------------------------------------------------------------------------------------------------------------------------------------------|--------------|---------------------------------------------------------------|---|
| Chlorocebus aethiops    | heavy chain non-muscle                           | 43 | F:GO:001295;<br>C:GO:0030863;<br>P:GO:0008360;<br>C:GO:0031594;<br>P:GO:0030048;<br>F:GO:0030898;<br>P:GO:0051295;<br>C:GO:0005913;<br>P:GO:0016337;<br>F:GO:0043531;<br>P:GO:0032796;<br>P:GO:0015031;<br>C:GO:0001772;<br>P:GO:0050900;<br>P:GO:0007229;<br>C:GO:0005829;<br>P:GO:0007520;<br>F:GO:0000146;<br>P:GO:0006509;<br>P:GO:0043534;<br>C:GO:0008305;<br>C:GO:0005819;<br>C:GO:0001726;<br>P:GO:0007132;<br>C:GO:0032154;<br>P:GO:0000904;<br>P:GO:0001768;<br>F:GO:0043495;<br>C:GO:0005737;<br>C:GO:0005730; | -            | -                                                             | - |
| Caenorhabditis briggsae | probable dimethyladenosine transferase           | 5  | F:GO:0003723;<br>P:GO:0000154;<br>F:GO:0000179                                                                                                                                                                                                                                                                                                                                                                                                                                                                            | -            | IPR001737; G3DSA:3.40.50.150 (GENE3D), SSF53335 (SUPERFAMILY) |   |
| -                       | -                                                | 0  | -                                                                                                                                                                                                                                                                                                                                                                                                                                                                                                                         | -            | -                                                             |   |
| Caenorhabditis elegans  | briggsae cbr-prx-2 protein                       | 1  | F:GO:0005488                                                                                                                                                                                                                                                                                                                                                                                                                                                                                                              | -            | -                                                             |   |
| Loa loa                 | hypothetical protein LOAG_05535 [Loa loa]        | 0  | -                                                                                                                                                                                                                                                                                                                                                                                                                                                                                                                         | -            | -                                                             |   |
| Loa loa                 | bromodomain containing protein                   | 1  | F:GO:0046872                                                                                                                                                                                                                                                                                                                                                                                                                                                                                                              | -            | -                                                             |   |
| -                       | -                                                | 0  | -                                                                                                                                                                                                                                                                                                                                                                                                                                                                                                                         | -            | -                                                             |   |
| Caenorhabditis elegans  | atp-dependent r-                                 | 4  | F:GO:0003676;<br>F:GO:0005524;<br>F:GO:0005515;<br>F:GO:0008026                                                                                                                                                                                                                                                                                                                                                                                                                                                           | -            | PTHR18934 (PANTHER), SSF52540 (SUPERFAMILY)                   |   |
| Caenorhabditis briggsae | elegans protein confirmed by transcript evidence | 0  | -                                                                                                                                                                                                                                                                                                                                                                                                                                                                                                                         | F:GO:0005515 | SignalIP (SIGNALP)                                            |   |
| -                       | -                                                | 0  | -                                                                                                                                                                                                                                                                                                                                                                                                                                                                                                                         | -            | -                                                             |   |
| -                       | -                                                | 0  | -                                                                                                                                                                                                                                                                                                                                                                                                                                                                                                                         | -            | -                                                             |   |
| Caenorhabditis elegans  | audal c homolog family member (bcc-1)            | 0  | -                                                                                                                                                                                                                                                                                                                                                                                                                                                                                                                         | -            | -                                                             |   |
| -                       | -                                                | 0  | -                                                                                                                                                                                                                                                                                                                                                                                                                                                                                                                         | -            | -                                                             |   |
| Caenorhabditis elegans  | calcium binding egf domain containing protein    | 0  | -                                                                                                                                                                                                                                                                                                                                                                                                                                                                                                                         | F:GO:0005509 | IPR000859                                                     |   |
| -                       | -                                                | 0  | -                                                                                                                                                                                                                                                                                                                                                                                                                                                                                                                         | -            | SignalIP (SIGNALP)                                            |   |
| -                       | -                                                | 0  | -                                                                                                                                                                                                                                                                                                                                                                                                                                                                                                                         | -            | -                                                             |   |
| -                       | -                                                | 0  | -                                                                                                                                                                                                                                                                                                                                                                                                                                                                                                                         | -            | -                                                             |   |
| Brugia malayi           | sh2 domain containing protein                    | 4  | P:GO:0006468;<br>F:GO:0005515;<br>F:GO:0004713;<br>F:GO:0005524                                                                                                                                                                                                                                                                                                                                                                                                                                                           | -            | EC:2.7.10.0 IPR000980                                         |   |
| -                       | -                                                | 0  | -                                                                                                                                                                                                                                                                                                                                                                                                                                                                                                                         | -            | -                                                             |   |

|                         |                                                                  |    |                                                                                                                                                                                        |                                                                 |            |                                                                                                                |
|-------------------------|------------------------------------------------------------------|----|----------------------------------------------------------------------------------------------------------------------------------------------------------------------------------------|-----------------------------------------------------------------|------------|----------------------------------------------------------------------------------------------------------------|
| Caenorhabditis briggsae | yms5_caeel ame: full=uncharacterized protein flags:<br>precursor | 0  |                                                                                                                                                                                        | P:GO:0007160;<br>C:GO:0016021                                   |            | IPR003886; SignalP (SIGNALP)                                                                                   |
| Caenorhabditis briggsae | elegans protein confirmed by transcript evidence                 | 0  |                                                                                                                                                                                        | P:GO:0006355;<br>F:GO:0043565;<br>F:GO:0046983;<br>F:GO:0003700 |            | -                                                                                                              |
|                         | -                                                                | 0  |                                                                                                                                                                                        |                                                                 |            | -                                                                                                              |
|                         | -                                                                | 0  |                                                                                                                                                                                        |                                                                 |            | -                                                                                                              |
| Caenorhabditis briggsae | Hypothetical protein CBG12331 [Caenorhabditis briggsae]          | 1  | F:GO:0016791                                                                                                                                                                           | -                                                               | EC:3.1.3.0 | PTHR19134 (PANTHER),<br>PTHR19134:SF26 (PANTHER)                                                               |
| Caenorhabditis elegans  | hypothetical protein C43H6.7 [Caenorhabditis elegans]            | 0  |                                                                                                                                                                                        |                                                                 |            | SignalP (SIGNALP)                                                                                              |
|                         | -                                                                | 0  |                                                                                                                                                                                        |                                                                 |            | -                                                                                                              |
| Caenorhabditis briggsae | briggsae cbr-sax-2 protein                                       | 11 | F:GO:0005515;<br>P:GO:0048601;<br>P:GO:0016055;<br>P:GO:0042052;<br>P:GO:0008407;<br>F:GO:0016563;<br>P:GO:0045860;<br>P:GO:0048800;<br>P:GO:0035317;<br>P:GO:0048814;<br>C:GO:0005938 | -                                                               |            | -                                                                                                              |
|                         | -                                                                | 0  |                                                                                                                                                                                        |                                                                 |            | -                                                                                                              |
|                         | -                                                                | 0  |                                                                                                                                                                                        |                                                                 |            | -                                                                                                              |
| Caenorhabditis elegans  | cytoplasmic intermediate filament protein                        | 10 | C:GO:0005737;<br>P:GO:0009792;<br>P:GO:0010171;<br>P:GO:0002119;<br>P:GO:0018991;<br>F:GO:0005515;<br>C:GO:0005882;<br>P:GO:0040011;<br>P:GO:0040007;<br>F:GO:0005198                  | -                                                               |            | SignalP (SIGNALP)                                                                                              |
|                         | -                                                                | 0  |                                                                                                                                                                                        |                                                                 |            | -                                                                                                              |
| Loa loa                 | g protein pathway suppressor 1                                   | 4  | P:GO:0000910;<br>P:GO:0040035;<br>F:GO:0005515;<br>C:GO:0005634                                                                                                                        | -                                                               |            | IPR000717; IPR011991; IPR019585;<br>PTHR14145 (PANTHER),<br>PTHR14145:SF2 (PANTHER), SSF46785<br>(SUPERFAMILY) |
|                         | -                                                                | 0  |                                                                                                                                                                                        |                                                                 |            | -                                                                                                              |
|                         | -                                                                | 0  |                                                                                                                                                                                        |                                                                 |            | SignalP (SIGNALP)                                                                                              |
|                         | -                                                                | 0  |                                                                                                                                                                                        |                                                                 |            | -                                                                                                              |
|                         | -                                                                | 0  |                                                                                                                                                                                        |                                                                 |            | -                                                                                                              |
|                         | -                                                                | 0  |                                                                                                                                                                                        |                                                                 |            | -                                                                                                              |
| Caenorhabditis elegans  | hypothetical protein F43D9.1 [Caenorhabditis elegans]            | 0  |                                                                                                                                                                                        | C:GO:0016020;<br>F:GO:0008158                                   |            | SignalP (SIGNALP)                                                                                              |
| Caenorhabditis briggsae | briggsae cbr-unc-8 protein                                       | 3  | C:GO:0016020;<br>F:GO:0005216;<br>P:GO:0006811                                                                                                                                         | -                                                               |            | SignalP (SIGNALP)                                                                                              |
|                         | -                                                                | 0  |                                                                                                                                                                                        |                                                                 |            | -                                                                                                              |
|                         | -                                                                | 0  |                                                                                                                                                                                        |                                                                 |            | IPR003378; PTHR10811 (PANTHER),<br>PTHR10811:SF1 (PANTHER)                                                     |
|                         | -                                                                | 0  |                                                                                                                                                                                        |                                                                 |            | -                                                                                                              |
| Homo sapiens            | immunoglobulin kappa chain                                       | 3  | C:GO:0005576;<br>F:GO:0003823;<br>P:GO:0006955                                                                                                                                         | -                                                               |            | IPR013106; IPR013783; PTHR23267<br>(PANTHER), PTHR23267:SF33<br>(PANTHER), SSF48726 (SUPERFAMILY)              |

|                         |                                                                |   |                                                                                                   |   |             |                                                                                                                                         |
|-------------------------|----------------------------------------------------------------|---|---------------------------------------------------------------------------------------------------|---|-------------|-----------------------------------------------------------------------------------------------------------------------------------------|
| Homo sapiens            | immunoglobulin kappa light chain vlj region                    | 4 | C:GO:0005576;<br>F:GO:0005515;<br>F:GO:0003823;<br>P:GO:0006955                                   | - |             | IPR013106; IPR013783; PTHR23267 (PANTHER), PTHR23267:SF33 (PANTHER), SSF48726 (SUPERFAMILY)                                             |
| Homo sapiens            | immunoglobulin kappa light chain vlj region                    | 0 |                                                                                                   | - |             | IPR003006; IPR003596; IPR003597; IPR007110; IPR013106; IPR013783; PTHR23267 (PANTHER), PTHR23267:SF33 (PANTHER), SSF48726 (SUPERFAMILY) |
| Homo sapiens            | anti-tetanus toxoid immunoglobulin light chain variable region | 0 |                                                                                                   | - |             | IPR003596; IPR007110; IPR013106; IPR013783; PTHR23267 (PANTHER), PTHR23267:SF33 (PANTHER), SSF48726 (SUPERFAMILY)                       |
| Homo sapiens            | ig kappa light chain                                           | 3 | C:GO:0005576;<br>F:GO:0003823;<br>P:GO:0006955                                                    | - |             | IPR003596; IPR007110; IPR013106; IPR013783; PTHR23267 (PANTHER), PTHR23267:SF33 (PANTHER), SignalP (SIGNALP), SSF48726 (SUPERFAMILY)    |
| Homo sapiens            | immunoglobulin light chain variable region                     | 3 | C:GO:0005576;<br>F:GO:0003823;<br>P:GO:0006955                                                    | - |             | IPR003596; IPR007110; IPR013106; IPR013783; PTHR23267 (PANTHER), PTHR23267:SF33 (PANTHER), SSF48726 (SUPERFAMILY)                       |
| Homo sapiens            | immunoglobulin kappa light chain vlj region                    | 3 | C:GO:0005576;<br>F:GO:0003823;<br>P:GO:0006955                                                    | - |             | IPR003596; IPR007110; IPR013106; IPR013783; PTHR23267 (PANTHER), PTHR23267:SF33 (PANTHER), SignalP (SIGNALP), SSF48726 (SUPERFAMILY)    |
| Homo sapiens            | immunoglobulin kappa light chain vlj region                    | 4 | C:GO:0005576;<br>F:GO:0005515;<br>F:GO:0003823;<br>P:GO:0006955                                   | - |             | IPR003006; IPR003596; IPR003597; IPR007110; IPR013106; IPR013783; PTHR23267 (PANTHER), PTHR23267:SF33 (PANTHER), SSF48726 (SUPERFAMILY) |
| Caenorhabditis brenneri | hypothetical protein Cbre_JD15.003 [Caenorhabditis brenneri]   | 0 |                                                                                                   | - |             | -                                                                                                                                       |
|                         | -                                                              | 0 |                                                                                                   | - |             | -                                                                                                                                       |
|                         | -                                                              | 0 |                                                                                                   | - |             | -                                                                                                                                       |
|                         | -                                                              | 0 |                                                                                                   | - |             | -                                                                                                                                       |
| Caenorhabditis remanei  | slo-2                                                          | 6 | C:GO:0016020;<br>P:GO:0006813;<br>P:GO:0008152;<br>F:GO:0003824;<br>F:GO:0015269;<br>F:GO:0005488 | - |             | PTHR10027 (PANTHER), PTHR10027:SF6 (PANTHER)                                                                                            |
|                         | -                                                              | 0 |                                                                                                   | - |             | -                                                                                                                                       |
|                         | -                                                              | 0 |                                                                                                   | - |             | -                                                                                                                                       |
|                         | -                                                              | 0 |                                                                                                   | - |             | -                                                                                                                                       |
|                         | -                                                              | 0 |                                                                                                   | - |             | -                                                                                                                                       |
| Brugia malayi           | protein-tyrosine phosphatase containing protein                | 3 | P:GO:0016311;<br>F:GO:0004721;<br>P:GO:0009792                                                    | - | EC:3.1.3.16 | IPR000242; G3DSA:3.90.190.10 (GENE3D), PTHR19134 (PANTHER), PTHR19134:SF26 (PANTHER), SSF52799 (SUPERFAMILY)                            |
| Caenorhabditis briggsae | briggsae cbr-dnj-2 protein                                     | 2 | C:GO:0016021;<br>F:GO:0031072                                                                     | - |             | IPR001623; IPR015609; PTHR11821:SF43 (PANTHER), SignalP (SIGNALP)                                                                       |

|                         |                                                            |   |                                                                                                                                                      |                                                                 |            |                                                                                                            |
|-------------------------|------------------------------------------------------------|---|------------------------------------------------------------------------------------------------------------------------------------------------------|-----------------------------------------------------------------|------------|------------------------------------------------------------------------------------------------------------|
| Caenorhabditis elegans  | elegans protein partially confirmed by transcript evidence | 9 | P:GO:0055085;<br>P:GO:0040010;<br>P:GO:0009851;<br>C:GO:0016021;<br>F:GO:0042626;<br>P:GO:0000003;<br>F:GO:0005524;<br>P:GO:0002119;<br>P:GO:0016246 | -                                                               |            | G3DSA:3.40.50.300 (GENE3D),<br>PTHR19242 (PANTHER),<br>PTHR19242:SF82 (PANTHER),<br>SSF52540 (SUPERFAMILY) |
| -                       | -                                                          | 0 |                                                                                                                                                      |                                                                 |            | PD035033 (PRODOM)                                                                                          |
| -                       | -                                                          | 0 |                                                                                                                                                      |                                                                 |            | SignalP (SIGNALP)                                                                                          |
| -                       | -                                                          | 0 |                                                                                                                                                      |                                                                 |            | SignalP (SIGNALP)                                                                                          |
| Caenorhabditis briggsae | duoxa_caeel ame: full=duoxa-like protein                   | 0 |                                                                                                                                                      | C:GO:0005789;<br>C:GO:0016021;<br>P:GO:0015031                  |            | IPR018469; SignalP (SIGNALP)                                                                               |
| Caenorhabditis elegans  | tfiih basal transcription factor complex helicase subunit  | 4 | F:GO:0008026;<br>P:GO:0006139;<br>F:GO:0003676;<br>F:GO:0000166                                                                                      | -                                                               |            | -                                                                                                          |
| -                       | -                                                          | 0 |                                                                                                                                                      |                                                                 |            | -                                                                                                          |
| Homo sapiens            | mitochondrial ribosomal protein s21                        | 4 | C:GO:0005763;<br>C:GO:0005743;<br>F:GO:0003735;<br>P:GO:0006412                                                                                      | -                                                               | EC:3.6.5.3 | IPR001911; PTHR21109 (PANTHER)                                                                             |
| Caenorhabditis briggsae | elegans protein confirmed by transcript evidence           | 0 |                                                                                                                                                      |                                                                 |            | SignalP (SIGNALP)                                                                                          |
| -                       | -                                                          | 0 |                                                                                                                                                      |                                                                 |            | -                                                                                                          |
| -                       | -                                                          | 0 |                                                                                                                                                      |                                                                 |            | -                                                                                                          |
| Loa loa                 | kelch-like 10                                              | 0 |                                                                                                                                                      | F:GO:0045480;<br>P:GO:0055114;<br>F:GO:0016491;<br>F:GO:0005515 |            | IPR006652; IPR013089; IPR015915;<br>PTHR23230:SF184 (PANTHER),<br>SSF117281 (SUPERFAMILY)                  |
| -                       | -                                                          | 0 |                                                                                                                                                      |                                                                 |            | -                                                                                                          |
| -                       | -                                                          | 0 |                                                                                                                                                      |                                                                 |            | -                                                                                                          |
| -                       | -                                                          | 0 |                                                                                                                                                      |                                                                 |            | -                                                                                                          |
| Caenorhabditis briggsae | briggsae cbr-tag-180 protein                               | 0 |                                                                                                                                                      | C:GO:0016020                                                    |            | PTHR10166 (PANTHER),<br>PTHR10166:SF4 (PANTHER)                                                            |
| Caenorhabditis briggsae | briggsae cbr-lam-3 protein                                 | 3 | P:GO:0007155;<br>P:GO:0050794;<br>C:GO:0005604                                                                                                       | -                                                               |            | -                                                                                                          |
| Loa loa                 | hypothetical protein LOAG_08316 [Loa loa]                  | 0 |                                                                                                                                                      |                                                                 |            | -                                                                                                          |
| -                       | -                                                          | 0 |                                                                                                                                                      |                                                                 |            | -                                                                                                          |
| Caenorhabditis elegans  | Hypothetical protein Y55F3BL.4 [Caenorhabditis elegans]    | 0 |                                                                                                                                                      |                                                                 |            | -                                                                                                          |
| -                       | -                                                          | 0 |                                                                                                                                                      |                                                                 |            | -                                                                                                          |
| Caenorhabditis elegans  | briggsae cbr-cpin-1 protein                                | 0 |                                                                                                                                                      | F:GO:0016787;<br>F:GO:0016810                                   |            | -                                                                                                          |
| Caenorhabditis elegans  | dynein heavy chain                                         | 5 | P:GO:0007018;<br>C:GO:0030286;<br>F:GO:0016887;<br>F:GO:0005524;<br>F:GO:0003777                                                                     | -                                                               |            | IPR004273; PTHR10676 (PANTHER),<br>PTHR10676:SF28 (PANTHER)                                                |
| -                       | -                                                          | 0 |                                                                                                                                                      |                                                                 |            | -                                                                                                          |
| Caenorhabditis briggsae | Hypothetical protein CBG19874 [Caenorhabditis briggsae]    | 4 | P:GO:0002119;<br>P:GO:0040010;<br>P:GO:0000003;<br>P:GO:0006898                                                                                      | -                                                               |            | -                                                                                                          |
| -                       | -                                                          | 0 |                                                                                                                                                      |                                                                 |            | SignalP (SIGNALP)                                                                                          |

|                           |                                                                |    |                                                                                                                                                                                                                                                                                                                                                                                                                                                                                         |                                                |   |                                                                                   |
|---------------------------|----------------------------------------------------------------|----|-----------------------------------------------------------------------------------------------------------------------------------------------------------------------------------------------------------------------------------------------------------------------------------------------------------------------------------------------------------------------------------------------------------------------------------------------------------------------------------------|------------------------------------------------|---|-----------------------------------------------------------------------------------|
| Pan troglodytes           | cystatin c                                                     | 44 | F:GO:0003867;<br>P:GO:0010711;<br>P:GO:0060548;<br>P:GO:0010951;<br>C:GO:0031982;<br>C:GO:0031965;<br>P:GO:0070301;<br>C:GO:0005615;<br>P:GO:0043067;<br>C:GO:0005764;<br>P:GO:0042747;<br>P:GO:0014070;<br>F:GO:0001540;<br>P:GO:0010716;<br>P:GO:0008284;<br>P:GO:0007420;<br>C:GO:0043025;<br>P:GO:0001654;<br>P:GO:0001666;<br>P:GO:0048678;<br>C:GO:0005771;<br>P:GO:0006915;<br>P:GO:0007566;<br>P:GO:0051789;<br>P:GO:0042493;<br>P:GO:0060009;<br>F:GO:0002020;<br>C:GO:0048471 | -                                              | - |                                                                                   |
| Caenorhabditis briggsae   | gamma-interferon-inducible lysosomal thiol reductase precursor | 0  |                                                                                                                                                                                                                                                                                                                                                                                                                                                                                         |                                                |   | IPR004911; PTHR13234:SF3 (PANTHER)                                                |
|                           | -                                                              | 0  |                                                                                                                                                                                                                                                                                                                                                                                                                                                                                         |                                                |   | -                                                                                 |
| Caenorhabditis briggsae   | Hypothetical protein CBG13928 [Caenorhabditis briggsae]        | 0  |                                                                                                                                                                                                                                                                                                                                                                                                                                                                                         | F:GO:0003951;<br>P:GO:0008152;<br>F:GO:0005515 |   | -                                                                                 |
|                           | -                                                              | 0  |                                                                                                                                                                                                                                                                                                                                                                                                                                                                                         |                                                |   | -                                                                                 |
| Caenorhabditis briggsae   | family c54 u-ssigned peptidase (c54 family)                    | 1  | F:GO:0016787                                                                                                                                                                                                                                                                                                                                                                                                                                                                            | -                                              |   | IPR005078; PTHR22624:SF15 (PANTHER)                                               |
| Caenorhabditis elegans    | briggsae cbr-atm-1 protein                                     | 4  | C:GO:0000785;<br>F:GO:0005488;<br>P:GO:0043581;<br>F:GO:0016740                                                                                                                                                                                                                                                                                                                                                                                                                         | -                                              |   | IPR000403; IPR011009; IPR015519; G3DSA:3.30.1010.10 (GENE3D), PTHR11139 (PANTHER) |
| Caenorhabditis sp. PS1010 | elegans protein confirmed by transcript evidence               | 0  |                                                                                                                                                                                                                                                                                                                                                                                                                                                                                         |                                                |   | IPR011107                                                                         |
| Caenorhabditis elegans    | elegans protein partially confirmed by transcript evidence     | 2  | F:GO:0015269;<br>C:GO:0016020                                                                                                                                                                                                                                                                                                                                                                                                                                                           | -                                              |   | IPR011996; IPR015449; PTHR10153:SF6 (PANTHER), SignalP (SIGNALP)                  |
|                           | -                                                              | 0  |                                                                                                                                                                                                                                                                                                                                                                                                                                                                                         |                                                |   | -                                                                                 |
|                           | -                                                              | 0  |                                                                                                                                                                                                                                                                                                                                                                                                                                                                                         |                                                |   | -                                                                                 |
|                           | -                                                              | 0  |                                                                                                                                                                                                                                                                                                                                                                                                                                                                                         |                                                |   | SignalP (SIGNALP)                                                                 |
| Caenorhabditis elegans    | polh (d- polymerase eta) homolog family member (polh-1)        | 0  |                                                                                                                                                                                                                                                                                                                                                                                                                                                                                         |                                                |   | -                                                                                 |
|                           | -                                                              | 0  |                                                                                                                                                                                                                                                                                                                                                                                                                                                                                         |                                                |   | -                                                                                 |
|                           | -                                                              | 0  |                                                                                                                                                                                                                                                                                                                                                                                                                                                                                         |                                                |   | SignalP (SIGNALP)                                                                 |
|                           | -                                                              | 0  |                                                                                                                                                                                                                                                                                                                                                                                                                                                                                         |                                                |   | -                                                                                 |



|                             |                                |    |                                                                                                                                                                                                                                                                                                                                |   |                                   |                                                                                     |
|-----------------------------|--------------------------------|----|--------------------------------------------------------------------------------------------------------------------------------------------------------------------------------------------------------------------------------------------------------------------------------------------------------------------------------|---|-----------------------------------|-------------------------------------------------------------------------------------|
| Caenorhabditis elegans      | kinesin family member 3a       | 15 | C:GO:0035085;<br>P:GO:0007224;<br>P:GO:0048260;<br>C:GO:0008021;<br>P:GO:0007507;<br>F:GO:0003774;<br>F:GO:0005515;<br>P:GO:0021904;<br>F:GO:0000166;<br>C:GO:0032391;<br>P:GO:0001822;<br>P:GO:0007368;<br>P:GO:0042384;<br>P:GO:0001701;<br>P:GO:0009952                                                                     | - |                                   | PTHR16012 (PANTHER),<br>PTHR16012:SF160 (PANTHER)                                   |
| -                           | -                              | 0  |                                                                                                                                                                                                                                                                                                                                |   |                                   | -                                                                                   |
| Caenorhabditis briggsae     | nuclear receptor nhr-1         | 1  | F:GO:0005515                                                                                                                                                                                                                                                                                                                   | - |                                   | -                                                                                   |
| -                           | -                              | 0  |                                                                                                                                                                                                                                                                                                                                |   |                                   | -                                                                                   |
| -                           | -                              | 0  |                                                                                                                                                                                                                                                                                                                                |   |                                   | -                                                                                   |
| Callithrix jacchus          | peroxiredoxin 1                | 19 | P:GO:0001501;<br>P:GO:0032872;<br>P:GO:0042744;<br>P:GO:0034101;<br>C:GO:0005759;<br>P:GO:0042267;<br>C:GO:0005719;<br>F:GO:0020037;<br>P:GO:0008283;<br>C:GO:0042470;<br>P:GO:0019430;<br>F:GO:0008379;<br>C:GO:0005730;<br>C:GO:0005829;<br>P:GO:0045454;<br>P:GO:0042345;<br>P:GO:0055114;<br>F:GO:0042803;<br>C:GO:0005782 | - |                                   | IPR000866; IPR012335; IPR012336;<br>PTHR10681 (PANTHER),<br>PTHR10681:SF8 (PANTHER) |
| Angiostrongylus cantonensis | gamma-butyrobetaine dioxyge-se | 7  | C:GO:0005737;<br>F:GO:0005506;<br>C:GO:0043231;<br>P:GO:0055114;<br>F:GO:0016702;<br>F:GO:0008336;<br>P:GO:0045329                                                                                                                                                                                                             | - | EC:1.13.11.0<br>;<br>EC:1.14.11.1 | IPR022407; PTHR10696 (PANTHER),<br>PTHR10696:SF3 (PANTHER)                          |
| Caenorhabditis elegans      | calcitonin receptor            | 5  | P:GO:0007186;<br>C:GO:0016021;<br>P:GO:0007165;<br>C:GO:0005886;<br>F:GO:0004930                                                                                                                                                                                                                                               | - |                                   | IPR000832; PTHR12011 (PANTHER),<br>PTHR12011:SF14 (PANTHER)                         |
| -                           | -                              | 0  |                                                                                                                                                                                                                                                                                                                                |   |                                   | IPR015418; PTHR13476 (PANTHER)                                                      |
| -                           | -                              | 0  |                                                                                                                                                                                                                                                                                                                                |   |                                   | -                                                                                   |
| -                           | -                              | 0  |                                                                                                                                                                                                                                                                                                                                |   |                                   | -                                                                                   |
| -                           | -                              | 0  |                                                                                                                                                                                                                                                                                                                                |   |                                   | -                                                                                   |
| -                           | -                              | 0  |                                                                                                                                                                                                                                                                                                                                |   |                                   | -                                                                                   |
| -                           | -                              | 0  |                                                                                                                                                                                                                                                                                                                                |   |                                   | SignalP (SIGNALP)                                                                   |

|                         |                                                            |    |                                                                                                                                                                                                                          |                                                                 |                             |                                                                                                                                  |
|-------------------------|------------------------------------------------------------|----|--------------------------------------------------------------------------------------------------------------------------------------------------------------------------------------------------------------------------|-----------------------------------------------------------------|-----------------------------|----------------------------------------------------------------------------------------------------------------------------------|
| Caenorhabditis elegans  | uncoordi-ted family member (unc-89)                        | 0  |                                                                                                                                                                                                                          | F:GO:0004672;<br>F:GO:0005524;<br>P:GO:0006468;<br>F:GO:0004674 |                             | IPR007110; IPR013098; IPR013783;<br>PTHR19897 (PANTHER),<br>PTHR19897:SF7 (PANTHER), SSF48726<br>(SUPERFAMILY)                   |
|                         | -                                                          | 0  |                                                                                                                                                                                                                          |                                                                 |                             | -                                                                                                                                |
| Caenorhabditis elegans  | briggsae cbr-ztf-8 protein                                 | 0  |                                                                                                                                                                                                                          | F:GO:0003676;<br>F:GO:0008270;<br>F:GO:0005515;<br>C:GO:0005622 |                             | -                                                                                                                                |
|                         | -                                                          | 0  |                                                                                                                                                                                                                          |                                                                 |                             | -                                                                                                                                |
| Ailuropoda melanoleuca  | p4hb protein                                               | 12 | F:GO:0003756;<br>F:GO:0004656;<br>C:GO:0005793;<br>P:GO:0045454;<br>C:GO:0009986;<br>C:GO:0042470;<br>C:GO:0005792;<br>C:GO:0005788;<br>F:GO:0005515;<br>P:GO:0018401;<br>C:GO:0005576;<br>C:GO:0005886                  |                                                                 | EC:5.3.4.1;<br>EC:1.14.11.2 | IPR012335; IPR012336; IPR013766;<br>PTHR18929 (PANTHER)                                                                          |
|                         | -                                                          | 0  |                                                                                                                                                                                                                          |                                                                 |                             | SignalP (SIGNALP)                                                                                                                |
| Caenorhabditis elegans  | serotonin receptor                                         | 4  | C:GO:0016021;<br>P:GO:0007186;<br>F:GO:0004930;<br>P:GO:0007165                                                                                                                                                          |                                                                 |                             | IPR000276; IPR017452;<br>G3DSA:1.20.1070.10 (GENE3D),<br>PTHR19266 (PANTHER),<br>PTHR19266:SF85 (PANTHER), SignalP<br>(SIGNALP)  |
|                         | -                                                          | 0  |                                                                                                                                                                                                                          |                                                                 |                             | SignalP (SIGNALP)                                                                                                                |
| Caenorhabditis elegans  | temporarily assigned gene -me family member (tag-180)      | 1  | C:GO:0016020                                                                                                                                                                                                             |                                                                 |                             | PTHR10166 (PANTHER),<br>PTHR10166:SF4 (PANTHER)                                                                                  |
| Caenorhabditis briggsae | elegans protein partially confirmed by transcript evidence | 1  | F:GO:0046872                                                                                                                                                                                                             |                                                                 |                             | IPR001128; PTHR19383:SF176<br>(PANTHER), SignalP (SIGNALP)                                                                       |
| Caenorhabditis briggsae | endoplasmic precursor                                      | 13 | C:GO:0016529;<br>P:GO:0040010;<br>P:GO:0030433;<br>P:GO:0006457;<br>C:GO:0044459;<br>C:GO:0042470;<br>F:GO:0005524;<br>P:GO:0002119;<br>C:GO:0005788;<br>P:GO:0040011;<br>F:GO:0051082;<br>P:GO:0006898;<br>P:GO:0006950 |                                                                 |                             | IPR001404; IPR003594; IPR015566;<br>IPR019805; IPR020568; IPR020575;<br>IPR020576; SignalP (SIGNALP),<br>SSF110942 (SUPERFAMILY) |

|                         |                                                         |    |                                                                                                                                                                                                                          |   |                                                                 |                                                                                                                                  |
|-------------------------|---------------------------------------------------------|----|--------------------------------------------------------------------------------------------------------------------------------------------------------------------------------------------------------------------------|---|-----------------------------------------------------------------|----------------------------------------------------------------------------------------------------------------------------------|
| Caenorhabditis briggsae | endoplasmic precursor                                   | 13 | C:GO:0016529;<br>P:GO:0040010;<br>P:GO:0030433;<br>P:GO:0006457;<br>C:GO:0044459;<br>C:GO:0042470;<br>F:GO:0005524;<br>P:GO:0002119;<br>C:GO:0005788;<br>P:GO:0040011;<br>F:GO:0051082;<br>P:GO:0006898;<br>P:GO:0006950 | - |                                                                 | IPR001404; IPR003594; IPR015566;<br>IPR019805; IPR020568; IPR020575;<br>IPR020576; SignalP (SIGNALP),<br>SSF110942 (SUPERFAMILY) |
| Caenorhabditis briggsae | endoplasmic precursor                                   | 13 | C:GO:0016529;<br>P:GO:0040010;<br>P:GO:0030433;<br>P:GO:0006457;<br>C:GO:0044459;<br>C:GO:0042470;<br>F:GO:0005524;<br>P:GO:0002119;<br>C:GO:0005788;<br>P:GO:0040011;<br>F:GO:0051082;<br>P:GO:0006898;<br>P:GO:0006950 | - |                                                                 | IPR001404; IPR003594; IPR015566;<br>IPR019805; IPR020568; IPR020575;<br>IPR020576; SignalP (SIGNALP),<br>SSF110942 (SUPERFAMILY) |
| Caenorhabditis elegans  | atp-binding domain-containing protein 3                 | 13 | P:GO:0006412;<br>C:GO:0005829;<br>P:GO:0034227;<br>P:GO:0000302;<br>P:GO:0048598;<br>P:GO:0048599;<br>P:GO:0007283;<br>F:GO:0005524;<br>F:GO:0016740;<br>P:GO:0040025;<br>P:GO:0002098;<br>F:GO:0000049;<br>P:GO:0006974 | - | EC:3.6.5.3                                                      | PTHR11807 (PANTHER),<br>PTHR11807:SF3 (PANTHER)                                                                                  |
|                         |                                                         |    | 0                                                                                                                                                                                                                        |   |                                                                 | -                                                                                                                                |
| Loa loa                 | acyltransferase family protein                          |    | 0                                                                                                                                                                                                                        |   | F:GO:0008415;<br>F:GO:0016740;<br>P:GO:0008152                  | SignalP (SIGNALP)                                                                                                                |
|                         |                                                         |    | 0                                                                                                                                                                                                                        |   |                                                                 | -                                                                                                                                |
| Caenorhabditis elegans  | briggsae cbr-qui-1 protein                              |    | 0                                                                                                                                                                                                                        |   |                                                                 | -                                                                                                                                |
|                         |                                                         |    | 0                                                                                                                                                                                                                        |   |                                                                 | -                                                                                                                                |
|                         |                                                         |    | 0                                                                                                                                                                                                                        |   |                                                                 | SignalP (SIGNALP)                                                                                                                |
| Caenorhabditis elegans  | hypothetical protein F46C5.6 [Caenorhabditis elegans]   |    | 0                                                                                                                                                                                                                        |   |                                                                 | -                                                                                                                                |
|                         |                                                         |    | 0                                                                                                                                                                                                                        |   |                                                                 | -                                                                                                                                |
| Caenorhabditis briggsae | Hypothetical protein CBG09112 [Caenorhabditis briggsae] |    | 0                                                                                                                                                                                                                        |   | F:GO:0003723;<br>F:GO:0005488;<br>P:GO:0006396;<br>C:GO:0005622 | IPR012340; IPR016027; IPR022967                                                                                                  |

|                             |                                                                            |    |                                                                                                                                                                                                                          |                                                                                                   |             |                                                                                                                                     |
|-----------------------------|----------------------------------------------------------------------------|----|--------------------------------------------------------------------------------------------------------------------------------------------------------------------------------------------------------------------------|---------------------------------------------------------------------------------------------------|-------------|-------------------------------------------------------------------------------------------------------------------------------------|
| Caenorhabditis briggsae     | acyl-coa dehydroge-se                                                      | 5  | F:GO:0050660;<br>P:GO:0009792;<br>P:GO:0055114;<br>F:GO:0003995;<br>P:GO:0040010                                                                                                                                         | -                                                                                                 | EC:1.3.99.3 | IPR006089; IPR006090; IPR006091;<br>IPR006092; IPR009075; IPR009100;<br>IPR013786; PTHR10909 (PANTHER),<br>PTHR10909:SF10 (PANTHER) |
| Caenorhabditis briggsae     | briggsae cbr-acn-1 protein                                                 | 12 | P:GO:0040035;<br>P:GO:0009792;<br>F:GO:0008241;<br>P:GO:0002119;<br>P:GO:0040018;<br>P:GO:0018991;<br>P:GO:0018996;<br>P:GO:0040010;<br>P:GO:0040011;<br>P:GO:0006508;<br>C:GO:0016020;<br>F:GO:0008237                  | -                                                                                                 | EC:3.4.15.0 | IPR001548; PTHR10514:SF7<br>(PANTHER)                                                                                               |
| Pongo abelii                | alpha-actinin-1-like isoform 4                                             | 13 | C:GO:0005829;<br>C:GO:0030018;<br>F:GO:0017166;<br>F:GO:0005509;<br>P:GO:0051271;<br>C:GO:0005730;<br>P:GO:0042981;<br>P:GO:0048041;<br>C:GO:0031143;<br>C:GO:0005925;<br>F:GO:0003779;<br>C:GO:0015629;<br>F:GO:0005178 | -                                                                                                 | -           | -                                                                                                                                   |
| -                           | -                                                                          | 0  | -                                                                                                                                                                                                                        | -                                                                                                 | -           | SignalP (SIGNALP)                                                                                                                   |
| -                           | -                                                                          | 0  | -                                                                                                                                                                                                                        | -                                                                                                 | -           | -                                                                                                                                   |
| -                           | -                                                                          | 0  | -                                                                                                                                                                                                                        | -                                                                                                 | -           | -                                                                                                                                   |
| Angiostrongylus cantonensis | briggsae cbr-nhl-1 protein                                                 | 3  | F:GO:0005515;<br>F:GO:0046872;<br>P:GO:0006915                                                                                                                                                                           | -                                                                                                 | -           | -                                                                                                                                   |
| Caenorhabditis japonica     | cpb1_caeja ame: full=cytoplasmic polyadenylation element-binding protein 1 | 0  | -                                                                                                                                                                                                                        | F:GO:0003676;<br>F:GO:0003723;<br>P:GO:0030154;<br>F:GO:0000166;<br>P:GO:0007275;<br>P:GO:0007283 | -           | -                                                                                                                                   |
| -                           | -                                                                          | 0  | -                                                                                                                                                                                                                        | -                                                                                                 | -           | -                                                                                                                                   |
| -                           | -                                                                          | 0  | -                                                                                                                                                                                                                        | -                                                                                                 | -           | -                                                                                                                                   |
| -                           | -                                                                          | 0  | -                                                                                                                                                                                                                        | -                                                                                                 | -           | -                                                                                                                                   |
| Brugia malayi               | polypeptide 1                                                              | 9  | F:GO:0003899;<br>P:GO:0000910;<br>P:GO:0040007;<br>P:GO:0006260;<br>P:GO:0040035;<br>P:GO:0002119;<br>F:GO:0005515;<br>P:GO:0002009;<br>P:GO:0009792                                                                     | -                                                                                                 | EC:2.7.7.6  | IPR002755; IPR014052;<br>G3DSA:3.90.920.10 (GENE3D),<br>SSF56747 (SUPERFAMILY)                                                      |

|                         |                                                             |   |                                                                                                   |                                                                                                                                     |                                                                                      |
|-------------------------|-------------------------------------------------------------|---|---------------------------------------------------------------------------------------------------|-------------------------------------------------------------------------------------------------------------------------------------|--------------------------------------------------------------------------------------|
| Loa loa                 | abnormal go-d development family member (gon-2)             | 6 | P:GO:0007067;<br>P:GO:0055085;<br>P:GO:0006811;<br>C:GO:0016021;<br>P:GO:0008406;<br>F:GO:0005216 | -                                                                                                                                   | PTHR13800 (PANTHER), SignalP (SIGNALP)                                               |
| -                       | -                                                           | 0 |                                                                                                   | -                                                                                                                                   | -                                                                                    |
| -                       | -                                                           | 0 |                                                                                                   | -                                                                                                                                   | -                                                                                    |
| -                       | -                                                           | 0 |                                                                                                   | -                                                                                                                                   | -                                                                                    |
| -                       | -                                                           | 0 |                                                                                                   | -                                                                                                                                   | -                                                                                    |
| -                       | -                                                           | 0 |                                                                                                   | -                                                                                                                                   | -                                                                                    |
| Haemonchus contortus    | ecdysone receptor isoform +                                 | 6 | F:GO:0003700;<br>F:GO:0043565;<br>F:GO:0003707;<br>C:GO:0005634;<br>F:GO:0008270;<br>P:GO:0006355 | -                                                                                                                                   | -                                                                                    |
| Caenorhabditis elegans  | olfactory receptor 350                                      | 4 | P:GO:0007186;<br>C:GO:0016021;<br>P:GO:0007165;<br>F:GO:0004930                                   | -                                                                                                                                   | -                                                                                    |
| Caenorhabditis briggsae | rnp-1 like r--binding protein                               | 4 | F:GO:0003723;<br>P:GO:0009792;<br>P:GO:0006378;<br>F:GO:0000166                                   | -                                                                                                                                   | IPR000504; IPR012677; IPR015465;<br>PTHR10432 (PANTHER), SSF54928 (SUPERFAMILY)      |
| Loa loa                 | ribonucleases p mrp protein subunit pop1 containing protein | 0 |                                                                                                   | P:GO:0001682;<br>F:GO:0004526;<br>P:GO:0006396                                                                                      | -                                                                                    |
| -                       | -                                                           | 0 |                                                                                                   | -                                                                                                                                   | -                                                                                    |
| Caenorhabditis briggsae | d- polymerase family b containing protein                   | 0 |                                                                                                   | F:GO:0003676;<br>P:GO:0006139;<br>P:GO:0006260;<br>F:GO:0016779;<br>F:GO:0003887;<br>F:GO:0016740;<br>F:GO:0000166;<br>F:GO:0003677 | -                                                                                    |
| -                       | -                                                           | 0 |                                                                                                   | -                                                                                                                                   | -                                                                                    |
| Brugia malayi           | briggsae cbr-emb-30 protein                                 | 2 | F:GO:0016787;<br>F:GO:0005515                                                                     | -                                                                                                                                   | IPR015943                                                                            |
| -                       | -                                                           | 0 |                                                                                                   | -                                                                                                                                   | -                                                                                    |
| -                       | -                                                           | 0 |                                                                                                   | -                                                                                                                                   | -                                                                                    |
| -                       | -                                                           | 0 |                                                                                                   | -                                                                                                                                   | -                                                                                    |
| -                       | -                                                           | 0 |                                                                                                   | -                                                                                                                                   | -                                                                                    |
| Caenorhabditis elegans  | elegans protein partially confirmed by transcript evidence  | 0 |                                                                                                   | -                                                                                                                                   | -                                                                                    |
| -                       | -                                                           | 0 |                                                                                                   | -                                                                                                                                   | -                                                                                    |
| -                       | -                                                           | 0 |                                                                                                   | -                                                                                                                                   | -                                                                                    |
| Caenorhabditis briggsae | elegans protein confirmed by transcript evidence            | 1 | F:GO:0005515                                                                                      | -                                                                                                                                   | SignalP (SIGNALP)                                                                    |
| -                       | -                                                           | 0 |                                                                                                   | -                                                                                                                                   | -                                                                                    |
| -                       | -                                                           | 0 |                                                                                                   | -                                                                                                                                   | -                                                                                    |
| Caenorhabditis briggsae | isoform c                                                   | 6 | P:GO:0043254;<br>P:GO:0006355;<br>F:GO:0005524;<br>F:GO:0016887;<br>F:GO:0008134;<br>C:GO:0005634 | -                                                                                                                                   | IPR011704; G3DSA:3.40.50.300 (GENE3D), PTHR22908 (PANTHER), PTHR22908:SF13 (PANTHER) |

|                         |                                                            |    |                                                                                                                                                                       |                                                |            |                                                                                                           |
|-------------------------|------------------------------------------------------------|----|-----------------------------------------------------------------------------------------------------------------------------------------------------------------------|------------------------------------------------|------------|-----------------------------------------------------------------------------------------------------------|
| Caenorhabditis elegans  | proteasome-associated protein ecm29 homolog                | 10 | C:GO:0000502;<br>P:GO:0030433;<br>C:GO:0030134;<br>C:GO:0005813;<br>C:GO:0005770;<br>C:GO:0005769;<br>P:GO:0007067;<br>C:GO:0005802;<br>C:GO:0005783;<br>C:GO:0005634 | -                                              |            | PTHR23346 (PANTHER),<br>PTHR23346:SF2 (PANTHER)                                                           |
| -                       | -                                                          | 0  |                                                                                                                                                                       |                                                |            | -                                                                                                         |
| -                       | -                                                          | 0  |                                                                                                                                                                       |                                                |            | -                                                                                                         |
| -                       | -                                                          | 0  |                                                                                                                                                                       |                                                |            | -                                                                                                         |
| -                       | -                                                          | 0  |                                                                                                                                                                       |                                                |            | -                                                                                                         |
| Pongo abelii            | transmembrane protein 219                                  | 0  |                                                                                                                                                                       | C:GO:0016021;<br>C:GO:0016020                  |            | SignalP (SIGNALP)                                                                                         |
| -                       | -                                                          | 0  |                                                                                                                                                                       |                                                |            | -                                                                                                         |
| Caenorhabditis elegans  | hypothetical protein Y95B8A.11 [Caenorhabditis elegans]    | 0  |                                                                                                                                                                       |                                                |            | -                                                                                                         |
| Caenorhabditis briggsae | elegans protein partially confirmed by transcript evidence | 0  |                                                                                                                                                                       |                                                |            | SignalP (SIGNALP)                                                                                         |
| Caenorhabditis briggsae | elegans protein partially confirmed by transcript evidence | 0  |                                                                                                                                                                       |                                                |            | -                                                                                                         |
| -                       | -                                                          | 0  |                                                                                                                                                                       |                                                |            | -                                                                                                         |
| Caenorhabditis elegans  | briggsae cbr-cua-1 protein                                 | 7  | F:GO:0046872;<br>F:GO:0015662;<br>F:GO:0046873;<br>F:GO:0000166;<br>P:GO:0008152;<br>P:GO:0030001;<br>C:GO:0016020                                                    | -                                              |            | IPR001757; IPR006121; IPR006403;<br>IPR017969; G3DSA:3.30.70.100<br>(GENE3D), PTHR11939:SF38<br>(PANTHER) |
| -                       | -                                                          | 0  |                                                                                                                                                                       |                                                |            | SignalP (SIGNALP)                                                                                         |
| -                       | -                                                          | 0  |                                                                                                                                                                       |                                                |            | -                                                                                                         |
| -                       | -                                                          | 0  |                                                                                                                                                                       |                                                |            | -                                                                                                         |
| -                       | -                                                          | 0  |                                                                                                                                                                       |                                                |            | -                                                                                                         |
| Caenorhabditis elegans  | olfactory ing defective family member (olrn-1)             | 0  |                                                                                                                                                                       |                                                |            | -                                                                                                         |
| Caenorhabditis briggsae | Hypothetical protein CBG19593 [Caenorhabditis briggsae]    | 0  |                                                                                                                                                                       |                                                |            | -                                                                                                         |
| Caenorhabditis briggsae | phosphatidate phosphatase                                  | 2  | F:GO:0016791;<br>C:GO:0016021                                                                                                                                         | -                                              | EC:3.1.3.0 | IPR000326; IPR016118; PTHR10165<br>(PANTHER), PTHR10165:SF22<br>(PANTHER)                                 |
| Caenorhabditis briggsae | phosphatidate phosphatase                                  | 2  | F:GO:0016791;<br>C:GO:0016021                                                                                                                                         | -                                              | EC:3.1.3.0 | IPR000326; IPR016118; PTHR10165<br>(PANTHER), PTHR10165:SF22<br>(PANTHER)                                 |
| Caenorhabditis briggsae | phosphatidate phosphatase                                  | 2  | F:GO:0016791;<br>C:GO:0016021                                                                                                                                         | -                                              | EC:3.1.3.0 | IPR000326; IPR016118; PTHR10165<br>(PANTHER), PTHR10165:SF22<br>(PANTHER)                                 |
| Caenorhabditis briggsae | phosphatidate phosphatase                                  | 2  | F:GO:0016791;<br>C:GO:0016021                                                                                                                                         | -                                              | EC:3.1.3.0 | IPR000326; IPR016118; PTHR10165<br>(PANTHER), PTHR10165:SF22<br>(PANTHER)                                 |
| Caenorhabditis elegans  | r- polymerase domain 2 family protein                      | 3  | C:GO:0005736;<br>F:GO:0005515;<br>F:GO:0016740                                                                                                                        | -                                              |            | IPR000722; IPR015699; PTHR19376<br>(PANTHER), SSF64484 (SUPERFAMILY)                                      |
| -                       | -                                                          | 0  |                                                                                                                                                                       |                                                |            | -                                                                                                         |
| Caenorhabditis elegans  | r- dependent r- polymerase family protein                  | 1  | F:GO:0005515                                                                                                                                                          | -                                              |            | -                                                                                                         |
| Caenorhabditis briggsae | hed family member (ptc-2)                                  | 0  |                                                                                                                                                                       | C:GO:0016021;<br>C:GO:0016020;<br>F:GO:0008158 |            | -                                                                                                         |
| Caenorhabditis elegans  | elegans protein confirmed by transcript evidence           | 1  | C:GO:0043229                                                                                                                                                          | -                                              |            | -                                                                                                         |

|                         |                                                           |    |                                                                                                                                                                                                                                           |                                                |                                                                                                             |
|-------------------------|-----------------------------------------------------------|----|-------------------------------------------------------------------------------------------------------------------------------------------------------------------------------------------------------------------------------------------|------------------------------------------------|-------------------------------------------------------------------------------------------------------------|
|                         | -                                                         | 0  |                                                                                                                                                                                                                                           |                                                | -                                                                                                           |
| Loa loa                 | uncoordinated family member (unc-13)                      | 8  | F:GO:0005516;<br>P:GO:0023034;<br>F:GO:0046872;<br>C:GO:0008021;<br>C:GO:0043195;<br>P:GO:0016082;<br>C:GO:0045211;<br>F:GO:0019992                                                                                                       |                                                | IPR014772; IPR019558; PTHR10480 (PANTHER)                                                                   |
| Caenorhabditis elegans  | ypc4_caeel ame: full=uncharacterized protein              | 0  |                                                                                                                                                                                                                                           | F:GO:0005515                                   | -                                                                                                           |
| Caenorhabditis briggsae | briggsae cbr-deg-1 protein                                | 4  | C:GO:0016021;<br>F:GO:0005272;<br>P:GO:0008219;<br>P:GO:0006814                                                                                                                                                                           |                                                | -                                                                                                           |
| Caenorhabditis briggsae | yk84_caeel ame: full=uncharacterized protein              | 1  | F:GO:0016787                                                                                                                                                                                                                              |                                                | -                                                                                                           |
| Caenorhabditis elegans  | calumenin isoform 1                                       | 14 | P:GO:0010171;<br>P:GO:0002119;<br>C:GO:0016529;<br>C:GO:0005788;<br>C:GO:0005794;<br>F:GO:0005515;<br>P:GO:0018996;<br>F:GO:0005509;<br>P:GO:0000003;<br>P:GO:0008340;<br>P:GO:0040011;<br>C:GO:0005576;<br>P:GO:0040007;<br>P:GO:0002009 |                                                | IPR002048; IPR011992; IPR018247; IPR018249; PTHR10827 (PANTHER), SSF47473 (SUPERFAMILY)                     |
| Brugia malayi           | regulator of g protein sig-ling domain containing protein | 0  |                                                                                                                                                                                                                                           | F:GO:0004871                                   | -                                                                                                           |
| Caenorhabditis briggsae | briggsae cbr-acc-1 protein                                | 4  | C:GO:0016021;<br>C:GO:0045211;<br>F:GO:0005230;<br>P:GO:0006810                                                                                                                                                                           |                                                | -                                                                                                           |
| Caenorhabditis briggsae | Hypothetical protein CBG17315 [Caenorhabditis briggsae]   | 1  | F:GO:0005488                                                                                                                                                                                                                              |                                                | -                                                                                                           |
|                         | -                                                         | 0  |                                                                                                                                                                                                                                           |                                                | -                                                                                                           |
|                         | -                                                         | 0  |                                                                                                                                                                                                                                           |                                                | -                                                                                                           |
| Caenorhabditis briggsae | protein-tyrosine phosphatase containing protein           | 1  | F:GO:0016791                                                                                                                                                                                                                              |                                                | EC:3.1.3.0<br>IPR000242; IPR000387; G3DSA:3.90.190.10 (GENE3D), PTHR19134 (PANTHER), SSF52799 (SUPERFAMILY) |
| Loa loa                 | elegans protein confirmed by transcript evidence          | 0  |                                                                                                                                                                                                                                           | C:GO:0016021;<br>C:GO:0016020;<br>C:GO:0005829 | IPR002110; IPR020683; PTHR18958 (PANTHER), PTHR18958:SF283 (PANTHER)                                        |
| Caenorhabditis briggsae | clc-type chloride channel family member (clh-2)           | 6  | P:GO:0009792;<br>F:GO:0005247;<br>P:GO:0005085;<br>P:GO:0000003;<br>C:GO:0016021;<br>P:GO:0006821                                                                                                                                         |                                                | -                                                                                                           |
|                         | -                                                         | 0  |                                                                                                                                                                                                                                           |                                                | -                                                                                                           |
|                         | -                                                         | 0  |                                                                                                                                                                                                                                           |                                                | -                                                                                                           |

|                         |                                                  |    |                                                                                                                                                                       |   |              |                                                                                                                                                   |
|-------------------------|--------------------------------------------------|----|-----------------------------------------------------------------------------------------------------------------------------------------------------------------------|---|--------------|---------------------------------------------------------------------------------------------------------------------------------------------------|
| Caenorhabditis briggsae | plasminogen precursor                            | 10 | P:GO:0022617;<br>F:GO:0004252;<br>C:GO:0005615;<br>P:GO:0051918;<br>P:GO:0048856;<br>P:GO:0010812;<br>F:GO:0043498;<br>P:GO:0051919;<br>F:GO:0034185;<br>C:GO:0031232 | - | EC:3.4.21.0  | -                                                                                                                                                 |
| -                       | -                                                | 0  |                                                                                                                                                                       |   |              | -                                                                                                                                                 |
| Caenorhabditis briggsae | lactate dehydroge-se d                           | 4  | F:GO:0016491;<br>F:GO:0005515;<br>C:GO:0016020;<br>C:GO:0005739                                                                                                       | - |              | -                                                                                                                                                 |
| -                       | -                                                | 0  |                                                                                                                                                                       |   |              | SignalP (SIGNALP)                                                                                                                                 |
| -                       | -                                                | 0  |                                                                                                                                                                       |   |              | -                                                                                                                                                 |
| Caenorhabditis briggsae | - h exchanger family member (nhx-9)              | 2  | P:GO:0006811;<br>F:GO:0015297                                                                                                                                         | - |              | -                                                                                                                                                 |
| -                       | -                                                | 0  |                                                                                                                                                                       |   |              | -                                                                                                                                                 |
| Caenorhabditis briggsae | protein ki-se domain containing protein          | 3  | F:GO:0004672;<br>P:GO:0000003;<br>F:GO:0000166                                                                                                                        | - |              | IPR000719; IPR001245; IPR008266;<br>IPR011009; IPR020685; IPR020764;<br>G3DSA:1.10.510.10 (GENE3D),<br>G3DSA:3.30.200.20 (GENE3D)                 |
| -                       | -                                                | 0  |                                                                                                                                                                       |   |              | -                                                                                                                                                 |
| -                       | -                                                | 0  |                                                                                                                                                                       |   |              | -                                                                                                                                                 |
| Caenorhabditis briggsae | annexin b11 isoform a                            | 2  | F:GO:0005509;<br>F:GO:0005544                                                                                                                                         | - |              | IPR001464; IPR013286; IPR018252;<br>IPR018502; PTHR10502:SF30<br>(PANTHER)                                                                        |
| Caenorhabditis elegans  | 6-phosphofructo-2-ki-se fructose -bisphosphatase | 4  | F:GO:0003873;<br>P:GO:0006003;<br>F:GO:0016787;<br>F:GO:0005524                                                                                                       | - | EC:2.7.1.105 | IPR001345; IPR003094; IPR013079;<br>G3DSA:3.40.50.300 (GENE3D),<br>PTHR10606:SF11 (PANTHER),<br>SSF52540 (SUPERFAMILY), SSF53254<br>(SUPERFAMILY) |
| -                       | -                                                | 0  |                                                                                                                                                                       |   |              | -                                                                                                                                                 |
| -                       | -                                                | 0  |                                                                                                                                                                       |   |              | -                                                                                                                                                 |
| -                       | -                                                | 0  |                                                                                                                                                                       |   |              | -                                                                                                                                                 |
| -                       | -                                                | 0  |                                                                                                                                                                       |   |              | SignalP (SIGNALP)                                                                                                                                 |
| Homo sapiens            | lactotransferrin precursor                       | 10 | F:GO:0008199;<br>P:GO:0042742;<br>P:GO:0006879;<br>P:GO:0006959;<br>P:GO:0006826;<br>F:GO:0005515;<br>F:GO:0004252;<br>F:GO:0008201;<br>C:GO:0030141;<br>C:GO:0005576 | - | EC:3.4.21.0  | -                                                                                                                                                 |
| -                       | -                                                | 0  |                                                                                                                                                                       |   |              | -                                                                                                                                                 |
| Apis mellifera          | pantothe-te ki-se 4                              | 8  | P:GO:0009792;<br>P:GO:0002119;<br>P:GO:0015937;<br>P:GO:0040010;<br>F:GO:0005524;<br>P:GO:0000003;<br>P:GO:0008340;<br>F:GO:0004594                                   | - | EC:2.7.1.33  | IPR011602; PTHR12280 (PANTHER)                                                                                                                    |
| -                       | -                                                | 0  |                                                                                                                                                                       |   |              | SignalP (SIGNALP)                                                                                                                                 |



|                         |                                                            |    |                                                                                                                                                                       |   |                                                                                                                                                                                        |                                                                               |
|-------------------------|------------------------------------------------------------|----|-----------------------------------------------------------------------------------------------------------------------------------------------------------------------|---|----------------------------------------------------------------------------------------------------------------------------------------------------------------------------------------|-------------------------------------------------------------------------------|
| Caenorhabditis elegans  | hypothetical protein C35B8.3 [Caenorhabditis elegans]      | 0  |                                                                                                                                                                       |   |                                                                                                                                                                                        | -                                                                             |
| Caenorhabditis elegans  | aldehyde dehydroge-se                                      | 2  | P:GO:0044237;<br>F:GO:0016491                                                                                                                                         | - |                                                                                                                                                                                        | IPR012394; IPR015590; IPR016161;<br>IPR016162                                 |
|                         | -                                                          | 0  |                                                                                                                                                                       |   |                                                                                                                                                                                        | -                                                                             |
|                         | -                                                          | 0  |                                                                                                                                                                       |   |                                                                                                                                                                                        | -                                                                             |
|                         | -                                                          | 0  |                                                                                                                                                                       |   |                                                                                                                                                                                        | -                                                                             |
|                         | -                                                          | 0  |                                                                                                                                                                       |   |                                                                                                                                                                                        | -                                                                             |
|                         | -                                                          | 0  |                                                                                                                                                                       |   |                                                                                                                                                                                        | -                                                                             |
|                         | -                                                          | 0  |                                                                                                                                                                       |   |                                                                                                                                                                                        | SignalP (SIGNALP)                                                             |
|                         | -                                                          | 0  |                                                                                                                                                                       |   |                                                                                                                                                                                        | -                                                                             |
|                         | -                                                          | 0  |                                                                                                                                                                       |   |                                                                                                                                                                                        | -                                                                             |
|                         | -                                                          | 0  |                                                                                                                                                                       |   |                                                                                                                                                                                        | -                                                                             |
|                         | -                                                          | 0  |                                                                                                                                                                       |   |                                                                                                                                                                                        | -                                                                             |
| Caenorhabditis elegans  | 24-dehydrocholesterol reductase                            | 10 | P:GO:0009888;<br>P:GO:0043154;<br>F:GO:0050614;<br>C:GO:0005789;<br>P:GO:0006916;<br>P:GO:0006695;<br>F:GO:0042605;<br>F:GO:0019899;<br>C:GO:0005634;<br>P:GO:0006979 | - | EC:1.3.1.72                                                                                                                                                                            | IPR006094; IPR016166; IPR016168;<br>PTHR10801 (PANTHER), SignalP<br>(SIGNALP) |
| Caenorhabditis elegans  | 24-dehydrocholesterol reductase                            | 10 | P:GO:0009888;<br>P:GO:0043154;<br>F:GO:0050614;<br>C:GO:0005789;<br>P:GO:0006916;<br>P:GO:0006695;<br>F:GO:0042605;<br>F:GO:0019899;<br>C:GO:0005634;<br>P:GO:0006979 | - | EC:1.3.1.72                                                                                                                                                                            | IPR006094; IPR016166; IPR016168;<br>PTHR10801 (PANTHER), SignalP<br>(SIGNALP) |
|                         | -                                                          | 0  |                                                                                                                                                                       |   |                                                                                                                                                                                        | -                                                                             |
|                         | -                                                          | 0  |                                                                                                                                                                       |   |                                                                                                                                                                                        | -                                                                             |
|                         | -                                                          | 0  |                                                                                                                                                                       |   |                                                                                                                                                                                        | IPR012435; SignalP (SIGNALP)                                                  |
|                         | -                                                          | 0  |                                                                                                                                                                       |   |                                                                                                                                                                                        | -                                                                             |
| Caenorhabditis briggsae | gf19599- partial                                           | 0  |                                                                                                                                                                       |   | C:GO:0016021;<br>P:GO:0008218;<br>F:GO:0004857;<br>C:GO:0016020;<br>P:GO:0018298;<br>C:GO:0005578;<br>C:GO:0005576;<br>F:GO:0030414;<br>F:GO:0005201;<br>F:GO:0004867;<br>F:GO:0005509 | -                                                                             |
|                         | -                                                          | 0  |                                                                                                                                                                       |   |                                                                                                                                                                                        | -                                                                             |
|                         | -                                                          | 0  |                                                                                                                                                                       |   |                                                                                                                                                                                        | SignalP (SIGNALP)                                                             |
|                         | -                                                          | 0  |                                                                                                                                                                       |   |                                                                                                                                                                                        | -                                                                             |
|                         | -                                                          | 0  |                                                                                                                                                                       |   |                                                                                                                                                                                        | -                                                                             |
| Caenorhabditis briggsae | Hypothetical protein CBG24940 [Caenorhabditis briggsae]    | 0  |                                                                                                                                                                       |   |                                                                                                                                                                                        | IPR000477                                                                     |
|                         | -                                                          | 0  |                                                                                                                                                                       |   |                                                                                                                                                                                        | -                                                                             |
|                         | -                                                          | 0  |                                                                                                                                                                       |   |                                                                                                                                                                                        | -                                                                             |
|                         | -                                                          | 0  |                                                                                                                                                                       |   |                                                                                                                                                                                        | -                                                                             |
| Caenorhabditis elegans  | elegans protein partially confirmed by transcript evidence | 0  |                                                                                                                                                                       |   |                                                                                                                                                                                        | -                                                                             |

|                         |                                                                                     |    |                                                                                                                                                                                        |                                                                                                   |             |                                                                                                                 |
|-------------------------|-------------------------------------------------------------------------------------|----|----------------------------------------------------------------------------------------------------------------------------------------------------------------------------------------|---------------------------------------------------------------------------------------------------|-------------|-----------------------------------------------------------------------------------------------------------------|
| Callithrix jacchus      | class member 1                                                                      | 8  | C:GO:0005625;<br>F:GO:0004559;<br>C:GO:0005764;<br>P:GO:0006013;<br>P:GO:0006517;<br>F:GO:0008270;<br>P:GO:0007611;<br>F:GO:0005537                                                    | -                                                                                                 | EC:3.2.1.24 | IPR000602; IPR011330; PTHR11607<br>(PANTHER), PTHR11607:SF3<br>(PANTHER)                                        |
|                         | -                                                                                   | 0  |                                                                                                                                                                                        |                                                                                                   |             | -                                                                                                               |
|                         | -                                                                                   | 0  |                                                                                                                                                                                        |                                                                                                   |             | -                                                                                                               |
|                         | -                                                                                   | 0  |                                                                                                                                                                                        |                                                                                                   |             | -                                                                                                               |
| Trichoplax adhaerens    | fat tumor suppressor homolog 1                                                      | 1  | P:GO:0009987                                                                                                                                                                           | -                                                                                                 |             | IPR002126; IPR015919; PTHR10596<br>(PANTHER), PTHR10596:SF74<br>(PANTHER)                                       |
| Caenorhabditis elegans  | groundhog (hedgehog-like family) protein partially confirmed by transcript evidence | 1  | F:GO:0005515                                                                                                                                                                           | -                                                                                                 |             | IPR007284                                                                                                       |
|                         | -                                                                                   | 0  |                                                                                                                                                                                        |                                                                                                   |             | -                                                                                                               |
| Ectocarpus siliculosus  | hypothetical protein [Ectocarpus siliculosus]                                       | 0  |                                                                                                                                                                                        | F:GO:0005524;<br>F:GO:0000166;<br>F:GO:0017111;<br>F:GO:0005515;<br>C:GO:0005622;<br>P:GO:0006810 |             | PTHR10887 (PANTHER)                                                                                             |
|                         | -                                                                                   | 0  |                                                                                                                                                                                        |                                                                                                   |             | -                                                                                                               |
| Caenorhabditis elegans  | neuro-l symmetry protein isoform b                                                  | 0  |                                                                                                                                                                                        |                                                                                                   |             | -                                                                                                               |
|                         | -                                                                                   | 0  |                                                                                                                                                                                        |                                                                                                   |             | SignalP (SIGNALP)                                                                                               |
|                         | -                                                                                   | 0  |                                                                                                                                                                                        |                                                                                                   |             | -                                                                                                               |
| Caenorhabditis briggsae | dolichyl pyrophosphate man9 c2 alpha- -glucosyltransferase                          | 2  | P:GO:0000003;<br>C:GO:0044425                                                                                                                                                          | -                                                                                                 |             | IPR004856; SignalP (SIGNALP)                                                                                    |
|                         | -                                                                                   | 0  |                                                                                                                                                                                        |                                                                                                   |             | -                                                                                                               |
|                         | -                                                                                   | 0  |                                                                                                                                                                                        |                                                                                                   |             | -                                                                                                               |
|                         | -                                                                                   | 0  |                                                                                                                                                                                        |                                                                                                   |             | SignalP (SIGNALP)                                                                                               |
| Caenorhabditis briggsae | topoisomerase iii alpha                                                             | 7  | P:GO:0006268;<br>P:GO:0007276;<br>F:GO:0003917;<br>P:GO:0007126;<br>C:GO:0005694;<br>P:GO:0006265;<br>F:GO:0008270                                                                     | -                                                                                                 | EC:5.99.1.2 | -                                                                                                               |
|                         | -                                                                                   | 0  |                                                                                                                                                                                        |                                                                                                   |             | -                                                                                                               |
| Nasonia vitripennis     | PREDICTED: similar to ENSANGP00000010363 [-sonia vitripennis]                       | 0  |                                                                                                                                                                                        |                                                                                                   |             | SignalP (SIGNALP)                                                                                               |
|                         | -                                                                                   | 0  |                                                                                                                                                                                        |                                                                                                   |             | -                                                                                                               |
| Caenorhabditis briggsae | sodium-bile acid cotransporter                                                      | 2  | F:GO:0008508;<br>C:GO:0016021                                                                                                                                                          | -                                                                                                 |             | IPR002657; SignalP (SIGNALP)                                                                                    |
| Caenorhabditis briggsae | serine threonine-protein phosphatase 5                                              | 11 | C:GO:0005829;<br>P:GO:0051291;<br>C:GO:0043005;<br>F:GO:0004871;<br>P:GO:0016311;<br>P:GO:0043123;<br>C:GO:0043025;<br>F:GO:0019904;<br>F:GO:0004721;<br>P:GO:0043278;<br>C:GO:0005634 | -                                                                                                 | EC:3.1.3.16 | IPR011990; IPR013026; IPR019734;<br>PTHR22904 (PANTHER),<br>PTHR22904:SF12 (PANTHER),<br>SSF48452 (SUPERFAMILY) |
|                         | -                                                                                   | 0  |                                                                                                                                                                                        |                                                                                                   |             | -                                                                                                               |
| Caenorhabditis elegans  | hypothetical protein Y69A2AR.31 [Caenorhabditis elegans]                            | 0  |                                                                                                                                                                                        |                                                                                                   |             | -                                                                                                               |

|                         |                                                          |   |                                                                                                                                     |                                                                                                                    |                                                                                                                     |
|-------------------------|----------------------------------------------------------|---|-------------------------------------------------------------------------------------------------------------------------------------|--------------------------------------------------------------------------------------------------------------------|---------------------------------------------------------------------------------------------------------------------|
|                         | -                                                        | 0 |                                                                                                                                     |                                                                                                                    | -                                                                                                                   |
|                         | -                                                        | 0 |                                                                                                                                     |                                                                                                                    | -                                                                                                                   |
| Caenorhabditis elegans  | low density lipid receptor-related                       | 3 | F:GO:0004872;<br>C:GO:0016021;<br>F:GO:0005509                                                                                      | -                                                                                                                  | IPR011042                                                                                                           |
| Caenorhabditis elegans  | hypothetical kda protein in chromosome                   | 1 | F:GO:0005515                                                                                                                        | -                                                                                                                  | -                                                                                                                   |
| Caenorhabditis elegans  | hypothetical protein Y71H2AM.15 [Caenorhabditis elegans] | 0 |                                                                                                                                     | P:GO:0008340;<br>F:GO:0005515                                                                                      | -                                                                                                                   |
|                         | -                                                        | 0 |                                                                                                                                     |                                                                                                                    | -                                                                                                                   |
|                         | -                                                        | 0 |                                                                                                                                     |                                                                                                                    | -                                                                                                                   |
|                         | -                                                        | 0 |                                                                                                                                     |                                                                                                                    | SignalP (SIGNALP)                                                                                                   |
| Caenorhabditis elegans  | u2af splicing factor family member (uaf-1)               | 7 | P:GO:0008380;<br>F:GO:0003723;<br>F:GO:0005515;<br>P:GO:0006397;<br>C:GO:0030529;<br>C:GO:0005634;<br>F:GO:0000166                  | -                                                                                                                  | -                                                                                                                   |
| Loa loa                 | zinc c2h2 type family protein                            | 0 |                                                                                                                                     | F:GO:0046872;<br>F:GO:0003676;<br>F:GO:0003674;<br>P:GO:0008150;<br>F:GO:0008270;<br>C:GO:0005575;<br>C:GO:0005622 | IPR007087; IPR013087; IPR015880;<br>PTHR23224 (PANTHER),<br>PTHR23224:SF209 (PANTHER),<br>SSF57667 (SUPERFAMILY)    |
|                         | -                                                        | 0 |                                                                                                                                     |                                                                                                                    | -                                                                                                                   |
| Loa loa                 | pdz domain containing protein                            | 0 |                                                                                                                                     | P:GO:0000003;<br>P:GO:0040035;<br>P:GO:0002119;<br>P:GO:0009792;<br>P:GO:0040007;<br>F:GO:0005515                  | -                                                                                                                   |
|                         | -                                                        | 0 |                                                                                                                                     |                                                                                                                    | -                                                                                                                   |
| Caenorhabditis elegans  | hypothetical protein Y71H2AM.13 [Caenorhabditis elegans] | 0 |                                                                                                                                     | F:GO:0016787                                                                                                       | -                                                                                                                   |
|                         | -                                                        | 0 |                                                                                                                                     |                                                                                                                    | -                                                                                                                   |
|                         | -                                                        | 0 |                                                                                                                                     |                                                                                                                    | -                                                                                                                   |
|                         | -                                                        | 0 |                                                                                                                                     |                                                                                                                    | -                                                                                                                   |
|                         | -                                                        | 0 |                                                                                                                                     |                                                                                                                    | -                                                                                                                   |
|                         | -                                                        | 0 |                                                                                                                                     |                                                                                                                    | -                                                                                                                   |
| Dictyocaulus viviparus  | 60s ribosomal protein l37a                               | 8 | P:GO:0000022;<br>P:GO:0006412;<br>P:GO:0040010;<br>F:GO:0046872;<br>F:GO:0003735;<br>P:GO:0002119;<br>P:GO:0009792;<br>C:GO:0022625 | -                                                                                                                  | EC:3.6.5.3<br>IPR002674; IPR011331; IPR011332;<br>PTHR11517:SF1 (PANTHER)                                           |
| Caenorhabditis briggsae | protein ki-se domain containing protein                  | 3 | F:GO:0004672;<br>P:GO:0040011;<br>F:GO:0000166                                                                                      | -                                                                                                                  | IPR000719; IPR011009; IPR017442;<br>G3DSA:1.10.510.10 (GENE3D),<br>PTHR11909 (PANTHER),<br>PTHR11909:SF19 (PANTHER) |
|                         | -                                                        | 0 |                                                                                                                                     |                                                                                                                    | -                                                                                                                   |
|                         | -                                                        | 0 |                                                                                                                                     |                                                                                                                    | SignalP (SIGNALP)                                                                                                   |

|                         |                                                         |    |                                                                                                                                                                                                                                                            |                                                                                                   |             |                                                                                                                       |
|-------------------------|---------------------------------------------------------|----|------------------------------------------------------------------------------------------------------------------------------------------------------------------------------------------------------------------------------------------------------------|---------------------------------------------------------------------------------------------------|-------------|-----------------------------------------------------------------------------------------------------------------------|
| Loa loa                 | mutator family member (mut-7)                           | 0  |                                                                                                                                                                                                                                                            | F:GO:0003676;<br>P:GO:0006139;<br>F:GO:0004527;<br>F:GO:0005515;<br>C:GO:0005622;<br>F:GO:0008408 |             | IPR002562; IPR012337;<br>G3DSA:3.30.420.10 (GENE3D)                                                                   |
| Caenorhabditis briggsae | hydroxypyruvate reductase                               | 0  |                                                                                                                                                                                                                                                            | P:GO:0055114;<br>F:GO:0016491                                                                     |             | G3DSA:3.40.50.10180 (GENE3D),<br>PTHR12227 (PANTHER), SignalP<br>(SIGNALP), SSF82544 (SUPERFAMILY)                    |
| Caenorhabditis briggsae | briggsae cbr-spon-1 protein                             | 0  |                                                                                                                                                                                                                                                            |                                                                                                   |             | -                                                                                                                     |
| Caenorhabditis briggsae | Hypothetical protein CBG03199 [Caenorhabditis briggsae] | 0  |                                                                                                                                                                                                                                                            | C:GO:0016021;<br>P:GO:0007186                                                                     |             | PTHR19264 (PANTHER),<br>PTHR19264:SF286 (PANTHER), SignalP<br>(SIGNALP)                                               |
| Caenorhabditis elegans  | elegans protein confirmed by transcript evidence        | 0  |                                                                                                                                                                                                                                                            |                                                                                                   |             | -                                                                                                                     |
| Caenorhabditis briggsae | briggsae cbr-cdh-12 protein                             | 1  | C:GO:0016020                                                                                                                                                                                                                                               |                                                                                                   |             | -                                                                                                                     |
|                         | -                                                       | 0  |                                                                                                                                                                                                                                                            |                                                                                                   |             | -                                                                                                                     |
| Brugia malayi           | golgi s-p receptor complex member 2                     | 4  | C:GO:0000139;<br>C:GO:0005789;<br>F:GO:0005515;<br>P:GO:0016192                                                                                                                                                                                            | -                                                                                                 |             | PTHR21230 (PANTHER),<br>PTHR21230:SF1 (PANTHER), PF12352<br>(PFAM)                                                    |
|                         | -                                                       | 0  |                                                                                                                                                                                                                                                            |                                                                                                   |             | -                                                                                                                     |
| Caenorhabditis briggsae | elegans protein confirmed by transcript evidence        | 0  |                                                                                                                                                                                                                                                            | C:GO:0016021;<br>C:GO:0016020                                                                     |             | -                                                                                                                     |
|                         | -                                                       | 0  |                                                                                                                                                                                                                                                            |                                                                                                   |             | -                                                                                                                     |
|                         | -                                                       | 0  |                                                                                                                                                                                                                                                            |                                                                                                   |             | -                                                                                                                     |
|                         | -                                                       | 0  |                                                                                                                                                                                                                                                            |                                                                                                   |             | -                                                                                                                     |
|                         | -                                                       | 0  |                                                                                                                                                                                                                                                            |                                                                                                   |             | -                                                                                                                     |
|                         | -                                                       | 0  |                                                                                                                                                                                                                                                            |                                                                                                   |             | -                                                                                                                     |
|                         | -                                                       | 0  |                                                                                                                                                                                                                                                            |                                                                                                   |             | -                                                                                                                     |
| Ailuropoda melanoleuca  | tripartite motif-containing 28                          | 15 | C:GO:0005654;<br>P:GO:0000122;<br>F:GO:0003714;<br>F:GO:0008270;<br>P:GO:0001837;<br>P:GO:0046777;<br>F:GO:0070087;<br>C:GO:0005719;<br>P:GO:0043193;<br>F:GO:0004672;<br>C:GO:0005730;<br>F:GO:0003713;<br>C:GO:0005720;<br>F:GO:0043565;<br>F:GO:0003700 | -                                                                                                 |             | -                                                                                                                     |
| Brugia malayi           | protein-tyrosine phosphatase containing protein         | 4  | P:GO:0016311;<br>F:GO:0004721;<br>P:GO:0009792;<br>P:GO:0000003                                                                                                                                                                                            | -                                                                                                 | EC:3.1.3.16 | IPR000242; G3DSA:3.90.190.10<br>(GENE3D), PTHR19134 (PANTHER),<br>PTHR19134:SF26 (PANTHER),<br>SSF52799 (SUPERFAMILY) |
| Caenorhabditis elegans  | thioredoxin-like protein                                | 0  |                                                                                                                                                                                                                                                            | P:GO:0045454                                                                                      |             | -                                                                                                                     |
|                         | -                                                       | 0  |                                                                                                                                                                                                                                                            |                                                                                                   |             | SignalP (SIGNALP)                                                                                                     |
| Haemonchus contortus    | microsomal aminopeptidase                               | 3  | C:GO:0016020;<br>F:GO:0046872;<br>F:GO:0070011                                                                                                                                                                                                             | -                                                                                                 |             | SignalP (SIGNALP)                                                                                                     |
|                         | -                                                       | 0  |                                                                                                                                                                                                                                                            |                                                                                                   |             | -                                                                                                                     |

|                         |                                                            |    |                                                                                                                                                                                                         |                                                                                                   |                                                                                                                                              |
|-------------------------|------------------------------------------------------------|----|---------------------------------------------------------------------------------------------------------------------------------------------------------------------------------------------------------|---------------------------------------------------------------------------------------------------|----------------------------------------------------------------------------------------------------------------------------------------------|
| Caenorhabditis elegans  | timeless protein                                           | 8  | P:GO:0042127;<br>F:GO:0005515;<br>P:GO:0007275;<br>P:GO:0033261;<br>P:GO:0048856;<br>P:GO:0009628;<br>P:GO:0016481;<br>C:GO:0000790                                                                     | -                                                                                                 | IPR006906                                                                                                                                    |
| Pan troglodytes         | alpha-2-macroglobulin precursor                            | 12 | F:GO:0004867;<br>F:GO:0043120;<br>F:GO:0019966;<br>P:GO:0001869;<br>P:GO:0007584;<br>C:GO:0005615;<br>C:GO:0031093;<br>F:GO:0019959;<br>F:GO:0019899;<br>P:GO:0010037;<br>P:GO:0051384;<br>P:GO:0006953 | -                                                                                                 | IPR011626; G3DSA:1.50.10.20 (GENE3D), PTHR11412 (PANTHER), PTHR11412:SF11 (PANTHER)                                                          |
| -                       | -                                                          | 0  |                                                                                                                                                                                                         |                                                                                                   | SignalP (SIGNALP)                                                                                                                            |
| -                       | -                                                          | 0  |                                                                                                                                                                                                         |                                                                                                   | -                                                                                                                                            |
| -                       | -                                                          | 0  |                                                                                                                                                                                                         |                                                                                                   | -                                                                                                                                            |
| -                       | -                                                          | 0  |                                                                                                                                                                                                         |                                                                                                   | -                                                                                                                                            |
| -                       | -                                                          | 0  |                                                                                                                                                                                                         |                                                                                                   | -                                                                                                                                            |
| Caenorhabditis briggsae | cd9 antigen                                                | 4  | P:GO:0009987;<br>C:GO:0016021;<br>P:GO:0016043;<br>C:GO:0005886                                                                                                                                         | -                                                                                                 | IPR000301; IPR008952; IPR018499; PTHR19282 (PANTHER), PTHR19282:SF14 (PANTHER), SignalP (SIGNALP)                                            |
| Caenorhabditis elegans  | cd9 antigen                                                | 4  | P:GO:0009987;<br>C:GO:0016021;<br>P:GO:0007399;<br>C:GO:0005886                                                                                                                                         | -                                                                                                 | IPR000301; IPR008952; IPR018499; PTHR19282 (PANTHER), PTHR19282:SF14 (PANTHER), SignalP (SIGNALP)                                            |
| Caenorhabditis elegans  | hypothetical protein Y54G2A.29 [Caenorhabditis elegans]    | 0  |                                                                                                                                                                                                         |                                                                                                   | IPR019326                                                                                                                                    |
| -                       | -                                                          | 0  |                                                                                                                                                                                                         |                                                                                                   | -                                                                                                                                            |
| Caenorhabditis briggsae | elegans protein partially confirmed by transcript evidence | 0  |                                                                                                                                                                                                         | P:GO:0000003;<br>P:GO:0040011;<br>C:GO:0016020;<br>P:GO:0040010;<br>P:GO:0002119;<br>P:GO:0040007 | -                                                                                                                                            |
| -                       | -                                                          | 0  |                                                                                                                                                                                                         |                                                                                                   | -                                                                                                                                            |
| -                       | -                                                          | 0  |                                                                                                                                                                                                         |                                                                                                   | SignalP (SIGNALP)                                                                                                                            |
| Schistosoma mansoni     | inhibitor of growth family member 5                        | 0  |                                                                                                                                                                                                         | F:GO:0046872;<br>F:GO:0008270;<br>F:GO:0005515                                                    | -                                                                                                                                            |
| -                       | -                                                          | 0  |                                                                                                                                                                                                         |                                                                                                   | SignalP (SIGNALP)                                                                                                                            |
| -                       | -                                                          | 0  |                                                                                                                                                                                                         |                                                                                                   | -                                                                                                                                            |
| Homo sapiens            | -dh dehydroge-se                                           | 4  | P:GO:0006120;<br>F:GO:0008137;<br>P:GO:0006810;<br>C:GO:0005747                                                                                                                                         | -                                                                                                 | EC:1.6.5.3                                                                                                                                   |
| -                       | -                                                          | 0  |                                                                                                                                                                                                         |                                                                                                   | -                                                                                                                                            |
| Brugia malayi           | nuclear receptor subfamily 2 group c member 2              | 3  | P:GO:0045449;<br>F:GO:0004872;<br>F:GO:0005515                                                                                                                                                          | -                                                                                                 | IPR001628; IPR008946; IPR013088; PRO0350 (PRINTS), PTHR11865 (PANTHER), PTHR11865:SF147 (PANTHER), SignalP (SIGNALP), SSF57716 (SUPERFAMILY) |

|                         |                                                            |   |                                                                                                                                                      |                                                                                                                                     |                                                                                                                             |
|-------------------------|------------------------------------------------------------|---|------------------------------------------------------------------------------------------------------------------------------------------------------|-------------------------------------------------------------------------------------------------------------------------------------|-----------------------------------------------------------------------------------------------------------------------------|
|                         | -                                                          | 0 |                                                                                                                                                      |                                                                                                                                     | SignalP (SIGNALP)                                                                                                           |
|                         | -                                                          | 0 |                                                                                                                                                      |                                                                                                                                     | -                                                                                                                           |
|                         | -                                                          | 0 |                                                                                                                                                      |                                                                                                                                     | -                                                                                                                           |
|                         | -                                                          | 0 |                                                                                                                                                      |                                                                                                                                     | -                                                                                                                           |
| Caenorhabditis elegans  | astacin-like metalloendopeptidase (m12 family)             | 3 | F:GO:0004222;<br>P:GO:0006508;<br>F:GO:0008270                                                                                                       | -                                                                                                                                   | EC:3.4.24.0<br>IPR001506; G3DSA:3.40.390.10 (GENE3D), PTHR10127 (PANTHER), PTHR10127:SF64 (PANTHER), SSF55486 (SUPERFAMILY) |
|                         | -                                                          | 0 |                                                                                                                                                      |                                                                                                                                     | -                                                                                                                           |
|                         | -                                                          | 0 |                                                                                                                                                      |                                                                                                                                     | -                                                                                                                           |
| Caenorhabditis elegans  | ck1 worm6 protein ki-se                                    | 4 | P:GO:0007283;<br>P:GO:0006468;<br>F:GO:0004672;<br>F:GO:0005524                                                                                      | -                                                                                                                                   | IPR000719; IPR011009; IPR017442; G3DSA:1.10.510.10 (GENE3D), PTHR11909 (PANTHER), PTHR11909:SF19 (PANTHER)                  |
|                         | -                                                          | 0 |                                                                                                                                                      |                                                                                                                                     | SignalP (SIGNALP)                                                                                                           |
|                         | -                                                          | 0 |                                                                                                                                                      |                                                                                                                                     | -                                                                                                                           |
| Brugia malayi           | nfrkb protein                                              | 0 |                                                                                                                                                      | F:GO:0002020;<br>P:GO:0006366;<br>F:GO:0003704;<br>C:GO:0031011;<br>C:GO:0005730;<br>F:GO:0003677;<br>P:GO:0006954;<br>C:GO:0005634 | -                                                                                                                           |
| Brugia malayi           | nfrkb protein                                              | 0 |                                                                                                                                                      | F:GO:0002020;<br>P:GO:0006366;<br>F:GO:0003704;<br>C:GO:0031011;<br>C:GO:0005730;<br>F:GO:0003677;<br>P:GO:0006954;<br>C:GO:0005634 | -                                                                                                                           |
|                         | -                                                          | 0 |                                                                                                                                                      |                                                                                                                                     | -                                                                                                                           |
|                         | -                                                          | 0 |                                                                                                                                                      |                                                                                                                                     | -                                                                                                                           |
| Caenorhabditis elegans  | elegans protein partially confirmed by transcript evidence | 5 | C:GO:0016021;<br>F:GO:0015250;<br>C:GO:0043025;<br>C:GO:0005929;<br>P:GO:0006833                                                                     | -                                                                                                                                   | IPR000425; PTHR19139:SF25 (PANTHER)                                                                                         |
| Caenorhabditis briggsae | tapt1_caee1 ame: full=protein tapt1 homolog                | 1 | P:GO:0009792                                                                                                                                         | -                                                                                                                                   | -                                                                                                                           |
| Caenorhabditis elegans  | briggsae cbr-casy-1 protein                                | 9 | P:GO:0009792;<br>C:GO:0005615;<br>P:GO:0007156;<br>F:GO:0005515;<br>C:GO:0032809;<br>P:GO:0008355;<br>C:GO:0043231;<br>F:GO:0005509;<br>C:GO:0016021 | -                                                                                                                                   | -                                                                                                                           |
|                         | -                                                          | 0 |                                                                                                                                                      |                                                                                                                                     | -                                                                                                                           |
|                         | -                                                          | 0 |                                                                                                                                                      |                                                                                                                                     | -                                                                                                                           |
| Brugia malayi           | adducin family member (add-1)                              | 0 |                                                                                                                                                      | F:GO:0046872                                                                                                                        | PTHR10672 (PANTHER), PTHR10672:SF3 (PANTHER)                                                                                |
|                         | -                                                          | 0 |                                                                                                                                                      |                                                                                                                                     | -                                                                                                                           |
| Caenorhabditis elegans  | hypothetical protein ZK973.1 [Caenorhabditis elegans]      | 0 |                                                                                                                                                      | P:GO:0006139;<br>F:GO:0016788                                                                                                       | IPR018974                                                                                                                   |

|                              |                                                                |   |                                                                                                   |   |             |                                                                                                                                                                                        |
|------------------------------|----------------------------------------------------------------|---|---------------------------------------------------------------------------------------------------|---|-------------|----------------------------------------------------------------------------------------------------------------------------------------------------------------------------------------|
| Haematobia irritans irritans | cyclin-dependent ki-se (cdc2-like) 10                          | 4 | P:GO:0009987;<br>C:GO:0005634;<br>F:GO:0004674;<br>F:GO:0000166                                   | - | EC:2.7.11.0 | IPR000719; IPR002290; IPR008271;<br>IPR011009; IPR017441; IPR017442;<br>G3DSA:1.10.510.10 (GENE3D),<br>G3DSA:3.30.200.20 (GENE3D),<br>PTHR11295 (PANTHER),<br>PTHR11295:SF86 (PANTHER) |
| -                            | -                                                              | 0 | -                                                                                                 | - | -           | SignalP (SIGNALP)                                                                                                                                                                      |
| Pongo abelii                 | tr- methyltransferase 112 homolog                              | 4 | C:GO:0043234;<br>F:GO:0008276;<br>F:GO:0005515;<br>P:GO:0018364                                   | - | -           | -                                                                                                                                                                                      |
| -                            | -                                                              | 0 | -                                                                                                 | - | -           | -                                                                                                                                                                                      |
| -                            | -                                                              | 0 | -                                                                                                 | - | -           | -                                                                                                                                                                                      |
| -                            | -                                                              | 0 | -                                                                                                 | - | -           | -                                                                                                                                                                                      |
| -                            | -                                                              | 0 | -                                                                                                 | - | -           | -                                                                                                                                                                                      |
| -                            | -                                                              | 0 | -                                                                                                 | - | -           | SignalP (SIGNALP)                                                                                                                                                                      |
| -                            | -                                                              | 0 | -                                                                                                 | - | -           | -                                                                                                                                                                                      |
| -                            | -                                                              | 0 | -                                                                                                 | - | -           | -                                                                                                                                                                                      |
| -                            | -                                                              | 0 | -                                                                                                 | - | -           | -                                                                                                                                                                                      |
| -                            | -                                                              | 0 | -                                                                                                 | - | -           | -                                                                                                                                                                                      |
| -                            | -                                                              | 0 | -                                                                                                 | - | -           | -                                                                                                                                                                                      |
| Caenorhabditis briggsae      | elegans protein partially confirmed by transcript evidence     | 5 | P:GO:0009792;<br>P:GO:0000003;<br>P:GO:0040010;<br>P:GO:0006810;<br>P:GO:0002119                  | - | -           | -                                                                                                                                                                                      |
| -                            | -                                                              | 0 | -                                                                                                 | - | -           | -                                                                                                                                                                                      |
| -                            | -                                                              | 0 | -                                                                                                 | - | -           | IPR003677; PTHR21593 (PANTHER)                                                                                                                                                         |
| Caenorhabditis elegans       | sdad1 protein                                                  | 5 | C:GO:0005730;<br>P:GO:0002119;<br>P:GO:0006898;<br>P:GO:0040007;<br>P:GO:0051729                  | - | -           | PTHR12730 (PANTHER)                                                                                                                                                                    |
| -                            | -                                                              | 0 | -                                                                                                 | - | -           | -                                                                                                                                                                                      |
| -                            | -                                                              | 0 | -                                                                                                 | - | -           | -                                                                                                                                                                                      |
| -                            | -                                                              | 0 | -                                                                                                 | - | -           | -                                                                                                                                                                                      |
| -                            | -                                                              | 0 | -                                                                                                 | - | -           | -                                                                                                                                                                                      |
| Caenorhabditis briggsae      | transcription elongation factor a 2                            | 6 | F:GO:0030528;<br>P:GO:0006357;<br>F:GO:0003676;<br>F:GO:0046872;<br>F:GO:0005515;<br>C:GO:0005654 | - | -           | IPR001222; IPR003618; IPR006289;<br>IPR016492; IPR017890; IPR017923;<br>G3DSA:2.20.25.10 (GENE3D),<br>PTHR11477 (PANTHER), SSF57783<br>(SUPERFAMILY)                                   |
| Nippostrongylus brasiliensis | globin                                                         | 6 | F:GO:0020037;<br>C:GO:0005615;<br>C:GO:0005737;<br>F:GO:0005344;<br>P:GO:0015671;<br>F:GO:0019825 | - | -           | -                                                                                                                                                                                      |
| -                            | -                                                              | 0 | -                                                                                                 | - | -           | -                                                                                                                                                                                      |
| -                            | -                                                              | 0 | -                                                                                                 | - | -           | -                                                                                                                                                                                      |
| Caenorhabditis elegans       | rn207_caeel ame: full=probable ring finger protein 207 homolog | 1 | F:GO:0046872                                                                                      | - | -           | SignalP (SIGNALP)                                                                                                                                                                      |
| -                            | -                                                              | 0 | -                                                                                                 | - | -           | -                                                                                                                                                                                      |
| Caenorhabditis elegans       | elegans protein partially confirmed by transcript evidence     | 1 | F:GO:0005515                                                                                      | - | -           | -                                                                                                                                                                                      |
| -                            | -                                                              | 0 | -                                                                                                 | - | -           | -                                                                                                                                                                                      |

|                           |                                                                                                    |   |                                                                                                                                     |              |                                                                                                                                                                          |
|---------------------------|----------------------------------------------------------------------------------------------------|---|-------------------------------------------------------------------------------------------------------------------------------------|--------------|--------------------------------------------------------------------------------------------------------------------------------------------------------------------------|
|                           | -                                                                                                  | 0 |                                                                                                                                     |              | -                                                                                                                                                                        |
|                           | -                                                                                                  | 0 |                                                                                                                                     |              | SignalP (SIGNALP)                                                                                                                                                        |
|                           | -                                                                                                  | 0 |                                                                                                                                     |              | SignalP (SIGNALP)                                                                                                                                                        |
| Caenorhabditis elegans    | cytochrome family subfamily polypeptide 2                                                          | 5 | F:GO:0009055;<br>F:GO:0004497;<br>F:GO:0020037;<br>P:GO:0055114;<br>C:GO:0016020                                                    | -            | IPR001128; IPR002403;<br>PTHR19383:SF165 (PANTHER)                                                                                                                       |
| Danio rerio               | alpha- -mannosylglycoprotein 6-beta-n-acetylglucosaminyltransferase a                              | 4 | C:GO:0000139;<br>F:GO:0030144;<br>P:GO:0006487;<br>C:GO:0016021                                                                     | -            | EC:2.4.1.155 PTHR15075 (PANTHER)                                                                                                                                         |
| Caenorhabditis elegans    | collagen type iv alpha-3-binding protein                                                           | 0 |                                                                                                                                     | F:GO:0004674 | IPR001849; IPR002913; IPR011993;<br>G3DSA:3.30.530.20 (GENE3D),<br>PTHR10219 (PANTHER),<br>PTHR10219:SF3 (PANTHER), SSF50729<br>(SUPERFAMILY), SSF55961<br>(SUPERFAMILY) |
|                           | -                                                                                                  | 0 |                                                                                                                                     |              | IPR000626; IPR019955;<br>G3DSA:3.10.20.90 (GENE3D),<br>SSF54236 (SUPERFAMILY)                                                                                            |
|                           | -                                                                                                  | 0 |                                                                                                                                     |              | -                                                                                                                                                                        |
| Schistosoma mansoni       | -s13_caeel ame: full=zinc metalloprotei-se -s-13 ame:<br>full=nematode astacin 13 flags: precursor | 0 |                                                                                                                                     | F:GO:0008233 | IPR003582                                                                                                                                                                |
|                           | -                                                                                                  | 0 |                                                                                                                                     |              | -                                                                                                                                                                        |
|                           | -                                                                                                  | 0 |                                                                                                                                     |              | -                                                                                                                                                                        |
| Caenorhabditis briggsae   | elegans protein partially confirmed by transcript evidence                                         | 3 | F:GO:0005515;<br>P:GO:0007600;<br>P:GO:0007165                                                                                      | -            | IPR011021; IPR014756; PTHR11188<br>(PANTHER), PTHR11188:SF13<br>(PANTHER)                                                                                                |
| Bos taurus                | chaperonin containing subunit 3                                                                    | 5 | C:GO:0005856;<br>P:GO:0006457;<br>C:GO:0005832;<br>F:GO:0005524;<br>F:GO:0051082                                                    | -            | -                                                                                                                                                                        |
| Caenorhabditis elegans    | elegans protein confirmed by transcript evidence                                                   | 0 |                                                                                                                                     |              | G3DSA:3.40.390.10 (GENE3D),<br>PTHR10201 (PANTHER),<br>PTHR10201:SF5 (PANTHER)                                                                                           |
| Caenorhabditis sp. PS1010 | elegans protein partially confirmed by transcript evidence                                         | 8 | P:GO:0002119;<br>P:GO:0006468;<br>P:GO:0040010;<br>F:GO:0005524;<br>P:GO:0019915;<br>P:GO:0006898;<br>P:GO:0006974;<br>F:GO:0004674 | -            | EC:2.7.11.0<br>IPR000719; IPR008271; IPR011009;<br>IPR017442; G3DSA:1.10.510.10<br>(GENE3D), PTHR11909 (PANTHER),<br>PTHR11909:SF19 (PANTHER)                            |
|                           | -                                                                                                  | 0 |                                                                                                                                     |              | SignalP (SIGNALP)                                                                                                                                                        |
| Caenorhabditis elegans    | daf-16 foxo germline tumor affecting family member (dct-1)                                         | 8 | F:GO:0002020;<br>P:GO:0043065;<br>F:GO:0003700;<br>P:GO:0051726;<br>P:GO:0008340;<br>C:GO:0016021;<br>F:GO:0042803;<br>C:GO:0031966 | -            | -                                                                                                                                                                        |
| Loa loa                   | chromaffin granule amine transporter                                                               | 0 |                                                                                                                                     |              | -                                                                                                                                                                        |
|                           | -                                                                                                  | 0 |                                                                                                                                     |              | -                                                                                                                                                                        |
|                           | -                                                                                                  | 0 |                                                                                                                                     |              | -                                                                                                                                                                        |



|                         |                                                                                            |    |                                                                                                                                                                                                                                                                             |                                                |                              |                                                                                                                                |
|-------------------------|--------------------------------------------------------------------------------------------|----|-----------------------------------------------------------------------------------------------------------------------------------------------------------------------------------------------------------------------------------------------------------------------------|------------------------------------------------|------------------------------|--------------------------------------------------------------------------------------------------------------------------------|
| Caenorhabditis elegans  | hot_caeeel ame: full=probable hydroxyacid-oxoacid mitochondrial short=hot flags: precursor | 7  | F:GO:0047988;<br>F:GO:0046872;<br>P:GO:0015993;<br>P:GO:0009073;<br>P:GO:0055114;<br>F:GO:0003856;<br>C:GO:0005739                                                                                                                                                          | -                                              | EC:1.1.99.24<br>; EC:4.2.3.4 | -                                                                                                                              |
| Pan troglodytes         | eukaryotic translation elongation factor 1 beta 2                                          | 5  | C:GO:0005829;<br>F:GO:0003746;<br>C:GO:0005853;<br>F:GO:0005515;<br>P:GO:0006414                                                                                                                                                                                            | -                                              |                              | IPR001326; IPR018940; PTHR11595 (PANTHER), PTHR11595:SF7 (PANTHER)                                                             |
| Caenorhabditis briggsae | 2-hydroxyacyl- lyase 1                                                                     | 3  | F:GO:0030976;<br>F:GO:0000287;<br>F:GO:0003824                                                                                                                                                                                                                              | -                                              |                              | -                                                                                                                              |
|                         | -                                                                                          | 0  |                                                                                                                                                                                                                                                                             |                                                |                              | -                                                                                                                              |
| Brugia malayi           | briggsae cbr-ctg-1 protein                                                                 | 0  |                                                                                                                                                                                                                                                                             | F:GO:0005215;<br>C:GO:0005622;<br>P:GO:0006810 |                              | -                                                                                                                              |
|                         | -                                                                                          | 0  |                                                                                                                                                                                                                                                                             |                                                |                              | -                                                                                                                              |
|                         | -                                                                                          | 0  |                                                                                                                                                                                                                                                                             |                                                |                              | -                                                                                                                              |
| Caenorhabditis elegans  | isoleucyl-tr- synthetase                                                                   | 6  | C:GO:0005625;<br>F:GO:0005515;<br>P:GO:0006418;<br>F:GO:0004822;<br>C:GO:0005829;<br>F:GO:0000166                                                                                                                                                                           | -                                              | EC:6.1.1.5                   | IPR002300; IPR002301; IPR009080; IPR013155; IPR014729; G3DSA:1.10.730.10 (GENE3D), PTHR11946 (PANTHER), SSF52374 (SUPERFAMILY) |
|                         | -                                                                                          | 0  |                                                                                                                                                                                                                                                                             |                                                |                              | SignalP (SIGNALP)                                                                                                              |
|                         | -                                                                                          | 0  |                                                                                                                                                                                                                                                                             |                                                |                              | -                                                                                                                              |
|                         | -                                                                                          | 0  |                                                                                                                                                                                                                                                                             |                                                |                              | -                                                                                                                              |
| Caenorhabditis elegans  | briggsae cbr-acl-7 protein                                                                 | 0  |                                                                                                                                                                                                                                                                             | F:GO:0008415                                   |                              | PTHR12563 (PANTHER), PTHR12563:SF3 (PANTHER)                                                                                   |
|                         | -                                                                                          | 0  |                                                                                                                                                                                                                                                                             |                                                |                              | -                                                                                                                              |
|                         | -                                                                                          | 0  |                                                                                                                                                                                                                                                                             |                                                |                              | -                                                                                                                              |
| Caenorhabditis elegans  | i uaiaretic acid resistant family member (ndg-4)                                           | 3  | P:GO:0009792;<br>P:GO:0010171;<br>P:GO:0040010                                                                                                                                                                                                                              | -                                              |                              | PTHR11161 (PANTHER), SignalP (SIGNALP)                                                                                         |
| Caenorhabditis elegans  | serine threonine-protein                                                                   | 3  | P:GO:0006468;<br>F:GO:0005524;<br>F:GO:0004674                                                                                                                                                                                                                              | -                                              | EC:2.7.11.0                  | -                                                                                                                              |
|                         | -                                                                                          | 0  |                                                                                                                                                                                                                                                                             |                                                |                              | -                                                                                                                              |
|                         | -                                                                                          | 0  |                                                                                                                                                                                                                                                                             |                                                |                              | -                                                                                                                              |
| Caenorhabditis briggsae | d- topoisomerase i                                                                         | 16 | C:GO:0005703;<br>C:GO:0005875;<br>P:GO:0006268;<br>P:GO:0030261;<br>C:GO:0005730;<br>F:GO:0003917;<br>P:GO:0002168;<br>P:GO:0007059;<br>C:GO:0005665;<br>C:GO:0005719;<br>F:GO:0003918;<br>P:GO:0048477;<br>P:GO:0006265;<br>P:GO:0008283;<br>C:GO:0005737;<br>P:GO:0009790 | -                                              | EC:5.99.1.2;<br>EC:5.99.1.3  | IPR001631; IPR009054; IPR011010; IPR013499; IPR013500; IPR014711; IPR014727; IPR018521; PTHR10290 (PANTHER)                    |

|                         |                                                         |    |                                                                                                                                                                                                                          |                                                |                                                                                                                                                           |
|-------------------------|---------------------------------------------------------|----|--------------------------------------------------------------------------------------------------------------------------------------------------------------------------------------------------------------------------|------------------------------------------------|-----------------------------------------------------------------------------------------------------------------------------------------------------------|
|                         | -                                                       | 0  |                                                                                                                                                                                                                          |                                                | -                                                                                                                                                         |
| Caenorhabditis elegans  | --+ k+-atpase alpha-subunit                             | 2  | P:GO:0006810;<br>F:GO:0003824                                                                                                                                                                                            | -                                              | IPR001757; G3DSA:3.40.1110.10 (GENE3D), PTHR11939:SF100 (PANTHER), SSF81660 (SUPERFAMILY)                                                                 |
| Caenorhabditis briggsae | zinc finger transcription factor family member (ztf-19) | 0  |                                                                                                                                                                                                                          | F:GO:0003676;<br>F:GO:0008270;<br>C:GO:0005622 | IPR020003                                                                                                                                                 |
|                         | -                                                       | 0  |                                                                                                                                                                                                                          |                                                | -                                                                                                                                                         |
| Callithrix jacchus      | polymerase ii (d- directed) polypeptide                 | 10 | F:GO:0003899;<br>F:GO:0030528;<br>F:GO:0008270;<br>F:GO:0004672;<br>P:GO:0006367;<br>P:GO:0045449;<br>P:GO:0008380;<br>C:GO:0005665;<br>F:GO:0003677;<br>P:GO:0006368                                                    | -                                              | EC:2.7.7.6<br>IPR001222; IPR001529; IPR003006; IPR019761; G3DSA:2.20.25.10 (GENE3D), PTHR11239 (PANTHER), PTHR11239:SF1 (PANTHER), SSF57783 (SUPERFAMILY) |
|                         | -                                                       | 0  |                                                                                                                                                                                                                          |                                                | -                                                                                                                                                         |
| Canis familiaris        | heat shock cog-te 71 kda                                | 2  | F:GO:0005524;<br>P:GO:0006950                                                                                                                                                                                            | -                                              | -                                                                                                                                                         |
| Pongo abelii            | transcription elongation factor b polypeptide 1         | 10 | C:GO:0005829;<br>F:GO:0003746;<br>P:GO:0006511;<br>P:GO:0006357;<br>F:GO:0004842;<br>F:GO:0005515;<br>F:GO:0003711;<br>P:GO:0044419;<br>C:GO:0005654;<br>C:GO:0030891                                                    | -                                              | EC:6.3.2.19                                                                                                                                               |
|                         | -                                                       | 0  |                                                                                                                                                                                                                          |                                                | -                                                                                                                                                         |
| Caenorhabditis elegans  | briggsae cbr-coq-8 protein                              | 0  |                                                                                                                                                                                                                          |                                                | -                                                                                                                                                         |
| Caenorhabditis elegans  | antigenic determi-nt of reca protein homolog            | 13 | P:GO:0040010;<br>F:GO:0003690;<br>F:GO:0046872;<br>P:GO:0006260;<br>P:GO:0000003;<br>P:GO:0010171;<br>P:GO:0002119;<br>P:GO:0040011;<br>P:GO:0010467;<br>P:GO:0002009;<br>P:GO:0009792;<br>C:GO:0005634;<br>P:GO:0006974 | -                                              | IPR019447; PTHR12805 (PANTHER)                                                                                                                            |

|                             |                                                                |    |                                                                                                                                                                                                                          |                                                                                                   |                                                                                                         |
|-----------------------------|----------------------------------------------------------------|----|--------------------------------------------------------------------------------------------------------------------------------------------------------------------------------------------------------------------------|---------------------------------------------------------------------------------------------------|---------------------------------------------------------------------------------------------------------|
| Caenorhabditis elegans      | antigenic determi-nt of reca protein homolog                   | 13 | P:GO:0040010;<br>F:GO:0003690;<br>F:GO:0046872;<br>P:GO:0006260;<br>P:GO:0000003;<br>P:GO:0010171;<br>P:GO:0002119;<br>P:GO:0040011;<br>P:GO:0010467;<br>P:GO:0002009;<br>P:GO:0009792;<br>C:GO:0005634;<br>P:GO:0006974 | -                                                                                                 | IPR019447; PTHR12805 (PANTHER)                                                                          |
| Caenorhabditis elegans      | antigenic determi-nt of reca protein homolog                   | 13 | P:GO:0040010;<br>F:GO:0003690;<br>F:GO:0046872;<br>P:GO:0006260;<br>P:GO:0000003;<br>P:GO:0010171;<br>P:GO:0002119;<br>P:GO:0040011;<br>P:GO:0010467;<br>P:GO:0002009;<br>P:GO:0009792;<br>C:GO:0005634;<br>P:GO:0006974 | -                                                                                                 | IPR019447; PTHR12805 (PANTHER)                                                                          |
|                             | -                                                              | 0  |                                                                                                                                                                                                                          |                                                                                                   | -                                                                                                       |
|                             | -                                                              | 0  |                                                                                                                                                                                                                          |                                                                                                   | -                                                                                                       |
|                             | -                                                              | 0  |                                                                                                                                                                                                                          |                                                                                                   | -                                                                                                       |
| Anopheles gambiae str. PEST | secreted trypsin-like serine protease                          | 0  |                                                                                                                                                                                                                          | P:GO:0006508;<br>F:GO:0004252;<br>F:GO:0008236;<br>F:GO:0016787;<br>F:GO:0003824;<br>F:GO:0008233 | IPR005514; IPR009003;<br>G3DSA:2.40.10.10 (GENE3D),<br>PTHR19355 (PANTHER),<br>PTHR19355:SF48 (PANTHER) |
|                             | -                                                              | 0  |                                                                                                                                                                                                                          |                                                                                                   | -                                                                                                       |
|                             | -                                                              | 0  |                                                                                                                                                                                                                          |                                                                                                   | PTHR21512 (PANTHER),<br>PTHR21512:SF7 (PANTHER)                                                         |
|                             | -                                                              | 0  |                                                                                                                                                                                                                          |                                                                                                   | -                                                                                                       |
|                             | -                                                              | 0  |                                                                                                                                                                                                                          |                                                                                                   | -                                                                                                       |
| Loa loa                     | rn207_caebra me: full=probable ring finger protein 207 homolog | 0  |                                                                                                                                                                                                                          | F:GO:0046872;<br>F:GO:0008270;<br>F:GO:0005515;<br>C:GO:0005622                                   | -                                                                                                       |
| Caenorhabditis briggsae     | Hypothetical protein CBG02374 [Caenorhabditis briggsae]        | 0  |                                                                                                                                                                                                                          | F:GO:0005515                                                                                      | -                                                                                                       |
| Ailuropoda melanoleuca      | cytohesin 1                                                    | 5  | C:GO:0005737;<br>P:GO:0030155;<br>C:GO:0005886;<br>F:GO:0005515;<br>P:GO:0016192                                                                                                                                         | -                                                                                                 | IPR000904; G3DSA:1.10.1000.11 (GENE3D), PTHR10663 (PANTHER)                                             |
| Caenorhabditis briggsae     | sushi domain containing                                        | 2  | C:GO:0016021;<br>P:GO:0007160                                                                                                                                                                                            | -                                                                                                 | IPR005533; PTHR13802 (PANTHER),<br>PTHR13802:SF1 (PANTHER)                                              |
|                             | -                                                              | 0  |                                                                                                                                                                                                                          |                                                                                                   | -                                                                                                       |
|                             | -                                                              | 0  |                                                                                                                                                                                                                          |                                                                                                   | -                                                                                                       |
| Caenorhabditis elegans      | hypothetical protein C46G7.1 [Caenorhabditis elegans]          | 0  |                                                                                                                                                                                                                          |                                                                                                   | -                                                                                                       |
| Pongo abelii                | PREDICTED: hypothetical protein LOC100437226 [Pongo abelii]    | 0  |                                                                                                                                                                                                                          |                                                                                                   | -                                                                                                       |

|                         |                                                         |   |                                                                                                                    |                                                                                                                                                                                                                                                                                              |  |                                                                |
|-------------------------|---------------------------------------------------------|---|--------------------------------------------------------------------------------------------------------------------|----------------------------------------------------------------------------------------------------------------------------------------------------------------------------------------------------------------------------------------------------------------------------------------------|--|----------------------------------------------------------------|
| Caenorhabditis elegans  | briggsae cbr-cav-1 protein                              | 0 |                                                                                                                    | C:GO:0030141;<br>C:GO:0016021;<br>C:GO:0005901;<br>C:GO:0016020;<br>C:GO:0000139;<br>C:GO:0030133;<br>C:GO:0005794;<br>C:GO:0009898;<br>C:GO:0048471;<br>P:GO:0040011;<br>C:GO:0005938;<br>P:GO:0007265;<br>P:GO:0040010;<br>C:GO:0005887;<br>P:GO:0040007;<br>C:GO:0005886;<br>P:GO:0007126 |  | IPR001612; PTHR10844:SF2 (PANTHER), SignalP (SIGNALP)          |
| Ixodes scapularis       | hexosaminidase domain-containing                        | 0 |                                                                                                                    | F:GO:0004553;<br>F:GO:0004563;<br>P:GO:0005975;<br>P:GO:0008152;<br>F:GO:0016787;<br>F:GO:0003824;<br>F:GO:0016798;<br>F:GO:0043169                                                                                                                                                          |  | -                                                              |
| Caenorhabditis elegans  | mitochondrial 2-oxoglutarate malate carrier protein     | 5 | F:GO:0005488;<br>C:GO:0005743;<br>P:GO:0055085;<br>C:GO:0016021;<br>F:GO:0005215                                   | -                                                                                                                                                                                                                                                                                            |  | IPR001993; G3DSA:1.50.40.10 (GENE3D), PTHR11896:SF78 (PANTHER) |
| -                       | -                                                       | 0 |                                                                                                                    |                                                                                                                                                                                                                                                                                              |  | -                                                              |
| Caenorhabditis briggsae | Hypothetical protein CBG02369 [Caenorhabditis briggsae] | 0 |                                                                                                                    |                                                                                                                                                                                                                                                                                              |  | -                                                              |
| Caenorhabditis elegans  | Hypothetical protein CBG02369 [Caenorhabditis briggsae] | 0 |                                                                                                                    |                                                                                                                                                                                                                                                                                              |  | -                                                              |
| Caenorhabditis briggsae | briggsae cbr-itx-1 protein                              | 0 |                                                                                                                    |                                                                                                                                                                                                                                                                                              |  | -                                                              |
| -                       | -                                                       | 0 |                                                                                                                    |                                                                                                                                                                                                                                                                                              |  | -                                                              |
| -                       | -                                                       | 0 |                                                                                                                    |                                                                                                                                                                                                                                                                                              |  | SignalP (SIGNALP)                                              |
| Caenorhabditis elegans  | briggsae cbr-rpy-1 protein                              | 7 | C:GO:0005856;<br>C:GO:0045211;<br>P:GO:0007268;<br>C:GO:0030054;<br>F:GO:0033130;<br>P:GO:0019915;<br>F:GO:0008270 | -                                                                                                                                                                                                                                                                                            |  | PTHR10098 (PANTHER), PTHR10098:SF7 (PANTHER)                   |
| Caenorhabditis briggsae | kinesin-like protein family member (klp-4)              | 5 | P:GO:0007018;<br>F:GO:0005515;<br>F:GO:0005524;<br>F:GO:0003777;<br>C:GO:0005874                                   | -                                                                                                                                                                                                                                                                                            |  | IPR022164; PTHR16012 (PANTHER), PTHR16012:SF65 (PANTHER)       |
| -                       | -                                                       | 0 |                                                                                                                    |                                                                                                                                                                                                                                                                                              |  | -                                                              |
| Taeniopygia guttata     | rcg47273-like                                           | 1 | C:GO:0016021                                                                                                       |                                                                                                                                                                                                                                                                                              |  | -                                                              |
| -                       | -                                                       | 0 |                                                                                                                    |                                                                                                                                                                                                                                                                                              |  | SignalP (SIGNALP)                                              |

|                         |                                                                      |    |                                                                                                                                                                                                                          |   |                              |                                                                                                                                          |
|-------------------------|----------------------------------------------------------------------|----|--------------------------------------------------------------------------------------------------------------------------------------------------------------------------------------------------------------------------|---|------------------------------|------------------------------------------------------------------------------------------------------------------------------------------|
| Callithrix jacchus      | glutamine synthetase                                                 | 10 | C:GO:0005829;<br>P:GO:0009749;<br>C:GO:0005739;<br>F:GO:0004351;<br>F:GO:0042802;<br>P:GO:0006542;<br>F:GO:0005524;<br>F:GO:0004356;<br>P:GO:0008283;<br>C:GO:0005794                                                    | - | EC:4.1.1.15;<br>EC:6.3.1.2   | IPR008146; IPR014746; PTHR20852<br>(PANTHER), PTHR20852:SF14<br>(PANTHER), SSF55931 (SUPERFAMILY)                                        |
| -                       | -                                                                    | 0  | -                                                                                                                                                                                                                        | - | -                            | SignalP (SIGNALP)                                                                                                                        |
| Caenorhabditis briggsae | dolichyl-phosphate mannosyltransferase polypeptide catalytic subunit | 12 | P:GO:0006506;<br>P:GO:0019673;<br>F:GO:0043178;<br>F:GO:0005537;<br>C:GO:0033185;<br>P:GO:0035269;<br>F:GO:0004582;<br>C:GO:0005792;<br>F:GO:0004169;<br>F:GO:0005515;<br>C:GO:0005789;<br>P:GO:0019348                  | - | EC:2.4.1.83;<br>EC:2.4.1.109 | IPR001173; G3DSA:3.90.550.10<br>(GENE3D), PTHR10859 (PANTHER),<br>SSF53448 (SUPERFAMILY)                                                 |
| Caenorhabditis briggsae | nudix hydrolase                                                      | 3  | F:GO:0030145;<br>P:GO:0009132;<br>F:GO:0016818                                                                                                                                                                           | - | EC:3.6.1.0                   | IPR000059; IPR000086; PTHR12992<br>(PANTHER)                                                                                             |
| -                       | -                                                                    | 0  | -                                                                                                                                                                                                                        | - | -                            | -                                                                                                                                        |
| Loa loa                 | c-termi-l binding protein 1                                          | 13 | C:GO:0005829;<br>F:GO:0003676;<br>C:GO:0017053;<br>P:GO:0050872;<br>C:GO:0005667;<br>F:GO:0016616;<br>F:GO:0016564;<br>P:GO:0000122;<br>F:GO:0051287;<br>F:GO:0003700;<br>P:GO:0007030;<br>F:GO:0008134;<br>F:GO:0042803 | - | EC:1.1.1.0                   | IPR006140; IPR016040; PTHR10996<br>(PANTHER), PTHR10996:SF11<br>(PANTHER), SSF51735 (SUPERFAMILY)                                        |
| -                       | -                                                                    | 0  | -                                                                                                                                                                                                                        | - | -                            | -                                                                                                                                        |
| -                       | -                                                                    | 0  | -                                                                                                                                                                                                                        | - | -                            | -                                                                                                                                        |
| -                       | -                                                                    | 0  | -                                                                                                                                                                                                                        | - | -                            | -                                                                                                                                        |
| Caenorhabditis briggsae | tr- (5-methylaminomethyl-2-thiouridylate)-methyltransferase          | 1  | F:GO:0005488                                                                                                                                                                                                             | - | -                            | IPR004506; G3DSA:2.30.30.280<br>(GENE3D)                                                                                                 |
| -                       | -                                                                    | 0  | -                                                                                                                                                                                                                        | - | -                            | -                                                                                                                                        |
| Caenorhabditis briggsae | receptor protein tyrosine                                            | 2  | F:GO:0004725;<br>P:GO:0006470                                                                                                                                                                                            | - | EC:3.1.3.48                  | IPR000242; G3DSA:3.90.190.10<br>(GENE3D), PTHR19134 (PANTHER),<br>PTHR19134:SF35 (PANTHER), SignalP<br>(SIGNALP), SSF52799 (SUPERFAMILY) |
| -                       | -                                                                    | 0  | -                                                                                                                                                                                                                        | - | -                            | -                                                                                                                                        |
| Loa loa                 | surp module family protein                                           | 1  | F:GO:0003676                                                                                                                                                                                                             | - | -                            | IPR000061; IPR006569; PTHR23140<br>(PANTHER), SSF109905 (SUPERFAMILY)                                                                    |
| -                       | -                                                                    | 0  | -                                                                                                                                                                                                                        | - | -                            | G3DSA:3.80.10.10 (GENE3D)                                                                                                                |
| -                       | -                                                                    | 0  | -                                                                                                                                                                                                                        | - | -                            | SignalP (SIGNALP)                                                                                                                        |

|                         |                                                         |    |                                                                                                                                                                                                                                                                                              |                                                                                  |             |                                                                                                                                                           |
|-------------------------|---------------------------------------------------------|----|----------------------------------------------------------------------------------------------------------------------------------------------------------------------------------------------------------------------------------------------------------------------------------------------|----------------------------------------------------------------------------------|-------------|-----------------------------------------------------------------------------------------------------------------------------------------------------------|
| Caenorhabditis briggsae | Hypothetical protein CBG09112 [Caenorhabditis briggsae] | 0  |                                                                                                                                                                                                                                                                                              | F:GO:0003723;<br>F:GO:0005488;<br>P:GO:0006396;<br>C:GO:0005622                  |             | -                                                                                                                                                         |
|                         |                                                         | 0  |                                                                                                                                                                                                                                                                                              |                                                                                  |             | SignalP (SIGNALP)                                                                                                                                         |
| Caenorhabditis briggsae | Hypothetical protein CBG18297 [Caenorhabditis briggsae] | 0  |                                                                                                                                                                                                                                                                                              |                                                                                  |             | SignalP (SIGNALP)                                                                                                                                         |
| Caenorhabditis elegans  | expulsion defective family member (exp-2)               | 5  | C:GO:0008076;<br>F:GO:0005249;<br>F:GO:0005515;<br>P:GO:0055085;<br>P:GO:0006813                                                                                                                                                                                                             | -                                                                                |             | -                                                                                                                                                         |
| Caenorhabditis briggsae | elegans protein confirmed by transcript evidence        | 0  |                                                                                                                                                                                                                                                                                              | C:GO:0005789;<br>P:GO:0040017;<br>N:GO:0035545;<br>P:GO:0032527;<br>P:GO:0035418 |             | -                                                                                                                                                         |
| Homo sapiens            | milk fat globule-egf factor 8 protein variant           | 17 | P:GO:0001525;<br>P:GO:0006910;<br>F:GO:0008429;<br>C:GO:0009897;<br>P:GO:0043627;<br>P:GO:0050766;<br>C:GO:0005615;<br>P:GO:0006911;<br>P:GO:0007155;<br>F:GO:0005178;<br>F:GO:0001786;<br>C:GO:0031012;<br>P:GO:0044419;<br>P:GO:0008284;<br>C:GO:0005737;<br>C:GO:0019897;<br>P:GO:0007338 | -                                                                                |             | -                                                                                                                                                         |
|                         |                                                         | 0  |                                                                                                                                                                                                                                                                                              |                                                                                  |             | -                                                                                                                                                         |
| Caenorhabditis briggsae | protein-tyrosine phosphatase containing protein         | 5  | P:GO:0009792;<br>P:GO:0016311;<br>F:GO:0004721;<br>P:GO:0000003;<br>P:GO:0043687                                                                                                                                                                                                             | -                                                                                | EC:3.1.3.16 | IPR000242; IPR000387; IPR003595;<br>IPR016130; G3DSA:3.90.190.10<br>(GENE3D), PTHR19134 (PANTHER),<br>PTHR19134:SF26 (PANTHER),<br>SSF52799 (SUPERFAMILY) |
|                         |                                                         | 0  |                                                                                                                                                                                                                                                                                              |                                                                                  |             | -                                                                                                                                                         |
|                         |                                                         | 0  |                                                                                                                                                                                                                                                                                              |                                                                                  |             | -                                                                                                                                                         |
| Caenorhabditis elegans  | dual specificity protein phosphatase 9                  | 5  | P:GO:0007254;<br>P:GO:0000188;<br>F:GO:0017017;<br>C:GO:0005783;<br>C:GO:0005634                                                                                                                                                                                                             | -                                                                                |             | -                                                                                                                                                         |
| Caenorhabditis elegans  | dual specificity protein phosphatase 9                  | 5  | P:GO:0007254;<br>P:GO:0000188;<br>F:GO:0017017;<br>C:GO:0005783;<br>C:GO:0005634                                                                                                                                                                                                             | -                                                                                |             | -                                                                                                                                                         |
| Caenorhabditis briggsae | hypothetical kda protein in chromosome                  | 4  | P:GO:0009792;<br>P:GO:0040010;<br>F:GO:0005515;<br>P:GO:0002119                                                                                                                                                                                                                              | -                                                                                |             | -                                                                                                                                                         |
|                         |                                                         | 0  |                                                                                                                                                                                                                                                                                              |                                                                                  |             | -                                                                                                                                                         |
|                         |                                                         | 0  |                                                                                                                                                                                                                                                                                              |                                                                                  |             | SignalP (SIGNALP)                                                                                                                                         |
|                         |                                                         | 0  |                                                                                                                                                                                                                                                                                              |                                                                                  |             | -                                                                                                                                                         |

|                         |                                                    |   |   |                                                                                                                                                      |   |                      |
|-------------------------|----------------------------------------------------|---|---|------------------------------------------------------------------------------------------------------------------------------------------------------|---|----------------------|
|                         | -                                                  | 0 |   |                                                                                                                                                      |   | -                    |
| Caenorhabditis elegans  | dynein heavy chain                                 |   | 5 | P:GO:0007018;<br>C:GO:0030286;<br>F:GO:0016887;<br>F:GO:0005524;<br>F:GO:0003777                                                                     | - | IPR013594            |
|                         | -                                                  | 0 |   |                                                                                                                                                      |   | -                    |
|                         | -                                                  | 0 |   |                                                                                                                                                      |   | SignalP (SIGNALP)    |
| Caenorhabditis briggsae | met-10+ like-protein                               |   | 0 | F:GO:0004827;<br>F:GO:0005524;<br>P:GO:0006412;<br>F:GO:0004812;<br>C:GO:0005737;<br>F:GO:0000166;<br>P:GO:0006433;<br>P:GO:0006418                  |   | -                    |
|                         | -                                                  | 0 |   |                                                                                                                                                      |   | -                    |
| Caenorhabditis briggsae | briggsae cbr-acr-6 protein                         |   | 9 | P:GO:0009792;<br>F:GO:0004872;<br>P:GO:0002119;<br>C:GO:0005887;<br>C:GO:0045211;<br>C:GO:0030054;<br>P:GO:0006811;<br>P:GO:0040007;<br>F:GO:0004889 | - | -                    |
| Caenorhabditis elegans  | briggsae cbr-cogc-1 protein                        |   | 1 | F:GO:0005515                                                                                                                                         | - | -                    |
| Ailuropoda melanoleuca  | eukaryotic translation initiation factor subunit 8 |   | 6 | C:GO:0005852;<br>F:GO:0005515;<br>P:GO:0045948;<br>F:GO:0003743;<br>C:GO:0005829;<br>F:GO:0043022                                                    | - | -                    |
| Caenorhabditis elegans  | elegans protein confirmed by transcript evidence   |   | 0 |                                                                                                                                                      |   | -                    |
|                         | -                                                  | 0 |   |                                                                                                                                                      |   | SignalP (SIGNALP)    |
|                         | -                                                  | 0 |   |                                                                                                                                                      |   | -                    |
|                         | -                                                  | 0 |   |                                                                                                                                                      |   | -                    |
|                         | -                                                  | 0 |   |                                                                                                                                                      |   | SignalP (SIGNALP)    |
| Homo sapiens            | ornithine decarboxylase antizyme 1                 |   | 4 | P:GO:0006596;<br>F:GO:0008073;<br>P:GO:0050790;<br>F:GO:0005515                                                                                      | - | SignalP (SIGNALP)    |
|                         | -                                                  | 0 |   |                                                                                                                                                      |   | -                    |
|                         | -                                                  | 0 |   |                                                                                                                                                      |   | -                    |
| Cooperia oncophora      | latrophilin-like protein 2                         |   | 6 | P:GO:0007218;<br>C:GO:0016021;<br>P:GO:0007165;<br>C:GO:0005886;<br>F:GO:0005529;<br>F:GO:0004930                                                    | - | IPR001304; IPR016186 |
| Caenorhabditis elegans  | msp-domain protein 1 variant                       |   | 6 | P:GO:0040018;<br>C:GO:0031143;<br>P:GO:0040017;<br>P:GO:0000003;<br>P:GO:0019915;<br>C:GO:0044297                                                    | - | -                    |
|                         | -                                                  | 0 |   |                                                                                                                                                      |   | SignalP (SIGNALP)    |

|                         |                                                        |   |                                                                                                                    |                                                                 |                                                                                                                                                                                                                                             |
|-------------------------|--------------------------------------------------------|---|--------------------------------------------------------------------------------------------------------------------|-----------------------------------------------------------------|---------------------------------------------------------------------------------------------------------------------------------------------------------------------------------------------------------------------------------------------|
|                         | -                                                      | 0 |                                                                                                                    |                                                                 | -                                                                                                                                                                                                                                           |
|                         | -                                                      | 0 |                                                                                                                    |                                                                 | -                                                                                                                                                                                                                                           |
|                         | -                                                      | 0 |                                                                                                                    |                                                                 | -                                                                                                                                                                                                                                           |
|                         | -                                                      | 0 |                                                                                                                    |                                                                 | -                                                                                                                                                                                                                                           |
|                         | -                                                      | 0 |                                                                                                                    |                                                                 | -                                                                                                                                                                                                                                           |
|                         | -                                                      | 0 |                                                                                                                    |                                                                 | -                                                                                                                                                                                                                                           |
| Ascaris suum            | serine threonine phosphatase                           | 2 | P:GO:0000003;<br>F:GO:0004721                                                                                      | -                                                               | EC:3.1.3.16<br>IPR004843; IPR006186;<br>G3DSA:3.60.21.10 (GENE3D),<br>PTHR11668:SF19 (PANTHER),<br>SSF56300 (SUPERFAMILY)                                                                                                                   |
|                         | -                                                      | 0 |                                                                                                                    |                                                                 | -                                                                                                                                                                                                                                           |
| Loa loa                 | briggsae cbr-ced-5 protein                             | 7 | F:GO:0005083;<br>P:GO:0043652;<br>C:GO:0005886;<br>F:GO:0032403;<br>F:GO:0019899;<br>P:GO:0040039;<br>F:GO:0017124 | -                                                               | PTHR23317 (PANTHER),<br>PTHR23317:SF16 (PANTHER)                                                                                                                                                                                            |
| Caenorhabditis elegans  | laminin b2                                             | 5 | C:GO:0005604;<br>P:GO:0048598;<br>P:GO:0009887;<br>P:GO:0007155;<br>P:GO:0009888                                   | -                                                               | IPR000034; IPR002049; IPR007087;<br>IPR008211; IPR013032; PR00011<br>(PRINTS), G3DSA:2.10.25.10<br>(GENE3D), G3DSA:2.60.120.260<br>(GENE3D), PTHR10574 (PANTHER),<br>PTHR10574:SF48 (PANTHER), SignalP<br>(SIGNALP), SSF57196 (SUPERFAMILY) |
|                         | -                                                      | 0 |                                                                                                                    |                                                                 | SignalP (SIGNALP)                                                                                                                                                                                                                           |
|                         | -                                                      | 0 |                                                                                                                    |                                                                 | -                                                                                                                                                                                                                                           |
|                         | -                                                      | 0 |                                                                                                                    |                                                                 | -                                                                                                                                                                                                                                           |
|                         | -                                                      | 0 |                                                                                                                    |                                                                 | -                                                                                                                                                                                                                                           |
|                         | -                                                      | 0 |                                                                                                                    |                                                                 | -                                                                                                                                                                                                                                           |
| Loa loa                 | phosphatidylcholine:ceramide cholinephosphotransferase | 1 | F:GO:0016740                                                                                                       | -                                                               | PTHR21290 (PANTHER),<br>PTHR21290:SF3 (PANTHER), SignalP<br>(SIGNALP)                                                                                                                                                                       |
| Caenorhabditis briggsae | d- polymerase eta                                      | 1 | P:GO:0006281                                                                                                       | -                                                               | IPR001126; IPR017961;<br>PTHR11076:SF11 (PANTHER), PF11799<br>(PFAM)                                                                                                                                                                        |
| Caenorhabditis briggsae | briggsae cbr-aex-1 protein                             | 0 |                                                                                                                    | F:GO:0004871;<br>P:GO:0016079;<br>P:GO:0030421;<br>C:GO:0005622 | -                                                                                                                                                                                                                                           |
| Caenorhabditis elegans  | hypothetical protein F55D12.5 [Caenorhabditis elegans] | 0 |                                                                                                                    |                                                                 | IPR013032                                                                                                                                                                                                                                   |
|                         | -                                                      | 0 |                                                                                                                    |                                                                 | -                                                                                                                                                                                                                                           |
|                         | -                                                      | 0 |                                                                                                                    |                                                                 | -                                                                                                                                                                                                                                           |
|                         | -                                                      | 0 |                                                                                                                    |                                                                 | -                                                                                                                                                                                                                                           |
|                         | -                                                      | 0 |                                                                                                                    |                                                                 | IPR000233; PTHR10596 (PANTHER),<br>PTHR10596:SF103 (PANTHER)                                                                                                                                                                                |
|                         | -                                                      | 0 |                                                                                                                    |                                                                 | -                                                                                                                                                                                                                                           |
|                         | -                                                      | 0 |                                                                                                                    |                                                                 | -                                                                                                                                                                                                                                           |
| Caenorhabditis briggsae | briggsae cbr-haf-9 protein                             | 6 | F:GO:0015197;<br>F:GO:0042626;<br>P:GO:0015833;<br>P:GO:0055085;<br>F:GO:0005524;<br>C:GO:0016021                  | -                                                               | IPR005829; IPR017940;<br>G3DSA:1.20.1560.10 (GENE3D),<br>PTHR19242 (PANTHER),<br>PTHR19242:SF82 (PANTHER), SignalP<br>(SIGNALP)                                                                                                             |
|                         | -                                                      | 0 |                                                                                                                    |                                                                 | -                                                                                                                                                                                                                                           |
| Loa loa                 | hypothetical protein LOAG_00885 [Loa loa]              | 0 |                                                                                                                    |                                                                 | -                                                                                                                                                                                                                                           |
| Loa loa                 | hypothetical protein LOAG_12685 [Loa loa]              | 0 |                                                                                                                    |                                                                 | -                                                                                                                                                                                                                                           |



|                        |                                              |   |                                                                                                                                                      |                                                |            |                                                                                    |
|------------------------|----------------------------------------------|---|------------------------------------------------------------------------------------------------------------------------------------------------------|------------------------------------------------|------------|------------------------------------------------------------------------------------|
| Caenorhabditis elegans | kiaa0152 homolog precursor                   | 4 | F:GO:0030246;<br>P:GO:0006496;<br>C:GO:0016020;<br>C:GO:0005783                                                                                      | -                                              |            | IPR021720; PTHR13460 (PANTHER)                                                     |
| -                      | -                                            | 0 |                                                                                                                                                      |                                                |            | -                                                                                  |
| Ancylostoma caninum    | cytochrome c oxidase subunit i               | 9 | P:GO:0009060;<br>C:GO:0005743;<br>C:GO:0070469;<br>F:GO:0009055;<br>F:GO:0020037;<br>P:GO:0006810;<br>C:GO:0016021;<br>P:GO:0022900;<br>F:GO:0004129 | -                                              | EC:1.9.3.1 | IPR000883; SignalP (SIGNALP)                                                       |
| -                      | -                                            | 0 |                                                                                                                                                      |                                                |            | -                                                                                  |
| -                      | -                                            | 0 |                                                                                                                                                      |                                                |            | -                                                                                  |
| -                      | -                                            | 0 |                                                                                                                                                      |                                                |            | SignalP (SIGNALP)                                                                  |
| -                      | -                                            | 0 |                                                                                                                                                      |                                                |            | -                                                                                  |
| -                      | -                                            | 0 |                                                                                                                                                      |                                                |            | -                                                                                  |
| -                      | -                                            | 0 |                                                                                                                                                      |                                                |            | -                                                                                  |
| -                      | -                                            | 0 |                                                                                                                                                      |                                                |            | -                                                                                  |
| -                      | -                                            | 0 |                                                                                                                                                      |                                                |            | -                                                                                  |
| Caenorhabditis elegans | wd repeat-containing protein 47              | 1 | F:GO:0005515                                                                                                                                         | -                                              |            | IPR001680; PTHR19863 (PANTHER),<br>PTHR19863:SF2 (PANTHER)                         |
| -                      | -                                            | 0 |                                                                                                                                                      |                                                |            | -                                                                                  |
| Caenorhabditis elegans | r- polymerase domain 2 family protein        | 4 | F:GO:0003899;<br>F:GO:0003677;<br>P:GO:0006350;<br>C:GO:0005634                                                                                      | -                                              | EC:2.7.7.6 | IPR000722; IPR007066; IPR015699;<br>PTHR19376 (PANTHER), SSF64484<br>(SUPERFAMILY) |
| -                      | -                                            | 0 |                                                                                                                                                      |                                                |            | SignalP (SIGNALP)                                                                  |
| Trichoplax adhaerens   | loc495229 protein                            | 0 |                                                                                                                                                      | P:GO:0008152;<br>F:GO:0003824;<br>F:GO:0016853 |            | SignalP (SIGNALP)                                                                  |
| -                      | -                                            | 0 |                                                                                                                                                      |                                                |            | -                                                                                  |
| -                      | -                                            | 0 |                                                                                                                                                      |                                                |            | -                                                                                  |
| -                      | -                                            | 0 |                                                                                                                                                      |                                                |            | -                                                                                  |
| Brugia malayi          | loc398543 protein                            | 0 |                                                                                                                                                      | F:GO:0003676                                   |            | -                                                                                  |
| Caenorhabditis elegans | myosin heavy chain                           | 6 | C:GO:0032982;<br>F:GO:0003779;<br>F:GO:0005524;<br>F:GO:0003774;<br>C:GO:0031672;<br>P:GO:0007626                                                    | -                                              |            | -                                                                                  |
| Tribolium castaneum    | ccaat-binding transcription factor subunit a | 3 | F:GO:0043565;<br>C:GO:0005634;<br>P:GO:0006355                                                                                                       | -                                              |            | IPR003957; IPR003958; IPR009072;<br>PTHR11064 (PANTHER)                            |
| -                      | -                                            | 0 |                                                                                                                                                      |                                                |            | -                                                                                  |
| Caenorhabditis elegans | proteasome ( macropain) activator subunit 4  | 0 |                                                                                                                                                      | F:GO:0005488;<br>C:GO:0000502;<br>C:GO:0005634 |            | -                                                                                  |
| Brugia malayi          | domain containing protein                    | 0 |                                                                                                                                                      |                                                |            | IPR003582; PTHR21724 (PANTHER),<br>SignalP (SIGNALP)                               |
| -                      | -                                            | 0 |                                                                                                                                                      |                                                |            | -                                                                                  |

|                           |                                                            |    |                                                                                                                                                                       |                                                                                                                                                                                        |                                                                             |
|---------------------------|------------------------------------------------------------|----|-----------------------------------------------------------------------------------------------------------------------------------------------------------------------|----------------------------------------------------------------------------------------------------------------------------------------------------------------------------------------|-----------------------------------------------------------------------------|
| Pongo abelii              | keratin 7                                                  | 10 | P:GO:0006417;<br>C:GO:0005730;<br>P:GO:0051325;<br>P:GO:0007010;<br>P:GO:0006260;<br>F:GO:0005515;<br>C:GO:0045095;<br>P:GO:0044419;<br>F:GO:0005198;<br>C:GO:0005737 | -                                                                                                                                                                                      | SignalP (SIGNALP)                                                           |
| Esox lucius               | mitochondrial precursor                                    | 3  | F:GO:0003676;<br>C:GO:0043231;<br>F:GO:0004527                                                                                                                        | -                                                                                                                                                                                      | IPR012337; IPR013520;<br>G3DSA:3.30.420.10 (GENE3D),<br>PTHR11046 (PANTHER) |
|                           | -                                                          | 0  |                                                                                                                                                                       |                                                                                                                                                                                        | -                                                                           |
| Caenorhabditis elegans    | let-23 fertility effector regulator family member (lfe-2)  | 1  | F:GO:0008440                                                                                                                                                          | -                                                                                                                                                                                      | EC:2.7.1.127 -                                                              |
|                           | -                                                          | 0  |                                                                                                                                                                       |                                                                                                                                                                                        | IPR003582; SignalP (SIGNALP)                                                |
| Caenorhabditis briggsae   | failed axon                                                | 0  |                                                                                                                                                                       |                                                                                                                                                                                        | PTHR12289 (PANTHER),<br>PTHR12289:SF17 (PANTHER)                            |
|                           | -                                                          | 0  |                                                                                                                                                                       |                                                                                                                                                                                        | -                                                                           |
|                           | -                                                          | 0  |                                                                                                                                                                       |                                                                                                                                                                                        | -                                                                           |
|                           | -                                                          | 0  |                                                                                                                                                                       |                                                                                                                                                                                        | SignalP (SIGNALP)                                                           |
| Nasonia vitripennis       | glycosyl group 2 family protein                            | 0  |                                                                                                                                                                       | F:GO:0016740;<br>C:GO:0016021;<br>C:GO:0016020;<br>F:GO:0005529;<br>C:GO:0005794;<br>F:GO:0016757                                                                                      | IPR000772; IPR008997;<br>G3DSA:2.80.10.50 (GENE3D)                          |
| Caenorhabditis briggsae   | elegans protein partially confirmed by transcript evidence | 0  |                                                                                                                                                                       | P:GO:0002119;<br>C:GO:0005622                                                                                                                                                          | IPR001357; G3DSA:3.40.50.10190<br>(GENE3D)                                  |
|                           | -                                                          | 0  |                                                                                                                                                                       |                                                                                                                                                                                        | -                                                                           |
| Caenorhabditis elegans    | dis3 mitotic control homolog ( cerevisiae)-like 2          | 2  | F:GO:0004540;<br>F:GO:0003723                                                                                                                                         | -                                                                                                                                                                                      | IPR001900; PTHR23355 (PANTHER),<br>PTHR23355:SF10 (PANTHER)                 |
| Caenorhabditis elegans    | dis3 mitotic control homolog ( cerevisiae)-like 2          | 2  | F:GO:0004540;<br>F:GO:0003723                                                                                                                                         | -                                                                                                                                                                                      | IPR001900; PTHR23355 (PANTHER),<br>PTHR23355:SF10 (PANTHER)                 |
| Loa loa                   | briggsae cbr-atf-2 protein                                 | 0  |                                                                                                                                                                       | P:GO:0006355;<br>F:GO:0043565;<br>F:GO:0046983;<br>F:GO:0005515;<br>F:GO:0003677;<br>F:GO:0003700;<br>C:GO:0005634                                                                     | -                                                                           |
|                           | -                                                          | 0  |                                                                                                                                                                       |                                                                                                                                                                                        | -                                                                           |
| Teladorsagia circumcincta | l3b25 precursor                                            | 0  |                                                                                                                                                                       |                                                                                                                                                                                        | IPR003677                                                                   |
| Caenorhabditis briggsae   | briggsae cbr-fshr-1 protein                                | 0  |                                                                                                                                                                       | F:GO:0003735;<br>P:GO:0006952;<br>C:GO:0016021;<br>P:GO:0006412;<br>P:GO:0000003;<br>P:GO:0009792;<br>C:GO:0005840;<br>C:GO:0005622;<br>P:GO:0040010;<br>P:GO:0007186;<br>F:GO:0016500 | -                                                                           |
|                           | -                                                          | 0  |                                                                                                                                                                       |                                                                                                                                                                                        | -                                                                           |
| Caenorhabditis briggsae   | ybri_ caeel ame: full=uncharacterized protein              | 1  | P:GO:0006898                                                                                                                                                          | -                                                                                                                                                                                      | -                                                                           |
|                           | -                                                          | 0  |                                                                                                                                                                       |                                                                                                                                                                                        | -                                                                           |

|                         |                                                            |   |                                                                                                                    |              |             |                                                                                                                                                                                  |
|-------------------------|------------------------------------------------------------|---|--------------------------------------------------------------------------------------------------------------------|--------------|-------------|----------------------------------------------------------------------------------------------------------------------------------------------------------------------------------|
| Caenorhabditis briggsae | activating sig-I cointegrator 1 complex subunit 3          | 4 | F:GO:0008026;<br>F:GO:0003677;<br>C:GO:0005622;<br>F:GO:0005524                                                    | -            |             | IPR001650; G3DSA:3.40.50.300 (GENE3D), PTHR11752 (PANTHER), PTHR11752:SF8 (PANTHER), SSF52540 (SUPERFAMILY)                                                                      |
| Caenorhabditis elegans  | : shorter than wild-type family member (dpy-27)            | 0 |                                                                                                                    | F:GO:0005515 |             | IPR010935; PTHR18937 (PANTHER), PTHR18937:SF13 (PANTHER)                                                                                                                         |
|                         | -                                                          | 0 |                                                                                                                    |              |             | -                                                                                                                                                                                |
|                         | -                                                          | 0 |                                                                                                                    |              |             | -                                                                                                                                                                                |
| Caenorhabditis elegans  | elegans protein partially confirmed by transcript evidence | 3 | P:GO:0006032;<br>P:GO:0016998;<br>F:GO:0004568                                                                     | -            | EC:3.2.1.14 | IPR000726; PTHR22595:SF6 (PANTHER)                                                                                                                                               |
|                         | -                                                          | 0 |                                                                                                                    |              |             | PTHR15286 (PANTHER), PTHR15286:SF2 (PANTHER)                                                                                                                                     |
|                         | -                                                          | 0 |                                                                                                                    |              |             | -                                                                                                                                                                                |
|                         | -                                                          | 0 |                                                                                                                    |              |             | -                                                                                                                                                                                |
|                         | -                                                          | 0 |                                                                                                                    |              |             | -                                                                                                                                                                                |
|                         | -                                                          | 0 |                                                                                                                    |              |             | -                                                                                                                                                                                |
| Caenorhabditis elegans  | class type 10a                                             | 7 | C:GO:0016021;<br>F:GO:0015662;<br>P:GO:0006754;<br>F:GO:0005524;<br>P:GO:0015914;<br>F:GO:0000287;<br>F:GO:0004012 | -            | EC:3.6.3.1  | IPR001757; IPR005834; G3DSA:3.40.1110.10 (GENE3D), G3DSA:3.40.50.1000 (GENE3D), PTHR11939:SF14 (PANTHER), SSF56784 (SUPERFAMILY), SSF81660 (SUPERFAMILY), SSF81665 (SUPERFAMILY) |
| Brugia malayi           | bax inhibitor 1                                            | 2 | P:GO:0007283;<br>P:GO:0030324                                                                                      | -            |             | IPR001412; IPR006214; PTHR23291:SF4 (PANTHER)                                                                                                                                    |
|                         | -                                                          | 0 |                                                                                                                    |              |             | -                                                                                                                                                                                |
|                         | -                                                          | 0 |                                                                                                                    |              |             | -                                                                                                                                                                                |
|                         | -                                                          | 0 |                                                                                                                    |              |             | SignalP (SIGNALP)                                                                                                                                                                |
| Caenorhabditis briggsae | cation efflux family protein                               | 5 | C:GO:0016021;<br>P:GO:0000003;<br>F:GO:0008324;<br>P:GO:0006812;<br>P:GO:0055085                                   | -            |             | SignalP (SIGNALP)                                                                                                                                                                |
|                         | -                                                          | 0 |                                                                                                                    |              |             | -                                                                                                                                                                                |
| Caenorhabditis elegans  | hypothetical protein ZK154.5 [Caenorhabditis elegans]      | 0 |                                                                                                                    |              |             | -                                                                                                                                                                                |
|                         | -                                                          | 0 |                                                                                                                    |              |             | SignalP (SIGNALP)                                                                                                                                                                |
|                         | -                                                          | 0 |                                                                                                                    |              |             | -                                                                                                                                                                                |
|                         | -                                                          | 0 |                                                                                                                    |              |             | -                                                                                                                                                                                |
|                         | -                                                          | 0 |                                                                                                                    |              |             | SignalP (SIGNALP)                                                                                                                                                                |
|                         | -                                                          | 0 |                                                                                                                    |              |             | SignalP (SIGNALP)                                                                                                                                                                |
| Homo sapiens            | phosphofurin acidic cluster sorting protein isoform cra_b  | 5 | C:GO:0030137;<br>F:GO:0005515;<br>P:GO:0000042;<br>C:GO:0005829;<br>P:GO:0044419                                   | -            |             | -                                                                                                                                                                                |
|                         | -                                                          | 0 |                                                                                                                    |              |             | -                                                                                                                                                                                |
|                         | -                                                          | 0 |                                                                                                                    |              |             | -                                                                                                                                                                                |
|                         | -                                                          | 0 |                                                                                                                    |              |             | -                                                                                                                                                                                |

|                         |                                                         |    |                                                                                                                                                                                                         |                                                                 |                                                         |                                                                                                                         |
|-------------------------|---------------------------------------------------------|----|---------------------------------------------------------------------------------------------------------------------------------------------------------------------------------------------------------|-----------------------------------------------------------------|---------------------------------------------------------|-------------------------------------------------------------------------------------------------------------------------|
| Caenorhabditis elegans  | bone morphogenetic protein 1                            | 10 | P:GO:0030154;<br>C:GO:0005615;<br>F:GO:0008083;<br>F:GO:0004222;<br>P:GO:0001503;<br>F:GO:0005125;<br>F:GO:0005509;<br>P:GO:0006508;<br>F:GO:0008270;<br>P:GO:0051216                                   | -                                                               | EC:3.4.24.0                                             | IPR001506; G3DSA:3.40.390.10 (GENE3D), PTHR10127 (PANTHER), PTHR10127:SF70 (PANTHER), SSF55486 (SUPERFAMILY)            |
| Heliconius melpomene    | endonuclease-reverse transcriptase -e01                 | 0  |                                                                                                                                                                                                         | F:GO:0003723;<br>P:GO:0006278;<br>F:GO:0004519;<br>F:GO:0003964 |                                                         | -                                                                                                                       |
|                         | -                                                       | 0  |                                                                                                                                                                                                         |                                                                 |                                                         | -                                                                                                                       |
| Caenorhabditis elegans  | selenocysteine-specific translation elongation factor   | 3  | F:GO:0003746;<br>F:GO:0005525;<br>F:GO:0003924                                                                                                                                                          | -                                                               | EC:3.6.5.1;<br>EC:3.6.5.2;<br>EC:3.6.5.3;<br>EC:3.6.5.4 | IPR000795; G3DSA:3.40.50.300 (GENE3D), PTHR23115 (PANTHER), PTHR23115:SF25 (PANTHER), SSF52540 (SUPERFAMILY)            |
| Brugia malayi           | abc transporter family protein                          | 5  | F:GO:0042626;<br>C:GO:0005886;<br>P:GO:0055085;<br>F:GO:0005524;<br>C:GO:0016021                                                                                                                        | -                                                               |                                                         | IPR003439; IPR017871; G3DSA:3.40.50.300 (GENE3D), PTHR19242 (PANTHER), PTHR19242:SF96 (PANTHER), SSF52540 (SUPERFAMILY) |
|                         | -                                                       | 0  |                                                                                                                                                                                                         |                                                                 |                                                         | -                                                                                                                       |
| Caenorhabditis briggsae | briggsae cbr-tag-241 protein                            | 0  |                                                                                                                                                                                                         |                                                                 |                                                         | -                                                                                                                       |
| Homo sapiens            | granulin                                                | 8  | C:GO:0005615;<br>P:GO:0050679;<br>F:GO:0008083;<br>F:GO:0005125;<br>P:GO:0007165;<br>C:GO:0005739;<br>P:GO:0007566;<br>P:GO:0001835                                                                     | -                                                               |                                                         | IPR000118; PTHR12274 (PANTHER), SSF57277 (SUPERFAMILY)                                                                  |
|                         | -                                                       | 0  |                                                                                                                                                                                                         |                                                                 |                                                         | -                                                                                                                       |
| Caenorhabditis elegans  | copine family protein                                   | 1  | F:GO:0016740                                                                                                                                                                                            | -                                                               |                                                         | -                                                                                                                       |
| Brugia malayi           | grip and coiled-coil domain-containing protein 1        | 0  |                                                                                                                                                                                                         |                                                                 |                                                         | PTHR23157 (PANTHER), PTHR23157:SF11 (PANTHER)                                                                           |
|                         | -                                                       | 0  |                                                                                                                                                                                                         |                                                                 |                                                         | -                                                                                                                       |
| Caenorhabditis briggsae | patched family protein                                  | 12 | P:GO:0040025;<br>F:GO:0008158;<br>P:GO:0040018;<br>P:GO:0018996;<br>P:GO:0040002;<br>P:GO:0006810;<br>P:GO:0000003;<br>P:GO:0008340;<br>P:GO:0040011;<br>C:GO:0016021;<br>P:GO:0019915;<br>F:GO:0005215 | -                                                               |                                                         | IPR001036; IPR003392; PTHR10796 (PANTHER), PTHR10796:SF14 (PANTHER), SignalP (SIGNALP), SSF82866 (SUPERFAMILY)          |
| Caenorhabditis elegans  | hypothetical protein T19D12.10 [Caenorhabditis elegans] | 1  | P:GO:0006810                                                                                                                                                                                            | -                                                               |                                                         | PTHR11662 (PANTHER), PTHR11662:SF17 (PANTHER)                                                                           |

|                         |                                           |    |                                                                                                                                                                                                         |   |                                                                                             |
|-------------------------|-------------------------------------------|----|---------------------------------------------------------------------------------------------------------------------------------------------------------------------------------------------------------|---|---------------------------------------------------------------------------------------------|
| Caenorhabditis briggsae | serine threonine protein ki-se            | 0  | P:GO:0000003;<br>F:GO:0004672;<br>F:GO:0005524;<br>F:GO:0000166;<br>P:GO:0006468;<br>P:GO:0009792;<br>F:GO:0004674                                                                                      | - | -                                                                                           |
| -                       | -                                         | 0  |                                                                                                                                                                                                         |   | SignalP (SIGNALP)                                                                           |
| -                       | -                                         | 0  |                                                                                                                                                                                                         |   | SignalP (SIGNALP)                                                                           |
| Loa loa                 | scf complex protein cul-1                 | 12 | P:GO:0007050;<br>C:GO:0005829;<br>P:GO:0051437;<br>C:GO:0019005;<br>P:GO:0009887;<br>P:GO:0008285;<br>F:GO:0004842;<br>P:GO:0008629;<br>F:GO:0005515;<br>P:GO:0000082;<br>P:GO:0031146;<br>C:GO:0005654 | - | EC:6.3.2.19<br>IPR001373; IPR016159;<br>G3DSA:1.20.1310.10 (GENE3D)                         |
| -                       | -                                         | 0  |                                                                                                                                                                                                         |   | -                                                                                           |
| -                       | -                                         | 0  |                                                                                                                                                                                                         |   | SignalP (SIGNALP)                                                                           |
| -                       | -                                         | 0  |                                                                                                                                                                                                         |   | -                                                                                           |
| -                       | -                                         | 0  |                                                                                                                                                                                                         |   | -                                                                                           |
| -                       | -                                         | 0  |                                                                                                                                                                                                         |   | -                                                                                           |
| -                       | -                                         | 0  |                                                                                                                                                                                                         |   | -                                                                                           |
| Brugia malayi           | fyve zinc finger family protein           | 3  | F:GO:0046872;<br>P:GO:0044237;<br>P:GO:0044238                                                                                                                                                          | - | IPR002423; G3DSA:3.50.7.10<br>(GENE3D), PTHR11353:SF14<br>(PANTHER), SSF52029 (SUPERFAMILY) |
| Caenorhabditis elegans  | briggsae cbr-rha-2 protein                | 7  | P:GO:0040010;<br>P:GO:0008340;<br>P:GO:0000003;<br>P:GO:0002119;<br>P:GO:0006898;<br>P:GO:0009792;<br>P:GO:0016246                                                                                      | - | -                                                                                           |
| Harpegnathos saltator   | histone-lysine n-methyltransferase setmar | 0  |                                                                                                                                                                                                         |   | SignalP (SIGNALP)                                                                           |
| -                       | -                                         | 0  |                                                                                                                                                                                                         |   | -                                                                                           |

|                         |                                                            |    |                                                                                                                                                                                                                                                                                                                                                                                   |   |             |                                                                                                                                                                                                                                  |
|-------------------------|------------------------------------------------------------|----|-----------------------------------------------------------------------------------------------------------------------------------------------------------------------------------------------------------------------------------------------------------------------------------------------------------------------------------------------------------------------------------|---|-------------|----------------------------------------------------------------------------------------------------------------------------------------------------------------------------------------------------------------------------------|
| Loa loa                 | polo-like ki-se                                            | 22 | P:GO:0007098;<br>P:GO:0031572;<br>P:GO:0007077;<br>C:GO:0000940;<br>F:GO:0005515;<br>P:GO:0007417;<br>F:GO:0000166;<br>P:GO:0035046;<br>P:GO:0007052;<br>P:GO:0007058;<br>P:GO:0006911;<br>P:GO:0007060;<br>P:GO:0007067;<br>F:GO:0004674;<br>C:GO:0005813;<br>P:GO:0007344;<br>C:GO:0030496;<br>P:GO:0007406;<br>C:GO:0005634;<br>C:GO:0000922;<br>P:GO:0035044;<br>P:GO:0000910 | - | EC:2.7.11.0 | IPR000719; IPR000959; IPR002290;<br>IPR008271; IPR011009; IPR015728;<br>IPR017441; IPR017442; IPR020636;<br>G3DSA:1.10.510.10 (GENE3D),<br>G3DSA:3.30.1120.30 (GENE3D),<br>G3DSA:3.30.200.20 (GENE3D),<br>SSF82615 (SUPERFAMILY) |
|                         | -                                                          | 0  |                                                                                                                                                                                                                                                                                                                                                                                   |   | -           |                                                                                                                                                                                                                                  |
| Loa loa                 | polo-like ki-se                                            | 22 | P:GO:0007098;<br>P:GO:0031572;<br>P:GO:0007077;<br>C:GO:0000940;<br>F:GO:0005515;<br>P:GO:0007417;<br>F:GO:0000166;<br>P:GO:0035046;<br>P:GO:0007052;<br>P:GO:0007058;<br>P:GO:0006911;<br>P:GO:0007060;<br>P:GO:0007067;<br>F:GO:0004674;<br>C:GO:0005813;<br>P:GO:0007344;<br>C:GO:0030496;<br>P:GO:0007406;<br>C:GO:0005634;<br>C:GO:0000922;<br>P:GO:0035044;<br>P:GO:0000910 | - | EC:2.7.11.0 | IPR000719; IPR000959; IPR002290;<br>IPR008271; IPR011009; IPR015728;<br>IPR017441; IPR017442; IPR020636;<br>G3DSA:1.10.510.10 (GENE3D),<br>G3DSA:3.30.1120.30 (GENE3D),<br>G3DSA:3.30.200.20 (GENE3D),<br>SSF82615 (SUPERFAMILY) |
|                         | -                                                          | 0  |                                                                                                                                                                                                                                                                                                                                                                                   |   | -           |                                                                                                                                                                                                                                  |
| Caenorhabditis briggsae | elegans protein partially confirmed by transcript evidence | 0  |                                                                                                                                                                                                                                                                                                                                                                                   |   | -           |                                                                                                                                                                                                                                  |

|                        |                                                            |    |                                                                                                                                                                                                                          |   |                                                                 |                                                             |
|------------------------|------------------------------------------------------------|----|--------------------------------------------------------------------------------------------------------------------------------------------------------------------------------------------------------------------------|---|-----------------------------------------------------------------|-------------------------------------------------------------|
| Loa loa                | polypyrimidine tract binding protein                       | 13 | P:GO:0007219;<br>P:GO:0008103;<br>P:GO:0008586;<br>F:GO:0000166;<br>F:GO:0000900;<br>F:GO:0003730;<br>C:GO:0005737;<br>P:GO:0000398;<br>P:GO:0008587;<br>P:GO:0007319;<br>F:GO:0008187;<br>C:GO:0005634;<br>C:GO:0030529 | - |                                                                 | IPR012677; PTHR11546 (PANTHER),<br>PTHR11546:SF4 (PANTHER)  |
|                        | -                                                          | 0  |                                                                                                                                                                                                                          |   |                                                                 | SignalP (SIGNALP)                                           |
|                        | -                                                          | 0  |                                                                                                                                                                                                                          |   |                                                                 | SignalP (SIGNALP)                                           |
|                        | -                                                          | 0  |                                                                                                                                                                                                                          |   |                                                                 | -                                                           |
| Caenorhabditis elegans | chromatin modifying protein 4b                             | 2  | C:GO:0044444;<br>P:GO:0006810                                                                                                                                                                                            | - |                                                                 | IPR005024; PTHR22761 (PANTHER)                              |
|                        | -                                                          | 0  |                                                                                                                                                                                                                          |   |                                                                 | -                                                           |
| Caenorhabditis elegans | elegans protein partially confirmed by transcript evidence | 8  | F:GO:0004383;<br>F:GO:0004674;<br>C:GO:0016021;<br>P:GO:0019932;<br>F:GO:0008528;<br>F:GO:0005524;<br>P:GO:0006468;<br>P:GO:0006182                                                                                      | - | EC:4.6.1.2;<br>EC:2.7.11.0                                      | IPR001054; PTHR11920 (PANTHER),<br>PTHR11920:SF40 (PANTHER) |
| Brugia malayi          | dehydroge-se reductase sdr family member 1                 | 4  | C:GO:0005794;<br>P:GO:0040010;<br>C:GO:0005634;<br>C:GO:0005783                                                                                                                                                          | - |                                                                 | IPR002198; IPR016040;<br>PTHR19410:SF32 (PANTHER)           |
|                        | -                                                          | 0  |                                                                                                                                                                                                                          |   |                                                                 | -                                                           |
|                        | -                                                          | 0  |                                                                                                                                                                                                                          |   |                                                                 | -                                                           |
|                        | -                                                          | 0  |                                                                                                                                                                                                                          |   |                                                                 | -                                                           |
|                        | -                                                          | 0  |                                                                                                                                                                                                                          |   |                                                                 | -                                                           |
|                        | -                                                          | 0  |                                                                                                                                                                                                                          |   |                                                                 | -                                                           |
| Caenorhabditis elegans | elegans protein confirmed by transcript evidence           | 0  |                                                                                                                                                                                                                          |   | C:GO:0005604;<br>P:GO:0007155;<br>C:GO:0031012;<br>C:GO:0005578 | IPR008985; IPR012679; IPR013320                             |
|                        | -                                                          | 0  |                                                                                                                                                                                                                          |   |                                                                 | -                                                           |

|                             |                                                    |    |                                                                                                                                                                                                                                                                                                                                                                                                                                                                                         |                                                                                                                    |                                                                                                                             |
|-----------------------------|----------------------------------------------------|----|-----------------------------------------------------------------------------------------------------------------------------------------------------------------------------------------------------------------------------------------------------------------------------------------------------------------------------------------------------------------------------------------------------------------------------------------------------------------------------------------|--------------------------------------------------------------------------------------------------------------------|-----------------------------------------------------------------------------------------------------------------------------|
| Bos taurus                  | nucleophosmin 1 isoform 1                          | 39 | F:GO:0012009;<br>F:GO:0043024;<br>F:GO:0051082;<br>P:GO:0008284;<br>P:GO:0000056;<br>C:GO:0015934;<br>C:GO:0015935;<br>P:GO:0006884;<br>F:GO:0043023;<br>P:GO:0042273;<br>C:GO:0005829;<br>P:GO:0042274;<br>P:GO:0016049;<br>F:GO:0019843;<br>P:GO:0007569;<br>P:GO:0031328;<br>P:GO:0010825;<br>P:GO:0006916;<br>P:GO:0010826;<br>F:GO:0003713;<br>C:GO:0031616;<br>P:GO:0006886;<br>P:GO:0051092;<br>F:GO:0042393;<br>P:GO:0048025;<br>P:GO:0006407;<br>P:GO:0044419;<br>P:GO:0008285 | -                                                                                                                  | IPR004301; G3DSA:2.60.120.340 (GENE3D), PTHR22747:SF2 (PANTHER)                                                             |
| Brugia malayi               | u3 small nucleolar r--associated protein 6 homolog | 0  |                                                                                                                                                                                                                                                                                                                                                                                                                                                                                         | F:GO:0005488;<br>P:GO:0006364;<br>P:GO:0006396;<br>F:GO:0005515;<br>C:GO:0005730;<br>C:GO:0005634;<br>C:GO:0005622 | PTHR23271 (PANTHER),<br>PTHR23271:SF1 (PANTHER)                                                                             |
| Caenorhabditis elegans      | cytoskeleton associated protein 5                  | 1  | P:GO:0009987                                                                                                                                                                                                                                                                                                                                                                                                                                                                            | -                                                                                                                  | -                                                                                                                           |
| Caenorhabditis elegans      | cytoskeleton associated protein 5                  | 1  | P:GO:0009987                                                                                                                                                                                                                                                                                                                                                                                                                                                                            | -                                                                                                                  | -                                                                                                                           |
| Caenorhabditis briggsae     | abhydrolase domain containing 14a                  | 1  | F:GO:0005515                                                                                                                                                                                                                                                                                                                                                                                                                                                                            | -                                                                                                                  | G3DSA:3.40.50.1820 (GENE3D),<br>PTHR10992 (PANTHER),<br>PTHR10992:SF20 (PANTHER), SignalP (SIGNALP), SSF53474 (SUPERFAMILY) |
| Caenorhabditis elegans      | elegans protein confirmed by transcript evidence   | 1  | C:GO:0016021                                                                                                                                                                                                                                                                                                                                                                                                                                                                            | -                                                                                                                  | IPR007237; SignalP (SIGNALP)                                                                                                |
| Angiostrongylus cantonensis | hypothetical protein [Angiostrongylus cantonensis] | 0  |                                                                                                                                                                                                                                                                                                                                                                                                                                                                                         |                                                                                                                    | -                                                                                                                           |
| -                           | -                                                  | 0  |                                                                                                                                                                                                                                                                                                                                                                                                                                                                                         |                                                                                                                    | -                                                                                                                           |
| -                           | -                                                  | 0  |                                                                                                                                                                                                                                                                                                                                                                                                                                                                                         |                                                                                                                    | SignalP (SIGNALP)                                                                                                           |
| -                           | -                                                  | 0  |                                                                                                                                                                                                                                                                                                                                                                                                                                                                                         |                                                                                                                    | -                                                                                                                           |
| -                           | -                                                  | 0  |                                                                                                                                                                                                                                                                                                                                                                                                                                                                                         |                                                                                                                    | -                                                                                                                           |
| -                           | -                                                  | 0  |                                                                                                                                                                                                                                                                                                                                                                                                                                                                                         |                                                                                                                    | -                                                                                                                           |
| -                           | -                                                  | 0  |                                                                                                                                                                                                                                                                                                                                                                                                                                                                                         |                                                                                                                    | -                                                                                                                           |
| Homo sapiens                | ring finger protein 181                            | 4  | F:GO:0008270;<br>F:GO:0016874;<br>F:GO:0005515;<br>P:GO:0008152                                                                                                                                                                                                                                                                                                                                                                                                                         | -                                                                                                                  | IPR001841; IPR013083; IPR018957;<br>PTHR22763 (PANTHER), SSF57850 (SUPERFAMILY)                                             |



|                         |                                    |    |                                                                                                                                                                                                                                                                                              |              |             |                                                                                                                                                                                                                 |
|-------------------------|------------------------------------|----|----------------------------------------------------------------------------------------------------------------------------------------------------------------------------------------------------------------------------------------------------------------------------------------------|--------------|-------------|-----------------------------------------------------------------------------------------------------------------------------------------------------------------------------------------------------------------|
| Caenorhabditis briggsae | nop16 nucleolar protein homolog    | 6  | P:GO:0040035;<br>P:GO:0009792;<br>P:GO:0002119;<br>P:GO:0040002;<br>P:GO:0040007;<br>P:GO:0006898                                                                                                                                                                                            | -            |             | IPR019002; PTHR13243 (PANTHER)                                                                                                                                                                                  |
| -                       | -                                  | 0  |                                                                                                                                                                                                                                                                                              |              |             | -                                                                                                                                                                                                               |
| -                       | -                                  | 0  |                                                                                                                                                                                                                                                                                              |              |             | -                                                                                                                                                                                                               |
| -                       | -                                  | 0  |                                                                                                                                                                                                                                                                                              |              |             | -                                                                                                                                                                                                               |
| -                       | -                                  | 0  |                                                                                                                                                                                                                                                                                              |              |             | -                                                                                                                                                                                                               |
| -                       | -                                  | 0  |                                                                                                                                                                                                                                                                                              |              |             | -                                                                                                                                                                                                               |
| -                       | -                                  | 0  |                                                                                                                                                                                                                                                                                              |              |             | -                                                                                                                                                                                                               |
| Caenorhabditis briggsae | briggsae cbr-tag-180 protein       | 0  |                                                                                                                                                                                                                                                                                              | C:GO:0016020 |             | PTHR10166 (PANTHER),<br>PTHR10166:SF4 (PANTHER)                                                                                                                                                                 |
| Caenorhabditis elegans  | leucine rich repeat family protein | 7  | P:GO:0018996;<br>C:GO:0016021;<br>P:GO:0009792;<br>P:GO:0040017;<br>P:GO:0040007;<br>F:GO:0005515;<br>P:GO:0002119                                                                                                                                                                           | -            |             | -                                                                                                                                                                                                               |
| Caenorhabditis briggsae | briggsae cbr-rgs-5 protein         | 0  |                                                                                                                                                                                                                                                                                              | F:GO:0004871 |             | -                                                                                                                                                                                                               |
| Caenorhabditis briggsae | ribosomal protein s6 ki-se alpha-5 | 17 | P:GO:0007243;<br>F:GO:0004674;<br>P:GO:0016572;<br>P:GO:0006355;<br>P:GO:0040007;<br>P:GO:0000003;<br>P:GO:0042221;<br>F:GO:0005524;<br>P:GO:0002119;<br>F:GO:0005515;<br>F:GO:0000287;<br>C:GO:0005654;<br>P:GO:0009792;<br>C:GO:0005737;<br>P:GO:0006950;<br>P:GO:0007173;<br>P:GO:0009605 | -            | EC:2.7.11.0 | IPR000719; IPR002290; IPR008271;<br>IPR011009; IPR017441; IPR017442;<br>G3DSA:1.10.510.10 (GENE3D),<br>G3DSA:3.30.200.20 (GENE3D),<br>PTHR22985 (PANTHER),<br>PTHR22985:SF82 (PANTHER)                          |
| Caenorhabditis elegans  | ribosomal protein s6 ki-se alpha-5 | 16 | P:GO:0007243;<br>F:GO:0004674;<br>P:GO:0016572;<br>P:GO:0006355;<br>P:GO:0040007;<br>P:GO:0000003;<br>P:GO:0042221;<br>F:GO:0005524;<br>P:GO:0002119;<br>F:GO:0005515;<br>F:GO:0000287;<br>C:GO:0005654;<br>P:GO:0009792;<br>P:GO:0006950;<br>P:GO:0007173;<br>P:GO:0009605                  | -            | EC:2.7.11.0 | IPR000719; IPR000961; IPR002290;<br>IPR008271; IPR011009; IPR017441;<br>IPR017442; IPR017892;<br>G3DSA:1.10.510.10 (GENE3D),<br>G3DSA:3.30.200.20 (GENE3D),<br>PTHR22985 (PANTHER),<br>PTHR22985:SF82 (PANTHER) |
| -                       | -                                  | 0  |                                                                                                                                                                                                                                                                                              |              |             | -                                                                                                                                                                                                               |
| -                       | -                                  | 0  |                                                                                                                                                                                                                                                                                              |              |             | -                                                                                                                                                                                                               |

|                         |                                                            |    |                                                                                                                                                                                                                                                            |                                                                                                   |                                                                                                                                                                          |
|-------------------------|------------------------------------------------------------|----|------------------------------------------------------------------------------------------------------------------------------------------------------------------------------------------------------------------------------------------------------------|---------------------------------------------------------------------------------------------------|--------------------------------------------------------------------------------------------------------------------------------------------------------------------------|
|                         | -                                                          | 0  |                                                                                                                                                                                                                                                            |                                                                                                   |                                                                                                                                                                          |
| Caenorhabditis elegans  | Hypothetical protein T15B7.1 [Caenorhabditis elegans]      | 1  | P:GO:0009792                                                                                                                                                                                                                                               | -                                                                                                 | -                                                                                                                                                                        |
| Caenorhabditis elegans  | cyclin-dependent ki-se 9                                   | 15 | P:GO:0007049;<br>P:GO:0006367;<br>C:GO:0005730;<br>F:GO:0008353;<br>P:GO:0045449;<br>C:GO:0008023;<br>P:GO:0051301;<br>F:GO:0003677;<br>F:GO:0005524;<br>F:GO:0005515;<br>P:GO:0006368;<br>F:GO:0004693;<br>P:GO:0008283;<br>F:GO:0017069;<br>P:GO:0006468 | -                                                                                                 | EC:2.7.11.23<br>;<br>EC:2.7.11.22<br><br>IPR000719; IPR008271; IPR011009;<br>IPR017442; G3DSA:1.10.510.10<br>(GENE3D), PTHR11295 (PANTHER),<br>PTHR11295:SF111 (PANTHER) |
| Caenorhabditis elegans  | elegans protein partially confirmed by transcript evidence | 0  |                                                                                                                                                                                                                                                            | F:GO:0046872;<br>F:GO:0003676;<br>F:GO:0016787;<br>P:GO:0008152;<br>C:GO:0016021;<br>F:GO:0003824 | PTHR10151 (PANTHER),<br>PTHR10151:SF28 (PANTHER)                                                                                                                         |
|                         | -                                                          | 0  |                                                                                                                                                                                                                                                            |                                                                                                   | SignalP (SIGNALP)                                                                                                                                                        |
|                         | -                                                          | 0  |                                                                                                                                                                                                                                                            |                                                                                                   | -                                                                                                                                                                        |
|                         | -                                                          | 0  |                                                                                                                                                                                                                                                            |                                                                                                   | SignalP (SIGNALP)                                                                                                                                                        |
| Caenorhabditis briggsae | ynx4_caeel ame: full=uncharacterized protein               | 0  |                                                                                                                                                                                                                                                            |                                                                                                   | -                                                                                                                                                                        |
| Caenorhabditis elegans  | programmed cell death 2                                    | 7  | P:GO:0040035;<br>P:GO:0009792;<br>P:GO:0002119;<br>F:GO:0005488;<br>P:GO:0040010;<br>C:GO:0044464;<br>P:GO:0006898                                                                                                                                         | -                                                                                                 | IPR007320; PTHR12298 (PANTHER),<br>PTHR12298:SF4 (PANTHER)                                                                                                               |
| Caenorhabditis briggsae | pla2g15 protein                                            | 2  | P:GO:0019915;<br>F:GO:0008415                                                                                                                                                                                                                              | -                                                                                                 | IPR003386; G3DSA:3.40.50.1820<br>(GENE3D), PTHR11440:SF15<br>(PANTHER)                                                                                                   |
| Branchiostoma floridae  | protein n-termi-l glutamine amidohydrolase                 | 0  |                                                                                                                                                                                                                                                            | C:GO:0005737;<br>F:GO:0016787;<br>C:GO:0005829;<br>F:GO:0070773;<br>C:GO:0005634;<br>P:GO:0006464 | IPR019161; IPR023128; PTHR13035<br>(PANTHER)                                                                                                                             |
| Caenorhabditis elegans  | transmembrane protein 144                                  | 2  | C:GO:0016020;<br>P:GO:0002119                                                                                                                                                                                                                              | -                                                                                                 | IPR012435                                                                                                                                                                |
|                         | -                                                          | 0  |                                                                                                                                                                                                                                                            |                                                                                                   | -                                                                                                                                                                        |
|                         | -                                                          | 0  |                                                                                                                                                                                                                                                            |                                                                                                   | -                                                                                                                                                                        |
|                         | -                                                          | 0  |                                                                                                                                                                                                                                                            |                                                                                                   | -                                                                                                                                                                        |
| Caenorhabditis elegans  | briggsae cbr-tag-241 protein                               | 0  |                                                                                                                                                                                                                                                            |                                                                                                   | -                                                                                                                                                                        |
|                         | -                                                          | 0  |                                                                                                                                                                                                                                                            |                                                                                                   | SignalP (SIGNALP)                                                                                                                                                        |

|                             |                                                  |    |                                                                                                                                                                                        |   |             |                                                                                                                                                     |
|-----------------------------|--------------------------------------------------|----|----------------------------------------------------------------------------------------------------------------------------------------------------------------------------------------|---|-------------|-----------------------------------------------------------------------------------------------------------------------------------------------------|
| Pan troglodytes             | interferon alpha-inducible protein               | 9  | C:GO:0005737;<br>C:GO:0005615;<br>P:GO:0032020;<br>F:GO:0031386;<br>P:GO:0019941;<br>F:GO:0005515;<br>P:GO:0007267;<br>P:GO:0009615;<br>P:GO:0044419                                   | - | -           | -                                                                                                                                                   |
|                             | -                                                | 0  |                                                                                                                                                                                        |   |             | -                                                                                                                                                   |
|                             | -                                                | 0  |                                                                                                                                                                                        |   |             | SignalP (SIGNALP)                                                                                                                                   |
| Caenorhabditis briggsae     | elegans protein confirmed by transcript evidence | 11 | C:GO:0005737;<br>P:GO:0009792;<br>F:GO:0004743;<br>F:GO:0016830;<br>P:GO:0006725;<br>F:GO:0005515;<br>F:GO:0030955;<br>C:GO:0043231;<br>F:GO:0000287;<br>P:GO:0006096;<br>F:GO:0000166 | - | EC:2.7.1.40 | -                                                                                                                                                   |
| Caenorhabditis briggsae     | elegans protein confirmed by transcript evidence | 11 | C:GO:0005737;<br>P:GO:0009792;<br>F:GO:0004743;<br>F:GO:0016830;<br>P:GO:0006725;<br>F:GO:0005515;<br>F:GO:0030955;<br>C:GO:0043231;<br>F:GO:0000287;<br>P:GO:0006096;<br>F:GO:0000166 | - | EC:2.7.1.40 | -                                                                                                                                                   |
|                             | -                                                | 0  |                                                                                                                                                                                        |   |             | -                                                                                                                                                   |
|                             | -                                                | 0  |                                                                                                                                                                                        |   |             | -                                                                                                                                                   |
| Caenorhabditis elegans      | zinc c2h2 type family protein                    | 3  | F:GO:0008270;<br>F:GO:0003676;<br>C:GO:0005622                                                                                                                                         | - |             | -                                                                                                                                                   |
|                             | -                                                | 0  |                                                                                                                                                                                        |   |             | -                                                                                                                                                   |
|                             | -                                                | 0  |                                                                                                                                                                                        |   |             | SignalP (SIGNALP)                                                                                                                                   |
|                             | -                                                | 0  |                                                                                                                                                                                        |   |             | SignalP (SIGNALP)                                                                                                                                   |
|                             | -                                                | 0  |                                                                                                                                                                                        |   |             | -                                                                                                                                                   |
|                             | -                                                | 0  |                                                                                                                                                                                        |   |             | -                                                                                                                                                   |
|                             | -                                                | 0  |                                                                                                                                                                                        |   |             | -                                                                                                                                                   |
|                             | -                                                | 0  |                                                                                                                                                                                        |   |             | -                                                                                                                                                   |
|                             | -                                                | 0  |                                                                                                                                                                                        |   |             | -                                                                                                                                                   |
| Angiostrongylus cantonensis | ring finger protein                              | 2  | F:GO:0008270;<br>F:GO:0005515                                                                                                                                                          | - |             | IPR001841; IPR013083; IPR018957;<br>PTHR22663 (PANTHER),<br>PTHR22663:SF10 (PANTHER),<br>SSF57850 (SUPERFAMILY)                                     |
| Homo sapiens                | mhc class ib antigen                             | 5  | P:GO:0006955;<br>F:GO:0032393;<br>C:GO:0016021;<br>P:GO:0002474;<br>C:GO:0042612                                                                                                       | - |             | IPR001039; IPR003597; IPR007110;<br>IPR011161; IPR011162; IPR013783;<br>PTHR16675 (PANTHER),<br>PTHR16675:SF53 (PANTHER),<br>SSF48726 (SUPERFAMILY) |
|                             | -                                                | 0  |                                                                                                                                                                                        |   |             | -                                                                                                                                                   |

|                         |                                  |    |                                                                                                                                                                                                                                                                                                                                                                                                                                                                                        |              |             |                                                                    |
|-------------------------|----------------------------------|----|----------------------------------------------------------------------------------------------------------------------------------------------------------------------------------------------------------------------------------------------------------------------------------------------------------------------------------------------------------------------------------------------------------------------------------------------------------------------------------------|--------------|-------------|--------------------------------------------------------------------|
| Caenorhabditis briggsae | wnt-4 protein                    | 55 | P:GO:007223;<br>C:GO:0009986;<br>P:GO:0030237;<br>P:GO:0045892;<br>P:GO:0030501;<br>F:GO:0004871;<br>P:GO:0007223;<br>P:GO:0072034;<br>N:GO:0039018;<br>P:GO:0071392;<br>P:GO:0018345;<br>P:GO:0045669;<br>P:GO:0032349;<br>N:GO:2000066;<br>P:GO:0045836;<br>P:GO:0009880;<br>P:GO:0048599;<br>P:GO:0001889;<br>C:GO:0005615;<br>N:GO:0061205;<br>P:GO:0001837;<br>P:GO:0045596;<br>P:GO:0060126;<br>P:GO:0090002;<br>F:GO:0003714;<br>P:GO:0006702;<br>P:GO:0060748;<br>P:GO:0000763 | -            | -           | -                                                                  |
|                         | -                                | 0  |                                                                                                                                                                                                                                                                                                                                                                                                                                                                                        |              |             | -                                                                  |
|                         | -                                | 0  |                                                                                                                                                                                                                                                                                                                                                                                                                                                                                        |              |             | -                                                                  |
|                         | -                                | 0  |                                                                                                                                                                                                                                                                                                                                                                                                                                                                                        |              |             | -                                                                  |
|                         | -                                | 0  |                                                                                                                                                                                                                                                                                                                                                                                                                                                                                        |              |             | SignalIP (SIGNALP)                                                 |
|                         | -                                | 0  |                                                                                                                                                                                                                                                                                                                                                                                                                                                                                        |              |             | SignalIP (SIGNALP)                                                 |
| Brugia malayi           | cdc73 domain protein             | 2  | P:GO:0044260;<br>P:GO:0044238                                                                                                                                                                                                                                                                                                                                                                                                                                                          | -            |             | SignalIP (SIGNALP)                                                 |
| Brugia malayi           | cdc73 domain protein             | 2  | P:GO:0044260;<br>P:GO:0044238                                                                                                                                                                                                                                                                                                                                                                                                                                                          | -            |             | SignalIP (SIGNALP)                                                 |
| Nematostella vectensis  | prokaryotic d- topoisomerase     | 6  | P:GO:0006268;<br>F:GO:0003917;<br>P:GO:0000737;<br>C:GO:0005694;<br>P:GO:0006265;<br>F:GO:0004520                                                                                                                                                                                                                                                                                                                                                                                      | -            | EC:5.99.1.2 | -                                                                  |
| Brugia malayi           | b-box zinc finger family protein | 1  | F:GO:0005488                                                                                                                                                                                                                                                                                                                                                                                                                                                                           | -            |             | IPR000408; IPR009091; PTHR12846 (PANTHER), PTHR12846:SF2 (PANTHER) |
| Caenorhabditis briggsae | briggsae cbr-sma-4 protein       | 5  | F:GO:0003700;<br>F:GO:0005515;<br>C:GO:0005667;<br>P:GO:0006355;<br>P:GO:0007179                                                                                                                                                                                                                                                                                                                                                                                                       | -            |             | -                                                                  |
|                         |                                  | 0  |                                                                                                                                                                                                                                                                                                                                                                                                                                                                                        |              |             |                                                                    |
| Ostertagia ostertagi    | ancyclostoma-secreted protein    | 0  |                                                                                                                                                                                                                                                                                                                                                                                                                                                                                        | C:GO:0005576 |             | IPR014044; SignalIP (SIGNALP)                                      |

|                         |                                                  |   |                                                                                                                                     |                                                                                                                                                                                                                                           |                                                                                                                      |
|-------------------------|--------------------------------------------------|---|-------------------------------------------------------------------------------------------------------------------------------------|-------------------------------------------------------------------------------------------------------------------------------------------------------------------------------------------------------------------------------------------|----------------------------------------------------------------------------------------------------------------------|
| Caenorhabditis elegans  | briggsae cbr-bub-1 protein                       | 8 | P:GO:000910;<br>P:GO:0040035;<br>C:GO:0000776;<br>P:GO:0002119;<br>F:GO:0005515;<br>P:GO:0040011;<br>P:GO:0002009;<br>P:GO:0009792  | -                                                                                                                                                                                                                                         | IPR015661                                                                                                            |
| Squalius cephalus       | atp-binding cassette transporter 13-like         | 8 | C:GO:0005887;<br>F:GO:0042626;<br>C:GO:0005624;<br>P:GO:0042493;<br>P:GO:0055085;<br>P:GO:0055114;<br>F:GO:0005524;<br>F:GO:0032440 | -                                                                                                                                                                                                                                         | EC:1.3.1.74<br>IPR003439; G3DSA:3.40.50.300 (GENE3D), PTHR19242 (PANTHER), SignalP (SIGNALP), SSF52540 (SUPERFAMILY) |
| Caenorhabditis briggsae | d- topoisomerase 2                               | 0 |                                                                                                                                     | F:GO:0003918;<br>F:GO:0003916;<br>P:GO:0006265;<br>P:GO:0000910;<br>C:GO:0005694;<br>F:GO:0003700;<br>P:GO:0006259;<br>F:GO:0003677;<br>F:GO:0000166;<br>P:GO:0051301;<br>F:GO:0005524;<br>P:GO:0009792;<br>P:GO:0006355;<br>F:GO:0016853 | -                                                                                                                    |
| -                       | -                                                | 0 |                                                                                                                                     |                                                                                                                                                                                                                                           | -                                                                                                                    |
| -                       | -                                                | 0 |                                                                                                                                     |                                                                                                                                                                                                                                           | -                                                                                                                    |
| -                       | -                                                | 0 |                                                                                                                                     |                                                                                                                                                                                                                                           | -                                                                                                                    |
| -                       | -                                                | 0 |                                                                                                                                     |                                                                                                                                                                                                                                           | SignalP (SIGNALP)                                                                                                    |
| Caenorhabditis briggsae | uroca-te hydratase                               | 2 | P:GO:0006548;<br>F:GO:0016153                                                                                                       | -                                                                                                                                                                                                                                         | EC:4.2.1.49                                                                                                          |
| -                       | -                                                | 0 |                                                                                                                                     |                                                                                                                                                                                                                                           | IPR020685; IPR020688; SignalP (SIGNALP)                                                                              |
| Caenorhabditis elegans  | elegans protein confirmed by transcript evidence | 1 | F:GO:0003824                                                                                                                        | -                                                                                                                                                                                                                                         | IPR000850; G3DSA:3.40.50.300 (GENE3D)                                                                                |
| -                       | -                                                | 0 |                                                                                                                                     |                                                                                                                                                                                                                                           | SignalP (SIGNALP)                                                                                                    |
| -                       | -                                                | 0 |                                                                                                                                     |                                                                                                                                                                                                                                           | -                                                                                                                    |
| -                       | -                                                | 0 |                                                                                                                                     |                                                                                                                                                                                                                                           | -                                                                                                                    |
| Caenorhabditis elegans  | briggsae cbr-sax-2 protein                       | 1 | F:GO:0005515                                                                                                                        | -                                                                                                                                                                                                                                         | PTHR12295 (PANTHER), PTHR12295:SF6 (PANTHER)                                                                         |
| -                       | -                                                | 0 |                                                                                                                                     |                                                                                                                                                                                                                                           | -                                                                                                                    |
| -                       | -                                                | 0 |                                                                                                                                     |                                                                                                                                                                                                                                           | -                                                                                                                    |
| Caenorhabditis briggsae | elegans protein confirmed by transcript evidence | 0 |                                                                                                                                     | P:GO:0008150;<br>C:GO:0005575                                                                                                                                                                                                             | IPR019132; PTHR16127 (PANTHER), PTHR16127:SF8 (PANTHER)                                                              |
| -                       | -                                                | 0 |                                                                                                                                     |                                                                                                                                                                                                                                           | -                                                                                                                    |
| Loa loa                 | hypothetical protein LOAG_01331 [Loa loa]        | 0 |                                                                                                                                     | C:GO:0005737;<br>C:GO:0016020                                                                                                                                                                                                             | -                                                                                                                    |
| Caenorhabditis elegans  | folate carrier                                   | 4 | P:GO:0006810;<br>P:GO:0040010;<br>P:GO:0008340;<br>C:GO:0016020                                                                     | -                                                                                                                                                                                                                                         | IPR001993; IPR018108; G3DSA:1.50.40.10 (GENE3D), PTHR11896:SF73 (PANTHER)                                            |
| -                       | -                                                | 0 |                                                                                                                                     |                                                                                                                                                                                                                                           | -                                                                                                                    |

|                        |                                                                           |    |                                                                                                                                                                                                                                                            |                                                                                                                                                                                        |                                                                        |                                                                                                                                                                            |
|------------------------|---------------------------------------------------------------------------|----|------------------------------------------------------------------------------------------------------------------------------------------------------------------------------------------------------------------------------------------------------------|----------------------------------------------------------------------------------------------------------------------------------------------------------------------------------------|------------------------------------------------------------------------|----------------------------------------------------------------------------------------------------------------------------------------------------------------------------|
| Caenorhabditis elegans | pfkfb3 protein                                                            | 4  | F:GO:0003873;<br>P:GO:0006003;<br>F:GO:0005524;<br>P:GO:0006796                                                                                                                                                                                            | -                                                                                                                                                                                      | EC:2.7.1.105                                                           | IPR003094; IPR013078;<br>G3DSA:3.40.50.1240 (GENE3D),<br>PTHR10606:SF11 (PANTHER),<br>SSF53254 (SUPERFAMILY)                                                               |
| Caenorhabditis elegans | protein ki-se c                                                           | 7  | P:GO:0006468;<br>F:GO:0046872;<br>P:GO:0023034;<br>F:GO:0019992;<br>F:GO:0004698;<br>F:GO:0005524;<br>C:GO:0016020                                                                                                                                         | -                                                                                                                                                                                      | -                                                                      | -                                                                                                                                                                          |
| Caenorhabditis elegans | cytochrome p450 family protein partially confirmed by transcript evidence | 0  |                                                                                                                                                                                                                                                            | F:GO:0020037;<br>F:GO:0005506;<br>C:GO:0016021;<br>F:GO:0009055;<br>P:GO:0019915;<br>P:GO:0055114;<br>F:GO:0016491;<br>P:GO:0008340;<br>F:GO:0005515;<br>F:GO:0046872;<br>F:GO:0004497 |                                                                        | IPR001128; PTHR19383:SF59<br>(PANTHER)                                                                                                                                     |
| -                      | -                                                                         | 0  |                                                                                                                                                                                                                                                            |                                                                                                                                                                                        |                                                                        | SignalP (SIGNALP)                                                                                                                                                          |
| -                      | -                                                                         | 0  |                                                                                                                                                                                                                                                            |                                                                                                                                                                                        |                                                                        | -                                                                                                                                                                          |
| Brugia malayi          | hypothetical protein Bm1_33605 [Brugia malayi]                            | 0  |                                                                                                                                                                                                                                                            |                                                                                                                                                                                        |                                                                        | -                                                                                                                                                                          |
| Caenorhabditis elegans | g elongation mitochondrial 1                                              | 11 | F:GO:0016779;<br>F:GO:0003746;<br>P:GO:0040010;<br>P:GO:0070125;<br>C:GO:0005739;<br>P:GO:0000003;<br>P:GO:0002119;<br>F:GO:0003924;<br>P:GO:0006898;<br>P:GO:0009792;<br>F:GO:0005525                                                                     | -                                                                                                                                                                                      | EC:2.7.7.0;<br>EC:3.6.5.1;<br>EC:3.6.5.2;<br>EC:3.6.5.3;<br>EC:3.6.5.4 | IPR005517; IPR009000; IPR009022;<br>IPR014721; IPR020568;<br>G3DSA:2.40.30.10 (GENE3D),<br>G3DSA:3.30.70.870 (GENE3D),<br>PTHR23115 (PANTHER),<br>PTHR23115:SF13 (PANTHER) |
| Mus musculus           | isoform cra_d                                                             | 15 | P:GO:0006470;<br>P:GO:0030324;<br>C:GO:0005829;<br>P:GO:0007049;<br>C:GO:0005730;<br>F:GO:0046872;<br>F:GO:0042802;<br>P:GO:0051301;<br>C:GO:0005741;<br>F:GO:0004722;<br>P:GO:0046822;<br>C:GO:0070688;<br>P:GO:0005977;<br>P:GO:0048754;<br>F:GO:0008599 | -                                                                                                                                                                                      | -                                                                      | -                                                                                                                                                                          |
| -                      | -                                                                         | 0  |                                                                                                                                                                                                                                                            |                                                                                                                                                                                        |                                                                        | -                                                                                                                                                                          |
| -                      | -                                                                         | 0  |                                                                                                                                                                                                                                                            |                                                                                                                                                                                        |                                                                        | -                                                                                                                                                                          |
| -                      | -                                                                         | 0  |                                                                                                                                                                                                                                                            |                                                                                                                                                                                        |                                                                        | IPR008160; PTHR10499 (PANTHER),<br>PTHR10499:SF114 (PANTHER)                                                                                                               |

|                         |                                                            |   |                                                                                                                                                      |                                                                                                                                                                                                                                           |            |                                                                                                                                                                              |
|-------------------------|------------------------------------------------------------|---|------------------------------------------------------------------------------------------------------------------------------------------------------|-------------------------------------------------------------------------------------------------------------------------------------------------------------------------------------------------------------------------------------------|------------|------------------------------------------------------------------------------------------------------------------------------------------------------------------------------|
| Caenorhabditis briggsae | - k 2cl co-transporter                                     | 0 |                                                                                                                                                      | F:GO:0015377;<br>F:GO:0005215;<br>F:GO:0008511;<br>C:GO:0016021;<br>C:GO:0016020;<br>P:GO:0006814;<br>P:GO:0006813;<br>P:GO:0003333;<br>F:GO:0015293;<br>P:GO:0006811;<br>P:GO:0006810;<br>P:GO:0055085;<br>F:GO:0015171;<br>P:GO:0006821 |            | -                                                                                                                                                                            |
| Sus scrofa              | protein tyrosine non-receptor type 20                      | 1 | F:GO:0016791                                                                                                                                         | -                                                                                                                                                                                                                                         | EC:3.1.3.0 | IPR000242; IPR000387;<br>G3DSA:3.90.190.10 (GENE3D),<br>PTHR19134 (PANTHER),<br>PTHR19134:SF26 (PANTHER),<br>SSF52799 (SUPERFAMILY)                                          |
|                         | -                                                          | 0 |                                                                                                                                                      |                                                                                                                                                                                                                                           |            | -                                                                                                                                                                            |
|                         | -                                                          | 0 |                                                                                                                                                      |                                                                                                                                                                                                                                           |            | -                                                                                                                                                                            |
| Caenorhabditis briggsae | elegans protein partially confirmed by transcript evidence | 3 | C:GO:0016021;<br>P:GO:0008340;<br>F:GO:0008378                                                                                                       | -                                                                                                                                                                                                                                         |            | IPR002659; PTHR23033 (PANTHER),<br>PTHR23033:SF1 (PANTHER)                                                                                                                   |
|                         | -                                                          | 0 |                                                                                                                                                      |                                                                                                                                                                                                                                           |            | -                                                                                                                                                                            |
| Brugia malayi           | low-density lipoprotein receptor                           | 0 |                                                                                                                                                      | P:GO:0042733;<br>P:GO:0042074;<br>C:GO:0016021;<br>C:GO:0016020;<br>P:GO:0009952;<br>C:GO:0005739;<br>P:GO:0060070;<br>F:GO:0004872;<br>P:GO:0060828;<br>P:GO:0001702                                                                     |            | IPR000033; IPR006210; IPR011042;<br>IPR013032; G3DSA:2.10.25.10<br>(GENE3D), PTHR10529 (PANTHER),<br>SignalP (SIGNALP), SSF57196<br>(SUPERFAMILY), SSF63825<br>(SUPERFAMILY) |
| Caenorhabditis briggsae | s-re domain containing protein                             | 9 | P:GO:0040010;<br>P:GO:0040035;<br>P:GO:0018996;<br>P:GO:0002119;<br>P:GO:0040011;<br>P:GO:0006898;<br>C:GO:0044464;<br>P:GO:0009792;<br>P:GO:0016246 | -                                                                                                                                                                                                                                         |            | IPR012890; IPR022783                                                                                                                                                         |
|                         | -                                                          | 0 |                                                                                                                                                      |                                                                                                                                                                                                                                           |            | -                                                                                                                                                                            |
| Caenorhabditis briggsae | myosin heavy chain                                         | 6 | C:GO:0032982;<br>F:GO:0003779;<br>F:GO:0005524;<br>F:GO:0003774;<br>C:GO:0031672;<br>P:GO:0007626                                                    | -                                                                                                                                                                                                                                         |            | IPR015650; G3DSA:4.10.270.10<br>(GENE3D), PTHR13140 (PANTHER)                                                                                                                |
|                         | -                                                          | 0 |                                                                                                                                                      |                                                                                                                                                                                                                                           |            | -                                                                                                                                                                            |
|                         | -                                                          | 0 |                                                                                                                                                      |                                                                                                                                                                                                                                           |            | -                                                                                                                                                                            |
|                         | -                                                          | 0 |                                                                                                                                                      |                                                                                                                                                                                                                                           |            | SignalP (SIGNALP)                                                                                                                                                            |
|                         | -                                                          | 0 |                                                                                                                                                      |                                                                                                                                                                                                                                           |            | -                                                                                                                                                                            |
|                         | -                                                          | 0 |                                                                                                                                                      |                                                                                                                                                                                                                                           |            | -                                                                                                                                                                            |

|                         |                                                                  |    |                                                                                                                                                                       |                                                                                  |                                                                                                                               |
|-------------------------|------------------------------------------------------------------|----|-----------------------------------------------------------------------------------------------------------------------------------------------------------------------|----------------------------------------------------------------------------------|-------------------------------------------------------------------------------------------------------------------------------|
| Caenorhabditis briggsae | dead h (asp-glu-ala-asp his) box polypeptide 11                  | 5  | F:GO:0005488;<br>P:GO:0007049;<br>P:GO:0000003;<br>F:GO:0004386;<br>P:GO:0009792                                                                                      | -                                                                                | PTHR11472 (PANTHER),<br>PTHR11472:SF5 (PANTHER)                                                                               |
| Caenorhabditis elegans  | elegans protein partially confirmed by transcript evidence       | 0  |                                                                                                                                                                       |                                                                                  | PTHR21749 (PANTHER)                                                                                                           |
| Caenorhabditis elegans  | briggsae cbr-cpt-6 protein                                       | 1  | F:GO:0008415                                                                                                                                                          | -                                                                                | -                                                                                                                             |
| Caenorhabditis briggsae | clathrin coat assembly protein                                   | 10 | P:GO:0009792;<br>P:GO:0010171;<br>P:GO:0002119;<br>F:GO:0005515;<br>C:GO:0030117;<br>F:GO:0008565;<br>P:GO:0016192;<br>P:GO:0000003;<br>P:GO:0006886;<br>P:GO:0040007 | -                                                                                | IPR000804; IPR011012; IPR016635;<br>IPR022775; G3DSA:3.30.450.60<br>(GENE3D), PTHR11753 (PANTHER),<br>PTHR11753:SF2 (PANTHER) |
|                         | -                                                                | 0  |                                                                                                                                                                       |                                                                                  | -                                                                                                                             |
|                         | -                                                                | 0  |                                                                                                                                                                       |                                                                                  | -                                                                                                                             |
|                         | -                                                                | 0  |                                                                                                                                                                       |                                                                                  | -                                                                                                                             |
| Caenorhabditis elegans  | anion bicarbo-te porter family member (abts-3)                   | 5  | F:GO:0005452;<br>P:GO:0006820;<br>P:GO:0009401;<br>F:GO:0005351;<br>C:GO:0016021                                                                                      | -                                                                                | -                                                                                                                             |
| Loa loa                 | coiled-coil domain-containing protein 75                         | 0  |                                                                                                                                                                       | F:GO:0003676;<br>F:GO:0003674;<br>P:GO:0008150;<br>C:GO:0005575;<br>C:GO:0005622 | SignalP (SIGNALP)                                                                                                             |
| Pan troglodytes         | PREDICTED: hypothetical protein [Pan troglodytes]                | 0  |                                                                                                                                                                       |                                                                                  | -                                                                                                                             |
| Pongo abelii            | midkine (neurite growth-promoting factor 2)                      | 10 | P:GO:0030154;<br>F:GO:0008083;<br>P:GO:0030325;<br>P:GO:0009611;<br>F:GO:0008201;<br>P:GO:0016477;<br>P:GO:0051781;<br>P:GO:0007399;<br>P:GO:0007165;<br>C:GO:0005576 | -                                                                                | -                                                                                                                             |
| Caenorhabditis elegans  | cleavage and polyadenylation specificity factor subunit 4        | 5  | P:GO:0009792;<br>P:GO:0002119;<br>F:GO:0003676;<br>P:GO:0000910;<br>F:GO:0008270                                                                                      | -                                                                                | IPR001878; IPR013084; PTHR23102<br>(PANTHER), PTHR23102:SF14<br>(PANTHER)                                                     |
| Caenorhabditis elegans  | cleavage and polyadenylation specificity factor subunit 4        | 5  | P:GO:0009792;<br>P:GO:0002119;<br>F:GO:0003676;<br>P:GO:0000910;<br>F:GO:0008270                                                                                      | -                                                                                | IPR001878; IPR013084; PTHR23102<br>(PANTHER), PTHR23102:SF14<br>(PANTHER)                                                     |
|                         | -                                                                | 0  |                                                                                                                                                                       |                                                                                  | SignalP (SIGNALP)                                                                                                             |
|                         | -                                                                | 0  |                                                                                                                                                                       |                                                                                  | -                                                                                                                             |
| Caenorhabditis briggsae | von willebrand factor type egf and pentraxin domain containing 1 | 1  | F:GO:0003682                                                                                                                                                          | -                                                                                | IPR000436; IPR016060; PTHR19325<br>(PANTHER), PTHR19325:SF40<br>(PANTHER)                                                     |
|                         | -                                                                | 0  |                                                                                                                                                                       |                                                                                  | -                                                                                                                             |



|                                        |                                                                         |    |                                                                                                                                                                                                                          |                                                |                                                                                    |
|----------------------------------------|-------------------------------------------------------------------------|----|--------------------------------------------------------------------------------------------------------------------------------------------------------------------------------------------------------------------------|------------------------------------------------|------------------------------------------------------------------------------------|
|                                        | -                                                                       | 0  |                                                                                                                                                                                                                          |                                                | -                                                                                  |
| Caenorhabditis elegans                 | pdz domain containing protein                                           | 5  | P:GO:0009792;<br>P:GO:0040007;<br>P:GO:0040035;<br>F:GO:0005515;<br>P:GO:0002119                                                                                                                                         | -                                              | IPR001478; G3DSA:2.30.42.10 (GENE3D), PTHR19964 (PANTHER), PTHR19964:SF5 (PANTHER) |
| Caenorhabditis briggsae                | briggsae cbr-1gc-2 protein                                              | 0  |                                                                                                                                                                                                                          |                                                | IPR006201; PTHR18945:SF55 (PANTHER), SignalP (SIGNALP)                             |
|                                        | -                                                                       | 0  |                                                                                                                                                                                                                          |                                                | -                                                                                  |
|                                        | -                                                                       | 0  |                                                                                                                                                                                                                          |                                                | -                                                                                  |
| Caenorhabditis briggsae                | ysyf_caee1 ame: full=uncharacterized f-box protein                      | 0  |                                                                                                                                                                                                                          |                                                | -                                                                                  |
|                                        | -                                                                       | 0  |                                                                                                                                                                                                                          |                                                | -                                                                                  |
| Homo sapiens                           | carrier liver isoform t2 variant                                        | 7  | P:GO:0006915;<br>F:GO:0005515;<br>P:GO:0055085;<br>F:GO:0005471;<br>C:GO:0005744;<br>C:GO:0016021;<br>P:GO:0044419                                                                                                       | -                                              | -                                                                                  |
|                                        | -                                                                       | 0  |                                                                                                                                                                                                                          |                                                | -                                                                                  |
|                                        | -                                                                       | 0  |                                                                                                                                                                                                                          |                                                | -                                                                                  |
| Onchocerca volvulus                    | thioredoxin                                                             | 0  |                                                                                                                                                                                                                          | P:GO:0045454;<br>F:GO:0016491;<br>F:GO:0016209 | IPR012335; PTHR13871 (PANTHER), PTHR13871:SF5 (PANTHER)                            |
| Caenorhabditis briggsae                | elegans protein confirmed by transcript evidence                        | 0  |                                                                                                                                                                                                                          |                                                | SignalP (SIGNALP)                                                                  |
|                                        | -                                                                       | 0  |                                                                                                                                                                                                                          |                                                | SignalP (SIGNALP)                                                                  |
| Clostridium perfringens C str. JGS1495 | conserved hypothetical protein [Clostridium perfringens C str. JGS1495] | 0  |                                                                                                                                                                                                                          |                                                | -                                                                                  |
|                                        | -                                                                       | 0  |                                                                                                                                                                                                                          |                                                | SignalP (SIGNALP)                                                                  |
|                                        | -                                                                       | 0  |                                                                                                                                                                                                                          |                                                | -                                                                                  |
| Homo sapiens                           | chloride intracellular channel 1                                        | 13 | P:GO:0044070;<br>F:GO:0005247;<br>P:GO:0034765;<br>C:GO:0005625;<br>C:GO:0031965;<br>C:GO:0005903;<br>C:GO:0034707;<br>C:GO:0005624;<br>P:GO:0006821;<br>F:GO:0005515;<br>P:GO:0007165;<br>C:GO:0005737;<br>C:GO:0005886 | -                                              | IPR002946; IPR010987; PTHR11260 (PANTHER), PTHR11260:SF1 (PANTHER)                 |

|                         |                                                        |    |                                                                                                                                                                                                                                                                                                                                                                                                                                                                         |                                                |              |                                                                           |
|-------------------------|--------------------------------------------------------|----|-------------------------------------------------------------------------------------------------------------------------------------------------------------------------------------------------------------------------------------------------------------------------------------------------------------------------------------------------------------------------------------------------------------------------------------------------------------------------|------------------------------------------------|--------------|---------------------------------------------------------------------------|
| Ailuropoda melanoleuca  | amyloid beta a4 isoform 4                              | 54 | C:GO:0043198;<br>F:GO:0016504;<br>C:GO:0019717;<br>P:GO:0050885;<br>F:GO:0008201;<br>P:GO:0035235;<br>F:GO:0004867;<br>P:GO:0007176;<br>P:GO:0050803;<br>P:GO:0016358;<br>C:GO:0031594;<br>P:GO:0000085;<br>F:GO:0046872;<br>C:GO:0035253;<br>P:GO:0040014;<br>P:GO:0030900;<br>P:GO:0001967;<br>P:GO:0051402;<br>P:GO:0010952;<br>P:GO:0008542;<br>C:GO:0030424;<br>C:GO:0051233;<br>P:GO:0016199;<br>P:GO:0045944;<br>P:GO:0007219;<br>C:GO:0005887;<br>C:GO:0048471; | -                                              |              | SignalIP (SIGNALP)                                                        |
| -                       | -                                                      | 0  |                                                                                                                                                                                                                                                                                                                                                                                                                                                                         |                                                |              | -                                                                         |
| Tribolium castaneum     | histone deacetylase 11                                 | 1  | F:GO:0016787                                                                                                                                                                                                                                                                                                                                                                                                                                                            | -                                              |              | IPR000286; PTHR10625-SF9 (PANTHER), SSF52768 (SUPERFAMILY)                |
| -                       | -                                                      | 0  |                                                                                                                                                                                                                                                                                                                                                                                                                                                                         |                                                |              | -                                                                         |
| -                       | -                                                      | 0  |                                                                                                                                                                                                                                                                                                                                                                                                                                                                         |                                                |              | -                                                                         |
| -                       | -                                                      | 0  |                                                                                                                                                                                                                                                                                                                                                                                                                                                                         |                                                |              | -                                                                         |
| Brugia malayi           | notch-like transmembrane receptor lin-12               | 1  | F:GO:0005515                                                                                                                                                                                                                                                                                                                                                                                                                                                            | -                                              |              | IPR002110; IPR020683; PTHR18958 (PANTHER)                                 |
| Caenorhabditis elegans  | camp-dependent protein ki-se catalytic                 | 6  | F:GO:0004872;<br>P:GO:0006468;<br>P:GO:0007224;<br>F:GO:0005524;<br>P:GO:0007165;<br>F:GO:0004703                                                                                                                                                                                                                                                                                                                                                                       | -                                              | EC:2.7.11.16 | -                                                                         |
| -                       | -                                                      | 0  |                                                                                                                                                                                                                                                                                                                                                                                                                                                                         |                                                |              | -                                                                         |
| -                       | -                                                      | 0  |                                                                                                                                                                                                                                                                                                                                                                                                                                                                         |                                                |              | SignalIP (SIGNALP)                                                        |
| Caenorhabditis elegans  | hypothetical protein H24K24.4 [Caenorhabditis elegans] | 0  |                                                                                                                                                                                                                                                                                                                                                                                                                                                                         | F:GO:0000166;<br>P:GO:0006396;<br>F:GO:0008173 |              | PTHR11061 (PANTHER), PTHR11061-SF2 (PANTHER)                              |
| -                       | -                                                      | 0  |                                                                                                                                                                                                                                                                                                                                                                                                                                                                         |                                                |              | -                                                                         |
| Caenorhabditis elegans  | elegans protein confirmed by transcript evidence       | 3  | P:GO:0006508;<br>F:GO:0004181;<br>F:GO:0008270                                                                                                                                                                                                                                                                                                                                                                                                                          | -                                              | EC:3.4.17.0  | G3DSA:3.40.630.10 (GENE3D), PTHR11705 (PANTHER), PTHR11705-SF12 (PANTHER) |
| Caenorhabditis briggsae | luc7-like protein 3                                    | 6  | P:GO:0008380;<br>F:GO:0003729;<br>P:GO:0006915;<br>F:GO:0005515;<br>P:GO:0006950;<br>C:GO:0005634                                                                                                                                                                                                                                                                                                                                                                       | -                                              |              | IPR004882; PTHR12375-SF17 (PANTHER)                                       |
| -                       | -                                                      | 0  |                                                                                                                                                                                                                                                                                                                                                                                                                                                                         |                                                |              | SignalIP (SIGNALP)                                                        |
| Caenorhabditis elegans  | Hypothetical protein F35D2.4 [Caenorhabditis elegans]  | 0  |                                                                                                                                                                                                                                                                                                                                                                                                                                                                         |                                                |              | SignalIP (SIGNALP)                                                        |

|                                     |                                                                               |    |                                                                                                                                                                                        |   |                                                                                      |
|-------------------------------------|-------------------------------------------------------------------------------|----|----------------------------------------------------------------------------------------------------------------------------------------------------------------------------------------|---|--------------------------------------------------------------------------------------|
|                                     | -                                                                             | 0  |                                                                                                                                                                                        |   | -                                                                                    |
|                                     | -                                                                             | 0  |                                                                                                                                                                                        |   | SignalP (SIGNALP)                                                                    |
| Methanobrevibacter smithii DSM 2374 | conserved hypothetical protein [Methanobrevibacter smithii DSM 2374]          | 0  |                                                                                                                                                                                        |   | SignalP (SIGNALP)                                                                    |
| Caenorhabditis briggsae             | zinc c2h2 type family protein                                                 | 5  | C:GO:0016021;<br>F:GO:0003676;<br>P:GO:0009792;<br>C:GO:0005622;<br>F:GO:0008270                                                                                                       | - | -                                                                                    |
|                                     | -                                                                             | 0  |                                                                                                                                                                                        |   | -                                                                                    |
|                                     | -                                                                             | 0  |                                                                                                                                                                                        |   | -                                                                                    |
| Brugia malayi                       | hypothetical protein Bm1_19380 [Brugia malayi]                                | 0  |                                                                                                                                                                                        |   | -                                                                                    |
| Caenorhabditis elegans              | hypothetical protein F13H6.5 [Caenorhabditis elegans]                         | 0  |                                                                                                                                                                                        |   | SignalP (SIGNALP)                                                                    |
|                                     | -                                                                             | 0  |                                                                                                                                                                                        |   | -                                                                                    |
|                                     | -                                                                             | 0  |                                                                                                                                                                                        |   | SignalP (SIGNALP)                                                                    |
|                                     | -                                                                             | 0  |                                                                                                                                                                                        |   | SignalP (SIGNALP)                                                                    |
|                                     | -                                                                             | 0  |                                                                                                                                                                                        |   | -                                                                                    |
|                                     | -                                                                             | 0  |                                                                                                                                                                                        |   | -                                                                                    |
| Caenorhabditis briggsae             | briggsae cbr-acl-12 protein                                                   | 1  | P:GO:0019915                                                                                                                                                                           | - | -                                                                                    |
| Loa loa                             | sec14l1 protein                                                               | 3  | C:GO:0005622;<br>P:GO:0006810;<br>F:GO:0005215                                                                                                                                         | - | IPR001251; PTHR23324 (PANTHER),<br>PTHR23324:SF8 (PANTHER)                           |
|                                     | -                                                                             | 0  |                                                                                                                                                                                        |   | -                                                                                    |
| Caenorhabditis elegans              | chondroitin sulfate proteoglycan 4                                            | 1  | P:GO:0009792                                                                                                                                                                           | - | -                                                                                    |
| Caenorhabditis elegans              | mrp-4                                                                         | 4  | F:GO:0016887;<br>P:GO:0006810;<br>F:GO:0000166;<br>F:GO:0005215                                                                                                                        | - | IPR001140; IPR011527; IPR017940;<br>PTHR19242 (PANTHER),<br>PTHR19242:SF15 (PANTHER) |
|                                     | -                                                                             | 0  |                                                                                                                                                                                        |   | -                                                                                    |
| Ancylostoma ceylanicum              | metalloprotease 1 precursor                                                   | 2  | F:GO:0046872;<br>F:GO:0008237                                                                                                                                                          | - | -                                                                                    |
| Caenorhabditis elegans              | uncoordi- ted family member (unc-89)                                          | 0  |                                                                                                                                                                                        |   | -                                                                                    |
| Brugia malayi                       | l-aminoadipate-semialdehyde dehydroge- se-<br>phosphopantetheinyl transferase | 3  | P:GO:0009792;<br>P:GO:0040010;<br>P:GO:0040011                                                                                                                                         | - | IPR008278; PTHR12215 (PANTHER),<br>PTHR12215:SF4 (PANTHER)                           |
|                                     | -                                                                             | 0  |                                                                                                                                                                                        |   | -                                                                                    |
|                                     | -                                                                             | 0  |                                                                                                                                                                                        |   | -                                                                                    |
| Mus musculus                        | ribosomal protein s15a                                                        | 11 | P:GO:0009615;<br>F:GO:0003723;<br>P:GO:0045787;<br>C:GO:0005739;<br>P:GO:0007420;<br>F:GO:0003735;<br>P:GO:0006414;<br>C:GO:0022627;<br>F:GO:0005515;<br>P:GO:0008284;<br>P:GO:0009790 | - | IPR000630; G3DSA:3.30.1370.30<br>(GENE3D), G3DSA:3.30.1490.10<br>(GENE3D)            |
| Caenorhabditis briggsae             | elegans protein partially confirmed by transcript evidence                    | 0  |                                                                                                                                                                                        |   | -                                                                                    |
|                                     | -                                                                             | 0  |                                                                                                                                                                                        |   | -                                                                                    |
|                                     | -                                                                             | 0  |                                                                                                                                                                                        |   | -                                                                                    |

|                               |                                                          |    |                                                                                                                                                                                                                                                            |                                                                 |              |                                                                                                              |
|-------------------------------|----------------------------------------------------------|----|------------------------------------------------------------------------------------------------------------------------------------------------------------------------------------------------------------------------------------------------------------|-----------------------------------------------------------------|--------------|--------------------------------------------------------------------------------------------------------------|
| Homo sapiens                  | defender against cell death 1                            | 8  | C:GO:0008250;<br>P:GO:0018279;<br>C:GO:0016021;<br>P:GO:0007584;<br>P:GO:0006916;<br>P:GO:0001824;<br>P:GO:0042493;<br>F:GO:0004579                                                                                                                        | -                                                               | EC:2.4.1.119 | SignalP (SIGNALP)                                                                                            |
|                               | -                                                        | 0  |                                                                                                                                                                                                                                                            |                                                                 |              | -                                                                                                            |
| Strongylocentrotus purpuratus | flavin-containing monoamine oxidase aofh                 | 1  | C:GO:0044464                                                                                                                                                                                                                                               | -                                                               |              | IPR002937; PR00419 (PRINTS),<br>G3DSA:3.50.50.60 (GENE3D),<br>PTHR10742 (PANTHER), SSF51905<br>(SUPERFAMILY) |
| Caenorhabditis briggsae       | briggsae cbr-unc-68 protein                              | 8  | F:GO:0004872;<br>P:GO:0006629;<br>F:GO:0005219;<br>P:GO:0006816;<br>P:GO:0006874;<br>P:GO:0055085;<br>F:GO:0005509;<br>C:GO:0016021                                                                                                                        | -                                                               |              | IPR015925; PTHR13715:SF11<br>(PANTHER)                                                                       |
|                               | -                                                        | 0  |                                                                                                                                                                                                                                                            |                                                                 |              | -                                                                                                            |
|                               | -                                                        | 0  |                                                                                                                                                                                                                                                            |                                                                 |              | SignalP (SIGNALP)                                                                                            |
| Caenorhabditis briggsae       | Hypothetical protein CBG19102 [Caenorhabditis briggsae]  | 0  |                                                                                                                                                                                                                                                            | F:GO:0005524;<br>F:GO:0004672;<br>F:GO:0004713;<br>P:GO:0006468 |              | SignalP (SIGNALP)                                                                                            |
| Loa loa                       | ring finger protein 121                                  | 3  | F:GO:0008270;<br>F:GO:0005515;<br>C:GO:0016020                                                                                                                                                                                                             | -                                                               |              | PTHR13407 (PANTHER)                                                                                          |
| Caenorhabditis briggsae       | elegans protein confirmed by transcript evidence         | 0  |                                                                                                                                                                                                                                                            |                                                                 |              | -                                                                                                            |
|                               | -                                                        | 0  |                                                                                                                                                                                                                                                            |                                                                 |              | -                                                                                                            |
|                               | -                                                        | 0  |                                                                                                                                                                                                                                                            |                                                                 |              | -                                                                                                            |
| Caenorhabditis elegans        | hypothetical protein Y110A7A.21 [Caenorhabditis elegans] | 0  |                                                                                                                                                                                                                                                            |                                                                 |              | -                                                                                                            |
|                               | -                                                        | 0  |                                                                                                                                                                                                                                                            |                                                                 |              | -                                                                                                            |
|                               | -                                                        | 0  |                                                                                                                                                                                                                                                            |                                                                 |              | -                                                                                                            |
|                               | -                                                        | 0  |                                                                                                                                                                                                                                                            |                                                                 |              | -                                                                                                            |
|                               | -                                                        | 0  |                                                                                                                                                                                                                                                            |                                                                 |              | -                                                                                                            |
|                               | -                                                        | 0  |                                                                                                                                                                                                                                                            |                                                                 |              | -                                                                                                            |
| Brugia malayi                 | coiled-coil domain containing 88a                        | 15 | F:GO:0035091;<br>P:GO:0030032;<br>C:GO:0030027;<br>P:GO:0016044;<br>P:GO:0031323;<br>C:GO:0005794;<br>C:GO:0005829;<br>F:GO:0003779;<br>P:GO:0032956;<br>C:GO:0031410;<br>F:GO:0043422;<br>F:GO:0042803;<br>C:GO:0005783;<br>C:GO:0005886;<br>P:GO:0016477 | -                                                               |              | PTHR18947 (PANTHER)                                                                                          |
|                               | -                                                        | 0  |                                                                                                                                                                                                                                                            |                                                                 |              | SignalP (SIGNALP)                                                                                            |

|                         |                                                                  |  |   |                                                                                  |                                                                                                                                                                                        |                                                                       |
|-------------------------|------------------------------------------------------------------|--|---|----------------------------------------------------------------------------------|----------------------------------------------------------------------------------------------------------------------------------------------------------------------------------------|-----------------------------------------------------------------------|
| Pan troglodytes         | heavy chain vh1 region precursor                                 |  | 5 | P:GO:0018298;<br>P:GO:0006955;<br>F:GO:0003823;<br>C:GO:0005624;<br>F:GO:0005515 | -                                                                                                                                                                                      | PTHR23266 (PANTHER),<br>PTHR23266:SF8 (PANTHER), SignalP<br>(SIGNALP) |
|                         | -                                                                |  | 0 |                                                                                  |                                                                                                                                                                                        | -                                                                     |
| Loa loa                 | de-etiolated homolog 1                                           |  | 0 |                                                                                  |                                                                                                                                                                                        | IPR019138                                                             |
| Caenorhabditis briggsae | Hypothetical protein CBG08133 [Caenorhabditis briggsae]          |  | 0 |                                                                                  |                                                                                                                                                                                        | IPR004012                                                             |
|                         | -                                                                |  | 0 |                                                                                  |                                                                                                                                                                                        | -                                                                     |
|                         | -                                                                |  | 0 |                                                                                  |                                                                                                                                                                                        | -                                                                     |
| Ixodes scapularis       | elegans protein partially confirmed by transcript evidence       |  | 1 | P:GO:0006898                                                                     | -                                                                                                                                                                                      | -                                                                     |
|                         | -                                                                |  | 0 |                                                                                  |                                                                                                                                                                                        | -                                                                     |
|                         | -                                                                |  | 0 |                                                                                  |                                                                                                                                                                                        | -                                                                     |
|                         | -                                                                |  | 0 |                                                                                  |                                                                                                                                                                                        | -                                                                     |
| Caenorhabditis elegans  | Hypothetical protein Y110A2AL.12a [Caenorhabditis elegans]       |  | 0 |                                                                                  | P:GO:0006506;<br>C:GO:0016021;<br>F:GO:0016746                                                                                                                                         | SignalP (SIGNALP)                                                     |
|                         | -                                                                |  | 0 |                                                                                  |                                                                                                                                                                                        | -                                                                     |
|                         | -                                                                |  | 0 |                                                                                  |                                                                                                                                                                                        | -                                                                     |
|                         | -                                                                |  | 0 |                                                                                  |                                                                                                                                                                                        | SignalP (SIGNALP)                                                     |
|                         | -                                                                |  | 0 |                                                                                  |                                                                                                                                                                                        | -                                                                     |
|                         | -                                                                |  | 0 |                                                                                  |                                                                                                                                                                                        | -                                                                     |
| Caenorhabditis elegans  | patched family protein                                           |  | 0 |                                                                                  | F:GO:0005215;<br>C:GO:0016021;<br>C:GO:0016020;<br>P:GO:0040025;<br>P:GO:0006810;<br>P:GO:0000003;<br>P:GO:0040018;<br>F:GO:0008158;<br>P:GO:0008340;<br>P:GO:0040011;<br>P:GO:0018996 | -                                                                     |
| Caenorhabditis briggsae | elegans protein partially confirmed by transcript evidence       |  | 4 | C:GO:0016021;<br>P:GO:0008152;<br>F:GO:0003824;<br>F:GO:0005488                  | -                                                                                                                                                                                      | PTHR10151 (PANTHER),<br>PTHR10151:SF28 (PANTHER)                      |
|                         | -                                                                |  | 0 |                                                                                  |                                                                                                                                                                                        | SignalP (SIGNALP)                                                     |
| Caenorhabditis elegans  | yms5_caeel ame: full=uncharacterized protein flags:<br>precursor |  | 0 |                                                                                  | P:GO:0007160;<br>C:GO:0016021                                                                                                                                                          | -                                                                     |
|                         | -                                                                |  | 0 |                                                                                  |                                                                                                                                                                                        | -                                                                     |
| Caenorhabditis briggsae | golgi traffic protein                                            |  | 5 | P:GO:0009792;<br>P:GO:0002119;<br>P:GO:0040010;<br>P:GO:0008340;<br>P:GO:0006898 | -                                                                                                                                                                                      | IPR007305; IPR011691                                                  |
|                         | -                                                                |  | 0 |                                                                                  |                                                                                                                                                                                        | -                                                                     |
|                         | -                                                                |  | 0 |                                                                                  |                                                                                                                                                                                        | -                                                                     |
|                         | -                                                                |  | 0 |                                                                                  |                                                                                                                                                                                        | -                                                                     |
|                         | -                                                                |  | 0 |                                                                                  |                                                                                                                                                                                        | -                                                                     |
|                         | -                                                                |  | 0 |                                                                                  |                                                                                                                                                                                        | -                                                                     |
|                         | -                                                                |  | 0 |                                                                                  |                                                                                                                                                                                        | SignalP (SIGNALP)                                                     |
| Brugia malayi           | egf-like domain containing protein                               |  | 3 | P:GO:0035152;<br>C:GO:0016324;<br>F:GO:0005488                                   | -                                                                                                                                                                                      | SignalP (SIGNALP)                                                     |
|                         | -                                                                |  | 0 |                                                                                  |                                                                                                                                                                                        | SignalP (SIGNALP)                                                     |

|                        |                                                                       |  |    |                                                                                                                                                                                                                                                                             |   |            |                                                                                                            |
|------------------------|-----------------------------------------------------------------------|--|----|-----------------------------------------------------------------------------------------------------------------------------------------------------------------------------------------------------------------------------------------------------------------------------|---|------------|------------------------------------------------------------------------------------------------------------|
| Achlya klebsiana       | heat shock cog-te 71 kda                                              |  | 3  | F:GO:0005524;<br>P:GO:0006950;<br>F:GO:0016491                                                                                                                                                                                                                              | - |            | IPR001023; IPR013126;<br>G3DSA:2.60.34.10 (GENE3D),<br>PTHR19375:SF1 (PANTHER),<br>SSF100920 (SUPERFAMILY) |
|                        | -                                                                     |  | 0  |                                                                                                                                                                                                                                                                             |   |            | -                                                                                                          |
|                        | -                                                                     |  | 0  |                                                                                                                                                                                                                                                                             |   |            | SignalP (SIGNALP)                                                                                          |
|                        | -                                                                     |  | 0  |                                                                                                                                                                                                                                                                             |   |            | -                                                                                                          |
| Caenorhabditis elegans | wd repeat domain 39                                                   |  | 3  | C:GO:0005856;<br>P:GO:0016226;<br>F:GO:0005488                                                                                                                                                                                                                              | - |            | IPR001680; IPR015943; IPR017986;<br>IPR019781; IPR019782; PTHR19920<br>(PANTHER)                           |
| Loa loa                | hypothetical protein LOAG_04713 [Loa loa]                             |  | 0  |                                                                                                                                                                                                                                                                             |   |            | -                                                                                                          |
|                        | -                                                                     |  | 0  |                                                                                                                                                                                                                                                                             |   |            | SignalP (SIGNALP)                                                                                          |
|                        | -                                                                     |  | 0  |                                                                                                                                                                                                                                                                             |   |            | -                                                                                                          |
|                        | -                                                                     |  | 0  |                                                                                                                                                                                                                                                                             |   |            | SignalP (SIGNALP)                                                                                          |
| Culex quinquefasciatus | atp-binding cassette transporter                                      |  | 4  | F:GO:0042626;<br>P:GO:0055085;<br>F:GO:0005524;<br>C:GO:0016021                                                                                                                                                                                                             | - |            | G3DSA:3.40.50.300 (GENE3D),<br>PTHR19242 (PANTHER),<br>PTHR19242:SF97 (PANTHER),<br>SSF52540 (SUPERFAMILY) |
|                        | -                                                                     |  | 0  |                                                                                                                                                                                                                                                                             |   |            | -                                                                                                          |
| Caenorhabditis elegans | AC024790_6Hypothetical protein Y47D7A.14a<br>[Caenorhabditis elegans] |  | 0  |                                                                                                                                                                                                                                                                             |   |            | IPR009357; SignalP (SIGNALP)                                                                               |
| Caenorhabditis elegans | chch domain containing protein                                        |  | 1  | F:GO:0005515                                                                                                                                                                                                                                                                | - |            | PTHR21622 (PANTHER)                                                                                        |
| Brugia malayi          | spry domain containing protein                                        |  | 8  | F:GO:0046872;<br>P:GO:0040007;<br>P:GO:0040027;<br>P:GO:0040035;<br>P:GO:0048096;<br>F:GO:0005515;<br>P:GO:0007474;<br>C:GO:0005634                                                                                                                                         | - |            | IPR001870; IPR003877; IPR008985;<br>IPR018355; PTHR10598 (PANTHER)                                         |
| Loa loa                | d- polymerase epsilon catalytic subunit                               |  | 16 | P:GO:0055085;<br>F:GO:0008270;<br>F:GO:0003887;<br>P:GO:0006260;<br>P:GO:0040035;<br>F:GO:0003677;<br>F:GO:0046873;<br>F:GO:0000166;<br>P:GO:0040011;<br>P:GO:0006997;<br>F:GO:0004527;<br>P:GO:0002009;<br>P:GO:0009792;<br>P:GO:0030001;<br>C:GO:0016020;<br>C:GO:0005634 | - | EC:2.7.7.7 | IPR012337; PTHR10670 (PANTHER)                                                                             |
|                        | -                                                                     |  | 0  |                                                                                                                                                                                                                                                                             |   |            | -                                                                                                          |

|                         |                                                     |    |                                                                                                                                                                                                                                                                                                                                                                                                                     |                                                                                                   |                                                                                                                                     |
|-------------------------|-----------------------------------------------------|----|---------------------------------------------------------------------------------------------------------------------------------------------------------------------------------------------------------------------------------------------------------------------------------------------------------------------------------------------------------------------------------------------------------------------|---------------------------------------------------------------------------------------------------|-------------------------------------------------------------------------------------------------------------------------------------|
|                         | -                                                   | 0  |                                                                                                                                                                                                                                                                                                                                                                                                                     |                                                                                                   | -                                                                                                                                   |
| Caenorhabditis elegans  | uncoordinated family member (unc-89)                | 1  | F:GO:0004674                                                                                                                                                                                                                                                                                                                                                                                                        | -                                                                                                 | EC:2.7.11.0<br>IPR003598; IPR007110; IPR013098;<br>IPR013783; PTHR19897 (PANTHER),<br>SSF48726 (SUPERFAMILY)                        |
|                         | -                                                   | 0  |                                                                                                                                                                                                                                                                                                                                                                                                                     |                                                                                                   | -                                                                                                                                   |
|                         | -                                                   | 0  |                                                                                                                                                                                                                                                                                                                                                                                                                     |                                                                                                   | -                                                                                                                                   |
| Caenorhabditis elegans  | serotonin octopamine receptor family member (ser-7) | 0  |                                                                                                                                                                                                                                                                                                                                                                                                                     | F:GO:0004872;<br>F:GO:0004930;<br>C:GO:0016021;<br>F:GO:0004871;<br>P:GO:0007165;<br>P:GO:0007186 | -                                                                                                                                   |
|                         | -                                                   | 0  |                                                                                                                                                                                                                                                                                                                                                                                                                     |                                                                                                   | -                                                                                                                                   |
| Pongo abelii            | gipc pdz domain containing member 1                 | 24 | P:GO:0014047;<br>C:GO:0043198;<br>P:GO:0043542;<br>C:GO:0012506;<br>C:GO:0043197;<br>F:GO:0005102;<br>F:GO:0030165;<br>P:GO:0031647;<br>C:GO:0005624;<br>P:GO:0006605;<br>P:GO:0048167;<br>F:GO:0017022;<br>F:GO:0003779;<br>C:GO:0030139;<br>C:GO:0044445;<br>P:GO:0032435;<br>F:GO:0005096;<br>C:GO:0005903;<br>P:GO:0007186;<br>C:GO:0008021;<br>P:GO:0030511;<br>F:GO:0042803;<br>C:GO:0005625;<br>C:GO:0005938 | -                                                                                                 | IPR001478; G3DSA:2.30.42.10<br>(GENE3D), PTHR12259 (PANTHER)                                                                        |
|                         | -                                                   | 0  |                                                                                                                                                                                                                                                                                                                                                                                                                     |                                                                                                   | SignalP (SIGNALP)                                                                                                                   |
| Caenorhabditis briggsae | t-complex protein 1 subunit delta                   | 13 | C:GO:0005737;<br>P:GO:0009792;<br>P:GO:0002119;<br>P:GO:0006457;<br>F:GO:0005524;<br>P:GO:0000003;<br>P:GO:0008340;<br>F:GO:0016740;<br>F:GO:0051082;<br>P:GO:0040007;<br>P:GO:0006898;<br>P:GO:0040032;<br>P:GO:0002009                                                                                                                                                                                            | -                                                                                                 | IPR002194; IPR002423; IPR012717;<br>IPR017998; G3DSA:1.10.560.10<br>(GENE3D), G3DSA:3.30.260.10<br>(GENE3D), SSF54849 (SUPERFAMILY) |
| Caenorhabditis elegans  | -dh dehydroge-se                                    | 7  | P:GO:0040010;<br>P:GO:0008340;<br>F:GO:0008137;<br>C:GO:0005747;<br>P:GO:0006120;<br>P:GO:0002119;<br>P:GO:0009792                                                                                                                                                                                                                                                                                                  | -                                                                                                 | EC:1.6.5.3<br>IPR006806; PTHR12653 (PANTHER)                                                                                        |





|                         |                                                                |    |                                                                                                                                                                                                                                           |                                                                                  |             |                                                                                         |
|-------------------------|----------------------------------------------------------------|----|-------------------------------------------------------------------------------------------------------------------------------------------------------------------------------------------------------------------------------------------|----------------------------------------------------------------------------------|-------------|-----------------------------------------------------------------------------------------|
|                         | -                                                              | 0  |                                                                                                                                                                                                                                           |                                                                                  |             | -                                                                                       |
| Caenorhabditis elegans  | elegans protein confirmed by transcript evidence               | 1  | P:GO:0000003                                                                                                                                                                                                                              | -                                                                                |             | IPR004245; IPR006061; IPR017849; PTHR10974:SF7 (PANTHER), SignalP (SIGNALP)             |
| Caenorhabditis elegans  | briggsae cbr-jph-1 protein                                     | 0  |                                                                                                                                                                                                                                           |                                                                                  |             | -                                                                                       |
| Caenorhabditis elegans  | multidrug resistance protein                                   | 5  | P:GO:0009792;<br>F:GO:0042626;<br>P:GO:0055085;<br>F:GO:0005524;<br>C:GO:0016021                                                                                                                                                          | -                                                                                |             | -                                                                                       |
| Caenorhabditis briggsae | cathepsin a                                                    | 3  | F:GO:0008233;<br>C:GO:0043231;<br>C:GO:0044444                                                                                                                                                                                            | -                                                                                |             | IPR001563; G3DSA:3.40.50.1820 (GENE3D), PTHR11802:SF9 (PANTHER), SSF53474 (SUPERFAMILY) |
|                         | -                                                              | 0  |                                                                                                                                                                                                                                           |                                                                                  |             | -                                                                                       |
|                         | -                                                              | 0  |                                                                                                                                                                                                                                           |                                                                                  |             | SignalP (SIGNALP)                                                                       |
|                         | -                                                              | 0  |                                                                                                                                                                                                                                           |                                                                                  |             | SignalP (SIGNALP)                                                                       |
| Caenorhabditis elegans  | yfef9_caeel ame: full=uncharacterized protein flags: precursor | 0  |                                                                                                                                                                                                                                           |                                                                                  |             | -                                                                                       |
| Caenorhabditis elegans  | multidrug resistance protein family member (mrp-3)             | 3  | F:GO:0016887;<br>P:GO:0006810;<br>F:GO:0000166                                                                                                                                                                                            | -                                                                                |             | SignalP (SIGNALP)                                                                       |
| Caenorhabditis briggsae | elegans protein partially confirmed by transcript evidence     | 0  |                                                                                                                                                                                                                                           | C:GO:0016021;<br>C:GO:0016020;<br>F:GO:0008375                                   |             | IPR003406; PTHR19297:SF3 (PANTHER)                                                      |
| Brugia malayi           | transcription elongation factor spt6-like                      | 14 | P:GO:0040010;<br>F:GO:0003723;<br>P:GO:0006310;<br>P:GO:0006281;<br>P:GO:0006357;<br>F:GO:0016788;<br>P:GO:0002119;<br>F:GO:0005515;<br>F:GO:0003700;<br>F:GO:0003711;<br>P:GO:0009792;<br>C:GO:0005737;<br>P:GO:0006338;<br>C:GO:0005634 | -                                                                                |             | IPR023097; PTHR10145 (PANTHER), PTHR10145:SF1 (PANTHER)                                 |
|                         | -                                                              | 0  |                                                                                                                                                                                                                                           |                                                                                  |             | -                                                                                       |
| Homo sapiens            | cathepsin s                                                    | 6  | P:GO:0006955;<br>C:GO:0005576;<br>C:GO:0016020;<br>C:GO:0005764;<br>P:GO:0006508;<br>F:GO:0004197                                                                                                                                         | -                                                                                | EC:3.4.22.0 | SignalP (SIGNALP)                                                                       |
|                         | -                                                              | 0  |                                                                                                                                                                                                                                           |                                                                                  |             | -                                                                                       |
|                         | -                                                              | 0  |                                                                                                                                                                                                                                           |                                                                                  |             | -                                                                                       |
| Caenorhabditis elegans  | mip tip subfamily                                              | 4  | F:GO:0015250;<br>C:GO:0043025;<br>C:GO:0005929;<br>P:GO:0006833                                                                                                                                                                           | -                                                                                |             | IPR000425; PTHR19139:SF25 (PANTHER)                                                     |
|                         | -                                                              | 0  |                                                                                                                                                                                                                                           |                                                                                  |             | -                                                                                       |
| Caenorhabditis briggsae | briggsae cbr-ric-3 protein                                     | 0  |                                                                                                                                                                                                                                           | C:GO:0005789;<br>C:GO:0016021;<br>C:GO:0005783;<br>C:GO:0016020;<br>F:GO:0005515 |             | SignalP (SIGNALP)                                                                       |

|                           |                                                            |   |                                                                                                                    |                                                                                                                    |             |                                                                                                                           |
|---------------------------|------------------------------------------------------------|---|--------------------------------------------------------------------------------------------------------------------|--------------------------------------------------------------------------------------------------------------------|-------------|---------------------------------------------------------------------------------------------------------------------------|
| Caenorhabditis briggsae   | cg12125 cg12125-pa                                         | 0 |                                                                                                                    | F:GO:0003674;<br>C:GO:0016021;<br>C:GO:0016020;<br>P:GO:0008150;<br>C:GO:0005575                                   |             | IPR019392; PTHR21508 (PANTHER)                                                                                            |
| Loa loa                   | hemicentin 1                                               | 0 |                                                                                                                    | P:GO:0007601;<br>P:GO:0050896;<br>F:GO:0005509;<br>C:GO:0005604;<br>P:GO:0018298;<br>C:GO:0005576;<br>P:GO:0008218 |             | IPR003598; IPR007110; IPR013151;<br>IPR013783; PTHR19897 (PANTHER),<br>PTHR19897:SF8 (PANTHER), SSF48726<br>(SUPERFAMILY) |
| Caenorhabditis elegans    | briggsae cbr-itx-1 protein                                 | 0 |                                                                                                                    |                                                                                                                    |             | IPR013320; PTHR10127 (PANTHER),<br>PTHR10127:SF11 (PANTHER)                                                               |
| Mus musculus              | proteophosphoglycan ppg4                                   | 0 |                                                                                                                    | F:GO:0005524;<br>F:GO:0003674;<br>P:GO:0006298;<br>F:GO:0030983;<br>C:GO:0005575                                   |             | -                                                                                                                         |
| Pongo abelii              | h+ lysosomal v0 subunit b                                  | 7 | F:GO:0008553;<br>C:GO:0016021;<br>C:GO:0016471;<br>P:GO:0015986;<br>C:GO:0033179;<br>C:GO:0005768;<br>P:GO:0015991 | -                                                                                                                  | EC:3.6.3.6  | PTHR10263 (PANTHER)                                                                                                       |
|                           | -                                                          | 0 |                                                                                                                    |                                                                                                                    |             | -                                                                                                                         |
| Caenorhabditis briggsae   | elegans protein partially confirmed by transcript evidence | 6 | P:GO:0002119;<br>P:GO:0006468;<br>F:GO:0005524;<br>P:GO:0040011;<br>P:GO:0040007;<br>F:GO:0004674                  | -                                                                                                                  | EC:2.7.11.0 | IPR011009; IPR017442;<br>G3DSA:1.10.510.10 (GENE3D),<br>PTHR11909 (PANTHER),<br>PTHR11909:SF19 (PANTHER)                  |
| Loa loa                   | hypothetical protein LOAG_04940 [Loa loa]                  | 0 |                                                                                                                    |                                                                                                                    |             | SignalP (SIGNALP)                                                                                                         |
|                           | -                                                          | 0 |                                                                                                                    |                                                                                                                    |             | SignalP (SIGNALP)                                                                                                         |
|                           | -                                                          | 0 |                                                                                                                    |                                                                                                                    |             | -                                                                                                                         |
| Caenorhabditis briggsae   | elegans protein partially confirmed by transcript evidence | 3 | F:GO:0022891;<br>C:GO:0016021;<br>P:GO:0055085                                                                     | -                                                                                                                  |             | IPR005828; IPR005829; IPR016196;<br>IPR020846; G3DSA:1.20.1250.20<br>(GENE3D), PTHR11600 (PANTHER)                        |
| Caenorhabditis elegans    | tr--dihydrouridine synthase 3-like                         | 6 | F:GO:0003676;<br>P:GO:0055114;<br>F:GO:0050660;<br>F:GO:0008270;<br>F:GO:0017150;<br>P:GO:0008033                  | -                                                                                                                  |             | IPR001269; PTHR11082:SF8<br>(PANTHER)                                                                                     |
|                           | -                                                          | 0 |                                                                                                                    |                                                                                                                    |             | SignalP (SIGNALP)                                                                                                         |
|                           | -                                                          | 0 |                                                                                                                    |                                                                                                                    |             | -                                                                                                                         |
|                           | -                                                          | 0 |                                                                                                                    |                                                                                                                    |             | -                                                                                                                         |
| Caenorhabditis sp. PS1010 | heavy unconvectio-l myosin protein 7                       | 5 | F:GO:0046872;<br>C:GO:0016459;<br>F:GO:0005524;<br>P:GO:0007165;<br>F:GO:0003774                                   | -                                                                                                                  |             | IPR002219; G3DSA:3.30.60.20<br>(GENE3D), SSF57889 (SUPERFAMILY)                                                           |
|                           | -                                                          | 0 |                                                                                                                    |                                                                                                                    |             | -                                                                                                                         |
| Caenorhabditis elegans    | protein clec16a                                            | 0 |                                                                                                                    | P:GO:0008150;<br>C:GO:0005575                                                                                      |             | IPR019155; PTHR21481 (PANTHER)                                                                                            |

|                         |                                                         |    |                                                                                                                                                                                                                          |                                                                                                                                     |             |                                                                                                                                      |
|-------------------------|---------------------------------------------------------|----|--------------------------------------------------------------------------------------------------------------------------------------------------------------------------------------------------------------------------|-------------------------------------------------------------------------------------------------------------------------------------|-------------|--------------------------------------------------------------------------------------------------------------------------------------|
| Aplysia californica     | poly                                                    | 13 | F:GO:0047485;<br>P:GO:0050789;<br>P:GO:0006281;<br>P:GO:0032869;<br>C:GO:0005730;<br>F:GO:0046872;<br>C:GO:0005667;<br>F:GO:0042802;<br>P:GO:0006471;<br>F:GO:0008134;<br>C:GO:0005635;<br>P:GO:0006366;<br>F:GO:0003950 | -                                                                                                                                   | EC:2.4.2.30 | IPR004102; PTHR15447 (PANTHER)                                                                                                       |
| Aspergillus niger       | hypothetical protein An03g03270 [Aspergillus niger]     | 0  |                                                                                                                                                                                                                          |                                                                                                                                     |             | -                                                                                                                                    |
|                         | -                                                       | 0  |                                                                                                                                                                                                                          |                                                                                                                                     |             | IPR017970                                                                                                                            |
|                         | -                                                       | 0  |                                                                                                                                                                                                                          |                                                                                                                                     |             | SignalP (SIGNALP)                                                                                                                    |
|                         | -                                                       | 0  |                                                                                                                                                                                                                          |                                                                                                                                     |             | -                                                                                                                                    |
|                         | -                                                       | 0  |                                                                                                                                                                                                                          |                                                                                                                                     |             | SignalP (SIGNALP)                                                                                                                    |
|                         | -                                                       | 0  |                                                                                                                                                                                                                          |                                                                                                                                     |             | SignalP (SIGNALP)                                                                                                                    |
| Caenorhabditis briggsae | malonyl- decarboxylase                                  | 7  | P:GO:0006085;<br>C:GO:0005829;<br>C:GO:0005777;<br>C:GO:0005739;<br>P:GO:0031998;<br>F:GO:0005515;<br>F:GO:0050080                                                                                                       | -                                                                                                                                   | EC:4.1.1.9  | IPR007956                                                                                                                            |
| Caenorhabditis briggsae | Hypothetical protein CBG19103 [Caenorhabditis briggsae] | 5  | P:GO:0040007;<br>F:GO:0005488;<br>P:GO:0006898;<br>P:GO:0002119;<br>P:GO:0040011                                                                                                                                         | -                                                                                                                                   |             | -                                                                                                                                    |
|                         | -                                                       | 0  |                                                                                                                                                                                                                          |                                                                                                                                     |             | -                                                                                                                                    |
|                         | -                                                       | 0  |                                                                                                                                                                                                                          |                                                                                                                                     |             | -                                                                                                                                    |
|                         | -                                                       | 0  |                                                                                                                                                                                                                          |                                                                                                                                     |             | -                                                                                                                                    |
|                         |                                                         |    |                                                                                                                                                                                                                          |                                                                                                                                     |             | IPR003599; IPR007110; IPR010939;<br>IPR013098; IPR013783; PTHR19897<br>(PANTHER), PTHR19897:SF9<br>(PANTHER), SSF48726 (SUPERFAMILY) |
| Caenorhabditis elegans  | aspartyl aminopeptidase                                 | 0  |                                                                                                                                                                                                                          | F:GO:0046872;<br>P:GO:0006508;<br>F:GO:0008237;<br>C:GO:0005773;<br>F:GO:0004177;<br>F:GO:0016787;<br>F:GO:0008233;<br>F:GO:0008270 |             | IPR001948; G3DSA:2.30.250.10<br>(GENE3D), SSF101821 (SUPERFAMILY)                                                                    |
|                         | -                                                       | 0  |                                                                                                                                                                                                                          |                                                                                                                                     |             | -                                                                                                                                    |
|                         | -                                                       | 0  |                                                                                                                                                                                                                          |                                                                                                                                     |             | -                                                                                                                                    |
|                         | -                                                       | 0  |                                                                                                                                                                                                                          |                                                                                                                                     |             | SignalP (SIGNALP)                                                                                                                    |
|                         | -                                                       | 0  |                                                                                                                                                                                                                          |                                                                                                                                     |             | SignalP (SIGNALP)                                                                                                                    |
| Caenorhabditis briggsae | sy-pse-associated protein 1                             | 0  |                                                                                                                                                                                                                          |                                                                                                                                     |             | -                                                                                                                                    |
| Loa loa                 | hypothetical protein LOAG_04165 [Loa loa]               | 0  |                                                                                                                                                                                                                          |                                                                                                                                     |             | -                                                                                                                                    |
| Brugia malayi           | vacuolar protein sorting protein                        | 0  |                                                                                                                                                                                                                          | C:GO:0005739;<br>F:GO:0008270;<br>F:GO:0005515                                                                                      |             | PTHR23323 (PANTHER),<br>PTHR23323:SF25 (PANTHER)                                                                                     |
| Caenorhabditis briggsae | Hypothetical protein CBG02032 [Caenorhabditis briggsae] | 0  |                                                                                                                                                                                                                          |                                                                                                                                     |             | -                                                                                                                                    |

|                           |                                                                  |   |                                                                                  |                                                                                                                    |                                                                                                                           |
|---------------------------|------------------------------------------------------------------|---|----------------------------------------------------------------------------------|--------------------------------------------------------------------------------------------------------------------|---------------------------------------------------------------------------------------------------------------------------|
| Caenorhabditis briggsae   | 26s proteasome subunit s9                                        | 4 | C:GO:0005875;<br>C:GO:0008541;<br>P:GO:0006508;<br>F:GO:0004175                  | -                                                                                                                  | PTHR10678 (PANTHER),<br>PTHR10678:SF2 (PANTHER)                                                                           |
| Caenorhabditis briggsae   | protein-tyrosine phosphatase containing protein                  | 0 |                                                                                  | P:GO:0016311;<br>F:GO:0016791;<br>P:GO:0006470;<br>F:GO:0016787;<br>F:GO:0004725;<br>F:GO:0005515;<br>F:GO:0004721 | IPR000242; G3DSA:3.90.190.10<br>(GENE3D), PTHR19134 (PANTHER),<br>PTHR19134:SF26 (PANTHER),<br>SSF52799 (SUPERFAMILY)     |
| -                         | -                                                                | 0 |                                                                                  |                                                                                                                    | -                                                                                                                         |
| Caenorhabditis briggsae   | leucine rich repeat family protein                               | 0 |                                                                                  | C:GO:0016021;<br>P:GO:0040010;<br>P:GO:0002119;<br>P:GO:0040007;<br>F:GO:0005515                                   | PTHR23154 (PANTHER),<br>PTHR23154:SF127 (PANTHER), SignalP<br>(SIGNALP)                                                   |
| -                         | -                                                                | 0 |                                                                                  |                                                                                                                    | SignalP (SIGNALP)                                                                                                         |
| -                         | -                                                                | 0 |                                                                                  |                                                                                                                    | -                                                                                                                         |
| -                         | -                                                                | 0 |                                                                                  |                                                                                                                    | -                                                                                                                         |
| Caenorhabditis elegans    | yo91_caee1_ame: full=tpr repeat-containing protein               | 0 |                                                                                  | F:GO:0005488                                                                                                       | -                                                                                                                         |
| Caenorhabditis briggsae   | lim domain family member (lim-8)                                 | 1 | F:GO:0005515                                                                     | -                                                                                                                  | -                                                                                                                         |
| -                         | -                                                                | 0 |                                                                                  |                                                                                                                    | -                                                                                                                         |
| -                         | -                                                                | 0 |                                                                                  |                                                                                                                    | -                                                                                                                         |
| -                         | -                                                                | 0 |                                                                                  |                                                                                                                    | -                                                                                                                         |
| Caenorhabditis elegans    | protein ki-se domain containing protein                          | 2 | F:GO:0016301;<br>P:GO:0000003                                                    | -                                                                                                                  | IPR011009; IPR017442;<br>G3DSA:1.10.510.10 (GENE3D),<br>PTHR11909 (PANTHER),<br>PTHR11909:SF19 (PANTHER)                  |
| -                         | -                                                                | 0 |                                                                                  |                                                                                                                    | -                                                                                                                         |
| -                         | -                                                                | 0 |                                                                                  |                                                                                                                    | -                                                                                                                         |
|                           |                                                                  |   |                                                                                  |                                                                                                                    | IPR003599; IPR007110; IPR013098;<br>IPR013783; PTHR19900 (PANTHER),<br>PTHR19900:SF7 (PANTHER), SSF48726<br>(SUPERFAMILY) |
| Trichostrongylus vitrinus | atp synthase f0 subunit 6                                        | 5 | F:GO:0015078;<br>C:GO:0005743;<br>C:GO:0016021;<br>P:GO:0015986;<br>C:GO:0045263 | -                                                                                                                  | SignalP (SIGNALP)                                                                                                         |
| -                         | -                                                                | 0 |                                                                                  |                                                                                                                    | -                                                                                                                         |
| -                         | -                                                                | 0 |                                                                                  |                                                                                                                    | SignalP (SIGNALP)                                                                                                         |
| Caenorhabditis briggsae   | r- dependent r- polymerase family protein                        | 2 | F:GO:0005515;<br>P:GO:0009792                                                    | -                                                                                                                  | IPR007855                                                                                                                 |
| -                         | -                                                                | 0 |                                                                                  |                                                                                                                    | -                                                                                                                         |
| -                         | -                                                                | 0 |                                                                                  |                                                                                                                    | -                                                                                                                         |
| Caenorhabditis briggsae   | ync9_caee1_ame: full=uncharacterized protein flags:<br>precursor | 0 |                                                                                  |                                                                                                                    | IPR012335; IPR012336                                                                                                      |
| -                         | -                                                                | 0 |                                                                                  |                                                                                                                    | -                                                                                                                         |
| Caenorhabditis elegans    | amidinotransferase family protein                                | 1 | F:GO:0016787                                                                     | -                                                                                                                  | IPR003198; G3DSA:3.75.10.10<br>(GENE3D), PTHR12737 (PANTHER),<br>PTHR12737:SF1 (PANTHER), SSF55909<br>(SUPERFAMILY)       |
| -                         | -                                                                | 0 |                                                                                  |                                                                                                                    | -                                                                                                                         |
| -                         | -                                                                | 0 |                                                                                  |                                                                                                                    | -                                                                                                                         |
| -                         | -                                                                | 0 |                                                                                  |                                                                                                                    | IPR013069                                                                                                                 |
| -                         | -                                                                | 0 |                                                                                  |                                                                                                                    | SignalP (SIGNALP)                                                                                                         |

|                         |                                                                                                                       |    |                                                                                                                                                                       |   |                           |                                                             |
|-------------------------|-----------------------------------------------------------------------------------------------------------------------|----|-----------------------------------------------------------------------------------------------------------------------------------------------------------------------|---|---------------------------|-------------------------------------------------------------|
| Caenorhabditis elegans  | methylenetetrahydrofolate dehydroge-se (-dp+ dependent)<br>methenyltetrahydrofolate formyltetrahydrofolate synthetase | 8  | P:GO:0040010;<br>P:GO:0008340;<br>F:GO:0004488;<br>F:GO:0004477;<br>P:GO:0008652;<br>F:GO:0005515;<br>P:GO:0009396;<br>C:GO:0005737                                   | - | EC:1.5.1.5;<br>EC:3.5.4.9 | -                                                           |
| Homo sapiens            | glucose phosphate isomerase                                                                                           | 10 | P:GO:0001525;<br>F:GO:0005125;<br>C:GO:0005615;<br>F:GO:0004347;<br>P:GO:0006959;<br>P:GO:0006096;<br>P:GO:0007599;<br>P:GO:0006094;<br>C:GO:0005737;<br>F:GO:0008083 | - | EC:5.3.1.9                | -                                                           |
| Caenorhabditis elegans  | ypl1_caeeel ame: full=protein yippee-like                                                                             | 0  |                                                                                                                                                                       |   |                           | -                                                           |
| -                       | -                                                                                                                     | 0  |                                                                                                                                                                       |   |                           | SignalP (SIGNALP)                                           |
| -                       | -                                                                                                                     | 0  |                                                                                                                                                                       |   |                           | -                                                           |
| -                       | -                                                                                                                     | 0  |                                                                                                                                                                       |   |                           | -                                                           |
| -                       | -                                                                                                                     | 0  |                                                                                                                                                                       |   |                           | SignalP (SIGNALP)                                           |
| Caenorhabditis elegans  | gl actin (drosophila neuroligin-like) homolog family member<br>(nrx-1)                                                | 0  |                                                                                                                                                                       |   |                           | IPR008985; IPR012680; IPR013320                             |
| -                       | -                                                                                                                     | 0  |                                                                                                                                                                       |   |                           | -                                                           |
| Loa loa                 | stromal antigen                                                                                                       | 1  | F:GO:0005488                                                                                                                                                          | - |                           | SignalP (SIGNALP)                                           |
| -                       | -                                                                                                                     | 0  |                                                                                                                                                                       |   |                           | -                                                           |
| -                       | -                                                                                                                     | 0  |                                                                                                                                                                       |   |                           | -                                                           |
| Caenorhabditis briggsae | rho gtpase-activating protein 26                                                                                      | 5  | P:GO:0019915;<br>F:GO:0005096;<br>P:GO:0007165;<br>C:GO:0005622;<br>F:GO:0005515                                                                                      | - |                           | -                                                           |
| Caenorhabditis elegans  | rho gtpase-activating protein 26                                                                                      | 4  | F:GO:0005096;<br>P:GO:0007165;<br>C:GO:0005622;<br>F:GO:0005515                                                                                                       | - |                           | -                                                           |
| -                       | -                                                                                                                     | 0  |                                                                                                                                                                       |   |                           | -                                                           |
| Pan troglodytes         | I antigen member 3                                                                                                    | 1  | F:GO:0005515                                                                                                                                                          | - |                           | -                                                           |
| -                       | -                                                                                                                     | 0  |                                                                                                                                                                       |   |                           | -                                                           |
| -                       | -                                                                                                                     | 0  |                                                                                                                                                                       |   |                           | -                                                           |
| Caenorhabditis elegans  | high incidence of males (increased x chromosome loss)<br>family member (him-4)                                        | 0  |                                                                                                                                                                       |   |                           | -                                                           |
| -                       | -                                                                                                                     | 0  |                                                                                                                                                                       |   |                           | -                                                           |
| -                       | -                                                                                                                     | 0  |                                                                                                                                                                       |   |                           | -                                                           |
| Caenorhabditis elegans  | follicle stimulating hormone receptor                                                                                 | 10 | P:GO:0009792;<br>C:GO:0005840;<br>P:GO:0006952;<br>F:GO:0003735;<br>P:GO:0040010;<br>P:GO:0000003;<br>P:GO:0007186;<br>C:GO:0016021;<br>F:GO:0016500;<br>P:GO:0006412 | - | EC:3.6.5.3                | IPR002131; PTHR23154 (PANTHER),<br>PTHR23154:SF24 (PANTHER) |
| -                       | -                                                                                                                     | 0  |                                                                                                                                                                       |   |                           | -                                                           |

|                         |                                                       |    |                                                                                                                                                                                                                                                                                                                                                                                                                     |                            |                                                                                                                                                           |
|-------------------------|-------------------------------------------------------|----|---------------------------------------------------------------------------------------------------------------------------------------------------------------------------------------------------------------------------------------------------------------------------------------------------------------------------------------------------------------------------------------------------------------------|----------------------------|-----------------------------------------------------------------------------------------------------------------------------------------------------------|
|                         | -                                                     | 0  |                                                                                                                                                                                                                                                                                                                                                                                                                     |                            | SignalP (SIGNALP)                                                                                                                                         |
|                         | -                                                     | 0  |                                                                                                                                                                                                                                                                                                                                                                                                                     |                            | -                                                                                                                                                         |
|                         | -                                                     | 0  |                                                                                                                                                                                                                                                                                                                                                                                                                     |                            | -                                                                                                                                                         |
| Caenorhabditis briggsae | williams-beuren syndrome chromosome region 16 protein | 0  | C:GO:0005739;<br>P:GO:0008150;<br>C:GO:0005575                                                                                                                                                                                                                                                                                                                                                                      |                            | IPR000408; IPR009091; PTHR22870 (PANTHER), PTHR22870:SF11 (PANTHER)                                                                                       |
|                         | -                                                     | 0  |                                                                                                                                                                                                                                                                                                                                                                                                                     |                            | -                                                                                                                                                         |
|                         | -                                                     | 0  |                                                                                                                                                                                                                                                                                                                                                                                                                     |                            | -                                                                                                                                                         |
| Caenorhabditis briggsae | briggsae cbr-asp-6 protein                            | 4  | P:GO:0008219;<br>F:GO:0005515;<br>P:GO:0040011;<br>F:GO:0008233                                                                                                                                                                                                                                                                                                                                                     |                            | IPR001461; IPR009007; IPR021109; PTHR13683:SF53 (PANTHER)                                                                                                 |
|                         | -                                                     | 0  |                                                                                                                                                                                                                                                                                                                                                                                                                     |                            | SignalP (SIGNALP)                                                                                                                                         |
| Brugia malayi           | zinc c2h2 type family protein                         | 2  | F:GO:0008270;<br>C:GO:0005622                                                                                                                                                                                                                                                                                                                                                                                       |                            | IPR015880                                                                                                                                                 |
| Loa loa                 | o-glycosyl hydrolase family 30 protein                | 6  | P:GO:0005975;<br>F:GO:0043169;<br>P:GO:0006665;<br>C:GO:0005764;<br>F:GO:0004348;<br>P:GO:0007040                                                                                                                                                                                                                                                                                                                   | EC:3.2.1.45                | IPR001139; IPR013781; IPR017853                                                                                                                           |
|                         | -                                                     | 0  |                                                                                                                                                                                                                                                                                                                                                                                                                     |                            | -                                                                                                                                                         |
|                         | -                                                     | 0  |                                                                                                                                                                                                                                                                                                                                                                                                                     |                            | -                                                                                                                                                         |
| Caenorhabditis briggsae | ca++ type member 1                                    | 24 | F:GO:0004871;<br>F:GO:0030145;<br>P:GO:0016339;<br>C:GO:0005802;<br>C:GO:0030133;<br>P:GO:0008544;<br>C:GO:0000139;<br>P:GO:0030026;<br>C:GO:0005792;<br>F:GO:0015410;<br>P:GO:0032468;<br>F:GO:0005509;<br>C:GO:0016021;<br>P:GO:0006754;<br>P:GO:0043123;<br>P:GO:0032472;<br>F:GO:0005388;<br>P:GO:0070588;<br>C:GO:0030141;<br>P:GO:0031532;<br>P:GO:0006200;<br>C:GO:0005886;<br>F:GO:0005524;<br>P:GO:0006828 | EC:3.6.3.35;<br>EC:3.6.3.8 | IPR001757; IPR004014; IPR008250; G3DSA:1.20.1110.10 (GENE3D), PTHR11939:SF87 (PANTHER), SignalP (SIGNALP), SSF81653 (SUPERFAMILY), SSF81665 (SUPERFAMILY) |
| Homo sapiens            | ig kappa light chain                                  | 3  | C:GO:0005576;<br>F:GO:0003823;<br>P:GO:0006955                                                                                                                                                                                                                                                                                                                                                                      |                            | IPR013783; PTHR23267 (PANTHER), PTHR23267:SF33 (PANTHER), SignalP (SIGNALP), SSF48726 (SUPERFAMILY)                                                       |
|                         | -                                                     | 0  |                                                                                                                                                                                                                                                                                                                                                                                                                     |                            | SignalP (SIGNALP)                                                                                                                                         |

|                         |                                                         |    |                                                                                                                                                                                                                                                                                                                                                 |                               |                                                                                                                                                                             |
|-------------------------|---------------------------------------------------------|----|-------------------------------------------------------------------------------------------------------------------------------------------------------------------------------------------------------------------------------------------------------------------------------------------------------------------------------------------------|-------------------------------|-----------------------------------------------------------------------------------------------------------------------------------------------------------------------------|
| Rattus norvegicus       | cold shock domain protein a                             | 20 | C:GO:0005921;<br>P:GO:0000122;<br>F:GO:0003714;<br>C:GO:0005844;<br>F:GO:0003730;<br>P:GO:0031100;<br>P:GO:0009566;<br>P:GO:0007283;<br>P:GO:0048642;<br>P:GO:0008584;<br>F:GO:0003697;<br>C:GO:0005737;<br>P:GO:0046622;<br>F:GO:0003702;<br>P:GO:0009409;<br>F:GO:0003700;<br>F:GO:0003690;<br>C:GO:0005634;<br>P:GO:0043066;<br>P:GO:0001701 | -                             | IPR001969                                                                                                                                                                   |
| Ailuropoda melanoleuca  | stress-induced phosphoprotein 1                         | 9  | P:GO:0046425;<br>F:GO:0051087;<br>P:GO:0045449;<br>F:GO:0008022;<br>C:GO:0008023;<br>F:GO:0019901;<br>P:GO:0006950;<br>C:GO:0005794;<br>F:GO:0030544                                                                                                                                                                                            | -                             | SignalP (SIGNALP)                                                                                                                                                           |
| Caenorhabditis briggsae | briggsae cbr-ugt-58 protein                             | 0  |                                                                                                                                                                                                                                                                                                                                                 | P:GO:0008152;<br>F:GO:0016758 | -                                                                                                                                                                           |
| Caenorhabditis briggsae | olin-like family member (gsnl-1)                        | 0  |                                                                                                                                                                                                                                                                                                                                                 | F:GO:0003779                  | -                                                                                                                                                                           |
| Caenorhabditis elegans  | mboat family protein                                    | 2  | C:GO:0016020;<br>P:GO:0010171                                                                                                                                                                                                                                                                                                                   | -                             | PTHR13906 (PANTHER),<br>PTHR13906:SF2 (PANTHER)                                                                                                                             |
| Caenorhabditis briggsae | g-patch domain containing protein                       | 7  | P:GO:0040035;<br>P:GO:0009792;<br>P:GO:0002119;<br>C:GO:0005622;<br>F:GO:0005515;<br>P:GO:0040011;<br>P:GO:0040007                                                                                                                                                                                                                              | -                             | IPR000467; PTHR13288 (PANTHER),<br>PTHR13288:SF8 (PANTHER)                                                                                                                  |
| Caenorhabditis briggsae | d- ligase                                               | 4  | P:GO:0006259;<br>F:GO:0016874;<br>P:GO:0006974;<br>F:GO:0000166                                                                                                                                                                                                                                                                                 | -                             | IPR012308; G3DSA:1.10.3260.10<br>(GENE3D), SSF117018 (SUPERFAMILY)                                                                                                          |
| Caenorhabditis briggsae | Hypothetical protein CBG10557 [Caenorhabditis briggsae] | 1  | F:GO:0005515                                                                                                                                                                                                                                                                                                                                    |                               | -                                                                                                                                                                           |
| Caenorhabditis briggsae | 3 -phosphoadenosine 5 -phosphosulfate synthase 2        | 8  | P:GO:0001501;<br>F:GO:0004781;<br>F:GO:0005515;<br>F:GO:0005524;<br>P:GO:0000003;<br>P:GO:0008340;<br>P:GO:0000103;<br>F:GO:0004020                                                                                                                                                                                                             | -                             | EC:2.7.7.4;<br>EC:2.7.1.25<br>IPR002650; IPR014729; IPR015947;<br>G3DSA:3.10.400.10 (GENE3D),<br>PTHR11055 (PANTHER),<br>PTHR11055:SF2 (PANTHER), SSF52374<br>(SUPERFAMILY) |
| -                       | -                                                       | 0  |                                                                                                                                                                                                                                                                                                                                                 |                               | -                                                                                                                                                                           |
| -                       | -                                                       | 0  |                                                                                                                                                                                                                                                                                                                                                 |                               | -                                                                                                                                                                           |
| -                       | -                                                       | 0  |                                                                                                                                                                                                                                                                                                                                                 |                               | -                                                                                                                                                                           |
| -                       | -                                                       | 0  |                                                                                                                                                                                                                                                                                                                                                 |                               | -                                                                                                                                                                           |

|                         |                                                                                        |   |                                                                                                                                     |                               |             |                                                                                                                                 |
|-------------------------|----------------------------------------------------------------------------------------|---|-------------------------------------------------------------------------------------------------------------------------------------|-------------------------------|-------------|---------------------------------------------------------------------------------------------------------------------------------|
| Caenorhabditis elegans  | hypothetical protein F25F6.1 [Caenorhabditis elegans]                                  | 0 |                                                                                                                                     |                               |             | -                                                                                                                               |
|                         | -                                                                                      | 0 |                                                                                                                                     |                               |             | -                                                                                                                               |
|                         | -                                                                                      | 0 |                                                                                                                                     |                               |             | -                                                                                                                               |
| Caenorhabditis briggsae | macrophage-stimulating protein receptor                                                | 8 | P:GO:0009615;<br>C:GO:0016021;<br>P:GO:0023052;<br>C:GO:0001725;<br>F:GO:0005515;<br>P:GO:0050794;<br>F:GO:0004714;<br>C:GO:0005886 | -                             | EC:2.7.10.1 | IPR001245; IPR011009; IPR020685;<br>IPR020739; G3DSA:1.10.510.10<br>(GENE3D)                                                    |
|                         | -                                                                                      | 0 |                                                                                                                                     |                               |             | -                                                                                                                               |
|                         | -                                                                                      | 0 |                                                                                                                                     |                               |             | -                                                                                                                               |
| Caenorhabditis elegans  | r- helicase                                                                            | 4 | F:GO:0003676;<br>F:GO:0000166;<br>F:GO:0004386;<br>C:GO:0005634                                                                     | -                             |             | -                                                                                                                               |
| Caenorhabditis elegans  | r- helicase                                                                            | 4 | F:GO:0003676;<br>F:GO:0000166;<br>F:GO:0004386;<br>C:GO:0005634                                                                     | -                             |             | -                                                                                                                               |
| Caenorhabditis elegans  | leucine-rich ras-like ki-se family member (lrk-1)                                      | 0 |                                                                                                                                     |                               |             | G3DSA:3.80.10.10 (GENE3D), PS51450<br>(PROFILE)                                                                                 |
|                         | -                                                                                      | 0 |                                                                                                                                     |                               |             | -                                                                                                                               |
| Caenorhabditis briggsae | Hypothetical protein CBG18375 [Caenorhabditis briggsae]                                | 0 |                                                                                                                                     | C:GO:0016020;<br>F:GO:0008158 |             | -                                                                                                                               |
|                         | -                                                                                      | 0 |                                                                                                                                     |                               |             | -                                                                                                                               |
|                         | -                                                                                      | 0 |                                                                                                                                     |                               |             | SignalP (SIGNALP)                                                                                                               |
| Caenorhabditis elegans  | phytanoyl- hydroxylase interacting                                                     | 0 |                                                                                                                                     |                               |             | -                                                                                                                               |
|                         | -                                                                                      | 0 |                                                                                                                                     |                               |             | -                                                                                                                               |
|                         | -                                                                                      | 0 |                                                                                                                                     |                               |             | -                                                                                                                               |
|                         | -                                                                                      | 0 |                                                                                                                                     |                               |             | -                                                                                                                               |
|                         | -                                                                                      | 0 |                                                                                                                                     |                               |             | -                                                                                                                               |
| Dictyocaulus viviparus  | acetylcholinesterase 2                                                                 | 5 | P:GO:0001507;<br>F:GO:0003990;<br>C:GO:0005623;<br>P:GO:0040012;<br>F:GO:0042803                                                    | -                             | EC:3.1.1.7  | SignalP (SIGNALP)                                                                                                               |
| Dictyocaulus viviparus  | acetylcholinesterase 2                                                                 | 5 | P:GO:0001507;<br>F:GO:0003990;<br>C:GO:0005623;<br>P:GO:0040012;<br>F:GO:0042803                                                    | -                             | EC:3.1.1.7  | IPR000997; IPR002018;<br>G3DSA:3.40.50.1820 (GENE3D),<br>PTHR11559:SF33 (PANTHER), SignalP<br>(SIGNALP), SSF53474 (SUPERFAMILY) |
| Dictyocaulus viviparus  | acetylcholinesterase 2                                                                 | 5 | P:GO:0001507;<br>F:GO:0003990;<br>C:GO:0005623;<br>P:GO:0040012;<br>F:GO:0042803                                                    | -                             | EC:3.1.1.7  | -                                                                                                                               |
| Dictyocaulus viviparus  | acetylcholinesterase 2                                                                 | 5 | P:GO:0001507;<br>F:GO:0003990;<br>C:GO:0005623;<br>P:GO:0040012;<br>F:GO:0042803                                                    | -                             | EC:3.1.1.7  | -                                                                                                                               |
| Caenorhabditis elegans  | briggsae cbr-hmr-1 protein                                                             | 1 | F:GO:0005515                                                                                                                        | -                             |             | -                                                                                                                               |
| Canis familiaris        | actin-related protein 2 3 complex subunit 1b (arp2 3 complex 41 kda subunit) (p41-arc) | 0 |                                                                                                                                     |                               |             | -                                                                                                                               |



|                         |                                     |    |                                                                                                                                                                                                                                                                                                                                                                                                                                      |  |                                                                                                                                 |
|-------------------------|-------------------------------------|----|--------------------------------------------------------------------------------------------------------------------------------------------------------------------------------------------------------------------------------------------------------------------------------------------------------------------------------------------------------------------------------------------------------------------------------------|--|---------------------------------------------------------------------------------------------------------------------------------|
|                         | -                                   | 0  |                                                                                                                                                                                                                                                                                                                                                                                                                                      |  | -                                                                                                                               |
|                         | -                                   | 0  |                                                                                                                                                                                                                                                                                                                                                                                                                                      |  | -                                                                                                                               |
| Loa loa                 | mef2c protein                       | 25 | P:GO:0035051;<br>F:GO:0042826;<br>P:GO:0002062;<br>P:GO:0001649;<br>P:GO:0003151;<br>C:GO:0016607;<br>F:GO:0019901;<br>P:GO:0009952;<br>P:GO:0001568;<br>P:GO:0010552;<br>C:GO:0005730;<br>F:GO:0016563;<br>F:GO:0003702;<br>P:GO:0010553;<br>P:GO:0045885;<br>P:GO:0003211;<br>P:GO:0007519;<br>F:GO:0043565;<br>F:GO:0003700;<br>P:GO:0007399;<br>P:GO:0007521;<br>P:GO:0090073;<br>P:GO:0001974;<br>P:GO:0051145;<br>P:GO:0001958 |  | IPR002100; PTHR11945 (PANTHER),<br>PTHR11945:SF24 (PANTHER)                                                                     |
|                         | -                                   | 0  |                                                                                                                                                                                                                                                                                                                                                                                                                                      |  | -                                                                                                                               |
|                         | -                                   | 0  |                                                                                                                                                                                                                                                                                                                                                                                                                                      |  | -                                                                                                                               |
|                         | -                                   | 0  |                                                                                                                                                                                                                                                                                                                                                                                                                                      |  | -                                                                                                                               |
| Caenorhabditis elegans  | uncoordi-ted family member (unc-62) | 13 | P:GO:0048645;<br>F:GO:0005515;<br>P:GO:0001752;<br>P:GO:0010552;<br>P:GO:0007383;<br>P:GO:0007420;<br>F:GO:0043565;<br>P:GO:0007480;<br>P:GO:0048735;<br>F:GO:0003700;<br>P:GO:0009954;<br>C:GO:0005634;<br>P:GO:0007476                                                                                                                                                                                                             |  | -                                                                                                                               |
|                         | -                                   | 0  |                                                                                                                                                                                                                                                                                                                                                                                                                                      |  | SignalP (SIGNALP)                                                                                                               |
| Caenorhabditis briggsae | briggsae cbr-mrp-6 protein          | 5  | F:GO:0022857;<br>F:GO:0016887;<br>P:GO:0006810;<br>C:GO:0016020;<br>F:GO:0000166                                                                                                                                                                                                                                                                                                                                                     |  | IPR001140; IPR009147; IPR011527;<br>IPR017940; G3DSA:1.20.1560.10<br>(GENE3D), PTHR19242 (PANTHER),<br>PTHR19242:SF97 (PANTHER) |
|                         | -                                   | 0  |                                                                                                                                                                                                                                                                                                                                                                                                                                      |  | -                                                                                                                               |
|                         | -                                   | 0  |                                                                                                                                                                                                                                                                                                                                                                                                                                      |  | -                                                                                                                               |
|                         | -                                   | 0  |                                                                                                                                                                                                                                                                                                                                                                                                                                      |  | SignalP (SIGNALP)                                                                                                               |
|                         | -                                   | 0  |                                                                                                                                                                                                                                                                                                                                                                                                                                      |  | -                                                                                                                               |
|                         | -                                   | 0  |                                                                                                                                                                                                                                                                                                                                                                                                                                      |  | -                                                                                                                               |

|                         |                                                 |    |                                                                                                                                                                                        |   |                               |                                                                                                                  |
|-------------------------|-------------------------------------------------|----|----------------------------------------------------------------------------------------------------------------------------------------------------------------------------------------|---|-------------------------------|------------------------------------------------------------------------------------------------------------------|
| Caenorhabditis briggsae | d- polymerase epsilon catalytic subunit         | 11 | F:GO:0008270;<br>F:GO:0003887;<br>P:GO:0006260;<br>P:GO:0040035;<br>F:GO:0003677;<br>F:GO:0000166;<br>P:GO:0040011;<br>P:GO:0006997;<br>P:GO:0002009;<br>P:GO:0009792;<br>C:GO:0005634 | - | EC:2.7.7.7                    | PTHR10670 (PANTHER)                                                                                              |
| Loa loa                 | transcription elongation factor b polypeptide 1 | 1  | F:GO:0005488                                                                                                                                                                           | - |                               | IPR011333; IPR016073; PTHR20648 (PANTHER)                                                                        |
|                         | -                                               | 0  |                                                                                                                                                                                        |   |                               | -                                                                                                                |
|                         | -                                               | 0  |                                                                                                                                                                                        |   |                               | -                                                                                                                |
|                         | -                                               | 0  |                                                                                                                                                                                        |   |                               | SignalP (SIGNALP)                                                                                                |
| Caenorhabditis elegans  | nuclear hormone receptor family member (nhr-1)  | 11 | F:GO:0008270;<br>P:GO:0006355;<br>F:GO:0042802;<br>F:GO:0043565;<br>P:GO:0002119;<br>P:GO:0040017;<br>F:GO:0003700;<br>F:GO:0003707;<br>P:GO:0040018;<br>P:GO:0032094;<br>C:GO:0005634 | - |                               | IPR001628; IPR008946; IPR013088;<br>PTHR11865 (PANTHER),<br>PTHR11865:SF218 (PANTHER),<br>SSF57716 (SUPERFAMILY) |
| Caenorhabditis elegans  | nuclear receptor nhr-1                          | 11 | F:GO:0008270;<br>P:GO:0006355;<br>F:GO:0042802;<br>F:GO:0043565;<br>P:GO:0002119;<br>P:GO:0040017;<br>F:GO:0003700;<br>F:GO:0003707;<br>P:GO:0040018;<br>P:GO:0032094;<br>C:GO:0005634 | - |                               | -                                                                                                                |
|                         | -                                               | 0  |                                                                                                                                                                                        |   |                               | -                                                                                                                |
|                         | -                                               | 0  |                                                                                                                                                                                        |   |                               | -                                                                                                                |
|                         | -                                               | 0  |                                                                                                                                                                                        |   |                               | -                                                                                                                |
|                         | -                                               | 0  |                                                                                                                                                                                        |   |                               | SignalP (SIGNALP)                                                                                                |
|                         | -                                               | 0  |                                                                                                                                                                                        |   |                               | -                                                                                                                |
|                         | -                                               | 0  |                                                                                                                                                                                        |   |                               | -                                                                                                                |
|                         | -                                               | 0  |                                                                                                                                                                                        |   |                               | -                                                                                                                |
| Caenorhabditis elegans  | mpo-a protein                                   | 6  | F:GO:0020037;<br>P:GO:0055114;<br>F:GO:0004666;<br>F:GO:0004601;<br>F:GO:0005509;<br>P:GO:0006979                                                                                      | - | EC:1.14.99.1<br>; EC:1.11.1.7 | -                                                                                                                |
| Caenorhabditis elegans  | mgc83087 protein                                | 1  | F:GO:0005515                                                                                                                                                                           | - |                               | -                                                                                                                |
|                         | -                                               | 0  |                                                                                                                                                                                        |   |                               | SignalP (SIGNALP)                                                                                                |

|                         |                                                |    |                                                                                                                                                                                        |   |                            |                                                                                     |
|-------------------------|------------------------------------------------|----|----------------------------------------------------------------------------------------------------------------------------------------------------------------------------------------|---|----------------------------|-------------------------------------------------------------------------------------|
| Brugia malayi           | adaptor-related protein complex beta 1 subunit | 9  | P:GO:0009792;<br>P:GO:0002119;<br>F:GO:0005515;<br>F:GO:0008565;<br>P:GO:0000003;<br>P:GO:0006886;<br>P:GO:0040007;<br>P:GO:0006898;<br>C:GO:0030131                                   | - |                            | IPR002553; IPR011989; IPR016024;<br>PTHR11134 (PANTHER),<br>PTHR11134:SF3 (PANTHER) |
|                         |                                                | 0  |                                                                                                                                                                                        |   |                            |                                                                                     |
| Homo sapiens            | protein disulfide isomerase family member 3    | 11 | F:GO:0004629;<br>F:GO:0003756;<br>P:GO:0043065;<br>P:GO:0006606;<br>P:GO:0045454;<br>F:GO:0004197;<br>C:GO:0042470;<br>C:GO:0005788;<br>F:GO:0005515;<br>P:GO:0007165;<br>P:GO:0006621 | - | EC:5.3.4.1;<br>EC:3.4.22.0 | IPR012335; IPR012336                                                                |
| Caenorhabditis elegans  | calcium alpha subunit family member (cca-1)    | 6  | P:GO:0051899;<br>P:GO:0045760;<br>P:GO:0043051;<br>P:GO:0006811;<br>C:GO:0016021;<br>F:GO:0008332                                                                                      | - |                            | -                                                                                   |
|                         |                                                | 0  |                                                                                                                                                                                        |   |                            |                                                                                     |
|                         |                                                | 0  |                                                                                                                                                                                        |   |                            | SignalP (SIGNALP)                                                                   |
|                         |                                                | 0  |                                                                                                                                                                                        |   |                            |                                                                                     |
| Caenorhabditis briggsae | briggsae cbr-asp-6 protein                     | 3  | P:GO:0008219;<br>F:GO:0016787;<br>F:GO:0005515                                                                                                                                         | - |                            | IPR001461; IPR009007; IPR021109;<br>PTHR13683:SF53 (PANTHER)                        |
|                         |                                                | 0  |                                                                                                                                                                                        |   |                            | SignalP (SIGNALP)                                                                   |
|                         |                                                | 0  |                                                                                                                                                                                        |   |                            |                                                                                     |
|                         |                                                | 0  |                                                                                                                                                                                        |   |                            |                                                                                     |
| Caenorhabditis briggsae | zo-1 mdck                                      | 6  | P:GO:0070830;<br>C:GO:0005923;<br>C:GO:0031410;<br>F:GO:0005515;<br>P:GO:0071277;<br>C:GO:0016323                                                                                      | - |                            | -                                                                                   |
| Caenorhabditis briggsae | zo-1 mdck                                      | 6  | P:GO:0070830;<br>C:GO:0005923;<br>C:GO:0031410;<br>F:GO:0005515;<br>P:GO:0071277;<br>C:GO:0016323                                                                                      | - |                            | IPR000906; PTHR13865 (PANTHER),<br>PTHR13865:SF7 (PANTHER)                          |
| Caenorhabditis briggsae | zo-1 mdck                                      | 6  | P:GO:0070830;<br>C:GO:0005923;<br>C:GO:0031410;<br>F:GO:0005515;<br>P:GO:0071277;<br>C:GO:0016323                                                                                      | - |                            | IPR000906; PTHR13865 (PANTHER),<br>PTHR13865:SF7 (PANTHER)                          |

|                         |                                  |    |                                                                                                                                                                                                                                                                                                                                                                                                                                                                        |                                                                                                                                                                                                                          |             |                                                                                         |
|-------------------------|----------------------------------|----|------------------------------------------------------------------------------------------------------------------------------------------------------------------------------------------------------------------------------------------------------------------------------------------------------------------------------------------------------------------------------------------------------------------------------------------------------------------------|--------------------------------------------------------------------------------------------------------------------------------------------------------------------------------------------------------------------------|-------------|-----------------------------------------------------------------------------------------|
| Caenorhabditis briggsae | tight junction protein           | 0  |                                                                                                                                                                                                                                                                                                                                                                                                                                                                        | F:GO:0004385;<br>P:GO:0007391;<br>P:GO:0035156;<br>P:GO:0016337;<br>P:GO:0007254;<br>P:GO:0046328;<br>P:GO:0035147;<br>P:GO:0007163;<br>C:GO:0005913;<br>C:GO:0005912;<br>C:GO:0005622;<br>F:GO:0005515;<br>P:GO:0042981 |             | PTHR13865 (PANTHER),<br>PTHR13865:SF7 (PANTHER)                                         |
| Caenorhabditis briggsae | zo-1 mdck                        | 6  | P:GO:0070830;<br>C:GO:0005923;<br>C:GO:0031410;<br>F:GO:0005515;<br>P:GO:0071277;<br>C:GO:0016323                                                                                                                                                                                                                                                                                                                                                                      | -                                                                                                                                                                                                                        |             | IPR000906; PTHR13865 (PANTHER),<br>PTHR13865:SF7 (PANTHER)                              |
|                         | -                                | 0  |                                                                                                                                                                                                                                                                                                                                                                                                                                                                        |                                                                                                                                                                                                                          |             | -                                                                                       |
|                         | -                                | 0  |                                                                                                                                                                                                                                                                                                                                                                                                                                                                        |                                                                                                                                                                                                                          |             | -                                                                                       |
|                         | -                                | 0  |                                                                                                                                                                                                                                                                                                                                                                                                                                                                        |                                                                                                                                                                                                                          |             | -                                                                                       |
|                         | -                                | 0  |                                                                                                                                                                                                                                                                                                                                                                                                                                                                        |                                                                                                                                                                                                                          |             | -                                                                                       |
| Drosophila melanogaster | cg3603-pa                        | 3  | F:GO:0016491;<br>P:GO:0055114;<br>F:GO:0005488                                                                                                                                                                                                                                                                                                                                                                                                                         | -                                                                                                                                                                                                                        |             | -                                                                                       |
| Caenorhabditis briggsae | otu domain-containing protein 6b | 0  |                                                                                                                                                                                                                                                                                                                                                                                                                                                                        | C:GO:0016021;<br>F:GO:0008233                                                                                                                                                                                            |             | -                                                                                       |
| Caenorhabditis elegans  | met proto-oncogene precursor     | 43 | P:GO:0033138;<br>F:GO:0004674;<br>P:GO:0006915;<br>P:GO:0010552;<br>F:GO:0005008;<br>C:GO:0009925;<br>C:GO:0014069;<br>P:GO:0050775;<br>P:GO:0030534;<br>P:GO:0007420;<br>P:GO:0048012;<br>P:GO:0001889;<br>C:GO:0005615;<br>P:GO:0014812;<br>P:GO:0014902;<br>F:GO:0008013;<br>P:GO:0045740;<br>C:GO:0005737;<br>P:GO:0051450;<br>P:GO:0030317;<br>C:GO:0005887;<br>C:GO:0060076;<br>P:GO:0001890;<br>F:GO:0005524;<br>C:GO:0045211;<br>F:GO:0003723;<br>F:GO:0043274 | -                                                                                                                                                                                                                        | EC:2.7.11.0 | IPR000719; IPR001245; IPR011009;<br>IPR020685; IPR020739;<br>G3DSA:1.10.510.10 (GENE3D) |
|                         | -                                | 0  |                                                                                                                                                                                                                                                                                                                                                                                                                                                                        |                                                                                                                                                                                                                          |             | SignalP (SIGNALP)                                                                       |
|                         | -                                | 0  |                                                                                                                                                                                                                                                                                                                                                                                                                                                                        |                                                                                                                                                                                                                          |             | -                                                                                       |
| Caenorhabditis elegans  | hd domain-containing protein 3   | 1  | F:GO:0003824                                                                                                                                                                                                                                                                                                                                                                                                                                                           | -                                                                                                                                                                                                                        |             | -                                                                                       |

|                               |                                                  |    |                                                                                                                                                                                                                                                                                                                                                                                                                                                                        |                               |                                                                                                        |
|-------------------------------|--------------------------------------------------|----|------------------------------------------------------------------------------------------------------------------------------------------------------------------------------------------------------------------------------------------------------------------------------------------------------------------------------------------------------------------------------------------------------------------------------------------------------------------------|-------------------------------|--------------------------------------------------------------------------------------------------------|
|                               |                                                  | 0  |                                                                                                                                                                                                                                                                                                                                                                                                                                                                        |                               |                                                                                                        |
| Brugia malayi                 | fizzy-related protein                            | 28 | P:GO:0006930;<br>C:GO:0016020;<br>C:GO:0005814;<br>P:GO:0007155;<br>P:GO:0001752;<br>P:GO:0030713;<br>F:GO:0005525;<br>C:GO:0008287;<br>F:GO:0046872;<br>P:GO:0007391;<br>P:GO:0035099;<br>C:GO:0005819;<br>P:GO:0008347;<br>P:GO:0007264;<br>P:GO:0007067;<br>P:GO:0007126;<br>P:GO:0007455;<br>P:GO:0030163;<br>P:GO:0006470;<br>P:GO:0010001;<br>P:GO:0030718;<br>F:GO:0019003;<br>C:GO:0005811;<br>F:GO:0003924;<br>P:GO:0016476;<br>P:GO:0046328;<br>F:GO:0004722 |                               | EC:3.6.5.1;<br>EC:3.6.5.2;<br>EC:3.6.5.3;<br>EC:3.6.5.4                                                |
| Strongylocentrotus purpuratus | mannose c type 1-like 1                          | 0  |                                                                                                                                                                                                                                                                                                                                                                                                                                                                        | F:GO:0005488;<br>F:GO:0005529 | IPR001304; IPR016186; IPR016187;<br>PTHR22802 (PANTHER),<br>PTHR22802:SF15 (PANTHER)                   |
|                               |                                                  | 0  |                                                                                                                                                                                                                                                                                                                                                                                                                                                                        |                               |                                                                                                        |
| Caenorhabditis elegans        | elegans protein confirmed by transcript evidence | 4  | F:GO:0003700;<br>F:GO:0043565;<br>C:GO:0005634;<br>P:GO:0006355                                                                                                                                                                                                                                                                                                                                                                                                        |                               |                                                                                                        |
|                               |                                                  | 0  |                                                                                                                                                                                                                                                                                                                                                                                                                                                                        |                               |                                                                                                        |
| Pongo abelii                  | mhc class ii antigen                             | 3  | P:GO:0006955;<br>P:GO:0002504;<br>C:GO:0042613                                                                                                                                                                                                                                                                                                                                                                                                                         |                               |                                                                                                        |
| Pongo abelii                  | mhc class ii antigen                             | 3  | P:GO:0006955;<br>P:GO:0002504;<br>C:GO:0042613                                                                                                                                                                                                                                                                                                                                                                                                                         |                               | PTHR19944 (PANTHER),<br>PTHR19944:SF27 (PANTHER), SignalP<br>(SIGNALP)                                 |
|                               |                                                  | 0  |                                                                                                                                                                                                                                                                                                                                                                                                                                                                        |                               |                                                                                                        |
|                               |                                                  | 0  |                                                                                                                                                                                                                                                                                                                                                                                                                                                                        |                               |                                                                                                        |
|                               |                                                  | 0  |                                                                                                                                                                                                                                                                                                                                                                                                                                                                        |                               |                                                                                                        |
|                               |                                                  | 0  |                                                                                                                                                                                                                                                                                                                                                                                                                                                                        |                               |                                                                                                        |
| Caenorhabditis elegans        | elegans protein confirmed by transcript evidence | 1  | F:GO:0005515                                                                                                                                                                                                                                                                                                                                                                                                                                                           |                               |                                                                                                        |
| Caenorhabditis elegans        | briggsae cbr-sel-2 protein                       | 6  | C:GO:0005737;<br>P:GO:0008104;<br>F:GO:0051018;<br>P:GO:0042675;<br>C:GO:0016020;<br>C:GO:0005634                                                                                                                                                                                                                                                                                                                                                                      |                               | IPR000409; IPR001680; IPR011046;<br>IPR015943; IPR017986; IPR019781;<br>IPR019782; PTHR13743 (PANTHER) |
|                               |                                                  | 0  |                                                                                                                                                                                                                                                                                                                                                                                                                                                                        |                               |                                                                                                        |

|                         |                                                         |    |                                                                                                                                                                                                                          |                                                                                                                    |             |                   |
|-------------------------|---------------------------------------------------------|----|--------------------------------------------------------------------------------------------------------------------------------------------------------------------------------------------------------------------------|--------------------------------------------------------------------------------------------------------------------|-------------|-------------------|
| Caenorhabditis elegans  | recombination factor ad54                               | 13 | P:GO:0006915;<br>P:GO:0000711;<br>P:GO:0010212;<br>P:GO:0000003;<br>P:GO:0051301;<br>F:GO:0003677;<br>F:GO:0005524;<br>F:GO:0005515;<br>P:GO:0007067;<br>F:GO:0004386;<br>P:GO:0006338;<br>P:GO:0043150;<br>C:GO:0005634 | -                                                                                                                  | -           | -                 |
| -                       | -                                                       | 0  |                                                                                                                                                                                                                          |                                                                                                                    |             | -                 |
| Caenorhabditis elegans  | hypothetical protein C37C3.12 [Caenorhabditis elegans]  | 0  |                                                                                                                                                                                                                          |                                                                                                                    |             | -                 |
| Caenorhabditis briggsae | adam metalloproteinase with thrombospondin type 1 7     | 4  | F:GO:0004222;<br>C:GO:0005578;<br>P:GO:0006508;<br>F:GO:0008270                                                                                                                                                          | -                                                                                                                  | EC:3.4.24.0 | -                 |
| -                       | -                                                       | 0  |                                                                                                                                                                                                                          |                                                                                                                    |             | -                 |
| Pongo abelii            | slc4a2 protein                                          | 6  | C:GO:0016323;<br>F:GO:0015108;<br>F:GO:0005452;<br>C:GO:0005624;<br>C:GO:0016021;<br>P:GO:0006821                                                                                                                        | -                                                                                                                  |             | SignalP (SIGNALP) |
| -                       | -                                                       | 0  |                                                                                                                                                                                                                          |                                                                                                                    |             | -                 |
| Caenorhabditis briggsae | Hypothetical protein CBG07699 [Caenorhabditis briggsae] | 0  |                                                                                                                                                                                                                          | F:GO:0005524;<br>F:GO:0016874;<br>P:GO:0008152;<br>F:GO:0003824;<br>F:GO:0009374;<br>P:GO:0006633;<br>F:GO:0003989 |             | -                 |
| -                       | -                                                       | 0  |                                                                                                                                                                                                                          |                                                                                                                    |             | -                 |
| Caenorhabditis elegans  | isoform e                                               | 11 | C:GO:0009353;<br>P:GO:0040010;<br>P:GO:0008340;<br>C:GO:0031966;<br>P:GO:0055114;<br>P:GO:0006099;<br>P:GO:0002119;<br>P:GO:0006096;<br>P:GO:0009792;<br>F:GO:0004591;<br>F:GO:0030976                                   | -                                                                                                                  | EC:1.2.4.2  | IPR011603         |

|                         |                                                  |    |                                                                                                                                                                                                                                                                                                                                                                                                                                                                        |   |                            |                                                                                                             |
|-------------------------|--------------------------------------------------|----|------------------------------------------------------------------------------------------------------------------------------------------------------------------------------------------------------------------------------------------------------------------------------------------------------------------------------------------------------------------------------------------------------------------------------------------------------------------------|---|----------------------------|-------------------------------------------------------------------------------------------------------------|
| Brugia malayi           | briggsae cbr-scc-3 protein                       | 30 | F:GO:0005515;<br>P:GO:0006412;<br>P:GO:0016045;<br>P:GO:0007141;<br>C:GO:0005576;<br>C:GO:0005730;<br>P:GO:0007286;<br>F:GO:0003677;<br>P:GO:0009253;<br>C:GO:0005875;<br>F:GO:0003735;<br>P:GO:0045449;<br>P:GO:0032494;<br>P:GO:0008592;<br>P:GO:0007379;<br>C:GO:0005811;<br>F:GO:0032500;<br>P:GO:0006965;<br>F:GO:0016019;<br>C:GO:0005887;<br>P:GO:0045087;<br>C:GO:0035327;<br>C:GO:0000922;<br>C:GO:0005721;<br>P:GO:0006260;<br>C:GO:0008278;<br>F:GO:0008745 | - | EC:3.6.5.3;<br>EC:3.5.1.28 | -                                                                                                           |
| Caenorhabditis elegans  | elegans protein confirmed by transcript evidence | 0  |                                                                                                                                                                                                                                                                                                                                                                                                                                                                        |   |                            | -                                                                                                           |
| Caenorhabditis briggsae | endothelin-converting protein 1                  | 3  | C:GO:0016021;<br>F:GO:0004222;<br>P:GO:0006508                                                                                                                                                                                                                                                                                                                                                                                                                         | - | EC:3.4.24.0                | IPR000718; IPR018497;<br>G3DSA:3.40.390.10 (GENE3D),<br>PTHR11733:SF20 (PANTHER),<br>SSF55486 (SUPERFAMILY) |
|                         | -                                                | 0  |                                                                                                                                                                                                                                                                                                                                                                                                                                                                        |   |                            | -                                                                                                           |
|                         | -                                                | 0  |                                                                                                                                                                                                                                                                                                                                                                                                                                                                        |   |                            | -                                                                                                           |
| Caenorhabditis elegans  | patched family protein                           | 7  | P:GO:0018996;<br>C:GO:0016021;<br>P:GO:0008340;<br>P:GO:0000003;<br>P:GO:0040025;<br>F:GO:0008158;<br>P:GO:0040011                                                                                                                                                                                                                                                                                                                                                     | - |                            | IPR003392; PTHR10796 (PANTHER),<br>PTHR10796:SF14 (PANTHER)                                                 |
|                         | -                                                | 0  |                                                                                                                                                                                                                                                                                                                                                                                                                                                                        |   |                            | -                                                                                                           |

|                         |                                                               |    |                                                                                                                                                                                                                                                                                                                                                                                                                                                                                         |                               |             |                                                                        |
|-------------------------|---------------------------------------------------------------|----|-----------------------------------------------------------------------------------------------------------------------------------------------------------------------------------------------------------------------------------------------------------------------------------------------------------------------------------------------------------------------------------------------------------------------------------------------------------------------------------------|-------------------------------|-------------|------------------------------------------------------------------------|
| Ailuropoda melanoleuca  | filamin alpha                                                 | 28 | F:GO:0003669;<br>F:GO:0004871;<br>C:GO:0005802;<br>P:GO:0043433;<br>P:GO:0034394;<br>C:GO:0015629;<br>P:GO:0050821;<br>P:GO:0051220;<br>C:GO:0005576;<br>C:GO:0005829;<br>F:GO:0001948;<br>P:GO:0051764;<br>P:GO:0043123;<br>F:GO:0051015;<br>F:GO:0048365;<br>P:GO:0045022;<br>P:GO:0007195;<br>F:GO:0042803;<br>F:GO:0034989;<br>P:GO:0031532;<br>F:GO:0034988;<br>C:GO:0005886;<br>F:GO:0008134;<br>P:GO:0042177;<br>C:GO:0005634;<br>P:GO:0042993;<br>C:GO:0005938;<br>P:GO:0043113 | -                             | -           | -                                                                      |
| Loa loa                 | uncharacterized protein family upf0005 containing protein     | 0  |                                                                                                                                                                                                                                                                                                                                                                                                                                                                                         | C:GO:0016021;<br>C:GO:0016020 |             | IPR006214; PTHR23291:SF14 (PANTHER), SignalP (SIGNALP)                 |
| Loa loa                 | uncoordi-ted family member (unc-13)                           | 0  |                                                                                                                                                                                                                                                                                                                                                                                                                                                                                         | F:GO:0046872                  |             | IPR010439; PTHR10480 (PANTHER)                                         |
| Caenorhabditis elegans  | trafficking protein particle complex                          | 3  | P:GO:0006182;<br>F:GO:0020037;<br>F:GO:0004383                                                                                                                                                                                                                                                                                                                                                                                                                                          | -                             | EC:4.6.1.2  | IPR007194; IPR011644; G3DSA:3.30.1380.20 (GENE3D), PTHR20902 (PANTHER) |
| Callithrix jacchus      | b chain activator-bound structure of human pyruvate kinase m2 | 11 | F:GO:0004743;<br>C:GO:0019861;<br>F:GO:0005515;<br>F:GO:0030955;<br>F:GO:0005524;<br>F:GO:0000287;<br>P:GO:0006096;<br>P:GO:0012501;<br>C:GO:0005634;<br>C:GO:0005829;<br>C:GO:0005739                                                                                                                                                                                                                                                                                                  | -                             | EC:2.7.1.40 | IPR001697; IPR015793; IPR015813                                        |
| Caenorhabditis elegans  | ynp8_caeel_ame: full=uncharacterized protein                  | 0  |                                                                                                                                                                                                                                                                                                                                                                                                                                                                                         |                               |             | -                                                                      |
| Caenorhabditis briggsae | atp-binding sub-family c (cfr mrp) member 2                   | 4  | F:GO:0016887;<br>P:GO:0006810;<br>F:GO:0000166;<br>F:GO:0005215                                                                                                                                                                                                                                                                                                                                                                                                                         | -                             |             | -                                                                      |
| -                       | -                                                             | 0  |                                                                                                                                                                                                                                                                                                                                                                                                                                                                                         |                               |             | -                                                                      |
| -                       | -                                                             | 0  |                                                                                                                                                                                                                                                                                                                                                                                                                                                                                         |                               |             | SignalP (SIGNALP)                                                      |
| -                       | -                                                             | 0  |                                                                                                                                                                                                                                                                                                                                                                                                                                                                                         |                               |             | IPR016186; IPR016187                                                   |
| -                       | -                                                             | 0  |                                                                                                                                                                                                                                                                                                                                                                                                                                                                                         |                               |             | -                                                                      |
| -                       | -                                                             | 0  |                                                                                                                                                                                                                                                                                                                                                                                                                                                                                         |                               |             | -                                                                      |



|                         |                                                         |    |                                                                                                                                                                                                         |                                                                                                                                                                       |                              |                                                                                             |
|-------------------------|---------------------------------------------------------|----|---------------------------------------------------------------------------------------------------------------------------------------------------------------------------------------------------------|-----------------------------------------------------------------------------------------------------------------------------------------------------------------------|------------------------------|---------------------------------------------------------------------------------------------|
| Caenorhabditis elegans  | atp dependent d- ligase c termi-l region family protein | 0  |                                                                                                                                                                                                         | P:GO:0006260;<br>F:GO:0005524;<br>F:GO:0016874;<br>P:GO:0006281;<br>F:GO:0003910;<br>P:GO:0006310;<br>F:GO:0003677;<br>C:GO:0005622                                   | -                            |                                                                                             |
| Caenorhabditis elegans  | briggsae cbr-dep-1 protein                              | 3  | P:GO:0040026;<br>P:GO:0040027;<br>F:GO:0016787                                                                                                                                                          | -                                                                                                                                                                     |                              | -                                                                                           |
| Caenorhabditis briggsae | cleft lip and palate associated transmembrane protein   | 1  | F:GO:0005515                                                                                                                                                                                            | -                                                                                                                                                                     |                              | IPR008429                                                                                   |
|                         | -                                                       | 0  |                                                                                                                                                                                                         |                                                                                                                                                                       |                              | -                                                                                           |
|                         | -                                                       | 0  |                                                                                                                                                                                                         |                                                                                                                                                                       |                              | IPR009003; G3DSA:2.40.10.10 (GENE3D)                                                        |
| Caenorhabditis elegans  | elegans protein confirmed by transcript evidence        | 3  | P:GO:0006952;<br>P:GO:0008152;<br>F:GO:0003824                                                                                                                                                          | -                                                                                                                                                                     |                              | IPR002198; IPR002347; IPR016040; PTHR19410:SF18 (PANTHER), SSF51735 (SUPERFAMILY)           |
| Branchiostoma floridae  | briggsae cbr-pan-1 protein                              | 0  |                                                                                                                                                                                                         | C:GO:0016021;<br>C:GO:0016020;<br>F:GO:0004930;<br>P:GO:0007165;<br>F:GO:0004872;<br>F:GO:0005515;<br>F:GO:0004871;<br>P:GO:0007186;<br>C:GO:0005886;<br>F:GO:0016500 |                              | -                                                                                           |
| Caenorhabditis briggsae | dihydrolipoamide branched chain transacylase e2         | 12 | F:GO:0008415;<br>F:GO:0004674;<br>C:GO:0042645;<br>F:GO:0005524;<br>F:GO:0043754;<br>P:GO:0032436;<br>C:GO:0005576;<br>F:GO:0005179;<br>P:GO:0009792;<br>P:GO:0046949;<br>F:GO:0048037;<br>P:GO:0006468 | -                                                                                                                                                                     | EC:2.7.11.0;<br>EC:2.3.1.168 | IPR000089; IPR003016; IPR011053; IPR015761; G3DSA:2.40.50.100 (GENE3D), PTHR23151 (PANTHER) |
|                         | -                                                       | 0  |                                                                                                                                                                                                         |                                                                                                                                                                       |                              | -                                                                                           |
|                         | -                                                       | 0  |                                                                                                                                                                                                         |                                                                                                                                                                       |                              | IPR000095; SignalP (SIGNALP)                                                                |
| Caenorhabditis elegans  | ataxia telangiectasia mutated                           | 1  | C:GO:0000785                                                                                                                                                                                            | -                                                                                                                                                                     |                              | PTHR11139 (PANTHER)                                                                         |
|                         | -                                                       | 0  |                                                                                                                                                                                                         |                                                                                                                                                                       |                              | -                                                                                           |
|                         | -                                                       | 0  |                                                                                                                                                                                                         |                                                                                                                                                                       |                              | SignalP (SIGNALP)                                                                           |
| Caenorhabditis elegans  | kinesin light chain family member (klc-2)               | 3  | F:GO:0003777;<br>F:GO:0005515;<br>C:GO:0005871                                                                                                                                                          | -                                                                                                                                                                     |                              | -                                                                                           |
|                         | -                                                       | 0  |                                                                                                                                                                                                         |                                                                                                                                                                       |                              | IPR002293; PTHR11785:SF76 (PANTHER), SignalP (SIGNALP)                                      |
|                         | -                                                       | 0  |                                                                                                                                                                                                         |                                                                                                                                                                       |                              | -                                                                                           |
| Caenorhabditis elegans  | briggsae cbr-tag-263 protein                            | 3  | C:GO:0016021;<br>F:GO:0005272;<br>P:GO:0006814                                                                                                                                                          | -                                                                                                                                                                     |                              | SignalP (SIGNALP)                                                                           |
|                         | -                                                       | 0  |                                                                                                                                                                                                         |                                                                                                                                                                       |                              | -                                                                                           |
|                         | -                                                       | 0  |                                                                                                                                                                                                         |                                                                                                                                                                       |                              | -                                                                                           |
|                         | -                                                       | 0  |                                                                                                                                                                                                         |                                                                                                                                                                       |                              | SignalP (SIGNALP)                                                                           |

|                             |                                              |   |                                                                                                                                                      |                                                |                                                                                                                      |
|-----------------------------|----------------------------------------------|---|------------------------------------------------------------------------------------------------------------------------------------------------------|------------------------------------------------|----------------------------------------------------------------------------------------------------------------------|
|                             | -                                            | 0 |                                                                                                                                                      |                                                | IPR004129; IPR017946; SignalP (SIGNALP)                                                                              |
| Caenorhabditis elegans      | cyclin-dependent ki-se family member (cdk-9) | 4 | P:GO:0006468;<br>F:GO:0005524;<br>F:GO:0004674;<br>P:GO:0051301                                                                                      | EC:2.7.11.0                                    | IPR000719; IPR011009; IPR017442;<br>G3DSA:1.10.510.10 (GENE3D),<br>PTHR11295 (PANTHER),<br>PTHR11295:SF111 (PANTHER) |
|                             | -                                            | 0 |                                                                                                                                                      |                                                | -                                                                                                                    |
|                             | -                                            | 0 |                                                                                                                                                      |                                                | -                                                                                                                    |
|                             | -                                            | 0 |                                                                                                                                                      |                                                | -                                                                                                                    |
|                             | -                                            | 0 |                                                                                                                                                      |                                                | SignalP (SIGNALP)                                                                                                    |
|                             | -                                            | 0 |                                                                                                                                                      |                                                | -                                                                                                                    |
|                             | -                                            | 0 |                                                                                                                                                      |                                                | -                                                                                                                    |
|                             | -                                            | 0 |                                                                                                                                                      |                                                | -                                                                                                                    |
| Angiostrongylus cantonensis | briggsae cbr-gbh-1 protein                   | 5 | F:GO:0005506;<br>P:GO:0055114;<br>F:GO:0016702;<br>F:GO:0008336;<br>P:GO:0045329                                                                     | EC:1.13.11.0<br>;<br>EC:1.14.11.1              | G3DSA:3.60.130.10 (GENE3D),<br>PTHR10696 (PANTHER),<br>PTHR10696:SF3 (PANTHER), SSF51197<br>(SUPERFAMILY)            |
| Caenorhabditis briggsae     | serine threonine-protein ki-se d3            | 2 | F:GO:0046872;<br>C:GO:0016021                                                                                                                        |                                                | IPR002219; G3DSA:3.30.60.20<br>(GENE3D), PTHR21119 (PANTHER),<br>PTHR21119:SF1 (PANTHER), SSF57889<br>(SUPERFAMILY)  |
| Loa loa                     | hypothetical protein LOAG_05011 [Loa loa]    | 0 |                                                                                                                                                      |                                                | IPR015633; SSF144074 (SUPERFAMILY)                                                                                   |
| Caenorhabditis briggsae     | programmed cell death 6-interacting protein  | 0 |                                                                                                                                                      |                                                | G3DSA:1.20.140.50 (GENE3D),<br>PTHR23030 (PANTHER),<br>PTHR23030:SF11 (PANTHER)                                      |
| Caenorhabditis briggsae     | tfiie alpha subunit family protein           | 9 | P:GO:0040010;<br>F:GO:0008270;<br>P:GO:0006367;<br>P:GO:0045449;<br>P:GO:0010171;<br>P:GO:0040011;<br>P:GO:0006898;<br>P:GO:0002009;<br>P:GO:0009792 |                                                | IPR017919; PTHR13097 (PANTHER),<br>PFO2002 (PFAM)                                                                    |
|                             | -                                            | 0 |                                                                                                                                                      |                                                | -                                                                                                                    |
| Caenorhabditis elegans      | spartin                                      | 0 |                                                                                                                                                      | C:GO:0005737;<br>F:GO:0031625;<br>P:GO:0008219 | IPR000169; IPR009686; PTHR21068<br>(PANTHER), PTHR21068:SF8<br>(PANTHER)                                             |
| Loa loa                     | acl-8 protein                                | 0 |                                                                                                                                                      |                                                | -                                                                                                                    |
| Caenorhabditis elegans      | c-type lectin family member (clec-89)        | 0 |                                                                                                                                                      |                                                | -                                                                                                                    |
| Caenorhabditis elegans      | briggsae cbr-imb-6 protein                   | 0 |                                                                                                                                                      |                                                | PTHR15952 (PANTHER),<br>PTHR15952:SF11 (PANTHER)                                                                     |
| Caenorhabditis elegans      | inositol -trisphosphate receptor             | 5 | P:GO:0006816;<br>F:GO:0005220;<br>P:GO:0055085;<br>C:GO:0016021;<br>C:GO:0005783                                                                     |                                                | IPR015925; PTHR13715:SF2<br>(PANTHER), SignalP (SIGNALP)                                                             |
|                             | -                                            | 0 |                                                                                                                                                      |                                                | -                                                                                                                    |
|                             | -                                            | 0 |                                                                                                                                                      |                                                | -                                                                                                                    |

|                         |                                                                |    |                                                                                                                                                                                                         |                                                                                                                                                                                                         |              |                                                                                                                       |
|-------------------------|----------------------------------------------------------------|----|---------------------------------------------------------------------------------------------------------------------------------------------------------------------------------------------------------|---------------------------------------------------------------------------------------------------------------------------------------------------------------------------------------------------------|--------------|-----------------------------------------------------------------------------------------------------------------------|
| Caenorhabditis elegans  | protein                                                        | 0  |                                                                                                                                                                                                         | C:GO:0016023;<br>C:GO:0016021;<br>P:GO:0006950;<br>C:GO:0005737;<br>F:GO:0005524;<br>F:GO:0031072;<br>C:GO:0005788;<br>P:GO:0009408;<br>P:GO:0006457;<br>F:GO:0046872;<br>C:GO:0005886;<br>F:GO:0051082 |              | IPR001623; IPR015609;<br>PTHR11821:SF22 (PANTHER)                                                                     |
| Taeniopygia guttata     | atp-binding sub-family a member 4                              | 5  | P:GO:0006649;<br>F:GO:0042626;<br>P:GO:0045494;<br>F:GO:0004012;<br>C:GO:0005887                                                                                                                        | -                                                                                                                                                                                                       | EC:3.6.3.1   | IPR003439; G3DSA:3.40.50.300<br>(GENE3D), PTHR19229 (PANTHER),<br>PTHR19229:SF30 (PANTHER),<br>SSF52540 (SUPERFAMILY) |
|                         | -                                                              | 0  |                                                                                                                                                                                                         |                                                                                                                                                                                                         |              | SignalP (SIGNALP)                                                                                                     |
|                         | -                                                              | 0  |                                                                                                                                                                                                         |                                                                                                                                                                                                         |              | -                                                                                                                     |
| Caenorhabditis elegans  | hypothetical protein Y75B7AR.1 [Caenorhabditis elegans]        | 0  |                                                                                                                                                                                                         |                                                                                                                                                                                                         |              | -                                                                                                                     |
| Caenorhabditis elegans  | hypothetical protein Y75B7AR.1 [Caenorhabditis elegans]        | 0  |                                                                                                                                                                                                         |                                                                                                                                                                                                         |              | -                                                                                                                     |
| Caenorhabditis elegans  | briggsae cbr-let-268 protein                                   | 6  | F:GO:0031418;<br>F:GO:0005506;<br>P:GO:0055114;<br>F:GO:0008475;<br>C:GO:0016020;<br>C:GO:0005783                                                                                                       | -                                                                                                                                                                                                       | EC:1.14.11.4 | PTHR10730 (PANTHER),<br>PTHR10730:SF1 (PANTHER)                                                                       |
| Haemonchus contortus    | acetylcholine receptor deg-3-like protein                      | 4  | C:GO:0016021;<br>C:GO:0045211;<br>P:GO:0006811;<br>F:GO:0005230                                                                                                                                         | -                                                                                                                                                                                                       |              | IPR006029; IPR006201;<br>G3DSA:1.20.120.370 (GENE3D),<br>PTHR18945:SF55 (PANTHER), SignalP<br>(SIGNALP)               |
|                         | -                                                              | 0  |                                                                                                                                                                                                         |                                                                                                                                                                                                         |              | -                                                                                                                     |
|                         | -                                                              | 0  |                                                                                                                                                                                                         |                                                                                                                                                                                                         |              | -                                                                                                                     |
| Heliconius melpomene    | endonuclease-reverse transcriptase -e01                        | 0  |                                                                                                                                                                                                         | F:GO:0003723;<br>P:GO:0006278;<br>F:GO:0004519;<br>F:GO:0003964                                                                                                                                         |              | -                                                                                                                     |
|                         | -                                                              | 0  |                                                                                                                                                                                                         |                                                                                                                                                                                                         |              | SignalP (SIGNALP)                                                                                                     |
|                         | -                                                              | 0  |                                                                                                                                                                                                         |                                                                                                                                                                                                         |              | -                                                                                                                     |
| Caenorhabditis elegans  | g in family member (glb-29)                                    | 3  | F:GO:0020037;<br>P:GO:0015671;<br>F:GO:0019825                                                                                                                                                          | -                                                                                                                                                                                                       |              | -                                                                                                                     |
|                         | -                                                              | 0  |                                                                                                                                                                                                         |                                                                                                                                                                                                         |              | -                                                                                                                     |
|                         | -                                                              | 0  |                                                                                                                                                                                                         |                                                                                                                                                                                                         |              | -                                                                                                                     |
| Caenorhabditis elegans  | spectrin alpha chain                                           | 1  | F:GO:0005509                                                                                                                                                                                            | -                                                                                                                                                                                                       |              | -                                                                                                                     |
| Caenorhabditis briggsae | taf5 r- polymerase tata box binding protein -associated factor | 12 | F:GO:0016986;<br>P:GO:0006367;<br>C:GO:0005730;<br>F:GO:0010843;<br>C:GO:0033276;<br>F:GO:0046983;<br>C:GO:0015629;<br>P:GO:0006368;<br>F:GO:0003700;<br>F:GO:0004402;<br>C:GO:0005669;<br>C:GO:0005737 | -                                                                                                                                                                                                       | EC:2.3.1.48  | IPR001680; IPR011047; IPR015943;<br>IPR017986; IPR019781; IPR019782;<br>PTHR19879 (PANTHER)                           |
| Caenorhabditis elegans  | elegans protein partially confirmed by transcript evidence     | 0  |                                                                                                                                                                                                         |                                                                                                                                                                                                         |              | -                                                                                                                     |

|                         |                                                              |    |                                                                                                                                                                                        |                                                |             |                                                                                                                     |
|-------------------------|--------------------------------------------------------------|----|----------------------------------------------------------------------------------------------------------------------------------------------------------------------------------------|------------------------------------------------|-------------|---------------------------------------------------------------------------------------------------------------------|
| Caenorhabditis elegans  | elegans protein partially confirmed by transcript evidence   | 0  |                                                                                                                                                                                        | P:GO:0055085                                   |             | SignalP (SIGNALP)                                                                                                   |
|                         | -                                                            | 0  |                                                                                                                                                                                        |                                                |             | -                                                                                                                   |
|                         | -                                                            | 0  |                                                                                                                                                                                        |                                                |             | IPR015880                                                                                                           |
| Ectocarpus siliculosus  | threonine dehydratase                                        | 3  | F:GO:0030170;<br>P:GO:0006520;<br>F:GO:0004794                                                                                                                                         | -                                              | EC:4.3.1.19 | IPR001926; G3DSA:3.40.50.1100 (GENE3D), PTHR10314 (PANTHER), PTHR10314:SF17 (PANTHER)                               |
|                         | -                                                            | 0  |                                                                                                                                                                                        |                                                |             | -                                                                                                                   |
|                         | -                                                            | 0  |                                                                                                                                                                                        |                                                |             | -                                                                                                                   |
| Caenorhabditis elegans  | elegans protein confirmed by transcript evidence             | 2  | F:GO:0016491;<br>P:GO:0055114                                                                                                                                                          | -                                              |             | -                                                                                                                   |
| Homo sapiens            | b chain activator-bound structure of human pyruvate ki-se m2 | 11 | F:GO:0004743;<br>C:GO:0019861;<br>F:GO:0005515;<br>F:GO:0030955;<br>F:GO:0005524;<br>F:GO:0000287;<br>P:GO:0006096;<br>P:GO:0012501;<br>C:GO:0005634;<br>C:GO:0005829;<br>C:GO:0005739 | -                                              | EC:2.7.1.40 | IPR001697; IPR015793; IPR015813; IPR018209                                                                          |
|                         | -                                                            | 0  |                                                                                                                                                                                        |                                                |             | -                                                                                                                   |
| Caenorhabditis briggsae | cell-cycle and apoptosis regulatory protein 1                | 4  | P:GO:0040027;<br>F:GO:0005515;<br>P:GO:0040017;<br>P:GO:0040010                                                                                                                        | -                                              |             | -                                                                                                                   |
|                         | -                                                            | 0  |                                                                                                                                                                                        |                                                |             | SignalP (SIGNALP)                                                                                                   |
| Caenorhabditis elegans  | briggsae cbr-deg-1 protein                                   | 3  | C:GO:0016021;<br>F:GO:0005272;<br>P:GO:0006814                                                                                                                                         | -                                              |             | IPR001873; G3DSA:2.60.470.10 (GENE3D), PTHR11690:SF17 (PANTHER)                                                     |
| Bos taurus              | amino-termi-l enhancer of split                              | 11 | P:GO:0040008;<br>P:GO:0031668;<br>P:GO:0060761;<br>P:GO:0009887;<br>P:GO:0032091;<br>P:GO:0001501;<br>P:GO:0010553;<br>F:GO:0003714;<br>P:GO:0090090;<br>P:GO:0070555;<br>C:GO:0005634 | -                                              |             | IPR005617; PTHR10814 (PANTHER)                                                                                      |
|                         | -                                                            | 0  |                                                                                                                                                                                        |                                                |             | -                                                                                                                   |
|                         | -                                                            | 0  |                                                                                                                                                                                        |                                                |             | -                                                                                                                   |
| Loa loa                 | elegans protein partially confirmed by transcript evidence   | 2  | P:GO:0006810;<br>C:GO:0016020                                                                                                                                                          | -                                              |             | -                                                                                                                   |
|                         | -                                                            | 0  |                                                                                                                                                                                        |                                                |             | -                                                                                                                   |
| Caenorhabditis elegans  | briggsae cbr-acl-4 protein                                   | 0  |                                                                                                                                                                                        | F:GO:0008415;<br>P:GO:0008152;<br>C:GO:0016021 |             | -                                                                                                                   |
| Caenorhabditis elegans  | homeodomain interacting protein ki-se family member (hpk-1)  | 5  | P:GO:0006468;<br>F:GO:0003677;<br>F:GO:0005524;<br>P:GO:0008340;<br>F:GO:0004674                                                                                                       | -                                              | EC:2.7.11.0 | IPR011009; IPR017442; G3DSA:1.10.510.10 (GENE3D), PTHR11295 (PANTHER), PTHR11295:SF117 (PANTHER), SignalP (SIGNALP) |
| Caenorhabditis elegans  | yws1_caeel ame: full=uncharacterized protein                 | 0  |                                                                                                                                                                                        | P:GO:0019915                                   |             | SignalP (SIGNALP)                                                                                                   |

|                           |                                                          |    |                                                                                                                                                                       |                                                |                                           |
|---------------------------|----------------------------------------------------------|----|-----------------------------------------------------------------------------------------------------------------------------------------------------------------------|------------------------------------------------|-------------------------------------------|
| Caenorhabditis briggsae   | fatty acid 2-hydroxylase                                 | 10 | P:GO:0040010;<br>P:GO:0006633;<br>C:GO:0016021;<br>P:GO:0055114;<br>F:GO:0016491;<br>P:GO:0002119;<br>F:GO:0005515;<br>F:GO:0020037;<br>P:GO:0040018;<br>C:GO:0005783 | -                                              | IPR001199; IPR006694; PTHR12863 (PANTHER) |
| -                         | -                                                        | 0  |                                                                                                                                                                       |                                                | -                                         |
| -                         | -                                                        | 0  |                                                                                                                                                                       |                                                | SignalP (SIGNALP)                         |
| -                         | -                                                        | 0  |                                                                                                                                                                       |                                                | -                                         |
| -                         | -                                                        | 0  |                                                                                                                                                                       |                                                | -                                         |
| Caenorhabditis briggsae   | d- chr erato doi isoform cra_a                           | 0  |                                                                                                                                                                       | F:GO:0003674;<br>P:GO:0008150;<br>C:GO:0005575 | -                                         |
| Caenorhabditis briggsae   | zcchc4 protein                                           | 2  | F:GO:0046872;<br>F:GO:0016740                                                                                                                                         | -                                              | IPR019369                                 |
| -                         | -                                                        | 0  |                                                                                                                                                                       |                                                | SignalP (SIGNALP)                         |
| -                         | -                                                        | 0  |                                                                                                                                                                       |                                                | -                                         |
| Teladorsagia circumcincta | nicotinic acetylcholine receptor alpha subunit 38        | 6  | F:GO:0004872;<br>C:GO:0045211;<br>C:GO:0030054;<br>P:GO:0006811;<br>C:GO:0016021;<br>F:GO:0004889                                                                     | -                                              | -                                         |
| -                         | -                                                        | 0  |                                                                                                                                                                       |                                                | SignalP (SIGNALP)                         |
| Caenorhabditis elegans    | hypothetical protein Y37E11AM.2 [Caenorhabditis elegans] | 0  |                                                                                                                                                                       |                                                | -                                         |
| Caenorhabditis elegans    | hypothetical protein Y37E11AM.2 [Caenorhabditis elegans] | 0  |                                                                                                                                                                       |                                                | -                                         |
| -                         | -                                                        | 0  |                                                                                                                                                                       |                                                | -                                         |
| -                         | -                                                        | 0  |                                                                                                                                                                       |                                                | -                                         |
| -                         | -                                                        | 0  |                                                                                                                                                                       |                                                | -                                         |
| -                         | -                                                        | 0  |                                                                                                                                                                       |                                                | SignalP (SIGNALP)                         |

|                        |                                                            |    |                                                                                                                                                                                                                                                                                                                                                                                                                                                                                         |                                                                                                                                                                                        |  |                                                                     |
|------------------------|------------------------------------------------------------|----|-----------------------------------------------------------------------------------------------------------------------------------------------------------------------------------------------------------------------------------------------------------------------------------------------------------------------------------------------------------------------------------------------------------------------------------------------------------------------------------------|----------------------------------------------------------------------------------------------------------------------------------------------------------------------------------------|--|---------------------------------------------------------------------|
| Neovison vison         | 78 kda glucose-regulated protein precursor                 | 30 | C:GO:0001759;<br>P:GO:0030433;<br>P:GO:0043154;<br>F:GO:0051087;<br>P:GO:0030512;<br>P:GO:0021680;<br>C:GO:0030176;<br>P:GO:0021589;<br>C:GO:0005788;<br>P:GO:0031398;<br>C:GO:0008303;<br>P:GO:0060904;<br>C:GO:0042470;<br>F:GO:0043027;<br>F:GO:0005509;<br>F:GO:0043022;<br>P:GO:0006983;<br>C:GO:0005576;<br>F:GO:0030674;<br>P:GO:0006916;<br>C:GO:0009986;<br>F:GO:0031625;<br>P:GO:0006987;<br>P:GO:0040019;<br>F:GO:0051082;<br>P:GO:0042149;<br>F:GO:0051787;<br>C:GO:0048471 |                                                                                                                                                                                        |  |                                                                     |
| Caenorhabditis elegans | hypothetical protein Y92H12A.5 [Caenorhabditis elegans]    | 0  |                                                                                                                                                                                                                                                                                                                                                                                                                                                                                         |                                                                                                                                                                                        |  | -                                                                   |
|                        | -                                                          | 0  |                                                                                                                                                                                                                                                                                                                                                                                                                                                                                         |                                                                                                                                                                                        |  | -                                                                   |
| Caenorhabditis elegans | elegans protein partially confirmed by transcript evidence | 0  |                                                                                                                                                                                                                                                                                                                                                                                                                                                                                         |                                                                                                                                                                                        |  | -                                                                   |
| Caenorhabditis elegans | olfactory ing defective family member (olrn-1)             | 0  |                                                                                                                                                                                                                                                                                                                                                                                                                                                                                         | F:GO:0005509                                                                                                                                                                           |  | -                                                                   |
| Brugia malayi          | voltage gated chloride channel family protein              | 0  |                                                                                                                                                                                                                                                                                                                                                                                                                                                                                         | F:GO:0005216;<br>C:GO:0005902;<br>C:GO:0016021;<br>C:GO:0016020;<br>C:GO:0015629;<br>C:GO:0005626;<br>F:GO:0005254;<br>F:GO:0005515;<br>P:GO:0055085;<br>F:GO:0005247;<br>P:GO:0006821 |  | IPR001807; IPR014743;<br>PTHR11689:SF5 (PANTHER), SignalP (SIGNALP) |
|                        | -                                                          | 0  |                                                                                                                                                                                                                                                                                                                                                                                                                                                                                         |                                                                                                                                                                                        |  | -                                                                   |
|                        | -                                                          | 0  |                                                                                                                                                                                                                                                                                                                                                                                                                                                                                         |                                                                                                                                                                                        |  | -                                                                   |
|                        | -                                                          | 0  |                                                                                                                                                                                                                                                                                                                                                                                                                                                                                         |                                                                                                                                                                                        |  | -                                                                   |
|                        | -                                                          | 0  |                                                                                                                                                                                                                                                                                                                                                                                                                                                                                         |                                                                                                                                                                                        |  | -                                                                   |
|                        | -                                                          | 0  |                                                                                                                                                                                                                                                                                                                                                                                                                                                                                         |                                                                                                                                                                                        |  | -                                                                   |
|                        | -                                                          | 0  |                                                                                                                                                                                                                                                                                                                                                                                                                                                                                         |                                                                                                                                                                                        |  | IPR006652; IPR015915                                                |
|                        | -                                                          | 0  |                                                                                                                                                                                                                                                                                                                                                                                                                                                                                         |                                                                                                                                                                                        |  | SignalP (SIGNALP)                                                   |
|                        | -                                                          | 0  |                                                                                                                                                                                                                                                                                                                                                                                                                                                                                         |                                                                                                                                                                                        |  | -                                                                   |
|                        | -                                                          | 0  |                                                                                                                                                                                                                                                                                                                                                                                                                                                                                         |                                                                                                                                                                                        |  | -                                                                   |
| Caenorhabditis elegans | hypothetical protein F01F1.2 [Caenorhabditis elegans]      | 0  |                                                                                                                                                                                                                                                                                                                                                                                                                                                                                         |                                                                                                                                                                                        |  | -                                                                   |
| Caenorhabditis elegans | trpa cation channel homolog family member (trpa-1)         | 0  |                                                                                                                                                                                                                                                                                                                                                                                                                                                                                         |                                                                                                                                                                                        |  | PTHR18958 (PANTHER),<br>PTHR18958:SF250 (PANTHER)                   |
|                        | -                                                          | 0  |                                                                                                                                                                                                                                                                                                                                                                                                                                                                                         |                                                                                                                                                                                        |  | -                                                                   |
| Caenorhabditis elegans | briggsae cbr-ztf-9 protein                                 | 1  | F:GO:0005515                                                                                                                                                                                                                                                                                                                                                                                                                                                                            | -                                                                                                                                                                                      |  | IPR015880; SSF57667 (SUPERFAMILY)                                   |

|                             |                                                                         |    |                                                                                                                                                                       |                                                                                                                                                      |            |                                                                                                    |
|-----------------------------|-------------------------------------------------------------------------|----|-----------------------------------------------------------------------------------------------------------------------------------------------------------------------|------------------------------------------------------------------------------------------------------------------------------------------------------|------------|----------------------------------------------------------------------------------------------------|
| Caenorhabditis elegans      | briggsae cbr-ztf-9 protein                                              | 1  | F:GO:0005515                                                                                                                                                          | -                                                                                                                                                    |            | IPR015880; SSF57667 (SUPERFAMILY)                                                                  |
| Caenorhabditis elegans      | lbp bpi cetp c-termi-l domain containing protein                        | 1  | F:GO:0008289                                                                                                                                                          | -                                                                                                                                                    |            | SignalP (SIGNALP)                                                                                  |
|                             |                                                                         | 0  |                                                                                                                                                                       |                                                                                                                                                      |            | -                                                                                                  |
|                             |                                                                         |    |                                                                                                                                                                       |                                                                                                                                                      |            | IPR003598; IPR007110; IPR009134; IPR013098; IPR013783; PTHR19897 (PANTHER), SSF48726 (SUPERFAMILY) |
|                             |                                                                         | 0  |                                                                                                                                                                       |                                                                                                                                                      |            | -                                                                                                  |
| Caenorhabditis elegans      | lethal family member (let-2)                                            | 3  | C:GO:0005587;<br>F:GO:0030020;<br>P:GO:0016043                                                                                                                        | -                                                                                                                                                    |            | SignalP (SIGNALP)                                                                                  |
|                             |                                                                         | 0  |                                                                                                                                                                       |                                                                                                                                                      |            | -                                                                                                  |
|                             |                                                                         | 0  |                                                                                                                                                                       |                                                                                                                                                      |            | -                                                                                                  |
|                             |                                                                         | 0  |                                                                                                                                                                       |                                                                                                                                                      |            | -                                                                                                  |
| Caenorhabditis briggsae     | major intrinsic protein                                                 | 3  | P:GO:0006810;<br>C:GO:0016021;<br>F:GO:0005215                                                                                                                        | -                                                                                                                                                    |            | IPR000425; PTHR19139:SF11 (PANTHER)                                                                |
|                             |                                                                         | 0  |                                                                                                                                                                       |                                                                                                                                                      |            | -                                                                                                  |
| Caenorhabditis elegans      | retinoblastoma-binding protein 8                                        | 0  |                                                                                                                                                                       | F:GO:0000014;<br>F:GO:0003684;<br>C:GO:0005634;<br>P:GO:0006357;<br>P:GO:0006281;<br>F:GO:0005515;<br>P:GO:0010792;<br>P:GO:0001835;<br>P:GO:0000075 |            | IPR013882                                                                                          |
|                             |                                                                         | 0  |                                                                                                                                                                       |                                                                                                                                                      |            | -                                                                                                  |
|                             |                                                                         | 0  |                                                                                                                                                                       |                                                                                                                                                      |            | SignalP (SIGNALP)                                                                                  |
| Ancylostoma duodenale       | ancylostoma-secreted protein 1 precursor                                | 0  |                                                                                                                                                                       | C:GO:0005576                                                                                                                                         |            | IPR001283; IPR014044; PTHR10334:SF2 (PANTHER)                                                      |
|                             |                                                                         | 0  |                                                                                                                                                                       |                                                                                                                                                      |            | -                                                                                                  |
| Caenorhabditis elegans      | ras and ef-hand domain containing                                       | 10 | P:GO:0006412;<br>C:GO:0005840;<br>F:GO:0005509;<br>P:GO:0007264;<br>F:GO:0003735;<br>P:GO:0006913;<br>F:GO:0005515;<br>C:GO:0048471;<br>P:GO:0006886;<br>F:GO:0005525 | -                                                                                                                                                    | EC:3.6.5.3 | -                                                                                                  |
|                             |                                                                         | 0  |                                                                                                                                                                       |                                                                                                                                                      |            | IPR007087; IPR015880; PTHR12487 (PANTHER), PTHR12487:SF1 (PANTHER)                                 |
|                             |                                                                         | 0  |                                                                                                                                                                       |                                                                                                                                                      |            | -                                                                                                  |
| Caenorhabditis briggsae     | related to yeast vacuolar protein sorting factor family member (vps-39) | 7  | P:GO:0002009;<br>P:GO:0008219;<br>P:GO:0009792;<br>P:GO:0000003;<br>F:GO:0005083;<br>P:GO:0010171;<br>F:GO:0005515                                                    | -                                                                                                                                                    |            | PTHR12894 (PANTHER), PTHR12894:SF10 (PANTHER), SignalP (SIGNALP)                                   |
| Cyathostominae sp. JM-2007a | temporarily assigned gene -me family member (tag-273)                   | 2  | F:GO:0008270;<br>P:GO:0000003                                                                                                                                         | -                                                                                                                                                    |            | -                                                                                                  |
|                             |                                                                         | 0  |                                                                                                                                                                       |                                                                                                                                                      |            | SignalP (SIGNALP)                                                                                  |

|                         |                                                            |    |                                                                                                                                                                                        |                                                                                                   |             |                                                                                             |
|-------------------------|------------------------------------------------------------|----|----------------------------------------------------------------------------------------------------------------------------------------------------------------------------------------|---------------------------------------------------------------------------------------------------|-------------|---------------------------------------------------------------------------------------------|
| Caenorhabditis elegans  | elegans protein confirmed by transcript evidence           | 0  |                                                                                                                                                                                        | C:GO:0016021;<br>P:GO:0016042;<br>P:GO:0006644                                                    |             | IPR013090; SignalP (SIGNALP)                                                                |
|                         | -                                                          | 0  |                                                                                                                                                                                        |                                                                                                   |             | -                                                                                           |
| Caenorhabditis elegans  | elegans protein partially confirmed by transcript evidence | 2  | F:GO:0003676;<br>F:GO:0000166                                                                                                                                                          | -                                                                                                 |             | IPR019363                                                                                   |
|                         | -                                                          | 0  |                                                                                                                                                                                        |                                                                                                   |             | -                                                                                           |
| Caenorhabditis elegans  | hla class iii protein dom3z                                | 0  |                                                                                                                                                                                        | P:GO:0006353;<br>P:GO:0006364;<br>P:GO:0006350;<br>P:GO:0006397;<br>P:GO:0045449;<br>C:GO:0005634 |             | -                                                                                           |
| Ailuropoda melanoleuca  | platelet                                                   | 11 | C:GO:0005625;<br>F:GO:0046872;<br>C:GO:0005945;<br>F:GO:0003872;<br>F:GO:0070095;<br>F:GO:0005524;<br>P:GO:0006002;<br>F:GO:0005515;<br>P:GO:0006096;<br>P:GO:0051289;<br>P:GO:0030388 | -                                                                                                 | EC:2.7.1.11 | G3DSA:3.40.50.460 (GENE3D),<br>PTHR13697 (PANTHER)                                          |
| Caenorhabditis briggsae | ykad_caeel ame: full=uncharacterized protein               | 0  |                                                                                                                                                                                        |                                                                                                   |             | -                                                                                           |
|                         | -                                                          | 0  |                                                                                                                                                                                        |                                                                                                   |             | SignalP (SIGNALP)                                                                           |
|                         | -                                                          | 0  |                                                                                                                                                                                        |                                                                                                   |             | -                                                                                           |
|                         | -                                                          | 0  |                                                                                                                                                                                        |                                                                                                   |             | SignalP (SIGNALP)                                                                           |
| Callithrix jacchus      | 40s ribosomal protein s25-like                             | 7  | F:GO:0003723;<br>C:GO:0005730;<br>F:GO:0003735;<br>P:GO:0006414;<br>C:GO:0022627;<br>F:GO:0005515;<br>P:GO:0000028                                                                     | -                                                                                                 |             | IPR004977; PTHR12850:SF4<br>(PANTHER)                                                       |
| Caenorhabditis elegans  | d- topoisomerase 2-binding protein 1                       | 6  | P:GO:0009987;<br>P:GO:0050896;<br>F:GO:0005488;<br>C:GO:0043232;<br>C:GO:0044446;<br>C:GO:0005634                                                                                      | -                                                                                                 |             | IPR001357; G3DSA:3.40.50.10190<br>(GENE3D), PTHR13561 (PANTHER),<br>PTHR13561:SF4 (PANTHER) |
|                         | -                                                          | 0  |                                                                                                                                                                                        |                                                                                                   |             | -                                                                                           |
|                         | -                                                          | 0  |                                                                                                                                                                                        |                                                                                                   |             | -                                                                                           |
|                         | -                                                          | 0  |                                                                                                                                                                                        |                                                                                                   |             | -                                                                                           |
| Caenorhabditis elegans  | osm-9 and capsaicin receptor-related family member (ocr-3) | 0  |                                                                                                                                                                                        |                                                                                                   |             | -                                                                                           |
| Ostertagia ostertagi    | sxc2 protein                                               | 0  |                                                                                                                                                                                        |                                                                                                   |             | IPR003582                                                                                   |
|                         | -                                                          | 0  |                                                                                                                                                                                        |                                                                                                   |             | SignalP (SIGNALP)                                                                           |
|                         | -                                                          | 0  |                                                                                                                                                                                        |                                                                                                   |             | IPR018073; SignalP (SIGNALP)                                                                |
|                         | -                                                          | 0  |                                                                                                                                                                                        |                                                                                                   |             | -                                                                                           |
|                         | -                                                          | 0  |                                                                                                                                                                                        |                                                                                                   |             | -                                                                                           |



|                         |                                                   |    |                                                                                                                                                                                                                                                                                                                                                                                                                                                                        |   |                                                                  |
|-------------------------|---------------------------------------------------|----|------------------------------------------------------------------------------------------------------------------------------------------------------------------------------------------------------------------------------------------------------------------------------------------------------------------------------------------------------------------------------------------------------------------------------------------------------------------------|---|------------------------------------------------------------------|
| Caenorhabditis briggsae | isl lim homeobox 2                                | 9  | F:GO:0003700;<br>F:GO:0043565;<br>F:GO:0003702;<br>F:GO:0005515;<br>P:GO:0007275;<br>C:GO:0005634;<br>F:GO:0008270;<br>P:GO:0006355;<br>P:GO:0006091                                                                                                                                                                                                                                                                                                                   | - | -                                                                |
| Homo sapiens            | cytochrome c oxidase subunit ii                   | 57 | F:GO:0004129;<br>P:GO:0042640;<br>C:GO:0005901;<br>F:GO:0008289;<br>F:GO:0005507;<br>P:GO:0030282;<br>P:GO:0045429;<br>P:GO:0090271;<br>P:GO:0051384;<br>C:GO:0043234;<br>P:GO:0031394;<br>P:GO:0031622;<br>P:GO:0043065;<br>P:GO:0010243;<br>P:GO:0019371;<br>P:GO:0010575;<br>P:GO:0031915;<br>P:GO:0051726;<br>P:GO:0007613;<br>C:GO:0005788;<br>F:GO:0020037;<br>P:GO:0008217;<br>C:GO:0005792;<br>P:GO:0006979;<br>F:GO:0004666;<br>P:GO:0010042;<br>C:GO:0016021 | - | EC:1.11.1.7;<br>EC:1.9.3.1;<br>EC:1.14.99.1<br>;<br>EC:1.13.11.0 |
|                         | -                                                 | 0  |                                                                                                                                                                                                                                                                                                                                                                                                                                                                        |   | -                                                                |
| Homo sapiens            | histidine triad nucleotide-binding protein 1-like | 6  | C:GO:0005856;<br>C:GO:0005737;<br>F:GO:0016787;<br>P:GO:0007165;<br>C:GO:0005634;<br>F:GO:0005080                                                                                                                                                                                                                                                                                                                                                                      | - | SignalP (SIGNALP)                                                |
| Caenorhabditis elegans  | uncoordinated family member (unc-13)              | 10 | C:GO:0030054;<br>F:GO:0001566;<br>P:GO:0006917;<br>P:GO:0023034;<br>F:GO:0046872;<br>C:GO:0045202;<br>P:GO:0007588;<br>P:GO:0016082;<br>P:GO:0007165;<br>C:GO:0005794                                                                                                                                                                                                                                                                                                  | - | IPR000008; IPR008973                                             |
|                         | -                                                 | 0  |                                                                                                                                                                                                                                                                                                                                                                                                                                                                        |   | -                                                                |
|                         | -                                                 | 0  |                                                                                                                                                                                                                                                                                                                                                                                                                                                                        |   | -                                                                |

|                            |                                                   |    |                                                                                                                                                                                        |   |                            |                                                                                                                      |
|----------------------------|---------------------------------------------------|----|----------------------------------------------------------------------------------------------------------------------------------------------------------------------------------------|---|----------------------------|----------------------------------------------------------------------------------------------------------------------|
| Pan troglodytes            | eukaryotic translation elongation factor 1 beta 2 | 5  | C:GO:0005829;<br>F:GO:0003746;<br>C:GO:0005853;<br>F:GO:0005515;<br>P:GO:0006414                                                                                                       | - |                            | PTHR11595 (PANTHER),<br>PTHR11595:SF7 (PANTHER)                                                                      |
| -                          | -                                                 | 0  |                                                                                                                                                                                        |   |                            | -                                                                                                                    |
| -                          | -                                                 | 0  |                                                                                                                                                                                        |   |                            | -                                                                                                                    |
| -                          | -                                                 | 0  |                                                                                                                                                                                        |   |                            | -                                                                                                                    |
| Caenorhabditis briggsae    | r- dependent r- polymerase family protein         | 2  | F:GO:0005515;<br>P:GO:0009792                                                                                                                                                          | - |                            | IPR000215; IPR007855                                                                                                 |
| Caenorhabditis elegans     | piwi domain containing protein                    | 1  | P:GO:0000003                                                                                                                                                                           | - |                            | IPR003165; IPR012337; PTHR22891<br>(PANTHER)                                                                         |
| -                          | -                                                 | 0  |                                                                                                                                                                                        |   |                            | SignalP (SIGNALP)                                                                                                    |
| -                          | -                                                 | 0  |                                                                                                                                                                                        |   |                            | SignalP (SIGNALP)                                                                                                    |
| -                          | -                                                 | 0  |                                                                                                                                                                                        |   |                            | -                                                                                                                    |
| Selaginella moellendorffii | -aladase ii protein                               | 1  | F:GO:0016787                                                                                                                                                                           | - |                            | IPR003137; G3DSA:3.50.30.30<br>(GENE3D), PTHR10404 (PANTHER),<br>PTHR10404:SF15 (PANTHER),<br>SSF52025 (SUPERFAMILY) |
| -                          | -                                                 | 0  |                                                                                                                                                                                        |   |                            | -                                                                                                                    |
| Oryctolagus cuniculus      | tropomyosin gamma isoform 8                       | 11 | C:GO:0002102;<br>C:GO:0030863;<br>P:GO:0006928;<br>C:GO:0030426;<br>P:GO:0006937;<br>F:GO:0003779;<br>C:GO:0005862;<br>C:GO:0031941;<br>C:GO:0032154;<br>P:GO:0007420;<br>C:GO:0001725 | - |                            | -                                                                                                                    |
| -                          | -                                                 | 0  |                                                                                                                                                                                        |   |                            | -                                                                                                                    |
| Caenorhabditis briggsae    | yqd7_caeel ame: full=uncharacterized protein      | 0  |                                                                                                                                                                                        |   |                            | -                                                                                                                    |
| -                          | -                                                 | 0  |                                                                                                                                                                                        |   |                            | -                                                                                                                    |
| Caenorhabditis briggsae    | innexin family protein                            | 3  | P:GO:0019915;<br>C:GO:0005921;<br>F:GO:0008234                                                                                                                                         | - |                            | IPR000990                                                                                                            |
| Caenorhabditis briggsae    | d-amino acid oxidase                              | 4  | P:GO:0009792;<br>P:GO:0055114;<br>F:GO:0008445;<br>F:GO:0047821                                                                                                                        | - | EC:1.4.3.1;<br>EC:1.4.3.7  | IPR016040; PTHR11530 (PANTHER)                                                                                       |
| Caenorhabditis elegans     | bifunctio-I purine biosynthesis protein purh      | 4  | F:GO:0004643;<br>P:GO:0006188;<br>F:GO:0003937;<br>F:GO:0042803                                                                                                                        | - | EC:2.1.2.3;<br>EC:3.5.4.10 | IPR002695; IPR011607; IPR013982;<br>IPR016193; G3DSA:1.10.287.440<br>(GENE3D), G3DSA:3.40.140.20<br>(GENE3D)         |
| Caenorhabditis elegans     | bifunctio-I purine biosynthesis protein purh      | 4  | F:GO:0004643;<br>P:GO:0006188;<br>F:GO:0003937;<br>F:GO:0042803                                                                                                                        | - | EC:2.1.2.3;<br>EC:3.5.4.10 | IPR002695; IPR011607; IPR013982;<br>IPR016193; G3DSA:1.10.287.440<br>(GENE3D), G3DSA:3.40.140.20<br>(GENE3D)         |
| Caenorhabditis briggsae    | alkali metal ion proton exchanger 3               | 6  | P:GO:0009792;<br>F:GO:0015385;<br>P:GO:0055085;<br>P:GO:0006885;<br>C:GO:0016021;<br>P:GO:0006814                                                                                      | - |                            | SignalP (SIGNALP)                                                                                                    |
| -                          | -                                                 | 0  |                                                                                                                                                                                        |   |                            | SignalP (SIGNALP)                                                                                                    |

|                         |                                                                  |    |  |                                                                                                                                                                                                                                                                                                                                                                                                                                                                        |  |                                                                                      |
|-------------------------|------------------------------------------------------------------|----|--|------------------------------------------------------------------------------------------------------------------------------------------------------------------------------------------------------------------------------------------------------------------------------------------------------------------------------------------------------------------------------------------------------------------------------------------------------------------------|--|--------------------------------------------------------------------------------------|
| Nasonia vitripennis     | ubiquitin associated and sh3 domain-containing protein b         | 0  |  | F:GO:0004619;<br>F:GO:0004872;<br>P:GO:0016070;<br>F:GO:0003824;<br>C:GO:0005622;<br>F:GO:0016853                                                                                                                                                                                                                                                                                                                                                                      |  | G3DSA:3.40.50.1240 (GENE3D),<br>PTHR16469 (PANTHER),<br>PTHR16469:SF8 (PANTHER)      |
| Ailuropoda melanoleuca  | filamin alpha                                                    | 28 |  | F:GO:0004871;<br>C:GO:0005802;<br>P:GO:0043433;<br>P:GO:0034394;<br>C:GO:0015629;<br>P:GO:0050821;<br>P:GO:0051220;<br>C:GO:0005576;<br>C:GO:0005829;<br>F:GO:0001948;<br>P:GO:0051764;<br>P:GO:0043123;<br>F:GO:0051015;<br>F:GO:0048365;<br>P:GO:0045022;<br>P:GO:0007195;<br>F:GO:0042803;<br>F:GO:0034989;<br>P:GO:0031532;<br>F:GO:0034988;<br>C:GO:0005886;<br>F:GO:0008134;<br>P:GO:0042177;<br>C:GO:0005634;<br>P:GO:0042993;<br>C:GO:0005938;<br>P:GO:0043113 |  | IPR013783; IPR014756; IPR017868;<br>PTHR11915 (PANTHER),<br>PTHR11915:SF24 (PANTHER) |
| Caenorhabditis elegans  | yms5_caeel_ame: full=uncharacterized protein flags:<br>precursor | 2  |  | C:GO:0016021;<br>P:GO:0007160                                                                                                                                                                                                                                                                                                                                                                                                                                          |  | PTHR13802 (PANTHER),<br>PTHR13802:SF1 (PANTHER)                                      |
| Caenorhabditis briggsae | elegans protein partially confirmed by transcript evidence       | 2  |  | F:GO:0003700;<br>P:GO:0045449                                                                                                                                                                                                                                                                                                                                                                                                                                          |  | -                                                                                    |
|                         | -                                                                | 0  |  |                                                                                                                                                                                                                                                                                                                                                                                                                                                                        |  | IPR000887                                                                            |
|                         | -                                                                | 0  |  |                                                                                                                                                                                                                                                                                                                                                                                                                                                                        |  | -                                                                                    |
| Caenorhabditis briggsae | phosphodiesterase cgmp-inhibited                                 | 13 |  | P:GO:0043951;<br>C:GO:0016020;<br>P:GO:0006198;<br>P:GO:0032869;<br>P:GO:0050995;<br>C:GO:0005792;<br>F:GO:0004114;<br>C:GO:0005794;<br>F:GO:0046872;<br>F:GO:0043422;<br>C:GO:0032045;<br>P:GO:0033629;<br>C:GO:0005783                                                                                                                                                                                                                                               |  | EC:3.1.4.17 -                                                                        |
| Caenorhabditis elegans  | multiple pdz domain protein family member (mpz-1)                | 2  |  | F:GO:0005515;<br>C:GO:0016021                                                                                                                                                                                                                                                                                                                                                                                                                                          |  | PTHR19964 (PANTHER),<br>PTHR19964:SF5 (PANTHER)                                      |

|                         |                                                            |   |                                                                                                                                                      |                                                                                                                                     |                                                         |                                                                                                                                              |
|-------------------------|------------------------------------------------------------|---|------------------------------------------------------------------------------------------------------------------------------------------------------|-------------------------------------------------------------------------------------------------------------------------------------|---------------------------------------------------------|----------------------------------------------------------------------------------------------------------------------------------------------|
| Brugia malayi           | d--directed r- polymerase ii kda polypeptide               | 7 | F:GO:0003899;<br>F:GO:0030528;<br>F:GO:0008270;<br>P:GO:0045449;<br>C:GO:0005665;<br>F:GO:0003677;<br>P:GO:0006366                                   | -                                                                                                                                   | EC:2.7.7.6                                              | IPR001222; IPR001529; IPR019761;<br>G3DSA:2.20.25.10 (GENE3D),<br>PTHR11239 (PANTHER),<br>PTHR11239:SF1 (PANTHER), SSF57783<br>(SUPERFAMILY) |
| Caenorhabditis elegans  | briggsae cbr-hmr-1 protein                                 | 3 | C:GO:0016020;<br>P:GO:0007155;<br>F:GO:0005515                                                                                                       | -                                                                                                                                   |                                                         | SignalP (SIGNALP)                                                                                                                            |
| -                       | -                                                          | 0 |                                                                                                                                                      |                                                                                                                                     |                                                         | -                                                                                                                                            |
| -                       | -                                                          | 0 |                                                                                                                                                      |                                                                                                                                     |                                                         | IPR019128                                                                                                                                    |
| -                       | -                                                          | 0 |                                                                                                                                                      |                                                                                                                                     |                                                         | -                                                                                                                                            |
| -                       | -                                                          | 0 |                                                                                                                                                      |                                                                                                                                     |                                                         | -                                                                                                                                            |
| -                       | -                                                          | 0 |                                                                                                                                                      |                                                                                                                                     |                                                         | -                                                                                                                                            |
| Caenorhabditis elegans  | hypothetical protein C26D10.6 [Caenorhabditis elegans]     | 0 |                                                                                                                                                      |                                                                                                                                     |                                                         | -                                                                                                                                            |
| Caenorhabditis elegans  | elegans protein confirmed by transcript evidence           | 0 |                                                                                                                                                      | F:GO:0016787;<br>F:GO:0003824;<br>F:GO:0008270                                                                                      |                                                         | -                                                                                                                                            |
| Caenorhabditis briggsae | elegans protein confirmed by transcript evidence           | 2 | P:GO:0008152;<br>F:GO:0016758                                                                                                                        | -                                                                                                                                   | EC:2.4.1.0                                              | SignalP (SIGNALP)                                                                                                                            |
| Caenorhabditis elegans  | hypothetical protein C06E7.2 [Caenorhabditis elegans]      | 0 |                                                                                                                                                      |                                                                                                                                     |                                                         | -                                                                                                                                            |
| Caenorhabditis briggsae | briggsae cbr-fzo-1 protein                                 | 5 | P:GO:0008053;<br>F:GO:0005525;<br>C:GO:0016021;<br>C:GO:0005741;<br>F:GO:0003924                                                                     | -                                                                                                                                   | EC:3.6.5.1;<br>EC:3.6.5.2;<br>EC:3.6.5.3;<br>EC:3.6.5.4 | IPR001019; IPR001401;<br>G3DSA:3.40.50.300 (GENE3D),<br>PTHR10465 (PANTHER), SSF52540<br>(SUPERFAMILY)                                       |
| Caenorhabditis elegans  | atp-dependent r- helicase ddx41                            | 4 | F:GO:0003676;<br>F:GO:0005524;<br>F:GO:0008270;<br>F:GO:0008026                                                                                      | -                                                                                                                                   |                                                         | -                                                                                                                                            |
| -                       | -                                                          | 0 |                                                                                                                                                      |                                                                                                                                     |                                                         | -                                                                                                                                            |
| Caenorhabditis elegans  | briggsae cbr-casy-1 protein                                | 9 | P:GO:0009792;<br>C:GO:0005615;<br>P:GO:0007156;<br>F:GO:0005515;<br>C:GO:0032809;<br>P:GO:0008355;<br>C:GO:0043231;<br>F:GO:0005509;<br>C:GO:0016021 | -                                                                                                                                   |                                                         | PTHR14139 (PANTHER)                                                                                                                          |
| -                       | -                                                          | 0 |                                                                                                                                                      |                                                                                                                                     |                                                         | -                                                                                                                                            |
| Caenorhabditis elegans  | thump domain containing 3                                  | 0 |                                                                                                                                                      | F:GO:0003723;<br>F:GO:0008168;<br>F:GO:0003674;<br>F:GO:0016740;<br>P:GO:0008152;<br>P:GO:0008150;<br>F:GO:0005515;<br>C:GO:0005575 |                                                         | IPR004114                                                                                                                                    |
| -                       | -                                                          | 0 |                                                                                                                                                      |                                                                                                                                     |                                                         | -                                                                                                                                            |
| Caenorhabditis briggsae | elegans protein partially confirmed by transcript evidence | 0 |                                                                                                                                                      | P:GO:0007264;<br>F:GO:0005085                                                                                                       |                                                         | -                                                                                                                                            |
| -                       | -                                                          | 0 |                                                                                                                                                      |                                                                                                                                     |                                                         | -                                                                                                                                            |
| -                       | -                                                          | 0 |                                                                                                                                                      |                                                                                                                                     |                                                         | -                                                                                                                                            |
| -                       | -                                                          | 0 |                                                                                                                                                      |                                                                                                                                     |                                                         | -                                                                                                                                            |
| -                       | -                                                          | 0 |                                                                                                                                                      |                                                                                                                                     |                                                         | -                                                                                                                                            |

|                         |                                                                          |    |                                                                                                                                                                                                                          |   |                                                                                                            |
|-------------------------|--------------------------------------------------------------------------|----|--------------------------------------------------------------------------------------------------------------------------------------------------------------------------------------------------------------------------|---|------------------------------------------------------------------------------------------------------------|
| Ancylostoma ceylanicum  | secreted protein asp-2                                                   | 2  | P:GO:0040011;<br>P:GO:0006898                                                                                                                                                                                            | - | IPR001283; IPR002413; IPR014044;<br>IPR018244; PTHR10334:SF11<br>(PANTHER), SignalP (SIGNALP)              |
|                         | -                                                                        | 0  |                                                                                                                                                                                                                          |   | -                                                                                                          |
| Ailuropoda melanoleuca  | calponin 2                                                               | 13 | P:GO:0042060;<br>P:GO:0031032;<br>F:GO:0005516;<br>P:GO:0030336;<br>P:GO:0050765;<br>P:GO:0030097;<br>P:GO:0032970;<br>C:GO:0001725;<br>C:GO:0005911;<br>F:GO:0003779;<br>P:GO:0010628;<br>P:GO:0042127;<br>P:GO:0071260 | - | -                                                                                                          |
|                         | -                                                                        | 0  |                                                                                                                                                                                                                          |   | SignalP (SIGNALP)                                                                                          |
|                         | -                                                                        | 0  |                                                                                                                                                                                                                          |   | -                                                                                                          |
|                         | -                                                                        | 0  |                                                                                                                                                                                                                          |   | -                                                                                                          |
| Pongo abelii            | keratin 5                                                                | 9  | F:GO:0005200;<br>P:GO:0050680;<br>P:GO:0030855;<br>P:GO:0031581;<br>P:GO:0008544;<br>F:GO:0005515;<br>C:GO:0005829;<br>C:GO:0005739;<br>C:GO:0045095                                                                     | - | -                                                                                                          |
|                         | -                                                                        | 0  |                                                                                                                                                                                                                          |   | -                                                                                                          |
|                         | -                                                                        | 0  |                                                                                                                                                                                                                          |   | SignalP (SIGNALP)                                                                                          |
|                         | -                                                                        | 0  |                                                                                                                                                                                                                          |   | -                                                                                                          |
|                         | -                                                                        | 0  |                                                                                                                                                                                                                          |   | -                                                                                                          |
| Caenorhabditis elegans  | nck adaptor protein 1                                                    | 10 | C:GO:0012506;<br>P:GO:0030032;<br>F:GO:0005102;<br>P:GO:0042102;<br>C:GO:0005829;<br>P:GO:0008285;<br>F:GO:0019904;<br>P:GO:0007176;<br>P:GO:0030838;<br>P:GO:0016477                                                    | - | IPR001452; G3DSA:2.30.30.40<br>(GENE3D), PTHR22820 (PANTHER),<br>PTHR22820:SF7 (PANTHER)                   |
|                         | -                                                                        | 0  |                                                                                                                                                                                                                          |   | -                                                                                                          |
|                         | -                                                                        | 0  |                                                                                                                                                                                                                          |   | SignalP (SIGNALP)                                                                                          |
|                         | -                                                                        | 0  |                                                                                                                                                                                                                          |   | -                                                                                                          |
| Caenorhabditis briggsae | gtp-binding protein alpha g-o                                            | 4  | P:GO:0007186;<br>F:GO:0004871;<br>P:GO:0007165;<br>F:GO:0005525                                                                                                                                                          | - | IPR001019; G3DSA:3.40.50.300<br>(GENE3D), PTHR10218:SF63<br>(PANTHER), SSF52540 (SUPERFAMILY)              |
| Caenorhabditis elegans  | had-superfamily subfamily variant 1 containing protein                   | 4  | P:GO:0009792;<br>F:GO:0016787;<br>P:GO:0040007;<br>P:GO:0002119                                                                                                                                                          | - | G3DSA:3.40.50.1000 (GENE3D),<br>PTHR12725 (PANTHER),<br>PTHR12725:SF5 (PANTHER), SSF56784<br>(SUPERFAMILY) |
| Loa loa                 | uncoordinated protein isoform partially confirmed by transcript evidence | 3  | P:GO:0006468;<br>F:GO:0005524;<br>F:GO:0004674                                                                                                                                                                           | - | EC:2.7.11.0<br>IPR000719; IPR011009; IPR017442;<br>G3DSA:1.10.510.10 (GENE3D),<br>PTHR22971 (PANTHER)      |
|                         | -                                                                        | 0  |                                                                                                                                                                                                                          |   | -                                                                                                          |

|                          |                                                                         |    |                                                                                                                                                                                                                                                                                                                                                                                                                                                                        |   |  |                                                                                                                       |
|--------------------------|-------------------------------------------------------------------------|----|------------------------------------------------------------------------------------------------------------------------------------------------------------------------------------------------------------------------------------------------------------------------------------------------------------------------------------------------------------------------------------------------------------------------------------------------------------------------|---|--|-----------------------------------------------------------------------------------------------------------------------|
|                          | -                                                                       | 0  |                                                                                                                                                                                                                                                                                                                                                                                                                                                                        |   |  | -                                                                                                                     |
|                          | -                                                                       | 0  |                                                                                                                                                                                                                                                                                                                                                                                                                                                                        |   |  | -                                                                                                                     |
| Saccoglossus kowalevskii | uncharacterized protein mitochondrial                                   | 2  | F:GO:0003824;<br>P:GO:0008152                                                                                                                                                                                                                                                                                                                                                                                                                                          | - |  | -                                                                                                                     |
|                          | -                                                                       | 0  |                                                                                                                                                                                                                                                                                                                                                                                                                                                                        |   |  | SignalP (SIGNALP)                                                                                                     |
| Caenorhabditis elegans   | spermatogenesis associated 20                                           | 1  | F:GO:0005515                                                                                                                                                                                                                                                                                                                                                                                                                                                           | - |  | IPR004879; IPR008928; IPR012335;<br>IPR012336; IPR012341; PTHR12145<br>(PANTHER)                                      |
| Caenorhabditis briggsae  | related to yeast vacuolar protein sorting factor family member (vps-41) | 8  | P:GO:0009792;<br>P:GO:0002119;<br>C:GO:0005773;<br>F:GO:0005488;<br>P:GO:0006624;<br>P:GO:0040007;<br>P:GO:0007034;<br>P:GO:0043066                                                                                                                                                                                                                                                                                                                                    | - |  | -                                                                                                                     |
| Caenorhabditis briggsae  | elegans protein partially confirmed by transcript evidence              | 2  | P:GO:0040010;<br>F:GO:0005515                                                                                                                                                                                                                                                                                                                                                                                                                                          | - |  | -                                                                                                                     |
| Caenorhabditis elegans   | elegans protein partially confirmed by transcript evidence              | 7  | F:GO:0004386;<br>P:GO:0007126;<br>F:GO:0003916;<br>F:GO:0005524;<br>C:GO:0005634;<br>P:GO:0006310;<br>P:GO:0006281                                                                                                                                                                                                                                                                                                                                                     | - |  | IPR001650; G3DSA:3.40.50.300<br>(GENE3D), PTHR10799 (PANTHER),<br>PTHR10799:SF66 (PANTHER),<br>SSF52540 (SUPERFAMILY) |
|                          | -                                                                       | 0  |                                                                                                                                                                                                                                                                                                                                                                                                                                                                        |   |  | -                                                                                                                     |
|                          | -                                                                       | 0  |                                                                                                                                                                                                                                                                                                                                                                                                                                                                        |   |  | -                                                                                                                     |
| Dictyocaulus viviparus   | aba-1 allergen                                                          | 1  | F:GO:0019841                                                                                                                                                                                                                                                                                                                                                                                                                                                           | - |  | -                                                                                                                     |
|                          | -                                                                       | 0  |                                                                                                                                                                                                                                                                                                                                                                                                                                                                        |   |  | -                                                                                                                     |
| Caenorhabditis briggsae  | p70 ribosomal protein s6 ki-se                                          | 47 | P:GO:0014878;<br>C:GO:0019717;<br>P:GO:0032868;<br>P:GO:0045948;<br>P:GO:0033762;<br>P:GO:0003009;<br>P:GO:0007584;<br>P:GO:0000082;<br>P:GO:0043491;<br>P:GO:0048015;<br>C:GO:0005625;<br>P:GO:0009749;<br>P:GO:0009612;<br>P:GO:0051384;<br>C:GO:0005829;<br>P:GO:0043201;<br>P:GO:0014911;<br>P:GO:0045471;<br>P:GO:0032870;<br>C:GO:0030054;<br>P:GO:0033574;<br>P:GO:0007568;<br>P:GO:0009408;<br>C:GO:0048471;<br>P:GO:0043066;<br>F:GO:0042277;<br>F:GO:0005515 | - |  | IPR000719; IPR011009; IPR017442;<br>G3DSA:3.30.200.20 (GENE3D),<br>PTHR22985 (PANTHER),<br>PTHR22985:SF83 (PANTHER)   |
|                          | -                                                                       | 0  |                                                                                                                                                                                                                                                                                                                                                                                                                                                                        |   |  | -                                                                                                                     |

|                         |                                                            |   |                                                                                                                                                      |                                                |             |                                                                                                                     |
|-------------------------|------------------------------------------------------------|---|------------------------------------------------------------------------------------------------------------------------------------------------------|------------------------------------------------|-------------|---------------------------------------------------------------------------------------------------------------------|
| Brugia malayi           | suppressor of cytokine sig-ling 9                          | 8 | P:GO:0007482;<br>P:GO:0045873;<br>P:GO:0048072;<br>P:GO:0008586;<br>P:GO:0048802;<br>P:GO:0042059;<br>P:GO:0046426;<br>P:GO:0030718                  | -                                              |             | IPR000980; IPR001496; PTHR10385 (PANTHER), PTHR10385:SF9 (PANTHER), SSF55550 (SUPERFAMILY)                          |
| Brugia malayi           | suppressor of cytokine sig-ling 9                          | 9 | P:GO:0007482;<br>P:GO:0045873;<br>P:GO:0048072;<br>P:GO:0008586;<br>P:GO:0048802;<br>P:GO:0042059;<br>F:GO:0005515;<br>P:GO:0046426;<br>P:GO:0030718 | -                                              |             | IPR000980; IPR001496; PTHR10385 (PANTHER), PTHR10385:SF9 (PANTHER), SSF55550 (SUPERFAMILY)                          |
| Caenorhabditis elegans  | elegans protein partially confirmed by transcript evidence | 0 |                                                                                                                                                      |                                                |             | -                                                                                                                   |
|                         | -                                                          | 0 |                                                                                                                                                      |                                                |             | -                                                                                                                   |
|                         | -                                                          | 0 |                                                                                                                                                      |                                                |             | -                                                                                                                   |
|                         | -                                                          | 0 |                                                                                                                                                      |                                                |             | -                                                                                                                   |
| Loa loa                 | dedicator of cytokinesis family protein                    | 0 |                                                                                                                                                      | F:GO:0005525;<br>F:GO:0051020;<br>F:GO:0005085 |             | PTHR23317 (PANTHER), PTHR23317:SF26 (PANTHER)                                                                       |
| Loa loa                 | sentrin-specific protease 8                                | 1 | F:GO:0008233                                                                                                                                         | -                                              |             | SignalP (SIGNALP)                                                                                                   |
|                         | -                                                          | 0 |                                                                                                                                                      |                                                |             | -                                                                                                                   |
| Loa loa                 | uncoordinated family member (unc-13)                       | 1 | F:GO:0046872                                                                                                                                         | -                                              |             | -                                                                                                                   |
|                         | -                                                          | 0 |                                                                                                                                                      |                                                |             | -                                                                                                                   |
|                         | -                                                          | 0 |                                                                                                                                                      |                                                |             | -                                                                                                                   |
|                         | -                                                          | 0 |                                                                                                                                                      |                                                |             | -                                                                                                                   |
|                         | -                                                          | 0 |                                                                                                                                                      |                                                |             | -                                                                                                                   |
| Loa loa                 | adam metalloproteinase with thrombospondin type 1          | 7 | F:GO:0004222;<br>P:GO:0007275;<br>P:GO:0006516;<br>P:GO:0006508;<br>F:GO:0008270;<br>C:GO:0005578;<br>P:GO:0048070                                   | -                                              | EC:3.4.24.0 | IPR010294; PTHR13723 (PANTHER), PTHR13723:SF36 (PANTHER)                                                            |
| Caenorhabditis elegans  | lethal family member (let-805)                             | 8 | P:GO:0018996;<br>P:GO:0009792;<br>P:GO:0008340;<br>P:GO:0000003;<br>F:GO:0005515;<br>P:GO:0006898;<br>P:GO:0002119;<br>P:GO:0040011                  | -                                              |             | PTHR19143 (PANTHER), PTHR19143:SF2 (PANTHER)                                                                        |
|                         | -                                                          | 0 |                                                                                                                                                      |                                                |             | SignalP (SIGNALP)                                                                                                   |
|                         | -                                                          | 0 |                                                                                                                                                      |                                                |             | -                                                                                                                   |
| Caenorhabditis briggsae | briggsae cbr-ndg-4 protein                                 | 3 | P:GO:0009792;<br>P:GO:0010171;<br>P:GO:0040010                                                                                                       | -                                              |             | SignalP (SIGNALP)                                                                                                   |
|                         | -                                                          | 0 |                                                                                                                                                      |                                                |             | SignalP (SIGNALP)                                                                                                   |
|                         | -                                                          | 0 |                                                                                                                                                      |                                                |             | -                                                                                                                   |
| Caenorhabditis briggsae | elegans protein confirmed by transcript evidence           | 2 | P:GO:0055085;<br>C:GO:0016021                                                                                                                        | -                                              |             | IPR011701; IPR016196; G3DSA:1.20.1250.20 (GENE3D), PTHR11662 (PANTHER), PTHR11662:SF17 (PANTHER), SignalP (SIGNALP) |

|                             |                                                                                                              |   |                                                                                                                                     |                                                                 |             |                                                                                                |
|-----------------------------|--------------------------------------------------------------------------------------------------------------|---|-------------------------------------------------------------------------------------------------------------------------------------|-----------------------------------------------------------------|-------------|------------------------------------------------------------------------------------------------|
| Caenorhabditis elegans      | statb_caeel ame: full=sig-l transducer and activator of transcription b ame: full=zinc finger protein stat-b | 7 | F:GO:0003700;<br>F:GO:0004871;<br>F:GO:0005515;<br>F:GO:0005509;<br>P:GO:0007165;<br>C:GO:0005634;<br>P:GO:0006355                  | -                                                               | -           |                                                                                                |
| Angiostrongylus cantonensis | elongation factor 1 beta                                                                                     | 7 | P:GO:0009792;<br>P:GO:0002119;<br>F:GO:0003746;<br>C:GO:0005853;<br>P:GO:0040010;<br>P:GO:0006898;<br>P:GO:0006414                  | -                                                               |             | IPR001326; IPR014038; IPR014717;<br>IPR018940; PTHR11595 (PANTHER),<br>PTHR11595:SF4 (PANTHER) |
|                             | -                                                                                                            | 0 |                                                                                                                                     |                                                                 |             | -                                                                                              |
|                             | -                                                                                                            | 0 |                                                                                                                                     |                                                                 |             | SignalP (SIGNALP)                                                                              |
|                             | -                                                                                                            | 0 |                                                                                                                                     |                                                                 |             | -                                                                                              |
|                             | -                                                                                                            | 0 |                                                                                                                                     |                                                                 |             | -                                                                                              |
| Caenorhabditis elegans      | leucine-rich repeat ki-se                                                                                    | 7 | P:GO:0006468;<br>F:GO:0005525;<br>C:GO:0005622;<br>F:GO:0005515;<br>F:GO:0005524;<br>F:GO:0004674;<br>P:GO:0007264                  | -                                                               | EC:2.7.11.0 | IPR001611; G3DSA:3.80.10.10<br>(GENE3D)                                                        |
|                             | -                                                                                                            | 0 |                                                                                                                                     |                                                                 |             | -                                                                                              |
| Caenorhabditis briggsae     | briggsae cbr-folt-1 protein                                                                                  | 8 | F:GO:0004872;<br>F:GO:0015234;<br>C:GO:0005886;<br>F:GO:0005542;<br>P:GO:0055085;<br>P:GO:0015888;<br>F:GO:0008518;<br>C:GO:0016021 | -                                                               |             | -                                                                                              |
| Pongo abelii                | interferon regulatory factor 2 binding protein 2                                                             | 2 | P:GO:0045449;<br>C:GO:0005634                                                                                                       | -                                                               |             | IPR022750                                                                                      |
|                             | -                                                                                                            | 0 |                                                                                                                                     |                                                                 |             | -                                                                                              |
|                             | -                                                                                                            | 0 |                                                                                                                                     |                                                                 |             | -                                                                                              |
|                             | -                                                                                                            | 0 |                                                                                                                                     |                                                                 |             | -                                                                                              |
| Caenorhabditis elegans      | hypothetical protein T20F7.6 [Caenorhabditis elegans]                                                        | 0 |                                                                                                                                     | P:GO:0008152;<br>F:GO:0003824                                   |             | -                                                                                              |
|                             | -                                                                                                            | 0 |                                                                                                                                     |                                                                 |             | -                                                                                              |
|                             | -                                                                                                            | 0 |                                                                                                                                     |                                                                 |             | -                                                                                              |
| Caenorhabditis briggsae     | elegans protein partially confirmed by transcript evidence                                                   | 0 |                                                                                                                                     | F:GO:0005488;<br>P:GO:0032012;<br>F:GO:0005086;<br>C:GO:0005622 |             | -                                                                                              |
|                             | -                                                                                                            | 0 |                                                                                                                                     |                                                                 |             | -                                                                                              |
|                             | -                                                                                                            | 0 |                                                                                                                                     |                                                                 |             | SignalP (SIGNALP)                                                                              |
|                             | -                                                                                                            | 0 |                                                                                                                                     |                                                                 |             | -                                                                                              |



|                         |                                                  |    |                                                                                                                                                                                                                                           |   |                                                         |                                                                                     |
|-------------------------|--------------------------------------------------|----|-------------------------------------------------------------------------------------------------------------------------------------------------------------------------------------------------------------------------------------------|---|---------------------------------------------------------|-------------------------------------------------------------------------------------|
| Homo sapiens            | fibronectin 1                                    | 13 | P:GO:0018149;<br>P:GO:0016477;<br>P:GO:0001525;<br>P:GO:0008360;<br>C:GO:0005793;<br>C:GO:0031093;<br>P:GO:0034446;<br>F:GO:0005518;<br>C:GO:0005577;<br>F:GO:0008201;<br>C:GO:0005578;<br>F:GO:0005201;<br>P:GO:0006953                  | - |                                                         | IPR003961; IPR008957; IPR013783;<br>PTHR19143 (PANTHER),<br>PTHR19143:SF6 (PANTHER) |
|                         | -                                                | 0  |                                                                                                                                                                                                                                           |   |                                                         | -                                                                                   |
|                         | -                                                | 0  |                                                                                                                                                                                                                                           |   |                                                         | -                                                                                   |
|                         | -                                                | 0  |                                                                                                                                                                                                                                           |   |                                                         | -                                                                                   |
| Caenorhabditis elegans  | r- 3 -termi-l phosphate cyclase-like protein     | 2  | F:GO:0003824;<br>C:GO:0005634                                                                                                                                                                                                             | - |                                                         | IPR000228; IPR013792; IPR013796;<br>IPR020719; PD397608 (PRODOM)                    |
| Caenorhabditis elegans  | elegans protein confirmed by transcript evidence | 4  | F:GO:0016810;<br>F:GO:0005524;<br>F:GO:0003952;<br>P:GO:0009435                                                                                                                                                                           | - | EC:6.3.5.1                                              | SignalP (SIGNALP)                                                                   |
|                         | -                                                | 0  |                                                                                                                                                                                                                                           |   |                                                         | -                                                                                   |
|                         | -                                                | 0  |                                                                                                                                                                                                                                           |   |                                                         | -                                                                                   |
| Caenorhabditis briggsae | tnni3 interacting ki-se                          | 7  | C:GO:0005737;<br>P:GO:0006468;<br>F:GO:0005524;<br>F:GO:0008022;<br>C:GO:0005634;<br>F:GO:0004674;<br>F:GO:0031013                                                                                                                        | - | EC:2.7.11.0                                             | -                                                                                   |
|                         | -                                                | 0  |                                                                                                                                                                                                                                           |   |                                                         | SignalP (SIGNALP)                                                                   |
|                         | -                                                | 0  |                                                                                                                                                                                                                                           |   |                                                         | -                                                                                   |
|                         | -                                                | 0  |                                                                                                                                                                                                                                           |   |                                                         | -                                                                                   |
| Squalus acanthias       | beta tubulin                                     | 14 | P:GO:0001764;<br>C:GO:0005829;<br>F:GO:0042277;<br>C:GO:0005874;<br>F:GO:0042288;<br>P:GO:0042267;<br>P:GO:0051258;<br>P:GO:0007018;<br>P:GO:0007067;<br>F:GO:0003924;<br>F:GO:0051082;<br>F:GO:0005198;<br>P:GO:0030182;<br>F:GO:0005525 | - | EC:3.6.5.1;<br>EC:3.6.5.2;<br>EC:3.6.5.3;<br>EC:3.6.5.4 | IPR000217; IPR002453; IPR008280;<br>IPR018316                                       |
| Haemonchus contortus    | microsomal aminopeptidase                        | 10 | C:GO:0005625;<br>C:GO:0031983;<br>P:GO:0006725;<br>F:GO:0004177;<br>C:GO:0012506;<br>F:GO:0042277;<br>C:GO:0016021;<br>P:GO:0006508;<br>F:GO:0008270;<br>F:GO:0008237                                                                     | - | EC:3.4.11.0                                             | -                                                                                   |

|                         |                                                            |   |                                                                                                                                                      |                                                                                                   |             |                                                                                                                           |
|-------------------------|------------------------------------------------------------|---|------------------------------------------------------------------------------------------------------------------------------------------------------|---------------------------------------------------------------------------------------------------|-------------|---------------------------------------------------------------------------------------------------------------------------|
| Caenorhabditis elegans  | hypothetical protein Y54E10A.11 [Caenorhabditis elegans]   | 0 |                                                                                                                                                      | F:GO:0046872;<br>F:GO:0005488;<br>F:GO:0008270;<br>F:GO:0005515                                   |             | PTHR12389 (PANTHER)                                                                                                       |
| Caenorhabditis briggsae | likely calmodulin                                          | 1 | F:GO:0005488                                                                                                                                         | -                                                                                                 |             | IPR002048; IPR011992; IPR018247;<br>IPR018249; PTHR23050 (PANTHER),<br>PTHR23050:SF1 (PANTHER), SSF47473<br>(SUPERFAMILY) |
| Caenorhabditis briggsae | briggsae cbr-gnrr-8 protein                                | 2 | P:GO:0007186;<br>C:GO:0016021                                                                                                                        | -                                                                                                 |             | -                                                                                                                         |
|                         | -                                                          | 0 |                                                                                                                                                      |                                                                                                   |             | SignalP (SIGNALP)                                                                                                         |
|                         | -                                                          | 0 |                                                                                                                                                      |                                                                                                   |             | -                                                                                                                         |
| Homo sapiens            | enoyl coenzyme a hydratase peroxisomal                     | 7 | C:GO:0005777;<br>F:GO:0005515;<br>P:GO:0006635;<br>F:GO:0016853;<br>C:GO:0005739;<br>F:GO:0004300;<br>P:GO:0006091                                   | -                                                                                                 | EC:4.2.1.17 | IPR014748; SSF52096 (SUPERFAMILY)                                                                                         |
| Caenorhabditis briggsae | briggsae cbr-ugt-63 protein                                | 0 |                                                                                                                                                      | P:GO:0030259;<br>F:GO:0030246;<br>P:GO:0005975;<br>C:GO:0016021;<br>P:GO:0008152;<br>F:GO:0016758 |             | -                                                                                                                         |
|                         | -                                                          | 0 |                                                                                                                                                      |                                                                                                   |             | -                                                                                                                         |
| Caenorhabditis briggsae | db module family protein                                   | 0 |                                                                                                                                                      |                                                                                                   |             | PTHR21679 (PANTHER)                                                                                                       |
|                         | -                                                          | 0 |                                                                                                                                                      |                                                                                                   |             | -                                                                                                                         |
| Caenorhabditis briggsae | elegans protein partially confirmed by transcript evidence | 0 |                                                                                                                                                      |                                                                                                   |             | IPR008976                                                                                                                 |
|                         | -                                                          | 0 |                                                                                                                                                      |                                                                                                   |             | -                                                                                                                         |
|                         | -                                                          | 0 |                                                                                                                                                      |                                                                                                   |             | -                                                                                                                         |
| Caenorhabditis elegans  | briggsae cbr-sbp-1 protein                                 | 1 | F:GO:0005515                                                                                                                                         | -                                                                                                 |             | PTHR12565 (PANTHER),<br>PTHR12565:SF3 (PANTHER)                                                                           |
| Pongo abelii            | stress-induced-phosphoprotein 1                            | 9 | P:GO:0046425;<br>F:GO:0051087;<br>P:GO:0045449;<br>F:GO:0008022;<br>C:GO:0008023;<br>F:GO:0019901;<br>P:GO:0006950;<br>C:GO:0005794;<br>F:GO:0030544 | -                                                                                                 |             | IPR001440; IPR011990; IPR013026;<br>PTHR22904 (PANTHER),<br>PTHR22904:SF14 (PANTHER)                                      |
|                         | -                                                          | 0 |                                                                                                                                                      |                                                                                                   |             | SignalP (SIGNALP)                                                                                                         |

|                        |                                |    |                                                                                                                                                                                                                                                                                                                                                                                                                                                       |   |                                                      |
|------------------------|--------------------------------|----|-------------------------------------------------------------------------------------------------------------------------------------------------------------------------------------------------------------------------------------------------------------------------------------------------------------------------------------------------------------------------------------------------------------------------------------------------------|---|------------------------------------------------------|
| Caenorhabditis elegans | kruppel-like factor 4          | 26 | P:GO:0007500;<br>C:GO:0000785;<br>P:GO:0014067;<br>F:GO:0008270;<br>P:GO:0048662;<br>P:GO:0031077;<br>P:GO:0032526;<br>P:GO:0048730;<br>P:GO:0070373;<br>F:GO:0035014;<br>P:GO:0009913;<br>P:GO:0045892;<br>C:GO:0005730;<br>F:GO:0016563;<br>C:GO:0005667;<br>P:GO:0019827;<br>F:GO:0003702;<br>F:GO:0043565;<br>P:GO:0042325;<br>P:GO:0050790;<br>P:GO:0014740;<br>F:GO:0003700;<br>P:GO:0045944;<br>F:GO:0003690;<br>P:GO:0051898;<br>F:GO:0016564 | - | -                                                    |
| -                      | -                              | 0  |                                                                                                                                                                                                                                                                                                                                                                                                                                                       | - | -                                                    |
| Pongo abelii           | type alpha 1                   | 22 | P:GO:0009314;<br>P:GO:0018149;<br>P:GO:0030168;<br>P:GO:0048565;<br>P:GO:0043206;<br>C:GO:0005586;<br>P:GO:0007229;<br>P:GO:0050777;<br>P:GO:0007507;<br>P:GO:0007160;<br>C:GO:0005615;<br>F:GO:0046332;<br>P:GO:0001501;<br>F:GO:0048407;<br>P:GO:0043588;<br>P:GO:0030199;<br>F:GO:0005178;<br>P:GO:0007179;<br>P:GO:0034097;<br>P:GO:0032964;<br>F:GO:0005201;<br>P:GO:0001568                                                                     | - | IPR000885; PTHR22687 (PANTHER),<br>PSS1461 (PROFILE) |
| Caenorhabditis elegans | lethal family member (let-805) | 8  | P:GO:0018996;<br>P:GO:0009792;<br>P:GO:0008340;<br>P:GO:0000003;<br>F:GO:0005515;<br>P:GO:0006898;<br>P:GO:0002119;<br>P:GO:0040011                                                                                                                                                                                                                                                                                                                   | - | -                                                    |
| -                      | -                              | 0  |                                                                                                                                                                                                                                                                                                                                                                                                                                                       | - | -                                                    |

|                         |                                                  |    |                                                                                                                                                                                                                          |   |             |                                                                                                                                                |
|-------------------------|--------------------------------------------------|----|--------------------------------------------------------------------------------------------------------------------------------------------------------------------------------------------------------------------------|---|-------------|------------------------------------------------------------------------------------------------------------------------------------------------|
| Caenorhabditis elegans  | c-type lectin family member (clec-225)           | 2  | C:GO:0016021;<br>F:GO:0005488                                                                                                                                                                                            | - |             | -                                                                                                                                              |
|                         |                                                  | 0  |                                                                                                                                                                                                                          |   |             | -                                                                                                                                              |
| Caenorhabditis briggsae | elegans protein confirmed by transcript evidence | 3  | F:GO:0003951;<br>P:GO:0008152;<br>C:GO:0005739                                                                                                                                                                           | - | EC:2.7.1.23 | PSS1257 (PROFILE)                                                                                                                              |
|                         |                                                  | 0  |                                                                                                                                                                                                                          |   |             | -                                                                                                                                              |
|                         |                                                  | 0  |                                                                                                                                                                                                                          |   |             | -                                                                                                                                              |
| Bos taurus              | heat shock protein hsp 90-beta                   | 13 | C:GO:0005739;<br>P:GO:0006457;<br>F:GO:0030235;<br>P:GO:0060334;<br>P:GO:0001890;<br>C:GO:0042470;<br>F:GO:0005524;<br>P:GO:0032435;<br>F:GO:0030911;<br>P:GO:0060338;<br>F:GO:0051082;<br>P:GO:0006986;<br>P:GO:0045429 | - |             | IPR001404; IPR020568; IPR020576                                                                                                                |
|                         |                                                  | 0  |                                                                                                                                                                                                                          |   |             | -                                                                                                                                              |
|                         |                                                  | 0  |                                                                                                                                                                                                                          |   |             | -                                                                                                                                              |
| Caenorhabditis elegans  | protein-tyrosine phosphatase containing protein  | 3  | F:GO:0004721;<br>P:GO:0009792;<br>P:GO:0000003                                                                                                                                                                           | - | EC:3.1.3.16 | IPR000242; IPR000387; IPR016130;<br>G3DSA:3.90.190.10 (GENE3D),<br>PTHR19134 (PANTHER),<br>PTHR19134:SF26 (PANTHER),<br>SSF52799 (SUPERFAMILY) |
|                         |                                                  | 0  |                                                                                                                                                                                                                          |   |             | -                                                                                                                                              |
| Callithrix jacchus      | myc-associated zinc finger protein               | 8  | F:GO:0003723;<br>P:GO:0006369;<br>F:GO:0008270;<br>P:GO:0006367;<br>P:GO:0045449;<br>F:GO:0003677;<br>F:GO:0005515;<br>C:GO:0005634                                                                                      | - |             | IPR007087; IPR013087; IPR015880;<br>PTHR23228 (PANTHER),<br>PTHR23228:SF28 (PANTHER),<br>SSF57667 (SUPERFAMILY)                                |
| Caenorhabditis briggsae | elegans protein confirmed by transcript evidence | 1  | C:GO:0016021                                                                                                                                                                                                             | - |             | -                                                                                                                                              |
|                         |                                                  | 0  |                                                                                                                                                                                                                          |   |             | -                                                                                                                                              |

|                         |                                                            |    |                                                                                                                                                                                                                                                                                                                                                                                                                     |            |                                                                                             |
|-------------------------|------------------------------------------------------------|----|---------------------------------------------------------------------------------------------------------------------------------------------------------------------------------------------------------------------------------------------------------------------------------------------------------------------------------------------------------------------------------------------------------------------|------------|---------------------------------------------------------------------------------------------|
| Drosophila willistoni   | importin 8                                                 | 24 | C:GO:0000790;<br>P:GO:0042052;<br>P:GO:0016321;<br>P:GO:0006325;<br>C:GO:0005700;<br>P:GO:0007474;<br>C:GO:0016456;<br>F:GO:0008565;<br>P:GO:0043524;<br>F:GO:0035175;<br>C:GO:0048471;<br>P:GO:0045465;<br>P:GO:0031936;<br>F:GO:0005515;<br>P:GO:0006468;<br>P:GO:0007173;<br>P:GO:0000189;<br>P:GO:0008283;<br>P:GO:0035311;<br>P:GO:0016318;<br>P:GO:0008586;<br>P:GO:0042675;<br>C:GO:0005938;<br>P:GO:0048477 | -          | IPR001494; IPR011989; IPR016024;<br>PTHR10997 (PANTHER),<br>PTHR10997:SF18 (PANTHER)        |
| -                       | -                                                          | 0  | -                                                                                                                                                                                                                                                                                                                                                                                                                   | -          | -                                                                                           |
| Caenorhabditis briggsae | briggsae cbr-dpf-6 protein                                 | 1  | F:GO:0016787                                                                                                                                                                                                                                                                                                                                                                                                        | -          | SignalP (SIGNALP)                                                                           |
| -                       | -                                                          | 0  | -                                                                                                                                                                                                                                                                                                                                                                                                                   | -          | SignalP (SIGNALP)                                                                           |
| -                       | -                                                          | 0  | -                                                                                                                                                                                                                                                                                                                                                                                                                   | -          | -                                                                                           |
| -                       | -                                                          | 0  | -                                                                                                                                                                                                                                                                                                                                                                                                                   | -          | -                                                                                           |
| -                       | -                                                          | 0  | -                                                                                                                                                                                                                                                                                                                                                                                                                   | -          | SignalP (SIGNALP)                                                                           |
| -                       | -                                                          | 0  | -                                                                                                                                                                                                                                                                                                                                                                                                                   | -          | SignalP (SIGNALP)                                                                           |
| -                       | -                                                          | 0  | -                                                                                                                                                                                                                                                                                                                                                                                                                   | -          | -                                                                                           |
| Caenorhabditis elegans  | elegans protein partially confirmed by transcript evidence | 2  | P:GO:0006541;<br>F:GO:0004359                                                                                                                                                                                                                                                                                                                                                                                       | EC:3.5.1.2 | IPR010916; IPR012338; IPR015868;<br>G3DSA:1.10.1500.10 (GENE3D),<br>PTHR12544:SF3 (PANTHER) |
| -                       | -                                                          | 0  | -                                                                                                                                                                                                                                                                                                                                                                                                                   | -          | -                                                                                           |
| -                       | -                                                          | 0  | -                                                                                                                                                                                                                                                                                                                                                                                                                   | -          | IPR018294; SignalP (SIGNALP),<br>SSF52058 (SUPERFAMILY)                                     |
| -                       | -                                                          | 0  | -                                                                                                                                                                                                                                                                                                                                                                                                                   | -          | -                                                                                           |
| -                       | -                                                          | 0  | -                                                                                                                                                                                                                                                                                                                                                                                                                   | -          | IPR008491; SignalP (SIGNALP)                                                                |
| Pan troglodytes         | brain protein i3                                           | 9  | P:GO:0012502;<br>C:GO:0005765;<br>C:GO:0016021;<br>F:GO:0001540;<br>C:GO:0005624;<br>F:GO:0005524;<br>C:GO:0048471;<br>P:GO:0010977;<br>C:GO:0005794                                                                                                                                                                                                                                                                | -          | -                                                                                           |
| -                       | -                                                          | 0  | -                                                                                                                                                                                                                                                                                                                                                                                                                   | -          | -                                                                                           |
| -                       | -                                                          | 0  | -                                                                                                                                                                                                                                                                                                                                                                                                                   | -          | -                                                                                           |
| -                       | -                                                          | 0  | -                                                                                                                                                                                                                                                                                                                                                                                                                   | -          | -                                                                                           |

|                         |                                                            |   |                                                                                                   |                                                                                                                                     |             |                                                             |
|-------------------------|------------------------------------------------------------|---|---------------------------------------------------------------------------------------------------|-------------------------------------------------------------------------------------------------------------------------------------|-------------|-------------------------------------------------------------|
| Haemonchus contortus    | aspartic protease                                          | 0 |                                                                                                   | P:GO:0006508;<br>C:GO:0016021;<br>F:GO:0004190;<br>F:GO:0016787;<br>P:GO:0040011;<br>F:GO:0008233;<br>P:GO:0008219;<br>F:GO:0005515 |             | IPR001461; IPR009007;<br>PTHR13683:SF53 (PANTHER)           |
| -                       | -                                                          | 0 |                                                                                                   |                                                                                                                                     |             | -                                                           |
| Loa loa                 | amp-activated protein gamma regulatory subunit             | 2 | F:GO:0003824;<br>P:GO:0008152                                                                     | -                                                                                                                                   |             | PTHR13780 (PANTHER)                                         |
| -                       | -                                                          | 0 |                                                                                                   |                                                                                                                                     |             | -                                                           |
| Caenorhabditis elegans  | h <sup>+</sup> -atpase v-type subunit                      | 6 | F:GO:0046933;<br>C:GO:0016021;<br>P:GO:0015986;<br>C:GO:0033179;<br>C:GO:0045263;<br>C:GO:0005774 | -                                                                                                                                   | EC:3.6.3.14 | IPR000245; IPR002379; IPR011555;<br>PTHR10263 (PANTHER)     |
| Brugia malayi           | cadherin domain containing protein                         | 2 | C:GO:0016020;<br>P:GO:0007155                                                                     | -                                                                                                                                   |             | -                                                           |
| -                       | -                                                          | 0 |                                                                                                   |                                                                                                                                     |             | SignalP (SIGNALP)                                           |
| -                       | -                                                          | 0 |                                                                                                   |                                                                                                                                     |             | -                                                           |
| Caenorhabditis briggsae | elegans protein partially confirmed by transcript evidence | 0 |                                                                                                   | P:GO:0007600;<br>P:GO:0007165;<br>F:GO:0042802;<br>F:GO:0005515                                                                     |             | IPR014756; PTHR11188 (PANTHER),<br>PTHR11188:SF13 (PANTHER) |
| -                       | -                                                          | 0 |                                                                                                   |                                                                                                                                     |             | -                                                           |
| -                       | -                                                          | 0 |                                                                                                   |                                                                                                                                     |             | SignalP (SIGNALP)                                           |
| -                       | -                                                          | 0 |                                                                                                   |                                                                                                                                     |             | -                                                           |
| -                       | -                                                          | 0 |                                                                                                   |                                                                                                                                     |             | -                                                           |
| Caenorhabditis elegans  | hypothetical protein R148.5 [Caenorhabditis elegans]       | 1 | F:GO:0005515                                                                                      | -                                                                                                                                   |             | -                                                           |
| -                       | -                                                          | 0 |                                                                                                   |                                                                                                                                     |             | -                                                           |
| Caenorhabditis briggsae | membrane calcium atpase family member (mca-1)              | 5 | F:GO:0005388;<br>C:GO:0016021;<br>P:GO:0006754;<br>F:GO:0005524;<br>P:GO:0006816                  | -                                                                                                                                   | EC:3.6.3.8  | SignalP (SIGNALP)                                           |
| -                       | -                                                          | 0 |                                                                                                   |                                                                                                                                     |             | -                                                           |
| -                       | -                                                          | 0 |                                                                                                   |                                                                                                                                     |             | -                                                           |
| -                       | -                                                          | 0 |                                                                                                   |                                                                                                                                     |             | -                                                           |
| -                       | -                                                          | 0 |                                                                                                   |                                                                                                                                     |             | -                                                           |
| Caenorhabditis elegans  | ras-related protein rab-                                   | 1 | F:GO:0000166                                                                                      | -                                                                                                                                   |             | -                                                           |
| -                       | -                                                          | 0 |                                                                                                   |                                                                                                                                     |             | -                                                           |
| Caenorhabditis elegans  | elegans protein partially confirmed by transcript evidence | 0 |                                                                                                   | F:GO:0005488;<br>C:GO:0016021                                                                                                       |             | -                                                           |
| -                       | -                                                          | 0 |                                                                                                   |                                                                                                                                     |             | -                                                           |
| -                       | -                                                          | 0 |                                                                                                   |                                                                                                                                     |             | -                                                           |
| -                       | -                                                          | 0 |                                                                                                   |                                                                                                                                     |             | -                                                           |
| Caenorhabditis briggsae | riken cd- 2700097o09                                       | 1 | P:GO:0009792                                                                                      | -                                                                                                                                   |             | -                                                           |
| -                       | -                                                          | 0 |                                                                                                   |                                                                                                                                     |             | -                                                           |
| -                       | -                                                          | 0 |                                                                                                   |                                                                                                                                     |             | -                                                           |

|                         |                                                         |   |                                                                                                                                     |                                                |                            |                                                                                                                                                  |
|-------------------------|---------------------------------------------------------|---|-------------------------------------------------------------------------------------------------------------------------------------|------------------------------------------------|----------------------------|--------------------------------------------------------------------------------------------------------------------------------------------------|
| Caenorhabditis elegans  | atp-binding sub-family b (mdr tap) member isoform cra_a | 6 | P:GO:0055085;<br>C:GO:0005739;<br>C:GO:0016021;<br>F:GO:0042626;<br>F:GO:0005524;<br>P:GO:0008152                                   | -                                              |                            | IPR003439; IPR017871;<br>G3DSA:3.40.50.300 (GENE3D),<br>PTHR19242 (PANTHER),<br>PTHR19242:SF62 (PANTHER),<br>SSF52540 (SUPERFAMILY)              |
| -                       | -                                                       | 0 |                                                                                                                                     |                                                |                            | -                                                                                                                                                |
| Caenorhabditis briggsae | chiti-se                                                | 8 | F:GO:0004383;<br>P:GO:0006032;<br>P:GO:0016998;<br>F:GO:0004672;<br>F:GO:0005524;<br>F:GO:0004568;<br>P:GO:0006468;<br>P:GO:0006182 | -                                              | EC:4.6.1.2;<br>EC:3.2.1.14 | IPR000726; G3DSA:1.10.530.10<br>(GENE3D), G3DSA:3.30.20.10<br>(GENE3D), PTHR22595:SF6<br>(PANTHER), SignalP (SIGNALP),<br>SSF53955 (SUPERFAMILY) |
| Caenorhabditis elegans  | hypothetical protein C06E7.2 [Caenorhabditis elegans]   | 0 |                                                                                                                                     |                                                |                            | -                                                                                                                                                |
| -                       | -                                                       | 0 |                                                                                                                                     |                                                |                            | -                                                                                                                                                |
| -                       | -                                                       | 0 |                                                                                                                                     |                                                |                            | -                                                                                                                                                |
| Caenorhabditis elegans  | yip1 domain member 6                                    | 1 | C:GO:0016020                                                                                                                        | -                                              |                            | IPR006977; PTHR21236 (PANTHER),<br>PTHR21236:SF1 (PANTHER)                                                                                       |
| Loa loa                 | briggsae cbr-cpg-3 protein                              | 0 |                                                                                                                                     |                                                |                            | SignalP (SIGNALP)                                                                                                                                |
| Loa loa                 | briggsae cbr-cpg-3 protein                              | 0 |                                                                                                                                     |                                                |                            | SignalP (SIGNALP)                                                                                                                                |
| Loa loa                 | briggsae cbr-cpg-3 protein                              | 0 |                                                                                                                                     |                                                |                            | -                                                                                                                                                |
| Loa loa                 | briggsae cbr-cpg-3 protein                              | 0 |                                                                                                                                     |                                                |                            | -                                                                                                                                                |
| Loa loa                 | briggsae cbr-cpg-3 protein                              | 0 |                                                                                                                                     |                                                |                            | SignalP (SIGNALP)                                                                                                                                |
| Loa loa                 | briggsae cbr-cpg-3 protein                              | 0 |                                                                                                                                     |                                                |                            | SignalP (SIGNALP)                                                                                                                                |
| Loa loa                 | briggsae cbr-cpg-3 protein                              | 0 |                                                                                                                                     |                                                |                            | SignalP (SIGNALP)                                                                                                                                |
| Loa loa                 | briggsae cbr-cpg-3 protein                              | 0 |                                                                                                                                     |                                                |                            | SignalP (SIGNALP)                                                                                                                                |
| Caenorhabditis elegans  | pyroglutamyl-peptidase 1                                | 0 |                                                                                                                                     | P:GO:0006508;<br>F:GO:0016787;<br>C:GO:0005575 |                            | IPR000816; IPR016125;<br>PTHR23402:SF1 (PANTHER)                                                                                                 |
| -                       | -                                                       | 0 |                                                                                                                                     |                                                |                            | -                                                                                                                                                |
| -                       | -                                                       | 0 |                                                                                                                                     |                                                |                            | -                                                                                                                                                |
| Pongo abelii            | proteasome ( macropain) beta 7                          | 8 | P:GO:0051436;<br>P:GO:0051437;<br>F:GO:0004298;<br>P:GO:0031145;<br>P:GO:0044419;<br>C:GO:0005737;<br>C:GO:0005839;<br>C:GO:0005634 | -                                              | EC:3.4.25.0                | -                                                                                                                                                |
| -                       | -                                                       | 0 |                                                                                                                                     |                                                |                            | -                                                                                                                                                |
| -                       | -                                                       | 0 |                                                                                                                                     |                                                |                            | -                                                                                                                                                |
| -                       | -                                                       | 0 |                                                                                                                                     |                                                |                            | -                                                                                                                                                |
| Caenorhabditis briggsae | briggsae cbr-mab-10 protein                             | 3 | P:GO:0040035;<br>F:GO:0005515;<br>P:GO:0002009                                                                                      | -                                              |                            | -                                                                                                                                                |
| -                       | -                                                       | 0 |                                                                                                                                     |                                                |                            | IPR000832; PTHR12011 (PANTHER),<br>PTHR12011:SF56 (PANTHER), SignalP<br>(SIGNALP)                                                                |
| -                       | -                                                       | 0 |                                                                                                                                     |                                                |                            | -                                                                                                                                                |
| -                       | -                                                       | 0 |                                                                                                                                     |                                                |                            | -                                                                                                                                                |

|                         |                                                            |    |                                                                                                                                                                                                                                                                                                                                                                                                                                                                         |              |                                                                                                                                                                                                                                                                                                           |
|-------------------------|------------------------------------------------------------|----|-------------------------------------------------------------------------------------------------------------------------------------------------------------------------------------------------------------------------------------------------------------------------------------------------------------------------------------------------------------------------------------------------------------------------------------------------------------------------|--------------|-----------------------------------------------------------------------------------------------------------------------------------------------------------------------------------------------------------------------------------------------------------------------------------------------------------|
| Caenorhabditis briggsae | heat shock 70kda protein 4                                 | 4  | F:GO:0005515;<br>P:GO:0006950;<br>P:GO:0051085;<br>F:GO:0000166                                                                                                                                                                                                                                                                                                                                                                                                         | -            | IPR001023; IPR013126; IPR018181;<br>G3DSA:1.20.1270.10 (GENE3D),<br>G3DSA:2.60.34.10 (GENE3D),<br>G3DSA:3.30.30.30 (GENE3D),<br>G3DSA:3.30.420.40 (GENE3D),<br>G3DSA:3.90.640.10 (GENE3D),<br>PTHR19375:SF15 (PANTHER),<br>SSF100920 (SUPERFAMILY), SSF100934<br>(SUPERFAMILY), SSF53067<br>(SUPERFAMILY) |
| -                       | -                                                          | 0  |                                                                                                                                                                                                                                                                                                                                                                                                                                                                         |              | SignalP (SIGNALP)                                                                                                                                                                                                                                                                                         |
| -                       | -                                                          | 0  |                                                                                                                                                                                                                                                                                                                                                                                                                                                                         |              | SignalP (SIGNALP)                                                                                                                                                                                                                                                                                         |
| Caenorhabditis elegans  | immunoglobulin i-set domain containing protein             | 2  | F:GO:0005509;<br>F:GO:0003824                                                                                                                                                                                                                                                                                                                                                                                                                                           | -            | IPR002035; G3DSA:3.40.50.410<br>(GENE3D), PTHR22992 (PANTHER),<br>SSF53300 (SUPERFAMILY)                                                                                                                                                                                                                  |
| Caenorhabditis elegans  | elegans protein partially confirmed by transcript evidence | 6  | C:GO:0016021;<br>P:GO:0009792;<br>P:GO:0000003;<br>P:GO:0040010;<br>P:GO:0055085;<br>P:GO:0002119                                                                                                                                                                                                                                                                                                                                                                       | -            | IPR016196; IPR020846;<br>G3DSA:1.20.1250.20 (GENE3D),<br>PTHR10074 (PANTHER),<br>PTHR10074:SF22 (PANTHER), SignalP<br>(SIGNALP)                                                                                                                                                                           |
| -                       | -                                                          | 0  |                                                                                                                                                                                                                                                                                                                                                                                                                                                                         |              | -                                                                                                                                                                                                                                                                                                         |
| Homo sapiens            | cd44 variant                                               | 30 | F:GO:0005057;<br>P:GO:0007160;<br>P:GO:0070374;<br>P:GO:0033138;<br>P:GO:0001558;<br>P:GO:0033189;<br>F:GO:0051219;<br>P:GO:0016337;<br>C:GO:0016323;<br>F:GO:0005540;<br>P:GO:0043518;<br>P:GO:0031175;<br>P:GO:0001955;<br>P:GO:0014070;<br>P:GO:0001658;<br>P:GO:0033031;<br>P:GO:0060442;<br>C:GO:0043234;<br>C:GO:0009897;<br>P:GO:0050731;<br>F:GO:0004872;<br>F:GO:0005518;<br>C:GO:0005887;<br>C:GO:0005634;<br>P:GO:0002246;<br>P:GO:0016477;<br>P:GO:0043066; | -            | IPR001231; PTHR10225 (PANTHER)                                                                                                                                                                                                                                                                            |
| -                       | -                                                          | 0  |                                                                                                                                                                                                                                                                                                                                                                                                                                                                         |              | -                                                                                                                                                                                                                                                                                                         |
| -                       | -                                                          | 0  |                                                                                                                                                                                                                                                                                                                                                                                                                                                                         |              | -                                                                                                                                                                                                                                                                                                         |
| -                       | -                                                          | 0  |                                                                                                                                                                                                                                                                                                                                                                                                                                                                         |              | -                                                                                                                                                                                                                                                                                                         |
| Frankia sp. Ccl3        | nudix hydrolase                                            | 0  |                                                                                                                                                                                                                                                                                                                                                                                                                                                                         | F:GO:0016787 | IPR000086; IPR015797; PTHR13994<br>(PANTHER), PTHR13994:SF4<br>(PANTHER)                                                                                                                                                                                                                                  |



|                        |                                                            |    |                                                                                                                                                                                                                                                                                                                                                                                                                                                                                         |                                                                                  |             |                                                                                                                                |
|------------------------|------------------------------------------------------------|----|-----------------------------------------------------------------------------------------------------------------------------------------------------------------------------------------------------------------------------------------------------------------------------------------------------------------------------------------------------------------------------------------------------------------------------------------------------------------------------------------|----------------------------------------------------------------------------------|-------------|--------------------------------------------------------------------------------------------------------------------------------|
| Caenorhabditis elegans | cathepsin a                                                | 3  | F:GO:0004185;<br>P:GO:0019915;<br>P:GO:0006508                                                                                                                                                                                                                                                                                                                                                                                                                                          | -                                                                                | EC:3.4.16.0 | IPR001563; IPR018202;<br>G3DSA:3.40.50.1820 (GENE3D),<br>PTHR11802:SF9 (PANTHER), SignalP<br>(SIGNALP), SSF53474 (SUPERFAMILY) |
| Caenorhabditis elegans | cathepsin a                                                | 3  | F:GO:0004185;<br>P:GO:0019915;<br>P:GO:0006508                                                                                                                                                                                                                                                                                                                                                                                                                                          | -                                                                                | EC:3.4.16.0 | IPR001563; IPR018202;<br>G3DSA:3.40.50.1820 (GENE3D),<br>PTHR11802:SF9 (PANTHER), SignalP<br>(SIGNALP), SSF53474 (SUPERFAMILY) |
| Loa loa                | der1-like domain member 3                                  | 6  | P:GO:0030433;<br>C:GO:0030176;<br>P:GO:0030968;<br>P:GO:0030970;<br>P:GO:0030307;<br>P:GO:0008284                                                                                                                                                                                                                                                                                                                                                                                       | -                                                                                |             | IPR007599; SignalP (SIGNALP)                                                                                                   |
| Caenorhabditis elegans | elegans protein partially confirmed by transcript evidence | 0  |                                                                                                                                                                                                                                                                                                                                                                                                                                                                                         |                                                                                  |             | -                                                                                                                              |
| Caenorhabditis elegans | hypothetical protein H05L14.1 [Caenorhabditis elegans]     | 0  |                                                                                                                                                                                                                                                                                                                                                                                                                                                                                         | F:GO:0004672;<br>F:GO:0005524;<br>F:GO:0000166;<br>P:GO:0006468;<br>F:GO:0004674 |             | IPR000719; IPR017441;<br>G3DSA:3.30.200.20 (GENE3D)                                                                            |
|                        |                                                            | 0  |                                                                                                                                                                                                                                                                                                                                                                                                                                                                                         |                                                                                  |             | -                                                                                                                              |
| Ailuropoda melanoleuca | high-mobility group box 1                                  | 67 | P:GO:0009980;<br>C:GO:0009986;<br>P:GO:0000902;<br>P:GO:0002053;<br>P:GO:0032868;<br>F:GO:0000401;<br>P:GO:0010552;<br>C:GO:0043005;<br>F:GO:0008201;<br>F:GO:0003690;<br>F:GO:0003697;<br>C:GO:0005625;<br>P:GO:0009749;<br>P:GO:0033151;<br>P:GO:0031532;<br>P:GO:0051384;<br>P:GO:0008156;<br>F:GO:0008301;<br>P:GO:0014911;<br>P:GO:0034341;<br>F:GO:0070491;<br>F:GO:0051861;<br>F:GO:0008134;<br>C:GO:0005615;<br>P:GO:0001934;<br>P:GO:0017055;<br>P:GO:0002437;<br>P:GO:0001654 | -                                                                                |             | IPR000135; IPR000910; IPR009071;<br>PTHR13711 (PANTHER)                                                                        |
|                        |                                                            | 0  |                                                                                                                                                                                                                                                                                                                                                                                                                                                                                         |                                                                                  |             | SignalP (SIGNALP)                                                                                                              |
| Caenorhabditis elegans | patched family protein                                     | 7  | P:GO:0040025;<br>F:GO:0008158;<br>P:GO:0040018;<br>P:GO:0018996;<br>P:GO:0040002;<br>C:GO:0016021;<br>P:GO:0019915                                                                                                                                                                                                                                                                                                                                                                      | -                                                                                |             | -                                                                                                                              |

|                         |                                                               |    |                                                                                                                                                                                                                                                            |                                                                                                   |             |                                                                                                            |
|-------------------------|---------------------------------------------------------------|----|------------------------------------------------------------------------------------------------------------------------------------------------------------------------------------------------------------------------------------------------------------|---------------------------------------------------------------------------------------------------|-------------|------------------------------------------------------------------------------------------------------------|
| Caenorhabditis elegans  | ipase c family member (plc-1)                                 | 9  | F:GO:0005085;<br>P:GO:0006629;<br>F:GO:0004871;<br>C:GO:0005622;<br>F:GO:0004435;<br>P:GO:0040010;<br>F:GO:0005509;<br>P:GO:0009566;<br>P:GO:0007264                                                                                                       | -                                                                                                 | EC:3.1.4.11 | IPR011992; IPR015359; PTHR10336 (PANTHER), PTHR10336:SF6 (PANTHER), SSF47473 (SUPERFAMILY)                 |
| -                       | -                                                             | 0  |                                                                                                                                                                                                                                                            |                                                                                                   |             | SignalP (SIGNALP)                                                                                          |
| -                       | -                                                             | 0  |                                                                                                                                                                                                                                                            |                                                                                                   |             | -                                                                                                          |
| Caenorhabditis briggsae | mitochondrial ornithine transporter 1                         | 2  | P:GO:0055085;<br>C:GO:0016020                                                                                                                                                                                                                              | -                                                                                                 |             | IPR001993; IPR018108; G3DSA:1.50.40.10 (GENE3D), PTHR11896:SF53 (PANTHER)                                  |
| Loa loa                 | fission 1 (mitochondrial outer membrane) homolog (cerevisiae) | 6  | C:GO:0005779;<br>P:GO:0006915;<br>F:GO:0005515;<br>P:GO:0016559;<br>P:GO:0000266;<br>C:GO:0031307                                                                                                                                                          | -                                                                                                 |             | IPR011990; PTHR13247 (PANTHER), SSF48452 (SUPERFAMILY)                                                     |
| Dictyocaulus viviparus  | calcium-independent phospholipase a2 isoform a                | 2  | P:GO:0016042;<br>F:GO:0016787                                                                                                                                                                                                                              | -                                                                                                 |             | -                                                                                                          |
| Caenorhabditis elegans  | protein ki-se domain containing protein                       | 7  | P:GO:0006468;<br>P:GO:0040022;<br>F:GO:0005515;<br>F:GO:0005524;<br>P:GO:0019915;<br>P:GO:0051729;<br>F:GO:0004674                                                                                                                                         | -                                                                                                 | EC:2.7.11.0 | IPR000719; IPR011009; IPR017442; G3DSA:1.10.510.10 (GENE3D), PTHR11909 (PANTHER), PTHR11909:SF19 (PANTHER) |
| -                       | -                                                             | 0  |                                                                                                                                                                                                                                                            |                                                                                                   |             | IPR003582; SignalP (SIGNALP)                                                                               |
| -                       | -                                                             | 0  |                                                                                                                                                                                                                                                            |                                                                                                   |             | -                                                                                                          |
| -                       | -                                                             | 0  |                                                                                                                                                                                                                                                            |                                                                                                   |             | -                                                                                                          |
| -                       | -                                                             | 0  |                                                                                                                                                                                                                                                            |                                                                                                   |             | -                                                                                                          |
| Caenorhabditis briggsae | briggsae cbr-trpa-1 protein                                   | 0  |                                                                                                                                                                                                                                                            | C:GO:0016021;<br>C:GO:0016020;<br>P:GO:0055085;<br>P:GO:0006811;<br>F:GO:0005216;<br>P:GO:0006810 |             | -                                                                                                          |
| Brugia malayi           | wd repeat domain 36                                           | 0  |                                                                                                                                                                                                                                                            | C:GO:0032040;<br>P:GO:0006364                                                                     |             | -                                                                                                          |
| Caenorhabditis briggsae | ipase c family member (plc-1)                                 | 15 | P:GO:0007265;<br>F:GO:0004435;<br>P:GO:0006629;<br>P:GO:0040010;<br>P:GO:0045859;<br>F:GO:0005509;<br>F:GO:0004871;<br>P:GO:0007186;<br>F:GO:0017016;<br>F:GO:0005085;<br>P:GO:0009566;<br>C:GO:0044444;<br>P:GO:0009966;<br>P:GO:0035466;<br>P:GO:0043085 | -                                                                                                 | EC:3.1.4.11 | -                                                                                                          |

|                         |                                                            |    |                                                                                                                                                                       |                                                                 |            |                                                                                                                |
|-------------------------|------------------------------------------------------------|----|-----------------------------------------------------------------------------------------------------------------------------------------------------------------------|-----------------------------------------------------------------|------------|----------------------------------------------------------------------------------------------------------------|
| Caenorhabditis briggsae | glutamine-oxaloacetic transami-se                          | 6  | F:GO:0030170;<br>P:GO:0006536;<br>P:GO:0006531;<br>P:GO:0006103;<br>P:GO:0009058;<br>F:GO:0004069                                                                     | -                                                               | EC:2.6.1.1 | IPR000796; IPR004838; IPR004839;<br>IPR015421; IPR015424                                                       |
| Caenorhabditis briggsae | glutamine-oxaloacetic transami-se                          | 6  | F:GO:0030170;<br>P:GO:0006536;<br>P:GO:0006531;<br>P:GO:0006103;<br>P:GO:0009058;<br>F:GO:0004069                                                                     | -                                                               | EC:2.6.1.1 | IPR000796; IPR004838; IPR004839;<br>IPR015421; IPR015424                                                       |
| Caenorhabditis briggsae | glutamine-oxaloacetic transami-se                          | 6  | F:GO:0030170;<br>P:GO:0006536;<br>P:GO:0006531;<br>P:GO:0006103;<br>P:GO:0009058;<br>F:GO:0004069                                                                     | -                                                               | EC:2.6.1.1 | IPR000796; IPR004838; IPR004839;<br>IPR015421; IPR015424                                                       |
| Caenorhabditis briggsae | glutamine-oxaloacetic transami-se                          | 6  | F:GO:0030170;<br>P:GO:0006536;<br>P:GO:0006531;<br>P:GO:0006103;<br>P:GO:0009058;<br>F:GO:0004069                                                                     | -                                                               | EC:2.6.1.1 | IPR000796; IPR004838; IPR004839;<br>IPR015421; IPR015424                                                       |
| -                       | -                                                          | 0  |                                                                                                                                                                       |                                                                 |            | SignalP (SIGNALP)                                                                                              |
| Caenorhabditis briggsae | elegans protein partially confirmed by transcript evidence | 1  | P:GO:0019915                                                                                                                                                          | -                                                               |            | IPR010291; IPR016196;<br>G3DSA:1.20.1250.20 (GENE3D),<br>PTHR23294 (PANTHER), SignalP<br>(SIGNALP)             |
| -                       | -                                                          | 0  |                                                                                                                                                                       |                                                                 |            | SignalP (SIGNALP)                                                                                              |
| -                       | -                                                          | 0  |                                                                                                                                                                       |                                                                 |            | -                                                                                                              |
| Caenorhabditis briggsae | elegans protein partially confirmed by transcript evidence | 0  |                                                                                                                                                                       |                                                                 |            | -                                                                                                              |
| Caenorhabditis elegans  | wd repeat and fyve domain-containing protein 3             | 1  | F:GO:0005488                                                                                                                                                          | -                                                               |            | -                                                                                                              |
| -                       | -                                                          | 0  |                                                                                                                                                                       |                                                                 |            | -                                                                                                              |
| Caenorhabditis elegans  | gns1 sur4 family protein                                   | 2  | C:GO:0016021;<br>P:GO:0007283                                                                                                                                         | -                                                               |            | IPR002076                                                                                                      |
| -                       | -                                                          | 0  |                                                                                                                                                                       |                                                                 |            | SignalP (SIGNALP)                                                                                              |
| -                       | -                                                          | 0  |                                                                                                                                                                       |                                                                 |            | -                                                                                                              |
| -                       | -                                                          | 0  |                                                                                                                                                                       |                                                                 |            | -                                                                                                              |
| -                       | -                                                          | 0  |                                                                                                                                                                       |                                                                 |            | -                                                                                                              |
| -                       | -                                                          | 0  |                                                                                                                                                                       |                                                                 |            | -                                                                                                              |
| Pongo abelii            | calcium and integrin binding 1                             | 10 | C:GO:0016324;<br>P:GO:0006915;<br>C:GO:0005654;<br>P:GO:0007229;<br>F:GO:0005515;<br>P:GO:0007155;<br>P:GO:0006302;<br>F:GO:0005509;<br>C:GO:0030175;<br>C:GO:0005783 | -                                                               |            | IPR011992; IPR018247; IPR018249;<br>PTHR23056 (PANTHER),<br>PTHR23056:SF7 (PANTHER), SSF47473<br>(SUPERFAMILY) |
| -                       | -                                                          | 0  |                                                                                                                                                                       |                                                                 |            | -                                                                                                              |
| -                       | -                                                          | 0  |                                                                                                                                                                       |                                                                 |            | -                                                                                                              |
| -                       | -                                                          | 0  |                                                                                                                                                                       |                                                                 |            | -                                                                                                              |
| Caenorhabditis elegans  | sucrase- intesti-l                                         | 0  |                                                                                                                                                                       | F:GO:0004553;<br>F:GO:0030246;<br>P:GO:0005975;<br>F:GO:0003824 |            | IPR000519                                                                                                      |

|                             |                                                    |   |                                                                                                                                     |                                                                                                                                                                                                         |            |                                                                                                   |
|-----------------------------|----------------------------------------------------|---|-------------------------------------------------------------------------------------------------------------------------------------|---------------------------------------------------------------------------------------------------------------------------------------------------------------------------------------------------------|------------|---------------------------------------------------------------------------------------------------|
|                             | -                                                  | 0 |                                                                                                                                     |                                                                                                                                                                                                         |            | -                                                                                                 |
|                             | -                                                  | 0 |                                                                                                                                     |                                                                                                                                                                                                         |            | -                                                                                                 |
| Loa loa                     | briggsae cbr-ctg-2 protein                         | 0 |                                                                                                                                     |                                                                                                                                                                                                         |            | -                                                                                                 |
| Angiostrongylus cantonensis | ap1 gamma subunit binding protein 1                | 0 |                                                                                                                                     | P:GO:0015031;<br>C:GO:0016020;<br>P:GO:0006897;<br>P:GO:0006810;<br>C:GO:0005737;<br>C:GO:0030130;<br>F:GO:0003674;<br>C:GO:0005794;<br>P:GO:0006886;<br>C:GO:0030121;<br>P:GO:0008150;<br>F:GO:0005509 |            | -                                                                                                 |
| Caenorhabditis briggsae     | briggsae cbr-vha-5 protein                         | 0 |                                                                                                                                     | F:GO:0015078;<br>P:GO:0015986;<br>C:GO:0033177                                                                                                                                                          |            | IPR002490; PTHR11629:SF23 (PANTHER)                                                               |
|                             | -                                                  | 0 |                                                                                                                                     |                                                                                                                                                                                                         |            | -                                                                                                 |
|                             | -                                                  | 0 |                                                                                                                                     |                                                                                                                                                                                                         |            | SignalP (SIGNALP)                                                                                 |
|                             | -                                                  | 0 |                                                                                                                                     |                                                                                                                                                                                                         |            | PTHR11127 (PANTHER)                                                                               |
|                             | -                                                  | 0 |                                                                                                                                     |                                                                                                                                                                                                         |            | -                                                                                                 |
|                             | -                                                  | 0 |                                                                                                                                     |                                                                                                                                                                                                         |            | -                                                                                                 |
|                             | -                                                  | 0 |                                                                                                                                     |                                                                                                                                                                                                         |            | -                                                                                                 |
|                             | -                                                  | 0 |                                                                                                                                     |                                                                                                                                                                                                         |            | SignalP (SIGNALP)                                                                                 |
|                             | -                                                  | 0 |                                                                                                                                     |                                                                                                                                                                                                         |            | -                                                                                                 |
| Caenorhabditis briggsae     | briggsae cbr-ocrl-1 protein                        | 5 | P:GO:0000003;<br>P:GO:0007165;<br>P:GO:0040013;<br>C:GO:0005622;<br>F:GO:0004437                                                    |                                                                                                                                                                                                         |            | G3DSA:3.60.10.10 (GENE3D),<br>PTHR11200 (PANTHER),<br>PTHR11200:SF26 (PANTHER), SignalP (SIGNALP) |
| Caenorhabditis elegans      | vacuolar protein sorting 35                        | 3 | C:GO:0016021;<br>P:GO:0006624;<br>F:GO:0005515                                                                                      |                                                                                                                                                                                                         |            | IPR005378                                                                                         |
| Caenorhabditis elegans      | carbonic anhydrase                                 | 4 | P:GO:0044237;<br>F:GO:0008270;<br>F:GO:0004089;<br>P:GO:0015976                                                                     |                                                                                                                                                                                                         | EC:4.2.1.1 | IPR001765                                                                                         |
| Caenorhabditis briggsae     | elegans protein confirmed by transcript evidence   | 1 | C:GO:0016021                                                                                                                        |                                                                                                                                                                                                         |            | SignalP (SIGNALP)                                                                                 |
|                             | -                                                  | 0 |                                                                                                                                     |                                                                                                                                                                                                         |            | SignalP (SIGNALP)                                                                                 |
|                             | -                                                  | 0 |                                                                                                                                     |                                                                                                                                                                                                         |            | SignalP (SIGNALP)                                                                                 |
| Angiostrongylus cantonensis | hypothetical protein [Angiostrongylus cantonensis] | 0 |                                                                                                                                     |                                                                                                                                                                                                         |            | -                                                                                                 |
|                             | -                                                  | 0 |                                                                                                                                     |                                                                                                                                                                                                         |            | -                                                                                                 |
|                             | -                                                  | 0 |                                                                                                                                     |                                                                                                                                                                                                         |            | -                                                                                                 |
| Pongo abelii                | hcls1 associated protein x-1                       | 8 | C:GO:0005625;<br>F:GO:0019966;<br>C:GO:0031965;<br>C:GO:0016529;<br>C:GO:0016023;<br>F:GO:0047485;<br>C:GO:0015629;<br>C:GO:0005739 |                                                                                                                                                                                                         |            | -                                                                                                 |
|                             | -                                                  | 0 |                                                                                                                                     |                                                                                                                                                                                                         |            | -                                                                                                 |

|                        |                                                                           |    |                                                                                                                                                                                                                                                                                                                                                                                                                                                                                         |   |                                                                                                                                                   |
|------------------------|---------------------------------------------------------------------------|----|-----------------------------------------------------------------------------------------------------------------------------------------------------------------------------------------------------------------------------------------------------------------------------------------------------------------------------------------------------------------------------------------------------------------------------------------------------------------------------------------|---|---------------------------------------------------------------------------------------------------------------------------------------------------|
| Brugia malayi          | riken cd- 2700097o09                                                      | 0  | F:GO:0003674;<br>F:GO:0000062;<br>F:GO:0008176;<br>P:GO:0008150;<br>P:GO:0009792;<br>F:GO:0008757                                                                                                                                                                                                                                                                                                                                                                                       |   | G3DSA:3.40.50.150 (GENE3D)                                                                                                                        |
| Caenorhabditis elegans | myotubularin-related protein 9                                            | 1  | F:GO:0005515                                                                                                                                                                                                                                                                                                                                                                                                                                                                            | - | IPR010569; IPR017906; PTHR10807 (PANTHER), PTHR10807:SF9 (PANTHER), SignalP (SIGNALP), SSF52799 (SUPERFAMILY)                                     |
| -                      | -                                                                         | 0  |                                                                                                                                                                                                                                                                                                                                                                                                                                                                                         |   | SignalP (SIGNALP)                                                                                                                                 |
| -                      | -                                                                         | 0  |                                                                                                                                                                                                                                                                                                                                                                                                                                                                                         |   | -                                                                                                                                                 |
| -                      | -                                                                         | 0  |                                                                                                                                                                                                                                                                                                                                                                                                                                                                                         |   | -                                                                                                                                                 |
| Brugia malayi          | excision repair cross-complementing rodent repair complementation group 2 | 42 | P:GO:0000079;<br>P:GO:0043249;<br>P:GO:0001701;<br>F:GO:0047485;<br>F:GO:0008022;<br>F:GO:0004003;<br>P:GO:0030282;<br>P:GO:0043588;<br>P:GO:0021510;<br>N:GO:0071817;<br>F:GO:0008353;<br>P:GO:0006283;<br>P:GO:0048820;<br>P:GO:0007059;<br>P:GO:0009791;<br>P:GO:0035264;<br>P:GO:0006368;<br>C:GO:0005675;<br>P:GO:0001666;<br>P:GO:0009650;<br>P:GO:0000718;<br>P:GO:0040016;<br>P:GO:0006979;<br>P:GO:0045944;<br>P:GO:0007568;<br>C:GO:0005737;<br>C:GO:0019907;<br>P:GO:0043066 | - | EC:2.7.11.23<br>IPR006554; IPR010614; IPR014013; G3DSA:3.40.50.300 (GENE3D), PTHR11472 (PANTHER), PTHR11472:SF1 (PANTHER), SSF52540 (SUPERFAMILY) |
| -                      | -                                                                         | 0  |                                                                                                                                                                                                                                                                                                                                                                                                                                                                                         |   | -                                                                                                                                                 |
| Caenorhabditis elegans | eps (human endocytosis) related family member (eps-8)                     | 1  | F:GO:0005515                                                                                                                                                                                                                                                                                                                                                                                                                                                                            | - | -                                                                                                                                                 |
| -                      | -                                                                         | 0  |                                                                                                                                                                                                                                                                                                                                                                                                                                                                                         |   | -                                                                                                                                                 |
| -                      | -                                                                         | 0  |                                                                                                                                                                                                                                                                                                                                                                                                                                                                                         |   | -                                                                                                                                                 |
| Caenorhabditis elegans | atpase aaa domain containing 1                                            | 11 | P:GO:0010171;<br>P:GO:0002119;<br>F:GO:0016887;<br>F:GO:0005515;<br>F:GO:0005524;<br>C:GO:0016021;<br>P:GO:0040007;<br>C:GO:0005739;<br>P:GO:0006310;<br>F:GO:0009378;<br>P:GO:0006281                                                                                                                                                                                                                                                                                                  | - | IPR003959; G3DSA:3.40.50.300 (GENE3D), PTHR23074 (PANTHER), PTHR23074:SF20 (PANTHER), SSF52540 (SUPERFAMILY)                                      |
| -                      | -                                                                         | 0  |                                                                                                                                                                                                                                                                                                                                                                                                                                                                                         |   | -                                                                                                                                                 |

|                               |                                                      |    |  |                                                                                                                                                                                        |  |                                                                                                                                                                                                                                    |
|-------------------------------|------------------------------------------------------|----|--|----------------------------------------------------------------------------------------------------------------------------------------------------------------------------------------|--|------------------------------------------------------------------------------------------------------------------------------------------------------------------------------------------------------------------------------------|
| Ancylostoma duodenale         | secreted protein 5 precursor                         | 0  |  | P:GO:0040011;<br>P:GO:0006898;<br>C:GO:0005576                                                                                                                                         |  | IPR001283; IPR014044; SignalP (SIGNALP)                                                                                                                                                                                            |
| Caenorhabditis elegans        | hypothetical kda protein in chromosome               | 0  |  |                                                                                                                                                                                        |  | SignalP (SIGNALP)                                                                                                                                                                                                                  |
|                               | -                                                    | 0  |  |                                                                                                                                                                                        |  | -                                                                                                                                                                                                                                  |
|                               | -                                                    | 0  |  |                                                                                                                                                                                        |  | -                                                                                                                                                                                                                                  |
|                               | -                                                    | 0  |  |                                                                                                                                                                                        |  | -                                                                                                                                                                                                                                  |
| Caenorhabditis elegans        | briggsae cbr-nlp-10 protein                          | 0  |  |                                                                                                                                                                                        |  | -                                                                                                                                                                                                                                  |
|                               | -                                                    | 0  |  |                                                                                                                                                                                        |  | SignalP (SIGNALP)                                                                                                                                                                                                                  |
|                               | -                                                    | 0  |  |                                                                                                                                                                                        |  | G3DSA:2.40.50.40 (GENE3D)                                                                                                                                                                                                          |
|                               | -                                                    | 0  |  |                                                                                                                                                                                        |  | SignalP (SIGNALP)                                                                                                                                                                                                                  |
| Angiostrongylus cantonensis   | ef hand family protein                               | 5  |  | C:GO:0005625;<br>F:GO:0005515;<br>F:GO:0005509;<br>C:GO:0005626;<br>C:GO:0016020                                                                                                       |  | IPR011992; IPR018247; IPR018248;<br>IPR018249; PTHR23050 (PANTHER),<br>PTHR23050:SF9 (PANTHER), SSF47473<br>(SUPERFAMILY)                                                                                                          |
| Caenorhabditis elegans        | -dp-dependent malic mitochondrial precursor          | 10 |  | P:GO:0009060;<br>F:GO:0046872;<br>P:GO:0006090;<br>F:GO:0051287;<br>C:GO:0005759;<br>F:GO:0016619;<br>P:GO:0006108;<br>P:GO:0055114;<br>F:GO:0004473;<br>P:GO:0006800                  |  | EC:1.1.1.38;<br>EC:1.1.1.40<br>IPR001891; IPR012301; IPR012302;<br>IPR015884; IPR016040;<br>G3DSA:3.40.50.10380 (GENE3D),<br>PTHR23406 (PANTHER),<br>PTHR23406:SF2 (PANTHER), SSF51735<br>(SUPERFAMILY), SSF53223<br>(SUPERFAMILY) |
|                               | -                                                    | 0  |  |                                                                                                                                                                                        |  | IPR006612; IPR007087; IPR015880                                                                                                                                                                                                    |
|                               | -                                                    | 0  |  |                                                                                                                                                                                        |  | IPR006612; IPR007087; IPR015880                                                                                                                                                                                                    |
| Caenorhabditis elegans        | briggsae cbr-tw-40 protein                           | 3  |  | C:GO:0016020;<br>F:GO:0005216;<br>P:GO:0006811                                                                                                                                         |  | -                                                                                                                                                                                                                                  |
|                               | -                                                    | 0  |  |                                                                                                                                                                                        |  | -                                                                                                                                                                                                                                  |
|                               | -                                                    | 0  |  |                                                                                                                                                                                        |  | -                                                                                                                                                                                                                                  |
|                               | -                                                    | 0  |  |                                                                                                                                                                                        |  | -                                                                                                                                                                                                                                  |
|                               | -                                                    | 0  |  |                                                                                                                                                                                        |  | -                                                                                                                                                                                                                                  |
| Strongylocentrotus purpuratus | copine viii                                          | 0  |  | F:GO:0003674;<br>P:GO:0008150;<br>C:GO:0005575                                                                                                                                         |  | -                                                                                                                                                                                                                                  |
| Caenorhabditis briggsae       | briggsae cbr-ga-1 protein                            | 3  |  | P:GO:0005975;<br>F:GO:0004553;<br>F:GO:0043169                                                                                                                                         |  | EC:3.2.1.0                                                                                                                                                                                                                         |
|                               | -                                                    | 0  |  |                                                                                                                                                                                        |  | -                                                                                                                                                                                                                                  |
| Caenorhabditis elegans        | elegans protein confirmed by transcript evidence     | 0  |  |                                                                                                                                                                                        |  | -                                                                                                                                                                                                                                  |
| Caenorhabditis briggsae       | briggsae cbr-npp-21 protein                          | 0  |  |                                                                                                                                                                                        |  | -                                                                                                                                                                                                                                  |
| Loa loa                       | twik (kcnk-like) family of potassium alpha subunit 5 | 0  |  | F:GO:0005216;<br>C:GO:0016021;<br>F:GO:0004674;<br>C:GO:0016020;<br>P:GO:0006813;<br>F:GO:0004672;<br>F:GO:0005267;<br>P:GO:0006811;<br>P:GO:0006810;<br>P:GO:0006468;<br>F:GO:0005524 |  | IPR013099; G3DSA:1.10.287.70<br>(GENE3D), PTHR11003 (PANTHER),<br>PTHR11003:SF7 (PANTHER), SSF81324<br>(SUPERFAMILY)                                                                                                               |
|                               | -                                                    | 0  |  |                                                                                                                                                                                        |  | -                                                                                                                                                                                                                                  |

|                         |                                                         |    |                                                                                                                                                                                                                                           |              |             |                                                                           |
|-------------------------|---------------------------------------------------------|----|-------------------------------------------------------------------------------------------------------------------------------------------------------------------------------------------------------------------------------------------|--------------|-------------|---------------------------------------------------------------------------|
| Homo sapiens            | glutathione s-transferase kappa 1                       |    | C:GO:0005777;<br>F:GO:0004364;<br>5 F:GO:0015035;<br>F:GO:0042802;<br>C:GO:0030288                                                                                                                                                        | -            | EC:2.5.1.18 | -                                                                         |
|                         | -                                                       | 0  |                                                                                                                                                                                                                                           |              |             | SignalP (SIGNALP)                                                         |
|                         | -                                                       | 0  |                                                                                                                                                                                                                                           |              |             | -                                                                         |
|                         | -                                                       | 0  |                                                                                                                                                                                                                                           |              |             | -                                                                         |
| Callithrix jacchus      | coactosin-like 1                                        |    | P:GO:0050832;<br>C:GO:0005856;<br>5 C:GO:0005737;<br>F:GO:0003779;<br>F:GO:0019899                                                                                                                                                        | -            |             | -                                                                         |
| Caenorhabditis elegans  | hypothetical protein F55D10.4 [Caenorhabditis elegans]  | 0  |                                                                                                                                                                                                                                           |              |             | G3DSA:1.20.1070.10 (GENE3D),<br>PTHR19266 (PANTHER), SignalP<br>(SIGNALP) |
|                         | -                                                       | 0  |                                                                                                                                                                                                                                           |              |             | -                                                                         |
|                         | -                                                       | 0  |                                                                                                                                                                                                                                           |              |             | -                                                                         |
| Caenorhabditis elegans  | briggsae cbr-ltd-1 protein                              | 1  | F:GO:0008270                                                                                                                                                                                                                              | -            |             | -                                                                         |
| Caenorhabditis briggsae | -dh dehydroge-se                                        | 14 | P:GO:0006810;<br>F:GO:0051537;<br>F:GO:0008137;<br>C:GO:0005747;<br>F:GO:0046872;<br>P:GO:0040007;<br>F:GO:0009055;<br>F:GO:0051287;<br>P:GO:0007399;<br>P:GO:0006120;<br>P:GO:0002119;<br>F:GO:0005515;<br>P:GO:0048738;<br>P:GO:0009792 | -            | EC:1.6.5.3  | IPR002023; IPR012335; IPR012336                                           |
|                         | -                                                       | 0  |                                                                                                                                                                                                                                           |              |             | -                                                                         |
|                         | -                                                       | 0  |                                                                                                                                                                                                                                           |              |             | SignalP (SIGNALP)                                                         |
|                         | -                                                       | 0  |                                                                                                                                                                                                                                           |              |             | SignalP (SIGNALP)                                                         |
| Caenorhabditis briggsae | briggsae cbr-lgc-30 protein                             | 4  | C:GO:0016021;<br>C:GO:0045211;<br>P:GO:0006811;<br>F:GO:0005230                                                                                                                                                                           | -            |             | -                                                                         |
|                         | -                                                       | 0  |                                                                                                                                                                                                                                           |              |             | -                                                                         |
|                         | -                                                       | 0  |                                                                                                                                                                                                                                           |              |             | -                                                                         |
|                         | -                                                       | 0  |                                                                                                                                                                                                                                           |              |             | SignalP (SIGNALP)                                                         |
|                         | -                                                       | 0  |                                                                                                                                                                                                                                           |              |             | -                                                                         |
|                         | -                                                       | 0  |                                                                                                                                                                                                                                           |              |             | SignalP (SIGNALP)                                                         |
|                         | -                                                       | 0  |                                                                                                                                                                                                                                           |              |             | -                                                                         |
|                         | -                                                       | 0  |                                                                                                                                                                                                                                           |              |             | -                                                                         |
|                         | -                                                       | 0  |                                                                                                                                                                                                                                           |              |             | -                                                                         |
|                         | -                                                       | 0  |                                                                                                                                                                                                                                           |              |             | -                                                                         |
|                         | -                                                       | 0  |                                                                                                                                                                                                                                           |              |             | -                                                                         |
|                         | -                                                       | 0  |                                                                                                                                                                                                                                           |              |             | -                                                                         |
|                         | -                                                       | 0  |                                                                                                                                                                                                                                           |              |             | -                                                                         |
|                         | -                                                       | 0  |                                                                                                                                                                                                                                           |              |             | -                                                                         |
|                         | -                                                       | 0  |                                                                                                                                                                                                                                           |              |             | -                                                                         |
| Caenorhabditis briggsae | Hypothetical protein CBG13418 [Caenorhabditis briggsae] | 0  |                                                                                                                                                                                                                                           |              |             | -                                                                         |
| Caenorhabditis briggsae | Hypothetical protein CBG07809 [Caenorhabditis briggsae] | 0  |                                                                                                                                                                                                                                           | F:GO:0005198 |             | IPR000535; IPR008962; PTHR22947<br>(PANTHER)                              |
|                         | -                                                       | 0  |                                                                                                                                                                                                                                           |              |             | -                                                                         |
|                         | -                                                       | 0  |                                                                                                                                                                                                                                           |              |             | -                                                                         |

|                         |                                                            |   |                                                                                                                                     |                                                                                                                                                                                                         |             |                                                                                                   |
|-------------------------|------------------------------------------------------------|---|-------------------------------------------------------------------------------------------------------------------------------------|---------------------------------------------------------------------------------------------------------------------------------------------------------------------------------------------------------|-------------|---------------------------------------------------------------------------------------------------|
| Caenorhabditis briggsae | cathepsin I-like cysteine protei-se                        | 1 | F:GO:0008234                                                                                                                        | -                                                                                                                                                                                                       |             | IPR000668; IPR013128; G3DSA:3.90.70.10 (GENE3D), PTHR12411:SF26 (PANTHER), SSF54001 (SUPERFAMILY) |
| Caenorhabditis briggsae | ferm domain ( -ezrin-radixin-moesin) family member (frm-8) | 1 | F:GO:0005515                                                                                                                        | -                                                                                                                                                                                                       |             | PTHR13436 (PANTHER), PTHR13436:SF1 (PANTHER)                                                      |
| Caenorhabditis elegans  | briggsae cbr-ark-1 protein                                 | 0 |                                                                                                                                     | F:GO:0016740;<br>F:GO:0004674;<br>P:GO:0040027;<br>F:GO:0004672;<br>F:GO:0000166;<br>P:GO:0006468;<br>F:GO:0005524;<br>F:GO:0016301;<br>P:GO:0009792;<br>F:GO:0004713;<br>P:GO:0042059;<br>F:GO:0005515 |             | -                                                                                                 |
| Caenorhabditis elegans  | - h exchanger family member (nhx-9)                        | 6 | P:GO:0009792;<br>F:GO:0015385;<br>P:GO:0055085;<br>P:GO:0006885;<br>C:GO:0016021;<br>P:GO:0006814                                   | -                                                                                                                                                                                                       |             | -                                                                                                 |
| Caenorhabditis briggsae | protein ki-se domain containing protein                    | 3 | P:GO:0006468;<br>F:GO:0005524;<br>F:GO:0004674                                                                                      | -                                                                                                                                                                                                       | EC:2.7.11.0 | G3DSA:3.30.200.20 (GENE3D)                                                                        |
| Caenorhabditis briggsae | tyrosylprotein sulfotransferase 2                          | 0 |                                                                                                                                     | F:GO:0008146;<br>F:GO:0016740;<br>C:GO:0016021;<br>C:GO:0016020;<br>C:GO:0000139;<br>C:GO:0005794;<br>F:GO:0008476;<br>P:GO:0008152;<br>C:GO:0005783                                                    |             | PTHR12788 (PANTHER)                                                                               |
| Caenorhabditis elegans  | f-box domain containing protein                            | 0 |                                                                                                                                     |                                                                                                                                                                                                         |             | -                                                                                                 |
| -                       | -                                                          | 0 |                                                                                                                                     |                                                                                                                                                                                                         |             | SignalP (SIGNALP)                                                                                 |
| -                       | -                                                          | 0 |                                                                                                                                     |                                                                                                                                                                                                         |             | -                                                                                                 |
| Caenorhabditis elegans  | briggsae cbr-tre-4 protein                                 | 0 |                                                                                                                                     | P:GO:0005991;<br>C:GO:0016021;<br>F:GO:0003824;<br>F:GO:0004555                                                                                                                                         |             | -                                                                                                 |
| Caenorhabditis briggsae | light protein                                              | 8 | P:GO:0009792;<br>P:GO:0002119;<br>C:GO:0005773;<br>F:GO:0005488;<br>P:GO:0006624;<br>P:GO:0040007;<br>P:GO:0007034;<br>P:GO:0043066 | -                                                                                                                                                                                                       |             | PTHR12616 (PANTHER)                                                                               |
| Caenorhabditis briggsae | briggsae cbr-rhr-1 protein                                 | 4 | C:GO:0016021;<br>P:GO:0009792;<br>P:GO:0055085;<br>F:GO:0008519                                                                     | -                                                                                                                                                                                                       |             | -                                                                                                 |
| -                       | -                                                          | 0 |                                                                                                                                     |                                                                                                                                                                                                         |             | -                                                                                                 |
| Caenorhabditis briggsae | elegans protein confirmed by transcript evidence           | 0 |                                                                                                                                     | F:GO:0005515                                                                                                                                                                                            |             | IPR000980                                                                                         |



|                         |                                                            |    |                                                                                                                                                                                        |   |                                                                                                                            |
|-------------------------|------------------------------------------------------------|----|----------------------------------------------------------------------------------------------------------------------------------------------------------------------------------------|---|----------------------------------------------------------------------------------------------------------------------------|
|                         |                                                            | 0  |                                                                                                                                                                                        |   |                                                                                                                            |
|                         | -                                                          | 0  |                                                                                                                                                                                        |   | -                                                                                                                          |
|                         | -                                                          | 0  |                                                                                                                                                                                        |   | SignalP (SIGNALP)                                                                                                          |
|                         | -                                                          | 0  |                                                                                                                                                                                        |   | SignalP (SIGNALP)                                                                                                          |
|                         | -                                                          | 0  |                                                                                                                                                                                        |   | -                                                                                                                          |
| Caenorhabditis briggsae | briggsae cbr-mbk-1 protein                                 | 11 | P:GO:0018108;<br>F:GO:0004674;<br>C:GO:0005730;<br>C:GO:0016607;<br>F:GO:0043621;<br>F:GO:0005524;<br>P:GO:0007399;<br>P:GO:0001706;<br>P:GO:0030100;<br>P:GO:0046777;<br>F:GO:0004715 | - | EC:2.7.11.0;<br>EC:2.7.10.2<br>IPR011009; G3DSA:3.30.200.20<br>(GENE3D), PTHR11295 (PANTHER),<br>PTHR11295:SF116 (PANTHER) |
|                         | -                                                          | 0  |                                                                                                                                                                                        |   | -                                                                                                                          |
| Caenorhabditis briggsae | intermediate filament protein                              | 4  | C:GO:0005882;<br>C:GO:0005737;<br>F:GO:0005198;<br>F:GO:0005515                                                                                                                        | - | IPR001664; IPR016044;<br>PTHR23239:SF13 (PANTHER)                                                                          |
|                         | -                                                          | 0  |                                                                                                                                                                                        |   | -                                                                                                                          |
| Caenorhabditis elegans  | ibromatosis homolog family member (nfm-1)                  | 7  | C:GO:0005737;<br>C:GO:0005856;<br>P:GO:0009792;<br>C:GO:0005912;<br>P:GO:0045197;<br>C:GO:0019898;<br>F:GO:0003779                                                                     | - | -                                                                                                                          |
|                         | -                                                          | 0  |                                                                                                                                                                                        |   | -                                                                                                                          |
|                         | -                                                          | 0  |                                                                                                                                                                                        |   | -                                                                                                                          |
|                         | -                                                          | 0  |                                                                                                                                                                                        |   | -                                                                                                                          |
|                         | -                                                          | 0  |                                                                                                                                                                                        |   | -                                                                                                                          |
| Loa loa                 | uncoordinated family member (unc-13)                       | 1  | F:GO:0046872                                                                                                                                                                           | - | -                                                                                                                          |
|                         | -                                                          | 0  |                                                                                                                                                                                        |   | SignalP (SIGNALP)                                                                                                          |
|                         | -                                                          | 0  |                                                                                                                                                                                        |   | -                                                                                                                          |
|                         | -                                                          | 0  |                                                                                                                                                                                        |   | -                                                                                                                          |
|                         | -                                                          | 0  |                                                                                                                                                                                        |   | -                                                                                                                          |
|                         | -                                                          | 0  |                                                                                                                                                                                        |   | SignalP (SIGNALP)                                                                                                          |
| Ostertagia ostertagi    | elegans protein partially confirmed by transcript evidence | 1  | F:GO:0008233                                                                                                                                                                           | - | -                                                                                                                          |
| Caenorhabditis elegans  | elegans protein confirmed by transcript evidence           | 0  |                                                                                                                                                                                        |   | -                                                                                                                          |
|                         | -                                                          | 0  |                                                                                                                                                                                        |   | -                                                                                                                          |
|                         | -                                                          | 0  |                                                                                                                                                                                        |   | -                                                                                                                          |
|                         | -                                                          | 0  |                                                                                                                                                                                        |   | SignalP (SIGNALP)                                                                                                          |
|                         | -                                                          | 0  |                                                                                                                                                                                        |   | SignalP (SIGNALP)                                                                                                          |
|                         | -                                                          | 0  |                                                                                                                                                                                        |   | -                                                                                                                          |
| Homo sapiens            | transmembrane protein 176b                                 | 4  | C:GO:0031965;<br>P:GO:0030154;<br>P:GO:0009887;<br>C:GO:0016021                                                                                                                        | - | IPR007237; IPR009281;<br>PTHR15756:SF1 (PANTHER), SignalP<br>(SIGNALP)                                                     |

|                         |                                              |    |                                                                                                                                                                                                                                           |   |            |                                                                                                                                          |
|-------------------------|----------------------------------------------|----|-------------------------------------------------------------------------------------------------------------------------------------------------------------------------------------------------------------------------------------------|---|------------|------------------------------------------------------------------------------------------------------------------------------------------|
| Caenorhabditis briggsae | laminin a                                    | 11 | P:GO:0016477;<br>P:GO:0007229;<br>C:GO:0005615;<br>P:GO:0034446;<br>P:GO:0048513;<br>F:GO:0005178;<br>P:GO:0050794;<br>C:GO:0043259;<br>P:GO:0002009;<br>P:GO:0009790;<br>N:GO:0071842                                                    | - |            | IPR002049; IPR013032; PR00011 (PRINTS), G3DSA:2.10.25.10 (GENE3D), PTHR10574 (PANTHER), PTHR10574:SF56 (PANTHER), SSF57196 (SUPERFAMILY) |
|                         | -                                            | 0  |                                                                                                                                                                                                                                           |   |            | -                                                                                                                                        |
|                         | -                                            | 0  |                                                                                                                                                                                                                                           |   |            | -                                                                                                                                        |
| Ancylostoma ceylanicum  | glutamate cysteine ligase                    | 8  | C:GO:0017109;<br>F:GO:0004357;<br>F:GO:0005515;<br>F:GO:0005524;<br>P:GO:0006974;<br>C:GO:0005634;<br>P:GO:0006750;<br>C:GO:0048471                                                                                                       | - | EC:6.3.2.2 | IPR004308; SSF55931 (SUPERFAMILY)                                                                                                        |
|                         | -                                            | 0  |                                                                                                                                                                                                                                           |   |            | SignalP (SIGNALP)                                                                                                                        |
|                         | -                                            | 0  |                                                                                                                                                                                                                                           |   |            | -                                                                                                                                        |
|                         | -                                            | 0  |                                                                                                                                                                                                                                           |   |            | -                                                                                                                                        |
|                         | -                                            | 0  |                                                                                                                                                                                                                                           |   |            | -                                                                                                                                        |
| Loa loa                 | tk fer protein ki-se                         | 14 | F:GO:0004718;<br>F:GO:0042393;<br>P:GO:0035409;<br>F:GO:0005102;<br>C:GO:0016020;<br>F:GO:0000166;<br>P:GO:0042531;<br>P:GO:0046777;<br>P:GO:0060397;<br>P:GO:0019221;<br>P:GO:0030218;<br>F:GO:0035401;<br>P:GO:0042977;<br>C:GO:0005634 | - |            | IPR000719; IPR001245; IPR011009; IPR020685; IPR020764; G3DSA:3.30.200.20 (GENE3D)                                                        |
| Caenorhabditis elegans  | acetyl- hydrolase transferase family protein | 1  | F:GO:0003824                                                                                                                                                                                                                              | - |            | IPR003702; G3DSA:3.40.1080.10 (GENE3D), PTHR21432:SF11 (PANTHER)                                                                         |
|                         | -                                            | 0  |                                                                                                                                                                                                                                           |   |            | SignalP (SIGNALP)                                                                                                                        |

|                         |                                                                |    |                                                                                                                                                                                                                                                                                                                                                                                   |                                                                                                   |                                                                                         |
|-------------------------|----------------------------------------------------------------|----|-----------------------------------------------------------------------------------------------------------------------------------------------------------------------------------------------------------------------------------------------------------------------------------------------------------------------------------------------------------------------------------|---------------------------------------------------------------------------------------------------|-----------------------------------------------------------------------------------------|
| Ailuropoda melanoleuca  | fn1 protein                                                    | 22 | P:GO:0042060;<br>P:GO:0018149;<br>F:GO:0045340;<br>P:GO:0016477;<br>P:GO:0001525;<br>P:GO:0008360;<br>C:GO:0005793;<br>C:GO:0005604;<br>P:GO:0007044;<br>P:GO:0007160;<br>C:GO:0031093;<br>P:GO:0006916;<br>F:GO:0002020;<br>P:GO:0034446;<br>F:GO:0005518;<br>C:GO:0005577;<br>C:GO:0016324;<br>F:GO:0008201;<br>F:GO:0005201;<br>F:GO:0016504;<br>P:GO:0006953;<br>P:GO:0030198 | -                                                                                                 | IPR003961; IPR008957; IPR013783                                                         |
|                         | -                                                              | 0  |                                                                                                                                                                                                                                                                                                                                                                                   |                                                                                                   | -                                                                                       |
|                         | -                                                              | 0  |                                                                                                                                                                                                                                                                                                                                                                                   |                                                                                                   | -                                                                                       |
| Caenorhabditis briggsae | briggsae cbr-emb-30 protein                                    | 0  |                                                                                                                                                                                                                                                                                                                                                                                   | P:GO:0016311;<br>F:GO:0016791;<br>P:GO:0006470;<br>F:GO:0016787;<br>F:GO:0008138;<br>F:GO:0004725 | -                                                                                       |
| Caenorhabditis elegans  | nuclear hormone receptor family member (nhr-66)                | 5  | P:GO:0040010;<br>P:GO:0000003;<br>P:GO:0002119;<br>F:GO:0005515;<br>P:GO:0009792                                                                                                                                                                                                                                                                                                  | -                                                                                                 | IPR000536; IPR008946; PTHR11865 (PANTHER), PTHR11865:SF235 (PANTHER)                    |
|                         | -                                                              | 0  |                                                                                                                                                                                                                                                                                                                                                                                   |                                                                                                   | -                                                                                       |
| Caenorhabditis elegans  | sy-ptotagmin i                                                 | 7  | P:GO:0006810;<br>C:GO:0030659;<br>C:GO:0008021;<br>C:GO:0044425;<br>F:GO:0005515;<br>F:GO:0005215;<br>C:GO:0030141                                                                                                                                                                                                                                                                | -                                                                                                 | -                                                                                       |
| Loa loa                 | briggsae cbr-ugt-58 protein                                    | 2  | C:GO:0005743;<br>F:GO:0016757                                                                                                                                                                                                                                                                                                                                                     | -                                                                                                 | IPR002213; G3DSA:3.40.50.2000 (GENE3D), PTHR11926:SF3 (PANTHER), SSF53756 (SUPERFAMILY) |
|                         | -                                                              | 0  |                                                                                                                                                                                                                                                                                                                                                                                   |                                                                                                   | -                                                                                       |
| Caenorhabditis briggsae | mpv17-like protein 2                                           | 0  |                                                                                                                                                                                                                                                                                                                                                                                   | C:GO:0005739;<br>F:GO:0003674;<br>C:GO:0016021;<br>C:GO:0016020;<br>P:GO:0008150                  | -                                                                                       |
| Caenorhabditis briggsae | cytochrome c oxidase assembly protein cox11 containing protein | 3  | F:GO:0016787;<br>F:GO:0008270;<br>F:GO:0005507                                                                                                                                                                                                                                                                                                                                    | -                                                                                                 | IPR007533                                                                               |
|                         | -                                                              | 0  |                                                                                                                                                                                                                                                                                                                                                                                   |                                                                                                   | -                                                                                       |
|                         | -                                                              | 0  |                                                                                                                                                                                                                                                                                                                                                                                   |                                                                                                   | SignalP (SIGNALP)                                                                       |
|                         | -                                                              | 0  |                                                                                                                                                                                                                                                                                                                                                                                   |                                                                                                   | -                                                                                       |

|                         |                                                                  |    |                                                                                                                                                                                                                                                                                              |   |                                                                      |
|-------------------------|------------------------------------------------------------------|----|----------------------------------------------------------------------------------------------------------------------------------------------------------------------------------------------------------------------------------------------------------------------------------------------|---|----------------------------------------------------------------------|
| Ostertagia ostertagi    | 24 kda excretory secretory protein                               | 1  | P:GO:0040011                                                                                                                                                                                                                                                                                 | - | IPR001283; IPR002413; IPR014044; IPR018244; PTHR10334:SF11 (PANTHER) |
| -                       | -                                                                | 0  | -                                                                                                                                                                                                                                                                                            | - | SignalP (SIGNALP)                                                    |
| Ostertagia ostertagi    | two-domain activation associated secreted protein asp4 precursor | 0  | C:GO:0005576                                                                                                                                                                                                                                                                                 | - | IPR001283; IPR014044                                                 |
| Ostertagia ostertagi    | venom-allergen-like protein family member (vap-1)                | 0  | P:GO:0040011;<br>P:GO:0006898;<br>C:GO:0005576                                                                                                                                                                                                                                               | - | IPR001283; IPR002413; IPR014044; IPR018244; PTHR10334:SF11 (PANTHER) |
| Ciona intestinalis      | uncharacterized transposase-like protein                         | 0  | F:GO:0046872;<br>P:GO:0055114;<br>F:GO:0009055;<br>F:GO:0016491;<br>F:GO:0020037;<br>F:GO:0005506;<br>F:GO:0004497                                                                                                                                                                           | - | IPR007087; IPR015880                                                 |
| -                       | -                                                                | 0  | -                                                                                                                                                                                                                                                                                            | - | -                                                                    |
| Caenorhabditis elegans  | uncoordinated family member (unc-13)                             | 17 | F:GO:0047485;<br>C:GO:0030054;<br>C:GO:0043234;<br>P:GO:0023034;<br>F:GO:0046872;<br>F:GO:0017075;<br>P:GO:0006887;<br>C:GO:0042734;<br>P:GO:0007269;<br>P:GO:0050435;<br>P:GO:0016188;<br>C:GO:0019717;<br>F:GO:0019992;<br>F:GO:0019904;<br>F:GO:0046982;<br>F:GO:0042803;<br>C:GO:0005737 | - | -                                                                    |
| -                       | -                                                                | 0  | -                                                                                                                                                                                                                                                                                            | - | SignalP (SIGNALP)                                                    |
| -                       | -                                                                | 0  | -                                                                                                                                                                                                                                                                                            | - | SignalP (SIGNALP)                                                    |
| Caenorhabditis briggsae | cytochrome p450 family member (cyp-34a9)                         | 0  | F:GO:0020037;<br>F:GO:0005506;<br>C:GO:0016021;<br>F:GO:0009055;<br>P:GO:0055114;<br>F:GO:0016491;<br>P:GO:0008340;<br>F:GO:0046872;<br>F:GO:0004497                                                                                                                                         | - | -                                                                    |
| -                       | -                                                                | 0  | -                                                                                                                                                                                                                                                                                            | - | -                                                                    |
| Caenorhabditis briggsae | briggsae cbr-lam-3 protein                                       | 5  | C:GO:0005606;<br>P:GO:0030334;<br>P:GO:0045995;<br>P:GO:0030155;<br>F:GO:0005102                                                                                                                                                                                                             | - | IPR000034; PTHR10574 (PANTHER), PTHR10574:SF38 (PANTHER)             |
| -                       | -                                                                | 0  | -                                                                                                                                                                                                                                                                                            | - | -                                                                    |
| Caenorhabditis elegans  | valyl-tr- synthetase                                             | 4  | C:GO:0005737;<br>P:GO:0006438;<br>F:GO:0005524;<br>F:GO:0004832                                                                                                                                                                                                                              | - | EC:6.1.1.9                                                           |
| -                       | -                                                                | 0  | -                                                                                                                                                                                                                                                                                            | - | -                                                                    |

|                         |                                                         |    |                                                                                                                                                                                                                                           |                                                                                                                                                      |             |                                                                                                                                                       |
|-------------------------|---------------------------------------------------------|----|-------------------------------------------------------------------------------------------------------------------------------------------------------------------------------------------------------------------------------------------|------------------------------------------------------------------------------------------------------------------------------------------------------|-------------|-------------------------------------------------------------------------------------------------------------------------------------------------------|
| Caenorhabditis elegans  | proteasome subunit alpha type-5                         | 14 | P:GO:0040022;<br>P:GO:0008340;<br>P:GO:0051436;<br>P:GO:0051437;<br>P:GO:0040007;<br>P:GO:0040027;<br>F:GO:0004298;<br>P:GO:0031145;<br>F:GO:0005515;<br>P:GO:0040011;<br>C:GO:0019773;<br>P:GO:0009792;<br>C:GO:0005737;<br>C:GO:0005634 | -                                                                                                                                                    | EC:3.4.25.0 | IPR000426; IPR001353;<br>G3DSA:3.60.20.10 (GENE3D),<br>PTHR11599 (PANTHER),<br>PTHR11599:SF14 (PANTHER), PS51475<br>(PROFILE), SSF56235 (SUPERFAMILY) |
| Caenorhabditis briggsae | briggsae cbr-lam-3 protein                              | 0  |                                                                                                                                                                                                                                           | C:GO:0005606;<br>F:GO:0005102;<br>C:GO:0005604;<br>P:GO:0045995;<br>C:GO:0005578;<br>P:GO:0030155;<br>C:GO:0031012;<br>P:GO:0030334;<br>P:GO:0007155 | -           |                                                                                                                                                       |
| Pongo abelii            | aurora ki-se a-interacting protein                      | 7  | P:GO:0045862;<br>C:GO:0005739;<br>P:GO:0045839;<br>F:GO:0005515;<br>P:GO:0016310;<br>F:GO:0016301;<br>C:GO:0005634                                                                                                                        | -                                                                                                                                                    | -           |                                                                                                                                                       |
| Caenorhabditis elegans  | ched related family member (ptr-23)                     | 7  | P:GO:0018996;<br>C:GO:0016021;<br>P:GO:0008340;<br>P:GO:0000003;<br>P:GO:0040025;<br>F:GO:0008158;<br>P:GO:0040011                                                                                                                        | -                                                                                                                                                    |             | IPR003392; PTHR10796 (PANTHER),<br>PTHR10796:SF14 (PANTHER)                                                                                           |
| Caenorhabditis elegans  | hypothetical protein Y53G8AL.1 [Caenorhabditis elegans] | 0  |                                                                                                                                                                                                                                           |                                                                                                                                                      |             | IPR000253; IPR001412                                                                                                                                  |
|                         | -                                                       | 0  |                                                                                                                                                                                                                                           |                                                                                                                                                      |             | -                                                                                                                                                     |
| Caenorhabditis briggsae | Hypothetical protein CBG08399 [Caenorhabditis briggsae] | 2  | P:GO:0007186;<br>C:GO:0016021                                                                                                                                                                                                             | -                                                                                                                                                    |             | G3DSA:1.20.1070.10 (GENE3D),<br>PTHR22751 (PANTHER),<br>PTHR22751:SF8 (PANTHER)                                                                       |
| Caenorhabditis elegans  | briggsae cbr-hex-2 protein                              | 1  | F:GO:0003824                                                                                                                                                                                                                              | -                                                                                                                                                    |             | -                                                                                                                                                     |
|                         | -                                                       | 0  |                                                                                                                                                                                                                                           |                                                                                                                                                      |             | -                                                                                                                                                     |
| Caenorhabditis briggsae | uncoordi-ted family member (unc-89)                     | 0  |                                                                                                                                                                                                                                           |                                                                                                                                                      |             | IPR013098; IPR013783; IPR020675;<br>PTHR22964:SF5 (PANTHER), SSF48726<br>(SUPERFAMILY)                                                                |
|                         | -                                                       | 0  |                                                                                                                                                                                                                                           |                                                                                                                                                      |             | -                                                                                                                                                     |
| Brugia malayi           | mynd finger family protein                              | 1  | F:GO:0008270                                                                                                                                                                                                                              | -                                                                                                                                                    |             | G3DSA:2.170.270.10 (GENE3D),<br>PTHR12197 (PANTHER),<br>PTHR12197:SF9 (PANTHER)                                                                       |
| Haemochus contortus     | briggsae cbr-gst- protein                               | 4  | P:GO:0008340;<br>F:GO:0004364;<br>P:GO:0040010;<br>F:GO:0005515                                                                                                                                                                           | -                                                                                                                                                    | EC:2.5.1.18 | -                                                                                                                                                     |
|                         | -                                                       | 0  |                                                                                                                                                                                                                                           |                                                                                                                                                      |             | -                                                                                                                                                     |

|                          |                                                                  |    |                                                                                                                                                                                        |                                                                                  |                                                                                                                      |
|--------------------------|------------------------------------------------------------------|----|----------------------------------------------------------------------------------------------------------------------------------------------------------------------------------------|----------------------------------------------------------------------------------|----------------------------------------------------------------------------------------------------------------------|
| Caenorhabditis elegans   | anten-pedia protein                                              | 6  | F:GO:0003700;<br>F:GO:0030528;<br>F:GO:0043565;<br>P:GO:0007275;<br>C:GO:0005634;<br>P:GO:0006355                                                                                      | -                                                                                | IPR001356; IPR001827; IPR009057;<br>IPR012287; IPR017995; PTHR19418<br>(PANTHER), PTHR19418:SF166<br>(PANTHER)       |
| Oesophagostomum dentatum | fmr-like peptide family member (flp-1)                           | 1  | P:GO:0007218                                                                                                                                                                           | -                                                                                | -                                                                                                                    |
| -                        | -                                                                | 0  | -                                                                                                                                                                                      | -                                                                                | -                                                                                                                    |
| -                        | -                                                                | 0  | -                                                                                                                                                                                      | -                                                                                | -                                                                                                                    |
| -                        | -                                                                | 0  | -                                                                                                                                                                                      | -                                                                                | SignalP (SIGNALP)                                                                                                    |
| -                        | -                                                                | 0  | -                                                                                                                                                                                      | -                                                                                | IPR010347; G3DSA:3.30.870.20<br>(GENE3D)                                                                             |
| Loa loa                  | nematode astacin protease protein 30                             | 1  | F:GO:0008233                                                                                                                                                                           | -                                                                                | IPR013032; PTHR10127 (PANTHER),<br>PTHR10127:SF65 (PANTHER)                                                          |
| -                        | -                                                                | 0  | -                                                                                                                                                                                      | -                                                                                | -                                                                                                                    |
| -                        | -                                                                | 0  | -                                                                                                                                                                                      | -                                                                                | -                                                                                                                    |
| -                        | -                                                                | 0  | -                                                                                                                                                                                      | -                                                                                | -                                                                                                                    |
| Caenorhabditis elegans   | - ca exchangers family member (ncx-2)                            | 6  | F:GO:0005432;<br>P:GO:0006816;<br>P:GO:0055085;<br>P:GO:0040010;<br>P:GO:0000003;<br>C:GO:0016021                                                                                      | -                                                                                | PTHR11878 (PANTHER),<br>PTHR11878:SF4 (PANTHER)                                                                      |
| Caenorhabditis briggsae  | ubiquitin associated and sh3 domain-containing protein b         | 0  |                                                                                                                                                                                        | F:GO:0004619;<br>P:GO:0016070;<br>F:GO:0003824;<br>C:GO:0005622;<br>F:GO:0016853 | G3DSA:3.40.50.1240 (GENE3D),<br>PTHR16469 (PANTHER),<br>PTHR16469:SF8 (PANTHER), SSF53254<br>(SUPERFAMILY)           |
| -                        | -                                                                | 0  | -                                                                                                                                                                                      | -                                                                                | -                                                                                                                    |
| Macaca mulatta           | epididymal secretory protein e1 precursor                        | 11 | P:GO:0042632;<br>P:GO:0046836;<br>C:GO:0005764;<br>P:GO:0033344;<br>P:GO:0032367;<br>F:GO:0019899;<br>C:GO:0005576;<br>P:GO:0015914;<br>P:GO:0009615;<br>F:GO:0015485;<br>P:GO:0019747 | -                                                                                | SignalP (SIGNALP)                                                                                                    |
| Caenorhabditis elegans   | atp-binding cassette sub-family b member mitochondrial precursor | 4  | F:GO:0042626;<br>P:GO:0055085;<br>C:GO:0016021;<br>F:GO:0000166                                                                                                                        | -                                                                                | IPR001140; IPR011527; IPR017940;<br>G3DSA:1.20.1560.10 (GENE3D),<br>PTHR19242 (PANTHER),<br>PTHR19242:SF77 (PANTHER) |
| -                        | -                                                                | 0  | -                                                                                                                                                                                      | -                                                                                | -                                                                                                                    |
| Caenorhabditis briggsae  | acyl- synthetase                                                 | 2  | F:GO:0016877;<br>P:GO:0008152                                                                                                                                                          | -                                                                                | IPR000873; G3DSA:2.30.38.10<br>(GENE3D), PTHR11968 (PANTHER),<br>PTHR11968:SF43 (PANTHER),<br>SSF56801 (SUPERFAMILY) |
| Caenorhabditis elegans   | elegans protein partially confirmed by transcript evidence       | 0  |                                                                                                                                                                                        | F:GO:0005515                                                                     | -                                                                                                                    |
| Caenorhabditis briggsae  | serine threonine-protein phosphatase 5                           | 6  | C:GO:0005737;<br>P:GO:0000278;<br>F:GO:0046872;<br>F:GO:0004722;<br>P:GO:0006470;<br>C:GO:0005634                                                                                      | -                                                                                | IPR006186; IPR013235;<br>G3DSA:3.60.21.10 (GENE3D),<br>PTHR11668:SF12 (PANTHER),<br>SSF56300 (SUPERFAMILY)           |

|                             |                                                         |    |                                                                                                                                                                                                         |                                                                 |                                                                                                              |
|-----------------------------|---------------------------------------------------------|----|---------------------------------------------------------------------------------------------------------------------------------------------------------------------------------------------------------|-----------------------------------------------------------------|--------------------------------------------------------------------------------------------------------------|
|                             |                                                         |    |                                                                                                                                                                                                         |                                                                 | IPR003598; IPR007110; IPR013098; IPR013783; PTHR19897 (PANTHER), SSF48726 (SUPERFAMILY)                      |
| Angiostrongylus cantonensis | hypothetical protein [Angiostrongylus cantonensis]      | 0  |                                                                                                                                                                                                         |                                                                 | -                                                                                                            |
| Angiostrongylus cantonensis | hypothetical protein [Angiostrongylus cantonensis]      | 0  |                                                                                                                                                                                                         |                                                                 | -                                                                                                            |
|                             | -                                                       | 0  |                                                                                                                                                                                                         |                                                                 | -                                                                                                            |
|                             | -                                                       | 0  |                                                                                                                                                                                                         |                                                                 | -                                                                                                            |
|                             | -                                                       | 0  |                                                                                                                                                                                                         |                                                                 | -                                                                                                            |
|                             | -                                                       | 0  |                                                                                                                                                                                                         |                                                                 | SignalP (SIGNALP)                                                                                            |
|                             | -                                                       | 0  |                                                                                                                                                                                                         |                                                                 | SignalP (SIGNALP)                                                                                            |
| Caenorhabditis briggsae     | briggsae cbr-gly-2 protein                              | 0  |                                                                                                                                                                                                         |                                                                 | PTHR15075 (PANTHER)                                                                                          |
|                             | -                                                       | 0  |                                                                                                                                                                                                         |                                                                 | -                                                                                                            |
|                             | -                                                       | 0  |                                                                                                                                                                                                         |                                                                 | -                                                                                                            |
| Caenorhabditis briggsae     | Hypothetical protein CBG18923 [Caenorhabditis briggsae] | 0  |                                                                                                                                                                                                         |                                                                 | -                                                                                                            |
|                             | -                                                       | 0  |                                                                                                                                                                                                         |                                                                 | -                                                                                                            |
|                             | -                                                       | 0  |                                                                                                                                                                                                         |                                                                 | -                                                                                                            |
|                             | -                                                       | 0  |                                                                                                                                                                                                         |                                                                 | -                                                                                                            |
|                             | -                                                       | 0  |                                                                                                                                                                                                         |                                                                 | SignalP (SIGNALP)                                                                                            |
| Caenorhabditis elegans      | hypothetical protein T19E7.6 [Caenorhabditis elegans]   | 0  |                                                                                                                                                                                                         |                                                                 | -                                                                                                            |
|                             | -                                                       | 0  |                                                                                                                                                                                                         |                                                                 | -                                                                                                            |
|                             | -                                                       | 0  |                                                                                                                                                                                                         |                                                                 | -                                                                                                            |
|                             | -                                                       | 0  |                                                                                                                                                                                                         |                                                                 | SignalP (SIGNALP)                                                                                            |
|                             | -                                                       | 0  |                                                                                                                                                                                                         |                                                                 | SignalP (SIGNALP)                                                                                            |
|                             | -                                                       | 0  |                                                                                                                                                                                                         |                                                                 | -                                                                                                            |
|                             | -                                                       | 0  |                                                                                                                                                                                                         |                                                                 | -                                                                                                            |
| Caenorhabditis elegans      | laminin alpha chain                                     | 4  | F:GO:0005488;<br>P:GO:0007155;<br>P:GO:0050794;<br>C:GO:0005604                                                                                                                                         |                                                                 | IPR001791; IPR008985; IPR012680; IPR013320                                                                   |
| Caenorhabditis briggsae     | fam108a1 protein                                        | 0  |                                                                                                                                                                                                         | P:GO:0006508;<br>F:GO:0008236;<br>F:GO:0016787;<br>C:GO:0005576 | IPR005645; G3DSA:3.40.50.1820 (GENE3D), PTHR12277 (PANTHER), PTHR12277:SF8 (PANTHER), SSF53474 (SUPERFAMILY) |
| Caenorhabditis elegans      | enhancer of polycomb homolog 1                          | 12 | P:GO:0008340;<br>P:GO:0000003;<br>P:GO:0040027;<br>P:GO:0040010;<br>P:GO:0006898;<br>P:GO:0040018;<br>P:GO:0040011;<br>P:GO:0010468;<br>P:GO:0006350;<br>P:GO:0009792;<br>P:GO:0050794;<br>C:GO:0005634 |                                                                 | IPR019542; PTHR14898 (PANTHER)                                                                               |
|                             | -                                                       | 0  |                                                                                                                                                                                                         |                                                                 | -                                                                                                            |
|                             | -                                                       | 0  |                                                                                                                                                                                                         |                                                                 | -                                                                                                            |
| Caenorhabditis briggsae     | protein fam73a-like                                     | 0  |                                                                                                                                                                                                         | C:GO:0016021;<br>C:GO:0016020                                   | IPR019392; PTHR21508 (PANTHER)                                                                               |
|                             | -                                                       | 0  |                                                                                                                                                                                                         |                                                                 | SignalP (SIGNALP)                                                                                            |
|                             | -                                                       | 0  |                                                                                                                                                                                                         |                                                                 | -                                                                                                            |
|                             | -                                                       | 0  |                                                                                                                                                                                                         |                                                                 | -                                                                                                            |
|                             | -                                                       | 0  |                                                                                                                                                                                                         |                                                                 | -                                                                                                            |
|                             | -                                                       | 0  |                                                                                                                                                                                                         |                                                                 | -                                                                                                            |
| Loa loa                     | myo-2                                                   | 4  | C:GO:0032982;<br>F:GO:0003779;<br>F:GO:0005524;<br>F:GO:0003774                                                                                                                                         |                                                                 | SignalP (SIGNALP)                                                                                            |

|                              |                                                                      |   |                                                                                                                                                      |                                                                                                   |                                |
|------------------------------|----------------------------------------------------------------------|---|------------------------------------------------------------------------------------------------------------------------------------------------------|---------------------------------------------------------------------------------------------------|--------------------------------|
|                              | -                                                                    | 0 |                                                                                                                                                      |                                                                                                   | -                              |
| Caenorhabditis briggsae      | elegans protein confirmed by transcript evidence                     | 5 | F:GO:0005097;<br>C:GO:0005622;<br>F:GO:0004222;<br>P:GO:0006508;<br>P:GO:0032313                                                                     | -                                                                                                 | EC:3.4.24.0 -                  |
| Caenorhabditis briggsae      | elegans protein confirmed by transcript evidence                     | 5 | F:GO:0005097;<br>C:GO:0005622;<br>F:GO:0004222;<br>P:GO:0006508;<br>P:GO:0032313                                                                     | -                                                                                                 | EC:3.4.24.0 -                  |
| Caenorhabditis briggsae      | elegans protein confirmed by transcript evidence                     | 5 | F:GO:0005097;<br>C:GO:0005622;<br>F:GO:0004222;<br>P:GO:0006508;<br>P:GO:0032313                                                                     | -                                                                                                 | EC:3.4.24.0 -                  |
| Caenorhabditis briggsae      | elegans protein confirmed by transcript evidence                     | 5 | F:GO:0005097;<br>C:GO:0005622;<br>F:GO:0004222;<br>P:GO:0006508;<br>P:GO:0032313                                                                     | -                                                                                                 | EC:3.4.24.0 -                  |
|                              | -                                                                    | 0 |                                                                                                                                                      |                                                                                                   | SignalP (SIGNALP)              |
| Homo sapiens                 | pre-mr-processing-splicing factor 8                                  | 8 | C:GO:0005682;<br>P:GO:0050896;<br>C:GO:0005681;<br>F:GO:0003723;<br>F:GO:0005515;<br>C:GO:0016607;<br>P:GO:0007601;<br>P:GO:0000398                  | -                                                                                                 | IPR012984; PTHR11140 (PANTHER) |
| Caenorhabditis elegans       | a disintegrin and metalloprotease with thrombospondin motifs 20-like | 9 | P:GO:0009967;<br>F:GO:0008270;<br>C:GO:0005615;<br>F:GO:0004222;<br>P:GO:0006508;<br>P:GO:0045636;<br>C:GO:0005578;<br>P:GO:0043066;<br>P:GO:0030198 | -                                                                                                 | EC:3.4.24.0 -                  |
|                              | -                                                                    | 0 |                                                                                                                                                      |                                                                                                   | IPR012317                      |
|                              | -                                                                    | 0 |                                                                                                                                                      |                                                                                                   | -                              |
|                              | -                                                                    | 0 |                                                                                                                                                      |                                                                                                   | -                              |
|                              | -                                                                    | 0 |                                                                                                                                                      |                                                                                                   | -                              |
|                              | -                                                                    | 0 |                                                                                                                                                      |                                                                                                   | -                              |
| Caenorhabditis briggsae      | elegans protein confirmed by transcript evidence                     | 0 |                                                                                                                                                      |                                                                                                   | IPR019363; PTHR13390 (PANTHER) |
|                              | -                                                                    | 0 |                                                                                                                                                      |                                                                                                   | -                              |
| Nippostrongylus brasiliensis | briggsae cbr-cpi-2 protein                                           | 2 | F:GO:0004869;<br>P:GO:0000003                                                                                                                        | -                                                                                                 | -                              |
| Nippostrongylus brasiliensis | briggsae cbr-cpi-2 protein                                           | 2 | F:GO:0004869;<br>P:GO:0000003                                                                                                                        | -                                                                                                 | -                              |
| Caenorhabditis elegans       | elegans protein partially confirmed by transcript evidence           | 0 |                                                                                                                                                      |                                                                                                   | SignalP (SIGNALP)              |
| Caenorhabditis briggsae      | briggsae cbr-trpa-1 protein                                          | 0 |                                                                                                                                                      | C:GO:0016021;<br>C:GO:0016020;<br>P:GO:0055085;<br>P:GO:0006811;<br>F:GO:0005216;<br>P:GO:0006810 | -                              |
|                              | -                                                                    | 0 |                                                                                                                                                      |                                                                                                   | SignalP (SIGNALP)              |



|                         |                                                                           |    |                                                                                                                                                                                                                                                                                                                                                                                                                                                                         |   |                                                         |                                                                                |
|-------------------------|---------------------------------------------------------------------------|----|-------------------------------------------------------------------------------------------------------------------------------------------------------------------------------------------------------------------------------------------------------------------------------------------------------------------------------------------------------------------------------------------------------------------------------------------------------------------------|---|---------------------------------------------------------|--------------------------------------------------------------------------------|
| Ailuropoda melanoleuca  | type alpha 1                                                              | 31 | P:GO:0060351;<br>P:GO:0001957;<br>P:GO:0071363;<br>P:GO:0007605;<br>P:GO:0034505;<br>P:GO:0042542;<br>P:GO:0001649;<br>P:GO:0009612;<br>P:GO:0001568;<br>P:GO:0060325;<br>F:GO:0005201;<br>C:GO:0005615;<br>P:GO:0048706;<br>P:GO:0015031;<br>F:GO:0048407;<br>C:GO:0005737;<br>P:GO:0043434;<br>P:GO:0071300;<br>P:GO:0007601;<br>P:GO:0010812;<br>C:GO:0005584;<br>F:GO:0042802;<br>P:GO:0060346;<br>P:GO:0032964;<br>P:GO:0030199;<br>P:GO:0051591;<br>P:GO:0031960; | - | -                                                       | -                                                                              |
| -                       | -                                                                         | 0  |                                                                                                                                                                                                                                                                                                                                                                                                                                                                         |   |                                                         | SignalP (SIGNALP)                                                              |
| Loa loa                 | laminin alpha chain                                                       | 5  | C:GO:0005606;<br>P:GO:0030334;<br>P:GO:0045995;<br>P:GO:0030155;<br>F:GO:0005102                                                                                                                                                                                                                                                                                                                                                                                        | - | -                                                       | -                                                                              |
| -                       | -                                                                         | 0  |                                                                                                                                                                                                                                                                                                                                                                                                                                                                         |   |                                                         | SignalP (SIGNALP)                                                              |
| -                       | -                                                                         | 0  |                                                                                                                                                                                                                                                                                                                                                                                                                                                                         |   |                                                         | -                                                                              |
| -                       | -                                                                         | 0  |                                                                                                                                                                                                                                                                                                                                                                                                                                                                         |   |                                                         | -                                                                              |
| -                       | -                                                                         | 0  |                                                                                                                                                                                                                                                                                                                                                                                                                                                                         |   |                                                         | -                                                                              |
| Caenorhabditis briggsae | transformation transcription domain-associated protein                    | 3  | C:GO:0070461;<br>F:GO:0005515;<br>P:GO:0016573                                                                                                                                                                                                                                                                                                                                                                                                                          | - | -                                                       | -                                                                              |
| Caenorhabditis briggsae | transformation transcription domain-associated protein                    | 3  | C:GO:0070461;<br>F:GO:0005515;<br>P:GO:0016573                                                                                                                                                                                                                                                                                                                                                                                                                          | - | -                                                       | -                                                                              |
| -                       | -                                                                         | 0  |                                                                                                                                                                                                                                                                                                                                                                                                                                                                         |   |                                                         | -                                                                              |
| -                       | -                                                                         | 0  |                                                                                                                                                                                                                                                                                                                                                                                                                                                                         |   |                                                         | -                                                                              |
| -                       | -                                                                         | 0  |                                                                                                                                                                                                                                                                                                                                                                                                                                                                         |   |                                                         | -                                                                              |
| -                       | -                                                                         | 0  |                                                                                                                                                                                                                                                                                                                                                                                                                                                                         |   |                                                         | -                                                                              |
| -                       | -                                                                         | 0  |                                                                                                                                                                                                                                                                                                                                                                                                                                                                         |   |                                                         | -                                                                              |
| -                       | -                                                                         | 0  |                                                                                                                                                                                                                                                                                                                                                                                                                                                                         |   |                                                         | -                                                                              |
| Caenorhabditis elegans  | uncharacterized protein c12orf4-like protein                              | 0  |                                                                                                                                                                                                                                                                                                                                                                                                                                                                         |   |                                                         | IPR019311                                                                      |
| Homo sapiens            | eukaryotic translation initiation factor subunit structural gene x-linked | 7  | F:GO:0003743;<br>C:GO:0005829;<br>P:GO:0045948;<br>P:GO:0006184;<br>F:GO:0005515;<br>F:GO:0003924;<br>F:GO:0005525                                                                                                                                                                                                                                                                                                                                                      | - | EC:3.6.5.1;<br>EC:3.6.5.2;<br>EC:3.6.5.3;<br>EC:3.6.5.4 | G3DSA:3.40.50.300 (GENE3D),<br>PTHR23115 (PANTHER),<br>PTHR23115:SF9 (PANTHER) |
| -                       | -                                                                         | 0  |                                                                                                                                                                                                                                                                                                                                                                                                                                                                         |   |                                                         | -                                                                              |

|                           |                                                                  |    |                                                                                                                                                                       |   |                             |                                                                                                                                                       |
|---------------------------|------------------------------------------------------------------|----|-----------------------------------------------------------------------------------------------------------------------------------------------------------------------|---|-----------------------------|-------------------------------------------------------------------------------------------------------------------------------------------------------|
| Caenorhabditis briggsae   | cd81 antigen                                                     | 10 | P:GO:0030307;<br>P:GO:0043128;<br>F:GO:0005515;<br>P:GO:0046813;<br>P:GO:0008104;<br>P:GO:0050731;<br>P:GO:0006661;<br>C:GO:0005887;<br>P:GO:0000187;<br>P:GO:0030890 | - |                             | IPR000301; IPR018499; IPR018503;<br>SignalP (SIGNALP)                                                                                                 |
| Caenorhabditis sp. PS1010 | tub family protein                                               | 0  |                                                                                                                                                                       |   |                             | IPR000007; IPR001680; IPR015943;<br>IPR019782; PTHR16517 (PANTHER),<br>PTHR16517:SF2 (PANTHER),<br>SSF117289 (SUPERFAMILY)                            |
| Caenorhabditis sp. PS1010 | tub family protein                                               | 0  |                                                                                                                                                                       |   |                             | IPR000007; PTHR16517 (PANTHER)                                                                                                                        |
|                           | -                                                                | 0  |                                                                                                                                                                       |   |                             | SignalP (SIGNALP)                                                                                                                                     |
|                           | -                                                                | 0  |                                                                                                                                                                       |   |                             | SignalP (SIGNALP)                                                                                                                                     |
|                           | -                                                                | 0  |                                                                                                                                                                       |   |                             | -                                                                                                                                                     |
|                           | -                                                                | 0  |                                                                                                                                                                       |   |                             | SignalP (SIGNALP)                                                                                                                                     |
| Bos taurus                | mitochondrial h+-transporting atp synthase f0 complex subunit c3 | 5  | F:GO:0046933;<br>C:GO:0016021;<br>P:GO:0015986;<br>F:GO:0008289;<br>C:GO:0045263                                                                                      | - | EC:3.6.3.14                 | IPR000454; IPR002379; IPR020537;<br>PTHR10031 (PANTHER), SignalP<br>(SIGNALP)                                                                         |
| Caenorhabditis elegans    | hypothetical protein H24K24.4 [Caenorhabditis elegans]           | 3  | F:GO:0008173;<br>P:GO:0006396;<br>F:GO:0000166                                                                                                                        | - |                             | SignalP (SIGNALP)                                                                                                                                     |
|                           | -                                                                | 0  |                                                                                                                                                                       |   |                             | -                                                                                                                                                     |
|                           | -                                                                | 0  |                                                                                                                                                                       |   |                             | -                                                                                                                                                     |
| Caenorhabditis elegans    | twik (kcnk-like) family of potassium alpha subunit 45            | 4  | C:GO:0016021;<br>P:GO:0006813;<br>F:GO:0005267;<br>P:GO:0055085                                                                                                       | - |                             | IPR013099; IPR018723;<br>G3DSA:1.10.287.70 (GENE3D),<br>PTHR11003 (PANTHER),<br>PTHR11003:SF7 (PANTHER), SignalP<br>(SIGNALP), SSF81324 (SUPERFAMILY) |
| Caenorhabditis elegans    | hypothetical protein F46F11.7 [Caenorhabditis elegans]           | 0  |                                                                                                                                                                       |   |                             | PTHR11201 (PANTHER),<br>PTHR11201:SF1 (PANTHER)                                                                                                       |
| Caenorhabditis elegans    | serine threonine protein ki-se                                   | 4  | F:GO:0017111;<br>P:GO:0050789;<br>C:GO:0005622;<br>F:GO:0000166                                                                                                       | - | EC:3.6.1.15                 | IPR002078; G3DSA:3.40.50.300<br>(GENE3D), PTHR22908 (PANTHER),<br>PTHR22908:SF13 (PANTHER),<br>SSF52540 (SUPERFAMILY)                                 |
| Caenorhabditis briggsae   | protein ki-se protein                                            | 8  | P:GO:0006468;<br>F:GO:0004715;<br>C:GO:0005886;<br>F:GO:0005515;<br>F:GO:0005524;<br>F:GO:0000287;<br>P:GO:0000003;<br>F:GO:0004674                                   | - | EC:2.7.10.2;<br>EC:2.7.11.0 | IPR000719; IPR001245; IPR008266;<br>IPR011009; IPR015779; IPR020685;<br>G3DSA:1.10.510.10 (GENE3D),<br>G3DSA:3.30.200.20 (GENE3D)                     |
| Caenorhabditis elegans    | calmodulin-binding transcription                                 | 7  | P:GO:0045449;<br>F:GO:0043565;<br>F:GO:0042803;<br>P:GO:0016059;<br>P:GO:0009792;<br>C:GO:0005634;<br>F:GO:0003702                                                    | - |                             | SignalP (SIGNALP)                                                                                                                                     |

|                         |                                                                                                                                                              |    |                                                                                                                                                                                        |                                                |             |                                                                                                                                                       |
|-------------------------|--------------------------------------------------------------------------------------------------------------------------------------------------------------|----|----------------------------------------------------------------------------------------------------------------------------------------------------------------------------------------|------------------------------------------------|-------------|-------------------------------------------------------------------------------------------------------------------------------------------------------|
| Caenorhabditis elegans  | calmodulin-binding transcription                                                                                                                             | 7  | P:GO:0045449;<br>F:GO:0043565;<br>F:GO:0042803;<br>P:GO:0016059;<br>P:GO:0009792;<br>C:GO:0005634;<br>F:GO:0003702                                                                     | -                                              | -           | -                                                                                                                                                     |
| -                       | -                                                                                                                                                            | 0  |                                                                                                                                                                                        |                                                |             | -                                                                                                                                                     |
| -                       | -                                                                                                                                                            | 0  |                                                                                                                                                                                        |                                                |             | SignalP (SIGNALP)                                                                                                                                     |
| Caenorhabditis elegans  | endou_caeel ame: full=poly -specific endoribonuclease homolog ame: full=protein endou ame: full=uridylate-specific endoribonuclease homolog flags: precursor | 2  | F:GO:0004521;<br>F:GO:0003723                                                                                                                                                          | -                                              | -           | -                                                                                                                                                     |
| -                       | -                                                                                                                                                            | 0  |                                                                                                                                                                                        |                                                |             | -                                                                                                                                                     |
| Caenorhabditis briggsae | Hypothetical protein CBG07002 [Caenorhabditis briggsae]                                                                                                      | 4  | P:GO:0040035;<br>P:GO:0002119;<br>P:GO:0040007;<br>P:GO:0006898                                                                                                                        | -                                              | -           | -                                                                                                                                                     |
| Caenorhabditis elegans  | elegans protein confirmed by transcript evidence                                                                                                             | 3  | P:GO:0006508;<br>F:GO:0004181;<br>F:GO:0008270                                                                                                                                         | -                                              | EC:3.4.17.0 | IPR000834; G3DSA:3.40.630.10 (GENE3D), PTHR11705 (PANTHER), PTHR11705:SF12 (PANTHER), SSF53187 (SUPERFAMILY)                                          |
| -                       | -                                                                                                                                                            | 0  |                                                                                                                                                                                        |                                                |             | -                                                                                                                                                     |
| -                       | -                                                                                                                                                            | 0  |                                                                                                                                                                                        |                                                |             | -                                                                                                                                                     |
| Caenorhabditis elegans  | briggsae cbr-pqn-48 protein                                                                                                                                  | 0  |                                                                                                                                                                                        |                                                |             | IPR004911; PTHR13234:SF3 (PANTHER)                                                                                                                    |
| Caenorhabditis elegans  | hypothetical protein Y73B6BL.1 [Caenorhabditis elegans]                                                                                                      | 0  |                                                                                                                                                                                        | F:GO:0046872;<br>F:GO:0016491;<br>P:GO:0008152 |             | -                                                                                                                                                     |
| Caenorhabditis briggsae | sugar transporter                                                                                                                                            | 11 | P:GO:0055085;<br>P:GO:0009845;<br>C:GO:0016021;<br>F:GO:0005353;<br>F:GO:0005355;<br>P:GO:0009911;<br>P:GO:0015758;<br>C:GO:0009705;<br>P:GO:0015755;<br>P:GO:0009624;<br>C:GO:0005886 | -                                              |             | IPR005828; IPR016196; PTHR11600 (PANTHER), SignalP (SIGNALP)                                                                                          |
| Caenorhabditis briggsae | glucose transporter                                                                                                                                          | 3  | F:GO:0022891;<br>P:GO:0055085;<br>C:GO:0016021                                                                                                                                         | -                                              |             | IPR003663; IPR005828; IPR005829; IPR016196; IPR020846; G3DSA:1.20.1250.20 (GENE3D), PTHR11600 (PANTHER), PTHR11600:SF103 (PANTHER), SignalP (SIGNALP) |
| -                       | -                                                                                                                                                            | 0  |                                                                                                                                                                                        |                                                |             | SignalP (SIGNALP)                                                                                                                                     |
| Caenorhabditis briggsae | briggsae cbr-dve-1 protein                                                                                                                                   | 5  | F:GO:0003700;<br>F:GO:0043565;<br>F:GO:0005515;<br>C:GO:0005634;<br>P:GO:0006355                                                                                                       | -                                              |             | PTHR15116 (PANTHER), PTHR15116:SF3 (PANTHER)                                                                                                          |
| -                       | -                                                                                                                                                            | 0  |                                                                                                                                                                                        |                                                |             | IPR015650; PTHR13140 (PANTHER)                                                                                                                        |
| -                       | -                                                                                                                                                            | 0  |                                                                                                                                                                                        |                                                |             | -                                                                                                                                                     |



|                         |                                                              |    |                                                                                                                                                                                        |                                                                 |            |                                                                                                                                     |
|-------------------------|--------------------------------------------------------------|----|----------------------------------------------------------------------------------------------------------------------------------------------------------------------------------------|-----------------------------------------------------------------|------------|-------------------------------------------------------------------------------------------------------------------------------------|
| Caenorhabditis elegans  | d- polymerase epsilon catalytic subunit a                    | 11 | F:GO:0008270;<br>F:GO:0003887;<br>P:GO:0006260;<br>P:GO:0040035;<br>F:GO:0003677;<br>F:GO:0000166;<br>P:GO:0040011;<br>P:GO:0006997;<br>P:GO:0002009;<br>P:GO:0009792;<br>C:GO:0005634 | -                                                               | EC:2.7.7.7 | PTHR10670 (PANTHER)                                                                                                                 |
| -                       | -                                                            | 0  |                                                                                                                                                                                        |                                                                 |            | -                                                                                                                                   |
| -                       | -                                                            | 0  |                                                                                                                                                                                        |                                                                 |            | SignalP (SIGNALP)                                                                                                                   |
| -                       | -                                                            | 0  |                                                                                                                                                                                        |                                                                 |            | -                                                                                                                                   |
| -                       | -                                                            | 0  |                                                                                                                                                                                        |                                                                 |            | -                                                                                                                                   |
| -                       | -                                                            | 0  |                                                                                                                                                                                        |                                                                 |            | -                                                                                                                                   |
| -                       | -                                                            | 0  |                                                                                                                                                                                        |                                                                 |            | -                                                                                                                                   |
| Macaca mulatta          | high density lipoprotein binding protein isoform 8           | 9  | C:GO:0005737;<br>F:GO:0008289;<br>C:GO:0005886;<br>F:GO:0003723;<br>F:GO:0005515;<br>P:GO:0006869;<br>P:GO:0008203;<br>C:GO:0005634;<br>C:GO:0034364                                   | -                                                               |            | IPR004088; IPR018111;<br>G3DSA:3.30.1370.10 (GENE3D),<br>PTHR10627 (PANTHER),<br>PTHR10627:SF9 (PANTHER), SSF54791<br>(SUPERFAMILY) |
| -                       | -                                                            | 0  |                                                                                                                                                                                        |                                                                 |            | SignalP (SIGNALP)                                                                                                                   |
| -                       | -                                                            | 0  |                                                                                                                                                                                        |                                                                 |            | -                                                                                                                                   |
| -                       | -                                                            | 0  |                                                                                                                                                                                        |                                                                 |            | -                                                                                                                                   |
| -                       | -                                                            | 0  |                                                                                                                                                                                        |                                                                 |            | -                                                                                                                                   |
| Caenorhabditis elegans  | alpha- ulin (catenin vinculin related) family member (ctn-1) | 5  | C:GO:0016021;<br>P:GO:0007155;<br>F:GO:0005198;<br>F:GO:0045296;<br>C:GO:0015629                                                                                                       | -                                                               |            | IPR006077; G3DSA:1.20.120.230<br>(GENE3D), PTHR18914 (PANTHER),<br>PTHR18914:SF8 (PANTHER)                                          |
| Caenorhabditis briggsae | elegans protein partially confirmed by transcript evidence   | 0  |                                                                                                                                                                                        | F:GO:0005524;<br>C:GO:0005856;<br>C:GO:0016459;<br>F:GO:0003774 |            | -                                                                                                                                   |
| -                       | -                                                            | 0  |                                                                                                                                                                                        |                                                                 |            | SignalP (SIGNALP)                                                                                                                   |
| -                       | -                                                            | 0  |                                                                                                                                                                                        |                                                                 |            | -                                                                                                                                   |
| -                       | -                                                            | 0  |                                                                                                                                                                                        |                                                                 |            | SignalP (SIGNALP)                                                                                                                   |
| Caenorhabditis briggsae | Hypothetical protein CBG18470 [Caenorhabditis briggsae]      | 0  |                                                                                                                                                                                        |                                                                 |            | -                                                                                                                                   |
| Caenorhabditis elegans  | abnormal go-d development family member (gon-2)              | 2  | C:GO:0016020;<br>P:GO:0006810                                                                                                                                                          | -                                                               |            | PTHR13800 (PANTHER)                                                                                                                 |

|              |                                                                        |    |                                                                                                                                                                                                                                                                             |   |             |                                                                     |
|--------------|------------------------------------------------------------------------|----|-----------------------------------------------------------------------------------------------------------------------------------------------------------------------------------------------------------------------------------------------------------------------------|---|-------------|---------------------------------------------------------------------|
| Homo sapiens | mhc class ii antigen                                                   | 14 | C:GO:0005789;<br>C:GO:0005769;<br>C:GO:0042613;<br>C:GO:0005771;<br>C:GO:0005794;<br>P:GO:0019886;<br>F:GO:0005515;<br>C:GO:0009897;<br>C:GO:0005765;<br>C:GO:0016021;<br>F:GO:0032395;<br>C:GO:0010008;<br>P:GO:0006955;<br>F:GO:0042605                                   | - |             | IPR003006; IPR013783; PTHR19944 (PANTHER), PTHR19944:SF26 (PANTHER) |
|              | -                                                                      | 0  |                                                                                                                                                                                                                                                                             |   |             | IPR001368; G3DSA:2.10.50.10 (GENE3D), SignalP (SIGNALP)             |
|              | -                                                                      | 0  |                                                                                                                                                                                                                                                                             |   |             | -                                                                   |
|              | -                                                                      | 0  |                                                                                                                                                                                                                                                                             |   |             | -                                                                   |
| Loa loa      | hr1 repeat family protein                                              | 5  | P:GO:0006468;<br>C:GO:0005622;<br>F:GO:0005524;<br>P:GO:0007165;<br>F:GO:0004674                                                                                                                                                                                            | - | EC:2.7.11.0 | -                                                                   |
| Homo sapiens | complement component 3                                                 | 16 | F:GO:0048037;<br>P:GO:0006957;<br>F:GO:0005102;<br>P:GO:0010951;<br>P:GO:0050766;<br>P:GO:0045766;<br>C:GO:0005615;<br>P:GO:0001798;<br>P:GO:0007596;<br>P:GO:0007165;<br>P:GO:0010575;<br>P:GO:0006935;<br>P:GO:0007186;<br>P:GO:0006958;<br>F:GO:0004866;<br>P:GO:0001970 | - |             | -                                                                   |
| Homo sapiens | tyrosine 3 tryptophan 5 -monooxyge-se activation zeta polypeptide-like | 15 | C:GO:0043234;<br>C:GO:0005625;<br>C:GO:0005739;<br>F:GO:0032403;<br>P:GO:0006626;<br>P:GO:0002553;<br>P:GO:0006916;<br>F:GO:0004497;<br>C:GO:0042470;<br>F:GO:0019904;<br>P:GO:0007165;<br>F:GO:0008134;<br>P:GO:0042493;<br>C:GO:0014069;<br>C:GO:0005634                  | - |             | SignalP (SIGNALP)                                                   |
|              | -                                                                      | 0  |                                                                                                                                                                                                                                                                             |   |             | SignalP (SIGNALP)                                                   |

|                         |                                       |    |                                                                                                                                                                                                         |   |             |                                                                                                                   |
|-------------------------|---------------------------------------|----|---------------------------------------------------------------------------------------------------------------------------------------------------------------------------------------------------------|---|-------------|-------------------------------------------------------------------------------------------------------------------|
| Caenorhabditis briggsae | r- polymerase domain 2 family protein | 8  | F:GO:0003899;<br>C:GO:0032991;<br>F:GO:0046872;<br>C:GO:0043232;<br>F:GO:0003677;<br>F:GO:0005515;<br>C:GO:0005654;<br>P:GO:0006350                                                                     | - | EC:2.7.7.6  | IPR007080; IPR015699; PTHR19376 (PANTHER), SSF64484 (SUPERFAMILY)                                                 |
| Caenorhabditis briggsae | cathepsin a                           | 2  | P:GO:0019915;<br>P:GO:0006508                                                                                                                                                                           | - |             | -                                                                                                                 |
|                         | -                                     | 0  |                                                                                                                                                                                                         |   |             | -                                                                                                                 |
|                         | -                                     | 0  |                                                                                                                                                                                                         |   |             | -                                                                                                                 |
| Caenorhabditis elegans  | uncoordinated family member (unc-52)  | 2  | P:GO:0030239;<br>C:GO:0005578                                                                                                                                                                           | - |             | IPR003599; IPR007110; IPR013098; IPR013783; PTHR10574 (PANTHER), PTHR10574:SF20 (PANTHER), SSF48726 (SUPERFAMILY) |
|                         | -                                     | 0  |                                                                                                                                                                                                         |   |             | -                                                                                                                 |
|                         | -                                     | 0  |                                                                                                                                                                                                         |   |             | -                                                                                                                 |
|                         | -                                     | 0  |                                                                                                                                                                                                         |   |             | -                                                                                                                 |
|                         | -                                     | 0  |                                                                                                                                                                                                         |   |             | -                                                                                                                 |
|                         | -                                     | 0  |                                                                                                                                                                                                         |   |             | -                                                                                                                 |
| Homo sapiens            | tyrosine kinase binding protein       | 7  | F:GO:0005057;<br>C:GO:0005887;<br>P:GO:0023034;<br>F:GO:0016301;<br>F:GO:0005515;<br>P:GO:0007165;<br>P:GO:0006968                                                                                      | - |             | -                                                                                                                 |
|                         | -                                     | 0  |                                                                                                                                                                                                         |   |             | -                                                                                                                 |
| Caenorhabditis briggsae | briggsae cbr-let-2 protein            | 4  | C:GO:0005587;<br>F:GO:0005488;<br>F:GO:0030020;<br>P:GO:0016043                                                                                                                                         | - |             | IPR008160; PTHR10499 (PANTHER), PTHR10499:SF114 (PANTHER)                                                         |
|                         | -                                     | 0  |                                                                                                                                                                                                         |   |             | -                                                                                                                 |
|                         | -                                     | 0  |                                                                                                                                                                                                         |   |             | SignalP (SIGNALP)                                                                                                 |
|                         | -                                     | 0  |                                                                                                                                                                                                         |   |             | -                                                                                                                 |
| Caenorhabditis briggsae | asparaginyl-tRNA synthetase           | 3  | F:GO:0016874;<br>F:GO:0005488;<br>P:GO:0006412                                                                                                                                                          | - | EC:3.6.5.3  | IPR004364; IPR018150; G3DSA:3.30.930.10 (GENE3D), PTHR22594:SF6 (PANTHER), SSF55681 (SUPERFAMILY)                 |
|                         | -                                     |    |                                                                                                                                                                                                         |   |             | -                                                                                                                 |
| Homo sapiens            | adam metalloproteinase domain 15      | 12 | P:GO:0001525;<br>F:GO:0008270;<br>C:GO:0005912;<br>C:GO:0016021;<br>P:GO:0007160;<br>F:GO:0004222;<br>P:GO:0006508;<br>C:GO:0001669;<br>C:GO:0012505;<br>C:GO:0019861;<br>P:GO:0030574;<br>F:GO:0017124 | - | EC:3.4.24.0 | PTHR11905 (PANTHER), PTHR11905:SF16 (PANTHER), SignalP (SIGNALP)                                                  |
|                         | -                                     | 0  |                                                                                                                                                                                                         |   |             | SignalP (SIGNALP)                                                                                                 |
|                         | -                                     | 0  |                                                                                                                                                                                                         |   |             | -                                                                                                                 |
|                         | -                                     | 0  |                                                                                                                                                                                                         |   |             | -                                                                                                                 |

|                        |                                                               |    |                                                                                                                                                                                                                                                                                                                                                                                   |   |             |                                                                                                                               |
|------------------------|---------------------------------------------------------------|----|-----------------------------------------------------------------------------------------------------------------------------------------------------------------------------------------------------------------------------------------------------------------------------------------------------------------------------------------------------------------------------------|---|-------------|-------------------------------------------------------------------------------------------------------------------------------|
| Heterotropus senex     | carbamoylphosphate synthase                                   | 4  | P:GO:0006541;<br>F:GO:0004086;<br>F:GO:0005524;<br>P:GO:0009058                                                                                                                                                                                                                                                                                                                   | - | -           |                                                                                                                               |
| Ailuropoda melanoleuca | proteasome activator complex subunit 2-like                   | 6  | P:GO:0019884;<br>P:GO:0051436;<br>P:GO:0051437;<br>C:GO:0008537;<br>P:GO:0031145;<br>N:GO:0061133                                                                                                                                                                                                                                                                                 | - |             | IPR003186; IPR009077;<br>PTHR10660:SF6 (PANTHER)                                                                              |
|                        |                                                               | 0  |                                                                                                                                                                                                                                                                                                                                                                                   |   |             |                                                                                                                               |
| Pongo abelii           | glycosyl hydrolase family catalytic domain containing protein | 22 | P:GO:0001501;<br>C:GO:0001669;<br>P:GO:0006689;<br>P:GO:0007605;<br>P:GO:0007626;<br>C:GO:0016020;<br>P:GO:0006874;<br>P:GO:0007040;<br>P:GO:0031323;<br>F:GO:0004563;<br>P:GO:0044267;<br>C:GO:0005764;<br>P:GO:0008049;<br>P:GO:0019915;<br>P:GO:0030203;<br>P:GO:0050885;<br>P:GO:0048477;<br>F:GO:0042803;<br>P:GO:0042552;<br>P:GO:0009313;<br>P:GO:0008654;<br>P:GO:0007341 | - | EC:3.2.1.52 | IPR001540; IPR005829; IPR013781;<br>IPR015882; IPR015883; IPR017853;<br>G3DSA:3.30.379.10 (GENE3D),<br>SSF55545 (SUPERFAMILY) |
| Necator americanus     | surface-associated antigen 2                                  | 0  |                                                                                                                                                                                                                                                                                                                                                                                   |   |             | IPR003677                                                                                                                     |
| Caenorhabditis elegans | protein strawberry notch homolog 1                            | 3  | F:GO:0005524;<br>F:GO:0004386;<br>F:GO:0003677                                                                                                                                                                                                                                                                                                                                    | - |             | PTHR12706 (PANTHER)                                                                                                           |
| Caenorhabditis elegans | protein strawberry notch homolog 1                            | 3  | F:GO:0005524;<br>F:GO:0004386;<br>F:GO:0003677                                                                                                                                                                                                                                                                                                                                    | - |             | PTHR12706 (PANTHER), SSF52540<br>(SUPERFAMILY)                                                                                |
| Caenorhabditis elegans | protein strawberry notch homolog 1                            | 3  | F:GO:0005524;<br>F:GO:0004386;<br>F:GO:0003677                                                                                                                                                                                                                                                                                                                                    | - |             | PTHR12706 (PANTHER), SSF52540<br>(SUPERFAMILY)                                                                                |
| Caenorhabditis elegans | protein strawberry notch homolog 1                            | 3  | F:GO:0005524;<br>F:GO:0004386;<br>F:GO:0003677                                                                                                                                                                                                                                                                                                                                    | - |             | PTHR12706 (PANTHER), SSF52540<br>(SUPERFAMILY)                                                                                |
|                        |                                                               | 0  |                                                                                                                                                                                                                                                                                                                                                                                   |   |             | IPR015313                                                                                                                     |
|                        |                                                               | 0  |                                                                                                                                                                                                                                                                                                                                                                                   |   |             |                                                                                                                               |
|                        |                                                               | 0  |                                                                                                                                                                                                                                                                                                                                                                                   |   |             |                                                                                                                               |
|                        |                                                               | 0  |                                                                                                                                                                                                                                                                                                                                                                                   |   |             | IPR006162; SignalP (SIGNALP)                                                                                                  |
| Caenorhabditis elegans | hypothetical protein ZK84.1 [Caenorhabditis elegans]          | 0  |                                                                                                                                                                                                                                                                                                                                                                                   |   |             | SignalP (SIGNALP)                                                                                                             |



|                         |                                                                   |    |                                                                                                                                                                       |                                                                                                                                                                                                                          |             |                                                                                                                                                                                                                              |
|-------------------------|-------------------------------------------------------------------|----|-----------------------------------------------------------------------------------------------------------------------------------------------------------------------|--------------------------------------------------------------------------------------------------------------------------------------------------------------------------------------------------------------------------|-------------|------------------------------------------------------------------------------------------------------------------------------------------------------------------------------------------------------------------------------|
| Caenorhabditis briggsae | adenylate ki-se 1                                                 | 10 | P:GO:0007050;<br>P:GO:0046939;<br>F:GO:0004017;<br>P:GO:0046034;<br>C:GO:0043005;<br>C:GO:0005739;<br>P:GO:0009165;<br>F:GO:0005524;<br>C:GO:0048471;<br>C:GO:0005886 | -                                                                                                                                                                                                                        | EC:2.7.4.3  | IPR000850; G3DSA:3.40.50.300<br>(GENE3D), PTHR23359:SF23<br>(PANTHER)                                                                                                                                                        |
| Caenorhabditis elegans  | long-chain acyl- synthetase                                       | 3  | C:GO:0016020;<br>P:GO:0001676;<br>F:GO:0004467                                                                                                                        | -                                                                                                                                                                                                                        | EC:6.2.1.3  | IPR000873; IPR020459; IPR020845;<br>G3DSA:3.40.50.980 (GENE3D),<br>PTHR11968 (PANTHER),<br>PTHR11968:SF8 (PANTHER), SSF56801<br>(SUPERFAMILY)                                                                                |
| -                       | -                                                                 | 0  |                                                                                                                                                                       |                                                                                                                                                                                                                          |             | -                                                                                                                                                                                                                            |
| -                       | -                                                                 | 0  |                                                                                                                                                                       |                                                                                                                                                                                                                          |             | -                                                                                                                                                                                                                            |
| -                       | -                                                                 | 0  |                                                                                                                                                                       |                                                                                                                                                                                                                          |             | -                                                                                                                                                                                                                            |
| Caenorhabditis elegans  | pdz exchange factor family member (pxf-1)                         | 7  | P:GO:0051056;<br>F:GO:0046582;<br>F:GO:0004871;<br>C:GO:0005622;<br>F:GO:0005515;<br>F:GO:0017034;<br>C:GO:0016020                                                    | -                                                                                                                                                                                                                        |             | IPR000159; IPR000595; IPR000651;<br>IPR001478; IPR001895; IPR008937;<br>IPR014710; IPR018490; IPR019804;<br>G3DSA:1.20.870.10 (GENE3D),<br>G3DSA:2.30.42.10 (GENE3D),<br>PTHR23113:SF21 (PANTHER),<br>SSF54236 (SUPERFAMILY) |
| Brugia malayi           | sec14-like 2 ( cerevisiae)                                        | 0  |                                                                                                                                                                       | F:GO:0005215;<br>F:GO:0016765;<br>C:GO:0005634;<br>P:GO:0006810;<br>C:GO:0005737;<br>P:GO:0045542;<br>P:GO:0050790;<br>F:GO:0008289;<br>F:GO:0008047;<br>C:GO:0005622;<br>P:GO:0006350;<br>C:GO:0005829;<br>P:GO:0045449 |             | SignalP (SIGNALP)                                                                                                                                                                                                            |
| Caenorhabditis elegans  | serine threonine protein ki-se                                    | 4  | F:GO:0017111;<br>P:GO:0050789;<br>C:GO:0005622;<br>F:GO:0000166                                                                                                       | -                                                                                                                                                                                                                        | EC:3.6.1.15 | IPR000523; G3DSA:3.40.50.300<br>(GENE3D), PTHR22908 (PANTHER),<br>PTHR22908:SF13 (PANTHER),<br>SSF52540 (SUPERFAMILY)                                                                                                        |
| -                       | -                                                                 | 0  |                                                                                                                                                                       |                                                                                                                                                                                                                          |             | -                                                                                                                                                                                                                            |
| Brugia malayi           | 20s rr- homolog                                                   | 3  | C:GO:0005730;<br>F:GO:0005515;<br>P:GO:0042255                                                                                                                        | -                                                                                                                                                                                                                        |             | IPR007034; PTHR12858 (PANTHER),<br>PTHR12858:SF1 (PANTHER)                                                                                                                                                                   |
| -                       | -                                                                 | 0  |                                                                                                                                                                       |                                                                                                                                                                                                                          |             | -                                                                                                                                                                                                                            |
| Caenorhabditis elegans  | briggsae cbr-unc- protein                                         | 0  |                                                                                                                                                                       |                                                                                                                                                                                                                          |             | SignalP (SIGNALP)                                                                                                                                                                                                            |
| Caenorhabditis elegans  | phosphatidylinositol 3- and 4-ki-se family protein                | 1  | F:GO:0016772                                                                                                                                                          | -                                                                                                                                                                                                                        |             | IPR000403; PTHR12865 (PANTHER)                                                                                                                                                                                               |
| -                       | -                                                                 | 0  |                                                                                                                                                                       |                                                                                                                                                                                                                          |             | -                                                                                                                                                                                                                            |
| -                       | -                                                                 | 0  |                                                                                                                                                                       |                                                                                                                                                                                                                          |             | -                                                                                                                                                                                                                            |
| Caenorhabditis briggsae | set (trithorax polycomb) domain containing family member (set-18) | 1  | F:GO:0005515                                                                                                                                                          | -                                                                                                                                                                                                                        |             | -                                                                                                                                                                                                                            |
| -                       | -                                                                 | 0  |                                                                                                                                                                       |                                                                                                                                                                                                                          |             | -                                                                                                                                                                                                                            |
| -                       | -                                                                 | 0  |                                                                                                                                                                       |                                                                                                                                                                                                                          |             | -                                                                                                                                                                                                                            |
| Brugia malayi           | hypothetical kda protein in chromosome                            | 0  |                                                                                                                                                                       |                                                                                                                                                                                                                          |             | -                                                                                                                                                                                                                            |
| -                       | -                                                                 | 0  |                                                                                                                                                                       |                                                                                                                                                                                                                          |             | -                                                                                                                                                                                                                            |

|                           |                                                                            |    |                                                                                                                                                                       |                                                                 |             |                                                              |
|---------------------------|----------------------------------------------------------------------------|----|-----------------------------------------------------------------------------------------------------------------------------------------------------------------------|-----------------------------------------------------------------|-------------|--------------------------------------------------------------|
| Caenorhabditis briggsae   | translocase of outer membrane 34                                           | 1  | F:GO:0005488                                                                                                                                                          | -                                                               |             | IPR011989; IPR016024                                         |
| Caenorhabditis briggsae   | elegans protein partially confirmed by transcript evidence                 | 0  |                                                                                                                                                                       | P:GO:0008152;<br>C:GO:0016021;<br>F:GO:0003824                  |             | -                                                            |
|                           |                                                                            | 0  |                                                                                                                                                                       |                                                                 |             |                                                              |
|                           |                                                                            | 0  |                                                                                                                                                                       |                                                                 |             | SignalP (SIGNALP)                                            |
| Teladorsagia circumcincta | nicotinic acetylcholine receptor non-alpha subunit                         | 6  | F:GO:0004872;<br>C:GO:0045211;<br>C:GO:0030054;<br>P:GO:0006811;<br>C:GO:0016021;<br>F:GO:0004889                                                                     | -                                                               |             | IPR006201; IPR006202; IPR018000;<br>PTHR18945:SF72 (PANTHER) |
|                           |                                                                            | 0  |                                                                                                                                                                       |                                                                 |             | -                                                            |
| Caenorhabditis elegans    | patched family protein                                                     | 3  | P:GO:0018996;<br>P:GO:0040018;<br>P:GO:0040011                                                                                                                        | -                                                               |             | IPR003392; PTHR10796 (PANTHER),<br>PTHR10796:SF14 (PANTHER)  |
| Caenorhabditis elegans    | briggsae cbr-gei-15 protein                                                | 0  |                                                                                                                                                                       |                                                                 |             | -                                                            |
| Loa loa                   | smc c-termi-l domain containing protein                                    | 0  |                                                                                                                                                                       | C:GO:0005694;<br>F:GO:0005524;<br>P:GO:0051276;<br>F:GO:0005515 |             | PTHR18937 (PANTHER),<br>PTHR18937:SF12 (PANTHER)             |
|                           |                                                                            | 0  |                                                                                                                                                                       |                                                                 |             | -                                                            |
|                           |                                                                            | 0  |                                                                                                                                                                       |                                                                 |             | -                                                            |
| Loa loa                   | nima (never in mitosis gene a)-related ki-se 7                             | 10 | C:GO:0005737;<br>P:GO:0040035;<br>P:GO:0006468;<br>F:GO:0046872;<br>F:GO:0005515;<br>P:GO:0040010;<br>F:GO:0005524;<br>P:GO:0040011;<br>F:GO:0004674;<br>P:GO:0002009 | -                                                               | EC:2.7.11.0 | G3DSA:1.10.510.10 (GENE3D)                                   |
| Caenorhabditis elegans    | yqk4_caeel ame: full=uncharacterized protein flags:<br>precursor           | 0  |                                                                                                                                                                       |                                                                 |             | SignalP (SIGNALP)                                            |
|                           |                                                                            | 0  |                                                                                                                                                                       |                                                                 |             | -                                                            |
| Caenorhabditis briggsae   | briggsae cbr-unc-45 protein                                                | 1  | F:GO:0005488                                                                                                                                                          | -                                                               |             | -                                                            |
| Homo sapiens              | diazepam-binding protein                                                   | 5  | F:GO:0030156;<br>C:GO:0016021;<br>C:GO:0005739;<br>P:GO:0006810;<br>F:GO:0000062                                                                                      | -                                                               |             | IPR000582; IPR014352; IPR022408;<br>PTHR23310:SF12 (PANTHER) |
|                           |                                                                            | 0  |                                                                                                                                                                       |                                                                 |             | -                                                            |
|                           |                                                                            | 0  |                                                                                                                                                                       |                                                                 |             | -                                                            |
|                           |                                                                            | 0  |                                                                                                                                                                       |                                                                 |             | IPR013032                                                    |
| Caenorhabditis elegans    | lethal family member (let-805)                                             | 8  | P:GO:0018996;<br>P:GO:0009792;<br>P:GO:0008340;<br>P:GO:0000003;<br>F:GO:0005515;<br>P:GO:0006898;<br>P:GO:0002119;<br>P:GO:0040011                                   | -                                                               |             | -                                                            |
| Caenorhabditis briggsae   | peptidylprolyl isomerase d                                                 | 2  | P:GO:0009792;<br>P:GO:0019915                                                                                                                                         | -                                                               |             | -                                                            |
| Caenorhabditis elegans    | lipb_caeel ame: full=liprin-beta ame: full=lar-interacting<br>protein beta | 0  |                                                                                                                                                                       |                                                                 |             | -                                                            |

|                         |                                                                                  |   |                                                                                                                                                      |                                                |              |                                                                                                     |
|-------------------------|----------------------------------------------------------------------------------|---|------------------------------------------------------------------------------------------------------------------------------------------------------|------------------------------------------------|--------------|-----------------------------------------------------------------------------------------------------|
|                         | -                                                                                | 0 |                                                                                                                                                      |                                                |              | -                                                                                                   |
|                         | -                                                                                | 0 |                                                                                                                                                      |                                                |              | SignalP (SIGNALP)                                                                                   |
| Caenorhabditis briggsae | patched family protein                                                           | 2 | F:GO:0008158;<br>C:GO:0016021                                                                                                                        | -                                              |              | IPR003392; PTHR10796 (PANTHER),<br>PTHR10796:SF14 (PANTHER), SignalP<br>(SIGNALP)                   |
|                         | -                                                                                | 0 |                                                                                                                                                      |                                                |              | -                                                                                                   |
| Caenorhabditis elegans  | choline ki-se a family member (cka-1)                                            | 6 | C:GO:0005887;<br>F:GO:0019904;<br>C:GO:0005938;<br>F:GO:0005069;<br>F:GO:0005080;<br>P:GO:0006612                                                    | -                                              |              | SignalP (SIGNALP)                                                                                   |
|                         | -                                                                                | 0 |                                                                                                                                                      |                                                |              | -                                                                                                   |
| Caenorhabditis elegans  | small g protein sig-ling modulator 1                                             | 3 | F:GO:0005097;<br>C:GO:0005622;<br>P:GO:0032313                                                                                                       | -                                              |              | IPR000195; G3DSA:1.10.8.270<br>(GENE3D), PTHR22957 (PANTHER),<br>PTHR22957:SF35 (PANTHER)           |
| Caenorhabditis elegans  | udp-n-acetylglucosamine-dolichyl-phosphate n-acetylglucosaminephosphotransferase | 7 | P:GO:0006487;<br>C:GO:0016021;<br>P:GO:0019408;<br>C:GO:0005792;<br>F:GO:0003975;<br>C:GO:0005789;<br>P:GO:0007040                                   | -                                              | EC:2.7.8.15  | IPR000715; PTHR10571 (PANTHER),<br>SignalP (SIGNALP)                                                |
| Caenorhabditis elegans  | cathepsin b-like cysteine protei-se                                              | 9 | P:GO:0009792;<br>P:GO:0002119;<br>F:GO:0005515;<br>P:GO:0040011;<br>F:GO:0004197;<br>P:GO:0040007;<br>P:GO:0006898;<br>P:GO:0006508;<br>P:GO:0050790 | -                                              | EC:3.4.22.0  | IPR000169; IPR000668; IPR013128;<br>IPR015643; G3DSA:3.90.70.10<br>(GENE3D), SSF54001 (SUPERFAMILY) |
| Caenorhabditis elegans  | elegans protein partially confirmed by transcript evidence                       | 1 | F:GO:0016787                                                                                                                                         | -                                              |              | IPR015868; PTHR12544:SF3<br>(PANTHER)                                                               |
|                         | -                                                                                | 0 |                                                                                                                                                      |                                                |              | -                                                                                                   |
|                         | -                                                                                | 0 |                                                                                                                                                      |                                                |              | SignalP (SIGNALP)                                                                                   |
| Caenorhabditis elegans  | uncoordi-ted family member (unc-89)                                              | 0 |                                                                                                                                                      |                                                |              | -                                                                                                   |
| Caenorhabditis elegans  | calcium atpase                                                                   | 5 | F:GO:0005388;<br>C:GO:0016021;<br>P:GO:0006754;<br>F:GO:0005524;<br>P:GO:0006816                                                                     | -                                              | EC:3.6.3.8   | IPR006068; G3DSA:1.20.1110.10<br>(GENE3D), SignalP (SIGNALP)                                        |
| Caenorhabditis elegans  | hypothetical protein Y71H2AM.7 [Caenorhabditis elegans]                          | 0 |                                                                                                                                                      |                                                |              | -                                                                                                   |
| synthetic construct     | defender against cell death 1                                                    | 8 | C:GO:0008250;<br>P:GO:0018279;<br>C:GO:0016021;<br>P:GO:0007584;<br>P:GO:0006916;<br>P:GO:0001824;<br>P:GO:0042493;<br>F:GO:0004579                  | -                                              | EC:2.4.1.119 | -                                                                                                   |
|                         | -                                                                                | 0 |                                                                                                                                                      |                                                |              | -                                                                                                   |
|                         | -                                                                                | 0 |                                                                                                                                                      |                                                |              | -                                                                                                   |
|                         | -                                                                                | 0 |                                                                                                                                                      |                                                |              | -                                                                                                   |
| Caenorhabditis elegans  | cwf19-like cell cycle control ( pombe)                                           | 0 |                                                                                                                                                      | F:GO:0003674;<br>F:GO:0003824;<br>P:GO:0008150 |              | IPR006768; PTHR12072 (PANTHER)                                                                      |
| Loa loa                 | hypothetical protein LOAG_05100 [Loa loa]                                        | 0 |                                                                                                                                                      |                                                |              | -                                                                                                   |

|                         |                                                                |   |                                                                                                                                     |   |                                                                                                 |
|-------------------------|----------------------------------------------------------------|---|-------------------------------------------------------------------------------------------------------------------------------------|---|-------------------------------------------------------------------------------------------------|
|                         | -                                                              | 0 |                                                                                                                                     |   | SignalP (SIGNALP)                                                                               |
| Bos taurus              | hydroxysteroid (17-beta) dehydroge-se 11                       | 8 | C:GO:0005737;<br>P:GO:0006694;<br>F:GO:0005488;<br>F:GO:0004303;<br>P:GO:0055114;<br>C:GO:0005576;<br>C:GO:0005634;<br>P:GO:0006710 | - | EC:1.1.1.62<br><br>IPR002198; IPR016040;<br>PTHR19410:SF36 (PANTHER),<br>SSF51735 (SUPERFAMILY) |
| Caenorhabditis elegans  | elegans protein partially confirmed by transcript evidence     | 0 |                                                                                                                                     |   | -                                                                                               |
| Caenorhabditis briggsae | atp-dependent r- helicase                                      | 5 | F:GO:0003676;<br>F:GO:0005524;<br>C:GO:0005622;<br>F:GO:0008270;<br>F:GO:0008026                                                    | - | -                                                                                               |
| Caenorhabditis briggsae | prolyl 4-hydroxylase                                           | 6 | F:GO:0031418;<br>F:GO:0005506;<br>F:GO:0004656;<br>P:GO:0055114;<br>F:GO:0016702;<br>C:GO:0005783                                   | - | EC:1.14.11.2<br>;<br>EC:1.13.11.0<br><br>PTHR10869 (PANTHER),<br>PTHR10869:SF13 (PANTHER)       |
| Caenorhabditis briggsae | tetratricopeptide repeat protein 39b                           | 1 | F:GO:0005488                                                                                                                        | - | IPR019412                                                                                       |
| Brugia malayi           | sphingosine ki-se 1                                            | 4 | F:GO:0005488;<br>P:GO:0006665;<br>P:GO:0016310;<br>F:GO:0017050                                                                     | - | PTHR12358 (PANTHER),<br>PTHR12358:SF9 (PANTHER)                                                 |
|                         | -                                                              | 0 |                                                                                                                                     |   | -                                                                                               |
|                         | -                                                              | 0 |                                                                                                                                     |   | SignalP (SIGNALP)                                                                               |
| Caenorhabditis briggsae | smooth muscle myosin heavy chain 11 isoform sm1-like isoform 1 | 0 |                                                                                                                                     |   | IPR019348; PTHR21448 (PANTHER)                                                                  |
|                         | -                                                              | 0 |                                                                                                                                     |   | -                                                                                               |
|                         | -                                                              | 0 |                                                                                                                                     |   | -                                                                                               |
| Homo sapiens            | protein s100-a10                                               | 5 | C:GO:0005783;<br>P:GO:0007165;<br>F:GO:0005102;<br>F:GO:0005509;<br>P:GO:0045595                                                    | - | SignalP (SIGNALP)                                                                               |
|                         | -                                                              | 0 |                                                                                                                                     |   | IPR001304; IPR016186; IPR016187;<br>PTHR22802 (PANTHER),<br>PTHR22802:SF7 (PANTHER)             |
|                         | -                                                              | 0 |                                                                                                                                     |   | -                                                                                               |
| Caenorhabditis briggsae | elegans protein confirmed by transcript evidence               | 3 | P:GO:0006637;<br>F:GO:0016290;<br>F:GO:0005515                                                                                      | - | EC:3.1.2.2<br><br>IPR014940; G3DSA:3.40.50.1820<br>(GENE3D), SSF53474 (SUPERFAMILY)             |
|                         | -                                                              | 0 |                                                                                                                                     |   | -                                                                                               |
|                         | -                                                              | 0 |                                                                                                                                     |   | -                                                                                               |
|                         | -                                                              | 0 |                                                                                                                                     |   | IPR001304; IPR016186; IPR016187;<br>PTHR10499 (PANTHER),<br>PTHR10499:SF13 (PANTHER)            |
|                         | -                                                              | 0 |                                                                                                                                     |   | SignalP (SIGNALP)                                                                               |
|                         | -                                                              | 0 |                                                                                                                                     |   | SignalP (SIGNALP)                                                                               |
|                         | -                                                              | 0 |                                                                                                                                     |   | -                                                                                               |
|                         | -                                                              | 0 |                                                                                                                                     |   | -                                                                                               |
|                         | -                                                              | 0 |                                                                                                                                     |   | SignalP (SIGNALP)                                                                               |
|                         | -                                                              | 0 |                                                                                                                                     |   | -                                                                                               |

|                             |                                                            |    |                                                                                                                                                                                        |                               |                                                         |                                                                                                                                      |
|-----------------------------|------------------------------------------------------------|----|----------------------------------------------------------------------------------------------------------------------------------------------------------------------------------------|-------------------------------|---------------------------------------------------------|--------------------------------------------------------------------------------------------------------------------------------------|
| Pongo abelii                | t-complex protein 1 subunit epsilon                        | 7  | C:GO:0005730;<br>P:GO:0006457;<br>C:GO:0005815;<br>C:GO:0005832;<br>F:GO:0005524;<br>F:GO:0051082;<br>P:GO:0009615                                                                     | -                             |                                                         | IPR002423; IPR012718;<br>G3DSA:3.30.260.10 (GENE3D),<br>SSF54849 (SUPERFAMILY)                                                       |
|                             | -                                                          | 0  |                                                                                                                                                                                        |                               |                                                         | -                                                                                                                                    |
|                             | -                                                          | 0  |                                                                                                                                                                                        |                               |                                                         | -                                                                                                                                    |
| Caenorhabditis elegans      | ef hand family protein                                     | 0  |                                                                                                                                                                                        | F:GO:0005509;<br>P:GO:0009792 |                                                         | SignalP (SIGNALP)                                                                                                                    |
| Macaca mulatta              | acidic coiled-coil containing protein 3                    | 11 | P:GO:0030953;<br>P:GO:0021987;<br>P:GO:0051726;<br>P:GO:0022008;<br>P:GO:0030097;<br>P:GO:0022027;<br>C:GO:0005813;<br>P:GO:0042994;<br>P:GO:0032886;<br>F:GO:0019904;<br>P:GO:0006950 | -                             |                                                         | SignalP (SIGNALP)                                                                                                                    |
|                             | -                                                          | 0  |                                                                                                                                                                                        |                               |                                                         | -                                                                                                                                    |
| Caenorhabditis briggsae     | elegans protein partially confirmed by transcript evidence | 3  | F:GO:0003723;<br>P:GO:0001522;<br>F:GO:0009982                                                                                                                                         | -                             | EC:5.4.99.12                                            | -                                                                                                                                    |
|                             | -                                                          | 0  |                                                                                                                                                                                        |                               |                                                         | SignalP (SIGNALP)                                                                                                                    |
| Caenorhabditis elegans      | integrator complex                                         | 6  | P:GO:0016180;<br>P:GO:0002119;<br>F:GO:0005515;<br>C:GO:0032039;<br>P:GO:0040011;<br>P:GO:0040015                                                                                      | -                             |                                                         | -                                                                                                                                    |
| Pongo abelii                | ras-related protein rab-1a                                 | 10 | C:GO:0005625;<br>F:GO:0005525;<br>C:GO:0005794;<br>P:GO:0032482;<br>P:GO:0006886;<br>C:GO:0005626;<br>P:GO:0006888;<br>C:GO:0005783;<br>C:GO:0043025;<br>F:GO:0003924                  | -                             | EC:3.6.5.1;<br>EC:3.6.5.2;<br>EC:3.6.5.3;<br>EC:3.6.5.4 | IPR013753; IPR020851;<br>G3DSA:3.40.50.300 (GENE3D),<br>PTHR11708 (PANTHER),<br>PTHR11708:SF302 (PANTHER),<br>SSF52540 (SUPERFAMILY) |
|                             | -                                                          | 0  |                                                                                                                                                                                        |                               |                                                         | -                                                                                                                                    |
|                             | -                                                          | 0  |                                                                                                                                                                                        |                               |                                                         | SignalP (SIGNALP)                                                                                                                    |
|                             | -                                                          | 0  |                                                                                                                                                                                        |                               |                                                         | -                                                                                                                                    |
|                             | -                                                          | 0  |                                                                                                                                                                                        |                               |                                                         | SignalP (SIGNALP)                                                                                                                    |
| Angiostrongylus cantonensis | elegans protein confirmed by transcript evidence           | 0  |                                                                                                                                                                                        |                               |                                                         | -                                                                                                                                    |
| Caenorhabditis elegans      | mgc80946 protein                                           | 10 | F:GO:0004872;<br>F:GO:0004715;<br>P:GO:0016032;<br>F:GO:0005515;<br>P:GO:0018108;<br>F:GO:0005524;<br>C:GO:0016021;<br>C:GO:0019028;<br>F:GO:0004674;<br>F:GO:0005198                  | -                             | EC:2.7.10.2;<br>EC:2.7.11.0                             | IPR000719; IPR001245; IPR008266;<br>IPR011009; IPR020685; IPR020764;<br>G3DSA:1.10.510.10 (GENE3D)                                   |

|                         |                                                       |    |                                                                                                                                                                                                                                                                             |                                                                                                                                     |                                                                                                                                                                                                                                 |
|-------------------------|-------------------------------------------------------|----|-----------------------------------------------------------------------------------------------------------------------------------------------------------------------------------------------------------------------------------------------------------------------------|-------------------------------------------------------------------------------------------------------------------------------------|---------------------------------------------------------------------------------------------------------------------------------------------------------------------------------------------------------------------------------|
|                         | -                                                     | 0  |                                                                                                                                                                                                                                                                             |                                                                                                                                     | SignalP (SIGNALP)                                                                                                                                                                                                               |
| Loa loa                 | elegans protein confirmed by transcript evidence      | 0  |                                                                                                                                                                                                                                                                             | C:GO:0016021;<br>P:GO:0055085;<br>P:GO:0019915;<br>P:GO:0006810                                                                     | PTHR11662 (PANTHER),<br>PTHR11662:SF17 (PANTHER), SignalP<br>(SIGNALP)                                                                                                                                                          |
|                         | -                                                     | 0  |                                                                                                                                                                                                                                                                             |                                                                                                                                     | IPR003094; IPR013079;<br>G3DSA:3.40.50.300 (GENE3D),<br>SSF52540 (SUPERFAMILY)                                                                                                                                                  |
| Caenorhabditis briggsae | pmr-type golgi atpase family member (pmr-1)           | 16 | F:GO:0004871;<br>F:GO:0030145;<br>P:GO:0016339;<br>C:GO:0005802;<br>P:GO:0008544;<br>C:GO:0000139;<br>P:GO:0030026;<br>F:GO:0015410;<br>P:GO:0032468;<br>F:GO:0005509;<br>P:GO:0043123;<br>P:GO:0032472;<br>F:GO:0005388;<br>P:GO:0031532;<br>F:GO:0005524;<br>P:GO:0006828 | -                                                                                                                                   | EC:3.6.3.35;<br>EC:3.6.3.8<br><br>IPR001757; IPR005834; IPR006069;<br>IPR018303; G3DSA:3.40.1110.10<br>(GENE3D), G3DSA:3.40.50.1000<br>(GENE3D), PTHR11939:SF87<br>(PANTHER), SSF56784 (SUPERFAMILY),<br>SSF81660 (SUPERFAMILY) |
| Brugia malayi           | integrator complex subunit 6                          | 0  |                                                                                                                                                                                                                                                                             |                                                                                                                                     | PTHR12957 (PANTHER),<br>PTHR12957:SF2 (PANTHER)                                                                                                                                                                                 |
|                         | -                                                     | 0  |                                                                                                                                                                                                                                                                             |                                                                                                                                     | -                                                                                                                                                                                                                               |
|                         | -                                                     | 0  |                                                                                                                                                                                                                                                                             |                                                                                                                                     | -                                                                                                                                                                                                                               |
|                         | -                                                     | 0  |                                                                                                                                                                                                                                                                             |                                                                                                                                     | -                                                                                                                                                                                                                               |
|                         | -                                                     | 0  |                                                                                                                                                                                                                                                                             |                                                                                                                                     | -                                                                                                                                                                                                                               |
|                         | -                                                     | 0  |                                                                                                                                                                                                                                                                             |                                                                                                                                     | -                                                                                                                                                                                                                               |
|                         | -                                                     | 0  |                                                                                                                                                                                                                                                                             |                                                                                                                                     | -                                                                                                                                                                                                                               |
|                         | -                                                     | 0  |                                                                                                                                                                                                                                                                             |                                                                                                                                     | -                                                                                                                                                                                                                               |
| Loa loa                 | helicase conserved c-term-I domain containing protein | 0  |                                                                                                                                                                                                                                                                             | P:GO:0006260;<br>F:GO:0003676;<br>F:GO:0004386;<br>F:GO:0005524;<br>F:GO:0003887;<br>F:GO:0016787;<br>F:GO:0003677;<br>F:GO:0008026 | PTHR11752 (PANTHER),<br>PTHR11752:SF3 (PANTHER)                                                                                                                                                                                 |
| Caenorhabditis briggsae | elegans protein confirmed by transcript evidence      | 0  |                                                                                                                                                                                                                                                                             | F:GO:0003723;<br>F:GO:0008168;<br>P:GO:0006396;<br>F:GO:0008173;<br>F:GO:0005515                                                    | IPR003582; PTHR21724 (PANTHER)                                                                                                                                                                                                  |
|                         | -                                                     | 0  |                                                                                                                                                                                                                                                                             |                                                                                                                                     | SignalP (SIGNALP)                                                                                                                                                                                                               |
|                         | -                                                     | 0  |                                                                                                                                                                                                                                                                             |                                                                                                                                     | SignalP (SIGNALP)                                                                                                                                                                                                               |
|                         | -                                                     | 0  |                                                                                                                                                                                                                                                                             |                                                                                                                                     | -                                                                                                                                                                                                                               |
| Caenorhabditis elegans  | glycosylation related family member (gly-11)          | 4  | C:GO:0016021;<br>C:GO:0005794;<br>F:GO:0016757;<br>F:GO:0005529                                                                                                                                                                                                             | -                                                                                                                                   | IPR001173; G3DSA:3.90.550.10<br>(GENE3D), PTHR11675 (PANTHER),<br>SSF53448 (SUPERFAMILY)                                                                                                                                        |
|                         | -                                                     | 0  |                                                                                                                                                                                                                                                                             |                                                                                                                                     | -                                                                                                                                                                                                                               |
|                         | -                                                     | 0  |                                                                                                                                                                                                                                                                             |                                                                                                                                     | -                                                                                                                                                                                                                               |
|                         | -                                                     | 0  |                                                                                                                                                                                                                                                                             |                                                                                                                                     | -                                                                                                                                                                                                                               |

|                         |                                                            |  |                                                                                                                                                                                                            |   |             |                                                                                          |
|-------------------------|------------------------------------------------------------|--|------------------------------------------------------------------------------------------------------------------------------------------------------------------------------------------------------------|---|-------------|------------------------------------------------------------------------------------------|
| Caenorhabditis elegans  | steroid receptor-interacting snf2 domain                   |  | F:GO:0004386;<br>F:GO:0003677;<br>5 F:GO:0005515;<br>F:GO:0005524;<br>C:GO:0016021                                                                                                                         | - |             | IPR000330; PTHR10799 (PANTHER),<br>PTHR10799:SF51 (PANTHER)                              |
|                         | -                                                          |  | 0                                                                                                                                                                                                          |   |             | -                                                                                        |
|                         | -                                                          |  | 0                                                                                                                                                                                                          |   |             | -                                                                                        |
|                         | -                                                          |  | 0                                                                                                                                                                                                          |   |             | SignalP (SIGNALP)                                                                        |
| Homo sapiens            | phosphohistidine phosphatase 1                             |  | P:GO:0016311;<br>F:GO:0004721;<br>4 C:GO:0005829;<br>F:GO:0008969                                                                                                                                          | - | EC:3.1.3.16 | IPR007702; SSF143724 (SUPERFAMILY)                                                       |
|                         | -                                                          |  | 0                                                                                                                                                                                                          |   |             | -                                                                                        |
|                         | -                                                          |  | 0                                                                                                                                                                                                          |   |             | -                                                                                        |
|                         | -                                                          |  | 0                                                                                                                                                                                                          |   |             | -                                                                                        |
|                         | -                                                          |  | 0                                                                                                                                                                                                          |   |             | -                                                                                        |
| Caenorhabditis briggsae | briggsae cbr-bch-1 protein                                 |  | F:GO:0008026;<br>3 F:GO:0000166;<br>P:GO:0010569                                                                                                                                                           | - |             | IPR002464; IPR010614; IPR014013;<br>PTHR11472 (PANTHER),<br>PTHR11472:SF4 (PANTHER)      |
|                         | -                                                          |  | 0                                                                                                                                                                                                          |   |             | -                                                                                        |
|                         | -                                                          |  | 0                                                                                                                                                                                                          |   |             | -                                                                                        |
| Loa loa                 | tnni3 interacting ki-se                                    |  | F:GO:0005488;<br>2 F:GO:0016301                                                                                                                                                                            | - |             | IPR002110; IPR020683; PTHR23257<br>(PANTHER), PTHR23257:SF6<br>(PANTHER)                 |
|                         | -                                                          |  | 0                                                                                                                                                                                                          |   |             | SignalP (SIGNALP)                                                                        |
|                         | -                                                          |  | 0                                                                                                                                                                                                          |   |             | -                                                                                        |
|                         | -                                                          |  | 0                                                                                                                                                                                                          |   |             | -                                                                                        |
|                         | -                                                          |  | 0                                                                                                                                                                                                          |   |             | -                                                                                        |
|                         | -                                                          |  | 0                                                                                                                                                                                                          |   |             | -                                                                                        |
|                         | -                                                          |  | 0                                                                                                                                                                                                          |   |             | -                                                                                        |
|                         | -                                                          |  | 0                                                                                                                                                                                                          |   |             | -                                                                                        |
|                         | -                                                          |  | 0                                                                                                                                                                                                          |   |             | -                                                                                        |
| Caenorhabditis elegans  | hypothetical protein F40H3.1 [Caenorhabditis elegans]      |  | 1 F:GO:0005515                                                                                                                                                                                             | - |             | -                                                                                        |
|                         | -                                                          |  | 0                                                                                                                                                                                                          |   |             | -                                                                                        |
| Caenorhabditis elegans  | ferm domain ( -ezrin-radixin-moesin) family member (frm-8) |  | 1 F:GO:0005515                                                                                                                                                                                             | - |             | IPR001478; G3DSA:2.30.42.10<br>(GENE3D), PTHR13436 (PANTHER),<br>PTHR13436:SF6 (PANTHER) |
|                         | -                                                          |  | 0                                                                                                                                                                                                          |   |             | -                                                                                        |
| Caenorhabditis briggsae | briggsae cbr-rev-1 protein                                 |  | P:GO:0009792;<br>4 P:GO:0040010;<br>P:GO:0006898;<br>P:GO:0006974                                                                                                                                          | - |             | IPR001126; IPR017963;<br>PTHR11076:SF13 (PANTHER)                                        |
|                         | -                                                          |  | 0                                                                                                                                                                                                          |   |             | -                                                                                        |
| Macaca mulatta          | heterogeneous nuclear ribonucleoprotein a3                 |  | 12 C:GO:0005737;<br>C:GO:0005730;<br>P:GO:0008380;<br>C:GO:0030530;<br>F:GO:0003729;<br>F:GO:0051033;<br>C:GO:0005681;<br>F:GO:0005515;<br>P:GO:0055085;<br>P:GO:0051028;<br>P:GO:0006397;<br>F:GO:0000166 | - |             | PTHR10432 (PANTHER),<br>PTHR10432:SF13 (PANTHER)                                         |
| Caenorhabditis briggsae | spingomyelin synthetase                                    |  | 2 F:GO:0016740;<br>C:GO:0016021                                                                                                                                                                            | - |             | PTHR21290 (PANTHER),<br>PTHR21290:SF4 (PANTHER), SignalP<br>(SIGNALP)                    |

|                               |                                                      |    |                                                                                                                                                                                                                                                                                                                                                                                                                                                                                         |                                                                                  |            |                   |
|-------------------------------|------------------------------------------------------|----|-----------------------------------------------------------------------------------------------------------------------------------------------------------------------------------------------------------------------------------------------------------------------------------------------------------------------------------------------------------------------------------------------------------------------------------------------------------------------------------------|----------------------------------------------------------------------------------|------------|-------------------|
| Loa loa                       | condensin-2 complex subunit h2                       | 0  |                                                                                                                                                                                                                                                                                                                                                                                                                                                                                         | C:GO:0005694;<br>P:GO:0030261;<br>F:GO:0003674;<br>C:GO:0005634;<br>C:GO:0005575 |            | IPR009378         |
|                               | -                                                    | 0  |                                                                                                                                                                                                                                                                                                                                                                                                                                                                                         |                                                                                  |            | SignalP (SIGNALP) |
| Caenorhabditis elegans        | inositol triphosphate receptor family member (itr-1) | 4  | F:GO:0004872;<br>F:GO:0005262;<br>P:GO:0006811;<br>C:GO:0016020                                                                                                                                                                                                                                                                                                                                                                                                                         | -                                                                                |            | -                 |
| Brugia malayi                 | leucyl-tr- synthetase                                | 3  | F:GO:0004812;<br>P:GO:0006418;<br>F:GO:0000166                                                                                                                                                                                                                                                                                                                                                                                                                                          | -                                                                                |            | -                 |
|                               | -                                                    | 0  |                                                                                                                                                                                                                                                                                                                                                                                                                                                                                         |                                                                                  |            | -                 |
|                               | -                                                    | 0  |                                                                                                                                                                                                                                                                                                                                                                                                                                                                                         |                                                                                  |            | -                 |
|                               | -                                                    | 0  |                                                                                                                                                                                                                                                                                                                                                                                                                                                                                         |                                                                                  |            | SignalP (SIGNALP) |
|                               | -                                                    | 0  |                                                                                                                                                                                                                                                                                                                                                                                                                                                                                         |                                                                                  |            | -                 |
|                               | -                                                    | 0  |                                                                                                                                                                                                                                                                                                                                                                                                                                                                                         |                                                                                  |            | -                 |
|                               | -                                                    | 0  |                                                                                                                                                                                                                                                                                                                                                                                                                                                                                         |                                                                                  |            | -                 |
| Xenopus (Silurana) tropicalis | heavy chain non-muscle                               | 44 | F:GO:0001295;<br>C:GO:0030863;<br>P:GO:0008360;<br>C:GO:0031594;<br>P:GO:0030048;<br>F:GO:0030898;<br>P:GO:0051295;<br>C:GO:0005913;<br>P:GO:0016337;<br>F:GO:0043531;<br>P:GO:0032796;<br>P:GO:0015031;<br>C:GO:0001772;<br>P:GO:0050900;<br>P:GO:0007229;<br>C:GO:0005829;<br>P:GO:0007520;<br>F:GO:0000146;<br>P:GO:0006509;<br>P:GO:0043534;<br>C:GO:0008305;<br>C:GO:0005819;<br>C:GO:0001726;<br>P:GO:0007132;<br>F:GO:0005391;<br>C:GO:0032154;<br>P:GO:0000904;<br>P:GO:0001768 | -                                                                                | EC:3.6.3.9 | -                 |



|                         |                                                                  |    |                                                                                                                                                                                                                                                                                                                                |   |                                                                     |
|-------------------------|------------------------------------------------------------------|----|--------------------------------------------------------------------------------------------------------------------------------------------------------------------------------------------------------------------------------------------------------------------------------------------------------------------------------|---|---------------------------------------------------------------------|
| Caenorhabditis briggsae | interferon-induced helicase c domain-containing protein 1        | 0  | F:GO:0004386;<br>P:GO:0009615;<br>F:GO:0003723;<br>F:GO:0016787;<br>F:GO:0003677;<br>C:GO:0005634;<br>F:GO:0003676;<br>F:GO:0005524;<br>F:GO:0046872;<br>P:GO:0044419;<br>P:GO:0042981;<br>F:GO:0000166;<br>C:GO:0005737;<br>F:GO:0043021;<br>F:GO:0008270;<br>C:GO:0005622;<br>F:GO:0005515;<br>F:GO:0008026;<br>P:GO:0045087 |   | IPR021673; PTHR14074 (PANTHER)                                      |
| Macaca mulatta          | polymerase ii (d- directed) polypeptide                          | 12 | F:GO:0003899;<br>F:GO:0030275;<br>F:GO:0004672;<br>P:GO:0006367;<br>P:GO:0008380;<br>C:GO:0005665;<br>F:GO:0003677;<br>F:GO:0046983;<br>P:GO:0006368;<br>P:GO:0051056;<br>C:GO:0005666;<br>F:GO:0005096                                                                                                                        | - | EC:2.7.7.6 -                                                        |
| -                       | -                                                                | 0  |                                                                                                                                                                                                                                                                                                                                |   | -                                                                   |
| -                       | -                                                                | 0  |                                                                                                                                                                                                                                                                                                                                |   | -                                                                   |
| -                       | -                                                                | 0  |                                                                                                                                                                                                                                                                                                                                |   | -                                                                   |
| -                       | -                                                                | 0  |                                                                                                                                                                                                                                                                                                                                |   | G3DSA:2.40.10.10 (GENE3D)                                           |
| -                       | -                                                                | 0  |                                                                                                                                                                                                                                                                                                                                |   | -                                                                   |
| -                       | -                                                                | 0  |                                                                                                                                                                                                                                                                                                                                |   | IPR008906; IPR012337                                                |
| Homo sapiens            | -dh dehydroge-se                                                 | 14 | C:GO:0005654;<br>P:GO:0017148;<br>F:GO:0005515;<br>F:GO:0008137;<br>P:GO:0030262;<br>C:GO:0016021;<br>P:GO:0045892;<br>P:GO:0022900;<br>P:GO:0008624;<br>C:GO:0005747;<br>P:GO:0030308;<br>P:GO:0006606;<br>F:GO:0005524;<br>P:GO:0006800                                                                                      | - | EC:1.6.5.3 IPR009346                                                |
| Caenorhabditis elegans  | trp (transient receptor potential) channel family member (trp-2) | 5  | C:GO:0016021;<br>F:GO:0005262;<br>P:GO:0006816;<br>F:GO:0005515;<br>P:GO:0055085                                                                                                                                                                                                                                               | - | IPR002153; IPR005821; PTHR10117 (PANTHER), PTHR10117:SF10 (PANTHER) |
| -                       | -                                                                | 0  |                                                                                                                                                                                                                                                                                                                                |   | -                                                                   |
| Caenorhabditis elegans  | immunogenic protein 3                                            | 0  |                                                                                                                                                                                                                                                                                                                                |   | SignalP (SIGNALP)                                                   |

|                         |                                                             |    |                                                                                                                                                                                                                                                                                                                                                                                   |   |                                                                                                                                       |
|-------------------------|-------------------------------------------------------------|----|-----------------------------------------------------------------------------------------------------------------------------------------------------------------------------------------------------------------------------------------------------------------------------------------------------------------------------------------------------------------------------------|---|---------------------------------------------------------------------------------------------------------------------------------------|
|                         | -                                                           | 0  |                                                                                                                                                                                                                                                                                                                                                                                   |   | -                                                                                                                                     |
|                         | -                                                           | 0  |                                                                                                                                                                                                                                                                                                                                                                                   |   | -                                                                                                                                     |
|                         | -                                                           | 0  |                                                                                                                                                                                                                                                                                                                                                                                   |   | SignalP (SIGNALP)                                                                                                                     |
| Caenorhabditis briggsae | briggsae cbr-dhs-7 protein                                  | 3  | P:GO:0008152;<br>F:GO:0005488;<br>F:GO:0003824                                                                                                                                                                                                                                                                                                                                    | - | IPR002198; IPR002347; IPR016040;<br>PTHR19410:SF99 (PANTHER),<br>SSF51735 (SUPERFAMILY)                                               |
|                         | -                                                           | 0  |                                                                                                                                                                                                                                                                                                                                                                                   |   | -                                                                                                                                     |
|                         | -                                                           | 0  |                                                                                                                                                                                                                                                                                                                                                                                   |   | -                                                                                                                                     |
|                         | -                                                           | 0  |                                                                                                                                                                                                                                                                                                                                                                                   |   | -                                                                                                                                     |
|                         | -                                                           | 0  |                                                                                                                                                                                                                                                                                                                                                                                   |   | -                                                                                                                                     |
|                         | -                                                           | 0  |                                                                                                                                                                                                                                                                                                                                                                                   |   | -                                                                                                                                     |
| Caenorhabditis elegans  | d- repair and recombination protein rad54-like              | 5  | P:GO:0006915;<br>P:GO:0033554;<br>F:GO:0003676;<br>P:GO:0000003;<br>F:GO:0005515                                                                                                                                                                                                                                                                                                  | - | -                                                                                                                                     |
|                         | -                                                           | 0  |                                                                                                                                                                                                                                                                                                                                                                                   |   | -                                                                                                                                     |
|                         | -                                                           | 0  |                                                                                                                                                                                                                                                                                                                                                                                   |   | -                                                                                                                                     |
|                         | -                                                           | 0  |                                                                                                                                                                                                                                                                                                                                                                                   |   | SignalP (SIGNALP)                                                                                                                     |
| Caenorhabditis briggsae | cadherin domain containing protein                          | 6  | P:GO:0007218;<br>C:GO:0016021;<br>P:GO:0007156;<br>F:GO:0005509;<br>C:GO:0005886;<br>F:GO:0004930                                                                                                                                                                                                                                                                                 | - | IPR002126; IPR015919; IPR020894;<br>PTHR10596 (PANTHER),<br>PTHR10596:SF73 (PANTHER)                                                  |
| Caenorhabditis elegans  | hypothetical protein C29A12.6 [Caenorhabditis elegans]      | 0  |                                                                                                                                                                                                                                                                                                                                                                                   |   | G3DSA:3.40.50.410 (GENE3D)                                                                                                            |
|                         | -                                                           | 0  |                                                                                                                                                                                                                                                                                                                                                                                   |   | -                                                                                                                                     |
| Homo sapiens            | calmodulin 2                                                | 22 | P:GO:0060316;<br>C:GO:0005654;<br>P:GO:0010880;<br>F:GO:0031996;<br>F:GO:0031997;<br>P:GO:0060315;<br>P:GO:0051592;<br>P:GO:0018298;<br>F:GO:0005509;<br>P:GO:0006936;<br>P:GO:0032465;<br>P:GO:0006091;<br>C:GO:0005576;<br>C:GO:0005829;<br>F:GO:0019904;<br>C:GO:0005813;<br>F:GO:0031432;<br>P:GO:0007186;<br>C:GO:0005876;<br>C:GO:0005886;<br>C:GO:0000922;<br>P:GO:0008218 | - | IPR002048; IPR011992; IPR018247;<br>IPR018248; IPR018249; PTHR23050<br>(PANTHER), PTHR23050:SF20<br>(PANTHER), SSF47473 (SUPERFAMILY) |
|                         | -                                                           | 0  |                                                                                                                                                                                                                                                                                                                                                                                   |   | -                                                                                                                                     |
|                         | -                                                           | 0  |                                                                                                                                                                                                                                                                                                                                                                                   |   | SignalP (SIGNALP)                                                                                                                     |
| Caenorhabditis briggsae | ribonucleases p mrp protein subunit pop1 containing protein | 7  | P:GO:0009792;<br>P:GO:0010171;<br>P:GO:0002119;<br>P:GO:0040010;<br>P:GO:0000003;<br>P:GO:0006898;<br>P:GO:0006396                                                                                                                                                                                                                                                                | - | IPR009723                                                                                                                             |

|                        |                                                        |    |                                                                                                                                                                                                         |                                                                                                   |             |                                                                                    |
|------------------------|--------------------------------------------------------|----|---------------------------------------------------------------------------------------------------------------------------------------------------------------------------------------------------------|---------------------------------------------------------------------------------------------------|-------------|------------------------------------------------------------------------------------|
|                        | -                                                      | 0  |                                                                                                                                                                                                         |                                                                                                   |             | -                                                                                  |
| Caenorhabditis elegans | briggsae cbr-pqn-39 protein                            | 0  |                                                                                                                                                                                                         |                                                                                                   |             | -                                                                                  |
| Homo sapiens           | cathepsin d                                            | 9  | P:GO:0000045;<br>C:GO:0005615;<br>C:GO:0031012;<br>C:GO:0005764;<br>F:GO:0004190;<br>C:GO:0042470;<br>P:GO:0008219;<br>P:GO:0006508;<br>C:GO:0005739                                                    | -                                                                                                 | EC:3.4.23.0 | IPR012848                                                                          |
|                        | -                                                      | 0  |                                                                                                                                                                                                         |                                                                                                   |             | -                                                                                  |
| Caenorhabditis elegans | elegans protein confirmed by transcript evidence       | 0  |                                                                                                                                                                                                         |                                                                                                   |             | SignalP (SIGNALP)                                                                  |
|                        | -                                                      | 0  |                                                                                                                                                                                                         |                                                                                                   |             | -                                                                                  |
|                        | -                                                      | 0  |                                                                                                                                                                                                         |                                                                                                   |             | -                                                                                  |
|                        | -                                                      | 0  |                                                                                                                                                                                                         |                                                                                                   |             | -                                                                                  |
|                        | -                                                      | 0  |                                                                                                                                                                                                         |                                                                                                   |             | -                                                                                  |
|                        | -                                                      | 0  |                                                                                                                                                                                                         |                                                                                                   |             | -                                                                                  |
|                        | -                                                      | 0  |                                                                                                                                                                                                         |                                                                                                   |             | -                                                                                  |
|                        | -                                                      | 0  |                                                                                                                                                                                                         |                                                                                                   |             | SignalP (SIGNALP)                                                                  |
| Caenorhabditis elegans | cleavage stimulation factor subunit 2 tau variant-like | 4  | C:GO:0005622;<br>P:GO:0009792;<br>F:GO:0000166;<br>F:GO:0003723                                                                                                                                         | -                                                                                                 |             | IPR000504; IPR012677; IPR015465;<br>PTHR10432 (PANTHER), SSF54928<br>(SUPERFAMILY) |
|                        | -                                                      | 0  |                                                                                                                                                                                                         |                                                                                                   |             | -                                                                                  |
|                        | -                                                      | 0  |                                                                                                                                                                                                         |                                                                                                   |             | -                                                                                  |
|                        | -                                                      | 0  |                                                                                                                                                                                                         |                                                                                                   |             | SignalP (SIGNALP)                                                                  |
|                        | -                                                      | 0  |                                                                                                                                                                                                         |                                                                                                   |             | -                                                                                  |
|                        | -                                                      | 0  |                                                                                                                                                                                                         |                                                                                                   |             | SignalP (SIGNALP)                                                                  |
|                        | -                                                      | 0  |                                                                                                                                                                                                         |                                                                                                   |             | SignalP (SIGNALP)                                                                  |
| Caenorhabditis elegans | g in family member (glb-26)                            | 0  |                                                                                                                                                                                                         | F:GO:0005344;<br>F:GO:0020037;<br>F:GO:0019825;<br>P:GO:0015671;<br>F:GO:0005506;<br>P:GO:0006810 |             | IPR012292                                                                          |
|                        | -                                                      | 0  |                                                                                                                                                                                                         |                                                                                                   |             | -                                                                                  |
| Homo sapiens           | alpha-2-macroglobulin precursor                        | 12 | F:GO:0004867;<br>F:GO:0043120;<br>F:GO:0019966;<br>P:GO:0001869;<br>P:GO:0007584;<br>C:GO:0005615;<br>C:GO:0031093;<br>F:GO:0019959;<br>F:GO:0019899;<br>P:GO:0010037;<br>P:GO:0051384;<br>P:GO:0006953 | -                                                                                                 |             | -                                                                                  |
|                        | -                                                      | 0  |                                                                                                                                                                                                         |                                                                                                   |             | -                                                                                  |
| Caenorhabditis elegans | elegans protein confirmed by transcript evidence       | 4  | F:GO:0008270;<br>C:GO:0005622;<br>F:GO:0005515;<br>F:GO:0003677                                                                                                                                         | -                                                                                                 |             | -                                                                                  |

|                         |                                                              |    |                                                                                                                                                                                                                                           |                                                |                                                         |                                                                                                                                                                                                                        |
|-------------------------|--------------------------------------------------------------|----|-------------------------------------------------------------------------------------------------------------------------------------------------------------------------------------------------------------------------------------------|------------------------------------------------|---------------------------------------------------------|------------------------------------------------------------------------------------------------------------------------------------------------------------------------------------------------------------------------|
| Caenorhabditis elegans  | elegans protein confirmed by transcript evidence             | 4  | F:GO:0008270;<br>C:GO:0005622;<br>F:GO:0005515;<br>F:GO:0003677                                                                                                                                                                           | -                                              | -                                                       | -                                                                                                                                                                                                                      |
| Caenorhabditis elegans  | hypothetical kda protein in chromosome                       | 0  |                                                                                                                                                                                                                                           |                                                |                                                         | IPR019384; PTHR21705 (PANTHER)                                                                                                                                                                                         |
|                         | -                                                            | 0  |                                                                                                                                                                                                                                           |                                                |                                                         | -                                                                                                                                                                                                                      |
| Brugia malayi           | family protein                                               | 0  |                                                                                                                                                                                                                                           | P:GO:0006281;<br>F:GO:0003684;<br>F:GO:0003887 |                                                         | -                                                                                                                                                                                                                      |
|                         | -                                                            | 0  |                                                                                                                                                                                                                                           |                                                |                                                         | -                                                                                                                                                                                                                      |
| Caenorhabditis elegans  | ke (drosophila actin-binding) homolog family member (ketn-1) | 1  | P:GO:0000003                                                                                                                                                                                                                              | -                                              |                                                         | -                                                                                                                                                                                                                      |
|                         | -                                                            | 0  |                                                                                                                                                                                                                                           |                                                |                                                         | SignalP (SIGNALP)                                                                                                                                                                                                      |
|                         | -                                                            | 0  |                                                                                                                                                                                                                                           |                                                |                                                         | -                                                                                                                                                                                                                      |
| Caenorhabditis briggsae | solute carrier family member 9                               | 1  | C:GO:0016021                                                                                                                                                                                                                              | -                                              |                                                         | SignalP (SIGNALP)                                                                                                                                                                                                      |
|                         | -                                                            | 0  |                                                                                                                                                                                                                                           |                                                |                                                         | -                                                                                                                                                                                                                      |
|                         | -                                                            | 0  |                                                                                                                                                                                                                                           |                                                |                                                         | -                                                                                                                                                                                                                      |
|                         | -                                                            | 0  |                                                                                                                                                                                                                                           |                                                |                                                         | -                                                                                                                                                                                                                      |
| Caenorhabditis elegans  | d- polymerase alpha catalytic subunit                        | 7  | F:GO:0016779;<br>P:GO:0006281;<br>C:GO:0044427;<br>P:GO:0006261;<br>P:GO:0030154;<br>F:GO:0005515;<br>C:GO:0044428                                                                                                                        | -                                              | EC:2.7.7.0                                              | IPR004578; IPR006133; IPR006134;<br>IPR006172; IPR012337;<br>G3DSA:3.30.420.10 (GENE3D),<br>G3DSA:3.90.1600.10 (GENE3D),<br>PTHR10322 (PANTHER),<br>PTHR10322:SF3 (PANTHER), PF12254<br>(PFAM), SSF56672 (SUPERFAMILY) |
|                         | -                                                            | 0  |                                                                                                                                                                                                                                           |                                                |                                                         | -                                                                                                                                                                                                                      |
|                         | -                                                            | 0  |                                                                                                                                                                                                                                           |                                                |                                                         | -                                                                                                                                                                                                                      |
|                         | -                                                            | 0  |                                                                                                                                                                                                                                           |                                                |                                                         | -                                                                                                                                                                                                                      |
| Caenorhabditis briggsae | uncoordinated family member (unc-22)                         | 3  | P:GO:0006468;<br>F:GO:0005524;<br>F:GO:0004674                                                                                                                                                                                            | -                                              | EC:2.7.11.0                                             | IPR003961; IPR008957; IPR013783;<br>PR00014 (PRINTS), PTHR19900<br>(PANTHER), PTHR19900:SF7<br>(PANTHER)                                                                                                               |
|                         | -                                                            | 0  |                                                                                                                                                                                                                                           |                                                |                                                         | IPR000782                                                                                                                                                                                                              |
| Danio rerio             | selenocysteine-specific elongation factor                    | 3  | F:GO:0003924;<br>F:GO:0003746;<br>F:GO:0000166                                                                                                                                                                                            | -                                              | EC:3.6.5.1;<br>EC:3.6.5.2;<br>EC:3.6.5.3;<br>EC:3.6.5.4 | -                                                                                                                                                                                                                      |
| Homo sapiens            | gamma-secretase subunit pen-2                                | 14 | C:GO:0032580;<br>F:GO:0004175;<br>P:GO:0006509;<br>P:GO:0007219;<br>P:GO:0031293;<br>F:GO:0005515;<br>P:GO:0007220;<br>P:GO:0042987;<br>P:GO:0008624;<br>P:GO:0016485;<br>P:GO:0043066;<br>C:GO:0005789;<br>P:GO:0043085;<br>C:GO:0005887 | -                                              |                                                         | -                                                                                                                                                                                                                      |

|                                   |                                                                                       |   |                                                                                                                                                                                                                          |   |                                                                                                               |
|-----------------------------------|---------------------------------------------------------------------------------------|---|--------------------------------------------------------------------------------------------------------------------------------------------------------------------------------------------------------------------------|---|---------------------------------------------------------------------------------------------------------------|
| Loa loa                           | histidine acid phosphatase family protein                                             | 0 | C:GO:0030141;<br>P:GO:0016311;<br>C:GO:0016020;<br>C:GO:0005771;<br>F:GO:0016787;<br>C:GO:0045177;<br>F:GO:0003993;<br>C:GO:0005765;<br>C:GO:0005764;<br>C:GO:0005576;<br>F:GO:0033265;<br>P:GO:0008152;<br>C:GO:0031985 |   | IPR000560; G3DSA:3.40.50.1240 (GENE3D), PTHR11567 (PANTHER), PTHR11567:SF18 (PANTHER), SSF53254 (SUPERFAMILY) |
|                                   | -                                                                                     | 0 |                                                                                                                                                                                                                          |   | SignalP (SIGNALP)                                                                                             |
| Pongo abelii                      | glutamate n-methyl d-aspartate-associated protein 1 (glutamate binding) isoform cra_a | 3 | C:GO:0016021;<br>F:GO:0005261;<br>F:GO:0004872                                                                                                                                                                           | - | -                                                                                                             |
| Caenorhabditis elegans            | briggsae cbr-lnp-1 protein                                                            | 3 | P:GO:0032501;<br>P:GO:0009987;<br>C:GO:0016020                                                                                                                                                                           | - | IPR019273; PTHR22166 (PANTHER), PTHR22166:SF4 (PANTHER)                                                       |
|                                   | -                                                                                     | 0 |                                                                                                                                                                                                                          |   | -                                                                                                             |
|                                   | -                                                                                     | 0 |                                                                                                                                                                                                                          |   | -                                                                                                             |
|                                   | -                                                                                     | 0 |                                                                                                                                                                                                                          |   | -                                                                                                             |
|                                   | -                                                                                     | 0 |                                                                                                                                                                                                                          |   | -                                                                                                             |
| Brugia malayi                     | leucine rich repeat family protein                                                    | 1 | P:GO:0009792                                                                                                                                                                                                             | - | G3DSA:3.80.10.10 (GENE3D)                                                                                     |
|                                   | -                                                                                     | 0 |                                                                                                                                                                                                                          |   | -                                                                                                             |
|                                   | -                                                                                     | 0 |                                                                                                                                                                                                                          |   | -                                                                                                             |
|                                   | -                                                                                     | 0 |                                                                                                                                                                                                                          |   | -                                                                                                             |
|                                   | -                                                                                     | 0 |                                                                                                                                                                                                                          |   | -                                                                                                             |
| Eubacterium ventriosum ATCC 27560 | pg1 homology to homo sapiens                                                          | 4 | F:GO:0008686;<br>F:GO:0046872;<br>P:GO:0009231;<br>F:GO:0016853                                                                                                                                                          | - | EC:4.1.99.12 SignalP (SIGNALP)                                                                                |
| Pan troglodytes                   | ribosomal protein s17                                                                 | 7 | P:GO:0006413;<br>F:GO:0003735;<br>P:GO:0006364;<br>C:GO:0022627;<br>P:GO:0042274;<br>P:GO:0034101;<br>P:GO:0006414                                                                                                       | - | IPR001210; IPR018273; SSF116820 (SUPERFAMILY)                                                                 |
| Caenorhabditis elegans            | copine domain atypical protein isoform partially confirmed by transcript evidence     | 0 |                                                                                                                                                                                                                          |   | -                                                                                                             |
| Sorghum bicolor                   | 10 kda secreted protein                                                               | 0 |                                                                                                                                                                                                                          |   | -                                                                                                             |
|                                   | -                                                                                     | 0 |                                                                                                                                                                                                                          |   | -                                                                                                             |
|                                   | -                                                                                     | 0 |                                                                                                                                                                                                                          |   | -                                                                                                             |
|                                   | -                                                                                     | 0 |                                                                                                                                                                                                                          |   | -                                                                                                             |

|                         |                                                         |    |                                                                                                                                                                                                         |   |                             |                                                                                                                                            |
|-------------------------|---------------------------------------------------------|----|---------------------------------------------------------------------------------------------------------------------------------------------------------------------------------------------------------|---|-----------------------------|--------------------------------------------------------------------------------------------------------------------------------------------|
| Homo sapiens            | prolyl 4- beta polypeptide                              | 12 | F:GO:0003756;<br>F:GO:0004656;<br>C:GO:0005793;<br>P:GO:0045454;<br>C:GO:0009986;<br>C:GO:0042470;<br>C:GO:0005792;<br>C:GO:0005788;<br>F:GO:0005515;<br>P:GO:0018401;<br>C:GO:0005576;<br>C:GO:0005886 | - | EC:5.3.4.1;<br>EC:1.14.11.2 | IPR012335; IPR012336; IPR013766;<br>IPR017936; IPR017937; PTHR18929<br>(PANTHER)                                                           |
| Caenorhabditis briggsae | tr- (guanine-n -)-methyltransferase                     | 5  | P:GO:0009792;<br>P:GO:0006400;<br>F:GO:0008176;<br>C:GO:0005634;<br>F:GO:0000049                                                                                                                        | - | EC:2.1.1.33                 | IPR003358; PTHR23417 (PANTHER)                                                                                                             |
|                         |                                                         | 0  |                                                                                                                                                                                                         |   |                             |                                                                                                                                            |
| Macaca mulatta          | adenylate ki-se 2                                       | 6  | C:GO:0005758;<br>F:GO:0004017;<br>C:GO:0005743;<br>P:GO:0009165;<br>F:GO:0005524;<br>P:GO:0046083                                                                                                       | - | EC:2.7.4.3                  | IPR000850; G3DSA:3.40.50.300<br>(GENE3D), PTHR23359:SF22<br>(PANTHER)                                                                      |
|                         |                                                         | 0  |                                                                                                                                                                                                         |   |                             |                                                                                                                                            |
|                         |                                                         | 0  |                                                                                                                                                                                                         |   |                             |                                                                                                                                            |
| Onchocerca volvulus     | intermediate filament protein                           | 7  | P:GO:0009792;<br>P:GO:0010171;<br>P:GO:0002119;<br>P:GO:0018991;<br>F:GO:0005515;<br>P:GO:0040011;<br>P:GO:0040007                                                                                      | - |                             | IPR001322; IPR001664;<br>G3DSA:1.20.5.170 (GENE3D),<br>G3DSA:2.60.40.1260 (GENE3D),<br>PTHR23239:SF13 (PANTHER),<br>SSF74853 (SUPERFAMILY) |
| Caenorhabditis briggsae | Hypothetical protein CBG10738 [Caenorhabditis briggsae] | 3  | P:GO:0009792;<br>P:GO:0000003;<br>P:GO:0008340                                                                                                                                                          | - |                             | SignalP (SIGNALP)                                                                                                                          |
|                         |                                                         | 0  |                                                                                                                                                                                                         |   |                             |                                                                                                                                            |
|                         |                                                         | 0  |                                                                                                                                                                                                         |   |                             |                                                                                                                                            |
| Homo sapiens            | granulin                                                | 8  | C:GO:0005615;<br>P:GO:0050679;<br>F:GO:0008083;<br>F:GO:0005125;<br>P:GO:0007165;<br>C:GO:0005739;<br>P:GO:0007566;<br>P:GO:0001835                                                                     | - |                             | PTHR12274 (PANTHER)                                                                                                                        |
|                         |                                                         | 0  |                                                                                                                                                                                                         |   |                             |                                                                                                                                            |
| Caenorhabditis elegans  | briggsae cbr-cdh-1 protein                              | 5  | P:GO:0002119;<br>P:GO:0007155;<br>P:GO:0040010;<br>P:GO:0040011;<br>C:GO:0016020                                                                                                                        | - |                             |                                                                                                                                            |
|                         |                                                         | 0  |                                                                                                                                                                                                         |   |                             |                                                                                                                                            |
|                         |                                                         | 0  |                                                                                                                                                                                                         |   |                             |                                                                                                                                            |

|                        |                                                            |    |                                                                                                                                                                                                                                                            |   |             |                                                                       |
|------------------------|------------------------------------------------------------|----|------------------------------------------------------------------------------------------------------------------------------------------------------------------------------------------------------------------------------------------------------------|---|-------------|-----------------------------------------------------------------------|
| Caenorhabditis elegans | protein                                                    | 5  | C:GO:0016021;<br>C:GO:0030054;<br>C:GO:0045211;<br>F:GO:0005230;<br>P:GO:0006811                                                                                                                                                                           | - |             | IPR006201; IPR006202;<br>PTHR18945:SF9 (PANTHER)                      |
| Caenorhabditis elegans | inositol triphosphate receptor family member (itr-1)       | 12 | P:GO:0055085;<br>C:GO:0030659;<br>F:GO:0005488;<br>C:GO:0043234;<br>C:GO:0016021;<br>F:GO:0005220;<br>C:GO:0043232;<br>C:GO:0071212;<br>P:GO:0032501;<br>P:GO:0006816;<br>C:GO:0005635;<br>C:GO:0005783                                                    | - |             | -                                                                     |
| Caenorhabditis elegans | 6-phosphogluco-te decarboxylating                          | 15 | C:GO:0005625;<br>P:GO:0055114;<br>P:GO:0019322;<br>P:GO:0018996;<br>C:GO:0005792;<br>P:GO:0002119;<br>P:GO:0019521;<br>P:GO:0009051;<br>F:GO:0031406;<br>F:GO:0005515;<br>F:GO:0004616;<br>F:GO:0050661;<br>P:GO:0009792;<br>C:GO:0005737;<br>F:GO:0005529 | - | EC:1.1.1.44 | -                                                                     |
|                        | -                                                          | 0  |                                                                                                                                                                                                                                                            |   |             | -                                                                     |
|                        | -                                                          | 0  |                                                                                                                                                                                                                                                            |   |             | -                                                                     |
|                        | -                                                          | 0  |                                                                                                                                                                                                                                                            |   |             | -                                                                     |
|                        | -                                                          | 0  |                                                                                                                                                                                                                                                            |   |             | -                                                                     |
|                        | -                                                          | 0  |                                                                                                                                                                                                                                                            |   |             | -                                                                     |
| Caenorhabditis elegans | elegans protein partially confirmed by transcript evidence | 7  | P:GO:0009792;<br>P:GO:0010171;<br>F:GO:0005267;<br>P:GO:0040011;<br>P:GO:0006813;<br>C:GO:0016021;<br>P:GO:0019915                                                                                                                                         | - |             | -                                                                     |
|                        | -                                                          | 0  |                                                                                                                                                                                                                                                            |   |             | -                                                                     |
| Brugia malayi          | pdz domain containing protein                              | 5  | P:GO:0009792;<br>P:GO:0040007;<br>P:GO:0040035;<br>F:GO:0005515;<br>P:GO:0002119                                                                                                                                                                           | - |             | -                                                                     |
| Caenorhabditis elegans | briggsae cbr-acy-3 protein                                 | 2  | P:GO:0009190;<br>F:GO:0016849                                                                                                                                                                                                                              | - |             | PTHR11920 (PANTHER),<br>PTHR11920:SF6 (PANTHER), SignalP<br>(SIGNALP) |

|                         |                                                                           |    |                                                                                                                                                                                                                                                            |                               |                                                         |                                                                                                                                                                                        |
|-------------------------|---------------------------------------------------------------------------|----|------------------------------------------------------------------------------------------------------------------------------------------------------------------------------------------------------------------------------------------------------------|-------------------------------|---------------------------------------------------------|----------------------------------------------------------------------------------------------------------------------------------------------------------------------------------------|
| Macaca mulatta          | transcription intermediary factor 1-beta                                  | 15 | C:GO:0005654;<br>P:GO:0000122;<br>F:GO:0003714;<br>F:GO:0008270;<br>P:GO:0001837;<br>P:GO:0046777;<br>F:GO:0070087;<br>C:GO:0005719;<br>P:GO:0043193;<br>F:GO:0004672;<br>C:GO:0005730;<br>F:GO:0003713;<br>C:GO:0005720;<br>F:GO:0043565;<br>F:GO:0003700 |                               |                                                         | PTHR13712 (PANTHER),<br>PTHR13712:SF18 (PANTHER)                                                                                                                                       |
| Loa loa                 | eukaryotic translation initiation factor subunit structural gene x-linked | 14 | F:GO:0003743;<br>C:GO:0005829;<br>P:GO:0040010;<br>P:GO:0045948;<br>P:GO:0000003;<br>P:GO:0006184;<br>P:GO:0010171;<br>P:GO:0002119;<br>F:GO:0005515;<br>P:GO:0040011;<br>F:GO:0003924;<br>P:GO:0009792;<br>P:GO:0040018;<br>F:GO:0005525                  |                               | EC:3.6.5.1;<br>EC:3.6.5.2;<br>EC:3.6.5.3;<br>EC:3.6.5.4 | IPR004161; IPR009000; IPR009001;<br>IPR015256; G3DSA:2.40.30.10<br>(GENE3D), G3DSA:3.40.50.300<br>(GENE3D), PTHR23115 (PANTHER),<br>PTHR23115:SF9 (PANTHER), SSF52540<br>(SUPERFAMILY) |
| -                       | -                                                                         | 0  |                                                                                                                                                                                                                                                            |                               |                                                         | -                                                                                                                                                                                      |
| -                       | -                                                                         | 0  |                                                                                                                                                                                                                                                            |                               |                                                         | -                                                                                                                                                                                      |
| -                       | -                                                                         | 0  |                                                                                                                                                                                                                                                            |                               |                                                         | -                                                                                                                                                                                      |
| Caenorhabditis elegans  | rhodanese-like domain containing protein                                  | 0  |                                                                                                                                                                                                                                                            |                               |                                                         | IPR001763; PTHR11364 (PANTHER)                                                                                                                                                         |
| Caenorhabditis elegans  | endonuclease v                                                            | 1  | F:GO:0016787                                                                                                                                                                                                                                               |                               |                                                         | IPR007581; IPR016040                                                                                                                                                                   |
| Caenorhabditis briggsae | mboat family protein                                                      | 2  | C:GO:0016020;<br>F:GO:0016747                                                                                                                                                                                                                              |                               | EC:2.3.1.0                                              | PTHR13906 (PANTHER),<br>PTHR13906:SF5 (PANTHER), SignalP<br>(SIGNALP)                                                                                                                  |
| -                       | -                                                                         | 0  |                                                                                                                                                                                                                                                            |                               |                                                         | -                                                                                                                                                                                      |
| -                       | -                                                                         | 0  |                                                                                                                                                                                                                                                            |                               |                                                         | SignalP (SIGNALP)                                                                                                                                                                      |
| -                       | -                                                                         | 0  |                                                                                                                                                                                                                                                            |                               |                                                         | SignalP (SIGNALP)                                                                                                                                                                      |
| Caenorhabditis elegans  | phosphatidylinositol 4-ki-se alpha                                        | 7  | F:GO:0004428;<br>F:GO:0016773;<br>P:GO:0035118;<br>P:GO:0046854;<br>P:GO:0000003;<br>P:GO:0008219;<br>P:GO:0048015                                                                                                                                         |                               | EC:2.7.1.0                                              | -                                                                                                                                                                                      |
| -                       | -                                                                         | 0  |                                                                                                                                                                                                                                                            |                               |                                                         | SignalP (SIGNALP)                                                                                                                                                                      |
| -                       | -                                                                         | 0  |                                                                                                                                                                                                                                                            |                               |                                                         | -                                                                                                                                                                                      |
| -                       | -                                                                         | 0  |                                                                                                                                                                                                                                                            |                               |                                                         | SignalP (SIGNALP)                                                                                                                                                                      |
| -                       | -                                                                         | 0  |                                                                                                                                                                                                                                                            |                               |                                                         | -                                                                                                                                                                                      |
| -                       | -                                                                         | 0  |                                                                                                                                                                                                                                                            |                               |                                                         | -                                                                                                                                                                                      |
| Caenorhabditis elegans  | protein o-fucosyltransferase 1                                            | 0  |                                                                                                                                                                                                                                                            | F:GO:0008417;<br>P:GO:0006493 |                                                         | -                                                                                                                                                                                      |
| -                       | -                                                                         | 0  |                                                                                                                                                                                                                                                            |                               |                                                         | -                                                                                                                                                                                      |
| -                       | -                                                                         | 0  |                                                                                                                                                                                                                                                            |                               |                                                         | -                                                                                                                                                                                      |
| -                       | -                                                                         | 0  |                                                                                                                                                                                                                                                            |                               |                                                         | -                                                                                                                                                                                      |
| -                       | -                                                                         | 0  |                                                                                                                                                                                                                                                            |                               |                                                         | -                                                                                                                                                                                      |



|                               |                                                                                   |    |                                                                                                                                                                                        |                                                                                  |                                                                                                                                        |
|-------------------------------|-----------------------------------------------------------------------------------|----|----------------------------------------------------------------------------------------------------------------------------------------------------------------------------------------|----------------------------------------------------------------------------------|----------------------------------------------------------------------------------------------------------------------------------------|
|                               | -                                                                                 | 0  |                                                                                                                                                                                        |                                                                                  | -                                                                                                                                      |
|                               | -                                                                                 | 0  |                                                                                                                                                                                        |                                                                                  | IPR013069                                                                                                                              |
|                               | -                                                                                 | 0  |                                                                                                                                                                                        |                                                                                  | -                                                                                                                                      |
| Caenorhabditis sp. PS1010     | cg12324 protein                                                                   | 7  | P:GO:0000022;<br>F:GO:0003676;<br>F:GO:0003735;<br>C:GO:0005811;<br>F:GO:0005515;<br>C:GO:0022627;<br>P:GO:0006412                                                                     | -                                                                                | EC:3.6.5.3                                                                                                                             |
| Drosophila melanogaster       | cg12324 protein                                                                   | 8  | P:GO:0000022;<br>F:GO:0003676;<br>F:GO:0003735;<br>C:GO:0005811;<br>P:GO:0045454;<br>F:GO:0005515;<br>C:GO:0022627;<br>P:GO:0006412                                                    | -                                                                                | EC:3.6.5.3<br><br>IPR000630; G3DSA:3.30.1370.30 (GENE3D), G3DSA:3.30.1490.10 (GENE3D)                                                  |
|                               | -                                                                                 | 0  |                                                                                                                                                                                        |                                                                                  | -                                                                                                                                      |
| Caenorhabditis briggsae       | elegans protein confirmed by transcript evidence                                  | 0  |                                                                                                                                                                                        |                                                                                  | IPR001534; SignalP (SIGNALP)                                                                                                           |
| Caenorhabditis elegans        | briggsae cbr-crp-1 protein                                                        | 0  |                                                                                                                                                                                        | F:GO:0005525;<br>P:GO:0007264;<br>F:GO:0000166;<br>C:GO:0016020;<br>C:GO:0005622 | -                                                                                                                                      |
|                               | -                                                                                 | 0  |                                                                                                                                                                                        |                                                                                  | -                                                                                                                                      |
|                               | -                                                                                 | 0  |                                                                                                                                                                                        |                                                                                  | -                                                                                                                                      |
|                               | -                                                                                 | 0  |                                                                                                                                                                                        |                                                                                  | -                                                                                                                                      |
| Caenorhabditis briggsae       | son of sevenless homolog 2                                                        | 2  | F:GO:0005085;<br>P:GO:0051056                                                                                                                                                          | -                                                                                | IPR000219                                                                                                                              |
|                               | -                                                                                 | 0  |                                                                                                                                                                                        |                                                                                  | -                                                                                                                                      |
|                               | -                                                                                 | 0  |                                                                                                                                                                                        |                                                                                  | -                                                                                                                                      |
| Caenorhabditis elegans        | elmd3_caeel ame: full=elmo domain-containing protein                              | 0  |                                                                                                                                                                                        | C:GO:0005856;<br>P:GO:0006909                                                    | -                                                                                                                                      |
|                               | -                                                                                 | 0  |                                                                                                                                                                                        |                                                                                  | -                                                                                                                                      |
|                               | -                                                                                 | 0  |                                                                                                                                                                                        |                                                                                  | -                                                                                                                                      |
| Caenorhabditis elegans        | domain containing protein                                                         | 0  |                                                                                                                                                                                        |                                                                                  | PTHR15854 (PANTHER)                                                                                                                    |
| Loa loa                       | briggsae cbr-lgc-26 protein                                                       | 4  | C:GO:0016021;<br>C:GO:0045211;<br>P:GO:0006811;<br>F:GO:0005230                                                                                                                        | -                                                                                | -                                                                                                                                      |
| Xenopus (Silurana) tropicalis | a chain crystal structures of hsc70bag1 in complex with small molecule inhibitors | 11 | P:GO:0006457;<br>P:GO:0006892;<br>F:GO:0042623;<br>C:GO:0009986;<br>P:GO:0016044;<br>C:GO:0042470;<br>F:GO:0005524;<br>F:GO:0005515;<br>C:GO:0030529;<br>P:GO:0006986;<br>P:GO:0044419 | -                                                                                | IPR001023; IPR013126;<br>G3DSA:3.30.420.40 (GENE3D),<br>G3DSA:3.90.640.10 (GENE3D),<br>PTHR19375:SF1 (PANTHER), SSF53067 (SUPERFAMILY) |
| Caenorhabditis briggsae       | isochorismatase family protein                                                    | 1  | F:GO:0042802                                                                                                                                                                           | -                                                                                | IPR000868; PTHR14119 (PANTHER)                                                                                                         |
| Caenorhabditis briggsae       | expulsion defective family member (exp-2)                                         | 5  | C:GO:0008076;<br>F:GO:0005249;<br>F:GO:0005515;<br>P:GO:0055085;<br>P:GO:0006813                                                                                                       | -                                                                                | -                                                                                                                                      |

|                         |                                                         |   |                                                                                                                                     |                                                |                                                                                                                           |
|-------------------------|---------------------------------------------------------|---|-------------------------------------------------------------------------------------------------------------------------------------|------------------------------------------------|---------------------------------------------------------------------------------------------------------------------------|
|                         | -                                                       | 0 |                                                                                                                                     |                                                | -                                                                                                                         |
|                         | -                                                       | 0 |                                                                                                                                     |                                                | -                                                                                                                         |
|                         | -                                                       | 0 |                                                                                                                                     |                                                | SignalP (SIGNALP)                                                                                                         |
|                         | -                                                       | 0 |                                                                                                                                     |                                                | -                                                                                                                         |
| Caenorhabditis briggsae | hypothetical zinc metalloprotei-se                      | 3 | C:GO:0016021;<br>F:GO:0004222;<br>P:GO:0006508                                                                                      | -                                              | EC:3.4.24.0<br>IPR000718; PTHR11733:SF20<br>(PANTHER), SignalP (SIGNALP)                                                  |
|                         | -                                                       | 0 |                                                                                                                                     |                                                | -                                                                                                                         |
| Caenorhabditis elegans  | required for meiotic nuclear division protein 1 homolog | 0 |                                                                                                                                     | C:GO:0005739;<br>P:GO:0008150;<br>C:GO:0005575 | IPR003734                                                                                                                 |
|                         | -                                                       | 0 |                                                                                                                                     |                                                | -                                                                                                                         |
| Stylochus zebra         | transposase                                             | 0 |                                                                                                                                     |                                                | -                                                                                                                         |
|                         | -                                                       | 0 |                                                                                                                                     |                                                | -                                                                                                                         |
|                         | -                                                       | 0 |                                                                                                                                     |                                                | -                                                                                                                         |
|                         | -                                                       | 0 |                                                                                                                                     |                                                | -                                                                                                                         |
| Caenorhabditis briggsae | Hypothetical protein CBG22281 [Caenorhabditis briggsae] | 0 |                                                                                                                                     |                                                | -                                                                                                                         |
| Ostertagia ostertagi    | hypothetical kda protein in plb1-hxt2 intergenic        | 5 | P:GO:0009792;<br>F:GO:0046872;<br>P:GO:0019509;<br>P:GO:0055114;<br>F:GO:0051213                                                    | -                                              | SignalP (SIGNALP)                                                                                                         |
|                         | -                                                       | 0 |                                                                                                                                     |                                                | -                                                                                                                         |
|                         | -                                                       | 0 |                                                                                                                                     |                                                | -                                                                                                                         |
| Caenorhabditis briggsae | xanthine dehydroge-se                                   | 8 | F:GO:0004855;<br>F:GO:0009055;<br>F:GO:0005506;<br>F:GO:0004854;<br>P:GO:0055114;<br>P:GO:0008340;<br>F:GO:0051537;<br>F:GO:0050660 | -                                              | EC:1.17.3.2;<br>EC:1.17.1.4<br>IPR000674; PTHR11908 (PANTHER),<br>PTHR11908:SF9 (PANTHER)                                 |
|                         | -                                                       | 0 |                                                                                                                                     |                                                | -                                                                                                                         |
|                         | -                                                       | 0 |                                                                                                                                     |                                                | SignalP (SIGNALP)                                                                                                         |
|                         | -                                                       | 0 |                                                                                                                                     |                                                | -                                                                                                                         |
|                         | -                                                       | 0 |                                                                                                                                     |                                                | -                                                                                                                         |
|                         | -                                                       | 0 |                                                                                                                                     |                                                | -                                                                                                                         |
| Caenorhabditis elegans  | dipeptidyl peptidase four family member (dpf-6)         | 1 | F:GO:0008236                                                                                                                        | -                                              | -                                                                                                                         |
| Macaca mulatta          | myosin regulatory light chain smooth muscle isoform     | 4 | C:GO:0016459;<br>F:GO:0005509;<br>F:GO:0003774;<br>F:GO:0005515                                                                     | -                                              | IPR011992; IPR018247; IPR018248;<br>IPR018249; PTHR23049 (PANTHER),<br>PTHR23049:SF6 (PANTHER), SSF47473<br>(SUPERFAMILY) |
|                         | -                                                       | 0 |                                                                                                                                     |                                                | -                                                                                                                         |

|                             |                                                                 |   |                                                                                                                                                                                                                                                                             |             |                                                                        |
|-----------------------------|-----------------------------------------------------------------|---|-----------------------------------------------------------------------------------------------------------------------------------------------------------------------------------------------------------------------------------------------------------------------------|-------------|------------------------------------------------------------------------|
| Callithrix jacchus          | cytochrome p450 2c18                                            | 0 | F:GO:0020037;<br>F:GO:0005506;<br>P:GO:0006082;<br>C:GO:0016020;<br>F:GO:0009055;<br>P:GO:0017144;<br>F:GO:0034875;<br>P:GO:0055114;<br>F:GO:0070330;<br>C:GO:0005792;<br>F:GO:0016491;<br>P:GO:0070989;<br>P:GO:0042738;<br>C:GO:0005783;<br>F:GO:0046872;<br>F:GO:0004497 |             | IPR001128; IPR002401; IPR017972;<br>PTHR19383:SF88 (PANTHER)           |
| Ailuropoda melanoleuca      | b chain activator-bound structure of human pyruvate ki-se<br>m2 | 9 | F:GO:0004743;<br>F:GO:0005515;<br>F:GO:0030955;<br>F:GO:0005524;<br>F:GO:0000287;<br>P:GO:0006096;<br>P:GO:0012501;<br>C:GO:0005634;<br>C:GO:0005829                                                                                                                        | EC:2.7.1.40 | IPR001697; IPR015793; IPR015806;<br>IPR015813                          |
|                             | -                                                               | 0 |                                                                                                                                                                                                                                                                             |             | -                                                                      |
|                             | -                                                               | 0 |                                                                                                                                                                                                                                                                             |             | IPR001283; IPR014044;<br>PTHR10334:SF2 (PANTHER), SignalP<br>(SIGNALP) |
| Caenorhabditis elegans      | elegans protein partially confirmed by transcript evidence      | 0 |                                                                                                                                                                                                                                                                             |             | SSF57501 (SUPERFAMILY)                                                 |
|                             | -                                                               | 0 |                                                                                                                                                                                                                                                                             |             | -                                                                      |
|                             | -                                                               | 0 |                                                                                                                                                                                                                                                                             |             | -                                                                      |
|                             | -                                                               | 0 |                                                                                                                                                                                                                                                                             |             | -                                                                      |
|                             | -                                                               | 0 |                                                                                                                                                                                                                                                                             |             | SignalP (SIGNALP)                                                      |
|                             | -                                                               | 0 |                                                                                                                                                                                                                                                                             |             | -                                                                      |
| Angiostrongylus cantonensis | pap 25a associated domain containing protein                    | 3 | C:GO:0005622;<br>F:GO:0005515;<br>F:GO:0003725                                                                                                                                                                                                                              |             | IPR002934; G3DSA:3.30.460.10<br>(GENE3D), SSF81301 (SUPERFAMILY)       |
|                             | -                                                               | 0 |                                                                                                                                                                                                                                                                             |             | -                                                                      |
| Caenorhabditis elegans      | rap ran-gap family protein                                      | 5 | F:GO:0005099;<br>C:GO:0005622;<br>P:GO:0051056;<br>F:GO:0005515;<br>P:GO:0007265                                                                                                                                                                                            |             | IPR000331; PTHR15711 (PANTHER),<br>SSF111347 (SUPERFAMILY)             |
|                             | -                                                               | 0 |                                                                                                                                                                                                                                                                             |             | -                                                                      |
| Ancylostoma caninum         | ribosomal protein l36                                           | 5 | C:GO:0005730;<br>F:GO:0003735;<br>F:GO:0005515;<br>C:GO:0022625;<br>P:GO:0006414                                                                                                                                                                                            |             | -                                                                      |

|                         |                                                                     |    |                                                                                                                                                                                                                          |   |                                                                                               |
|-------------------------|---------------------------------------------------------------------|----|--------------------------------------------------------------------------------------------------------------------------------------------------------------------------------------------------------------------------|---|-----------------------------------------------------------------------------------------------|
| Brugia malayi           | elegans protein partially confirmed by transcript evidence          | 13 | P:GO:0009792;<br>P:GO:0002119;<br>F:GO:0008158;<br>P:GO:0040018;<br>P:GO:0001703;<br>P:GO:0018996;<br>P:GO:0000910;<br>P:GO:0006810;<br>P:GO:0040010;<br>P:GO:0000003;<br>P:GO:0040011;<br>C:GO:0016021;<br>F:GO:0005215 | - | IPR000731; IPR003392; PTHR10796 (PANTHER), PTHR10796:SF32 (PANTHER), SSF82866 (SUPERFAMILY)   |
| -                       | -                                                                   | 0  | -                                                                                                                                                                                                                        | - | -                                                                                             |
| -                       | -                                                                   | 0  | -                                                                                                                                                                                                                        | - | SignalP (SIGNALP)                                                                             |
| -                       | -                                                                   | 0  | -                                                                                                                                                                                                                        | - | -                                                                                             |
| -                       | -                                                                   | 0  | -                                                                                                                                                                                                                        | - | -                                                                                             |
| -                       | -                                                                   | 0  | -                                                                                                                                                                                                                        | - | -                                                                                             |
| Caenorhabditis elegans  | sodium-coupled neutral amino acid transporter 9                     | 2  | C:GO:0016021;<br>P:GO:0006810                                                                                                                                                                                            | - | IPR013057; SignalP (SIGNALP)                                                                  |
| -                       | -                                                                   | 0  | -                                                                                                                                                                                                                        | - | -                                                                                             |
| -                       | -                                                                   | 0  | -                                                                                                                                                                                                                        | - | -                                                                                             |
| -                       | -                                                                   | 0  | -                                                                                                                                                                                                                        | - | -                                                                                             |
| Caenorhabditis elegans  | a in (actin filament binding protein) homolog family member (afd-1) | 2  | P:GO:0040010;<br>F:GO:0005515                                                                                                                                                                                            | - | -                                                                                             |
| Caenorhabditis elegans  | a in (actin filament binding protein) homolog family member (afd-1) | 2  | P:GO:0040010;<br>F:GO:0005515                                                                                                                                                                                            | - | -                                                                                             |
| -                       | -                                                                   | 0  | -                                                                                                                                                                                                                        | - | SignalP (SIGNALP)                                                                             |
| Loa loa                 | cathepsin b                                                         | 1  | F:GO:0008233                                                                                                                                                                                                             | - | IPR000169; IPR000668; IPR013128; IPR015643; G3DSA:3.90.70.10 (GENE3D), SSF54001 (SUPERFAMILY) |
| -                       | -                                                                   | 0  | -                                                                                                                                                                                                                        | - | SignalP (SIGNALP)                                                                             |
| Caenorhabditis briggsae | neuro-I igcam family member (rig-6)                                 | 4  | C:GO:0016021;<br>P:GO:0040018;<br>P:GO:0000003;<br>F:GO:0005488                                                                                                                                                          | - | IPR013783; PTHR10489 (PANTHER), PTHR10489:SF38 (PANTHER)                                      |
| -                       | -                                                                   | 0  | -                                                                                                                                                                                                                        | - | IPR000718; PTHR11733:SF23 (PANTHER), SignalP (SIGNALP)                                        |
| Caenorhabditis elegans  | poly(adp-ribose) metabolism enzyme family member (pme-5)            | 0  | -                                                                                                                                                                                                                        | - | PTHR18958 (PANTHER), PTHR18958:SF255 (PANTHER)                                                |
| -                       | -                                                                   | 0  | -                                                                                                                                                                                                                        | - | IPR004296                                                                                     |
| -                       | -                                                                   | 0  | -                                                                                                                                                                                                                        | - | -                                                                                             |
| Caenorhabditis elegans  | clc-type chloride channel family member (clh-2)                     | 7  | P:GO:0009792;<br>F:GO:0005247;<br>C:GO:0005886;<br>P:GO:0055085;<br>P:GO:0000003;<br>C:GO:0016021;<br>P:GO:0006821                                                                                                       | - | IPR001807; IPR014743; PTHR11689:SF5 (PANTHER), SignalP (SIGNALP)                              |

|                         |                                                         |    |                                                                                                                                                                       |   |             |                                                                                                                                          |
|-------------------------|---------------------------------------------------------|----|-----------------------------------------------------------------------------------------------------------------------------------------------------------------------|---|-------------|------------------------------------------------------------------------------------------------------------------------------------------|
| Caenorhabditis briggsae | probable e3 ubiquitin-protein ligase mycbp2             | 10 | C:GO:0015630;<br>C:GO:0030424;<br>F:GO:0008270;<br>P:GO:0021785;<br>P:GO:0051493;<br>P:GO:0032880;<br>P:GO:0021952;<br>P:GO:0030071;<br>F:GO:0042803;<br>C:GO:0005680 | - |             | IPR012983; PTHR12846 (PANTHER),<br>PTHR12846:SF2 (PANTHER)                                                                               |
| Steinernema feltiae     | glycogen synthase                                       | 7  | P:GO:0009792;<br>P:GO:0010171;<br>P:GO:0002119;<br>P:GO:0005978;<br>F:GO:0005515;<br>F:GO:0004373;<br>P:GO:0040011                                                    | - | EC:2.4.1.11 | IPR008631                                                                                                                                |
| Caenorhabditis briggsae | briggsae cbr-twk-25 protein                             | 3  | C:GO:0016021;<br>P:GO:0006813;<br>F:GO:0005267                                                                                                                        | - |             | IPR013099; G3DSA:1.10.287.70<br>(GENE3D), PTHR11003 (PANTHER),<br>SSF81324 (SUPERFAMILY)                                                 |
| Haemonchus contortus    | multidrug resistance protein 1                          | 5  | F:GO:0042626;<br>C:GO:0005886;<br>P:GO:0055085;<br>F:GO:0005524;<br>C:GO:0016021                                                                                      | - |             | G3DSA:3.40.50.300 (GENE3D),<br>PTHR19242 (PANTHER),<br>PTHR19242:SF96 (PANTHER),<br>SSF52540 (SUPERFAMILY)                               |
| Brugia malayi           | mediator of r- polymerase ii subunit 19 homolog         | 7  | P:GO:0045449;<br>P:GO:0040035;<br>P:GO:0002119;<br>F:GO:0005515;<br>C:GO:0016592;<br>P:GO:0048477;<br>P:GO:0040018                                                    | - |             | IPR019403; PTHR22536 (PANTHER)                                                                                                           |
| -                       | -                                                       | 0  |                                                                                                                                                                       |   |             | -                                                                                                                                        |
| -                       | -                                                       | 0  |                                                                                                                                                                       |   |             | -                                                                                                                                        |
| -                       | -                                                       | 0  |                                                                                                                                                                       |   |             | -                                                                                                                                        |
| Caenorhabditis briggsae | Hypothetical protein CBG10706 [Caenorhabditis briggsae] | 0  |                                                                                                                                                                       |   |             | -                                                                                                                                        |
| -                       | -                                                       | 0  |                                                                                                                                                                       |   |             | -                                                                                                                                        |
| Pongo abelii            | proteasome ( macropain) beta 2                          | 10 | P:GO:0010243;<br>P:GO:0051436;<br>P:GO:0051437;<br>F:GO:0004298;<br>P:GO:0031145;<br>P:GO:0014070;<br>P:GO:0044419;<br>C:GO:0005737;<br>C:GO:0005839;<br>C:GO:0005634 | - | EC:3.4.25.0 | IPR001353; G3DSA:3.60.20.10<br>(GENE3D), PTHR11599 (PANTHER),<br>PTHR11599:SF6 (PANTHER), PS51476<br>(PROFILE), SSF56235 (SUPERFAMILY)   |
| -                       | -                                                       | 0  |                                                                                                                                                                       |   |             | -                                                                                                                                        |
| Caenorhabditis elegans  | cathepsin z                                             | 2  | F:GO:0004197;<br>P:GO:0006508                                                                                                                                         | - | EC:3.4.22.0 | IPR000169; IPR000668; IPR013128;<br>G3DSA:3.90.70.10 (GENE3D),<br>PTHR12411:SF14 (PANTHER), SignalP<br>(SIGNALP), SSF54001 (SUPERFAMILY) |
| -                       | -                                                       | 0  |                                                                                                                                                                       |   |             | -                                                                                                                                        |

|                          |                                                         |    |  |                                                                                                                                                                                                                                                                                                                                                                                                                                                       |  |                   |
|--------------------------|---------------------------------------------------------|----|--|-------------------------------------------------------------------------------------------------------------------------------------------------------------------------------------------------------------------------------------------------------------------------------------------------------------------------------------------------------------------------------------------------------------------------------------------------------|--|-------------------|
| Ixodes scapularis        | protein-tyrosine phosphatase                            | 0  |  | F:GO:0016740;<br>F:GO:0004725;<br>C:GO:0016021;<br>P:GO:0016311;<br>C:GO:0016020;<br>F:GO:0016791;<br>F:GO:0004721;<br>F:GO:0016787;<br>P:GO:0006470;<br>P:GO:0007507;<br>P:GO:0007165;<br>F:GO:0050254;<br>F:GO:0004872;<br>P:GO:0001570                                                                                                                                                                                                             |  | SignalP (SIGNALP) |
| Caenorhabditis briggsae  | Hypothetical protein CBG21816 [Caenorhabditis briggsae] | 0  |  | P:GO:0008152;<br>F:GO:0008080                                                                                                                                                                                                                                                                                                                                                                                                                         |  | -                 |
|                          | -                                                       | 0  |  |                                                                                                                                                                                                                                                                                                                                                                                                                                                       |  | SignalP (SIGNALP) |
|                          | -                                                       | 0  |  |                                                                                                                                                                                                                                                                                                                                                                                                                                                       |  | -                 |
|                          | -                                                       | 0  |  |                                                                                                                                                                                                                                                                                                                                                                                                                                                       |  | -                 |
|                          | -                                                       | 0  |  |                                                                                                                                                                                                                                                                                                                                                                                                                                                       |  | -                 |
| Callithrix jacchus       | actin binding 1a                                        | 26 |  | C:GO:0030670;<br>P:GO:0043029;<br>F:GO:0043548;<br>P:GO:0030217;<br>C:GO:0030027;<br>P:GO:0008360;<br>P:GO:0048873;<br>F:GO:0008022;<br>C:GO:0031941;<br>C:GO:0001891;<br>P:GO:0050918;<br>P:GO:0006816;<br>P:GO:0051126;<br>P:GO:0032796;<br>P:GO:0001845;<br>P:GO:0042102;<br>C:GO:0001772;<br>P:GO:0034097;<br>P:GO:0031589;<br>F:GO:0051015;<br>F:GO:0042803;<br>C:GO:0030864;<br>P:GO:0030335;<br>P:GO:0045087;<br>C:GO:0005634;<br>P:GO:0030595 |  | -                 |
|                          | -                                                       | 0  |  |                                                                                                                                                                                                                                                                                                                                                                                                                                                       |  | SignalP (SIGNALP) |
|                          | -                                                       | 0  |  |                                                                                                                                                                                                                                                                                                                                                                                                                                                       |  | -                 |
| Ornithorhynchus anatinus | atp synthase subunit mitochondrial                      | 4  |  | F:GO:0015078;<br>C:GO:0000276;<br>P:GO:0042776;<br>F:GO:0016887                                                                                                                                                                                                                                                                                                                                                                                       |  | SignalP (SIGNALP) |
| Caenorhabditis elegans   | l-carnitine dehydratase bile acid-inducible protein f   | 2  |  | P:GO:0008152;<br>F:GO:0003824                                                                                                                                                                                                                                                                                                                                                                                                                         |  | -                 |
|                          | -                                                       | 0  |  |                                                                                                                                                                                                                                                                                                                                                                                                                                                       |  | -                 |
|                          | -                                                       | 0  |  |                                                                                                                                                                                                                                                                                                                                                                                                                                                       |  | SignalP (SIGNALP) |

|                        |                                                               |   |                                                                                                                                                      |              |             |                                                                                                                                   |
|------------------------|---------------------------------------------------------------|---|------------------------------------------------------------------------------------------------------------------------------------------------------|--------------|-------------|-----------------------------------------------------------------------------------------------------------------------------------|
| Caenorhabditis elegans | briggsae cbr-odd-2 protein                                    | 8 | F:GO:0003676;<br>P:GO:0000003;<br>P:GO:0043050;<br>C:GO:0005622;<br>P:GO:0040010;<br>F:GO:0008270;<br>P:GO:0002119;<br>P:GO:0040011                  | -            | -           | -                                                                                                                                 |
| -                      | -                                                             | 0 |                                                                                                                                                      |              |             | -                                                                                                                                 |
| -                      | -                                                             | 0 |                                                                                                                                                      |              |             | -                                                                                                                                 |
| -                      | -                                                             | 0 |                                                                                                                                                      |              |             | -                                                                                                                                 |
| -                      | -                                                             | 0 |                                                                                                                                                      |              |             | -                                                                                                                                 |
| Caenorhabditis elegans | cytosolic iron-sulfur protein assembly 1 homolog (cerevisiae) | 1 | P:GO:0016226                                                                                                                                         | -            |             | IPR001680; IPR011046; IPR015943;<br>IPR017986; IPR019781; IPR019782;<br>PTHR19920 (PANTHER)                                       |
| -                      | -                                                             | 0 |                                                                                                                                                      |              |             | SignalP (SIGNALP)                                                                                                                 |
| Loa loa                | spc-1                                                         | 2 | F:GO:0004725;<br>F:GO:0005509                                                                                                                        | -            | EC:3.1.3.48 | IPR002017; IPR018159;<br>G3DSA:1.20.58.60 (GENE3D),<br>PTHR11915 (PANTHER),<br>PTHR11915:SF6 (PANTHER), SSF46966<br>(SUPERFAMILY) |
| Loa loa                | hypothetical protein LOAG_10587 [Loa loa]                     | 5 | P:GO:0040007;<br>F:GO:0005488;<br>P:GO:0006898;<br>P:GO:0002119;<br>P:GO:0040011                                                                     | -            |             | -                                                                                                                                 |
| -                      | -                                                             | 0 |                                                                                                                                                      |              |             | -                                                                                                                                 |
| -                      | -                                                             | 0 |                                                                                                                                                      |              |             | -                                                                                                                                 |
| -                      | -                                                             | 0 |                                                                                                                                                      |              |             | -                                                                                                                                 |
| -                      | -                                                             | 0 |                                                                                                                                                      |              |             | SignalP (SIGNALP)                                                                                                                 |
| Caenorhabditis elegans | btb poz domain containing protein                             | 0 |                                                                                                                                                      | F:GO:0005515 |             | -                                                                                                                                 |
| Caenorhabditis elegans | btb poz domain containing protein                             | 0 |                                                                                                                                                      | F:GO:0005515 |             | -                                                                                                                                 |
| -                      | -                                                             | 0 |                                                                                                                                                      |              |             | SignalP (SIGNALP)                                                                                                                 |
| -                      | -                                                             | 0 |                                                                                                                                                      |              |             | -                                                                                                                                 |
| Brugia malayi          | d-directed r- beta subunit family protein                     | 9 | P:GO:0040035;<br>P:GO:0009792;<br>P:GO:0002119;<br>F:GO:0003899;<br>F:GO:0003677;<br>P:GO:0006350;<br>F:GO:0032549;<br>P:GO:0040007;<br>C:GO:0005634 | -            | EC:2.7.7.6  | -                                                                                                                                 |
| -                      | -                                                             | 0 |                                                                                                                                                      |              |             | PTHR10127 (PANTHER),<br>PTHR10127:SF2 (PANTHER), SignalP<br>(SIGNALP)                                                             |
| Loa loa                | ubiquitin-conjugating enzyme e2 h                             | 6 | P:GO:0006511;<br>F:GO:0005524;<br>P:GO:0070936;<br>F:GO:0004842;<br>P:GO:0051246;<br>P:GO:0070979                                                    | -            | EC:6.3.2.19 | -                                                                                                                                 |
| Loa loa                | ubiquitin-conjugating enzyme e2 h                             | 6 | P:GO:0006511;<br>F:GO:0005524;<br>P:GO:0070936;<br>F:GO:0004842;<br>P:GO:0051246;<br>P:GO:0070979                                                    | -            | EC:6.3.2.19 | -                                                                                                                                 |

|                         |                                    |    |                                                                                                                                                                                                                                                                                                                                                 |                                                                                                                    |                             |                                                             |
|-------------------------|------------------------------------|----|-------------------------------------------------------------------------------------------------------------------------------------------------------------------------------------------------------------------------------------------------------------------------------------------------------------------------------------------------|--------------------------------------------------------------------------------------------------------------------|-----------------------------|-------------------------------------------------------------|
| Caenorhabditis briggsae | cadherin domain containing protein | 2  | C:GO:0016020;<br>P:GO:0007155                                                                                                                                                                                                                                                                                                                   | -                                                                                                                  |                             | IPR008985; IPR012680; IPR013320                             |
| Drosophila ananassae    | GF22278 [Drosophila a--ssae]       | 0  |                                                                                                                                                                                                                                                                                                                                                 | F:GO:0003676                                                                                                       |                             | IPR012337                                                   |
|                         | -                                  | 0  |                                                                                                                                                                                                                                                                                                                                                 |                                                                                                                    |                             | -                                                           |
|                         | -                                  | 0  |                                                                                                                                                                                                                                                                                                                                                 |                                                                                                                    |                             | -                                                           |
| Trichoplax adhaerens    | xylulose ki-se                     | 2  | F:GO:0016773;<br>P:GO:0005975                                                                                                                                                                                                                                                                                                                   | -                                                                                                                  | EC:2.7.1.0                  | IPR000577; PTHR10196:SF5 (PANTHER)                          |
| Homo sapiens            | ribonuclease inhibitor             | 11 | C:GO:0032311;<br>F:GO:0003723;<br>C:GO:0005739;<br>P:GO:0006264;<br>F:GO:0008428;<br>P:GO:0006402;<br>F:GO:0000287;<br>F:GO:0004523;<br>P:GO:0045765;<br>F:GO:0042803;<br>C:GO:0005634                                                                                                                                                          | -                                                                                                                  | EC:3.1.26.4                 | -                                                           |
| Caenorhabditis briggsae | sy-ptojanin 1 isoform a            | 20 | P:GO:0016082;<br>P:GO:0046856;<br>F:GO:0008022;<br>F:GO:0000166;<br>P:GO:0016191;<br>P:GO:0032526;<br>P:GO:0007612;<br>C:GO:0019717;<br>F:GO:0017120;<br>P:GO:0034097;<br>F:GO:0004445;<br>P:GO:0007420;<br>P:GO:0048260;<br>P:GO:0014015;<br>F:GO:0003723;<br>F:GO:0004439;<br>F:GO:0032403;<br>C:GO:0030118;<br>F:GO:0017124;<br>P:GO:0048015 | -                                                                                                                  | EC:3.1.3.56;<br>EC:3.1.3.36 | SignalP (SIGNALP)                                           |
|                         | -                                  | 0  |                                                                                                                                                                                                                                                                                                                                                 |                                                                                                                    |                             | -                                                           |
| Rattus norvegicus       | h+ v0 subunit b isoform cra_c      | 2  | C:GO:0016021;<br>C:GO:0005768                                                                                                                                                                                                                                                                                                                   | -                                                                                                                  |                             | -                                                           |
|                         | -                                  | 0  |                                                                                                                                                                                                                                                                                                                                                 |                                                                                                                    |                             | -                                                           |
|                         | -                                  | 0  |                                                                                                                                                                                                                                                                                                                                                 |                                                                                                                    |                             | -                                                           |
| Nematostella vectensis  | ubiquitin-conjugating enzyme e2o   | 0  |                                                                                                                                                                                                                                                                                                                                                 | F:GO:0005524;<br>P:GO:0051246;<br>P:GO:0043687;<br>F:GO:0000166;<br>F:GO:0019787;<br>F:GO:0004842;<br>P:GO:0016567 |                             | -                                                           |
|                         | -                                  | 0  |                                                                                                                                                                                                                                                                                                                                                 |                                                                                                                    |                             | -                                                           |
|                         | -                                  | 0  |                                                                                                                                                                                                                                                                                                                                                 |                                                                                                                    |                             | SignalP (SIGNALP)                                           |
|                         | -                                  | 0  |                                                                                                                                                                                                                                                                                                                                                 |                                                                                                                    |                             | -                                                           |
|                         | -                                  | 0  |                                                                                                                                                                                                                                                                                                                                                 |                                                                                                                    |                             | IPR002198; PTHR19410:SF18 (PANTHER), SSF51735 (SUPERFAMILY) |
|                         | -                                  | 0  |                                                                                                                                                                                                                                                                                                                                                 |                                                                                                                    |                             | -                                                           |



|                             |                                                  |    |                                                                                                                                                                                                                          |                                                |                                                                                                                     |
|-----------------------------|--------------------------------------------------|----|--------------------------------------------------------------------------------------------------------------------------------------------------------------------------------------------------------------------------|------------------------------------------------|---------------------------------------------------------------------------------------------------------------------|
| Loa loa                     | cubilin (intrinsic factor-cobalamin receptor)    | 7  | P:GO:0006810;<br>C:GO:0043231;<br>F:GO:0046872;<br>C:GO:0044459;<br>C:GO:0044444;<br>F:GO:0042803;<br>F:GO:0016787                                                                                                       | -                                              | IPR000859; PTHR10127 (PANTHER),<br>PTHR10127:SF22 (PANTHER)                                                         |
| -                           | -                                                | 0  |                                                                                                                                                                                                                          |                                                | -                                                                                                                   |
| -                           | -                                                | 0  |                                                                                                                                                                                                                          |                                                | -                                                                                                                   |
| -                           | -                                                | 0  |                                                                                                                                                                                                                          |                                                | SignalP (SIGNALP)                                                                                                   |
| -                           | -                                                | 0  |                                                                                                                                                                                                                          |                                                | -                                                                                                                   |
| Angiostrongylus cantonensis | zyg-11 homolog b                                 | 1  | F:GO:0005515                                                                                                                                                                                                             | -                                              | -                                                                                                                   |
| -                           | -                                                | 0  |                                                                                                                                                                                                                          |                                                | -                                                                                                                   |
| -                           | -                                                | 0  |                                                                                                                                                                                                                          |                                                | SignalP (SIGNALP)                                                                                                   |
| -                           | -                                                | 0  |                                                                                                                                                                                                                          |                                                | PSS1257 (PROFILE)                                                                                                   |
| -                           | -                                                | 0  |                                                                                                                                                                                                                          |                                                | -                                                                                                                   |
| -                           | -                                                | 0  |                                                                                                                                                                                                                          |                                                | -                                                                                                                   |
| -                           | -                                                | 0  |                                                                                                                                                                                                                          |                                                | -                                                                                                                   |
| -                           | -                                                | 0  |                                                                                                                                                                                                                          |                                                | -                                                                                                                   |
| -                           | -                                                | 0  |                                                                                                                                                                                                                          |                                                | -                                                                                                                   |
| -                           | -                                                | 0  |                                                                                                                                                                                                                          |                                                | -                                                                                                                   |
| Pongo abelii                | peroxiredoxin 5                                  | 11 | P:GO:0006954;<br>C:GO:0005777;<br>P:GO:0045454;<br>C:GO:0044445;<br>P:GO:0055114;<br>F:GO:0004601;<br>F:GO:0043027;<br>F:GO:0051920;<br>P:GO:0034614;<br>P:GO:0043066;<br>C:GO:0005739                                   | -                                              | EC:1.11.1.7;<br>EC:1.11.1.15<br>IPR012335; IPR012336; IPR013740;<br>PTHR10430 (PANTHER),<br>PTHR10430:SF3 (PANTHER) |
| Caenorhabditis elegans      | elegans protein confirmed by transcript evidence | 0  |                                                                                                                                                                                                                          | F:GO:0016888                                   | -                                                                                                                   |
| Caenorhabditis elegans      | phosphatase and actin regulator 2                | 2  | F:GO:0003779;<br>F:GO:0004864                                                                                                                                                                                            | -                                              | IPR019775                                                                                                           |
| -                           | -                                                | 0  |                                                                                                                                                                                                                          |                                                | -                                                                                                                   |
| -                           | -                                                | 0  |                                                                                                                                                                                                                          |                                                | -                                                                                                                   |
| Caenorhabditis briggsae     | elegans protein confirmed by transcript evidence | 0  |                                                                                                                                                                                                                          | F:GO:0008168;<br>P:GO:0008152;<br>P:GO:0009792 | -                                                                                                                   |
| -                           | -                                                | 0  |                                                                                                                                                                                                                          |                                                | -                                                                                                                   |
| Caenorhabditis elegans      | glycerol ki-se                                   | 13 | C:GO:0005829;<br>F:GO:0042393;<br>C:GO:0005625;<br>C:GO:0005739;<br>P:GO:0045471;<br>F:GO:0004370;<br>P:GO:0009409;<br>P:GO:0006072;<br>F:GO:0000166;<br>P:GO:0016310;<br>P:GO:0042493;<br>C:GO:0016020;<br>C:GO:0005634 | -                                              | EC:2.7.1.30<br>IPR018484; G3DSA:3.30.420.40<br>(GENE3D), SSF53067 (SUPERFAMILY)                                     |
| -                           | -                                                | 0  |                                                                                                                                                                                                                          |                                                | IPR002129; IPR015421                                                                                                |
| -                           | -                                                | 0  |                                                                                                                                                                                                                          |                                                | -                                                                                                                   |

|                           |                                                            |   |                                                                                                                                                      |                                                                                                                                     |             |                                                                                                              |
|---------------------------|------------------------------------------------------------|---|------------------------------------------------------------------------------------------------------------------------------------------------------|-------------------------------------------------------------------------------------------------------------------------------------|-------------|--------------------------------------------------------------------------------------------------------------|
| Caenorhabditis briggsae   | elegans protein partially confirmed by transcript evidence | 0 |                                                                                                                                                      |                                                                                                                                     |             | IPR002018; G3DSA:3.40.50.1820 (GENE3D), PTHR11559:SF15 (PANTHER)                                             |
|                           | -                                                          | 0 |                                                                                                                                                      |                                                                                                                                     |             | -                                                                                                            |
|                           | -                                                          | 0 |                                                                                                                                                      |                                                                                                                                     |             | -                                                                                                            |
|                           | -                                                          | 0 |                                                                                                                                                      |                                                                                                                                     |             | -                                                                                                            |
|                           | -                                                          | 0 |                                                                                                                                                      |                                                                                                                                     |             | -                                                                                                            |
|                           | -                                                          | 0 |                                                                                                                                                      |                                                                                                                                     |             | -                                                                                                            |
| Caenorhabditis elegans    | elegans protein confirmed by transcript evidence           | 0 |                                                                                                                                                      | F:GO:0016301;<br>F:GO:0004672;<br>F:GO:0005524;<br>F:GO:0016740;<br>F:GO:0000166;<br>F:GO:0004713;<br>P:GO:0006468;<br>F:GO:0005515 |             | -                                                                                                            |
|                           | -                                                          | 0 |                                                                                                                                                      |                                                                                                                                     |             | -                                                                                                            |
|                           | -                                                          | 0 |                                                                                                                                                      |                                                                                                                                     |             | -                                                                                                            |
|                           | -                                                          | 0 |                                                                                                                                                      |                                                                                                                                     |             | -                                                                                                            |
|                           | -                                                          | 0 |                                                                                                                                                      |                                                                                                                                     |             | SignalP (SIGNALP)                                                                                            |
| Caenorhabditis elegans    | zinc carboxypeptidase family protein                       | 0 |                                                                                                                                                      | P:GO:0006508;<br>F:GO:0004181;<br>F:GO:0004180;<br>F:GO:0008270                                                                     |             | IPR000834; G3DSA:3.40.630.10 (GENE3D), PTHR11705 (PANTHER), PTHR11705:SF12 (PANTHER), SSF53187 (SUPERFAMILY) |
|                           | -                                                          | 0 |                                                                                                                                                      |                                                                                                                                     |             | -                                                                                                            |
|                           | -                                                          | 0 |                                                                                                                                                      |                                                                                                                                     |             | SignalP (SIGNALP)                                                                                            |
|                           | -                                                          | 0 |                                                                                                                                                      |                                                                                                                                     |             | -                                                                                                            |
|                           | -                                                          | 0 |                                                                                                                                                      |                                                                                                                                     |             | -                                                                                                            |
| Caenorhabditis briggsae   | elegans protein partially confirmed by transcript evidence | 0 |                                                                                                                                                      |                                                                                                                                     |             | PTHR13056 (PANTHER)                                                                                          |
| Hydra magnipapillata      | transposase homolog                                        | 1 | P:GO:0006259                                                                                                                                         | -                                                                                                                                   |             | PTHR23022 (PANTHER), PTHR23022:SF10 (PANTHER)                                                                |
|                           | -                                                          | 0 |                                                                                                                                                      |                                                                                                                                     |             | -                                                                                                            |
| Loa loa                   | paz domain containing protein                              | 0 |                                                                                                                                                      | F:GO:0003676                                                                                                                        |             | -                                                                                                            |
| Teladorsagia circumcincta | elegans protein confirmed by transcript evidence           | 3 | C:GO:0005576;<br>P:GO:0007218;<br>C:GO:0016021                                                                                                       | -                                                                                                                                   |             | IPR002544; PTHR20986 (PANTHER)                                                                               |
|                           | -                                                          | 0 |                                                                                                                                                      |                                                                                                                                     |             | -                                                                                                            |
|                           | -                                                          | 0 |                                                                                                                                                      |                                                                                                                                     |             | SignalP (SIGNALP)                                                                                            |
|                           | -                                                          | 0 |                                                                                                                                                      |                                                                                                                                     |             | -                                                                                                            |
| Caenorhabditis elegans    | elegans protein confirmed by transcript evidence           | 0 |                                                                                                                                                      |                                                                                                                                     |             | PTHR10566 (PANTHER), PTHR10566:SF6 (PANTHER)                                                                 |
| Caenorhabditis briggsae   | legumain                                                   | 9 | P:GO:0009792;<br>P:GO:0040015;<br>C:GO:0045177;<br>C:GO:0043231;<br>C:GO:0044444;<br>P:GO:0000003;<br>P:GO:0006508;<br>F:GO:0004674;<br>F:GO:0008234 | -                                                                                                                                   | EC:2.7.11.0 | IPR001096; PTHR12000:SF4 (PANTHER), SignalP (SIGNALP)                                                        |
| Ailuropoda melanoleuca    | h2a histone member y                                       | 8 | P:GO:0016568;<br>C:GO:0000786;<br>F:GO:0003677;<br>P:GO:0006334;<br>F:GO:0003682;<br>P:GO:0007549;<br>C:GO:0001740;<br>C:GO:0000793                  | -                                                                                                                                   |             | G3DSA:3.40.220.10 (GENE3D), SSF52949 (SUPERFAMILY)                                                           |

|                         |                                                                          |    |                                                                                                                                                                       |                                                                                                   |                                                                                              |
|-------------------------|--------------------------------------------------------------------------|----|-----------------------------------------------------------------------------------------------------------------------------------------------------------------------|---------------------------------------------------------------------------------------------------|----------------------------------------------------------------------------------------------|
|                         | -                                                                        | 0  |                                                                                                                                                                       |                                                                                                   | -                                                                                            |
|                         | -                                                                        | 0  |                                                                                                                                                                       |                                                                                                   | -                                                                                            |
|                         | -                                                                        | 0  |                                                                                                                                                                       |                                                                                                   | -                                                                                            |
|                         | -                                                                        | 0  |                                                                                                                                                                       |                                                                                                   | -                                                                                            |
| Ailuropoda melanoleuca  | mitogen-activated protein ki-se ki-se 7                                  | 10 | F:GO:0004708;<br>P:GO:0051403;<br>F:GO:0004674;<br>F:GO:0005524;<br>F:GO:0004713;<br>F:GO:0000287;<br>F:GO:0019901;<br>C:GO:0005737;<br>C:GO:0005634;<br>P:GO:0006468 | -                                                                                                 | EC:2.7.11.0;<br>EC:2.7.10.0                                                                  |
| Brugia malayi           | briggsae cbr-grh-1 protein                                               | 0  |                                                                                                                                                                       |                                                                                                   | -                                                                                            |
|                         | -                                                                        | 0  |                                                                                                                                                                       |                                                                                                   | -                                                                                            |
|                         | -                                                                        | 0  |                                                                                                                                                                       |                                                                                                   | -                                                                                            |
|                         | -                                                                        | 0  |                                                                                                                                                                       |                                                                                                   | -                                                                                            |
| Caenorhabditis elegans  | protein                                                                  | 1  | P:GO:0065007                                                                                                                                                          | -                                                                                                 | IPR000716; PTHR14093 (PANTHER), PTHR14093:SF5 (PANTHER), SignalP (SIGNALP)                   |
|                         | -                                                                        | 0  |                                                                                                                                                                       |                                                                                                   | -                                                                                            |
|                         | -                                                                        | 0  |                                                                                                                                                                       |                                                                                                   | -                                                                                            |
| Caenorhabditis elegans  | -d-dependent epimerase dehydratase                                       | 7  | P:GO:0009792;<br>P:GO:0010171;<br>P:GO:0002119;<br>P:GO:0000003;<br>P:GO:0040011;<br>P:GO:0008152;<br>F:GO:0003824                                                    | -                                                                                                 | IPR002225; IPR016040; PTHR10366 (PANTHER), SSF51735 (SUPERFAMILY)                            |
| Caenorhabditis elegans  | elegans protein confirmed by transcript evidence                         | 2  | P:GO:0007155;<br>C:GO:0005604                                                                                                                                         | -                                                                                                 | IPR010307                                                                                    |
| Caenorhabditis brenneri | briggsae cbr-nlp-3 protein                                               | 0  |                                                                                                                                                                       |                                                                                                   | -                                                                                            |
| Caenorhabditis elegans  | fibronectin type-iii domain-containing protein c4orf31 homolog precursor | 0  |                                                                                                                                                                       | F:GO:0008201;<br>P:GO:0019800;<br>P:GO:0030198;<br>C:GO:0031012;<br>F:GO:0005539;<br>C:GO:0005576 | IPR019326                                                                                    |
| Caenorhabditis briggsae | Hypothetical protein CBG14163 [Caenorhabditis briggsae]                  | 1  | P:GO:0040010                                                                                                                                                          | -                                                                                                 | -                                                                                            |
|                         | -                                                                        | 0  |                                                                                                                                                                       |                                                                                                   | -                                                                                            |
| Loa loa                 | uncoordi-ted family member (unc-89)                                      | 0  |                                                                                                                                                                       |                                                                                                   | -                                                                                            |
|                         | -                                                                        | 0  |                                                                                                                                                                       |                                                                                                   | SignalP (SIGNALP)                                                                            |
| Caenorhabditis elegans  | filamin abp280 repeat family protein                                     | 8  | P:GO:0009792;<br>P:GO:0010171;<br>C:GO:0005840;<br>F:GO:0003735;<br>F:GO:0003779;<br>P:GO:0007126;<br>P:GO:0000003;<br>P:GO:0006412                                   | -                                                                                                 | EC:3.6.5.3<br>IPR013783; IPR014756; IPR017868; PTHR11915 (PANTHER), PTHR11915:SF24 (PANTHER) |
| Caenorhabditis elegans  | briggsae cbr-pgp-11 protein                                              | 5  | F:GO:0015440;<br>F:GO:0008559;<br>P:GO:0055085;<br>F:GO:0005524;<br>C:GO:0016021                                                                                      | -                                                                                                 | EC:3.6.3.43;<br>EC:3.6.3.44                                                                  |
| Caenorhabditis briggsae | uncharacterized transposase-like protein                                 | 1  | F:GO:0046872                                                                                                                                                          | -                                                                                                 | -                                                                                            |

|                         |                                                            |   |                                                                                                                    |                                                                                                                                                      |                             |                                                                                                                                      |
|-------------------------|------------------------------------------------------------|---|--------------------------------------------------------------------------------------------------------------------|------------------------------------------------------------------------------------------------------------------------------------------------------|-----------------------------|--------------------------------------------------------------------------------------------------------------------------------------|
| Harpegnathos saltator   | proclotting enzyme                                         | 0 |                                                                                                                    | P:GO:0006508;<br>F:GO:0004252;<br>F:GO:0008236;<br>F:GO:0016787;<br>F:GO:0003824;<br>F:GO:0008233                                                    |                             | IPR001254; IPR009003; IPR018114;<br>G3DSA:2.40.10.10 (GENE3D),<br>PTHR19355 (PANTHER),<br>PTHR19355:SF126 (PANTHER)                  |
| Caenorhabditis elegans  | elegans protein partially confirmed by transcript evidence | 0 |                                                                                                                    | F:GO:0016740;<br>F:GO:0030246;<br>C:GO:0016021;<br>F:GO:0016758;<br>F:GO:0016757;<br>P:GO:0019915;<br>P:GO:0005975;<br>P:GO:0030259;<br>P:GO:0008152 |                             | IPR002213; PTHR11926:SF3<br>(PANTHER)                                                                                                |
| Caenorhabditis briggsae | Hypothetical protein CBG11187 [Caenorhabditis briggsae]    | 7 | P:GO:0006468;<br>F:GO:0005515;<br>F:GO:0004713;<br>P:GO:0040010;<br>F:GO:0005524;<br>C:GO:0016021;<br>F:GO:0004674 | -                                                                                                                                                    | EC:2.7.10.0;<br>EC:2.7.11.0 | -                                                                                                                                    |
| Caenorhabditis briggsae | elegans protein confirmed by transcript evidence           | 0 |                                                                                                                    | F:GO:0005525;<br>P:GO:0007264;<br>F:GO:0000166;<br>C:GO:0005622;<br>P:GO:0015031                                                                     |                             | -                                                                                                                                    |
| -                       | -                                                          | 0 |                                                                                                                    |                                                                                                                                                      |                             | -                                                                                                                                    |
| -                       | -                                                          | 0 |                                                                                                                    |                                                                                                                                                      |                             | -                                                                                                                                    |
| Callithrix jacchus      | chromosome 19 open reading frame 43                        | 0 |                                                                                                                    | F:GO:0003674;<br>P:GO:0008150                                                                                                                        |                             | -                                                                                                                                    |
| -                       | -                                                          | 0 |                                                                                                                    |                                                                                                                                                      |                             | -                                                                                                                                    |
| -                       | -                                                          | 0 |                                                                                                                    |                                                                                                                                                      |                             | -                                                                                                                                    |
| -                       | -                                                          | 0 |                                                                                                                    |                                                                                                                                                      |                             | -                                                                                                                                    |
| -                       | -                                                          | 0 |                                                                                                                    |                                                                                                                                                      |                             | SignalP (SIGNALP)                                                                                                                    |
| -                       | -                                                          | 0 |                                                                                                                    |                                                                                                                                                      |                             | -                                                                                                                                    |
| -                       | -                                                          | 0 |                                                                                                                    |                                                                                                                                                      |                             | -                                                                                                                                    |
| Caenorhabditis briggsae | myg1 protein                                               | 1 | P:GO:0043473                                                                                                       | -                                                                                                                                                    |                             | IPR003226                                                                                                                            |
| Callithrix jacchus      | h aca ribonucleoprotein complex subunit 2                  | 6 | C:GO:0005730;<br>C:GO:0015030;<br>F:GO:0030515;<br>P:GO:0031118;<br>C:GO:0005732;<br>F:GO:0005515                  | -                                                                                                                                                    |                             | IPR004038; IPR018492;<br>G3DSA:3.30.1330.30 (GENE3D),<br>PTHR23105 (PANTHER),<br>PTHR23105:SF12 (PANTHER),<br>SSF55315 (SUPERFAMILY) |
| -                       | -                                                          | 0 |                                                                                                                    |                                                                                                                                                      |                             | SignalP (SIGNALP)                                                                                                                    |
| -                       | -                                                          | 0 |                                                                                                                    |                                                                                                                                                      |                             | SignalP (SIGNALP)                                                                                                                    |

|                         |                                                                  |   |                                                                                                                                                                                                                                                                                                                                                 |   |                                                              |
|-------------------------|------------------------------------------------------------------|---|-------------------------------------------------------------------------------------------------------------------------------------------------------------------------------------------------------------------------------------------------------------------------------------------------------------------------------------------------|---|--------------------------------------------------------------|
| Branchiostoma floridae  | domain containing protein                                        | 0 | P:GO:0007422;<br>P:GO:0008360;<br>P:GO:0007111;<br>P:GO:0051225;<br>P:GO:0007110;<br>C:GO:0005634;<br>P:GO:0007155;<br>P:GO:0000915;<br>P:GO:0035023;<br>F:GO:0005089;<br>P:GO:0000910;<br>P:GO:0050770;<br>F:GO:0005085;<br>P:GO:0008078;<br>P:GO:0045184;<br>P:GO:0007443;<br>P:GO:0007399;<br>P:GO:0007509;<br>P:GO:0023034;<br>C:GO:0005622 |   | IPR001357; G3DSA:3.40.50.10190 (GENE3D), PTHR16777 (PANTHER) |
|                         | -                                                                | 0 |                                                                                                                                                                                                                                                                                                                                                 |   | -                                                            |
| Caenorhabditis elegans  | briggsae cbr-hsr-9 protein                                       | 5 | P:GO:0002009;<br>P:GO:0019915;<br>P:GO:0040007;<br>P:GO:0040035;<br>P:GO:0002119                                                                                                                                                                                                                                                                | - | -                                                            |
|                         | -                                                                | 0 |                                                                                                                                                                                                                                                                                                                                                 |   | -                                                            |
|                         | -                                                                | 0 |                                                                                                                                                                                                                                                                                                                                                 |   | -                                                            |
|                         | -                                                                | 0 |                                                                                                                                                                                                                                                                                                                                                 |   | -                                                            |
| Callithrix jacchus      | ergic and golgi 3                                                | 6 | C:GO:0005789;<br>C:GO:0005794;<br>F:GO:0005515;<br>P:GO:0016192;<br>C:GO:0016021;<br>C:GO:0033116                                                                                                                                                                                                                                               | - | IPR012936; PTHR10984 (PANTHER)                               |
|                         | -                                                                | 0 |                                                                                                                                                                                                                                                                                                                                                 |   | -                                                            |
|                         | -                                                                | 0 |                                                                                                                                                                                                                                                                                                                                                 |   | SignalP (SIGNALP)                                            |
|                         | -                                                                | 0 |                                                                                                                                                                                                                                                                                                                                                 |   | -                                                            |
|                         | -                                                                | 0 |                                                                                                                                                                                                                                                                                                                                                 |   | -                                                            |
| Caenorhabditis elegans  | elegans protein confirmed by transcript evidence                 | 0 |                                                                                                                                                                                                                                                                                                                                                 |   | SignalP (SIGNALP)                                            |
|                         | -                                                                | 0 |                                                                                                                                                                                                                                                                                                                                                 |   | SignalP (SIGNALP)                                            |
| Caenorhabditis elegans  | pab-dependent poly -specific ribonuclease subunit                | 0 | F:GO:0004221;<br>P:GO:0006397;<br>F:GO:0016787;<br>F:GO:0004535;<br>F:GO:0003676;<br>C:GO:0005737;<br>F:GO:0004527;<br>P:GO:0006511;<br>C:GO:0005622;<br>F:GO:0004518                                                                                                                                                                           |   | PTHR15728 (PANTHER)                                          |
| Caenorhabditis briggsae | sig-l transducing adaptor molecule (sh3 domain and itam motif) 2 | 5 | C:GO:0005768;<br>P:GO:0043409;<br>C:GO:0044441;<br>P:GO:0048013;<br>F:GO:0005515                                                                                                                                                                                                                                                                | - | -                                                            |

|                                   |                                                          |   |                                                                                                                                     |                                                |             |                                                                                                                                     |
|-----------------------------------|----------------------------------------------------------|---|-------------------------------------------------------------------------------------------------------------------------------------|------------------------------------------------|-------------|-------------------------------------------------------------------------------------------------------------------------------------|
| Caenorhabditis elegans            | elegans protein confirmed by transcript evidence         | 0 |                                                                                                                                     | P:GO:0019915                                   |             | IPR000626; IPR019955;<br>G3DSA:3.10.20.90 (GENE3D),<br>SSF54236 (SUPERFAMILY)                                                       |
|                                   | -                                                        | 0 |                                                                                                                                     |                                                |             | -                                                                                                                                   |
|                                   | -                                                        | 0 |                                                                                                                                     |                                                |             | -                                                                                                                                   |
|                                   | -                                                        | 0 |                                                                                                                                     |                                                |             | -                                                                                                                                   |
| Caenorhabditis briggsae           | bardet-biedl syndrome 7                                  | 4 | C:GO:0043005;<br>F:GO:0005515;<br>P:GO:0035058;<br>P:GO:0045444                                                                     | -                                              |             | -                                                                                                                                   |
|                                   | -                                                        | 0 |                                                                                                                                     |                                                |             | -                                                                                                                                   |
|                                   | -                                                        | 0 |                                                                                                                                     |                                                |             | -                                                                                                                                   |
| Clostridium botulinum D str. 1873 | pyrroline-5-carboxylate reductase                        | 4 | F:GO:0005488;<br>F:GO:0004735;<br>P:GO:0055114;<br>P:GO:0006561                                                                     | -                                              | EC:1.5.1.2  | IPR000304; IPR008927                                                                                                                |
|                                   | -                                                        | 0 |                                                                                                                                     |                                                |             | -                                                                                                                                   |
|                                   | -                                                        | 0 |                                                                                                                                     |                                                |             | -                                                                                                                                   |
| Caenorhabditis elegans            | lim and sh3 domain protein                               | 2 | F:GO:0008270;<br>P:GO:0000003                                                                                                       | -                                              |             | -                                                                                                                                   |
| Caenorhabditis elegans            | member ras oncogene partial                              | 8 | F:GO:0005525;<br>F:GO:0005515;<br>P:GO:0006913;<br>F:GO:0005509;<br>P:GO:0006886;<br>C:GO:0005634;<br>P:GO:0007264;<br>C:GO:0048471 | -                                              |             | -                                                                                                                                   |
| Heliconius melpomene              | r--directed d- polymerase hmg-i and hmg- d--             | 4 | F:GO:0004519;<br>F:GO:0003723;<br>F:GO:0003964;<br>P:GO:0006278                                                                     | -                                              | EC:2.7.7.49 | -                                                                                                                                   |
| Caenorhabditis elegans            | receptor protein tyrosine                                | 3 | F:GO:0004725;<br>F:GO:0008238;<br>P:GO:0006470                                                                                      | -                                              | EC:3.1.3.48 | IPR000242; IPR000387;<br>G3DSA:3.90.190.10 (GENE3D),<br>PTHR19134 (PANTHER),<br>PTHR19134:SF35 (PANTHER),<br>SSF52799 (SUPERFAMILY) |
|                                   | -                                                        | 0 |                                                                                                                                     |                                                |             | -                                                                                                                                   |
|                                   | -                                                        | 0 |                                                                                                                                     |                                                |             | -                                                                                                                                   |
| Brugia malayi                     | protein-tyrosine phosphatase containing protein          | 2 | F:GO:0004725;<br>P:GO:0006470                                                                                                       | -                                              | EC:3.1.3.48 | -                                                                                                                                   |
|                                   | -                                                        | 0 |                                                                                                                                     |                                                |             | -                                                                                                                                   |
|                                   | -                                                        | 0 |                                                                                                                                     |                                                |             | -                                                                                                                                   |
| Caenorhabditis elegans            | briggsae cbr-tag-273 protein                             | 2 | F:GO:0046872;<br>P:GO:0000003                                                                                                       | -                                              |             | IPR001781                                                                                                                           |
|                                   | -                                                        | 0 |                                                                                                                                     |                                                |             | SignalP (SIGNALP)                                                                                                                   |
| Caenorhabditis briggsae           | calcium calmodulin-dependent protein ki-se type 1        | 2 | F:GO:0016301;<br>F:GO:0005515                                                                                                       | -                                              |             | -                                                                                                                                   |
| Caenorhabditis elegans            | suppressor of activated let-60 ras family member (sur-2) | 0 |                                                                                                                                     | P:GO:0006350;<br>P:GO:0045449;<br>C:GO:0005634 |             | -                                                                                                                                   |
| Caenorhabditis briggsae           | briggsae cbr-exoc-8 protein                              | 6 | P:GO:0009792;<br>P:GO:0040018;<br>P:GO:0000003;<br>P:GO:0010171;<br>P:GO:0002119;<br>P:GO:0040011                                   | -                                              |             | PTHR21426 (PANTHER),<br>PTHR21426:SF9 (PANTHER)                                                                                     |
|                                   | -                                                        | 0 |                                                                                                                                     |                                                |             | -                                                                                                                                   |



|                         |                                          |    |                                                                                                                                                                                                                                                                                                               |                                                                                                                                                      |             |                                                                                           |
|-------------------------|------------------------------------------|----|---------------------------------------------------------------------------------------------------------------------------------------------------------------------------------------------------------------------------------------------------------------------------------------------------------------|------------------------------------------------------------------------------------------------------------------------------------------------------|-------------|-------------------------------------------------------------------------------------------|
| Caenorhabditis briggsae | s-phase ki-se-associated protein 1       | 18 | P:GO:0008340;<br>C:GO:0005654;<br>F:GO:0016301;<br>P:GO:0016246;<br>F:GO:0005515;<br>P:GO:0051437;<br>P:GO:0040010;<br>P:GO:0006898;<br>P:GO:0040011;<br>P:GO:0016310;<br>C:GO:0005829;<br>C:GO:0019005;<br>P:GO:0009792;<br>P:GO:0002009;<br>F:GO:0004842;<br>P:GO:0002119;<br>P:GO:0031146;<br>P:GO:0040035 | -                                                                                                                                                    | EC:6.3.2.19 | -                                                                                         |
| Ciona intestinalis      | briggsae cbr-opt-1 protein               | 0  |                                                                                                                                                                                                                                                                                                               | F:GO:0015198;<br>P:GO:0006857;<br>C:GO:0016021;<br>C:GO:0016020;<br>F:GO:0005215;<br>P:GO:0006810                                                    |             | IPR000109; PTHR11654 (PANTHER),<br>PTHR11654:SF13 (PANTHER), SignalP<br>(SIGNALP)         |
| -                       | -                                        | 0  |                                                                                                                                                                                                                                                                                                               |                                                                                                                                                      |             | -                                                                                         |
| Caenorhabditis elegans  | ain family member (clp-1)                | 4  | P:GO:0008219;<br>C:GO:0005622;<br>P:GO:0006508;<br>F:GO:0004198                                                                                                                                                                                                                                               | -                                                                                                                                                    |             | G3DSA:3.90.70.10 (GENE3D),<br>PTHR10183 (PANTHER),<br>PTHR10183:SF45 (PANTHER)            |
| -                       | -                                        | 0  |                                                                                                                                                                                                                                                                                                               |                                                                                                                                                      |             | -                                                                                         |
| -                       | -                                        | 0  |                                                                                                                                                                                                                                                                                                               |                                                                                                                                                      |             | -                                                                                         |
| Branchiostoma floridae  | tbcl domain family member 30             | 0  |                                                                                                                                                                                                                                                                                                               | P:GO:0032313;<br>F:GO:0005097;<br>C:GO:0005622                                                                                                       |             | IPR000195; G3DSA:1.10.8.270<br>(GENE3D), PTHR22957 (PANTHER),<br>PTHR22957:SF20 (PANTHER) |
| -                       | -                                        | 0  |                                                                                                                                                                                                                                                                                                               |                                                                                                                                                      |             | -                                                                                         |
| -                       | -                                        | 0  |                                                                                                                                                                                                                                                                                                               |                                                                                                                                                      |             | SignalP (SIGNALP)                                                                         |
| -                       | -                                        | 0  |                                                                                                                                                                                                                                                                                                               |                                                                                                                                                      |             | -                                                                                         |
| Caenorhabditis elegans  | atp-binding cassette transporter 13-like | 0  |                                                                                                                                                                                                                                                                                                               | F:GO:0042626;<br>F:GO:0005215;<br>C:GO:0016021;<br>P:GO:0006810;<br>F:GO:0000166;<br>F:GO:0017111;<br>F:GO:0005524;<br>F:GO:0016887;<br>P:GO:0055085 |             | -                                                                                         |
| Caenorhabditis briggsae | phosphatidate cytidyltransferase         | 12 | P:GO:0016056;<br>P:GO:0008340;<br>C:GO:0016021;<br>P:GO:0040007;<br>P:GO:0007602;<br>P:GO:0000003;<br>P:GO:0043052;<br>P:GO:0002119;<br>F:GO:0004605;<br>C:GO:0005635;<br>C:GO:0005790;<br>C:GO:0005886                                                                                                       | -                                                                                                                                                    | EC:2.7.7.41 | IPR000374; PTHR13773 (PANTHER)                                                            |



|                           |                                             |    |                                                                                                                                                                                                                                                                                                                                |   |                             |                                                                                               |
|---------------------------|---------------------------------------------|----|--------------------------------------------------------------------------------------------------------------------------------------------------------------------------------------------------------------------------------------------------------------------------------------------------------------------------------|---|-----------------------------|-----------------------------------------------------------------------------------------------|
| Caenorhabditis briggsae   | phosphatidate cytidyltransferase            | 12 | P:GO:0016056;<br>P:GO:0008340;<br>C:GO:0016021;<br>P:GO:0040007;<br>P:GO:0007602;<br>P:GO:0000003;<br>P:GO:0043052;<br>P:GO:0002119;<br>F:GO:0004605;<br>C:GO:0005635;<br>C:GO:0005790;<br>C:GO:0005886                                                                                                                        | - | EC:2.7.7.41                 | IPR000374; PTHR13773 (PANTHER)                                                                |
| -                         | -                                           | 0  |                                                                                                                                                                                                                                                                                                                                |   |                             | -                                                                                             |
| -                         | -                                           | 0  |                                                                                                                                                                                                                                                                                                                                |   |                             | -                                                                                             |
| -                         | -                                           | 0  |                                                                                                                                                                                                                                                                                                                                |   |                             | SignalP (SIGNALP)                                                                             |
| Heligmosomoides polygyrus | glutathione s-transferase                   | 2  | F:GO:0016740;<br>P:GO:0008340                                                                                                                                                                                                                                                                                                  | - |                             | IPR004045; IPR012335; IPR012336;<br>PTHR11571 (PANTHER),<br>PTHR11571:SF7 (PANTHER)           |
| -                         | -                                           | 0  |                                                                                                                                                                                                                                                                                                                                |   |                             | -                                                                                             |
| -                         | -                                           | 0  |                                                                                                                                                                                                                                                                                                                                |   |                             | -                                                                                             |
| -                         | -                                           | 0  |                                                                                                                                                                                                                                                                                                                                |   |                             | -                                                                                             |
| -                         | -                                           | 0  |                                                                                                                                                                                                                                                                                                                                |   |                             | -                                                                                             |
| -                         | -                                           | 0  |                                                                                                                                                                                                                                                                                                                                |   |                             | -                                                                                             |
| -                         | -                                           | 0  |                                                                                                                                                                                                                                                                                                                                |   |                             | -                                                                                             |
| -                         | -                                           | 0  |                                                                                                                                                                                                                                                                                                                                |   |                             | SignalP (SIGNALP)                                                                             |
| Caenorhabditis elegans    | peptidylglycine alpha-amidating monoxyge-se | 19 | P:GO:0044260;<br>P:GO:0007595;<br>P:GO:0060173;<br>F:GO:0005515;<br>F:GO:0004598;<br>P:GO:0007417;<br>P:GO:0007507;<br>C:GO:0005624;<br>P:GO:0009268;<br>C:GO:0005615;<br>P:GO:0051384;<br>P:GO:0046688;<br>P:GO:0044238;<br>P:GO:0042493;<br>F:GO:0004504;<br>C:GO:0030141;<br>F:GO:0005507;<br>P:GO:0032355;<br>C:GO:0043204 | - | EC:4.3.2.5;<br>EC:1.14.17.3 | IPR000720; IPR001258; IPR011042;<br>IPR013017; PTHR10680 (PANTHER),<br>SSF63829 (SUPERFAMILY) |

|              |                                                  |    |                                                                                                                                                                                                                                                                                                                                                                                                                                                       |   |   |                                                                                                                                                           |
|--------------|--------------------------------------------------|----|-------------------------------------------------------------------------------------------------------------------------------------------------------------------------------------------------------------------------------------------------------------------------------------------------------------------------------------------------------------------------------------------------------------------------------------------------------|---|---|-----------------------------------------------------------------------------------------------------------------------------------------------------------|
| Pongo abelii | notch partial                                    | 26 | P:GO:0030097;<br>P:GO:0007219;<br>F:GO:0005515;<br>P:GO:0042246;<br>P:GO:0006355;<br>F:GO:0005509;<br>P:GO:0030326;<br>F:GO:0003706;<br>P:GO:0002011;<br>C:GO:0005576;<br>C:GO:0005737;<br>P:GO:0008285;<br>P:GO:0006916;<br>P:GO:0007050;<br>C:GO:0009986;<br>P:GO:0019827;<br>P:GO:0006917;<br>P:GO:0001709;<br>P:GO:0046579;<br>P:GO:0009887;<br>P:GO:0007368;<br>P:GO:0007399;<br>P:GO:0016049;<br>F:GO:0004872;<br>C:GO:0005887;<br>C:GO:0005634 | - | - | IPR000742; IPR006210; IPR013032;<br>IPR013111; G3DSA:2.10.25.10<br>(GENE3D), PTHR11201 (PANTHER),<br>PTHR11201:SF199 (PANTHER),<br>SSF57196 (SUPERFAMILY) |
|              |                                                  | 0  |                                                                                                                                                                                                                                                                                                                                                                                                                                                       |   |   |                                                                                                                                                           |
| Homo sapiens | wd repeat-containing protein 1 isoform 1 variant | 5  | C:GO:0005856;<br>C:GO:0005576;<br>C:GO:0005829;<br>F:GO:0003779;<br>P:GO:0007605                                                                                                                                                                                                                                                                                                                                                                      | - | - |                                                                                                                                                           |
|              |                                                  | 0  |                                                                                                                                                                                                                                                                                                                                                                                                                                                       |   |   |                                                                                                                                                           |
|              |                                                  | 0  |                                                                                                                                                                                                                                                                                                                                                                                                                                                       |   |   |                                                                                                                                                           |

|                         |                       |    |                                                                                                                                                                                                                                                                                                                                                                                                                                                                                                                                    |   |                                                                         |                                                                                                     |
|-------------------------|-----------------------|----|------------------------------------------------------------------------------------------------------------------------------------------------------------------------------------------------------------------------------------------------------------------------------------------------------------------------------------------------------------------------------------------------------------------------------------------------------------------------------------------------------------------------------------|---|-------------------------------------------------------------------------|-----------------------------------------------------------------------------------------------------|
| Caenorhabditis elegans  | aldehyde dehydroge-se | 35 | <p>P:GO:0030324;<br/> P:GO:0010628;<br/> P:GO:0031016;<br/> F:GO:0004028;<br/> P:GO:0051289;<br/> P:GO:0048566;<br/> P:GO:0048384;<br/> F:GO:0018479;<br/> P:GO:0035115;<br/> P:GO:0009952;<br/> P:GO:0001568;<br/> P:GO:0030902;<br/> P:GO:0014032;<br/> P:GO:0030900;<br/> P:GO:0009855;<br/> P:GO:0060324;<br/> C:GO:0005829;<br/> P:GO:0001936;<br/> P:GO:0008284;<br/> F:GO:0005497;<br/> P:GO:0042904;<br/> F:GO:0016918;<br/> F:GO:0042802;<br/> F:GO:0047113;<br/> F:GO:0004029;<br/> F:GO:0001758;<br/> P:GO:0031076;</p> | - | <p>EC:1.2.1.28;<br/> EC:1.2.99.3;<br/> EC:1.2.1.3;<br/> EC:1.2.1.36</p> | <p>IPR015590; IPR016161; IPR016163;<br/> PTHR11699:SF46 (PANTHER)</p>                               |
| -                       | -                     | 0  |                                                                                                                                                                                                                                                                                                                                                                                                                                                                                                                                    |   |                                                                         | -                                                                                                   |
| -                       | -                     | 0  |                                                                                                                                                                                                                                                                                                                                                                                                                                                                                                                                    |   |                                                                         | SignalP (SIGNALP)                                                                                   |
| Caenorhabditis briggsae | carboxypeptidase b1   | 0  | <p>F:GO:0004181;<br/> F:GO:0004180;<br/> P:GO:0030030;<br/> C:GO:0014704;<br/> C:GO:0030018;<br/> F:GO:0046872;<br/> F:GO:0008237;<br/> C:GO:0016020;<br/> C:GO:0030863;<br/> F:GO:0008233;<br/> C:GO:0008290;<br/> C:GO:0030027;<br/> P:GO:0008152;<br/> P:GO:0008150;<br/> P:GO:0006508;<br/> C:GO:0005737;<br/> F:GO:0003779;<br/> P:GO:0051693;<br/> F:GO:0008270;<br/> C:GO:0005856;<br/> P:GO:0030036;<br/> C:GO:0005576;<br/> C:GO:0005575;<br/> P:GO:0030032</p>                                                           |   |                                                                         | <p>IPR000834; G3DSA:3.40.630.10<br/> (GENE3D), PTHR11705 (PANTHER),<br/> SSF53187 (SUPERFAMILY)</p> |
| -                       | -                     | 0  |                                                                                                                                                                                                                                                                                                                                                                                                                                                                                                                                    |   |                                                                         | -                                                                                                   |

|                         |                                                            |    |                                                                                                                                                                       |                                                                                                                                                      |              |                                                                                                                                   |
|-------------------------|------------------------------------------------------------|----|-----------------------------------------------------------------------------------------------------------------------------------------------------------------------|------------------------------------------------------------------------------------------------------------------------------------------------------|--------------|-----------------------------------------------------------------------------------------------------------------------------------|
| Caenorhabditis elegans  | gei-4 interacting protein family member (gfi-2)            | 8  | P:GO:0040035;<br>P:GO:0009792;<br>P:GO:0010171;<br>P:GO:0002119;<br>P:GO:0040018;<br>P:GO:0040010;<br>P:GO:0008340;<br>P:GO:0006898                                   | -                                                                                                                                                    | -            |                                                                                                                                   |
| Caenorhabditis elegans  | gei-4 interacting protein family member (gfi-2)            | 8  | P:GO:0040035;<br>P:GO:0009792;<br>P:GO:0010171;<br>P:GO:0002119;<br>P:GO:0040018;<br>P:GO:0040010;<br>P:GO:0008340;<br>P:GO:0006898                                   | -                                                                                                                                                    | -            |                                                                                                                                   |
| -                       | -                                                          | 0  |                                                                                                                                                                       |                                                                                                                                                      |              | SignalP (SIGNALP)                                                                                                                 |
| -                       | -                                                          | 0  |                                                                                                                                                                       |                                                                                                                                                      |              | -                                                                                                                                 |
| -                       | -                                                          | 0  |                                                                                                                                                                       |                                                                                                                                                      |              | -                                                                                                                                 |
| -                       | -                                                          | 0  |                                                                                                                                                                       |                                                                                                                                                      |              | SignalP (SIGNALP)                                                                                                                 |
| -                       | -                                                          | 0  |                                                                                                                                                                       |                                                                                                                                                      |              | -                                                                                                                                 |
| Caenorhabditis briggsae | excitatory amino acid transporter 5-like                   | 3  | P:GO:0006835;<br>F:GO:0017153;<br>C:GO:0016021                                                                                                                        | -                                                                                                                                                    |              | IPR001991; PTHR11958:SF17 (PANTHER), SignalP (SIGNALP)                                                                            |
| Caenorhabditis briggsae | fat tumor suppressor homolog 3                             | 0  |                                                                                                                                                                       | C:GO:0016021;<br>C:GO:0016020;<br>F:GO:0003674;<br>P:GO:0007275;<br>C:GO:0005575;<br>C:GO:0005886;<br>P:GO:0007156;<br>F:GO:0005509;<br>P:GO:0007155 |              | IPR002126; IPR015919; IPR020894; PTHR10596 (PANTHER), PTHR10596:SF116 (PANTHER)                                                   |
| Caenorhabditis briggsae | g protein-coupled receptor ki-se 4                         | 5  | F:GO:0004872;<br>P:GO:0006468;<br>F:GO:0005524;<br>P:GO:0007165;<br>F:GO:0004703                                                                                      | -                                                                                                                                                    | EC:2.7.11.16 | IPR000239; IPR000719; IPR000961; IPR011009; IPR017442; G3DSA:1.10.510.10 (GENE3D), PTHR22985 (PANTHER), PTHR22985:SF101 (PANTHER) |
| Caenorhabditis elegans  | elegans protein partially confirmed by transcript evidence | 0  |                                                                                                                                                                       |                                                                                                                                                      |              | SignalP (SIGNALP)                                                                                                                 |
| -                       | -                                                          | 0  |                                                                                                                                                                       |                                                                                                                                                      |              | -                                                                                                                                 |
| Caenorhabditis briggsae | atp-binding cassette subfamily member 1                    | 10 | P:GO:0055114;<br>P:GO:0045329;<br>P:GO:0033539;<br>F:GO:0070991;<br>F:GO:0042802;<br>P:GO:0051793;<br>P:GO:0019915;<br>C:GO:0005759;<br>P:GO:0019254;<br>F:GO:0050660 | -                                                                                                                                                    |              | IPR006089; IPR006091; IPR006092; IPR009100; IPR013786; PTHR10909 (PANTHER), PTHR10909:SF10 (PANTHER)                              |
| -                       | -                                                          | 0  |                                                                                                                                                                       |                                                                                                                                                      |              | -                                                                                                                                 |
| -                       | -                                                          | 0  |                                                                                                                                                                       |                                                                                                                                                      |              | -                                                                                                                                 |
| -                       | -                                                          | 0  |                                                                                                                                                                       |                                                                                                                                                      |              | SignalP (SIGNALP)                                                                                                                 |
| -                       | -                                                          | 0  |                                                                                                                                                                       |                                                                                                                                                      |              | SignalP (SIGNALP)                                                                                                                 |
| Caenorhabditis elegans  | suppressor of activated let-60 ras family member (sur-2)   | 0  |                                                                                                                                                                       | P:GO:0006350;<br>P:GO:0045449;<br>C:GO:0005634                                                                                                       |              | -                                                                                                                                 |

|                         |                                                      |   |                                                                                                                                     |                                                                                                                    |                                                         |                                                                                                                                                                                                                  |
|-------------------------|------------------------------------------------------|---|-------------------------------------------------------------------------------------------------------------------------------------|--------------------------------------------------------------------------------------------------------------------|---------------------------------------------------------|------------------------------------------------------------------------------------------------------------------------------------------------------------------------------------------------------------------|
| Loa loa                 | negative elongation factor c d                       |   | F:GO:0003746;<br>3 C:GO:0017053;<br>P:GO:0007070                                                                                    | -                                                                                                                  |                                                         | IPR006942                                                                                                                                                                                                        |
| Caenorhabditis briggsae | briggsae cbr-tgt-2 protein                           | 0 |                                                                                                                                     | F:GO:0046872;<br>F:GO:0008479;<br>P:GO:0006400;<br>P:GO:0008033;<br>F:GO:0016740;<br>P:GO:0008616;<br>F:GO:0016757 |                                                         | -                                                                                                                                                                                                                |
| Caenorhabditis elegans  | neutral endopeptidase                                | 1 | F:GO:0008237                                                                                                                        | -                                                                                                                  |                                                         | IPR000718; IPR008753;<br>G3DSA:3.40.390.10 (GENE3D),<br>PTHR11733:SF24 (PANTHER),<br>SSF55486 (SUPERFAMILY)                                                                                                      |
|                         |                                                      | 0 |                                                                                                                                     |                                                                                                                    |                                                         | -                                                                                                                                                                                                                |
|                         |                                                      | 0 |                                                                                                                                     |                                                                                                                    |                                                         | -                                                                                                                                                                                                                |
| Caenorhabditis briggsae | binding protein family member (pab-1)                | 3 | P:GO:0009792;<br>F:GO:0000166;<br>F:GO:0003723                                                                                      | -                                                                                                                  |                                                         | -                                                                                                                                                                                                                |
| Caenorhabditis briggsae | binding protein family member (pab-1)                | 3 | P:GO:0009792;<br>F:GO:0000166;<br>F:GO:0003723                                                                                      | -                                                                                                                  |                                                         | -                                                                                                                                                                                                                |
| Caenorhabditis elegans  | binding protein family member (pab-1)                | 3 | P:GO:0009792;<br>F:GO:0000166;<br>F:GO:0003723                                                                                      | -                                                                                                                  |                                                         | SignalP (SIGNALP)                                                                                                                                                                                                |
| Caenorhabditis elegans  | binding protein family member (pab-1)                | 3 | P:GO:0009792;<br>F:GO:0000166;<br>F:GO:0003723                                                                                      | -                                                                                                                  |                                                         | SignalP (SIGNALP)                                                                                                                                                                                                |
| Ancylostoma ceylanicum  | tpa_inf: eukaryotic translation elongation factor 1a | 8 | C:GO:0005737;<br>P:GO:0009792;<br>P:GO:0002119;<br>P:GO:0007276;<br>F:GO:0003746;<br>F:GO:0005525;<br>P:GO:0006414;<br>F:GO:0003924 | -                                                                                                                  | EC:3.6.5.1;<br>EC:3.6.5.2;<br>EC:3.6.5.3;<br>EC:3.6.5.4 | IPR000795; IPR004160; IPR004161;<br>IPR004539; IPR009000; IPR009001;<br>G3DSA:2.40.30.10 (GENE3D),<br>G3DSA:3.40.50.300 (GENE3D),<br>PTHR23115 (PANTHER),<br>PTHR23115:SF37 (PANTHER),<br>SSF52540 (SUPERFAMILY) |
| Caenorhabditis elegans  | microtubule binding protein                          | 2 | P:GO:0009987;<br>F:GO:0005515                                                                                                       | -                                                                                                                  |                                                         | IPR000048; IPR001715; SignalP<br>(SIGNALP), SSF52540 (SUPERFAMILY)                                                                                                                                               |
| Caenorhabditis elegans  | microtubule binding protein                          | 2 | P:GO:0009987;<br>F:GO:0005515                                                                                                       | -                                                                                                                  |                                                         | IPR000048; IPR001715; SignalP<br>(SIGNALP), SSF52540 (SUPERFAMILY)                                                                                                                                               |
| Caenorhabditis elegans  | microtubule binding protein                          | 2 | P:GO:0009987;<br>F:GO:0005515                                                                                                       | -                                                                                                                  |                                                         | IPR000048; IPR001715; SignalP<br>(SIGNALP), SSF52540 (SUPERFAMILY)                                                                                                                                               |
| Caenorhabditis elegans  | microtubule binding protein                          | 2 | P:GO:0009987;<br>F:GO:0005515                                                                                                       | -                                                                                                                  |                                                         | IPR000048; IPR001715; SignalP<br>(SIGNALP), SSF52540 (SUPERFAMILY)                                                                                                                                               |
|                         |                                                      | 0 |                                                                                                                                     |                                                                                                                    |                                                         | -                                                                                                                                                                                                                |
|                         |                                                      | 0 |                                                                                                                                     |                                                                                                                    |                                                         | -                                                                                                                                                                                                                |
|                         |                                                      | 0 |                                                                                                                                     |                                                                                                                    |                                                         | -                                                                                                                                                                                                                |
|                         |                                                      | 0 |                                                                                                                                     |                                                                                                                    |                                                         | -                                                                                                                                                                                                                |
|                         |                                                      | 0 |                                                                                                                                     |                                                                                                                    |                                                         | SignalP (SIGNALP)                                                                                                                                                                                                |
| Caenorhabditis briggsae | zinc finger in meiosis family member (zim-3)         | 0 |                                                                                                                                     | F:GO:0008270;<br>C:GO:0005622                                                                                      |                                                         | IPR007087; IPR015880                                                                                                                                                                                             |
| Loa loa                 | hypothetical protein LOAG_02027 [Loa loa]            | 0 |                                                                                                                                     | F:GO:0005525;<br>F:GO:0051020;<br>F:GO:0005085                                                                     |                                                         | -                                                                                                                                                                                                                |

|                         |                                                               |   |                                                                                                                                                      |                                                                 |             |                                                                                                                     |
|-------------------------|---------------------------------------------------------------|---|------------------------------------------------------------------------------------------------------------------------------------------------------|-----------------------------------------------------------------|-------------|---------------------------------------------------------------------------------------------------------------------|
| Ectocarpus siliculosus  | protein                                                       | 9 | F:GO:0004674;<br>C:GO:0005874;<br>F:GO:0031625;<br>C:GO:0005813;<br>P:GO:0051301;<br>F:GO:0005524;<br>P:GO:0007067;<br>C:GO:0005819;<br>P:GO:0006468 | -                                                               | EC:2.7.11.0 | IPR000719; IPR011009; IPR017442;<br>IPR020636; IPR020663;<br>G3DSA:1.10.510.10 (GENE3D)                             |
| -                       | -                                                             | 0 |                                                                                                                                                      |                                                                 |             | SignalP (SIGNALP)                                                                                                   |
| -                       | -                                                             | 0 |                                                                                                                                                      |                                                                 |             | -                                                                                                                   |
| Caenorhabditis briggsae | Hypothetical protein CBG11218 [Caenorhabditis briggsae]       | 0 |                                                                                                                                                      | F:GO:0003723;<br>F:GO:0005488;<br>P:GO:0006396;<br>F:GO:0008173 |             | -                                                                                                                   |
| -                       | -                                                             | 0 |                                                                                                                                                      |                                                                 |             | -                                                                                                                   |
| Caenorhabditis briggsae | ybri_caeel ame: full=uncharacterized protein                  | 0 |                                                                                                                                                      | P:GO:0006898                                                    |             | -                                                                                                                   |
| -                       | -                                                             | 0 |                                                                                                                                                      |                                                                 |             | -                                                                                                                   |
| -                       | -                                                             | 0 |                                                                                                                                                      |                                                                 |             | -                                                                                                                   |
| -                       | -                                                             | 0 |                                                                                                                                                      |                                                                 |             | -                                                                                                                   |
| -                       | -                                                             | 0 |                                                                                                                                                      |                                                                 |             | SignalP (SIGNALP)                                                                                                   |
| Macaca mulatta          | PREDICTED: hypothetical protein LOC100427666 [Macaca mulatta] | 0 |                                                                                                                                                      |                                                                 |             | SignalP (SIGNALP)                                                                                                   |
| Caenorhabditis briggsae | serine threonine-protein ki-se sbk1                           | 5 | P:GO:0018107;<br>P:GO:0018105;<br>F:GO:0005524;<br>P:GO:0007420;<br>F:GO:0004674                                                                     | -                                                               | EC:2.7.11.0 | IPR000719; IPR011009; IPR017442;<br>G3DSA:1.10.510.10 (GENE3D),<br>PTHR22986 (PANTHER),<br>PTHR22986:SF19 (PANTHER) |
| -                       | -                                                             | 0 |                                                                                                                                                      |                                                                 |             | -                                                                                                                   |
| -                       | -                                                             | 0 |                                                                                                                                                      |                                                                 |             | -                                                                                                                   |
| Loa loa                 | voltage-gated ion channel                                     | 4 | C:GO:0016021;<br>F:GO:0005216;<br>P:GO:0006811;<br>P:GO:0055085                                                                                      | -                                                               |             | -                                                                                                                   |
| -                       | -                                                             | 0 |                                                                                                                                                      |                                                                 |             | -                                                                                                                   |
| -                       | -                                                             | 0 |                                                                                                                                                      |                                                                 |             | -                                                                                                                   |
| -                       | -                                                             | 0 |                                                                                                                                                      |                                                                 |             | -                                                                                                                   |
| Caenorhabditis elegans  | r--dependent r- polymerase family family member (rrf-1)       | 0 |                                                                                                                                                      |                                                                 |             | -                                                                                                                   |
| Caenorhabditis briggsae | mgc26979 protein                                              | 8 | C:GO:0030659;<br>P:GO:0030433;<br>C:GO:0060170;<br>C:GO:0005813;<br>P:GO:0010826;<br>F:GO:0051082;<br>P:GO:0042384;<br>C:GO:0005789                  | -                                                               |             | IPR019170; PTHR21274 (PANTHER),<br>SignalP (SIGNALP)                                                                |
| Caenorhabditis elegans  | patched family protein                                        | 8 | P:GO:0040025;<br>F:GO:0008158;<br>P:GO:0040018;<br>P:GO:0018996;<br>P:GO:0040002;<br>P:GO:0040011;<br>C:GO:0016021;<br>P:GO:0019915                  | -                                                               |             | IPR003392; PTHR10796 (PANTHER),<br>PTHR10796:SF14 (PANTHER), SignalP<br>(SIGNALP)                                   |
| Caenorhabditis briggsae | reti-l pigment epithelium-specific protein b                  | 1 | F:GO:0005515                                                                                                                                         | -                                                               |             | IPR004294; PTHR10543:SF4<br>(PANTHER)                                                                               |
| -                       | -                                                             | 0 |                                                                                                                                                      |                                                                 |             | SignalP (SIGNALP)                                                                                                   |

|                         |                                                         |   |                                                                                                                    |                                                                                                                                                      |                                                                                                                                   |
|-------------------------|---------------------------------------------------------|---|--------------------------------------------------------------------------------------------------------------------|------------------------------------------------------------------------------------------------------------------------------------------------------|-----------------------------------------------------------------------------------------------------------------------------------|
|                         | -                                                       | 0 |                                                                                                                    |                                                                                                                                                      | -                                                                                                                                 |
| Ostertagia ostertagi    | metalloprotease 1 precursor                             | 2 | F:GO:0004222;<br>P:GO:0006508                                                                                      | -                                                                                                                                                    | EC:3.4.24.0<br>IPR013032; PTHR10127 (PANTHER),<br>PTHR10127:SF65 (PANTHER)                                                        |
|                         | -                                                       | 0 |                                                                                                                    |                                                                                                                                                      | -                                                                                                                                 |
| Caenorhabditis elegans  | quiescin q6 sulfhydryl oxidase 2                        | 5 | P:GO:0040010;<br>C:GO:0043231;<br>F:GO:0016491;<br>P:GO:0040017;<br>C:GO:0016020                                   | -                                                                                                                                                    | IPR005746; IPR012335; IPR012336;<br>IPR013766; IPR017936; PTHR18929<br>(PANTHER), SignalP (SIGNALP)                               |
| Homo sapiens            | cytochrome b5 reductase 3                               | 7 | F:GO:0004128;<br>C:GO:0005789;<br>P:GO:0008015;<br>C:GO:0005833;<br>P:GO:0055114;<br>P:GO:0006695;<br>C:GO:0005741 | -                                                                                                                                                    | EC:1.6.2.2<br>IPR001433; G3DSA:3.40.50.80<br>(GENE3D), PTHR19370 (PANTHER),<br>PTHR19370:SF3 (PANTHER), SSF52343<br>(SUPERFAMILY) |
|                         | -                                                       | 0 |                                                                                                                    |                                                                                                                                                      | SignalP (SIGNALP)                                                                                                                 |
| Caenorhabditis briggsae | arch_caebr_ame: full=protein archease-like              | 0 |                                                                                                                    |                                                                                                                                                      | IPR002804; PD012969 (PRODOM),<br>PTHR12682:SF8 (PANTHER)                                                                          |
|                         | -                                                       | 0 |                                                                                                                    |                                                                                                                                                      | -                                                                                                                                 |
| Caenorhabditis elegans  | glycerol uptake facilitator                             | 0 |                                                                                                                    | F:GO:0005215;<br>C:GO:0005929;<br>C:GO:0016021;<br>C:GO:0016020;<br>P:GO:0006810;<br>C:GO:0043025;<br>P:GO:0006833;<br>P:GO:0055085;<br>F:GO:0015250 | -                                                                                                                                 |
|                         | -                                                       | 0 |                                                                                                                    |                                                                                                                                                      | SignalP (SIGNALP)                                                                                                                 |
|                         | -                                                       | 0 |                                                                                                                    |                                                                                                                                                      | -                                                                                                                                 |
| Caenorhabditis elegans  | cuticular collagen                                      | 3 | C:GO:0016021;<br>P:GO:0010171;<br>F:GO:0005515                                                                     | -                                                                                                                                                    | PTHR10499 (PANTHER),<br>PTHR10499:SF58 (PANTHER)                                                                                  |
| Caenorhabditis briggsae | Hypothetical protein CBG13503 [Caenorhabditis briggsae] | 0 |                                                                                                                    |                                                                                                                                                      | -                                                                                                                                 |
|                         | -                                                       | 0 |                                                                                                                    |                                                                                                                                                      | SignalP (SIGNALP)                                                                                                                 |
| Caenorhabditis briggsae | preg-nicy-induced growth inhibitor                      | 0 |                                                                                                                    | P:GO:0007281;<br>F:GO:0003674;<br>F:GO:0005488;<br>P:GO:0008152;<br>F:GO:0003824;<br>P:GO:0008150;<br>P:GO:0007126;<br>C:GO:0005575                  | G3DSA:3.50.50.60 (GENE3D),<br>SSF51905 (SUPERFAMILY)                                                                              |
|                         | -                                                       | 0 |                                                                                                                    |                                                                                                                                                      | -                                                                                                                                 |
|                         | -                                                       | 0 |                                                                                                                    |                                                                                                                                                      | -                                                                                                                                 |
| Caenorhabditis elegans  | 3-oxoacyl-                                              | 2 | F:GO:0016747;<br>P:GO:0009058                                                                                      | -                                                                                                                                                    | EC:2.3.1.0<br>IPR000794; IPR014031; IPR016038;<br>IPR016039; PTHR11712:SF23<br>(PANTHER)                                          |
| Caenorhabditis elegans  | briggsae cbr-hhat-1 protein                             | 0 |                                                                                                                    |                                                                                                                                                      | SignalP (SIGNALP)                                                                                                                 |
|                         | -                                                       | 0 |                                                                                                                    |                                                                                                                                                      | -                                                                                                                                 |

|                         |                                                                  |    |                                                                                                                                                                       |                                                                                                                                                                       |             |                                                                                                              |
|-------------------------|------------------------------------------------------------------|----|-----------------------------------------------------------------------------------------------------------------------------------------------------------------------|-----------------------------------------------------------------------------------------------------------------------------------------------------------------------|-------------|--------------------------------------------------------------------------------------------------------------|
| Brugia malayi           | plasma glutamate carboxypeptidase                                | 0  |                                                                                                                                                                       | F:GO:0003674;<br>F:GO:0008237;<br>C:GO:0005576;<br>C:GO:0005575;<br>F:GO:0008233;<br>P:GO:0006508;<br>F:GO:0046872;<br>P:GO:0008150;<br>F:GO:0004180;<br>F:GO:0004177 |             | IPR007484; G3DSA:3.40.630.10 (GENE3D), PTHR12053 (PANTHER), PTHR12053:SF2 (PANTHER), SSF53187 (SUPERFAMILY)  |
| -                       | -                                                                | 0  |                                                                                                                                                                       |                                                                                                                                                                       |             | -                                                                                                            |
| Caenorhabditis briggsae | atpase type 13a1                                                 | 5  | C:GO:0016021;<br>F:GO:0015662;<br>P:GO:0006754;<br>F:GO:0005524;<br>P:GO:0006812                                                                                      | -                                                                                                                                                                     |             | IPR001757; PTHR11939:SF48 (PANTHER)                                                                          |
| Caenorhabditis elegans  | c2 domain containing protein                                     | 0  |                                                                                                                                                                       |                                                                                                                                                                       |             | -                                                                                                            |
| -                       | -                                                                | 0  |                                                                                                                                                                       |                                                                                                                                                                       |             | -                                                                                                            |
| -                       | -                                                                | 0  |                                                                                                                                                                       |                                                                                                                                                                       |             | -                                                                                                            |
| -                       | -                                                                | 0  |                                                                                                                                                                       |                                                                                                                                                                       |             | -                                                                                                            |
| -                       | -                                                                | 0  |                                                                                                                                                                       |                                                                                                                                                                       |             | -                                                                                                            |
| Caenorhabditis briggsae | serine threonine-protein phosphatase pp1-alpha catalytic subunit | 1  | F:GO:0016787                                                                                                                                                          | -                                                                                                                                                                     |             | IPR004843; IPR006186; G3DSA:3.60.21.10 (GENE3D), PTHR11668:SF19 (PANTHER), SSF56300 (SUPERFAMILY)            |
| -                       | -                                                                | 0  |                                                                                                                                                                       |                                                                                                                                                                       |             | -                                                                                                            |
| Caenorhabditis remanei  | elegans protein confirmed by transcript evidence                 | 3  | P:GO:0006508;<br>F:GO:0004181;<br>F:GO:0008270                                                                                                                        | -                                                                                                                                                                     | EC:3.4.17.0 | IPR000834; G3DSA:3.40.630.10 (GENE3D), PTHR11705 (PANTHER), PTHR11705:SF12 (PANTHER), SSF53187 (SUPERFAMILY) |
| -                       | -                                                                | 0  |                                                                                                                                                                       |                                                                                                                                                                       |             | -                                                                                                            |
| -                       | -                                                                | 0  |                                                                                                                                                                       |                                                                                                                                                                       |             | -                                                                                                            |
| Caenorhabditis elegans  | hypothetical protein F07C3.2 [Caenorhabditis elegans]            | 0  |                                                                                                                                                                       |                                                                                                                                                                       |             | -                                                                                                            |
| -                       | -                                                                | 0  |                                                                                                                                                                       |                                                                                                                                                                       |             | -                                                                                                            |
| -                       | -                                                                | 0  |                                                                                                                                                                       |                                                                                                                                                                       |             | -                                                                                                            |
| Caenorhabditis elegans  | obg-like atpase 1                                                | 10 | C:GO:0016021;<br>P:GO:0006200;<br>P:GO:0015684;<br>F:GO:0015093;<br>F:GO:0005524;<br>F:GO:0005515;<br>P:GO:0009792;<br>C:GO:0005737;<br>F:GO:0016787;<br>F:GO:0005525 | -                                                                                                                                                                     |             | -                                                                                                            |
| Caenorhabditis elegans  | obg-like atpase 1                                                | 10 | C:GO:0016021;<br>P:GO:0006200;<br>P:GO:0015684;<br>F:GO:0015093;<br>F:GO:0005524;<br>F:GO:0005515;<br>P:GO:0009792;<br>C:GO:0005737;<br>F:GO:0016787;<br>F:GO:0005525 | -                                                                                                                                                                     |             | -                                                                                                            |
| -                       | -                                                                | 0  |                                                                                                                                                                       |                                                                                                                                                                       |             | -                                                                                                            |
| -                       | -                                                                | 0  |                                                                                                                                                                       |                                                                                                                                                                       |             | SignalP (SIGNALP)                                                                                            |



|                         |                                                  |    |  |                                                                                                                                                                                                                          |   |                                                                                                                                                                                                                               |
|-------------------------|--------------------------------------------------|----|--|--------------------------------------------------------------------------------------------------------------------------------------------------------------------------------------------------------------------------|---|-------------------------------------------------------------------------------------------------------------------------------------------------------------------------------------------------------------------------------|
| Caenorhabditis elegans  | lbp bpi cetp n-termi-l domain containing protein | 0  |  | F:GO:0008289                                                                                                                                                                                                             |   | IPR017943; G3DSA:3.15.10.10 (GENE3D), PTHR10504 (PANTHER), PTHR10504:SF19 (PANTHER)                                                                                                                                           |
|                         | -                                                | 0  |  |                                                                                                                                                                                                                          |   | -                                                                                                                                                                                                                             |
|                         | -                                                | 0  |  |                                                                                                                                                                                                                          |   | -                                                                                                                                                                                                                             |
|                         | -                                                | 0  |  |                                                                                                                                                                                                                          |   | -                                                                                                                                                                                                                             |
|                         | -                                                | 0  |  |                                                                                                                                                                                                                          |   | -                                                                                                                                                                                                                             |
|                         | -                                                | 0  |  |                                                                                                                                                                                                                          |   | SignalP (SIGNALP)                                                                                                                                                                                                             |
|                         | -                                                | 0  |  |                                                                                                                                                                                                                          |   | -                                                                                                                                                                                                                             |
| Macaca mulatta          | transcription factor dp-1                        | 11 |  | P:GO:0000084;<br>P:GO:0006357;<br>P:GO:0006915;<br>C:GO:0005667;<br>P:GO:0008544;<br>F:GO:0003677;<br>F:GO:0003700;<br>F:GO:0019904;<br>F:GO:0003713;<br>P:GO:0045893;<br>P:GO:0008283                                   | - | -                                                                                                                                                                                                                             |
|                         | -                                                | 0  |  |                                                                                                                                                                                                                          |   | -                                                                                                                                                                                                                             |
| Caenorhabditis elegans  | briggsae cbr-fer-1 protein                       | 0  |  | C:GO:0016021                                                                                                                                                                                                             |   | -                                                                                                                                                                                                                             |
| Caenorhabditis elegans  | elegans protein confirmed by transcript evidence | 1  |  | F:GO:0005515                                                                                                                                                                                                             | - | -                                                                                                                                                                                                                             |
|                         | -                                                | 0  |  |                                                                                                                                                                                                                          |   | -                                                                                                                                                                                                                             |
|                         | -                                                | 0  |  |                                                                                                                                                                                                                          |   | -                                                                                                                                                                                                                             |
| Caenorhabditis briggsae | briggsae cbr-tim-1 protein                       | 0  |  |                                                                                                                                                                                                                          |   | SignalP (SIGNALP)                                                                                                                                                                                                             |
|                         | -                                                | 0  |  |                                                                                                                                                                                                                          |   | -                                                                                                                                                                                                                             |
|                         | -                                                | 0  |  |                                                                                                                                                                                                                          |   | -                                                                                                                                                                                                                             |
|                         | -                                                | 0  |  |                                                                                                                                                                                                                          |   | -                                                                                                                                                                                                                             |
| Caenorhabditis remanei  | briggsae cbr-tag-151 protein                     | 6  |  | P:GO:0009792;<br>F:GO:0005515;<br>P:GO:0042254;<br>P:GO:0040010;<br>P:GO:0040011;<br>C:GO:0005634                                                                                                                        | - | IPR012948                                                                                                                                                                                                                     |
| Loa loa                 | hypothetical protein LOAG_04123 [Loa loa]        | 0  |  |                                                                                                                                                                                                                          |   | SignalP (SIGNALP)                                                                                                                                                                                                             |
| Caenorhabditis elegans  | megf11 protein                                   | 13 |  | P:GO:0012501;<br>P:GO:0043652;<br>P:GO:0008340;<br>C:GO:0030670;<br>P:GO:0042742;<br>P:GO:0034620;<br>P:GO:0031532;<br>P:GO:0045184;<br>P:GO:0043654;<br>C:GO:0031260;<br>C:GO:0009986;<br>F:GO:0005515;<br>P:GO:0001845 | - | IPR000742; IPR002049; IPR006210; IPR009030; IPR011489; IPR013032; PD936484 (PRODOM), PR00011 (PRINTS), G3DSA:2.170.300.10 (GENE3D), PTHR11201 (PANTHER), PTHR11201:SF221 (PANTHER), SignalP (SIGNALP), SSF57196 (SUPERFAMILY) |
|                         | -                                                | 0  |  |                                                                                                                                                                                                                          |   | -                                                                                                                                                                                                                             |
|                         | -                                                | 0  |  |                                                                                                                                                                                                                          |   | -                                                                                                                                                                                                                             |

|                               |                                                            |    |                                                                                                                                                                                                         |                                                                                                   |             |                                                          |
|-------------------------------|------------------------------------------------------------|----|---------------------------------------------------------------------------------------------------------------------------------------------------------------------------------------------------------|---------------------------------------------------------------------------------------------------|-------------|----------------------------------------------------------|
| Selaginella moellendorffii    | d-2-like helicase                                          | 11 | C:GO:0005654;<br>F:GO:0016890;<br>P:GO:0043137;<br>F:GO:0017108;<br>F:GO:0004386;<br>P:GO:0006284;<br>P:GO:0006264;<br>F:GO:0016887;<br>P:GO:0045740;<br>C:GO:0005760;<br>F:GO:0005488                  | -                                                                                                 | EC:3.1.25.0 | PTHR10887 (PANTHER)                                      |
| -                             | -                                                          | 0  | -                                                                                                                                                                                                       | -                                                                                                 | -           | -                                                        |
| -                             | -                                                          | 0  | -                                                                                                                                                                                                       | -                                                                                                 | -           | -                                                        |
| Loa loa                       | briggsae cbr-nex-3 protein                                 | 0  | -                                                                                                                                                                                                       | F:GO:0005509;<br>F:GO:0005544;<br>F:GO:0005515                                                    | -           | -                                                        |
| -                             | -                                                          | 0  | -                                                                                                                                                                                                       | -                                                                                                 | -           | -                                                        |
| Brugia malayi                 | sodium:neurotransmitter symporter family protein           | 3  | C:GO:0005887;<br>F:GO:0005328;<br>P:GO:0006836                                                                                                                                                          | -                                                                                                 | -           | IPR000175; PTHR11616:SF20 (PANTHER), SignalP (SIGNALP)   |
| -                             | -                                                          | 0  | -                                                                                                                                                                                                       | -                                                                                                 | -           | SignalP (SIGNALP)                                        |
| -                             | -                                                          | 0  | -                                                                                                                                                                                                       | -                                                                                                 | -           | -                                                        |
| Caenorhabditis briggsae       | rt14 protein                                               | 1  | F:GO:0005515                                                                                                                                                                                            | -                                                                                                 | -           | IPR015362; PTHR22959 (PANTHER)                           |
| Caenorhabditis briggsae       | within the bgcn gene intron protein                        | 5  | C:GO:0035145;<br>F:GO:0043022;<br>P:GO:0045727;<br>F:GO:0005515;<br>P:GO:0000184                                                                                                                        | -                                                                                                 | -           | IPR015362; PTHR22959 (PANTHER)                           |
| -                             | -                                                          | 0  | -                                                                                                                                                                                                       | -                                                                                                 | -           | -                                                        |
| -                             | -                                                          | 0  | -                                                                                                                                                                                                       | -                                                                                                 | -           | -                                                        |
| -                             | -                                                          | 0  | -                                                                                                                                                                                                       | -                                                                                                 | -           | -                                                        |
| Brugia malayi                 | dystrobrevin beta                                          | 12 | F:GO:0005277;<br>P:GO:0015870;<br>F:GO:0008270;<br>F:GO:0005509;<br>C:GO:0045202;<br>P:GO:0007271;<br>F:GO:0005515;<br>P:GO:0007529;<br>P:GO:0046716;<br>P:GO:0040017;<br>C:GO:0016010;<br>C:GO:0005737 | -                                                                                                 | -           | IPR000433; PTHR11915 (PANTHER), PTHR11915:SF16 (PANTHER) |
| -                             | -                                                          | 0  | -                                                                                                                                                                                                       | -                                                                                                 | -           | PS51257 (PROFILE)                                        |
| Strongylocentrotus purpuratus | endonuclease-reverse transcriptase                         | 0  | -                                                                                                                                                                                                       | F:GO:0003723;<br>P:GO:0006278;<br>F:GO:0008270;<br>F:GO:0004519;<br>C:GO:0005622;<br>F:GO:0003964 | -           | -                                                        |
| Caenorhabditis elegans        | elegans protein partially confirmed by transcript evidence | 0  | -                                                                                                                                                                                                       | -                                                                                                 | -           | -                                                        |
| Caenorhabditis elegans        | briggsae cbr-ptr-16 protein                                | 5  | P:GO:0018996;<br>C:GO:0016021;<br>P:GO:0040018;<br>F:GO:0008158;<br>P:GO:0040011                                                                                                                        | -                                                                                                 | -           | -                                                        |
| -                             | -                                                          | 0  | -                                                                                                                                                                                                       | -                                                                                                 | -           | -                                                        |
| -                             | -                                                          | 0  | -                                                                                                                                                                                                       | -                                                                                                 | -           | -                                                        |

|                         |                                                            |    |                                                                                                                                                                                                                                                                                                                                                                                                                                                                                         |              |                                                                                                                       |                                    |
|-------------------------|------------------------------------------------------------|----|-----------------------------------------------------------------------------------------------------------------------------------------------------------------------------------------------------------------------------------------------------------------------------------------------------------------------------------------------------------------------------------------------------------------------------------------------------------------------------------------|--------------|-----------------------------------------------------------------------------------------------------------------------|------------------------------------|
|                         | -                                                          | 0  |                                                                                                                                                                                                                                                                                                                                                                                                                                                                                         |              | -                                                                                                                     |                                    |
|                         | -                                                          | 0  |                                                                                                                                                                                                                                                                                                                                                                                                                                                                                         |              | -                                                                                                                     |                                    |
|                         | -                                                          | 0  |                                                                                                                                                                                                                                                                                                                                                                                                                                                                                         |              | PTHR14790 (PANTHER),<br>PTHR14790:SF3 (PANTHER)                                                                       |                                    |
|                         | -                                                          | 0  |                                                                                                                                                                                                                                                                                                                                                                                                                                                                                         |              | SignalP (SIGNALP)                                                                                                     |                                    |
|                         | -                                                          | 0  |                                                                                                                                                                                                                                                                                                                                                                                                                                                                                         |              | -                                                                                                                     |                                    |
|                         | -                                                          | 0  |                                                                                                                                                                                                                                                                                                                                                                                                                                                                                         |              | -                                                                                                                     |                                    |
|                         | -                                                          | 0  |                                                                                                                                                                                                                                                                                                                                                                                                                                                                                         |              | -                                                                                                                     |                                    |
| Caenorhabditis briggsae | briggsae cbr-rbc-2 protein                                 | 1  | P:GO:0006508                                                                                                                                                                                                                                                                                                                                                                                                                                                                            | -            | IPR015943; PTHR22847 (PANTHER),<br>PTHR22847:SF4 (PANTHER)                                                            |                                    |
| Caenorhabditis remanei  | tryptophan -dioxyge-se                                     | 59 | P:GO:0006006;<br>P:GO:0006006;<br>P:GO:0045892;<br>P:GO:0008595;<br>P:GO:0035289;<br>P:GO:0006357;<br>P:GO:0035071;<br>P:GO:0035224;<br>P:GO:0050770;<br>P:GO:0019441;<br>P:GO:0008348;<br>P:GO:0006911;<br>P:GO:0007418;<br>F:GO:0020037;<br>F:GO:0008134;<br>P:GO:0007377;<br>P:GO:0046843;<br>P:GO:0007388;<br>P:GO:0007464;<br>P:GO:0040010;<br>P:GO:0007486;<br>P:GO:0007367;<br>P:GO:0007254;<br>F:GO:0004558;<br>P:GO:0007485;<br>C:GO:0005737;<br>F:GO:0004833;<br>P:GO:0048099 | -            | EC:3.2.1.20;<br>EC:1.13.11.1<br>1                                                                                     | IPR004981; SSF140959 (SUPERFAMILY) |
|                         | -                                                          | 0  |                                                                                                                                                                                                                                                                                                                                                                                                                                                                                         |              | -                                                                                                                     |                                    |
| Caenorhabditis elegans  | cubn_caeel_ame: full=probable cubilin flags: precursor     | 0  |                                                                                                                                                                                                                                                                                                                                                                                                                                                                                         | F:GO:0005509 | -                                                                                                                     |                                    |
|                         | -                                                          | 0  |                                                                                                                                                                                                                                                                                                                                                                                                                                                                                         |              | -                                                                                                                     |                                    |
| Caenorhabditis elegans  | elegans protein partially confirmed by transcript evidence | 0  |                                                                                                                                                                                                                                                                                                                                                                                                                                                                                         | F:GO:0003676 | -                                                                                                                     |                                    |
| Caenorhabditis elegans  | elegans protein partially confirmed by transcript evidence | 0  |                                                                                                                                                                                                                                                                                                                                                                                                                                                                                         | F:GO:0003676 | IPR003034; G3DSA:1.10.720.30<br>(GENE3D), PTHR15683 (PANTHER),<br>SSF68906 (SUPERFAMILY)                              |                                    |
| Caenorhabditis elegans  | elegans protein partially confirmed by transcript evidence | 0  |                                                                                                                                                                                                                                                                                                                                                                                                                                                                                         | F:GO:0003676 | IPR003034; G3DSA:1.10.720.30<br>(GENE3D), PTHR15683 (PANTHER),<br>SSF68906 (SUPERFAMILY)                              |                                    |
|                         | -                                                          | 0  |                                                                                                                                                                                                                                                                                                                                                                                                                                                                                         |              | -                                                                                                                     |                                    |
|                         | -                                                          | 0  |                                                                                                                                                                                                                                                                                                                                                                                                                                                                                         |              | -                                                                                                                     |                                    |
|                         | -                                                          | 0  |                                                                                                                                                                                                                                                                                                                                                                                                                                                                                         |              | -                                                                                                                     |                                    |
|                         | -                                                          | 0  |                                                                                                                                                                                                                                                                                                                                                                                                                                                                                         |              | -                                                                                                                     |                                    |
|                         | -                                                          | 0  |                                                                                                                                                                                                                                                                                                                                                                                                                                                                                         |              | -                                                                                                                     |                                    |
| Caenorhabditis elegans  | Hypothetical protein R12B2.2 [Caenorhabditis elegans]      | 0  |                                                                                                                                                                                                                                                                                                                                                                                                                                                                                         |              | -                                                                                                                     |                                    |
| Loa loa                 | methyltransferase type 11                                  | 0  | P:GO:0008610;<br>F:GO:0008168;<br>F:GO:0016740;<br>P:GO:0008152                                                                                                                                                                                                                                                                                                                                                                                                                         |              | IPR013216; G3DSA:3.40.50.150<br>(GENE3D), PTHR10108 (PANTHER),<br>PTHR10108:SF10 (PANTHER),<br>SSF53335 (SUPERFAMILY) |                                    |
|                         | -                                                          | 0  |                                                                                                                                                                                                                                                                                                                                                                                                                                                                                         |              | SignalP (SIGNALP)                                                                                                     |                                    |





|                         |                                                            |    |                                                                                                                                                                                                                                                                                                                                                                                                                                                                                         |                                                |                                                                                     |
|-------------------------|------------------------------------------------------------|----|-----------------------------------------------------------------------------------------------------------------------------------------------------------------------------------------------------------------------------------------------------------------------------------------------------------------------------------------------------------------------------------------------------------------------------------------------------------------------------------------|------------------------------------------------|-------------------------------------------------------------------------------------|
|                         | -                                                          | 0  |                                                                                                                                                                                                                                                                                                                                                                                                                                                                                         |                                                | -                                                                                   |
| Loa loa                 | sh2 domain binding protein                                 | 4  | C:GO:0016593;<br>P:GO:0010390;<br>P:GO:0033523;<br>F:GO:0042169                                                                                                                                                                                                                                                                                                                                                                                                                         |                                                | PTHR14027 (PANTHER),<br>PTHR14027:SF2 (PANTHER)                                     |
|                         | -                                                          | 0  |                                                                                                                                                                                                                                                                                                                                                                                                                                                                                         |                                                | -                                                                                   |
|                         | -                                                          | 0  |                                                                                                                                                                                                                                                                                                                                                                                                                                                                                         |                                                | SignalP (SIGNALP)                                                                   |
|                         | -                                                          | 0  |                                                                                                                                                                                                                                                                                                                                                                                                                                                                                         |                                                | -                                                                                   |
| Caenorhabditis briggsae | elegans protein partially confirmed by transcript evidence | 2  | F:GO:0005488;<br>P:GO:0033036                                                                                                                                                                                                                                                                                                                                                                                                                                                           |                                                | IPR001680; IPR011046; IPR015943;<br>PTHR23287 (PANTHER),<br>PTHR23287:SF2 (PANTHER) |
| Caenorhabditis briggsae | elegans protein partially confirmed by transcript evidence | 2  | F:GO:0005488;<br>P:GO:0033036                                                                                                                                                                                                                                                                                                                                                                                                                                                           |                                                | IPR001680; IPR011046; IPR015943;<br>PTHR23287 (PANTHER),<br>PTHR23287:SF2 (PANTHER) |
| Pongo abelii            | c-x-c chemokine receptor 4                                 | 32 | F:GO:0001209;<br>P:GO:0009615;<br>P:GO:0001764;<br>P:GO:0008354;<br>C:GO:0016023;<br>C:GO:0030426;<br>P:GO:0001667;<br>F:GO:0015026;<br>P:GO:0007204;<br>P:GO:0030334;<br>P:GO:0050920;<br>F:GO:0016493;<br>F:GO:0016494;<br>C:GO:0016021;<br>F:GO:0043130;<br>C:GO:0009986;<br>C:GO:0031252;<br>F:GO:0003779;<br>P:GO:0007420;<br>F:GO:0032027;<br>P:GO:0008045;<br>F:GO:0031625;<br>P:GO:0001666;<br>P:GO:0006915;<br>P:GO:0007281;<br>P:GO:0007186;<br>P:GO:0006954;<br>C:GO:0005886 |                                                | PTHR19264 (PANTHER),<br>PTHR19264:SF206 (PANTHER), SignalP<br>(SIGNALP)             |
|                         | -                                                          | 0  |                                                                                                                                                                                                                                                                                                                                                                                                                                                                                         |                                                | SignalP (SIGNALP)                                                                   |
|                         | -                                                          | 0  |                                                                                                                                                                                                                                                                                                                                                                                                                                                                                         |                                                | -                                                                                   |
|                         | -                                                          | 0  |                                                                                                                                                                                                                                                                                                                                                                                                                                                                                         |                                                | -                                                                                   |
|                         | -                                                          | 0  |                                                                                                                                                                                                                                                                                                                                                                                                                                                                                         |                                                | -                                                                                   |
|                         | -                                                          | 0  |                                                                                                                                                                                                                                                                                                                                                                                                                                                                                         |                                                | -                                                                                   |
|                         | -                                                          | 0  |                                                                                                                                                                                                                                                                                                                                                                                                                                                                                         |                                                | -                                                                                   |
| Caenorhabditis briggsae | ys31_caeel ame: full=uncharacterized protein               | 0  |                                                                                                                                                                                                                                                                                                                                                                                                                                                                                         |                                                | -                                                                                   |
|                         | -                                                          | 0  |                                                                                                                                                                                                                                                                                                                                                                                                                                                                                         |                                                | -                                                                                   |
| Caenorhabditis elegans  | low density lipoprotein receptor associated protein ( kd)  | 0  |                                                                                                                                                                                                                                                                                                                                                                                                                                                                                         | F:GO:0008201;<br>F:GO:0050750;<br>C:GO:0005783 | SignalP (SIGNALP)                                                                   |
| Caenorhabditis elegans  | elegans protein confirmed by transcript evidence           | 1  | F:GO:0005515                                                                                                                                                                                                                                                                                                                                                                                                                                                                            |                                                | -                                                                                   |
|                         | -                                                          | 0  |                                                                                                                                                                                                                                                                                                                                                                                                                                                                                         |                                                | -                                                                                   |
|                         | -                                                          | 0  |                                                                                                                                                                                                                                                                                                                                                                                                                                                                                         |                                                | -                                                                                   |
|                         | -                                                          | 0  |                                                                                                                                                                                                                                                                                                                                                                                                                                                                                         |                                                | -                                                                                   |

|                        |                                                        |   |                                                                                                                                     |                                                                                                                    |                   |                                                                                                                                    |
|------------------------|--------------------------------------------------------|---|-------------------------------------------------------------------------------------------------------------------------------------|--------------------------------------------------------------------------------------------------------------------|-------------------|------------------------------------------------------------------------------------------------------------------------------------|
| Ailuropoda melanoleuca | eukaryotic translation initiation factor 3 subunit c   | 6 | C:GO:0005852;<br>F:GO:0005515;<br>P:GO:0045948;<br>F:GO:0003743;<br>C:GO:0005829;<br>F:GO:0043022                                   | -                                                                                                                  | -                 |                                                                                                                                    |
| -                      | -                                                      | 0 |                                                                                                                                     |                                                                                                                    |                   | SignalP (SIGNALP)                                                                                                                  |
| Loa loa                | jumonji domain containing 5                            | 7 | F:GO:0051864;<br>P:GO:0000086;<br>F:GO:0016740;<br>P:GO:0070544;<br>P:GO:0045893;<br>F:GO:0003682;<br>C:GO:0005634                  | -                                                                                                                  | EC:1.14.11.2<br>7 | IPR003347; PTHR12461 (PANTHER),<br>PTHR12461:SF3 (PANTHER), SSF51197<br>(SUPERFAMILY)                                              |
| Caenorhabditis elegans | histidine acid phosphatase family protein              | 5 | P:GO:0009792;<br>P:GO:0002119;<br>P:GO:0000003;<br>P:GO:0040007;<br>P:GO:0006898                                                    | -                                                                                                                  |                   | IPR000560; G3DSA:3.40.50.1240<br>(GENE3D), PTHR11567 (PANTHER),<br>PTHR11567:SF17 (PANTHER),<br>SSF53254 (SUPERFAMILY)             |
| Caenorhabditis elegans | hypothetical protein F44E7.2 [Caenorhabditis elegans]  | 2 | P:GO:0008152;<br>F:GO:0016791                                                                                                       | -                                                                                                                  | EC:3.1.3.0        | PTHR19288 (PANTHER),<br>PTHR19288:SF11 (PANTHER)                                                                                   |
| -                      | -                                                      | 0 |                                                                                                                                     |                                                                                                                    |                   | -                                                                                                                                  |
| -                      | -                                                      | 0 |                                                                                                                                     |                                                                                                                    |                   | SignalP (SIGNALP)                                                                                                                  |
| -                      | -                                                      | 0 |                                                                                                                                     |                                                                                                                    |                   | -                                                                                                                                  |
| -                      | -                                                      | 0 |                                                                                                                                     |                                                                                                                    |                   | -                                                                                                                                  |
| -                      | -                                                      | 0 |                                                                                                                                     |                                                                                                                    |                   | SignalP (SIGNALP)                                                                                                                  |
| -                      | -                                                      | 0 |                                                                                                                                     |                                                                                                                    |                   | SignalP (SIGNALP)                                                                                                                  |
| Caenorhabditis remanei | leukotriene a4 hydrolase                               | 5 | P:GO:0006954;<br>P:GO:0019370;<br>P:GO:0006508;<br>F:GO:0008270;<br>F:GO:0008237                                                    | -                                                                                                                  |                   | IPR001930; IPR014782;<br>PTHR11533:SF4 (PANTHER), SSF63737<br>(SUPERFAMILY)                                                        |
| -                      | -                                                      | 0 |                                                                                                                                     |                                                                                                                    |                   | -                                                                                                                                  |
| -                      | -                                                      | 0 |                                                                                                                                     |                                                                                                                    |                   | -                                                                                                                                  |
| -                      | -                                                      | 0 |                                                                                                                                     |                                                                                                                    |                   | -                                                                                                                                  |
| -                      | -                                                      | 0 |                                                                                                                                     |                                                                                                                    |                   | SignalP (SIGNALP)                                                                                                                  |
| -                      | -                                                      | 0 |                                                                                                                                     |                                                                                                                    |                   | SignalP (SIGNALP)                                                                                                                  |
| Loa loa                | transcription factor e2f3                              | 0 |                                                                                                                                     | P:GO:0006355;<br>C:GO:0005667;<br>P:GO:0006350;<br>P:GO:0045449;<br>F:GO:0003677;<br>F:GO:0003700;<br>C:GO:0005634 |                   | -                                                                                                                                  |
| Caenorhabditis elegans | hypothetical protein F35H10.5 [Caenorhabditis elegans] | 1 | P:GO:0040011                                                                                                                        | -                                                                                                                  |                   | IPR018552                                                                                                                          |
| Caenorhabditis elegans | e75 nuclear receptor                                   | 8 | F:GO:0008270;<br>P:GO:0006355;<br>P:GO:0043053;<br>F:GO:0004887;<br>F:GO:0043565;<br>F:GO:0003700;<br>F:GO:0003707;<br>C:GO:0005634 | -                                                                                                                  |                   | IPR001628; IPR008946; IPR013088;<br>PRO0350 (PRINTS), PTHR11865<br>(PANTHER), PTHR11865:SF172<br>(PANTHER), SSF57716 (SUPERFAMILY) |
| -                      | -                                                      | 0 |                                                                                                                                     |                                                                                                                    |                   | -                                                                                                                                  |
| -                      | -                                                      | 0 |                                                                                                                                     |                                                                                                                    |                   | -                                                                                                                                  |
| -                      | -                                                      | 0 |                                                                                                                                     |                                                                                                                    |                   | SignalP (SIGNALP)                                                                                                                  |
| -                      | -                                                      | 0 |                                                                                                                                     |                                                                                                                    |                   | -                                                                                                                                  |
| -                      | -                                                      | 0 |                                                                                                                                     |                                                                                                                    |                   | -                                                                                                                                  |
| -                      | -                                                      | 0 |                                                                                                                                     |                                                                                                                    |                   | SignalP (SIGNALP)                                                                                                                  |

|                         |                                                                           |    |                                                                                                                                                                                        |                                                |            |                                                                                                                   |
|-------------------------|---------------------------------------------------------------------------|----|----------------------------------------------------------------------------------------------------------------------------------------------------------------------------------------|------------------------------------------------|------------|-------------------------------------------------------------------------------------------------------------------|
|                         | -                                                                         | 0  |                                                                                                                                                                                        |                                                |            | -                                                                                                                 |
|                         | -                                                                         | 0  |                                                                                                                                                                                        |                                                |            | -                                                                                                                 |
| Rattus norvegicus       | kdel (lys-asp-glu-leu) endoplasmic reticulum protein retention receptor 1 | 11 | F:GO:0004872;<br>C:GO:0005789;<br>C:GO:0005793;<br>C:GO:0005624;<br>P:GO:0006621;<br>F:GO:0005515;<br>F:GO:0005046;<br>P:GO:0016192;<br>P:GO:0006886;<br>P:GO:0007165;<br>C:GO:0016021 | -                                              |            | -                                                                                                                 |
|                         | -                                                                         | 0  |                                                                                                                                                                                        |                                                |            | -                                                                                                                 |
| Caenorhabditis briggsae | zinc c2h2 type family protein                                             | 0  |                                                                                                                                                                                        | F:GO:0008270;<br>C:GO:0005622                  |            | IPR015880                                                                                                         |
| Caenorhabditis briggsae | zinc c2h2 type family protein                                             | 0  |                                                                                                                                                                                        | F:GO:0003676;<br>F:GO:0008270;<br>C:GO:0005622 |            | IPR015880                                                                                                         |
|                         | -                                                                         | 0  |                                                                                                                                                                                        |                                                |            | -                                                                                                                 |
|                         | -                                                                         | 0  |                                                                                                                                                                                        |                                                |            | -                                                                                                                 |
|                         | -                                                                         | 0  |                                                                                                                                                                                        |                                                |            | IPR007151                                                                                                         |
|                         | -                                                                         | 0  |                                                                                                                                                                                        |                                                |            | -                                                                                                                 |
|                         | -                                                                         | 0  |                                                                                                                                                                                        |                                                |            | -                                                                                                                 |
| Pongo abelii            | histone-lysine n-methyltransferase setmar                                 | 5  | F:GO:0046872;<br>P:GO:0006313;<br>F:GO:0016787;<br>F:GO:0008168;<br>F:GO:0004803                                                                                                       | -                                              | EC:2.1.1.0 | -                                                                                                                 |
|                         | -                                                                         | 0  |                                                                                                                                                                                        |                                                |            | IPR001372                                                                                                         |
| Caenorhabditis elegans  | major facilitator superfamily protein                                     | 4  | C:GO:0016021;<br>P:GO:0040010;<br>P:GO:0055085;<br>F:GO:0005215                                                                                                                        | -                                              |            | PTHR11360 (PANTHER),<br>PTHR11360:SF3 (PANTHER)                                                                   |
|                         | -                                                                         | 0  |                                                                                                                                                                                        |                                                |            | SignalP (SIGNALP)                                                                                                 |
|                         | -                                                                         | 0  |                                                                                                                                                                                        |                                                |            | SignalP (SIGNALP)                                                                                                 |
|                         | -                                                                         | 0  |                                                                                                                                                                                        |                                                |            | -                                                                                                                 |
| Caenorhabditis elegans  | syntaxin 16-like isoform 2                                                | 2  | P:GO:0040010;<br>C:GO:0016020                                                                                                                                                          | -                                              |            | IPR000727; IPR006011; IPR010989;<br>G3DSA:1.20.58.70 (GENE3D),<br>PTHR19957 (PANTHER),<br>PTHR19957:SF5 (PANTHER) |
|                         | -                                                                         | 0  |                                                                                                                                                                                        |                                                |            | -                                                                                                                 |
| Caenorhabditis remanei  | kinesin family member 13b                                                 | 5  | P:GO:0007018;<br>F:GO:0005515;<br>F:GO:0005524;<br>F:GO:0003777;<br>C:GO:0005874                                                                                                       | -                                              |            | IPR001752; IPR019821; PTHR16012<br>(PANTHER), PTHR16012:SF65<br>(PANTHER), SSF52540 (SUPERFAMILY)                 |
|                         | -                                                                         | 0  |                                                                                                                                                                                        |                                                |            | -                                                                                                                 |
| Caenorhabditis briggsae | clc-type chloride channel family member (clh-2)                           | 6  | P:GO:0009792;<br>F:GO:0005247;<br>P:GO:0055085;<br>P:GO:0000003;<br>C:GO:0016021;<br>P:GO:0006821                                                                                      | -                                              |            | -                                                                                                                 |



|                         |                                     |   |                                                                                                                                                      |                                                                 |             |                                                                                       |
|-------------------------|-------------------------------------|---|------------------------------------------------------------------------------------------------------------------------------------------------------|-----------------------------------------------------------------|-------------|---------------------------------------------------------------------------------------|
| Caenorhabditis remanei  | 40s ribosomal protein s12           | 9 | P:GO:0009792;<br>P:GO:0010171;<br>P:GO:0002119;<br>P:GO:0040017;<br>P:GO:0040010;<br>C:GO:0044444;<br>P:GO:0000003;<br>C:GO:0043229;<br>C:GO:0030529 | -                                                               |             | SignalP (SIGNALP)                                                                     |
|                         | -                                   | 0 |                                                                                                                                                      |                                                                 |             | -                                                                                     |
|                         | -                                   | 0 |                                                                                                                                                      |                                                                 |             | SignalP (SIGNALP)                                                                     |
|                         | -                                   | 0 |                                                                                                                                                      |                                                                 |             | -                                                                                     |
| Homo sapiens            | -like protein 2-like                | 0 |                                                                                                                                                      | F:GO:0003674;<br>P:GO:0008150                                   |             | -                                                                                     |
|                         | -                                   | 0 |                                                                                                                                                      |                                                                 |             | SignalP (SIGNALP)                                                                     |
| Caenorhabditis briggsae | briggsae cbr-cpg-4 protein          | 0 |                                                                                                                                                      | P:GO:0040010                                                    |             | -                                                                                     |
|                         | -                                   | 0 |                                                                                                                                                      |                                                                 |             | -                                                                                     |
| Loa loa                 | rhomboid family protein             | 0 |                                                                                                                                                      | F:GO:0004252;<br>F:GO:0005509;<br>C:GO:0016021;<br>P:GO:0007165 |             | SignalP (SIGNALP)                                                                     |
| Ascaris suum            | hypothetical protein [Ascaris suum] | 0 |                                                                                                                                                      | F:GO:0005488                                                    |             | IPR001304; IPR016186; IPR016187;<br>PTHR22802 (PANTHER),<br>PTHR22802:SF17 (PANTHER)  |
| Caenorhabditis elegans  | ipase c family member (plc-1)       | 9 | F:GO:0005085;<br>P:GO:0006629;<br>F:GO:0004871;<br>C:GO:0005622;<br>F:GO:0004435;<br>P:GO:0040010;<br>F:GO:0005509;<br>P:GO:0009566;<br>P:GO:0007264 | -                                                               | EC:3.1.4.11 | IPR000159; PTHR10336 (PANTHER),<br>PTHR10336:SF6 (PANTHER), SSF54236<br>(SUPERFAMILY) |

|                         |                                                            |    |                                                                                                                                                                                                                                                                                                                                                                                                                                                                         |              |             |                                     |
|-------------------------|------------------------------------------------------------|----|-------------------------------------------------------------------------------------------------------------------------------------------------------------------------------------------------------------------------------------------------------------------------------------------------------------------------------------------------------------------------------------------------------------------------------------------------------------------------|--------------|-------------|-------------------------------------|
| Bos taurus              | heat shock 70kda protein 5                                 | 30 | P:GO:0030433;<br>P:GO:0043154;<br>F:GO:0051087;<br>P:GO:0030512;<br>P:GO:0021680;<br>C:GO:0030176;<br>P:GO:0021589;<br>C:GO:0005788;<br>P:GO:0031398;<br>C:GO:0008303;<br>P:GO:0060904;<br>C:GO:0042470;<br>F:GO:0043027;<br>F:GO:0005509;<br>F:GO:0043022;<br>P:GO:0006983;<br>C:GO:0005576;<br>F:GO:0030674;<br>P:GO:0006916;<br>C:GO:0009986;<br>F:GO:0031625;<br>P:GO:0006987;<br>P:GO:0040019;<br>F:GO:0051082;<br>P:GO:0042149;<br>F:GO:0051787;<br>C:GO:0048471; | -            |             | SignalP (SIGNALP)                   |
| Loa loa                 | elegans protein confirmed by transcript evidence           | 5  | C:GO:0000139;<br>F:GO:0005244;<br>P:GO:0006811;<br>C:GO:0016021;<br>P:GO:0015031                                                                                                                                                                                                                                                                                                                                                                                        | -            |             | IPR015672; PF12430 (PFAM)           |
|                         | -                                                          | 0  |                                                                                                                                                                                                                                                                                                                                                                                                                                                                         |              |             | SignalP (SIGNALP)                   |
| Caenorhabditis elegans  | hypothetical protein R06A10.4 [Caenorhabditis elegans]     | 3  | P:GO:0006468;<br>F:GO:0005524;<br>F:GO:0004674                                                                                                                                                                                                                                                                                                                                                                                                                          | -            | EC:2.7.11.0 | IPR020636; PTHR22982:SF12 (PANTHER) |
| Loa loa                 | hypothetical protein LOAG_08965 [Loa loa]                  | 0  |                                                                                                                                                                                                                                                                                                                                                                                                                                                                         |              |             | -                                   |
|                         | -                                                          | 0  |                                                                                                                                                                                                                                                                                                                                                                                                                                                                         |              |             | -                                   |
| Caenorhabditis elegans  | family with sequence similarity member a                   | 0  |                                                                                                                                                                                                                                                                                                                                                                                                                                                                         | P:GO:0007275 |             | PTHR14592 (PANTHER)                 |
| Caenorhabditis elegans  | family with sequence similarity member a                   | 0  |                                                                                                                                                                                                                                                                                                                                                                                                                                                                         | P:GO:0007275 |             | PTHR14592 (PANTHER)                 |
| Caenorhabditis elegans  | briggsae cbr-lpr-2 protein                                 | 2  | C:GO:0016021;<br>F:GO:0005488                                                                                                                                                                                                                                                                                                                                                                                                                                           | -            |             | -                                   |
|                         | -                                                          | 0  |                                                                                                                                                                                                                                                                                                                                                                                                                                                                         |              |             | -                                   |
|                         | -                                                          | 0  |                                                                                                                                                                                                                                                                                                                                                                                                                                                                         |              |             | -                                   |
| Caenorhabditis briggsae | briggsae cbr-smg-5 protein                                 | 0  |                                                                                                                                                                                                                                                                                                                                                                                                                                                                         |              |             | -                                   |
|                         | -                                                          | 0  |                                                                                                                                                                                                                                                                                                                                                                                                                                                                         |              |             | -                                   |
|                         | -                                                          | 0  |                                                                                                                                                                                                                                                                                                                                                                                                                                                                         |              |             | SignalP (SIGNALP)                   |
|                         | -                                                          | 0  |                                                                                                                                                                                                                                                                                                                                                                                                                                                                         |              |             | -                                   |
| Caenorhabditis remanei  | elegans protein partially confirmed by transcript evidence | 1  | C:GO:0016020                                                                                                                                                                                                                                                                                                                                                                                                                                                            | -            |             | -                                   |
|                         | -                                                          | 0  |                                                                                                                                                                                                                                                                                                                                                                                                                                                                         |              |             | -                                   |

|                         |                                                         |    |                                                                                                                                                                                                                                                                                                                                                                                                                                                                        |   |   |                                                   |
|-------------------------|---------------------------------------------------------|----|------------------------------------------------------------------------------------------------------------------------------------------------------------------------------------------------------------------------------------------------------------------------------------------------------------------------------------------------------------------------------------------------------------------------------------------------------------------------|---|---|---------------------------------------------------|
| Callithrix jacchus      | valosin-containing protein                              | 27 | C:GO:0000785;<br>P:GO:0030433;<br>P:GO:0006919;<br>C:GO:0005792;<br>F:GO:0031593;<br>P:GO:0006302;<br>C:GO:0005730;<br>C:GO:0005829;<br>P:GO:0032436;<br>F:GO:0019904;<br>P:GO:0016567;<br>F:GO:0042802;<br>C:GO:0000502;<br>F:GO:0019903;<br>P:GO:0006888;<br>F:GO:0008289;<br>P:GO:0030970;<br>P:GO:0070842;<br>F:GO:0032403;<br>F:GO:0016887;<br>P:GO:0051260;<br>C:GO:0005783;<br>P:GO:0006200;<br>C:GO:0035101;<br>P:GO:0030968;<br>F:GO:0005524;<br>P:GO:0034214 | - | - | SignalP (SIGNALP)                                 |
| -                       | -                                                       | 0  | -                                                                                                                                                                                                                                                                                                                                                                                                                                                                      | - | - | -                                                 |
| Caenorhabditis briggsae | nicotinic acetylcholine receptor alpha subunit 63b      | 9  | P:GO:0009792;<br>F:GO:0004872;<br>P:GO:0002119;<br>C:GO:0045211;<br>C:GO:0030054;<br>P:GO:0006811;<br>C:GO:0016021;<br>P:GO:0040007;<br>F:GO:0004889                                                                                                                                                                                                                                                                                                                   | - | - | IPR006201; IPR006202;<br>PTHR18945:SF62 (PANTHER) |
| -                       | -                                                       | 0  | -                                                                                                                                                                                                                                                                                                                                                                                                                                                                      | - | - | -                                                 |
| Caenorhabditis remanei  | hypothetical protein CRE_25481 [Caenorhabditis remanei] | 0  | -                                                                                                                                                                                                                                                                                                                                                                                                                                                                      | - | - | -                                                 |
| Ailuropoda melanoleuca  | 10 kda heat shock mitochondrial-like                    | 7  | P:GO:0006457;<br>F:GO:0051087;<br>F:GO:0005524;<br>C:GO:0005759;<br>F:GO:0051082;<br>P:GO:0006986;<br>P:GO:0006919                                                                                                                                                                                                                                                                                                                                                     | - | - | IPR011032; IPR020818                              |
| Caenorhabditis elegans  | hypothetical protein R148.5 [Caenorhabditis elegans]    | 1  | F:GO:0005515                                                                                                                                                                                                                                                                                                                                                                                                                                                           | - | - | -                                                 |
| Caenorhabditis remanei  | variable abnormal morphology family member (vab-10)     | 0  | -                                                                                                                                                                                                                                                                                                                                                                                                                                                                      | - | - | -                                                 |
| Macaca mulatta          | polyglutamine binding protein 1                         | 5  | C:GO:0005737;<br>F:GO:0003713;<br>C:GO:0005730;<br>F:GO:0003677;<br>P:GO:0006355                                                                                                                                                                                                                                                                                                                                                                                       | - | - | PTHR21737 (PANTHER),<br>PTHR21737:SF3 (PANTHER)   |
| -                       | -                                                       | 0  | -                                                                                                                                                                                                                                                                                                                                                                                                                                                                      | - | - | -                                                 |
| Loa loa                 | variant sh3 domain containing protein                   | 1  | F:GO:0005515                                                                                                                                                                                                                                                                                                                                                                                                                                                           | - | - | -                                                 |



|                        |                                 |    |                                                                                                                                                                                                                                                                                              |   |            |                                                                                                    |
|------------------------|---------------------------------|----|----------------------------------------------------------------------------------------------------------------------------------------------------------------------------------------------------------------------------------------------------------------------------------------------|---|------------|----------------------------------------------------------------------------------------------------|
| Harpegnathos saltator  | s-adenosylmethionine synthetase | 12 | P:GO:0040010;<br>P:GO:0008340;<br>F:GO:0004478;<br>P:GO:0000003;<br>P:GO:0006556;<br>P:GO:0006730;<br>F:GO:0005524;<br>F:GO:0000287;<br>P:GO:0040011;<br>C:GO:0005737;<br>P:GO:0040015;<br>P:GO:0040018                                                                                      | - | EC:2.5.1.6 | IPR002133; IPR022628; IPR022636;<br>G3DSA:3.30.300.10 (GENE3D)                                     |
| Caenorhabditis elegans | s-adenosylmethionine synthetase | 17 | P:GO:0040010;<br>P:GO:0008340;<br>C:GO:0016021;<br>F:GO:0004478;<br>P:GO:0040035;<br>P:GO:0032940;<br>P:GO:0006556;<br>P:GO:0006730;<br>F:GO:0005524;<br>P:GO:0019915;<br>P:GO:0002119;<br>F:GO:0000287;<br>P:GO:0040017;<br>P:GO:0002009;<br>C:GO:0005737;<br>P:GO:0040015;<br>P:GO:0040018 | - | EC:2.5.1.6 | IPR002133; IPR022628; IPR022629;<br>IPR022630; IPR022631; IPR022636;<br>G3DSA:3.30.300.10 (GENE3D) |
| Caenorhabditis elegans | s-adenosylmethionine synthetase | 17 | P:GO:0040010;<br>P:GO:0008340;<br>C:GO:0016021;<br>F:GO:0004478;<br>P:GO:0040035;<br>P:GO:0032940;<br>P:GO:0006556;<br>P:GO:0006730;<br>F:GO:0005524;<br>P:GO:0019915;<br>P:GO:0002119;<br>F:GO:0000287;<br>P:GO:0040017;<br>P:GO:0002009;<br>C:GO:0005737;<br>P:GO:0040015;<br>P:GO:0040018 | - | EC:2.5.1.6 | IPR002133; IPR022628; IPR022629;<br>IPR022630; IPR022631; IPR022636;<br>G3DSA:3.30.300.10 (GENE3D) |

|                        |                                                         |    |                                                                                                                                                                                                                                                                                              |   |            |                                                                                                    |
|------------------------|---------------------------------------------------------|----|----------------------------------------------------------------------------------------------------------------------------------------------------------------------------------------------------------------------------------------------------------------------------------------------|---|------------|----------------------------------------------------------------------------------------------------|
| Caenorhabditis elegans | s-adenosylmethionine synthetase                         | 17 | P:GO:0040010;<br>P:GO:0008340;<br>C:GO:0016021;<br>F:GO:0004478;<br>P:GO:0040035;<br>P:GO:0032940;<br>P:GO:0006556;<br>P:GO:0006730;<br>F:GO:0005524;<br>P:GO:0019915;<br>P:GO:0002119;<br>F:GO:0000287;<br>P:GO:0040017;<br>P:GO:0002009;<br>C:GO:0005737;<br>P:GO:0040015;<br>P:GO:0040018 | - | EC:2.5.1.6 | IPR002133; IPR022628; IPR022629;<br>IPR022630; IPR022631; IPR022636;<br>G3DSA:3.30.300.10 (GENE3D) |
| Caenorhabditis elegans | s-adenosylmethionine synthetase                         | 17 | P:GO:0040010;<br>P:GO:0008340;<br>C:GO:0016021;<br>F:GO:0004478;<br>P:GO:0040035;<br>P:GO:0032940;<br>P:GO:0006556;<br>P:GO:0006730;<br>F:GO:0005524;<br>P:GO:0019915;<br>P:GO:0002119;<br>F:GO:0000287;<br>P:GO:0040017;<br>P:GO:0002009;<br>C:GO:0005737;<br>P:GO:0040015;<br>P:GO:0040018 | - | EC:2.5.1.6 | IPR002133; IPR022628; IPR022629;<br>IPR022630; IPR022631; IPR022636;<br>G3DSA:3.30.300.10 (GENE3D) |
| -                      | -                                                       | 0  |                                                                                                                                                                                                                                                                                              |   |            | -                                                                                                  |
| -                      | -                                                       | 0  |                                                                                                                                                                                                                                                                                              |   |            | PTHR16012 (PANTHER),<br>PTHR16012:SF14 (PANTHER)                                                   |
| -                      | -                                                       | 0  |                                                                                                                                                                                                                                                                                              |   |            | -                                                                                                  |
| -                      | -                                                       | 0  |                                                                                                                                                                                                                                                                                              |   |            | -                                                                                                  |
| Caenorhabditis remanei | hypothetical protein CRE_01961 [Caenorhabditis remanei] | 0  |                                                                                                                                                                                                                                                                                              |   |            | IPR008559; SignalP (SIGNALP)                                                                       |
| -                      | -                                                       | 0  |                                                                                                                                                                                                                                                                                              |   |            | SignalP (SIGNALP)                                                                                  |
| -                      | -                                                       | 0  |                                                                                                                                                                                                                                                                                              |   |            | -                                                                                                  |
| Caenorhabditis elegans | vacuolar proton                                         | 4  | F:GO:0015078;<br>C:GO:0033177;<br>P:GO:0015986;<br>F:GO:0016787                                                                                                                                                                                                                              | - |            | IPR002490; PTHR11629:SF1<br>(PANTHER)                                                              |
| -                      | -                                                       | 0  |                                                                                                                                                                                                                                                                                              |   |            | -                                                                                                  |
| -                      | -                                                       | 0  |                                                                                                                                                                                                                                                                                              |   |            | IPR001254; G3DSA:2.40.10.10<br>(GENE3D)                                                            |

|                             |                                                            |    |                                                                                                                                                                                                         |                                                                                                   |                                   |                                                                     |
|-----------------------------|------------------------------------------------------------|----|---------------------------------------------------------------------------------------------------------------------------------------------------------------------------------------------------------|---------------------------------------------------------------------------------------------------|-----------------------------------|---------------------------------------------------------------------|
| Homo sapiens                | n-termi-l ki-se-like protein                               | 12 | C:GO:0005815;<br>C:GO:0030126;<br>P:GO:0006890;<br>C:GO:0005793;<br>P:GO:0045449;<br>F:GO:0003677;<br>F:GO:0004713;<br>F:GO:0005524;<br>F:GO:0005515;<br>C:GO:0005801;<br>C:GO:0005634;<br>P:GO:0006468 | -                                                                                                 | EC:2.7.10.0                       | SignalP (SIGNALP)                                                   |
| Brugia malayi               | hypothetical protein Bm1_43075 [Brugia malayi]             | 0  |                                                                                                                                                                                                         |                                                                                                   |                                   | -                                                                   |
| Caenorhabditis remanei      | sudlg2 protein                                             | 4  | P:GO:0009792;<br>P:GO:0008152;<br>F:GO:0005524;<br>F:GO:0003824                                                                                                                                         | -                                                                                                 |                                   | IPR005809; IPR013650; SSF56059 (SUPERFAMILY)                        |
|                             | -                                                          | 0  |                                                                                                                                                                                                         |                                                                                                   |                                   | -                                                                   |
| Caenorhabditis elegans      | phosphatidylglycerophosphate synthase 1                    | 2  | F:GO:0016740;<br>C:GO:0005783                                                                                                                                                                           | -                                                                                                 |                                   | G3DSA:3.30.870.10 (GENE3D),<br>PTHR12586 (PANTHER)                  |
|                             | -                                                          | 0  |                                                                                                                                                                                                         |                                                                                                   |                                   | -                                                                   |
| Caenorhabditis remanei      | hypothetical protein CRE_01767 [Caenorhabditis remanei]    | 4  | F:GO:0020037;<br>P:GO:0055114;<br>F:GO:0004601;<br>P:GO:0006979                                                                                                                                         | -                                                                                                 | EC:1.11.1.7                       | IPR002007; IPR010255; PTHR11475 (PANTHER), PTHR11475:SF6 (PANTHER)  |
| Loa loa                     | family protein                                             | 0  |                                                                                                                                                                                                         |                                                                                                   |                                   | -                                                                   |
|                             | -                                                          | 0  |                                                                                                                                                                                                         |                                                                                                   |                                   | -                                                                   |
|                             | -                                                          | 0  |                                                                                                                                                                                                         |                                                                                                   |                                   | -                                                                   |
|                             | -                                                          | 0  |                                                                                                                                                                                                         |                                                                                                   |                                   | -                                                                   |
|                             | -                                                          | 0  |                                                                                                                                                                                                         |                                                                                                   |                                   | -                                                                   |
| Caenorhabditis elegans      | hypothetical protein C27A12.9 [Caenorhabditis elegans]     | 0  |                                                                                                                                                                                                         | P:GO:0008152;<br>F:GO:0003824                                                                     |                                   | -                                                                   |
|                             | -                                                          | 0  |                                                                                                                                                                                                         |                                                                                                   |                                   | -                                                                   |
|                             | -                                                          | 0  |                                                                                                                                                                                                         |                                                                                                   |                                   | -                                                                   |
|                             | -                                                          | 0  |                                                                                                                                                                                                         |                                                                                                   |                                   | -                                                                   |
| Caenorhabditis briggsae     | prolyl 4-hydroxylase                                       | 6  | F:GO:0031418;<br>F:GO:0005506;<br>F:GO:0004656;<br>P:GO:0055114;<br>F:GO:0016702;<br>C:GO:0005783                                                                                                       | -                                                                                                 | EC:1.14.11.2<br>;<br>EC:1.13.11.0 | PTHR10869 (PANTHER),<br>PTHR10869:SF13 (PANTHER), SignalP (SIGNALP) |
|                             | -                                                          | 0  |                                                                                                                                                                                                         |                                                                                                   |                                   | SignalP (SIGNALP)                                                   |
|                             | -                                                          | 0  |                                                                                                                                                                                                         |                                                                                                   |                                   | -                                                                   |
| Caenorhabditis briggsae     | elegans protein partially confirmed by transcript evidence | 2  | C:GO:0005622;<br>F:GO:0005525                                                                                                                                                                           | -                                                                                                 |                                   | -                                                                   |
| Caenorhabditis remanei      | elegans protein partially confirmed by transcript evidence | 0  |                                                                                                                                                                                                         |                                                                                                   |                                   | -                                                                   |
|                             | -                                                          | 0  |                                                                                                                                                                                                         |                                                                                                   |                                   | SignalP (SIGNALP)                                                   |
| Caenorhabditis briggsae     | briggsae cbr-sas-6 protein                                 | 0  |                                                                                                                                                                                                         | C:GO:0005737;<br>P:GO:0007049;<br>C:GO:0005856;<br>P:GO:0007275;<br>F:GO:0005515;<br>C:GO:0005814 |                                   | -                                                                   |
| Angiostrongylus cantonensis | 15 kda selenoprotein                                       | 0  |                                                                                                                                                                                                         | C:GO:0005788;<br>C:GO:0005783                                                                     |                                   | -                                                                   |
| Monodelphis domestica       | protein                                                    | 0  |                                                                                                                                                                                                         |                                                                                                   |                                   | -                                                                   |
|                             | -                                                          | 0  |                                                                                                                                                                                                         |                                                                                                   |                                   | -                                                                   |
|                             | -                                                          | 0  |                                                                                                                                                                                                         |                                                                                                   |                                   | -                                                                   |

|                         |                                                            |  |   |                                                                 |                                                                                                                                                                                                         |             |                                                                                                                    |
|-------------------------|------------------------------------------------------------|--|---|-----------------------------------------------------------------|---------------------------------------------------------------------------------------------------------------------------------------------------------------------------------------------------------|-------------|--------------------------------------------------------------------------------------------------------------------|
| Caenorhabditis remanei  | elegans protein confirmed by transcript evidence           |  | 3 | F:GO:0003951;<br>F:GO:0005515;<br>P:GO:0008152                  | -                                                                                                                                                                                                       | EC:2.7.1.23 | SignalP (SIGNALP)                                                                                                  |
| Caenorhabditis remanei  | elegans protein partially confirmed by transcript evidence |  | 1 | P:GO:0044238                                                    | -                                                                                                                                                                                                       |             | IPR002213; G3DSA:3.40.50.2000 (GENE3D), PTHR11926:SF3 (PANTHER), SSF53756 (SUPERFAMILY)                            |
| Caenorhabditis briggsae | methuselah-like protein mth-2                              |  | 2 | P:GO:0007218;<br>C:GO:0016020                                   | -                                                                                                                                                                                                       |             | IPR010916                                                                                                          |
| Caenorhabditis elegans  | cre-npr-19 protein                                         |  | 2 | P:GO:0007186;<br>C:GO:0016021                                   | -                                                                                                                                                                                                       |             | IPR000276; IPR017452; G3DSA:1.20.1070.10 (GENE3D), PTHR22718 (PANTHER), PTHR22718:SF8 (PANTHER), SignalP (SIGNALP) |
|                         | -                                                          |  | 0 |                                                                 |                                                                                                                                                                                                         |             | -                                                                                                                  |
|                         | -                                                          |  | 0 |                                                                 |                                                                                                                                                                                                         |             | SignalP (SIGNALP)                                                                                                  |
| Caenorhabditis briggsae | guanylyl cyclase family member (gcy-5)                     |  | 0 |                                                                 | C:GO:0016021;<br>F:GO:0004674;<br>F:GO:0004383;<br>F:GO:0004672;<br>P:GO:0009190;<br>P:GO:0006182;<br>P:GO:0023034;<br>P:GO:0006468;<br>F:GO:0000166;<br>F:GO:0005524;<br>F:GO:0016829;<br>F:GO:0016849 |             | -                                                                                                                  |
| Caenorhabditis remanei  | hypothetical protein CRE_01591 [Caenorhabditis remanei]    |  | 0 |                                                                 |                                                                                                                                                                                                         |             | -                                                                                                                  |
| Caenorhabditis briggsae | -d dependent epimerase dehydratase                         |  | 4 | F:GO:0050662;<br>P:GO:0051246;<br>F:GO:0019787;<br>P:GO:0043687 | -                                                                                                                                                                                                       |             | IPR001509; IPR016040; PTHR10366 (PANTHER), PTHR10366:SF25 (PANTHER), SSF51735 (SUPERFAMILY)                        |
| Caenorhabditis briggsae | -d dependent epimerase dehydratase                         |  | 4 | F:GO:0050662;<br>P:GO:0051246;<br>F:GO:0019787;<br>P:GO:0043687 | -                                                                                                                                                                                                       |             | IPR001509; IPR016040; PTHR10366 (PANTHER), PTHR10366:SF25 (PANTHER), SSF51735 (SUPERFAMILY)                        |
|                         | -                                                          |  | 0 |                                                                 |                                                                                                                                                                                                         |             | -                                                                                                                  |
| Brugia malayi           | iq calmodulin-binding motif family protein                 |  | 0 |                                                                 |                                                                                                                                                                                                         |             | -                                                                                                                  |
|                         | -                                                          |  | 0 |                                                                 |                                                                                                                                                                                                         |             | -                                                                                                                  |
|                         | -                                                          |  | 0 |                                                                 |                                                                                                                                                                                                         |             | SignalP (SIGNALP)                                                                                                  |
| Caenorhabditis elegans  | serpentine class ab (class a-like) family member (srab-14) |  | 3 | C:GO:0016021;<br>P:GO:0007606;<br>F:GO:0004888                  | -                                                                                                                                                                                                       |             | SignalP (SIGNALP)                                                                                                  |
| Caenorhabditis elegans  | 7 transmembrane                                            |  | 0 |                                                                 | F:GO:0016740;<br>F:GO:0004872;<br>F:GO:0004871;<br>F:GO:0004930;<br>C:GO:0016021;<br>P:GO:0007165;<br>F:GO:0050254;<br>P:GO:0007186                                                                     |             | -                                                                                                                  |



|                             |                                                    |    |                                                                                                                                                                                                                                                                                                                                                                                                                                                                        |                               |                                                         |                                                                                                                                           |
|-----------------------------|----------------------------------------------------|----|------------------------------------------------------------------------------------------------------------------------------------------------------------------------------------------------------------------------------------------------------------------------------------------------------------------------------------------------------------------------------------------------------------------------------------------------------------------------|-------------------------------|---------------------------------------------------------|-------------------------------------------------------------------------------------------------------------------------------------------|
| Homo sapiens                | mutant truncated midkine b                         | 9  | P:GO:0030154;<br>F:GO:0008083;<br>P:GO:0030325;<br>P:GO:0009611;<br>F:GO:0008201;<br>P:GO:0051781;<br>P:GO:0007399;<br>P:GO:0007165;<br>C:GO:0005576                                                                                                                                                                                                                                                                                                                   | -                             | -                                                       |                                                                                                                                           |
| Caenorhabditis elegans      | elegans protein confirmed by transcript evidence   | 2  | P:GO:0040011;<br>P:GO:0040018                                                                                                                                                                                                                                                                                                                                                                                                                                          | -                             |                                                         | IPR000615                                                                                                                                 |
| Brugia malayi               | hepatocellular carcinoma-associated antigen 66     | 0  |                                                                                                                                                                                                                                                                                                                                                                                                                                                                        |                               |                                                         | IPR013949; PTHR23271 (PANTHER),<br>PTHR23271:SF1 (PANTHER)                                                                                |
|                             | -                                                  | 0  |                                                                                                                                                                                                                                                                                                                                                                                                                                                                        |                               |                                                         | -                                                                                                                                         |
| Caenorhabditis elegans      | elegans protein confirmed by transcript evidence   | 0  |                                                                                                                                                                                                                                                                                                                                                                                                                                                                        |                               |                                                         | IPR001534; SignalP (SIGNALP)                                                                                                              |
|                             | -                                                  | 0  |                                                                                                                                                                                                                                                                                                                                                                                                                                                                        |                               |                                                         | -                                                                                                                                         |
|                             | -                                                  | 0  |                                                                                                                                                                                                                                                                                                                                                                                                                                                                        |                               |                                                         | -                                                                                                                                         |
|                             | -                                                  | 0  |                                                                                                                                                                                                                                                                                                                                                                                                                                                                        |                               |                                                         | -                                                                                                                                         |
|                             | -                                                  | 0  |                                                                                                                                                                                                                                                                                                                                                                                                                                                                        |                               |                                                         | -                                                                                                                                         |
|                             | -                                                  | 0  |                                                                                                                                                                                                                                                                                                                                                                                                                                                                        |                               |                                                         | SignalP (SIGNALP)                                                                                                                         |
|                             | -                                                  | 0  |                                                                                                                                                                                                                                                                                                                                                                                                                                                                        |                               |                                                         | -                                                                                                                                         |
|                             | -                                                  | 0  |                                                                                                                                                                                                                                                                                                                                                                                                                                                                        |                               |                                                         | IPR001254; IPR009003; IPR018114;<br>G3DSA:2.40.10.10 (GENE3D),<br>PTHR19355 (PANTHER),<br>PTHR19355:SF90 (PANTHER)                        |
| Caenorhabditis remanei      | elegans protein confirmed by transcript evidence   | 0  |                                                                                                                                                                                                                                                                                                                                                                                                                                                                        | C:GO:0016021                  |                                                         | -                                                                                                                                         |
|                             | -                                                  | 0  |                                                                                                                                                                                                                                                                                                                                                                                                                                                                        |                               |                                                         | -                                                                                                                                         |
| Angiostrongylus cantonensis | hypothetical protein [Angiostrongylus cantonensis] | 0  |                                                                                                                                                                                                                                                                                                                                                                                                                                                                        | F:GO:0008270;<br>C:GO:0005622 |                                                         | -                                                                                                                                         |
| Caenorhabditis briggsae     | adp-ribosylation factor 6                          | 27 | P:GO:0016358;<br>C:GO:0055037;<br>P:GO:0031529;<br>P:GO:0007155;<br>F:GO:0031996;<br>P:GO:0040010;<br>C:GO:0005624;<br>P:GO:0006928;<br>F:GO:0005525;<br>C:GO:0005794;<br>P:GO:0006886;<br>C:GO:0001726;<br>P:GO:0009792;<br>P:GO:0006915;<br>C:GO:0005769;<br>P:GO:0048261;<br>P:GO:0007186;<br>P:GO:0035020;<br>C:GO:0012505;<br>P:GO:0030838;<br>P:GO:0001889;<br>F:GO:0003924;<br>P:GO:0030866;<br>C:GO:0005886;<br>C:GO:0005634;<br>C:GO:0010008;<br>C:GO:0005938 | -                             | EC:3.6.5.1;<br>EC:3.6.5.2;<br>EC:3.6.5.3;<br>EC:3.6.5.4 | IPR005225; IPR006688; IPR006689;<br>G3DSA:3.40.50.300 (GENE3D),<br>PTHR11711:SF30 (PANTHER), PS51417<br>(PROFILE), SSF52540 (SUPERFAMILY) |
|                             | -                                                  | 0  |                                                                                                                                                                                                                                                                                                                                                                                                                                                                        |                               |                                                         | SignalP (SIGNALP)                                                                                                                         |

|                         |                                                         |    |                                                                                                                                                                                                                                           |                                                                                                                                     |             |                                                                                            |
|-------------------------|---------------------------------------------------------|----|-------------------------------------------------------------------------------------------------------------------------------------------------------------------------------------------------------------------------------------------|-------------------------------------------------------------------------------------------------------------------------------------|-------------|--------------------------------------------------------------------------------------------|
|                         | -                                                       | 0  |                                                                                                                                                                                                                                           |                                                                                                                                     |             | -                                                                                          |
| Caenorhabditis remanei  | hypothetical protein CRE_07374 [Caenorhabditis remanei] | 0  |                                                                                                                                                                                                                                           |                                                                                                                                     |             | -                                                                                          |
|                         | -                                                       | 0  |                                                                                                                                                                                                                                           |                                                                                                                                     |             | -                                                                                          |
|                         | -                                                       | 0  |                                                                                                                                                                                                                                           |                                                                                                                                     |             | -                                                                                          |
| Caenorhabditis briggsae | related to the icc protein                              | 0  |                                                                                                                                                                                                                                           | F:GO:0003674;<br>F:GO:0016787;<br>P:GO:0008150;<br>C:GO:0005575                                                                     |             | PTHR12905 (PANTHER)                                                                        |
|                         | -                                                       | 0  |                                                                                                                                                                                                                                           |                                                                                                                                     |             | -                                                                                          |
|                         | -                                                       | 0  |                                                                                                                                                                                                                                           |                                                                                                                                     |             | -                                                                                          |
| Caenorhabditis elegans  | - ca exchangers family member (ncx-2)                   | 12 | P:GO:0055085;<br>F:GO:0005432;<br>P:GO:0040010;<br>C:GO:0016021;<br>P:GO:0001947;<br>P:GO:0000003;<br>P:GO:0006816;<br>P:GO:0007368;<br>P:GO:0007154;<br>P:GO:0009792;<br>P:GO:0051480;<br>P:GO:0042044                                   | -                                                                                                                                   |             | PTHR11878 (PANTHER),<br>PTHR11878:SF4 (PANTHER), SignalP<br>(SIGNALP)                      |
| Caenorhabditis briggsae | methyltransferase-like protein 13                       | 2  | F:GO:0005515;<br>F:GO:0003824                                                                                                                                                                                                             | -                                                                                                                                   |             | IPR001045; G3DSA:3.40.50.150<br>(GENE3D), PTHR12176 (PANTHER),<br>SSF53335 (SUPERFAMILY)   |
|                         | -                                                       | 0  |                                                                                                                                                                                                                                           |                                                                                                                                     |             | IPR002619                                                                                  |
|                         | -                                                       | 0  |                                                                                                                                                                                                                                           |                                                                                                                                     |             | -                                                                                          |
| Caenorhabditis remanei  | hypothetical protein CRE_04697 [Caenorhabditis remanei] | 0  |                                                                                                                                                                                                                                           | P:GO:0016311;<br>F:GO:0016791;<br>F:GO:0016787;<br>P:GO:0006470;<br>F:GO:0004725;<br>F:GO:0008138;<br>P:GO:0009792;<br>F:GO:0004721 |             | IPR000242; G3DSA:3.90.190.10<br>(GENE3D), PTHR19134 (PANTHER),<br>PTHR19134:SF26 (PANTHER) |
|                         | -                                                       | 0  |                                                                                                                                                                                                                                           |                                                                                                                                     |             | -                                                                                          |
| Homo sapiens            | major histocompatibility class dq beta 1                | 14 | C:GO:0005789;<br>C:GO:0005769;<br>C:GO:0042613;<br>C:GO:0005771;<br>C:GO:0005794;<br>P:GO:0019886;<br>F:GO:0005515;<br>C:GO:0009897;<br>C:GO:0005765;<br>C:GO:0016021;<br>F:GO:0032395;<br>C:GO:0010008;<br>P:GO:0006955;<br>F:GO:0042605 | -                                                                                                                                   |             | PTHR19944 (PANTHER),<br>PTHR19944:SF26 (PANTHER), SignalP<br>(SIGNALP)                     |
| Caenorhabditis briggsae | sluggish isoform e                                      | 5  | F:GO:0004657;<br>P:GO:0006537;<br>P:GO:0042331;<br>C:GO:0005759;<br>P:GO:0006562                                                                                                                                                          | -                                                                                                                                   | EC:1.5.99.8 | -                                                                                          |

|                         |                                                            |    |                                                                                                                                                                                                                                                            |                                                                                                                                                      |  |                                                             |
|-------------------------|------------------------------------------------------------|----|------------------------------------------------------------------------------------------------------------------------------------------------------------------------------------------------------------------------------------------------------------|------------------------------------------------------------------------------------------------------------------------------------------------------|--|-------------------------------------------------------------|
| Caenorhabditis elegans  | periodic tryptophan protein 2 homolog                      | 0  |                                                                                                                                                                                                                                                            | F:GO:0004252;<br>C:GO:0016021;<br>C:GO:0016020;<br>C:GO:0005634;<br>P:GO:0007165;<br>C:GO:0005730;<br>P:GO:0006508;<br>F:GO:0004871;<br>P:GO:0055085 |  | IPR007148; PTHR19858 (PANTHER)                              |
|                         | -                                                          | 0  |                                                                                                                                                                                                                                                            |                                                                                                                                                      |  | -                                                           |
| Ancylostoma caninum     | metalloprotease 1 precursor                                | 0  |                                                                                                                                                                                                                                                            | F:GO:0046872;<br>P:GO:0006508;<br>F:GO:0008237;<br>F:GO:0016787;<br>F:GO:0004222;<br>F:GO:0008233;<br>F:GO:0008270                                   |  | -                                                           |
|                         | -                                                          | 0  |                                                                                                                                                                                                                                                            |                                                                                                                                                      |  | -                                                           |
| Danio rerio             | desmocollin 2-like                                         | 0  |                                                                                                                                                                                                                                                            | F:GO:0004872;<br>C:GO:0016021;<br>P:GO:0007596                                                                                                       |  | PTHR14360 (PANTHER),<br>PTHR14360:SF2 (PANTHER)             |
|                         | -                                                          | 0  |                                                                                                                                                                                                                                                            |                                                                                                                                                      |  | -                                                           |
|                         | -                                                          | 0  |                                                                                                                                                                                                                                                            |                                                                                                                                                      |  | -                                                           |
| Caenorhabditis elegans  | -dph:adrenodoxin mitochondrial                             | 1  | P:GO:0008152                                                                                                                                                                                                                                               | -                                                                                                                                                    |  | IPR016040; PTHR11938 (PANTHER),<br>PTHR11938:SF4 (PANTHER)  |
| Caenorhabditis remanei  | alpha 1                                                    | 15 | P:GO:0030155;<br>P:GO:0060441;<br>P:GO:0060445;<br>P:GO:0045198;<br>C:GO:0005608;<br>P:GO:0045995;<br>C:GO:0005606;<br>P:GO:0031175;<br>P:GO:0002011;<br>F:GO:0043208;<br>C:GO:0005615;<br>P:GO:0030334;<br>F:GO:0005102;<br>F:GO:0005201;<br>P:GO:0007166 | -                                                                                                                                                    |  | IPR008211; PTHR10574 (PANTHER),<br>PTHR10574:SF38 (PANTHER) |
| Caenorhabditis briggsae | lethal family member (let-805)                             | 0  |                                                                                                                                                                                                                                                            | P:GO:0000003;<br>P:GO:0018996;<br>P:GO:0040011;<br>P:GO:0006898;<br>P:GO:0002119;<br>P:GO:0008340;<br>P:GO:0009792;<br>F:GO:0005515                  |  | PTHR19143 (PANTHER),<br>PTHR19143:SF2 (PANTHER)             |
|                         | -                                                          | 0  |                                                                                                                                                                                                                                                            |                                                                                                                                                      |  | -                                                           |
| Caenorhabditis elegans  | elegans protein partially confirmed by transcript evidence | 1  | F:GO:0005515                                                                                                                                                                                                                                               | -                                                                                                                                                    |  | SignalIP (SIGNALP)                                          |
|                         | -                                                          | 0  |                                                                                                                                                                                                                                                            |                                                                                                                                                      |  | -                                                           |
|                         | -                                                          | 0  |                                                                                                                                                                                                                                                            |                                                                                                                                                      |  | -                                                           |
| Caenorhabditis briggsae | amop domain containing protein                             | 2  | C:GO:0016021;<br>P:GO:0007160                                                                                                                                                                                                                              | -                                                                                                                                                    |  | IPR003886; PTHR13802 (PANTHER),<br>PTHR13802:SF2 (PANTHER)  |
| Caenorhabditis elegans  | hypothetical protein T23B12.11 [Caenorhabditis elegans]    | 0  |                                                                                                                                                                                                                                                            |                                                                                                                                                      |  | SignalIP (SIGNALP)                                          |
| Caenorhabditis briggsae | elegans protein confirmed by transcript evidence           | 0  |                                                                                                                                                                                                                                                            | P:GO:0008152;<br>F:GO:0003824                                                                                                                        |  | SignalIP (SIGNALP)                                          |

|                         |                                                                              |   |                                                                                                                                                      |                                                                                                                                                      |                           |                                                                                                     |
|-------------------------|------------------------------------------------------------------------------|---|------------------------------------------------------------------------------------------------------------------------------------------------------|------------------------------------------------------------------------------------------------------------------------------------------------------|---------------------------|-----------------------------------------------------------------------------------------------------|
| Brugia malayi           | eb module family protein                                                     | 0 |                                                                                                                                                      | F:GO:0004674;<br>F:GO:0016810;<br>F:GO:0004672;<br>P:GO:0006468;<br>F:GO:0000166;<br>F:GO:0005524;<br>P:GO:0005975;<br>F:GO:0003824;<br>F:GO:0005488 |                           | -                                                                                                   |
|                         | -                                                                            | 0 |                                                                                                                                                      |                                                                                                                                                      |                           | SignalP (SIGNALP)                                                                                   |
|                         | -                                                                            | 0 |                                                                                                                                                      |                                                                                                                                                      |                           | -                                                                                                   |
|                         | -                                                                            | 0 |                                                                                                                                                      |                                                                                                                                                      |                           | -                                                                                                   |
| Homo sapiens            | immunoglobulin lambda light chain variable region vI3                        | 0 |                                                                                                                                                      |                                                                                                                                                      |                           | IPR013783; PTHR23267 (PANTHER), PTHR23267:SF14 (PANTHER), SignalP (SIGNALP), SSF48726 (SUPERFAMILY) |
| Caenorhabditis elegans  | carbamoyl-phosphate synthetase                                               | 7 | P:GO:0006541;<br>F:GO:0016812;<br>F:GO:0016597;<br>F:GO:0004086;<br>F:GO:0005524;<br>P:GO:0006207;<br>F:GO:0004070                                   | -                                                                                                                                                    | EC:3.5.2.0;<br>EC:2.1.3.2 | -                                                                                                   |
|                         | -                                                                            | 0 |                                                                                                                                                      |                                                                                                                                                      |                           | IPR021843                                                                                           |
| Caenorhabditis briggsae | Hypothetical protein CBG19248 [Caenorhabditis briggsae]                      | 1 | F:GO:0008289                                                                                                                                         | -                                                                                                                                                    |                           | SignalP (SIGNALP)                                                                                   |
| Homo sapiens            | cytochrome b5 reductase 3                                                    | 7 | F:GO:0004128;<br>C:GO:0005789;<br>P:GO:0008015;<br>C:GO:0005833;<br>P:GO:0055114;<br>P:GO:0006695;<br>C:GO:0005741                                   | -                                                                                                                                                    | EC:1.6.2.2                | G3DSA:3.40.50.80 (GENE3D), PTHR19370 (PANTHER), PTHR19370:SF4 (PANTHER), SSF52343 (SUPERFAMILY)     |
|                         | -                                                                            | 0 |                                                                                                                                                      |                                                                                                                                                      |                           | -                                                                                                   |
| Caenorhabditis briggsae | solute carrier family 25 (mitochondrial carrier phosphate carrier) member 23 | 9 | C:GO:0005743;<br>P:GO:0055085;<br>P:GO:0055114;<br>F:GO:0005509;<br>P:GO:0007165;<br>C:GO:0016021;<br>C:GO:0005578;<br>F:GO:0032440;<br>F:GO:0005215 | -                                                                                                                                                    | EC:1.3.1.74               | IPR001993; IPR018108; G3DSA:1.50.40.10 (GENE3D), PTHR11896:SF34 (PANTHER)                           |
|                         | -                                                                            | 0 |                                                                                                                                                      |                                                                                                                                                      |                           | -                                                                                                   |
| Homo sapiens            | -dh dehydroge-se                                                             | 5 | P:GO:0006120;<br>P:GO:0007605;<br>F:GO:0008137;<br>P:GO:0006810;<br>C:GO:0005747                                                                     | -                                                                                                                                                    | EC:1.6.5.3                | PTHR12868 (PANTHER)                                                                                 |
|                         | -                                                                            | 0 |                                                                                                                                                      |                                                                                                                                                      |                           | -                                                                                                   |
|                         | -                                                                            | 0 |                                                                                                                                                      |                                                                                                                                                      |                           | -                                                                                                   |
|                         | -                                                                            | 0 |                                                                                                                                                      |                                                                                                                                                      |                           | -                                                                                                   |
|                         | -                                                                            | 0 |                                                                                                                                                      |                                                                                                                                                      |                           | SignalP (SIGNALP)                                                                                   |

|                         |                                                            |   |                                                                                                                                                      |                                                                                                                                                      |                                                                                                                                                          |
|-------------------------|------------------------------------------------------------|---|------------------------------------------------------------------------------------------------------------------------------------------------------|------------------------------------------------------------------------------------------------------------------------------------------------------|----------------------------------------------------------------------------------------------------------------------------------------------------------|
| Loa loa                 | briggsae cbr-cdh-1 protein                                 | 0 |                                                                                                                                                      | C:GO:0016021;<br>C:GO:0016020;<br>P:GO:0002119;<br>P:GO:0040011;<br>P:GO:0040010;<br>F:GO:0005509;<br>C:GO:0005886;<br>P:GO:0007156;<br>P:GO:0007155 | -                                                                                                                                                        |
|                         | -                                                          | 0 |                                                                                                                                                      |                                                                                                                                                      | -                                                                                                                                                        |
|                         | -                                                          | 0 |                                                                                                                                                      |                                                                                                                                                      | -                                                                                                                                                        |
| Caenorhabditis briggsae | c termi-I region family protein                            | 9 | F:GO:0046872;<br>P:GO:0006457;<br>P:GO:0007224;<br>F:GO:0031072;<br>F:GO:0005113;<br>F:GO:0005524;<br>F:GO:0051082;<br>C:GO:0005829;<br>P:GO:0009408 | -                                                                                                                                                    | IPR001305; IPR001623; IPR001878;<br>IPR002939; IPR003095; IPR008971;<br>IPR015609; IPR018253;<br>G3DSA:2.60.260.20 (GENE3D),<br>PTHR11821:SF80 (PANTHER) |
|                         | -                                                          | 0 |                                                                                                                                                      |                                                                                                                                                      | IPR019265; PTHR15924 (PANTHER),<br>PTHR15924:SF9 (PANTHER)                                                                                               |
|                         | -                                                          | 0 |                                                                                                                                                      |                                                                                                                                                      | IPR001245; G3DSA:3.30.200.20<br>(GENE3D)                                                                                                                 |
| Pan troglodytes         | chromosome 1 open reading frame 43                         | 3 | F:GO:0016491;<br>C:GO:0016021;<br>F:GO:0050662                                                                                                       | -                                                                                                                                                    | IPR010876                                                                                                                                                |
|                         | -                                                          | 0 |                                                                                                                                                      |                                                                                                                                                      | -                                                                                                                                                        |
|                         | -                                                          | 0 |                                                                                                                                                      |                                                                                                                                                      | -                                                                                                                                                        |
|                         | -                                                          | 0 |                                                                                                                                                      |                                                                                                                                                      | -                                                                                                                                                        |
|                         | -                                                          | 0 |                                                                                                                                                      |                                                                                                                                                      | -                                                                                                                                                        |
| Caenorhabditis elegans  | elegans protein confirmed by transcript evidence           | 0 |                                                                                                                                                      | P:GO:0055114;<br>F:GO:0005488;<br>F:GO:0016491;<br>P:GO:0008152;<br>F:GO:0003824                                                                     | IPR002198; PTHR19410:SF18<br>(PANTHER)                                                                                                                   |
|                         | -                                                          | 0 |                                                                                                                                                      |                                                                                                                                                      | -                                                                                                                                                        |
| Caenorhabditis elegans  | elegans protein partially confirmed by transcript evidence | 0 |                                                                                                                                                      |                                                                                                                                                      | -                                                                                                                                                        |
|                         | -                                                          | 0 |                                                                                                                                                      |                                                                                                                                                      | SignalP (SIGNALP)                                                                                                                                        |
| Caenorhabditis briggsae | kiaa1143 homolog                                           | 0 |                                                                                                                                                      | F:GO:0003674;<br>P:GO:0008150                                                                                                                        | -                                                                                                                                                        |
| Caenorhabditis briggsae | kiaa1143 homolog                                           | 0 |                                                                                                                                                      | F:GO:0003674;<br>P:GO:0008150                                                                                                                        | -                                                                                                                                                        |
|                         | -                                                          | 0 |                                                                                                                                                      |                                                                                                                                                      | -                                                                                                                                                        |
|                         | -                                                          | 0 |                                                                                                                                                      |                                                                                                                                                      | -                                                                                                                                                        |
| Brugia malayi           | mast c-terminus family protein                             | 1 | F:GO:0005488                                                                                                                                         | -                                                                                                                                                    | PTHR21567 (PANTHER),<br>PTHR21567:SF10 (PANTHER)                                                                                                         |
|                         | -                                                          | 0 |                                                                                                                                                      |                                                                                                                                                      | -                                                                                                                                                        |
|                         | -                                                          | 0 |                                                                                                                                                      |                                                                                                                                                      | -                                                                                                                                                        |
| Caenorhabditis remanei  | - h exchanger family member (nhx-9)                        | 6 | P:GO:0009792;<br>F:GO:0015385;<br>P:GO:0055085;<br>P:GO:0006885;<br>C:GO:0016021;<br>P:GO:0006814                                                    | -                                                                                                                                                    | IPR006153; IPR018416; IPR018422;<br>SignalP (SIGNALP)                                                                                                    |

|                        |                                          |    |                                                                                                                                                                                                                                                                                              |              |             |                                                                      |
|------------------------|------------------------------------------|----|----------------------------------------------------------------------------------------------------------------------------------------------------------------------------------------------------------------------------------------------------------------------------------------------|--------------|-------------|----------------------------------------------------------------------|
| Caenorhabditis elegans | malate dehydroge-se                      | 4  | P:GO:0018991;<br>P:GO:0008152;<br>F:GO:0016491;<br>P:GO:0040011                                                                                                                                                                                                                              | -            |             | IPR018486; SignalP (SIGNALP)                                         |
| Ancylostoma caninum    | secreted protein 4 precursor             | 0  |                                                                                                                                                                                                                                                                                              | C:GO:0005576 |             | IPR001283; IPR014044;<br>PTHR10334:SF11 (PANTHER), SignalP (SIGNALP) |
| Homo sapiens           | kallikrein related-peptidase 6 precursor | 17 | P:GO:0042552;<br>P:GO:0007417;<br>P:GO:0042445;<br>C:GO:0005739;<br>C:GO:0005730;<br>P:GO:0042982;<br>P:GO:0016540;<br>P:GO:0006508;<br>C:GO:0005792;<br>F:GO:0005515;<br>P:GO:0045745;<br>P:GO:0010975;<br>F:GO:0004252;<br>C:GO:0005576;<br>P:GO:0030574;<br>C:GO:0005783;<br>P:GO:0042246 | -            | EC:3.4.21.0 | -                                                                    |
|                        | -                                        | 0  |                                                                                                                                                                                                                                                                                              |              |             | -                                                                    |
| Loa loa                | histone deacetylase complex subunit      | 8  | C:GO:0071011;<br>P:GO:0032582;<br>P:GO:0000122;<br>P:GO:0006342;<br>F:GO:0003714;<br>P:GO:0000398;<br>C:GO:0071013;<br>C:GO:0016580                                                                                                                                                          | -            |             | -                                                                    |

|                               |                                                            |   |                                                                 |                                                                                                                                                                                                                                                                                                                                                                                                                                                                       |                                                                               |
|-------------------------------|------------------------------------------------------------|---|-----------------------------------------------------------------|-----------------------------------------------------------------------------------------------------------------------------------------------------------------------------------------------------------------------------------------------------------------------------------------------------------------------------------------------------------------------------------------------------------------------------------------------------------------------|-------------------------------------------------------------------------------|
| Loa loa                       | egf-like domain containing protein                         | 0 |                                                                 | P:GO:000718;<br>P:GO:0008360;<br>P:GO:0016477;<br>P:GO:0007517;<br>P:GO:0016339;<br>P:GO:0007157;<br>C:GO:0016021;<br>P:GO:0007608;<br>P:GO:0007155;<br>C:GO:0016020;<br>P:GO:0035160;<br>P:GO:0008340;<br>P:GO:0007494;<br>C:GO:0005925;<br>F:GO:0050839;<br>F:GO:0004872;<br>P:GO:0007275;<br>P:GO:0007417;<br>P:GO:0035099;<br>F:GO:0005488;<br>P:GO:0016340;<br>P:GO:0007475;<br>P:GO:0016203;<br>P:GO:0007411;<br>P:GO:0007160;<br>P:GO:0007229;<br>P:GO:0007391 | IPR001169; PTHR10082:SF5 (PANTHER)                                            |
| Caenorhabditis elegans        | elegans protein confirmed by transcript evidence           | 4 | C:GO:0016021;<br>F:GO:0008271;<br>P:GO:0008272;<br>P:GO:0055085 | -                                                                                                                                                                                                                                                                                                                                                                                                                                                                     | IPR011547; PTHR11814 (PANTHER), PTHR11814:SF25 (PANTHER), SignalP (SIGNALP)   |
|                               | -                                                          | 0 |                                                                 |                                                                                                                                                                                                                                                                                                                                                                                                                                                                       | -                                                                             |
|                               | -                                                          | 0 |                                                                 |                                                                                                                                                                                                                                                                                                                                                                                                                                                                       | -                                                                             |
| Caenorhabditis remanei        | elegans protein partially confirmed by transcript evidence | 2 | F:GO:0005506;<br>P:GO:0040010                                   | -                                                                                                                                                                                                                                                                                                                                                                                                                                                                     | IPR001128; PTHR19383:SF176 (PANTHER)                                          |
|                               | -                                                          | 0 |                                                                 |                                                                                                                                                                                                                                                                                                                                                                                                                                                                       | SignalP (SIGNALP)                                                             |
|                               | -                                                          | 0 |                                                                 |                                                                                                                                                                                                                                                                                                                                                                                                                                                                       | -                                                                             |
|                               | -                                                          | 0 |                                                                 |                                                                                                                                                                                                                                                                                                                                                                                                                                                                       | SignalP (SIGNALP)                                                             |
| Caenorhabditis elegans        | ysyf_caeel ame: full=uncharacterized f-box protein         | 0 |                                                                 |                                                                                                                                                                                                                                                                                                                                                                                                                                                                       | -                                                                             |
|                               | -                                                          | 0 |                                                                 |                                                                                                                                                                                                                                                                                                                                                                                                                                                                       | -                                                                             |
| Caenorhabditis briggsae       | n -(beta-n-acetylglucosaminy)-l-asparagi-se                | 1 | F:GO:0016787                                                    | -                                                                                                                                                                                                                                                                                                                                                                                                                                                                     | IPR000246; PTHR10188:SF6 (PANTHER), SignalP (SIGNALP), SSF56235 (SUPERFAMILY) |
|                               | -                                                          | 0 |                                                                 |                                                                                                                                                                                                                                                                                                                                                                                                                                                                       | -                                                                             |
| Cooperia punctata             | af352702_1activation associated secreted protein           | 0 |                                                                 | C:GO:0005576                                                                                                                                                                                                                                                                                                                                                                                                                                                          | -                                                                             |
|                               | -                                                          | 0 |                                                                 |                                                                                                                                                                                                                                                                                                                                                                                                                                                                       | -                                                                             |
|                               | -                                                          | 0 |                                                                 |                                                                                                                                                                                                                                                                                                                                                                                                                                                                       | -                                                                             |
| Strongylocentrotus purpuratus | lipase maturation factor 2                                 | 1 | C:GO:0016020                                                    | -                                                                                                                                                                                                                                                                                                                                                                                                                                                                     | -                                                                             |
|                               | -                                                          | 0 |                                                                 |                                                                                                                                                                                                                                                                                                                                                                                                                                                                       | SignalP (SIGNALP)                                                             |
|                               | -                                                          | 0 |                                                                 |                                                                                                                                                                                                                                                                                                                                                                                                                                                                       | -                                                                             |
|                               | -                                                          | 0 |                                                                 |                                                                                                                                                                                                                                                                                                                                                                                                                                                                       | SignalP (SIGNALP)                                                             |

|                        |                                                     |    |                                                                                                                                                                                                                                                                                                                                                                                                                                                                        |                                                                                  |                                                                           |
|------------------------|-----------------------------------------------------|----|------------------------------------------------------------------------------------------------------------------------------------------------------------------------------------------------------------------------------------------------------------------------------------------------------------------------------------------------------------------------------------------------------------------------------------------------------------------------|----------------------------------------------------------------------------------|---------------------------------------------------------------------------|
| Caenorhabditis remanei | fumarylacetoacetate hydrolase domain containing 1   | 6  | P:GO:0009792;<br>P:GO:0002119;<br>C:GO:0005743;<br>P:GO:0008152;<br>P:GO:0040007;<br>F:GO:0003824                                                                                                                                                                                                                                                                                                                                                                      | -                                                                                | IPR002529; IPR011234; PTHR11820 (PANTHER), PTHR11820:SF7 (PANTHER)        |
| Homo sapiens           | endoglin                                            | 37 | P:GO:0001300;<br>F:GO:0042803;<br>P:GO:0010552;<br>P:GO:0030512;<br>F:GO:0005114;<br>P:GO:0070278;<br>P:GO:0048745;<br>P:GO:0030513;<br>P:GO:0051001;<br>F:GO:0005534;<br>P:GO:0010862;<br>C:GO:0005615;<br>P:GO:0001947;<br>P:GO:0003084;<br>F:GO:0005539;<br>P:GO:0031960;<br>P:GO:0042060;<br>P:GO:0001937;<br>P:GO:0030155;<br>P:GO:0048844;<br>P:GO:0031953;<br>C:GO:0009897;<br>P:GO:0022617;<br>F:GO:0005024;<br>P:GO:0001569;<br>C:GO:0070022;<br>F:GO:0050431 | -                                                                                | PTHR14002 (PANTHER), PTHR14002:SF1 (PANTHER), SignalP (SIGNALP)           |
| Caenorhabditis elegans | serine threonine protein ki-se                      | 1  | F:GO:0005488                                                                                                                                                                                                                                                                                                                                                                                                                                                           | -                                                                                | G3DSA:3.40.50.300 (GENE3D), PTHR22908 (PANTHER), PTHR22908:SF13 (PANTHER) |
|                        | -                                                   | 0  |                                                                                                                                                                                                                                                                                                                                                                                                                                                                        |                                                                                  | -                                                                         |
| Ciona intestinalis     | eukaryotic translation initiation factor subunit 10 | 0  |                                                                                                                                                                                                                                                                                                                                                                                                                                                                        |                                                                                  | -                                                                         |
|                        | -                                                   | 0  |                                                                                                                                                                                                                                                                                                                                                                                                                                                                        |                                                                                  | -                                                                         |
|                        | -                                                   | 0  |                                                                                                                                                                                                                                                                                                                                                                                                                                                                        |                                                                                  | -                                                                         |
|                        | -                                                   | 0  |                                                                                                                                                                                                                                                                                                                                                                                                                                                                        |                                                                                  | -                                                                         |
|                        | -                                                   | 0  |                                                                                                                                                                                                                                                                                                                                                                                                                                                                        |                                                                                  | -                                                                         |
|                        | -                                                   | 0  |                                                                                                                                                                                                                                                                                                                                                                                                                                                                        |                                                                                  | SignalP (SIGNALP)                                                         |
| Loa loa                | briggsae cbr-sec-3 protein                          | 0  |                                                                                                                                                                                                                                                                                                                                                                                                                                                                        | P:GO:0000003;<br>P:GO:0040011;<br>P:GO:0040010;<br>F:GO:0005515;<br>P:GO:0007126 | IPR019160                                                                 |
|                        | -                                                   | 0  |                                                                                                                                                                                                                                                                                                                                                                                                                                                                        |                                                                                  | -                                                                         |
| Loa loa                | hypothetical protein LOAG_07407 [Loa loa]           | 0  |                                                                                                                                                                                                                                                                                                                                                                                                                                                                        |                                                                                  | -                                                                         |
| Bombyx mori            | endonuclease-reverse transcriptase                  | 0  |                                                                                                                                                                                                                                                                                                                                                                                                                                                                        | F:GO:0003723;<br>P:GO:0006278;<br>F:GO:0004519;<br>F:GO:0003964                  | -                                                                         |



|                         |                                                                         |    |                                                                                                                                                                                                                          |                                                                                                   |                           |                                                                                                         |
|-------------------------|-------------------------------------------------------------------------|----|--------------------------------------------------------------------------------------------------------------------------------------------------------------------------------------------------------------------------|---------------------------------------------------------------------------------------------------|---------------------------|---------------------------------------------------------------------------------------------------------|
| Homo sapiens            | complement c1r subcomponent precursor                                   | 6  | F:GO:0004252;<br>P:GO:0045087;<br>F:GO:0005509;<br>P:GO:0006958;<br>C:GO:0005576;<br>P:GO:0006508                                                                                                                        | -                                                                                                 | EC:3.4.21.0               | -                                                                                                       |
| Caenorhabditis elegans  | glutamyl-tr- amidotransferase subunit a                                 | 4  | P:GO:0019915;<br>P:GO:0006412;<br>F:GO:0050567;<br>F:GO:0016740                                                                                                                                                          | -                                                                                                 | EC:3.6.5.3;<br>EC:6.3.5.7 | IPR000120; PTHR11895:SF7 (PANTHER)                                                                      |
| -                       | -                                                                       | 0  |                                                                                                                                                                                                                          |                                                                                                   |                           | -                                                                                                       |
| -                       | -                                                                       | 0  |                                                                                                                                                                                                                          |                                                                                                   |                           | -                                                                                                       |
| -                       | -                                                                       | 0  |                                                                                                                                                                                                                          |                                                                                                   |                           | -                                                                                                       |
| Loa loa                 | olfactomedin-like domain containing protein                             | 0  |                                                                                                                                                                                                                          |                                                                                                   |                           | PTHR23192 (PANTHER),<br>PTHR23192:SF6 (PANTHER)                                                         |
| Brugia malayi           | hypothetical kda protein in chromosome                                  | 0  |                                                                                                                                                                                                                          |                                                                                                   |                           | -                                                                                                       |
| -                       | -                                                                       | 0  |                                                                                                                                                                                                                          |                                                                                                   |                           | -                                                                                                       |
| Caenorhabditis elegans  | mgc80013 protein                                                        | 0  |                                                                                                                                                                                                                          |                                                                                                   |                           | PTHR22774 (PANTHER),<br>PTHR22774:SF5 (PANTHER)                                                         |
| -                       | -                                                                       | 0  |                                                                                                                                                                                                                          |                                                                                                   |                           | -                                                                                                       |
| -                       | -                                                                       | 0  |                                                                                                                                                                                                                          |                                                                                                   |                           | -                                                                                                       |
| Caenorhabditis elegans  | adenylate cyclase type                                                  | 12 | P:GO:0006952;<br>P:GO:0008219;<br>C:GO:0016021;<br>F:GO:0004016;<br>P:GO:0007188;<br>P:GO:0009190;<br>P:GO:0042221;<br>P:GO:0002119;<br>P:GO:0040017;<br>F:GO:0000166;<br>C:GO:0005886;<br>P:GO:0030431                  | -                                                                                                 | EC:4.6.1.1                | IPR001054; PTHR11920 (PANTHER),<br>PTHR11920:SF10 (PANTHER)                                             |
| Caenorhabditis briggsae | briggsae cbr-rhr-1 protein                                              | 0  |                                                                                                                                                                                                                          | C:GO:0016021;<br>C:GO:0016020;<br>F:GO:0008519;<br>P:GO:0055085;<br>P:GO:0009792;<br>P:GO:0006810 |                           | IPR001905; G3DSA:1.10.3430.10 (GENE3D), PTHR11883 (PANTHER), PTHR11883:SF6 (PANTHER), SignalP (SIGNALP) |
| Caenorhabditis briggsae | zinc c2h2 type family protein                                           | 0  |                                                                                                                                                                                                                          | F:GO:0003676;<br>F:GO:0008270;<br>C:GO:0005622                                                    |                           | IPR007087; IPR013087; IPR015880                                                                         |
| Caenorhabditis elegans  | related to yeast vacuolar protein sorting factor family member (vps-41) | 13 | C:GO:0005829;<br>C:GO:0030897;<br>P:GO:0007034;<br>P:GO:0040007;<br>P:GO:0006624;<br>C:GO:0005624;<br>P:GO:0002119;<br>F:GO:0005515;<br>P:GO:0048193;<br>P:GO:0009792;<br>P:GO:0043066;<br>C:GO:0005798;<br>P:GO:0015031 | -                                                                                                 |                           | IPR011990; IPR016024; IPR019453;<br>PTHR12616 (PANTHER), PF00637 (PFAM)                                 |
| -                       | -                                                                       | 0  |                                                                                                                                                                                                                          |                                                                                                   |                           | -                                                                                                       |
| -                       | -                                                                       | 0  |                                                                                                                                                                                                                          |                                                                                                   |                           | -                                                                                                       |

|                         |                                                                                   |    |                                                                                                                                                                                        |              |  |                                                    |
|-------------------------|-----------------------------------------------------------------------------------|----|----------------------------------------------------------------------------------------------------------------------------------------------------------------------------------------|--------------|--|----------------------------------------------------|
| Caenorhabditis briggsae | elegans protein confirmed by transcript evidence                                  | 1  | F:GO:0005515                                                                                                                                                                           | -            |  | SignalP (SIGNALP)                                  |
| Homo sapiens            | transmembrane protein 66                                                          | 1  | C:GO:0016021                                                                                                                                                                           | -            |  | IPR009567                                          |
|                         | -                                                                                 | 0  |                                                                                                                                                                                        |              |  | SignalP (SIGNALP)                                  |
|                         | -                                                                                 | 0  |                                                                                                                                                                                        |              |  | -                                                  |
|                         | -                                                                                 | 0  |                                                                                                                                                                                        |              |  | -                                                  |
| Pongo abelii            | heterogeneous nuclear ribonucleoprotein I                                         | 9  | C:GO:0005737;<br>P:GO:0008380;<br>C:GO:0030530;<br>C:GO:0005654;<br>C:GO:0045120;<br>F:GO:0003723;<br>F:GO:0005515;<br>P:GO:0006397;<br>F:GO:0000166                                   | -            |  | -                                                  |
|                         | -                                                                                 | 0  |                                                                                                                                                                                        |              |  | SignalP (SIGNALP)                                  |
|                         | -                                                                                 | 0  |                                                                                                                                                                                        |              |  | -                                                  |
| Caenorhabditis elegans  | enhancer of unc-40 ventral axon guidance defects family member (eva-1)            | 0  |                                                                                                                                                                                        | F:GO:0005529 |  | -                                                  |
| Caenorhabditis elegans  | enhancer of unc-40 ventral axon guidance defects family member (eva-1)            | 0  |                                                                                                                                                                                        | F:GO:0005529 |  | -                                                  |
| Caenorhabditis remanei  | integrin alpha-8 precursor                                                        | 11 | P:GO:0009792;<br>F:GO:0004872;<br>P:GO:0002119;<br>P:GO:0007229;<br>P:GO:0018991;<br>P:GO:0032940;<br>P:GO:0007155;<br>P:GO:0040007;<br>P:GO:0006898;<br>P:GO:0040039;<br>C:GO:0008305 | -            |  | PTHR23220 (PANTHER),<br>PTHR23220:SF11 (PANTHER)   |
|                         | -                                                                                 | 0  |                                                                                                                                                                                        |              |  | -                                                  |
| Caenorhabditis elegans  | paps (adenosine 3 -phosphate 5 -phosphosulfate) transporter family member (pst-1) | 2  | P:GO:0055085;<br>C:GO:0016021                                                                                                                                                          | -            |  | -                                                  |
|                         | -                                                                                 | 0  |                                                                                                                                                                                        |              |  | -                                                  |
|                         | -                                                                                 | 0  |                                                                                                                                                                                        |              |  | -                                                  |
|                         | -                                                                                 | 0  |                                                                                                                                                                                        |              |  | -                                                  |
|                         | -                                                                                 | 0  |                                                                                                                                                                                        |              |  | -                                                  |
|                         | -                                                                                 | 0  |                                                                                                                                                                                        |              |  | IPR006210; IPR013032;<br>G3DSA:2.10.25.10 (GENE3D) |
| Homo sapiens            | lysosomal multispinning membrane protein 5                                        | 3  | C:GO:0005887;<br>C:GO:0005765;<br>P:GO:0006810                                                                                                                                         | -            |  | -                                                  |
|                         | -                                                                                 | 0  |                                                                                                                                                                                        |              |  | SignalP (SIGNALP)                                  |
|                         | -                                                                                 | 0  |                                                                                                                                                                                        |              |  | -                                                  |
|                         | -                                                                                 | 0  |                                                                                                                                                                                        |              |  | -                                                  |
|                         | -                                                                                 | 0  |                                                                                                                                                                                        |              |  | -                                                  |
|                         | -                                                                                 | 0  |                                                                                                                                                                                        |              |  | -                                                  |
|                         | -                                                                                 | 0  |                                                                                                                                                                                        |              |  | -                                                  |
| Caenorhabditis elegans  | elegans protein confirmed by transcript evidence                                  | 1  | F:GO:0005515                                                                                                                                                                           | -            |  | -                                                  |
| Caenorhabditis elegans  | briggsae cbr-hhat-1 protein                                                       | 0  |                                                                                                                                                                                        |              |  | -                                                  |
|                         | -                                                                                 | 0  |                                                                                                                                                                                        |              |  | -                                                  |
| Caenorhabditis elegans  | hypothetical protein F43D9.1 [Caenorhabditis elegans]                             | 2  | F:GO:0008158;<br>C:GO:0016020                                                                                                                                                          | -            |  | PTHR10796 (PANTHER),<br>PTHR10796:SF13 (PANTHER)   |
|                         | -                                                                                 | 0  |                                                                                                                                                                                        |              |  | -                                                  |

|                             |                                                         |    |                                                                                                                                                                                                                                                                                                                                                                                                                                                       |                                                |   |                                                                                              |
|-----------------------------|---------------------------------------------------------|----|-------------------------------------------------------------------------------------------------------------------------------------------------------------------------------------------------------------------------------------------------------------------------------------------------------------------------------------------------------------------------------------------------------------------------------------------------------|------------------------------------------------|---|----------------------------------------------------------------------------------------------|
| Ancylostoma caninum         | activin a type i                                        | 26 | P:GO:0006468;<br>P:GO:0048332;<br>F:GO:0005515;<br>P:GO:0046588;<br>P:GO:0009952;<br>P:GO:0035124;<br>P:GO:0048264;<br>P:GO:0001944;<br>P:GO:0035162;<br>C:GO:0070724;<br>P:GO:0051216;<br>F:GO:0005024;<br>P:GO:0042475;<br>P:GO:0003230;<br>P:GO:0001947;<br>P:GO:0060030;<br>P:GO:0007420;<br>P:GO:0007368;<br>P:GO:0021556;<br>P:GO:0051260;<br>P:GO:0001889;<br>P:GO:0003146;<br>F:GO:0005524;<br>P:GO:0030510;<br>P:GO:0048368;<br>C:GO:0005938 | -                                              | - | -                                                                                            |
|                             | -                                                       | 0  |                                                                                                                                                                                                                                                                                                                                                                                                                                                       |                                                |   | -                                                                                            |
|                             | -                                                       | 0  |                                                                                                                                                                                                                                                                                                                                                                                                                                                       |                                                |   | -                                                                                            |
| Caenorhabditis remanei      | nuclear hormone receptor family member (nhr-105)        | 7  | F:GO:0042802;<br>F:GO:0003700;<br>F:GO:0043565;<br>F:GO:0003707;<br>C:GO:0005634;<br>F:GO:0008270;<br>P:GO:0006355                                                                                                                                                                                                                                                                                                                                    | -                                              |   | SignalP (SIGNALP)                                                                            |
|                             | -                                                       | 0  |                                                                                                                                                                                                                                                                                                                                                                                                                                                       |                                                |   | -                                                                                            |
|                             | -                                                       | 0  |                                                                                                                                                                                                                                                                                                                                                                                                                                                       |                                                |   | -                                                                                            |
|                             | -                                                       | 0  |                                                                                                                                                                                                                                                                                                                                                                                                                                                       |                                                |   | -                                                                                            |
|                             | -                                                       | 0  |                                                                                                                                                                                                                                                                                                                                                                                                                                                       |                                                |   | -                                                                                            |
| Micromonas pusilla CCMP1545 | protein                                                 | 0  |                                                                                                                                                                                                                                                                                                                                                                                                                                                       |                                                |   | -                                                                                            |
| Caenorhabditis briggsae     | Hypothetical protein CBG00701 [Caenorhabditis briggsae] | 0  |                                                                                                                                                                                                                                                                                                                                                                                                                                                       |                                                |   | -                                                                                            |
| Brugia malayi               | 3 5 -cyclic nucleotide phosphodiesterase family protein | 1  | F:GO:0016787                                                                                                                                                                                                                                                                                                                                                                                                                                          | -                                              |   | -                                                                                            |
| Caenorhabditis elegans      | kelch domain containing 10                              | 0  |                                                                                                                                                                                                                                                                                                                                                                                                                                                       | F:GO:0003674;<br>F:GO:0005515;<br>C:GO:0005575 |   | IPR006652; IPR015915; PTHR23244 (PANTHER), PTHR23244:SF35 (PANTHER), SSF117281 (SUPERFAMILY) |

|                             |                                                    |    |                                                                                                                                                                                                         |                                                                                                   |                                                                                                                                                                          |
|-----------------------------|----------------------------------------------------|----|---------------------------------------------------------------------------------------------------------------------------------------------------------------------------------------------------------|---------------------------------------------------------------------------------------------------|--------------------------------------------------------------------------------------------------------------------------------------------------------------------------|
| Caenorhabditis briggsae     | laminin a                                          | 12 | P:GO:0007411;<br>P:GO:0016321;<br>P:GO:0007498;<br>P:GO:0031987;<br>P:GO:0050789;<br>P:GO:0001964;<br>P:GO:0048854;<br>P:GO:0007507;<br>C:GO:0005605;<br>P:GO:0007155;<br>P:GO:0002121;<br>P:GO:0009790 | -                                                                                                 | IPR002049; IPR013032;<br>G3DSA:2.10.25.10 (GENE3D),<br>PTHR10574 (PANTHER),<br>PTHR10574:SF56 (PANTHER),<br>SSF57196 (SUPERFAMILY)                                       |
| -                           | -                                                  | 0  |                                                                                                                                                                                                         |                                                                                                   | -                                                                                                                                                                        |
| -                           | -                                                  | 0  |                                                                                                                                                                                                         |                                                                                                   | -                                                                                                                                                                        |
| -                           | -                                                  | 0  |                                                                                                                                                                                                         |                                                                                                   | -                                                                                                                                                                        |
| -                           | -                                                  | 0  |                                                                                                                                                                                                         |                                                                                                   | SignalP (SIGNALP)                                                                                                                                                        |
| Caenorhabditis briggsae     | briggsae cbr-haf-6 protein                         | 4  | F:GO:0042626;<br>P:GO:0055085;<br>F:GO:0005524;<br>C:GO:0016021                                                                                                                                         | -                                                                                                 | PTHR19242 (PANTHER),<br>PTHR19242:SF77 (PANTHER), SignalP<br>(SIGNALP)                                                                                                   |
| -                           | -                                                  | 0  |                                                                                                                                                                                                         |                                                                                                   | -                                                                                                                                                                        |
| Loa loa                     | cleavage and polyadenylation specific factor 73kda | 0  |                                                                                                                                                                                                         | F:GO:0016787                                                                                      | IPR021718; PTHR11203 (PANTHER),<br>PTHR11203:SF11 (PANTHER), SignalP<br>(SIGNALP)                                                                                        |
| -                           | -                                                  | 0  |                                                                                                                                                                                                         |                                                                                                   | SignalP (SIGNALP)                                                                                                                                                        |
| -                           | -                                                  | 0  |                                                                                                                                                                                                         |                                                                                                   | -                                                                                                                                                                        |
| Caenorhabditis briggsae     | pyruvate carboxylase                               | 10 | P:GO:0006107;<br>F:GO:0004736;<br>C:GO:0005625;<br>C:GO:0005743;<br>F:GO:0009374;<br>P:GO:0009252;<br>F:GO:0005524;<br>P:GO:0006094;<br>C:GO:0005759;<br>F:GO:0008716                                   | -                                                                                                 | EC:6.4.1.1;<br>EC:6.3.2.4<br><br>IPR000089; IPR011053;<br>G3DSA:2.40.50.100 (GENE3D),<br>G3DSA:3.10.600.10 (GENE3D),<br>PTHR18866 (PANTHER),<br>PTHR18866:SF10 (PANTHER) |
| -                           | -                                                  | 0  |                                                                                                                                                                                                         |                                                                                                   | -                                                                                                                                                                        |
| -                           | -                                                  | 0  |                                                                                                                                                                                                         |                                                                                                   | -                                                                                                                                                                        |
| -                           | -                                                  | 0  |                                                                                                                                                                                                         |                                                                                                   | -                                                                                                                                                                        |
| -                           | -                                                  | 0  |                                                                                                                                                                                                         |                                                                                                   | -                                                                                                                                                                        |
| Caenorhabditis briggsae     | c2 domain containing protein                       | 0  |                                                                                                                                                                                                         | F:GO:0003674;<br>C:GO:0008021;<br>C:GO:0016020;<br>P:GO:0008150;<br>F:GO:0005215;<br>P:GO:0006810 | -                                                                                                                                                                        |
| -                           | -                                                  | 0  |                                                                                                                                                                                                         |                                                                                                   | -                                                                                                                                                                        |
| -                           | -                                                  | 0  |                                                                                                                                                                                                         |                                                                                                   | -                                                                                                                                                                        |
| -                           | -                                                  | 0  |                                                                                                                                                                                                         |                                                                                                   | -                                                                                                                                                                        |
| Pinus koraiensis            | ORF124 [Pinus koraiensis]                          | 1  | C:GO:0009507                                                                                                                                                                                            | -                                                                                                 | -                                                                                                                                                                        |
| -                           | -                                                  | 0  |                                                                                                                                                                                                         |                                                                                                   | -                                                                                                                                                                        |
| Angiostrongylus cantonensis | hypothetical protein [Angiostrongylus cantonensis] | 2  | F:GO:0008270;<br>F:GO:0005515                                                                                                                                                                           | -                                                                                                 | IPR000253; IPR008984; IPR013083;<br>SSF57850 (SUPERFAMILY)                                                                                                               |
| -                           | -                                                  | 0  |                                                                                                                                                                                                         |                                                                                                   | IPR000253; IPR008984                                                                                                                                                     |
| Angiostrongylus cantonensis | hypothetical protein [Angiostrongylus cantonensis] | 2  | F:GO:0008270;<br>F:GO:0005515                                                                                                                                                                           | -                                                                                                 | IPR000253; IPR008984; IPR013083;<br>SSF57850 (SUPERFAMILY)                                                                                                               |
| Angiostrongylus cantonensis | si:dkey- protein                                   | 1  | F:GO:0046872                                                                                                                                                                                            | -                                                                                                 | -                                                                                                                                                                        |
| -                           | -                                                  | 0  |                                                                                                                                                                                                         |                                                                                                   | IPR000253; IPR008984                                                                                                                                                     |

|                                      |                                                  |   |                                                                                                                    |                                                                                  |                                                                            |
|--------------------------------------|--------------------------------------------------|---|--------------------------------------------------------------------------------------------------------------------|----------------------------------------------------------------------------------|----------------------------------------------------------------------------|
| Caenorhabditis briggsae              | polymerase (d- directed) alpha 2 (70kd subunit)  | 6 | P:GO:0040007;<br>P:GO:0002119;<br>F:GO:0005515;<br>C:GO:0044428;<br>P:GO:0002009;<br>P:GO:0009792                  | -                                                                                | -                                                                          |
| -                                    | -                                                | 0 |                                                                                                                    |                                                                                  | -                                                                          |
| Caenorhabditis elegans               | elegans protein confirmed by transcript evidence | 0 |                                                                                                                    | P:GO:0008152;<br>F:GO:0003824                                                    | G3DSA:3.40.50.980 (GENE3D)                                                 |
| -                                    | -                                                | 0 |                                                                                                                    |                                                                                  | -                                                                          |
| -                                    | -                                                | 0 |                                                                                                                    |                                                                                  | -                                                                          |
| -                                    | -                                                | 0 |                                                                                                                    |                                                                                  | -                                                                          |
| -                                    | -                                                | 0 |                                                                                                                    |                                                                                  | -                                                                          |
| -                                    | -                                                | 0 |                                                                                                                    |                                                                                  | -                                                                          |
| Caenorhabditis remanei               | der1-like domain member 2                        | 6 | P:GO:0030433;<br>C:GO:0030176;<br>P:GO:0030968;<br>P:GO:0030970;<br>P:GO:0030307;<br>P:GO:0008284                  | -                                                                                | -                                                                          |
| Caenorhabditis elegans               | hed family member (ptc-3)                        | 7 | P:GO:0018996;<br>C:GO:0016020;<br>P:GO:0009792;<br>P:GO:0040018;<br>P:GO:0000003;<br>P:GO:0002119;<br>P:GO:0040011 | -                                                                                | SignalP (SIGNALP)                                                          |
| -                                    | -                                                | 0 |                                                                                                                    |                                                                                  | -                                                                          |
| Caenorhabditis brenneri              | elegans protein confirmed by transcript evidence | 0 |                                                                                                                    |                                                                                  | -                                                                          |
| Schizosaccharomyces japonicus yFS275 | cysteine string protein                          | 4 | P:GO:0006457;<br>F:GO:0046872;<br>F:GO:0051082;<br>F:GO:0031072                                                    | -                                                                                | -                                                                          |
| Caenorhabditis briggsae              | elegans protein confirmed by transcript evidence | 7 | P:GO:0040035;<br>P:GO:0009792;<br>P:GO:0018991;<br>F:GO:0005515;<br>C:GO:0016607;<br>P:GO:0040011;<br>P:GO:0006898 | -                                                                                | IPR018482                                                                  |
| Caenorhabditis briggsae              | tata-binding protein-associated factor mot1      | 0 |                                                                                                                    | F:GO:0004386;<br>F:GO:0003676;<br>F:GO:0005524;<br>F:GO:0005488;<br>F:GO:0003677 | IPR000330; PTHR10799 (PANTHER),<br>PTHR10799:SF72 (PANTHER)                |
| Caenorhabditis remanei               | aldo keto reductase family protein               | 6 | P:GO:0009792;<br>P:GO:0055114;<br>F:GO:0016491;<br>P:GO:0040010;<br>P:GO:0002119;<br>P:GO:0040011                  | -                                                                                | IPR001395; IPR018170; IPR020471;<br>IPR023210; PTHR11732:SF34<br>(PANTHER) |
| -                                    | -                                                | 0 |                                                                                                                    |                                                                                  | -                                                                          |
| Caenorhabditis remanei               | briggsae cbr-sqv-8 protein                       | 0 |                                                                                                                    | F:GO:0016740;<br>C:GO:0016020;<br>F:GO:0015018;<br>F:GO:0016757                  | -                                                                          |

|                         |                                                            |    |                                                                                                                                                                                                                                                                                                                                                                                   |                                                |            |                                                                 |
|-------------------------|------------------------------------------------------------|----|-----------------------------------------------------------------------------------------------------------------------------------------------------------------------------------------------------------------------------------------------------------------------------------------------------------------------------------------------------------------------------------|------------------------------------------------|------------|-----------------------------------------------------------------|
| Homo sapiens            | protein tyrosine receptor f                                | 22 | P:GO:0050775;<br>P:GO:0001960;<br>P:GO:0007185;<br>P:GO:0042059;<br>P:GO:0050803;<br>C:GO:0030426;<br>F:GO:0005001;<br>F:GO:0030971;<br>C:GO:0005792;<br>P:GO:0043525;<br>F:GO:0042301;<br>P:GO:0008285;<br>C:GO:0043025;<br>P:GO:0007156;<br>C:GO:0060076;<br>P:GO:0051387;<br>C:GO:0005768;<br>P:GO:0006470;<br>P:GO:0046627;<br>C:GO:0005887;<br>P:GO:0031345;<br>F:GO:0005158 | -                                              | -          |                                                                 |
| -                       | -                                                          | 0  |                                                                                                                                                                                                                                                                                                                                                                                   |                                                |            | -                                                               |
| -                       | -                                                          | 0  |                                                                                                                                                                                                                                                                                                                                                                                   |                                                |            | -                                                               |
| -                       | -                                                          | 0  |                                                                                                                                                                                                                                                                                                                                                                                   |                                                |            | -                                                               |
| Brugia malayi           | hypothetical protein Bm1_26975 [Brugia malayi]             | 0  |                                                                                                                                                                                                                                                                                                                                                                                   |                                                |            | -                                                               |
| Caenorhabditis elegans  | calmodulin                                                 | 1  | F:GO:0005509                                                                                                                                                                                                                                                                                                                                                                      | -                                              |            | IPR011992; PTHR23050 (PANTHER), PTHR23050:SF7 (PANTHER)         |
| -                       | -                                                          | 0  |                                                                                                                                                                                                                                                                                                                                                                                   |                                                |            | -                                                               |
| -                       | -                                                          | 0  |                                                                                                                                                                                                                                                                                                                                                                                   |                                                |            | -                                                               |
| -                       | -                                                          | 0  |                                                                                                                                                                                                                                                                                                                                                                                   |                                                |            | -                                                               |
| -                       | -                                                          | 0  |                                                                                                                                                                                                                                                                                                                                                                                   |                                                |            | -                                                               |
| Caenorhabditis briggsae | leucyl tr- synthetase family member (lrs-2)                | 2  | F:GO:0016874;<br>P:GO:0006412                                                                                                                                                                                                                                                                                                                                                     | -                                              | EC:3.6.5.3 | IPR002302; PTHR11946 (PANTHER)                                  |
| -                       | -                                                          | 0  |                                                                                                                                                                                                                                                                                                                                                                                   |                                                |            | -                                                               |
| -                       | -                                                          | 0  |                                                                                                                                                                                                                                                                                                                                                                                   |                                                |            | PTHR14167 (PANTHER), PTHR14167:SF2 (PANTHER)                    |
| -                       | -                                                          | 0  |                                                                                                                                                                                                                                                                                                                                                                                   |                                                |            | SignalP (SIGNALP)                                               |
| -                       | -                                                          | 0  |                                                                                                                                                                                                                                                                                                                                                                                   |                                                |            | -                                                               |
| Caenorhabditis briggsae | mitochondrial 28s ribosomal protein s28                    | 1  | P:GO:0000003                                                                                                                                                                                                                                                                                                                                                                      | -                                              |            | -                                                               |
| -                       | -                                                          | 0  |                                                                                                                                                                                                                                                                                                                                                                                   |                                                |            | -                                                               |
| Caenorhabditis elegans  | elegans protein partially confirmed by transcript evidence | 0  |                                                                                                                                                                                                                                                                                                                                                                                   |                                                |            | PTHR12187 (PANTHER), PTHR12187:SF2 (PANTHER)                    |
| -                       | -                                                          | 0  |                                                                                                                                                                                                                                                                                                                                                                                   |                                                |            | SignalP (SIGNALP)                                               |
| -                       | -                                                          | 0  |                                                                                                                                                                                                                                                                                                                                                                                   |                                                |            | -                                                               |
| -                       | -                                                          | 0  |                                                                                                                                                                                                                                                                                                                                                                                   |                                                |            | -                                                               |
| -                       | -                                                          | 0  |                                                                                                                                                                                                                                                                                                                                                                                   |                                                |            | -                                                               |
| -                       | -                                                          | 0  |                                                                                                                                                                                                                                                                                                                                                                                   |                                                |            | -                                                               |
| -                       | -                                                          | 0  |                                                                                                                                                                                                                                                                                                                                                                                   |                                                |            | SignalP (SIGNALP)                                               |
| Caenorhabditis remanei  | elegans protein confirmed by transcript evidence           | 1  | P:GO:0019915                                                                                                                                                                                                                                                                                                                                                                      | -                                              |            | -                                                               |
| Caenorhabditis elegans  | hypothetical protein Y69A2AR.16 [Caenorhabditis elegans]   | 0  |                                                                                                                                                                                                                                                                                                                                                                                   | P:GO:0055114;<br>F:GO:0005488;<br>F:GO:0016491 |            | PTHR12596 (PANTHER), PTHR12596:SF3 (PANTHER), SignalP (SIGNALP) |

|                               |                                                                                                                                                                                         |   |                                                                                                                                                      |                                                                                                                                                                       |             |                                                                                                          |
|-------------------------------|-----------------------------------------------------------------------------------------------------------------------------------------------------------------------------------------|---|------------------------------------------------------------------------------------------------------------------------------------------------------|-----------------------------------------------------------------------------------------------------------------------------------------------------------------------|-------------|----------------------------------------------------------------------------------------------------------|
| Brugia malayi                 | integrator complex subunit 5                                                                                                                                                            | 0 |                                                                                                                                                      | F:GO:0005215;<br>C:GO:0016021;<br>C:GO:0016020;<br>P:GO:0016180;<br>C:GO:0032039;<br>P:GO:0006810;<br>F:GO:0003674;<br>C:GO:0005575;<br>P:GO:0055085;<br>P:GO:0008150 | -           |                                                                                                          |
| Brugia malayi                 | integrator complex subunit 5                                                                                                                                                            | 0 |                                                                                                                                                      | F:GO:0005215;<br>C:GO:0016021;<br>C:GO:0016020;<br>P:GO:0016180;<br>C:GO:0032039;<br>P:GO:0006810;<br>F:GO:0003674;<br>C:GO:0005575;<br>P:GO:0055085;<br>P:GO:0008150 | -           |                                                                                                          |
| -                             | -                                                                                                                                                                                       | 0 |                                                                                                                                                      |                                                                                                                                                                       | -           |                                                                                                          |
| Caenorhabditis briggsae       | Hypothetical protein CBG12852 [Caenorhabditis briggsae]                                                                                                                                 | 0 |                                                                                                                                                      | P:GO:0006412;<br>P:GO:0009408                                                                                                                                         | -           |                                                                                                          |
| Caenorhabditis briggsae       | feline leukemia virus subgroup c receptor-related protein 1                                                                                                                             | 4 | P:GO:0055085;<br>P:GO:0040011;<br>C:GO:0016021;<br>P:GO:0007413                                                                                      | -                                                                                                                                                                     | -           |                                                                                                          |
| -                             | -                                                                                                                                                                                       | 0 |                                                                                                                                                      |                                                                                                                                                                       | -           |                                                                                                          |
| Caenorhabditis remanei        | noc3l_caeel ame: full=nucleolar complex protein 3 homolog<br>short=noc3 protein homolog ame: full=noc3-like protein<br>ame: full=nucleolar complex-associated protein 3-like<br>protein | 0 |                                                                                                                                                      | C:GO:0005634;<br>C:GO:0005730                                                                                                                                         | -           |                                                                                                          |
| Nyctotherus ovalis            | adp atp translocase                                                                                                                                                                     | 5 | F:GO:0005488;<br>C:GO:0005743;<br>P:GO:0055085;<br>C:GO:0016021;<br>F:GO:0005215                                                                     | -                                                                                                                                                                     | -           |                                                                                                          |
| Caenorhabditis elegans        | myosin heavy chain                                                                                                                                                                      | 4 | C:GO:0032982;<br>F:GO:0003779;<br>F:GO:0005524;<br>F:GO:0003774                                                                                      | -                                                                                                                                                                     |             | IPR015650; PTHR13140 (PANTHER)                                                                           |
| -                             | -                                                                                                                                                                                       | 0 |                                                                                                                                                      |                                                                                                                                                                       | -           |                                                                                                          |
| -                             | -                                                                                                                                                                                       | 0 |                                                                                                                                                      |                                                                                                                                                                       | -           |                                                                                                          |
|                               |                                                                                                                                                                                         |   |                                                                                                                                                      |                                                                                                                                                                       |             | IPR003961; IPR008957; IPR013783;<br>PRO0014 (PRINTS), PTHR19900<br>(PANTHER), PTHR19900:SF7<br>(PANTHER) |
|                               |                                                                                                                                                                                         | 0 |                                                                                                                                                      |                                                                                                                                                                       |             | SignalP (SIGNALP)                                                                                        |
| NADP, mitochondrial isoform 3 | isocitrate dehydroge-se                                                                                                                                                                 | 9 | P:GO:0006099;<br>P:GO:0006103;<br>C:GO:0005743;<br>P:GO:0055114;<br>P:GO:0006099;<br>F:GO:0051287;<br>F:GO:0004450;<br>F:GO:0000287;<br>P:GO:0006102 | -                                                                                                                                                                     | EC:1.1.1.42 | -                                                                                                        |
| -                             | -                                                                                                                                                                                       | 0 |                                                                                                                                                      |                                                                                                                                                                       | -           |                                                                                                          |

|                         |                                                  |    |                                                                                                                                                                                                                                                                                                                                                                                                                                                       |   |                                                                                                                     |
|-------------------------|--------------------------------------------------|----|-------------------------------------------------------------------------------------------------------------------------------------------------------------------------------------------------------------------------------------------------------------------------------------------------------------------------------------------------------------------------------------------------------------------------------------------------------|---|---------------------------------------------------------------------------------------------------------------------|
|                         | -                                                | 0  |                                                                                                                                                                                                                                                                                                                                                                                                                                                       |   | -                                                                                                                   |
|                         | -                                                | 0  |                                                                                                                                                                                                                                                                                                                                                                                                                                                       |   | SignalP (SIGNALP)                                                                                                   |
|                         | -                                                | 0  |                                                                                                                                                                                                                                                                                                                                                                                                                                                       |   | -                                                                                                                   |
|                         | -                                                | 0  |                                                                                                                                                                                                                                                                                                                                                                                                                                                       |   | -                                                                                                                   |
| Loa loa                 | ck1 ttbk protein ki-se                           | 0  |                                                                                                                                                                                                                                                                                                                                                                                                                                                       |   | IPR017441                                                                                                           |
|                         | -                                                | 0  |                                                                                                                                                                                                                                                                                                                                                                                                                                                       |   | IPR015880; PTHR10071 (PANTHER),<br>PTHR10071:SF5 (PANTHER)                                                          |
| Homo sapiens            | lysosomal-associated membrane protein 1          | 9  | C:GO:0005887;<br>C:GO:0005624;<br>C:GO:0005771;<br>C:GO:0042383;<br>C:GO:0042470;<br>C:GO:0009897;<br>C:GO:0005765;<br>C:GO:0010008;<br>P:GO:0006914                                                                                                                                                                                                                                                                                                  | - | -                                                                                                                   |
| Caenorhabditis briggsae | abc1 protein                                     | 0  |                                                                                                                                                                                                                                                                                                                                                                                                                                                       |   | PTHR10566 (PANTHER)                                                                                                 |
| Caenorhabditis briggsae | heat shock protein family member (hsp- )         | 26 | P:GO:0006457;<br>P:GO:0042542;<br>C:GO:0032432;<br>P:GO:0043010;<br>C:GO:0000267;<br>C:GO:0015630;<br>P:GO:0007568;<br>P:GO:0006936;<br>C:GO:0005794;<br>P:GO:0006916;<br>C:GO:0009986;<br>P:GO:0031109;<br>C:GO:0031674;<br>F:GO:0008017;<br>P:GO:0030308;<br>P:GO:0006006;<br>F:GO:0051082;<br>P:GO:0019222;<br>P:GO:0032387;<br>F:GO:0042803;<br>P:GO:0051260;<br>C:GO:0005634;<br>P:GO:0032355;<br>P:GO:0006800;<br>P:GO:0051403;<br>F:GO:0005212 | - | IPR001436; IPR002068; IPR008978;<br>G3DSA:2.60.40.790 (GENE3D),<br>PTHR11527 (PANTHER),<br>PTHR11527:SF34 (PANTHER) |
|                         | -                                                | 0  |                                                                                                                                                                                                                                                                                                                                                                                                                                                       |   | -                                                                                                                   |
|                         | -                                                | 0  |                                                                                                                                                                                                                                                                                                                                                                                                                                                       |   | -                                                                                                                   |
| Brugia malayi           | ccr4-not transcription complex                   | 1  | P:GO:0048731                                                                                                                                                                                                                                                                                                                                                                                                                                          | - | PTHR13162 (PANTHER)                                                                                                 |
|                         | -                                                | 0  |                                                                                                                                                                                                                                                                                                                                                                                                                                                       |   | -                                                                                                                   |
| Caenorhabditis elegans  | elegans protein confirmed by transcript evidence | 4  | P:GO:0055114;<br>P:GO:0006952;<br>F:GO:0016491;<br>F:GO:0005488                                                                                                                                                                                                                                                                                                                                                                                       | - | IPR002198; IPR016040;<br>PTHR19410:SF18 (PANTHER),<br>SSF51735 (SUPERFAMILY)                                        |



|                             |                                                            |    |                                                                                                                                                                                                                                                                                              |                                                |             |                                                                                                                                                           |
|-----------------------------|------------------------------------------------------------|----|----------------------------------------------------------------------------------------------------------------------------------------------------------------------------------------------------------------------------------------------------------------------------------------------|------------------------------------------------|-------------|-----------------------------------------------------------------------------------------------------------------------------------------------------------|
| Homo sapiens                | milk fat globule-egf factor 8 protein                      | 17 | P:GO:0001525;<br>P:GO:0006910;<br>F:GO:0008429;<br>C:GO:0009897;<br>P:GO:0043627;<br>P:GO:0050766;<br>C:GO:0005615;<br>P:GO:0006911;<br>P:GO:0007155;<br>F:GO:0005178;<br>F:GO:0001786;<br>C:GO:0031012;<br>P:GO:0044419;<br>P:GO:0008284;<br>C:GO:0005737;<br>C:GO:0019897;<br>P:GO:0007338 | -                                              |             | IPR000421; IPR008979;<br>G3DSA:2.60.120.260 (GENE3D),<br>PTHR10127 (PANTHER),<br>PTHR10127:SF28 (PANTHER)                                                 |
| Brugia malayi               | expressed sequence ai841794-like                           | 0  |                                                                                                                                                                                                                                                                                              | P:GO:0030510;<br>F:GO:0005515;<br>C:GO:0005886 |             | IPR001611; IPR003591;<br>G3DSA:3.80.10.10 (GENE3D),<br>PTHR23154 (PANTHER),<br>PTHR23154:SF134 (PANTHER),<br>PS51450 (PROFILE), SSF52058<br>(SUPERFAMILY) |
| Caenorhabditis briggsae     | udp-xylose and udp-n-acetylglucosamine transporter         | 6  | F:GO:0005464;<br>C:GO:0005794;<br>P:GO:0015790;<br>P:GO:0015788;<br>C:GO:0016020;<br>F:GO:0005462                                                                                                                                                                                            | -                                              |             | IPR013657; PTHR10778 (PANTHER),<br>PTHR10778:SF4 (PANTHER), SignalP<br>(SIGNALP)                                                                          |
| Caenorhabditis remanei      | elegans protein partially confirmed by transcript evidence | 3  | F:GO:0004725;<br>P:GO:0006470;<br>F:GO:0008138                                                                                                                                                                                                                                               | -                                              | EC:3.1.3.48 | -                                                                                                                                                         |
|                             | -                                                          | 0  |                                                                                                                                                                                                                                                                                              |                                                |             | -                                                                                                                                                         |
| Caenorhabditis elegans      | atpase h+ transporting v0 subunit                          | 8  | F:GO:0015078;<br>F:GO:0042625;<br>P:GO:0016049;<br>C:GO:0016021;<br>P:GO:0015986;<br>C:GO:0033179;<br>P:GO:0007035;<br>P:GO:0015991                                                                                                                                                          | -                                              |             | IPR008389                                                                                                                                                 |
|                             |                                                            |    |                                                                                                                                                                                                                                                                                              |                                                |             | IPR003961; IPR008957; IPR013783;<br>PTHR19900 (PANTHER),<br>PTHR19900:SF7 (PANTHER)                                                                       |
|                             | -                                                          | 0  |                                                                                                                                                                                                                                                                                              |                                                |             | -                                                                                                                                                         |
|                             | -                                                          | 0  |                                                                                                                                                                                                                                                                                              |                                                |             | -                                                                                                                                                         |
| Caenorhabditis briggsae     | phosphoserine aminotransferase                             | 5  | F:GO:0030170;<br>F:GO:0004648;<br>P:GO:0051188;<br>P:GO:0006564;<br>P:GO:0008615                                                                                                                                                                                                             | -                                              | EC:2.6.1.52 | IPR015421; IPR015424; PTHR21152<br>(PANTHER), PTHR21152:SF1<br>(PANTHER)                                                                                  |
|                             | -                                                          | 0  |                                                                                                                                                                                                                                                                                              |                                                |             | -                                                                                                                                                         |
|                             |                                                            | 0  |                                                                                                                                                                                                                                                                                              |                                                |             |                                                                                                                                                           |
| Angiostrongylus cantonensis | briggsae cbr-nhl-1 protein                                 | 3  | F:GO:0008270;<br>F:GO:0005515;<br>P:GO:0006915                                                                                                                                                                                                                                               | -                                              |             | PTHR13712 (PANTHER),<br>PTHR13712:SF9 (PANTHER)                                                                                                           |
|                             | -                                                          | 0  |                                                                                                                                                                                                                                                                                              |                                                |             | -                                                                                                                                                         |

|                         |                                                                       |    |                                                                                                                                                                                                                                                                                                                                |   |            |                                                                                                            |
|-------------------------|-----------------------------------------------------------------------|----|--------------------------------------------------------------------------------------------------------------------------------------------------------------------------------------------------------------------------------------------------------------------------------------------------------------------------------|---|------------|------------------------------------------------------------------------------------------------------------|
| Gorilla gorilla         | -dh dehydroge-se                                                      | 4  | P:GO:0006120;<br>F:GO:0008137;<br>P:GO:0006810;<br>C:GO:0005747                                                                                                                                                                                                                                                                | - | EC:1.6.5.3 | -                                                                                                          |
|                         | -                                                                     | 0  |                                                                                                                                                                                                                                                                                                                                |   |            | -                                                                                                          |
| Ascaris suum            | disorganized muscle protein 1                                         | 4  | P:GO:0007498;<br>C:GO:0030018;<br>F:GO:0008307;<br>F:GO:0005515                                                                                                                                                                                                                                                                | - |            | -                                                                                                          |
|                         | -                                                                     | 0  |                                                                                                                                                                                                                                                                                                                                |   |            | -                                                                                                          |
|                         | -                                                                     | 0  |                                                                                                                                                                                                                                                                                                                                |   |            | -                                                                                                          |
| Caenorhabditis briggsae | briggsae cbr-fshr-1 protein                                           | 10 | P:GO:0009792;<br>C:GO:0005840;<br>P:GO:0006952;<br>F:GO:0003735;<br>P:GO:0040010;<br>P:GO:0000003;<br>P:GO:0007186;<br>C:GO:0016021;<br>F:GO:0016500;<br>P:GO:0006412                                                                                                                                                          | - | EC:3.6.5.3 | SignalIP (SIGNALP)                                                                                         |
| Caenorhabditis briggsae | spc-1                                                                 | 1  | F:GO:0005509                                                                                                                                                                                                                                                                                                                   |   |            | SignalIP (SIGNALP)                                                                                         |
|                         | -                                                                     | 0  |                                                                                                                                                                                                                                                                                                                                |   |            | SignalIP (SIGNALP)                                                                                         |
|                         | -                                                                     | 0  |                                                                                                                                                                                                                                                                                                                                |   |            | -                                                                                                          |
|                         | -                                                                     | 0  |                                                                                                                                                                                                                                                                                                                                |   |            | -                                                                                                          |
| Caenorhabditis remanei  | egg laying defective protein isoform confirmed by transcript evidence | 4  | P:GO:0048675;<br>P:GO:0006355;<br>F:GO:0003700;<br>C:GO:0005634                                                                                                                                                                                                                                                                | - |            | -                                                                                                          |
| Ailuropoda melanoleuca  | t-complex protein 1 subunit gamma-like isoform 2                      | 5  | C:GO:0005856;<br>P:GO:0006457;<br>C:GO:0005832;<br>F:GO:0005524;<br>F:GO:0051082                                                                                                                                                                                                                                               | - |            | -                                                                                                          |
|                         | -                                                                     | 0  |                                                                                                                                                                                                                                                                                                                                |   |            | -                                                                                                          |
| Caenorhabditis elegans  | peroxisomal biogenesis factor 19                                      | 4  | C:GO:0005777;<br>F:GO:0005515;<br>P:GO:0007031;<br>C:GO:0044425                                                                                                                                                                                                                                                                | - |            | IPR006708                                                                                                  |
| Homo sapiens            | transporter atp-binding sub-family b (mdr tap)                        | 19 | F:GO:0046979;<br>C:GO:0042825;<br>P:GO:0019060;<br>F:GO:0015197;<br>C:GO:0005792;<br>P:GO:0042270;<br>F:GO:0043531;<br>C:GO:0005829;<br>F:GO:0046982;<br>F:GO:0046978;<br>P:GO:0046967;<br>P:GO:0015833;<br>F:GO:0042626;<br>P:GO:0019885;<br>P:GO:0055085;<br>F:GO:0042605;<br>F:GO:0042803;<br>F:GO:0005524;<br>C:GO:0005739 | - |            | G3DSA:3.40.50.300 (GENE3D),<br>PTHR19242 (PANTHER),<br>PTHR19242:SF79 (PANTHER),<br>SSF52540 (SUPERFAMILY) |



|                         |                                                                   |    |                                                                                                                                                                                                                          |                                                |                                                         |                                                                                                                      |
|-------------------------|-------------------------------------------------------------------|----|--------------------------------------------------------------------------------------------------------------------------------------------------------------------------------------------------------------------------|------------------------------------------------|---------------------------------------------------------|----------------------------------------------------------------------------------------------------------------------|
| Brugia malayi           | heparan 6-o sulfotransferase hst-6                                | 5  | C:GO:0016021;<br>P:GO:0048048;<br>P:GO:0016051;<br>F:GO:0017095;<br>P:GO:0001569                                                                                                                                         | -                                              |                                                         | IPR005331; IPR010635                                                                                                 |
| -                       | -                                                                 | 0  |                                                                                                                                                                                                                          |                                                |                                                         | -                                                                                                                    |
| Caenorhabditis briggsae | elegans protein confirmed by transcript evidence                  | 2  | F:GO:0016491;<br>P:GO:0055114                                                                                                                                                                                            | -                                              |                                                         | IPR023210                                                                                                            |
| Homo sapiens            | optical protein ki-se 1                                           | 4  | P:GO:0006468;<br>F:GO:0005515;<br>F:GO:0005524;<br>F:GO:0004693                                                                                                                                                          | -                                              | EC:2.7.11.22                                            | IPR000719; IPR011009; IPR017442;<br>G3DSA:3.30.200.20 (GENE3D),<br>PTHR11295 (PANTHER),<br>PTHR11295:SF104 (PANTHER) |
| Caenorhabditis remanei  | ceramide ki-se                                                    | 2  | P:GO:0007205;<br>F:GO:0004143                                                                                                                                                                                            | -                                              | EC:2.7.1.107                                            | -                                                                                                                    |
| -                       | -                                                                 | 0  |                                                                                                                                                                                                                          |                                                |                                                         | -                                                                                                                    |
| -                       | -                                                                 | 0  |                                                                                                                                                                                                                          |                                                |                                                         | -                                                                                                                    |
| -                       | -                                                                 | 0  |                                                                                                                                                                                                                          |                                                |                                                         | SignalP (SIGNALP)                                                                                                    |
| -                       | -                                                                 | 0  |                                                                                                                                                                                                                          |                                                |                                                         | -                                                                                                                    |
| Ailuropoda melanoleuca  | guanine nucleotide binding protein (g protein) beta polypeptide 1 | 13 | P:GO:0007603;<br>P:GO:0007265;<br>F:GO:0004871;<br>P:GO:0007213;<br>C:GO:0001750;<br>P:GO:0050909;<br>P:GO:0007200;<br>P:GO:0007204;<br>C:GO:0005834;<br>P:GO:0009755;<br>F:GO:0003924;<br>F:GO:0031702;<br>P:GO:0008283 | -                                              | EC:3.6.5.1;<br>EC:3.6.5.2;<br>EC:3.6.5.3;<br>EC:3.6.5.4 | -                                                                                                                    |
| -                       | -                                                                 | 0  |                                                                                                                                                                                                                          |                                                |                                                         | -                                                                                                                    |
| Brugia malayi           | sh3 adapter protein spin90                                        | 0  |                                                                                                                                                                                                                          | F:GO:0005488                                   |                                                         | -                                                                                                                    |
| -                       | -                                                                 | 0  |                                                                                                                                                                                                                          |                                                |                                                         | -                                                                                                                    |
| Caenorhabditis elegans  | voltage-gated potassium channel                                   | 5  | C:GO:0008076;<br>C:GO:0030659;<br>F:GO:0005249;<br>P:GO:0055085;<br>P:GO:0006813                                                                                                                                         | -                                              |                                                         | SignalP (SIGNALP)                                                                                                    |
| -                       | -                                                                 | 0  |                                                                                                                                                                                                                          |                                                |                                                         | -                                                                                                                    |
| Caenorhabditis briggsae | elegans protein confirmed by transcript evidence                  | 0  |                                                                                                                                                                                                                          | F:GO:0003676;<br>F:GO:0008270;<br>C:GO:0005622 |                                                         | IPR007087; IPR015880; PTHR10032 (PANTHER), PTHR10032:SF32 (PANTHER)                                                  |
| Caenorhabditis briggsae | elegans protein confirmed by transcript evidence                  | 2  | P:GO:0055085;<br>C:GO:0016021                                                                                                                                                                                            | -                                              |                                                         | IPR011701; IPR016196;<br>G3DSA:1.20.1250.20 (GENE3D),<br>PTHR11662 (PANTHER),<br>PTHR11662:SF17 (PANTHER)            |
| Caenorhabditis briggsae | cathepsin a                                                       | 2  | F:GO:0004185;<br>P:GO:0006508                                                                                                                                                                                            | -                                              | EC:3.4.16.0                                             | -                                                                                                                    |
| -                       | -                                                                 | 0  |                                                                                                                                                                                                                          |                                                |                                                         | -                                                                                                                    |
| Caenorhabditis briggsae | elegans protein confirmed by transcript evidence                  | 2  | P:GO:0006629;<br>F:GO:0004806                                                                                                                                                                                            | -                                              | EC:3.1.1.3                                              | IPR002921; G3DSA:3.40.50.1820 (GENE3D), SSF53474 (SUPERFAMILY)                                                       |
| Caenorhabditis elegans  | exosome complex exonuclease rrp45                                 | 5  | P:GO:0009792;<br>P:GO:0002119;<br>F:GO:0004527;<br>P:GO:0040010;<br>P:GO:0000003                                                                                                                                         | -                                              |                                                         | IPR020568                                                                                                            |
| -                       | -                                                                 | 0  |                                                                                                                                                                                                                          |                                                |                                                         | SignalP (SIGNALP)                                                                                                    |

|                        |                                                           |    |                                                                                                                                                                                                                                                            |   |                                                                                                                                                                                                                          |                                                                               |
|------------------------|-----------------------------------------------------------|----|------------------------------------------------------------------------------------------------------------------------------------------------------------------------------------------------------------------------------------------------------------|---|--------------------------------------------------------------------------------------------------------------------------------------------------------------------------------------------------------------------------|-------------------------------------------------------------------------------|
| Caenorhabditis elegans | pp2c-like domain-containing protein cg9801                | 1  | F:GO:0003824                                                                                                                                                                                                                                               | - |                                                                                                                                                                                                                          | IPR001932; IPR010822; PTHR21586 (PANTHER)                                     |
| Mus musculus           | lipoprotein receptor-related protein                      | 0  |                                                                                                                                                                                                                                                            |   |                                                                                                                                                                                                                          | -                                                                             |
|                        | -                                                         | 0  |                                                                                                                                                                                                                                                            |   |                                                                                                                                                                                                                          | -                                                                             |
| Homo sapiens           | protein cornichon homolog 4                               | 4  | P:GO:0023034;<br>C:GO:0016021;<br>C:GO:0005783;<br>F:GO:0005515                                                                                                                                                                                            | - |                                                                                                                                                                                                                          | IPR003377; PTHR12290 (PANTHER),<br>PTHR12290:SF4 (PANTHER), SignalP (SIGNALP) |
| Homo sapiens           | apoptosis-associated speck-like protein containing a card | 13 | F:GO:0004197;<br>C:GO:0008385;<br>P:GO:0050718;<br>P:GO:0006919;<br>C:GO:0005576;<br>P:GO:0033209;<br>P:GO:0006917;<br>P:GO:0006954;<br>P:GO:0006508;<br>F:GO:0042803;<br>P:GO:0051092;<br>F:GO:0032090;<br>F:GO:0008656                                   | - | EC:3.4.22.0                                                                                                                                                                                                              | -                                                                             |
|                        | -                                                         | 0  |                                                                                                                                                                                                                                                            |   |                                                                                                                                                                                                                          | -                                                                             |
| Pongo abelii           | protein inhibitor of activated 3                          | 15 | F:GO:0047485;<br>P:GO:0009725;<br>F:GO:0008270;<br>F:GO:0003676;<br>C:GO:0030425;<br>P:GO:0045449;<br>F:GO:0008022;<br>C:GO:0045202;<br>C:GO:0016607;<br>F:GO:0015459;<br>P:GO:0033235;<br>F:GO:0019899;<br>P:GO:0010628;<br>F:GO:0019789;<br>P:GO:0045838 | - |                                                                                                                                                                                                                          | -                                                                             |
| Caenorhabditis remanei | briggsae cbr-nhr-22 protein                               | 0  |                                                                                                                                                                                                                                                            |   | F:GO:0043565;<br>F:GO:0003700;<br>F:GO:0003677;<br>C:GO:0005634;<br>F:GO:0004879;<br>F:GO:0008270;<br>P:GO:0006355;<br>F:GO:0004872;<br>F:GO:0005515;<br>F:GO:0046872;<br>P:GO:0006350;<br>F:GO:0003707;<br>P:GO:0045449 | -                                                                             |

|                       |                                                                          |    |                                                                                                                                                                                                                                                                                                                                                                                                                                                                        |   |                           |                                                                                           |
|-----------------------|--------------------------------------------------------------------------|----|------------------------------------------------------------------------------------------------------------------------------------------------------------------------------------------------------------------------------------------------------------------------------------------------------------------------------------------------------------------------------------------------------------------------------------------------------------------------|---|---------------------------|-------------------------------------------------------------------------------------------|
| Streptomyces sp. ACTE | aldehyde dehydroge-se                                                    | 15 | F:GO:0004028;<br>P:GO:0008284;<br>P:GO:0014070;<br>F:GO:0004029;<br>P:GO:0007584;<br>P:GO:0042493;<br>F:GO:0008106;<br>P:GO:0007568;<br>P:GO:0055114;<br>P:GO:0051384;<br>P:GO:0001666;<br>C:GO:0005829;<br>P:GO:0006081;<br>C:GO:0005783;<br>P:GO:0051591                                                                                                                                                                                                             | - | EC:1.2.1.3;<br>EC:1.1.1.2 | -                                                                                         |
| -                     | -                                                                        | 0  |                                                                                                                                                                                                                                                                                                                                                                                                                                                                        |   |                           | -                                                                                         |
| -                     | -                                                                        | 0  |                                                                                                                                                                                                                                                                                                                                                                                                                                                                        |   |                           | SignalP (SIGNALP)                                                                         |
| -                     | -                                                                        | 0  |                                                                                                                                                                                                                                                                                                                                                                                                                                                                        |   |                           | SignalP (SIGNALP)                                                                         |
| Brugia malayi         | tyrosyl-d- phosphodiesterase 1                                           | 4  | F:GO:0008081;<br>F:GO:0043566;<br>P:GO:0006281;<br>C:GO:0044424                                                                                                                                                                                                                                                                                                                                                                                                        | - | EC:3.1.4.0                | IPR001736; IPR010347; IPR010916;<br>G3DSA:3.30.870.10 (GENE3D),<br>SSF56024 (SUPERFAMILY) |
| -                     | -                                                                        | 0  |                                                                                                                                                                                                                                                                                                                                                                                                                                                                        |   |                           | -                                                                                         |
| -                     | -                                                                        | 0  |                                                                                                                                                                                                                                                                                                                                                                                                                                                                        |   |                           | -                                                                                         |
| -                     | -                                                                        | 0  |                                                                                                                                                                                                                                                                                                                                                                                                                                                                        |   |                           | -                                                                                         |
| Pongo abelii          | nuclear factor of kappa light polypeptide gene enhancer in b-cells alpha | 28 | F:GO:0008139;<br>P:GO:0045746;<br>P:GO:0010745;<br>P:GO:0032270;<br>P:GO:0007253;<br>P:GO:0070427;<br>P:GO:0045638;<br>P:GO:0042127;<br>P:GO:0034142;<br>P:GO:0010552;<br>P:GO:0010875;<br>P:GO:0031663;<br>P:GO:0070431;<br>C:GO:0005829;<br>P:GO:0006916;<br>P:GO:0032088;<br>F:GO:0031072;<br>F:GO:0031625;<br>F:GO:0042802;<br>P:GO:0000060;<br>P:GO:0010888;<br>F:GO:0051059;<br>P:GO:0032495;<br>F:GO:0032403;<br>C:GO:0005634;<br>P:GO:0043330;<br>P:GO:0044419 | - |                           | IPR002110; IPR015681; IPR020683;<br>PTHR18958 (PANTHER)                                   |

|                         |                                                            |    |                                                                                                                                                                       |                                                                                                                                                                                                         |  |                                                                                   |
|-------------------------|------------------------------------------------------------|----|-----------------------------------------------------------------------------------------------------------------------------------------------------------------------|---------------------------------------------------------------------------------------------------------------------------------------------------------------------------------------------------------|--|-----------------------------------------------------------------------------------|
| Loa loa                 | abc transporter                                            | 0  |                                                                                                                                                                       | F:GO:0042626;<br>C:GO:0016021;<br>C:GO:0016020;<br>F:GO:0016787;<br>C:GO:0005739;<br>P:GO:0006810;<br>F:GO:0008559;<br>F:GO:0000166;<br>F:GO:0017111;<br>F:GO:0005524;<br>F:GO:0016887;<br>P:GO:0055085 |  | G3DSA:3.40.50.300 (GENE3D),<br>PTHR11384 (PANTHER), SSF52540<br>(SUPERFAMILY)     |
| Caenorhabditis elegans  | major facilitator superfamily protein                      | 3  | P:GO:0055085;<br>C:GO:0016021;<br>F:GO:0005215                                                                                                                        | -                                                                                                                                                                                                       |  | IPR005828; PTHR11600 (PANTHER),<br>PTHR11600:SF99 (PANTHER), SignalP<br>(SIGNALP) |
| Caenorhabditis remanei  | udp-galactose transporter                                  | 6  | C:GO:0000139;<br>P:GO:0007275;<br>P:GO:0055085;<br>F:GO:0046964;<br>P:GO:0046963;<br>C:GO:0016021                                                                     | -                                                                                                                                                                                                       |  | IPR013657; PTHR10778 (PANTHER),<br>PTHR10778:SF8 (PANTHER)                        |
| -                       | -                                                          | 0  |                                                                                                                                                                       |                                                                                                                                                                                                         |  | -                                                                                 |
| Caenorhabditis briggsae | Hypothetical protein CBG07050 [Caenorhabditis briggsae]    | 0  |                                                                                                                                                                       | F:GO:0005515                                                                                                                                                                                            |  | -                                                                                 |
| Caenorhabditis elegans  | son of sevenless homolog 2                                 | 5  | F:GO:0005085;<br>P:GO:0006915;<br>F:GO:0005488;<br>C:GO:0005622;<br>P:GO:0007264                                                                                      | -                                                                                                                                                                                                       |  | IPR001895; IPR008937; IPR015759                                                   |
| Homo sapiens            | proteasome ( macropain) 26s non- 4                         | 10 | P:GO:0006281;<br>C:GO:0000502;<br>F:GO:0008270;<br>P:GO:0051436;<br>P:GO:0051437;<br>P:GO:0045449;<br>P:GO:0031145;<br>F:GO:0005515;<br>C:GO:0005737;<br>P:GO:0042044 | -                                                                                                                                                                                                       |  | -                                                                                 |
| Caenorhabditis briggsae | elegans protein partially confirmed by transcript evidence | 4  | F:GO:0005488;<br>F:GO:0005086;<br>P:GO:0032012;<br>C:GO:0005622                                                                                                       | -                                                                                                                                                                                                       |  | -                                                                                 |
| -                       | -                                                          | 0  |                                                                                                                                                                       |                                                                                                                                                                                                         |  | -                                                                                 |
| -                       | -                                                          | 0  |                                                                                                                                                                       |                                                                                                                                                                                                         |  | -                                                                                 |





|                         |                                                                                |   |                                                                                                                                     |                                                                                                                                                                                                                                                            |                                                                                                                                                    |
|-------------------------|--------------------------------------------------------------------------------|---|-------------------------------------------------------------------------------------------------------------------------------------|------------------------------------------------------------------------------------------------------------------------------------------------------------------------------------------------------------------------------------------------------------|----------------------------------------------------------------------------------------------------------------------------------------------------|
|                         | -                                                                              | 0 |                                                                                                                                     |                                                                                                                                                                                                                                                            | SignalP (SIGNALP)                                                                                                                                  |
| Caenorhabditis elegans  | o- c selective n-acetyl-beta-d-glucosaminidase (o- case) family member (oga-1) | 0 |                                                                                                                                     | F:GO:0004415;<br>P:GO:0008152;<br>F:GO:0016787;<br>F:GO:0008080;<br>F:GO:0016798                                                                                                                                                                           | -                                                                                                                                                  |
|                         | -                                                                              | 0 |                                                                                                                                     |                                                                                                                                                                                                                                                            | -                                                                                                                                                  |
|                         | -                                                                              | 0 |                                                                                                                                     |                                                                                                                                                                                                                                                            | -                                                                                                                                                  |
| Caenorhabditis remanei  | sy-ptotagmin 1                                                                 | 8 | C:GO:0030054;<br>P:GO:0016079;<br>F:GO:0005509;<br>F:GO:0000149;<br>P:GO:0045955;<br>F:GO:0035005;<br>C:GO:0030285;<br>F:GO:0005215 | -                                                                                                                                                                                                                                                          | EC:2.7.1.154<br><br>IPR000008; IPR001565; IPR008973;<br>IPR018029; G3DSA:2.60.40.150<br>(GENE3D), PTHR10024 (PANTHER),<br>PTHR10024:SF40 (PANTHER) |
| Caenorhabditis elegans  | briggsae cbr-gop-1 protein                                                     | 0 |                                                                                                                                     |                                                                                                                                                                                                                                                            | IPR019155; PTHR21481 (PANTHER)                                                                                                                     |
| Loa loa                 | hypothetical protein LOAG_05911 [Loa loa]                                      | 0 |                                                                                                                                     |                                                                                                                                                                                                                                                            | -                                                                                                                                                  |
| Pan troglodytes         | hmg-17 protein                                                                 | 0 |                                                                                                                                     |                                                                                                                                                                                                                                                            | IPR000079; PTHR23087:SF2<br>(PANTHER)                                                                                                              |
|                         | -                                                                              | 0 |                                                                                                                                     |                                                                                                                                                                                                                                                            | -                                                                                                                                                  |
|                         | -                                                                              | 0 |                                                                                                                                     |                                                                                                                                                                                                                                                            | -                                                                                                                                                  |
| Caenorhabditis briggsae | elegans protein partially confirmed by transcript evidence                     | 0 |                                                                                                                                     | F:GO:0004568;<br>C:GO:0016021;<br>F:GO:0004674;<br>F:GO:0004383;<br>F:GO:0004672;<br>P:GO:0009190;<br>P:GO:0006182;<br>P:GO:0016998;<br>P:GO:0023034;<br>P:GO:0006468;<br>F:GO:0000166;<br>F:GO:0005524;<br>F:GO:0016829;<br>P:GO:0006032;<br>F:GO:0016849 | -                                                                                                                                                  |
| Caenorhabditis briggsae | sulfate transporter                                                            | 3 | P:GO:0055085;<br>C:GO:0016021;<br>F:GO:0005215                                                                                      | -                                                                                                                                                                                                                                                          | -                                                                                                                                                  |

|                         |                                                         |    |                                                                                                                                                                                                                                                                                                                                                                                                                                                                         |   |                                                         |                                                                                                                                                            |
|-------------------------|---------------------------------------------------------|----|-------------------------------------------------------------------------------------------------------------------------------------------------------------------------------------------------------------------------------------------------------------------------------------------------------------------------------------------------------------------------------------------------------------------------------------------------------------------------|---|---------------------------------------------------------|------------------------------------------------------------------------------------------------------------------------------------------------------------|
| Caenorhabditis elegans  | cell division control protein 42 homolog precursor      | 28 | P:GO:0040027;<br>P:GO:0040007;<br>F:GO:0031996;<br>P:GO:0006898;<br>C:GO:0005626;<br>P:GO:0031274;<br>C:GO:0030175;<br>P:GO:0000132;<br>F:GO:0005525;<br>P:GO:0040002;<br>P:GO:0015031;<br>C:GO:0016021;<br>P:GO:0032970;<br>C:GO:0005829;<br>P:GO:0040039;<br>P:GO:0030036;<br>P:GO:0007264;<br>P:GO:0009792;<br>P:GO:0031333;<br>C:GO:0005813;<br>P:GO:0010171;<br>C:GO:0048471;<br>F:GO:0003924;<br>C:GO:0005886;<br>P:GO:0040035;<br>C:GO:0005938;<br>P:GO:0009910; | - | EC:3.6.5.1;<br>EC:3.6.5.2;<br>EC:3.6.5.3;<br>EC:3.6.5.4 | IPR001806; IPR003578; IPR005225;<br>IPR013753; G3DSA:3.40.50.300<br>(GENE3D), PTHR11708 (PANTHER),<br>PTHR11708:SF286 (PANTHER),<br>SSF52540 (SUPERFAMILY) |
| Caenorhabditis briggsae | adam metalloproteinase with thrombospondin type 1 9     | 9  | P:GO:0009967;<br>F:GO:0008270;<br>C:GO:0005615;<br>F:GO:0004222;<br>P:GO:0006508;<br>P:GO:0045636;<br>C:GO:0005578;<br>P:GO:0043066;<br>P:GO:0030198                                                                                                                                                                                                                                                                                                                    | - | EC:3.4.24.0                                             | -                                                                                                                                                          |
| Caenorhabditis elegans  | ck1 worm6 protein ki-se                                 | 6  | P:GO:0006468;<br>F:GO:0005524;<br>P:GO:0000003;<br>P:GO:0040011;<br>P:GO:0019915;<br>F:GO:0004674                                                                                                                                                                                                                                                                                                                                                                       | - | EC:2.7.11.0                                             | IPR000719; IPR011009; IPR017442;<br>G3DSA:1.10.510.10 (GENE3D),<br>PTHR11909 (PANTHER),<br>PTHR11909:SF19 (PANTHER)                                        |
| -                       | -                                                       | 0  | -                                                                                                                                                                                                                                                                                                                                                                                                                                                                       | - | -                                                       | SignalP (SIGNALP)                                                                                                                                          |
| Caenorhabditis briggsae | Hypothetical protein CBG22251 [Caenorhabditis briggsae] | 0  | -                                                                                                                                                                                                                                                                                                                                                                                                                                                                       | - | -                                                       | -                                                                                                                                                          |
| -                       | -                                                       | 0  | -                                                                                                                                                                                                                                                                                                                                                                                                                                                                       | - | -                                                       | -                                                                                                                                                          |
| Caenorhabditis briggsae | multiple pdz domain protein family member (mpz-1)       | 1  | C:GO:0016021                                                                                                                                                                                                                                                                                                                                                                                                                                                            | - | -                                                       | -                                                                                                                                                          |
| -                       | -                                                       | 0  | -                                                                                                                                                                                                                                                                                                                                                                                                                                                                       | - | -                                                       | IPR008160; PTHR10499 (PANTHER),<br>PTHR10499:SF58 (PANTHER)                                                                                                |

|                         |                                                       |    |                                                                                                                                                                                                                          |   |                                                                                                           |
|-------------------------|-------------------------------------------------------|----|--------------------------------------------------------------------------------------------------------------------------------------------------------------------------------------------------------------------------|---|-----------------------------------------------------------------------------------------------------------|
| Homo sapiens            | fibronectin 1                                         | 13 | P:GO:0018149;<br>P:GO:0016477;<br>P:GO:0001525;<br>P:GO:0008360;<br>C:GO:0005793;<br>C:GO:0031093;<br>P:GO:0034446;<br>F:GO:0005518;<br>C:GO:0005577;<br>F:GO:0008201;<br>C:GO:0005578;<br>F:GO:0005201;<br>P:GO:0006953 | - | SignalP (SIGNALP)                                                                                         |
|                         | -                                                     | 0  |                                                                                                                                                                                                                          |   | IPR019809                                                                                                 |
|                         | -                                                     | 0  |                                                                                                                                                                                                                          |   | -                                                                                                         |
| Caenorhabditis briggsae | u4 u6 small nuclear ribonucleoprotein prp4            | 10 | P:GO:0040010;<br>P:GO:0040035;<br>P:GO:0008380;<br>P:GO:0002119;<br>F:GO:0005515;<br>P:GO:0040011;<br>C:GO:0030529;<br>P:GO:0009792;<br>P:GO:0001703;<br>C:GO:0005634                                                    | - | IPR001680; IPR011046; IPR014906;<br>IPR015943; PTHR19846 (PANTHER)                                        |
| Homo sapiens            | PREDICTED: similar to hCG2040253 [Homo sapiens]       | 0  |                                                                                                                                                                                                                          |   | -                                                                                                         |
|                         | -                                                     | 0  |                                                                                                                                                                                                                          |   | -                                                                                                         |
|                         | -                                                     | 0  |                                                                                                                                                                                                                          |   | SignalP (SIGNALP)                                                                                         |
| Caenorhabditis remanei  | temporarily assigned gene -me family member (tag-308) | 0  |                                                                                                                                                                                                                          |   | -                                                                                                         |
| Caenorhabditis elegans  | fad-binding protein                                   | 2  | F:GO:0016491;<br>F:GO:0050660                                                                                                                                                                                            | - | IPR004113; IPR016164; IPR016171;<br>PTHR11748 (PANTHER),<br>PTHR11748:SF7 (PANTHER)                       |
|                         | -                                                     | 0  |                                                                                                                                                                                                                          |   | -                                                                                                         |
| Caenorhabditis remanei  | transmembrane protein 16h                             | 0  |                                                                                                                                                                                                                          |   | -                                                                                                         |
| Caenorhabditis remanei  | elegans protein confirmed by transcript evidence      | 0  |                                                                                                                                                                                                                          |   | -                                                                                                         |
|                         | -                                                     | 0  |                                                                                                                                                                                                                          |   | -                                                                                                         |
|                         | -                                                     | 0  |                                                                                                                                                                                                                          |   | SignalP (SIGNALP)                                                                                         |
| Ixodes scapularis       | snf2 super family                                     | 3  | F:GO:0046872;<br>F:GO:0003676;<br>F:GO:0003824                                                                                                                                                                           | - | IPR001650; PTHR10799 (PANTHER),<br>PTHR10799:SF59 (PANTHER), SignalP<br>(SIGNALP), SSF52540 (SUPERFAMILY) |
| Caenorhabditis elegans  | patched family protein                                | 13 | P:GO:0009792;<br>P:GO:0002119;<br>F:GO:0008158;<br>P:GO:0040018;<br>P:GO:0001703;<br>P:GO:0018996;<br>P:GO:0000910;<br>P:GO:0006810;<br>P:GO:0040010;<br>P:GO:0000003;<br>P:GO:0040011;<br>C:GO:0016021;<br>F:GO:0005215 | - | IPR003392; PTHR10796 (PANTHER),<br>PTHR10796:SF32 (PANTHER), SignalP<br>(SIGNALP)                         |

|                         |                                                            |    |                                                                                                                                                                                                         |                                                                                                   |                                                                                                                                     |
|-------------------------|------------------------------------------------------------|----|---------------------------------------------------------------------------------------------------------------------------------------------------------------------------------------------------------|---------------------------------------------------------------------------------------------------|-------------------------------------------------------------------------------------------------------------------------------------|
| Caenorhabditis elegans  | patched family protein                                     | 12 | P:GO:0009792;<br>P:GO:0002119;<br>F:GO:0008158;<br>P:GO:0040018;<br>P:GO:0001703;<br>P:GO:0018996;<br>P:GO:0000910;<br>P:GO:0006810;<br>P:GO:0040010;<br>P:GO:0000003;<br>P:GO:0040011;<br>C:GO:0016021 | -                                                                                                 | IPR000731; IPR001036; IPR003392;<br>PTHR10796 (PANTHER),<br>PTHR10796:SF32 (PANTHER), SignalP<br>(SIGNALP), SSF82866 (SUPERFAMILY)  |
| Caenorhabditis briggsae | patched family protein                                     | 12 | P:GO:0009792;<br>P:GO:0002119;<br>F:GO:0008158;<br>P:GO:0040018;<br>P:GO:0001703;<br>P:GO:0018996;<br>P:GO:0000910;<br>P:GO:0006810;<br>P:GO:0040010;<br>P:GO:0000003;<br>P:GO:0040011;<br>C:GO:0016021 | -                                                                                                 | IPR000731; IPR001036; IPR003392;<br>PTHR10796 (PANTHER),<br>PTHR10796:SF32 (PANTHER),<br>SSF82866 (SUPERFAMILY)                     |
| -                       | -                                                          | 0  | -                                                                                                                                                                                                       | -                                                                                                 | -                                                                                                                                   |
| Caenorhabditis elegans  | elegans protein partially confirmed by transcript evidence | 0  | -                                                                                                                                                                                                       | F:GO:0005515                                                                                      | -                                                                                                                                   |
| -                       | -                                                          | 0  | -                                                                                                                                                                                                       | -                                                                                                 | -                                                                                                                                   |
| -                       | -                                                          | 0  | -                                                                                                                                                                                                       | -                                                                                                 | -                                                                                                                                   |
| -                       | -                                                          | 0  | -                                                                                                                                                                                                       | -                                                                                                 | -                                                                                                                                   |
| -                       | -                                                          | 0  | -                                                                                                                                                                                                       | -                                                                                                 | -                                                                                                                                   |
| -                       | -                                                          | 0  | -                                                                                                                                                                                                       | -                                                                                                 | -                                                                                                                                   |
| Caenorhabditis remanei  | briggsae cbr-ced-11 protein                                | 3  | P:GO:0043068;<br>P:GO:0006915;<br>F:GO:0016787                                                                                                                                                          | -                                                                                                 | -                                                                                                                                   |
| Caenorhabditis elegans  | cg12581 cg12581-pa                                         | 1  | F:GO:0005515                                                                                                                                                                                            | -                                                                                                 | -                                                                                                                                   |
| -                       | -                                                          | 0  | -                                                                                                                                                                                                       | -                                                                                                 | SignalP (SIGNALP)                                                                                                                   |
| -                       | -                                                          | 0  | -                                                                                                                                                                                                       | -                                                                                                 | -                                                                                                                                   |
| Caenorhabditis elegans  | briggsae cbr-cpg-3 protein                                 | 0  | -                                                                                                                                                                                                       | -                                                                                                 | SignalP (SIGNALP)                                                                                                                   |
| -                       | -                                                          | 0  | -                                                                                                                                                                                                       | -                                                                                                 | SignalP (SIGNALP)                                                                                                                   |
| Loa loa                 | protein-tyrosine phosphatase containing protein            | 0  | -                                                                                                                                                                                                       | P:GO:0016311;<br>F:GO:0016791;<br>P:GO:0006470;<br>F:GO:0016787;<br>F:GO:0004725;<br>F:GO:0004721 | IPR000242; IPR000387;<br>G3DSA:3.90.190.10 (GENE3D),<br>PTHR19134 (PANTHER),<br>PTHR19134:SF29 (PANTHER),<br>SSF52799 (SUPERFAMILY) |
| -                       | -                                                          | 0  | -                                                                                                                                                                                                       | -                                                                                                 | -                                                                                                                                   |
| Caenorhabditis elegans  | elegans protein partially confirmed by transcript evidence | 0  | -                                                                                                                                                                                                       | -                                                                                                 | -                                                                                                                                   |
| Loa loa                 | hypothetical protein LOAG_04772 [Loa loa]                  | 2  | P:GO:0040039;<br>P:GO:0000003                                                                                                                                                                           | -                                                                                                 | IPR002049; IPR013032;<br>G3DSA:2.10.25.10 (GENE3D),<br>PTHR11201 (PANTHER),<br>PTHR11201:SF148 (PANTHER)                            |
| Brugia malayi           | chromaffin granule amine transporter                       | 0  | -                                                                                                                                                                                                       | F:GO:0015520;<br>P:GO:0046677;<br>C:GO:0016021;<br>P:GO:0055085;<br>P:GO:0015904                  | IPR016196; G3DSA:1.20.1250.20<br>(GENE3D), PTHR10074 (PANTHER),<br>PTHR10074:SF32 (PANTHER), SignalP<br>(SIGNALP)                   |

|                        |                                                         |    |                                                                                                                                                                                                                                                                                                                                                                                                                                                                                         |   |             |                                                           |
|------------------------|---------------------------------------------------------|----|-----------------------------------------------------------------------------------------------------------------------------------------------------------------------------------------------------------------------------------------------------------------------------------------------------------------------------------------------------------------------------------------------------------------------------------------------------------------------------------------|---|-------------|-----------------------------------------------------------|
| Caenorhabditis remanei | fyve finger-containing phosphoinositide ki-se           | 12 | P:GO:0042147;<br>C:GO:0031901;<br>P:GO:0046488;<br>P:GO:0044267;<br>F:GO:0008270;<br>P:GO:0034504;<br>C:GO:0031982;<br>F:GO:0016308;<br>F:GO:0005524;<br>F:GO:0005515;<br>C:GO:0045121;<br>P:GO:0006898                                                                                                                                                                                                                                                                                 | - | EC:2.7.1.68 | -                                                         |
| Caenorhabditis remanei | hypothetical protein CRE_06660 [Caenorhabditis remanei] | 0  |                                                                                                                                                                                                                                                                                                                                                                                                                                                                                         |   |             | -                                                         |
| Loa loa                | hypothetical protein LOAG_15135 [Loa loa]               | 0  |                                                                                                                                                                                                                                                                                                                                                                                                                                                                                         |   |             | -                                                         |
| -                      | -                                                       | 0  |                                                                                                                                                                                                                                                                                                                                                                                                                                                                                         |   |             | -                                                         |
| Loa loa                | tmem16d protein                                         | 1  | C:GO:0016020                                                                                                                                                                                                                                                                                                                                                                                                                                                                            | - |             | IPR000418; IPR007632                                      |
| -                      | -                                                       | 0  |                                                                                                                                                                                                                                                                                                                                                                                                                                                                                         |   |             | -                                                         |
| -                      | -                                                       | 0  |                                                                                                                                                                                                                                                                                                                                                                                                                                                                                         |   |             | -                                                         |
| Pongo abelii           | filamin a                                               | 28 | P:GO:0000000;<br>F:GO:0004871;<br>C:GO:0005802;<br>P:GO:0043433;<br>P:GO:0034394;<br>C:GO:0015629;<br>P:GO:0050821;<br>P:GO:0051220;<br>C:GO:0005576;<br>C:GO:0005829;<br>F:GO:0001948;<br>P:GO:0051764;<br>P:GO:0043123;<br>F:GO:0051015;<br>F:GO:0048365;<br>P:GO:0045022;<br>P:GO:0007195;<br>F:GO:0042803;<br>F:GO:0034989;<br>P:GO:0031532;<br>F:GO:0034988;<br>C:GO:0005886;<br>F:GO:0008134;<br>P:GO:0042177;<br>C:GO:0005634;<br>P:GO:0042993;<br>C:GO:0005938;<br>P:GO:0043113 | - |             | SignalP (SIGNALP)                                         |
| -                      | -                                                       | 0  |                                                                                                                                                                                                                                                                                                                                                                                                                                                                                         |   |             | -                                                         |
| Caenorhabditis elegans | sy-ptosomal associated protein                          | 1  | C:GO:0019717                                                                                                                                                                                                                                                                                                                                                                                                                                                                            | - |             | IPR000727; G3DSA:1.20.5.110 (GENE3D), PTHR19305 (PANTHER) |

|                         |                                                  |    |                                                                                                                                                                                                                          |   |                                                                                            |
|-------------------------|--------------------------------------------------|----|--------------------------------------------------------------------------------------------------------------------------------------------------------------------------------------------------------------------------|---|--------------------------------------------------------------------------------------------|
| Caenorhabditis elegans  | structural maintenance of chromosomes 1a         | 13 | P:GO:0009314;<br>P:GO:0000075;<br>P:GO:0006281;<br>P:GO:0007126;<br>P:GO:0042770;<br>P:GO:0051276;<br>P:GO:0051301;<br>F:GO:0005524;<br>C:GO:0000776;<br>F:GO:0005515;<br>P:GO:0007067;<br>F:GO:0003682;<br>C:GO:0005634 | - | PTHR18937 (PANTHER),<br>PTHR18937:SF12 (PANTHER)                                           |
| -                       | -                                                | 0  | -                                                                                                                                                                                                                        | - | -                                                                                          |
| Caenorhabditis remanei  | uncoordinated family member (unc-89)             | 0  | -                                                                                                                                                                                                                        | - | IPR013098; IPR013783; SSF48726 (SUPERFAMILY)                                               |
| -                       | -                                                | 0  | -                                                                                                                                                                                                                        | - | -                                                                                          |
| Caenorhabditis brenneri | briggsae cbr-casy-1 protein                      | 7  | C:GO:0043231;<br>C:GO:0032809;<br>C:GO:0005615;<br>P:GO:0007155;<br>F:GO:0005515;<br>P:GO:0008355;<br>P:GO:0009792                                                                                                       | - | PTHR14139 (PANTHER)                                                                        |
| Loa loa                 | open transcriptional regulator                   | 3  | F:GO:0030528;<br>F:GO:0003676;<br>P:GO:0045449                                                                                                                                                                           | - | IPR000504; IPR012677; PTHR23189 (PANTHER), PTHR23189:SF9 (PANTHER), SSF54928 (SUPERFAMILY) |
| Caenorhabditis briggsae | briggsae cbr-amx-2 protein                       | 0  | -                                                                                                                                                                                                                        | - | PTHR10742 (PANTHER),<br>PTHR10742:SF6 (PANTHER)                                            |
| -                       | -                                                | 0  | -                                                                                                                                                                                                                        | - | -                                                                                          |
| -                       | -                                                | 0  | -                                                                                                                                                                                                                        | - | -                                                                                          |
| Caenorhabditis elegans  | cx module family protein                         | 0  | -                                                                                                                                                                                                                        | - | -                                                                                          |
| -                       | -                                                | 0  | -                                                                                                                                                                                                                        | - | -                                                                                          |
| -                       | -                                                | 0  | -                                                                                                                                                                                                                        | - | -                                                                                          |
| -                       | -                                                | 0  | -                                                                                                                                                                                                                        | - | -                                                                                          |
| Caenorhabditis elegans  | membrane calcium ATPase family member (mca-1)    | 6  | F:GO:0015662;<br>F:GO:0015085;<br>F:GO:0000166;<br>P:GO:0008152;<br>P:GO:0006812;<br>C:GO:0016020                                                                                                                        | - | IPR001757; IPR010916;<br>PTHR11939:SF75 (PANTHER)                                          |
| -                       | -                                                | 0  | -                                                                                                                                                                                                                        | - | -                                                                                          |
| Caenorhabditis remanei  | elegans protein confirmed by transcript evidence | 0  | -                                                                                                                                                                                                                        | - | -                                                                                          |
| -                       | -                                                | 0  | -                                                                                                                                                                                                                        | - | -                                                                                          |
| -                       | -                                                | 0  | -                                                                                                                                                                                                                        | - | -                                                                                          |
| -                       | -                                                | 0  | -                                                                                                                                                                                                                        | - | -                                                                                          |
| Caenorhabditis elegans  | elegans protein confirmed by transcript evidence | 2  | C:GO:0016020;<br>F:GO:0016757                                                                                                                                                                                            | - | IPR003406; PTHR19297:SF4 (PANTHER)                                                         |
| -                       | -                                                | 0  | -                                                                                                                                                                                                                        | - | -                                                                                          |
| -                       | -                                                | 0  | -                                                                                                                                                                                                                        | - | -                                                                                          |
| Caenorhabditis briggsae | briggsae cbr-hmr-1 protein                       | 1  | F:GO:0005515                                                                                                                                                                                                             | - | -                                                                                          |
| -                       | -                                                | 0  | -                                                                                                                                                                                                                        | - | -                                                                                          |

|                         |                                                                        |    |                                                                                                                                                                       |                                                                                                                                                                                                                                           |                                                                                            |
|-------------------------|------------------------------------------------------------------------|----|-----------------------------------------------------------------------------------------------------------------------------------------------------------------------|-------------------------------------------------------------------------------------------------------------------------------------------------------------------------------------------------------------------------------------------|--------------------------------------------------------------------------------------------|
| Caenorhabditis remanei  | protein prenyltransferase alpha subunit repeat containing protein      | 8  | P:GO:0009792;<br>P:GO:0002119;<br>P:GO:0040010;<br>P:GO:0008340;<br>P:GO:0040011;<br>P:GO:0008219;<br>F:GO:0016740;<br>P:GO:0002009                                   | -                                                                                                                                                                                                                                         | IPR002088; IPR008940; PTHR11129 (PANTHER), PTHR11129:SF1 (PANTHER), SSF48439 (SUPERFAMILY) |
| -                       | -                                                                      | 0  | -                                                                                                                                                                     | -                                                                                                                                                                                                                                         | -                                                                                          |
| -                       | -                                                                      | 0  | -                                                                                                                                                                     | -                                                                                                                                                                                                                                         | SignalP (SIGNALP)                                                                          |
| Caenorhabditis briggsae | x-ray repair complementing defective repair in chinese hamster cells 6 | 1  | P:GO:0006950                                                                                                                                                          | -                                                                                                                                                                                                                                         | IPR016194; G3DSA:3.40.50.410 (GENE3D), PTHR12604 (PANTHER), PTHR12604:SF2 (PANTHER)        |
| Callithrix jacchus      | eukaryotic translation initiation factor subunit e                     | 9  | F:GO:0003743;<br>C:GO:0005829;<br>F:GO:0047485;<br>P:GO:0045948;<br>C:GO:0005852;<br>C:GO:0000785;<br>C:GO:0016605;<br>P:GO:0045947;<br>P:GO:0000184                  | -                                                                                                                                                                                                                                         | IPR019010; PTHR10317 (PANTHER)                                                             |
| Loa loa                 | tk fer protein ki-se                                                   | 0  |                                                                                                                                                                       | F:GO:0016740;<br>C:GO:0016021;<br>C:GO:0016020;<br>F:GO:0004674;<br>F:GO:0004672;<br>P:GO:0006468;<br>F:GO:0000166;<br>F:GO:0005524;<br>F:GO:0016301;<br>F:GO:0004713;<br>F:GO:0004872;<br>F:GO:0005515;<br>F:GO:0005509;<br>F:GO:0005488 | -                                                                                          |
| -                       | -                                                                      | 0  | -                                                                                                                                                                     | -                                                                                                                                                                                                                                         | -                                                                                          |
| -                       | -                                                                      | 0  | -                                                                                                                                                                     | -                                                                                                                                                                                                                                         | -                                                                                          |
| Caenorhabditis elegans  | elegans protein confirmed by transcript evidence                       | 0  | -                                                                                                                                                                     | -                                                                                                                                                                                                                                         | -                                                                                          |
| -                       | -                                                                      | 0  | -                                                                                                                                                                     | -                                                                                                                                                                                                                                         | -                                                                                          |
| Homo sapiens            | cathepsin d                                                            | 10 | F:GO:0042277;<br>C:GO:0005764;<br>C:GO:0005739;<br>P:GO:0008219;<br>C:GO:0005615;<br>P:GO:0000045;<br>P:GO:0006508;<br>C:GO:0042470;<br>F:GO:0004190;<br>C:GO:0031012 | -                                                                                                                                                                                                                                         | EC:3.4.23.0<br>IPR001461; IPR009007; IPR021109; PTHR13683:SF84 (PANTHER)                   |
| -                       | -                                                                      | 0  | -                                                                                                                                                                     | -                                                                                                                                                                                                                                         | SignalP (SIGNALP)                                                                          |
| -                       | -                                                                      | 0  | -                                                                                                                                                                     | -                                                                                                                                                                                                                                         | -                                                                                          |
| -                       | -                                                                      | 0  | -                                                                                                                                                                     | -                                                                                                                                                                                                                                         | -                                                                                          |

|                         |                                                  |    |                                                                                                                                                                                                                                                                                                                                                                                                                                                                                          |   |                                                                                            |                                                                                                                                                                                                                                                                                                                             |
|-------------------------|--------------------------------------------------|----|------------------------------------------------------------------------------------------------------------------------------------------------------------------------------------------------------------------------------------------------------------------------------------------------------------------------------------------------------------------------------------------------------------------------------------------------------------------------------------------|---|--------------------------------------------------------------------------------------------|-----------------------------------------------------------------------------------------------------------------------------------------------------------------------------------------------------------------------------------------------------------------------------------------------------------------------------|
| Caenorhabditis elegans  | protein ki-se iota                               | 30 | P:GO:0007338;<br>P:GO:0006468;<br>P:GO:0007369;<br>F:GO:0008270;<br>P:GO:0032869;<br>C:GO:0005624;<br>P:GO:0048194;<br>P:GO:0006612;<br>F:GO:0005543;<br>P:GO:0045197;<br>P:GO:0007506;<br>C:GO:0005829;<br>P:GO:0006916;<br>F:GO:0019904;<br>P:GO:0035089;<br>P:GO:0007015;<br>P:GO:0042462;<br>P:GO:0090004;<br>C:GO:0000133;<br>P:GO:0070555;<br>C:GO:0005923;<br>C:GO:0030864;<br>C:GO:0005625;<br>C:GO:0005634;<br>F:GO:0005524;<br>P:GO:0046903;<br>P:GO:0045216;<br>P:GO:0046326; | - | EC:2.7.11.13                                                                               | IPR000270; IPR000719; IPR002219;<br>IPR002290; IPR008271; IPR011009;<br>IPR015745; IPR017441; IPR017442;<br>IPR020454; G3DSA:1.10.510.10<br>(GENE3D), G3DSA:3.10.20.240<br>(GENE3D), G3DSA:3.30.200.20<br>(GENE3D), G3DSA:3.30.60.20<br>(GENE3D), PTHR22985 (PANTHER),<br>SSF54277 (SUPERFAMILY), SSF57889<br>(SUPERFAMILY) |
| -                       | -                                                | 0  | -                                                                                                                                                                                                                                                                                                                                                                                                                                                                                        | - | -                                                                                          |                                                                                                                                                                                                                                                                                                                             |
| Caenorhabditis briggsae | elegans protein confirmed by transcript evidence | 1  | F:GO:0005488                                                                                                                                                                                                                                                                                                                                                                                                                                                                             | - | PTHR13986 (PANTHER),<br>PTHR13986:SF1 (PANTHER)                                            |                                                                                                                                                                                                                                                                                                                             |
| Caenorhabditis briggsae | ophagy (yeast atg homolog) family member (atg- ) | 2  | P:GO:0006810;<br>F:GO:0008233                                                                                                                                                                                                                                                                                                                                                                                                                                                            | - | -                                                                                          |                                                                                                                                                                                                                                                                                                                             |
| Caenorhabditis remanei  | nematode astacin protease family member (-s-9)   | 5  | P:GO:0009792;<br>P:GO:0040010;<br>P:GO:0006508;<br>F:GO:0008270;<br>F:GO:0008237                                                                                                                                                                                                                                                                                                                                                                                                         | - | IPR001506; G3DSA:3.40.390.10<br>(GENE3D), PTHR10127 (PANTHER),<br>PTHR10127:SF66 (PANTHER) |                                                                                                                                                                                                                                                                                                                             |
| -                       | -                                                | 0  | -                                                                                                                                                                                                                                                                                                                                                                                                                                                                                        | - | -                                                                                          |                                                                                                                                                                                                                                                                                                                             |
| -                       | -                                                | 0  | -                                                                                                                                                                                                                                                                                                                                                                                                                                                                                        | - | PTHR11521 (PANTHER),<br>PTHR11521:SF1 (PANTHER)                                            |                                                                                                                                                                                                                                                                                                                             |
| -                       | -                                                | 0  | -                                                                                                                                                                                                                                                                                                                                                                                                                                                                                        | - | -                                                                                          |                                                                                                                                                                                                                                                                                                                             |
| -                       | -                                                | 0  | -                                                                                                                                                                                                                                                                                                                                                                                                                                                                                        | - | -                                                                                          |                                                                                                                                                                                                                                                                                                                             |
| -                       | -                                                | 0  | -                                                                                                                                                                                                                                                                                                                                                                                                                                                                                        | - | -                                                                                          |                                                                                                                                                                                                                                                                                                                             |
| -                       | -                                                | 0  | -                                                                                                                                                                                                                                                                                                                                                                                                                                                                                        | - | -                                                                                          |                                                                                                                                                                                                                                                                                                                             |
| -                       | -                                                | 0  | -                                                                                                                                                                                                                                                                                                                                                                                                                                                                                        | - | SignalP (SIGNALP)                                                                          |                                                                                                                                                                                                                                                                                                                             |
| -                       | -                                                | 0  | -                                                                                                                                                                                                                                                                                                                                                                                                                                                                                        | - | -                                                                                          |                                                                                                                                                                                                                                                                                                                             |
| -                       | -                                                | 0  | -                                                                                                                                                                                                                                                                                                                                                                                                                                                                                        | - | -                                                                                          |                                                                                                                                                                                                                                                                                                                             |
| -                       | -                                                | 0  | -                                                                                                                                                                                                                                                                                                                                                                                                                                                                                        | - | -                                                                                          |                                                                                                                                                                                                                                                                                                                             |
| -                       | -                                                | 0  | -                                                                                                                                                                                                                                                                                                                                                                                                                                                                                        | - | -                                                                                          |                                                                                                                                                                                                                                                                                                                             |
| -                       | -                                                | 0  | -                                                                                                                                                                                                                                                                                                                                                                                                                                                                                        | - | -                                                                                          |                                                                                                                                                                                                                                                                                                                             |



|                         |                                            |    |                                                                                                                                                                                                                                                                                                                                                 |              |             |                                                                              |
|-------------------------|--------------------------------------------|----|-------------------------------------------------------------------------------------------------------------------------------------------------------------------------------------------------------------------------------------------------------------------------------------------------------------------------------------------------|--------------|-------------|------------------------------------------------------------------------------|
| Pongo abelii            | annexin a5                                 | 16 | P:GO:0043065;<br>P:GO:0050819;<br>C:GO:0014704;<br>F:GO:0005509;<br>F:GO:0005544;<br>P:GO:0051260;<br>F:GO:0043499;<br>P:GO:0006916;<br>C:GO:0042995;<br>P:GO:0007165;<br>F:GO:0030971;<br>C:GO:0042383;<br>C:GO:0005737;<br>F:GO:0004859;<br>P:GO:0007596;<br>P:GO:0010033                                                                     | -            | -           |                                                                              |
|                         | -                                          | 0  |                                                                                                                                                                                                                                                                                                                                                 |              |             | -                                                                            |
|                         | -                                          | 0  |                                                                                                                                                                                                                                                                                                                                                 |              |             | -                                                                            |
|                         | -                                          | 0  |                                                                                                                                                                                                                                                                                                                                                 |              |             | SignalP (SIGNALP)                                                            |
|                         | -                                          | 0  |                                                                                                                                                                                                                                                                                                                                                 |              |             | -                                                                            |
|                         | -                                          | 0  |                                                                                                                                                                                                                                                                                                                                                 |              |             | -                                                                            |
|                         | -                                          | 0  |                                                                                                                                                                                                                                                                                                                                                 |              |             | -                                                                            |
|                         | -                                          | 0  |                                                                                                                                                                                                                                                                                                                                                 |              |             | -                                                                            |
| Caenorhabditis briggsae | briggsae cbr-fer-1 protein                 | 0  |                                                                                                                                                                                                                                                                                                                                                 | C:GO:0016021 |             | PTHR12546 (PANTHER),<br>PTHR12546:SF5 (PANTHER)                              |
|                         | -                                          | 0  |                                                                                                                                                                                                                                                                                                                                                 |              |             | -                                                                            |
| Salmo salar             | 3-oxo-5-alpha-steroid 4-dehydroge-se 2     | 6  | C:GO:0016021;<br>F:GO:0003865;<br>P:GO:0055114;<br>C:GO:0005737;<br>P:GO:0008202;<br>F:GO:0005515                                                                                                                                                                                                                                               | -            | EC:1.3.99.5 | IPR001104; PTHR10556 (PANTHER),<br>PTHR10556:SF5 (PANTHER)                   |
| Macaca mulatta          | moesin                                     | 20 | P:GO:0022614;<br>F:GO:0030674;<br>C:GO:0019898;<br>C:GO:0009898;<br>C:GO:0031527;<br>C:GO:0005856;<br>C:GO:0005625;<br>C:GO:0005730;<br>C:GO:0009986;<br>P:GO:0050900;<br>F:GO:0005102;<br>C:GO:0001931;<br>F:GO:0050839;<br>F:GO:0003779;<br>C:GO:0030667;<br>P:GO:0007159;<br>F:GO:0005200;<br>C:GO:0016324;<br>C:GO:0031528;<br>C:GO:0016323 | -            |             | SignalP (SIGNALP)                                                            |
|                         | -                                          | 0  |                                                                                                                                                                                                                                                                                                                                                 |              |             | SignalP (SIGNALP)                                                            |
| Sorghum bicolor         | dehydroge-se reductase sdr family member 2 | 3  | F:GO:0016491;<br>P:GO:0055114;<br>F:GO:0005488                                                                                                                                                                                                                                                                                                  | -            |             | IPR002198; IPR016040;<br>PTHR19410:SF67 (PANTHER),<br>SSF51735 (SUPERFAMILY) |

|                          |                                                            |    |                                                                                                                                                                       |   |                                                                                                                                                     |
|--------------------------|------------------------------------------------------------|----|-----------------------------------------------------------------------------------------------------------------------------------------------------------------------|---|-----------------------------------------------------------------------------------------------------------------------------------------------------|
| Ornithorhynchus anatinus | tmprss11a protein                                          | 0  | P:GO:0006508;<br>F:GO:0004252;<br>F:GO:0008236;<br>F:GO:0016787;<br>F:GO:0003824;<br>F:GO:0008233                                                                     |   | IPR001254; IPR009003;<br>G3DSA:2.40.10.10 (GENE3D),<br>PTHR19355 (PANTHER),<br>PTHR19355:SF168 (PANTHER)                                            |
| -                        | -                                                          | 0  |                                                                                                                                                                       |   | -                                                                                                                                                   |
| Loa loa                  | akirin 1                                                   | 2  | P:GO:0048518;<br>P:GO:0050794                                                                                                                                         | - | PTHR13293 (PANTHER),<br>PTHR13293:SF6 (PANTHER)                                                                                                     |
| Homo sapiens             | mhc class ii antigen                                       | 9  | C:GO:0005789;<br>C:GO:0005887;<br>C:GO:0042613;<br>C:GO:0005794;<br>P:GO:0002504;<br>C:GO:0005765;<br>F:GO:0032395;<br>C:GO:0010008;<br>P:GO:0006955                  | - | IPR001003; IPR003597; IPR007110;<br>IPR011162; IPR013783; IPR014745;<br>PTHR19944 (PANTHER),<br>PTHR19944:SF27 (PANTHER),<br>SSF48726 (SUPERFAMILY) |
| -                        | -                                                          | 0  |                                                                                                                                                                       |   | -                                                                                                                                                   |
| -                        | -                                                          | 0  |                                                                                                                                                                       |   | -                                                                                                                                                   |
| Ailuropoda melanoleuca   | protein fat-free homolog                                   | 5  | P:GO:0006869;<br>P:GO:0015031;<br>C:GO:0016021;<br>C:GO:0005794;<br>C:GO:0005634                                                                                      | - | -                                                                                                                                                   |
| -                        | -                                                          | 0  |                                                                                                                                                                       |   | -                                                                                                                                                   |
| -                        | -                                                          | 0  |                                                                                                                                                                       |   | -                                                                                                                                                   |
| -                        | -                                                          | 0  |                                                                                                                                                                       |   | -                                                                                                                                                   |
| -                        | -                                                          | 0  |                                                                                                                                                                       |   | -                                                                                                                                                   |
| -                        | -                                                          | 0  |                                                                                                                                                                       |   | -                                                                                                                                                   |
| Caenorhabditis elegans   | major facilitator superfamily expressed                    | 1  | C:GO:0005886                                                                                                                                                          | - | IPR008509; IPR016196;<br>G3DSA:1.20.1250.20 (GENE3D),<br>SignalP (SIGNALP)                                                                          |
| Caenorhabditis elegans   | map ki-se activated protein ki-se family member (mak-2)    | 6  | P:GO:0008360;<br>P:GO:0006468;<br>F:GO:0005515;<br>P:GO:0007155;<br>F:GO:0005524;<br>F:GO:0004674                                                                     | - | EC:2.7.11.0<br>IPR000719; IPR008271; IPR011009;<br>IPR017442; IPR020636; IPR020646;<br>G3DSA:1.10.510.10 (GENE3D),<br>G3DSA:4.10.1170.10 (GENE3D)   |
| Homo sapiens             | lipopolysaccharide-induced tn timer factor                 | 10 | C:GO:0005765;<br>P:GO:0006357;<br>P:GO:0006915;<br>F:GO:0004871;<br>C:GO:0005813;<br>P:GO:0043123;<br>C:GO:0005576;<br>F:GO:0050699;<br>C:GO:0005794;<br>F:GO:0003702 | - | -                                                                                                                                                   |
| -                        | -                                                          | 0  |                                                                                                                                                                       |   | -                                                                                                                                                   |
| -                        | -                                                          | 0  |                                                                                                                                                                       |   | -                                                                                                                                                   |
| -                        | -                                                          | 0  |                                                                                                                                                                       |   | -                                                                                                                                                   |
| Caenorhabditis elegans   | eating: abnormal pharyngeal pumping family member (eat-18) | 0  |                                                                                                                                                                       |   | -                                                                                                                                                   |
| -                        | -                                                          | 0  |                                                                                                                                                                       |   | -                                                                                                                                                   |
| Homo sapiens             | adp-ribosylation-like factor 6 interacting protein 4       | 2  | C:GO:0005634;<br>P:GO:0008380                                                                                                                                         | - | -                                                                                                                                                   |

|                         |                                                            |   |                                                                                                                                     |                                                                                  |            |                                                                                                                        |
|-------------------------|------------------------------------------------------------|---|-------------------------------------------------------------------------------------------------------------------------------------|----------------------------------------------------------------------------------|------------|------------------------------------------------------------------------------------------------------------------------|
|                         | -                                                          | 0 |                                                                                                                                     |                                                                                  |            | -                                                                                                                      |
| Caenorhabditis briggsae | ester hydrolase c11orf54 homolog                           | 3 | F:GO:0016788;<br>C:GO:0005634;<br>F:GO:0008270                                                                                      | -                                                                                |            | -                                                                                                                      |
|                         | -                                                          | 0 |                                                                                                                                     |                                                                                  |            | SignalP (SIGNALP)                                                                                                      |
| Brugia malayi           | rap ran-gap family protein                                 | 0 |                                                                                                                                     | F:GO:0005096;<br>P:GO:0051056;<br>F:GO:0005488;<br>C:GO:0005622;<br>P:GO:0043547 |            | IPR000331; PTHR10063 (PANTHER),<br>SignalP (SIGNALP), SSF111347<br>(SUPERFAMILY)                                       |
|                         | -                                                          | 0 |                                                                                                                                     |                                                                                  |            | -                                                                                                                      |
|                         | -                                                          | 0 |                                                                                                                                     |                                                                                  |            | -                                                                                                                      |
|                         | -                                                          | 0 |                                                                                                                                     |                                                                                  |            | -                                                                                                                      |
|                         | -                                                          | 0 |                                                                                                                                     |                                                                                  |            | -                                                                                                                      |
| Caenorhabditis remanei  | elegans protein partially confirmed by transcript evidence | 1 | F:GO:0005488                                                                                                                        | -                                                                                |            | -                                                                                                                      |
|                         | -                                                          | 0 |                                                                                                                                     |                                                                                  |            | -                                                                                                                      |
|                         | -                                                          | 0 |                                                                                                                                     |                                                                                  |            | -                                                                                                                      |
|                         | -                                                          | 0 |                                                                                                                                     |                                                                                  |            | -                                                                                                                      |
|                         | -                                                          | 0 |                                                                                                                                     |                                                                                  |            | -                                                                                                                      |
|                         | -                                                          | 0 |                                                                                                                                     |                                                                                  |            | -                                                                                                                      |
| Brugia malayi           | cortactin                                                  | 6 | C:GO:0005625;<br>C:GO:0030027;<br>F:GO:0005515;<br>C:GO:0001726;<br>C:GO:0005938;<br>P:GO:0006898                                   | -                                                                                |            | IPR001452; IPR003134; IPR008162;<br>IPR015503; G3DSA:2.30.30.40<br>(GENE3D), PTHR10829 (PANTHER),<br>SignalP (SIGNALP) |
| Tribolium castaneum     | xylulose ki-se                                             | 3 | P:GO:0005975;<br>F:GO:0016773;<br>P:GO:0006091                                                                                      | -                                                                                | EC:2.7.1.0 | IPR000577; PTHR10196:SF5<br>(PANTHER)                                                                                  |
|                         | -                                                          | 0 |                                                                                                                                     |                                                                                  |            | SignalP (SIGNALP)                                                                                                      |
|                         | -                                                          | 0 |                                                                                                                                     |                                                                                  |            | -                                                                                                                      |
|                         | -                                                          | 0 |                                                                                                                                     |                                                                                  |            | -                                                                                                                      |
| Callithrix jacchus      | angio-associated migratory cell protein                    | 8 | C:GO:0005737;<br>P:GO:0030154;<br>C:GO:0009986;<br>P:GO:0045766;<br>P:GO:0010595;<br>F:GO:0008201;<br>C:GO:0005886;<br>P:GO:0014909 | -                                                                                |            | SignalP (SIGNALP)                                                                                                      |
| Caenorhabditis elegans  | beta- -galactosyltransferase 6                             | 7 | P:GO:0007411;<br>P:GO:0006024;<br>C:GO:0005797;<br>P:GO:0007608;<br>P:GO:0006486;<br>F:GO:0008499;<br>C:GO:0016020                  | -                                                                                |            | IPR002659; PTHR11214:SF10<br>(PANTHER), SignalP (SIGNALP)                                                              |

|                         |                                                                              |    |                                                                                                                                                                                                                                                                                                                                                                                                                                                                                         |   |                                                       |
|-------------------------|------------------------------------------------------------------------------|----|-----------------------------------------------------------------------------------------------------------------------------------------------------------------------------------------------------------------------------------------------------------------------------------------------------------------------------------------------------------------------------------------------------------------------------------------------------------------------------------------|---|-------------------------------------------------------|
| Homo sapiens            | ywhaz protein                                                                | 14 | C:GO:0043234;<br>C:GO:0005625;<br>C:GO:0005739;<br>F:GO:0032403;<br>P:GO:0006626;<br>P:GO:0002553;<br>P:GO:0006916;<br>C:GO:0042470;<br>F:GO:0019904;<br>P:GO:0007165;<br>F:GO:0008134;<br>P:GO:0042493;<br>C:GO:0014069;<br>C:GO:0005634                                                                                                                                                                                                                                               | - | IPR000308                                             |
|                         | -                                                                            | 0  |                                                                                                                                                                                                                                                                                                                                                                                                                                                                                         |   | IPR002259; PTHR10332:SF6 (PANTHER), SignalP (SIGNALP) |
|                         | -                                                                            | 0  |                                                                                                                                                                                                                                                                                                                                                                                                                                                                                         |   | -                                                     |
|                         | -                                                                            | 0  |                                                                                                                                                                                                                                                                                                                                                                                                                                                                                         |   | -                                                     |
| Caenorhabditis elegans  | elegans protein confirmed by transcript evidence                             | 0  |                                                                                                                                                                                                                                                                                                                                                                                                                                                                                         |   | IPR001810; IPR022364; G3DSA:1.20.1280.50 (GENE3D)     |
| Caenorhabditis briggsae | major intrinsic protein                                                      | 7  | C:GO:0016323;<br>P:GO:0045087;<br>P:GO:0008340;<br>P:GO:0050829;<br>C:GO:0016021;<br>P:GO:0015793;<br>F:GO:0022838                                                                                                                                                                                                                                                                                                                                                                      | - | -                                                     |
| Homo sapiens            | af220047_1uncharacterized hematopoietic stem progenitor cells protein mds027 | 2  | C:GO:0005856;<br>C:GO:0005737                                                                                                                                                                                                                                                                                                                                                                                                                                                           | - | -                                                     |
| Callithrix jacchus      | phosphatidylethanolamine-binding protein 1                                   | 40 | C:GO:0005737;<br>C:GO:0019717;<br>C:GO:0005791;<br>P:GO:0001933;<br>P:GO:0060409;<br>C:GO:0005625;<br>P:GO:0007420;<br>P:GO:0051602;<br>F:GO:0004867;<br>F:GO:0005102;<br>P:GO:0010243;<br>C:GO:0043679;<br>C:GO:0005615;<br>P:GO:0045471;<br>P:GO:0043409;<br>F:GO:0008429;<br>P:GO:0002026;<br>P:GO:0051592;<br>P:GO:0006979;<br>P:GO:0007568;<br>P:GO:0009408;<br>P:GO:0007286;<br>C:GO:0005794;<br>P:GO:0051412;<br>P:GO:0014823;<br>P:GO:0042755;<br>F:GO:0005524;<br>P:GO:0010951 | - | IPR008914; PTHR11362 (PANTHER)                        |

|                        |                                            |    |                                                                                                                                                                                                                                                                                                                                                                                                                                      |   |                                                                              |
|------------------------|--------------------------------------------|----|--------------------------------------------------------------------------------------------------------------------------------------------------------------------------------------------------------------------------------------------------------------------------------------------------------------------------------------------------------------------------------------------------------------------------------------|---|------------------------------------------------------------------------------|
| Brugia malayi          | pr domain containing with znf domain       | 15 | P:GO:0040010;<br>P:GO:0008340;<br>F:GO:0008270;<br>F:GO:0003676;<br>P:GO:0006915;<br>C:GO:0005622;<br>P:GO:0040035;<br>P:GO:0000122;<br>P:GO:0010171;<br>P:GO:0019915;<br>P:GO:0002119;<br>F:GO:0003700;<br>P:GO:0040011;<br>P:GO:0002009;<br>P:GO:0040018                                                                                                                                                                           | - | IPR001214; G3DSA:2.170.270.10 (GENE3D)                                       |
| Caenorhabditis remanei | cre-klf-1 protein                          | 0  |                                                                                                                                                                                                                                                                                                                                                                                                                                      |   | -                                                                            |
|                        | -                                          | 0  |                                                                                                                                                                                                                                                                                                                                                                                                                                      |   | -                                                                            |
|                        | -                                          | 0  |                                                                                                                                                                                                                                                                                                                                                                                                                                      |   | -                                                                            |
|                        | -                                          | 0  |                                                                                                                                                                                                                                                                                                                                                                                                                                      |   | -                                                                            |
|                        | -                                          | 0  |                                                                                                                                                                                                                                                                                                                                                                                                                                      |   | -                                                                            |
|                        | -                                          | 0  |                                                                                                                                                                                                                                                                                                                                                                                                                                      |   | -                                                                            |
| Ixodes scapularis      | delta-like 4 protein                       | 0  | P:GO:0008595;<br>P:GO:0000003;<br>P:GO:0060325;<br>P:GO:0009953;<br>P:GO:0040028;<br>P:GO:0030154;<br>P:GO:0046331;<br>P:GO:0060351;<br>F:GO:0003674;<br>P:GO:0001889;<br>P:GO:0016331;<br>C:GO:0016021;<br>C:GO:0016020;<br>P:GO:0031016;<br>P:GO:0007154;<br>P:GO:0009792;<br>P:GO:0007219;<br>F:GO:0005509;<br>F:GO:0030414;<br>P:GO:0007275;<br>P:GO:0001525;<br>P:GO:0009880;<br>P:GO:0043537;<br>F:GO:0005112;<br>F:GO:0005515 |   | IPR001774; PTHR11201 (PANTHER), PTHR11201:SF192 (PANTHER), SignalP (SIGNALP) |
| Loa loa                | prp39 pre-mr- processing factor 39 homolog | 0  |                                                                                                                                                                                                                                                                                                                                                                                                                                      |   | -                                                                            |
|                        | -                                          | 0  |                                                                                                                                                                                                                                                                                                                                                                                                                                      |   | -                                                                            |
|                        | -                                          | 0  |                                                                                                                                                                                                                                                                                                                                                                                                                                      |   | -                                                                            |
|                        | -                                          | 0  |                                                                                                                                                                                                                                                                                                                                                                                                                                      |   | -                                                                            |
|                        | -                                          | 0  |                                                                                                                                                                                                                                                                                                                                                                                                                                      |   | SignalP (SIGNALP)                                                            |
|                        | -                                          | 0  |                                                                                                                                                                                                                                                                                                                                                                                                                                      |   | -                                                                            |

|                         |                                                                             |    |                                                                                                                                                                       |                                                                 |                                   |                                                                                                                 |
|-------------------------|-----------------------------------------------------------------------------|----|-----------------------------------------------------------------------------------------------------------------------------------------------------------------------|-----------------------------------------------------------------|-----------------------------------|-----------------------------------------------------------------------------------------------------------------|
| Caenorhabditis remanei  | calcium alpha subunit family member (cca-1)                                 | 7  | P:GO:0051899;<br>P:GO:0045760;<br>P:GO:0043051;<br>P:GO:0006816;<br>P:GO:0055085;<br>C:GO:0005891;<br>F:GO:0008332                                                    | -                                                               |                                   | IPR005445; IPR005821; PTHR10037 (PANTHER)                                                                       |
| Caenorhabditis briggsae | elegans protein partially confirmed by transcript evidence                  | 0  |                                                                                                                                                                       | P:GO:0000003;<br>P:GO:0040010                                   |                                   | -                                                                                                               |
|                         |                                                                             | 0  |                                                                                                                                                                       |                                                                 |                                   | -                                                                                                               |
| Caenorhabditis briggsae | uncoordinated family member (unc-22)                                        | 3  | P:GO:0006468;<br>F:GO:0005524;<br>F:GO:0004674                                                                                                                        | -                                                               | EC:2.7.11.0                       | IPR003961; IPR013783                                                                                            |
| Brugia malayi           | lem domain containing 3                                                     | 4  | P:GO:0090101;<br>F:GO:0005488;<br>C:GO:0016021;<br>C:GO:0005637                                                                                                       | -                                                               |                                   | -                                                                                                               |
| Caenorhabditis briggsae | inner nuclear membrane protein man1                                         | 7  | P:GO:0030514;<br>P:GO:0032926;<br>P:GO:0030512;<br>C:GO:0016021;<br>C:GO:0005624;<br>F:GO:0005515;<br>C:GO:0005637                                                    | -                                                               |                                   | -                                                                                                               |
|                         |                                                                             | 0  |                                                                                                                                                                       |                                                                 |                                   | -                                                                                                               |
| Brugia malayi           | g protein-coupled receptor ki-se 4                                          | 10 | C:GO:0005829;<br>P:GO:0002031;<br>F:GO:0050254;<br>C:GO:0030425;<br>F:GO:0004872;<br>F:GO:0004703;<br>F:GO:0005524;<br>C:GO:0043025;<br>P:GO:0007165;<br>P:GO:0006468 | -                                                               | EC:2.7.11.14<br>;<br>EC:2.7.11.16 | -                                                                                                               |
|                         |                                                                             | 0  |                                                                                                                                                                       |                                                                 |                                   | -                                                                                                               |
|                         |                                                                             | 0  |                                                                                                                                                                       |                                                                 |                                   | -                                                                                                               |
|                         |                                                                             | 0  |                                                                                                                                                                       |                                                                 |                                   | -                                                                                                               |
| Caenorhabditis remanei  | high incidence of males (increased x chromosome loss) family member (him-4) | 1  | F:GO:0005509                                                                                                                                                          | -                                                               |                                   | -                                                                                                               |
|                         |                                                                             | 0  |                                                                                                                                                                       |                                                                 |                                   | -                                                                                                               |
| Caenorhabditis elegans  | elegans protein confirmed by transcript evidence                            | 2  | P:GO:0007155;<br>C:GO:0005604                                                                                                                                         | -                                                               |                                   | -                                                                                                               |
|                         |                                                                             | 0  |                                                                                                                                                                       |                                                                 |                                   | -                                                                                                               |
|                         |                                                                             | 0  |                                                                                                                                                                       |                                                                 |                                   | -                                                                                                               |
| Caenorhabditis elegans  | f-box protein 42                                                            | 0  |                                                                                                                                                                       | F:GO:0003674;<br>P:GO:0008150;<br>F:GO:0005515;<br>C:GO:0005575 |                                   | IPR001810; IPR015915; IPR018229;<br>PTHR23244 (PANTHER),<br>PTHR23244:SF7 (PANTHER),<br>SSF117281 (SUPERFAMILY) |
|                         |                                                                             | 0  |                                                                                                                                                                       |                                                                 |                                   | P551257 (PROFILE)                                                                                               |
| Caenorhabditis elegans  | briggsae cbr-pho-1 protein                                                  | 0  |                                                                                                                                                                       | F:GO:0003993                                                    |                                   | -                                                                                                               |
| Caenorhabditis elegans  | briggsae cbr-hmr-1 protein                                                  | 3  | C:GO:0016020;<br>P:GO:0007155;<br>F:GO:0005515                                                                                                                        | -                                                               |                                   | IPR002126                                                                                                       |
|                         |                                                                             | 0  |                                                                                                                                                                       |                                                                 |                                   | -                                                                                                               |
|                         |                                                                             | 0  |                                                                                                                                                                       |                                                                 |                                   | -                                                                                                               |
| Apis mellifera          | atg2 autophagy related 2 homolog b                                          | 0  |                                                                                                                                                                       |                                                                 |                                   | PTHR13190 (PANTHER),<br>PTHR13190:SF9 (PANTHER)                                                                 |

|                        |                                                            |    |                                                                                                                                                                                                                                                                                                               |                               |                             |                                                 |
|------------------------|------------------------------------------------------------|----|---------------------------------------------------------------------------------------------------------------------------------------------------------------------------------------------------------------------------------------------------------------------------------------------------------------|-------------------------------|-----------------------------|-------------------------------------------------|
|                        | -                                                          | 0  |                                                                                                                                                                                                                                                                                                               |                               |                             | -                                               |
| Caenorhabditis elegans | briggsae cbr-spe-10 protein                                | 1  | F:GO:0046872                                                                                                                                                                                                                                                                                                  | -                             |                             | -                                               |
| Homo sapiens           | galactoside- 3 binding protein                             | 9  | F:GO:0005044;<br>C:GO:0005615;<br>F:GO:0005515;<br>P:GO:0007155;<br>P:GO:0007165;<br>C:GO:0016020;<br>C:GO:0005634;<br>C:GO:0005578;<br>P:GO:0006968                                                                                                                                                          | -                             |                             | PTHR19331 (PANTHER),<br>PTHR19331:SF8 (PANTHER) |
| Pongo abelii           | nodal modulator 1                                          | 5  | C:GO:0005789;<br>F:GO:0004180;<br>F:GO:0030246;<br>F:GO:0005515;<br>C:GO:0016021                                                                                                                                                                                                                              | -                             |                             | PTHR23303 (PANTHER),<br>PTHR23303:SF2 (PANTHER) |
| Culex quinquefasciatus | conserved hypothetical protein [Culex quinquefasciatus]    | 0  |                                                                                                                                                                                                                                                                                                               | F:GO:0008270;<br>C:GO:0005622 |                             | IPR007087; IPR015880                            |
|                        | -                                                          | 0  |                                                                                                                                                                                                                                                                                                               |                               |                             | SignalP (SIGNALP)                               |
| Caenorhabditis elegans | elegans protein partially confirmed by transcript evidence | 0  |                                                                                                                                                                                                                                                                                                               |                               |                             | -                                               |
|                        | -                                                          | 0  |                                                                                                                                                                                                                                                                                                               |                               |                             | -                                               |
| synthetic construct    | monocyte differentiation antigen cd14                      | 18 | F:GO:0070891;<br>P:GO:0006915;<br>P:GO:0006954;<br>P:GO:0006909;<br>P:GO:0071223;<br>P:GO:0032760;<br>C:GO:0005615;<br>P:GO:0045087;<br>P:GO:0009408;<br>F:GO:0001530;<br>C:GO:0045121;<br>F:GO:0001847;<br>C:GO:0031225;<br>C:GO:0046696;<br>P:GO:0007166;<br>P:GO:0071222;<br>F:GO:0016019;<br>C:GO:0005886 | -                             |                             | -                                               |
|                        | -                                                          | 0  |                                                                                                                                                                                                                                                                                                               |                               |                             | -                                               |
|                        | -                                                          | 0  |                                                                                                                                                                                                                                                                                                               |                               |                             | SignalP (SIGNALP)                               |
| Caenorhabditis elegans | uncoordi-ted family member (unc-22)                        | 6  | C:GO:0030018;<br>P:GO:0006468;<br>F:GO:0008307;<br>P:GO:0007498;<br>F:GO:0005524;<br>F:GO:0004674                                                                                                                                                                                                             | -                             | EC:2.7.11.0                 | IPR013098; IPR013783; SSF48726<br>(SUPERFAMILY) |
|                        | -                                                          | 0  |                                                                                                                                                                                                                                                                                                               |                               |                             | -                                               |
| Brugia malayi          | -d-dependent malic mitochondrial precursor                 | 8  | F:GO:0046872;<br>P:GO:0006090;<br>F:GO:0051287;<br>C:GO:0005759;<br>F:GO:0016619;<br>P:GO:0006108;<br>P:GO:0055114;<br>F:GO:0004473                                                                                                                                                                           | -                             | EC:1.1.1.38;<br>EC:1.1.1.40 | -                                               |

|                         |                                 |    |                                                                                                                                                                                                                                                                                              |   |                                                                             |
|-------------------------|---------------------------------|----|----------------------------------------------------------------------------------------------------------------------------------------------------------------------------------------------------------------------------------------------------------------------------------------------|---|-----------------------------------------------------------------------------|
|                         | -                               | 0  |                                                                                                                                                                                                                                                                                              |   | -                                                                           |
|                         | -                               | 0  |                                                                                                                                                                                                                                                                                              |   | IPR007834                                                                   |
|                         | -                               | 0  |                                                                                                                                                                                                                                                                                              |   | -                                                                           |
|                         | -                               | 0  |                                                                                                                                                                                                                                                                                              |   | -                                                                           |
|                         | -                               | 0  |                                                                                                                                                                                                                                                                                              |   | SignalP (SIGNALP)                                                           |
|                         | -                               | 0  |                                                                                                                                                                                                                                                                                              |   | -                                                                           |
| Haemonchus contortus    | serine protease                 | 3  | P:GO:0006508;<br>F:GO:0008236;<br>F:GO:0004180                                                                                                                                                                                                                                               | - | IPR008758; PTHR11010:SF4<br>(PANTHER)                                       |
|                         | -                               | 0  |                                                                                                                                                                                                                                                                                              |   | -                                                                           |
| Caenorhabditis briggsae | briggsae cbr-oct-2 protein      | 3  | P:GO:0055085;<br>C:GO:0016021;<br>F:GO:0005215                                                                                                                                                                                                                                               | - | -                                                                           |
|                         | -                               | 0  |                                                                                                                                                                                                                                                                                              |   | -                                                                           |
|                         | -                               | 0  |                                                                                                                                                                                                                                                                                              |   | SignalP (SIGNALP)                                                           |
|                         | -                               | 0  |                                                                                                                                                                                                                                                                                              |   | -                                                                           |
|                         | -                               | 0  |                                                                                                                                                                                                                                                                                              |   | -                                                                           |
|                         | -                               | 0  |                                                                                                                                                                                                                                                                                              |   | -                                                                           |
| Caenorhabditis elegans  | vacuolar atp synthase subunit h | 17 | F:GO:0046961;<br>P:GO:0008340;<br>F:GO:0005515;<br>F:GO:0008553;<br>P:GO:0040007;<br>P:GO:0033227;<br>P:GO:0040011;<br>P:GO:0040002;<br>P:GO:0018996;<br>C:GO:0005829;<br>P:GO:0050690;<br>P:GO:0009792;<br>P:GO:0015986;<br>P:GO:0006897;<br>P:GO:0002119;<br>C:GO:0000221;<br>C:GO:0005886 | - | EC:3.6.3.14;<br>EC:3.6.3.6<br>IPR004908; IPR011989; IPR016024               |
| Caenorhabditis elegans  | vacuolar atp synthase subunit h | 14 | F:GO:0046961;<br>P:GO:0008340;<br>F:GO:0008553;<br>P:GO:0040007;<br>P:GO:0033227;<br>P:GO:0040011;<br>P:GO:0040002;<br>P:GO:0018996;<br>P:GO:0009792;<br>P:GO:0015986;<br>P:GO:0002119;<br>C:GO:0000221;<br>C:GO:0005886;<br>F:GO:0005488                                                    | - | EC:3.6.3.14;<br>EC:3.6.3.6<br>IPR004908; IPR011987; IPR011989;<br>IPR016024 |



|                         |                                                         |    |                                                                                                                                                                                                                                           |                                                                                                                                                                       |                            |                                                                                                             |
|-------------------------|---------------------------------------------------------|----|-------------------------------------------------------------------------------------------------------------------------------------------------------------------------------------------------------------------------------------------|-----------------------------------------------------------------------------------------------------------------------------------------------------------------------|----------------------------|-------------------------------------------------------------------------------------------------------------|
| Caenorhabditis elegans  | vacuolar atp synthase subunit h                         | 14 | F:GO:0046961;<br>P:GO:0008340;<br>F:GO:0008553;<br>P:GO:0040007;<br>P:GO:0033227;<br>P:GO:0040011;<br>P:GO:0040002;<br>P:GO:0018996;<br>P:GO:0009792;<br>P:GO:0015986;<br>P:GO:0002119;<br>C:GO:0000221;<br>C:GO:0005886;<br>F:GO:0005488 | -                                                                                                                                                                     | EC:3.6.3.14;<br>EC:3.6.3.6 | IPR004908; IPR011987; IPR011989;<br>IPR016024                                                               |
| Caenorhabditis elegans  | vacuolar atp synthase subunit h                         | 14 | F:GO:0046961;<br>P:GO:0008340;<br>F:GO:0008553;<br>P:GO:0040007;<br>P:GO:0033227;<br>P:GO:0040011;<br>P:GO:0040002;<br>P:GO:0018996;<br>P:GO:0009792;<br>P:GO:0015986;<br>P:GO:0002119;<br>C:GO:0000221;<br>C:GO:0005886;<br>F:GO:0005488 | -                                                                                                                                                                     | EC:3.6.3.14;<br>EC:3.6.3.6 | IPR004908; IPR011987; IPR011989;<br>IPR016024                                                               |
| Caenorhabditis elegans  | tetraspanin family protein                              | 1  | C:GO:0016021                                                                                                                                                                                                                              | -                                                                                                                                                                     |                            | IPR008952; IPR018499; PTHR19282<br>(PANTHER), PTHR19282:SF65<br>(PANTHER), SignalP (SIGNALP)                |
| Caenorhabditis remanei  | hypothetical protein CRE_21280 [Caenorhabditis remanei] | 0  |                                                                                                                                                                                                                                           |                                                                                                                                                                       |                            | IPR015063                                                                                                   |
|                         | -                                                       | 0  |                                                                                                                                                                                                                                           |                                                                                                                                                                       |                            | -                                                                                                           |
| Caenorhabditis elegans  | olin-like family member (gsnl-1)                        | 0  |                                                                                                                                                                                                                                           | F:GO:0003779                                                                                                                                                          |                            | IPR007122; PTHR11977:SF8<br>(PANTHER)                                                                       |
|                         | -                                                       | 0  |                                                                                                                                                                                                                                           |                                                                                                                                                                       |                            | -                                                                                                           |
|                         | -                                                       | 0  |                                                                                                                                                                                                                                           |                                                                                                                                                                       |                            | -                                                                                                           |
| Homo sapiens            | hCG2042149 [Homo sapiens]                               | 0  |                                                                                                                                                                                                                                           |                                                                                                                                                                       |                            | -                                                                                                           |
| Caenorhabditis briggsae | mboat family protein                                    | 1  | P:GO:0010171                                                                                                                                                                                                                              | -                                                                                                                                                                     |                            | PTHR13906 (PANTHER),<br>PTHR13906:SF2 (PANTHER)                                                             |
|                         | -                                                       | 0  |                                                                                                                                                                                                                                           |                                                                                                                                                                       |                            | -                                                                                                           |
|                         | -                                                       | 0  |                                                                                                                                                                                                                                           |                                                                                                                                                                       |                            | -                                                                                                           |
| Caenorhabditis briggsae | abhydrolase domain containing 4                         | 2  | P:GO:0040011;<br>P:GO:0008152                                                                                                                                                                                                             | -                                                                                                                                                                     |                            | G3DSA:3.40.50.1820 (GENE3D),<br>PTHR10992 (PANTHER),<br>PTHR10992:SF19 (PANTHER),<br>SSF53474 (SUPERFAMILY) |
| Brugia malayi           | zinc zz type family protein                             | 0  |                                                                                                                                                                                                                                           | P:GO:0015870;<br>F:GO:0008270;<br>P:GO:0046716;<br>C:GO:0016010;<br>P:GO:0040017;<br>P:GO:0007271;<br>P:GO:0007529;<br>F:GO:0005515;<br>F:GO:0005509;<br>F:GO:0005277 |                            | -                                                                                                           |

|                         |                                                            |   |                                                                                                                                                      |                                                                                       |
|-------------------------|------------------------------------------------------------|---|------------------------------------------------------------------------------------------------------------------------------------------------------|---------------------------------------------------------------------------------------|
| Caenorhabditis elegans  | briggsae cbr-crp-1 protein                                 | 0 | F:GO:0005525;<br>P:GO:0007264;<br>F:GO:0000166;<br>C:GO:0016020;<br>C:GO:0005622                                                                     | -                                                                                     |
| -                       | -                                                          | 0 |                                                                                                                                                      | -                                                                                     |
| -                       | -                                                          | 0 |                                                                                                                                                      | -                                                                                     |
| Caenorhabditis elegans  | hypothetical protein T20B5.2 [Caenorhabditis elegans]      | 0 |                                                                                                                                                      | -                                                                                     |
| -                       | -                                                          | 0 |                                                                                                                                                      | -                                                                                     |
| -                       | -                                                          | 0 |                                                                                                                                                      | -                                                                                     |
| Ailuropoda melanoleuca  | structure specific recognition protein 1                   | 9 | C:GO:0005737;<br>P:GO:0006260;<br>F:GO:0030528;<br>C:GO:0005654;<br>F:GO:0003677;<br>P:GO:0045449;<br>F:GO:0005515;<br>C:GO:0005694;<br>P:GO:0006281 | IPR000969; PTHR13711 (PANTHER),<br>PTHR13711:SF2 (PANTHER), SSF50729<br>(SUPERFAMILY) |
| -                       | -                                                          | 0 |                                                                                                                                                      | -                                                                                     |
| -                       | -                                                          | 0 |                                                                                                                                                      | -                                                                                     |
| Caenorhabditis elegans  | elegans protein partially confirmed by transcript evidence | 0 |                                                                                                                                                      | -                                                                                     |
| -                       | -                                                          | 0 |                                                                                                                                                      | IPR002110; IPR020683; PTHR18958<br>(PANTHER), PTHR18958:SF284<br>(PANTHER)            |
| -                       | -                                                          | 0 |                                                                                                                                                      | -                                                                                     |
| -                       | -                                                          | 0 |                                                                                                                                                      | -                                                                                     |
| Caenorhabditis remanei  | briggsae cbr-ocr-2 protein                                 | 4 | C:GO:0016021;<br>F:GO:0005216;<br>P:GO:0006811;<br>P:GO:0055085                                                                                      | IPR020683; PTHR10582 (PANTHER),<br>PTHR10582:SF2 (PANTHER)                            |
| -                       | -                                                          | 0 |                                                                                                                                                      | -                                                                                     |
| -                       | -                                                          | 0 |                                                                                                                                                      | -                                                                                     |
| Caenorhabditis briggsae | scp-2 sterol transfer family protein                       | 0 | F:GO:0032934;<br>C:GO:0016020                                                                                                                        | -                                                                                     |
| -                       | -                                                          | 0 |                                                                                                                                                      | -                                                                                     |
| -                       | -                                                          | 0 |                                                                                                                                                      | SignalP (SIGNALP)                                                                     |
| -                       | -                                                          | 0 |                                                                                                                                                      | -                                                                                     |
| Caenorhabditis elegans  | vacuolar protein sorting 13d                               | 0 | P:GO:0008104                                                                                                                                         | -                                                                                     |
| -                       | -                                                          | 0 |                                                                                                                                                      | -                                                                                     |
| -                       | -                                                          | 0 |                                                                                                                                                      | SignalP (SIGNALP)                                                                     |
| -                       | -                                                          | 0 |                                                                                                                                                      | -                                                                                     |
| Branchiostoma floridae  | -dh-cytochrome b5 reductase 3                              | 0 | P:GO:0055114;<br>F:GO:0016491;<br>F:GO:0020037                                                                                                       | G3DSA:3.40.50.80 (GENE3D),<br>PTHR19370 (PANTHER),<br>PTHR19370:SF1 (PANTHER)         |
| Caenorhabditis briggsae | aldo-keto reductase                                        | 4 | P:GO:0009792;<br>P:GO:0040010;<br>P:GO:0002119;<br>P:GO:0040011                                                                                      | IPR001395; IPR023210;<br>PTHR11732:SF34 (PANTHER)                                     |
| -                       | -                                                          | 0 |                                                                                                                                                      | SignalP (SIGNALP)                                                                     |
| -                       | -                                                          | 0 |                                                                                                                                                      | SignalP (SIGNALP)                                                                     |
| Caenorhabditis elegans  | briggsae cbr-gl-4 protein                                  | 0 | F:GO:0004970;<br>F:GO:0005234;<br>C:GO:0016020;<br>F:GO:0005215;<br>P:GO:0006810;<br>C:GO:0030288                                                    | IPR015683; G3DSA:3.40.190.10<br>(GENE3D), PTHR18966:SF39<br>(PANTHER)                 |
| -                       | -                                                          | 0 |                                                                                                                                                      | -                                                                                     |

|                         |                                                            |   |                                                                                                                                     |                                                                                                                                                                                                                                                                                              |             |                                                                                        |
|-------------------------|------------------------------------------------------------|---|-------------------------------------------------------------------------------------------------------------------------------------|----------------------------------------------------------------------------------------------------------------------------------------------------------------------------------------------------------------------------------------------------------------------------------------------|-------------|----------------------------------------------------------------------------------------|
|                         | -                                                          | 0 |                                                                                                                                     |                                                                                                                                                                                                                                                                                              |             | -                                                                                      |
|                         | -                                                          | 0 |                                                                                                                                     |                                                                                                                                                                                                                                                                                              |             | -                                                                                      |
| Caenorhabditis briggsae | briggsae cbr-rpm-1 protein                                 | 0 |                                                                                                                                     | F:GO:0046872;<br>P:GO:0030071;<br>C:GO:0005680;<br>F:GO:0008270;<br>F:GO:0005515;<br>C:GO:0005622                                                                                                                                                                                            |             | -                                                                                      |
| Ailuropoda melanoleuca  | homer protein homolog 3-like                               | 8 | C:GO:0005737;<br>C:GO:0045211;<br>F:GO:0019904;<br>C:GO:0030054;<br>P:GO:0006605;<br>C:GO:0014069;<br>F:GO:0008022;<br>P:GO:0007216 | -                                                                                                                                                                                                                                                                                            |             | SignalP (SIGNALP)                                                                      |
| Caenorhabditis briggsae | amino acid transporter family member (aat-5)               | 3 | C:GO:0016020;<br>C:GO:0009986;<br>P:GO:0006810                                                                                      | -                                                                                                                                                                                                                                                                                            |             | IPR002293; PTHR11785:SF76 (PANTHER)                                                    |
|                         | -                                                          | 0 |                                                                                                                                     |                                                                                                                                                                                                                                                                                              |             | -                                                                                      |
| Caenorhabditis briggsae | elegans protein confirmed by transcript evidence           | 5 | F:GO:0008667;<br>P:GO:0009239;<br>P:GO:0055114;<br>F:GO:0050662;<br>F:GO:0005515                                                    | -                                                                                                                                                                                                                                                                                            | EC:1.3.1.28 | -                                                                                      |
|                         | -                                                          | 0 |                                                                                                                                     |                                                                                                                                                                                                                                                                                              |             | -                                                                                      |
| Loa loa                 | uridine cytidine ki-se                                     | 0 |                                                                                                                                     | F:GO:0016740;<br>P:GO:0009058;<br>F:GO:0004386;<br>F:GO:0003677;<br>F:GO:0016757;<br>F:GO:0003676;<br>F:GO:0000166;<br>F:GO:0004849;<br>F:GO:0005524;<br>F:GO:0016301;<br>F:GO:0004845;<br>C:GO:0005575;<br>P:GO:0006777;<br>P:GO:0009116;<br>P:GO:0008152;<br>F:GO:0016773;<br>P:GO:0001906 |             | G3DSA:3.40.50.300 (GENE3D),<br>PF03205 (PFAM), SSF52540 (SUPERFAMILY)                  |
|                         | -                                                          | 0 |                                                                                                                                     |                                                                                                                                                                                                                                                                                              |             | -                                                                                      |
|                         | -                                                          | 0 |                                                                                                                                     |                                                                                                                                                                                                                                                                                              |             | -                                                                                      |
|                         | -                                                          | 0 |                                                                                                                                     |                                                                                                                                                                                                                                                                                              |             | -                                                                                      |
| Brugia malayi           | fk506-binding protein                                      | 4 | P:GO:0006457;<br>F:GO:0016887;<br>F:GO:0005524;<br>F:GO:0003755                                                                     | -                                                                                                                                                                                                                                                                                            | EC:5.2.1.8  | IPR001179; G3DSA:3.10.50.40 (GENE3D), PTHR10516:SF29 (PANTHER), SSF54534 (SUPERFAMILY) |
|                         | -                                                          | 0 |                                                                                                                                     |                                                                                                                                                                                                                                                                                              |             | SignalP (SIGNALP)                                                                      |
|                         | -                                                          | 0 |                                                                                                                                     |                                                                                                                                                                                                                                                                                              |             | -                                                                                      |
| Caenorhabditis elegans  | elegans protein partially confirmed by transcript evidence | 3 | P:GO:0006541;<br>F:GO:0005509;<br>F:GO:0004359                                                                                      | -                                                                                                                                                                                                                                                                                            | EC:3.5.1.2  | -                                                                                      |
| Caenorhabditis elegans  | ankyrin repeat-containing protein                          | 0 |                                                                                                                                     |                                                                                                                                                                                                                                                                                              |             | IPR002110; IPR020683; PTHR18958 (PANTHER), PTHR18958:SF113 (PANTHER)                   |

|                               |                                                                          |    |                                                                                                                                                                                                                                                                                                                                                                                   |                               |            |                                                                                                                                                |
|-------------------------------|--------------------------------------------------------------------------|----|-----------------------------------------------------------------------------------------------------------------------------------------------------------------------------------------------------------------------------------------------------------------------------------------------------------------------------------------------------------------------------------|-------------------------------|------------|------------------------------------------------------------------------------------------------------------------------------------------------|
| Caenorhabditis remanei        | phytanoyl- 2-hydroxylase                                                 | 0  |                                                                                                                                                                                                                                                                                                                                                                                   | P:GO:0008150;<br>C:GO:0005575 |            | PTHR21308 (PANTHER)                                                                                                                            |
|                               | -                                                                        | 0  |                                                                                                                                                                                                                                                                                                                                                                                   |                               |            | -                                                                                                                                              |
|                               | -                                                                        | 0  |                                                                                                                                                                                                                                                                                                                                                                                   |                               |            | -                                                                                                                                              |
| Caenorhabditis elegans        | briggsae cbr-rad-54 protein                                              | 5  | P:GO:0006915;<br>P:GO:0033554;<br>F:GO:0003676;<br>P:GO:0000003;<br>F:GO:0005515                                                                                                                                                                                                                                                                                                  | -                             |            | -                                                                                                                                              |
| Caenorhabditis remanei        | myb-like d-binding domain containing protein                             | 0  |                                                                                                                                                                                                                                                                                                                                                                                   | F:GO:0003677                  |            | -                                                                                                                                              |
|                               | -                                                                        | 0  |                                                                                                                                                                                                                                                                                                                                                                                   |                               |            | SignalP (SIGNALP)                                                                                                                              |
|                               | -                                                                        | 0  |                                                                                                                                                                                                                                                                                                                                                                                   |                               |            | -                                                                                                                                              |
| Caenorhabditis remanei        | uncoordinated protein isoform partially confirmed by transcript evidence | 8  | F:GO:0004872;<br>P:GO:0006629;<br>F:GO:0005219;<br>P:GO:0006816;<br>P:GO:0006874;<br>P:GO:0055085;<br>F:GO:0005509;<br>C:GO:0016021                                                                                                                                                                                                                                               | -                             |            | IPR000699; IPR015925;<br>PTHR13715:SF11 (PANTHER)                                                                                              |
|                               | -                                                                        | 0  |                                                                                                                                                                                                                                                                                                                                                                                   |                               |            | SignalP (SIGNALP)                                                                                                                              |
| Teladorsagia circumcincta     | class 3 lipase protein                                                   | 2  | P:GO:0006629;<br>F:GO:0004806                                                                                                                                                                                                                                                                                                                                                     | -                             | EC:3.1.1.3 | -                                                                                                                                              |
|                               | -                                                                        | 0  |                                                                                                                                                                                                                                                                                                                                                                                   |                               |            | SignalP (SIGNALP)                                                                                                                              |
|                               | -                                                                        | 0  |                                                                                                                                                                                                                                                                                                                                                                                   |                               |            | -                                                                                                                                              |
|                               | -                                                                        | 0  |                                                                                                                                                                                                                                                                                                                                                                                   |                               |            | -                                                                                                                                              |
|                               | -                                                                        | 0  |                                                                                                                                                                                                                                                                                                                                                                                   |                               |            | -                                                                                                                                              |
|                               | -                                                                        | 0  |                                                                                                                                                                                                                                                                                                                                                                                   |                               |            | -                                                                                                                                              |
|                               | -                                                                        | 0  |                                                                                                                                                                                                                                                                                                                                                                                   |                               |            | SignalP (SIGNALP)                                                                                                                              |
|                               | -                                                                        | 0  |                                                                                                                                                                                                                                                                                                                                                                                   |                               |            | -                                                                                                                                              |
| Angiostrongylus cantonensis   | briggsae cbr-cpi-1 protein                                               | 0  |                                                                                                                                                                                                                                                                                                                                                                                   | F:GO:0004869                  |            | SignalP (SIGNALP)                                                                                                                              |
| Xenopus (Silurana) tropicalis | protein tyrosine receptor f                                              | 22 | P:GO:0050775;<br>P:GO:0001960;<br>P:GO:0007185;<br>P:GO:0042059;<br>P:GO:0050803;<br>C:GO:0030426;<br>F:GO:0005001;<br>F:GO:0030971;<br>C:GO:0005792;<br>P:GO:0043525;<br>F:GO:0042301;<br>P:GO:0008285;<br>C:GO:0043025;<br>P:GO:0007156;<br>C:GO:0060076;<br>P:GO:0051387;<br>C:GO:0005768;<br>P:GO:0006470;<br>P:GO:0046627;<br>C:GO:0005887;<br>P:GO:0031345;<br>F:GO:0005158 | -                             |            | IPR000242; IPR000387; IPR016130;<br>G3DSA:3.90.190.10 (GENE3D),<br>PTHR19134 (PANTHER),<br>PTHR19134:SF48 (PANTHER),<br>SSF52799 (SUPERFAMILY) |
|                               | -                                                                        | 0  |                                                                                                                                                                                                                                                                                                                                                                                   |                               |            | -                                                                                                                                              |
|                               | -                                                                        | 0  |                                                                                                                                                                                                                                                                                                                                                                                   |                               |            | -                                                                                                                                              |
|                               | -                                                                        | 0  |                                                                                                                                                                                                                                                                                                                                                                                   |                               |            | SignalP (SIGNALP)                                                                                                                              |
| Caenorhabditis remanei        | cation efflux family protein                                             | 2  | C:GO:0016020;<br>P:GO:0006810                                                                                                                                                                                                                                                                                                                                                     | -                             |            | G3DSA:1.20.1510.10 (GENE3D),<br>SignalP (SIGNALP)                                                                                              |

|                         |                                                         |    |                                                                                                                                                                                                                                                            |                                                                 |                                                                                  |
|-------------------------|---------------------------------------------------------|----|------------------------------------------------------------------------------------------------------------------------------------------------------------------------------------------------------------------------------------------------------------|-----------------------------------------------------------------|----------------------------------------------------------------------------------|
|                         | -                                                       | 0  |                                                                                                                                                                                                                                                            |                                                                 | -                                                                                |
|                         | -                                                       | 0  |                                                                                                                                                                                                                                                            |                                                                 | -                                                                                |
|                         | -                                                       | 0  |                                                                                                                                                                                                                                                            |                                                                 | -                                                                                |
|                         | -                                                       | 0  |                                                                                                                                                                                                                                                            |                                                                 | -                                                                                |
| Caenorhabditis elegans  | - ca exchangers family member (ncx-2)                   | 15 | P:GO:0002026;<br>P:GO:0055085;<br>C:GO:0030315;<br>F:GO:0005432;<br>P:GO:0040010;<br>F:GO:0031072;<br>F:GO:0005516;<br>C:GO:0016021;<br>C:GO:0005901;<br>P:GO:0051924;<br>P:GO:0000003;<br>P:GO:0002028;<br>C:GO:0005624;<br>P:GO:0007204;<br>P:GO:0007154 | -                                                               | IPR004837; PTHR11878 (PANTHER),<br>PTHR11878:SF4 (PANTHER), SignalP<br>(SIGNALP) |
| Caenorhabditis elegans  | elegans protein confirmed by transcript evidence        | 0  |                                                                                                                                                                                                                                                            |                                                                 | -                                                                                |
|                         | -                                                       | 0  |                                                                                                                                                                                                                                                            |                                                                 | -                                                                                |
| Caenorhabditis briggsae | Hypothetical protein CBG03789 [Caenorhabditis briggsae] | 0  |                                                                                                                                                                                                                                                            | P:GO:0009058;<br>F:GO:0016740;<br>P:GO:0008152;<br>F:GO:0003824 | -                                                                                |
|                         | -                                                       | 0  |                                                                                                                                                                                                                                                            |                                                                 | -                                                                                |
|                         | -                                                       | 0  |                                                                                                                                                                                                                                                            |                                                                 | -                                                                                |
|                         | -                                                       | 0  |                                                                                                                                                                                                                                                            |                                                                 | -                                                                                |
|                         | -                                                       | 0  |                                                                                                                                                                                                                                                            |                                                                 | -                                                                                |
|                         | -                                                       | 0  |                                                                                                                                                                                                                                                            |                                                                 | -                                                                                |
|                         | -                                                       | 0  |                                                                                                                                                                                                                                                            |                                                                 | -                                                                                |
| Pongo abelii            | lamin a c                                               | 13 | C:GO:0005626;<br>C:GO:0016363;<br>P:GO:0006998;<br>P:GO:0035105;<br>C:GO:0005638;<br>P:GO:0007517;<br>P:GO:0007283;<br>N:GO:0090343;<br>P:GO:0055015;<br>F:GO:0005515;<br>C:GO:0048471;<br>C:GO:0005635;<br>F:GO:0005198                                   | -                                                               | -                                                                                |
| Pongo abelii            | insulin-like growth factor binding protein 7            | 13 | P:GO:0051414;<br>P:GO:0050810;<br>P:GO:0007566;<br>P:GO:0001558;<br>C:GO:0005615;<br>P:GO:0009408;<br>P:GO:0008285;<br>P:GO:0007155;<br>P:GO:0032870;<br>P:GO:0014070;<br>F:GO:0005520;<br>P:GO:0032526;<br>C:GO:0031012                                   | -                                                               | SignalP (SIGNALP)                                                                |

|                         |                                                                                       |   |                                                                                                                                                        |                                                                                  |                                                                                       |
|-------------------------|---------------------------------------------------------------------------------------|---|--------------------------------------------------------------------------------------------------------------------------------------------------------|----------------------------------------------------------------------------------|---------------------------------------------------------------------------------------|
| Caenorhabditis briggsae | i-d-like protein                                                                      |   | P:GO:0040022;<br>F:GO:0005488;<br>P:GO:0045132;<br>P:GO:0040007;<br>9 P:GO:0002119;<br>P:GO:0042127;<br>P:GO:0008406;<br>C:GO:0005737;<br>P:GO:0040020 | -                                                                                | -                                                                                     |
| Caenorhabditis briggsae | i-d-like protein                                                                      |   | P:GO:0040022;<br>F:GO:0005488;<br>P:GO:0045132;<br>P:GO:0040007;<br>9 P:GO:0002119;<br>P:GO:0042127;<br>P:GO:0008406;<br>C:GO:0005737;<br>P:GO:0040020 | -                                                                                | -                                                                                     |
| -                       | -                                                                                     | 0 |                                                                                                                                                        |                                                                                  | -                                                                                     |
| Pongo abelii            | glutamate n-methyl d-aspartate-associated protein 1 (glutamate binding) isoform cra_a | 1 | C:GO:0016021                                                                                                                                           | -                                                                                | SignalP (SIGNALP)                                                                     |
| Acyrtosiphon pisum      | protein                                                                               | 0 |                                                                                                                                                        | F:GO:0016597;<br>P:GO:0008152;<br>F:GO:0003824;<br>F:GO:0030170;<br>F:GO:0004794 | IPR001926; G3DSA:3.40.50.1100 (GENE3D), PTHR10314 (PANTHER), PTHR10314:SF17 (PANTHER) |
| -                       | -                                                                                     | 0 |                                                                                                                                                        |                                                                                  |                                                                                       |
| Caenorhabditis briggsae | major facilitator superfamily protein                                                 | 2 | P:GO:0055085;<br>C:GO:0016021                                                                                                                          | -                                                                                | -                                                                                     |
| -                       | -                                                                                     | 0 |                                                                                                                                                        |                                                                                  | SignalP (SIGNALP)                                                                     |
| Homo sapiens            | transformation-related protein                                                        | 0 |                                                                                                                                                        |                                                                                  | SignalP (SIGNALP)                                                                     |
| -                       | -                                                                                     | 0 |                                                                                                                                                        |                                                                                  | -                                                                                     |
| -                       | -                                                                                     | 0 |                                                                                                                                                        |                                                                                  | SignalP (SIGNALP)                                                                     |
| -                       | -                                                                                     | 0 |                                                                                                                                                        |                                                                                  | -                                                                                     |
| -                       | -                                                                                     | 0 |                                                                                                                                                        |                                                                                  | -                                                                                     |
| Caenorhabditis elegans  | briggsae cbr-vit-2 protein                                                            | 4 | P:GO:0009792;<br>P:GO:0008340;<br>P:GO:0040010;<br>F:GO:0005515                                                                                        | -                                                                                | IPR011030; IPR015255; PTHR23345 (PANTHER)                                             |
| Caenorhabditis briggsae | briggsae cbr-lact-6 protein                                                           | 4 | P:GO:0009792;<br>P:GO:0008340;<br>P:GO:0040010;<br>F:GO:0005515                                                                                        | -                                                                                | IPR015255; IPR015817; IPR015819; PTHR23345 (PANTHER)                                  |
| Caenorhabditis briggsae | briggsae cbr-vit-2 protein                                                            | 4 | P:GO:0009792;<br>F:GO:0005515;<br>P:GO:0040010;<br>P:GO:0008340                                                                                        | -                                                                                | IPR011030; IPR015255; IPR015817; IPR015819; PTHR23345 (PANTHER)                       |
| Caenorhabditis briggsae | briggsae cbr-nrf-5 protein                                                            | 0 |                                                                                                                                                        | F:GO:0008289                                                                     | IPR017942; IPR017943; G3DSA:3.15.10.10 (GENE3D)                                       |
| Caenorhabditis elegans  | kelch-like 18                                                                         | 1 | F:GO:0005515                                                                                                                                           | -                                                                                | -                                                                                     |
| -                       | -                                                                                     | 0 |                                                                                                                                                        |                                                                                  | -                                                                                     |
| -                       | -                                                                                     | 0 |                                                                                                                                                        |                                                                                  | -                                                                                     |
| -                       | -                                                                                     | 0 |                                                                                                                                                        |                                                                                  | -                                                                                     |

|                         |                                                                                  |    |                                                                                                                                                                                                         |   |              |                                                                                                                                    |
|-------------------------|----------------------------------------------------------------------------------|----|---------------------------------------------------------------------------------------------------------------------------------------------------------------------------------------------------------|---|--------------|------------------------------------------------------------------------------------------------------------------------------------|
| Caenorhabditis remanei  | briggsae cbr-acy-1 protein                                                       | 11 | P:GO:0006952;<br>P:GO:0008219;<br>C:GO:0016021;<br>F:GO:0004016;<br>P:GO:0007188;<br>P:GO:0009190;<br>P:GO:0042221;<br>P:GO:0002119;<br>P:GO:0040017;<br>C:GO:0005886;<br>P:GO:0030431                  | - | EC:4.6.1.1   | -                                                                                                                                  |
| -                       | -                                                                                | 0  |                                                                                                                                                                                                         |   |              | -                                                                                                                                  |
| Caenorhabditis elegans  | hypothetical protein M03F8.4 [Caenorhabditis elegans]                            | 0  |                                                                                                                                                                                                         |   |              | -                                                                                                                                  |
| Pongo abelii            | glycosyltransferase-like 1b                                                      | 5  | C:GO:0000139;<br>F:GO:0016757;<br>C:GO:0016021;<br>P:GO:0008152;<br>P:GO:0046716                                                                                                                        | - |              | PTHR12270 (PANTHER),<br>PTHR12270:SF6 (PANTHER)                                                                                    |
| Brugia malayi           | briggsae cbr-cln- protein                                                        | 4  | C:GO:0016020;<br>C:GO:0005737;<br>P:GO:0008340;<br>P:GO:0046662                                                                                                                                         | - |              | IPR003492                                                                                                                          |
| Ceratitis capitata      | histone-lysine n-methyltransferase setmar                                        | 0  |                                                                                                                                                                                                         |   |              | -                                                                                                                                  |
| Caenorhabditis briggsae | nuclear receptor nhr-1                                                           | 12 | F:GO:0008270;<br>P:GO:0006355;<br>F:GO:0042802;<br>F:GO:0043565;<br>P:GO:0019915;<br>P:GO:0002119;<br>P:GO:0040017;<br>F:GO:0003700;<br>F:GO:0003707;<br>P:GO:0040018;<br>P:GO:0032094;<br>C:GO:0005634 | - |              | IPR001628; IPR008946; IPR013088;<br>PR00350 (PRINTS), PTHR11865<br>(PANTHER), PTHR11865:SF218<br>(PANTHER), SSF57716 (SUPERFAMILY) |
| Callithrix jacchus      | proteasome activator complex subunit 2-like                                      | 6  | P:GO:0019884;<br>P:GO:0051436;<br>P:GO:0051437;<br>C:GO:0008537;<br>P:GO:0031145;<br>N:GO:0061133                                                                                                       | - |              | SignalP (SIGNALP)                                                                                                                  |
| -                       | -                                                                                | 0  |                                                                                                                                                                                                         |   |              | -                                                                                                                                  |
| -                       | -                                                                                | 0  |                                                                                                                                                                                                         |   |              | SignalP (SIGNALP)                                                                                                                  |
| -                       | -                                                                                | 0  |                                                                                                                                                                                                         |   |              | SignalP (SIGNALP)                                                                                                                  |
| Pan troglodytes         | coiled-coil-helix-coiled-coil-helix domain-containing protein mitochondrial-like | 1  | C:GO:0005739                                                                                                                                                                                            | - |              | IPR010625; PTHR13523 (PANTHER)                                                                                                     |
| -                       | -                                                                                | 0  |                                                                                                                                                                                                         |   |              | -                                                                                                                                  |
| Caenorhabditis briggsae | briggsae cbr-asd-2 protein                                                       | 0  |                                                                                                                                                                                                         |   | F:GO:0003723 | -                                                                                                                                  |
| -                       | -                                                                                | 0  |                                                                                                                                                                                                         |   |              | -                                                                                                                                  |
| Homo sapiens            | gpi transamidase component pig-t                                                 | 7  | C:GO:0042765;<br>P:GO:0016255;<br>C:GO:0016023;<br>F:GO:0005515;<br>P:GO:0051402;<br>P:GO:0030182;<br>F:GO:0003923                                                                                      | - |              | -                                                                                                                                  |

|                         |                                                            |    |                                                                                                                                                                                                         |                                                                 |                                                                                                |
|-------------------------|------------------------------------------------------------|----|---------------------------------------------------------------------------------------------------------------------------------------------------------------------------------------------------------|-----------------------------------------------------------------|------------------------------------------------------------------------------------------------|
| Caenorhabditis briggsae | elegans protein partially confirmed by transcript evidence | 0  |                                                                                                                                                                                                         |                                                                 | G3DSA:2.40.30.10 (GENE3D), PTHR19370 (PANTHER), PTHR19370:SF1 (PANTHER)                        |
| Ancylostoma caninum     | secreted protein asp-2                                     | 0  |                                                                                                                                                                                                         | P:GO:0040011;<br>C:GO:0005576                                   | IPR001283; IPR014044;<br>PTHR10334:SF11 (PANTHER)                                              |
| Ancylostoma caninum     | secreted protein asp-2                                     | 0  |                                                                                                                                                                                                         | P:GO:0040011;<br>C:GO:0005576                                   | IPR001283; IPR014044;<br>PTHR10334:SF11 (PANTHER), SignalP (SIGNALP)                           |
| Ancylostoma caninum     | secreted protein asp-2                                     | 0  |                                                                                                                                                                                                         | P:GO:0040011;<br>C:GO:0005576                                   | IPR001283; IPR014044;<br>PTHR10334:SF11 (PANTHER)                                              |
| Branchiostoma floridae  | set binding factor 1                                       | 12 | F:GO:0008239;<br>P:GO:0006470;<br>C:GO:0016021;<br>F:GO:0046872;<br>P:GO:0001558;<br>P:GO:0007283;<br>P:GO:0006508;<br>F:GO:0008138;<br>F:GO:0008235;<br>F:GO:0016805;<br>C:GO:0005634;<br>F:GO:0001691 | -                                                               | EC:3.4.13.0<br>IPR017906; PTHR10807 (PANTHER), PTHR10807:SF4 (PANTHER), SSF52799 (SUPERFAMILY) |
| Caenorhabditis briggsae | ankyrin repeats- partial                                   | 4  | C:GO:0016021;<br>F:GO:0005216;<br>P:GO:0006811;<br>P:GO:0055085                                                                                                                                         | -                                                               | SignalP (SIGNALP)                                                                              |
|                         | -                                                          | 0  |                                                                                                                                                                                                         |                                                                 | SignalP (SIGNALP)                                                                              |
|                         | -                                                          | 0  |                                                                                                                                                                                                         |                                                                 | -                                                                                              |
|                         | -                                                          | 0  |                                                                                                                                                                                                         |                                                                 | -                                                                                              |
| Caenorhabditis briggsae | elegans protein confirmed by transcript evidence           | 0  |                                                                                                                                                                                                         | P:GO:0045449;<br>F:GO:0003700;<br>C:GO:0005634;<br>F:GO:0003677 | IPR008895                                                                                      |
| Caenorhabditis remanei  | d-2-hydroxyglutarate mitochondrial precursor               | 3  | F:GO:0016491;<br>C:GO:0016020;<br>F:GO:0050660                                                                                                                                                          | -                                                               | SignalP (SIGNALP)                                                                              |
|                         | -                                                          | 0  |                                                                                                                                                                                                         |                                                                 | -                                                                                              |
|                         | -                                                          | 0  |                                                                                                                                                                                                         |                                                                 | -                                                                                              |
|                         | -                                                          | 0  |                                                                                                                                                                                                         |                                                                 | -                                                                                              |
|                         | -                                                          | 0  |                                                                                                                                                                                                         |                                                                 | SignalP (SIGNALP)                                                                              |
| Caenorhabditis elegans  | c2 domain containing protein                               | 0  |                                                                                                                                                                                                         |                                                                 | -                                                                                              |
|                         | -                                                          | 0  |                                                                                                                                                                                                         |                                                                 | SignalP (SIGNALP)                                                                              |
| Caenorhabditis remanei  | rte-1 element                                              | 0  |                                                                                                                                                                                                         | F:GO:0003723;<br>P:GO:0006278;<br>F:GO:0004519;<br>F:GO:0003964 | -                                                                                              |
| Caenorhabditis elegans  | elegans protein confirmed by transcript evidence           | 0  |                                                                                                                                                                                                         |                                                                 | -                                                                                              |
|                         | -                                                          | 0  |                                                                                                                                                                                                         |                                                                 | -                                                                                              |
|                         | -                                                          | 0  |                                                                                                                                                                                                         |                                                                 | -                                                                                              |
|                         | -                                                          | 0  |                                                                                                                                                                                                         |                                                                 | -                                                                                              |
|                         | -                                                          | 0  |                                                                                                                                                                                                         |                                                                 | -                                                                                              |
| Caenorhabditis elegans  | briggsae cbr-dep-1 protein                                 | 5  | F:GO:0004725;<br>P:GO:0040026;<br>P:GO:0040027;<br>P:GO:0006470;<br>C:GO:0016021                                                                                                                        | -                                                               | EC:3.1.3.48 -                                                                                  |



|                         |                                                        |   |                                                                                                                                     |                                                                                                                                                                                                                                           |                                                                                               |
|-------------------------|--------------------------------------------------------|---|-------------------------------------------------------------------------------------------------------------------------------------|-------------------------------------------------------------------------------------------------------------------------------------------------------------------------------------------------------------------------------------------|-----------------------------------------------------------------------------------------------|
|                         | -                                                      | 0 |                                                                                                                                     |                                                                                                                                                                                                                                           | SignalP (SIGNALP)                                                                             |
|                         | -                                                      | 0 |                                                                                                                                     |                                                                                                                                                                                                                                           | -                                                                                             |
| Caenorhabditis briggsae | ribosome biogenesis protein brx1 homolog               | 6 | P:GO:0009987;<br>P:GO:0040010;<br>F:GO:0005488;<br>P:GO:0040035;<br>P:GO:0002119;<br>P:GO:0009792                                   | -                                                                                                                                                                                                                                         | IPR004154; IPR007109; PTHR13634 (PANTHER)                                                     |
|                         | -                                                      | 0 |                                                                                                                                     |                                                                                                                                                                                                                                           | -                                                                                             |
|                         | -                                                      | 0 |                                                                                                                                     |                                                                                                                                                                                                                                           | -                                                                                             |
| Caenorhabditis remanei  | briggsae cbr-rhgf-1 protein                            | 5 | F:GO:0046872;<br>F:GO:0005089;<br>C:GO:0005622;<br>F:GO:0005515;<br>P:GO:0035023                                                    | -                                                                                                                                                                                                                                         | IPR002219; G3DSA:3.30.60.20 (GENE3D), SSF57889 (SUPERFAMILY)                                  |
| Gibberella zeae PH-1    | histone acetyltransferase myst2                        | 0 |                                                                                                                                     | F:GO:0016740;<br>C:GO:0000785;<br>F:GO:0003682;<br>F:GO:0003700;<br>C:GO:0005634;<br>F:GO:0003677;<br>P:GO:0006333;<br>F:GO:0008270;<br>P:GO:0006355;<br>F:GO:0016747;<br>C:GO:0005622;<br>F:GO:0005515;<br>F:GO:0046872;<br>P:GO:0045449 | IPR002717; IPR016181; PTHR10615 (PANTHER), PTHR10615:SF28 (PANTHER)                           |
|                         | -                                                      | 0 |                                                                                                                                     |                                                                                                                                                                                                                                           | -                                                                                             |
|                         | -                                                      | 0 |                                                                                                                                     |                                                                                                                                                                                                                                           | -                                                                                             |
|                         | -                                                      | 0 |                                                                                                                                     |                                                                                                                                                                                                                                           | -                                                                                             |
|                         | -                                                      | 0 |                                                                                                                                     |                                                                                                                                                                                                                                           | -                                                                                             |
|                         | -                                                      | 0 |                                                                                                                                     |                                                                                                                                                                                                                                           | SignalP (SIGNALP)                                                                             |
| Ascaris suum            | translation elongation factor tu                       | 8 | C:GO:0005737;<br>P:GO:0009792;<br>F:GO:0003746;<br>F:GO:0005525;<br>P:GO:0040010;<br>P:GO:0000003;<br>P:GO:0006414;<br>F:GO:0003924 | EC:3.6.5.1;<br>EC:3.6.5.2;<br>EC:3.6.5.3;<br>EC:3.6.5.4                                                                                                                                                                                   | IPR000795; IPR004541; G3DSA:3.40.50.300 (GENE3D), PTHR23115 (PANTHER), SSF52540 (SUPERFAMILY) |
|                         | -                                                      | 0 |                                                                                                                                     |                                                                                                                                                                                                                                           | -                                                                                             |
| Caenorhabditis elegans  | hypothetical protein F08A10.1 [Caenorhabditis elegans] | 2 | F:GO:0005267;<br>C:GO:0016020                                                                                                       | -                                                                                                                                                                                                                                         | -                                                                                             |
|                         | -                                                      | 0 |                                                                                                                                     |                                                                                                                                                                                                                                           | SignalP (SIGNALP)                                                                             |
| Homo sapiens            | slc2a4 regulator                                       | 6 | C:GO:0005737;<br>F:GO:0003700;<br>F:GO:0003677;<br>C:GO:0005634;<br>F:GO:0008270;<br>P:GO:0006355                                   | -                                                                                                                                                                                                                                         | PTHR13006 (PANTHER)                                                                           |

|                          |                                                                                                |   |                                                                                                                                     |                                                                                                                                                                       |            |                                                                                                                                                             |
|--------------------------|------------------------------------------------------------------------------------------------|---|-------------------------------------------------------------------------------------------------------------------------------------|-----------------------------------------------------------------------------------------------------------------------------------------------------------------------|------------|-------------------------------------------------------------------------------------------------------------------------------------------------------------|
| Saccoglossus kowalevskii | sphk1 (sphingosine ki-se 1) d-erythro-sphingosine ki-se diacylglycerol ki-se sphinganine ki-se | 0 |                                                                                                                                     | F:GO:0016740;<br>C:GO:0005773;<br>F:GO:0004143;<br>P:GO:0009845;<br>P:GO:0009737;<br>C:GO:0009705;<br>F:GO:0016301;<br>F:GO:0008481;<br>F:GO:0017050;<br>P:GO:0007205 |            | -                                                                                                                                                           |
| Caenorhabditis elegans   | hypothetical protein R01H2.7 [Caenorhabditis elegans]                                          | 0 |                                                                                                                                     |                                                                                                                                                                       |            | -                                                                                                                                                           |
| Ciona intestinalis       | sp4 protein                                                                                    | 0 |                                                                                                                                     |                                                                                                                                                                       |            | -                                                                                                                                                           |
| Caenorhabditis elegans   | aldehyde dehydroge-se family member (alh-4)                                                    | 7 | F:GO:0004030;<br>C:GO:0005811;<br>P:GO:0008218;<br>P:GO:0055114;<br>C:GO:0016021;<br>P:GO:0006081;<br>C:GO:0005739                  | -                                                                                                                                                                     | EC:1.2.1.5 | -                                                                                                                                                           |
| -                        | -                                                                                              | 0 |                                                                                                                                     |                                                                                                                                                                       |            | SignalP (SIGNALP)                                                                                                                                           |
| -                        | -                                                                                              | 0 |                                                                                                                                     |                                                                                                                                                                       |            | -                                                                                                                                                           |
| -                        | -                                                                                              | 0 |                                                                                                                                     |                                                                                                                                                                       |            | -                                                                                                                                                           |
| Caenorhabditis briggsae  | elegans protein partially confirmed by transcript evidence                                     | 8 | P:GO:0055085;<br>C:GO:0016021;<br>F:GO:0015662;<br>P:GO:0006754;<br>F:GO:0005524;<br>P:GO:0015914;<br>F:GO:0000287;<br>F:GO:0004012 | -                                                                                                                                                                     | EC:3.6.3.1 | IPR001757; IPR008250;<br>G3DSA:2.70.150.10 (GENE3D),<br>PTHR11939:SF18 (PANTHER),<br>SSF81653 (SUPERFAMILY), SSF81665<br>(SUPERFAMILY)                      |
| -                        | -                                                                                              | 0 |                                                                                                                                     |                                                                                                                                                                       |            | SignalP (SIGNALP)                                                                                                                                           |
| -                        | -                                                                                              | 0 |                                                                                                                                     |                                                                                                                                                                       |            | -                                                                                                                                                           |
| Homo sapiens             | af061732_1my029 protein                                                                        | 0 |                                                                                                                                     |                                                                                                                                                                       |            | SignalP (SIGNALP)                                                                                                                                           |
| -                        | -                                                                                              | 0 |                                                                                                                                     |                                                                                                                                                                       |            | -                                                                                                                                                           |
| -                        | -                                                                                              | 0 |                                                                                                                                     |                                                                                                                                                                       |            | SignalP (SIGNALP)                                                                                                                                           |
| Caenorhabditis elegans   | clc-type chloride channel family member (clh-3)                                                | 7 | C:GO:0005902;<br>C:GO:0005886;<br>F:GO:0005515;<br>F:GO:0005254;<br>C:GO:0005626;<br>C:GO:0015629;<br>P:GO:0006821                  | -                                                                                                                                                                     |            | -                                                                                                                                                           |
| -                        | -                                                                                              | 0 |                                                                                                                                     |                                                                                                                                                                       |            | -                                                                                                                                                           |
| Caenorhabditis remanei   | troponin i                                                                                     | 0 |                                                                                                                                     |                                                                                                                                                                       |            | -                                                                                                                                                           |
| -                        | -                                                                                              | 0 |                                                                                                                                     |                                                                                                                                                                       |            | -                                                                                                                                                           |
| Caenorhabditis elegans   | briggsae cbr-rgs-6 protein                                                                     | 0 |                                                                                                                                     | F:GO:0004871                                                                                                                                                          |            | PTHR10845 (PANTHER),<br>PTHR10845:SF14 (PANTHER)                                                                                                            |
| Caenorhabditis elegans   | kiaa0975 protein                                                                               | 4 | P:GO:0009987;<br>C:GO:0005829;<br>F:GO:0005515;<br>C:GO:0005886                                                                     | -                                                                                                                                                                     |            | IPR001611; PRO0019 (PRINTS),<br>G3DSA:3.80.10.10 (GENE3D),<br>PTHR15454 (PANTHER),<br>PTHR15454:SF6 (PANTHER), PS51450<br>(PROFILE), SSF52058 (SUPERFAMILY) |
| -                        | -                                                                                              | 0 |                                                                                                                                     |                                                                                                                                                                       |            | -                                                                                                                                                           |
| -                        | -                                                                                              | 0 |                                                                                                                                     |                                                                                                                                                                       |            | -                                                                                                                                                           |
| Caenorhabditis briggsae  | elegans protein partially confirmed by transcript evidence                                     | 1 | P:GO:0019915                                                                                                                        | -                                                                                                                                                                     |            | IPR010291; PTHR23294 (PANTHER)                                                                                                                              |
| -                        | -                                                                                              | 0 |                                                                                                                                     |                                                                                                                                                                       |            | SignalP (SIGNALP)                                                                                                                                           |

|                           |                                                         |    |                                                                                                                                                                                        |                                                                                                                                                                                                                                           |             |                                                                                                                     |
|---------------------------|---------------------------------------------------------|----|----------------------------------------------------------------------------------------------------------------------------------------------------------------------------------------|-------------------------------------------------------------------------------------------------------------------------------------------------------------------------------------------------------------------------------------------|-------------|---------------------------------------------------------------------------------------------------------------------|
| Brugia malayi             | nodal modulator 2                                       | 4  | C:GO:0016021;<br>P:GO:0000003;<br>F:GO:0030246;<br>F:GO:0004180                                                                                                                        | -                                                                                                                                                                                                                                         | -           | -                                                                                                                   |
| -                         | -                                                       | 0  | -                                                                                                                                                                                      | -                                                                                                                                                                                                                                         | -           | -                                                                                                                   |
| Caenorhabditis elegans    | elegans protein confirmed by transcript evidence        | 0  | -                                                                                                                                                                                      | P:GO:0007155;<br>C:GO:0016021;<br>C:GO:0016020                                                                                                                                                                                            | -           | IPR002159; PTHR11923:SF6 (PANTHER)                                                                                  |
| Caenorhabditis elegans    | briggsae cbr-wrs-2 protein                              | 0  | -                                                                                                                                                                                      | F:GO:0016874;<br>P:GO:0006418;<br>F:GO:0004830;<br>F:GO:0000166;<br>C:GO:0005737;<br>P:GO:0006412;<br>F:GO:0008270;<br>F:GO:0005524;<br>P:GO:0006436;<br>P:GO:0007031;<br>F:GO:0005515;<br>F:GO:0004812;<br>F:GO:0046872;<br>C:GO:0005778 | -           | IPR013090                                                                                                           |
| Caenorhabditis briggsae   | Hypothetical protein CBG12847 [Caenorhabditis briggsae] | 0  | -                                                                                                                                                                                      | -                                                                                                                                                                                                                                         | -           | -                                                                                                                   |
| Caenorhabditis remanei    | cre-nhr-62 protein                                      | 0  | -                                                                                                                                                                                      | -                                                                                                                                                                                                                                         | -           | -                                                                                                                   |
| Caenorhabditis briggsae   | mitochondrial ribosomal protein l24                     | 11 | P:GO:0006412;<br>C:GO:0005840;<br>C:GO:0005739;<br>P:GO:0040007;<br>F:GO:0003735;<br>P:GO:0000003;<br>P:GO:0002119;<br>F:GO:0005515;<br>P:GO:0006898;<br>P:GO:0009792;<br>P:GO:0016246 | -                                                                                                                                                                                                                                         | EC:3.6.5.3  | IPR003256; IPR005824; IPR005825;<br>IPR008991; IPR014723; IPR020894                                                 |
| -                         | -                                                       | 0  | -                                                                                                                                                                                      | -                                                                                                                                                                                                                                         | -           | -                                                                                                                   |
| Caenorhabditis elegans    | uncoordinated family member (unc-22)                    | 3  | P:GO:0006468;<br>F:GO:0005524;<br>F:GO:0004674                                                                                                                                         | -                                                                                                                                                                                                                                         | EC:2.7.11.0 | PTHR19900 (PANTHER),<br>PTHR19900:SF7 (PANTHER)                                                                     |
| Anthopleura elegantissima | plasma glutamate carboxypeptidase precursor             | 7  | C:GO:0005615;<br>F:GO:0046872;<br>F:GO:0004180;<br>F:GO:0004177;<br>P:GO:0006508;<br>F:GO:0008237;<br>P:GO:0042246                                                                     | -                                                                                                                                                                                                                                         | EC:3.4.11.0 | IPR007484; G3DSA:3.40.630.10 (GENE3D),<br>PTHR12053 (PANTHER),<br>PTHR12053:SF1 (PANTHER), SSF53187 (SUPERFAMILY)   |
| -                         | -                                                       | 0  | -                                                                                                                                                                                      | -                                                                                                                                                                                                                                         | -           | SignalP (SIGNALP)                                                                                                   |
| -                         | -                                                       | 0  | -                                                                                                                                                                                      | -                                                                                                                                                                                                                                         | -           | -                                                                                                                   |
| -                         | -                                                       | 0  | -                                                                                                                                                                                      | -                                                                                                                                                                                                                                         | -           | SignalP (SIGNALP)                                                                                                   |
| -                         | -                                                       | 0  | -                                                                                                                                                                                      | -                                                                                                                                                                                                                                         | -           | IPR000615                                                                                                           |
| -                         | -                                                       | 0  | -                                                                                                                                                                                      | -                                                                                                                                                                                                                                         | -           | -                                                                                                                   |
| -                         | -                                                       | 0  | -                                                                                                                                                                                      | -                                                                                                                                                                                                                                         | -           | -                                                                                                                   |
| Caenorhabditis briggsae   | germi-l center ki-se family member (gck-1)              | 4  | P:GO:0006468;<br>F:GO:0005515;<br>F:GO:0005524;<br>F:GO:0004674                                                                                                                        | -                                                                                                                                                                                                                                         | EC:2.7.11.0 | IPR000719; IPR011009; IPR017442;<br>G3DSA:1.10.510.10 (GENE3D),<br>PTHR22986 (PANTHER),<br>PTHR22986:SF95 (PANTHER) |
| -                         | -                                                       | 0  | -                                                                                                                                                                                      | -                                                                                                                                                                                                                                         | -           | -                                                                                                                   |
| -                         | -                                                       | 0  | -                                                                                                                                                                                      | -                                                                                                                                                                                                                                         | -           | SignalP (SIGNALP)                                                                                                   |

|                         |                                                             |    |                                                                                                                                                                                                         |                                                                                                                                     |                             |                                                                                                    |
|-------------------------|-------------------------------------------------------------|----|---------------------------------------------------------------------------------------------------------------------------------------------------------------------------------------------------------|-------------------------------------------------------------------------------------------------------------------------------------|-----------------------------|----------------------------------------------------------------------------------------------------|
| Monodelphis domestica   | chkb protein                                                | 0  |                                                                                                                                                                                                         |                                                                                                                                     |                             | IPR002573; G3DSA:3.90.1200.10 (GENE3D), PTHR22603:SF7 (PANTHER)                                    |
|                         | -                                                           | 0  |                                                                                                                                                                                                         |                                                                                                                                     |                             | SignalP (SIGNALP)                                                                                  |
| Rattus norvegicus       | isoform cra_b                                               | 12 | C:GO:0005737;<br>C:GO:0005730;<br>P:GO:0008380;<br>C:GO:0030530;<br>C:GO:0005654;<br>C:GO:0005681;<br>F:GO:0003723;<br>F:GO:0005515;<br>F:GO:0003697;<br>P:GO:0006397;<br>P:GO:0007165;<br>P:GO:0044419 | -                                                                                                                                   |                             | PTHR10288 (PANTHER),<br>PTHR10288:SF38 (PANTHER)                                                   |
| Caenorhabditis elegans  | abhydrolase domain-containing protein fam108a precursor     | 0  |                                                                                                                                                                                                         | P:GO:0006508;<br>F:GO:0003674;<br>F:GO:0008236;<br>P:GO:0008152;<br>F:GO:0016787;<br>P:GO:0008150;<br>C:GO:0005576;<br>C:GO:0005575 |                             | G3DSA:3.40.50.1820 (GENE3D),<br>PTHR12277 (PANTHER),<br>PTHR12277:SF8 (PANTHER)                    |
| Brugia malayi           | dedicator of cytokinesis protein 6                          | 2  | P:GO:0008152;<br>F:GO:0005488                                                                                                                                                                           | -                                                                                                                                   |                             | PTHR23317 (PANTHER),<br>PTHR23317:SF27 (PANTHER)                                                   |
|                         | -                                                           | 0  |                                                                                                                                                                                                         |                                                                                                                                     |                             | -                                                                                                  |
|                         | -                                                           | 0  |                                                                                                                                                                                                         |                                                                                                                                     |                             | SignalP (SIGNALP)                                                                                  |
|                         | -                                                           | 0  |                                                                                                                                                                                                         |                                                                                                                                     |                             | -                                                                                                  |
| Caenorhabditis elegans  | aspartyl protease family member (asp-2)                     | 3  | P:GO:0008219;<br>F:GO:0005515;<br>F:GO:0008233                                                                                                                                                          | -                                                                                                                                   |                             | -                                                                                                  |
| Steinernema carpcapsae  | briggsae cbr-asp-2 protein                                  | 4  | P:GO:0008219;<br>P:GO:0006508;<br>F:GO:0004190;<br>F:GO:0005515                                                                                                                                         | -                                                                                                                                   | EC:3.4.23.0                 | -                                                                                                  |
|                         | -                                                           | 0  |                                                                                                                                                                                                         |                                                                                                                                     |                             | -                                                                                                  |
|                         | -                                                           | 0  |                                                                                                                                                                                                         |                                                                                                                                     |                             | -                                                                                                  |
| Caenorhabditis elegans  | eb module family protein                                    | 0  |                                                                                                                                                                                                         | F:GO:0008061;<br>P:GO:0006030;<br>P:GO:0005975;<br>F:GO:0016810;<br>F:GO:0003824;<br>C:GO:0005576                                   |                             | -                                                                                                  |
| Caenorhabditis briggsae | ufsp_caebr ame: full=probable ufm1-specific protease short= | 0  |                                                                                                                                                                                                         | F:GO:0016787;<br>F:GO:0008234;<br>F:GO:0008233                                                                                      |                             | -                                                                                                  |
| Loa loa                 | protein ki-se domain containing protein                     | 11 | P:GO:0006468;<br>C:GO:0005929;<br>C:GO:0030425;<br>F:GO:0005515;<br>P:GO:0034606;<br>F:GO:0004713;<br>C:GO:0030424;<br>P:GO:0034608;<br>F:GO:0005524;<br>C:GO:0043025;<br>F:GO:0004674                  | -                                                                                                                                   | EC:2.7.10.0;<br>EC:2.7.11.0 | IPR000719; IPR001245; IPR008266;<br>IPR011009; IPR020685; IPR020764;<br>G3DSA:1.10.510.10 (GENE3D) |

|                         |                                                                                                                                                             |    |                                                                                                                                                                                                                                                                                                                                                 |   |                                                |                                                                       |
|-------------------------|-------------------------------------------------------------------------------------------------------------------------------------------------------------|----|-------------------------------------------------------------------------------------------------------------------------------------------------------------------------------------------------------------------------------------------------------------------------------------------------------------------------------------------------|---|------------------------------------------------|-----------------------------------------------------------------------|
| Caenorhabditis remanei  | briggsae cbr-spo-11 protein                                                                                                                                 | 5  | P:GO:0006259;<br>F:GO:0003677;<br>F:GO:0005524;<br>C:GO:0005694;<br>F:GO:0003824                                                                                                                                                                                                                                                                | - |                                                | IPR002815; G3DSA:3.40.1360.10<br>(GENE3D)                             |
| -                       | -                                                                                                                                                           | 0  |                                                                                                                                                                                                                                                                                                                                                 |   |                                                | -                                                                     |
| Caenorhabditis elegans  | elegans protein partially confirmed by transcript evidence                                                                                                  | 0  |                                                                                                                                                                                                                                                                                                                                                 |   | P:GO:0032313;<br>F:GO:0005097;<br>C:GO:0005622 | -                                                                     |
| -                       | -                                                                                                                                                           | 0  |                                                                                                                                                                                                                                                                                                                                                 |   |                                                | -                                                                     |
| -                       | -                                                                                                                                                           | 0  |                                                                                                                                                                                                                                                                                                                                                 |   |                                                | -                                                                     |
| Caenorhabditis elegans  | xylulose ki-se                                                                                                                                              | 1  | F:GO:0016773                                                                                                                                                                                                                                                                                                                                    | - | EC:2.7.1.0                                     | IPR000577; PTHR10196:SF5<br>(PANTHER)                                 |
| Homo sapiens            | clu protein                                                                                                                                                 | 20 | P:GO:0009615;<br>P:GO:0051788;<br>P:GO:0048812;<br>C:GO:0034366;<br>P:GO:0045597;<br>P:GO:0032463;<br>P:GO:0043691;<br>P:GO:0031018;<br>C:GO:0016235;<br>P:GO:0006916;<br>P:GO:0008284;<br>P:GO:0006629;<br>P:GO:0006958;<br>F:GO:0051787;<br>C:GO:0048471;<br>P:GO:0001836;<br>P:GO:0045087;<br>P:GO:0006979;<br>C:GO:0031012;<br>C:GO:0005739 | - |                                                | SignalP (SIGNALP)                                                     |
| Caenorhabditis briggsae | acase_caebr ame: full=alkaline ceramidase short= ase ame:<br>full=alkaline n-acylsphingosine amidohydrolase ame:<br>full=alkaline acylsphingosine deacylase | 3  | P:GO:0006672;<br>C:GO:0016021;<br>F:GO:0017040                                                                                                                                                                                                                                                                                                  | - | EC:3.5.1.23                                    | -                                                                     |
| -                       | -                                                                                                                                                           | 0  |                                                                                                                                                                                                                                                                                                                                                 |   |                                                | SignalP (SIGNALP)                                                     |
| Homo sapiens            | protein yif1a                                                                                                                                               | 6  | C:GO:0000139;<br>C:GO:0005789;<br>C:GO:0005793;<br>P:GO:0016192;<br>C:GO:0016021;<br>P:GO:0015031                                                                                                                                                                                                                                               | - |                                                | IPR005578                                                             |
| Caenorhabditis briggsae | briggsae cbr-tat- protein                                                                                                                                   | 8  | F:GO:0008270;<br>C:GO:0016021;<br>F:GO:0015662;<br>P:GO:0006754;<br>F:GO:0005524;<br>P:GO:0015914;<br>F:GO:0000287;<br>F:GO:0004012                                                                                                                                                                                                             | - | EC:3.6.3.1                                     | IPR001757; G3DSA:2.70.150.10<br>(GENE3D), PTHR11939:SF14<br>(PANTHER) |
| -                       | -                                                                                                                                                           | 0  |                                                                                                                                                                                                                                                                                                                                                 |   |                                                | SignalP (SIGNALP)                                                     |
| -                       | -                                                                                                                                                           | 0  |                                                                                                                                                                                                                                                                                                                                                 |   |                                                | SignalP (SIGNALP)                                                     |
| -                       | -                                                                                                                                                           | 0  |                                                                                                                                                                                                                                                                                                                                                 |   |                                                | SignalP (SIGNALP)                                                     |



|                               |                                                                           |   |                                                                                                   |                                                                                                                                                                                                                          |                                                         |                                                                                                             |
|-------------------------------|---------------------------------------------------------------------------|---|---------------------------------------------------------------------------------------------------|--------------------------------------------------------------------------------------------------------------------------------------------------------------------------------------------------------------------------|---------------------------------------------------------|-------------------------------------------------------------------------------------------------------------|
| Caenorhabditis elegans        | briggsae cbr-nhl-1 protein                                                | 0 |                                                                                                   | F:GO:0046872;<br>P:GO:0006915;<br>F:GO:0008270;<br>F:GO:0005515                                                                                                                                                          |                                                         | -                                                                                                           |
| Caenorhabditis briggsae       | elegans protein partially confirmed by transcript evidence                | 0 |                                                                                                   |                                                                                                                                                                                                                          |                                                         | IPR004988                                                                                                   |
| Caenorhabditis briggsae       | Hypothetical protein CBG12847 [Caenorhabditis briggsae]                   | 0 |                                                                                                   |                                                                                                                                                                                                                          |                                                         | -                                                                                                           |
|                               | -                                                                         | 0 |                                                                                                   |                                                                                                                                                                                                                          |                                                         | -                                                                                                           |
| Caenorhabditis remanei        | briggsae cbr-mup-2 protein                                                | 0 |                                                                                                   | P:GO:0040017;<br>P:GO:0040011                                                                                                                                                                                            |                                                         | SignalP (SIGNALP)                                                                                           |
|                               | -                                                                         | 0 |                                                                                                   |                                                                                                                                                                                                                          |                                                         | -                                                                                                           |
|                               | -                                                                         | 0 |                                                                                                   |                                                                                                                                                                                                                          |                                                         | -                                                                                                           |
|                               | -                                                                         | 0 |                                                                                                   |                                                                                                                                                                                                                          |                                                         | -                                                                                                           |
| Xenopus (Silurana) tropicalis | tp53-regulating ki-se                                                     | 0 |                                                                                                   | F:GO:0004674;<br>C:GO:0016020;<br>P:GO:0009103;<br>F:GO:0004672;<br>C:GO:0005634;<br>P:GO:0006468;<br>F:GO:0005524;<br>F:GO:0016301;<br>F:GO:0004713;<br>F:GO:0002039;<br>F:GO:0003824;<br>F:GO:0005515;<br>F:GO:0016773 |                                                         | -                                                                                                           |
|                               | -                                                                         | 0 |                                                                                                   |                                                                                                                                                                                                                          |                                                         | -                                                                                                           |
| Caenorhabditis elegans        | l2hdh_caeel ame: full=l-2-hydroxyglutarate mitochondrial flags: precursor | 4 | P:GO:0055114;<br>C:GO:0005739;<br>F:GO:0005488;<br>F:GO:0047545                                   | -                                                                                                                                                                                                                        | EC:1.1.99.2                                             | IPR006076; G3DSA:3.50.50.60 (GENE3D), PTHR13847 (PANTHER), PTHR13847:SF23 (PANTHER), SSF51905 (SUPERFAMILY) |
|                               | -                                                                         | 0 |                                                                                                   |                                                                                                                                                                                                                          |                                                         | IPR000276                                                                                                   |
|                               | -                                                                         | 0 |                                                                                                   |                                                                                                                                                                                                                          |                                                         | -                                                                                                           |
| Caenorhabditis elegans        | hypothetical protein W03G9.5 [Caenorhabditis elegans]                     | 0 |                                                                                                   | F:GO:0004672;<br>F:GO:0005524;<br>P:GO:0006468;<br>F:GO:0004674                                                                                                                                                          |                                                         | -                                                                                                           |
|                               | -                                                                         | 0 |                                                                                                   |                                                                                                                                                                                                                          |                                                         | -                                                                                                           |
| Caenorhabditis briggsae       | briggsae cbr-nol-10 protein                                               | 0 |                                                                                                   | P:GO:0000003;<br>P:GO:0040010;<br>P:GO:0009792;<br>P:GO:0002119;<br>P:GO:0040007;<br>P:GO:0018991;<br>C:GO:0005634                                                                                                       |                                                         | IPR012580; PTHR14927 (PANTHER)                                                                              |
| Loa loa                       | amino acids transporter                                                   | 3 | P:GO:0019915;<br>P:GO:0006810;<br>C:GO:0005886                                                    | -                                                                                                                                                                                                                        |                                                         | IPR002293; PTHR11785:SF74 (PANTHER), SignalP (SIGNALP)                                                      |
|                               | -                                                                         | 0 |                                                                                                   |                                                                                                                                                                                                                          |                                                         | -                                                                                                           |
| Caenorhabditis remanei        | alpha-tubulin                                                             | 6 | P:GO:0007018;<br>F:GO:0005525;<br>P:GO:0051258;<br>F:GO:0005198;<br>F:GO:0003924;<br>C:GO:0005874 | -                                                                                                                                                                                                                        | EC:3.6.5.1;<br>EC:3.6.5.2;<br>EC:3.6.5.3;<br>EC:3.6.5.4 | IPR000217; IPR002452; IPR003008; IPR008280                                                                  |

|                         |                                                     |    |                                                                                                                                                                                        |                                                                                                                                                                                        |            |                                                                                                                                                                     |
|-------------------------|-----------------------------------------------------|----|----------------------------------------------------------------------------------------------------------------------------------------------------------------------------------------|----------------------------------------------------------------------------------------------------------------------------------------------------------------------------------------|------------|---------------------------------------------------------------------------------------------------------------------------------------------------------------------|
| Caenorhabditis briggsae | mitochondrial carrier protein                       | 6  | F:GO:0005488;<br>C:GO:0005743;<br>P:GO:0055085;<br>C:GO:0016021;<br>P:GO:0019915;<br>F:GO:0005215                                                                                      | -                                                                                                                                                                                      |            | IPR001993; IPR018108;<br>G3DSA:1.50.40.10 (GENE3D),<br>PTHR11896:SF75 (PANTHER)                                                                                     |
|                         | -                                                   | 0  |                                                                                                                                                                                        |                                                                                                                                                                                        |            | -                                                                                                                                                                   |
| Caenorhabditis elegans  | briggsae cbr-lap-1 protein                          | 2  | C:GO:0005622;<br>F:GO:0042802                                                                                                                                                          | -                                                                                                                                                                                      |            | IPR000819; IPR011356;<br>G3DSA:3.40.50.10590 (GENE3D),<br>G3DSA:3.40.630.10 (GENE3D),<br>PTHR11963 (PANTHER),<br>PTHR11963:SF4 (PANTHER), SSF53187<br>(SUPERFAMILY) |
| Caenorhabditis remanei  | amp-binding enzyme family protein                   | 2  | F:GO:0003824;<br>P:GO:0008152                                                                                                                                                          | -                                                                                                                                                                                      |            | -                                                                                                                                                                   |
| Homo sapiens            | -scent polypeptide-associated complex subunit alpha | 7  | F:GO:0003677;<br>P:GO:0006350;<br>C:GO:0005854;<br>C:GO:0005634;<br>P:GO:0006412;<br>P:GO:0044419;<br>P:GO:0015031                                                                     | -                                                                                                                                                                                      | EC:3.6.5.3 | IPR002715                                                                                                                                                           |
|                         | -                                                   | 0  |                                                                                                                                                                                        |                                                                                                                                                                                        |            | -                                                                                                                                                                   |
| Caenorhabditis remanei  | cre-dsc-4 protein                                   | 0  |                                                                                                                                                                                        | P:GO:0040011                                                                                                                                                                           |            | -                                                                                                                                                                   |
|                         | -                                                   | 0  |                                                                                                                                                                                        |                                                                                                                                                                                        |            | -                                                                                                                                                                   |
|                         | -                                                   | 0  |                                                                                                                                                                                        |                                                                                                                                                                                        |            | -                                                                                                                                                                   |
|                         | -                                                   | 0  |                                                                                                                                                                                        |                                                                                                                                                                                        |            | -                                                                                                                                                                   |
| Callithrix jacchus      | heterogeneous nuclear ribonucleoprotein a2 b1       | 11 | C:GO:0005737;<br>C:GO:0005730;<br>P:GO:0050658;<br>C:GO:0030530;<br>C:GO:0005654;<br>C:GO:0005681;<br>F:GO:0003723;<br>F:GO:0005515;<br>F:GO:0043047;<br>P:GO:0000398;<br>F:GO:0000166 | -                                                                                                                                                                                      |            | SignalP (SIGNALP)                                                                                                                                                   |
|                         | -                                                   | 0  |                                                                                                                                                                                        |                                                                                                                                                                                        |            | -                                                                                                                                                                   |
|                         | -                                                   | 0  |                                                                                                                                                                                        |                                                                                                                                                                                        |            | -                                                                                                                                                                   |
| Caenorhabditis elegans  | gamma-interferon inducible lysosomal thiol          | 0  |                                                                                                                                                                                        | C:GO:0005576                                                                                                                                                                           |            | IPR004911; PTHR13234:SF2<br>(PANTHER)                                                                                                                               |
| Caenorhabditis remanei  | briggsae cbr-psr-1 protein                          | 0  |                                                                                                                                                                                        | F:GO:0070815;<br>C:GO:0005634;<br>F:GO:0016702;<br>P:GO:0055114;<br>P:GO:0016568;<br>F:GO:0016491;<br>P:GO:0018395;<br>F:GO:0005515;<br>F:GO:0046872;<br>P:GO:0006350;<br>P:GO:0045449 |            | -                                                                                                                                                                   |
|                         | -                                                   | 0  |                                                                                                                                                                                        |                                                                                                                                                                                        |            | -                                                                                                                                                                   |



|                           |                                                          |   |                                                                                                                                                      |                                                                                                                                                                       |                                   |                                                                                                        |
|---------------------------|----------------------------------------------------------|---|------------------------------------------------------------------------------------------------------------------------------------------------------|-----------------------------------------------------------------------------------------------------------------------------------------------------------------------|-----------------------------------|--------------------------------------------------------------------------------------------------------|
| Caenorhabditis remanei    | briggsae cbr-cdh-1 protein                               | 0 |                                                                                                                                                      | C:GO:0016021;<br>C:GO:0016020;<br>P:GO:0002119;<br>P:GO:0040011;<br>P:GO:0040010;<br>F:GO:0005509;<br>C:GO:0005886;<br>P:GO:0007156;<br>P:GO:0007155                  |                                   | IPR002126; IPR015919; PTHR10596 (PANTHER), PTHR10596:SF77 (PANTHER)                                    |
|                           | -                                                        | 0 |                                                                                                                                                      |                                                                                                                                                                       |                                   | SignalP (SIGNALP)                                                                                      |
| Trichostrongylus vitrinus | serine or cysteine protease inhibitor                    | 2 | F:GO:0004867;<br>F:GO:0008233                                                                                                                        |                                                                                                                                                                       |                                   | IPR000215; G3DSA:3.30.497.10 (GENE3D)                                                                  |
|                           | -                                                        | 0 |                                                                                                                                                      |                                                                                                                                                                       |                                   | -                                                                                                      |
|                           | -                                                        | 0 |                                                                                                                                                      |                                                                                                                                                                       |                                   | SignalP (SIGNALP)                                                                                      |
|                           | -                                                        | 0 |                                                                                                                                                      |                                                                                                                                                                       |                                   | -                                                                                                      |
|                           | -                                                        | 0 |                                                                                                                                                      |                                                                                                                                                                       |                                   | -                                                                                                      |
|                           | -                                                        | 0 |                                                                                                                                                      |                                                                                                                                                                       |                                   | -                                                                                                      |
| Tetraodon nigroviridis    | translocase of outer mitochondrial membrane 70 homolog a | 1 | C:GO:0044464                                                                                                                                         |                                                                                                                                                                       |                                   | IPR011990; IPR013026; IPR019734; PTHR22904 (PANTHER), PTHR22904:SF32 (PANTHER), SSF48452 (SUPERFAMILY) |
| Tetraodon nigroviridis    | translocase of outer mitochondrial membrane 70 homolog a | 1 | C:GO:0044464                                                                                                                                         |                                                                                                                                                                       |                                   | IPR011990; IPR013026; IPR019734; PTHR22904 (PANTHER), PTHR22904:SF32 (PANTHER), SSF48452 (SUPERFAMILY) |
|                           | -                                                        | 0 |                                                                                                                                                      |                                                                                                                                                                       |                                   | SignalP (SIGNALP)                                                                                      |
|                           | -                                                        | 0 |                                                                                                                                                      |                                                                                                                                                                       |                                   | -                                                                                                      |
| Loa loa                   | rb13-6 antigen                                           | 0 |                                                                                                                                                      | C:GO:0016021;<br>C:GO:0016020;<br>F:GO:0016787;<br>F:GO:0003674;<br>F:GO:0004528;<br>F:GO:0003824;<br>C:GO:0005575;<br>F:GO:0004551;<br>P:GO:0008152;<br>P:GO:0008150 |                                   | IPR017849; IPR017850; PTHR10151 (PANTHER)                                                              |
|                           | -                                                        | 0 |                                                                                                                                                      |                                                                                                                                                                       |                                   | -                                                                                                      |
|                           | -                                                        | 0 |                                                                                                                                                      |                                                                                                                                                                       |                                   | -                                                                                                      |
|                           | -                                                        | 0 |                                                                                                                                                      |                                                                                                                                                                       |                                   | -                                                                                                      |
|                           | -                                                        | 0 |                                                                                                                                                      |                                                                                                                                                                       |                                   | SignalP (SIGNALP)                                                                                      |
|                           | -                                                        | 0 |                                                                                                                                                      |                                                                                                                                                                       |                                   | SignalP (SIGNALP)                                                                                      |
| Caenorhabditis briggsae   | briggsae cbr-cdh-1 protein                               | 1 | C:GO:0016020                                                                                                                                         |                                                                                                                                                                       |                                   | -                                                                                                      |
| Caenorhabditis elegans    | dtdp-glucose -dehydratase                                | 9 | P:GO:0002119;<br>P:GO:0006694;<br>F:GO:0003854;<br>P:GO:0018991;<br>P:GO:0045226;<br>P:GO:0040011;<br>F:GO:0050662;<br>P:GO:0040007;<br>F:GO:0008831 |                                                                                                                                                                       | EC:1.1.1.145<br>;<br>EC:1.1.1.133 | IPR001509; G3DSA:3.90.25.10 (GENE3D), PTHR10366 (PANTHER), PTHR10366:SF41 (PANTHER)                    |

|                         |                                                                                      |    |                                                                                                                                                                       |                                                                 |              |                                                                                                             |
|-------------------------|--------------------------------------------------------------------------------------|----|-----------------------------------------------------------------------------------------------------------------------------------------------------------------------|-----------------------------------------------------------------|--------------|-------------------------------------------------------------------------------------------------------------|
| Caenorhabditis elegans  | dihydrolipoamide s-acetyltransferase (e2 component of pyruvate dehydroge-se complex) | 10 | P:GO:0040010;<br>F:GO:0004742;<br>P:GO:0000003;<br>F:GO:0005515;<br>P:GO:0006096;<br>P:GO:0006898;<br>C:GO:0005967;<br>P:GO:0010510;<br>P:GO:0009792;<br>P:GO:0030431 | -                                                               | EC:2.3.1.12  | IPR001078; G3DSA:3.30.559.10 (GENE3D), PTHR23151 (PANTHER), PTHR23151:SF9 (PANTHER), SSF52777 (SUPERFAMILY) |
| Cooperia oncophora      | latrophilin-like protein 2                                                           | 6  | P:GO:0007218;<br>C:GO:0016021;<br>P:GO:0007165;<br>C:GO:0005886;<br>F:GO:0005529;<br>F:GO:0004930                                                                     | -                                                               | -            | -                                                                                                           |
| Ailuropoda melanoleuca  | lysyl oxidase-like 1                                                                 | 7  | F:GO:0005507;<br>C:GO:0005615;<br>P:GO:0055114;<br>F:GO:0016641;<br>C:GO:0005578;<br>P:GO:0018277;<br>F:GO:0005515                                                    | -                                                               | EC:1.4.3.0   | -                                                                                                           |
| -                       | -                                                                                    | 0  | -                                                                                                                                                                     | -                                                               | -            | -                                                                                                           |
| Caenorhabditis briggsae | atp-dependent d- helicase recq                                                       | 5  | F:GO:0008026;<br>F:GO:0003676;<br>F:GO:0005524;<br>P:GO:0006974;<br>P:GO:0006310                                                                                      | -                                                               | -            | IPR004589; PTHR13710:SF6 (PANTHER)                                                                          |
| -                       | -                                                                                    | 0  | -                                                                                                                                                                     | -                                                               | -            | SignalP (SIGNALP)                                                                                           |
| -                       | -                                                                                    | 0  | -                                                                                                                                                                     | -                                                               | -            | -                                                                                                           |
| -                       | -                                                                                    | 0  | -                                                                                                                                                                     | -                                                               | -            | -                                                                                                           |
| -                       | -                                                                                    | 0  | -                                                                                                                                                                     | -                                                               | -            | -                                                                                                           |
| Caenorhabditis elegans  | sh3-domain grb2-like endophilin b2                                                   | 4  | P:GO:0007126;<br>P:GO:0009792;<br>C:GO:0005737;<br>F:GO:0005515                                                                                                       | -                                                               | -            | G3DSA:2.30.30.40 (GENE3D), PTHR10661 (PANTHER), PTHR10661:SF12 (PANTHER)                                    |
| -                       | -                                                                                    | 0  | -                                                                                                                                                                     | -                                                               | -            | -                                                                                                           |
| Brugia malayi           | d- excision repair protein ercc-6                                                    | 3  | F:GO:0005524;<br>F:GO:0004386;<br>F:GO:0003677                                                                                                                        | -                                                               | -            | IPR000330; IPR014021; PTHR10799 (PANTHER), PTHR10799:SF67 (PANTHER), SSF52540 (SUPERFAMILY)                 |
| -                       | -                                                                                    | 0  | -                                                                                                                                                                     | -                                                               | -            | SignalP (SIGNALP)                                                                                           |
| Caenorhabditis elegans  | neuro-l igcam family member (rig-6)                                                  | 0  | -                                                                                                                                                                     | P:GO:0000003;<br>F:GO:0005488;<br>C:GO:0016021;<br>P:GO:0040018 | -            | PTHR10489 (PANTHER), PTHR10489:SF38 (PANTHER)                                                               |
| Caenorhabditis elegans  | elegans protein partially confirmed by transcript evidence                           | 7  | P:GO:0009792;<br>P:GO:0002119;<br>P:GO:0055085;<br>P:GO:0040010;<br>P:GO:0000003;<br>P:GO:0042221;<br>C:GO:0016021                                                    | -                                                               | -            | IPR020846; PTHR10074 (PANTHER), PTHR10074:SF22 (PANTHER), SignalP (SIGNALP)                                 |
| Loa loa                 | alg3 protein                                                                         | 5  | P:GO:0006487;<br>F:GO:0004584;<br>F:GO:0046527;<br>C:GO:0016021;<br>C:GO:0005783                                                                                      | -                                                               | EC:2.4.1.130 | -                                                                                                           |

|                        |                                                            |   |                                                                 |                                                                                                                                     |                                                                                                     |
|------------------------|------------------------------------------------------------|---|-----------------------------------------------------------------|-------------------------------------------------------------------------------------------------------------------------------------|-----------------------------------------------------------------------------------------------------|
|                        | -                                                          | 0 |                                                                 |                                                                                                                                     | -                                                                                                   |
|                        | -                                                          | 0 |                                                                 |                                                                                                                                     | -                                                                                                   |
|                        | -                                                          | 0 |                                                                 |                                                                                                                                     | IPR013032                                                                                           |
| Caenorhabditis remanei | ifa-1                                                      | 4 | C:GO:0005882;<br>C:GO:0005737;<br>F:GO:0005198;<br>F:GO:0005515 | -                                                                                                                                   | IPR001664; PTHR23239:SF13 (PANTHER)                                                                 |
|                        | -                                                          | 0 |                                                                 |                                                                                                                                     | -                                                                                                   |
|                        | -                                                          | 0 |                                                                 |                                                                                                                                     | SignalP (SIGNALP)                                                                                   |
|                        | -                                                          | 0 |                                                                 |                                                                                                                                     | -                                                                                                   |
|                        | -                                                          | 0 |                                                                 |                                                                                                                                     | -                                                                                                   |
| Caenorhabditis remanei | elegans protein partially confirmed by transcript evidence | 2 | P:GO:0055085;<br>C:GO:0016021                                   | -                                                                                                                                   | PTHR11662 (PANTHER), PTHR11662:SF21 (PANTHER), SignalP (SIGNALP)                                    |
|                        | -                                                          | 0 |                                                                 |                                                                                                                                     | -                                                                                                   |
| Caenorhabditis remanei | briggsae cbr-sulp-3 protein                                | 4 | C:GO:0016021;<br>F:GO:0008271;<br>P:GO:0008272;<br>P:GO:0055085 | -                                                                                                                                   | IPR011547; PTHR11814 (PANTHER), PTHR11814:SF26 (PANTHER), SignalP (SIGNALP)                         |
|                        | -                                                          | 0 |                                                                 |                                                                                                                                     | -                                                                                                   |
| Caenorhabditis elegans | zinc carboxypeptidase                                      | 3 | P:GO:0006508;<br>F:GO:0004181;<br>F:GO:0008270                  | -                                                                                                                                   | EC:3.4.17.0 IPR000834; G3DSA:3.40.630.10 (GENE3D), PTHR11705 (PANTHER), SSF53187 (SUPERFAMILY)      |
|                        | -                                                          | 0 |                                                                 |                                                                                                                                     | -                                                                                                   |
|                        | -                                                          | 0 |                                                                 |                                                                                                                                     | IPR020683; PTHR18958 (PANTHER), PTHR18958:SF271 (PANTHER)                                           |
| Caenorhabditis elegans | cathepsin a                                                | 4 | F:GO:0004185;<br>P:GO:0002119;<br>P:GO:0040007;<br>P:GO:0006508 | -                                                                                                                                   | EC:3.4.16.0 IPR001563; G3DSA:3.40.50.1820 (GENE3D), PTHR11802:SF9 (PANTHER), SSF53474 (SUPERFAMILY) |
| Caenorhabditis remanei | alpha-methylacyl- racemase                                 | 2 | F:GO:0003824;<br>P:GO:0008152                                   | -                                                                                                                                   | -                                                                                                   |
| Caenorhabditis elegans | spondin 1a                                                 | 0 |                                                                 | F:GO:0004867                                                                                                                        | IPR009465; PTHR11311 (PANTHER), PTHR11311:SF2 (PANTHER), PF06468 (PFAM)                             |
| Mus musculus           | type i ii iii v alpha                                      | 0 |                                                                 | P:GO:0007218;<br>F:GO:0003674;<br>F:GO:0004872;<br>F:GO:0004871;<br>C:GO:0016020;<br>F:GO:0008270;<br>P:GO:0008150;<br>C:GO:0005622 | SignalP (SIGNALP)                                                                                   |
|                        | -                                                          | 0 |                                                                 |                                                                                                                                     | -                                                                                                   |
|                        | -                                                          | 0 |                                                                 |                                                                                                                                     | -                                                                                                   |
|                        | -                                                          | 0 |                                                                 |                                                                                                                                     | -                                                                                                   |
|                        | -                                                          | 0 |                                                                 |                                                                                                                                     | -                                                                                                   |
| Caenorhabditis remanei | hypothetical protein CRE_15394 [Caenorhabditis remanei]    | 0 |                                                                 |                                                                                                                                     | -                                                                                                   |
|                        | -                                                          | 0 |                                                                 |                                                                                                                                     | -                                                                                                   |



|                         |                                                         |   |                                                                                                                                                      |              |              |                                                                                                            |
|-------------------------|---------------------------------------------------------|---|------------------------------------------------------------------------------------------------------------------------------------------------------|--------------|--------------|------------------------------------------------------------------------------------------------------------|
| Caenorhabditis remanei  | ubiquitin-conjugating enzyme family protein             | 9 | P:GO:0060711;<br>P:GO:0008284;<br>C:GO:0005624;<br>P:GO:0060712;<br>F:GO:0005515;<br>P:GO:0016567;<br>P:GO:0006916;<br>P:GO:0051246;<br>F:GO:0019787 | -            |              | IPR000608; IPR016135; PTHR11621 (PANTHER), PTHR11621:SF9 (PANTHER)                                         |
| Caenorhabditis remanei  | elegans protein confirmed by transcript evidence        | 2 | F:GO:0005515;<br>F:GO:0003677                                                                                                                        | -            |              | IPR006578                                                                                                  |
| Caenorhabditis elegans  | sy-ptotagmin i                                          | 4 | C:GO:0016020;<br>C:GO:0008021;<br>P:GO:0006810;<br>F:GO:0005215                                                                                      | -            |              | IPR000008; IPR008973; IPR018029; G3DSA:2.60.40.150 (GENE3D), PTHR10024 (PANTHER), PTHR10024:SF40 (PANTHER) |
| Ancylostoma caninum     | briggsae cbr-jnk-1 protein                              | 6 | F:GO:0004707;<br>P:GO:0030050;<br>P:GO:0007254;<br>F:GO:0005524;<br>F:GO:0005515;<br>P:GO:0006468                                                    | -            | EC:2.7.11.24 | SignalP (SIGNALP)                                                                                          |
|                         | -                                                       | 0 |                                                                                                                                                      |              |              | SignalP (SIGNALP)                                                                                          |
| Caenorhabditis elegans  | elegans protein confirmed by transcript evidence        | 0 |                                                                                                                                                      | F:GO:0000166 |              | -                                                                                                          |
|                         | -                                                       | 0 |                                                                                                                                                      |              |              | -                                                                                                          |
|                         | -                                                       | 0 |                                                                                                                                                      |              |              | -                                                                                                          |
|                         | -                                                       | 0 |                                                                                                                                                      |              |              | -                                                                                                          |
|                         | -                                                       | 0 |                                                                                                                                                      |              |              | -                                                                                                          |
|                         | -                                                       | 0 |                                                                                                                                                      |              |              | -                                                                                                          |
|                         | -                                                       | 0 |                                                                                                                                                      |              |              | -                                                                                                          |
|                         | -                                                       | 0 |                                                                                                                                                      |              |              | -                                                                                                          |
| Caenorhabditis elegans  | hypothetical protein Y119C1A.1 [Caenorhabditis elegans] | 0 |                                                                                                                                                      | F:GO:0005515 |              | IPR001876                                                                                                  |
| Caenorhabditis elegans  | hypothetical protein Y119C1A.1 [Caenorhabditis elegans] | 0 |                                                                                                                                                      | F:GO:0005515 |              | IPR001876                                                                                                  |
| Caenorhabditis elegans  | hypothetical protein Y119C1A.1 [Caenorhabditis elegans] | 0 |                                                                                                                                                      | F:GO:0005515 |              | IPR001876                                                                                                  |
|                         | -                                                       | 0 |                                                                                                                                                      |              |              | -                                                                                                          |
|                         | -                                                       | 0 |                                                                                                                                                      |              |              | -                                                                                                          |
| Caenorhabditis briggsae | ptprf interacting binding protein 1 (liprin beta 1)     | 0 |                                                                                                                                                      |              |              | IPR011510; PTHR12587 (PANTHER), PTHR12587:SF1 (PANTHER)                                                    |
|                         | -                                                       | 0 |                                                                                                                                                      |              |              | -                                                                                                          |
|                         | -                                                       | 0 |                                                                                                                                                      |              |              | -                                                                                                          |

|                            |                                                                             |    |                                                                                                                                                                                                                                                                                                                                                                                   |                                                                                                   |                   |                                                                                                                       |
|----------------------------|-----------------------------------------------------------------------------|----|-----------------------------------------------------------------------------------------------------------------------------------------------------------------------------------------------------------------------------------------------------------------------------------------------------------------------------------------------------------------------------------|---------------------------------------------------------------------------------------------------|-------------------|-----------------------------------------------------------------------------------------------------------------------|
| Pongo abelii               | type alpha 1 (ehlers-danlos syndrome type autosomal dominant) isoform cra_b | 22 | P:GO:0009314;<br>P:GO:0018149;<br>P:GO:0030168;<br>P:GO:0048565;<br>P:GO:0043206;<br>C:GO:0005586;<br>P:GO:0007229;<br>P:GO:0050777;<br>P:GO:0007507;<br>P:GO:0007160;<br>C:GO:0005615;<br>F:GO:0046332;<br>P:GO:0001501;<br>F:GO:0048407;<br>P:GO:0043588;<br>P:GO:0030199;<br>F:GO:0005178;<br>P:GO:0007179;<br>P:GO:0034097;<br>P:GO:0032964;<br>F:GO:0005201;<br>P:GO:0001568 | -                                                                                                 |                   | IPR000885; PTHR10499 (PANTHER),<br>PTHR10499:SF71 (PANTHER), PSS1461<br>(PROFILE)                                     |
|                            | -                                                                           | 0  |                                                                                                                                                                                                                                                                                                                                                                                   |                                                                                                   |                   | IPR007087; IPR015880; SSF57667<br>(SUPERFAMILY)                                                                       |
|                            | -                                                                           | 0  |                                                                                                                                                                                                                                                                                                                                                                                   |                                                                                                   |                   | -                                                                                                                     |
|                            | -                                                                           | 0  |                                                                                                                                                                                                                                                                                                                                                                                   |                                                                                                   |                   | -                                                                                                                     |
|                            | -                                                                           | 0  |                                                                                                                                                                                                                                                                                                                                                                                   |                                                                                                   |                   | -                                                                                                                     |
| Oscheius sp. (strain CEW1) | briggsae cbr-vit-6 protein                                                  | 3  | P:GO:0006810;<br>F:GO:0022892;<br>P:GO:0033036                                                                                                                                                                                                                                                                                                                                    | -                                                                                                 |                   | -                                                                                                                     |
|                            | -                                                                           | 0  |                                                                                                                                                                                                                                                                                                                                                                                   |                                                                                                   |                   | -                                                                                                                     |
| Caenorhabditis briggsae    | tryptophan -dioxyge-se                                                      | 11 | C:GO:0005829;<br>P:GO:0040010;<br>C:GO:0005625;<br>P:GO:0019441;<br>P:GO:0055114;<br>F:GO:0042802;<br>F:GO:0019825;<br>F:GO:0004833;<br>F:GO:0020037;<br>F:GO:0016597;<br>P:GO:0019442                                                                                                                                                                                            | -                                                                                                 | EC:1.13.11.1<br>1 | IPR004981; SSF140959 (SUPERFAMILY)                                                                                    |
|                            | -                                                                           | 0  |                                                                                                                                                                                                                                                                                                                                                                                   |                                                                                                   |                   | -                                                                                                                     |
|                            | -                                                                           | 0  |                                                                                                                                                                                                                                                                                                                                                                                   |                                                                                                   |                   | -                                                                                                                     |
| Caenorhabditis elegans     | hypothetical protein Y71F9AL.1 [Caenorhabditis elegans]                     | 0  |                                                                                                                                                                                                                                                                                                                                                                                   | F:GO:0003676;<br>F:GO:0008168;<br>P:GO:0032259                                                    |                   | -                                                                                                                     |
|                            | -                                                                           | 0  |                                                                                                                                                                                                                                                                                                                                                                                   |                                                                                                   |                   | SignalP (SIGNALP)                                                                                                     |
| Caenorhabditis briggsae    | Hypothetical protein CBG05371 [Caenorhabditis briggsae]                     | 0  |                                                                                                                                                                                                                                                                                                                                                                                   | P:GO:0016311;<br>F:GO:0016791;<br>P:GO:0006470;<br>F:GO:0016787;<br>F:GO:0004725;<br>F:GO:0004721 |                   | IPR000242; G3DSA:3.90.190.10<br>(GENE3D), PTHR19134 (PANTHER),<br>PTHR19134:SF26 (PANTHER),<br>SSF52799 (SUPERFAMILY) |
| Caenorhabditis elegans     | atp binding domain 4                                                        | 0  |                                                                                                                                                                                                                                                                                                                                                                                   | F:GO:0003674;<br>P:GO:0008150;<br>C:GO:0005575                                                    |                   | IPR002761; G3DSA:3.90.1490.10<br>(GENE3D), PTHR12196 (PANTHER),<br>SSF52402 (SUPERFAMILY)                             |
|                            | -                                                                           | 0  |                                                                                                                                                                                                                                                                                                                                                                                   |                                                                                                   |                   | -                                                                                                                     |

|                         |                                                                             |    |                                                                                                                                                                                                         |                               |                                   |                                                                                                                     |
|-------------------------|-----------------------------------------------------------------------------|----|---------------------------------------------------------------------------------------------------------------------------------------------------------------------------------------------------------|-------------------------------|-----------------------------------|---------------------------------------------------------------------------------------------------------------------|
| Homo sapiens            | procollagen-oxoglutarate 5-dioxyge-se 1 precursor                           | 11 | P:GO:0001666;<br>P:GO:0055114;<br>P:GO:0008544;<br>F:GO:0016702;<br>F:GO:0008475;<br>F:GO:0031418;<br>C:GO:0030867;<br>F:GO:0042803;<br>F:GO:0005506;<br>P:GO:0046947;<br>P:GO:0006464                  | -                             | EC:1.13.11.0<br>;<br>EC:1.14.11.4 | IPR001006; PTHR10730 (PANTHER),<br>PTHR10730:SF1 (PANTHER)                                                          |
| Loa loa                 | elegans protein partially confirmed by transcript evidence                  | 0  |                                                                                                                                                                                                         | F:GO:0003676;<br>P:GO:0002119 |                                   | IPR003100; IPR003165; IPR012337;<br>G3DSA:2.170.260.10 (GENE3D),<br>PTHR22891 (PANTHER), SSF101690<br>(SUPERFAMILY) |
| Loa loa                 | elegans protein partially confirmed by transcript evidence                  | 0  |                                                                                                                                                                                                         | F:GO:0003676;<br>P:GO:0002119 |                                   | -                                                                                                                   |
| Caenorhabditis briggsae | probable inner membrane protein oxa12                                       | 2  | P:GO:0051205;<br>C:GO:0016021                                                                                                                                                                           | -                             |                                   | -                                                                                                                   |
| Caenorhabditis briggsae | neurotransmitter-gated ion-channel ligand binding domain containing protein | 5  | C:GO:0016021;<br>C:GO:0030054;<br>C:GO:0045211;<br>F:GO:0005230;<br>P:GO:0006811                                                                                                                        | -                             |                                   | IPR006201; PTHR18945:SF13<br>(PANTHER)                                                                              |
|                         | -                                                                           | 0  |                                                                                                                                                                                                         |                               |                                   | -                                                                                                                   |
|                         | -                                                                           | 0  |                                                                                                                                                                                                         |                               |                                   | -                                                                                                                   |
|                         | -                                                                           | 0  |                                                                                                                                                                                                         |                               |                                   | -                                                                                                                   |
|                         | -                                                                           | 0  |                                                                                                                                                                                                         |                               |                                   | SignalP (SIGNALP)                                                                                                   |
|                         | -                                                                           | 0  |                                                                                                                                                                                                         |                               |                                   | -                                                                                                                   |
|                         | -                                                                           | 0  |                                                                                                                                                                                                         |                               |                                   | -                                                                                                                   |
|                         | -                                                                           | 0  |                                                                                                                                                                                                         |                               |                                   | -                                                                                                                   |
|                         | -                                                                           | 0  |                                                                                                                                                                                                         |                               |                                   | -                                                                                                                   |
| Caenorhabditis elegans  | briggsae cbr-dyxi-1 protein                                                 | 12 | C:GO:0043234;<br>C:GO:0015630;<br>P:GO:0040007;<br>P:GO:0035046;<br>P:GO:0000226;<br>P:GO:0002119;<br>P:GO:0030154;<br>F:GO:0005515;<br>P:GO:0046907;<br>P:GO:0006898;<br>P:GO:0009653;<br>C:GO:0044430 | -                             |                                   | PTHR12442 (PANTHER),<br>PTHR12442:SF22 (PANTHER)                                                                    |
| Caenorhabditis elegans  | epoxide hydrolase                                                           | 2  | F:GO:0016787;<br>C:GO:0016021                                                                                                                                                                           | -                             |                                   | G3DSA:3.40.50.1820 (GENE3D),<br>PTHR10992 (PANTHER),<br>PTHR10992:SF22 (PANTHER),<br>SSF53474 (SUPERFAMILY)         |
|                         | -                                                                           | 0  |                                                                                                                                                                                                         |                               |                                   | -                                                                                                                   |
|                         | -                                                                           | 0  |                                                                                                                                                                                                         |                               |                                   | -                                                                                                                   |
|                         | -                                                                           | 0  |                                                                                                                                                                                                         |                               |                                   | -                                                                                                                   |
|                         | -                                                                           | 0  |                                                                                                                                                                                                         |                               |                                   | IPR002717; IPR016181; PTHR10615<br>(PANTHER), PTHR10615:SF24<br>(PANTHER)                                           |
|                         | -                                                                           | 0  |                                                                                                                                                                                                         |                               |                                   | -                                                                                                                   |
|                         | -                                                                           | 0  |                                                                                                                                                                                                         |                               |                                   | SignalP (SIGNALP)                                                                                                   |
| Loa loa                 | leucine rich repeat family protein                                          | 1  | P:GO:0009792                                                                                                                                                                                            | -                             |                                   | -                                                                                                                   |

|                               |                                                                |   |                                                                                                                                     |                                                                                                                                                                                                                          |                                                                                                                     |
|-------------------------------|----------------------------------------------------------------|---|-------------------------------------------------------------------------------------------------------------------------------------|--------------------------------------------------------------------------------------------------------------------------------------------------------------------------------------------------------------------------|---------------------------------------------------------------------------------------------------------------------|
| Loa loa                       | ck1 ttbkl protein ki-se                                        | 4 | F:GO:0004672;<br>P:GO:0019915;<br>P:GO:0006898;<br>P:GO:0006974                                                                     |                                                                                                                                                                                                                          | IPR000719; IPR011009; IPR017442;<br>G3DSA:3.30.200.20 (GENE3D),<br>PTHR11909 (PANTHER),<br>PTHR11909:SF19 (PANTHER) |
| Homo sapiens                  | deoxyguanosine ki-se                                           | 8 | C:GO:0005829;<br>C:GO:0005739;<br>F:GO:0016773;<br>F:GO:0005524;<br>F:GO:0004138;<br>P:GO:0046070;<br>P:GO:0008617;<br>P:GO:0006468 |                                                                                                                                                                                                                          | EC:2.7.1.0;<br>EC:2.7.1.113                                                                                         |
|                               |                                                                | 0 |                                                                                                                                     |                                                                                                                                                                                                                          |                                                                                                                     |
| Strongylocentrotus purpuratus | reverse ribonuclease integrase                                 | 0 |                                                                                                                                     | F:GO:0003677;<br>F:GO:0003676;<br>F:GO:0005524;<br>F:GO:0003964;<br>F:GO:0008270;<br>F:GO:0003723;<br>P:GO:0015074;<br>P:GO:0006281;<br>P:GO:0006278;<br>C:GO:0005622;<br>F:GO:0004519;<br>F:GO:0046872;<br>F:GO:0004518 |                                                                                                                     |
| Caenorhabditis briggsae       | briggsae cbr-dct-10 protein                                    | 0 |                                                                                                                                     | F:GO:0046872;<br>F:GO:0003676;<br>F:GO:0008270                                                                                                                                                                           | IPR005162                                                                                                           |
| Caenorhabditis elegans        | nonsense-mediated mr- decay protein 1                          | 0 |                                                                                                                                     | F:GO:0004386;<br>F:GO:0016787;<br>F:GO:0003677;<br>F:GO:0000166;<br>C:GO:0005737;<br>F:GO:0017111;<br>F:GO:0008270;<br>F:GO:0005524;<br>P:GO:0000184                                                                     |                                                                                                                     |
| Caenorhabditis elegans        | nonsense-mediated mr- decay protein 1                          | 0 |                                                                                                                                     | F:GO:0004386;<br>F:GO:0016787;<br>F:GO:0003677;<br>F:GO:0000166;<br>C:GO:0005737;<br>F:GO:0017111;<br>F:GO:0008270;<br>F:GO:0005524;<br>P:GO:0000184                                                                     | G3DSA:3.40.50.300 (GENE3D),<br>PTHR10887 (PANTHER), SSF52540<br>(SUPERFAMILY)                                       |
| Ajellomyces dermatitidis ER-3 | conserved hypothetical protein [Ajellomyces dermatitidis ER-3] | 0 |                                                                                                                                     | F:GO:0003676;<br>F:GO:0008270                                                                                                                                                                                            |                                                                                                                     |
| Caenorhabditis elegans        | nonsense-mediated mr- decay protein 1                          | 0 |                                                                                                                                     | F:GO:0004386;<br>F:GO:0016787;<br>F:GO:0003677;<br>F:GO:0000166;<br>C:GO:0005737;<br>F:GO:0017111;<br>F:GO:0008270;<br>F:GO:0005524;<br>P:GO:0000184                                                                     | G3DSA:3.40.50.300 (GENE3D),<br>PTHR10887 (PANTHER), SSF52540<br>(SUPERFAMILY)                                       |



|                         |                                                            |   |                                                                                                                    |                                                                                                                                                      |            |                                                                                                                              |
|-------------------------|------------------------------------------------------------|---|--------------------------------------------------------------------------------------------------------------------|------------------------------------------------------------------------------------------------------------------------------------------------------|------------|------------------------------------------------------------------------------------------------------------------------------|
| Caenorhabditis briggsae | briggsae cbr-dct-10 protein                                | 0 |                                                                                                                    | F:GO:0046872;<br>F:GO:0003676;<br>F:GO:0008270                                                                                                       |            | IPR005162                                                                                                                    |
|                         | -                                                          | 0 |                                                                                                                    |                                                                                                                                                      |            | -                                                                                                                            |
| Caenorhabditis briggsae | briggsae cbr-dct-10 protein                                | 0 |                                                                                                                    | F:GO:0003676;<br>P:GO:0015074;<br>F:GO:0003682;<br>C:GO:0000785;<br>P:GO:0006333;<br>F:GO:0003677;<br>C:GO:0005634                                   |            | IPR001878; IPR013084                                                                                                         |
| Caenorhabditis elegans  | nonsense-mediated mr- decay protein 1                      | 0 |                                                                                                                    | F:GO:0004386;<br>F:GO:0016787;<br>F:GO:0003677;<br>F:GO:0000166;<br>C:GO:0005737;<br>F:GO:0017111;<br>F:GO:0008270;<br>F:GO:0005524;<br>P:GO:0000184 |            | G3DSA:3.40.50.300 (GENE3D),<br>PTHR10887 (PANTHER), SSF52540<br>(SUPERFAMILY)                                                |
| Caenorhabditis briggsae | briggsae cbr-dct-10 protein                                | 0 |                                                                                                                    | F:GO:0046872;<br>F:GO:0003676;<br>F:GO:0008270                                                                                                       |            | IPR005162                                                                                                                    |
|                         | -                                                          | 0 |                                                                                                                    |                                                                                                                                                      |            | -                                                                                                                            |
|                         | -                                                          | 0 |                                                                                                                    |                                                                                                                                                      |            | -                                                                                                                            |
|                         | -                                                          | 0 |                                                                                                                    |                                                                                                                                                      |            | -                                                                                                                            |
|                         | -                                                          | 0 |                                                                                                                    |                                                                                                                                                      |            | -                                                                                                                            |
|                         | -                                                          | 0 |                                                                                                                    |                                                                                                                                                      |            | -                                                                                                                            |
| Caenorhabditis elegans  | ribose-5-phosphate isomerase                               | 7 | P:GO:0009052;<br>F:GO:0005529;<br>C:GO:0000267;<br>P:GO:0040011;<br>F:GO:0004751;<br>P:GO:0019915;<br>C:GO:0005829 | -                                                                                                                                                    | EC:5.3.1.6 | IPR004788; G3DSA:3.30.70.260<br>(GENE3D), G3DSA:3.40.50.1360<br>(GENE3D), SSF100950 (SUPERFAMILY),<br>SSF75445 (SUPERFAMILY) |
|                         | -                                                          | 0 |                                                                                                                    |                                                                                                                                                      |            | -                                                                                                                            |
|                         | -                                                          | 0 |                                                                                                                    |                                                                                                                                                      |            | SignalP (SIGNALP)                                                                                                            |
| Caenorhabditis briggsae | beta lysosomal                                             | 1 | F:GO:0003824                                                                                                       | -                                                                                                                                                    |            | IPR013781; PTHR10066 (PANTHER),<br>PTHR10066:SF12 (PANTHER)                                                                  |
|                         | -                                                          | 0 |                                                                                                                    |                                                                                                                                                      |            | SignalP (SIGNALP)                                                                                                            |
| Caenorhabditis briggsae | tetraspanin family protein                                 | 0 |                                                                                                                    | F:GO:0046872;<br>C:GO:0016021;<br>C:GO:0016020;<br>P:GO:0030001                                                                                      |            | -                                                                                                                            |
| Caenorhabditis elegans  | elegans protein partially confirmed by transcript evidence | 2 | C:GO:0016021;<br>F:GO:0005488                                                                                      | -                                                                                                                                                    |            | -                                                                                                                            |
| Caenorhabditis briggsae | uncoordinated family member (unc-89)                       | 0 |                                                                                                                    | F:GO:0004672;<br>F:GO:0005524;<br>F:GO:0000166;<br>P:GO:0006468;<br>F:GO:0004674                                                                     |            | IPR013098; IPR013783; PTHR19897<br>(PANTHER), SSF48726 (SUPERFAMILY)                                                         |
| Brugia malayi           | map ki-se ki-se                                            | 2 | F:GO:0016301;<br>P:GO:0016246                                                                                      | -                                                                                                                                                    |            | IPR000719; IPR001245; IPR011009;<br>G3DSA:1.10.510.10 (GENE3D),<br>PTHR22986 (PANTHER),<br>PTHR22986:SF28 (PANTHER)          |
| Caenorhabditis elegans  | hypothetical protein F28B4.3 [Caenorhabditis elegans]      | 0 |                                                                                                                    |                                                                                                                                                      |            | -                                                                                                                            |
|                         | -                                                          | 0 |                                                                                                                    |                                                                                                                                                      |            | -                                                                                                                            |

|                             |                                                                                 |  |    |                                                                                                                                                                                                                                                                                                                                                                                                                                                                        |   |                                                                       |                                                                                                                                                            |
|-----------------------------|---------------------------------------------------------------------------------|--|----|------------------------------------------------------------------------------------------------------------------------------------------------------------------------------------------------------------------------------------------------------------------------------------------------------------------------------------------------------------------------------------------------------------------------------------------------------------------------|---|-----------------------------------------------------------------------|------------------------------------------------------------------------------------------------------------------------------------------------------------|
| Angiostrongylus cantonensis | elegans protein confirmed by transcript evidence                                |  | 3  | F:GO:0005515;<br>P:GO:0000003;<br>F:GO:0005529                                                                                                                                                                                                                                                                                                                                                                                                                         | - | IPR001079; IPR008985; IPR013320;<br>PTHR11346:SF4 (PANTHER)           |                                                                                                                                                            |
| Ailuropoda melanoleuca      | mgc81609 protein                                                                |  | 0  | C:GO:0016021;<br>C:GO:0016020;<br>P:GO:0050873;<br>C:GO:0005737;<br>F:GO:0003674;<br>C:GO:0005575;<br>C:GO:0005783;<br>P:GO:0008150;<br>C:GO:0005886                                                                                                                                                                                                                                                                                                                   |   | PTHR21650 (PANTHER),<br>PTHR21650:SF3 (PANTHER), SignalP<br>(SIGNALP) |                                                                                                                                                            |
|                             | -                                                                               |  | 0  |                                                                                                                                                                                                                                                                                                                                                                                                                                                                        |   | -                                                                     |                                                                                                                                                            |
|                             | -                                                                               |  | 0  |                                                                                                                                                                                                                                                                                                                                                                                                                                                                        |   | -                                                                     |                                                                                                                                                            |
|                             | -                                                                               |  | 0  |                                                                                                                                                                                                                                                                                                                                                                                                                                                                        |   | -                                                                     |                                                                                                                                                            |
| Callithrix jacchus          | protein                                                                         |  | 0  | P:GO:0006412;<br>F:GO:0005488;<br>F:GO:0004045;<br>P:GO:0008152;<br>F:GO:0003824;<br>F:GO:0008270                                                                                                                                                                                                                                                                                                                                                                      |   | -                                                                     |                                                                                                                                                            |
| Caenorhabditis sp. PS1010   | elegans protein confirmed by transcript evidence                                |  | 0  |                                                                                                                                                                                                                                                                                                                                                                                                                                                                        |   | -                                                                     |                                                                                                                                                            |
|                             | -                                                                               |  | 0  |                                                                                                                                                                                                                                                                                                                                                                                                                                                                        |   | -                                                                     |                                                                                                                                                            |
|                             | -                                                                               |  | 0  |                                                                                                                                                                                                                                                                                                                                                                                                                                                                        |   | SignalP (SIGNALP)                                                     |                                                                                                                                                            |
|                             | -                                                                               |  | 0  |                                                                                                                                                                                                                                                                                                                                                                                                                                                                        |   | -                                                                     |                                                                                                                                                            |
| Caenorhabditis briggsae     | elegans protein confirmed by transcript evidence                                |  | 0  | C:GO:0016021;<br>P:GO:0016042;<br>P:GO:0006644                                                                                                                                                                                                                                                                                                                                                                                                                         |   | SignalP (SIGNALP)                                                     |                                                                                                                                                            |
| Caenorhabditis elegans      | ras-related c3 botulinum toxin substrate 1 (rho small gtp binding protein rac1) |  | 57 | F:GO:0005525;<br>P:GO:0006954;<br>P:GO:0030334;<br>P:GO:0030838;<br>P:GO:0050885;<br>P:GO:0048261;<br>P:GO:0007160;<br>C:GO:0030426;<br>P:GO:0043652;<br>C:GO:0005625;<br>P:GO:0031103;<br>P:GO:0048846;<br>P:GO:0016358;<br>C:GO:0030027;<br>C:GO:0005829;<br>P:GO:0043552;<br>P:GO:0040039;<br>P:GO:0008624;<br>P:GO:0033563;<br>C:GO:0009898;<br>C:GO:0000139;<br>P:GO:0045740;<br>P:GO:0035025;<br>P:GO:0007520;<br>P:GO:0016601;<br>P:GO:0031529;<br>P:GO:0034446 |   | EC:3.6.5.1;<br>EC:3.6.5.2;<br>EC:3.6.5.3;<br>EC:3.6.5.4               | IPR001806; IPR003578; IPR005225;<br>IPR013753; G3DSA:3.40.50.300<br>(GENE3D), PTHR11708 (PANTHER),<br>PTHR11708:SF285 (PANTHER),<br>SSF52540 (SUPERFAMILY) |
| Caenorhabditis briggsae     | Hypothetical protein CBG16894 [Caenorhabditis briggsae]                         |  | 0  |                                                                                                                                                                                                                                                                                                                                                                                                                                                                        |   | -                                                                     |                                                                                                                                                            |
|                             | -                                                                               |  | 0  |                                                                                                                                                                                                                                                                                                                                                                                                                                                                        |   | -                                                                     |                                                                                                                                                            |
|                             | -                                                                               |  | 0  |                                                                                                                                                                                                                                                                                                                                                                                                                                                                        |   | -                                                                     |                                                                                                                                                            |

|                        |                                                             |    |                                                                                                                                                                                                                                                                                                                                |                                                                 |             |                                                                                     |                                                                                           |
|------------------------|-------------------------------------------------------------|----|--------------------------------------------------------------------------------------------------------------------------------------------------------------------------------------------------------------------------------------------------------------------------------------------------------------------------------|-----------------------------------------------------------------|-------------|-------------------------------------------------------------------------------------|-------------------------------------------------------------------------------------------|
| Caenorhabditis elegans | Hypothetical protein C01B10.11 [Caenorhabditis elegans]     | 0  |                                                                                                                                                                                                                                                                                                                                | P:GO:0040011                                                    |             | -                                                                                   |                                                                                           |
|                        | -                                                           | 0  |                                                                                                                                                                                                                                                                                                                                |                                                                 |             | -                                                                                   |                                                                                           |
|                        | -                                                           | 0  |                                                                                                                                                                                                                                                                                                                                |                                                                 |             | -                                                                                   |                                                                                           |
|                        | -                                                           | 0  |                                                                                                                                                                                                                                                                                                                                |                                                                 |             | -                                                                                   |                                                                                           |
|                        | -                                                           | 0  |                                                                                                                                                                                                                                                                                                                                |                                                                 |             | SignalP (SIGNALP)                                                                   |                                                                                           |
|                        | -                                                           | 0  |                                                                                                                                                                                                                                                                                                                                |                                                                 |             | G3DSA:2.40.10.10 (GENE3D)                                                           |                                                                                           |
|                        | -                                                           | 0  |                                                                                                                                                                                                                                                                                                                                |                                                                 |             | -                                                                                   |                                                                                           |
| Brugia malayi          | hypothetical protein [Brugia malayi]                        | 0  |                                                                                                                                                                                                                                                                                                                                | F:GO:0000166                                                    |             | -                                                                                   |                                                                                           |
| Caenorhabditis elegans | lethal family member (let-805)                              | 8  | P:GO:0018996;<br>P:GO:0009792;<br>P:GO:0008340;<br>P:GO:0000003;<br>F:GO:0005515;<br>P:GO:0006898;<br>P:GO:0002119;<br>P:GO:0040011                                                                                                                                                                                            | -                                                               |             | -                                                                                   |                                                                                           |
| Loa loa                | homeodomain interacting protein ki-se family member (hpk-1) | 4  | P:GO:0006468;<br>F:GO:0005524;<br>P:GO:0008340;<br>F:GO:0004674                                                                                                                                                                                                                                                                | -                                                               | EC:2.7.11.0 | G3DSA:1.10.510.10 (GENE3D),<br>PTHR11295 (PANTHER),<br>PTHR11295:SF117 (PANTHER)    |                                                                                           |
| Caenorhabditis elegans | uncoordinated family member (unc-26)                        | 19 | P:GO:0016082;<br>P:GO:0046856;<br>F:GO:0008022;<br>F:GO:0000166;<br>P:GO:0016191;<br>P:GO:0032526;<br>P:GO:0007612;<br>C:GO:0019717;<br>F:GO:0017120;<br>P:GO:0034097;<br>P:GO:0048260;<br>P:GO:0014015;<br>F:GO:0003723;<br>F:GO:0004439;<br>F:GO:0004518;<br>F:GO:0032403;<br>C:GO:0030118;<br>F:GO:0017124;<br>P:GO:0048015 | -                                                               |             | EC:3.1.3.36                                                                         | IPR005135; G3DSA:3.60.10.10<br>(GENE3D), PTHR11200 (PANTHER),<br>PTHR11200:SF10 (PANTHER) |
|                        | -                                                           | 0  |                                                                                                                                                                                                                                                                                                                                |                                                                 |             | -                                                                                   |                                                                                           |
| Tetraodon nigroviridis | elegans protein confirmed by transcript evidence            | 5  | C:GO:0005743;<br>F:GO:0005515;<br>F:GO:0004458;<br>P:GO:0055114;<br>F:GO:0050660                                                                                                                                                                                                                                               | -                                                               | EC:1.1.2.4  | IPR006094; IPR016166; IPR016168;<br>PTHR11748 (PANTHER),<br>PTHR11748:SF6 (PANTHER) |                                                                                           |
| Caenorhabditis remanei | cerebral endothelial cell adhesion molecule                 | 6  | P:GO:0040035;<br>P:GO:0009103;<br>F:GO:0005515;<br>P:GO:0040010;<br>P:GO:0040011;<br>P:GO:0002009                                                                                                                                                                                                                              | -                                                               |             | IPR002654; PTHR10730 (PANTHER)                                                      |                                                                                           |
| Caenorhabditis remanei | uridine nucleosidase                                        | 0  |                                                                                                                                                                                                                                                                                                                                | P:GO:0008152;<br>F:GO:0016787;<br>F:GO:0016798;<br>F:GO:0045437 |             | IPR001910; IPR023186                                                                |                                                                                           |
|                        | -                                                           | 0  |                                                                                                                                                                                                                                                                                                                                |                                                                 |             | -                                                                                   |                                                                                           |

|                        |                                                            |    |                                                                                                                                                                                                                                                                                                                                                                                                                                                                         |   |                                                |                                                                                                                                                         |
|------------------------|------------------------------------------------------------|----|-------------------------------------------------------------------------------------------------------------------------------------------------------------------------------------------------------------------------------------------------------------------------------------------------------------------------------------------------------------------------------------------------------------------------------------------------------------------------|---|------------------------------------------------|---------------------------------------------------------------------------------------------------------------------------------------------------------|
| Ailuropoda melanoleuca | secreted frizzled-related protein 2                        | 53 | P:GO:0008284;<br>P:GO:0007584;<br>N:GO:2000041;<br>P:GO:0050680;<br>P:GO:0032582;<br>P:GO:0045669;<br>P:GO:0003214;<br>P:GO:0030336;<br>P:GO:0002063;<br>P:GO:0043065;<br>P:GO:0031668;<br>P:GO:0045766;<br>P:GO:0030199;<br>F:GO:0005178;<br>P:GO:0048546;<br>C:GO:0005615;<br>N:GO:2000035;<br>P:GO:0090179;<br>P:GO:0060349;<br>P:GO:0043154;<br>P:GO:0043508;<br>F:GO:0001968;<br>P:GO:0003151;<br>P:GO:0061056;<br>P:GO:0090263;<br>F:GO:0017147;<br>P:GO:0042723; | - |                                                | IPR001134; IPR015526; IPR018933;<br>PTHR11309:SF10 (PANTHER)                                                                                            |
| Caenorhabditis remanei | elegans protein partially confirmed by transcript evidence | 2  | F:GO:0004867;<br>C:GO:0016021                                                                                                                                                                                                                                                                                                                                                                                                                                           | - |                                                | IPR002223                                                                                                                                               |
| Loa loa                | ubiquitin c                                                | 2  | C:GO:0005634;<br>C:GO:0005737                                                                                                                                                                                                                                                                                                                                                                                                                                           | - |                                                | -                                                                                                                                                       |
| Loa loa                | ubiquitin                                                  | 5  | C:GO:0005737;<br>P:GO:0000003;<br>P:GO:0040007;<br>C:GO:0005634;<br>P:GO:0002119                                                                                                                                                                                                                                                                                                                                                                                        | - |                                                | IPR000626; IPR019954; IPR019955;<br>IPR019956; G3DSA:3.10.20.90<br>(GENE3D), PTHR10666 (PANTHER),<br>PTHR10666:SF9 (PANTHER), SSF54236<br>(SUPERFAMILY) |
|                        |                                                            | 0  |                                                                                                                                                                                                                                                                                                                                                                                                                                                                         |   |                                                | -                                                                                                                                                       |
| Caenorhabditis remanei | pyruvate carboxylase                                       | 6  | F:GO:0004736;<br>P:GO:0009252;<br>F:GO:0005524;<br>P:GO:0006094;<br>C:GO:0005737;<br>F:GO:0008716                                                                                                                                                                                                                                                                                                                                                                       | - | EC:6.4.1.1;<br>EC:6.3.2.4                      | IPR005479; IPR013816; PTHR18866<br>(PANTHER), PTHR18866:SF10<br>(PANTHER)                                                                               |
| Homo sapiens           | ig kappa light chain                                       | 3  | C:GO:0005576;<br>F:GO:0003823;<br>P:GO:0006955                                                                                                                                                                                                                                                                                                                                                                                                                          | - |                                                | IPR013783; PTHR23267 (PANTHER),<br>PTHR23267:SF33 (PANTHER), SignalP<br>(SIGNALP)                                                                       |
| Ailuropoda melanoleuca | wd repeat-containing protein 1 isoform 2                   | 6  | C:GO:0005856;<br>C:GO:0005576;<br>C:GO:0005829;<br>F:GO:0003779;<br>F:GO:0003824;<br>P:GO:0007605                                                                                                                                                                                                                                                                                                                                                                       | - |                                                | SignalP (SIGNALP)                                                                                                                                       |
|                        |                                                            | 0  |                                                                                                                                                                                                                                                                                                                                                                                                                                                                         |   |                                                |                                                                                                                                                         |
| Caenorhabditis remanei | g-protein coupled receptor                                 | 0  |                                                                                                                                                                                                                                                                                                                                                                                                                                                                         |   | F:GO:0004872;<br>C:GO:0016021;<br>P:GO:0007186 | -                                                                                                                                                       |

|                         |                                                            |   |                                                                                                                                     |                                                                                                                                                                       |            |                                                                                                                |
|-------------------------|------------------------------------------------------------|---|-------------------------------------------------------------------------------------------------------------------------------------|-----------------------------------------------------------------------------------------------------------------------------------------------------------------------|------------|----------------------------------------------------------------------------------------------------------------|
| Homo sapiens            | chromosome 19 open reading frame 6                         | 4 | P:GO:0050873;<br>C:GO:0016021;<br>C:GO:0005783;<br>C:GO:0005886                                                                     | -                                                                                                                                                                     | -          | -                                                                                                              |
| -                       | -                                                          | 0 |                                                                                                                                     |                                                                                                                                                                       |            | -                                                                                                              |
| -                       | -                                                          | 0 |                                                                                                                                     |                                                                                                                                                                       |            | -                                                                                                              |
| Caenorhabditis elegans  | hypothetical protein F43D9.1 [Caenorhabditis elegans]      | 0 |                                                                                                                                     | C:GO:0016020;<br>F:GO:0008158                                                                                                                                         |            | SignalP (SIGNALP)                                                                                              |
| Caenorhabditis elegans  | guanosine monophosphate reductase                          | 8 | P:GO:0009792;<br>P:GO:0002119;<br>F:GO:0046872;<br>P:GO:0009409;<br>F:GO:0003920;<br>P:GO:0055114;<br>P:GO:0040007;<br>P:GO:0009117 | -                                                                                                                                                                     | EC:1.7.1.7 | IPR001093; IPR013785; IPR015875;<br>PTHR11911 (PANTHER),<br>PTHR11911:SF7 (PANTHER), SSF51412<br>(SUPERFAMILY) |
| Loa loa                 | four domain-type voltage-gated ion channel alpha-1 subunit | 4 | C:GO:0016021;<br>F:GO:0005216;<br>P:GO:0006811;<br>P:GO:0055085                                                                     | -                                                                                                                                                                     |            | -                                                                                                              |
| -                       | -                                                          | 0 |                                                                                                                                     |                                                                                                                                                                       |            | SignalP (SIGNALP)                                                                                              |
| -                       | -                                                          | 0 |                                                                                                                                     |                                                                                                                                                                       |            | -                                                                                                              |
| Caenorhabditis elegans  | gns1 sur4 family protein                                   | 1 | C:GO:0016021                                                                                                                        | -                                                                                                                                                                     |            | -                                                                                                              |
| Loa loa                 | plasma glutamate carboxypeptidase                          | 0 |                                                                                                                                     | F:GO:0003674;<br>F:GO:0008237;<br>C:GO:0005576;<br>C:GO:0005575;<br>F:GO:0008233;<br>P:GO:0006508;<br>F:GO:0046872;<br>F:GO:0004180;<br>P:GO:0008150;<br>F:GO:0004177 |            | IPR003137; PTHR12053 (PANTHER),<br>PTHR12053:SF1 (PANTHER)                                                     |
| Pongo abelii            | complement component q subcomponent binding protein        | 6 | C:GO:0005886;<br>C:GO:0005759;<br>F:GO:0001849;<br>C:GO:0005634;<br>P:GO:0006955;<br>P:GO:0044419                                   | -                                                                                                                                                                     |            | IPR003428; PTHR10826 (PANTHER),<br>PTHR10826:SF3 (PANTHER)                                                     |
| Caenorhabditis elegans  | mboat family protein                                       | 2 | C:GO:0016020;<br>P:GO:0010171                                                                                                       | -                                                                                                                                                                     |            | IPR004299; PTHR13906 (PANTHER),<br>PTHR13906:SF2 (PANTHER)                                                     |
| -                       | -                                                          | 0 |                                                                                                                                     |                                                                                                                                                                       |            | -                                                                                                              |
| -                       | -                                                          | 0 |                                                                                                                                     |                                                                                                                                                                       |            | IPR002110; IPR020683; PTHR18958<br>(PANTHER), PTHR18958:SF181<br>(PANTHER)                                     |
| -                       | -                                                          | 0 |                                                                                                                                     |                                                                                                                                                                       |            | SignalP (SIGNALP)                                                                                              |
| Caenorhabditis briggsae | Hypothetical protein CBG04065 [Caenorhabditis briggsae]    | 1 | P:GO:0040027                                                                                                                        | -                                                                                                                                                                     |            | SignalP (SIGNALP)                                                                                              |
| Caenorhabditis briggsae | Hypothetical protein CBG04065 [Caenorhabditis briggsae]    | 1 | P:GO:0040027                                                                                                                        | -                                                                                                                                                                     |            | SignalP (SIGNALP)                                                                                              |
| Caenorhabditis briggsae | Hypothetical protein CBG04065 [Caenorhabditis briggsae]    | 1 | P:GO:0040027                                                                                                                        | -                                                                                                                                                                     |            | SignalP (SIGNALP)                                                                                              |
| Caenorhabditis briggsae | uncoordi-ted family member (unc-32)                        | 6 | F:GO:0015078;<br>C:GO:0033177;<br>C:GO:0016021;<br>P:GO:0015986;<br>P:GO:0040013;<br>C:GO:0016023                                   | -                                                                                                                                                                     |            | IPR002490; PTHR11629:SF23<br>(PANTHER)                                                                         |
| -                       | -                                                          | 0 |                                                                                                                                     |                                                                                                                                                                       |            | -                                                                                                              |

|                             |                                                            |   |                                                                                                                    |                                                                                                   |                             |                                                                                                                                          |
|-----------------------------|------------------------------------------------------------|---|--------------------------------------------------------------------------------------------------------------------|---------------------------------------------------------------------------------------------------|-----------------------------|------------------------------------------------------------------------------------------------------------------------------------------|
| Caenorhabditis briggsae     | probable dimethyladenosine transferase                     |   | C:GO:0005737;<br>C:GO:0005730;<br>5 P:GO:0031167;<br>F:GO:0003723;<br>F:GO:0000179                                 | -                                                                                                 |                             | IPR001737; IPR020596;<br>G3DSA:3.40.50.150 (GENE3D),<br>SSF53335 (SUPERFAMILY)                                                           |
| Caenorhabditis elegans      | hypothetical protein T06D8.1 [Caenorhabditis elegans]      | 0 |                                                                                                                    | F:GO:0008061;<br>P:GO:0006030;<br>C:GO:0005576                                                    |                             | -                                                                                                                                        |
| Loa loa                     | briggsae cbr-lact-2 protein                                | 0 |                                                                                                                    |                                                                                                   |                             | -                                                                                                                                        |
|                             | -                                                          | 0 |                                                                                                                    |                                                                                                   |                             | -                                                                                                                                        |
|                             | -                                                          | 0 |                                                                                                                    |                                                                                                   |                             | -                                                                                                                                        |
|                             | -                                                          | 0 |                                                                                                                    |                                                                                                   |                             | -                                                                                                                                        |
|                             | -                                                          | 0 |                                                                                                                    |                                                                                                   |                             | -                                                                                                                                        |
|                             | -                                                          | 0 |                                                                                                                    |                                                                                                   |                             | -                                                                                                                                        |
| Caenorhabditis briggsae     | 26s proteasome regulatory subunit                          | 3 | C:GO:0000502;<br>F:GO:0005515;<br>P:GO:0000003                                                                     | -                                                                                                 |                             | IPR000555; G3DSA:3.40.140.10<br>(GENE3D), PTHR10410 (PANTHER),<br>PTHR10410:SF5 (PANTHER), SignalP<br>(SIGNALP), SSF102712 (SUPERFAMILY) |
|                             | -                                                          | 0 |                                                                                                                    |                                                                                                   |                             | -                                                                                                                                        |
| Caenorhabditis remanei      | elegans protein confirmed by transcript evidence           | 0 |                                                                                                                    |                                                                                                   |                             | SignalP (SIGNALP)                                                                                                                        |
| Caenorhabditis elegans      | eb module family protein                                   | 4 | P:GO:0018991;<br>P:GO:0040010;<br>P:GO:0040035;<br>P:GO:0040011                                                    | -                                                                                                 |                             | IPR006149                                                                                                                                |
|                             | -                                                          | 0 |                                                                                                                    |                                                                                                   |                             | -                                                                                                                                        |
|                             | -                                                          | 0 |                                                                                                                    |                                                                                                   |                             | -                                                                                                                                        |
| Callithrix jacchus          | heterogeneous nuclear ribonucleoprotein a0                 | 5 | P:GO:0008380;<br>C:GO:0030530;<br>F:GO:0003723;<br>P:GO:0006397;<br>F:GO:0000166                                   | -                                                                                                 |                             | -                                                                                                                                        |
| Caenorhabditis remanei      | elegans protein confirmed by transcript evidence           | 2 | P:GO:0007155;<br>C:GO:0005604                                                                                      | -                                                                                                 |                             | -                                                                                                                                        |
| Loa loa                     | elegans protein partially confirmed by transcript evidence | 5 | P:GO:0006468;<br>F:GO:0005515;<br>F:GO:0004713;<br>F:GO:0005524;<br>F:GO:0004674                                   | -                                                                                                 | EC:2.7.10.0;<br>EC:2.7.11.0 | -                                                                                                                                        |
|                             | -                                                          | 0 |                                                                                                                    |                                                                                                   |                             | -                                                                                                                                        |
| Loa loa                     | egg laying defective family member (egl-15)                | 7 | P:GO:0006468;<br>P:GO:0008543;<br>P:GO:0008284;<br>F:GO:0005515;<br>F:GO:0005007;<br>F:GO:0005524;<br>C:GO:0016021 | -                                                                                                 |                             | IPR000719; IPR001245; IPR011009;<br>IPR020685; IPR020725;<br>G3DSA:1.10.510.10 (GENE3D)                                                  |
| Caenorhabditis elegans      | vab-10b protein                                            | 0 |                                                                                                                    |                                                                                                   |                             | -                                                                                                                                        |
| Caenorhabditis remanei      | briggsae cbr-nrx-1 protein                                 | 0 |                                                                                                                    |                                                                                                   |                             | -                                                                                                                                        |
|                             | -                                                          | 0 |                                                                                                                    |                                                                                                   |                             | -                                                                                                                                        |
| Loa loa                     | beta-galactosyltransferase 6                               | 2 | F:GO:0016757;<br>C:GO:0044464                                                                                      | -                                                                                                 |                             | -                                                                                                                                        |
| Anopheles gambiae str. PEST | proclotting enzyme                                         | 0 |                                                                                                                    | P:GO:0006508;<br>F:GO:0004252;<br>F:GO:0008236;<br>F:GO:0016787;<br>F:GO:0003824;<br>F:GO:0008233 |                             | IPR001254; IPR009003; IPR018114;<br>G3DSA:2.40.10.10 (GENE3D),<br>PTHR19355 (PANTHER),<br>PTHR19355:SF126 (PANTHER)                      |

|                        |                                                    |    |                                                                                                                                                                                                                                                                                                               |                                                                                                   |                                                                          |
|------------------------|----------------------------------------------------|----|---------------------------------------------------------------------------------------------------------------------------------------------------------------------------------------------------------------------------------------------------------------------------------------------------------------|---------------------------------------------------------------------------------------------------|--------------------------------------------------------------------------|
|                        | -                                                  | 0  |                                                                                                                                                                                                                                                                                                               |                                                                                                   | -                                                                        |
|                        | -                                                  | 0  |                                                                                                                                                                                                                                                                                                               |                                                                                                   | -                                                                        |
|                        | -                                                  | 0  |                                                                                                                                                                                                                                                                                                               |                                                                                                   | -                                                                        |
| Caenorhabditis elegans | ryanodine receptor homologue                       | 10 | P:GO:0055085;<br>P:GO:0006629;<br>C:GO:0005875;<br>F:GO:0005509;<br>C:GO:0016021;<br>F:GO:0004872;<br>P:GO:0006874;<br>P:GO:0006816;<br>F:GO:0005219;<br>P:GO:0006936                                                                                                                                         |                                                                                                   | IPR015925; PTHR13715:SF11 (PANTHER)                                      |
| Loa loa                | elegans protein confirmed by transcript evidence   | 0  |                                                                                                                                                                                                                                                                                                               |                                                                                                   | IPR001534                                                                |
|                        | -                                                  | 0  |                                                                                                                                                                                                                                                                                                               |                                                                                                   | -                                                                        |
| Hydra magnipapillata   | haloacid dehaloge-se-like hydrolase family protein | 0  |                                                                                                                                                                                                                                                                                                               | F:GO:0003674;<br>F:GO:0016787;<br>P:GO:0008152;<br>F:GO:0003824;<br>P:GO:0008150;<br>C:GO:0005575 | G3DSA:3.40.50.1000 (GENE3D), PTHR18901 (PANTHER), SSF56784 (SUPERFAMILY) |
| Hydra magnipapillata   | haloacid dehaloge-se-like hydrolase family protein | 0  |                                                                                                                                                                                                                                                                                                               | F:GO:0003674;<br>F:GO:0016787;<br>P:GO:0008152;<br>F:GO:0003824;<br>P:GO:0008150;<br>C:GO:0005575 | G3DSA:3.40.50.1000 (GENE3D), PTHR18901 (PANTHER), SSF56784 (SUPERFAMILY) |
| Hydra magnipapillata   | haloacid dehaloge-se-like hydrolase family protein | 0  |                                                                                                                                                                                                                                                                                                               | F:GO:0003674;<br>F:GO:0016787;<br>P:GO:0008152;<br>F:GO:0003824;<br>P:GO:0008150;<br>C:GO:0005575 | G3DSA:3.40.50.1000 (GENE3D), PTHR18901 (PANTHER), SSF56784 (SUPERFAMILY) |
| Homo sapiens           | fibronectin 1 protein                              | 18 | P:GO:0042060;<br>P:GO:0018149;<br>P:GO:0016477;<br>P:GO:0001525;<br>P:GO:0008360;<br>C:GO:0005793;<br>C:GO:0005604;<br>P:GO:0007044;<br>P:GO:0007160;<br>C:GO:0031093;<br>P:GO:0034446;<br>F:GO:0005518;<br>C:GO:0005577;<br>C:GO:0016324;<br>F:GO:0008201;<br>F:GO:0005201;<br>F:GO:0016504;<br>P:GO:0006953 |                                                                                                   | IPR003961; IPR008957; IPR013783; PTHR19143 (PANTHER)                     |
|                        | -                                                  | 0  |                                                                                                                                                                                                                                                                                                               |                                                                                                   | -                                                                        |
|                        | -                                                  | 0  |                                                                                                                                                                                                                                                                                                               |                                                                                                   | -                                                                        |

|                         |                                                         |   |                                                                                                                                     |                                                                                  |            |                                                                                           |
|-------------------------|---------------------------------------------------------|---|-------------------------------------------------------------------------------------------------------------------------------------|----------------------------------------------------------------------------------|------------|-------------------------------------------------------------------------------------------|
| Loa loa                 | polymerase iii (d- directed) polypeptide 155kda         | 8 | F:GO:0003899;<br>F:GO:0008270;<br>P:GO:0032728;<br>P:GO:0045087;<br>F:GO:0003677;<br>F:GO:0032549;<br>P:GO:0006351;<br>C:GO:0005666 | -                                                                                | EC:2.7.7.6 | IPR007066; IPR015700; PTHR19376 (PANTHER), SSF64484 (SUPERFAMILY)                         |
| Caenorhabditis remanei  | hypothetical protein CRE_22505 [Caenorhabditis remanei] | 0 |                                                                                                                                     |                                                                                  |            | -                                                                                         |
| Pan troglodytes         | nicoti-mide n-methyltransferase                         | 7 | C:GO:0005737;<br>C:GO:0005625;<br>P:GO:0042493;<br>P:GO:0010243;<br>F:GO:0008112;<br>P:GO:0031100;<br>P:GO:0032259                  | -                                                                                | EC:2.1.1.1 | IPR000940; G3DSA:3.40.50.150 (GENE3D), PTHR10867:SF5 (PANTHER)                            |
| Caenorhabditis remanei  | cre-npr-13 protein                                      | 0 |                                                                                                                                     |                                                                                  |            | -                                                                                         |
|                         | -                                                       | 0 |                                                                                                                                     |                                                                                  |            | IPR013032                                                                                 |
|                         | -                                                       | 0 |                                                                                                                                     |                                                                                  |            | G3DSA:3.80.10.10 (GENE3D)                                                                 |
| Caenorhabditis briggsae | ester hydrolase c11orf54 homolog                        | 0 |                                                                                                                                     | F:GO:0046872;<br>F:GO:0016788;<br>F:GO:0016787;<br>F:GO:0008270;<br>C:GO:0005634 |            | IPR015021; SSF117856 (SUPERFAMILY)                                                        |
| Caenorhabditis elegans  | briggsae cbr-ucr- protein                               | 4 | P:GO:0009792;<br>P:GO:0000003;<br>P:GO:0040019;<br>P:GO:0040011                                                                     | -                                                                                |            | IPR007863; IPR011237; IPR011249; IPR011765; PTHR11851 (PANTHER), PTHR11851:SF59 (PANTHER) |
| Caenorhabditis elegans  | briggsae cbr-ucr- protein                               | 4 | P:GO:0009792;<br>P:GO:0000003;<br>P:GO:0040019;<br>P:GO:0040011                                                                     | -                                                                                |            | IPR007863; IPR011237; IPR011249; IPR011765; PTHR11851 (PANTHER), PTHR11851:SF59 (PANTHER) |
| Caenorhabditis briggsae | elegans protein confirmed by transcript evidence        | 1 | F:GO:0005515                                                                                                                        | -                                                                                |            | IPR004202; G3DSA:4.10.49.10 (GENE3D), SSF81427 (SUPERFAMILY)                              |
| Pan troglodytes         | fc fragment of alpha                                    | 8 | P:GO:0006955;<br>P:GO:0019882;<br>F:GO:0030881;<br>C:GO:0016021;<br>F:GO:0019864;<br>F:GO:0004872;<br>P:GO:0007565;<br>C:GO:0042612 | -                                                                                |            | -                                                                                         |
| Macaca mulatta          | major vault protein                                     | 8 | C:GO:0005737;<br>C:GO:0005643;<br>P:GO:0042493;<br>F:GO:0005515;<br>P:GO:0055085;<br>P:GO:0051028;<br>C:GO:0030529;<br>P:GO:0015031 | -                                                                                |            | -                                                                                         |
|                         | -                                                       | 0 |                                                                                                                                     |                                                                                  |            | -                                                                                         |
| Caenorhabditis remanei  | matrixin family protein                                 | 2 | F:GO:0046872;<br>P:GO:0008152                                                                                                       | -                                                                                |            | -                                                                                         |
|                         | -                                                       | 0 |                                                                                                                                     |                                                                                  |            | SignalP (SIGNALP)                                                                         |
|                         | -                                                       | 0 |                                                                                                                                     |                                                                                  |            | -                                                                                         |
|                         | -                                                       | 0 |                                                                                                                                     |                                                                                  |            | -                                                                                         |
|                         | -                                                       | 0 |                                                                                                                                     |                                                                                  |            | SignalP (SIGNALP)                                                                         |
| Brugia malayi           | sea domain containing protein                           | 0 |                                                                                                                                     |                                                                                  |            | -                                                                                         |



|                             |                                                             |   |                                                                                                                                     |   |             |                                                                                                                                      |
|-----------------------------|-------------------------------------------------------------|---|-------------------------------------------------------------------------------------------------------------------------------------|---|-------------|--------------------------------------------------------------------------------------------------------------------------------------|
|                             | -                                                           | 0 |                                                                                                                                     |   |             | -                                                                                                                                    |
| Angiostrongylus cantonensis | rab interacting factor                                      | 6 | P:GO:0040035;<br>F:GO:0005085;<br>P:GO:0009792;<br>P:GO:0040010;<br>P:GO:0040011;<br>P:GO:0007264                                   | - |             | -                                                                                                                                    |
| Angiostrongylus cantonensis | rab interacting factor                                      | 6 | P:GO:0040035;<br>F:GO:0005085;<br>P:GO:0009792;<br>P:GO:0040010;<br>P:GO:0040011;<br>P:GO:0007264                                   | - |             | -                                                                                                                                    |
| Caenorhabditis elegans      | lethal family member (let-805)                              | 8 | P:GO:0018996;<br>P:GO:0009792;<br>P:GO:0008340;<br>P:GO:0000003;<br>F:GO:0005515;<br>P:GO:0006898;<br>P:GO:0002119;<br>P:GO:0040011 | - |             | IPR003961; IPR008957; IPR013783                                                                                                      |
|                             | -                                                           | 0 |                                                                                                                                     |   |             | IPR000560; G3DSA:3.40.50.1240 (GENE3D), SignalP (SIGNALP)                                                                            |
| Caenorhabditis remanei      | nnmt pnmt temt family protein                               | 1 | F:GO:0008168                                                                                                                        | - | EC:2.1.1.0  | IPR000940; PTHR10867:SF3 (PANTHER)                                                                                                   |
|                             | -                                                           | 0 |                                                                                                                                     |   |             | SignalP (SIGNALP)                                                                                                                    |
| Caenorhabditis elegans      | small g protein rab                                         | 3 | P:GO:0015031;<br>F:GO:0005525;<br>P:GO:0007264                                                                                      | - |             | IPR013753; IPR020851;<br>G3DSA:3.40.50.300 (GENE3D),<br>PTHR11708 (PANTHER),<br>PTHR11708:SF264 (PANTHER),<br>SSF52540 (SUPERFAMILY) |
|                             | -                                                           | 0 |                                                                                                                                     |   |             | -                                                                                                                                    |
|                             | -                                                           | 0 |                                                                                                                                     |   |             | -                                                                                                                                    |
|                             | -                                                           | 0 |                                                                                                                                     |   |             | SignalP (SIGNALP)                                                                                                                    |
|                             | -                                                           | 0 |                                                                                                                                     |   |             | -                                                                                                                                    |
| Caenorhabditis remanei      | oxidase peroxidase                                          | 4 | F:GO:0020037;<br>P:GO:0055114;<br>F:GO:0004601;<br>P:GO:0006979                                                                     | - | EC:1.11.1.7 | IPR002007; IPR010255; PTHR11475 (PANTHER), PTHR11475:SF9 (PANTHER)                                                                   |
| Caenorhabditis elegans      | methylmalonyl epimerase                                     | 2 | P:GO:0046491;<br>C:GO:0005739                                                                                                       | - |             | -                                                                                                                                    |
| Ailuropoda melanoleuca      | otu ubiquitin aldehyde binding 1                            | 5 | C:GO:0005737;<br>F:GO:0004843;<br>P:GO:0071108;<br>F:GO:0019784;<br>F:GO:0043130                                                    | - |             | IPR019400; PTHR12931 (PANTHER), PTHR12931:SF6 (PANTHER), SSF54001 (SUPERFAMILY)                                                      |
| Brugia malayi               | short-chain dehydroge-se reductase sdr                      | 2 | P:GO:0008152;<br>F:GO:0016491                                                                                                       | - |             | IPR002198; IPR016040;<br>PTHR19410:SF85 (PANTHER),<br>SSF51735 (SUPERFAMILY)                                                         |
|                             | -                                                           | 0 |                                                                                                                                     |   |             | -                                                                                                                                    |
|                             | -                                                           | 0 |                                                                                                                                     |   |             | SignalP (SIGNALP)                                                                                                                    |
| Pongo abelii                | PREDICTED: hypothetical protein LOC100447004 [Pongo abelii] | 0 |                                                                                                                                     |   |             | -                                                                                                                                    |
|                             | -                                                           | 0 |                                                                                                                                     |   |             | -                                                                                                                                    |
|                             | -                                                           | 0 |                                                                                                                                     |   |             | -                                                                                                                                    |
|                             | -                                                           | 0 |                                                                                                                                     |   |             | IPR013930                                                                                                                            |
|                             | -                                                           | 0 |                                                                                                                                     |   |             | -                                                                                                                                    |
|                             | -                                                           | 0 |                                                                                                                                     |   |             | -                                                                                                                                    |

|                         |                                                         |  |   |                                                                                                                                     |   |                                                                                                   |                                                                                                    |
|-------------------------|---------------------------------------------------------|--|---|-------------------------------------------------------------------------------------------------------------------------------------|---|---------------------------------------------------------------------------------------------------|----------------------------------------------------------------------------------------------------|
| Caenorhabditis elegans  | amp-activated protein ki-se gamma subunit               |  | 3 | P:GO:0015758;<br>F:GO:0003824;<br>P:GO:0005978                                                                                      | - |                                                                                                   | IPR000644; IPR013785; PTHR13780 (PANTHER), SSF54631 (SUPERFAMILY)                                  |
|                         | -                                                       |  | 0 |                                                                                                                                     |   |                                                                                                   | -                                                                                                  |
| Caenorhabditis elegans  | hypothetical protein F48E3.2 [Caenorhabditis elegans]   |  | 0 |                                                                                                                                     |   | C:GO:0016021;<br>C:GO:0016020;<br>P:GO:0055085;<br>P:GO:0009792;<br>F:GO:0005215;<br>P:GO:0006810 | SignalP (SIGNALP)                                                                                  |
|                         | -                                                       |  | 0 |                                                                                                                                     |   |                                                                                                   | -                                                                                                  |
|                         | -                                                       |  | 0 |                                                                                                                                     |   |                                                                                                   | -                                                                                                  |
|                         | -                                                       |  | 0 |                                                                                                                                     |   |                                                                                                   | -                                                                                                  |
|                         | -                                                       |  | 0 |                                                                                                                                     |   |                                                                                                   | -                                                                                                  |
|                         | -                                                       |  | 0 |                                                                                                                                     |   |                                                                                                   | SignalP (SIGNALP)                                                                                  |
|                         | -                                                       |  | 0 |                                                                                                                                     |   |                                                                                                   | -                                                                                                  |
|                         | -                                                       |  | 0 |                                                                                                                                     |   |                                                                                                   | -                                                                                                  |
| Caenorhabditis elegans  | protein ki-se domain containing protein                 |  | 8 | P:GO:0006468;<br>P:GO:0030154;<br>P:GO:0009103;<br>F:GO:0005515;<br>F:GO:0005524;<br>F:GO:0000287;<br>C:GO:0016020;<br>F:GO:0004674 | - | EC:2.7.11.0                                                                                       | IPR000719; IPR008271; IPR011009;<br>IPR017442; IPR020636; IPR020659;<br>G3DSA:1.10.510.10 (GENE3D) |
| Caenorhabditis briggsae | tbcl domain member 17                                   |  | 2 | C:GO:0005622;<br>F:GO:0005096                                                                                                       | - |                                                                                                   | IPR006162; IPR021935                                                                               |
| Caenorhabditis briggsae | tbcl domain member 17                                   |  | 2 | C:GO:0005622;<br>F:GO:0005096                                                                                                       | - |                                                                                                   | IPR006162; IPR021935                                                                               |
|                         | -                                                       |  | 0 |                                                                                                                                     |   |                                                                                                   | -                                                                                                  |
|                         | -                                                       |  | 0 |                                                                                                                                     |   |                                                                                                   | -                                                                                                  |
|                         | -                                                       |  | 0 |                                                                                                                                     |   |                                                                                                   | -                                                                                                  |
| Caenorhabditis briggsae | Hypothetical protein CBG19249 [Caenorhabditis briggsae] |  | 5 | C:GO:0008076;<br>F:GO:0005249;<br>F:GO:0005515;<br>P:GO:0055085;<br>P:GO:0006813                                                    | - |                                                                                                   | -                                                                                                  |
|                         | -                                                       |  | 0 |                                                                                                                                     |   |                                                                                                   | -                                                                                                  |
| Caenorhabditis elegans  | hypothetical protein F43C9.2 [Caenorhabditis elegans]   |  | 1 | F:GO:0005509                                                                                                                        | - |                                                                                                   | IPR011992; IPR018247; IPR018249;<br>PTHR23050 (PANTHER),<br>PTHR23050:SF5 (PANTHER)                |
|                         | -                                                       |  | 0 |                                                                                                                                     |   |                                                                                                   | -                                                                                                  |
|                         | -                                                       |  | 0 |                                                                                                                                     |   |                                                                                                   | SignalP (SIGNALP)                                                                                  |
|                         | -                                                       |  | 0 |                                                                                                                                     |   |                                                                                                   | -                                                                                                  |
| Ailurogoda melanoleuca  | eif3b protein                                           |  | 7 | C:GO:0005852;<br>F:GO:0003723;<br>P:GO:0045948;<br>F:GO:0032947;<br>F:GO:0003743;<br>C:GO:0005829;<br>F:GO:0000166                  | - |                                                                                                   | IPR011400; IPR013979                                                                               |
| Caenorhabditis elegans  | short-chain dehydroge-se                                |  | 5 | C:GO:0005875;<br>P:GO:0055114;<br>F:GO:0016491;<br>F:GO:0032934;<br>C:GO:0005811                                                    | - |                                                                                                   | SignalP (SIGNALP)                                                                                  |
|                         | -                                                       |  | 0 |                                                                                                                                     |   |                                                                                                   | SignalP (SIGNALP)                                                                                  |
|                         | -                                                       |  | 0 |                                                                                                                                     |   |                                                                                                   | -                                                                                                  |

|                         |                                                      |    |                                                                                                                                                                                                                                           |   |                                                                                                           |
|-------------------------|------------------------------------------------------|----|-------------------------------------------------------------------------------------------------------------------------------------------------------------------------------------------------------------------------------------------|---|-----------------------------------------------------------------------------------------------------------|
|                         | -                                                    | 0  |                                                                                                                                                                                                                                           |   | -                                                                                                         |
|                         | -                                                    | 0  |                                                                                                                                                                                                                                           |   | IPR000615; IPR021134; SignalP (SIGNALP)                                                                   |
|                         | -                                                    | 0  |                                                                                                                                                                                                                                           |   | -                                                                                                         |
|                         | -                                                    | 0  |                                                                                                                                                                                                                                           |   | -                                                                                                         |
|                         | -                                                    | 0  |                                                                                                                                                                                                                                           |   | -                                                                                                         |
|                         | -                                                    | 0  |                                                                                                                                                                                                                                           |   | SignalP (SIGNALP)                                                                                         |
|                         | -                                                    | 0  |                                                                                                                                                                                                                                           |   | -                                                                                                         |
| Caenorhabditis briggsae | man-n-binding lectin serine protease 1               | 1  | F:GO:0008233                                                                                                                                                                                                                              | - | IPR001254; IPR009003; IPR018114; G3DSA:2.40.10.10 (GENE3D), PTHR19355 (PANTHER), PTHR19355:SF82 (PANTHER) |
| Caenorhabditis briggsae | phosphatidate cytidyltransferase                     | 13 | P:GO:0016056;<br>P:GO:0016024;<br>P:GO:0007430;<br>P:GO:0008340;<br>P:GO:0040007;<br>P:GO:0007602;<br>P:GO:0000003;<br>P:GO:0043052;<br>P:GO:0002119;<br>F:GO:0004605;<br>C:GO:0005635;<br>C:GO:0005887;<br>C:GO:0005790                  | - | EC:2.7.7.41<br>IPR000374; PTHR13773 (PANTHER), SignalP (SIGNALP)                                          |
| Caenorhabditis briggsae | briggsae cbr-ltd-1 protein                           | 1  | F:GO:0008270                                                                                                                                                                                                                              | - | -                                                                                                         |
| Caenorhabditis briggsae | kynurenine 3-monooxyge-se (kynurenine 3-hydroxylase) | 14 | P:GO:0019363;<br>F:GO:0016174;<br>C:GO:0005829;<br>P:GO:0009651;<br>C:GO:0016021;<br>C:GO:0005743;<br>P:GO:0019441;<br>P:GO:0055114;<br>F:GO:0009055;<br>C:GO:0005741;<br>P:GO:0019674;<br>F:GO:0004502;<br>F:GO:0050660;<br>P:GO:0070189 | - | EC:1.6.3.1;<br>EC:1.14.13.9                                                                               |
|                         | -                                                    | 0  |                                                                                                                                                                                                                                           |   | -                                                                                                         |
|                         | -                                                    | 0  |                                                                                                                                                                                                                                           |   | -                                                                                                         |

|                        |                                                   |    |                                                                                                                                                                                                                                                                                                                                                                                                                                      |                               |                                                   |
|------------------------|---------------------------------------------------|----|--------------------------------------------------------------------------------------------------------------------------------------------------------------------------------------------------------------------------------------------------------------------------------------------------------------------------------------------------------------------------------------------------------------------------------------|-------------------------------|---------------------------------------------------|
| Macaca mulatta         | annexin a1                                        | 25 | P:GO:0018149;<br>P:GO:0006629;<br>F:GO:0030674;<br>P:GO:0006954;<br>P:GO:0007049;<br>F:GO:0005509;<br>P:GO:0030216;<br>F:GO:0005544;<br>P:GO:0006916;<br>F:GO:0005102;<br>P:GO:0050482;<br>C:GO:0005929;<br>F:GO:0019834;<br>P:GO:0006928;<br>P:GO:0042127;<br>P:GO:0007165;<br>C:GO:0042383;<br>C:GO:0016323;<br>C:GO:0005576;<br>F:GO:0005198;<br>P:GO:0007166;<br>C:GO:0005737;<br>P:GO:0031340;<br>C:GO:0001533;<br>C:GO:0005634 | -                             | IPR001464; IPR018502;<br>PTHR10502:SF17 (PANTHER) |
| -                      | -                                                 | 0  |                                                                                                                                                                                                                                                                                                                                                                                                                                      | -                             | -                                                 |
| -                      | -                                                 | 0  |                                                                                                                                                                                                                                                                                                                                                                                                                                      | -                             | -                                                 |
| -                      | -                                                 | 0  |                                                                                                                                                                                                                                                                                                                                                                                                                                      | -                             | -                                                 |
| -                      | -                                                 | 0  |                                                                                                                                                                                                                                                                                                                                                                                                                                      | -                             | -                                                 |
| -                      | -                                                 | 0  |                                                                                                                                                                                                                                                                                                                                                                                                                                      | -                             | SignalP (SIGNALP)                                 |
| Ancylostoma ceylanicum | venom-allergen-like protein family member (vap-1) | 1  | P:GO:0040011                                                                                                                                                                                                                                                                                                                                                                                                                         | -                             | IPR001283; IPR014044; SignalP (SIGNALP)           |
| Caenorhabditis remanei | r- dependent r- polymerase family protein         | 1  | F:GO:0005515                                                                                                                                                                                                                                                                                                                                                                                                                         | -                             | IPR007855                                         |
| -                      | -                                                 | 0  |                                                                                                                                                                                                                                                                                                                                                                                                                                      | -                             | SignalP (SIGNALP)                                 |
| -                      | -                                                 | 0  |                                                                                                                                                                                                                                                                                                                                                                                                                                      | -                             | -                                                 |
| Caenorhabditis remanei | major facilitator superfamily protein             | 3  | P:GO:0055085;<br>C:GO:0016021;<br>F:GO:0005215                                                                                                                                                                                                                                                                                                                                                                                       | -                             | -                                                 |
| -                      | -                                                 | 0  |                                                                                                                                                                                                                                                                                                                                                                                                                                      | -                             | -                                                 |
| -                      | -                                                 | 0  |                                                                                                                                                                                                                                                                                                                                                                                                                                      | -                             | -                                                 |
| -                      | -                                                 | 0  |                                                                                                                                                                                                                                                                                                                                                                                                                                      | -                             | -                                                 |
| Brugia malayi          | ync3_caeel ame: full= zinc finger protein         | 0  |                                                                                                                                                                                                                                                                                                                                                                                                                                      | F:GO:0008270;<br>C:GO:0005622 | -                                                 |
| Loa loa                | diacylglycerol ki-se                              | 13 | F:GO:0004143;<br>F:GO:0008270;<br>F:GO:0003676;<br>P:GO:0023034;<br>P:GO:0006355;<br>F:GO:0005515;<br>F:GO:0003700;<br>F:GO:0000166;<br>F:GO:0019992;<br>P:GO:0007165;<br>F:GO:0003707;<br>P:GO:0007205;<br>C:GO:0005634                                                                                                                                                                                                             | -                             | EC:2.7.1.107 -                                    |
| -                      | -                                                 | 0  |                                                                                                                                                                                                                                                                                                                                                                                                                                      |                               | SignalP (SIGNALP)                                 |

|                          |                                             |    |                                                                                                                                                                                                         |   |   |                                                                                       |
|--------------------------|---------------------------------------------|----|---------------------------------------------------------------------------------------------------------------------------------------------------------------------------------------------------------|---|---|---------------------------------------------------------------------------------------|
| Loa loa                  | prp31 pre-mr- processing factor 31 homolog  | 12 | C:GO:0005687;<br>F:GO:0070990;<br>C:GO:0071339;<br>C:GO:0015030;<br>C:GO:0016607;<br>P:GO:0040035;<br>P:GO:0018996;<br>P:GO:0040011;<br>C:GO:0046540;<br>P:GO:0002009;<br>P:GO:0001703;<br>P:GO:0000244 | - | - | IPR002687; IPR012976; PTHR13904 (PANTHER), SSF89124 (SUPERFAMILY)                     |
| -                        | -                                           | 0  |                                                                                                                                                                                                         | - | - | -                                                                                     |
| -                        | -                                           | 0  |                                                                                                                                                                                                         | - | - | -                                                                                     |
| -                        | -                                           | 0  |                                                                                                                                                                                                         | - | - | -                                                                                     |
| -                        | -                                           | 0  |                                                                                                                                                                                                         | - | - | -                                                                                     |
| Caenorhabditis remanei   | briggsae cbr-rhgf-2 protein                 | 1  | P:GO:0009792                                                                                                                                                                                            | - | - | -                                                                                     |
| -                        | -                                           | 0  |                                                                                                                                                                                                         | - | - | -                                                                                     |
| -                        | -                                           | 0  |                                                                                                                                                                                                         | - | - | -                                                                                     |
| -                        | -                                           | 0  |                                                                                                                                                                                                         | - | - | SignalP (SIGNALP)                                                                     |
| Caenorhabditis remanei   | glucose transporter 1 transcript            | 3  | P:GO:0055085;<br>C:GO:0016021;<br>F:GO:0005215                                                                                                                                                          | - | - | -                                                                                     |
| Caenorhabditis elegans   | lethal family member (let-805)              | 8  | P:GO:0018996;<br>P:GO:0009792;<br>P:GO:0008340;<br>P:GO:0000003;<br>F:GO:0005515;<br>P:GO:0006898;<br>P:GO:0002119;<br>P:GO:0040011                                                                     | - | - | -                                                                                     |
| Loa loa                  | will die slowly                             | 5  | C:GO:0071339;<br>F:GO:0042800;<br>P:GO:0045449;<br>P:GO:0051568;<br>F:GO:0005515                                                                                                                        | - | - | -                                                                                     |
| -                        | -                                           | 0  |                                                                                                                                                                                                         | - | - | SignalP (SIGNALP)                                                                     |
| -                        | -                                           | 0  |                                                                                                                                                                                                         | - | - | -                                                                                     |
| -                        | -                                           | 0  |                                                                                                                                                                                                         | - | - | -                                                                                     |
| Ostreococcus tauri       | un-med protein product [Ostreococcus tauri] | 0  |                                                                                                                                                                                                         | - | - | -                                                                                     |
| -                        | -                                           | 0  |                                                                                                                                                                                                         | - | - | SignalP (SIGNALP)                                                                     |
| Caenorhabditis elegans   | est2_caee1 ame: full=esterase cm06b1        | 1  | F:GO:0016787                                                                                                                                                                                            | - | - | -                                                                                     |
| -                        | -                                           | 0  |                                                                                                                                                                                                         | - | - | -                                                                                     |
| -                        | -                                           | 0  |                                                                                                                                                                                                         | - | - | -                                                                                     |
| -                        | -                                           | 0  |                                                                                                                                                                                                         | - | - | -                                                                                     |
| -                        | -                                           | 0  |                                                                                                                                                                                                         | - | - | -                                                                                     |
| -                        | -                                           | 0  |                                                                                                                                                                                                         | - | - | -                                                                                     |
| Caenorhabditis briggsae  | briggsae cbr-pis-1 protein                  | 2  | P:GO:0040018;<br>P:GO:0000003                                                                                                                                                                           | - | - | IPR001357; G3DSA:3.40.50.10190 (GENE3D), PTHR23196 (PANTHER), PTHR23196:SF1 (PANTHER) |
| -                        | -                                           | 0  |                                                                                                                                                                                                         | - | - | -                                                                                     |
| -                        | -                                           | 0  |                                                                                                                                                                                                         | - | - | -                                                                                     |
| -                        | -                                           | 0  |                                                                                                                                                                                                         | - | - | -                                                                                     |
| -                        | -                                           | 0  |                                                                                                                                                                                                         | - | - | -                                                                                     |
| -                        | -                                           | 0  |                                                                                                                                                                                                         | - | - | -                                                                                     |
| -                        | -                                           | 0  |                                                                                                                                                                                                         | - | - | -                                                                                     |
| -                        | -                                           | 0  |                                                                                                                                                                                                         | - | - | -                                                                                     |
| -                        | -                                           | 0  |                                                                                                                                                                                                         | - | - | SignalP (SIGNALP)                                                                     |
| Saccoglossus kowalevskii | endonuclease-reverse partial                | 0  |                                                                                                                                                                                                         | - | - | -                                                                                     |



|                         |                                                       |    |                                                                                                                                                                                                         |   |                                                         |                                                                                       |
|-------------------------|-------------------------------------------------------|----|---------------------------------------------------------------------------------------------------------------------------------------------------------------------------------------------------------|---|---------------------------------------------------------|---------------------------------------------------------------------------------------|
| Homo sapiens            | vitamin k epoxide reductase complex subunit 1         | 12 | F:GO:0047057;<br>P:GO:0046677;<br>P:GO:0010243;<br>C:GO:0016021;<br>F:GO:0047058;<br>P:GO:0030193;<br>P:GO:0055114;<br>P:GO:0042371;<br>C:GO:0005792;<br>P:GO:0050820;<br>P:GO:0014070;<br>C:GO:0005789 | - | EC:1.1.4.1;<br>EC:1.1.4.2                               | IPR012932; PTHR14519 (PANTHER)                                                        |
| Caenorhabditis elegans  | ephrin b2                                             | 1  | C:GO:0016020                                                                                                                                                                                            | - |                                                         | IPR001799; IPR008972;<br>PTHR11304:SF21 (PANTHER)                                     |
|                         | -                                                     | 0  |                                                                                                                                                                                                         |   |                                                         | -                                                                                     |
|                         | -                                                     | 0  |                                                                                                                                                                                                         |   |                                                         | SignalP (SIGNALP)                                                                     |
|                         | -                                                     | 0  |                                                                                                                                                                                                         |   |                                                         | -                                                                                     |
|                         | -                                                     | 0  |                                                                                                                                                                                                         |   |                                                         | -                                                                                     |
| Caenorhabditis elegans  | tr- pseudouridine synthase a                          | 4  | F:GO:0003723;<br>P:GO:0001522;<br>F:GO:0009982;<br>P:GO:0008033                                                                                                                                         | - | EC:5.4.99.12                                            | IPR001406; IPR020095; IPR020103                                                       |
| Caenorhabditis elegans  | briggsae cbr-hmr-1 protein                            | 12 | C:GO:0005911;<br>P:GO:0016339;<br>F:GO:0005515;<br>P:GO:0007412;<br>P:GO:0050774;<br>P:GO:0007156;<br>P:GO:0048676;<br>P:GO:0031290;<br>P:GO:0045467;<br>P:GO:0016318;<br>P:GO:0045463;<br>P:GO:0048841 | - |                                                         | IPR002126; IPR015919; IPR020894;<br>PTHR10596 (PANTHER),<br>PTHR10596:SF114 (PANTHER) |
| Caenorhabditis remanei  | briggsae cbr-dyb-1 protein                            | 10 | F:GO:0005277;<br>P:GO:0015870;<br>F:GO:0008270;<br>F:GO:0005509;<br>P:GO:0007271;<br>F:GO:0005515;<br>P:GO:0007529;<br>P:GO:0046716;<br>P:GO:0040017;<br>C:GO:0016010                                   | - |                                                         | -                                                                                     |
| Caenorhabditis remanei  | tubulin beta-2c chain                                 | 6  | P:GO:0007018;<br>F:GO:0005525;<br>P:GO:0051258;<br>F:GO:0005198;<br>F:GO:0003924;<br>C:GO:0005874                                                                                                       | - | EC:3.6.5.1;<br>EC:3.6.5.2;<br>EC:3.6.5.3;<br>EC:3.6.5.4 | IPR000217; IPR002453; IPR003008                                                       |
| Caenorhabditis elegans  | hypothetical protein T23F4.2 [Caenorhabditis elegans] | 0  |                                                                                                                                                                                                         |   |                                                         | -                                                                                     |
| Caenorhabditis briggsae | db module family protein                              | 0  |                                                                                                                                                                                                         |   |                                                         | -                                                                                     |
|                         | -                                                     | 0  |                                                                                                                                                                                                         |   |                                                         | -                                                                                     |
|                         | -                                                     | 0  |                                                                                                                                                                                                         |   |                                                         | -                                                                                     |
| Loa loa                 | exosome component 7                                   | 4  | F:GO:0005515;<br>F:GO:0004518;<br>P:GO:0016070;<br>C:GO:0044424                                                                                                                                         | - |                                                         | SignalP (SIGNALP)                                                                     |

|                         |                                     |    |                                                                                                                                                                                                                                                                                                                                                                                                                                                                        |                                                                                                   |             |                                                                                                                     |
|-------------------------|-------------------------------------|----|------------------------------------------------------------------------------------------------------------------------------------------------------------------------------------------------------------------------------------------------------------------------------------------------------------------------------------------------------------------------------------------------------------------------------------------------------------------------|---------------------------------------------------------------------------------------------------|-------------|---------------------------------------------------------------------------------------------------------------------|
| Loa loa                 | exosome component 7                 | 4  | F:GO:0005515;<br>F:GO:0004518;<br>P:GO:0016070;<br>C:GO:0044424                                                                                                                                                                                                                                                                                                                                                                                                        | -                                                                                                 |             | SignalP (SIGNALP)                                                                                                   |
|                         | -                                   | 0  |                                                                                                                                                                                                                                                                                                                                                                                                                                                                        |                                                                                                   |             | SignalP (SIGNALP)                                                                                                   |
| Caenorhabditis remanei  | phospholipase c gamma               | 5  | F:GO:0004871;<br>F:GO:0005515;<br>F:GO:0004435;<br>P:GO:0009395;<br>P:GO:0007165                                                                                                                                                                                                                                                                                                                                                                                       | -                                                                                                 | EC:3.1.4.11 | IPR000008; IPR008973; IPR018029;<br>G3DSA:2.60.40.150 (GENE3D),<br>PTHR10336 (PANTHER),<br>PTHR10336:SF22 (PANTHER) |
| Ailuropoda melanoleuca  | secreted frizzled-related protein 2 | 53 | P:GO:0008284;<br>P:GO:0007584;<br>N:GO:2000041;<br>P:GO:0050680;<br>P:GO:0032582;<br>P:GO:0045669;<br>P:GO:0003214;<br>P:GO:0030336;<br>P:GO:0002063;<br>P:GO:0043065;<br>P:GO:0031668;<br>P:GO:0045766;<br>P:GO:0030199;<br>F:GO:0005178;<br>P:GO:0048546;<br>C:GO:0005615;<br>N:GO:2000035;<br>P:GO:0090179;<br>P:GO:0060349;<br>P:GO:0043154;<br>P:GO:0043508;<br>F:GO:0001968;<br>P:GO:0003151;<br>P:GO:0061056;<br>P:GO:0090263;<br>F:GO:0017147;<br>P:GO:0042733 | -                                                                                                 |             | IPR015526; IPR020067;<br>PTHR11309:SF3 (PANTHER)                                                                    |
| Caenorhabditis elegans  | briggsae cbr-rpm-1 protein          | 0  |                                                                                                                                                                                                                                                                                                                                                                                                                                                                        | F:GO:0046872;<br>P:GO:0030071;<br>C:GO:0005680;<br>F:GO:0008270;<br>F:GO:0005515;<br>C:GO:0005622 |             | PTHR12846 (PANTHER),<br>PTHR12846:SF2 (PANTHER)                                                                     |
|                         | -                                   | 0  |                                                                                                                                                                                                                                                                                                                                                                                                                                                                        |                                                                                                   |             | PTHR23022 (PANTHER),<br>PTHR23022:SF3 (PANTHER)                                                                     |
|                         | -                                   | 0  |                                                                                                                                                                                                                                                                                                                                                                                                                                                                        |                                                                                                   |             | -                                                                                                                   |
|                         | -                                   | 0  |                                                                                                                                                                                                                                                                                                                                                                                                                                                                        |                                                                                                   |             | -                                                                                                                   |
|                         | -                                   | 0  |                                                                                                                                                                                                                                                                                                                                                                                                                                                                        |                                                                                                   |             | -                                                                                                                   |
|                         | -                                   | 0  |                                                                                                                                                                                                                                                                                                                                                                                                                                                                        |                                                                                                   |             | -                                                                                                                   |
|                         | -                                   | 0  |                                                                                                                                                                                                                                                                                                                                                                                                                                                                        |                                                                                                   |             | -                                                                                                                   |
|                         | -                                   | 0  |                                                                                                                                                                                                                                                                                                                                                                                                                                                                        |                                                                                                   |             | IPR013083                                                                                                           |
|                         | -                                   | 0  |                                                                                                                                                                                                                                                                                                                                                                                                                                                                        |                                                                                                   |             | -                                                                                                                   |
| Caenorhabditis briggsae | myosin heavy chain                  | 6  | C:GO:0032982;<br>F:GO:0003779;<br>F:GO:0005524;<br>F:GO:0003774;<br>C:GO:0031672;<br>P:GO:0007626                                                                                                                                                                                                                                                                                                                                                                      | -                                                                                                 |             | -                                                                                                                   |



|                        |                                             |   |                                                                                                                    |                                                                                                                                                                                                                                                                                                                                                                                                                                                                                                                                                      |                                                                                       |
|------------------------|---------------------------------------------|---|--------------------------------------------------------------------------------------------------------------------|------------------------------------------------------------------------------------------------------------------------------------------------------------------------------------------------------------------------------------------------------------------------------------------------------------------------------------------------------------------------------------------------------------------------------------------------------------------------------------------------------------------------------------------------------|---------------------------------------------------------------------------------------|
|                        | -                                           | 0 |                                                                                                                    |                                                                                                                                                                                                                                                                                                                                                                                                                                                                                                                                                      | -                                                                                     |
|                        | -                                           | 0 |                                                                                                                    |                                                                                                                                                                                                                                                                                                                                                                                                                                                                                                                                                      | SignalP (SIGNALP)                                                                     |
|                        | -                                           | 0 |                                                                                                                    |                                                                                                                                                                                                                                                                                                                                                                                                                                                                                                                                                      | SignalP (SIGNALP)                                                                     |
|                        | -                                           | 0 |                                                                                                                    |                                                                                                                                                                                                                                                                                                                                                                                                                                                                                                                                                      | -                                                                                     |
| Tetraodon nigroviridis | acyl- synthetase long-chain family member 5 | 0 |                                                                                                                    | <p>P:GO:0070529;<br/> C:GO:0005829;<br/> C:GO:0005886;<br/> P:GO:0006641;<br/> P:GO:0009749;<br/> F:GO:0003987;<br/> P:GO:0008152;<br/> C:GO:0016021;<br/> P:GO:0010747;<br/> P:GO:0009744;<br/> C:GO:0016020;<br/> C:GO:0005789;<br/> P:GO:0034201;<br/> P:GO:0070723;<br/> C:GO:0005783;<br/> F:GO:0003824;<br/> P:GO:0007584;<br/> C:GO:0005625;<br/> P:GO:0015908;<br/> P:GO:0010033;<br/> P:GO:0010867;<br/> P:GO:0006631;<br/> F:GO:0005524;<br/> C:GO:0005778;<br/> C:GO:0005777;<br/> C:GO:0005743;<br/> P:GO:0008654;<br/> C:GO:0005741</p> | <p>PTHR11968 (PANTHER),<br/> PTHR11968:SF8 (PANTHER), SSF56801<br/> (SUPERFAMILY)</p> |
|                        | -                                           | 0 |                                                                                                                    |                                                                                                                                                                                                                                                                                                                                                                                                                                                                                                                                                      | -                                                                                     |
| Meloidogyne artiellia  | briggsae cbr-lys- protein                   | 4 | <p>P:GO:0005975;<br/> F:GO:0003824;<br/> P:GO:0043170;<br/> P:GO:0009056</p>                                       |                                                                                                                                                                                                                                                                                                                                                                                                                                                                                                                                                      | -                                                                                     |
|                        | -                                           | 0 |                                                                                                                    |                                                                                                                                                                                                                                                                                                                                                                                                                                                                                                                                                      | SignalP (SIGNALP)                                                                     |
|                        | -                                           | 0 |                                                                                                                    |                                                                                                                                                                                                                                                                                                                                                                                                                                                                                                                                                      | -                                                                                     |
|                        | -                                           | 0 |                                                                                                                    |                                                                                                                                                                                                                                                                                                                                                                                                                                                                                                                                                      | -                                                                                     |
|                        | -                                           | 0 |                                                                                                                    |                                                                                                                                                                                                                                                                                                                                                                                                                                                                                                                                                      | -                                                                                     |
| Callithrix jacchus     | tr- (cytosine-5-)-methyltransferase         | 6 | <p>F:GO:0003676;<br/> F:GO:0008415;<br/> P:GO:0044260;<br/> P:GO:0090304;<br/> P:GO:0010467;<br/> F:GO:0003886</p> | EC:2.1.1.37                                                                                                                                                                                                                                                                                                                                                                                                                                                                                                                                          | SignalP (SIGNALP)                                                                     |
|                        | -                                           | 0 |                                                                                                                    |                                                                                                                                                                                                                                                                                                                                                                                                                                                                                                                                                      | IPR003618                                                                             |
|                        | -                                           | 0 |                                                                                                                    |                                                                                                                                                                                                                                                                                                                                                                                                                                                                                                                                                      | -                                                                                     |
|                        | -                                           | 0 |                                                                                                                    |                                                                                                                                                                                                                                                                                                                                                                                                                                                                                                                                                      | -                                                                                     |

|                              |                                                       |    |                                                                                                                                                                                                                                                                                                                                                                                   |   |                                                         |                                                                                                                                     |
|------------------------------|-------------------------------------------------------|----|-----------------------------------------------------------------------------------------------------------------------------------------------------------------------------------------------------------------------------------------------------------------------------------------------------------------------------------------------------------------------------------|---|---------------------------------------------------------|-------------------------------------------------------------------------------------------------------------------------------------|
| Caenorhabditis briggsae      | vacuolar protein sorting 11                           | 10 | P:GO:0040010;<br>C:GO:0030897;<br>P:GO:0008219;<br>F:GO:0046872;<br>P:GO:0000003;<br>P:GO:0018996;<br>P:GO:0010171;<br>F:GO:0005515;<br>P:GO:0009792;<br>P:GO:0040018                                                                                                                                                                                                             | - |                                                         | IPR001841; IPR013083; PTHR23323 (PANTHER), PTHR23323:SF24 (PANTHER), PF12451 (PFAM), SSF57850 (SUPERFAMILY)                         |
| -                            | -                                                     | 0  |                                                                                                                                                                                                                                                                                                                                                                                   |   |                                                         | -                                                                                                                                   |
| Caenorhabditis elegans       | tpr domain containing protein                         | 2  | P:GO:0040010;<br>P:GO:0040017                                                                                                                                                                                                                                                                                                                                                     | - |                                                         | -                                                                                                                                   |
| Perkinsus marinus ATCC 50983 | d- topoisomerase 2-                                   | 10 | P:GO:0000910;<br>P:GO:0006355;<br>P:GO:0000003;<br>F:GO:0005524;<br>F:GO:0003700;<br>F:GO:0003918;<br>C:GO:0005694;<br>P:GO:0006265;<br>P:GO:0009792;<br>P:GO:0016246                                                                                                                                                                                                             | - | EC:5.99.1.3                                             | IPR002205; IPR013758; IPR013760; PTHR10169 (PANTHER), PTHR10169:SF2 (PANTHER)                                                       |
| -                            | -                                                     | 0  |                                                                                                                                                                                                                                                                                                                                                                                   |   |                                                         | -                                                                                                                                   |
| Ailuropoda melanoleuca       | member ras oncogene family                            | 23 | C:GO:0000785;<br>C:GO:0005654;<br>P:GO:0007052;<br>C:GO:0042470;<br>F:GO:0005525;<br>P:GO:0030521;<br>P:GO:0006611;<br>P:GO:0051301;<br>P:GO:0006184;<br>P:GO:0006259;<br>C:GO:0005829;<br>P:GO:0007067;<br>F:GO:0003713;<br>P:GO:0007286;<br>P:GO:0007165;<br>P:GO:0045893;<br>F:GO:0003682;<br>F:GO:0003924;<br>P:GO:0006606;<br>F:GO:0050681;<br>P:GO:0006405;<br>P:GO:0044419 | - | EC:3.6.5.1;<br>EC:3.6.5.2;<br>EC:3.6.5.3;<br>EC:3.6.5.4 | IPR001806; IPR013753; IPR020851; G3DSA:3.40.50.300 (GENE3D), PTHR11708 (PANTHER), PTHR11708:SF269 (PANTHER), SSF52540 (SUPERFAMILY) |
| -                            | -                                                     | 0  |                                                                                                                                                                                                                                                                                                                                                                                   |   |                                                         | -                                                                                                                                   |
| -                            | -                                                     | 0  |                                                                                                                                                                                                                                                                                                                                                                                   |   |                                                         | -                                                                                                                                   |
| -                            | -                                                     | 0  |                                                                                                                                                                                                                                                                                                                                                                                   |   |                                                         | -                                                                                                                                   |
| -                            | -                                                     | 0  |                                                                                                                                                                                                                                                                                                                                                                                   |   |                                                         | -                                                                                                                                   |
| Caenorhabditis elegans       | hypothetical protein C50D2.9 [Caenorhabditis elegans] | 2  | F:GO:0016773;<br>P:GO:0005975                                                                                                                                                                                                                                                                                                                                                     | - | EC:2.7.1.0                                              | SignalP (SIGNALP)                                                                                                                   |
| -                            | -                                                     | 0  |                                                                                                                                                                                                                                                                                                                                                                                   |   |                                                         | -                                                                                                                                   |
| -                            | -                                                     | 0  |                                                                                                                                                                                                                                                                                                                                                                                   |   |                                                         | -                                                                                                                                   |
| -                            | -                                                     | 0  |                                                                                                                                                                                                                                                                                                                                                                                   |   |                                                         | SignalP (SIGNALP)                                                                                                                   |
| -                            | -                                                     | 0  |                                                                                                                                                                                                                                                                                                                                                                                   |   |                                                         | -                                                                                                                                   |

|                         |                                                            |   |                                                                                                                    |                                                |             |                                                                                                                                    |
|-------------------------|------------------------------------------------------------|---|--------------------------------------------------------------------------------------------------------------------|------------------------------------------------|-------------|------------------------------------------------------------------------------------------------------------------------------------|
| Caenorhabditis elegans  | 3-hydroxy-3-methylglutaryl-coenzyme a reductase            | 6 | F:GO:0016616;<br>C:GO:0044425;<br>F:GO:0050662;<br>P:GO:0006694;<br>P:GO:0044281;<br>P:GO:0044237                  | -                                              | EC:1.1.1.0  | IPR002202; IPR004554; IPR009023;<br>IPR009029; IPR023074; IPR023076;<br>G3DSA:1.10.3270.10 (GENE3D),<br>G3DSA:3.30.70.420 (GENE3D) |
| Caenorhabditis briggsae | Hypothetical protein CBG20279 [Caenorhabditis briggsae]    | 2 | P:GO:0016311;<br>F:GO:0004721                                                                                      | -                                              | EC:3.1.3.16 | IPR000242; G3DSA:3.90.190.10<br>(GENE3D), PTHR19134 (PANTHER),<br>PTHR19134:SF26 (PANTHER)                                         |
| Caenorhabditis briggsae | briggsae cbr-elo-1 protein                                 | 1 | C:GO:0016021                                                                                                       |                                                |             | -                                                                                                                                  |
| Caenorhabditis remanei  | hypothetical protein CRE_19702 [Caenorhabditis remanei]    | 0 |                                                                                                                    | P:GO:0008152;<br>F:GO:0003824                  |             | -                                                                                                                                  |
| Caenorhabditis briggsae | briggsae cbr-tat-3 protein                                 | 7 | C:GO:0016021;<br>F:GO:0015662;<br>P:GO:0006754;<br>F:GO:0005524;<br>P:GO:0015914;<br>F:GO:0000287;<br>F:GO:0004012 | -                                              | EC:3.6.3.1  | IPR001757; PTHR11939:SF14<br>(PANTHER)                                                                                             |
|                         | -                                                          | 0 |                                                                                                                    |                                                |             | SignalP (SIGNALP)                                                                                                                  |
| Caenorhabditis elegans  | hypothetical protein K06A5.8 [Caenorhabditis elegans]      | 1 | F:GO:0005515                                                                                                       | -                                              |             | PTHR19863 (PANTHER),<br>PTHR19863:SF2 (PANTHER), SignalP<br>(SIGNALP)                                                              |
|                         | -                                                          | 0 |                                                                                                                    |                                                |             | -                                                                                                                                  |
| Caenorhabditis elegans  | elegans protein confirmed by transcript evidence           | 0 |                                                                                                                    | P:GO:0006629;<br>F:GO:0016788;<br>F:GO:0016787 |             | -                                                                                                                                  |
|                         | -                                                          | 0 |                                                                                                                    |                                                |             | -                                                                                                                                  |
| Caenorhabditis briggsae | alkyldihydroxyacetonephosphate synthase                    | 6 | F:GO:0050660;<br>P:GO:0009792;<br>F:GO:0016491;<br>P:GO:0040007;<br>F:GO:0016740;<br>P:GO:0002119                  | -                                              |             | PTHR11748 (PANTHER),<br>PTHR11748:SF3 (PANTHER)                                                                                    |
| Caenorhabditis elegans  | alpha- -glucosyltransferase alg10-b                        | 2 | C:GO:0016020;<br>P:GO:0040011                                                                                      | -                                              |             | IPR007006; PTHR12989:SF10<br>(PANTHER)                                                                                             |
|                         | -                                                          | 0 |                                                                                                                    |                                                |             | -                                                                                                                                  |
|                         | -                                                          | 0 |                                                                                                                    |                                                |             | -                                                                                                                                  |
| Caenorhabditis briggsae | elegans protein partially confirmed by transcript evidence | 0 |                                                                                                                    |                                                |             | PTHR22989 (PANTHER)                                                                                                                |
|                         | -                                                          | 0 |                                                                                                                    |                                                |             | SignalP (SIGNALP)                                                                                                                  |
| Caenorhabditis remanei  | briggsae cbr-set-18 protein                                | 1 | F:GO:0005515                                                                                                       | -                                              |             | -                                                                                                                                  |
| Caenorhabditis remanei  | briggsae cbr-mlt-7 protein                                 | 4 | F:GO:0020037;<br>P:GO:0055114;<br>F:GO:0004601;<br>P:GO:0006979                                                    | -                                              | EC:1.11.1.7 | IPR002007; PTHR11475 (PANTHER),<br>PTHR11475:SF9 (PANTHER)                                                                         |
|                         | -                                                          | 0 |                                                                                                                    |                                                |             | -                                                                                                                                  |
| Caenorhabditis elegans  | elegans protein partially confirmed by transcript evidence | 1 | P:GO:0009792                                                                                                       | -                                              |             | -                                                                                                                                  |
|                         | -                                                          | 0 |                                                                                                                    |                                                |             | -                                                                                                                                  |
|                         | -                                                          | 0 |                                                                                                                    |                                                |             | -                                                                                                                                  |

|                         |                                              |    |                                                                                                                                                                                                                                                                                                                                                 |                                                                 |            |                                                                                                                                                                                                                    |
|-------------------------|----------------------------------------------|----|-------------------------------------------------------------------------------------------------------------------------------------------------------------------------------------------------------------------------------------------------------------------------------------------------------------------------------------------------|-----------------------------------------------------------------|------------|--------------------------------------------------------------------------------------------------------------------------------------------------------------------------------------------------------------------|
| Caenorhabditis briggsae | d- replication licensing factor mcm4         | 17 | F:GO:0003678;<br>F:GO:0016851;<br>P:GO:0006268;<br>C:GO:0005730;<br>P:GO:0040007;<br>P:GO:0015995;<br>C:GO:0042555;<br>F:GO:0005524;<br>P:GO:0002119;<br>C:GO:0000785;<br>F:GO:0016887;<br>F:GO:0005515;<br>P:GO:0030174;<br>P:GO:0006997;<br>F:GO:0003697;<br>P:GO:0009792;<br>F:GO:0003682                                                    | -                                                               | EC:6.6.1.1 | IPR001208; IPR003593; IPR008047;<br>IPR012340; IPR016027; IPR018525;<br>G3DSA:3.30.1640.10 (GENE3D),<br>G3DSA:3.40.50.300 (GENE3D),<br>PTHR11630 (PANTHER),<br>PTHR11630:SF45 (PANTHER),<br>SSF52540 (SUPERFAMILY) |
| Caenorhabditis briggsae | d- replication licensing factor mcm4         | 20 | F:GO:0003678;<br>F:GO:0016851;<br>P:GO:0006268;<br>C:GO:0005730;<br>F:GO:0046872;<br>P:GO:0040007;<br>P:GO:0015995;<br>C:GO:0042555;<br>F:GO:0009055;<br>F:GO:0005524;<br>P:GO:0002119;<br>C:GO:0000785;<br>F:GO:0016887;<br>F:GO:0005515;<br>P:GO:0030174;<br>P:GO:0006997;<br>F:GO:0003697;<br>P:GO:0009792;<br>P:GO:0006350;<br>F:GO:0003682 | -                                                               | EC:6.6.1.1 | IPR001208; IPR003593; IPR008047;<br>IPR012340; IPR016027; IPR018525;<br>G3DSA:3.30.1640.10 (GENE3D),<br>G3DSA:3.40.50.300 (GENE3D),<br>PTHR11630 (PANTHER),<br>PTHR11630:SF45 (PANTHER),<br>SSF52540 (SUPERFAMILY) |
| Caenorhabditis briggsae | phosphatidylinositol glycan anchor class n   | 4  | P:GO:0006506;<br>F:GO:0016740;<br>C:GO:0005783;<br>C:GO:0044425                                                                                                                                                                                                                                                                                 | -                                                               |            | IPR000917; IPR007070; IPR017849;<br>IPR017850; IPR017852                                                                                                                                                           |
| Caenorhabditis briggsae | briggsae cbr-puf-12 protein                  | 0  |                                                                                                                                                                                                                                                                                                                                                 | P:GO:0000003;<br>F:GO:0003723;<br>F:GO:0005488;<br>P:GO:0018991 |            | -                                                                                                                                                                                                                  |
| Caenorhabditis elegans  | yqjq_caeel ame: full=uncharacterized protein | 0  |                                                                                                                                                                                                                                                                                                                                                 | P:GO:0044249                                                    |            | -                                                                                                                                                                                                                  |
| Ancylostoma caninum     | transforming growth factor beta              | 2  | P:GO:0040007;<br>F:GO:0008083                                                                                                                                                                                                                                                                                                                   | -                                                               |            | -                                                                                                                                                                                                                  |
|                         | -                                            | 0  |                                                                                                                                                                                                                                                                                                                                                 |                                                                 |            | SignalP (SIGNALP)                                                                                                                                                                                                  |
|                         | -                                            | 0  |                                                                                                                                                                                                                                                                                                                                                 |                                                                 |            | -                                                                                                                                                                                                                  |
| Schistosoma japonicum   | endonuclease-reverse transcriptase           | 0  |                                                                                                                                                                                                                                                                                                                                                 | F:GO:0003723;<br>P:GO:0006278;<br>F:GO:0004519;<br>F:GO:0003964 |            | -                                                                                                                                                                                                                  |
| Pan troglodytes         | protein rer1                                 | 2  | P:GO:0006890;<br>C:GO:0030173                                                                                                                                                                                                                                                                                                                   | -                                                               |            | SignalP (SIGNALP)                                                                                                                                                                                                  |
|                         | -                                            | 0  |                                                                                                                                                                                                                                                                                                                                                 |                                                                 |            | -                                                                                                                                                                                                                  |

|                         |                                                                                              |   |                                                                                                                                                      |                               |             |                                                                                                                                    |
|-------------------------|----------------------------------------------------------------------------------------------|---|------------------------------------------------------------------------------------------------------------------------------------------------------|-------------------------------|-------------|------------------------------------------------------------------------------------------------------------------------------------|
| Loa loa                 | kinesin family member 13a                                                                    | 6 | P:GO:0007018;<br>F:GO:0005515;<br>F:GO:0005524;<br>F:GO:0003777;<br>P:GO:0015031;<br>C:GO:0005874                                                    | -                             |             | IPR001752; PTHR16012 (PANTHER),<br>PTHR16012:SF65 (PANTHER),<br>SSF52540 (SUPERFAMILY)                                             |
|                         | -                                                                                            | 0 |                                                                                                                                                      |                               |             | SignalP (SIGNALP)                                                                                                                  |
| Caenorhabditis briggsae | pyruvic acid -diamide mitochondrial precursor                                                | 3 | P:GO:0009236;<br>F:GO:0008817;<br>F:GO:0005524                                                                                                       | -                             | EC:2.5.1.17 | IPR002779; IPR016030; IPR017858                                                                                                    |
|                         | -                                                                                            | 0 |                                                                                                                                                      |                               |             | SignalP (SIGNALP)                                                                                                                  |
|                         | -                                                                                            | 0 |                                                                                                                                                      |                               |             | -                                                                                                                                  |
|                         | -                                                                                            | 0 |                                                                                                                                                      |                               |             | SignalP (SIGNALP)                                                                                                                  |
|                         | -                                                                                            | 0 |                                                                                                                                                      |                               |             | -                                                                                                                                  |
|                         | -                                                                                            | 0 |                                                                                                                                                      |                               |             | -                                                                                                                                  |
| Caenorhabditis briggsae | udp-n-acetyl-alpha-d-galactosamine:polypeptide n-acetylgalactosaminyltransferase 11 ( c-t11) | 1 | C:GO:0044464                                                                                                                                         | -                             |             | -                                                                                                                                  |
| Caenorhabditis briggsae | Hypothetical protein CBG16766 [Caenorhabditis briggsae]                                      | 0 |                                                                                                                                                      |                               |             | PTHR21579 (PANTHER),<br>PTHR21579:SF2 (PANTHER), SignalP<br>(SIGNALP)                                                              |
|                         | -                                                                                            | 0 |                                                                                                                                                      |                               |             | -                                                                                                                                  |
| Caenorhabditis briggsae | gns1 sur4 family protein                                                                     | 1 | C:GO:0016021                                                                                                                                         |                               |             | -                                                                                                                                  |
| Caenorhabditis elegans  | briggsae cbr-rpc-1 protein                                                                   | 3 | P:GO:0006350;<br>F:GO:0003899;<br>F:GO:0003677                                                                                                       | -                             | EC:2.7.7.6  | IPR015700; PTHR19376 (PANTHER)                                                                                                     |
| Caenorhabditis elegans  | a transferase-like family member (acl-6)                                                     | 0 |                                                                                                                                                      | F:GO:0008415;<br>P:GO:0008152 |             | -                                                                                                                                  |
|                         | -                                                                                            | 0 |                                                                                                                                                      |                               |             | SignalP (SIGNALP)                                                                                                                  |
|                         | -                                                                                            | 0 |                                                                                                                                                      |                               |             | -                                                                                                                                  |
| Caenorhabditis elegans  | elegans protein confirmed by transcript evidence                                             | 2 | P:GO:0007155;<br>C:GO:0005604                                                                                                                        | -                             |             | IPR002049; IPR013032;<br>G3DSA:2.10.25.10 (GENE3D),<br>PTHR10574 (PANTHER),<br>PTHR10574:SF56 (PANTHER),<br>SSF57196 (SUPERFAMILY) |
|                         | -                                                                                            | 0 |                                                                                                                                                      |                               |             | -                                                                                                                                  |
| Caenorhabditis remanei  | transmembrane amino acid transporter protein                                                 | 3 | P:GO:0019915;<br>C:GO:0016020;<br>P:GO:0040011                                                                                                       | -                             |             | IPR013057; PTHR22950 (PANTHER),<br>SignalP (SIGNALP)                                                                               |
| Caenorhabditis remanei  | briggsae cbr-pif-1 protein                                                                   | 9 | F:GO:0042162;<br>F:GO:0033682;<br>F:GO:0005524;<br>F:GO:0017116;<br>F:GO:0043141;<br>F:GO:0000287;<br>C:GO:0000784;<br>P:GO:0051974;<br>P:GO:0032204 | -                             |             | IPR010285; PTHR23274 (PANTHER),<br>SSF52540 (SUPERFAMILY)                                                                          |
| Caenorhabditis elegans  | solute carrier family 27 (fatty acid transporter) member 4                                   | 9 | P:GO:0046474;<br>C:GO:0044464;<br>P:GO:0050896;<br>P:GO:0044283;<br>P:GO:0042439;<br>P:GO:0050789;<br>F:GO:0016877;<br>F:GO:0005488;<br>P:GO:0015908 | -                             |             | PTHR11968 (PANTHER),<br>PTHR11968:SF15 (PANTHER)                                                                                   |
|                         | -                                                                                            | 0 |                                                                                                                                                      |                               |             | -                                                                                                                                  |
| Loa loa                 | hypothetical protein LOAG_09400 [Loa loa]                                                    | 0 |                                                                                                                                                      |                               |             | -                                                                                                                                  |

|                         |                                                               |    |                                                                                                                                                                                                                                                                                                                                |                                                |                                                                                                              |                                                                                                                 |
|-------------------------|---------------------------------------------------------------|----|--------------------------------------------------------------------------------------------------------------------------------------------------------------------------------------------------------------------------------------------------------------------------------------------------------------------------------|------------------------------------------------|--------------------------------------------------------------------------------------------------------------|-----------------------------------------------------------------------------------------------------------------|
|                         | -                                                             | 0  |                                                                                                                                                                                                                                                                                                                                |                                                | -                                                                                                            |                                                                                                                 |
| Caenorhabditis briggsae | tpr domain containing protein                                 | 1  | F:GO:0005488                                                                                                                                                                                                                                                                                                                   | -                                              | -                                                                                                            |                                                                                                                 |
|                         | -                                                             | 0  |                                                                                                                                                                                                                                                                                                                                |                                                | SignalP (SIGNALP)                                                                                            |                                                                                                                 |
| Macaca mulatta          | PREDICTED: hypothetical protein LOC100427250 [Macaca mulatta] | 0  |                                                                                                                                                                                                                                                                                                                                |                                                | -                                                                                                            |                                                                                                                 |
|                         | -                                                             | 0  |                                                                                                                                                                                                                                                                                                                                |                                                | -                                                                                                            |                                                                                                                 |
| Loa loa                 | hypothetical protein LOAG_08413 [Loa loa]                     | 0  |                                                                                                                                                                                                                                                                                                                                |                                                | IPR010916                                                                                                    |                                                                                                                 |
|                         | -                                                             | 0  |                                                                                                                                                                                                                                                                                                                                |                                                | -                                                                                                            |                                                                                                                 |
| Caenorhabditis briggsae | elegans protein partially confirmed by transcript evidence    | 2  | P:GO:0007186;<br>C:GO:0016021                                                                                                                                                                                                                                                                                                  | -                                              | SignalP (SIGNALP)                                                                                            |                                                                                                                 |
|                         | -                                                             | 0  |                                                                                                                                                                                                                                                                                                                                |                                                | -                                                                                                            |                                                                                                                 |
| Caenorhabditis remanei  | hypothetical protein CRE_16805 [Caenorhabditis remanei]       | 0  |                                                                                                                                                                                                                                                                                                                                |                                                | IPR004988                                                                                                    |                                                                                                                 |
|                         | -                                                             | 0  |                                                                                                                                                                                                                                                                                                                                |                                                | -                                                                                                            |                                                                                                                 |
|                         | -                                                             | 0  |                                                                                                                                                                                                                                                                                                                                |                                                | SignalP (SIGNALP)                                                                                            |                                                                                                                 |
| Caenorhabditis elegans  | transmembrane protein 167b                                    | 2  | C:GO:0000139;<br>C:GO:0016021                                                                                                                                                                                                                                                                                                  | -                                              | SignalP (SIGNALP)                                                                                            |                                                                                                                 |
|                         | -                                                             | 0  |                                                                                                                                                                                                                                                                                                                                |                                                | -                                                                                                            |                                                                                                                 |
|                         | -                                                             | 0  |                                                                                                                                                                                                                                                                                                                                |                                                | -                                                                                                            |                                                                                                                 |
| Caenorhabditis elegans  | ser thr protein phosphatase family protein                    | 0  |                                                                                                                                                                                                                                                                                                                                | F:GO:0016787;<br>C:GO:0016021                  | -                                                                                                            |                                                                                                                 |
|                         | -                                                             | 0  |                                                                                                                                                                                                                                                                                                                                |                                                | -                                                                                                            |                                                                                                                 |
|                         | -                                                             | 0  |                                                                                                                                                                                                                                                                                                                                |                                                | -                                                                                                            |                                                                                                                 |
|                         | -                                                             | 0  |                                                                                                                                                                                                                                                                                                                                |                                                | -                                                                                                            |                                                                                                                 |
| Caenorhabditis briggsae | thioredoxin family protein                                    | 5  | P:GO:0040035;<br>P:GO:0045454;<br>P:GO:0040010;<br>P:GO:0019915;<br>P:GO:0006898                                                                                                                                                                                                                                               | -                                              | -                                                                                                            |                                                                                                                 |
| Loa loa                 | negative elongation factor c d                                | 0  |                                                                                                                                                                                                                                                                                                                                | F:GO:0003746;<br>P:GO:0016481;<br>C:GO:0005634 | IPR006942                                                                                                    |                                                                                                                 |
| Ancylostoma ceylanicum  | metalloprotease 1 precursor                                   | 2  | F:GO:0046872;<br>F:GO:0008237                                                                                                                                                                                                                                                                                                  | -                                              | IPR001506; G3DSA:3.40.390.10 (GENE3D), PTHR10127 (PANTHER), PTHR10127:SF65 (PANTHER), SSF55486 (SUPERFAMILY) |                                                                                                                 |
| Ailuropoda melanoleuca  | sodium potassium-transporting atpase subunit alpha-3-like     | 19 | F:GO:0005515;<br>P:GO:0045989;<br>P:GO:0045822;<br>F:GO:0003869;<br>C:GO:0005792;<br>C:GO:0016323;<br>C:GO:0016021;<br>F:GO:0046872;<br>P:GO:0006754;<br>C:GO:0042383;<br>F:GO:0005391;<br>P:GO:0045823;<br>P:GO:0042493;<br>P:GO:0031947;<br>P:GO:0006813;<br>P:GO:0002026;<br>F:GO:0005524;<br>P:GO:0008217;<br>P:GO:0006814 | -                                              | EC:3.1.3.41;<br>EC:3.6.3.9                                                                                   | IPR000695; IPR001757; IPR005834; G3DSA:1.20.1110.10 (GENE3D), PTHR11939:SF100 (PANTHER), SSF56784 (SUPERFAMILY) |
| Ancylostoma caninum     | secreted protein 4 precursor                                  | 0  |                                                                                                                                                                                                                                                                                                                                | C:GO:0005576                                   | -                                                                                                            |                                                                                                                 |
|                         | -                                                             | 0  |                                                                                                                                                                                                                                                                                                                                |                                                | -                                                                                                            |                                                                                                                 |

|                         |                                                            |   |                                                                                                   |                                                                                                   |             |                                                                                                                            |
|-------------------------|------------------------------------------------------------|---|---------------------------------------------------------------------------------------------------|---------------------------------------------------------------------------------------------------|-------------|----------------------------------------------------------------------------------------------------------------------------|
| Homo sapiens            | major histocompatibility class dm alpha                    | 6 | C:GO:0042613;<br>P:GO:0002504;<br>C:GO:0031902;<br>C:GO:0005765;<br>C:GO:0016021;<br>P:GO:0006955 | -                                                                                                 |             | IPR003006; IPR013783; PTHR19944 (PANTHER), PTHR19944:SF13 (PANTHER)                                                        |
|                         | -                                                          | 0 |                                                                                                   |                                                                                                   |             | -                                                                                                                          |
| Loa loa                 | cathepsin a                                                | 2 | F:GO:0004185;<br>P:GO:0006508                                                                     | -                                                                                                 | EC:3.4.16.0 | IPR001563; G3DSA:3.40.50.1820 (GENE3D), PTHR11802:SF9 (PANTHER), SSF53474 (SUPERFAMILY)                                    |
|                         | -                                                          | 0 |                                                                                                   |                                                                                                   |             | -                                                                                                                          |
| Loa loa                 | protein-tyrosine phosphatase containing protein            | 0 |                                                                                                   | P:GO:0016311;<br>F:GO:0016791;<br>P:GO:0006470;<br>F:GO:0016787;<br>F:GO:0004725;<br>F:GO:0004721 |             | G3DSA:3.90.190.10 (GENE3D), PTHR19134 (PANTHER), PTHR19134:SF76 (PANTHER)                                                  |
| Caenorhabditis elegans  | elegans protein partially confirmed by transcript evidence | 0 |                                                                                                   |                                                                                                   |             | -                                                                                                                          |
|                         | -                                                          | 0 |                                                                                                   |                                                                                                   |             | -                                                                                                                          |
|                         | -                                                          | 0 |                                                                                                   |                                                                                                   |             | -                                                                                                                          |
|                         | -                                                          | 0 |                                                                                                   |                                                                                                   |             | -                                                                                                                          |
| Haemonchus contortus    | nicotinic acetylcholine receptor non-alpha subunit         | 6 | F:GO:0004872;<br>C:GO:0045211;<br>C:GO:0030054;<br>P:GO:0006811;<br>C:GO:0016021;<br>F:GO:0004889 | -                                                                                                 |             | IPR002394; IPR006201; IPR006202; PTHR18945:SF72 (PANTHER)                                                                  |
| Caenorhabditis remanei  | serotonin octopamine receptor family member (ser-7)        | 4 | P:GO:0007186;<br>C:GO:0016021;<br>P:GO:0007165;<br>F:GO:0004930                                   | -                                                                                                 |             | -                                                                                                                          |
|                         | -                                                          | 0 |                                                                                                   |                                                                                                   |             | -                                                                                                                          |
|                         | -                                                          | 0 |                                                                                                   |                                                                                                   |             | -                                                                                                                          |
|                         | -                                                          | 0 |                                                                                                   |                                                                                                   |             | PTHR12064 (PANTHER), PTHR12064:SF4 (PANTHER), SignalP (SIGNALP)                                                            |
|                         | -                                                          | 0 |                                                                                                   |                                                                                                   |             | -                                                                                                                          |
|                         | -                                                          | 0 |                                                                                                   |                                                                                                   |             | -                                                                                                                          |
|                         | -                                                          | 0 |                                                                                                   |                                                                                                   |             | -                                                                                                                          |
|                         | -                                                          | 0 |                                                                                                   |                                                                                                   |             | -                                                                                                                          |
|                         | -                                                          | 0 |                                                                                                   |                                                                                                   |             | -                                                                                                                          |
| Caenorhabditis briggsae | briggsae cbr-anc-1 protein                                 | 0 |                                                                                                   | F:GO:0003677                                                                                      |             | PTHR11915 (PANTHER), PTHR11915:SF54 (PANTHER)                                                                              |
| Brugia malayi           | bromodomain containing protein                             | 2 | F:GO:0005488;<br>P:GO:0033563                                                                     | -                                                                                                 |             | IPR001487; IPR001965; IPR011011; IPR013083; IPR019542; IPR019786; IPR019787; PTHR13793 (PANTHER), PTHR13793:SF29 (PANTHER) |
| Caenorhabditis elegans  | four domain-type voltage-gated ion channel alpha-1 subunit | 4 | C:GO:0016021;<br>F:GO:0005216;<br>P:GO:0006811;<br>P:GO:0055085                                   | -                                                                                                 |             | PTHR10037 (PANTHER), PTHR10037:SF60 (PANTHER), SignalP (SIGNALP)                                                           |
| Caenorhabditis elegans  | elegans protein partially confirmed by transcript evidence | 0 |                                                                                                   | C:GO:0016021                                                                                      |             | -                                                                                                                          |

|                         |                                                            |    |                                                                                                                                                                                                         |   |                                                                                  |
|-------------------------|------------------------------------------------------------|----|---------------------------------------------------------------------------------------------------------------------------------------------------------------------------------------------------------|---|----------------------------------------------------------------------------------|
| Brugia malayi           | riken cd- 5730509k17 gene                                  | 0  | C:GO:0005932;<br>C:GO:0005929;<br>C:GO:0005737;<br>C:GO:0005856;<br>P:GO:0030030;<br>P:GO:0008150;<br>C:GO:0042995;<br>C:GO:0005575                                                                     | - | -                                                                                |
| -                       | -                                                          | 0  | -                                                                                                                                                                                                       | - | -                                                                                |
| -                       | -                                                          | 0  | -                                                                                                                                                                                                       | - | SignalP (SIGNALP)                                                                |
| -                       | -                                                          | 0  | -                                                                                                                                                                                                       | - | -                                                                                |
| -                       | -                                                          | 0  | -                                                                                                                                                                                                       | - | -                                                                                |
| Alluropoda melanoleuca  | ptbp1 protein                                              | 10 | C:GO:0005730;<br>P:GO:0008380;<br>C:GO:0030530;<br>F:GO:0004519;<br>C:GO:0005654;<br>F:GO:0005515;<br>F:GO:0003697;<br>P:GO:0006397;<br>F:GO:0008187;<br>F:GO:0000166                                   | - | IPR012677; PTHR11546 (PANTHER),<br>PTHR11546:SF4 (PANTHER)                       |
| -                       | -                                                          | 0  | -                                                                                                                                                                                                       | - | SignalP (SIGNALP)                                                                |
| -                       | -                                                          | 0  | -                                                                                                                                                                                                       | - | -                                                                                |
| Caenorhabditis briggsae | hippocampus abundant transcript 1                          | 5  | P:GO:0015904;<br>P:GO:0055085;<br>C:GO:0016021;<br>P:GO:0046677;<br>F:GO:0015520                                                                                                                        | - | -                                                                                |
| Caenorhabditis briggsae | Hypothetical protein CBG19875 [Caenorhabditis briggsae]    | 0  | -                                                                                                                                                                                                       | - | -                                                                                |
| -                       | -                                                          | 0  | -                                                                                                                                                                                                       | - | -                                                                                |
| -                       | -                                                          | 0  | -                                                                                                                                                                                                       | - | -                                                                                |
| Caenorhabditis elegans  | peroxisomal membrane protein related family member (pmp-5) | 4  | F:GO:0042626;<br>P:GO:0055085;<br>F:GO:0005524;<br>C:GO:0016021                                                                                                                                         | - | -                                                                                |
| -                       | -                                                          | 0  | -                                                                                                                                                                                                       | - | -                                                                                |
| Caenorhabditis elegans  | hypothetical protein C18C4.5 [Caenorhabditis elegans]      | 0  | -                                                                                                                                                                                                       | - | -                                                                                |
| -                       | -                                                          | 0  | -                                                                                                                                                                                                       | - | IPR002995; PTHR23427 (PANTHER),<br>PTHR23427:SF1 (PANTHER), SignalP<br>(SIGNALP) |
| -                       | -                                                          | 0  | -                                                                                                                                                                                                       | - | -                                                                                |
| -                       | -                                                          | 0  | -                                                                                                                                                                                                       | - | -                                                                                |
| -                       | -                                                          | 0  | -                                                                                                                                                                                                       | - | -                                                                                |
| Caenorhabditis briggsae | histone h2a                                                | 12 | P:GO:0040010;<br>C:GO:0000786;<br>P:GO:0045132;<br>P:GO:0040035;<br>F:GO:0003677;<br>P:GO:0010171;<br>P:GO:0002119;<br>P:GO:0040011;<br>P:GO:0006334;<br>P:GO:0002009;<br>P:GO:0009792;<br>C:GO:0005634 | - | IPR002119; IPR007125; IPR009072                                                  |



|                         |                                                  |    |                                                                                                                                                                                                                                           |   |                                                         |                                                                                                       |
|-------------------------|--------------------------------------------------|----|-------------------------------------------------------------------------------------------------------------------------------------------------------------------------------------------------------------------------------------------|---|---------------------------------------------------------|-------------------------------------------------------------------------------------------------------|
| Caenorhabditis briggsae | sodium:neurotransmitter symporter family protein | 10 | P:GO:0007274;<br>F:GO:0005277;<br>F:GO:0005328;<br>P:GO:0015870;<br>P:GO:0001504;<br>P:GO:0015871;<br>F:GO:0030165;<br>P:GO:0040017;<br>C:GO:0045211;<br>C:GO:0005887                                                                     | - |                                                         | IPR000175; PTHR11616:SF17<br>(PANTHER), SignalP (SIGNALP)                                             |
| -                       | -                                                | 0  |                                                                                                                                                                                                                                           |   |                                                         | -                                                                                                     |
| -                       | -                                                | 0  |                                                                                                                                                                                                                                           |   |                                                         | -                                                                                                     |
| Caenorhabditis briggsae | peptidase c13 family protein                     | 7  | P:GO:0009792;<br>F:GO:0008233;<br>C:GO:0005770;<br>P:GO:0040015;<br>C:GO:0045177;<br>P:GO:0000003;<br>P:GO:0006508                                                                                                                        | - |                                                         | IPR001096; PTHR12000:SF4<br>(PANTHER)                                                                 |
| Caenorhabditis remanei  | cre-npr-19 protein                               | 2  | P:GO:0007186;<br>C:GO:0016021                                                                                                                                                                                                             | - |                                                         | G3DSA:1.20.1070.10 (GENE3D),<br>PTHR22718 (PANTHER),<br>PTHR22718:SF8 (PANTHER), SignalP<br>(SIGNALP) |
| -                       | -                                                | 0  |                                                                                                                                                                                                                                           |   |                                                         | -                                                                                                     |
| -                       | -                                                | 0  |                                                                                                                                                                                                                                           |   |                                                         | -                                                                                                     |
| -                       | -                                                | 0  |                                                                                                                                                                                                                                           |   |                                                         | SignalP (SIGNALP)                                                                                     |
| -                       | -                                                | 0  |                                                                                                                                                                                                                                           |   |                                                         | -                                                                                                     |
| -                       | -                                                | 0  |                                                                                                                                                                                                                                           |   |                                                         | -                                                                                                     |
| Caenorhabditis elegans  | dy-min 1-like                                    | 14 | P:GO:0043653;<br>C:GO:0005829;<br>C:GO:0005777;<br>P:GO:0007006;<br>C:GO:0005741;<br>C:GO:0005792;<br>F:GO:0005515;<br>F:GO:0003924;<br>C:GO:0005801;<br>P:GO:0008152;<br>P:GO:0007275;<br>P:GO:0007154;<br>C:GO:0005783;<br>F:GO:0005525 | - | EC:3.6.5.1;<br>EC:3.6.5.2;<br>EC:3.6.5.3;<br>EC:3.6.5.4 | -                                                                                                     |
| Caenorhabditis elegans  | dy-min 1-like                                    | 14 | P:GO:0043653;<br>C:GO:0005829;<br>C:GO:0005777;<br>P:GO:0007006;<br>C:GO:0005741;<br>C:GO:0005792;<br>F:GO:0005515;<br>F:GO:0003924;<br>C:GO:0005801;<br>P:GO:0008152;<br>P:GO:0007275;<br>P:GO:0007154;<br>C:GO:0005783;<br>F:GO:0005525 | - | EC:3.6.5.1;<br>EC:3.6.5.2;<br>EC:3.6.5.3;<br>EC:3.6.5.4 | -                                                                                                     |

|                        |                                                            |    |                                                                                                                                                                                                                                                                                                                                                                                                                                      |              |                                                                                                         |
|------------------------|------------------------------------------------------------|----|--------------------------------------------------------------------------------------------------------------------------------------------------------------------------------------------------------------------------------------------------------------------------------------------------------------------------------------------------------------------------------------------------------------------------------------|--------------|---------------------------------------------------------------------------------------------------------|
| Caenorhabditis elegans | vesicle-associated membrane protein 2                      | 25 | C:GO:0030054;<br>P:GO:0009749;<br>P:GO:0016079;<br>F:GO:0005516;<br>P:GO:0006892;<br>P:GO:0017156;<br>C:GO:0060203;<br>F:GO:0005543;<br>C:GO:0030672;<br>F:GO:0008022;<br>F:GO:0017075;<br>F:GO:0032403;<br>P:GO:0017157;<br>P:GO:0006461;<br>C:GO:0005792;<br>P:GO:0006944;<br>C:GO:0070044;<br>C:GO:0019717;<br>C:GO:0005802;<br>C:GO:0048471;<br>C:GO:0042589;<br>F:GO:0017022;<br>P:GO:0015031;<br>C:GO:0005887;<br>C:GO:0070032 | -            | IPR001388; IPR016444;<br>G3DSA:1.20.5.110 (GENE3D),<br>PTHR21136 (PANTHER),<br>PTHR21136:SF28 (PANTHER) |
| -                      | -                                                          | 0  |                                                                                                                                                                                                                                                                                                                                                                                                                                      |              | -                                                                                                       |
| -                      | -                                                          | 0  |                                                                                                                                                                                                                                                                                                                                                                                                                                      |              | SignalP (SIGNALP)                                                                                       |
| -                      | -                                                          | 0  |                                                                                                                                                                                                                                                                                                                                                                                                                                      |              | SignalP (SIGNALP)                                                                                       |
| -                      | -                                                          | 0  |                                                                                                                                                                                                                                                                                                                                                                                                                                      |              | SignalP (SIGNALP)                                                                                       |
| -                      | -                                                          | 0  |                                                                                                                                                                                                                                                                                                                                                                                                                                      |              | -                                                                                                       |
| -                      | -                                                          | 0  |                                                                                                                                                                                                                                                                                                                                                                                                                                      |              | -                                                                                                       |
| -                      | -                                                          | 0  |                                                                                                                                                                                                                                                                                                                                                                                                                                      |              | IPR008160; PTHR10499 (PANTHER),<br>PTHR10499:SF115 (PANTHER)                                            |
| -                      | -                                                          | 0  |                                                                                                                                                                                                                                                                                                                                                                                                                                      |              | SignalP (SIGNALP)                                                                                       |
| -                      | -                                                          | 0  |                                                                                                                                                                                                                                                                                                                                                                                                                                      |              | -                                                                                                       |
| Homo sapiens           | fibronectin 1 protein                                      | 13 | P:GO:0018149;<br>P:GO:0016477;<br>P:GO:0001525;<br>P:GO:0008360;<br>C:GO:0005793;<br>C:GO:0031093;<br>P:GO:0034446;<br>F:GO:0005518;<br>C:GO:0005577;<br>F:GO:0008201;<br>C:GO:0005578;<br>F:GO:0005201;<br>P:GO:0006953                                                                                                                                                                                                             | -            | SignalP (SIGNALP)                                                                                       |
| Caenorhabditis elegans | briggsae cbr-pqn-95 protein                                | 0  |                                                                                                                                                                                                                                                                                                                                                                                                                                      | F:GO:0005515 | IPR013032; SignalP (SIGNALP)                                                                            |
| -                      | -                                                          | 0  |                                                                                                                                                                                                                                                                                                                                                                                                                                      |              | SignalP (SIGNALP)                                                                                       |
| Caenorhabditis remanei | elegans protein partially confirmed by transcript evidence | 2  | F:GO:0003676;<br>F:GO:0000166                                                                                                                                                                                                                                                                                                                                                                                                        | -            | IPR019363; PTHR13390 (PANTHER)                                                                          |
| -                      | -                                                          | 0  |                                                                                                                                                                                                                                                                                                                                                                                                                                      |              | -                                                                                                       |
| -                      | -                                                          | 0  |                                                                                                                                                                                                                                                                                                                                                                                                                                      |              | SignalP (SIGNALP)                                                                                       |
| Caenorhabditis elegans | epithelial fusion failure family member (eff-1)            | 0  |                                                                                                                                                                                                                                                                                                                                                                                                                                      |              | -                                                                                                       |
| -                      | -                                                          | 0  |                                                                                                                                                                                                                                                                                                                                                                                                                                      |              | -                                                                                                       |

|                         |                                                         |    |                                                                                                                                                                                                                                                                                                                                                                                                                                                                                         |   |                              |
|-------------------------|---------------------------------------------------------|----|-----------------------------------------------------------------------------------------------------------------------------------------------------------------------------------------------------------------------------------------------------------------------------------------------------------------------------------------------------------------------------------------------------------------------------------------------------------------------------------------|---|------------------------------|
|                         | -                                                       | 0  |                                                                                                                                                                                                                                                                                                                                                                                                                                                                                         |   | -                            |
| Caenorhabditis briggsae | rap gtpase-activating protein                           | 4  | F:GO:0005096;<br>C:GO:0005622;<br>P:GO:0051056;<br>F:GO:0005515                                                                                                                                                                                                                                                                                                                                                                                                                         | - | -                            |
|                         | -                                                       | 0  |                                                                                                                                                                                                                                                                                                                                                                                                                                                                                         |   | SignalP (SIGNALP)            |
|                         | -                                                       | 0  |                                                                                                                                                                                                                                                                                                                                                                                                                                                                                         |   | -                            |
| Brugia malayi           | gtpase_rho                                              | 4  | C:GO:0016020;<br>C:GO:0005622;<br>F:GO:0005525;<br>P:GO:0007264                                                                                                                                                                                                                                                                                                                                                                                                                         | - | -                            |
|                         | -                                                       | 0  |                                                                                                                                                                                                                                                                                                                                                                                                                                                                                         |   | -                            |
|                         | -                                                       | 0  |                                                                                                                                                                                                                                                                                                                                                                                                                                                                                         |   | -                            |
|                         | -                                                       | 0  |                                                                                                                                                                                                                                                                                                                                                                                                                                                                                         |   | -                            |
|                         | -                                                       | 0  |                                                                                                                                                                                                                                                                                                                                                                                                                                                                                         |   | -                            |
|                         | -                                                       | 0  |                                                                                                                                                                                                                                                                                                                                                                                                                                                                                         |   | SignalP (SIGNALP)            |
| Caenorhabditis briggsae | Hypothetical protein CBG01587 [Caenorhabditis briggsae] | 0  |                                                                                                                                                                                                                                                                                                                                                                                                                                                                                         |   | IPR000938                    |
| Caenorhabditis remanei  | hypothetical protein CRE_30788 [Caenorhabditis remanei] | 0  |                                                                                                                                                                                                                                                                                                                                                                                                                                                                                         |   | -                            |
|                         | -                                                       | 0  |                                                                                                                                                                                                                                                                                                                                                                                                                                                                                         |   | SignalP (SIGNALP)            |
|                         | -                                                       | 0  |                                                                                                                                                                                                                                                                                                                                                                                                                                                                                         |   | -                            |
|                         | -                                                       | 0  |                                                                                                                                                                                                                                                                                                                                                                                                                                                                                         |   | -                            |
| Caenorhabditis elegans  | r- binding identical                                    | 5  | F:GO:0003723;<br>P:GO:0009792;<br>C:GO:0005622;<br>P:GO:0006378;<br>F:GO:0000166                                                                                                                                                                                                                                                                                                                                                                                                        | - | -                            |
| Ailuropoda melanoleuca  | filamin alpha isoform 2                                 | 28 | F:GO:0005800;<br>F:GO:0004871;<br>C:GO:0005802;<br>P:GO:0043433;<br>P:GO:0034394;<br>C:GO:0015629;<br>P:GO:0050821;<br>P:GO:0051220;<br>C:GO:0005576;<br>C:GO:0005829;<br>F:GO:0001948;<br>P:GO:0051764;<br>P:GO:0043123;<br>F:GO:0051015;<br>F:GO:0048365;<br>P:GO:0045022;<br>P:GO:0007195;<br>F:GO:0042803;<br>F:GO:0034989;<br>P:GO:0031532;<br>F:GO:0034988;<br>C:GO:0005886;<br>F:GO:0008134;<br>P:GO:0042177;<br>C:GO:0005634;<br>P:GO:0042993;<br>C:GO:0005938;<br>P:GO:0043113 | - | -                            |
|                         | -                                                       | 0  |                                                                                                                                                                                                                                                                                                                                                                                                                                                                                         |   | IPR017441; SignalP (SIGNALP) |
|                         | -                                                       | 0  |                                                                                                                                                                                                                                                                                                                                                                                                                                                                                         |   | -                            |
|                         | -                                                       | 0  |                                                                                                                                                                                                                                                                                                                                                                                                                                                                                         |   | -                            |
|                         | -                                                       | 0  |                                                                                                                                                                                                                                                                                                                                                                                                                                                                                         |   | -                            |
|                         | -                                                       | 0  |                                                                                                                                                                                                                                                                                                                                                                                                                                                                                         |   | -                            |

|                         |                                                            |    |                                                                                                                                                                                                         |                                                |              |                                                                                                           |
|-------------------------|------------------------------------------------------------|----|---------------------------------------------------------------------------------------------------------------------------------------------------------------------------------------------------------|------------------------------------------------|--------------|-----------------------------------------------------------------------------------------------------------|
| Caenorhabditis briggsae | beta- glucuronosyltransferase                              | 2  | C:GO:0016021;<br>F:GO:0015018                                                                                                                                                                           | -                                              | EC:2.4.1.135 | IPR005027; G3DSA:3.90.550.10<br>(GENE3D), PTHR10896:SF2<br>(PANTHER), SSF53448 (SUPERFAMILY)              |
| -                       | -                                                          | 0  | -                                                                                                                                                                                                       | -                                              | -            | SignalP (SIGNALP)                                                                                         |
| -                       | -                                                          | 0  | -                                                                                                                                                                                                       | -                                              | -            | -                                                                                                         |
| -                       | -                                                          | 0  | -                                                                                                                                                                                                       | -                                              | -            | SignalP (SIGNALP)                                                                                         |
| Loa loa                 | pre-mr--processing factor 19                               | 12 | P:GO:0000209;<br>P:GO:0045665;<br>C:GO:0016607;<br>P:GO:0008610;<br>F:GO:0034450;<br>P:GO:0001833;<br>P:GO:0000245;<br>C:GO:0000151;<br>C:GO:0005681;<br>F:GO:0042802;<br>P:GO:0048711;<br>C:GO:0005811 | -                                              | -            | -                                                                                                         |
| Caenorhabditis elegans  | sh3 and multiple ankyrin repeat domains protein 3-like     | 2  | C:GO:0044464;<br>F:GO:0005515                                                                                                                                                                           | -                                              | -            | IPR001478; G3DSA:2.30.42.10<br>(GENE3D), PTHR23031 (PANTHER),<br>PTHR23031:SF3 (PANTHER)                  |
| -                       | -                                                          | 0  | -                                                                                                                                                                                                       | -                                              | -            | -                                                                                                         |
| Caenorhabditis remanei  | uncoordinated family member (unc-70)                       | 0  | -                                                                                                                                                                                                       | F:GO:0005200;<br>F:GO:0003779;<br>C:GO:0008091 | -            | -                                                                                                         |
| -                       | -                                                          | 0  | -                                                                                                                                                                                                       | -                                              | -            | SignalP (SIGNALP)                                                                                         |
| Loa loa                 | cardiac ankyrin repeat partial                             | 2  | F:GO:0004672;<br>F:GO:0000166                                                                                                                                                                           | -                                              | -            | -                                                                                                         |
| -                       | -                                                          | 0  | -                                                                                                                                                                                                       | -                                              | -            | -                                                                                                         |
| -                       | -                                                          | 0  | -                                                                                                                                                                                                       | -                                              | -            | -                                                                                                         |
| Brugia malayi           | elegans protein partially confirmed by transcript evidence | 1  | F:GO:0016787                                                                                                                                                                                            | -                                              | -            | IPR015868; PTHR12544:SF3<br>(PANTHER)                                                                     |
| -                       | -                                                          | 0  | -                                                                                                                                                                                                       | -                                              | -            | -                                                                                                         |
| -                       | -                                                          | 0  | -                                                                                                                                                                                                       | -                                              | -            | -                                                                                                         |
| Caenorhabditis elegans  | succinyl- ligase                                           | 7  | P:GO:0006105;<br>C:GO:0005739;<br>P:GO:0006099;<br>P:GO:0006781;<br>F:GO:0004775;<br>F:GO:0005524;<br>F:GO:0005515                                                                                      | -                                              | EC:6.2.1.5   | IPR005809; IPR005811; IPR013650;<br>IPR013815; IPR013816; IPR016102;<br>IPR017866; SSF56059 (SUPERFAMILY) |
| -                       | -                                                          | 0  | -                                                                                                                                                                                                       | -                                              | -            | -                                                                                                         |
| -                       | -                                                          | 0  | -                                                                                                                                                                                                       | -                                              | -            | -                                                                                                         |
| -                       | -                                                          | 0  | -                                                                                                                                                                                                       | -                                              | -            | -                                                                                                         |
| -                       | -                                                          | 0  | -                                                                                                                                                                                                       | -                                              | -            | -                                                                                                         |
| -                       | -                                                          | 0  | -                                                                                                                                                                                                       | -                                              | -            | -                                                                                                         |
| Loa loa                 | protein kinase domain containing protein                   | 2  | F:GO:0005488;<br>F:GO:0016301                                                                                                                                                                           | -                                              | -            | -                                                                                                         |
| -                       | -                                                          | 0  | -                                                                                                                                                                                                       | -                                              | -            | IPR000082                                                                                                 |
| Caenorhabditis remanei  | briggsae cbr-dep-1 protein                                 | 5  | F:GO:0004725;<br>P:GO:0040026;<br>P:GO:0040027;<br>P:GO:0006470;<br>C:GO:0016021                                                                                                                        | -                                              | EC:3.1.3.48  | -                                                                                                         |
| Caenorhabditis remanei  | elegans protein confirmed by transcript evidence           | 2  | P:GO:0045449;<br>C:GO:0005634                                                                                                                                                                           | -                                              | -            | IPR015633; PTHR12081:SF7<br>(PANTHER)                                                                     |
| -                       | -                                                          | 0  | -                                                                                                                                                                                                       | -                                              | -            | -                                                                                                         |

|                        |                                                            |    |                                                                                                                                                                                                                                                                                                                                                                                                                                                                                         |                               |                           |                                                                                                  |
|------------------------|------------------------------------------------------------|----|-----------------------------------------------------------------------------------------------------------------------------------------------------------------------------------------------------------------------------------------------------------------------------------------------------------------------------------------------------------------------------------------------------------------------------------------------------------------------------------------|-------------------------------|---------------------------|--------------------------------------------------------------------------------------------------|
| Caenorhabditis elegans | cystathionine gamma-lyase                                  | 13 | P:GO:0019346;<br>P:GO:0018272;<br>F:GO:0004123;<br>P:GO:0030308;<br>F:GO:0016769;<br>P:GO:0006749;<br>P:GO:0008285;<br>F:GO:0004121;<br>P:GO:0070814;<br>P:GO:0051289;<br>P:GO:0009792;<br>F:GO:0030170;<br>P:GO:0019344                                                                                                                                                                                                                                                                | -                             | EC:4.4.1.1;<br>EC:4.4.1.8 | IPR000277; IPR015421; IPR015422;<br>IPR015424; PTHR11808:SF15<br>(PANTHER)                       |
| Caenorhabditis elegans | hypothetical protein C30B5.5 [Caenorhabditis elegans]      | 2  | P:GO:0007186;<br>C:GO:0016021                                                                                                                                                                                                                                                                                                                                                                                                                                                           | -                             |                           | -                                                                                                |
| Caenorhabditis elegans | elegans protein partially confirmed by transcript evidence | 0  |                                                                                                                                                                                                                                                                                                                                                                                                                                                                                         | C:GO:0016021                  |                           | -                                                                                                |
| -                      | -                                                          | 0  |                                                                                                                                                                                                                                                                                                                                                                                                                                                                                         |                               |                           | SignalP (SIGNALP)                                                                                |
| -                      | -                                                          | 0  |                                                                                                                                                                                                                                                                                                                                                                                                                                                                                         |                               |                           | -                                                                                                |
| -                      | -                                                          | 0  |                                                                                                                                                                                                                                                                                                                                                                                                                                                                                         |                               |                           | -                                                                                                |
| Caenorhabditis elegans | immunoglobulin i-set domain containing protein             | 0  |                                                                                                                                                                                                                                                                                                                                                                                                                                                                                         | F:GO:0005509;<br>F:GO:0003824 |                           | -                                                                                                |
| -                      | -                                                          | 0  |                                                                                                                                                                                                                                                                                                                                                                                                                                                                                         |                               |                           | -                                                                                                |
| Caenorhabditis remanei | briggsae cbr-set-14 protein                                | 0  |                                                                                                                                                                                                                                                                                                                                                                                                                                                                                         | F:GO:0046872;<br>F:GO:0008270 |                           | PTHR12197 (PANTHER),<br>PTHR12197:SF9 (PANTHER)                                                  |
| -                      | -                                                          | 0  |                                                                                                                                                                                                                                                                                                                                                                                                                                                                                         |                               |                           | -                                                                                                |
| -                      | -                                                          | 0  |                                                                                                                                                                                                                                                                                                                                                                                                                                                                                         |                               |                           | PTHR11600 (PANTHER),<br>PTHR11600:SF98 (PANTHER)                                                 |
| Ixodes scapularis      | mothers against decapentaplegic homolog 3                  | 67 | P:GO:0006937;<br>F:GO:0019901;<br>C:GO:0005637;<br>F:GO:0005160;<br>P:GO:0032909;<br>P:GO:0048340;<br>P:GO:0030878;<br>P:GO:0045216;<br>C:GO:0043235;<br>P:GO:0010551;<br>P:GO:0001701;<br>P:GO:0031053;<br>F:GO:0008134;<br>P:GO:0007050;<br>F:GO:0042803;<br>P:GO:0048701;<br>F:GO:0031625;<br>P:GO:0001933;<br>F:GO:0008013;<br>P:GO:0035413;<br>F:GO:0030618;<br>P:GO:0006917;<br>P:GO:0048589;<br>P:GO:0045944;<br>P:GO:0006919;<br>P:GO:0008637;<br>P:GO:0001819;<br>P:GO:0019049 | -                             |                           | IPR001132; IPR003619; IPR008984;<br>IPR013019; IPR013790; IPR017855;<br>PTHR13703:SF19 (PANTHER) |

|                         |                                                            |    |                                                                                                                                                                                                                                                                                                                                                                                   |                                                |                             |                                         |
|-------------------------|------------------------------------------------------------|----|-----------------------------------------------------------------------------------------------------------------------------------------------------------------------------------------------------------------------------------------------------------------------------------------------------------------------------------------------------------------------------------|------------------------------------------------|-----------------------------|-----------------------------------------|
| Caenorhabditis briggsae | protein mto1-like mitochondrial                            |    | F:GO:0005488;<br>P:GO:0045333;<br>5 F:GO:0003824;<br>P:GO:0008033;<br>C:GO:0005739                                                                                                                                                                                                                                                                                                | -                                              |                             | IPR002218; PTHR11806 (PANTHER)          |
| Caenorhabditis remanei  | elegans protein partially confirmed by transcript evidence | 0  |                                                                                                                                                                                                                                                                                                                                                                                   | C:GO:0034703;<br>P:GO:0055080;<br>F:GO:0005261 |                             | -                                       |
|                         | -                                                          | 0  |                                                                                                                                                                                                                                                                                                                                                                                   |                                                |                             | -                                       |
|                         | -                                                          | 0  |                                                                                                                                                                                                                                                                                                                                                                                   |                                                |                             | -                                       |
| Homo sapiens            | complement c1r subcomponent precursor                      | 6  | F:GO:0004252;<br>P:GO:0045087;<br>F:GO:0005509;<br>P:GO:0006958;<br>C:GO:0005576;<br>P:GO:0006508                                                                                                                                                                                                                                                                                 | -                                              | EC:3.4.21.0                 | -                                       |
|                         | -                                                          | 0  |                                                                                                                                                                                                                                                                                                                                                                                   |                                                |                             | -                                       |
|                         | -                                                          | 0  |                                                                                                                                                                                                                                                                                                                                                                                   |                                                |                             | SignalP (SIGNALP)                       |
| Caenorhabditis briggsae | xanthine dehydroge-se                                      | 8  | F:GO:0004855;<br>F:GO:0009055;<br>F:GO:0005506;<br>F:GO:0004854;<br>P:GO:0055114;<br>P:GO:0008340;<br>F:GO:0051537;<br>F:GO:0050660                                                                                                                                                                                                                                               | -                                              | EC:1.17.3.2;<br>EC:1.17.1.4 | -                                       |
|                         | -                                                          | 0  |                                                                                                                                                                                                                                                                                                                                                                                   |                                                |                             | -                                       |
|                         | -                                                          | 0  |                                                                                                                                                                                                                                                                                                                                                                                   |                                                |                             | -                                       |
| Caenorhabditis elegans  | hypothetical kda protein in ste6-los1 intergenic           | 1  | C:GO:0016021                                                                                                                                                                                                                                                                                                                                                                      | -                                              |                             | IPR002809; IPR008568                    |
| Caenorhabditis elegans  | hypothetical kda protein in ste6-los1 intergenic           | 0  |                                                                                                                                                                                                                                                                                                                                                                                   |                                                |                             | IPR002809; IPR008568; SignalP (SIGNALP) |
| Caenorhabditis elegans  | hypothetical kda protein in ste6-los1 intergenic           | 0  |                                                                                                                                                                                                                                                                                                                                                                                   |                                                |                             | IPR002809; IPR008568; SignalP (SIGNALP) |
| Ailuropoda melanoleuca  | hla-b associated transcript 1                              | 22 | F:GO:0015184;<br>P:GO:0015804;<br>C:GO:0016607;<br>P:GO:0006461;<br>F:GO:0043008;<br>P:GO:0000245;<br>C:GO:0005681;<br>P:GO:0046784;<br>F:GO:0042802;<br>P:GO:0006520;<br>F:GO:0017070;<br>F:GO:0015175;<br>C:GO:0005688;<br>P:GO:0055085;<br>C:GO:0000346;<br>F:GO:0042605;<br>C:GO:0005687;<br>C:GO:0005887;<br>F:GO:0004004;<br>F:GO:0005524;<br>P:GO:0010501;<br>F:GO:0030621 | -                                              |                             | SignalP (SIGNALP)                       |
|                         | -                                                          | 0  |                                                                                                                                                                                                                                                                                                                                                                                   |                                                |                             | -                                       |
|                         | -                                                          | 0  |                                                                                                                                                                                                                                                                                                                                                                                   |                                                |                             | -                                       |
|                         | -                                                          | 0  |                                                                                                                                                                                                                                                                                                                                                                                   |                                                |                             | -                                       |

|                         |                                                         |    |                                                                                                                                                                                        |   |              |                                                                                                                                |
|-------------------------|---------------------------------------------------------|----|----------------------------------------------------------------------------------------------------------------------------------------------------------------------------------------|---|--------------|--------------------------------------------------------------------------------------------------------------------------------|
| Caenorhabditis briggsae | eb module family protein                                | 4  | P:GO:0018991;<br>P:GO:0040010;<br>P:GO:0040035;<br>P:GO:0040011                                                                                                                        | - | -            | -                                                                                                                              |
| -                       | -                                                       | 0  |                                                                                                                                                                                        |   |              | -                                                                                                                              |
| -                       | -                                                       | 0  |                                                                                                                                                                                        |   |              | -                                                                                                                              |
| Caenorhabditis briggsae | methyltransferase like 6                                | 2  | F:GO:0008168;<br>P:GO:0032259                                                                                                                                                          | - | EC:2.1.1.0   | -                                                                                                                              |
| -                       | -                                                       | 0  |                                                                                                                                                                                        |   |              | -                                                                                                                              |
| -                       | -                                                       | 0  |                                                                                                                                                                                        |   |              | -                                                                                                                              |
| -                       | -                                                       | 0  |                                                                                                                                                                                        |   |              | SignalP (SIGNALP)                                                                                                              |
| -                       | -                                                       | 0  |                                                                                                                                                                                        |   |              | SignalP (SIGNALP)                                                                                                              |
| -                       | -                                                       | 0  |                                                                                                                                                                                        |   |              | -                                                                                                                              |
| -                       | -                                                       | 0  |                                                                                                                                                                                        |   |              | -                                                                                                                              |
| -                       | -                                                       | 0  |                                                                                                                                                                                        |   |              | -                                                                                                                              |
| -                       | -                                                       | 0  |                                                                                                                                                                                        |   |              | SignalP (SIGNALP)                                                                                                              |
| Caenorhabditis briggsae | polymerase (d- directed) epsilon                        | 11 | P:GO:0040035;<br>P:GO:0009792;<br>F:GO:0003887;<br>P:GO:0006260;<br>F:GO:0003677;<br>P:GO:0006997;<br>P:GO:0040011;<br>C:GO:0005634;<br>F:GO:0008270;<br>F:GO:0000166;<br>P:GO:0002009 | - | EC:2.7.7.7   | PTHR10670 (PANTHER)                                                                                                            |
| -                       | -                                                       | 0  |                                                                                                                                                                                        |   |              | -                                                                                                                              |
| -                       | -                                                       | 0  |                                                                                                                                                                                        |   |              | -                                                                                                                              |
| Caenorhabditis elegans  | general transcription factor iih subunit 1              | 2  | P:GO:0008152;<br>F:GO:0016740                                                                                                                                                          | - |              | -                                                                                                                              |
| Caenorhabditis briggsae | deoxyribonuclease ii                                    | 2  | P:GO:0006259;<br>F:GO:0004531                                                                                                                                                          | - | EC:3.1.22.1  | IPR004947; PTHR10858:SF10 (PANTHER)                                                                                            |
| Caenorhabditis briggsae | Hypothetical protein CBG08769 [Caenorhabditis briggsae] | 0  |                                                                                                                                                                                        |   |              | -                                                                                                                              |
| Caenorhabditis briggsae | ring box protein                                        | 9  | C:GO:0005737;<br>P:GO:0042787;<br>P:GO:0008283;<br>F:GO:0005515;<br>F:GO:0004842;<br>P:GO:0019915;<br>C:GO:0005634;<br>F:GO:0008270;<br>C:GO:0019005                                   | - | EC:6.3.2.19  | IPR001841; IPR013083; PTHR11210 (PANTHER), PTHR11210:SF2 (PANTHER), SSF57850 (SUPERFAMILY)                                     |
| -                       | -                                                       | 0  |                                                                                                                                                                                        |   |              | -                                                                                                                              |
| -                       | -                                                       | 0  |                                                                                                                                                                                        |   |              | -                                                                                                                              |
| -                       | -                                                       | 0  |                                                                                                                                                                                        |   |              | -                                                                                                                              |
| -                       | -                                                       | 0  |                                                                                                                                                                                        |   |              | -                                                                                                                              |
| -                       | -                                                       | 0  |                                                                                                                                                                                        |   |              | -                                                                                                                              |
| Ailuropoda melanoleuca  | pctaire protein ki-se 1                                 | 4  | P:GO:0006468;<br>F:GO:0005515;<br>F:GO:0005524;<br>F:GO:0004693                                                                                                                        | - | EC:2.7.11.22 | -                                                                                                                              |
| Caenorhabditis elegans  | major facilitator superfamily protein                   | 2  | P:GO:0006810;<br>P:GO:0019915                                                                                                                                                          | - |              | IPR011701; IPR016196; IPR020846; G3DSA:1.20.1250.20 (GENE3D), PTHR11662 (PANTHER), PTHR11662:SF17 (PANTHER), SignalP (SIGNALP) |
| -                       | -                                                       | 0  |                                                                                                                                                                                        |   |              | -                                                                                                                              |

|                        |                                                      |    |                                                                                                                                                                                                         |                                                                                                   |             |                                                                                               |
|------------------------|------------------------------------------------------|----|---------------------------------------------------------------------------------------------------------------------------------------------------------------------------------------------------------|---------------------------------------------------------------------------------------------------|-------------|-----------------------------------------------------------------------------------------------|
| Caenorhabditis elegans | briggsae cbr-nlr-1 protein                           | 0  |                                                                                                                                                                                                         |                                                                                                   |             | IPR001791; IPR008985; IPR012680; IPR013320; PTHR10127 (PANTHER), PTHR10127:SF2 (PANTHER)      |
| -                      | -                                                    | 0  |                                                                                                                                                                                                         |                                                                                                   |             | -                                                                                             |
| -                      | -                                                    | 0  |                                                                                                                                                                                                         |                                                                                                   |             | -                                                                                             |
| -                      | -                                                    | 0  |                                                                                                                                                                                                         |                                                                                                   |             | -                                                                                             |
| -                      | -                                                    | 0  |                                                                                                                                                                                                         |                                                                                                   |             | -                                                                                             |
| Caenorhabditis elegans | cysteine synthase                                    | 6  | C:GO:0005737;<br>F:GO:0030170;<br>F:GO:0004124;<br>F:GO:0005515;<br>P:GO:0006535;<br>F:GO:0016740                                                                                                       | -                                                                                                 | EC:2.5.1.47 | -                                                                                             |
| Caenorhabditis elegans | uncoordi-ted family member (unc-22)                  | 0  |                                                                                                                                                                                                         |                                                                                                   |             | -                                                                                             |
| -                      | -                                                    | 0  |                                                                                                                                                                                                         |                                                                                                   |             | -                                                                                             |
| -                      | -                                                    | 0  |                                                                                                                                                                                                         |                                                                                                   |             | -                                                                                             |
| -                      | -                                                    | 0  |                                                                                                                                                                                                         |                                                                                                   |             | -                                                                                             |
| -                      | -                                                    | 0  |                                                                                                                                                                                                         |                                                                                                   |             | -                                                                                             |
| Caenorhabditis elegans | pp-loop atpase superfamily protein                   | 12 | P:GO:0006412;<br>C:GO:0005829;<br>P:GO:0034227;<br>P:GO:0048598;<br>P:GO:0048599;<br>P:GO:0007283;<br>F:GO:0005524;<br>F:GO:0016740;<br>P:GO:0040025;<br>P:GO:0002098;<br>F:GO:0000049;<br>P:GO:0006974 | -                                                                                                 | EC:3.6.5.3  | PTHR11807 (PANTHER), PTHR11807:SF3 (PANTHER), SSF52402 (SUPERFAMILY)                          |
| -                      | -                                                    | 0  |                                                                                                                                                                                                         |                                                                                                   |             | SignalP (SIGNALP)                                                                             |
| Loa loa                | actin-related protein 10                             | 0  |                                                                                                                                                                                                         | C:GO:0005869;<br>C:GO:0005737;<br>C:GO:0005856;<br>P:GO:0008150;<br>P:GO:0007018;<br>F:GO:0005515 |             | IPR004000; G3DSA:3.30.420.40 (GENE3D), PTHR11937:SF14 (PANTHER), SSF53067 (SUPERFAMILY)       |
| Callithrix jacchus     | fumarate hydratase                                   | 7  | C:GO:0045239;<br>C:GO:0005759;<br>P:GO:0048873;<br>P:GO:0006106;<br>P:GO:0006108;<br>P:GO:0006099;<br>F:GO:0004333                                                                                      | -                                                                                                 | EC:4.2.1.2  | IPR008948; IPR018951; G3DSA:1.10.40.30 (GENE3D), PTHR11444 (PANTHER), PTHR11444:SF1 (PANTHER) |
| -                      | -                                                    | 0  |                                                                                                                                                                                                         |                                                                                                   |             | SignalP (SIGNALP)                                                                             |
| Caenorhabditis elegans | tbc (tre-2 bub2 cdc16) domain family member (tbc-18) | 3  | F:GO:0005097;<br>C:GO:0005622;<br>P:GO:0032313                                                                                                                                                          | -                                                                                                 |             | IPR004012; PTHR22957 (PANTHER), PTHR22957:SF53 (PANTHER)                                      |
| -                      | -                                                    | 0  |                                                                                                                                                                                                         |                                                                                                   |             | -                                                                                             |
| Homo sapiens           | fk506 binding protein 13kda                          | 5  | C:GO:0005789;<br>P:GO:0006457;<br>F:GO:0005528;<br>F:GO:0005515;<br>F:GO:0003755                                                                                                                        | -                                                                                                 | EC:5.2.1.8  | -                                                                                             |
| -                      | -                                                    | 0  |                                                                                                                                                                                                         |                                                                                                   |             | -                                                                                             |
| -                      | -                                                    | 0  |                                                                                                                                                                                                         |                                                                                                   |             | -                                                                                             |
| -                      | -                                                    | 0  |                                                                                                                                                                                                         |                                                                                                   |             | -                                                                                             |



|                         |                                                               |   |                                                                                                                    |                                                                 |                            |                                                                                                                                   |
|-------------------------|---------------------------------------------------------------|---|--------------------------------------------------------------------------------------------------------------------|-----------------------------------------------------------------|----------------------------|-----------------------------------------------------------------------------------------------------------------------------------|
|                         | -                                                             | 0 |                                                                                                                    |                                                                 |                            | SignalP (SIGNALP)                                                                                                                 |
|                         | -                                                             | 0 |                                                                                                                    |                                                                 |                            | SignalP (SIGNALP)                                                                                                                 |
| Caenorhabditis elegans  | tr- (adenine-n -)-methyltransferase catalytic subunit trmt61a | 5 | P:GO:0040010;<br>F:GO:0016429;<br>P:GO:0040035;<br>P:GO:0030488;<br>P:GO:0006898                                   | -                                                               | EC:2.1.1.36                | IPR014816; G3DSA:3.10.330.20 (GENE3D), G3DSA:3.40.50.150 (GENE3D), PIRSF017269 (PIR), PTHR12133 (PANTHER), SSF53335 (SUPERFAMILY) |
|                         | -                                                             | 0 |                                                                                                                    |                                                                 |                            | -                                                                                                                                 |
| Caenorhabditis elegans  | b-box zinc finger family protein                              | 2 | F:GO:0046872;<br>C:GO:0005622                                                                                      | -                                                               |                            | PTHR12846 (PANTHER), PTHR12846:SF2 (PANTHER)                                                                                      |
| Caenorhabditis briggsae | Hypothetical protein CBG05657 [Caenorhabditis briggsae]       | 0 |                                                                                                                    | C:GO:0016021;<br>P:GO:0055085;<br>F:GO:0005215;<br>P:GO:0006810 |                            | PTHR11600 (PANTHER), PTHR11600:SF35 (PANTHER)                                                                                     |
| Pongo abelii            | leucine aminopeptidase 3                                      | 7 | F:GO:0030145;<br>F:GO:0008235;<br>F:GO:0004177;<br>F:GO:0000287;<br>P:GO:0006508;<br>F:GO:0008270;<br>C:GO:0005739 | -                                                               | EC:3.4.11.0                | IPR000819; IPR011356; G3DSA:3.40.630.10 (GENE3D), PTHR11963 (PANTHER), SSF53187 (SUPERFAMILY)                                     |
|                         | -                                                             | 0 |                                                                                                                    |                                                                 |                            | -                                                                                                                                 |
|                         | -                                                             | 0 |                                                                                                                    |                                                                 |                            | -                                                                                                                                 |
| Caenorhabditis remanei  | elegans protein partially confirmed by transcript evidence    | 3 | C:GO:0034703;<br>F:GO:0005261;<br>P:GO:0055080                                                                     | -                                                               |                            | -                                                                                                                                 |
| Brugia malayi           | protein-tyrosine phosphatase containing protein               | 2 | F:GO:0004725;<br>P:GO:0006470                                                                                      | -                                                               | EC:3.1.3.48                | SignalP (SIGNALP)                                                                                                                 |
|                         | -                                                             | 0 |                                                                                                                    |                                                                 |                            | IPR015650; PTHR13140 (PANTHER)                                                                                                    |
| Caenorhabditis elegans  | briggsae cbr-cpt-6 protein                                    | 1 | F:GO:0016740                                                                                                       | -                                                               |                            | -                                                                                                                                 |
| Caenorhabditis elegans  | alanine aminotransferase                                      | 5 | F:GO:0030170;<br>P:GO:0000003;<br>F:GO:0016847;<br>P:GO:0009058;<br>F:GO:0008483                                   | -                                                               | EC:4.4.1.14;<br>EC:2.6.1.0 | IPR001176; IPR004839; IPR015421; IPR015422; IPR015424; PTHR11751 (PANTHER), PTHR11751:SF29 (PANTHER), SignalP (SIGNALP)           |
|                         | -                                                             | 0 |                                                                                                                    |                                                                 |                            | SignalP (SIGNALP)                                                                                                                 |
|                         | -                                                             | 0 |                                                                                                                    |                                                                 |                            | -                                                                                                                                 |
|                         | -                                                             | 0 |                                                                                                                    |                                                                 |                            | -                                                                                                                                 |
| Pan troglodytes         | actin related protein 2 3 subunit 41kda                       | 6 | C:GO:0005737;<br>F:GO:0005200;<br>C:GO:0005885;<br>P:GO:0030833;<br>P:GO:0006928;<br>F:GO:0003779                  | -                                                               |                            | SignalP (SIGNALP)                                                                                                                 |
| Caenorhabditis elegans  | elegans protein confirmed by transcript evidence              | 0 |                                                                                                                    |                                                                 |                            | SignalP (SIGNALP)                                                                                                                 |
| Caenorhabditis briggsae | carboxypeptidase b                                            | 1 | F:GO:0004180                                                                                                       | -                                                               |                            | IPR000834; G3DSA:3.40.630.10 (GENE3D), PTHR11705 (PANTHER), SSF53187 (SUPERFAMILY)                                                |
| Caenorhabditis briggsae | briggsae cbr-nsy-1 protein                                    | 4 | P:GO:0006468;<br>F:GO:0005515;<br>F:GO:0005524;<br>F:GO:0004674                                                    | -                                                               | EC:2.7.11.0                | -                                                                                                                                 |
| Necator americanus      | c-type lectin precursor                                       | 0 |                                                                                                                    | F:GO:0005488;<br>F:GO:0005529                                   |                            | -                                                                                                                                 |

|                         |                                                            |    |                                                                                                                                                                                                         |   |                             |                                                                                                                                                                     |
|-------------------------|------------------------------------------------------------|----|---------------------------------------------------------------------------------------------------------------------------------------------------------------------------------------------------------|---|-----------------------------|---------------------------------------------------------------------------------------------------------------------------------------------------------------------|
| Pongo abelii            | glutathione s-transferase kappa 1                          | 5  | C:GO:0005777;<br>F:GO:0004364;<br>F:GO:0015035;<br>F:GO:0042802;<br>C:GO:0030288                                                                                                                        | - | EC:2.5.1.18                 | IPR001853; IPR012336; PTHR13887 (PANTHER)                                                                                                                           |
|                         | -                                                          | 0  |                                                                                                                                                                                                         |   |                             | SignalP (SIGNALP)                                                                                                                                                   |
| Caenorhabditis elegans  | activating sig-I cointegrator 1 complex subunit 3-like 1   | 12 | P:GO:0018991;<br>C:GO:0005681;<br>F:GO:0008026;<br>P:GO:0040007;<br>F:GO:0003677;<br>F:GO:0005524;<br>P:GO:0007601;<br>P:GO:0002119;<br>F:GO:0005515;<br>P:GO:0000354;<br>C:GO:0005682;<br>P:GO:0009792 | - |                             | IPR001650; IPR003593; IPR011545;<br>IPR014001; IPR014021;<br>G3DSA:3.40.50.300 (GENE3D),<br>PTHR11752 (PANTHER),<br>PTHR11752:SF7 (PANTHER), SSF52540 (SUPERFAMILY) |
| Caenorhabditis elegans  | activating sig-I cointegrator 1 complex subunit 3-like 1   | 12 | P:GO:0018991;<br>C:GO:0005681;<br>F:GO:0008026;<br>P:GO:0040007;<br>F:GO:0003677;<br>F:GO:0005524;<br>P:GO:0007601;<br>P:GO:0002119;<br>F:GO:0005515;<br>P:GO:0000354;<br>C:GO:0005682;<br>P:GO:0009792 | - |                             | IPR001650; IPR003593; IPR011545;<br>IPR014001; IPR014021;<br>G3DSA:3.40.50.300 (GENE3D),<br>PTHR11752 (PANTHER),<br>PTHR11752:SF7 (PANTHER), SSF52540 (SUPERFAMILY) |
|                         | -                                                          | 0  |                                                                                                                                                                                                         |   |                             | -                                                                                                                                                                   |
|                         | -                                                          | 0  |                                                                                                                                                                                                         |   |                             | SignalP (SIGNALP)                                                                                                                                                   |
| Caenorhabditis elegans  | elegans protein partially confirmed by transcript evidence | 0  |                                                                                                                                                                                                         |   |                             | -                                                                                                                                                                   |
|                         | -                                                          | 0  |                                                                                                                                                                                                         |   |                             | -                                                                                                                                                                   |
| Caenorhabditis remanei  | procollagen- 2-oxoglutarate 5-dioxyge-se 3                 | 5  | F:GO:0046872;<br>F:GO:0016705;<br>P:GO:0032870;<br>P:GO:0008045;<br>C:GO:0005783                                                                                                                        | - |                             | -                                                                                                                                                                   |
| Caenorhabditis elegans  | hypothetical protein F57B10.9 [Caenorhabditis elegans]     | 0  |                                                                                                                                                                                                         |   |                             | -                                                                                                                                                                   |
|                         | -                                                          | 0  |                                                                                                                                                                                                         |   |                             | SignalP (SIGNALP)                                                                                                                                                   |
| Caenorhabditis briggsae | elegans protein confirmed by transcript evidence           | 0  |                                                                                                                                                                                                         |   |                             | PTHR14167 (PANTHER),<br>PTHR14167:SF2 (PANTHER)                                                                                                                     |
|                         | -                                                          | 0  |                                                                                                                                                                                                         |   |                             | -                                                                                                                                                                   |
|                         | -                                                          | 0  |                                                                                                                                                                                                         |   |                             | -                                                                                                                                                                   |
|                         | -                                                          | 0  |                                                                                                                                                                                                         |   |                             | -                                                                                                                                                                   |
|                         | -                                                          | 0  |                                                                                                                                                                                                         |   |                             | -                                                                                                                                                                   |
| Caenorhabditis elegans  | choline ethanolamine ki-se                                 | 10 | F:GO:0005080;<br>F:GO:0004103;<br>P:GO:0006646;<br>C:GO:0005938;<br>P:GO:0006612;<br>F:GO:0004305;<br>F:GO:0000166;<br>F:GO:0019904;<br>F:GO:0005069;<br>C:GO:0005887                                   | - | EC:2.7.1.32;<br>EC:2.7.1.82 | IPR011009; G3DSA:3.10.450.110 (GENE3D)                                                                                                                              |

|                               |                                                            |    |                                                                                                                                                                                                                                           |   |                                                                                                                                                                                                       |
|-------------------------------|------------------------------------------------------------|----|-------------------------------------------------------------------------------------------------------------------------------------------------------------------------------------------------------------------------------------------|---|-------------------------------------------------------------------------------------------------------------------------------------------------------------------------------------------------------|
| Caenorhabditis briggsae       | briggsae cbr-pkc-2 protein                                 | 2  | F:GO:0004672;<br>F:GO:0000166                                                                                                                                                                                                             | - | -                                                                                                                                                                                                     |
| Pongo abelii                  | integrin beta-2 precursor                                  | 14 | C:GO:0008305;<br>P:GO:0006915;<br>P:GO:0007267;<br>P:GO:0006954;<br>P:GO:0008360;<br>P:GO:0007229;<br>F:GO:0001948;<br>F:GO:0004872;<br>P:GO:0007160;<br>P:GO:0050730;<br>F:GO:0019901;<br>P:GO:0007159;<br>P:GO:0007275;<br>P:GO:0030593 | - | SignalP (SIGNALP)                                                                                                                                                                                     |
| -                             | -                                                          | 0  | -                                                                                                                                                                                                                                         | - | -                                                                                                                                                                                                     |
| -                             | -                                                          | 0  | -                                                                                                                                                                                                                                         | - | -                                                                                                                                                                                                     |
| -                             | -                                                          | 0  | -                                                                                                                                                                                                                                         | - | SignalP (SIGNALP)                                                                                                                                                                                     |
| -                             | -                                                          | 0  | -                                                                                                                                                                                                                                         | - | -                                                                                                                                                                                                     |
| Caenorhabditis remanei        | hypothetical protein CRE_04697 [Caenorhabditis remanei]    | 0  | -                                                                                                                                                                                                                                         | - | IPR000242; G3DSA:3.90.190.10 (GENE3D)                                                                                                                                                                 |
| -                             | -                                                          | 0  | -                                                                                                                                                                                                                                         | - | -                                                                                                                                                                                                     |
| -                             | -                                                          | 0  | -                                                                                                                                                                                                                                         | - | -                                                                                                                                                                                                     |
| Caenorhabditis elegans        | eating: abnormal pharyngeal pumping family member (eat-20) | 4  | F:GO:0005488;<br>P:GO:0007275;<br>P:GO:0009987;<br>C:GO:0016020                                                                                                                                                                           | - | IPR000742; IPR002052; IPR003645;<br>IPR006209; IPR006210; IPR013032;<br>IPR013111; G3DSA:2.10.25.10 (GENE3D), PTHR11201 (PANTHER), PTHR11201:SF8 (PANTHER), SignalP (SIGNALP), SSF57196 (SUPERFAMILY) |
| Caenorhabditis remanei        | briggsae cbr-deg-1 protein                                 | 9  | F:GO:0005272;<br>P:GO:0015693;<br>P:GO:0007517;<br>P:GO:0006816;<br>P:GO:0040018;<br>P:GO:0040011;<br>P:GO:0008219;<br>C:GO:0016021;<br>P:GO:0006814                                                                                      | - | IPR001873; G3DSA:2.60.470.10 (GENE3D), PTHR11690:SF17 (PANTHER)                                                                                                                                       |
| Caenorhabditis elegans        | elegans protein confirmed by transcript evidence           | 0  | -                                                                                                                                                                                                                                         | - | SignalP (SIGNALP)                                                                                                                                                                                     |
| -                             | -                                                          | 0  | -                                                                                                                                                                                                                                         | - | -                                                                                                                                                                                                     |
| Homo sapiens                  | ah-k nucleoprotein                                         | 3  | C:GO:0005634;<br>F:GO:0005515;<br>P:GO:0007399                                                                                                                                                                                            | - | -                                                                                                                                                                                                     |
| -                             | -                                                          | 0  | -                                                                                                                                                                                                                                         | - | -                                                                                                                                                                                                     |
| Caenorhabditis remanei        | tyrosylprotein sulfotransferase 1                          | 1  | F:GO:0008476                                                                                                                                                                                                                              | - | EC:2.8.2.20                                                                                                                                                                                           |
| -                             | -                                                          | 0  | -                                                                                                                                                                                                                                         | - | -                                                                                                                                                                                                     |
| -                             | -                                                          | 0  | -                                                                                                                                                                                                                                         | - | -                                                                                                                                                                                                     |
| Caenorhabditis remanei        | ryanodine receptor 1b                                      | 8  | F:GO:0004872;<br>P:GO:0006629;<br>F:GO:0005219;<br>P:GO:0006816;<br>P:GO:0006874;<br>P:GO:0055085;<br>F:GO:0005509;<br>C:GO:0016021                                                                                                       | - | IPR015925; PTHR13715:SF8 (PANTHER)                                                                                                                                                                    |
| -                             | -                                                          | 0  | -                                                                                                                                                                                                                                         | - | SignalP (SIGNALP)                                                                                                                                                                                     |
| Strongylocentrotus purpuratus | kiaa1636 protein                                           | 0  | -                                                                                                                                                                                                                                         | - | -                                                                                                                                                                                                     |

|                          |                                                  |    |                                                                                                                                                                                                         |   |                                           |                                                                                                            |
|--------------------------|--------------------------------------------------|----|---------------------------------------------------------------------------------------------------------------------------------------------------------------------------------------------------------|---|-------------------------------------------|------------------------------------------------------------------------------------------------------------|
|                          | -                                                | 0  |                                                                                                                                                                                                         |   | -                                         |                                                                                                            |
|                          | -                                                | 0  |                                                                                                                                                                                                         |   | -                                         |                                                                                                            |
| Saccoglossus kowalevskii | -d-dependent deacetylase sirtuin-6               | 12 | F:GO:0070403;<br>F:GO:0008270;<br>P:GO:0006476;<br>C:GO:0005730;<br>C:GO:0005724;<br>P:GO:0006342;<br>P:GO:0006471;<br>F:GO:0005515;<br>F:GO:0046969;<br>F:GO:0003956;<br>C:GO:0005654;<br>F:GO:0003950 | - | EC:2.4.2.31;<br>EC:2.4.2.30               | IPR003000; G3DSA:3.40.50.1220<br>(GENE3D), SSF52467 (SUPERFAMILY)                                          |
|                          | -                                                | 0  |                                                                                                                                                                                                         |   | -                                         |                                                                                                            |
| Pongo abelii             | cathepsin I                                      | 5  | C:GO:0005576;<br>C:GO:0005764;<br>P:GO:0006508;<br>F:GO:0005515;<br>F:GO:0004197                                                                                                                        | - | EC:3.4.22.0                               | IPR013128; IPR013201;<br>G3DSA:3.90.70.10 (GENE3D),<br>PTHR12411:SF57 (PANTHER),<br>SSF54001 (SUPERFAMILY) |
|                          | -                                                | 0  |                                                                                                                                                                                                         |   |                                           | PTHR11295 (PANTHER),<br>PTHR11295:SF6 (PANTHER)                                                            |
|                          | -                                                | 0  |                                                                                                                                                                                                         |   |                                           | -                                                                                                          |
| Caenorhabditis elegans   | elegans protein confirmed by transcript evidence | 0  |                                                                                                                                                                                                         |   |                                           | -                                                                                                          |
|                          | -                                                | 0  |                                                                                                                                                                                                         |   |                                           | -                                                                                                          |
| Homo sapiens             | isoform cra_c                                    | 8  | P:GO:0045730;<br>C:GO:0005829;<br>F:GO:0004083;<br>P:GO:0043456;<br>F:GO:0004619;<br>F:GO:0019901;<br>P:GO:0006110;<br>F:GO:0004082                                                                     | - | EC:3.1.3.13;<br>EC:5.4.2.1;<br>EC:5.4.2.4 | SignalIP (SIGNALP)                                                                                         |
|                          | -                                                | 0  |                                                                                                                                                                                                         |   |                                           | -                                                                                                          |
|                          | -                                                | 0  |                                                                                                                                                                                                         |   |                                           | SignalIP (SIGNALP)                                                                                         |
| Caenorhabditis briggsae  | briggsae cbr-lmp-1 protein                       | 3  | C:GO:0043231;<br>C:GO:0044444;<br>C:GO:0016020                                                                                                                                                          | - |                                           | IPR002000; SignalIP (SIGNALP)                                                                              |
|                          | -                                                | 0  |                                                                                                                                                                                                         |   |                                           | -                                                                                                          |
| Caenorhabditis briggsae  | solute carrier family member 37                  | 8  | P:GO:0048250;<br>P:GO:0040010;<br>F:GO:0005488;<br>F:GO:0005381;<br>C:GO:0016021;<br>C:GO:0005743;<br>P:GO:0034755;<br>P:GO:0009792                                                                     | - |                                           | IPR001993; IPR018108;<br>G3DSA:1.50.40.10 (GENE3D),<br>PTHR11896:SF77 (PANTHER)                            |
|                          | -                                                | 0  |                                                                                                                                                                                                         |   |                                           | -                                                                                                          |

|                         |                                                            |    |                                                                                                                                                                                                                                           |   |                                                |                                                                                                                                               |
|-------------------------|------------------------------------------------------------|----|-------------------------------------------------------------------------------------------------------------------------------------------------------------------------------------------------------------------------------------------|---|------------------------------------------------|-----------------------------------------------------------------------------------------------------------------------------------------------|
| Ailuropoda melanoleuca  | spectrin beta 2                                            | 14 | P:GO:0007182;<br>C:GO:0008091;<br>C:GO:0005730;<br>C:GO:0005829;<br>C:GO:0031430;<br>F:GO:0003779;<br>C:GO:0043234;<br>C:GO:0032437;<br>P:GO:0051693;<br>F:GO:0032403;<br>P:GO:0007184;<br>C:GO:0005886;<br>F:GO:0005516;<br>F:GO:0005200 | - |                                                | IPR001849; IPR011993; PTHR11915 (PANTHER), PTHR11915:SF48 (PANTHER), SSF50729 (SUPERFAMILY)                                                   |
| -                       | -                                                          | 0  |                                                                                                                                                                                                                                           |   |                                                | SignalP (SIGNALP)                                                                                                                             |
| Caenorhabditis briggsae | maf protein                                                | 1  | F:GO:0005515                                                                                                                                                                                                                              | - |                                                | IPR003697; G3DSA:3.90.950.10 (GENE3D), SSF52972 (SUPERFAMILY)                                                                                 |
| -                       | -                                                          | 0  |                                                                                                                                                                                                                                           |   |                                                | SignalP (SIGNALP)                                                                                                                             |
| -                       | -                                                          | 0  |                                                                                                                                                                                                                                           |   |                                                | -                                                                                                                                             |
| -                       | -                                                          | 0  |                                                                                                                                                                                                                                           |   |                                                | -                                                                                                                                             |
| -                       | -                                                          | 0  |                                                                                                                                                                                                                                           |   |                                                | SignalP (SIGNALP)                                                                                                                             |
| Caenorhabditis briggsae | snf2 family n-term-l domain containing protein             | 3  | F:GO:0005524;<br>F:GO:0004386;<br>F:GO:0003677                                                                                                                                                                                            | - |                                                | IPR000330; IPR001650; IPR014001; IPR014021; G3DSA:3.40.50.300 (GENE3D), PTHR10799 (PANTHER), PTHR10799:SF75 (PANTHER), SSF52540 (SUPERFAMILY) |
| Caenorhabditis elegans  | family with sequence similarity member a                   | 1  | F:GO:0005515                                                                                                                                                                                                                              | - |                                                | IPR012486; IPR021819; PTHR13239 (PANTHER)                                                                                                     |
| Caenorhabditis elegans  | family with sequence similarity member a                   | 1  | F:GO:0005515                                                                                                                                                                                                                              | - |                                                | IPR012486; IPR021819; PTHR13239 (PANTHER)                                                                                                     |
| -                       | -                                                          | 0  |                                                                                                                                                                                                                                           |   |                                                | SignalP (SIGNALP)                                                                                                                             |
| Caenorhabditis remanei  | briggsae cbr-acy-2 protein                                 | 9  | C:GO:0016021;<br>F:GO:0004016;<br>P:GO:0007188;<br>P:GO:0009190;<br>P:GO:0002119;<br>F:GO:0000166;<br>P:GO:0040011;<br>P:GO:0040015;<br>C:GO:0005886                                                                                      | - | EC:4.6.1.1                                     | IPR001054; PTHR11920 (PANTHER), PTHR11920:SF12 (PANTHER)                                                                                      |
| Caenorhabditis briggsae | glycosylation related family member (gly-5)                | 5  | C:GO:0016021;<br>C:GO:0005794;<br>F:GO:0005515;<br>F:GO:0016757;<br>F:GO:0005529                                                                                                                                                          | - |                                                | PTHR11675 (PANTHER)                                                                                                                           |
| -                       | -                                                          | 0  |                                                                                                                                                                                                                                           |   |                                                | -                                                                                                                                             |
| Branchiostoma floridae  | atp-binding cassette superfamily                           | 2  | F:GO:0016887;<br>F:GO:0005524                                                                                                                                                                                                             | - |                                                | IPR003439; G3DSA:3.40.50.300 (GENE3D), PTHR19222 (PANTHER), PTHR19222:SF16 (PANTHER), SSF52540 (SUPERFAMILY)                                  |
| -                       | -                                                          | 0  |                                                                                                                                                                                                                                           |   |                                                | -                                                                                                                                             |
| Caenorhabditis remanei  | elegans protein partially confirmed by transcript evidence | 3  | F:GO:0015144;<br>C:GO:0016021;<br>P:GO:0002119                                                                                                                                                                                            | - |                                                | IPR012435; SignalP (SIGNALP)                                                                                                                  |
| -                       | -                                                          | 0  |                                                                                                                                                                                                                                           |   |                                                | -                                                                                                                                             |
| Nematostella vectensis  | neurogenic locus notch                                     | 0  |                                                                                                                                                                                                                                           |   | F:GO:0005488;<br>F:GO:0005509;<br>F:GO:0004867 | -                                                                                                                                             |

|                         |                                                            |    |                                                                                                                                                                                                                                           |                                                                 |                                                         |                                                                     |
|-------------------------|------------------------------------------------------------|----|-------------------------------------------------------------------------------------------------------------------------------------------------------------------------------------------------------------------------------------------|-----------------------------------------------------------------|---------------------------------------------------------|---------------------------------------------------------------------|
| Caenorhabditis briggsae | briggsae cbr-ugt-45 protein                                | 0  |                                                                                                                                                                                                                                           | P:GO:0008152;<br>F:GO:0016758                                   |                                                         | SignalP (SIGNALP)                                                   |
| Caenorhabditis elegans  | elegans protein partially confirmed by transcript evidence | 0  |                                                                                                                                                                                                                                           | C:GO:0016021                                                    |                                                         | -                                                                   |
|                         | -                                                          | 0  |                                                                                                                                                                                                                                           |                                                                 |                                                         | SignalP (SIGNALP)                                                   |
|                         | -                                                          | 0  |                                                                                                                                                                                                                                           |                                                                 |                                                         | -                                                                   |
| Caenorhabditis briggsae | ortin family member (fpn- )                                | 0  |                                                                                                                                                                                                                                           | F:GO:0005381;<br>C:GO:0016021;<br>P:GO:0006826                  |                                                         | IPR009716; SignalP (SIGNALP)                                        |
|                         | -                                                          | 0  |                                                                                                                                                                                                                                           |                                                                 |                                                         | -                                                                   |
|                         | -                                                          | 0  |                                                                                                                                                                                                                                           |                                                                 |                                                         | -                                                                   |
| Caenorhabditis elegans  | alpha- -mannosyltransferase alg9-like                      | 0  |                                                                                                                                                                                                                                           | P:GO:0006506;<br>C:GO:0031227;<br>F:GO:0000030;<br>F:GO:0016757 |                                                         | -                                                                   |
|                         | -                                                          | 0  |                                                                                                                                                                                                                                           |                                                                 |                                                         | -                                                                   |
| Equus caballus          | n-ethylmaleimide-sensitive factor attachment alpha         | 14 | P:GO:0045176;<br>P:GO:0006892;<br>P:GO:0007420;<br>P:GO:0006891;<br>P:GO:0006508;<br>P:GO:0006944;<br>C:GO:0070044;<br>F:GO:0004190;<br>F:GO:0019905;<br>P:GO:0006886;<br>C:GO:0005576;<br>C:GO:0005783;<br>C:GO:0005794;<br>P:GO:0030182 | -                                                               | EC:3.4.23.0                                             | -                                                                   |
| Caenorhabditis remanei  | tubulin beta chain                                         | 6  | P:GO:0007018;<br>F:GO:0005525;<br>P:GO:0051258;<br>F:GO:0005198;<br>F:GO:0003924;<br>C:GO:0005874                                                                                                                                         | -                                                               | EC:3.6.5.1;<br>EC:3.6.5.2;<br>EC:3.6.5.3;<br>EC:3.6.5.4 | IPR000217; IPR002453; IPR003008                                     |
| Caenorhabditis briggsae | zo- pellucida-like domain containing protein               | 0  |                                                                                                                                                                                                                                           |                                                                 |                                                         | IPR001507; PTHR22907 (PANTHER)                                      |
| Caenorhabditis elegans  | briggsae cbr-npp-3 protein                                 | 0  |                                                                                                                                                                                                                                           |                                                                 |                                                         | -                                                                   |
|                         | -                                                          | 0  |                                                                                                                                                                                                                                           |                                                                 |                                                         | -                                                                   |
|                         | -                                                          | 0  |                                                                                                                                                                                                                                           |                                                                 |                                                         | -                                                                   |
|                         | -                                                          | 0  |                                                                                                                                                                                                                                           |                                                                 |                                                         | SignalP (SIGNALP)                                                   |
|                         | -                                                          | 0  |                                                                                                                                                                                                                                           |                                                                 |                                                         | -                                                                   |
| Caenorhabditis elegans  | elegans protein confirmed by transcript evidence           | 0  |                                                                                                                                                                                                                                           | C:GO:0016021;<br>C:GO:0016020;<br>F:GO:0008375                  |                                                         | IPR003406; PTHR19297:SF4 (PANTHER)                                  |
| Caenorhabditis briggsae | briggsae cbr-asah-1 protein                                | 0  |                                                                                                                                                                                                                                           | P:GO:0006629;<br>C:GO:0005764                                   |                                                         | -                                                                   |
| Loa loa                 | fat tumor suppressor homolog 1                             | 1  | C:GO:0016020                                                                                                                                                                                                                              | -                                                               |                                                         | IPR002126; IPR015919; PTHR10596 (PANTHER), PTHR10596:SF74 (PANTHER) |
|                         | -                                                          | 0  |                                                                                                                                                                                                                                           |                                                                 |                                                         | -                                                                   |
|                         | -                                                          | 0  |                                                                                                                                                                                                                                           |                                                                 |                                                         | SignalP (SIGNALP)                                                   |
|                         | -                                                          | 0  |                                                                                                                                                                                                                                           |                                                                 |                                                         | SignalP (SIGNALP)                                                   |

|                         |                                                            |    |                                                                                                                                                                                                                                                                                              |                                                                                                                                                                                                                                                                                              |                             |                                                                                                                                                                                            |
|-------------------------|------------------------------------------------------------|----|----------------------------------------------------------------------------------------------------------------------------------------------------------------------------------------------------------------------------------------------------------------------------------------------|----------------------------------------------------------------------------------------------------------------------------------------------------------------------------------------------------------------------------------------------------------------------------------------------|-----------------------------|--------------------------------------------------------------------------------------------------------------------------------------------------------------------------------------------|
| Caenorhabditis briggsae | briggsae cbr-tol-1 protein                                 | 2  | F:GO:0005515;<br>C:GO:0016020                                                                                                                                                                                                                                                                | -                                                                                                                                                                                                                                                                                            |                             | IPR000157; IPR001611; PRO0019 (PRINTS), G3DSA:3.40.50.10140 (GENE3D), G3DSA:3.80.10.10 (GENE3D), PTHR23154 (PANTHER), PTHR23154:SF118 (PANTHER), PSS1450 (PROFILE), SSF52058 (SUPERFAMILY) |
| Caenorhabditis briggsae | domain containing protein                                  | 1  | F:GO:0005085                                                                                                                                                                                                                                                                                 | -                                                                                                                                                                                                                                                                                            |                             | -                                                                                                                                                                                          |
| Caenorhabditis elegans  | elegans protein partially confirmed by transcript evidence | 0  |                                                                                                                                                                                                                                                                                              |                                                                                                                                                                                                                                                                                              |                             | -                                                                                                                                                                                          |
|                         | -                                                          | 0  |                                                                                                                                                                                                                                                                                              |                                                                                                                                                                                                                                                                                              |                             | -                                                                                                                                                                                          |
|                         | -                                                          | 0  |                                                                                                                                                                                                                                                                                              |                                                                                                                                                                                                                                                                                              |                             | -                                                                                                                                                                                          |
|                         | -                                                          | 0  |                                                                                                                                                                                                                                                                                              |                                                                                                                                                                                                                                                                                              |                             | SignalP (SIGNALP)                                                                                                                                                                          |
| Loa loa                 | protein-tyrosine phosphatase containing protein            | 2  | P:GO:0016311;<br>F:GO:0004721                                                                                                                                                                                                                                                                | -                                                                                                                                                                                                                                                                                            | EC:3.1.3.16                 | IPR000242; G3DSA:3.90.190.10 (GENE3D), PTHR23219 (PANTHER), PTHR23219:SF2 (PANTHER), SSF52799 (SUPERFAMILY)                                                                                |
| Caenorhabditis briggsae | calcium binding egf domain containing protein              | 0  |                                                                                                                                                                                                                                                                                              | C:GO:0016021;<br>F:GO:0004222;<br>C:GO:0016020;<br>F:GO:0016787;<br>F:GO:0003674;<br>P:GO:0050896;<br>F:GO:0008270;<br>P:GO:0007275;<br>F:GO:0008237;<br>P:GO:0030154;<br>P:GO:0009790;<br>C:GO:0005576;<br>F:GO:0008233;<br>P:GO:0006508;<br>F:GO:0046872;<br>F:GO:0005509;<br>P:GO:0007601 |                             | IPR000859; PTHR10127 (PANTHER), PTHR10127:SF72 (PANTHER)                                                                                                                                   |
|                         | -                                                          | 0  |                                                                                                                                                                                                                                                                                              |                                                                                                                                                                                                                                                                                              |                             | -                                                                                                                                                                                          |
| Caenorhabditis elegans  | hunchback                                                  | 17 | P:GO:0045941;<br>F:GO:0008270;<br>P:GO:0007417;<br>P:GO:0042659;<br>P:GO:0001763;<br>P:GO:0007402;<br>P:GO:0007400;<br>P:GO:0035290;<br>F:GO:0016563;<br>P:GO:0040034;<br>P:GO:0007362;<br>P:GO:0008293;<br>C:GO:0005622;<br>F:GO:0003677;<br>P:GO:0007427;<br>P:GO:0007431;<br>P:GO:0035289 | -                                                                                                                                                                                                                                                                                            |                             | IPR015880; PTHR10032 (PANTHER), PTHR10032:SF69 (PANTHER)                                                                                                                                   |
| Apis mellifera          | aromatic amino acid decarboxylase                          | 4  | F:GO:0004837;<br>P:GO:0044237;<br>F:GO:0004058;<br>P:GO:0044281                                                                                                                                                                                                                              | -                                                                                                                                                                                                                                                                                            | EC:4.1.1.25;<br>EC:4.1.1.28 | IPR002129; IPR010977; IPR015424; G3DSA:1.20.1340.10 (GENE3D)                                                                                                                               |

|                         |                                                            |   |                                                                                                                                                      |                                                                                                                                                                                        |                                        |
|-------------------------|------------------------------------------------------------|---|------------------------------------------------------------------------------------------------------------------------------------------------------|----------------------------------------------------------------------------------------------------------------------------------------------------------------------------------------|----------------------------------------|
| Caenorhabditis briggsae | elegans protein partially confirmed by transcript evidence | 6 | P:GO:0043652;<br>F:GO:0042626;<br>C:GO:0005886;<br>F:GO:0005524;<br>P:GO:0012501;<br>C:GO:0016021                                                    | -                                                                                                                                                                                      | -                                      |
| Caenorhabditis briggsae | elegans protein partially confirmed by transcript evidence | 9 | P:GO:0033700;<br>P:GO:0012501;<br>P:GO:0043652;<br>C:GO:0016021;<br>F:GO:0042626;<br>C:GO:0005622;<br>F:GO:0005548;<br>F:GO:0005524;<br>C:GO:0016324 | -                                                                                                                                                                                      | -                                      |
| Ailurogoda melanoleuca  | type alpha 2                                               | 8 | F:GO:0005201;<br>F:GO:0030674;<br>C:GO:0005615;<br>P:GO:0016337;<br>C:GO:0005578;<br>P:GO:0009749;<br>P:GO:0030198;<br>C:GO:0042383                  | -                                                                                                                                                                                      | -                                      |
| Haemonchus contortus    | gaba a glycine receptor subunit                            | 6 | F:GO:0004872;<br>C:GO:0045211;<br>C:GO:0030054;<br>F:GO:0005230;<br>P:GO:0006811;<br>C:GO:0016021                                                    | -                                                                                                                                                                                      | IPR006201; PTHR18945:SF14<br>(PANTHER) |
| -                       | -                                                          | 0 |                                                                                                                                                      |                                                                                                                                                                                        | -                                      |
| -                       | -                                                          | 0 |                                                                                                                                                      |                                                                                                                                                                                        | -                                      |
| Caenorhabditis remanei  | briggsae cbr-rpy-1 protein                                 | 7 | C:GO:0005856;<br>C:GO:0045211;<br>P:GO:0007268;<br>C:GO:0030054;<br>F:GO:0033130;<br>P:GO:0019915;<br>F:GO:0008270                                   | -                                                                                                                                                                                      | -                                      |
| -                       | -                                                          | 0 |                                                                                                                                                      |                                                                                                                                                                                        | SignalP (SIGNALP)                      |
| -                       | -                                                          | 0 |                                                                                                                                                      |                                                                                                                                                                                        | -                                      |
| Caenorhabditis elegans  | briggsae cbr-tag-96 protein                                | 0 |                                                                                                                                                      | F:GO:0016740;<br>P:GO:0046835;<br>P:GO:0016310;<br>F:GO:0000166;<br>C:GO:0005737;<br>F:GO:0005524;<br>F:GO:0016301;<br>P:GO:0006012;<br>P:GO:0008152;<br>F:GO:0016773;<br>F:GO:0004335 | IPR014721; IPR019539; IPR020568        |
| -                       | -                                                          | 0 |                                                                                                                                                      |                                                                                                                                                                                        | -                                      |
| -                       | -                                                          | 0 |                                                                                                                                                      |                                                                                                                                                                                        | SignalP (SIGNALP)                      |



|                         |                                                  |   |                                                                                                                    |                                                                                  |             |                                                                                                      |
|-------------------------|--------------------------------------------------|---|--------------------------------------------------------------------------------------------------------------------|----------------------------------------------------------------------------------|-------------|------------------------------------------------------------------------------------------------------|
| Caenorhabditis elegans  | phenylalanyl-tr- synthetase mitochondrial        | 7 | C:GO:0005625;<br>P:GO:0006432;<br>P:GO:0008033;<br>F:GO:0004826;<br>F:GO:0000166;<br>C:GO:0005759;<br>F:GO:0000049 | -                                                                                | EC:6.1.1.20 | IPR002319; IPR004530; IPR005121;<br>IPR006195; G3DSA:3.30.930.10<br>(GENE3D), SSF55681 (SUPERFAMILY) |
| Caenorhabditis elegans  | elegans protein confirmed by transcript evidence | 1 | P:GO:0019915                                                                                                       | -                                                                                |             | SignalP (SIGNALP)                                                                                    |
| Caenorhabditis remanei  | briggsae cbr-sro-1 protein                       | 2 | P:GO:0007186;<br>C:GO:0016021                                                                                      | -                                                                                |             | PTHR19264 (PANTHER),<br>PTHR19264:SF1 (PANTHER), SignalP<br>(SIGNALP)                                |
|                         | -                                                | 0 |                                                                                                                    |                                                                                  |             | -                                                                                                    |
| Caenorhabditis remanei  | serpentine class e protein 39                    | 0 |                                                                                                                    |                                                                                  |             | -                                                                                                    |
|                         | -                                                | 0 |                                                                                                                    |                                                                                  |             | -                                                                                                    |
|                         | -                                                | 0 |                                                                                                                    |                                                                                  |             | -                                                                                                    |
| Haemochus contortus     | elegans protein confirmed by transcript evidence | 1 | F:GO:0016740                                                                                                       | -                                                                                |             | -                                                                                                    |
|                         | -                                                | 0 |                                                                                                                    |                                                                                  |             | -                                                                                                    |
|                         | -                                                | 0 |                                                                                                                    |                                                                                  |             | SignalP (SIGNALP)                                                                                    |
|                         | -                                                | 0 |                                                                                                                    |                                                                                  |             | -                                                                                                    |
| Caenorhabditis briggsae | myosin via                                       | 5 | P:GO:0009792;<br>F:GO:0003779;<br>C:GO:0016459;<br>F:GO:0005524;<br>F:GO:0003774                                   | -                                                                                |             | IPR001609; IPR004009; PTHR13140<br>(PANTHER), PTHR13140:SF26<br>(PANTHER), SSF52540 (SUPERFAMILY)    |
|                         | -                                                | 0 |                                                                                                                    |                                                                                  |             | -                                                                                                    |
|                         | -                                                | 0 |                                                                                                                    |                                                                                  |             | -                                                                                                    |
| Caenorhabditis remanei  | aldo keto reductase family protein               | 4 | P:GO:0055114;<br>P:GO:0043050;<br>F:GO:0016491;<br>P:GO:0040011                                                    | -                                                                                |             | IPR001395; IPR023210;<br>PTHR11732:SF34 (PANTHER)                                                    |
| Caenorhabditis elegans  | gex interacting protein family member (gei-3)    | 0 |                                                                                                                    | C:GO:0005634                                                                     |             | -                                                                                                    |
|                         | -                                                | 0 |                                                                                                                    |                                                                                  |             | -                                                                                                    |
|                         | -                                                | 0 |                                                                                                                    |                                                                                  |             | -                                                                                                    |
| Caenorhabditis remanei  | briggsae cbr-unc-122 protein                     | 0 |                                                                                                                    |                                                                                  |             | -                                                                                                    |
|                         | -                                                | 0 |                                                                                                                    |                                                                                  |             | -                                                                                                    |
| Caenorhabditis remanei  | briggsae cbr-dhs-20 protein                      | 0 |                                                                                                                    | P:GO:0055114;<br>F:GO:0005488;<br>F:GO:0016491;<br>P:GO:0008152;<br>F:GO:0003824 |             | IPR002198; IPR016040;<br>PTHR19410:SF25 (PANTHER)                                                    |
|                         | -                                                | 0 |                                                                                                                    |                                                                                  |             | -                                                                                                    |
| Caenorhabditis elegans  | tpa: zinc finger protein                         | 0 |                                                                                                                    | F:GO:0003676;<br>F:GO:0008270;<br>F:GO:0005515;<br>C:GO:0005622                  |             | IPR007087; IPR015880                                                                                 |
|                         | -                                                | 0 |                                                                                                                    |                                                                                  |             | -                                                                                                    |
|                         | -                                                | 0 |                                                                                                                    |                                                                                  |             | SignalP (SIGNALP)                                                                                    |
| Caenorhabditis remanei  | briggsae cbr-wht-4 protein                       | 3 | C:GO:0016020;<br>F:GO:0016887;<br>F:GO:0005524                                                                     | -                                                                                |             | PTHR19241 (PANTHER),<br>PTHR19241:SF30 (PANTHER)                                                     |
|                         | -                                                | 0 |                                                                                                                    |                                                                                  |             | SignalP (SIGNALP)                                                                                    |
|                         | -                                                | 0 |                                                                                                                    |                                                                                  |             | -                                                                                                    |

|                            |                                                                          |    |                                                                                                                                                                                                         |                                                                                                                                                      |             |                                                                                 |
|----------------------------|--------------------------------------------------------------------------|----|---------------------------------------------------------------------------------------------------------------------------------------------------------------------------------------------------------|------------------------------------------------------------------------------------------------------------------------------------------------------|-------------|---------------------------------------------------------------------------------|
| Caenorhabditis elegans     | multidrug resistance protein 3                                           | 12 | P:GO:0007595;<br>C:GO:0016021;<br>F:GO:0042626;<br>P:GO:0006855;<br>C:GO:0046581;<br>F:GO:0005524;<br>F:GO:0005515;<br>P:GO:0014070;<br>P:GO:0033280;<br>P:GO:0009792;<br>P:GO:0046686;<br>C:GO:0005794 | -                                                                                                                                                    | -           |                                                                                 |
| -                          | -                                                                        | 0  |                                                                                                                                                                                                         |                                                                                                                                                      |             |                                                                                 |
| Caenorhabditis remanei     | elegans protein confirmed by transcript evidence                         | 2  | P:GO:0016311;<br>F:GO:0004721                                                                                                                                                                           | -                                                                                                                                                    | EC:3.1.3.16 | G3DSA:3.90.190.10 (GENE3D),<br>PTHR19134 (PANTHER),<br>PTHR19134:SF26 (PANTHER) |
| -                          | -                                                                        | 0  |                                                                                                                                                                                                         |                                                                                                                                                      |             |                                                                                 |
| -                          | -                                                                        | 0  |                                                                                                                                                                                                         |                                                                                                                                                      |             | SignalP (SIGNALP)                                                               |
| Brugia malayi              | apoptosis antagonizing transcription factor                              | 0  |                                                                                                                                                                                                         | C:GO:0005634                                                                                                                                         |             | IPR012617; PTHR15565 (PANTHER)                                                  |
| -                          | -                                                                        | 0  |                                                                                                                                                                                                         |                                                                                                                                                      |             |                                                                                 |
| Caenorhabditis elegans     | elegans protein confirmed by transcript evidence                         | 0  |                                                                                                                                                                                                         | F:GO:0004725;<br>P:GO:0016311;<br>F:GO:0016791;<br>F:GO:0004721;<br>F:GO:0008138;<br>F:GO:0016787;<br>P:GO:0000003;<br>P:GO:0006470;<br>P:GO:0009792 |             |                                                                                 |
| -                          | -                                                                        | 0  |                                                                                                                                                                                                         |                                                                                                                                                      |             |                                                                                 |
| Caenorhabditis elegans     | tlc domain-containing protein 2                                          | 1  | C:GO:0016020                                                                                                                                                                                            | -                                                                                                                                                    |             | SignalP (SIGNALP)                                                               |
| Caenorhabditis remanei     | leucine rich repeat family protein                                       | 2  | F:GO:0003676;<br>F:GO:0000166                                                                                                                                                                           | -                                                                                                                                                    |             |                                                                                 |
| -                          | -                                                                        | 0  |                                                                                                                                                                                                         |                                                                                                                                                      |             |                                                                                 |
| -                          | -                                                                        | 0  |                                                                                                                                                                                                         |                                                                                                                                                      |             |                                                                                 |
| -                          | -                                                                        | 0  |                                                                                                                                                                                                         |                                                                                                                                                      |             | PTHR10151 (PANTHER),<br>PTHR10151:SF28 (PANTHER)                                |
| -                          | -                                                                        | 0  |                                                                                                                                                                                                         |                                                                                                                                                      |             |                                                                                 |
| -                          | -                                                                        | 0  |                                                                                                                                                                                                         |                                                                                                                                                      |             | SignalP (SIGNALP)                                                               |
| -                          | -                                                                        | 0  |                                                                                                                                                                                                         |                                                                                                                                                      |             |                                                                                 |
| -                          | -                                                                        | 0  |                                                                                                                                                                                                         |                                                                                                                                                      |             |                                                                                 |
| -                          | -                                                                        | 0  |                                                                                                                                                                                                         |                                                                                                                                                      |             | IPR001810                                                                       |
| Oscheius sp. (strain CEW1) | vitellogenin structural genes (yolk protein genes) protein isoform a     | 4  | P:GO:0009792;<br>P:GO:0008340;<br>P:GO:0040010;<br>F:GO:0005515                                                                                                                                         | -                                                                                                                                                    |             | SignalP (SIGNALP)                                                               |
| Oscheius sp. (strain CEW1) | vitellogenin structural genes (yolk protein genes) family member (vit-2) | 4  | P:GO:0009792;<br>F:GO:0005515;<br>P:GO:0040010;<br>P:GO:0008340                                                                                                                                         | -                                                                                                                                                    |             | SignalP (SIGNALP)                                                               |

|                         |                                                    |    |                                                                                                                                                                                                                          |   |             |                                                                                                                                                                                             |
|-------------------------|----------------------------------------------------|----|--------------------------------------------------------------------------------------------------------------------------------------------------------------------------------------------------------------------------|---|-------------|---------------------------------------------------------------------------------------------------------------------------------------------------------------------------------------------|
| Caenorhabditis elegans  | jumonji domain containing 6                        | 13 | P:GO:0048024;<br>P:GO:0070079;<br>F:GO:0033749;<br>P:GO:0048513;<br>P:GO:0018395;<br>F:GO:0070815;<br>P:GO:0006350;<br>F:GO:0042802;<br>P:GO:0030154;<br>P:GO:0002376;<br>P:GO:0070078;<br>F:GO:0033746;<br>C:GO:0005634 | - |             | IPR003347; IPR013129; PTHR12480 (PANTHER), SSF51197 (SUPERFAMILY)                                                                                                                           |
| Caenorhabditis briggsae | glucosamine--fructose-6-phosphate aminotransferase | 9  | P:GO:0000910;<br>F:GO:0004360;<br>P:GO:0016051;<br>P:GO:0009792;<br>C:GO:0005737;<br>P:GO:0000003;<br>P:GO:0040007;<br>F:GO:0005529;<br>P:GO:0002119                                                                     | - | EC:2.6.1.16 | IPR000583; IPR001347; IPR005855; IPR017932; G3DSA:3.40.50.10490 (GENE3D), G3DSA:3.60.20.10 (GENE3D), PTHR10937 (PANTHER), PSS1464 (PROFILE), SSF53697 (SUPERFAMILY), SSF56235 (SUPERFAMILY) |
| Caenorhabditis briggsae | glucosamine--fructose-6-phosphate aminotransferase | 9  | P:GO:0000910;<br>F:GO:0004360;<br>P:GO:0016051;<br>P:GO:0009792;<br>C:GO:0005737;<br>P:GO:0000003;<br>P:GO:0040007;<br>F:GO:0005529;<br>P:GO:0002119                                                                     | - | EC:2.6.1.16 | IPR000583; IPR001347; IPR005855; IPR017932; G3DSA:3.40.50.10490 (GENE3D), G3DSA:3.60.20.10 (GENE3D), PTHR10937 (PANTHER), PSS1464 (PROFILE), SSF53697 (SUPERFAMILY), SSF56235 (SUPERFAMILY) |
| Caenorhabditis briggsae | glucosamine--fructose-6-phosphate aminotransferase | 9  | P:GO:0000910;<br>F:GO:0004360;<br>P:GO:0016051;<br>P:GO:0009792;<br>C:GO:0005737;<br>P:GO:0000003;<br>P:GO:0040007;<br>F:GO:0005529;<br>P:GO:0002119                                                                     | - | EC:2.6.1.16 | IPR000583; IPR001347; IPR005855; IPR017932; G3DSA:3.40.50.10490 (GENE3D), G3DSA:3.60.20.10 (GENE3D), PTHR10937 (PANTHER), PSS1464 (PROFILE), SSF53697 (SUPERFAMILY), SSF56235 (SUPERFAMILY) |
| Caenorhabditis elegans  | h+-atpase v-type subunit                           | 6  | F:GO:0046933;<br>C:GO:0016021;<br>P:GO:0015986;<br>C:GO:0033179;<br>C:GO:0045263;<br>C:GO:0005774                                                                                                                        | - | EC:3.6.3.14 |                                                                                                                                                                                             |
| Caenorhabditis briggsae | proteasome ( macropain) 26s non- 9                 | 6  | F:GO:0005515;<br>P:GO:0051437;<br>P:GO:0051436;<br>C:GO:0044424;<br>P:GO:0070682;<br>P:GO:0031145                                                                                                                        | - |             |                                                                                                                                                                                             |
| -                       | -                                                  | 0  |                                                                                                                                                                                                                          | - |             |                                                                                                                                                                                             |
| Loa loa                 | uracil phosphoribosyltransferase                   | 2  | C:GO:0044424;<br>F:GO:0016740                                                                                                                                                                                            | - |             |                                                                                                                                                                                             |

|                             |                                                               |   |                                                                                                                                                      |                                                                                                   |            |                                                                                                                                                                        |
|-----------------------------|---------------------------------------------------------------|---|------------------------------------------------------------------------------------------------------------------------------------------------------|---------------------------------------------------------------------------------------------------|------------|------------------------------------------------------------------------------------------------------------------------------------------------------------------------|
| Homo sapiens                | interleukin-32 isoform b                                      | 5 | P:GO:0006955;<br>P:GO:0006952;<br>C:GO:0005615;<br>P:GO:0007155;<br>F:GO:0005125                                                                     | -                                                                                                 | -          |                                                                                                                                                                        |
| -                           | -                                                             | 0 |                                                                                                                                                      |                                                                                                   |            |                                                                                                                                                                        |
| -                           | -                                                             | 0 |                                                                                                                                                      |                                                                                                   |            |                                                                                                                                                                        |
| Dictyocaulus viviparus      | protein I3i10 isoform a                                       | 0 |                                                                                                                                                      |                                                                                                   |            | SignalP (SIGNALP)                                                                                                                                                      |
| Dictyocaulus viviparus      | protein I3i10 isoform b                                       | 0 |                                                                                                                                                      |                                                                                                   |            | -                                                                                                                                                                      |
| Dictyocaulus viviparus      | protein I3i10 isoform a                                       | 0 |                                                                                                                                                      |                                                                                                   |            | SignalP (SIGNALP)                                                                                                                                                      |
| Caenorhabditis elegans      | lam-2                                                         | 2 | P:GO:0007155;<br>C:GO:0005578                                                                                                                        | -                                                                                                 |            | IPR002049; IPR013032; PR00011 (PRINTS), G3DSA:2.10.25.10 (GENE3D), PTHR10574 (PANTHER), PTHR10574:SF48 (PANTHER), SSF57196 (SUPERFAMILY)                               |
| Caenorhabditis elegans      | protein tyrosine phosphatase isoform cra_a                    | 7 | F:GO:0042802;<br>C:GO:0005768;<br>F:GO:0008138;<br>P:GO:0006470;<br>P:GO:0019915;<br>C:GO:0016020;<br>F:GO:0004727                                   | -                                                                                                 |            | IPR000242; IPR000387; G3DSA:3.90.190.10 (GENE3D), PTHR23339 (PANTHER), PTHR23339:SF23 (PANTHER), SSF52799 (SUPERFAMILY)                                                |
| Caenorhabditis elegans      | protein tyrosine phosphatase isoform cra_a                    | 7 | F:GO:0042802;<br>C:GO:0005768;<br>F:GO:0008138;<br>P:GO:0006470;<br>P:GO:0019915;<br>C:GO:0016020;<br>F:GO:0004727                                   | -                                                                                                 |            | IPR000242; IPR000387; G3DSA:3.90.190.10 (GENE3D), PTHR23339 (PANTHER), PTHR23339:SF23 (PANTHER), SSF52799 (SUPERFAMILY)                                                |
| Haemonchus contortus        | myosin heavy chain                                            | 6 | C:GO:0032982;<br>F:GO:0003779;<br>F:GO:0005524;<br>F:GO:0003774;<br>C:GO:0031672;<br>P:GO:0007626                                                    | -                                                                                                 |            | IPR002928; IPR015650; PTHR13140 (PANTHER)                                                                                                                              |
| Caenorhabditis elegans      | a-phase-promoting complex subunit 2-like                      | 1 | F:GO:0005515                                                                                                                                         | -                                                                                                 |            | -                                                                                                                                                                      |
| Caenorhabditis briggsae     | glutathione reductase                                         | 9 | C:GO:0005829;<br>P:GO:0045454;<br>P:GO:0055114;<br>P:GO:0000003;<br>F:GO:0009055;<br>P:GO:0006749;<br>F:GO:0004362;<br>F:GO:0050660;<br>F:GO:0050661 | -                                                                                                 | EC:1.8.1.7 | IPR000815; IPR012999; IPR013027; PR00411 (PRINTS), G3DSA:3.50.50.60 (GENE3D), PTHR22912 (PANTHER), PTHR22912:SF27 (PANTHER), SignalP (SIGNALP), SSF51905 (SUPERFAMILY) |
| Micromonas pusilla CCMP1545 | protein                                                       | 1 | C:GO:0005739                                                                                                                                         | -                                                                                                 |            | -                                                                                                                                                                      |
| Sorghum bicolor             | hypothetical protein SORBIDRAFT_0070s002020 [Sorghum bicolor] | 0 |                                                                                                                                                      |                                                                                                   |            | -                                                                                                                                                                      |
| Caenorhabditis elegans      | hypothetical protein H20J04.3 [Caenorhabditis elegans]        | 0 |                                                                                                                                                      | F:GO:0046872;<br>P:GO:0008150;<br>F:GO:0008270;<br>F:GO:0005515;<br>C:GO:0005575;<br>F:GO:0003677 |            | IPR006578                                                                                                                                                              |
| -                           | -                                                             | 0 |                                                                                                                                                      |                                                                                                   |            | IPR006578                                                                                                                                                              |

|                         |                                                      |   |                                                                                  |                                                                                                                    |             |                                                                                                                                                        |
|-------------------------|------------------------------------------------------|---|----------------------------------------------------------------------------------|--------------------------------------------------------------------------------------------------------------------|-------------|--------------------------------------------------------------------------------------------------------------------------------------------------------|
| Caenorhabditis elegans  | glutaminyl-tr- synthetase                            | 4 | C:GO:0005737;<br>F:GO:0004819;<br>P:GO:0006425;<br>F:GO:0005524                  | -                                                                                                                  | EC:6.1.1.18 | IPR000924; IPR004514; IPR011035;<br>IPR014729; IPR020056; IPR020058;<br>IPR020059; IPR020061; SSF52374<br>(SUPERFAMILY)                                |
| Caenorhabditis elegans  | glutaminyl-tr- synthetase                            | 4 | C:GO:0005737;<br>F:GO:0004819;<br>P:GO:0006425;<br>F:GO:0005524                  | -                                                                                                                  | EC:6.1.1.18 | IPR000924; IPR004514; IPR011035;<br>IPR014729; IPR020056; IPR020058;<br>IPR020059; IPR020061;<br>G3DSA:3.90.800.10 (GENE3D),<br>SSF52374 (SUPERFAMILY) |
| Caenorhabditis elegans  | briggsae cbr-ttr-53 protein                          | 0 |                                                                                  | F:GO:0046872;<br>P:GO:0006508;<br>F:GO:0008237;<br>F:GO:0016787;<br>F:GO:0004222;<br>F:GO:0008233;<br>F:GO:0008270 |             | -                                                                                                                                                      |
| Caenorhabditis elegans  | kiaa1219 protein                                     | 0 |                                                                                  | F:GO:0005096;<br>P:GO:0051056;<br>P:GO:0032859;<br>F:GO:0017123;<br>F:GO:0046982;<br>F:GO:0005515;<br>C:GO:0005622 |             | PTHR21344 (PANTHER), SignalP<br>(SIGNALP)                                                                                                              |
| -                       | -                                                    | 0 |                                                                                  |                                                                                                                    |             | SignalP (SIGNALP)                                                                                                                                      |
| Caenorhabditis briggsae | briggsae cbr-tag-325 protein                         | 0 |                                                                                  | P:GO:0007165;<br>F:GO:0005515;<br>C:GO:0005622                                                                     |             | IPR001202; G3DSA:2.20.70.10<br>(GENE3D), PTHR13173 (PANTHER),<br>PTHR13173:SF10 (PANTHER), SignalP<br>(SIGNALP)                                        |
| Caenorhabditis elegans  | aminotransferase class-iii                           | 4 | F:GO:0008453;<br>F:GO:0030170;<br>C:GO:0005739;<br>P:GO:0019544                  | -                                                                                                                  | EC:2.6.1.44 | -                                                                                                                                                      |
| -                       | -                                                    | 0 |                                                                                  |                                                                                                                    |             | SignalP (SIGNALP)                                                                                                                                      |
| Caenorhabditis elegans  | neuralized family protein                            | 3 | F:GO:0046872;<br>P:GO:0009792;<br>P:GO:0000003                                   | -                                                                                                                  |             | IPR006573; PTHR12429 (PANTHER)                                                                                                                         |
| Caenorhabditis elegans  | budding uninhibited by benzimidazoles 1 homolog beta | 1 | F:GO:0005488                                                                     | -                                                                                                                  |             | SignalP (SIGNALP)                                                                                                                                      |
| -                       | -                                                    | 0 |                                                                                  |                                                                                                                    |             | -                                                                                                                                                      |
| Caenorhabditis briggsae | eukaryotic translation initiation factor 2a          | 4 | P:GO:0006413;<br>F:GO:0005488;<br>P:GO:0006417;<br>C:GO:0005737                  | -                                                                                                                  |             | PTHR13227 (PANTHER)                                                                                                                                    |
| Caenorhabditis briggsae | eukaryotic translation initiation factor 2a          | 3 | F:GO:0003743;<br>P:GO:0006412;<br>C:GO:0044424                                   | -                                                                                                                  | EC:3.6.5.3  | IPR013979; IPR015943; PTHR13227<br>(PANTHER), SSF50960 (SUPERFAMILY)                                                                                   |
| Brugia malayi           | ubiquitin ligase                                     | 0 |                                                                                  | F:GO:0046872;<br>F:GO:0016874;<br>F:GO:0008270;<br>F:GO:0005515;<br>F:GO:0004842                                   |             | -                                                                                                                                                      |
| Caenorhabditis elegans  | rho gtpase activating protein 27                     | 5 | C:GO:0005622;<br>P:GO:0043089;<br>F:GO:0030675;<br>P:GO:0006898;<br>F:GO:0017124 | -                                                                                                                  |             | IPR000198; IPR001849; IPR008936;<br>IPR011993; IPR015767; SSF50729<br>(SUPERFAMILY)                                                                    |

|                         |                                                      |    |                                                                                                                                                                                                                                                                                                                                                                  |   |                                                                                                                                                                                             |
|-------------------------|------------------------------------------------------|----|------------------------------------------------------------------------------------------------------------------------------------------------------------------------------------------------------------------------------------------------------------------------------------------------------------------------------------------------------------------|---|---------------------------------------------------------------------------------------------------------------------------------------------------------------------------------------------|
| Mus musculus            | ribosomal protein l35                                | 10 | C:GO:0005730;<br>P:GO:0009792;<br>P:GO:0002119;<br>F:GO:0003729;<br>F:GO:0003735;<br>F:GO:0005515;<br>P:GO:0000003;<br>C:GO:0022625;<br>P:GO:0040007;<br>P:GO:0006414                                                                                                                                                                                            | - | IPR001854; IPR018254; PTHR13872 (PANTHER)                                                                                                                                                   |
| Caenorhabditis briggsae | transmembrane and ubiquitin-like domain containing 1 | 1  | C:GO:0044464                                                                                                                                                                                                                                                                                                                                                     | - | -                                                                                                                                                                                           |
| Caenorhabditis briggsae | transmembrane and ubiquitin-like domain containing 1 | 1  | C:GO:0044464                                                                                                                                                                                                                                                                                                                                                     | - | -                                                                                                                                                                                           |
|                         | -                                                    | 0  |                                                                                                                                                                                                                                                                                                                                                                  |   | -                                                                                                                                                                                           |
|                         | -                                                    | 0  |                                                                                                                                                                                                                                                                                                                                                                  |   | -                                                                                                                                                                                           |
| Sus scrofa              | amine oxidase (flavin containing) domain 2           | 21 | P:GO:0033169;<br>P:GO:0043433;<br>P:GO:0008283;<br>F:GO:0034648;<br>P:GO:0021983;<br>F:GO:0016491;<br>P:GO:0034720;<br>F:GO:0050660;<br>C:GO:0005667;<br>P:GO:0010553;<br>P:GO:0034339;<br>F:GO:0032454;<br>F:GO:0003700;<br>P:GO:0045944;<br>P:GO:0046886;<br>F:GO:0003682;<br>F:GO:0010843;<br>F:GO:0030374;<br>F:GO:0050681;<br>P:GO:0001701;<br>F:GO:0016564 | - | IPR002937; G3DSA:1.10.287.80 (GENE3D), G3DSA:3.50.50.60 (GENE3D), G3DSA:3.90.660.10 (GENE3D), PTHR10742 (PANTHER), PTHR10742:SF35 (PANTHER), SSF51905 (SUPERFAMILY), SSF54373 (SUPERFAMILY) |
| Sus scrofa              | amine oxidase (flavin containing) domain 2           | 21 | P:GO:0033169;<br>P:GO:0043433;<br>P:GO:0008283;<br>F:GO:0034648;<br>P:GO:0021983;<br>F:GO:0016491;<br>P:GO:0034720;<br>F:GO:0050660;<br>C:GO:0005667;<br>P:GO:0010553;<br>P:GO:0034339;<br>F:GO:0032454;<br>F:GO:0003700;<br>P:GO:0045944;<br>P:GO:0046886;<br>F:GO:0003682;<br>F:GO:0010843;<br>F:GO:0030374;<br>F:GO:0050681;<br>P:GO:0001701;<br>F:GO:0016564 | - | IPR002937; G3DSA:1.10.287.80 (GENE3D), G3DSA:3.50.50.60 (GENE3D), G3DSA:3.90.660.10 (GENE3D), PTHR10742 (PANTHER), PTHR10742:SF35 (PANTHER), SSF51905 (SUPERFAMILY), SSF54373 (SUPERFAMILY) |

|                        |                                                                          |    |                                                                                                                                                                                                                                                                                                                                                                  |   |                                                                                                                                                                                                                                                  |
|------------------------|--------------------------------------------------------------------------|----|------------------------------------------------------------------------------------------------------------------------------------------------------------------------------------------------------------------------------------------------------------------------------------------------------------------------------------------------------------------|---|--------------------------------------------------------------------------------------------------------------------------------------------------------------------------------------------------------------------------------------------------|
| Sus scrofa             | amine oxidase (flavin containing) domain 2                               | 21 | P:GO:0033169;<br>P:GO:0043433;<br>P:GO:0008283;<br>F:GO:0034648;<br>P:GO:0021983;<br>F:GO:0016491;<br>P:GO:0034720;<br>F:GO:0050660;<br>C:GO:0005667;<br>P:GO:0010553;<br>P:GO:0034339;<br>F:GO:0032454;<br>F:GO:0003700;<br>P:GO:0045944;<br>P:GO:0046886;<br>F:GO:0003682;<br>F:GO:0010843;<br>F:GO:0030374;<br>F:GO:0050681;<br>P:GO:0001701;<br>F:GO:0016564 | - | IPR002937; G3DSA:1.10.287.80 (GENE3D), G3DSA:3.50.50.60 (GENE3D), G3DSA:3.90.660.10 (GENE3D), PTHR10742 (PANTHER), PTHR10742:SF35 (PANTHER), SSF51905 (SUPERFAMILY), SSF54373 (SUPERFAMILY)                                                      |
| Sus scrofa             | amine oxidase (flavin containing) domain 2                               | 21 | P:GO:0033169;<br>P:GO:0043433;<br>P:GO:0008283;<br>F:GO:0034648;<br>P:GO:0021983;<br>F:GO:0016491;<br>P:GO:0034720;<br>F:GO:0050660;<br>C:GO:0005667;<br>P:GO:0010553;<br>P:GO:0034339;<br>F:GO:0032454;<br>F:GO:0003700;<br>P:GO:0045944;<br>P:GO:0046886;<br>F:GO:0003682;<br>F:GO:0010843;<br>F:GO:0030374;<br>F:GO:0050681;<br>P:GO:0001701;<br>F:GO:0016564 | - | IPR002937; G3DSA:1.10.287.80 (GENE3D), G3DSA:3.50.50.60 (GENE3D), G3DSA:3.90.660.10 (GENE3D), PTHR10742 (PANTHER), PTHR10742:SF35 (PANTHER), SSF51905 (SUPERFAMILY), SSF54373 (SUPERFAMILY)                                                      |
| Homo sapiens           | chromosome 4 open reading frame 7                                        | 1  | C:GO:0005576                                                                                                                                                                                                                                                                                                                                                     | - | SignalP (SIGNALP)                                                                                                                                                                                                                                |
|                        | -                                                                        | 0  |                                                                                                                                                                                                                                                                                                                                                                  |   | -                                                                                                                                                                                                                                                |
| Caenorhabditis elegans | serca (sarco-endoplasmic reticulum calcium atpase) family member (sca-1) | 12 | F:GO:0005515;<br>P:GO:0006816;<br>C:GO:0016021;<br>C:GO:0033017;<br>F:GO:0046872;<br>P:GO:0006754;<br>C:GO:0005635;<br>P:GO:0051282;<br>F:GO:0005388;<br>P:GO:0007274;<br>C:GO:0005811;<br>F:GO:0005524                                                                                                                                                          | - | EC:3.6.3.8<br>IPR001757; IPR004014; IPR008250; IPR018303; G3DSA:1.20.1110.10 (GENE3D), G3DSA:2.70.150.10 (GENE3D), G3DSA:3.40.1110.10 (GENE3D), PTHR11939:SF94 (PANTHER), SSF81653 (SUPERFAMILY), SSF81660 (SUPERFAMILY), SSF81665 (SUPERFAMILY) |

|                         |                                                                                    |   |                                                                                                                                     |   |                                                         |                                                                                                                                                                                                                                                                                                                        |
|-------------------------|------------------------------------------------------------------------------------|---|-------------------------------------------------------------------------------------------------------------------------------------|---|---------------------------------------------------------|------------------------------------------------------------------------------------------------------------------------------------------------------------------------------------------------------------------------------------------------------------------------------------------------------------------------|
| Caenorhabditis elegans  | calcium-transporting atpase sarcoplasmic endoplasmic reticulum type (calcium pump) | 7 | F:GO:0005388;<br>C:GO:0016021;<br>F:GO:0046872;<br>P:GO:0006754;<br>F:GO:0005524;<br>P:GO:0006816;<br>C:GO:0033017                  | - | EC:3.6.3.8                                              | IPR001757; IPR004014; IPR005782;<br>IPR005834; IPR006068; IPR008250;<br>IPR018303; G3DSA:1.20.1110.10<br>(GENE3D), G3DSA:2.70.150.10<br>(GENE3D), G3DSA:3.40.1110.10<br>(GENE3D), PTHR11939:SF94<br>(PANTHER), SSF56784 (SUPERFAMILY),<br>SSF81653 (SUPERFAMILY), SSF81660<br>(SUPERFAMILY), SSF81665<br>(SUPERFAMILY) |
| Caenorhabditis elegans  | calcium-transporting atpase sarcoplasmic endoplasmic reticulum type (calcium pump) | 7 | F:GO:0005388;<br>C:GO:0016021;<br>F:GO:0046872;<br>P:GO:0006754;<br>F:GO:0005524;<br>P:GO:0006816;<br>C:GO:0033017                  | - | EC:3.6.3.8                                              | IPR001757; IPR004014; IPR005782;<br>IPR005834; IPR006068; IPR008250;<br>IPR018303; G3DSA:1.20.1110.10<br>(GENE3D), G3DSA:2.70.150.10<br>(GENE3D), G3DSA:3.40.1110.10<br>(GENE3D), PTHR11939:SF94<br>(PANTHER), SSF56784 (SUPERFAMILY),<br>SSF81653 (SUPERFAMILY), SSF81660<br>(SUPERFAMILY), SSF81665<br>(SUPERFAMILY) |
| Caenorhabditis elegans  | transmembrane protein 56                                                           | 1 | C:GO:0016020                                                                                                                        | - |                                                         | IPR006634; SignalP (SIGNALP)                                                                                                                                                                                                                                                                                           |
|                         |                                                                                    | 0 |                                                                                                                                     |   |                                                         | -                                                                                                                                                                                                                                                                                                                      |
|                         |                                                                                    | 0 |                                                                                                                                     |   |                                                         | -                                                                                                                                                                                                                                                                                                                      |
| Caenorhabditis briggsae | glycoprotein-n-acetylgalactosamine 3-beta-galactosyltransferase 1                  | 5 | P:GO:0009247;<br>P:GO:0016267;<br>P:GO:0021551;<br>C:GO:0016021;<br>F:GO:0016263                                                    | - | EC:2.4.1.122                                            | IPR003378; PTHR23033 (PANTHER),<br>PTHR23033:SF1 (PANTHER), SignalP<br>(SIGNALP)                                                                                                                                                                                                                                       |
| Gobio cypris rarus      | low quality protein: tubulin alpha-1c chain-like                                   | 7 | P:GO:0007018;<br>F:GO:0005525;<br>F:GO:0005515;<br>P:GO:0051258;<br>F:GO:0005198;<br>F:GO:0003924;<br>C:GO:0005874                  | - | EC:3.6.5.1;<br>EC:3.6.5.2;<br>EC:3.6.5.3;<br>EC:3.6.5.4 | IPR000217; IPR002452; IPR003008                                                                                                                                                                                                                                                                                        |
| Caenorhabditis elegans  | uncoordinated family member (unc-83)                                               | 0 |                                                                                                                                     |   |                                                         | -                                                                                                                                                                                                                                                                                                                      |
| Caenorhabditis elegans  | osta1_caeel ame: full=organic solute transporter alpha-like protein                | 4 | C:GO:0016021;<br>P:GO:0009792;<br>P:GO:0006810;<br>F:GO:0005215                                                                     | - |                                                         | IPR005178; PTHR23423:SF3<br>(PANTHER), SignalP (SIGNALP)                                                                                                                                                                                                                                                               |
| Caenorhabditis elegans  | uncoordinated family member (unc-52)                                               | 2 | P:GO:0030239;<br>C:GO:0005578                                                                                                       | - |                                                         | IPR007110; IPR013783; PTHR10574<br>(PANTHER), PTHR10574:SF20<br>(PANTHER), SSF48726 (SUPERFAMILY)                                                                                                                                                                                                                      |
| Caenorhabditis elegans  | succinate dehydrogenase                                                            | 8 | P:GO:0006810;<br>P:GO:0022900;<br>C:GO:0016021;<br>C:GO:0005749;<br>F:GO:0009055;<br>P:GO:0006099;<br>F:GO:0020037;<br>F:GO:0000104 | - | EC:1.3.99.1                                             | IPR000701; IPR014314; IPR014361;<br>IPR018495; G3DSA:1.20.1300.10<br>(GENE3D), PTHR10978 (PANTHER),<br>SignalP (SIGNALP), SSF81343<br>(SUPERFAMILY)                                                                                                                                                                    |



|                         |                                                         |    |                                                                                                                                                                                                         |                                                                                                                    |   |                                                                    |
|-------------------------|---------------------------------------------------------|----|---------------------------------------------------------------------------------------------------------------------------------------------------------------------------------------------------------|--------------------------------------------------------------------------------------------------------------------|---|--------------------------------------------------------------------|
| Loa loa                 | 2-aminoethanethiol dioxyge-se                           | 0  |                                                                                                                                                                                                         | F:GO:0046872;<br>C:GO:0005739;<br>P:GO:0055114;<br>F:GO:0016491;<br>F:GO:0016702;<br>F:GO:0047800;<br>C:GO:0005575 | - |                                                                    |
| Drosophila ananassae    | GF16318 [Drosophila a--ssae]                            | 0  |                                                                                                                                                                                                         |                                                                                                                    | - |                                                                    |
| Caenorhabditis elegans  | jnk sapk-associated protein                             | 12 | P:GO:0016192;<br>C:GO:0016021;<br>F:GO:0019894;<br>P:GO:0046328;<br>F:GO:0005078;<br>C:GO:0005925;<br>C:GO:0030140;<br>F:GO:0019901;<br>P:GO:0008045;<br>P:GO:0050908;<br>C:GO:0005576;<br>F:GO:0004888 | -                                                                                                                  |   | IPR019143; PTHR13886 (PANTHER)                                     |
| Caenorhabditis elegans  | elegans protein confirmed by transcript evidence        | 6  | C:GO:0005737;<br>F:GO:0005078;<br>F:GO:0019894;<br>P:GO:0046328;<br>P:GO:0016192;<br>F:GO:0019901                                                                                                       | -                                                                                                                  |   | IPR019143; PTHR13886 (PANTHER)                                     |
| Caenorhabditis elegans  | mitogen-activated protein ki-se 8 interacting protein 3 | 6  | C:GO:0005737;<br>F:GO:0005078;<br>F:GO:0019894;<br>P:GO:0046328;<br>P:GO:0016192;<br>F:GO:0019901                                                                                                       | -                                                                                                                  |   | IPR015943; IPR019143; PTHR13886 (PANTHER), SSF101908 (SUPERFAMILY) |
| Caenorhabditis briggsae | elegans protein confirmed by transcript evidence        | 6  | C:GO:0005737;<br>F:GO:0005078;<br>F:GO:0019894;<br>P:GO:0046328;<br>P:GO:0016192;<br>F:GO:0019901                                                                                                       | -                                                                                                                  |   | IPR015943; IPR019143; PTHR13886 (PANTHER), SSF101908 (SUPERFAMILY) |
| Caenorhabditis briggsae | elegans protein confirmed by transcript evidence        | 6  | C:GO:0005737;<br>F:GO:0005078;<br>F:GO:0019894;<br>P:GO:0046328;<br>P:GO:0016192;<br>F:GO:0019901                                                                                                       | -                                                                                                                  |   | IPR015943; IPR019143; PTHR13886 (PANTHER), SSF101908 (SUPERFAMILY) |
| Caenorhabditis briggsae | elegans protein confirmed by transcript evidence        | 6  | C:GO:0005737;<br>F:GO:0005078;<br>F:GO:0019894;<br>P:GO:0046328;<br>P:GO:0016192;<br>F:GO:0019901                                                                                                       | -                                                                                                                  |   | IPR015943; IPR019143; PTHR13886 (PANTHER), SSF101908 (SUPERFAMILY) |
| Caenorhabditis briggsae | elegans protein confirmed by transcript evidence        | 6  | C:GO:0005737;<br>F:GO:0005078;<br>F:GO:0019894;<br>P:GO:0046328;<br>P:GO:0016192;<br>F:GO:0019901                                                                                                       | -                                                                                                                  |   | IPR015943; IPR019143; PTHR13886 (PANTHER), SSF101908 (SUPERFAMILY) |
| Caenorhabditis briggsae | f-box domain containing protein                         | 0  |                                                                                                                                                                                                         |                                                                                                                    | - |                                                                    |

|                          |                                                  |    |                                                                                                                                                                                                                          |                                                                 |            |                                                                                                                      |
|--------------------------|--------------------------------------------------|----|--------------------------------------------------------------------------------------------------------------------------------------------------------------------------------------------------------------------------|-----------------------------------------------------------------|------------|----------------------------------------------------------------------------------------------------------------------|
| Caenorhabditis elegans   | isoform c                                        | 7  | P:GO:0002119;<br>P:GO:0006144;<br>F:GO:0003876;<br>P:GO:0009168;<br>F:GO:0005515;<br>P:GO:0040010;<br>P:GO:0040011                                                                                                       | -                                                               | EC:3.5.4.6 | IPR001365; PTHR11359 (PANTHER),<br>SSF51556 (SUPERFAMILY)                                                            |
| Trichomonas vaginalis G3 | collagen-binding surface protein                 | 0  |                                                                                                                                                                                                                          | F:GO:0008061;<br>P:GO:0006030;<br>F:GO:0005488;<br>C:GO:0005576 |            | -                                                                                                                    |
| Caenorhabditis elegans   | anion bicarbo-te porter family member (abts-1)   | 13 | P:GO:0006814;<br>C:GO:0043229;<br>F:GO:0015106;<br>P:GO:0015701;<br>C:GO:0016021;<br>F:GO:0015293;<br>P:GO:0006821;<br>F:GO:0005515;<br>C:GO:0016324;<br>C:GO:0016323;<br>F:GO:0005452;<br>C:GO:0005737;<br>P:GO:0015992 | -                                                               |            | IPR003020; IPR003024; IPR011531;<br>IPR013769; IPR016152;<br>G3DSA:1.10.287.570 (GENE3D),<br>PTHR11453:SF8 (PANTHER) |
| Caenorhabditis briggsae  | anion bicarbo-te porter family member (abts-1)   | 13 | P:GO:0006814;<br>C:GO:0043229;<br>F:GO:0015106;<br>P:GO:0015701;<br>C:GO:0016021;<br>F:GO:0015293;<br>P:GO:0006821;<br>F:GO:0005515;<br>C:GO:0016324;<br>C:GO:0016323;<br>F:GO:0005452;<br>C:GO:0005737;<br>P:GO:0015992 | -                                                               |            | IPR003020; IPR003024; IPR011531;<br>IPR013769; IPR016152;<br>G3DSA:1.10.287.570 (GENE3D),<br>PTHR11453:SF8 (PANTHER) |
| Loa loa                  | karyopherin beta 1                               | 10 | C:GO:0005829;<br>F:GO:0008565;<br>F:GO:0008270;<br>P:GO:0000060;<br>C:GO:0005643;<br>F:GO:0008139;<br>P:GO:0006607;<br>F:GO:0019904;<br>C:GO:0005654;<br>P:GO:0006610                                                    | -                                                               |            | IPR001494; IPR011989; IPR016024;<br>PTHR10527 (PANTHER),<br>PTHR10527:SF1 (PANTHER)                                  |
| Caenorhabditis brenneri  | elegans protein confirmed by transcript evidence | 0  |                                                                                                                                                                                                                          | P:GO:0016539                                                    |            | IPR001534; SignalP (SIGNALP)                                                                                         |
| Ornithorhynchus anatinus | ribosomal protein s12                            | 4  | F:GO:0003735;<br>C:GO:0022627;<br>C:GO:0005739;<br>P:GO:0006414                                                                                                                                                          | -                                                               |            | IPR000530; IPR004038;<br>G3DSA:3.30.1330.30 (GENE3D),<br>SSF55315 (SUPERFAMILY)                                      |
| Brugia malayi            | es2 protein                                      | 2  | F:GO:0005515;<br>P:GO:0045132                                                                                                                                                                                            | -                                                               |            | IPR019148; PTHR12940 (PANTHER)                                                                                       |
| Brugia malayi            | es2 protein                                      | 2  | F:GO:0005515;<br>P:GO:0045132                                                                                                                                                                                            | -                                                               |            | IPR019148; PTHR12940 (PANTHER)                                                                                       |
| Brugia malayi            | es2 protein                                      | 2  | F:GO:0005515;<br>P:GO:0045132                                                                                                                                                                                            | -                                                               |            | IPR019148; PTHR12940 (PANTHER)                                                                                       |

|                         |                                                         |   |                                                                                                                                                      |   |             |                                                                                                                                    |
|-------------------------|---------------------------------------------------------|---|------------------------------------------------------------------------------------------------------------------------------------------------------|---|-------------|------------------------------------------------------------------------------------------------------------------------------------|
| Brugia malayi           | splicing arginine serine-rich 7                         | 6 | P:GO:0008380;<br>F:GO:0003723;<br>F:GO:0005515;<br>C:GO:0005634;<br>P:GO:0008406;<br>F:GO:0000166                                                    | - |             | SignalP (SIGNALP)                                                                                                                  |
|                         | -                                                       | 0 |                                                                                                                                                      |   |             | -                                                                                                                                  |
| Caenorhabditis briggsae | Hypothetical protein CBG06078 [Caenorhabditis briggsae] | 0 |                                                                                                                                                      |   |             | PTHR13923 (PANTHER),<br>PTHR13923:SF1 (PANTHER)                                                                                    |
| Loa loa                 | arsenical pump-driving atpase                           | 9 | F:GO:0046872;<br>F:GO:0016491;<br>F:GO:0005515;<br>P:GO:0006810;<br>P:GO:0055114;<br>F:GO:0016787;<br>F:GO:0005524;<br>C:GO:0005783;<br>P:GO:0006875 | - |             | -                                                                                                                                  |
| Caenorhabditis elegans  | cg9383-pa                                               | 8 | P:GO:0048024;<br>P:GO:0051726;<br>P:GO:0007517;<br>F:GO:0005515;<br>P:GO:0006334;<br>C:GO:0035059;<br>P:GO:0048813;<br>C:GO:0005678                  | - |             | IPR006818                                                                                                                          |
| Caenorhabditis elegans  | protein ki-se c                                         | 5 | P:GO:0006468;<br>F:GO:0046872;<br>F:GO:0019992;<br>F:GO:0004698;<br>F:GO:0005524                                                                     | - |             | IPR002219; IPR008973; IPR015727;<br>IPR020454; G3DSA:2.60.40.150<br>(GENE3D), G3DSA:3.30.60.20<br>(GENE3D), SSF57889 (SUPERFAMILY) |
| Caenorhabditis briggsae | sig-I recognition particle 9 kda protein                | 5 | C:GO:0005786;<br>P:GO:0045900;<br>F:GO:0008312;<br>F:GO:0005515;<br>P:GO:0006614                                                                     | - | EC:3.6.5.4  | -                                                                                                                                  |
| Caenorhabditis briggsae | general vesicular transport factor p115                 | 5 | F:GO:0042802;<br>P:GO:0032940;<br>P:GO:0019915;<br>P:GO:0006898;<br>P:GO:0040039                                                                     | - |             | IPR006955                                                                                                                          |
| Caenorhabditis elegans  | otu domain containing 7a                                | 1 | F:GO:0008233                                                                                                                                         | - |             | PTHR13367 (PANTHER),<br>PTHR13367:SF6 (PANTHER)                                                                                    |
| Caenorhabditis elegans  | otud7b protein                                          | 4 | P:GO:0016579;<br>F:GO:0005488;<br>F:GO:0004221;<br>C:GO:0044424                                                                                      | - | EC:3.1.2.15 | IPR003323; IPR009060; PTHR13367<br>(PANTHER), PTHR13367:SF6<br>(PANTHER)                                                           |
| Caenorhabditis elegans  | otu domain containing 7a                                | 0 |                                                                                                                                                      |   |             | PTHR13367 (PANTHER),<br>PTHR13367:SF6 (PANTHER)                                                                                    |
| Loa loa                 | dedicator of cytokinesis protein 2                      | 0 |                                                                                                                                                      |   |             | PTHR23317 (PANTHER),<br>PTHR23317:SF27 (PANTHER), SignalP<br>(SIGNALP)                                                             |

|                         |                                                            |    |                                                                                                                                                                                                                                                                                                               |                                                                                                                                                      |                                                                        |                                                                                                                                                                              |
|-------------------------|------------------------------------------------------------|----|---------------------------------------------------------------------------------------------------------------------------------------------------------------------------------------------------------------------------------------------------------------------------------------------------------------|------------------------------------------------------------------------------------------------------------------------------------------------------|------------------------------------------------------------------------|------------------------------------------------------------------------------------------------------------------------------------------------------------------------------|
| Loa loa                 | dedicator of cytokinesis protein 6                         | 0  |                                                                                                                                                                                                                                                                                                               | P:GO:0032259;<br>F:GO:0051020;<br>F:GO:0005085;<br>F:GO:0008168;<br>F:GO:0005525;<br>P:GO:0050790;<br>C:GO:0005575;<br>P:GO:0008150;<br>F:GO:0005488 |                                                                        | PTHR23317 (PANTHER),<br>PTHR23317:SF27 (PANTHER)                                                                                                                             |
| Caenorhabditis briggsae | g1 to s phase transition 1                                 | 7  | F:GO:0003746;<br>P:GO:0006479;<br>F:GO:0005525;<br>F:GO:0005515;<br>F:GO:0003747;<br>F:GO:0016779;<br>F:GO:0003924                                                                                                                                                                                            | -                                                                                                                                                    | EC:2.7.7.0;<br>EC:3.6.5.1;<br>EC:3.6.5.2;<br>EC:3.6.5.3;<br>EC:3.6.5.4 | IPR000795; IPR004161; IPR009000;<br>G3DSA:2.40.30.10 (GENE3D),<br>G3DSA:3.40.50.300 (GENE3D),<br>PTHR23115 (PANTHER),<br>PTHR23115:SF36 (PANTHER),<br>SSF52540 (SUPERFAMILY) |
| Caenorhabditis elegans  | ras-related protein orab-1                                 | 18 | P:GO:0008340;<br>P:GO:0007264;<br>P:GO:0006355;<br>P:GO:0040007;<br>P:GO:0006913;<br>P:GO:0018996;<br>F:GO:0005524;<br>P:GO:0002119;<br>P:GO:0040011;<br>F:GO:0008134;<br>P:GO:0006898;<br>P:GO:0006886;<br>P:GO:0048477;<br>P:GO:0009792;<br>C:GO:0005794;<br>C:GO:0005783;<br>C:GO:0005634;<br>F:GO:0005525 | -                                                                                                                                                    |                                                                        | -                                                                                                                                                                            |
| Caenorhabditis briggsae | stress-induced-phosphoprotein 1                            | 1  | F:GO:0005488                                                                                                                                                                                                                                                                                                  | -                                                                                                                                                    |                                                                        | -                                                                                                                                                                            |
| Brugia malayi           | elegans protein partially confirmed by transcript evidence | 13 | P:GO:0030900;<br>P:GO:0048041;<br>P:GO:0003007;<br>P:GO:0030036;<br>P:GO:0021575;<br>C:GO:0044425;<br>F:GO:0005515;<br>C:GO:0015629;<br>P:GO:0007165;<br>P:GO:0050790;<br>F:GO:0005096;<br>C:GO:0044430;<br>P:GO:0001843                                                                                      | -                                                                                                                                                    |                                                                        | IPR000198; IPR008936; PTHR12659 (PANTHER)                                                                                                                                    |
| Caenorhabditis elegans  | r- binding motif protein 5                                 | 2  | F:GO:0005515;<br>P:GO:0000003                                                                                                                                                                                                                                                                                 | -                                                                                                                                                    |                                                                        | IPR000504; IPR001876; IPR012677;<br>G3DSA:4.10.1060.10 (GENE3D),<br>PTHR13948 (PANTHER),<br>PTHR13948:SF5 (PANTHER),<br>SSF54928 (SUPERFAMILY),<br>SSF90209 (SUPERFAMILY)    |

|                         |                                                |   |                                                                                                                    |                                                                                                   |                                                                                                                                                                           |
|-------------------------|------------------------------------------------|---|--------------------------------------------------------------------------------------------------------------------|---------------------------------------------------------------------------------------------------|---------------------------------------------------------------------------------------------------------------------------------------------------------------------------|
| Caenorhabditis elegans  | r- binding motif protein 5                     | 2 | F:GO:0005515;<br>P:GO:0000003                                                                                      | -                                                                                                 | IPR000504; IPR001876; IPR012677;<br>G3DSA:4.10.1060.10 (GENE3D),<br>PTHR13948 (PANTHER),<br>PTHR13948:SF5 (PANTHER), SSF54928<br>(SUPERFAMILY), SSF90209<br>(SUPERFAMILY) |
| Caenorhabditis elegans  | r- binding motif protein 5                     | 2 | F:GO:0005515;<br>P:GO:0000003                                                                                      | -                                                                                                 | IPR000504; IPR001876; IPR012677;<br>G3DSA:4.10.1060.10 (GENE3D),<br>PTHR13948 (PANTHER),<br>PTHR13948:SF5 (PANTHER), SSF54928<br>(SUPERFAMILY), SSF90209<br>(SUPERFAMILY) |
|                         |                                                | 0 |                                                                                                                    |                                                                                                   |                                                                                                                                                                           |
| Caenorhabditis elegans  | leucine rich repeat family protein             | 0 |                                                                                                                    | F:GO:0016787;<br>F:GO:0005515;<br>F:GO:0004721                                                    | IPR003599; IPR007110; IPR013783;<br>G3DSA:3.80.10.10 (GENE3D),<br>PTHR10489 (PANTHER),<br>PTHR10489:SF25 (PANTHER),<br>SSF48726 (SUPERFAMILY), SSF52058<br>(SUPERFAMILY)  |
| Caenorhabditis elegans  | leucine rich repeat family protein             | 0 |                                                                                                                    | F:GO:0016787;<br>F:GO:0005515;<br>F:GO:0004721                                                    | IPR003599; IPR007110; IPR013783;<br>G3DSA:3.80.10.10 (GENE3D),<br>PTHR10489 (PANTHER),<br>PTHR10489:SF25 (PANTHER),<br>SSF48726 (SUPERFAMILY), SSF52058<br>(SUPERFAMILY)  |
| Caenorhabditis elegans  | leucine rich repeat family protein             | 0 |                                                                                                                    | F:GO:0016787;<br>F:GO:0005515;<br>F:GO:0004721                                                    | -                                                                                                                                                                         |
|                         |                                                | 0 |                                                                                                                    |                                                                                                   | -                                                                                                                                                                         |
|                         |                                                | 0 |                                                                                                                    |                                                                                                   | -                                                                                                                                                                         |
| Caenorhabditis elegans  | solute carrier family 23 member 2-like         | 3 | C:GO:0016021;<br>P:GO:0055085;<br>F:GO:0005215                                                                     | -                                                                                                 | IPR006043; PTHR11119:SF8<br>(PANTHER), SignalP (SIGNALP)                                                                                                                  |
| Brugia malayi           | hypothetical protein Bm1_48395 [Brugia malayi] | 0 |                                                                                                                    |                                                                                                   | IPR017956                                                                                                                                                                 |
| Brugia malayi           | hypothetical protein Bm1_48395 [Brugia malayi] | 0 |                                                                                                                    |                                                                                                   | IPR017956                                                                                                                                                                 |
| Caenorhabditis briggsae | egf-like domain containing protein             | 0 |                                                                                                                    | P:GO:0016539;<br>F:GO:0004180;<br>F:GO:0005509;<br>F:GO:0030246;<br>P:GO:0007156;<br>C:GO:0016020 | -                                                                                                                                                                         |
| Caenorhabditis briggsae | lipoic acid synthetase                         | 7 | P:GO:0040010;<br>F:GO:0051539;<br>P:GO:0002119;<br>P:GO:0008152;<br>P:GO:0009792;<br>F:GO:0016992;<br>C:GO:0005737 | -                                                                                                 | EC:2.8.1.8<br>IPR013785; PTHR10949 (PANTHER),<br>SSF102114 (SUPERFAMILY)                                                                                                  |
| Caenorhabditis briggsae | arginyl-tr- synthetase                         | 7 | P:GO:0006420;<br>C:GO:0017101;<br>C:GO:0005739;<br>F:GO:0005524;<br>F:GO:0034618;<br>F:GO:0004814;<br>F:GO:0000049 | -                                                                                                 | EC:6.1.1.19<br>IPR001278; IPR001412; IPR005148;<br>IPR008909; IPR009080; IPR014729;<br>IPR015945; G3DSA:1.10.730.10<br>(GENE3D), SSF52374 (SUPERFAMILY)                   |

|                         |                                                            |    |                                                                                                                                                                                                                                           |   |            |                                                                                                                                                               |
|-------------------------|------------------------------------------------------------|----|-------------------------------------------------------------------------------------------------------------------------------------------------------------------------------------------------------------------------------------------|---|------------|---------------------------------------------------------------------------------------------------------------------------------------------------------------|
| Loa loa                 | 3-phosphoinositide-dependent protein ki-se 1               | 10 | P:GO:0046620;<br>P:GO:0007276;<br>P:GO:0001558;<br>P:GO:0045793;<br>P:GO:0006916;<br>F:GO:0005515;<br>F:GO:0016301;<br>P:GO:0007166;<br>P:GO:0006468;<br>P:GO:0006974                                                                     | - | -          |                                                                                                                                                               |
| Caenorhabditis briggsae | chromosome 2 open reading frame 30                         | 3  | F:GO:0001948;<br>C:GO:0005788;<br>P:GO:0030433                                                                                                                                                                                            | - |            | IPR009011; IPR012913;<br>G3DSA:2.70.130.10 (GENE3D),<br>PTHR15414 (PANTHER), SignalP<br>(SIGNALP)                                                             |
| Caenorhabditis elegans  | elegans protein partially confirmed by transcript evidence | 2  | F:GO:0005488;<br>P:GO:0009987                                                                                                                                                                                                             | - |            | IPR000719; IPR011009; IPR017442;<br>G3DSA:1.10.510.10 (GENE3D),<br>PTHR15508 (PANTHER)                                                                        |
| Caenorhabditis elegans  | vacuolar atp synthase subunit ac39                         | 6  | F:GO:0008553;<br>P:GO:0015986;<br>P:GO:0008593;<br>P:GO:0007035;<br>C:GO:0000220;<br>C:GO:0005886                                                                                                                                         | - | EC:3.6.3.6 | IPR002843; PTHR11028 (PANTHER)                                                                                                                                |
| Caenorhabditis elegans  | elegans protein confirmed by transcript evidence           | 0  |                                                                                                                                                                                                                                           |   |            | -                                                                                                                                                             |
| Caenorhabditis briggsae | mitogen-activated protein ki-se 11                         | 14 | P:GO:0007166;<br>P:GO:0006468;<br>C:GO:0005654;<br>P:GO:0007265;<br>P:GO:0007243;<br>F:GO:0004708;<br>F:GO:0005515;<br>F:GO:0008339;<br>P:GO:0006928;<br>C:GO:0005829;<br>P:GO:0048856;<br>P:GO:0006935;<br>P:GO:0006950;<br>F:GO:0005524 | - |            | IPR000719; IPR003527; IPR011009;<br>IPR017442; G3DSA:1.10.510.10<br>(GENE3D), G3DSA:3.30.200.20<br>(GENE3D), PTHR11295 (PANTHER),<br>PTHR11295:SF55 (PANTHER) |
| Caenorhabditis elegans  | briggsae cbr-dys-1 protein                                 | 11 | F:GO:0005277;<br>P:GO:0015870;<br>C:GO:0005856;<br>P:GO:0007517;<br>C:GO:0045202;<br>P:GO:0007271;<br>F:GO:0003779;<br>P:GO:0046716;<br>P:GO:0040017;<br>C:GO:0016010;<br>C:GO:0005737                                                    | - |            | IPR002017; IPR018159;<br>G3DSA:1.20.58.60 (GENE3D),<br>PTHR11915 (PANTHER),<br>PTHR11915:SF46 (PANTHER),<br>SSF46966 (SUPERFAMILY)                            |
| Brugia malayi           | elegans protein confirmed by transcript evidence           | 8  | P:GO:0040022;<br>P:GO:0050789;<br>P:GO:0007126;<br>P:GO:0018991;<br>F:GO:0005515;<br>C:GO:0044444;<br>C:GO:0030529;<br>P:GO:0051729                                                                                                       | - |            | IPR009604; IPR010920;<br>G3DSA:2.30.30.100 (GENE3D),<br>PTHR12854 (PANTHER),<br>PTHR12854:SF7 (PANTHER)                                                       |

|                         |                                                  |   |                                                                                                   |                                                                                                                                                                                                         |                                                                                  |
|-------------------------|--------------------------------------------------|---|---------------------------------------------------------------------------------------------------|---------------------------------------------------------------------------------------------------------------------------------------------------------------------------------------------------------|----------------------------------------------------------------------------------|
| Caenorhabditis briggsae | k-cl cotransporter                               | 6 | C:GO:0005887;<br>C:GO:0005624;<br>P:GO:0055085;<br>P:GO:0006811;<br>F:GO:0015379;<br>P:GO:0006884 | -                                                                                                                                                                                                       | IPR004841; PTHR11827 (PANTHER),<br>PTHR11827:SF5 (PANTHER), SignalP<br>(SIGNALP) |
| Caenorhabditis briggsae | k-cl cotransporter                               | 6 | C:GO:0005887;<br>C:GO:0005624;<br>P:GO:0055085;<br>P:GO:0006811;<br>F:GO:0015379;<br>P:GO:0006884 | -                                                                                                                                                                                                       | -                                                                                |
| Loa loa                 | adaptin ear-binding coat-associated              | 4 | C:GO:0005905;<br>C:GO:0030125;<br>F:GO:0005515;<br>P:GO:0006897                                   | -                                                                                                                                                                                                       | -                                                                                |
| -                       | -                                                | 0 |                                                                                                   |                                                                                                                                                                                                         | -                                                                                |
| -                       | -                                                | 0 |                                                                                                   |                                                                                                                                                                                                         | -                                                                                |
| Caenorhabditis briggsae | briggsae cbr-nhr-48 protein                      | 0 |                                                                                                   | F:GO:0043565;<br>F:GO:0003700;<br>F:GO:0003677;<br>C:GO:0005634;<br>F:GO:0004879;<br>F:GO:0008270;<br>P:GO:0006355;<br>F:GO:0046872;<br>P:GO:0006350;<br>F:GO:0003707;<br>P:GO:0045449                  | -                                                                                |
| -                       | -                                                | 0 |                                                                                                   |                                                                                                                                                                                                         | -                                                                                |
| Caenorhabditis briggsae | briggsae cbr-nhr-48 protein                      | 0 |                                                                                                   | F:GO:0043565;<br>F:GO:0003700;<br>F:GO:0003677;<br>C:GO:0005634;<br>F:GO:0004879;<br>F:GO:0008270;<br>P:GO:0006355;<br>F:GO:0005515;<br>F:GO:0046872;<br>P:GO:0006350;<br>F:GO:0003707;<br>P:GO:0045449 | -                                                                                |
| Caenorhabditis elegans  | zinc finger protein                              | 3 | F:GO:0008270;<br>C:GO:0005622;<br>F:GO:0005515                                                    | -                                                                                                                                                                                                       | IPR015880                                                                        |
| Caenorhabditis elegans  | elegans protein confirmed by transcript evidence | 3 | F:GO:0008270;<br>C:GO:0005622;<br>F:GO:0005515                                                    | -                                                                                                                                                                                                       | -                                                                                |
| Caenorhabditis elegans  | zinc finger protein                              | 3 | F:GO:0008270;<br>C:GO:0005622;<br>F:GO:0005515                                                    | -                                                                                                                                                                                                       | IPR015880                                                                        |
| -                       | -                                                | 0 |                                                                                                   |                                                                                                                                                                                                         | -                                                                                |

|                             |                                                                     |   |                                                                 |                                                                                                                                                                                                                                                                                                                                                                                                                                                       |            |                                                                                                                  |
|-----------------------------|---------------------------------------------------------------------|---|-----------------------------------------------------------------|-------------------------------------------------------------------------------------------------------------------------------------------------------------------------------------------------------------------------------------------------------------------------------------------------------------------------------------------------------------------------------------------------------------------------------------------------------|------------|------------------------------------------------------------------------------------------------------------------|
| Caenorhabditis elegans      | tripartite motif-containing 23                                      | 0 |                                                                 | F:GO:0019003;<br>P:GO:0015986;<br>C:GO:0005634;<br>F:GO:0003924;<br>F:GO:0005525;<br>P:GO:0007264;<br>F:GO:0046872;<br>P:GO:0016567;<br>C:GO:0016020;<br>P:GO:0007154;<br>F:GO:0016874;<br>C:GO:0045263;<br>F:GO:0004842;<br>C:GO:0000139;<br>P:GO:0008152;<br>F:GO:0000166;<br>P:GO:0006471;<br>C:GO:0005737;<br>C:GO:0005765;<br>C:GO:0005764;<br>C:GO:0005794;<br>F:GO:0035091;<br>F:GO:0008270;<br>C:GO:0005622;<br>F:GO:0005515;<br>P:GO:0040010 |            | IPR001841; IPR013083; IPR018957;<br>PTHR13139 (PANTHER),<br>PTHR13139:SF3 (PANTHER), SSF57850<br>(SUPERFAMILY)   |
| Brugia malayi               | Imbr1-like conserved region family protein                          | 0 |                                                                 | F:GO:0004872                                                                                                                                                                                                                                                                                                                                                                                                                                          |            | IPR006876; IPR008075; PTHR12625<br>(PANTHER)                                                                     |
| Anopheles gambiae str. PEST | lipocalin-1 interacting membrane receptor                           | 0 |                                                                 | F:GO:0004872                                                                                                                                                                                                                                                                                                                                                                                                                                          |            | IPR006876; IPR008075; PTHR12625<br>(PANTHER), SignalP (SIGNALP)                                                  |
| Caenorhabditis elegans      | proteasomal atpase-associated factor 1                              | 0 |                                                                 | P:GO:0044419;<br>C:GO:0000502;<br>F:GO:0005515                                                                                                                                                                                                                                                                                                                                                                                                        |            | IPR001680; IPR011046; IPR015943;<br>IPR017986; IPR019781; IPR019782;<br>PTHR22847 (PANTHER)                      |
| Loa loa                     | eukaryotic-type d- large subunit family protein                     | 0 |                                                                 | P:GO:0006269;<br>F:GO:0003896                                                                                                                                                                                                                                                                                                                                                                                                                         |            | IPR007238                                                                                                        |
| Brugia malayi               | ring finger protein 1                                               | 0 |                                                                 | F:GO:0046872;<br>F:GO:0008270;<br>F:GO:0005515                                                                                                                                                                                                                                                                                                                                                                                                        |            | -                                                                                                                |
| Loa loa                     | domain containing protein                                           | 0 |                                                                 | F:GO:0046872;<br>P:GO:0007165;<br>C:GO:0005622                                                                                                                                                                                                                                                                                                                                                                                                        |            | IPR000198; IPR002219; IPR008936;<br>G3DSA:3.30.60.20 (GENE3D),<br>PTHR23174 (PANTHER), SSF57889<br>(SUPERFAMILY) |
| Caenorhabditis elegans      | gl actin (drosophila neuroligin-like) homolog family member (nrx-1) | 0 |                                                                 |                                                                                                                                                                                                                                                                                                                                                                                                                                                       |            | SignalP (SIGNALP)                                                                                                |
| Caenorhabditis briggsae     | 60s ribosomal protein l4                                            | 4 | C:GO:0005840;<br>F:GO:0003735;<br>P:GO:0006412;<br>F:GO:0005515 | -                                                                                                                                                                                                                                                                                                                                                                                                                                                     | EC:3.6.5.3 | IPR002136; IPR013000;<br>G3DSA:3.40.1370.10 (GENE3D),<br>PTHR19431 (PANTHER)                                     |
| Caenorhabditis briggsae     | 60s ribosomal protein l4                                            | 4 | C:GO:0005840;<br>F:GO:0003735;<br>P:GO:0006412;<br>F:GO:0005515 | -                                                                                                                                                                                                                                                                                                                                                                                                                                                     | EC:3.6.5.3 | IPR002136; IPR013000;<br>G3DSA:3.40.1370.10 (GENE3D),<br>PTHR19431 (PANTHER)                                     |



|                             |                                                              |    |                                                                                                                                                                                                                                                                                                                                |              |            |                                                                                                                                                                                             |
|-----------------------------|--------------------------------------------------------------|----|--------------------------------------------------------------------------------------------------------------------------------------------------------------------------------------------------------------------------------------------------------------------------------------------------------------------------------|--------------|------------|---------------------------------------------------------------------------------------------------------------------------------------------------------------------------------------------|
| Angiostrongylus cantonensis | 60s ribosomal protein l4 l1                                  | 9  | C:GO:0005730;<br>C:GO:0005773;<br>F:GO:0003735;<br>C:GO:0005886;<br>F:GO:0005515;<br>C:GO:0005618;<br>C:GO:0022625;<br>C:GO:0009507;<br>P:GO:0006412                                                                                                                                                                           | -            | EC:3.6.5.3 | -                                                                                                                                                                                           |
| Angiostrongylus cantonensis | 60s ribosomal protein l4 l1                                  | 9  | C:GO:0005730;<br>C:GO:0005773;<br>F:GO:0003735;<br>C:GO:0005886;<br>F:GO:0005515;<br>C:GO:0005618;<br>C:GO:0022625;<br>C:GO:0009507;<br>P:GO:0006412                                                                                                                                                                           | -            | EC:3.6.5.3 | IPR002136; G3DSA:3.40.1370.10 (GENE3D), PTHR19431 (PANTHER)                                                                                                                                 |
| Caenorhabditis briggsae     | 60s ribosomal protein l4                                     | 4  | C:GO:0005840;<br>F:GO:0003735;<br>P:GO:0006412;<br>F:GO:0005515                                                                                                                                                                                                                                                                | -            | EC:3.6.5.3 | IPR002136; IPR013000; G3DSA:3.40.1370.10 (GENE3D), PTHR19431 (PANTHER)                                                                                                                      |
| Caenorhabditis briggsae     | 60s ribosomal protein l4                                     | 4  | C:GO:0005840;<br>F:GO:0003735;<br>P:GO:0006412;<br>F:GO:0005515                                                                                                                                                                                                                                                                | -            | EC:3.6.5.3 | IPR002136; IPR013000; G3DSA:3.40.1370.10 (GENE3D), PTHR19431 (PANTHER)                                                                                                                      |
| Caenorhabditis elegans      | -dh-ubiquinone oxidoreductase 75 kda mitochondrial precursor | 19 | P:GO:0006810;<br>P:GO:0040010;<br>P:GO:0046034;<br>P:GO:0008340;<br>P:GO:0006800;<br>P:GO:0006915;<br>F:GO:0051537;<br>F:GO:0008137;<br>C:GO:0005747;<br>F:GO:0046872;<br>P:GO:0000003;<br>F:GO:0009055;<br>P:GO:0051881;<br>C:GO:0005758;<br>F:GO:0051539;<br>P:GO:0006120;<br>P:GO:0002119;<br>F:GO:0005515;<br>P:GO:0009792 | -            | EC:1.6.5.3 | IPR000283; IPR001041; IPR006656; IPR010228; IPR012675; IPR019574; G3DSA:3.40.50.740 (GENE3D), PTHR11615 (PANTHER), PTHR11615:SF10 (PANTHER), SSF53706 (SUPERFAMILY), SSF54862 (SUPERFAMILY) |
| -                           | -                                                            | 0  | -                                                                                                                                                                                                                                                                                                                              | -            | -          | IPR011001                                                                                                                                                                                   |
| Caenorhabditis elegans      | hypothetical protein F41C3.8 [Caenorhabditis elegans]        | 1  | P:GO:0006952                                                                                                                                                                                                                                                                                                                   | -            | -          | -                                                                                                                                                                                           |
| -                           | -                                                            | 0  | -                                                                                                                                                                                                                                                                                                                              | -            | -          | -                                                                                                                                                                                           |
| -                           | -                                                            | 0  | -                                                                                                                                                                                                                                                                                                                              | -            | -          | -                                                                                                                                                                                           |
| Caenorhabditis briggsae     | briggsae cbr-vab-2 protein                                   | 0  | -                                                                                                                                                                                                                                                                                                                              | C:GO:0016020 | -          | IPR001799; IPR008972; PTHR11304:SF23 (PANTHER), SignalP (SIGNALP)                                                                                                                           |
| Caenorhabditis elegans      | elegans protein confirmed by transcript evidence             | 4  | F:GO:0046872;<br>F:GO:0004879;<br>F:GO:0003677;<br>P:GO:0045449                                                                                                                                                                                                                                                                | -            | -          | IPR000536; IPR001628; IPR001723; IPR008946; IPR013088; PR00350 (PRINTS), PTHR11865 (PANTHER), PTHR11865:SF238 (PANTHER), SSF57716 (SUPERFAMILY)                                             |

|                         |                                                            |    |                                                                                                                                                                                                         |   |            |                                                                                                                                                                                                                                       |
|-------------------------|------------------------------------------------------------|----|---------------------------------------------------------------------------------------------------------------------------------------------------------------------------------------------------------|---|------------|---------------------------------------------------------------------------------------------------------------------------------------------------------------------------------------------------------------------------------------|
| Caenorhabditis elegans  | elegans protein confirmed by transcript evidence           | 4  | F:GO:0046872;<br>F:GO:0004879;<br>F:GO:0003677;<br>P:GO:0045449                                                                                                                                         | - |            | IPR000536; IPR001628; IPR001723;<br>IPR008946; IPR013088; PR00350<br>(PRINTS), PTHR11865 (PANTHER),<br>PTHR11865:SF238 (PANTHER),<br>SSF57716 (SUPERFAMILY)                                                                           |
| Caenorhabditis briggsae | small subunit ribosomal protein 1                          | 9  | P:GO:0040035;<br>P:GO:0009792;<br>P:GO:0002119;<br>C:GO:0005840;<br>F:GO:0003735;<br>P:GO:0018996;<br>F:GO:0005515;<br>P:GO:0040007;<br>P:GO:0006412                                                    | - | EC:3.6.5.3 | IPR001593; IPR018281                                                                                                                                                                                                                  |
| Caenorhabditis briggsae | ribosomal protein I22                                      | 11 | P:GO:0040010;<br>F:GO:0003735;<br>P:GO:0000003;<br>P:GO:0006414;<br>P:GO:0046632;<br>P:GO:0002119;<br>F:GO:0008201;<br>P:GO:0009792;<br>P:GO:0040015;<br>P:GO:0040018;<br>C:GO:0022625                  | - |            | SignalP (SIGNALP)                                                                                                                                                                                                                     |
| Caenorhabditis elegans  | briggsae cbr-mrp-4 protein                                 | 12 | P:GO:0007427;<br>P:GO:0055085;<br>P:GO:0006941;<br>F:GO:0008307;<br>C:GO:0005863;<br>F:GO:0000146;<br>C:GO:0016021;<br>F:GO:0042626;<br>C:GO:0031672;<br>F:GO:0005524;<br>F:GO:0042803;<br>P:GO:0030241 | - |            | IPR001140; IPR003439; IPR003593;<br>IPR011527; IPR017871; IPR017940;<br>G3DSA:1.20.1560.10 (GENE3D),<br>G3DSA:3.40.50.300 (GENE3D),<br>PTHR19242 (PANTHER),<br>PTHR19242:SF34 (PANTHER), SignalP<br>(SIGNALP), SSF52540 (SUPERFAMILY) |
| Caenorhabditis elegans  | elegans protein partially confirmed by transcript evidence | 3  | F:GO:0005089;<br>C:GO:0005622;<br>P:GO:0035023                                                                                                                                                          | - |            | -                                                                                                                                                                                                                                     |
| Loa loa                 | oligonucleotide oligosaccharide-binding fold containing 2b | 6  | C:GO:0070876;<br>P:GO:0000724;<br>F:GO:0005515;<br>F:GO:0003697;<br>P:GO:0010212;<br>P:GO:0031576                                                                                                       | - |            | IPR012340; IPR016027; PTHR13356<br>(PANTHER)                                                                                                                                                                                          |
| Loa loa                 | oligonucleotide oligosaccharide-binding fold containing 2b | 6  | C:GO:0070876;<br>P:GO:0000724;<br>F:GO:0005515;<br>F:GO:0003697;<br>P:GO:0010212;<br>P:GO:0031576                                                                                                       | - |            | IPR012340; IPR016027; PTHR13356<br>(PANTHER)                                                                                                                                                                                          |

|                         |                                                                                                                    |    |                                                                                                                                                                                                         |   |                            |                                                                                                                      |
|-------------------------|--------------------------------------------------------------------------------------------------------------------|----|---------------------------------------------------------------------------------------------------------------------------------------------------------------------------------------------------------|---|----------------------------|----------------------------------------------------------------------------------------------------------------------|
| Caenorhabditis briggsae | transcription initiation factor tfiid subunit 2                                                                    | 7  | P:GO:0010552;<br>P:GO:0006367;<br>F:GO:0010843;<br>P:GO:0000086;<br>C:GO:0033276;<br>F:GO:0005515;<br>C:GO:0005669                                                                                      | - |                            | PTHR15137 (PANTHER),<br>PTHR15137:SF7 (PANTHER)                                                                      |
| Caenorhabditis briggsae | elegans protein confirmed by transcript evidence                                                                   | 1  | F:GO:0005515                                                                                                                                                                                            | - |                            | IPR004202; G3DSA:4.10.49.10<br>(GENE3D), SignalP (SIGNALP),<br>SSF81427 (SUPERFAMILY)                                |
| Caenorhabditis elegans  | proliferation-associated protein 2g4                                                                               | 8  | C:GO:0005730;<br>F:GO:0031625;<br>F:GO:0003677;<br>F:GO:0003700;<br>C:GO:0030529;<br>P:GO:0045892;<br>C:GO:0005737;<br>F:GO:0016787                                                                     | - |                            | IPR000994; IPR004545; IPR011991;<br>PTHR10804:SF11 (PANTHER),<br>SSF46785 (SUPERFAMILY)                              |
| Caenorhabditis elegans  | g chain low resolution structures of bovine mitochondrial f1-atpase during controlled dehydration: hydration state | 9  | F:GO:0008553;<br>F:GO:0046933;<br>C:GO:0000275;<br>P:GO:0015986;<br>P:GO:0006911;<br>F:GO:0005515;<br>F:GO:0046961;<br>P:GO:0009792;<br>C:GO:0005811                                                    | - | EC:3.6.3.6;<br>EC:3.6.3.14 | IPR000131; G3DSA:1.10.287.80<br>(GENE3D), G3DSA:3.40.1380.10<br>(GENE3D), PTHR11693:SF5 (PANTHER)                    |
|                         | -                                                                                                                  | 0  |                                                                                                                                                                                                         |   |                            | -                                                                                                                    |
| Brugia malayi           | smc3 protein                                                                                                       | 6  | P:GO:0051276;<br>F:GO:0042802;<br>F:GO:0005524;<br>P:GO:0007067;<br>C:GO:0005694;<br>P:GO:0006974                                                                                                       | - |                            | IPR003395; G3DSA:3.40.50.300<br>(GENE3D), PTHR18937 (PANTHER),<br>PTHR18937:SF8 (PANTHER), SSF52540<br>(SUPERFAMILY) |
| Brugia malayi           | r- polymerase 2                                                                                                    | 12 | F:GO:0003899;<br>F:GO:0003968;<br>F:GO:0004672;<br>P:GO:0006367;<br>C:GO:0005730;<br>F:GO:0046872;<br>P:GO:0006355;<br>F:GO:0031625;<br>P:GO:0008380;<br>C:GO:0005665;<br>F:GO:0003677;<br>P:GO:0006368 | - | EC:2.7.7.6;<br>EC:2.7.7.48 | IPR007073; IPR007075; IPR007081;<br>PTHR19376 (PANTHER),<br>PTHR19376:SF14 (PANTHER),<br>SSF64484 (SUPERFAMILY)      |
| Brugia malayi           | r- polymerase 2                                                                                                    | 12 | F:GO:0003899;<br>F:GO:0003968;<br>F:GO:0004672;<br>P:GO:0006367;<br>C:GO:0005730;<br>F:GO:0046872;<br>P:GO:0006355;<br>F:GO:0031625;<br>P:GO:0008380;<br>C:GO:0005665;<br>F:GO:0003677;<br>P:GO:0006368 | - | EC:2.7.7.6;<br>EC:2.7.7.48 | IPR007073; IPR007075; IPR007081;<br>PTHR19376 (PANTHER),<br>PTHR19376:SF14 (PANTHER),<br>SSF64484 (SUPERFAMILY)      |

|               |                                                                                                 |    |                                                                                                                                                                                                         |   |                                                |                                                                                                                 |
|---------------|-------------------------------------------------------------------------------------------------|----|---------------------------------------------------------------------------------------------------------------------------------------------------------------------------------------------------------|---|------------------------------------------------|-----------------------------------------------------------------------------------------------------------------|
| Brugia malayi | r- polymerase 2                                                                                 | 12 | F:GO:0003899;<br>F:GO:0003968;<br>F:GO:0004672;<br>P:GO:0006367;<br>C:GO:0005730;<br>F:GO:0046872;<br>P:GO:0006355;<br>F:GO:0031625;<br>P:GO:0008380;<br>C:GO:0005665;<br>F:GO:0003677;<br>P:GO:0006368 | - | EC:2.7.7.6;<br>EC:2.7.7.48                     | IPR007073; IPR007075; IPR007081;<br>PTHR19376 (PANTHER),<br>PTHR19376:SF14 (PANTHER),<br>SSF64484 (SUPERFAMILY) |
| Brugia malayi | r- polymerase 2                                                                                 | 12 | F:GO:0003899;<br>F:GO:0003968;<br>F:GO:0004672;<br>P:GO:0006367;<br>C:GO:0005730;<br>F:GO:0046872;<br>P:GO:0006355;<br>F:GO:0031625;<br>P:GO:0008380;<br>C:GO:0005665;<br>F:GO:0003677;<br>P:GO:0006368 | - | EC:2.7.7.6;<br>EC:2.7.7.48                     | IPR007073; IPR007075; IPR007081;<br>PTHR19376 (PANTHER),<br>PTHR19376:SF14 (PANTHER),<br>SSF64484 (SUPERFAMILY) |
|               |                                                                                                 | 0  |                                                                                                                                                                                                         |   |                                                |                                                                                                                 |
| Loa loa       | chromodomain helicase d- binding protein                                                        | 11 | F:GO:0004003;<br>P:GO:0042766;<br>F:GO:0046872;<br>P:GO:0006333;<br>P:GO:0007517;<br>F:GO:0016564;<br>F:GO:0003677;<br>C:GO:0005700;<br>C:GO:0016581;<br>F:GO:0031491;<br>P:GO:0048813                  | - |                                                | SignalP (SIGNALP)                                                                                               |
| Loa loa       | splicing factor 3b subunit 3                                                                    | 4  | P:GO:0006461;<br>F:GO:0005515;<br>P:GO:0000375;<br>C:GO:0030532                                                                                                                                         | - |                                                | IPR004871; PTHR10644 (PANTHER),<br>PTHR10644:SF1 (PANTHER)                                                      |
| Loa loa       | splicing factor 3b subunit 3                                                                    | 4  | P:GO:0006461;<br>F:GO:0005515;<br>P:GO:0000375;<br>C:GO:0030532                                                                                                                                         | - |                                                | IPR004871; PTHR10644 (PANTHER),<br>PTHR10644:SF1 (PANTHER)                                                      |
| Loa loa       | splicing factor 3b subunit 3                                                                    | 4  | P:GO:0006461;<br>F:GO:0005515;<br>P:GO:0000375;<br>C:GO:0030532                                                                                                                                         | - |                                                | IPR004871; PTHR10644 (PANTHER),<br>PTHR10644:SF1 (PANTHER)                                                      |
| Loa loa       | splicing factor 3b subunit 3                                                                    | 4  | P:GO:0006461;<br>F:GO:0005515;<br>P:GO:0000375;<br>C:GO:0030532                                                                                                                                         | - |                                                | IPR004871; PTHR10644 (PANTHER),<br>PTHR10644:SF1 (PANTHER)                                                      |
| Loa loa       | prion-like-(q n-rich)-domain-bearing protein protein partially confirmed by transcript evidence | 0  |                                                                                                                                                                                                         |   | F:GO:0016455;<br>P:GO:0006357;<br>C:GO:0016592 | IPR001660; IPR010993; IPR013761                                                                                 |

|                         |                                                                             |    |                                                                                                                                                                       |   |                             |                                                                                                                                               |
|-------------------------|-----------------------------------------------------------------------------|----|-----------------------------------------------------------------------------------------------------------------------------------------------------------------------|---|-----------------------------|-----------------------------------------------------------------------------------------------------------------------------------------------|
| Caenorhabditis briggsae | 1-acylglycerol-3-phosphate o-acyltransferase 6 (lysophosphatidic acid zeta) | 10 | P:GO:0006656;<br>C:GO:0016021;<br>P:GO:0006637;<br>P:GO:0030879;<br>C:GO:0005624;<br>F:GO:0003841;<br>P:GO:0019432;<br>P:GO:0065007;<br>F:GO:0004366;<br>C:GO:0005783 | - | EC:2.3.1.51;<br>EC:2.3.1.15 | IPR002123; PTHR23063 (PANTHER),<br>PTHR23063:SF2 (PANTHER), SignalP<br>(SIGNALP), SSF69593 (SUPERFAMILY)                                      |
| -                       | -                                                                           | 0  | -                                                                                                                                                                     | - | -                           | -                                                                                                                                             |
| Caenorhabditis elegans  | phosphatidylethanolamine-binding protein                                    | 0  | -                                                                                                                                                                     | - | -                           | IPR001858; IPR008914; PTHR11362<br>(PANTHER), SignalP (SIGNALP)                                                                               |
| Caenorhabditis elegans  | phosphatidylethanolamine-binding protein                                    | 0  | -                                                                                                                                                                     | - | -                           | IPR001858; IPR008914; PTHR11362<br>(PANTHER), SignalP (SIGNALP)                                                                               |
| Caenorhabditis elegans  | tld family protein                                                          | 3  | C:GO:0005622;<br>F:GO:0005515;<br>P:GO:0016998                                                                                                                        | - | -                           | IPR006571; PTHR23354 (PANTHER),<br>PTHR23354:SF8 (PANTHER), PF07534<br>(PFAM)                                                                 |
| Caenorhabditis elegans  | tld family protein                                                          | 3  | C:GO:0005622;<br>F:GO:0005515;<br>P:GO:0016998                                                                                                                        | - | -                           | IPR006571; PTHR23354 (PANTHER),<br>PTHR23354:SF8 (PANTHER), PF07534<br>(PFAM)                                                                 |
| -                       | -                                                                           | 0  | -                                                                                                                                                                     | - | -                           | -                                                                                                                                             |
| Caenorhabditis elegans  | subfamily member 2                                                          | 3  | F:GO:0005488;<br>P:GO:0008284;<br>P:GO:0008340                                                                                                                        | - | -                           | IPR001305; IPR001623; IPR002939;<br>IPR003095; IPR008971; IPR015609;<br>IPR018253; G3DSA:2.60.260.20<br>(GENE3D), PTHR11821:SF72<br>(PANTHER) |
| Caenorhabditis briggsae | probable protein-tyrosine phosphatase                                       | 6  | F:GO:0004725;<br>P:GO:0009792;<br>F:GO:0008138;<br>P:GO:0006470;<br>P:GO:0000003;<br>P:GO:0002009                                                                     | - | EC:3.1.3.48                 | IPR000340; IPR000387; IPR016130;<br>G3DSA:3.90.190.10 (GENE3D),<br>PTHR10367 (PANTHER), SSF52799<br>(SUPERFAMILY)                             |
| Caenorhabditis briggsae | probable protein-tyrosine phosphatase                                       | 6  | F:GO:0004725;<br>P:GO:0009792;<br>F:GO:0008138;<br>P:GO:0006470;<br>P:GO:0000003;<br>P:GO:0002009                                                                     | - | EC:3.1.3.48                 | IPR000340; IPR000387; IPR016130;<br>G3DSA:3.90.190.10 (GENE3D),<br>PTHR10367 (PANTHER), SSF52799<br>(SUPERFAMILY)                             |
| Caenorhabditis briggsae | annexin a13                                                                 | 4  | C:GO:0044464;<br>F:GO:0005544;<br>F:GO:0005509;<br>F:GO:0005515                                                                                                       | - | -                           | IPR001464; IPR018252; IPR018502;<br>PTHR10502:SF30 (PANTHER)                                                                                  |
| Caenorhabditis elegans  | uncoordinated protein isoform confirmed by transcript evidence              | 7  | F:GO:0005089;<br>C:GO:0005829;<br>F:GO:0004672;<br>F:GO:0000166;<br>P:GO:0035023;<br>P:GO:0008624;<br>P:GO:0007185                                                    | - | -                           | IPR000219; IPR001452;<br>G3DSA:2.30.30.40 (GENE3D),<br>PTHR22826 (PANTHER),<br>PTHR22826:SF47 (PANTHER)                                       |
| Caenorhabditis elegans  | uncoordinated protein isoform confirmed by transcript evidence              | 7  | F:GO:0005089;<br>C:GO:0005829;<br>F:GO:0004672;<br>F:GO:0000166;<br>P:GO:0035023;<br>P:GO:0008624;<br>P:GO:0007185                                                    | - | -                           | IPR000219; PTHR22826 (PANTHER),<br>PTHR22826:SF47 (PANTHER)                                                                                   |

|                           |                                                      |   |                                                                                                                    |                                                                                                                                                                       |            |                                                                                                   |
|---------------------------|------------------------------------------------------|---|--------------------------------------------------------------------------------------------------------------------|-----------------------------------------------------------------------------------------------------------------------------------------------------------------------|------------|---------------------------------------------------------------------------------------------------|
| Loa loa                   | sumo-activating enzyme subunit 2                     | 4 | F:GO:0008047;<br>P:GO:0016925;<br>F:GO:0019948;<br>F:GO:0046982                                                    | -                                                                                                                                                                     |            | IPR000127; IPR009036; IPR016040;<br>G3DSA:1.10.3240.10 (GENE3D),<br>G3DSA:3.10.290.20 (GENE3D)    |
| Loa loa                   | sumo-activating enzyme subunit 2                     | 4 | F:GO:0008047;<br>P:GO:0016925;<br>F:GO:0019948;<br>F:GO:0046982                                                    | -                                                                                                                                                                     |            | IPR000127; IPR009036; IPR016040;<br>G3DSA:1.10.3240.10 (GENE3D),<br>G3DSA:3.10.290.20 (GENE3D)    |
| Caenorhabditis briggsae   | mitochondrial ribosomal protein l35                  | 4 | C:GO:0005840;<br>F:GO:0003735;<br>P:GO:0006412;<br>C:GO:0005739                                                    | -                                                                                                                                                                     | EC:3.6.5.3 | IPR019338; IPR021137; SignalP<br>(SIGNALP)                                                        |
| Brugia malayi             | r-se h family protein                                | 1 | F:GO:0005488                                                                                                       | -                                                                                                                                                                     |            | IPR002156; IPR012337;<br>G3DSA:3.30.420.10 (GENE3D),<br>PTHR10642 (PANTHER), SignalP<br>(SIGNALP) |
| Loa loa                   | #NAME?                                               | 5 | P:GO:0055114;<br>F:GO:0016491;<br>P:GO:0040010;<br>P:GO:0002119;<br>P:GO:0040011                                   | -                                                                                                                                                                     |            | IPR001395; IPR023210;<br>PTHR11732:SF34 (PANTHER)                                                 |
| Heliconius melpomene      | endonuclease-reverse transcriptase                   | 2 | F:GO:0005488;<br>F:GO:0003824                                                                                      | -                                                                                                                                                                     |            | IPR015706; PTHR19446:SF100<br>(PANTHER)                                                           |
| Heliconius melpomene      | endonuclease-reverse transcriptase                   | 0 |                                                                                                                    | F:GO:0003723;<br>P:GO:0006508;<br>P:GO:0006278;<br>F:GO:0008270;<br>F:GO:0004519;<br>F:GO:0004197;<br>C:GO:0005622;<br>F:GO:0003964                                   |            | IPR000477; IPR015706;<br>PTHR19446:SF100 (PANTHER),<br>SSF56672 (SUPERFAMILY)                     |
| Heliconius melpomene      | endonuclease-reverse transcriptase                   | 0 |                                                                                                                    | F:GO:0004197;<br>F:GO:0030528;<br>F:GO:0003964;<br>F:GO:0008270;<br>F:GO:0003723;<br>P:GO:0006278;<br>P:GO:0006508;<br>C:GO:0005622;<br>F:GO:0004519;<br>P:GO:0045449 |            | IPR000477; IPR015706;<br>PTHR19446:SF100 (PANTHER),<br>SSF56672 (SUPERFAMILY)                     |
| Heliconius melpomene      | endonuclease-reverse transcriptase                   | 2 | F:GO:0005488;<br>F:GO:0003824                                                                                      | -                                                                                                                                                                     |            | IPR015706; PTHR19446:SF100<br>(PANTHER)                                                           |
| Heliconius melpomene      | endonuclease-reverse transcriptase                   | 2 | F:GO:0005488;<br>F:GO:0003824                                                                                      | -                                                                                                                                                                     |            | IPR015706; PTHR19446:SF100<br>(PANTHER)                                                           |
| Loa loa                   | eukaryotic translation initiation factor 4e member 2 | 7 | F:GO:0003743;<br>P:GO:0006413;<br>C:GO:0005845;<br>P:GO:0018991;<br>F:GO:0000339;<br>F:GO:0005515;<br>C:GO:0005737 | -                                                                                                                                                                     |            | IPR001040                                                                                         |
| Heligmosomoides polygyrus | elegans protein confirmed by transcript evidence     | 4 | C:GO:0005576;<br>F:GO:0005515;<br>F:GO:0019842;<br>F:GO:0005501                                                    | -                                                                                                                                                                     |            | -                                                                                                 |

|                           |                                                                       |   |                                                                                                   |                                                                                                   |                                                                                                 |
|---------------------------|-----------------------------------------------------------------------|---|---------------------------------------------------------------------------------------------------|---------------------------------------------------------------------------------------------------|-------------------------------------------------------------------------------------------------|
| Heligmosomoides polygyrus | elegans protein confirmed by transcript evidence                      | 4 | C:GO:0005576;<br>F:GO:0005515;<br>F:GO:0019842;<br>F:GO:0005501                                   | -                                                                                                 | -                                                                                               |
|                           | -                                                                     | 0 |                                                                                                   |                                                                                                   | -                                                                                               |
| Caenorhabditis briggsae   | r- binding identical                                                  | 5 | F:GO:0003723;<br>P:GO:0009792;<br>C:GO:0005622;<br>P:GO:0006378;<br>F:GO:0000166                  | -                                                                                                 | IPR000504; IPR012677; IPR015465;<br>PTHR10432 (PANTHER), SSF54928<br>(SUPERFAMILY)              |
| Caenorhabditis elegans    | r- binding identical                                                  | 4 | C:GO:0005622;<br>P:GO:0009792;<br>F:GO:0000166;<br>F:GO:0003723                                   | -                                                                                                 | -                                                                                               |
| Brugia malayi             | myeloid lymphoid or mixed lineage-leukemia translocation to 3 homolog | 1 | P:GO:0003002                                                                                      | -                                                                                                 | IPR005033; PTHR23195:SF13<br>(PANTHER)                                                          |
| Caenorhabditis elegans    | 50s ribosomal protein l10                                             | 6 | P:GO:0040010;<br>C:GO:0005840;<br>P:GO:0002119;<br>P:GO:0006898;<br>P:GO:0009792;<br>P:GO:0040018 | -                                                                                                 | IPR001790                                                                                       |
| Brugia malayi             | 50s ribosomal protein l10                                             | 0 |                                                                                                   | C:GO:0005840                                                                                      | -                                                                                               |
| Caenorhabditis elegans    | 50s ribosomal protein l10                                             | 6 | P:GO:0040010;<br>C:GO:0005840;<br>P:GO:0002119;<br>P:GO:0006898;<br>P:GO:0009792;<br>P:GO:0040018 | -                                                                                                 | IPR001790                                                                                       |
| Caenorhabditis elegans    | mitogen activated protein ki-se ki-se ki-se mekk5                     | 3 | F:GO:0005515;<br>F:GO:0004672;<br>F:GO:0000166                                                    | -                                                                                                 | -                                                                                               |
| Caenorhabditis elegans    | mtm family member (mtm-6)                                             | 0 |                                                                                                   | F:GO:0046872;<br>P:GO:0016311;<br>F:GO:0016791;<br>F:GO:0016787;<br>F:GO:0004725;<br>F:GO:0008270 | IPR000306; IPR011011; IPR013083;<br>IPR017455; PTHR10807 (PANTHER),<br>PTHR10807:SF11 (PANTHER) |
| Caenorhabditis briggsae   | briggsae cbr-vit-6 protein                                            | 0 |                                                                                                   | P:GO:0006869;<br>F:GO:0005319;<br>F:GO:0045735;<br>P:GO:0006886;<br>C:GO:0005576;<br>F:GO:0008565 | IPR001747; IPR015816; IPR015819                                                                 |
| Caenorhabditis briggsae   | briggsae cbr-vit-6 protein                                            | 0 |                                                                                                   | P:GO:0006869;<br>F:GO:0005319;<br>F:GO:0045735;<br>P:GO:0006886;<br>C:GO:0005576;<br>F:GO:0008565 | -                                                                                               |

|                         |              |    |                                                                                                                                                                                                                          |   |  |                                                 |
|-------------------------|--------------|----|--------------------------------------------------------------------------------------------------------------------------------------------------------------------------------------------------------------------------|---|--|-------------------------------------------------|
| Caenorhabditis briggsae | gbf1 protein | 13 | C:GO:0000139;<br>F:GO:0005515;<br>C:GO:0005829;<br>F:GO:0016563;<br>F:GO:0003677;<br>F:GO:0005086;<br>P:GO:0006892;<br>P:GO:0045449;<br>P:GO:0006890;<br>C:GO:0005634;<br>P:GO:0046903;<br>P:GO:0048205;<br>C:GO:0005739 | - |  | PTHR10663 (PANTHER),<br>PTHR10663:SF8 (PANTHER) |
| Caenorhabditis briggsae | gbf1 protein | 13 | C:GO:0000139;<br>F:GO:0005515;<br>C:GO:0005829;<br>F:GO:0016563;<br>F:GO:0003677;<br>F:GO:0005086;<br>P:GO:0006892;<br>P:GO:0045449;<br>P:GO:0006890;<br>C:GO:0005634;<br>P:GO:0046903;<br>P:GO:0048205;<br>C:GO:0005739 | - |  | PTHR10663 (PANTHER),<br>PTHR10663:SF8 (PANTHER) |
| Caenorhabditis briggsae | gbf1 protein | 13 | C:GO:0000139;<br>F:GO:0005515;<br>C:GO:0005829;<br>F:GO:0016563;<br>F:GO:0003677;<br>F:GO:0005086;<br>P:GO:0006892;<br>P:GO:0045449;<br>P:GO:0006890;<br>C:GO:0005634;<br>P:GO:0046903;<br>P:GO:0048205;<br>C:GO:0005739 | - |  | PTHR10663 (PANTHER),<br>PTHR10663:SF8 (PANTHER) |
| Caenorhabditis briggsae | gbf1 protein | 13 | C:GO:0000139;<br>F:GO:0005515;<br>C:GO:0005829;<br>F:GO:0016563;<br>F:GO:0003677;<br>F:GO:0005086;<br>P:GO:0006892;<br>P:GO:0045449;<br>P:GO:0006890;<br>C:GO:0005634;<br>P:GO:0046903;<br>P:GO:0048205;<br>C:GO:0005739 | - |  | PTHR10663 (PANTHER),<br>PTHR10663:SF8 (PANTHER) |



|                         |                                                                  |    |                                                                                                                                                                                                                          |   |             |                                                                                     |
|-------------------------|------------------------------------------------------------------|----|--------------------------------------------------------------------------------------------------------------------------------------------------------------------------------------------------------------------------|---|-------------|-------------------------------------------------------------------------------------|
| Caenorhabditis briggsae | gbf1 protein                                                     | 13 | C:GO:0000139;<br>F:GO:0005515;<br>C:GO:0005829;<br>F:GO:0016563;<br>F:GO:0003677;<br>F:GO:0005086;<br>P:GO:0006892;<br>P:GO:0045449;<br>P:GO:0006890;<br>C:GO:0005634;<br>P:GO:0046903;<br>P:GO:0048205;<br>C:GO:0005739 | - |             | PTHR10663 (PANTHER),<br>PTHR10663:SF8 (PANTHER)                                     |
| Caenorhabditis briggsae | gbf1 protein                                                     | 13 | C:GO:0000139;<br>F:GO:0005515;<br>C:GO:0005829;<br>F:GO:0016563;<br>F:GO:0003677;<br>F:GO:0005086;<br>P:GO:0006892;<br>P:GO:0045449;<br>P:GO:0006890;<br>C:GO:0005634;<br>P:GO:0046903;<br>P:GO:0048205;<br>C:GO:0005739 | - |             | PTHR10663 (PANTHER),<br>PTHR10663:SF8 (PANTHER)                                     |
| Caenorhabditis briggsae | protein ltv1 homolog                                             | 6  | P:GO:0040035;<br>P:GO:0009792;<br>P:GO:0002119;<br>F:GO:0005515;<br>P:GO:0016246;<br>P:GO:0040007                                                                                                                        | - |             | IPR007307; PTHR21531 (PANTHER)                                                      |
| Homo sapiens            | apc11 a-phase promoting complex subunit 11 homolog isoform cra_b | 12 | C:GO:0005829;<br>F:GO:0008270;<br>P:GO:0051436;<br>P:GO:0051437;<br>P:GO:0070979;<br>P:GO:0051301;<br>P:GO:0031145;<br>F:GO:0004842;<br>F:GO:0005515;<br>P:GO:0007067;<br>C:GO:0005654;<br>C:GO:0005680                  | - | EC:6.3.2.19 |                                                                                     |
| -                       | -                                                                | 0  |                                                                                                                                                                                                                          | - |             |                                                                                     |
| -                       | -                                                                | 0  |                                                                                                                                                                                                                          | - |             |                                                                                     |
| Caenorhabditis briggsae | d- topoisomeraseii_beta                                          | 10 | C:GO:0043229;<br>P:GO:0071103;<br>P:GO:0000910;<br>P:GO:0006259;<br>P:GO:0006355;<br>P:GO:0000003;<br>F:GO:0000166;<br>P:GO:0009792;<br>F:GO:0003916;<br>P:GO:0016246                                                    | - |             | IPR002205; IPR013757; IPR013760;<br>PTHR10169 (PANTHER),<br>PTHR10169:SF2 (PANTHER) |

|                         |                                                                                      |    |                                                                                                                                                                                                                                                                                                               |                                                                                                                                     |                   |                                                                                                                                                        |
|-------------------------|--------------------------------------------------------------------------------------|----|---------------------------------------------------------------------------------------------------------------------------------------------------------------------------------------------------------------------------------------------------------------------------------------------------------------|-------------------------------------------------------------------------------------------------------------------------------------|-------------------|--------------------------------------------------------------------------------------------------------------------------------------------------------|
| Caenorhabditis elegans  | elegans protein confirmed by transcript evidence                                     | 0  |                                                                                                                                                                                                                                                                                                               | F:GO:0030246;<br>F:GO:0004500;<br>C:GO:0016021;<br>F:GO:0003824;<br>P:GO:0009792;<br>C:GO:0005576;<br>P:GO:0006548;<br>P:GO:0016052 |                   | IPR005018; IPR015920; SignalP (SIGNALP)                                                                                                                |
| -                       | -                                                                                    | 0  |                                                                                                                                                                                                                                                                                                               |                                                                                                                                     |                   | -                                                                                                                                                      |
| Caenorhabditis briggsae | elegans protein confirmed by transcript evidence                                     | 0  |                                                                                                                                                                                                                                                                                                               | F:GO:0008270;<br>P:GO:0019915                                                                                                       |                   | IPR007087; SignalP (SIGNALP)                                                                                                                           |
| Schistosoma mansoni     | b chain helical extension of the neuro-l s-re complex into the spacegroup i 21 21 21 | 10 | F:GO:0005515;<br>P:GO:0051046;<br>P:GO:0023061;<br>P:GO:0065008;<br>P:GO:0010646;<br>P:GO:0060341;<br>P:GO:0006887;<br>C:GO:0044425;<br>C:GO:0031410;<br>C:GO:0005886                                                                                                                                         | -                                                                                                                                   |                   | IPR000727; IPR010989;<br>G3DSA:1.20.5.110 (GENE3D)                                                                                                     |
| Caenorhabditis elegans  | transcription factor jmc domain-containing protein                                   | 7  | F:GO:0051864;<br>P:GO:0034720;<br>F:GO:0032453;<br>P:GO:0070544;<br>P:GO:0045892;<br>F:GO:0005506;<br>C:GO:0005634                                                                                                                                                                                            | -                                                                                                                                   | EC:1.14.11.2<br>7 | IPR003347; IPR013109; IPR022777;<br>SSF51197 (SUPERFAMILY)                                                                                             |
| Caenorhabditis elegans  | actin                                                                                | 18 | P:GO:0007126;<br>P:GO:0007108;<br>P:GO:0040007;<br>P:GO:0007517;<br>P:GO:0000281;<br>P:GO:0040035;<br>P:GO:0030036;<br>C:GO:0005865;<br>F:GO:0005524;<br>C:GO:0005938;<br>P:GO:0002119;<br>F:GO:0016887;<br>F:GO:0005515;<br>C:GO:0005884;<br>F:GO:0005200;<br>P:GO:0040039;<br>P:GO:0006898;<br>P:GO:0009792 | -                                                                                                                                   |                   | IPR004000; IPR004001; IPR020902;<br>G3DSA:2.30.36.70 (GENE3D),<br>G3DSA:3.30.420.40 (GENE3D),<br>G3DSA:3.90.640.10 (GENE3D),<br>SSF53067 (SUPERFAMILY) |

|                        |                                                    |    |                                                                                                                                                                                                                                                                                                               |   |             |                                                                                                                                                           |
|------------------------|----------------------------------------------------|----|---------------------------------------------------------------------------------------------------------------------------------------------------------------------------------------------------------------------------------------------------------------------------------------------------------------|---|-------------|-----------------------------------------------------------------------------------------------------------------------------------------------------------|
| Caenorhabditis elegans | actin                                              | 18 | P:GO:0007126;<br>P:GO:0007108;<br>P:GO:0040007;<br>P:GO:0007517;<br>P:GO:0000281;<br>P:GO:0040035;<br>P:GO:0030036;<br>C:GO:0005865;<br>F:GO:0005524;<br>C:GO:0005938;<br>P:GO:0002119;<br>F:GO:0016887;<br>F:GO:0005515;<br>C:GO:0005884;<br>F:GO:0005200;<br>P:GO:0040039;<br>P:GO:0006898;<br>P:GO:0009792 | - |             | IPR004000; IPR004001; IPR020902;<br>G3DSA:2.30.36.70 (GENE3D),<br>G3DSA:3.30.420.40 (GENE3D),<br>G3DSA:3.90.640.10 (GENE3D),<br>SSF53067 (SUPERFAMILY)    |
|                        | -                                                  | 0  |                                                                                                                                                                                                                                                                                                               |   |             | -                                                                                                                                                         |
|                        | -                                                  | 0  |                                                                                                                                                                                                                                                                                                               |   |             | SignalP (SIGNALP)                                                                                                                                         |
|                        | -                                                  | 0  |                                                                                                                                                                                                                                                                                                               |   |             | SignalP (SIGNALP)                                                                                                                                         |
| Caenorhabditis elegans | cell division cycle related family member (cdc-14) | 11 | P:GO:0040010;<br>P:GO:0000910;<br>C:GO:0030496;<br>P:GO:0060284;<br>F:GO:0004725;<br>F:GO:0005515;<br>C:GO:0005819;<br>P:GO:0045786;<br>P:GO:0009792;<br>C:GO:0005737;<br>P:GO:0006974                                                                                                                        | - | EC:3.1.3.48 | -                                                                                                                                                         |
| Caenorhabditis elegans | cell division cycle related family member (cdc-14) | 11 | P:GO:0040010;<br>P:GO:0000910;<br>C:GO:0030496;<br>P:GO:0060284;<br>F:GO:0004725;<br>F:GO:0005515;<br>C:GO:0005819;<br>P:GO:0045786;<br>P:GO:0009792;<br>C:GO:0005737;<br>P:GO:0006974                                                                                                                        | - | EC:3.1.3.48 | IPR000242; IPR000340; IPR000387;<br>IPR016130; G3DSA:3.90.190.10<br>(GENE3D), PTHR23339 (PANTHER),<br>PTHR23339:SF27 (PANTHER),<br>SSF52799 (SUPERFAMILY) |
| Caenorhabditis elegans | cell division cycle related family member (cdc-14) | 11 | P:GO:0040010;<br>P:GO:0000910;<br>C:GO:0030496;<br>P:GO:0060284;<br>F:GO:0004725;<br>F:GO:0005515;<br>C:GO:0005819;<br>P:GO:0045786;<br>P:GO:0009792;<br>C:GO:0005737;<br>P:GO:0006974                                                                                                                        | - | EC:3.1.3.48 | IPR000242; IPR000340; IPR000387;<br>IPR016130; G3DSA:3.90.190.10<br>(GENE3D), PTHR23339 (PANTHER),<br>PTHR23339:SF27 (PANTHER),<br>SSF52799 (SUPERFAMILY) |

|                         |                                                                    |    |                                                                                                                                                                                                                                                            |                                                |            |                                                                                                                                                                            |
|-------------------------|--------------------------------------------------------------------|----|------------------------------------------------------------------------------------------------------------------------------------------------------------------------------------------------------------------------------------------------------------|------------------------------------------------|------------|----------------------------------------------------------------------------------------------------------------------------------------------------------------------------|
| Caenorhabditis elegans  | d--directed r- polymerase ii subunit rpb2                          | 15 | F:GO:0003899;<br>P:GO:0040010;<br>P:GO:0008340;<br>F:GO:0004672;<br>P:GO:0006367;<br>F:GO:0046872;<br>P:GO:0000003;<br>P:GO:0008380;<br>C:GO:0005665;<br>F:GO:0003677;<br>P:GO:0002119;<br>F:GO:0005515;<br>P:GO:0006368;<br>F:GO:0032549;<br>P:GO:0009792 | -                                              | EC:2.7.7.6 | IPR013838                                                                                                                                                                  |
| Caenorhabditis elegans  | fts and hook-interacting protein                                   | 6  | P:GO:0008333;<br>P:GO:0045022;<br>P:GO:0007032;<br>F:GO:0005515;<br>P:GO:0007040;<br>C:GO:0070695                                                                                                                                                          | -                                              |            | IPR019384; PTHR21705 (PANTHER)                                                                                                                                             |
| Brugia malayi           | low-density lipoprotein receptor                                   | 7  | F:GO:0030229;<br>C:GO:0005624;<br>P:GO:0042221;<br>P:GO:0034447;<br>F:GO:0005515;<br>P:GO:0050794;<br>C:GO:0016020                                                                                                                                         | -                                              |            | IPR002172; IPR006210; IPR011042;<br>G3DSA:2.10.25.10 (GENE3D),<br>PTHR10529 (PANTHER),<br>PTHR10529:SF2 (PANTHER), SSF63825<br>(SUPERFAMILY)                               |
| Brugia malayi           | low-density lipoprotein receptor repeat class b containing protein | 0  |                                                                                                                                                                                                                                                            | F:GO:0004872;<br>C:GO:0016021;<br>C:GO:0016020 |            | IPR011042                                                                                                                                                                  |
| Brugia malayi           | low-density lipoprotein receptor                                   | 10 | F:GO:0005041;<br>P:GO:0042221;<br>F:GO:0005515;<br>P:GO:0007613;<br>C:GO:0005624;<br>P:GO:0034447;<br>P:GO:0007165;<br>P:GO:0007399;<br>F:GO:0030229;<br>C:GO:0005886                                                                                      | -                                              |            | IPR002172; IPR006210; IPR011042;<br>G3DSA:2.10.25.10 (GENE3D),<br>PTHR10529 (PANTHER),<br>PTHR10529:SF2 (PANTHER), SSF63825<br>(SUPERFAMILY)                               |
| Brugia malayi           | low-density lipoprotein receptor                                   | 7  | F:GO:0030229;<br>C:GO:0005624;<br>P:GO:0042221;<br>P:GO:0034447;<br>F:GO:0005515;<br>P:GO:0050794;<br>C:GO:0016020                                                                                                                                         | -                                              |            | IPR002172; IPR006210; IPR011042;<br>G3DSA:2.10.25.10 (GENE3D),<br>PTHR10529 (PANTHER),<br>PTHR10529:SF2 (PANTHER), SSF63825<br>(SUPERFAMILY)                               |
|                         | -                                                                  | 0  |                                                                                                                                                                                                                                                            |                                                |            | -                                                                                                                                                                          |
|                         | -                                                                  | 0  |                                                                                                                                                                                                                                                            |                                                |            | -                                                                                                                                                                          |
|                         | -                                                                  | 0  |                                                                                                                                                                                                                                                            |                                                |            | -                                                                                                                                                                          |
| Lepeophtheirus salmonis | ubiquitin                                                          | 5  | C:GO:0005737;<br>P:GO:0000003;<br>P:GO:0040007;<br>C:GO:0005634;<br>P:GO:0002119                                                                                                                                                                           | -                                              |            | IPR000626; IPR019954; IPR019955;<br>IPR019956; G3DSA:3.10.20.90<br>(GENE3D), PTHR10666 (PANTHER),<br>PTHR10666:SF9 (PANTHER), SignalP<br>(SIGNALP), SSF54236 (SUPERFAMILY) |

|                               |                                                                   |   |                                                                 |                                                                                                                                                                                                                                                                                              |             |                                                                                                                                                |
|-------------------------------|-------------------------------------------------------------------|---|-----------------------------------------------------------------|----------------------------------------------------------------------------------------------------------------------------------------------------------------------------------------------------------------------------------------------------------------------------------------------|-------------|------------------------------------------------------------------------------------------------------------------------------------------------|
| Caenorhabditis elegans        | bess motif family protein                                         | 0 |                                                                 | P:GO:0008355;<br>F:GO:0003702;<br>F:GO:0003677;<br>C:GO:0005634;<br>P:GO:0048813;<br>P:GO:0045941;<br>P:GO:0007616;<br>F:GO:0008270;<br>P:GO:0008345;<br>P:GO:0007613;<br>F:GO:0016251;<br>P:GO:0006357;<br>P:GO:0007611;<br>F:GO:0005515;<br>P:GO:0040011;<br>F:GO:0046872;<br>P:GO:0007416 |             | IPR006578                                                                                                                                      |
| Caenorhabditis briggsae       | briggsae cbr-ttr-47 protein                                       | 1 | P:GO:0040011                                                    | -                                                                                                                                                                                                                                                                                            |             | -                                                                                                                                              |
| Caenorhabditis briggsae       | unidentified vitellogenin-linked transcript family member (lvt-5) | 0 |                                                                 | F:GO:0016757                                                                                                                                                                                                                                                                                 |             | -                                                                                                                                              |
| Caenorhabditis elegans        | n-term-l domain containing protein                                | 0 |                                                                 | C:GO:0016021                                                                                                                                                                                                                                                                                 |             | IPR013922; PTHR15615 (PANTHER)                                                                                                                 |
| Caenorhabditis elegans        | eukaryotic translation initiation factor 3 subunit d              | 4 | F:GO:0003743;<br>C:GO:0005852;<br>F:GO:0005515;<br>P:GO:0001732 | -                                                                                                                                                                                                                                                                                            |             | IPR007783                                                                                                                                      |
|                               | -                                                                 | 0 |                                                                 |                                                                                                                                                                                                                                                                                              |             | SignalP (SIGNALP)                                                                                                                              |
|                               | -                                                                 | 0 |                                                                 |                                                                                                                                                                                                                                                                                              |             | -                                                                                                                                              |
| Caenorhabditis elegans        | acyl-coa dehydroge-se                                             | 4 | P:GO:0009792;<br>P:GO:0008152;<br>F:GO:0016627;<br>P:GO:0040010 | -                                                                                                                                                                                                                                                                                            |             | IPR006089; IPR006090; IPR009075;<br>PTHR10909 (PANTHER),<br>PTHR10909:SF10 (PANTHER)                                                           |
| Caenorhabditis sp. PS1010     | er degradation-enhancing alpha-mannosidase-like 1                 | 1 | C:GO:0016020                                                    | -                                                                                                                                                                                                                                                                                            |             | SignalP (SIGNALP)                                                                                                                              |
| Caenorhabditis elegans        | midasin homolog                                                   | 0 |                                                                 | C:GO:0005634;<br>F:GO:0000166;<br>F:GO:0003674;<br>F:GO:0008134;<br>F:GO:0017111;<br>F:GO:0005524;<br>F:GO:0016887;<br>C:GO:0005575;<br>P:GO:0006355;<br>C:GO:0005622;<br>P:GO:0008150;<br>P:GO:0043254                                                                                      |             | PTHR22908 (PANTHER),<br>PTHR22908:SF13 (PANTHER)                                                                                               |
| Caenorhabditis elegans        | displaced go-d family member (dig-1)                              | 1 | F:GO:0003824                                                    | -                                                                                                                                                                                                                                                                                            |             | IPR003961; IPR007110; IPR008957;<br>IPR013783; PRO0014 (PRINTS),<br>PTHR10489 (PANTHER),<br>PTHR10489:SF3 (PANTHER), SSF48726<br>(SUPERFAMILY) |
| Strongylocentrotus purpuratus | atp-binding cassette superfamily                                  | 1 | F:GO:0017111                                                    | -                                                                                                                                                                                                                                                                                            | EC:3.6.1.15 | G3DSA:3.40.50.300 (GENE3D),<br>PTHR19229 (PANTHER), SSF52540<br>(SUPERFAMILY)                                                                  |
| Caenorhabditis briggsae       | briggsae cbr-rgl-1 protein                                        | 1 | P:GO:0040010                                                    | -                                                                                                                                                                                                                                                                                            |             | IPR000159; IPR008937;<br>G3DSA:3.10.20.90 (GENE3D),<br>PTHR23113:SF29 (PANTHER),<br>SSF54236 (SUPERFAMILY)                                     |
| Caenorhabditis elegans        | coiled-coil domain-containing protein 141-like                    | 0 |                                                                 | F:GO:0005515                                                                                                                                                                                                                                                                                 |             | SSF46966 (SUPERFAMILY)                                                                                                                         |
| Caenorhabditis elegans        | coiled-coil domain-containing protein 141-like                    | 0 |                                                                 | F:GO:0005515                                                                                                                                                                                                                                                                                 |             | SSF46966 (SUPERFAMILY)                                                                                                                         |

|                         |                                                                             |    |                                                                                                                                                                                                         |                                                                 |                             |                                                                                                                                                                                                                     |
|-------------------------|-----------------------------------------------------------------------------|----|---------------------------------------------------------------------------------------------------------------------------------------------------------------------------------------------------------|-----------------------------------------------------------------|-----------------------------|---------------------------------------------------------------------------------------------------------------------------------------------------------------------------------------------------------------------|
| Caenorhabditis briggsae | briggsae cbr-rbg-2 protein                                                  | 0  |                                                                                                                                                                                                         | F:GO:0030234;<br>P:GO:0043087;<br>C:GO:0005625;<br>F:GO:0046982 |                             | -                                                                                                                                                                                                                   |
| Caenorhabditis briggsae | low quality protein: tyrosine-protein phosphatase non-receptor type 13-like | 10 | P:GO:0040022;<br>C:GO:0043229;<br>F:GO:0005488;<br>P:GO:0045132;<br>P:GO:0040007;<br>P:GO:0002119;<br>P:GO:0042127;<br>P:GO:0008406;<br>F:GO:0016787;<br>P:GO:0040020                                   | -                                                               |                             | IPR000299; IPR011019; IPR011993;<br>IPR014352; IPR018979; IPR018980;<br>IPR019748; IPR019749; IPR019750;<br>G3DSA:3.10.20.90 (GENE3D),<br>PTHR23280 (PANTHER), SSF50729<br>(SUPERFAMILY), SSF54236<br>(SUPERFAMILY) |
|                         | -                                                                           | 0  |                                                                                                                                                                                                         |                                                                 |                             | -                                                                                                                                                                                                                   |
| Brugia malayi           | ubiquitin specific peptidase 7 (herpes virus-associated)                    | 12 | P:GO:0006511;<br>F:GO:0004221;<br>F:GO:0002039;<br>P:GO:0051090;<br>F:GO:0008022;<br>F:GO:0031625;<br>F:GO:0004197;<br>F:GO:0004843;<br>F:GO:0008134;<br>P:GO:0016579;<br>C:GO:0005737;<br>C:GO:0005634 | -                                                               | EC:3.1.2.15;<br>EC:3.4.22.0 | IPR001394; IPR002083; IPR008974;<br>IPR013322; IPR018200; PTHR10420<br>(PANTHER), PTHR10420:SF43<br>(PANTHER), PF12436 (PFAM),<br>SSF54001 (SUPERFAMILY)                                                            |
|                         | -                                                                           | 0  |                                                                                                                                                                                                         |                                                                 |                             | -                                                                                                                                                                                                                   |
| Caenorhabditis briggsae | peptidyl-prolyl cis-trans isomerase nima-interacting 1                      | 9  | P:GO:0060393;<br>P:GO:0030512;<br>P:GO:0006457;<br>P:GO:0007088;<br>F:GO:0050816;<br>P:GO:0051443;<br>F:GO:0003755;<br>F:GO:0050815;<br>P:GO:0042127                                                    | -                                                               | EC:5.2.1.8                  | IPR000297; IPR001202;<br>G3DSA:2.20.70.10 (GENE3D),<br>G3DSA:3.10.50.40 (GENE3D),<br>PTHR10657 (PANTHER), SSF54534<br>(SUPERFAMILY)                                                                                 |
| Caenorhabditis briggsae | exocyst complex component 6b                                                | 2  | C:GO:0000145;<br>P:GO:0006904                                                                                                                                                                           | -                                                               |                             | IPR007225                                                                                                                                                                                                           |
| Dictyocaulus filaria    | fmrfamide-related peptide flp-21 precursor                                  | 0  |                                                                                                                                                                                                         |                                                                 |                             | -                                                                                                                                                                                                                   |
| Gallus gallus           | telomere-associated protein rif1                                            | 0  |                                                                                                                                                                                                         | F:GO:0005488                                                    |                             | -                                                                                                                                                                                                                   |
|                         | -                                                                           | 0  |                                                                                                                                                                                                         |                                                                 |                             | -                                                                                                                                                                                                                   |
| Caenorhabditis briggsae | multiple pdz domain protein family member (mpz-1)                           | 2  | F:GO:0005515;<br>C:GO:0016021                                                                                                                                                                           | -                                                               |                             | G3DSA:2.30.42.10 (GENE3D),<br>PTHR19964 (PANTHER),<br>PTHR19964:SF5 (PANTHER)                                                                                                                                       |

|                         |                                                 |    |                                                                                                                                                                                                                                                                                                                                                                                                                     |   |                                         |                                                                                                                                                                                                                                                              |
|-------------------------|-------------------------------------------------|----|---------------------------------------------------------------------------------------------------------------------------------------------------------------------------------------------------------------------------------------------------------------------------------------------------------------------------------------------------------------------------------------------------------------------|---|-----------------------------------------|--------------------------------------------------------------------------------------------------------------------------------------------------------------------------------------------------------------------------------------------------------------|
| Homo sapiens            | indoleamine -dioxyge-se 1                       | 24 | F:GO:0004833;<br>P:GO:0032496;<br>P:GO:0032693;<br>P:GO:0002666;<br>P:GO:0070233;<br>P:GO:0033555;<br>P:GO:0002534;<br>F:GO:0016597;<br>F:GO:0020037;<br>F:GO:0009055;<br>C:GO:0005829;<br>P:GO:0007610;<br>P:GO:0032735;<br>P:GO:0002830;<br>P:GO:0007565;<br>F:GO:0019825;<br>P:GO:0019441;<br>P:GO:0046007;<br>P:GO:0034276;<br>P:GO:0055114;<br>F:GO:0033754;<br>P:GO:0002678;<br>C:GO:0005625;<br>P:GO:0043065 | - | EC:1.13.11.1<br>1;<br>EC:1.13.11.5<br>2 | IPR000898; SSF140959 (SUPERFAMILY)                                                                                                                                                                                                                           |
| Caenorhabditis briggsae | endoplasmic reticulum metallopeptidase 1        | 4  | F:GO:0008233;<br>P:GO:0040011;<br>C:GO:0016021;<br>P:GO:0006508                                                                                                                                                                                                                                                                                                                                                     | - |                                         | PTHR12147 (PANTHER), PS51257 (PROFILE), SignalP (SIGNALP)                                                                                                                                                                                                    |
|                         | -                                               | 0  |                                                                                                                                                                                                                                                                                                                                                                                                                     |   |                                         | -                                                                                                                                                                                                                                                            |
|                         | -                                               | 0  |                                                                                                                                                                                                                                                                                                                                                                                                                     |   |                                         | -                                                                                                                                                                                                                                                            |
| Caenorhabditis briggsae | uncoordi-ted family member (unc-11)             | 13 | C:GO:0005829;<br>P:GO:0016183;<br>C:GO:0008021;<br>P:GO:0007270;<br>P:GO:0048268;<br>F:GO:0030276;<br>F:GO:0005545;<br>F:GO:0004177;<br>C:GO:0030131;<br>C:GO:0005905;<br>P:GO:0007269;<br>P:GO:0042331;<br>P:GO:0006898                                                                                                                                                                                            | - | EC:3.4.11.0                             | IPR008942; IPR011417; IPR013809;<br>IPR014712; PTHR22951 (PANTHER),<br>PTHR22951:SF3 (PANTHER), SSF89009<br>(SUPERFAMILY)                                                                                                                                    |
| Aedes aegypti           | ring finger and ccch-type zinc finger domains 2 | 1  | F:GO:0005488                                                                                                                                                                                                                                                                                                                                                                                                        | - |                                         | PTHR13139 (PANTHER),<br>PTHR13139:SF1 (PANTHER)                                                                                                                                                                                                              |
| Aedes aegypti           | ring finger and ccch-type zinc finger domains 2 | 1  | F:GO:0005488                                                                                                                                                                                                                                                                                                                                                                                                        | - |                                         | IPR000571; G3DSA:4.10.1000.10<br>(GENE3D), PTHR13139 (PANTHER),<br>SSF90229 (SUPERFAMILY)                                                                                                                                                                    |
| Caenorhabditis elegans  | membrane calcium atpase family member (mca-3)   | 5  | F:GO:0005388;<br>C:GO:0016021;<br>P:GO:0006754;<br>F:GO:0005524;<br>P:GO:0006816                                                                                                                                                                                                                                                                                                                                    | - | EC:3.6.3.8                              | IPR001757; IPR005834; IPR006068;<br>IPR006069; IPR006408; IPR008250;<br>IPR018303; G3DSA:1.20.1110.10<br>(GENE3D), G3DSA:3.40.1110.10<br>(GENE3D), PTHR11939:SF76<br>(PANTHER), SSF56784 (SUPERFAMILY),<br>SSF81660 (SUPERFAMILY), SSF81665<br>(SUPERFAMILY) |

|                         |                                               |    |                                                                                                                                                                                                                                           |   |             |                                                                                                                                                                                                                                                              |
|-------------------------|-----------------------------------------------|----|-------------------------------------------------------------------------------------------------------------------------------------------------------------------------------------------------------------------------------------------|---|-------------|--------------------------------------------------------------------------------------------------------------------------------------------------------------------------------------------------------------------------------------------------------------|
| Caenorhabditis elegans  | membrane calcium atpase family member (mca-3) | 7  | F:GO:0005388;<br>C:GO:0016021;<br>P:GO:0006754;<br>F:GO:0005524;<br>P:GO:0006816;<br>C:GO:0005794;<br>C:GO:0005886                                                                                                                        | - | EC:3.6.3.8  | IPR001757; IPR005834; IPR006068;<br>IPR006069; IPR006408; IPR008250;<br>IPR018303; G3DSA:1.20.1110.10<br>(GENE3D), G3DSA:3.40.1110.10<br>(GENE3D), PTHR11939:SF76<br>(PANTHER), SSF56784 (SUPERFAMILY),<br>SSF81660 (SUPERFAMILY), SSF81665<br>(SUPERFAMILY) |
|                         | -                                             | 0  |                                                                                                                                                                                                                                           |   |             | -                                                                                                                                                                                                                                                            |
|                         | -                                             | 0  |                                                                                                                                                                                                                                           |   |             | -                                                                                                                                                                                                                                                            |
| Loa loa                 | zinc finger protein                           | 13 | P:GO:0040010;<br>F:GO:0003723;<br>F:GO:0008270;<br>C:GO:0071011;<br>P:GO:0040035;<br>P:GO:0010171;<br>P:GO:0002119;<br>P:GO:0040011;<br>P:GO:0000398;<br>P:GO:0006898;<br>P:GO:0002121;<br>P:GO:0002009;<br>P:GO:0009792                  | - |             | IPR001878; IPR013084;<br>G3DSA:3.30.1370.10 (GENE3D),<br>PTHR11208 (PANTHER),<br>PTHR11208:SF6 (PANTHER), SSF57756<br>(SUPERFAMILY)                                                                                                                          |
| Caenorhabditis briggsae | heterogeneous nuclear ribonucleoprotein       | 1  | F:GO:0005515                                                                                                                                                                                                                              | - |             | -                                                                                                                                                                                                                                                            |
| Caenorhabditis briggsae | heterogeneous nuclear ribonucleoprotein h3    | 1  | F:GO:0003676                                                                                                                                                                                                                              | - |             | -                                                                                                                                                                                                                                                            |
| Caenorhabditis elegans  | heterogeneous nuclear ribonucleoprotein h3    | 1  | F:GO:0003676                                                                                                                                                                                                                              | - |             | SignalP (SIGNALP)                                                                                                                                                                                                                                            |
| Caenorhabditis elegans  | heterogeneous nuclear ribonucleoprotein h3    | 1  | F:GO:0003676                                                                                                                                                                                                                              | - |             | IPR000504; IPR012677; PTHR13976<br>(PANTHER), SSF54928 (SUPERFAMILY)                                                                                                                                                                                         |
|                         | -                                             | 0  |                                                                                                                                                                                                                                           |   |             | -                                                                                                                                                                                                                                                            |
| Loa loa                 | protein ki-se domain containing protein       | 1  | F:GO:0016301                                                                                                                                                                                                                              | - |             | PTHR13902 (PANTHER),<br>PTHR13902:SF12 (PANTHER)                                                                                                                                                                                                             |
| Brugia malayi           | protein ki-se domain containing protein       | 14 | F:GO:0030291;<br>P:GO:0007243;<br>F:GO:0004674;<br>C:GO:0005625;<br>F:GO:0019870;<br>F:GO:0005524;<br>P:GO:0042326;<br>P:GO:0033673;<br>F:GO:0005515;<br>F:GO:0000287;<br>P:GO:0003084;<br>P:GO:0046777;<br>C:GO:0042598;<br>C:GO:0005737 | - | EC:2.7.11.0 | IPR000719; IPR002290; IPR008271;<br>IPR011009; IPR017442;<br>G3DSA:1.10.510.10 (GENE3D),<br>G3DSA:3.30.200.20 (GENE3D),<br>PTHR13902 (PANTHER),<br>PTHR13902:SF12 (PANTHER), PF12202<br>(PFAM)                                                               |



|                         |                                                               |    |                                                                                                                                                                                                                                           |                                                                                                                    |             |                                                                                                                                                                                                |
|-------------------------|---------------------------------------------------------------|----|-------------------------------------------------------------------------------------------------------------------------------------------------------------------------------------------------------------------------------------------|--------------------------------------------------------------------------------------------------------------------|-------------|------------------------------------------------------------------------------------------------------------------------------------------------------------------------------------------------|
| Brugia malayi           | protein ki-se domain containing protein                       | 14 | F:GO:0030291;<br>P:GO:0007243;<br>F:GO:0004674;<br>C:GO:0005625;<br>F:GO:0019870;<br>F:GO:0005524;<br>P:GO:0042326;<br>P:GO:0033673;<br>F:GO:0005515;<br>F:GO:0000287;<br>P:GO:0003084;<br>P:GO:0046777;<br>C:GO:0042598;<br>C:GO:0005737 | -                                                                                                                  | EC:2.7.11.0 | IPR000719; IPR002290; IPR008271;<br>IPR011009; IPR017442;<br>G3DSA:1.10.510.10 (GENE3D),<br>G3DSA:3.30.200.20 (GENE3D),<br>PTHR13902 (PANTHER),<br>PTHR13902:SF12 (PANTHER), PF12202<br>(PFAM) |
| Brugia malayi           | wd repeat domain 45                                           | 0  |                                                                                                                                                                                                                                           | F:GO:0003674;<br>P:GO:0008150;<br>C:GO:0005575                                                                     | -           | -                                                                                                                                                                                              |
|                         | -                                                             | 0  |                                                                                                                                                                                                                                           |                                                                                                                    | -           | -                                                                                                                                                                                              |
| Loa loa                 | brca1 associated protein                                      | 10 | P:GO:0007265;<br>P:GO:0009968;<br>P:GO:0000165;<br>F:GO:0046872;<br>F:GO:0042802;<br>F:GO:0008139;<br>F:GO:0004842;<br>F:GO:0000166;<br>C:GO:0000151;<br>C:GO:0005737                                                                     | -                                                                                                                  | EC:6.3.2.19 | IPR001607; IPR001841; IPR011422;<br>IPR013083; IPR018957; PTHR10420<br>(PANTHER), PTHR10420:SF8<br>(PANTHER), SignalP (SIGNALP),<br>SSF57850 (SUPERFAMILY)                                     |
| Caenorhabditis elegans  | vacuolar protein sorting 13d                                  | 3  | P:GO:0040010;<br>P:GO:0002119;<br>P:GO:0040011                                                                                                                                                                                            | -                                                                                                                  |             | IPR009543; PTHR16166 (PANTHER),<br>PTHR16166:SF24 (PANTHER)                                                                                                                                    |
| Caenorhabditis briggsae | peptidase s9 prolyl oligopeptidase active site domain protein | 1  | F:GO:0016787                                                                                                                                                                                                                              | -                                                                                                                  |             | IPR011042; SignalP (SIGNALP)                                                                                                                                                                   |
| Caenorhabditis briggsae | d--directed r- beta subunit family protein                    | 9  | P:GO:0040035;<br>P:GO:0009792;<br>P:GO:0002119;<br>F:GO:0003899;<br>F:GO:0003677;<br>P:GO:0006350;<br>F:GO:0032549;<br>P:GO:0040007;<br>C:GO:0005634                                                                                      | -                                                                                                                  | EC:2.7.7.6  | IPR009674; IPR015712;<br>PTHR20856:SF5 (PANTHER)                                                                                                                                               |
| Loa loa                 | wd repeat domain 22                                           | 1  | C:GO:0080008                                                                                                                                                                                                                              | -                                                                                                                  |             | IPR001680; IPR011046; IPR015943;<br>IPR017986; IPR019781; IPR019782;<br>PTHR15574 (PANTHER),<br>PTHR15574:SF3 (PANTHER)                                                                        |
| Caenorhabditis elegans  | phosphoacetylglucosamine mutase                               | 4  | P:GO:0009792;<br>F:GO:0046872;<br>P:GO:0005975;<br>F:GO:0016868                                                                                                                                                                           | -                                                                                                                  | EC:5.4.2.0  | IPR005843; G3DSA:3.30.310.50<br>(GENE3D), PTHR22573 (PANTHER),<br>PTHR22573:SF3 (PANTHER), SSF55957<br>(SUPERFAMILY)                                                                           |
| Brugia malayi           | tetratricopeptide repeat protein 5                            | 0  |                                                                                                                                                                                                                                           | F:GO:0003674;<br>F:GO:0005488;<br>P:GO:0006281;<br>C:GO:0005737;<br>P:GO:0008150;<br>C:GO:0005575;<br>C:GO:0005634 |             | IPR008940; IPR011990; IPR013026;<br>IPR019734; PTHR23083 (PANTHER),<br>PTHR23083:SF8 (PANTHER), SSF48452<br>(SUPERFAMILY)                                                                      |

|                         |                                                                |   |                                                                                                                                     |                                                                                                                                                      |            |                                                                   |
|-------------------------|----------------------------------------------------------------|---|-------------------------------------------------------------------------------------------------------------------------------------|------------------------------------------------------------------------------------------------------------------------------------------------------|------------|-------------------------------------------------------------------|
| Caenorhabditis briggsae | golgi phosphoprotein 3                                         |   | P:GO:0009792;<br>3 P:GO:0008340;<br>P:GO:0010171                                                                                    | -                                                                                                                                                    |            | -                                                                 |
| Brugia malayi           | dep domain containing 1                                        | 0 |                                                                                                                                     | P:GO:0023034;<br>F:GO:0003674;<br>P:GO:0050790;<br>P:GO:0007165;<br>C:GO:0005575;<br>C:GO:0005622;<br>F:GO:0005515;<br>F:GO:0005096;<br>P:GO:0008150 |            | IPR000591; IPR011991; PTHR16206 (PANTHER), SSF46785 (SUPERFAMILY) |
| Caenorhabditis elegans  | elegans protein confirmed by transcript evidence               |   | P:GO:0045132;<br>3 P:GO:0010171;<br>F:GO:0005515                                                                                    | -                                                                                                                                                    |            | -                                                                 |
| Caenorhabditis briggsae | ribosomal protein l21                                          | 8 | P:GO:0009792;<br>P:GO:0002119;<br>C:GO:0005840;<br>F:GO:0003735;<br>F:GO:0005515;<br>P:GO:0000003;<br>P:GO:0040007;<br>P:GO:0006412 | -                                                                                                                                                    | EC:3.6.5.3 | IPR001147; IPR008991; IPR018259; G3DSA:2.30.30.70 (GENE3D)        |
| Caenorhabditis briggsae | ribosomal protein l21                                          | 8 | P:GO:0009792;<br>P:GO:0002119;<br>C:GO:0005840;<br>F:GO:0003735;<br>F:GO:0005515;<br>P:GO:0000003;<br>P:GO:0040007;<br>P:GO:0006412 | -                                                                                                                                                    | EC:3.6.5.3 | IPR001147; IPR008991; IPR018259; G3DSA:2.30.30.70 (GENE3D)        |
|                         | -                                                              | 0 |                                                                                                                                     |                                                                                                                                                      |            | -                                                                 |
|                         | -                                                              | 0 |                                                                                                                                     |                                                                                                                                                      |            | -                                                                 |
| Caenorhabditis briggsae | Hypothetical protein CBG22497 [Caenorhabditis briggsae]        | 0 |                                                                                                                                     | P:GO:0055114;<br>F:GO:0005488;<br>F:GO:0016491                                                                                                       |            | PTHR12596 (PANTHER), PTHR12596:SF3 (PANTHER)                      |
| Caenorhabditis briggsae | Hypothetical protein CBG22497 [Caenorhabditis briggsae]        | 0 |                                                                                                                                     | P:GO:0055114;<br>F:GO:0005488;<br>F:GO:0016491                                                                                                       |            | PTHR12596 (PANTHER), PTHR12596:SF3 (PANTHER)                      |
| Caenorhabditis elegans  | helicase conserved c-term-l domain containing protein          | 3 | F:GO:0005488;<br>P:GO:0008152;<br>F:GO:0016787                                                                                      | -                                                                                                                                                    |            | -                                                                 |
|                         | -                                                              | 0 |                                                                                                                                     |                                                                                                                                                      |            | -                                                                 |
| Caenorhabditis elegans  | zn-finger in ran binding protein and others containing protein | 5 | P:GO:0021954;<br>F:GO:0003676;<br>C:GO:0005622;<br>F:GO:0000166;<br>F:GO:0008270                                                    | -                                                                                                                                                    |            | -                                                                 |
| Caenorhabditis elegans  | zn-finger in ran binding protein and others containing protein | 5 | P:GO:0021954;<br>F:GO:0003676;<br>C:GO:0005622;<br>F:GO:0000166;<br>F:GO:0008270                                                    | -                                                                                                                                                    |            | -                                                                 |

|                             |                                                            |   |                                                                                                   |                                                                                                                                                                                                                                                                                                               |            |                                                                                          |
|-----------------------------|------------------------------------------------------------|---|---------------------------------------------------------------------------------------------------|---------------------------------------------------------------------------------------------------------------------------------------------------------------------------------------------------------------------------------------------------------------------------------------------------------------|------------|------------------------------------------------------------------------------------------|
| Caenorhabditis briggsae     | protein ki-se domain containing protein                    | 0 |                                                                                                   | F:GO:0004674;<br>F:GO:0004672;<br>P:GO:0006468;<br>F:GO:0000166;<br>F:GO:0005524;<br>F:GO:0016301;<br>P:GO:0000154;<br>F:GO:0000179;<br>F:GO:0008649                                                                                                                                                          |            | IPR018628                                                                                |
| Caenorhabditis briggsae     | protein ki-se domain containing protein                    | 0 |                                                                                                   | F:GO:0004674;<br>F:GO:0004672;<br>P:GO:0006468;<br>F:GO:0000166;<br>F:GO:0005524;<br>F:GO:0016301;<br>P:GO:0000154;<br>F:GO:0000179;<br>F:GO:0008649                                                                                                                                                          |            | IPR018628                                                                                |
| Caenorhabditis briggsae     | protein ki-se domain containing protein                    | 0 |                                                                                                   | F:GO:0004674;<br>F:GO:0004672;<br>P:GO:0006468;<br>F:GO:0000166;<br>F:GO:0005524;<br>F:GO:0016301;<br>P:GO:0000154;<br>F:GO:0000179;<br>F:GO:0008649                                                                                                                                                          |            | IPR018628                                                                                |
| Ixodes scapularis           | ecm 18                                                     | 0 |                                                                                                   | F:GO:0005529;<br>F:GO:0003674;<br>C:GO:0016021;<br>P:GO:0007155;<br>C:GO:0016020;<br>F:GO:0008233;<br>C:GO:0005615;<br>F:GO:0005509;<br>F:GO:0004872;<br>P:GO:0008150;<br>F:GO:0005488;<br>P:GO:0055114;<br>F:GO:0047712;<br>F:GO:0005515;<br>C:GO:0005886;<br>C:GO:0005576;<br>F:GO:0016491;<br>C:GO:0005575 |            | IPR002919; G3DSA:2.10.25.10<br>(GENE3D), SignalP (SIGNALP)                               |
| Caenorhabditis briggsae     | elegans protein partially confirmed by transcript evidence | 0 |                                                                                                   | F:GO:0016301;<br>F:GO:0005488;<br>F:GO:0005515                                                                                                                                                                                                                                                                |            | IPR001478; G3DSA:2.30.42.10<br>(GENE3D), PTHR10316 (PANTHER),<br>PTHR10316:SF7 (PANTHER) |
| Caenorhabditis briggsae     | amp deami-se                                               | 6 | P:GO:0002119;<br>P:GO:0006144;<br>F:GO:0003876;<br>P:GO:0009168;<br>P:GO:0040010;<br>P:GO:0040011 | -                                                                                                                                                                                                                                                                                                             | EC:3.5.4.6 | -                                                                                        |
| Angiostrongylus cantonensis | ribosomal protein l19                                      | 4 | P:GO:0000022;<br>F:GO:0003735;<br>C:GO:0022625;<br>P:GO:0006412                                   | -                                                                                                                                                                                                                                                                                                             | EC:3.6.5.3 | SignalP (SIGNALP)                                                                        |

|                        |                                                                                                                                                                                      |   |                                                                                                                                     |                                                                 |                                                                                                                         |
|------------------------|--------------------------------------------------------------------------------------------------------------------------------------------------------------------------------------|---|-------------------------------------------------------------------------------------------------------------------------------------|-----------------------------------------------------------------|-------------------------------------------------------------------------------------------------------------------------|
| Caenorhabditis elegans | suppressor of lineage defect family member (sli-1)                                                                                                                                   | 5 | P:GO:0007166;<br>F:GO:0004871;<br>C:GO:0005634;<br>F:GO:0005509;<br>F:GO:0005515                                                    | -                                                               | -                                                                                                                       |
| Caenorhabditis elegans | atp-dependent r- helicase ddx51                                                                                                                                                      | 6 | P:GO:0002119;<br>F:GO:0005488;<br>P:GO:0040010;<br>F:GO:0016787;<br>P:GO:0008340;<br>P:GO:0006898                                   | -                                                               | IPR001650; G3DSA:3.40.50.300 (GENE3D), PTHR10967 (PANTHER), PTHR10967:SF34 (PANTHER), SSF52540 (SUPERFAMILY)            |
| Loa loa                | extra sexcombs                                                                                                                                                                       | 8 | P:GO:0048666;<br>P:GO:0016458;<br>F:GO:0042054;<br>P:GO:0006355;<br>P:GO:0016571;<br>C:GO:0044428;<br>F:GO:0005488;<br>P:GO:0040029 | -                                                               | IPR001680; IPR011046; IPR015943; IPR017986; IPR019781; IPR019782; IPR020472; PTHR10253 (PANTHER), SignalP (SIGNALP)     |
| Caenorhabditis elegans | elegans protein confirmed by transcript evidence                                                                                                                                     | 2 | C:GO:0016020;<br>P:GO:0006810                                                                                                       | -                                                               | SignalP (SIGNALP)                                                                                                       |
| -                      | -                                                                                                                                                                                    | 0 |                                                                                                                                     |                                                                 | -                                                                                                                       |
| -                      | -                                                                                                                                                                                    | 0 |                                                                                                                                     |                                                                 | -                                                                                                                       |
| Caenorhabditis elegans | elegans protein confirmed by transcript evidence                                                                                                                                     | 0 |                                                                                                                                     |                                                                 | PTHR21095 (PANTHER)                                                                                                     |
| Brugia malayi          | rhodanese-like domain containing protein                                                                                                                                             | 0 |                                                                                                                                     | P:GO:0000087;<br>P:GO:0006470;<br>F:GO:0004725;<br>C:GO:0005622 | IPR000751                                                                                                               |
| Brugia malayi          | rhodanese-like domain containing protein                                                                                                                                             | 0 |                                                                                                                                     | P:GO:0000087;<br>P:GO:0006470;<br>F:GO:0004725;<br>C:GO:0005622 | IPR000751; PTHR10828:SF14 (PANTHER)                                                                                     |
| Caenorhabditis elegans | elegans protein partially confirmed by transcript evidence                                                                                                                           | 0 |                                                                                                                                     | C:GO:0016021;<br>C:GO:0016020;<br>F:GO:0008375                  | IPR003406; PTHR19297:SF3 (PANTHER), SignalP (SIGNALP)                                                                   |
| Caenorhabditis elegans | elegans protein partially confirmed by transcript evidence                                                                                                                           | 4 | F:GO:0046872;<br>F:GO:0008233;<br>P:GO:0000003;<br>P:GO:0007413                                                                     | -                                                               | IPR001506; G3DSA:3.40.390.10 (GENE3D), PTHR10127 (PANTHER), PTHR10127:SF73 (PANTHER), SSF55486 (SUPERFAMILY)            |
| Caenorhabditis elegans | elegans protein partially confirmed by transcript evidence                                                                                                                           | 2 | F:GO:0008233;<br>P:GO:0007413                                                                                                       | -                                                               | IPR001506; IPR006026; G3DSA:3.40.390.10 (GENE3D), PTHR10127 (PANTHER), PTHR10127:SF73 (PANTHER), SSF55486 (SUPERFAMILY) |
| Caenorhabditis elegans | elegans protein partially confirmed by transcript evidence                                                                                                                           | 4 | F:GO:0046872;<br>F:GO:0008233;<br>P:GO:0000003;<br>P:GO:0007413                                                                     | -                                                               | IPR001506; G3DSA:3.40.390.10 (GENE3D), PTHR10127 (PANTHER), PTHR10127:SF73 (PANTHER), SSF55486 (SUPERFAMILY)            |
| Caenorhabditis elegans | elegans protein partially confirmed by transcript evidence                                                                                                                           | 4 | F:GO:0046872;<br>F:GO:0008233;<br>P:GO:0000003;<br>P:GO:0007413                                                                     | -                                                               | IPR001506; G3DSA:3.40.390.10 (GENE3D), PTHR10127 (PANTHER), PTHR10127:SF73 (PANTHER), SSF55486 (SUPERFAMILY)            |
| Caenorhabditis elegans | a chain crystal spectroscopic and catalytic properties of cobalt copper nickel and mercury derivatives of the zinc endopeptidase a correlation of structure and proteolytic activity | 4 | F:GO:0046872;<br>F:GO:0008233;<br>P:GO:0000003;<br>P:GO:0007413                                                                     | -                                                               | IPR001506; IPR006026; G3DSA:3.40.390.10 (GENE3D), PTHR10127 (PANTHER), PTHR10127:SF73 (PANTHER), SSF55486 (SUPERFAMILY) |

|                         |                                                                                                                                                                                      |    |                                                                                                                                                                                                         |   |                                                         |                                                                                                                                                                                                                      |
|-------------------------|--------------------------------------------------------------------------------------------------------------------------------------------------------------------------------------|----|---------------------------------------------------------------------------------------------------------------------------------------------------------------------------------------------------------|---|---------------------------------------------------------|----------------------------------------------------------------------------------------------------------------------------------------------------------------------------------------------------------------------|
| Caenorhabditis elegans  | a chain crystal spectroscopic and catalytic properties of cobalt copper nickel and mercury derivatives of the zinc endopeptidase a correlation of structure and proteolytic activity | 4  | F:GO:0046872;<br>F:GO:0008233;<br>P:GO:0000003;<br>P:GO:0007413                                                                                                                                         | - |                                                         | IPR001506; IPR006026;<br>G3DSA:3.40.390.10 (GENE3D),<br>PTHR10127 (PANTHER),<br>PTHR10127:SF73 (PANTHER),<br>SSF55486 (SUPERFAMILY)                                                                                  |
| Caenorhabditis elegans  | thiosulfate sulfurtransferase                                                                                                                                                        | 2  | C:GO:0016020;<br>C:GO:0005739                                                                                                                                                                           | - |                                                         | IPR001763; PTHR11364 (PANTHER)                                                                                                                                                                                       |
| Caenorhabditis elegans  | phosphorylated adaptor for r-                                                                                                                                                        | 3  | P:GO:0009987;<br>C:GO:0005654;<br>C:GO:0005737                                                                                                                                                          | - |                                                         | -                                                                                                                                                                                                                    |
| Caenorhabditis elegans  | phosphorylated adaptor for r-                                                                                                                                                        | 3  | P:GO:0009987;<br>C:GO:0005654;<br>C:GO:0005737                                                                                                                                                          | - |                                                         | -                                                                                                                                                                                                                    |
| Caenorhabditis elegans  | claspin homolog (xenopus laevis)                                                                                                                                                     | 1  | P:GO:0009987                                                                                                                                                                                            | - |                                                         | PTHR14396 (PANTHER)                                                                                                                                                                                                  |
|                         | -                                                                                                                                                                                    | 0  |                                                                                                                                                                                                         |   |                                                         | -                                                                                                                                                                                                                    |
| Caenorhabditis elegans  | class member 1                                                                                                                                                                       | 5  | F:GO:0046872;<br>P:GO:0044262;<br>P:GO:0032501;<br>F:GO:0015923;<br>C:GO:0016020                                                                                                                        | - |                                                         | IPR000602; IPR011013; IPR011330;<br>IPR011682; IPR013780; IPR015341;<br>G3DSA:1.20.1270.50 (GENE3D),<br>PTHR11607 (PANTHER),<br>PTHR11607:SF4 (PANTHER),<br>SSF88688 (SUPERFAMILY)                                   |
| Caenorhabditis briggsae | elongation factor tu homologue precursor                                                                                                                                             | 12 | F:GO:0003746;<br>P:GO:0008340;<br>C:GO:0005743;<br>P:GO:0040007;<br>P:GO:0000003;<br>C:GO:0042645;<br>P:GO:0006414;<br>P:GO:0002119;<br>F:GO:0005515;<br>F:GO:0003924;<br>P:GO:0009792;<br>F:GO:0005525 | - | EC:3.6.5.1;<br>EC:3.6.5.2;<br>EC:3.6.5.3;<br>EC:3.6.5.4 | IPR000795; IPR004160; IPR004161;<br>IPR004541; IPR005225; IPR009000;<br>IPR009001; G3DSA:2.40.30.10<br>(GENE3D), G3DSA:3.40.50.300<br>(GENE3D), PTHR23115 (PANTHER),<br>SignalP (SIGNALP),<br>SSF52540 (SUPERFAMILY) |
|                         | -                                                                                                                                                                                    | 0  |                                                                                                                                                                                                         |   |                                                         | SignalP (SIGNALP)                                                                                                                                                                                                    |
| Loa loa                 | oxysterol binding 9                                                                                                                                                                  | 1  | P:GO:0006810                                                                                                                                                                                            | - |                                                         | IPR001849; IPR010916; IPR011993;<br>PTHR10219 (PANTHER),<br>PTHR10219:SF3 (PANTHER),<br>SSF50729 (SUPERFAMILY)                                                                                                       |
| Caenorhabditis briggsae | hexosaminidase domain-containing protein                                                                                                                                             | 1  | F:GO:0016798                                                                                                                                                                                            | - |                                                         | IPR013781; IPR015883; IPR017853;<br>PTHR21040 (PANTHER),<br>SignalP (SIGNALP)                                                                                                                                        |
| Caenorhabditis briggsae | glycosyl hydrolase family catalytic domain containing protein                                                                                                                        | 1  | F:GO:0016787                                                                                                                                                                                            | - |                                                         | IPR017853; PTHR21040 (PANTHER),<br>SignalP (SIGNALP)                                                                                                                                                                 |
|                         | -                                                                                                                                                                                    | 0  |                                                                                                                                                                                                         |   |                                                         | -                                                                                                                                                                                                                    |
| Caenorhabditis elegans  | angio-associated migratory cell protein                                                                                                                                              | 5  | P:GO:0009987;<br>P:GO:0000003;<br>P:GO:0002119;<br>C:GO:0044464;<br>P:GO:0040018                                                                                                                        | - |                                                         | -                                                                                                                                                                                                                    |
| Caenorhabditis briggsae | calponin transgelin                                                                                                                                                                  | 2  | P:GO:0002119;<br>P:GO:0040007                                                                                                                                                                           | - |                                                         | -                                                                                                                                                                                                                    |
| Caenorhabditis elegans  | ferritin                                                                                                                                                                             | 5  | F:GO:0042802;<br>P:GO:0006879;<br>F:GO:0008199;<br>P:GO:0040010;<br>P:GO:0006826                                                                                                                        | - |                                                         | -                                                                                                                                                                                                                    |

|                         |                                                   |    |                                                                                                                                                                                                                                                                                                                                                 |   |             |                                                                                                                                          |
|-------------------------|---------------------------------------------------|----|-------------------------------------------------------------------------------------------------------------------------------------------------------------------------------------------------------------------------------------------------------------------------------------------------------------------------------------------------|---|-------------|------------------------------------------------------------------------------------------------------------------------------------------|
| Caenorhabditis elegans  | ferritin                                          | 7  | F:GO:0042802;<br>P:GO:0006879;<br>F:GO:0016491;<br>F:GO:0008199;<br>P:GO:0040010;<br>P:GO:0055114;<br>P:GO:0006826                                                                                                                                                                                                                              | - | -           |                                                                                                                                          |
| Loa loa                 | heavy unconvencion-I myosin family member (hum-2) | 20 | C:GO:0043005;<br>P:GO:0007267;<br>P:GO:0006582;<br>C:GO:0016023;<br>F:GO:0000166;<br>P:GO:0030048;<br>P:GO:0065008;<br>F:GO:0000149;<br>P:GO:0006887;<br>F:GO:0046983;<br>P:GO:0048513;<br>F:GO:0003779;<br>F:GO:0003774;<br>P:GO:0050794;<br>P:GO:0019226;<br>P:GO:0032400;<br>C:GO:0042641;<br>P:GO:0044249;<br>C:GO:0016459;<br>P:GO:0048066 | - |             | IPR002710; PTHR13140 (PANTHER),<br>PTHR13140:SF15 (PANTHER), SignalP<br>(SIGNALP)                                                        |
| Caenorhabditis briggsae | proteasome subunit alpha type 4                   | 9  | P:GO:0051436;<br>P:GO:0051437;<br>F:GO:0042802;<br>F:GO:0004298;<br>P:GO:0031145;<br>C:GO:0019773;<br>P:GO:0044419;<br>C:GO:0005737;<br>C:GO:0005634                                                                                                                                                                                            | - | EC:3.4.25.0 | -                                                                                                                                        |
| Caenorhabditis briggsae | fructose-bisphosphate aldolase                    | 3  | P:GO:0006096;<br>F:GO:0004332;<br>F:GO:0042802                                                                                                                                                                                                                                                                                                  | - | EC:4.1.2.13 | IPR000741; IPR013785; SSF51569<br>(SUPERFAMILY)                                                                                          |
|                         | -                                                 | 0  |                                                                                                                                                                                                                                                                                                                                                 |   |             | SignalP (SIGNALP)                                                                                                                        |
| Caenorhabditis elegans  | protein tyrosine receptor d                       | 8  | P:GO:0008340;<br>P:GO:0000003;<br>P:GO:0018996;<br>P:GO:0002119;<br>F:GO:0005515;<br>P:GO:0040011;<br>P:GO:0006898;<br>P:GO:0009792                                                                                                                                                                                                             | - |             | IPR003961; IPR008957; IPR013783;<br>PR00014 (PRINTS), PTHR10489<br>(PANTHER)                                                             |
| Caenorhabditis elegans  | heat shock 70 kda protein 13 precursor            | 1  | F:GO:0005524                                                                                                                                                                                                                                                                                                                                    | - |             | IPR001023; IPR013126;<br>G3DSA:3.30.30.30 (GENE3D),<br>G3DSA:3.30.420.40 (GENE3D),<br>PTHR19375:SF1 (PANTHER), SSF53067<br>(SUPERFAMILY) |
|                         | -                                                 | 0  |                                                                                                                                                                                                                                                                                                                                                 |   |             | -                                                                                                                                        |
|                         | -                                                 | 0  |                                                                                                                                                                                                                                                                                                                                                 |   |             | IPR011989                                                                                                                                |
|                         | -                                                 | 0  |                                                                                                                                                                                                                                                                                                                                                 |   |             | IPR011989                                                                                                                                |
|                         | -                                                 | 0  |                                                                                                                                                                                                                                                                                                                                                 |   |             | -                                                                                                                                        |
|                         | -                                                 | 0  |                                                                                                                                                                                                                                                                                                                                                 |   |             | IPR011989                                                                                                                                |

|                         |                                                  |    |                                                                                                                                                                                                                                                                                                                                                                                                                                      |   |                             |                                                                                                                                                                                                                                                                            |
|-------------------------|--------------------------------------------------|----|--------------------------------------------------------------------------------------------------------------------------------------------------------------------------------------------------------------------------------------------------------------------------------------------------------------------------------------------------------------------------------------------------------------------------------------|---|-----------------------------|----------------------------------------------------------------------------------------------------------------------------------------------------------------------------------------------------------------------------------------------------------------------------|
|                         | -                                                | 0  |                                                                                                                                                                                                                                                                                                                                                                                                                                      |   |                             | IPR011989                                                                                                                                                                                                                                                                  |
|                         | -                                                | 0  |                                                                                                                                                                                                                                                                                                                                                                                                                                      |   |                             | IPR011989                                                                                                                                                                                                                                                                  |
|                         | -                                                | 0  |                                                                                                                                                                                                                                                                                                                                                                                                                                      |   |                             | IPR011989                                                                                                                                                                                                                                                                  |
|                         | -                                                | 0  |                                                                                                                                                                                                                                                                                                                                                                                                                                      |   |                             | IPR011989                                                                                                                                                                                                                                                                  |
| Carassius auratus       | -                                                | 0  |                                                                                                                                                                                                                                                                                                                                                                                                                                      |   |                             | -                                                                                                                                                                                                                                                                          |
| Caenorhabditis elegans  | elegans protein confirmed by transcript evidence | 12 | P:GO:0009792;<br>P:GO:0010171;<br>P:GO:0002119;<br>P:GO:0040002;<br>P:GO:0040010;<br>P:GO:0008340;<br>P:GO:0040011;<br>C:GO:0005576;<br>P:GO:0019915;<br>P:GO:0006898;<br>F:GO:0042302;<br>P:GO:0002009                                                                                                                                                                                                                              | - |                             | IPR002486; IPR008160; PTHR10499<br>(PANTHER), PTHR10499:SF58<br>(PANTHER)                                                                                                                                                                                                  |
| Caenorhabditis briggsae | d-3-phosphoglycerate dehydroge-se                | 9  | P:GO:0040010;<br>P:GO:0006098;<br>P:GO:0055114;<br>F:GO:0004617;<br>F:GO:0004455;<br>F:GO:0051287;<br>F:GO:0005515;<br>P:GO:0009792;<br>P:GO:0006564                                                                                                                                                                                                                                                                                 | - | EC:1.1.1.95;<br>EC:1.1.1.86 |                                                                                                                                                                                                                                                                            |
|                         | -                                                | 0  |                                                                                                                                                                                                                                                                                                                                                                                                                                      |   |                             | SignalP (SIGNALP)                                                                                                                                                                                                                                                          |
|                         | -                                                | 0  |                                                                                                                                                                                                                                                                                                                                                                                                                                      |   |                             | SignalP (SIGNALP)                                                                                                                                                                                                                                                          |
| Caenorhabditis briggsae | 78 kda glucose-regulated protein precursor       | 25 | C:GO:0005793;<br>P:GO:0051603;<br>P:GO:0043154;<br>P:GO:0030512;<br>P:GO:0021680;<br>C:GO:0030176;<br>P:GO:0021589;<br>C:GO:0005788;<br>P:GO:0031398;<br>C:GO:0008303;<br>C:GO:0042470;<br>F:GO:0043027;<br>F:GO:0043022;<br>P:GO:0006983;<br>C:GO:0005576;<br>P:GO:0006916;<br>C:GO:0009986;<br>P:GO:0006987;<br>P:GO:0040019;<br>F:GO:0051082;<br>P:GO:0042149;<br>F:GO:0051787;<br>C:GO:0048471;<br>C:GO:0005634;<br>F:GO:0005524 | - |                             | IPR001023; IPR013126; IPR018181;<br>G3DSA:1.20.1270.10 (GENE3D),<br>G3DSA:2.60.34.10 (GENE3D),<br>G3DSA:3.30.420.40 (GENE3D),<br>G3DSA:3.90.640.10 (GENE3D),<br>PTHR19375:SF1 (PANTHER),<br>SSF100920 (SUPERFAMILY), SSF100934<br>(SUPERFAMILY), SSF53067<br>(SUPERFAMILY) |

|                         |                                                            |    |                                                                                                                                                                                                                                                                                                                                                                                                                                      |   |            |                                                                                                                                                                                                                                                                            |
|-------------------------|------------------------------------------------------------|----|--------------------------------------------------------------------------------------------------------------------------------------------------------------------------------------------------------------------------------------------------------------------------------------------------------------------------------------------------------------------------------------------------------------------------------------|---|------------|----------------------------------------------------------------------------------------------------------------------------------------------------------------------------------------------------------------------------------------------------------------------------|
| Caenorhabditis briggsae | 78 kda glucose-regulated protein precursor                 | 25 | C:GO:0005793;<br>P:GO:0051603;<br>P:GO:0043154;<br>P:GO:0030512;<br>P:GO:0021680;<br>C:GO:0030176;<br>P:GO:0021589;<br>C:GO:0005788;<br>P:GO:0031398;<br>C:GO:0008303;<br>C:GO:0042470;<br>F:GO:0043027;<br>F:GO:0043022;<br>P:GO:0006983;<br>C:GO:0005576;<br>P:GO:0006916;<br>C:GO:0009986;<br>P:GO:0006987;<br>P:GO:0040019;<br>F:GO:0051082;<br>P:GO:0042149;<br>F:GO:0051787;<br>C:GO:0048471;<br>C:GO:0005634;<br>F:GO:0005524 | - |            | IPR001023; IPR013126; IPR018181;<br>G3DSA:1.20.1270.10 (GENE3D),<br>G3DSA:2.60.34.10 (GENE3D),<br>G3DSA:3.30.420.40 (GENE3D),<br>G3DSA:3.90.640.10 (GENE3D),<br>PTHR19375:SF1 (PANTHER),<br>SSF100920 (SUPERFAMILY), SSF100934<br>(SUPERFAMILY), SSF53067<br>(SUPERFAMILY) |
|                         |                                                            | 0  |                                                                                                                                                                                                                                                                                                                                                                                                                                      |   |            |                                                                                                                                                                                                                                                                            |
| Homo sapiens            | cytochrome c oxidase subunit vb                            | 4  | F:GO:0046872;<br>C:GO:0005743;<br>P:GO:0007585;<br>F:GO:0004129                                                                                                                                                                                                                                                                                                                                                                      | - | EC:1.9.3.1 | IPR002124; IPR020893; SSF57802<br>(SUPERFAMILY)                                                                                                                                                                                                                            |
|                         |                                                            | 0  |                                                                                                                                                                                                                                                                                                                                                                                                                                      |   |            | IPR000276                                                                                                                                                                                                                                                                  |
| Caenorhabditis briggsae | peroxisomal biogenesis factor 12                           | 5  | F:GO:0046872;<br>P:GO:0006625;<br>C:GO:0005778;<br>F:GO:0005515;<br>C:GO:0016021                                                                                                                                                                                                                                                                                                                                                     | - |            | IPR001841; IPR006845; IPR013083;<br>PTHR12888 (PANTHER), SSF57850<br>(SUPERFAMILY)                                                                                                                                                                                         |
| Caenorhabditis elegans  | elegans protein partially confirmed by transcript evidence | 5  | F:GO:0004930;<br>P:GO:0007165;<br>P:GO:0007186;<br>C:GO:0042995;<br>P:GO:0032501                                                                                                                                                                                                                                                                                                                                                     | - |            | IPR000832; IPR001879; IPR017981;<br>IPR017983; PTHR12011 (PANTHER),<br>PTHR12011:SF13 (PANTHER),<br>SSF111418 (SUPERFAMILY)                                                                                                                                                |
| Brugia malayi           | phd-finger family protein                                  | 8  | P:GO:0043967;<br>F:GO:0005515;<br>P:GO:0090304;<br>P:GO:0034645;<br>P:GO:0006915;<br>P:GO:0048523;<br>C:GO:0005634;<br>P:GO:0007049                                                                                                                                                                                                                                                                                                  | - |            | IPR001965; IPR011011; IPR013083;<br>IPR019786; IPR019787; PTHR10333<br>(PANTHER), PTHR10333:SF20<br>(PANTHER)                                                                                                                                                              |
| Caenorhabditis briggsae | small subunit ribosomal protein 14                         | 8  | P:GO:0009792;<br>P:GO:0002119;<br>C:GO:0005840;<br>F:GO:0003735;<br>P:GO:0018996;<br>P:GO:0040010;<br>P:GO:0000003;<br>P:GO:0006412                                                                                                                                                                                                                                                                                                  | - | EC:3.6.5.3 | IPR001971; PTHR11759:SF1<br>(PANTHER), SSF53137 (SUPERFAMILY)                                                                                                                                                                                                              |



|                         |                                                                                                      |    |                                                                                                                                                                                                                                                            |   |            |                                                                                                                                |
|-------------------------|------------------------------------------------------------------------------------------------------|----|------------------------------------------------------------------------------------------------------------------------------------------------------------------------------------------------------------------------------------------------------------|---|------------|--------------------------------------------------------------------------------------------------------------------------------|
| Caenorhabditis briggsae | small subunit ribosomal protein 14                                                                   | 8  | P:GO:0009792;<br>P:GO:0002119;<br>C:GO:0005840;<br>F:GO:0003735;<br>P:GO:0018996;<br>P:GO:0040010;<br>P:GO:0000003;<br>P:GO:0006412                                                                                                                        | - | EC:3.6.5.3 | IPR001971; PTHR11759:SF1 (PANTHER), SSF53137 (SUPERFAMILY)                                                                     |
| Caenorhabditis briggsae | glucose transporter                                                                                  | 3  | P:GO:0040007;<br>P:GO:0006810;<br>P:GO:0002119                                                                                                                                                                                                             | - |            | IPR005828; IPR016196; IPR020846; G3DSA:1.20.1250.20 (GENE3D), PTHR11600 (PANTHER), PTHR11600:SF12 (PANTHER), SignalP (SIGNALP) |
| Caenorhabditis briggsae | dicer-1                                                                                              | 15 | P:GO:0007279;<br>F:GO:0005515;<br>C:GO:0016442;<br>P:GO:0033227;<br>P:GO:0042078;<br>P:GO:0048813;<br>P:GO:0035087;<br>P:GO:0030422;<br>C:GO:0005737;<br>F:GO:0003676;<br>P:GO:0007367;<br>P:GO:0045448;<br>F:GO:0016443;<br>P:GO:0031054;<br>C:GO:0005634 | - |            | IPR003100; PTHR14950 (PANTHER), PTHR14950:SF3 (PANTHER), SSF101690 (SUPERFAMILY)                                               |
| Caenorhabditis elegans  | copb2_caeel ame: full=probable coatomer subunit beta<br>ame: full=beta -coat protein short=beta -cop | 6  | P:GO:0009792;<br>P:GO:0002119;<br>P:GO:0032940;<br>P:GO:0048599;<br>P:GO:0006886;<br>P:GO:0006898                                                                                                                                                          | - |            | PTHR19876 (PANTHER), PTHR19876:SF2 (PANTHER)                                                                                   |
| Caenorhabditis elegans  | copb2_caeel ame: full=probable coatomer subunit beta<br>ame: full=beta -coat protein short=beta -cop | 6  | P:GO:0009792;<br>P:GO:0002119;<br>P:GO:0032940;<br>P:GO:0048599;<br>P:GO:0006886;<br>P:GO:0006898                                                                                                                                                          | - |            | PTHR19876 (PANTHER), PTHR19876:SF2 (PANTHER)                                                                                   |
| Caenorhabditis briggsae | g-protein sig-lling modulator                                                                        | 1  | F:GO:0005515                                                                                                                                                                                                                                               | - |            | IPR003109; PTHR10098 (PANTHER), PTHR10098:SF11 (PANTHER)                                                                       |
| Caenorhabditis elegans  | protein trs85 homolog                                                                                | 6  | P:GO:0009987;<br>P:GO:0000003;<br>P:GO:0032501;<br>P:GO:0045927;<br>P:GO:0040011;<br>P:GO:0009653                                                                                                                                                          | - |            | PTHR12975 (PANTHER)                                                                                                            |
| Caenorhabditis briggsae | proteasome 26s subunit subunit 4 atpase                                                              | 9  | P:GO:0000022;<br>P:GO:0006511;<br>C:GO:0008540;<br>F:GO:0004175;<br>F:GO:0005524;<br>F:GO:0016887;<br>P:GO:0008283;<br>C:GO:0005737;<br>P:GO:0006974                                                                                                       | - |            | -                                                                                                                              |

|                         |                                   |   |                                                                                                                                                      |                               |                                                         |                                                                                                                                                                      |
|-------------------------|-----------------------------------|---|------------------------------------------------------------------------------------------------------------------------------------------------------|-------------------------------|---------------------------------------------------------|----------------------------------------------------------------------------------------------------------------------------------------------------------------------|
| Caenorhabditis elegans  | spliceosome associated            | 3 | F:GO:0005515;<br>F:GO:0003676;<br>F:GO:0000166                                                                                                       | -                             |                                                         | IPR000504; IPR012677; PTHR10432 (PANTHER), PTHR10432:SF51 (PANTHER), SSF54928 (SUPERFAMILY)                                                                          |
| Caenorhabditis briggsae | headcase protein                  | 5 | P:GO:0048519;<br>P:GO:0048666;<br>P:GO:0008152;<br>P:GO:0009653;<br>P:GO:0007424                                                                     | -                             |                                                         | PTHR13425 (PANTHER)                                                                                                                                                  |
| Caenorhabditis briggsae | headcase protein                  | 5 | P:GO:0048519;<br>P:GO:0048666;<br>P:GO:0008152;<br>P:GO:0009653;<br>P:GO:0007424                                                                     | -                             |                                                         | PTHR13425 (PANTHER)                                                                                                                                                  |
|                         | -                                 | 0 |                                                                                                                                                      |                               |                                                         | IPR013169                                                                                                                                                            |
| Brugia malayi           | prolyl endopeptidase              | 8 | F:GO:0046872;<br>F:GO:0004252;<br>F:GO:0042277;<br>P:GO:0006508;<br>C:GO:0005634;<br>C:GO:0005829;<br>F:GO:0008237;<br>C:GO:0005739                  | -                             | EC:3.4.21.0                                             | IPR001375; IPR002470; IPR002471; G3DSA:3.40.50.1820 (GENE3D), PTHR11757:SF2 (PANTHER), SSF53474 (SUPERFAMILY)                                                        |
|                         | -                                 | 0 |                                                                                                                                                      |                               |                                                         | IPR001357; G3DSA:3.40.50.10190 (GENE3D)                                                                                                                              |
| Caenorhabditis briggsae | g-patch domain containing protein | 0 |                                                                                                                                                      | F:GO:0003676;<br>C:GO:0005622 |                                                         | IPR000467                                                                                                                                                            |
| Caenorhabditis elegans  | briggsae cbr-jph-1 protein        | 0 |                                                                                                                                                      |                               |                                                         | -                                                                                                                                                                    |
| Caenorhabditis elegans  | briggsae cbr-jph-1 protein        | 0 |                                                                                                                                                      |                               |                                                         | -                                                                                                                                                                    |
| Caenorhabditis elegans  | ubiquitin specific protease 32    | 5 | P:GO:0009792;<br>P:GO:0006511;<br>F:GO:0005509;<br>F:GO:0004221;<br>C:GO:0044464                                                                     | -                             | EC:3.1.2.15                                             | IPR001394; PTHR10420 (PANTHER), PTHR10420:SF68 (PANTHER), SSF54001 (SUPERFAMILY)                                                                                     |
| Caenorhabditis elegans  | ubiquitin specific protease 32    | 5 | P:GO:0009792;<br>P:GO:0006511;<br>F:GO:0005509;<br>F:GO:0004221;<br>C:GO:0044464                                                                     | -                             | EC:3.1.2.15                                             | IPR001394; PTHR10420 (PANTHER), PTHR10420:SF68 (PANTHER), SSF54001 (SUPERFAMILY)                                                                                     |
| Caenorhabditis briggsae | transthyretin-like family protein | 0 |                                                                                                                                                      |                               |                                                         | -                                                                                                                                                                    |
|                         | -                                 | 0 |                                                                                                                                                      |                               |                                                         | -                                                                                                                                                                    |
| Caenorhabditis elegans  | ribosomal small subunit           | 9 | P:GO:0040035;<br>P:GO:0009792;<br>P:GO:0002119;<br>F:GO:0003735;<br>P:GO:0018996;<br>C:GO:0015935;<br>P:GO:0008340;<br>P:GO:0040007;<br>P:GO:0006412 | -                             | EC:3.6.5.3                                              | IPR005680; IPR006032; IPR012340; IPR016027                                                                                                                           |
| Caenorhabditis elegans  | elongation factor tu (ef-tu)      | 8 | P:GO:0009792;<br>F:GO:0003746;<br>F:GO:0005525;<br>C:GO:0005622;<br>P:GO:0040010;<br>P:GO:0000003;<br>P:GO:0006414;<br>F:GO:0003924                  | -                             | EC:3.6.5.1;<br>EC:3.6.5.2;<br>EC:3.6.5.3;<br>EC:3.6.5.4 | IPR000795; IPR004160; IPR004161; IPR004541; IPR009000; IPR009001; G3DSA:2.40.30.10 (GENE3D), G3DSA:3.40.50.300 (GENE3D), PTHR23115 (PANTHER), SSF52540 (SUPERFAMILY) |

|                         |                                                  |    |                                                                                                                                                                                                                                                                                              |   |             |                                                                                                                                                            |
|-------------------------|--------------------------------------------------|----|----------------------------------------------------------------------------------------------------------------------------------------------------------------------------------------------------------------------------------------------------------------------------------------------|---|-------------|------------------------------------------------------------------------------------------------------------------------------------------------------------|
| Brugia malayi           | serine threonine-protein ki-se 11                | 17 | F:GO:0030275;<br>P:GO:0060070;<br>P:GO:0051291;<br>P:GO:0007409;<br>P:GO:0033762;<br>P:GO:0016310;<br>C:GO:0005737;<br>P:GO:0030111;<br>F:GO:0004674;<br>C:GO:0043234;<br>P:GO:0060770;<br>P:GO:0051896;<br>F:GO:0032403;<br>P:GO:0033993;<br>C:GO:0005634;<br>P:GO:0045722;<br>P:GO:0001894 | - | EC:2.7.11.0 | IPR000719; IPR002290; IPR008271;<br>IPR011009; IPR015735; IPR017441;<br>IPR017442; IPR020636;<br>G3DSA:1.10.510.10 (GENE3D),<br>G3DSA:3.30.200.20 (GENE3D) |
|                         |                                                  | 0  |                                                                                                                                                                                                                                                                                              |   |             |                                                                                                                                                            |
| Brugia malayi           | serine threonine-protein ki-se 11                | 17 | F:GO:0030275;<br>P:GO:0060070;<br>P:GO:0051291;<br>P:GO:0007409;<br>P:GO:0033762;<br>P:GO:0016310;<br>C:GO:0005737;<br>P:GO:0030111;<br>F:GO:0004674;<br>C:GO:0043234;<br>P:GO:0060770;<br>P:GO:0051896;<br>F:GO:0032403;<br>P:GO:0033993;<br>C:GO:0005634;<br>P:GO:0045722;<br>P:GO:0001894 | - | EC:2.7.11.0 | IPR000719; IPR002290; IPR008271;<br>IPR011009; IPR015735; IPR017441;<br>IPR017442; IPR020636;<br>G3DSA:1.10.510.10 (GENE3D),<br>G3DSA:3.30.200.20 (GENE3D) |
| Caenorhabditis briggsae | ribosomal protein s16                            | 10 | P:GO:0000022;<br>P:GO:0009792;<br>P:GO:0002119;<br>F:GO:0003735;<br>C:GO:0005811;<br>P:GO:0018996;<br>P:GO:0000003;<br>C:GO:0022627;<br>P:GO:0040007;<br>P:GO:0006412                                                                                                                        | - | EC:3.6.5.3  | IPR000754; IPR014721; IPR020568;<br>IPR020574                                                                                                              |
| Caenorhabditis elegans  | i uaiaretic acid resistant family member (ndg-4) | 3  | P:GO:0009792;<br>P:GO:0010171;<br>P:GO:0040010                                                                                                                                                                                                                                               | - |             | PTHR11161 (PANTHER), SignalP (SIGNALP)                                                                                                                     |
| Caenorhabditis elegans  | i uaiaretic acid resistant family member (ndg-4) | 3  | P:GO:0009792;<br>P:GO:0010171;<br>P:GO:0040010                                                                                                                                                                                                                                               | - |             | PTHR11161 (PANTHER), SignalP (SIGNALP)                                                                                                                     |

|                         |                                                           |   |                                                                                                                                                        |   |                                                                                                                                                                                                         |                                                                                                                                                                            |
|-------------------------|-----------------------------------------------------------|---|--------------------------------------------------------------------------------------------------------------------------------------------------------|---|---------------------------------------------------------------------------------------------------------------------------------------------------------------------------------------------------------|----------------------------------------------------------------------------------------------------------------------------------------------------------------------------|
| Caenorhabditis elegans  | rab11 family interacting protein 4 (class ii)             |   | P:GO:0006810;<br>F:GO:0005515;<br>C:GO:0016020;<br>C:GO:0043231;<br>9 P:GO:0044238;<br>P:GO:0050794;<br>C:GO:0044444;<br>P:GO:0044249;<br>P:GO:0007049 | - | -                                                                                                                                                                                                       |                                                                                                                                                                            |
|                         |                                                           | - | 0                                                                                                                                                      |   |                                                                                                                                                                                                         |                                                                                                                                                                            |
| Loa loa                 | briggsae cbr-npp-5 protein                                |   | 0                                                                                                                                                      |   | P:GO:0000003;<br>C:GO:0005643;<br>P:GO:0040010;<br>P:GO:0009792;<br>P:GO:0006810                                                                                                                        | IPR007252                                                                                                                                                                  |
| Caenorhabditis elegans  | patched family protein                                    | 1 | C:GO:0016020                                                                                                                                           | - |                                                                                                                                                                                                         | IPR003392; PTHR10796 (PANTHER),<br>PTHR10796:SF14 (PANTHER)                                                                                                                |
| Caenorhabditis elegans  | granulin                                                  | 1 | C:GO:0044424                                                                                                                                           | - |                                                                                                                                                                                                         | IPR000118; PTHR12274 (PANTHER),<br>SSF57277 (SUPERFAMILY)                                                                                                                  |
|                         |                                                           | - | 0                                                                                                                                                      |   |                                                                                                                                                                                                         |                                                                                                                                                                            |
| Equus caballus          | ribosomal protein l10                                     |   | 6                                                                                                                                                      |   | P:GO:0007283;<br>F:GO:0003735;<br>C:GO:0022625;<br>C:GO:0005634;<br>C:GO:0005783;<br>P:GO:0006414                                                                                                       | IPR001197; IPR016180; IPR018255;<br>G3DSA:3.90.1170.10 (GENE3D)                                                                                                            |
| Caenorhabditis briggsae | adam 10                                                   |   | 12                                                                                                                                                     |   | F:GO:0008270;<br>P:GO:0008347;<br>P:GO:0003007;<br>P:GO:0007298;<br>F:GO:0004222;<br>P:GO:0006508;<br>P:GO:0006911;<br>P:GO:0048542;<br>P:GO:0007519;<br>P:GO:0007220;<br>P:GO:0007166;<br>P:GO:0007513 | EC:3.4.24.0<br>IPR001590; IPR001762;<br>G3DSA:3.40.390.10 (GENE3D),<br>PTHR11905 (PANTHER),<br>PTHR11905:SF4 (PANTHER), SSF55486<br>(SUPERFAMILY)                          |
| Caenorhabditis briggsae | phosphatidylinositol transfer membrane-associated 1       |   | 11                                                                                                                                                     |   | P:GO:0006810;<br>P:GO:0007602;<br>F:GO:0005548;<br>P:GO:0016056;<br>F:GO:0046872;<br>P:GO:0007601;<br>C:GO:0044425;<br>P:GO:0006629;<br>C:GO:0044446;<br>C:GO:0005783;<br>C:GO:0005886                  | IPR001666; IPR004177;<br>PTHR10658:SF6 (PANTHER)                                                                                                                           |
|                         |                                                           | - | 0                                                                                                                                                      |   |                                                                                                                                                                                                         |                                                                                                                                                                            |
| Brugia malayi           | laminin subunit beta-1                                    |   | 5                                                                                                                                                      |   | P:GO:0000003;<br>P:GO:0010171;<br>P:GO:0040010;<br>F:GO:0005515;<br>P:GO:0040011                                                                                                                        | IPR002049; IPR013032; PD968187<br>(PRODOM), PRO0011 (PRINTS),<br>G3DSA:2.10.25.10 (GENE3D),<br>PTHR10574 (PANTHER),<br>PTHR10574:SF36 (PANTHER),<br>SSF57196 (SUPERFAMILY) |
| Caenorhabditis elegans  | transmembrane emp24 protein transport domain containing 5 | 1 | C:GO:0044444                                                                                                                                           | - |                                                                                                                                                                                                         | IPR000348; IPR015717; PTHR22811<br>(PANTHER), SignalP (SIGNALP)                                                                                                            |

|                         |                                                           |    |                                                                                                                                                                                                                                                                             |              |                             |                                                                                                                                                    |
|-------------------------|-----------------------------------------------------------|----|-----------------------------------------------------------------------------------------------------------------------------------------------------------------------------------------------------------------------------------------------------------------------------|--------------|-----------------------------|----------------------------------------------------------------------------------------------------------------------------------------------------|
| Caenorhabditis elegans  | transmembrane emp24 protein transport domain containing 5 | 1  | C:GO:0044444                                                                                                                                                                                                                                                                | -            |                             | IPR000348; IPR015717; PTHR22811 (PANTHER), SignalP (SIGNALP)                                                                                       |
| Tribolium castaneum     | wd40 protein                                              | 2  | F:GO:0016740;<br>P:GO:0051013                                                                                                                                                                                                                                               | -            |                             | IPR001680; IPR011046; IPR015943; IPR017986; IPR019781; IPR019782; PTHR19861 (PANTHER), SignalP (SIGNALP)                                           |
| Caenorhabditis briggsae | sy-ptic glycoprotein sc2                                  | 4  | C:GO:0005737;<br>P:GO:0006629;<br>F:GO:0016627;<br>C:GO:0016021                                                                                                                                                                                                             | -            |                             | IPR001104; IPR019955; G3DSA:3.10.20.90 (GENE3D), PTHR10556 (PANTHER), PTHR10556:SF16 (PANTHER)                                                     |
| Caenorhabditis briggsae | transducin -like 2                                        | 1  | F:GO:0005515                                                                                                                                                                                                                                                                | -            |                             | PSS1257 (PROFILE), SignalP (SIGNALP)                                                                                                               |
| Caenorhabditis elegans  | in family member (-b-1)                                   | 0  |                                                                                                                                                                                                                                                                             | F:GO:0005515 |                             | -                                                                                                                                                  |
| Caenorhabditis elegans  | protein-tyrosine phosphatase containing protein           | 3  | F:GO:0016791;<br>P:GO:0009792;<br>P:GO:0000003                                                                                                                                                                                                                              | -            | EC:3.1.3.0                  | IPR000242; IPR000387; IPR016130; G3DSA:3.90.190.10 (GENE3D), PTHR19134 (PANTHER), PTHR19134:SF26 (PANTHER), SSF52799 (SUPERFAMILY)                 |
| Nematostella vectensis  | protein                                                   | 0  |                                                                                                                                                                                                                                                                             | F:GO:0016787 |                             | -                                                                                                                                                  |
| Loa loa                 | elegans protein confirmed by transcript evidence          | 0  |                                                                                                                                                                                                                                                                             |              |                             | -                                                                                                                                                  |
| Caenorhabditis elegans  | receptor tyrosine ki-se-like orphan receptor 1            | 16 | P:GO:0016477;<br>P:GO:0007411;<br>C:GO:0030424;<br>C:GO:0032809;<br>F:GO:0004674;<br>C:GO:0030425;<br>P:GO:0005975;<br>P:GO:0040035;<br>P:GO:0007169;<br>F:GO:0005524;<br>C:GO:0031594;<br>F:GO:0005515;<br>F:GO:0004714;<br>C:GO:0005887;<br>P:GO:0006468;<br>P:GO:0045200 | -            | EC:2.7.11.0;<br>EC:2.7.10.1 | IPR000001; IPR003598; IPR007110; IPR013098; IPR013783; IPR013806; IPR020067; PTHR10489 (PANTHER), PTHR10489:SF20 (PANTHER), SSF48726 (SUPERFAMILY) |
| Caenorhabditis elegans  | nuclear pore complex protein family member (npp-21)       | 4  | P:GO:0040015;<br>P:GO:0000003;<br>P:GO:0002119;<br>P:GO:0040011                                                                                                                                                                                                             | -            |                             | -                                                                                                                                                  |
|                         |                                                           | 0  |                                                                                                                                                                                                                                                                             |              |                             | -                                                                                                                                                  |
| Caenorhabditis elegans  | death-associated protein                                  | 0  |                                                                                                                                                                                                                                                                             |              |                             | PTHR13177 (PANTHER)                                                                                                                                |
| Caenorhabditis briggsae | sb:cb283 protein                                          | 3  | C:GO:0005622;<br>P:GO:0006508;<br>F:GO:0004177                                                                                                                                                                                                                              | -            | EC:3.4.11.0                 | IPR000819; IPR011356; G3DSA:3.40.630.10 (GENE3D), PTHR11963 (PANTHER), PTHR11963:SF2 (PANTHER), SSF53187 (SUPERFAMILY)                             |
| Caenorhabditis briggsae | sb:cb283 protein                                          | 3  | C:GO:0005622;<br>P:GO:0006508;<br>F:GO:0004177                                                                                                                                                                                                                              | -            | EC:3.4.11.0                 | IPR000819; IPR011356; G3DSA:3.40.630.10 (GENE3D), PTHR11963 (PANTHER), PTHR11963:SF2 (PANTHER), SSF53187 (SUPERFAMILY)                             |
| Caenorhabditis elegans  | coiled-coil domain-containing protein 51                  | 1  | C:GO:0044464                                                                                                                                                                                                                                                                | -            |                             | -                                                                                                                                                  |
| Caenorhabditis elegans  | coiled-coil domain-containing protein 51                  | 1  | C:GO:0044464                                                                                                                                                                                                                                                                | -            |                             | -                                                                                                                                                  |
|                         |                                                           |    |                                                                                                                                                                                                                                                                             |              |                             | IPR007110; IPR013098; IPR013783; PTHR19897 (PANTHER), SSF48726 (SUPERFAMILY)                                                                       |

|                         |                                             |    |                                                                                                                                                                                                                                                            |                                                                                  |             |                                                                                                                                                                                   |
|-------------------------|---------------------------------------------|----|------------------------------------------------------------------------------------------------------------------------------------------------------------------------------------------------------------------------------------------------------------|----------------------------------------------------------------------------------|-------------|-----------------------------------------------------------------------------------------------------------------------------------------------------------------------------------|
|                         |                                             |    |                                                                                                                                                                                                                                                            |                                                                                  |             | IPR007110; IPR013098; IPR013783;<br>PTHR19897 (PANTHER), SSF48726<br>(SUPERFAMILY)                                                                                                |
| Brugia malayi           | uridine-cytidine ki-se 2                    | 8  | C:GO:0005792;<br>P:GO:0007631;<br>P:GO:0016579;<br>P:GO:0071453;<br>P:GO:0048678;<br>F:GO:0016301;<br>C:GO:0005829;<br>F:GO:0000166                                                                                                                        | -                                                                                |             | -                                                                                                                                                                                 |
| Caenorhabditis elegans  | cytochrome c1                               | 10 | P:GO:0040035;<br>P:GO:0009792;<br>P:GO:0002119;<br>F:GO:0009055;<br>P:GO:0018991;<br>F:GO:0020037;<br>P:GO:0040010;<br>P:GO:0008340;<br>P:GO:0040019;<br>C:GO:0016021                                                                                      | -                                                                                |             | IPR002326; IPR009056; IPR021157                                                                                                                                                   |
| Caenorhabditis briggsae | fructose-bisphosphate aldolase c            | 3  | P:GO:0006096;<br>F:GO:0004332;<br>F:GO:0042802                                                                                                                                                                                                             | -                                                                                | EC:4.1.2.13 | IPR000741; IPR013785; SSF51569<br>(SUPERFAMILY)                                                                                                                                   |
| Brugia malayi           | ubiquitin specific                          | 2  | F:GO:0016787;<br>P:GO:0000289                                                                                                                                                                                                                              | -                                                                                |             | PTHR15728 (PANTHER)                                                                                                                                                               |
|                         | -                                           | 0  |                                                                                                                                                                                                                                                            |                                                                                  |             | -                                                                                                                                                                                 |
| Caenorhabditis elegans  | mitochondrial ribosomal                     | 4  | P:GO:0009792;<br>P:GO:0002119;<br>F:GO:0005515;<br>P:GO:0040010                                                                                                                                                                                            | -                                                                                |             | PTHR12899 (PANTHER), SSF53137<br>(SUPERFAMILY)                                                                                                                                    |
|                         | -                                           | 0  |                                                                                                                                                                                                                                                            |                                                                                  |             | SignalP (SIGNALP)                                                                                                                                                                 |
| Caenorhabditis briggsae | formin-like 3 isoform 1                     | 0  |                                                                                                                                                                                                                                                            | F:GO:0005488;<br>F:GO:0003779;<br>P:GO:0016043;<br>C:GO:0015629;<br>P:GO:0030036 |             | IPR010472; IPR010473; IPR014768;<br>IPR016024; PTHR23213 (PANTHER),<br>PTHR23213:SF24 (PANTHER)                                                                                   |
|                         | -                                           | 0  |                                                                                                                                                                                                                                                            |                                                                                  |             | -                                                                                                                                                                                 |
| Caenorhabditis elegans  | briggsae cbr-bre-3 protein                  | 15 | P:GO:0007411;<br>P:GO:0075015;<br>P:GO:0016325;<br>P:GO:0033227;<br>P:GO:0045165;<br>P:GO:0001744;<br>C:GO:0005737;<br>P:GO:0046662;<br>P:GO:0007299;<br>P:GO:0006688;<br>P:GO:0042248;<br>P:GO:0030720;<br>C:GO:0005887;<br>P:GO:0045434;<br>F:GO:0019187 | -                                                                                |             | PTHR16779 (PANTHER), SignalP<br>(SIGNALP), SSF53448 (SUPERFAMILY)                                                                                                                 |
| Caenorhabditis elegans  | sensory axon guidance family member (sax-7) | 5  | P:GO:0048812;<br>P:GO:0065008;<br>P:GO:0048513;<br>P:GO:0048667;<br>C:GO:0044459                                                                                                                                                                           | -                                                                                |             | IPR003598; IPR003599; IPR003961;<br>IPR007110; IPR008957; IPR013098;<br>IPR013783; PTHR10489 (PANTHER),<br>PTHR10489:SF39 (PANTHER), SignalP<br>(SIGNALP), SSF48726 (SUPERFAMILY) |

|                           |                                                                |    |                                                                                                                                                                                        |                                                                 |                                                                                                                                                                |
|---------------------------|----------------------------------------------------------------|----|----------------------------------------------------------------------------------------------------------------------------------------------------------------------------------------|-----------------------------------------------------------------|----------------------------------------------------------------------------------------------------------------------------------------------------------------|
| Caenorhabditis elegans    | sensory axon guidance family member (sax-7)                    | 5  | P:GO:0048812;<br>P:GO:0065008;<br>P:GO:0048513;<br>P:GO:0048667;<br>C:GO:0044459                                                                                                       | -                                                               | IPR003598; IPR003599; IPR003961;<br>IPR007110; IPR008957; IPR013098;<br>IPR013783; PTHR10489 (PANTHER),<br>PTHR10489:SF39 (PANTHER),<br>SSF48726 (SUPERFAMILY) |
|                           | -                                                              | 0  |                                                                                                                                                                                        |                                                                 | -                                                                                                                                                              |
| Caenorhabditis briggsae   | ribonuclease h2 subunit b                                      | 0  |                                                                                                                                                                                        | C:GO:0005634                                                    | IPR019024; PTHR13383 (PANTHER),<br>PTHR13383:SF1 (PANTHER)                                                                                                     |
| Caenorhabditis sp. PS1010 | briggsae cbr-cdh-4 protein                                     | 5  | P:GO:0007411;<br>P:GO:0007163;<br>C:GO:0044459;<br>P:GO:0007155;<br>P:GO:0007413                                                                                                       | -                                                               | IPR002126; IPR015919; IPR020894;<br>PTHR10596 (PANTHER),<br>PTHR10596:SF74 (PANTHER)                                                                           |
| Caenorhabditis briggsae   | u3 small nucleolar homolog                                     | 11 | P:GO:0040010;<br>C:GO:0005840;<br>C:GO:0005730;<br>P:GO:0006364;<br>F:GO:0019843;<br>P:GO:0040035;<br>P:GO:0002119;<br>F:GO:0005515;<br>P:GO:0006898;<br>F:GO:0030519;<br>P:GO:0009792 | -                                                               | SignalP (SIGNALP)                                                                                                                                              |
| Caenorhabditis briggsae   | laminin a                                                      | 11 | P:GO:0050896;<br>F:GO:0005488;<br>C:GO:0005605;<br>P:GO:0007399;<br>P:GO:0007155;<br>P:GO:0048513;<br>P:GO:0006928;<br>P:GO:0040011;<br>P:GO:0050794;<br>P:GO:0009653;<br>P:GO:0009790 | -                                                               | IPR001791; IPR008985; IPR012680;<br>IPR013320; PTHR10574 (PANTHER),<br>PTHR10574:SF17 (PANTHER)                                                                |
| Caenorhabditis briggsae   | armadillo repeat-containing                                    | 1  | F:GO:0005488                                                                                                                                                                           | -                                                               | IPR006911; IPR011989; IPR016024                                                                                                                                |
| Caenorhabditis elegans    | elegans protein partially confirmed by transcript evidence     | 0  |                                                                                                                                                                                        | F:GO:0016491;<br>P:GO:0009792;<br>F:GO:0004867;<br>F:GO:0005515 | IPR002223; IPR006150; IPR020901;<br>PTHR10083 (PANTHER),<br>PTHR10083:SF36 (PANTHER)                                                                           |
| Caenorhabditis briggsae   | neutral sphingomyeli-se (n-smase) activation associated factor | 0  |                                                                                                                                                                                        | F:GO:0016740;<br>F:GO:0016905                                   | -                                                                                                                                                              |
| Caenorhabditis elegans    | transport protein sec61 subunit alpha 2                        | 8  | P:GO:0009792;<br>C:GO:0005789;<br>F:GO:0015450;<br>P:GO:0055085;<br>P:GO:0000003;<br>C:GO:0016021;<br>F:GO:0043022;<br>P:GO:0015031                                                    | -                                                               | IPR002208; IPR019561; IPR023201;<br>PTHR10906:SF1 (PANTHER), SignalP<br>(SIGNALP)                                                                              |
| Brugia malayi             | transport protein sec61 subunit alpha 2                        | 8  | P:GO:0009792;<br>C:GO:0005789;<br>F:GO:0015450;<br>P:GO:0055085;<br>P:GO:0000003;<br>C:GO:0016021;<br>F:GO:0043022;<br>P:GO:0015031                                                    | -                                                               | IPR002208; IPR023201;<br>PTHR10906:SF1 (PANTHER), SignalP<br>(SIGNALP)                                                                                         |

|                         |                                                      |    |                                                                                                                                                                                                                                                            |   |            |                                                                                                                 |
|-------------------------|------------------------------------------------------|----|------------------------------------------------------------------------------------------------------------------------------------------------------------------------------------------------------------------------------------------------------------|---|------------|-----------------------------------------------------------------------------------------------------------------|
| Caenorhabditis briggsae | leukotriene a4 hydrolase                             | 4  | P:GO:0006954;<br>F:GO:0005488;<br>F:GO:0070011;<br>P:GO:0044238                                                                                                                                                                                            | - |            | IPR001930; IPR015211; IPR016024;<br>PTHR11533:SF4 (PANTHER)                                                     |
| Caenorhabditis elegans  | myosin id                                            | 4  | F:GO:0003779;<br>C:GO:0016459;<br>F:GO:0005524;<br>F:GO:0003774                                                                                                                                                                                            | - |            | IPR000048; IPR001609; IPR010926;<br>PTHR13140 (PANTHER),<br>PTHR13140:SF31 (PANTHER),<br>SSF52540 (SUPERFAMILY) |
| Brugia malayi           | innexin family protein                               | 5  | P:GO:0040035;<br>C:GO:0005921;<br>P:GO:0040010;<br>P:GO:0040011;<br>P:GO:0002009                                                                                                                                                                           | - |            | SignalP (SIGNALP)                                                                                               |
| Caenorhabditis elegans  | coronin 7                                            | 2  | C:GO:0044444;<br>C:GO:0043229                                                                                                                                                                                                                              | - |            | IPR001680; IPR011046; IPR015505;<br>IPR015943; IPR017986; IPR019775;<br>IPR019781                               |
|                         | -                                                    | 0  |                                                                                                                                                                                                                                                            |   |            | -                                                                                                               |
| Loa loa                 | host cell factor 1                                   | 15 | C:GO:0071339;<br>P:GO:0045787;<br>P:GO:0006013;<br>P:GO:0043254;<br>P:GO:0045449;<br>F:GO:0042802;<br>F:GO:0004476;<br>F:GO:0008080;<br>P:GO:0019046;<br>F:GO:0003700;<br>P:GO:0044419;<br>C:GO:0070688;<br>F:GO:0003713;<br>C:GO:0005737;<br>P:GO:0006366 | - | EC:5.3.1.8 | IPR006652; IPR015915; PTHR23244<br>(PANTHER), PTHR23244:SF36<br>(PANTHER), SSF117281 (SUPERFAMILY)              |
| Caenorhabditis briggsae | cationic amino acid transporter                      | 5  | P:GO:0019915;<br>C:GO:0016021;<br>F:GO:0015171;<br>C:GO:0005886;<br>P:GO:0003333                                                                                                                                                                           | - |            | IPR002293; IPR004841;<br>PTHR11785:SF74 (PANTHER)                                                               |
| Caenorhabditis elegans  | eukaryotic translation initiation factor 3 subunit c | 6  | C:GO:0005829;<br>P:GO:0000003;<br>C:GO:0005852;<br>F:GO:0005515;<br>P:GO:0006413;<br>F:GO:0003743                                                                                                                                                          | - |            | IPR000717; IPR008905; IPR011991;<br>PTHR13937 (PANTHER), SSF46785<br>(SUPERFAMILY)                              |
| Caenorhabditis briggsae | otu-like cysteine protease family protein            | 1  | F:GO:0016787                                                                                                                                                                                                                                               | - |            | -                                                                                                               |
| Loa loa                 | importin subunit alpha-4                             | 6  | C:GO:0005737;<br>C:GO:0005643;<br>P:GO:0007292;<br>F:GO:0005515;<br>F:GO:0008565;<br>P:GO:0006607                                                                                                                                                          | - |            | IPR000225; IPR002652; IPR011989;<br>IPR016024; PTHR23316 (PANTHER)                                              |
|                         | -                                                    | 0  |                                                                                                                                                                                                                                                            |   |            | -                                                                                                               |
| Caenorhabditis elegans  | cyclin h                                             | 5  | C:GO:0043234;<br>F:GO:0004672;<br>P:GO:0045449;<br>C:GO:0005654;<br>P:GO:0006366                                                                                                                                                                           | - |            | IPR005479; IPR006670; IPR006671;<br>IPR011028; IPR013763; IPR015429;<br>IPR015432; PIRSF028758 (PIR)            |



|                         |                                                                |    |                                                                                                                                                                                                         |   |             |                                                                                                                                                                              |
|-------------------------|----------------------------------------------------------------|----|---------------------------------------------------------------------------------------------------------------------------------------------------------------------------------------------------------|---|-------------|------------------------------------------------------------------------------------------------------------------------------------------------------------------------------|
| Loa loa                 | histone-lysine n- h3 lysine-79 specific                        | 1  | F:GO:0008168                                                                                                                                                                                            | - | EC:2.1.1.0  | IPR013110; G3DSA:3.40.50.150 (GENE3D), PTHR21451 (PANTHER), SSF53335 (SUPERFAMILY)                                                                                           |
| Loa loa                 | dot1- histone h3 methyltransferase ( cerevisiae) isoform cra_a | 1  | F:GO:0042054                                                                                                                                                                                            | - |             | IPR013110; G3DSA:3.40.50.150 (GENE3D), PTHR21451 (PANTHER), SSF53335 (SUPERFAMILY)                                                                                           |
| Loa loa                 | dot1- histone h3 methyltransferase ( cerevisiae) isoform cra_a | 1  | F:GO:0042054                                                                                                                                                                                            | - |             | IPR013110; G3DSA:3.40.50.150 (GENE3D), PTHR21451 (PANTHER), SSF53335 (SUPERFAMILY)                                                                                           |
| Caenorhabditis briggsae | membrane-associated protein                                    | 4  | P:GO:0016477;<br>P:GO:0018991;<br>F:GO:0005515;<br>P:GO:0010172                                                                                                                                         | - |             | IPR019137; PTHR12093 (PANTHER), PTHR12093:SF4 (PANTHER)                                                                                                                      |
| Caenorhabditis briggsae | seryl-tr- synthetase                                           | 4  | C:GO:0005737;<br>F:GO:0005524;<br>P:GO:0006434;<br>F:GO:0004828                                                                                                                                         | - | EC:6.1.1.11 | IPR002314; IPR002317; IPR006195; IPR010978; G3DSA:3.30.930.10 (GENE3D), SignalP (SIGNALP), SSF55681 (SUPERFAMILY)                                                            |
|                         |                                                                | 0  |                                                                                                                                                                                                         |   |             | IPR001969                                                                                                                                                                    |
| Caenorhabditis elegans  | dab (drosophila disabled) homolog family member (dab-1)        | 10 | P:GO:0007411;<br>P:GO:0007417;<br>F:GO:0042169;<br>C:GO:0016021;<br>P:GO:0042051;<br>P:GO:0045500;<br>P:GO:0007413;<br>C:GO:0016323;<br>C:GO:0005737;<br>F:GO:0017124                                   | - |             |                                                                                                                                                                              |
|                         |                                                                | 0  |                                                                                                                                                                                                         |   |             |                                                                                                                                                                              |
| Caenorhabditis elegans  | chaperonin containing subunit 2                                | 9  | C:GO:0005737;<br>P:GO:0040035;<br>P:GO:0009792;<br>P:GO:0002119;<br>P:GO:0006457;<br>F:GO:0005524;<br>F:GO:0051082;<br>P:GO:0040007;<br>P:GO:0006898                                                    | - |             | IPR002194; IPR002423; IPR012716; IPR017998; G3DSA:1.10.560.10 (GENE3D), G3DSA:3.30.260.10 (GENE3D), G3DSA:3.50.7.10 (GENE3D), SSF52029 (SUPERFAMILY), SSF54849 (SUPERFAMILY) |
| Caenorhabditis elegans  | ribosomal protein l12                                          | 12 | P:GO:0000022;<br>P:GO:0006412;<br>P:GO:0040010;<br>F:GO:0003723;<br>F:GO:0003735;<br>P:GO:0000003;<br>P:GO:0032940;<br>P:GO:0002119;<br>P:GO:0006898;<br>P:GO:0009792;<br>C:GO:0005811;<br>C:GO:0022625 | - | EC:3.6.5.3  | IPR000911; IPR020783; IPR020784; IPR020785; PTHR11661:SF2 (PANTHER)                                                                                                          |

|                         |                                                                   |    |                                                                                                                                                                                                                                                                                                               |   |             |                                                                                                              |
|-------------------------|-------------------------------------------------------------------|----|---------------------------------------------------------------------------------------------------------------------------------------------------------------------------------------------------------------------------------------------------------------------------------------------------------------|---|-------------|--------------------------------------------------------------------------------------------------------------|
| Caenorhabditis elegans  | capping protein (actin filament) muscle z- beta                   | 18 | C:GO:0030863;<br>P:GO:0030032;<br>C:GO:0030027;<br>C:GO:0016020;<br>P:GO:0035046;<br>P:GO:0040010;<br>C:GO:0071203;<br>P:GO:0006928;<br>P:GO:0009792;<br>P:GO:0002119;<br>C:GO:0008290;<br>P:GO:0000578;<br>P:GO:0051693;<br>F:GO:0051015;<br>P:GO:0010171;<br>C:GO:0030018;<br>P:GO:0040022;<br>P:GO:0040035 | - |             | IPR001698; SSF90096 (SUPERFAMILY)                                                                            |
| Caenorhabditis elegans  | lysosomal alpha-mannosidase (mannosidase alpha class 2b member 1) | 2  | F:GO:0004553;<br>F:GO:0005488                                                                                                                                                                                                                                                                                 | - | EC:3.2.1.0  | -                                                                                                            |
| Caenorhabditis briggsae | proteasome subunit alpha type 7-                                  | 14 | P:GO:0040010;<br>P:GO:0051436;<br>P:GO:0051437;<br>P:GO:0000003;<br>F:GO:0042802;<br>F:GO:0004298;<br>P:GO:0031145;<br>P:GO:0002119;<br>P:GO:0040011;<br>C:GO:0019773;<br>P:GO:0044419;<br>P:GO:0009792;<br>C:GO:0005737;<br>C:GO:0005634                                                                     | - | EC:3.4.25.0 | -                                                                                                            |
| Caenorhabditis elegans  | translocase of inner mitochondrial membrane 50 homolog            | 6  | P:GO:0009792;<br>C:GO:0005743;<br>P:GO:0055085;<br>P:GO:0000003;<br>C:GO:0016021;<br>P:GO:0015031                                                                                                                                                                                                             | - |             | IPR004274; G3DSA:3.40.50.1000 (GENE3D), PTHR12210 (PANTHER), PTHR12210:SF3 (PANTHER), SSF56784 (SUPERFAMILY) |
|                         | -                                                                 | 0  |                                                                                                                                                                                                                                                                                                               |   |             | -                                                                                                            |
|                         | -                                                                 | 0  |                                                                                                                                                                                                                                                                                                               |   |             | -                                                                                                            |
| Heliconius melpomene    | endonuclease-reverse transcriptase                                | 1  | F:GO:0005488                                                                                                                                                                                                                                                                                                  | - |             | IPR000477; IPR015706; G3DSA:3.30.70.270 (GENE3D), SSF56672 (SUPERFAMILY)                                     |

|                                     |                                                   |    |                                                                                                                                                                                                                                                                                              |                                                                                                                                                                                                                                                                                              |             |                                                                                                             |
|-------------------------------------|---------------------------------------------------|----|----------------------------------------------------------------------------------------------------------------------------------------------------------------------------------------------------------------------------------------------------------------------------------------------|----------------------------------------------------------------------------------------------------------------------------------------------------------------------------------------------------------------------------------------------------------------------------------------------|-------------|-------------------------------------------------------------------------------------------------------------|
| Heliconius melpomene                | endonuclease-reverse transcriptase                | 0  |                                                                                                                                                                                                                                                                                              | C:GO:0005672;<br>P:GO:0016337;<br>F:GO:0003702;<br>P:GO:0006367;<br>C:GO:0030027;<br>F:GO:0003677;<br>C:GO:0015629;<br>F:GO:0008270;<br>F:GO:0003964;<br>F:GO:0003723;<br>C:GO:0005916;<br>P:GO:0006278;<br>F:GO:0005515;<br>C:GO:0005622;<br>F:GO:0004519;<br>F:GO:0045296;<br>F:GO:0005198 |             | IPR000477; SSF56672 (SUPERFAMILY)                                                                           |
| Plasmodium yoelii yoelii str. 17XNL | antigen 332                                       | 0  |                                                                                                                                                                                                                                                                                              | C:GO:0001533;<br>P:GO:0030216                                                                                                                                                                                                                                                                |             | PR00211 (PRINTS), SignalP (SIGNALP)                                                                         |
| -                                   | -                                                 | 0  |                                                                                                                                                                                                                                                                                              |                                                                                                                                                                                                                                                                                              |             | -                                                                                                           |
| Caenorhabditis briggsae             | briggsae cbr-flp-9 protein                        | 0  |                                                                                                                                                                                                                                                                                              | P:GO:0007218                                                                                                                                                                                                                                                                                 |             | -                                                                                                           |
| Nasonia vitripennis                 | r--binding protein 35a                            | 6  | P:GO:0008380;<br>F:GO:0003729;<br>P:GO:0006397;<br>P:GO:0007173;<br>C:GO:0005634;<br>F:GO:0000166                                                                                                                                                                                            | -                                                                                                                                                                                                                                                                                            |             | PTHR13976 (PANTHER),<br>PTHR13976:SF2 (PANTHER)                                                             |
| Caenorhabditis elegans              | phenylalanyl tr- synthetase family member (frs-1) | 5  | C:GO:0005737;<br>F:GO:0004826;<br>F:GO:0005524;<br>P:GO:0006432;<br>F:GO:0000049                                                                                                                                                                                                             | -                                                                                                                                                                                                                                                                                            | EC:6.1.1.20 | IPR002319; IPR006195;<br>G3DSA:3.30.930.10 (GENE3D),<br>PTHR11538:SF15 (PANTHER),<br>SSF55681 (SUPERFAMILY) |
| -                                   | -                                                 | 0  |                                                                                                                                                                                                                                                                                              |                                                                                                                                                                                                                                                                                              |             | -                                                                                                           |
| Caenorhabditis briggsae             | briggsae cbr-ceh-60 protein                       | 0  |                                                                                                                                                                                                                                                                                              | P:GO:0006355;<br>F:GO:0043565;<br>P:GO:0045449;<br>F:GO:0030528;<br>F:GO:0003700;<br>C:GO:0005634;<br>F:GO:0003677                                                                                                                                                                           |             | IPR012287; PTHR11850 (PANTHER),<br>PTHR11850:SF2 (PANTHER)                                                  |
| -                                   | -                                                 | 0  |                                                                                                                                                                                                                                                                                              |                                                                                                                                                                                                                                                                                              |             | -                                                                                                           |
| Caenorhabditis briggsae             | pre-b-cell leukemia transcription factor 3        | 17 | P:GO:0008340;<br>P:GO:0018991;<br>F:GO:0005515;<br>P:GO:0040027;<br>P:GO:0040010;<br>P:GO:0006898;<br>P:GO:0006355;<br>C:GO:0005737;<br>P:GO:0009792;<br>F:GO:0003677;<br>P:GO:0007388;<br>P:GO:0007501;<br>P:GO:0042692;<br>P:GO:0010171;<br>C:GO:0005634;<br>P:GO:0016477;<br>P:GO:0007387 | -                                                                                                                                                                                                                                                                                            |             | -                                                                                                           |

|                         |                                                       |    |                                                                                                                                                                                                                                                                                              |                                                |             |                                                                                                               |
|-------------------------|-------------------------------------------------------|----|----------------------------------------------------------------------------------------------------------------------------------------------------------------------------------------------------------------------------------------------------------------------------------------------|------------------------------------------------|-------------|---------------------------------------------------------------------------------------------------------------|
| Caenorhabditis briggsae | pre-b-cell leukemia transcription factor 3            | 17 | P:GO:0008340;<br>P:GO:0018991;<br>F:GO:0005515;<br>P:GO:0040027;<br>P:GO:0040010;<br>P:GO:0006898;<br>P:GO:0006355;<br>C:GO:0005737;<br>P:GO:0009792;<br>F:GO:0003677;<br>P:GO:0007388;<br>P:GO:0007501;<br>P:GO:0042692;<br>P:GO:0010171;<br>C:GO:0005634;<br>P:GO:0016477;<br>P:GO:0007387 | -                                              |             | IPR001356; IPR005542; IPR009057;<br>IPR012287; IPR017970; PTHR11850<br>(PANTHER), PTHR11850:SF2<br>(PANTHER)  |
|                         | -                                                     | 0  |                                                                                                                                                                                                                                                                                              |                                                |             | G3DSA:2.40.10.10 (GENE3D)                                                                                     |
|                         | -                                                     | 0  |                                                                                                                                                                                                                                                                                              |                                                |             | IPR015880                                                                                                     |
|                         | -                                                     | 0  |                                                                                                                                                                                                                                                                                              |                                                |             | SignalP (SIGNALP)                                                                                             |
|                         | -                                                     | 0  |                                                                                                                                                                                                                                                                                              |                                                |             | SignalP (SIGNALP)                                                                                             |
| Caenorhabditis elegans  | golgi reassembly stacking protein 2                   | 2  | C:GO:0005794;<br>F:GO:0005515                                                                                                                                                                                                                                                                | -                                              |             | -                                                                                                             |
| Caenorhabditis briggsae | heterogeneous nuclear ribonucleoprotein a1            | 11 | P:GO:0051168;<br>C:GO:0005681;<br>C:GO:0005730;<br>P:GO:0050658;<br>P:GO:0008380;<br>F:GO:0005515;<br>P:GO:0051170;<br>F:GO:0003697;<br>P:GO:0006397;<br>C:GO:0005654;<br>C:GO:0005737                                                                                                       | -                                              |             | IPR000504; IPR012677; PTHR10432<br>(PANTHER), PTHR10432:SF13<br>(PANTHER), SSF54928 (SUPERFAMILY)             |
| Loa loa                 | d-glucuronyl c5 epimerase                             | 0  |                                                                                                                                                                                                                                                                                              | C:GO:0016021;<br>F:GO:0016857;<br>P:GO:0006024 |             | IPR010598                                                                                                     |
|                         | -                                                     | 0  |                                                                                                                                                                                                                                                                                              |                                                |             | -                                                                                                             |
|                         | -                                                     | 0  |                                                                                                                                                                                                                                                                                              |                                                |             | -                                                                                                             |
| Barentsia elongata      | ribosomal protein s11                                 | 5  | F:GO:0003735;<br>F:GO:0005515;<br>C:GO:0022627;<br>F:GO:0019843;<br>P:GO:0006414                                                                                                                                                                                                             | -                                              |             | -                                                                                                             |
| Caenorhabditis elegans  | briggsae cbr-tag-164 protein                          | 0  |                                                                                                                                                                                                                                                                                              | C:GO:0016021                                   |             | -                                                                                                             |
|                         | -                                                     | 0  |                                                                                                                                                                                                                                                                                              |                                                |             | -                                                                                                             |
| Caenorhabditis briggsae | hir histone cell cycle regulation defective homolog a | 3  | P:GO:0009792;<br>P:GO:0040010;<br>P:GO:0000003                                                                                                                                                                                                                                               | -                                              |             | IPR011494; PTHR13831 (PANTHER)                                                                                |
| Caenorhabditis briggsae | isovaleryl coenzyme a dehydroge-se                    | 3  | F:GO:0050660;<br>P:GO:0055114;<br>F:GO:0003995                                                                                                                                                                                                                                               | -                                              | EC:1.3.99.3 | IPR006089; IPR006090; IPR006091;<br>IPR009075; IPR009100; PTHR10909<br>(PANTHER), PTHR10909:SF10<br>(PANTHER) |
| Loa loa                 | mitochondrial-processing peptidase subunit alpha      | 4  | F:GO:0046872;<br>P:GO:0016485;<br>C:GO:0005759;<br>F:GO:0016787                                                                                                                                                                                                                              | -                                              |             | IPR007863; IPR011237; IPR011249;<br>PTHR11851 (PANTHER),<br>PTHR11851:SF49 (PANTHER)                          |

|                             |                                                  |    |                                                                                                                                                                                                                                                                                                                                                                                                    |   |                                                                                                                       |
|-----------------------------|--------------------------------------------------|----|----------------------------------------------------------------------------------------------------------------------------------------------------------------------------------------------------------------------------------------------------------------------------------------------------------------------------------------------------------------------------------------------------|---|-----------------------------------------------------------------------------------------------------------------------|
|                             | -                                                | 0  |                                                                                                                                                                                                                                                                                                                                                                                                    |   | -                                                                                                                     |
|                             | -                                                | 0  |                                                                                                                                                                                                                                                                                                                                                                                                    |   | -                                                                                                                     |
|                             | -                                                | 0  |                                                                                                                                                                                                                                                                                                                                                                                                    |   | -                                                                                                                     |
| Brugia malayi               | nck-associated protein 1                         | 23 | P:GO:0007492;<br>P:GO:0045176;<br>P:GO:0030032;<br>P:GO:0018991;<br>C:GO:0030027;<br>F:GO:0005515;<br>C:GO:0016020;<br>P:GO:0007417;<br>P:GO:0048617;<br>P:GO:0001756;<br>P:GO:0048340;<br>P:GO:0050821;<br>P:GO:0030950;<br>P:GO:0048570;<br>P:GO:0035050;<br>P:GO:0032880;<br>P:GO:0045175;<br>P:GO:0001843;<br>P:GO:0006915;<br>P:GO:0008078;<br>P:GO:0010172;<br>P:GO:0007354;<br>P:GO:0001701 | - | IPR019137; PTHR12093 (PANTHER),<br>PTHR12093:SF4 (PANTHER)                                                            |
| Caenorhabditis elegans      | rab3a interacting partial                        | 2  | F:GO:0005515;<br>F:GO:0017112                                                                                                                                                                                                                                                                                                                                                                      | - | PTHR14430 (PANTHER)                                                                                                   |
| Caenorhabditis elegans      | hla-b associated transcript 5                    | 0  |                                                                                                                                                                                                                                                                                                                                                                                                    |   | IPR000073; G3DSA:3.40.50.1820<br>(GENE3D), PTHR12277 (PANTHER),<br>PTHR12277:SF3 (PANTHER), SSF53474<br>(SUPERFAMILY) |
| Angiostrongylus cantonensis | elegans protein confirmed by transcript evidence | 0  |                                                                                                                                                                                                                                                                                                                                                                                                    |   | IPR021010; SSF141739 (SUPERFAMILY)                                                                                    |
| Caenorhabditis briggsae     | serine hydroxymethyltransferase                  | 15 | C:GO:0005829;<br>P:GO:0006565;<br>P:GO:0019264;<br>C:GO:0005739;<br>P:GO:0046655;<br>P:GO:0032259;<br>F:GO:0004372;<br>F:GO:0016597;<br>F:GO:0008732;<br>P:GO:0051289;<br>F:GO:0042803;<br>F:GO:0030170;<br>P:GO:0009113;<br>C:GO:0005634;<br>P:GO:0009790                                                                                                                                         | - | EC:2.1.2.1<br>IPR001085; IPR015421; IPR015422;<br>IPR015424; IPR019798                                                |
| Caenorhabditis briggsae     | mosc domain-containing protein mitochondrial     | 4  | F:GO:0030170;<br>F:GO:0030151;<br>F:GO:0003824;<br>F:GO:0005515                                                                                                                                                                                                                                                                                                                                    | - | IPR005302; IPR005303; IPR011037;<br>PTHR14237 (PANTHER), SSF141673<br>(SUPERFAMILY)                                   |

|                         |                                                |   |                                                                                                   |                                                                                                                                                                                                                                                                                                                                                                                                                                                                        |             |                                                                          |   |
|-------------------------|------------------------------------------------|---|---------------------------------------------------------------------------------------------------|------------------------------------------------------------------------------------------------------------------------------------------------------------------------------------------------------------------------------------------------------------------------------------------------------------------------------------------------------------------------------------------------------------------------------------------------------------------------|-------------|--------------------------------------------------------------------------|---|
| Caenorhabditis elegans  | zinc finger protein family member (zfp-1)      | 6 | F:GO:0003700;<br>F:GO:0005488;<br>P:GO:0007482;<br>P:GO:0002168;<br>P:GO:0007591;<br>C:GO:0005634 | -                                                                                                                                                                                                                                                                                                                                                                                                                                                                      |             | PTHR13793 (PANTHER),<br>PTHR13793:SF1 (PANTHER)                          |   |
| Caenorhabditis briggsae | briggsae cbr-wrn-1 protein                     | 2 | P:GO:0044237;<br>F:GO:0016787                                                                     | -                                                                                                                                                                                                                                                                                                                                                                                                                                                                      |             | -                                                                        |   |
| Taeniopygia guttata     | ventricular myosin heavy chain                 | 0 |                                                                                                   | C:GO:0005634;<br>F:GO:0046982;<br>P:GO:0030049;<br>C:GO:0030017;<br>F:GO:0005524;<br>P:GO:0007512;<br>F:GO:0042803;<br>F:GO:0030898;<br>P:GO:0055010;<br>C:GO:0016459;<br>P:GO:0035050;<br>C:GO:0005925;<br>F:GO:0000166;<br>C:GO:0005737;<br>F:GO:0016887;<br>F:GO:0003779;<br>F:GO:0003774;<br>P:GO:0000302;<br>C:GO:0005730;<br>C:GO:0005859;<br>F:GO:0008307;<br>P:GO:0055005;<br>F:GO:0005516;<br>F:GO:0005515;<br>P:GO:0006936;<br>F:GO:0000146;<br>C:GO:0032982 | -           |                                                                          | - |
| Caenorhabditis elegans  | lim domain family member (lim-8)               | 2 | F:GO:0008270;<br>F:GO:0005515                                                                     | -                                                                                                                                                                                                                                                                                                                                                                                                                                                                      |             | IPR001781; PTHR15551 (PANTHER)                                           |   |
| Brugia malayi           | fructose- -bisphosphatase 1                    | 3 | P:GO:0016051;<br>C:GO:0005737;<br>F:GO:0042132                                                    | -                                                                                                                                                                                                                                                                                                                                                                                                                                                                      | EC:3.1.3.11 | IPR000146; G3DSA:3.30.540.10<br>(GENE3D), SSF56655 (SUPERFAMILY)         |   |
| Caenorhabditis elegans  | spindle-pole body protein                      | 1 | F:GO:0005488                                                                                      | -                                                                                                                                                                                                                                                                                                                                                                                                                                                                      |             | PD936484 (PRODOM), SignalP<br>(SIGNALP)                                  |   |
| Caenorhabditis elegans  | n-alpha-acetyltransferase catalytic subunit    | 1 | F:GO:0008080                                                                                      | -                                                                                                                                                                                                                                                                                                                                                                                                                                                                      |             | IPR000182; IPR016181; PTHR23091<br>(PANTHER), PTHR23091:SF3<br>(PANTHER) |   |
|                         | -                                              | 0 |                                                                                                   |                                                                                                                                                                                                                                                                                                                                                                                                                                                                        |             | -                                                                        |   |
| Brugia malayi           | hypothetical protein Bm1_07015 [Brugia malayi] | 0 |                                                                                                   |                                                                                                                                                                                                                                                                                                                                                                                                                                                                        |             | IPR019193                                                                |   |
| Caenorhabditis briggsae | cral n-terminus family protein                 | 0 |                                                                                                   | P:GO:0040010;<br>F:GO:0005215;<br>C:GO:0005622;<br>P:GO:0006810                                                                                                                                                                                                                                                                                                                                                                                                        |             | IPR001251; PTHR23324 (PANTHER),<br>PTHR23324:SF3 (PANTHER)               |   |

|                             |                                                            |    |                                                                                                                                                                                                                                           |                                                                                                                                                                                                         |                                                                                                                   |
|-----------------------------|------------------------------------------------------------|----|-------------------------------------------------------------------------------------------------------------------------------------------------------------------------------------------------------------------------------------------|---------------------------------------------------------------------------------------------------------------------------------------------------------------------------------------------------------|-------------------------------------------------------------------------------------------------------------------|
| Caenorhabditis elegans      | superkiller viralicidic activity 2-like 2                  | 9  | P:GO:0040035;<br>P:GO:0009792;<br>P:GO:0002119;<br>F:GO:0008026;<br>F:GO:0003676;<br>P:GO:0040010;<br>F:GO:0005524;<br>P:GO:0040011;<br>P:GO:0002009                                                                                      | -                                                                                                                                                                                                       | IPR011545; G3DSA:3.40.50.300 (GENE3D), PTHR11752 (PANTHER), PTHR11752:SF2 (PANTHER), SSF52540 (SUPERFAMILY)       |
| Caenorhabditis elegans      | thioesterase superfamily member 2                          | 4  | F:GO:0042802;<br>F:GO:0016291;<br>C:GO:0005739;<br>P:GO:0051289                                                                                                                                                                           | -                                                                                                                                                                                                       | SignalP (SIGNALP)                                                                                                 |
| Brugia malayi               | wd-repeat protein                                          | 0  |                                                                                                                                                                                                                                           |                                                                                                                                                                                                         | IPR001680; IPR011046; IPR015943; IPR017986; IPR019775; IPR019781; IPR019782; PTHR19856 (PANTHER)                  |
| Brugia malayi               | hypothetical protein Bm1_49115 [Brugia malayi]             | 0  |                                                                                                                                                                                                                                           |                                                                                                                                                                                                         | -                                                                                                                 |
| Caenorhabditis elegans      | elegans protein partially confirmed by transcript evidence | 2  | F:GO:0016787;<br>F:GO:0005515                                                                                                                                                                                                             | -                                                                                                                                                                                                       | PTHR15829 (PANTHER), PTHR15829:SF3 (PANTHER)                                                                      |
|                             |                                                            | 0  |                                                                                                                                                                                                                                           |                                                                                                                                                                                                         |                                                                                                                   |
| Caenorhabditis elegans      | tpr domain containing protein                              | 14 | C:GO:0005654;<br>P:GO:0000003;<br>P:GO:0070979;<br>F:GO:0005515;<br>P:GO:0007275;<br>P:GO:0051437;<br>C:GO:0005680;<br>P:GO:0051436;<br>P:GO:0008283;<br>P:GO:0007091;<br>C:GO:0005829;<br>C:GO:0005813;<br>C:GO:0005876;<br>P:GO:0031145 | -                                                                                                                                                                                                       | IPR001440; IPR011990; IPR013026; IPR019734; PTHR12558 (PANTHER), PTHR12558:SF11 (PANTHER), SSF48452 (SUPERFAMILY) |
| Brugia malayi               | sy-pse-associated protein 1                                | 0  |                                                                                                                                                                                                                                           | C:GO:0005634                                                                                                                                                                                            | IPR005607; PTHR16019 (PANTHER), SSF140383 (SUPERFAMILY)                                                           |
| Caenorhabditis elegans      | urb1 ribosome biogenesis 1 homolog                         | 0  |                                                                                                                                                                                                                                           | F:GO:0003674;<br>F:GO:0005488;<br>P:GO:0008150;<br>F:GO:0005515;<br>C:GO:0005634;<br>C:GO:0005730                                                                                                       | -                                                                                                                 |
|                             |                                                            | 0  |                                                                                                                                                                                                                                           |                                                                                                                                                                                                         | SignalP (SIGNALP)                                                                                                 |
| Candida tropicalis MYA-3404 | negative affector of salt tolerance                        | 0  |                                                                                                                                                                                                                                           | C:GO:0009986;<br>P:GO:0006950;<br>C:GO:0005694;<br>P:GO:0007067;<br>C:GO:0000775;<br>C:GO:0005737;<br>F:GO:0005524;<br>P:GO:0051276;<br>F:GO:0005515;<br>C:GO:0005618;<br>F:GO:0005198;<br>F:GO:0005488 | -                                                                                                                 |

|                             |                                                                                                                                                    |   |                                                                                                                                                                                                                                                                                                                                                 |   |                                                                                                                                      |
|-----------------------------|----------------------------------------------------------------------------------------------------------------------------------------------------|---|-------------------------------------------------------------------------------------------------------------------------------------------------------------------------------------------------------------------------------------------------------------------------------------------------------------------------------------------------|---|--------------------------------------------------------------------------------------------------------------------------------------|
| Candida tropicalis MYA-3404 | negative effector of salt tolerance                                                                                                                | 0 | C:GO:0009986;<br>P:GO:0007067;<br>F:GO:0003924;<br>C:GO:0005694;<br>F:GO:0005525;<br>F:GO:0005524;<br>C:GO:0000775;<br>F:GO:0005198;<br>C:GO:0005618;<br>P:GO:0006413;<br>C:GO:0019861;<br>P:GO:0006412;<br>F:GO:0000166;<br>C:GO:0005737;<br>F:GO:0005488;<br>P:GO:0006950;<br>P:GO:0051276;<br>F:GO:0003743;<br>C:GO:0005622;<br>F:GO:0005515 | - |                                                                                                                                      |
| Candida tropicalis MYA-3404 | negative effector of salt tolerance                                                                                                                | 0 | C:GO:0009986;<br>P:GO:0006950;<br>C:GO:0005694;<br>P:GO:0007067;<br>C:GO:0000775;<br>C:GO:0005737;<br>F:GO:0005524;<br>P:GO:0051276;<br>F:GO:0005515;<br>C:GO:0005618;<br>F:GO:0005198;<br>F:GO:0005488                                                                                                                                         | - |                                                                                                                                      |
| Caenorhabditis elegans      | mtap_caeel ame: full= s-methyl-5 -thioadenosine phosphorylase ame: full=5 -methylthioadenosine phosphorylase short=mta phosphorylase short=mtapase | 2 | P:GO:0044237;<br>F:GO:0016763                                                                                                                                                                                                                                                                                                                   | - | EC:2.4.2.0<br>IPR000845; IPR001369; IPR010044;<br>G3DSA:3.40.50.1580 (GENE3D),<br>PTHR11904:SF1 (PANTHER), SSF53167<br>(SUPERFAMILY) |
| Loa loa                     | calmodulin                                                                                                                                         | 2 | P:GO:0009792;<br>F:GO:0005509                                                                                                                                                                                                                                                                                                                   | - | IPR011992; IPR018247; IPR018248;<br>IPR018249; PTHR23050 (PANTHER),<br>PTHR23050:SF20 (PANTHER),<br>SSF47473 (SUPERFAMILY)           |
| Caenorhabditis briggsae     | ribonucleotide reductase m2 polypeptide                                                                                                            | 9 | C:GO:0005737;<br>P:GO:0009263;<br>P:GO:0006260;<br>F:GO:0046914;<br>F:GO:0005515;<br>P:GO:0055114;<br>P:GO:0051290;<br>P:GO:0009186;<br>F:GO:0004748                                                                                                                                                                                            | - | EC:1.17.4.1<br>IPR000358; IPR009078; IPR012348                                                                                       |



|                         |                                                  |    |                                                                                                                                                                                        |                                                |             |                                                                                                                                                       |
|-------------------------|--------------------------------------------------|----|----------------------------------------------------------------------------------------------------------------------------------------------------------------------------------------|------------------------------------------------|-------------|-------------------------------------------------------------------------------------------------------------------------------------------------------|
| Caenorhabditis briggsae | proteasome subunit alpha type-2                  | 11 | P:GO:0009615;<br>P:GO:0051436;<br>P:GO:0051437;<br>F:GO:0004298;<br>P:GO:0031145;<br>P:GO:0002119;<br>F:GO:0005515;<br>C:GO:0019773;<br>P:GO:0009792;<br>C:GO:0005737;<br>C:GO:0005634 | -                                              | EC:3.4.25.0 | IPR000426; IPR001353;<br>G3DSA:3.60.20.10 (GENE3D),<br>PTHR11599 (PANTHER),<br>PTHR11599:SF16 (PANTHER), PSS1475<br>(PROFILE), SSF56235 (SUPERFAMILY) |
| Loa loa                 | ectonucleoside triphosphate diphosphohydrolase 7 | 5  | P:GO:0032502;<br>C:GO:0043231;<br>F:GO:0016787;<br>C:GO:0044444;<br>C:GO:0016020                                                                                                       | -                                              |             | IPR000407; PTHR11782:SF5<br>(PANTHER)                                                                                                                 |
| Caenorhabditis brenneri | polymerase iii (d- directed) polypeptide b       | 11 | F:GO:0003899;<br>P:GO:0009615;<br>P:GO:0048565;<br>P:GO:0032728;<br>P:GO:0045089;<br>F:GO:0046872;<br>P:GO:0031017;<br>P:GO:0009304;<br>F:GO:0003677;<br>F:GO:0032549;<br>C:GO:0005634 | -                                              | EC:2.7.7.6  | -                                                                                                                                                     |
| Caenorhabditis brenneri | polymerase iii (d- directed) polypeptide b       | 11 | F:GO:0003899;<br>P:GO:0009615;<br>P:GO:0048565;<br>P:GO:0032728;<br>P:GO:0045089;<br>F:GO:0046872;<br>P:GO:0031017;<br>P:GO:0009304;<br>F:GO:0003677;<br>F:GO:0032549;<br>C:GO:0005634 | -                                              | EC:2.7.7.6  | -                                                                                                                                                     |
| Caenorhabditis elegans  | transcription elongation factor spt6             | 5  | P:GO:0040010;<br>P:GO:0048856;<br>P:GO:0002119;<br>P:GO:0009792;<br>P:GO:0006350                                                                                                       | -                                              |             | IPR006641; G3DSA:1.10.3500.10<br>(GENE3D), PTHR10145 (PANTHER),<br>PTHR10145:SF1 (PANTHER)                                                            |
| Caenorhabditis elegans  | dep domain containing protein                    | 1  | P:GO:0040010                                                                                                                                                                           | -                                              |             | PTHR13179 (PANTHER)                                                                                                                                   |
| Caenorhabditis elegans  | transmembrane protein 32                         | 0  |                                                                                                                                                                                        | P:GO:0009058;<br>F:GO:0016740;<br>C:GO:0016021 |             | IPR002060; IPR008949; PTHR21181<br>(PANTHER), PTHR21181:SF5<br>(PANTHER)                                                                              |
| Caenorhabditis elegans  | bifunctio-l aminoacyl-tr- synthetase             | 4  | F:GO:0000166;<br>F:GO:0004812;<br>P:GO:0006418;<br>C:GO:0005737                                                                                                                        | -                                              |             | IPR000924; IPR011035; IPR020056;<br>IPR020059; PTHR10119:SF11<br>(PANTHER)                                                                            |
| Caenorhabditis elegans  | lycan beta homolog family member (sgcb-1)        | 0  |                                                                                                                                                                                        |                                                |             | IPR006875; PTHR21142 (PANTHER)                                                                                                                        |
| Homo sapiens            | mucin cell surface associated                    | 5  | C:GO:0005576;<br>C:GO:0016324;<br>C:GO:0005737;<br>C:GO:0005887;<br>C:GO:0005634                                                                                                       | -                                              |             | SignalP (SIGNALP)                                                                                                                                     |

|                           |                                                                               |   |                                                                                                                    |                                                                 |                            |                                                                                                                                                                                          |
|---------------------------|-------------------------------------------------------------------------------|---|--------------------------------------------------------------------------------------------------------------------|-----------------------------------------------------------------|----------------------------|------------------------------------------------------------------------------------------------------------------------------------------------------------------------------------------|
| Caenorhabditis elegans    | briggsae cbr-cogc-8 protein                                                   | 0 |                                                                                                                    |                                                                 |                            | -                                                                                                                                                                                        |
| Caenorhabditis briggsae   | briggsae cbr-unc-5 protein                                                    | 0 |                                                                                                                    | F:GO:0004872;<br>P:GO:0007165;<br>F:GO:0005515                  |                            | IPR000884; IPR003598; IPR007110;<br>IPR013098; IPR013783; PR01705<br>(PRINTS), G3DSA:2.20.100.10<br>(GENE3D), PTHR12582 (PANTHER),<br>PTHR12582:SF2 (PANTHER), SSF48726<br>(SUPERFAMILY) |
| Brugia malayi             | tata box binding protein -associated factor                                   | 6 | P:GO:0002119;<br>F:GO:0004017;<br>F:GO:0003676;<br>F:GO:0004765;<br>P:GO:0040010;<br>F:GO:0005524                  | -                                                               | EC:2.7.4.3;<br>EC:2.7.1.71 | IPR003959; G3DSA:3.40.50.300<br>(GENE3D), PTHR12595 (PANTHER),<br>SSF52540 (SUPERFAMILY)                                                                                                 |
| Danio rerio               | serine threonine-protein phosphatase 2a regulatory subunit<br>b subunit gamma | 0 |                                                                                                                    | F:GO:0005509;<br>C:GO:0005737;<br>C:GO:0005634                  |                            | IPR011992; IPR018249; PTHR12085<br>(PANTHER), SSF47473 (SUPERFAMILY)                                                                                                                     |
| Brugia malayi             | nipped-b-like protein                                                         | 0 |                                                                                                                    | F:GO:0005488;<br>P:GO:0034088;<br>C:GO:0032116;<br>F:GO:0005515 |                            | PTHR21704 (PANTHER),<br>PTHR21704:SF5 (PANTHER)                                                                                                                                          |
| Caenorhabditis briggsae   | cop9 sig-losome complex subunit 4                                             | 7 | P:GO:0040035;<br>P:GO:0002119;<br>F:GO:0005515;<br>P:GO:0000910;<br>P:GO:0040011;<br>P:GO:0040007;<br>C:GO:0008180 | -                                                               |                            | SignalP (SIGNALP)                                                                                                                                                                        |
| Caenorhabditis briggsae   | cop9 sig-losome complex subunit 4                                             | 7 | P:GO:0040035;<br>P:GO:0002119;<br>F:GO:0005515;<br>P:GO:0000910;<br>P:GO:0040011;<br>P:GO:0040007;<br>C:GO:0008180 | -                                                               |                            | IPR000717; IPR011990; IPR011991;<br>IPR013026; IPR019734; PTHR10855<br>(PANTHER), PTHR10855:SF2<br>(PANTHER), SSF46785 (SUPERFAMILY)                                                     |
| Caenorhabditis elegans    | hypothetical protein H24G06.1 [Caenorhabditis elegans]                        | 3 | P:GO:0009792;<br>P:GO:0040035;<br>F:GO:0005515                                                                     | -                                                               |                            | -                                                                                                                                                                                        |
| Caenorhabditis briggsae   | renin receptor isoform 2                                                      | 6 | P:GO:0050789;<br>P:GO:0040007;<br>P:GO:0002119;<br>P:GO:0040011;<br>P:GO:0009792;<br>C:GO:0016020                  | -                                                               |                            | IPR012493; SignalP (SIGNALP)                                                                                                                                                             |
| Caenorhabditis elegans    | suppressor of activated let-60 ras family member (sur-2)                      | 3 | P:GO:0044260;<br>P:GO:0090304;<br>P:GO:0010467                                                                     | -                                                               |                            | IPR021629; PTHR12691 (PANTHER),<br>PTHR12691:SF3 (PANTHER)                                                                                                                               |
| Caenorhabditis sp. PS1010 | hypothetical protein Csp3_JD07.006 [Caenorhabditis sp.<br>PS1010]             | 0 |                                                                                                                    |                                                                 |                            | -                                                                                                                                                                                        |
| Caenorhabditis briggsae   | briggsae cbr-pink-1 protein                                                   | 1 | F:GO:0005488                                                                                                       | -                                                               |                            | -                                                                                                                                                                                        |
|                           |                                                                               | 0 |                                                                                                                    |                                                                 |                            | -                                                                                                                                                                                        |
| Brugia malayi             | elegans protein confirmed by transcript evidence                              | 0 |                                                                                                                    | F:GO:0003676;<br>F:GO:0005524;<br>F:GO:0008026                  |                            | -                                                                                                                                                                                        |
| Caenorhabditis elegans    | mif4g domain containing                                                       | 1 | F:GO:0005515                                                                                                       | -                                                               |                            | IPR003890; IPR016021; PTHR23254<br>(PANTHER), PTHR23254:SF10<br>(PANTHER)                                                                                                                |
| Brugia malayi             | breast cancer anti-estrogen resistance                                        | 1 | P:GO:0007414                                                                                                       | -                                                               |                            | IPR021901; PTHR10654 (PANTHER)                                                                                                                                                           |

|                            |                                                 |  |   |                                                                                                                                                      |   |                                                                                                                                                                       |                                                                                                                                                             |
|----------------------------|-------------------------------------------------|--|---|------------------------------------------------------------------------------------------------------------------------------------------------------|---|-----------------------------------------------------------------------------------------------------------------------------------------------------------------------|-------------------------------------------------------------------------------------------------------------------------------------------------------------|
| Caenorhabditis elegans     | 5-3 exoribonuclease 2                           |  | 9 | F:GO:0008270;<br>F:GO:0003676;<br>F:GO:0004534;<br>C:GO:0005730;<br>P:GO:0045449;<br>F:GO:0005515;<br>P:GO:0006353;<br>P:GO:0000738;<br>P:GO:0006397 | - |                                                                                                                                                                       | IPR001878; IPR004859                                                                                                                                        |
| Caenorhabditis elegans     | 5-3 exoribonuclease 2                           |  | 9 | F:GO:0008270;<br>F:GO:0003676;<br>F:GO:0004534;<br>C:GO:0005730;<br>P:GO:0045449;<br>F:GO:0005515;<br>P:GO:0006353;<br>P:GO:0000738;<br>P:GO:0006397 | - |                                                                                                                                                                       | IPR001878; IPR004859                                                                                                                                        |
| Caenorhabditis elegans     | briggsae cbr-ugt-62 protein                     |  | 1 | P:GO:0040010                                                                                                                                         | - |                                                                                                                                                                       | -                                                                                                                                                           |
| Tetrahymena thermophila    | viral a-type inclusion                          |  | 0 |                                                                                                                                                      |   | C:GO:0005882;<br>F:GO:0042802;<br>C:GO:0005923;<br>C:GO:0030054;<br>F:GO:0003779;<br>C:GO:0016459;<br>F:GO:0003774;<br>F:GO:0005515;<br>P:GO:0008150;<br>F:GO:0005198 | PD936484 (PRODOM)                                                                                                                                           |
| Caenorhabditis elegans     | nuclear hormone receptor family member (nhr-49) |  | 5 | F:GO:0046872;<br>F:GO:0004879;<br>F:GO:0003677;<br>P:GO:0045449;<br>F:GO:0005515                                                                     | - |                                                                                                                                                                       | IPR000536; IPR001628; IPR001723;<br>IPR008946; IPR013088; PR00350<br>(PRINTS), PTHR11865 (PANTHER),<br>PTHR11865:SF195 (PANTHER),<br>SSF57716 (SUPERFAMILY) |
|                            | -                                               |  | 0 |                                                                                                                                                      |   |                                                                                                                                                                       | -                                                                                                                                                           |
|                            | -                                               |  | 0 |                                                                                                                                                      |   |                                                                                                                                                                       | -                                                                                                                                                           |
|                            | -                                               |  | 0 |                                                                                                                                                      |   |                                                                                                                                                                       | -                                                                                                                                                           |
| Oscheius tipulae           | briggsae cbr-vit-6 protein                      |  | 3 | P:GO:0006810;<br>F:GO:0022892;<br>P:GO:0033036                                                                                                       | - |                                                                                                                                                                       | -                                                                                                                                                           |
| Oscheius sp. (strain CEW1) | briggsae cbr-vit-6 protein                      |  | 6 | P:GO:0009792;<br>F:GO:0022892;<br>P:GO:0006810;<br>P:GO:0040010;<br>P:GO:0033036;<br>P:GO:0008340                                                    | - |                                                                                                                                                                       | SignalIP (SIGNALP)                                                                                                                                          |
| Caenorhabditis elegans     | briggsae cbr-lin-66 protein                     |  | 4 | P:GO:0040017;<br>P:GO:0040035;<br>F:GO:0005515;<br>P:GO:0002119                                                                                      | - |                                                                                                                                                                       | IPR020845                                                                                                                                                   |
| Tribolium castaneum        | wd repeat protein 26                            |  | 0 |                                                                                                                                                      |   | C:GO:0005737                                                                                                                                                          | -                                                                                                                                                           |
| Caenorhabditis briggsae    | patched family protein                          |  | 4 | P:GO:0040025;<br>P:GO:0040018;<br>P:GO:0040011;<br>C:GO:0016020                                                                                      | - |                                                                                                                                                                       | IPR000731; IPR003392; PTHR10796<br>(PANTHER), PTHR10796:SF14<br>(PANTHER), SignalIP (SIGNALP),<br>SSF82866 (SUPERFAMILY)                                    |

|                         |                                                                               |    |                                                                                                                                                                                                                                                            |                               |                                                                                                                                               |
|-------------------------|-------------------------------------------------------------------------------|----|------------------------------------------------------------------------------------------------------------------------------------------------------------------------------------------------------------------------------------------------------------|-------------------------------|-----------------------------------------------------------------------------------------------------------------------------------------------|
| Caenorhabditis briggsae | elegans protein partially confirmed by transcript evidence                    | 4  | P:GO:0023034;<br>F:GO:0046872;<br>C:GO:0016021;<br>F:GO:0005515                                                                                                                                                                                            | -                             | IPR001478; G3DSA:2.30.42.10 (GENE3D)                                                                                                          |
| Mus musculus            | PREDICTED: hypothetical protein [Mus musculus]                                | 0  |                                                                                                                                                                                                                                                            |                               | -                                                                                                                                             |
| Caenorhabditis elegans  | sensory axon guidance family member (sax-2)                                   | 1  | F:GO:0005515                                                                                                                                                                                                                                               | -                             | PTHR12295 (PANTHER),<br>PTHR12295:SF6 (PANTHER)                                                                                               |
|                         | -                                                                             | 0  |                                                                                                                                                                                                                                                            |                               | -                                                                                                                                             |
| Caenorhabditis elegans  | coiled-coil domain containing 97                                              | 0  |                                                                                                                                                                                                                                                            | F:GO:0003674;<br>P:GO:0008150 | -                                                                                                                                             |
|                         | -                                                                             | 0  |                                                                                                                                                                                                                                                            |                               | PR01217 (PRINTS)                                                                                                                              |
| Loa loa                 | fms interacting protein                                                       | 1  | P:GO:0009987                                                                                                                                                                                                                                               | -                             | IPR019163; PTHR13375 (PANTHER)                                                                                                                |
| Ostertagia ostertagi    | cysteine protei-se                                                            | 1  | F:GO:0008234                                                                                                                                                                                                                                               | -                             | IPR000169; IPR000668; IPR013128;<br>IPR015643; G3DSA:3.90.70.10 (GENE3D),<br>SSF54001 (SUPERFAMILY)                                           |
| Caenorhabditis briggsae | tetratricopeptide repeat protein 38                                           | 0  |                                                                                                                                                                                                                                                            | F:GO:0005488                  | -                                                                                                                                             |
| Caenorhabditis elegans  | snf2 family n-termi-l domain containing protein                               | 3  | F:GO:0003676;<br>C:GO:0005634;<br>F:GO:0000166                                                                                                                                                                                                             | -                             | -                                                                                                                                             |
| Caenorhabditis elegans  | gex interacting protein family member (gei-4)                                 | 1  | F:GO:0005515                                                                                                                                                                                                                                               | -                             | PTHR22084 (PANTHER)                                                                                                                           |
|                         | -                                                                             | 0  |                                                                                                                                                                                                                                                            |                               | -                                                                                                                                             |
|                         | -                                                                             | 0  |                                                                                                                                                                                                                                                            |                               | -                                                                                                                                             |
| Brugia malayi           | valyl-tr- synthetase                                                          | 4  | C:GO:0043229;<br>F:GO:0000166;<br>F:GO:0004812;<br>P:GO:0006418                                                                                                                                                                                            | -                             | IPR002300; IPR002303; IPR009080;<br>IPR013155; IPR014729;<br>G3DSA:1.10.730.10 (GENE3D),<br>PTHR11946 (PANTHER),<br>SSF52374 (SUPERFAMILY)    |
| Caenorhabditis elegans  | protein phosphatase 2c containing protein                                     | 15 | P:GO:0006470;<br>C:GO:0005739;<br>F:GO:0046872;<br>P:GO:0040007;<br>P:GO:0007584;<br>C:GO:0008287;<br>P:GO:0007623;<br>F:GO:0003677;<br>F:GO:0004722;<br>F:GO:0046983;<br>P:GO:0007067;<br>F:GO:0003700;<br>P:GO:0042023;<br>P:GO:0006350;<br>C:GO:0005634 | -                             | IPR001932; IPR014045; IPR015655;<br>PTHR13832:SF98 (PANTHER)                                                                                  |
| Caenorhabditis briggsae | briggsae cbr-smp-1 protein                                                    | 3  | C:GO:0016021;<br>P:GO:0007275;<br>F:GO:0004872                                                                                                                                                                                                             | -                             | IPR001627; IPR002165; IPR003659;<br>IPR015943; IPR016201;<br>G3DSA:3.30.1680.10 (GENE3D),<br>PTHR11036 (PANTHER),<br>PTHR11036:SF29 (PANTHER) |
| Caenorhabditis elegans  | hypothetical protein F57A8.1 [Caenorhabditis elegans]                         | 0  |                                                                                                                                                                                                                                                            |                               | -                                                                                                                                             |
| Caenorhabditis elegans  | udp-n-acetylglucosamine:a-3-d-mannoside b- -n-acetylglucosaminyltransferase i | 2  | F:GO:0016757;<br>C:GO:0016020                                                                                                                                                                                                                              | -                             | -                                                                                                                                             |
| Caenorhabditis elegans  | xenotropic and polytropic retrovirus receptor 1                               | 6  | P:GO:0010171;<br>F:GO:0004872;<br>P:GO:0018991;<br>P:GO:0040010;<br>C:GO:0016021;<br>P:GO:0009615                                                                                                                                                          | -                             | IPR004331; PTHR10783 (PANTHER),<br>PTHR10783:SF4 (PANTHER)                                                                                    |

|                         |                                                    |   |                                                                                                                                     |                                                                                                                                                                       |              |                                                                                     |
|-------------------------|----------------------------------------------------|---|-------------------------------------------------------------------------------------------------------------------------------------|-----------------------------------------------------------------------------------------------------------------------------------------------------------------------|--------------|-------------------------------------------------------------------------------------|
| Caenorhabditis elegans  | 26s proteasome subunit s9                          | 5 | C:GO:0005875;<br>C:GO:0008541;<br>P:GO:0006508;<br>F:GO:0005488;<br>F:GO:0004175                                                    | -                                                                                                                                                                     |              | PTHR10678 (PANTHER),<br>PTHR10678:SF2 (PANTHER)                                     |
| Caenorhabditis briggsae | carboxypeptidase regulatory region-containing      | 1 | P:GO:0000003                                                                                                                        | -                                                                                                                                                                     |              | IPR008969; IPR013784; IPR014766;<br>PTHR23303 (PANTHER),<br>PTHR23303:SF1 (PANTHER) |
| Brugia malayi           | negative elongation factor a                       | 0 |                                                                                                                                     | C:GO:0016021;<br>P:GO:0006813;<br>F:GO:0030955;<br>F:GO:0003674;<br>F:GO:0003746;<br>C:GO:0005575;<br>P:GO:0006350;<br>F:GO:0005249;<br>P:GO:0008150;<br>P:GO:0045449 |              | PTHR13328 (PANTHER)                                                                 |
| Caenorhabditis elegans  | gtp binding protein 2                              | 2 | F:GO:0042802;<br>F:GO:0000166                                                                                                       | -                                                                                                                                                                     |              | -                                                                                   |
| Caenorhabditis briggsae | d ki-se family family member (dkf-2)               | 8 | C:GO:0005737;<br>P:GO:0006468;<br>F:GO:0046872;<br>P:GO:0045087;<br>P:GO:0023034;<br>F:GO:0004697;<br>F:GO:0005524;<br>C:GO:0016020 | -                                                                                                                                                                     | EC:2.7.11.13 | IPR015727; G3DSA:1.10.510.10<br>(GENE3D)                                            |
| Caenorhabditis briggsae | elegans protein confirmed by transcript evidence   | 0 |                                                                                                                                     |                                                                                                                                                                       |              | IPR022559; PD030565 (PRODOM),<br>SignalP (SIGNALP)                                  |
| Caenorhabditis elegans  | uncharacterized fam18-like protein cg5021          | 0 |                                                                                                                                     | C:GO:0016021;<br>P:GO:0008150                                                                                                                                         |              | IPR008564                                                                           |
| Caenorhabditis elegans  | uncharacterized fam18-like protein cg5021          | 0 |                                                                                                                                     | C:GO:0016021;<br>P:GO:0008150                                                                                                                                         |              | IPR008564                                                                           |
| Caenorhabditis elegans  | vacuolar protein sorting 8 homolog                 | 0 |                                                                                                                                     | F:GO:0046872;<br>F:GO:0005488;<br>F:GO:0003674;<br>F:GO:0008270;<br>F:GO:0005515;<br>C:GO:0005575                                                                     |              | IPR011046; IPR015943                                                                |
| Caenorhabditis elegans  | tubulin tyrosine ligase like family member (ttl-4) | 4 | F:GO:0004835;<br>P:GO:0006464;<br>C:GO:0044464;<br>F:GO:0005524                                                                     | -                                                                                                                                                                     | EC:6.3.2.25  | IPR004344; PTHR12241:SF9<br>(PANTHER), SSF56059 (SUPERFAMILY)                       |
|                         | -                                                  | 0 |                                                                                                                                     |                                                                                                                                                                       |              | -                                                                                   |
| Caenorhabditis elegans  | ceramide ki-se                                     | 3 | F:GO:0004143;<br>C:GO:0044464;<br>P:GO:0007205                                                                                      | -                                                                                                                                                                     | EC:2.7.1.107 | -                                                                                   |
| Ancylostoma caninum     | venom-allergen-like protein family member (vap-1)  | 1 | P:GO:0040011                                                                                                                        | -                                                                                                                                                                     |              | SignalP (SIGNALP)                                                                   |
| Caenorhabditis elegans  | isoform a                                          | 4 | P:GO:0006470;<br>F:GO:0046872;<br>F:GO:0004722;<br>C:GO:0008287                                                                     | -                                                                                                                                                                     |              | -                                                                                   |
| Caenorhabditis elegans  | isoform a                                          | 4 | P:GO:0006470;<br>F:GO:0046872;<br>F:GO:0004722;<br>C:GO:0008287                                                                     | -                                                                                                                                                                     |              | -                                                                                   |

|                          |                                                                         |   |                                                                                  |                                                                                                                    |             |                                                                                                                                           |
|--------------------------|-------------------------------------------------------------------------|---|----------------------------------------------------------------------------------|--------------------------------------------------------------------------------------------------------------------|-------------|-------------------------------------------------------------------------------------------------------------------------------------------|
| Caenorhabditis briggsae  | domain containing protein                                               | 2 | F:GO:0005515;<br>P:GO:0009792                                                    | -                                                                                                                  |             | IPR000198; IPR008936; PTHR23178 (PANTHER)                                                                                                 |
| Caenorhabditis elegans   | u3 small nucleolar r- interacting protein 2                             | 1 | F:GO:0034511                                                                     | -                                                                                                                  |             | IPR001680; IPR011046; IPR015943; IPR017986; IPR019781; IPR019782; PTHR19865 (PANTHER)                                                     |
| Caenorhabditis briggsae  | pterin-4-alpha-carbinolamine dehydratase                                | 2 | F:GO:0008124;<br>P:GO:0006729                                                    | -                                                                                                                  | EC:4.2.1.96 | IPR001533                                                                                                                                 |
| Ailuropoda melanoleuca   | serologically defined colon cancer antigen 1                            | 0 |                                                                                  | F:GO:0003676;<br>F:GO:0003674;<br>C:GO:0005737;<br>F:GO:0008270;<br>P:GO:0008150;<br>C:GO:0005575;<br>C:GO:0005634 |             | -                                                                                                                                         |
| -                        | -                                                                       | 0 |                                                                                  |                                                                                                                    |             | -                                                                                                                                         |
| Caenorhabditis elegans   | cation efflux system protein                                            | 1 | P:GO:0006810                                                                     | -                                                                                                                  |             | IPR002524; G3DSA:1.20.1510.10 (GENE3D), SignalP (SIGNALP)                                                                                 |
| Caenorhabditis elegans   | organic cation transporter                                              | 4 | P:GO:0019915;<br>C:GO:0016021;<br>P:GO:0055085;<br>F:GO:0005215                  | -                                                                                                                  |             | IPR005828; IPR005829; IPR016196; IPR020846; G3DSA:1.20.1250.20 (GENE3D), PTHR11600 (PANTHER), PTHR11600:SF44 (PANTHER), SignalP (SIGNALP) |
| Trichomonas vaginalis G3 | pre-rr- processing and ribosome nuclear localization sequence nucleolar | 0 |                                                                                  | P:GO:0060271;<br>F:GO:0003676;<br>P:GO:0060041;<br>P:GO:0010842;<br>F:GO:0000166;<br>P:GO:0007018                  |             | -                                                                                                                                         |
| Aedes aegypti            | nucleolar and coiled-body phosphoprotein 1                              | 3 | P:GO:0048731;<br>P:GO:0016043;<br>P:GO:0009987                                   | -                                                                                                                  |             | -                                                                                                                                         |
| Loa loa                  | pdz domain containing protein                                           | 5 | P:GO:0009792;<br>P:GO:0040007;<br>P:GO:0040035;<br>F:GO:0005515;<br>P:GO:0002119 | -                                                                                                                  |             | IPR001478; G3DSA:2.30.42.10 (GENE3D)                                                                                                      |
| Caenorhabditis elegans   | briggsae cbr-sel-2 protein                                              | 4 | C:GO:0005737;<br>P:GO:0008104;<br>F:GO:0051018;<br>P:GO:0042675                  | -                                                                                                                  |             | -                                                                                                                                         |
| Caenorhabditis elegans   | briggsae cbr-sel-2 protein                                              | 4 | C:GO:0005737;<br>P:GO:0008104;<br>F:GO:0051018;<br>P:GO:0042675                  | -                                                                                                                  |             | -                                                                                                                                         |
| Caenorhabditis elegans   | briggsae cbr-sel-2 protein                                              | 4 | C:GO:0005737;<br>P:GO:0008104;<br>F:GO:0051018;<br>P:GO:0042675                  | -                                                                                                                  |             | -                                                                                                                                         |
| Caenorhabditis elegans   | briggsae cbr-gck-2 protein                                              | 5 | F:GO:0004672;<br>P:GO:0042059;<br>P:GO:0048149;<br>P:GO:0032008;<br>P:GO:0006468 | -                                                                                                                  |             | IPR001180; PTHR22986 (PANTHER), PTHR22986:SF76 (PANTHER), PS50219 (PROFILE)                                                               |
| Caenorhabditis elegans   | briggsae cbr-gck-2 protein                                              | 5 | F:GO:0004672;<br>P:GO:0042059;<br>P:GO:0048149;<br>P:GO:0032008;<br>P:GO:0006468 | -                                                                                                                  |             | IPR001180; PTHR22986 (PANTHER), PTHR22986:SF76 (PANTHER), PS50219 (PROFILE)                                                               |

|                               |                                                         |   |                                                                                                   |                                                                                                                    |              |                                                                                                            |
|-------------------------------|---------------------------------------------------------|---|---------------------------------------------------------------------------------------------------|--------------------------------------------------------------------------------------------------------------------|--------------|------------------------------------------------------------------------------------------------------------|
| Caenorhabditis elegans        | zinc nfx1-type containing 1                             | 0 |                                                                                                   | F:GO:0046872;<br>P:GO:0006508;<br>F:GO:0008168;<br>F:GO:0003674;<br>P:GO:0008150;<br>C:GO:0005575                  |              | G3DSA:3.40.50.300 (GENE3D),<br>PTHR10887 (PANTHER),<br>PTHR10887:SF10 (PANTHER),<br>SSF52540 (SUPERFAMILY) |
| Strongylocentrotus purpuratus | nfx1-type zinc finger-containing protein 1              | 0 |                                                                                                   | F:GO:0005524;<br>P:GO:0006508;<br>F:GO:0008168;<br>F:GO:0000166;<br>F:GO:0017111                                   |              | PTHR10887 (PANTHER),<br>PTHR10887:SF10 (PANTHER),<br>SSF52540 (SUPERFAMILY)                                |
| Caenorhabditis elegans        | kiaa1404 protein                                        | 0 |                                                                                                   | P:GO:0006508;<br>F:GO:0008168                                                                                      |              | G3DSA:3.40.50.300 (GENE3D),<br>PTHR10887 (PANTHER),<br>PTHR10887:SF10 (PANTHER),<br>SSF52540 (SUPERFAMILY) |
| Caenorhabditis elegans        | zinc nfx1-type containing 1                             | 0 |                                                                                                   | F:GO:0046872;<br>P:GO:0006508;<br>F:GO:0008168;<br>F:GO:0003674;<br>P:GO:0008150;<br>C:GO:0005575                  |              | G3DSA:3.40.50.300 (GENE3D),<br>PTHR10887 (PANTHER),<br>PTHR10887:SF10 (PANTHER),<br>SSF52540 (SUPERFAMILY) |
| -                             | -                                                       | 0 |                                                                                                   |                                                                                                                    |              | IPR018378; SignalP (SIGNALP)                                                                               |
| -                             | -                                                       | 0 |                                                                                                   |                                                                                                                    |              | -                                                                                                          |
| -                             | -                                                       | 0 |                                                                                                   |                                                                                                                    |              | IPR018378; SignalP (SIGNALP)                                                                               |
| -                             | -                                                       | 0 |                                                                                                   |                                                                                                                    |              | SignalP (SIGNALP)                                                                                          |
| -                             | -                                                       | 0 |                                                                                                   |                                                                                                                    |              | IPR018378; SignalP (SIGNALP)                                                                               |
| Caenorhabditis elegans        | kinesin-like protein family member (klp-12)             | 4 | P:GO:0009792;<br>F:GO:0005515;<br>P:GO:0007067;<br>F:GO:0003824                                   | -                                                                                                                  |              | IPR001752; IPR019821; PTHR16012<br>(PANTHER), PTHR16012:SF173<br>(PANTHER), SSF52540 (SUPERFAMILY)         |
| Caenorhabditis elegans        | kinesin-like protein family member (klp-12)             | 4 | P:GO:0009792;<br>F:GO:0005515;<br>P:GO:0007067;<br>F:GO:0003824                                   | -                                                                                                                  |              | IPR001752; IPR019821; PTHR16012<br>(PANTHER), PTHR16012:SF173<br>(PANTHER), SSF52540 (SUPERFAMILY)         |
| Caenorhabditis briggsae       | Hypothetical protein CBG16936 [Caenorhabditis briggsae] | 0 |                                                                                                   |                                                                                                                    |              | IPR000436; IPR016060; SignalP<br>(SIGNALP)                                                                 |
| Caenorhabditis briggsae       | Hypothetical protein CBG16936 [Caenorhabditis briggsae] | 0 |                                                                                                   |                                                                                                                    |              | IPR000436; IPR016060; PTHR19325<br>(PANTHER), PTHR19325:SF25<br>(PANTHER), SignalP (SIGNALP)               |
| Caenorhabditis briggsae       | Hypothetical protein CBG16936 [Caenorhabditis briggsae] | 0 |                                                                                                   |                                                                                                                    |              | IPR000436; IPR016060; SignalP<br>(SIGNALP)                                                                 |
| Caenorhabditis elegans        | hypothetical protein F13H6.1 [Caenorhabditis elegans]   | 4 | F:GO:0005488;<br>P:GO:0040010;<br>P:GO:0040011;<br>P:GO:0001703                                   | -                                                                                                                  |              | PTHR23233 (PANTHER),<br>PTHR23233:SF1 (PANTHER)                                                            |
| Caenorhabditis briggsae       | 3-ketodihydrospingosine reductase                       | 6 | C:GO:0005789;<br>C:GO:0005615;<br>F:GO:0047560;<br>F:GO:0005488;<br>P:GO:0030148;<br>P:GO:0006666 | -                                                                                                                  | EC:1.1.1.102 | IPR002198; IPR002347; IPR016040;<br>PTHR19410:SF40 (PANTHER), SignalP<br>(SIGNALP), SSF51735 (SUPERFAMILY) |
| Caenorhabditis elegans        | glycosyltransferase aer61 precursor                     | 0 |                                                                                                   | F:GO:0003674;<br>F:GO:0016740;<br>P:GO:0008152;<br>C:GO:0005783;<br>C:GO:0005576;<br>C:GO:0005575;<br>F:GO:0016757 |              | IPR007657; PTHR20961 (PANTHER),<br>SignalP (SIGNALP)                                                       |

|                             |                                                            |   |                                                                                                   |                                                                                                                                                                                        |            |                                                                                                                                     |
|-----------------------------|------------------------------------------------------------|---|---------------------------------------------------------------------------------------------------|----------------------------------------------------------------------------------------------------------------------------------------------------------------------------------------|------------|-------------------------------------------------------------------------------------------------------------------------------------|
| Caenorhabditis elegans      | receptor expression-enhancing protein 5                    | 1 | F:GO:0005515                                                                                      | -                                                                                                                                                                                      | -          | -                                                                                                                                   |
| Caenorhabditis elegans      | receptor expression-enhancing protein 5                    | 1 | F:GO:0005515                                                                                      | -                                                                                                                                                                                      | -          | -                                                                                                                                   |
| Caenorhabditis elegans      | myc binding protein 2                                      | 1 | F:GO:0005488                                                                                      | -                                                                                                                                                                                      | -          | IPR004939; PTHR12846 (PANTHER), PTHR12846:SF2 (PANTHER)                                                                             |
| Caenorhabditis elegans      | elegans protein partially confirmed by transcript evidence | 0 |                                                                                                   | C:GO:0016021;<br>P:GO:0006898;<br>P:GO:0019915;<br>P:GO:0009792;<br>P:GO:0002119;<br>P:GO:0040017;<br>P:GO:0016246;<br>P:GO:0040011;<br>P:GO:0040010                                   | -          | -                                                                                                                                   |
| Caenorhabditis briggsae     | briggsae cbr-oma-2 protein                                 | 3 | P:GO:0048599;<br>F:GO:0008270;<br>F:GO:0005515                                                    | -                                                                                                                                                                                      | -          | IPR000571; G3DSA:4.10.1000.10 (GENE3D), PTHR12547 (PANTHER), PTHR12547:SF17 (PANTHER), SSF90229 (SUPERFAMILY)                       |
| -                           | -                                                          | 0 |                                                                                                   |                                                                                                                                                                                        |            | SignalP (SIGNALP)                                                                                                                   |
| -                           | -                                                          | 0 |                                                                                                   |                                                                                                                                                                                        |            | SignalP (SIGNALP)                                                                                                                   |
| -                           | -                                                          | 0 |                                                                                                   |                                                                                                                                                                                        |            | -                                                                                                                                   |
| -                           | -                                                          | 0 |                                                                                                   |                                                                                                                                                                                        |            | SignalP (SIGNALP)                                                                                                                   |
| -                           | -                                                          | 0 |                                                                                                   |                                                                                                                                                                                        |            | SignalP (SIGNALP)                                                                                                                   |
| Caenorhabditis elegans      | teneurin family member (ten-1)                             | 0 |                                                                                                   | F:GO:0016740;<br>P:GO:0007366;<br>F:GO:0030246;<br>C:GO:0016021;<br>C:GO:0016020;<br>F:GO:0004714;<br>C:GO:0005578;<br>C:GO:0005576;<br>P:GO:0007160;<br>C:GO:0005886;<br>P:GO:0007155 | -          | PTHR11219 (PANTHER), PTHR11219:SF4 (PANTHER)                                                                                        |
| Caenorhabditis elegans      | g-protein coupled receptor                                 | 4 | F:GO:0004983;<br>F:GO:0005515;<br>P:GO:0007186;<br>C:GO:0016021                                   | -                                                                                                                                                                                      | -          | IPR000276; IPR000611; IPR017452; G3DSA:1.20.1070.10 (GENE3D), PTHR19264 (PANTHER), PTHR19264:SF92 (PANTHER), SSF81321 (SUPERFAMILY) |
| Caenorhabditis elegans      | -d synthetase 1                                            | 6 | F:GO:0016810;<br>F:GO:0005515;<br>F:GO:0005524;<br>F:GO:0003952;<br>C:GO:0005829;<br>P:GO:0009435 | -                                                                                                                                                                                      | EC:6.3.5.1 | IPR003010; PTHR23090 (PANTHER), PTHR23090:SF1 (PANTHER)                                                                             |
| -                           | -                                                          | 0 |                                                                                                   |                                                                                                                                                                                        |            | -                                                                                                                                   |
| Caenorhabditis elegans      | briggsae cbr-hum-5 protein                                 | 0 |                                                                                                   | F:GO:0005524;<br>F:GO:0003779;<br>F:GO:0000166;<br>F:GO:0003774;<br>C:GO:0016459                                                                                                       | -          | -                                                                                                                                   |
| Angiostrongylus cantonensis | heat shock protein family member (hsp- )                   | 1 | P:GO:0009408                                                                                      | -                                                                                                                                                                                      | -          | -                                                                                                                                   |
| Angiostrongylus cantonensis | heat shock protein family member (hsp- )                   | 1 | P:GO:0009408                                                                                      | -                                                                                                                                                                                      | -          | -                                                                                                                                   |



|                         |                                                                                      |  |                                                                                                                                                                                                                                              |   |                                                                  |                                                                                                                                                                        |
|-------------------------|--------------------------------------------------------------------------------------|--|----------------------------------------------------------------------------------------------------------------------------------------------------------------------------------------------------------------------------------------------|---|------------------------------------------------------------------|------------------------------------------------------------------------------------------------------------------------------------------------------------------------|
| Caenorhabditis briggsae | nuclear receptor nhr-1                                                               |  | F:GO:0046872;<br>P:GO:0045449;<br>5 F:GO:0003677;<br>F:GO:0004879;<br>F:GO:0005515                                                                                                                                                           | - |                                                                  | IPR000536; IPR001628; IPR001723;<br>IPR008946; IPR013088; IPR018247;<br>PR00350 (PRINTS), PTHR11865<br>(PANTHER), PTHR11865:SF218<br>(PANTHER), SSF57716 (SUPERFAMILY) |
|                         | -                                                                                    |  | 0                                                                                                                                                                                                                                            |   |                                                                  | IPR001810; IPR022364;<br>G3DSA:1.20.1280.50 (GENE3D)                                                                                                                   |
| Caenorhabditis elegans  | itbl_ caeel ame: full=uncharacterized integrin beta-like<br>protein flags: precursor |  | 2 C:GO:0016021;<br>P:GO:0007155                                                                                                                                                                                                              | - |                                                                  | IPR001169; IPR002165; IPR003659;<br>IPR016201; PTHR10082:SF5<br>(PANTHER), SignalP (SIGNALP)                                                                           |
| Loa loa                 | zinc c2h2 type family protein                                                        |  | 0                                                                                                                                                                                                                                            |   | F:GO:0008270;<br>C:GO:0005622                                    | IPR001781; IPR015880; SSF57667<br>(SUPERFAMILY)                                                                                                                        |
| synthetic construct     | cystatin b                                                                           |  | 7 P:GO:0042981;<br>C:GO:0005737;<br>C:GO:0005730;<br>F:GO:0002020;<br>F:GO:0004869;<br>P:GO:0010466;<br>P:GO:0008344                                                                                                                         | - |                                                                  | IPR000010; IPR001713; IPR018073;<br>G3DSA:3.10.450.10 (GENE3D),<br>PTHR11414 (PANTHER),<br>PTHR11414:SF1 (PANTHER), SSF54403<br>(SUPERFAMILY)                          |
| Caenorhabditis briggsae | hydroxysteroid (17-beta) dehydroge-se 4                                              |  | 14 P:GO:0000038;<br>P:GO:0060009;<br>F:GO:0032934;<br>C:GO:0005739;<br>F:GO:0033989;<br>P:GO:0033540;<br>P:GO:0055114;<br>F:GO:0015248;<br>F:GO:0030283;<br>F:GO:0003857;<br>F:GO:0005515;<br>F:GO:0004303;<br>P:GO:0008203;<br>C:GO:0005782 | - | EC:4.2.1.107<br>;<br>EC:1.1.1.51;<br>EC:1.1.1.35;<br>EC:1.1.1.62 | IPR002198; IPR002347; IPR003033;<br>IPR016040; IPR020904;<br>G3DSA:3.30.1050.10 (GENE3D),<br>PTHR19410:SF50 (PANTHER),<br>SSF51735 (SUPERFAMILY)                       |
| Caenorhabditis elegans  | component of oligomeric golgi complex 5                                              |  | 5 P:GO:0009792;<br>C:GO:0043231;<br>P:GO:0040010;<br>C:GO:0044444;<br>P:GO:0040039                                                                                                                                                           | - |                                                                  | PTHR13228 (PANTHER)                                                                                                                                                    |
| Caenorhabditis briggsae | elegans protein confirmed by transcript evidence                                     |  | 0                                                                                                                                                                                                                                            |   | P:GO:0016539                                                     | IPR001534; SignalP (SIGNALP)                                                                                                                                           |
|                         | -                                                                                    |  | 0                                                                                                                                                                                                                                            |   |                                                                  | IPR001534; SignalP (SIGNALP)                                                                                                                                           |
| Caenorhabditis elegans  | in family member (-b-1)                                                              |  | 7 C:GO:0043197;<br>P:GO:0007015;<br>P:GO:0031175;<br>C:GO:0030426;<br>F:GO:0005515;<br>C:GO:0030175;<br>C:GO:0030864                                                                                                                         | - |                                                                  | IPR001660; IPR010993; IPR013761;<br>IPR021129; PTHR16154 (PANTHER),<br>PTHR16154:SF3 (PANTHER)                                                                         |
|                         | -                                                                                    |  | 0                                                                                                                                                                                                                                            |   |                                                                  | SignalP (SIGNALP)                                                                                                                                                      |
|                         | -                                                                                    |  | 0                                                                                                                                                                                                                                            |   |                                                                  | -                                                                                                                                                                      |
|                         | -                                                                                    |  | 0                                                                                                                                                                                                                                            |   |                                                                  | SignalP (SIGNALP)                                                                                                                                                      |
| Caenorhabditis briggsae | beta (bile acid) 2                                                                   |  | 7 P:GO:0006629;<br>P:GO:0009056;<br>P:GO:0018991;<br>F:GO:0004553;<br>P:GO:0040011;<br>P:GO:0044237;<br>C:GO:0016020                                                                                                                         | - | EC:3.2.1.0                                                       | IPR006775; IPR008928; IPR014551;<br>PTHR12654 (PANTHER), PF12215<br>(PFAM), SignalP (SIGNALP)                                                                          |
|                         | -                                                                                    |  | 0                                                                                                                                                                                                                                            |   |                                                                  | SignalP (SIGNALP)                                                                                                                                                      |

|                         |                                             |    |                                                                                                                                                                                                                                                            |                                                                                                                                     |                               |                                                                                                                                                           |
|-------------------------|---------------------------------------------|----|------------------------------------------------------------------------------------------------------------------------------------------------------------------------------------------------------------------------------------------------------------|-------------------------------------------------------------------------------------------------------------------------------------|-------------------------------|-----------------------------------------------------------------------------------------------------------------------------------------------------------|
| Haemonchus contortus    | acetylcholine regulator unc-                | 1  | P:GO:0006904                                                                                                                                                                                                                                               | -                                                                                                                                   |                               | IPR001619; G3DSA:3.40.50.1910 (GENE3D), PTHR11679:SF7 (PANTHER)                                                                                           |
|                         | -                                           | 0  |                                                                                                                                                                                                                                                            |                                                                                                                                     |                               | -                                                                                                                                                         |
|                         |                                             | 0  |                                                                                                                                                                                                                                                            |                                                                                                                                     |                               |                                                                                                                                                           |
| Caenorhabditis elegans  | phytochelatin synthase                      | 15 | C:GO:0005829;<br>F:GO:0005507;<br>P:GO:0008219;<br>P:GO:0042742;<br>F:GO:0045551;<br>P:GO:0046938;<br>P:GO:0006955;<br>P:GO:0052544;<br>P:GO:0046685;<br>F:GO:0016756;<br>F:GO:0005515;<br>P:GO:0009809;<br>P:GO:0042344;<br>F:GO:0046870;<br>P:GO:0046686 | -                                                                                                                                   | EC:1.1.1.195<br>; EC:2.3.2.15 | IPR007719; SSF54001 (SUPERFAMILY)                                                                                                                         |
| Caenorhabditis elegans  | acyl- synthetase long-chain family member 4 | 2  | F:GO:0003824;<br>P:GO:0008152                                                                                                                                                                                                                              | -                                                                                                                                   |                               | IPR000873; G3DSA:2.30.38.10 (GENE3D), G3DSA:3.40.50.980 (GENE3D), PTHR11968 (PANTHER), PTHR11968:SF8 (PANTHER), SignalP (SIGNALP), SSF56801 (SUPERFAMILY) |
| Caenorhabditis briggsae | nfx1-type zinc finger-containing protein 1  | 0  |                                                                                                                                                                                                                                                            | P:GO:0006355;<br>P:GO:0006508;<br>F:GO:0008168;<br>F:GO:0003674;<br>F:GO:0008270;<br>P:GO:0008150;<br>C:GO:0005634;<br>C:GO:0005575 |                               | PTHR10887 (PANTHER),<br>PTHR10887:SF2 (PANTHER)                                                                                                           |
| Caenorhabditis briggsae | nfx1-type zinc finger-containing protein 1  | 0  |                                                                                                                                                                                                                                                            | P:GO:0006355;<br>P:GO:0006508;<br>F:GO:0008168;<br>F:GO:0003674;<br>P:GO:0008150;<br>F:GO:0008270;<br>C:GO:0005575;<br>C:GO:0005634 |                               | PTHR10887 (PANTHER),<br>PTHR10887:SF2 (PANTHER)                                                                                                           |
| Caenorhabditis briggsae | nfx1-type zinc finger-containing protein 1  | 0  |                                                                                                                                                                                                                                                            | P:GO:0006355;<br>P:GO:0006508;<br>F:GO:0008168;<br>F:GO:0003674;<br>F:GO:0008270;<br>P:GO:0008150;<br>C:GO:0005634;<br>C:GO:0005575 |                               | PTHR10887 (PANTHER),<br>PTHR10887:SF2 (PANTHER)                                                                                                           |
|                         | -                                           | 0  |                                                                                                                                                                                                                                                            |                                                                                                                                     |                               | -                                                                                                                                                         |
| Caenorhabditis elegans  | ras association ( af-6) domain family 1     | 4  | F:GO:0005515;<br>P:GO:0009987;<br>P:GO:0023052;<br>C:GO:0044424                                                                                                                                                                                            | -                                                                                                                                   |                               | SignalP (SIGNALP)                                                                                                                                         |
| Caenorhabditis elegans  | mgc79752 protein                            | 2  | P:GO:0008152;<br>F:GO:0016491                                                                                                                                                                                                                              | -                                                                                                                                   |                               | IPR002198; IPR002347; IPR016040;<br>PTHR19410:SF76 (PANTHER),<br>SSF51735 (SUPERFAMILY)                                                                   |
|                         | -                                           | 0  |                                                                                                                                                                                                                                                            |                                                                                                                                     |                               | -                                                                                                                                                         |

|                        |                                                            |    |                                                                                                                                                                                                                                                                                                               |   |                                                                 |                                                                                                              |
|------------------------|------------------------------------------------------------|----|---------------------------------------------------------------------------------------------------------------------------------------------------------------------------------------------------------------------------------------------------------------------------------------------------------------|---|-----------------------------------------------------------------|--------------------------------------------------------------------------------------------------------------|
| Caenorhabditis elegans | isoform b                                                  | 1  | F:GO:0005515                                                                                                                                                                                                                                                                                                  | - |                                                                 | IPR019149; G3DSA:3.40.50.1820 (GENE3D), PTHR13617 (PANTHER), PTHR13617:SF2 (PANTHER), SSF53474 (SUPERFAMILY) |
|                        | -                                                          | 0  |                                                                                                                                                                                                                                                                                                               |   |                                                                 | -                                                                                                            |
|                        | -                                                          | 0  |                                                                                                                                                                                                                                                                                                               |   |                                                                 | -                                                                                                            |
| Caenorhabditis elegans | r--binding protein with serine-rich domain 1               | 7  | P:GO:0008380;<br>F:GO:0003676;<br>F:GO:0005515;<br>P:GO:0006350;<br>P:GO:0016071;<br>C:GO:0005634;<br>F:GO:0000166                                                                                                                                                                                            | - |                                                                 | IPR000504; IPR012677; PTHR15481 (PANTHER), SSF54928 (SUPERFAMILY)                                            |
| Caenorhabditis elegans | r--binding protein with serine-rich domain 1               | 7  | P:GO:0008380;<br>F:GO:0003676;<br>F:GO:0005515;<br>P:GO:0006350;<br>P:GO:0016071;<br>C:GO:0005634;<br>F:GO:0000166                                                                                                                                                                                            | - |                                                                 | IPR000504; IPR012677; PTHR15481 (PANTHER), SSF54928 (SUPERFAMILY)                                            |
|                        | -                                                          | 0  |                                                                                                                                                                                                                                                                                                               |   |                                                                 | -                                                                                                            |
|                        | -                                                          | 0  |                                                                                                                                                                                                                                                                                                               |   |                                                                 | -                                                                                                            |
| Macaca mulatta         | heat shock 70kda protein 1a                                | 18 | F:GO:0047485;<br>P:GO:0042026;<br>P:GO:0090084;<br>C:GO:0005739;<br>P:GO:0030308;<br>F:GO:0031625;<br>C:GO:0016607;<br>F:GO:0044183;<br>P:GO:0006916;<br>P:GO:0008285;<br>C:GO:0016234;<br>F:GO:0005524;<br>P:GO:0006402;<br>C:GO:0048471;<br>C:GO:0030529;<br>F:GO:0051082;<br>P:GO:0006986;<br>C:GO:0005783 | - |                                                                 | -                                                                                                            |
| Brugia malayi          | hypothetical protein Bm1_12105 [Brugia malayi]             | 0  |                                                                                                                                                                                                                                                                                                               |   |                                                                 | -                                                                                                            |
| Caenorhabditis elegans | ferm domain ( -ezrin-radixin-moesin) family member (frm-1) | 1  | F:GO:0005488                                                                                                                                                                                                                                                                                                  | - |                                                                 | -                                                                                                            |
|                        | -                                                          | 0  |                                                                                                                                                                                                                                                                                                               |   |                                                                 | -                                                                                                            |
| Caenorhabditis elegans | ferm domain ( -ezrin-radixin-moesin) family member (frm-1) | 0  |                                                                                                                                                                                                                                                                                                               |   | F:GO:0005488;<br>C:GO:0019898;<br>F:GO:0008092;<br>F:GO:0005515 |                                                                                                              |
| Caenorhabditis elegans | ferm domain ( -ezrin-radixin-moesin) family member (frm-1) | 1  | F:GO:0005488                                                                                                                                                                                                                                                                                                  | - |                                                                 | -                                                                                                            |
| Caenorhabditis elegans | ferm domain ( -ezrin-radixin-moesin) family member (frm-1) | 1  | F:GO:0005488                                                                                                                                                                                                                                                                                                  | - |                                                                 | -                                                                                                            |
| Caenorhabditis elegans | wd repeat domain-containing protein 83                     | 3  | C:GO:0005737;<br>C:GO:0005681;<br>P:GO:0000398                                                                                                                                                                                                                                                                | - |                                                                 | IPR001680; IPR011046; IPR015943; IPR017986; IPR019781; IPR019782; PTHR22842 (PANTHER)                        |

|                           |                                                            |    |                                                                                                                                                                                                                                                                             |   |                                                                                                                                                                                                   |
|---------------------------|------------------------------------------------------------|----|-----------------------------------------------------------------------------------------------------------------------------------------------------------------------------------------------------------------------------------------------------------------------------|---|---------------------------------------------------------------------------------------------------------------------------------------------------------------------------------------------------|
| Caenorhabditis elegans    | vacuolar protein sorting 36                                | 4  | C:GO:0005770;<br>C:GO:0005764;<br>P:GO:0016197;<br>F:GO:0043130                                                                                                                                                                                                             | - | IPR007286; IPR021648; PTHR13128 (PANTHER), PTHR13128:SF6 (PANTHER), SSF46785 (SUPERFAMILY), SSF50729 (SUPERFAMILY)                                                                                |
| Caenorhabditis elegans    | tmco4_caeel ame: full=uncharacterized membrane protein     | 0  |                                                                                                                                                                                                                                                                             |   | IPR007941                                                                                                                                                                                         |
|                           | -                                                          | 0  |                                                                                                                                                                                                                                                                             |   | -                                                                                                                                                                                                 |
| Caenorhabditis sp. PS1010 | yl58_caeel ame: full=uncharacterized protein               | 3  | P:GO:0040010;<br>P:GO:0040035;<br>F:GO:0005515                                                                                                                                                                                                                              | - | IPR012816; SSF143990 (SUPERFAMILY)                                                                                                                                                                |
|                           | -                                                          | 0  |                                                                                                                                                                                                                                                                             |   | -                                                                                                                                                                                                 |
| Loa loa                   | ubiquitin                                                  | 5  | C:GO:0005737;<br>P:GO:0000003;<br>P:GO:0040007;<br>C:GO:0005634;<br>P:GO:0002119                                                                                                                                                                                            | - | -                                                                                                                                                                                                 |
| Caenorhabditis briggsae   | barrier-to-autointegration factor                          | 16 | P:GO:0009615;<br>C:GO:0005829;<br>F:GO:0003690;<br>P:GO:0051276;<br>P:GO:0007059;<br>F:GO:0042802;<br>P:GO:0040035;<br>P:GO:0010171;<br>P:GO:0019059;<br>P:GO:0019047;<br>P:GO:0040011;<br>P:GO:0006997;<br>C:GO:0005635;<br>C:GO:0000779;<br>C:GO:0005654;<br>P:GO:0009792 | - | IPR004122; PD019964 (PRODOM), PTHR12912:SF2 (PANTHER)                                                                                                                                             |
|                           |                                                            |    |                                                                                                                                                                                                                                                                             |   | P551257 (PROFILE)                                                                                                                                                                                 |
|                           |                                                            |    |                                                                                                                                                                                                                                                                             |   | P551257 (PROFILE)                                                                                                                                                                                 |
|                           | -                                                          | 0  |                                                                                                                                                                                                                                                                             |   | SignalP (SIGNALP)                                                                                                                                                                                 |
| Caenorhabditis elegans    | sex-determining protein fem-1                              | 3  | F:GO:0005515;<br>P:GO:0008152;<br>F:GO:0003824                                                                                                                                                                                                                              | - | IPR002110; IPR020683; PTHR18958 (PANTHER), PTHR18958:SF131 (PANTHER)                                                                                                                              |
| Loa loa                   | u1 zinc finger                                             | 9  | P:GO:0009792;<br>F:GO:0003723;<br>P:GO:0040010;<br>P:GO:0000003;<br>P:GO:0008340;<br>P:GO:0006898;<br>C:GO:0030529;<br>C:GO:0005634;<br>F:GO:0008270                                                                                                                        | - | -                                                                                                                                                                                                 |
| Caenorhabditis briggsae   | elegans protein partially confirmed by transcript evidence | 2  | P:GO:0006541;<br>F:GO:0004359                                                                                                                                                                                                                                               | - | EC:3.5.1.2<br>IPR002110; IPR012338; IPR015868; IPR020683; G3DSA:1.10.1500.10 (GENE3D), PTHR12544:SF3 (PANTHER)                                                                                    |
| Caenorhabditis elegans    | acetolactate synthase-like protein                         | 5  | F:GO:0030976;<br>C:GO:0016021;<br>P:GO:0009792;<br>F:GO:0000287;<br>F:GO:0016740                                                                                                                                                                                            | - | IPR000399; IPR011766; IPR012000; IPR012001; G3DSA:3.40.50.1220 (GENE3D), G3DSA:3.40.50.970 (GENE3D), PTHR18968 (PANTHER), PTHR18968:SF7 (PANTHER), SSF52467 (SUPERFAMILY), SSF52518 (SUPERFAMILY) |

|                         |                                                  |   |                                                                                                                                     |                                                                                                                                     |             |                                                                                                                                   |
|-------------------------|--------------------------------------------------|---|-------------------------------------------------------------------------------------------------------------------------------------|-------------------------------------------------------------------------------------------------------------------------------------|-------------|-----------------------------------------------------------------------------------------------------------------------------------|
| Pongo abelii            | tissue factor pathway inhibitor                  | 0 |                                                                                                                                     | F:GO:0030414;<br>P:GO:0007598;<br>C:GO:0005615;<br>P:GO:0007596;<br>F:GO:0004867;<br>F:GO:0004866;<br>C:GO:0005576;<br>C:GO:0005886 |             | -                                                                                                                                 |
| Caenorhabditis elegans  | cation efflux family protein                     | 0 |                                                                                                                                     | F:GO:0008324;<br>C:GO:0016021;<br>C:GO:0016020;<br>P:GO:0055085;<br>P:GO:0006812                                                    |             | IPR002524; G3DSA:1.20.1510.10 (GENE3D), G3DSA:3.30.70.1350 (GENE3D)                                                               |
| Caenorhabditis briggsae | nucleotide binding protein 1 ( coli)             | 7 | F:GO:0046872;<br>P:GO:0065008;<br>P:GO:0016226;<br>F:GO:0005524;<br>F:GO:0051539;<br>F:GO:0017111;<br>C:GO:0005829                  | -                                                                                                                                   | EC:3.6.1.15 | IPR000808; IPR003593; IPR019591; G3DSA:3.40.50.300 (GENE3D), PTHR23264 (PANTHER), PTHR23264:SF8 (PANTHER), SSF52540 (SUPERFAMILY) |
|                         | -                                                | 0 |                                                                                                                                     |                                                                                                                                     |             | -                                                                                                                                 |
| Caenorhabditis elegans  | hect domain containing 1                         | 3 | F:GO:0016874;<br>F:GO:0005515;<br>P:GO:0000003                                                                                      | -                                                                                                                                   |             | -                                                                                                                                 |
| Caenorhabditis elegans  | hect domain containing 1                         | 3 | F:GO:0016874;<br>F:GO:0005515;<br>P:GO:0000003                                                                                      | -                                                                                                                                   |             | -                                                                                                                                 |
| Caenorhabditis elegans  | hect domain containing 1                         | 3 | F:GO:0016874;<br>F:GO:0005515;<br>P:GO:0000003                                                                                      | -                                                                                                                                   |             | -                                                                                                                                 |
| Caenorhabditis elegans  | hect domain containing 1                         | 3 | F:GO:0016874;<br>F:GO:0005515;<br>P:GO:0000003                                                                                      | -                                                                                                                                   |             | -                                                                                                                                 |
| Loa loa                 | f-box domain containing protein                  | 6 | C:GO:0031981;<br>P:GO:0044267;<br>P:GO:0022402;<br>P:GO:0050794;<br>F:GO:0003824;<br>F:GO:0005488                                   | -                                                                                                                                   |             | -                                                                                                                                 |
| Loa loa                 | f-box domain containing protein                  | 6 | C:GO:0031981;<br>P:GO:0044267;<br>P:GO:0022402;<br>P:GO:0050794;<br>F:GO:0003824;<br>F:GO:0005488                                   | -                                                                                                                                   |             | -                                                                                                                                 |
| Caenorhabditis elegans  | elegans protein confirmed by transcript evidence | 1 | F:GO:0005488                                                                                                                        | -                                                                                                                                   |             | IPR013781; IPR017853; PTHR23208 (PANTHER), PTHR23208:SF13 (PANTHER)                                                               |
|                         | -                                                | 0 |                                                                                                                                     |                                                                                                                                     |             | -                                                                                                                                 |
|                         | -                                                | 0 |                                                                                                                                     |                                                                                                                                     |             | -                                                                                                                                 |
| Caenorhabditis elegans  | ribosomal protein s6 polypeptide 2               | 8 | C:GO:0005829;<br>P:GO:0007243;<br>F:GO:0004674;<br>F:GO:0005524;<br>F:GO:0005515;<br>F:GO:0000287;<br>C:GO:0005654;<br>P:GO:0006468 | -                                                                                                                                   | EC:2.7.11.0 | IPR000719; IPR011009; IPR017441; IPR017442; G3DSA:3.30.200.20 (GENE3D), PTHR22985 (PANTHER), PTHR22985:SF67 (PANTHER)             |

|                        |                              |    |                                                                                                                                                                                                                                                                                                                                                                                                   |                                                                                                                    |                                                         |                                                                                                      |
|------------------------|------------------------------|----|---------------------------------------------------------------------------------------------------------------------------------------------------------------------------------------------------------------------------------------------------------------------------------------------------------------------------------------------------------------------------------------------------|--------------------------------------------------------------------------------------------------------------------|---------------------------------------------------------|------------------------------------------------------------------------------------------------------|
| Brugia malayi          | gtp-binding protein sar1b    | 23 | P:GO:000003;<br>P:GO:0035293;<br>P:GO:0040007;<br>P:GO:0006898;<br>F:GO:0005525;<br>C:GO:0005789;<br>P:GO:0048081;<br>P:GO:0035050;<br>P:GO:0007029;<br>P:GO:0018996;<br>P:GO:0006886;<br>P:GO:0050774;<br>F:GO:0046872;<br>C:GO:0030134;<br>P:GO:0007264;<br>P:GO:0009792;<br>P:GO:0002119;<br>P:GO:0007186;<br>C:GO:0032580;<br>C:GO:0005811;<br>F:GO:0003924;<br>C:GO:0005634;<br>P:GO:0032940 | -                                                                                                                  | EC:3.6.5.1;<br>EC:3.6.5.2;<br>EC:3.6.5.3;<br>EC:3.6.5.4 | IPR001412; IPR005225; IPR006687;<br>IPR006689; G3DSA:3.40.50.300<br>(GENE3D), SSF52540 (SUPERFAMILY) |
|                        | -                            | 0  |                                                                                                                                                                                                                                                                                                                                                                                                   |                                                                                                                    |                                                         | -                                                                                                    |
|                        | -                            | 0  |                                                                                                                                                                                                                                                                                                                                                                                                   |                                                                                                                    |                                                         | -                                                                                                    |
|                        | -                            | 0  |                                                                                                                                                                                                                                                                                                                                                                                                   |                                                                                                                    |                                                         | -                                                                                                    |
|                        | -                            | 0  |                                                                                                                                                                                                                                                                                                                                                                                                   |                                                                                                                    |                                                         | -                                                                                                    |
| Caenorhabditis elegans | dep domain-containing        | 1  | P:GO:0040010                                                                                                                                                                                                                                                                                                                                                                                      | -                                                                                                                  |                                                         | IPR022046; PTHR13179 (PANTHER)                                                                       |
| Caenorhabditis elegans | fibrinogen-binding protein a | 0  |                                                                                                                                                                                                                                                                                                                                                                                                   | C:GO:0005618;<br>P:GO:0007155;<br>C:GO:0009986;<br>C:GO:0016020;<br>C:GO:0005576;<br>F:GO:0005515;<br>P:GO:0009405 |                                                         | -                                                                                                    |
| Caenorhabditis elegans | fibrinogen-binding protein a | 0  |                                                                                                                                                                                                                                                                                                                                                                                                   | C:GO:0005618;<br>P:GO:0007155;<br>C:GO:0009986;<br>C:GO:0016020;<br>C:GO:0005576;<br>F:GO:0005515;<br>P:GO:0009405 |                                                         | -                                                                                                    |
| Caenorhabditis elegans | wd-repeat protein 37         | 0  |                                                                                                                                                                                                                                                                                                                                                                                                   |                                                                                                                    |                                                         | PTHR19855 (PANTHER),<br>PTHR19855:SF12 (PANTHER)                                                     |

|                              |                                                      |    |                                                                                                                                                                                                                                                                                                               |   |   |                                                                                                                                                               |
|------------------------------|------------------------------------------------------|----|---------------------------------------------------------------------------------------------------------------------------------------------------------------------------------------------------------------------------------------------------------------------------------------------------------------|---|---|---------------------------------------------------------------------------------------------------------------------------------------------------------------|
| Haemonchus contortus         | adp atp translocase                                  | 18 | F:GO:0008233;<br>P:GO:0055085;<br>P:GO:0040010;<br>P:GO:0008340;<br>C:GO:0016021;<br>C:GO:0005743;<br>P:GO:0040002;<br>P:GO:0040035;<br>F:GO:0005471;<br>P:GO:0015867;<br>P:GO:0010171;<br>P:GO:0002119;<br>F:GO:0005515;<br>P:GO:0015866;<br>P:GO:0006898;<br>P:GO:0002009;<br>P:GO:0009792;<br>C:GO:0005811 | - | - |                                                                                                                                                               |
|                              | -                                                    | 0  |                                                                                                                                                                                                                                                                                                               |   |   | -                                                                                                                                                             |
| Loa loa                      | h aca ribonucleoprotein complex non-core subunit -f1 | 7  | P:GO:0040010;<br>F:GO:0005488;<br>C:GO:0005732;<br>P:GO:0040035;<br>P:GO:0019915;<br>P:GO:0042254;<br>P:GO:0006898                                                                                                                                                                                            | - |   | IPR007504; IPR009000                                                                                                                                          |
| Caenorhabditis elegans       | elegans protein confirmed by transcript evidence     | 2  | P:GO:0009792;<br>P:GO:0000003                                                                                                                                                                                                                                                                                 | - |   | -                                                                                                                                                             |
| Caenorhabditis remanei       | zag-1                                                | 5  | F:GO:0003700;<br>F:GO:0043565;<br>C:GO:0005634;<br>F:GO:0008270;<br>P:GO:0006355                                                                                                                                                                                                                              | - |   | IPR001356; IPR007087; IPR009057;<br>IPR012287; IPR013087; IPR015880;<br>IPR017970; PTHR13919 (PANTHER),<br>PTHR13919:SF1 (PANTHER), SSF57667<br>(SUPERFAMILY) |
| Angiostrongylus cantonensis  | briggsae cbr-pod-1 protein                           | 0  |                                                                                                                                                                                                                                                                                                               |   |   | IPR015049; IPR015505                                                                                                                                          |
|                              |                                                      | 0  |                                                                                                                                                                                                                                                                                                               |   |   |                                                                                                                                                               |
| Nippostrongylus brasiliensis | globin                                               | 6  | F:GO:0020037;<br>C:GO:0005615;<br>C:GO:0005737;<br>F:GO:0005344;<br>P:GO:0015671;<br>F:GO:0019825                                                                                                                                                                                                             | - |   | IPR000971; IPR009050; IPR012085;<br>IPR012292                                                                                                                 |
| Nippostrongylus brasiliensis | globin                                               | 6  | F:GO:0020037;<br>C:GO:0005615;<br>C:GO:0005737;<br>F:GO:0005344;<br>P:GO:0015671;<br>F:GO:0019825                                                                                                                                                                                                             | - |   | -                                                                                                                                                             |
|                              |                                                      | 0  |                                                                                                                                                                                                                                                                                                               |   |   |                                                                                                                                                               |
| Brugia malayi                | ccr4-not transcription subunit 3                     | 7  | C:GO:0005737;<br>P:GO:0040035;<br>P:GO:0009792;<br>P:GO:0002119;<br>F:GO:0005515;<br>P:GO:0008340;<br>P:GO:0040007                                                                                                                                                                                            | - |   | IPR007282; PTHR23326 (PANTHER)                                                                                                                                |

|                              |                                                                   |   |                                                                                                                    |                                                                                                   |                                                      |
|------------------------------|-------------------------------------------------------------------|---|--------------------------------------------------------------------------------------------------------------------|---------------------------------------------------------------------------------------------------|------------------------------------------------------|
| Caenorhabditis elegans       | ccr4-not transcription subunit 3                                  | 5 | P:GO:0040035;<br>P:GO:0009792;<br>P:GO:0002119;<br>P:GO:0008340;<br>P:GO:0040007                                   | -                                                                                                 | IPR007207; IPR007282; PTHR23326 (PANTHER)            |
| Caenorhabditis elegans       | not-like (yeast ccr4 not complex component) family member (ntl-3) | 5 | P:GO:0040035;<br>P:GO:0009792;<br>P:GO:0002119;<br>P:GO:0008340;<br>P:GO:0040007                                   | -                                                                                                 | IPR007207; IPR007282; IPR012270; PTHR23326 (PANTHER) |
| Caenorhabditis elegans       | ccr4-not transcription subunit 3                                  | 6 | P:GO:0040035;<br>P:GO:0009792;<br>P:GO:0002119;<br>P:GO:0008340;<br>P:GO:0040007;<br>C:GO:0044424                  | -                                                                                                 | IPR007207; IPR007282; IPR012270; PTHR23326 (PANTHER) |
| Caenorhabditis elegans       | hypothetical protein Y4C6B.7 [Caenorhabditis elegans]             | 0 |                                                                                                                    |                                                                                                   | -                                                    |
| Caenorhabditis briggsae      | Hypothetical protein CBG13961 [Caenorhabditis briggsae]           | 0 |                                                                                                                    | P:GO:0000003                                                                                      | -                                                    |
| Debaryomyces hansenii CBS767 | bifunctio-l r-se h acid phosphatase                               | 0 |                                                                                                                    | F:GO:0003674;<br>C:GO:0016021;<br>C:GO:0012511;<br>C:GO:0005575                                   | -                                                    |
| Brugia malayi                | pab-dependent poly -specific ribonuclease subunit 2               | 7 | P:GO:0006355;<br>P:GO:0044267;<br>F:GO:0016787;<br>F:GO:0046983;<br>P:GO:0050896;<br>F:GO:0003677;<br>C:GO:0005634 | -                                                                                                 | PTHR15728 (PANTHER)                                  |
| Brugia malayi                | pab-dependent poly -specific ribonuclease subunit 2               | 7 | P:GO:0006355;<br>P:GO:0044267;<br>F:GO:0016787;<br>F:GO:0046983;<br>P:GO:0050896;<br>F:GO:0003677;<br>C:GO:0005634 | -                                                                                                 | PTHR15728 (PANTHER)                                  |
| Brugia malayi                | pab-dependent poly -specific ribonuclease subunit 2               | 7 | P:GO:0006355;<br>P:GO:0044267;<br>F:GO:0016787;<br>F:GO:0046983;<br>P:GO:0050896;<br>F:GO:0003677;<br>C:GO:0005634 | -                                                                                                 | PTHR15728 (PANTHER)                                  |
|                              | -                                                                 | 0 |                                                                                                                    |                                                                                                   | SignalP (SIGNALP)                                    |
|                              | -                                                                 | 0 |                                                                                                                    |                                                                                                   | SignalP (SIGNALP)                                    |
|                              | -                                                                 | 0 |                                                                                                                    |                                                                                                   | SignalP (SIGNALP)                                    |
|                              | -                                                                 | 0 |                                                                                                                    |                                                                                                   | -                                                    |
|                              | -                                                                 | 0 |                                                                                                                    |                                                                                                   | -                                                    |
|                              | -                                                                 | 0 |                                                                                                                    |                                                                                                   | -                                                    |
| Brugia malayi                | kiaa1259 protein                                                  | 0 |                                                                                                                    | F:GO:0003676;<br>F:GO:0004386;<br>F:GO:0005524;<br>C:GO:0031011;<br>C:GO:0005634;<br>F:GO:0003677 | -                                                    |
|                              | -                                                                 | 0 |                                                                                                                    |                                                                                                   | -                                                    |
|                              | -                                                                 | 0 |                                                                                                                    |                                                                                                   | -                                                    |



|                        |                                                          |   |                                                                                                                                                                       |   |                                                                                                                                                                                                 |
|------------------------|----------------------------------------------------------|---|-----------------------------------------------------------------------------------------------------------------------------------------------------------------------|---|-------------------------------------------------------------------------------------------------------------------------------------------------------------------------------------------------|
| Brugia malayi          | negative elongation factor e                             | 0 | C:GO:0005634;<br>C:GO:0005739;<br>F:GO:0003676;<br>F:GO:0000166;<br>F:GO:0003723;<br>F:GO:0003746;<br>C:GO:0005654;<br>C:GO:0005730;<br>F:GO:0005515;<br>P:GO:0006350 |   | SignalP (SIGNALP)                                                                                                                                                                               |
| Caenorhabditis elegans | receptor family ligand binding region containing protein | 5 | P:GO:0007186;<br>C:GO:0016021;<br>P:GO:0007165;<br>F:GO:0004965;<br>F:GO:0004930                                                                                      | - | IPR001828; IPR002455; IPR002456;<br>IPR017978; G3DSA:3.40.50.2300<br>(GENE3D), PTHR10519 (PANTHER),<br>PTHR10519:SF3 (PANTHER), SignalP<br>(SIGNALP), SSF53822 (SUPERFAMILY)                    |
|                        | -                                                        | 0 |                                                                                                                                                                       |   | -                                                                                                                                                                                               |
|                        | -                                                        | 0 |                                                                                                                                                                       |   | -                                                                                                                                                                                               |
| Caenorhabditis elegans | leucine-rich repeat flightless-interacting protein 2     | 2 | F:GO:0005515;<br>P:GO:0009792                                                                                                                                         | - | IPR019139; PD936484 (PRODOM)                                                                                                                                                                    |
| Brugia malayi          | chromodomain helicase d- binding protein 1-like          | 1 | F:GO:0005488                                                                                                                                                          | - | IPR001357; IPR001650;<br>G3DSA:3.40.50.10190 (GENE3D),<br>G3DSA:3.40.50.300 (GENE3D),<br>PTHR10799 (PANTHER),<br>PTHR10799:SF74 (PANTHER),<br>SSF52540 (SUPERFAMILY), SSF52949<br>(SUPERFAMILY) |
| Caenorhabditis elegans | btb poz domain-containing protein kctd3                  | 1 | P:GO:0009792                                                                                                                                                          | - | IPR000210; IPR001680; IPR003131;<br>IPR007087; IPR011046; IPR011333;<br>IPR015943; PTHR15859 (PANTHER)                                                                                          |
| Caenorhabditis elegans | btb poz domain-containing protein kctd3                  | 1 | P:GO:0009792                                                                                                                                                          | - | IPR000210; IPR001680; IPR003131;<br>IPR007087; IPR011046; IPR011333;<br>IPR015943; PTHR15859 (PANTHER)                                                                                          |
| Caenorhabditis elegans | btb poz domain-containing protein kctd3                  | 2 | P:GO:0009792;<br>C:GO:0016020                                                                                                                                         | - | -                                                                                                                                                                                               |
| Caenorhabditis elegans | btb poz domain-containing protein kctd3                  | 1 | P:GO:0009792                                                                                                                                                          | - | -                                                                                                                                                                                               |
| Caenorhabditis elegans | btb poz domain-containing protein kctd3                  | 1 | P:GO:0009792                                                                                                                                                          | - | -                                                                                                                                                                                               |
| Caenorhabditis elegans | btb poz domain-containing protein kctd3                  | 1 | P:GO:0009792                                                                                                                                                          | - | -                                                                                                                                                                                               |
|                        | -                                                        | 0 |                                                                                                                                                                       |   | SignalP (SIGNALP)                                                                                                                                                                               |
|                        | -                                                        | 0 |                                                                                                                                                                       |   | SignalP (SIGNALP)                                                                                                                                                                               |
| Caenorhabditis elegans | -dh:ubiquinone ndufb6 b17                                | 5 | P:GO:0009792;<br>P:GO:0002119;<br>P:GO:0008340;<br>P:GO:0040007;<br>P:GO:0006898                                                                                      | - | -                                                                                                                                                                                               |
| Caenorhabditis elegans | -dh:ubiquinone ndufb6 b17                                | 5 | P:GO:0009792;<br>P:GO:0002119;<br>P:GO:0008340;<br>P:GO:0040007;<br>P:GO:0006898                                                                                      | - | -                                                                                                                                                                                               |
| Loa loa                | splicing factor u2af large subunit                       | 6 | P:GO:0008380;<br>F:GO:0003723;<br>F:GO:0005515;<br>P:GO:0006397;<br>C:GO:0005634;<br>F:GO:0000166                                                                     | - | IPR000504; IPR012677; SSF54928<br>(SUPERFAMILY)                                                                                                                                                 |

|                         |                                                        |    |                                                                                                                                                                                        |                                                                                                                                                                       |                                                                                                                                                                      |
|-------------------------|--------------------------------------------------------|----|----------------------------------------------------------------------------------------------------------------------------------------------------------------------------------------|-----------------------------------------------------------------------------------------------------------------------------------------------------------------------|----------------------------------------------------------------------------------------------------------------------------------------------------------------------|
| Loa loa                 | splicing factor u2af large subunit                     | 6  | P:GO:0008380;<br>F:GO:0003723;<br>F:GO:0005515;<br>P:GO:0006397;<br>C:GO:0005634;<br>F:GO:0000166                                                                                      | -                                                                                                                                                                     | -                                                                                                                                                                    |
| Brugia malayi           | protein ki-se domain containing protein                | 11 | P:GO:0006468;<br>C:GO:0005929;<br>C:GO:0030425;<br>F:GO:0005515;<br>P:GO:0034606;<br>F:GO:0004713;<br>C:GO:0030424;<br>P:GO:0034608;<br>F:GO:0005524;<br>C:GO:0043025;<br>F:GO:0004674 | -                                                                                                                                                                     | EC:2.7.10.0;<br>EC:2.7.11.0<br><br>IPR000719; IPR001245; IPR008266;<br>IPR011009; IPR020685; IPR020764;<br>G3DSA:1.10.510.10 (GENE3D),<br>G3DSA:3.30.200.20 (GENE3D) |
| Caenorhabditis briggsae | f-box domain-containing protein                        | 0  |                                                                                                                                                                                        | F:GO:0003676;<br>F:GO:0000166;<br>F:GO:0005515                                                                                                                        | SignalP (SIGNALP)                                                                                                                                                    |
| Caenorhabditis elegans  | f-box domain-containing protein                        | 0  |                                                                                                                                                                                        | F:GO:0003676;<br>F:GO:0000166;<br>F:GO:0005515                                                                                                                        | -                                                                                                                                                                    |
| Caenorhabditis briggsae | f-box domain-containing protein                        | 0  |                                                                                                                                                                                        | F:GO:0003676;<br>F:GO:0000166;<br>F:GO:0005515                                                                                                                        | SignalP (SIGNALP)                                                                                                                                                    |
| Caenorhabditis briggsae | f-box domain-containing protein                        | 0  |                                                                                                                                                                                        | F:GO:0003676;<br>F:GO:0000166;<br>F:GO:0005515                                                                                                                        | SignalP (SIGNALP)                                                                                                                                                    |
| Brugia malayi           | mediator protein 4                                     | 0  |                                                                                                                                                                                        |                                                                                                                                                                       | PTHR13208 (PANTHER)                                                                                                                                                  |
| Caenorhabditis briggsae | elegans protein confirmed by transcript evidence       | 0  |                                                                                                                                                                                        | F:GO:0004222;<br>F:GO:0016787;<br>F:GO:0008270;<br>F:GO:0008237;<br>C:GO:0031012;<br>F:GO:0008233;<br>P:GO:0006508;<br>F:GO:0046872;<br>P:GO:0008152;<br>F:GO:0005509 | IPR000585; PTHR10201 (PANTHER),<br>PTHR10201:SF6 (PANTHER), SignalP<br>(SIGNALP)                                                                                     |
| -                       | -                                                      | 0  |                                                                                                                                                                                        |                                                                                                                                                                       | -                                                                                                                                                                    |
| Loa loa                 | hypothetical protein LOAG_06796 [Loa loa]              | 0  |                                                                                                                                                                                        |                                                                                                                                                                       | SignalP (SIGNALP)                                                                                                                                                    |
| Caenorhabditis elegans  | vh1 dual-specificity phosphatase family member (vhp-1) | 5  | C:GO:0005737;<br>F:GO:0008138;<br>P:GO:0016311;<br>F:GO:0005515;<br>C:GO:0005634                                                                                                       | -                                                                                                                                                                     | IPR000340; IPR000387; IPR016130;<br>IPR020422; G3DSA:3.90.190.10<br>(GENE3D), PTHR10159 (PANTHER),<br>PTHR10159:SF35 (PANTHER),<br>SSF52799 (SUPERFAMILY)            |

|                         |                                                                    |    |                                                                                                                                                                                                                          |                                                                                                   |            |                                                                                                                                              |
|-------------------------|--------------------------------------------------------------------|----|--------------------------------------------------------------------------------------------------------------------------------------------------------------------------------------------------------------------------|---------------------------------------------------------------------------------------------------|------------|----------------------------------------------------------------------------------------------------------------------------------------------|
| Brugia malayi           | katanin p60 (atpase-containing) subunit a 1                        | 13 | C:GO:0043005;<br>P:GO:0048699;<br>P:GO:0007017;<br>C:GO:0005815;<br>F:GO:0008568;<br>P:GO:0051329;<br>F:GO:0046982;<br>P:GO:0051179;<br>P:GO:0006996;<br>F:GO:0008017;<br>F:GO:0005524;<br>P:GO:0008152;<br>C:GO:0000922 | -                                                                                                 | EC:3.6.4.3 | IPR003959; G3DSA:3.40.50.300 (GENE3D), PTHR23074 (PANTHER), PTHR23074:SF19 (PANTHER), SSF52540 (SUPERFAMILY)                                 |
|                         | -                                                                  | 0  |                                                                                                                                                                                                                          |                                                                                                   |            | -                                                                                                                                            |
|                         | -                                                                  | 0  |                                                                                                                                                                                                                          |                                                                                                   |            | -                                                                                                                                            |
|                         | -                                                                  | 0  |                                                                                                                                                                                                                          |                                                                                                   |            | -                                                                                                                                            |
| Caenorhabditis briggsae | briggsae cbr-rad-26 protein                                        | 0  |                                                                                                                                                                                                                          | F:GO:0004386;<br>F:GO:0003676;<br>F:GO:0005524;<br>C:GO:0016021;<br>F:GO:0005515;<br>F:GO:0003677 |            | -                                                                                                                                            |
|                         | -                                                                  | 0  |                                                                                                                                                                                                                          |                                                                                                   |            | -                                                                                                                                            |
| Brugia malayi           | activating sig-I cointegrator 1 complex subunit 3-like 1 isoform 1 | 12 | P:GO:0018991;<br>C:GO:0005681;<br>F:GO:0008026;<br>P:GO:0040007;<br>F:GO:0003677;<br>F:GO:0005524;<br>P:GO:0007601;<br>P:GO:0002119;<br>F:GO:0005515;<br>P:GO:0000354;<br>C:GO:0005682;<br>P:GO:0009792                  | -                                                                                                 |            | IPR004179; G3DSA:1.10.150.20 (GENE3D), G3DSA:1.10.3380.10 (GENE3D), G3DSA:2.60.40.150 (GENE3D), PTHR11752 (PANTHER), PTHR11752:SF7 (PANTHER) |
| Brugia malayi           | u5 small nuclear ribonucleoprotein 200 kda helicase                | 11 | P:GO:0018991;<br>F:GO:0004004;<br>C:GO:0071011;<br>P:GO:0000381;<br>P:GO:0040007;<br>F:GO:0003677;<br>F:GO:0005524;<br>P:GO:0002119;<br>C:GO:0005682;<br>C:GO:0071013;<br>P:GO:0009792                                   | -                                                                                                 |            | IPR004179; G3DSA:2.60.40.150 (GENE3D), PTHR11752 (PANTHER), PTHR11752:SF7 (PANTHER)                                                          |
| Brugia malayi           | activating sig-I cointegrator 1 complex subunit 3-like 1 isoform 1 | 12 | P:GO:0018991;<br>C:GO:0005681;<br>F:GO:0008026;<br>P:GO:0040007;<br>F:GO:0003677;<br>F:GO:0005524;<br>P:GO:0007601;<br>P:GO:0002119;<br>F:GO:0005515;<br>P:GO:0000354;<br>C:GO:0005682;<br>P:GO:0009792                  | -                                                                                                 |            | IPR004179; G3DSA:1.10.150.20 (GENE3D), G3DSA:1.10.3380.10 (GENE3D), G3DSA:2.60.40.150 (GENE3D), PTHR11752 (PANTHER), PTHR11752:SF7 (PANTHER) |

|                          |                                                  |   |                                                                                                                                     |                               |             |                                                                                                                                                                               |
|--------------------------|--------------------------------------------------|---|-------------------------------------------------------------------------------------------------------------------------------------|-------------------------------|-------------|-------------------------------------------------------------------------------------------------------------------------------------------------------------------------------|
| Caenorhabditis elegans   | elegans protein confirmed by transcript evidence | 0 |                                                                                                                                     |                               |             | -                                                                                                                                                                             |
| Caenorhabditis briggsae  | cytosolic non-specific dipeptidase               | 4 | F:GO:0008237;<br>F:GO:0016805;<br>P:GO:0006508;<br>F:GO:0005515                                                                     | -                             | EC:3.4.13.0 | IPR001261; IPR002933; IPR011650;<br>G3DSA:3.30.70.360 (GENE3D),<br>G3DSA:3.40.630.10 (GENE3D),<br>PTHR11014 (PANTHER),<br>PTHR11014:SF15 (PANTHER),<br>SSF53187 (SUPERFAMILY) |
| Caenorhabditis briggsae  | wd repeat domain 46                              | 3 | P:GO:0002119;<br>P:GO:0009792;<br>P:GO:0040007                                                                                      | -                             |             | IPR001680; IPR011046; IPR012952;<br>IPR015943; IPR017986; IPR019775;<br>IPR019781; IPR019782; PD023243<br>(PRODOM), PTHR14085 (PANTHER)                                       |
| Caenorhabditis briggsae  | briggsae cbr-atp-4 protein                       | 8 | P:GO:0040010;<br>F:GO:0015078;<br>P:GO:0008340;<br>C:GO:0000276;<br>P:GO:0015986;<br>P:GO:0000003;<br>P:GO:0002119;<br>P:GO:0009792 | -                             |             | -                                                                                                                                                                             |
| Brugia malayi            | amino acid permease family protein               | 2 | P:GO:0055085;<br>C:GO:0016020                                                                                                       | -                             |             | IPR000076; IPR004841; PTHR11827<br>(PANTHER), PTHR11827:SF2<br>(PANTHER)                                                                                                      |
| Caenorhabditis briggsae  | alkylation repair homolog 4 ( coli)              | 1 | P:GO:0009792                                                                                                                        | -                             |             | IPR005123; G3DSA:2.60.120.590<br>(GENE3D), PTHR12463 (PANTHER),<br>SSF51197 (SUPERFAMILY)                                                                                     |
| Trichomonas vaginalis G3 | ankyrin repeat protein                           | 0 |                                                                                                                                     | F:GO:0003674;<br>P:GO:0008150 |             | IPR002110; IPR020683; PR01415<br>(PRINTS), PTHR18958 (PANTHER),<br>PTHR18958:SF306 (PANTHER)                                                                                  |
| Loa loa                  | -dh-dependent fumarate reductase                 | 2 | F:GO:0016627;<br>P:GO:0008152                                                                                                       | -                             |             | IPR003953; G3DSA:3.50.50.60<br>(GENE3D), G3DSA:3.90.700.10<br>(GENE3D), PTHR11632 (PANTHER),<br>PTHR11632:SF3 (PANTHER), SSF51905<br>(SUPERFAMILY), SSF56425<br>(SUPERFAMILY) |
| Caenorhabditis elegans   | rho guanine nucleotide exchange factor 9-like    | 1 | P:GO:0040011                                                                                                                        | -                             |             | IPR000108; IPR000219; IPR001452;<br>IPR011511; G3DSA:2.30.30.40<br>(GENE3D), PTHR22834 (PANTHER),<br>PTHR22834:SF2 (PANTHER),<br>SSF103657 (SUPERFAMILY)                      |
| Caenorhabditis elegans   | ribonucleases p mrp protein subunit pop1         | 6 | P:GO:0009792;<br>P:GO:0010171;<br>P:GO:0002119;<br>P:GO:0040010;<br>P:GO:0000003;<br>P:GO:0006898                                   | -                             |             | -                                                                                                                                                                             |
| Caenorhabditis briggsae  | d- replication complex gins protein psf1         | 0 |                                                                                                                                     | P:GO:0006260;<br>C:GO:0005634 |             | IPR005339; IPR021151;<br>PTHR12914:SF2 (PANTHER)                                                                                                                              |
|                          | -                                                | 0 |                                                                                                                                     |                               |             | -                                                                                                                                                                             |
| Loa loa                  | microtubule associated-protein orbit             | 6 | P:GO:0009987;<br>F:GO:0005488;<br>C:GO:0043234;<br>C:GO:0005856;<br>C:GO:0044446;<br>C:GO:0005737                                   | -                             |             | IPR011989; PTHR21567 (PANTHER),<br>PTHR21567:SF12 (PANTHER), PF12348<br>(PFAM)                                                                                                |

|                         |                                                   |   |                                                                                                                    |                               |                                                                                                                                                                                                   |
|-------------------------|---------------------------------------------------|---|--------------------------------------------------------------------------------------------------------------------|-------------------------------|---------------------------------------------------------------------------------------------------------------------------------------------------------------------------------------------------|
| Caenorhabditis briggsae | fha domain containing protein                     | 6 | P:GO:0040035;<br>C:GO:0005622;<br>F:GO:0005515;<br>P:GO:0040011;<br>P:GO:0006898;<br>P:GO:0002009                  | -                             | IPR000253; IPR001159; IPR008984;<br>PTHR23308 (PANTHER),<br>PTHR23308:SF2 (PANTHER), SSF54768<br>(SUPERFAMILY)                                                                                    |
|                         |                                                   | 0 |                                                                                                                    |                               |                                                                                                                                                                                                   |
|                         |                                                   |   |                                                                                                                    |                               | IPR003961; IPR008957; IPR013098;<br>IPR013783; PRO0014 (PRINTS),<br>PTHR19900 (PANTHER),<br>PTHR19900:SF7 (PANTHER), SSF48726<br>(SUPERFAMILY)                                                    |
| Caenorhabditis elegans  | elegans protein confirmed by transcript evidence  | 0 |                                                                                                                    | P:GO:0008150;<br>C:GO:0005575 | IPR003169; G3DSA:3.30.1490.40<br>(GENE3D), PTHR14445 (PANTHER),<br>PTHR14445:SF5 (PANTHER)                                                                                                        |
| Brugia malayi           | chromosome 1 open reading frame 9                 | 1 | C:GO:0044464                                                                                                       | -                             | IPR012919; PTHR12953 (PANTHER),<br>PS51469 (PROFILE)                                                                                                                                              |
| Brugia malayi           | ligase atp-dependent                              | 7 | P:GO:0006281;<br>F:GO:0003909;<br>F:GO:0046872;<br>F:GO:0005515;<br>F:GO:0000166;<br>P:GO:0033151;<br>C:GO:0005654 | -                             | IPR000977; IPR012309; IPR012310;<br>IPR012340; IPR016027; IPR016059;<br>G3DSA:3.30.470.30 (GENE3D),<br>PTHR10459 (PANTHER),<br>PTHR10459:SF11 (PANTHER),<br>SSF56091 (SUPERFAMILY)                |
| Loa loa                 | wd and tetratricopeptide repeats 1                | 1 | P:GO:0019915                                                                                                       | -                             | IPR001680; IPR011046; IPR011990;<br>IPR013026; IPR015943; IPR017986;<br>IPR019734; IPR019775; IPR019781;<br>IPR019782; PTHR15574 (PANTHER),<br>PTHR15574:SF6 (PANTHER), SSF48452<br>(SUPERFAMILY) |
| Loa loa                 | wd and tetratricopeptide repeats 1                | 1 | P:GO:0019915                                                                                                       | -                             | IPR001680; IPR011046; IPR011990;<br>IPR013026; IPR015943; IPR017986;<br>IPR019734; IPR019775; IPR019781;<br>IPR019782; PTHR15574 (PANTHER),<br>PTHR15574:SF6 (PANTHER), SSF48452<br>(SUPERFAMILY) |
| Loa loa                 | wd and tetratricopeptide repeats 1                | 1 | P:GO:0019915                                                                                                       | -                             | IPR001680; IPR011046; IPR011990;<br>IPR013026; IPR015943; IPR017986;<br>IPR019734; IPR019775; IPR019781;<br>IPR019782; PTHR15574 (PANTHER),<br>PTHR15574:SF6 (PANTHER), SSF48452<br>(SUPERFAMILY) |
| Loa loa                 | wd and tetratricopeptide repeats 1                | 1 | P:GO:0019915                                                                                                       | -                             | IPR001680; IPR011046; IPR011990;<br>IPR013026; IPR015943; IPR017986;<br>IPR019734; IPR019775; IPR019781;<br>IPR019782; PTHR15574 (PANTHER),<br>PTHR15574:SF6 (PANTHER), SSF48452<br>(SUPERFAMILY) |
|                         |                                                   | 0 |                                                                                                                    |                               |                                                                                                                                                                                                   |
| Loa loa                 | proprotein convertase subtilisin kexin type furin | 3 | F:GO:0004252;<br>P:GO:0000003;<br>P:GO:0006508                                                                     | -                             | EC:3.4.21.0<br>IPR000209; IPR002884; IPR008979;<br>IPR015500; IPR022398;<br>G3DSA:2.60.120.260 (GENE3D),<br>PTHR10795:SF14 (PANTHER), SignalP<br>(SIGNALP)                                        |

|                         |                                                                                       |   |                                                                                                   |   |            |                                                                                                                                                                                    |
|-------------------------|---------------------------------------------------------------------------------------|---|---------------------------------------------------------------------------------------------------|---|------------|------------------------------------------------------------------------------------------------------------------------------------------------------------------------------------|
| Brugia malayi           | cleavage and polyadenylation specificity factor subunit 4                             | 6 | P:GO:0009792;<br>P:GO:0002119;<br>F:GO:0003676;<br>F:GO:0005515;<br>P:GO:0000910;<br>F:GO:0008270 | - |            | IPR000571; IPR001878;<br>G3DSA:4.10.1000.10 (GENE3D),<br>PTHR23102 (PANTHER),<br>PTHR23102:SF14 (PANTHER),<br>SSF90229 (SUPERFAMILY)                                               |
| Brugia malayi           | cleavage and polyadenylation specificity factor subunit 4                             | 6 | P:GO:0009792;<br>P:GO:0002119;<br>F:GO:0003676;<br>F:GO:0005515;<br>P:GO:0000910;<br>F:GO:0008270 | - |            | IPR000571; IPR001878;<br>G3DSA:4.10.1000.10 (GENE3D),<br>PTHR23102 (PANTHER),<br>PTHR23102:SF14 (PANTHER),<br>SSF90229 (SUPERFAMILY)                                               |
| Brugia malayi           | cleavage and polyadenylation specificity factor subunit 4                             | 6 | P:GO:0009792;<br>P:GO:0002119;<br>F:GO:0003676;<br>F:GO:0005515;<br>P:GO:0000910;<br>F:GO:0008270 | - |            | IPR000571; IPR001878;<br>G3DSA:4.10.1000.10 (GENE3D),<br>PTHR23102 (PANTHER),<br>PTHR23102:SF14 (PANTHER),<br>SSF90229 (SUPERFAMILY)                                               |
| Caenorhabditis elegans  | pleckstrin homology domain family f (with fyve domain) member 2                       | 3 | F:GO:0008270;<br>F:GO:0005515;<br>C:GO:0030133                                                    | - |            | IPR000306; IPR001849; IPR011011;<br>IPR011993; IPR013083; IPR017455;<br>PTHR22835 (PANTHER),<br>PTHR22835:SF40 (PANTHER),<br>SSF50729 (SUPERFAMILY)                                |
| Caenorhabditis elegans  | non-claret disjunctio-1                                                               | 3 | F:GO:0005488;<br>P:GO:0032502;<br>P:GO:0007126                                                    | - |            | IPR001752; PTHR16012 (PANTHER),<br>PTHR16012:SF170 (PANTHER),<br>SSF52540 (SUPERFAMILY)                                                                                            |
| Caenorhabditis elegans  | elegans protein confirmed by transcript evidence                                      | 3 | F:GO:0005488;<br>P:GO:0032502;<br>P:GO:0007126                                                    | - |            | IPR001752; PTHR16012 (PANTHER),<br>PTHR16012:SF170 (PANTHER),<br>SSF52540 (SUPERFAMILY)                                                                                            |
| Caenorhabditis briggsae | briggsae cbr-ile-2 protein                                                            | 4 | P:GO:0018991;<br>C:GO:0016021;<br>P:GO:0009792;<br>F:GO:0005529                                   | - |            | IPR005052; IPR008985; IPR013320;<br>PTHR12223:SF6 (PANTHER), SignalP<br>(SIGNALP)                                                                                                  |
| Caenorhabditis elegans  | cation transporting atpase protein isoform partially confirmed by transcript evidence | 5 | F:GO:0016820;<br>F:GO:0016887;<br>F:GO:0000166;<br>P:GO:0008152;<br>C:GO:0016020                  | - | EC:3.6.3.0 | IPR001757; IPR005834; IPR018303;<br>G3DSA:3.40.1110.10 (GENE3D),<br>G3DSA:3.40.50.1000 (GENE3D),<br>PTHR11939:SF54 (PANTHER),<br>SSF56784 (SUPERFAMILY), SSF81660<br>(SUPERFAMILY) |
| Caenorhabditis elegans  | cation transporting atpase protein isoform partially confirmed by transcript evidence | 5 | F:GO:0016820;<br>F:GO:0016887;<br>F:GO:0000166;<br>P:GO:0008152;<br>C:GO:0016020                  | - | EC:3.6.3.0 | IPR001757; IPR005834; IPR018303;<br>G3DSA:3.40.1110.10 (GENE3D),<br>G3DSA:3.40.50.1000 (GENE3D),<br>PTHR11939:SF54 (PANTHER),<br>SSF56784 (SUPERFAMILY), SSF81660<br>(SUPERFAMILY) |
| Caenorhabditis elegans  | fumarylacetoacetate hydrolase                                                         | 6 | F:GO:0004334;<br>F:GO:0046872;<br>P:GO:0006572;<br>P:GO:0006527;<br>C:GO:0005829;<br>P:GO:0006559 | - | EC:3.7.1.2 | IPR002529; IPR005959; IPR011234;<br>IPR015377; PTHR11820 (PANTHER)                                                                                                                 |
|                         | -                                                                                     | 0 |                                                                                                   |   |            | -                                                                                                                                                                                  |

|                         |                                                       |   |                                                                                                                      |                                                                                  |  |                                                                                                         |
|-------------------------|-------------------------------------------------------|---|----------------------------------------------------------------------------------------------------------------------|----------------------------------------------------------------------------------|--|---------------------------------------------------------------------------------------------------------|
| Caenorhabditis briggsae | riken cd- 2310046k01                                  |   | P:GO:0009792;<br>C:GO:0005887;<br>F:GO:0005515;<br>7 P:GO:0034605;<br>P:GO:0032218;<br>F:GO:0032217;<br>P:GO:0006898 | -                                                                                |  | IPR009357                                                                                               |
| Caenorhabditis briggsae | riken cd- 2310046k01                                  |   | P:GO:0009792;<br>3 P:GO:0006898;<br>C:GO:0016020                                                                     | -                                                                                |  | IPR009357                                                                                               |
| Caenorhabditis briggsae | riken cd- 2310046k01                                  |   | P:GO:0009792;<br>C:GO:0005887;<br>F:GO:0005515;<br>7 P:GO:0034605;<br>P:GO:0032218;<br>F:GO:0032217;<br>P:GO:0006898 | -                                                                                |  | IPR009357                                                                                               |
| Drosophila melanogaster | catsup protein                                        | 0 |                                                                                                                      | C:GO:0016020;<br>P:GO:0055085;<br>P:GO:0030001;<br>F:GO:0046873                  |  | SignalP (SIGNALP)                                                                                       |
| Caenorhabditis briggsae | zinc dhhc-type containing 20                          | 1 | F:GO:0046872                                                                                                         | -                                                                                |  | PTHR22883 (PANTHER), SignalP (SIGNALP)                                                                  |
| Caenorhabditis elegans  | zinc dhhc-type containing 20                          | 1 | F:GO:0046872                                                                                                         | -                                                                                |  | PTHR22883 (PANTHER), SignalP (SIGNALP)                                                                  |
| Caenorhabditis elegans  | metallophosphoesterase 1                              | 6 | P:GO:0016192;<br>F:GO:0046872;<br>C:GO:0005793;<br>C:GO:0044446;<br>F:GO:0016787;<br>C:GO:0005794                    | -                                                                                |  | IPR004843; G3DSA:3.60.21.10 (GENE3D), PTHR13315 (PANTHER), SignalP (SIGNALP), SSF56300 (SUPERFAMILY)    |
| Caenorhabditis elegans  | cg17180 cg17180-pa                                    | 0 |                                                                                                                      |                                                                                  |  | IPR019314; PTHR13440 (PANTHER)                                                                          |
|                         | -                                                     | 0 |                                                                                                                      |                                                                                  |  | -                                                                                                       |
| Caenorhabditis briggsae | cat eye syndrome chromosome candidate 5               | 1 | C:GO:0005739                                                                                                         | -                                                                                |  | G3DSA:3.40.50.1000 (GENE3D), PTHR14269 (PANTHER), PTHR14269:SF2 (PANTHER)                               |
| Brugia malayi           | helicase conserved c-term-l domain containing protein | 0 |                                                                                                                      | F:GO:0003676;<br>F:GO:0004386;<br>F:GO:0005524;<br>F:GO:0016787;<br>F:GO:0008026 |  | -                                                                                                       |
| Loa loa                 | small nuclear ribonucleoprotein sm d1                 | 5 | F:GO:0003676;<br>C:GO:0030532;<br>C:GO:0071011;<br>P:GO:0000398;<br>C:GO:0071013                                     | -                                                                                |  | -                                                                                                       |
| Loa loa                 | small nuclear ribonucleoprotein sm d1                 | 5 | F:GO:0003676;<br>C:GO:0030532;<br>C:GO:0071011;<br>P:GO:0000398;<br>C:GO:0071013                                     | -                                                                                |  | SignalP (SIGNALP)                                                                                       |
|                         | -                                                     | 0 |                                                                                                                      |                                                                                  |  | -                                                                                                       |
| Caenorhabditis elegans  | solute carrier family 25 member 39                    | 1 | C:GO:0016020                                                                                                         | -                                                                                |  | IPR001993; IPR002067; IPR018108; G3DSA:1.50.40.10 (GENE3D), PTHR11896:SF43 (PANTHER), SignalP (SIGNALP) |

|                        |                                                   |  |                                                                                                                                                           |   |                                                                                                                                     |                                                                                                                                            |
|------------------------|---------------------------------------------------|--|-----------------------------------------------------------------------------------------------------------------------------------------------------------|---|-------------------------------------------------------------------------------------------------------------------------------------|--------------------------------------------------------------------------------------------------------------------------------------------|
| Caenorhabditis elegans | solute carrier family 25 member 40                |  | 3<br>C:GO:0016020;<br>C:GO:0005739;<br>P:GO:0006810                                                                                                       | - |                                                                                                                                     | IPR001993; IPR002067; IPR002113;<br>IPR018108; G3DSA:1.50.40.10<br>(GENE3D), PTHR11896:SF43<br>(PANTHER)                                   |
| Caenorhabditis elegans | e3 ubiquitin-protein ligase ubr2                  |  | 0                                                                                                                                                         |   | P:GO:0030163;<br>F:GO:0008270;<br>F:GO:0004842;<br>F:GO:0005515                                                                     | PTHR21497 (PANTHER),<br>PTHR21497:SF6 (PANTHER)                                                                                            |
| Brugia malayi          | calcium homeostasis endoplasmic reticulum protein |  | 0                                                                                                                                                         |   | F:GO:0003723;<br>F:GO:0003676;<br>C:GO:0000786;<br>P:GO:0006396;<br>P:GO:0007283;<br>F:GO:0003677;<br>C:GO:0005634;<br>C:GO:0005622 | PTHR12323 (PANTHER)                                                                                                                        |
| Brugia malayi          | btb poz domain containing protein                 |  | 0                                                                                                                                                         |   | F:GO:0046872;<br>F:GO:0008270;<br>F:GO:0005515;<br>C:GO:0005622                                                                     | IPR007087; IPR015880; SSF57667<br>(SUPERFAMILY)                                                                                            |
| Brugia malayi          | zinc c2h2 type family protein                     |  | 0                                                                                                                                                         |   | F:GO:0008270;<br>C:GO:0005622                                                                                                       | IPR007087; IPR015880; SSF57667<br>(SUPERFAMILY)                                                                                            |
| Caenorhabditis elegans | yqw3_caeel ame: full=uncharacterized protein      |  | 7<br>P:GO:0009792;<br>P:GO:0010171;<br>P:GO:0002119;<br>P:GO:0040002;<br>P:GO:0040010;<br>P:GO:0000003;<br>P:GO:0045132                                   | - |                                                                                                                                     | PTHR13361 (PANTHER),<br>PTHR13361:SF2 (PANTHER)                                                                                            |
| Caenorhabditis elegans | armadillo beta-catenin-like repeat family protein |  | 0                                                                                                                                                         |   | C:GO:0005643;<br>F:GO:0005488;<br>C:GO:0005737;<br>P:GO:0006886;<br>F:GO:0005515;<br>C:GO:0005634;<br>P:GO:0006606;<br>F:GO:0008565 | IPR011989; IPR016024; PTHR23316<br>(PANTHER)                                                                                               |
| Caenorhabditis elegans | acyl- :lyosphosphatidylglycerol acyltransferase 1 |  | 5<br>C:GO:0005737;<br>P:GO:0009792;<br>F:GO:0008415;<br>C:GO:0016021;<br>P:GO:0008152                                                                     | - |                                                                                                                                     | IPR002123; PTHR10983 (PANTHER),<br>PTHR10983:SF2 (PANTHER), SignalP<br>(SIGNALP)                                                           |
| Caenorhabditis elegans | small subunit ribosomal protein 21                |  | 9<br>P:GO:0009792;<br>P:GO:0002119;<br>C:GO:0005840;<br>F:GO:0003735;<br>P:GO:0018996;<br>F:GO:0005515;<br>P:GO:0040010;<br>P:GO:0000003;<br>P:GO:0006412 | - | EC:3.6.5.3                                                                                                                          | IPR001931                                                                                                                                  |
| Caenorhabditis elegans | notchless homolog 1                               |  | 7<br>C:GO:0005730;<br>P:GO:0002119;<br>P:GO:0007219;<br>P:GO:0001826;<br>P:GO:0000003;<br>P:GO:0040007;<br>P:GO:0006898                                   | - |                                                                                                                                     | IPR001632; IPR001680; IPR011046;<br>IPR012972; IPR015943; IPR017986;<br>IPR019775; IPR019781; IPR019782;<br>IPR020472; PTHR19848 (PANTHER) |



|                         |                                                            |    |                                                                                                                                                                       |   |                                                                                                   |                                                                                                                                 |
|-------------------------|------------------------------------------------------------|----|-----------------------------------------------------------------------------------------------------------------------------------------------------------------------|---|---------------------------------------------------------------------------------------------------|---------------------------------------------------------------------------------------------------------------------------------|
| Caenorhabditis briggsae | notchless homolog 1                                        | 7  | C:GO:0005730;<br>P:GO:0002119;<br>P:GO:0007219;<br>P:GO:0001826;<br>P:GO:0000003;<br>P:GO:0006898;<br>P:GO:0040007                                                    | - |                                                                                                   | IPR001632; IPR001680; IPR011046;<br>IPR015943; IPR017986; IPR019775;<br>IPR019781; IPR019782; IPR020472;<br>PTHR19848 (PANTHER) |
| Caenorhabditis elegans  | elegans protein partially confirmed by transcript evidence | 3  | P:GO:0050789;<br>P:GO:0009987;<br>C:GO:0005622                                                                                                                        | - |                                                                                                   | IPR002913; G3DSA:3.30.530.20<br>(GENE3D), PTHR12659 (PANTHER),<br>SSF55961 (SUPERFAMILY)                                        |
| Loa loa                 | d- damage-binding protein 1                                | 10 | P:GO:0043161;<br>P:GO:0000718;<br>P:GO:0000075;<br>F:GO:0003684;<br>C:GO:0031464;<br>C:GO:0031465;<br>P:GO:0042787;<br>F:GO:0005515;<br>C:GO:0005654;<br>C:GO:0005737 | - |                                                                                                   | PTHR10644 (PANTHER),<br>PTHR10644:SF3 (PANTHER)                                                                                 |
| Caenorhabditis briggsae | phospholipase a-2-activating protein                       | 6  | P:GO:0006954;<br>F:GO:0005515;<br>P:GO:0040010;<br>F:GO:0016005;<br>P:GO:0009987;<br>P:GO:0008152                                                                     | - |                                                                                                   | IPR015155; PTHR19849 (PANTHER)                                                                                                  |
| -                       | -                                                          | 0  |                                                                                                                                                                       |   |                                                                                                   | -                                                                                                                               |
| Caenorhabditis briggsae | elegans protein partially confirmed by transcript evidence | 0  |                                                                                                                                                                       |   |                                                                                                   | -                                                                                                                               |
| Caenorhabditis briggsae | elegans protein partially confirmed by transcript evidence | 0  |                                                                                                                                                                       |   | P:GO:0000003;<br>P:GO:0040011;<br>P:GO:0010171;<br>P:GO:0040010;<br>P:GO:0006898;<br>P:GO:0002119 | -                                                                                                                               |
| Caenorhabditis elegans  | nucleoside diphosphate ki-se                               | 4  | P:GO:0009209;<br>F:GO:0000166;<br>F:GO:0016301;<br>P:GO:0046131                                                                                                       | - |                                                                                                   | -                                                                                                                               |
| Caenorhabditis briggsae | mitochondrial ribosomal protein l39                        | 1  | C:GO:0005739                                                                                                                                                          | - |                                                                                                   | IPR015552; IPR018163; PTHR11451<br>(PANTHER)                                                                                    |
| -                       | -                                                          | 0  |                                                                                                                                                                       |   |                                                                                                   | -                                                                                                                               |
| Loa loa                 | polymerase (d- directed) epsilon 3 (p17 subunit)           | 5  | P:GO:0006260;<br>F:GO:0003677;<br>C:GO:0005622;<br>F:GO:0005515;<br>F:GO:0016779                                                                                      | - | EC:2.7.7.0                                                                                        | IPR003958; IPR009072; PTHR11064<br>(PANTHER)                                                                                    |
| Caenorhabditis briggsae | nucleolar protein 6                                        | 0  |                                                                                                                                                                       |   | C:GO:0005694;<br>C:GO:0000794;<br>F:GO:0003723;<br>P:GO:0006364;<br>C:GO:0005634;<br>C:GO:0005730 | IPR005554                                                                                                                       |
| Caenorhabditis elegans  | pin2-interacting protein x1                                | 5  | F:GO:0003676;<br>P:GO:0051276;<br>C:GO:0000776;<br>P:GO:0065007;<br>C:GO:0044428                                                                                      | - |                                                                                                   | IPR000467; PTHR23149 (PANTHER),<br>PTHR23149:SF1 (PANTHER)                                                                      |

|                         |                                                                     |  |   |                                                                                                                    |                               |             |                                                                                                                                                                                        |
|-------------------------|---------------------------------------------------------------------|--|---|--------------------------------------------------------------------------------------------------------------------|-------------------------------|-------------|----------------------------------------------------------------------------------------------------------------------------------------------------------------------------------------|
| Caenorhabditis elegans  | jumonji domain containing 2a                                        |  | 5 | P:GO:0016568;<br>F:GO:0005488;<br>P:GO:0044238;<br>P:GO:0044260;<br>F:GO:0016491                                   | -                             | -           |                                                                                                                                                                                        |
| Caenorhabditis elegans  | hypothetical protein C24G6.3 [Caenorhabditis elegans]               |  | 0 |                                                                                                                    |                               |             | -                                                                                                                                                                                      |
|                         |                                                                     |  | 0 |                                                                                                                    |                               |             | SignalP (SIGNALP)                                                                                                                                                                      |
| Caenorhabditis briggsae | dual specificity mitogen-activated protein ki-se ki-se 6            |  | 7 | P:GO:0043065;<br>F:GO:0004674;<br>F:GO:0005524;<br>F:GO:0005515;<br>P:GO:0042493;<br>P:GO:0000187;<br>P:GO:0060048 | -                             | EC:2.7.11.0 | IPR000719; IPR002290; IPR008271;<br>IPR011009; IPR017441; IPR017442;<br>G3DSA:1.10.510.10 (GENE3D),<br>G3DSA:3.30.200.20 (GENE3D),<br>PTHR22986 (PANTHER),<br>PTHR22986:SF36 (PANTHER) |
| Caenorhabditis briggsae | proteasome ( macropain) activator subunit 4                         |  | 0 |                                                                                                                    | F:GO:0005488                  |             | IPR011989                                                                                                                                                                              |
| Caenorhabditis elegans  | prion-like-(q n-rich)-domain-bearing protein family member (pqn-35) |  | 0 |                                                                                                                    |                               |             | -                                                                                                                                                                                      |
| Caenorhabditis elegans  | prion-like-(q n-rich)-domain-bearing protein family member (pqn-35) |  | 0 |                                                                                                                    |                               |             | -                                                                                                                                                                                      |
| Loa loa                 | bromodomain containing 9                                            |  | 5 | P:GO:0002119;<br>F:GO:0005515;<br>P:GO:0009792;<br>P:GO:0000003;<br>P:GO:0010171                                   | -                             |             | IPR021900; PTHR22881 (PANTHER),<br>PTHR22881:SF3 (PANTHER)                                                                                                                             |
| Caenorhabditis elegans  | bromodomain containing 9                                            |  | 5 | P:GO:0002119;<br>F:GO:0005515;<br>P:GO:0009792;<br>P:GO:0000003;<br>P:GO:0010171                                   | -                             |             | IPR001487; IPR021900; PTHR22881<br>(PANTHER), PTHR22881:SF3<br>(PANTHER)                                                                                                               |
| Caenorhabditis elegans  | bromodomain containing 9                                            |  | 5 | P:GO:0002119;<br>F:GO:0005515;<br>P:GO:0009792;<br>P:GO:0000003;<br>P:GO:0010171                                   | -                             |             | IPR001487; IPR021900; PTHR22881<br>(PANTHER), PTHR22881:SF3<br>(PANTHER)                                                                                                               |
| Caenorhabditis elegans  | bromodomain containing 9                                            |  | 5 | P:GO:0002119;<br>F:GO:0005515;<br>P:GO:0009792;<br>P:GO:0000003;<br>P:GO:0010171                                   | -                             |             | IPR001487; IPR021900; PTHR22881<br>(PANTHER), PTHR22881:SF3<br>(PANTHER)                                                                                                               |
| Caenorhabditis elegans  | est2_caee1 ame: full=esterase cm06b1                                |  | 1 | F:GO:0005515                                                                                                       | -                             |             | IPR002018; IPR019826;<br>G3DSA:3.40.50.1820 (GENE3D),<br>PTHR11559:SF21 (PANTHER),<br>SSF53474 (SUPERFAMILY)                                                                           |
| Caenorhabditis elegans  | est2_caee1 ame: full=esterase cm06b1                                |  | 1 | F:GO:0005515                                                                                                       | -                             |             | IPR002018; IPR019826;<br>G3DSA:3.40.50.1820 (GENE3D),<br>PTHR11559:SF21 (PANTHER),<br>SSF53474 (SUPERFAMILY)                                                                           |
| Tribolium castaneum     | amsh                                                                |  | 0 |                                                                                                                    | F:GO:0003674;<br>C:GO:0005575 |             | SignalP (SIGNALP)                                                                                                                                                                      |
| Caenorhabditis elegans  | n-acetylglucosamine-6-phosphate deacetylase                         |  | 3 | P:GO:0005975;<br>F:GO:0016810;<br>F:GO:0005515                                                                     | -                             |             | IPR006680; G3DSA:3.20.20.140<br>(GENE3D), PTHR11113 (PANTHER),<br>SSF51556 (SUPERFAMILY)                                                                                               |

|                         |                                                            |    |                                                                                                                                                                                                                                                            |   |             |                                                                                                                                                                                                        |
|-------------------------|------------------------------------------------------------|----|------------------------------------------------------------------------------------------------------------------------------------------------------------------------------------------------------------------------------------------------------------|---|-------------|--------------------------------------------------------------------------------------------------------------------------------------------------------------------------------------------------------|
| Caenorhabditis elegans  | elegans protein partially confirmed by transcript evidence | 10 | P:GO:0009056;<br>P:GO:0048856;<br>P:GO:0016486;<br>F:GO:0004222;<br>P:GO:0006508;<br>C:GO:0044444;<br>P:GO:0007275;<br>F:GO:0042803;<br>P:GO:0044237;<br>C:GO:0016020                                                                                      | - | EC:3.4.24.0 | IPR000718; IPR008753; IPR018497;<br>G3DSA:3.40.390.10 (GENE3D),<br>PTHR11733:SF15 (PANTHER),<br>SSF55486 (SUPERFAMILY)                                                                                 |
| Caenorhabditis elegans  | d--directed r- polymerase ii subunit rpb2                  | 15 | F:GO:0003899;<br>P:GO:0040010;<br>P:GO:0008340;<br>F:GO:0004672;<br>P:GO:0006367;<br>F:GO:0046872;<br>P:GO:0000003;<br>P:GO:0008380;<br>C:GO:0005665;<br>F:GO:0003677;<br>P:GO:0002119;<br>F:GO:0005515;<br>P:GO:0006368;<br>F:GO:0032549;<br>P:GO:0009792 | - | EC:2.7.7.6  | IPR007120; IPR007644; IPR007645;<br>IPR007646; IPR007647; IPR015712;<br>G3DSA:3.90.1100.10 (GENE3D),<br>PTHR20856:SF7 (PANTHER), SSF64484<br>(SUPERFAMILY)                                             |
| Caenorhabditis briggsae | d- polymerase delta catalytic subunit                      | 14 | C:GO:0005875;<br>P:GO:0000910;<br>F:GO:0003887;<br>F:GO:0008310;<br>C:GO:0043625;<br>F:GO:0003677;<br>P:GO:0006272;<br>P:GO:0035188;<br>P:GO:0002119;<br>F:GO:0000166;<br>P:GO:0006898;<br>P:GO:0006273;<br>P:GO:0009792;<br>P:GO:0006974                  | - | EC:2.7.7.7  | IPR006133; IPR006134; IPR006172;<br>IPR012337; IPR017964;<br>G3DSA:3.30.420.10 (GENE3D),<br>G3DSA:3.90.1600.10 (GENE3D),<br>PTHR10322 (PANTHER),<br>PTHR10322:SF4 (PANTHER), SSF56672<br>(SUPERFAMILY) |
| Caenorhabditis briggsae | dead eye                                                   | 2  | P:GO:0006810;<br>C:GO:0005634                                                                                                                                                                                                                              | - |             | IPR007231                                                                                                                                                                                              |
| Loa loa                 | hypothetical protein LOAG_00531 [Loa loa]                  | 0  |                                                                                                                                                                                                                                                            |   |             | -                                                                                                                                                                                                      |

|                         |                                                       |    |                                                                                                                                                                                                                                                                                              |                                                                                                                                                      |            |                                                                                                                                                                                        |
|-------------------------|-------------------------------------------------------|----|----------------------------------------------------------------------------------------------------------------------------------------------------------------------------------------------------------------------------------------------------------------------------------------------|------------------------------------------------------------------------------------------------------------------------------------------------------|------------|----------------------------------------------------------------------------------------------------------------------------------------------------------------------------------------|
| Caenorhabditis elegans  | mr- capping enzyme                                    | 17 | P:GO:0040010;<br>P:GO:0008340;<br>P:GO:0006259;<br>C:GO:0005622;<br>P:GO:0000003;<br>F:GO:0008186;<br>P:GO:0018996;<br>F:GO:0016791;<br>P:GO:0010171;<br>F:GO:0016740;<br>P:GO:0019915;<br>P:GO:0002119;<br>P:GO:0006370;<br>P:GO:0040017;<br>P:GO:0006898;<br>P:GO:0002009;<br>P:GO:0009792 | -                                                                                                                                                    | EC:3.1.3.0 | IPR000340; IPR000387; IPR001339;<br>IPR016130; G3DSA:3.30.470.30<br>(GENE3D), G3DSA:3.90.190.10<br>(GENE3D), PTHR10367 (PANTHER),<br>SSF52799 (SUPERFAMILY), SSF56091<br>(SUPERFAMILY) |
| Brugia malayi           | cleavage stimulation factor subunit 2                 | 7  | C:GO:0005730;<br>P:GO:0006378;<br>P:GO:0008380;<br>F:GO:0003676;<br>F:GO:0005515;<br>P:GO:0006379;<br>F:GO:0000166                                                                                                                                                                           | -                                                                                                                                                    |            | IPR000504; IPR012677; PTHR23139<br>(PANTHER), PTHR23139:SF8<br>(PANTHER), SignalP (SIGNALP),<br>SSF54928 (SUPERFAMILY)                                                                 |
| Caenorhabditis elegans  | hypothetical protein T23B3.2 [Caenorhabditis elegans] | 1  | C:GO:0016021                                                                                                                                                                                                                                                                                 | -                                                                                                                                                    |            | IPR000612; SignalP (SIGNALP)                                                                                                                                                           |
| Caenorhabditis elegans  | hypothetical protein W02D7.3 [Caenorhabditis elegans] | 0  |                                                                                                                                                                                                                                                                                              |                                                                                                                                                      |            | -                                                                                                                                                                                      |
| Caenorhabditis elegans  | psp family protein                                    | 0  |                                                                                                                                                                                                                                                                                              | P:GO:0006397;<br>P:GO:0008380;<br>F:GO:0003676;<br>F:GO:0008270;<br>F:GO:0003674;<br>C:GO:0005575;<br>C:GO:0005681;<br>F:GO:0046872;<br>P:GO:0008150 |            | IPR006568; PTHR13316 (PANTHER)                                                                                                                                                         |
| Haemonchus contortus    | zinc metalloproteinase                                | 2  | P:GO:0008152;<br>F:GO:0008237                                                                                                                                                                                                                                                                | -                                                                                                                                                    |            | IPR000718; IPR008753;<br>G3DSA:1.10.1380.10 (GENE3D),<br>PTHR11733:SF15 (PANTHER), SignalP<br>(SIGNALP), SSF55486 (SUPERFAMILY)                                                        |
| Caenorhabditis briggsae | mesoderm induction early response 1                   | 1  | P:GO:0000003                                                                                                                                                                                                                                                                                 | -                                                                                                                                                    |            | IPR000949; IPR001005; IPR009057;<br>IPR017884; PTHR10865 (PANTHER),<br>PTHR10865:SF1 (PANTHER)                                                                                         |
| Caenorhabditis briggsae | myb-like d-binding domain containing protein          | 3  | P:GO:0009987;<br>P:GO:0000003;<br>C:GO:0044424                                                                                                                                                                                                                                               | -                                                                                                                                                    |            | IPR000949; IPR001005; IPR009057;<br>IPR017884; PTHR10865 (PANTHER),<br>PTHR10865:SF1 (PANTHER)                                                                                         |
| Caenorhabditis elegans  | membrane-bound transcription factor site 2            | 0  |                                                                                                                                                                                                                                                                                              | P:GO:0001501;<br>P:GO:0006508;<br>F:GO:0003674;<br>C:GO:0016020;<br>F:GO:0008233;<br>P:GO:0008150;<br>F:GO:0004222                                   |            | IPR008915; PTHR13325 (PANTHER)                                                                                                                                                         |
| Caenorhabditis elegans  | ypc1_caeel ame: full=uncharacterized protein          | 0  |                                                                                                                                                                                                                                                                                              |                                                                                                                                                      |            | -                                                                                                                                                                                      |
| Loa loa                 | abnormal cell lineage protein 37                      | 4  | F:GO:0003723;<br>C:GO:0005634;<br>F:GO:0000166;<br>P:GO:0008380                                                                                                                                                                                                                              | -                                                                                                                                                    |            | -                                                                                                                                                                                      |
| -                       | -                                                     | 0  |                                                                                                                                                                                                                                                                                              |                                                                                                                                                      |            | SignalP (SIGNALP)                                                                                                                                                                      |

|                           |                                                                                                                                                                                      |   |                                                                                                                    |                                                                                                                                                      |            |                                                                                                                                     |
|---------------------------|--------------------------------------------------------------------------------------------------------------------------------------------------------------------------------------|---|--------------------------------------------------------------------------------------------------------------------|------------------------------------------------------------------------------------------------------------------------------------------------------|------------|-------------------------------------------------------------------------------------------------------------------------------------|
| Heligmosomoides polygyrus | cytosolic glutathione s-transferase 1                                                                                                                                                | 4 | P:GO:0008340;<br>P:GO:0040010;<br>F:GO:0005515;<br>F:GO:0016740                                                    | -                                                                                                                                                    |            | IPR004045; IPR004046; IPR010987;<br>IPR012335; IPR012336; IPR017933;<br>PTHR11571 (PANTHER),<br>PTHR11571:SF6 (PANTHER)             |
|                           | -                                                                                                                                                                                    | 0 |                                                                                                                    |                                                                                                                                                      |            | SignalP (SIGNALP)                                                                                                                   |
| Caenorhabditis elegans    | a chain crystal spectroscopic and catalytic properties of cobalt copper nickel and mercury derivatives of the zinc endopeptidase a correlation of structure and proteolytic activity | 2 | F:GO:0016787;<br>P:GO:0007413                                                                                      | -                                                                                                                                                    |            | IPR001506; G3DSA:3.40.390.10 (GENE3D), PTHR10127 (PANTHER), PTHR10127:SF73 (PANTHER), SSF55486 (SUPERFAMILY)                        |
| Caenorhabditis elegans    | high choriolytic enzyme 1 precursor                                                                                                                                                  | 2 | F:GO:0016787;<br>P:GO:0007413                                                                                      | -                                                                                                                                                    |            | IPR001506; G3DSA:3.40.390.10 (GENE3D), PTHR10127 (PANTHER), PTHR10127:SF73 (PANTHER), SSF55486 (SUPERFAMILY)                        |
| Caenorhabditis elegans    | high choriolytic enzyme 1 precursor                                                                                                                                                  | 2 | F:GO:0016787;<br>P:GO:0007413                                                                                      | -                                                                                                                                                    |            | IPR001506; G3DSA:3.40.390.10 (GENE3D), PTHR10127 (PANTHER), PTHR10127:SF73 (PANTHER), SSF55486 (SUPERFAMILY)                        |
| Caenorhabditis elegans    | hatching enzyme                                                                                                                                                                      | 2 | F:GO:0016787;<br>P:GO:0007413                                                                                      | -                                                                                                                                                    |            | IPR001506; G3DSA:3.40.390.10 (GENE3D), PTHR10127 (PANTHER), PTHR10127:SF73 (PANTHER), SSF55486 (SUPERFAMILY)                        |
| Caenorhabditis elegans    | novel protein hatching enzymes                                                                                                                                                       | 2 | F:GO:0016787;<br>P:GO:0007413                                                                                      | -                                                                                                                                                    |            | IPR001506; IPR006026;<br>G3DSA:3.40.390.10 (GENE3D),<br>PTHR10127 (PANTHER),<br>PTHR10127:SF73 (PANTHER),<br>SSF55486 (SUPERFAMILY) |
| Caenorhabditis elegans    | hypothetical protein F56E10.1 [Caenorhabditis elegans]                                                                                                                               | 0 |                                                                                                                    |                                                                                                                                                      |            | IPR011990; PTHR23405 (PANTHER),<br>PTHR23405:SF2 (PANTHER)                                                                          |
| Caenorhabditis elegans    | elegans protein confirmed by transcript evidence                                                                                                                                     | 0 |                                                                                                                    | P:GO:0051301;<br>P:GO:0009792;<br>P:GO:0007126                                                                                                       |            | IPR008574                                                                                                                           |
| Caenorhabditis briggsae   | briggsae cbr-lin-36 protein                                                                                                                                                          | 0 |                                                                                                                    | F:GO:0003676;<br>F:GO:0008270;<br>C:GO:0005622                                                                                                       |            | IPR006612; IPR015880                                                                                                                |
| Caenorhabditis elegans    | g e synthetase (glutamate-ammonia ligase) family member (gln-3)                                                                                                                      | 7 | P:GO:0045213;<br>P:GO:0007416;<br>P:GO:0006542;<br>F:GO:0005524;<br>F:GO:0004356;<br>P:GO:0006538;<br>C:GO:0005737 | -                                                                                                                                                    | EC:6.3.1.2 | SignalP (SIGNALP)                                                                                                                   |
| Loa loa                   | chitin binding peritrophin-a domain containing protein                                                                                                                               | 0 |                                                                                                                    | P:GO:0000281;<br>F:GO:0008061;<br>P:GO:0051301;<br>P:GO:0007275;<br>P:GO:0009790;<br>C:GO:0005576;<br>F:GO:0005515;<br>P:GO:0007049;<br>P:GO:0006030 |            | IPR002557; G3DSA:2.170.140.10 (GENE3D), PTHR23301 (PANTHER)                                                                         |

|                         |                                                                 |   |                                                                                                                    |                                                                                                                                                                                        |            |                                                                                                        |
|-------------------------|-----------------------------------------------------------------|---|--------------------------------------------------------------------------------------------------------------------|----------------------------------------------------------------------------------------------------------------------------------------------------------------------------------------|------------|--------------------------------------------------------------------------------------------------------|
| Caenorhabditis briggsae | briggsae cbr-cpg-2 protein                                      | 0 |                                                                                                                    | P:GO:0000281;<br>F:GO:0008061;<br>P:GO:0051301;<br>P:GO:0009792;<br>P:GO:0007275;<br>P:GO:0009790;<br>C:GO:0005576;<br>P:GO:0030703;<br>F:GO:0005515;<br>P:GO:0007049;<br>P:GO:0006030 |            | IPR002557; G3DSA:2.170.140.10 (GENE3D), PTHR23301 (PANTHER)                                            |
| Loa loa                 | chitin binding peritrophin-a domain containing protein          | 0 |                                                                                                                    | P:GO:0000281;<br>F:GO:0008061;<br>P:GO:0051301;<br>P:GO:0007275;<br>P:GO:0009790;<br>C:GO:0005576;<br>F:GO:0005515;<br>P:GO:0007049;<br>P:GO:0006030                                   |            | IPR002557; G3DSA:2.170.140.10 (GENE3D), PTHR23301 (PANTHER)                                            |
| Loa loa                 | chitin binding peritrophin-a domain containing protein          | 0 |                                                                                                                    | P:GO:0000281;<br>F:GO:0008061;<br>P:GO:0051301;<br>P:GO:0007275;<br>P:GO:0009790;<br>C:GO:0005576;<br>F:GO:0005515;<br>P:GO:0007049;<br>P:GO:0006030                                   |            | IPR002557; G3DSA:2.170.140.10 (GENE3D), PTHR23301 (PANTHER)                                            |
| Caenorhabditis elegans  | g e synthetase (glutamate-ammonia ligase) family member (gln-3) | 7 | P:GO:0045213;<br>P:GO:0007416;<br>P:GO:0006542;<br>F:GO:0005524;<br>F:GO:0004356;<br>P:GO:0006538;<br>C:GO:0005737 | -                                                                                                                                                                                      | EC:6.3.1.2 | IPR008146; IPR008147; IPR014746; PTHR20852 (PANTHER), PTHR20852:SF14 (PANTHER), SSF55931 (SUPERFAMILY) |
| Loa loa                 | chitin binding peritrophin-a domain containing protein          | 0 |                                                                                                                    | P:GO:0000281;<br>F:GO:0008061;<br>P:GO:0051301;<br>P:GO:0007275;<br>P:GO:0009790;<br>C:GO:0005576;<br>F:GO:0005515;<br>P:GO:0007049;<br>P:GO:0006030                                   |            | IPR002557; G3DSA:2.170.140.10 (GENE3D), PTHR23301 (PANTHER)                                            |
| Caenorhabditis elegans  | pecanex-like protein 1                                          | 1 | P:GO:0040011                                                                                                       | -                                                                                                                                                                                      |            | -                                                                                                      |
| Caenorhabditis elegans  | pecanex-like protein 1                                          | 1 | P:GO:0040011                                                                                                       | -                                                                                                                                                                                      |            | -                                                                                                      |
| Caenorhabditis elegans  | pecanex-like protein 1                                          | 0 |                                                                                                                    | C:GO:0016021;<br>P:GO:0040011                                                                                                                                                          |            | -                                                                                                      |
| Caenorhabditis elegans  | pecanex-like protein 1                                          | 0 |                                                                                                                    | C:GO:0016021;<br>P:GO:0040011                                                                                                                                                          |            | -                                                                                                      |
| Caenorhabditis briggsae | skeletal muscle cells re-entry induced                          | 3 | P:GO:0018991;<br>F:GO:0005488;<br>P:GO:0040011                                                                     | -                                                                                                                                                                                      |            | -                                                                                                      |

|                         |                                            |   |                                                                                                                    |                                                                                  |             |                                                                                                                      |
|-------------------------|--------------------------------------------|---|--------------------------------------------------------------------------------------------------------------------|----------------------------------------------------------------------------------|-------------|----------------------------------------------------------------------------------------------------------------------|
| Caenorhabditis elegans  | boc homolog                                | 2 | P:GO:0009987;<br>C:GO:0044464                                                                                      | -                                                                                |             | IPR003598; IPR003599; IPR007110;<br>IPR013783; PTHR10489 (PANTHER),<br>SignalIP (SIGNALP), SSF48726<br>(SUPERFAMILY) |
| Caenorhabditis elegans  | abnormal chemotaxis family member (tax-6)  | 4 | P:GO:0006470;<br>P:GO:0051533;<br>F:GO:0004722;<br>F:GO:0005515                                                    | -                                                                                |             | IPR004843; IPR006186;<br>G3DSA:3.60.21.10 (GENE3D),<br>PTHR11668:SF15 (PANTHER),<br>SSF56300 (SUPERFAMILY)           |
|                         |                                            | 0 |                                                                                                                    |                                                                                  |             |                                                                                                                      |
| Caenorhabditis elegans  | cg13189-pa                                 | 4 | P:GO:0030001;<br>C:GO:0016020;<br>F:GO:0046873;<br>P:GO:0055085                                                    | -                                                                                |             | SignalIP (SIGNALP)                                                                                                   |
| Caenorhabditis elegans  | zinc zip family                            | 4 | C:GO:0016021;<br>F:GO:0046873;<br>P:GO:0034220;<br>P:GO:0006829                                                    | -                                                                                |             | -                                                                                                                    |
| Caenorhabditis briggsae | kinesin-like protein family member (klp-4) | 5 | P:GO:0007018;<br>F:GO:0005515;<br>F:GO:0005524;<br>F:GO:0003777;<br>C:GO:0005874                                   | -                                                                                |             | IPR000253; IPR008984; PTHR16012<br>(PANTHER), PTHR16012:SF67<br>(PANTHER)                                            |
| Taeniopygia guttata     | splicing arginine serine-rich 4            | 2 | F:GO:0005488;<br>P:GO:0008380                                                                                      | -                                                                                |             | IPR000504; IPR012677; PTHR10548<br>(PANTHER), SSF54928 (SUPERFAMILY)                                                 |
| Salmo salar             | splicing arginine serine-rich 5            | 7 | P:GO:0040009;<br>P:GO:0007283;<br>P:GO:0008380;<br>F:GO:0003723;<br>P:GO:0007275;<br>C:GO:0005882;<br>C:GO:0005634 | -                                                                                |             | IPR000504; IPR012677; PTHR10548<br>(PANTHER), SSF54928 (SUPERFAMILY)                                                 |
| Loa loa                 | splicing arginine serine-rich 5            | 3 | C:GO:0005882;<br>F:GO:0003676;<br>F:GO:0000166                                                                     | -                                                                                |             | -                                                                                                                    |
| Taeniopygia guttata     | splicing arginine serine-rich 4            | 4 | P:GO:0008380;<br>F:GO:0005488;<br>P:GO:0016311;<br>F:GO:0004721                                                    | -                                                                                | EC:3.1.3.16 | IPR000504; IPR012677; PTHR10548<br>(PANTHER), SSF54928 (SUPERFAMILY)                                                 |
| Caenorhabditis elegans  | ccr4-not transcription complex subunit 1   | 2 | P:GO:0048731;<br>P:GO:0009987                                                                                      | -                                                                                |             | PTHR13162 (PANTHER)                                                                                                  |
| Ancylostoma ceylanicum  | secreted protein 5 precursor               | 0 |                                                                                                                    | C:GO:0005576                                                                     |             | IPR014044                                                                                                            |
| Ancylostoma caninum     | secreted protein asp-2                     | 0 |                                                                                                                    | F:GO:0009055;<br>P:GO:0019646;<br>P:GO:0040011;<br>P:GO:0006898;<br>C:GO:0005576 |             | IPR001283; IPR014044;<br>PTHR10334:SF11 (PANTHER)                                                                    |
| Caenorhabditis elegans  | ethylmalonic encephalopathy 1              | 2 | F:GO:0016787;<br>C:GO:0005739                                                                                      | -                                                                                |             | IPR001279; G3DSA:3.60.15.10<br>(GENE3D), PTHR11935 (PANTHER),<br>PTHR11935:SF10 (PANTHER),<br>SSF56281 (SUPERFAMILY) |
| Caenorhabditis briggsae | large subunit ribosomal protein 32         | 7 | P:GO:0002119;<br>C:GO:0005840;<br>F:GO:0003735;<br>P:GO:0018996;<br>P:GO:0000003;<br>P:GO:0040007;<br>P:GO:0006412 | -                                                                                | EC:3.6.5.3  | IPR001515; IPR018263; PTHR23413<br>(PANTHER)                                                                         |

|                             |                                                      |   |                                                                                                                    |   |                                                                                                                                                                                             |
|-----------------------------|------------------------------------------------------|---|--------------------------------------------------------------------------------------------------------------------|---|---------------------------------------------------------------------------------------------------------------------------------------------------------------------------------------------|
| Caenorhabditis elegans      | merlin moesin ezrin radixin                          | 5 | C:GO:0005856;<br>P:GO:0009792;<br>C:GO:0005737;<br>F:GO:0008092;<br>C:GO:0019898                                   | - | IPR000299; IPR000798; IPR014352;<br>IPR018979; IPR019748; IPR019749;<br>IPR019750; G3DSA:3.10.20.90<br>(GENE3D), PTHR23281 (PANTHER),<br>PTHR23281:SF1 (PANTHER), SSF54236<br>(SUPERFAMILY) |
| Caenorhabditis elegans      | fas associated factor 1                              | 7 | F:GO:0005515;<br>P:GO:0048518;<br>P:GO:0008219;<br>P:GO:0030163;<br>P:GO:0050794;<br>C:GO:0044444;<br>C:GO:0005634 | - | IPR001012; IPR006577;<br>G3DSA:3.10.20.90 (GENE3D),<br>PTHR23322 (PANTHER),<br>PTHR23322:SF5 (PANTHER), SSF54236<br>(SUPERFAMILY)                                                           |
| Caenorhabditis briggsae     | briggsae cbr-rnf-121 protein                         | 2 | F:GO:0008270;<br>F:GO:0005515                                                                                      | - | IPR001841; IPR013083; IPR018957;<br>PTHR13407 (PANTHER), SSF57850<br>(SUPERFAMILY)                                                                                                          |
| -                           | -                                                    | 0 | -                                                                                                                  | - | -                                                                                                                                                                                           |
| Plasmodium vivax Sal-1      | hypothetical protein [Plasmodium vivax Sal-1]        | 0 | -                                                                                                                  | - | -                                                                                                                                                                                           |
| Plasmodium vivax Sal-1      | hypothetical protein [Plasmodium vivax Sal-1]        | 0 | -                                                                                                                  | - | -                                                                                                                                                                                           |
| -                           | -                                                    | 0 | -                                                                                                                  | - | -                                                                                                                                                                                           |
| Plasmodium vivax Sal-1      | hypothetical protein [Plasmodium vivax Sal-1]        | 0 | -                                                                                                                  | - | -                                                                                                                                                                                           |
| Caenorhabditis briggsae     | zinc finger protein 622                              | 6 | P:GO:0009792;<br>F:GO:0046872;<br>C:GO:0005622;<br>P:GO:0016246;<br>P:GO:0040010;<br>P:GO:0000003                  | - | IPR003604; IPR007087; IPR015880;<br>IPR022755; PTHR13182 (PANTHER),<br>SSF57667 (SUPERFAMILY)                                                                                               |
| Brugia malayi               | disco-interacting protein 2 homolog c                | 2 | P:GO:0008152;<br>F:GO:0016874                                                                                      | - | IPR000873; G3DSA:2.30.38.10<br>(GENE3D), G3DSA:3.40.50.980<br>(GENE3D), PTHR22754 (PANTHER),<br>PTHR22754:SF8 (PANTHER), SSF56801<br>(SUPERFAMILY)                                          |
| Caenorhabditis elegans      | family with sequence similarity member isoform cra_a | 1 | F:GO:0005515                                                                                                       | - | -                                                                                                                                                                                           |
| Caenorhabditis elegans      | family with sequence similarity member isoform cra_a | 1 | F:GO:0005515                                                                                                       | - | -                                                                                                                                                                                           |
| Angiostrongylus cantonensis | grp1 protein                                         | 2 | P:GO:0040018;<br>F:GO:0005515                                                                                      | - | -                                                                                                                                                                                           |
| -                           | -                                                    | 0 | -                                                                                                                  | - | SignalP (SIGNALP)                                                                                                                                                                           |
| -                           | -                                                    | 0 | -                                                                                                                  | - | -                                                                                                                                                                                           |
| -                           | -                                                    | 0 | -                                                                                                                  | - | -                                                                                                                                                                                           |
| Heligmosomoides polygyrus   | tropomyosin                                          | 6 | C:GO:0005737;<br>P:GO:0009790;<br>P:GO:0007015;<br>P:GO:0034609;<br>P:GO:0040011;<br>F:GO:0051015                  | - | IPR000533; G3DSA:1.20.5.340<br>(GENE3D), PTHR19269 (PANTHER),<br>PTHR19269:SF11 (PANTHER)                                                                                                   |
| Heligmosomoides polygyrus   | tropomyosin                                          | 6 | C:GO:0005737;<br>P:GO:0009790;<br>P:GO:0007015;<br>P:GO:0034609;<br>P:GO:0040011;<br>F:GO:0051015                  | - | IPR000533; PD936484 (PRODOM),<br>G3DSA:1.20.5.340 (GENE3D),<br>PTHR19269 (PANTHER),<br>PTHR19269:SF11 (PANTHER)                                                                             |
| Heligmosomoides polygyrus   | tropomyosin                                          | 6 | C:GO:0005737;<br>P:GO:0009790;<br>P:GO:0007015;<br>P:GO:0034609;<br>P:GO:0040011;<br>F:GO:0051015                  | - | IPR000533; G3DSA:1.20.5.340<br>(GENE3D), PTHR19269 (PANTHER),<br>PTHR19269:SF11 (PANTHER)                                                                                                   |



|                         |                                                  |    |                                                                                                                                                                                                                                                                             |   |            |                                                                                                 |
|-------------------------|--------------------------------------------------|----|-----------------------------------------------------------------------------------------------------------------------------------------------------------------------------------------------------------------------------------------------------------------------------|---|------------|-------------------------------------------------------------------------------------------------|
| Brugia malayi           | d- replication licensing factor mcm3             | 16 | F:GO:0016851;<br>P:GO:0006268;<br>P:GO:0000910;<br>P:GO:0007049;<br>P:GO:0045449;<br>P:GO:0015995;<br>C:GO:0042555;<br>P:GO:0040035;<br>F:GO:0003677;<br>F:GO:0005524;<br>C:GO:0000785;<br>F:GO:0016887;<br>F:GO:0005515;<br>P:GO:0030174;<br>P:GO:0009792;<br>F:GO:0003682 | - | EC:6.6.1.1 | IPR001208; IPR008046; IPR012340;<br>IPR016027; PTHR11630 (PANTHER),<br>PTHR11630:SF46 (PANTHER) |
|                         | -                                                | 0  |                                                                                                                                                                                                                                                                             |   |            | -                                                                                               |
| Caenorhabditis elegans  | elegans protein confirmed by transcript evidence | 4  | P:GO:0006284;<br>F:GO:0005488;<br>F:GO:0019104;<br>C:GO:0042644                                                                                                                                                                                                             | - |            | -                                                                                               |
| Caenorhabditis elegans  | sy-ptic vesicle-associated integral membrane     | 5  | C:GO:0008021;<br>F:GO:0005484;<br>P:GO:0035149;<br>P:GO:0016081;<br>C:GO:0005886                                                                                                                                                                                            | - |            | IPR001388; G3DSA:1.20.5.110<br>(GENE3D), PTHR21136 (PANTHER)                                    |
|                         | -                                                | 0  |                                                                                                                                                                                                                                                                             |   |            | -                                                                                               |
|                         | -                                                | 0  |                                                                                                                                                                                                                                                                             |   |            | -                                                                                               |
| Caenorhabditis elegans  | hypothetical kda protein in chromosome iii       | 11 | P:GO:0006412;<br>P:GO:0051078;<br>P:GO:0001745;<br>P:GO:0048132;<br>P:GO:0048137;<br>P:GO:0007067;<br>P:GO:0007054;<br>P:GO:0008315;<br>C:GO:0005737;<br>C:GO:0005634;<br>P:GO:0030718                                                                                      | - | EC:3.6.5.3 | IPR004405; IPR005140; IPR005141                                                                 |
| Caenorhabditis briggsae | cancer susceptibility candidate 3                | 6  | P:GO:0044238;<br>P:GO:0044260;<br>F:GO:0042802;<br>P:GO:0008298;<br>C:GO:0030529;<br>C:GO:0005634                                                                                                                                                                           | - |            | IPR018545                                                                                       |
| Caenorhabditis briggsae | cancer susceptibility candidate 3                | 6  | P:GO:0044238;<br>P:GO:0044260;<br>F:GO:0042802;<br>P:GO:0008298;<br>C:GO:0030529;<br>C:GO:0005634                                                                                                                                                                           | - |            | IPR018545                                                                                       |

|                         |                                                               |    |                                                                                                                                                                                                                                                                                                                                                 |                                                                                                   |                                                                                                                                                                  |
|-------------------------|---------------------------------------------------------------|----|-------------------------------------------------------------------------------------------------------------------------------------------------------------------------------------------------------------------------------------------------------------------------------------------------------------------------------------------------|---------------------------------------------------------------------------------------------------|------------------------------------------------------------------------------------------------------------------------------------------------------------------|
| Caenorhabditis briggsae | briggsae cbr-ceh-20 protein                                   | 20 | P:GO:0008340;<br>F:GO:0030528;<br>P:GO:0018991;<br>F:GO:0005515;<br>P:GO:0040027;<br>P:GO:0040010;<br>P:GO:0006898;<br>P:GO:0009952;<br>P:GO:0030326;<br>C:GO:0005667;<br>P:GO:0009792;<br>F:GO:0043565;<br>P:GO:0007501;<br>P:GO:0042692;<br>F:GO:0003700;<br>P:GO:0010171;<br>P:GO:0045944;<br>P:GO:0009954;<br>F:GO:0003682;<br>P:GO:0016477 | -                                                                                                 | IPR001356; IPR005542; IPR009057;<br>IPR012287; IPR017970; PTHR11850<br>(PANTHER), PTHR11850:SF2<br>(PANTHER)                                                     |
| Caenorhabditis briggsae | hepatocyte growth factor-regulated tyrosine ki-se substrate   | 4  | C:GO:0005829;<br>C:GO:0005769;<br>P:GO:0046426;<br>F:GO:0019904                                                                                                                                                                                                                                                                                 | -                                                                                                 | IPR000306; IPR002014; IPR003903;<br>IPR008942; IPR011011; IPR013083;<br>IPR017455; IPR018205; PTHR13856<br>(PANTHER), PTHR13856:SF9<br>(PANTHER), PF12210 (PFAM) |
| Caenorhabditis briggsae | hepatocyte growth factor-regulated tyrosine ki-se substrate   | 4  | C:GO:0005829;<br>C:GO:0005769;<br>P:GO:0046426;<br>F:GO:0019904                                                                                                                                                                                                                                                                                 | -                                                                                                 | IPR000306; IPR002014; IPR003903;<br>IPR008942; IPR011011; IPR013083;<br>IPR017455; IPR018205; PTHR13856<br>(PANTHER), PTHR13856:SF9<br>(PANTHER), PF12210 (PFAM) |
| Caenorhabditis briggsae | exocyst complex component 3                                   | 0  |                                                                                                                                                                                                                                                                                                                                                 | F:GO:0003674;<br>P:GO:0006887;<br>P:GO:0008150;<br>P:GO:0015031;<br>P:GO:0006810;<br>C:GO:0005575 | IPR010326; PTHR21292:SF5<br>(PANTHER)                                                                                                                            |
| Caenorhabditis briggsae | exocyst complex component 3                                   | 0  |                                                                                                                                                                                                                                                                                                                                                 | F:GO:0003674;<br>P:GO:0006887;<br>P:GO:0008150;<br>P:GO:0015031;<br>P:GO:0006810;<br>C:GO:0005575 | IPR010326; PTHR21292:SF5<br>(PANTHER)                                                                                                                            |
| Caenorhabditis elegans  | briggsae cbr-ehbp-1 protein                                   | 0  |                                                                                                                                                                                                                                                                                                                                                 | F:GO:0005509                                                                                      | IPR022735                                                                                                                                                        |
| Caenorhabditis briggsae | ys96_caee1 ame: full= g-protein coupled receptor-like protein | 1  | P:GO:0040010                                                                                                                                                                                                                                                                                                                                    | -                                                                                                 | IPR000276; IPR017452;<br>G3DSA:1.20.1070.10 (GENE3D),<br>PTHR19264 (PANTHER), SSF81321<br>(SUPERFAMILY)                                                          |
| Caenorhabditis briggsae | nucleoporin 50kda                                             | 1  | P:GO:0000003                                                                                                                                                                                                                                                                                                                                    | -                                                                                                 | IPR011993; PTHR13118 (PANTHER),<br>SSF50729 (SUPERFAMILY)                                                                                                        |

|                         |                                                                        |    |                                                                                                                                                                                                                                                                                                                                                 |                                                |              |                                                                                                                            |
|-------------------------|------------------------------------------------------------------------|----|-------------------------------------------------------------------------------------------------------------------------------------------------------------------------------------------------------------------------------------------------------------------------------------------------------------------------------------------------|------------------------------------------------|--------------|----------------------------------------------------------------------------------------------------------------------------|
| Caenorhabditis briggsae | peptidylglycine alpha-hydroxylating monooxyge-se                       | 20 | P:GO:0008340;<br>F:GO:0051087;<br>C:GO:0016020;<br>P:GO:0016458;<br>P:GO:0007613;<br>P:GO:0035186;<br>P:GO:0021954;<br>P:GO:0030708;<br>P:GO:0006697;<br>P:GO:0030713;<br>F:GO:0035302;<br>P:GO:0006518;<br>C:GO:0005730;<br>P:GO:0001700;<br>P:GO:0035075;<br>F:GO:0004504;<br>P:GO:0055114;<br>F:GO:0003682;<br>C:GO:0005783;<br>F:GO:0005507 | -                                              | EC:1.14.17.3 | IPR000323; IPR000720; IPR000945;<br>IPR008977; IPR014784;<br>PTHR10157:SF3 (PANTHER), PF03712<br>(PFAM), SignalP (SIGNALP) |
| Caenorhabditis briggsae | Hypothetical protein CBG08512 [Caenorhabditis briggsae]                | 0  |                                                                                                                                                                                                                                                                                                                                                 |                                                |              | IPR007087; IPR015880                                                                                                       |
|                         | -                                                                      | 0  |                                                                                                                                                                                                                                                                                                                                                 |                                                |              | SignalP (SIGNALP)                                                                                                          |
|                         | -                                                                      | 0  |                                                                                                                                                                                                                                                                                                                                                 |                                                |              | SignalP (SIGNALP)                                                                                                          |
|                         | -                                                                      | 0  |                                                                                                                                                                                                                                                                                                                                                 |                                                |              | -                                                                                                                          |
| Caenorhabditis elegans  | acetyl- hydrolase transferase family protein                           | 6  | F:GO:0008775;<br>F:GO:0019239;<br>C:GO:0005811;<br>P:GO:0009168;<br>P:GO:0006084;<br>F:GO:0016787                                                                                                                                                                                                                                               | -                                              | EC:2.8.3.8   | IPR003702; G3DSA:3.40.810.20<br>(GENE3D), PTHR21432:SF11<br>(PANTHER), SSF100950 (SUPERFAMILY)                             |
|                         | -                                                                      | 0  |                                                                                                                                                                                                                                                                                                                                                 |                                                |              | SignalP (SIGNALP)                                                                                                          |
| Caenorhabditis elegans  | prion-like-(q n-rich)-domain-bearing protein family member<br>(pqn-83) | 3  | P:GO:0002119;<br>P:GO:0000003;<br>P:GO:0040011                                                                                                                                                                                                                                                                                                  | -                                              |              | SignalP (SIGNALP)                                                                                                          |
| Caenorhabditis elegans  | prion-like-(q n-rich)-domain-bearing protein family member<br>(pqn-83) | 3  | P:GO:0002119;<br>P:GO:0000003;<br>P:GO:0040011                                                                                                                                                                                                                                                                                                  | -                                              |              | IPR001464; IPR002619;<br>PTHR10502:SF11 (PANTHER)                                                                          |
| Brugia malayi           | hypothetical protein [Brugia malayi]                                   | 0  |                                                                                                                                                                                                                                                                                                                                                 | F:GO:0003676;<br>F:GO:0046872;<br>F:GO:0008270 |              | IPR000571; G3DSA:4.10.1000.10<br>(GENE3D), PTHR12547 (PANTHER),<br>PTHR12547:SF17 (PANTHER),<br>SSF90229 (SUPERFAMILY)     |
| Brugia malayi           | hypothetical protein [Brugia malayi]                                   | 1  | F:GO:0046872                                                                                                                                                                                                                                                                                                                                    | -                                              |              | SignalP (SIGNALP)                                                                                                          |
| Caenorhabditis briggsae | fox-1 homolog c-like                                                   | 1  | F:GO:0003676                                                                                                                                                                                                                                                                                                                                    | -                                              |              | IPR000504; IPR012677; PTHR15597<br>(PANTHER), PTHR15597:SF2<br>(PANTHER), SignalP (SIGNALP),<br>SSF54928 (SUPERFAMILY)     |
| Caenorhabditis elegans  | hexoki-se family protein                                               | 4  | P:GO:0060361;<br>F:GO:0005524;<br>P:GO:0006096;<br>F:GO:0004396                                                                                                                                                                                                                                                                                 | -                                              | EC:2.7.1.1   | IPR001312; IPR022673;<br>G3DSA:3.40.367.20 (GENE3D),<br>SSF53067 (SUPERFAMILY)                                             |
| Caenorhabditis elegans  | hexoki-se family protein                                               | 4  | P:GO:0060361;<br>F:GO:0005524;<br>P:GO:0006096;<br>F:GO:0004396                                                                                                                                                                                                                                                                                 | -                                              | EC:2.7.1.1   | IPR001312; IPR022673;<br>G3DSA:3.40.367.20 (GENE3D),<br>SSF53067 (SUPERFAMILY)                                             |

|                         |                                |    |                                                                                                                                                                                                                                                                                                                                                                  |   |            |                                                                                                                                                                                   |
|-------------------------|--------------------------------|----|------------------------------------------------------------------------------------------------------------------------------------------------------------------------------------------------------------------------------------------------------------------------------------------------------------------------------------------------------------------|---|------------|-----------------------------------------------------------------------------------------------------------------------------------------------------------------------------------|
| Caenorhabditis briggsae | dihydroipoamide dehydroge-se   | 21 | C:GO:0043159;<br>P:GO:0048240;<br>F:GO:0004148;<br>P:GO:0007369;<br>P:GO:0010510;<br>C:GO:0005759;<br>C:GO:0019861;<br>P:GO:0006120;<br>P:GO:0007568;<br>F:GO:0009055;<br>C:GO:0045252;<br>P:GO:0009106;<br>P:GO:0051068;<br>F:GO:0050660;<br>P:GO:0045454;<br>F:GO:0051287;<br>C:GO:0045254;<br>P:GO:0006103;<br>P:GO:0006508;<br>F:GO:0043544;<br>P:GO:0042391 | - | EC:1.8.1.4 | IPR000815; IPR001327; IPR006258;<br>IPR012999; IPR013027; PR00411<br>(PRINTS), G3DSA:3.50.50.60<br>(GENE3D), PTHR22912 (PANTHER),<br>SignalP (SIGNALP), SSF51905<br>(SUPERFAMILY) |
| Loa loa                 | r--binding protein             | 4  | P:GO:0006397;<br>F:GO:0017091;<br>F:GO:0000166;<br>F:GO:0003730                                                                                                                                                                                                                                                                                                  | - |            | IPR000504; IPR012677; PTHR10432<br>(PANTHER), PTHR10432:SF55<br>(PANTHER), SSF54928 (SUPERFAMILY)                                                                                 |
|                         | -                              | 0  |                                                                                                                                                                                                                                                                                                                                                                  |   |            | SignalP (SIGNALP)                                                                                                                                                                 |
| Ailuropoda melanoleuca  | alpha-actinin-4-like isoform 3 | 21 | P:GO:0001666;<br>F:GO:0047485;<br>C:GO:0030863;<br>C:GO:0043234;<br>F:GO:0005509;<br>P:GO:0051271;<br>C:GO:0005730;<br>P:GO:0042981;<br>P:GO:0051017;<br>F:GO:0051015;<br>F:GO:0001882;<br>P:GO:0051272;<br>C:GO:0001725;<br>P:GO:0048549;<br>C:GO:0031143;<br>F:GO:0005178;<br>C:GO:0048471;<br>C:GO:0030529;<br>F:GO:0042803;<br>P:GO:0015031;<br>P:GO:0032417 | - |            |                                                                                                                                                                                   |
|                         | -                              | 0  |                                                                                                                                                                                                                                                                                                                                                                  |   |            | -                                                                                                                                                                                 |
| Steinernema carpocapsae | aspartic protease              | 5  | C:GO:0005623;<br>P:GO:0008219;<br>F:GO:0005515;<br>P:GO:0040011;<br>F:GO:0008233                                                                                                                                                                                                                                                                                 | - |            | IPR001461; IPR001969; IPR009007;<br>IPR012848; IPR021109;<br>PTHR13683:SF53 (PANTHER), SignalP<br>(SIGNALP)                                                                       |
| Steinernema carpocapsae | aspartic protease              | 5  | C:GO:0005623;<br>P:GO:0008219;<br>F:GO:0005515;<br>P:GO:0040011;<br>F:GO:0008233                                                                                                                                                                                                                                                                                 | - |            | IPR001461; IPR001969; IPR009007;<br>IPR012848; IPR021109;<br>PTHR13683:SF53 (PANTHER), SignalP<br>(SIGNALP)                                                                       |

|                             |                                                                                                                 |    |                                                                                                                                                                       |   |              |                                                                                                                                                                                                                                                             |
|-----------------------------|-----------------------------------------------------------------------------------------------------------------|----|-----------------------------------------------------------------------------------------------------------------------------------------------------------------------|---|--------------|-------------------------------------------------------------------------------------------------------------------------------------------------------------------------------------------------------------------------------------------------------------|
| Steinernema carpocapsae     | aspartic protease                                                                                               | 5  | C:GO:0005623;<br>P:GO:0008219;<br>F:GO:0005515;<br>P:GO:0040011;<br>F:GO:0008233                                                                                      | - |              | IPR001461; IPR001969; IPR009007;<br>IPR012848; IPR021109;<br>PTHR13683:SF53 (PANTHER), SignalP<br>(SIGNALP)                                                                                                                                                 |
| Caenorhabditis elegans      | exocyst complex component 8                                                                                     | 6  | P:GO:0009792;<br>P:GO:0010171;<br>P:GO:0002119;<br>P:GO:0040018;<br>P:GO:0000003;<br>P:GO:0040011                                                                     | - |              | IPR001849; IPR016159; PTHR21426<br>(PANTHER), PTHR21426:SF9<br>(PANTHER), SSF50729 (SUPERFAMILY)                                                                                                                                                            |
| Caenorhabditis elegans      | ylb8_caeel ame: full=uncharacterized protein                                                                    | 0  |                                                                                                                                                                       |   |              | IPR017871                                                                                                                                                                                                                                                   |
| Caenorhabditis elegans      | ylb8_caeel ame: full=uncharacterized protein                                                                    | 0  |                                                                                                                                                                       |   |              | IPR017871                                                                                                                                                                                                                                                   |
| Caenorhabditis elegans      | ylb8_caeel ame: full=uncharacterized protein                                                                    | 0  |                                                                                                                                                                       |   |              | IPR017871                                                                                                                                                                                                                                                   |
| Caenorhabditis briggsae     | neuroendocrine convertase                                                                                       | 5  | F:GO:0004252;<br>P:GO:0002165;<br>C:GO:0005576;<br>P:GO:0006508;<br>P:GO:0035187                                                                                      | - | EC:3.4.21.0  | IPR002884; IPR008979; IPR015500;<br>G3DSA:2.60.120.260 (GENE3D),<br>PTHR10795:SF11 (PANTHER)                                                                                                                                                                |
| Caenorhabditis elegans      | briggsae cbr-cpg-3 protein                                                                                      | 0  |                                                                                                                                                                       |   |              | -                                                                                                                                                                                                                                                           |
| Caenorhabditis elegans      | briggsae cbr-cpg-3 protein                                                                                      | 0  |                                                                                                                                                                       |   |              | -                                                                                                                                                                                                                                                           |
| Brugia malayi               | o-linked n-acetylglucosamine transferase (udp-n-acetylglucosamine:polypeptide-n-acetylglucosaminyl transferase) | 10 | C:GO:0005829;<br>F:GO:0042277;<br>P:GO:0070207;<br>P:GO:0006493;<br>F:GO:0048029;<br>P:GO:0007584;<br>F:GO:0016262;<br>F:GO:0005515;<br>P:GO:0007165;<br>C:GO:0070688 | - | EC:2.4.1.94  | IPR001440; IPR011717; IPR011990;<br>IPR013026; IPR019734; PTHR23083<br>(PANTHER), PTHR23083:SF21<br>(PANTHER), SSF48452 (SUPERFAMILY)                                                                                                                       |
| Loa loa                     | pellino family protein                                                                                          | 2  | F:GO:0005515;<br>P:GO:0048522                                                                                                                                         | - |              | -                                                                                                                                                                                                                                                           |
| Caenorhabditis briggsae     | briggsae cbr-tag-53 protein                                                                                     | 5  | F:GO:0005488;<br>P:GO:0018991;<br>P:GO:0040010;<br>P:GO:0040011;<br>C:GO:0016020                                                                                      | - |              | IPR000742; IPR000859; IPR002165;<br>IPR003659; IPR006210; IPR006652;<br>IPR013032; IPR015915; IPR016201;<br>IPR017937; G3DSA:2.10.25.10<br>(GENE3D), PTHR10574 (PANTHER),<br>PTHR10574:SF3 (PANTHER),<br>SSF117281 (SUPERFAMILY), SSF57196<br>(SUPERFAMILY) |
| Caenorhabditis briggsae     | 39s ribosomal protein mitochondrial                                                                             | 4  | P:GO:0009792;<br>C:GO:0005840;<br>F:GO:0003735;<br>P:GO:0006412                                                                                                       | - | EC:3.6.5.3   | SignalP (SIGNALP)                                                                                                                                                                                                                                           |
| Brugia malayi               | innexin family protein                                                                                          | 4  | P:GO:0040035;<br>P:GO:0040010;<br>P:GO:0040011;<br>P:GO:0002009                                                                                                       | - |              | -                                                                                                                                                                                                                                                           |
|                             | -                                                                                                               | 0  |                                                                                                                                                                       |   |              | SignalP (SIGNALP)                                                                                                                                                                                                                                           |
| Caenorhabditis elegans      | elegans protein confirmed by transcript evidence                                                                | 0  |                                                                                                                                                                       |   | P:GO:0000003 | SignalP (SIGNALP)                                                                                                                                                                                                                                           |
| Angiostrongylus cantonensis | galactoside- 12-like                                                                                            | 3  | P:GO:0009792;<br>F:GO:0005529;<br>F:GO:0005515                                                                                                                        | - |              | -                                                                                                                                                                                                                                                           |

|                             |                               |    |                                                                                                                                                                                                                                                            |   |                                                                                                                                                                                                      |
|-----------------------------|-------------------------------|----|------------------------------------------------------------------------------------------------------------------------------------------------------------------------------------------------------------------------------------------------------------|---|------------------------------------------------------------------------------------------------------------------------------------------------------------------------------------------------------|
| Angiostrongylus cantonensis | galactoside- 12-like          | 3  | P:GO:0009792;<br>F:GO:0005529;<br>F:GO:0005515                                                                                                                                                                                                             | - | IPR001079; IPR008985; IPR013320;<br>PTHR11346:SF4 (PANTHER)                                                                                                                                          |
| Caenorhabditis briggsae     | ctp synthase ii               | 6  | F:GO:0016874;<br>C:GO:0016323;<br>C:GO:0016324;<br>P:GO:0006220;<br>F:GO:0005488;<br>C:GO:0005739                                                                                                                                                          | - | IPR000630; IPR000991; IPR004468;<br>IPR017456; IPR017926;<br>G3DSA:3.40.50.300 (GENE3D),<br>G3DSA:3.40.50.880 (GENE3D),<br>PTHR11550 (PANTHER), SSF52317<br>(SUPERFAMILY), SSF52540<br>(SUPERFAMILY) |
| Loa loa                     | spectrin beta                 | 12 | P:GO:0007184;<br>F:GO:0005516;<br>C:GO:0043234;<br>F:GO:0032403;<br>C:GO:0008091;<br>F:GO:0004725;<br>F:GO:0003779;<br>P:GO:0007182;<br>C:GO:0032437;<br>F:GO:0005200;<br>C:GO:0005634;<br>C:GO:0005886                                                    | - | EC:3.1.3.48<br>IPR001715; G3DSA:1.20.58.60<br>(GENE3D), PTHR11915 (PANTHER),<br>PTHR11915:SF48 (PANTHER),<br>SSF46966 (SUPERFAMILY)                                                                  |
| Loa loa                     | mh2 domain containing protein | 15 | P:GO:0009653;<br>P:GO:0006915;<br>P:GO:0048522;<br>P:GO:0048513;<br>P:GO:0031324;<br>P:GO:0050896;<br>C:GO:0044424;<br>P:GO:0009888;<br>P:GO:0006355;<br>P:GO:0051239;<br>P:GO:0016043;<br>P:GO:0010629;<br>P:GO:0030154;<br>P:GO:0009790;<br>F:GO:0005515 | - | IPR001132; IPR008984; IPR013790;<br>IPR017855                                                                                                                                                        |
| Loa loa                     | mothers against dpp protein   | 15 | P:GO:0009653;<br>P:GO:0010605;<br>P:GO:0006915;<br>P:GO:0048522;<br>P:GO:0048513;<br>P:GO:0050896;<br>C:GO:0044424;<br>P:GO:0048523;<br>P:GO:0009888;<br>P:GO:0006355;<br>P:GO:0051239;<br>P:GO:0016043;<br>P:GO:0030154;<br>P:GO:0009790;<br>F:GO:0005515 | - | IPR001132; IPR008984; IPR013790;<br>IPR017855                                                                                                                                                        |
| -                           | -                             | 0  | -                                                                                                                                                                                                                                                          | - | -                                                                                                                                                                                                    |

|                           |                                                        |    |                                                                                                                                                                                                         |   |                                                                                                                                            |
|---------------------------|--------------------------------------------------------|----|---------------------------------------------------------------------------------------------------------------------------------------------------------------------------------------------------------|---|--------------------------------------------------------------------------------------------------------------------------------------------|
| Caenorhabditis elegans    | ubx domain containing 2                                | 0  | C:GO:0016020;<br>C:GO:0005635;<br>C:GO:0005634;<br>F:GO:0003674;<br>C:GO:0005789;<br>C:GO:0005575;<br>F:GO:0005515;<br>C:GO:0005783;<br>P:GO:0006986;<br>P:GO:0008150                                   |   | IPR001012; G3DSA:3.10.20.90 (GENE3D), PTHR13020 (PANTHER), PTHR13020:SF5 (PANTHER), SSF54236 (SUPERFAMILY)                                 |
| -                         | -                                                      | 0  |                                                                                                                                                                                                         |   | -                                                                                                                                          |
| -                         | -                                                      | 0  |                                                                                                                                                                                                         |   | -                                                                                                                                          |
| -                         | -                                                      | 0  |                                                                                                                                                                                                         |   | -                                                                                                                                          |
| Caenorhabditis elegans    | hypothetical protein C34D10.1 [Caenorhabditis elegans] | 0  | F:GO:0005198;<br>C:GO:0016021;<br>F:GO:0005515                                                                                                                                                          |   | -                                                                                                                                          |
| -                         | -                                                      | 0  |                                                                                                                                                                                                         |   | IPR000477                                                                                                                                  |
| Podospira anserina S mat+ | plasma membrane proteolipid 3                          | 3  | C:GO:0016020;<br>P:GO:0043581;<br>P:GO:0006810                                                                                                                                                          | - | -                                                                                                                                          |
| -                         | -                                                      | 0  |                                                                                                                                                                                                         |   | -                                                                                                                                          |
| -                         | -                                                      | 0  |                                                                                                                                                                                                         |   | -                                                                                                                                          |
| Loa loa                   | lactoylglutathione lyase                               | 2  | F:GO:0046872;<br>F:GO:0004462                                                                                                                                                                           | - | EC:4.4.1.5<br>IPR004360; IPR004361; IPR018146; G3DSA:3.10.180.10 (GENE3D), PTHR10374 (PANTHER), SSF54593 (SUPERFAMILY)                     |
| Caenorhabditis elegans    | integrin alpha-ps2                                     | 11 | P:GO:0009792;<br>F:GO:0004872;<br>P:GO:0002119;<br>P:GO:0007229;<br>P:GO:0018991;<br>P:GO:0032940;<br>P:GO:0007155;<br>P:GO:0040007;<br>P:GO:0006898;<br>P:GO:0040039;<br>C:GO:0008305                  | - | IPR013649; G3DSA:2.60.40.1510 (GENE3D), G3DSA:2.60.40.1530 (GENE3D), PTHR23220 (PANTHER), PTHR23220:SF11 (PANTHER), SSF69179 (SUPERFAMILY) |
| Caenorhabditis elegans    | tlc domain containing 1                                | 1  | C:GO:0016021                                                                                                                                                                                            | - | IPR006634; SignalP (SIGNALP)                                                                                                               |
| Caenorhabditis elegans    | tlc domain containing 1                                | 1  | C:GO:0016021                                                                                                                                                                                            | - | IPR006634; SignalP (SIGNALP)                                                                                                               |
| Caenorhabditis elegans    | ribosomal protein s8                                   | 12 | P:GO:0008340;<br>P:GO:0051726;<br>P:GO:0040007;<br>F:GO:0003735;<br>P:GO:0000003;<br>P:GO:0006414;<br>C:GO:0022627;<br>P:GO:0019915;<br>P:GO:0002119;<br>F:GO:0005515;<br>P:GO:0006898;<br>P:GO:0009790 | - | IPR001047; IPR018283; IPR022309; PTHR10394 (PANTHER), PTHR10394:SF1 (PANTHER)                                                              |

|                                |                                                               |    |                                                                                                                                                                                                                                                                                                               |   |                           |                                                                                                                      |
|--------------------------------|---------------------------------------------------------------|----|---------------------------------------------------------------------------------------------------------------------------------------------------------------------------------------------------------------------------------------------------------------------------------------------------------------|---|---------------------------|----------------------------------------------------------------------------------------------------------------------|
| Brugia malayi                  | aurin family member (cnt-2)                                   | 9  | P:GO:0006810;<br>F:GO:0008060;<br>P:GO:0032312;<br>F:GO:0008270;<br>P:GO:0000003;<br>F:GO:0005515;<br>F:GO:0000166;<br>P:GO:0009792;<br>C:GO:0044424                                                                                                                                                          | - |                           | IPR001164; IPR011993; PTHR23180 (PANTHER), PTHR23180:SF21 (PANTHER)                                                  |
| Caenorhabditis elegans         | atp-dependent helicase brm                                    | 8  | P:GO:0040010;<br>P:GO:0045449;<br>P:GO:0040035;<br>F:GO:0003677;<br>F:GO:0005524;<br>F:GO:0004386;<br>P:GO:0009792;<br>C:GO:0005634                                                                                                                                                                           | - |                           | SignalP (SIGNALP)                                                                                                    |
|                                | -                                                             | 0  |                                                                                                                                                                                                                                                                                                               |   |                           | -                                                                                                                    |
|                                |                                                               |    |                                                                                                                                                                                                                                                                                                               |   |                           | IPR001442; IPR008160; IPR016187; PTHR10499 (PANTHER), PTHR10499:SF78 (PANTHER)                                       |
|                                |                                                               | 0  |                                                                                                                                                                                                                                                                                                               |   |                           |                                                                                                                      |
| Caenorhabditis briggsae        | elegans protein partially confirmed by transcript evidence    | 6  | F:GO:0043492;<br>F:GO:0022892;<br>F:GO:0016820;<br>F:GO:0000166;<br>P:GO:0008152;<br>C:GO:0016020                                                                                                                                                                                                             | - | EC:3.6.3.0                | SignalP (SIGNALP), SSF81665 (SUPERFAMILY)                                                                            |
| Caenorhabditis briggsae        | elegans protein partially confirmed by transcript evidence    | 6  | F:GO:0042625;<br>F:GO:0005548;<br>P:GO:0006869;<br>F:GO:0000166;<br>P:GO:0008152;<br>C:GO:0016020                                                                                                                                                                                                             | - |                           | SignalP (SIGNALP), SSF81665 (SUPERFAMILY)                                                                            |
| Polysphondylium pallidum PN500 | epithelial cell transforming sequence 2 oncogene protein      | 2  | P:GO:0023034;<br>P:GO:0050794                                                                                                                                                                                                                                                                                 | - |                           | IPR000219; PTHR12673 (PANTHER), PTHR12673:SF6 (PANTHER)                                                              |
| Caenorhabditis briggsae        | ynv9_caeel ame: full=uncharacterized protein flags: precursor | 1  | F:GO:0005488                                                                                                                                                                                                                                                                                                  | - |                           | SSF57501 (SUPERFAMILY)                                                                                               |
| Caenorhabditis briggsae        | elegans protein partially confirmed by transcript evidence    | 0  |                                                                                                                                                                                                                                                                                                               |   |                           | -                                                                                                                    |
| Caenorhabditis briggsae        | aconitase mitochondrial                                       | 18 | P:GO:0008340;<br>F:GO:0016747;<br>C:GO:0005739;<br>P:GO:0040007;<br>P:GO:0040035;<br>P:GO:0006099;<br>F:GO:0051539;<br>F:GO:0051538;<br>P:GO:0002119;<br>F:GO:0005515;<br>F:GO:0003994;<br>P:GO:0040011;<br>P:GO:0006102;<br>P:GO:0009792;<br>F:GO:0005506;<br>P:GO:0006101;<br>C:GO:0005634;<br>P:GO:0016246 | - | EC:2.3.1.0;<br>EC:4.2.1.3 | IPR000573; IPR001030; IPR006248; IPR015928; IPR015931; IPR015932; IPR015937; IPR018136; IPR020610; SignalP (SIGNALP) |
| Caenorhabditis briggsae        | Hypothetical protein CBG18891 [Caenorhabditis briggsae]       | 0  |                                                                                                                                                                                                                                                                                                               |   |                           | -                                                                                                                    |



|                        |                                                                              |    |                                                                                                                                                                                                                                                                             |                                                                                  |                                                                                                                                                            |
|------------------------|------------------------------------------------------------------------------|----|-----------------------------------------------------------------------------------------------------------------------------------------------------------------------------------------------------------------------------------------------------------------------------|----------------------------------------------------------------------------------|------------------------------------------------------------------------------------------------------------------------------------------------------------|
|                        |                                                                              | 0  |                                                                                                                                                                                                                                                                             |                                                                                  |                                                                                                                                                            |
| Loa loa                | cullin 4b                                                                    | 0  |                                                                                                                                                                                                                                                                             | F:GO:0003674;<br>C:GO:0031461;<br>F:GO:0031625;<br>C:GO:0005575;<br>P:GO:0006511 | IPR001373; IPR011991; IPR016158;<br>IPR019559; G3DSA:4.10.1030.10<br>(GENE3D), PTHR11932 (PANTHER),<br>PTHR11932:SF22 (PANTHER),<br>SSF46785 (SUPERFAMILY) |
|                        |                                                                              | 0  |                                                                                                                                                                                                                                                                             |                                                                                  |                                                                                                                                                            |
| Caenorhabditis elegans | serine threonine-protein phosphatase 4 catalytic subunit                     | 16 | P:GO:0001525;<br>P:GO:0007126;<br>P:GO:0018991;<br>C:GO:0030289;<br>F:GO:0004704;<br>P:GO:0016311;<br>F:GO:0046872;<br>P:GO:0040007;<br>P:GO:0007052;<br>C:GO:0005813;<br>F:GO:0004722;<br>P:GO:0002119;<br>F:GO:0005515;<br>P:GO:0009792;<br>C:GO:0005634;<br>P:GO:0006468 |                                                                                  | IPR004843; IPR006186;<br>G3DSA:3.60.21.10 (GENE3D),<br>PTHR11668:SF22 (PANTHER), SignalP<br>(SIGNALP), SSF56300 (SUPERFAMILY)                              |
| Caenorhabditis elegans | inositol-requiring 1 alpha-like                                              | 14 | P:GO:0000003;<br>F:GO:0005515;<br>C:GO:0030176;<br>P:GO:0010467;<br>P:GO:0046777;<br>P:GO:0090304;<br>F:GO:0004521;<br>P:GO:0040017;<br>P:GO:0007050;<br>F:GO:0004674;<br>P:GO:0006987;<br>P:GO:0006917;<br>F:GO:0000287;<br>F:GO:0005524                                   | EC:2.7.11.0                                                                      | SignalP (SIGNALP)                                                                                                                                          |
| Caenorhabditis elegans | wapl (drosophila wings apart-like cohesin interactor) family member (wapl-1) | 3  | P:GO:0018991;<br>P:GO:0040010;<br>P:GO:0040011                                                                                                                                                                                                                              |                                                                                  | IPR012502; IPR022771; PTHR22100<br>(PANTHER), PTHR22100:SF7<br>(PANTHER)                                                                                   |
| Caenorhabditis elegans | diacylglycerol ki-se eta2                                                    | 1  | F:GO:0005515                                                                                                                                                                                                                                                                |                                                                                  |                                                                                                                                                            |
| Caenorhabditis elegans | phosphatidylcholine:ceramide cholinephosphotransferase                       | 3  | F:GO:0047493;<br>C:GO:0016021;<br>P:GO:0006686                                                                                                                                                                                                                              | EC:2.7.8.3                                                                       | PTHR21290 (PANTHER),<br>PTHR21290:SF3 (PANTHER)                                                                                                            |
| Brugia malayi          | stip1-like proteiny and u box-containing protein 1                           | 11 | P:GO:0007411;<br>P:GO:0045941;<br>P:GO:0070983;<br>P:GO:0008407;<br>P:GO:0006911;<br>F:GO:0004842;<br>P:GO:0007350;<br>C:GO:0030018;<br>F:GO:0005488;<br>C:GO:0005634;<br>P:GO:0007476                                                                                      | EC:6.3.2.19                                                                      | SignalP (SIGNALP)                                                                                                                                          |

|                         |                                                     |   |                                                                                                                                                      |                                                                                                                                                                                                                                                                                                                                                                  |                            |                                                                                                                                                         |
|-------------------------|-----------------------------------------------------|---|------------------------------------------------------------------------------------------------------------------------------------------------------|------------------------------------------------------------------------------------------------------------------------------------------------------------------------------------------------------------------------------------------------------------------------------------------------------------------------------------------------------------------|----------------------------|---------------------------------------------------------------------------------------------------------------------------------------------------------|
| Caenorhabditis elegans  | briggsae cbr-ubh-1 protein                          | 1 | P:GO:0040010                                                                                                                                         | -                                                                                                                                                                                                                                                                                                                                                                |                            | IPR001965; IPR011011; IPR013083; IPR019786; IPR019787; PTHR10615 (PANTHER), PTHR10615:SF11 (PANTHER)                                                    |
|                         | -                                                   | 0 |                                                                                                                                                      |                                                                                                                                                                                                                                                                                                                                                                  |                            | SignalP (SIGNALP)                                                                                                                                       |
| Caenorhabditis elegans  | chitin synthase                                     | 5 | P:GO:0009792;<br>P:GO:0000003;<br>C:GO:0005887;<br>F:GO:0016758;<br>P:GO:0040010                                                                     | -                                                                                                                                                                                                                                                                                                                                                                | EC:2.4.1.0                 | IPR004835; G3DSA:3.90.550.10 (GENE3D), PTHR22914 (PANTHER), SignalP (SIGNALP), SSF53448 (SUPERFAMILY)                                                   |
| Caenorhabditis briggsae | protein ki-se c substrate 80k-h                     | 2 | F:GO:0005515;<br>C:GO:0005783                                                                                                                        | -                                                                                                                                                                                                                                                                                                                                                                |                            | SignalP (SIGNALP)                                                                                                                                       |
| Caenorhabditis briggsae | protein ki-se c substrate 80k-h                     | 2 | F:GO:0005515;<br>C:GO:0005783                                                                                                                        | -                                                                                                                                                                                                                                                                                                                                                                |                            | IPR009011; IPR011992; IPR012913; IPR018247; IPR018249; G3DSA:2.70.130.10 (GENE3D), PTHR12630 (PANTHER), PTHR12630:SF1 (PANTHER), SSF47473 (SUPERFAMILY) |
| Caenorhabditis elegans  | proline synthetase co-transcribed protein           | 0 |                                                                                                                                                      | P:GO:0008150;<br>C:GO:0005575                                                                                                                                                                                                                                                                                                                                    |                            | IPR001608; IPR011078; G3DSA:3.20.20.10 (GENE3D), SignalP (SIGNALP), SSF51419 (SUPERFAMILY)                                                              |
| Loa loa                 | homeobox protein pknox1                             | 0 |                                                                                                                                                      | C:GO:0005667;<br>F:GO:0003677;<br>C:GO:0005634;<br>F:GO:0046982;<br>P:GO:0010551;<br>P:GO:0006357;<br>F:GO:0030528;<br>P:GO:0030218;<br>P:GO:0006355;<br>P:GO:0030217;<br>F:GO:0003705;<br>F:GO:0016563;<br>P:GO:0043010;<br>F:GO:0003700;<br>P:GO:0045944;<br>P:GO:0001525;<br>C:GO:0005737;<br>P:GO:0045449;<br>F:GO:0043565;<br>F:GO:0005515;<br>P:GO:0030097 |                            | IPR001356; IPR009057; IPR012287; PTHR11211 (PANTHER), PTHR11211:SF3 (PANTHER)                                                                           |
| Caenorhabditis elegans  | cytidine deami-se                                   | 9 | P:GO:0009790;<br>F:GO:0046872;<br>C:GO:0005622;<br>F:GO:0047844;<br>F:GO:0003723;<br>F:GO:0005515;<br>P:GO:0006217;<br>F:GO:0004126;<br>P:GO:0009451 | -                                                                                                                                                                                                                                                                                                                                                                | EC:3.5.4.14;<br>EC:3.5.4.5 |                                                                                                                                                         |
| Caenorhabditis elegans  | ubiquitin carboxyl-termi-l hydrolase family protein | 0 |                                                                                                                                                      | F:GO:0016787;<br>F:GO:0004221;<br>P:GO:0006511                                                                                                                                                                                                                                                                                                                   |                            | -                                                                                                                                                       |
| Caenorhabditis elegans  | ubiquitin carboxyl-termi-l hydrolase family protein | 0 |                                                                                                                                                      | F:GO:0016787;<br>F:GO:0004221;<br>P:GO:0006511                                                                                                                                                                                                                                                                                                                   |                            | -                                                                                                                                                       |

|                         |                                                            |   |                                                                                                                                                      |                                                                                                                    |             |                                                                                                   |
|-------------------------|------------------------------------------------------------|---|------------------------------------------------------------------------------------------------------------------------------------------------------|--------------------------------------------------------------------------------------------------------------------|-------------|---------------------------------------------------------------------------------------------------|
| Caenorhabditis elegans  | type alpha isoform cra_b                                   | 8 | P:GO:0018996;<br>P:GO:0009792;<br>P:GO:0008340;<br>P:GO:0000003;<br>F:GO:0005515;<br>P:GO:0006898;<br>P:GO:0002119;<br>P:GO:0040011                  | -                                                                                                                  |             | IPR003961; IPR008957; IPR013783;<br>PTHR19143 (PANTHER),<br>PTHR19143:SF3 (PANTHER)               |
| -                       | -                                                          | 0 |                                                                                                                                                      |                                                                                                                    |             | -                                                                                                 |
| Caenorhabditis elegans  | ymq4_caeel ame: full=uncharacterized protein               | 0 |                                                                                                                                                      |                                                                                                                    |             | -                                                                                                 |
| Caenorhabditis briggsae | cysteine protease atg4d                                    | 1 | F:GO:0016787                                                                                                                                         | -                                                                                                                  |             | -                                                                                                 |
| Caenorhabditis briggsae | ophagy (yeast atg homolog) family member (atg- )           | 0 |                                                                                                                                                      | P:GO:0006914;<br>C:GO:0005737;<br>F:GO:0016787;<br>F:GO:0008234;<br>F:GO:0008233;<br>P:GO:0006810;<br>P:GO:0015031 |             | -                                                                                                 |
| Caenorhabditis elegans  | elegans protein confirmed by transcript evidence           | 2 | C:GO:0016020;<br>P:GO:0006821                                                                                                                        | -                                                                                                                  |             | IPR000615; IPR021134                                                                              |
| Haemochus contortus     | isoform a                                                  | 9 | C:GO:0005945;<br>F:GO:0003872;<br>F:GO:0003677;<br>F:GO:0005524;<br>C:GO:0005700;<br>F:GO:0005515;<br>P:GO:0006096;<br>P:GO:0006338;<br>C:GO:0005634 | -                                                                                                                  | EC:2.7.1.11 | IPR000023; IPR009161; IPR015912;<br>IPR022953; G3DSA:3.40.50.450<br>(GENE3D), PTHR13697 (PANTHER) |
| Harpegnathos saltator   | serine peptidase kunitz 2                                  | 2 | F:GO:0008233;<br>C:GO:0005576                                                                                                                        | -                                                                                                                  |             | IPR002223; IPR020901; PTHR10083<br>(PANTHER), PTHR10083:SF39<br>(PANTHER)                         |
| Harpegnathos saltator   | serine protei-se                                           | 2 | F:GO:0008233;<br>C:GO:0005576                                                                                                                        | -                                                                                                                  |             | IPR002223; IPR020901; PTHR10083<br>(PANTHER), PTHR10083:SF39<br>(PANTHER)                         |
| -                       | -                                                          | 0 |                                                                                                                                                      |                                                                                                                    |             | -                                                                                                 |
| -                       | -                                                          | 0 |                                                                                                                                                      |                                                                                                                    |             | -                                                                                                 |
| Caenorhabditis elegans  | elegans protein partially confirmed by transcript evidence | 0 |                                                                                                                                                      | P:GO:0008104                                                                                                       |             | -                                                                                                 |
| Caenorhabditis elegans  | elegans protein partially confirmed by transcript evidence | 0 |                                                                                                                                                      | P:GO:0008104                                                                                                       |             | PTHR16166 (PANTHER),<br>PTHR16166:SF25 (PANTHER)                                                  |
| Caenorhabditis briggsae | elegans protein partially confirmed by transcript evidence | 0 |                                                                                                                                                      | P:GO:0008104                                                                                                       |             | PTHR16166 (PANTHER),<br>PTHR16166:SF25 (PANTHER)                                                  |
| Caenorhabditis briggsae | elegans protein partially confirmed by transcript evidence | 0 |                                                                                                                                                      | P:GO:0008104                                                                                                       |             | PTHR16166 (PANTHER),<br>PTHR16166:SF25 (PANTHER)                                                  |
| Caenorhabditis briggsae | atp-binding sub-family a member 1                          | 5 | P:GO:0033036;<br>P:GO:0006810;<br>C:GO:0044464;<br>P:GO:0009987;<br>F:GO:0005488                                                                     | -                                                                                                                  |             | IPR006162; PTHR19229 (PANTHER),<br>PTHR19229:SF25 (PANTHER)                                       |
| Caenorhabditis briggsae | atp-binding sub-family a member 1                          | 5 | P:GO:0033036;<br>P:GO:0006810;<br>C:GO:0044464;<br>P:GO:0009987;<br>F:GO:0005488                                                                     | -                                                                                                                  |             | IPR006162; PTHR19229 (PANTHER),<br>PTHR19229:SF25 (PANTHER)                                       |

|                              |                                                                   |   |                                                                                                   |                               |             |                                                                                                                                                                         |
|------------------------------|-------------------------------------------------------------------|---|---------------------------------------------------------------------------------------------------|-------------------------------|-------------|-------------------------------------------------------------------------------------------------------------------------------------------------------------------------|
| Caenorhabditis briggsae      | serine threonine-protein ki-se vrk                                | 6 | P:GO:0016572;<br>P:GO:0018107;<br>P:GO:0030717;<br>P:GO:0007143;<br>F:GO:0035184;<br>F:GO:0000166 | -                             |             | IPR000719; IPR008271; IPR011009;<br>IPR017442; G3DSA:1.10.510.10<br>(GENE3D), G3DSA:3.30.200.20<br>(GENE3D), PTHR11909 (PANTHER),<br>PTHR11909:SF17 (PANTHER)           |
| Caenorhabditis elegans       | serine threonine-protein ki-se vrk                                | 2 | F:GO:0004672;<br>F:GO:0000166                                                                     | -                             |             | IPR000719; IPR008271; IPR011009;<br>IPR017442; G3DSA:1.10.510.10<br>(GENE3D), G3DSA:3.30.200.20<br>(GENE3D), PTHR11909 (PANTHER),<br>PTHR11909:SF17 (PANTHER)           |
| Caenorhabditis elegans       | subfamily member 1                                                | 3 | F:GO:0003676;<br>F:GO:0005515;<br>P:GO:0044267                                                    | -                             |             | IPR001623; IPR003095; IPR015609;<br>PTHR11821:SF30 (PANTHER), SignalP<br>(SIGNALP)                                                                                      |
| Caenorhabditis elegans       | -like protein subfamily c member 1                                | 1 | F:GO:0005488                                                                                      | -                             |             | IPR001005; IPR001623; IPR003095;<br>IPR009057; IPR012287; IPR014778;<br>IPR015609; IPR017877; IPR017884;<br>PTHR11821:SF30 (PANTHER), SignalP<br>(SIGNALP)              |
| Caenorhabditis briggsae      | Hypothetical protein CBG22485 [Caenorhabditis briggsae]           | 0 |                                                                                                   | F:GO:0003676                  |             | -                                                                                                                                                                       |
| Caenorhabditis elegans       | integral membrane                                                 | 1 | F:GO:0005515                                                                                      | -                             |             | IPR008547; G3DSA:3.40.50.1820<br>(GENE3D), SSF53474 (SUPERFAMILY)                                                                                                       |
| Camponotus floridanus        | poly(adp-ribose) polymerase                                       | 5 | F:GO:0003676;<br>F:GO:0003950;<br>P:GO:0006471;<br>C:GO:0005634;<br>C:GO:0005739                  | -                             | EC:2.4.2.30 | IPR006061; IPR008893; IPR012317;<br>G3DSA:3.90.228.10 (GENE3D),<br>PTHR15447 (PANTHER)                                                                                  |
| -                            | -                                                                 | 0 |                                                                                                   |                               |             | SignalP (SIGNALP)                                                                                                                                                       |
| -                            | -                                                                 | 0 |                                                                                                   |                               |             | SignalP (SIGNALP)                                                                                                                                                       |
| Caenorhabditis elegans       | ras suppressor protein 1                                          | 3 | C:GO:0005829;<br>F:GO:0005515;<br>P:GO:0007265                                                    | -                             |             | IPR001611; IPR003591; PR00019<br>(PRINTS), G3DSA:3.80.10.10<br>(GENE3D), PTHR23155 (PANTHER),<br>PTHR23155:SF21 (PANTHER), PSS1450<br>(PROFILE), SSF52058 (SUPERFAMILY) |
| Brugia malayi                | transmembrane protein 38a                                         | 3 | C:GO:0016020;<br>F:GO:0005261;<br>P:GO:0015672                                                    | -                             |             | IPR007866; PTHR12454:SF2<br>(PANTHER)                                                                                                                                   |
| Caenorhabditis briggsae      | trimeric intracellular cation channel type b                      | 3 | C:GO:0016021;<br>F:GO:0005261;<br>P:GO:0015672                                                    | -                             |             | IPR007866; PTHR12454:SF2<br>(PANTHER), SignalP (SIGNALP)                                                                                                                |
| Caenorhabditis briggsae      | briggsae cbr-sel-2 protein                                        | 6 | C:GO:0005737;<br>P:GO:0008104;<br>F:GO:0051018;<br>P:GO:0042675;<br>C:GO:0016020;<br>C:GO:0005634 | -                             |             | -                                                                                                                                                                       |
| Plasmodium chabaudi chabaudi | hypothetical protein PC101070.00.0 [Plasmodium chabaudi chabaudi] | 0 |                                                                                                   |                               |             | -                                                                                                                                                                       |
| Caenorhabditis briggsae      | briggsae cbr-mel-28 protein                                       | 0 |                                                                                                   | P:GO:0006355;<br>F:GO:0003677 |             | -                                                                                                                                                                       |
| Caenorhabditis elegans       | deoxyhypusine synthase                                            | 3 | P:GO:0009792;<br>F:GO:0005515;<br>P:GO:0008612                                                    | -                             |             | IPR002773; SSF52467 (SUPERFAMILY)                                                                                                                                       |
| -                            | -                                                                 | 0 |                                                                                                   |                               |             | IPR007527; IPR013032                                                                                                                                                    |

|                         |                                   |   |                                                                                                                                                                                                                                                                                                                                                                                                                                                       |   |                                                      |
|-------------------------|-----------------------------------|---|-------------------------------------------------------------------------------------------------------------------------------------------------------------------------------------------------------------------------------------------------------------------------------------------------------------------------------------------------------------------------------------------------------------------------------------------------------|---|------------------------------------------------------|
| Caenorhabditis briggsae | glycine cleavage system h protein | 4 | P:GO:0009792;<br>C:GO:0005960;<br>C:GO:0005739;<br>P:GO:0019464                                                                                                                                                                                                                                                                                                                                                                                       | - | -                                                    |
| -                       | -                                 | 0 |                                                                                                                                                                                                                                                                                                                                                                                                                                                       |   | -                                                    |
| Loa loa                 | gpi transamidase component pig-t  | 0 | C:GO:0042765;<br>P:GO:0051402;<br>F:GO:0003923;<br>C:GO:0005737;<br>C:GO:0016023;<br>C:GO:0016021;<br>F:GO:0005515;<br>P:GO:0030182                                                                                                                                                                                                                                                                                                                   |   | -                                                    |
| -                       | -                                 | 0 |                                                                                                                                                                                                                                                                                                                                                                                                                                                       |   | -                                                    |
| -                       | -                                 | 0 |                                                                                                                                                                                                                                                                                                                                                                                                                                                       |   | -                                                    |
| Ostertagia ostertagi    | sxc2 protein                      | 0 |                                                                                                                                                                                                                                                                                                                                                                                                                                                       |   | IPR003582                                            |
| Loa loa                 | timeless protein                  | 0 | P:GO:0042127;<br>P:GO:0051301;<br>C:GO:0000790;<br>P:GO:0007067;<br>P:GO:0007623;<br>P:GO:0001658;<br>C:GO:0005634;<br>F:GO:0003677;<br>F:GO:0046982;<br>P:GO:0010553;<br>P:GO:0002009;<br>P:GO:0030324;<br>F:GO:0042803;<br>P:GO:0048754;<br>P:GO:0006974;<br>P:GO:0007049;<br>P:GO:0001822;<br>P:GO:0006350;<br>P:GO:0042753;<br>P:GO:0009790;<br>P:GO:0007275;<br>P:GO:0033261;<br>P:GO:0016481;<br>P:GO:0045449;<br>P:GO:0048511;<br>F:GO:0005515 |   | IPR006906                                            |
| -                       | -                                 | 0 |                                                                                                                                                                                                                                                                                                                                                                                                                                                       |   | -                                                    |
| Caenorhabditis elegans  | transmembrane protein 185b        | 0 | C:GO:0016021;<br>C:GO:0016020                                                                                                                                                                                                                                                                                                                                                                                                                         |   | IPR019396; PTHR13568 (PANTHER),<br>SignalP (SIGNALP) |

|                                  |                                    |    |                                                                                                                                                                                                                                                                                              |                                                                                                                                                                       |                                                                                             |
|----------------------------------|------------------------------------|----|----------------------------------------------------------------------------------------------------------------------------------------------------------------------------------------------------------------------------------------------------------------------------------------------|-----------------------------------------------------------------------------------------------------------------------------------------------------------------------|---------------------------------------------------------------------------------------------|
| Caenorhabditis briggsae          | pabpn1 protein                     | 17 | P:GO:0040010;<br>C:GO:0005730;<br>P:GO:0006378;<br>P:GO:0000003;<br>P:GO:0008380;<br>F:GO:0008143;<br>P:GO:0002119;<br>F:GO:0005515;<br>F:GO:0000166;<br>P:GO:0040011;<br>C:GO:0030529;<br>P:GO:0006898;<br>C:GO:0005654;<br>P:GO:0009792;<br>C:GO:0005737;<br>P:GO:0016973;<br>P:GO:0040019 | -                                                                                                                                                                     | IPR000504; IPR012677; PTHR10432 (PANTHER), PTHR10432:SF61 (PANTHER), SSF54928 (SUPERFAMILY) |
| Caenorhabditis briggsae          | pabpn1 protein                     | 17 | P:GO:0040010;<br>C:GO:0005730;<br>P:GO:0006378;<br>P:GO:0000003;<br>P:GO:0008380;<br>F:GO:0008143;<br>P:GO:0002119;<br>F:GO:0005515;<br>F:GO:0000166;<br>P:GO:0040011;<br>C:GO:0030529;<br>P:GO:0006898;<br>C:GO:0005654;<br>P:GO:0009792;<br>C:GO:0005737;<br>P:GO:0016973;<br>P:GO:0040019 | -                                                                                                                                                                     | IPR000504; IPR012677; PTHR10432 (PANTHER), PTHR10432:SF61 (PANTHER), SSF54928 (SUPERFAMILY) |
| Leishmania major strain Friedlin | chromosome segregation protein smc | 0  |                                                                                                                                                                                                                                                                                              | C:GO:0005694;<br>C:GO:0005737;<br>P:GO:0051301;<br>F:GO:0005524;<br>P:GO:0051276;<br>C:GO:0005575;<br>F:GO:0005515;<br>P:GO:0000917;<br>P:GO:0008150;<br>P:GO:0007049 | -                                                                                           |

|                         |                                                         |    |                                                                                                                                                                                                                                                                                                               |                                                |            |                                                                                                                                                      |
|-------------------------|---------------------------------------------------------|----|---------------------------------------------------------------------------------------------------------------------------------------------------------------------------------------------------------------------------------------------------------------------------------------------------------------|------------------------------------------------|------------|------------------------------------------------------------------------------------------------------------------------------------------------------|
| Brugia malayi           | paired amphipathic helix protein sin3a isoform 1        | 17 | C:GO:0000785;<br>P:GO:0000122;<br>F:GO:0003714;<br>P:GO:0034613;<br>P:GO:0010243;<br>P:GO:0051329;<br>P:GO:0007568;<br>P:GO:0043619;<br>C:GO:0000776;<br>F:GO:0003677;<br>F:GO:0003700;<br>F:GO:0032403;<br>F:GO:0003682;<br>C:GO:0005634;<br>P:GO:0043066;<br>P:GO:0001701;<br>P:GO:0006260                  | -                                              |            | PTHR12346 (PANTHER)                                                                                                                                  |
| Brugia malayi           | paired amphipathic helix repeat family protein          | 4  | F:GO:0030528;<br>P:GO:0045449;<br>P:GO:0007399;<br>C:GO:0000785                                                                                                                                                                                                                                               | -                                              |            | PTHR12346 (PANTHER)                                                                                                                                  |
| Caenorhabditis briggsae | Hypothetical protein CBG13624 [Caenorhabditis briggsae] | 0  |                                                                                                                                                                                                                                                                                                               | F:GO:0046872;<br>F:GO:0008270;<br>F:GO:0005515 |            | -                                                                                                                                                    |
| Caenorhabditis elegans  | lipid phosphate phosphohydrolase 1                      | 6  | P:GO:0009987;<br>P:GO:0006629;<br>P:GO:0040010;<br>P:GO:0023033;<br>F:GO:0016791;<br>C:GO:0005886                                                                                                                                                                                                             | -                                              | EC:3.1.3.0 | IPR000326; IPR016118; PTHR10165 (PANTHER), PTHR10165-SF22 (PANTHER), SignalP (SIGNALP)                                                               |
| Loa loa                 | s1 r--binding domain-containing protein 1               | 1  | P:GO:0006139                                                                                                                                                                                                                                                                                                  | -                                              |            | IPR005227; IPR006641; IPR023097; G3DSA:1.10.3500.10 (GENE3D), PTHR10724 (PANTHER)                                                                    |
| Homo sapiens            | alpha (gene sequence 28)                                | 0  |                                                                                                                                                                                                                                                                                                               | P:GO:0043154                                   |            | IPR004931                                                                                                                                            |
| Caenorhabditis briggsae | deah (asp-glu-ala-his) box polypeptide 15               | 18 | P:GO:0016246;<br>C:GO:0005689;<br>P:GO:0040010;<br>P:GO:0006898;<br>P:GO:0006397;<br>P:GO:0040011;<br>F:GO:0003676;<br>P:GO:0009792;<br>P:GO:0002009;<br>P:GO:0008380;<br>P:GO:0002119;<br>C:GO:0030686;<br>P:GO:0006200;<br>F:GO:0004004;<br>F:GO:0005524;<br>P:GO:0006364;<br>P:GO:0040035;<br>C:GO:0005739 | -                                              |            | IPR001650; IPR002464; IPR007502; IPR011545; IPR011709; IPR014001; IPR014021; G3DSA:3.40.50.300 (GENE3D), PTHR18934 (PANTHER), SSF52540 (SUPERFAMILY) |
| Caenorhabditis elegans  | 5 -3 exoribonuclease 2                                  | 6  | P:GO:0044260;<br>C:GO:0005622;<br>P:GO:0090304;<br>F:GO:0005515;<br>F:GO:0004527;<br>P:GO:0010467                                                                                                                                                                                                             | -                                              |            | -                                                                                                                                                    |

|                         |                                                            |    |                                                                                                                                                                                                                                                                                                                                                                                                                                                                        |   |              |                                                                                                                                                                                                                                       |
|-------------------------|------------------------------------------------------------|----|------------------------------------------------------------------------------------------------------------------------------------------------------------------------------------------------------------------------------------------------------------------------------------------------------------------------------------------------------------------------------------------------------------------------------------------------------------------------|---|--------------|---------------------------------------------------------------------------------------------------------------------------------------------------------------------------------------------------------------------------------------|
| Caenorhabditis briggsae | camp-dependent protein ki-se catalytic                     | 6  | P:GO:0009792;<br>P:GO:0002119;<br>P:GO:0000003;<br>P:GO:0040007;<br>F:GO:0004674;<br>F:GO:0000166                                                                                                                                                                                                                                                                                                                                                                      | - | EC:2.7.11.0  | IPR000719; IPR011009; IPR015746;<br>IPR017441; IPR017442;<br>G3DSA:3.30.200.20 (GENE3D),<br>PTHR22985 (PANTHER)                                                                                                                       |
| -                       | -                                                          | 0  | -                                                                                                                                                                                                                                                                                                                                                                                                                                                                      | - | -            | -                                                                                                                                                                                                                                     |
| Caenorhabditis elegans  | elegans protein confirmed by transcript evidence           | 0  | -                                                                                                                                                                                                                                                                                                                                                                                                                                                                      | - | -            | IPR022559; PD030565 (PRODOM),<br>SignalP (SIGNALP)                                                                                                                                                                                    |
| Caenorhabditis elegans  | isoform b                                                  | 4  | P:GO:0008340;<br>P:GO:0040035;<br>P:GO:0040039;<br>P:GO:0002119                                                                                                                                                                                                                                                                                                                                                                                                        | - | -            | IPR018619                                                                                                                                                                                                                             |
| Caenorhabditis briggsae | elegans protein confirmed by transcript evidence           | 0  | -                                                                                                                                                                                                                                                                                                                                                                                                                                                                      | - | -            | IPR020376; SignalP (SIGNALP)                                                                                                                                                                                                          |
| Caenorhabditis briggsae | elegans protein partially confirmed by transcript evidence | 2  | F:GO:0050662;<br>F:GO:0000166                                                                                                                                                                                                                                                                                                                                                                                                                                          | - | -            | G3DSA:2.10.60.10 (GENE3D), SignalP<br>(SIGNALP), SSF57302 (SUPERFAMILY)                                                                                                                                                               |
| -                       | -                                                          | 0  | -                                                                                                                                                                                                                                                                                                                                                                                                                                                                      | - | -            | -                                                                                                                                                                                                                                     |
| Caenorhabditis elegans  | cgmp-dependent protein ki-se egl-4                         | 6  | P:GO:0006468;<br>F:GO:0046872;<br>F:GO:0030553;<br>P:GO:0007275;<br>F:GO:0005524;<br>F:GO:0004692                                                                                                                                                                                                                                                                                                                                                                      | - | EC:2.7.11.12 | IPR000595; IPR000719; IPR002374;<br>IPR008271; IPR011009; IPR014710;<br>IPR017441; IPR017442; IPR018488;<br>IPR018490; G3DSA:1.10.510.10<br>(GENE3D), G3DSA:3.30.200.20<br>(GENE3D), PTHR22985 (PANTHER),<br>PTHR22985:SF90 (PANTHER) |
| Caenorhabditis elegans  | p21 -activated ki-se 7                                     | 5  | P:GO:0006468;<br>F:GO:0005524;<br>P:GO:0006916;<br>F:GO:0004674;<br>C:GO:0005739                                                                                                                                                                                                                                                                                                                                                                                       | - | EC:2.7.11.0  | IPR000095; G3DSA:3.90.810.10<br>(GENE3D), PTHR12779 (PANTHER)                                                                                                                                                                         |
| Brugia malayi           | protein ki-se domain containing protein                    | 39 | P:GO:0010907;<br>C:GO:0043005;<br>C:GO:0005901;<br>P:GO:0010557;<br>P:GO:0030010;<br>P:GO:0051054;<br>P:GO:0007420;<br>F:GO:0005102;<br>P:GO:0009790;<br>P:GO:0043467;<br>N:GO:2000112;<br>P:GO:0043409;<br>F:GO:0005010;<br>P:GO:0031328;<br>P:GO:0050793;<br>P:GO:0007409;<br>P:GO:0051262;<br>F:GO:0043560;<br>C:GO:0016021;<br>F:GO:0019904;<br>P:GO:0006468;<br>F:GO:0005524;<br>P:GO:0048009;<br>P:GO:0045768;<br>F:GO:0005520;<br>P:GO:0030238;<br>P:GO:0065008 | - | -            | IPR000719; IPR001245; IPR008266;<br>IPR011009; IPR020635; IPR020685;<br>IPR020772; G3DSA:1.10.510.10<br>(GENE3D), G3DSA:3.30.200.20<br>(GENE3D)                                                                                       |
| Caenorhabditis elegans  | aspergillus nuclear division related family member (nud-2) | 0  | -                                                                                                                                                                                                                                                                                                                                                                                                                                                                      | - | -            | -                                                                                                                                                                                                                                     |



|                         |                                                        |    |                                                                                                                                                                                                                                                                                                                                |   |                                                                         |                                                                                                                                                                                     |
|-------------------------|--------------------------------------------------------|----|--------------------------------------------------------------------------------------------------------------------------------------------------------------------------------------------------------------------------------------------------------------------------------------------------------------------------------|---|-------------------------------------------------------------------------|-------------------------------------------------------------------------------------------------------------------------------------------------------------------------------------|
| Caenorhabditis briggsae | polymerase (d--directed) delta interacting protein 2   | 1  | C:GO:0005739                                                                                                                                                                                                                                                                                                                   | - | -                                                                       | -                                                                                                                                                                                   |
|                         | -                                                      | 0  |                                                                                                                                                                                                                                                                                                                                |   |                                                                         | -                                                                                                                                                                                   |
| Caenorhabditis briggsae | vacuolar protein sorting-associated protein 33a        | 7  | P:GO:0016192;<br>P:GO:0043473;<br>C:GO:0005768;<br>C:GO:0044446;<br>F:GO:0005515;<br>C:GO:0031090;<br>P:GO:0051641                                                                                                                                                                                                             | - |                                                                         | IPR001619; G3DSA:3.40.50.1910 (GENE3D), PTHR11679:SF1 (PANTHER)                                                                                                                     |
| Loa loa                 | hypothetical protein LOAG_11160 [Loa loa]              | 0  |                                                                                                                                                                                                                                                                                                                                |   |                                                                         | IPR011990; SSF48452 (SUPERFAMILY)                                                                                                                                                   |
| Loa loa                 | proteasome ( macropain) 26s non- 2                     | 4  | P:GO:0042176;<br>C:GO:0000502;<br>F:GO:0030234;<br>F:GO:0005515                                                                                                                                                                                                                                                                | - |                                                                         | -                                                                                                                                                                                   |
| Loa loa                 | proteasome ( macropain) 26s non- 2                     | 4  | P:GO:0042176;<br>C:GO:0000502;<br>F:GO:0030234;<br>F:GO:0005515                                                                                                                                                                                                                                                                | - |                                                                         | -                                                                                                                                                                                   |
| Loa loa                 | proteasome ( macropain) 26s non- 2                     | 4  | P:GO:0042176;<br>C:GO:0000502;<br>F:GO:0030234;<br>F:GO:0005515                                                                                                                                                                                                                                                                | - |                                                                         | -                                                                                                                                                                                   |
| Loa loa                 | proteasome ( macropain) 26s non- 2                     | 4  | P:GO:0042176;<br>C:GO:0000502;<br>F:GO:0030234;<br>F:GO:0005515                                                                                                                                                                                                                                                                | - |                                                                         | -                                                                                                                                                                                   |
| Loa loa                 | proteasome ( macropain) 26s non- 2                     | 4  | P:GO:0042176;<br>C:GO:0000502;<br>F:GO:0030234;<br>F:GO:0005515                                                                                                                                                                                                                                                                | - |                                                                         | -                                                                                                                                                                                   |
| Loa loa                 | member ras oncogene family                             | 19 | P:GO:0000910;<br>C:GO:0045171;<br>C:GO:0005739;<br>P:GO:0007264;<br>P:GO:0006355;<br>P:GO:0006913;<br>F:GO:0004767;<br>C:GO:0005905;<br>F:GO:0005546;<br>C:GO:0042470;<br>F:GO:0005524;<br>C:GO:0031253;<br>F:GO:0003924;<br>F:GO:0008134;<br>P:GO:0006886;<br>P:GO:0016197;<br>C:GO:0045334;<br>C:GO:0005634;<br>F:GO:0005525 | - | EC:3.1.4.12;<br>EC:3.6.5.1;<br>EC:3.6.5.2;<br>EC:3.6.5.3;<br>EC:3.6.5.4 | IPR001806; IPR002078; IPR003579;<br>IPR005225; IPR013753; IPR020851;<br>G3DSA:3.40.50.300 (GENE3D),<br>PTHR11708 (PANTHER),<br>PTHR11708:SF228 (PANTHER),<br>SSF52540 (SUPERFAMILY) |
| Caenorhabditis elegans  | hypothetical protein H20J04.3 [Caenorhabditis elegans] | 0  |                                                                                                                                                                                                                                                                                                                                |   |                                                                         | -                                                                                                                                                                                   |
|                         | -                                                      | 0  |                                                                                                                                                                                                                                                                                                                                |   |                                                                         | -                                                                                                                                                                                   |
| Caenorhabditis elegans  | hypothetical protein H20J04.3 [Caenorhabditis elegans] | 0  |                                                                                                                                                                                                                                                                                                                                |   |                                                                         | -                                                                                                                                                                                   |
| Ostertagia ostertagi    | depsiphilin                                            | 6  | P:GO:0007218;<br>C:GO:0016021;<br>P:GO:0007165;<br>C:GO:0005886;<br>F:GO:0005529;<br>F:GO:0004930                                                                                                                                                                                                                              | - |                                                                         | -                                                                                                                                                                                   |

|                         |                                                         |    |                                                                                                                                                                                        |              |            |                                                                                                              |
|-------------------------|---------------------------------------------------------|----|----------------------------------------------------------------------------------------------------------------------------------------------------------------------------------------|--------------|------------|--------------------------------------------------------------------------------------------------------------|
|                         | -                                                       | 0  |                                                                                                                                                                                        |              |            | SignalP (SIGNALP)                                                                                            |
|                         | -                                                       | 0  |                                                                                                                                                                                        |              |            | -                                                                                                            |
| Loa loa                 | tetratricopeptide repeat domain 7b                      | 0  |                                                                                                                                                                                        | F:GO:0005488 |            | IPR011990; PTHR23083 (PANTHER), PTHR23083:SF7 (PANTHER), SignalP (SIGNALP)                                   |
| Caenorhabditis elegans  | mitochondrial ribosomal protein l21                     | 3  | P:GO:0040010;<br>C:GO:0044444;<br>C:GO:0043229                                                                                                                                         | -            |            | IPR001787; SSF141091 (SUPERFAMILY)                                                                           |
| Caenorhabditis elegans  | methyltransferase type 11                               | 2  | P:GO:0008152;<br>F:GO:0008168                                                                                                                                                          | -            | EC:2.1.1.0 | IPR013216; G3DSA:3.40.50.150 (GENE3D), PTHR10108 (PANTHER), PTHR10108:SF17 (PANTHER), SSF53335 (SUPERFAMILY) |
| Caenorhabditis briggsae | protein cwc15 homolog                                   | 6  | P:GO:0009792;<br>C:GO:0005681;<br>F:GO:0003723;<br>F:GO:0005515;<br>P:GO:0006898;<br>P:GO:0000398                                                                                      | -            |            | IPR006973                                                                                                    |
| Caenorhabditis elegans  | hypothetical protein ZK418.2 [Caenorhabditis elegans]   | 0  |                                                                                                                                                                                        |              |            | -                                                                                                            |
| Pongo abelii            | myeloid leukemia factor 2                               | 5  | P:GO:0006952;<br>C:GO:0005737;<br>C:GO:0005634;<br>F:GO:0005515;<br>C:GO:0005925                                                                                                       | -            |            | IPR019376; PTHR13105 (PANTHER), PTHR13105:SF4 (PANTHER)                                                      |
| Caenorhabditis briggsae | general transcription factor polypeptide alpha 56kda    | 11 | P:GO:0040010;<br>P:GO:0006367;<br>F:GO:0046872;<br>P:GO:0010171;<br>F:GO:0005515;<br>P:GO:0006368;<br>P:GO:0040011;<br>P:GO:0006898;<br>C:GO:0005654;<br>P:GO:0002009;<br>P:GO:0009792 | -            |            | IPR013083; PTHR13097 (PANTHER), SSF57783 (SUPERFAMILY)                                                       |
| Caenorhabditis elegans  | ester hydrolase c11orf54 homolog                        | 3  | F:GO:0016788;<br>C:GO:0005634;<br>F:GO:0008270                                                                                                                                         | -            |            | IPR015021; SSF117856 (SUPERFAMILY)                                                                           |
| Caenorhabditis elegans  | ester hydrolase c11orf54 homolog                        | 4  | F:GO:0016788;<br>C:GO:0005634;<br>F:GO:0008270;<br>F:GO:0005515                                                                                                                        | -            |            | -                                                                                                            |
| Caenorhabditis briggsae | Hypothetical protein CBG18736 [Caenorhabditis briggsae] | 0  |                                                                                                                                                                                        |              |            | -                                                                                                            |
| Caenorhabditis elegans  | activator 1 36                                          | 2  | F:GO:0005515;<br>F:GO:0016787                                                                                                                                                          | -            |            | IPR008921; IPR013748; G3DSA:1.20.272.10 (GENE3D)                                                             |
|                         | -                                                       | 0  |                                                                                                                                                                                        |              |            | -                                                                                                            |
| Caenorhabditis brenneri | protein fam32a                                          | 2  | P:GO:0040010;<br>P:GO:0009792                                                                                                                                                          | -            |            | -                                                                                                            |
| Caenorhabditis brenneri | protein fam32a                                          | 2  | P:GO:0040010;<br>P:GO:0009792                                                                                                                                                          | -            |            | -                                                                                                            |
| Caenorhabditis briggsae | methyltransferase like 2 isoform 1                      | 2  | P:GO:0008152;<br>F:GO:0008168                                                                                                                                                          | -            | EC:2.1.1.0 | IPR013217; G3DSA:3.40.50.150 (GENE3D), PTHR22809 (PANTHER), SSF53335 (SUPERFAMILY)                           |

|                         |                                                            |    |                                                                                                                                                                                                                          |                                                                                                                                                                                                                                                            |                                                                                                                                                                                                   |
|-------------------------|------------------------------------------------------------|----|--------------------------------------------------------------------------------------------------------------------------------------------------------------------------------------------------------------------------|------------------------------------------------------------------------------------------------------------------------------------------------------------------------------------------------------------------------------------------------------------|---------------------------------------------------------------------------------------------------------------------------------------------------------------------------------------------------|
| Pan troglodytes         | ribosomal protein s27a                                     | 9  | F:GO:0030528;<br>F:GO:0046872;<br>F:GO:0003735;<br>P:GO:0006414;<br>C:GO:0022627;<br>P:GO:0016567;<br>F:GO:0005515;<br>C:GO:0005634;<br>P:GO:0045941                                                                     | -                                                                                                                                                                                                                                                          | IPR000626; IPR002906; IPR019954;<br>IPR019955; IPR019956;<br>G3DSA:3.10.20.90 (GENE3D),<br>PTHR10666 (PANTHER),<br>PTHR10666:SF2 (PANTHER), SSF54236<br>(SUPERFAMILY)                             |
|                         | -                                                          | 0  |                                                                                                                                                                                                                          |                                                                                                                                                                                                                                                            | -                                                                                                                                                                                                 |
|                         | -                                                          | 0  |                                                                                                                                                                                                                          |                                                                                                                                                                                                                                                            | -                                                                                                                                                                                                 |
| Caenorhabditis elegans  | i lweq domain containing protein                           | 4  | C:GO:0005856;<br>F:GO:0005515;<br>P:GO:0009987;<br>F:GO:0005198                                                                                                                                                          | -                                                                                                                                                                                                                                                          | IPR006077; IPR015009; IPR015710;<br>IPR015711; G3DSA:1.20.1410.10<br>(GENE3D)                                                                                                                     |
| Harpegnathos saltator   | histone-lysine n-methyltransferase setmar                  | 0  |                                                                                                                                                                                                                          | F:GO:0016740;<br>F:GO:0004803;<br>P:GO:0006313;<br>F:GO:0008168;<br>C:GO:0005634;<br>F:GO:0003677;<br>F:GO:0016787;<br>F:GO:0008270;<br>F:GO:0018024;<br>P:GO:0016568;<br>P:GO:0015074;<br>P:GO:0006281;<br>C:GO:0005575;<br>F:GO:0046872;<br>F:GO:0004519 | -                                                                                                                                                                                                 |
| Caenorhabditis elegans  | hypothetical protein Y5F3BL.1 [Caenorhabditis elegans]     | 0  |                                                                                                                                                                                                                          |                                                                                                                                                                                                                                                            | -                                                                                                                                                                                                 |
| Caenorhabditis elegans  | hypothetical protein Y5F3BL.1 [Caenorhabditis elegans]     | 0  |                                                                                                                                                                                                                          |                                                                                                                                                                                                                                                            | -                                                                                                                                                                                                 |
| Caenorhabditis briggsae | elegans protein partially confirmed by transcript evidence | 0  |                                                                                                                                                                                                                          | P:GO:0051028;<br>F:GO:0000166;<br>C:GO:0005634                                                                                                                                                                                                             | G3DSA:3.10.450.50 (GENE3D),<br>PTHR10662 (PANTHER),<br>PTHR10662:SF21 (PANTHER),<br>SSF54427 (SUPERFAMILY)                                                                                        |
| Caenorhabditis elegans  | elegans protein partially confirmed by transcript evidence | 1  | F:GO:0005488                                                                                                                                                                                                             | -                                                                                                                                                                                                                                                          | IPR001304; IPR002035; IPR013032;<br>IPR016186; IPR016187;<br>G3DSA:3.40.50.410 (GENE3D),<br>PTHR22802 (PANTHER),<br>PTHR22802:SF6 (PANTHER), SSF53300<br>(SUPERFAMILY), SSF57196<br>(SUPERFAMILY) |
| Caenorhabditis elegans  | cell death abnormality family member (ced-4)               | 13 | C:GO:0005829;<br>P:GO:0043281;<br>P:GO:0043065;<br>C:GO:0005625;<br>C:GO:0005739;<br>F:GO:0051434;<br>C:GO:0005624;<br>P:GO:0008361;<br>F:GO:0005524;<br>F:GO:0051432;<br>C:GO:0048471;<br>P:GO:0043066;<br>C:GO:0005634 | -                                                                                                                                                                                                                                                          | IPR002182                                                                                                                                                                                         |
|                         | -                                                          | 0  |                                                                                                                                                                                                                          |                                                                                                                                                                                                                                                            | -                                                                                                                                                                                                 |

|                         |                                                                                              |    |                                                                                                                                                                       |                                                                 |              |                                                                                                                                                                                                   |
|-------------------------|----------------------------------------------------------------------------------------------|----|-----------------------------------------------------------------------------------------------------------------------------------------------------------------------|-----------------------------------------------------------------|--------------|---------------------------------------------------------------------------------------------------------------------------------------------------------------------------------------------------|
| Bombyx mori             | isoform b                                                                                    | 0  |                                                                                                                                                                       | F:GO:0003842;<br>P:GO:0055114;<br>C:GO:0005759;<br>P:GO:0006562 |              | -                                                                                                                                                                                                 |
|                         | -                                                                                            | 0  |                                                                                                                                                                       |                                                                 |              | -                                                                                                                                                                                                 |
| Caenorhabditis briggsae | ubiquitin carboxyl-termini hydrolase 5                                                       | 1  | F:GO:0016787                                                                                                                                                          | -                                                               |              | IPR001394; IPR009060; IPR018200;<br>G3DSA:1.10.8.10 (GENE3D), SSF54001<br>(SUPERFAMILY)                                                                                                           |
| Caenorhabditis briggsae | ubiquitin carboxyl-termini hydrolase 5                                                       | 1  | F:GO:0016787                                                                                                                                                          | -                                                               |              | IPR001394; IPR009060; IPR018200;<br>G3DSA:1.10.8.10 (GENE3D), SSF54001<br>(SUPERFAMILY)                                                                                                           |
| Caenorhabditis briggsae | ubiquitin carboxyl-termini hydrolase 5                                                       | 1  | F:GO:0016787                                                                                                                                                          | -                                                               |              | IPR001394; IPR009060; IPR018200;<br>G3DSA:1.10.8.10 (GENE3D), SSF54001<br>(SUPERFAMILY)                                                                                                           |
|                         | -                                                                                            | 0  |                                                                                                                                                                       |                                                                 |              | IPR003677; PTHR21593 (PANTHER)                                                                                                                                                                    |
| Caenorhabditis briggsae | udp-n-acetyl-alpha-d-galactosamine:polypeptide n-acetylgalactosaminyltransferase 11 ( c-t11) | 2  | C:GO:0016020;<br>F:GO:0016757                                                                                                                                         | -                                                               |              | IPR001173; G3DSA:3.90.550.10<br>(GENE3D), PTHR11675 (PANTHER),<br>SSF53448 (SUPERFAMILY)                                                                                                          |
| Caenorhabditis elegans  | isoform a                                                                                    | 0  |                                                                                                                                                                       | F:GO:0046872;<br>F:GO:0008270                                   |              | IPR000260; IPR001452; PTHR22883<br>(PANTHER), SignalP (SIGNALP)                                                                                                                                   |
| Caenorhabditis elegans  | cytochrome c oxidase subunit vib isoform 1                                                   | 7  | P:GO:0009792;<br>P:GO:0002119;<br>P:GO:0040010;<br>P:GO:0000003;<br>P:GO:0008340;<br>C:GO:0005739;<br>F:GO:0004129                                                    | -                                                               | EC:1.9.3.1   | IPR003213; PD015172 (PRODOM),<br>PTHR11387 (PANTHER)                                                                                                                                              |
| Caenorhabditis elegans  | briggsae cbr-hum-5 protein                                                                   | 4  | F:GO:0003779;<br>C:GO:0016459;<br>F:GO:0005524;<br>F:GO:0003774                                                                                                       | -                                                               |              | IPR001609; PTHR13140 (PANTHER),<br>PTHR13140:SF31 (PANTHER),<br>SSF52540 (SUPERFAMILY)                                                                                                            |
| Loa loa                 | transcription initiation factor tfiid subunit 6                                              | 2  | P:GO:0006350;<br>C:GO:0005634                                                                                                                                         | -                                                               |              | PTHR10221 (PANTHER),<br>PTHR10221:SF7 (PANTHER)                                                                                                                                                   |
| Caenorhabditis briggsae | atp-dependent r- helicase dhx8                                                               | 4  | F:GO:0003723;<br>F:GO:0005524;<br>F:GO:0005515;<br>F:GO:0008026                                                                                                       | -                                                               |              | IPR007502; PTHR18934 (PANTHER),<br>SSF52540 (SUPERFAMILY)                                                                                                                                         |
| Caenorhabditis elegans  | glucosyl glucuronosyl transferases                                                           | 2  | P:GO:0044238;<br>F:GO:0016757                                                                                                                                         | -                                                               |              | IPR002213; G3DSA:3.40.50.2000<br>(GENE3D), PTHR11926:SF3<br>(PANTHER), SSF53756 (SUPERFAMILY)                                                                                                     |
| Caenorhabditis elegans  | loss of estine family member (lit-1)                                                         | 10 | F:GO:0004707;<br>F:GO:0047485;<br>P:GO:0008586;<br>P:GO:0030178;<br>P:GO:0007492;<br>F:GO:0005524;<br>P:GO:0016318;<br>P:GO:0007474;<br>P:GO:0042332;<br>P:GO:0006468 | -                                                               | EC:2.7.11.24 | IPR000719; IPR002290; IPR003527;<br>IPR008271; IPR011009; IPR017441;<br>IPR017442; G3DSA:1.10.510.10<br>(GENE3D), G3DSA:3.30.200.20<br>(GENE3D), PTHR11295 (PANTHER),<br>PTHR11295:SF65 (PANTHER) |

|                         |                                                                                       |    |                                                                                                                                                                       |                                                                                  |              |                                                                                                                                                                                                                                                                                                                                           |
|-------------------------|---------------------------------------------------------------------------------------|----|-----------------------------------------------------------------------------------------------------------------------------------------------------------------------|----------------------------------------------------------------------------------|--------------|-------------------------------------------------------------------------------------------------------------------------------------------------------------------------------------------------------------------------------------------------------------------------------------------------------------------------------------------|
| Caenorhabditis elegans  | loss of estine family member (lit-1)                                                  | 10 | F:GO:0004707;<br>F:GO:0047485;<br>P:GO:0008586;<br>P:GO:0030178;<br>P:GO:0007492;<br>F:GO:0005524;<br>P:GO:0016318;<br>P:GO:0007474;<br>P:GO:0042332;<br>P:GO:0006468 | -                                                                                | EC:2.7.11.24 | IPR000719; IPR002290; IPR003527;<br>IPR008271; IPR011009; IPR017441;<br>IPR017442; G3DSA:1.10.510.10<br>(GENE3D), G3DSA:3.30.200.20<br>(GENE3D), PTHR11295 (PANTHER),<br>PTHR11295:SF65 (PANTHER)                                                                                                                                         |
| -                       | -                                                                                     | 0  |                                                                                                                                                                       |                                                                                  |              | -                                                                                                                                                                                                                                                                                                                                         |
| Loa loa                 | hypothetical protein LOAG_07027 [Loa loa]                                             | 0  |                                                                                                                                                                       |                                                                                  |              | -                                                                                                                                                                                                                                                                                                                                         |
| Caenorhabditis elegans  | ctcl tumor antigen l14-2                                                              | 1  | F:GO:0005515                                                                                                                                                          | -                                                                                |              | PD936484 (PRODOM), PTHR18911<br>(PANTHER)                                                                                                                                                                                                                                                                                                 |
| Brugia malayi           | cell cycle regulator mat89bb homolog                                                  | 0  |                                                                                                                                                                       | P:GO:0007049;<br>P:GO:0007346;<br>P:GO:0051301;<br>P:GO:0007067;<br>F:GO:0005515 |              | IPR019355; PTHR12955 (PANTHER)                                                                                                                                                                                                                                                                                                            |
| Caenorhabditis briggsae | elegans protein confirmed by transcript evidence                                      | 0  |                                                                                                                                                                       |                                                                                  |              | IPR001534                                                                                                                                                                                                                                                                                                                                 |
| Caenorhabditis elegans  | let-23 fertility effector regulator family member (lfe-2)                             | 0  |                                                                                                                                                                       | F:GO:0008440                                                                     |              | -                                                                                                                                                                                                                                                                                                                                         |
| Caenorhabditis elegans  | cation transporting atpase protein isoform partially confirmed by transcript evidence | 5  | F:GO:0016820;<br>F:GO:0016887;<br>F:GO:0000166;<br>P:GO:0008152;<br>C:GO:0016020                                                                                      | -                                                                                | EC:3.6.3.0   | IPR000150; IPR001757; IPR004014;<br>IPR005834; IPR006544; IPR008250;<br>IPR018303; G3DSA:2.70.150.10<br>(GENE3D), G3DSA:3.40.1110.10<br>(GENE3D), G3DSA:3.40.50.1000<br>(GENE3D), PTHR11939:SF54<br>(PANTHER), PF12409 (PFAM),<br>SSF56784 (SUPERFAMILY), SSF81653<br>(SUPERFAMILY), SSF81660<br>(SUPERFAMILY), SSF81665<br>(SUPERFAMILY) |
| Caenorhabditis briggsae | cation transporting atpase protein isoform partially confirmed by transcript evidence | 5  | F:GO:0016820;<br>F:GO:0016887;<br>F:GO:0000166;<br>P:GO:0008152;<br>C:GO:0016020                                                                                      | -                                                                                | EC:3.6.3.0   | IPR000150; IPR001757;<br>G3DSA:3.40.50.1000 (GENE3D),<br>PTHR11939:SF54 (PANTHER),<br>SSF56784 (SUPERFAMILY), SSF81665<br>(SUPERFAMILY)                                                                                                                                                                                                   |
| Caenorhabditis briggsae | set (trithorax polycomb) domain containing family member (set-33)                     | 4  | P:GO:0009792;<br>P:GO:0016246;<br>P:GO:0040007;<br>P:GO:0002119                                                                                                       | -                                                                                |              | -                                                                                                                                                                                                                                                                                                                                         |
| Caenorhabditis elegans  | clathrin light chain                                                                  | 5  | P:GO:0009987;<br>P:GO:0006810;<br>C:GO:0030118;<br>C:GO:0012505;<br>P:GO:0009792                                                                                      | -                                                                                |              | -                                                                                                                                                                                                                                                                                                                                         |
| -                       | -                                                                                     | 0  |                                                                                                                                                                       |                                                                                  |              | SignalP (SIGNALP)                                                                                                                                                                                                                                                                                                                         |
| Brugia malayi           | ubiquitin-like modifier activating enzyme 1                                           | 4  | F:GO:0005524;<br>F:GO:0008641;<br>P:GO:0006464;<br>F:GO:0016874                                                                                                       | -                                                                                |              | IPR020003                                                                                                                                                                                                                                                                                                                                 |
| Brugia malayi           | ubiquitin-like modifier activating enzyme 1                                           | 4  | F:GO:0005524;<br>F:GO:0008641;<br>P:GO:0006464;<br>F:GO:0016874                                                                                                       | -                                                                                |              | IPR000011; IPR000127; IPR000594;<br>IPR009036; IPR016040; IPR018074;<br>IPR018075; IPR018965; IPR019572;<br>G3DSA:1.10.3240.10 (GENE3D),<br>PTHR10953 (PANTHER),<br>PTHR10953:SF4 (PANTHER)                                                                                                                                               |

|                        |                                                      |   |                                                                                  |                                                                                                                                                                                                                                                                                                                                                                                                                                                                         |                                                                                                                                                                                                                     |   |
|------------------------|------------------------------------------------------|---|----------------------------------------------------------------------------------|-------------------------------------------------------------------------------------------------------------------------------------------------------------------------------------------------------------------------------------------------------------------------------------------------------------------------------------------------------------------------------------------------------------------------------------------------------------------------|---------------------------------------------------------------------------------------------------------------------------------------------------------------------------------------------------------------------|---|
| Dracunculus medinensis | heat shock protein 70                                | 2 | F:GO:0005524;<br>P:GO:0006950                                                    | -                                                                                                                                                                                                                                                                                                                                                                                                                                                                       | -                                                                                                                                                                                                                   |   |
| Caenorhabditis elegans | solute carrier family 17 (sodium phosphate) member 2 | 4 | P:GO:0055085;<br>F:GO:0015114;<br>P:GO:0006811;<br>C:GO:0044425                  | -                                                                                                                                                                                                                                                                                                                                                                                                                                                                       | -                                                                                                                                                                                                                   |   |
| Caenorhabditis elegans | variable abnormal morphology family member (vab-10)  | 0 |                                                                                  | P:GO:0007423;<br>P:GO:0016199;<br>P:GO:0030716;<br>P:GO:0007517;<br>C:GO:0005912;<br>C:GO:0000235;<br>P:GO:0007409;<br>F:GO:0008092;<br>P:GO:0007017;<br>F:GO:0005509;<br>P:GO:0016319;<br>P:GO:0035149;<br>P:GO:0035147;<br>P:GO:0048813;<br>F:GO:0008017;<br>C:GO:0005874;<br>F:GO:0003779;<br>P:GO:0016204;<br>P:GO:0007475;<br>P:GO:0016203;<br>P:GO:0007026;<br>C:GO:0045169;<br>C:GO:0030426;<br>P:GO:0000226;<br>C:GO:0005856;<br>P:GO:0030036;<br>F:GO:0005515; | -                                                                                                                                                                                                                   | - |
| Caenorhabditis elegans | etoposide-induced protein homolog isoform 2          | 3 | P:GO:0006917;<br>P:GO:0042493;<br>P:GO:0030308                                   | -                                                                                                                                                                                                                                                                                                                                                                                                                                                                       | SignalP (SIGNALP)                                                                                                                                                                                                   |   |
|                        | -                                                    | 0 |                                                                                  |                                                                                                                                                                                                                                                                                                                                                                                                                                                                         | -                                                                                                                                                                                                                   |   |
| Caenorhabditis elegans | cullin family member (cul-2)                         | 3 | C:GO:0031461;<br>P:GO:0006511;<br>F:GO:0031625                                   | -                                                                                                                                                                                                                                                                                                                                                                                                                                                                       | IPR001373; IPR011991; IPR016157;<br>IPR016158; IPR016159; IPR019559;<br>G3DSA:1.20.1310.10 (GENE3D),<br>G3DSA:4.10.1030.10 (GENE3D),<br>PTHR11932 (PANTHER),<br>PTHR11932:SF18 (PANTHER),<br>SSF46785 (SUPERFAMILY) |   |
| Caenorhabditis elegans | splicing factor 3b subunit 3                         | 5 | P:GO:0008380;<br>F:GO:0003676;<br>C:GO:0005681;<br>F:GO:0005515;<br>P:GO:0006397 | -                                                                                                                                                                                                                                                                                                                                                                                                                                                                       | IPR004871; PTHR10644 (PANTHER),<br>PTHR10644:SF1 (PANTHER)                                                                                                                                                          |   |
| Caenorhabditis elegans | elegans protein confirmed by transcript evidence     | 0 |                                                                                  | F:GO:0005524;<br>F:GO:0016887;<br>C:GO:0016021;<br>F:GO:0003993                                                                                                                                                                                                                                                                                                                                                                                                         | PTHR11567 (PANTHER),<br>PTHR11567:SF6 (PANTHER), SignalP<br>(SIGNALP)                                                                                                                                               |   |
| Caenorhabditis elegans | elegans protein confirmed by transcript evidence     | 0 |                                                                                  | F:GO:0005524;<br>F:GO:0016887;<br>C:GO:0016021;<br>F:GO:0003993                                                                                                                                                                                                                                                                                                                                                                                                         | PTHR11567 (PANTHER),<br>PTHR11567:SF6 (PANTHER), SignalP<br>(SIGNALP)                                                                                                                                               |   |

|                         |                                                        |    |                                                                                                                                                                       |   |                                                                                                                                                                                                              |
|-------------------------|--------------------------------------------------------|----|-----------------------------------------------------------------------------------------------------------------------------------------------------------------------|---|--------------------------------------------------------------------------------------------------------------------------------------------------------------------------------------------------------------|
| Caenorhabditis elegans  | elegans protein confirmed by transcript evidence       | 0  | F:GO:0005524;<br>F:GO:0016887;<br>C:GO:0016021;<br>F:GO:0003993                                                                                                       |   | PTHR11567 (PANTHER),<br>PTHR11567:SF6 (PANTHER), SignalP<br>(SIGNALP)                                                                                                                                        |
| -                       | -                                                      | 0  |                                                                                                                                                                       |   | -                                                                                                                                                                                                            |
| Caenorhabditis elegans  | elegans protein confirmed by transcript evidence       | 0  | P:GO:0040015;<br>P:GO:0018996;<br>P:GO:0040035;<br>P:GO:0040011;<br>P:GO:0002119;<br>P:GO:0009792;<br>P:GO:0040007;<br>P:GO:0040018                                   |   | PTHR11909 (PANTHER),<br>PTHR11909:SF11 (PANTHER), SignalP<br>(SIGNALP)                                                                                                                                       |
| Caenorhabditis briggsae | pms2 postmeiotic segregation increased 2 ( cerevisiae) | 6  | F:GO:0032138;<br>F:GO:0032407;<br>P:GO:0006298;<br>F:GO:0003697;<br>P:GO:0009792;<br>C:GO:0005634                                                                     | - | -                                                                                                                                                                                                            |
| Caenorhabditis elegans  | d-3-phosphoglycerate dehydroge-se                      | 9  | P:GO:0040010;<br>P:GO:0006098;<br>P:GO:0055114;<br>F:GO:0004617;<br>F:GO:0004455;<br>F:GO:0051287;<br>F:GO:0005515;<br>P:GO:0009792;<br>P:GO:0006564                  | - | EC:1.1.1.95;<br>EC:1.1.1.86                                                                                                                                                                                  |
| Caenorhabditis elegans  | d-3-phosphoglycerate dehydroge-se                      | 9  | P:GO:0040010;<br>P:GO:0006098;<br>P:GO:0055114;<br>F:GO:0004617;<br>F:GO:0004455;<br>F:GO:0051287;<br>F:GO:0005515;<br>P:GO:0009792;<br>P:GO:0006564                  | - | EC:1.1.1.95;<br>EC:1.1.1.86                                                                                                                                                                                  |
| Loa loa                 | homology domain containing protein                     | 0  |                                                                                                                                                                       |   | IPR022158                                                                                                                                                                                                    |
| -                       | -                                                      | 0  |                                                                                                                                                                       |   | -                                                                                                                                                                                                            |
| Caenorhabditis briggsae | cytochrome c oxidase assembly                          | 10 | C:GO:0016020;<br>P:GO:0040007;<br>P:GO:0006898;<br>P:GO:0006461;<br>P:GO:0009792;<br>P:GO:0002119;<br>P:GO:0065007;<br>F:GO:0005507;<br>P:GO:0040035;<br>C:GO:0005739 | - | IPR003782; IPR012335; IPR012336;<br>IPR022272                                                                                                                                                                |
| -                       | -                                                      | 0  |                                                                                                                                                                       |   | SignalP (SIGNALP)                                                                                                                                                                                            |
| Caenorhabditis elegans  | ash1 ( or homeotic)-like                               | 1  | P:GO:0044237                                                                                                                                                          | - | IPR001025; IPR001214; IPR001965;<br>IPR003616; IPR006560; IPR011011;<br>IPR013083; IPR019787;<br>G3DSA:2.170.270.10 (GENE3D),<br>PTHR22884 (PANTHER),<br>PTHR22884:SF27 (PANTHER),<br>SSF82199 (SUPERFAMILY) |

|                                |                                                                |    |                                                                                                                                                                                                                                                                                              |   |                                                                                                                                                                                  |
|--------------------------------|----------------------------------------------------------------|----|----------------------------------------------------------------------------------------------------------------------------------------------------------------------------------------------------------------------------------------------------------------------------------------------|---|----------------------------------------------------------------------------------------------------------------------------------------------------------------------------------|
|                                | -                                                              | 0  |                                                                                                                                                                                                                                                                                              |   | -                                                                                                                                                                                |
| Caenorhabditis briggsae        | methylcrotonoyl-coenzyme a carboxylase 2                       | 10 | P:GO:0015936;<br>P:GO:0040010;<br>F:GO:0004525;<br>F:GO:0003723;<br>P:GO:0006396;<br>F:GO:0005524;<br>P:GO:0002119;<br>C:GO:0005759;<br>F:GO:0004485;<br>P:GO:0009792                                                                                                                        | - | EC:3.1.26.3;<br>EC:6.4.1.4<br><br>IPR000022; IPR011762; IPR011763;<br>G3DSA:3.90.226.10 (GENE3D),<br>PTHR22855 (PANTHER),<br>PTHR22855:SF13 (PANTHER),<br>SSF52096 (SUPERFAMILY) |
| Caenorhabditis briggsae        | cg16916 protein                                                | 17 | C:GO:0001673;<br>P:GO:0006310;<br>P:GO:0008340;<br>P:GO:0006281;<br>C:GO:0008540;<br>F:GO:0004175;<br>P:GO:0006457;<br>P:GO:0000003;<br>P:GO:0006508;<br>F:GO:0005524;<br>P:GO:0002119;<br>F:GO:0016887;<br>F:GO:0005515;<br>F:GO:0009378;<br>P:GO:0030163;<br>P:GO:0009792;<br>C:GO:0005737 | - | IPR003593; IPR003959; IPR003960;<br>IPR005937; G3DSA:3.40.50.300<br>(GENE3D), PTHR23073 (PANTHER),<br>PTHR23073:SF8 (PANTHER), SSF52540<br>(SUPERFAMILY)                         |
| Caenorhabditis briggsae        | cg16916 protein                                                | 17 | C:GO:0001673;<br>P:GO:0006310;<br>P:GO:0008340;<br>P:GO:0006281;<br>C:GO:0008540;<br>F:GO:0004175;<br>P:GO:0006457;<br>P:GO:0000003;<br>P:GO:0006508;<br>F:GO:0005524;<br>P:GO:0002119;<br>F:GO:0016887;<br>F:GO:0005515;<br>F:GO:0009378;<br>P:GO:0030163;<br>P:GO:0009792;<br>C:GO:0005737 | - | IPR003593; IPR003959; IPR003960;<br>IPR005937; G3DSA:3.40.50.300<br>(GENE3D), PTHR23073 (PANTHER),<br>PTHR23073:SF8 (PANTHER), SSF52540<br>(SUPERFAMILY)                         |
| Caenorhabditis brenneri        | microtubule-associated proteins 1a 1b light chain 3a precursor | 1  | F:GO:0005515                                                                                                                                                                                                                                                                                 | - | IPR004241; G3DSA:3.10.20.90<br>(GENE3D), PTHR10969:SF1<br>(PANTHER), SSF54236 (SUPERFAMILY)                                                                                      |
| Candida albicans SC5314        | sjchgc01393 protein                                            | 0  |                                                                                                                                                                                                                                                                                              |   | -                                                                                                                                                                                |
| Candida albicans SC5314        | sjchgc01393 protein                                            | 0  |                                                                                                                                                                                                                                                                                              |   | -                                                                                                                                                                                |
| Trichostrongylus colubriformis | globin                                                         | 6  | F:GO:0020037;<br>C:GO:0005615;<br>C:GO:0005737;<br>F:GO:0005344;<br>P:GO:0015671;<br>F:GO:0019825                                                                                                                                                                                            | - | -                                                                                                                                                                                |
| Caenorhabditis elegans         | cysteine-rich hydrophobic domain 1                             | 1  | C:GO:0044464                                                                                                                                                                                                                                                                                 | - | IPR019383; PTHR13005 (PANTHER)                                                                                                                                                   |



|                                |                                                            |   |                                                                                                                    |                                                                                                                    |            |                                                                                                                                    |
|--------------------------------|------------------------------------------------------------|---|--------------------------------------------------------------------------------------------------------------------|--------------------------------------------------------------------------------------------------------------------|------------|------------------------------------------------------------------------------------------------------------------------------------|
| Trichostrongylus colubriformis | globin                                                     | 6 | F:GO:0020037;<br>C:GO:0005615;<br>C:GO:0005737;<br>F:GO:0005344;<br>P:GO:0015671;<br>F:GO:0019825                  | -                                                                                                                  |            | IPR000971; IPR009050; IPR012085;<br>IPR012292; SignalP (SIGNALP)                                                                   |
| Ancylostoma ceylanicum         | tissue factor pathway inhibitor a                          | 3 | F:GO:0008233;<br>F:GO:0004867;<br>C:GO:0005576                                                                     | -                                                                                                                  |            | IPR002223; IPR020901; PTHR10083<br>(PANTHER), PTHR10083:SF39<br>(PANTHER)                                                          |
| Caenorhabditis elegans         | protein-tyrosine phosphatase containing protein            | 2 | F:GO:0016791;<br>F:GO:0005515                                                                                      | -                                                                                                                  | EC:3.1.3.0 | -                                                                                                                                  |
| Trichostrongylus colubriformis | globin                                                     | 6 | F:GO:0020037;<br>C:GO:0005615;<br>C:GO:0005737;<br>F:GO:0005344;<br>P:GO:0015671;<br>F:GO:0019825                  | -                                                                                                                  |            | IPR000971; IPR009050; IPR012085;<br>IPR012292; SignalP (SIGNALP)                                                                   |
| Candida albicans SC5314        | sjchgc01393 protein                                        | 0 |                                                                                                                    |                                                                                                                    |            | -                                                                                                                                  |
| Caenorhabditis elegans         | polymerase iii (d- directed) polypeptide c                 | 7 | P:GO:0040010;<br>P:GO:0000003;<br>P:GO:0045087;<br>P:GO:0010171;<br>F:GO:0016740;<br>P:GO:0002119;<br>P:GO:0006350 | -                                                                                                                  |            | IPR008806; PTHR12949 (PANTHER),<br>PF02002 (PFAM), SSF46785<br>(SUPERFAMILY)                                                       |
| Caenorhabditis elegans         | fyve zinc finger family protein                            | 0 |                                                                                                                    | F:GO:0046872;<br>F:GO:0005524;<br>P:GO:0044267;<br>P:GO:0046488;<br>F:GO:0016307;<br>F:GO:0008270;<br>F:GO:0005515 |            | -                                                                                                                                  |
| Caenorhabditis elegans         | btb poz domain containing protein                          | 1 | F:GO:0005515                                                                                                       | -                                                                                                                  |            | IPR000210; IPR002083; IPR008974;<br>IPR011333; IPR013069; IPR013089;<br>IPR013322; PTHR23230:SF169<br>(PANTHER), SignalP (SIGNALP) |
|                                | -                                                          | 0 |                                                                                                                    |                                                                                                                    |            | -                                                                                                                                  |
| Loa loa                        | elegans protein partially confirmed by transcript evidence | 0 |                                                                                                                    |                                                                                                                    |            | PTHR19327 (PANTHER)                                                                                                                |
| Pongo abelii                   | histone-lysine n-methyltransferase setmar                  | 4 | F:GO:0005488;<br>P:GO:0006313;<br>F:GO:0016740;<br>F:GO:0004803                                                    | -                                                                                                                  |            | PTHR23016 (PANTHER)                                                                                                                |
| Caenorhabditis elegans         | sulfite oxidase                                            | 5 | F:GO:0046914;<br>F:GO:0016491;<br>P:GO:0040017;<br>P:GO:0040010;<br>P:GO:0000003                                   | -                                                                                                                  |            | -                                                                                                                                  |
| Caenorhabditis elegans         | exocyst complex component 2                                | 1 | P:GO:0000003                                                                                                       | -                                                                                                                  |            | PTHR13043 (PANTHER)                                                                                                                |

|                        |                                                                    |    |                                                                                                                                                                                                         |   |                                                                                                                                       |
|------------------------|--------------------------------------------------------------------|----|---------------------------------------------------------------------------------------------------------------------------------------------------------------------------------------------------------|---|---------------------------------------------------------------------------------------------------------------------------------------|
| Caenorhabditis elegans | sorting nexin 14                                                   | 0  | P:GO:0007154;<br>P:GO:0015031;<br>C:GO:0016021;<br>C:GO:0016020;<br>P:GO:0006810;<br>F:GO:0003674;<br>P:GO:0007165;<br>C:GO:0005575;<br>F:GO:0005515;<br>F:GO:0004871;<br>F:GO:0035091;<br>P:GO:0008150 |   | IPR000342; IPR001683; IPR003114;<br>IPR013937; IPR016137; PTHR22775<br>(PANTHER), PTHR22775:SF5<br>(PANTHER), SignalP (SIGNALP)       |
|                        | -                                                                  | 0  |                                                                                                                                                                                                         |   | -                                                                                                                                     |
| Caenorhabditis elegans | ccaat enhancer-binding protein zeta                                | 7  | F:GO:0005488;<br>P:GO:0040007;<br>P:GO:0000003;<br>P:GO:0002119;<br>P:GO:0006898;<br>P:GO:0009792;<br>P:GO:0006350                                                                                      | - | IPR005612; PTHR12048 (PANTHER)                                                                                                        |
|                        | -                                                                  | 0  |                                                                                                                                                                                                         |   | -                                                                                                                                     |
| Brugia malayi          | kh domain r- sig-l transduction associated 1                       | 10 | P:GO:0040035;<br>P:GO:0002119;<br>P:GO:0006468;<br>F:GO:0003723;<br>P:GO:0018996;<br>P:GO:0040010;<br>F:GO:0005524;<br>P:GO:0040011;<br>C:GO:0016021;<br>F:GO:0004674                                   | - | EC:2.7.11.0<br>IPR004087; G3DSA:3.30.1370.10<br>(GENE3D), PTHR11208 (PANTHER),<br>PTHR11208:SF22 (PANTHER),<br>SSF54791 (SUPERFAMILY) |
| Brugia malayi          | kh domain containing protein                                       | 11 | P:GO:0040010;<br>F:GO:0003723;<br>F:GO:0004674;<br>C:GO:0016021;<br>P:GO:0040035;<br>P:GO:0018996;<br>F:GO:0005524;<br>P:GO:0002119;<br>P:GO:0040011;<br>C:GO:0005737;<br>P:GO:0006468                  | - | EC:2.7.11.0<br>SignalP (SIGNALP)                                                                                                      |
| Caenorhabditis elegans | aldo-keto reductase                                                | 8  | P:GO:0042840;<br>P:GO:0046185;<br>C:GO:0016324;<br>P:GO:0055114;<br>P:GO:0019853;<br>F:GO:0047939;<br>F:GO:0004032;<br>C:GO:0005829                                                                     | - | EC:1.1.1.19;<br>EC:1.1.1.21<br>IPR001395; IPR018170; IPR020471;<br>IPR023210; PTHR11732:SF34<br>(PANTHER)                             |
| Caenorhabditis elegans | abnormal embryonic partitioning of cytoplasm family member (par-3) | 4  | P:GO:0048856;<br>P:GO:0007275;<br>C:GO:0044464;<br>P:GO:0009987                                                                                                                                         | - | IPR010916; PTHR16484 (PANTHER),<br>PTHR16484:SF2 (PANTHER)                                                                            |
|                        | -                                                                  | 0  |                                                                                                                                                                                                         |   | -                                                                                                                                     |
| Loa loa                | programmed cell death 6 interacting protein                        | 0  | F:GO:0003674;<br>P:GO:0015031;<br>P:GO:0006810                                                                                                                                                          |   | IPR004328; G3DSA:1.25.40.280<br>(GENE3D), PTHR23030 (PANTHER),<br>PTHR23030:SF11 (PANTHER)                                            |

|                           |                                                                        |   |                                                                                                   |                                                                                                                    |                                                                                                                                          |
|---------------------------|------------------------------------------------------------------------|---|---------------------------------------------------------------------------------------------------|--------------------------------------------------------------------------------------------------------------------|------------------------------------------------------------------------------------------------------------------------------------------|
| Loa loa                   | npl (yeast nuclear protein localization) homolog family member (npl- ) | 6 | P:GO:0007030;<br>P:GO:0006944;<br>F:GO:0005515;<br>C:GO:0043231;<br>C:GO:0044444;<br>F:GO:0008270 | -                                                                                                                  | IPR007716; IPR007717; PTHR12710 (PANTHER)                                                                                                |
| Caenorhabditis briggsae   | npl (yeast nuclear protein localization) homolog family member (npl- ) | 6 | P:GO:0007030;<br>P:GO:0006944;<br>F:GO:0046872;<br>F:GO:0005515;<br>C:GO:0043231;<br>C:GO:0044444 | -                                                                                                                  | IPR001876; IPR007716; IPR007717; PTHR12710 (PANTHER), SSF90209 (SUPERFAMILY)                                                             |
| Caenorhabditis elegans    | ophagy (yeast atg homolog) family member (atg- )                       | 1 | C:GO:0044464                                                                                      | -                                                                                                                  | IPR001680; IPR011046; IPR015943; IPR017986; IPR019775; IPR019781; IPR019782; IPR020472; PTHR19878 (PANTHER)                              |
| Drosophila virilis        | serine protease                                                        | 0 |                                                                                                   | P:GO:0006508;<br>F:GO:0004252;<br>F:GO:0008236;<br>P:GO:0006911;<br>F:GO:0016787;<br>F:GO:0003824;<br>F:GO:0008233 | -                                                                                                                                        |
| Haemaphysalis longicornis | tick serine protease                                                   | 0 |                                                                                                   | P:GO:0006508;<br>F:GO:0004252;<br>F:GO:0008236;<br>P:GO:0006911;<br>F:GO:0016787;<br>F:GO:0003824;<br>F:GO:0008233 | IPR001254; IPR001314; IPR009003; IPR018114; G3DSA:2.40.10.10 (GENE3D), PTHR19355 (PANTHER), PTHR19355:SF174 (PANTHER), SignalP (SIGNALP) |
| Drosophila virilis        | serine protease                                                        | 0 |                                                                                                   | P:GO:0006508;<br>F:GO:0004252;<br>F:GO:0008236;<br>P:GO:0006911;<br>F:GO:0016787;<br>F:GO:0003824;<br>F:GO:0008233 | IPR001254; IPR001314; IPR009003; IPR018114; G3DSA:2.40.10.10 (GENE3D), PTHR19355 (PANTHER), PTHR19355:SF174 (PANTHER), SignalP (SIGNALP) |
| Drosophila mojavensis     | proclotting enzyme                                                     | 0 |                                                                                                   | P:GO:0006508;<br>F:GO:0004252;<br>F:GO:0008236;<br>F:GO:0016787;<br>F:GO:0003824;<br>F:GO:0008233                  | IPR001254; IPR001314; IPR009003; IPR018114; G3DSA:2.40.10.10 (GENE3D), PTHR19355 (PANTHER), PTHR19355:SF174 (PANTHER)                    |
| Haemaphysalis longicornis | serine protease                                                        | 0 |                                                                                                   | P:GO:0006508;<br>F:GO:0004252;<br>F:GO:0008236;<br>P:GO:0006911;<br>F:GO:0016787;<br>F:GO:0003824;<br>F:GO:0008233 | IPR001254; IPR001314; IPR009003; IPR018114; G3DSA:2.40.10.10 (GENE3D), PTHR19355 (PANTHER), PTHR19355:SF174 (PANTHER), SignalP (SIGNALP) |
| Ciona intestinalis        | novel protein                                                          | 0 |                                                                                                   | F:GO:0046872;<br>P:GO:0055114;<br>F:GO:0009055;<br>F:GO:0016491;<br>F:GO:0020037;<br>F:GO:0005506;<br>F:GO:0004497 | -                                                                                                                                        |

|                         |                                                                                   |    |                                                                                                                                                                                                                                                                                                                                                                                                                                                                                                                                                             |                               |             |                                                                                                            |
|-------------------------|-----------------------------------------------------------------------------------|----|-------------------------------------------------------------------------------------------------------------------------------------------------------------------------------------------------------------------------------------------------------------------------------------------------------------------------------------------------------------------------------------------------------------------------------------------------------------------------------------------------------------------------------------------------------------|-------------------------------|-------------|------------------------------------------------------------------------------------------------------------|
| Caenorhabditis elegans  | cln3 protein                                                                      | 29 | P:GO:0008340;<br>P:GO:0043086;<br>C:GO:0044433;<br>C:GO:0005776;<br>P:GO:0001508;<br>P:GO:0006672;<br>C:GO:0044431;<br>P:GO:0007040;<br>F:GO:0048306;<br>C:GO:0005764;<br>C:GO:0016021;<br>P:GO:0016242;<br>P:GO:0008306;<br>C:GO:0005770;<br>P:GO:0043524;<br>P:GO:0051480;<br>P:GO:0046662;<br>P:GO:0045861;<br>P:GO:0016485;<br>P:GO:0009792;<br>P:GO:0006687;<br>P:GO:0042133;<br>C:GO:0031090;<br>P:GO:0006520;<br>C:GO:0005769;<br>P:GO:0050885;<br>P:GO:0035225;<br>F:GO:0003980;<br>P:GO:0006457;<br>C:GO:0005788;<br>C:GO:0005793;<br>F:GO:0051082 | -                             | -           | IPR003492; IPR016196; IPR018460                                                                            |
| Caenorhabditis elegans  | udp-glucose:glycoprotein glucosyltransferase containing protein                   | 5  | P:GO:0009792;<br>F:GO:0005515                                                                                                                                                                                                                                                                                                                                                                                                                                                                                                                               | -                             | -           | IPR009448                                                                                                  |
| Loa loa                 | btb and math domain containing protein partially confirmed by transcript evidence | 2  | P:GO:0009792;<br>F:GO:0005515                                                                                                                                                                                                                                                                                                                                                                                                                                                                                                                               | -                             | -           | -                                                                                                          |
| -                       | -                                                                                 | 0  | -                                                                                                                                                                                                                                                                                                                                                                                                                                                                                                                                                           | -                             | -           | SignalP (SIGNALP)                                                                                          |
| -                       | -                                                                                 | 0  | -                                                                                                                                                                                                                                                                                                                                                                                                                                                                                                                                                           | -                             | -           | -                                                                                                          |
| Caenorhabditis briggsae | sy-ptophysin sy-ptoporin family protein                                           | 0  | -                                                                                                                                                                                                                                                                                                                                                                                                                                                                                                                                                           | C:GO:0016020                  | -           | -                                                                                                          |
| Loa loa                 | regulation of nuclear pre-mr- domain containing 1b                                | 0  | -                                                                                                                                                                                                                                                                                                                                                                                                                                                                                                                                                           | F:GO:0003674;<br>C:GO:0005575 | -           | IPR006569; IPR006903; IPR008942;<br>PTHR12460 (PANTHER)                                                    |
| Caenorhabditis elegans  | neighbor of cox4                                                                  | 7  | P:GO:0009792;<br>P:GO:0000003;<br>P:GO:0040007;<br>F:GO:0005515;<br>P:GO:0006898;<br>P:GO:0002119;<br>P:GO:0040011                                                                                                                                                                                                                                                                                                                                                                                                                                          | -                             | -           | IPR005366; PTHR12941:SF2 (PANTHER)                                                                         |
| Caenorhabditis briggsae | briggsae cbr-ubxn-1 protein                                                       | 1  | F:GO:0005515                                                                                                                                                                                                                                                                                                                                                                                                                                                                                                                                                | -                             | -           | IPR001012; G3DSA:3.10.20.90 (GENE3D), PTHR13020 (PANTHER), PTHR13020:SF4 (PANTHER), SSF54236 (SUPERFAMILY) |
| Caenorhabditis elegans  | elegans protein confirmed by transcript evidence                                  | 6  | F:GO:0046933;<br>C:GO:0016021;<br>P:GO:0015986;<br>C:GO:0033179;<br>C:GO:0045263;<br>C:GO:0005773                                                                                                                                                                                                                                                                                                                                                                                                                                                           | -                             | EC:3.6.3.14 | IPR000245; IPR002379; IPR011555;<br>PTHR10263 (PANTHER), SignalP (SIGNALP)                                 |
| -                       | -                                                                                 | 0  | -                                                                                                                                                                                                                                                                                                                                                                                                                                                                                                                                                           | -                             | -           | -                                                                                                          |

|                         |                                                         |    |                                                                                                                                                                       |                               |            |                                                           |
|-------------------------|---------------------------------------------------------|----|-----------------------------------------------------------------------------------------------------------------------------------------------------------------------|-------------------------------|------------|-----------------------------------------------------------|
| Culex quinquefasciatus  | 40s ribosomal protein s9                                | 4  | F:GO:0003735;<br>C:GO:0015935;<br>P:GO:0006412;<br>F:GO:0019843                                                                                                       | -                             | EC:3.6.5.3 | SignalIP (SIGNALP)                                        |
| Culex quinquefasciatus  | 40s ribosomal protein s9                                | 4  | F:GO:0003735;<br>C:GO:0015935;<br>P:GO:0006412;<br>F:GO:0019843                                                                                                       | -                             | EC:3.6.5.3 | SignalIP (SIGNALP)                                        |
| Brugia malayi           | 40s ribosomal protein                                   | 10 | P:GO:0009792;<br>P:GO:0010171;<br>P:GO:0002119;<br>F:GO:0003735;<br>P:GO:0040010;<br>C:GO:0015935;<br>P:GO:0000003;<br>P:GO:0008340;<br>P:GO:0006412;<br>F:GO:0019843 | -                             | EC:3.6.5.3 | SignalIP (SIGNALP)                                        |
| Brugia malayi           | 40s ribosomal protein                                   | 10 | P:GO:0009792;<br>P:GO:0010171;<br>P:GO:0002119;<br>F:GO:0003735;<br>P:GO:0040010;<br>C:GO:0015935;<br>P:GO:0000003;<br>P:GO:0008340;<br>P:GO:0006412;<br>F:GO:0019843 | -                             | EC:3.6.5.3 | SignalIP (SIGNALP)                                        |
| -                       | -                                                       | 0  | -                                                                                                                                                                     | -                             | -          | -                                                         |
| Caenorhabditis elegans  | elegans protein confirmed by transcript evidence        | 0  | -                                                                                                                                                                     | P:GO:0055114;<br>F:GO:0016491 | -          | -                                                         |
| Brugia malayi           | zinc c2h2 type family protein                           | 1  | F:GO:0005515                                                                                                                                                          | -                             | -          | IPR015880                                                 |
| Caenorhabditis briggsae | Hypothetical protein CBG22132 [Caenorhabditis briggsae] | 0  | -                                                                                                                                                                     | -                             | -          | IPR006210; IPR013032                                      |
| Caenorhabditis briggsae | temporarily assigned gene -me family member (tag-60)    | 0  | -                                                                                                                                                                     | P:GO:0008340;<br>F:GO:0005515 | -          | -                                                         |
| Caenorhabditis elegans  | temporarily assigned gene -me family member (tag-60)    | 0  | -                                                                                                                                                                     | P:GO:0008340;<br>F:GO:0005515 | -          | -                                                         |
| Caenorhabditis briggsae | pdz domain-containing                                   | 2  | F:GO:0005515;<br>P:GO:0008340                                                                                                                                         | -                             | -          | IPR001478; G3DSA:2.30.42.10 (GENE3D), PTHR14191 (PANTHER) |
| Caenorhabditis elegans  | pdz domain-containing                                   | 2  | F:GO:0005515;<br>P:GO:0008340                                                                                                                                         | -                             | -          | IPR001478; G3DSA:2.30.42.10 (GENE3D), PTHR14191 (PANTHER) |
| Caenorhabditis elegans  | pdz domain-containing                                   | 2  | F:GO:0005515;<br>P:GO:0008340                                                                                                                                         | -                             | -          | IPR001478; G3DSA:2.30.42.10 (GENE3D), PTHR14191 (PANTHER) |
| Caenorhabditis elegans  | pdz domain-containing                                   | 2  | F:GO:0005515;<br>P:GO:0008340                                                                                                                                         | -                             | -          | IPR001478; G3DSA:2.30.42.10 (GENE3D), PTHR14191 (PANTHER) |
| Caenorhabditis elegans  | pdz domain-containing                                   | 2  | F:GO:0005515;<br>P:GO:0008340                                                                                                                                         | -                             | -          | IPR001478; G3DSA:2.30.42.10 (GENE3D), PTHR14191 (PANTHER) |
| Caenorhabditis elegans  | elegans protein confirmed by transcript evidence        | 0  | -                                                                                                                                                                     | P:GO:0008150;<br>C:GO:0005575 | -          | -                                                         |
| Caenorhabditis briggsae | briggsae cbr-sys-1 protein                              | 0  | -                                                                                                                                                                     | F:GO:0005488                  | -          | IPR011989; IPR016024                                      |
| Nematostella vectensis  | predicted protein [Nematostella vectensis]              | 0  | -                                                                                                                                                                     | -                             | -          | -                                                         |
| Caenorhabditis briggsae | elegans protein confirmed by transcript evidence        | 0  | -                                                                                                                                                                     | F:GO:0005515                  | -          | -                                                         |
| Caenorhabditis briggsae | elegans protein confirmed by transcript evidence        | 0  | -                                                                                                                                                                     | F:GO:0005515                  | -          | -                                                         |

|                         |                                                            |    |                                                                                                                                                                                                                                                                             |                                                                                                                    |   |                                                                                                            |
|-------------------------|------------------------------------------------------------|----|-----------------------------------------------------------------------------------------------------------------------------------------------------------------------------------------------------------------------------------------------------------------------------|--------------------------------------------------------------------------------------------------------------------|---|------------------------------------------------------------------------------------------------------------|
| Brugia malayi           | mediator complex subunit rgr-1                             | 6  | F:GO:0030528;<br>P:GO:0040007;<br>P:GO:0002119;<br>F:GO:0008134;<br>P:GO:0009792;<br>P:GO:0006350                                                                                                                                                                           | -                                                                                                                  | - |                                                                                                            |
| Caenorhabditis briggsae | 26s proteasome regulatory subunit s3                       | 9  | P:GO:0009792;<br>P:GO:0042176;<br>P:GO:0002119;<br>F:GO:0005515;<br>P:GO:0000003;<br>P:GO:0008340;<br>F:GO:0030234;<br>C:GO:0000502;<br>P:GO:0040007                                                                                                                        | -                                                                                                                  |   | IPR000717; IPR011990; IPR011991;<br>IPR013143; IPR013586; PTHR10758<br>(PANTHER), SSF46785 (SUPERFAMILY)   |
| Caenorhabditis briggsae | 26s proteasome regulatory subunit s3                       | 9  | P:GO:0009792;<br>P:GO:0042176;<br>P:GO:0002119;<br>F:GO:0005515;<br>P:GO:0000003;<br>P:GO:0008340;<br>F:GO:0030234;<br>C:GO:0000502;<br>P:GO:0040007                                                                                                                        | -                                                                                                                  |   | IPR000717; IPR011990; IPR011991;<br>IPR013143; IPR013586; PTHR10758<br>(PANTHER), SSF46785 (SUPERFAMILY)   |
| Caenorhabditis briggsae | 26s proteasome regulatory subunit s3                       | 9  | P:GO:0009792;<br>P:GO:0042176;<br>P:GO:0002119;<br>F:GO:0005515;<br>P:GO:0000003;<br>P:GO:0008340;<br>F:GO:0030234;<br>C:GO:0000502;<br>P:GO:0040007                                                                                                                        | -                                                                                                                  |   | IPR000717; IPR011990; IPR011991;<br>IPR013143; IPR013586; PTHR10758<br>(PANTHER), SSF46785 (SUPERFAMILY)   |
| Loa loa                 | zinc finger protein 37 homolog                             | 0  |                                                                                                                                                                                                                                                                             | F:GO:0003676;<br>F:GO:0016455;<br>P:GO:0008150;<br>F:GO:0008270;<br>P:GO:0006357;<br>C:GO:0016592;<br>C:GO:0005622 |   | IPR007087; IPR013087; IPR015880;<br>PTHR14596 (PANTHER), SSF57667<br>(SUPERFAMILY)                         |
| Caenorhabditis briggsae | elegans protein partially confirmed by transcript evidence | 0  |                                                                                                                                                                                                                                                                             |                                                                                                                    |   | PTHR19303 (PANTHER),<br>PTHR19303:SF2 (PANTHER)                                                            |
| Loa loa                 | regulator of nonsense transcripts 1                        | 16 | P:GO:0000184;<br>C:GO:0000785;<br>F:GO:0005515;<br>F:GO:0008270;<br>P:GO:0006406;<br>P:GO:0006449;<br>F:GO:0003677;<br>F:GO:0003723;<br>C:GO:0000932;<br>F:GO:0003682;<br>F:GO:0004004;<br>P:GO:0071044;<br>F:GO:0005524;<br>P:GO:0006260;<br>P:GO:0007049;<br>P:GO:0006281 | -                                                                                                                  |   | G3DSA:3.40.50.300 (GENE3D),<br>PTHR10887 (PANTHER),<br>PTHR10887:SF26 (PANTHER),<br>SSF52540 (SUPERFAMILY) |

|                         |                                                        |    |                                                                                                                                                                                                                                                            |             |                                                                                                                                                                                                                          |
|-------------------------|--------------------------------------------------------|----|------------------------------------------------------------------------------------------------------------------------------------------------------------------------------------------------------------------------------------------------------------|-------------|--------------------------------------------------------------------------------------------------------------------------------------------------------------------------------------------------------------------------|
|                         | -                                                      | 0  |                                                                                                                                                                                                                                                            |             | -                                                                                                                                                                                                                        |
|                         | -                                                      | 0  |                                                                                                                                                                                                                                                            |             | -                                                                                                                                                                                                                        |
| Caenorhabditis briggsae | myosin-2 essential light chain                         | 3  | P:GO:0009792;<br>F:GO:0016491;<br>F:GO:0005509                                                                                                                                                                                                             |             | IPR002048; IPR011992; IPR018249;<br>PTHR23048 (PANTHER), SSF47473<br>(SUPERFAMILY)                                                                                                                                       |
| Loa loa                 | temporarily assigned gene -me family member (tag-76)   | 15 | P:GO:0030423;<br>C:GO:0016442;<br>F:GO:0003743;<br>P:GO:0030422;<br>P:GO:0006342;<br>P:GO:0006402;<br>F:GO:0035198;<br>P:GO:0035279;<br>P:GO:0007367;<br>C:GO:0005850;<br>P:GO:0035196;<br>C:GO:0048471;<br>F:GO:0019899;<br>C:GO:0005634;<br>P:GO:0007416 |             | -                                                                                                                                                                                                                        |
|                         | -                                                      | 0  |                                                                                                                                                                                                                                                            |             | -                                                                                                                                                                                                                        |
|                         | -                                                      | 0  |                                                                                                                                                                                                                                                            |             | -                                                                                                                                                                                                                        |
| Loa loa                 | eph receptor a4                                        | 10 | P:GO:0007411;<br>P:GO:0030900;<br>P:GO:0007391;<br>F:GO:0004872;<br>F:GO:0004713;<br>P:GO:0009988;<br>F:GO:0005515;<br>F:GO:0000166;<br>P:GO:0007628;<br>P:GO:0009952                                                                                      | EC:2.7.10.0 | IPR000719; IPR001245; IPR001660;<br>IPR011009; IPR011510; IPR020685;<br>G3DSA:1.10.510.10 (GENE3D),<br>PTHR23256:SF59 (PANTHER)                                                                                          |
| Loa loa                 | chitin binding peritrophin-a domain containing protein | 1  | F:GO:0005488                                                                                                                                                                                                                                               |             | -                                                                                                                                                                                                                        |
| Caenorhabditis briggsae | chitin binding peritrophin-a domain containing protein | 1  | F:GO:0005515                                                                                                                                                                                                                                               |             | -                                                                                                                                                                                                                        |
| Brugia malayi           | chitin binding peritrophin-a domain containing protein | 1  | F:GO:0005515                                                                                                                                                                                                                                               |             | -                                                                                                                                                                                                                        |
| Caenorhabditis elegans  | phosphatidylserine synthase 1                          | 3  | P:GO:0006659;<br>P:GO:0040018;<br>C:GO:0016021                                                                                                                                                                                                             |             | IPR004277; SignalP (SIGNALP)                                                                                                                                                                                             |
| Caenorhabditis elegans  | fidgetin-like 1                                        | 6  | F:GO:0017111;<br>P:GO:0046034;<br>P:GO:0000003;<br>F:GO:0042802;<br>F:GO:0005524;<br>F:GO:0000287                                                                                                                                                          | EC:3.6.1.15 | IPR003593; IPR003959; IPR003960;<br>IPR015415; G3DSA:1.10.8.60<br>(GENE3D), G3DSA:3.40.50.300<br>(GENE3D), PTHR23074 (PANTHER),<br>PTHR23074:SF17 (PANTHER),<br>SSF52540 (SUPERFAMILY)                                   |
| Caenorhabditis elegans  | ef hand family protein                                 | 11 | P:GO:0047497;<br>P:GO:0006915;<br>F:GO:0005509;<br>P:GO:0007264;<br>P:GO:0019725;<br>P:GO:0002119;<br>F:GO:0005515;<br>C:GO:0031307;<br>F:GO:0016787;<br>P:GO:0015031;<br>F:GO:0005525                                                                     |             | IPR011992; IPR013566; IPR013567;<br>IPR013684; IPR018247; IPR018249;<br>IPR020860; G3DSA:3.40.50.300<br>(GENE3D), PTHR11708 (PANTHER),<br>PTHR11708:SF13 (PANTHER),<br>SSF47473 (SUPERFAMILY), SSF52540<br>(SUPERFAMILY) |

|                         |                                                       |    |                                                                                                                                                                                                                                           |   |                                                                   |
|-------------------------|-------------------------------------------------------|----|-------------------------------------------------------------------------------------------------------------------------------------------------------------------------------------------------------------------------------------------|---|-------------------------------------------------------------------|
| Caenorhabditis elegans  | nuclear hormone receptor e75                          | 0  | F:GO:0004887;<br>F:GO:0043565;<br>F:GO:0003700;<br>F:GO:0003677;<br>C:GO:0005634;<br>F:GO:0004879;<br>F:GO:0008270;<br>P:GO:0043053;<br>P:GO:0006355;<br>F:GO:0004872;<br>F:GO:0046872;<br>P:GO:0006350;<br>P:GO:0045449;<br>F:GO:0003707 | - | -                                                                 |
| -                       | -                                                     | 0  | -                                                                                                                                                                                                                                         | - | -                                                                 |
| Caenorhabditis elegans  | pdz domain-containing                                 | 2  | F:GO:0005515;<br>P:GO:0008340                                                                                                                                                                                                             | - | IPR001478; G3DSA:2.30.42.10 (GENE3D), PTHR14191 (PANTHER)         |
| Loa loa                 | splicing factor 14 kda subunit                        | 6  | F:GO:0003723;<br>P:GO:0006397;<br>C:GO:0005634;<br>F:GO:0000166;<br>P:GO:0008380;<br>F:GO:0005515                                                                                                                                         | - | IPR000504; IPR012677; PTHR22630 (PANTHER), SSF54928 (SUPERFAMILY) |
| Caenorhabditis briggsae | phosphorylase b ki-se                                 | 10 | F:GO:0004339;<br>F:GO:0005516;<br>C:GO:0016021;<br>F:GO:0008607;<br>F:GO:0005524;<br>F:GO:0004812;<br>F:GO:0016301;<br>P:GO:0006418;<br>P:GO:0005977;<br>C:GO:0005737                                                                     | - | EC:3.2.1.3<br>IPR008734; IPR011613                                |
| -                       | -                                                     | 0  | -                                                                                                                                                                                                                                         | - | SignalP (SIGNALP)                                                 |
| Caenorhabditis briggsae | yow5_caeel ame: full=uncharacterized protein          | 0  | F:GO:0005515                                                                                                                                                                                                                              | - | -                                                                 |
| Caenorhabditis briggsae | yow5_caeel ame: full=uncharacterized protein          | 1  | F:GO:0005515                                                                                                                                                                                                                              | - | -                                                                 |
| -                       | -                                                     | 0  | -                                                                                                                                                                                                                                         | - | -                                                                 |
| Caenorhabditis elegans  | hypothetical protein F59G1.4 [Caenorhabditis elegans] | 0  | -                                                                                                                                                                                                                                         | - | -                                                                 |
| -                       | -                                                     | 0  | -                                                                                                                                                                                                                                         | - | -                                                                 |
| -                       | -                                                     | 0  | -                                                                                                                                                                                                                                         | - | IPR001810; IPR022364;<br>G3DSA:1.20.1280.50 (GENE3D)              |



|                         |                                                           |    |                                                                                                                                                                                                                                                                                                               |                                                                 |                                          |                                                                                                                                                    |
|-------------------------|-----------------------------------------------------------|----|---------------------------------------------------------------------------------------------------------------------------------------------------------------------------------------------------------------------------------------------------------------------------------------------------------------|-----------------------------------------------------------------|------------------------------------------|----------------------------------------------------------------------------------------------------------------------------------------------------|
| Homo sapiens            | immunoglobulin m heavy chain                              | 18 | P:GO:0050853;<br>P:GO:0043410;<br>P:GO:0019882;<br>F:GO:0005515;<br>F:GO:0003823;<br>C:GO:0005624;<br>P:GO:0002455;<br>C:GO:0016021;<br>C:GO:0009897;<br>P:GO:0050731;<br>P:GO:0045022;<br>P:GO:0045807;<br>C:GO:0019815;<br>C:GO:0048471;<br>C:GO:0042571;<br>P:GO:0000187;<br>F:GO:0004888;<br>P:GO:0030890 | -                                                               |                                          | IPR003006; IPR003596; IPR003597;<br>IPR007110; IPR013106; IPR013783;<br>PTHR23266 (PANTHER),<br>PTHR23266:SF3 (PANTHER), SSF48726<br>(SUPERFAMILY) |
| Caenorhabditis elegans  | monofunctio-l c1-tetrahydrofolate mitochondrial precursor | 7  | P:GO:0009257;<br>F:GO:0004488;<br>F:GO:0004329;<br>F:GO:0004477;<br>P:GO:0006730;<br>F:GO:0005524;<br>C:GO:0005739                                                                                                                                                                                            | -                                                               | EC:1.5.1.5;<br>EC:6.3.4.3;<br>EC:3.5.4.9 | IPR000559; G3DSA:3.40.50.300<br>(GENE3D), PTHR10025 (PANTHER),<br>SSF52540 (SUPERFAMILY)                                                           |
| Caenorhabditis elegans  | hypothetical protein K04C2.2 [Caenorhabditis elegans]     | 5  | P:GO:0040035;<br>P:GO:0009792;<br>P:GO:0002119;<br>P:GO:0040010;<br>P:GO:0006898                                                                                                                                                                                                                              | -                                                               |                                          | IPR007015; PTHR13213:SF5<br>(PANTHER)                                                                                                              |
| Caenorhabditis elegans  | u2 small nuclear ribonucleoprotein                        | 8  | P:GO:0040035;<br>P:GO:0009792;<br>P:GO:0002119;<br>F:GO:0005488;<br>P:GO:0040010;<br>P:GO:0008340;<br>P:GO:0040011;<br>P:GO:0006898                                                                                                                                                                           | -                                                               |                                          | IPR015016; PTHR12097 (PANTHER)                                                                                                                     |
| -                       | -                                                         | 0  |                                                                                                                                                                                                                                                                                                               |                                                                 |                                          | SignalP (SIGNALP)                                                                                                                                  |
| -                       | -                                                         | 0  |                                                                                                                                                                                                                                                                                                               |                                                                 |                                          | -                                                                                                                                                  |
| Brugia malayi           | zgc:162613 protein                                        | 0  |                                                                                                                                                                                                                                                                                                               | F:GO:0003674;<br>P:GO:0008150                                   |                                          | IPR006968; IPR018202;<br>PTHR12770:SF10 (PANTHER)                                                                                                  |
| Brugia malayi           | cd- sequence bc017158                                     | 0  |                                                                                                                                                                                                                                                                                                               | F:GO:0003674;<br>C:GO:0016020;<br>P:GO:0008150;<br>C:GO:0005575 |                                          | IPR006968; PTHR12770:SF11<br>(PANTHER), SignalP (SIGNALP)                                                                                          |
| Caenorhabditis elegans  | choline ethanolaminophosphotransferase 1                  | 4  | C:GO:0043231;<br>P:GO:0008654;<br>F:GO:0016780;<br>C:GO:0016020                                                                                                                                                                                                                                               | -                                                               | EC:2.7.8.0                               | IPR000462; IPR014472; PTHR10414<br>(PANTHER), PTHR10414:SF4<br>(PANTHER)                                                                           |
| Caenorhabditis briggsae | large subunit ribosomal protein 6                         | 3  | C:GO:0005840;<br>F:GO:0003735;<br>P:GO:0006412                                                                                                                                                                                                                                                                | -                                                               | EC:3.6.5.3                               | IPR001747; IPR011030; PTHR23345<br>(PANTHER), SSF48431 (SUPERFAMILY)                                                                               |

|                        |                                                                                  |    |                                                                                                                                                                       |                                                |                                                                               |
|------------------------|----------------------------------------------------------------------------------|----|-----------------------------------------------------------------------------------------------------------------------------------------------------------------------|------------------------------------------------|-------------------------------------------------------------------------------|
| Caenorhabditis elegans | briggsae cbr-vit-2 protein                                                       | 6  | P:GO:0009792;<br>F:GO:0005319;<br>F:GO:0005515;<br>P:GO:0040010;<br>P:GO:0006869;<br>P:GO:0008340                                                                     | -                                              | IPR001747; IPR011030; PTHR23345 (PANTHER), SSF48431 (SUPERFAMILY)             |
| Brugia malayi          | math (meprin-associated traf homology) domain containing family member (math-33) | 3  | P:GO:0032501;<br>P:GO:0045927;<br>F:GO:0016787                                                                                                                        | -                                              | -                                                                             |
| Brugia malayi          | metallopeptidase family m24 containing protein                                   | 10 | P:GO:0006281;<br>P:GO:0045449;<br>P:GO:0006260;<br>P:GO:0018996;<br>F:GO:0003677;<br>C:GO:0035101;<br>C:GO:0005694;<br>P:GO:0009792;<br>P:GO:0001703;<br>P:GO:0001672 | -                                              | IPR000994; IPR013719; IPR013953; PTHR13980 (PANTHER), PTHR13980:SF6 (PANTHER) |
| Brugia malayi          | fact complex subunit                                                             | 10 | P:GO:0006281;<br>P:GO:0045449;<br>P:GO:0006260;<br>P:GO:0018996;<br>F:GO:0003677;<br>C:GO:0035101;<br>C:GO:0005694;<br>P:GO:0009792;<br>P:GO:0001703;<br>P:GO:0001672 | -                                              | IPR000994; IPR013719; IPR013953; PTHR13980 (PANTHER), PTHR13980:SF6 (PANTHER) |
| Loa loa                | chitin binding peritrophin-a domain containing protein                           | 0  |                                                                                                                                                                       | F:GO:0008061;<br>P:GO:0006030;<br>C:GO:0005576 | IPR002557; G3DSA:2.170.140.10 (GENE3D), PTHR23301 (PANTHER)                   |
| Loa loa                | chitin binding peritrophin-a domain containing protein                           | 0  |                                                                                                                                                                       | F:GO:0008061;<br>P:GO:0006030;<br>C:GO:0005576 | IPR002557; G3DSA:2.170.140.10 (GENE3D), PTHR23301 (PANTHER)                   |
| Loa loa                | chitin binding peritrophin-a domain containing protein                           | 0  |                                                                                                                                                                       | F:GO:0008061;<br>P:GO:0006030;<br>C:GO:0005576 | IPR002557; G3DSA:2.170.140.10 (GENE3D), PTHR23301 (PANTHER)                   |
| Drosophila ananassae   | chitin binding peritrophin-a domain containing protein                           | 0  |                                                                                                                                                                       | F:GO:0008061;<br>P:GO:0006030;<br>C:GO:0005576 | IPR002557; G3DSA:2.170.140.10 (GENE3D), PTHR23301 (PANTHER)                   |
| Loa loa                | chitin binding peritrophin-a domain containing protein                           | 0  |                                                                                                                                                                       | F:GO:0008061;<br>P:GO:0006030;<br>C:GO:0005576 | IPR002557; G3DSA:2.170.140.10 (GENE3D), PTHR23301 (PANTHER)                   |
| Loa loa                | mast c-terminus family protein                                                   | 10 | P:GO:0007026;<br>F:GO:0051010;<br>P:GO:0021987;<br>P:GO:0021769;<br>C:GO:0005881;<br>C:GO:0005938;<br>P:GO:0000279;<br>C:GO:0005819;<br>C:GO:0005694;<br>C:GO:0005794 | -                                              | IPR011989; IPR016024; PTHR21567 (PANTHER), PTHR21567:SF10 (PANTHER)           |

|                         |                                                                             |    |                                                                                                                                                                                                                                                            |                                                                                                                                                                                        |             |                                                                                             |
|-------------------------|-----------------------------------------------------------------------------|----|------------------------------------------------------------------------------------------------------------------------------------------------------------------------------------------------------------------------------------------------------------|----------------------------------------------------------------------------------------------------------------------------------------------------------------------------------------|-------------|---------------------------------------------------------------------------------------------|
| Loa loa                 | mast c-terminus family protein                                              | 10 | P:GO:0007026;<br>F:GO:0051010;<br>P:GO:0021987;<br>P:GO:0021769;<br>C:GO:0005881;<br>C:GO:0005938;<br>P:GO:0000279;<br>C:GO:0005819;<br>C:GO:0005694;<br>C:GO:0005794                                                                                      | -                                                                                                                                                                                      |             | IPR011989; IPR016024; PTHR21567 (PANTHER), PTHR21567:SF10 (PANTHER)                         |
| Loa loa                 | briggsae cbr-ttr-16 protein                                                 | 0  |                                                                                                                                                                                                                                                            | P:GO:0016539                                                                                                                                                                           |             | IPR001534; SignalP (SIGNALP)                                                                |
| Caenorhabditis briggsae | mannose- 1                                                                  | 15 | F:GO:0042802;<br>C:GO:0005792;<br>C:GO:0012505;<br>C:GO:0005793;<br>C:GO:0005794;<br>F:GO:0003677;<br>C:GO:0030017;<br>C:GO:0031090;<br>F:GO:0005509;<br>C:GO:0016021;<br>P:GO:0006888;<br>C:GO:0005634;<br>C:GO:0005783;<br>F:GO:0005537;<br>C:GO:0044446 | -                                                                                                                                                                                      |             | -                                                                                           |
|                         |                                                                             | 0  |                                                                                                                                                                                                                                                            |                                                                                                                                                                                        |             |                                                                                             |
| Caenorhabditis elegans  | tudor domain-containing protein 3                                           | 0  |                                                                                                                                                                                                                                                            | P:GO:0006397;<br>C:GO:0005634;<br>P:GO:0016226;<br>F:GO:0003676;<br>C:GO:0005737;<br>F:GO:0003723;<br>F:GO:0003674;<br>F:GO:0051536;<br>C:GO:0005575;<br>P:GO:0008150;<br>F:GO:0005198 |             | PTHR13681 (PANTHER), PTHR13681:SF4 (PANTHER)                                                |
| Caenorhabditis elegans  | splicing factor (suppressor of white apricot) related family member (swp-1) | 1  | F:GO:0005488                                                                                                                                                                                                                                               | -                                                                                                                                                                                      |             | IPR000061; IPR019147; PTHR13161 (PANTHER), PTHR13161:SF2 (PANTHER), SSF109905 (SUPERFAMILY) |
| Loa loa                 | testis-specific serine ki-se 6                                              | 5  | P:GO:0006468;<br>P:GO:0035092;<br>F:GO:0005524;<br>F:GO:0000287;<br>F:GO:0004674                                                                                                                                                                           | -                                                                                                                                                                                      | EC:2.7.11.0 | -                                                                                           |
| Caenorhabditis elegans  | nuclear transcription x-box binding 1                                       | 3  | F:GO:0005488;<br>P:GO:0000122;<br>P:GO:0045347                                                                                                                                                                                                             | -                                                                                                                                                                                      |             | IPR000967; IPR001374; PTHR12360 (PANTHER), SSF82708 (SUPERFAMILY)                           |
|                         |                                                                             | 0  |                                                                                                                                                                                                                                                            |                                                                                                                                                                                        |             |                                                                                             |
|                         |                                                                             | 0  |                                                                                                                                                                                                                                                            |                                                                                                                                                                                        |             |                                                                                             |
|                         |                                                                             | 0  |                                                                                                                                                                                                                                                            |                                                                                                                                                                                        |             | SignalP (SIGNALP)                                                                           |
|                         |                                                                             | 0  |                                                                                                                                                                                                                                                            |                                                                                                                                                                                        |             |                                                                                             |

|                         |                                                              |    |                                                                                                                                                                                                                                                                             |                                                                 |                                                         |                                                                                                                                            |
|-------------------------|--------------------------------------------------------------|----|-----------------------------------------------------------------------------------------------------------------------------------------------------------------------------------------------------------------------------------------------------------------------------|-----------------------------------------------------------------|---------------------------------------------------------|--------------------------------------------------------------------------------------------------------------------------------------------|
| Caenorhabditis elegans  | mtm family member (mtm-6)                                    | 4  | P:GO:0016311;<br>F:GO:0004721;<br>F:GO:0046872;<br>P:GO:0000278                                                                                                                                                                                                             | -                                                               | EC:3.1.3.16                                             | IPR010569; IPR016130; IPR017906;<br>PTHR10807 (PANTHER),<br>PTHR10807:SF11 (PANTHER),<br>SSF50729 (SUPERFAMILY), SSF52799<br>(SUPERFAMILY) |
|                         | -                                                            | 0  |                                                                                                                                                                                                                                                                             |                                                                 |                                                         | SignalP (SIGNALP)                                                                                                                          |
| Caenorhabditis briggsae | briggsae cbr-swm-1 protein                                   | 0  |                                                                                                                                                                                                                                                                             |                                                                 |                                                         | -                                                                                                                                          |
| Caenorhabditis briggsae | briggsae cbr-vang-1 protein                                  | 1  | P:GO:0009792                                                                                                                                                                                                                                                                | -                                                               |                                                         | IPR009539; PTHR20886:SF1<br>(PANTHER)                                                                                                      |
|                         | -                                                            | 0  |                                                                                                                                                                                                                                                                             |                                                                 |                                                         | -                                                                                                                                          |
| Caenorhabditis briggsae | elegans protein partially confirmed by transcript evidence   | 0  |                                                                                                                                                                                                                                                                             | F:GO:0005515                                                    |                                                         | -                                                                                                                                          |
| Ostertagia ostertagi    | metalloprotease 1 precursor                                  | 1  | F:GO:0008233                                                                                                                                                                                                                                                                | -                                                               |                                                         | IPR000859; PTHR10127 (PANTHER),<br>PTHR10127:SF60 (PANTHER)                                                                                |
| Ostertagia ostertagi    | metalloprotease 1 precursor                                  | 1  | F:GO:0008233                                                                                                                                                                                                                                                                | -                                                               |                                                         | IPR000859; PTHR10127 (PANTHER),<br>PTHR10127:SF60 (PANTHER)                                                                                |
| Brugia malayi           | transmembrane emp24 domain-containing protein 9<br>precursor | 6  | C:GO:0005789;<br>P:GO:0009953;<br>P:GO:0006810;<br>P:GO:0000003;<br>P:GO:0040011;<br>C:GO:0016021                                                                                                                                                                           | -                                                               |                                                         | -                                                                                                                                          |
| Syngamus trachea        | globin                                                       | 6  | F:GO:0020037;<br>C:GO:0005576;<br>C:GO:0005737;<br>F:GO:0005344;<br>P:GO:0015671;<br>F:GO:0019825                                                                                                                                                                           | -                                                               |                                                         | -                                                                                                                                          |
| Drosophila simulans     | arsenite inducible r- associated protein aip-1               | 1  | F:GO:0046872                                                                                                                                                                                                                                                                | -                                                               |                                                         | IPR000058; PTHR14677 (PANTHER),<br>PTHR14677:SF2 (PANTHER),<br>SSF118310 (SUPERFAMILY)                                                     |
| Drosophila mojavensis   | conserved domain protein                                     | 0  |                                                                                                                                                                                                                                                                             | F:GO:0030414;<br>F:GO:0005509;<br>F:GO:0004867;<br>C:GO:0005576 |                                                         | SignalP (SIGNALP)                                                                                                                          |
|                         | -                                                            | 0  |                                                                                                                                                                                                                                                                             |                                                                 |                                                         | -                                                                                                                                          |
| Homo sapiens            | adp-ribosylation factor 3                                    | 16 | F:GO:0005057;<br>C:GO:0000139;<br>F:GO:0005515;<br>F:GO:0008270;<br>F:GO:0005525;<br>P:GO:0015031;<br>C:GO:0005829;<br>P:GO:0032312;<br>P:GO:0006892;<br>P:GO:0006890;<br>C:GO:0048471;<br>F:GO:0003924;<br>C:GO:0005886;<br>P:GO:0048205;<br>F:GO:0008060;<br>C:GO:0030017 | -                                                               | EC:3.6.5.1;<br>EC:3.6.5.2;<br>EC:3.6.5.3;<br>EC:3.6.5.4 | IPR006689; G3DSA:3.40.50.300<br>(GENE3D), PTHR11711:SF30<br>(PANTHER), PS51417 (PROFILE),<br>SSF52540 (SUPERFAMILY)                        |
| Caenorhabditis briggsae | rwd domain containing 1                                      | 0  |                                                                                                                                                                                                                                                                             | F:GO:0003674;<br>C:GO:0005575                                   |                                                         | IPR006575; IPR016135; PTHR12292<br>(PANTHER)                                                                                               |
| Caenorhabditis elegans  | atad3a protein                                               | 4  | C:GO:0005743;<br>F:GO:0005515;<br>F:GO:0005524;<br>F:GO:0017111                                                                                                                                                                                                             | -                                                               | EC:3.6.1.15                                             | IPR003959; G3DSA:3.40.50.300<br>(GENE3D), PTHR23075 (PANTHER),<br>SSF52540 (SUPERFAMILY)                                                   |

|                         |                                                                     |    |                                                                                                                                                                                        |                                                |            |                                                                                                                                                                                  |
|-------------------------|---------------------------------------------------------------------|----|----------------------------------------------------------------------------------------------------------------------------------------------------------------------------------------|------------------------------------------------|------------|----------------------------------------------------------------------------------------------------------------------------------------------------------------------------------|
| Caenorhabditis briggsae | arginyl-tr- synthetase mitochondrial                                | 4  | P:GO:0006412;<br>F:GO:0005488;<br>F:GO:0016874;<br>C:GO:0005737                                                                                                                        | -                                              | EC:3.6.5.3 | IPR001278; IPR008909; IPR009080;<br>G3DSA:1.10.730.10 (GENE3D)                                                                                                                   |
| Caenorhabditis elegans  | guanine nucleotide-binding protein beta 5 (g protein beta5)         | 2  | P:GO:0007186;<br>C:GO:0005834                                                                                                                                                          | -                                              | EC:3.6.5.1 | IPR001632; IPR001680; IPR011046;<br>IPR015943; IPR016346; IPR017986;<br>IPR019775; IPR019781; IPR019782;<br>IPR020472; PTHR19850 (PANTHER),<br>PTHR19850:SF12 (PANTHER)          |
| -                       | -                                                                   | 0  | -                                                                                                                                                                                      | -                                              | -          | -                                                                                                                                                                                |
| Brugia malayi           | briggsae cbr-dpy-22 protein                                         | 3  | P:GO:0050789;<br>P:GO:0032501;<br>P:GO:0032502                                                                                                                                         | -                                              | -          | -                                                                                                                                                                                |
| Tribolium castaneum     | cg14607 cg14607-pa                                                  | 0  | -                                                                                                                                                                                      | -                                              | -          | -                                                                                                                                                                                |
| Caenorhabditis elegans  | prion-like-(q n-rich)-domain-bearing protein family member (pqn-87) | 0  | -                                                                                                                                                                                      | -                                              | -          | -                                                                                                                                                                                |
| Caenorhabditis elegans  | protein ndrg3                                                       | 0  | -                                                                                                                                                                                      | F:GO:0003674;<br>C:GO:0005575                  | -          | IPR004142; G3DSA:3.40.50.1820<br>(GENE3D), PTHR11034:SF7<br>(PANTHER), SSF53474 (SUPERFAMILY)                                                                                    |
| -                       | -                                                                   | 0  | -                                                                                                                                                                                      | -                                              | -          | -                                                                                                                                                                                |
| Caenorhabditis briggsae | inositol -trisphosphate receptor                                    | 4  | F:GO:0004872;<br>F:GO:0005262;<br>P:GO:0006811;<br>C:GO:0016020                                                                                                                        | -                                              | -          | -                                                                                                                                                                                |
| -                       | -                                                                   | 0  | -                                                                                                                                                                                      | -                                              | -          | -                                                                                                                                                                                |
| Caenorhabditis briggsae | briggsae cbr-rig-4 protein                                          | 0  | -                                                                                                                                                                                      | P:GO:0007155;<br>C:GO:0016021;<br>C:GO:0016020 | -          | -                                                                                                                                                                                |
| Caenorhabditis briggsae | briggsae cbr-fum-1 protein                                          | 9  | P:GO:0009792;<br>C:GO:0045239;<br>F:GO:0005515;<br>P:GO:0006106;<br>P:GO:0040010;<br>P:GO:0000003;<br>P:GO:0006099;<br>P:GO:0006898;<br>F:GO:0004333                                   | -                                              | EC:4.2.1.2 | IPR000362; IPR008948; IPR018951;<br>IPR020557; IPR022761;<br>G3DSA:1.10.40.30 (GENE3D),<br>G3DSA:1.20.200.10 (GENE3D),<br>PTHR11444 (PANTHER),<br>PTHR11444:SF1 (PANTHER)        |
| -                       | -                                                                   | 0  | -                                                                                                                                                                                      | -                                              | -          | -                                                                                                                                                                                |
| Caenorhabditis elegans  | splicing factor subunit 1                                           | 11 | P:GO:0000389;<br>F:GO:0003723;<br>C:GO:0005730;<br>P:GO:0040002;<br>P:GO:0040035;<br>C:GO:0005684;<br>F:GO:0005515;<br>P:GO:0006898;<br>P:GO:0002009;<br>P:GO:0009792;<br>P:GO:0016246 | -                                              | -          | IPR000061; IPR000626; IPR019954;<br>IPR019955; IPR019956; IPR022030;<br>G3DSA:3.10.20.90 (GENE3D),<br>PTHR15316 (PANTHER), SSF109905<br>(SUPERFAMILY), SSF54236<br>(SUPERFAMILY) |
| Caenorhabditis elegans  | sh3-binding domain protein 5-like                                   | 0  | -                                                                                                                                                                                      | F:GO:0003674;<br>C:GO:0005575                  | -          | IPR007940                                                                                                                                                                        |

|                         |                                                            |    |                                                                                                                                                                                                                                           |                                                                                                                                     |             |                                                                                                                                                             |
|-------------------------|------------------------------------------------------------|----|-------------------------------------------------------------------------------------------------------------------------------------------------------------------------------------------------------------------------------------------|-------------------------------------------------------------------------------------------------------------------------------------|-------------|-------------------------------------------------------------------------------------------------------------------------------------------------------------|
| Caenorhabditis elegans  | 26s protease regulatory subunit s10b                       | 7  | C:GO:0005737;<br>F:GO:0008233;<br>F:GO:0005515;<br>P:GO:0030163;<br>F:GO:0005524;<br>C:GO:0000502;<br>F:GO:0017111                                                                                                                        | -                                                                                                                                   | EC:3.6.1.15 | -                                                                                                                                                           |
| Caenorhabditis elegans  | elegans protein partially confirmed by transcript evidence | 1  | P:GO:0006810                                                                                                                                                                                                                              | -                                                                                                                                   |             | IPR011701; IPR016196;<br>G3DSA:1.20.1250.20 (GENE3D),<br>PTHR10924 (PANTHER), SignalP<br>(SIGNALP)                                                          |
| Caenorhabditis briggsae | Hypothetical protein CBG15940 [Caenorhabditis briggsae]    | 0  |                                                                                                                                                                                                                                           |                                                                                                                                     |             | -                                                                                                                                                           |
| Caenorhabditis elegans  | hat family dimerisation domain containing protein          | 2  | F:GO:0003676;<br>F:GO:0046983                                                                                                                                                                                                             | -                                                                                                                                   |             | -                                                                                                                                                           |
| Dirofilaria immitis     | ecdysone inducible protein 75                              | 2  | F:GO:0004872;<br>F:GO:0005488                                                                                                                                                                                                             | -                                                                                                                                   |             | IPR000536; IPR001628; IPR001723;<br>IPR008946; IPR013088; PR00350<br>(PRINTS), PTHR11865 (PANTHER),<br>PTHR11865:SF120 (PANTHER),<br>SSF57716 (SUPERFAMILY) |
|                         | -                                                          | 0  |                                                                                                                                                                                                                                           |                                                                                                                                     |             | -                                                                                                                                                           |
| Homo sapiens            | ap-2 complex subunit mu-1                                  | 14 | P:GO:0016192;<br>C:GO:0005829;<br>C:GO:0030125;<br>C:GO:0030132;<br>C:GO:0005739;<br>C:GO:0030133;<br>F:GO:0008289;<br>C:GO:0030131;<br>C:GO:0005778;<br>C:GO:0030666;<br>P:GO:0050690;<br>F:GO:0005515;<br>F:GO:0005215;<br>P:GO:0006886 | -                                                                                                                                   |             | IPR001392; IPR008968; IPR015629;<br>G3DSA:2.60.40.1170 (GENE3D),<br>PTHR11998 (PANTHER)                                                                     |
| Caenorhabditis briggsae | tubulin-specific chaperone c                               | 0  |                                                                                                                                                                                                                                           | F:GO:0003674;<br>F:GO:0005488;<br>C:GO:0005856;<br>P:GO:0007023;<br>P:GO:0006457;<br>F:GO:0051087;<br>C:GO:0005575;<br>C:GO:0005874 |             | IPR006599; IPR012945; IPR017901;<br>PTHR15139 (PANTHER)                                                                                                     |
| Caenorhabditis briggsae | tubulin-specific chaperone c                               | 0  |                                                                                                                                                                                                                                           | F:GO:0003674;<br>F:GO:0005488;<br>C:GO:0005856;<br>P:GO:0007023;<br>P:GO:0006457;<br>F:GO:0051087;<br>C:GO:0005575;<br>C:GO:0005874 |             | IPR006599; IPR012945; IPR017901;<br>PTHR15139 (PANTHER)                                                                                                     |
| Caenorhabditis briggsae | tubulin-specific chaperone c                               | 1  | C:GO:0043229                                                                                                                                                                                                                              | -                                                                                                                                   |             | IPR006599; IPR012945; IPR017901;<br>PTHR15139 (PANTHER)                                                                                                     |

|                            |                                                                   |    |              |                                                                                                                                                                                                                                                                                                                                                                                                                                                                        |                                                                                                                                    |
|----------------------------|-------------------------------------------------------------------|----|--------------|------------------------------------------------------------------------------------------------------------------------------------------------------------------------------------------------------------------------------------------------------------------------------------------------------------------------------------------------------------------------------------------------------------------------------------------------------------------------|------------------------------------------------------------------------------------------------------------------------------------|
| Caenorhabditis briggsae    | tubulin-specific chaperone c                                      | 0  |              | F:GO:0003674;<br>F:GO:0005488;<br>C:GO:0005856;<br>P:GO:0007023;<br>P:GO:0006457;<br>F:GO:0051087;<br>C:GO:0005575;<br>C:GO:0005874                                                                                                                                                                                                                                                                                                                                    | IPR006599; IPR012945; IPR017901;<br>PTHR15139 (PANTHER)                                                                            |
| Brugia malayi              | bat2 n-terminus family protein                                    | 0  |              | F:GO:0008022                                                                                                                                                                                                                                                                                                                                                                                                                                                           | IPR004827                                                                                                                          |
| Caenorhabditis briggsae    | elegans protein confirmed by transcript evidence                  | 0  |              |                                                                                                                                                                                                                                                                                                                                                                                                                                                                        | PTHR23076 (PANTHER),<br>PTHR23076:SF7 (PANTHER), SignalP<br>(SIGNALP)                                                              |
| Pediculus humanus corporis | chromosome 14 open reading frame 10                               | 0  |              | C:GO:0005737;<br>F:GO:0005509;<br>C:GO:0005634                                                                                                                                                                                                                                                                                                                                                                                                                         | PTHR12085 (PANTHER)                                                                                                                |
| Brugia malayi              | cd- sequence bc056474                                             | 1  | C:GO:0016021 | -                                                                                                                                                                                                                                                                                                                                                                                                                                                                      | -                                                                                                                                  |
| Mus musculus               | component of oligomeric golgi complex 6                           | 1  | C:GO:0017119 | -                                                                                                                                                                                                                                                                                                                                                                                                                                                                      | IPR010490                                                                                                                          |
| Caenorhabditis elegans     | spectrin alpha chain                                              | 28 |              | P:GO:0007026;<br>P:GO:0008360;<br>C:GO:0031594;<br>P:GO:0030721;<br>P:GO:0007417;<br>P:GO:0007009;<br>P:GO:0016337;<br>C:GO:0016323;<br>F:GO:0005509;<br>P:GO:0008302;<br>C:GO:0008091;<br>C:GO:0005794;<br>C:GO:0045170;<br>P:GO:0002168;<br>F:GO:0003779;<br>F:GO:0008017;<br>P:GO:0030707;<br>C:GO:0045169;<br>P:GO:0007308;<br>P:GO:0045478;<br>P:GO:0042062;<br>P:GO:0007274;<br>C:GO:0005811;<br>P:GO:0030727;<br>P:GO:0048790;<br>F:GO:0005516;<br>P:GO:0007294 | IPR002017; IPR018159;<br>G3DSA:1.20.58.60 (GENE3D),<br>PTHR11915 (PANTHER),<br>PTHR11915:SF48 (PANTHER),<br>SSF46966 (SUPERFAMILY) |
| Caenorhabditis elegans     | unidentified vitellogenin-linked transcript family member (lvt-5) | 1  | F:GO:0016757 | -                                                                                                                                                                                                                                                                                                                                                                                                                                                                      | IPR002495; G3DSA:3.90.550.10<br>(GENE3D), PTHR11183 (PANTHER),<br>PTHR11183:SF6 (PANTHER), SSF53448<br>(SUPERFAMILY)               |
| Caenorhabditis elegans     | unidentified vitellogenin-linked transcript family member (lvt-5) | 1  | F:GO:0016757 | -                                                                                                                                                                                                                                                                                                                                                                                                                                                                      | IPR002495; G3DSA:3.90.550.10<br>(GENE3D), PTHR11183 (PANTHER),<br>PTHR11183:SF6 (PANTHER), SSF53448<br>(SUPERFAMILY)               |
| Caenorhabditis elegans     | unidentified vitellogenin-linked transcript family member (lvt-5) | 0  |              | F:GO:0005515;<br>F:GO:0016757                                                                                                                                                                                                                                                                                                                                                                                                                                          | IPR002495; G3DSA:3.90.550.10<br>(GENE3D), PTHR11183 (PANTHER),<br>PTHR11183:SF6 (PANTHER), SSF53448<br>(SUPERFAMILY)               |

|                         |                                                                     |    |                                                                                                                                                                                                                                                                                                                                                                                                                                                                        |                                                |                             |                                                                                                                                              |
|-------------------------|---------------------------------------------------------------------|----|------------------------------------------------------------------------------------------------------------------------------------------------------------------------------------------------------------------------------------------------------------------------------------------------------------------------------------------------------------------------------------------------------------------------------------------------------------------------|------------------------------------------------|-----------------------------|----------------------------------------------------------------------------------------------------------------------------------------------|
| Caenorhabditis briggsae | btb poz domain containing protein                                   | 0  |                                                                                                                                                                                                                                                                                                                                                                                                                                                                        | P:GO:0006397;<br>F:GO:0005515;<br>C:GO:0005634 |                             | IPR000210; IPR011333; IPR013069;<br>IPR013089; PTHR23230:SF176<br>(PANTHER)                                                                  |
| Caenorhabditis elegans  | serine threonine-protein phosphatase 5                              | 5  | C:GO:0005737;<br>F:GO:0046872;<br>F:GO:0004722;<br>P:GO:0006470;<br>C:GO:0005634                                                                                                                                                                                                                                                                                                                                                                                       | -                                              |                             | IPR006186; G3DSA:3.60.21.10<br>(GENE3D), PTHR11668:SF12<br>(PANTHER), SSF56300 (SUPERFAMILY)                                                 |
| Caenorhabditis elegans  | citrate synthase                                                    | 31 | P:GO:0006101;<br>P:GO:0006107;<br>C:GO:0031594;<br>F:GO:0004108;<br>F:GO:0019901;<br>P:GO:0071374;<br>P:GO:0040010;<br>C:GO:0005759;<br>P:GO:0046777;<br>C:GO:0005624;<br>P:GO:0044262;<br>C:GO:0005794;<br>P:GO:0046827;<br>C:GO:0005829;<br>P:GO:0051447;<br>P:GO:0006099;<br>P:GO:0018105;<br>P:GO:0009792;<br>P:GO:0043457;<br>C:GO:0005952;<br>P:GO:0002119;<br>P:GO:0006950;<br>C:GO:0048471;<br>F:GO:0032403;<br>P:GO:0001707;<br>P:GO:0051966;<br>C:GO:0005886 | -                                              | EC:2.3.3.1;<br>EC:2.7.11.11 | IPR002020; IPR010109; IPR016141;<br>IPR016142; IPR019810                                                                                     |
| Caenorhabditis elegans  | neuro-I symmetry protein partially confirmed by transcript evidence | 1  | F:GO:0005515                                                                                                                                                                                                                                                                                                                                                                                                                                                           | -                                              |                             | -                                                                                                                                            |
|                         | -                                                                   | 0  |                                                                                                                                                                                                                                                                                                                                                                                                                                                                        |                                                |                             | -                                                                                                                                            |
| Brugia malayi           | an1-like zinc finger family protein                                 | 0  |                                                                                                                                                                                                                                                                                                                                                                                                                                                                        | C:GO:0005737;<br>F:GO:0008270;<br>C:GO:0005840 |                             | IPR000058; IPR000626; IPR019955;<br>G3DSA:3.10.20.90 (GENE3D),<br>PTHR10666 (PANTHER), SSF118310<br>(SUPERFAMILY), SSF54236<br>(SUPERFAMILY) |
| Brugia malayi           | an1-like zinc finger family protein                                 | 0  |                                                                                                                                                                                                                                                                                                                                                                                                                                                                        | C:GO:0005737;<br>F:GO:0008270;<br>C:GO:0005840 |                             | IPR000058; IPR000626; IPR019955;<br>G3DSA:3.10.20.90 (GENE3D),<br>PTHR10666 (PANTHER), SSF118310<br>(SUPERFAMILY), SSF54236<br>(SUPERFAMILY) |



|                        |                                        |    |                                                                                                                                                                                                                                                                                                                                                                  |   |             |                                                                                                                                                  |
|------------------------|----------------------------------------|----|------------------------------------------------------------------------------------------------------------------------------------------------------------------------------------------------------------------------------------------------------------------------------------------------------------------------------------------------------------------|---|-------------|--------------------------------------------------------------------------------------------------------------------------------------------------|
| Caenorhabditis elegans | dihydrolipoyl mitochondrial            | 21 | C:GO:0043159;<br>P:GO:0048240;<br>F:GO:0004148;<br>P:GO:0007369;<br>P:GO:0010510;<br>C:GO:0005759;<br>C:GO:0019861;<br>P:GO:0006120;<br>P:GO:0007568;<br>F:GO:0009055;<br>C:GO:0045252;<br>P:GO:0009106;<br>P:GO:0051068;<br>F:GO:0050660;<br>P:GO:0045454;<br>F:GO:0051287;<br>C:GO:0045254;<br>P:GO:0006103;<br>P:GO:0006508;<br>F:GO:0043544;<br>P:GO:0042391 | - | EC:1.8.1.4  | IPR004099; IPR006258; IPR013027;<br>IPR016156; PRO0411 (PRINTS),<br>G3DSA:3.50.50.60 (GENE3D),<br>PTHR22912 (PANTHER), SSF51905<br>(SUPERFAMILY) |
| Brugia malayi          | sr protein                             | 9  | F:GO:0003729;<br>C:GO:0005681;<br>P:GO:0000381;<br>P:GO:0006376;<br>C:GO:0000785;<br>F:GO:0005515;<br>F:GO:0000166;<br>C:GO:0035062;<br>F:GO:0016787                                                                                                                                                                                                             | - |             | IPR000504; IPR012677; PTHR23147<br>(PANTHER), SSF54928 (SUPERFAMILY)                                                                             |
| Brugia malayi          | sr protein                             | 9  | F:GO:0003729;<br>C:GO:0005681;<br>P:GO:0000381;<br>P:GO:0006376;<br>C:GO:0000785;<br>F:GO:0005515;<br>F:GO:0000166;<br>C:GO:0035062;<br>F:GO:0016787                                                                                                                                                                                                             | - |             |                                                                                                                                                  |
| Ancylostoma ceylanicum | macrophage migration inhibitory factor | 16 | P:GO:0035468;<br>P:GO:0042325;<br>P:GO:0006955;<br>P:GO:0009966;<br>P:GO:0002684;<br>P:GO:0042127;<br>P:GO:0051047;<br>P:GO:0032268;<br>F:GO:0004167;<br>P:GO:0048523;<br>P:GO:0048583;<br>N:GO:0035556;<br>P:GO:0006950;<br>P:GO:0033036;<br>F:GO:0005488;<br>P:GO:0048598                                                                                      | - | EC:5.3.3.12 | IPR001398; IPR014347;<br>PTHR11954:SF4 (PANTHER), SSF55331<br>(SUPERFAMILY)                                                                      |
| Loa loa                | ubiquitin carboxyl-termini-l           | 1  | F:GO:0016787                                                                                                                                                                                                                                                                                                                                                     | - |             | IPR002083; IPR008974; IPR013322;<br>PTHR10420 (PANTHER),<br>PTHR10420:SF10 (PANTHER)                                                             |

|                         |                                                                                                                    |   |                                                                                                                                                      |                                                                 |            |                                                                                                                                  |
|-------------------------|--------------------------------------------------------------------------------------------------------------------|---|------------------------------------------------------------------------------------------------------------------------------------------------------|-----------------------------------------------------------------|------------|----------------------------------------------------------------------------------------------------------------------------------|
| Caenorhabditis briggsae | acetyl- hydrolase transferase family protein                                                                       | 6 | F:GO:0019239;<br>C:GO:0005811;<br>P:GO:0009168;<br>P:GO:0006084;<br>F:GO:0016787;<br>F:GO:0016740                                                    | -                                                               |            | IPR003702; G3DSA:3.40.1080.10 (GENE3D), G3DSA:3.40.810.20 (GENE3D), PTHR21432:SF11 (PANTHER), SSF100950 (SUPERFAMILY)            |
| Caenorhabditis briggsae | acetyl- hydrolase transferase family protein                                                                       | 6 | F:GO:0019239;<br>C:GO:0005811;<br>P:GO:0009168;<br>P:GO:0006084;<br>F:GO:0016787;<br>F:GO:0016740                                                    | -                                                               |            | IPR003702; G3DSA:3.40.1080.10 (GENE3D), G3DSA:3.40.810.20 (GENE3D), PTHR21432:SF11 (PANTHER), SSF100950 (SUPERFAMILY)            |
| Caenorhabditis briggsae | acetyl- hydrolase transferase family protein                                                                       | 6 | F:GO:0019239;<br>C:GO:0005811;<br>P:GO:0009168;<br>P:GO:0006084;<br>F:GO:0016787;<br>F:GO:0016740                                                    | -                                                               |            | IPR003702; G3DSA:3.40.1080.10 (GENE3D), G3DSA:3.40.810.20 (GENE3D), PTHR21432:SF11 (PANTHER), SSF100950 (SUPERFAMILY)            |
| Caenorhabditis briggsae | acetyl- hydrolase transferase family protein                                                                       | 6 | F:GO:0019239;<br>C:GO:0005811;<br>P:GO:0009168;<br>P:GO:0006084;<br>F:GO:0016787;<br>F:GO:0016740                                                    | -                                                               |            | IPR003702; G3DSA:3.40.1080.10 (GENE3D), G3DSA:3.40.810.20 (GENE3D), PTHR21432:SF11 (PANTHER), SSF100950 (SUPERFAMILY)            |
| -                       | -                                                                                                                  | 0 |                                                                                                                                                      |                                                                 |            | -                                                                                                                                |
| Loa loa                 | mpps one binder ki-se activator-like 1a                                                                            | 6 | C:GO:0005737;<br>F:GO:0019209;<br>P:GO:0035329;<br>C:GO:0005634;<br>P:GO:0046777;<br>F:GO:0019900                                                    | -                                                               |            | IPR005301; PTHR22599:SF8 (PANTHER)                                                                                               |
| Caenorhabditis elegans  | alanine-glyoxylate aminotransferase (oxalosis i hyperoxaluria i glycolicaciduria serine-pyruvate aminotransferase) | 5 | C:GO:0005777;<br>C:GO:0005739;<br>F:GO:0008483;<br>P:GO:0009058;<br>F:GO:0030170                                                                     | -                                                               | EC:2.6.1.0 | IPR000192; IPR015421; IPR015422; IPR015424; PTHR21152 (PANTHER), PTHR21152:SF5 (PANTHER)                                         |
| Caenorhabditis elegans  | alanine-glyoxylate aminotransferase (oxalosis i hyperoxaluria i glycolicaciduria serine-pyruvate aminotransferase) | 5 | C:GO:0005777;<br>C:GO:0005739;<br>F:GO:0008483;<br>P:GO:0009058;<br>F:GO:0030170                                                                     | -                                                               | EC:2.6.1.0 | IPR000192; IPR015421; IPR015422; IPR015424; PTHR21152 (PANTHER), PTHR21152:SF5 (PANTHER)                                         |
| Caenorhabditis elegans  | adapter molecule crk                                                                                               | 9 | P:GO:0016477;<br>P:GO:0043652;<br>P:GO:0006915;<br>F:GO:0005070;<br>P:GO:0031532;<br>F:GO:0032403;<br>P:GO:0007165;<br>P:GO:0009653;<br>C:GO:0005886 | -                                                               |            | IPR000980; IPR001452; IPR011511; G3DSA:2.30.30.40 (GENE3D), PTHR19969 (PANTHER), PTHR19969:SF2 (PANTHER), SSF55550 (SUPERFAMILY) |
| Loa loa                 | briggsae cbr-oig-4 protein                                                                                         | 0 |                                                                                                                                                      |                                                                 |            | -                                                                                                                                |
| Caenorhabditis briggsae | inositol polyphosphate-5- 40kda                                                                                    | 1 | F:GO:0004437                                                                                                                                         | -                                                               |            | PTHR12997 (PANTHER), PTHR12997:SF2 (PANTHER)                                                                                     |
| Caenorhabditis elegans  | hypothetical protein C09E8.1 [Caenorhabditis elegans]                                                              | 0 |                                                                                                                                                      | F:GO:0005328;<br>C:GO:0016020;<br>P:GO:0006836;<br>C:GO:0005887 |            | -                                                                                                                                |

|                         |                                                                   |    |                                                                                                                                                                                        |                                                |                               |                                                                                                                    |
|-------------------------|-------------------------------------------------------------------|----|----------------------------------------------------------------------------------------------------------------------------------------------------------------------------------------|------------------------------------------------|-------------------------------|--------------------------------------------------------------------------------------------------------------------|
|                         | -                                                                 | 0  |                                                                                                                                                                                        |                                                |                               | -                                                                                                                  |
| Caenorhabditis elegans  | prolactin regulatory element-binding protein                      | 1  | P:GO:0006350                                                                                                                                                                           |                                                |                               | -                                                                                                                  |
| Caenorhabditis elegans  | mgc68553 protein                                                  | 0  |                                                                                                                                                                                        | F:GO:0003674;<br>P:GO:0008150;<br>C:GO:0005575 |                               | -                                                                                                                  |
|                         | -                                                                 | 0  |                                                                                                                                                                                        |                                                |                               | -                                                                                                                  |
|                         | -                                                                 | 0  |                                                                                                                                                                                        |                                                |                               | -                                                                                                                  |
|                         | -                                                                 | 0  |                                                                                                                                                                                        |                                                |                               | -                                                                                                                  |
| Caenorhabditis briggsae | briggsae cbr-let-2 protein                                        | 5  | C:GO:0005587;<br>F:GO:0016787;<br>F:GO:0005488;<br>F:GO:0030020;<br>P:GO:0016043                                                                                                       | -                                              |                               | IPR001442; IPR016187; PTHR10499 (PANTHER), PTHR10499:SF78 (PANTHER)                                                |
|                         | -                                                                 | 0  |                                                                                                                                                                                        |                                                |                               | SignalP (SIGNALP)                                                                                                  |
| Caenorhabditis elegans  | bt (bacillus thuringiensis) toxin resistant family member (bre-1) | 11 | P:GO:0042350;<br>F:GO:0008831;<br>P:GO:0045226;<br>F:GO:0008446;<br>P:GO:0019673;<br>P:GO:0075015;<br>P:GO:0006664;<br>F:GO:0005515;<br>P:GO:0017085;<br>F:GO:0050662;<br>C:GO:0005634 | -                                              | EC:1.1.1.133<br>; EC:4.2.1.47 | IPR001509; IPR006368; IPR016040; IPR020904; G3DSA:3.90.25.10 (GENE3D), PTHR10366 (PANTHER), SSF51735 (SUPERFAMILY) |
| Caenorhabditis elegans  | bt (bacillus thuringiensis) toxin resistant family member (bre-1) | 11 | P:GO:0042350;<br>F:GO:0008831;<br>P:GO:0045226;<br>F:GO:0008446;<br>P:GO:0019673;<br>P:GO:0075015;<br>P:GO:0006664;<br>F:GO:0005515;<br>P:GO:0017085;<br>F:GO:0050662;<br>C:GO:0005634 | -                                              | EC:1.1.1.133<br>; EC:4.2.1.47 | IPR001509; IPR006368; IPR016040; IPR020904; G3DSA:3.90.25.10 (GENE3D), PTHR10366 (PANTHER), SSF51735 (SUPERFAMILY) |
|                         | -                                                                 | 0  |                                                                                                                                                                                        |                                                |                               | -                                                                                                                  |
|                         | -                                                                 | 0  |                                                                                                                                                                                        |                                                |                               | -                                                                                                                  |
| Caenorhabditis briggsae | -dh dehydroge-se 1 beta subcomplex subunit 7                      | 8  | P:GO:0040010;<br>P:GO:0008340;<br>F:GO:0008137;<br>C:GO:0005739;<br>P:GO:0040035;<br>P:GO:0002119;<br>P:GO:0009792;<br>C:GO:0016020                                                    | -                                              | EC:1.6.5.3                    | IPR008698                                                                                                          |
| Caenorhabditis elegans  | hypothetical protein M01H9.3 [Caenorhabditis elegans]             | 0  |                                                                                                                                                                                        |                                                |                               | -                                                                                                                  |
| Caenorhabditis briggsae | glutamate semialdehyde dehydroge-se                               | 9  | P:GO:0040010;<br>C:GO:0005743;<br>P:GO:0055114;<br>F:GO:0004350;<br>P:GO:0006898;<br>P:GO:0006561;<br>F:GO:0004349;<br>C:GO:0005811;<br>F:GO:0017084                                   | -                                              | EC:1.2.1.41;<br>EC:2.7.2.11   | IPR016161; IPR016162; PTHR11063 (PANTHER), PTHR11063:SF2 (PANTHER)                                                 |
|                         | -                                                                 | 0  |                                                                                                                                                                                        |                                                |                               | SignalP (SIGNALP)                                                                                                  |

|                         |                                                       |   |                                                                                                                                                      |   |            |                                                                                                                                          |
|-------------------------|-------------------------------------------------------|---|------------------------------------------------------------------------------------------------------------------------------------------------------|---|------------|------------------------------------------------------------------------------------------------------------------------------------------|
| Caenorhabditis elegans  | 40s ribosomal protein s12                             | 9 | P:GO:0009792;<br>P:GO:0010171;<br>P:GO:0002119;<br>F:GO:0003735;<br>P:GO:0040017;<br>P:GO:0040010;<br>P:GO:0000003;<br>C:GO:0022627;<br>P:GO:0006412 | - | EC:3.6.5.3 | IPR000530; IPR001313; IPR004038;<br>G3DSA:3.30.1330.30 (GENE3D),<br>SSF55315 (SUPERFAMILY)                                               |
| Caenorhabditis briggsae | lipoate-protein ligase                                | 4 | C:GO:0005737;<br>P:GO:0006464;<br>F:GO:0016415;<br>P:GO:0009107                                                                                      | - |            | IPR000544; IPR004143; IPR020605;<br>PD006086 (PRODOM),<br>G3DSA:3.90.1550.10 (GENE3D),<br>PTHR10993 (PANTHER), SSF55681<br>(SUPERFAMILY) |
| Caenorhabditis briggsae | nnmt pnmt temt family protein                         | 2 | F:GO:0005515;<br>F:GO:0008168                                                                                                                        | - | EC:2.1.1.0 | IPR000940; G3DSA:3.40.50.150<br>(GENE3D), PTHR10867:SF3<br>(PANTHER), SSF53335 (SUPERFAMILY)                                             |
| Caenorhabditis briggsae | collagen type xviii alpha 1                           | 6 | C:GO:0005604;<br>P:GO:0007155;<br>C:GO:0030054;<br>F:GO:0005198;<br>F:GO:0005488;<br>P:GO:0040035                                                    | - |            | IPR010515; IPR016186; IPR016187;<br>PTHR10499 (PANTHER),<br>PTHR10499:SF7 (PANTHER)                                                      |
| -                       | -                                                     | 0 |                                                                                                                                                      |   |            | -                                                                                                                                        |
| -                       | -                                                     | 0 |                                                                                                                                                      |   |            | -                                                                                                                                        |
| Caenorhabditis elegans  | hypothetical protein B0041.8 [Caenorhabditis elegans] | 0 |                                                                                                                                                      |   |            | -                                                                                                                                        |
| Loa loa                 | kelch-like protein                                    | 3 | P:GO:0050807;<br>F:GO:0003779;<br>P:GO:0016049                                                                                                       | - |            | IPR000210; IPR006652; IPR011333;<br>IPR011705; IPR013069; IPR013089;<br>IPR015915; PTHR23230:SF157<br>(PANTHER), SSF117281 (SUPERFAMILY) |
| Loa loa                 | kelch-like protein                                    | 3 | P:GO:0050807;<br>F:GO:0003779;<br>P:GO:0016049                                                                                                       | - |            | IPR000210; IPR006652; IPR011333;<br>IPR011705; IPR013069; IPR013089;<br>IPR015915; PTHR23230:SF157<br>(PANTHER), SSF117281 (SUPERFAMILY) |
| Loa loa                 | ring ca-l kelch protein                               | 3 | P:GO:0050807;<br>F:GO:0003779;<br>P:GO:0016049                                                                                                       | - |            | IPR000210; IPR006652; IPR011333;<br>IPR011705; IPR013069; IPR013089;<br>IPR015915; PTHR23230:SF157<br>(PANTHER), SSF117281 (SUPERFAMILY) |
| Loa loa                 | kelch-like protein                                    | 3 | P:GO:0050807;<br>F:GO:0003779;<br>P:GO:0016049                                                                                                       | - |            | IPR000210; IPR006652; IPR011333;<br>IPR011705; IPR013069; IPR013089;<br>IPR015915; PTHR23230:SF157<br>(PANTHER), SSF117281 (SUPERFAMILY) |
| Caenorhabditis elegans  | nuclear pore complex protein family member (npp-6)    | 6 | P:GO:0006997;<br>P:GO:0000003;<br>P:GO:0040007;<br>P:GO:0006898;<br>P:GO:0040039;<br>P:GO:0002119                                                    | - |            | IPR021717                                                                                                                                |
| Caenorhabditis briggsae | briggsae cbr-npp-6 protein                            | 6 | P:GO:0006997;<br>P:GO:0000003;<br>P:GO:0040007;<br>P:GO:0006898;<br>P:GO:0040039;<br>P:GO:0002119                                                    | - |            | IPR021717                                                                                                                                |

|                          |                            |    |                                                                                                                                                                                                                                                                                                                                                                                                                                                                        |   |            |                                                                                                                                                                                                                                                                                                                    |
|--------------------------|----------------------------|----|------------------------------------------------------------------------------------------------------------------------------------------------------------------------------------------------------------------------------------------------------------------------------------------------------------------------------------------------------------------------------------------------------------------------------------------------------------------------|---|------------|--------------------------------------------------------------------------------------------------------------------------------------------------------------------------------------------------------------------------------------------------------------------------------------------------------------------|
| Enterobacteria phage S13 | protein a                  | 6  | F:GO:0004519;<br>F:GO:0003910;<br>F:GO:0005524;<br>F:GO:0003677;<br>F:GO:0004857;<br>F:GO:0008270                                                                                                                                                                                                                                                                                                                                                                      | - | EC:6.5.1.1 | IPR008683; IPR008684                                                                                                                                                                                                                                                                                               |
| Caenorhabditis elegans   | briggsae cbr-dlg-1 protein | 57 | P:GO:0030838;<br>P:GO:0048608;<br>C:GO:0019717;<br>P:GO:0031579;<br>F:GO:0032947;<br>P:GO:0008284;<br>P:GO:0002369;<br>F:GO:0008022;<br>P:GO:0050680;<br>C:GO:0009925;<br>C:GO:0014069;<br>C:GO:0001772;<br>P:GO:0043297;<br>P:GO:0032880;<br>P:GO:0042982;<br>P:GO:0007268;<br>C:GO:0016327;<br>P:GO:0032147;<br>P:GO:0048745;<br>P:GO:0043268;<br>P:GO:0046956;<br>C:GO:0031594;<br>P:GO:0042391;<br>P:GO:0051726;<br>C:GO:0030315;<br>P:GO:0001771;<br>P:GO:0008049 | - |            | IPR001452; IPR001478; IPR004172;<br>IPR008144; IPR008145; IPR015143;<br>IPR020590; G3DSA:2.30.30.40<br>(GENE3D), G3DSA:2.30.42.10<br>(GENE3D), G3DSA:3.30.63.10<br>(GENE3D), G3DSA:3.40.50.300<br>(GENE3D), PTHR23119 (PANTHER),<br>PTHR23119:SF2 (PANTHER),<br>SSF101288 (SUPERFAMILY), SSF52540<br>(SUPERFAMILY) |

|                         |                                                         |    |                                                                                                                                                                                                                                                                                                                                                                                                                                                                         |                                                |                                                                                                                                                                                                                                                                                                                    |
|-------------------------|---------------------------------------------------------|----|-------------------------------------------------------------------------------------------------------------------------------------------------------------------------------------------------------------------------------------------------------------------------------------------------------------------------------------------------------------------------------------------------------------------------------------------------------------------------|------------------------------------------------|--------------------------------------------------------------------------------------------------------------------------------------------------------------------------------------------------------------------------------------------------------------------------------------------------------------------|
| Caenorhabditis elegans  | briggsae cbr-dlg-1 protein                              | 57 | P:GO:0030838;<br>P:GO:0048608;<br>C:GO:0019717;<br>P:GO:0031579;<br>F:GO:0032947;<br>P:GO:0008284;<br>P:GO:0002369;<br>F:GO:0008022;<br>P:GO:0050680;<br>C:GO:0009925;<br>C:GO:0014069;<br>C:GO:0001772;<br>P:GO:0043297;<br>P:GO:0032880;<br>P:GO:0042982;<br>P:GO:0007268;<br>C:GO:0016327;<br>P:GO:0032147;<br>P:GO:0048745;<br>P:GO:0043268;<br>P:GO:0046956;<br>C:GO:0031594;<br>P:GO:0042391;<br>P:GO:0051726;<br>C:GO:0030315;<br>P:GO:0001771;<br>P:GO:0008049; | -                                              | IPR001452; IPR001478; IPR004172;<br>IPR008144; IPR008145; IPR015143;<br>IPR020590; G3DSA:2.30.30.40<br>(GENE3D), G3DSA:2.30.42.10<br>(GENE3D), G3DSA:3.30.63.10<br>(GENE3D), G3DSA:3.40.50.300<br>(GENE3D), PTHR23119 (PANTHER),<br>PTHR23119:SF2 (PANTHER),<br>SSF101288 (SUPERFAMILY), SSF52540<br>(SUPERFAMILY) |
| Brugia malayi           | ribosomal protein l23a-like                             | 12 | P:GO:0040010;<br>P:GO:0051726;<br>F:GO:0019843;<br>F:GO:0003735;<br>P:GO:0040035;<br>P:GO:0006414;<br>P:GO:0002119;<br>F:GO:0005515;<br>F:GO:0000166;<br>P:GO:0009792;<br>P:GO:0040018;<br>C:GO:0022625                                                                                                                                                                                                                                                                 | -                                              | IPR012677; PTHR11620 (PANTHER)                                                                                                                                                                                                                                                                                     |
| Caenorhabditis elegans  | tgf-beta resistance-associated protein trag isoform 2   | 0  |                                                                                                                                                                                                                                                                                                                                                                                                                                                                         |                                                | -                                                                                                                                                                                                                                                                                                                  |
| Brugia malayi           | fimbrin plastin                                         | 3  | P:GO:0016321;<br>F:GO:0003779;<br>F:GO:0005509                                                                                                                                                                                                                                                                                                                                                                                                                          | -                                              | IPR001589; IPR001715; IPR011992;<br>IPR018249; PTHR19961 (PANTHER),<br>PTHR19961:SF8 (PANTHER), SSF47473<br>(SUPERFAMILY)                                                                                                                                                                                          |
| Caenorhabditis briggsae | Hypothetical protein CBG05152 [Caenorhabditis briggsae] | 0  |                                                                                                                                                                                                                                                                                                                                                                                                                                                                         | F:GO:0005096;<br>P:GO:0051056;<br>C:GO:0005622 | -                                                                                                                                                                                                                                                                                                                  |
| Caenorhabditis elegans  | coatomer subunit beta                                   | 8  | F:GO:0005515;<br>P:GO:0032940;<br>P:GO:0016192;<br>P:GO:0000003;<br>P:GO:0008340;<br>P:GO:0006886;<br>C:GO:0030126;<br>F:GO:0005198                                                                                                                                                                                                                                                                                                                                     | -                                              | IPR011710; PTHR10635 (PANTHER)                                                                                                                                                                                                                                                                                     |

|                         |                                                                |   |                                                                                                                                     |   |             |                                                                                                                                                                                                       |
|-------------------------|----------------------------------------------------------------|---|-------------------------------------------------------------------------------------------------------------------------------------|---|-------------|-------------------------------------------------------------------------------------------------------------------------------------------------------------------------------------------------------|
| Caenorhabditis elegans  | coatomer subunit beta                                          | 8 | F:GO:0005515;<br>P:GO:0032940;<br>P:GO:0016192;<br>P:GO:0000003;<br>P:GO:0008340;<br>P:GO:0006886;<br>C:GO:0030126;<br>F:GO:0005198 | - |             | IPR011710; PTHR10635 (PANTHER)                                                                                                                                                                        |
| -                       | -                                                              | 0 |                                                                                                                                     |   |             | -                                                                                                                                                                                                     |
| Loa loa                 | cytoplasmic intermediate filament protein                      | 1 | P:GO:0007275                                                                                                                        | - |             | IPR001322; IPR001664;<br>G3DSA:2.60.40.1260 (GENE3D),<br>PTHR23239:SF13 (PANTHER),<br>SSF74853 (SUPERFAMILY)                                                                                          |
| -                       | -                                                              | 0 |                                                                                                                                     |   |             | -                                                                                                                                                                                                     |
| Caenorhabditis elegans  | bifunctio-l atp-dependent dihydroxyacetone ki-se fad-amp lyase | 2 | F:GO:0005488;<br>F:GO:0003824                                                                                                       | - |             | IPR000923; IPR004006; IPR004007;<br>IPR012734; G3DSA:3.30.1180.20<br>(GENE3D), G3DSA:3.40.50.10440<br>(GENE3D), PS51480 (PROFILE),<br>PS51481 (PROFILE), SignalP (SIGNALP),<br>SSF82549 (SUPERFAMILY) |
| Caenorhabditis briggsae | pyruvate ki-se                                                 | 8 | P:GO:0009792;<br>F:GO:0004743;<br>F:GO:0016830;<br>P:GO:0006725;<br>F:GO:0005515;<br>F:GO:0030955;<br>F:GO:0000287;<br>P:GO:0006096 | - | EC:2.7.1.40 | IPR001697; IPR015793; IPR015794;<br>IPR015813                                                                                                                                                         |
| Brugia malayi           | calcium homeostasis endoplasmic reticulum protein              | 4 | C:GO:0005737;<br>P:GO:0008285;<br>P:GO:0006874;<br>P:GO:0007399                                                                     | - |             | -                                                                                                                                                                                                     |
| Loa loa                 | hypothetical protein LOAG_09335 [Loa loa]                      | 0 |                                                                                                                                     |   |             | -                                                                                                                                                                                                     |
| Homo sapiens            | ribosomal protein l13a                                         | 4 | F:GO:0003735;<br>C:GO:0015934;<br>C:GO:0005829;<br>P:GO:0006414                                                                     | - |             | IPR005755; IPR005822                                                                                                                                                                                  |
| Caenorhabditis elegans  | briggsae cbr-hex-3 protein                                     | 3 | P:GO:0005975;<br>F:GO:0004553;<br>F:GO:0043169                                                                                      | - | EC:3.2.1.0  | IPR017853; PTHR21040 (PANTHER)                                                                                                                                                                        |
| Caenorhabditis briggsae | elegans protein partially confirmed by transcript evidence     | 4 | F:GO:0005089;<br>C:GO:0005622;<br>P:GO:0000003;<br>P:GO:0035023                                                                     | - |             | -                                                                                                                                                                                                     |
| Loa loa                 | n-acetyltransferase 13                                         | 5 | C:GO:0005737;<br>F:GO:0008415;<br>P:GO:0006474;<br>F:GO:0005515;<br>P:GO:0001756                                                    | - |             | IPR000182; IPR016181; PTHR23091<br>(PANTHER), PTHR23091:SF2<br>(PANTHER)                                                                                                                              |
| -                       | -                                                              | 0 |                                                                                                                                     |   |             | SignalP (SIGNALP)                                                                                                                                                                                     |
| -                       | -                                                              | 0 |                                                                                                                                     |   |             | SignalP (SIGNALP)                                                                                                                                                                                     |
| Caenorhabditis elegans  | ki-se-like protein splice variant 2                            | 4 | P:GO:0006468;<br>F:GO:0005524;<br>F:GO:0004672;<br>F:GO:0005515                                                                     | - |             | IPR000719; IPR011009; IPR017442;<br>G3DSA:3.30.200.20 (GENE3D),<br>PTHR12984 (PANTHER),<br>PTHR12984:SF3 (PANTHER)                                                                                    |
| -                       | -                                                              | 0 |                                                                                                                                     |   |             | IPR000519; SignalP (SIGNALP)                                                                                                                                                                          |

|                         |                                                    |   |                                                                                                                    |   |             |                                                                                                                                                                                                                   |
|-------------------------|----------------------------------------------------|---|--------------------------------------------------------------------------------------------------------------------|---|-------------|-------------------------------------------------------------------------------------------------------------------------------------------------------------------------------------------------------------------|
| Caenorhabditis briggsae | deleted in colorectal carcinoma                    | 7 | P:GO:0007411;<br>C:GO:0043005;<br>F:GO:0005515;<br>C:GO:0044425;<br>P:GO:0007165;<br>P:GO:0048522;<br>F:GO:0004888 | - |             | IPR003598; IPR003599; IPR003961;<br>IPR007110; IPR008957; IPR009138;<br>IPR013098; IPR013783; PR00014<br>(PRINTS), PTHR10489 (PANTHER),<br>PTHR10489:SF55 (PANTHER), SignalP<br>(SIGNALP), SSF48726 (SUPERFAMILY) |
| Caenorhabditis elegans  | pip ki-se protein 1                                | 2 | P:GO:0046488;<br>F:GO:0016307                                                                                      | - |             | IPR002498; G3DSA:3.30.800.10<br>(GENE3D), PTHR23086:SF5<br>(PANTHER), SSF56104 (SUPERFAMILY)                                                                                                                      |
| Caenorhabditis briggsae | cell death abnormality family member (ced-7)       | 5 | P:GO:0043652;<br>F:GO:0016887;<br>C:GO:0005886;<br>P:GO:0012501;<br>F:GO:0000166                                   | - |             | PTHR19229 (PANTHER),<br>PTHR19229:SF18 (PANTHER), SignalP<br>(SIGNALP)                                                                                                                                            |
| Caenorhabditis elegans  | cell death abnormality family member (ced-7)       | 4 | P:GO:0043652;<br>C:GO:0005886;<br>P:GO:0012501;<br>F:GO:0017111                                                    | - | EC:3.6.1.15 | IPR003439; G3DSA:3.40.50.300<br>(GENE3D), PTHR19229 (PANTHER),<br>PTHR19229:SF18 (PANTHER), SignalP<br>(SIGNALP), SSF52540 (SUPERFAMILY)                                                                          |
| Caenorhabditis briggsae | cell death abnormality family member (ced-7)       | 5 | P:GO:0043652;<br>F:GO:0016887;<br>C:GO:0005886;<br>P:GO:0012501;<br>F:GO:0000166                                   | - |             | PTHR19229 (PANTHER),<br>PTHR19229:SF18 (PANTHER), SignalP<br>(SIGNALP)                                                                                                                                            |
| Caenorhabditis elegans  | cell death abnormality family member (ced-7)       | 4 | P:GO:0043652;<br>C:GO:0005886;<br>P:GO:0012501;<br>F:GO:0017111                                                    | - | EC:3.6.1.15 | IPR003439; IPR003593; IPR017871;<br>G3DSA:3.40.50.300 (GENE3D),<br>PTHR19229 (PANTHER),<br>PTHR19229:SF18 (PANTHER), SignalP<br>(SIGNALP), SSF52540 (SUPERFAMILY)                                                 |
| Caenorhabditis elegans  | phenylalanyl-tr- beta subunit                      | 7 | C:GO:0005625;<br>F:GO:0004826;<br>F:GO:0003723;<br>F:GO:0005524;<br>F:GO:0000287;<br>P:GO:0006432;<br>C:GO:0005829 | - | EC:6.1.1.20 | IPR005146; IPR005147; IPR009061;<br>IPR020825; PTHR10947 (PANTHER),<br>PS51483 (PROFILE)                                                                                                                          |
| Caenorhabditis elegans  | cutaneous t cell lymphoma tumor antigen rrm rnp    | 0 |                                                                                                                    |   |             | IPR000504; IPR012677; PTHR14398<br>(PANTHER), SSF54928 (SUPERFAMILY)                                                                                                                                              |
| Streptococcus pyogenes  | collagen-like surface protein                      | 0 |                                                                                                                    |   |             | -                                                                                                                                                                                                                 |
|                         | -                                                  | 0 |                                                                                                                    |   |             | -                                                                                                                                                                                                                 |
| Brugia malayi           | guanine nucleotide-binding protein gamma-1 subunit | 4 | P:GO:0007186;<br>F:GO:0004871;<br>P:GO:0007165;<br>C:GO:0005834                                                    | - | EC:3.6.5.1  | SignalP (SIGNALP)                                                                                                                                                                                                 |



|                         |                                                |    |                                                                                                                                                                                                                                                                                                               |   |                             |                                                                                                                                                                                                                                   |
|-------------------------|------------------------------------------------|----|---------------------------------------------------------------------------------------------------------------------------------------------------------------------------------------------------------------------------------------------------------------------------------------------------------------|---|-----------------------------|-----------------------------------------------------------------------------------------------------------------------------------------------------------------------------------------------------------------------------------|
| Caenorhabditis elegans  | hypoxanthine-guanine phosphoribosyltransferase | 18 | P:GO:0006168;<br>P:GO:0045964;<br>P:GO:0006178;<br>F:GO:0004422;<br>P:GO:0032263;<br>F:GO:0002060;<br>C:GO:0005829;<br>P:GO:0019915;<br>P:GO:0007610;<br>P:GO:0032264;<br>C:GO:0005694;<br>F:GO:0042802;<br>P:GO:0046100;<br>F:GO:0000287;<br>P:GO:0016043;<br>P:GO:0006166;<br>P:GO:0007399;<br>P:GO:0032940 | - | EC:2.4.2.8                  | IPR000836; IPR005904;<br>G3DSA:3.40.50.2020 (GENE3D),<br>PTHR22573 (PANTHER),<br>PTHR22573:SF8 (PANTHER), SSF53271<br>(SUPERFAMILY)                                                                                               |
| Caenorhabditis briggsae | dual oxidase                                   | 18 | P:GO:0018149;<br>P:GO:0006979;<br>P:GO:0006952;<br>F:GO:0016174;<br>P:GO:0040032;<br>F:GO:0005509;<br>C:GO:0016021;<br>P:GO:0042338;<br>P:GO:0055114;<br>P:GO:0040007;<br>F:GO:0004601;<br>F:GO:0009055;<br>P:GO:0002119;<br>P:GO:0040011;<br>F:GO:0020037;<br>F:GO:0050660;<br>P:GO:0009792;<br>C:GO:0005882 | - | EC:1.6.3.1;<br>EC:1.11.1.7  | IPR001221; IPR013112; IPR013121;<br>IPR013130; IPR017927; IPR017938;<br>G3DSA:2.40.30.10 (GENE3D),<br>G3DSA:3.40.50.80 (GENE3D),<br>PTHR11972 (PANTHER),<br>PTHR11972:SF6 (PANTHER), SignalP<br>(SIGNALP), SSF52343 (SUPERFAMILY) |
| -                       | -                                              | 0  |                                                                                                                                                                                                                                                                                                               |   |                             |                                                                                                                                                                                                                                   |
| Caenorhabditis elegans  | protein sidekick                               | 4  | C:GO:0005887;<br>P:GO:0042675;<br>P:GO:0046533;<br>P:GO:0007155                                                                                                                                                                                                                                               | - |                             | IPR003961; IPR008957; IPR013783;<br>PTHR10489 (PANTHER),<br>PTHR10489:SF57 (PANTHER)                                                                                                                                              |
| Caenorhabditis elegans  | briggsae cbr-tdc-1 protein                     | 4  | F:GO:0030170;<br>P:GO:0019752;<br>P:GO:0006519;<br>F:GO:0016831                                                                                                                                                                                                                                               | - | EC:4.1.1.0                  | -                                                                                                                                                                                                                                 |
| Caenorhabditis briggsae | aromatic amino acid decarboxylase              | 8  | F:GO:0030170;<br>P:GO:0006519;<br>F:GO:0004837;<br>P:GO:0018991;<br>P:GO:0048148;<br>P:GO:0019752;<br>F:GO:0004058;<br>P:GO:0007626                                                                                                                                                                           | - | EC:4.1.1.25;<br>EC:4.1.1.28 | IPR002129; IPR010977; IPR015421;<br>IPR015422; IPR015424; IPR021115;<br>G3DSA:1.20.1340.10 (GENE3D),<br>PTHR11999:SF11 (PANTHER)                                                                                                  |

|                         |                                   |   |                                                                                                                                     |                                                                                  |                             |                                                                                                                                                         |
|-------------------------|-----------------------------------|---|-------------------------------------------------------------------------------------------------------------------------------------|----------------------------------------------------------------------------------|-----------------------------|---------------------------------------------------------------------------------------------------------------------------------------------------------|
| Caenorhabditis briggsae | aromatic amino acid decarboxylase | 8 | F:GO:0030170;<br>P:GO:0006519;<br>F:GO:0004837;<br>P:GO:0018991;<br>P:GO:0048148;<br>P:GO:0019752;<br>F:GO:0004058;<br>P:GO:0007626 | -                                                                                | EC:4.1.1.25;<br>EC:4.1.1.28 | IPR002129; IPR010977; IPR015421;<br>IPR015422; IPR015424; IPR021115;<br>G3DSA:1.20.1340.10 (GENE3D),<br>PTHR11999:SF11 (PANTHER)                        |
| Caenorhabditis briggsae | aromatic amino acid decarboxylase | 8 | F:GO:0030170;<br>P:GO:0006519;<br>F:GO:0004837;<br>P:GO:0018991;<br>P:GO:0048148;<br>P:GO:0019752;<br>F:GO:0004058;<br>P:GO:0007626 | -                                                                                | EC:4.1.1.25;<br>EC:4.1.1.28 | IPR002129; IPR010977; IPR015421;<br>IPR015422; IPR015424; IPR021115;<br>G3DSA:1.20.1340.10 (GENE3D),<br>PTHR11999:SF11 (PANTHER)                        |
| Caenorhabditis briggsae | aromatic amino acid decarboxylase | 8 | F:GO:0030170;<br>P:GO:0006519;<br>F:GO:0004837;<br>P:GO:0018991;<br>P:GO:0048148;<br>P:GO:0019752;<br>F:GO:0004058;<br>P:GO:0007626 | -                                                                                | EC:4.1.1.25;<br>EC:4.1.1.28 | IPR002129; IPR010977; IPR015421;<br>IPR015422; IPR015424; IPR021115;<br>G3DSA:1.20.1340.10 (GENE3D),<br>PTHR11999:SF11 (PANTHER)                        |
| Caenorhabditis briggsae | briggsae cbr-ten-1 protein        | 2 | C:GO:0016021;<br>P:GO:0042051                                                                                                       | -                                                                                |                             | IPR000742; IPR006210; IPR013032;<br>IPR013111; G3DSA:2.10.25.10<br>(GENE3D), PTHR11219 (PANTHER),<br>PTHR11219:SF4 (PANTHER), SSF57196<br>(SUPERFAMILY) |
| Brugia malayi           | anion exchange protein            | 3 | P:GO:0006811;<br>F:GO:0015291;<br>C:GO:0016020                                                                                      | -                                                                                |                             | IPR003020; IPR011531; IPR013769;<br>IPR016152; G3DSA:1.10.287.570<br>(GENE3D), PTHR11453:SF9 (PANTHER)                                                  |
|                         | -                                 | 0 |                                                                                                                                     |                                                                                  |                             | IPR002919; IPR013032;<br>G3DSA:2.10.25.10 (GENE3D)                                                                                                      |
| Caenorhabditis elegans  | wd repeat domain 23               | 0 |                                                                                                                                     | F:GO:0003674;<br>P:GO:0008150;<br>F:GO:0005515;<br>C:GO:0080008;<br>C:GO:0005575 |                             | IPR001680; IPR011046; IPR015943;<br>IPR017986; IPR019781; IPR019782;<br>PTHR19847 (PANTHER),<br>PTHR19847:SF4 (PANTHER)                                 |
| Caenorhabditis elegans  | wd repeat domain 23               | 0 |                                                                                                                                     | F:GO:0003674;<br>P:GO:0008150;<br>F:GO:0005515;<br>C:GO:0080008;<br>C:GO:0005575 |                             | IPR001680; IPR011046; IPR015943;<br>IPR017986; IPR019781; IPR019782;<br>PTHR19847 (PANTHER),<br>PTHR19847:SF4 (PANTHER)                                 |
| Caenorhabditis elegans  | wd repeat domain 23               | 0 |                                                                                                                                     | F:GO:0003674;<br>P:GO:0008150;<br>F:GO:0005515;<br>C:GO:0080008;<br>C:GO:0005575 |                             | IPR001680; IPR011046; IPR015943;<br>IPR017986; IPR019781; IPR019782;<br>PTHR19847 (PANTHER),<br>PTHR19847:SF4 (PANTHER)                                 |
| Caenorhabditis elegans  | ran gtpase activating protein 1   | 2 | C:GO:0043229;<br>C:GO:0048471                                                                                                       | -                                                                                |                             | G3DSA:3.80.10.10 (GENE3D),<br>PTHR13824 (PANTHER),<br>PTHR13824:SF8 (PANTHER), SSF52047<br>(SUPERFAMILY)                                                |
| Brugia malayi           | briggsae cbr-zyx-1 protein        | 1 | F:GO:0005515                                                                                                                        | -                                                                                |                             | -                                                                                                                                                       |

|                         |                                                  |   |                                                                                                                    |                               |             |                                                                                                                                     |
|-------------------------|--------------------------------------------------|---|--------------------------------------------------------------------------------------------------------------------|-------------------------------|-------------|-------------------------------------------------------------------------------------------------------------------------------------|
| Caenorhabditis elegans  | 2-acylglycerol o-acyltransferase 1               | 4 | P:GO:0006629;<br>F:GO:0008415;<br>C:GO:0016021;<br>C:GO:0005783                                                    | -                             |             | IPR007130                                                                                                                           |
| Haemonchus contortus    | heat shock protein family member (hsp- )         | 0 |                                                                                                                    | P:GO:0006950;<br>P:GO:0009408 |             | -                                                                                                                                   |
|                         | -                                                | 0 |                                                                                                                    |                               |             | -                                                                                                                                   |
| Caenorhabditis elegans  | abnormal cell migration family member (mig-10)   | 2 | F:GO:0005515;<br>P:GO:0007165                                                                                      | -                             |             | -                                                                                                                                   |
| Caenorhabditis elegans  | abnormal cell migration family member (mig-10)   | 2 | F:GO:0005515;<br>P:GO:0007165                                                                                      | -                             |             | -                                                                                                                                   |
| Caenorhabditis briggsae | wd repeat-containing protein 3                   | 2 | F:GO:0003824;<br>P:GO:0006898                                                                                      | -                             |             | IPR001680; IPR011046; IPR015943;<br>IPR017986; IPR019775; IPR019781;<br>IPR019782; PTHR22847 (PANTHER),<br>PTHR22847:SF48 (PANTHER) |
| Caenorhabditis briggsae | wd repeat-containing protein 3                   | 2 | P:GO:0006898;<br>F:GO:0003824                                                                                      | -                             |             | IPR001680; IPR011046; IPR015943;<br>IPR017986; IPR019775; IPR019781;<br>IPR019782; PTHR22847 (PANTHER)                              |
| Caenorhabditis briggsae | wd repeat-containing protein 3                   | 2 | P:GO:0006898;<br>F:GO:0003824                                                                                      | -                             |             | IPR001680; IPR011046; IPR015943;<br>IPR017986; IPR019775; IPR019781;<br>IPR019782; PTHR22847 (PANTHER)                              |
|                         | -                                                | 0 |                                                                                                                    |                               |             | -                                                                                                                                   |
| Caenorhabditis briggsae | elegans protein confirmed by transcript evidence | 7 | P:GO:0009056;<br>P:GO:0005975;<br>F:GO:0043169;<br>F:GO:0005515;<br>P:GO:0008340;<br>F:GO:0003796;<br>P:GO:0043170 | -                             | EC:3.2.1.17 | IPR013781; IPR017853; PTHR23208<br>(PANTHER), PTHR23208:SF13<br>(PANTHER)                                                           |
| Caenorhabditis briggsae | elegans protein confirmed by transcript evidence | 7 | P:GO:0009056;<br>P:GO:0005975;<br>F:GO:0043169;<br>F:GO:0005515;<br>P:GO:0008340;<br>F:GO:0003796;<br>P:GO:0043170 | -                             | EC:3.2.1.17 | IPR013781; IPR017853; PTHR23208<br>(PANTHER), PTHR23208:SF13<br>(PANTHER)                                                           |
| Caenorhabditis briggsae | briggsae cbr-lys-8 protein                       | 3 | P:GO:0008152;<br>P:GO:0008340;<br>F:GO:0005515                                                                     | -                             |             | PTHR23208 (PANTHER),<br>PTHR23208:SF13 (PANTHER), SignalP<br>(SIGNALP)                                                              |
| Caenorhabditis briggsae | briggsae cbr-lys-8 protein                       | 3 | P:GO:0008152;<br>P:GO:0008340;<br>F:GO:0005515                                                                     | -                             |             | PTHR23208 (PANTHER),<br>PTHR23208:SF13 (PANTHER), SignalP<br>(SIGNALP)                                                              |
| Caenorhabditis briggsae | elegans protein confirmed by transcript evidence | 7 | P:GO:0009056;<br>P:GO:0005975;<br>F:GO:0043169;<br>F:GO:0005515;<br>P:GO:0008340;<br>F:GO:0003796;<br>P:GO:0043170 | -                             | EC:3.2.1.17 | IPR013781; IPR017853; PTHR23208<br>(PANTHER), PTHR23208:SF13<br>(PANTHER)                                                           |
| Caenorhabditis briggsae | elegans protein confirmed by transcript evidence | 7 | P:GO:0009056;<br>P:GO:0005975;<br>F:GO:0043169;<br>F:GO:0005515;<br>P:GO:0008340;<br>F:GO:0003796;<br>P:GO:0043170 | -                             | EC:3.2.1.17 | IPR013781; IPR017853; PTHR23208<br>(PANTHER), PTHR23208:SF13<br>(PANTHER)                                                           |
|                         | -                                                | 0 |                                                                                                                    |                               |             | SignalP (SIGNALP)                                                                                                                   |

|                         |                                                           |   |                                                                                                                                                      |                                                                                                                                     |                                                                                                                                                                                                        |
|-------------------------|-----------------------------------------------------------|---|------------------------------------------------------------------------------------------------------------------------------------------------------|-------------------------------------------------------------------------------------------------------------------------------------|--------------------------------------------------------------------------------------------------------------------------------------------------------------------------------------------------------|
| Loa loa                 | presenilin spe-4                                          | 4 | C:GO:0016020;<br>P:GO:0016048;<br>F:GO:0005515;<br>P:GO:0007399                                                                                      | -                                                                                                                                   | IPR001108; PTHR10202:SF1<br>(PANTHER), SignalP (SIGNALP)                                                                                                                                               |
| Caenorhabditis briggsae | Hypothetical protein CBG21915 [Caenorhabditis briggsae]   | 0 |                                                                                                                                                      |                                                                                                                                     | -                                                                                                                                                                                                      |
| Loa loa                 | viral a-type inclusion protein repeat containing protein  | 0 |                                                                                                                                                      |                                                                                                                                     | IPR019139                                                                                                                                                                                              |
|                         | -                                                         | 0 |                                                                                                                                                      |                                                                                                                                     | SignalP (SIGNALP)                                                                                                                                                                                      |
| Caenorhabditis elegans  | ain family member (clp-1)                                 | 5 | C:GO:0016021;<br>P:GO:0008219;<br>C:GO:0005622;<br>P:GO:0006508;<br>F:GO:0004198                                                                     | -                                                                                                                                   | IPR000169; IPR001300; IPR022682;<br>IPR022683; IPR022684;<br>G3DSA:2.60.120.380 (GENE3D),<br>G3DSA:3.90.70.10 (GENE3D),<br>PTHR10183 (PANTHER),<br>PTHR10183:SF45 (PANTHER),<br>SSF54001 (SUPERFAMILY) |
| Caenorhabditis elegans  | ain family member (clp-1)                                 | 5 | C:GO:0016021;<br>P:GO:0008219;<br>C:GO:0005622;<br>P:GO:0006508;<br>F:GO:0004198                                                                     | -                                                                                                                                   | IPR000169; IPR001300; IPR022682;<br>IPR022683; IPR022684;<br>G3DSA:2.60.120.380 (GENE3D),<br>G3DSA:3.90.70.10 (GENE3D),<br>PTHR10183 (PANTHER),<br>PTHR10183:SF45 (PANTHER),<br>SSF54001 (SUPERFAMILY) |
| Loa loa                 | cleavage and polyadenylation specificity factor subunit 2 | 0 |                                                                                                                                                      | F:GO:0003723;<br>C:GO:0005737;<br>P:GO:0006398;<br>P:GO:0008380;<br>F:GO:0016787;<br>P:GO:0006397;<br>F:GO:0005515;<br>C:GO:0005634 | IPR011108; PTHR11203 (PANTHER),<br>PTHR11203:SF5 (PANTHER)                                                                                                                                             |
| Caenorhabditis briggsae | heat shock 70kda protein 9                                | 9 | P:GO:0006457;<br>P:GO:0006611;<br>C:GO:0042645;<br>C:GO:0009986;<br>F:GO:0019899;<br>P:GO:0006916;<br>F:GO:0005524;<br>F:GO:0051082;<br>P:GO:0006950 | -                                                                                                                                   | IPR019651; SignalP (SIGNALP)                                                                                                                                                                           |
| Caenorhabditis elegans  | yo30_caee1.ame: full=gilt-like protein flags: precursor   | 0 |                                                                                                                                                      | C:GO:0005576                                                                                                                        | IPR004911; PTHR13234:SF2<br>(PANTHER)                                                                                                                                                                  |
| Caenorhabditis briggsae | briggsae cbr-unc-68 protein                               | 8 | F:GO:0004872;<br>P:GO:0006629;<br>F:GO:0005219;<br>P:GO:0006816;<br>P:GO:0006874;<br>P:GO:0055085;<br>F:GO:0005509;<br>C:GO:0016021                  | -                                                                                                                                   | IPR003608; IPR013333; IPR014821;<br>IPR015925; IPR016093;<br>G3DSA:2.80.10.50 (GENE3D),<br>PTHR13715:SF11 (PANTHER)                                                                                    |

|                         |                                                    |    |                                                                                                                                                                                                                                                                                                                                |                               |                              |                                                                                                              |
|-------------------------|----------------------------------------------------|----|--------------------------------------------------------------------------------------------------------------------------------------------------------------------------------------------------------------------------------------------------------------------------------------------------------------------------------|-------------------------------|------------------------------|--------------------------------------------------------------------------------------------------------------|
| Caenorhabditis elegans  | 6-phosphofructo-2-ki-se fructose- -biphosphatase 1 | 19 | P:GO:0006094;<br>P:GO:0007243;<br>F:GO:0004331;<br>P:GO:0032868;<br>P:GO:0046835;<br>P:GO:0031100;<br>P:GO:0033762;<br>C:GO:0043540;<br>P:GO:0051384;<br>P:GO:0033133;<br>P:GO:0006003;<br>F:GO:0070095;<br>P:GO:0006096;<br>F:GO:0042802;<br>F:GO:0003873;<br>P:GO:0042594;<br>P:GO:0051591;<br>F:GO:0005524;<br>F:GO:0019900 | -                             | EC:3.1.3.46;<br>EC:2.7.1.105 | IPR003094; IPR013078;<br>G3DSA:3.40.50.1240 (GENE3D),<br>PTHR10606:SF11 (PANTHER),<br>SSF53254 (SUPERFAMILY) |
| Caenorhabditis elegans  | hydroxypyruvate isomerase                          | 0  |                                                                                                                                                                                                                                                                                                                                | F:GO:0008903;<br>F:GO:0016853 |                              | IPR012307; IPR013022; PTHR12110 (PANTHER)                                                                    |
|                         | -                                                  | 0  |                                                                                                                                                                                                                                                                                                                                |                               |                              | IPR000436                                                                                                    |
| Caenorhabditis briggsae | briggsae cbr-ckr-1 protein                         | 1  | F:GO:0004871                                                                                                                                                                                                                                                                                                                   | -                             |                              | -                                                                                                            |
|                         | -                                                  | 0  |                                                                                                                                                                                                                                                                                                                                |                               |                              | -                                                                                                            |
|                         | -                                                  | 0  |                                                                                                                                                                                                                                                                                                                                |                               |                              | -                                                                                                            |
| Caenorhabditis elegans  | transportin 1                                      | 12 | P:GO:0040010;<br>P:GO:0000060;<br>P:GO:0000003;<br>F:GO:0008139;<br>P:GO:0010171;<br>P:GO:0002119;<br>F:GO:0005515;<br>P:GO:0040011;<br>P:GO:0006898;<br>P:GO:0009792;<br>C:GO:0044424;<br>P:GO:0016246                                                                                                                        | -                             |                              | IPR000357; IPR001494; IPR011989;<br>IPR016024; IPR021133; PTHR10527 (PANTHER), PTHR10527:SF3 (PANTHER)       |
| Caenorhabditis elegans  | transportin 1                                      | 12 | P:GO:0040010;<br>P:GO:0000060;<br>P:GO:0000003;<br>F:GO:0008139;<br>P:GO:0010171;<br>P:GO:0002119;<br>F:GO:0005515;<br>P:GO:0040011;<br>P:GO:0006898;<br>P:GO:0009792;<br>C:GO:0044424;<br>P:GO:0016246                                                                                                                        | -                             |                              | IPR000357; IPR001494; IPR011989;<br>IPR016024; IPR021133; PTHR10527 (PANTHER), PTHR10527:SF3 (PANTHER)       |
| Caenorhabditis elegans  | deoxyribonuclease ii                               | 3  | P:GO:0006259;<br>P:GO:0007275;<br>F:GO:0004520                                                                                                                                                                                                                                                                                 | -                             |                              | IPR004947; PTHR10858:SF1 (PANTHER), SignalP (SIGNALP)                                                        |
| Tribolium castaneum     | anopheles stephensi                                | 0  |                                                                                                                                                                                                                                                                                                                                |                               |                              | IPR000626; IPR019955;<br>G3DSA:3.10.20.90 (GENE3D),<br>SSF54236 (SUPERFAMILY)                                |

|                         |                                                  |    |                                                                                                                                                                       |   |                                  |                                                                                                                                                                       |
|-------------------------|--------------------------------------------------|----|-----------------------------------------------------------------------------------------------------------------------------------------------------------------------|---|----------------------------------|-----------------------------------------------------------------------------------------------------------------------------------------------------------------------|
| Caenorhabditis briggsae | briggsae cbr-dcp-66 protein                      | 7  | P:GO:0040010;<br>P:GO:0040027;<br>P:GO:0040035;<br>P:GO:0040026;<br>P:GO:0040011;<br>P:GO:0006898;<br>P:GO:0002009                                                    | - |                                  | PTHR13455 (PANTHER),<br>PTHR13455:SF1 (PANTHER)                                                                                                                       |
| Caenorhabditis elegans  | briggsae cbr-imb-6 protein                       | 0  |                                                                                                                                                                       |   |                                  | -                                                                                                                                                                     |
| Caenorhabditis elegans  | briggsae cbr-imb-6 protein                       | 0  |                                                                                                                                                                       |   |                                  | -                                                                                                                                                                     |
| Loa loa                 | ring finger ubc associated family member (rfp-1) | 3  | F:GO:0005515;<br>P:GO:0006664;<br>C:GO:0005634                                                                                                                        | - |                                  | PD936484 (PRODOM), PTHR23163 (PANTHER)                                                                                                                                |
| Loa loa                 | ring finger protein 20                           | 1  | F:GO:0046872                                                                                                                                                          | - |                                  | IPR001841; IPR013083; IPR017907;<br>IPR018957; PTHR23163 (PANTHER),<br>SSF57850 (SUPERFAMILY)                                                                         |
| Loa loa                 | ring finger ubc associated family member (rfp-1) | 3  | F:GO:0005515;<br>P:GO:0006664;<br>C:GO:0005634                                                                                                                        | - |                                  | PD936484 (PRODOM), PTHR23163 (PANTHER)                                                                                                                                |
| Loa loa                 | ring finger protein 20                           | 1  | F:GO:0046872                                                                                                                                                          | - |                                  | -                                                                                                                                                                     |
|                         | -                                                | 0  |                                                                                                                                                                       |   |                                  | -                                                                                                                                                                     |
| Caenorhabditis elegans  | malate synthase a                                | 2  | P:GO:0006099;<br>F:GO:0004474                                                                                                                                         | - | EC:2.3.3.9                       | IPR001465; IPR006252; IPR011076;<br>G3DSA:1.20.1220.12 (GENE3D),<br>G3DSA:3.20.20.360 (GENE3D),<br>PTHR21631 (PANTHER)                                                |
| Caenorhabditis elegans  | isocitrate lyase                                 | 4  | F:GO:0004451;<br>P:GO:0019752;<br>P:GO:0055114;<br>F:GO:0051864                                                                                                       | - | EC:4.1.3.1;<br>EC:1.14.11.2<br>7 | IPR000918; IPR001465; IPR006252;<br>IPR006254; IPR011076; IPR015813;<br>IPR018523; G3DSA:1.20.1220.12 (GENE3D),<br>G3DSA:3.20.20.360 (GENE3D),<br>PTHR21631 (PANTHER) |
| Caenorhabditis elegans  | camp-regulated phosphoprotein 19                 | 0  |                                                                                                                                                                       |   | C:GO:0005737                     | IPR006760                                                                                                                                                             |
|                         | -                                                | 0  |                                                                                                                                                                       |   |                                  | -                                                                                                                                                                     |
|                         | -                                                | 0  |                                                                                                                                                                       |   |                                  | SignalP (SIGNALP)                                                                                                                                                     |
| Caenorhabditis briggsae | briggsae cbr-itsn-1 protein                      | 10 | P:GO:0045746;<br>F:GO:0005515;<br>P:GO:0051124;<br>C:GO:0042734;<br>C:GO:0045179;<br>P:GO:0008104;<br>P:GO:0045860;<br>P:GO:0002052;<br>C:GO:0005886;<br>P:GO:0048488 | - |                                  | IPR000108; IPR001452;<br>G3DSA:2.30.30.40 (GENE3D),<br>PTHR11216 (PANTHER),<br>PTHR11216:SF24 (PANTHER)                                                               |
| Caenorhabditis briggsae | briggsae cbr-itsn-1 protein                      | 10 | P:GO:0045746;<br>F:GO:0005515;<br>P:GO:0051124;<br>C:GO:0042734;<br>C:GO:0045179;<br>P:GO:0008104;<br>P:GO:0045860;<br>P:GO:0002052;<br>C:GO:0005886;<br>P:GO:0048488 | - |                                  | IPR000108; IPR001452;<br>G3DSA:2.30.30.40 (GENE3D),<br>PTHR11216 (PANTHER),<br>PTHR11216:SF24 (PANTHER)                                                               |

|                         |                                                               |    |                                                                                                                                                                                                                                                                                                               |   |                                                                                                                                                              |
|-------------------------|---------------------------------------------------------------|----|---------------------------------------------------------------------------------------------------------------------------------------------------------------------------------------------------------------------------------------------------------------------------------------------------------------|---|--------------------------------------------------------------------------------------------------------------------------------------------------------------|
| Caenorhabditis elegans  | intersectin 1 (sh3 domain protein)                            | 13 | C:GO:0005829;<br>F:GO:0005509;<br>P:GO:0007264;<br>F:GO:0005085;<br>C:GO:0030139;<br>P:GO:0051897;<br>F:GO:0005515;<br>P:GO:0008624;<br>C:GO:0030027;<br>P:GO:0048488;<br>P:GO:0043524;<br>C:GO:0005886;<br>F:GO:0019209                                                                                      | - | IPR001452; G3DSA:2.30.30.40 (GENE3D), PTHR11216 (PANTHER), PTHR11216:SF24 (PANTHER)                                                                          |
| Caenorhabditis briggsae | briggsae cbr-itsn-1 protein                                   | 10 | P:GO:0045746;<br>F:GO:0005515;<br>P:GO:0051124;<br>C:GO:0042734;<br>C:GO:0045179;<br>P:GO:0008104;<br>P:GO:0045860;<br>P:GO:0002052;<br>C:GO:0005886;<br>P:GO:0048488                                                                                                                                         | - | IPR000108; IPR001452; G3DSA:2.30.30.40 (GENE3D), PTHR11216 (PANTHER), PTHR11216:SF24 (PANTHER)                                                               |
| Caenorhabditis elegans  | membrane palmitoylated 5 (maguk p55 subfamily member 5)       | 18 | C:GO:0043296;<br>P:GO:0008078;<br>P:GO:0045176;<br>P:GO:0040010;<br>P:GO:0016337;<br>P:GO:0007420;<br>P:GO:0001841;<br>P:GO:0002011;<br>P:GO:0060059;<br>P:GO:0045199;<br>P:GO:0016332;<br>P:GO:0035050;<br>F:GO:0005515;<br>C:GO:0001917;<br>C:GO:0031226;<br>P:GO:0055008;<br>C:GO:0005737;<br>C:GO:0005634 | - | IPR008144; IPR008145; IPR020590; G3DSA:3.30.63.10 (GENE3D), G3DSA:3.40.50.300 (GENE3D), PTHR23122 (PANTHER), PTHR23122:SF5 (PANTHER), SSF52540 (SUPERFAMILY) |
| Homo sapiens            | wd repeat-containing protein 5                                | 5  | C:GO:0071339;<br>F:GO:0042800;<br>F:GO:0035064;<br>P:GO:0045449;<br>P:GO:0051568                                                                                                                                                                                                                              | - | IPR001680; IPR011046; IPR015943; IPR017986; IPR019775; IPR019781; IPR019782; IPR020472; PTHR22847 (PANTHER), PTHR22847:SF48 (PANTHER)                        |
| Caenorhabditis elegans  | rr--processing protein fcf1 homolog                           | 3  | P:GO:0040010;<br>P:GO:0006898;<br>P:GO:0002119                                                                                                                                                                                                                                                                | - | IPR006596; IPR006984; G3DSA:3.40.50.1010 (GENE3D), SSF88723 (SUPERFAMILY)                                                                                    |
| Caenorhabditis elegans  | ectonucleotide pyrophosphatase phosphodiesterase 4 (function) | 1  | F:GO:0003824                                                                                                                                                                                                                                                                                                  | - | IPR002591; IPR017849; IPR017850; PTHR10151 (PANTHER), PTHR10151:SF11 (PANTHER), SignalP (SIGNALP)                                                            |
| Caenorhabditis elegans  | ectonucleotide pyrophosphatase phosphodiesterase 4            | 1  | F:GO:0003824                                                                                                                                                                                                                                                                                                  | - | IPR002591; IPR017849; IPR017850; PTHR10151 (PANTHER), PTHR10151:SF11 (PANTHER), SignalP (SIGNALP)                                                            |
| Caenorhabditis elegans  | ectonucleotide pyrophosphatase phosphodiesterase 4            | 1  | F:GO:0003824                                                                                                                                                                                                                                                                                                  | - | -                                                                                                                                                            |

|                            |                                                                          |   |                                                                                                                                                                                                                                                                             |   |                                                                                                                                    |
|----------------------------|--------------------------------------------------------------------------|---|-----------------------------------------------------------------------------------------------------------------------------------------------------------------------------------------------------------------------------------------------------------------------------|---|------------------------------------------------------------------------------------------------------------------------------------|
| Loa loa                    | kh domain containing protein                                             | 1 | P:GO:0009987                                                                                                                                                                                                                                                                | - | IPR004087; IPR004088; IPR018111; G3DSA:3.30.1370.10 (GENE3D), PTHR11208 (PANTHER), PTHR11208:SF8 (PANTHER), SSF54791 (SUPERFAMILY) |
| Loa loa                    | kh domain containing protein                                             | 1 | P:GO:0009987                                                                                                                                                                                                                                                                | - | IPR004087; IPR004088; IPR018111; G3DSA:3.30.1370.10 (GENE3D), PTHR11208 (PANTHER), PTHR11208:SF8 (PANTHER), SSF54791 (SUPERFAMILY) |
| -                          | -                                                                        | 0 | -                                                                                                                                                                                                                                                                           | - | -                                                                                                                                  |
| Caenorhabditis elegans     | cleavage and polyadenylation specificity factor subunit 6                | 3 | F:GO:0003676;<br>F:GO:0000166;<br>F:GO:0005515                                                                                                                                                                                                                              | - | -                                                                                                                                  |
| Caenorhabditis elegans     | cleavage and polyadenylation specificity factor subunit 6                | 3 | F:GO:0003676;<br>F:GO:0000166;<br>F:GO:0005515                                                                                                                                                                                                                              | - | -                                                                                                                                  |
| Oscheius sp. (strain CEW1) | vitellogenin structural genes (yolk protein genes) family member (vit-6) | 6 | P:GO:0009792;<br>F:GO:0005515;<br>P:GO:0006810;<br>P:GO:0040010;<br>P:GO:0033036;<br>P:GO:0008340                                                                                                                                                                           | - | SignalP (SIGNALP)                                                                                                                  |
| -                          | -                                                                        | 0 | -                                                                                                                                                                                                                                                                           | - | -                                                                                                                                  |
| Caenorhabditis elegans     | complement component 6                                                   | 0 | P:GO:0045766;<br>P:GO:0043065;<br>P:GO:0045917;<br>P:GO:0006919;<br>P:GO:0006917;<br>F:GO:0003674;<br>C:GO:0005579;<br>P:GO:0019835;<br>C:GO:0005576;<br>F:GO:0005515;<br>P:GO:0001701;<br>P:GO:0001970;<br>P:GO:0045087;<br>P:GO:0006958;<br>P:GO:0006956;<br>C:GO:0005615 | - | IPR000436; IPR016060; SignalP (SIGNALP)                                                                                            |
| Homo sapiens               | complement component 6                                                   | 0 | P:GO:0045766;<br>P:GO:0043065;<br>P:GO:0045917;<br>P:GO:0006919;<br>P:GO:0006917;<br>F:GO:0003674;<br>C:GO:0005579;<br>P:GO:0019835;<br>C:GO:0005576;<br>F:GO:0005515;<br>P:GO:0001701;<br>P:GO:0001970;<br>P:GO:0045087;<br>P:GO:0006958;<br>P:GO:0006956;<br>C:GO:0005615 | - | IPR000436; IPR016060; SignalP (SIGNALP)                                                                                            |



|                         |                                   |    |                                                                                                                                                                                                                          |   |             |                                                                                                                                         |
|-------------------------|-----------------------------------|----|--------------------------------------------------------------------------------------------------------------------------------------------------------------------------------------------------------------------------|---|-------------|-----------------------------------------------------------------------------------------------------------------------------------------|
| Caenorhabditis briggsae | r--specific adenosine deami-se b1 | 5  | F:GO:0005515;<br>F:GO:0004000;<br>P:GO:0000003;<br>P:GO:0016071;<br>C:GO:0031981                                                                                                                                         | - | EC:3.5.4.4  | IPR002466; PTHR10910 (PANTHER),<br>PTHR10910:SF15 (PANTHER)                                                                             |
| Brugia malayi           | 40s ribosomal protein s19s        | 8  | P:GO:0009792;<br>P:GO:0002119;<br>C:GO:0005840;<br>F:GO:0003735;<br>P:GO:0018996;<br>P:GO:0000003;<br>P:GO:0040007;<br>P:GO:0006412                                                                                      | - | EC:3.6.5.3  | IPR001266; IPR018277; SSF46785<br>(SUPERFAMILY)                                                                                         |
| Caenorhabditis briggsae | proteasome subunit alpha type 6   | 13 | P:GO:0006511;<br>P:GO:0008340;<br>P:GO:0000003;<br>F:GO:0004298;<br>P:GO:0018996;<br>P:GO:0002119;<br>F:GO:0005515;<br>P:GO:0040011;<br>C:GO:0019773;<br>P:GO:0009792;<br>C:GO:0005737;<br>P:GO:0040015;<br>C:GO:0005634 | - | EC:3.4.25.0 | IPR001353; G3DSA:3.60.20.10<br>(GENE3D), PTHR11599 (PANTHER),<br>PTHR11599:SF11 (PANTHER), PSS1475<br>(PROFILE), SSF56235 (SUPERFAMILY) |
| Caenorhabditis briggsae | proteasome subunit alpha type 6   | 13 | P:GO:0006511;<br>P:GO:0008340;<br>P:GO:0000003;<br>F:GO:0004298;<br>P:GO:0018996;<br>P:GO:0002119;<br>F:GO:0005515;<br>P:GO:0040011;<br>C:GO:0019773;<br>P:GO:0009792;<br>C:GO:0005737;<br>P:GO:0040015;<br>C:GO:0005634 | - | EC:3.4.25.0 | IPR001353; G3DSA:3.60.20.10<br>(GENE3D), PTHR11599 (PANTHER),<br>PTHR11599:SF11 (PANTHER), PSS1475<br>(PROFILE), SSF56235 (SUPERFAMILY) |
| Caenorhabditis briggsae | proteasome subunit alpha type 6   | 13 | P:GO:0006511;<br>P:GO:0008340;<br>P:GO:0000003;<br>F:GO:0004298;<br>P:GO:0018996;<br>P:GO:0002119;<br>F:GO:0005515;<br>P:GO:0040011;<br>C:GO:0019773;<br>P:GO:0009792;<br>C:GO:0005737;<br>P:GO:0040015;<br>C:GO:0005634 | - | EC:3.4.25.0 | IPR001353; G3DSA:3.60.20.10<br>(GENE3D), PTHR11599 (PANTHER),<br>PTHR11599:SF11 (PANTHER), PSS1475<br>(PROFILE), SSF56235 (SUPERFAMILY) |
| Brugia malayi           | brain tumor protein               | 3  | F:GO:0008270;<br>C:GO:0005622;<br>F:GO:0005515                                                                                                                                                                           | - |             | IPR000315; IPR001841; IPR013083;<br>IPR017907; IPR018957; PTHR13712<br>(PANTHER), PTHR13712:SF6<br>(PANTHER), SSF57850 (SUPERFAMILY)    |
|                         | -                                 | 0  |                                                                                                                                                                                                                          |   |             | SignalP (SIGNALP)                                                                                                                       |
|                         | -                                 | 0  |                                                                                                                                                                                                                          |   |             | SignalP (SIGNALP)                                                                                                                       |

|                         |                                                  |   |                                                                                                                                     |                                                                                                                                     |             |                                                                                                            |
|-------------------------|--------------------------------------------------|---|-------------------------------------------------------------------------------------------------------------------------------------|-------------------------------------------------------------------------------------------------------------------------------------|-------------|------------------------------------------------------------------------------------------------------------|
| Brugia malayi           | zinc c2h2 type family protein                    | 0 |                                                                                                                                     | F:GO:0003676;<br>P:GO:0030536;<br>P:GO:0046580;<br>P:GO:0006099;<br>F:GO:0008270;<br>P:GO:0046672;<br>C:GO:0005634;<br>C:GO:0005622 |             | IPR007087                                                                                                  |
|                         | -                                                | 0 |                                                                                                                                     |                                                                                                                                     |             | -                                                                                                          |
|                         | -                                                | 0 |                                                                                                                                     |                                                                                                                                     |             | -                                                                                                          |
| Caenorhabditis briggsae | methionine aminopeptidase                        | 5 | P:GO:0009987;<br>P:GO:0006508;<br>F:GO:0008270;<br>F:GO:0008235;<br>F:GO:0004177                                                    | -                                                                                                                                   | EC:3.4.11.0 | IPR000994; IPR001714; IPR002467                                                                            |
|                         | -                                                | 0 |                                                                                                                                     |                                                                                                                                     |             | -                                                                                                          |
| Caenorhabditis briggsae | briggsae cbr-asp-2 protein                       | 0 |                                                                                                                                     | P:GO:0006508;<br>F:GO:0004190;<br>F:GO:0016787;<br>F:GO:0008233                                                                     |             | IPR001461; IPR009007; IPR021109;<br>PTHR13683:SF53 (PANTHER)                                               |
|                         | -                                                | 0 |                                                                                                                                     |                                                                                                                                     |             |                                                                                                            |
| Caenorhabditis briggsae | aspartic protease 2b                             | 0 |                                                                                                                                     | P:GO:0006508;<br>F:GO:0004190;<br>F:GO:0016787;<br>F:GO:0008233                                                                     |             | IPR001461; IPR009007; IPR021109;<br>PTHR13683:SF53 (PANTHER)                                               |
| Caenorhabditis elegans  | aspartyl protease family member (asp-2)          | 5 | P:GO:0008219;<br>P:GO:0006508;<br>F:GO:0004190;<br>F:GO:0005515;<br>P:GO:0040011                                                    | -                                                                                                                                   | EC:3.4.23.0 | IPR001461; IPR001969; IPR009007;<br>IPR021109; PTHR13683:SF53<br>(PANTHER)                                 |
| Loa loa                 | hypothetical protein LOAG_07630 [Loa loa]        | 0 |                                                                                                                                     |                                                                                                                                     |             |                                                                                                            |
| Caenorhabditis elegans  | aspartyl protease family member (asp-2)          | 5 | P:GO:0008219;<br>P:GO:0006508;<br>F:GO:0004190;<br>F:GO:0005515;<br>P:GO:0040011                                                    | -                                                                                                                                   | EC:3.4.23.0 | IPR001461; IPR001969; IPR009007;<br>IPR021109; PTHR13683:SF53<br>(PANTHER)                                 |
|                         | -                                                | 0 |                                                                                                                                     |                                                                                                                                     |             | SignalP (SIGNALP)                                                                                          |
| Caenorhabditis elegans  | elegans protein confirmed by transcript evidence | 8 | C:GO:0005737;<br>C:GO:0005730;<br>C:GO:0008287;<br>F:GO:0004722;<br>F:GO:0005515;<br>P:GO:0006470;<br>P:GO:0040011;<br>P:GO:0019915 | -                                                                                                                                   |             | IPR004843; IPR006186;<br>G3DSA:3.60.21.10 (GENE3D),<br>PTHR11668:SF19 (PANTHER),<br>SSF56300 (SUPERFAMILY) |
| Caenorhabditis elegans  | elegans protein confirmed by transcript evidence | 8 | C:GO:0005737;<br>C:GO:0005730;<br>C:GO:0008287;<br>F:GO:0004722;<br>F:GO:0005515;<br>P:GO:0006470;<br>P:GO:0040011;<br>P:GO:0019915 | -                                                                                                                                   |             | IPR004843; IPR006186;<br>G3DSA:3.60.21.10 (GENE3D),<br>PTHR11668:SF19 (PANTHER),<br>SSF56300 (SUPERFAMILY) |

|                         |                                              |    |                                                                                                                                                                                                                                                                             |   |                                                                                                                                                                                                                            |
|-------------------------|----------------------------------------------|----|-----------------------------------------------------------------------------------------------------------------------------------------------------------------------------------------------------------------------------------------------------------------------------|---|----------------------------------------------------------------------------------------------------------------------------------------------------------------------------------------------------------------------------|
| Caenorhabditis briggsae | cdc5 cell division cycle 5-like              | 13 | P:GO:0016070;<br>P:GO:0000910;<br>F:GO:0003676;<br>C:GO:0031981;<br>P:GO:0040007;<br>P:GO:0045449;<br>P:GO:0000003;<br>P:GO:0018996;<br>P:GO:0002119;<br>F:GO:0005515;<br>P:GO:0009792;<br>P:GO:0001703;<br>P:GO:0006974                                                    | - | IPR015495; IPR021786;<br>PTHR10641:SF17 (PANTHER)                                                                                                                                                                          |
| Homo sapiens            | ubiquitin d                                  | 16 | F:GO:0070628;<br>P:GO:0010243;<br>F:GO:0004930;<br>C:GO:0016021;<br>C:GO:0016235;<br>C:GO:0005737;<br>P:GO:0006511;<br>P:GO:0043123;<br>P:GO:0035417;<br>P:GO:0034612;<br>P:GO:0016567;<br>P:GO:0034341;<br>P:GO:0070842;<br>C:GO:0005634;<br>P:GO:0043011;<br>P:GO:0043065 | - | IPR000626; IPR019955; IPR019956;<br>G3DSA:3.10.20.90 (GENE3D),<br>PTHR10666 (PANTHER),<br>PTHR10666:SF5 (PANTHER), SSF54236<br>(SUPERFAMILY)                                                                               |
| Caenorhabditis briggsae | transmembrane amino acid transporter protein | 5  | P:GO:0019915;<br>C:GO:0016021;<br>P:GO:0040010;<br>F:GO:0008270;<br>P:GO:0040011                                                                                                                                                                                            | - | IPR013057; PTHR22950 (PANTHER),<br>SignalP (SIGNALP)                                                                                                                                                                       |
| Caenorhabditis briggsae | protein sidekick                             | 3  | P:GO:0030154;<br>P:GO:0048731;<br>C:GO:0016021                                                                                                                                                                                                                              | - | IPR003961; IPR008957; IPR013783;<br>PRO0014 (PRINTS), PTHR10489<br>(PANTHER)                                                                                                                                               |
| Caenorhabditis elegans  | phospholipase beta 4                         | 10 | C:GO:0005829;<br>F:GO:0004629;<br>C:GO:0030425;<br>C:GO:0005792;<br>P:GO:0043267;<br>P:GO:0007165;<br>F:GO:0051019;<br>C:GO:0014069;<br>C:GO:0005634;<br>C:GO:0005790                                                                                                       | - | IPR000008; IPR000909; IPR001192;<br>IPR001711; IPR008973; IPR009535;<br>IPR014815; IPR017946; IPR018029;<br>G3DSA:1.20.1230.10 (GENE3D),<br>G3DSA:2.60.40.150 (GENE3D),<br>PTHR10336 (PANTHER),<br>PTHR10336:SF8 (PANTHER) |
| Caenorhabditis elegans  | phospholipase beta 4                         | 10 | C:GO:0005829;<br>F:GO:0004629;<br>C:GO:0030425;<br>C:GO:0005792;<br>P:GO:0043267;<br>P:GO:0007165;<br>F:GO:0051019;<br>C:GO:0014069;<br>C:GO:0005634;<br>C:GO:0005790                                                                                                       | - | IPR000008; IPR000909; IPR001192;<br>IPR001711; IPR008973; IPR009535;<br>IPR014815; IPR017946; IPR018029;<br>G3DSA:1.20.1230.10 (GENE3D),<br>G3DSA:2.60.40.150 (GENE3D),<br>PTHR10336 (PANTHER),<br>PTHR10336:SF8 (PANTHER) |

|                         |                                                               |    |                                                                                                                                                                                                                          |   |             |                                                                                                                                                                                                                            |
|-------------------------|---------------------------------------------------------------|----|--------------------------------------------------------------------------------------------------------------------------------------------------------------------------------------------------------------------------|---|-------------|----------------------------------------------------------------------------------------------------------------------------------------------------------------------------------------------------------------------------|
| Caenorhabditis elegans  | phospholipase beta 4                                          | 10 | C:GO:0005829;<br>F:GO:0004629;<br>C:GO:0030425;<br>C:GO:0005792;<br>P:GO:0043267;<br>P:GO:0007165;<br>F:GO:0051019;<br>C:GO:0014069;<br>C:GO:0005634;<br>C:GO:0005790                                                    | - |             | IPR000008; IPR000909; IPR001192;<br>IPR001711; IPR008973; IPR009535;<br>IPR014815; IPR017946; IPR018029;<br>G3DSA:1.20.1230.10 (GENE3D),<br>G3DSA:2.60.40.150 (GENE3D),<br>PTHR10336 (PANTHER),<br>PTHR10336:SF8 (PANTHER) |
| Loa loa                 | r- polymerase ii subunit a c-termi-l domain phosphatase ssu72 | 3  | F:GO:0004721;<br>P:GO:0006397;<br>C:GO:0005634                                                                                                                                                                           | - | EC:3.1.3.16 | IPR006811; PTHR20383:SF3 (PANTHER)                                                                                                                                                                                         |
| Caenorhabditis briggsae | briggsae cbr-pad-1 protein                                    | 1  | P:GO:0006810                                                                                                                                                                                                             | - |             | -                                                                                                                                                                                                                          |
| Caenorhabditis elegans  | pyrroline-5-carboxylate reductase 1                           | 6  | F:GO:0005488;<br>F:GO:0004735;<br>P:GO:0034599;<br>P:GO:0055114;<br>P:GO:0006561;<br>C:GO:0005739                                                                                                                        | - | EC:1.5.1.2  | IPR000304; IPR004455; IPR008927;<br>IPR016040; SSF51735 (SUPERFAMILY)                                                                                                                                                      |
|                         | succi-te dehydroge-se                                         | 13 | P:GO:0006810;<br>C:GO:0005875;<br>F:GO:0048039;<br>F:GO:0051537;<br>C:GO:0005749;<br>F:GO:0046872;<br>F:GO:0009055;<br>P:GO:0006099;<br>F:GO:0051539;<br>F:GO:0051538;<br>F:GO:0005515;<br>P:GO:0006121;<br>F:GO:0008177 | - | EC:1.3.5.1  | -                                                                                                                                                                                                                          |
| Caenorhabditis briggsae | mitotic spindle assembly checkpoint protein mad2a             | 9  | P:GO:0007094;<br>P:GO:0051436;<br>C:GO:0005829;<br>C:GO:0005643;<br>C:GO:0000776;<br>C:GO:0005816;<br>C:GO:0048471;<br>P:GO:0031145;<br>F:GO:0042803                                                                     | - |             | -                                                                                                                                                                                                                          |
| Caenorhabditis briggsae | n-acetylated alpha-linked acidic dipeptidase 2-like           | 3  | C:GO:0016020;<br>P:GO:0006508;<br>F:GO:0004181                                                                                                                                                                           | - | EC:3.4.17.0 | IPR007484; G3DSA:3.40.630.10 (GENE3D), G3DSA:3.50.30.30 (GENE3D), PTHR10404 (PANTHER), PTHR10404:SF15 (PANTHER), SSF53187 (SUPERFAMILY)                                                                                    |
|                         | -                                                             | 0  |                                                                                                                                                                                                                          |   |             | SignalP (SIGNALP)                                                                                                                                                                                                          |
|                         | -                                                             | 0  |                                                                                                                                                                                                                          |   |             | SignalP (SIGNALP)                                                                                                                                                                                                          |
| Loa loa                 | briggsae cbr-acy-4 protein                                    | 3  | P:GO:0009190;<br>F:GO:0000166;<br>F:GO:0016849                                                                                                                                                                           | - |             | PTHR11920 (PANTHER),<br>PTHR11920:SF14 (PANTHER), SignalP (SIGNALP)                                                                                                                                                        |
|                         | -                                                             | 0  |                                                                                                                                                                                                                          |   |             | -                                                                                                                                                                                                                          |
| Caenorhabditis briggsae | briggsae cbr-abf-2 protein                                    | 0  |                                                                                                                                                                                                                          |   |             | SignalP (SIGNALP)                                                                                                                                                                                                          |
| Caenorhabditis briggsae | briggsae cbr-abf-2 protein                                    | 0  |                                                                                                                                                                                                                          |   |             | -                                                                                                                                                                                                                          |
| Caenorhabditis briggsae | briggsae cbr-abf-2 protein                                    | 0  |                                                                                                                                                                                                                          |   |             | SignalP (SIGNALP)                                                                                                                                                                                                          |
| Caenorhabditis briggsae | briggsae cbr-abf-2 protein                                    | 0  |                                                                                                                                                                                                                          |   |             | SignalP (SIGNALP)                                                                                                                                                                                                          |
| Caenorhabditis briggsae | briggsae cbr-abf-2 protein                                    | 0  |                                                                                                                                                                                                                          |   |             | SignalP (SIGNALP)                                                                                                                                                                                                          |

|                         |                                                                     |    |  |                                                                                                                                                                                                                          |             |                                                                                                                                                                                               |
|-------------------------|---------------------------------------------------------------------|----|--|--------------------------------------------------------------------------------------------------------------------------------------------------------------------------------------------------------------------------|-------------|-----------------------------------------------------------------------------------------------------------------------------------------------------------------------------------------------|
| Caenorhabditis elegans  | ank repeat and lem domain-containing protein kiaa0692               | 0  |  | F:GO:0003674;<br>C:GO:0016021;<br>C:GO:0016020;<br>P:GO:0008150;<br>C:GO:0005635;<br>C:GO:0005575                                                                                                                        |             | IPR002110; IPR020683; PTHR20976 (PANTHER)                                                                                                                                                     |
| Caenorhabditis briggsae | prion-like-(q n-rich)-domain-bearing protein family member (pqn-44) | 0  |  |                                                                                                                                                                                                                          |             | IPR012937; PTHR12974 (PANTHER)                                                                                                                                                                |
| Caenorhabditis briggsae | Hypothetical protein CBG09307 [Caenorhabditis briggsae]             | 0  |  |                                                                                                                                                                                                                          |             | -                                                                                                                                                                                             |
| Caenorhabditis elegans  | malic enzyme -dp(+)- mitochondrial                                  | 6  |  | F:GO:0046872;<br>F:GO:0051287;<br>C:GO:0005759;<br>F:GO:0016619;<br>P:GO:0006108;<br>P:GO:0055114                                                                                                                        | EC:1.1.1.38 | IPR001891; IPR012301; IPR012302;<br>IPR015884; IPR016040;<br>G3DSA:3.40.50.10380 (GENE3D),<br>PTHR23406 (PANTHER),<br>PTHR23406:SF2 (PANTHER), SSF51735 (SUPERFAMILY), SSF53223 (SUPERFAMILY) |
| Caenorhabditis briggsae | elongator complex protein 3                                         | 8  |  | F:GO:0051536;<br>P:GO:0006357;<br>F:GO:0046872;<br>F:GO:0008607;<br>C:GO:0008023;<br>P:GO:0007409;<br>F:GO:0004402;<br>C:GO:0005737                                                                                      | EC:2.3.1.48 | IPR000182; IPR006638; IPR007197;<br>IPR016181; G3DSA:3.80.30.20 (GENE3D), PTHR11135 (PANTHER), SSF102114 (SUPERFAMILY)                                                                        |
| Caenorhabditis briggsae | coatomer protein subunit beta 2 (beta prime)                        | 13 |  | F:GO:0005080;<br>C:GO:0030126;<br>C:GO:0005829;<br>P:GO:0006890;<br>P:GO:0048599;<br>P:GO:0032940;<br>P:GO:0006891;<br>P:GO:0002119;<br>P:GO:0048205;<br>P:GO:0006898;<br>P:GO:0006886;<br>F:GO:0005198;<br>P:GO:0009792 |             | IPR006692; PTHR19876 (PANTHER), PTHR19876:SF2 (PANTHER)                                                                                                                                       |
| Caenorhabditis briggsae | coatomer protein subunit beta 2 (beta prime)                        | 13 |  | F:GO:0005080;<br>C:GO:0030126;<br>C:GO:0005829;<br>P:GO:0006890;<br>P:GO:0048599;<br>P:GO:0032940;<br>P:GO:0006891;<br>P:GO:0002119;<br>P:GO:0048205;<br>P:GO:0006898;<br>P:GO:0006886;<br>F:GO:0005198;<br>P:GO:0009792 |             | IPR006692; PTHR19876 (PANTHER), PTHR19876:SF2 (PANTHER)                                                                                                                                       |
| Caenorhabditis elegans  | briggsae cbr-wrm-1 protein                                          | 5  |  | P:GO:0050789;<br>F:GO:0005515;<br>P:GO:0007275;<br>C:GO:0044424;<br>P:GO:0006350                                                                                                                                         |             | IPR011989; IPR016024; PTHR23315 (PANTHER), PTHR23315:SF2 (PANTHER)                                                                                                                            |
|                         | -                                                                   | 0  |  |                                                                                                                                                                                                                          |             | -                                                                                                                                                                                             |

|                         |                                                       |    |                                                                                                                                                                                                                                                                             |                                                |             |                                                                                                                                                               |
|-------------------------|-------------------------------------------------------|----|-----------------------------------------------------------------------------------------------------------------------------------------------------------------------------------------------------------------------------------------------------------------------------|------------------------------------------------|-------------|---------------------------------------------------------------------------------------------------------------------------------------------------------------|
| Caenorhabditis elegans  | cyclin dependent ki-se 4                              | 14 | P:GO:0006468;<br>P:GO:0000080;<br>P:GO:0040011;<br>C:GO:0044464;<br>P:GO:0002009;<br>P:GO:0007067;<br>F:GO:0004674;<br>P:GO:0007126;<br>P:GO:0002119;<br>P:GO:0048869;<br>P:GO:0050794;<br>P:GO:0010171;<br>F:GO:0005524;<br>P:GO:0040035                                   | -                                              | EC:2.7.11.0 | IPR000719; IPR008271; IPR011009;<br>IPR017442; G3DSA:1.10.510.10<br>(GENE3D), G3DSA:3.30.200.20<br>(GENE3D), PTHR11295 (PANTHER),<br>PTHR11295:SF82 (PANTHER) |
| -                       | -                                                     | 0  |                                                                                                                                                                                                                                                                             |                                                |             | SignalP (SIGNALP)                                                                                                                                             |
| Caenorhabditis elegans  | hypothetical protein C49H3.4 [Caenorhabditis elegans] | 0  |                                                                                                                                                                                                                                                                             |                                                |             | -                                                                                                                                                             |
| Caenorhabditis elegans  | sm protein                                            | 0  |                                                                                                                                                                                                                                                                             |                                                |             | IPR001163; IPR006649; IPR010920;<br>G3DSA:2.30.30.100 (GENE3D)                                                                                                |
| -                       | -                                                     | 0  |                                                                                                                                                                                                                                                                             |                                                |             | -                                                                                                                                                             |
| Caenorhabditis briggsae | mitochondrial dicarboxylate carrier                   | 16 | P:GO:0055085;<br>P:GO:0015743;<br>F:GO:0015141;<br>P:GO:0015709;<br>F:GO:0015116;<br>F:GO:0015140;<br>P:GO:0015744;<br>C:GO:0016021;<br>C:GO:0005743;<br>P:GO:0008272;<br>F:GO:0015117;<br>F:GO:0005515;<br>P:GO:0006094;<br>F:GO:0015297;<br>P:GO:0006817;<br>F:GO:0015114 | -                                              |             | IPR001993; IPR018108;<br>G3DSA:1.50.40.10 (GENE3D),<br>PTHR11896:SF29 (PANTHER)                                                                               |
| Brugia malayi           | kh domain containing protein                          | 3  | P:GO:0009987;<br>P:GO:0007275;<br>P:GO:0061061                                                                                                                                                                                                                              | -                                              |             | PTHR10603 (PANTHER)                                                                                                                                           |
| Loa loa                 | amop domain containing protein                        | 0  |                                                                                                                                                                                                                                                                             | P:GO:0007160;<br>C:GO:0016021                  |             | IPR000436; PTHR13802 (PANTHER),<br>PTHR13802:SF2 (PANTHER)                                                                                                    |
| Loa loa                 | amop domain containing protein                        | 0  |                                                                                                                                                                                                                                                                             | P:GO:0007160;<br>C:GO:0016021                  |             | IPR000436; PTHR13802 (PANTHER),<br>PTHR13802:SF2 (PANTHER)                                                                                                    |
| Caenorhabditis elegans  | peptidylglycine alpha-amidating monoxyge-se           | 4  | F:GO:0046914;<br>F:GO:0004497;<br>P:GO:0044237;<br>C:GO:0016020                                                                                                                                                                                                             | -                                              |             | IPR001258; IPR011042; IPR013017;<br>PTHR10680 (PANTHER), SSF63829<br>(SUPERFAMILY)                                                                            |
| Caenorhabditis elegans  | peptidylglycine alpha-amidating monoxyge-se           | 4  | F:GO:0046914;<br>F:GO:0004497;<br>P:GO:0044237;<br>C:GO:0016020                                                                                                                                                                                                             | -                                              |             | IPR001258; IPR011042; IPR013017;<br>PTHR10680 (PANTHER), SSF63829<br>(SUPERFAMILY)                                                                            |
| Caenorhabditis elegans  | peptidylglycine alpha-amidating monoxyge-se           | 4  | F:GO:0046914;<br>F:GO:0004497;<br>P:GO:0044237;<br>C:GO:0016020                                                                                                                                                                                                             | -                                              |             | IPR001258; IPR011042; IPR013017;<br>PTHR10680 (PANTHER), SSF63829<br>(SUPERFAMILY)                                                                            |
| Caenorhabditis elegans  | gtpase activating protein family member (gap-3)       | 0  |                                                                                                                                                                                                                                                                             | P:GO:0007165;<br>F:GO:0005515;<br>C:GO:0005622 |             | IPR008936; G3DSA:1.10.494.10<br>(GENE3D)                                                                                                                      |

|                         |                                                 |    |                                                                                                                                                                                                                          |                                                |             |                                                                                                                                    |
|-------------------------|-------------------------------------------------|----|--------------------------------------------------------------------------------------------------------------------------------------------------------------------------------------------------------------------------|------------------------------------------------|-------------|------------------------------------------------------------------------------------------------------------------------------------|
| Caenorhabditis briggsae | gtpase activating protein family member (gap-3) | 0  |                                                                                                                                                                                                                          | P:GO:0007165;<br>F:GO:0005515;<br>C:GO:0005622 |             | -                                                                                                                                  |
| Caenorhabditis briggsae | speckle-type poz                                | 1  | F:GO:0005515                                                                                                                                                                                                             | -                                              |             | -                                                                                                                                  |
| Loa loa                 | calcyclin binding protein                       | 11 | C:GO:0005641;<br>C:GO:0043005;<br>C:GO:0005625;<br>P:GO:0045740;<br>C:GO:0044297;<br>P:GO:0055007;<br>P:GO:0060416;<br>P:GO:0007568;<br>P:GO:0071277;<br>C:GO:0005737;<br>P:GO:0060548                                   | -                                              |             | SignalP (SIGNALP)                                                                                                                  |
| Caenorhabditis elegans  | isoform a                                       | 0  |                                                                                                                                                                                                                          | F:GO:0003674;<br>P:GO:0008150;<br>C:GO:0005575 |             | IPR018908; SignalP (SIGNALP)                                                                                                       |
| Loa loa                 | otu domain containing 5                         | 1  | F:GO:0016787                                                                                                                                                                                                             | -                                              |             | IPR003323; IPR003903; PTHR12419 (PANTHER), SSF54001 (SUPERFAMILY)                                                                  |
| Loa loa                 | otu domain containing 5                         | 1  | F:GO:0016787                                                                                                                                                                                                             | -                                              |             | IPR003323; PTHR12419 (PANTHER), SSF54001 (SUPERFAMILY)                                                                             |
| Caenorhabditis briggsae | coatomer protein subunit beta 2 (beta prime)    | 13 | F:GO:0005080;<br>C:GO:0030126;<br>P:GO:0006890;<br>P:GO:0048599;<br>P:GO:0032940;<br>P:GO:0006891;<br>F:GO:0016905;<br>P:GO:0002119;<br>P:GO:0006898;<br>P:GO:0030903;<br>P:GO:0006886;<br>F:GO:0005198;<br>P:GO:0009792 | -                                              | EC:2.7.11.7 | IPR001680; IPR011046; IPR015943;<br>IPR017986; IPR019781; IPR019782;<br>IPR020472; PTHR19876 (PANTHER),<br>PTHR19876:SF2 (PANTHER) |
| Caenorhabditis briggsae | coatomer protein subunit beta 2 (beta prime)    | 13 | F:GO:0005080;<br>C:GO:0030126;<br>P:GO:0006890;<br>P:GO:0048599;<br>P:GO:0032940;<br>P:GO:0006891;<br>F:GO:0016905;<br>P:GO:0002119;<br>P:GO:0006898;<br>P:GO:0030903;<br>P:GO:0006886;<br>F:GO:0005198;<br>P:GO:0009792 | -                                              | EC:2.7.11.7 | IPR001680; IPR011046; IPR015943;<br>IPR017986; IPR019781; IPR019782;<br>IPR020472; PTHR19876 (PANTHER),<br>PTHR19876:SF2 (PANTHER) |

|                             |                                                               |    |                                                                                                                                                                                                                          |                                                                 |             |                                                                                                                                              |
|-----------------------------|---------------------------------------------------------------|----|--------------------------------------------------------------------------------------------------------------------------------------------------------------------------------------------------------------------------|-----------------------------------------------------------------|-------------|----------------------------------------------------------------------------------------------------------------------------------------------|
| Caenorhabditis briggsae     | coatomer protein subunit beta 2 (beta prime)                  | 13 | F:GO:0005080;<br>C:GO:0030126;<br>P:GO:0006890;<br>P:GO:0048599;<br>P:GO:0032940;<br>P:GO:0006891;<br>F:GO:0016905;<br>P:GO:0002119;<br>P:GO:0006898;<br>P:GO:0030903;<br>P:GO:0006886;<br>F:GO:0005198;<br>P:GO:0009792 | -                                                               | EC:2.7.11.7 | IPR001680; IPR011046; IPR015943;<br>IPR017986; IPR019781; IPR019782;<br>IPR020472; PTHR19876 (PANTHER),<br>PTHR19876:SF2 (PANTHER)           |
| Caenorhabditis elegans      | chromosome segregation protein smc                            | 0  |                                                                                                                                                                                                                          | C:GO:0005694;<br>F:GO:0005524;<br>P:GO:0051276;<br>F:GO:0005515 |             | -                                                                                                                                            |
| Angiostrongylus cantonensis | nematode cuticle collagen n-termi-l domain containing protein | 1  | F:GO:0042302                                                                                                                                                                                                             | -                                                               |             | IPR002486; PTHR10499 (PANTHER),<br>PTHR10499:SF58 (PANTHER), SignalP<br>(SIGNALP)                                                            |
| Caenorhabditis elegans      | elegans protein confirmed by transcript evidence              | 2  | C:GO:0043231;<br>C:GO:0044444                                                                                                                                                                                            | -                                                               |             | -                                                                                                                                            |
|                             |                                                               | 0  |                                                                                                                                                                                                                          |                                                                 |             | -                                                                                                                                            |
| Sus scrofa                  | 60s acidic ribosomal protein p1                               | 5  | F:GO:0003735;<br>F:GO:0003723;<br>F:GO:0005515;<br>C:GO:0022625;<br>P:GO:0006414                                                                                                                                         | -                                                               |             | IPR001813; IPR001859; PTHR21141<br>(PANTHER), PTHR21141:SF6<br>(PANTHER)                                                                     |
|                             |                                                               | 0  |                                                                                                                                                                                                                          |                                                                 |             | -                                                                                                                                            |
|                             |                                                               | 0  |                                                                                                                                                                                                                          |                                                                 |             | SignalP (SIGNALP)                                                                                                                            |
|                             |                                                               | 0  |                                                                                                                                                                                                                          |                                                                 |             | -                                                                                                                                            |
|                             |                                                               | 0  |                                                                                                                                                                                                                          |                                                                 |             | -                                                                                                                                            |
|                             |                                                               | 0  |                                                                                                                                                                                                                          |                                                                 |             | -                                                                                                                                            |
| Haemonchus contortus        | peroxiredoxin 1 variant 2                                     | 13 | P:GO:0032872;<br>P:GO:0042744;<br>F:GO:0005515;<br>P:GO:0034101;<br>P:GO:0042267;<br>P:GO:0008283;<br>P:GO:0019430;<br>F:GO:0008379;<br>P:GO:0045454;<br>P:GO:0042345;<br>P:GO:0055114;<br>C:GO:0005634;<br>C:GO:0005739 | -                                                               |             | IPR000866; IPR012335; IPR012336;<br>IPR017936; IPR019479;<br>G3DSA:3.30.1020.10 (GENE3D),<br>PTHR10681 (PANTHER),<br>PTHR10681:SF8 (PANTHER) |



|                      |                           |    |                                                                                                                                                                                                                          |   |                                                                                                                                              |
|----------------------|---------------------------|----|--------------------------------------------------------------------------------------------------------------------------------------------------------------------------------------------------------------------------|---|----------------------------------------------------------------------------------------------------------------------------------------------|
| Haemonchus contortus | peroxiredoxin 1 variant 2 | 13 | P:GO:0032872;<br>P:GO:0042744;<br>F:GO:0005515;<br>P:GO:0034101;<br>P:GO:0042267;<br>P:GO:0008283;<br>P:GO:0019430;<br>F:GO:0008379;<br>P:GO:0045454;<br>P:GO:0042345;<br>P:GO:0055114;<br>C:GO:0005634;<br>C:GO:0005739 | - | IPR000866; IPR012335; IPR012336;<br>IPR017936; IPR019479;<br>G3DSA:3.30.1020.10 (GENE3D),<br>PTHR10681 (PANTHER),<br>PTHR10681:SF8 (PANTHER) |
| Haemonchus contortus | peroxiredoxin 1 variant 2 | 13 | P:GO:0032872;<br>P:GO:0042744;<br>F:GO:0005515;<br>P:GO:0034101;<br>P:GO:0042267;<br>P:GO:0008283;<br>P:GO:0019430;<br>F:GO:0008379;<br>P:GO:0045454;<br>P:GO:0042345;<br>P:GO:0055114;<br>C:GO:0005634;<br>C:GO:0005739 | - | IPR000866; IPR012335; IPR012336;<br>IPR017936; IPR019479; PTHR10681<br>(PANTHER), PTHR10681:SF8<br>(PANTHER)                                 |
| Haemonchus contortus | peroxiredoxin 1 variant 2 | 13 | P:GO:0032872;<br>P:GO:0042744;<br>F:GO:0005515;<br>P:GO:0034101;<br>P:GO:0042267;<br>P:GO:0008283;<br>P:GO:0019430;<br>F:GO:0008379;<br>P:GO:0045454;<br>P:GO:0042345;<br>P:GO:0055114;<br>C:GO:0005634;<br>C:GO:0005739 | - | IPR000866; IPR012335; IPR012336;<br>IPR017936; IPR019479; PTHR10681<br>(PANTHER), PTHR10681:SF8<br>(PANTHER)                                 |
| Haemonchus contortus | peroxiredoxin 1 variant 2 | 13 | P:GO:0032872;<br>P:GO:0042744;<br>F:GO:0005515;<br>P:GO:0034101;<br>P:GO:0042267;<br>P:GO:0008283;<br>P:GO:0019430;<br>F:GO:0008379;<br>P:GO:0045454;<br>P:GO:0042345;<br>P:GO:0055114;<br>C:GO:0005634;<br>C:GO:0005739 | - | IPR000866; IPR012335; IPR012336;<br>IPR017936; IPR019479;<br>G3DSA:3.30.1020.10 (GENE3D),<br>PTHR10681 (PANTHER),<br>PTHR10681:SF8 (PANTHER) |

|                               |                                                            |    |                                                                                                                                                                                                                                                            |                                                |             |                                                                                                                                              |
|-------------------------------|------------------------------------------------------------|----|------------------------------------------------------------------------------------------------------------------------------------------------------------------------------------------------------------------------------------------------------------|------------------------------------------------|-------------|----------------------------------------------------------------------------------------------------------------------------------------------|
| Haemonchus contortus          | peroxiredoxin 1 variant 2                                  | 13 | P:GO:0032872;<br>P:GO:0042744;<br>F:GO:0005515;<br>P:GO:0034101;<br>P:GO:0042267;<br>P:GO:0008283;<br>P:GO:0019430;<br>F:GO:0008379;<br>P:GO:0045454;<br>P:GO:0042345;<br>P:GO:0055114;<br>C:GO:0005634;<br>C:GO:0005739                                   | -                                              |             | IPR000866; IPR012335; IPR012336;<br>IPR017936; IPR019479;<br>G3DSA:3.30.1020.10 (GENE3D),<br>PTHR10681 (PANTHER),<br>PTHR10681:SF8 (PANTHER) |
| Strongylocentrotus purpuratus | mucin 68d                                                  | 0  |                                                                                                                                                                                                                                                            | F:GO:0008061;<br>P:GO:0006030;<br>C:GO:0005576 | -           |                                                                                                                                              |
| Caenorhabditis briggsae       | fatty acid synthase-like                                   | 15 | F:GO:0008144;<br>F:GO:0004312;<br>P:GO:0006633;<br>C:GO:0043231;<br>F:GO:0016788;<br>F:GO:0008270;<br>F:GO:0016829;<br>C:GO:0005625;<br>P:GO:0055114;<br>P:GO:0006084;<br>F:GO:0000036;<br>F:GO:0016491;<br>C:GO:0044444;<br>F:GO:0070402;<br>F:GO:0042803 | -                                              | EC:2.3.1.85 | IPR000794; IPR011032; IPR013149;<br>IPR016040; IPR020843;<br>PTHR11712:SF5 (PANTHER), SSF51735<br>(SUPERFAMILY), SSF53335<br>(SUPERFAMILY)   |
| Caenorhabditis elegans        | elegans protein partially confirmed by transcript evidence | 8  | P:GO:0018996;<br>P:GO:0009792;<br>P:GO:0008340;<br>P:GO:0000003;<br>F:GO:0005515;<br>P:GO:0006898;<br>P:GO:0002119;<br>P:GO:0040011                                                                                                                        | -                                              |             | PTHR19143 (PANTHER),<br>PTHR19143:SF3 (PANTHER)                                                                                              |
| Haemonchus contortus          | aspartyl protease family member (asp-2)                    | 2  | P:GO:0008219;<br>F:GO:0005515                                                                                                                                                                                                                              | -                                              |             | IPR001461; IPR001969; IPR009007;<br>IPR012848; IPR021109;<br>PTHR13683:SF53 (PANTHER), SignalP<br>(SIGNALP)                                  |
| Caenorhabditis elegans        | cog2 protein                                               | 9  | P:GO:0040010;<br>P:GO:0040035;<br>P:GO:0030334;<br>P:GO:0002119;<br>F:GO:0005515;<br>P:GO:0040039;<br>P:GO:0048477;<br>P:GO:0009792;<br>P:GO:0035262                                                                                                       | -                                              |             | IPR009316; PF12022 (PFAM), SignalP<br>(SIGNALP)                                                                                              |

|                        |                                                  |    |                                                                                                                                                                       |   |                                                         |                                                                                                              |
|------------------------|--------------------------------------------------|----|-----------------------------------------------------------------------------------------------------------------------------------------------------------------------|---|---------------------------------------------------------|--------------------------------------------------------------------------------------------------------------|
| Caenorhabditis elegans | cog2 protein                                     | 9  | P:GO:0040035;<br>P:GO:0009792;<br>P:GO:0030334;<br>P:GO:0002119;<br>F:GO:0005515;<br>P:GO:0040010;<br>P:GO:0035262;<br>P:GO:0040039;<br>P:GO:0048477                  | - |                                                         | IPR009316; PF12022 (PFAM)                                                                                    |
| Caenorhabditis elegans | component of oligomeric golgi complex 2          | 10 | P:GO:0040010;<br>P:GO:0040035;<br>P:GO:0030334;<br>P:GO:0002119;<br>F:GO:0005515;<br>P:GO:0040039;<br>P:GO:0048477;<br>C:GO:0044464;<br>P:GO:0009792;<br>P:GO:0035262 | - |                                                         | IPR009316; PF12022 (PFAM), SignalP (SIGNALP)                                                                 |
| Caenorhabditis elegans | component of oligomeric golgi complex 2          | 10 | P:GO:0040010;<br>P:GO:0040035;<br>P:GO:0030334;<br>P:GO:0002119;<br>F:GO:0005515;<br>P:GO:0040039;<br>P:GO:0048477;<br>C:GO:0044464;<br>P:GO:0009792;<br>P:GO:0035262 | - |                                                         | IPR009316; PF12022 (PFAM), SignalP (SIGNALP)                                                                 |
| Caenorhabditis elegans | elegans protein confirmed by transcript evidence | 0  |                                                                                                                                                                       |   | P:GO:0016539                                            | IPR001534                                                                                                    |
| Caenorhabditis elegans | translation elongation factor g                  | 10 | F:GO:0003746;<br>P:GO:0040010;<br>P:GO:0070125;<br>C:GO:0005739;<br>P:GO:0000003;<br>P:GO:0002119;<br>F:GO:0003924;<br>P:GO:0006898;<br>P:GO:0009792;<br>F:GO:0005525 | - | EC:3.6.5.1;<br>EC:3.6.5.2;<br>EC:3.6.5.3;<br>EC:3.6.5.4 | IPR000640; IPR005517; IPR009022;<br>IPR014721; IPR020568; PTHR23115<br>(PANTHER), PTHR23115:SF4<br>(PANTHER) |
| Caenorhabditis elegans | translation elongation factor g                  | 10 | F:GO:0003746;<br>P:GO:0040010;<br>P:GO:0070125;<br>C:GO:0005739;<br>P:GO:0000003;<br>P:GO:0002119;<br>F:GO:0003924;<br>P:GO:0006898;<br>P:GO:0009792;<br>F:GO:0005525 | - | EC:3.6.5.1;<br>EC:3.6.5.2;<br>EC:3.6.5.3;<br>EC:3.6.5.4 | IPR000640; IPR005517; IPR009022;<br>IPR014721; IPR020568; PTHR23115<br>(PANTHER), PTHR23115:SF4<br>(PANTHER) |

|                         |                                      |   |                                                                                                                                                                                                                                                                                                                                                                                   |   |                                                                                             |
|-------------------------|--------------------------------------|---|-----------------------------------------------------------------------------------------------------------------------------------------------------------------------------------------------------------------------------------------------------------------------------------------------------------------------------------------------------------------------------------|---|---------------------------------------------------------------------------------------------|
| Caenorhabditis elegans  | uncoordinated family member (unc-89) | 0 | F:GO:0005200;<br>P:GO:0006468;<br>P:GO:0001701;<br>C:GO:0030018;<br>C:GO:0030017;<br>C:GO:0030016;<br>F:GO:0005524;<br>P:GO:0007512;<br>F:GO:0004674;<br>C:GO:0031430;<br>F:GO:0004672;<br>P:GO:0003007;<br>F:GO:0000166;<br>P:GO:0043056;<br>P:GO:0045214;<br>C:GO:0031674;<br>C:GO:0031672;<br>F:GO:0008307;<br>F:GO:0005515;<br>P:GO:0055003;<br>P:GO:0006936;<br>P:GO:0055002 | - | -                                                                                           |
| -                       | -                                    | 0 | -                                                                                                                                                                                                                                                                                                                                                                                 | - | -                                                                                           |
| -                       | -                                    | 0 | -                                                                                                                                                                                                                                                                                                                                                                                 | - | SignalP (SIGNALP)                                                                           |
| -                       | -                                    | 0 | -                                                                                                                                                                                                                                                                                                                                                                                 | - | -                                                                                           |
| Brugia malayi           | tia-1 homologue                      | 9 | P:GO:0002009;<br>F:GO:0003676;<br>P:GO:0009792;<br>P:GO:0000003;<br>P:GO:0040007;<br>P:GO:0010171;<br>F:GO:0000166;<br>P:GO:0002119;<br>P:GO:0040011                                                                                                                                                                                                                              | - | IPR000504; IPR012677; PTHR10432 (PANTHER), PTHR10432:SF66 (PANTHER), SSF54928 (SUPERFAMILY) |
| -                       | -                                    | 0 | -                                                                                                                                                                                                                                                                                                                                                                                 | - | -                                                                                           |
| Caenorhabditis elegans  | tia-1 homologue                      | 9 | P:GO:0002009;<br>F:GO:0003676;<br>P:GO:0009792;<br>P:GO:0000003;<br>P:GO:0040007;<br>P:GO:0010171;<br>F:GO:0000166;<br>P:GO:0002119;<br>P:GO:0040011                                                                                                                                                                                                                              | - | IPR000504; IPR012677; PTHR10432 (PANTHER), PTHR10432:SF66 (PANTHER), SSF54928 (SUPERFAMILY) |
| Caenorhabditis briggsae | -dh oxidase                          | 4 | P:GO:0008152;<br>F:GO:0016491;<br>P:GO:0043581;<br>F:GO:0010181                                                                                                                                                                                                                                                                                                                   | - | IPR001155; IPR013785; PTHR22893 (PANTHER), PTHR22893:SF6 (PANTHER), SSF51395 (SUPERFAMILY)  |

|                             |                                                            |    |                                                                                                                                                                                                                                                                             |                                                                                  |                                                                         |                                                                                                                                                                                     |
|-----------------------------|------------------------------------------------------------|----|-----------------------------------------------------------------------------------------------------------------------------------------------------------------------------------------------------------------------------------------------------------------------------|----------------------------------------------------------------------------------|-------------------------------------------------------------------------|-------------------------------------------------------------------------------------------------------------------------------------------------------------------------------------|
| Angiostrongylus cantonensis | polymerase ii (d- directed) polypeptide h                  | 16 | F:GO:0003899;<br>P:GO:0040010;<br>F:GO:0008270;<br>F:GO:0004672;<br>P:GO:0006367;<br>C:GO:0005730;<br>P:GO:0040035;<br>P:GO:0008380;<br>C:GO:0005665;<br>P:GO:0002119;<br>F:GO:0005515;<br>P:GO:0006368;<br>P:GO:0040039;<br>P:GO:0006898;<br>P:GO:0009792;<br>P:GO:0040018 | -                                                                                | EC:2.7.7.6                                                              | -                                                                                                                                                                                   |
| Caenorhabditis elegans      | ras-related protein rab-2a                                 | 14 | C:GO:0005625;<br>P:GO:0007264;<br>C:GO:0000139;<br>F:GO:0004767;<br>C:GO:0005624;<br>F:GO:0019003;<br>C:GO:0042470;<br>C:GO:0033116;<br>P:GO:0006888;<br>C:GO:0043025;<br>F:GO:0003924;<br>P:GO:0006886;<br>C:GO:0005789;<br>F:GO:0005525                                   | -                                                                                | EC:3.1.4.12;<br>EC:3.6.5.1;<br>EC:3.6.5.2;<br>EC:3.6.5.3;<br>EC:3.6.5.4 | IPR001806; IPR002078; IPR003579;<br>IPR005225; IPR013753; IPR020851;<br>G3DSA:3.40.50.300 (GENE3D),<br>PTHR11708 (PANTHER),<br>PTHR11708:SF246 (PANTHER),<br>SSF52540 (SUPERFAMILY) |
| Caenorhabditis briggsae     | elegans protein partially confirmed by transcript evidence | 6  | P:GO:0040035;<br>P:GO:0002119;<br>F:GO:0005515;<br>P:GO:0040002;<br>P:GO:0040010;<br>P:GO:0006898                                                                                                                                                                           | -                                                                                | -                                                                       | -                                                                                                                                                                                   |
| Loa loa                     | hypothetical protein LOAG_03184 [Loa loa]                  | 0  |                                                                                                                                                                                                                                                                             |                                                                                  |                                                                         | -                                                                                                                                                                                   |
| Brugia malayi               | hypothetical protein Bm1_17075 [Brugia malayi]             | 0  |                                                                                                                                                                                                                                                                             |                                                                                  |                                                                         | -                                                                                                                                                                                   |
| Loa loa                     | hypothetical protein LOAG_03184 [Loa loa]                  | 0  |                                                                                                                                                                                                                                                                             |                                                                                  |                                                                         | -                                                                                                                                                                                   |
| Loa loa                     | hypothetical protein LOAG_03184 [Loa loa]                  | 0  |                                                                                                                                                                                                                                                                             |                                                                                  |                                                                         | -                                                                                                                                                                                   |
| Loa loa                     | hypothetical protein LOAG_03184 [Loa loa]                  | 0  |                                                                                                                                                                                                                                                                             |                                                                                  |                                                                         | -                                                                                                                                                                                   |
|                             | -                                                          | 0  |                                                                                                                                                                                                                                                                             |                                                                                  |                                                                         | -                                                                                                                                                                                   |
| Caenorhabditis elegans      | elegans protein confirmed by transcript evidence           | 0  |                                                                                                                                                                                                                                                                             | P:GO:0016311;<br>F:GO:0016791;<br>F:GO:0008138;<br>F:GO:0004725;<br>P:GO:0008340 |                                                                         | -                                                                                                                                                                                   |
| Loa loa                     | kiaa1370 protein                                           | 0  |                                                                                                                                                                                                                                                                             |                                                                                  |                                                                         | PTHR13199 (PANTHER)                                                                                                                                                                 |
| Culex quinquefasciatus      | elegans protein confirmed by transcript evidence           | 1  | F:GO:0005515                                                                                                                                                                                                                                                                | -                                                                                |                                                                         | IPR002919; IPR013032;<br>G3DSA:2.10.25.10 (GENE3D),<br>PTHR23259 (PANTHER), SignalP<br>(SIGNALP)                                                                                    |
| Culex quinquefasciatus      | elegans protein confirmed by transcript evidence           | 1  | F:GO:0005515                                                                                                                                                                                                                                                                | -                                                                                |                                                                         | IPR002919; IPR013032;<br>G3DSA:2.10.25.10 (GENE3D),<br>PTHR23259 (PANTHER), SignalP<br>(SIGNALP)                                                                                    |

|                         |                                                    |   |                                                                                                   |                                                                                                                                                                                                                                                                                                               |                             |                                                                                                                                                               |                                                                                                    |
|-------------------------|----------------------------------------------------|---|---------------------------------------------------------------------------------------------------|---------------------------------------------------------------------------------------------------------------------------------------------------------------------------------------------------------------------------------------------------------------------------------------------------------------|-----------------------------|---------------------------------------------------------------------------------------------------------------------------------------------------------------|----------------------------------------------------------------------------------------------------|
| Caenorhabditis elegans  | germi-I center ki-se family member (gck-1)         |   | F:GO:0042802;<br>P:GO:0006468;<br>5 P:GO:0007015;<br>F:GO:0004702;<br>F:GO:0005524                | -                                                                                                                                                                                                                                                                                                             |                             | IPR000719; IPR011009; IPR017441;<br>IPR017442; G3DSA:1.10.510.10<br>(GENE3D), G3DSA:3.30.200.20<br>(GENE3D), PTHR22986 (PANTHER),<br>PTHR22986:SF95 (PANTHER) |                                                                                                    |
| Caenorhabditis briggsae | cell cycle control protein cwf19                   | 0 |                                                                                                   | F:GO:0003824                                                                                                                                                                                                                                                                                                  |                             | -                                                                                                                                                             |                                                                                                    |
|                         | -                                                  | 0 |                                                                                                   |                                                                                                                                                                                                                                                                                                               |                             | -                                                                                                                                                             |                                                                                                    |
|                         | -                                                  | 0 |                                                                                                   |                                                                                                                                                                                                                                                                                                               |                             | -                                                                                                                                                             |                                                                                                    |
| Brugia malayi           | arid bright d- binding domain-containing protein   | 0 |                                                                                                   | C:GO:0005622                                                                                                                                                                                                                                                                                                  |                             | IPR016197; G3DSA:2.30.30.270<br>(GENE3D), PF11717 (PFAM)                                                                                                      |                                                                                                    |
| Brugia malayi           | arid bright d- binding domain-containing protein   | 0 |                                                                                                   |                                                                                                                                                                                                                                                                                                               |                             | -                                                                                                                                                             |                                                                                                    |
| Caenorhabditis elegans  | calmodulin regulated spectrin-associated protein 1 | 0 |                                                                                                   | F:GO:0003674;<br>P:GO:0008150;<br>F:GO:0005515;<br>C:GO:0005874;<br>C:GO:0005575                                                                                                                                                                                                                              |                             | IPR001715; IPR022613; PTHR21595<br>(PANTHER)                                                                                                                  |                                                                                                    |
| Ancylostoma caninum     | activation-associated secreted protein-1           | 1 | P:GO:0051179                                                                                      |                                                                                                                                                                                                                                                                                                               |                             | -                                                                                                                                                             |                                                                                                    |
| Caenorhabditis elegans  | elegans protein confirmed by transcript evidence   | 0 |                                                                                                   | F:GO:0016740;<br>P:GO:0008152;<br>C:GO:0005615;<br>F:GO:0005515;<br>C:GO:0005576                                                                                                                                                                                                                              |                             | -                                                                                                                                                             |                                                                                                    |
| Caenorhabditis briggsae | glycogen debranching enzyme                        | 6 | P:GO:0009792;<br>F:GO:0004135;<br>P:GO:0005978;<br>F:GO:0043169;<br>F:GO:0004134;<br>P:GO:0006508 |                                                                                                                                                                                                                                                                                                               | EC:3.2.1.33;<br>EC:2.4.1.25 | IPR008928; IPR010401                                                                                                                                          |                                                                                                    |
| Hydra magnipapillata    | pygopus homolog 1                                  | 0 |                                                                                                   | F:GO:0046872;<br>P:GO:0001822;<br>P:GO:0016055;<br>F:GO:0008270;<br>P:GO:0009791;<br>F:GO:0005515;<br>C:GO:0005634                                                                                                                                                                                            |                             | IPR001965; IPR011011; IPR013083;<br>IPR019786; IPR019787; PTHR23194<br>(PANTHER), PTHR23194:SF6<br>(PANTHER)                                                  |                                                                                                    |
| Caenorhabditis briggsae | briggsae cbr-lin-13 protein                        | 0 |                                                                                                   | P:GO:0001702;<br>C:GO:0005634;<br>F:GO:0003677;<br>P:GO:0040027;<br>F:GO:0003676;<br>F:GO:0003674;<br>F:GO:0046872;<br>P:GO:0006355;<br>F:GO:0003700;<br>P:GO:0007275;<br>P:GO:0008150;<br>P:GO:0045449;<br>P:GO:0007398;<br>P:GO:0045893;<br>F:GO:0008270;<br>P:GO:0045786;<br>C:GO:0005622;<br>F:GO:0005515 |                             |                                                                                                                                                               | IPR007087; IPR015880; PTHR23224<br>(PANTHER), PTHR23224:SF459<br>(PANTHER), SSF57667 (SUPERFAMILY) |
| Caenorhabditis briggsae | pyruvate dehydroge-se component x                  | 1 | F:GO:0016747                                                                                      |                                                                                                                                                                                                                                                                                                               | EC:2.3.1.0                  | IPR001078; G3DSA:3.30.559.10<br>(GENE3D), PTHR23151 (PANTHER),<br>PTHR23151:SF9 (PANTHER), SSF52777<br>(SUPERFAMILY)                                          |                                                                                                    |
|                         | -                                                  | 0 |                                                                                                   |                                                                                                                                                                                                                                                                                                               |                             | SignalP (SIGNALP)                                                                                                                                             |                                                                                                    |

|                         |                                            |    |                                                                                                                                                                                                                                                                                                                                                                                                    |   |                                                                                                                                                                                                                                                                                          |                                                                                                                                                             |
|-------------------------|--------------------------------------------|----|----------------------------------------------------------------------------------------------------------------------------------------------------------------------------------------------------------------------------------------------------------------------------------------------------------------------------------------------------------------------------------------------------|---|------------------------------------------------------------------------------------------------------------------------------------------------------------------------------------------------------------------------------------------------------------------------------------------|-------------------------------------------------------------------------------------------------------------------------------------------------------------|
|                         | -                                          | 0  |                                                                                                                                                                                                                                                                                                                                                                                                    |   | SignalP (SIGNALP)                                                                                                                                                                                                                                                                        |                                                                                                                                                             |
| Caenorhabditis briggsae | nuclear receptor nhr-86                    | 4  | F:GO:0046872;<br>F:GO:0004879;<br>F:GO:0003677;<br>P:GO:0045449                                                                                                                                                                                                                                                                                                                                    | - | IPR001628; IPR008946; IPR013088;<br>PTHR11865 (PANTHER),<br>PTHR11865:SF235 (PANTHER),<br>SSF57716 (SUPERFAMILY)                                                                                                                                                                         |                                                                                                                                                             |
| Caenorhabditis elegans  | serine threonine protein ki-se             | 23 | F:GO:0035091;<br>P:GO:0030307;<br>P:GO:0008340;<br>P:GO:0006468;<br>P:GO:0008360;<br>P:GO:0008286;<br>P:GO:0023034;<br>P:GO:0008362;<br>P:GO:0040010;<br>P:GO:0007424;<br>P:GO:0040018;<br>P:GO:0043053;<br>C:GO:0005737;<br>P:GO:0006916;<br>P:GO:0019915;<br>C:GO:0009986;<br>P:GO:0046622;<br>F:GO:0004674;<br>P:GO:0042306;<br>C:GO:0005886;<br>F:GO:0005516;<br>F:GO:0005524;<br>P:GO:0050773 | - | EC:2.7.11.0                                                                                                                                                                                                                                                                              | IPR000719; IPR000961; IPR008271;<br>IPR011009; IPR015744; IPR017442;<br>IPR017892; G3DSA:1.10.510.10<br>(GENE3D), PTHR22985 (PANTHER),<br>SignalP (SIGNALP) |
| Brugia malayi           | mi-2                                       | 14 | C:GO:0005700;<br>F:GO:0031491;<br>P:GO:0040027;<br>P:GO:0048813;<br>P:GO:0006333;<br>C:GO:0016581;<br>P:GO:0007517;<br>P:GO:0046580;<br>F:GO:0046872;<br>F:GO:0003677;<br>P:GO:0001709;<br>P:GO:0042766;<br>F:GO:0004003;<br>F:GO:0016564                                                                                                                                                          | - | IPR009462; IPR012957; PTHR10799<br>(PANTHER), PTHR10799:SF64<br>(PANTHER)                                                                                                                                                                                                                |                                                                                                                                                             |
| Brugia malayi           | chromodomain helicase d- binding protein 3 | 15 | C:GO:0000785;<br>F:GO:0030528;<br>F:GO:0005515;<br>F:GO:0008270;<br>P:GO:0006357;<br>P:GO:0040027;<br>P:GO:0006333;<br>C:GO:0016581;<br>P:GO:0046580;<br>F:GO:0003677;<br>P:GO:0001709;<br>P:GO:0006338;<br>F:GO:0004003;<br>F:GO:0003682;<br>F:GO:0005524                                                                                                                                         | - | IPR000330; IPR000953; IPR001650;<br>IPR001965; IPR009462; IPR009463;<br>IPR012957; IPR013083; IPR014001;<br>IPR014021; IPR016197; IPR019787;<br>G3DSA:2.40.50.40 (GENE3D),<br>G3DSA:3.40.50.300 (GENE3D),<br>PTHR10799 (PANTHER),<br>PTHR10799:SF64 (PANTHER),<br>SSF52540 (SUPERFAMILY) |                                                                                                                                                             |

|                        |                                            |    |                                                                                                                                                                                                                                                            |   |                                                                                                                                                                                                                                                                                          |
|------------------------|--------------------------------------------|----|------------------------------------------------------------------------------------------------------------------------------------------------------------------------------------------------------------------------------------------------------------|---|------------------------------------------------------------------------------------------------------------------------------------------------------------------------------------------------------------------------------------------------------------------------------------------|
| Brugia malayi          | chromodomain helicase d- binding protein 3 | 15 | C:GO:0000785;<br>F:GO:0030528;<br>F:GO:0005515;<br>F:GO:0008270;<br>P:GO:0006357;<br>P:GO:0040027;<br>P:GO:0006333;<br>C:GO:0016581;<br>P:GO:0046580;<br>F:GO:0003677;<br>P:GO:0001709;<br>P:GO:0006338;<br>F:GO:0004003;<br>F:GO:0003682;<br>F:GO:0005524 | - | IPR000330; IPR000953; IPR001650;<br>IPR001965; IPR009462; IPR009463;<br>IPR012957; IPR013083; IPR014001;<br>IPR014021; IPR016197; IPR019787;<br>G3DSA:2.40.50.40 (GENE3D),<br>G3DSA:3.40.50.300 (GENE3D),<br>PTHR10799 (PANTHER),<br>PTHR10799:SF64 (PANTHER),<br>SSF52540 (SUPERFAMILY) |
| Brugia malayi          | chromodomain helicase d- binding protein 3 | 15 | C:GO:0000785;<br>F:GO:0030528;<br>F:GO:0005515;<br>F:GO:0008270;<br>P:GO:0006357;<br>P:GO:0040027;<br>P:GO:0006333;<br>C:GO:0016581;<br>P:GO:0046580;<br>F:GO:0003677;<br>P:GO:0001709;<br>P:GO:0006338;<br>F:GO:0004003;<br>F:GO:0003682;<br>F:GO:0005524 | - | IPR000330; IPR000953; IPR001650;<br>IPR001965; IPR009462; IPR009463;<br>IPR012957; IPR013083; IPR014001;<br>IPR014021; IPR016197; IPR019787;<br>G3DSA:2.40.50.40 (GENE3D),<br>G3DSA:3.40.50.300 (GENE3D),<br>PTHR10799 (PANTHER),<br>PTHR10799:SF64 (PANTHER),<br>SSF52540 (SUPERFAMILY) |
| Brugia malayi          | chromodomain helicase d- binding protein 3 | 15 | C:GO:0000785;<br>F:GO:0030528;<br>F:GO:0005515;<br>F:GO:0008270;<br>P:GO:0006357;<br>P:GO:0040027;<br>P:GO:0006333;<br>C:GO:0016581;<br>P:GO:0046580;<br>F:GO:0003677;<br>P:GO:0001709;<br>P:GO:0006338;<br>F:GO:0004003;<br>F:GO:0003682;<br>F:GO:0005524 | - | IPR000330; IPR000953; IPR001650;<br>IPR001965; IPR009462; IPR009463;<br>IPR012957; IPR013083; IPR014001;<br>IPR014021; IPR016197; IPR019787;<br>G3DSA:2.40.50.40 (GENE3D),<br>G3DSA:3.40.50.300 (GENE3D),<br>PTHR10799 (PANTHER),<br>PTHR10799:SF64 (PANTHER),<br>SSF52540 (SUPERFAMILY) |
| Caenorhabditis elegans | tbcl domain member 22b                     | 4  | F:GO:0005097;<br>C:GO:0005622;<br>F:GO:0032555;<br>P:GO:0032313                                                                                                                                                                                            | - | IPR000195; G3DSA:1.10.8.270<br>(GENE3D), PTHR22957 (PANTHER),<br>PTHR22957:SF26 (PANTHER)                                                                                                                                                                                                |
| -                      | -                                          | 0  |                                                                                                                                                                                                                                                            | - | -                                                                                                                                                                                                                                                                                        |
| Caenorhabditis elegans | cg3004-pa                                  | 3  | P:GO:0019915;<br>P:GO:0040018;<br>P:GO:0002119                                                                                                                                                                                                             | - | IPR001680; IPR011047; IPR015943;<br>IPR017986; IPR019775; IPR019781;<br>IPR019782; PTHR19842 (PANTHER)                                                                                                                                                                                   |
| -                      | -                                          | 0  |                                                                                                                                                                                                                                                            | - | SignalP (SIGNALP)                                                                                                                                                                                                                                                                        |
| -                      | -                                          | 0  |                                                                                                                                                                                                                                                            | - | -                                                                                                                                                                                                                                                                                        |



|                              |                                                               |   |                                                                                                                                     |                                                                 |             |                                                                                                                              |
|------------------------------|---------------------------------------------------------------|---|-------------------------------------------------------------------------------------------------------------------------------------|-----------------------------------------------------------------|-------------|------------------------------------------------------------------------------------------------------------------------------|
| Caenorhabditis elegans       | cation efflux family protein                                  | 4 | C:GO:0016021;<br>P:GO:0000003;<br>F:GO:0008324;<br>P:GO:0055085                                                                     | -                                                               |             | IPR002524; G3DSA:1.20.1510.10 (GENE3D), SignalP (SIGNALP)                                                                    |
|                              | -                                                             | 0 |                                                                                                                                     |                                                                 |             | -                                                                                                                            |
| Caenorhabditis briggsae      | briggsae cbr-shw-3 protein                                    | 8 | C:GO:0008076;<br>C:GO:0005622;<br>F:GO:0005249;<br>F:GO:0005515;<br>P:GO:0055085;<br>P:GO:0046959;<br>P:GO:0006813;<br>F:GO:0008270 | -                                                               |             | IPR013099; IPR015572; G3DSA:1.10.287.70 (GENE3D), PTHR11537 (PANTHER), SignalP (SIGNALP), SSF81324 (SUPERFAMILY)             |
| Nippostrongylus brasiliensis | globin                                                        | 6 | F:GO:0020037;<br>C:GO:0005576;<br>C:GO:0005737;<br>F:GO:0005344;<br>P:GO:0015671;<br>F:GO:0019825                                   | -                                                               |             | -                                                                                                                            |
| Loa loa                      | sig-I peptidase complex catalytic subunit sec11a              | 7 | P:GO:0002119;<br>P:GO:0018996;<br>P:GO:0006465;<br>P:GO:0000003;<br>C:GO:0016021;<br>F:GO:0008236;<br>P:GO:0006508                  | -                                                               |             | IPR001733; IPR011056; IPR015927; IPR019756; IPR019758; IPR019759                                                             |
| Mus musculus                 | melanoma inhibitory activity protein 3 precursor              | 0 |                                                                                                                                     |                                                                 |             | -                                                                                                                            |
|                              | -                                                             | 0 |                                                                                                                                     |                                                                 |             | -                                                                                                                            |
|                              | -                                                             | 0 |                                                                                                                                     |                                                                 |             | SignalP (SIGNALP)                                                                                                            |
| Caenorhabditis briggsae      | s-adenosyl-l-methionine-dependent methyltransferase ftsjd2    | 4 | F:GO:0004483;<br>P:GO:0080009;<br>P:GO:0006370;<br>P:GO:0000003                                                                     | -                                                               | EC:2.1.1.57 | -                                                                                                                            |
| Caenorhabditis elegans       | briggsae cbr-puf-12 protein                                   | 0 |                                                                                                                                     | F:GO:0003723;<br>P:GO:0000003;<br>F:GO:0005488;<br>P:GO:0018991 |             | -                                                                                                                            |
| Caenorhabditis briggsae      | phosphofurin acidic cluster sorting protein 2                 | 0 |                                                                                                                                     | C:GO:0005739;<br>C:GO:0005783                                   |             | IPR019381; PTHR13280 (PANTHER), PTHR13280:SF4 (PANTHER)                                                                      |
| Caenorhabditis briggsae      | phosphofurin acidic cluster sorting protein 2                 | 0 |                                                                                                                                     | C:GO:0005739;<br>C:GO:0005783                                   |             | IPR019381; PTHR13280 (PANTHER), PTHR13280:SF4 (PANTHER)                                                                      |
| Caenorhabditis elegans       | peptidase (mitochondrial processing) beta                     | 4 | C:GO:0005743;<br>F:GO:0046872;<br>P:GO:0019538;<br>F:GO:0008237                                                                     | -                                                               |             | -                                                                                                                            |
| Caenorhabditis elegans       | peptidase (mitochondrial processing) beta                     | 4 | C:GO:0005743;<br>F:GO:0046872;<br>P:GO:0019538;<br>F:GO:0008237                                                                     | -                                                               |             | IPR007863; IPR011237; IPR011249; PTHR11851 (PANTHER), PTHR11851:SF58 (PANTHER)                                               |
| Brugia malayi                | small glutamine-rich tetratricopeptide repeat - isoform cra_a | 5 | P:GO:0009792;<br>P:GO:0000003;<br>P:GO:0040007;<br>F:GO:0005515;<br>P:GO:0002119                                                    | -                                                               |             | IPR001440; IPR011990; IPR013026; IPR019734; IPR023114; PTHR22904 (PANTHER), PTHR22904:SF11 (PANTHER), SSF48452 (SUPERFAMILY) |

|                         |                                                  |    |                                                                                                                                                                                                                                                                                                                                                                                                                                                                                          |   |                             |                                                            |
|-------------------------|--------------------------------------------------|----|------------------------------------------------------------------------------------------------------------------------------------------------------------------------------------------------------------------------------------------------------------------------------------------------------------------------------------------------------------------------------------------------------------------------------------------------------------------------------------------|---|-----------------------------|------------------------------------------------------------|
| Ixodes scapularis       | platelet-activating factor isoform beta1 subunit | 55 | C:GO:0031512;<br>P:GO:0021766;<br>F:GO:0042803;<br>P:GO:0008090;<br>P:GO:0050885;<br>C:GO:0033267;<br>P:GO:0000132;<br>C:GO:0030426;<br>C:GO:0031252;<br>F:GO:0008201;<br>P:GO:0045494;<br>C:GO:0005625;<br>P:GO:0007268;<br>P:GO:0007405;<br>P:GO:0010977;<br>C:GO:0005829;<br>C:GO:0000776;<br>P:GO:0051081;<br>P:GO:0045176;<br>F:GO:0047179;<br>C:GO:0042598;<br>P:GO:0007611;<br>P:GO:0021540;<br>C:GO:0031513;<br>F:GO:0034452;<br>F:GO:0045505;<br>C:GO:0048471;<br>C:GO:0005739; | - | EC:2.3.1.149                | -                                                          |
| Caenorhabditis briggsae | arginyl-tr- synthetase                           | 4  | F:GO:0000166;<br>F:GO:0004812;<br>P:GO:0006418                                                                                                                                                                                                                                                                                                                                                                                                                                           | - |                             | IPR001278; IPR014729; IPR015945;<br>SSF52374 (SUPERFAMILY) |
| Caenorhabditis elegans  | elegans protein confirmed by transcript evidence | 0  |                                                                                                                                                                                                                                                                                                                                                                                                                                                                                          |   |                             | IPR001534; SignalP (SIGNALP)                               |
| Ancylostoma caninum     | abnormal dauer formation family member (daf-16)  | 4  | F:GO:0003700;<br>F:GO:0043565;<br>C:GO:0005634;<br>P:GO:0006355                                                                                                                                                                                                                                                                                                                                                                                                                          | - |                             | -                                                          |
| Caenorhabditis briggsae | pyruvate dehydroge-se                            | 19 | P:GO:0030307;<br>P:GO:0007548;<br>P:GO:0008286;<br>P:GO:0006974;<br>C:GO:0005759;<br>P:GO:0018106;<br>P:GO:0006090;<br>P:GO:0007283;<br>F:GO:0004740;<br>P:GO:0006916;<br>P:GO:0030036;<br>F:GO:0004674;<br>P:GO:0006006;<br>P:GO:0007165;<br>F:GO:0000155;<br>P:GO:0048477;<br>C:GO:0005886;<br>P:GO:0046620;<br>F:GO:0005524                                                                                                                                                           | - | EC:2.7.11.2;<br>EC:2.7.11.0 | -                                                          |

|                         |                                                       |    |                                                                                                                                                                                                                                                                                                                                |                                                                                  |                             |                                                                                                                                     |
|-------------------------|-------------------------------------------------------|----|--------------------------------------------------------------------------------------------------------------------------------------------------------------------------------------------------------------------------------------------------------------------------------------------------------------------------------|----------------------------------------------------------------------------------|-----------------------------|-------------------------------------------------------------------------------------------------------------------------------------|
| Caenorhabditis briggsae | pyruvate dehydroge-se                                 | 19 | P:GO:0030307;<br>P:GO:0007548;<br>P:GO:0008286;<br>P:GO:0006974;<br>C:GO:0005759;<br>P:GO:0018106;<br>P:GO:0006090;<br>P:GO:0007283;<br>F:GO:0004740;<br>P:GO:0006916;<br>P:GO:0030036;<br>F:GO:0004674;<br>P:GO:0006006;<br>P:GO:0007165;<br>F:GO:0000155;<br>P:GO:0048477;<br>C:GO:0005886;<br>P:GO:0046620;<br>F:GO:0005524 | -                                                                                | EC:2.7.11.2;<br>EC:2.7.11.0 | -                                                                                                                                   |
| -                       | -                                                     | 0  |                                                                                                                                                                                                                                                                                                                                |                                                                                  |                             | -                                                                                                                                   |
| Caenorhabditis briggsae | protein phosphatase                                   | 7  | P:GO:0040010;<br>P:GO:0044238;<br>P:GO:0044260;<br>P:GO:0000003;<br>F:GO:0005515;<br>P:GO:0035303;<br>P:GO:0009792                                                                                                                                                                                                             | -                                                                                |                             | IPR007062; PTHR12398 (PANTHER),<br>PTHR12398:SF7 (PANTHER)                                                                          |
| Loa loa                 | smc proteins flexible hinge domain containing protein | 6  | C:GO:0005737;<br>P:GO:0044403;<br>C:GO:0000228;<br>C:GO:0000796;<br>P:GO:0007076;<br>F:GO:0046982                                                                                                                                                                                                                              | -                                                                                |                             | PTHR18937 (PANTHER),<br>PTHR18937:SF9 (PANTHER)                                                                                     |
| Caenorhabditis elegans  | briggsae cbr-adm-2 protein                            | 0  |                                                                                                                                                                                                                                                                                                                                | P:GO:0006508;<br>C:GO:0016021;<br>F:GO:0004222;<br>F:GO:0008270;<br>C:GO:0031012 |                             | IPR001590; IPR001762;<br>G3DSA:3.40.390.10 (GENE3D),<br>PTHR11905 (PANTHER),<br>PTHR11905:SF15 (PANTHER),<br>SSF55486 (SUPERFAMILY) |
| Caenorhabditis elegans  | briggsae cbr-adm-2 protein                            | 0  |                                                                                                                                                                                                                                                                                                                                | P:GO:0006508;<br>C:GO:0016021;<br>F:GO:0004222;<br>F:GO:0008270;<br>C:GO:0031012 |                             | IPR001590; IPR001762;<br>G3DSA:3.40.390.10 (GENE3D),<br>PTHR11905 (PANTHER),<br>PTHR11905:SF15 (PANTHER),<br>SSF55486 (SUPERFAMILY) |
| Brugia malayi           | large subunit ribosomal protein 28                    | 5  | P:GO:0009792;<br>P:GO:0002119;<br>C:GO:0005622;<br>F:GO:0005515;<br>P:GO:0040007                                                                                                                                                                                                                                               | -                                                                                |                             | IPR002672                                                                                                                           |

|                         |                                                      |    |                                                                                                                                                                                                                                                                                                                                                                                                                                                                                                                                    |  |  |                                                                                                                                                                                                                                                                                                                                                      |
|-------------------------|------------------------------------------------------|----|------------------------------------------------------------------------------------------------------------------------------------------------------------------------------------------------------------------------------------------------------------------------------------------------------------------------------------------------------------------------------------------------------------------------------------------------------------------------------------------------------------------------------------|--|--|------------------------------------------------------------------------------------------------------------------------------------------------------------------------------------------------------------------------------------------------------------------------------------------------------------------------------------------------------|
| Caenorhabditis briggsae | heat shock 70kda protein 5 (glucose-regulated 78kda) | 30 | <p>P:GO:0030433;<br/> P:GO:0043154;<br/> F:GO:0051087;<br/> P:GO:0030512;<br/> P:GO:0021680;<br/> C:GO:0030176;<br/> P:GO:0021589;<br/> C:GO:0005788;<br/> P:GO:0031398;<br/> C:GO:0008303;<br/> P:GO:0060904;<br/> C:GO:0042470;<br/> F:GO:0043027;<br/> F:GO:0005509;<br/> F:GO:0043022;<br/> P:GO:0006983;<br/> C:GO:0005576;<br/> F:GO:0030674;<br/> P:GO:0006916;<br/> C:GO:0009986;<br/> F:GO:0031625;<br/> P:GO:0006987;<br/> P:GO:0040019;<br/> F:GO:0051082;<br/> P:GO:0042149;<br/> F:GO:0051787;<br/> C:GO:0048471;</p> |  |  | <p>IPR001023; IPR013126; IPR018181;<br/> G3DSA:1.20.1270.10 (GENE3D),<br/> G3DSA:2.60.34.10 (GENE3D),<br/> G3DSA:3.30.420.40 (GENE3D),<br/> G3DSA:3.90.640.10 (GENE3D),<br/> PTHR19375:SF1 (PANTHER),<br/> SSF100920 (SUPERFAMILY), SSF100934<br/> (SUPERFAMILY), SSF53067<br/> (SUPERFAMILY)</p>                                                    |
| Caenorhabditis briggsae | heat shock 70kda protein 5 (glucose-regulated 78kda) | 28 | <p>P:GO:0030433;<br/> F:GO:0051087;<br/> P:GO:0043154;<br/> P:GO:0030512;<br/> P:GO:0021680;<br/> C:GO:0030176;<br/> P:GO:0021589;<br/> C:GO:0005788;<br/> P:GO:0031398;<br/> C:GO:0008303;<br/> P:GO:0060904;<br/> C:GO:0042470;<br/> F:GO:0043027;<br/> F:GO:0005509;<br/> F:GO:0043022;<br/> P:GO:0006983;<br/> F:GO:0030674;<br/> P:GO:0006916;<br/> C:GO:0009986;<br/> F:GO:0031625;<br/> P:GO:0006987;<br/> F:GO:0051082;<br/> P:GO:0042149;<br/> F:GO:0051787;<br/> C:GO:0048471;<br/> C:GO:0005634;<br/> F:GO:0005524</p>  |  |  | <p>IPR001023; IPR013126; IPR018181;<br/> G3DSA:1.20.1270.10 (GENE3D),<br/> G3DSA:2.60.34.10 (GENE3D),<br/> G3DSA:3.30.30.30 (GENE3D),<br/> G3DSA:3.30.420.40 (GENE3D),<br/> G3DSA:3.90.640.10 (GENE3D),<br/> PTHR19375:SF1 (PANTHER), SignalP<br/> (SIGNALP), SSF100920 (SUPERFAMILY),<br/> SSF100934 (SUPERFAMILY), SSF53067<br/> (SUPERFAMILY)</p> |
|                         | -                                                    | 0  |                                                                                                                                                                                                                                                                                                                                                                                                                                                                                                                                    |  |  | -                                                                                                                                                                                                                                                                                                                                                    |
|                         | -                                                    | 0  |                                                                                                                                                                                                                                                                                                                                                                                                                                                                                                                                    |  |  | SignalP (SIGNALP)                                                                                                                                                                                                                                                                                                                                    |

|                             |                                                            |   |                                                                                                                                                      |                                                                                                                    |            |                                                                                                        |
|-----------------------------|------------------------------------------------------------|---|------------------------------------------------------------------------------------------------------------------------------------------------------|--------------------------------------------------------------------------------------------------------------------|------------|--------------------------------------------------------------------------------------------------------|
| Caenorhabditis elegans      | nucleoporin seh1                                           | 6 | P:GO:0006999;<br>P:GO:0006810;<br>P:GO:0051315;<br>P:GO:0007080;<br>C:GO:0000776;<br>C:GO:0031080                                                    | -                                                                                                                  |            | SignalP (SIGNALP)                                                                                      |
| Caenorhabditis briggsae     | nfi (nuclear factor i) family member (nfi-1)               | 0 |                                                                                                                                                      | P:GO:0006260;<br>P:GO:0006355;<br>P:GO:0006350;<br>P:GO:0045449;<br>F:GO:0003700;<br>C:GO:0005622;<br>C:GO:0005634 |            | -                                                                                                      |
| Caenorhabditis briggsae     | 7sk snr- methylphosphate capping enzyme                    | 6 | P:GO:0009792;<br>P:GO:0002119;<br>P:GO:0040010;<br>P:GO:0000003;<br>P:GO:0040011;<br>F:GO:0016740                                                    | -                                                                                                                  |            | IPR010675; G3DSA:3.40.50.150 (GENE3D), PTHR12315 (PANTHER), SSF53335 (SUPERFAMILY)                     |
| Caenorhabditis elegans      | elegans protein partially confirmed by transcript evidence | 0 |                                                                                                                                                      |                                                                                                                    |            | -                                                                                                      |
| Loa loa                     | homocysteine s-methyltransferase                           | 0 |                                                                                                                                                      | F:GO:0008168;<br>F:GO:0008898;<br>F:GO:0016740;<br>P:GO:0008150;<br>C:GO:0005575                                   |            | IPR003726; PTHR21091 (PANTHER), PTHR21091:SF4 (PANTHER)                                                |
| Caenorhabditis elegans      | thioredoxin domain-containing protein 9                    | 9 | P:GO:0040035;<br>P:GO:0009792;<br>P:GO:0046785;<br>P:GO:0035046;<br>P:GO:0018991;<br>P:GO:0045454;<br>P:GO:0000910;<br>P:GO:0040002;<br>P:GO:0040011 | -                                                                                                                  |            | IPR012335; IPR012336; IPR013766; PTHR21148 (PANTHER), PTHR21148:SF11 (PANTHER)                         |
| Caenorhabditis elegans      | phosphorylase ki-se                                        | 4 | F:GO:0016301;<br>F:GO:0004339;<br>P:GO:0005977;<br>F:GO:0005516                                                                                      | -                                                                                                                  | EC:3.2.1.3 | IPR008734; IPR008928; IPR011613; PTHR10749:SF1 (PANTHER)                                               |
| Caenorhabditis briggsae     | flap endonuclease-1                                        | 3 | F:GO:0004519;<br>P:GO:0006281;<br>F:GO:0003677                                                                                                       | -                                                                                                                  |            | -                                                                                                      |
| Angiostrongylus cantonensis | x-box binding protein 1                                    | 2 | F:GO:0003677;<br>F:GO:0005515                                                                                                                        | -                                                                                                                  |            | IPR004827; IPR011616; G3DSA:1.20.5.170 (GENE3D), PTHR13301 (PANTHER), PTHR13301:SF13 (PANTHER)         |
| Angiostrongylus cantonensis | x-box binding protein 1                                    | 5 | F:GO:0003700;<br>F:GO:0043565;<br>F:GO:0046983;<br>C:GO:0005634;<br>P:GO:0006355                                                                     | -                                                                                                                  |            | SignalP (SIGNALP)                                                                                      |
| Candida glabrata CBS 138    | choline-phosphate cytidyltransferase                       | 1 | F:GO:0003824                                                                                                                                         | -                                                                                                                  |            | IPR004820; IPR004821; IPR014729; PTHR10739 (PANTHER), PTHR10739:SF13 (PANTHER), SSF52374 (SUPERFAMILY) |
| -                           | -                                                          | 0 |                                                                                                                                                      |                                                                                                                    |            | -                                                                                                      |
| -                           | -                                                          | 0 |                                                                                                                                                      |                                                                                                                    |            | -                                                                                                      |
| -                           | -                                                          | 0 |                                                                                                                                                      |                                                                                                                    |            | SignalP (SIGNALP)                                                                                      |

|                         |                                                            |    |                                                                                                                                                                                                                                                                                              |                                                                 |                           |                                                                                                                                                                                                       |
|-------------------------|------------------------------------------------------------|----|----------------------------------------------------------------------------------------------------------------------------------------------------------------------------------------------------------------------------------------------------------------------------------------------|-----------------------------------------------------------------|---------------------------|-------------------------------------------------------------------------------------------------------------------------------------------------------------------------------------------------------|
|                         | -                                                          | 0  |                                                                                                                                                                                                                                                                                              |                                                                 |                           | -                                                                                                                                                                                                     |
| Caenorhabditis briggsae | Hypothetical protein CBG14241 [Caenorhabditis briggsae]    | 0  |                                                                                                                                                                                                                                                                                              |                                                                 |                           | -                                                                                                                                                                                                     |
| Haemonchus contortus    | glutamate dehydroge-se                                     | 17 | P:GO:0000003;<br>F:GO:0070403;<br>F:GO:0070728;<br>F:GO:0004353;<br>P:GO:0040010;<br>C:GO:0005759;<br>F:GO:0043531;<br>F:GO:0005525;<br>C:GO:0005743;<br>P:GO:0006537;<br>P:GO:0007616;<br>F:GO:0004352;<br>P:GO:0019459;<br>P:GO:0055114;<br>F:GO:0019899;<br>F:GO:0005524;<br>P:GO:0032024 | -                                                               | EC:1.4.1.3;<br>EC:1.4.1.2 | IPR006095; IPR006096; IPR006097;<br>IPR014362; IPR016040;<br>G3DSA:1.10.287.140 (GENE3D),<br>G3DSA:3.40.192.10 (GENE3D),<br>PTHR11606 (PANTHER), SSF51735<br>(SUPERFAMILY), SSF53223<br>(SUPERFAMILY) |
| Caenorhabditis briggsae | isoform cra_a                                              | 1  | F:GO:0005488                                                                                                                                                                                                                                                                                 | -                                                               |                           | IPR011989; IPR016024                                                                                                                                                                                  |
| Caenorhabditis elegans  | hypothetical protein F26F12.3 [Caenorhabditis elegans]     | 0  |                                                                                                                                                                                                                                                                                              | F:GO:0003676;<br>F:GO:0046872;<br>F:GO:0008270;<br>F:GO:0005515 |                           | SignalP (SIGNALP)                                                                                                                                                                                     |
| Caenorhabditis briggsae | rab3 gtpase-activating protein non-catalytic subunit       | 2  | F:GO:0030234;<br>F:GO:0005515                                                                                                                                                                                                                                                                | -                                                               |                           | IPR000923; PTHR12472 (PANTHER)                                                                                                                                                                        |
|                         | -                                                          | 0  |                                                                                                                                                                                                                                                                                              |                                                                 |                           | SignalP (SIGNALP)                                                                                                                                                                                     |
| Caenorhabditis elegans  | r--binding protein 10-like                                 | 3  | F:GO:0005515;<br>P:GO:0000003;<br>C:GO:0005634                                                                                                                                                                                                                                               | -                                                               |                           | IPR000467; IPR015880; PTHR13948<br>(PANTHER), PTHR13948:SF5<br>(PANTHER)                                                                                                                              |
| Caenorhabditis elegans  | r--binding protein 10-like                                 | 3  | F:GO:0005515;<br>P:GO:0000003;<br>C:GO:0005634                                                                                                                                                                                                                                               | -                                                               |                           | IPR000467; IPR015880; PTHR13948<br>(PANTHER), PTHR13948:SF5<br>(PANTHER)                                                                                                                              |
| Caenorhabditis elegans  | isoform d                                                  | 0  |                                                                                                                                                                                                                                                                                              | F:GO:0005096;<br>P:GO:0051056;<br>C:GO:0005622                  |                           | PTHR21344 (PANTHER), SSF111347<br>(SUPERFAMILY)                                                                                                                                                       |
| Caenorhabditis elegans  | isoform d                                                  | 0  |                                                                                                                                                                                                                                                                                              | F:GO:0005096;<br>P:GO:0051056;<br>C:GO:0005622                  |                           | PTHR21344 (PANTHER), SSF111347<br>(SUPERFAMILY)                                                                                                                                                       |
| Caenorhabditis elegans  | elegans protein partially confirmed by transcript evidence | 0  |                                                                                                                                                                                                                                                                                              | F:GO:0008270;<br>C:GO:0005622                                   |                           | -                                                                                                                                                                                                     |
| Ancylostoma caninum     | venom-allergen-like protein family member (vap-1)          | 0  |                                                                                                                                                                                                                                                                                              | P:GO:0040011;<br>P:GO:0006898;<br>C:GO:0005576                  |                           | IPR001283; IPR013032; IPR014044;<br>IPR018244; PTHR10334:SF11<br>(PANTHER), SignalP (SIGNALP)                                                                                                         |
| Caenorhabditis briggsae | iq calmodulin-binding motif domain protein                 | 0  |                                                                                                                                                                                                                                                                                              |                                                                 |                           | SignalP (SIGNALP)                                                                                                                                                                                     |
|                         | -                                                          | 0  |                                                                                                                                                                                                                                                                                              |                                                                 |                           | -                                                                                                                                                                                                     |
| Caenorhabditis elegans  | mitochondrial ribosomal protein s14                        | 5  | C:GO:0005840;<br>F:GO:0003735;<br>F:GO:0005515;<br>P:GO:0006412;<br>C:GO:0005739                                                                                                                                                                                                             | -                                                               | EC:3.6.5.3                | IPR001209; G3DSA:4.10.830.10<br>(GENE3D), PTHR19836:SF4<br>(PANTHER), SSF57716 (SUPERFAMILY)                                                                                                          |

|                         |                                                  |    |                                                                                                                                                                                                                                                                                                                                |                               |             |                                                                                                                                     |
|-------------------------|--------------------------------------------------|----|--------------------------------------------------------------------------------------------------------------------------------------------------------------------------------------------------------------------------------------------------------------------------------------------------------------------------------|-------------------------------|-------------|-------------------------------------------------------------------------------------------------------------------------------------|
| Caenorhabditis briggsae | caax alpha                                       | 19 | P:GO:0042221;<br>P:GO:0018991;<br>P:GO:0040007;<br>F:GO:0004660;<br>P:GO:0040011;<br>C:GO:0005829;<br>P:GO:0023052;<br>F:GO:0008017;<br>F:GO:0043014;<br>P:GO:0009792;<br>P:GO:0002009;<br>P:GO:0018347;<br>P:GO:0002119;<br>C:GO:0005875;<br>P:GO:0090045;<br>P:GO:0010171;<br>F:GO:0004661;<br>P:GO:0040035;<br>P:GO:0090044 | -                             | EC:2.5.1.58 | IPR002088; IPR008940; PTHR11129 (PANTHER), PTHR11129:SF1 (PANTHER), SSF48439 (SUPERFAMILY)                                          |
| -                       | -                                                | 0  |                                                                                                                                                                                                                                                                                                                                |                               |             | -                                                                                                                                   |
| Caenorhabditis elegans  | subfamily member 13                              | 1  | F:GO:0005515                                                                                                                                                                                                                                                                                                                   | -                             |             | IPR011989; IPR016024                                                                                                                |
| Caenorhabditis elegans  | subfamily member 13                              | 1  | F:GO:0005515                                                                                                                                                                                                                                                                                                                   | -                             |             | IPR011989; IPR016024                                                                                                                |
| Caenorhabditis elegans  | subfamily member 13                              | 1  | F:GO:0005515                                                                                                                                                                                                                                                                                                                   | -                             |             | IPR011989; IPR016024                                                                                                                |
| Ancylostoma caninum     | secreted protein 4 precursor                     | 0  |                                                                                                                                                                                                                                                                                                                                | P:GO:0006898;<br>C:GO:0005576 |             | IPR014044; SignalP (SIGNALP)                                                                                                        |
| Ancylostoma caninum     | secreted protein 4 precursor                     | 0  |                                                                                                                                                                                                                                                                                                                                | P:GO:0006898;<br>C:GO:0005576 |             | IPR014044; SignalP (SIGNALP)                                                                                                        |
| Ancylostoma caninum     | secreted protein 5 precursor                     | 0  |                                                                                                                                                                                                                                                                                                                                | C:GO:0005576                  |             | IPR014044; SignalP (SIGNALP)                                                                                                        |
| Ancylostoma caninum     | secreted protein 5 precursor                     | 0  |                                                                                                                                                                                                                                                                                                                                | P:GO:0006898;<br>C:GO:0005576 |             | IPR001283; IPR014044;<br>PTHR10334:SF11 (PANTHER)                                                                                   |
| Ancylostoma caninum     | secreted protein 5 precursor                     | 0  |                                                                                                                                                                                                                                                                                                                                | P:GO:0006898;<br>C:GO:0005576 |             | IPR001283; IPR014044;<br>PTHR10334:SF11 (PANTHER)                                                                                   |
| Ancylostoma caninum     | secreted protein 5 precursor                     | 0  |                                                                                                                                                                                                                                                                                                                                | C:GO:0005576                  |             | IPR014044; SignalP (SIGNALP)                                                                                                        |
| -                       | -                                                | 0  |                                                                                                                                                                                                                                                                                                                                |                               |             | SignalP (SIGNALP)                                                                                                                   |
| -                       | -                                                | 0  |                                                                                                                                                                                                                                                                                                                                |                               |             | SignalP (SIGNALP)                                                                                                                   |
| -                       | -                                                | 0  |                                                                                                                                                                                                                                                                                                                                |                               |             | -                                                                                                                                   |
| -                       | -                                                | 0  |                                                                                                                                                                                                                                                                                                                                |                               |             | -                                                                                                                                   |
| -                       | -                                                | 0  |                                                                                                                                                                                                                                                                                                                                |                               |             | SignalP (SIGNALP)                                                                                                                   |
| Caenorhabditis elegans  | receptor-type tyrosine-protein phosphatase n2    | 7  | P:GO:0006470;<br>C:GO:0043195;<br>C:GO:0005624;<br>P:GO:0034260;<br>F:GO:0004725;<br>F:GO:0005515;<br>C:GO:0030141                                                                                                                                                                                                             | -                             | EC:3.1.3.48 | IPR000242; IPR000387;<br>G3DSA:3.90.190.10 (GENE3D),<br>PTHR19134 (PANTHER),<br>PTHR19134:SF36 (PANTHER),<br>SSF52799 (SUPERFAMILY) |
| Caenorhabditis elegans  | elegans protein confirmed by transcript evidence | 0  |                                                                                                                                                                                                                                                                                                                                |                               |             | -                                                                                                                                   |
| Caenorhabditis elegans  | elegans protein confirmed by transcript evidence | 0  |                                                                                                                                                                                                                                                                                                                                |                               |             | -                                                                                                                                   |
| Vitis vinifera          | hypothetical protein [Vitis vinifera]            | 0  |                                                                                                                                                                                                                                                                                                                                |                               |             | -                                                                                                                                   |

|                         |                                                         |    |                                                                                                                                                                                                                          |                                                                                                                                                      |                                                                                                               |
|-------------------------|---------------------------------------------------------|----|--------------------------------------------------------------------------------------------------------------------------------------------------------------------------------------------------------------------------|------------------------------------------------------------------------------------------------------------------------------------------------------|---------------------------------------------------------------------------------------------------------------|
| Loa loa                 | cytoplasmic polyadenylation element-binding protein 1   | 13 | C:GO:0030054;<br>F:GO:0003729;<br>P:GO:0006417;<br>C:GO:0030425;<br>C:GO:0000932;<br>P:GO:0007130;<br>C:GO:0005624;<br>P:GO:0048168;<br>F:GO:0005515;<br>F:GO:0000166;<br>C:GO:0045211;<br>P:GO:0006397;<br>C:GO:0014069 | -                                                                                                                                                    | IPR000504; IPR012677; PTHR12566 (PANTHER), SSF54928 (SUPERFAMILY)                                             |
| Caenorhabditis briggsae | peptide chain release factor 1                          | 4  | C:GO:0005737;<br>P:GO:0006415;<br>F:GO:0016149;<br>F:GO:0016787                                                                                                                                                          | -                                                                                                                                                    | IPR000352; G3DSA:3.30.160.200 (GENE3D), PTHR11075 (PANTHER), PTHR11075:SF11 (PANTHER), SSF75620 (SUPERFAMILY) |
| Gallus gallus           | ftsj methyltransferase domain-containing protein 1      | 0  |                                                                                                                                                                                                                          | F:GO:0016740;<br>P:GO:0032259;<br>C:GO:0016021;<br>C:GO:0016020;<br>F:GO:0008168;<br>F:GO:0003676;<br>F:GO:0003674;<br>C:GO:0005575;<br>P:GO:0008150 | PTHR16121 (PANTHER)                                                                                           |
| Callithrix jacchus      | ribosomal protein l39-like                              | 4  | F:GO:0003735;<br>F:GO:0003723;<br>C:GO:0022625;<br>P:GO:0006414                                                                                                                                                          | -                                                                                                                                                    | IPR000077; IPR020083; PD007914 (PRODOM)                                                                       |
|                         | -                                                       | 0  |                                                                                                                                                                                                                          |                                                                                                                                                      | SignalP (SIGNALP)                                                                                             |
| Caenorhabditis elegans  | exonuclease nef-                                        | 1  | F:GO:0004527                                                                                                                                                                                                             | -                                                                                                                                                    | IPR006055; IPR012337; IPR013520; G3DSA:3.30.420.10 (GENE3D), PTHR12801 (PANTHER), PTHR12801:SF11 (PANTHER)    |
|                         | -                                                       | 0  |                                                                                                                                                                                                                          |                                                                                                                                                      | PRO1217 (PRINTS), SignalP (SIGNALP)                                                                           |
| Caenorhabditis briggsae | lipoma preferred partner lpp                            | 4  | F:GO:0046872;<br>F:GO:0005515;<br>P:GO:0060030;<br>C:GO:0044464                                                                                                                                                          | -                                                                                                                                                    | SignalP (SIGNALP)                                                                                             |
| Caenorhabditis elegans  | lipoma preferred partner lpp                            | 4  | C:GO:0005886;<br>F:GO:0005515;<br>P:GO:0060030;<br>F:GO:0008270                                                                                                                                                          | -                                                                                                                                                    | -                                                                                                             |
| Caenorhabditis briggsae | Hypothetical protein CBG07025 [Caenorhabditis briggsae] | 0  |                                                                                                                                                                                                                          |                                                                                                                                                      | SignalP (SIGNALP)                                                                                             |



|                         |                                                           |    |                                                                                                                                                                                                                                                                                                                                                                  |                               |                                                                                                           |
|-------------------------|-----------------------------------------------------------|----|------------------------------------------------------------------------------------------------------------------------------------------------------------------------------------------------------------------------------------------------------------------------------------------------------------------------------------------------------------------|-------------------------------|-----------------------------------------------------------------------------------------------------------|
| Caenorhabditis elegans  | arp3 actin-related protein 3 homolog                      | 21 | P:GO:0050775;<br>C:GO:0030056;<br>C:GO:0030027;<br>C:GO:0000139;<br>P:GO:0043519;<br>C:GO:0005884;<br>P:GO:0010631;<br>P:GO:0046677;<br>P:GO:0034314;<br>F:GO:0003779;<br>P:GO:0009792;<br>C:GO:0060076;<br>P:GO:0051789;<br>C:GO:0005885;<br>P:GO:0045666;<br>P:GO:0016331;<br>P:GO:0010592;<br>P:GO:0009743;<br>F:GO:0005524;<br>C:GO:0002102;<br>P:GO:0051491 | -                             | SignalP (SIGNALP)                                                                                         |
| Loa loa                 | hypothetical protein LOAG_04573 [Loa loa]                 | 0  |                                                                                                                                                                                                                                                                                                                                                                  |                               | IPR005579; PTHR13557 (PANTHER)                                                                            |
| Brugia malayi           | nuclear pore complex protein family member (npp-21)       | 4  | P:GO:0040015;<br>P:GO:0000003;<br>P:GO:0002119;<br>P:GO:0040011                                                                                                                                                                                                                                                                                                  | -                             | -                                                                                                         |
| Caenorhabditis elegans  | protein o-linked mannose -n-acetylglucosaminyltransferase | 2  | F:GO:0016757;<br>C:GO:0044464                                                                                                                                                                                                                                                                                                                                    | -                             | G3DSA:3.90.550.10 (GENE3D),<br>PTHR14592 (PANTHER),<br>PTHR14592:SF1 (PANTHER), SSF53448<br>(SUPERFAMILY) |
| Caenorhabditis elegans  | nicalin                                                   | 8  | F:GO:0022834;<br>P:GO:0000003;<br>P:GO:0007271;<br>C:GO:0044446;<br>P:GO:0040011;<br>C:GO:0016020;<br>C:GO:0005783;<br>C:GO:0005634                                                                                                                                                                                                                              | -                             | IPR007484; G3DSA:3.40.630.10<br>(GENE3D), SignalP (SIGNALP),<br>SSF53187 (SUPERFAMILY)                    |
|                         |                                                           | 0  |                                                                                                                                                                                                                                                                                                                                                                  |                               |                                                                                                           |
| Brugia malayi           | chromosome 6 open reading frame 106                       | 0  |                                                                                                                                                                                                                                                                                                                                                                  | F:GO:0003674;<br>C:GO:0005575 | IPR009060; G3DSA:1.10.8.10<br>(GENE3D), PTHR20930 (PANTHER)                                               |
| Caenorhabditis briggsae | dynein heavy chain                                        | 5  | P:GO:0007018;<br>C:GO:0030286;<br>F:GO:0016887;<br>F:GO:0005524;<br>F:GO:0003777                                                                                                                                                                                                                                                                                 | -                             | IPR013594                                                                                                 |
| Caenorhabditis elegans  | elegans protein confirmed by transcript evidence          | 6  | P:GO:0002119;<br>P:GO:0046686;<br>C:GO:0005764;<br>P:GO:0040002;<br>P:GO:0040010;<br>P:GO:0008340                                                                                                                                                                                                                                                                | -                             | -                                                                                                         |
| Caenorhabditis elegans  | elegans protein confirmed by transcript evidence          | 6  | P:GO:0002119;<br>P:GO:0046686;<br>C:GO:0005764;<br>P:GO:0040002;<br>P:GO:0040010;<br>P:GO:0008340                                                                                                                                                                                                                                                                | -                             | -                                                                                                         |

|                         |                                                            |    |                                                                                                                                                                                                                                                                                                                                |                                                                                  |            |                                                                                                                                                                                                                                                                                                                       |
|-------------------------|------------------------------------------------------------|----|--------------------------------------------------------------------------------------------------------------------------------------------------------------------------------------------------------------------------------------------------------------------------------------------------------------------------------|----------------------------------------------------------------------------------|------------|-----------------------------------------------------------------------------------------------------------------------------------------------------------------------------------------------------------------------------------------------------------------------------------------------------------------------|
| Caenorhabditis elegans  | phosphoglucose isomerase                                   | 19 | C:GO:0005829;<br>P:GO:0008340;<br>F:GO:0048029;<br>C:GO:0005625;<br>P:GO:0046185;<br>P:GO:0007611;<br>P:GO:0043154;<br>F:GO:0016866;<br>F:GO:0005125;<br>C:GO:0005615;<br>P:GO:0019242;<br>F:GO:0004347;<br>C:GO:0019717;<br>P:GO:0006096;<br>P:GO:0006094;<br>P:GO:0051156;<br>P:GO:0009792;<br>F:GO:0008083;<br>P:GO:0043524 | -                                                                                | EC:5.3.1.9 | IPR001672; IPR018189; IPR023096;<br>G3DSA:3.40.50.10490 (GENE3D),<br>PS51463 (PROFILE), SSF53697<br>(SUPERFAMILY)                                                                                                                                                                                                     |
| -                       | -                                                          | 0  |                                                                                                                                                                                                                                                                                                                                |                                                                                  |            | -                                                                                                                                                                                                                                                                                                                     |
| -                       | -                                                          | 0  |                                                                                                                                                                                                                                                                                                                                |                                                                                  |            | IPR014044                                                                                                                                                                                                                                                                                                             |
| -                       | -                                                          | 0  |                                                                                                                                                                                                                                                                                                                                |                                                                                  |            | -                                                                                                                                                                                                                                                                                                                     |
| Schistosoma mansoni     | elongator complex protein 1                                | 1  | P:GO:0043581                                                                                                                                                                                                                                                                                                                   | -                                                                                |            | IPR006849                                                                                                                                                                                                                                                                                                             |
| Caenorhabditis elegans  | elegans protein partially confirmed by transcript evidence | 0  |                                                                                                                                                                                                                                                                                                                                | F:GO:0005488;<br>P:GO:0042331;<br>P:GO:0006886;<br>P:GO:0050804;<br>F:GO:0008565 |            | IPR016024; PTHR12363 (PANTHER),<br>PTHR12363:SF3 (PANTHER)                                                                                                                                                                                                                                                            |
| Caenorhabditis briggsae | importin isoform cra_b                                     | 1  | P:GO:0006810                                                                                                                                                                                                                                                                                                                   | -                                                                                |            | IPR011989; IPR013598; IPR016024;<br>PTHR12363 (PANTHER),<br>PTHR12363:SF3 (PANTHER)                                                                                                                                                                                                                                   |
| Caenorhabditis elegans  | elegans protein partially confirmed by transcript evidence | 0  |                                                                                                                                                                                                                                                                                                                                | F:GO:0005488;<br>P:GO:0042331;<br>P:GO:0006886;<br>P:GO:0050804;<br>F:GO:0008565 |            | IPR011989; IPR016024; PTHR12363<br>(PANTHER), PTHR12363:SF3<br>(PANTHER)                                                                                                                                                                                                                                              |
| Caenorhabditis elegans  | dy-ctin subunit 1                                          | 1  | C:GO:0044424                                                                                                                                                                                                                                                                                                                   | -                                                                                |            | IPR022157; PD936484 (PRODOM),<br>PTHR18916 (PANTHER),<br>PTHR18916:SF2 (PANTHER)                                                                                                                                                                                                                                      |
| Caenorhabditis briggsae | briggsae cbr-tag-18 protein                                | 0  |                                                                                                                                                                                                                                                                                                                                |                                                                                  |            | -                                                                                                                                                                                                                                                                                                                     |
| Caenorhabditis briggsae | -dph dependent diflavin oxidoreductase 1                   | 8  | F:GO:0016491;<br>F:GO:0050661;<br>F:GO:0005515;<br>F:GO:0010181;<br>P:GO:0055114;<br>P:GO:0008219;<br>F:GO:0050660;<br>C:GO:0005829                                                                                                                                                                                            | -                                                                                |            | IPR001094; IPR001433; IPR001709;<br>IPR003097; IPR008254; IPR017927;<br>IPR017938; IPR023173;<br>G3DSA:2.40.30.10 (GENE3D),<br>G3DSA:3.40.50.360 (GENE3D),<br>G3DSA:3.40.50.80 (GENE3D),<br>PTHR19384 (PANTHER),<br>PTHR19384:SF10 (PANTHER), SignalP<br>(SIGNALP), SSF52218 (SUPERFAMILY),<br>SSF52343 (SUPERFAMILY) |
| Caenorhabditis elegans  | upf2 regulator of nonsense transcripts homolog             | 3  | C:GO:0005737;<br>F:GO:0005515;<br>P:GO:0016070                                                                                                                                                                                                                                                                                 | -                                                                                |            | IPR003890; IPR016021; IPR016024;<br>PTHR12839 (PANTHER)                                                                                                                                                                                                                                                               |

|                               |                                                                     |    |                                                                                                                                                                                                         |   |                                                                                                                                                     |
|-------------------------------|---------------------------------------------------------------------|----|---------------------------------------------------------------------------------------------------------------------------------------------------------------------------------------------------------|---|-----------------------------------------------------------------------------------------------------------------------------------------------------|
| Caenorhabditis elegans        | sorting and assembly machinery component 50 homolog (cerevisiae)    | 7  | P:GO:0040010;<br>C:GO:0031966;<br>P:GO:0000003;<br>C:GO:0019867;<br>P:GO:0002119;<br>P:GO:0006898;<br>P:GO:0009792                                                                                      | - | IPR000184                                                                                                                                           |
| -                             | -                                                                   | 0  |                                                                                                                                                                                                         |   | -                                                                                                                                                   |
| Apis mellifera                | peroxiredoxin 6                                                     | 2  | F:GO:0016491;<br>F:GO:0016209                                                                                                                                                                           | - | IPR000866; IPR012335; IPR012336;<br>IPR017936; G3DSA:3.30.1020.10<br>(GENE3D), PTHR10681 (PANTHER),<br>PTHR10681:SF17 (PANTHER)                     |
| -                             | -                                                                   | 0  |                                                                                                                                                                                                         |   | -                                                                                                                                                   |
| -                             | -                                                                   | 0  |                                                                                                                                                                                                         |   | -                                                                                                                                                   |
| Strongylocentrotus purpuratus | polymerase (d- directed) epsilon 3 (p17 subunit)                    | 1  | F:GO:0005488                                                                                                                                                                                            | - | IPR003958; IPR009072; PTHR11064<br>(PANTHER), SignalP (SIGNALP)                                                                                     |
| -                             | -                                                                   | 0  |                                                                                                                                                                                                         |   | IPR007087                                                                                                                                           |
| Caenorhabditis elegans        | - h exchanger family member (nhx-9)                                 | 6  | P:GO:0009792;<br>F:GO:0015385;<br>P:GO:0055085;<br>P:GO:0006885;<br>C:GO:0016021;<br>P:GO:0006814                                                                                                       | - | IPR018416; IPR018422                                                                                                                                |
| Caenorhabditis elegans        | dual oxidase 1                                                      | 12 | P:GO:0018149;<br>P:GO:0006979;<br>P:GO:0006952;<br>P:GO:0040032;<br>P:GO:0042338;<br>F:GO:0046872;<br>P:GO:0040007;<br>F:GO:0016491;<br>P:GO:0002119;<br>P:GO:0040011;<br>P:GO:0009792;<br>C:GO:0005882 | - | PTHR11972 (PANTHER),<br>PTHR11972:SF1 (PANTHER)                                                                                                     |
| -                             | -                                                                   | 0  |                                                                                                                                                                                                         |   | -                                                                                                                                                   |
| Caenorhabditis elegans        | isoform g                                                           | 2  | C:GO:0031012;<br>F:GO:0016787                                                                                                                                                                           | - | IPR002223; IPR003599; IPR007110;<br>IPR010909; IPR013783; IPR020901;<br>PTHR10083 (PANTHER),<br>PTHR10083:SF39 (PANTHER),<br>SSF48726 (SUPERFAMILY) |
| Caenorhabditis elegans        | mitogen-activated protein ki-se ki-se ki-se 7 interacting protein 1 | 1  | F:GO:0005515                                                                                                                                                                                            | - | IPR001932; IPR014045; IPR015655;<br>PTHR13832:SF100 (PANTHER)                                                                                       |
| -                             | -                                                                   | 0  |                                                                                                                                                                                                         |   | SignalP (SIGNALP)                                                                                                                                   |

|                               |                                                 |    |                                                                                                                                                                                                                          |   |                                                                 |                                                                                                                                                                                                                                                                       |
|-------------------------------|-------------------------------------------------|----|--------------------------------------------------------------------------------------------------------------------------------------------------------------------------------------------------------------------------|---|-----------------------------------------------------------------|-----------------------------------------------------------------------------------------------------------------------------------------------------------------------------------------------------------------------------------------------------------------------|
| Caenorhabditis elegans        | rain ki-se homolog family member (mbk-2)        | 13 | F:GO:0030145;<br>P:GO:0006468;<br>P:GO:0045725;<br>F:GO:0005515;<br>P:GO:0007275;<br>F:GO:0004713;<br>P:GO:0042771;<br>F:GO:0004674;<br>F:GO:0000287;<br>C:GO:0005634;<br>F:GO:0005524;<br>P:GO:0007608;<br>C:GO:0005938 | - | EC:2.7.10.0;<br>EC:2.7.11.0                                     | IPR011009; IPR017442;<br>G3DSA:1.10.510.10 (GENE3D),<br>PTHR22986 (PANTHER),<br>PTHR22986:SF30 (PANTHER)                                                                                                                                                              |
| Caenorhabditis briggsae       | clc-type chloride channel family member (clh-2) | 11 | P:GO:0009792;<br>F:GO:0005247;<br>C:GO:0005902;<br>C:GO:0005886;<br>F:GO:0005515;<br>P:GO:0055085;<br>P:GO:0000003;<br>C:GO:0016021;<br>C:GO:0005626;<br>C:GO:0015629;<br>P:GO:0006821                                   | - |                                                                 | IPR001807; IPR014743;<br>PTHR11689:SF5 (PANTHER), SignalP<br>(SIGNALP)                                                                                                                                                                                                |
| Caenorhabditis elegans        | adhesion regulating molecule 1                  | 3  | F:GO:0005515;<br>P:GO:0009987;<br>C:GO:0044424                                                                                                                                                                           | - |                                                                 | IPR006773                                                                                                                                                                                                                                                             |
| Caenorhabditis briggsae       | sorting nexin isoform cra_c                     | 5  | F:GO:0035091;<br>F:GO:0004871;<br>F:GO:0005515;<br>C:GO:0016021;<br>P:GO:0007154                                                                                                                                         | - |                                                                 | IPR003114; PTHR22775 (PANTHER),<br>PTHR22775:SF4 (PANTHER)                                                                                                                                                                                                            |
| Caenorhabditis briggsae       | methylcrotonoyl-coenzyme a carboxylase 1        | 7  | P:GO:0019752;<br>C:GO:0005743;<br>F:GO:0016874;<br>P:GO:0034641;<br>F:GO:0009374;<br>F:GO:0005524;<br>C:GO:0005794                                                                                                       | - |                                                                 | IPR000089; IPR001882; IPR005479;<br>IPR005481; IPR005482; IPR011053;<br>IPR011054; IPR011761; IPR011764;<br>IPR013815; IPR013816; IPR013817;<br>IPR016185; G3DSA:2.40.50.100<br>(GENE3D), PTHR18866 (PANTHER),<br>PTHR18866:SF19 (PANTHER),<br>SSF56059 (SUPERFAMILY) |
| Caenorhabditis elegans        | yot0_caeel ame: full=upf0057 membrane protein   | 0  |                                                                                                                                                                                                                          |   | C:GO:0016021                                                    | IPR000612; SignalP (SIGNALP)                                                                                                                                                                                                                                          |
|                               | -                                               | 0  |                                                                                                                                                                                                                          |   |                                                                 | -                                                                                                                                                                                                                                                                     |
| Caenorhabditis elegans        | zinc transporter zip3                           | 2  | P:GO:0006829;<br>F:GO:0005385                                                                                                                                                                                            | - |                                                                 | IPR003689; PTHR11040 (PANTHER),<br>PTHR11040:SF5 (PANTHER)                                                                                                                                                                                                            |
| Caenorhabditis elegans        | calcium-binding protein p22                     | 3  | F:GO:0016491;<br>F:GO:0005509;<br>P:GO:0040011                                                                                                                                                                           | - |                                                                 | IPR002048; IPR008080; IPR011992;<br>IPR018247; IPR018248; IPR018249;<br>PTHR23056 (PANTHER),<br>PTHR23056:SF4 (PANTHER), SSF47473<br>(SUPERFAMILY)                                                                                                                    |
| Strongylocentrotus purpuratus | nuclease harbi1-like                            | 0  |                                                                                                                                                                                                                          |   | C:GO:0005737;<br>F:GO:0016787;<br>F:GO:0004518;<br>C:GO:0005634 | PTHR22930 (PANTHER), SignalP<br>(SIGNALP)                                                                                                                                                                                                                             |

|                        |                                                                 |    |                                                                                                                                                                                                                                           |   |                                                                                                                                                                                        |
|------------------------|-----------------------------------------------------------------|----|-------------------------------------------------------------------------------------------------------------------------------------------------------------------------------------------------------------------------------------------|---|----------------------------------------------------------------------------------------------------------------------------------------------------------------------------------------|
| Caenorhabditis elegans | heavy chain non-muscle                                          | 14 | P:GO:0051234;<br>P:GO:0007010;<br>P:GO:0007275;<br>F:GO:0003779;<br>F:GO:0032559;<br>F:GO:0003774;<br>P:GO:0030154;<br>P:GO:0002376;<br>C:GO:0042995;<br>P:GO:0048646;<br>C:GO:0044459;<br>P:GO:0008152;<br>C:GO:0016459;<br>C:GO:0005938 | - | PD968187 (PRODOM), PTHR13140 (PANTHER), PTHR13140:SF23 (PANTHER)                                                                                                                       |
| -                      | -                                                               | 0  |                                                                                                                                                                                                                                           |   | -                                                                                                                                                                                      |
| -                      | -                                                               | 0  |                                                                                                                                                                                                                                           |   | IPR007087                                                                                                                                                                              |
| -                      | -                                                               | 0  |                                                                                                                                                                                                                                           |   | IPR007087                                                                                                                                                                              |
| Caenorhabditis elegans | tbc domain containing protein                                   | 1  | F:GO:0005515                                                                                                                                                                                                                              | - | IPR001849; IPR011993; SSF50729 (SUPERFAMILY)                                                                                                                                           |
| -                      | -                                                               | 0  |                                                                                                                                                                                                                                           |   | SignalP (SIGNALP)                                                                                                                                                                      |
| Homo sapiens           | testis enhanced gene transcript (bax inhibitor 1) isoform cra_a | 7  | P:GO:0007283;<br>C:GO:0005887;<br>P:GO:0030324;<br>C:GO:0005626;<br>C:GO:0005634;<br>P:GO:0043066;<br>C:GO:0005783                                                                                                                        | - | IPR006213; IPR006214; PTHR23291:SF4 (PANTHER), SignalP (SIGNALP)                                                                                                                       |
| Caenorhabditis elegans | vasa- and belle-like helicase family member (vbh-1)             | 8  | P:GO:0009792;<br>P:GO:0002119;<br>F:GO:0008026;<br>F:GO:0003676;<br>C:GO:0043186;<br>P:GO:0042006;<br>F:GO:0005524;<br>P:GO:0040007                                                                                                       | - | IPR000629; IPR001650; IPR011545; IPR014001; IPR014014; IPR014021; G3DSA:3.40.50.300 (GENE3D), PTHR10967 (PANTHER), PTHR10967:SF59 (PANTHER), SignalP (SIGNALP), SSF52540 (SUPERFAMILY) |
| -                      | -                                                               | 0  |                                                                                                                                                                                                                                           |   | -                                                                                                                                                                                      |
| Caenorhabditis elegans | novel protein human and mouse neuroblastoma-amplified protein   | 0  |                                                                                                                                                                                                                                           |   | SignalP (SIGNALP)                                                                                                                                                                      |

|                     |                                                                                                            |    |                                                                                                                                                                                                                                                                                                                                                                                                                                                                                                                                    |  |                                                                                                |
|---------------------|------------------------------------------------------------------------------------------------------------|----|------------------------------------------------------------------------------------------------------------------------------------------------------------------------------------------------------------------------------------------------------------------------------------------------------------------------------------------------------------------------------------------------------------------------------------------------------------------------------------------------------------------------------------|--|------------------------------------------------------------------------------------------------|
| synthetic construct | cd74 major histocompatibility class ii invariant chain                                                     | 35 | <p>P:GO:0048146;<br/> C:GO:0005771;<br/> C:GO:0005764;<br/> F:GO:0005215;<br/> P:GO:0006814;<br/> P:GO:0070374;<br/> F:GO:0042289;<br/> P:GO:0045060;<br/> P:GO:0043030;<br/> P:GO:0006952;<br/> P:GO:0019883;<br/> P:GO:0051085;<br/> F:GO:0001540;<br/> P:GO:0019886;<br/> P:GO:0016064;<br/> P:GO:0043518;<br/> P:GO:0050731;<br/> P:GO:0030890;<br/> P:GO:0045582;<br/> P:GO:0001516;<br/> F:GO:0004896;<br/> C:GO:0005887;<br/> P:GO:0045581;<br/> P:GO:0043066;<br/> P:GO:0006886;<br/> F:GO:0042802;<br/> C:GO:0005794;</p> |  | <p>IPR011988; IPR015386; IPR022339;<br/> PTHR14093 (PANTHER),<br/> PTHR14093:SF5 (PANTHER)</p> |
| Pan troglodytes     | cd74 antigen (invariant polypeptide of major histocompatibility class ii antigen-associated) isoform cra_d | 35 | <p>P:GO:0048146;<br/> C:GO:0005771;<br/> C:GO:0005764;<br/> F:GO:0005215;<br/> P:GO:0006814;<br/> P:GO:0070374;<br/> F:GO:0042289;<br/> P:GO:0045060;<br/> P:GO:0043030;<br/> P:GO:0006952;<br/> P:GO:0019883;<br/> P:GO:0051085;<br/> F:GO:0001540;<br/> P:GO:0019886;<br/> P:GO:0016064;<br/> P:GO:0043518;<br/> P:GO:0050731;<br/> P:GO:0030890;<br/> P:GO:0045582;<br/> P:GO:0001516;<br/> F:GO:0004896;<br/> C:GO:0005887;<br/> P:GO:0045581;<br/> P:GO:0043066;<br/> P:GO:0006886;<br/> F:GO:0042802;<br/> C:GO:0005794;</p> |  |                                                                                                |
| Brugia malayi       | melanoma antigen family 4                                                                                  | 0  |                                                                                                                                                                                                                                                                                                                                                                                                                                                                                                                                    |  | IPR002190; IPR003006                                                                           |

|                            |                                                           |    |                                                                                                                                                                                                         |   |   |                                                                                                                |
|----------------------------|-----------------------------------------------------------|----|---------------------------------------------------------------------------------------------------------------------------------------------------------------------------------------------------------|---|---|----------------------------------------------------------------------------------------------------------------|
| Homo sapiens               | thymosin beta-10                                          | 5  | F:GO:0003785;<br>C:GO:0005856;<br>P:GO:0042989;<br>P:GO:0007286;<br>C:GO:0005737                                                                                                                        | - | - |                                                                                                                |
|                            | -                                                         | 0  |                                                                                                                                                                                                         |   |   |                                                                                                                |
| Caenorhabditis briggsae    | importin subunit alpha-1                                  | 4  | C:GO:0005737;<br>C:GO:0005643;<br>P:GO:0006606;<br>F:GO:0008565                                                                                                                                         | - | - |                                                                                                                |
| Pediculus humanus corporis | cop9 constitutive photomorphogenic homolog subunit 2      | 10 | F:GO:0004871;<br>C:GO:0005730;<br>C:GO:0008180;<br>F:GO:0003714;<br>P:GO:0007165;<br>P:GO:0016481;<br>P:GO:0008283;<br>C:GO:0005737;<br>P:GO:0030182;<br>P:GO:0006366                                   | - |   | IPR000717; IPR011991; IPR013143;<br>PTHR10678 (PANTHER),<br>PTHR10678:SF3 (PANTHER), SSF46785<br>(SUPERFAMILY) |
| Pediculus humanus corporis | cop9 constitutive photomorphogenic homolog subunit 2      | 10 | F:GO:0004871;<br>C:GO:0005730;<br>C:GO:0008180;<br>F:GO:0003714;<br>P:GO:0007165;<br>P:GO:0016481;<br>P:GO:0008283;<br>C:GO:0005737;<br>P:GO:0030182;<br>P:GO:0006366                                   | - |   | IPR000717; IPR011991; IPR013143;<br>PTHR10678 (PANTHER),<br>PTHR10678:SF3 (PANTHER), SSF46785<br>(SUPERFAMILY) |
| Pediculus humanus corporis | cop9 constitutive photomorphogenic homolog subunit 2      | 10 | F:GO:0004871;<br>C:GO:0005730;<br>C:GO:0008180;<br>F:GO:0003714;<br>P:GO:0007165;<br>P:GO:0016481;<br>P:GO:0008283;<br>C:GO:0005737;<br>P:GO:0030182;<br>P:GO:0006366                                   | - |   | IPR000717; IPR011991; IPR013143;<br>PTHR10678 (PANTHER),<br>PTHR10678:SF3 (PANTHER), SSF46785<br>(SUPERFAMILY) |
| Loa loa                    | scavenger receptor class a- c-type lectin (agap009143-pa) | 1  | F:GO:0004872                                                                                                                                                                                            | - |   |                                                                                                                |
| Brugia malayi              | nfkb activating protein                                   | 12 | F:GO:0005515;<br>P:GO:0040027;<br>P:GO:0040010;<br>P:GO:0006898;<br>P:GO:0040011;<br>C:GO:0005737;<br>C:GO:0005730;<br>P:GO:0010171;<br>F:GO:0003682;<br>P:GO:0001703;<br>P:GO:0046638;<br>F:GO:0016564 | - |   | IPR009269                                                                                                      |

|                         |                                                            |    |                                                                                                                                                                                                         |                                                                                                                                                                                                                                                                                                                                |                                                            |
|-------------------------|------------------------------------------------------------|----|---------------------------------------------------------------------------------------------------------------------------------------------------------------------------------------------------------|--------------------------------------------------------------------------------------------------------------------------------------------------------------------------------------------------------------------------------------------------------------------------------------------------------------------------------|------------------------------------------------------------|
| Brugia malayi           | nfkB activating protein                                    | 12 | F:GO:0005515;<br>P:GO:0040027;<br>P:GO:0040010;<br>P:GO:0006898;<br>P:GO:0040011;<br>C:GO:0005737;<br>C:GO:0005730;<br>P:GO:0010171;<br>F:GO:0003682;<br>P:GO:0001703;<br>P:GO:0046638;<br>F:GO:0016564 | -                                                                                                                                                                                                                                                                                                                              | IPR009269                                                  |
|                         | -                                                          | 0  |                                                                                                                                                                                                         |                                                                                                                                                                                                                                                                                                                                | -                                                          |
| Loa loa                 | elegans protein partially confirmed by transcript evidence | 0  |                                                                                                                                                                                                         | P:GO:0000003;<br>P:GO:0005975;<br>P:GO:0009792;<br>P:GO:0019915                                                                                                                                                                                                                                                                | -                                                          |
| Caenorhabditis briggsae | briggsae cbr-vig-1 protein                                 | 1  | P:GO:0009792                                                                                                                                                                                            | -                                                                                                                                                                                                                                                                                                                              | IPR006861; PTHR12299 (PANTHER),<br>PTHR12299:SF5 (PANTHER) |
| Caenorhabditis briggsae | briggsae cbr-vig-1 protein                                 | 1  | P:GO:0009792                                                                                                                                                                                            | -                                                                                                                                                                                                                                                                                                                              | IPR006861; PTHR12299 (PANTHER),<br>PTHR12299:SF5 (PANTHER) |
| Loa loa                 | elegans protein partially confirmed by transcript evidence | 0  |                                                                                                                                                                                                         | P:GO:0000003;<br>P:GO:0005975;<br>P:GO:0009792;<br>P:GO:0019915                                                                                                                                                                                                                                                                | -                                                          |
| Caenorhabditis briggsae | briggsae cbr-vig-1 protein                                 | 1  | P:GO:0009792                                                                                                                                                                                            | -                                                                                                                                                                                                                                                                                                                              | IPR006861; PTHR12299 (PANTHER),<br>PTHR12299:SF5 (PANTHER) |
| Caenorhabditis briggsae | beta-lactamase family protein                              | 0  |                                                                                                                                                                                                         |                                                                                                                                                                                                                                                                                                                                | -                                                          |
| Caenorhabditis elegans  | viral a-type inclusion protein                             | 0  |                                                                                                                                                                                                         | F:GO:0051082;<br>F:GO:0016787;<br>P:GO:0007269;<br>C:GO:0019717;<br>C:GO:0005783;<br>C:GO:0045202;<br>P:GO:0050808;<br>F:GO:0030165;<br>P:GO:0007416;<br>C:GO:0030054;<br>C:GO:0005737;<br>C:GO:0042734;<br>C:GO:0030426;<br>P:GO:0055114;<br>P:GO:0006457;<br>F:GO:0032440;<br>C:GO:0005856;<br>F:GO:0005515;<br>F:GO:0016491 | -                                                          |
| Caenorhabditis elegans  | viral a-type inclusion protein                             | 1  | C:GO:0044464                                                                                                                                                                                            | -                                                                                                                                                                                                                                                                                                                              | -                                                          |



|                             |                                                   |   |                                                                                                                                                                                                                          |   |                                                 |
|-----------------------------|---------------------------------------------------|---|--------------------------------------------------------------------------------------------------------------------------------------------------------------------------------------------------------------------------|---|-------------------------------------------------|
| Angiostrongylus cantonensis | isoamylase n-termi-l domain protein               | 0 | F:GO:0019901;<br>P:GO:0006633;<br>F:GO:0016787;<br>C:GO:0005952;<br>F:GO:0016301;<br>P:GO:0005975;<br>P:GO:0046320;<br>F:GO:0003824;<br>C:GO:0005654;<br>F:GO:0004553;<br>F:GO:0005515;<br>C:GO:0005829;<br>C:GO:0031588 |   | PTHR10343 (PANTHER),<br>PTHR10343:SF3 (PANTHER) |
| Angiostrongylus cantonensis | isoamylase n-termi-l domain protein               | 0 | F:GO:0019901;<br>P:GO:0006633;<br>F:GO:0016787;<br>C:GO:0005952;<br>F:GO:0016301;<br>P:GO:0005975;<br>P:GO:0046320;<br>F:GO:0003824;<br>C:GO:0005654;<br>F:GO:0004553;<br>F:GO:0005515;<br>C:GO:0005829;<br>C:GO:0031588 |   | PTHR10343 (PANTHER),<br>PTHR10343:SF3 (PANTHER) |
| Angiostrongylus cantonensis | n-ethylmaleimide-sensitive factor attachment beta | 5 | F:GO:0019905;<br>C:GO:0005794;<br>P:GO:0006886;<br>F:GO:0008270;<br>C:GO:0005783                                                                                                                                         | - | -                                               |
|                             | -                                                 | 0 |                                                                                                                                                                                                                          |   | -                                               |

|                               |                                                            |    |                                                                                                                                                                                                                                                                                                                                                                                                                                                                                         |              |   |                                                                                                                |
|-------------------------------|------------------------------------------------------------|----|-----------------------------------------------------------------------------------------------------------------------------------------------------------------------------------------------------------------------------------------------------------------------------------------------------------------------------------------------------------------------------------------------------------------------------------------------------------------------------------------|--------------|---|----------------------------------------------------------------------------------------------------------------|
| Strongylocentrotus purpuratus | tyramine receptor                                          | 36 | F:GO:0000007;<br>P:GO:0001963;<br>P:GO:0044092;<br>P:GO:0051051;<br>P:GO:0009628;<br>P:GO:0043085;<br>P:GO:0051480;<br>P:GO:0060255;<br>C:GO:0044425;<br>P:GO:0048522;<br>P:GO:0051046;<br>P:GO:0007212;<br>P:GO:0030814;<br>P:GO:0044260;<br>P:GO:0008277;<br>P:GO:0030900;<br>P:GO:0051050;<br>P:GO:0031326;<br>P:GO:0023061;<br>C:GO:0005886;<br>P:GO:0010627;<br>P:GO:0035467;<br>P:GO:0007611;<br>C:GO:0043005;<br>P:GO:0009605;<br>P:GO:0010959;<br>F:GO:0004952;<br>P:GO:0016043 | -            | - |                                                                                                                |
| Brugia malayi                 | nf-kappa-b inhibitor-like protein 2                        | 0  |                                                                                                                                                                                                                                                                                                                                                                                                                                                                                         | F:GO:0005488 |   | IPR002110; IPR020683; PTHR18958 (PANTHER), PTHR18958:SF58 (PANTHER)                                            |
| Caenorhabditis elegans        | elegans protein partially confirmed by transcript evidence | 6  | F:GO:0046872;<br>F:GO:0004879;<br>F:GO:0003677;<br>P:GO:0045449;<br>F:GO:0005515;<br>P:GO:0000003                                                                                                                                                                                                                                                                                                                                                                                       | -            |   | IPR001628; IPR013088; PRO0350 (PRINTS), PTHR11865 (PANTHER), PTHR11865:SF236 (PANTHER), SSF57716 (SUPERFAMILY) |
| Caenorhabditis elegans        | ferm domain ( -ezrin-radixin-moesin) family member (frm-1) | 9  | F:GO:0008092;<br>P:GO:0009888;<br>P:GO:0048598;<br>C:GO:0043232;<br>C:GO:0016327;<br>P:GO:0030154;<br>C:GO:0044444;<br>P:GO:0048513;<br>P:GO:0016043                                                                                                                                                                                                                                                                                                                                    | -            |   | IPR008379; PTHR23280 (PANTHER)                                                                                 |
| Caenorhabditis briggsae       | ferm domain ( -ezrin-radixin-moesin) family member (frm-1) | 10 | F:GO:0008092;<br>P:GO:0035151;<br>C:GO:0045169;<br>C:GO:0005918;<br>P:GO:0048598;<br>P:GO:0045216;<br>C:GO:0045170;<br>P:GO:0035321;<br>P:GO:0060857;<br>N:GO:0071842                                                                                                                                                                                                                                                                                                                   | -            |   | IPR008379; PTHR23280 (PANTHER)                                                                                 |
| Caenorhabditis elegans        | ferm domain ( -ezrin-radixin-moesin) family member (frm-1) | 1  | F:GO:0005515                                                                                                                                                                                                                                                                                                                                                                                                                                                                            | -            |   | -                                                                                                              |

|                            |                                                                                                |    |                                                                                                                                                                       |                                                                                                   |             |                                                                                                                        |
|----------------------------|------------------------------------------------------------------------------------------------|----|-----------------------------------------------------------------------------------------------------------------------------------------------------------------------|---------------------------------------------------------------------------------------------------|-------------|------------------------------------------------------------------------------------------------------------------------|
| Caenorhabditis briggsae    | ferm domain ( -ezrin-radixin-moesin) family member (frm-1)                                     | 10 | F:GO:0008092;<br>P:GO:0035151;<br>C:GO:0045169;<br>C:GO:0005918;<br>P:GO:0048598;<br>P:GO:0045216;<br>C:GO:0045170;<br>P:GO:0035321;<br>P:GO:0060857;<br>N:GO:0071842 | -                                                                                                 |             | IPR008379; PTHR23280 (PANTHER)                                                                                         |
| Caenorhabditis elegans     | pa2l_caeel ame: full=phospholipase a2-like protein flags: precursor                            | 0  |                                                                                                                                                                       | C:GO:0016021;<br>P:GO:0016042;<br>P:GO:0006644                                                    |             | SignalP (SIGNALP)                                                                                                      |
| Caenorhabditis elegans     | dihydrolipoamide s-succinyltransferase (e2 component of 2-oxo-glutarate complex) isoform cra_a | 10 | F:GO:0031072;<br>P:GO:0006103;<br>C:GO:0005739;<br>P:GO:0006734;<br>F:GO:0051087;<br>P:GO:0006099;<br>C:GO:0005792;<br>F:GO:0004149;<br>C:GO:0045252;<br>C:GO:0005886 | -                                                                                                 | EC:2.3.1.61 | IPR001078; G3DSA:3.30.559.10 (GENE3D), PTHR23151 (PANTHER), PTHR23151:SF8 (PANTHER), SSF52777 (SUPERFAMILY)            |
| Bursaphelenchus xylophilus | 60s ribosomal protein l5                                                                       | 9  | P:GO:0040035;<br>P:GO:0009792;<br>P:GO:0010171;<br>P:GO:0002119;<br>C:GO:0005840;<br>F:GO:0008097;<br>F:GO:0003735;<br>P:GO:0040010;<br>P:GO:0006412                  | -                                                                                                 | EC:3.6.5.3  | IPR005484; IPR005485; G3DSA:3.30.420.100 (GENE3D), PTHR23410:SF1 (PANTHER), SSF53137 (SUPERFAMILY)                     |
| Caenorhabditis elegans     | briggsae cbr-bag-1 protein                                                                     | 0  |                                                                                                                                                                       | P:GO:0006915;<br>P:GO:0016049;<br>P:GO:0006950;<br>P:GO:0006457;<br>F:GO:0051087;<br>F:GO:0005515 |             | -                                                                                                                      |
| Caenorhabditis elegans     | pyruvate dehydroge-se component x                                                              | 2  | F:GO:0016747;<br>C:GO:0044444                                                                                                                                         | -                                                                                                 | EC:2.3.1.0  | IPR001078; IPR004167; G3DSA:3.30.559.10 (GENE3D), PTHR23151 (PANTHER), PTHR23151:SF9 (PANTHER), SSF52777 (SUPERFAMILY) |
|                            | -                                                                                              | 0  |                                                                                                                                                                       |                                                                                                   |             | PTHR14429 (PANTHER), PTHR14429:SF3 (PANTHER)                                                                           |
|                            | -                                                                                              | 0  |                                                                                                                                                                       |                                                                                                   |             | PTHR14429 (PANTHER), PTHR14429:SF3 (PANTHER)                                                                           |
|                            | -                                                                                              | 0  |                                                                                                                                                                       |                                                                                                   |             | -                                                                                                                      |
|                            | -                                                                                              | 0  |                                                                                                                                                                       |                                                                                                   |             | -                                                                                                                      |

|                         |                                                            |    |                                                                                                                                                                                                                                                                                                                                                 |                                                                 |                                                                                        |                                                                                                                                                    |
|-------------------------|------------------------------------------------------------|----|-------------------------------------------------------------------------------------------------------------------------------------------------------------------------------------------------------------------------------------------------------------------------------------------------------------------------------------------------|-----------------------------------------------------------------|----------------------------------------------------------------------------------------|----------------------------------------------------------------------------------------------------------------------------------------------------|
| Caenorhabditis elegans  | translation initiation factor 2 gamma subunit              | 20 | P:GO:0016568;<br>F:GO:0003743;<br>P:GO:0006413;<br>P:GO:0040010;<br>F:GO:0008270;<br>F:GO:0004781;<br>P:GO:0006333;<br>P:GO:0000003;<br>F:GO:0018024;<br>P:GO:0010171;<br>P:GO:0002119;<br>C:GO:0000785;<br>F:GO:0005515;<br>P:GO:0040011;<br>F:GO:0003924;<br>P:GO:0009792;<br>P:GO:0040018;<br>F:GO:0003682;<br>C:GO:0005634;<br>F:GO:0005525 | -                                                               | EC:2.7.7.4;<br>EC:2.1.1.43;<br>EC:3.6.5.1;<br>EC:3.6.5.2;<br>EC:3.6.5.3;<br>EC:3.6.5.4 | IPR000795; G3DSA:3.40.50.300<br>(GENE3D), PTHR23115 (PANTHER),<br>PTHR23115:SF9 (PANTHER), SSF52540<br>(SUPERFAMILY)                               |
| Caenorhabditis briggsae | b-cell cll lymphoma 7b                                     | 0  |                                                                                                                                                                                                                                                                                                                                                 | F:GO:0003674;<br>F:GO:0003779;<br>P:GO:0008150;<br>C:GO:0005575 |                                                                                        | IPR006804; PTHR12767:SF1<br>(PANTHER)                                                                                                              |
|                         | -                                                          | 0  |                                                                                                                                                                                                                                                                                                                                                 |                                                                 |                                                                                        | -                                                                                                                                                  |
| Caenorhabditis elegans  | cytochrome p450 family protein                             | 6  | P:GO:0016539;<br>F:GO:0009055;<br>F:GO:0004497;<br>F:GO:0020037;<br>P:GO:0055114;<br>C:GO:0044464                                                                                                                                                                                                                                               | -                                                               |                                                                                        | IPR001128; PTHR19383:SF165<br>(PANTHER)                                                                                                            |
| Caenorhabditis elegans  | family with sequence similarity member a                   | 1  | C:GO:0005783                                                                                                                                                                                                                                                                                                                                    | -                                                               |                                                                                        | IPR019154; PTHR21357 (PANTHER)                                                                                                                     |
| Caenorhabditis elegans  | 1110033m05rik protein                                      | 0  |                                                                                                                                                                                                                                                                                                                                                 | C:GO:0005576                                                    |                                                                                        | IPR019154; PTHR21357 (PANTHER)                                                                                                                     |
| Caenorhabditis elegans  | u528_caeel ame: full=upf0528 protein                       | 0  |                                                                                                                                                                                                                                                                                                                                                 |                                                                 |                                                                                        | -                                                                                                                                                  |
| Caenorhabditis elegans  | 1110033m05rik protein                                      | 0  |                                                                                                                                                                                                                                                                                                                                                 |                                                                 |                                                                                        | IPR019154; PTHR21357 (PANTHER)                                                                                                                     |
| Caenorhabditis elegans  | 1110033m05rik protein                                      | 0  |                                                                                                                                                                                                                                                                                                                                                 |                                                                 |                                                                                        | IPR019154; PTHR21357 (PANTHER)                                                                                                                     |
| Caenorhabditis briggsae | carboxyl transferase domain containing protein             | 3  | F:GO:0016874;<br>P:GO:0008152;<br>F:GO:0000166                                                                                                                                                                                                                                                                                                  | -                                                               |                                                                                        | IPR000022; IPR011762; IPR011763;<br>G3DSA:3.90.226.10 (GENE3D),<br>PTHR18866 (PANTHER),<br>PTHR18866:SF6 (PANTHER), SSF52096<br>(SUPERFAMILY)      |
| Caenorhabditis elegans  | telomerase-binding protein est1a                           | 2  | F:GO:0005488;<br>C:GO:0044424                                                                                                                                                                                                                                                                                                                   | -                                                               |                                                                                        | IPR019458; PTHR15696 (PANTHER),<br>SSF48452 (SUPERFAMILY)                                                                                          |
| Caenorhabditis elegans  | telomerase-binding protein est1a                           | 2  | F:GO:0005488;<br>C:GO:0044424                                                                                                                                                                                                                                                                                                                   | -                                                               |                                                                                        | IPR019458; PTHR15696 (PANTHER),<br>SSF48452 (SUPERFAMILY)                                                                                          |
|                         | -                                                          | 0  |                                                                                                                                                                                                                                                                                                                                                 |                                                                 |                                                                                        | -                                                                                                                                                  |
| Caenorhabditis elegans  | elegans protein partially confirmed by transcript evidence | 2  | F:GO:0004067;<br>P:GO:0006528                                                                                                                                                                                                                                                                                                                   | -                                                               | EC:3.5.1.1                                                                             | IPR002110; IPR006033; IPR006034;<br>IPR020683; IPR020827;<br>G3DSA:3.40.50.1170 (GENE3D),<br>G3DSA:3.40.50.40 (GENE3D),<br>PTHR11707:SF3 (PANTHER) |
| Caenorhabditis elegans  | elegans protein partially confirmed by transcript evidence | 2  | F:GO:0004067;<br>P:GO:0006528                                                                                                                                                                                                                                                                                                                   | -                                                               | EC:3.5.1.1                                                                             | IPR002110; IPR006033; IPR006034;<br>IPR020683; IPR020827;<br>G3DSA:3.40.50.1170 (GENE3D),<br>G3DSA:3.40.50.40 (GENE3D),<br>PTHR11707:SF3 (PANTHER) |

|                         |                                                            |   |                                                                                                                                                      |                                                                 |                                           |                                                                                                                                                    |
|-------------------------|------------------------------------------------------------|---|------------------------------------------------------------------------------------------------------------------------------------------------------|-----------------------------------------------------------------|-------------------------------------------|----------------------------------------------------------------------------------------------------------------------------------------------------|
| Caenorhabditis elegans  | elegans protein partially confirmed by transcript evidence | 2 | F:GO:0004067;<br>P:GO:0006528                                                                                                                        | -                                                               | EC:3.5.1.1                                | IPR002110; IPR006033; IPR006034;<br>IPR020683; IPR020827;<br>G3DSA:3.40.50.1170 (GENE3D),<br>G3DSA:3.40.50.40 (GENE3D),<br>PTHR11707:SF3 (PANTHER) |
| Caenorhabditis elegans  | elegans protein partially confirmed by transcript evidence | 2 | F:GO:0004067;<br>P:GO:0006528                                                                                                                        | -                                                               | EC:3.5.1.1                                | IPR002110; IPR006033; IPR006034;<br>IPR020683; IPR020827;<br>G3DSA:3.40.50.1170 (GENE3D),<br>G3DSA:3.40.50.40 (GENE3D),<br>PTHR11707:SF3 (PANTHER) |
| Caenorhabditis elegans  | elegans protein partially confirmed by transcript evidence | 2 | F:GO:0004067;<br>P:GO:0006528                                                                                                                        | -                                                               | EC:3.5.1.1                                | IPR002110; IPR006033; IPR006034;<br>IPR020683; IPR020827;<br>G3DSA:3.40.50.1170 (GENE3D),<br>G3DSA:3.40.50.40 (GENE3D),<br>PTHR11707:SF3 (PANTHER) |
| Caenorhabditis elegans  | elegans protein partially confirmed by transcript evidence | 2 | F:GO:0004067;<br>P:GO:0006528                                                                                                                        | -                                                               | EC:3.5.1.1                                | IPR002110; IPR006033; IPR006034;<br>IPR020683; IPR020827;<br>G3DSA:3.40.50.1170 (GENE3D),<br>G3DSA:3.40.50.40 (GENE3D),<br>PTHR11707:SF3 (PANTHER) |
| Caenorhabditis elegans  | elegans protein partially confirmed by transcript evidence | 2 | F:GO:0004067;<br>P:GO:0006528                                                                                                                        | -                                                               | EC:3.5.1.1                                | IPR002110; IPR006033; IPR006034;<br>IPR020683; IPR020827;<br>G3DSA:3.40.50.1170 (GENE3D),<br>G3DSA:3.40.50.40 (GENE3D),<br>PTHR11707:SF3 (PANTHER) |
| Caenorhabditis elegans  | aldehyde dehydroge-se 7 member a1                          | 9 | F:GO:0004029;<br>C:GO:0005829;<br>P:GO:0055114;<br>F:GO:0008802;<br>F:GO:0004043;<br>P:GO:0006081;<br>C:GO:0005739;<br>C:GO:0005634;<br>P:GO:0007605 | -                                                               | EC:1.2.1.3;<br>EC:1.2.1.8;<br>EC:1.2.1.31 | IPR015590; IPR016160; IPR016161;<br>IPR016162; IPR016163;<br>PTHR11699:SF26 (PANTHER)                                                              |
| Caenorhabditis briggsae | cytochrome c oxidase subunit via polypeptide 1             | 5 | C:GO:0005743;<br>P:GO:0040010;<br>P:GO:0000003;<br>P:GO:0008340;<br>C:GO:0044425                                                                     | -                                                               |                                           | IPR001349; IPR018507                                                                                                                               |
| Ancylostoma caninum     | secreted protein 5 precursor                               | 0 |                                                                                                                                                      | C:GO:0005576                                                    |                                           | IPR001283; IPR014044; SignalP (SIGNALP)                                                                                                            |
| Caenorhabditis briggsae | elegans lipi-3 partially confirmed by transcript evidence  | 5 | P:GO:0006629;<br>F:GO:0005488;<br>P:GO:0044281;<br>P:GO:0044237;<br>F:GO:0004806                                                                     | -                                                               | EC:3.1.1.3                                | IPR000073; IPR006693;<br>G3DSA:3.40.50.1820 (GENE3D),<br>PTHR11005 (PANTHER), SignalP (SIGNALP), SSF53474 (SUPERFAMILY)                            |
| Caenorhabditis elegans  | elegans protein partially confirmed by transcript evidence | 0 |                                                                                                                                                      | P:GO:0006508;<br>F:GO:0004222;<br>F:GO:0008270;<br>C:GO:0031012 |                                           | IPR011705; IPR013089                                                                                                                               |
| -                       | -                                                          | 0 |                                                                                                                                                      |                                                                 |                                           | -                                                                                                                                                  |
| Caenorhabditis briggsae | Hypothetical protein CBG21271 [Caenorhabditis briggsae]    | 0 |                                                                                                                                                      |                                                                 |                                           | -                                                                                                                                                  |
| Caenorhabditis elegans  | dopey family member 1                                      | 0 |                                                                                                                                                      | P:GO:0007275;<br>P:GO:0006810;<br>P:GO:0015031                  |                                           | -                                                                                                                                                  |
| -                       | -                                                          | 0 |                                                                                                                                                      |                                                                 |                                           | PR00021 (PRINTS), PR01217 (PRINTS)                                                                                                                 |
| -                       | -                                                          | 0 |                                                                                                                                                      |                                                                 |                                           | PR00021 (PRINTS), PR01217 (PRINTS)                                                                                                                 |

|                                        |                                                                                        |    |                                                                                                                                                                                                         |   |                               |                                                                                                                                                                                                             |
|----------------------------------------|----------------------------------------------------------------------------------------|----|---------------------------------------------------------------------------------------------------------------------------------------------------------------------------------------------------------|---|-------------------------------|-------------------------------------------------------------------------------------------------------------------------------------------------------------------------------------------------------------|
| Lodderomyces elongisporus NRRL YB-4239 | alanyl-tr- synthetase                                                                  | 4  | F:GO:0004812;<br>P:GO:0006412;<br>P:GO:0043039;<br>F:GO:0000166                                                                                                                                         | - | EC:3.6.5.3                    | IPR002318; IPR018162; IPR018164;<br>IPR018165; G3DSA:3.30.930.10<br>(GENE3D), PTHR11777 (PANTHER),<br>SignalP (SIGNALP), SSF55681<br>(SUPERFAMILY)                                                          |
| -                                      | -                                                                                      | 0  |                                                                                                                                                                                                         |   |                               | -                                                                                                                                                                                                           |
| Caenorhabditis elegans                 | variant sh3 domain containing protein                                                  | 0  |                                                                                                                                                                                                         |   | P:GO:0008150;<br>C:GO:0005575 | IPR001452; IPR011511;<br>G3DSA:2.30.30.40 (GENE3D),<br>PTHR14167 (PANTHER),<br>PTHR14167:SF4 (PANTHER)                                                                                                      |
| Brugia malayi                          | elegans protein confirmed by transcript evidence                                       | 0  |                                                                                                                                                                                                         |   |                               | SignalP (SIGNALP)                                                                                                                                                                                           |
| Brugia malayi                          | elegans protein confirmed by transcript evidence                                       | 0  |                                                                                                                                                                                                         |   |                               | SignalP (SIGNALP)                                                                                                                                                                                           |
| Caenorhabditis elegans                 | transbilayer amphipath transporters (subfamily iv p-type atpase) family member (tat-5) | 7  | C:GO:0016021;<br>F:GO:0015662;<br>P:GO:0006754;<br>F:GO:0005524;<br>P:GO:0015914;<br>F:GO:0000287;<br>F:GO:0004012                                                                                      | - | EC:3.6.3.1                    | IPR001757; IPR008250; IPR018303;<br>G3DSA:2.70.150.10 (GENE3D),<br>G3DSA:3.40.1110.10 (GENE3D),<br>PTHR11939:SF9 (PANTHER), SSF81653<br>(SUPERFAMILY), SSF81660<br>(SUPERFAMILY), SSF81665<br>(SUPERFAMILY) |
| Caenorhabditis briggsae                | briggsae cbr-mab-20 protein                                                            | 3  | P:GO:0030534;<br>P:GO:0007626;<br>P:GO:0048666                                                                                                                                                          | - |                               | -                                                                                                                                                                                                           |
| Caenorhabditis briggsae                | semaphorin 2a                                                                          | 3  | P:GO:0030534;<br>P:GO:0007626;<br>P:GO:0048666                                                                                                                                                          | - |                               | SignalP (SIGNALP)                                                                                                                                                                                           |
| Caenorhabditis briggsae                | semaphorin 2a                                                                          | 3  | P:GO:0030534;<br>P:GO:0007626;<br>P:GO:0048666                                                                                                                                                          | - |                               | -                                                                                                                                                                                                           |
| -                                      | -                                                                                      | 0  |                                                                                                                                                                                                         |   |                               | SignalP (SIGNALP)                                                                                                                                                                                           |
| Caenorhabditis elegans                 | eps (human endocytosis) related family member (eps-8)                                  | 1  | F:GO:0005515                                                                                                                                                                                            | - |                               | IPR013625; PTHR12287 (PANTHER),<br>PTHR12287:SF1 (PANTHER), SSF50729<br>(SUPERFAMILY)                                                                                                                       |
| Caenorhabditis briggsae                | c10orf28 protein                                                                       | 0  |                                                                                                                                                                                                         |   | F:GO:0000166                  | IPR012677; PTHR21678 (PANTHER)                                                                                                                                                                              |
| Homo sapiens                           | barrier-to-autointegration factor                                                      | 9  | P:GO:0050792;<br>F:GO:0003677;<br>P:GO:0019047;<br>C:GO:0005694;<br>C:GO:0005634;<br>C:GO:0005829;<br>P:GO:0009615;<br>P:GO:0044419;<br>P:GO:0019059                                                    | - |                               | -                                                                                                                                                                                                           |
| Caenorhabditis briggsae                | chaperonin containing subunit 7                                                        | 12 | C:GO:0005739;<br>P:GO:0006457;<br>P:GO:0040007;<br>C:GO:0005832;<br>F:GO:0042802;<br>P:GO:0040035;<br>F:GO:0005524;<br>P:GO:0002119;<br>P:GO:0040011;<br>P:GO:0006898;<br>F:GO:0051082;<br>P:GO:0009792 | - |                               | IPR002423; IPR012720; IPR017998;<br>G3DSA:1.10.560.10 (GENE3D),<br>G3DSA:3.30.260.10 (GENE3D),<br>G3DSA:3.50.7.10 (GENE3D), SSF52029<br>(SUPERFAMILY)                                                       |
| Brugia malayi                          | ring finger protein 5                                                                  | 1  | F:GO:0005488                                                                                                                                                                                            | - |                               | PTHR12313 (PANTHER)                                                                                                                                                                                         |

|                         |                                |    |                                                                                                                                                                                                                                                                                                               |                                                                 |                                             |                                                                                                                                   |
|-------------------------|--------------------------------|----|---------------------------------------------------------------------------------------------------------------------------------------------------------------------------------------------------------------------------------------------------------------------------------------------------------------|-----------------------------------------------------------------|---------------------------------------------|-----------------------------------------------------------------------------------------------------------------------------------|
| Caenorhabditis briggsae | briggsae cbr-ubh-3 protein     | 18 | F:GO:0004197;<br>P:GO:0007412;<br>P:GO:0016579;<br>P:GO:0040010;<br>P:GO:0042755;<br>P:GO:0043407;<br>P:GO:0008283;<br>F:GO:0043130;<br>C:GO:0005829;<br>P:GO:0007628;<br>C:GO:0043025;<br>F:GO:0004221;<br>C:GO:0030424;<br>F:GO:0008242;<br>F:GO:0031694;<br>P:GO:0006950;<br>C:GO:0005886;<br>P:GO:0050905 | -                                                               | EC:3.4.22.0;<br>EC:3.1.2.15;<br>EC:3.4.19.0 | -                                                                                                                                 |
| Ancylostoma caninum     | scp-like extracellular protein | 2  | P:GO:0006898;<br>P:GO:0040011                                                                                                                                                                                                                                                                                 | -                                                               |                                             | IPR001283; IPR014044;<br>PTHR10334:SF11 (PANTHER)                                                                                 |
| Caenorhabditis briggsae | briggsae cbr-hsp-43 protein    | 0  |                                                                                                                                                                                                                                                                                                               | P:GO:0009408;<br>F:GO:0005515                                   |                                             | -                                                                                                                                 |
| Homo sapiens            | selenoprotein 1                | 3  | P:GO:0045454;<br>F:GO:0008430;<br>C:GO:0005737                                                                                                                                                                                                                                                                | -                                                               |                                             | -                                                                                                                                 |
|                         | -                              | 0  |                                                                                                                                                                                                                                                                                                               |                                                                 |                                             | -                                                                                                                                 |
| Macaca mulatta          | ubiquitin                      | 2  | C:GO:0005634;<br>C:GO:0005737                                                                                                                                                                                                                                                                                 | -                                                               |                                             | IPR000626; IPR019955;<br>G3DSA:3.10.20.90 (GENE3D),<br>PTHR10666 (PANTHER),<br>PTHR10666:SF9 (PANTHER), SSF54236<br>(SUPERFAMILY) |
| Caenorhabditis briggsae | #NAME?                         | 7  | P:GO:0040010;<br>P:GO:0002119;<br>P:GO:0008152;<br>C:GO:0005759;<br>P:GO:0006898;<br>F:GO:0051082;<br>P:GO:0009792                                                                                                                                                                                            | -                                                               |                                             | IPR000740; IPR009012;<br>PTHR21237:SF8 (PANTHER)                                                                                  |
| Loa loa                 | integrator complex             | 2  | P:GO:0009790;<br>P:GO:0009653                                                                                                                                                                                                                                                                                 | -                                                               |                                             | IPR022145                                                                                                                         |
|                         | -                              | 0  |                                                                                                                                                                                                                                                                                                               |                                                                 |                                             | -                                                                                                                                 |
| Caenorhabditis briggsae | ham-2                          | 2  | P:GO:0010171;<br>F:GO:0005488                                                                                                                                                                                                                                                                                 | -                                                               |                                             | IPR007087; IPR015880; PTHR23228<br>(PANTHER), PTHR23228:SF45<br>(PANTHER)                                                         |
| Caenorhabditis elegans  | pot family protein             | 3  | C:GO:0016020;<br>P:GO:0006810;<br>F:GO:0005215                                                                                                                                                                                                                                                                | -                                                               |                                             | PTHR11654 (PANTHER),<br>PTHR11654:SF12 (PANTHER)                                                                                  |
|                         | -                              | 0  |                                                                                                                                                                                                                                                                                                               |                                                                 |                                             | -                                                                                                                                 |
| Caenorhabditis elegans  | mitochondrial ribosomal        | 0  |                                                                                                                                                                                                                                                                                                               | F:GO:0003735;<br>P:GO:0006412;<br>C:GO:0005840;<br>F:GO:0019843 |                                             | -                                                                                                                                 |
|                         | -                              | 0  |                                                                                                                                                                                                                                                                                                               |                                                                 |                                             | -                                                                                                                                 |

|                          |                           |    |                                                                                                                                                                                                                                                                                              |                                                                                                                                                                                                                          |            |                                                                                                           |
|--------------------------|---------------------------|----|----------------------------------------------------------------------------------------------------------------------------------------------------------------------------------------------------------------------------------------------------------------------------------------------|--------------------------------------------------------------------------------------------------------------------------------------------------------------------------------------------------------------------------|------------|-----------------------------------------------------------------------------------------------------------|
| Haemonchus contortus     | hexoki-se type ii         | 8  | F:GO:0004396;<br>P:GO:0007595;<br>C:GO:0005741;<br>F:GO:0005536;<br>P:GO:0046835;<br>F:GO:0005524;<br>F:GO:0005515;<br>P:GO:0006096                                                                                                                                                          | -                                                                                                                                                                                                                        | EC:2.7.1.1 | IPR001312; IPR022672;<br>G3DSA:3.30.420.40 (GENE3D),<br>SSF53067 (SUPERFAMILY)                            |
| Saccoglossus kowalevskii | mannose c type 1          | 0  |                                                                                                                                                                                                                                                                                              | C:GO:0009986;<br>F:GO:0004888;<br>C:GO:0016021;<br>F:GO:0005529;<br>P:GO:0006897;<br>C:GO:0005576;<br>P:GO:0007165;<br>F:GO:0004872;<br>P:GO:0009405;<br>P:GO:0008150;<br>P:GO:0007155;<br>F:GO:0005537;<br>F:GO:0005488 |            | IPR001304; IPR016186; IPR016187;<br>PTHR22802 (PANTHER),<br>PTHR22802:SF5 (PANTHER), SignalP<br>(SIGNALP) |
| Caenorhabditis briggsae  | hed family member (ptc-3) | 6  | P:GO:0009792;<br>P:GO:0002119;<br>P:GO:0040018;<br>P:GO:0018996;<br>P:GO:0000003;<br>P:GO:0040011                                                                                                                                                                                            | -                                                                                                                                                                                                                        |            | PTHR10796 (PANTHER),<br>PTHR10796:SF34 (PANTHER)                                                          |
| Caenorhabditis briggsae  | hed family member (ptc-3) | 17 | P:GO:0009653;<br>P:GO:0000003;<br>F:GO:0005515;<br>C:GO:0016020;<br>P:GO:0009612;<br>P:GO:0040018;<br>P:GO:0032526;<br>P:GO:0040011;<br>P:GO:0008283;<br>P:GO:0014070;<br>P:GO:0018996;<br>P:GO:0048513;<br>P:GO:0009792;<br>P:GO:0002119;<br>P:GO:0042493;<br>P:GO:0032355;<br>P:GO:0060429 | -                                                                                                                                                                                                                        |            | PTHR10796 (PANTHER),<br>PTHR10796:SF34 (PANTHER)                                                          |
| Caenorhabditis briggsae  | patched homolog 2         | 10 | P:GO:0009792;<br>F:GO:0004872;<br>P:GO:0002119;<br>P:GO:0040018;<br>P:GO:0018996;<br>P:GO:0043588;<br>P:GO:0000003;<br>P:GO:0040011;<br>P:GO:0042633;<br>C:GO:0016020                                                                                                                        | -                                                                                                                                                                                                                        |            | IPR000731; IPR003392; PD019290<br>(PRODOM), PTHR10796 (PANTHER),<br>PTHR10796:SF34 (PANTHER)              |



|                         |                                                            |    |                                                                                                                                                                                                                          |                                                                                                                                                                                                                                                                                                                                                                                                                                                       |            |                                                                                                                                                             |                                                 |
|-------------------------|------------------------------------------------------------|----|--------------------------------------------------------------------------------------------------------------------------------------------------------------------------------------------------------------------------|-------------------------------------------------------------------------------------------------------------------------------------------------------------------------------------------------------------------------------------------------------------------------------------------------------------------------------------------------------------------------------------------------------------------------------------------------------|------------|-------------------------------------------------------------------------------------------------------------------------------------------------------------|-------------------------------------------------|
| Caenorhabditis briggsae | hed family member (ptc-3)                                  | 6  | P:GO:0009792;<br>P:GO:0002119;<br>P:GO:0040018;<br>P:GO:0018996;<br>P:GO:0000003;<br>P:GO:0040011                                                                                                                        | -                                                                                                                                                                                                                                                                                                                                                                                                                                                     |            | PTHR10796 (PANTHER),<br>PTHR10796:SF34 (PANTHER)                                                                                                            |                                                 |
| Loa loa                 | ferm domain ( -ezrin-radixin-moesin) family member (frm-1) | 2  | C:GO:0044424;<br>F:GO:0008092                                                                                                                                                                                            | -                                                                                                                                                                                                                                                                                                                                                                                                                                                     |            | IPR000299; IPR011993; IPR014847;<br>IPR018980; PTHR23280 (PANTHER),<br>SSF50729 (SUPERFAMILY)                                                               |                                                 |
| Loa loa                 | ferm domain ( -ezrin-radixin-moesin) family member (frm-1) | 2  | C:GO:0044424;<br>F:GO:0008092                                                                                                                                                                                            | -                                                                                                                                                                                                                                                                                                                                                                                                                                                     |            | IPR000299; IPR011993; IPR014847;<br>IPR018980; PTHR23280 (PANTHER),<br>SSF50729 (SUPERFAMILY)                                                               |                                                 |
| Loa loa                 | beta-catenin armadillo related family member (bar-1)       | 0  |                                                                                                                                                                                                                          | P:GO:0001708;<br>P:GO:0040028;<br>C:GO:0005913;<br>C:GO:0005634;<br>P:GO:0040026;<br>P:GO:0007265;<br>P:GO:0016055;<br>P:GO:0002009;<br>P:GO:0007155;<br>P:GO:0006898;<br>P:GO:0040035;<br>P:GO:0030334;<br>P:GO:0043058;<br>C:GO:0030054;<br>P:GO:0045944;<br>C:GO:0005737;<br>P:GO:0007617;<br>P:GO:0042659;<br>F:GO:0003713;<br>C:GO:0005625;<br>C:GO:0005624;<br>F:GO:0008134;<br>F:GO:0005515;<br>P:GO:0040011;<br>P:GO:0040010;<br>P:GO:0018991 |            |                                                                                                                                                             | PTHR23315 (PANTHER),<br>PTHR23315:SF3 (PANTHER) |
|                         |                                                            | 0  |                                                                                                                                                                                                                          |                                                                                                                                                                                                                                                                                                                                                                                                                                                       |            |                                                                                                                                                             |                                                 |
| Haemonchus contortus    | thioredoxin reductase 1                                    | 13 | C:GO:0005829;<br>P:GO:0042744;<br>C:GO:0005739;<br>P:GO:0045454;<br>P:GO:0055114;<br>F:GO:0009055;<br>F:GO:0050660;<br>F:GO:0050661;<br>P:GO:0008283;<br>P:GO:0001707;<br>F:GO:0004791;<br>C:GO:0005634;<br>F:GO:0015035 | -                                                                                                                                                                                                                                                                                                                                                                                                                                                     | EC:1.8.1.9 | IPR001327; IPR004099; IPR006338;<br>IPR013027; IPR016156; PR00411<br>(PRINTS), G3DSA:3.50.50.60<br>(GENE3D), PTHR22912 (PANTHER),<br>SSF51905 (SUPERFAMILY) |                                                 |

|                        |                                                            |    |                                                                                                                                                                                                                          |   |            |                                                                                                                                                             |
|------------------------|------------------------------------------------------------|----|--------------------------------------------------------------------------------------------------------------------------------------------------------------------------------------------------------------------------|---|------------|-------------------------------------------------------------------------------------------------------------------------------------------------------------|
| Haemonchus contortus   | thioredoxin reductase 1                                    | 13 | C:GO:0005829;<br>P:GO:0042744;<br>C:GO:0005739;<br>P:GO:0045454;<br>P:GO:0055114;<br>F:GO:0009055;<br>F:GO:0050660;<br>F:GO:0050661;<br>P:GO:0008283;<br>P:GO:0001707;<br>F:GO:0004791;<br>C:GO:0005634;<br>F:GO:0015035 | - | EC:1.8.1.9 | IPR001327; IPR004099; IPR006338;<br>IPR013027; IPR016156; PR00411<br>(PRINTS), G3DSA:3.50.50.60<br>(GENE3D), PTHR22912 (PANTHER),<br>SSF51905 (SUPERFAMILY) |
|                        | -                                                          | 0  |                                                                                                                                                                                                                          |   |            | -                                                                                                                                                           |
| Caenorhabditis elegans | probable ribonuclease zc3h12d                              | 3  | F:GO:0016787;<br>F:GO:0008270;<br>F:GO:0003676                                                                                                                                                                           | - |            | IPR000571; IPR021869; PTHR12876<br>(PANTHER)                                                                                                                |
| Caenorhabditis elegans | elegans protein partially confirmed by transcript evidence | 0  |                                                                                                                                                                                                                          |   |            | IPR000210; IPR011333; IPR013089;<br>PTHR23230:SF181 (PANTHER)                                                                                               |
|                        | -                                                          | 0  |                                                                                                                                                                                                                          |   |            | -                                                                                                                                                           |
| Caenorhabditis elegans | briggsae cbr-psr-1 protein                                 | 8  | P:GO:0035212;<br>P:GO:0046329;<br>P:GO:0018395;<br>F:GO:0005515;<br>F:GO:0070815;<br>P:GO:0043066;<br>P:GO:0006350;<br>C:GO:0005634                                                                                      | - |            | -                                                                                                                                                           |
| Caenorhabditis elegans | briggsae cbr-psr-1 protein                                 | 8  | P:GO:0035212;<br>P:GO:0046329;<br>P:GO:0018395;<br>F:GO:0005515;<br>F:GO:0070815;<br>P:GO:0043066;<br>P:GO:0006350;<br>C:GO:0005634                                                                                      | - |            | SSF51197 (SUPERFAMILY)                                                                                                                                      |

|                         |                                                              |    |                                                                                                                                                                                                                                                                                                                                                                                                                                                       |   |              |                                                                   |
|-------------------------|--------------------------------------------------------------|----|-------------------------------------------------------------------------------------------------------------------------------------------------------------------------------------------------------------------------------------------------------------------------------------------------------------------------------------------------------------------------------------------------------------------------------------------------------|---|--------------|-------------------------------------------------------------------|
| Caenorhabditis elegans  | bifunctio-l arginine demethylase and lysyl-hydroxylase jmjd6 | 26 | P:GO:0007166;<br>P:GO:0030324;<br>P:GO:0048024;<br>P:GO:0001822;<br>P:GO:0042116;<br>P:GO:0070079;<br>P:GO:0007507;<br>P:GO:0001568;<br>P:GO:0048821;<br>F:GO:0033749;<br>F:GO:0016702;<br>P:GO:0018395;<br>F:GO:0046872;<br>F:GO:0070815;<br>P:GO:0060041;<br>F:GO:0042802;<br>P:GO:0006915;<br>P:GO:0033077;<br>P:GO:0070078;<br>P:GO:0045449;<br>P:GO:0055114;<br>F:GO:0004872;<br>P:GO:0043654;<br>F:GO:0033746;<br>C:GO:0005886;<br>C:GO:0005634 | - | EC:1.13.11.0 | IPR003347; IPR013129; PTHR12480 (PANTHER), SSF51197 (SUPERFAMILY) |
| Caenorhabditis elegans  | bifunctio-l arginine demethylase and lysyl-hydroxylase jmjd6 | 26 | P:GO:0007166;<br>P:GO:0030324;<br>P:GO:0048024;<br>P:GO:0001822;<br>P:GO:0042116;<br>P:GO:0070079;<br>P:GO:0007507;<br>P:GO:0001568;<br>P:GO:0048821;<br>F:GO:0033749;<br>F:GO:0016702;<br>P:GO:0018395;<br>F:GO:0046872;<br>F:GO:0070815;<br>P:GO:0060041;<br>F:GO:0042802;<br>P:GO:0006915;<br>P:GO:0033077;<br>P:GO:0070078;<br>P:GO:0045449;<br>P:GO:0055114;<br>F:GO:0004872;<br>P:GO:0043654;<br>F:GO:0033746;<br>C:GO:0005886;<br>C:GO:0005634 | - | EC:1.13.11.0 | IPR003347; IPR013129; PTHR12480 (PANTHER), SSF51197 (SUPERFAMILY) |
| Caenorhabditis elegans  | hypothetical protein F55A12.2 [Caenorhabditis elegans]       | 1  | P:GO:0040010                                                                                                                                                                                                                                                                                                                                                                                                                                          | - | -            | -                                                                 |
| Caenorhabditis briggsae | elegans protein partially confirmed by transcript evidence   | 0  |                                                                                                                                                                                                                                                                                                                                                                                                                                                       |   |              | IPR003124                                                         |
| Caenorhabditis elegans  | mon2 homolog isoform 1                                       | 2  | P:GO:0015031;<br>F:GO:0005488                                                                                                                                                                                                                                                                                                                                                                                                                         | - |              | -                                                                 |

|                         |                                                         |    |                                                                                                                                                                                                                          |                                                                                  |             |                                                                                                                                                   |
|-------------------------|---------------------------------------------------------|----|--------------------------------------------------------------------------------------------------------------------------------------------------------------------------------------------------------------------------|----------------------------------------------------------------------------------|-------------|---------------------------------------------------------------------------------------------------------------------------------------------------|
| Caenorhabditis elegans  | zinc zz type family protein                             | 7  | P:GO:0007271;<br>F:GO:0005515;<br>P:GO:0040017;<br>C:GO:0016010;<br>F:GO:0005277;<br>P:GO:0015870;<br>P:GO:0046716                                                                                                       | -                                                                                | -           |                                                                                                                                                   |
| Caenorhabditis elegans  | golgi golgin subfamily 5                                | 4  | C:GO:0031985;<br>F:GO:0005515;<br>P:GO:0048193;<br>C:GO:0016020                                                                                                                                                          | -                                                                                |             | PD936484 (PRODOM)                                                                                                                                 |
| Caenorhabditis briggsae | component of oligomeric golgi complex 4                 | 2  | P:GO:0006810;<br>C:GO:0044464                                                                                                                                                                                            | -                                                                                |             | IPR013167                                                                                                                                         |
| Caenorhabditis briggsae | major facilitator superfamily protein                   | 1  | P:GO:0006810                                                                                                                                                                                                             | -                                                                                |             | IPR011701; IPR016196; IPR020846;<br>G3DSA:1.20.1250.20 (GENE3D),<br>PTHR11662 (PANTHER),<br>PTHR11662:SF21 (PANTHER), SignalP<br>(SIGNALP)        |
| Caenorhabditis briggsae | aspartyl aminopeptidase                                 | 3  | F:GO:0046872;<br>C:GO:0005737;<br>F:GO:0070011                                                                                                                                                                           | -                                                                                |             | IPR001948; G3DSA:2.30.250.10<br>(GENE3D), G3DSA:3.40.630.10<br>(GENE3D), SignalP (SIGNALP),<br>SSF101821 (SUPERFAMILY), SSF53187<br>(SUPERFAMILY) |
| Caenorhabditis briggsae | aspartyl aminopeptidase                                 | 3  | F:GO:0046872;<br>C:GO:0005737;<br>F:GO:0070011                                                                                                                                                                           | -                                                                                |             | IPR001948; G3DSA:3.40.630.10<br>(GENE3D), SSF53187 (SUPERFAMILY)                                                                                  |
| Caenorhabditis elegans  | elegans protein confirmed by transcript evidence        | 0  |                                                                                                                                                                                                                          |                                                                                  |             | -                                                                                                                                                 |
| Loa loa                 | seven in absentia homolog 1                             | 13 | P:GO:0043161;<br>P:GO:0007411;<br>F:GO:0008270;<br>P:GO:0006915;<br>P:GO:0007049;<br>C:GO:0008021;<br>F:GO:0008022;<br>P:GO:0007283;<br>C:GO:0005769;<br>F:GO:0004842;<br>P:GO:0042787;<br>C:GO:0030877;<br>C:GO:0005634 | -                                                                                | EC:6.3.2.19 | -                                                                                                                                                 |
| Caenorhabditis briggsae | leucine zipper and cttnbip1 domain containing           | 0  |                                                                                                                                                                                                                          | F:GO:0008013;<br>P:GO:0010212;<br>F:GO:0003674;<br>P:GO:0008150;<br>C:GO:0005575 |             | IPR009428                                                                                                                                         |
|                         | -                                                       | 0  |                                                                                                                                                                                                                          |                                                                                  |             | -                                                                                                                                                 |
| Caenorhabditis briggsae | elegans protein confirmed by transcript evidence        | 0  |                                                                                                                                                                                                                          | P:GO:0009793;<br>C:GO:0005575                                                    |             | IPR011989; IPR019156; PTHR13255<br>(PANTHER)                                                                                                      |
| Caenorhabditis briggsae | riken cd- 1300012g16 gene                               | 1  | C:GO:0005764                                                                                                                                                                                                             | -                                                                                |             | IPR007000                                                                                                                                         |
| Caenorhabditis briggsae | Hypothetical protein CBG01673 [Caenorhabditis briggsae] | 4  | F:GO:0017111;<br>P:GO:0050789;<br>C:GO:0005622;<br>F:GO:0000166                                                                                                                                                          | -                                                                                | EC:3.6.1.15 | PTHR22908 (PANTHER),<br>PTHR22908:SF13 (PANTHER)                                                                                                  |
| Brugia malayi           | tb2 hva22 family protein                                | 1  | F:GO:0005515                                                                                                                                                                                                             | -                                                                                |             | IPR004345; PTHR12300:SF13<br>(PANTHER), SignalP (SIGNALP)                                                                                         |

|                         |                                                        |   |                                                                                                                                                      |                                                                                                                                     |             |                                                                                                                                                                         |
|-------------------------|--------------------------------------------------------|---|------------------------------------------------------------------------------------------------------------------------------------------------------|-------------------------------------------------------------------------------------------------------------------------------------|-------------|-------------------------------------------------------------------------------------------------------------------------------------------------------------------------|
| Caenorhabditis elegans  | yo93_caeel ame: full=uncharacterized protein           | 0 |                                                                                                                                                      | P:GO:0000003;<br>P:GO:0040011;<br>P:GO:0040010;<br>P:GO:0006898;<br>P:GO:0002119;<br>P:GO:0009792;<br>P:GO:0040018                  |             | -                                                                                                                                                                       |
| Caenorhabditis elegans  | isoform a                                              | 0 |                                                                                                                                                      | P:GO:0055114;<br>C:GO:0005739;<br>F:GO:0016491;<br>F:GO:0004129                                                                     |             | -                                                                                                                                                                       |
| Caenorhabditis elegans  | iron-sulfur cluster assembly 1 mitochondrial precursor | 9 | P:GO:0040010;<br>P:GO:0006783;<br>F:GO:0051536;<br>F:GO:0003676;<br>P:GO:0016226;<br>P:GO:0002119;<br>P:GO:0006898;<br>F:GO:0005198;<br>P:GO:0009792 | -                                                                                                                                   |             | IPR000361; PTHR10072:SF27 (PANTHER)                                                                                                                                     |
| Brugia malayi           | hypothetical protein Bm1_23545 [Brugia malayi]         | 0 |                                                                                                                                                      |                                                                                                                                     |             | -                                                                                                                                                                       |
| Loa loa                 | kinesin family protein                                 | 0 |                                                                                                                                                      | F:GO:0005524;<br>F:GO:0000166;<br>F:GO:0003777;<br>F:GO:0003774;<br>P:GO:0007018;<br>F:GO:0005515;<br>C:GO:0005874;<br>C:GO:0000795 |             | -                                                                                                                                                                       |
| Caenorhabditis briggsae | udp-gal:beta c beta - polypeptide 2                    | 1 | F:GO:0016757                                                                                                                                         | -                                                                                                                                   |             | IPR002659; PTHR11214:SF13 (PANTHER), SignalP (SIGNALP)                                                                                                                  |
|                         | -                                                      | 0 |                                                                                                                                                      |                                                                                                                                     |             | SignalP (SIGNALP)                                                                                                                                                       |
| Caenorhabditis elegans  | briggsae cbr-ncbp-1 protein                            | 0 |                                                                                                                                                      | F:GO:0005488;<br>P:GO:0008380;<br>P:GO:0016070;<br>P:GO:0006397;<br>P:GO:0031047;<br>F:GO:0005515;<br>P:GO:0006370;<br>C:GO:0005634 |             | IPR016021; IPR016024                                                                                                                                                    |
| Loa loa                 | protein ki-se domain containing protein                | 6 | F:GO:0004674;<br>F:GO:0005524;<br>P:GO:0000082;<br>P:GO:0006350;<br>C:GO:0005634;<br>P:GO:0006468                                                    | -                                                                                                                                   | EC:2.7.11.0 | IPR000719; IPR002290; IPR008271; IPR011009; IPR017441; IPR017442; G3DSA:1.10.510.10 (GENE3D), G3DSA:3.30.200.20 (GENE3D), PTHR11295 (PANTHER), PTHR11295:SF83 (PANTHER) |
| Loa loa                 | protein ki-se domain containing protein                | 6 | F:GO:0004674;<br>F:GO:0005524;<br>P:GO:0000082;<br>P:GO:0006350;<br>C:GO:0005634;<br>P:GO:0006468                                                    | -                                                                                                                                   | EC:2.7.11.0 | IPR000719; IPR002290; IPR008271; IPR011009; IPR017441; IPR017442; G3DSA:1.10.510.10 (GENE3D), G3DSA:3.30.200.20 (GENE3D), PTHR11295 (PANTHER), PTHR11295:SF83 (PANTHER) |
| Loa loa                 | protein ki-se domain containing protein                | 6 | F:GO:0004674;<br>F:GO:0005524;<br>P:GO:0000082;<br>P:GO:0006350;<br>C:GO:0005634;<br>P:GO:0006468                                                    | -                                                                                                                                   | EC:2.7.11.0 | IPR000719; IPR002290; IPR008271; IPR011009; IPR017441; IPR017442; G3DSA:1.10.510.10 (GENE3D), G3DSA:3.30.200.20 (GENE3D), PTHR11295 (PANTHER), PTHR11295:SF83 (PANTHER) |

|                         |                                                    |    |                                                                                                                                                                                                                          |                                                                 |                                                                                                                                                                                     |
|-------------------------|----------------------------------------------------|----|--------------------------------------------------------------------------------------------------------------------------------------------------------------------------------------------------------------------------|-----------------------------------------------------------------|-------------------------------------------------------------------------------------------------------------------------------------------------------------------------------------|
|                         | -                                                  | 0  |                                                                                                                                                                                                                          |                                                                 | -                                                                                                                                                                                   |
| Brugia malayi           | briggsae cbr-clu-1 protein                         | 0  |                                                                                                                                                                                                                          | F:GO:0003674;<br>F:GO:0005488;<br>P:GO:0008150;<br>C:GO:0005575 | IPR007967; IPR011990; PTHR12601 (PANTHER), SSF103107 (SUPERFAMILY), SSF48452 (SUPERFAMILY)                                                                                          |
| Caenorhabditis elegans  | -                                                  | 0  |                                                                                                                                                                                                                          |                                                                 | -                                                                                                                                                                                   |
|                         | -                                                  | 0  |                                                                                                                                                                                                                          |                                                                 | -                                                                                                                                                                                   |
| Caenorhabditis elegans  | ribonucleoside-diphosphate reductase large subunit | 13 | P:GO:0009263;<br>F:GO:0004748;<br>P:GO:0055114;<br>P:GO:0040007;<br>P:GO:0006260;<br>P:GO:0040035;<br>P:GO:0051290;<br>F:GO:0005524;<br>P:GO:0002119;<br>F:GO:0005515;<br>P:GO:0040017;<br>C:GO:0005971;<br>P:GO:0009792 | -                                                               | EC:1.17.4.1<br><br>IPR000276; IPR000788; IPR005144; IPR008926; IPR013346; IPR013509; G3DSA:3.20.70.20 (GENE3D), PTHR11573:SF6 (PANTHER), SSF51998 (SUPERFAMILY)                     |
|                         | -                                                  | 0  |                                                                                                                                                                                                                          |                                                                 | SignalP (SIGNALP)                                                                                                                                                                   |
| Caenorhabditis briggsae | mitochondrial carrier homolog 2                    | 1  | C:GO:0016020                                                                                                                                                                                                             | -                                                               | PTHR10780 (PANTHER), PTHR10780:SF1 (PANTHER)                                                                                                                                        |
| Caenorhabditis briggsae | briggsae cbr-elt-3 protein                         | 1  | F:GO:0005488                                                                                                                                                                                                             | -                                                               | IPR000679; IPR013088; PTHR10071 (PANTHER), PTHR10071:SF15 (PANTHER), SSF57716 (SUPERFAMILY)                                                                                         |
| Brugia malayi           | hbs1-like protein                                  | 2  | F:GO:0016740;<br>F:GO:0000166                                                                                                                                                                                            | -                                                               | IPR000795; IPR004160; IPR009000; IPR009001; IPR015033; G3DSA:2.40.30.10 (GENE3D), G3DSA:3.40.50.300 (GENE3D), PTHR23115 (PANTHER), PTHR23115:SF38 (PANTHER), SSF52540 (SUPERFAMILY) |
| Caenorhabditis elegans  | e1a binding protein p400                           | 5  | P:GO:0040035;<br>P:GO:0009792;<br>P:GO:0002119;<br>P:GO:0040010;<br>P:GO:0040011                                                                                                                                         | -                                                               | IPR017877; PTHR10799 (PANTHER), PTHR10799:SF45 (PANTHER)                                                                                                                            |
| Caenorhabditis briggsae | mitochondrial ribosomal                            | 3  | C:GO:0005840;<br>F:GO:0003735;<br>P:GO:0006412                                                                                                                                                                           | -                                                               | EC:3.6.5.3<br><br>IPR000244; IPR009027; IPR020070; PTHR21368:SF16 (PANTHER)                                                                                                         |
| Brugia malayi           | threonyl-tr- synthetase                            | 4  | F:GO:0004829;<br>F:GO:0005515;<br>P:GO:0006418;<br>C:GO:0005829                                                                                                                                                          | -                                                               | EC:6.1.1.3<br><br>IPR002320; IPR004154; G3DSA:3.30.930.10 (GENE3D), PTHR11451 (PANTHER), PTHR11451:SF5 (PANTHER), SSF55681 (SUPERFAMILY)                                            |
| Loa loa                 | structure-specific recognition protein             | 11 | P:GO:0040010;<br>P:GO:0000910;<br>P:GO:0040035;<br>F:GO:0003677;<br>P:GO:0010171;<br>P:GO:0007413;<br>P:GO:0002119;<br>P:GO:0040011;<br>P:GO:0009792;<br>P:GO:0040018;<br>C:GO:0005634                                   | -                                                               | SignalP (SIGNALP)                                                                                                                                                                   |
| Caenorhabditis elegans  | elegans protein confirmed by transcript evidence   | 0  |                                                                                                                                                                                                                          |                                                                 | IPR001534; SignalP (SIGNALP)                                                                                                                                                        |

|                         |                                                                                                                                   |    |                                                                                                                                                                                        |   |                                                                               |                                                                                                                          |
|-------------------------|-----------------------------------------------------------------------------------------------------------------------------------|----|----------------------------------------------------------------------------------------------------------------------------------------------------------------------------------------|---|-------------------------------------------------------------------------------|--------------------------------------------------------------------------------------------------------------------------|
| Brugia malayi           | mitochondrial ribosomal protein s21                                                                                               | 7  | P:GO:0006412;<br>P:GO:0040010;<br>F:GO:0003735;<br>C:GO:0005763;<br>P:GO:0002119;<br>P:GO:0006898;<br>P:GO:0009792                                                                     | - | EC:3.6.5.3                                                                    | IPR001911; PTHR21109 (PANTHER)                                                                                           |
| Caenorhabditis elegans  | hydroxyacyl-coenzyme a dehydroge-se 3-ketoacyl-coenzyme a thiolase enoyl-coenzyme a hydratase (trifunctio-l protein) beta subunit | 11 | F:GO:0016508;<br>F:GO:0000062;<br>F:GO:0003988;<br>C:GO:0005743;<br>C:GO:0016507;<br>C:GO:0042645;<br>F:GO:0003857;<br>P:GO:0006635;<br>F:GO:0016509;<br>P:GO:0009792;<br>F:GO:0004300 | - | EC:4.2.1.74;<br>EC:2.3.1.16;<br>EC:1.1.1.35;<br>EC:1.1.1.211<br>; EC:4.2.1.17 | IPR002155; IPR016038; IPR016039;<br>IPR020610; IPR020613; IPR020615;<br>IPR020616; IPR020617;<br>PTHR18919:SF5 (PANTHER) |
| -                       | -                                                                                                                                 | 0  | -                                                                                                                                                                                      | - | -                                                                             | -                                                                                                                        |
| Caenorhabditis elegans  | biotin protein ligase family member (bpl-1)                                                                                       | 6  | F:GO:0005488;<br>C:GO:0043231;<br>F:GO:0018271;<br>P:GO:0043687;<br>C:GO:0044446;<br>C:GO:0005737                                                                                      | - | -                                                                             | IPR004143; IPR004408;<br>G3DSA:3.30.930.10 (GENE3D),<br>SSF55681 (SUPERFAMILY)                                           |
| -                       | -                                                                                                                                 | 0  | -                                                                                                                                                                                      | - | -                                                                             | -                                                                                                                        |
| Ancylostoma caninum     | mater-l embryonic leucine zipper ki-se                                                                                            | 7  | P:GO:0008016;<br>F:GO:0004674;<br>P:GO:0048821;<br>F:GO:0005524;<br>F:GO:0005515;<br>C:GO:0005737;<br>P:GO:0006468                                                                     | - | EC:2.7.11.0                                                                   | IPR000719; IPR008271; IPR011009;<br>IPR015739; IPR017442; IPR020636;<br>G3DSA:1.10.510.10 (GENE3D)                       |
| Ancylostoma caninum     | mater-l embryonic leucine zipper ki-se                                                                                            | 7  | P:GO:0008016;<br>F:GO:0004674;<br>P:GO:0048821;<br>F:GO:0005524;<br>F:GO:0005515;<br>C:GO:0005737;<br>P:GO:0006468                                                                     | - | EC:2.7.11.0                                                                   | IPR000719; IPR008271; IPR011009;<br>IPR015739; IPR017442; IPR020636;<br>G3DSA:1.10.510.10 (GENE3D)                       |
| Ancylostoma caninum     | protein ki-se domain containing protein                                                                                           | 3  | P:GO:0006468;<br>F:GO:0005524;<br>F:GO:0004674                                                                                                                                         | - | EC:2.7.11.0                                                                   | -                                                                                                                        |
| Ancylostoma caninum     | mater-l embryonic leucine zipper ki-se                                                                                            | 5  | P:GO:0008016;<br>F:GO:0004674;<br>P:GO:0048821;<br>F:GO:0005524;<br>P:GO:0006468                                                                                                       | - | EC:2.7.11.0                                                                   | -                                                                                                                        |
| Ancylostoma caninum     | mater-l embryonic leucine zipper ki-se                                                                                            | 5  | F:GO:0004674;<br>F:GO:0005524;<br>P:GO:0032501;<br>P:GO:0065007;<br>P:GO:0006468                                                                                                       | - | EC:2.7.11.0                                                                   | -                                                                                                                        |
| Caenorhabditis briggsae | viral a-type inclusion protein repeat containing protein                                                                          | 4  | P:GO:0000003;<br>P:GO:0002119;<br>P:GO:0040011;<br>P:GO:0040015                                                                                                                        | - | -                                                                             | PD936484 (PRODOM)                                                                                                        |

|                         |                    |    |                                                                                                                                                                                                                                                                                                                                                                                                                                                                         |   |                                                                                                                         |
|-------------------------|--------------------|----|-------------------------------------------------------------------------------------------------------------------------------------------------------------------------------------------------------------------------------------------------------------------------------------------------------------------------------------------------------------------------------------------------------------------------------------------------------------------------|---|-------------------------------------------------------------------------------------------------------------------------|
| Caenorhabditis elegans  | cg32645 cg32645-pb | 4  | P:GO:0009792;<br>P:GO:0010171;<br>P:GO:0040017;<br>P:GO:0006898                                                                                                                                                                                                                                                                                                                                                                                                         | - | PTHR11161 (PANTHER), SignalP (SIGNALP)                                                                                  |
| Brugia malayi           | nipped-b homolog   | 31 | P:GO:0007605;<br>F:GO:0042826;<br>P:GO:0034613;<br>P:GO:0003151;<br>P:GO:0006974;<br>F:GO:0008022;<br>C:GO:0032116;<br>P:GO:0040018;<br>F:GO:0070087;<br>P:GO:0060325;<br>F:GO:0047485;<br>P:GO:0071481;<br>P:GO:0061010;<br>P:GO:0034088;<br>P:GO:0045444;<br>P:GO:0050890;<br>P:GO:0031065;<br>P:GO:0007420;<br>P:GO:0010553;<br>P:GO:0048703;<br>P:GO:0048592;<br>P:GO:0035261;<br>P:GO:0045995;<br>P:GO:0045778;<br>P:GO:0042471;<br>P:GO:0042634;<br>P:GO:0061038; | - | PTHR21704 (PANTHER),<br>PTHR21704:SF5 (PANTHER)                                                                         |
| Caenorhabditis elegans  | -like 2            | 13 | F:GO:0003678;<br>P:GO:0040010;<br>C:GO:0071339;<br>P:GO:0006310;<br>P:GO:0000910;<br>P:GO:0040035;<br>F:GO:0005524;<br>P:GO:0002119;<br>F:GO:0016887;<br>P:GO:0006898;<br>P:GO:0016481;<br>P:GO:0009792;<br>P:GO:0016246                                                                                                                                                                                                                                                | - | -                                                                                                                       |
|                         | -                  | 0  |                                                                                                                                                                                                                                                                                                                                                                                                                                                                         |   | SignalP (SIGNALP)                                                                                                       |
|                         | -                  | 0  |                                                                                                                                                                                                                                                                                                                                                                                                                                                                         |   | SignalP (SIGNALP)                                                                                                       |
| Caenorhabditis briggsae | tal1n 1            | 6  | F:GO:0005158;<br>C:GO:0001726;<br>P:GO:0007016;<br>C:GO:0005856;<br>C:GO:0005925;<br>F:GO:0005200                                                                                                                                                                                                                                                                                                                                                                       | - | IPR000299; IPR011993; IPR014352;<br>IPR015710; IPR018979; IPR019747;<br>IPR019748; IPR019749; SSF54236<br>(SUPERFAMILY) |
| Caenorhabditis briggsae | tal1n 1            | 6  | F:GO:0005158;<br>C:GO:0001726;<br>P:GO:0007016;<br>C:GO:0005856;<br>C:GO:0005925;<br>F:GO:0005200                                                                                                                                                                                                                                                                                                                                                                       | - | IPR000299; IPR011993; IPR014352;<br>IPR015710; IPR018979; IPR019747;<br>IPR019748; IPR019749; SSF54236<br>(SUPERFAMILY) |



|                               |                                                        |    |                                                                                                                                                                       |                                                                                                                                                      |             |                                                                                                                                          |
|-------------------------------|--------------------------------------------------------|----|-----------------------------------------------------------------------------------------------------------------------------------------------------------------------|------------------------------------------------------------------------------------------------------------------------------------------------------|-------------|------------------------------------------------------------------------------------------------------------------------------------------|
| Caenorhabditis briggsae       | deah (asp-glu-ala-his) box polypeptide 38              | 6  | F:GO:0008026;<br>F:GO:0003676;<br>C:GO:0005681;<br>F:GO:0005515;<br>F:GO:0005524;<br>P:GO:0000398                                                                     | -                                                                                                                                                    |             | IPR007502; IPR011709; PTHR18934 (PANTHER), SSF52540 (SUPERFAMILY)                                                                        |
| Strongylocentrotus purpuratus | ankyrin unc44                                          | 0  |                                                                                                                                                                       | C:GO:0016021;<br>C:GO:0016020;<br>C:GO:0005576;<br>P:GO:0006887;<br>P:GO:0007268;<br>C:GO:0044279;<br>P:GO:0009405;<br>C:GO:0044218;<br>C:GO:0042734 |             | IPR002110; IPR018170; IPR020683; PTHR18958 (PANTHER)                                                                                     |
| Strongylocentrotus purpuratus | ankyrin unc44                                          | 0  |                                                                                                                                                                       | C:GO:0016021;<br>C:GO:0016020;<br>C:GO:0005576;<br>P:GO:0006887;<br>P:GO:0007268;<br>C:GO:0044279;<br>P:GO:0009405;<br>C:GO:0044218;<br>C:GO:0042734 |             | IPR002110; IPR018170; IPR020683; PTHR18958 (PANTHER)                                                                                     |
| Caenorhabditis elegans        | myotubularin                                           | 1  | P:GO:0046716                                                                                                                                                          | -                                                                                                                                                    |             | IPR000387; IPR010569; IPR016130; IPR017906; PTHR10807 (PANTHER), PTHR10807:SF6 (PANTHER), SSF50729 (SUPERFAMILY), SSF52799 (SUPERFAMILY) |
| -                             | -                                                      | 0  |                                                                                                                                                                       |                                                                                                                                                      |             | -                                                                                                                                        |
| -                             | -                                                      | 0  |                                                                                                                                                                       |                                                                                                                                                      |             | -                                                                                                                                        |
| -                             | -                                                      | 0  |                                                                                                                                                                       |                                                                                                                                                      |             | -                                                                                                                                        |
| -                             | -                                                      | 0  |                                                                                                                                                                       |                                                                                                                                                      |             | -                                                                                                                                        |
| Caenorhabditis briggsae       | eukaryotic initiation factor family member (eif-)      | 1  | P:GO:0009792                                                                                                                                                          | -                                                                                                                                                    |             | IPR013906; IPR023194                                                                                                                     |
| Caenorhabditis elegans        | large subunit ribosomal protein 23                     | 10 | P:GO:0006412;<br>C:GO:0005840;<br>P:GO:0006355;<br>P:GO:0040007;<br>F:GO:0003735;<br>P:GO:0000003;<br>P:GO:0018996;<br>P:GO:0002119;<br>P:GO:0007165;<br>P:GO:0009792 | -                                                                                                                                                    | EC:3.6.5.3  | IPR000218; IPR001610; IPR019972; PTHR11761:SF4 (PANTHER)                                                                                 |
| Loa loa                       | topoisomerase iii alpha                                | 10 | P:GO:0007276;<br>P:GO:0006268;<br>P:GO:0007126;<br>F:GO:0008270;<br>F:GO:0003917;<br>F:GO:0005524;<br>C:GO:0016605;<br>F:GO:0005515;<br>C:GO:0005694;<br>P:GO:0006265 | -                                                                                                                                                    | EC:5.99.1.2 | IPR000380; IPR013497; IPR013824                                                                                                          |
| Caenorhabditis elegans        | elegans protein confirmed by transcript evidence       | 0  |                                                                                                                                                                       | P:GO:0008150;<br>C:GO:0005575                                                                                                                        |             | IPR018785                                                                                                                                |
| Caenorhabditis elegans        | hypothetical protein Y49G5B.1 [Caenorhabditis elegans] | 0  |                                                                                                                                                                       |                                                                                                                                                      |             | SignalP (SIGNALP)                                                                                                                        |

|                         |                                                                                           |   |                                                                                                                                                      |                                                                                                                                     |                                                         |                                                                                                                                     |
|-------------------------|-------------------------------------------------------------------------------------------|---|------------------------------------------------------------------------------------------------------------------------------------------------------|-------------------------------------------------------------------------------------------------------------------------------------|---------------------------------------------------------|-------------------------------------------------------------------------------------------------------------------------------------|
| Caenorhabditis briggsae | gpi-anchor transamidase                                                                   | 2 | F:GO:0004197;<br>P:GO:0006508                                                                                                                        | -                                                                                                                                   | EC:3.4.22.0                                             | IPR001096; PTHR12000:SF1 (PANTHER)                                                                                                  |
| Loa loa                 | cuticlin 1                                                                                | 0 |                                                                                                                                                      |                                                                                                                                     |                                                         | -                                                                                                                                   |
| Caenorhabditis briggsae | protein                                                                                   | 5 | C:GO:0016020;<br>F:GO:0015250;<br>C:GO:0043025;<br>C:GO:0005929;<br>P:GO:0006833                                                                     | -                                                                                                                                   |                                                         | IPR000425; IPR022357;<br>PTHR19139:SF25 (PANTHER), SignalP (SIGNALP)                                                                |
| Caenorhabditis elegans  | briggsae cbr-eat-3 protein                                                                | 9 | C:GO:0030061;<br>P:GO:0045768;<br>C:GO:0030425;<br>C:GO:0005741;<br>C:GO:0005758;<br>P:GO:0007601;<br>P:GO:0007007;<br>F:GO:0003924;<br>F:GO:0005525 | -                                                                                                                                   | EC:3.6.5.1;<br>EC:3.6.5.2;<br>EC:3.6.5.3;<br>EC:3.6.5.4 | PTHR11566 (PANTHER),<br>PTHR11566:SF8 (PANTHER)                                                                                     |
|                         | -                                                                                         | 0 |                                                                                                                                                      |                                                                                                                                     |                                                         | -                                                                                                                                   |
| Loa loa                 | myotubularin-related family protein                                                       | 0 |                                                                                                                                                      | P:GO:0016311;<br>F:GO:0016791                                                                                                       |                                                         | IPR017906; IPR022587; PTHR10807 (PANTHER), PTHR10807:SF3 (PANTHER), SSF52799 (SUPERFAMILY)                                          |
| Caenorhabditis elegans  | briggsae cbr-ttm-2 protein                                                                | 0 |                                                                                                                                                      |                                                                                                                                     |                                                         | -                                                                                                                                   |
| Caenorhabditis briggsae | galactosyltransferase family protein                                                      | 3 | F:GO:0016757;<br>P:GO:0005975;<br>C:GO:0016021                                                                                                       | -                                                                                                                                   |                                                         | IPR003859; G3DSA:3.90.550.10 (GENE3D), PTHR19300:SF2 (PANTHER), SSF53448 (SUPERFAMILY)                                              |
|                         | -                                                                                         | 0 |                                                                                                                                                      |                                                                                                                                     |                                                         | SignalP (SIGNALP)                                                                                                                   |
| Loa loa                 | dual oxidase maturation factor 1                                                          | 0 |                                                                                                                                                      | C:GO:0005789;<br>C:GO:0016021;<br>C:GO:0016020;<br>P:GO:0015031                                                                     |                                                         | IPR018469                                                                                                                           |
| Caenorhabditis elegans  | general transcription factor 3c polypeptide 3                                             | 3 | P:GO:0040010;<br>F:GO:0005488;<br>P:GO:0006898                                                                                                       | -                                                                                                                                   |                                                         | IPR011990; IPR013026; IPR019734;<br>PTHR23082 (PANTHER), SSF48452 (SUPERFAMILY)                                                     |
|                         | -                                                                                         | 0 |                                                                                                                                                      |                                                                                                                                     |                                                         | -                                                                                                                                   |
|                         | -                                                                                         | 0 |                                                                                                                                                      |                                                                                                                                     |                                                         | -                                                                                                                                   |
|                         | -                                                                                         | 0 |                                                                                                                                                      |                                                                                                                                     |                                                         | -                                                                                                                                   |
| Caenorhabditis briggsae | Hypothetical protein CBG07002 [Caenorhabditis briggsae]                                   | 4 | P:GO:0040035;<br>P:GO:0002119;<br>P:GO:0040007;<br>P:GO:0006898                                                                                      | -                                                                                                                                   |                                                         | IPR009668                                                                                                                           |
| Caenorhabditis elegans  | inhibitor of kappa light polypeptide gene enhancer in b- ki-se complex-associated protein | 0 |                                                                                                                                                      | F:GO:0016301;<br>C:GO:0008023;<br>C:GO:0005737;<br>F:GO:0008607;<br>P:GO:0006350;<br>P:GO:0045449;<br>P:GO:0006357;<br>C:GO:0005634 |                                                         | IPR006849                                                                                                                           |
| Branchiostoma floridae  | multidrug resistance protein family member (mrp-5)                                        | 8 | P:GO:0002119;<br>F:GO:0042626;<br>P:GO:0040002;<br>P:GO:0040017;<br>P:GO:0055085;<br>P:GO:0040010;<br>F:GO:0005524;<br>C:GO:0016021                  | -                                                                                                                                   |                                                         | IPR003439; IPR017871;<br>G3DSA:3.40.50.300 (GENE3D),<br>PTHR19242 (PANTHER),<br>PTHR19242:SF17 (PANTHER),<br>SSF52540 (SUPERFAMILY) |

|                         |                                                  |  |                                                                                                                                                                                                                                                                                                                                                    |                                                                                                                                                      |                            |                                                                                                                                                                                                                                 |
|-------------------------|--------------------------------------------------|--|----------------------------------------------------------------------------------------------------------------------------------------------------------------------------------------------------------------------------------------------------------------------------------------------------------------------------------------------------|------------------------------------------------------------------------------------------------------------------------------------------------------|----------------------------|---------------------------------------------------------------------------------------------------------------------------------------------------------------------------------------------------------------------------------|
| Caenorhabditis briggsae | briggsae cbr-ppn-1 protein                       |  | F:GO:0004185;<br>3 F:GO:0004867;<br>P:GO:0006508                                                                                                                                                                                                                                                                                                   | -                                                                                                                                                    | EC:3.4.16.0                | IPR002223; IPR020901; PTHR10083<br>(PANTHER), PTHR10083:SF32<br>(PANTHER)                                                                                                                                                       |
|                         |                                                  |  | 0                                                                                                                                                                                                                                                                                                                                                  |                                                                                                                                                      |                            |                                                                                                                                                                                                                                 |
|                         |                                                  |  | 0                                                                                                                                                                                                                                                                                                                                                  |                                                                                                                                                      |                            |                                                                                                                                                                                                                                 |
| Brugia malayi           | transmembrane protein 98                         |  | 1 C:GO:0044464                                                                                                                                                                                                                                                                                                                                     | -                                                                                                                                                    |                            | SignalP (SIGNALP)                                                                                                                                                                                                               |
| Brugia malayi           | transmembrane protein 98                         |  | 1 C:GO:0044464                                                                                                                                                                                                                                                                                                                                     | -                                                                                                                                                    |                            | SignalP (SIGNALP)                                                                                                                                                                                                               |
| Caenorhabditis elegans  | zinc metallopeptidase                            |  | 6 C:GO:0016021;<br>F:GO:0004222;<br>F:GO:0003676;<br>P:GO:0032259;<br>P:GO:0006508;<br>F:GO:0008168                                                                                                                                                                                                                                                | -                                                                                                                                                    | EC:3.4.24.0;<br>EC:2.1.1.0 | IPR000718; IPR002052; IPR018497;<br>G3DSA:3.40.390.10 (GENE3D),<br>PTHR11733:SF15 (PANTHER),<br>SSF55486 (SUPERFAMILY)                                                                                                          |
| Caenorhabditis elegans  | heavy unconvectio-I myosin family member (hum-2) |  | 2 F:GO:0005515;<br>F:GO:0000166                                                                                                                                                                                                                                                                                                                    | -                                                                                                                                                    |                            | PTHR13140 (PANTHER),<br>PTHR13140:SF15 (PANTHER)                                                                                                                                                                                |
| Caenorhabditis elegans  | heavy unconvectio-I myosin family member (hum-2) |  | 2 F:GO:0005515;<br>F:GO:0000166                                                                                                                                                                                                                                                                                                                    | -                                                                                                                                                    |                            | PTHR13140 (PANTHER),<br>PTHR13140:SF15 (PANTHER)                                                                                                                                                                                |
| Dictyocaulus viviparus  | briggsae cbr-unc-15 protein                      |  | 4 C:GO:0030016;<br>C:GO:0032982;<br>F:GO:0003774;<br>F:GO:0005515                                                                                                                                                                                                                                                                                  | -                                                                                                                                                    |                            |                                                                                                                                                                                                                                 |
| Caenorhabditis briggsae | -dh dehydroge-se                                 |  | 0                                                                                                                                                                                                                                                                                                                                                  | C:GO:0016020;<br>C:GO:0005743;<br>C:GO:0070469;<br>C:GO:0005739;<br>P:GO:0006810;<br>P:GO:0006120;<br>F:GO:0003954;<br>P:GO:0022900;<br>P:GO:0032981 |                            | IPR019342; PTHR21268 (PANTHER)                                                                                                                                                                                                  |
| Caenorhabditis briggsae | lin-5 interacting protein family member (lfi-1)  |  | 4 P:GO:0009987;<br>C:GO:0043232;<br>C:GO:0044446;<br>F:GO:0005515                                                                                                                                                                                                                                                                                  | -                                                                                                                                                    |                            |                                                                                                                                                                                                                                 |
|                         |                                                  |  | 0                                                                                                                                                                                                                                                                                                                                                  |                                                                                                                                                      |                            |                                                                                                                                                                                                                                 |
|                         |                                                  |  | 0                                                                                                                                                                                                                                                                                                                                                  |                                                                                                                                                      |                            |                                                                                                                                                                                                                                 |
| Loa loa                 | topoisomerase ii beta                            |  | 20 P:GO:0001764;<br>C:GO:0005654;<br>F:GO:0008094;<br>F:GO:0008144;<br>P:GO:0006974;<br>P:GO:0007409;<br>P:GO:0006355;<br>P:GO:0030900;<br>P:GO:0006265;<br>F:GO:0003918;<br>C:GO:0009330;<br>P:GO:0009792;<br>C:GO:0005694;<br>P:GO:0006266;<br>P:GO:0007059;<br>P:GO:0030263;<br>F:GO:0003700;<br>F:GO:0005524;<br>P:GO:0043065;<br>P:GO:0000910 | -                                                                                                                                                    | EC:5.99.1.3                | IPR001154; IPR001241; IPR002205;<br>IPR003594; IPR013506; IPR013758;<br>IPR013759; IPR013760; IPR014721;<br>IPR018522; IPR020568; IPR020899;<br>G3DSA:3.30.1490.30 (GENE3D),<br>PTHR10169 (PANTHER),<br>PTHR10169:SF2 (PANTHER) |

|                         |                                                           |    |                                                                                                                                                                                                                                                                                                                                                 |                                                |             |                                                                                                                                                                                                                                 |
|-------------------------|-----------------------------------------------------------|----|-------------------------------------------------------------------------------------------------------------------------------------------------------------------------------------------------------------------------------------------------------------------------------------------------------------------------------------------------|------------------------------------------------|-------------|---------------------------------------------------------------------------------------------------------------------------------------------------------------------------------------------------------------------------------|
| Loa loa                 | topoisomerase ii beta                                     | 20 | P:GO:0001764;<br>C:GO:0005654;<br>F:GO:0008094;<br>F:GO:0008144;<br>P:GO:0006974;<br>P:GO:0007409;<br>P:GO:0006355;<br>P:GO:0030900;<br>P:GO:0006265;<br>F:GO:0003918;<br>C:GO:0009330;<br>P:GO:0009792;<br>C:GO:0005694;<br>P:GO:0006266;<br>P:GO:0007059;<br>P:GO:0030263;<br>F:GO:0003700;<br>F:GO:0005524;<br>P:GO:0043065;<br>P:GO:0000910 | -                                              | EC:5.99.1.3 | IPR001154; IPR001241; IPR002205;<br>IPR003594; IPR013506; IPR013758;<br>IPR013759; IPR013760; IPR014721;<br>IPR018522; IPR020568; IPR020899;<br>G3DSA:3.30.1490.30 (GENE3D),<br>PTHR10169 (PANTHER),<br>PTHR10169:SF2 (PANTHER) |
| Loa loa                 | topoisomerase ii beta                                     | 20 | P:GO:0001764;<br>C:GO:0005654;<br>F:GO:0008094;<br>F:GO:0008144;<br>P:GO:0006974;<br>P:GO:0007409;<br>P:GO:0006355;<br>P:GO:0030900;<br>P:GO:0006265;<br>F:GO:0003918;<br>C:GO:0009330;<br>P:GO:0009792;<br>C:GO:0005694;<br>P:GO:0006266;<br>P:GO:0007059;<br>P:GO:0030263;<br>F:GO:0003700;<br>F:GO:0005524;<br>P:GO:0043065;<br>P:GO:0000910 | -                                              | EC:5.99.1.3 | IPR001154; IPR001241; IPR002205;<br>IPR003594; IPR013506; IPR013758;<br>IPR013759; IPR013760; IPR014721;<br>IPR018522; IPR020568; IPR020899;<br>G3DSA:3.30.1490.30 (GENE3D),<br>PTHR10169 (PANTHER),<br>PTHR10169:SF2 (PANTHER) |
| Caenorhabditis briggsae | mmp37-like mitochondrial precursor                        | 2  | P:GO:0030150;<br>C:GO:0031314                                                                                                                                                                                                                                                                                                                   | -                                              |             | IPR015222                                                                                                                                                                                                                       |
| Loa loa                 | cleft lip and palate transmembrane protein 1-like protein | 0  |                                                                                                                                                                                                                                                                                                                                                 | P:GO:0006915;<br>C:GO:0016021;<br>C:GO:0016020 |             | IPR008429                                                                                                                                                                                                                       |
| Caenorhabditis elegans  | monocarboxylate transporter                               | 0  |                                                                                                                                                                                                                                                                                                                                                 | P:GO:0055085                                   |             | IPR011701; IPR016196; IPR020846;<br>G3DSA:1.20.1250.20 (GENE3D),<br>PTHR11360 (PANTHER),<br>PTHR11360:SF10 (PANTHER)                                                                                                            |
|                         | -                                                         | 0  |                                                                                                                                                                                                                                                                                                                                                 |                                                |             | -                                                                                                                                                                                                                               |
| Brugia malayi           | c-myc promoter-binding protein irlb                       | 0  |                                                                                                                                                                                                                                                                                                                                                 |                                                |             | -                                                                                                                                                                                                                               |
|                         | -                                                         | 0  |                                                                                                                                                                                                                                                                                                                                                 |                                                |             | -                                                                                                                                                                                                                               |
| Caenorhabditis briggsae | briggsae cbr--s-7 protein                                 | 1  | F:GO:0008233                                                                                                                                                                                                                                                                                                                                    | -                                              |             | IPR001506; G3DSA:3.40.390.10<br>(GENE3D), PTHR10127 (PANTHER),<br>PTHR10127:SF80 (PANTHER), SignalP<br>(SIGNALP), SSF55486 (SUPERFAMILY)                                                                                        |

|                         |                                                       |  |   |                                                                 |   |             |                                                                                                                       |
|-------------------------|-------------------------------------------------------|--|---|-----------------------------------------------------------------|---|-------------|-----------------------------------------------------------------------------------------------------------------------|
| Caenorhabditis briggsae | phosphatidylinositol-5-phosphate 4- type alpha        |  | 3 | P:GO:0046488;<br>P:GO:0016310;<br>F:GO:0016308                  | - | EC:2.7.1.68 | IPR002498; G3DSA:3.30.800.10 (GENE3D), G3DSA:3.30.810.10 (GENE3D), PTHR23086:SF3 (PANTHER), SSF56104 (SUPERFAMILY)    |
| Caenorhabditis briggsae | phosphatidylinositol-5-phosphate 4- type alpha        |  | 3 | P:GO:0046488;<br>P:GO:0016310;<br>F:GO:0016308                  | - | EC:2.7.1.68 | IPR002498; G3DSA:3.30.800.10 (GENE3D), G3DSA:3.30.810.10 (GENE3D), PTHR23086:SF3 (PANTHER), SSF56104 (SUPERFAMILY)    |
| Caenorhabditis briggsae | phosphatidylinositol-5-phosphate 4-ki-se type-2 alpha |  | 3 | P:GO:0046488;<br>P:GO:0016310;<br>F:GO:0016308                  | - | EC:2.7.1.68 | -                                                                                                                     |
| Caenorhabditis briggsae | phosphatidylinositol-5-phosphate 4-ki-se type-2 alpha |  | 3 | P:GO:0046488;<br>P:GO:0016310;<br>F:GO:0016308                  | - | EC:2.7.1.68 | -                                                                                                                     |
| Ancylostoma caninum     | secreted protein asp-2                                |  | 0 |                                                                 |   |             | IPR001283; IPR014044; IPR018244; PTHR10334:SF11 (PANTHER)                                                             |
| Ixodes scapularis       | spermatogenesis-associated protein 20                 |  | 0 |                                                                 |   |             | PTH12145 (PANTHER)                                                                                                    |
| Caenorhabditis briggsae | formin homology 2 domain containing protein           |  | 1 | F:GO:0005515                                                    | - |             | IPR010472; IPR016024; PTHR23213 (PANTHER), PTHR23213:SF12 (PANTHER)                                                   |
| Caenorhabditis briggsae | formin homology 2 domain containing protein           |  | 1 | F:GO:0005515                                                    | - |             | IPR010472; IPR016024; PTHR23213 (PANTHER), PTHR23213:SF12 (PANTHER)                                                   |
| -                       | -                                                     |  | 0 |                                                                 |   |             | -                                                                                                                     |
| Drosophila ananassae    | elegans protein confirmed by transcript evidence      |  | 0 |                                                                 |   |             | -                                                                                                                     |
| -                       | -                                                     |  | 0 |                                                                 |   |             | -                                                                                                                     |
| -                       | -                                                     |  | 0 |                                                                 |   |             | SignalP (SIGNALP)                                                                                                     |
| Caenorhabditis elegans  | scavenger receptor class member 2                     |  | 1 | C:GO:0044464                                                    | - |             | IPR002159                                                                                                             |
| Loa loa                 | c2 domain containing protein                          |  | 0 |                                                                 |   |             | -                                                                                                                     |
| Dictyocaulus viviparus  | putative protein [Dictyocaulus viviparus]             |  | 0 |                                                                 |   |             | -                                                                                                                     |
| Caenorhabditis briggsae | leucine rich repeat family protein                    |  | 4 | P:GO:0051438;<br>F:GO:0005515;<br>C:GO:0031462;<br>F:GO:0004842 | - | EC:6.3.2.19 | IPR011989; IPR016024; G3DSA:3.80.10.10 (GENE3D), PTHR12904 (PANTHER), PTHR12904:SF6 (PANTHER), SSF52047 (SUPERFAMILY) |
| Caenorhabditis briggsae | leucine rich repeat family protein                    |  | 1 | F:GO:0005515                                                    | - |             | G3DSA:3.80.10.10 (GENE3D)                                                                                             |
| Caenorhabditis briggsae | leucine rich repeat family protein                    |  | 4 | P:GO:0051438;<br>F:GO:0005515;<br>C:GO:0031462;<br>F:GO:0004842 | - | EC:6.3.2.19 | IPR011989; IPR016024; G3DSA:3.80.10.10 (GENE3D), PTHR12904 (PANTHER), PTHR12904:SF6 (PANTHER), SSF52047 (SUPERFAMILY) |
| Caenorhabditis briggsae | leucine rich repeat family protein                    |  | 4 | P:GO:0051438;<br>F:GO:0005515;<br>C:GO:0031462;<br>F:GO:0004842 | - | EC:6.3.2.19 | IPR011989; IPR016024; G3DSA:3.80.10.10 (GENE3D), PTHR12904 (PANTHER), PTHR12904:SF6 (PANTHER), SSF52047 (SUPERFAMILY) |
| Caenorhabditis briggsae | leucine rich repeat family protein                    |  | 4 | P:GO:0051438;<br>F:GO:0005515;<br>C:GO:0031462;<br>F:GO:0004842 | - | EC:6.3.2.19 | IPR011989; IPR016024; G3DSA:3.80.10.10 (GENE3D), PTHR12904 (PANTHER), PTHR12904:SF6 (PANTHER), SSF52047 (SUPERFAMILY) |
| Brugia malayi           | cleavage and polyadenylation specific factor 3-like   |  | 2 | P:GO:0006396;<br>C:GO:0044424                                   | - |             | PTH11203 (PANTHER), PTHR11203:SF8 (PANTHER)                                                                           |
| -                       | -                                                     |  | 0 |                                                                 |   |             | -                                                                                                                     |
| Caenorhabditis elegans  | elegans protein confirmed by transcript evidence      |  | 0 |                                                                 |   |             | SignalP (SIGNALP)                                                                                                     |

|                        |                                                                                 |    |                                                                                                                                                                                                                          |   |  |                                                                                  |
|------------------------|---------------------------------------------------------------------------------|----|--------------------------------------------------------------------------------------------------------------------------------------------------------------------------------------------------------------------------|---|--|----------------------------------------------------------------------------------|
| Caenorhabditis elegans | growth arrest and d--damage-inducible proteins-interacting protein 1            | 2  | C:GO:0005634;<br>P:GO:0007049                                                                                                                                                                                            | - |  | IPR018472                                                                        |
|                        | -                                                                               | 0  |                                                                                                                                                                                                                          |   |  | -                                                                                |
| Caenorhabditis elegans | c-type lectin family member (clec-152)                                          | 0  |                                                                                                                                                                                                                          |   |  | IPR002035; G3DSA:3.40.50.410 (GENE3D), SignalP (SIGNALP), SSF53300 (SUPERFAMILY) |
|                        | -                                                                               | 0  |                                                                                                                                                                                                                          |   |  | -                                                                                |
|                        | -                                                                               | 0  |                                                                                                                                                                                                                          |   |  | -                                                                                |
|                        | -                                                                               | 0  |                                                                                                                                                                                                                          |   |  | -                                                                                |
|                        | -                                                                               | 0  |                                                                                                                                                                                                                          |   |  | SignalP (SIGNALP)                                                                |
| Caenorhabditis elegans | integrator complex subunit 2                                                    | 2  | P:GO:0032501;<br>P:GO:0040007                                                                                                                                                                                            | - |  | -                                                                                |
| Loa loa                | integrator complex subunit 2                                                    | 2  | P:GO:0032501;<br>P:GO:0040007                                                                                                                                                                                            | - |  | -                                                                                |
| Caenorhabditis elegans | charged multivesicular body protein 3                                           | 13 | P:GO:0009792;<br>P:GO:0002119;<br>C:GO:0005768;<br>P:GO:0040018;<br>F:GO:0005515;<br>P:GO:0018996;<br>P:GO:0040010;<br>P:GO:0008340;<br>P:GO:0040011;<br>P:GO:0009987;<br>P:GO:0019915;<br>C:GO:0016020;<br>P:GO:0015031 | - |  | IPR005024; PTHR10476 (PANTHER), PTHR10476:SF1 (PANTHER)                          |
| Caenorhabditis elegans | charged multivesicular body protein 3                                           | 13 | P:GO:0009792;<br>P:GO:0002119;<br>C:GO:0005768;<br>P:GO:0040018;<br>F:GO:0005515;<br>P:GO:0018996;<br>P:GO:0040010;<br>P:GO:0008340;<br>P:GO:0040011;<br>P:GO:0009987;<br>P:GO:0019915;<br>C:GO:0016020;<br>P:GO:0015031 | - |  | SignalP (SIGNALP)                                                                |
| Caenorhabditis elegans | tim44-like domain containing protein                                            | 10 | P:GO:0040010;<br>F:GO:0008270;<br>F:GO:0015450;<br>C:GO:0005744;<br>P:GO:0000003;<br>P:GO:0006626;<br>P:GO:0002119;<br>F:GO:0005515;<br>P:GO:0006898;<br>P:GO:0009792                                                    | - |  | IPR007379; PTHR10721 (PANTHER), PTHR10721:SF1 (PANTHER), SSF54427 (SUPERFAMILY)  |
| Caenorhabditis elegans | abnormal dye filling protein isoform partially confirmed by transcript evidence | 4  | F:GO:0005515;<br>C:GO:0005694;<br>P:GO:0009987;<br>C:GO:0044446                                                                                                                                                          | - |  | SignalP (SIGNALP)                                                                |
| Caenorhabditis elegans | abnormal dye filling protein isoform partially confirmed by transcript evidence | 4  | F:GO:0005515;<br>C:GO:0005694;<br>P:GO:0009987;<br>C:GO:0044446                                                                                                                                                          | - |  | PD968187 (PRODOM), PTHR23159 (PANTHER), PTHR23159:SF6 (PANTHER)                  |

|                             |                                                                                 |   |                                                                                                                                                      |              |                                                                                                                                        |
|-----------------------------|---------------------------------------------------------------------------------|---|------------------------------------------------------------------------------------------------------------------------------------------------------|--------------|----------------------------------------------------------------------------------------------------------------------------------------|
| Caenorhabditis elegans      | abnormal dye filling protein isoform partially confirmed by transcript evidence | 4 | F:GO:0005515;<br>C:GO:0005694;<br>P:GO:0009987;<br>C:GO:0044446                                                                                      | -            | PD936484 (PRODOM), PTHR23159 (PANTHER), PTHR23159:SF6 (PANTHER)                                                                        |
| Caenorhabditis elegans      | hypothetical protein C26B9.1 [Caenorhabditis elegans]                           | 0 |                                                                                                                                                      |              | -                                                                                                                                      |
| Caenorhabditis elegans      | briggsae cbr-igcm-1 protein                                                     | 0 |                                                                                                                                                      | C:GO:0016020 | IPR003599; IPR003961; IPR007110; IPR008957; IPR013098; IPR013783; PTHR11640 (PANTHER), PTHR11640:SF2 (PANTHER), SSF48726 (SUPERFAMILY) |
| Caenorhabditis elegans      | regulator of g protein sig-ling family member (rgs-7)                           | 0 |                                                                                                                                                      | F:GO:0004871 | IPR000008; IPR008973; IPR018029; G3DSA:2.60.40.150 (GENE3D)                                                                            |
| Caenorhabditis briggsae     | d- replication complex gins protein psf2                                        | 9 | P:GO:0040007;<br>P:GO:0040035;<br>P:GO:0010171;<br>P:GO:0002119;<br>F:GO:0005515;<br>P:GO:0040011;<br>P:GO:0006898;<br>P:GO:0009792;<br>P:GO:0001703 | -            | -                                                                                                                                      |
| Caenorhabditis briggsae     | protoheme ix farnesyltransferase family protein                                 | 5 | P:GO:0048034;<br>C:GO:0005886;<br>F:GO:0008495;<br>C:GO:0016021;<br>C:GO:0031966                                                                     | -            | IPR006369; PTHR11048 (PANTHER), SignalP (SIGNALP)                                                                                      |
| Caenorhabditis elegans      | yfe5_caeel ame: full=uncharacterized protein flags: precursor                   | 0 |                                                                                                                                                      |              | SignalP (SIGNALP)                                                                                                                      |
| Caenorhabditis elegans      | hypothetical kda protein in chromosome                                          | 4 | P:GO:0009792;<br>P:GO:0002119;<br>P:GO:0040010;<br>P:GO:0040011                                                                                      | -            | IPR011989; IPR012954; IPR016024; PTHR13457 (PANTHER)                                                                                   |
| Angiostrongylus cantonensis | hypothetical protein [Angiostrongylus cantonensis]                              | 0 |                                                                                                                                                      |              | -                                                                                                                                      |
| Angiostrongylus cantonensis | hypothetical protein [Angiostrongylus cantonensis]                              | 0 |                                                                                                                                                      |              | -                                                                                                                                      |
| Loa loa                     | speckle-type poz protein                                                        | 9 | P:GO:0007367;<br>P:GO:0043065;<br>P:GO:0042067;<br>P:GO:0007349;<br>P:GO:0016567;<br>P:GO:0046330;<br>F:GO:0005515;<br>P:GO:0030162;<br>C:GO:0005634 | -            | -                                                                                                                                      |
| Caenorhabditis briggsae     | rho gtpase-activating protein 26                                                | 5 | F:GO:0005096;<br>C:GO:0005622;<br>F:GO:0005515;<br>P:GO:0009987;<br>P:GO:0019915                                                                     | -            | IPR000198; IPR001849; IPR008936; IPR011993; PTHR12552 (PANTHER), PTHR12552:SF1 (PANTHER), SSF50729 (SUPERFAMILY)                       |
| Caenorhabditis briggsae     | ap1 gamma subunit binding protein 1                                             | 3 | P:GO:0006810;<br>F:GO:0005509;<br>C:GO:0005737                                                                                                       | -            | -                                                                                                                                      |
| Pan troglodytes             | PREDICTED: hypothetical protein [Pan troglodytes]                               | 0 |                                                                                                                                                      |              | -                                                                                                                                      |
| Caenorhabditis briggsae     | bromodomain and wd repeat domain containing 2                                   | 1 | P:GO:0050794                                                                                                                                         | -            | IPR011046; IPR015943                                                                                                                   |

|                             |                                                        |   |                                                                                                                    |                                                                                                                                                      |            |                                                                                                                         |
|-----------------------------|--------------------------------------------------------|---|--------------------------------------------------------------------------------------------------------------------|------------------------------------------------------------------------------------------------------------------------------------------------------|------------|-------------------------------------------------------------------------------------------------------------------------|
| Caenorhabditis briggsae     | zinc finger protein 7-like                             | 0 |                                                                                                                    | P:GO:0006355;<br>F:GO:0046872;<br>F:GO:0003676;<br>F:GO:0003674;<br>P:GO:0040027;<br>F:GO:0008270;<br>C:GO:0005634;<br>C:GO:0005622                  |            | IPR007087; IPR015880; PTHR23224 (PANTHER), PTHR23224:SF465 (PANTHER), SSF57667 (SUPERFAMILY)                            |
| Caenorhabditis briggsae     | zinc finger protein 555                                | 0 |                                                                                                                    | P:GO:0040027;<br>F:GO:0003677;<br>C:GO:0005634;<br>F:GO:0003676;<br>F:GO:0008270;<br>F:GO:0003674;<br>P:GO:0006355;<br>C:GO:0005622;<br>F:GO:0046872 |            | IPR007087; IPR015880; PTHR11389 (PANTHER), SSF57667 (SUPERFAMILY)                                                       |
| Caenorhabditis briggsae     | zinc finger protein 555                                | 0 |                                                                                                                    | P:GO:0040027;<br>F:GO:0003677;<br>C:GO:0005634;<br>F:GO:0003676;<br>F:GO:0008270;<br>F:GO:0003674;<br>P:GO:0006355;<br>C:GO:0005622;<br>F:GO:0046872 |            | IPR007087; IPR015880; PTHR23224 (PANTHER), PTHR23224:SF461 (PANTHER), SSF57667 (SUPERFAMILY)                            |
| Caenorhabditis briggsae     | zinc finger protein 555                                | 0 |                                                                                                                    | P:GO:0040027;<br>F:GO:0003677;<br>C:GO:0005634;<br>F:GO:0003676;<br>F:GO:0008270;<br>F:GO:0003674;<br>P:GO:0006355;<br>C:GO:0005622;<br>F:GO:0046872 |            | IPR007087; IPR015880; PTHR11389 (PANTHER), SSF57667 (SUPERFAMILY)                                                       |
| -                           | -                                                      | 0 |                                                                                                                    |                                                                                                                                                      |            | -                                                                                                                       |
| -                           | -                                                      | 0 |                                                                                                                    |                                                                                                                                                      |            | SignalP (SIGNALP)                                                                                                       |
| -                           | -                                                      | 0 |                                                                                                                    |                                                                                                                                                      |            | -                                                                                                                       |
| -                           | -                                                      | 0 |                                                                                                                    |                                                                                                                                                      |            | SignalP (SIGNALP)                                                                                                       |
| Caenorhabditis briggsae     | transformation transcription domain-associated protein | 1 | P:GO:0009987                                                                                                       | -                                                                                                                                                    |            | -                                                                                                                       |
| Caenorhabditis briggsae     | transformation transcription domain-associated protein | 1 | P:GO:0009987                                                                                                       | -                                                                                                                                                    |            | -                                                                                                                       |
| -                           | -                                                      | 0 |                                                                                                                    |                                                                                                                                                      |            | IPR007726                                                                                                               |
| Brugia malayi               | r- polymerase ii associated protein 2                  | 5 | P:GO:0040035;<br>P:GO:0009792;<br>P:GO:0006898;<br>P:GO:0040039;<br>P:GO:0002009                                   | -                                                                                                                                                    |            | IPR007308; IPR010916; PTHR14732 (PANTHER), PS51479 (PROFILE)                                                            |
| Angiostrongylus cantonensis | hypothetical protein [Angiostrongylus cantonensis]     | 0 |                                                                                                                    |                                                                                                                                                      |            | -                                                                                                                       |
| Angiostrongylus cantonensis | hypothetical protein [Angiostrongylus cantonensis]     | 0 |                                                                                                                    |                                                                                                                                                      |            | -                                                                                                                       |
| Caenorhabditis briggsae     | heat shock protein family member (hsp- )               | 0 |                                                                                                                    | P:GO:0009408                                                                                                                                         |            | IPR002068; PTHR11527 (PANTHER), PTHR11527:SF28 (PANTHER)                                                                |
| Caenorhabditis elegans      | receptor type guanylyl cyclase                         | 7 | F:GO:0004383;<br>F:GO:0004672;<br>F:GO:0008528;<br>F:GO:0005524;<br>C:GO:0016020;<br>P:GO:0006468;<br>P:GO:0006182 | -                                                                                                                                                    | EC:4.6.1.2 | IPR001170; IPR001828; G3DSA:3.40.50.2300 (GENE3D), PTHR11920 (PANTHER), PTHR11920:SF2 (PANTHER), SSF53822 (SUPERFAMILY) |



|                        |                                                             |    |                                                                                                                                                                                                                                                                                                                                                                                                                                                                        |                                                                                                   |            |                                                                                                                                     |
|------------------------|-------------------------------------------------------------|----|------------------------------------------------------------------------------------------------------------------------------------------------------------------------------------------------------------------------------------------------------------------------------------------------------------------------------------------------------------------------------------------------------------------------------------------------------------------------|---------------------------------------------------------------------------------------------------|------------|-------------------------------------------------------------------------------------------------------------------------------------|
| Caenorhabditis elegans | receptor type guanylyl cyclase                              | 7  | F:GO:0004383;<br>F:GO:0004672;<br>F:GO:0008528;<br>F:GO:0005524;<br>C:GO:0016020;<br>P:GO:0006468;<br>P:GO:0006182                                                                                                                                                                                                                                                                                                                                                     | -                                                                                                 | EC:4.6.1.2 | IPR001170; IPR001828;<br>G3DSA:3.40.50.2300 (GENE3D),<br>PTHR11920 (PANTHER),<br>PTHR11920:SF2 (PANTHER), SSF53822<br>(SUPERFAMILY) |
| Loa loa                | entric chromosome binding protein family member (hcp-6)     | 4  | C:GO:0043234;<br>F:GO:0005515;<br>P:GO:0007067;<br>C:GO:0005634                                                                                                                                                                                                                                                                                                                                                                                                        | -                                                                                                 | -          | -                                                                                                                                   |
| Brugia malayi          | cleavage and polyadenylation factor i homolog ( cerevisiae) | 28 | P:GO:0000122;<br>P:GO:0030423;<br>F:GO:0030169;<br>F:GO:0005515;<br>P:GO:0006388;<br>P:GO:0040010;<br>P:GO:0040015;<br>P:GO:0007507;<br>F:GO:0008329;<br>F:GO:0017069;<br>C:GO:0016021;<br>P:GO:0035087;<br>P:GO:0045736;<br>C:GO:0005737;<br>F:GO:0005044;<br>P:GO:0031124;<br>P:GO:0009792;<br>F:GO:0004861;<br>F:GO:0005529;<br>F:GO:0051733;<br>P:GO:0002119;<br>P:GO:0006910;<br>C:GO:0000214;<br>F:GO:0051736;<br>P:GO:0045087;<br>F:GO:0005524;<br>P:GO:0040035 | -                                                                                                 | -          | IPR010655; G3DSA:3.40.50.300<br>(GENE3D), PTHR12755 (PANTHER),<br>PF03205 (PFAM), SSF52540<br>(SUPERFAMILY)                         |
| Caenorhabditis elegans | zinc finger protein                                         | 0  |                                                                                                                                                                                                                                                                                                                                                                                                                                                                        | F:GO:0003676;<br>F:GO:0046872;<br>F:GO:0016874;<br>F:GO:0008270;<br>F:GO:0004842;<br>F:GO:0005515 |            | IPR001841; PTHR11685 (PANTHER),<br>PTHR11685:SF17 (PANTHER), SignalP<br>(SIGNALP), SSF57850 (SUPERFAMILY)                           |
|                        | -                                                           | 0  |                                                                                                                                                                                                                                                                                                                                                                                                                                                                        |                                                                                                   |            | SignalP (SIGNALP)                                                                                                                   |
| Caenorhabditis elegans | nucleoporin 155kda                                          | 2  | F:GO:0005515;<br>C:GO:0005635                                                                                                                                                                                                                                                                                                                                                                                                                                          | -                                                                                                 |            | -                                                                                                                                   |
| Caenorhabditis elegans | nucleoporin 155kda                                          | 2  | F:GO:0005515;<br>C:GO:0005635                                                                                                                                                                                                                                                                                                                                                                                                                                          | -                                                                                                 |            | -                                                                                                                                   |
| Caenorhabditis elegans | nucleoporin 155kda                                          | 2  | F:GO:0005515;<br>C:GO:0005635                                                                                                                                                                                                                                                                                                                                                                                                                                          | -                                                                                                 |            | -                                                                                                                                   |
| Caenorhabditis elegans | nucleoporin 155kda                                          | 2  | F:GO:0005515;<br>C:GO:0005635                                                                                                                                                                                                                                                                                                                                                                                                                                          | -                                                                                                 |            | -                                                                                                                                   |
| Caenorhabditis elegans | nucleoporin 155kda                                          | 2  | F:GO:0005515;<br>C:GO:0005635                                                                                                                                                                                                                                                                                                                                                                                                                                          | -                                                                                                 |            | -                                                                                                                                   |

|                        |                                                    |    |                                                                                                                                                                                        |   |             |                                                                                                                                                                         |
|------------------------|----------------------------------------------------|----|----------------------------------------------------------------------------------------------------------------------------------------------------------------------------------------|---|-------------|-------------------------------------------------------------------------------------------------------------------------------------------------------------------------|
| Caenorhabditis elegans | nuclear pore complex protein family member (npp-8) | 9  | P:GO:0006810;<br>P:GO:0040007;<br>P:GO:0040035;<br>P:GO:0002119;<br>F:GO:0005515;<br>P:GO:0006997;<br>C:GO:0005635;<br>P:GO:0009792;<br>C:GO:0016020                                   | - |             | IPR004870; IPR014908;<br>PTHR10350:SF3 (PANTHER)                                                                                                                        |
| Caenorhabditis elegans | nucleoporin 155kda                                 | 2  | F:GO:0005515;<br>C:GO:0005635                                                                                                                                                          | - |             | -                                                                                                                                                                       |
|                        | -                                                  | 0  |                                                                                                                                                                                        |   |             | IPR000436                                                                                                                                                               |
|                        | -                                                  | 0  |                                                                                                                                                                                        |   |             | IPR000436; SignalP (SIGNALP)                                                                                                                                            |
| Caenorhabditis elegans | isoform cra_b                                      | 8  | P:GO:0000278;<br>P:GO:0048699;<br>P:GO:0006996;<br>P:GO:0009792;<br>P:GO:0050794;<br>C:GO:0043229;<br>P:GO:0022403;<br>F:GO:0005488                                                    | - |             | IPR001849; IPR002219; IPR011993;<br>G3DSA:3.30.60.20 (GENE3D),<br>PTHR22988 (PANTHER),<br>PTHR22988:SF1 (PANTHER), SSF50729<br>(SUPERFAMILY), SSF57889<br>(SUPERFAMILY) |
| Ailuropoda melanoleuca | 40s ribosomal protein s5                           | 9  | P:GO:0006413;<br>F:GO:0003729;<br>F:GO:0008270;<br>P:GO:0006355;<br>F:GO:0003735;<br>P:GO:0006450;<br>C:GO:0022627;<br>F:GO:0005515;<br>C:GO:0005634                                   | - |             | SignalP (SIGNALP)                                                                                                                                                       |
|                        | -                                                  | 0  |                                                                                                                                                                                        |   |             | -                                                                                                                                                                       |
|                        | -                                                  | 0  |                                                                                                                                                                                        |   |             | -                                                                                                                                                                       |
| Pan troglodytes        | proteasome ( macropain) beta 4                     | 11 | P:GO:0051436;<br>P:GO:0051437;<br>F:GO:0004298;<br>C:GO:0045111;<br>C:GO:0005813;<br>P:GO:0031145;<br>F:GO:0001530;<br>P:GO:0002862;<br>P:GO:0044419;<br>C:GO:0005839;<br>C:GO:0005634 | - | EC:3.4.25.0 | IPR001353; G3DSA:3.60.20.10<br>(GENE3D), PTHR11599 (PANTHER),<br>PTHR11599:SF5 (PANTHER), PS51476<br>(PROFILE), SSF56235 (SUPERFAMILY)                                  |
| Ancylostoma caninum    | metalloprotease 1 precursor                        | 2  | F:GO:0046872;<br>F:GO:0008237                                                                                                                                                          | - |             | IPR001506; IPR006026;<br>G3DSA:3.40.390.10 (GENE3D),<br>PTHR10127 (PANTHER),<br>PTHR10127:SF65 (PANTHER),<br>SSF55486 (SUPERFAMILY)                                     |
| Caenorhabditis elegans | elegans protein confirmed by transcript evidence   | 2  | P:GO:0055085;<br>C:GO:0016021                                                                                                                                                          | - |             | IPR011701; IPR016196; IPR020846;<br>G3DSA:1.20.1250.20 (GENE3D),<br>PTHR11662 (PANTHER),<br>PTHR11662:SF11 (PANTHER), SignalP<br>(SIGNALP)                              |

|                         |                                                         |    |                                                                                                                                                                       |                                                                                                                                                                                                         |            |                                                                                                                     |
|-------------------------|---------------------------------------------------------|----|-----------------------------------------------------------------------------------------------------------------------------------------------------------------------|---------------------------------------------------------------------------------------------------------------------------------------------------------------------------------------------------------|------------|---------------------------------------------------------------------------------------------------------------------|
| Caenorhabditis briggsae | ribosomal r-                                            | 10 | P:GO:0040010;<br>P:GO:0031167;<br>F:GO:0003676;<br>P:GO:0000003;<br>P:GO:0002119;<br>P:GO:0040039;<br>P:GO:0006898;<br>P:GO:0009792;<br>F:GO:0008168;<br>C:GO:0005634 | -                                                                                                                                                                                                       | EC:2.1.1.0 | IPR008162; IPR012920; IPR015507                                                                                     |
| -                       | -                                                       | 0  |                                                                                                                                                                       |                                                                                                                                                                                                         |            | -                                                                                                                   |
| Ostertagia ostertagi    | heat shock protein family member (hsp- )                | 1  | P:GO:0006950                                                                                                                                                          | -                                                                                                                                                                                                       |            | IPR001436; IPR002068; IPR008978;<br>G3DSA:2.60.40.790 (GENE3D),<br>PTHR11527 (PANTHER),<br>PTHR11527:SF28 (PANTHER) |
| -                       | -                                                       | 0  |                                                                                                                                                                       |                                                                                                                                                                                                         |            | -                                                                                                                   |
| Caenorhabditis elegans  | tbcl domain member 5                                    | 2  | P:GO:0019915;<br>F:GO:0005515                                                                                                                                         | -                                                                                                                                                                                                       |            | SignalP (SIGNALP)                                                                                                   |
| Caenorhabditis elegans  | tbcl domain member 5                                    | 2  | P:GO:0019915;<br>F:GO:0005515                                                                                                                                         | -                                                                                                                                                                                                       |            | SignalP (SIGNALP)                                                                                                   |
| Caenorhabditis elegans  | tbcl domain member 5                                    | 2  | P:GO:0019915;<br>F:GO:0005515                                                                                                                                         | -                                                                                                                                                                                                       |            | IPR000195; G3DSA:1.10.8.270<br>(GENE3D), PTHR22957 (PANTHER),<br>PTHR22957:SF25 (PANTHER), SignalP<br>(SIGNALP)     |
| Caenorhabditis elegans  | tbcl domain member 5                                    | 2  | P:GO:0019915;<br>F:GO:0005515                                                                                                                                         | -                                                                                                                                                                                                       |            | IPR000195; G3DSA:1.10.8.270<br>(GENE3D), PTHR22957 (PANTHER),<br>PTHR22957:SF25 (PANTHER), SignalP<br>(SIGNALP)     |
| -                       | -                                                       | 0  |                                                                                                                                                                       |                                                                                                                                                                                                         |            | -                                                                                                                   |
| Caenorhabditis elegans  | carbonic ydrase family member (cah-4)                   | 0  |                                                                                                                                                                       | P:GO:0000003;<br>P:GO:0040011                                                                                                                                                                           |            | -                                                                                                                   |
| -                       | -                                                       | 0  |                                                                                                                                                                       |                                                                                                                                                                                                         |            | -                                                                                                                   |
| Caenorhabditis elegans  | hypothetical protein Y34B4A.4 [Caenorhabditis elegans]  | 3  | F:GO:0005085;<br>C:GO:0005622;<br>P:GO:0051056                                                                                                                        | -                                                                                                                                                                                                       |            | IPR008937; PTHR23113:SF40<br>(PANTHER), SignalP (SIGNALP)                                                           |
| Caenorhabditis briggsae | Hypothetical protein CBG18218 [Caenorhabditis briggsae] | 3  | P:GO:0007275;<br>P:GO:0000003;<br>P:GO:0009987                                                                                                                        | -                                                                                                                                                                                                       |            | -                                                                                                                   |
| Caenorhabditis briggsae | translocon-associated protein gamma                     | 3  | C:GO:0030176;<br>C:GO:0005784;<br>P:GO:0006613                                                                                                                        | -                                                                                                                                                                                                       |            | IPR009779; SignalP (SIGNALP)                                                                                        |
| Caenorhabditis elegans  | elegans protein confirmed by transcript evidence        | 0  |                                                                                                                                                                       |                                                                                                                                                                                                         |            | IPR013883                                                                                                           |
| Caenorhabditis elegans  | elegans protein confirmed by transcript evidence        | 0  |                                                                                                                                                                       |                                                                                                                                                                                                         |            | IPR013883                                                                                                           |
| Physcomitrella patens   | d1 chromosomal isoform a                                | 0  |                                                                                                                                                                       | C:GO:0000785;<br>F:GO:0004540;<br>P:GO:0006396;<br>F:GO:0003680;<br>F:GO:0003677;<br>C:GO:0005634;<br>C:GO:0005737;<br>F:GO:0003723;<br>F:GO:0008270;<br>F:GO:0003696;<br>P:GO:0006355;<br>F:GO:0003690 |            | IPR017956; IPR020478                                                                                                |

|                          |                                                               |   |                                                                                                                                                      |                                                                 |             |                                                                                                                                     |
|--------------------------|---------------------------------------------------------------|---|------------------------------------------------------------------------------------------------------------------------------------------------------|-----------------------------------------------------------------|-------------|-------------------------------------------------------------------------------------------------------------------------------------|
| Caenorhabditis briggsae  | innexin family protein                                        | 4 | P:GO:0019915;<br>C:GO:0016021;<br>C:GO:0005921;<br>F:GO:0008233                                                                                      | -                                                               |             | PSS1257 (PROFILE), SignalP (SIGNALP)                                                                                                |
| -                        | -                                                             | 0 |                                                                                                                                                      |                                                                 |             | -                                                                                                                                   |
| Ornithorhynchus anatinus | pot1 protection of telomeres 1 homolog                        | 0 |                                                                                                                                                      | P:GO:0040010;<br>P:GO:0000723;<br>C:GO:0000784;<br>F:GO:0003677 |             | IPR012340; IPR016027;<br>G3DSA:2.40.50.210 (GENE3D)                                                                                 |
| Caenorhabditis briggsae  | rho guanyl-nucleotide exchange factor                         | 1 | P:GO:0000003                                                                                                                                         | -                                                               |             | IPR000219                                                                                                                           |
| Brugia malayi            | myosin xviii                                                  | 4 | C:GO:0005856;<br>C:GO:0005730;<br>F:GO:0042802;<br>C:GO:0005794                                                                                      | -                                                               |             | IPR001478; G3DSA:2.30.42.10<br>(GENE3D), PTHR13140 (PANTHER),<br>PTHR13140:SF14 (PANTHER),<br>SSF52540 (SUPERFAMILY)                |
| Taeniopygia guttata      | sequestosome 1                                                | 6 | F:GO:0005515;<br>C:GO:0043231;<br>P:GO:0044237;<br>P:GO:0006915;<br>P:GO:0048522;<br>C:GO:0044444                                                    | -                                                               |             | IPR000270; IPR000433;<br>G3DSA:3.10.20.240 (GENE3D),<br>PTHR15090 (PANTHER), SSF54277<br>(SUPERFAMILY)                              |
| Taeniopygia guttata      | sequestosome 1                                                | 6 | F:GO:0005515;<br>C:GO:0043231;<br>P:GO:0044237;<br>P:GO:0006915;<br>P:GO:0048522;<br>C:GO:0044444                                                    | -                                                               |             | IPR000270; IPR000433;<br>G3DSA:3.10.20.240 (GENE3D),<br>PTHR15090 (PANTHER), SSF54277<br>(SUPERFAMILY)                              |
| Taeniopygia guttata      | sequestosome 1                                                | 6 | F:GO:0005515;<br>C:GO:0043231;<br>P:GO:0044237;<br>P:GO:0006915;<br>P:GO:0048522;<br>C:GO:0044444                                                    | -                                                               |             | IPR000433; G3DSA:3.10.20.240<br>(GENE3D), PTHR15090 (PANTHER),<br>SSF54277 (SUPERFAMILY)                                            |
| -                        | -                                                             | 0 |                                                                                                                                                      |                                                                 |             | -                                                                                                                                   |
| Caenorhabditis elegans   | cwf19-like protein 1                                          | 1 | F:GO:0003824                                                                                                                                         | -                                                               |             | -                                                                                                                                   |
| Caenorhabditis elegans   | cwf19-like protein 1                                          | 1 | F:GO:0003824                                                                                                                                         | -                                                               |             | -                                                                                                                                   |
| Caenorhabditis elegans   | citin family member (cex-1)                                   | 0 |                                                                                                                                                      |                                                                 |             | -                                                                                                                                   |
| -                        | -                                                             | 0 |                                                                                                                                                      |                                                                 |             | -                                                                                                                                   |
| Caenorhabditis briggsae  | nuclear vcp-like                                              | 4 | F:GO:0004176;<br>F:GO:0005524;<br>P:GO:0006508;<br>F:GO:0004252                                                                                      | -                                                               | EC:3.4.21.0 | IPR003959; G3DSA:3.40.50.300<br>(GENE3D), PTHR23077 (PANTHER),<br>PTHR23077:SF16 (PANTHER),<br>SSF52540 (SUPERFAMILY)               |
| Loa loa                  | frizzled smoothened family membrane region containing protein | 7 | P:GO:0007186;<br>F:GO:0004926;<br>C:GO:0016021;<br>P:GO:0007165;<br>P:GO:0007275;<br>P:GO:0016055;<br>F:GO:0004930                                   | -                                                               |             | -                                                                                                                                   |
| Caenorhabditis briggsae  | briggsae cbr-nmy-2 protein                                    | 9 | F:GO:0008307;<br>C:GO:0044449;<br>P:GO:0048739;<br>C:GO:0016459;<br>P:GO:0048251;<br>P:GO:0006939;<br>F:GO:0005515;<br>F:GO:0000166;<br>P:GO:0030241 | -                                                               |             | IPR000048; IPR001609;<br>G3DSA:4.10.270.10 (GENE3D),<br>PTHR13140 (PANTHER),<br>PTHR13140:SF23 (PANTHER),<br>SSF52540 (SUPERFAMILY) |

|                         |                                                                             |   |                                                                                                                                     |                                                                                  |                                                                                                                                                                                         |
|-------------------------|-----------------------------------------------------------------------------|---|-------------------------------------------------------------------------------------------------------------------------------------|----------------------------------------------------------------------------------|-----------------------------------------------------------------------------------------------------------------------------------------------------------------------------------------|
| Caenorhabditis elegans  | temporarily assigned gene -me family member (tag-333)                       | 0 |                                                                                                                                     | F:GO:0005515                                                                     | -                                                                                                                                                                                       |
|                         | -                                                                           | 0 |                                                                                                                                     |                                                                                  | -                                                                                                                                                                                       |
|                         |                                                                             | 0 |                                                                                                                                     |                                                                                  |                                                                                                                                                                                         |
|                         | -                                                                           | 0 |                                                                                                                                     |                                                                                  | IPR000436; IPR016060; SignalP (SIGNALP)                                                                                                                                                 |
|                         | -                                                                           | 0 |                                                                                                                                     |                                                                                  | -                                                                                                                                                                                       |
| Caenorhabditis elegans  | 1-acylglycerol-3-phosphate o-acyltransferase 2 (lysophosphatidic acid beta) | 5 | F:GO:0008415;<br>P:GO:0008544;<br>C:GO:0044444;<br>P:GO:0008654;<br>C:GO:0016020                                                    | -                                                                                | IPR002123; G3DSA:3.40.1130.10 (GENE3D), PTHR10434 (PANTHER), SignalP (SIGNALP), SSF69593 (SUPERFAMILY)                                                                                  |
| Caenorhabditis elegans  | 1-acylglycerol-3-phosphate o-acyltransferase 2 (lysophosphatidic acid beta) | 5 | F:GO:0008415;<br>P:GO:0008544;<br>C:GO:0044444;<br>P:GO:0008654;<br>C:GO:0016020                                                    | -                                                                                | IPR002123; G3DSA:3.40.1130.10 (GENE3D), PTHR10434 (PANTHER), SignalP (SIGNALP), SSF69593 (SUPERFAMILY)                                                                                  |
| Caenorhabditis elegans  | briggsae cbr-ain-1 protein                                                  | 0 |                                                                                                                                     | F:GO:0005515                                                                     | -                                                                                                                                                                                       |
| Caenorhabditis elegans  | briggsae cbr-ain-1 protein                                                  | 1 | F:GO:0005515                                                                                                                        | -                                                                                | SignalP (SIGNALP)                                                                                                                                                                       |
| Caenorhabditis elegans  | briggsae cbr-ain-1 protein                                                  | 0 |                                                                                                                                     | F:GO:0005515                                                                     | -                                                                                                                                                                                       |
| Caenorhabditis briggsae | ubiquitin-like modifier-activating enzyme 5                                 | 8 | C:GO:0005737;<br>F:GO:0046872;<br>F:GO:0005515;<br>F:GO:0071566;<br>F:GO:0005524;<br>F:GO:0016616;<br>F:GO:0048037;<br>P:GO:0071569 | -                                                                                | EC:1.1.1.0<br>IPR000594; IPR006140; IPR009036;<br>IPR016040; PTHR10953 (PANTHER),<br>PTHR10953:SF9 (PANTHER)                                                                            |
| Caenorhabditis elegans  | elegans protein partially confirmed by transcript evidence                  | 0 |                                                                                                                                     |                                                                                  | PTHR13167 (PANTHER),<br>PTHR13167:SF7 (PANTHER), SignalP (SIGNALP)                                                                                                                      |
| Caenorhabditis briggsae | dipeptidyl peptidase 9                                                      | 1 | F:GO:0016787                                                                                                                        | -                                                                                | IPR001375; IPR002469;<br>G3DSA:2.140.10.30 (GENE3D),<br>G3DSA:3.40.50.1820 (GENE3D),<br>PTHR11731 (PANTHER),<br>PTHR11731:SF8 (PANTHER), SSF53474 (SUPERFAMILY), SSF82171 (SUPERFAMILY) |
| Caenorhabditis elegans  | tbcl domain member 16                                                       | 0 |                                                                                                                                     | F:GO:0005096;<br>P:GO:0032313;<br>C:GO:0005622;<br>F:GO:0005097                  | IPR000195; G3DSA:1.10.8.270 (GENE3D), PTHR22957 (PANTHER), PTHR22957:SF33 (PANTHER)                                                                                                     |
| Loa loa                 | hypothetical protein LOAG_14117 [Loa loa]                                   | 0 |                                                                                                                                     |                                                                                  | -                                                                                                                                                                                       |
|                         | -                                                                           | 0 |                                                                                                                                     |                                                                                  | SignalP (SIGNALP)                                                                                                                                                                       |
| Callithrix jacchus      | programmed cell death 5                                                     | 2 | F:GO:0003677;<br>P:GO:0006917                                                                                                       | -                                                                                | SignalP (SIGNALP)                                                                                                                                                                       |
| Caenorhabditis elegans  | elegans protein partially confirmed by transcript evidence                  | 0 |                                                                                                                                     | C:GO:0016021;<br>C:GO:0016020;<br>F:GO:0005215;<br>P:GO:0006810;<br>F:GO:0008158 | IPR003392; PTHR10796 (PANTHER),<br>PTHR10796:SF12 (PANTHER),<br>SSF82866 (SUPERFAMILY)                                                                                                  |
| Caenorhabditis elegans  | Hypothetical protein Y45G12C.13 [Caenorhabditis elegans]                    | 0 |                                                                                                                                     |                                                                                  | PTHR23016 (PANTHER)                                                                                                                                                                     |

|                         |                                            |    |                                                                                                                                                                                                                                                                                              |                                                                                                                                                                                                                                                            |                                                                                                                                                                                              |
|-------------------------|--------------------------------------------|----|----------------------------------------------------------------------------------------------------------------------------------------------------------------------------------------------------------------------------------------------------------------------------------------------|------------------------------------------------------------------------------------------------------------------------------------------------------------------------------------------------------------------------------------------------------------|----------------------------------------------------------------------------------------------------------------------------------------------------------------------------------------------|
| Loa loa                 | rbm25 protein                              | 5  | F:GO:0003729;<br>P:GO:0006915;<br>P:GO:0000381;<br>F:GO:0005515;<br>C:GO:0016607                                                                                                                                                                                                             | -                                                                                                                                                                                                                                                          | IPR002483; G3DSA:1.20.1390.10 (GENE3D), PTHR18806 (PANTHER), SSF101233 (SUPERFAMILY)                                                                                                         |
| Loa loa                 | aldo-keto reductase                        | 4  | P:GO:0009792;<br>P:GO:0040010;<br>P:GO:0002119;<br>P:GO:0040011                                                                                                                                                                                                                              | -                                                                                                                                                                                                                                                          | IPR001395; IPR018170; IPR020471; IPR023210; PTHR11732:SF34 (PANTHER)                                                                                                                         |
| Loa loa                 | hypothetical upf0049 protein in chromosome | 0  |                                                                                                                                                                                                                                                                                              | F:GO:0016740;<br>P:GO:0006479;<br>F:GO:0008276;<br>P:GO:0007098;<br>F:GO:0008168;<br>P:GO:0040025;<br>C:GO:0005634;<br>P:GO:0000003;<br>C:GO:0005737;<br>P:GO:0040020;<br>P:GO:0009790;<br>F:GO:0005515;<br>P:GO:0040010;<br>P:GO:0042127;<br>P:GO:0040035 | -                                                                                                                                                                                            |
|                         | -                                          | 0  |                                                                                                                                                                                                                                                                                              |                                                                                                                                                                                                                                                            | -                                                                                                                                                                                            |
|                         | -                                          | 0  |                                                                                                                                                                                                                                                                                              |                                                                                                                                                                                                                                                            | -                                                                                                                                                                                            |
| Caenorhabditis briggsae | kinesin-associated protein 3               | 5  | P:GO:0051179;<br>C:GO:0043229;<br>F:GO:0032266;<br>F:GO:0005515;<br>P:GO:0050794                                                                                                                                                                                                             | -                                                                                                                                                                                                                                                          | IPR008658; PTHR15605:SF1 (PANTHER), PF05804 (PFAM)                                                                                                                                           |
|                         | -                                          | 0  |                                                                                                                                                                                                                                                                                              |                                                                                                                                                                                                                                                            | -                                                                                                                                                                                            |
| Caenorhabditis elegans  | sig-I recognition particle 54 kda protein  | 17 | F:GO:0008144;<br>C:GO:0005829;<br>C:GO:0005786;<br>F:GO:0030942;<br>F:GO:0043021;<br>C:GO:0005730;<br>F:GO:0008312;<br>C:GO:0016607;<br>P:GO:0000003;<br>P:GO:0006617;<br>F:GO:0019003;<br>P:GO:0002119;<br>F:GO:0005515;<br>F:GO:0003924;<br>P:GO:0042493;<br>P:GO:0006616;<br>F:GO:0005525 | -                                                                                                                                                                                                                                                          | EC:3.6.5.4;<br>EC:3.6.5.1;<br>EC:3.6.5.2;<br>EC:3.6.5.3<br>IPR000897; IPR003593; IPR013822; G3DSA:3.40.50.300 (GENE3D), PTHR11564 (PANTHER), PTHR11564:SF5 (PANTHER), SSF52540 (SUPERFAMILY) |
|                         | -                                          | 0  |                                                                                                                                                                                                                                                                                              |                                                                                                                                                                                                                                                            | SignalP (SIGNALP)                                                                                                                                                                            |
| Caenorhabditis brenneri | isoleucyl-tr- synthetase                   | 1  | F:GO:0003824                                                                                                                                                                                                                                                                                 | -                                                                                                                                                                                                                                                          | IPR002301; IPR009080; IPR013155; G3DSA:1.10.730.10 (GENE3D), PTHR11946 (PANTHER)                                                                                                             |

|                         |                                                               |    |                                                                                                                                                                                                                                                                                                                                                                  |                                                                                                                    |                               |                                                                      |
|-------------------------|---------------------------------------------------------------|----|------------------------------------------------------------------------------------------------------------------------------------------------------------------------------------------------------------------------------------------------------------------------------------------------------------------------------------------------------------------|--------------------------------------------------------------------------------------------------------------------|-------------------------------|----------------------------------------------------------------------|
| Caenorhabditis elegans  | hypothetical protein F25G6.9 [Caenorhabditis elegans]         | 0  |                                                                                                                                                                                                                                                                                                                                                                  | F:GO:0008312;<br>F:GO:0030942;<br>C:GO:0005786;<br>P:GO:0006614;<br>C:GO:0048500;<br>F:GO:0005515;<br>P:GO:0045900 |                               | IPR022542                                                            |
| Caenorhabditis elegans  | elegans protein partially confirmed by transcript evidence    | 0  |                                                                                                                                                                                                                                                                                                                                                                  |                                                                                                                    |                               | G3DSA:2.10.90.10 (GENE3D), SignalP (SIGNALP), SSF57501 (SUPERFAMILY) |
| Brugia malayi           | high mobility group protein                                   | 11 | P:GO:0008348;<br>P:GO:0043388;<br>P:GO:0035218;<br>F:GO:0016564;<br>F:GO:0008301;<br>P:GO:0000122;<br>F:GO:0008134;<br>P:GO:0007379;<br>P:GO:0006338;<br>C:GO:0005634;<br>F:GO:0003702                                                                                                                                                                           | -                                                                                                                  |                               | IPR000135; IPR000910; IPR009071;<br>PTHR13711 (PANTHER)              |
| Caenorhabditis elegans  | tm2d4_caeel ame: full-tm2 domain-containing protein           | 0  |                                                                                                                                                                                                                                                                                                                                                                  |                                                                                                                    |                               | SignalP (SIGNALP)                                                    |
| Caenorhabditis briggsae | vacuolar protein sorting-associated protein 54                | 1  | P:GO:0006810                                                                                                                                                                                                                                                                                                                                                     | -                                                                                                                  |                               | IPR019515; PTHR12965 (PANTHER)                                       |
| Caenorhabditis elegans  | r- binding identical                                          | 0  |                                                                                                                                                                                                                                                                                                                                                                  | F:GO:0003676;<br>F:GO:0000166;<br>P:GO:0009792                                                                     |                               | -                                                                    |
| Caenorhabditis briggsae | bestrophin family protein                                     | 2  | P:GO:0040011;<br>P:GO:0040018                                                                                                                                                                                                                                                                                                                                    | -                                                                                                                  |                               | IPR000615; IPR021134; SignalP (SIGNALP)                              |
| Caenorhabditis elegans  | pleckstrin homology domain family member 3                    | 1  | F:GO:0005488                                                                                                                                                                                                                                                                                                                                                     | -                                                                                                                  |                               | IPR002219; PTHR12326 (PANTHER)                                       |
| Ailuropoda melanoleuca  | heterogeneous nuclear ribonucleoprotein u-like protein 1-like | 6  | P:GO:0008380;<br>C:GO:0030530;<br>P:GO:0045449;<br>F:GO:0003723;<br>F:GO:0005515;<br>P:GO:0009615                                                                                                                                                                                                                                                                | -                                                                                                                  |                               | PTHR12381 (PANTHER),<br>PTHR12381:SF10 (PANTHER)                     |
|                         | -                                                             | 0  |                                                                                                                                                                                                                                                                                                                                                                  |                                                                                                                    |                               | -                                                                    |
| Caenorhabditis elegans  | thioredoxin peroxidase 1                                      | 21 | C:GO:0008385;<br>P:GO:0032496;<br>P:GO:0042744;<br>F:GO:0008022;<br>F:GO:0051920;<br>F:GO:0019901;<br>P:GO:0033673;<br>F:GO:0043027;<br>F:GO:0004601;<br>P:GO:0045454;<br>P:GO:0008284;<br>P:GO:0001893;<br>F:GO:0042802;<br>P:GO:0051881;<br>P:GO:0030099;<br>C:GO:0005769;<br>P:GO:0007005;<br>P:GO:0055114;<br>P:GO:0051092;<br>P:GO:0043066;<br>C:GO:0005739 | -                                                                                                                  | EC:1.11.1.15<br>; EC:1.11.1.7 |                                                                      |

|                         |                                                  |   |                                                                                                   |                                                |              |                                                                                                                                               |
|-------------------------|--------------------------------------------------|---|---------------------------------------------------------------------------------------------------|------------------------------------------------|--------------|-----------------------------------------------------------------------------------------------------------------------------------------------|
| Caenorhabditis elegans  | motile sperm domain-containing protein 2         | 0 |                                                                                                   | C:GO:0005856;<br>C:GO:0016021;<br>F:GO:0005198 |              | IPR001251; PTHR19993 (PANTHER)                                                                                                                |
| Loa loa                 | novel protein (zgc:55794)                        | 0 |                                                                                                   | F:GO:0003674;<br>C:GO:0005575                  |              | PTHR13532 (PANTHER)                                                                                                                           |
| Caenorhabditis elegans  | 3-hydroxyacyl- dehydroge-se -d-binding           | 3 | P:GO:0008152;<br>F:GO:0016491;<br>F:GO:0005488                                                    | -                                              |              | IPR006108; IPR006176; IPR008927;<br>IPR013328; IPR016040; PTHR23309<br>(PANTHER), SSF51735 (SUPERFAMILY)                                      |
| Caenorhabditis elegans  | protein jagu-l                                   | 6 | P:GO:0009792;<br>C:GO:0005789;<br>P:GO:0040010;<br>P:GO:0000003;<br>P:GO:0040011;<br>C:GO:0016021 | -                                              |              | IPR009787; SignalP (SIGNALP)                                                                                                                  |
| Caenorhabditis briggsae | endoplasmic reticulum metalloproteinase 1        | 4 | F:GO:0008233;<br>P:GO:0040011;<br>C:GO:0016021;<br>P:GO:0006508                                   | -                                              |              | IPR007484; G3DSA:3.40.630.10<br>(GENE3D), PTHR12147 (PANTHER),<br>SSF53187 (SUPERFAMILY)                                                      |
| Caenorhabditis briggsae | structural maintenance of chromosomes protein 5  | 2 | P:GO:0009792;<br>P:GO:0045132                                                                     | -                                              |              | -                                                                                                                                             |
| Caenorhabditis briggsae | structural maintenance of chromosomes protein 5  | 2 | P:GO:0009792;<br>P:GO:0045132                                                                     | -                                              |              | -                                                                                                                                             |
|                         | -                                                | 0 |                                                                                                   |                                                |              | -                                                                                                                                             |
| Caenorhabditis briggsae | cg12024- isoform b                               | 0 |                                                                                                   |                                                |              | IPR003892; IPR009060;<br>G3DSA:1.10.8.10 (GENE3D),<br>PTHR13467 (PANTHER)                                                                     |
| Caenorhabditis elegans  | elegans protein confirmed by transcript evidence | 3 | P:GO:0008152;<br>F:GO:0005515;<br>F:GO:0016790                                                    | -                                              | EC:3.1.2.0   | IPR014940                                                                                                                                     |
| Caenorhabditis briggsae | delta-6 fatty acid desaturase                    | 5 | P:GO:0006633;<br>F:GO:0016717;<br>F:GO:0005515;<br>F:GO:0020037;<br>P:GO:0055114                  | -                                              | EC:1.14.19.0 | IPR001199; IPR005804; IPR012171;<br>IPR022272; PTHR19353 (PANTHER)                                                                            |
|                         | -                                                | 0 |                                                                                                   |                                                |              | -                                                                                                                                             |
|                         | -                                                | 0 |                                                                                                   |                                                |              | IPR000436; IPR016060; SignalP<br>(SIGNALP)                                                                                                    |
| Brugia malayi           | ef hand family protein                           | 0 |                                                                                                   | F:GO:0005509;<br>F:GO:0004871                  |              | -                                                                                                                                             |
|                         | -                                                | 0 |                                                                                                   |                                                |              | SignalP (SIGNALP)                                                                                                                             |
| Caenorhabditis briggsae | probable sulfotransferase                        | 1 | F:GO:0008146                                                                                      | -                                              | EC:2.8.2.0   | -                                                                                                                                             |
| Caenorhabditis briggsae | briggsae cbr-cdc- protein                        | 2 | F:GO:0017111;<br>F:GO:0005524                                                                     | -                                              | EC:3.6.1.15  | IPR003593; IPR003959; IPR003960;<br>G3DSA:3.40.50.300 (GENE3D),<br>PTHR23077 (PANTHER),<br>PTHR23077:SF7 (PANTHER), SSF52540<br>(SUPERFAMILY) |
|                         | -                                                | 0 |                                                                                                   |                                                |              | -                                                                                                                                             |
| Caenorhabditis elegans  | briggsae cbr-teg-1 protein                       | 0 |                                                                                                   | F:GO:0005515                                   |              | -                                                                                                                                             |
| Caenorhabditis elegans  | gon4l protein                                    | 0 |                                                                                                   | P:GO:0006355;<br>F:GO:0003677;<br>C:GO:0005634 |              | -                                                                                                                                             |



|                         |                                                    |   |                                                                                                                                     |                                                                                                                                                                                                         |            |                                                                                                                              |
|-------------------------|----------------------------------------------------|---|-------------------------------------------------------------------------------------------------------------------------------------|---------------------------------------------------------------------------------------------------------------------------------------------------------------------------------------------------------|------------|------------------------------------------------------------------------------------------------------------------------------|
| Caenorhabditis elegans  | elegans protein confirmed by transcript evidence   | 8 | P:GO:0040035;<br>P:GO:0009792;<br>P:GO:0002119;<br>P:GO:0040015;<br>P:GO:0040010;<br>P:GO:0008340;<br>P:GO:0040011;<br>F:GO:0004129 | -                                                                                                                                                                                                       | EC:1.9.3.1 | IPR004204; SignalP (SIGNALP)                                                                                                 |
| Caenorhabditis elegans  | elegans protein confirmed by transcript evidence   | 0 |                                                                                                                                     |                                                                                                                                                                                                         |            | -                                                                                                                            |
| Caenorhabditis elegans  | translation initiation factor eif-2b subunit gamma | 0 |                                                                                                                                     | F:GO:0016740;<br>P:GO:0009058;<br>C:GO:0005851;<br>F:GO:0005085;<br>P:GO:0014003;<br>P:GO:0006413;<br>C:GO:0005737;<br>F:GO:0008135;<br>F:GO:0016779;<br>C:GO:0005575;<br>P:GO:0051716;<br>F:GO:0003743 |            | -                                                                                                                            |
| Caenorhabditis elegans  | translation initiation factor eif-2b subunit gamma | 0 |                                                                                                                                     | F:GO:0016740;<br>P:GO:0009058;<br>C:GO:0005851;<br>F:GO:0005085;<br>P:GO:0014003;<br>P:GO:0006413;<br>C:GO:0005737;<br>F:GO:0008135;<br>F:GO:0016779;<br>C:GO:0005575;<br>P:GO:0051716;<br>F:GO:0003743 |            | -                                                                                                                            |
|                         | -                                                  | 0 |                                                                                                                                     |                                                                                                                                                                                                         |            | SignalP (SIGNALP)                                                                                                            |
| Dictyocaulus viviparus  | calcium-independent phospholipase a2-gamma         | 5 | P:GO:0016042;<br>C:GO:0043231;<br>F:GO:0016787;<br>C:GO:0044444;<br>C:GO:0016020                                                    | -                                                                                                                                                                                                       |            | IPR002641; IPR016035;<br>G3DSA:3.40.1090.10 (GENE3D),<br>PTHR18958 (PANTHER),<br>PTHR18958:SF28 (PANTHER)                    |
| Caenorhabditis briggsae | copine family protein                              | 2 | F:GO:0005515;<br>P:GO:0008340                                                                                                       | -                                                                                                                                                                                                       |            | IPR000008; IPR002035; IPR008973;<br>IPR010734; G3DSA:2.60.40.150<br>(GENE3D), PTHR10857 (PANTHER),<br>SSF53300 (SUPERFAMILY) |
| Caenorhabditis briggsae | elegans protein confirmed by transcript evidence   | 0 |                                                                                                                                     | P:GO:0008340;<br>F:GO:0005515                                                                                                                                                                           |            | G3DSA:2.60.40.150 (GENE3D)                                                                                                   |

|                 |                                                            |    |                                                                                                                                                                                                                                                                                                                                                                                                                                                                         |                               |                                                                                                                                                       |                                              |
|-----------------|------------------------------------------------------------|----|-------------------------------------------------------------------------------------------------------------------------------------------------------------------------------------------------------------------------------------------------------------------------------------------------------------------------------------------------------------------------------------------------------------------------------------------------------------------------|-------------------------------|-------------------------------------------------------------------------------------------------------------------------------------------------------|----------------------------------------------|
| Pan troglodytes | phosphatidylethanolamine-binding protein 1                 | 40 | C:GO:0019717;<br>C:GO:0005791;<br>P:GO:0001933;<br>P:GO:0060409;<br>C:GO:0005625;<br>P:GO:0007420;<br>P:GO:0051602;<br>F:GO:0004867;<br>F:GO:0005102;<br>P:GO:0010243;<br>C:GO:0043679;<br>C:GO:0005615;<br>P:GO:0045471;<br>P:GO:0043409;<br>F:GO:0008429;<br>P:GO:0002026;<br>P:GO:0051592;<br>P:GO:0006979;<br>P:GO:0007568;<br>P:GO:0048240;<br>P:GO:0009408;<br>C:GO:0005794;<br>P:GO:0051412;<br>P:GO:0014823;<br>P:GO:0042755;<br>F:GO:0005524;<br>P:GO:0010951; | -                             | -                                                                                                                                                     |                                              |
| -               | -                                                          | 0  | -                                                                                                                                                                                                                                                                                                                                                                                                                                                                       | -                             | -                                                                                                                                                     |                                              |
| Brugia malayi   | elegans protein partially confirmed by transcript evidence | 1  | P:GO:0006810                                                                                                                                                                                                                                                                                                                                                                                                                                                            | -                             | IPR003280; IPR013099;<br>G3DSA:1.10.287.70 (GENE3D),<br>PTHR11003 (PANTHER),<br>PTHR11003:SF7 (PANTHER), SignalP<br>(SIGNALP), SSF81324 (SUPERFAMILY) |                                              |
| Loa loa         | cell cycle-regulated factor p78                            | 0  | -                                                                                                                                                                                                                                                                                                                                                                                                                                                                       | P:GO:0007099;<br>C:GO:0005634 | PTHR13233 (PANTHER)                                                                                                                                   |                                              |
| Loa loa         | transcription initiation factor tfiid subunit 1            | 22 | F:GO:0002039;<br>P:GO:0006367;<br>P:GO:0000080;<br>F:GO:0004402;<br>P:GO:0018107;<br>P:GO:0006974;<br>F:GO:0017025;<br>P:GO:0046777;<br>P:GO:0010552;<br>C:GO:0005730;<br>P:GO:0032436;<br>P:GO:0018105;<br>F:GO:0004674;<br>F:GO:0003713;<br>F:GO:0043565;<br>P:GO:0006368;<br>C:GO:0045120;<br>P:GO:0042493;<br>C:GO:0005669;<br>F:GO:0070577;<br>P:GO:0016573;<br>C:GO:0071339                                                                                       | -                             | EC:2.3.1.48;<br>EC:2.7.11.0                                                                                                                           | IPR001487; IPR018359; PTHR13900<br>(PANTHER) |
| -               | -                                                          | 0  | -                                                                                                                                                                                                                                                                                                                                                                                                                                                                       | -                             | -                                                                                                                                                     |                                              |

|                         |                                                  |    |                                                                                                                                                                                                                                                                                                                                                                                                                                                                                                           |                               |  |                                                                                  |
|-------------------------|--------------------------------------------------|----|-----------------------------------------------------------------------------------------------------------------------------------------------------------------------------------------------------------------------------------------------------------------------------------------------------------------------------------------------------------------------------------------------------------------------------------------------------------------------------------------------------------|-------------------------------|--|----------------------------------------------------------------------------------|
| Brugia malayi           | polyphosphoinositide phosphatase                 | 13 | P:GO:0008219;<br>P:GO:0043473;<br>P:GO:0016311;<br>P:GO:0030384;<br>P:GO:0007626;<br>F:GO:0017120;<br>C:GO:0055037;<br>F:GO:0005515;<br>P:GO:0010976;<br>P:GO:0007033;<br>C:GO:0010008;<br>C:GO:0005794;<br>C:GO:0005783                                                                                                                                                                                                                                                                                  |                               |  | IPR002013; PTHR11200 (PANTHER),<br>PTHR11200:SF9 (PANTHER)                       |
| Brugia malayi           | polyphosphoinositide phosphatase                 | 7  | F:GO:0017120;<br>C:GO:0055037;<br>F:GO:0005515;<br>P:GO:0010976;<br>C:GO:0010008;<br>C:GO:0005783;<br>C:GO:0005794                                                                                                                                                                                                                                                                                                                                                                                        |                               |  | IPR002013; PTHR11200 (PANTHER),<br>PTHR11200:SF9 (PANTHER)                       |
| Caenorhabditis elegans  | elegans protein confirmed by transcript evidence | 0  |                                                                                                                                                                                                                                                                                                                                                                                                                                                                                                           |                               |  | IPR001534; SignalP (SIGNALP)                                                     |
| Caenorhabditis elegans  | copper-transporting atpase 1                     | 50 | P:GO:0010692;<br>P:GO:0010468;<br>P:GO:0015677;<br>P:GO:0031069;<br>P:GO:0048813;<br>C:GO:0043005;<br>C:GO:0005802;<br>F:GO:0004008;<br>C:GO:0030140;<br>P:GO:0043588;<br>P:GO:0010273;<br>P:GO:0051542;<br>C:GO:0005783;<br>P:GO:0042417;<br>P:GO:0051353;<br>C:GO:0005829;<br>P:GO:0030199;<br>C:GO:0016323;<br>P:GO:0002082;<br>F:GO:0032767;<br>P:GO:0006754;<br>P:GO:0042093;<br>P:GO:0018205;<br>P:GO:0006570;<br>P:GO:0019430;<br>P:GO:0001974;<br>P:GO:0042414;<br>P:GO:0007626;<br>P:GO:0046662; | EC:3.6.3.4                    |  | IPR001757; PTHR11939:SF38<br>(PANTHER), SignalP (SIGNALP)                        |
| Caenorhabditis briggsae | nitric oxide synthase 1 adaptor protein          | 5  | F:GO:0005515;<br>P:GO:0040017;<br>C:GO:0016010;<br>P:GO:0046716                                                                                                                                                                                                                                                                                                                                                                                                                                           |                               |  | PTHR11232 (PANTHER),<br>PTHR11232:SF17 (PANTHER)                                 |
| Caenorhabditis elegans  | dmx-like 1                                       | 0  |                                                                                                                                                                                                                                                                                                                                                                                                                                                                                                           | F:GO:0003674;<br>P:GO:0008150 |  | IPR022033; PTHR13950 (PANTHER),<br>PTHR13950:SF1 (PANTHER), SignalP<br>(SIGNALP) |
|                         | -                                                | 0  |                                                                                                                                                                                                                                                                                                                                                                                                                                                                                                           |                               |  | -                                                                                |

|                         |                                                                                          |   |                                                                                                                                                      |            |                                                                                                                                                      |
|-------------------------|------------------------------------------------------------------------------------------|---|------------------------------------------------------------------------------------------------------------------------------------------------------|------------|------------------------------------------------------------------------------------------------------------------------------------------------------|
|                         |                                                                                          | 0 |                                                                                                                                                      |            |                                                                                                                                                      |
| Ancylostoma ceylanicum  | tissue factor pathway inhibitor (lipoprotein-associated coagulation inhibitor) isoform 2 | 4 | F:GO:0030414;<br>F:GO:0008200;<br>C:GO:0031012;<br>F:GO:0008237                                                                                      |            | IPR002223; IPR020901; PTHR10083 (PANTHER), PTHR10083:SF39 (PANTHER), SignalP (SIGNALP)                                                               |
| Caenorhabditis briggsae | yoy6_caee1 ame: full=uncharacterized protein                                             | 1 | F:GO:0005488                                                                                                                                         |            | PTHR12268 (PANTHER), PTHR12268:SF3 (PANTHER)                                                                                                         |
| Caenorhabditis briggsae | yoy6_caee1 ame: full=uncharacterized protein                                             | 1 | F:GO:0005488                                                                                                                                         |            | PTHR12268 (PANTHER), PTHR12268:SF3 (PANTHER)                                                                                                         |
| Caenorhabditis briggsae | yoy6_caee1 ame: full=uncharacterized protein                                             | 1 | F:GO:0005488                                                                                                                                         |            | PTHR12268 (PANTHER), PTHR12268:SF3 (PANTHER)                                                                                                         |
| Caenorhabditis elegans  | ribosomal protein l14p l23e containing protein                                           | 3 | F:GO:0003735;<br>C:GO:0015934;<br>P:GO:0006412                                                                                                       | EC:3.6.5.3 | -                                                                                                                                                    |
| Brugia malayi           | nuclear distribution gene c homolog                                                      | 8 | P:GO:0007097;<br>C:GO:0005794;<br>P:GO:0043434;<br>F:GO:0005515;<br>P:GO:0007067;<br>C:GO:0005634;<br>P:GO:0051301;<br>C:GO:0005874                  |            | IPR007052; IPR008978; IPR017447; G3DSA:2.60.40.790 (GENE3D), PTHR12356 (PANTHER), PTHR12356:SF3 (PANTHER)                                            |
| Loa loa                 | inositol -pentakisphosphate 2-ki-se                                                      | 3 | F:GO:0000166;<br>F:GO:0016301;<br>C:GO:0044424                                                                                                       |            | IPR009286                                                                                                                                            |
| Caenorhabditis briggsae | hit zinc finger family protein                                                           | 0 |                                                                                                                                                      |            | IPR007529; PTHR13483 (PANTHER), SSF144232 (SUPERFAMILY)                                                                                              |
| Caenorhabditis elegans  | mitochondrial ribosomal                                                                  | 7 | P:GO:0009792;<br>P:GO:0002119;<br>F:GO:0003735;<br>P:GO:0000003;<br>C:GO:0015934;<br>P:GO:0040007;<br>P:GO:0006412                                   | EC:3.6.5.3 | IPR001063; IPR005727; SignalP (SIGNALP)                                                                                                              |
|                         |                                                                                          | 0 |                                                                                                                                                      |            |                                                                                                                                                      |
|                         |                                                                                          | 0 |                                                                                                                                                      |            |                                                                                                                                                      |
| Oryctolagus cuniculus   | protein                                                                                  | 0 |                                                                                                                                                      |            |                                                                                                                                                      |
| Caenorhabditis briggsae | carboxypeptidase d                                                                       | 9 | C:GO:0005737;<br>F:GO:0030160;<br>F:GO:0046872;<br>C:GO:0005624;<br>F:GO:0004180;<br>F:GO:0003779;<br>C:GO:0043231;<br>F:GO:0008237;<br>P:GO:0007216 |            | IPR000834; IPR008969; IPR014766; G3DSA:3.40.630.10 (GENE3D), PTHR11532 (PANTHER), PTHR11532:SF2 (PANTHER), SignalP (SIGNALP), SSF53187 (SUPERFAMILY) |
|                         |                                                                                          | 0 |                                                                                                                                                      |            | SignalP (SIGNALP)                                                                                                                                    |
|                         |                                                                                          | 0 |                                                                                                                                                      |            |                                                                                                                                                      |
| Caenorhabditis elegans  | transmembrane protein                                                                    | 7 | C:GO:0000139;<br>C:GO:0005764;<br>P:GO:0055085;<br>P:GO:0040010;<br>F:GO:0005351;<br>P:GO:0008643;<br>C:GO:0016021                                   |            | IPR004853; IPR012404; PTHR13146 (PANTHER), SignalP (SIGNALP), SSF103481 (SUPERFAMILY)                                                                |

|                         |                                              |    |                                                                                                                                                                                                                                                                                              |   |             |                                                                                                                                                                |
|-------------------------|----------------------------------------------|----|----------------------------------------------------------------------------------------------------------------------------------------------------------------------------------------------------------------------------------------------------------------------------------------------|---|-------------|----------------------------------------------------------------------------------------------------------------------------------------------------------------|
| Mus musculus            | ribosomal protein s16                        | 7  | F:GO:0003735;<br>F:GO:0003723;<br>F:GO:0005515;<br>P:GO:0006364;<br>C:GO:0022627;<br>P:GO:0042274;<br>P:GO:0006414                                                                                                                                                                           | - |             | IPR000754; IPR014721; IPR020568;<br>IPR020574                                                                                                                  |
|                         | -                                            | 0  |                                                                                                                                                                                                                                                                                              |   |             | -                                                                                                                                                              |
| Loa loa                 | regulator of nonsense transcripts 1          | 17 | P:GO:0000184;<br>C:GO:0000785;<br>F:GO:0005515;<br>F:GO:0008270;<br>P:GO:0006406;<br>P:GO:0006449;<br>F:GO:0003677;<br>P:GO:0009790;<br>F:GO:0003723;<br>C:GO:0000932;<br>F:GO:0003682;<br>F:GO:0004004;<br>P:GO:0071044;<br>F:GO:0005524;<br>P:GO:0006260;<br>P:GO:0007049;<br>P:GO:0006281 | - |             | IPR006935; G3DSA:3.40.50.300<br>(GENE3D), PTHR10887 (PANTHER),<br>PTHR10887:SF26 (PANTHER),<br>SSF52540 (SUPERFAMILY)                                          |
| Caenorhabditis elegans  | protein timeless homolog                     | 0  |                                                                                                                                                                                                                                                                                              |   |             | PTHR22940 (PANTHER),<br>PTHR22940:SF6 (PANTHER)                                                                                                                |
| Caenorhabditis briggsae | mater-I effect lethal family member (mel-11) | 3  | P:GO:0051017;<br>F:GO:0005515;<br>P:GO:0001889                                                                                                                                                                                                                                               | - |             | IPR002110; IPR020683; PR01415<br>(PRINTS), PTHR18958 (PANTHER),<br>PTHR18958:SF166 (PANTHER)                                                                   |
| Caenorhabditis elegans  | mater-I effect lethal family member (mel-11) | 1  | F:GO:0005515                                                                                                                                                                                                                                                                                 | - |             | IPR020683; PTHR18958 (PANTHER),<br>PTHR18958:SF166 (PANTHER)                                                                                                   |
|                         | -                                            | 0  |                                                                                                                                                                                                                                                                                              |   |             | SignalP (SIGNALP)                                                                                                                                              |
|                         | -                                            | 0  |                                                                                                                                                                                                                                                                                              |   |             | SignalP (SIGNALP)                                                                                                                                              |
| Caenorhabditis elegans  | peroxidasin homolog                          | 11 | P:GO:0042744;<br>P:GO:0055114;<br>P:GO:0000003;<br>C:GO:0005615;<br>F:GO:0004601;<br>F:GO:0005515;<br>F:GO:0020037;<br>C:GO:0031012;<br>F:GO:0005201;<br>P:GO:0030198;<br>C:GO:0005783                                                                                                       | - | EC:1.11.1.7 | IPR002007; IPR003598; IPR007110;<br>IPR010255; IPR013098; IPR013783;<br>IPR019791; PTHR11475 (PANTHER),<br>PTHR11475:SF10 (PANTHER),<br>SSF48726 (SUPERFAMILY) |
| Caenorhabditis briggsae | deah (asp-glu-ala-his) box polypeptide 35    | 4  | F:GO:0008026;<br>F:GO:0003676;<br>F:GO:0005524;<br>P:GO:0006396                                                                                                                                                                                                                              | - |             | -                                                                                                                                                              |
| Loa loa                 | protein cereblon                             | 4  | P:GO:0044248;<br>P:GO:0044267;<br>P:GO:0006508;<br>C:GO:0044424                                                                                                                                                                                                                              | - |             | IPR003111; IPR015947; PTHR14255<br>(PANTHER)                                                                                                                   |
| Loa loa                 | protein cereblon                             | 4  | P:GO:0044248;<br>P:GO:0044267;<br>P:GO:0006508;<br>C:GO:0044424                                                                                                                                                                                                                              | - |             | IPR003111; IPR015947; PTHR14255<br>(PANTHER)                                                                                                                   |

|                         |                                                            |   |                                                                                                                                     |                                                                                                   |             |                                                                                                       |
|-------------------------|------------------------------------------------------------|---|-------------------------------------------------------------------------------------------------------------------------------------|---------------------------------------------------------------------------------------------------|-------------|-------------------------------------------------------------------------------------------------------|
| Caenorhabditis briggsae | isopentenyl-diphosphate delta-isomerase                    | 1 | F:GO:0003824                                                                                                                        | -                                                                                                 |             | IPR000086; IPR011876; IPR015797; PSS1462 (PROFILE)                                                    |
| Ostertagia ostertagi    | venom-allergen-like protein family member (vap-1)          | 0 |                                                                                                                                     | P:GO:0040011;<br>C:GO:0005576                                                                     |             | IPR001283; IPR014044; PTHR10334:SF9 (PANTHER), SignalP (SIGNALP)                                      |
| -                       | -                                                          | 0 |                                                                                                                                     |                                                                                                   |             | -                                                                                                     |
| Brugia malayi           | mgc80099 protein                                           | 1 | P:GO:0009792                                                                                                                        | -                                                                                                 |             | SignalP (SIGNALP)                                                                                     |
| Caenorhabditis briggsae | elegans protein confirmed by transcript evidence           | 0 |                                                                                                                                     |                                                                                                   |             | -                                                                                                     |
| Caenorhabditis elegans  | elegans protein partially confirmed by transcript evidence | 0 |                                                                                                                                     | C:GO:0016021;<br>C:GO:0016020;<br>P:GO:0055085;<br>F:GO:0005215;<br>P:GO:0006810                  |             | IPR005828; PTHR11600 (PANTHER)                                                                        |
| Caenorhabditis elegans  | actin-like protein 6b                                      | 7 | C:GO:0071565;<br>P:GO:0006333;<br>F:GO:0005524;<br>P:GO:0007399;<br>F:GO:0005515;<br>F:GO:0005200;<br>C:GO:0016514                  | -                                                                                                 |             | IPR004000; IPR004001; G3DSA:3.30.420.40 (GENE3D), PTHR11937:SF32 (PANTHER), SSF53067 (SUPERFAMILY)    |
| Caenorhabditis elegans  | r3h domain-containing protein c19orf22 homolog             | 0 |                                                                                                                                     | F:GO:0003676;<br>F:GO:0003674;<br>P:GO:0008150;<br>C:GO:0005575;<br>C:GO:0005634                  |             | SSF82708 (SUPERFAMILY)                                                                                |
| Caenorhabditis elegans  | phosphatidylserine decarboxylase                           | 3 | P:GO:0040010;<br>F:GO:0004609;<br>P:GO:0008654                                                                                      | -                                                                                                 | EC:4.1.1.65 | IPR003817; IPR005221; SignalP (SIGNALP)                                                               |
| -                       | -                                                          | 0 |                                                                                                                                     |                                                                                                   |             | -                                                                                                     |
| -                       | -                                                          | 0 |                                                                                                                                     |                                                                                                   |             | -                                                                                                     |
| Caenorhabditis briggsae | briggsae cbr-rga-2 protein                                 | 0 |                                                                                                                                     | P:GO:0000003;<br>F:GO:0005096;<br>P:GO:0040010;<br>P:GO:0007165;<br>P:GO:0009792;<br>C:GO:0005622 |             | -                                                                                                     |
| Caenorhabditis briggsae | rho gtpase-activating protein 20                           | 1 | P:GO:0050789                                                                                                                        | -                                                                                                 |             | IPR000198; IPR008936; PTHR23179 (PANTHER), SignalP (SIGNALP)                                          |
| Caenorhabditis briggsae | rho gtpase-activating protein 20                           | 1 | P:GO:0050789                                                                                                                        | -                                                                                                 |             | IPR000198; IPR008936; PTHR23179 (PANTHER), SignalP (SIGNALP)                                          |
| Caenorhabditis briggsae | rnpl like r-binding protein                                | 2 | P:GO:0009792;<br>F:GO:0000166                                                                                                       | -                                                                                                 |             | IPR000504; IPR012677; IPR015465; PTHR10432 (PANTHER), SSF54928 (SUPERFAMILY)                          |
| Caenorhabditis brenneri | protein phosphatase 1f                                     | 2 | F:GO:0005515;<br>F:GO:0003824                                                                                                       | -                                                                                                 |             | SignalP (SIGNALP)                                                                                     |
| Caenorhabditis elegans  | heterogeneous nuclear ribonucleoprotein l                  | 8 | P:GO:0008380;<br>C:GO:0045120;<br>F:GO:0003723;<br>F:GO:0005515;<br>C:GO:0044428;<br>P:GO:0006397;<br>C:GO:0030529;<br>F:GO:0000166 | -                                                                                                 |             | IPR000504; IPR006536; IPR012677; PTHR11546 (PANTHER), PTHR11546:SF5 (PANTHER), SSF54928 (SUPERFAMILY) |

|                        |                                                  |    |                                                                                                                                                                                                                                                            |                               |             |                                                                                                                                                           |
|------------------------|--------------------------------------------------|----|------------------------------------------------------------------------------------------------------------------------------------------------------------------------------------------------------------------------------------------------------------|-------------------------------|-------------|-----------------------------------------------------------------------------------------------------------------------------------------------------------|
| Loa loa                | d- topoisomerase 2-binding protein 1             | 7  | P:GO:0080090;<br>P:GO:0006270;<br>P:GO:0031323;<br>C:GO:0043229;<br>P:GO:0034622;<br>F:GO:0005488;<br>P:GO:0060255                                                                                                                                         | -                             | -           |                                                                                                                                                           |
| Brugia malayi          | msh domain protein                               | 0  |                                                                                                                                                                                                                                                            | C:GO:0005856;<br>F:GO:0005198 | -           |                                                                                                                                                           |
| Caenorhabditis elegans | p21-activated ki-se family member (pak-1)        | 15 | C:GO:0005925;<br>P:GO:0007411;<br>P:GO:0006468;<br>P:GO:0008360;<br>F:GO:0005515;<br>P:GO:0050803;<br>P:GO:0007155;<br>F:GO:0005525;<br>C:GO:0016021;<br>P:GO:0007391;<br>F:GO:0004674;<br>C:GO:0005856;<br>F:GO:0005524;<br>P:GO:0050770;<br>N:GO:0035556 | -                             | EC:2.7.11.0 | IPR000095; IPR000719; IPR011009;<br>IPR015750; IPR017441; IPR017442;<br>G3DSA:3.30.200.20 (GENE3D),<br>G3DSA:3.90.810.10 (GENE3D),<br>PTHR22986 (PANTHER) |
| Caenorhabditis elegans | heat shock protein                               | 2  | P:GO:0009408;<br>F:GO:0005515                                                                                                                                                                                                                              | -                             |             | IPR001436; IPR002068; IPR008978;<br>G3DSA:2.60.40.790 (GENE3D),<br>PTHR11527 (PANTHER),<br>PTHR11527:SF31 (PANTHER)                                       |
| Caenorhabditis elegans | sodium potassium-dependent atpase beta-2 subunit | 13 | P:GO:0006814;<br>P:GO:0040010;<br>F:GO:0005391;<br>C:GO:0016021;<br>P:GO:0006813;<br>P:GO:0000003;<br>P:GO:0006754;<br>P:GO:0010171;<br>P:GO:0002119;<br>P:GO:0040011;<br>P:GO:0006898;<br>P:GO:0009792;<br>P:GO:0040018                                   | -                             | EC:3.6.3.9  | IPR000402; G3DSA:1.20.5.170<br>(GENE3D), PTHR11523:SF7<br>(PANTHER), SignalP (SIGNALP)                                                                    |
| Caenorhabditis elegans | sodium potassium-dependent atpase beta-2 subunit | 13 | P:GO:0006814;<br>P:GO:0040010;<br>F:GO:0005391;<br>C:GO:0016021;<br>P:GO:0006813;<br>P:GO:0000003;<br>P:GO:0006754;<br>P:GO:0010171;<br>P:GO:0002119;<br>P:GO:0040011;<br>P:GO:0006898;<br>P:GO:0009792;<br>P:GO:0040018                                   | -                             | EC:3.6.3.9  | -                                                                                                                                                         |

|                        |                                                                            |    |                                                                                                                                                                                                                          |   |            |                                                                                                                                                                                                |
|------------------------|----------------------------------------------------------------------------|----|--------------------------------------------------------------------------------------------------------------------------------------------------------------------------------------------------------------------------|---|------------|------------------------------------------------------------------------------------------------------------------------------------------------------------------------------------------------|
| Caenorhabditis elegans | sodium potassium-dependent atpase beta-2 subunit                           | 13 | P:GO:0006814;<br>P:GO:0040010;<br>F:GO:0005391;<br>C:GO:0016021;<br>P:GO:0006813;<br>P:GO:0000003;<br>P:GO:0006754;<br>P:GO:0010171;<br>P:GO:0002119;<br>P:GO:0040011;<br>P:GO:0006898;<br>P:GO:0009792;<br>P:GO:0040018 | - | EC:3.6.3.9 | IPR000402; G3DSA:1.20.5.170 (GENE3D), PTHR11523:SF7 (PANTHER), SignalP (SIGNALP)                                                                                                               |
| Caenorhabditis elegans | sodium potassium-dependent atpase beta-2 subunit                           | 13 | P:GO:0006814;<br>P:GO:0040010;<br>F:GO:0005391;<br>C:GO:0016021;<br>P:GO:0006813;<br>P:GO:0000003;<br>P:GO:0006754;<br>P:GO:0010171;<br>P:GO:0002119;<br>P:GO:0040011;<br>P:GO:0006898;<br>P:GO:0009792;<br>P:GO:0040018 | - | EC:3.6.3.9 | IPR000402; G3DSA:1.20.5.170 (GENE3D), PTHR11523:SF7 (PANTHER), SignalP (SIGNALP)                                                                                                               |
| Caenorhabditis elegans | chromodomain-helicase-d-binding protein 1                                  | 12 | C:GO:0005703;<br>C:GO:0005705;<br>F:GO:0008026;<br>P:GO:0006333;<br>P:GO:0035042;<br>P:GO:0007476;<br>F:GO:0003677;<br>F:GO:0005524;<br>C:GO:0000785;<br>P:GO:0048477;<br>F:GO:0003682;<br>C:GO:0005634                  | - |            | IPR000330; IPR000953; IPR001650; IPR014001; IPR014021; IPR016197; G3DSA:2.40.50.40 (GENE3D), G3DSA:3.40.50.300 (GENE3D), PTHR10799 (PANTHER), PTHR10799:SF70 (PANTHER), SSF52540 (SUPERFAMILY) |
|                        |                                                                            | 0  |                                                                                                                                                                                                                          |   |            | IPR000210; IPR011333                                                                                                                                                                           |
|                        |                                                                            | 0  |                                                                                                                                                                                                                          |   |            | SignalP (SIGNALP)                                                                                                                                                                              |
| Caenorhabditis elegans | swi snf matrix actin dependent regulator of subfamily member isoform cra_a | 12 | C:GO:0071564;<br>C:GO:0071565;<br>P:GO:0006357;<br>C:GO:0017053;<br>C:GO:0005730;<br>F:GO:0042802;<br>F:GO:0003677;<br>C:GO:0016514;<br>F:GO:0003713;<br>P:GO:0045892;<br>P:GO:0045893;<br>P:GO:0006338                  | - |            | IPR001005; IPR007526; IPR009057; IPR011991; IPR012287; IPR014778; IPR017884; PTHR12802 (PANTHER), PTHR12802:SF7 (PANTHER)                                                                      |



|                         |                                                                                                                        |   |                                                                                                                    |                                                                                                                                                                                                         |            |                                                                                                                                                                                                                                                                                                                    |
|-------------------------|------------------------------------------------------------------------------------------------------------------------|---|--------------------------------------------------------------------------------------------------------------------|---------------------------------------------------------------------------------------------------------------------------------------------------------------------------------------------------------|------------|--------------------------------------------------------------------------------------------------------------------------------------------------------------------------------------------------------------------------------------------------------------------------------------------------------------------|
| Caenorhabditis elegans  | glyci-mide ribonucleotide synthetase-aminoimidazole ribonucleotide synthetase-glyci-mide ribonucleotide transformylase | 7 | P:GO:0010035;<br>F:GO:0005488;<br>F:GO:0016874;<br>P:GO:0009168;<br>P:GO:0048513;<br>F:GO:0004644;<br>P:GO:0010033 | -                                                                                                                                                                                                       | EC:2.1.2.2 | IPR000115; IPR000728; IPR010918;<br>IPR011054; IPR011761; IPR013815;<br>IPR013816; IPR013817; IPR016185;<br>IPR016188; IPR020559; IPR020560;<br>IPR020561; IPR020562;<br>G3DSA:3.30.1330.10 (GENE3D),<br>G3DSA:3.90.650.10 (GENE3D),<br>PTHR10520 (PANTHER),<br>PTHR10520:SF2 (PANTHER), SSF56059<br>(SUPERFAMILY) |
| Caenorhabditis elegans  | cgmp-dependent protein ki-se foraging                                                                                  | 2 | F:GO:0004672;<br>P:GO:0000003                                                                                      | -                                                                                                                                                                                                       |            | IPR000595; IPR002373; IPR014710;<br>IPR018488; IPR018490; PTHR11635<br>(PANTHER)                                                                                                                                                                                                                                   |
| Brugia malayi           | riken cd- 2610019a05 gene                                                                                              | 4 | F:GO:0005488;<br>F:GO:0004672;<br>P:GO:0031323;<br>P:GO:0016310                                                    | -                                                                                                                                                                                                       |            | -                                                                                                                                                                                                                                                                                                                  |
| Brugia malayi           | riken cd- 2610019a05 gene                                                                                              | 4 | F:GO:0005488;<br>F:GO:0004672;<br>P:GO:0031323;<br>P:GO:0016310                                                    | -                                                                                                                                                                                                       |            | IPR000719; IPR011009; IPR017442;<br>G3DSA:1.10.510.10 (GENE3D),<br>G3DSA:3.30.200.20 (GENE3D),<br>PTHR22986 (PANTHER),<br>PTHR22986:SF22 (PANTHER)                                                                                                                                                                 |
| -                       | -                                                                                                                      | 0 |                                                                                                                    |                                                                                                                                                                                                         |            | -                                                                                                                                                                                                                                                                                                                  |
| -                       | -                                                                                                                      | 0 |                                                                                                                    |                                                                                                                                                                                                         |            | -                                                                                                                                                                                                                                                                                                                  |
| Caenorhabditis elegans  | small optic lobes protein                                                                                              | 0 |                                                                                                                    | F:GO:0004198;<br>F:GO:0004197;<br>F:GO:0016787;<br>C:GO:0005737;<br>F:GO:0008270;<br>F:GO:0008234;<br>F:GO:0008233;<br>P:GO:0006508;<br>C:GO:0005622;<br>P:GO:0007399;<br>P:GO:0007632;<br>F:GO:0005488 |            | IPR001876                                                                                                                                                                                                                                                                                                          |
| Caenorhabditis elegans  | small optic lobes protein                                                                                              | 0 |                                                                                                                    | F:GO:0004198;<br>F:GO:0004197;<br>F:GO:0016787;<br>C:GO:0005737;<br>F:GO:0008270;<br>F:GO:0008234;<br>F:GO:0008233;<br>P:GO:0006508;<br>C:GO:0005622;<br>P:GO:0007399;<br>P:GO:0007632;<br>F:GO:0005488 |            | IPR001876                                                                                                                                                                                                                                                                                                          |
| Caenorhabditis briggsae | multiple coagulation factor deficiency isoform cra_b                                                                   | 6 | P:GO:0009792;<br>P:GO:0006810;<br>F:GO:0005509;<br>C:GO:0044444;<br>P:GO:0019752;<br>C:GO:0005576                  | -                                                                                                                                                                                                       |            | IPR002048; IPR011992; IPR018247;<br>IPR018249; PTHR23104 (PANTHER),<br>SSF47473 (SUPERFAMILY)                                                                                                                                                                                                                      |

|                         |                                                      |    |                                                                                                                                                                                                                                           |                                                                                                   |            |                                                                                                                         |
|-------------------------|------------------------------------------------------|----|-------------------------------------------------------------------------------------------------------------------------------------------------------------------------------------------------------------------------------------------|---------------------------------------------------------------------------------------------------|------------|-------------------------------------------------------------------------------------------------------------------------|
| Caenorhabditis briggsae | multiple coagulation factor deficiency isoform cra_b | 6  | P:GO:0009792;<br>P:GO:0006810;<br>F:GO:0005509;<br>C:GO:0044444;<br>P:GO:0019752;<br>C:GO:0005576                                                                                                                                         | -                                                                                                 |            | IPR002048; IPR011992; IPR018247;<br>IPR018249; PTHR23104 (PANTHER),<br>SSF47473 (SUPERFAMILY)                           |
| Caenorhabditis elegans  | multiple coagulation factor deficiency isoform cra_b | 5  | P:GO:0009792;<br>P:GO:0006810;<br>C:GO:0044444;<br>P:GO:0019752;<br>C:GO:0005576                                                                                                                                                          | -                                                                                                 |            | IPR002048; IPR011992; IPR018247;<br>IPR018249; PTHR23104 (PANTHER),<br>SignalP (SIGNALP), SSF47473<br>(SUPERFAMILY)     |
| Brugia malayi           | ankrd13d protein                                     | 0  |                                                                                                                                                                                                                                           |                                                                                                   |            | IPR002110; IPR003903; IPR020683;<br>IPR021832; PTHR12447 (PANTHER)                                                      |
| Ancylostoma caninum     | ribosomal protein s4                                 | 7  | P:GO:0009792;<br>C:GO:0005840;<br>F:GO:0003735;<br>F:GO:0005515;<br>P:GO:0007420;<br>P:GO:0006412;<br>F:GO:0019843                                                                                                                        | -                                                                                                 | EC:3.6.5.3 | -                                                                                                                       |
| Caenorhabditis briggsae | briggsae cbr-ten-1 protein                           | 0  |                                                                                                                                                                                                                                           | C:GO:0016021;<br>C:GO:0016020;<br>P:GO:0007165                                                    |            | IPR011042; IPR013090; PTHR11219<br>(PANTHER), PTHR11219:SF4<br>(PANTHER), SSF63829 (SUPERFAMILY)                        |
| Caenorhabditis briggsae | briggsae cbr-ten-1 protein                           | 2  | P:GO:0007366;<br>C:GO:0016020                                                                                                                                                                                                             | -                                                                                                 |            | IPR011042; PTHR11219 (PANTHER),<br>PTHR11219:SF4 (PANTHER), SSF63829<br>(SUPERFAMILY)                                   |
| Caenorhabditis briggsae | odd oz ten-m homolog 4                               | 0  |                                                                                                                                                                                                                                           | F:GO:0003674;<br>P:GO:0001702;<br>C:GO:0016020;<br>P:GO:0007165;<br>C:GO:0005575                  |            | IPR011042; PTHR11219 (PANTHER),<br>PTHR11219:SF4 (PANTHER), SSF63829<br>(SUPERFAMILY)                                   |
|                         | -                                                    | 0  |                                                                                                                                                                                                                                           |                                                                                                   |            | -                                                                                                                       |
| Caenorhabditis elegans  | uncharacterized protein c18orf8                      | 1  | F:GO:0005515                                                                                                                                                                                                                              | -                                                                                                 |            | IPR009755; PTHR12897 (PANTHER)                                                                                          |
| Caenorhabditis elegans  | kinesin family member 23                             | 5  | P:GO:0007049;<br>C:GO:0030496;<br>F:GO:0005515;<br>C:GO:0005819;<br>C:GO:0005654                                                                                                                                                          | -                                                                                                 |            | IPR001752; IPR019821; PTHR16012<br>(PANTHER), PTHR16012:SF60<br>(PANTHER), SignalP (SIGNALP),<br>SSF52540 (SUPERFAMILY) |
| Schistosoma mansoni     | rabkinesin-6-related [Schistosoma mansoni]           | 0  |                                                                                                                                                                                                                                           | F:GO:0005524;<br>F:GO:0000166;<br>F:GO:0003777;<br>F:GO:0003774;<br>P:GO:0007018;<br>C:GO:0005874 |            | -                                                                                                                       |
| Caenorhabditis briggsae | uncoordi-ted family member (unc-60)                  | 14 | P:GO:0042067;<br>P:GO:0016319;<br>P:GO:0007409;<br>P:GO:0035286;<br>P:GO:0008585;<br>P:GO:0030041;<br>P:GO:0001737;<br>C:GO:0005737;<br>F:GO:0003727;<br>F:GO:0003779;<br>P:GO:0010591;<br>C:GO:0005875;<br>P:GO:0007298;<br>P:GO:0000910 | -                                                                                                 |            | IPR002108; G3DSA:3.40.20.10<br>(GENE3D), PTHR11913 (PANTHER),<br>PTHR11913:SF12 (PANTHER),<br>SSF55753 (SUPERFAMILY)    |

|                         |                                                                            |   |                                                                                  |                                                                                                                                                                                                                          |            |                                                                                                                             |
|-------------------------|----------------------------------------------------------------------------|---|----------------------------------------------------------------------------------|--------------------------------------------------------------------------------------------------------------------------------------------------------------------------------------------------------------------------|------------|-----------------------------------------------------------------------------------------------------------------------------|
| Haemonchus contortus    | pra1 family protein 3                                                      | 2 | F:GO:000515;<br>P:GO:0000003                                                     | -                                                                                                                                                                                                                        |            | IPR004895; PTHR12859 (PANTHER)                                                                                              |
| Caenorhabditis briggsae | cdgsh iron sulfur domain 1                                                 | 5 | P:GO:0043457;<br>F:GO:0005506;<br>F:GO:0051537;<br>C:GO:0016021;<br>C:GO:0005741 | -                                                                                                                                                                                                                        |            | IPR006622; IPR018967; PTHR13680 (PANTHER), PTHR13680:SF2 (PANTHER)                                                          |
| Caenorhabditis briggsae | briggsae cbr-grh-1 protein                                                 | 3 | P:GO:0002119;<br>P:GO:0000003;<br>P:GO:0040007                                   | -                                                                                                                                                                                                                        |            | -                                                                                                                           |
| -                       | -                                                                          | 0 |                                                                                  |                                                                                                                                                                                                                          |            | -                                                                                                                           |
| -                       | -                                                                          | 0 |                                                                                  |                                                                                                                                                                                                                          |            | -                                                                                                                           |
| -                       | -                                                                          | 0 |                                                                                  |                                                                                                                                                                                                                          |            | SignalP (SIGNALP)                                                                                                           |
| Caenorhabditis elegans  | hypothetical upf0028 protein in chromosome                                 | 5 | C:GO:0016021;<br>P:GO:0046470;<br>P:GO:0009653;<br>F:GO:0004622;<br>C:GO:0005789 | -                                                                                                                                                                                                                        | EC:3.1.1.5 | -                                                                                                                           |
| -                       | -                                                                          | 0 |                                                                                  |                                                                                                                                                                                                                          |            | -                                                                                                                           |
|                         |                                                                            |   |                                                                                  |                                                                                                                                                                                                                          |            | IPR003599; IPR007110; IPR010939; IPR013098; IPR013783; PTHR19897 (PANTHER), PTHR19897:SF9 (PANTHER), SSF48726 (SUPERFAMILY) |
| Caenorhabditis briggsae | sh2 domain-containing adapter protein b                                    | 0 |                                                                                  | C:GO:0016020;<br>P:GO:0006915;<br>C:GO:0005737;<br>P:GO:0001525;<br>F:GO:0001948;<br>P:GO:0007275;<br>P:GO:0030154;<br>P:GO:0007165;<br>C:GO:0005575;<br>F:GO:0005515;<br>F:GO:0005070;<br>P:GO:0042100;<br>C:GO:0005886 |            | IPR000980; PTHR15127 (PANTHER), PTHR15127:SF7 (PANTHER), SSF55550 (SUPERFAMILY)                                             |
| Caenorhabditis briggsae | accessory gland protein                                                    | 1 | P:GO:0000003                                                                     | -                                                                                                                                                                                                                        |            | -                                                                                                                           |
| Loa loa                 | infection response gene protein partially confirmed by transcript evidence | 1 | P:GO:0045087                                                                     | -                                                                                                                                                                                                                        |            | IPR012816; SSF143990 (SUPERFAMILY)                                                                                          |
| -                       | -                                                                          | 0 |                                                                                  |                                                                                                                                                                                                                          |            | -                                                                                                                           |
| Caenorhabditis elegans  | protein downstream neighbor of son-like protein                            | 1 | P:GO:0048856                                                                     | -                                                                                                                                                                                                                        |            | -                                                                                                                           |
| Caenorhabditis elegans  | protein downstream neighbor of son-like protein                            | 1 | P:GO:0048856                                                                     | -                                                                                                                                                                                                                        |            | -                                                                                                                           |
| Caenorhabditis elegans  | protein downstream neighbor of son-like protein                            | 1 | P:GO:0048856                                                                     | -                                                                                                                                                                                                                        |            | -                                                                                                                           |
| -                       | -                                                                          | 0 |                                                                                  |                                                                                                                                                                                                                          |            | -                                                                                                                           |
| Loa loa                 | briggsae cbr-cdh-4 protein                                                 | 0 |                                                                                  | P:GO:0007413;<br>C:GO:0016021;<br>C:GO:0016020;<br>P:GO:0007411;<br>P:GO:0007163;<br>F:GO:0005509;<br>C:GO:0005886;<br>P:GO:0007156;<br>P:GO:0007155                                                                     |            | -                                                                                                                           |
| -                       | -                                                                          | 0 |                                                                                  |                                                                                                                                                                                                                          |            | SignalP (SIGNALP)                                                                                                           |

|                              |                                                                      |    |                                                                                                                                                                                                         |                                                                                  |             |                                                                                                                                                                                                                     |
|------------------------------|----------------------------------------------------------------------|----|---------------------------------------------------------------------------------------------------------------------------------------------------------------------------------------------------------|----------------------------------------------------------------------------------|-------------|---------------------------------------------------------------------------------------------------------------------------------------------------------------------------------------------------------------------|
| Caenorhabditis elegans       | cullin 1                                                             | 12 | P:GO:0007050;<br>C:GO:0005829;<br>P:GO:0051437;<br>C:GO:0019005;<br>P:GO:0009887;<br>P:GO:0008285;<br>F:GO:0004842;<br>P:GO:0008629;<br>F:GO:0005515;<br>P:GO:0000082;<br>P:GO:0031146;<br>C:GO:0005654 | -                                                                                | EC:6.3.2.19 | IPR001373; IPR011991; IPR016157;<br>IPR016158; IPR016159; IPR019559;<br>G3DSA:1.20.1310.10 (GENE3D),<br>G3DSA:4.10.1030.10 (GENE3D),<br>PTHR11932 (PANTHER),<br>PTHR11932:SF17 (PANTHER),<br>SSF46785 (SUPERFAMILY) |
| Caenorhabditis elegans       | elegans protein confirmed by transcript evidence                     | 5  | P:GO:0002119;<br>P:GO:0040002;<br>P:GO:0040010;<br>C:GO:0044464;<br>P:GO:0008340                                                                                                                        | -                                                                                |             | IPR010987; IPR012336; PTHR12289<br>(PANTHER), PTHR12289:SF17<br>(PANTHER), SignalP (SIGNALP)                                                                                                                        |
| Caenorhabditis elegans       | hypothetical protein C48E7.1 [Caenorhabditis elegans]                | 0  |                                                                                                                                                                                                         |                                                                                  |             | SignalP (SIGNALP)                                                                                                                                                                                                   |
| Caenorhabditis elegans       | glycolipid transfer protein                                          | 6  | P:GO:0055114;<br>F:GO:0017089;<br>C:GO:0005737;<br>P:GO:0008340;<br>F:GO:0051861;<br>P:GO:0046836                                                                                                       | -                                                                                |             | IPR014830; PTHR10219 (PANTHER)                                                                                                                                                                                      |
| Caenorhabditis briggsae      | chromobox protein homolog 1 (heterochromatin protein 1 homolog beta) | 0  |                                                                                                                                                                                                         | F:GO:0003682;<br>P:GO:0009792;<br>C:GO:0000785;<br>P:GO:0006333;<br>C:GO:0005634 |             | IPR000953; IPR001525; IPR016197;<br>G3DSA:2.40.50.40 (GENE3D),<br>PTHR10629:SF1 (PANTHER)                                                                                                                           |
| Caenorhabditis elegans       | protein phosphatase 2c containing protein                            | 5  | C:GO:0008287;<br>F:GO:0004722;<br>P:GO:0006470;<br>F:GO:0005509;<br>C:GO:0005739                                                                                                                        | -                                                                                |             | IPR001932; IPR014045; IPR015655;<br>PTHR13832:SF98 (PANTHER)                                                                                                                                                        |
| Nippostrongylus brasiliensis | elegans protein partially confirmed by transcript evidence           | 1  | P:GO:0009792                                                                                                                                                                                            | -                                                                                |             | SignalP (SIGNALP)                                                                                                                                                                                                   |
| Nippostrongylus brasiliensis | elegans protein partially confirmed by transcript evidence           | 1  | P:GO:0009792                                                                                                                                                                                            | -                                                                                |             | SignalP (SIGNALP)                                                                                                                                                                                                   |
|                              |                                                                      | 0  |                                                                                                                                                                                                         |                                                                                  |             | -                                                                                                                                                                                                                   |
| Caenorhabditis elegans       | diaphanous homolog 2                                                 | 1  | F:GO:0005515                                                                                                                                                                                            | -                                                                                |             | IPR015425; PTHR23213 (PANTHER),<br>PTHR23213:SF12 (PANTHER)                                                                                                                                                         |
| Caenorhabditis elegans       | tbc1 domain family member 23-like                                    | 0  |                                                                                                                                                                                                         | P:GO:0032313;<br>F:GO:0005097;<br>C:GO:0005622                                   |             | IPR001763; PTHR13297 (PANTHER)                                                                                                                                                                                      |
| Caenorhabditis briggsae      | abnormal cell lineage family member (lin-10)                         | 4  | C:GO:0005737;<br>P:GO:0007163;<br>C:GO:0005886;<br>P:GO:0016081                                                                                                                                         | -                                                                                |             | IPR006020; IPR011993; PTHR12345<br>(PANTHER), PTHR12345:SF1<br>(PANTHER), SSF50729 (SUPERFAMILY)                                                                                                                    |
| Caenorhabditis briggsae      | abnormal cell lineage family member (lin-10)                         | 4  | C:GO:0005737;<br>P:GO:0007163;<br>C:GO:0005886;<br>P:GO:0016081                                                                                                                                         | -                                                                                |             | IPR006020; IPR011993; PTHR12345<br>(PANTHER), PTHR12345:SF1<br>(PANTHER), SignalP (SIGNALP),<br>SSF50729 (SUPERFAMILY)                                                                                              |
| Caenorhabditis elegans       | elegans protein partially confirmed by transcript evidence           | 0  |                                                                                                                                                                                                         |                                                                                  |             | PTHR23241 (PANTHER),<br>PTHR23241:SF5 (PANTHER), SignalP<br>(SIGNALP)                                                                                                                                               |
| Caenorhabditis elegans       | spectrin beta chain                                                  | 4  | F:GO:0005200;<br>C:GO:0008091;<br>F:GO:0003779;<br>F:GO:0016787                                                                                                                                         | -                                                                                |             | IPR002017; IPR018159; PD936484<br>(PRODOM), G3DSA:1.20.58.60<br>(GENE3D), PTHR11915 (PANTHER),<br>PTHR11915:SF48 (PANTHER),<br>SSF46966 (SUPERFAMILY)                                                               |

|                         |                                                  |    |                                                                                                                                                                                                                                                                                                               |                                                |            |                                                                                                   |
|-------------------------|--------------------------------------------------|----|---------------------------------------------------------------------------------------------------------------------------------------------------------------------------------------------------------------------------------------------------------------------------------------------------------------|------------------------------------------------|------------|---------------------------------------------------------------------------------------------------|
| Caenorhabditis briggsae | heterogeneous nuclear ribonucleoprotein a b      | 2  | F:GO:0003676;<br>F:GO:0000166                                                                                                                                                                                                                                                                                 | -                                              |            | IPR000504; IPR012677; PTHR10432<br>(PANTHER), PTHR10432:SF15<br>(PANTHER), SSF54928 (SUPERFAMILY) |
| Caenorhabditis elegans  | arginine ki-se                                   | 4  | C:GO:0016021;<br>F:GO:0005524;<br>F:GO:0005515;<br>F:GO:0004054                                                                                                                                                                                                                                               | -                                              | EC:2.7.3.3 | -                                                                                                 |
| Caenorhabditis elegans  | elegans protein confirmed by transcript evidence | 0  |                                                                                                                                                                                                                                                                                                               |                                                |            | IPR001534; SignalP (SIGNALP)                                                                      |
| -                       | -                                                | 0  |                                                                                                                                                                                                                                                                                                               |                                                |            | -                                                                                                 |
| -                       | -                                                | 0  |                                                                                                                                                                                                                                                                                                               |                                                |            | -                                                                                                 |
| -                       | -                                                | 0  |                                                                                                                                                                                                                                                                                                               |                                                |            | -                                                                                                 |
| Caenorhabditis briggsae | mitochondrial -dh:ubiquinone oxidoreductase esss | 3  | P:GO:0002119;<br>P:GO:0009792;<br>P:GO:0040007                                                                                                                                                                                                                                                                | -                                              |            | -                                                                                                 |
| -                       | -                                                | 0  |                                                                                                                                                                                                                                                                                                               |                                                |            | -                                                                                                 |
| Brugia malayi           | 2700029m09rik protein                            | 0  |                                                                                                                                                                                                                                                                                                               |                                                |            |                                                                                                   |
| -                       | -                                                | 0  |                                                                                                                                                                                                                                                                                                               |                                                |            | SignalP (SIGNALP)                                                                                 |
| -                       | -                                                | 0  |                                                                                                                                                                                                                                                                                                               |                                                |            | SignalP (SIGNALP)                                                                                 |
| -                       | -                                                | 0  |                                                                                                                                                                                                                                                                                                               |                                                |            | -                                                                                                 |
| -                       | -                                                | 0  |                                                                                                                                                                                                                                                                                                               |                                                |            | SignalP (SIGNALP)                                                                                 |
| Caenorhabditis elegans  | huntingtin interacting protein                   | 18 | P:GO:0030324;<br>P:GO:0048268;<br>P:GO:0007405;<br>F:GO:0005543;<br>C:GO:0009986;<br>F:GO:0003779;<br>F:GO:0030276;<br>P:GO:0048260;<br>P:GO:0006915;<br>P:GO:0007165;<br>P:GO:0040036;<br>P:GO:0009887;<br>C:GO:0043229;<br>P:GO:0009953;<br>C:GO:0005887;<br>C:GO:0044444;<br>P:GO:0008152;<br>P:GO:0045879 | -                                              |            | IPR011417; PTHR10407 (PANTHER),<br>PTHR10407:SF4 (PANTHER)                                        |
| Caenorhabditis elegans  | briggsae cbr-npp-3 protein                       | 0  |                                                                                                                                                                                                                                                                                                               |                                                |            | -                                                                                                 |
| Caenorhabditis briggsae | interferon-related developmental regulator 2     | 0  |                                                                                                                                                                                                                                                                                                               | F:GO:0003674;<br>F:GO:0005488;<br>C:GO:0005575 |            | IPR006921; IPR007701; PTHR12354<br>(PANTHER), PTHR12354:SF4<br>(PANTHER)                          |
| Caenorhabditis briggsae | interferon-related developmental regulator 2     | 0  |                                                                                                                                                                                                                                                                                                               | F:GO:0003674;<br>F:GO:0005488;<br>C:GO:0005575 |            | IPR006921; IPR007701; PTHR12354<br>(PANTHER), PTHR12354:SF4<br>(PANTHER)                          |
| Ancylostoma ceylanicum  | briggsae cbr-vap-1 protein                       | 0  |                                                                                                                                                                                                                                                                                                               | C:GO:0005576                                   |            | IPR014044                                                                                         |

|                         |                                                                            |    |                                                                                                                                                                                                                                                            |                                                                 |                                            |                                                                                                                                      |
|-------------------------|----------------------------------------------------------------------------|----|------------------------------------------------------------------------------------------------------------------------------------------------------------------------------------------------------------------------------------------------------------|-----------------------------------------------------------------|--------------------------------------------|--------------------------------------------------------------------------------------------------------------------------------------|
| Caenorhabditis briggsae | aldehyde dehydroge-se 9 member a1                                          | 15 | C:GO:0005829;<br>F:GO:0043176;<br>C:GO:0015630;<br>P:GO:0042445;<br>P:GO:0001889;<br>P:GO:0055114;<br>P:GO:0045329;<br>F:GO:0051287;<br>F:GO:0019145;<br>P:GO:0006081;<br>P:GO:0042136;<br>F:GO:0042803;<br>F:GO:0047105;<br>F:GO:0004029;<br>C:GO:0005634 | -                                                               | EC:1.2.1.19;<br>EC:1.2.1.47;<br>EC:1.2.1.3 | SignalP (SIGNALP)                                                                                                                    |
| Caenorhabditis elegans  | target of erk ki-se mpk-1 protein isoform confirmed by transcript evidence | 0  |                                                                                                                                                                                                                                                            | P:GO:0007165;<br>P:GO:0023034;<br>F:GO:0005515;<br>C:GO:0005622 |                                            | -                                                                                                                                    |
| Caenorhabditis elegans  | target of erk ki-se mpk-1 protein isoform confirmed by transcript evidence | 0  |                                                                                                                                                                                                                                                            | P:GO:0007165;<br>P:GO:0023034;<br>F:GO:0005515;<br>C:GO:0005622 |                                            | -                                                                                                                                    |
| Caenorhabditis briggsae | Hypothetical protein CBG09291 [Caenorhabditis briggsae]                    | 0  |                                                                                                                                                                                                                                                            |                                                                 |                                            | -                                                                                                                                    |
| Loa loa                 | double-strand-break repair protein rad21 homolog                           | 6  | P:GO:0006996;<br>P:GO:0045132;<br>F:GO:0005515;<br>P:GO:0040011;<br>P:GO:0009792;<br>C:GO:0005634                                                                                                                                                          | -                                                               |                                            | IPR006909; IPR023093; PTHR12585 (PANTHER), PTHR12585:SF6 (PANTHER), SSF46785 (SUPERFAMILY)                                           |
| Homo sapiens            | immunoglobulin light chain variable region                                 | 0  |                                                                                                                                                                                                                                                            |                                                                 |                                            | IPR003596; IPR007110; IPR013106; IPR013783; PTHR23267 (PANTHER), PTHR23267:SF14 (PANTHER), SignalP (SIGNALP), SSF48726 (SUPERFAMILY) |
| Loa loa                 | protein-tyrosine phosphatase containing protein                            | 1  | F:GO:0004721                                                                                                                                                                                                                                               | -                                                               | EC:3.1.3.16                                | IPR000242; IPR000387; IPR016130; G3DSA:3.90.190.10 (GENE3D), PTHR19134 (PANTHER), PTHR19134:SF26 (PANTHER), SSF52799 (SUPERFAMILY)   |
| Caenorhabditis briggsae | o-sialoglycoprotein endopeptidase-like 1                                   | 1  | F:GO:0070011                                                                                                                                                                                                                                               | -                                                               |                                            | SignalP (SIGNALP)                                                                                                                    |
| Loa loa                 | hypothetical protein LOAG_06829 [Loa loa]                                  | 0  |                                                                                                                                                                                                                                                            |                                                                 |                                            | G3DSA:3.80.10.10 (GENE3D), SSF52058 (SUPERFAMILY)                                                                                    |
| Caenorhabditis briggsae | syntaxin 5                                                                 | 9  | P:GO:0042147;<br>F:GO:0047485;<br>P:GO:0006903;<br>C:GO:0005730;<br>F:GO:0005484;<br>P:GO:0016081;<br>P:GO:0006886;<br>C:GO:0031201;<br>C:GO:0005794                                                                                                       | -                                                               |                                            | -                                                                                                                                    |
| Haemonchus contortus    | hexoki-se                                                                  | 5  | P:GO:0060361;<br>P:GO:0005975;<br>F:GO:0005515;<br>F:GO:0004396;<br>F:GO:0000166                                                                                                                                                                           | -                                                               | EC:2.7.1.1                                 | IPR001312; IPR019807; IPR022672; IPR022673; G3DSA:3.40.367.20 (GENE3D), SSF53067 (SUPERFAMILY)                                       |
|                         | -                                                                          | 0  |                                                                                                                                                                                                                                                            |                                                                 |                                            | -                                                                                                                                    |
|                         | -                                                                          | 0  |                                                                                                                                                                                                                                                            |                                                                 |                                            | -                                                                                                                                    |

|                         |                                                                                               |    |                                                                                                                                                                                                         |                                                                                                                    |  |                                                                                                            |
|-------------------------|-----------------------------------------------------------------------------------------------|----|---------------------------------------------------------------------------------------------------------------------------------------------------------------------------------------------------------|--------------------------------------------------------------------------------------------------------------------|--|------------------------------------------------------------------------------------------------------------|
|                         | -                                                                                             | 0  |                                                                                                                                                                                                         |                                                                                                                    |  | -                                                                                                          |
| Caenorhabditis elegans  | n-myc downstream regulated                                                                    | 0  |                                                                                                                                                                                                         |                                                                                                                    |  | IPR004142; G3DSA:3.40.50.1820 (GENE3D), PTHR11034:SF2 (PANTHER), SSF53474 (SUPERFAMILY)                    |
| Caenorhabditis elegans  | hypothetical kda protein in chromosome                                                        | 0  |                                                                                                                                                                                                         |                                                                                                                    |  | IPR004142; G3DSA:3.40.50.1820 (GENE3D), PTHR11034:SF2 (PANTHER), SSF53474 (SUPERFAMILY)                    |
| Brugia malayi           | hypothetical protein Bm1_55095 [Brugia malayi]                                                | 0  |                                                                                                                                                                                                         |                                                                                                                    |  | -                                                                                                          |
|                         | -                                                                                             | 0  |                                                                                                                                                                                                         |                                                                                                                    |  | -                                                                                                          |
| Caenorhabditis elegans  | 26s proteasome non-atpase regulatory subunit 8                                                | 1  | C:GO:0044424                                                                                                                                                                                            | -                                                                                                                  |  | IPR006746; IPR019280                                                                                       |
| Caenorhabditis elegans  | translocon-associated protein subunit delta precursor                                         | 3  | C:GO:0044464;<br>F:GO:0005515;<br>P:GO:0040011                                                                                                                                                          | -                                                                                                                  |  | IPR002114; IPR008855; SignalP (SIGNALP)                                                                    |
| Caenorhabditis elegans  | translocon-associated protein subunit delta precursor                                         | 3  | C:GO:0044464;<br>F:GO:0005515;<br>P:GO:0040011                                                                                                                                                          | -                                                                                                                  |  | IPR002114; IPR008855; SignalP (SIGNALP)                                                                    |
| Caenorhabditis elegans  | herpud family member 2                                                                        | 0  |                                                                                                                                                                                                         | F:GO:0003674;<br>P:GO:0006986;<br>C:GO:0016021;<br>C:GO:0016020;<br>P:GO:0008150;<br>P:GO:0007283;<br>C:GO:0005575 |  | PTHR12943 (PANTHER),<br>PTHR12943:SF2 (PANTHER)                                                            |
| Caenorhabditis elegans  | homocysteine-responsive endoplasmic reticulum-resident ubiquitin-like domain member 2 protein | 0  |                                                                                                                                                                                                         | P:GO:0006986;<br>C:GO:0016021;<br>P:GO:0006983;<br>C:GO:0016020;<br>C:GO:0005875                                   |  | IPR019955; G3DSA:3.10.20.90 (GENE3D), PTHR12943 (PANTHER), PTHR12943:SF2 (PANTHER), SSF54236 (SUPERFAMILY) |
| Caenorhabditis elegans  | homocysteine-responsive endoplasmic reticulum-resident ubiquitin-like domain member 2 protein | 0  |                                                                                                                                                                                                         | P:GO:0006986;<br>C:GO:0016021;<br>P:GO:0006983;<br>C:GO:0016020;<br>C:GO:0005875                                   |  | IPR019955; G3DSA:3.10.20.90 (GENE3D), PTHR12943 (PANTHER), PTHR12943:SF2 (PANTHER), SSF54236 (SUPERFAMILY) |
|                         | -                                                                                             | 0  |                                                                                                                                                                                                         |                                                                                                                    |  | -                                                                                                          |
| Caenorhabditis briggsae | brefeldin a-inhibited guanine nucleotide-exchange protein 1-like                              | 12 | P:GO:0040010;<br>F:GO:0008060;<br>C:GO:0005622;<br>F:GO:0005086;<br>P:GO:0006887;<br>P:GO:0000003;<br>P:GO:0032012;<br>P:GO:0002119;<br>P:GO:0040011;<br>P:GO:0006898;<br>F:GO:0017022;<br>P:GO:0009792 | -                                                                                                                  |  | IPR011989; IPR015403; IPR016024; PTHR10663 (PANTHER), PTHR10663:SF16 (PANTHER)                             |

|                         |                                                                  |    |                                                                                                                                                                                                                                           |   |                                                                                           |
|-------------------------|------------------------------------------------------------------|----|-------------------------------------------------------------------------------------------------------------------------------------------------------------------------------------------------------------------------------------------|---|-------------------------------------------------------------------------------------------|
| Caenorhabditis briggsae | brefeldin a-inhibited guanine nucleotide-exchange protein 1-like | 12 | P:GO:0040010;<br>F:GO:0008060;<br>C:GO:0005622;<br>F:GO:0005086;<br>P:GO:0006887;<br>P:GO:0000003;<br>P:GO:0032012;<br>P:GO:0002119;<br>P:GO:0040011;<br>P:GO:0006898;<br>F:GO:0017022;<br>P:GO:0009792                                   | - | IPR011989; IPR015403; IPR016024;<br>PTHR10663 (PANTHER),<br>PTHR10663:SF16 (PANTHER)      |
| Caenorhabditis briggsae | brefeldin a-inhibited guanine nucleotide-exchange protein 1-like | 12 | P:GO:0040010;<br>F:GO:0008060;<br>C:GO:0005622;<br>F:GO:0005086;<br>P:GO:0006887;<br>P:GO:0000003;<br>P:GO:0032012;<br>P:GO:0002119;<br>P:GO:0040011;<br>P:GO:0006898;<br>F:GO:0017022;<br>P:GO:0009792                                   | - | IPR011989; IPR015403; IPR016024;<br>PTHR10663 (PANTHER),<br>PTHR10663:SF16 (PANTHER)      |
| -                       | -                                                                | 0  | -                                                                                                                                                                                                                                         | - | -                                                                                         |
| Caenorhabditis elegans  | elegans protein confirmed by transcript evidence                 | 0  | -                                                                                                                                                                                                                                         | - | IPR009673; SignalP (SIGNALP)                                                              |
| Caenorhabditis elegans  | msp-domain protein 1 variant                                     | 6  | C:GO:0044297;<br>P:GO:0019915;<br>P:GO:0040018;<br>P:GO:0000003;<br>F:GO:0005198;<br>C:GO:0031143                                                                                                                                         | - | IPR000535; IPR008962; PTHR22947 (PANTHER)                                                 |
| Brugia malayi           | histone h2a                                                      | 14 | P:GO:0006952;<br>P:GO:0040010;<br>C:GO:0000786;<br>P:GO:0006281;<br>P:GO:0018991;<br>P:GO:0045449;<br>P:GO:0040035;<br>F:GO:0043565;<br>P:GO:0002119;<br>P:GO:0040011;<br>P:GO:0006334;<br>P:GO:0006997;<br>P:GO:0009792;<br>C:GO:0005634 | - | -                                                                                         |
| -                       | -                                                                | 0  | -                                                                                                                                                                                                                                         | - | -                                                                                         |
| Loa loa                 | palmitoyltransferase zdhhc17                                     | 8  | F:GO:0019706;<br>F:GO:0004871;<br>P:GO:0042953;<br>F:GO:0015095;<br>F:GO:0046872;<br>C:GO:0030660;<br>P:GO:0043123;<br>F:GO:0005515                                                                                                       | - | IPR002110; IPR020683; PR01415 (PRINTS), PTHR18958 (PANTHER),<br>PTHR18958:SF137 (PANTHER) |



|                         |                                  |    |                                                                                                                                                                                                         |   |                                                                                                                                                                        |
|-------------------------|----------------------------------|----|---------------------------------------------------------------------------------------------------------------------------------------------------------------------------------------------------------|---|------------------------------------------------------------------------------------------------------------------------------------------------------------------------|
| Caenorhabditis elegans  | kiaa0966 protein                 | 4  | P:GO:0006629;<br>C:GO:0005795;<br>C:GO:0005798;<br>F:GO:0016787                                                                                                                                         | - | IPR002013; PTHR11200 (PANTHER),<br>PTHR11200:SF11 (PANTHER)                                                                                                            |
| Caenorhabditis elegans  | fibulin-1 isoform c precursor    | 1  | F:GO:0005515                                                                                                                                                                                            | - | IPR000152; IPR001881; IPR013032;<br>IPR013091; IPR018097;<br>G3DSA:2.10.25.10 (GENE3D),<br>PTHR11201 (PANTHER),<br>PTHR11201:SF89 (PANTHER),<br>SSF57196 (SUPERFAMILY) |
|                         | -                                | 0  |                                                                                                                                                                                                         |   | -                                                                                                                                                                      |
|                         | -                                | 0  |                                                                                                                                                                                                         |   | -                                                                                                                                                                      |
| Caenorhabditis elegans  | chromosome transmission fidelity | 3  | F:GO:0005488;<br>F:GO:0016787;<br>P:GO:0006974                                                                                                                                                          | - | G3DSA:1.10.8.60 (GENE3D),<br>G3DSA:3.40.50.300 (GENE3D),<br>PTHR23389 (PANTHER), SSF52540<br>(SUPERFAMILY)                                                             |
| Loa loa                 | lin-9 homolog ( elegans)         | 1  | C:GO:0070176                                                                                                                                                                                            | - | IPR010561; PTHR21689 (PANTHER),<br>PTHR21689:SF3 (PANTHER)                                                                                                             |
|                         | -                                | 0  |                                                                                                                                                                                                         |   | -                                                                                                                                                                      |
|                         | -                                | 0  |                                                                                                                                                                                                         |   | -                                                                                                                                                                      |
| synthetic construct     | ribosomal protein s11            | 5  | F:GO:0003735;<br>F:GO:0005515;<br>C:GO:0022627;<br>F:GO:0019843;<br>P:GO:0006414                                                                                                                        | - | IPR000266; IPR012340; IPR016027;<br>IPR019978; IPR019979;<br>PTHR10744:SF2 (PANTHER)                                                                                   |
| Ancylostoma caninum     | histone h3                       | 4  | C:GO:0000786;<br>F:GO:0003677;<br>P:GO:0006334;<br>C:GO:0005634                                                                                                                                         | - | IPR000164; IPR007125; IPR009072                                                                                                                                        |
| Caenorhabditis briggsae | tubulin alpha 1                  | 12 | P:GO:0040010;<br>C:GO:0043234;<br>P:GO:0035046;<br>P:GO:0002119;<br>F:GO:0005515;<br>P:GO:0007017;<br>P:GO:0040017;<br>F:GO:0000166;<br>P:GO:0040039;<br>P:GO:0006898;<br>P:GO:0002009;<br>P:GO:0009792 | - | IPR000217; IPR002452; IPR003008;<br>PTHR11588:SF11 (PANTHER)                                                                                                           |
|                         | -                                | 0  |                                                                                                                                                                                                         |   | -                                                                                                                                                                      |
| Ailuropoda melanoleuca  | tumor translatio-ly-controlled 1 | 9  | P:GO:0009615;<br>F:GO:0005509;<br>C:GO:0005771;<br>C:GO:0045298;<br>P:GO:0006874;<br>C:GO:0005615;<br>P:GO:0006916;<br>F:GO:0005515;<br>P:GO:0006816                                                    | - | IPR011057; IPR011323; IPR018103;<br>IPR018105                                                                                                                          |

|                        |                                                       |   |                                                                                                                                                                                                                                                                                                                                                 |   |                                                                                                                                                                                                |
|------------------------|-------------------------------------------------------|---|-------------------------------------------------------------------------------------------------------------------------------------------------------------------------------------------------------------------------------------------------------------------------------------------------------------------------------------------------|---|------------------------------------------------------------------------------------------------------------------------------------------------------------------------------------------------|
| Ailuropoda melanoleuca | tumor translatio-ly-controlled 1                      | 9 | P:GO:0009615;<br>F:GO:0005509;<br>C:GO:0005771;<br>C:GO:0045298;<br>P:GO:0006874;<br>C:GO:0005615;<br>P:GO:0006916;<br>F:GO:0005515;<br>P:GO:0006816                                                                                                                                                                                            | - | IPR011057; IPR011323; IPR018103;<br>IPR018105                                                                                                                                                  |
| Pongo abelii           | tumor translatio-ly-controlled 1                      | 9 | P:GO:0009615;<br>F:GO:0005509;<br>C:GO:0005771;<br>C:GO:0045298;<br>P:GO:0006874;<br>C:GO:0005615;<br>P:GO:0006916;<br>F:GO:0005515;<br>P:GO:0006816                                                                                                                                                                                            | - | IPR011057; IPR011323; IPR018103;<br>IPR018105                                                                                                                                                  |
| -                      | -                                                     | 0 |                                                                                                                                                                                                                                                                                                                                                 |   | SignalP (SIGNALP)                                                                                                                                                                              |
| -                      | -                                                     | 0 |                                                                                                                                                                                                                                                                                                                                                 |   | SignalP (SIGNALP)                                                                                                                                                                              |
| -                      | -                                                     | 0 |                                                                                                                                                                                                                                                                                                                                                 |   | -                                                                                                                                                                                              |
| Caenorhabditis elegans | actin-depolymerizing factor                           | 2 | F:GO:0003779;<br>C:GO:0005622                                                                                                                                                                                                                                                                                                                   | - | IPR002108; G3DSA:3.40.20.10<br>(GENE3D), PTHR11913 (PANTHER),<br>PTHR11913:SF12 (PANTHER),<br>SSF55753 (SUPERFAMILY)                                                                           |
| Caenorhabditis elegans | fusion (involved in t(12 16) in malign-t liposarcoma) | 7 | P:GO:0021954;<br>F:GO:0008270;<br>F:GO:0003676;<br>C:GO:0005730;<br>P:GO:0008380;<br>F:GO:0005515;<br>F:GO:0000166                                                                                                                                                                                                                              | - | IPR000504; IPR001876; IPR012677;<br>PR01228 (PRINTS),<br>G3DSA:4.10.1060.10 (GENE3D),<br>PTHR23238 (PANTHER),<br>PTHR23238:SF2 (PANTHER), SSF54928<br>(SUPERFAMILY), SSF90209<br>(SUPERFAMILY) |
| -                      | -                                                     | 0 |                                                                                                                                                                                                                                                                                                                                                 |   | SignalP (SIGNALP)                                                                                                                                                                              |
| -                      | -                                                     | 0 |                                                                                                                                                                                                                                                                                                                                                 |   | SignalP (SIGNALP)                                                                                                                                                                              |
| Rattus norvegicus      | type alpha 2                                          | 0 | P:GO:0001501;<br>F:GO:0046332;<br>P:GO:0007266;<br>C:GO:0005584;<br>F:GO:0042802;<br>C:GO:0005581;<br>P:GO:0043589;<br>P:GO:0070208;<br>P:GO:0030199;<br>C:GO:0005615;<br>C:GO:0031012;<br>F:GO:0030674;<br>P:GO:0008217;<br>F:GO:0048407;<br>F:GO:0005515;<br>C:GO:0005886;<br>C:GO:0005576;<br>P:GO:0007179;<br>P:GO:0001568;<br>F:GO:0005201 | - | -                                                                                                                                                                                              |
| -                      | -                                                     | 0 |                                                                                                                                                                                                                                                                                                                                                 |   | SignalP (SIGNALP)                                                                                                                                                                              |
| -                      | -                                                     | 0 |                                                                                                                                                                                                                                                                                                                                                 |   | -                                                                                                                                                                                              |

|                         |                                               |    |                                                                                                                                                                                        |                                                                                                                                                                                                                          |             |                                                                                                                                                                   |
|-------------------------|-----------------------------------------------|----|----------------------------------------------------------------------------------------------------------------------------------------------------------------------------------------|--------------------------------------------------------------------------------------------------------------------------------------------------------------------------------------------------------------------------|-------------|-------------------------------------------------------------------------------------------------------------------------------------------------------------------|
| synthetic construct     | lipolysis stimulated lipoprotein receptor     | 11 | P:GO:0009790;<br>C:GO:0005730;<br>F:GO:0004872;<br>C:GO:0034362;<br>C:GO:0005794;<br>C:GO:0005886;<br>C:GO:0042627;<br>P:GO:0001889;<br>C:GO:0016021;<br>P:GO:0019216;<br>C:GO:0034361 | -                                                                                                                                                                                                                        | -           |                                                                                                                                                                   |
| Caenorhabditis briggsae | briggsae cbr-abt-2 protein                    | 2  | F:GO:0017111;<br>F:GO:0000166                                                                                                                                                          | -                                                                                                                                                                                                                        | EC:3.6.1.15 | IPR003439; IPR003593; IPR017871;<br>G3DSA:3.40.50.300 (GENE3D),<br>PTHR19229 (PANTHER),<br>PTHR19229:SF25 (PANTHER), SignalP<br>(SIGNALP), SSF52540 (SUPERFAMILY) |
| Loa loa                 | briggsae cbr-tag-340 protein                  | 0  |                                                                                                                                                                                        | F:GO:0015485;<br>F:GO:0017127;<br>P:GO:0008150;<br>P:GO:0006694;<br>C:GO:0005575                                                                                                                                         |             | IPR019498; PTHR12136 (PANTHER),<br>PTHR12136:SF2 (PANTHER), SignalP<br>(SIGNALP)                                                                                  |
| Caenorhabditis elegans  | zinc finger and btb domain containing 1       | 0  |                                                                                                                                                                                        | F:GO:0003677;<br>C:GO:0005634;<br>F:GO:0003676;<br>F:GO:0008270;<br>C:GO:0005575;<br>C:GO:0005622;<br>F:GO:0005515;<br>F:GO:0046872;<br>P:GO:0006350;<br>P:GO:0008150;<br>P:GO:0045449                                   |             | IPR007087; IPR015880; PTHR14596<br>(PANTHER), SSF57667 (SUPERFAMILY)                                                                                              |
|                         | -                                             | 0  |                                                                                                                                                                                        |                                                                                                                                                                                                                          |             | -                                                                                                                                                                 |
| Caenorhabditis elegans  | lipophorin receptor                           | 1  | P:GO:0009792                                                                                                                                                                           |                                                                                                                                                                                                                          |             | SignalP (SIGNALP)                                                                                                                                                 |
| Caenorhabditis elegans  | lipophorin receptor                           | 1  | P:GO:0009792                                                                                                                                                                           | -                                                                                                                                                                                                                        |             | SignalP (SIGNALP)                                                                                                                                                 |
| Caenorhabditis briggsae | zinc finger and btb domain containing 40      | 0  |                                                                                                                                                                                        | F:GO:0003677;<br>C:GO:0005634;<br>F:GO:0003676;<br>P:GO:0000003;<br>F:GO:0003674;<br>F:GO:0008270;<br>C:GO:0005813;<br>C:GO:0005575;<br>P:GO:0006355;<br>C:GO:0005730;<br>C:GO:0005622;<br>F:GO:0046872;<br>P:GO:0008150 |             | IPR007087; IPR015880; PTHR11389<br>(PANTHER), SSF57667 (SUPERFAMILY)                                                                                              |
| Branchiostoma floridae  | small subunit processome component 20 homolog | 3  | F:GO:0005488;<br>C:GO:0031981;<br>P:GO:0006364                                                                                                                                         | -                                                                                                                                                                                                                        |             | IPR011430                                                                                                                                                         |
| Caenorhabditis elegans  | major facilitator superfamily protein         | 0  |                                                                                                                                                                                        | C:GO:0016021;<br>C:GO:0016020;<br>P:GO:0055085;<br>F:GO:0005215;<br>P:GO:0006810                                                                                                                                         |             | IPR005829; IPR011701; IPR016196;<br>IPR020846; G3DSA:1.20.1250.20<br>(GENE3D), PTHR11600 (PANTHER),<br>PTHR11600:SF28 (PANTHER)                                   |
| Caenorhabditis elegans  | transmembrane protein 188                     | 0  |                                                                                                                                                                                        | C:GO:0016021;<br>C:GO:0016020                                                                                                                                                                                            |             | IPR019168                                                                                                                                                         |

|                         |                                    |    |                                                                                                                                                                       |                               |            |                                                                                                                                                           |
|-------------------------|------------------------------------|----|-----------------------------------------------------------------------------------------------------------------------------------------------------------------------|-------------------------------|------------|-----------------------------------------------------------------------------------------------------------------------------------------------------------|
| Caenorhabditis elegans  | transmembrane protein 188          | 0  |                                                                                                                                                                       | C:GO:0016021;<br>C:GO:0016020 |            | IPR019168                                                                                                                                                 |
| Caenorhabditis elegans  | transmembrane protein 188          | 0  |                                                                                                                                                                       | C:GO:0016021;<br>C:GO:0016020 |            | IPR019168                                                                                                                                                 |
| Caenorhabditis elegans  | transmembrane protein 188          | 0  |                                                                                                                                                                       | C:GO:0016021;<br>C:GO:0016020 |            | IPR019168                                                                                                                                                 |
| Caenorhabditis elegans  | px domain containing protein       | 3  | F:GO:0035091;<br>F:GO:0005515;<br>P:GO:0007154                                                                                                                        | -                             |            | IPR001683; PTHR15454 (PANTHER),<br>PTHR15454:SF6 (PANTHER), SignalP<br>(SIGNALP)                                                                          |
| Caenorhabditis elegans  | px domain containing protein       | 3  | F:GO:0035091;<br>F:GO:0005515;<br>P:GO:0007154                                                                                                                        | -                             |            | IPR001683; PTHR15454 (PANTHER),<br>PTHR15454:SF6 (PANTHER), SignalP<br>(SIGNALP)                                                                          |
| Yarrowia lipolytica     | YALIOF12793p [Yarrowia lipolytica] | 0  |                                                                                                                                                                       |                               |            | -                                                                                                                                                         |
| Macaca mulatta          | ribosomal protein s29              | 10 | P:GO:0001525;<br>P:GO:0001570;<br>F:GO:0008270;<br>P:GO:0051726;<br>F:GO:0003735;<br>P:GO:0006414;<br>C:GO:0022627;<br>F:GO:0005515;<br>P:GO:0060218;<br>P:GO:0009790 | -                             |            | -                                                                                                                                                         |
| Loa loa                 | sumo-1 activating enzyme subunit 1 | 5  | F:GO:0043008;<br>P:GO:0016925;<br>F:GO:0008022;<br>F:GO:0019948;<br>F:GO:0046982                                                                                      | -                             |            | IPR000011; IPR000594; IPR009036;<br>IPR016040; PTHR10953 (PANTHER),<br>PTHR10953:SF30 (PANTHER)                                                           |
| -                       | -                                  | 0  |                                                                                                                                                                       |                               |            | -                                                                                                                                                         |
| -                       | -                                  | 0  |                                                                                                                                                                       |                               |            | -                                                                                                                                                         |
| -                       | -                                  | 0  |                                                                                                                                                                       |                               |            | -                                                                                                                                                         |
| -                       | -                                  | 0  |                                                                                                                                                                       |                               |            | -                                                                                                                                                         |
| -                       | -                                  | 0  |                                                                                                                                                                       |                               |            | -                                                                                                                                                         |
| -                       | -                                  | 0  |                                                                                                                                                                       |                               |            | -                                                                                                                                                         |
| -                       | -                                  | 0  |                                                                                                                                                                       |                               |            | -                                                                                                                                                         |
| -                       | -                                  | 0  |                                                                                                                                                                       |                               |            | -                                                                                                                                                         |
| -                       | -                                  | 0  |                                                                                                                                                                       |                               |            | -                                                                                                                                                         |
| -                       | -                                  | 0  |                                                                                                                                                                       |                               |            | -                                                                                                                                                         |
| -                       | -                                  | 0  |                                                                                                                                                                       |                               |            | -                                                                                                                                                         |
| -                       | -                                  | 0  |                                                                                                                                                                       |                               |            | -                                                                                                                                                         |
| -                       | -                                  | 0  |                                                                                                                                                                       |                               |            | -                                                                                                                                                         |
| -                       | -                                  | 0  |                                                                                                                                                                       |                               |            | -                                                                                                                                                         |
| Caenorhabditis briggsae | briggsae cbr-let-19 protein        | 9  | P:GO:0006367;<br>P:GO:0045944;<br>F:GO:0004872;<br>F:GO:0016455;<br>F:GO:0046966;<br>C:GO:0016592;<br>F:GO:0003713;<br>P:GO:0009792;<br>P:GO:0030521                  | -                             |            | IPR009401; PTHR12950 (PANTHER)                                                                                                                            |
| Caenorhabditis briggsae | briggsae cbr-lrs-1 protein         | 5  | F:GO:0004823;<br>P:GO:0006429;<br>F:GO:0005515;<br>F:GO:0005524;<br>C:GO:0005829                                                                                      | -                             | EC:6.1.1.4 | IPR009080; IPR013155; IPR014729;<br>IPR015413; G3DSA:1.10.730.10<br>(GENE3D), PTHR11946 (PANTHER),<br>PTHR11946:SF10 (PANTHER),<br>SSF52374 (SUPERFAMILY) |
| Caenorhabditis elegans  | briggsae cbr-rbc-2 protein         | 0  |                                                                                                                                                                       |                               |            | -                                                                                                                                                         |

|                         |                                                         |   |                                                                                                                                     |   |                                                                                                                                                               |
|-------------------------|---------------------------------------------------------|---|-------------------------------------------------------------------------------------------------------------------------------------|---|---------------------------------------------------------------------------------------------------------------------------------------------------------------|
| Caenorhabditis elegans  | sh3-domain grb2-like endophilin b2                      | 8 | F:GO:0005515;<br>C:GO:0016020;<br>C:GO:0043231;<br>P:GO:0044237;<br>P:GO:0009792;<br>P:GO:0007126;<br>P:GO:0044238;<br>C:GO:0044444 | - | IPR004148; IPR013606; PTHR10661 (PANTHER), PTHR10661:SF12 (PANTHER), SSF103657 (SUPERFAMILY)                                                                  |
| Caenorhabditis elegans  | briggsae cbr-dnj-11 protein                             | 8 | P:GO:0040010;<br>F:GO:0005488;<br>P:GO:0034645;<br>P:GO:0090304;<br>P:GO:0000003;<br>P:GO:0008356;<br>P:GO:0010467;<br>P:GO:0009792 | - | IPR001623; IPR015609; PTHR11821:SF29 (PANTHER)                                                                                                                |
| -                       | -                                                       | 0 |                                                                                                                                     | - | -                                                                                                                                                             |
| -                       | -                                                       | 0 |                                                                                                                                     | - | -                                                                                                                                                             |
| Caenorhabditis elegans  | innexin family protein                                  | 4 | P:GO:0019915;<br>P:GO:0009792;<br>P:GO:0008340;<br>P:GO:0000003                                                                     | - | IPR000990                                                                                                                                                     |
| Caenorhabditis briggsae | elegans protein confirmed by transcript evidence        | 3 | P:GO:0019915;<br>P:GO:0009792;<br>P:GO:0040010                                                                                      | - | -                                                                                                                                                             |
| Caenorhabditis briggsae | supervillin                                             | 1 | P:GO:0045132                                                                                                                        | - | IPR007122; IPR015628; G3DSA:3.40.20.10 (GENE3D), SSF55753 (SUPERFAMILY)                                                                                       |
| Caenorhabditis briggsae | Hypothetical protein CBG08094 [Caenorhabditis briggsae] | 0 |                                                                                                                                     |   | SignalIP (SIGNALP)                                                                                                                                            |
| Caenorhabditis elegans  | l80003_1guanylyl cyclase                                | 0 |                                                                                                                                     |   | SignalIP (SIGNALP)                                                                                                                                            |
| -                       | -                                                       | 0 |                                                                                                                                     | - | -                                                                                                                                                             |
| Caenorhabditis elegans  | ki-se suppressor of ras                                 | 1 | F:GO:0004672                                                                                                                        | - | IPR000719; IPR002219; IPR017441; G3DSA:3.30.200.20 (GENE3D), G3DSA:3.30.60.20 (GENE3D), PTHR23257 (PANTHER), PTHR23257:SF90 (PANTHER), SSF57889 (SUPERFAMILY) |
| Gallus gallus           | PREDICTED: similar to Ac1147 [Gallus gallus]            | 0 |                                                                                                                                     |   | -                                                                                                                                                             |
| -                       | -                                                       | 0 |                                                                                                                                     | - | -                                                                                                                                                             |
| -                       | -                                                       | 0 |                                                                                                                                     | - | -                                                                                                                                                             |
| Caenorhabditis briggsae | zinc nfx1-type containing 1                             | 1 | F:GO:0005488                                                                                                                        | - | PTHR10887 (PANTHER), PTHR10887:SF10 (PANTHER)                                                                                                                 |

|                         |                                                 |    |                                                                                                                                                                                                                                                                                                                                                                                   |  |  |                                                            |
|-------------------------|-------------------------------------------------|----|-----------------------------------------------------------------------------------------------------------------------------------------------------------------------------------------------------------------------------------------------------------------------------------------------------------------------------------------------------------------------------------|--|--|------------------------------------------------------------|
| Caenorhabditis briggsae | abnormal dauer formation family member (daf-16) | 18 | P:GO:0009411;<br>P:GO:0002821;<br>P:GO:0008286;<br>P:GO:0008340;<br>P:GO:0043065;<br>F:GO:0033613;<br>P:GO:0010564;<br>P:GO:0006355;<br>F:GO:0031625;<br>F:GO:0043565;<br>P:GO:0046890;<br>P:GO:0002119;<br>F:GO:0003700;<br>P:GO:0060537;<br>P:GO:0043620;<br>P:GO:0034605;<br>C:GO:0005737;<br>C:GO:0005634                                                                     |  |  | IPR001766; IPR011991; IPR018122;<br>SSF46785 (SUPERFAMILY) |
| Ancylostoma ceylanicum  | abnormal dauer formation family member (daf-16) | 22 | P:GO:0002821;<br>P:GO:0008340;<br>F:GO:0008270;<br>P:GO:0008286;<br>P:GO:0046890;<br>P:GO:0065008;<br>P:GO:0006355;<br>P:GO:0060537;<br>P:GO:0009411;<br>C:GO:0005737;<br>P:GO:0010564;<br>P:GO:0040008;<br>P:GO:0043620;<br>F:GO:0031625;<br>F:GO:0043565;<br>P:GO:0002119;<br>F:GO:0033613;<br>F:GO:0003700;<br>P:GO:0034605;<br>P:GO:0048523;<br>C:GO:0005634;<br>P:GO:0043065 |  |  | IPR001766; IPR011991; IPR018122;<br>SSF46785 (SUPERFAMILY) |
| Caenorhabditis briggsae | abnormal dauer formation family member (daf-16) | 18 | P:GO:0009411;<br>P:GO:0002821;<br>P:GO:0008286;<br>P:GO:0008340;<br>P:GO:0043065;<br>F:GO:0033613;<br>P:GO:0010564;<br>P:GO:0006355;<br>F:GO:0031625;<br>F:GO:0043565;<br>P:GO:0046890;<br>P:GO:0002119;<br>F:GO:0003700;<br>P:GO:0060537;<br>P:GO:0043620;<br>P:GO:0034605;<br>C:GO:0005737;<br>C:GO:0005634                                                                     |  |  | PTHR16166 (PANTHER),<br>PTHR16166:SF25 (PANTHER)           |

|                         |                                                                             |    |                                                                                                                                                                                                                                           |                                                                                  |                                                                                                       |
|-------------------------|-----------------------------------------------------------------------------|----|-------------------------------------------------------------------------------------------------------------------------------------------------------------------------------------------------------------------------------------------|----------------------------------------------------------------------------------|-------------------------------------------------------------------------------------------------------|
| Caenorhabditis elegans  | liprin alpha (lar-interacting protein alpha) (sy-pse defective protein 2)   | 11 | P:GO:0045467;<br>P:GO:0048490;<br>P:GO:0007416;<br>P:GO:0008594;<br>P:GO:0048676;<br>C:GO:0045202;<br>F:GO:0016491;<br>P:GO:0007412;<br>F:GO:0005515;<br>P:GO:0031290;<br>P:GO:0048841                                                    | -                                                                                | PTHR12587 (PANTHER),<br>PTHR12587:SF2 (PANTHER)                                                       |
| Caenorhabditis elegans  | glutamate-rich wd repeat containing 1                                       | 0  |                                                                                                                                                                                                                                           | F:GO:0003674;<br>P:GO:0008150;<br>C:GO:0005730;<br>C:GO:0005634;<br>C:GO:0005575 | IPR022052; PTHR22850 (PANTHER),<br>PTHR22850:SF6 (PANTHER)                                            |
| Caenorhabditis elegans  | transcriptio-l adaptor 2 (ada2 yeast)-like                                  | 3  | P:GO:0048856;<br>P:GO:0007275;<br>P:GO:0050789                                                                                                                                                                                            | -                                                                                | IPR001005; IPR009057; IPR017884;<br>PTHR12374 (PANTHER)                                               |
| Loa loa                 | histone deacetylase                                                         | 14 | F:GO:0016566;<br>P:GO:0000122;<br>F:GO:0004407;<br>F:GO:0003714;<br>P:GO:0007043;<br>P:GO:0030183;<br>C:GO:0005737;<br>P:GO:0006954;<br>C:GO:0000118;<br>P:GO:0007399;<br>F:GO:0003682;<br>P:GO:0016568;<br>P:GO:0045843;<br>P:GO:0001570 | -                                                                                | IPR000286; PTHR10625:SF21<br>(PANTHER), SSF52768 (SUPERFAMILY)                                        |
| Caenorhabditis elegans  | hypothetical protein Y48G9A.3 [Caenorhabditis elegans]                      | 1  | P:GO:0000003                                                                                                                                                                                                                              |                                                                                  | SignalP (SIGNALP)                                                                                     |
| Caenorhabditis briggsae | briggsae cbr-cogc-3 protein                                                 | 6  | P:GO:0043170;<br>P:GO:0034613;<br>P:GO:0048193;<br>C:GO:0044431;<br>P:GO:0015031;<br>C:GO:0016020                                                                                                                                         | -                                                                                | -                                                                                                     |
| Caenorhabditis elegans  | ubl3 protein                                                                | 1  | C:GO:0005622                                                                                                                                                                                                                              | -                                                                                | IPR000626; IPR019955;<br>G3DSA:3.10.20.90 (GENE3D),<br>PTHR13169 (PANTHER), SSF54236<br>(SUPERFAMILY) |
| Loa loa                 | laterally symmetric (defective in lateral asymmetry) family member (lisy-2) | 3  | F:GO:0008270;<br>F:GO:0003676;<br>C:GO:0005622                                                                                                                                                                                            | -                                                                                | IPR007087; IPR013087; IPR015880;<br>PTHR23224 (PANTHER),<br>PTHR23224:SF422 (PANTHER)                 |
|                         | -                                                                           | 0  |                                                                                                                                                                                                                                           |                                                                                  | -                                                                                                     |
|                         | -                                                                           | 0  |                                                                                                                                                                                                                                           |                                                                                  | -                                                                                                     |
| Caenorhabditis briggsae | translocase of outer mitochondrial membrane 20 homolog                      | 9  | P:GO:0040010;<br>F:GO:0015450;<br>C:GO:0016021;<br>C:GO:0005742;<br>P:GO:0000003;<br>P:GO:0006626;<br>P:GO:0002119;<br>F:GO:0051082;<br>P:GO:0009792                                                                                      | -                                                                                | IPR002056; IPR022422;<br>G3DSA:1.20.960.10 (GENE3D)                                                   |

|                                  |                                                                       |    |                                                                                                                                                                                        |                                                                                                   |             |                                                                                                                                                               |
|----------------------------------|-----------------------------------------------------------------------|----|----------------------------------------------------------------------------------------------------------------------------------------------------------------------------------------|---------------------------------------------------------------------------------------------------|-------------|---------------------------------------------------------------------------------------------------------------------------------------------------------------|
|                                  | -                                                                     | 0  |                                                                                                                                                                                        |                                                                                                   |             | -                                                                                                                                                             |
| Leishmania major strain Friedlin | myosin heavy chain                                                    | 2  | C:GO:0043232;<br>F:GO:0005515                                                                                                                                                          | -                                                                                                 |             | SignalP (SIGNALP)                                                                                                                                             |
| Caenorhabditis elegans           | loc446287 protein                                                     | 2  | P:GO:0055114;<br>F:GO:0003995                                                                                                                                                          | -                                                                                                 | EC:1.3.99.3 | -                                                                                                                                                             |
|                                  | -                                                                     | 0  |                                                                                                                                                                                        |                                                                                                   |             | -                                                                                                                                                             |
|                                  | -                                                                     | 0  |                                                                                                                                                                                        |                                                                                                   |             | -                                                                                                                                                             |
| Caenorhabditis elegans           | cy romatosis (human disease gene) homolog family member (cyld-1)      | 0  |                                                                                                                                                                                        | F:GO:0003735;<br>P:GO:0006412;<br>F:GO:0004221;<br>C:GO:0005840;<br>P:GO:0006511;<br>C:GO:0005622 |             | -                                                                                                                                                             |
| Caenorhabditis briggsae          | blastula protease-10                                                  | 1  | F:GO:0008233                                                                                                                                                                           | -                                                                                                 |             | IPR001506; IPR006026;<br>G3DSA:3.40.390.10 (GENE3D),<br>PTHR10127 (PANTHER),<br>PTHR10127:SF65 (PANTHER),<br>SSF55486 (SUPERFAMILY)                           |
| Caenorhabditis elegans           | elegans protein partially confirmed by transcript evidence            | 8  | F:GO:0046872;<br>F:GO:0016491;<br>P:GO:0040018;<br>P:GO:0040010;<br>P:GO:0000003;<br>P:GO:0008340;<br>P:GO:0040011;<br>P:GO:0008152                                                    | -                                                                                                 |             | IPR001128; IPR002401; IPR017972;<br>PTHR19383:SF176 (PANTHER)                                                                                                 |
| Caenorhabditis briggsae          | calreticulin family protein                                           | 11 | P:GO:0040010;<br>P:GO:0009306;<br>C:GO:0043005;<br>F:GO:0005509;<br>P:GO:0006457;<br>P:GO:0002119;<br>C:GO:0044425;<br>P:GO:0007281;<br>F:GO:0051082;<br>P:GO:0009792;<br>C:GO:0005783 | -                                                                                                 |             | IPR001580; IPR008985; IPR009033;<br>IPR013320; IPR018124;<br>PTHR11073:SF1 (PANTHER), SignalP<br>(SIGNALP)                                                    |
|                                  | -                                                                     | 0  |                                                                                                                                                                                        |                                                                                                   |             | SignalP (SIGNALP)                                                                                                                                             |
| Caenorhabditis briggsae          | l-lactate dehydroge-se                                                | 5  | C:GO:0005737;<br>F:GO:0005488;<br>F:GO:0004459;<br>P:GO:0055114;<br>P:GO:0006096                                                                                                       | -                                                                                                 | EC:1.1.1.27 | IPR015955; IPR018177; IPR022383;<br>PTHR11540 (PANTHER),<br>PTHR11540:SF3 (PANTHER)                                                                           |
| Caenorhabditis briggsae          | l-lactate dehydroge-se                                                | 5  | C:GO:0005737;<br>F:GO:0005488;<br>F:GO:0004459;<br>P:GO:0055114;<br>P:GO:0006096                                                                                                       | -                                                                                                 | EC:1.1.1.27 | IPR001236; IPR001557; IPR011304;<br>IPR015955; IPR016040; IPR018177;<br>IPR022383; PTHR11540 (PANTHER),<br>PTHR11540:SF3 (PANTHER), SSF51735<br>(SUPERFAMILY) |
| Caenorhabditis briggsae          | briggsae cbr-gei-15 protein                                           | 0  |                                                                                                                                                                                        |                                                                                                   |             | -                                                                                                                                                             |
| Caenorhabditis briggsae          | dihydrolipoamide acetyltransferase component of pyruvate dehydroge-se | 9  | P:GO:0009792;<br>C:GO:0045254;<br>C:GO:0005811;<br>F:GO:0004742;<br>F:GO:0005515;<br>P:GO:0040010;<br>P:GO:0000003;<br>P:GO:0006898;<br>P:GO:0006086                                   | -                                                                                                 | EC:2.3.1.12 | IPR000089; IPR003016; IPR011053;<br>G3DSA:2.40.50.100 (GENE3D),<br>PTHR23151 (PANTHER),<br>PTHR23151:SF9 (PANTHER)                                            |



|                         |                                                                |    |                                                                                                                                                                                                                                                                                                                                                                                   |                                                |                                                                                                             |
|-------------------------|----------------------------------------------------------------|----|-----------------------------------------------------------------------------------------------------------------------------------------------------------------------------------------------------------------------------------------------------------------------------------------------------------------------------------------------------------------------------------|------------------------------------------------|-------------------------------------------------------------------------------------------------------------|
|                         | -                                                              | 0  |                                                                                                                                                                                                                                                                                                                                                                                   |                                                | -                                                                                                           |
| Loa loa                 | rnft1 protein                                                  | 2  | F:GO:0046872;<br>C:GO:0016020                                                                                                                                                                                                                                                                                                                                                     | -                                              | IPR001841; IPR013083; IPR017907;<br>IPR018957; PTHR15860 (PANTHER),<br>SSF57850 (SUPERFAMILY)               |
| Loa loa                 | protein disulfide                                              | 6  | P:GO:0045454;<br>C:GO:0044444;<br>C:GO:0043229;<br>F:GO:0016853;<br>P:GO:0008152;<br>C:GO:0030529                                                                                                                                                                                                                                                                                 | -                                              | IPR012335; IPR012336; IPR013766;<br>IPR017937; PTHR18929 (PANTHER),<br>PSS1257 (PROFILE), SignalP (SIGNALP) |
| Caenorhabditis elegans  | rest corepressor                                               | 3  | F:GO:0046872;<br>F:GO:0003676;<br>C:GO:0005622                                                                                                                                                                                                                                                                                                                                    | -                                              | IPR000949; IPR001005; IPR007087;<br>IPR009057; IPR014778; IPR015880;<br>IPR017884; PTHR16089 (PANTHER)      |
| Caenorhabditis briggsae | swi snf matrix actin dependent regulator of subfamily member 1 | 22 | F:GO:0002039;<br>C:GO:0005654;<br>P:GO:0051091;<br>P:GO:0018991;<br>C:GO:0071565;<br>P:GO:0040010;<br>C:GO:0016514;<br>P:GO:0006898;<br>C:GO:0001741;<br>P:GO:0015074;<br>C:GO:0071564;<br>P:GO:0040017;<br>P:GO:0010552;<br>P:GO:0045090;<br>C:GO:0005730;<br>P:GO:0008285;<br>F:GO:0003676;<br>P:GO:0002119;<br>P:GO:0006338;<br>P:GO:0030154;<br>P:GO:0001835;<br>P:GO:0040035 | -                                              | IPR006939                                                                                                   |
| Harpegnathos saltator   | hypothetical protein EAI_03706 [Harpeg-thos saltator]          | 0  |                                                                                                                                                                                                                                                                                                                                                                                   | F:GO:0003676;<br>F:GO:0008270;<br>C:GO:0005622 | IPR006578                                                                                                   |
|                         | -                                                              | 0  |                                                                                                                                                                                                                                                                                                                                                                                   |                                                | -                                                                                                           |
| Caenorhabditis elegans  | phosphatidylinositol n-acetylglucosaminyltransferase subunit c | 4  | F:GO:0017176;<br>C:GO:0016021;<br>P:GO:0016254;<br>C:GO:0005783                                                                                                                                                                                                                                                                                                                   | -                                              | EC:2.4.1.198                                                                                                |
| Caenorhabditis briggsae | briggsae cbr-sel-2 protein                                     | 7  | C:GO:0005737;<br>P:GO:0008104;<br>F:GO:0051018;<br>P:GO:0042675;<br>F:GO:0016740;<br>C:GO:0016020;<br>C:GO:0005634                                                                                                                                                                                                                                                                | -                                              | -                                                                                                           |
| Caenorhabditis briggsae | aurin family member (cnt-2)                                    | 8  | F:GO:0008060;<br>P:GO:0032312;<br>F:GO:0008270;<br>P:GO:0000003;<br>F:GO:0005515;<br>F:GO:0000166;<br>C:GO:0044464;<br>P:GO:0009792                                                                                                                                                                                                                                               | -                                              | IPR011993; SSF50729 (SUPERFAMILY)                                                                           |

|                         |                                                           |    |                                                                                                                                                                                                         |                                                                 |                                                         |                                                                                                  |
|-------------------------|-----------------------------------------------------------|----|---------------------------------------------------------------------------------------------------------------------------------------------------------------------------------------------------------|-----------------------------------------------------------------|---------------------------------------------------------|--------------------------------------------------------------------------------------------------|
| Caenorhabditis briggsae | calmodulin                                                | 1  | F:GO:0005509                                                                                                                                                                                            | -                                                               |                                                         | IPR011992; IPR018249; PTHR10891 (PANTHER), PTHR10891:SF3 (PANTHER), SSF47473 (SUPERFAMILY)       |
| Caenorhabditis briggsae | nuclear cap-binding protein subunit 2                     | 12 | F:GO:0003723;<br>P:GO:0046833;<br>P:GO:0006417;<br>P:GO:0008380;<br>P:GO:0031047;<br>P:GO:0006370;<br>P:GO:0006408;<br>F:GO:0000166;<br>C:GO:0005737;<br>P:GO:0000184;<br>C:GO:0005634;<br>P:GO:0051028 | -                                                               |                                                         | -                                                                                                |
| Caenorhabditis elegans  | zinc finger in n-recognin family protein                  | 0  |                                                                                                                                                                                                         | P:GO:0030163;<br>F:GO:0008270;<br>F:GO:0004842;<br>F:GO:0005515 |                                                         | -                                                                                                |
| Brugia malayi           | laminin b2                                                | 1  | C:GO:0005578                                                                                                                                                                                            | -                                                               |                                                         | PD936484 (PRODOM), PTHR10574 (PANTHER), PTHR10574:SF14 (PANTHER)                                 |
| Brugia malayi           | hypothetical protein Bm1_25410 [Brugia malayi]            | 0  |                                                                                                                                                                                                         |                                                                 |                                                         | -                                                                                                |
|                         | -                                                         | 0  |                                                                                                                                                                                                         |                                                                 |                                                         | -                                                                                                |
| Caenorhabditis elegans  | major facilitator superfamily protein                     | 3  | P:GO:0019915;<br>C:GO:0016020;<br>P:GO:0006810                                                                                                                                                          | -                                                               |                                                         | IPR011701; IPR016196; G3DSA:1.20.1250.20 (GENE3D), PTHR11662 (PANTHER), PTHR11662:SF21 (PANTHER) |
| Loa loa                 | probable 26s proteasome non-atpase regulatory subunit     | 6  | P:GO:0009792;<br>P:GO:0002119;<br>F:GO:0005515;<br>P:GO:0000003;<br>P:GO:0008340;<br>P:GO:0040007                                                                                                       | -                                                               |                                                         | -                                                                                                |
| Caenorhabditis elegans  | ras association                                           | 0  |                                                                                                                                                                                                         | P:GO:0007165                                                    |                                                         | IPR000159; PTHR21298 (PANTHER), SSF54236 (SUPERFAMILY)                                           |
| Caenorhabditis elegans  | cgmp-dependent protein ki-se egl-4                        | 6  | P:GO:0006468;<br>F:GO:0046872;<br>F:GO:0030553;<br>P:GO:0007275;<br>F:GO:0005524;<br>F:GO:0004692                                                                                                       | -                                                               | EC:2.7.11.12                                            | -                                                                                                |
| Caenorhabditis briggsae | translation initiation factor if-2                        | 11 | F:GO:0003743;<br>P:GO:0006413;<br>P:GO:0040010;<br>C:GO:0016021;<br>P:GO:0007264;<br>P:GO:0015684;<br>F:GO:0015093;<br>F:GO:0003924;<br>P:GO:0006898;<br>C:GO:0005737;<br>F:GO:0005525                  | -                                                               | EC:3.6.5.1;<br>EC:3.6.5.2;<br>EC:3.6.5.3;<br>EC:3.6.5.4 | IPR000795; IPR015760; G3DSA:3.40.50.300 (GENE3D), PTHR23115 (PANTHER), SSF52540 (SUPERFAMILY)    |
| Caenorhabditis briggsae | let-23 fertility effector regulator family member (lfe-2) | 1  | F:GO:0008440                                                                                                                                                                                            | -                                                               | EC:2.7.1.127                                            | IPR005522; PTHR12400:SF5 (PANTHER), SSF56104 (SUPERFAMILY)                                       |
|                         | -                                                         | 0  |                                                                                                                                                                                                         |                                                                 |                                                         | -                                                                                                |
| Brugia malayi           | th1-like homolog                                          | 1  | P:GO:0006350                                                                                                                                                                                            | -                                                               |                                                         | -                                                                                                |
|                         | -                                                         | 0  |                                                                                                                                                                                                         |                                                                 |                                                         | -                                                                                                |

|                         |                                         |    |                                                                                                                                                                                                                                                                                                                                |                                                         |                                                                                     |
|-------------------------|-----------------------------------------|----|--------------------------------------------------------------------------------------------------------------------------------------------------------------------------------------------------------------------------------------------------------------------------------------------------------------------------------|---------------------------------------------------------|-------------------------------------------------------------------------------------|
|                         | -                                       | 0  |                                                                                                                                                                                                                                                                                                                                |                                                         | -                                                                                   |
| Caenorhabditis elegans  | nitrilase                               | 12 | P:GO:0009684;<br>P:GO:0051410;<br>F:GO:0047558;<br>F:GO:0080061;<br>P:GO:0000003;<br>P:GO:0019499;<br>F:GO:0016740;<br>C:GO:0009507;<br>F:GO:0047427;<br>F:GO:0080109;<br>C:GO:0005886;<br>C:GO:0048046                                                                                                                        | EC:4.2.1.65;<br>EC:3.5.5.4                              | IPR000132; IPR003010; PTHR23088 (PANTHER)                                           |
| Caenorhabditis briggsae | briggsae cbr-wip-1 protein              | 0  |                                                                                                                                                                                                                                                                                                                                | P:GO:0016477;<br>P:GO:0040010;<br>P:GO:0008340          | IPR003124; PTHR23202 (PANTHER),<br>PTHR23202:SF3 (PANTHER)                          |
| Caenorhabditis elegans  | uncoordi-ted family member (unc-84)     | 1  | F:GO:0005515                                                                                                                                                                                                                                                                                                                   |                                                         | -                                                                                   |
| Caenorhabditis briggsae | adp-ribosylation factor-like protein 8b | 19 | P:GO:0008340;<br>C:GO:0005765;<br>P:GO:0007264;<br>C:GO:0030496;<br>P:GO:0007186;<br>P:GO:0007059;<br>P:GO:0000003;<br>C:GO:0031902;<br>P:GO:0051301;<br>F:GO:0019003;<br>F:GO:0043014;<br>P:GO:0007067;<br>F:GO:0003924;<br>F:GO:0048487;<br>P:GO:0006886;<br>P:GO:0009792;<br>C:GO:0051233;<br>F:GO:0005525;<br>C:GO:0005634 | EC:3.6.5.1;<br>EC:3.6.5.2;<br>EC:3.6.5.3;<br>EC:3.6.5.4 | SignalP (SIGNALP)                                                                   |
| Brugia malayi           | mif4g domain containing protein         | 2  | F:GO:0005488;<br>P:GO:0006396                                                                                                                                                                                                                                                                                                  |                                                         | IPR015172; IPR016021; IPR016024;<br>PTHR12412 (PANTHER),<br>PTHR12412:SF2 (PANTHER) |
|                         | -                                       | 0  |                                                                                                                                                                                                                                                                                                                                |                                                         | -                                                                                   |
| Caenorhabditis elegans  | alanyl-tr- synthetase                   | 17 | P:GO:0006457;<br>P:GO:0021680;<br>F:GO:0004813;<br>P:GO:0006400;<br>P:GO:0006450;<br>F:GO:0016597;<br>P:GO:0001942;<br>C:GO:0005737;<br>P:GO:0043524;<br>P:GO:0043200;<br>P:GO:0043588;<br>P:GO:0050885;<br>F:GO:0002161;<br>F:GO:0003723;<br>P:GO:0006419;<br>P:GO:0030968;<br>F:GO:0005524                                   | EC:6.1.1.7                                              | IPR003156; IPR012947; IPR018163;<br>IPR018165; PTHR11777 (PANTHER)                  |

|                         |                                                                   |   |                                                                                                                                     |                                                                                                                                                                                                                                           |                           |                                                                                                                                                                  |
|-------------------------|-------------------------------------------------------------------|---|-------------------------------------------------------------------------------------------------------------------------------------|-------------------------------------------------------------------------------------------------------------------------------------------------------------------------------------------------------------------------------------------|---------------------------|------------------------------------------------------------------------------------------------------------------------------------------------------------------|
| Caenorhabditis elegans  | alanyl-tr- synthetase                                             | 7 | F:GO:0003723;<br>C:GO:0005625;<br>F:GO:0004813;<br>P:GO:0006419;<br>P:GO:0008033;<br>F:GO:0005524;<br>C:GO:0005737                  | -                                                                                                                                                                                                                                         | EC:6.1.1.7                | IPR002318; IPR003156; IPR012947;<br>IPR018162; IPR018163; IPR018164;<br>IPR018165; G3DSA:3.30.930.10<br>(GENE3D), PTHR11777 (PANTHER),<br>SSF55681 (SUPERFAMILY) |
| Acyrtosiphon pisum      | nuclease harbi1-like                                              | 0 |                                                                                                                                     |                                                                                                                                                                                                                                           |                           | -                                                                                                                                                                |
| Caenorhabditis elegans  | AC103567_7Hypothetical protein Y51F10.6 [Caenorhabditis elegans]  | 0 |                                                                                                                                     |                                                                                                                                                                                                                                           |                           | -                                                                                                                                                                |
|                         | -                                                                 | 0 |                                                                                                                                     |                                                                                                                                                                                                                                           |                           | -                                                                                                                                                                |
| Caenorhabditis elegans  | hypothetical protein F55A4.8 [Caenorhabditis elegans]             | 0 |                                                                                                                                     | C:GO:0016021                                                                                                                                                                                                                              |                           | -                                                                                                                                                                |
| Caenorhabditis briggsae | isochorismatase domain-containing protein mitochondrial precursor | 5 | P:GO:0008152;<br>C:GO:0005737;<br>F:GO:0016787;<br>F:GO:0042802;<br>C:GO:0043231                                                    | -                                                                                                                                                                                                                                         |                           | IPR000868; PTHR14119 (PANTHER)                                                                                                                                   |
| Loa loa                 | mh2 domain containing protein                                     | 5 | F:GO:0003700;<br>F:GO:0005515;<br>C:GO:0005667;<br>P:GO:0006355;<br>P:GO:0007179                                                    | -                                                                                                                                                                                                                                         |                           | IPR003619; IPR013019; IPR013790;<br>PTHR13703:SF13 (PANTHER)                                                                                                     |
| Caenorhabditis elegans  | branched chain keto acid dehydroge-se alpha polypeptide           | 8 | F:GO:0046872;<br>F:GO:0003826;<br>F:GO:0003863;<br>F:GO:0005515;<br>F:GO:0016831;<br>P:GO:0055114;<br>C:GO:0005947;<br>P:GO:0009083 | -                                                                                                                                                                                                                                         | EC:1.2.4.4;<br>EC:4.1.1.0 | -                                                                                                                                                                |
|                         | -                                                                 | 0 |                                                                                                                                     |                                                                                                                                                                                                                                           |                           | -                                                                                                                                                                |
|                         | -                                                                 | 0 |                                                                                                                                     |                                                                                                                                                                                                                                           |                           | -                                                                                                                                                                |
|                         | -                                                                 | 0 |                                                                                                                                     |                                                                                                                                                                                                                                           |                           | -                                                                                                                                                                |
|                         | -                                                                 | 0 |                                                                                                                                     |                                                                                                                                                                                                                                           |                           | SignalP (SIGNALP)                                                                                                                                                |
|                         | -                                                                 | 0 |                                                                                                                                     |                                                                                                                                                                                                                                           |                           | -                                                                                                                                                                |
| Caenorhabditis elegans  | elegans protein confirmed by transcript evidence                  | 0 |                                                                                                                                     | C:GO:0016021;<br>P:GO:0055085                                                                                                                                                                                                             |                           | -                                                                                                                                                                |
| Caenorhabditis elegans  | elegans protein confirmed by transcript evidence                  | 0 |                                                                                                                                     | C:GO:0016021;<br>P:GO:0055085                                                                                                                                                                                                             |                           | -                                                                                                                                                                |
|                         | -                                                                 | 0 |                                                                                                                                     |                                                                                                                                                                                                                                           |                           | -                                                                                                                                                                |
| Caenorhabditis elegans  | zinc finger in n-recognin family protein                          | 2 | P:GO:0032501;<br>P:GO:0048468                                                                                                       | -                                                                                                                                                                                                                                         |                           | PTHR21725 (PANTHER)                                                                                                                                              |
| Caenorhabditis elegans  | ubiquitin protein ligase e3 component n-recognin 4                | 0 |                                                                                                                                     | F:GO:0016874;<br>C:GO:0016021;<br>C:GO:0016020;<br>C:GO:0005634;<br>P:GO:0006260;<br>F:GO:0008270;<br>P:GO:0016567;<br>F:GO:0005516;<br>C:GO:0005622;<br>F:GO:0004842;<br>F:GO:0046872;<br>P:GO:0008152;<br>F:GO:0005488;<br>C:GO:0005856 |                           | PTHR21725 (PANTHER)                                                                                                                                              |

|                         |                                                                       |    |                                                                                                                                                                                                                                           |   |                             |                                                                                                                                                                            |
|-------------------------|-----------------------------------------------------------------------|----|-------------------------------------------------------------------------------------------------------------------------------------------------------------------------------------------------------------------------------------------|---|-----------------------------|----------------------------------------------------------------------------------------------------------------------------------------------------------------------------|
| Caenorhabditis elegans  | mitochondrial cytochrome c oxidase subunit 4                          | 7  | P:GO:0040010;<br>F:GO:0004129;<br>P:GO:0008340;<br>P:GO:0000003;<br>P:GO:0002119;<br>P:GO:0009792;<br>C:GO:0005811                                                                                                                        | - | EC:1.9.3.1                  | -                                                                                                                                                                          |
| Brugia malayi           | receptor accessory protein 4                                          | 1  | C:GO:0044464                                                                                                                                                                                                                              | - |                             | IPR004345; PTHR12300:SF19 (PANTHER), SignalP (SIGNALP)                                                                                                                     |
| Caenorhabditis briggsae | sig-I recognition particle 72 kda protein                             | 2  | F:GO:0005488;<br>C:GO:0048500                                                                                                                                                                                                             | - |                             | IPR011990; IPR013699; IPR019734; PTHR14094 (PANTHER), PTHR14094:SF9 (PANTHER), SSF48452 (SUPERFAMILY)                                                                      |
| -                       | -                                                                     | 0  |                                                                                                                                                                                                                                           |   |                             | -                                                                                                                                                                          |
| -                       | -                                                                     | 0  |                                                                                                                                                                                                                                           |   |                             | -                                                                                                                                                                          |
| Loa loa                 | phosphoglycerate ki-se                                                | 5  | C:GO:0005737;<br>F:GO:0004618;<br>P:GO:0016310;<br>F:GO:0005524;<br>P:GO:0006096                                                                                                                                                          | - | EC:2.7.2.3                  | IPR001576; IPR015824; IPR015901; IPR015911                                                                                                                                 |
| Caenorhabditis elegans  | low quality protein: uncharacterized protein kiaa0467-like            | 0  |                                                                                                                                                                                                                                           |   |                             | -                                                                                                                                                                          |
| Brugia malayi           | dynein light chain cytoplasmic                                        | 14 | F:GO:0003777;<br>F:GO:0008092;<br>C:GO:0005829;<br>C:GO:0030286;<br>C:GO:0005874;<br>C:GO:0016459;<br>P:GO:0007017;<br>C:GO:0043186;<br>P:GO:0008039;<br>P:GO:0046907;<br>C:GO:0019861;<br>P:GO:0008152;<br>C:GO:0005634;<br>C:GO:0005886 | - |                             | -                                                                                                                                                                          |
| Caenorhabditis elegans  | oaz_caeel ame: full=ornithine decarboxylase antizyme short=odc-az     | 1  | P:GO:0000003                                                                                                                                                                                                                              | - |                             | -                                                                                                                                                                          |
| -                       | -                                                                     | 0  |                                                                                                                                                                                                                                           |   |                             | SignalP (SIGNALP)                                                                                                                                                          |
| -                       | -                                                                     | 0  |                                                                                                                                                                                                                                           |   |                             | -                                                                                                                                                                          |
| Caenorhabditis briggsae | pol ii c-termi-I interaction domain suppressor family member (cids-2) | 1  | F:GO:0005515                                                                                                                                                                                                                              | - |                             | IPR006569                                                                                                                                                                  |
| Caenorhabditis elegans  | bifunctio-I aminoacyl-tr- synthetase                                  | 7  | C:GO:0005737;<br>F:GO:0004827;<br>P:GO:0006433;<br>C:GO:0017101;<br>F:GO:0004818;<br>P:GO:0006424;<br>F:GO:0005524                                                                                                                        | - | EC:6.1.1.15;<br>EC:6.1.1.17 | IPR000738; IPR002314; IPR002316; IPR004154; IPR004499; IPR006195; IPR009068; IPR016061; IPR017449; G3DSA:3.30.930.10 (GENE3D), PTHR11451 (PANTHER), SSF55681 (SUPERFAMILY) |
| Caenorhabditis elegans  | bifunctio-I aminoacyl-tr- synthetase                                  | 7  | C:GO:0005737;<br>F:GO:0004827;<br>P:GO:0006433;<br>C:GO:0017101;<br>F:GO:0004818;<br>P:GO:0006424;<br>F:GO:0005524                                                                                                                        | - | EC:6.1.1.15;<br>EC:6.1.1.17 | IPR000738; IPR002314; IPR002316; IPR004154; IPR004499; IPR006195; IPR009068; IPR016061; IPR017449; G3DSA:3.30.930.10 (GENE3D), PTHR11451 (PANTHER), SSF55681 (SUPERFAMILY) |

|                         |                                                  |    |                                                                                                                                                                                                                          |   |                                                |                                                                                                                                                                                           |
|-------------------------|--------------------------------------------------|----|--------------------------------------------------------------------------------------------------------------------------------------------------------------------------------------------------------------------------|---|------------------------------------------------|-------------------------------------------------------------------------------------------------------------------------------------------------------------------------------------------|
| Caenorhabditis elegans  | bifunctio-l aminoacyl-tr- synthetase             | 7  | C:GO:0005737;<br>F:GO:0004827;<br>P:GO:0006433;<br>C:GO:0017101;<br>F:GO:0004818;<br>P:GO:0006424;<br>F:GO:0005524                                                                                                       | - | EC:6.1.1.15;<br>EC:6.1.1.17                    | IPR000738; IPR002314; IPR002316;<br>IPR004154; IPR004499; IPR006195;<br>IPR009068; IPR016061; IPR017449;<br>G3DSA:3.30.930.10 (GENE3D),<br>PTHR11451 (PANTHER), SSF55681<br>(SUPERFAMILY) |
| Caenorhabditis briggsae | elegans protein confirmed by transcript evidence | 0  |                                                                                                                                                                                                                          |   |                                                | IPR022559; PDO30565 (PRODOM),<br>SignalP (SIGNALP)                                                                                                                                        |
| Pongo abelii            | 40s ribosomal protein sa-like                    | 13 | P:GO:0016337;<br>F:GO:0003735;<br>C:GO:0005604;<br>F:GO:0004872;<br>P:GO:0006414;<br>C:GO:0022627;<br>F:GO:0043022;<br>C:GO:0005624;<br>F:GO:0043236;<br>C:GO:0043025;<br>P:GO:0007165;<br>C:GO:0005634;<br>C:GO:0005886 | - |                                                | IPR001865; IPR005707; IPR018130                                                                                                                                                           |
| Caenorhabditis elegans  | sig-l transducer and activator of transcription  | 10 | C:GO:0005737;<br>F:GO:0042802;<br>F:GO:0003700;<br>F:GO:0004871;<br>F:GO:0003677;<br>P:GO:0007275;<br>F:GO:0005509;<br>P:GO:0007165;<br>C:GO:0005634;<br>P:GO:0006355                                                    | - |                                                | IPR000980; IPR001217; IPR008967;<br>IPR011992; IPR013801;<br>PTHR11801:SF3 (PANTHER), SSF55550<br>(SUPERFAMILY)                                                                           |
| Caenorhabditis elegans  | sig-l transducer and activator of transcription  | 10 | C:GO:0005737;<br>F:GO:0042802;<br>F:GO:0003700;<br>F:GO:0004871;<br>F:GO:0003677;<br>P:GO:0007275;<br>F:GO:0005509;<br>P:GO:0007165;<br>C:GO:0005634;<br>P:GO:0006355                                                    | - |                                                | IPR000980; IPR001217; IPR008967;<br>IPR011992; IPR013801;<br>PTHR11801:SF3 (PANTHER), SSF55550<br>(SUPERFAMILY)                                                                           |
| -                       | -                                                | 0  |                                                                                                                                                                                                                          |   |                                                | -                                                                                                                                                                                         |
| Caenorhabditis briggsae | hypothetical kda protein in chromosome           | 0  |                                                                                                                                                                                                                          |   | C:GO:0005739;<br>F:GO:0003674;<br>P:GO:0008150 | IPR010625; PTHR13523 (PANTHER)                                                                                                                                                            |
| Caenorhabditis briggsae | hypothetical kda protein in chromosome           | 0  |                                                                                                                                                                                                                          |   | C:GO:0005739;<br>F:GO:0003674;<br>P:GO:0008150 | IPR010625; PTHR13523 (PANTHER)                                                                                                                                                            |

|                        |                                                                                 |    |                                                                                                                                                                                        |   |                                                                                  |                                                                                     |
|------------------------|---------------------------------------------------------------------------------|----|----------------------------------------------------------------------------------------------------------------------------------------------------------------------------------------|---|----------------------------------------------------------------------------------|-------------------------------------------------------------------------------------|
| Brugia malayi          | calcium-binding protein 39                                                      | 11 | P:GO:0051291;<br>C:GO:0043234;<br>F:GO:0004674;<br>F:GO:0005509;<br>P:GO:0046320;<br>P:GO:0000003;<br>F:GO:0005515;<br>P:GO:0040017;<br>P:GO:0009792;<br>C:GO:0005737;<br>P:GO:0040018 | - | EC:2.7.11.0                                                                      | IPR011989; IPR013878; IPR016024;<br>PTHR10182 (PANTHER),<br>PTHR10182:SF3 (PANTHER) |
| Caenorhabditis elegans | adipocyte plasma membrane-associated protein                                    | 1  | F:GO:0003824                                                                                                                                                                           | - |                                                                                  | IPR004141; IPR011042;<br>PTHR10426:SF2 (PANTHER), SSF63829<br>(SUPERFAMILY)         |
| Caenorhabditis elegans | dolichyl-diphosphooligosaccharide--protein<br>glycosyltransferase subunit stt3b | 10 | C:GO:0008250;<br>P:GO:0018279;<br>C:GO:0016021;<br>P:GO:0000003;<br>P:GO:0002119;<br>F:GO:0005515;<br>P:GO:0040011;<br>P:GO:0009792;<br>F:GO:0004579;<br>P:GO:0040015                  | - | EC:2.4.1.119                                                                     | IPR003674; PTHR13872 (PANTHER),<br>PTHR13872:SF1 (PANTHER), SignalP<br>(SIGNALP)    |
| Caenorhabditis elegans | dolichyl-diphosphooligosaccharide--protein<br>glycosyltransferase subunit stt3b | 10 | C:GO:0008250;<br>P:GO:0018279;<br>C:GO:0016021;<br>P:GO:0000003;<br>P:GO:0002119;<br>F:GO:0005515;<br>P:GO:0040011;<br>P:GO:0009792;<br>F:GO:0004579;<br>P:GO:0040015                  | - | EC:2.4.1.119                                                                     | IPR003674; PTHR13872 (PANTHER),<br>PTHR13872:SF1 (PANTHER), SignalP<br>(SIGNALP)    |
| Caenorhabditis elegans | hypothetical upf0131 protein cg2811                                             | 0  |                                                                                                                                                                                        |   | F:GO:0003674;<br>F:GO:0016740;<br>F:GO:0008415;<br>P:GO:0008150;<br>C:GO:0005575 | IPR009288; IPR013024; PTHR12510<br>(PANTHER), SSF110857 (SUPERFAMILY)               |

|                         |                                     |    |                                                                                                                                                                                                                                                                                                                                                 |                              |                                                                                               |
|-------------------------|-------------------------------------|----|-------------------------------------------------------------------------------------------------------------------------------------------------------------------------------------------------------------------------------------------------------------------------------------------------------------------------------------------------|------------------------------|-----------------------------------------------------------------------------------------------|
| Caenorhabditis elegans  | vinculin isoform 1                  | 20 | C:GO:0005829;<br>P:GO:0007016;<br>P:GO:0030032;<br>C:GO:0043034;<br>P:GO:0090136;<br>P:GO:0034333;<br>F:GO:0002166;<br>P:GO:0043297;<br>P:GO:0030334;<br>C:GO:0001725;<br>C:GO:0005925;<br>P:GO:0034394;<br>F:GO:0003779;<br>C:GO:0005884;<br>F:GO:0005200;<br>F:GO:0045294;<br>C:GO:0005576;<br>F:GO:0017048;<br>C:GO:0005916;<br>P:GO:0006936 |                              | SignalP (SIGNALP)                                                                             |
| Caenorhabditis elegans  | vinculin isoform 1                  | 20 | C:GO:0005829;<br>P:GO:0007016;<br>P:GO:0030032;<br>C:GO:0043034;<br>P:GO:0090136;<br>P:GO:0034333;<br>F:GO:0002166;<br>P:GO:0043297;<br>P:GO:0030334;<br>C:GO:0001725;<br>C:GO:0005925;<br>P:GO:0034394;<br>F:GO:0003779;<br>C:GO:0005884;<br>F:GO:0005200;<br>F:GO:0045294;<br>C:GO:0005576;<br>F:GO:0017048;<br>C:GO:0005916;<br>P:GO:0006936 |                              |                                                                                               |
| Caenorhabditis briggsae | hydroxyacyl-coenzyme a dehydroge-se | 11 | P:GO:0055114;<br>P:GO:0040007;<br>C:GO:0016507;<br>P:GO:0019915;<br>F:GO:0003857;<br>P:GO:0002119;<br>P:GO:0006635;<br>F:GO:0050662;<br>P:GO:0006898;<br>P:GO:0009792;<br>F:GO:0004300                                                                                                                                                          | EC:1.1.1.135;<br>EC:4.2.1.17 | IPR006176; IPR016040; SSF51735 (SUPERFAMILY)                                                  |
| Caenorhabditis briggsae | valyl-tr- synthetase                | 4  | P:GO:0006438;<br>F:GO:0005524;<br>F:GO:0004832;<br>C:GO:0005739                                                                                                                                                                                                                                                                                 | EC:6.1.1.9                   | IPR001412; IPR002300; IPR002303;<br>IPR014729; PTHR11946 (PANTHER),<br>SSF52374 (SUPERFAMILY) |
|                         | -                                   | 0  |                                                                                                                                                                                                                                                                                                                                                 |                              | SignalP (SIGNALP)                                                                             |
|                         | -                                   | 0  |                                                                                                                                                                                                                                                                                                                                                 |                              | SignalP (SIGNALP)                                                                             |
|                         | -                                   | 0  |                                                                                                                                                                                                                                                                                                                                                 |                              | SignalP (SIGNALP)                                                                             |



|                             |                                                       |    |                                                                                                                                                                                                                                                                             |                                                                                                   |                                                                                                                                                                                                            |
|-----------------------------|-------------------------------------------------------|----|-----------------------------------------------------------------------------------------------------------------------------------------------------------------------------------------------------------------------------------------------------------------------------|---------------------------------------------------------------------------------------------------|------------------------------------------------------------------------------------------------------------------------------------------------------------------------------------------------------------|
|                             | -                                                     | 0  |                                                                                                                                                                                                                                                                             |                                                                                                   | SignalP (SIGNALP)                                                                                                                                                                                          |
|                             | -                                                     | 0  |                                                                                                                                                                                                                                                                             |                                                                                                   | SignalP (SIGNALP)                                                                                                                                                                                          |
|                             | -                                                     | 0  |                                                                                                                                                                                                                                                                             |                                                                                                   | SignalP (SIGNALP)                                                                                                                                                                                          |
|                             | -                                                     | 0  |                                                                                                                                                                                                                                                                             |                                                                                                   | SignalP (SIGNALP)                                                                                                                                                                                          |
|                             | -                                                     | 0  |                                                                                                                                                                                                                                                                             |                                                                                                   | -                                                                                                                                                                                                          |
| Caenorhabditis elegans      | isoform d                                             | 0  |                                                                                                                                                                                                                                                                             | P:GO:0009116;<br>F:GO:0003824                                                                     | G3DSA:3.40.50.1580 (GENE3D)                                                                                                                                                                                |
|                             | -                                                     | 0  |                                                                                                                                                                                                                                                                             |                                                                                                   | PTHR16950 (PANTHER),<br>PTHR16950:SF6 (PANTHER)                                                                                                                                                            |
| Caenorhabditis elegans      | elegans protein confirmed by transcript evidence      | 0  |                                                                                                                                                                                                                                                                             | P:GO:0051301;<br>P:GO:0009792;<br>P:GO:0007126                                                    | -                                                                                                                                                                                                          |
|                             | -                                                     | 0  |                                                                                                                                                                                                                                                                             |                                                                                                   | -                                                                                                                                                                                                          |
| Caenorhabditis elegans      | nol1 nop2 sun domain member 5                         | 0  |                                                                                                                                                                                                                                                                             | F:GO:0003674;<br>F:GO:0016740;<br>P:GO:0008152;<br>P:GO:0008150;<br>P:GO:0032259;<br>C:GO:0005575 | IPR001678; G3DSA:3.40.50.150<br>(GENE3D), PTHR22807 (PANTHER),<br>PTHR22807:SF4 (PANTHER), SSF53335<br>(SUPERFAMILY)                                                                                       |
| Caenorhabditis briggsae     | d- ligase 1                                           | 4  | P:GO:0006259;<br>F:GO:0016874;<br>P:GO:0006974;<br>F:GO:0000166                                                                                                                                                                                                             | -                                                                                                 | IPR012308; IPR012310; IPR016059;<br>G3DSA:1.10.3260.10 (GENE3D),<br>G3DSA:3.30.470.30 (GENE3D),<br>PTHR10459 (PANTHER),<br>PTHR10459:SF10 (PANTHER),<br>SSF117018 (SUPERFAMILY), SSF56091<br>(SUPERFAMILY) |
|                             | -                                                     | 0  |                                                                                                                                                                                                                                                                             |                                                                                                   | SignalP (SIGNALP)                                                                                                                                                                                          |
|                             | -                                                     | 0  |                                                                                                                                                                                                                                                                             |                                                                                                   | -                                                                                                                                                                                                          |
|                             | -                                                     | 0  |                                                                                                                                                                                                                                                                             |                                                                                                   | -                                                                                                                                                                                                          |
| Angiostrongylus cantonensis | eukaryotic translation initiation factor 5            | 11 | P:GO:0009792;<br>C:GO:0005851;<br>P:GO:0002119;<br>P:GO:0006413;<br>P:GO:0018996;<br>F:GO:0005515;<br>P:GO:0040010;<br>P:GO:0000003;<br>F:GO:0003743;<br>P:GO:0016070;<br>P:GO:0006898                                                                                      | -                                                                                                 | IPR002735; IPR003307; IPR016021;<br>IPR016024; IPR016189; IPR016190;<br>G3DSA:3.30.30.50 (GENE3D),<br>PTHR23001 (PANTHER),<br>PTHR23001:SF1 (PANTHER)                                                      |
| Caenorhabditis elegans      | nuclear mitogen- and stress-activated protein ki-se-1 | 16 | P:GO:0007243;<br>F:GO:0004674;<br>P:GO:0016572;<br>P:GO:0006355;<br>P:GO:0040007;<br>P:GO:0000003;<br>P:GO:0042221;<br>F:GO:0005524;<br>P:GO:0002119;<br>F:GO:0005515;<br>F:GO:0000287;<br>C:GO:0005654;<br>P:GO:0009792;<br>P:GO:0006950;<br>P:GO:0007173;<br>P:GO:0009605 | -                                                                                                 | EC:2.7.11.0<br>IPR000719; IPR002290; IPR008271;<br>IPR011009; IPR017441; IPR017442;<br>IPR020636; G3DSA:1.10.510.10<br>(GENE3D), G3DSA:3.30.200.20<br>(GENE3D)                                             |

|                         |                                                       |    |                                                                                                                                                                                                                                                                             |                                                                                                                                                      |             |                                                                                                                                                          |
|-------------------------|-------------------------------------------------------|----|-----------------------------------------------------------------------------------------------------------------------------------------------------------------------------------------------------------------------------------------------------------------------------|------------------------------------------------------------------------------------------------------------------------------------------------------|-------------|----------------------------------------------------------------------------------------------------------------------------------------------------------|
| Caenorhabditis elegans  | nuclear mitogen- and stress-activated protein ki-se-1 | 16 | P:GO:0007243;<br>F:GO:0004674;<br>P:GO:0016572;<br>P:GO:0006355;<br>P:GO:0040007;<br>P:GO:0000003;<br>P:GO:0042221;<br>F:GO:0005524;<br>P:GO:0002119;<br>F:GO:0005515;<br>F:GO:0000287;<br>C:GO:0005654;<br>P:GO:0009792;<br>P:GO:0006950;<br>P:GO:0007173;<br>P:GO:0009605 | -                                                                                                                                                    | EC:2.7.11.0 | IPR000719; IPR002290; IPR008271;<br>IPR011009; IPR017441; IPR017442;<br>IPR020636; G3DSA:1.10.510.10<br>(GENE3D), G3DSA:3.30.200.20<br>(GENE3D)          |
| Caenorhabditis briggsae | type iii restriction res subunit family protein       | 0  |                                                                                                                                                                                                                                                                             | C:GO:0000785;<br>F:GO:0004386;<br>F:GO:0003682;<br>F:GO:0003677;<br>C:GO:0005634;<br>F:GO:0003676;<br>P:GO:0006333;<br>F:GO:0005524;<br>F:GO:0008026 | -           |                                                                                                                                                          |
| Caenorhabditis briggsae | mitochondrial import receptor subunit tom40           | 10 | P:GO:0040010;<br>F:GO:0015288;<br>P:GO:0006820;<br>P:GO:0000003;<br>P:GO:0006626;<br>C:GO:0005741;<br>F:GO:0008308;<br>C:GO:0046930;<br>P:GO:0009792;<br>P:GO:0040018                                                                                                       | -                                                                                                                                                    |             | IPR001925; PTHR10802 (PANTHER)                                                                                                                           |
| Caenorhabditis elegans  | upf0558 protein                                       | 0  |                                                                                                                                                                                                                                                                             |                                                                                                                                                      |             | G3DSA:3.40.50.150 (GENE3D),<br>PTHR21095 (PANTHER), SSF53335<br>(SUPERFAMILY)                                                                            |
| Caenorhabditis elegans  | upf0558 protein                                       | 0  |                                                                                                                                                                                                                                                                             |                                                                                                                                                      |             | G3DSA:3.40.50.150 (GENE3D),<br>PTHR21095 (PANTHER), SSF53335<br>(SUPERFAMILY)                                                                            |
| Caenorhabditis elegans  | briggsae cbr-gpa-17 protein                           | 0  |                                                                                                                                                                                                                                                                             | F:GO:0005525;<br>F:GO:0019001;<br>F:GO:0004871;<br>F:GO:0000166;<br>P:GO:0007165;<br>P:GO:0007186                                                    |             | IPR001019; IPR011025;<br>PTHR10218:SF16 (PANTHER)                                                                                                        |
| Caenorhabditis elegans  | atp-binding sub-family d member 4                     | 8  | P:GO:0055085;<br>C:GO:0016021;<br>F:GO:0042626;<br>C:GO:0005622;<br>P:GO:0006355;<br>C:GO:0043190;<br>F:GO:0005524;<br>F:GO:0008134                                                                                                                                         | -                                                                                                                                                    |             | IPR002078; IPR003439; IPR003593;<br>IPR017871; G3DSA:3.40.50.300<br>(GENE3D), PTHR11384 (PANTHER),<br>PTHR11384:SF3 (PANTHER), SSF52540<br>(SUPERFAMILY) |

|                         |                                                         |    |                                                                                                                                                                                                                                                                                              |                                                                                  |             |                                                                                                                                                                                        |
|-------------------------|---------------------------------------------------------|----|----------------------------------------------------------------------------------------------------------------------------------------------------------------------------------------------------------------------------------------------------------------------------------------------|----------------------------------------------------------------------------------|-------------|----------------------------------------------------------------------------------------------------------------------------------------------------------------------------------------|
| Homo sapiens            | collagen alpha-2 chain precursor                        | 17 | P:GO:0042476;<br>F:GO:0030674;<br>P:GO:0070208;<br>P:GO:0043589;<br>P:GO:0008217;<br>F:GO:0042802;<br>C:GO:0005615;<br>F:GO:0046332;<br>P:GO:0001501;<br>F:GO:0048407;<br>C:GO:0005584;<br>P:GO:0030199;<br>P:GO:0007179;<br>F:GO:0005201;<br>P:GO:0001568;<br>P:GO:0007266;<br>C:GO:0005886 | -                                                                                | -           |                                                                                                                                                                                        |
| Caenorhabditis briggsae | Hypothetical protein CBG21101 [Caenorhabditis briggsae] | 1  | F:GO:0005515                                                                                                                                                                                                                                                                                 | -                                                                                | -           |                                                                                                                                                                                        |
| Caenorhabditis elegans  | elegans protein confirmed by transcript evidence        | 0  |                                                                                                                                                                                                                                                                                              |                                                                                  |             | IPR001534                                                                                                                                                                              |
| Caenorhabditis briggsae | Hypothetical protein CBG21101 [Caenorhabditis briggsae] | 1  | F:GO:0005515                                                                                                                                                                                                                                                                                 |                                                                                  |             |                                                                                                                                                                                        |
| Caenorhabditis elegans  | zinc finger protein                                     | 4  | F:GO:0008270;<br>F:GO:0003676;<br>F:GO:0005515;<br>F:GO:0004842                                                                                                                                                                                                                              | -                                                                                | EC:6.3.2.19 | IPR002867; PTHR11685 (PANTHER),<br>PTHR11685:SF17 (PANTHER),<br>SSF57850 (SUPERFAMILY)                                                                                                 |
|                         | -                                                       | 0  |                                                                                                                                                                                                                                                                                              |                                                                                  |             | PTHR15111 (PANTHER)                                                                                                                                                                    |
| Caenorhabditis elegans  | serf-like protein                                       | 0  |                                                                                                                                                                                                                                                                                              |                                                                                  |             | SignalP (SIGNALP)                                                                                                                                                                      |
| Caenorhabditis elegans  | mitogen-activated protein ki-se 11                      | 14 | C:GO:0005829;<br>P:GO:0007265;<br>P:GO:0007243;<br>C:GO:0005625;<br>P:GO:0040007;<br>P:GO:0040035;<br>F:GO:0005524;<br>P:GO:0002119;<br>F:GO:0005515;<br>F:GO:0008339;<br>C:GO:0005654;<br>P:GO:0009792;<br>P:GO:0006950;<br>P:GO:0006468                                                    | -                                                                                |             | IPR000719; IPR002290; IPR008351;<br>IPR011009; IPR017441; IPR017442;<br>G3DSA:1.10.510.10 (GENE3D),<br>G3DSA:3.30.200.20 (GENE3D),<br>PTHR11295 (PANTHER),<br>PTHR11295:SF61 (PANTHER) |
|                         | -                                                       | 0  |                                                                                                                                                                                                                                                                                              |                                                                                  |             | SignalP (SIGNALP)                                                                                                                                                                      |
| Caenorhabditis briggsae | protein xap-                                            | 2  | C:GO:0005739;<br>F:GO:0008137                                                                                                                                                                                                                                                                | -                                                                                | EC:1.6.5.3  | PF07225 (PFAM)                                                                                                                                                                         |
| Loa loa                 | briggsae cbr-spr-4 protein                              | 0  |                                                                                                                                                                                                                                                                                              | F:GO:0003676;<br>F:GO:0005488;<br>F:GO:0005529;<br>F:GO:0008270;<br>C:GO:0005622 |             | IPR007087; IPR015880; PTHR11389<br>(PANTHER), SignalP (SIGNALP),<br>SSF57667 (SUPERFAMILY)                                                                                             |
| Caenorhabditis elegans  | huntingtin interacting protein 1                        | 7  | F:GO:0005515;<br>F:GO:0005543;<br>P:GO:0006897;<br>P:GO:0048522;<br>P:GO:0019222;<br>C:GO:0030136;<br>P:GO:0042981                                                                                                                                                                           | -                                                                                |             | IPR002558; G3DSA:1.20.1410.10<br>(GENE3D), PTHR10407 (PANTHER),<br>PTHR10407:SF4 (PANTHER),<br>SSF109885 (SUPERFAMILY)                                                                 |

|                           |                                                                  |    |                                                                                                                                                                       |   |                               |                                                                                                                                     |
|---------------------------|------------------------------------------------------------------|----|-----------------------------------------------------------------------------------------------------------------------------------------------------------------------|---|-------------------------------|-------------------------------------------------------------------------------------------------------------------------------------|
| Caenorhabditis elegans    | huntingtin interacting protein 1                                 | 7  | F:GO:0005515;<br>F:GO:0005543;<br>P:GO:0006897;<br>P:GO:0048522;<br>P:GO:0019222;<br>C:GO:0030136;<br>P:GO:0042981                                                    | - |                               | IPR002558; G3DSA:1.20.1410.10 (GENE3D), PTHR10407 (PANTHER), PTHR10407:SF4 (PANTHER), SSF109885 (SUPERFAMILY)                       |
| Caenorhabditis elegans    | loner iso1                                                       | 5  | P:GO:0007520;<br>F:GO:0005086;<br>P:GO:0032012;<br>C:GO:0005622;<br>P:GO:0002121                                                                                      | - |                               | IPR000904; IPR011993; G3DSA:1.10.1000.11 (GENE3D), PTHR10663 (PANTHER), PTHR10663:SF12 (PANTHER), SSF50729 (SUPERFAMILY)            |
| Caenorhabditis elegans    | loner iso1                                                       | 5  | P:GO:0007520;<br>F:GO:0005086;<br>P:GO:0032012;<br>C:GO:0005622;<br>P:GO:0002121                                                                                      | - |                               | IPR000904; IPR011993; G3DSA:1.10.1000.11 (GENE3D), PTHR10663 (PANTHER), PTHR10663:SF12 (PANTHER), SSF50729 (SUPERFAMILY)            |
| Caenorhabditis elegans    | heavy unconvectio-I myosin family member (hum-2)                 | 3  | F:GO:0005515;<br>F:GO:0003824;<br>F:GO:0000166                                                                                                                        | - |                               | IPR001609; PTHR13140 (PANTHER), PTHR13140:SF15 (PANTHER), SSF52540 (SUPERFAMILY)                                                    |
| Caenorhabditis elegans    | transmembrane protein                                            | 5  | P:GO:0006810;<br>C:GO:0043231;<br>P:GO:0040010;<br>C:GO:0044444;<br>C:GO:0016020                                                                                      | - |                               | IPR004853; PTHR13146 (PANTHER), SignalP (SIGNALP), SSF103481 (SUPERFAMILY)                                                          |
| Loa loa                   | d domain (prokaryotic heat shock protein) family member (dnj-8)  | 3  | P:GO:0018991;<br>P:GO:0040011;<br>P:GO:0006898                                                                                                                        | - |                               | IPR001623; IPR003095; IPR012335; IPR012336; IPR015609; IPR018253; PTHR11821:SF14 (PANTHER), SignalP (SIGNALP)                       |
|                           | -                                                                | 0  |                                                                                                                                                                       |   |                               | -                                                                                                                                   |
| Caenorhabditis elegans    | novel protein                                                    | 2  | P:GO:0005975;<br>F:GO:0008081                                                                                                                                         | - | EC:3.1.4.0                    | IPR002044; IPR013783; IPR013784                                                                                                     |
| Loa loa                   | transformation transcription domain-associated protein isoform 1 | 1  | P:GO:0009987                                                                                                                                                          | - |                               | PTHR11139 (PANTHER), PTHR11139:SF2 (PANTHER)                                                                                        |
| Caenorhabditis briggsae   | ankyrin repeat protein                                           | 1  | F:GO:0003824                                                                                                                                                          | - |                               | IPR002110; IPR015882; IPR020683; G3DSA:3.30.379.10 (GENE3D), PTHR18958 (PANTHER), PTHR18958:SF102 (PANTHER), SSF55545 (SUPERFAMILY) |
| Caenorhabditis briggsae   | elegans protein partially confirmed by transcript evidence       | 0  |                                                                                                                                                                       |   | F:GO:0004563;<br>P:GO:0005975 | IPR002110; IPR020683; PTHR18958 (PANTHER), PTHR18958:SF102 (PANTHER)                                                                |
|                           | -                                                                | 0  |                                                                                                                                                                       |   |                               | -                                                                                                                                   |
| Caenorhabditis sp. PS1010 | glucan ( -alpha-) branching enzyme 1                             | 10 | C:GO:0005829;<br>F:GO:0043169;<br>P:GO:0040010;<br>F:GO:0031072;<br>F:GO:0003844;<br>F:GO:0004553;<br>P:GO:0000003;<br>P:GO:0010171;<br>P:GO:0005977;<br>P:GO:0009792 | - | EC:2.4.1.18;<br>EC:3.2.1.0    | IPR004193; IPR006047; IPR013781; IPR013783; IPR014756; IPR017853; PTHR10357 (PANTHER), PTHR10357:SF27 (PANTHER)                     |
| Caenorhabditis briggsae   | briggsae cbr-sop-3 protein                                       | 1  | P:GO:0050789                                                                                                                                                          | - |                               | IPR019680                                                                                                                           |
| Caenorhabditis briggsae   | briggsae cbr-sop-3 protein                                       | 1  | P:GO:0050789                                                                                                                                                          | - |                               | IPR019680                                                                                                                           |

|                         |                                                      |    |                                                                                                                                                                                        |   |                                                                                                                        |
|-------------------------|------------------------------------------------------|----|----------------------------------------------------------------------------------------------------------------------------------------------------------------------------------------|---|------------------------------------------------------------------------------------------------------------------------|
| Caenorhabditis elegans  | myosin light polypeptide 5 regulatory                | 5  | C:GO:0016021;<br>P:GO:0000003;<br>P:GO:0040010;<br>P:GO:0006898;<br>P:GO:0055085                                                                                                       | - | IPR011701; IPR016196; IPR020846;<br>G3DSA:1.20.1250.20 (GENE3D),<br>PTHR10924 (PANTHER)                                |
| Caenorhabditis elegans  | myosin light polypeptide 5 regulatory                | 5  | C:GO:0016021;<br>P:GO:0000003;<br>P:GO:0040010;<br>P:GO:0006898;<br>P:GO:0055085                                                                                                       | - | IPR011701; IPR016196; IPR020846;<br>G3DSA:1.20.1250.20 (GENE3D),<br>PTHR10924 (PANTHER)                                |
| Acyrtosiphon pisum      | histone h2b                                          | 3  | C:GO:0005811;<br>C:GO:0035267;<br>C:GO:0005694                                                                                                                                         | - | IPR000558; IPR007125; IPR009072;<br>PTHR23428:SF1 (PANTHER)                                                            |
| Caenorhabditis elegans  | nuclear export factor crm1                           | 11 | F:GO:0008565;<br>P:GO:0040010;<br>P:GO:0006611;<br>C:GO:0005643;<br>P:GO:0051301;<br>P:GO:0010171;<br>P:GO:0002119;<br>F:GO:0005049;<br>P:GO:0040011;<br>P:GO:0007099;<br>P:GO:0009792 | - | IPR001494; IPR011989; IPR013598;<br>IPR016024; PTHR11223 (PANTHER),<br>PTHR11223:SF2 (PANTHER)                         |
| Caenorhabditis briggsae | in family member (ttn-1)                             | 6  | P:GO:0009987;<br>C:GO:0005856;<br>F:GO:0004672;<br>F:GO:0005515;<br>F:GO:0000166;<br>P:GO:0009792                                                                                      | - | IPR003598; IPR003599; IPR007110;<br>IPR013098; IPR013783; PTHR19897<br>(PANTHER), SSF48726 (SUPERFAMILY)               |
| Caenorhabditis elegans  | elegans protein confirmed by transcript evidence     | 0  |                                                                                                                                                                                        |   | -                                                                                                                      |
| Caenorhabditis elegans  | briggsae cbr-gsa-1 protein                           | 6  | P:GO:0007186;<br>F:GO:0004871;<br>P:GO:0050896;<br>P:GO:0007165;<br>F:GO:0005525;<br>P:GO:0007608                                                                                      | - | IPR000367; IPR001019; IPR011025;<br>G3DSA:3.40.50.300 (GENE3D),<br>PTHR10218:SF33 (PANTHER),<br>SSF52540 (SUPERFAMILY) |
| Caenorhabditis elegans  | uncoordi-ted family member (unc-52)                  | 2  | P:GO:0030239;<br>C:GO:0005578                                                                                                                                                          | - | IPR007110; IPR013783; PTHR10574<br>(PANTHER), PTHR10574:SF20<br>(PANTHER), SSF48726 (SUPERFAMILY)                      |
| Caenorhabditis briggsae | briggsae cbr-ttr-48 protein                          | 1  | P:GO:0040011                                                                                                                                                                           | - | IPR001534; SignalP (SIGNALP)                                                                                           |
|                         |                                                      | 0  |                                                                                                                                                                                        |   | -                                                                                                                      |
| Caenorhabditis elegans  | solute carrier family 30 (zinc transporter) member 2 | 10 | F:GO:0005385;<br>P:GO:0055085;<br>P:GO:0040010;<br>P:GO:0006829;<br>C:GO:0016021;<br>C:GO:0016023;<br>C:GO:0005770;<br>P:GO:0061090;<br>F:GO:0005515;<br>C:GO:0010008                  | - | IPR002524; G3DSA:1.20.1510.10<br>(GENE3D), SignalP (SIGNALP)                                                           |
| Loa loa                 | hypothetical protein LOAG_00085 [Loa loa]            | 0  |                                                                                                                                                                                        |   | -                                                                                                                      |
|                         |                                                      | 0  |                                                                                                                                                                                        |   | -                                                                                                                      |

|                           |                                                  |    |                                                                                                                                                                                        |                                                                 |  |                                                                                                                                                                                    |
|---------------------------|--------------------------------------------------|----|----------------------------------------------------------------------------------------------------------------------------------------------------------------------------------------|-----------------------------------------------------------------|--|------------------------------------------------------------------------------------------------------------------------------------------------------------------------------------|
| Haemonchus contortus      | cytochrome c                                     | 11 | P:GO:0009792;<br>P:GO:0002119;<br>P:GO:0040018;<br>C:GO:0070469;<br>F:GO:0009055;<br>C:GO:0005759;<br>F:GO:0020037;<br>P:GO:0006810;<br>P:GO:0040010;<br>P:GO:0008340;<br>P:GO:0022900 | -                                                               |  | IPR002327; IPR009056                                                                                                                                                               |
| Caenorhabditis elegans    | tgf-beta induced apoptosis protein 12            | 1  | P:GO:0006350                                                                                                                                                                           | -                                                               |  | PTHR13580 (PANTHER),<br>PTHR13580:SF11 (PANTHER)                                                                                                                                   |
| Caenorhabditis briggsae   | chromosome 20 open reading frame 116             | 2  | P:GO:0000003;<br>C:GO:0005783                                                                                                                                                          | -                                                               |  | IPR019153; PTHR13270 (PANTHER),<br>SSF46785 (SUPERFAMILY)                                                                                                                          |
| Caenorhabditis briggsae   | chromosome 20 open reading frame 116             | 2  | P:GO:0000003;<br>C:GO:0005783                                                                                                                                                          | -                                                               |  | IPR019153; PTHR13270 (PANTHER),<br>SignalP (SIGNALP), SSF46785<br>(SUPERFAMILY)                                                                                                    |
| Caenorhabditis elegans    | d- methyltransferase 1 associated protein 1      | 10 | F:GO:0003714;<br>P:GO:0040010;<br>P:GO:0006898;<br>P:GO:0040011;<br>P:GO:0045892;<br>P:GO:0009792;<br>P:GO:0001703;<br>P:GO:0016568;<br>P:GO:0040035;<br>C:GO:0005657                  | -                                                               |  | IPR001005; IPR008468; PTHR12855<br>(PANTHER), PTHR12855:SF7<br>(PANTHER)                                                                                                           |
| -                         | -                                                | 0  |                                                                                                                                                                                        |                                                                 |  | -                                                                                                                                                                                  |
| Caenorhabditis briggsae   | oxysterol binding protein                        | 2  | P:GO:0008202;<br>P:GO:0006869                                                                                                                                                          | -                                                               |  | IPR000648; PTHR10972:SF21<br>(PANTHER), SSF144000 (SUPERFAMILY)                                                                                                                    |
| Heligmosomoides polygyrus | c-type lectin-1                                  | 1  | F:GO:0005488                                                                                                                                                                           | -                                                               |  | IPR001304; IPR016186; IPR016187;<br>IPR022272; PTHR22803 (PANTHER),<br>PTHR22803:SF16 (PANTHER), SignalP<br>(SIGNALP)                                                              |
| Brugia malayi             | phosphatidylinositol ki-se tor2                  | 2  | F:GO:0000166;<br>F:GO:0016772                                                                                                                                                          | -                                                               |  | IPR000403; IPR003152; IPR011009;<br>PTHR11139 (PANTHER),<br>PTHR11139:SF9 (PANTHER)                                                                                                |
| Caenorhabditis briggsae   | serine protease inhibitor 1                      | 0  |                                                                                                                                                                                        | F:GO:0030414;<br>F:GO:0008233;<br>F:GO:0004867;<br>C:GO:0005576 |  | -                                                                                                                                                                                  |
| Loa loa                   | dead (asp-glu-ala-asp) box polypeptide 46        | 5  | P:GO:0006396;<br>F:GO:0003676;<br>C:GO:0016604;<br>F:GO:0008026;<br>F:GO:0005524                                                                                                       | -                                                               |  | IPR000629; IPR001650; IPR011545;<br>IPR014001; IPR014014; IPR014021;<br>G3DSA:3.40.50.300 (GENE3D),<br>PTHR10967 (PANTHER),<br>PTHR10967:SF45 (PANTHER),<br>SSF52540 (SUPERFAMILY) |
| Caenorhabditis briggsae   | elegans protein confirmed by transcript evidence | 0  |                                                                                                                                                                                        | P:GO:0016539                                                    |  | IPR001534; SignalP (SIGNALP)                                                                                                                                                       |
| Caenorhabditis elegans    | dgn-1                                            | 0  |                                                                                                                                                                                        | F:GO:0005509;<br>C:GO:0016020;<br>F:GO:0005515                  |  | IPR006644; IPR013783; IPR015919;<br>PTHR21559 (PANTHER),<br>PTHR21559:SF10 (PANTHER)                                                                                               |

|                             |                                                         |    |                                                                                                                                                                                                                                                                                                               |   |                              |                                                                                                                                                      |
|-----------------------------|---------------------------------------------------------|----|---------------------------------------------------------------------------------------------------------------------------------------------------------------------------------------------------------------------------------------------------------------------------------------------------------------|---|------------------------------|------------------------------------------------------------------------------------------------------------------------------------------------------|
| Caenorhabditis briggsae     | proteasome ( macropain) beta 1                          | 14 | P:GO:0008340;<br>P:GO:0018991;<br>P:GO:0051439;<br>P:GO:0040007;<br>F:GO:0004298;<br>P:GO:0051603;<br>P:GO:0010171;<br>P:GO:0002119;<br>F:GO:0005515;<br>P:GO:0040011;<br>P:GO:0009792;<br>C:GO:0005737;<br>C:GO:0005839;<br>C:GO:0005634                                                                     | - | EC:3.4.25.0                  | IPR001353; IPR016050;<br>G3DSA:3.60.20.10 (GENE3D),<br>PTHR11599 (PANTHER),<br>PTHR11599:SF8 (PANTHER), PS51476<br>(PROFILE), SSF56235 (SUPERFAMILY) |
| Angiostrongylus cantonensis | abc transporter family protein                          | 5  | F:GO:0016887;<br>P:GO:0006200;<br>F:GO:0005524;<br>C:GO:0043190;<br>F:GO:0005215                                                                                                                                                                                                                              | - |                              | IPR003439; IPR003593; IPR017871;<br>G3DSA:3.40.50.300 (GENE3D),<br>PTHR19211 (PANTHER),<br>PTHR19211:SF17 (PANTHER),<br>SSF52540 (SUPERFAMILY)       |
| Caenorhabditis briggsae     | amidinotransferase                                      | 2  | C:GO:0005737;<br>F:GO:0016813                                                                                                                                                                                                                                                                                 | - | EC:3.5.3.0                   | G3DSA:3.75.10.10 (GENE3D),<br>PTHR12737 (PANTHER),<br>PTHR12737:SF1 (PANTHER), SSF55909<br>(SUPERFAMILY)                                             |
| Pan troglodytes             | glutathione peroxidase 4 (phospholipid hydroperoxidase) | 18 | C:GO:0005829;<br>P:GO:0006644;<br>P:GO:0042744;<br>C:GO:0005625;<br>C:GO:0005743;<br>F:GO:0004602;<br>P:GO:0055114;<br>P:GO:0007283;<br>P:GO:0006749;<br>P:GO:0007568;<br>F:GO:0043295;<br>P:GO:0032355;<br>P:GO:0006325;<br>P:GO:0007275;<br>C:GO:0005635;<br>F:GO:0008430;<br>P:GO:0050727;<br>F:GO:0047066 | - | EC:1.11.1.9;<br>EC:1.11.1.12 |                                                                                                                                                      |
| Loa loa                     | elegans protein confirmed by transcript evidence        | 1  | P:GO:0006898                                                                                                                                                                                                                                                                                                  | - |                              | -                                                                                                                                                    |
| -                           | -                                                       | 0  |                                                                                                                                                                                                                                                                                                               |   |                              | -                                                                                                                                                    |
| -                           | -                                                       | 0  |                                                                                                                                                                                                                                                                                                               |   |                              | -                                                                                                                                                    |
| Brugia malayi               | histone h1                                              | 5  | P:GO:0009792;<br>P:GO:0002119;<br>C:GO:0005694;<br>P:GO:0000003;<br>P:GO:0040007                                                                                                                                                                                                                              | - |                              | IPR005818; IPR005819; IPR011991;<br>PTHR11467 (PANTHER), SSF46785<br>(SUPERFAMILY)                                                                   |
| Caenorhabditis briggsae     | aspartate aminotransferase                              | 2  | P:GO:0008152;<br>F:GO:0008483                                                                                                                                                                                                                                                                                 | - | EC:2.6.1.0                   | -                                                                                                                                                    |

|                                |                                                  |    |                                                                                                                                                                                                                                                            |              |                             |                                                                                                                                      |
|--------------------------------|--------------------------------------------------|----|------------------------------------------------------------------------------------------------------------------------------------------------------------------------------------------------------------------------------------------------------------|--------------|-----------------------------|--------------------------------------------------------------------------------------------------------------------------------------|
| Caenorhabditis elegans         | thioredoxin 2                                    | 15 | F:GO:0033743;<br>P:GO:0009725;<br>P:GO:0006979;<br>P:GO:0014070;<br>P:GO:0048678;<br>P:GO:0007584;<br>P:GO:0042493;<br>F:GO:0032403;<br>P:GO:0045454;<br>P:GO:0031669;<br>P:GO:0009749;<br>P:GO:0008152;<br>F:GO:0015035;<br>F:GO:0008113;<br>C:GO:0005739 | -            | EC:1.8.4.12;<br>EC:1.8.4.11 | IPR005746; IPR012335; IPR012336;<br>IPR013766; IPR017936; IPR017937;<br>PTHR10438:SF13 (PANTHER)                                     |
| Caenorhabditis briggsae        | enhancer trap locus 4                            | 2  | F:GO:0005515;<br>P:GO:0008340                                                                                                                                                                                                                              | -            |                             | PTHR22741 (PANTHER),<br>PTHR22741:SF2 (PANTHER)                                                                                      |
| Loa loa                        | elegans protein confirmed by transcript evidence | 0  |                                                                                                                                                                                                                                                            |              |                             | -                                                                                                                                    |
| Caenorhabditis briggsae        | zip zinc transporter family protein              | 3  | P:GO:0009792;<br>F:GO:0046873;<br>P:GO:0006829                                                                                                                                                                                                             | -            |                             | IPR003689; PTHR11040 (PANTHER),<br>PTHR11040:SF8 (PANTHER), SignalP<br>(SIGNALP)                                                     |
| Caenorhabditis briggsae        | zip zinc transporter family protein              | 5  | P:GO:0009792;<br>F:GO:0046873;<br>C:GO:0005886;<br>P:GO:0006829;<br>F:GO:0008270                                                                                                                                                                           | -            |                             | IPR003689; PTHR11040 (PANTHER),<br>PTHR11040:SF8 (PANTHER), SignalP<br>(SIGNALP)                                                     |
| Camponotus floridanus          | integrator complex subunit 1                     | 0  |                                                                                                                                                                                                                                                            | F:GO:0005488 |                             | -                                                                                                                                    |
| Caenorhabditis briggsae        | elegans protein confirmed by transcript evidence | 0  |                                                                                                                                                                                                                                                            |              |                             | -                                                                                                                                    |
| Caenorhabditis briggsae        | sfrs12-interacting protein 1                     | 1  | F:GO:0005515                                                                                                                                                                                                                                               | -            |                             | IPR001878                                                                                                                            |
| Haemonchus contortus           | phosphoenolpyruvate carboxyke                    | 8  | C:GO:0005625;<br>P:GO:0006094;<br>F:GO:0046872;<br>F:GO:0005525;<br>P:GO:0006107;<br>F:GO:0016301;<br>F:GO:0004613;<br>C:GO:0005739                                                                                                                        | -            | EC:4.1.1.32                 | IPR008209; IPR008210; IPR013035;<br>IPR018091; IPR019825;<br>G3DSA:2.170.8.10 (GENE3D), SignalP<br>(SIGNALP), SSF53795 (SUPERFAMILY) |
| Loa loa                        | translocation protein 1                          | 7  | F:GO:0004872;<br>C:GO:0071212;<br>C:GO:0045111;<br>C:GO:0016235;<br>P:GO:0006613;<br>C:GO:0005783;<br>C:GO:0044425                                                                                                                                         | -            |                             | IPR004728; PTHR12443:SF6<br>(PANTHER)                                                                                                |
| Pan troglodytes schweinfurthii | -dh dehydroge-se subunit 2                       | 6  | P:GO:0006120;<br>C:GO:0005743;<br>C:GO:0070469;<br>F:GO:0008137;<br>P:GO:0006810;<br>C:GO:0016021                                                                                                                                                          | -            | EC:1.6.5.3                  | -                                                                                                                                    |
| Drosophila persimilis          | zinc finger protein 330                          | 4  | C:GO:0000775;<br>C:GO:0005730;<br>C:GO:0030496;<br>F:GO:0008270                                                                                                                                                                                            | -            |                             | IPR010531                                                                                                                            |



|                         |                                                         |    |                                                                                                                                                                                                                                                                                                                                                                  |              |                            |                                                                                                                                                          |
|-------------------------|---------------------------------------------------------|----|------------------------------------------------------------------------------------------------------------------------------------------------------------------------------------------------------------------------------------------------------------------------------------------------------------------------------------------------------------------|--------------|----------------------------|----------------------------------------------------------------------------------------------------------------------------------------------------------|
| Caenorhabditis briggsae | tyrosine aminotransferase                               | 11 | P:GO:0006103;<br>C:GO:0005739;<br>P:GO:0009058;<br>P:GO:0000003;<br>F:GO:0016847;<br>P:GO:0006572;<br>F:GO:0005515;<br>P:GO:0006536;<br>F:GO:0004838;<br>F:GO:0030170;<br>P:GO:0010033                                                                                                                                                                           | -            | EC:4.4.1.14;<br>EC:2.6.1.5 | -                                                                                                                                                        |
| Caenorhabditis briggsae | deoxyribose-phosphate aldolase                          | 5  | C:GO:0005737;<br>F:GO:0004139;<br>P:GO:0046121;<br>P:GO:0009264;<br>F:GO:0005515                                                                                                                                                                                                                                                                                 | -            | EC:4.1.2.4                 | IPR002915; IPR011343; IPR013785;<br>SSF51569 (SUPERFAMILY)                                                                                               |
| Caenorhabditis elegans  | villin headpiece domain containing protein              | 1  | P:GO:0045132                                                                                                                                                                                                                                                                                                                                                     | -            |                            | -                                                                                                                                                        |
| Caenorhabditis elegans  | villin headpiece domain containing protein              | 1  | P:GO:0045132                                                                                                                                                                                                                                                                                                                                                     | -            |                            | -                                                                                                                                                        |
|                         |                                                         | 0  |                                                                                                                                                                                                                                                                                                                                                                  |              |                            |                                                                                                                                                          |
| Brugia malayi           | gtpase activating protein and vps9 domains 1            | 3  | C:GO:0005622;<br>P:GO:0009987;<br>P:GO:0050789                                                                                                                                                                                                                                                                                                                   | -            |                            | -                                                                                                                                                        |
| Caenorhabditis elegans  | evelled related family member (dsh-1)                   | 21 | P:GO:0007166;<br>F:GO:0004871;<br>C:GO:0005929;<br>P:GO:0007369;<br>F:GO:0005515;<br>C:GO:0016020;<br>P:GO:0060026;<br>C:GO:0043231;<br>P:GO:0040007;<br>P:GO:0007052;<br>P:GO:0022607;<br>P:GO:0003002;<br>P:GO:0030030;<br>P:GO:0009792;<br>C:GO:0031410;<br>P:GO:0009798;<br>P:GO:0002119;<br>P:GO:0048869;<br>P:GO:0019222;<br>P:GO:0010171;<br>P:GO:0007399 | -            |                            | IPR000591; IPR001158; IPR001478;<br>IPR008339; IPR011991; IPR015506;<br>G3DSA:2.30.42.10 (GENE3D),<br>PTHR10878:SF2 (PANTHER), SSF46785<br>(SUPERFAMILY) |
|                         |                                                         | 0  |                                                                                                                                                                                                                                                                                                                                                                  |              |                            |                                                                                                                                                          |
| Caenorhabditis elegans  | uncoordi-ted family member (unc-44)                     | 2  | F:GO:0005515;<br>P:GO:0007165                                                                                                                                                                                                                                                                                                                                    | -            |                            | IPR002110; IPR018120; IPR020683;<br>PR01415 (PRINTS), PTHR18958<br>(PANTHER), PTHR18958:SF296<br>(PANTHER)                                               |
| Caenorhabditis briggsae | Hypothetical protein CBG15717 [Caenorhabditis briggsae] | 0  |                                                                                                                                                                                                                                                                                                                                                                  |              |                            | -                                                                                                                                                        |
|                         |                                                         | 0  |                                                                                                                                                                                                                                                                                                                                                                  |              |                            | -                                                                                                                                                        |
| Hydra magnipapillata    | nuclease harbi1-like                                    | 0  |                                                                                                                                                                                                                                                                                                                                                                  | C:GO:0009507 |                            | -                                                                                                                                                        |
| Caenorhabditis briggsae | deah (asp-glu-ala-his) box polypeptide partial          | 5  | F:GO:0003723;<br>F:GO:0005524;<br>C:GO:0005622;<br>F:GO:0008270;<br>F:GO:0008026                                                                                                                                                                                                                                                                                 | -            |                            | IPR011545; IPR014021;<br>G3DSA:3.40.50.300 (GENE3D),<br>PTHR18934 (PANTHER), SSF52540<br>(SUPERFAMILY)                                                   |

|                         |                                                            |   |                                                                                                                                     |                                                                                                                    |            |                                                                                    |
|-------------------------|------------------------------------------------------------|---|-------------------------------------------------------------------------------------------------------------------------------------|--------------------------------------------------------------------------------------------------------------------|------------|------------------------------------------------------------------------------------|
| Brugia malayi           | btb domain containing 9                                    | 2 | F:GO:0005515;<br>P:GO:0007155                                                                                                       | -                                                                                                                  |            | IPR008979; IPR013089;<br>G3DSA:2.60.120.260 (GENE3D),<br>PTHR23230:SF181 (PANTHER) |
| Caenorhabditis briggsae | dihydropyridine-sensitive l-type calcium channel           | 7 | F:GO:0065008;<br>C:GO:0016021;<br>N:GO:0071842;<br>F:GO:0005216;<br>P:GO:0007268;<br>P:GO:0050794;<br>P:GO:0006811                  | -                                                                                                                  |            | -                                                                                  |
| Caenorhabditis briggsae | elegans protein partially confirmed by transcript evidence | 0 |                                                                                                                                     |                                                                                                                    |            | SignalP (SIGNALP)                                                                  |
| Caenorhabditis briggsae | elegans protein partially confirmed by transcript evidence | 0 |                                                                                                                                     |                                                                                                                    |            | PSS1257 (PROFILE)                                                                  |
| Camponotus floridanus   | uncharacterized transposase-like protein                   | 0 |                                                                                                                                     | F:GO:0046872;<br>P:GO:0055114;<br>F:GO:0009055;<br>F:GO:0016491;<br>F:GO:0020037;<br>F:GO:0005506;<br>F:GO:0004497 |            | -                                                                                  |
| Caenorhabditis elegans  | vacuolar proton atpase                                     | 7 | F:GO:0005516;<br>F:GO:0008553;<br>C:GO:0016021;<br>P:GO:0015986;<br>C:GO:0045202;<br>P:GO:0040013;<br>C:GO:0000220                  | -                                                                                                                  | EC:3.6.3.6 | IPR002490; PTHR11629:SF23<br>(PANTHER)                                             |
| Caenorhabditis elegans  | uncoordi-ted family member (unc-32)                        | 5 | F:GO:0015078;<br>C:GO:0033177;<br>C:GO:0016021;<br>P:GO:0015986;<br>P:GO:0040013                                                    | -                                                                                                                  |            | IPR002490; PTHR11629:SF1<br>(PANTHER)                                              |
| Caenorhabditis briggsae | elegans protein partially confirmed by transcript evidence | 0 |                                                                                                                                     | F:GO:0004500;<br>P:GO:0006548                                                                                      |            | -                                                                                  |
|                         |                                                            | 0 |                                                                                                                                     |                                                                                                                    |            |                                                                                    |
| Caenorhabditis briggsae | protein lsm14 homolog a                                    | 6 | F:GO:0003723;<br>P:GO:0017148;<br>C:GO:0043234;<br>P:GO:0033962;<br>C:GO:0010494;<br>F:GO:0017151                                   | -                                                                                                                  |            | IPR010920; IPR019053; PTHR13586<br>(PANTHER)                                       |
| Caenorhabditis briggsae | phosphoglucomutase 2                                       | 8 | P:GO:0009792;<br>P:GO:0002119;<br>P:GO:0005975;<br>F:GO:0005515;<br>P:GO:0040010;<br>F:GO:0000287;<br>F:GO:0016868;<br>C:GO:0005829 | -                                                                                                                  | EC:5.4.2.0 | -                                                                                  |
|                         |                                                            | 0 |                                                                                                                                     |                                                                                                                    |            | IPR003645; PRO1217 (PRINTS)                                                        |
| Caenorhabditis elegans  | briggsae cbr-swm-1 protein                                 | 1 | F:GO:0005488                                                                                                                        | -                                                                                                                  |            | IPR002919; IPR013032;<br>G3DSA:2.10.25.10 (GENE3D),<br>PTHR23259 (PANTHER)         |
|                         |                                                            | 0 |                                                                                                                                     |                                                                                                                    |            | IPR003645; PRO1217 (PRINTS)                                                        |
| Caenorhabditis elegans  | briggsae cbr-swm-1 protein                                 | 1 | F:GO:0005515                                                                                                                        | -                                                                                                                  |            | -                                                                                  |

|                                |                                                                 |   |                                                                                                                                     |                               |             |                                                                                                                   |
|--------------------------------|-----------------------------------------------------------------|---|-------------------------------------------------------------------------------------------------------------------------------------|-------------------------------|-------------|-------------------------------------------------------------------------------------------------------------------|
| Caenorhabditis briggsae        | phosphoglucomutase 2                                            | 8 | P:GO:0009792;<br>P:GO:0002119;<br>P:GO:0005975;<br>F:GO:0005515;<br>P:GO:0040010;<br>F:GO:0000287;<br>F:GO:0016868;<br>C:GO:0005829 | -                             | EC:5.4.2.0  | -                                                                                                                 |
| -                              | -                                                               | 0 |                                                                                                                                     |                               |             | IPR003645; PR01217 (PRINTS)                                                                                       |
| Caenorhabditis elegans         | briggsae cbr-swm-1 protein                                      | 1 | F:GO:0005515                                                                                                                        | -                             |             | IPR002919; IPR013032;<br>G3DSA:2.10.25.10 (GENE3D),<br>PTHR23259 (PANTHER)                                        |
| Caenorhabditis elegans         | protein tyrosine non-receptor type 22                           | 6 | P:GO:0006470;<br>P:GO:0050860;<br>P:GO:0030217;<br>F:GO:0004725;<br>C:GO:0005737;<br>F:GO:0017124                                   | -                             | EC:3.1.3.48 | SignalP (SIGNALP)                                                                                                 |
| Caenorhabditis elegans         | hypothetical protein C44C1.1 [Caenorhabditis elegans]           | 0 |                                                                                                                                     |                               |             | -                                                                                                                 |
| Caenorhabditis elegans         | chromosome 16 open reading frame 61                             | 0 |                                                                                                                                     | F:GO:0003674;<br>P:GO:0008150 |             | SignalP (SIGNALP)                                                                                                 |
| Caenorhabditis briggsae        | rw1 protein                                                     | 1 | F:GO:0005515                                                                                                                        | -                             |             | PTHR22050 (PANTHER)                                                                                               |
| -                              | -                                                               | 0 |                                                                                                                                     |                               |             | SignalP (SIGNALP)                                                                                                 |
| Polysphondylium pallidum PN500 | hypothetical protein PPL_02455 [Polysphondylium pallidum PN500] | 0 |                                                                                                                                     | F:GO:0030246;<br>C:GO:0005576 |             | -                                                                                                                 |
| Caenorhabditis briggsae        | proteasome 26s non-atpase subunit 4                             | 1 | C:GO:0000502                                                                                                                        | -                             |             | IPR002035; IPR003903; IPR007198;<br>G3DSA:3.40.50.410 (GENE3D),<br>PTHR10223 (PANTHER), SSF53300<br>(SUPERFAMILY) |
| Caenorhabditis briggsae        | cytochrome p450 family protein                                  | 3 | F:GO:0016491;<br>F:GO:0005506;<br>F:GO:0005515                                                                                      | -                             |             | IPR001128; IPR002401;<br>PTHR19383:SF66 (PANTHER)                                                                 |
| -                              | -                                                               | 0 |                                                                                                                                     |                               |             | -                                                                                                                 |
| Caenorhabditis briggsae        | elegans protein partially confirmed by transcript evidence      | 3 | F:GO:0009055;<br>F:GO:0008137;<br>C:GO:0016020                                                                                      | -                             | EC:1.6.5.3  | SignalP (SIGNALP)                                                                                                 |
| Homo sapiens                   | eukaryotic translation elongation factor 1 gamma                | 6 | F:GO:0003746;<br>C:GO:0005853;<br>F:GO:0005515;<br>C:GO:0005829;<br>P:GO:0009615;<br>P:GO:0006414                                   | -                             |             | -                                                                                                                 |
| Caenorhabditis elegans         | r- polymerase rpc34 subunit family protein                      | 5 | F:GO:0003899;<br>F:GO:0003677;<br>P:GO:0006350;<br>P:GO:0000003;<br>C:GO:0005634                                                    | -                             | EC:2.7.7.6  | IPR007832; IPR016049                                                                                              |
| -                              | -                                                               | 0 |                                                                                                                                     |                               |             | -                                                                                                                 |

|                        |                                                       |    |                                                                                                                                                                                                                                                            |                                                |                                                                                                                              |
|------------------------|-------------------------------------------------------|----|------------------------------------------------------------------------------------------------------------------------------------------------------------------------------------------------------------------------------------------------------------|------------------------------------------------|------------------------------------------------------------------------------------------------------------------------------|
| Caenorhabditis elegans | myosin va                                             | 15 | P:GO:0048731;<br>P:GO:0051648;<br>C:GO:0016023;<br>P:GO:0043473;<br>C:GO:0044430;<br>C:GO:0015629;<br>F:GO:0008092;<br>P:GO:0007154;<br>P:GO:0023060;<br>C:GO:0043234;<br>P:GO:0050877;<br>C:GO:0042995;<br>P:GO:0065007;<br>P:GO:0008152;<br>P:GO:0032940 | -                                              | IPR000048; IPR001609; PTHR13140 (PANTHER), PTHR13140:SF15 (PANTHER), SSF52540 (SUPERFAMILY)                                  |
| Caenorhabditis elegans | myosin va                                             | 15 | P:GO:0048731;<br>P:GO:0051648;<br>C:GO:0016023;<br>P:GO:0043473;<br>C:GO:0044430;<br>C:GO:0015629;<br>F:GO:0008092;<br>P:GO:0007154;<br>P:GO:0023060;<br>C:GO:0043234;<br>P:GO:0050877;<br>C:GO:0042995;<br>P:GO:0065007;<br>P:GO:0008152;<br>P:GO:0032940 | -                                              | IPR000048; IPR001609; PTHR13140 (PANTHER), PTHR13140:SF15 (PANTHER), SSF52540 (SUPERFAMILY)                                  |
| Caenorhabditis elegans | heat shock 70kd protein binding protein               | 3  | P:GO:0042026;<br>F:GO:0005515;<br>C:GO:0005737                                                                                                                                                                                                             | -                                              | IPR001440; IPR006636; IPR011990; IPR013026; IPR019734; PTHR22904 (PANTHER), PTHR22904:SF34 (PANTHER), SSF48452 (SUPERFAMILY) |
| Caenorhabditis elegans | heat shock 70kd protein binding protein               | 2  | P:GO:0006457;<br>F:GO:0030674                                                                                                                                                                                                                              | -                                              | IPR001440; IPR006636; IPR011990; IPR013026; IPR019734; PTHR22904 (PANTHER), PTHR22904:SF34 (PANTHER), SSF48452 (SUPERFAMILY) |
| Caenorhabditis elegans | elegans protein confirmed by transcript evidence      | 0  |                                                                                                                                                                                                                                                            | P:GO:0051301;<br>P:GO:0009792;<br>P:GO:0007126 | IPR008574                                                                                                                    |
| Caenorhabditis elegans | hypothetical protein ZK470.2 [Caenorhabditis elegans] | 0  |                                                                                                                                                                                                                                                            |                                                | IPR010916                                                                                                                    |
| Caenorhabditis elegans | elegans protein confirmed by transcript evidence      | 0  |                                                                                                                                                                                                                                                            |                                                | IPR006696; SignalP (SIGNALP)                                                                                                 |
|                        | -                                                     | 0  |                                                                                                                                                                                                                                                            |                                                | SignalP (SIGNALP)                                                                                                            |
| Caenorhabditis elegans | upf0451 protein c17orf61-like protein                 | 0  |                                                                                                                                                                                                                                                            | C:GO:0016021;<br>C:GO:0016020;<br>C:GO:0005886 | IPR006696; PTHR10584 (PANTHER), PTHR10584:SF8 (PANTHER), SignalP (SIGNALP)                                                   |
|                        | -                                                     | 0  |                                                                                                                                                                                                                                                            |                                                | -                                                                                                                            |

|                         |                                                                                                           |    |                                                                                                                                                                                                                                                                                                                                |   |  |                                                                                                                     |
|-------------------------|-----------------------------------------------------------------------------------------------------------|----|--------------------------------------------------------------------------------------------------------------------------------------------------------------------------------------------------------------------------------------------------------------------------------------------------------------------------------|---|--|---------------------------------------------------------------------------------------------------------------------|
| Ailuropoda melanoleuca  | thioredoxin interacting protein                                                                           | 19 | P:GO:0009749;<br>P:GO:0000122;<br>P:GO:0042127;<br>P:GO:0042542;<br>C:GO:0005758;<br>P:GO:0009612;<br>P:GO:0051592;<br>P:GO:0032570;<br>F:GO:0031625;<br>P:GO:0050790;<br>P:GO:0042493;<br>P:GO:0048008;<br>P:GO:0030216;<br>F:GO:0004857;<br>P:GO:0006606;<br>C:GO:0005634;<br>P:GO:0032355;<br>P:GO:0043065;<br>P:GO:0007049 | - |  | PTHR11188 (PANTHER),<br>PTHR11188:SF14 (PANTHER)                                                                    |
| Caenorhabditis elegans  | elav-type r- binding protein family member (etr-1)                                                        | 10 | P:GO:0043484;<br>F:GO:0003729;<br>P:GO:0008016;<br>P:GO:0007286;<br>P:GO:0006376;<br>F:GO:0042835;<br>C:GO:0005737;<br>P:GO:0040018;<br>C:GO:0005634;<br>F:GO:0031369                                                                                                                                                          | - |  | IPR000504; IPR012677; IPR015903;<br>PTHR10432 (PANTHER), SSF54928<br>(SUPERFAMILY)                                  |
| Caenorhabditis elegans  | elav-type r- binding protein family member (etr-1)                                                        | 10 | P:GO:0043484;<br>F:GO:0003729;<br>P:GO:0008016;<br>P:GO:0007286;<br>P:GO:0006376;<br>F:GO:0042835;<br>C:GO:0005737;<br>P:GO:0040018;<br>C:GO:0005634;<br>F:GO:0031369                                                                                                                                                          | - |  | IPR000504; IPR012677; IPR015903;<br>PTHR10432 (PANTHER), SSF54928<br>(SUPERFAMILY)                                  |
| Caenorhabditis briggsae | protein ki-se domain containing protein                                                                   | 5  | P:GO:0006468;<br>F:GO:0004672;<br>F:GO:0005524;<br>P:GO:0000003;<br>P:GO:0040011                                                                                                                                                                                                                                               | - |  | IPR000719; IPR011009; IPR017442;<br>G3DSA:1.10.510.10 (GENE3D),<br>PTHR11909 (PANTHER),<br>PTHR11909:SF19 (PANTHER) |
| Caenorhabditis elegans  | novel protein vertebrate myeloid lymphoid or mixed-lineage leukemia (trithorax drosophila) translocated 4 | 11 | P:GO:0040022;<br>P:GO:0045132;<br>P:GO:0040007;<br>P:GO:0002119;<br>F:GO:0005515;<br>P:GO:0042127;<br>P:GO:0008406;<br>C:GO:0005737;<br>F:GO:0016787;<br>P:GO:0040020;<br>C:GO:0005886                                                                                                                                         | - |  | IPR001478; G3DSA:2.30.42.10<br>(GENE3D), PTHR19964 (PANTHER)                                                        |
|                         | -                                                                                                         | 0  |                                                                                                                                                                                                                                                                                                                                |   |  | -                                                                                                                   |

|                         |                                                        |   |                                                                                                                    |                                                                                                                                                                                                                                           |            |                                                                                                                     |
|-------------------------|--------------------------------------------------------|---|--------------------------------------------------------------------------------------------------------------------|-------------------------------------------------------------------------------------------------------------------------------------------------------------------------------------------------------------------------------------------|------------|---------------------------------------------------------------------------------------------------------------------|
| Caenorhabditis elegans  | transformation transcription domain-associated protein | 2 | F:GO:0016773;<br>F:GO:0005488                                                                                      | -                                                                                                                                                                                                                                         | EC:2.7.1.0 | IPR011989; PTHR11139 (PANTHER),<br>PTHR11139:SF2 (PANTHER)                                                          |
| -                       | -                                                      | 0 | -                                                                                                                  | -                                                                                                                                                                                                                                         | -          | -                                                                                                                   |
| -                       | -                                                      | 0 | -                                                                                                                  | -                                                                                                                                                                                                                                         | -          | -                                                                                                                   |
| Caenorhabditis elegans  | mpps one binder ki-se activator-like 2b                | 4 | F:GO:0016301;<br>F:GO:0046872;<br>P:GO:0016310;<br>F:GO:0005515                                                    | -                                                                                                                                                                                                                                         | -          | -                                                                                                                   |
| Brugia malayi           | -dh-dependent fumarate reductase                       | 3 | C:GO:0020015;<br>F:GO:0016156;<br>P:GO:0008152                                                                     | -                                                                                                                                                                                                                                         | EC:1.3.1.6 | IPR003953; G3DSA:3.50.50.60<br>(GENE3D), PTHR11632 (PANTHER),<br>PTHR11632:SF3 (PANTHER), SSF51905<br>(SUPERFAMILY) |
| Caenorhabditis briggsae | enoyl- hydratase isomerase family protein              | 3 | P:GO:0002119;<br>P:GO:0008152;<br>P:GO:0040007                                                                     | -                                                                                                                                                                                                                                         | -          | IPR001753; G3DSA:3.90.226.10<br>(GENE3D), PTHR11941 (PANTHER),<br>SignalP (SIGNALP), SSF52096<br>(SUPERFAMILY)      |
| Caenorhabditis elegans  | nucleoporin nup43                                      | 0 | -                                                                                                                  | C:GO:0005643;<br>P:GO:0015031;<br>C:GO:0005694;<br>C:GO:0005634;<br>P:GO:0007067;<br>P:GO:0006810;<br>C:GO:0000776;<br>F:GO:0003674;<br>P:GO:0051301;<br>P:GO:0007059;<br>C:GO:0005575;<br>P:GO:0055085;<br>P:GO:0051028;<br>P:GO:0008150 | -          | IPR001680; IPR011046; IPR015943;<br>IPR017986; IPR019781; IPR019782;<br>PTHR22652 (PANTHER)                         |
| Caenorhabditis elegans  | nucleoporin nup43                                      | 0 | -                                                                                                                  | C:GO:0005643;<br>P:GO:0015031;<br>C:GO:0005694;<br>C:GO:0005634;<br>P:GO:0007067;<br>P:GO:0006810;<br>C:GO:0000776;<br>F:GO:0003674;<br>P:GO:0051301;<br>P:GO:0007059;<br>C:GO:0005575;<br>P:GO:0055085;<br>P:GO:0051028;<br>P:GO:0008150 | -          | IPR001680; IPR011046; IPR015943;<br>IPR017986; IPR019781; IPR019782;<br>PTHR22652 (PANTHER)                         |
| -                       | -                                                      | 0 | -                                                                                                                  | -                                                                                                                                                                                                                                         | -          | -                                                                                                                   |
| Homo sapiens            | peptidylprolyl isomerase b (cyclophilin b)             | 7 | P:GO:0006457;<br>C:GO:0005788;<br>C:GO:0042470;<br>P:GO:0051169;<br>F:GO:0042277;<br>F:GO:0051082;<br>F:GO:0003755 | -                                                                                                                                                                                                                                         | EC:5.2.1.8 | IPR002130; IPR015891; PTHR11071<br>(PANTHER), PTHR11071:SF63<br>(PANTHER)                                           |
| Caenorhabditis elegans  | mgc80520 protein                                       | 0 | -                                                                                                                  | F:GO:0003674;<br>P:GO:0008150                                                                                                                                                                                                             | -          | -                                                                                                                   |
| Loa loa                 | autosomal zinc finger protein                          | 1 | F:GO:0005488                                                                                                       | -                                                                                                                                                                                                                                         | -          | IPR007087; IPR015880; PTHR11389<br>(PANTHER), SSF57667 (SUPERFAMILY)                                                |

|                         |                                                  |    |                                                                                                                                                                                                                                                                                                                                                 |   |                            |                                                                                                              |
|-------------------------|--------------------------------------------------|----|-------------------------------------------------------------------------------------------------------------------------------------------------------------------------------------------------------------------------------------------------------------------------------------------------------------------------------------------------|---|----------------------------|--------------------------------------------------------------------------------------------------------------|
| Loa loa                 | autosomal zinc finger protein                    | 1  | F:GO:0005488                                                                                                                                                                                                                                                                                                                                    | - |                            | IPR007087; IPR015880; PTHR11389 (PANTHER), SSF57667 (SUPERFAMILY)                                            |
|                         |                                                  | 0  |                                                                                                                                                                                                                                                                                                                                                 |   |                            |                                                                                                              |
|                         |                                                  | 0  |                                                                                                                                                                                                                                                                                                                                                 |   |                            | SignalP (SIGNALP)                                                                                            |
| Caenorhabditis elegans  | #NAME?                                           | 20 | F:GO:0005515;<br>P:GO:0045989;<br>P:GO:0045822;<br>F:GO:0003869;<br>C:GO:0005792;<br>C:GO:0016323;<br>C:GO:0042470;<br>F:GO:0046872;<br>P:GO:0006754;<br>C:GO:0042383;<br>F:GO:0005391;<br>P:GO:0045823;<br>P:GO:0042493;<br>P:GO:0031947;<br>C:GO:0005890;<br>P:GO:0006813;<br>P:GO:0002026;<br>F:GO:0005524;<br>P:GO:0008217;<br>P:GO:0006814 | - | EC:3.1.3.41;<br>EC:3.6.3.9 | IPR001757; IPR004014; IPR006069;<br>PTHR11939:SF100 (PANTHER),<br>SSF81665 (SUPERFAMILY)                     |
| Caenorhabditis elegans  | golgi vesicular membrane trafficking protein p18 | 2  | C:GO:0016021;<br>P:GO:0000003                                                                                                                                                                                                                                                                                                                   | - |                            | IPR000727; G3DSA:1.20.5.110 (GENE3D), PTHR12791 (PANTHER), PTHR12791:SF10 (PANTHER)                          |
| Caenorhabditis briggsae | sn1-specific diacylglycerol lipase beta          | 1  | F:GO:0005515                                                                                                                                                                                                                                                                                                                                    | - |                            | IPR002921; G3DSA:3.40.50.1820 (GENE3D), PTHR21493 (PANTHER), PTHR21493:SF6 (PANTHER), SSF53474 (SUPERFAMILY) |
| Caenorhabditis elegans  | briggsae cbr-pro-2 protein                       | 8  | P:GO:0040007;<br>P:GO:0000003;<br>P:GO:0019915;<br>P:GO:0002119;<br>P:GO:0006898;<br>P:GO:0009792;<br>P:GO:0051729;<br>P:GO:0016246                                                                                                                                                                                                             | - |                            | IPR005343; PTHR12687:SF4 (PANTHER)                                                                           |
| Loa loa                 | nonmuscle myosin heavy chain                     | 13 | C:GO:0043005;<br>P:GO:0048699;<br>P:GO:0007507;<br>P:GO:0006928;<br>P:GO:0048468;<br>P:GO:0051179;<br>F:GO:0003779;<br>N:GO:0071842;<br>P:GO:0021591;<br>P:GO:0030030;<br>F:GO:0003774;<br>F:GO:0005524;<br>C:GO:0016459                                                                                                                        | - |                            | IPR002928; PD936484 (PRODOM), PTHR13140 (PANTHER), PTHR13140:SF23 (PANTHER)                                  |
| Caenorhabditis briggsae | inositol polyphosphate multiki-se                | 2  | F:GO:0004428;<br>F:GO:0016773                                                                                                                                                                                                                                                                                                                   | - | EC:2.7.1.0                 | IPR005522; PTHR12400:SF7 (PANTHER), SSF56104 (SUPERFAMILY)                                                   |

|                         |                                                            |    |                                                                                                                                                                                        |                                                                                                                                     |             |                                                                                                                                                                                                                    |
|-------------------------|------------------------------------------------------------|----|----------------------------------------------------------------------------------------------------------------------------------------------------------------------------------------|-------------------------------------------------------------------------------------------------------------------------------------|-------------|--------------------------------------------------------------------------------------------------------------------------------------------------------------------------------------------------------------------|
| Ciona intestinalis      | multidrug resistance-associated                            | 0  |                                                                                                                                                                                        | F:GO:0005524;<br>F:GO:0016887;<br>F:GO:0000166;<br>C:GO:0016021;<br>F:GO:0042626;<br>F:GO:0017111;<br>P:GO:0055085;<br>P:GO:0006810 |             | IPR001140; IPR003439; IPR003593;<br>IPR011527; IPR017871; IPR017940;<br>G3DSA:1.20.1560.10 (GENE3D),<br>G3DSA:3.40.50.300 (GENE3D),<br>PTHR19242 (PANTHER),<br>PTHR19242:SF22 (PANTHER),<br>SSF52540 (SUPERFAMILY) |
|                         | -                                                          | 0  |                                                                                                                                                                                        |                                                                                                                                     |             | SignalP (SIGNALP)                                                                                                                                                                                                  |
| Caenorhabditis elegans  | lin-48 expression abnormal family member (lex-1)           | 7  | F:GO:0017111;<br>P:GO:0045132;<br>P:GO:0031445;<br>F:GO:0005524;<br>P:GO:0009792;<br>P:GO:0008406;<br>P:GO:0006350                                                                     | -                                                                                                                                   | EC:3.6.1.15 | IPR001487; IPR003593; IPR003959;<br>IPR003960; IPR018359;<br>G3DSA:3.40.50.300 (GENE3D),<br>PTHR23069 (PANTHER), SSF52540<br>(SUPERFAMILY)                                                                         |
| Caenorhabditis brenneri | brain protein 44                                           | 0  |                                                                                                                                                                                        |                                                                                                                                     |             | IPR005336; PTHR14154 (PANTHER),<br>PTHR14154:SF2 (PANTHER)                                                                                                                                                         |
| Caenorhabditis elegans  | hypothetical protein F56A6.4 [Caenorhabditis elegans]      | 0  |                                                                                                                                                                                        |                                                                                                                                     |             | -                                                                                                                                                                                                                  |
| Caenorhabditis elegans  | in family member (ttn-1)                                   | 1  | P:GO:0009792                                                                                                                                                                           | -                                                                                                                                   |             | IPR003599; IPR007110; IPR013098;<br>IPR013783; PTHR19897 (PANTHER),<br>SSF48726 (SUPERFAMILY)                                                                                                                      |
| synthetic construct     | cd81 antigen                                               | 11 | P:GO:0030307;<br>P:GO:0043128;<br>F:GO:0005515;<br>P:GO:0046813;<br>P:GO:0008104;<br>P:GO:0050731;<br>P:GO:0006661;<br>C:GO:0005887;<br>P:GO:0000187;<br>C:GO:0016324;<br>P:GO:0030890 | -                                                                                                                                   |             | IPR008952; IPR018499;<br>G3DSA:1.10.1450.10 (GENE3D),<br>PTHR19282 (PANTHER),<br>PTHR19282:SF19 (PANTHER)                                                                                                          |
| Brugia malayi           | elegans protein partially confirmed by transcript evidence | 8  | P:GO:0040010;<br>F:GO:0005488;<br>P:GO:0000070;<br>P:GO:0040002;<br>P:GO:0040035;<br>P:GO:0040011;<br>P:GO:0006898;<br>P:GO:0009792                                                    | -                                                                                                                                   |             | IPR011989; IPR016024; PF12422<br>(PFAM)                                                                                                                                                                            |
| Caenorhabditis briggsae | kh domain containing protein                               | 3  | F:GO:0003676;<br>F:GO:0005515;<br>P:GO:0016246                                                                                                                                         | -                                                                                                                                   |             | IPR004087; IPR004088; IPR015096;<br>IPR018111; G3DSA:3.30.1370.10<br>(GENE3D), PTHR10288 (PANTHER),<br>PTHR10288:SF57 (PANTHER),<br>SSF54791 (SUPERFAMILY)                                                         |
| Brugia malayi           | kh domain containing protein                               | 2  | F:GO:0005515;<br>P:GO:0016246                                                                                                                                                          | -                                                                                                                                   |             | IPR004087; IPR004088; IPR015096;<br>IPR018111; G3DSA:3.30.1370.10<br>(GENE3D), PTHR10288 (PANTHER),<br>PTHR10288:SF57 (PANTHER),<br>SSF54791 (SUPERFAMILY)                                                         |
| Brugia malayi           | kh domain containing protein                               | 4  | F:GO:0003676;<br>F:GO:0005515;<br>C:GO:0005634;<br>P:GO:0016246                                                                                                                        | -                                                                                                                                   |             | IPR004087; IPR004088; IPR015096;<br>IPR018111; G3DSA:3.30.1370.10<br>(GENE3D), PTHR10288 (PANTHER),<br>PTHR10288:SF57 (PANTHER), SignalP<br>(SIGNALP), SSF54791 (SUPERFAMILY)                                      |



|                         |                                                              |    |                                                                                                                                                                       |                               |             |                                                                                                                                                                                                   |
|-------------------------|--------------------------------------------------------------|----|-----------------------------------------------------------------------------------------------------------------------------------------------------------------------|-------------------------------|-------------|---------------------------------------------------------------------------------------------------------------------------------------------------------------------------------------------------|
| Brugia malayi           | kh domain containing protein                                 | 4  | F:GO:0003676;<br>F:GO:0005515;<br>C:GO:0005634;<br>P:GO:0016246                                                                                                       | -                             |             | IPR004087; IPR004088; IPR015096;<br>IPR018111; G3DSA:3.30.1370.10<br>(GENE3D), PTHR10288 (PANTHER),<br>PTHR10288:SF57 (PANTHER),<br>SSF54791 (SUPERFAMILY)                                        |
| Brugia malayi           | kh domain containing protein                                 | 3  | F:GO:0003676;<br>F:GO:0005515;<br>P:GO:0016246                                                                                                                        | -                             |             | IPR004087; IPR004088; IPR015096;<br>IPR018111; G3DSA:3.30.1370.10<br>(GENE3D), PTHR10288 (PANTHER),<br>PTHR10288:SF57 (PANTHER),<br>SSF54791 (SUPERFAMILY)                                        |
| Caenorhabditis elegans  | briggsae cbr-frm-7 protein                                   | 0  |                                                                                                                                                                       | F:GO:0005488;<br>C:GO:0005856 |             | IPR000299; IPR011993; IPR018980;<br>SSF50729 (SUPERFAMILY)                                                                                                                                        |
| Brugia malayi           | related to oncogene abl family member (abl-1)                | 7  | F:GO:0004715;<br>F:GO:0030145;<br>F:GO:0005515;<br>P:GO:0018108;<br>F:GO:0005524;<br>F:GO:0000287;<br>P:GO:0007165                                                    | -                             | EC:2.7.10.2 | IPR000719; IPR001245; IPR008266;<br>IPR011009; IPR020635; IPR020685;<br>IPR020700; G3DSA:1.10.510.10<br>(GENE3D), G3DSA:3.30.200.20<br>(GENE3D)                                                   |
| Caenorhabditis elegans  | sphingolipid delta 4 desaturase c-4 hydroxylase protein des2 | 6  | C:GO:0005789;<br>P:GO:0006633;<br>F:GO:0005515;<br>P:GO:0055114;<br>F:GO:0016705;<br>C:GO:0016021                                                                     | -                             |             | IPR005804; PTHR12879 (PANTHER),<br>SignalP (SIGNALP)                                                                                                                                              |
|                         | -                                                            | 0  |                                                                                                                                                                       |                               |             | SignalP (SIGNALP)                                                                                                                                                                                 |
| Rhabditoides inermis    | small subunit ribosomal protein 7                            | 10 | P:GO:0009792;<br>P:GO:0002119;<br>C:GO:0005840;<br>F:GO:0003735;<br>P:GO:0055085;<br>P:GO:0000003;<br>P:GO:0040007;<br>C:GO:0016020;<br>P:GO:0006412;<br>F:GO:0005215 | -                             | EC:3.6.5.3  | IPR000554                                                                                                                                                                                         |
| Caenorhabditis briggsae | elegans protein confirmed by transcript evidence             | 0  |                                                                                                                                                                       |                               |             | -                                                                                                                                                                                                 |
| Caenorhabditis elegans  | briggsae cbr-pqn-34 protein                                  | 3  | P:GO:0000022;<br>P:GO:0051013;<br>C:GO:0005819                                                                                                                        | -                             |             | IPR011033; IPR014797; PTHR21595<br>(PANTHER)                                                                                                                                                      |
| Caenorhabditis elegans  | briggsae cbr-pqn-34 protein                                  | 3  | P:GO:0000022;<br>P:GO:0051013;<br>C:GO:0005819                                                                                                                        | -                             |             | IPR011033; IPR014797; PTHR21595<br>(PANTHER)                                                                                                                                                      |
| Caenorhabditis briggsae | atp-binding sub-family b (mdr tap) member 9                  | 6  | P:GO:0006810;<br>F:GO:0005515;<br>C:GO:0030176;<br>F:GO:0015197;<br>C:GO:0043234;<br>F:GO:0042626                                                                     | -                             |             | IPR001140; IPR011527; IPR017940;<br>G3DSA:1.20.1560.10 (GENE3D),<br>G3DSA:3.40.50.300 (GENE3D),<br>PTHR19242 (PANTHER),<br>PTHR19242:SF82 (PANTHER), SignalP<br>(SIGNALP), SSF52540 (SUPERFAMILY) |
| Caenorhabditis elegans  | heterotrimeric g protein alpha subunit                       | 4  | P:GO:0007186;<br>F:GO:0004871;<br>P:GO:0007165;<br>F:GO:0005525                                                                                                       | -                             |             | IPR001019; IPR011025;<br>G3DSA:3.40.50.300 (GENE3D),<br>PTHR10218:SF63 (PANTHER),<br>SSF52540 (SUPERFAMILY)                                                                                       |
|                         | -                                                            | 0  |                                                                                                                                                                       |                               |             | -                                                                                                                                                                                                 |
|                         | -                                                            | 0  |                                                                                                                                                                       |                               |             | -                                                                                                                                                                                                 |

|                         |                                                |    |                                                                                                                                                                                                                                                                                                                                                                                                                                                                        |                               |                                                                                                                  |
|-------------------------|------------------------------------------------|----|------------------------------------------------------------------------------------------------------------------------------------------------------------------------------------------------------------------------------------------------------------------------------------------------------------------------------------------------------------------------------------------------------------------------------------------------------------------------|-------------------------------|------------------------------------------------------------------------------------------------------------------|
| Haemonchus contortus    | syntaxin binding protein 1                     | 28 | P:GO:0007412;<br>F:GO:0030347;<br>P:GO:0006944;<br>C:GO:0042581;<br>P:GO:0070527;<br>P:GO:0006904;<br>F:GO:0047485;<br>P:GO:0050821;<br>F:GO:0030348;<br>P:GO:0015031;<br>C:GO:0042582;<br>P:GO:0060292;<br>C:GO:0070820;<br>C:GO:0005829;<br>P:GO:0043524;<br>C:GO:0031091;<br>F:GO:0019904;<br>P:GO:0016188;<br>F:GO:0042802;<br>C:GO:0043234;<br>P:GO:0010807;<br>P:GO:0043312;<br>P:GO:0002576;<br>F:GO:0017075;<br>P:GO:0007274;<br>C:GO:0005886;<br>C:GO:0005739 | -                             | IPR001619; G3DSA:3.40.50.2060 (GENE3D), PTHR11679:SF7 (PANTHER)                                                  |
| -                       | -                                              | 0  |                                                                                                                                                                                                                                                                                                                                                                                                                                                                        |                               | -                                                                                                                |
| Caenorhabditis elegans  | denn madd domain containing 5b                 | 1  | C:GO:0016021                                                                                                                                                                                                                                                                                                                                                                                                                                                           | -                             | IPR004012; SSF140741 (SUPERFAMILY)                                                                               |
| Caenorhabditis elegans  | denn domain-containing protein 5b              | 0  |                                                                                                                                                                                                                                                                                                                                                                                                                                                                        | C:GO:0016021;<br>C:GO:0016020 | IPR004012; IPR005112; SSF140741 (SUPERFAMILY)                                                                    |
| Caenorhabditis elegans  | denn domain-containing protein 5b              | 0  |                                                                                                                                                                                                                                                                                                                                                                                                                                                                        | C:GO:0016021;<br>C:GO:0016020 | IPR004012; IPR005112; SSF140741 (SUPERFAMILY)                                                                    |
| Caenorhabditis briggsae | immunoglobulin i-set domain containing protein | 1  | F:GO:0005515                                                                                                                                                                                                                                                                                                                                                                                                                                                           | -                             | IPR003599; IPR007110; IPR013098; IPR013783; PTHR19897 (PANTHER), PTHR19897:SF7 (PANTHER), SSF48726 (SUPERFAMILY) |
| Caenorhabditis briggsae | 5-azacytidine resistance protein               | 2  | P:GO:0000003;<br>F:GO:0004721                                                                                                                                                                                                                                                                                                                                                                                                                                          | -                             | EC:3.1.3.16<br>IPR001932; IPR010822; IPR022398; PTHR12320 (PANTHER), SignalP (SIGNALP)                           |
| -                       | -                                              | 0  |                                                                                                                                                                                                                                                                                                                                                                                                                                                                        |                               | -                                                                                                                |
| Ailuropoda melanoleuca  | ribosomal protein l7a                          | 11 | F:GO:0030528;<br>F:GO:0003729;<br>F:GO:0003735;<br>P:GO:0045449;<br>P:GO:0006414;<br>C:GO:0005624;<br>F:GO:0003677;<br>P:GO:0042254;<br>C:GO:0042788;<br>F:GO:0042803;<br>C:GO:0022625                                                                                                                                                                                                                                                                                 | -                             | -                                                                                                                |
| Caenorhabditis elegans  | trab domain-containing protein                 | 0  |                                                                                                                                                                                                                                                                                                                                                                                                                                                                        | P:GO:0008150;<br>C:GO:0005575 | IPR002816; PTHR21530 (PANTHER)                                                                                   |
| -                       | -                                              | 0  |                                                                                                                                                                                                                                                                                                                                                                                                                                                                        |                               | SignalP (SIGNALP)                                                                                                |

|                         |                                                            |    |                                                                                                                                                                       |                                                |            |                                                                                                                                             |
|-------------------------|------------------------------------------------------------|----|-----------------------------------------------------------------------------------------------------------------------------------------------------------------------|------------------------------------------------|------------|---------------------------------------------------------------------------------------------------------------------------------------------|
| Caenorhabditis elegans  | serine threonine protein                                   | 1  | F:GO:0004722                                                                                                                                                          | -                                              |            | IPR004843; IPR006186; G3DSA:3.60.21.10 (GENE3D), PTHR11668:SF10 (PANTHER), SSF56300 (SUPERFAMILY)                                           |
| Caenorhabditis elegans  | elegans protein partially confirmed by transcript evidence | 4  | F:GO:0005488;<br>P:GO:0000003;<br>P:GO:0007186;<br>C:GO:0016021                                                                                                       | -                                              |            | IPR000276; IPR017452; G3DSA:1.20.1070.10 (GENE3D), PTHR19264 (PANTHER), PTHR19264:SF93 (PANTHER), SignalP (SIGNALP), SSF81321 (SUPERFAMILY) |
| Caenorhabditis briggsae | testis expressed sequence 264                              | 0  |                                                                                                                                                                       | F:GO:0003674;<br>P:GO:0008150                  |            | G3DSA:3.20.80.10 (GENE3D), SignalP (SIGNALP)                                                                                                |
| Caenorhabditis elegans  | importin subunit beta-1                                    | 0  |                                                                                                                                                                       | F:GO:0005488;<br>P:GO:0006886;<br>F:GO:0008565 |            | IPR011989; IPR016024; PTHR10527 (PANTHER), PTHR10527:SF1 (PANTHER), SignalP (SIGNALP)                                                       |
|                         | -                                                          | 0  |                                                                                                                                                                       |                                                |            | -                                                                                                                                           |
|                         | -                                                          | 0  |                                                                                                                                                                       |                                                |            | -                                                                                                                                           |
| Caenorhabditis elegans  | rrp15-like protein                                         | 1  | F:GO:0005515                                                                                                                                                          | -                                              |            | IPR012459; PTHR13245:SF3 (PANTHER)                                                                                                          |
|                         | -                                                          | 0  |                                                                                                                                                                       |                                                |            | -                                                                                                                                           |
| Caenorhabditis elegans  | transformation transcription domain-associated protein     | 0  |                                                                                                                                                                       | F:GO:0005488;<br>F:GO:0016773                  |            | -                                                                                                                                           |
| Caenorhabditis briggsae | annexin a13                                                | 4  | F:GO:0005515;<br>F:GO:0005509;<br>C:GO:0044464;<br>F:GO:0005544                                                                                                       | -                                              |            | IPR001464; IPR018252; IPR018502; PTHR10502:SF30 (PANTHER)                                                                                   |
|                         | -                                                          | 0  |                                                                                                                                                                       |                                                |            | SignalP (SIGNALP)                                                                                                                           |
| Caenorhabditis briggsae | mitochondrial 39s ribosomal protein l4                     | 10 | P:GO:0009792;<br>P:GO:0002119;<br>C:GO:0005840;<br>F:GO:0003735;<br>F:GO:0005515;<br>P:GO:0040010;<br>P:GO:0000003;<br>P:GO:0040011;<br>P:GO:0006898;<br>P:GO:0006412 | -                                              | EC:3.6.5.3 | IPR002136; IPR013005; IPR015498; G3DSA:3.40.1370.10 (GENE3D)                                                                                |
| Caenorhabditis briggsae | 2-oxoglutarate dehydroge-se                                | 10 | P:GO:0040010;<br>P:GO:0008340;<br>C:GO:0031966;<br>P:GO:0055114;<br>P:GO:0002119;<br>P:GO:0006096;<br>C:GO:0005759;<br>P:GO:0009792;<br>F:GO:0004591;<br>F:GO:0030976 | -                                              | EC:1.2.4.2 | IPR001017; IPR005475; IPR011603; G3DSA:3.40.50.970 (GENE3D), SSF52518 (SUPERFAMILY)                                                         |
| Caenorhabditis briggsae | 2-oxoglutarate dehydroge-se                                | 10 | P:GO:0040010;<br>P:GO:0008340;<br>C:GO:0031966;<br>P:GO:0055114;<br>P:GO:0002119;<br>P:GO:0006096;<br>C:GO:0005759;<br>P:GO:0009792;<br>F:GO:0004591;<br>F:GO:0030976 | -                                              | EC:1.2.4.2 | IPR001017; IPR005475; IPR011603; G3DSA:3.40.50.970 (GENE3D), SSF52518 (SUPERFAMILY)                                                         |

|                         |                                                  |    |                                                                                                                                                                                                                                                                                              |                                                                                  |            |                                                                                                      |
|-------------------------|--------------------------------------------------|----|----------------------------------------------------------------------------------------------------------------------------------------------------------------------------------------------------------------------------------------------------------------------------------------------|----------------------------------------------------------------------------------|------------|------------------------------------------------------------------------------------------------------|
| Caenorhabditis briggsae | 2-oxoglutarate dehydroge-se                      | 10 | P:GO:0040010;<br>P:GO:0008340;<br>C:GO:0031966;<br>P:GO:0055114;<br>P:GO:0002119;<br>P:GO:0006096;<br>C:GO:0005759;<br>P:GO:0009792;<br>F:GO:0004591;<br>F:GO:0030976                                                                                                                        | -                                                                                | EC:1.2.4.2 | IPR001017; IPR005475; IPR011603;<br>G3DSA:3.40.50.970 (GENE3D),<br>SSF52518 (SUPERFAMILY)            |
| -                       | -                                                | 0  |                                                                                                                                                                                                                                                                                              |                                                                                  |            | -                                                                                                    |
| -                       | -                                                | 0  |                                                                                                                                                                                                                                                                                              |                                                                                  |            | -                                                                                                    |
| Caenorhabditis elegans  | elegans protein confirmed by transcript evidence | 0  |                                                                                                                                                                                                                                                                                              |                                                                                  |            | IPR021010; SSF141739 (SUPERFAMILY)                                                                   |
| Caenorhabditis briggsae | protein unc-79 homolog                           | 0  |                                                                                                                                                                                                                                                                                              | F:GO:0003674;<br>C:GO:0016021;<br>C:GO:0016020;<br>P:GO:0008150;<br>C:GO:0005575 |            | PTHR21696 (PANTHER)                                                                                  |
| Brugia malayi           | gem (nuclear organelle) associated protein 8     | 1  | C:GO:0044424                                                                                                                                                                                                                                                                                 | -                                                                                |            | -                                                                                                    |
| Ancylostoma caninum     | 14-3-3 protein                                   | 7  | C:GO:0005737;<br>F:GO:0019904;<br>P:GO:0018991;<br>P:GO:0040010;<br>P:GO:0008340;<br>P:GO:0006898;<br>P:GO:0043053                                                                                                                                                                           | -                                                                                |            | IPR000308                                                                                            |
| Ancylostoma caninum     | 14-3-3 protein                                   | 7  | C:GO:0005737;<br>F:GO:0019904;<br>P:GO:0018991;<br>P:GO:0040010;<br>P:GO:0008340;<br>P:GO:0006898;<br>P:GO:0043053                                                                                                                                                                           | -                                                                                |            | IPR000308                                                                                            |
| Haemonchus contortus    | hexoki-se family protein                         | 17 | P:GO:0018105;<br>C:GO:0005829;<br>P:GO:0018108;<br>F:GO:0004672;<br>C:GO:0005739;<br>C:GO:0005901;<br>P:GO:0010359;<br>P:GO:0018107;<br>F:GO:0005536;<br>P:GO:0046835;<br>F:GO:0005524;<br>F:GO:0016887;<br>P:GO:0006096;<br>F:GO:0042803;<br>P:GO:0046777;<br>P:GO:0043066;<br>F:GO:0004340 | -                                                                                | EC:2.7.1.2 | IPR001312; IPR019807; IPR022672;<br>IPR022673; G3DSA:3.40.367.20<br>(GENE3D), SSF53067 (SUPERFAMILY) |
| -                       | -                                                | 0  |                                                                                                                                                                                                                                                                                              |                                                                                  |            | -                                                                                                    |
| -                       | -                                                | 0  |                                                                                                                                                                                                                                                                                              |                                                                                  |            | -                                                                                                    |
| -                       | -                                                | 0  |                                                                                                                                                                                                                                                                                              |                                                                                  |            | -                                                                                                    |
| Caenorhabditis elegans  | wd repeat-containing protein 3                   | 1  | P:GO:0006898                                                                                                                                                                                                                                                                                 | -                                                                                |            | IPR001680; IPR011046; IPR015943;<br>PTHR19853 (PANTHER)                                              |
| Caenorhabditis elegans  | wd repeat-containing protein 3                   | 1  | P:GO:0006898                                                                                                                                                                                                                                                                                 | -                                                                                |            | IPR001680; IPR011046; IPR015943;<br>PTHR19853 (PANTHER)                                              |

|                                     |                                                      |    |                                                                                                                                                                                                                                                                                                                                                                                                                                                                                          |   |                                                                                                                                |
|-------------------------------------|------------------------------------------------------|----|------------------------------------------------------------------------------------------------------------------------------------------------------------------------------------------------------------------------------------------------------------------------------------------------------------------------------------------------------------------------------------------------------------------------------------------------------------------------------------------|---|--------------------------------------------------------------------------------------------------------------------------------|
| Physcomitrella patens subsp. patens | atp-dependent r- helicase                            | 1  | F:GO:0005488                                                                                                                                                                                                                                                                                                                                                                                                                                                                             | - | IPR000629; IPR011545; IPR014001; IPR014014; IPR014021; G3DSA:3.40.50.300 (GENE3D), PTHR10967 (PANTHER), SSF52540 (SUPERFAMILY) |
| Caenorhabditis elegans              | wrapper rega-1 klingon homolog family member (wrk-1) | 2  | P:GO:0007611;<br>P:GO:0009987                                                                                                                                                                                                                                                                                                                                                                                                                                                            | - | -                                                                                                                              |
| Caenorhabditis briggsae             | wrapper rega-1 klingon homolog family member (wrk-1) | 2  | P:GO:0007611;<br>P:GO:0009987                                                                                                                                                                                                                                                                                                                                                                                                                                                            | - | SignalP (SIGNALP)                                                                                                              |
| synthetic construct                 | cystatin c                                           | 44 | P:GO:0010711;<br>P:GO:0060548;<br>P:GO:0010951;<br>C:GO:0031982;<br>C:GO:0031965;<br>P:GO:0070301;<br>C:GO:0005615;<br>P:GO:0043067;<br>C:GO:0005764;<br>P:GO:0042747;<br>P:GO:0014070;<br>F:GO:0001540;<br>P:GO:0010716;<br>P:GO:0008284;<br>P:GO:0007420;<br>C:GO:0043025;<br>P:GO:0001654;<br>P:GO:0001666;<br>P:GO:0048678;<br>C:GO:0005771;<br>P:GO:0006915;<br>P:GO:0007566;<br>P:GO:0051789;<br>P:GO:0042493;<br>P:GO:0060009;<br>F:GO:0002020;<br>C:GO:0048471;<br>F:GO:0016798; | - | -                                                                                                                              |
| Caenorhabditis briggsae             | amylo- 6- 4-alpha-glucanotransferase isoform 1       | 8  | F:GO:0004133;<br>F:GO:0005515;<br>C:GO:0043033;<br>P:GO:0005977;<br>P:GO:0009792;<br>C:GO:0005737;<br>F:GO:0016757                                                                                                                                                                                                                                                                                                                                                                       | - | IPR010401; IPR013781; IPR017853                                                                                                |
| Caenorhabditis briggsae             | amylo- 6- 4-alpha-glucanotransferase isoform 1       | 8  | F:GO:0016798;<br>F:GO:0004133;<br>F:GO:0005515;<br>C:GO:0043033;<br>P:GO:0005977;<br>P:GO:0009792;<br>C:GO:0005737;<br>F:GO:0016757                                                                                                                                                                                                                                                                                                                                                      | - | IPR010401; IPR013781; IPR017853                                                                                                |

|                        |                                                            |    |                                                                                                                                                                                                                                                                                                                                                                                                                                                                                         |                                                |                                                                                                            |
|------------------------|------------------------------------------------------------|----|-----------------------------------------------------------------------------------------------------------------------------------------------------------------------------------------------------------------------------------------------------------------------------------------------------------------------------------------------------------------------------------------------------------------------------------------------------------------------------------------|------------------------------------------------|------------------------------------------------------------------------------------------------------------|
| Caenorhabditis elegans | immunoglobulin binding protein 1                           | 9  | P:GO:0040035;<br>P:GO:0009792;<br>P:GO:0010171;<br>P:GO:0002119;<br>P:GO:0018991;<br>F:GO:0005515;<br>P:GO:0040017;<br>P:GO:0040007;<br>P:GO:0002009                                                                                                                                                                                                                                                                                                                                    | -                                              | IPR007304; PTHR10933:SF8<br>(PANTHER)                                                                      |
| Caenorhabditis elegans | arrestin domain containing 2                               | 0  |                                                                                                                                                                                                                                                                                                                                                                                                                                                                                         | P:GO:0007600;<br>P:GO:0007165;<br>F:GO:0005515 | IPR011021; IPR014756; PTHR11188<br>(PANTHER)                                                               |
| Loa loa                | protein phosphatase 2 (formerly 2a) catalytic beta isoform | 35 | P:GO:0000077;<br>P:GO:0042542;<br>P:GO:0043161;<br>F:GO:0008022;<br>P:GO:0046677;<br>P:GO:0006672;<br>C:GO:0000159;<br>P:GO:0010033;<br>P:GO:0042518;<br>P:GO:0030155;<br>P:GO:0007498;<br>P:GO:0046580;<br>C:GO:0005829;<br>F:GO:0046982;<br>F:GO:0046872;<br>P:GO:0030111;<br>F:GO:0019904;<br>C:GO:0000775;<br>P:GO:0008380;<br>P:GO:0051726;<br>P:GO:0006917;<br>P:GO:0030308;<br>P:GO:0007126;<br>P:GO:0000188;<br>P:GO:0045595;<br>P:GO:0006470;<br>P:GO:0045449;<br>P:GO:0019932 | -                                              | IPR004843; IPR006186;<br>G3DSA:3.60.21.10 (GENE3D),<br>PTHR11668:SF21 (PANTHER),<br>SSF56300 (SUPERFAMILY) |

|                         |                                          |    |                                                                                                                                                                                                                                                                                                                                                                                                                                      |   |            |                                                                                                                             |
|-------------------------|------------------------------------------|----|--------------------------------------------------------------------------------------------------------------------------------------------------------------------------------------------------------------------------------------------------------------------------------------------------------------------------------------------------------------------------------------------------------------------------------------|---|------------|-----------------------------------------------------------------------------------------------------------------------------|
| Brugia malayi           | hdac7 protein                            | 25 | F:GO:0016566;<br>F:GO:0005080;<br>F:GO:0004407;<br>F:GO:0003714;<br>P:GO:0070932;<br>F:GO:0042826;<br>P:GO:0032869;<br>P:GO:0007043;<br>P:GO:0007507;<br>P:GO:0030183;<br>P:GO:0032703;<br>F:GO:0070491;<br>P:GO:0070933;<br>C:GO:0005737;<br>C:GO:0005667;<br>C:GO:0035097;<br>P:GO:0048742;<br>P:GO:0090050;<br>P:GO:0034983;<br>P:GO:0010553;<br>P:GO:0045668;<br>P:GO:0006954;<br>C:GO:0000118;<br>F:GO:0003682;<br>P:GO:0001570 | - |            | IPR000286; PTHR10625:SF21 (PANTHER), SSF52768 (SUPERFAMILY)                                                                 |
| Caenorhabditis briggsae | calcium atpase                           | 5  | F:GO:0005388;<br>C:GO:0016021;<br>P:GO:0006754;<br>F:GO:0005524;<br>P:GO:0006816                                                                                                                                                                                                                                                                                                                                                     | - | EC:3.6.3.8 | IPR001757; IPR006068; G3DSA:1.20.1110.10 (GENE3D), PTHR11939:SF76 (PANTHER), SSF56784 (SUPERFAMILY), SSF81665 (SUPERFAMILY) |
| Caenorhabditis briggsae | calcium atpase                           | 5  | F:GO:0005388;<br>C:GO:0016021;<br>P:GO:0006754;<br>F:GO:0005524;<br>P:GO:0006816                                                                                                                                                                                                                                                                                                                                                     | - | EC:3.6.3.8 | IPR001757; IPR006068; G3DSA:1.20.1110.10 (GENE3D), PTHR11939:SF76 (PANTHER), SSF56784 (SUPERFAMILY), SSF81665 (SUPERFAMILY) |
| Caenorhabditis briggsae | calcium atpase                           | 5  | F:GO:0005388;<br>C:GO:0016021;<br>P:GO:0006754;<br>F:GO:0005524;<br>P:GO:0006816                                                                                                                                                                                                                                                                                                                                                     | - | EC:3.6.3.8 | IPR001757; IPR006068; G3DSA:1.20.1110.10 (GENE3D), PTHR11939:SF76 (PANTHER), SSF56784 (SUPERFAMILY), SSF81665 (SUPERFAMILY) |
| Caenorhabditis briggsae | calcium atpase                           | 5  | F:GO:0005388;<br>C:GO:0016021;<br>P:GO:0006754;<br>F:GO:0005524;<br>P:GO:0006816                                                                                                                                                                                                                                                                                                                                                     | - | EC:3.6.3.8 | IPR001757; IPR006068; G3DSA:1.20.1110.10 (GENE3D), PTHR11939:SF76 (PANTHER), SSF56784 (SUPERFAMILY), SSF81665 (SUPERFAMILY) |
|                         |                                          |    |                                                                                                                                                                                                                                                                                                                                                                                                                                      |   |            | IPR003599; IPR007110; IPR013098; IPR013783; PTHR19897 (PANTHER), PTHR19897:SF9 (PANTHER), SSF48726 (SUPERFAMILY)            |
|                         |                                          | 0  |                                                                                                                                                                                                                                                                                                                                                                                                                                      |   |            |                                                                                                                             |
| Caenorhabditis elegans  | mtk1 mekk4 homolog family member (mtk-1) | 2  | P:GO:0009987;<br>P:GO:0043170                                                                                                                                                                                                                                                                                                                                                                                                        | - |            |                                                                                                                             |
| Loa loa                 | inositol -trisphosphate receptor         | 4  | P:GO:0006810;<br>C:GO:0043231;<br>C:GO:0044444;<br>C:GO:0016020                                                                                                                                                                                                                                                                                                                                                                      | - |            | IPR001917; IPR015925; PTHR13715:SF2 (PANTHER)                                                                               |

|                            |                                                                          |   |                                                                                                                                     |                                                                                                                                     |            |                                                                                                                                                                                                     |
|----------------------------|--------------------------------------------------------------------------|---|-------------------------------------------------------------------------------------------------------------------------------------|-------------------------------------------------------------------------------------------------------------------------------------|------------|-----------------------------------------------------------------------------------------------------------------------------------------------------------------------------------------------------|
| Caenorhabditis briggsae    | cysteine-rich with egf-like domains 1                                    | 1 | C:GO:0016020                                                                                                                        | -                                                                                                                                   | -          | IPR000152; IPR000742; IPR002049; IPR006210; IPR006212; IPR013032; IPR013091; IPR018097; IPR021852; G3DSA:2.10.25.10 (GENE3D), PTHR11201 (PANTHER), PTHR11201:SF61 (PANTHER), SSF57196 (SUPERFAMILY) |
| -                          | -                                                                        | 0 | -                                                                                                                                   | -                                                                                                                                   | -          | -                                                                                                                                                                                                   |
| -                          | -                                                                        | 0 | -                                                                                                                                   | -                                                                                                                                   | -          | -                                                                                                                                                                                                   |
| Caenorhabditis briggsae    | cysteine-rich with egf-like domains 1                                    | 1 | C:GO:0016020                                                                                                                        | -                                                                                                                                   | -          | -                                                                                                                                                                                                   |
| -                          | -                                                                        | 0 | -                                                                                                                                   | -                                                                                                                                   | -          | -                                                                                                                                                                                                   |
| Caenorhabditis briggsae    | sy-ptosomal-associated 29kda                                             | 5 | P:GO:0009792;<br>P:GO:0000003;<br>P:GO:0040007;<br>P:GO:0006898;<br>P:GO:0002119                                                    | -                                                                                                                                   | -          | SignalP (SIGNALP)                                                                                                                                                                                   |
| Ascaris suum               | briggsae cbr-flp-12 protein                                              | 0 | -                                                                                                                                   | -                                                                                                                                   | -          | -                                                                                                                                                                                                   |
| Oscheius sp. (strain CEW1) | vit6_oscbr ame: full=vitellogenin-6 flags: precursor                     | 0 | -                                                                                                                                   | P:GO:0006869;<br>F:GO:0005319;<br>F:GO:0045735;<br>C:GO:0005576                                                                     | -          | -                                                                                                                                                                                                   |
| Caenorhabditis briggsae    | vitellogenin structural genes (yolk protein genes) family member (vit-2) | 0 | -                                                                                                                                   | P:GO:0006869;<br>F:GO:0005319;<br>P:GO:0040010;<br>F:GO:0045735;<br>P:GO:0009792;<br>P:GO:0008340;<br>F:GO:0005515;<br>C:GO:0005576 | -          | -                                                                                                                                                                                                   |
| Caenorhabditis elegans     | ccr4-not transcription subunit 1                                         | 1 | F:GO:0005515                                                                                                                        | -                                                                                                                                   | -          | IPR007196; IPR018087; IPR019825; PTHR13162 (PANTHER)                                                                                                                                                |
| Homo sapiens               | thymosin beta 4                                                          | 6 | C:GO:0005829;<br>C:GO:0005856;<br>P:GO:0042989;<br>P:GO:0030334;<br>F:GO:0003779;<br>C:GO:0005634                                   | -                                                                                                                                   | -          | SignalP (SIGNALP)                                                                                                                                                                                   |
| Caenorhabditis elegans     | filamin abp280 repeat family protein                                     | 8 | P:GO:0009792;<br>P:GO:0010171;<br>C:GO:0005840;<br>F:GO:0003735;<br>F:GO:0003779;<br>P:GO:0007126;<br>P:GO:0000003;<br>P:GO:0006412 | -                                                                                                                                   | EC:3.6.5.3 | IPR001298; IPR013783; IPR014756; IPR017868; PTHR11915 (PANTHER), PTHR11915:SF24 (PANTHER)                                                                                                           |
| Caenorhabditis elegans     | elegans protein partially confirmed by transcript evidence               | 0 | -                                                                                                                                   | -                                                                                                                                   | -          | -                                                                                                                                                                                                   |
| -                          | -                                                                        | 0 | -                                                                                                                                   | -                                                                                                                                   | -          | -                                                                                                                                                                                                   |
| Caenorhabditis elegans     | ga17538                                                                  | 3 | P:GO:0008593;<br>P:GO:0007035;<br>P:GO:0007424                                                                                      | -                                                                                                                                   | -          | -                                                                                                                                                                                                   |
| Caenorhabditis elegans     | variable abnormal morphology family member (vab-10)                      | 1 | F:GO:0003779                                                                                                                        | -                                                                                                                                   | -          | IPR001452; IPR018159; PD968187 (PRODOM), G3DSA:1.20.58.60 (GENE3D), PTHR11915 (PANTHER), PTHR11915:SF49 (PANTHER), SignalP (SIGNALP), SSF46966 (SUPERFAMILY)                                        |



|                             |                                                       |    |                                                                                                                                                                                        |                                                                                  |                                                                                                                                                                         |
|-----------------------------|-------------------------------------------------------|----|----------------------------------------------------------------------------------------------------------------------------------------------------------------------------------------|----------------------------------------------------------------------------------|-------------------------------------------------------------------------------------------------------------------------------------------------------------------------|
| Caenorhabditis elegans      | variable abnormal morphology family member (vab-10)   | 1  | F:GO:0003779                                                                                                                                                                           | -                                                                                | IPR001452; IPR018159; G3DSA:1.20.58.60 (GENE3D), PTHR11915 (PANTHER), PTHR11915:SF49 (PANTHER), SignalP (SIGNALP), SSF46966 (SUPERFAMILY)                               |
| -                           | -                                                     | 0  | -                                                                                                                                                                                      | -                                                                                | -                                                                                                                                                                       |
| -                           | -                                                     | 0  | -                                                                                                                                                                                      | -                                                                                | -                                                                                                                                                                       |
| -                           | -                                                     | 0  | -                                                                                                                                                                                      | -                                                                                | -                                                                                                                                                                       |
| Bos taurus                  | heavy polypeptide 15                                  | 0  |                                                                                                                                                                                        | F:GO:0005524;<br>C:GO:0016459;<br>F:GO:0003774                                   | -                                                                                                                                                                       |
| -                           | -                                                     | 0  | -                                                                                                                                                                                      | -                                                                                | -                                                                                                                                                                       |
| Brugia malayi               | phd finger protein                                    | 0  |                                                                                                                                                                                        | F:GO:0046872;<br>P:GO:0055085;<br>F:GO:0008270;<br>F:GO:0005515;<br>C:GO:0005634 | PTHR13793 (PANTHER), PTHR13793:SF9 (PANTHER), SignalP (SIGNALP)                                                                                                         |
| Caenorhabditis briggsae     | briggsae cbr-far-7 protein                            | 1  | F:GO:0008289                                                                                                                                                                           | -                                                                                | IPR008632                                                                                                                                                               |
| Caenorhabditis briggsae     | briggsae cbr-far-7 protein                            | 1  | F:GO:0008289                                                                                                                                                                           | -                                                                                | IPR008632                                                                                                                                                               |
| -                           | -                                                     | 0  | -                                                                                                                                                                                      | -                                                                                | IPR001205; SSF56672 (SUPERFAMILY)                                                                                                                                       |
| -                           | -                                                     | 0  | -                                                                                                                                                                                      | -                                                                                | SignalP (SIGNALP)                                                                                                                                                       |
| Caenorhabditis elegans      | temporarily assigned gene -me family member (tag-333) | 0  |                                                                                                                                                                                        | P:GO:0007165;<br>F:GO:0005515                                                    | -                                                                                                                                                                       |
| Caenorhabditis elegans      | briggsae cbr-rbr-2 protein                            | 6  | F:GO:0005488;<br>C:GO:0005730;<br>F:GO:0016563;<br>C:GO:0019907;<br>C:GO:0005737;<br>P:GO:0045941                                                                                      | -                                                                                | IPR001606; IPR001965; IPR003347; IPR004198; IPR011011; IPR013083; IPR013129; IPR013637; IPR019787; PTHR10694 (PANTHER), PTHR10694:SF1 (PANTHER), SSF51197 (SUPERFAMILY) |
| -                           | -                                                     | 0  | -                                                                                                                                                                                      | -                                                                                | -                                                                                                                                                                       |
| Brugia malayi               | general transcription factor polypeptide beta         | 11 | P:GO:0000003;<br>P:GO:0040010;<br>P:GO:0006898;<br>P:GO:0040011;<br>F:GO:0016787;<br>F:GO:0003676;<br>P:GO:0006350;<br>P:GO:0009792;<br>P:GO:0002119;<br>P:GO:0010171;<br>C:GO:0005634 | -                                                                                | IPR003166; IPR011991; PTHR12716 (PANTHER), PTHR12716:SF8 (PANTHER), SSF46785 (SUPERFAMILY)                                                                              |
| Danio rerio                 | nuclear receptor coactivator 4                        | 1  | F:GO:0005515                                                                                                                                                                           | -                                                                                | -                                                                                                                                                                       |
| Danio rerio                 | nuclear receptor coactivator 4                        | 1  | F:GO:0005515                                                                                                                                                                           | -                                                                                | -                                                                                                                                                                       |
| Loa loa                     | dead h                                                | 0  | -                                                                                                                                                                                      | -                                                                                | -                                                                                                                                                                       |
| Caenorhabditis briggsae     | briggsae cbr-dsc-4 protein                            | 1  | P:GO:0040011                                                                                                                                                                           | -                                                                                | -                                                                                                                                                                       |
| Caenorhabditis briggsae     | nucleoredoxin-like protein 2                          | 4  | P:GO:0009792;<br>P:GO:0040007;<br>F:GO:0005515;<br>P:GO:0002119                                                                                                                        | -                                                                                | SignalP (SIGNALP)                                                                                                                                                       |
| Caenorhabditis elegans      | pppde peptidase domain-containing protein 1           | 1  | P:GO:0060027                                                                                                                                                                           | -                                                                                | IPR008580; PTHR12378 (PANTHER)                                                                                                                                          |
| Angiostrongylus cantonensis | nucleolar gtp-binding protein 2                       | 6  | P:GO:0040035;<br>P:GO:0009792;<br>P:GO:0002119;<br>F:GO:0005525;<br>C:GO:0005622;<br>P:GO:0040010                                                                                      | -                                                                                | IPR023179; PTHR11089 (PANTHER), PTHR11089:SF9 (PANTHER)                                                                                                                 |
| -                           | -                                                     | 0  | -                                                                                                                                                                                      | -                                                                                | -                                                                                                                                                                       |

|                         |                                                 |    |                                                                                                                                                                                                         |                                                                                                   |                           |                                                                                                                                           |
|-------------------------|-------------------------------------------------|----|---------------------------------------------------------------------------------------------------------------------------------------------------------------------------------------------------------|---------------------------------------------------------------------------------------------------|---------------------------|-------------------------------------------------------------------------------------------------------------------------------------------|
| Caenorhabditis briggsae | protein phosphatase 1h (pp2c domain containing) | 4  | C:GO:0008287;<br>F:GO:0046872;<br>F:GO:0004722;<br>P:GO:0006470                                                                                                                                         | -                                                                                                 |                           | IPR001932; IPR014045; IPR015655;<br>PTHR13832:SF96 (PANTHER)                                                                              |
| -                       | -                                               | 0  |                                                                                                                                                                                                         |                                                                                                   |                           | SignalP (SIGNALP)                                                                                                                         |
| -                       | -                                               | 0  |                                                                                                                                                                                                         |                                                                                                   |                           | -                                                                                                                                         |
| Caenorhabditis elegans  | smad nuclear interacting protein 1              | 12 | P:GO:0035196;<br>P:GO:0006355;<br>P:GO:0040007;<br>P:GO:0000003;<br>P:GO:0010171;<br>P:GO:0002119;<br>F:GO:0005515;<br>P:GO:0040011;<br>P:GO:0007249;<br>P:GO:0006898;<br>P:GO:0009792;<br>C:GO:0005634 | -                                                                                                 |                           | IPR000253; IPR008984; PTHR23308<br>(PANTHER)                                                                                              |
| Caenorhabditis elegans  | smad nuclear interacting protein 1              | 12 | P:GO:0035196;<br>P:GO:0006355;<br>P:GO:0040007;<br>P:GO:0000003;<br>P:GO:0010171;<br>P:GO:0002119;<br>F:GO:0005515;<br>P:GO:0040011;<br>P:GO:0007249;<br>P:GO:0006898;<br>P:GO:0009792;<br>C:GO:0005634 | -                                                                                                 |                           | IPR000253; IPR008984; PTHR23308<br>(PANTHER)                                                                                              |
| Caenorhabditis briggsae | tumor suppressor candidate 2                    | 0  |                                                                                                                                                                                                         | P:GO:0007267;<br>F:GO:0003674;<br>P:GO:0007049;<br>P:GO:0008283;<br>F:GO:0005515;<br>C:GO:0005575 |                           | PTHR15453 (PANTHER)                                                                                                                       |
| Caenorhabditis elegans  | succinyl- synthetase small                      | 5  | F:GO:0005488;<br>C:GO:0005743;<br>F:GO:0003878;<br>P:GO:0006099;<br>F:GO:0004775                                                                                                                        | -                                                                                                 | EC:2.3.3.8;<br>EC:6.2.1.5 | IPR003781; IPR005810; IPR005811;<br>IPR016040; IPR016102; IPR017440;<br>PTHR11117 (PANTHER), SignalP<br>(SIGNALP), SSF51735 (SUPERFAMILY) |
| Caenorhabditis elegans  | ras family protein                              | 6  | C:GO:0005622;<br>F:GO:0005524;<br>F:GO:0008134;<br>P:GO:0007264;<br>P:GO:0006355;<br>P:GO:0015031                                                                                                       | -                                                                                                 |                           | -                                                                                                                                         |
| Brugia malayi           | general transcription factor polypeptide alpha  | 0  |                                                                                                                                                                                                         |                                                                                                   |                           | PTHR15180 (PANTHER)                                                                                                                       |
| Brugia malayi           | abnormal go-d development family member (gon-4) | 0  |                                                                                                                                                                                                         |                                                                                                   |                           | -                                                                                                                                         |
| Caenorhabditis briggsae | briggsae cbr-xpg-1 protein                      | 4  | P:GO:0009792;<br>F:GO:0003677;<br>F:GO:0004518;<br>P:GO:0006281                                                                                                                                         | -                                                                                                 |                           | IPR001044; IPR006084; IPR006086;<br>IPR008918; G3DSA:1.10.150.20<br>(GENE3D), G3DSA:3.40.50.1010<br>(GENE3D), SSF88723 (SUPERFAMILY)      |
| -                       | -                                               | 0  |                                                                                                                                                                                                         |                                                                                                   |                           | -                                                                                                                                         |

|                         |                                                  |    |                                                                                                                                                                                                                                                                                                                                                                                                                                                       |                                                                                                                                                                       |                                                                                   |
|-------------------------|--------------------------------------------------|----|-------------------------------------------------------------------------------------------------------------------------------------------------------------------------------------------------------------------------------------------------------------------------------------------------------------------------------------------------------------------------------------------------------------------------------------------------------|-----------------------------------------------------------------------------------------------------------------------------------------------------------------------|-----------------------------------------------------------------------------------|
| Caenorhabditis elegans  | heavy chain non-muscle                           | 26 | P:GO:0001525;<br>P:GO:0008360;<br>P:GO:0030048;<br>F:GO:0030898;<br>F:GO:0043531;<br>P:GO:0015031;<br>C:GO:0001772;<br>C:GO:0005829;<br>F:GO:0000146;<br>P:GO:0006509;<br>P:GO:0043534;<br>C:GO:0008305;<br>C:GO:0001726;<br>C:GO:0032154;<br>F:GO:0043495;<br>F:GO:0051015;<br>C:GO:0001725;<br>C:GO:0001931;<br>F:GO:0042803;<br>P:GO:0031532;<br>P:GO:0030220;<br>P:GO:0030224;<br>C:GO:0005634;<br>F:GO:0005524;<br>P:GO:0000910;<br>C:GO:0005826 | -                                                                                                                                                                     | IPR002928; PD936484 (PRODOM),<br>PTHR13140 (PANTHER),<br>PTHR13140:SF23 (PANTHER) |
| Loa loa                 | loc398088 protein                                | 6  | P:GO:0040008;<br>P:GO:0009987;<br>P:GO:0048856;<br>P:GO:0048518;<br>P:GO:0007275;<br>P:GO:0016043                                                                                                                                                                                                                                                                                                                                                     | -                                                                                                                                                                     | IPR016024                                                                         |
| Loa loa                 | trak1 protein                                    | 0  |                                                                                                                                                                                                                                                                                                                                                                                                                                                       | F:GO:0016740;<br>C:GO:0005769;<br>C:GO:0005634;<br>C:GO:0005768;<br>C:GO:0005739;<br>F:GO:0050811;<br>C:GO:0005575;<br>F:GO:0005515;<br>P:GO:0008150;<br>P:GO:0008333 | IPR006933; PTHR15751 (PANTHER),<br>PTHR15751:SF2 (PANTHER)                        |
| Loa loa                 | trak1 protein                                    | 0  |                                                                                                                                                                                                                                                                                                                                                                                                                                                       | F:GO:0016740;<br>C:GO:0005769;<br>C:GO:0005634;<br>C:GO:0005768;<br>C:GO:0005739;<br>F:GO:0050811;<br>C:GO:0005575;<br>F:GO:0005515;<br>P:GO:0008150;<br>P:GO:0008333 | IPR006933; PTHR15751 (PANTHER),<br>PTHR15751:SF2 (PANTHER)                        |
| Caenorhabditis briggsae | elegans protein confirmed by transcript evidence | 0  |                                                                                                                                                                                                                                                                                                                                                                                                                                                       | C:GO:0043234;<br>F:GO:0017124;<br>F:GO:0003824;<br>P:GO:0008150                                                                                                       | -                                                                                 |
| -                       | -                                                | 0  |                                                                                                                                                                                                                                                                                                                                                                                                                                                       |                                                                                                                                                                       | -                                                                                 |

|                         |                                                                                          |    |                                                                                                                                                                                        |   |             |                                                                                                                                                               |
|-------------------------|------------------------------------------------------------------------------------------|----|----------------------------------------------------------------------------------------------------------------------------------------------------------------------------------------|---|-------------|---------------------------------------------------------------------------------------------------------------------------------------------------------------|
| Loa loa                 | btb domain containing 12                                                                 | 4  | P:GO:0006281;<br>C:GO:0043234;<br>C:GO:0044454;<br>F:GO:0004520                                                                                                                        | - | -           | -                                                                                                                                                             |
| Caenorhabditis elegans  | protein ki-se domain containing protein                                                  | 7  | P:GO:0006468;<br>P:GO:0008360;<br>P:GO:0051726;<br>P:GO:0007155;<br>F:GO:0005524;<br>C:GO:0005634;<br>F:GO:0004674                                                                     | - | EC:2.7.11.0 | IPR000719; IPR008271; IPR011009;<br>IPR017442; G3DSA:1.10.510.10<br>(GENE3D), G3DSA:3.30.200.20<br>(GENE3D), PTHR11295 (PANTHER),<br>PTHR11295:SF86 (PANTHER) |
| Caenorhabditis elegans  | protein ki-se domain containing protein                                                  | 7  | P:GO:0006468;<br>P:GO:0008360;<br>P:GO:0051726;<br>P:GO:0007155;<br>F:GO:0005524;<br>C:GO:0005634;<br>F:GO:0004674                                                                     | - | EC:2.7.11.0 | IPR000719; IPR008271; IPR011009;<br>IPR017442; G3DSA:1.10.510.10<br>(GENE3D), G3DSA:3.30.200.20<br>(GENE3D), PTHR11295 (PANTHER),<br>PTHR11295:SF86 (PANTHER) |
| Caenorhabditis elegans  | elegans protein confirmed by transcript evidence                                         | 0  |                                                                                                                                                                                        |   |             | -                                                                                                                                                             |
| Caenorhabditis briggsae | splicing factor proline glutamine rich (polypyrimidine tract binding protein associated) | 8  | P:GO:0002009;<br>P:GO:0007420;<br>C:GO:0016021;<br>F:GO:0003676;<br>P:GO:0000003;<br>P:GO:0040007;<br>F:GO:0000166;<br>P:GO:0002119                                                    | - |             | IPR000504; IPR012677; IPR012975;<br>PTHR23189 (PANTHER),<br>PTHR23189:SF12 (PANTHER),<br>SSF54928 (SUPERFAMILY)                                               |
| -                       | -                                                                                        | 0  |                                                                                                                                                                                        |   |             | -                                                                                                                                                             |
| Caenorhabditis briggsae | splicing factor proline glutamine rich (polypyrimidine tract binding protein associated) | 8  | P:GO:0002009;<br>P:GO:0007420;<br>C:GO:0016021;<br>F:GO:0003676;<br>P:GO:0000003;<br>P:GO:0040007;<br>F:GO:0000166;<br>P:GO:0002119                                                    | - |             | IPR000504; IPR012677; IPR012975;<br>PTHR23189 (PANTHER),<br>PTHR23189:SF12 (PANTHER),<br>SSF54928 (SUPERFAMILY)                                               |
| Caenorhabditis briggsae | splicing factor proline glutamine rich (polypyrimidine tract binding protein associated) | 8  | P:GO:0002009;<br>P:GO:0007420;<br>C:GO:0016021;<br>F:GO:0003676;<br>P:GO:0000003;<br>P:GO:0040007;<br>F:GO:0000166;<br>P:GO:0002119                                                    | - |             | IPR000504; IPR012677; IPR012975;<br>PTHR23189 (PANTHER),<br>PTHR23189:SF12 (PANTHER),<br>SSF54928 (SUPERFAMILY)                                               |
| Caenorhabditis elegans  | hypothetical protein Y69A2AR.3 [Caenorhabditis elegans]                                  | 0  |                                                                                                                                                                                        |   |             | -                                                                                                                                                             |
| Homo sapiens            | keratin 19                                                                               | 11 | P:GO:0060706;<br>C:GO:0030018;<br>F:GO:0008307;<br>P:GO:0045214;<br>C:GO:0043034;<br>P:GO:0043627;<br>F:GO:0005515;<br>F:GO:0005200;<br>P:GO:0044419;<br>C:GO:0042383;<br>C:GO:0005882 | - |             | IPR001664; IPR002957; IPR009053;<br>IPR016044; IPR018039;<br>G3DSA:1.20.5.170 (GENE3D),<br>PTHR23239:SF14 (PANTHER)                                           |
| -                       | -                                                                                        | 0  |                                                                                                                                                                                        |   |             | SignalP (SIGNALP)                                                                                                                                             |

|                         |                                               |    |                                                                                                                                                                                                                                                                                                                                |   |            |                                                                                                                    |
|-------------------------|-----------------------------------------------|----|--------------------------------------------------------------------------------------------------------------------------------------------------------------------------------------------------------------------------------------------------------------------------------------------------------------------------------|---|------------|--------------------------------------------------------------------------------------------------------------------|
| Caenorhabditis elegans  | cytoplasmic aconitate hydratase               | 19 | C:GO:0005829;<br>P:GO:0006417;<br>C:GO:0005625;<br>C:GO:0005739;<br>F:GO:0030350;<br>F:GO:0046872;<br>P:GO:0010040;<br>P:GO:0006879;<br>P:GO:0006099;<br>F:GO:0051539;<br>F:GO:0048027;<br>C:GO:0005792;<br>F:GO:0005515;<br>P:GO:0009791;<br>F:GO:0003994;<br>P:GO:0050892;<br>C:GO:0005794;<br>P:GO:0006101;<br>C:GO:0005783 | - | EC:4.2.1.3 | IPR001030; IPR015931; IPR015934;<br>IPR015937                                                                      |
| Brugia malayi           | briggsae cbr-cku-70 protein                   | 8  | P:GO:0050769;<br>P:GO:0006303;<br>P:GO:0033151;<br>C:GO:0044428;<br>C:GO:0043234;<br>F:GO:0003677;<br>P:GO:0010212;<br>F:GO:0003824                                                                                                                                                                                            | - |            | IPR005160; IPR006164; IPR016194;<br>G3DSA:2.40.290.10 (GENE3D),<br>PTHR12604 (PANTHER),<br>PTHR12604:SF2 (PANTHER) |
| Brugia malayi           | zinc c2h2 type family protein                 | 1  | F:GO:0005488                                                                                                                                                                                                                                                                                                                   | - |            | -                                                                                                                  |
| Caenorhabditis elegans  | differentially expressed in fdcp 8 homolog    | 1  | F:GO:0005488                                                                                                                                                                                                                                                                                                                   | - |            | -                                                                                                                  |
| Caenorhabditis elegans  | transmembrane protein 41a                     | 1  | P:GO:0010171                                                                                                                                                                                                                                                                                                                   | - |            | -                                                                                                                  |
| Caenorhabditis elegans  | mitogen-activated protein ki-se ki-se ki-se 4 | 6  | F:GO:0004672;<br>P:GO:0043507;<br>F:GO:0005515;<br>P:GO:0009792;<br>C:GO:0005737;<br>P:GO:0016246                                                                                                                                                                                                                              | - |            | -                                                                                                                  |
| Loa loa                 | hypothetical protein LOAG_01987 [Loa loa]     | 0  |                                                                                                                                                                                                                                                                                                                                |   |            | -                                                                                                                  |
| Caenorhabditis briggsae | phosphoethanolamine n-                        | 1  | F:GO:0003824                                                                                                                                                                                                                                                                                                                   | - |            | IPR000169; IPR002591; IPR017849;<br>IPR017850; PTHR23071 (PANTHER),<br>SignalP (SIGNALP)                           |
| Caenorhabditis briggsae | atp synthase g chain                          | 10 | P:GO:0008340;<br>C:GO:0005929;<br>P:GO:0040010;<br>F:GO:0015078;<br>P:GO:0034606;<br>P:GO:0009792;<br>P:GO:0015986;<br>P:GO:0010171;<br>C:GO:0005811;<br>C:GO:0000276                                                                                                                                                          | - |            | IPR006808; PTHR12386 (PANTHER),<br>PTHR12386:SF1 (PANTHER)                                                         |
| -                       | -                                             | 0  |                                                                                                                                                                                                                                                                                                                                |   |            | SignalP (SIGNALP)                                                                                                  |
| Brugia malayi           | sart3 protein                                 | 5  | F:GO:0005488;<br>P:GO:0030098;<br>P:GO:0048538;<br>P:GO:0031017;<br>P:GO:0000245                                                                                                                                                                                                                                               | - |            | PTHR23269 (PANTHER)                                                                                                |

|                             |                                                            |   |                                                                                                   |                                                |            |                                                                                                                     |
|-----------------------------|------------------------------------------------------------|---|---------------------------------------------------------------------------------------------------|------------------------------------------------|------------|---------------------------------------------------------------------------------------------------------------------|
| Caenorhabditis briggsae     | elegans protein partially confirmed by transcript evidence | 0 |                                                                                                   | F:GO:0008270;<br>C:GO:0005622                  |            | -                                                                                                                   |
| Caenorhabditis elegans      | neuroendocrine protein 7b2                                 | 2 | C:GO:0030141;<br>P:GO:0007218                                                                     | -                                              |            | IPR007945                                                                                                           |
| Loa loa                     | hras-like suppressor 2                                     | 0 |                                                                                                   | F:GO:0003674;<br>P:GO:0008150;<br>F:GO:0005515 |            | IPR007053; PTHR13943 (PANTHER),<br>PTHR13943:SF9 (PANTHER)                                                          |
| Loa loa                     | hras-like suppressor 2                                     | 0 |                                                                                                   | F:GO:0003674;<br>P:GO:0008150;<br>F:GO:0005515 |            | IPR007053; PTHR13943 (PANTHER),<br>PTHR13943:SF9 (PANTHER)                                                          |
| Brugia malayi               | dopey family member 1                                      | 1 | P:GO:0006810                                                                                      | -                                              |            | -                                                                                                                   |
| Caenorhabditis elegans      | r- binding motif protein 12                                | 1 | F:GO:0005515                                                                                      | -                                              |            | IPR000504; IPR012677; PTHR13976<br>(PANTHER), PTHR13976:SF1<br>(PANTHER), SSF54928 (SUPERFAMILY)                    |
| Caenorhabditis elegans      | tryptophan-rich antigen (pv-fam-a)                         | 3 | F:GO:0005515;<br>C:GO:0044444;<br>F:GO:0000166                                                    | -                                              |            | IPR000504; IPR012677; PTHR13976<br>(PANTHER), PTHR13976:SF1<br>(PANTHER), SSF54928 (SUPERFAMILY)                    |
| Caenorhabditis elegans      | heat shock protein family member (hsp- )                   | 4 | C:GO:0005737;<br>P:GO:0006950;<br>C:GO:0005634;<br>F:GO:0005515                                   | -                                              |            | IPR001436; IPR002068; IPR008978;<br>G3DSA:2.60.40.790 (GENE3D),<br>PTHR11527 (PANTHER),<br>PTHR11527:SF34 (PANTHER) |
| Angiostrongylus cantonensis | coatomer subunit epsilon                                   | 4 | P:GO:0006890;<br>F:GO:0005515;<br>C:GO:0030126;<br>F:GO:0005198                                   | -                                              |            | IPR006822; IPR011990; SSF48452<br>(SUPERFAMILY)                                                                     |
| Angiostrongylus cantonensis | coatomer subunit epsilon                                   | 4 | P:GO:0006890;<br>F:GO:0005515;<br>C:GO:0030126;<br>F:GO:0005198                                   | -                                              |            | IPR006822; IPR011990; SSF48452<br>(SUPERFAMILY)                                                                     |
| Caenorhabditis elegans      | mitotic control protein dis3                               | 2 | F:GO:0004540;<br>F:GO:0003723                                                                     | -                                              |            | IPR001900; IPR022966; PTHR23355<br>(PANTHER), PTHR23355:SF13<br>(PANTHER)                                           |
| Caenorhabditis elegans      | aliphatic nitrilase                                        | 4 | F:GO:0003837;<br>P:GO:0000003;<br>P:GO:0006208;<br>P:GO:0006207                                   | -                                              | EC:3.5.1.6 | IPR003010; PTHR23088 (PANTHER)                                                                                      |
| Caenorhabditis briggsae     | pre-rr--processing protein tsr1 homolog                    | 6 | P:GO:0009792;<br>F:GO:0005515;<br>P:GO:0042254;<br>P:GO:0040010;<br>P:GO:0040011;<br>C:GO:0005634 | -                                              |            | IPR007034; PTHR12858 (PANTHER),<br>PTHR12858:SF1 (PANTHER)                                                          |
| -                           | -                                                          | 0 |                                                                                                   |                                                |            | -                                                                                                                   |
| -                           | -                                                          | 0 |                                                                                                   |                                                |            | -                                                                                                                   |
| -                           | -                                                          | 0 |                                                                                                   |                                                |            | -                                                                                                                   |
| Caenorhabditis briggsae     | alpha beta                                                 | 1 | F:GO:0016787                                                                                      | -                                              |            | SignalP (SIGNALP)                                                                                                   |
| Caenorhabditis briggsae     | ser thr protein phosphatase                                | 0 |                                                                                                   | F:GO:0016787;<br>F:GO:0004721                  |            | IPR006186; G3DSA:3.60.21.10<br>(GENE3D), PTHR11668:SF16<br>(PANTHER), SignalP (SIGNALP),<br>SSF56300 (SUPERFAMILY)  |
| -                           | -                                                          | 0 |                                                                                                   |                                                |            | -                                                                                                                   |
| Caenorhabditis briggsae     | btb poz domain containing protein                          | 1 | P:GO:0000003                                                                                      | -                                              |            | IPR000210; IPR011333; IPR013069;<br>PTHR22743 (PANTHER),<br>PTHR22743:SF10 (PANTHER)                                |

|                         |                                             |    |                                                                                                                                                                                                                          |   |                                                                 |                                                                                                                       |
|-------------------------|---------------------------------------------|----|--------------------------------------------------------------------------------------------------------------------------------------------------------------------------------------------------------------------------|---|-----------------------------------------------------------------|-----------------------------------------------------------------------------------------------------------------------|
| Caenorhabditis elegans  | aldehyde dehydroge-se 1 member I2 isoform 2 | 9  | C:GO:0005737;<br>F:GO:0000036;<br>P:GO:0009058;<br>F:GO:0016742;<br>P:GO:0055114;<br>P:GO:0006730;<br>F:GO:0016155;<br>F:GO:0048037;<br>P:GO:0009258                                                                     | - | EC:2.1.2.0;<br>EC:1.5.1.6                                       | IPR001555; IPR002376; IPR005793;<br>IPR011034; IPR015518                                                              |
| Caenorhabditis briggsae | briggsae cbr-obr-4 protein                  | 2  | P:GO:0008202;<br>P:GO:0006869                                                                                                                                                                                            | - |                                                                 | IPR000648; IPR018494;<br>PTHR10972:SF21 (PANTHER),<br>SSF144000 (SUPERFAMILY)                                         |
| Caenorhabditis briggsae | briggsae cbr-obr-4 protein                  | 2  | P:GO:0008202;<br>P:GO:0006869                                                                                                                                                                                            | - |                                                                 | IPR000648; IPR018494;<br>PTHR10972:SF21 (PANTHER),<br>SSF144000 (SUPERFAMILY)                                         |
| Caenorhabditis elegans  | mov34 mpn pad-1 family protein              | 11 | F:GO:0003743;<br>C:GO:0005829;<br>F:GO:0032403;<br>C:GO:0005852;<br>C:GO:0005792;<br>P:GO:0007413;<br>P:GO:0002119;<br>P:GO:0040011;<br>P:GO:0006446;<br>P:GO:0006898;<br>P:GO:0009792                                   | - |                                                                 | IPR000555; PTHR10410 (PANTHER),<br>PTHR10410:SF3 (PANTHER)                                                            |
| -                       | -                                           | 0  |                                                                                                                                                                                                                          |   |                                                                 | SignalP (SIGNALP)                                                                                                     |
| -                       | -                                           | 0  |                                                                                                                                                                                                                          |   |                                                                 | SignalP (SIGNALP)                                                                                                     |
| Caenorhabditis briggsae | nucleolin                                   | 4  | P:GO:0040010;<br>F:GO:0003676;<br>P:GO:0009792;<br>C:GO:0044424                                                                                                                                                          | - |                                                                 | IPR000504; IPR012677; PTHR10432<br>(PANTHER), PTHR10432:SF37<br>(PANTHER), SSF54928 (SUPERFAMILY)                     |
| Caenorhabditis briggsae | nucleolin                                   | 4  | P:GO:0040010;<br>F:GO:0003676;<br>P:GO:0009792;<br>C:GO:0044424                                                                                                                                                          | - |                                                                 | IPR000504; IPR012677; PTHR10432<br>(PANTHER), PTHR10432:SF37<br>(PANTHER), SSF54928 (SUPERFAMILY)                     |
| Caenorhabditis briggsae | loc495387 protein                           | 0  |                                                                                                                                                                                                                          |   | P:GO:0008152;<br>F:GO:0016787;<br>C:GO:0016021;<br>F:GO:0004091 | IPR013094; G3DSA:3.40.50.1820<br>(GENE3D), PTHR23024 (PANTHER),<br>SignalP (SIGNALP), SSF53474<br>(SUPERFAMILY)       |
| Brugia malayi           | wd repeat domain 57 (u5 snrnp specific)     | 13 | P:GO:0040010;<br>C:GO:0005681;<br>F:GO:0003676;<br>P:GO:0000375;<br>C:GO:0005732;<br>P:GO:0040035;<br>P:GO:0002119;<br>F:GO:0005515;<br>P:GO:0040011;<br>C:GO:0005682;<br>P:GO:0006397;<br>P:GO:0009792;<br>F:GO:0003824 | - |                                                                 | IPR001650; G3DSA:3.40.50.300<br>(GENE3D), PTHR10799 (PANTHER),<br>PTHR10799:SF75 (PANTHER),<br>SSF52540 (SUPERFAMILY) |

|                        |                                                       |    |                                                                                                                                                                                                                                                                                                                                                                                                                                      |   |             |                                                                                                                                                     |
|------------------------|-------------------------------------------------------|----|--------------------------------------------------------------------------------------------------------------------------------------------------------------------------------------------------------------------------------------------------------------------------------------------------------------------------------------------------------------------------------------------------------------------------------------|---|-------------|-----------------------------------------------------------------------------------------------------------------------------------------------------|
| Caenorhabditis elegans | nuclear receptor nhr-1                                | 10 | F:GO:0008270;<br>P:GO:0006355;<br>F:GO:0043565;<br>P:GO:0002119;<br>P:GO:0040017;<br>F:GO:0003700;<br>F:GO:0003707;<br>P:GO:0040018;<br>P:GO:0032094;<br>C:GO:0005634                                                                                                                                                                                                                                                                | - |             | IPR000536; IPR001628; IPR008946;<br>IPR013088; PRO0350 (PRINTS),<br>PTHR11865 (PANTHER),<br>PTHR11865:SF218 (PANTHER),<br>SSF57716 (SUPERFAMILY)    |
| Caenorhabditis elegans | defective spermatogenesis family member (spe-15)-like | 25 | P:GO:0051046;<br>C:GO:0031941;<br>P:GO:0030048;<br>C:GO:0031965;<br>F:GO:0043531;<br>C:GO:0005794;<br>P:GO:0006886;<br>C:GO:0005905;<br>C:GO:0001726;<br>P:GO:0009792;<br>P:GO:0048839;<br>F:GO:0003774;<br>P:GO:0006897;<br>P:GO:0007268;<br>F:GO:0051015;<br>P:GO:0030330;<br>C:GO:0016591;<br>P:GO:0045944;<br>C:GO:0048471;<br>F:GO:0005516;<br>F:GO:0005524;<br>C:GO:0016459;<br>C:GO:0005938;<br>P:GO:0030182;<br>C:GO:0045334 | - |             | IPR000048; IPR001609; PTHR13140<br>(PANTHER), PTHR13140:SF26<br>(PANTHER), SSF52540 (SUPERFAMILY)                                                   |
| Caenorhabditis elegans | rab beta subunit                                      | 7  | F:GO:0004663;<br>P:GO:0009792;<br>F:GO:0005515;<br>P:GO:0000003;<br>P:GO:0008219;<br>P:GO:0007601;<br>P:GO:0018348                                                                                                                                                                                                                                                                                                                   | - | EC:2.5.1.60 | IPR001330; IPR008930;<br>G3DSA:1.50.10.20 (GENE3D),<br>PTHR11774 (PANTHER),<br>PTHR11774:SF5 (PANTHER)                                              |
|                        | -                                                     | 0  |                                                                                                                                                                                                                                                                                                                                                                                                                                      |   |             | -                                                                                                                                                   |
| Caenorhabditis elegans | protein arginine n-methyltransferase 10               | 1  | F:GO:0016740                                                                                                                                                                                                                                                                                                                                                                                                                         | - |             | IPR010456; G3DSA:2.70.160.11<br>(GENE3D), G3DSA:3.40.50.150<br>(GENE3D), PTHR11006 (PANTHER),<br>PTHR11006:SF3 (PANTHER), SSF53335<br>(SUPERFAMILY) |
| Caenorhabditis elegans | protein arginine n-methyltransferase 10               | 1  | F:GO:0016740                                                                                                                                                                                                                                                                                                                                                                                                                         | - |             | IPR010456; G3DSA:2.70.160.11<br>(GENE3D), G3DSA:3.40.50.150<br>(GENE3D), PTHR11006 (PANTHER),<br>PTHR11006:SF3 (PANTHER), SSF53335<br>(SUPERFAMILY) |
| Caenorhabditis elegans | igf2 mr- binding                                      | 5  | P:GO:0009987;<br>C:GO:0005681;<br>F:GO:0003676;<br>P:GO:0000003;<br>P:GO:0007399                                                                                                                                                                                                                                                                                                                                                     | - |             | IPR004087; IPR004088; IPR018111;<br>G3DSA:3.30.1370.10 (GENE3D),<br>PTHR10288 (PANTHER),<br>PTHR10288:SF58 (PANTHER),<br>SSF54791 (SUPERFAMILY)     |



|                         |                                                       |    |                                                                                                                                                                                        |   |                                                                                                   |
|-------------------------|-------------------------------------------------------|----|----------------------------------------------------------------------------------------------------------------------------------------------------------------------------------------|---|---------------------------------------------------------------------------------------------------|
|                         | -                                                     | 0  |                                                                                                                                                                                        |   | -                                                                                                 |
| Caenorhabditis elegans  | integrator complex subunit 4                          | 9  | P:GO:0040010;<br>P:GO:0040035;<br>P:GO:0010171;<br>P:GO:0019915;<br>P:GO:0002119;<br>P:GO:0040011;<br>P:GO:0009792;<br>P:GO:0001703;<br>P:GO:0016246                                   | - | PTHR20938 (PANTHER)                                                                               |
|                         | -                                                     | 0  |                                                                                                                                                                                        |   | -                                                                                                 |
| Caenorhabditis elegans  | f-box only protein 32                                 | 4  | F:GO:0005515;<br>P:GO:0006508;<br>C:GO:0016020;<br>P:GO:0043053                                                                                                                        | - | PTHR13123 (PANTHER),<br>PTHR13123:SF1 (PANTHER)                                                   |
| Caenorhabditis elegans  | neuralized                                            | 1  | F:GO:0005488                                                                                                                                                                           | - | IPR001841; IPR006573; IPR013083;<br>PTHR12183 (PANTHER), SSF57850<br>(SUPERFAMILY)                |
| Brugia malayi           | cdc23 (cell division cycle homolog)                   | 8  | P:GO:0007126;<br>P:GO:0040035;<br>P:GO:0010171;<br>P:GO:0002119;<br>F:GO:0005515;<br>P:GO:0006898;<br>P:GO:0002009;<br>P:GO:0009792                                                    | - | IPR011990; IPR013026; PTHR12558<br>(PANTHER), PTHR12558:SF10<br>(PANTHER), SSF48452 (SUPERFAMILY) |
|                         | -                                                     | 0  |                                                                                                                                                                                        |   | -                                                                                                 |
| Nematostella vectensis  | r- (guanine-9-) methyltransferase domain containing 2 | 2  | F:GO:0008168;<br>P:GO:0032259                                                                                                                                                          | - | EC:2.1.1.0                                                                                        |
|                         | -                                                     | 0  |                                                                                                                                                                                        |   | -                                                                                                 |
| Caenorhabditis elegans  | hypothetical protein B0336.7 [Caenorhabditis elegans] | 1  | F:GO:0005488                                                                                                                                                                           | - | IPR006612                                                                                         |
| Caenorhabditis elegans  | elegans protein confirmed by transcript evidence      | 0  |                                                                                                                                                                                        |   | -                                                                                                 |
| Caenorhabditis elegans  | amop domain containing protein                        | 2  | C:GO:0016021;<br>P:GO:0007160                                                                                                                                                          | - | PTHR13802 (PANTHER),<br>PTHR13802:SF2 (PANTHER)                                                   |
| Caenorhabditis elegans  | mitochondrial carrier protein                         | 6  | P:GO:0009792;<br>F:GO:0005488;<br>C:GO:0005743;<br>P:GO:0055085;<br>P:GO:0040010;<br>C:GO:0016021                                                                                      | - | IPR001993; IPR002067; IPR018108;<br>G3DSA:1.50.40.10 (GENE3D),<br>PTHR11896:SF34 (PANTHER)        |
| Caenorhabditis elegans  | mitochondrial carrier protein                         | 7  | P:GO:0009792;<br>F:GO:0005488;<br>C:GO:0005743;<br>F:GO:0022857;<br>P:GO:0055085;<br>P:GO:0040010;<br>C:GO:0016021                                                                     | - | IPR001993; IPR002067; IPR018108;<br>G3DSA:1.50.40.10 (GENE3D),<br>PTHR11896:SF34 (PANTHER)        |
| Caenorhabditis briggsae | translation initiation factor if- mitochondrial       | 11 | P:GO:0006413;<br>P:GO:0040010;<br>C:GO:0016021;<br>P:GO:0007264;<br>C:GO:0005622;<br>P:GO:0015684;<br>F:GO:0015093;<br>F:GO:0008135;<br>F:GO:0003924;<br>P:GO:0006898;<br>F:GO:0005525 | - | EC:3.6.5.1;<br>EC:3.6.5.2;<br>EC:3.6.5.3;<br>EC:3.6.5.4                                           |

|                         |                                              |   |                                                                                                                                     |                                                                                                                                                      |                            |                                                                         |
|-------------------------|----------------------------------------------|---|-------------------------------------------------------------------------------------------------------------------------------------|------------------------------------------------------------------------------------------------------------------------------------------------------|----------------------------|-------------------------------------------------------------------------|
| Caenorhabditis briggsae | briggsae cbr-mdt-29 protein                  | 0 |                                                                                                                                     | P:GO:0006350;<br>P:GO:0045449;<br>F:GO:0005515;<br>C:GO:0005634                                                                                      | -                          |                                                                         |
| Loa loa                 | disco-interacting protein 2                  | 0 |                                                                                                                                     | P:GO:0008152;<br>F:GO:0003824;<br>C:GO:0005634;<br>F:GO:0008134                                                                                      |                            | IPR010506; PTHR22754 (PANTHER),<br>PTHR22754:SF8 (PANTHER)              |
| Caenorhabditis briggsae | ywie_caee1 ame: full=uncharacterized protein | 3 | P:GO:0040007;<br>P:GO:0006898;<br>P:GO:0002119                                                                                      | -                                                                                                                                                    | -                          | -                                                                       |
| Caenorhabditis briggsae | vacuolar atp synthase subunit e              | 5 | F:GO:0008553;<br>C:GO:0000221;<br>P:GO:0015986;<br>F:GO:0046961;<br>C:GO:0005886                                                    | -                                                                                                                                                    | EC:3.6.3.6;<br>EC:3.6.3.14 | -                                                                       |
| -                       | -                                            | 0 |                                                                                                                                     |                                                                                                                                                      |                            | SignalP (SIGNALP)                                                       |
| Caenorhabditis elegans  | dnz1                                         | 1 | F:GO:0008270                                                                                                                        | -                                                                                                                                                    |                            | IPR001594; PTHR22883 (PANTHER),<br>PSS1257 (PROFILE), SignalP (SIGNALP) |
| Caenorhabditis elegans  | dnz1                                         | 1 | F:GO:0008270                                                                                                                        | -                                                                                                                                                    |                            | IPR001594; PTHR22883 (PANTHER),<br>PSS1257 (PROFILE), SignalP (SIGNALP) |
| Caenorhabditis elegans  | dnz1                                         | 1 | F:GO:0008270                                                                                                                        | -                                                                                                                                                    |                            | IPR001594; PTHR22883 (PANTHER),<br>PSS1257 (PROFILE), SignalP (SIGNALP) |
| -                       | -                                            | 0 |                                                                                                                                     |                                                                                                                                                      |                            | IPR005514; IPR009003;<br>G3DSA:2.40.10.10 (GENE3D)                      |
| Caenorhabditis briggsae | briggsae cbr-vit-6 protein                   | 0 |                                                                                                                                     | F:GO:0045735;<br>F:GO:0005319;<br>F:GO:0008565;<br>P:GO:0006869;<br>P:GO:0009792;<br>C:GO:0005576;<br>P:GO:0006886;<br>P:GO:0008340;<br>P:GO:0040010 | -                          | -                                                                       |
| Caenorhabditis briggsae | phosphoinositide-3- class beta polypeptide   | 8 | P:GO:0009987;<br>F:GO:0001727;<br>F:GO:0016773;<br>P:GO:0019915;<br>P:GO:0002119;<br>F:GO:0005515;<br>C:GO:0044444;<br>F:GO:0004428 | -                                                                                                                                                    | EC:2.7.1.0                 | -                                                                       |
| -                       | -                                            | 0 |                                                                                                                                     |                                                                                                                                                      |                            | -                                                                       |
| -                       | -                                            | 0 |                                                                                                                                     |                                                                                                                                                      |                            | SignalP (SIGNALP)                                                       |
| -                       | -                                            | 0 |                                                                                                                                     |                                                                                                                                                      |                            | SignalP (SIGNALP)                                                       |
| Brugia malayi           | lethal giant                                 | 0 |                                                                                                                                     | F:GO:0019901;<br>C:GO:0005737;<br>P:GO:0006887;<br>P:GO:0030866;<br>P:GO:0006461;<br>F:GO:0005515;<br>C:GO:0030864;<br>P:GO:0035090;<br>C:GO:0005856 |                            | PTHR10241 (PANTHER),<br>PTHR10241:SF10 (PANTHER)                        |
| Caenorhabditis elegans  | hypothetical upf0041 protein in chromosome   | 0 |                                                                                                                                     |                                                                                                                                                      |                            | IPR005336; PTHR14154 (PANTHER),<br>PTHR14154:SF3 (PANTHER)              |

|                         |                                                         |    |                                                                                                                                                                                                                                                                                                                                                                                                                                                                        |                                                                                                   |             |                                                                                     |
|-------------------------|---------------------------------------------------------|----|------------------------------------------------------------------------------------------------------------------------------------------------------------------------------------------------------------------------------------------------------------------------------------------------------------------------------------------------------------------------------------------------------------------------------------------------------------------------|---------------------------------------------------------------------------------------------------|-------------|-------------------------------------------------------------------------------------|
| Caenorhabditis briggsae | small subunit processome component 20 homolog           | 3  | F:GO:0005488;<br>C:GO:0031981;<br>P:GO:0006364                                                                                                                                                                                                                                                                                                                                                                                                                         | -                                                                                                 | -           | -                                                                                   |
| Caenorhabditis elegans  | elegans protein confirmed by transcript evidence        | 3  | P:GO:0006508;<br>F:GO:0004181;<br>F:GO:0008270                                                                                                                                                                                                                                                                                                                                                                                                                         | -                                                                                                 | EC:3.4.17.0 | -                                                                                   |
| Loa loa                 | in family member (ttn-1)                                | 0  |                                                                                                                                                                                                                                                                                                                                                                                                                                                                        | F:GO:0004672;<br>F:GO:0005524;<br>F:GO:0000166;<br>P:GO:0006468;<br>P:GO:0009792;<br>F:GO:0004674 |             | IPR013783; PTHR19897 (PANTHER),<br>PTHR19897:SF17 (PANTHER)                         |
|                         |                                                         | 0  |                                                                                                                                                                                                                                                                                                                                                                                                                                                                        |                                                                                                   |             |                                                                                     |
| Pongo abelii            | type alpha 1                                            | 31 | P:GO:0060351;<br>P:GO:0001957;<br>P:GO:0071363;<br>P:GO:0007605;<br>P:GO:0034505;<br>P:GO:0042542;<br>P:GO:0001649;<br>P:GO:0009612;<br>P:GO:0001568;<br>P:GO:0060325;<br>F:GO:0005201;<br>C:GO:0005615;<br>P:GO:0048706;<br>P:GO:0015031;<br>F:GO:0048407;<br>C:GO:0005737;<br>P:GO:0043434;<br>P:GO:0071300;<br>P:GO:0007601;<br>P:GO:0010812;<br>C:GO:0005584;<br>F:GO:0042802;<br>P:GO:0060346;<br>P:GO:0032964;<br>P:GO:0030199;<br>P:GO:0051591;<br>P:GO:0031960 | -                                                                                                 |             | IPR008160; PTHR10499 (PANTHER),<br>PTHR10499:SF127 (PANTHER)                        |
|                         |                                                         | 0  |                                                                                                                                                                                                                                                                                                                                                                                                                                                                        |                                                                                                   |             |                                                                                     |
|                         |                                                         | 0  |                                                                                                                                                                                                                                                                                                                                                                                                                                                                        |                                                                                                   |             |                                                                                     |
|                         |                                                         | 0  |                                                                                                                                                                                                                                                                                                                                                                                                                                                                        |                                                                                                   |             |                                                                                     |
| Caenorhabditis briggsae | Hypothetical protein CBG07008 [Caenorhabditis briggsae] | 0  |                                                                                                                                                                                                                                                                                                                                                                                                                                                                        | F:GO:0005509                                                                                      |             | -                                                                                   |
| Caenorhabditis elegans  | novel protein containing 10 heat domains                | 10 | C:GO:0000502;<br>P:GO:0030433;<br>C:GO:0030134;<br>C:GO:0005813;<br>C:GO:0005770;<br>C:GO:0005769;<br>P:GO:0007067;<br>C:GO:0005802;<br>C:GO:0005783;<br>C:GO:0005634                                                                                                                                                                                                                                                                                                  | -                                                                                                 |             | IPR000357; IPR011989; IPR016024;<br>PTHR23346 (PANTHER),<br>PTHR23346:SF2 (PANTHER) |

|                                    |                                                                         |    |                                                                                                                                                                                                         |   |                            |                                                                                                                                                                         |
|------------------------------------|-------------------------------------------------------------------------|----|---------------------------------------------------------------------------------------------------------------------------------------------------------------------------------------------------------|---|----------------------------|-------------------------------------------------------------------------------------------------------------------------------------------------------------------------|
| Caenorhabditis elegans             | pla2g15 protein                                                         | 12 | C:GO:0005764;<br>F:GO:0004607;<br>F:GO:0047499;<br>C:GO:0005625;<br>C:GO:0005739;<br>F:GO:0005543;<br>P:GO:0046470;<br>P:GO:0009062;<br>P:GO:0019915;<br>P:GO:0006672;<br>C:GO:0005576;<br>F:GO:0004622 | - | EC:2.3.1.43;<br>EC:3.1.1.5 | IPR003386; SignalP (SIGNALP)                                                                                                                                            |
| -                                  | -                                                                       | 0  |                                                                                                                                                                                                         |   |                            | -                                                                                                                                                                       |
| -                                  | -                                                                       | 0  |                                                                                                                                                                                                         |   |                            | -                                                                                                                                                                       |
| -                                  | -                                                                       | 0  |                                                                                                                                                                                                         |   |                            | -                                                                                                                                                                       |
| -                                  | -                                                                       | 0  |                                                                                                                                                                                                         |   |                            | -                                                                                                                                                                       |
| Caenorhabditis elegans             | pp2c-like domain-containing protein cg9801                              | 1  | F:GO:0004721                                                                                                                                                                                            | - | EC:3.1.3.16                | PTHR21586 (PANTHER)                                                                                                                                                     |
| Paramecium tetraurelia strain d4-2 | hypothetical protein [Paramecium tetraurelia strain d4-2]               | 0  |                                                                                                                                                                                                         |   |                            | -                                                                                                                                                                       |
| -                                  | -                                                                       | 0  |                                                                                                                                                                                                         |   |                            | -                                                                                                                                                                       |
| Caenorhabditis elegans             | dead deah box helicase family protein                                   | 7  | P:GO:0040010;<br>F:GO:0003676;<br>P:GO:0000003;<br>F:GO:0000166;<br>F:GO:0004386;<br>P:GO:0006898;<br>C:GO:0044424                                                                                      | - |                            | IPR000629; IPR011545; IPR014001;<br>IPR014014; IPR014021;<br>G3DSA:3.40.50.300 (GENE3D),<br>PTHR10967 (PANTHER),<br>PTHR10967:SF13 (PANTHER),<br>SSF52540 (SUPERFAMILY) |
| Caenorhabditis briggsae            | isocitrate dehydroge-se                                                 | 9  | C:GO:0005875;<br>F:GO:0051287;<br>C:GO:0005811;<br>F:GO:0005515;<br>P:GO:0055114;<br>F:GO:0000287;<br>P:GO:0006099;<br>F:GO:0004449;<br>C:GO:0005739                                                    | - | EC:1.1.1.41                | IPR001804; IPR004434; IPR019818;<br>PTHR11835:SF5 (PANTHER), SSF53659<br>(SUPERFAMILY)                                                                                  |
| Caenorhabditis elegans             | related to yeast vacuolar protein sorting factor family member (vps-39) | 6  | P:GO:0009792;<br>P:GO:0010171;<br>F:GO:0005515;<br>P:GO:0000003;<br>P:GO:0008219;<br>P:GO:0002009                                                                                                       | - |                            | IPR001180; PTHR12894 (PANTHER),<br>PTHR12894:SF10 (PANTHER)                                                                                                             |
| Caenorhabditis briggsae            | rgs-gaip interacting protein gipc                                       | 1  | F:GO:0005515                                                                                                                                                                                            | - |                            | IPR001478; G3DSA:2.30.42.10<br>(GENE3D), PTHR12259 (PANTHER)                                                                                                            |
| Caenorhabditis briggsae            | rgs-gaip interacting protein gipc                                       | 1  | F:GO:0005515                                                                                                                                                                                            | - |                            | IPR001478; G3DSA:2.30.42.10<br>(GENE3D), PTHR12259 (PANTHER)                                                                                                            |
| Caenorhabditis briggsae            | rgs-gaip interacting protein gipc                                       | 1  | F:GO:0005515                                                                                                                                                                                            | - |                            | IPR001478; G3DSA:2.30.42.10<br>(GENE3D), PTHR12259 (PANTHER)                                                                                                            |
| Caenorhabditis briggsae            | rgs-gaip interacting protein gipc                                       | 1  | F:GO:0005515                                                                                                                                                                                            | - |                            | IPR001478; G3DSA:2.30.42.10<br>(GENE3D), PTHR12259 (PANTHER)                                                                                                            |
| Caenorhabditis briggsae            | rgs-gaip interacting protein gipc                                       | 1  | F:GO:0005515                                                                                                                                                                                            | - |                            | IPR001478; G3DSA:2.30.42.10<br>(GENE3D), PTHR12259 (PANTHER)                                                                                                            |
| -                                  | -                                                                       | 0  |                                                                                                                                                                                                         |   |                            | -                                                                                                                                                                       |

|                                      |                                                      |   |                                                                                  |                                                                                                                                                                                                                                                                                                                                |                                                                                                                                                                 |
|--------------------------------------|------------------------------------------------------|---|----------------------------------------------------------------------------------|--------------------------------------------------------------------------------------------------------------------------------------------------------------------------------------------------------------------------------------------------------------------------------------------------------------------------------|-----------------------------------------------------------------------------------------------------------------------------------------------------------------|
| Epulopiscium sp. 'N.t. morphotype B' | clostripain family protein                           | 0 |                                                                                  | C:GO:0009986;<br>F:GO:0003677;<br>F:GO:0046872;<br>C:GO:0016020;<br>C:GO:0005618;<br>F:GO:0003735;<br>F:GO:0004872;<br>P:GO:0015031;<br>P:GO:0008152;<br>P:GO:0006412;<br>F:GO:0003824;<br>C:GO:0000786;<br>P:GO:0006334;<br>C:GO:0005840;<br>C:GO:0020011;<br>P:GO:0006457;<br>F:GO:0008270;<br>C:GO:0005622;<br>F:GO:0005515 | -                                                                                                                                                               |
| Caenorhabditis briggsae              | isoform cra_a                                        | 0 |                                                                                  | P:GO:0006468;<br>F:GO:0003677;<br>F:GO:0003674;<br>P:GO:0045110;<br>F:GO:0005524;<br>F:GO:0004674;<br>F:GO:0004672;<br>P:GO:0060052;<br>C:GO:0005739;<br>P:GO:0008219;<br>C:GO:0000786;<br>P:GO:0006334;<br>P:GO:0007399;<br>P:GO:0008380;<br>C:GO:0030424;<br>P:GO:0000226;<br>P:GO:0042790;<br>F:GO:0005515;<br>C:GO:0005883 | -                                                                                                                                                               |
| Caenorhabditis elegans               | briggsae cbr-vrk-1 protein                           | 0 |                                                                                  | F:GO:0004672;<br>F:GO:0005524;<br>P:GO:0006468;<br>F:GO:0004674                                                                                                                                                                                                                                                                | -                                                                                                                                                               |
|                                      |                                                      |   |                                                                                  |                                                                                                                                                                                                                                                                                                                                | -                                                                                                                                                               |
| Caenorhabditis briggsae              | membrane bound o-acyltransferase domain containing 1 | 1 | C:GO:0016020                                                                     | -                                                                                                                                                                                                                                                                                                                              | PTHR13906 (PANTHER),<br>PTHR13906:SF4 (PANTHER)                                                                                                                 |
|                                      |                                                      | 0 |                                                                                  |                                                                                                                                                                                                                                                                                                                                | -                                                                                                                                                               |
| Caenorhabditis briggsae              | kinesin-associated protein 3                         | 5 | P:GO:0051179;<br>F:GO:0032266;<br>F:GO:0005515;<br>C:GO:0005871;<br>P:GO:0050794 | -                                                                                                                                                                                                                                                                                                                              | IPR000225; IPR008658; IPR011989;<br>IPR016024; PTHR15605:SF1<br>(PANTHER), PF05804 (PFAM)                                                                       |
| Loa loa                              | ubiquitin carboxyl-termi-l                           | 1 | F:GO:0008233                                                                     | -                                                                                                                                                                                                                                                                                                                              | -                                                                                                                                                               |
| Caenorhabditis briggsae              | beige beach domain containing protein                | 1 | F:GO:0008270                                                                     | -                                                                                                                                                                                                                                                                                                                              | IPR000409; IPR001680; IPR011046;<br>IPR015943; IPR017986; IPR019781;<br>IPR019782; G3DSA:2.30.29.40<br>(GENE3D), PTHR13743 (PANTHER),<br>SSF50729 (SUPERFAMILY) |

|                         |                                       |    |                                                                                                                                                                                                                          |   |                                                                                                                                                           |
|-------------------------|---------------------------------------|----|--------------------------------------------------------------------------------------------------------------------------------------------------------------------------------------------------------------------------|---|-----------------------------------------------------------------------------------------------------------------------------------------------------------|
| Caenorhabditis elegans  | t-complex protein 1 subunit eta       | 12 | P:GO:0051086;<br>C:GO:0005739;<br>P:GO:0040007;<br>C:GO:0005832;<br>F:GO:0042802;<br>P:GO:0040035;<br>F:GO:0005524;<br>P:GO:0002119;<br>P:GO:0040011;<br>P:GO:0006898;<br>F:GO:0051082;<br>P:GO:0009792                  | - | IPR002194; IPR002423; IPR012720;<br>IPR017998; G3DSA:1.10.560.10<br>(GENE3D), G3DSA:3.30.260.10<br>(GENE3D), SignalP (SIGNALP),<br>SSF54849 (SUPERFAMILY) |
| Caenorhabditis elegans  | myosin ie                             | 13 | P:GO:0001570;<br>P:GO:0048008;<br>C:GO:0043234;<br>F:GO:0000146;<br>F:GO:0042623;<br>P:GO:0035166;<br>F:GO:0005515;<br>C:GO:0015629;<br>F:GO:0000166;<br>P:GO:0006807;<br>P:GO:0001822;<br>P:GO:0030048;<br>P:GO:0001701 | - | IPR010926; PTHR13140 (PANTHER),<br>PTHR13140:SF31 (PANTHER)                                                                                               |
| Caenorhabditis elegans  | hedgehog acyltransferase              | 2  | P:GO:0006810;<br>C:GO:0016020                                                                                                                                                                                            | - | IPR004299; PTHR13285 (PANTHER),<br>PTHR13285:SF8 (PANTHER), SignalP<br>(SIGNALP)                                                                          |
| Caenorhabditis elegans  | uncoordi- ted family member (unc-104) | 10 | F:GO:0003777;<br>P:GO:0007411;<br>P:GO:0048490;<br>C:GO:0005875;<br>P:GO:0007528;<br>C:GO:0005874;<br>P:GO:0008345;<br>P:GO:0047496;<br>F:GO:0005524;<br>P:GO:0016188                                                    | - | IPR022140; IPR022164; PTHR16012<br>(PANTHER), PTHR16012:SF104<br>(PANTHER)                                                                                |
| Caenorhabditis elegans  | uncoordi- ted family member (unc-104) | 10 | F:GO:0003777;<br>P:GO:0007411;<br>P:GO:0048490;<br>C:GO:0005875;<br>P:GO:0007528;<br>C:GO:0005874;<br>P:GO:0008345;<br>P:GO:0047496;<br>F:GO:0005524;<br>P:GO:0016188                                                    | - | IPR022140; IPR022164; PTHR16012<br>(PANTHER), PTHR16012:SF104<br>(PANTHER)                                                                                |
| -                       | -                                     | 0  |                                                                                                                                                                                                                          |   | -                                                                                                                                                         |
| Caenorhabditis briggsae | briggsae cbr-dad-1 protein            | 6  | C:GO:0005886;<br>F:GO:0005515;<br>P:GO:0007040;<br>P:GO:0006916;<br>C:GO:0016021;<br>F:GO:0004579                                                                                                                        | - | EC:2.4.1.119 IPR003038                                                                                                                                    |
| -                       | -                                     | 0  |                                                                                                                                                                                                                          |   | SignalP (SIGNALP)                                                                                                                                         |

|                         |                                                                    |    |                                                                                                                                                                                        |              |             |                                                                                    |
|-------------------------|--------------------------------------------------------------------|----|----------------------------------------------------------------------------------------------------------------------------------------------------------------------------------------|--------------|-------------|------------------------------------------------------------------------------------|
| Loa loa                 | steroidogenic acute regulatory protein                             | 7  | P:GO:0042221;<br>P:GO:0006694;<br>P:GO:0023052;<br>P:GO:0050789;<br>P:GO:0009987;<br>F:GO:0005488;<br>C:GO:0005739                                                                     | -            |             | IPR002913; G3DSA:3.30.530.20 (GENE3D), PTHR12136 (PANTHER), SSF55961 (SUPERFAMILY) |
| -                       | -                                                                  | 0  |                                                                                                                                                                                        |              |             | -                                                                                  |
| Caenorhabditis elegans  | cdp-diacylglycerol--glycerol-3-phosphate 3-phosphatidyltransferase | 5  | F:GO:0008444;<br>P:GO:0008654;<br>P:GO:0000003;<br>C:GO:0016021;<br>P:GO:0019915                                                                                                       | -            | EC:2.7.8.5  | IPR000462; PTHR14269 (PANTHER), PTHR14269:SF3 (PANTHER)                            |
| Brugia malayi           | retinoblastoma-associated protein a domain containing protein      | 0  |                                                                                                                                                                                        | F:GO:0005515 |             | PTHR13742 (PANTHER), PTHR13742:SF6 (PANTHER)                                       |
| Caenorhabditis briggsae | isocitrate dehydroge-se                                            | 6  | F:GO:0004450;<br>P:GO:0055114;<br>P:GO:0008340;<br>P:GO:0006102;<br>F:GO:0051287;<br>F:GO:0000287                                                                                      | -            | EC:1.1.1.42 | IPR001804; IPR004790; IPR019818; SSF53659 (SUPERFAMILY)                            |
| -                       | -                                                                  | 0  |                                                                                                                                                                                        |              |             | -                                                                                  |
| Caenorhabditis briggsae | briggsae cbr-rsp-7 protein                                         | 11 | P:GO:0040010;<br>F:GO:0003676;<br>P:GO:0000003;<br>P:GO:0019915;<br>P:GO:0002119;<br>F:GO:0005515;<br>P:GO:0040017;<br>F:GO:0000166;<br>P:GO:0006898;<br>P:GO:0009792;<br>P:GO:0016246 | -            |             | IPR000504; IPR012677; PTHR23365 (PANTHER), SSF54928 (SUPERFAMILY)                  |
| Caenorhabditis elegans  | tho complex 4                                                      | 7  | P:GO:0009987;<br>F:GO:0003723;<br>F:GO:0005515;<br>P:GO:0040011;<br>F:GO:0003697;<br>C:GO:0044428;<br>P:GO:0051028                                                                     | -            |             | -                                                                                  |
| Caenorhabditis elegans  | ankyrin repeat protein                                             | 1  | P:GO:0007413                                                                                                                                                                           | -            |             | IPR002110; IPR020683; PTHR18958 (PANTHER), PTHR18958:SF203 (PANTHER)               |
| Brugia malayi           | polyribonucleotide nucleotidyltransferase 1                        | 3  | F:GO:0016779;<br>P:GO:0016070;<br>C:GO:0005739                                                                                                                                         | -            | EC:2.7.7.0  | IPR001247; IPR012162; IPR015847; IPR020568                                         |
| -                       | -                                                                  | 0  |                                                                                                                                                                                        |              |             | -                                                                                  |
| -                       | -                                                                  | 0  |                                                                                                                                                                                        |              |             | -                                                                                  |
| -                       | -                                                                  | 0  |                                                                                                                                                                                        |              |             | SignalP (SIGNALP)                                                                  |
| Caenorhabditis elegans  | transmembrane protein 144                                          | 2  | C:GO:0016020;<br>P:GO:0002119                                                                                                                                                          | -            |             | IPR012435; SignalP (SIGNALP)                                                       |
| Caenorhabditis briggsae | - ca exchangers family member (ncx-2)                              | 7  | F:GO:0005432;<br>P:GO:0006816;<br>P:GO:0055085;<br>P:GO:0040010;<br>P:GO:0000003;<br>C:GO:0016021;<br>P:GO:0007154                                                                     | -            |             | IPR003644; PTHR11878 (PANTHER), PTHR11878:SF4 (PANTHER), SSF141072 (SUPERFAMILY)   |

|                         |                                                            |    |                                                                                                                                                                                                         |   |             |                                                                                                                                               |
|-------------------------|------------------------------------------------------------|----|---------------------------------------------------------------------------------------------------------------------------------------------------------------------------------------------------------|---|-------------|-----------------------------------------------------------------------------------------------------------------------------------------------|
| Caenorhabditis briggsae | zinc dhhc-type containing 3                                | 6  | C:GO:0042765;<br>F:GO:0008270;<br>F:GO:0016409;<br>P:GO:0018345;<br>P:GO:0006605;<br>C:GO:0005794                                                                                                       | - |             | IPR001594; PTHR22883 (PANTHER),<br>SignalP (SIGNALP)                                                                                          |
| Brugia malayi           | ring ca-l kelch protein                                    | 1  | P:GO:0019915                                                                                                                                                                                            | - |             | IPR006652; IPR013089; IPR015916;<br>PR00501 (PRINTS), PTHR23230:SF147<br>(PANTHER), SSF117281 (SUPERFAMILY)                                   |
|                         | -                                                          | 0  |                                                                                                                                                                                                         |   |             | -                                                                                                                                             |
|                         | -                                                          | 0  |                                                                                                                                                                                                         |   |             | -                                                                                                                                             |
| Caenorhabditis elegans  | elegans protein partially confirmed by transcript evidence | 0  |                                                                                                                                                                                                         |   |             | -                                                                                                                                             |
| Caenorhabditis briggsae | briggsae cbr-cdc- protein                                  | 10 | P:GO:0040010;<br>P:GO:0007126;<br>P:GO:0000212;<br>P:GO:0000003;<br>P:GO:0051301;<br>P:GO:0008283;<br>P:GO:0009792;<br>F:GO:0004721;<br>P:GO:0051729;<br>C:GO:0005634                                   | - | EC:3.1.3.16 | IPR000751; IPR001763;<br>PTHR10828:SF7 (PANTHER)                                                                                              |
| Brugia malayi           | elegans protein confirmed by transcript evidence           | 0  |                                                                                                                                                                                                         |   |             | -                                                                                                                                             |
|                         | -                                                          | 0  |                                                                                                                                                                                                         |   |             | -                                                                                                                                             |
| Caenorhabditis elegans  | hypothetical protein F48C1.6 [Caenorhabditis elegans]      | 0  |                                                                                                                                                                                                         |   |             | -                                                                                                                                             |
| Caenorhabditis elegans  | hypothetical protein F48C1.6 [Caenorhabditis elegans]      | 0  |                                                                                                                                                                                                         |   |             | -                                                                                                                                             |
|                         | -                                                          | 0  |                                                                                                                                                                                                         |   |             | -                                                                                                                                             |
|                         | -                                                          | 0  |                                                                                                                                                                                                         |   |             | SignalP (SIGNALP)                                                                                                                             |
| Caenorhabditis elegans  | fij12716-like protein                                      | 1  | P:GO:0006974                                                                                                                                                                                            | - |             | PTHR14374 (PANTHER)                                                                                                                           |
| Caenorhabditis elegans  | mitochondrial chaperone bcs1                               | 12 | P:GO:0034551;<br>P:GO:0033617;<br>F:GO:0017111;<br>P:GO:0040010;<br>C:GO:0005750;<br>P:GO:0000003;<br>F:GO:0005524;<br>P:GO:0002119;<br>F:GO:0005515;<br>P:GO:0006898;<br>P:GO:0032981;<br>P:GO:0009792 | - | EC:3.6.1.15 | IPR003959; IPR014851; IPR019742;<br>G3DSA:3.40.50.300 (GENE3D),<br>PTHR23070 (PANTHER),<br>PTHR23070:SF2 (PANTHER), SSF52540<br>(SUPERFAMILY) |
| Caenorhabditis elegans  | adam 10                                                    | 2  | F:GO:0046872;<br>F:GO:0008237                                                                                                                                                                           | - |             | IPR002870; PTHR11905 (PANTHER),<br>PTHR11905:SF4 (PANTHER), SignalP<br>(SIGNALP)                                                              |
|                         | -                                                          | 0  |                                                                                                                                                                                                         |   |             | -                                                                                                                                             |



|                         |                                                            |    |                                                                                                                                                                                                                                                                                                                                                                  |   |             |                                                                                                                                                           |
|-------------------------|------------------------------------------------------------|----|------------------------------------------------------------------------------------------------------------------------------------------------------------------------------------------------------------------------------------------------------------------------------------------------------------------------------------------------------------------|---|-------------|-----------------------------------------------------------------------------------------------------------------------------------------------------------|
| Caenorhabditis briggsae | cg11981-pa                                                 | 14 | P:GO:0008340;<br>P:GO:0051436;<br>P:GO:0051437;<br>P:GO:0000003;<br>F:GO:0004298;<br>P:GO:0031145;<br>P:GO:0002119;<br>F:GO:0005515;<br>P:GO:0040011;<br>P:GO:0009792;<br>C:GO:0005737;<br>C:GO:0005839;<br>C:GO:0005634;<br>P:GO:0006974                                                                                                                        | - | EC:3.4.25.0 | IPR001353; IPR016050;<br>G3DSA:3.60.20.10 (GENE3D),<br>PTHR11599 (PANTHER),<br>PTHR11599:SF7 (PANTHER),<br>PSS1476 (PROFILE),<br>SSF56235 (SUPERFAMILY)   |
| -                       | -                                                          | 0  | -                                                                                                                                                                                                                                                                                                                                                                | - | -           | -                                                                                                                                                         |
| Caenorhabditis briggsae | Hypothetical protein CBG06707 [Caenorhabditis briggsae]    | 0  | -                                                                                                                                                                                                                                                                                                                                                                | - | -           | SignalP (SIGNALP)                                                                                                                                         |
| Caenorhabditis elegans  | isoform c                                                  | 3  | P:GO:0007186;<br>C:GO:0016021;<br>F:GO:0004930                                                                                                                                                                                                                                                                                                                   | - | -           | IPR017978; SignalP (SIGNALP)                                                                                                                              |
| Caenorhabditis elegans  | amp-binding enzyme family protein                          | 3  | F:GO:0016874;<br>P:GO:0008152;<br>C:GO:0016021                                                                                                                                                                                                                                                                                                                   | - | -           | IPR000873; G3DSA:3.40.50.980 (GENE3D),<br>PTHR11968 (PANTHER),<br>PTHR11968:SF15 (PANTHER),<br>SSF56801 (SUPERFAMILY)                                     |
| Caenorhabditis briggsae | solute carrier family 27 (fatty acid transporter) member 4 | 21 | P:GO:0006659;<br>F:GO:0005515;<br>C:GO:0031526;<br>P:GO:0015909;<br>P:GO:0001676;<br>C:GO:0005792;<br>C:GO:0005902;<br>P:GO:0001579;<br>C:GO:0005743;<br>P:GO:0032049;<br>F:GO:0004467;<br>P:GO:0006646;<br>P:GO:0071072;<br>P:GO:0043588;<br>P:GO:0042760;<br>P:GO:0006661;<br>P:GO:0006654;<br>C:GO:0005783;<br>C:GO:0005901;<br>P:GO:0006656;<br>F:GO:0031957 | - | EC:6.2.1.3  | IPR000873; IPR020845;<br>G3DSA:3.40.50.980 (GENE3D),<br>PTHR11968 (PANTHER),<br>PTHR11968:SF15 (PANTHER),<br>SignalP (SIGNALP),<br>SSF56801 (SUPERFAMILY) |
| -                       | -                                                          | 0  | -                                                                                                                                                                                                                                                                                                                                                                | - | -           | -                                                                                                                                                         |
| -                       | -                                                          | 0  | -                                                                                                                                                                                                                                                                                                                                                                | - | -           | -                                                                                                                                                         |
| -                       | -                                                          | 0  | -                                                                                                                                                                                                                                                                                                                                                                | - | -           | SignalP (SIGNALP)                                                                                                                                         |
| -                       | -                                                          | 0  | -                                                                                                                                                                                                                                                                                                                                                                | - | -           | SignalP (SIGNALP)                                                                                                                                         |
| -                       | -                                                          | 0  | -                                                                                                                                                                                                                                                                                                                                                                | - | -           | -                                                                                                                                                         |
| -                       | -                                                          | 0  | -                                                                                                                                                                                                                                                                                                                                                                | - | -           | -                                                                                                                                                         |
| Caenorhabditis briggsae | briggsae cbr-asp-6 protein                                 | 0  | P:GO:0006508;<br>C:GO:0016021;<br>F:GO:0004190;<br>F:GO:0016787;<br>P:GO:0040011;<br>F:GO:0008233;<br>P:GO:0008219;<br>F:GO:0005515                                                                                                                                                                                                                              | - | -           | IPR001461; IPR009007; IPR021109;<br>PTHR13683:SF53 (PANTHER),<br>SignalP (SIGNALP)                                                                        |

|                         |                                                            |   |                                                                                                                    |                                                                 |                                                                                                                 |
|-------------------------|------------------------------------------------------------|---|--------------------------------------------------------------------------------------------------------------------|-----------------------------------------------------------------|-----------------------------------------------------------------------------------------------------------------|
| Drosophila virilis      | g patch domain containing 1                                | 7 | P:GO:0010171;<br>P:GO:0002119;<br>F:GO:0003676;<br>C:GO:0071011;<br>P:GO:0019915;<br>P:GO:0000398;<br>C:GO:0071013 | -                                                               | IPR011666; PTHR13384 (PANTHER),<br>PTHR13384:SF8 (PANTHER)                                                      |
| Caenorhabditis briggsae | briggsae cbr-smg-3 protein                                 | 0 |                                                                                                                    | F:GO:0005488;<br>P:GO:0016070;<br>F:GO:0005515                  | SignalP (SIGNALP)                                                                                               |
|                         | -                                                          | 0 |                                                                                                                    |                                                                 | -                                                                                                               |
| Caenorhabditis elegans  | programmed cell death 6-interacting protein                | 4 | P:GO:0006915;<br>F:GO:0046983;<br>C:GO:0005829;<br>F:GO:0017124                                                    | -                                                               | G3DSA:1.20.120.560 (GENE3D),<br>G3DSA:1.20.140.50 (GENE3D),<br>PTHR23030 (PANTHER),<br>PTHR23030:SF11 (PANTHER) |
|                         | -                                                          | 0 |                                                                                                                    |                                                                 | SignalP (SIGNALP)                                                                                               |
|                         | -                                                          | 0 |                                                                                                                    |                                                                 | -                                                                                                               |
| Caenorhabditis briggsae | elegans protein confirmed by transcript evidence           | 1 | P:GO:0008340                                                                                                       | -                                                               | IPR012816; SSF143990 (SUPERFAMILY)                                                                              |
| Caenorhabditis elegans  | elegans protein partially confirmed by transcript evidence | 0 |                                                                                                                    | C:GO:0016021;<br>P:GO:0023034                                   | -                                                                                                               |
| Caenorhabditis briggsae | elegans protein confirmed by transcript evidence           | 0 |                                                                                                                    | F:GO:0016887;<br>P:GO:0008340                                   | -                                                                                                               |
| Caenorhabditis elegans  | elegans protein partially confirmed by transcript evidence | 0 |                                                                                                                    | C:GO:0016021;<br>P:GO:0023034                                   | -                                                                                                               |
| Caenorhabditis briggsae | elegans protein confirmed by transcript evidence           | 1 | P:GO:0008340                                                                                                       | -                                                               | -                                                                                                               |
| Caenorhabditis briggsae | mgc83793 protein                                           | 0 |                                                                                                                    |                                                                 | PTHR12786 (PANTHER),<br>PTHR12786:SF1 (PANTHER)                                                                 |
|                         | -                                                          | 0 |                                                                                                                    |                                                                 | SignalP (SIGNALP)                                                                                               |
|                         | -                                                          | 0 |                                                                                                                    |                                                                 | -                                                                                                               |
| Ancylostoma caninum     | secreted protein asp-2                                     | 2 | P:GO:0040011;<br>C:GO:0005576                                                                                      | -                                                               | IPR001283; IPR014044;<br>PTHR10334:SF11 (PANTHER)                                                               |
| Haemonchus contortus    | elegans protein confirmed by transcript evidence           | 3 | F:GO:0015078;<br>C:GO:0033177;<br>P:GO:0015986                                                                     | -                                                               | IPR002490; PTHR11629:SF23<br>(PANTHER)                                                                          |
| Brugia malayi           | lim domain binding protein                                 | 0 |                                                                                                                    | P:GO:0007275;<br>F:GO:0003677;<br>F:GO:0003712;<br>C:GO:0005634 | -                                                                                                               |
| Brugia malayi           | lim domain binding protein family member (ldb-1)           | 6 | F:GO:0030528;<br>F:GO:0005515;<br>P:GO:0048513;<br>P:GO:0030154;<br>P:GO:0045449;<br>P:GO:0007399                  | -                                                               | -                                                                                                               |
| Brugia malayi           | lim domain binding protein                                 | 0 |                                                                                                                    | P:GO:0007275;<br>F:GO:0003677;<br>F:GO:0003712;<br>C:GO:0005634 | -                                                                                                               |
|                         | -                                                          | 0 |                                                                                                                    |                                                                 | -                                                                                                               |
|                         | -                                                          | 0 |                                                                                                                    |                                                                 | -                                                                                                               |
| Brugia malayi           | macrophage erythroblast attacker                           | 7 | P:GO:0048821;<br>C:GO:0015629;<br>P:GO:0050794;<br>C:GO:0005737;<br>C:GO:0044430;<br>C:GO:0005634;<br>C:GO:0005886 | -                                                               | IPR006594; IPR006595; PTHR12170<br>(PANTHER), PTHR12170:SF2<br>(PANTHER), SSF57850 (SUPERFAMILY)                |

|                         |                                                                             |    |                                                                                                                                                                                        |   |            |                                                                                                                                     |
|-------------------------|-----------------------------------------------------------------------------|----|----------------------------------------------------------------------------------------------------------------------------------------------------------------------------------------|---|------------|-------------------------------------------------------------------------------------------------------------------------------------|
| Loa loa                 | variant sh3 domain containing protein                                       | 7  | P:GO:0023033;<br>F:GO:0005515;<br>C:GO:0005829;<br>P:GO:0042110;<br>P:GO:0006915;<br>P:GO:0048522;<br>F:GO:0005089                                                                     | - |            | IPR002219; G3DSA:3.30.60.20 (GENE3D), PTHR22826 (PANTHER), PTHR22826:SF53 (PANTHER), SSF57889 (SUPERFAMILY)                         |
| Caenorhabditis briggsae | ribosomal protein s15                                                       | 11 | F:GO:0003723;<br>P:GO:0006364;<br>F:GO:0003735;<br>P:GO:0006414;<br>C:GO:0022627;<br>P:GO:0000056;<br>F:GO:0003677;<br>F:GO:0005515;<br>P:GO:0000028;<br>C:GO:0005654;<br>P:GO:0009790 | - |            | IPR002222; IPR005713; IPR020934                                                                                                     |
| Caenorhabditis briggsae | ribosomal protein s15                                                       | 11 | F:GO:0003723;<br>P:GO:0006364;<br>F:GO:0003735;<br>P:GO:0006414;<br>C:GO:0022627;<br>P:GO:0000056;<br>F:GO:0003677;<br>F:GO:0005515;<br>P:GO:0000028;<br>C:GO:0005654;<br>P:GO:0009790 | - |            | IPR002222; IPR005713                                                                                                                |
| Caenorhabditis elegans  | dihydroorotate dehydroge-se                                                 | 8  | P:GO:0043065;<br>F:GO:0004158;<br>C:GO:0016021;<br>C:GO:0005743;<br>P:GO:0055114;<br>P:GO:0006222;<br>P:GO:0090140;<br>P:GO:0006207                                                    | - | EC:1.3.3.1 | IPR001295; IPR012135; IPR013785; PTHR11938 (PANTHER), PTHR11938:SF7 (PANTHER), SSF51395 (SUPERFAMILY)                               |
|                         |                                                                             | 0  |                                                                                                                                                                                        |   |            |                                                                                                                                     |
| Caenorhabditis elegans  | 5 -amp-activated protein beta complex-interacting region containing protein | 5  | F:GO:0016301;<br>P:GO:0035090;<br>P:GO:0070050;<br>F:GO:0030246;<br>P:GO:0006974                                                                                                       | - |            | IPR006828; PTHR10343 (PANTHER), PTHR10343:SF10 (PANTHER)                                                                            |
| Caenorhabditis elegans  | actin family protein                                                        | 5  | P:GO:0000003;<br>P:GO:0040007;<br>F:GO:0005515;<br>P:GO:0006898;<br>P:GO:0002119                                                                                                       | - |            | IPR001849; IPR004000; PTHR11937:SF19 (PANTHER)                                                                                      |
| Caenorhabditis elegans  | mitochondrial ribosomal protein l2                                          | 3  | C:GO:0005840;<br>F:GO:0003735;<br>P:GO:0006412                                                                                                                                         | - | EC:3.6.5.3 | IPR002171; IPR008991; IPR012340; IPR014722; IPR016027; IPR018130; IPR022666; IPR022669; PTHR13691:SF6 (PANTHER), SignalIP (SIGNALP) |
| Caenorhabditis elegans  | g-t family protein                                                          | 1  | P:GO:0006911                                                                                                                                                                           | - |            |                                                                                                                                     |

|                               |                                                    |    |                                                                                                                                                                                                                                           |                                                                                  |                             |                                                                                                                                                             |
|-------------------------------|----------------------------------------------------|----|-------------------------------------------------------------------------------------------------------------------------------------------------------------------------------------------------------------------------------------------|----------------------------------------------------------------------------------|-----------------------------|-------------------------------------------------------------------------------------------------------------------------------------------------------------|
| Caenorhabditis briggsae       | mitogen-activated protein ki-se ki-se 2            | 12 | C:GO:0005625;<br>F:GO:0004708;<br>P:GO:0006468;<br>P:GO:0000165;<br>F:GO:0005515;<br>F:GO:0004713;<br>C:GO:0005938;<br>F:GO:0005524;<br>C:GO:0005576;<br>C:GO:0005829;<br>F:GO:0004674;<br>P:GO:0007265                                   | -                                                                                | EC:2.7.10.0;<br>EC:2.7.11.0 | IPR000719; IPR011009; IPR017442;<br>G3DSA:1.10.510.10 (GENE3D),<br>PTHR22986 (PANTHER),<br>PTHR22986:SF46 (PANTHER)                                         |
| -                             | -                                                  | 0  |                                                                                                                                                                                                                                           |                                                                                  |                             | -                                                                                                                                                           |
| -                             | -                                                  | 0  |                                                                                                                                                                                                                                           |                                                                                  |                             | PD936484 (PRODOM)                                                                                                                                           |
| Caenorhabditis elegans        | ef hand family protein                             | 5  | P:GO:0065008;<br>P:GO:0007268;<br>P:GO:0006897;<br>P:GO:0050794;<br>C:GO:0044464                                                                                                                                                          | -                                                                                |                             | IPR000261; IPR002048; IPR011992;<br>IPR018247; IPR018249; PD936484<br>(PRODOM), PTHR11216 (PANTHER),<br>PTHR11216:SF34 (PANTHER),<br>SSF47473 (SUPERFAMILY) |
| -                             | -                                                  | 0  |                                                                                                                                                                                                                                           |                                                                                  |                             | -                                                                                                                                                           |
| -                             | -                                                  | 0  |                                                                                                                                                                                                                                           |                                                                                  |                             | -                                                                                                                                                           |
| Angiostrongylus cantonensis   | hypothetical protein [Angiostrongylus cantonensis] | 0  |                                                                                                                                                                                                                                           |                                                                                  |                             | -                                                                                                                                                           |
| Loa loa                       | d- mismatch repair protein msh2                    | 14 | F:GO:0032139;<br>F:GO:0032138;<br>F:GO:0003684;<br>P:GO:0006310;<br>P:GO:0019724;<br>P:GO:0002520;<br>C:GO:0044428;<br>F:GO:0042802;<br>F:GO:0032559;<br>P:GO:0019222;<br>C:GO:0032300;<br>P:GO:0048523;<br>F:GO:0019899;<br>P:GO:0006281 | -                                                                                |                             | IPR000432; IPR007695; IPR007696;<br>IPR007860; IPR007861;<br>G3DSA:1.10.1420.10 (GENE3D),<br>PTHR11361:SF4 (PANTHER)                                        |
| -                             | -                                                  | 0  |                                                                                                                                                                                                                                           |                                                                                  |                             | -                                                                                                                                                           |
| Caenorhabditis elegans        | dead (asp-glu-ala-asp) box polypeptide 23          | 8  | F:GO:0004004;<br>C:GO:0005681;<br>F:GO:0003676;<br>F:GO:0005524;<br>F:GO:0005515;<br>P:GO:0000354;<br>C:GO:0005682;<br>C:GO:0046540                                                                                                       | -                                                                                |                             | IPR001650; G3DSA:3.40.50.300<br>(GENE3D), PTHR10967 (PANTHER),<br>PTHR10967:SF47 (PANTHER),<br>SSF52540 (SUPERFAMILY)                                       |
| Caulobacter segnis ATCC 21756 | alkaline phosphatase                               | 0  |                                                                                                                                                                                                                                           | F:GO:0016791;<br>F:GO:0004035;<br>F:GO:0016787;<br>P:GO:0008152;<br>F:GO:0003824 |                             | IPR001952; IPR017849; IPR017850;<br>PTHR11596 (PANTHER),<br>PTHR11596:SF11 (PANTHER)                                                                        |
| Caenorhabditis briggsae       | tensin 3                                           | 4  | P:GO:0009987;<br>F:GO:0005515;<br>C:GO:0044464;<br>F:GO:0016787                                                                                                                                                                           | -                                                                                |                             | IPR014019; G3DSA:3.90.190.10<br>(GENE3D), PTHR12305 (PANTHER),<br>PTHR12305:SF12 (PANTHER),<br>SSF52799 (SUPERFAMILY)                                       |
| Loa loa                       | trm112-like protein                                | 0  |                                                                                                                                                                                                                                           | F:GO:0003674;<br>C:GO:0005575                                                    |                             | -                                                                                                                                                           |
| Loa loa                       | trm112-like protein                                | 0  |                                                                                                                                                                                                                                           | F:GO:0003674;<br>C:GO:0005575                                                    |                             | IPR005651; G3DSA:2.20.25.10<br>(GENE3D)                                                                                                                     |

|                                 |                                                                |   |                                                                                  |                                                                 |            |                                                                                                                             |
|---------------------------------|----------------------------------------------------------------|---|----------------------------------------------------------------------------------|-----------------------------------------------------------------|------------|-----------------------------------------------------------------------------------------------------------------------------|
| Caenorhabditis elegans          | rn207_caeel ame: full=probable ring finger protein 207 homolog | 1 | F:GO:0005488                                                                     | -                                                               | -          | -                                                                                                                           |
| Caenorhabditis elegans          | rn207_caeel ame: full=probable ring finger protein 207 homolog | 1 | F:GO:0005488                                                                     | -                                                               | -          | -                                                                                                                           |
| -                               | -                                                              | 0 | -                                                                                | -                                                               | -          | -                                                                                                                           |
| Caenorhabditis elegans          | foie gras                                                      | 1 | P:GO:0006974                                                                     | -                                                               | -          | IPR021773; PTHR14374 (PANTHER)                                                                                              |
| Saccharomyces cerevisiae EC1118 | branched-chain amino acid transami-se                          | 3 | P:GO:0008652;<br>P:GO:0009081;<br>F:GO:0008483                                   | -                                                               | EC:2.6.1.0 | IPR001544; IPR005786;<br>G3DSA:3.30.470.10 (GENE3D)                                                                         |
| Caenorhabditis briggsae         | serine beta-lactamase-like protein mitochondrial               | 4 | P:GO:0009792;<br>P:GO:0040007;<br>C:GO:0005739;<br>P:GO:0002119                  | -                                                               | -          | IPR001466; IPR012338;<br>G3DSA:3.40.710.10 (GENE3D),<br>PTHR22935 (PANTHER),<br>PTHR22935:SF13 (PANTHER), SignalP (SIGNALP) |
| Caenorhabditis elegans          | transmembrane protein 65                                       | 1 | C:GO:0016020                                                                     | -                                                               | -          | IPR019537; PTHR21706 (PANTHER),<br>PTHR21706:SF7 (PANTHER)                                                                  |
| Caenorhabditis elegans          | viral a-type inclusion protein                                 | 2 | F:GO:0005488;<br>C:GO:0044464                                                    | -                                                               | -          | PD936484 (PRODOM)                                                                                                           |
| Hydra magnipapillata            | chromobox protein homolog 5                                    | 0 | -                                                                                | -                                                               | -          | IPR008251; IPR016197;<br>G3DSA:2.40.50.40 (GENE3D)                                                                          |
| -                               | -                                                              | 0 | -                                                                                | -                                                               | -          | -                                                                                                                           |
| Loa loa                         | mannose-6-phosphate isomerase                                  | 2 | P:GO:0005975;<br>F:GO:0004476                                                    | -                                                               | EC:5.3.1.8 | IPR001250; IPR011051; IPR014710;<br>IPR016305; IPR018050;<br>G3DSA:1.10.441.10 (GENE3D),<br>PTHR10309 (PANTHER)             |
| -                               | -                                                              | 0 | -                                                                                | -                                                               | -          | -                                                                                                                           |
| -                               | -                                                              | 0 | -                                                                                | -                                                               | -          | -                                                                                                                           |
| Caenorhabditis elegans          | nudix (nucleoside diphosphate linked moiety x)-type motif 18   | 2 | F:GO:0016787;<br>F:GO:0005515                                                    | -                                                               | -          | IPR000086; IPR015797; IPR020084;<br>IPR020476; PTHR22769 (PANTHER),<br>PSS1462 (PROFILE)                                    |
| Caenorhabditis elegans          | nudix (nucleoside diphosphate linked moiety x)-type motif 18   | 2 | F:GO:0016787;<br>F:GO:0005515                                                    | -                                                               | -          | IPR000086; IPR015797; IPR020084;<br>IPR020476; PTHR22769 (PANTHER),<br>PSS1462 (PROFILE)                                    |
| Loa loa                         | hypothetical protein LOAG_06999 [Loa loa]                      | 0 | -                                                                                | F:GO:0004864;<br>P:GO:0043666;<br>P:GO:0009966                  | -          | IPR007062; PTHR12398 (PANTHER),<br>PTHR12398:SF7 (PANTHER), SignalP (SIGNALP)                                               |
| -                               | -                                                              | 0 | -                                                                                | -                                                               | -          | -                                                                                                                           |
| Caenorhabditis briggsae         | briggsae cbr-alh-7 protein                                     | 3 | P:GO:0055114;<br>F:GO:0016491;<br>C:GO:0016021                                   | -                                                               | -          | IPR015590; IPR016161; IPR016162;<br>IPR016163; PTHR11699:SF49 (PANTHER)                                                     |
| Caenorhabditis elegans          | endonuclease-reverse transcriptase                             | 0 | -                                                                                | F:GO:0003723;<br>P:GO:0006278;<br>F:GO:0004519;<br>F:GO:0003964 | -          | -                                                                                                                           |
| Caenorhabditis elegans          | talin 2                                                        | 5 | F:GO:0008092;<br>C:GO:0030054;<br>C:GO:0005856;<br>C:GO:0044444;<br>N:GO:0071842 | -                                                               | -          | IPR006077; IPR015710; IPR015711;<br>G3DSA:1.20.1490.10 (GENE3D),<br>SSF109885 (SUPERFAMILY)                                 |
| Loa loa                         | r- guanine-9- methyltransferase domain containing              | 2 | P:GO:0000003;<br>P:GO:0006898                                                    | -                                                               | -          | -                                                                                                                           |
| Caenorhabditis briggsae         | helicase arip4                                                 | 4 | F:GO:0003676;<br>F:GO:0005515;<br>F:GO:0016787;<br>F:GO:0000166                  | -                                                               | -          | IPR001650; G3DSA:3.40.50.300 (GENE3D), PTHR10799 (PANTHER),<br>PTHR10799:SF51 (PANTHER),<br>SSF52540 (SUPERFAMILY)          |
| -                               | -                                                              | 0 | -                                                                                | -                                                               | -          | IPR011992; IPR018247; SignalP (SIGNALP), SSF47473 (SUPERFAMILY)                                                             |

|                         |                                                            |    |                                                                                                                                                                                                                          |   |                                                                                                                                                                 |
|-------------------------|------------------------------------------------------------|----|--------------------------------------------------------------------------------------------------------------------------------------------------------------------------------------------------------------------------|---|-----------------------------------------------------------------------------------------------------------------------------------------------------------------|
| Caenorhabditis elegans  | speckle-type poz protein                                   | 9  | P:GO:0007367;<br>P:GO:0043065;<br>P:GO:0042067;<br>P:GO:0007349;<br>P:GO:0016567;<br>P:GO:0046330;<br>F:GO:0005515;<br>P:GO:0030162;<br>C:GO:0005634                                                                     | - | IPR000210; IPR002083; IPR008974;<br>IPR011333; IPR013069; IPR013089;<br>IPR013322; PTHR23230:SF176<br>(PANTHER)                                                 |
| -                       | -                                                          | 0  |                                                                                                                                                                                                                          | - | -                                                                                                                                                               |
| Caenorhabditis briggsae | small nuclear ribonucleoprotein-associated protein b       | 13 | C:GO:0005829;<br>F:GO:0071208;<br>C:GO:0005681;<br>P:GO:0040007;<br>C:GO:0005683;<br>P:GO:0000003;<br>P:GO:0040027;<br>F:GO:0042802;<br>P:GO:0000387;<br>C:GO:0071204;<br>P:GO:0006898;<br>C:GO:0005654;<br>P:GO:0009792 | - | IPR001163; IPR006649; IPR010920;<br>G3DSA:2.30.30.100 (GENE3D),<br>PTHR10701 (PANTHER)                                                                          |
| Callithrix jacchus      | ribosomal protein l3                                       | 6  | C:GO:0005730;<br>F:GO:0003735;<br>F:GO:0003723;<br>F:GO:0005515;<br>C:GO:0022625;<br>P:GO:0006414                                                                                                                        | - | SignalP (SIGNALP)                                                                                                                                               |
| Caenorhabditis elegans  | elegans protein partially confirmed by transcript evidence | 7  | P:GO:0009792;<br>F:GO:0046872;<br>P:GO:0040018;<br>P:GO:0040017;<br>P:GO:0040010;<br>P:GO:0000003;<br>P:GO:0008340                                                                                                       | - | IPR001128; PTHR19383:SF176<br>(PANTHER)                                                                                                                         |
| Caenorhabditis elegans  | briggsae cbr-cdc-6 protein                                 | 8  | C:GO:0005730;<br>C:GO:0000794;<br>P:GO:0040007;<br>P:GO:0040035;<br>P:GO:0002119;<br>P:GO:0006898;<br>P:GO:0009792;<br>C:GO:0005737                                                                                      | - | IPR003593; IPR003959;<br>G3DSA:1.10.8.60 (GENE3D),<br>G3DSA:3.40.50.300 (GENE3D),<br>PTHR10763 (PANTHER),<br>PTHR10763:SF5 (PANTHER), SSF52540<br>(SUPERFAMILY) |
| Caenorhabditis briggsae | h aca ribonucleoprotein complex subunit 2-like protein     | 8  | P:GO:0040010;<br>C:GO:0005840;<br>C:GO:0005730;<br>C:GO:0005732;<br>F:GO:0030515;<br>P:GO:0006898;<br>P:GO:0031118;<br>F:GO:0030559                                                                                      | - | IPR002415; IPR004038; IPR018492;<br>G3DSA:3.30.1330.30 (GENE3D),<br>PTHR23105 (PANTHER),<br>PTHR23105:SF12 (PANTHER),<br>SSF55315 (SUPERFAMILY)                 |
| -                       | -                                                          | 0  |                                                                                                                                                                                                                          | - | -                                                                                                                                                               |

|                         |                                    |    |                                                                                                                                                                                                                          |   |                                                                                                                                                                                                                    |
|-------------------------|------------------------------------|----|--------------------------------------------------------------------------------------------------------------------------------------------------------------------------------------------------------------------------|---|--------------------------------------------------------------------------------------------------------------------------------------------------------------------------------------------------------------------|
| Caenorhabditis briggsae | nuclear pore complex protein nup85 | 13 | P:GO:0051179;<br>P:GO:0008340;<br>C:GO:0043234;<br>P:GO:0018991;<br>P:GO:0040007;<br>P:GO:0040035;<br>C:GO:0043232;<br>P:GO:0002119;<br>P:GO:0040017;<br>P:GO:0006997;<br>C:GO:0005635;<br>P:GO:0009792;<br>C:GO:0016020 | - | IPR011502; PTHR13373 (PANTHER),<br>PTHR13373:SF2 (PANTHER)                                                                                                                                                         |
| Caenorhabditis briggsae | nuclear pore complex protein nup85 | 13 | P:GO:0051179;<br>P:GO:0008340;<br>C:GO:0043234;<br>P:GO:0018991;<br>P:GO:0040007;<br>P:GO:0040035;<br>C:GO:0043232;<br>P:GO:0002119;<br>P:GO:0040017;<br>P:GO:0006997;<br>C:GO:0005635;<br>P:GO:0009792;<br>C:GO:0016020 | - | IPR011502; PTHR13373 (PANTHER),<br>PTHR13373:SF2 (PANTHER)                                                                                                                                                         |
| Caenorhabditis elegans  | abc transporter                    | 7  | P:GO:0009792;<br>F:GO:0042626;<br>C:GO:0005743;<br>P:GO:0055085;<br>F:GO:0005524;<br>P:GO:0000003;<br>C:GO:0016021                                                                                                       | - | IPR001140; IPR003439; IPR003593;<br>IPR011527; IPR017871; IPR017940;<br>G3DSA:1.20.1560.10 (GENE3D),<br>G3DSA:3.40.50.300 (GENE3D),<br>PTHR19242 (PANTHER),<br>PTHR19242:SF68 (PANTHER),<br>SSF52540 (SUPERFAMILY) |
| -                       | -                                  | 0  |                                                                                                                                                                                                                          |   | SignalP (SIGNALP)                                                                                                                                                                                                  |
| -                       | -                                  | 0  |                                                                                                                                                                                                                          |   | SignalP (SIGNALP)                                                                                                                                                                                                  |
| Caenorhabditis elegans  | abc transporter                    | 7  | P:GO:0009792;<br>F:GO:0042626;<br>C:GO:0005743;<br>P:GO:0055085;<br>F:GO:0005524;<br>P:GO:0000003;<br>C:GO:0016021                                                                                                       | - | IPR001140; IPR003439; IPR003593;<br>IPR011527; IPR017871; IPR017940;<br>G3DSA:1.20.1560.10 (GENE3D),<br>G3DSA:3.40.50.300 (GENE3D),<br>PTHR19242 (PANTHER),<br>PTHR19242:SF68 (PANTHER),<br>SSF52540 (SUPERFAMILY) |
| Caenorhabditis elegans  | abc transporter                    | 7  | P:GO:0009792;<br>F:GO:0042626;<br>C:GO:0005743;<br>P:GO:0055085;<br>F:GO:0005524;<br>P:GO:0000003;<br>C:GO:0016021                                                                                                       | - | IPR001140; IPR003439; IPR003593;<br>IPR011527; IPR017871; IPR017940;<br>G3DSA:1.20.1560.10 (GENE3D),<br>G3DSA:3.40.50.300 (GENE3D),<br>PTHR19242 (PANTHER),<br>PTHR19242:SF68 (PANTHER),<br>SSF52540 (SUPERFAMILY) |
| Caenorhabditis elegans  | abc transporter                    | 7  | P:GO:0009792;<br>F:GO:0042626;<br>C:GO:0005743;<br>P:GO:0055085;<br>F:GO:0005524;<br>P:GO:0000003;<br>C:GO:0016021                                                                                                       | - | IPR001140; IPR003439; IPR003593;<br>IPR011527; IPR017871; IPR017940;<br>G3DSA:1.20.1560.10 (GENE3D),<br>G3DSA:3.40.50.300 (GENE3D),<br>PTHR19242 (PANTHER),<br>PTHR19242:SF68 (PANTHER),<br>SSF52540 (SUPERFAMILY) |

|                         |                                                  |    |                                                                                                                                                                                                                                           |                               |                                        |                                                                                                                                                                               |
|-------------------------|--------------------------------------------------|----|-------------------------------------------------------------------------------------------------------------------------------------------------------------------------------------------------------------------------------------------|-------------------------------|----------------------------------------|-------------------------------------------------------------------------------------------------------------------------------------------------------------------------------|
| Caenorhabditis elegans  | inosine monophosphate dehydroge-se 1             | 6  | F:GO:0003938;<br>P:GO:0006177;<br>F:GO:0046872;<br>P:GO:0055114;<br>F:GO:0018580;<br>P:GO:0009451                                                                                                                                         | -                             | EC:1.1.1.205<br>;<br>EC:1.13.11.3<br>2 | IPR000644; IPR001093; IPR013785;<br>IPR015875; PTHR11911 (PANTHER),<br>PTHR11911:SF6 (PANTHER), SSF51412<br>(SUPERFAMILY), SSF54631<br>(SUPERFAMILY)                          |
| Caenorhabditis briggsae | inosine monophosphate dehydroge-se 1             | 6  | F:GO:0003938;<br>P:GO:0006177;<br>F:GO:0046872;<br>P:GO:0055114;<br>F:GO:0018580;<br>P:GO:0009451                                                                                                                                         | -                             | EC:1.1.1.205<br>;<br>EC:1.13.11.3<br>2 | IPR000644; IPR001093; IPR005990;<br>IPR013785; IPR015875; IPR018529;<br>PTHR11911 (PANTHER),<br>PTHR11911:SF6 (PANTHER), SSF51412<br>(SUPERFAMILY), SSF54631<br>(SUPERFAMILY) |
| Caenorhabditis elegans  | briggsae cbr--s-7 protein                        | 2  | F:GO:0046872;<br>F:GO:0008237                                                                                                                                                                                                             | -                             |                                        | IPR001506; IPR003582; IPR006026;<br>G3DSA:3.40.390.10 (GENE3D),<br>PTHR10127 (PANTHER),<br>PTHR10127:SF80 (PANTHER),<br>SSF55486 (SUPERFAMILY)                                |
| Caenorhabditis elegans  | prp4 pre-mr- processing factor 4 homolog         | 14 | P:GO:0040010;<br>C:GO:0015030;<br>C:GO:0005681;<br>F:GO:0003676;<br>C:GO:0016607;<br>P:GO:0040035;<br>P:GO:0008380;<br>P:GO:0002119;<br>C:GO:0071001;<br>F:GO:0005515;<br>P:GO:0040011;<br>P:GO:0006397;<br>P:GO:0009792;<br>P:GO:0001703 | -                             |                                        | IPR001680; IPR011047; IPR015943;<br>IPR017986; IPR019781; IPR019782;<br>PTHR19846 (PANTHER)                                                                                   |
| Caenorhabditis elegans  | peptidylprolyl isomerase -like 4                 | 8  | P:GO:0040035;<br>P:GO:0009792;<br>P:GO:0002119;<br>P:GO:0006457;<br>F:GO:0003676;<br>P:GO:0040007;<br>F:GO:0003755;<br>F:GO:0000166                                                                                                       | -                             | EC:5.2.1.8                             | IPR000504; IPR002130; IPR012677;<br>IPR015891; PTHR11071 (PANTHER),<br>PTHR11071:SF27 (PANTHER),<br>SSF54928 (SUPERFAMILY)                                                    |
| Brugia malayi           | regulator of nonsense transcripts 1              | 6  | C:GO:0005737;<br>P:GO:0009790;<br>F:GO:0046872;<br>P:GO:0000184;<br>F:GO:0017111;<br>F:GO:0000166                                                                                                                                         | -                             | EC:3.6.1.15                            | IPR018999; PTHR10887 (PANTHER),<br>PTHR10887:SF26 (PANTHER)                                                                                                                   |
| Caenorhabditis briggsae | uncoordi-ted family member (unc-89)              | 0  |                                                                                                                                                                                                                                           |                               |                                        | -                                                                                                                                                                             |
| Caenorhabditis briggsae | yqvw_caeel ame: full=uncharacterized protein     | 1  | P:GO:0040011                                                                                                                                                                                                                              |                               |                                        | IPR009622                                                                                                                                                                     |
| Caenorhabditis briggsae | spermatogenesis-associated serine-rich protein 2 | 0  |                                                                                                                                                                                                                                           | F:GO:0003674;<br>C:GO:0005737 |                                        | SignalP (SIGNALP)                                                                                                                                                             |
| -                       | -                                                | 0  |                                                                                                                                                                                                                                           |                               |                                        | SignalP (SIGNALP)                                                                                                                                                             |



|                        |                                                         |    |                                                                                                                                                                                                                                                                                                                                                 |   |                           |                                                                                                                                                                                                                                                        |
|------------------------|---------------------------------------------------------|----|-------------------------------------------------------------------------------------------------------------------------------------------------------------------------------------------------------------------------------------------------------------------------------------------------------------------------------------------------|---|---------------------------|--------------------------------------------------------------------------------------------------------------------------------------------------------------------------------------------------------------------------------------------------------|
| Loa loa                | fk506 binding protein 12-rapamycin associated protein 1 | 20 | F:GO:0004674;<br>P:GO:0030838;<br>P:GO:0032868;<br>P:GO:0032314;<br>C:GO:0043234;<br>P:GO:0048565;<br>P:GO:0043200;<br>P:GO:0018107;<br>P:GO:0031529;<br>P:GO:0050731;<br>P:GO:0045859;<br>P:GO:0051496;<br>F:GO:0000166;<br>F:GO:0005515;<br>P:GO:0007281;<br>P:GO:0010592;<br>P:GO:0045792;<br>C:GO:0044444;<br>C:GO:0005634;<br>P:GO:0016242 | - | EC:2.7.11.0               | IPR011989; IPR016024                                                                                                                                                                                                                                   |
| Caenorhabditis elegans | small nuclear r- activating polypeptide 50kda           | 6  | P:GO:0040035;<br>P:GO:0009792;<br>P:GO:0002119;<br>P:GO:0006898;<br>P:GO:0040007;<br>P:GO:0002009                                                                                                                                                                                                                                               | - |                           | IPR022042; PTHR13421 (PANTHER),<br>PTHR13421:SF6 (PANTHER)                                                                                                                                                                                             |
| Caenorhabditis elegans | briggsae cbr-pyc-1 protein                              | 9  | C:GO:0005875;<br>F:GO:0004736;<br>F:GO:0009374;<br>P:GO:0009252;<br>F:GO:0005524;<br>P:GO:0006094;<br>C:GO:0005759;<br>C:GO:0005811;<br>F:GO:0008716                                                                                                                                                                                            | - | EC:6.4.1.1;<br>EC:6.3.2.4 | IPR005479; IPR005481; IPR005482;<br>IPR005483; IPR011054; IPR011761;<br>IPR011764; IPR013785; IPR013815;<br>IPR013816; IPR013817; IPR016185;<br>PTHR18866 (PANTHER),<br>PTHR18866:SF10 (PANTHER),<br>SSF51569 (SUPERFAMILY), SSF56059<br>(SUPERFAMILY) |
| Caenorhabditis elegans | briggsae cbr-pyc-1 protein                              | 9  | C:GO:0005875;<br>F:GO:0004736;<br>F:GO:0009374;<br>P:GO:0009252;<br>F:GO:0005524;<br>P:GO:0006094;<br>C:GO:0005759;<br>C:GO:0005811;<br>F:GO:0008716                                                                                                                                                                                            | - | EC:6.4.1.1;<br>EC:6.3.2.4 | IPR005479; IPR005481; IPR005482;<br>IPR005483; IPR011054; IPR011761;<br>IPR011764; IPR013785; IPR013815;<br>IPR013816; IPR013817; IPR016185;<br>PTHR18866 (PANTHER),<br>PTHR18866:SF10 (PANTHER),<br>SSF51569 (SUPERFAMILY), SSF56059<br>(SUPERFAMILY) |
| Canis familiaris       | ribosomal protein s25                                   | 7  | F:GO:0003723;<br>C:GO:0005730;<br>F:GO:0003735;<br>P:GO:0006414;<br>C:GO:0022627;<br>F:GO:0005515;<br>P:GO:0000028                                                                                                                                                                                                                              | - |                           | IPR004977; PTHR12850:SF4<br>(PANTHER)                                                                                                                                                                                                                  |

|                         |                                                     |    |                                                                                                                                                                                                                                                                                                                                                                                   |                                                                                                                                                                                                         |                                                                                                       |
|-------------------------|-----------------------------------------------------|----|-----------------------------------------------------------------------------------------------------------------------------------------------------------------------------------------------------------------------------------------------------------------------------------------------------------------------------------------------------------------------------------|---------------------------------------------------------------------------------------------------------------------------------------------------------------------------------------------------------|-------------------------------------------------------------------------------------------------------|
| Macaca mulatta          | y box binding protein 1                             | 22 | F:GO:0002039;<br>P:GO:0000122;<br>P:GO:0070934;<br>C:GO:0010494;<br>P:GO:0006397;<br>F:GO:0003697;<br>C:GO:0071204;<br>C:GO:0030425;<br>P:GO:0008284;<br>P:GO:0008380;<br>F:GO:0043565;<br>F:GO:0003700;<br>P:GO:0046627;<br>P:GO:0045944;<br>F:GO:0003690;<br>C:GO:0048471;<br>F:GO:0004872;<br>C:GO:0070937;<br>P:GO:0043066;<br>P:GO:0001701;<br>F:GO:0016564;<br>F:GO:0003729 | -                                                                                                                                                                                                       | SignalP (SIGNALP)                                                                                     |
| Caenorhabditis elegans  | briggsae cbr-pqn-96 protein                         | 0  |                                                                                                                                                                                                                                                                                                                                                                                   |                                                                                                                                                                                                         | -                                                                                                     |
|                         | -                                                   | 0  |                                                                                                                                                                                                                                                                                                                                                                                   |                                                                                                                                                                                                         | -                                                                                                     |
| Caenorhabditis briggsae | endonuclease exonuclease phosphatase family protein | 5  | P:GO:0000003;<br>F:GO:0004437;<br>C:GO:0042995;<br>P:GO:0048523;<br>P:GO:0008152                                                                                                                                                                                                                                                                                                  | -                                                                                                                                                                                                       | IPR005135; G3DSA:3.60.10.10 (GENE3D), PTHR11200 (PANTHER), PTHR11200:SF15 (PANTHER)                   |
| Caenorhabditis elegans  | ring finger protein 11                              | 2  | F:GO:0008270;<br>F:GO:0005515                                                                                                                                                                                                                                                                                                                                                     | -                                                                                                                                                                                                       | IPR001841; IPR013083; IPR018957; PTHR22764 (PANTHER), PTHR22764:SF3 (PANTHER), SSF57850 (SUPERFAMILY) |
| Caenorhabditis elegans  | ring finger protein 11                              | 2  | F:GO:0008270;<br>F:GO:0005515                                                                                                                                                                                                                                                                                                                                                     | -                                                                                                                                                                                                       | IPR001841; IPR013083; IPR018957; PTHR22764 (PANTHER), PTHR22764:SF3 (PANTHER), SSF57850 (SUPERFAMILY) |
| Brugia malayi           | dedicator of cytokinesis 8                          | 1  | F:GO:0005488                                                                                                                                                                                                                                                                                                                                                                      | -                                                                                                                                                                                                       | PTHR23317 (PANTHER), PTHR23317:SF27 (PANTHER)                                                         |
| Caenorhabditis briggsae | briggsae cbr-rbr-2 protein                          | 0  |                                                                                                                                                                                                                                                                                                                                                                                   | F:GO:0003677;<br>C:GO:0005634;<br>F:GO:0016702;<br>F:GO:0008270;<br>P:GO:0055114;<br>P:GO:0016568;<br>F:GO:0016491;<br>F:GO:0005515;<br>C:GO:0005622;<br>F:GO:0046872;<br>P:GO:0006350;<br>P:GO:0045449 | IPR001965; IPR011011; IPR013083; IPR019786; PTHR10694 (PANTHER), PTHR10694:SF1 (PANTHER)              |

|                         |                                                                              |    |                                                                                                                                                                       |                                                                                                                                     |                                                                                                                                                |
|-------------------------|------------------------------------------------------------------------------|----|-----------------------------------------------------------------------------------------------------------------------------------------------------------------------|-------------------------------------------------------------------------------------------------------------------------------------|------------------------------------------------------------------------------------------------------------------------------------------------|
| Caenorhabditis elegans  | glutamate synthase                                                           | 10 | P:GO:0006537;<br>P:GO:0009792;<br>F:GO:0045181;<br>P:GO:0002119;<br>F:GO:0051536;<br>F:GO:0005506;<br>F:GO:0010181;<br>P:GO:0040010;<br>P:GO:0055114;<br>F:GO:0050660 | -                                                                                                                                   | IPR009051; IPR012285; IPR013027;<br>IPR016040; PRO0419 (PRINTS),<br>PTHR11938 (PANTHER),<br>PTHR11938:SF9 (PANTHER), SSF51971<br>(SUPERFAMILY) |
|                         | -                                                                            | 0  |                                                                                                                                                                       |                                                                                                                                     | -                                                                                                                                              |
| Caenorhabditis elegans  | elegans protein confirmed by transcript evidence                             | 4  | C:GO:0016021;<br>P:GO:0008340;<br>F:GO:0005488;<br>P:GO:0055085                                                                                                       | -                                                                                                                                   | IPR001993; IPR018108;<br>G3DSA:1.50.40.10 (GENE3D),<br>PTHR11896:SF23 (PANTHER)                                                                |
| Caenorhabditis elegans  | wapl (drosophila wings apart-like cohesin interactor) family member (wapl-1) | 0  |                                                                                                                                                                       | P:GO:0000003;<br>F:GO:0005488;<br>P:GO:0040011;<br>P:GO:0040010;<br>P:GO:0018991                                                    | IPR012502; IPR022771; PTHR22100<br>(PANTHER), PTHR22100:SF7<br>(PANTHER)                                                                       |
| Caenorhabditis elegans  | wapl (drosophila wings apart-like cohesin interactor) family member (wapl-1) | 0  |                                                                                                                                                                       | P:GO:0000003;<br>F:GO:0005524;<br>F:GO:0005488;<br>P:GO:0040011;<br>P:GO:0040010;<br>P:GO:0006298;<br>F:GO:0030983;<br>P:GO:0018991 | IPR012502; IPR022771; PTHR22100<br>(PANTHER), PTHR22100:SF7<br>(PANTHER)                                                                       |
| Caenorhabditis briggsae | heterogeneous nuclear ribonucleoprotein f                                    | 6  | C:GO:0005737;<br>C:GO:0005730;<br>C:GO:0030530;<br>P:GO:0043484;<br>F:GO:0017025;<br>F:GO:0003727                                                                     | -                                                                                                                                   | IPR000504; IPR012677; PTHR13976<br>(PANTHER), PTHR13976:SF3<br>(PANTHER), SSF54928 (SUPERFAMILY)                                               |
| Caenorhabditis briggsae | heterogeneous nuclear ribonucleoprotein f                                    | 6  | C:GO:0005737;<br>C:GO:0005730;<br>C:GO:0030530;<br>P:GO:0043484;<br>F:GO:0017025;<br>F:GO:0003727                                                                     | -                                                                                                                                   | IPR000504; IPR012677; PTHR13976<br>(PANTHER), PTHR13976:SF3<br>(PANTHER), SSF54928 (SUPERFAMILY)                                               |
| Caenorhabditis briggsae | heterogeneous nuclear ribonucleoprotein f                                    | 7  | C:GO:0005737;<br>C:GO:0005730;<br>C:GO:0030530;<br>C:GO:0005654;<br>P:GO:0043484;<br>F:GO:0017025;<br>F:GO:0003727                                                    | -                                                                                                                                   | IPR000504; IPR012677; PTHR13976<br>(PANTHER), PTHR13976:SF3<br>(PANTHER), SSF54928 (SUPERFAMILY)                                               |
|                         | -                                                                            | 0  |                                                                                                                                                                       |                                                                                                                                     | -                                                                                                                                              |
| Caenorhabditis elegans  | aarf domain containing ki-se 1                                               | 0  |                                                                                                                                                                       | C:GO:0005739;<br>F:GO:0004672;<br>F:GO:0005524;<br>P:GO:0006468                                                                     | IPR000719; IPR004147; IPR011009;<br>G3DSA:3.30.200.20 (GENE3D),<br>PTHR10566 (PANTHER),<br>PTHR10566:SF7 (PANTHER)                             |

|                         |                                                  |    |                                                                                                                                                                                                                                                                                                                                                                                   |                               |                                                                                                                                                 |
|-------------------------|--------------------------------------------------|----|-----------------------------------------------------------------------------------------------------------------------------------------------------------------------------------------------------------------------------------------------------------------------------------------------------------------------------------------------------------------------------------|-------------------------------|-------------------------------------------------------------------------------------------------------------------------------------------------|
| Caenorhabditis elegans  | snurportin 1                                     | 13 | P:GO:0000003;<br>F:GO:0005515;<br>P:GO:0040007;<br>P:GO:0006898;<br>P:GO:0040011;<br>P:GO:0006259;<br>C:GO:0005829;<br>P:GO:0009792;<br>C:GO:0043234;<br>P:GO:0002119;<br>F:GO:0003723;<br>C:GO:0005634;<br>P:GO:0000387                                                                                                                                                          | -                             | IPR002652; PTHR13403 (PANTHER),<br>PTHR13403:SF6 (PANTHER), PF11538<br>(PFAM), SSF56091 (SUPERFAMILY)                                           |
| Caenorhabditis elegans  | phosphatidylinositol glycan anchor class s       | 1  | P:GO:0006898                                                                                                                                                                                                                                                                                                                                                                      | -                             | IPR019540; PTHR21072 (PANTHER),<br>PTHR21072:SF1 (PANTHER)                                                                                      |
| Caenorhabditis elegans  | phosphatidylinositol glycan anchor class s       | 1  | P:GO:0006898                                                                                                                                                                                                                                                                                                                                                                      | -                             | IPR019540; PTHR21072 (PANTHER),<br>PTHR21072:SF1 (PANTHER)                                                                                      |
| Caenorhabditis briggsae | briggsae cbr-sdc-3 protein                       | 0  |                                                                                                                                                                                                                                                                                                                                                                                   | F:GO:0008270;<br>C:GO:0005622 | IPR007087                                                                                                                                       |
| Caenorhabditis elegans  | polymerase (d--directed) epsilon 4 (p12 subunit) | 2  | F:GO:0005515;<br>F:GO:0016740                                                                                                                                                                                                                                                                                                                                                     | -                             | IPR003958; IPR009072; PTHR10252<br>(PANTHER), PTHR10252:SF7<br>(PANTHER)                                                                        |
| Caenorhabditis briggsae | kh domain containing protein                     | 14 | P:GO:0007424;<br>P:GO:0044238;<br>P:GO:0016337;<br>P:GO:0044260;<br>P:GO:0016043;<br>P:GO:0009653;<br>P:GO:0016477;<br>P:GO:0048513;<br>C:GO:0043231;<br>C:GO:0044459;<br>P:GO:0023033;<br>F:GO:0005515;<br>P:GO:0048523;<br>C:GO:0044444                                                                                                                                         | -                             | IPR004087; IPR004088; IPR018111;<br>G3DSA:3.30.1370.10 (GENE3D),<br>PTHR10288 (PANTHER),<br>PTHR10288:SF34 (PANTHER),<br>SSF54791 (SUPERFAMILY) |
| Caenorhabditis briggsae | kh domain containing protein                     | 22 | P:GO:0048468;<br>C:GO:0044422;<br>P:GO:0007424;<br>P:GO:0016337;<br>P:GO:0009790;<br>P:GO:0009653;<br>P:GO:0016477;<br>P:GO:0007517;<br>C:GO:0043231;<br>C:GO:0042995;<br>P:GO:0007399;<br>C:GO:0005887;<br>P:GO:0043066;<br>F:GO:0005515;<br>P:GO:0065008;<br>P:GO:0007166;<br>P:GO:0044267;<br>P:GO:0023034;<br>N:GO:0071842;<br>C:GO:0044444;<br>P:GO:0030030;<br>P:GO:0035220 | -                             | IPR004087; IPR004088; IPR018111;<br>G3DSA:3.30.1370.10 (GENE3D),<br>PTHR10288 (PANTHER),<br>PTHR10288:SF34 (PANTHER),<br>SSF54791 (SUPERFAMILY) |

|                            |                                                  |    |                                                                                                                                                                                                                                           |                                                                                                                                                                       |                                                                                                                                                 |
|----------------------------|--------------------------------------------------|----|-------------------------------------------------------------------------------------------------------------------------------------------------------------------------------------------------------------------------------------------|-----------------------------------------------------------------------------------------------------------------------------------------------------------------------|-------------------------------------------------------------------------------------------------------------------------------------------------|
| Caenorhabditis briggsae    | kh domain containing protein                     | 14 | P:GO:0007424;<br>P:GO:0044238;<br>P:GO:0016337;<br>P:GO:0044260;<br>P:GO:0016043;<br>P:GO:0009653;<br>P:GO:0016477;<br>P:GO:0048513;<br>C:GO:0043231;<br>C:GO:0044459;<br>P:GO:0023033;<br>F:GO:0005515;<br>P:GO:0048523;<br>C:GO:0044444 | -                                                                                                                                                                     | IPR004087; IPR004088; IPR018111;<br>G3DSA:3.30.1370.10 (GENE3D),<br>PTHR10288 (PANTHER),<br>PTHR10288:SF34 (PANTHER),<br>SSF54791 (SUPERFAMILY) |
| Caenorhabditis briggsae    | hig1 domain family member 2a                     | 1  | P:GO:0040011                                                                                                                                                                                                                              | -                                                                                                                                                                     | -                                                                                                                                               |
| Caenorhabditis elegans     | elegans protein confirmed by transcript evidence | 0  |                                                                                                                                                                                                                                           |                                                                                                                                                                       | -                                                                                                                                               |
| Caenorhabditis elegans     | tpr domain containing protein                    | 0  |                                                                                                                                                                                                                                           | F:GO:0005488;<br>P:GO:0000956                                                                                                                                         | IPR011990; IPR013026; IPR019734;<br>PTHR23083 (PANTHER), SSF48452<br>(SUPERFAMILY)                                                              |
| Caenorhabditis elegans     | tpr domain containing protein                    | 0  |                                                                                                                                                                                                                                           | F:GO:0005488;<br>P:GO:0000956                                                                                                                                         | IPR011990; IPR013026; IPR019734;<br>PTHR23083 (PANTHER), SignalP<br>(SIGNALP), SSF48452 (SUPERFAMILY)                                           |
| Caenorhabditis elegans     | tpr domain containing protein                    | 0  |                                                                                                                                                                                                                                           | F:GO:0005488;<br>P:GO:0000956                                                                                                                                         | IPR011990; IPR013026; IPR019734;<br>PTHR23083 (PANTHER), SignalP<br>(SIGNALP), SSF48452 (SUPERFAMILY)                                           |
| Caenorhabditis elegans     | tpr domain containing protein                    | 0  |                                                                                                                                                                                                                                           | F:GO:0005488;<br>P:GO:0000956                                                                                                                                         | IPR011990; IPR013026; IPR019734;<br>PTHR23083 (PANTHER), SignalP<br>(SIGNALP), SSF48452 (SUPERFAMILY)                                           |
| Laccaria bicolor S238N-H82 | d- polymerase epsilon                            | 0  |                                                                                                                                                                                                                                           | F:GO:0016740;<br>F:GO:0003677;<br>C:GO:0005634;<br>P:GO:0006260;<br>F:GO:0003676;<br>F:GO:0000166;<br>F:GO:0003887;<br>F:GO:0008270;<br>F:GO:0016779;<br>P:GO:0006139 | -                                                                                                                                               |
| -                          | -                                                | 0  |                                                                                                                                                                                                                                           |                                                                                                                                                                       | SignalP (SIGNALP)                                                                                                                               |
| Caenorhabditis elegans     | subfamily member 11                              | 6  | P:GO:0006457;<br>F:GO:0031072;<br>F:GO:0051082;<br>P:GO:0016556;<br>C:GO:0005634;<br>C:GO:0005783                                                                                                                                         | -                                                                                                                                                                     | IPR001623; IPR002939; IPR003095;<br>IPR008971; IPR015609; IPR018253;<br>G3DSA:2.60.260.20 (GENE3D),<br>PTHR11821:SF69 (PANTHER)                 |
| Caenorhabditis briggsae    | briggsae cbr-cid-1 protein                       | 0  |                                                                                                                                                                                                                                           | F:GO:0003676;<br>F:GO:0008270;<br>F:GO:0005515                                                                                                                        | IPR007087; IPR015880                                                                                                                            |
| -                          | -                                                | 0  |                                                                                                                                                                                                                                           |                                                                                                                                                                       | -                                                                                                                                               |
| Caenorhabditis elegans     | hypothetical kda protein in chromosome           | 4  | P:GO:0006071;<br>F:GO:0008889;<br>F:GO:0030246;<br>P:GO:0006629                                                                                                                                                                           | -                                                                                                                                                                     | EC:3.1.4.46<br>IPR004129; IPR017946; IPR018247;<br>PTHR22958 (PANTHER)                                                                          |
| Brugia malayi              | kiaa0467 protein                                 | 0  |                                                                                                                                                                                                                                           |                                                                                                                                                                       | -                                                                                                                                               |

|                         |                                         |    |                                                                                                                                                                       |   |                                                                                                                                                                                            |
|-------------------------|-----------------------------------------|----|-----------------------------------------------------------------------------------------------------------------------------------------------------------------------|---|--------------------------------------------------------------------------------------------------------------------------------------------------------------------------------------------|
| Loa loa                 | isoform a                               | 8  | C:GO:0070864;<br>P:GO:0007291;<br>F:GO:0008270;<br>P:GO:0007279;<br>C:GO:0005925;<br>F:GO:0003779;<br>C:GO:0015629;<br>P:GO:0045856                                   | - | SignalP (SIGNALP)                                                                                                                                                                          |
| Caenorhabditis elegans  | isoform a                               | 8  | C:GO:0070864;<br>P:GO:0007291;<br>F:GO:0008270;<br>P:GO:0007279;<br>C:GO:0005925;<br>F:GO:0003779;<br>C:GO:0015629;<br>P:GO:0045856                                   | - | IPR000900; IPR001781; IPR013998;<br>PTHR11039:SF3 (PANTHER), SSF57716 (SUPERFAMILY)                                                                                                        |
| Caenorhabditis elegans  | lim and sh3 domain protein lasp-        | 7  | C:GO:0070864;<br>P:GO:0007291;<br>F:GO:0008270;<br>P:GO:0007279;<br>C:GO:0005925;<br>F:GO:0003779;<br>P:GO:0045856                                                    | - | IPR000900; IPR001781; IPR013998;<br>PTHR11039:SF3 (PANTHER), SSF57716 (SUPERFAMILY)                                                                                                        |
| Brugia malayi           | lim domains containing 1                | 8  | C:GO:0005737;<br>F:GO:0046872;<br>F:GO:0005515;<br>P:GO:0007275;<br>P:GO:0007165;<br>C:GO:0005634;<br>P:GO:0006355;<br>F:GO:0016564                                   | - | IPR001781; PTHR18973 (PANTHER),<br>PTHR18973:SF60 (PANTHER),<br>SSF57716 (SUPERFAMILY)                                                                                                     |
| Brugia malayi           | lim domains containing 1                | 8  | C:GO:0005737;<br>F:GO:0046872;<br>F:GO:0005515;<br>P:GO:0007275;<br>P:GO:0007165;<br>C:GO:0005634;<br>P:GO:0006355;<br>F:GO:0016564                                   | - | IPR001781; PTHR18973 (PANTHER),<br>PTHR18973:SF60 (PANTHER),<br>SSF57716 (SUPERFAMILY)                                                                                                     |
| Caenorhabditis briggsae | atp synthase subunit mitochondrial      | 4  | P:GO:0040007;<br>P:GO:0010171;<br>P:GO:0040035;<br>P:GO:0002119                                                                                                       | - | -                                                                                                                                                                                          |
| Caenorhabditis briggsae | briggsae cbr-eat-3 protein              | 10 | C:GO:0030061;<br>P:GO:0045768;<br>C:GO:0016021;<br>C:GO:0030425;<br>C:GO:0005741;<br>C:GO:0005758;<br>P:GO:0007601;<br>P:GO:0007007;<br>F:GO:0003924;<br>F:GO:0005525 | - | EC:3.6.5.1;<br>EC:3.6.5.2;<br>EC:3.6.5.3;<br>EC:3.6.5.4<br>IPR001401; IPR022812;<br>G3DSA:3.40.50.300 (GENE3D),<br>PTHR11566 (PANTHER),<br>PTHR11566:SF8 (PANTHER), SSF52540 (SUPERFAMILY) |
| Caenorhabditis elegans  | helix loop helix family member (hlh-30) | 2  | P:GO:0000003;<br>P:GO:0019915                                                                                                                                         | - | PTHR10014 (PANTHER),<br>PTHR10014:SF7 (PANTHER)                                                                                                                                            |
|                         | -                                       | 0  |                                                                                                                                                                       |   | -                                                                                                                                                                                          |
|                         | -                                       | 0  |                                                                                                                                                                       |   | -                                                                                                                                                                                          |
|                         | -                                       | 0  |                                                                                                                                                                       |   | -                                                                                                                                                                                          |

|                         |                                                            |   |                                                                                                                    |                                                                                                   |            |                                                                                                                                                               |
|-------------------------|------------------------------------------------------------|---|--------------------------------------------------------------------------------------------------------------------|---------------------------------------------------------------------------------------------------|------------|---------------------------------------------------------------------------------------------------------------------------------------------------------------|
| Caenorhabditis briggsae | cleft lip and palate associated transmembrane protein 1    | 4 | C:GO:0005887;<br>F:GO:0005515;<br>C:GO:0009897;<br>P:GO:0033081                                                    | -                                                                                                 |            | IPR008429; SignalP (SIGNALP)                                                                                                                                  |
| Caenorhabditis briggsae | elegans protein confirmed by transcript evidence           | 0 |                                                                                                                    | P:GO:0000003;<br>P:GO:0006915                                                                     |            | -                                                                                                                                                             |
| Caenorhabditis briggsae | elegans protein confirmed by transcript evidence           | 4 | P:GO:0006915;<br>P:GO:0000003;<br>F:GO:0030296;<br>C:GO:0005912                                                    | -                                                                                                 |            | IPR001452; IPR002110; IPR020683;<br>G3DSA:2.30.30.40 (GENE3D),<br>PTHR18958 (PANTHER),<br>PTHR18958:SF32 (PANTHER)                                            |
| Caenorhabditis briggsae | elegans protein confirmed by transcript evidence           | 4 | P:GO:0006915;<br>P:GO:0000003;<br>F:GO:0030296;<br>C:GO:0005912                                                    | -                                                                                                 |            | IPR001452; IPR002110; IPR020683;<br>G3DSA:2.30.30.40 (GENE3D),<br>PTHR18958 (PANTHER),<br>PTHR18958:SF32 (PANTHER)                                            |
| Caenorhabditis briggsae | inner centromere protein                                   | 4 | C:GO:0032133;<br>C:GO:0005694;<br>P:GO:0051225;<br>F:GO:0019901                                                    | -                                                                                                 |            | IPR005635; PTHR13142 (PANTHER)                                                                                                                                |
| Caenorhabditis briggsae | acid phosphatase-1                                         | 1 | F:GO:0016787                                                                                                       | -                                                                                                 |            | IPR000560; G3DSA:3.40.50.1240<br>(GENE3D), PTHR11567 (PANTHER),<br>PTHR11567:SF20 (PANTHER), SignalP<br>(SIGNALP), SSF53254 (SUPERFAMILY)                     |
| Caenorhabditis briggsae | efr3 homolog a ( cerevisiae)                               | 7 | P:GO:0009792;<br>F:GO:0005488;<br>C:GO:0005622;<br>C:GO:0005886;<br>P:GO:0040010;<br>C:GO:0016021;<br>P:GO:0006898 | -                                                                                                 |            | PTHR12444 (PANTHER)                                                                                                                                           |
| Caenorhabditis elegans  | riken cd- 2610003j06                                       | 0 |                                                                                                                    | F:GO:0003674;<br>P:GO:0008150                                                                     |            | -                                                                                                                                                             |
|                         | -                                                          | 0 |                                                                                                                    |                                                                                                   |            | -                                                                                                                                                             |
| Caenorhabditis briggsae | guanylyl cyclase family member (gcy-28)                    | 7 | F:GO:0004383;<br>F:GO:0004672;<br>F:GO:0008528;<br>F:GO:0005524;<br>C:GO:0016020;<br>P:GO:0006468;<br>P:GO:0006182 | -                                                                                                 | EC:4.6.1.2 | IPR000719; IPR001054; IPR001245;<br>IPR011009; G3DSA:1.10.510.10<br>(GENE3D), G3DSA:3.30.200.20<br>(GENE3D), PTHR11920 (PANTHER),<br>PTHR11920:SF50 (PANTHER) |
| Loa loa                 | hypothetical protein LOAG_10146 [Loa loa]                  | 0 |                                                                                                                    |                                                                                                   |            | -                                                                                                                                                             |
| Caenorhabditis briggsae | elegans protein partially confirmed by transcript evidence | 1 | F:GO:0005515                                                                                                       | -                                                                                                 |            | -                                                                                                                                                             |
| Brugia malayi           | 2 -phosphodiesterase                                       | 0 |                                                                                                                    | C:GO:0005739;<br>F:GO:0004527;<br>F:GO:0016787;<br>P:GO:0008150;<br>F:GO:0004519;<br>C:GO:0005575 |            | IPR005135; G3DSA:3.60.10.10<br>(GENE3D), PTHR12121 (PANTHER),<br>PTHR12121:SF12 (PANTHER)                                                                     |
| Loa loa                 | zinc c2h2 type family protein                              | 7 | P:GO:0040035;<br>P:GO:0002119;<br>F:GO:0046872;<br>F:GO:0017151;<br>F:GO:0008134;<br>C:GO:0005634;<br>F:GO:0042826 | -                                                                                                 |            | -                                                                                                                                                             |
| Caenorhabditis elegans  | embrane protease family member (imp-1)                     | 1 | F:GO:0005515                                                                                                       | -                                                                                                 |            | SignalP (SIGNALP)                                                                                                                                             |
|                         | -                                                          | 0 |                                                                                                                    |                                                                                                   |            | -                                                                                                                                                             |
| Caenorhabditis elegans  | isoform b                                                  | 1 | F:GO:0005488                                                                                                       | -                                                                                                 |            | SignalP (SIGNALP)                                                                                                                                             |

|                         |                                                          |    |                                                                                                                                                                                                                                                                             |   |                             |                                                                                                                      |
|-------------------------|----------------------------------------------------------|----|-----------------------------------------------------------------------------------------------------------------------------------------------------------------------------------------------------------------------------------------------------------------------------|---|-----------------------------|----------------------------------------------------------------------------------------------------------------------|
| Caenorhabditis elegans  | zinc finger protein                                      | 2  | F:GO:0008270;<br>F:GO:0003677                                                                                                                                                                                                                                               | - |                             | SignalP (SIGNALP)                                                                                                    |
| Camponotus floridanus   | ubiquitin associated and sh3 domain-containing protein b | 0  |                                                                                                                                                                                                                                                                             |   |                             | G3DSA:3.40.50.1240 (GENE3D)                                                                                          |
|                         | -                                                        | 0  |                                                                                                                                                                                                                                                                             |   |                             | -                                                                                                                    |
|                         | -                                                        | 0  |                                                                                                                                                                                                                                                                             |   |                             | SignalP (SIGNALP)                                                                                                    |
|                         | -                                                        | 0  |                                                                                                                                                                                                                                                                             |   |                             | -                                                                                                                    |
| Caenorhabditis elegans  | furry homolog                                            | 1  | F:GO:0005515                                                                                                                                                                                                                                                                | - |                             | PTHR12295 (PANTHER),<br>PTHR12295:SF6 (PANTHER)                                                                      |
| Caenorhabditis briggsae | briggsae cbr-apb-3 protein                               | 7  | P:GO:0009792;<br>P:GO:0010171;<br>P:GO:0002119;<br>P:GO:0006810;<br>P:GO:0007040;<br>P:GO:0019915;<br>P:GO:0040007                                                                                                                                                          | - |                             | -                                                                                                                    |
| Caenorhabditis briggsae | briggsae cbr-apb-3 protein                               | 7  | P:GO:0009792;<br>P:GO:0010171;<br>P:GO:0002119;<br>P:GO:0006810;<br>P:GO:0007040;<br>P:GO:0019915;<br>P:GO:0040007                                                                                                                                                          | - |                             | PS51257 (PROFILE)                                                                                                    |
| Caenorhabditis briggsae | briggsae cbr-apb-3 protein                               | 7  | P:GO:0009792;<br>P:GO:0010171;<br>P:GO:0002119;<br>P:GO:0006810;<br>P:GO:0007040;<br>P:GO:0019915;<br>P:GO:0040007                                                                                                                                                          | - |                             | -                                                                                                                    |
| Caenorhabditis elegans  | ain family member (clp-1)                                | 9  | P:GO:0042335;<br>P:GO:0008219;<br>P:GO:0016540;<br>P:GO:0006508;<br>P:GO:0030036;<br>P:GO:0006911;<br>F:GO:0004198;<br>C:GO:0005737;<br>P:GO:0021919                                                                                                                        | - |                             | IPR001300; G3DSA:3.90.70.10<br>(GENE3D), PTHR10183 (PANTHER),<br>PTHR10183:SF45 (PANTHER),<br>SSF54001 (SUPERFAMILY) |
|                         | -                                                        | 0  |                                                                                                                                                                                                                                                                             |   |                             | -                                                                                                                    |
| Caenorhabditis briggsae | afg3-like protein 2                                      | 16 | F:GO:0008270;<br>F:GO:0017111;<br>P:GO:0060013;<br>P:GO:0007409;<br>C:GO:0005743;<br>C:GO:0016021;<br>P:GO:0007528;<br>F:GO:0004222;<br>F:GO:0051082;<br>P:GO:0021675;<br>P:GO:0008219;<br>P:GO:0030163;<br>P:GO:0006508;<br>P:GO:0042552;<br>P:GO:0040014;<br>F:GO:0005524 | - | EC:3.6.1.15;<br>EC:3.4.24.0 | IPR000642; PTHR23076 (PANTHER),<br>PTHR23076:SF11 (PANTHER),<br>SSF140990 (SUPERFAMILY)                              |



|                           |                                                                                                                                                             |    |                                                                                                                                                                                        |                                                                 |                            |                                                                                               |
|---------------------------|-------------------------------------------------------------------------------------------------------------------------------------------------------------|----|----------------------------------------------------------------------------------------------------------------------------------------------------------------------------------------|-----------------------------------------------------------------|----------------------------|-----------------------------------------------------------------------------------------------|
| Caenorhabditis briggsae   | afg3-like protein 2                                                                                                                                         |    | F:GO:0004222;<br>P:GO:0030163;<br>F:GO:0005524;<br>7 F:GO:0008568;<br>C:GO:0016021;<br>P:GO:0006508;<br>F:GO:0008270                                                                   | -                                                               | EC:3.4.24.0;<br>EC:3.6.4.3 | IPR000642; PTHR23076 (PANTHER),<br>PTHR23076:SF11 (PANTHER),<br>SSF140990 (SUPERFAMILY)       |
| Caenorhabditis briggsae   | anis1_anisi ame: full=major allergen ani s 1 ame: full=21 kda<br>allergen ame: full=excretory gland allergen ans1 ame:<br>allergen=ani s 1 flags: precursor | 0  |                                                                                                                                                                                        | P:GO:0006915;<br>F:GO:0030414;<br>F:GO:0004867;<br>C:GO:0005576 |                            | IPR002223; IPR020901; PTHR10083<br>(PANTHER), PTHR10083:SF39<br>(PANTHER), SignalP (SIGNALP)  |
| Caenorhabditis elegans    | anis1_anisi ame: full=major allergen ani s 1 ame: full=21 kda<br>allergen ame: full=excretory gland allergen ans1 ame:<br>allergen=ani s 1 flags: precursor | 0  |                                                                                                                                                                                        | P:GO:0006915;<br>F:GO:0030414;<br>F:GO:0004867;<br>C:GO:0005576 |                            | IPR002223; IPR020901; PTHR10083<br>(PANTHER), PTHR10083:SF39<br>(PANTHER), SignalP (SIGNALP)  |
| Caenorhabditis briggsae   | anis1_anisi ame: full=major allergen ani s 1 ame: full=21 kda<br>allergen ame: full=excretory gland allergen ans1 ame:<br>allergen=ani s 1 flags: precursor | 0  |                                                                                                                                                                                        | P:GO:0006915;<br>F:GO:0030414;<br>F:GO:0004867;<br>C:GO:0005576 |                            | IPR002223; IPR020901; PTHR10083<br>(PANTHER), PTHR10083:SF39<br>(PANTHER), SignalP (SIGNALP)  |
| Loa loa                   | dynein light chain                                                                                                                                          | 11 | C:GO:0030286;<br>P:GO:0018991;<br>P:GO:0016319;<br>F:GO:0042623;<br>P:GO:0040035;<br>P:GO:0035046;<br>P:GO:0007052;<br>P:GO:0007018;<br>P:GO:0010171;<br>F:GO:0005515;<br>P:GO:0048813 | -                                                               |                            | IPR004942; G3DSA:3.30.450.30<br>(GENE3D), PTHR10779 (PANTHER),<br>SSF103196 (SUPERFAMILY)     |
| Caenorhabditis elegans    | innexin family protein                                                                                                                                      | 3  | P:GO:0019915;<br>F:GO:0016787;<br>C:GO:0044425                                                                                                                                         | -                                                               |                            | IPR000990; SignalP (SIGNALP)                                                                  |
| Caenorhabditis briggsae   | innexin family protein                                                                                                                                      | 4  | P:GO:0019915;<br>C:GO:0016021;<br>C:GO:0005921;<br>F:GO:0008234                                                                                                                        | -                                                               |                            | IPR000990; SignalP (SIGNALP)                                                                  |
| Loa loa                   | atg9                                                                                                                                                        | 1  | P:GO:0009792                                                                                                                                                                           | -                                                               |                            | IPR007241; PTHR13038:SF1<br>(PANTHER)                                                         |
| Caenorhabditis elegans    | zinc finger protein 667                                                                                                                                     | 3  | F:GO:0003676;<br>C:GO:0005622;<br>F:GO:0008270                                                                                                                                         | -                                                               |                            | IPR007087; IPR013087; IPR015880;<br>PTHR11389 (PANTHER), SSF57667<br>(SUPERFAMILY)            |
| Haemonchus contortus      | glutathione peroxidase                                                                                                                                      | 4  | F:GO:0004602;<br>C:GO:0005615;<br>P:GO:0055114;<br>P:GO:0006979                                                                                                                        | -                                                               | EC:1.11.1.9                | IPR000889; IPR012335; IPR012336;<br>SignalP (SIGNALP)                                         |
| Caenorhabditis elegans    | r- binding motif protein 4                                                                                                                                  | 3  | F:GO:0005515;<br>P:GO:0000003;<br>P:GO:0006396                                                                                                                                         | -                                                               |                            | IPR000504; IPR001878; IPR012677;<br>IPR015466; PTHR10432 (PANTHER),<br>SSF54928 (SUPERFAMILY) |
|                           | -                                                                                                                                                           | 0  |                                                                                                                                                                                        |                                                                 |                            | IPR000276                                                                                     |
|                           | -                                                                                                                                                           | 0  |                                                                                                                                                                                        |                                                                 |                            | -                                                                                             |
|                           | -                                                                                                                                                           | 0  |                                                                                                                                                                                        |                                                                 |                            | -                                                                                             |
| Loa loa                   | cuticlin 1                                                                                                                                                  | 0  |                                                                                                                                                                                        | P:GO:0010171                                                    |                            | IPR001507; PTHR22907 (PANTHER),<br>SignalP (SIGNALP)                                          |
| Heligmosomoides polygyrus | c-type lectin-1                                                                                                                                             | 1  | F:GO:0005529                                                                                                                                                                           | -                                                               |                            | IPR001304; IPR016186; IPR016187;<br>PTHR22801 (PANTHER),<br>PTHR22801:SF9 (PANTHER)           |

|                         |                                                                   |   |                                                                                                   |                                                                                  |                            |                                                                                                                                                           |
|-------------------------|-------------------------------------------------------------------|---|---------------------------------------------------------------------------------------------------|----------------------------------------------------------------------------------|----------------------------|-----------------------------------------------------------------------------------------------------------------------------------------------------------|
| Loa loa                 | moz sas family protein                                            | 5 | F:GO:0016747;<br>P:GO:0006350;<br>C:GO:0043229;<br>F:GO:0005488;<br>P:GO:0006325                  | -                                                                                | EC:2.3.1.0                 | IPR002717; IPR016181; PTHR10615 (PANTHER), PTHR10615:SF28 (PANTHER)                                                                                       |
| Loa loa                 | integrin-linked ki-se-associated serine threonine phosphatase 2c  | 6 | P:GO:0007090;<br>F:GO:0004722;<br>F:GO:0005515;<br>P:GO:0006470;<br>C:GO:0044464;<br>P:GO:0045786 | -                                                                                |                            | IPR000222; IPR001932; IPR014045; IPR015655; PTHR13832:SF89 (PANTHER)                                                                                      |
| Caenorhabditis elegans  | ribosomal protein s26                                             | 6 | F:GO:0003729;<br>F:GO:0003735;<br>P:GO:0006414;<br>C:GO:0022627;<br>P:GO:0033119;<br>F:GO:0005515 | -                                                                                |                            | IPR000892                                                                                                                                                 |
| Caenorhabditis briggsae | ras-related protein rab-33b                                       | 5 | C:GO:0000139;<br>F:GO:0005525;<br>C:GO:0005886;<br>P:GO:0007264;<br>P:GO:0015031                  | -                                                                                |                            | IPR001806; IPR003579; IPR005225; IPR013753; IPR020851; G3DSA:3.40.50.300 (GENE3D), PTHR11708 (PANTHER), PTHR11708:SF203 (PANTHER), SSF52540 (SUPERFAMILY) |
| Loa loa                 | a-macroglobulin complement component family protein               | 3 | C:GO:0005615;<br>F:GO:0005515;<br>F:GO:0004866                                                    | -                                                                                |                            | IPR008930; IPR019565; IPR019742; G3DSA:1.50.10.20 (GENE3D), PTHR11412 (PANTHER), PTHR11412:SF30 (PANTHER)                                                 |
| Caenorhabditis elegans  | glycosylation related family member (gly-12)                      | 2 | P:GO:0009792;<br>C:GO:0016020                                                                     | -                                                                                |                            | IPR004139; G3DSA:3.10.180.20 (GENE3D), G3DSA:3.90.550.10 (GENE3D), SSF53448 (SUPERFAMILY)                                                                 |
| Nematostella vectensis  | transmembrane protein 229b                                        | 0 |                                                                                                   | F:GO:0003674;<br>C:GO:0016021;<br>C:GO:0016020;<br>P:GO:0008150;<br>C:GO:0005575 |                            | SignalP (SIGNALP)                                                                                                                                         |
| Caenorhabditis elegans  | foie gras                                                         | 1 | P:GO:0006974                                                                                      | -                                                                                |                            | IPR012880; PTHR14374 (PANTHER)                                                                                                                            |
|                         | -                                                                 | 0 |                                                                                                   |                                                                                  |                            | -                                                                                                                                                         |
| Caenorhabditis elegans  | mitochondrial precursor                                           | 4 | C:GO:0005737;<br>P:GO:0006546;<br>F:GO:0004047;<br>F:GO:0008483                                   | -                                                                                | EC:2.1.2.10;<br>EC:2.6.1.0 | IPR006222; PTHR13847 (PANTHER), PTHR13847:SF5 (PANTHER), SignalP (SIGNALP), SSF103025 (SUPERFAMILY)                                                       |
|                         | -                                                                 | 0 |                                                                                                   |                                                                                  |                            | -                                                                                                                                                         |
| Loa loa                 | transmembrane cell surface protein homolog family member (ttyh-1) | 0 |                                                                                                   |                                                                                  |                            | IPR006990; PTHR12424:SF2 (PANTHER), SignalP (SIGNALP)                                                                                                     |
| Caenorhabditis elegans  | elegans protein confirmed by transcript evidence                  | 4 | P:GO:0009792;<br>P:GO:0040010;<br>P:GO:0006898;<br>P:GO:0002119                                   | -                                                                                |                            | SignalP (SIGNALP)                                                                                                                                         |
| Caenorhabditis elegans  | elegans protein confirmed by transcript evidence                  | 4 | P:GO:0009792;<br>P:GO:0040010;<br>P:GO:0006898;<br>P:GO:0002119                                   | -                                                                                |                            | SignalP (SIGNALP)                                                                                                                                         |
| Caenorhabditis briggsae | elegans protein confirmed by transcript evidence                  | 0 |                                                                                                   | F:GO:0004672;<br>F:GO:0005524;<br>P:GO:0006468                                   |                            | IPR012877                                                                                                                                                 |
|                         | -                                                                 | 0 |                                                                                                   |                                                                                  |                            | -                                                                                                                                                         |

|                         |                                                         |   |                                                                                                                                     |   |             |                                                                                                                                                                            |
|-------------------------|---------------------------------------------------------|---|-------------------------------------------------------------------------------------------------------------------------------------|---|-------------|----------------------------------------------------------------------------------------------------------------------------------------------------------------------------|
| Caenorhabditis elegans  | helicase conserved c-termi-l domain containing protein  | 6 | P:GO:0002119;<br>F:GO:0004004;<br>F:GO:0003676;<br>P:GO:0042254;<br>P:GO:0040010;<br>F:GO:0005524                                   | - |             | IPR001650; G3DSA:3.40.50.300 (GENE3D), PTHR10967 (PANTHER), PTHR10967:SF19 (PANTHER), SSF52540 (SUPERFAMILY)                                                               |
| Caenorhabditis elegans  | helicase conserved c-termi-l domain containing protein  | 6 | P:GO:0002119;<br>F:GO:0004004;<br>F:GO:0003676;<br>P:GO:0042254;<br>P:GO:0040010;<br>F:GO:0005524                                   | - |             | IPR001650; G3DSA:3.40.50.300 (GENE3D), PTHR10967 (PANTHER), PTHR10967:SF19 (PANTHER), SSF52540 (SUPERFAMILY)                                                               |
| Caenorhabditis elegans  | helicase conserved c-termi-l domain containing protein  | 6 | P:GO:0002119;<br>F:GO:0004004;<br>F:GO:0003676;<br>P:GO:0042254;<br>P:GO:0040010;<br>F:GO:0005524                                   | - |             | IPR001650; G3DSA:3.40.50.300 (GENE3D), PTHR10967 (PANTHER), PTHR10967:SF19 (PANTHER), SSF52540 (SUPERFAMILY)                                                               |
| Caenorhabditis briggsae | in family member (ttn-1)                                | 4 | P:GO:0009792;<br>P:GO:0006468;<br>F:GO:0004672;<br>F:GO:0005524                                                                     | - |             | -                                                                                                                                                                          |
| Caenorhabditis briggsae | hect domain containing 1                                | 7 | F:GO:0003676;<br>C:GO:0005622;<br>P:GO:0016567;<br>P:GO:0001843;<br>P:GO:0000003;<br>F:GO:0004842;<br>F:GO:0008270                  | - | EC:6.3.2.19 | IPR011989; IPR016024                                                                                                                                                       |
| Caenorhabditis elegans  | fk506 binding protein 12-rapamycin associated protein 1 | 3 | F:GO:0016772;<br>P:GO:0048565;<br>F:GO:0000166                                                                                      | - |             | IPR003151; IPR014009; PTHR11139 (PANTHER), PTHR11139:SF9 (PANTHER)                                                                                                         |
| Caenorhabditis elegans  | probable atp-dependent r- helicase ddx60-like           | 2 | F:GO:0005488;<br>F:GO:0016462                                                                                                       | - |             | -                                                                                                                                                                          |
|                         | -                                                       | 0 |                                                                                                                                     |   |             | -                                                                                                                                                                          |
| Caenorhabditis briggsae | c2 domain containing protein                            | 0 |                                                                                                                                     |   |             | -                                                                                                                                                                          |
| Caenorhabditis elegans  | kex-2 proprotein convertase family member (kpc-1)       | 6 | F:GO:0004252;<br>C:GO:0005795;<br>C:GO:0005886;<br>P:GO:0000003;<br>P:GO:0006508;<br>C:GO:0030173                                   | - | EC:3.4.21.0 | IPR002884; IPR008979; G3DSA:2.60.120.260 (GENE3D)                                                                                                                          |
| Caenorhabditis elegans  | kinesin light chain 1 and                               | 5 | C:GO:0005829;<br>F:GO:0003777;<br>C:GO:0005874;<br>F:GO:0005515;<br>C:GO:0005871                                                    | - |             | IPR001440; IPR002151; IPR002885; IPR011990; IPR013026; IPR015390; IPR015792; IPR019734; PTHR19959 (PANTHER), PTHR19959:SF20 (PANTHER), SSF48452 (SUPERFAMILY)              |
| Brugia malayi           | hypothetical protein Bm1_30495 [Brugia malayi]          | 0 |                                                                                                                                     |   |             | -                                                                                                                                                                          |
| Loa loa                 | multidrug resistance protein family member (mrp-5)      | 8 | P:GO:0002119;<br>F:GO:0016887;<br>P:GO:0040002;<br>P:GO:0040017;<br>P:GO:0006810;<br>P:GO:0040010;<br>F:GO:0000166;<br>F:GO:0005215 | - |             | IPR003439; IPR011527; IPR017871; IPR017940; G3DSA:1.20.1560.10 (GENE3D), G3DSA:3.40.50.300 (GENE3D), PTHR19242 (PANTHER), PTHR19242:SF14 (PANTHER), SSF52540 (SUPERFAMILY) |
| Caenorhabditis elegans  | hypothetical protein B0432.13 [Caenorhabditis elegans]  | 0 |                                                                                                                                     |   |             | -                                                                                                                                                                          |

|                        |                                                                    |    |                                                                                                                                                                                                                                                                                                                                |   |                           |                                                                                                                           |
|------------------------|--------------------------------------------------------------------|----|--------------------------------------------------------------------------------------------------------------------------------------------------------------------------------------------------------------------------------------------------------------------------------------------------------------------------------|---|---------------------------|---------------------------------------------------------------------------------------------------------------------------|
| Caenorhabditis elegans | 10-formyltetrahydrofolate dehydroge-se                             | 9  | F:GO:0000036;<br>P:GO:0009058;<br>F:GO:0016742;<br>P:GO:0006730;<br>P:GO:0055114;<br>F:GO:0016155;<br>F:GO:0048037;<br>P:GO:0009258;<br>C:GO:0005739                                                                                                                                                                           | - | EC:2.1.2.0;<br>EC:1.5.1.6 | IPR006163; IPR009081; IPR015590;<br>IPR016160; IPR016161; IPR016162;<br>IPR016163; IPR020785;<br>PTHR11699:SF46 (PANTHER) |
| Caenorhabditis elegans | yip1 domain containing protein                                     | 1  | C:GO:0016020                                                                                                                                                                                                                                                                                                                   | - |                           | IPR006977; PTHR12822 (PANTHER)                                                                                            |
| Caenorhabditis elegans | abnormal embryonic partitioning of cytoplasm family member (par-3) | 8  | C:GO:0005737;<br>P:GO:0007163;<br>P:GO:0040001;<br>F:GO:0005515;<br>P:GO:0007155;<br>P:GO:0007369;<br>C:GO:0016021;<br>P:GO:0008406                                                                                                                                                                                            | - |                           | IPR021922; PTHR16484 (PANTHER),<br>PTHR16484:SF2 (PANTHER)                                                                |
|                        | -                                                                  | 0  |                                                                                                                                                                                                                                                                                                                                |   |                           | -                                                                                                                         |
| Caenorhabditis elegans | ferm domain ( -ezrin-radixin-moesin) family member (frm-1)         | 1  | F:GO:0005488                                                                                                                                                                                                                                                                                                                   | - |                           | -                                                                                                                         |
| Caenorhabditis elegans | ferm domain ( -ezrin-radixin-moesin) family member (frm-1)         | 1  | F:GO:0005488                                                                                                                                                                                                                                                                                                                   | - |                           | -                                                                                                                         |
| Caenorhabditis elegans | ferm domain ( -ezrin-radixin-moesin) family member (frm-1)         | 1  | F:GO:0005488                                                                                                                                                                                                                                                                                                                   | - |                           | -                                                                                                                         |
| Caenorhabditis elegans | ferm domain ( -ezrin-radixin-moesin) family member (frm-1)         | 1  | F:GO:0005488                                                                                                                                                                                                                                                                                                                   | - |                           | -                                                                                                                         |
| Caenorhabditis elegans | viral a-type inclusion protein repeat containing protein           | 0  |                                                                                                                                                                                                                                                                                                                                |   |                           | IPR007648; G3DSA:1.20.5.500<br>(GENE3D), PTHR23407 (PANTHER),<br>PTHR23407:SF2 (PANTHER)                                  |
| Asterina pectinifera   | h4 histone protein                                                 | 19 | C:GO:0005654;<br>F:GO:0005515;<br>P:GO:0040010;<br>P:GO:0006898;<br>P:GO:0040011;<br>C:GO:0000786;<br>P:GO:0019915;<br>P:GO:0009792;<br>P:GO:0045653;<br>F:GO:0043565;<br>P:GO:0002119;<br>P:GO:0010171;<br>P:GO:0006352;<br>F:GO:0016986;<br>P:GO:0006334;<br>P:GO:0006952;<br>P:GO:0048015;<br>P:GO:0040035;<br>P:GO:0032940 | - |                           | -                                                                                                                         |

|                        |                                     |    |                                                                                                                                                                                                                                                                                                                                |   |             |                                                                                                                                                                                                                                                                                                                |
|------------------------|-------------------------------------|----|--------------------------------------------------------------------------------------------------------------------------------------------------------------------------------------------------------------------------------------------------------------------------------------------------------------------------------|---|-------------|----------------------------------------------------------------------------------------------------------------------------------------------------------------------------------------------------------------------------------------------------------------------------------------------------------------|
| Asterina pectinifera   | h4 histone protein                  | 19 | C:GO:0005654;<br>F:GO:0005515;<br>P:GO:0040010;<br>P:GO:0006898;<br>P:GO:0040011;<br>C:GO:0000786;<br>P:GO:0019915;<br>P:GO:0009792;<br>P:GO:0045653;<br>F:GO:0043565;<br>P:GO:0002119;<br>P:GO:0010171;<br>P:GO:0006352;<br>F:GO:0016986;<br>P:GO:0006334;<br>P:GO:0006952;<br>P:GO:0048015;<br>P:GO:0040035;<br>P:GO:0032940 | - | -           |                                                                                                                                                                                                                                                                                                                |
| Caenorhabditis elegans | briggsae cbr-plc-4 protein          | 17 | F:GO:0004871;<br>P:GO:0000003;<br>F:GO:0005515;<br>C:GO:0016020;<br>F:GO:0004435;<br>P:GO:0023034;<br>C:GO:0043231;<br>F:GO:0005509;<br>F:GO:0005543;<br>P:GO:0006629;<br>P:GO:0010038;<br>P:GO:0007165;<br>P:GO:0048522;<br>P:GO:0007186;<br>P:GO:0019222;<br>P:GO:0009725;<br>C:GO:0044444                                   | - | EC:3.1.4.11 | IPR000008; IPR000909; IPR001192;<br>IPR001711; IPR001849; IPR002048;<br>IPR008973; IPR011992; IPR011993;<br>IPR015359; IPR017946; IPR018029;<br>IPR018247; IPR018249;<br>G3DSA:2.60.40.150 (GENE3D),<br>PTHR10336 (PANTHER),<br>PTHR10336:SF27 (PANTHER),<br>SSF47473 (SUPERFAMILY), SSF50729<br>(SUPERFAMILY) |
|                        | -                                   | 0  |                                                                                                                                                                                                                                                                                                                                |   |             | SignalP (SIGNALP)                                                                                                                                                                                                                                                                                              |
|                        | -                                   | 0  |                                                                                                                                                                                                                                                                                                                                |   |             | -                                                                                                                                                                                                                                                                                                              |
|                        | -                                   | 0  |                                                                                                                                                                                                                                                                                                                                |   |             | -                                                                                                                                                                                                                                                                                                              |
| Caenorhabditis elegans | protein ki-se family member (kin-2) | 18 | F:GO:0008603;<br>F:GO:0016301;<br>P:GO:0019933;<br>P:GO:0008103;<br>F:GO:0005515;<br>P:GO:0040007;<br>P:GO:0008355;<br>P:GO:0040011;<br>P:GO:0018996;<br>P:GO:0007591;<br>P:GO:0001932;<br>P:GO:0007015;<br>F:GO:0030551;<br>C:GO:0005952;<br>P:GO:0002119;<br>P:GO:0010171;<br>P:GO:0007274;<br>P:GO:0032940                  | - |             | IPR000595; IPR002373; IPR003117;<br>IPR012198; IPR014710; IPR018488;<br>IPR018490; PTHR11635 (PANTHER),<br>PTHR11635:SF17 (PANTHER)                                                                                                                                                                            |
| Brugia malayi          | ensangp00000014982 isoform 2        | 1  | C:GO:0016020                                                                                                                                                                                                                                                                                                                   | - |             | IPR017970; SignalP (SIGNALP)                                                                                                                                                                                                                                                                                   |

|                         |                                                                             |    |                                                                                                                                                                                                                                                                                                                                                                                                                     |                               |                                                 |                                                                                                                                                                                                                                                                                                                    |
|-------------------------|-----------------------------------------------------------------------------|----|---------------------------------------------------------------------------------------------------------------------------------------------------------------------------------------------------------------------------------------------------------------------------------------------------------------------------------------------------------------------------------------------------------------------|-------------------------------|-------------------------------------------------|--------------------------------------------------------------------------------------------------------------------------------------------------------------------------------------------------------------------------------------------------------------------------------------------------------------------|
| Caenorhabditis elegans  | abnormal cell migration family member (mig-15)                              | 8  | F:GO:0005083;<br>P:GO:0006468;<br>F:GO:0000155;<br>F:GO:0005515;<br>F:GO:0005524;<br>P:GO:0007165;<br>C:GO:0016020;<br>F:GO:0004674                                                                                                                                                                                                                                                                                 | -                             | EC:2.7.11.0                                     | IPR001180; PTHR22986 (PANTHER),<br>PTHR22986:SF5 (PANTHER), PS50219<br>(PROFILE)                                                                                                                                                                                                                                   |
| Caenorhabditis briggsae | elegans protein confirmed by transcript evidence                            | 1  | F:GO:0005515                                                                                                                                                                                                                                                                                                                                                                                                        | -                             | -                                               | -                                                                                                                                                                                                                                                                                                                  |
| Caenorhabditis elegans  | calcium calmodulin-dependent serine protein ki-se (maguk family)            | 24 | P:GO:0006468;<br>F:GO:0042043;<br>F:GO:0004683;<br>F:GO:0008022;<br>P:GO:0007155;<br>F:GO:0030165;<br>P:GO:0006461;<br>C:GO:0015629;<br>C:GO:0019717;<br>F:GO:0004713;<br>C:GO:0016323;<br>P:GO:0006886;<br>C:GO:0005829;<br>C:GO:0030425;<br>F:GO:0004385;<br>F:GO:0003713;<br>C:GO:0043234;<br>P:GO:0045944;<br>F:GO:0032403;<br>F:GO:0004872;<br>F:GO:0005516;<br>C:GO:0005625;<br>F:GO:0005524;<br>C:GO:0045202 | -                             | EC:2.7.11.17<br>;<br>EC:2.7.10.0;<br>EC:2.7.4.8 | IPR001452; IPR001478; IPR004172;<br>IPR008144; IPR011511; IPR014775;<br>IPR020590; G3DSA:2.30.30.40<br>(GENE3D), G3DSA:2.30.42.10<br>(GENE3D), G3DSA:3.30.63.10<br>(GENE3D), G3DSA:3.40.50.300<br>(GENE3D), PTHR23122 (PANTHER),<br>PTHR23122:SF7 (PANTHER),<br>SSF101288 (SUPERFAMILY), SSF52540<br>(SUPERFAMILY) |
| Caenorhabditis elegans  | transducin -like 3                                                          | 6  | P:GO:0040010;<br>P:GO:0045132;<br>P:GO:0000003;<br>P:GO:0006898;<br>P:GO:0009792;<br>C:GO:0044424                                                                                                                                                                                                                                                                                                                   | -                             | -                                               | IPR001680; IPR011046; IPR013934;<br>IPR015943; IPR017986; IPR018983;<br>IPR019782; PTHR19854 (PANTHER),<br>PTHR19854:SF2 (PANTHER)                                                                                                                                                                                 |
| Haemonchus contortus    | neurotransmitter-gated ion-channel ligand binding domain containing protein | 4  | C:GO:0016021;<br>C:GO:0045211;<br>F:GO:0005230;<br>P:GO:0006810                                                                                                                                                                                                                                                                                                                                                     | -                             | -                                               | IPR006201; PTHR18945:SF13<br>(PANTHER)                                                                                                                                                                                                                                                                             |
| Caenorhabditis elegans  | hypothetical protein H24G06.1 [Caenorhabditis elegans]                      | 3  | P:GO:0009792;<br>P:GO:0040035;<br>F:GO:0005515                                                                                                                                                                                                                                                                                                                                                                      | -                             | -                                               | -                                                                                                                                                                                                                                                                                                                  |
| Caenorhabditis elegans  | hypothetical protein H24G06.1 [Caenorhabditis elegans]                      | 3  | P:GO:0009792;<br>P:GO:0040035;<br>F:GO:0005515                                                                                                                                                                                                                                                                                                                                                                      | -                             | -                                               | -                                                                                                                                                                                                                                                                                                                  |
| Caenorhabditis briggsae | briggsae cbr-eat-18 protein                                                 | 0  |                                                                                                                                                                                                                                                                                                                                                                                                                     | C:GO:0005615;<br>F:GO:0016787 | -                                               | IPR000859; PTHR10127 (PANTHER),<br>PTHR10127:SF33 (PANTHER)                                                                                                                                                                                                                                                        |
| -                       | -                                                                           | 0  |                                                                                                                                                                                                                                                                                                                                                                                                                     |                               |                                                 | SignalP (SIGNALP)                                                                                                                                                                                                                                                                                                  |
| Caenorhabditis elegans  | ectonucleoside triphosphate diphosphohydrolase 5                            | 3  | C:GO:0005737;<br>F:GO:0004382;<br>F:GO:0045134                                                                                                                                                                                                                                                                                                                                                                      | -                             | EC:3.6.1.42                                     | IPR000407; PTHR11782:SF7<br>(PANTHER), SignalP (SIGNALP)                                                                                                                                                                                                                                                           |
| Caenorhabditis elegans  | ectonucleoside triphosphate diphosphohydrolase 5                            | 2  | P:GO:0008152;<br>F:GO:0016787                                                                                                                                                                                                                                                                                                                                                                                       | -                             | -                                               | IPR000407; PTHR11782:SF7<br>(PANTHER), SignalP (SIGNALP)                                                                                                                                                                                                                                                           |

|                          |                                                       |   |                                                                                                                                     |                                                                                                                    |             |                                                                                                        |
|--------------------------|-------------------------------------------------------|---|-------------------------------------------------------------------------------------------------------------------------------------|--------------------------------------------------------------------------------------------------------------------|-------------|--------------------------------------------------------------------------------------------------------|
| Caenorhabditis elegans   | r- helicase                                           | 1 | F:GO:0042802                                                                                                                        | -                                                                                                                  |             | IPR001878; IPR013084; PTHR23002 (PANTHER), PTHR23002:SF11 (PANTHER), SSF57756 (SUPERFAMILY)            |
| Caenorhabditis elegans   | r- helicase                                           | 1 | F:GO:0042802                                                                                                                        | -                                                                                                                  |             | IPR001878; IPR013084; IPR022631; PTHR23002 (PANTHER), PTHR23002:SF11 (PANTHER), SSF57756 (SUPERFAMILY) |
| Caenorhabditis elegans   | r- helicase                                           | 1 | F:GO:0042802                                                                                                                        | -                                                                                                                  |             | IPR001878; IPR013084; PTHR23002 (PANTHER), PTHR23002:SF11 (PANTHER), SSF57756 (SUPERFAMILY)            |
|                          | -                                                     | 0 |                                                                                                                                     |                                                                                                                    |             | -                                                                                                      |
| Brugia malayi            | elegans protein confirmed by transcript evidence      | 0 |                                                                                                                                     | P:GO:0000003;<br>F:GO:0005488                                                                                      |             | -                                                                                                      |
|                          | -                                                     | 0 |                                                                                                                                     |                                                                                                                    |             | -                                                                                                      |
|                          | -                                                     | 0 |                                                                                                                                     |                                                                                                                    |             | SignalP (SIGNALP)                                                                                      |
| Caenorhabditis elegans   | importin subunit beta-1                               | 4 | C:GO:0005829;<br>P:GO:0006606;<br>F:GO:0019904;<br>C:GO:0005654                                                                     | -                                                                                                                  |             | SignalP (SIGNALP)                                                                                      |
| Caenorhabditis elegans   | importin subunit beta-1                               | 4 | C:GO:0005829;<br>P:GO:0006606;<br>F:GO:0019904;<br>C:GO:0005654                                                                     | -                                                                                                                  |             | SignalP (SIGNALP)                                                                                      |
| Caenorhabditis briggsae  | phosphatidylinositol-4-phosphate 5-ki-se type i       | 2 | P:GO:0030384;<br>F:GO:0016307                                                                                                       | -                                                                                                                  |             | -                                                                                                      |
| Caenorhabditis briggsae  | phosphatidylinositol-4-phosphate 5-ki-se type i       | 2 | P:GO:0030384;<br>F:GO:0016307                                                                                                       | -                                                                                                                  |             | IPR002498; G3DSA:3.30.810.10 (GENE3D), PTHR23086:SF5 (PANTHER), SSF56104 (SUPERFAMILY)                 |
| Caenorhabditis briggsae  | phosphatidylinositol-4-phosphate 5-ki-se type i       | 2 | P:GO:0030384;<br>F:GO:0016307                                                                                                       | -                                                                                                                  |             | IPR002498; G3DSA:3.30.810.10 (GENE3D), PTHR23086:SF5 (PANTHER), SSF56104 (SUPERFAMILY)                 |
| Caenorhabditis elegans   | g protein-coupled receptor 177                        | 8 | C:GO:0043229;<br>P:GO:0043010;<br>P:GO:0030177;<br>P:GO:0023061;<br>P:GO:0050708;<br>C:GO:0044444;<br>P:GO:0048793;<br>C:GO:0016020 | -                                                                                                                  |             | IPR009551; PF06664 (PFAM), SignalP (SIGNALP)                                                           |
|                          | -                                                     | 0 |                                                                                                                                     |                                                                                                                    |             | -                                                                                                      |
| Caenorhabditis elegans   | hypothetical protein W02B8.1 [Caenorhabditis elegans] | 0 |                                                                                                                                     |                                                                                                                    |             | IPR007087                                                                                              |
|                          | -                                                     | 0 |                                                                                                                                     |                                                                                                                    |             | -                                                                                                      |
| Caenorhabditis briggsae  | v-raf murine sarcoma viral oncogene homolog b1        | 8 | F:GO:0005057;<br>P:GO:0006468;<br>F:GO:0046872;<br>F:GO:0005515;<br>P:GO:0007275;<br>F:GO:0005524;<br>P:GO:0007165;<br>F:GO:0004674 | -                                                                                                                  | EC:2.7.11.0 | -                                                                                                      |
| Saccoglossus kowalevskii | chromosome 9 open reading frame 4                     | 0 |                                                                                                                                     | F:GO:0003674;<br>F:GO:0004500;<br>C:GO:0016021;<br>C:GO:0016020;<br>P:GO:0008150;<br>P:GO:0006548;<br>C:GO:0005575 |             | IPR005018; PTHR23130 (PANTHER), PTHR23130:SF3 (PANTHER), SignalP (SIGNALP)                             |

|                              |                                                            |   |                                                                                  |                                                                                                                                                      |            |                                                                                                                     |
|------------------------------|------------------------------------------------------------|---|----------------------------------------------------------------------------------|------------------------------------------------------------------------------------------------------------------------------------------------------|------------|---------------------------------------------------------------------------------------------------------------------|
| Nippostrongylus brasiliensis | elegans protein partially confirmed by transcript evidence | 0 |                                                                                  | C:GO:0005882;<br>P:GO:0009792;<br>F:GO:0005515                                                                                                       |            | IPR003677; PTHR21593 (PANTHER),<br>SignalP (SIGNALP)                                                                |
| Nippostrongylus brasiliensis | elegans protein partially confirmed by transcript evidence | 0 |                                                                                  | C:GO:0005882;<br>P:GO:0009792;<br>F:GO:0005515                                                                                                       |            | IPR003677; PTHR21593 (PANTHER),<br>SignalP (SIGNALP)                                                                |
| Nippostrongylus brasiliensis | keratin-like protein                                       | 0 |                                                                                  | C:GO:0005882                                                                                                                                         |            | IPR003677; PTHR21593 (PANTHER)                                                                                      |
| Caenorhabditis elegans       | serotonin octopamine receptor family member (ser-2)        | 5 | C:GO:0016021;<br>P:GO:0007165;<br>P:GO:0007211;<br>F:GO:0008226;<br>F:GO:0004989 | -                                                                                                                                                    |            | -                                                                                                                   |
| Caenorhabditis briggsae      | cytoskeleton associated protein 1                          | 4 | F:GO:0005515;<br>P:GO:0007023;<br>C:GO:0005829;<br>C:GO:0015630                  | -                                                                                                                                                    |            | IPR000938; G3DSA:3.10.20.90<br>(GENE3D), PTHR18916 (PANTHER),<br>PTHR18916:SF6 (PANTHER), SSF54236<br>(SUPERFAMILY) |
| Caenorhabditis briggsae      | elegans protein partially confirmed by transcript evidence | 0 |                                                                                  | P:GO:0018991;<br>C:GO:0016021;<br>P:GO:0010171;<br>F:GO:0042302;<br>P:GO:0000003;<br>P:GO:0009792;<br>P:GO:0002119;<br>P:GO:0040011;<br>P:GO:0040007 |            | IPR002486; PTHR10499 (PANTHER),<br>PTHR10499:SF58 (PANTHER), SignalP<br>(SIGNALP)                                   |
| Caenorhabditis briggsae      | dehydroge-se e1 and transketolase domain containing 1      | 3 | F:GO:0004591;<br>P:GO:0006096;<br>F:GO:0030976                                   | -                                                                                                                                                    | EC:1.2.4.2 | IPR001017; IPR011603;<br>G3DSA:3.40.50.970 (GENE3D),<br>SSF52518 (SUPERFAMILY)                                      |
| -                            | -                                                          | 0 |                                                                                  |                                                                                                                                                      |            | SignalP (SIGNALP)                                                                                                   |
| -                            | -                                                          | 0 |                                                                                  |                                                                                                                                                      |            | SignalP (SIGNALP)                                                                                                   |
| Caenorhabditis elegans       | elegans protein confirmed by transcript evidence           | 2 | F:GO:0005488;<br>C:GO:0071011                                                    | -                                                                                                                                                    |            | IPR000467; PTHR23106 (PANTHER),<br>PTHR23106:SF1 (PANTHER)                                                          |
| -                            | -                                                          | 0 |                                                                                  |                                                                                                                                                      |            | -                                                                                                                   |
| -                            | -                                                          | 0 |                                                                                  |                                                                                                                                                      |            | -                                                                                                                   |
| -                            | -                                                          | 0 |                                                                                  |                                                                                                                                                      |            | -                                                                                                                   |
| -                            | -                                                          | 0 |                                                                                  |                                                                                                                                                      |            | -                                                                                                                   |
| Brugia malayi                | zinc finger protein 37 homolog                             | 2 | F:GO:0005488;<br>P:GO:0007275                                                    | -                                                                                                                                                    |            | -                                                                                                                   |
| Loa loa                      | d- helicase hel308                                         | 3 | F:GO:0004386;<br>F:GO:0003676;<br>F:GO:0000166                                   | -                                                                                                                                                    |            | G3DSA:1.10.150.20 (GENE3D)                                                                                          |
| Caenorhabditis elegans       | protein phosphatase 1h (pp2c domain containing)            | 1 | F:GO:0016787                                                                     | -                                                                                                                                                    |            | IPR000222; IPR001932; IPR014045;<br>IPR015655; PTHR13832:SF96<br>(PANTHER)                                          |
| Ciona intestinalis           | uncharacterized transposase-like protein                   | 0 |                                                                                  | F:GO:0046872;<br>P:GO:0055114;<br>F:GO:0009055;<br>F:GO:0016491;<br>F:GO:0020037;<br>F:GO:0005506;<br>F:GO:0004497                                   |            | IPR007087; IPR015880                                                                                                |
| Angiostrongylus cantonensis  | hypothetical protein [Angiostrongylus cantonensis]         | 5 | F:GO:0003700;<br>F:GO:0043565;<br>F:GO:0046983;<br>C:GO:0005634;<br>P:GO:0006355 | -                                                                                                                                                    |            | IPR002112; IPR004827; IPR011616;<br>G3DSA:1.20.5.170 (GENE3D),<br>PTHR11462 (PANTHER),<br>PTHR11462:SF3 (PANTHER)   |
| -                            | -                                                          | 0 |                                                                                  |                                                                                                                                                      |            | -                                                                                                                   |
| -                            | -                                                          | 0 |                                                                                  |                                                                                                                                                      |            | -                                                                                                                   |



|                                |                                                       |  |    |                                                                                                                                                                                        |                                                |                                                                                                                                                                                         |
|--------------------------------|-------------------------------------------------------|--|----|----------------------------------------------------------------------------------------------------------------------------------------------------------------------------------------|------------------------------------------------|-----------------------------------------------------------------------------------------------------------------------------------------------------------------------------------------|
|                                | -                                                     |  | 0  |                                                                                                                                                                                        |                                                | -                                                                                                                                                                                       |
| <i>Ciona intestinalis</i>      | PREDICTED: hypothetical protein [Cio- intesti-lis]    |  | 0  |                                                                                                                                                                                        |                                                | -                                                                                                                                                                                       |
| <i>Canis familiaris</i>        | ribosomal protein l32                                 |  | 4  | F:GO:0003735;<br>F:GO:0005515;<br>C:GO:0022625;<br>P:GO:0006414                                                                                                                        | -                                              | IPR001515; IPR018263; PTHR23413 (PANTHER), SignalP (SIGNALP)                                                                                                                            |
| <i>Caenorhabditis briggsae</i> | mitochondrial carnitine acylcarnitine carrier protein |  | 3  | P:GO:0055085;<br>C:GO:0016020;<br>F:GO:0005215                                                                                                                                         | -                                              | SignalP (SIGNALP)                                                                                                                                                                       |
| <i>Caenorhabditis elegans</i>  | mitochondrial carnitine acylcarnitine carrier protein |  | 3  | P:GO:0006810;<br>C:GO:0016020;<br>F:GO:0005215                                                                                                                                         | -                                              | -                                                                                                                                                                                       |
| <i>Caenorhabditis elegans</i>  | mitochondrial carnitine acylcarnitine carrier protein |  | 3  | P:GO:0055085;<br>C:GO:0016020;<br>F:GO:0005215                                                                                                                                         | -                                              | SignalP (SIGNALP)                                                                                                                                                                       |
| <i>Caenorhabditis elegans</i>  | variable abnormal morphology family member (vab-10)   |  | 0  |                                                                                                                                                                                        | F:GO:0005509;<br>P:GO:0007050;<br>F:GO:0003779 | IPR002017; IPR003108; IPR011992; IPR018159; G3DSA:1.20.58.60 (GENE3D), PTHR11915 (PANTHER), PTHR11915:SF49 (PANTHER), PS51460 (PROFILE), SSF46966 (SUPERFAMILY), SSF47473 (SUPERFAMILY) |
|                                | -                                                     |  | 0  |                                                                                                                                                                                        |                                                | -                                                                                                                                                                                       |
| <i>Caenorhabditis briggsae</i> | copine v                                              |  | 3  | P:GO:0000003;<br>C:GO:0043025;<br>C:GO:0043005                                                                                                                                         | -                                              | IPR002035; IPR010734; PTHR10857 (PANTHER), SSF53300 (SUPERFAMILY)                                                                                                                       |
| <i>Homo sapiens</i>            | igha1_human ame: full=ig alpha-1 chain c region       |  | 4  | P:GO:0018298;<br>P:GO:0006955;<br>F:GO:0003823;<br>F:GO:0005515                                                                                                                        | -                                              | IPR003597; IPR007110; IPR013783; PTHR23266 (PANTHER), PTHR23266:SF11 (PANTHER), SSF48726 (SUPERFAMILY)                                                                                  |
| <i>Caenorhabditis briggsae</i> | ring finger protein 141                               |  | 1  | F:GO:0005488                                                                                                                                                                           | -                                              | IPR001841; IPR013083; IPR017907; IPR018957; PTHR22938 (PANTHER), SSF57850 (SUPERFAMILY)                                                                                                 |
|                                | -                                                     |  | 0  |                                                                                                                                                                                        |                                                | SignalP (SIGNALP)                                                                                                                                                                       |
|                                | -                                                     |  | 0  |                                                                                                                                                                                        |                                                | -                                                                                                                                                                                       |
|                                | -                                                     |  | 0  |                                                                                                                                                                                        |                                                | -                                                                                                                                                                                       |
| <i>Caenorhabditis elegans</i>  | rab11 interacting isoform b                           |  | 1  | P:GO:0040018                                                                                                                                                                           | -                                              | -                                                                                                                                                                                       |
| <i>Caenorhabditis elegans</i>  | rab11 interacting isoform b                           |  | 1  | P:GO:0040018                                                                                                                                                                           | -                                              | -                                                                                                                                                                                       |
| <i>Caenorhabditis briggsae</i> | mbr family protein                                    |  | 2  | F:GO:0004872;<br>C:GO:0016021                                                                                                                                                          | -                                              | -                                                                                                                                                                                       |
|                                | -                                                     |  | 0  |                                                                                                                                                                                        |                                                | SignalP (SIGNALP)                                                                                                                                                                       |
| <i>Brugia malayi</i>           | histone h2b                                           |  | 11 | P:GO:0040010;<br>C:GO:0000786;<br>P:GO:0018991;<br>P:GO:0040035;<br>F:GO:0043565;<br>C:GO:0035267;<br>P:GO:0002119;<br>P:GO:0040011;<br>P:GO:0006334;<br>P:GO:0009792;<br>C:GO:0005811 | -                                              | IPR000558; IPR007125; IPR009072                                                                                                                                                         |

|                         |                                                                 |    |                                                                                                                                                                                                         |   |                                                                                 |
|-------------------------|-----------------------------------------------------------------|----|---------------------------------------------------------------------------------------------------------------------------------------------------------------------------------------------------------|---|---------------------------------------------------------------------------------|
| Brugia malayi           | histone h2b                                                     | 11 | P:GO:0040010;<br>C:GO:0000786;<br>P:GO:0018991;<br>P:GO:0040035;<br>F:GO:0043565;<br>C:GO:0035267;<br>P:GO:0002119;<br>P:GO:0040011;<br>P:GO:0006334;<br>P:GO:0009792;<br>C:GO:0005811                  | - | IPR000558; IPR007125; IPR009072                                                 |
| Brugia malayi           | protein n-termi-l glutamine amidohydrolase                      | 4  | P:GO:0006464;<br>F:GO:0005515;<br>C:GO:0005634;<br>C:GO:0005829                                                                                                                                         | - | IPR019161; IPR023128; PTHR13035 (PANTHER)                                       |
| Caenorhabditis elegans  | eukaryotic translation initiation factor 3 subunit 9            | 12 | P:GO:0006413;<br>P:GO:0040010;<br>P:GO:0008340;<br>F:GO:0003676;<br>P:GO:0000003;<br>P:GO:0010171;<br>P:GO:0019915;<br>P:GO:0002119;<br>P:GO:0040011;<br>P:GO:0006898;<br>P:GO:0009792;<br>C:GO:0005737 | - | IPR000504; IPR011400; IPR012677; SSF54928 (SUPERFAMILY)                         |
| Brugia malayi           | phd finger protein 5a                                           | 10 | C:GO:0016363;<br>C:GO:0005730;<br>C:GO:0071011;<br>C:GO:0005686;<br>F:GO:0003677;<br>P:GO:0002119;<br>F:GO:0003700;<br>P:GO:0000398;<br>C:GO:0071013;<br>P:GO:0045893                                   | - | -                                                                               |
| -                       | -                                                               | 0  | -                                                                                                                                                                                                       | - | -                                                                               |
| Caenorhabditis briggsae | atf (camp-dependent transcription factor) family member (atf-7) | 5  | P:GO:0048519;<br>P:GO:0048518;<br>F:GO:0005515;<br>P:GO:0045088;<br>P:GO:0010551                                                                                                                        | - | IPR000408; IPR004827; IPR011700; G3DSA:1.20.5.170 (GENE3D), PTHR13044 (PANTHER) |
| -                       | -                                                               | 0  | -                                                                                                                                                                                                       | - | -                                                                               |
| -                       | -                                                               | 0  | -                                                                                                                                                                                                       | - | -                                                                               |
| -                       | -                                                               | 0  | -                                                                                                                                                                                                       | - | SignalP (SIGNALP)                                                               |
| -                       | -                                                               | 0  | -                                                                                                                                                                                                       | - | SignalP (SIGNALP)                                                               |
| -                       | -                                                               | 0  | -                                                                                                                                                                                                       | - | SignalP (SIGNALP)                                                               |
| -                       | -                                                               | 0  | -                                                                                                                                                                                                       | - | SignalP (SIGNALP)                                                               |
| Caenorhabditis elegans  | briggsae cbr-frm-10 protein                                     | 1  | P:GO:0030178                                                                                                                                                                                            | - | PTHR13283 (PANTHER)                                                             |
| -                       | -                                                               | 0  | -                                                                                                                                                                                                       | - | -                                                                               |
| -                       | -                                                               | 0  | -                                                                                                                                                                                                       | - | -                                                                               |

|                         |                                                |    |                                                                                                                                                                                                                                                                                                                                |   |            |                                                                                           |
|-------------------------|------------------------------------------------|----|--------------------------------------------------------------------------------------------------------------------------------------------------------------------------------------------------------------------------------------------------------------------------------------------------------------------------------|---|------------|-------------------------------------------------------------------------------------------|
| Caenorhabditis elegans  | valyl-tr- synthetase                           | 8  | F:GO:0004832;<br>P:GO:0006438;<br>C:GO:0005739;<br>P:GO:0006333;<br>F:GO:0005524;<br>C:GO:0000785;<br>F:GO:0003682;<br>C:GO:0005634                                                                                                                                                                                            | - | EC:6.1.1.9 | IPR002300; IPR002303; IPR009008;<br>G3DSA:3.90.740.10 (GENE3D),<br>PTHR11946 (PANTHER)    |
|                         | -                                              | 0  |                                                                                                                                                                                                                                                                                                                                |   |            | SignalP (SIGNALP)                                                                         |
| Brugia malayi           | hypothetical protein Bm1_47635 [Brugia malayi] | 0  |                                                                                                                                                                                                                                                                                                                                |   |            | -                                                                                         |
| Caenorhabditis briggsae | metaxin 2                                      | 3  | P:GO:0006626;<br>F:GO:0005515;<br>C:GO:0005739                                                                                                                                                                                                                                                                                 | - |            | IPR004046; IPR010987; PTHR12289<br>(PANTHER), PTHR12289:SF11<br>(PANTHER), PF11801 (PFAM) |
| Caenorhabditis elegans  | aha-1                                          | 19 | P:GO:0040010;<br>P:GO:0048813;<br>P:GO:0009410;<br>P:GO:0040017;<br>P:GO:0010552;<br>P:GO:0007517;<br>F:GO:0016563;<br>F:GO:0046982;<br>F:GO:0003702;<br>P:GO:0007420;<br>F:GO:0043565;<br>C:GO:0043234;<br>P:GO:0007165;<br>P:GO:0002119;<br>P:GO:0030522;<br>F:GO:0003700;<br>P:GO:0010171;<br>F:GO:0004872;<br>C:GO:0005634 | - |            | -                                                                                         |
|                         | -                                              | 0  |                                                                                                                                                                                                                                                                                                                                |   |            | -                                                                                         |

|                         |                                                            |    |                                                                                                                                                                                                                                                                                                                                                                                                                                                                         |   |             |                                                                                                          |
|-------------------------|------------------------------------------------------------|----|-------------------------------------------------------------------------------------------------------------------------------------------------------------------------------------------------------------------------------------------------------------------------------------------------------------------------------------------------------------------------------------------------------------------------------------------------------------------------|---|-------------|----------------------------------------------------------------------------------------------------------|
| Caenorhabditis briggsae | proprotein convertase subtilisin kexin type 1              | 38 | P:GO:0032496;<br>F:GO:0051087;<br>C:GO:0005802;<br>P:GO:0031016;<br>F:GO:0004252;<br>F:GO:0043559;<br>P:GO:0010157;<br>P:GO:0040010;<br>C:GO:0043679;<br>P:GO:0051592;<br>P:GO:0040011;<br>P:GO:0070542;<br>C:GO:0005615;<br>P:GO:0021983;<br>P:GO:0051384;<br>P:GO:0016540;<br>C:GO:0030425;<br>P:GO:0043434;<br>C:GO:0043025;<br>P:GO:0043278;<br>P:GO:0009792;<br>P:GO:0050714;<br>P:GO:0048678;<br>P:GO:0002119;<br>P:GO:0051789;<br>P:GO:0042493;<br>P:GO:0016486; | - | EC:3.4.21.0 | -                                                                                                        |
| Caenorhabditis elegans  | briggsae cbr-spat-1 protein                                | 1  | P:GO:0009987                                                                                                                                                                                                                                                                                                                                                                                                                                                            | - |             | -                                                                                                        |
| Caenorhabditis briggsae | chromatin modifying protein 1b                             | 9  | P:GO:0009792;<br>P:GO:0002119;<br>C:GO:0005768;<br>F:GO:0019904;<br>P:GO:0040010;<br>P:GO:0040011;<br>P:GO:0009987;<br>C:GO:0016020;<br>P:GO:0015031                                                                                                                                                                                                                                                                                                                    | - |             | -                                                                                                        |
| Caenorhabditis briggsae | elegans protein partially confirmed by transcript evidence | 1  | F:GO:0016301                                                                                                                                                                                                                                                                                                                                                                                                                                                            | - |             | IPR003598; IPR003599; IPR007110;<br>IPR013098; IPR013783; PTHR10489<br>(PANTHER), SSF48726 (SUPERFAMILY) |
| Caenorhabditis elegans  | g patch domain and kow motifs                              | 8  | P:GO:0009792;<br>P:GO:0010171;<br>P:GO:0002119;<br>F:GO:0005515;<br>P:GO:0040010;<br>P:GO:0000003;<br>P:GO:0040011;<br>P:GO:0006898                                                                                                                                                                                                                                                                                                                                     | - |             | IPR000467; IPR005824; IPR008991;<br>IPR014722; PTHR15818 (PANTHER)                                       |
| Caenorhabditis briggsae | deoxyribonuclease ii family protein                        | 3  | C:GO:0005737;<br>C:GO:0005576;<br>F:GO:0004520                                                                                                                                                                                                                                                                                                                                                                                                                          | - |             | IPR004947; SignalP (SIGNALP)                                                                             |
| Caenorhabditis elegans  | elegans protein confirmed by transcript evidence           | 0  |                                                                                                                                                                                                                                                                                                                                                                                                                                                                         |   |             | SignalP (SIGNALP)                                                                                        |

|                         |                                |    |                                                                                                                                                                                                         |   |             |                                                                                                                                                                                       |
|-------------------------|--------------------------------|----|---------------------------------------------------------------------------------------------------------------------------------------------------------------------------------------------------------|---|-------------|---------------------------------------------------------------------------------------------------------------------------------------------------------------------------------------|
| Caenorhabditis elegans  | pre-mr--splicing factor rbm22  | 7  | F:GO:0003729;<br>F:GO:0008270;<br>C:GO:0071011;<br>P:GO:0000381;<br>F:GO:0000166;<br>C:GO:0071013;<br>P:GO:0009790                                                                                      | - |             | PTHR14089 (PANTHER),<br>PTHR14089:SF4 (PANTHER)                                                                                                                                       |
| Loa loa                 | mr- cleavage stimulating 50kd- | 7  | P:GO:0009792;<br>P:GO:0002119;<br>P:GO:0001703;<br>P:GO:0040010;<br>P:GO:0040011;<br>P:GO:0006898;<br>P:GO:0048477                                                                                      | - |             | IPR001680; IPR011046; IPR015943;<br>IPR017986; IPR019775; IPR019781;<br>IPR019782; IPR020472; PTHR22840<br>(PANTHER), PTHR22840:SF5<br>(PANTHER)                                      |
| Caenorhabditis elegans  | splicing factor 3b subunit 3   | 7  | P:GO:0006461;<br>F:GO:0003676;<br>C:GO:0005681;<br>F:GO:0005515;<br>P:GO:0000375;<br>C:GO:0030532;<br>P:GO:0006397                                                                                      | - |             | PTHR10644 (PANTHER),<br>PTHR10644:SF1 (PANTHER)                                                                                                                                       |
| Caenorhabditis briggsae | briggsae cbr-cpg-4 protein     | 0  |                                                                                                                                                                                                         |   |             | SignalP (SIGNALP)                                                                                                                                                                     |
| Haemonchus contortus    | enolase                        | 12 | P:GO:0040010;<br>P:GO:0008340;<br>P:GO:0040035;<br>C:GO:0000015;<br>C:GO:0009986;<br>P:GO:0002119;<br>F:GO:0000287;<br>P:GO:0006096;<br>P:GO:0006898;<br>P:GO:0009792;<br>P:GO:0040018;<br>F:GO:0004634 | - | EC:4.2.1.11 | IPR000941; IPR020809; IPR020810;<br>G3DSA:3.20.20.120 (GENE3D),<br>PTHR11902 (PANTHER), PS51257<br>(PROFILE), SignalP (SIGNALP),<br>SSF51604 (SUPERFAMILY), SSF54826<br>(SUPERFAMILY) |
|                         | -                              | 0  |                                                                                                                                                                                                         |   |             | SignalP (SIGNALP)                                                                                                                                                                     |
| Haemonchus contortus    | enolase                        | 12 | P:GO:0040010;<br>P:GO:0008340;<br>P:GO:0040035;<br>C:GO:0000015;<br>C:GO:0009986;<br>P:GO:0002119;<br>F:GO:0000287;<br>P:GO:0006096;<br>P:GO:0006898;<br>P:GO:0009792;<br>P:GO:0040018;<br>F:GO:0004634 | - | EC:4.2.1.11 | IPR000941; IPR020809; IPR020810;<br>G3DSA:3.20.20.120 (GENE3D),<br>PTHR11902 (PANTHER), PS51257<br>(PROFILE), SSF51604 (SUPERFAMILY),<br>SSF54826 (SUPERFAMILY)                       |

|                           |                                                       |    |                                                                                                                                                                                                         |   |             |                                                                                                                                                                                       |
|---------------------------|-------------------------------------------------------|----|---------------------------------------------------------------------------------------------------------------------------------------------------------------------------------------------------------|---|-------------|---------------------------------------------------------------------------------------------------------------------------------------------------------------------------------------|
| Haemonchus contortus      | enolase                                               | 12 | P:GO:0040010;<br>P:GO:0008340;<br>P:GO:0040035;<br>C:GO:0000015;<br>C:GO:0009986;<br>P:GO:0002119;<br>F:GO:0000287;<br>P:GO:0006096;<br>P:GO:0006898;<br>P:GO:0009792;<br>P:GO:0040018;<br>F:GO:0004634 | - | EC:4.2.1.11 | IPR000941; IPR020809; IPR020810;<br>G3DSA:3.20.20.120 (GENE3D),<br>PTHR11902 (PANTHER), PS51257<br>(PROFILE), SignalP (SIGNALP),<br>SSF51604 (SUPERFAMILY), SSF54826<br>(SUPERFAMILY) |
| -                         | -                                                     | 0  |                                                                                                                                                                                                         |   |             | -                                                                                                                                                                                     |
| Loa loa                   | protein c1orf9-like protein                           | 1  | P:GO:0032502                                                                                                                                                                                            | - |             | SignalP (SIGNALP)                                                                                                                                                                     |
| -                         | -                                                     | 0  |                                                                                                                                                                                                         |   |             | -                                                                                                                                                                                     |
| -                         | -                                                     | 0  |                                                                                                                                                                                                         |   |             | SignalP (SIGNALP)                                                                                                                                                                     |
| Caenorhabditis briggsae   | ain family member (clp-1)                             | 3  | C:GO:0044464;<br>P:GO:0008219;<br>F:GO:0004197                                                                                                                                                          | - | EC:3.4.22.0 | -                                                                                                                                                                                     |
| Caenorhabditis elegans    | elegans protein confirmed by transcript evidence      | 0  |                                                                                                                                                                                                         |   |             | G3DSA:2.10.60.10 (GENE3D),<br>PTHR21749 (PANTHER), SignalP<br>(SIGNALP)                                                                                                               |
| Caenorhabditis elegans    | ankyrin repeat protein                                | 6  | P:GO:0033036;<br>P:GO:0023033;<br>P:GO:0048518;<br>P:GO:0050896;<br>P:GO:0048523;<br>F:GO:0005488                                                                                                       | - |             | IPR002110; IPR020683; PTHR18958<br>(PANTHER), PTHR18958:SF290<br>(PANTHER)                                                                                                            |
| Caenorhabditis briggsae   | briggsae cbr-ttr-33 protein                           | 0  |                                                                                                                                                                                                         |   |             | IPR001534; SignalP (SIGNALP)                                                                                                                                                          |
| Caenorhabditis sp. PS1010 | briggsae cbr-dnj-18 protein                           | 2  | P:GO:0009792;<br>F:GO:0005488                                                                                                                                                                           | - |             | -                                                                                                                                                                                     |
| -                         | -                                                     | 0  |                                                                                                                                                                                                         |   |             | -                                                                                                                                                                                     |
| Caenorhabditis elegans    | bromodomain containing protein                        | 2  | F:GO:0008270;<br>P:GO:0040011                                                                                                                                                                           | - |             | IPR018501; SignalP (SIGNALP)                                                                                                                                                          |
| Brugia malayi             | recombining binding protein suppressor of hairless    | 5  | F:GO:0003700;<br>F:GO:0003677;<br>F:GO:0005515;<br>C:GO:0005634;<br>P:GO:0006355                                                                                                                        | - |             | IPR002909; IPR008967; IPR013783;<br>IPR014756; IPR015350; IPR015351;<br>G3DSA:2.80.10.50 (GENE3D),<br>PTHR10665 (PANTHER)                                                             |
| Brugia malayi             | recombining binding protein suppressor of hairless    | 5  | F:GO:0003700;<br>F:GO:0003677;<br>F:GO:0005515;<br>C:GO:0005634;<br>P:GO:0006355                                                                                                                        | - |             | IPR002909; IPR008967; IPR013783;<br>IPR014756; IPR015350; IPR015351;<br>G3DSA:2.80.10.50 (GENE3D),<br>PTHR10665 (PANTHER)                                                             |
| -                         | -                                                     | 0  |                                                                                                                                                                                                         |   |             | SignalP (SIGNALP)                                                                                                                                                                     |
| Caenorhabditis elegans    | ypc1_caee1 ame: full=uncharacterized protein          | 1  | F:GO:0003677                                                                                                                                                                                            | - |             | IPR017956                                                                                                                                                                             |
| Caenorhabditis elegans    | suppression of tumorigenicity                         | 5  | C:GO:0016020;<br>P:GO:0040018;<br>P:GO:0000003;<br>P:GO:0010171;<br>P:GO:0002119                                                                                                                        | - |             | -                                                                                                                                                                                     |
| Caenorhabditis elegans    | hypothetical protein F53H1.4 [Caenorhabditis elegans] | 2  | P:GO:0040010;<br>P:GO:0006898                                                                                                                                                                           | - |             | -                                                                                                                                                                                     |

|                           |                                                            |    |                                                                                                                                                                                        |                                                                                                   |            |                                                                                                                                                                                              |
|---------------------------|------------------------------------------------------------|----|----------------------------------------------------------------------------------------------------------------------------------------------------------------------------------------|---------------------------------------------------------------------------------------------------|------------|----------------------------------------------------------------------------------------------------------------------------------------------------------------------------------------------|
| Caenorhabditis briggsae   | malate cytoplasmic                                         | 7  | P:GO:0009056;<br>P:GO:0044262;<br>F:GO:0016615;<br>P:GO:0044281;<br>F:GO:0016616;<br>C:GO:0005829;<br>P:GO:0006091                                                                     | -                                                                                                 | EC:1.1.1.0 | -                                                                                                                                                                                            |
| Caenorhabditis briggsae   | cwf19-like protein 1                                       | 1  | F:GO:0003824                                                                                                                                                                           | -                                                                                                 |            | -                                                                                                                                                                                            |
| -                         | -                                                          | 0  |                                                                                                                                                                                        |                                                                                                   |            | -                                                                                                                                                                                            |
| -                         | -                                                          | 0  |                                                                                                                                                                                        |                                                                                                   |            | -                                                                                                                                                                                            |
| Loa loa                   | myb binding protein 1a                                     | 5  | P:GO:0040035;<br>P:GO:0009792;<br>P:GO:0002119;<br>P:GO:0040010;<br>P:GO:0006898                                                                                                       | -                                                                                                 |            | IPR007015; PTHR13213:SF5 (PANTHER)                                                                                                                                                           |
| Caenorhabditis briggsae   | guanylate ki-se                                            | 7  | P:GO:0040010;<br>P:GO:0040035;<br>F:GO:0004385;<br>F:GO:0000166;<br>P:GO:0040011;<br>P:GO:0006898;<br>P:GO:0006163                                                                     | -                                                                                                 | EC:2.7.4.8 | -                                                                                                                                                                                            |
| Caenorhabditis briggsae   | guanylate ki-se                                            | 7  | P:GO:0040010;<br>P:GO:0040035;<br>F:GO:0004385;<br>F:GO:0000166;<br>P:GO:0040011;<br>P:GO:0006898;<br>P:GO:0006163                                                                     | -                                                                                                 | EC:2.7.4.8 | -                                                                                                                                                                                            |
| Caenorhabditis sp. PS1010 | briggsae cbr-cdh-4 protein                                 | 5  | P:GO:0007411;<br>P:GO:0007163;<br>P:GO:0007155;<br>P:GO:0007413;<br>C:GO:0016020                                                                                                       | -                                                                                                 |            | IPR000742; IPR001791; IPR006210;<br>IPR008985; IPR012680; IPR013032;<br>IPR013320; G3DSA:2.10.25.10<br>(GENE3D), PTHR10574 (PANTHER),<br>PTHR10574:SF17 (PANTHER),<br>SSF57196 (SUPERFAMILY) |
| Caenorhabditis elegans    | aldehyde dehydroge-se family subfamily a2                  | 11 | F:GO:0004028;<br>F:GO:0004030;<br>C:GO:0005743;<br>P:GO:0008218;<br>P:GO:0046292;<br>P:GO:0055114;<br>C:GO:0016021;<br>C:GO:0005634;<br>C:GO:0005829;<br>C:GO:0042406;<br>P:GO:0000302 | -                                                                                                 | EC:1.2.1.5 | IPR012394; IPR015590; IPR016161;<br>IPR016162; IPR016163                                                                                                                                     |
| -                         | -                                                          | 0  |                                                                                                                                                                                        |                                                                                                   |            | -                                                                                                                                                                                            |
| -                         | -                                                          | 0  |                                                                                                                                                                                        |                                                                                                   |            | -                                                                                                                                                                                            |
| -                         | -                                                          | 0  |                                                                                                                                                                                        |                                                                                                   |            | -                                                                                                                                                                                            |
| -                         | -                                                          | 0  |                                                                                                                                                                                        |                                                                                                   |            | SignalP (SIGNALP)                                                                                                                                                                            |
| Caenorhabditis elegans    | elegans protein partially confirmed by transcript evidence | 0  |                                                                                                                                                                                        | F:GO:0004871;<br>C:GO:0016021;<br>P:GO:0007165;<br>F:GO:0003774;<br>C:GO:0016459;<br>F:GO:0005515 |            | PD936484 (PRODOM)                                                                                                                                                                            |

|                         |                                                            |   |                                                                                                                                                                       |   |                                                                                                                                                                                                                 |
|-------------------------|------------------------------------------------------------|---|-----------------------------------------------------------------------------------------------------------------------------------------------------------------------|---|-----------------------------------------------------------------------------------------------------------------------------------------------------------------------------------------------------------------|
| Caenorhabditis briggsae | ankyrin unc44                                              | 0 | F:GO:0004672;<br>P:GO:0006915;<br>P:GO:0006468;<br>F:GO:0000166;<br>F:GO:0017111;<br>F:GO:0005524;<br>P:GO:0016567;<br>F:GO:0004842;<br>C:GO:0000151;<br>F:GO:0005488 | - | -                                                                                                                                                                                                               |
| Caenorhabditis elegans  | abnormal dauer formation family member (daf-12)            | 6 | F:GO:0003700;<br>F:GO:0043565;<br>F:GO:0003707;<br>C:GO:0005634;<br>F:GO:0008270;<br>P:GO:0006355                                                                     | - | -                                                                                                                                                                                                               |
| -                       | -                                                          | 0 |                                                                                                                                                                       |   | SignalP (SIGNALP)                                                                                                                                                                                               |
| -                       | -                                                          | 0 |                                                                                                                                                                       |   | SignalP (SIGNALP)                                                                                                                                                                                               |
| -                       | -                                                          | 0 |                                                                                                                                                                       |   | -                                                                                                                                                                                                               |
| Brugia malayi           | briggsae cbr-tag-335 protein                               | 9 | P:GO:0009792;<br>P:GO:0002119;<br>F:GO:0005525;<br>P:GO:0009058;<br>F:GO:0004475;<br>P:GO:0000003;<br>P:GO:0008340;<br>P:GO:0040007;<br>P:GO:0006898                  | - | EC:2.7.7.13<br>IPR001451; IPR005835; IPR018357;<br>G3DSA:2.160.10.10 (GENE3D),<br>G3DSA:3.90.550.10 (GENE3D),<br>PTHR22572 (PANTHER),<br>PTHR22572:SF15 (PANTHER), SignalP<br>(SIGNALP), SSF53448 (SUPERFAMILY) |
| Brugia malayi           | briggsae cbr-tag-335 protein                               | 9 | P:GO:0009792;<br>P:GO:0002119;<br>F:GO:0005525;<br>P:GO:0009058;<br>F:GO:0004475;<br>P:GO:0000003;<br>P:GO:0008340;<br>P:GO:0040007;<br>P:GO:0006898                  | - | EC:2.7.7.13<br>IPR001451; IPR005835; IPR018357;<br>G3DSA:2.160.10.10 (GENE3D),<br>G3DSA:3.90.550.10 (GENE3D),<br>PTHR22572 (PANTHER),<br>PTHR22572:SF15 (PANTHER), SignalP<br>(SIGNALP), SSF53448 (SUPERFAMILY) |
| Caenorhabditis elegans  | translation initiation factor eif-2b subunit alpha         | 1 | F:GO:0005515                                                                                                                                                          | - | IPR000649; G3DSA:3.40.50.10470<br>(GENE3D), PTHR10233:SF7<br>(PANTHER), SSF100950 (SUPERFAMILY)                                                                                                                 |
| -                       | -                                                          | 0 |                                                                                                                                                                       |   | -                                                                                                                                                                                                               |
| Caenorhabditis briggsae | charged multivesicular body protein 4b                     | 3 | P:GO:0015031;<br>C:GO:0005829;<br>C:GO:0031902                                                                                                                        | - | -                                                                                                                                                                                                               |
| Caenorhabditis briggsae | charged multivesicular body protein 4b                     | 3 | P:GO:0015031;<br>C:GO:0005829;<br>C:GO:0031902                                                                                                                        | - | -                                                                                                                                                                                                               |
| Caenorhabditis elegans  | ubiquitin carboxyl-termini hydrolase family protein        | 3 | F:GO:0008233;<br>P:GO:0006511;<br>F:GO:0005488                                                                                                                        | - | IPR001394; PTHR10420 (PANTHER),<br>PTHR10420:SF36 (PANTHER),<br>SSF54001 (SUPERFAMILY)                                                                                                                          |
| -                       | -                                                          | 0 |                                                                                                                                                                       |   | -                                                                                                                                                                                                               |
| Caenorhabditis briggsae | elegans protein partially confirmed by transcript evidence | 0 |                                                                                                                                                                       |   | -                                                                                                                                                                                                               |
| Caenorhabditis briggsae | elegans protein partially confirmed by transcript evidence | 0 |                                                                                                                                                                       |   | -                                                                                                                                                                                                               |
| Caenorhabditis briggsae | elegans protein partially confirmed by transcript evidence | 0 |                                                                                                                                                                       |   | -                                                                                                                                                                                                               |
| -                       | -                                                          | 0 |                                                                                                                                                                       |   | -                                                                                                                                                                                                               |
| Caenorhabditis briggsae | Hypothetical protein CBG05711 [Caenorhabditis briggsae]    | 0 |                                                                                                                                                                       |   | -                                                                                                                                                                                                               |
| Caenorhabditis briggsae | polymerase iii (d- directed) polypeptide 39 kda            | 1 | P:GO:0000003                                                                                                                                                          | - | -                                                                                                                                                                                                               |



|                         |                                                                              |    |                                                                                                                                                                                        |                                                                                                                                                                                                                                           |                                                                                                                            |
|-------------------------|------------------------------------------------------------------------------|----|----------------------------------------------------------------------------------------------------------------------------------------------------------------------------------------|-------------------------------------------------------------------------------------------------------------------------------------------------------------------------------------------------------------------------------------------|----------------------------------------------------------------------------------------------------------------------------|
|                         | -                                                                            | 0  |                                                                                                                                                                                        |                                                                                                                                                                                                                                           | SignalP (SIGNALP)                                                                                                          |
| Caenorhabditis briggsae | elegans protein confirmed by transcript evidence                             | 0  |                                                                                                                                                                                        |                                                                                                                                                                                                                                           | -                                                                                                                          |
| Caenorhabditis elegans  | lethal family member (let-805)                                               | 8  | P:GO:0018996;<br>P:GO:0009792;<br>P:GO:0008340;<br>P:GO:0000003;<br>F:GO:0005515;<br>P:GO:0006898;<br>P:GO:0002119;<br>P:GO:0040011                                                    | -                                                                                                                                                                                                                                         | PTHR19143 (PANTHER),<br>PTHR19143:SF4 (PANTHER)                                                                            |
| Caenorhabditis elegans  | transcription factor iiaa                                                    | 0  |                                                                                                                                                                                        | P:GO:0040027;<br>C:GO:0005634;<br>F:GO:0003677;<br>F:GO:0003676;<br>F:GO:0008270;<br>F:GO:0003674;<br>F:GO:0003723;<br>P:GO:0009303;<br>P:GO:0006383;<br>F:GO:0005515;<br>C:GO:0005622;<br>F:GO:0046872;<br>F:GO:0003709;<br>P:GO:0045449 | -                                                                                                                          |
| Caenorhabditis briggsae | elegans protein partially confirmed by transcript evidence                   | 1  | F:GO:0005515                                                                                                                                                                           | -                                                                                                                                                                                                                                         | -                                                                                                                          |
|                         |                                                                              |    |                                                                                                                                                                                        |                                                                                                                                                                                                                                           | IPR003598; IPR007110; IPR013098;<br>IPR013783; PTHR19897 (PANTHER),<br>PTHR19897:SF11 (PANTHER),<br>SSF48726 (SUPERFAMILY) |
| Caenorhabditis elegans  | wapl (drosophila wings apart-like cohesin interactor) family member (wapl-1) | 5  | P:GO:0009636;<br>P:GO:0018991;<br>P:GO:0040010;<br>P:GO:0040011;<br>C:GO:0000795                                                                                                       | -                                                                                                                                                                                                                                         | IPR012502; IPR022771; PTHR22100<br>(PANTHER), PTHR22100:SF7<br>(PANTHER)                                                   |
| Homo sapiens            | ubiquitously-expressed transcript                                            | 11 | F:GO:0008017;<br>P:GO:0047497;<br>P:GO:0006457;<br>F:GO:0051015;<br>C:GO:0005813;<br>P:GO:0051297;<br>F:GO:0051082;<br>F:GO:0048487;<br>C:GO:0016272;<br>C:GO:0000930;<br>C:GO:0005634 | -                                                                                                                                                                                                                                         | SignalP (SIGNALP)                                                                                                          |
| Caenorhabditis elegans  | cell adhesion                                                                | 8  | P:GO:0009792;<br>P:GO:0002119;<br>P:GO:0018996;<br>F:GO:0005515;<br>P:GO:0000003;<br>P:GO:0008340;<br>P:GO:0040011;<br>P:GO:0006898                                                    | -                                                                                                                                                                                                                                         | IPR003961; IPR008957; IPR013783;<br>PTHR19900 (PANTHER),<br>PTHR19900:SF3 (PANTHER)                                        |

|                         |                                                            |    |                                                                                                                                                                                                         |   |             |                                                                                        |
|-------------------------|------------------------------------------------------------|----|---------------------------------------------------------------------------------------------------------------------------------------------------------------------------------------------------------|---|-------------|----------------------------------------------------------------------------------------|
| Caenorhabditis elegans  | phosphoenolpyruvate carboxy-kinase                         | 6  | C:GO:0005737;<br>P:GO:0006094;<br>F:GO:0046872;<br>F:GO:0005525;<br>F:GO:0016301;<br>F:GO:0004613                                                                                                       | - | EC:4.1.1.32 | IPR008209; IPR008210                                                                   |
| Caenorhabditis briggsae | phosphatidylinositol-4-phosphate 5-kinase type I           | 2  | P:GO:0046488;<br>F:GO:0016307                                                                                                                                                                           | - |             | IPR002498; G3DSA:3.30.810.10 (GENE3D), PTHR23086:SF5 (PANTHER), SSF56104 (SUPERFAMILY) |
|                         | -                                                          | 0  |                                                                                                                                                                                                         |   |             | -                                                                                      |
| Oryctolagus cuniculus   | ribosomal protein S8                                       | 4  | F:GO:0003735;<br>F:GO:0005515;<br>C:GO:0022627;<br>P:GO:0006414                                                                                                                                         | - |             | IPR022309; PTHR10394 (PANTHER), PTHR10394:SF1 (PANTHER)                                |
|                         | -                                                          | 0  |                                                                                                                                                                                                         |   |             | -                                                                                      |
| Caenorhabditis briggsae | atp-dependent transporter                                  | 2  | F:GO:0016887;<br>F:GO:0005524                                                                                                                                                                           | - |             | G3DSA:3.40.50.300 (GENE3D), PTHR19222 (PANTHER), SSF52540 (SUPERFAMILY)                |
|                         | -                                                          | 0  |                                                                                                                                                                                                         |   |             | -                                                                                      |
| Brugia malayi           | hypothetical protein Bm1_05610 [Brugia malayi]             | 0  |                                                                                                                                                                                                         |   |             | PF05536 (PFAM)                                                                         |
|                         | -                                                          | 0  |                                                                                                                                                                                                         |   |             | -                                                                                      |
| Caenorhabditis elegans  | ubiquinol-cytochrome c reductase iron-sulfur polypeptide 1 | 12 | C:GO:0005875;<br>P:GO:0009725;<br>F:GO:0008121;<br>F:GO:0051537;<br>P:GO:0046677;<br>F:GO:0046872;<br>C:GO:0005750;<br>P:GO:0006811;<br>F:GO:0032403;<br>P:GO:0006122;<br>P:GO:0042493;<br>P:GO:0007040 | - | EC:1.10.2.2 | IPR004192; IPR005805; IPR006317; IPR014349; IPR017941                                  |
| Caenorhabditis elegans  | h+ lysosomal v1 subunit d                                  | 10 | C:GO:0016471;<br>P:GO:0015986;<br>P:GO:0040007;<br>P:GO:0006200;<br>P:GO:0002119;<br>F:GO:0005515;<br>F:GO:0046961;<br>P:GO:0009792;<br>C:GO:0005634;<br>C:GO:0033178                                   | - | EC:3.6.3.14 | IPR002699                                                                              |
| Caenorhabditis briggsae | atp synthase b                                             | 10 | P:GO:0008340;<br>C:GO:0005929;<br>P:GO:0040027;<br>P:GO:0040010;<br>F:GO:0015078;<br>P:GO:0034606;<br>P:GO:0009792;<br>P:GO:0015986;<br>P:GO:0007281;<br>C:GO:0000276                                   | - |             | IPR008688; IPR013837                                                                   |
| Caenorhabditis elegans  | elav-type r-binding protein family member (etr-1)          | 4  | F:GO:0003729;<br>F:GO:0005515;<br>P:GO:0017148;<br>F:GO:0000166                                                                                                                                         | - |             | -                                                                                      |
|                         | -                                                          | 0  |                                                                                                                                                                                                         |   |             | -                                                                                      |

|                        |                                                                  |    |                                                                                                                                                                                                         |                                                                                                                                                                                        |             |                                                                                                                                    |
|------------------------|------------------------------------------------------------------|----|---------------------------------------------------------------------------------------------------------------------------------------------------------------------------------------------------------|----------------------------------------------------------------------------------------------------------------------------------------------------------------------------------------|-------------|------------------------------------------------------------------------------------------------------------------------------------|
| Brugia malayi          | presenilin spe-4                                                 | 0  |                                                                                                                                                                                                         | C:GO:0016021                                                                                                                                                                           |             | IPR001108; PTHR10202:SF1 (PANTHER)                                                                                                 |
| Caenorhabditis elegans | step ii splicing factor slu7                                     | 12 | P:GO:0008340;<br>F:GO:0008270;<br>F:GO:0003676;<br>P:GO:0040007;<br>P:GO:0000003;<br>P:GO:0018996;<br>P:GO:0002119;<br>P:GO:0040011;<br>P:GO:0000398;<br>C:GO:0030529;<br>C:GO:0044428;<br>P:GO:0009792 | -                                                                                                                                                                                      |             | IPR001878; IPR021715; PTHR12942 (PANTHER)                                                                                          |
| Caenorhabditis elegans | cystathionine gamma-synthase                                     | 3  | F:GO:0030170;<br>P:GO:0006520;<br>F:GO:0003824                                                                                                                                                          | -                                                                                                                                                                                      |             | -                                                                                                                                  |
|                        | -                                                                | 0  |                                                                                                                                                                                                         |                                                                                                                                                                                        |             | IPR006909; IPR023093; SSF46785 (SUPERFAMILY)                                                                                       |
|                        | -                                                                | 0  |                                                                                                                                                                                                         |                                                                                                                                                                                        |             | IPR000436; IPR016060                                                                                                               |
|                        | -                                                                | 0  |                                                                                                                                                                                                         |                                                                                                                                                                                        |             | -                                                                                                                                  |
| Caenorhabditis elegans | btb poz domain containing protein                                | 1  | F:GO:0005515                                                                                                                                                                                            | -                                                                                                                                                                                      |             | SignalP (SIGNALP)                                                                                                                  |
|                        | -                                                                | 0  |                                                                                                                                                                                                         |                                                                                                                                                                                        |             | -                                                                                                                                  |
| Caenorhabditis elegans | subfamily member 13                                              | 1  | F:GO:0031072                                                                                                                                                                                            | -                                                                                                                                                                                      |             | IPR001623                                                                                                                          |
| Caenorhabditis elegans | subfamily member 13                                              | 1  | F:GO:0031072                                                                                                                                                                                            | -                                                                                                                                                                                      |             | IPR001623                                                                                                                          |
| Caenorhabditis elegans | subfamily member 13                                              | 3  | P:GO:0006457;<br>F:GO:0031072;<br>F:GO:0051082                                                                                                                                                          | -                                                                                                                                                                                      |             | -                                                                                                                                  |
| Caenorhabditis elegans | subfamily member 13                                              | 1  | F:GO:0031072                                                                                                                                                                                            | -                                                                                                                                                                                      |             | IPR001623                                                                                                                          |
| Caenorhabditis elegans | subfamily member 13                                              | 1  | F:GO:0031072                                                                                                                                                                                            | -                                                                                                                                                                                      |             | IPR001623                                                                                                                          |
| Loa loa                | protein-tyrosine phosphatase containing protein                  | 4  | F:GO:0004725;<br>P:GO:0006470;<br>P:GO:0009792;<br>P:GO:0000003                                                                                                                                         | -                                                                                                                                                                                      | EC:3.1.3.48 | IPR000242; IPR000387; IPR016130; G3DSA:3.90.190.10 (GENE3D), PTHR19134 (PANTHER), PTHR19134:SF26 (PANTHER), SSF52799 (SUPERFAMILY) |
| Physarum polycephalum  | d--topoisomerase ii                                              | 0  |                                                                                                                                                                                                         | F:GO:0003918;<br>F:GO:0003916;<br>P:GO:0006265;<br>C:GO:0005694;<br>F:GO:0003700;<br>P:GO:0006259;<br>F:GO:0003677;<br>F:GO:0000166;<br>F:GO:0005524;<br>P:GO:0006355;<br>F:GO:0016853 |             | -                                                                                                                                  |
| Caenorhabditis elegans | syntaxin 6                                                       | 4  | P:GO:0046907;<br>F:GO:0005515;<br>P:GO:0016081;<br>C:GO:0016020                                                                                                                                         | -                                                                                                                                                                                      |             | -                                                                                                                                  |
| Caenorhabditis elegans | yhb8_caeel ame: full=uncharacterized protein flags:<br>precursor | 0  |                                                                                                                                                                                                         |                                                                                                                                                                                        |             | -                                                                                                                                  |
|                        | -                                                                | 0  |                                                                                                                                                                                                         |                                                                                                                                                                                        |             | -                                                                                                                                  |

|                         |                                                                           |    |                                                                                                                                                                                                         |              |  |                                                                                             |
|-------------------------|---------------------------------------------------------------------------|----|---------------------------------------------------------------------------------------------------------------------------------------------------------------------------------------------------------|--------------|--|---------------------------------------------------------------------------------------------|
| Caenorhabditis briggsae | mammalian fe65 homolog family member (feh-1)                              | 0  |                                                                                                                                                                                                         | F:GO:0005515 |  | IPR001202; G3DSA:2.20.70.10 (GENE3D), PTHR14058 (PANTHER), PTHR14058:SF9 (PANTHER)          |
| Loa loa                 | microtubule associated calponin and lim domain containing 2               | 2  | F:GO:0003824;<br>F:GO:0005488                                                                                                                                                                           | -            |  | PTHR11915 (PANTHER), PTHR11915:SF1 (PANTHER)                                                |
| Caenorhabditis elegans  | shc (src homology domain c-termi-l) adaptor homolog family member (shc-1) | 0  |                                                                                                                                                                                                         | F:GO:0005515 |  | IPR011993; SignalP (SIGNALP), SSF50729 (SUPERFAMILY)                                        |
| Caenorhabditis briggsae | briggsae cbr-shc-1 protein                                                | 1  | F:GO:0005515                                                                                                                                                                                            | -            |  | IPR006020; IPR011993; PTHR10337 (PANTHER), SSF50729 (SUPERFAMILY)                           |
| Loa loa                 | swi snf matrix actin dependent regulator of subfamily member 2            | 12 | C:GO:0071564;<br>C:GO:0071565;<br>P:GO:0006357;<br>C:GO:0017053;<br>C:GO:0005730;<br>F:GO:0042802;<br>F:GO:0003677;<br>C:GO:0016514;<br>F:GO:0003713;<br>P:GO:0045892;<br>P:GO:0045893;<br>P:GO:0006338 | -            |  | -                                                                                           |
| Loa loa                 | swi snf matrix actin dependent regulator of subfamily member 2            | 12 | C:GO:0071564;<br>C:GO:0071565;<br>P:GO:0006357;<br>C:GO:0017053;<br>C:GO:0005730;<br>F:GO:0042802;<br>F:GO:0003677;<br>C:GO:0016514;<br>F:GO:0003713;<br>P:GO:0045892;<br>P:GO:0045893;<br>P:GO:0006338 | -            |  | -                                                                                           |
| Caenorhabditis elegans  | msf1-like conserved region family protein                                 | 4  | P:GO:0030432;<br>C:GO:0005739;<br>P:GO:0030537;<br>P:GO:0007283                                                                                                                                         | -            |  | IPR006797; PTHR11158 (PANTHER), PTHR11158:SF15 (PANTHER)                                    |
| Caenorhabditis elegans  | elegans protein confirmed by transcript evidence                          | 0  |                                                                                                                                                                                                         |              |  | -                                                                                           |
|                         | -                                                                         | 0  |                                                                                                                                                                                                         |              |  | -                                                                                           |
| Caenorhabditis briggsae | briggsae cbr-apl-1 protein                                                | 9  | P:GO:0009792;<br>P:GO:0010171;<br>P:GO:0002119;<br>P:GO:0042395;<br>P:GO:0040018;<br>F:GO:0003723;<br>P:GO:0018991;<br>P:GO:0040017;<br>C:GO:0031410                                                    | -            |  | IPR008155; IPR019543; PTHR23103 (PANTHER), PTHR23103:SF3 (PANTHER), SSF109843 (SUPERFAMILY) |
| Caenorhabditis briggsae | briggsae cbr-puf-12 protein                                               | 2  | P:GO:0018991;<br>F:GO:0003723                                                                                                                                                                           | -            |  | -                                                                                           |

|                         |                                                 |    |                                                                                                                                                                                                                                                            |                                                |                                                                                                                                                                                          |
|-------------------------|-------------------------------------------------|----|------------------------------------------------------------------------------------------------------------------------------------------------------------------------------------------------------------------------------------------------------------|------------------------------------------------|------------------------------------------------------------------------------------------------------------------------------------------------------------------------------------------|
| Caenorhabditis briggsae | briggsae cbr-apl-1 protein                      | 15 | P:GO:0000003;<br>P:GO:0042395;<br>C:GO:0031410;<br>P:GO:0048812;<br>P:GO:0010171;<br>P:GO:0002119;<br>P:GO:0007422;<br>F:GO:0005515;<br>P:GO:0050808;<br>P:GO:0040017;<br>P:GO:0048678;<br>C:GO:0005576;<br>P:GO:0009792;<br>P:GO:0040018;<br>C:GO:0005886 | -                                              | IPR008154; IPR008155; IPR011178;<br>IPR015849; IPR019543; IPR019744;<br>PTHR23103 (PANTHER),<br>PTHR23103:SF3 (PANTHER), SignalP<br>(SIGNALP), SSF109843 (SUPERFAMILY)                   |
| Caenorhabditis briggsae | 26s proteasome non-atpase regulatory subunit 12 | 1  | P:GO:0000003                                                                                                                                                                                                                                               | -                                              | PTHR10855 (PANTHER),<br>PTHR10855:SF1 (PANTHER)                                                                                                                                          |
| Ancylostoma caninum     | cysteine-rich secretory protein-buccal gland    | 0  |                                                                                                                                                                                                                                                            | P:GO:0006898;<br>C:GO:0005576                  | IPR001283; IPR014044; IPR018244;<br>PTHR10334:SF11 (PANTHER)                                                                                                                             |
|                         | -                                               | 0  |                                                                                                                                                                                                                                                            |                                                | -                                                                                                                                                                                        |
|                         | -                                               | 0  |                                                                                                                                                                                                                                                            |                                                | -                                                                                                                                                                                        |
| Caenorhabditis elegans  | briggsae cbr-npp-15 protein                     | 0  |                                                                                                                                                                                                                                                            | F:GO:0003674;<br>C:GO:0016021;<br>P:GO:0040010 | IPR007187; PTHR13405 (PANTHER),<br>PTHR13405:SF6 (PANTHER)                                                                                                                               |
|                         | -                                               | 0  |                                                                                                                                                                                                                                                            |                                                | -                                                                                                                                                                                        |
| Caenorhabditis elegans  | novel protein vertebrate alpha 6                | 5  | F:GO:0004872;<br>P:GO:0007229;<br>F:GO:0005515;<br>P:GO:0007155;<br>C:GO:0008305                                                                                                                                                                           | -                                              | IPR000413; IPR013517; IPR013519;<br>G3DSA:2.130.10.130 (GENE3D),<br>PTHR23220 (PANTHER),<br>PTHR23220:SF11 (PANTHER), PS51470<br>(PROFILE), SSF69318 (SUPERFAMILY)                       |
| Caenorhabditis elegans  | novel protein vertebrate alpha 6                | 1  | C:GO:0016021                                                                                                                                                                                                                                               | -                                              | IPR000413; IPR013517; IPR013519;<br>G3DSA:2.130.10.130 (GENE3D),<br>PTHR23220 (PANTHER),<br>PTHR23220:SF11 (PANTHER), PS51470<br>(PROFILE), SSF69318 (SUPERFAMILY)                       |
|                         | -                                               | 0  |                                                                                                                                                                                                                                                            |                                                | -                                                                                                                                                                                        |
| Caenorhabditis elegans  | briggsae cbr-i--1 protein                       | 4  | F:GO:0005515;<br>P:GO:0009987;<br>C:GO:0016021;<br>P:GO:0023052                                                                                                                                                                                            | -                                              | IPR000413; IPR013517; IPR013519;<br>G3DSA:2.130.10.130 (GENE3D),<br>PTHR23220 (PANTHER),<br>PTHR23220:SF11 (PANTHER), PS51470<br>(PROFILE), SignalP (SIGNALP),<br>SSF69318 (SUPERFAMILY) |
| Brugia malayi           | hypothetical protein Bm1_14505 [Brugia malayi]  | 0  |                                                                                                                                                                                                                                                            |                                                | -                                                                                                                                                                                        |
| Caenorhabditis elegans  | gtpase activating protein family member (gap-2) | 5  | C:GO:0005737;<br>P:GO:0046580;<br>P:GO:0040010;<br>P:GO:0000003;<br>F:GO:0005099                                                                                                                                                                           | -                                              | IPR001936; IPR008936; IPR023152;<br>PTHR10194 (PANTHER),<br>PTHR10194:SF25 (PANTHER)                                                                                                     |
| Caenorhabditis elegans  | gtpase activating protein family member (gap-2) | 5  | C:GO:0005737;<br>P:GO:0046580;<br>P:GO:0040010;<br>P:GO:0000003;<br>F:GO:0005099                                                                                                                                                                           | -                                              | IPR001936; IPR008936; IPR023152;<br>PTHR10194 (PANTHER),<br>PTHR10194:SF25 (PANTHER)                                                                                                     |

|                        |                                                               |    |                                                                                                                                                                                                                                                                                                                                                                                                                                                                         |   |              |                                                                                                                                            |
|------------------------|---------------------------------------------------------------|----|-------------------------------------------------------------------------------------------------------------------------------------------------------------------------------------------------------------------------------------------------------------------------------------------------------------------------------------------------------------------------------------------------------------------------------------------------------------------------|---|--------------|--------------------------------------------------------------------------------------------------------------------------------------------|
| Caenorhabditis elegans | tfiih basal transcription factor complex helicase xpb subunit | 32 | P:GO:0000718;<br>P:GO:0006468;<br>P:GO:0009650;<br>C:GO:0000441;<br>P:GO:0000075;<br>F:GO:0003684;<br>F:GO:0008022;<br>P:GO:0006283;<br>F:GO:0047485;<br>F:GO:0005525;<br>P:GO:0006265;<br>P:GO:0000717;<br>C:GO:0005675;<br>P:GO:0009792;<br>F:GO:0032564;<br>P:GO:0001666;<br>P:GO:0008104;<br>P:GO:0006917;<br>P:GO:0033683;<br>P:GO:0006368;<br>F:GO:0042277;<br>P:GO:0045944;<br>F:GO:0008353;<br>F:GO:0004003;<br>P:GO:0006200;<br>F:GO:0008134;<br>F:GO:0005524; | - | EC:2.7.11.23 | IPR001161; IPR001650; IPR006935;<br>IPR014001; IPR014021;<br>G3DSA:3.40.50.300 (GENE3D),<br>PTHR11274 (PANTHER), SSF52540<br>(SUPERFAMILY) |
| Caenorhabditis elegans | tfiih basal transcription factor complex helicase xpb subunit | 32 | P:GO:0000718;<br>P:GO:0006468;<br>P:GO:0009650;<br>C:GO:0000441;<br>P:GO:0000075;<br>F:GO:0003684;<br>F:GO:0008022;<br>P:GO:0006283;<br>F:GO:0047485;<br>F:GO:0005525;<br>P:GO:0006265;<br>P:GO:0000717;<br>C:GO:0005675;<br>P:GO:0009792;<br>F:GO:0032564;<br>P:GO:0001666;<br>P:GO:0008104;<br>P:GO:0006917;<br>P:GO:0033683;<br>P:GO:0006368;<br>F:GO:0042277;<br>P:GO:0045944;<br>F:GO:0008353;<br>F:GO:0004003;<br>P:GO:0006200;<br>F:GO:0008134;<br>F:GO:0005524; | - | EC:2.7.11.23 | IPR001161; IPR001650; IPR006935;<br>IPR014001; IPR014021;<br>G3DSA:3.40.50.300 (GENE3D),<br>PTHR11274 (PANTHER), SSF52540<br>(SUPERFAMILY) |

|                         |                                                               |    |                                                                                                                                                                                                                                                                                                                                                                                                                                                                         |              |                                                                                                                                            |
|-------------------------|---------------------------------------------------------------|----|-------------------------------------------------------------------------------------------------------------------------------------------------------------------------------------------------------------------------------------------------------------------------------------------------------------------------------------------------------------------------------------------------------------------------------------------------------------------------|--------------|--------------------------------------------------------------------------------------------------------------------------------------------|
| Caenorhabditis elegans  | tfiih basal transcription factor complex helicase xpb subunit | 32 | P:GO:0000718;<br>P:GO:0006468;<br>P:GO:0009650;<br>C:GO:0000441;<br>P:GO:0000075;<br>F:GO:0003684;<br>F:GO:0008022;<br>P:GO:0006283;<br>F:GO:0047485;<br>F:GO:0005525;<br>P:GO:0006265;<br>P:GO:0000717;<br>C:GO:0005675;<br>P:GO:0009792;<br>F:GO:0032564;<br>P:GO:0001666;<br>P:GO:0008104;<br>P:GO:0006917;<br>P:GO:0033683;<br>P:GO:0006368;<br>F:GO:0042277;<br>P:GO:0045944;<br>F:GO:0008353;<br>F:GO:0004003;<br>P:GO:0006200;<br>F:GO:0008134;<br>F:GO:0005524; | EC:2.7.11.23 | IPR001161; IPR001650; IPR006935;<br>IPR014001; IPR014021;<br>G3DSA:3.40.50.300 (GENE3D),<br>PTHR11274 (PANTHER), SSF52540<br>(SUPERFAMILY) |
| Caenorhabditis elegans  | tfiih basal transcription factor complex helicase xpb subunit | 32 | P:GO:0000718;<br>P:GO:0006468;<br>P:GO:0009650;<br>C:GO:0000441;<br>P:GO:0000075;<br>F:GO:0003684;<br>F:GO:0008022;<br>P:GO:0006283;<br>F:GO:0047485;<br>F:GO:0005525;<br>P:GO:0006265;<br>P:GO:0000717;<br>C:GO:0005675;<br>P:GO:0009792;<br>F:GO:0032564;<br>P:GO:0001666;<br>P:GO:0008104;<br>P:GO:0006917;<br>P:GO:0033683;<br>P:GO:0006368;<br>F:GO:0042277;<br>P:GO:0045944;<br>F:GO:0008353;<br>F:GO:0004003;<br>P:GO:0006200;<br>F:GO:0008134;<br>F:GO:0005524; | EC:2.7.11.23 | IPR001161; IPR001650; IPR006935;<br>IPR014001; IPR014021;<br>G3DSA:3.40.50.300 (GENE3D),<br>PTHR11274 (PANTHER), SSF52540<br>(SUPERFAMILY) |
| Caenorhabditis briggsae | briggsae cbr-cpg-4 protein                                    | 0  |                                                                                                                                                                                                                                                                                                                                                                                                                                                                         |              | SignalP (SIGNALP)                                                                                                                          |
| Caenorhabditis briggsae | briggsae cbr-cpg-4 protein                                    | 0  |                                                                                                                                                                                                                                                                                                                                                                                                                                                                         |              | SignalP (SIGNALP)                                                                                                                          |
| -                       | -                                                             | 0  |                                                                                                                                                                                                                                                                                                                                                                                                                                                                         |              | -                                                                                                                                          |

|                         |                                                            |    |                                                                                                                                                                                        |   |                                                |                                                                                                                                                                         |
|-------------------------|------------------------------------------------------------|----|----------------------------------------------------------------------------------------------------------------------------------------------------------------------------------------|---|------------------------------------------------|-------------------------------------------------------------------------------------------------------------------------------------------------------------------------|
| Caenorhabditis briggsae | aurin family member (cnt-2)                                | 5  | C:GO:0005622;<br>P:GO:0000003;<br>F:GO:0005515;<br>P:GO:0050794;<br>P:GO:0009792                                                                                                       | - |                                                | IPR001164; IPR002110; IPR020683;<br>PTHR23180 (PANTHER),<br>PTHR23180:SF21 (PANTHER)                                                                                    |
| Caenorhabditis briggsae | exocyst complex component 7                                | 2  | C:GO:0044444;<br>C:GO:0044446                                                                                                                                                          | - |                                                | IPR004140; IPR016159;<br>PTHR12542:SF7 (PANTHER)                                                                                                                        |
| Caenorhabditis elegans  | apical junction molecule family member (ajm-1)             | 7  | P:GO:0009792;<br>C:GO:0043296;<br>P:GO:0045216;<br>F:GO:0008092;<br>C:GO:0005913;<br>P:GO:0040010;<br>P:GO:0040011                                                                     | - |                                                | PR01217 (PRINTS), PTHR23202<br>(PANTHER), PTHR23202:SF3<br>(PANTHER)                                                                                                    |
| -                       | -                                                          | 0  |                                                                                                                                                                                        |   |                                                | -                                                                                                                                                                       |
| -                       | -                                                          | 0  |                                                                                                                                                                                        |   |                                                | -                                                                                                                                                                       |
| Caenorhabditis elegans  | u3 small nucleolar r--associated protein 15 homolog        | 1  | C:GO:0005737                                                                                                                                                                           | - |                                                | IPR001680; IPR011046; IPR015943;<br>IPR017986; IPR019781; IPR019782;<br>IPR020472; PTHR19924 (PANTHER),<br>PTHR19924:SF2 (PANTHER)                                      |
| Caenorhabditis elegans  | squamous cell carcinoma antigen recognized by t cells      | 10 | C:GO:0015030;<br>P:GO:0040007;<br>P:GO:0006397;<br>P:GO:0040011;<br>C:GO:0005737;<br>P:GO:0018996;<br>P:GO:0008380;<br>P:GO:0002119;<br>P:GO:0045585;<br>P:GO:0040035                  | - |                                                | IPR005011                                                                                                                                                               |
| Caenorhabditis elegans  | vacuolar h                                                 | 11 | P:GO:0016337;<br>F:GO:0008553;<br>F:GO:0046933;<br>C:GO:0000221;<br>P:GO:0008219;<br>P:GO:0015986;<br>C:GO:0005769;<br>F:GO:0005524;<br>P:GO:0015988;<br>F:GO:0046961;<br>C:GO:0005886 | - | EC:3.6.3.6;<br>EC:3.6.3.14                     | IPR000194; IPR000793; IPR004100;<br>IPR005723; IPR020003;<br>G3DSA:3.40.50.300 (GENE3D),<br>PTHR15184 (PANTHER),<br>PTHR15184:SF11 (PANTHER),<br>SSF52540 (SUPERFAMILY) |
| Caenorhabditis briggsae | wd repeat and fyve domain containing 2                     | 3  | P:GO:0006897;<br>F:GO:0008270;<br>F:GO:0005515                                                                                                                                         | - |                                                | -                                                                                                                                                                       |
| -                       | -                                                          | 0  |                                                                                                                                                                                        |   |                                                | -                                                                                                                                                                       |
| Caenorhabditis briggsae | y92h3_caeel ame: full=uncharacterized protein              | 0  |                                                                                                                                                                                        |   | F:GO:0003735;<br>P:GO:0006412;<br>C:GO:0015934 | -                                                                                                                                                                       |
| -                       | -                                                          | 0  |                                                                                                                                                                                        |   |                                                | -                                                                                                                                                                       |
| Caenorhabditis elegans  | elegans protein confirmed by transcript evidence           | 0  |                                                                                                                                                                                        |   | C:GO:0016021                                   | -                                                                                                                                                                       |
| -                       | -                                                          | 0  |                                                                                                                                                                                        |   |                                                | -                                                                                                                                                                       |
| Caenorhabditis elegans  | elegans protein partially confirmed by transcript evidence | 0  |                                                                                                                                                                                        |   |                                                | -                                                                                                                                                                       |
| Caenorhabditis elegans  | elegans protein partially confirmed by transcript evidence | 0  |                                                                                                                                                                                        |   |                                                | IPR004988                                                                                                                                                               |
| Caenorhabditis briggsae | briggsae cbr-ttr-8 protein                                 | 0  |                                                                                                                                                                                        |   |                                                | -                                                                                                                                                                       |
| -                       | -                                                          | 0  |                                                                                                                                                                                        |   |                                                | -                                                                                                                                                                       |
| -                       | -                                                          | 0  |                                                                                                                                                                                        |   |                                                | -                                                                                                                                                                       |
| -                       | -                                                          | 0  |                                                                                                                                                                                        |   |                                                | -                                                                                                                                                                       |



|                         |                                                         |    |                                                                                                                                                                                                                                                                                                                                                                                                                                      |   |                                                                                                                                                                                   |
|-------------------------|---------------------------------------------------------|----|--------------------------------------------------------------------------------------------------------------------------------------------------------------------------------------------------------------------------------------------------------------------------------------------------------------------------------------------------------------------------------------------------------------------------------------|---|-----------------------------------------------------------------------------------------------------------------------------------------------------------------------------------|
| Caenorhabditis briggsae | developmentally regulated gtp binding protein 1         | 12 | C:GO:0016021;<br>P:GO:0040007;<br>P:GO:0015684;<br>P:GO:0040035;<br>F:GO:0015093;<br>C:GO:0045111;<br>P:GO:0002119;<br>F:GO:0005515;<br>P:GO:0009792;<br>C:GO:0005737;<br>C:GO:0005634;<br>F:GO:0005525                                                                                                                                                                                                                              | - | IPR002917; IPR004095; IPR005225;<br>IPR006073; IPR006074; IPR012676;<br>G3DSA:3.40.50.300 (GENE3D),<br>PTHR11702 (PANTHER),<br>PTHR11702:SF8 (PANTHER), SSF52540<br>(SUPERFAMILY) |
| -                       | -                                                       | 0  |                                                                                                                                                                                                                                                                                                                                                                                                                                      |   | -                                                                                                                                                                                 |
| Apis mellifera          | nuclear membrane protein xman1                          | 0  |                                                                                                                                                                                                                                                                                                                                                                                                                                      |   | IPR003887; IPR011015                                                                                                                                                              |
| Caenorhabditis briggsae | Hypothetical protein CBG22717 [Caenorhabditis briggsae] | 0  |                                                                                                                                                                                                                                                                                                                                                                                                                                      |   | -                                                                                                                                                                                 |
| Caenorhabditis elegans  | heterogeneous nuclear ribonucleoprotein                 | 3  | F:GO:0003676;<br>P:GO:0000003;<br>F:GO:0000166                                                                                                                                                                                                                                                                                                                                                                                       | - | IPR000504; IPR012677; PTHR10432<br>(PANTHER), PTHR10432:SF7<br>(PANTHER), SSF54928 (SUPERFAMILY)                                                                                  |
| Caenorhabditis elegans  | briggsae cbr-nhr-17 protein                             | 6  | F:GO:0003700;<br>F:GO:0043565;<br>F:GO:0003707;<br>C:GO:0005634;<br>F:GO:0008270;<br>P:GO:0006355                                                                                                                                                                                                                                                                                                                                    | - | -                                                                                                                                                                                 |
| Ustilago maydis 521     | hypothetical protein UM00480.1 [Ustilago maydis 521]    | 0  |                                                                                                                                                                                                                                                                                                                                                                                                                                      |   | -                                                                                                                                                                                 |
| Ustilago maydis 521     | hypothetical protein UM00480.1 [Ustilago maydis 521]    | 0  |                                                                                                                                                                                                                                                                                                                                                                                                                                      |   | -                                                                                                                                                                                 |
| Caenorhabditis elegans  | probable dolichol-phosphate mannosyltransferase subunit | 3  | P:GO:0040018;<br>P:GO:0000003;<br>C:GO:0016020                                                                                                                                                                                                                                                                                                                                                                                       | - | IPR013174; SignalP (SIGNALP)                                                                                                                                                      |
| -                       | -                                                       | 0  |                                                                                                                                                                                                                                                                                                                                                                                                                                      |   | -                                                                                                                                                                                 |
| Nematostella vectensis  | p63-like transcription factor                           | 25 | P:GO:0006461;<br>P:GO:0006281;<br>P:GO:0009607;<br>P:GO:0006996;<br>C:GO:0043234;<br>C:GO:0043232;<br>P:GO:0008104;<br>P:GO:0051336;<br>P:GO:0051128;<br>C:GO:0016604;<br>P:GO:0045944;<br>P:GO:0040007;<br>P:GO:0010212;<br>P:GO:0030330;<br>P:GO:0007050;<br>P:GO:0008629;<br>F:GO:0003677;<br>P:GO:0030154;<br>P:GO:0065008;<br>P:GO:0008283;<br>P:GO:0007154;<br>F:GO:0046914;<br>F:GO:0019899;<br>C:GO:0044444;<br>P:GO:0048731 | - | IPR008967; IPR011615; IPR012346;<br>IPR015551; PTHR11447:SF9<br>(PANTHER)                                                                                                         |
| -                       | -                                                       | 0  |                                                                                                                                                                                                                                                                                                                                                                                                                                      |   | -                                                                                                                                                                                 |
| -                       | -                                                       | 0  |                                                                                                                                                                                                                                                                                                                                                                                                                                      |   | -                                                                                                                                                                                 |
| -                       | -                                                       | 0  |                                                                                                                                                                                                                                                                                                                                                                                                                                      |   | -                                                                                                                                                                                 |

|                         |                                                       |   |                                                                                                                                                      |                                                |                                                                                                                                                                 |
|-------------------------|-------------------------------------------------------|---|------------------------------------------------------------------------------------------------------------------------------------------------------|------------------------------------------------|-----------------------------------------------------------------------------------------------------------------------------------------------------------------|
| Taeniopygia guttata     | ribosomal protein s9                                  | 8 | C:GO:0005730;<br>F:GO:0045182;<br>P:GO:0008284;<br>F:GO:0003735;<br>F:GO:0005515;<br>C:GO:0022627;<br>F:GO:0019843;<br>P:GO:0006414                  | -                                              | IPR001912; IPR002942; IPR005710;<br>IPR018079; IPR022801;<br>G3DSA:3.10.290.10 (GENE3D),<br>PTHR11831:SF3 (PANTHER), SSF55174<br>(SUPERFAMILY)                  |
| Ancylostoma ceylanicum  | secreted protein asp-2                                | 0 |                                                                                                                                                      | P:GO:0040011;<br>P:GO:0006898;<br>C:GO:0005576 | IPR001283; IPR014044; SignalP<br>(SIGNALP)                                                                                                                      |
| Caenorhabditis elegans  | plexin a                                              | 5 | C:GO:0016021;<br>P:GO:0007165;<br>P:GO:0007275;<br>F:GO:0004872;<br>C:GO:0005622                                                                     | -                                              | PTHR22625 (PANTHER),<br>PTHR22625:SF11 (PANTHER)                                                                                                                |
| Caenorhabditis briggsae | mitochondrial carnitine acylcarnitine carrier protein | 7 | P:GO:0009792;<br>F:GO:0005488;<br>C:GO:0005743;<br>P:GO:00055085;<br>P:GO:0006839;<br>C:GO:0016021;<br>F:GO:0005215                                  | -                                              | -                                                                                                                                                               |
| Caenorhabditis briggsae | briggsae cbr-tag-174 protein                          | 2 | C:GO:0016020;<br>C:GO:0005739                                                                                                                        | -                                              | -                                                                                                                                                               |
| Caenorhabditis elegans  | stromal cell derived factor 4                         | 1 | F:GO:0005515                                                                                                                                         | -                                              | IPR011992; IPR018247; IPR018249;<br>PTHR10827 (PANTHER),<br>PTHR10827:SF13 (PANTHER),<br>SSF47473 (SUPERFAMILY)                                                 |
| Caenorhabditis briggsae | phosphoglucose isomerase                              | 5 | P:GO:0009792;<br>F:GO:0005515;<br>P:GO:0006006;<br>P:GO:0008340;<br>F:GO:0016853                                                                     | -                                              | IPR001672; G3DSA:3.40.50.10490<br>(GENE3D), PS51463 (PROFILE),<br>SSF53697 (SUPERFAMILY)                                                                        |
| Caenorhabditis briggsae | vesicle protein sorting-associated                    | 9 | P:GO:0031101;<br>P:GO:0000003;<br>P:GO:0018996;<br>F:GO:0005515;<br>P:GO:0048193;<br>P:GO:0006898;<br>C:GO:0044431;<br>P:GO:0006904;<br>C:GO:0016020 | -                                              | IPR001619; G3DSA:1.25.40.60<br>(GENE3D), G3DSA:3.40.50.1910<br>(GENE3D), G3DSA:3.40.50.2060<br>(GENE3D), G3DSA:3.90.830.10<br>(GENE3D), PTHR11679:SF2 (PANTHER) |
| -                       | -                                                     | 0 |                                                                                                                                                      |                                                | SignalP (SIGNALP)                                                                                                                                               |
| Macaca mulatta          | ribosomal protein l36                                 | 5 | C:GO:0005730;<br>F:GO:0003735;<br>F:GO:0005515;<br>C:GO:0022625;<br>P:GO:0006414                                                                     | -                                              | -                                                                                                                                                               |
| Homo sapiens            | cytochrome b                                          | 0 |                                                                                                                                                      |                                                | -                                                                                                                                                               |
| -                       | -                                                     | 0 |                                                                                                                                                      |                                                | -                                                                                                                                                               |
| Caenorhabditis briggsae | mgc69286 protein                                      | 0 |                                                                                                                                                      |                                                | PTHR12460 (PANTHER)                                                                                                                                             |
| -                       | -                                                     | 0 |                                                                                                                                                      |                                                | -                                                                                                                                                               |
| -                       | -                                                     | 0 |                                                                                                                                                      |                                                | -                                                                                                                                                               |
| -                       | -                                                     | 0 |                                                                                                                                                      |                                                | -                                                                                                                                                               |
| -                       | -                                                     | 0 |                                                                                                                                                      |                                                | -                                                                                                                                                               |
| Caenorhabditis briggsae | elegans protein confirmed by transcript evidence      | 0 |                                                                                                                                                      |                                                | SignalP (SIGNALP)                                                                                                                                               |
| -                       | -                                                     | 0 |                                                                                                                                                      |                                                | -                                                                                                                                                               |

|                         |                                                            |    |                                                                                                                                                                       |                                                                                                                                     |                                                                                                                                                                  |
|-------------------------|------------------------------------------------------------|----|-----------------------------------------------------------------------------------------------------------------------------------------------------------------------|-------------------------------------------------------------------------------------------------------------------------------------|------------------------------------------------------------------------------------------------------------------------------------------------------------------|
| Macaca mulatta          | PREDICTED: hypothetical protein LOC718269 [Macaca mulatta] | 0  |                                                                                                                                                                       |                                                                                                                                     | SignalP (SIGNALP)                                                                                                                                                |
| Brugia malayi           | pre-b-cell colony-enhancing factor                         | 10 | F:GO:0008144;<br>F:GO:0047280;<br>P:GO:0007049;<br>F:GO:0004514;<br>P:GO:0009435;<br>F:GO:0005125;<br>F:GO:0042803;<br>C:GO:0005737;<br>P:GO:0048661;<br>C:GO:0005634 | -                                                                                                                                   | EC:2.4.2.12;<br>EC:2.4.2.19<br><br>IPR002638; IPR015977;<br>G3DSA:3.20.140.10 (GENE3D),<br>PTHR11098 (PANTHER),<br>PTHR11098:SF2 (PANTHER), SignalP<br>(SIGNALP) |
| Brugia malayi           | nicoti-mide phosphoribosyltransferase-like                 | 9  | F:GO:0008144;<br>F:GO:0047280;<br>P:GO:0007049;<br>P:GO:0009435;<br>F:GO:0005125;<br>F:GO:0042803;<br>C:GO:0005737;<br>P:GO:0048661;<br>C:GO:0005634                  | -                                                                                                                                   | EC:2.4.2.12<br><br>IPR002638; IPR015977; PTHR11098<br>(PANTHER), PTHR11098:SF2<br>(PANTHER)                                                                      |
| Loa loa                 | structural maintenance of chromosomes protein 5            | 1  | P:GO:0007126                                                                                                                                                          | -                                                                                                                                   | PTHR19306 (PANTHER),<br>PTHR19306:SF1 (PANTHER)                                                                                                                  |
| Loa loa                 | structural maintenance of chromosomes protein 5            | 1  | P:GO:0007126                                                                                                                                                          | -                                                                                                                                   | PTHR19306 (PANTHER),<br>PTHR19306:SF1 (PANTHER)                                                                                                                  |
|                         | -                                                          | 0  |                                                                                                                                                                       |                                                                                                                                     | PRO0211 (PRINTS), SignalP (SIGNALP)                                                                                                                              |
| Caenorhabditis elegans  | cytochrome p450 family protein                             | 4  | F:GO:0020037;<br>P:GO:0055114;<br>F:GO:0004497;<br>F:GO:0009055                                                                                                       | -                                                                                                                                   | IPR001128; IPR017972;<br>PTHR19383:SF165 (PANTHER)                                                                                                               |
| Caenorhabditis briggsae | nuclear export factor crm1                                 | 6  | P:GO:0009792;<br>P:GO:0010171;<br>P:GO:0002119;<br>P:GO:0040010;<br>P:GO:0040011;<br>P:GO:0051301                                                                     | -                                                                                                                                   | PTHR11223 (PANTHER)                                                                                                                                              |
| Brugia malayi           | btb poz domain-containing protein 9                        | 5  | P:GO:0045132;<br>P:GO:0009792;<br>P:GO:0040007;<br>F:GO:0042802;<br>P:GO:0002119                                                                                      | -                                                                                                                                   | IPR011705; IPR013089;<br>PTHR23230:SF181 (PANTHER)                                                                                                               |
|                         | -                                                          | 0  |                                                                                                                                                                       |                                                                                                                                     | IPR009057                                                                                                                                                        |
| Caenorhabditis elegans  | phospholipase activating protein                           | 1  | P:GO:0040010                                                                                                                                                          | -                                                                                                                                   | -                                                                                                                                                                |
| Caenorhabditis briggsae | briggsae cbr-lin-66 protein                                | 4  | P:GO:0040017;<br>P:GO:0040035;<br>F:GO:0005515;<br>P:GO:0002119                                                                                                       | -                                                                                                                                   | -                                                                                                                                                                |
| Caenorhabditis elegans  | elegans protein confirmed by transcript evidence           | 1  | F:GO:0005515                                                                                                                                                          | -                                                                                                                                   | IPR017853; PTHR23208 (PANTHER),<br>PTHR23208:SF13 (PANTHER)                                                                                                      |
| Caenorhabditis elegans  | briggsae cbr-ssq-2 protein                                 | 0  |                                                                                                                                                                       | F:GO:0008061;<br>P:GO:0006030;<br>P:GO:0044419;<br>P:GO:0006350;<br>P:GO:0016032;<br>P:GO:0045449;<br>C:GO:0005576;<br>C:GO:0042025 | -                                                                                                                                                                |

|                          |                                                                 |    |                                                                                                                                                                                                                                                                                                                                                                                                                     |   |                                                                                                                                      |
|--------------------------|-----------------------------------------------------------------|----|---------------------------------------------------------------------------------------------------------------------------------------------------------------------------------------------------------------------------------------------------------------------------------------------------------------------------------------------------------------------------------------------------------------------|---|--------------------------------------------------------------------------------------------------------------------------------------|
|                          | -                                                               | 0  |                                                                                                                                                                                                                                                                                                                                                                                                                     |   | -                                                                                                                                    |
| Brugia malayi            | moz sas family protein                                          | 2  | F:GO:0016747;<br>F:GO:0005488                                                                                                                                                                                                                                                                                                                                                                                       | - | EC:2.3.1.0<br>IPR002717; IPR016181;<br>G3DSA:3.30.60.60 (GENE3D),<br>PTHR10615 (PANTHER),<br>PTHR10615:SF28 (PANTHER)                |
| Ciona intestinalis       | matrix metalloprotei-se e                                       | 0  |                                                                                                                                                                                                                                                                                                                                                                                                                     |   | IPR003582; PTHR21724 (PANTHER),<br>SSF57546 (SUPERFAMILY)                                                                            |
|                          | -                                                               | 0  |                                                                                                                                                                                                                                                                                                                                                                                                                     |   | -                                                                                                                                    |
| Loa loa                  | troponin i                                                      | 1  | F:GO:0005515                                                                                                                                                                                                                                                                                                                                                                                                        | - | SignalP (SIGNALP)                                                                                                                    |
| Brugia malayi            | ribonuclease 3 isoform 1                                        | 3  | P:GO:0009987;<br>F:GO:0005488;<br>P:GO:0043170                                                                                                                                                                                                                                                                                                                                                                      | - | -                                                                                                                                    |
| Brugia malayi            | leucine carboxyl methyltransferase                              | 2  | P:GO:0040010;<br>F:GO:0016740                                                                                                                                                                                                                                                                                                                                                                                       | - | IPR007213; IPR016651; IPR021121;<br>SSF53335 (SUPERFAMILY)                                                                           |
|                          | -                                                               | 0  |                                                                                                                                                                                                                                                                                                                                                                                                                     |   | -                                                                                                                                    |
| Caenorhabditis elegans   | oxysterol binding protein related family member (obr-1)         | 2  | P:GO:0009792;<br>P:GO:0006810                                                                                                                                                                                                                                                                                                                                                                                       | - | -                                                                                                                                    |
| Caenorhabditis briggsae  | oxysterol-binding protein                                       | 2  | P:GO:0009792;<br>P:GO:0006810                                                                                                                                                                                                                                                                                                                                                                                       | - | -                                                                                                                                    |
|                          | -                                                               | 0  |                                                                                                                                                                                                                                                                                                                                                                                                                     |   | -                                                                                                                                    |
| Oesophagostomum dentatum | ubiquitin-conjugating enzyme e2d 3 (ubc4 5 yeast) isoform cra_a | 24 | P:GO:0000209;<br>P:GO:0008054;<br>P:GO:0070979;<br>F:GO:0005515;<br>P:GO:0070936;<br>P:GO:0045676;<br>P:GO:0031647;<br>P:GO:0048132;<br>P:GO:0006513;<br>P:GO:0051246;<br>P:GO:0051276;<br>P:GO:0007067;<br>F:GO:0004842;<br>P:GO:0007286;<br>P:GO:0006915;<br>P:GO:0007140;<br>C:GO:0005875;<br>P:GO:0030718;<br>P:GO:0016322;<br>C:GO:0005886;<br>P:GO:0030509;<br>F:GO:0005524;<br>C:GO:0010008;<br>P:GO:0006281 | - | EC:6.3.2.19                                                                                                                          |
| Drosophila yakuba        | cell division cycle like                                        | 6  | P:GO:0007498;<br>F:GO:0005488;<br>P:GO:0008360;<br>P:GO:0007298;<br>P:GO:0007155;<br>P:GO:0006974                                                                                                                                                                                                                                                                                                                   | - | IPR001806; IPR013753;<br>G3DSA:3.40.50.300 (GENE3D),<br>PTHR11708 (PANTHER),<br>PTHR11708:SF286 (PANTHER),<br>SSF52540 (SUPERFAMILY) |
| Drosophila yakuba        | cell division cycle like                                        | 6  | P:GO:0007498;<br>F:GO:0005488;<br>P:GO:0008360;<br>P:GO:0007298;<br>P:GO:0007155;<br>P:GO:0006974                                                                                                                                                                                                                                                                                                                   | - | IPR001806; IPR013753;<br>G3DSA:3.40.50.300 (GENE3D),<br>PTHR11708 (PANTHER),<br>PTHR11708:SF286 (PANTHER),<br>SSF52540 (SUPERFAMILY) |
| Caenorhabditis elegans   | upf0378 protein kiaa0100                                        | 0  |                                                                                                                                                                                                                                                                                                                                                                                                                     |   | IPR019441                                                                                                                            |
|                          | -                                                               | 0  |                                                                                                                                                                                                                                                                                                                                                                                                                     |   | -                                                                                                                                    |

|                           |                                                                |    |                                                                                                                                                                                                                                                                                                                                                                                                                                                                                                                          |  |                                                                                                     |                                                                                                                                 |
|---------------------------|----------------------------------------------------------------|----|--------------------------------------------------------------------------------------------------------------------------------------------------------------------------------------------------------------------------------------------------------------------------------------------------------------------------------------------------------------------------------------------------------------------------------------------------------------------------------------------------------------------------|--|-----------------------------------------------------------------------------------------------------|---------------------------------------------------------------------------------------------------------------------------------|
|                           | -                                                              | 0  |                                                                                                                                                                                                                                                                                                                                                                                                                                                                                                                          |  | -                                                                                                   |                                                                                                                                 |
| Caenorhabditis elegans    | palmitoyl-protein thioesterase 1                               | 36 | C:GO:004257;<br>P:GO:0044257;<br>P:GO:0048666;<br>P:GO:0050803;<br>F:GO:0008474;<br>P:GO:0051181;<br>P:GO:0007269;<br>P:GO:0007625;<br>C:GO:0005624;<br>P:GO:0006309;<br>P:GO:0048167;<br>C:GO:0005615;<br>C:GO:0005764;<br>P:GO:0048549;<br>P:GO:0015031;<br>P:GO:0008306;<br>C:GO:0005794;<br>C:GO:0005829;<br>P:GO:0043524;<br>C:GO:0030425;<br>P:GO:0007042;<br>P:GO:0007420;<br>C:GO:0043025;<br>P:GO:0007601;<br>P:GO:0048260;<br>P:GO:0030308;<br>P:GO:0002084;<br>C:GO:0030424;<br>P:GO:0009792;<br>F:GO:0016491 |  | EC:3.1.2.22;<br>EC:3.1.2.2                                                                          | IPR002472; G3DSA:3.40.50.1820 (GENE3D), PTHR11247 (PANTHER), PTHR11247:SF8 (PANTHER), SignalP (SIGNALP), SSF53474 (SUPERFAMILY) |
| Caenorhabditis elegans    | lethal neo18                                                   | 2  | P:GO:0007163;<br>F:GO:0005488;<br>P:GO:0016337;<br>C:GO:0005886;<br>P:GO:0007411;<br>C:GO:0044425;<br>C:GO:0042995;<br>P:GO:0007413                                                                                                                                                                                                                                                                                                                                                                                      |  | IPR019173; PTHR13178 (PANTHER), SignalP (SIGNALP)                                                   |                                                                                                                                 |
| Caenorhabditis sp. PS1010 | briggsae cbr-cdh-4 protein                                     | 8  | F:GO:0016787                                                                                                                                                                                                                                                                                                                                                                                                                                                                                                             |  | -                                                                                                   |                                                                                                                                 |
| Caenorhabditis elegans    | exosome component 6                                            | 1  | C:GO:0016020;<br>C:GO:0044444;<br>C:GO:0043231                                                                                                                                                                                                                                                                                                                                                                                                                                                                           |  | IPR012936; PTHR10984 (PANTHER), PTHR10984:SF6 (PANTHER)                                             |                                                                                                                                 |
| Caenorhabditis elegans    | endoplasmic reticulum-golgi intermediate compartment protein 3 | 3  | C:GO:0016020;<br>C:GO:0044444;<br>C:GO:0043231                                                                                                                                                                                                                                                                                                                                                                                                                                                                           |  | IPR012936; PTHR10984 (PANTHER), PTHR10984:SF6 (PANTHER)                                             |                                                                                                                                 |
| Caenorhabditis elegans    | endoplasmic reticulum-golgi intermediate compartment protein 3 | 3  | C:GO:0005730;<br>P:GO:0051014;<br>C:GO:0005813;<br>P:GO:0030036;<br>F:GO:0003779;<br>P:GO:0007275;<br>P:GO:0006350;<br>P:GO:0006936                                                                                                                                                                                                                                                                                                                                                                                      |  | IPR001611; PR00019 (PRINTS), G3DSA:3.80.10.10 (GENE3D), PTHR23155 (PANTHER), SSF52058 (SUPERFAMILY) |                                                                                                                                 |
| Brugia malayi             | flightless i homolog                                           | 8  |                                                                                                                                                                                                                                                                                                                                                                                                                                                                                                                          |  |                                                                                                     |                                                                                                                                 |

|                         |                                                       |    |                                                                                                                                                                                                                                                            |                                                                                  |              |                                                                                                                                |
|-------------------------|-------------------------------------------------------|----|------------------------------------------------------------------------------------------------------------------------------------------------------------------------------------------------------------------------------------------------------------|----------------------------------------------------------------------------------|--------------|--------------------------------------------------------------------------------------------------------------------------------|
| Caenorhabditis elegans  | yeats domain containing 4                             | 7  | P:GO:0043967;<br>P:GO:0043968;<br>P:GO:0006355;<br>F:GO:0008022;<br>F:GO:0003677;<br>C:GO:0035267;<br>F:GO:0003700                                                                                                                                         | -                                                                                | -            |                                                                                                                                |
| Caenorhabditis elegans  | mflj00229 protein                                     | 0  |                                                                                                                                                                                                                                                            | F:GO:0005524                                                                     |              | IPR012860                                                                                                                      |
| Caenorhabditis elegans  | mflj00229 protein                                     | 0  |                                                                                                                                                                                                                                                            | F:GO:0005524                                                                     |              | IPR012860                                                                                                                      |
| Caenorhabditis elegans  | mflj00229 protein                                     | 0  |                                                                                                                                                                                                                                                            | F:GO:0005524                                                                     |              | IPR012860                                                                                                                      |
| Caenorhabditis briggsae | b-box zinc finger family protein                      | 3  | F:GO:0008270;<br>C:GO:0005622;<br>F:GO:0005515                                                                                                                                                                                                             | -                                                                                |              | SignalP (SIGNALP)                                                                                                              |
| Caenorhabditis briggsae | b-box type zinc-finger protein ncl-1                  | 5  | C:GO:0005622;<br>P:GO:0007126;<br>F:GO:0005515;<br>P:GO:0007281;<br>F:GO:0008270                                                                                                                                                                           | -                                                                                |              | SignalP (SIGNALP)                                                                                                              |
| Caenorhabditis briggsae | ecdysone-induced protein isoform h                    | 10 | P:GO:0001700;<br>P:GO:0006468;<br>P:GO:0007552;<br>P:GO:0048589;<br>F:GO:0020037;<br>F:GO:0005524;<br>P:GO:0002168;<br>F:GO:0004693;<br>F:GO:0030332;<br>P:GO:0002009                                                                                      | -                                                                                | EC:2.7.11.22 | IPR000719; IPR008271; IPR011009;<br>IPR017442; G3DSA:1.10.510.10<br>(GENE3D), PTHR11295 (PANTHER),<br>PTHR11295:SF95 (PANTHER) |
|                         | -                                                     | 0  |                                                                                                                                                                                                                                                            |                                                                                  |              | -                                                                                                                              |
|                         | -                                                     | 0  |                                                                                                                                                                                                                                                            |                                                                                  |              | IPR001841; IPR013083; PTHR12183<br>(PANTHER), SSF57850 (SUPERFAMILY)                                                           |
| Caenorhabditis elegans  | hypothetical protein F10D7.5 [Caenorhabditis elegans] | 0  |                                                                                                                                                                                                                                                            | P:GO:0000003;<br>F:GO:0008270;<br>P:GO:0009792                                   |              | IPR001841; IPR013083; PTHR12183<br>(PANTHER), SSF57850 (SUPERFAMILY)                                                           |
| Brugia malayi           | tho complex subunit 6 homolog                         | 0  |                                                                                                                                                                                                                                                            | F:GO:0003723;<br>P:GO:0051028;<br>P:GO:0008380;<br>P:GO:0006397;<br>P:GO:0006810 |              | IPR015943                                                                                                                      |
| Caenorhabditis elegans  | sy-ptobrevin homolog ykt6                             | 15 | P:GO:0042147;<br>F:GO:0019706;<br>P:GO:0006903;<br>F:GO:0005484;<br>C:GO:0005768;<br>C:GO:0031410;<br>C:GO:0044446;<br>C:GO:0031090;<br>P:GO:0006888;<br>C:GO:0012505;<br>C:GO:0031201;<br>P:GO:0006904;<br>C:GO:0005783;<br>C:GO:0005794;<br>C:GO:0005887 | -                                                                                |              | IPR001388; IPR010908; IPR011012;<br>G3DSA:1.20.5.110 (GENE3D),<br>PTHR21136 (PANTHER),<br>PTHR21136:SF5 (PANTHER)              |
| Caenorhabditis elegans  | mannosyl-oligosaccharide -alpha-mannosidase ib        | 3  | C:GO:0016020;<br>F:GO:0004571;<br>F:GO:0005509                                                                                                                                                                                                             | -                                                                                | EC:3.2.1.113 | IPR001382; PTHR11742:SF10<br>(PANTHER), SignalP (SIGNALP)                                                                      |

|                         |                                                            |    |                                                                                                                                                                                                                                                                                                                                                                                                                                                                                          |   |              |                                                                          |
|-------------------------|------------------------------------------------------------|----|------------------------------------------------------------------------------------------------------------------------------------------------------------------------------------------------------------------------------------------------------------------------------------------------------------------------------------------------------------------------------------------------------------------------------------------------------------------------------------------|---|--------------|--------------------------------------------------------------------------|
| Caenorhabditis elegans  | mannosyl-oligosaccharide -alpha-mannosidase ib             | 3  | C:GO:0016020;<br>F:GO:0004571;<br>F:GO:0005509                                                                                                                                                                                                                                                                                                                                                                                                                                           | - | EC:3.2.1.113 | IPR001382; PTHR11742:SF10<br>(PANTHER), SignalP (SIGNALP)                |
| Caenorhabditis elegans  | tfiih basal transcription factor complex helicase subunit  | 43 | P:GO:0043249;<br>P:GO:0001701;<br>F:GO:0047485;<br>F:GO:0008022;<br>F:GO:0004003;<br>P:GO:0030282;<br>P:GO:0043588;<br>P:GO:0021510;<br>N:GO:0071817;<br>F:GO:0008353;<br>P:GO:0006283;<br>P:GO:0048820;<br>P:GO:0007059;<br>F:GO:0046872;<br>P:GO:0009791;<br>P:GO:0035264;<br>P:GO:0006368;<br>C:GO:0005675;<br>P:GO:0009650;<br>P:GO:0000718;<br>P:GO:0040016;<br>P:GO:0006979;<br>P:GO:0045944;<br>P:GO:0007568;<br>C:GO:0005737;<br>C:GO:0019907;<br>P:GO:0043066;<br>P:GO:0008340; | - | EC:2.7.11.23 | IPR001945; IPR006555; PTHR11472<br>(PANTHER), PTHR11472:SF1<br>(PANTHER) |
| Brugia malayi           | down-regulated by cttnb1 protein                           | 4  | P:GO:0040035;<br>P:GO:0040039;<br>P:GO:0002119                                                                                                                                                                                                                                                                                                                                                                                                                                           | - |              | IPR018619                                                                |
| Caenorhabditis elegans  | elegans protein partially confirmed by transcript evidence | 0  |                                                                                                                                                                                                                                                                                                                                                                                                                                                                                          |   |              | IPR001680; IPR017986; IPR019782                                          |
| Caenorhabditis elegans  | elegans protein partially confirmed by transcript evidence | 0  |                                                                                                                                                                                                                                                                                                                                                                                                                                                                                          |   |              | IPR001680; IPR017986; IPR019782                                          |
| Brugia malayi           | wd repeat-containing protein 48                            | 3  | P:GO:0016579;<br>F:GO:0005515;<br>C:GO:0005634                                                                                                                                                                                                                                                                                                                                                                                                                                           | - |              | -                                                                        |
| Caenorhabditis elegans  | elegans protein partially confirmed by transcript evidence | 0  |                                                                                                                                                                                                                                                                                                                                                                                                                                                                                          |   |              | -                                                                        |
| Caenorhabditis elegans  | kinesin k39                                                | 8  | F:GO:0005515;<br>F:GO:0017111;<br>C:GO:0044430;<br>P:GO:0048513;<br>P:GO:0051179;<br>P:GO:0016043;<br>P:GO:0007399;<br>P:GO:0009987                                                                                                                                                                                                                                                                                                                                                      | - | EC:3.6.1.15  | IPR009053; PD968187 (PRODOM)                                             |
| Ascaris suum            | spliced leader 175 kda protein                             | 3  | P:GO:0000003;<br>P:GO:0007275;<br>P:GO:0040007                                                                                                                                                                                                                                                                                                                                                                                                                                           | - |              | -                                                                        |
| Caenorhabditis briggsae | briggsae cbr-s--2 protein                                  | 3  | P:GO:0040010;<br>P:GO:0040035;<br>P:GO:0002119                                                                                                                                                                                                                                                                                                                                                                                                                                           | - |              | -                                                                        |
| Caenorhabditis elegans  | elegans protein confirmed by transcript evidence           | 4  | P:GO:0009792;<br>P:GO:0040007;<br>P:GO:0040035;<br>P:GO:0002119                                                                                                                                                                                                                                                                                                                                                                                                                          | - |              | SignalP (SIGNALP)                                                        |

|                         |                                       |    |                                                                                                                                                                                                                                                                                                                                                                                   |                                                                                  |                                                                                                                                                 |
|-------------------------|---------------------------------------|----|-----------------------------------------------------------------------------------------------------------------------------------------------------------------------------------------------------------------------------------------------------------------------------------------------------------------------------------------------------------------------------------|----------------------------------------------------------------------------------|-------------------------------------------------------------------------------------------------------------------------------------------------|
| Caenorhabditis briggsae | isoform cra_a                         | 6  | C:GO:0005829;<br>F:GO:0003723;<br>C:GO:0030529;<br>C:GO:0005634;<br>F:GO:0003677;<br>P:GO:0016071                                                                                                                                                                                                                                                                                 | -                                                                                | IPR004087; IPR004088; IPR018111;<br>G3DSA:3.30.1370.10 (GENE3D),<br>PTHR10288 (PANTHER),<br>PTHR10288:SF48 (PANTHER),<br>SSF54791 (SUPERFAMILY) |
| Caenorhabditis briggsae | m-rdgb2 reti-l degeneration protein b | 3  | C:GO:0005622;<br>P:GO:0006810;<br>F:GO:0046872                                                                                                                                                                                                                                                                                                                                    | -                                                                                | IPR001666; IPR013209;<br>G3DSA:3.40.50.1000 (GENE3D),<br>PTHR10658:SF6 (PANTHER), SSF56784<br>(SUPERFAMILY)                                     |
| Caenorhabditis elegans  | nuclear pore complex protein nup205   | 0  |                                                                                                                                                                                                                                                                                                                                                                                   |                                                                                  | IPR021827                                                                                                                                       |
| Loa loa                 | zinc finger protein 291               | 0  |                                                                                                                                                                                                                                                                                                                                                                                   | F:GO:0046872;<br>C:GO:0005783;<br>F:GO:0008270;<br>C:GO:0005634;<br>C:GO:0005622 | -                                                                                                                                               |
| Caenorhabditis elegans  | probable protein brick1               | 6  | C:GO:0005856;<br>C:GO:0005737;<br>P:GO:0008340;<br>P:GO:0040010;<br>F:GO:0005515;<br>P:GO:0002119                                                                                                                                                                                                                                                                                 | -                                                                                | -                                                                                                                                               |
| Caenorhabditis elegans  | chromosome 3 open reading frame 10    | 3  | P:GO:0008340;<br>P:GO:0040010;<br>P:GO:0002119                                                                                                                                                                                                                                                                                                                                    | -                                                                                | -                                                                                                                                               |
| Caenorhabditis elegans  | mak16 protein                         | 4  | P:GO:0040035;<br>C:GO:0005730;<br>P:GO:0002119;<br>P:GO:0040010                                                                                                                                                                                                                                                                                                                   | -                                                                                | SignalIP (SIGNALP)                                                                                                                              |
|                         | -                                     | 0  |                                                                                                                                                                                                                                                                                                                                                                                   |                                                                                  | -                                                                                                                                               |
| Mus musculus            | ribosomal protein s6                  | 22 | P:GO:0006924;<br>P:GO:0007369;<br>F:GO:0005515;<br>C:GO:0005844;<br>P:GO:0000028;<br>P:GO:0048821;<br>P:GO:0006414;<br>P:GO:0031929;<br>P:GO:0001890;<br>C:GO:0005730;<br>P:GO:0002309;<br>P:GO:0022605;<br>P:GO:0007067;<br>P:GO:0033077;<br>F:GO:0003735;<br>P:GO:0031575;<br>C:GO:0048471;<br>P:GO:0006364;<br>P:GO:0043066;<br>P:GO:0042593;<br>P:GO:0043065;<br>C:GO:0022627 | -                                                                                | IPR001377; IPR014401; IPR018282                                                                                                                 |
| Loa loa                 | tho complex 3                         | 0  |                                                                                                                                                                                                                                                                                                                                                                                   | F:GO:0003674;<br>F:GO:0008415;<br>F:GO:0016740;<br>F:GO:0004402;<br>C:GO:0005575 | IPR001680; IPR011046; IPR015943;<br>IPR017986; IPR019775; IPR019781;<br>IPR019782; PTHR22839 (PANTHER)                                          |



|                         |                                                  |    |                                                                                                                                                                                                                                                                             |              |                                                                                                                                                                                       |
|-------------------------|--------------------------------------------------|----|-----------------------------------------------------------------------------------------------------------------------------------------------------------------------------------------------------------------------------------------------------------------------------|--------------|---------------------------------------------------------------------------------------------------------------------------------------------------------------------------------------|
| Caenorhabditis briggsae | reticulon 4 interacting protein 1                | 3  | P:GO:0055114;<br>F:GO:0016491;<br>F:GO:0008270                                                                                                                                                                                                                              | -            | IPR002085; IPR016040;<br>PTHR11695:SF34 (PANTHER),<br>SSF51735 (SUPERFAMILY)                                                                                                          |
| Caenorhabditis elegans  | 26s protease regulatory subunit 6a               | 16 | P:GO:0006310;<br>P:GO:0008340;<br>P:GO:0006281;<br>F:GO:0004175;<br>C:GO:0008540;<br>P:GO:0000003;<br>P:GO:0006508;<br>F:GO:0005524;<br>P:GO:0002119;<br>F:GO:0016887;<br>F:GO:0005515;<br>P:GO:0001824;<br>F:GO:0009378;<br>P:GO:0030163;<br>C:GO:0005737;<br>C:GO:0005634 | -            | IPR003593; IPR003959; IPR003960;<br>IPR005937; G3DSA:1.10.8.60<br>(GENE3D), G3DSA:3.40.50.300<br>(GENE3D), PTHR23073 (PANTHER),<br>PTHR23073:SF7 (PANTHER), SSF52540<br>(SUPERFAMILY) |
| Caenorhabditis elegans  | 26s protease regulatory subunit 6a               | 16 | P:GO:0006310;<br>P:GO:0008340;<br>P:GO:0006281;<br>F:GO:0004175;<br>C:GO:0008540;<br>P:GO:0000003;<br>P:GO:0006508;<br>F:GO:0005524;<br>P:GO:0002119;<br>F:GO:0016887;<br>F:GO:0005515;<br>P:GO:0001824;<br>F:GO:0009378;<br>P:GO:0030163;<br>C:GO:0005737;<br>C:GO:0005634 | -            | IPR003593; IPR003959; IPR003960;<br>IPR005937; G3DSA:1.10.8.60<br>(GENE3D), G3DSA:3.40.50.300<br>(GENE3D), PTHR23073 (PANTHER),<br>PTHR23073:SF7 (PANTHER), SSF52540<br>(SUPERFAMILY) |
| Caenorhabditis elegans  | protein ki-se domain containing protein          | 7  | P:GO:0002119;<br>P:GO:0040022;<br>F:GO:0004672;<br>P:GO:0040011;<br>P:GO:0040007;<br>P:GO:0051729;<br>F:GO:0000166                                                                                                                                                          | -            | IPR000719; IPR008271; IPR011009;<br>IPR017441; IPR017442;<br>G3DSA:1.10.510.10 (GENE3D),<br>G3DSA:3.30.200.20 (GENE3D),<br>PTHR11909 (PANTHER),<br>PTHR11909:SF19 (PANTHER)           |
| Caenorhabditis briggsae | briggsae cbr-fl--1 protein                       | 0  |                                                                                                                                                                                                                                                                             | P:GO:0009612 | IPR001298; IPR013783; IPR014756;<br>IPR017868; PTHR11915 (PANTHER),<br>PTHR11915:SF55 (PANTHER)                                                                                       |
| -                       | -                                                | 0  |                                                                                                                                                                                                                                                                             |              | -                                                                                                                                                                                     |
| Caenorhabditis elegans  | elegans protein confirmed by transcript evidence | 6  | P:GO:0002009;<br>P:GO:0018996;<br>P:GO:0008340;<br>P:GO:0000003;<br>P:GO:0040010;<br>P:GO:0002119                                                                                                                                                                           | -            | IPR000276; SignalP (SIGNALP)                                                                                                                                                          |
| Caenorhabditis briggsae | cg7289 cg7289-pa                                 | 0  |                                                                                                                                                                                                                                                                             |              |                                                                                                                                                                                       |
| Caenorhabditis elegans  | chiti-se 7                                       | 1  | F:GO:0003824                                                                                                                                                                                                                                                                | -            | IPR001223; IPR011583; IPR013781;<br>IPR017853; PTHR11177 (PANTHER),<br>PTHR11177:SF5 (PANTHER), SignalP<br>(SIGNALP)                                                                  |

|                         |                                                         |    |                                                                                                                                                                                                                                                                                                                                |                                                                                                                                     |             |                                                                                                             |
|-------------------------|---------------------------------------------------------|----|--------------------------------------------------------------------------------------------------------------------------------------------------------------------------------------------------------------------------------------------------------------------------------------------------------------------------------|-------------------------------------------------------------------------------------------------------------------------------------|-------------|-------------------------------------------------------------------------------------------------------------|
| Caenorhabditis elegans  | chiti-se 7                                              | 1  | F:GO:0003824                                                                                                                                                                                                                                                                                                                   | -                                                                                                                                   |             | IPR001223; IPR011583; IPR013781; IPR017853; PTHR11177 (PANTHER), PTHR11177:SF5 (PANTHER), SignalP (SIGNALP) |
| Caenorhabditis elegans  | chiti-se 7                                              | 1  | F:GO:0003824                                                                                                                                                                                                                                                                                                                   | -                                                                                                                                   |             | IPR001223; IPR011583; IPR013781; IPR017853; PTHR11177 (PANTHER), PTHR11177:SF5 (PANTHER), SignalP (SIGNALP) |
| Caenorhabditis briggsae | Hypothetical protein CBG17874 [Caenorhabditis briggsae] | 0  |                                                                                                                                                                                                                                                                                                                                |                                                                                                                                     |             | -                                                                                                           |
| Caenorhabditis briggsae | briggsae cbr-nsy-4 protein                              | 2  | P:GO:0009792;<br>C:GO:0016021                                                                                                                                                                                                                                                                                                  | -                                                                                                                                   |             | IPR010761; SignalP (SIGNALP)                                                                                |
| Caenorhabditis elegans  | elegans protein confirmed by transcript evidence        | 0  |                                                                                                                                                                                                                                                                                                                                | P:GO:0045449;<br>F:GO:0003677                                                                                                       |             | IPR018586                                                                                                   |
| Taeniopygia guttata     | dek oncogene (d- binding)                               | 0  |                                                                                                                                                                                                                                                                                                                                | F:GO:0003676;<br>F:GO:0042393;<br>F:GO:0003674;<br>P:GO:0008150;<br>P:GO:0051789;<br>C:GO:0005634;<br>F:GO:0003677;<br>C:GO:0005575 |             | IPR014876; SSF109715 (SUPERFAMILY)                                                                          |
| Caenorhabditis elegans  | helix loop helix family member (hlh-30)                 | 0  |                                                                                                                                                                                                                                                                                                                                | P:GO:0000003;<br>P:GO:0045449;<br>F:GO:0030528;<br>P:GO:0019915;<br>C:GO:0005634                                                    |             | -                                                                                                           |
| Caenorhabditis elegans  | helix loop helix family member (hlh-30)                 | 0  |                                                                                                                                                                                                                                                                                                                                | P:GO:0000003;<br>P:GO:0045449;<br>P:GO:0019915;<br>C:GO:0005634                                                                     |             | -                                                                                                           |
| Caenorhabditis briggsae | lon protease mitochondrial precursor                    | 19 | P:GO:0034619;<br>F:GO:0004252;<br>F:GO:0004176;<br>F:GO:0070361;<br>F:GO:0070363;<br>F:GO:0070362;<br>P:GO:0070407;<br>F:GO:0003697;<br>C:GO:0042645;<br>F:GO:0003727;<br>C:GO:0005777;<br>P:GO:0006515;<br>F:GO:0070364;<br>P:GO:0001666;<br>P:GO:0007005;<br>P:GO:0051260;<br>P:GO:0006200;<br>F:GO:0005524;<br>P:GO:0034599 | -                                                                                                                                   | EC:3.4.21.0 | IPR003111; IPR003959; G3DSA:3.40.50.300 (GENE3D), PTHR10046 (PANTHER), SSF52540 (SUPERFAMILY)               |

|                         |                             |    |                                                                                                                                                                                                                                           |                                                                                                                                                                                                                                                            |             |                                                                                                        |
|-------------------------|-----------------------------|----|-------------------------------------------------------------------------------------------------------------------------------------------------------------------------------------------------------------------------------------------|------------------------------------------------------------------------------------------------------------------------------------------------------------------------------------------------------------------------------------------------------------|-------------|--------------------------------------------------------------------------------------------------------|
| Caenorhabditis briggsae | atp-dependent ion           | 14 | P:GO:0001666;<br>F:GO:0003727;<br>P:GO:0051260;<br>C:GO:0042645;<br>F:GO:0004176;<br>P:GO:0034599;<br>F:GO:0005524;<br>P:GO:0007005;<br>P:GO:0070407;<br>F:GO:0003697;<br>F:GO:0004252;<br>F:GO:0070361;<br>P:GO:0006515;<br>P:GO:0034619 | -                                                                                                                                                                                                                                                          | EC:3.4.21.0 | IPR003111; IPR003959;<br>G3DSA:3.40.50.300 (GENE3D),<br>PTHR10046 (PANTHER), SSF52540<br>(SUPERFAMILY) |
| Caenorhabditis elegans  | briggsae cbr-cogc-5 protein | 0  |                                                                                                                                                                                                                                           | F:GO:0050662;<br>P:GO:0006414;<br>F:GO:0000166;<br>F:GO:0005525;<br>C:GO:0019867;<br>P:GO:0009792;<br>F:GO:0016491;<br>F:GO:0003824;<br>F:GO:0003746;<br>C:GO:0005622;<br>P:GO:0040039;<br>F:GO:0004308;<br>P:GO:0009405;<br>P:GO:0008152;<br>F:GO:0003924 |             | IPR012677; IPR019825; PTHR14127<br>(PANTHER), SSF54928 (SUPERFAMILY)                                   |
| Caenorhabditis elegans  | briggsae cbr-cogc-5 protein | 0  |                                                                                                                                                                                                                                           | F:GO:0050662;<br>P:GO:0006414;<br>F:GO:0000166;<br>F:GO:0005525;<br>C:GO:0019867;<br>P:GO:0009792;<br>F:GO:0016491;<br>F:GO:0003824;<br>F:GO:0003746;<br>C:GO:0005622;<br>P:GO:0040039;<br>F:GO:0004308;<br>P:GO:0009405;<br>P:GO:0008152;<br>F:GO:0003924 |             | IPR012677; IPR019825; PTHR14127<br>(PANTHER), SSF54928 (SUPERFAMILY)                                   |
|                         |                             | 0  |                                                                                                                                                                                                                                           |                                                                                                                                                                                                                                                            |             |                                                                                                        |

|                             |                                                  |    |                                                                                                                                                                                                                                           |   |                                                                                                                                                                                                                                       |
|-----------------------------|--------------------------------------------------|----|-------------------------------------------------------------------------------------------------------------------------------------------------------------------------------------------------------------------------------------------|---|---------------------------------------------------------------------------------------------------------------------------------------------------------------------------------------------------------------------------------------|
| Brugia malayi               | metastasis associated isoform cra_c              | 14 | P:GO:0008340;<br>P:GO:0018991;<br>P:GO:0040027;<br>P:GO:0040010;<br>P:GO:0006898;<br>P:GO:0040011;<br>C:GO:0005737;<br>C:GO:0005730;<br>F:GO:0003676;<br>P:GO:0009792;<br>P:GO:0002009;<br>P:GO:0007165;<br>P:GO:0010171;<br>P:GO:0040035 | - | IPR000679; IPR000949; IPR001005;<br>IPR001025; IPR009057; IPR017884;<br>PTHR10865 (PANTHER),<br>PTHR10865:SF3 (PANTHER)                                                                                                               |
| Brugia malayi               | metastasis associated isoform cra_c              | 14 | P:GO:0008340;<br>P:GO:0018991;<br>P:GO:0040027;<br>P:GO:0040010;<br>P:GO:0006898;<br>P:GO:0040011;<br>C:GO:0005737;<br>C:GO:0005730;<br>F:GO:0003676;<br>P:GO:0009792;<br>P:GO:0002009;<br>P:GO:0007165;<br>P:GO:0010171;<br>P:GO:0040035 | - | IPR000679; IPR000949; IPR001005;<br>IPR001025; IPR009057; IPR017884;<br>PTHR10865 (PANTHER),<br>PTHR10865:SF3 (PANTHER)                                                                                                               |
| Brugia malayi               | metastasis associated isoform cra_c              | 14 | P:GO:0008340;<br>P:GO:0018991;<br>P:GO:0040027;<br>P:GO:0040010;<br>P:GO:0006898;<br>P:GO:0040011;<br>C:GO:0005737;<br>C:GO:0005730;<br>F:GO:0003676;<br>P:GO:0009792;<br>P:GO:0002009;<br>P:GO:0007165;<br>P:GO:0010171;<br>P:GO:0040035 | - | IPR000679; IPR000949; IPR001005;<br>IPR001025; IPR009057; IPR017884;<br>PTHR10865 (PANTHER),<br>PTHR10865:SF3 (PANTHER)                                                                                                               |
| -                           | -                                                | 0  | -                                                                                                                                                                                                                                         | - | -                                                                                                                                                                                                                                     |
| Angiostrongylus cantonensis | elegans protein confirmed by transcript evidence | 1  | P:GO:0009792                                                                                                                                                                                                                              | - | IPR002486; IPR008160; PTHR10499<br>(PANTHER), PTHR10499:SF58<br>(PANTHER)                                                                                                                                                             |
| Angiostrongylus cantonensis | elegans protein confirmed by transcript evidence | 1  | F:GO:0042302                                                                                                                                                                                                                              | - | IPR002486; IPR008160; PTHR10499<br>(PANTHER)                                                                                                                                                                                          |
| Angiostrongylus cantonensis | elegans protein confirmed by transcript evidence | 1  | P:GO:0009792                                                                                                                                                                                                                              | - | IPR002486; IPR008160; PTHR10499<br>(PANTHER)                                                                                                                                                                                          |
| Caenorhabditis briggsae     | elegans protein confirmed by transcript evidence | 0  | -                                                                                                                                                                                                                                         | - | SignalP (SIGNALP)                                                                                                                                                                                                                     |
| Caenorhabditis briggsae     | gtp-binding protein guf1 homolog                 | 3  | F:GO:0005525;<br>C:GO:0005739;<br>F:GO:0003924                                                                                                                                                                                            | - | EC:3.6.5.1;<br>EC:3.6.5.2;<br>EC:3.6.5.3;<br>EC:3.6.5.4<br>IPR000640; IPR004161; IPR009000;<br>IPR009022; IPR013842;<br>G3DSA:2.40.30.10 (GENE3D),<br>G3DSA:3.30.70.870 (GENE3D),<br>PTHR23115 (PANTHER),<br>PTHR23115:SF40 (PANTHER) |

|                               |                                                        |   |                                                                 |                                                                                                                                     |                                                                                                |
|-------------------------------|--------------------------------------------------------|---|-----------------------------------------------------------------|-------------------------------------------------------------------------------------------------------------------------------------|------------------------------------------------------------------------------------------------|
| Caenorhabditis elegans        | phd finger protein 10                                  | 0 |                                                                 | F:GO:0046872;<br>P:GO:0007399;<br>P:GO:0006350;<br>P:GO:0045449;<br>F:GO:0008270;<br>F:GO:0005515;<br>C:GO:0005634                  | IPR001965; IPR011011; IPR013083;<br>IPR019787; PTHR10615 (PANTHER),<br>PTHR10615:SF8 (PANTHER) |
| Caenorhabditis elegans        | hypothetical protein D1007.15 [Caenorhabditis elegans] | 0 |                                                                 |                                                                                                                                     | -                                                                                              |
|                               | -                                                      | 0 |                                                                 |                                                                                                                                     | -                                                                                              |
|                               | -                                                      | 0 |                                                                 |                                                                                                                                     | -                                                                                              |
| Caenorhabditis briggsae       | r- family protein                                      | 0 |                                                                 | F:GO:0003723;<br>F:GO:0008168;<br>P:GO:0045454;<br>F:GO:0005488;<br>F:GO:0016740;<br>P:GO:0006396;<br>F:GO:0008173;<br>F:GO:0016853 | -                                                                                              |
| Caenorhabditis elegans        | neuro-I igcam family member (rig-1)                    | 2 | P:GO:0009792;<br>P:GO:0000003                                   | -                                                                                                                                   | -                                                                                              |
| Caenorhabditis elegans        | elegans protein confirmed by transcript evidence       | 3 | C:GO:0016021;<br>F:GO:0005272;<br>P:GO:0006814                  | -                                                                                                                                   | -                                                                                              |
| Strongylocentrotus purpuratus | ensangp00000010363                                     | 0 |                                                                 |                                                                                                                                     | PTHR22930 (PANTHER)                                                                            |
| Caenorhabditis briggsae       | vacuolar atp synthase 21 kda proteolipid subunit       | 4 | F:GO:0015078;<br>P:GO:0048066;<br>P:GO:0015986;<br>C:GO:0033179 | -                                                                                                                                   | SignalP (SIGNALP)                                                                              |
|                               | -                                                      | 0 |                                                                 |                                                                                                                                     | SignalP (SIGNALP)                                                                              |
| Caenorhabditis elegans        | endonuclease-reverse transcriptase                     | 0 |                                                                 | F:GO:0003723;<br>P:GO:0006278;<br>F:GO:0004519;<br>F:GO:0003964                                                                     | IPR000477; IPR015706;<br>PTHR19446:SF100 (PANTHER),<br>SSF56672 (SUPERFAMILY)                  |
| Caenorhabditis elegans        | endonuclease-reverse transcriptase                     | 0 |                                                                 | F:GO:0003723;<br>P:GO:0006278;<br>F:GO:0004519;<br>F:GO:0003964                                                                     | IPR000477; IPR015706;<br>PTHR19446:SF100 (PANTHER),<br>SSF56672 (SUPERFAMILY)                  |
| Caenorhabditis elegans        | endonuclease-reverse transcriptase                     | 1 | F:GO:0003824                                                    | -                                                                                                                                   | IPR000477; IPR015706;<br>PTHR19446:SF100 (PANTHER),<br>SSF56672 (SUPERFAMILY)                  |
| Caenorhabditis elegans        | endonuclease-reverse transcriptase                     | 0 |                                                                 | F:GO:0003723;<br>P:GO:0006278;<br>F:GO:0004519;<br>F:GO:0003964                                                                     | IPR000477; IPR015706;<br>PTHR19446:SF100 (PANTHER),<br>SSF56672 (SUPERFAMILY)                  |
| Caenorhabditis elegans        | endonuclease-reverse transcriptase                     | 0 |                                                                 | F:GO:0003723;<br>P:GO:0006278;<br>F:GO:0004519;<br>F:GO:0003964                                                                     | IPR000477; IPR015706;<br>PTHR19446:SF100 (PANTHER),<br>SSF56672 (SUPERFAMILY)                  |
| Caenorhabditis elegans        | endonuclease-reverse transcriptase                     | 1 | F:GO:0003824                                                    | -                                                                                                                                   |                                                                                                |
| Caenorhabditis elegans        | endonuclease-reverse transcriptase                     | 0 |                                                                 | F:GO:0003723;<br>P:GO:0006278;<br>F:GO:0004519;<br>F:GO:0003964                                                                     | IPR000477; IPR015706;<br>PTHR19446:SF100 (PANTHER),<br>SSF56672 (SUPERFAMILY)                  |
|                               | -                                                      | 0 |                                                                 |                                                                                                                                     | SignalP (SIGNALP)                                                                              |

|                         |                                                            |    |                                                                                                                                                                                                                          |                                                                 |             |                                                                                                                          |
|-------------------------|------------------------------------------------------------|----|--------------------------------------------------------------------------------------------------------------------------------------------------------------------------------------------------------------------------|-----------------------------------------------------------------|-------------|--------------------------------------------------------------------------------------------------------------------------|
| Caenorhabditis elegans  | endonuclease-reverse transcriptase                         | 0  |                                                                                                                                                                                                                          | F:GO:0003723;<br>P:GO:0006278;<br>F:GO:0004519;<br>F:GO:0003964 |             | IPR000477; IPR015706;<br>PTHR19446:SF100 (PANTHER),<br>SSF56672 (SUPERFAMILY)                                            |
| Caenorhabditis elegans  | skeletal muscle cells re-entry induced                     | 2  | P:GO:0018991;<br>P:GO:0040011                                                                                                                                                                                            | -                                                               |             | -                                                                                                                        |
| Caenorhabditis elegans  | skeletal muscle cells re-entry induced                     | 2  | P:GO:0018991;<br>P:GO:0040011                                                                                                                                                                                            | -                                                               |             | -                                                                                                                        |
| Caenorhabditis elegans  | skeletal muscle cells re-entry induced                     | 2  | P:GO:0018991;<br>P:GO:0040011                                                                                                                                                                                            | -                                                               |             | -                                                                                                                        |
| Caenorhabditis elegans  | briggsae cbr-osm-11 protein                                | 0  |                                                                                                                                                                                                                          |                                                                 |             | -                                                                                                                        |
|                         |                                                            | 0  |                                                                                                                                                                                                                          |                                                                 |             |                                                                                                                          |
| Caenorhabditis elegans  | amop domain containing protein                             | 1  | P:GO:0007160                                                                                                                                                                                                             | -                                                               |             | IPR005533; PTHR13802 (PANTHER),<br>PTHR13802:SF2 (PANTHER)                                                               |
| Caenorhabditis elegans  | elegans protein partially confirmed by transcript evidence | 2  | C:GO:0016021;<br>P:GO:0007160                                                                                                                                                                                            | -                                                               |             | IPR005533; PTHR13802 (PANTHER),<br>PTHR13802:SF2 (PANTHER)                                                               |
| Caenorhabditis briggsae | histidyl-tr- synthetase                                    | 4  | P:GO:0006427;<br>F:GO:0005524;<br>C:GO:0005829;<br>F:GO:0004821                                                                                                                                                          | -                                                               | EC:6.1.1.21 | IPR000738; IPR002314; IPR004516;<br>IPR006195; IPR009068;<br>G3DSA:3.30.930.10 (GENE3D),<br>SSF55681 (SUPERFAMILY)       |
|                         |                                                            | 0  |                                                                                                                                                                                                                          |                                                                 |             | -                                                                                                                        |
| Caenorhabditis briggsae | tgf beta-inducible nuclear protein 1                       | 2  | C:GO:0005634;<br>P:GO:0040035                                                                                                                                                                                            | -                                                               |             | IPR022309; PTHR12642 (PANTHER)                                                                                           |
|                         |                                                            | 0  |                                                                                                                                                                                                                          |                                                                 |             | -                                                                                                                        |
| Caenorhabditis briggsae | Hypothetical protein CBG04315 [Caenorhabditis briggsae]    | 0  |                                                                                                                                                                                                                          |                                                                 |             | -                                                                                                                        |
|                         |                                                            | 0  |                                                                                                                                                                                                                          |                                                                 |             | -                                                                                                                        |
| Caenorhabditis elegans  | transmembrane emp24 domain trafficking protein 2           | 11 | C:GO:0012507;<br>P:GO:0006903;<br>C:GO:0016021;<br>C:GO:0005793;<br>C:GO:0005792;<br>F:GO:0005515;<br>C:GO:0030663;<br>P:GO:0006888;<br>F:GO:0005215;<br>C:GO:0042589;<br>P:GO:0006886                                   | -                                                               |             | IPR000348; IPR009038; PTHR22811<br>(PANTHER), PTHR22811:SF11<br>(PANTHER), SignalP (SIGNALP),<br>SSF101576 (SUPERFAMILY) |
| Brugia malayi           | posterior sex combs                                        | 13 | P:GO:0030097;<br>F:GO:0005515;<br>P:GO:0016570;<br>P:GO:0048706;<br>P:GO:0003002;<br>P:GO:0016567;<br>C:GO:0044428;<br>C:GO:0043234;<br>P:GO:0045449;<br>P:GO:0007399;<br>P:GO:0050671;<br>F:GO:0003824;<br>P:GO:0048523 | -                                                               |             | IPR001841; IPR013083; IPR017907;<br>PTHR10825 (PANTHER),<br>PTHR10825:SF19 (PANTHER),<br>SSF57850 (SUPERFAMILY)          |
| Caenorhabditis briggsae | fshd region gene 1                                         | 2  | C:GO:0031981;<br>P:GO:0006396                                                                                                                                                                                            | -                                                               |             | IPR010414                                                                                                                |
|                         |                                                            | 0  |                                                                                                                                                                                                                          |                                                                 |             | -                                                                                                                        |
|                         |                                                            | 0  |                                                                                                                                                                                                                          |                                                                 |             | -                                                                                                                        |

|                         |                                                                           |    |                                                                                                                                                                                                                                                                                                                                                 |   |                               |                                                                                                                                                          |
|-------------------------|---------------------------------------------------------------------------|----|-------------------------------------------------------------------------------------------------------------------------------------------------------------------------------------------------------------------------------------------------------------------------------------------------------------------------------------------------|---|-------------------------------|----------------------------------------------------------------------------------------------------------------------------------------------------------|
| Caenorhabditis elegans  | dcun1d1 protein                                                           | 5  | C:GO:0005737;<br>F:GO:0043130;<br>C:GO:0000151;<br>C:GO:0005634;<br>P:GO:0045116                                                                                                                                                                                                                                                                | - |                               | IPR005176; IPR009060; IPR014764;<br>G3DSA:1.10.8.10 (GENE3D)                                                                                             |
|                         | -                                                                         | 0  |                                                                                                                                                                                                                                                                                                                                                 |   |                               | -                                                                                                                                                        |
| Caenorhabditis elegans  | fanci (fanconi anemia complex component i) homolog family member (fnci-1) | 0  |                                                                                                                                                                                                                                                                                                                                                 |   |                               | -                                                                                                                                                        |
|                         | -                                                                         | 0  |                                                                                                                                                                                                                                                                                                                                                 |   |                               | -                                                                                                                                                        |
| Caenorhabditis elegans  | 4-nitrophenylphosphatase isoform 2                                        | 2  | P:GO:0008152;<br>F:GO:0016791                                                                                                                                                                                                                                                                                                                   | - | EC:3.1.3.0                    | IPR005834; G3DSA:3.40.50.1000<br>(GENE3D), G3DSA:3.40.50.10410<br>(GENE3D), PTHR19288 (PANTHER),<br>PTHR19288-SF11 (PANTHER),<br>SSF56784 (SUPERFAMILY)  |
| Caenorhabditis briggsae | briggsae cbr-atn-1 protein                                                | 13 | P:GO:0040010;<br>C:GO:0030018;<br>P:GO:0007016;<br>F:GO:0005509;<br>P:GO:0007629;<br>C:GO:0055120;<br>P:GO:0051017;<br>P:GO:0031532;<br>F:GO:0051015;<br>F:GO:0042802;<br>C:GO:0005925;<br>P:GO:0007067;<br>P:GO:0009792                                                                                                                        | - |                               | IPR002017; IPR011992; IPR018159;<br>IPR018249; G3DSA:1.20.58.60<br>(GENE3D), PTHR11915 (PANTHER),<br>PTHR11915-SF47 (PANTHER),<br>SSF46966 (SUPERFAMILY) |
| Caenorhabditis elegans  | sphingosine-1-phosphate lyase 1                                           | 20 | P:GO:0030097;<br>P:GO:0008340;<br>P:GO:0060021;<br>P:GO:0001822;<br>P:GO:0040010;<br>P:GO:0008210;<br>P:GO:0010761;<br>P:GO:0008209;<br>P:GO:0007283;<br>P:GO:0006807;<br>P:GO:0060325;<br>P:GO:0009791;<br>F:GO:0016830;<br>C:GO:0044425;<br>P:GO:0001553;<br>P:GO:0048008;<br>P:GO:0048705;<br>P:GO:0033327;<br>P:GO:0040014;<br>P:GO:0001570 | - |                               | IPR015421; IPR015424                                                                                                                                     |
| Haemonchus contortus    | parasitic stage specific protein 2                                        | 0  |                                                                                                                                                                                                                                                                                                                                                 |   |                               | -                                                                                                                                                        |
| Haemonchus contortus    | parasitic stage specific protein 2                                        | 0  |                                                                                                                                                                                                                                                                                                                                                 |   |                               | -                                                                                                                                                        |
| Haemonchus contortus    | transmembrane domain-containing                                           | 0  |                                                                                                                                                                                                                                                                                                                                                 |   | C:GO:0009536;<br>C:GO:0016021 | -                                                                                                                                                        |
| Haemonchus contortus    | transmembrane domain-containing                                           | 0  |                                                                                                                                                                                                                                                                                                                                                 |   | C:GO:0009536;<br>C:GO:0016021 | -                                                                                                                                                        |
| Haemonchus contortus    | parasitic stage specific protein 2                                        | 0  |                                                                                                                                                                                                                                                                                                                                                 |   |                               | -                                                                                                                                                        |
| Haemonchus contortus    | parasitic stage specific protein 2                                        | 0  |                                                                                                                                                                                                                                                                                                                                                 |   |                               | -                                                                                                                                                        |
| Haemonchus contortus    | transmembrane domain-containing                                           | 0  |                                                                                                                                                                                                                                                                                                                                                 |   | C:GO:0009536;<br>C:GO:0016021 | -                                                                                                                                                        |

|                             |                                             |    |                                                                                                                                                                                                                                                                                              |                               |                             |                                                                                                                                            |
|-----------------------------|---------------------------------------------|----|----------------------------------------------------------------------------------------------------------------------------------------------------------------------------------------------------------------------------------------------------------------------------------------------|-------------------------------|-----------------------------|--------------------------------------------------------------------------------------------------------------------------------------------|
| Caenorhabditis briggsae     | wd repeat phosphoinositide interacting 1    | 1  | C:GO:0044444                                                                                                                                                                                                                                                                                 | -                             |                             | IPR001680; IPR011046; IPR015943; IPR019781; PTHR11227 (PANTHER), PTHR11227:SF17 (PANTHER)                                                  |
| Brugia malayi               | 85 kda calcium-independent phospholipase a2 | 2  | F:GO:0016787;<br>P:GO:0016042                                                                                                                                                                                                                                                                | -                             |                             | IPR002110; IPR020683; PTHR18958 (PANTHER), PTHR18958:SF81 (PANTHER)                                                                        |
|                             | -                                           | 0  |                                                                                                                                                                                                                                                                                              |                               |                             | SignalP (SIGNALP)                                                                                                                          |
| Caenorhabditis briggsae     | bcr-associated bap                          | 1  | C:GO:0044464                                                                                                                                                                                                                                                                                 | -                             |                             | IPR008417; PTHR12701:SF3 (PANTHER), SignalP (SIGNALP)                                                                                      |
| Brugia malayi               | variant sh3 domain containing protein       | 1  | F:GO:0005509                                                                                                                                                                                                                                                                                 | -                             |                             | IPR000108; IPR001452; G3DSA:2.30.30.40 (GENE3D), PTHR11216 (PANTHER), PTHR11216:SF24 (PANTHER)                                             |
| Brugia malayi               | variant sh3 domain containing protein       | 1  | F:GO:0005509                                                                                                                                                                                                                                                                                 | -                             |                             | -                                                                                                                                          |
| Brugia malayi               | variant sh3 domain containing protein       | 1  | F:GO:0005509                                                                                                                                                                                                                                                                                 | -                             |                             | -                                                                                                                                          |
| Brugia malayi               | transcription factor ib                     | 0  |                                                                                                                                                                                                                                                                                              | F:GO:0003674;<br>C:GO:0005575 |                             | IPR007714                                                                                                                                  |
| Angiostrongylus cantonensis | large subunit ribosomal protein 34          | 7  | P:GO:0009792;<br>P:GO:0002119;<br>C:GO:0005840;<br>F:GO:0003735;<br>P:GO:0040010;<br>P:GO:0008340;<br>P:GO:0006412                                                                                                                                                                           | -                             | EC:3.6.5.3                  | IPR008195                                                                                                                                  |
| Caenorhabditis elegans      | lysyl-tr- synthetase                        | 11 | C:GO:0005829;<br>C:GO:0017101;<br>F:GO:0004824;<br>P:GO:0015966;<br>F:GO:000524;<br>F:GO:0005515;<br>F:GO:000287;<br>C:GO:0005759;<br>F:GO:0016597;<br>P:GO:0006430;<br>F:GO:0000049                                                                                                         | -                             | EC:6.1.1.6                  | IPR002313; IPR004364; IPR004365; IPR006195; IPR012340; IPR016027; IPR018149; IPR018150; G3DSA:3.30.930.10 (GENE3D), SSF55681 (SUPERFAMILY) |
|                             | -                                           | 0  |                                                                                                                                                                                                                                                                                              |                               |                             | SignalP (SIGNALP)                                                                                                                          |
|                             | -                                           | 0  |                                                                                                                                                                                                                                                                                              |                               |                             | SignalP (SIGNALP)                                                                                                                          |
| Loa loa                     | topoisomerase i                             | 17 | P:GO:0012501;<br>P:GO:0040016;<br>P:GO:0006268;<br>C:GO:0000228;<br>C:GO:0005730;<br>F:GO:0003917;<br>F:GO:0005524;<br>F:GO:0005515;<br>F:GO:0003918;<br>P:GO:0016310;<br>P:GO:0042493;<br>P:GO:0044419;<br>C:GO:0005654;<br>P:GO:0006265;<br>C:GO:0005737;<br>F:GO:0003682;<br>C:GO:0043204 | -                             | EC:5.99.1.2;<br>EC:5.99.1.3 | IPR001631; IPR008336; IPR011010; IPR013030; IPR013034; IPR013499; IPR013500; IPR014711; PTHR10290 (PANTHER)                                |
|                             | -                                           | 0  |                                                                                                                                                                                                                                                                                              |                               |                             | SignalP (SIGNALP)                                                                                                                          |
|                             | -                                           | 0  |                                                                                                                                                                                                                                                                                              |                               |                             | -                                                                                                                                          |



|                        |                                                                 |    |                                                                                                                                                                                        |              |             |                                                                                                                                                  |
|------------------------|-----------------------------------------------------------------|----|----------------------------------------------------------------------------------------------------------------------------------------------------------------------------------------|--------------|-------------|--------------------------------------------------------------------------------------------------------------------------------------------------|
| Caenorhabditis elegans | potassium channel tetramerisation domain containing 5           | 5  | F:GO:0042802;<br>C:GO:0008076;<br>F:GO:0005249;<br>P:GO:0006813;<br>C:GO:0005829                                                                                                       | -            |             | IPR000210; IPR003131; IPR011333;<br>PTHR14958 (PANTHER)                                                                                          |
| Loa loa                | protein phosphatase regulatory subunit 7                        | 7  | C:GO:0005737;<br>P:GO:0040035;<br>P:GO:0009792;<br>F:GO:0005515;<br>F:GO:0008599;<br>P:GO:0040011;<br>P:GO:0006898                                                                     | -            |             | IPR003603; G3DSA:3.80.10.10<br>(GENE3D), SSF52058 (SUPERFAMILY)                                                                                  |
| Brugia malayi          | endothelin converting enzyme-like 1                             | 1  | F:GO:0016787                                                                                                                                                                           | -            |             | IPR000718; IPR008753;<br>G3DSA:1.10.1380.10 (GENE3D),<br>SSF55486 (SUPERFAMILY)                                                                  |
| Brugia malayi          | nuclear receptor nhr-88                                         | 9  | P:GO:0008340;<br>F:GO:0008270;<br>P:GO:0006355;<br>F:GO:0043565;<br>P:GO:0019915;<br>F:GO:0005515;<br>F:GO:0003700;<br>F:GO:0003707;<br>C:GO:0005634                                   | -            |             | IPR001628; IPR008946; IPR013088;<br>PRO0350 (PRINTS), PTHR11865<br>(PANTHER), PTHR11865:SF197<br>(PANTHER), SSF57716 (SUPERFAMILY)               |
| Caenorhabditis elegans | nuclear receptor nhr-88                                         | 7  | F:GO:0008270;<br>P:GO:0006355;<br>F:GO:0043565;<br>P:GO:0019915;<br>F:GO:0003700;<br>F:GO:0003707;<br>C:GO:0005634                                                                     | -            |             | IPR000536; IPR001628; IPR008946;<br>IPR013088; PRO0350 (PRINTS),<br>PTHR11865 (PANTHER),<br>PTHR11865:SF197 (PANTHER),<br>SSF57716 (SUPERFAMILY) |
|                        | -                                                               | 0  |                                                                                                                                                                                        |              |             | -                                                                                                                                                |
| Caenorhabditis elegans | hypothetical bps2 protein                                       | 0  |                                                                                                                                                                                        | F:GO:0005515 |             | -                                                                                                                                                |
| Caenorhabditis elegans | cytoplasmic dynein 1 heavy chain 1                              | 9  | F:GO:0003777;<br>P:GO:0006810;<br>C:GO:0030286;<br>C:GO:0005874;<br>P:GO:0006200;<br>F:GO:0005524;<br>P:GO:0007018;<br>F:GO:0016887;<br>F:GO:0005515                                   | -            |             | IPR013602                                                                                                                                        |
| Oryctolagus cuniculus  | b chain activator-bound structure of human pyruvate ki-se<br>m2 | 11 | F:GO:0004743;<br>C:GO:0019861;<br>F:GO:0005515;<br>F:GO:0030955;<br>F:GO:0005524;<br>F:GO:0000287;<br>P:GO:0006096;<br>P:GO:0012501;<br>C:GO:0005634;<br>C:GO:0005829;<br>C:GO:0005739 | -            | EC:2.7.1.40 | -                                                                                                                                                |

|                                |                                        |   |                                                                                                                                                                                                                                           |   |                                                                                           |
|--------------------------------|----------------------------------------|---|-------------------------------------------------------------------------------------------------------------------------------------------------------------------------------------------------------------------------------------------|---|-------------------------------------------------------------------------------------------|
| Caenorhabditis briggsae        | briggsae cbr-ced-9 protein             | 6 | P:GO:0009792;<br>C:GO:0005624;<br>F:GO:0005515;<br>P:GO:0006916;<br>C:GO:0005741;<br>C:GO:0048471                                                                                                                                         | - | IPR000712; IPR002475; IPR003093;<br>G3DSA:1.10.437.10 (GENE3D),<br>SSF56854 (SUPERFAMILY) |
| Trichostrongylus colubriformis | globin                                 | 3 | C:GO:0005576;<br>F:GO:0005506;<br>P:GO:0006810                                                                                                                                                                                            | - | IPR000971; IPR009050; IPR012292                                                           |
| Trichostrongylus colubriformis | globin                                 | 6 | F:GO:0020037;<br>C:GO:0005576;<br>C:GO:0005737;<br>F:GO:0005344;<br>P:GO:0015671;<br>F:GO:0019825                                                                                                                                         | - | IPR009548                                                                                 |
| Trichostrongylus colubriformis | globin                                 | 6 | F:GO:0020037;<br>C:GO:0005576;<br>C:GO:0005737;<br>F:GO:0005344;<br>P:GO:0015671;<br>F:GO:0019825                                                                                                                                         | - | IPR009548                                                                                 |
| Trichostrongylus colubriformis | globin                                 | 6 | F:GO:0020037;<br>C:GO:0005576;<br>C:GO:0005737;<br>F:GO:0005344;<br>P:GO:0015671;<br>F:GO:0019825                                                                                                                                         | - | IPR009548                                                                                 |
| Trichostrongylus colubriformis | globin                                 | 6 | F:GO:0020037;<br>C:GO:0005615;<br>C:GO:0005737;<br>F:GO:0005344;<br>P:GO:0015671;<br>F:GO:0019825                                                                                                                                         | - | IPR000971; IPR009050; IPR012292                                                           |
| Trichostrongylus colubriformis | globin                                 | 6 | F:GO:0020037;<br>C:GO:0005576;<br>C:GO:0005737;<br>F:GO:0005344;<br>P:GO:0015671;<br>F:GO:0019825                                                                                                                                         | - | IPR000971; IPR009050; IPR012292                                                           |
| Brugia malayi                  | no mechanoreceptor potential isoform d | 0 | F:GO:0005216;<br>C:GO:0000785;<br>P:GO:0006816;<br>C:GO:0016021;<br>C:GO:0016020;<br>F:GO:0003682;<br>P:GO:0006811;<br>C:GO:0005634;<br>F:GO:0003677;<br>P:GO:0006810;<br>P:GO:0006306;<br>P:GO:0006333;<br>F:GO:0005262;<br>P:GO:0055085 | - | IPR002110; IPR020683; PTHR18958<br>(PANTHER), PTHR18958:SF294<br>(PANTHER)                |
| -                              | -                                      | 0 | -                                                                                                                                                                                                                                         | - | -                                                                                         |

|                           |                                                                                                                                    |    |                                                                                                                                                                                                                                                                                                                                |              |                                                                                              |                                                                                                                            |
|---------------------------|------------------------------------------------------------------------------------------------------------------------------------|----|--------------------------------------------------------------------------------------------------------------------------------------------------------------------------------------------------------------------------------------------------------------------------------------------------------------------------------|--------------|----------------------------------------------------------------------------------------------|----------------------------------------------------------------------------------------------------------------------------|
| Caenorhabditis elegans    | fatty acid binding protein muscle and heart                                                                                        | 8  | P:GO:0006810;<br>P:GO:0008340;<br>P:GO:0006656;<br>F:GO:0008289;<br>F:GO:0005515;<br>C:GO:0044444;<br>P:GO:0040011;<br>F:GO:0005215                                                                                                                                                                                            | -            |                                                                                              | IPR000463; IPR000566; IPR011038;<br>IPR012674                                                                              |
|                           | -                                                                                                                                  | 0  |                                                                                                                                                                                                                                                                                                                                |              |                                                                                              | -                                                                                                                          |
| Caenorhabditis briggsae   | temporarily assigned gene -me family member (tag-163)                                                                              | 0  |                                                                                                                                                                                                                                                                                                                                | F:GO:0005515 |                                                                                              | PTHR12583 (PANTHER),<br>PTHR12583:SF1 (PANTHER)                                                                            |
|                           | -                                                                                                                                  | 0  |                                                                                                                                                                                                                                                                                                                                |              |                                                                                              | -                                                                                                                          |
|                           | -                                                                                                                                  | 0  |                                                                                                                                                                                                                                                                                                                                |              |                                                                                              | -                                                                                                                          |
| Caenorhabditis elegans    | transmembrane protein 66                                                                                                           | 1  | C:GO:0016021                                                                                                                                                                                                                                                                                                                   | -            |                                                                                              | IPR009567; SignalP (SIGNALP)                                                                                               |
|                           | -                                                                                                                                  | 0  |                                                                                                                                                                                                                                                                                                                                |              |                                                                                              | -                                                                                                                          |
| Phragmatopoma californica | cement precursor protein 3b variant 1                                                                                              | 0  |                                                                                                                                                                                                                                                                                                                                |              |                                                                                              | -                                                                                                                          |
|                           | -                                                                                                                                  | 0  |                                                                                                                                                                                                                                                                                                                                |              |                                                                                              | -                                                                                                                          |
| Caenorhabditis briggsae   | hydroxypyruvate reductase                                                                                                          | 1  | F:GO:0003824                                                                                                                                                                                                                                                                                                                   | -            |                                                                                              | IPR007835; G3DSA:3.40.1480.10<br>(GENE3D), G3DSA:3.40.50.10180<br>(GENE3D), PTHR12227 (PANTHER),<br>SSF82544 (SUPERFAMILY) |
| Caenorhabditis elegans    | elegans protein confirmed by transcript evidence                                                                                   | 11 | P:GO:0009792;<br>P:GO:0010171;<br>P:GO:0002119;<br>P:GO:0040002;<br>P:GO:0040011;<br>C:GO:0016021;<br>C:GO:0005576;<br>P:GO:0019915;<br>P:GO:0040007;<br>P:GO:0006898;<br>F:GO:0042302                                                                                                                                         | -            |                                                                                              | IPR002486; IPR008160; PTHR10499<br>(PANTHER), PTHR10499:SF58<br>(PANTHER), SignalP (SIGNALP)                               |
| Caenorhabditis briggsae   | hydroxyacyl-coenzyme a dehydroge-se 3-ketoacyl-coenzyme a thiolase enoyl-coenzyme a hydratase (trifunctio-l protein) alpha subunit | 19 | F:GO:0003985;<br>F:GO:0016508;<br>F:GO:0000062;<br>F:GO:0003988;<br>C:GO:0005743;<br>P:GO:0055114;<br>P:GO:0040007;<br>C:GO:0016507;<br>C:GO:0042645;<br>F:GO:0051287;<br>P:GO:0019915;<br>F:GO:0003857;<br>P:GO:0002119;<br>P:GO:0006635;<br>P:GO:0042493;<br>P:GO:0006898;<br>F:GO:0016509;<br>P:GO:0009792;<br>F:GO:0004300 | -            | EC:2.3.1.9;<br>EC:4.2.1.74;<br>EC:2.3.1.16;<br>EC:1.1.1.35;<br>EC:1.1.1.211<br>; EC:4.2.1.17 | IPR006108; IPR008927; IPR013328;<br>PTHR23309 (PANTHER)                                                                    |
| Caenorhabditis briggsae   | briggsae cbr-tmd-1 protein                                                                                                         | 4  | C:GO:0045169;<br>C:GO:0005856;<br>P:GO:0000003;<br>F:GO:0005523                                                                                                                                                                                                                                                                | -            |                                                                                              | IPR004934; G3DSA:3.80.10.10<br>(GENE3D), PTHR10901:SF7<br>(PANTHER), SSF52047 (SUPERFAMILY)                                |

|                         |                                                                |  |    |                                                                                                                                                                                        |                                                                                  |                                                                                                                                                            |
|-------------------------|----------------------------------------------------------------|--|----|----------------------------------------------------------------------------------------------------------------------------------------------------------------------------------------|----------------------------------------------------------------------------------|------------------------------------------------------------------------------------------------------------------------------------------------------------|
| Caenorhabditis elegans  | subfamily member 12                                            |  | 5  | P:GO:0006457;<br>C:GO:0005783;<br>F:GO:0051082;<br>F:GO:0031072;<br>P:GO:0040011                                                                                                       | -                                                                                | IPR001623; IPR003095; IPR015399;<br>IPR015609; IPR018253;<br>PTHR11821:SF17 (PANTHER)                                                                      |
| Caenorhabditis elegans  | subfamily member 12                                            |  | 5  | P:GO:0006457;<br>C:GO:0005783;<br>F:GO:0051082;<br>F:GO:0031072;<br>P:GO:0040011                                                                                                       | -                                                                                | IPR001623; IPR003095; IPR015399;<br>IPR015609; IPR018253;<br>PTHR11821:SF17 (PANTHER)                                                                      |
| Caenorhabditis briggsae | elegans protein partially confirmed by transcript evidence     |  | 0  |                                                                                                                                                                                        |                                                                                  | SignalP (SIGNALP)                                                                                                                                          |
| Caenorhabditis briggsae | transmembrane protein 41a                                      |  | 0  |                                                                                                                                                                                        | F:GO:0003674;<br>C:GO:0016021;<br>C:GO:0016020;<br>P:GO:0008150;<br>C:GO:0005575 | PTHR12677 (PANTHER)                                                                                                                                        |
| Caenorhabditis briggsae | elegans protein partially confirmed by transcript evidence     |  | 0  |                                                                                                                                                                                        | F:GO:0003674;<br>C:GO:0016021;<br>C:GO:0016020                                   | SignalP (SIGNALP)                                                                                                                                          |
| Caenorhabditis elegans  | transmembrane protein 41a                                      |  | 1  | P:GO:0010171                                                                                                                                                                           | -                                                                                | IPR015414; PTHR12677 (PANTHER)                                                                                                                             |
| Caenorhabditis briggsae | mtch1 protein                                                  |  | 9  | F:GO:0005488;<br>P:GO:0008340;<br>C:GO:0005739;<br>P:GO:0042981;<br>P:GO:0040007;<br>P:GO:0019915;<br>P:GO:0002119;<br>P:GO:0009792;<br>C:GO:0016020                                   | -                                                                                | IPR001993; IPR018108;<br>G3DSA:1.50.40.10 (GENE3D),<br>PTHR10780 (PANTHER),<br>PTHR10780:SF1 (PANTHER)                                                     |
| Caenorhabditis briggsae | mtch1 protein                                                  |  | 9  | F:GO:0005488;<br>P:GO:0008340;<br>C:GO:0005739;<br>P:GO:0042981;<br>P:GO:0040007;<br>P:GO:0019915;<br>P:GO:0002119;<br>P:GO:0009792;<br>C:GO:0016020                                   | -                                                                                | IPR001993; IPR018108;<br>G3DSA:1.50.40.10 (GENE3D),<br>PTHR10780 (PANTHER),<br>PTHR10780:SF1 (PANTHER)                                                     |
| Caenorhabditis elegans  | sphingolipid delta 4 desaturase c-4 hydroxylase protein des2   |  | 5  | P:GO:0006633;<br>F:GO:0005515;<br>P:GO:0055114;<br>F:GO:0016705;<br>C:GO:0016021                                                                                                       | -                                                                                | IPR005804; IPR011388; IPR013866;<br>PTHR12879 (PANTHER), SignalP<br>(SIGNALP)                                                                              |
| Caenorhabditis elegans  | high temperature-induced dauer formation family member (hid-1) |  | 0  |                                                                                                                                                                                        |                                                                                  | PTHR21575 (PANTHER),<br>PTHR21575:SF9 (PANTHER)                                                                                                            |
| Loa loa                 | pre-mr- splicing                                               |  | 11 | P:GO:0000003;<br>F:GO:0005515;<br>P:GO:0040010;<br>P:GO:0040015;<br>P:GO:0006898;<br>C:GO:0030532;<br>P:GO:0018996;<br>P:GO:0040039;<br>P:GO:0000398;<br>P:GO:0009792;<br>P:GO:0002119 | -                                                                                | IPR003107; IPR010491; IPR011990;<br>IPR013026; IPR019734; PTHR11246<br>(PANTHER), PTHR11246:SF1<br>(PANTHER), SignalP (SIGNALP),<br>SSF48452 (SUPERFAMILY) |
| Loa loa                 | tcf3 fusion partner-like                                       |  | 0  |                                                                                                                                                                                        | F:GO:0003677;<br>C:GO:0005634                                                    | -                                                                                                                                                          |

|                         |                                                            |    |                                                                                                                                                                                                                                                                                                                                                 |                                                                                                                                     |                                                         |                                                                                                                                            |
|-------------------------|------------------------------------------------------------|----|-------------------------------------------------------------------------------------------------------------------------------------------------------------------------------------------------------------------------------------------------------------------------------------------------------------------------------------------------|-------------------------------------------------------------------------------------------------------------------------------------|---------------------------------------------------------|--------------------------------------------------------------------------------------------------------------------------------------------|
| Caenorhabditis briggsae | briggsae cbr-ergo- protein                                 | 0  |                                                                                                                                                                                                                                                                                                                                                 | F:GO:0003676;<br>F:GO:0005509;<br>P:GO:0007156;<br>F:GO:0005544;<br>P:GO:0007155;<br>C:GO:0008305;<br>C:GO:0016020;<br>F:GO:0005515 | -                                                       |                                                                                                                                            |
| Brugia malayi           | elegans protein confirmed by transcript evidence           | 0  |                                                                                                                                                                                                                                                                                                                                                 | F:GO:0003676;<br>F:GO:0008270;<br>C:GO:0005622                                                                                      |                                                         | IPR007087; IPR015880; PTHR23228 (PANTHER), PTHR23228:SF45 (PANTHER), SSF57667 (SUPERFAMILY)                                                |
| Caenorhabditis elegans  | 5 -3 exoribonuclease 1                                     | 5  | C:GO:0005737;<br>P:GO:0044260;<br>F:GO:0003676;<br>P:GO:0090304;<br>F:GO:0008409                                                                                                                                                                                                                                                                | -                                                                                                                                   |                                                         | IPR004859                                                                                                                                  |
| Caenorhabditis briggsae | cathepsin a                                                | 6  | F:GO:0008047;<br>F:GO:0004180;<br>F:GO:0005515;<br>P:GO:0006886;<br>P:GO:0019915;<br>C:GO:0005783                                                                                                                                                                                                                                               | -                                                                                                                                   |                                                         | IPR001563; IPR018202; IPR019775; G3DSA:3.40.50.1820 (GENE3D), PTHR11802:SF9 (PANTHER), SignalP (SIGNALP), SSF53474 (SUPERFAMILY)           |
| Oryctolagus cuniculus   | beta                                                       | 20 | C:GO:0042612;<br>P:GO:0019882;<br>P:GO:0042267;<br>C:GO:0045298;<br>P:GO:0006928;<br>F:GO:0005525;<br>F:GO:0042288;<br>C:GO:0016021;<br>P:GO:0006184;<br>P:GO:0051225;<br>C:GO:0005829;<br>C:GO:0005874;<br>P:GO:0051258;<br>P:GO:0007067;<br>F:GO:0042277;<br>F:GO:0032403;<br>F:GO:0003924;<br>P:GO:0007018;<br>F:GO:0005200;<br>P:GO:0030182 | -                                                                                                                                   | EC:3.6.5.1;<br>EC:3.6.5.2;<br>EC:3.6.5.3;<br>EC:3.6.5.4 | IPR000217; IPR002453; IPR003008; IPR008280; IPR018316                                                                                      |
| Caenorhabditis elegans  | briggsae cbr-max-1 protein                                 | 4  | C:GO:0005856;<br>P:GO:0008340;<br>F:GO:0005488;<br>P:GO:0040010                                                                                                                                                                                                                                                                                 | -                                                                                                                                   |                                                         | -                                                                                                                                          |
| Caenorhabditis briggsae | 3-oxoacid transferase 1                                    | 4  | F:GO:0008260;<br>C:GO:0005759;<br>P:GO:0046952;<br>F:GO:0042803                                                                                                                                                                                                                                                                                 | -                                                                                                                                   | EC:2.8.3.5                                              | IPR004164; IPR004165; IPR012791; G3DSA:3.40.1080.10 (GENE3D), G3DSA:3.40.810.20 (GENE3D), PTHR13707:SF1 (PANTHER), SSF100950 (SUPERFAMILY) |
| Caenorhabditis elegans  | elegans protein partially confirmed by transcript evidence | 0  |                                                                                                                                                                                                                                                                                                                                                 | F:GO:0005515                                                                                                                        |                                                         | IPR011333; IPR013069                                                                                                                       |
| Caenorhabditis briggsae | cysteine and histidine-rich domain-containing protein 1    | 4  | P:GO:0040035;<br>F:GO:0042802;<br>P:GO:0002119;<br>P:GO:0006898                                                                                                                                                                                                                                                                                 | -                                                                                                                                   |                                                         | IPR007051; IPR007052; IPR008978; IPR017447; G3DSA:2.60.40.790 (GENE3D), PTHR12621 (PANTHER), PTHR12621:SF3 (PANTHER)                       |
|                         | -                                                          | 0  |                                                                                                                                                                                                                                                                                                                                                 |                                                                                                                                     |                                                         | -                                                                                                                                          |

|                         |                                                              |    |                                                                                                                                                                                                                                                                                                                                                                                                    |                                                                                  |              |                                                                                                                                   |
|-------------------------|--------------------------------------------------------------|----|----------------------------------------------------------------------------------------------------------------------------------------------------------------------------------------------------------------------------------------------------------------------------------------------------------------------------------------------------------------------------------------------------|----------------------------------------------------------------------------------|--------------|-----------------------------------------------------------------------------------------------------------------------------------|
| Caenorhabditis briggsae | briggsae cbr-rha-2 protein                                   | 23 | P:GO:0008340;<br>P:GO:0000003;<br>P:GO:0016246;<br>F:GO:0000166;<br>F:GO:0008026;<br>F:GO:0004687;<br>P:GO:0040010;<br>P:GO:0006898;<br>P:GO:0007076;<br>P:GO:0040011;<br>P:GO:0007498;<br>P:GO:0045214;<br>P:GO:0007520;<br>F:GO:0003779;<br>F:GO:0008307;<br>P:GO:0009792;<br>P:GO:0016203;<br>P:GO:0007519;<br>P:GO:0002119;<br>C:GO:0005875;<br>C:GO:0000794;<br>C:GO:0030018;<br>P:GO:0007062 | -                                                                                | EC:2.7.11.18 | IPR001650; IPR002464; IPR011545;<br>IPR014021; G3DSA:3.40.50.300<br>(GENE3D), PTHR18934 (PANTHER),<br>SSF52540 (SUPERFAMILY)      |
| -                       | -                                                            | 0  |                                                                                                                                                                                                                                                                                                                                                                                                    |                                                                                  |              | -                                                                                                                                 |
| Caenorhabditis elegans  | protein ki-se domain containing protein                      | 8  | P:GO:0006007;<br>F:GO:0005516;<br>P:GO:0048598;<br>F:GO:0004689;<br>F:GO:0005524;<br>C:GO:0005964;<br>P:GO:0005978;<br>P:GO:0006468                                                                                                                                                                                                                                                                | -                                                                                | EC:2.7.11.19 | IPR000719; IPR002291; IPR008271;<br>IPR011009; IPR017442; IPR020636;<br>G3DSA:1.10.510.10 (GENE3D),<br>G3DSA:3.30.200.20 (GENE3D) |
| Caenorhabditis elegans  | phosphorylase gamma 2                                        | 7  | F:GO:0005516;<br>P:GO:0048598;<br>F:GO:0004689;<br>F:GO:0005524;<br>C:GO:0005964;<br>P:GO:0005978;<br>P:GO:0006468                                                                                                                                                                                                                                                                                 | -                                                                                | EC:2.7.11.19 | IPR000719; IPR002291; IPR008271;<br>IPR011009; IPR017442; IPR020636;<br>G3DSA:1.10.510.10 (GENE3D),<br>G3DSA:3.30.200.20 (GENE3D) |
| Caenorhabditis elegans  | ke (drosophila actin-binding) homolog family member (ketn-1) | 1  | P:GO:0000003                                                                                                                                                                                                                                                                                                                                                                                       | -                                                                                |              | IPR007110; IPR013783; PTHR10489<br>(PANTHER), PTHR10489:SF27<br>(PANTHER), SSF48726 (SUPERFAMILY)                                 |
| Brugia malayi           | protein ki-se domain containing protein                      | 0  |                                                                                                                                                                                                                                                                                                                                                                                                    | F:GO:0016301;<br>F:GO:0004672;<br>F:GO:0005524;<br>P:GO:0006468;<br>F:GO:0004674 |              | -                                                                                                                                 |
| -                       | -                                                            | 0  |                                                                                                                                                                                                                                                                                                                                                                                                    |                                                                                  |              | -                                                                                                                                 |
| Ancylostoma caninum     | venom-allergen-like protein family member (vap-1)            | 0  |                                                                                                                                                                                                                                                                                                                                                                                                    | F:GO:0009055;<br>P:GO:0019646;<br>P:GO:0040011;<br>C:GO:0005576                  |              | IPR001283; IPR002172; IPR014044;<br>PTHR10334:SF11 (PANTHER),<br>SSF57059 (SUPERFAMILY)                                           |
| Brugia malayi           | domain containing protein                                    | 0  |                                                                                                                                                                                                                                                                                                                                                                                                    | F:GO:0005089;<br>P:GO:0035023;<br>C:GO:0005622                                   |              | IPR001357; G3DSA:3.40.50.10190<br>(GENE3D)                                                                                        |

|                             |                                                                              |    |                                                                                                                                                                                                                                                            |                                                                 |                                                                                                             |
|-----------------------------|------------------------------------------------------------------------------|----|------------------------------------------------------------------------------------------------------------------------------------------------------------------------------------------------------------------------------------------------------------|-----------------------------------------------------------------|-------------------------------------------------------------------------------------------------------------|
| Caenorhabditis elegans      | fad-dependent oxidoreductase domain-containing protein 1                     | 5  | P:GO:0009792;<br>F:GO:0016491;<br>P:GO:0040010;<br>C:GO:0044464;<br>P:GO:0000003                                                                                                                                                                           | -                                                               | IPR006076; G3DSA:3.50.50.60 (GENE3D), PTHR13847 (PANTHER), PTHR13847:SF12 (PANTHER), SSF51905 (SUPERFAMILY) |
| Caenorhabditis elegans      | -methenyltetrahydrofolate synthetase (5-formyltetrahydrofolate cyclo-ligase) | 4  | F:GO:0016874;<br>P:GO:0006760;<br>F:GO:0005488;<br>C:GO:0044464                                                                                                                                                                                            | -                                                               | IPR002698; PTHR23407 (PANTHER), SSF100950 (SUPERFAMILY)                                                     |
| Loa loa                     | ephrin efn-4                                                                 | 0  |                                                                                                                                                                                                                                                            |                                                                 | IPR001799; IPR008972; PTHR11304:SF23 (PANTHER)                                                              |
| Brugia malayi               | elegans protein confirmed by transcript evidence                             | 0  |                                                                                                                                                                                                                                                            |                                                                 | IPR019361; PTHR13386 (PANTHER)                                                                              |
| Caenorhabditis briggsae     | ypd7_caeel ame: full=uncharacterized protein                                 | 1  | P:GO:0006629                                                                                                                                                                                                                                               | -                                                               | -                                                                                                           |
| Caenorhabditis briggsae     | Hypothetical protein CBG06964 [Caenorhabditis briggsae]                      | 0  |                                                                                                                                                                                                                                                            |                                                                 | SignalP (SIGNALP)                                                                                           |
| Caenorhabditis briggsae     | Hypothetical protein CBG06964 [Caenorhabditis briggsae]                      | 0  |                                                                                                                                                                                                                                                            |                                                                 | -                                                                                                           |
| Brugia malayi               | ac1147-like protein                                                          | 0  |                                                                                                                                                                                                                                                            |                                                                 | -                                                                                                           |
| Brugia malayi               | ac1147-like protein                                                          | 0  |                                                                                                                                                                                                                                                            |                                                                 | -                                                                                                           |
| Brugia malayi               | ac1147-like protein                                                          | 0  |                                                                                                                                                                                                                                                            |                                                                 | -                                                                                                           |
| Caenorhabditis briggsae     | myosin ie                                                                    | 15 | F:GO:0005516;<br>P:GO:0001570;<br>P:GO:0048008;<br>F:GO:0000146;<br>C:GO:0016459;<br>F:GO:0042623;<br>F:GO:0032403;<br>P:GO:0035166;<br>P:GO:0006508;<br>F:GO:0005524;<br>F:GO:0003779;<br>P:GO:0006807;<br>P:GO:0001822;<br>P:GO:0030048;<br>P:GO:0001701 | -                                                               | IPR000169; IPR001609; PTHR13140 (PANTHER), PTHR13140:SF31 (PANTHER), SSF52540 (SUPERFAMILY)                 |
| Angiostrongylus cantonensis | briggsae cbr-pod-1 protein                                                   | 0  |                                                                                                                                                                                                                                                            | F:GO:0008415;<br>F:GO:0016740;<br>F:GO:0004402                  | IPR015049; IPR015505                                                                                        |
| Caenorhabditis briggsae     | eukaryotic initiation factor gamma subunit family protein                    | 0  |                                                                                                                                                                                                                                                            | P:GO:0006413;<br>P:GO:0006446;<br>F:GO:0003743;<br>C:GO:0005575 | IPR007316                                                                                                   |
|                             | -                                                                            | 0  |                                                                                                                                                                                                                                                            |                                                                 | -                                                                                                           |
| Bombyx mori                 | annexin b13                                                                  | 0  |                                                                                                                                                                                                                                                            | F:GO:0005509;<br>F:GO:0005544                                   | -                                                                                                           |
| Caenorhabditis elegans      | iron regulatory protein                                                      | 13 | C:GO:0005829;<br>F:GO:0030350;<br>P:GO:0006447;<br>P:GO:0010040;<br>P:GO:0006879;<br>P:GO:0006099;<br>F:GO:0051539;<br>F:GO:0005515;<br>F:GO:0003994;<br>F:GO:0005506;<br>C:GO:0005794;<br>P:GO:0006101;<br>C:GO:0005783                                   | -                                                               | EC:4.2.1.3<br>IPR000573; IPR015928; IPR015934; IPR015937                                                    |
| Caenorhabditis elegans      | wd repeat domain 24                                                          | 1  | P:GO:0009987                                                                                                                                                                                                                                               | -                                                               | PTHR16453 (PANTHER), PTHR16453:SF2 (PANTHER)                                                                |

|                         |                                                            |    |                                                                                                                                                                                                                                                                                                                                |                                                |  |                                                                                                                                                                                   |
|-------------------------|------------------------------------------------------------|----|--------------------------------------------------------------------------------------------------------------------------------------------------------------------------------------------------------------------------------------------------------------------------------------------------------------------------------|------------------------------------------------|--|-----------------------------------------------------------------------------------------------------------------------------------------------------------------------------------|
| Loa loa                 | expressed sequence aw209491                                | 0  |                                                                                                                                                                                                                                                                                                                                | F:GO:0003674;<br>P:GO:0008150;<br>C:GO:0005575 |  | IPR010733                                                                                                                                                                         |
|                         | -                                                          | 0  |                                                                                                                                                                                                                                                                                                                                |                                                |  | SignalP (SIGNALP)                                                                                                                                                                 |
| Caenorhabditis elegans  | d- polymerase family exonuclease domain containing protein | 7  | F:GO:0005488;<br>P:GO:0040035;<br>F:GO:0016740;<br>P:GO:0040011;<br>P:GO:0006997;<br>P:GO:0002009;<br>P:GO:0009792                                                                                                                                                                                                             | -                                              |  | IPR013697; PTHR10670 (PANTHER)                                                                                                                                                    |
| Caenorhabditis briggsae | Hypothetical protein CBG15176 [Caenorhabditis briggsae]    | 0  |                                                                                                                                                                                                                                                                                                                                | F:GO:0003676;<br>F:GO:0008270;<br>C:GO:0005622 |  | -                                                                                                                                                                                 |
|                         | -                                                          | 0  |                                                                                                                                                                                                                                                                                                                                |                                                |  | -                                                                                                                                                                                 |
| Caenorhabditis briggsae | eukaryotic initiation factor 4a                            | 10 | P:GO:0009792;<br>P:GO:0002119;<br>F:GO:0008026;<br>P:GO:0040010;<br>F:GO:0005524;<br>P:GO:0000003;<br>P:GO:0008340;<br>P:GO:0040011;<br>F:GO:0003743;<br>P:GO:0019915                                                                                                                                                          | -                                              |  | IPR000629; IPR001650; IPR011545;<br>IPR014001; IPR014014; IPR014021;<br>G3DSA:3.40.50.300 (GENE3D),<br>PTHR10967 (PANTHER),<br>PTHR10967:SF2 (PANTHER), SSF52540<br>(SUPERFAMILY) |
| Ailuropoda melanoleuca  | cytoplasmic 1                                              | 19 | C:GO:0005829;<br>C:GO:0030863;<br>P:GO:0045214;<br>C:GO:0030424;<br>C:GO:0005625;<br>F:GO:0019894;<br>C:GO:0030016;<br>F:GO:0042802;<br>C:GO:0035267;<br>F:GO:0005524;<br>P:GO:0007409;<br>F:GO:0050998;<br>P:GO:0006928;<br>C:GO:0031941;<br>F:GO:0019901;<br>F:GO:0005200;<br>C:GO:0030529;<br>C:GO:0070688;<br>P:GO:0051592 | -                                              |  | IPR004000; IPR004001; IPR020902;<br>G3DSA:2.30.36.70 (GENE3D),<br>G3DSA:3.30.420.40 (GENE3D),<br>G3DSA:3.90.640.10 (GENE3D),<br>SSF53067 (SUPERFAMILY)                            |
| Ancylostoma ceylanicum  | elegans protein partially confirmed by transcript evidence | 2  | F:GO:0046872;<br>F:GO:0008237                                                                                                                                                                                                                                                                                                  | -                                              |  | IPR001506; G3DSA:3.40.390.10<br>(GENE3D), PTHR10127 (PANTHER),<br>PTHR10127:SF65 (PANTHER),<br>SSF55486 (SUPERFAMILY)                                                             |
| Ancylostoma ceylanicum  | metalloprotease 1 precursor                                | 2  | F:GO:0046872;<br>F:GO:0008237                                                                                                                                                                                                                                                                                                  | -                                              |  | IPR000859; IPR001506; IPR006026;<br>IPR013032; G3DSA:3.40.390.10<br>(GENE3D), PTHR10127 (PANTHER),<br>PTHR10127:SF65 (PANTHER),<br>SSF55486 (SUPERFAMILY)                         |
| Ancylostoma ceylanicum  | metalloprotease 1 precursor                                | 2  | F:GO:0046872;<br>F:GO:0008237                                                                                                                                                                                                                                                                                                  | -                                              |  | IPR000859; IPR001506; IPR006026;<br>IPR013032; G3DSA:3.40.390.10<br>(GENE3D), PTHR10127 (PANTHER),<br>PTHR10127:SF65 (PANTHER),<br>SSF55486 (SUPERFAMILY)                         |



|                         |                                                    |    |                                                                                                                                                                                        |   |                                   |                                                                                                                                                           |
|-------------------------|----------------------------------------------------|----|----------------------------------------------------------------------------------------------------------------------------------------------------------------------------------------|---|-----------------------------------|-----------------------------------------------------------------------------------------------------------------------------------------------------------|
| Ancylostoma ceylanicum  | metalloprotease 1 precursor                        | 2  | F:GO:0046872;<br>F:GO:0008237                                                                                                                                                          | - |                                   | IPR000859; IPR001506; IPR006026;<br>IPR013032; G3DSA:3.40.390.10<br>(GENE3D), PTHR10127 (PANTHER),<br>PTHR10127:SF65 (PANTHER),<br>SSF55486 (SUPERFAMILY) |
| Caenorhabditis briggsae | acyl- thioesterase 8                               | 5  | P:GO:0006637;<br>C:GO:0005777;<br>F:GO:0005515;<br>P:GO:0033540;<br>F:GO:0016291                                                                                                       | - |                                   | IPR003703; G3DSA:3.10.129.10<br>(GENE3D), PTHR11066:SF7<br>(PANTHER), SSF54637 (SUPERFAMILY)                                                              |
|                         | -                                                  | 0  |                                                                                                                                                                                        |   |                                   | SignalP (SIGNALP)                                                                                                                                         |
| Caenorhabditis briggsae | -dh-ubiquinone oxidoreductase 39 kda subunit       | 10 | P:GO:0009792;<br>P:GO:0002119;<br>P:GO:0006694;<br>F:GO:0003854;<br>P:GO:0045226;<br>P:GO:0040010;<br>P:GO:0008340;<br>F:GO:0050662;<br>P:GO:0006898;<br>F:GO:0008831                  | - | EC:1.1.1.145<br>;<br>EC:1.1.1.133 | IPR001509; IPR016040; PTHR12126<br>(PANTHER), PTHR12126:SF1<br>(PANTHER), SignalP (SIGNALP),<br>SSF51735 (SUPERFAMILY)                                    |
|                         | -                                                  | 0  |                                                                                                                                                                                        |   |                                   | -                                                                                                                                                         |
|                         | -                                                  | 0  |                                                                                                                                                                                        |   |                                   | -                                                                                                                                                         |
| Caenorhabditis elegans  | briggsae cbr-mppb-1 protein                        | 11 | C:GO:0005875;<br>F:GO:0008121;<br>F:GO:0008270;<br>C:GO:0005750;<br>P:GO:0031122;<br>F:GO:0004222;<br>P:GO:0006508;<br>P:GO:0006122;<br>C:GO:0005759;<br>P:GO:0016485;<br>C:GO:0005811 | - | EC:1.10.2.2;<br>EC:3.4.24.0       | IPR001431; IPR007863; IPR011237;<br>IPR011249; IPR011765; PTHR11851<br>(PANTHER), PTHR11851:SF58<br>(PANTHER)                                             |
| Loa loa                 | nuclear pore complex protein family member (npp-1) | 4  | P:GO:0046907;<br>C:GO:0005635;<br>C:GO:0016020;<br>P:GO:0015031                                                                                                                        | - |                                   | PTHR13000 (PANTHER)                                                                                                                                       |
| Caenorhabditis briggsae | r--binding protein 28                              | 1  | F:GO:0005488                                                                                                                                                                           | - |                                   | IPR000504; IPR012677; PTHR10432<br>(PANTHER), PTHR10432:SF50<br>(PANTHER), SSF54928 (SUPERFAMILY)                                                         |
|                         | -                                                  | 0  |                                                                                                                                                                                        |   |                                   | -                                                                                                                                                         |
| Brugia malayi           | domain containing protein                          | 4  | P:GO:0018991;<br>F:GO:0005515;<br>P:GO:0040011;<br>P:GO:0006898                                                                                                                        | - |                                   | -                                                                                                                                                         |
|                         | -                                                  | 0  |                                                                                                                                                                                        |   |                                   | -                                                                                                                                                         |
| Caenorhabditis elegans  | ras association domain family 1 isoform a          | 4  | F:GO:0042802;<br>P:GO:0009987;<br>P:GO:0023052;<br>C:GO:0044424                                                                                                                        | - |                                   | -                                                                                                                                                         |
| Caenorhabditis elegans  | ras association domain family 1 isoform a          | 4  | F:GO:0042802;<br>P:GO:0009987;<br>P:GO:0023052;<br>C:GO:0044424                                                                                                                        | - |                                   | -                                                                                                                                                         |

|                         |                                                                    |    |                                                                                                                                                                                                                                           |                                                                                                                                     |                             |                                                                                                                                                                                                         |
|-------------------------|--------------------------------------------------------------------|----|-------------------------------------------------------------------------------------------------------------------------------------------------------------------------------------------------------------------------------------------|-------------------------------------------------------------------------------------------------------------------------------------|-----------------------------|---------------------------------------------------------------------------------------------------------------------------------------------------------------------------------------------------------|
| Caenorhabditis elegans  | ras association domain family 1 isoform a                          | 4  | F:GO:0042802;<br>P:GO:0009987;<br>P:GO:0023052;<br>C:GO:0044424                                                                                                                                                                           | -                                                                                                                                   | -                           | -                                                                                                                                                                                                       |
| Caenorhabditis elegans  | sorting nexin 6                                                    | 3  | P:GO:0048523;<br>F:GO:0005515;<br>P:GO:0007154                                                                                                                                                                                            | -                                                                                                                                   | -                           | IPR015404; PTHR10555 (PANTHER),<br>PTHR10555:SF7 (PANTHER)                                                                                                                                              |
| Caenorhabditis elegans  | protein transport protein sec31                                    | 2  | C:GO:0043231;<br>C:GO:0044444                                                                                                                                                                                                             | -                                                                                                                                   | -                           | IPR001680; IPR011046; IPR015943;<br>IPR019781; PTHR13923 (PANTHER),<br>PTHR13923:SF1 (PANTHER)                                                                                                          |
| Caenorhabditis elegans  | 1-aminocyclopropane-1-carboxylate synthase homolog (non-functio-l) | 0  |                                                                                                                                                                                                                                           | P:GO:0009058;<br>F:GO:0003674;<br>F:GO:0016847;<br>F:GO:0003824;<br>P:GO:0042218;<br>P:GO:0008150;<br>F:GO:0030170;<br>F:GO:0016769 | -                           | -                                                                                                                                                                                                       |
| Caenorhabditis elegans  | briggsae cbr-wrs-2 protein                                         | 3  | P:GO:0006412;<br>F:GO:0005488;<br>F:GO:0016874                                                                                                                                                                                            | -                                                                                                                                   | EC:3.6.5.3                  | -                                                                                                                                                                                                       |
| Haemonchus contortus    | multidrug resistance protein                                       | 9  | C:GO:0009986;<br>F:GO:0042626;<br>C:GO:0005624;<br>P:GO:0042493;<br>C:GO:0005886;<br>F:GO:0005515;<br>P:GO:0055085;<br>F:GO:0005524;<br>C:GO:0016021                                                                                      | -                                                                                                                                   | -                           | IPR001140; IPR003439; IPR011527;<br>IPR017871; IPR017940;<br>G3DSA:1.20.1560.10 (GENE3D),<br>G3DSA:3.40.50.300 (GENE3D),<br>PTHR19242 (PANTHER),<br>PTHR19242:SF96 (PANTHER),<br>SSF52540 (SUPERFAMILY) |
| Caenorhabditis elegans  | tr--dihydrouridine synthase 1-like                                 | 4  | P:GO:0055114;<br>F:GO:0050660;<br>F:GO:0017150;<br>P:GO:0008033                                                                                                                                                                           | -                                                                                                                                   | -                           | IPR001269; IPR013785; IPR018517;<br>PTHR11082:SF5 (PANTHER), SSF51395<br>(SUPERFAMILY)                                                                                                                  |
| Caenorhabditis briggsae | 5-methyltetrahydrofolate-homocysteine methyltransferase            | 14 | P:GO:0046653;<br>C:GO:0005829;<br>P:GO:0009086;<br>F:GO:0008705;<br>F:GO:0008270;<br>C:GO:0005625;<br>F:GO:0005542;<br>P:GO:0032940;<br>P:GO:0007399;<br>F:GO:0008898;<br>F:GO:0005515;<br>P:GO:0006479;<br>P:GO:0050667;<br>F:GO:0031419 | -                                                                                                                                   | EC:2.1.1.13;<br>EC:2.1.1.10 | IPR000489; IPR003726; IPR003759;<br>IPR004223; IPR006158; IPR011005;<br>IPR011822; PTHR21091 (PANTHER),<br>PTHR21091:SF9 (PANTHER)                                                                      |

|                         |                                                            |    |                                                                                                                                                                                                                                                                             |   |                             |                                                                                                                                    |
|-------------------------|------------------------------------------------------------|----|-----------------------------------------------------------------------------------------------------------------------------------------------------------------------------------------------------------------------------------------------------------------------------|---|-----------------------------|------------------------------------------------------------------------------------------------------------------------------------|
| Caenorhabditis briggsae | 5-methyltetrahydrofolate-homocysteine methyltransferase    | 14 | P:GO:0046653;<br>C:GO:0005829;<br>P:GO:0009086;<br>F:GO:0008705;<br>F:GO:0008270;<br>C:GO:0005625;<br>F:GO:0005542;<br>P:GO:0032940;<br>P:GO:0007399;<br>F:GO:0008898;<br>F:GO:0005515;<br>P:GO:0006479;<br>P:GO:0050667;<br>F:GO:0031419                                   | - | EC:2.1.1.13;<br>EC:2.1.1.10 | IPR000489; IPR003726; IPR003759;<br>IPR004223; IPR006158; IPR011005;<br>IPR011822; PTHR21091 (PANTHER),<br>PTHR21091:SF9 (PANTHER) |
| Loa loa                 | dis3-like exonuclease 2                                    | 1  | F:GO:0004518                                                                                                                                                                                                                                                                | - |                             | IPR001900; IPR022966; PTHR23355<br>(PANTHER), PTHR23355:SF10<br>(PANTHER)                                                          |
| Loa loa                 | dis3-like exonuclease 2                                    | 1  | F:GO:0004518                                                                                                                                                                                                                                                                | - |                             | IPR001900; IPR022966; PTHR23355<br>(PANTHER), PTHR23355:SF10<br>(PANTHER)                                                          |
| Loa loa                 | dis3-like exonuclease 2                                    | 1  | F:GO:0004518                                                                                                                                                                                                                                                                | - |                             | IPR001900; IPR022966; PTHR23355<br>(PANTHER), PTHR23355:SF10<br>(PANTHER)                                                          |
| Caenorhabditis briggsae | calcium voltage- alpha2 delta subunit 3                    | 5  | F:GO:0005262;<br>P:GO:0006816;<br>P:GO:0034220;<br>F:GO:0005244;<br>C:GO:0016021                                                                                                                                                                                            | - |                             | IPR002035; G3DSA:3.40.50.410<br>(GENE3D), PTHR10166 (PANTHER),<br>PTHR10166:SF5 (PANTHER), SSF53300<br>(SUPERFAMILY)               |
| Caenorhabditis elegans  | ubiquitin-conjugating enzyme e2 l3                         | 16 | P:GO:0006511;<br>P:GO:0000209;<br>P:GO:0070979;<br>P:GO:0071385;<br>P:GO:0051246;<br>F:GO:0019899;<br>P:GO:0007090;<br>F:GO:0004842;<br>F:GO:0005524;<br>C:GO:0000151;<br>F:GO:0050662;<br>F:GO:0003713;<br>P:GO:0008283;<br>C:GO:0005737;<br>C:GO:0005634;<br>P:GO:0032583 | - | EC:6.3.2.19                 | IPR000608; IPR016135; PTHR11621<br>(PANTHER), PTHR11621:SF23<br>(PANTHER)                                                          |
| Caenorhabditis elegans  | ring finger and spry domain containing 1                   | 1  | F:GO:0046872                                                                                                                                                                                                                                                                | - |                             | IPR001841; IPR001870; IPR003877;<br>IPR008985; IPR013083; IPR018355;<br>PTHR13363 (PANTHER), SSF57850<br>(SUPERFAMILY)             |
| Caenorhabditis elegans  | ring finger and spry domain containing 1                   | 1  | F:GO:0046872                                                                                                                                                                                                                                                                | - |                             | IPR001841; IPR001870; IPR003877;<br>IPR008985; IPR013083; IPR018355;<br>PTHR13363 (PANTHER), SSF57850<br>(SUPERFAMILY)             |
| Caenorhabditis elegans  | elegans protein partially confirmed by transcript evidence | 0  |                                                                                                                                                                                                                                                                             |   |                             | PTHR21724 (PANTHER), SignalP<br>(SIGNALP)                                                                                          |
|                         | -                                                          | 0  |                                                                                                                                                                                                                                                                             |   |                             | -                                                                                                                                  |
|                         | -                                                          | 0  |                                                                                                                                                                                                                                                                             |   |                             | -                                                                                                                                  |

|                         |                                                            |    |                                                                                                                                                                                                                                                                                                               |                                                                                                                    |             |                                                                                                                          |
|-------------------------|------------------------------------------------------------|----|---------------------------------------------------------------------------------------------------------------------------------------------------------------------------------------------------------------------------------------------------------------------------------------------------------------|--------------------------------------------------------------------------------------------------------------------|-------------|--------------------------------------------------------------------------------------------------------------------------|
| Caenorhabditis briggsae | ubx domain-containing protein 4                            | 0  |                                                                                                                                                                                                                                                                                                               | C:GO:0005789;<br>P:GO:0006986;<br>C:GO:0005783;<br>C:GO:0016020;<br>F:GO:0005515;<br>C:GO:0005635;<br>C:GO:0005634 |             | PTHR13020 (PANTHER),<br>PTHR13020:SF5 (PANTHER)                                                                          |
| Caenorhabditis briggsae | ubx domain-containing protein 4                            | 0  |                                                                                                                                                                                                                                                                                                               | C:GO:0005789;<br>P:GO:0006986;<br>C:GO:0005783;<br>C:GO:0016020;<br>F:GO:0005515;<br>C:GO:0005635;<br>C:GO:0005634 |             | PTHR13020 (PANTHER),<br>PTHR13020:SF5 (PANTHER)                                                                          |
| Loa loa                 | tripartite motif-containing 33                             | 4  | P:GO:0009987;<br>P:GO:0050789;<br>C:GO:0005622;<br>F:GO:0005515                                                                                                                                                                                                                                               | -                                                                                                                  |             | IPR001487; IPR001965; IPR011011;<br>IPR013083; IPR013090; IPR019787;<br>PTHR13712 (PANTHER),<br>PTHR13712:SF18 (PANTHER) |
| -                       | -                                                          | 0  |                                                                                                                                                                                                                                                                                                               |                                                                                                                    |             | -                                                                                                                        |
| -                       | -                                                          | 0  |                                                                                                                                                                                                                                                                                                               |                                                                                                                    |             | -                                                                                                                        |
| Caenorhabditis briggsae | adam metallopeptidase domain 32                            | 3  | F:GO:0004222;<br>P:GO:0006508;<br>F:GO:0008270                                                                                                                                                                                                                                                                | -                                                                                                                  | EC:3.4.24.0 | IPR002870; PTHR11905 (PANTHER),<br>PTHR11905:SF11 (PANTHER)                                                              |
| Caenorhabditis elegans  | fad-dependent pyridine nucleotide-disulfide oxidoreductase | 2  | F:GO:0016491;<br>P:GO:0055114                                                                                                                                                                                                                                                                                 | -                                                                                                                  |             | -                                                                                                                        |
| Brugia malayi           | actin                                                      | 18 | P:GO:0007126;<br>P:GO:0007108;<br>P:GO:0040007;<br>P:GO:0007517;<br>P:GO:0000281;<br>P:GO:0040035;<br>P:GO:0030036;<br>C:GO:0005865;<br>F:GO:0005524;<br>C:GO:0005938;<br>P:GO:0002119;<br>F:GO:0016887;<br>F:GO:0005515;<br>C:GO:0005884;<br>F:GO:0005200;<br>P:GO:0040039;<br>P:GO:0006898;<br>P:GO:0009792 | -                                                                                                                  |             | -                                                                                                                        |
| Nematostella vectensis  | coiled-coil domain containing 88a                          | 4  | P:GO:0009950;<br>P:GO:0060071;<br>P:GO:0007257;<br>P:GO:0060070                                                                                                                                                                                                                                               | -                                                                                                                  |             | PTHR18947 (PANTHER),<br>PTHR18947:SF4 (PANTHER),<br>SSF116907 (SUPERFAMILY)                                              |
| -                       | -                                                          | 0  |                                                                                                                                                                                                                                                                                                               |                                                                                                                    |             | -                                                                                                                        |

|                               |                                                                        |    |                                                                                                                                                                                                                                           |                                                                                                                                                                                        |   |                                                                                                                                                                                                                           |
|-------------------------------|------------------------------------------------------------------------|----|-------------------------------------------------------------------------------------------------------------------------------------------------------------------------------------------------------------------------------------------|----------------------------------------------------------------------------------------------------------------------------------------------------------------------------------------|---|---------------------------------------------------------------------------------------------------------------------------------------------------------------------------------------------------------------------------|
| Volvox carteri f. nagariensis | hypothetical protein VOLCADRAFT_118487 [Volvox carteri f. nagariensis] | 0  |                                                                                                                                                                                                                                           | F:GO:0003702;<br>F:GO:0003677;<br>C:GO:0005634;<br>F:GO:0030528;<br>F:GO:0003676;<br>F:GO:0008270;<br>F:GO:0003746;<br>P:GO:0006355;<br>P:GO:0006354;<br>F:GO:0005515;<br>P:GO:0006350 | - |                                                                                                                                                                                                                           |
| Caenorhabditis elegans        | hypothetical protein F56H1.7 [Caenorhabditis elegans]                  | 0  |                                                                                                                                                                                                                                           |                                                                                                                                                                                        |   | PF10937 (PFAM)                                                                                                                                                                                                            |
|                               | -                                                                      | 0  |                                                                                                                                                                                                                                           |                                                                                                                                                                                        |   | -                                                                                                                                                                                                                         |
|                               | -                                                                      | 0  |                                                                                                                                                                                                                                           |                                                                                                                                                                                        |   | -                                                                                                                                                                                                                         |
|                               | -                                                                      | 0  |                                                                                                                                                                                                                                           |                                                                                                                                                                                        |   | -                                                                                                                                                                                                                         |
|                               | -                                                                      | 0  |                                                                                                                                                                                                                                           |                                                                                                                                                                                        |   | -                                                                                                                                                                                                                         |
| Brugia malayi                 | fyve zinc finger family protein                                        | 1  | F:GO:0046872                                                                                                                                                                                                                              | -                                                                                                                                                                                      |   | IPR021565; SSF140125 (SUPERFAMILY)                                                                                                                                                                                        |
| Caenorhabditis elegans        | hypothetical protein F40F4.6 [Caenorhabditis elegans]                  | 1  | P:GO:0040010                                                                                                                                                                                                                              |                                                                                                                                                                                        |   |                                                                                                                                                                                                                           |
| Caenorhabditis briggsae       | odd oz protein                                                         | 0  |                                                                                                                                                                                                                                           | P:GO:0006629;<br>F:GO:0016740;<br>F:GO:0030246;<br>F:GO:0004714;<br>C:GO:0016021;<br>F:GO:0004629;<br>C:GO:0016020                                                                     |   | IPR006530; PTHR11219 (PANTHER),<br>PTHR11219:SF4 (PANTHER)                                                                                                                                                                |
| Glossina morsitans morsitans  | chromobox protein 5                                                    | 1  | C:GO:0043229                                                                                                                                                                                                                              | -                                                                                                                                                                                      |   | IPR000953; IPR016197; IPR017984;<br>G3DSA:2.40.50.40 (GENE3D),<br>PTHR22812 (PANTHER)                                                                                                                                     |
|                               | -                                                                      | 0  |                                                                                                                                                                                                                                           |                                                                                                                                                                                        |   | -                                                                                                                                                                                                                         |
|                               | -                                                                      | 0  |                                                                                                                                                                                                                                           |                                                                                                                                                                                        |   | SignalP (SIGNALP)                                                                                                                                                                                                         |
|                               | -                                                                      | 0  |                                                                                                                                                                                                                                           |                                                                                                                                                                                        |   | G3DSA:3.40.50.1980 (GENE3D)                                                                                                                                                                                               |
|                               | -                                                                      | 0  |                                                                                                                                                                                                                                           |                                                                                                                                                                                        |   | SignalP (SIGNALP)                                                                                                                                                                                                         |
|                               | -                                                                      | 0  |                                                                                                                                                                                                                                           |                                                                                                                                                                                        |   | -                                                                                                                                                                                                                         |
|                               | -                                                                      | 0  |                                                                                                                                                                                                                                           |                                                                                                                                                                                        |   | SignalP (SIGNALP)                                                                                                                                                                                                         |
|                               | -                                                                      | 0  |                                                                                                                                                                                                                                           |                                                                                                                                                                                        |   | -                                                                                                                                                                                                                         |
| Caenorhabditis briggsae       | elegans protein confirmed by transcript evidence                       | 2  | P:GO:0009792;<br>P:GO:0000003                                                                                                                                                                                                             | -                                                                                                                                                                                      |   | -                                                                                                                                                                                                                         |
| Caenorhabditis elegans        | cell death abnormality family member (ced-1)                           | 14 | P:GO:0012501;<br>P:GO:0043652;<br>P:GO:0008340;<br>C:GO:0030670;<br>P:GO:0042742;<br>P:GO:0034620;<br>P:GO:0031532;<br>P:GO:0045184;<br>P:GO:0043654;<br>C:GO:0031260;<br>C:GO:0009986;<br>F:GO:0005515;<br>F:GO:0005044;<br>P:GO:0001845 | -                                                                                                                                                                                      |   | IPR000742; IPR002049; IPR006210;<br>IPR009030; IPR013032; PR00011<br>(PRINTS), G3DSA:2.10.25.10<br>(GENE3D), G3DSA:2.170.300.10<br>(GENE3D), PTHR11201 (PANTHER),<br>PTHR11201:SF221 (PANTHER),<br>SSF57196 (SUPERFAMILY) |

|                         |                                                  |    |                                                                                                                                                                                                                                           |                                                |                                                                                                                                                                                                                           |
|-------------------------|--------------------------------------------------|----|-------------------------------------------------------------------------------------------------------------------------------------------------------------------------------------------------------------------------------------------|------------------------------------------------|---------------------------------------------------------------------------------------------------------------------------------------------------------------------------------------------------------------------------|
| Caenorhabditis elegans  | cell death abnormality family member (ced-1)     | 14 | P:GO:0012501;<br>P:GO:0043652;<br>P:GO:0008340;<br>C:GO:0030670;<br>P:GO:0042742;<br>P:GO:0034620;<br>P:GO:0031532;<br>P:GO:0045184;<br>P:GO:0043654;<br>C:GO:0031260;<br>C:GO:0009986;<br>F:GO:0005515;<br>F:GO:0005044;<br>P:GO:0001845 | -                                              | SignalP (SIGNALP)                                                                                                                                                                                                         |
| -                       | -                                                | 0  |                                                                                                                                                                                                                                           |                                                | -                                                                                                                                                                                                                         |
| Caenorhabditis elegans  | cell death abnormality family member (ced-1)     | 14 | P:GO:0012501;<br>P:GO:0043652;<br>P:GO:0008340;<br>C:GO:0030670;<br>P:GO:0042742;<br>P:GO:0034620;<br>P:GO:0031532;<br>P:GO:0045184;<br>P:GO:0043654;<br>C:GO:0031260;<br>C:GO:0009986;<br>F:GO:0005515;<br>F:GO:0005044;<br>P:GO:0001845 | -                                              | IPR000742; IPR002049; IPR006210;<br>IPR009030; IPR013032; PR00011<br>(PRINTS), G3DSA:2.10.25.10<br>(GENE3D), G3DSA:2.170.300.10<br>(GENE3D), PTHR11201 (PANTHER),<br>PTHR11201:SF221 (PANTHER),<br>SSF57196 (SUPERFAMILY) |
| Caenorhabditis elegans  | cell death abnormality family member (ced-1)     | 14 | P:GO:0012501;<br>P:GO:0043652;<br>P:GO:0008340;<br>C:GO:0030670;<br>P:GO:0042742;<br>P:GO:0034620;<br>P:GO:0031532;<br>P:GO:0045184;<br>P:GO:0043654;<br>C:GO:0031260;<br>C:GO:0009986;<br>F:GO:0005515;<br>F:GO:0005044;<br>P:GO:0001845 | -                                              | IPR000742; IPR002049; IPR006210;<br>IPR009030; IPR013032; PR00011<br>(PRINTS), G3DSA:2.10.25.10<br>(GENE3D), G3DSA:2.170.300.10<br>(GENE3D), PTHR11201 (PANTHER),<br>PTHR11201:SF221 (PANTHER),<br>SSF57196 (SUPERFAMILY) |
| Caenorhabditis briggsae | ovarian cancer-associated gene 2 protein homolog | 0  |                                                                                                                                                                                                                                           | F:GO:0003674;<br>P:GO:0008150;<br>C:GO:0005575 | IPR005645; G3DSA:3.40.50.1820<br>(GENE3D), PTHR22778 (PANTHER),<br>SSF53474 (SUPERFAMILY)                                                                                                                                 |
| Caenorhabditis briggsae | ovca2 protein                                    | 0  |                                                                                                                                                                                                                                           | F:GO:0003674;<br>P:GO:0008150                  | IPR005645; PTHR22778 (PANTHER)                                                                                                                                                                                            |
| Caenorhabditis briggsae | hypothetical kda protein in pop4-shm1 intergenic | 8  | P:GO:0016477;<br>P:GO:0007411;<br>P:GO:0006480;<br>P:GO:0043050;<br>F:GO:0016740;<br>P:GO:0002119;<br>P:GO:0009792;<br>P:GO:0008406                                                                                                       | -                                              | IPR008576; G3DSA:3.40.50.150<br>(GENE3D), SignalP (SIGNALP),<br>SSF53335 (SUPERFAMILY)                                                                                                                                    |
| -                       | -                                                | 0  |                                                                                                                                                                                                                                           |                                                | -                                                                                                                                                                                                                         |

|                         |                                                            |   |                                                                                                                                     |                                                                                                   |              |                                                                                                                     |
|-------------------------|------------------------------------------------------------|---|-------------------------------------------------------------------------------------------------------------------------------------|---------------------------------------------------------------------------------------------------|--------------|---------------------------------------------------------------------------------------------------------------------|
| Caenorhabditis elegans  | sac3 domain containing 1                                   | 4 | P:GO:0000226;<br>C:GO:0044430;<br>P:GO:0000279;<br>C:GO:0015630                                                                     | -                                                                                                 |              | IPR005062; PTHR12436 (PANTHER)                                                                                      |
| Caenorhabditis briggsae | leucine rich repeat family protein                         | 1 | F:GO:0005515                                                                                                                        | -                                                                                                 |              | IPR001806; IPR008467; IPR022780;<br>G3DSA:3.40.50.300 (GENE3D),<br>SSF52540 (SUPERFAMILY)                           |
| Caenorhabditis remanei  | briggsae cbr-itsn-1 protein                                | 0 |                                                                                                                                     | F:GO:0005509                                                                                      |              | PTHR11216 (PANTHER),<br>PTHR11216:SF24 (PANTHER)                                                                    |
| Loa loa                 | zinc finger swim domain-containing protein kiaa0913        | 0 |                                                                                                                                     | F:GO:0046872;<br>F:GO:0008270                                                                     |              | -                                                                                                                   |
| Caenorhabditis elegans  | plexin a                                                   | 4 | P:GO:0016199;<br>F:GO:0005515;<br>C:GO:0044464;<br>F:GO:0004888                                                                     | -                                                                                                 |              | IPR001627; IPR015943; PTHR22625<br>(PANTHER), PTHR22625:SF11<br>(PANTHER), SignalP (SIGNALP)                        |
| Caenorhabditis elegans  | plexin a                                                   | 4 | P:GO:0016199;<br>F:GO:0005515;<br>C:GO:0044464;<br>F:GO:0004888                                                                     | -                                                                                                 | F:GO:0005515 | IPR001627; IPR015943; PTHR22625<br>(PANTHER), PTHR22625:SF11<br>(PANTHER), SignalP (SIGNALP)                        |
| Homo sapiens            | igh@ protein                                               | 4 | P:GO:0018298;<br>P:GO:0006955;<br>F:GO:0003823;<br>F:GO:0005515                                                                     | -                                                                                                 |              | -                                                                                                                   |
| Caenorhabditis briggsae | ribosomal protein l16 containing protein                   | 8 | P:GO:0009792;<br>P:GO:0002119;<br>C:GO:0005840;<br>F:GO:0003735;<br>F:GO:0005515;<br>P:GO:0040010;<br>P:GO:0006412;<br>F:GO:0019843 | -                                                                                                 | EC:3.6.5.3   | IPR000114; PTHR12220:SF12<br>(PANTHER)                                                                              |
| Brugia malayi           | cytoskeletal structural protein                            | 0 |                                                                                                                                     | P:GO:0007165                                                                                      |              | IPR000159                                                                                                           |
|                         | -                                                          | 0 |                                                                                                                                     |                                                                                                   |              | -                                                                                                                   |
| Caenorhabditis briggsae | elegans protein partially confirmed by transcript evidence | 0 |                                                                                                                                     | C:GO:0016021;<br>P:GO:0007186                                                                     |              | -                                                                                                                   |
| Caenorhabditis briggsae | briggsae cbr-mac-1 protein                                 | 2 | F:GO:0017111;<br>F:GO:0005524                                                                                                       | -                                                                                                 | EC:3.6.1.15  | IPR015415; G3DSA:1.10.8.60<br>(GENE3D), PTHR23077 (PANTHER),<br>PTHR23077:SF16 (PANTHER),<br>SSF52540 (SUPERFAMILY) |
| Caenorhabditis elegans  | briggsae cbr-gad-1 protein                                 | 3 | F:GO:0005515;<br>F:GO:0004672;<br>F:GO:0000166                                                                                      | -                                                                                                 |              | IPR001680; IPR011046; IPR015943;<br>IPR019781; PTHR16017 (PANTHER)                                                  |
| Caenorhabditis briggsae | elegans protein confirmed by transcript evidence           | 0 |                                                                                                                                     | F:GO:0003676;<br>C:GO:0005622                                                                     |              | IPR000253; IPR008984; PTHR23106<br>(PANTHER), PTHR23106:SF1<br>(PANTHER)                                            |
|                         | -                                                          | 0 |                                                                                                                                     |                                                                                                   |              | -                                                                                                                   |
| Pan troglodytes         | tumor necrosis factor receptor member 10c                  | 0 |                                                                                                                                     | F:GO:0004888;<br>P:GO:0006915;<br>P:GO:0007165;<br>C:GO:0005887;<br>C:GO:0031225;<br>C:GO:0005886 |              | -                                                                                                                   |

|                         |                                                    |    |                                                                                                                                                                                                                                                                                                                                                                                                                                                                                         |              |                                                                                                                                                              |
|-------------------------|----------------------------------------------------|----|-----------------------------------------------------------------------------------------------------------------------------------------------------------------------------------------------------------------------------------------------------------------------------------------------------------------------------------------------------------------------------------------------------------------------------------------------------------------------------------------|--------------|--------------------------------------------------------------------------------------------------------------------------------------------------------------|
| Caenorhabditis briggsae | ubiquitin protein ligase e3 component n-recognin 4 | 0  | F:GO:0016874;<br>C:GO:0016021;<br>C:GO:0016020;<br>C:GO:0005634;<br>P:GO:0006260;<br>F:GO:0008270;<br>P:GO:0016567;<br>F:GO:0005516;<br>F:GO:0004842;<br>F:GO:0046872;<br>P:GO:0008152;<br>C:GO:0005856                                                                                                                                                                                                                                                                                 |              | PTHR21725 (PANTHER)                                                                                                                                          |
|                         | -                                                  | 0  |                                                                                                                                                                                                                                                                                                                                                                                                                                                                                         |              | -                                                                                                                                                            |
| Dictyocaulus viviparus  | paramyosin                                         | 4  | C:GO:0030016;<br>C:GO:0032982;<br>F:GO:0003774;<br>F:GO:0005515                                                                                                                                                                                                                                                                                                                                                                                                                         |              | IPR002928; IPR009053; IPR010978;<br>PD936484 (PRODOM), PTHR13140<br>(PANTHER), PTHR13140:SF11<br>(PANTHER)                                                   |
| Caenorhabditis elegans  | elegans protein confirmed by transcript evidence   | 0  |                                                                                                                                                                                                                                                                                                                                                                                                                                                                                         |              | IPR001534; SignalP (SIGNALP)                                                                                                                                 |
|                         | -                                                  | 0  |                                                                                                                                                                                                                                                                                                                                                                                                                                                                                         |              | -                                                                                                                                                            |
| Caenorhabditis briggsae | myotonin-protein ki-se                             | 6  | F:GO:0005083;<br>P:GO:0006468;<br>F:GO:0046872;<br>P:GO:0023034;<br>F:GO:0004697;<br>F:GO:0005524                                                                                                                                                                                                                                                                                                                                                                                       | EC:2.7.11.13 | IPR000719; IPR008271; IPR011009;<br>IPR017442; G3DSA:1.10.510.10<br>(GENE3D), G3DSA:3.30.200.20<br>(GENE3D), PTHR22988 (PANTHER),<br>PTHR22988:SF2 (PANTHER) |
| Caenorhabditis elegans  | wingless-type mmtv integration site member 7b      | 48 | F:GO:0005079;<br>C:GO:0009986;<br>P:GO:0050768;<br>F:GO:0005109;<br>P:GO:0032364;<br>P:GO:0060560;<br>P:GO:0060710;<br>P:GO:0008284;<br>P:GO:0060669;<br>P:GO:0072060;<br>P:GO:0045669;<br>P:GO:0051384;<br>C:GO:0005615;<br>P:GO:0032536;<br>P:GO:0072089;<br>P:GO:0032583;<br>P:GO:0048864;<br>P:GO:0060428;<br>P:GO:0072205;<br>P:GO:0003338;<br>P:GO:0060482;<br>C:GO:0005886;<br>C:GO:0005737;<br>P:GO:0071300;<br>P:GO:0050808;<br>P:GO:0072061;<br>P:GO:0048812;<br>P:GO:0051145 |              | IPR005816; IPR005817; IPR018161;<br>PTHR12027:SF3 (PANTHER)                                                                                                  |



|                                 |                                   |    |                                                                                                                                                                       |                                                                                                                                                                                                         |            |                                                                                                                                                                                                         |
|---------------------------------|-----------------------------------|----|-----------------------------------------------------------------------------------------------------------------------------------------------------------------------|---------------------------------------------------------------------------------------------------------------------------------------------------------------------------------------------------------|------------|---------------------------------------------------------------------------------------------------------------------------------------------------------------------------------------------------------|
| Desulfovibrio fructosovorans JJ | adenylate cyclase                 | 0  |                                                                                                                                                                       | F:GO:0004651;<br>C:GO:0016021;<br>P:GO:0006370;<br>C:GO:0016020;<br>P:GO:0006810;<br>F:GO:0016829;<br>P:GO:0006171;<br>F:GO:0005515;<br>P:GO:0055085;<br>F:GO:0004016;<br>C:GO:0031533;<br>F:GO:0005488 |            | IPR004206; IPR008172; PD009560 (PRODOM), G3DSA:2.40.320.10 (GENE3D), PTHR21028 (PANTHER)                                                                                                                |
| Caenorhabditis elegans          | regulator of g protein sig-ling   | 3  | P:GO:0007186;<br>F:GO:0004871;<br>C:GO:0005834                                                                                                                        | -                                                                                                                                                                                                       | EC:3.6.5.1 | IPR000342; IPR000591; IPR011991; IPR015898; IPR016137; G3DSA:1.10.167.10 (GENE3D), G3DSA:1.10.196.10 (GENE3D), PTHR10845 (PANTHER), PTHR10845:SF24 (PANTHER), SignalP (SIGNALP), SSF46785 (SUPERFAMILY) |
| Caenorhabditis elegans          | regulator of g protein sig-ling   | 3  | P:GO:0007186;<br>F:GO:0004871;<br>C:GO:0005834                                                                                                                        | -                                                                                                                                                                                                       | EC:3.6.5.1 | IPR000342; IPR000591; IPR011991; IPR015898; IPR016137; G3DSA:1.10.167.10 (GENE3D), G3DSA:1.10.196.10 (GENE3D), PTHR10845 (PANTHER), PTHR10845:SF24 (PANTHER), SignalP (SIGNALP), SSF46785 (SUPERFAMILY) |
| -                               | -                                 | 0  |                                                                                                                                                                       |                                                                                                                                                                                                         |            | -                                                                                                                                                                                                       |
| -                               | -                                 | 0  |                                                                                                                                                                       |                                                                                                                                                                                                         |            | -                                                                                                                                                                                                       |
| -                               | -                                 | 0  |                                                                                                                                                                       |                                                                                                                                                                                                         |            | -                                                                                                                                                                                                       |
| -                               | -                                 | 0  |                                                                                                                                                                       |                                                                                                                                                                                                         |            | -                                                                                                                                                                                                       |
| Pristionchus uniformis          | large subunit ribosomal protein 1 | 10 | P:GO:0009792;<br>P:GO:0002119;<br>C:GO:0005840;<br>F:GO:0003735;<br>F:GO:0003723;<br>F:GO:0005515;<br>P:GO:0040010;<br>P:GO:0000003;<br>P:GO:0006412;<br>P:GO:0006396 | -                                                                                                                                                                                                       | EC:3.6.5.3 | IPR002143; IPR016094; IPR016095; PTHR23105 (PANTHER), PTHR23105:SF4 (PANTHER)                                                                                                                           |
| Pristionchus lheritieri         | large subunit ribosomal protein 1 | 5  | C:GO:0005840;<br>F:GO:0003735;<br>F:GO:0003723;<br>P:GO:0006412;<br>P:GO:0006396                                                                                      | -                                                                                                                                                                                                       | EC:3.6.5.3 | SignalP (SIGNALP)                                                                                                                                                                                       |
| Caenorhabditis briggsae         | zinc finger protein               | 0  |                                                                                                                                                                       | F:GO:0003676;<br>F:GO:0008270;<br>C:GO:0005622                                                                                                                                                          |            | IPR007087; IPR015880                                                                                                                                                                                    |
| -                               | -                                 | 0  |                                                                                                                                                                       |                                                                                                                                                                                                         |            | IPR007087; IPR015880                                                                                                                                                                                    |
| Caenorhabditis elegans          | alpha- -mannosyltransferase alg12 | 4  | C:GO:0031224;<br>P:GO:0006488;<br>F:GO:0000009;<br>C:GO:0005783                                                                                                       | -                                                                                                                                                                                                       |            | -                                                                                                                                                                                                       |
| -                               | -                                 | 0  |                                                                                                                                                                       |                                                                                                                                                                                                         |            | -                                                                                                                                                                                                       |

|                             |                                                         |   |                                                                                  |                                                                                                                                                                                                                                                                                                                                                                  |             |                                                                                                                                     |
|-----------------------------|---------------------------------------------------------|---|----------------------------------------------------------------------------------|------------------------------------------------------------------------------------------------------------------------------------------------------------------------------------------------------------------------------------------------------------------------------------------------------------------------------------------------------------------|-------------|-------------------------------------------------------------------------------------------------------------------------------------|
| Brugia malayi               | protein ki-se n2                                        | 2 | F:GO:0005488;<br>F:GO:0004674                                                    | -                                                                                                                                                                                                                                                                                                                                                                | EC:2.7.11.0 | IPR008973; G3DSA:2.60.40.150 (GENE3D), G3DSA:3.30.200.20 (GENE3D), PTHR22985 (PANTHER), PTHR22985:SF54 (PANTHER), SignalP (SIGNALP) |
| Brugia malayi               | protein ki-se c                                         | 1 | F:GO:0016301                                                                     | -                                                                                                                                                                                                                                                                                                                                                                |             | IPR008973; G3DSA:2.60.40.150 (GENE3D), G3DSA:3.30.200.20 (GENE3D), PTHR22985 (PANTHER), PTHR22985:SF54 (PANTHER), SignalP (SIGNALP) |
| Ciona intestinalis          | astacin family metalloendopeptidase farm-1              | 1 | F:GO:0016787                                                                     | -                                                                                                                                                                                                                                                                                                                                                                |             | IPR003582; PTHR21724 (PANTHER), SSF57546 (SUPERFAMILY)                                                                              |
| Caenorhabditis briggsae     | Hypothetical protein CBG22158 [Caenorhabditis briggsae] | 0 |                                                                                  | C:GO:0005634                                                                                                                                                                                                                                                                                                                                                     |             | PTHR15565 (PANTHER)                                                                                                                 |
| Caenorhabditis briggsae     | Hypothetical protein CBG22158 [Caenorhabditis briggsae] | 0 |                                                                                  | C:GO:0005634                                                                                                                                                                                                                                                                                                                                                     |             | PTHR15565 (PANTHER)                                                                                                                 |
| Caenorhabditis elegans      | briggsae cbr-ceh-20 protein                             | 0 |                                                                                  | P:GO:0016477;<br>P:GO:0009952;<br>F:GO:0003677;<br>C:GO:0005634;<br>P:GO:0040027;<br>P:GO:0042692;<br>F:GO:0030528;<br>P:GO:0006355;<br>P:GO:0007498;<br>P:GO:0008340;<br>P:GO:0006898;<br>P:GO:0009792;<br>F:GO:0003700;<br>P:GO:0010171;<br>P:GO:0045449;<br>F:GO:0043565;<br>F:GO:0005515;<br>P:GO:0040011;<br>P:GO:0007501;<br>P:GO:0040010;<br>P:GO:0018991 | -           |                                                                                                                                     |
|                             | -                                                       | 0 |                                                                                  |                                                                                                                                                                                                                                                                                                                                                                  |             | SignalP (SIGNALP)                                                                                                                   |
| Caenorhabditis briggsae     | sjoegren syndrome scleroderma autoantigen 1 homolog     | 0 |                                                                                  | F:GO:0003674;<br>P:GO:0008150                                                                                                                                                                                                                                                                                                                                    |             | IPR009563                                                                                                                           |
| Caenorhabditis briggsae     | sjoegren syndrome scleroderma autoantigen 1 homolog     | 0 |                                                                                  | F:GO:0003674;<br>P:GO:0008150                                                                                                                                                                                                                                                                                                                                    |             | IPR009563                                                                                                                           |
| Loa loa                     | gmp synthase                                            | 5 | P:GO:0006541;<br>F:GO:0003922;<br>F:GO:0005524;<br>F:GO:0005515;<br>P:GO:0006177 | -                                                                                                                                                                                                                                                                                                                                                                | EC:6.3.5.2  | IPR001674; G3DSA:3.30.300.10 (GENE3D), PTHR11922 (PANTHER), PTHR11922:SF2 (PANTHER), SSF54810 (SUPERFAMILY)                         |
|                             | -                                                       | 0 |                                                                                  |                                                                                                                                                                                                                                                                                                                                                                  |             | -                                                                                                                                   |
|                             | -                                                       | 0 |                                                                                  |                                                                                                                                                                                                                                                                                                                                                                  |             | -                                                                                                                                   |
|                             | -                                                       | 0 |                                                                                  |                                                                                                                                                                                                                                                                                                                                                                  |             | IPR013032                                                                                                                           |
| Caenorhabditis elegans      | ras gtp exchange son of sevenless                       | 2 | P:GO:0009987;<br>C:GO:0005622                                                    | -                                                                                                                                                                                                                                                                                                                                                                |             | IPR000651; IPR001849; IPR008937; IPR011993; IPR015759; G3DSA:1.20.870.10 (GENE3D), SSF50729 (SUPERFAMILY)                           |
|                             | -                                                       | 0 |                                                                                  |                                                                                                                                                                                                                                                                                                                                                                  |             | -                                                                                                                                   |
|                             | -                                                       | 0 |                                                                                  |                                                                                                                                                                                                                                                                                                                                                                  |             | -                                                                                                                                   |
|                             | -                                                       | 0 |                                                                                  |                                                                                                                                                                                                                                                                                                                                                                  |             | -                                                                                                                                   |
| Angiostrongylus cantonensis | proton-coupled amino acid transporter 1                 | 1 | C:GO:0016021                                                                     | -                                                                                                                                                                                                                                                                                                                                                                |             | -                                                                                                                                   |

|                         |                                                            |   |                                                                                  |                                                                                                                                                                                        |            |                                                                                                                                  |
|-------------------------|------------------------------------------------------------|---|----------------------------------------------------------------------------------|----------------------------------------------------------------------------------------------------------------------------------------------------------------------------------------|------------|----------------------------------------------------------------------------------------------------------------------------------|
| Ostreococcus tauri      | dentin sialophosphoprotein precursor                       | 0 |                                                                                  | F:GO:0016740;<br>C:GO:0009986;<br>F:GO:0003677;<br>P:GO:0071460;<br>C:GO:0005578;<br>C:GO:0031012;<br>F:GO:0016779;<br>C:GO:0005618;<br>P:GO:0006350;<br>P:GO:0031214;<br>F:GO:0003899 |            | -                                                                                                                                |
| Ostreococcus tauri      | d--directed r- polymerase                                  | 0 |                                                                                  | F:GO:0016779;<br>F:GO:0003899;<br>F:GO:0016740;<br>P:GO:0006350;<br>F:GO:0003677                                                                                                       |            | -                                                                                                                                |
| Caenorhabditis briggsae | elegans protein partially confirmed by transcript evidence | 0 |                                                                                  | F:GO:0046872;<br>C:GO:0016021;<br>C:GO:0016020;<br>P:GO:0023034;<br>F:GO:0005515                                                                                                       |            | IPR002219; G3DSA:3.30.60.20 (GENE3D), SSF57889 (SUPERFAMILY)                                                                     |
| Caenorhabditis briggsae | elegans protein partially confirmed by transcript evidence | 0 |                                                                                  | F:GO:0046872;<br>C:GO:0016021;<br>C:GO:0016020;<br>P:GO:0023034;<br>F:GO:0005515                                                                                                       |            | IPR002219; G3DSA:3.30.60.20 (GENE3D), SSF57889 (SUPERFAMILY)                                                                     |
| Caenorhabditis elegans  | zip zinc transporter family protein                        | 2 | P:GO:0009792;<br>P:GO:0006810                                                    | -                                                                                                                                                                                      |            | IPR003689; PTHR11040 (PANTHER), PTHR11040:SF8 (PANTHER), SignalP (SIGNALP)                                                       |
| Caenorhabditis briggsae | zip zinc transporter family protein                        | 5 | P:GO:0030001;<br>C:GO:0016021;<br>P:GO:0009792;<br>F:GO:0046873;<br>P:GO:0055085 | -                                                                                                                                                                                      |            | IPR003689; PTHR11040 (PANTHER), PTHR11040:SF8 (PANTHER)                                                                          |
| Caenorhabditis elegans  | zip zinc transporter family protein                        | 2 | C:GO:0016020;<br>P:GO:0006810                                                    | -                                                                                                                                                                                      |            | IPR003689; PTHR11040 (PANTHER), PTHR11040:SF8 (PANTHER), SignalP (SIGNALP)                                                       |
|                         | -                                                          | 0 |                                                                                  |                                                                                                                                                                                        |            | -                                                                                                                                |
| Caenorhabditis elegans  | tryptophanyl-tr- synthetase                                | 5 | C:GO:0005737;<br>F:GO:0004830;<br>P:GO:0006436;<br>F:GO:0005524;<br>P:GO:0007040 | -                                                                                                                                                                                      | EC:6.1.1.2 | IPR001412; IPR002305; IPR002306; IPR014729; G3DSA:1.10.240.10 (GENE3D), SSF52374 (SUPERFAMILY)                                   |
| Caenorhabditis briggsae | unconventio-l s-re in the er 1 homolog                     | 5 | P:GO:0046907;<br>F:GO:0005488;<br>C:GO:0043231;<br>C:GO:0044444;<br>P:GO:0016192 | -                                                                                                                                                                                      |            | IPR019150; PTHR13050 (PANTHER)                                                                                                   |
|                         | -                                                          | 0 |                                                                                  |                                                                                                                                                                                        |            | -                                                                                                                                |
| Brugia malayi           | ubiquitin-activating enzyme e1                             | 3 | F:GO:0008641;<br>P:GO:0006464;<br>F:GO:0008134                                   | -                                                                                                                                                                                      |            | IPR000594; IPR009036; IPR016040; IPR018074; IPR019572; G3DSA:1.10.3240.10 (GENE3D), PTHR10953 (PANTHER), PTHR10953:SF5 (PANTHER) |
|                         | -                                                          | 0 |                                                                                  |                                                                                                                                                                                        |            | -                                                                                                                                |
|                         | -                                                          | 0 |                                                                                  |                                                                                                                                                                                        |            | -                                                                                                                                |
|                         | -                                                          | 0 |                                                                                  |                                                                                                                                                                                        |            | -                                                                                                                                |
|                         | -                                                          | 0 |                                                                                  |                                                                                                                                                                                        |            | -                                                                                                                                |

|                         |                                                     |    |                                                                                                                                                                                                                                           |                                                                 |                                                                                                            |
|-------------------------|-----------------------------------------------------|----|-------------------------------------------------------------------------------------------------------------------------------------------------------------------------------------------------------------------------------------------|-----------------------------------------------------------------|------------------------------------------------------------------------------------------------------------|
|                         | -                                                   | 0  |                                                                                                                                                                                                                                           |                                                                 | -                                                                                                          |
| Caenorhabditis elegans  | briggsae cbr-ccdc-55 protein                        | 4  | P:GO:0002119;<br>P:GO:0040010;<br>P:GO:0006898;<br>P:GO:0040039                                                                                                                                                                           |                                                                 | IPR018612; PTHR22908 (PANTHER),<br>PTHR22908:SF4 (PANTHER)                                                 |
| Loa loa                 | agap010322 protein                                  | 7  | P:GO:0045944;<br>F:GO:0016564;<br>P:GO:0000122;<br>F:GO:0016563;<br>F:GO:0005515;<br>C:GO:0005634;<br>F:GO:0003702                                                                                                                        |                                                                 | IPR009072; PTHR11064 (PANTHER),<br>PTHR11064:SF8 (PANTHER)                                                 |
| Caenorhabditis elegans  | protein fam69c-like                                 | 0  |                                                                                                                                                                                                                                           | F:GO:0003674;<br>C:GO:0016021;<br>C:GO:0016020;<br>P:GO:0008150 | IPR022049; PTHR21093 (PANTHER)                                                                             |
|                         | -                                                   | 0  |                                                                                                                                                                                                                                           |                                                                 | -                                                                                                          |
| Loa loa                 | kinesin-like protein at 3a-like                     | 2  | F:GO:0005488;<br>C:GO:0043232                                                                                                                                                                                                             |                                                                 | PTHR16012 (PANTHER),<br>PTHR16012:SF119 (PANTHER)                                                          |
| Loa loa                 | kinesin-like protein at 3a-like                     | 2  | F:GO:0005488;<br>C:GO:0043232                                                                                                                                                                                                             |                                                                 | PTHR16012 (PANTHER),<br>PTHR16012:SF119 (PANTHER)                                                          |
| Caenorhabditis briggsae | outer membrane protein                              | 1  | F:GO:0005515                                                                                                                                                                                                                              |                                                                 | IPR011935                                                                                                  |
| Caenorhabditis briggsae | mucoidy inhibitor a                                 | 1  | F:GO:0005515                                                                                                                                                                                                                              |                                                                 | -                                                                                                          |
| Caenorhabditis briggsae | mucoidy inhibitor a                                 | 1  | F:GO:0005515                                                                                                                                                                                                                              |                                                                 | IPR011935                                                                                                  |
| Caenorhabditis briggsae | outer membrane protein                              | 1  | F:GO:0005515                                                                                                                                                                                                                              |                                                                 | IPR011935                                                                                                  |
|                         | -                                                   | 0  |                                                                                                                                                                                                                                           |                                                                 | -                                                                                                          |
|                         | -                                                   | 0  |                                                                                                                                                                                                                                           |                                                                 | -                                                                                                          |
| Caenorhabditis briggsae | outer membrane protein                              | 1  | F:GO:0005515                                                                                                                                                                                                                              |                                                                 | -                                                                                                          |
| Caenorhabditis briggsae | outer membrane protein                              | 1  | F:GO:0005515                                                                                                                                                                                                                              |                                                                 | IPR011935                                                                                                  |
| Caenorhabditis briggsae | mucoidy inhibitor a                                 | 1  | F:GO:0005515                                                                                                                                                                                                                              |                                                                 | -                                                                                                          |
| Caenorhabditis briggsae | outer membrane protein                              | 1  | F:GO:0005515                                                                                                                                                                                                                              |                                                                 | -                                                                                                          |
| Caenorhabditis briggsae | outer membrane protein                              | 1  | F:GO:0005515                                                                                                                                                                                                                              |                                                                 | IPR011935                                                                                                  |
| Caenorhabditis briggsae | mucoidy inhibitor a                                 | 1  | F:GO:0005515                                                                                                                                                                                                                              |                                                                 | -                                                                                                          |
|                         | -                                                   | 0  |                                                                                                                                                                                                                                           |                                                                 | -                                                                                                          |
| Caenorhabditis elegans  | mitochondrial ribosomal protein l46                 | 0  |                                                                                                                                                                                                                                           | F:GO:0003735;<br>F:GO:0016787                                   | IPR000086; IPR015797; IPR021757;<br>PTHR13124 (PANTHER),<br>PTHR13124:SF11 (PANTHER), SignalP<br>(SIGNALP) |
| Caenorhabditis elegans  | salt tolerance protein                              | 6  | P:GO:0008380;<br>F:GO:0003729;<br>P:GO:0006915;<br>F:GO:0005515;<br>P:GO:0006950;<br>C:GO:0005634                                                                                                                                         |                                                                 | IPR004882; PTHR12375:SF17<br>(PANTHER)                                                                     |
| Caenorhabditis briggsae | hydroxysteroid (17-beta) dehydroge-se isoform cra_a | 14 | P:GO:0006952;<br>P:GO:0000038;<br>P:GO:0060009;<br>P:GO:0008340;<br>C:GO:0005739;<br>F:GO:0033989;<br>P:GO:0033540;<br>F:GO:0015248;<br>F:GO:0042802;<br>F:GO:0030283;<br>P:GO:0019915;<br>F:GO:0003857;<br>F:GO:0004303;<br>C:GO:0005782 |                                                                 | EC:4.2.1.107<br>;<br>EC:1.1.1.51;<br>EC:1.1.1.35;<br>EC:1.1.1.62                                           |

|                         |                                                         |   |                                                                                                                                     |   |                                                                                                                                             |
|-------------------------|---------------------------------------------------------|---|-------------------------------------------------------------------------------------------------------------------------------------|---|---------------------------------------------------------------------------------------------------------------------------------------------|
|                         |                                                         | 0 |                                                                                                                                     |   |                                                                                                                                             |
| Loa loa                 | vacuolar protein sorting-associated protein 33b         | 7 | P:GO:0016192;<br>C:GO:0005764;<br>P:GO:0051640;<br>C:GO:0005774;<br>C:GO:0005770;<br>F:GO:0019905;<br>P:GO:0016043                  | - | IPR001619; G3DSA:3.40.50.1910 (GENE3D), G3DSA:3.90.830.10 (GENE3D), PTHR11679:SF1 (PANTHER)                                                 |
| Caenorhabditis briggsae | vacuolar protein sorting 35                             | 4 | C:GO:0005768;<br>F:GO:0005515;<br>P:GO:0006810;<br>C:GO:0005829                                                                     | - | -                                                                                                                                           |
| Caenorhabditis elegans  | rho gtpase activating protein 29                        | 3 | F:GO:0046872;<br>P:GO:0007165;<br>C:GO:0005622                                                                                      | - | IPR000198; IPR002219; IPR008936; G3DSA:3.30.60.20 (GENE3D), PTHR15228 (PANTHER), PTHR15228:SF1 (PANTHER), SSF57889 (SUPERFAMILY)            |
| Caenorhabditis briggsae | adipokinetic hormone receptor                           | 4 | P:GO:0007186;<br>C:GO:0016021;<br>P:GO:0007165;<br>F:GO:0005000                                                                     | - | IPR000276; IPR017452; G3DSA:1.20.1070.10 (GENE3D), PTHR19264 (PANTHER), PTHR19264:SF50 (PANTHER), SignalP (SIGNALP), SSF81321 (SUPERFAMILY) |
| Caenorhabditis briggsae | Hypothetical protein CBG13933 [Caenorhabditis briggsae] | 2 | P:GO:0040010;<br>P:GO:0006898                                                                                                       | - | -                                                                                                                                           |
| Caenorhabditis briggsae | bromodomain adjacent to zinc finger 1b                  | 7 | F:GO:0005515;<br>P:GO:0010468;<br>F:GO:0016740;<br>P:GO:0006350;<br>C:GO:0044446;<br>C:GO:0005634;<br>P:GO:0016568                  | - | IPR001965; IPR011011; IPR013083; IPR019786; IPR019787; PTHR22880 (PANTHER), PTHR22880:SF4 (PANTHER)                                         |
| Caenorhabditis briggsae | bromodomain adjacent to zinc finger 1b                  | 7 | F:GO:0005515;<br>P:GO:0010468;<br>F:GO:0016740;<br>P:GO:0006350;<br>C:GO:0044446;<br>C:GO:0005634;<br>P:GO:0016568                  | - | -                                                                                                                                           |
|                         |                                                         | 0 |                                                                                                                                     |   |                                                                                                                                             |
| Caenorhabditis briggsae | bromodomain adjacent to zinc finger 1b                  | 8 | P:GO:0044260;<br>P:GO:0010467;<br>F:GO:0016740;<br>P:GO:0044238;<br>P:GO:0050789;<br>C:GO:0043229;<br>F:GO:0005488;<br>P:GO:0006325 | - | IPR001965; IPR011011; IPR013083; IPR019786; IPR019787; PTHR22880 (PANTHER), PTHR22880:SF4 (PANTHER)                                         |
| Brugia malayi           | alpha 1b                                                | 8 | F:GO:0005200;<br>P:GO:0007018;<br>F:GO:0005525;<br>F:GO:0005515;<br>P:GO:0000226;<br>P:GO:0051258;<br>F:GO:0003924;<br>C:GO:0005874 | - | EC:3.6.5.1;<br>EC:3.6.5.2;<br>EC:3.6.5.3;<br>EC:3.6.5.4<br>IPR000217; IPR002452; IPR003008; IPR008280; IPR017975; IPR018316; IPR023123      |

|                         |                                                |    |                                                                                                                                                                                                                                                                                                                                                 |   |            |                                                                                                                                                         |
|-------------------------|------------------------------------------------|----|-------------------------------------------------------------------------------------------------------------------------------------------------------------------------------------------------------------------------------------------------------------------------------------------------------------------------------------------------|---|------------|---------------------------------------------------------------------------------------------------------------------------------------------------------|
| Loa loa                 | bromodomain containing protein                 | 12 | P:GO:0000117;<br>F:GO:0008270;<br>P:GO:0006367;<br>P:GO:0051726;<br>P:GO:0045944;<br>F:GO:0016251;<br>F:GO:0035174;<br>F:GO:0043565;<br>F:GO:0016563;<br>F:GO:0005515;<br>P:GO:0016573;<br>C:GO:0005669                                                                                                                                         | - |            | IPR022591; PTHR13900 (PANTHER)                                                                                                                          |
| Caenorhabditis elegans  | bifunctional coenzyme a synthase               | 7  | F:GO:0016779;<br>P:GO:0007303;<br>P:GO:0007297;<br>P:GO:0009058;<br>P:GO:0070328;<br>P:GO:0007476;<br>F:GO:0016301                                                                                                                                                                                                                              | - | EC:2.7.7.0 | IPR001977; IPR004820; IPR004821;<br>IPR014729; G3DSA:3.40.50.300<br>(GENE3D), PTHR10695 (PANTHER),<br>SSF52374 (SUPERFAMILY), SSF52540<br>(SUPERFAMILY) |
|                         | -                                              | 0  |                                                                                                                                                                                                                                                                                                                                                 |   |            | -                                                                                                                                                       |
|                         | -                                              | 0  |                                                                                                                                                                                                                                                                                                                                                 |   |            | SignalP (SIGNALP)                                                                                                                                       |
|                         | -                                              | 0  |                                                                                                                                                                                                                                                                                                                                                 |   |            | SignalP (SIGNALP)                                                                                                                                       |
| Loa loa                 | iron-sulfur cluster assembly accessory protein | 1  | F:GO:0005488                                                                                                                                                                                                                                                                                                                                    | - |            | IPR010304; IPR018351;<br>G3DSA:2.30.30.140 (GENE3D),<br>PTHR12664 (PANTHER), SSF63748<br>(SUPERFAMILY)                                                  |
| Caenorhabditis briggsae | protein mago -shi                              | 20 | P:GO:0008340;<br>P:GO:0016246;<br>P:GO:0008103;<br>P:GO:0007267;<br>F:GO:0005515;<br>P:GO:0006406;<br>P:GO:0040010;<br>C:GO:0071011;<br>P:GO:0040011;<br>P:GO:0007318;<br>P:GO:0007317;<br>C:GO:0071013;<br>P:GO:0046594;<br>P:GO:0000398;<br>C:GO:0045495;<br>P:GO:0009792;<br>P:GO:0002119;<br>P:GO:0010171;<br>P:GO:0040022;<br>P:GO:0001703 | - |            | IPR004023                                                                                                                                               |

|                         |                                          |    |                                                                                                                                                                                                                                                                                                                                                 |                                                                                                   |                                                         |
|-------------------------|------------------------------------------|----|-------------------------------------------------------------------------------------------------------------------------------------------------------------------------------------------------------------------------------------------------------------------------------------------------------------------------------------------------|---------------------------------------------------------------------------------------------------|---------------------------------------------------------|
| Caenorhabditis briggsae | protein mago -shi                        | 20 | P:GO:0008340;<br>P:GO:0016246;<br>P:GO:0008103;<br>P:GO:0007267;<br>F:GO:0005515;<br>P:GO:0006406;<br>P:GO:0040010;<br>C:GO:0071011;<br>P:GO:0040011;<br>P:GO:0007318;<br>P:GO:0007317;<br>C:GO:0071013;<br>P:GO:0046594;<br>P:GO:0000398;<br>C:GO:0045495;<br>P:GO:0009792;<br>P:GO:0002119;<br>P:GO:0010171;<br>P:GO:0040022;<br>P:GO:0001703 | -                                                                                                 | IPR004023                                               |
| Caenorhabditis briggsae | protein mago -shi                        | 20 | P:GO:0008340;<br>P:GO:0016246;<br>P:GO:0008103;<br>P:GO:0007267;<br>F:GO:0005515;<br>P:GO:0006406;<br>P:GO:0040010;<br>C:GO:0071011;<br>P:GO:0040011;<br>P:GO:0007318;<br>P:GO:0007317;<br>C:GO:0071013;<br>P:GO:0046594;<br>P:GO:0000398;<br>C:GO:0045495;<br>P:GO:0009792;<br>P:GO:0002119;<br>P:GO:0010171;<br>P:GO:0040022;<br>P:GO:0001703 | -                                                                                                 | IPR004023                                               |
| Caenorhabditis briggsae | protein phosphatase regulatory subunit 1 | 1  | P:GO:0000003                                                                                                                                                                                                                                                                                                                                    | -                                                                                                 | IPR011989; IPR016024; IPR021133;<br>PTHR10648 (PANTHER) |
|                         |                                          | 0  |                                                                                                                                                                                                                                                                                                                                                 |                                                                                                   |                                                         |
| Caenorhabditis briggsae | rcc1 protein                             | 0  |                                                                                                                                                                                                                                                                                                                                                 | C:GO:0005737;<br>P:GO:0007049;<br>P:GO:0051301;<br>P:GO:0007067;<br>F:GO:0005085;<br>C:GO:0005634 | PS51257 (PROFILE), SignalP (SIGNALP)                    |
| Caenorhabditis briggsae | rcc1 protein                             | 0  |                                                                                                                                                                                                                                                                                                                                                 | C:GO:0005737;<br>P:GO:0007049;<br>P:GO:0051301;<br>P:GO:0007067;<br>F:GO:0005085;<br>C:GO:0005634 | -                                                       |
|                         |                                          | 0  |                                                                                                                                                                                                                                                                                                                                                 |                                                                                                   |                                                         |
|                         |                                          | 0  |                                                                                                                                                                                                                                                                                                                                                 |                                                                                                   |                                                         |

|                                  |                                                                     |    |                                                                                                                                                                       |                                                                                  |             |                                                                                                                           |
|----------------------------------|---------------------------------------------------------------------|----|-----------------------------------------------------------------------------------------------------------------------------------------------------------------------|----------------------------------------------------------------------------------|-------------|---------------------------------------------------------------------------------------------------------------------------|
| Loa loa                          | unc-119 homolog b                                                   | 3  | F:GO:0004114;<br>F:GO:0005515;<br>P:GO:0007275                                                                                                                        | -                                                                                | EC:3.1.4.17 | IPR008015; IPR014756; PTHR12951 (PANTHER), PTHR12951:SF1 (PANTHER)                                                        |
| Caenorhabditis elegans           | protein rer1                                                        | 2  | P:GO:0006890;<br>C:GO:0030173                                                                                                                                         | -                                                                                |             | IPR004932; SignalP (SIGNALP)                                                                                              |
| Caenorhabditis elegans           | lung seven transmembrane receptor family protein                    | 1  | C:GO:0016021                                                                                                                                                          | -                                                                                |             | -                                                                                                                         |
| Caenorhabditis elegans           | deah (asp-glu-ala-his) box polypeptide 35                           | 4  | F:GO:0008026;<br>F:GO:0003676;<br>F:GO:0005524;<br>P:GO:0006396                                                                                                       | -                                                                                |             | IPR002464; IPR014021; G3DSA:3.40.50.300 (GENE3D), PTHR18934 (PANTHER), SSF52540 (SUPERFAMILY)                             |
| Caenorhabditis briggsae          | cmc1_caeel ame: full=probable calcium-binding mitochondrial carrier | 3  | F:GO:0005488;<br>P:GO:0006810;<br>C:GO:0016020                                                                                                                        | -                                                                                |             | -                                                                                                                         |
| Caenorhabditis briggsae          | salivary secreted ribonuclease                                      | 6  | P:GO:0009792;<br>P:GO:0002119;<br>P:GO:0018996;<br>F:GO:0004518;<br>P:GO:0000003;<br>P:GO:0006898                                                                     | -                                                                                |             | SignalP (SIGNALP)                                                                                                         |
| Caenorhabditis briggsae          | salivary secreted ribonuclease                                      | 6  | P:GO:0009792;<br>P:GO:0002119;<br>P:GO:0018996;<br>F:GO:0004518;<br>P:GO:0000003;<br>P:GO:0006898                                                                     | -                                                                                |             | SignalP (SIGNALP)                                                                                                         |
| Caenorhabditis elegans           | rgp1 retrograde golgi transport homolog                             | 0  |                                                                                                                                                                       | F:GO:0003674;<br>P:GO:0008150;<br>C:GO:0005575                                   |             | IPR014848; PTHR12507 (PANTHER)                                                                                            |
| Caenorhabditis elegans           | cell division cycle 40 homolog                                      | 10 | P:GO:0040007;<br>P:GO:0000003;<br>P:GO:0008380;<br>P:GO:0010171;<br>P:GO:0002119;<br>P:GO:0040039;<br>P:GO:0002009;<br>P:GO:0001703;<br>C:GO:0005634;<br>P:GO:0016246 | -                                                                                |             | IPR001680; IPR011046; IPR015943; IPR017986; IPR019781; IPR019782; IPR020472; PTHR19852 (PANTHER), PTHR19852:SF7 (PANTHER) |
| Caenorhabditis briggsae          | transmembrane protein 180-like                                      | 2  | C:GO:0016021;<br>P:GO:0008340                                                                                                                                         | -                                                                                |             | IPR016196                                                                                                                 |
| Brugia malayi                    | cutaneous t-cell lymphoma tumor antigen se70-2                      | 3  | P:GO:0010171;<br>F:GO:0005488;<br>P:GO:0040010                                                                                                                        | -                                                                                |             | IPR000504; IPR000571; IPR012677; G3DSA:4.10.1000.10 (GENE3D), PTHR14398 (PANTHER), SSF54928 (SUPERFAMILY)                 |
| Clavospora lusitaniae ATCC 42720 | proteophosphoglycan ppg4                                            | 0  |                                                                                                                                                                       | F:GO:0005524;<br>F:GO:0004479;<br>P:GO:0006412;<br>F:GO:0003774;<br>C:GO:0016459 |             | -                                                                                                                         |
| Caenorhabditis elegans           | uncoordinated family member (unc-22)                                | 5  | C:GO:0030018;<br>F:GO:0008307;<br>P:GO:0007498;<br>F:GO:0004674;<br>F:GO:0000166                                                                                      | -                                                                                | EC:2.7.11.0 | -                                                                                                                         |



|                         |                                                         |    |                                                                                                                                                                                                                                                                                                                                                                                                                                                                        |   |   |                                                                                                           |
|-------------------------|---------------------------------------------------------|----|------------------------------------------------------------------------------------------------------------------------------------------------------------------------------------------------------------------------------------------------------------------------------------------------------------------------------------------------------------------------------------------------------------------------------------------------------------------------|---|---|-----------------------------------------------------------------------------------------------------------|
| Caenorhabditis elegans  | myosin regulatory light chain                           | 7  | C:GO:0005856;<br>F:GO:0005509;<br>C:GO:0030016;<br>P:GO:0055003;<br>F:GO:0005515;<br>P:GO:0042694;<br>P:GO:0060048                                                                                                                                                                                                                                                                                                                                                     | - | - |                                                                                                           |
| Nasonia vitripennis     | histone                                                 | 16 | P:GO:0040010;<br>C:GO:0000786;<br>P:GO:0008340;<br>P:GO:0009725;<br>P:GO:0008360;<br>P:GO:0007420;<br>F:GO:0003677;<br>C:GO:0005700;<br>P:GO:0010171;<br>P:GO:0007155;<br>P:GO:0002119;<br>P:GO:0006334;<br>P:GO:0009792;<br>P:GO:0007140;<br>C:GO:0005634;<br>P:GO:0006974                                                                                                                                                                                            | - |   | IPR000164; IPR007125; IPR009072                                                                           |
| Caenorhabditis briggsae | atpase 7b                                               | 33 | P:GO:0006915;<br>P:GO:0035434;<br>C:GO:0005923;<br>C:GO:0005802;<br>F:GO:0005507;<br>P:GO:0042415;<br>P:GO:0007420;<br>P:GO:0043085;<br>P:GO:0048552;<br>P:GO:0009072;<br>P:GO:0044283;<br>F:GO:0043682;<br>P:GO:0006464;<br>P:GO:0007005;<br>P:GO:0006586;<br>P:GO:0010043;<br>P:GO:0008544;<br>P:GO:0009101;<br>C:GO:0042995;<br>P:GO:0021954;<br>P:GO:0046688;<br>F:GO:0008270;<br>P:GO:0048812;<br>P:GO:0050794;<br>P:GO:0030198;<br>P:GO:0051591;<br>P:GO:0030005 | - |   | IPR001757; IPR006121; IPR006403;<br>IPR017969; G3DSA:3.30.70.100<br>(GENE3D), PTHR11939:SF38<br>(PANTHER) |
| -                       | -                                                       | 0  |                                                                                                                                                                                                                                                                                                                                                                                                                                                                        |   |   | -                                                                                                         |
| -                       | -                                                       | 0  |                                                                                                                                                                                                                                                                                                                                                                                                                                                                        |   |   | SignalP (SIGNALP)                                                                                         |
| -                       | -                                                       | 0  |                                                                                                                                                                                                                                                                                                                                                                                                                                                                        |   |   | SignalP (SIGNALP)                                                                                         |
| Culex quinquefasciatus  | conserved hypothetical protein [Culex quinquefasciatus] | 0  |                                                                                                                                                                                                                                                                                                                                                                                                                                                                        |   |   | -                                                                                                         |
| Caenorhabditis elegans  | riken cd- 2400010d15                                    | 1  | F:GO:0005515                                                                                                                                                                                                                                                                                                                                                                                                                                                           | - |   | IPR000532; PTHR12897 (PANTHER)                                                                            |
| -                       | -                                                       | 0  |                                                                                                                                                                                                                                                                                                                                                                                                                                                                        |   |   | IPR022353; SignalP (SIGNALP)                                                                              |
| -                       | -                                                       | 0  |                                                                                                                                                                                                                                                                                                                                                                                                                                                                        |   |   | -                                                                                                         |

|                         |                                                                         |   |                                                                                                   |                                                                                                                                                                                                         |                                                                                                                                                                                                                    |
|-------------------------|-------------------------------------------------------------------------|---|---------------------------------------------------------------------------------------------------|---------------------------------------------------------------------------------------------------------------------------------------------------------------------------------------------------------|--------------------------------------------------------------------------------------------------------------------------------------------------------------------------------------------------------------------|
| Caenorhabditis elegans  | small nuclear ribonucleoprotein polypeptide a                           | 5 | C:GO:0005686;<br>F:GO:0003676;<br>C:GO:0005681;<br>F:GO:0005515;<br>P:GO:0000398                  | -                                                                                                                                                                                                       | -                                                                                                                                                                                                                  |
| Caenorhabditis briggsae | suppressor with morphological effect on genitalia family member (smg-6) | 0 |                                                                                                   |                                                                                                                                                                                                         | -                                                                                                                                                                                                                  |
| Caenorhabditis elegans  | tld family protein                                                      | 1 | F:GO:0005515                                                                                      | -                                                                                                                                                                                                       | -                                                                                                                                                                                                                  |
|                         | briggsae cbr-crn-5 protein                                              | 3 | F:GO:0005488;<br>F:GO:0016787;<br>C:GO:0044424                                                    | -                                                                                                                                                                                                       | IPR001247; IPR015847; IPR020568;<br>PTHR11953 (PANTHER)                                                                                                                                                            |
|                         | exosome component 5                                                     | 3 | F:GO:0005488;<br>F:GO:0016787;<br>C:GO:0044424                                                    | -                                                                                                                                                                                                       | -                                                                                                                                                                                                                  |
|                         | briggsae cbr-crn-5 protein                                              | 3 | F:GO:0005488;<br>F:GO:0016787;<br>C:GO:0044424                                                    | -                                                                                                                                                                                                       | IPR001247; IPR015847; IPR020568;<br>PTHR11953 (PANTHER)                                                                                                                                                            |
| Caenorhabditis elegans  | hypothetical protein C50F2.3 [Caenorhabditis elegans]                   | 0 |                                                                                                   | P:GO:0000910;<br>P:GO:0006396;<br>P:GO:0000003;<br>P:GO:0051301;<br>P:GO:0002119;<br>P:GO:0009792;<br>P:GO:0009790;<br>P:GO:0001703;<br>P:GO:0040010;<br>P:GO:0007369;<br>P:GO:0040007;<br>F:GO:0005488 | -                                                                                                                                                                                                                  |
| Loa loa                 | hypothetical protein LOAG_10592 [Loa loa]                               | 0 |                                                                                                   |                                                                                                                                                                                                         | -                                                                                                                                                                                                                  |
|                         | -                                                                       | 0 |                                                                                                   |                                                                                                                                                                                                         | SignalP (SIGNALP)                                                                                                                                                                                                  |
| Caenorhabditis elegans  | elegans protein partially confirmed by transcript evidence              | 1 | P:GO:0002119                                                                                      | -                                                                                                                                                                                                       | -                                                                                                                                                                                                                  |
| Loa loa                 | kiaa1530 protein                                                        | 0 |                                                                                                   |                                                                                                                                                                                                         | -                                                                                                                                                                                                                  |
|                         | -                                                                       | 0 |                                                                                                   |                                                                                                                                                                                                         | IPR001111; SignalP (SIGNALP)                                                                                                                                                                                       |
| Caenorhabditis briggsae | chl1 potential helicase                                                 | 6 | F:GO:0003676;<br>F:GO:0008026;<br>P:GO:0000003;<br>F:GO:0000166;<br>P:GO:0006139;<br>P:GO:0009792 | -                                                                                                                                                                                                       | IPR010614; IPR014013; PTHR11472<br>(PANTHER), PTHR11472:SF5<br>(PANTHER)                                                                                                                                           |
|                         | -                                                                       | 0 |                                                                                                   |                                                                                                                                                                                                         | -                                                                                                                                                                                                                  |
|                         | -                                                                       | 0 |                                                                                                   |                                                                                                                                                                                                         | -                                                                                                                                                                                                                  |
|                         | -                                                                       | 0 |                                                                                                   |                                                                                                                                                                                                         | -                                                                                                                                                                                                                  |
| Caenorhabditis elegans  | activating sig-I cointegrator 1 complex subunit 1                       | 2 | F:GO:0005488;<br>P:GO:0050789                                                                     | -                                                                                                                                                                                                       | IPR004087; IPR004088; IPR009210;<br>IPR018111; IPR019510;<br>G3DSA:3.30.1370.10 (GENE3D),<br>G3DSA:3.90.1140.10 (GENE3D),<br>PTHR11208 (PANTHER),<br>PTHR11208:SF7 (PANTHER), SSF54791<br>(SUPERFAMILY)            |
| Caenorhabditis briggsae | activating sig-I cointegrator 1 complex subunit 1                       | 2 | F:GO:0005488;<br>P:GO:0050789                                                                     | -                                                                                                                                                                                                       | IPR004087; IPR004088; IPR009097;<br>IPR009210; IPR018111; IPR019510;<br>G3DSA:3.30.1370.10 (GENE3D),<br>G3DSA:3.90.1140.10 (GENE3D),<br>PTHR11208 (PANTHER),<br>PTHR11208:SF7 (PANTHER), SSF54791<br>(SUPERFAMILY) |
| Loa loa                 | thioredoxin domain-containing protein 11                                | 1 | C:GO:0016020                                                                                      | -                                                                                                                                                                                                       | IPR012335; IPR012336                                                                                                                                                                                               |

|                         |                                                      |    |                                                                                                                                                                                        |                                                |                                                                                                                                                        |
|-------------------------|------------------------------------------------------|----|----------------------------------------------------------------------------------------------------------------------------------------------------------------------------------------|------------------------------------------------|--------------------------------------------------------------------------------------------------------------------------------------------------------|
|                         | -                                                    | 0  |                                                                                                                                                                                        |                                                | P551257 (PROFILE), SignalP (SIGNALP)                                                                                                                   |
|                         | -                                                    | 0  |                                                                                                                                                                                        |                                                | -                                                                                                                                                      |
| Caenorhabditis elegans  | membrane protein tms1d                               | 3  | P:GO:0018991;<br>C:GO:0016021;<br>P:GO:0040010                                                                                                                                         | -                                              | IPR005016; IPR015461; SignalP (SIGNALP)                                                                                                                |
| Caenorhabditis elegans  | tde2 protein                                         | 3  | P:GO:0018991;<br>C:GO:0016021;<br>P:GO:0040010                                                                                                                                         | -                                              | IPR005016; IPR015461; SignalP (SIGNALP)                                                                                                                |
| Caenorhabditis elegans  | membrane protein tms1d                               | 3  | P:GO:0018991;<br>C:GO:0016021;<br>P:GO:0040010                                                                                                                                         | -                                              | IPR005016; IPR015461; SignalP (SIGNALP)                                                                                                                |
| Caenorhabditis elegans  | membrane protein tms1d                               | 3  | P:GO:0018991;<br>C:GO:0016021;<br>P:GO:0040010                                                                                                                                         | -                                              | IPR005016; IPR015461; SignalP (SIGNALP)                                                                                                                |
| Caenorhabditis elegans  | membrane protein tms1d                               | 3  | P:GO:0018991;<br>C:GO:0016021;<br>P:GO:0040010                                                                                                                                         | -                                              | IPR005016; IPR015461; SignalP (SIGNALP)                                                                                                                |
| Caenorhabditis elegans  | membrane protein tms1d                               | 3  | P:GO:0018991;<br>C:GO:0016021;<br>P:GO:0040010                                                                                                                                         | -                                              | IPR005016; IPR015461; SignalP (SIGNALP)                                                                                                                |
| Loa loa                 | hypothetical protein LOAG_06660 [Loa loa]            | 0  |                                                                                                                                                                                        |                                                | -                                                                                                                                                      |
| Caenorhabditis briggsae | tissue factor pathway inhibitor 2                    | 1  | F:GO:0004867                                                                                                                                                                           | -                                              | -                                                                                                                                                      |
| Caenorhabditis briggsae | tissue factor pathway inhibitor 2                    | 1  | F:GO:0004867                                                                                                                                                                           | -                                              | -                                                                                                                                                      |
| Caenorhabditis briggsae | phosphoenolpyruvate carboxyke                        | 6  | C:GO:0005737;<br>P:GO:0006094;<br>F:GO:0046872;<br>F:GO:0005525;<br>F:GO:0016301;<br>F:GO:0004613                                                                                      | EC:4.1.1.32                                    | IPR008209; IPR008210; IPR013035;<br>IPR018091; G3DSA:2.170.8.10 (GENE3D), SSF53795 (SUPERFAMILY)                                                       |
| Caenorhabditis briggsae | briggsae cbr-kbp-2 protein                           | 0  |                                                                                                                                                                                        | F:GO:0003676;<br>F:GO:0008270;<br>C:GO:0005622 | -                                                                                                                                                      |
|                         | -                                                    | 0  |                                                                                                                                                                                        |                                                | -                                                                                                                                                      |
| Caenorhabditis elegans  | rab proteins geranylgeranyltransferase component a 2 | 4  | P:GO:0060042;<br>P:GO:0050910;<br>P:GO:0048798;<br>P:GO:0050935                                                                                                                        | -                                              | IPR002005; IPR016664; IPR018203;<br>G3DSA:1.10.405.10 (GENE3D),<br>G3DSA:3.30.519.10 (GENE3D),<br>G3DSA:3.50.50.60 (GENE3D),<br>SSF51905 (SUPERFAMILY) |
| Caenorhabditis elegans  | rab escort protein homolog family member (rep-1)     | 2  | P:GO:0009987;<br>F:GO:0017137                                                                                                                                                          | -                                              | IPR002005; IPR016664; IPR018203;<br>G3DSA:1.10.405.10 (GENE3D),<br>G3DSA:3.30.519.10 (GENE3D),<br>G3DSA:3.50.50.60 (GENE3D),<br>SSF51905 (SUPERFAMILY) |
| Caenorhabditis elegans  | protein fem-1 homolog c                              | 1  | F:GO:0005515                                                                                                                                                                           | -                                              | PTHR18958 (PANTHER),<br>PTHR18958:SF131 (PANTHER), SignalP (SIGNALP)                                                                                   |
| Loa loa                 | geranylgeranyl pyrophosphate synthetase              | 11 | F:GO:0004337;<br>P:GO:0000022;<br>P:GO:0008354;<br>F:GO:0003735;<br>F:GO:0004161;<br>F:GO:0004311;<br>P:GO:0035050;<br>C:GO:0043025;<br>C:GO:0005811;<br>C:GO:0022625;<br>P:GO:0008299 | EC:2.5.1.10;<br>EC:2.5.1.1;<br>EC:2.5.1.29     | IPR000092; IPR008949; IPR017446;<br>PTHR12001:SF5 (PANTHER)                                                                                            |

|                         |                                                            |   |                                                                                                   |                                                                 |                                                                                                     |
|-------------------------|------------------------------------------------------------|---|---------------------------------------------------------------------------------------------------|-----------------------------------------------------------------|-----------------------------------------------------------------------------------------------------|
| Caenorhabditis briggsae | lipoyltransferase mitochondrial precursor                  | 4 | P:GO:0006629;<br>P:GO:0006464;<br>F:GO:0005515;<br>F:GO:0003824                                   | -                                                               | IPR004143; G3DSA:3.90.1550.10 (GENE3D), PTHR12561 (PANTHER), SSF55681 (SUPERFAMILY)                 |
| -                       | -                                                          | 0 | -                                                                                                 | -                                                               | -                                                                                                   |
| Caenorhabditis elegans  | myb-like d--binding domain containing protein              | 1 | F:GO:0005488                                                                                      | -                                                               | IPR000949; IPR001005; IPR009057; IPR014778; IPR017884; PTHR16089 (PANTHER), PTHR16089:SF1 (PANTHER) |
| Caenorhabditis elegans  | dense body family member (deb-1)                           | 6 | F:GO:0005200;<br>C:GO:0005856;<br>C:GO:0005912;<br>P:GO:0007016;<br>F:GO:0005515;<br>P:GO:0006911 | -                                                               | IPR006077; G3DSA:1.20.120.230 (GENE3D)                                                              |
| -                       | -                                                          | 0 | -                                                                                                 | -                                                               | -                                                                                                   |
| Caenorhabditis briggsae | thioredoxin                                                | 0 |                                                                                                   | P:GO:0045454;<br>F:GO:0016491;<br>F:GO:0016209;<br>C:GO:0005575 | IPR012335; IPR012336; IPR013766; IPR017936; PTHR13871 (PANTHER), PTHR13871:SF5 (PANTHER)            |
| -                       | -                                                          | 0 | -                                                                                                 | -                                                               | -                                                                                                   |
| Caenorhabditis briggsae | elegans protein partially confirmed by transcript evidence | 2 | P:GO:0042981;<br>C:GO:0005622                                                                     | -                                                               | IPR001315; IPR011029                                                                                |
| -                       | -                                                          | 0 | -                                                                                                 | -                                                               | -                                                                                                   |
| Lepeophtheirus salmonis | yippee-like 5                                              | 0 |                                                                                                   | P:GO:0055114;<br>F:GO:0003674;<br>F:GO:0008113;<br>C:GO:0005575 | IPR004910; PTHR13847 (PANTHER), PTHR13847:SF1 (PANTHER)                                             |
| Caenorhabditis elegans  | uncoordi-ted family member (unc-52)                        | 0 |                                                                                                   | F:GO:0003674;<br>C:GO:0005578;<br>P:GO:0030239                  | IPR007110; IPR013783; PTHR10489 (PANTHER), PTHR10489:SF20 (PANTHER)                                 |
| Caenorhabditis elegans  | 39s ribosomal protein mitochondrial                        | 2 | C:GO:0044444;<br>C:GO:0043229                                                                     | -                                                               | IPR010793; PTHR15889 (PANTHER)                                                                      |
| Caenorhabditis elegans  | mitochondrial ribosomal protein l37                        | 2 | C:GO:0044444;<br>C:GO:0043229                                                                     | -                                                               | IPR010793; PTHR15889 (PANTHER)                                                                      |
| Caenorhabditis briggsae | ribosomal protein l13 containing protein                   | 5 | F:GO:0005488;<br>P:GO:0055085;<br>P:GO:0008340;<br>C:GO:0016021;<br>F:GO:0005215                  | -                                                               | IPR001993; IPR018108; G3DSA:1.50.40.10 (GENE3D), PTHR11896:SF23 (PANTHER)                           |
| -                       | -                                                          | 0 | -                                                                                                 | -                                                               | -                                                                                                   |
| Caenorhabditis elegans  | hypothetical protein T05C1.1 [Caenorhabditis elegans]      | 0 |                                                                                                   |                                                                 | SignalP (SIGNALP)                                                                                   |
| Caenorhabditis elegans  | hypothetical tyrosi-se-like protein in chromosome          | 4 | F:GO:0005515;<br>F:GO:0046872;<br>P:GO:0008152;<br>F:GO:0016491                                   | -                                                               | IPR002227; IPR008922                                                                                |
| Caenorhabditis elegans  | hypothetical tyrosi-se-like protein in chromosome          | 4 | F:GO:0005515;<br>F:GO:0046872;<br>P:GO:0008152;<br>F:GO:0016491                                   | -                                                               | IPR002227; IPR008922                                                                                |
| -                       | -                                                          | 0 | -                                                                                                 | -                                                               | -                                                                                                   |
| Ancylostoma caninum     | secreted protein asp-2                                     | 0 |                                                                                                   | P:GO:0040011;<br>C:GO:0005576                                   | IPR014044                                                                                           |
| -                       | -                                                          | 0 | -                                                                                                 | -                                                               | -                                                                                                   |

|                         |                                                            |    |                                                                                                                                                                                                                                           |                                                                                                                                                                                                                                                                                                                                |                            |                                                                                                                                    |
|-------------------------|------------------------------------------------------------|----|-------------------------------------------------------------------------------------------------------------------------------------------------------------------------------------------------------------------------------------------|--------------------------------------------------------------------------------------------------------------------------------------------------------------------------------------------------------------------------------------------------------------------------------------------------------------------------------|----------------------------|------------------------------------------------------------------------------------------------------------------------------------|
| Caenorhabditis elegans  | ferm domain ( -ezrin-radixin-moesin) family member (frm-1) | 0  |                                                                                                                                                                                                                                           | F:GO:0004386;<br>P:GO:0006030;<br>F:GO:0003677;<br>C:GO:0005634;<br>F:GO:0003676;<br>F:GO:0005524;<br>F:GO:0005198;<br>F:GO:0008061;<br>F:GO:0008092;<br>C:GO:0019898;<br>F:GO:0003682;<br>C:GO:0005737;<br>C:GO:0000785;<br>F:GO:0005488;<br>F:GO:0003779;<br>P:GO:0006333;<br>C:GO:0005856;<br>F:GO:0005515;<br>C:GO:0005576 | -                          |                                                                                                                                    |
| Caenorhabditis elegans  | autophagy-related protein 2 homolog b-like                 | 0  |                                                                                                                                                                                                                                           |                                                                                                                                                                                                                                                                                                                                |                            | PTHR13190 (PANTHER),<br>PTHR13190:SF2 (PANTHER)                                                                                    |
|                         |                                                            | 0  |                                                                                                                                                                                                                                           |                                                                                                                                                                                                                                                                                                                                |                            | SignalP (SIGNALP)                                                                                                                  |
| Caenorhabditis elegans  | u1 small nuclear ribonucleoprotein a                       | 4  | P:GO:0002119;<br>F:GO:0005488;<br>P:GO:0016246;<br>P:GO:0040007                                                                                                                                                                           | -                                                                                                                                                                                                                                                                                                                              |                            | IPR000504; IPR012677; PTHR10501<br>(PANTHER), SSF54928 (SUPERFAMILY)                                                               |
|                         |                                                            | 0  |                                                                                                                                                                                                                                           |                                                                                                                                                                                                                                                                                                                                |                            |                                                                                                                                    |
| Caenorhabditis briggsae | hypothetical kda protein in mob1-sga1 intergenic           | 4  | C:GO:0044424;<br>P:GO:0000003;<br>P:GO:0040010;<br>P:GO:0002119                                                                                                                                                                           | -                                                                                                                                                                                                                                                                                                                              |                            | IPR002728; PTHR10762:SF1<br>(PANTHER)                                                                                              |
| Caenorhabditis briggsae | elegans protein partially confirmed by transcript evidence | 1  | C:GO:0005739                                                                                                                                                                                                                              | -                                                                                                                                                                                                                                                                                                                              |                            | IPR003593; IPR011704;<br>G3DSA:3.40.50.300 (GENE3D),<br>PTHR21610 (PANTHER),<br>PTHR21610:SF1 (PANTHER), SSF52540<br>(SUPERFAMILY) |
|                         |                                                            | 0  |                                                                                                                                                                                                                                           |                                                                                                                                                                                                                                                                                                                                |                            |                                                                                                                                    |
| Caenorhabditis elegans  | adenylate ki-se 2                                          | 14 | P:GO:0046939;<br>P:GO:0040010;<br>F:GO:0004017;<br>C:GO:0005743;<br>P:GO:0040035;<br>P:GO:0035046;<br>C:GO:0005758;<br>F:GO:0005524;<br>P:GO:0002119;<br>P:GO:0009792;<br>C:GO:0005811;<br>P:GO:0040018;<br>P:GO:0006172;<br>F:GO:0046899 | -                                                                                                                                                                                                                                                                                                                              | EC:2.7.4.3;<br>EC:2.7.4.10 | IPR000850; IPR006259; IPR007862;<br>G3DSA:3.40.50.300 (GENE3D),<br>PTHR23359:SF22 (PANTHER),<br>SSF52540 (SUPERFAMILY)             |
|                         |                                                            | 0  |                                                                                                                                                                                                                                           |                                                                                                                                                                                                                                                                                                                                |                            |                                                                                                                                    |
|                         |                                                            | 0  |                                                                                                                                                                                                                                           |                                                                                                                                                                                                                                                                                                                                |                            |                                                                                                                                    |
|                         |                                                            | 0  |                                                                                                                                                                                                                                           |                                                                                                                                                                                                                                                                                                                                |                            | SignalP (SIGNALP)                                                                                                                  |

|                               |                                                                |    |                                                                                                                                                                       |              |             |                                                                                                                                    |
|-------------------------------|----------------------------------------------------------------|----|-----------------------------------------------------------------------------------------------------------------------------------------------------------------------|--------------|-------------|------------------------------------------------------------------------------------------------------------------------------------|
| Mus musculus                  | nuclear transport factor 2                                     | 5  | C:GO:0005643;<br>P:GO:0006606;<br>F:GO:0005515;<br>F:GO:0008565;<br>C:GO:0005829                                                                                      | -            | -           | -                                                                                                                                  |
| Brugia malayi                 | fas apoptotic inhibitory molecule 2                            | 3  | P:GO:0006915;<br>F:GO:0005515;<br>C:GO:0044425                                                                                                                        | -            | -           | SignalIP (SIGNALP)                                                                                                                 |
| -                             | -                                                              | 0  | -                                                                                                                                                                     | -            | -           | SignalIP (SIGNALP)                                                                                                                 |
| Brugia malayi                 | fas apoptotic inhibitory molecule 2                            | 3  | P:GO:0006915;<br>F:GO:0005515;<br>C:GO:0016021                                                                                                                        | -            | -           | IPR006214; PTHR23291:SF14 (PANTHER)                                                                                                |
| -                             | -                                                              | 0  | -                                                                                                                                                                     | -            | -           | SignalIP (SIGNALP)                                                                                                                 |
| Caenorhabditis elegans        | phospholipase c gamma                                          | 10 | P:GO:0051239;<br>P:GO:0048514;<br>F:GO:0004435;<br>P:GO:0009395;<br>F:GO:0004871;<br>P:GO:0048646;<br>P:GO:0030154;<br>F:GO:0005515;<br>P:GO:0007165;<br>P:GO:0007275 | -            | EC:3.1.4.11 | IPR000980; IPR001452;<br>G3DSA:2.30.30.40 (GENE3D),<br>PTHR22820 (PANTHER),<br>PTHR22820:SF14 (PANTHER),<br>SSF55550 (SUPERFAMILY) |
| Caenorhabditis elegans        | -dc (-+coupled dicarboxylate transporter) family member (-c-3) | 5  | P:GO:0055085;<br>P:GO:0006814;<br>C:GO:0030054;<br>F:GO:0015362;<br>C:GO:0005813                                                                                      | -            | -           | IPR001898; PTHR10283 (PANTHER),<br>PTHR10283:SF15 (PANTHER), SignalIP (SIGNALP)                                                    |
| Strongylocentrotus purpuratus | sphen transcriptio-l regulator                                 | 7  | P:GO:0006357;<br>F:GO:0003714;<br>F:GO:0016563;<br>F:GO:0003700;<br>F:GO:0003697;<br>P:GO:0045892;<br>C:GO:0005634                                                    | -            | -           | IPR010912; IPR012921; IPR016194;<br>G3DSA:2.40.290.10 (GENE3D)                                                                     |
| Strongylocentrotus purpuratus | sphen transcriptio-l regulator                                 | 7  | P:GO:0006357;<br>F:GO:0003714;<br>F:GO:0016563;<br>F:GO:0003700;<br>F:GO:0003697;<br>P:GO:0045892;<br>C:GO:0005634                                                    | -            | -           | IPR010912; IPR012921; IPR016194;<br>G3DSA:2.40.290.10 (GENE3D)                                                                     |
| Caenorhabditis briggsae       | 3-5 exonuclease family protein                                 | 9  | P:GO:0006139;<br>F:GO:0003676;<br>C:GO:0005622;<br>F:GO:0005515;<br>P:GO:0018996;<br>F:GO:0008408;<br>P:GO:0000003;<br>P:GO:0040011;<br>P:GO:0002009                  | -            | -           | IPR002355; IPR002562; IPR012337;<br>G3DSA:3.30.420.10 (GENE3D)                                                                     |
| Ancylostoma caninum           | secreted protein asp-2                                         | 0  | -                                                                                                                                                                     | C:GO:0005576 | -           | IPR001283; IPR014044;<br>PTHR10334:SF11 (PANTHER)                                                                                  |

|                          |                                              |    |                                                                                                                                                                                                         |   |                           |                                                                                                            |
|--------------------------|----------------------------------------------|----|---------------------------------------------------------------------------------------------------------------------------------------------------------------------------------------------------------|---|---------------------------|------------------------------------------------------------------------------------------------------------|
| Caenorhabditis elegans   | acid phosphatase tartrate resistant          | 6  | P:GO:0048519;<br>C:GO:0044464;<br>F:GO:0016787;<br>P:GO:0050896;<br>F:GO:0046872;<br>P:GO:0032501                                                                                                       | - |                           | IPR004843; G3DSA:3.60.21.10 (GENE3D), PTHR10161 (PANTHER), PTHR10161:SF3 (PANTHER), SSF56300 (SUPERFAMILY) |
| Caenorhabditis elegans   | briggsae cbr-him-17 protein                  | 0  |                                                                                                                                                                                                         | - |                           | IPR006612                                                                                                  |
| Caenorhabditis elegans   | pp-loop domain protein                       | 6  | P:GO:0006357;<br>F:GO:0016455;<br>F:GO:0000166;<br>C:GO:0016592;<br>F:GO:0003824;<br>F:GO:0030170                                                                                                       | - |                           | PTHR11807 (PANTHER), PTHR11807:SF4 (PANTHER), SSF52402 (SUPERFAMILY)                                       |
| Caenorhabditis briggsae  | solute carrier family member 46              | 1  | C:GO:0016020                                                                                                                                                                                            | - |                           | IPR001993; IPR018108; G3DSA:1.50.40.10 (GENE3D), PTHR21252 (PANTHER)                                       |
| Caenorhabditis briggsae  | solute carrier family member 46              | 1  | C:GO:0016020                                                                                                                                                                                            | - |                           | IPR001993; IPR018108; G3DSA:1.50.40.10 (GENE3D), PTHR21252 (PANTHER)                                       |
| Caenorhabditis briggsae  | benzodiazapine receptor associated protein 1 | 1  | C:GO:0005737                                                                                                                                                                                            | - |                           | IPR001452; IPR011511; G3DSA:2.30.30.40 (GENE3D), PTHR14234 (PANTHER), PTHR14234:SF1 (PANTHER)              |
| Caenorhabditis briggsae  | succi-te dehydroge-se                        | 12 | P:GO:0040010;<br>P:GO:0022900;<br>P:GO:0018991;<br>C:GO:0005749;<br>F:GO:0009055;<br>P:GO:0006099;<br>P:GO:0010171;<br>P:GO:0002119;<br>F:GO:0008177;<br>F:GO:0050660;<br>P:GO:0009792;<br>F:GO:0004776 | - | EC:1.3.5.1;<br>EC:6.2.1.4 |                                                                                                            |
| Ornithorhynchus anatinus | microspherule protein 1                      | 1  | C:GO:0005654                                                                                                                                                                                            | - |                           | PTHR13233 (PANTHER)                                                                                        |
| Tetraodon nigroviridis   | microspherule protein 1                      | 0  |                                                                                                                                                                                                         | - |                           | PTHR13233 (PANTHER)                                                                                        |
| Caenorhabditis elegans   | ubiquitin-conjugating enzyme e2w             | 6  | P:GO:0006513;<br>F:GO:0005515;<br>F:GO:0005524;<br>F:GO:0004842;<br>P:GO:0051246;<br>P:GO:0070979                                                                                                       | - | EC:6.3.2.19               | IPR000608; IPR016135; PTHR11621 (PANTHER), PTHR11621:SF16 (PANTHER)                                        |
| Caenorhabditis elegans   | thyroid hormone receptor interactor 11       | 2  | F:GO:0005515;<br>C:GO:0043229                                                                                                                                                                           | - |                           | -                                                                                                          |
| Brugia malayi            | argo-ute-like protein                        | 1  | P:GO:0016246                                                                                                                                                                                            | - |                           | IPR003165; IPR012337; PTHR22891 (PANTHER)                                                                  |
| Caenorhabditis elegans   | dystrophin                                   | 7  | P:GO:0007271;<br>F:GO:0005515;<br>P:GO:0040017;<br>C:GO:0016010;<br>F:GO:0005277;<br>P:GO:0015870;<br>P:GO:0046716                                                                                      | - |                           | IPR015153; PTHR11915 (PANTHER), PTHR11915:SF57 (PANTHER), SSF47473 (SUPERFAMILY)                           |

|                         |                                                  |    |                                                                                                                                                                                                                                           |                               |                                                                        |                                                                                                                                    |
|-------------------------|--------------------------------------------------|----|-------------------------------------------------------------------------------------------------------------------------------------------------------------------------------------------------------------------------------------------|-------------------------------|------------------------------------------------------------------------|------------------------------------------------------------------------------------------------------------------------------------|
| Brugia malayi           | dead box atp-dependent r- helicase               | 7  | F:GO:0003676;<br>F:GO:0008026;<br>F:GO:0005524;<br>F:GO:0005515;<br>P:GO:0006406;<br>C:GO:0005635;<br>C:GO:0016020                                                                                                                        | -                             |                                                                        | IPR011545; IPR014021;<br>G3DSA:3.40.50.300 (GENE3D),<br>PTHR10967 (PANTHER),<br>PTHR10967:SF3 (PANTHER), SSF52540<br>(SUPERFAMILY) |
| Brugia malayi           | dead box atp-dependent r- helicase               | 7  | F:GO:0003676;<br>F:GO:0008026;<br>F:GO:0005524;<br>F:GO:0005515;<br>P:GO:0006406;<br>C:GO:0005635;<br>C:GO:0016020                                                                                                                        | -                             |                                                                        | IPR011545; IPR014021;<br>G3DSA:3.40.50.300 (GENE3D),<br>PTHR10967 (PANTHER),<br>PTHR10967:SF3 (PANTHER), SSF52540<br>(SUPERFAMILY) |
|                         | -                                                | 0  |                                                                                                                                                                                                                                           |                               |                                                                        | SignalP (SIGNALP)                                                                                                                  |
| Caenorhabditis elegans  | elac homolog 2 ( coli)                           | 3  | F:GO:0005488;<br>F:GO:0016787;<br>C:GO:0005739                                                                                                                                                                                            | -                             |                                                                        | IPR001279; G3DSA:3.60.15.10<br>(GENE3D), PTHR12553 (PANTHER),<br>PTHR12553:SF3 (PANTHER), SSF56281<br>(SUPERFAMILY)                |
| Caenorhabditis elegans  | elac homolog 2 ( coli)                           | 3  | F:GO:0005488;<br>F:GO:0016787;<br>C:GO:0005739                                                                                                                                                                                            | -                             |                                                                        | IPR001279; G3DSA:3.60.15.10<br>(GENE3D), PTHR12553 (PANTHER),<br>PTHR12553:SF3 (PANTHER), SSF56281<br>(SUPERFAMILY)                |
| Brugia malayi           | r- binding motif protein 21                      | 0  |                                                                                                                                                                                                                                           | F:GO:0003676;<br>F:GO:0000166 |                                                                        | IPR000504; IPR002934;<br>G3DSA:3.30.460.10 (GENE3D),<br>SSF81301 (SUPERFAMILY)                                                     |
|                         | -                                                | 0  |                                                                                                                                                                                                                                           |                               |                                                                        | -                                                                                                                                  |
| Caenorhabditis elegans  | translation initiation factor if-2               | 14 | F:GO:0003743;<br>F:GO:0016779;<br>F:GO:0003746;<br>P:GO:0040010;<br>C:GO:0005739;<br>C:GO:0016021;<br>P:GO:0007264;<br>F:GO:0043024;<br>P:GO:0015684;<br>F:GO:0015093;<br>F:GO:0003924;<br>P:GO:0006446;<br>P:GO:0006898;<br>F:GO:0005525 | -                             | EC:2.7.7.0;<br>EC:3.6.5.1;<br>EC:3.6.5.2;<br>EC:3.6.5.3;<br>EC:3.6.5.4 | -                                                                                                                                  |
| Caenorhabditis elegans  | briggsae cbr-taf-1 protein                       | 1  | F:GO:0005515                                                                                                                                                                                                                              | -                             |                                                                        | -                                                                                                                                  |
|                         | -                                                | 0  |                                                                                                                                                                                                                                           |                               |                                                                        | -                                                                                                                                  |
|                         | -                                                | 0  |                                                                                                                                                                                                                                           |                               |                                                                        | IPR005479                                                                                                                          |
| Caenorhabditis briggsae | trehalase family protein                         | 5  | P:GO:0009792;<br>P:GO:0002119;<br>F:GO:0004553;<br>P:GO:0044262;<br>P:GO:0040007                                                                                                                                                          | -                             | EC:3.2.1.0                                                             | IPR001661; IPR008928;<br>PTHR23403:SF1 (PANTHER)                                                                                   |
|                         | -                                                | 0  |                                                                                                                                                                                                                                           |                               |                                                                        | IPR013783; SSF48726 (SUPERFAMILY)                                                                                                  |
|                         | -                                                | 0  |                                                                                                                                                                                                                                           |                               |                                                                        | -                                                                                                                                  |
|                         | -                                                | 0  |                                                                                                                                                                                                                                           |                               |                                                                        | -                                                                                                                                  |
| Caenorhabditis elegans  | elegans protein confirmed by transcript evidence | 1  | F:GO:0016787                                                                                                                                                                                                                              | -                             |                                                                        | IPR002921; G3DSA:3.40.50.1820<br>(GENE3D), SSF53474 (SUPERFAMILY)                                                                  |



|                          |                                                             |   |                                                                                                   |                                                                                                                                                                                                                                                                                                                                                                                                                                      |             |                                                                                                          |
|--------------------------|-------------------------------------------------------------|---|---------------------------------------------------------------------------------------------------|--------------------------------------------------------------------------------------------------------------------------------------------------------------------------------------------------------------------------------------------------------------------------------------------------------------------------------------------------------------------------------------------------------------------------------------|-------------|----------------------------------------------------------------------------------------------------------|
| Haemonchus contortus     | ilin (drosophila ecm protein) homolog family member (ppn-1) | 6 | P:GO:0009987;<br>F:GO:0004867;<br>F:GO:0008270;<br>F:GO:0004222;<br>F:GO:0005515;<br>C:GO:0005578 | -                                                                                                                                                                                                                                                                                                                                                                                                                                    | EC:3.4.24.0 | SignalP (SIGNALP)                                                                                        |
| Haemonchus contortus     | ilin (drosophila ecm protein) homolog family member (ppn-1) | 6 | P:GO:0009987;<br>F:GO:0004867;<br>F:GO:0008270;<br>F:GO:0004222;<br>F:GO:0005515;<br>C:GO:0005578 | -                                                                                                                                                                                                                                                                                                                                                                                                                                    | EC:3.4.24.0 | IPR000884; IPR002223; IPR020901;<br>PTHR13723 (PANTHER),<br>PTHR13723:SF18 (PANTHER)                     |
| Caenorhabditis elegans   | cral trio domain containing protein                         | 0 |                                                                                                   | F:GO:0005215;<br>C:GO:0005634;<br>P:GO:0006810;<br>C:GO:0005737;<br>F:GO:0003674;<br>C:GO:0005575;<br>F:GO:0008289;<br>C:GO:0005622;<br>P:GO:0008150;<br>P:GO:0045449                                                                                                                                                                                                                                                                | -           |                                                                                                          |
| Saccoglossus kowalevskii | cut-like homeobox 1                                         | 0 |                                                                                                   | F:GO:0003677;<br>C:GO:0005634;<br>P:GO:0042491;<br>P:GO:0006357;<br>P:GO:0030324;<br>F:GO:0030528;<br>P:GO:0006355;<br>C:GO:0016021;<br>P:GO:0000122;<br>C:GO:0016020;<br>F:GO:0016564;<br>P:GO:0006350;<br>F:GO:0003702;<br>F:GO:0003700;<br>P:GO:0006891;<br>C:GO:0000139;<br>P:GO:0007275;<br>F:GO:0003682;<br>F:GO:0030674;<br>P:GO:0045449;<br>C:GO:0005794;<br>F:GO:0043565;<br>P:GO:0000301;<br>P:GO:0006810;<br>C:GO:0030173 | -           |                                                                                                          |
| Caenorhabditis elegans   | g-patch domain containing protein                           | 2 | F:GO:0005488;<br>P:GO:0019915                                                                     | -                                                                                                                                                                                                                                                                                                                                                                                                                                    |             | IPR000467; IPR000571;<br>G3DSA:4.10.1000.10 (GENE3D),<br>PTHR23329 (PANTHER),<br>PTHR23329:SF2 (PANTHER) |

|                         |                                                                          |   |                                                                                                                                     |                                                                                  |              |                                                                                                                                                                        |
|-------------------------|--------------------------------------------------------------------------|---|-------------------------------------------------------------------------------------------------------------------------------------|----------------------------------------------------------------------------------|--------------|------------------------------------------------------------------------------------------------------------------------------------------------------------------------|
| Caenorhabditis briggsae | lipoic acid mitochondrial precursor                                      | 8 | P:GO:0040010;<br>C:GO:0005739;<br>F:GO:0046872;<br>P:GO:0009107;<br>F:GO:0051539;<br>P:GO:0002119;<br>P:GO:0009792;<br>F:GO:0016992 | -                                                                                | EC:2.8.1.8   | IPR013785; PTHR10949 (PANTHER),<br>SSF102114 (SUPERFAMILY)                                                                                                             |
| Caenorhabditis briggsae | programmed cell death 6-interacting protein                              | 0 |                                                                                                                                     |                                                                                  |              | IPR004328; G3DSA:1.20.120.560<br>(GENE3D), G3DSA:1.25.40.280<br>(GENE3D), PTHR23030 (PANTHER),<br>PTHR23030:SF11 (PANTHER)                                             |
| Caenorhabditis elegans  | rw1 protein                                                              | 1 | F:GO:0005515                                                                                                                        | -                                                                                |              | IPR022113; PTHR22050 (PANTHER),<br>SignalP (SIGNALP)                                                                                                                   |
| Brugia malayi           | related to oncogene abl family member (abl-1)                            | 7 | F:GO:0004715;<br>F:GO:0030145;<br>F:GO:0005515;<br>P:GO:0018108;<br>F:GO:0005524;<br>F:GO:0000287;<br>P:GO:0007165                  | -                                                                                | EC:2.7.10.2  | IPR000719; IPR000980; IPR001245;<br>IPR001452; IPR017441; IPR020685;<br>IPR020700; G3DSA:2.30.30.40<br>(GENE3D), G3DSA:3.30.200.20<br>(GENE3D), SSF55550 (SUPERFAMILY) |
| -                       | -                                                                        | 0 |                                                                                                                                     |                                                                                  |              | SignalP (SIGNALP)                                                                                                                                                      |
| Caenorhabditis elegans  | uncoordinated protein isoform partially confirmed by transcript evidence | 0 |                                                                                                                                     | F:GO:0004672;<br>F:GO:0005524;<br>F:GO:0000166;<br>P:GO:0006468;<br>F:GO:0004674 |              | -                                                                                                                                                                      |
| Caenorhabditis briggsae | ornithine aminotransferase                                               | 4 | F:GO:0030170;<br>C:GO:0005739;<br>F:GO:0008483;<br>F:GO:0005515                                                                     | -                                                                                | EC:2.6.1.0   | IPR005814; IPR010164; IPR015421;<br>IPR015422; IPR015424                                                                                                               |
| Ixodes scapularis       | tpa: zinc finger protein                                                 | 0 |                                                                                                                                     | F:GO:0003676;<br>F:GO:0008270;<br>C:GO:0005622                                   |              | -                                                                                                                                                                      |
| -                       | -                                                                        | 0 |                                                                                                                                     |                                                                                  |              | -                                                                                                                                                                      |
| Caenorhabditis elegans  | universal minicircle sequence binding protein                            | 6 | P:GO:0009792;<br>P:GO:0002119;<br>F:GO:0005488;<br>P:GO:0000003;<br>P:GO:0040011;<br>P:GO:0040007                                   | -                                                                                |              | -                                                                                                                                                                      |
| Caenorhabditis briggsae | coenzyme q10 homolog b ( cerevisiae)                                     | 1 | C:GO:0005739                                                                                                                        | -                                                                                |              | IPR007087; IPR015880                                                                                                                                                   |
| Caenorhabditis elegans  | briggsae cbr-sel-2 protein                                               | 4 | C:GO:0005737;<br>P:GO:0008104;<br>F:GO:0051018;<br>P:GO:0042675                                                                     | -                                                                                |              | IPR000409; IPR010508; PD329443<br>(PRODOM), G3DSA:2.30.29.40<br>(GENE3D), PTHR13743 (PANTHER),<br>SSF50729 (SUPERFAMILY)                                               |
| -                       | -                                                                        | 0 |                                                                                                                                     |                                                                                  |              | SignalP (SIGNALP)                                                                                                                                                      |
| -                       | -                                                                        | 0 |                                                                                                                                     |                                                                                  |              | SignalP (SIGNALP)                                                                                                                                                      |
| Loa loa                 | cdc215 protein ki-se                                                     | 6 | P:GO:0006468;<br>P:GO:0008284;<br>P:GO:0007275;<br>P:GO:0007088;<br>F:GO:0005524;<br>F:GO:0004693                                   | -                                                                                | EC:2.7.11.22 | IPR000719; IPR011009; IPR017441;<br>IPR017442; G3DSA:3.30.200.20<br>(GENE3D), PTHR11295 (PANTHER),<br>PTHR11295:SF112 (PANTHER)                                        |
| -                       | -                                                                        | 0 |                                                                                                                                     |                                                                                  |              | -                                                                                                                                                                      |
| -                       | -                                                                        | 0 |                                                                                                                                     |                                                                                  |              | -                                                                                                                                                                      |
| -                       | -                                                                        | 0 |                                                                                                                                     |                                                                                  |              | -                                                                                                                                                                      |
| Caenorhabditis briggsae | Hypothetical protein CBG09770 [Caenorhabditis briggsae]                  | 0 |                                                                                                                                     |                                                                                  |              | -                                                                                                                                                                      |

|                         |                                                         |   |                                                                                                                                                      |                                                                                  |                                                         |                                                                                                                                                                                                                                    |
|-------------------------|---------------------------------------------------------|---|------------------------------------------------------------------------------------------------------------------------------------------------------|----------------------------------------------------------------------------------|---------------------------------------------------------|------------------------------------------------------------------------------------------------------------------------------------------------------------------------------------------------------------------------------------|
| Caenorhabditis elegans  | rilp-like protein                                       | 0 |                                                                                                                                                      |                                                                                  |                                                         | IPR019143; IPR021563; PD936484 (PRODOM)                                                                                                                                                                                            |
| Caenorhabditis briggsae | rilp-like protein                                       | 0 |                                                                                                                                                      | F:GO:0003674;<br>C:GO:0005575                                                    |                                                         | IPR019143; IPR021563; PD936484 (PRODOM)                                                                                                                                                                                            |
| Ostertagia ostertagi    | metalloprotease 1 precursor                             | 2 | F:GO:0046872;<br>F:GO:0008237                                                                                                                        | -                                                                                |                                                         | IPR001506; IPR006026; IPR013032; G3DSA:3.40.390.10 (GENE3D), PTHR10127 (PANTHER), PTHR10127:SF65 (PANTHER), SignalP (SIGNALP), SSF55486 (SUPERFAMILY)                                                                              |
| Caenorhabditis elegans  | receptor mediated endocytosis family member (rme-1)     | 9 | P:GO:0007291;<br>F:GO:0005509;<br>F:GO:0005515;<br>P:GO:0007474;<br>P:GO:0006897;<br>F:GO:0003924;<br>P:GO:0048477;<br>P:GO:0008587;<br>F:GO:0005525 | -                                                                                | EC:3.6.5.1;<br>EC:3.6.5.2;<br>EC:3.6.5.3;<br>EC:3.6.5.4 | -                                                                                                                                                                                                                                  |
|                         | -                                                       | 0 |                                                                                                                                                      |                                                                                  |                                                         | -                                                                                                                                                                                                                                  |
| Caenorhabditis briggsae | ras-related gtp-binding protein a                       | 4 | C:GO:0005737;<br>F:GO:0005525;<br>C:GO:0005634;<br>P:GO:0007264                                                                                      | -                                                                                |                                                         | IPR006762; PTHR11259:SF1 (PANTHER)                                                                                                                                                                                                 |
| Brugia malayi           | insulin-like growth factor 1 receptor                   | 5 | P:GO:0009987;<br>F:GO:0004872;<br>F:GO:0004713;<br>F:GO:0005515;<br>C:GO:0016020                                                                     | -                                                                                | EC:2.7.10.0                                             | IPR000494; IPR003961; IPR006211; IPR006212; IPR008957; IPR009030; IPR013783; IPR017441; IPR017896; IPR020685; IPR020772; G3DSA:2.10.220.10 (GENE3D), G3DSA:3.30.200.20 (GENE3D), G3DSA:3.80.20.20 (GENE3D), SSF52058 (SUPERFAMILY) |
|                         | -                                                       | 0 |                                                                                                                                                      |                                                                                  |                                                         | -                                                                                                                                                                                                                                  |
|                         | -                                                       | 0 |                                                                                                                                                      |                                                                                  |                                                         | -                                                                                                                                                                                                                                  |
| Caenorhabditis briggsae | Hypothetical protein CBG07001 [Caenorhabditis briggsae] | 0 |                                                                                                                                                      | P:GO:0040017;<br>P:GO:0000003;<br>P:GO:0040035;<br>P:GO:0006898;<br>P:GO:0009792 |                                                         | -                                                                                                                                                                                                                                  |
| Caenorhabditis elegans  | jnk1 mapk8-associated membrane protein                  | 1 | P:GO:0000003                                                                                                                                         | -                                                                                |                                                         | IPR008485; SignalP (SIGNALP)                                                                                                                                                                                                       |
| Caenorhabditis elegans  | jnk1 mapk8-associated membrane protein                  | 1 | P:GO:0000003                                                                                                                                         | -                                                                                |                                                         | IPR008485; SignalP (SIGNALP)                                                                                                                                                                                                       |
|                         | -                                                       | 0 |                                                                                                                                                      |                                                                                  |                                                         | -                                                                                                                                                                                                                                  |
|                         | -                                                       | 0 |                                                                                                                                                      |                                                                                  |                                                         | -                                                                                                                                                                                                                                  |
|                         | -                                                       | 0 |                                                                                                                                                      |                                                                                  |                                                         | -                                                                                                                                                                                                                                  |
| Caenorhabditis elegans  | deah (asp-glu-ala-his) box polypeptide 8                | 8 | F:GO:0003723;<br>F:GO:0004004;<br>C:GO:0005681;<br>P:GO:0006200;<br>P:GO:0008380;<br>F:GO:0005524;<br>F:GO:0005515;<br>P:GO:0006397                  | -                                                                                |                                                         | IPR001650; IPR002464; IPR011545; IPR014001; IPR014021; G3DSA:3.40.50.300 (GENE3D), PTHR18934 (PANTHER), SSF52540 (SUPERFAMILY)                                                                                                     |
|                         | -                                                       | 0 |                                                                                                                                                      |                                                                                  |                                                         | -                                                                                                                                                                                                                                  |
| Caenorhabditis briggsae | bess motif family protein                               | 0 |                                                                                                                                                      | F:GO:0046872;<br>F:GO:0008270;<br>F:GO:0005515;<br>F:GO:0003677                  |                                                         | -                                                                                                                                                                                                                                  |

|                         |                                                                                                 |   |                                                                                                                                     |                             |                                                                                                                              |
|-------------------------|-------------------------------------------------------------------------------------------------|---|-------------------------------------------------------------------------------------------------------------------------------------|-----------------------------|------------------------------------------------------------------------------------------------------------------------------|
| Caenorhabditis briggsae | bess motif family protein                                                                       | 0 | F:GO:0046872;<br>F:GO:0008270;<br>F:GO:0005515;<br>F:GO:0003677                                                                     |                             | -                                                                                                                            |
| Aedes aegypti           | cysteine-rich venom                                                                             | 0 |                                                                                                                                     |                             | IPR002919; G3DSA:2.10.25.10 (GENE3D), SignalP (SIGNALP)                                                                      |
|                         | -                                                                                               | 0 |                                                                                                                                     |                             | -                                                                                                                            |
|                         | -                                                                                               | 0 |                                                                                                                                     |                             | -                                                                                                                            |
|                         | -                                                                                               | 0 |                                                                                                                                     |                             | -                                                                                                                            |
| Caenorhabditis elegans  | illin homolo family member (pxl-1)                                                              | 4 | P:GO:0009792;<br>P:GO:0040010;<br>F:GO:0008270;<br>P:GO:0002119                                                                     |                             | IPR001781; PTHR18973 (PANTHER), PTHR18973:SF96 (PANTHER), SSF57716 (SUPERFAMILY)                                             |
|                         | -                                                                                               | 0 |                                                                                                                                     |                             | -                                                                                                                            |
| Caenorhabditis elegans  | 3-hydroxyisobutyrate dehydroge-se                                                               | 8 | F:GO:0008442;<br>P:GO:0006098;<br>P:GO:0006813;<br>P:GO:0055114;<br>P:GO:0006573;<br>F:GO:0051287;<br>C:GO:0005759;<br>F:GO:0004616 | EC:1.1.1.31;<br>EC:1.1.1.44 | IPR002204; IPR006115; IPR008927; IPR011548; IPR013328; IPR015815; IPR016040; PTHR22981:SF7 (PANTHER), SSF51735 (SUPERFAMILY) |
| Caenorhabditis elegans  | 3-hydroxyisobutyrate dehydroge-se                                                               | 8 | F:GO:0008442;<br>P:GO:0006098;<br>P:GO:0006813;<br>P:GO:0055114;<br>P:GO:0006573;<br>F:GO:0051287;<br>C:GO:0005759;<br>F:GO:0004616 | EC:1.1.1.31;<br>EC:1.1.1.44 | -                                                                                                                            |
| Caenorhabditis elegans  | 3-hydroxyisobutyrate dehydroge-se                                                               | 8 | F:GO:0008442;<br>P:GO:0006098;<br>P:GO:0006813;<br>P:GO:0055114;<br>P:GO:0006573;<br>F:GO:0051287;<br>C:GO:0005759;<br>F:GO:0004616 | EC:1.1.1.31;<br>EC:1.1.1.44 | -                                                                                                                            |
| Loa loa                 | kinesin family member 4                                                                         | 6 | P:GO:0006996;<br>C:GO:0005876;<br>F:GO:0003774;<br>F:GO:0005515;<br>P:GO:0008089;<br>F:GO:0000166                                   |                             | IPR001752; IPR019821; PTHR16012 (PANTHER), PTHR16012:SF119 (PANTHER), SSF52540 (SUPERFAMILY)                                 |
| Caenorhabditis briggsae | h aca ribonucleoprotein complex subunit 1                                                       | 5 | F:GO:0009982;<br>C:GO:0001651;<br>F:GO:0030515;<br>C:GO:0031429;<br>P:GO:0006364                                                    | EC:5.4.99.12                | IPR007504; IPR009000; IPR021154                                                                                              |
| Loa loa                 | hypothetical protein LOAG_05186 [Loa loa]                                                       | 0 |                                                                                                                                     |                             | -                                                                                                                            |
| Loa loa                 | hypothetical protein LOAG_05186 [Loa loa]                                                       | 0 |                                                                                                                                     |                             | -                                                                                                                            |
|                         | -                                                                                               | 0 |                                                                                                                                     |                             | -                                                                                                                            |
|                         | -                                                                                               | 0 |                                                                                                                                     |                             | -                                                                                                                            |
| Caenorhabditis elegans  | prion-like-(q n-rich)-domain-bearing protein protein partially confirmed by transcript evidence | 0 | P:GO:0009792;<br>F:GO:0005515                                                                                                       |                             | -                                                                                                                            |
| Caenorhabditis elegans  | transcription termi-tion r- polymerase ii                                                       | 3 | F:GO:0005488;<br>P:GO:0006139;<br>F:GO:0016787                                                                                      |                             | IPR010916; PTHR10799 (PANTHER), PTHR10799:SF63 (PANTHER)                                                                     |

|                         |                                                               |   |                                                                                                                    |                                                                                                                    |                                                                                                                         |
|-------------------------|---------------------------------------------------------------|---|--------------------------------------------------------------------------------------------------------------------|--------------------------------------------------------------------------------------------------------------------|-------------------------------------------------------------------------------------------------------------------------|
|                         | -                                                             | 0 |                                                                                                                    |                                                                                                                    | -                                                                                                                       |
| Caenorhabditis elegans  | elegans protein confirmed by transcript evidence              | 1 | F:GO:0003840                                                                                                       | -                                                                                                                  | EC:2.3.2.2                                                                                                              |
| Homo sapiens            | -dh dehydroge-se subunit 2                                    | 6 | P:GO:0006120;<br>C:GO:0005743;<br>C:GO:0070469;<br>F:GO:0008137;<br>P:GO:0006810;<br>C:GO:0016021                  | -                                                                                                                  | EC:1.6.5.3                                                                                                              |
|                         | -                                                             | 0 |                                                                                                                    |                                                                                                                    | -                                                                                                                       |
| Caenorhabditis briggsae | Hypothetical protein CBG10904 [Caenorhabditis briggsae]       | 0 |                                                                                                                    |                                                                                                                    | -                                                                                                                       |
| Loa loa                 | loc431806 protein                                             | 0 |                                                                                                                    | F:GO:0000049;<br>C:GO:0005737;<br>P:GO:0008033;<br>C:GO:0005829;<br>P:GO:0008150;<br>P:GO:0002098;<br>P:GO:0034227 | -                                                                                                                       |
| Brugia malayi           | tyrosyl-d- phosphodiesterase 1                                | 7 | C:GO:0005737;<br>P:GO:0000012;<br>F:GO:0005515;<br>F:GO:0003697;<br>F:GO:0017005;<br>P:GO:0006302;<br>F:GO:0003690 | -                                                                                                                  | IPR010347; G3DSA:3.30.870.20 (GENE3D), SSF56024 (SUPERFAMILY)                                                           |
| Caenorhabditis briggsae | lim domain family member (lim-8)                              | 1 | F:GO:0005515                                                                                                       | -                                                                                                                  | -                                                                                                                       |
| Caenorhabditis briggsae | lim domain family member (lim-8)                              | 1 | F:GO:0005515                                                                                                       | -                                                                                                                  | -                                                                                                                       |
| Caenorhabditis elegans  | hypothetical protein F01F1.3 [Caenorhabditis elegans]         | 0 |                                                                                                                    |                                                                                                                    | -                                                                                                                       |
|                         | -                                                             | 0 |                                                                                                                    |                                                                                                                    | SignalP (SIGNALP)                                                                                                       |
| Caenorhabditis briggsae | mitochondrial ribosomal protein l17                           | 3 | C:GO:0005840;<br>F:GO:0003735;<br>P:GO:0006412                                                                     | -                                                                                                                  | EC:3.6.5.3                                                                                                              |
| Caenorhabditis elegans  | elegans protein confirmed by transcript evidence              | 0 |                                                                                                                    |                                                                                                                    | SignalP (SIGNALP)                                                                                                       |
| Caenorhabditis elegans  | : shorter than wild-type family member (dpy-23)               | 4 | C:GO:0030122;<br>F:GO:0005515;<br>P:GO:0016192;<br>P:GO:0006886                                                    | -                                                                                                                  | IPR011012; IPR015629; G3DSA:3.30.450.60 (GENE3D), PTHR11998 (PANTHER)                                                   |
| Caenorhabditis briggsae | d- topoisomerase iii                                          | 5 | P:GO:0006259;<br>P:GO:0007276;<br>P:GO:0007126;<br>P:GO:0071103;<br>F:GO:0003916                                   | -                                                                                                                  | IPR000380; IPR006171; G3DSA:3.40.50.140 (GENE3D)                                                                        |
| Caenorhabditis briggsae | peptidase s9 prolyl oligopeptidase active site domain protein | 2 | P:GO:0008152;<br>F:GO:0008236                                                                                      | -                                                                                                                  | IPR001375; IPR015943; G3DSA:3.40.50.1820 (GENE3D), PTHR11731 (PANTHER), PTHR11731:SF7 (PANTHER), SSF53474 (SUPERFAMILY) |
| Caenorhabditis elegans  | ubiquitin-conjugating enzyme e2r                              | 3 | P:GO:0051246;<br>F:GO:0019787;<br>P:GO:0043687                                                                     | -                                                                                                                  | IPR000608; IPR016135; PTHR11621 (PANTHER), PTHR11621:SF37 (PANTHER)                                                     |
| Loa loa                 | fidipidine                                                    | 0 |                                                                                                                    |                                                                                                                    | PD936484 (PRODOM), PTHR16441 (PANTHER)                                                                                  |
| Caenorhabditis elegans  | lysosomal acid lipase cholesteryl ester hydrolase             | 3 | F:GO:0016788;<br>P:GO:0032501;<br>P:GO:0001666                                                                     | -                                                                                                                  | IPR000073; IPR006693; G3DSA:3.40.50.1820 (GENE3D), PTHR11005 (PANTHER), SignalP (SIGNALP), SSF53474 (SUPERFAMILY)       |

|                         |                                                                              |    |                                                                                                                                                                                                                                                                                                                                                 |   |                                                         |                                                                                                 |
|-------------------------|------------------------------------------------------------------------------|----|-------------------------------------------------------------------------------------------------------------------------------------------------------------------------------------------------------------------------------------------------------------------------------------------------------------------------------------------------|---|---------------------------------------------------------|-------------------------------------------------------------------------------------------------|
| Oryctolagus cuniculus   | beta                                                                         | 20 | C:GO:0042612;<br>P:GO:0019882;<br>P:GO:0042267;<br>C:GO:0045298;<br>P:GO:0006928;<br>F:GO:0005525;<br>F:GO:0042288;<br>C:GO:0016021;<br>P:GO:0006184;<br>P:GO:0051225;<br>C:GO:0005829;<br>C:GO:0005874;<br>P:GO:0051258;<br>P:GO:0007067;<br>F:GO:0042277;<br>F:GO:0032403;<br>F:GO:0003924;<br>P:GO:0007018;<br>F:GO:0005200;<br>P:GO:0030182 | - | EC:3.6.5.1;<br>EC:3.6.5.2;<br>EC:3.6.5.3;<br>EC:3.6.5.4 | IPR000217; IPR002453; IPR008280;<br>IPR018316; IPR023123                                        |
| Caenorhabditis elegans  | sensory axon guidance family member (sax-7)                                  | 16 | P:GO:0007158;<br>P:GO:0016319;<br>P:GO:0019991;<br>P:GO:0048813;<br>C:GO:0030175;<br>F:GO:0005509;<br>P:GO:0007173;<br>P:GO:0035151;<br>P:GO:0048675;<br>C:GO:0005919;<br>P:GO:0021682;<br>P:GO:0050808;<br>P:GO:0008366;<br>P:GO:0007560;<br>P:GO:0035011;<br>P:GO:0060857                                                                     | - | -                                                       | -                                                                                               |
| Caenorhabditis briggsae | phosphoribosylaminoimidazolecarboxamide formyltransferase imp cyclohydrolase | 3  | F:GO:0004643;<br>F:GO:0003937;<br>P:GO:0006188                                                                                                                                                                                                                                                                                                  | - | EC:2.1.2.3;<br>EC:3.5.4.10                              | -                                                                                               |
| Caenorhabditis elegans  | hypothetical protein Y57E12AL.6 [Caenorhabditis elegans]                     | 2  | P:GO:0002119;<br>P:GO:0009792                                                                                                                                                                                                                                                                                                                   | - | -                                                       | -                                                                                               |
| Caenorhabditis elegans  | hypothetical protein Y57E12AL.6 [Caenorhabditis elegans]                     | 2  | P:GO:0002119;<br>P:GO:0009792                                                                                                                                                                                                                                                                                                                   | - | -                                                       | -                                                                                               |
| -                       | -                                                                            | 0  |                                                                                                                                                                                                                                                                                                                                                 |   |                                                         | IPR007087; IPR015880; PTHR11389 (PANTHER)                                                       |
| -                       | -                                                                            | 0  |                                                                                                                                                                                                                                                                                                                                                 |   |                                                         | -                                                                                               |
| Caenorhabditis elegans  | 28s ribosomal protein mitochondrial                                          | 4  | P:GO:0000003;<br>P:GO:0040007;<br>P:GO:0006898;<br>P:GO:0002119                                                                                                                                                                                                                                                                                 | - | -                                                       | IPR019266; SignalP (SIGNALP)                                                                    |
| Caenorhabditis elegans  | amylase 2- pancreatic                                                        | 5  | C:GO:0005615;<br>F:GO:0031404;<br>F:GO:0004556;<br>P:GO:0016052;<br>F:GO:0005509                                                                                                                                                                                                                                                                | - | EC:3.2.1.1                                              | IPR006046; IPR006047; IPR013781;<br>IPR017853; PTHR10357 (PANTHER),<br>PTHR10357:SF26 (PANTHER) |

|                         |                                                        |    |                                                                                                                                                                                        |   |            |                                                                                                                                                |
|-------------------------|--------------------------------------------------------|----|----------------------------------------------------------------------------------------------------------------------------------------------------------------------------------------|---|------------|------------------------------------------------------------------------------------------------------------------------------------------------|
| Oryctolagus cuniculus   | zinc finger protein 701-like                           | 5  | F:GO:0003676;<br>C:GO:0005622;<br>F:GO:0005515;<br>F:GO:0008270;<br>P:GO:0006355                                                                                                       | - | -          | -                                                                                                                                              |
| Oryctolagus cuniculus   | zinc finger protein 701-like                           | 5  | F:GO:0003676;<br>C:GO:0005622;<br>F:GO:0005515;<br>F:GO:0008270;<br>P:GO:0006355                                                                                                       | - | -          | -                                                                                                                                              |
| Brugia malayi           | d--directed r- polymerases and iii subunit rpabc2      | 11 | F:GO:0003899;<br>F:GO:0004672;<br>P:GO:0006367;<br>C:GO:0005730;<br>P:GO:0000003;<br>P:GO:0008380;<br>C:GO:0005665;<br>F:GO:0003677;<br>P:GO:0006368;<br>P:GO:0006898;<br>P:GO:0009792 | - | EC:2.7.7.6 | IPR006110; IPR006111; IPR012293;<br>IPR020708; PTHR10773:SF8<br>(PANTHER)                                                                      |
| Brugia malayi           | d--directed r- polymerases and iii subunit rpabc2      | 11 | F:GO:0003899;<br>F:GO:0004672;<br>P:GO:0006367;<br>C:GO:0005730;<br>P:GO:0000003;<br>P:GO:0008380;<br>C:GO:0005665;<br>F:GO:0003677;<br>P:GO:0006368;<br>P:GO:0006898;<br>P:GO:0009792 | - | EC:2.7.7.6 | SignalP (SIGNALP)                                                                                                                              |
| Brugia malayi           | d--directed r- polymerases and iii subunit rpabc2      | 11 | F:GO:0003899;<br>F:GO:0004672;<br>P:GO:0006367;<br>C:GO:0005730;<br>P:GO:0000003;<br>P:GO:0008380;<br>C:GO:0005665;<br>F:GO:0003677;<br>P:GO:0006368;<br>P:GO:0006898;<br>P:GO:0009792 | - | EC:2.7.7.6 | IPR006110; IPR006111; IPR012293;<br>IPR020708; PTHR10773:SF8<br>(PANTHER)                                                                      |
| Cooperia oncophora      | briggsae cbr-lat-1 protein                             | 6  | P:GO:0007218;<br>C:GO:0016021;<br>P:GO:0007165;<br>C:GO:0005886;<br>F:GO:0005529;<br>F:GO:0004930                                                                                      | - | -          | IPR000203; IPR000922; IPR001879;<br>IPR022624; PTHR12011 (PANTHER),<br>PTHR12011:SF55 (PANTHER), SignalP<br>(SIGNALP), SSF111418 (SUPERFAMILY) |
| Caenorhabditis briggsae | eukaryotic translation initiation factor 3 subunit k   | 6  | C:GO:0005852;<br>F:GO:0005515;<br>P:GO:0006446;<br>F:GO:0003743;<br>C:GO:0005634;<br>F:GO:0043022                                                                                      | - | -          | IPR005062; IPR009374; IPR011991;<br>IPR016020; IPR016024; SignalP<br>(SIGNALP), SSF46785 (SUPERFAMILY)                                         |
| -                       | -                                                      | 0  | -                                                                                                                                                                                      | - | -          | -                                                                                                                                              |
| Caenorhabditis elegans  | Hypothetical protein C25H3.17 [Caenorhabditis elegans] | 0  | -                                                                                                                                                                                      | - | -          | SignalP (SIGNALP)                                                                                                                              |

|                         |                                                         |    |                                                                                                                                                                                                                                                                                                                                                                                                                                                                        |                                                |                                                                                                                                                                                                                                                                                 |
|-------------------------|---------------------------------------------------------|----|------------------------------------------------------------------------------------------------------------------------------------------------------------------------------------------------------------------------------------------------------------------------------------------------------------------------------------------------------------------------------------------------------------------------------------------------------------------------|------------------------------------------------|---------------------------------------------------------------------------------------------------------------------------------------------------------------------------------------------------------------------------------------------------------------------------------|
| Loa loa                 | paz piwi domain-containing family member (ppw-1)        | 0  |                                                                                                                                                                                                                                                                                                                                                                                                                                                                        | P:GO:0000003;<br>F:GO:0003676;<br>P:GO:0016246 | G3DSA:2.170.260.10 (GENE3D),<br>SSF101690 (SUPERFAMILY)                                                                                                                                                                                                                         |
| Caenorhabditis elegans  | protein ki-se isoform cra_a                             | 35 | P:GO:0008340;<br>P:GO:0000003;<br>P:GO:0009749;<br>P:GO:0043410;<br>P:GO:0042542;<br>C:GO:0016020;<br>F:GO:0019901;<br>P:GO:0046777;<br>P:GO:0045471;<br>P:GO:0009612;<br>C:GO:0005624;<br>P:GO:0016064;<br>P:GO:0014070;<br>F:GO:0046872;<br>P:GO:0050732;<br>P:GO:0009792;<br>P:GO:0042100;<br>F:GO:0043560;<br>P:GO:0015810;<br>P:GO:0043406;<br>P:GO:0001666;<br>P:GO:0006917;<br>P:GO:0042493;<br>P:GO:0043200;<br>P:GO:0042149;<br>P:GO:0032615;<br>P:GO:0009408 | -                                              | IPR000719; IPR000961; IPR002219;<br>IPR002290; IPR008271; IPR011009;<br>IPR015745; IPR017441; IPR017442;<br>IPR017892; IPR020454;<br>G3DSA:1.10.510.10 (GENE3D),<br>G3DSA:3.30.200.20 (GENE3D),<br>G3DSA:3.30.60.20 (GENE3D),<br>PTHR22985 (PANTHER), SSF57889<br>(SUPERFAMILY) |
| Caenorhabditis briggsae | tripartite motif protein trim9                          | 2  | P:GO:0008340;<br>F:GO:0005488                                                                                                                                                                                                                                                                                                                                                                                                                                          | -                                              | IPR001841; IPR013083; PTHR13712<br>(PANTHER), PTHR13712:SF62<br>(PANTHER), SSF57850 (SUPERFAMILY)                                                                                                                                                                               |
| Caenorhabditis briggsae | Hypothetical protein CBG04315 [Caenorhabditis briggsae] | 0  |                                                                                                                                                                                                                                                                                                                                                                                                                                                                        |                                                | -                                                                                                                                                                                                                                                                               |
| Caenorhabditis briggsae | nuclear transcription x-box binding 1                   | 3  | F:GO:0003676;<br>F:GO:0046872;<br>P:GO:0006355                                                                                                                                                                                                                                                                                                                                                                                                                         | -                                              | IPR000967; IPR001841; IPR018271;<br>PTHR12360 (PANTHER), SSF57850<br>(SUPERFAMILY)                                                                                                                                                                                              |
| Caenorhabditis elegans  | genghis khan                                            | 3  | P:GO:0009987;<br>F:GO:0005488;<br>F:GO:0016301                                                                                                                                                                                                                                                                                                                                                                                                                         | -                                              | PTHR22988 (PANTHER),<br>PTHR22988:SF2 (PANTHER)                                                                                                                                                                                                                                 |
| Caenorhabditis elegans  | genghis khan                                            | 3  | P:GO:0009987;<br>F:GO:0005488;<br>F:GO:0016301                                                                                                                                                                                                                                                                                                                                                                                                                         | -                                              | PTHR22988 (PANTHER),<br>PTHR22988:SF2 (PANTHER)                                                                                                                                                                                                                                 |
| -                       | -                                                       | 0  |                                                                                                                                                                                                                                                                                                                                                                                                                                                                        |                                                | -                                                                                                                                                                                                                                                                               |



|                         |                                              |    |                                                                                                                                                                                                                                                                                                                                                                                   |                                                |                                                                                                                                                |
|-------------------------|----------------------------------------------|----|-----------------------------------------------------------------------------------------------------------------------------------------------------------------------------------------------------------------------------------------------------------------------------------------------------------------------------------------------------------------------------------|------------------------------------------------|------------------------------------------------------------------------------------------------------------------------------------------------|
| Caenorhabditis elegans  | ubiquinone biosynthesis protein coq7 homolog | 22 | P:GO:0070584;<br>F:GO:0046914;<br>P:GO:0008340;<br>P:GO:0000003;<br>P:GO:0051094;<br>P:GO:0001841;<br>C:GO:0016020;<br>P:GO:0040010;<br>P:GO:0006744;<br>P:GO:0001306;<br>P:GO:0006355;<br>P:GO:0030534;<br>F:GO:0016491;<br>P:GO:0048520;<br>P:GO:0042775;<br>P:GO:0042493;<br>P:GO:0022008;<br>C:GO:0005634;<br>P:GO:0034599;<br>P:GO:0001701;<br>C:GO:0005739;<br>P:GO:0019538 | -                                              | -                                                                                                                                              |
| Caenorhabditis elegans  | dynein heavy chain                           | 5  | P:GO:0007018;<br>C:GO:0030286;<br>F:GO:0016887;<br>F:GO:0005524;<br>F:GO:0003777                                                                                                                                                                                                                                                                                                  | -                                              | IPR003593; IPR011704; IPR013602;<br>G3DSA:3.40.50.300 (GENE3D),<br>PTHR10676 (PANTHER),<br>PTHR10676:SF28 (PANTHER),<br>SSF52540 (SUPERFAMILY) |
| Tribolium castaneum     | isoform d                                    | 8  | P:GO:0016321;<br>F:GO:0004672;<br>P:GO:0051225;<br>P:GO:0007348;<br>P:GO:0051299;<br>P:GO:0000077;<br>F:GO:0031151;<br>C:GO:0005634                                                                                                                                                                                                                                               | -                                              | -                                                                                                                                              |
| Caenorhabditis briggsae | suppressor of variegation 4-20 homolog 1     | 5  | P:GO:0000003;<br>F:GO:0042799;<br>C:GO:0000780;<br>P:GO:0006350;<br>P:GO:0016571                                                                                                                                                                                                                                                                                                  | -                                              | -                                                                                                                                              |
| Caenorhabditis briggsae | suppressor of variegation 4-20 homolog 1     | 5  | P:GO:0000003;<br>F:GO:0042799;<br>C:GO:0000780;<br>P:GO:0006350;<br>P:GO:0016571                                                                                                                                                                                                                                                                                                  | -                                              | -                                                                                                                                              |
|                         | -                                            | 0  |                                                                                                                                                                                                                                                                                                                                                                                   |                                                | -                                                                                                                                              |
| Brugia malayi           | negative elongation factor b homolog         | 0  |                                                                                                                                                                                                                                                                                                                                                                                   | F:GO:0003746;<br>P:GO:0016481;<br>C:GO:0005634 | IPR010405; PTHR13503:SF1<br>(PANTHER)                                                                                                          |

|                         |                                                        |    |                                                                                                                                                                                                                                                                                                                                                 |   |                                                                                                                                  |
|-------------------------|--------------------------------------------------------|----|-------------------------------------------------------------------------------------------------------------------------------------------------------------------------------------------------------------------------------------------------------------------------------------------------------------------------------------------------|---|----------------------------------------------------------------------------------------------------------------------------------|
| Caenorhabditis briggsae | briggsae cbr-glit-1 protein                            | 20 | P:GO:0048666;<br>F:GO:0030528;<br>P:GO:0035220;<br>P:GO:0007448;<br>P:GO:0008544;<br>P:GO:0006357;<br>P:GO:0040010;<br>P:GO:0007424;<br>C:GO:0044424;<br>P:GO:0030030;<br>C:GO:0043234;<br>P:GO:0007350;<br>P:GO:0048522;<br>P:GO:0009887;<br>P:GO:0022403;<br>P:GO:0048477;<br>P:GO:0030855;<br>P:GO:0007346;<br>C:GO:0005886;<br>F:GO:0005488 | - | IPR002018; IPR019819;<br>G3DSA:3.40.50.1820 (PANTHER),<br>PTHR11559:SF32 (PANTHER), SignalP<br>(SIGNALP), SSF53474 (SUPERFAMILY) |
| Caenorhabditis elegans  | briggsae cbr-bag-1 protein                             | 4  | P:GO:0006457;<br>P:GO:0016049;<br>P:GO:0006950;<br>F:GO:0051087                                                                                                                                                                                                                                                                                 | - | IPR003103; G3DSA:1.20.58.120<br>(GENE3D), SSF63491 (SUPERFAMILY)                                                                 |
| Caenorhabditis briggsae | translocase of inner mitochondrial membrane 22 homolog | 6  | P:GO:0009792;<br>C:GO:0005743;<br>F:GO:0005515;<br>F:GO:0008565;<br>C:GO:0016021;<br>P:GO:0015031                                                                                                                                                                                                                                               | - | IPR003397; PTHR14110 (PANTHER)                                                                                                   |
| Caenorhabditis briggsae | translocase of inner mitochondrial membrane 22 homolog | 6  | P:GO:0009792;<br>C:GO:0005743;<br>F:GO:0005515;<br>F:GO:0008565;<br>C:GO:0016021;<br>P:GO:0015031                                                                                                                                                                                                                                               | - | -                                                                                                                                |
| Caenorhabditis briggsae | solute carrier family 35 member c2                     | 4  | C:GO:0016021;<br>F:GO:0016491;<br>F:GO:0008270;<br>P:GO:0055085                                                                                                                                                                                                                                                                                 | - | IPR004853; IPR020904; PTHR11132<br>(PANTHER), SignalP (SIGNALP),<br>SSF103481 (SUPERFAMILY)                                      |
| Caenorhabditis briggsae | solute carrier family 35 member c2                     | 4  | C:GO:0016021;<br>F:GO:0016491;<br>F:GO:0008270;<br>P:GO:0055085                                                                                                                                                                                                                                                                                 | - | IPR004853; IPR020904; PTHR11132<br>(PANTHER), SignalP (SIGNALP),<br>SSF103481 (SUPERFAMILY)                                      |
| Caenorhabditis elegans  | elegans protein confirmed by transcript evidence       | 1  | P:GO:0009987                                                                                                                                                                                                                                                                                                                                    | - | -                                                                                                                                |
| Caenorhabditis elegans  | elegans protein confirmed by transcript evidence       | 0  | C:GO:0005666;<br>P:GO:0006898;<br>F:GO:0003677;<br>P:GO:0002119;<br>P:GO:0009792;<br>P:GO:0016246;<br>P:GO:0006383;<br>P:GO:0040007;<br>F:GO:0003899                                                                                                                                                                                            | - | SignalP (SIGNALP)                                                                                                                |
| -                       | -                                                      | 0  | -                                                                                                                                                                                                                                                                                                                                               | - | -                                                                                                                                |
| Caenorhabditis elegans  | spindle pole body                                      | 2  | C:GO:0044444;<br>F:GO:0005515                                                                                                                                                                                                                                                                                                                   | - | IPR005061; PTHR12161 (PANTHER),<br>PTHR12161:SF3 (PANTHER)                                                                       |
| -                       | -                                                      | 0  | -                                                                                                                                                                                                                                                                                                                                               | - | -                                                                                                                                |

|                         |                                                                       |    |                                                                                                                                                                                                                                                                                                                                                                                                                                      |                                                |                                                                                                                                                                          |
|-------------------------|-----------------------------------------------------------------------|----|--------------------------------------------------------------------------------------------------------------------------------------------------------------------------------------------------------------------------------------------------------------------------------------------------------------------------------------------------------------------------------------------------------------------------------------|------------------------------------------------|--------------------------------------------------------------------------------------------------------------------------------------------------------------------------|
|                         | -                                                                     | 0  |                                                                                                                                                                                                                                                                                                                                                                                                                                      |                                                | SignalP (SIGNALP)                                                                                                                                                        |
| Canis familiaris        | ribosomal protein l18a                                                | 5  | F:GO:0003735;<br>F:GO:0003723;<br>F:GO:0005515;<br>C:GO:0022625;<br>P:GO:0006414                                                                                                                                                                                                                                                                                                                                                     | -                                              | IPR002670; IPR021138;<br>G3DSA:3.10.20.10 (GENE3D),<br>PTHR10052 (PANTHER)                                                                                               |
|                         | -                                                                     | 0  |                                                                                                                                                                                                                                                                                                                                                                                                                                      |                                                | -                                                                                                                                                                        |
| Loa loa                 | bess motif family protein                                             | 3  | F:GO:0008270;<br>F:GO:0005515;<br>F:GO:0003677                                                                                                                                                                                                                                                                                                                                                                                       | -                                              | IPR006578                                                                                                                                                                |
| Loa loa                 | bess motif family protein                                             | 3  | F:GO:0008270;<br>F:GO:0005515;<br>F:GO:0003677                                                                                                                                                                                                                                                                                                                                                                                       | -                                              | IPR006578                                                                                                                                                                |
| Caenorhabditis briggsae | atp-dependent protease la                                             | 25 | P:GO:0034619;<br>F:GO:0004252;<br>F:GO:0004176;<br>F:GO:0070361;<br>F:GO:0070363;<br>F:GO:0070362;<br>P:GO:0007568;<br>P:GO:0010044;<br>F:GO:0043531;<br>P:GO:0070407;<br>F:GO:0003697;<br>C:GO:0042645;<br>F:GO:0003727;<br>C:GO:0005777;<br>P:GO:0006515;<br>F:GO:0070364;<br>P:GO:0001666;<br>F:GO:0070182;<br>F:GO:0051880;<br>P:GO:0007005;<br>P:GO:0051260;<br>P:GO:0006200;<br>P:GO:0009725;<br>F:GO:0005524;<br>P:GO:0034599 | -                                              | EC:3.4.21.0<br>IPR001984; IPR008268; IPR008269;<br>IPR020568; G3DSA:1.10.8.60<br>(GENE3D), G3DSA:3.40.50.300<br>(GENE3D), PTHR10046 (PANTHER),<br>SSF52540 (SUPERFAMILY) |
| Loa loa                 | r--binding protein 12 (sh3 ww domain anchor protein in the nucleus)   | 1  | F:GO:0005515                                                                                                                                                                                                                                                                                                                                                                                                                         | -                                              | PTHR13976 (PANTHER),<br>PTHR13976:SF1 (PANTHER), SignalP<br>(SIGNALP), SSF54928 (SUPERFAMILY)                                                                            |
| Caenorhabditis elegans  | elegans protein partially confirmed by transcript evidence            | 0  |                                                                                                                                                                                                                                                                                                                                                                                                                                      | C:GO:0016021;<br>C:GO:0016020;<br>F:GO:0008375 | IPR003406; PTHR19297:SF3<br>(PANTHER)                                                                                                                                    |
|                         | -                                                                     | 0  |                                                                                                                                                                                                                                                                                                                                                                                                                                      |                                                | PR01217 (PRINTS)                                                                                                                                                         |
| Caenorhabditis elegans  | lipopolysaccharide-induced tumor necrosis factor-alpha factor homolog | 0  |                                                                                                                                                                                                                                                                                                                                                                                                                                      |                                                | -                                                                                                                                                                        |
| Caenorhabditis elegans  | double-stranded r- binding motif family protein                       | 2  | P:GO:0007126;<br>P:GO:0009792                                                                                                                                                                                                                                                                                                                                                                                                        | -                                              | IPR001159; IPR014720; PTHR10910<br>(PANTHER), PTHR10910:SF2<br>(PANTHER), SSF54768 (SUPERFAMILY)                                                                         |
| Caenorhabditis elegans  | double-stranded r- binding motif family protein                       | 2  | P:GO:0007126;<br>P:GO:0009792                                                                                                                                                                                                                                                                                                                                                                                                        | -                                              | IPR001159; IPR014720; PTHR10910<br>(PANTHER), PTHR10910:SF2<br>(PANTHER), SSF54768 (SUPERFAMILY)                                                                         |
| Caenorhabditis elegans  | transcription factor mitochondrial                                    | 4  | P:GO:0000154;<br>C:GO:0042645;<br>F:GO:0000179;<br>F:GO:0005515                                                                                                                                                                                                                                                                                                                                                                      | -                                              | IPR001737; IPR020598; IPR023165;<br>G3DSA:3.40.50.150 (GENE3D),<br>SSF53335 (SUPERFAMILY)                                                                                |

|                         |                                      |    |                                                                                                                                                                                                                          |   |             |                                                                                                                                                  |
|-------------------------|--------------------------------------|----|--------------------------------------------------------------------------------------------------------------------------------------------------------------------------------------------------------------------------|---|-------------|--------------------------------------------------------------------------------------------------------------------------------------------------|
| Caenorhabditis briggsae | adipor-like receptor                 | 6  | F:GO:0042562;<br>C:GO:0016021;<br>F:GO:0004872;<br>P:GO:0009755;<br>P:GO:0050794;<br>P:GO:0019395                                                                                                                        | - |             | IPR004254; PTHR20855:SF13<br>(PANTHER)                                                                                                           |
| Caenorhabditis briggsae | adipor-like receptor                 | 6  | F:GO:0042562;<br>C:GO:0016021;<br>F:GO:0004872;<br>P:GO:0009755;<br>P:GO:0050794;<br>P:GO:0019395                                                                                                                        | - |             | IPR004254; PTHR20855:SF13<br>(PANTHER)                                                                                                           |
|                         | -                                    | 0  |                                                                                                                                                                                                                          |   |             | -                                                                                                                                                |
| Caenorhabditis elegans  | subfamily member 10                  | 2  | F:GO:0005515;<br>P:GO:0009987                                                                                                                                                                                            | - |             | IPR005746; IPR012335; IPR012336;<br>IPR013766; IPR015609; IPR017936;<br>IPR017937; PTHR11821:SF16<br>(PANTHER)                                   |
| Caenorhabditis elegans  | integrin-linked protein ki-se        | 7  | P:GO:0006468;<br>P:GO:0007229;<br>F:GO:0005515;<br>F:GO:0016787;<br>F:GO:0005524;<br>P:GO:0009966;<br>F:GO:0004674                                                                                                       | - | EC:2.7.11.0 | IPR002110; IPR020683; PTHR18958<br>(PANTHER)                                                                                                     |
| Caenorhabditis elegans  | zinc and double phd fingers family 2 | 3  | F:GO:0046872;<br>F:GO:0005515;<br>C:GO:0005634                                                                                                                                                                           | - |             | IPR001841; IPR001965; IPR007087;<br>IPR011011; IPR013083; IPR015880;<br>IPR019786; IPR019787; PTHR10615<br>(PANTHER), PTHR10615:SF9<br>(PANTHER) |
| Caenorhabditis briggsae | zinc and double phd fingers family 2 | 5  | F:GO:0046872;<br>P:GO:0045449;<br>P:GO:0048644;<br>F:GO:0005515;<br>C:GO:0005634                                                                                                                                         | - |             | PTHR10615 (PANTHER),<br>PTHR10615:SF9 (PANTHER)                                                                                                  |
| Caenorhabditis elegans  | zinc and double phd fingers family 2 | 3  | F:GO:0046872;<br>F:GO:0005515;<br>C:GO:0005634                                                                                                                                                                           | - |             | -                                                                                                                                                |
| Caenorhabditis elegans  | clathrin coat assembly protein ap19  | 13 | F:GO:0008565;<br>P:GO:0006901;<br>C:GO:0030130;<br>C:GO:0008021;<br>P:GO:0040007;<br>P:GO:0000003;<br>C:GO:0030131;<br>P:GO:0002119;<br>P:GO:0007269;<br>F:GO:0005515;<br>P:GO:0040011;<br>P:GO:0006886;<br>P:GO:0009792 | - |             | IPR000804; IPR011012; IPR015604;<br>IPR016635; IPR022775;<br>G3DSA:3.30.450.60 (GENE3D),<br>PTHR11753 (PANTHER), SignalP<br>(SIGNALP)            |
| Caenorhabditis elegans  | zinc and double phd fingers family 2 | 3  | F:GO:0046872;<br>F:GO:0005515;<br>C:GO:0005634                                                                                                                                                                           | - |             | IPR001841; IPR001965; IPR007087;<br>IPR011011; IPR013083; IPR015880;<br>IPR019786; IPR019787; PTHR10615<br>(PANTHER), PTHR10615:SF9<br>(PANTHER) |
| Caenorhabditis elegans  | chromosome 6 open reading frame 211  | 1  | F:GO:0005515                                                                                                                                                                                                             | - |             | IPR002791; PTHR12260 (PANTHER)                                                                                                                   |
| Caenorhabditis elegans  | chromosome 6 open reading frame 211  | 1  | F:GO:0005515                                                                                                                                                                                                             | - |             | IPR002791; PTHR12260 (PANTHER)                                                                                                                   |

|                             |                                                   |    |                                                                                                                                                                                        |                                                                                                   |             |                                                                                             |
|-----------------------------|---------------------------------------------------|----|----------------------------------------------------------------------------------------------------------------------------------------------------------------------------------------|---------------------------------------------------------------------------------------------------|-------------|---------------------------------------------------------------------------------------------|
| Caenorhabditis elegans      | bis(5 -nucleosyl)-tetrphosphatase                 | 2  | P:GO:0006917;<br>F:GO:0004081                                                                                                                                                          | -                                                                                                 | EC:3.6.1.17 | IPR000086; IPR003565; IPR015797;<br>IPR020084; PTHR21340 (PANTHER),<br>PSS1462 (PROFILE)    |
| Caenorhabditis elegans      | tgf-beta resistance-associated protein trag       | 0  |                                                                                                                                                                                        |                                                                                                   |             | -                                                                                           |
|                             | -                                                 | 0  |                                                                                                                                                                                        |                                                                                                   |             | SignalP (SIGNALP)                                                                           |
| Caenorhabditis elegans      | phospholipase d1                                  | 11 | P:GO:0001525;<br>P:GO:0007265;<br>F:GO:0004630;<br>P:GO:0016042;<br>C:GO:0044431;<br>C:GO:0031090;<br>P:GO:0006935;<br>C:GO:0005768;<br>P:GO:0008654;<br>P:GO:0050830;<br>F:GO:0005488 | -                                                                                                 | EC:3.1.4.4  | SignalP (SIGNALP)                                                                           |
| Caenorhabditis briggsae     | briggsae cbr-pld-1 protein                        | 0  |                                                                                                                                                                                        | F:GO:0035091;<br>P:GO:0008152;<br>F:GO:0003824;<br>P:GO:0007154;<br>F:GO:0005515                  |             | IPR015679; PTHR18896:SF6<br>(PANTHER)                                                       |
| Caenorhabditis briggsae     | briggsae cbr-vit-4 protein                        | 0  |                                                                                                                                                                                        | P:GO:0006869;<br>F:GO:0005319;<br>P:GO:0040010;<br>P:GO:0009792;<br>P:GO:0008340;<br>F:GO:0005515 |             | IPR015816; PTHR23345 (PANTHER)                                                              |
| Caenorhabditis briggsae     | briggsae cbr-vit-4 protein                        | 0  |                                                                                                                                                                                        | P:GO:0006869;<br>F:GO:0005319;<br>P:GO:0040010;<br>P:GO:0009792;<br>P:GO:0008340;<br>F:GO:0005515 |             | IPR015816; PTHR23345 (PANTHER)                                                              |
| Callithrix jacchus          | chromosome segregation protein smc                | 4  | F:GO:0005488;<br>C:GO:0043232;<br>P:GO:0032501;<br>N:GO:0071842                                                                                                                        | -                                                                                                 |             | PD936484 (PRODOM)                                                                           |
| Angiostrongylus cantonensis | pleiotropic regulator 1                           | 5  | P:GO:0018996;<br>P:GO:0000003;<br>P:GO:0040007;<br>P:GO:0002119;<br>P:GO:0040011                                                                                                       | -                                                                                                 |             | IPR001680; IPR011046; IPR015943;<br>IPR017986; IPR019781; IPR019782;<br>PTHR19923 (PANTHER) |
| Angiostrongylus cantonensis | pleiotropic regulator 1                           | 5  | P:GO:0002119;<br>P:GO:0018996;<br>P:GO:0000003;<br>P:GO:0040007;<br>P:GO:0040011                                                                                                       | -                                                                                                 |             | IPR001680; IPR011046; IPR015943;<br>IPR017986; IPR019781; IPR019782;<br>PTHR19923 (PANTHER) |
| Caenorhabditis briggsae     | transcription elongation factor spt5              | 2  | P:GO:0000003;<br>P:GO:0007275                                                                                                                                                          | -                                                                                                 |             | PTHR11125 (PANTHER)                                                                         |
| Caenorhabditis elegans      | rrn3 r- polymerase i transcription factor homolog | 4  | P:GO:0009987;<br>P:GO:0008340;<br>C:GO:0031981;<br>P:GO:0000003                                                                                                                        | -                                                                                                 |             | IPR007991                                                                                   |
| Caenorhabditis elegans      | tb2 hva22 family protein                          | 1  | F:GO:0005515                                                                                                                                                                           | -                                                                                                 |             | IPR004345; PTHR12300:SF13<br>(PANTHER)                                                      |
| Caenorhabditis elegans      | tb2 hva22 family protein                          | 0  |                                                                                                                                                                                        | C:GO:0016021;<br>C:GO:0016020                                                                     |             | IPR004345; PTHR12300:SF13<br>(PANTHER)                                                      |

|                         |                                    |    |                                                                                                                                                                                                                                                                             |                                                |             |                                                                                                                                                                                    |
|-------------------------|------------------------------------|----|-----------------------------------------------------------------------------------------------------------------------------------------------------------------------------------------------------------------------------------------------------------------------------|------------------------------------------------|-------------|------------------------------------------------------------------------------------------------------------------------------------------------------------------------------------|
| Caenorhabditis briggsae | briggsae cbr-sec-8 protein         | 0  |                                                                                                                                                                                                                                                                             | P:GO:0006904;<br>C:GO:0000145;<br>P:GO:0015031 |             | -                                                                                                                                                                                  |
| Caenorhabditis elegans  | briggsae cbr-gly-7 protein         | 5  | F:GO:0004653;<br>F:GO:0005529;<br>C:GO:0005795;<br>P:GO:0009312;<br>C:GO:0016021                                                                                                                                                                                            | -                                              | EC:2.4.1.41 | IPR000772; IPR001173; IPR008997;<br>G3DSA:2.80.10.50 (GENE3D),<br>G3DSA:3.90.550.10 (GENE3D),<br>PTHR11675 (PANTHER), SignalP<br>(SIGNALP), SSF53448 (SUPERFAMILY)                 |
| Caenorhabditis elegans  | briggsae cbr-gly-7 protein         | 5  | F:GO:0004653;<br>F:GO:0005529;<br>C:GO:0005795;<br>P:GO:0009312;<br>C:GO:0016021                                                                                                                                                                                            | -                                              | EC:2.4.1.41 | IPR000772; IPR001173; IPR008997;<br>G3DSA:2.80.10.50 (GENE3D),<br>G3DSA:3.90.550.10 (GENE3D),<br>PTHR11675 (PANTHER), SignalP<br>(SIGNALP), SSF53448 (SUPERFAMILY)                 |
| Caenorhabditis elegans  | s-phase ki-se-associated protein 2 | 0  |                                                                                                                                                                                                                                                                             | F:GO:0016301;<br>P:GO:0006511                  |             | IPR001810; G3DSA:3.80.10.10<br>(GENE3D), PTHR23125 (PANTHER),<br>PTHR23125:SF34 (PANTHER),<br>SSF52047 (SUPERFAMILY)                                                               |
| Caenorhabditis elegans  | s-phase ki-se-associated protein 2 | 0  |                                                                                                                                                                                                                                                                             | F:GO:0016301;<br>P:GO:0006511                  |             | IPR001810; G3DSA:3.80.10.10<br>(GENE3D), PTHR23125 (PANTHER),<br>PTHR23125:SF34 (PANTHER),<br>SSF52047 (SUPERFAMILY)                                                               |
| Caenorhabditis briggsae | -dh dehydroge-se                   | 5  | F:GO:0008137;<br>C:GO:0005747;<br>P:GO:0055114;<br>P:GO:0006091;<br>P:GO:0001932                                                                                                                                                                                            | -                                              | EC:1.6.5.3  | IPR006885; G3DSA:3.30.160.190<br>(GENE3D), PTHR12219:SF7 (PANTHER)                                                                                                                 |
| Caenorhabditis elegans  | r- binding motif protein 22        | 10 | F:GO:0003723;<br>C:GO:0005681;<br>F:GO:0008270;<br>C:GO:0005730;<br>P:GO:0000060;<br>P:GO:0008380;<br>F:GO:0048306;<br>F:GO:0000166;<br>P:GO:0006397;<br>C:GO:0005737                                                                                                       | -                                              |             | IPR000504; IPR012677; PTHR14089<br>(PANTHER), PTHR14089:SF4<br>(PANTHER), SSF54928 (SUPERFAMILY)                                                                                   |
| Caenorhabditis briggsae | sec23 protein                      | 16 | P:GO:0040010;<br>P:GO:0030421;<br>F:GO:0008270;<br>C:GO:0000139;<br>P:GO:0048821;<br>P:GO:0032940;<br>P:GO:0018996;<br>P:GO:0002119;<br>F:GO:0005515;<br>C:GO:0030127;<br>P:GO:0006888;<br>C:GO:0048471;<br>P:GO:0006898;<br>P:GO:0006886;<br>P:GO:0048477;<br>P:GO:0048702 | -                                              |             | IPR006896; IPR006900; IPR007123;<br>IPR012990; G3DSA:3.40.50.410<br>(GENE3D), PTHR11141 (PANTHER),<br>SSF53300 (SUPERFAMILY), SSF81995<br>(SUPERFAMILY), SSF82754<br>(SUPERFAMILY) |
|                         | -                                  | 0  |                                                                                                                                                                                                                                                                             |                                                |             | -                                                                                                                                                                                  |
|                         | -                                  | 0  |                                                                                                                                                                                                                                                                             |                                                |             | -                                                                                                                                                                                  |

|                                  |                                                 |   |                                                                                                                                                      |   |            |                                                                                                                                                      |
|----------------------------------|-------------------------------------------------|---|------------------------------------------------------------------------------------------------------------------------------------------------------|---|------------|------------------------------------------------------------------------------------------------------------------------------------------------------|
| Caenorhabditis elegans           | 39s ribosomal protein mitochondrial             | 9 | P:GO:0009792;<br>P:GO:0010171;<br>P:GO:0002119;<br>C:GO:0005761;<br>F:GO:0003735;<br>P:GO:0040010;<br>P:GO:0000003;<br>P:GO:0008340;<br>P:GO:0006412 | - | EC:3.6.5.3 | IPR010729; PTHR21183:SF12 (PANTHER)                                                                                                                  |
| Caenorhabditis elegans           | 39s ribosomal protein mitochondrial             | 9 | P:GO:0009792;<br>P:GO:0010171;<br>P:GO:0002119;<br>C:GO:0005761;<br>F:GO:0003735;<br>P:GO:0040010;<br>P:GO:0000003;<br>P:GO:0008340;<br>P:GO:0006412 | - | EC:3.6.5.3 | IPR010729; PTHR21183:SF12 (PANTHER)                                                                                                                  |
| Caenorhabditis briggsae          | kiaa1688 protein                                | 3 | C:GO:0005856;<br>P:GO:0007165;<br>F:GO:0005515                                                                                                       | - |            | IPR000198; IPR008936; PTHR23177 (PANTHER), PTHR23177:SF1 (PANTHER)                                                                                   |
|                                  | -                                               | 0 |                                                                                                                                                      |   |            | -                                                                                                                                                    |
| Caenorhabditis elegans           | rapamycin and fkbp12 target-1 partial           | 1 | F:GO:0016740                                                                                                                                         | - |            | IPR003151; IPR011989; IPR014009; IPR016024; PTHR11139 (PANTHER), PTHR11139:SF9 (PANTHER)                                                             |
| Caenorhabditis elegans           | start domain containing 3                       | 2 | P:GO:0006629;<br>C:GO:0044464                                                                                                                        | - |            | IPR000799; IPR002913; IPR019498; G3DSA:3.30.530.20 (GENE3D), PTHR12136 (PANTHER), PTHR12136:SF3 (PANTHER), SignalP (SIGNALP), SSF55961 (SUPERFAMILY) |
| Streptomyces avermitilis MA-4680 | briggsae cbr-dao-5 protein                      | 0 |                                                                                                                                                      |   |            | IPR017956                                                                                                                                            |
| Caenorhabditis briggsae          | -dh dehydroge-se 1 alpha subcomplex 2 variant 1 | 2 | C:GO:0016020;<br>C:GO:0005739                                                                                                                        | - |            | IPR007741; IPR012336; PTHR12878 (PANTHER)                                                                                                            |

|                         |                                                                                    |    |                                                                                                                                                                                                                             |                               |             |                                                                                                                                    |
|-------------------------|------------------------------------------------------------------------------------|----|-----------------------------------------------------------------------------------------------------------------------------------------------------------------------------------------------------------------------------|-------------------------------|-------------|------------------------------------------------------------------------------------------------------------------------------------|
| Pongo abelii            | low quality protein: guanine nucleotide-binding protein subunit beta-2-like 1-like |    | P:GO:0023034;<br>P:GO:0008104;<br>F:GO:0019903;<br>C:GO:0005737;<br>9 C:GO:0043025;<br>F:GO:0004872;<br>F:GO:0005102;<br>F:GO:0005080;<br>C:GO:0005886                                                                      |                               |             | IPR001680; IPR015943; IPR017986;<br>IPR019775; IPR019781; IPR019782;<br>IPR020472; PTHR19868 (PANTHER),<br>SSF101908 (SUPERFAMILY) |
| Caenorhabditis elegans  | hypothetical protein F48E3.4 [Caenorhabditis elegans]                              | 0  |                                                                                                                                                                                                                             | F:GO:0003824                  |             | IPR001254; IPR009003;<br>G3DSA:2.40.10.10 (GENE3D),<br>PTHR19355 (PANTHER),<br>PTHR19355:SF135 (PANTHER), SignalP<br>(SIGNALP)     |
| Caenorhabditis briggsae | ribosomal protein s17                                                              | 13 | P:GO:0006413;<br>P:GO:0040010;<br>P:GO:0006364;<br>F:GO:0003735;<br>P:GO:0034101;<br>P:GO:0000003;<br>13 P:GO:0006414;<br>C:GO:0022627;<br>P:GO:0042274;<br>P:GO:0010171;<br>P:GO:0002119;<br>P:GO:0009792;<br>P:GO:0040018 |                               |             | IPR001210; IPR018273; SSF116820<br>(SUPERFAMILY)                                                                                   |
| Caenorhabditis elegans  | orotate phosphoribosyltransferase family protein                                   | 5  | P:GO:0034404;<br>C:GO:0005875;<br>5 F:GO:0005515;<br>P:GO:0046483;<br>F:GO:0004588                                                                                                                                          |                               | EC:2.4.2.10 | IPR000836; IPR004467;<br>G3DSA:3.40.50.2020 (GENE3D),<br>SSF53271 (SUPERFAMILY)                                                    |
| Caenorhabditis briggsae | upf0402 protein cg32590                                                            | 0  |                                                                                                                                                                                                                             | F:GO:0003674;<br>C:GO:0005575 |             | -                                                                                                                                  |
| Caenorhabditis elegans  | hypothetical protein F29C12.3 [Caenorhabditis elegans]                             | 0  |                                                                                                                                                                                                                             |                               |             | PTHR13298 (PANTHER),<br>PTHR13298:SF2 (PANTHER)                                                                                    |
| Caenorhabditis briggsae | Hypothetical protein CBG20694 [Caenorhabditis briggsae]                            | 0  |                                                                                                                                                                                                                             |                               |             | -                                                                                                                                  |
| Caenorhabditis briggsae | Hypothetical protein CBG20694 [Caenorhabditis briggsae]                            | 0  |                                                                                                                                                                                                                             |                               |             | -                                                                                                                                  |
| Caenorhabditis briggsae | Hypothetical protein CBG20694 [Caenorhabditis briggsae]                            | 0  |                                                                                                                                                                                                                             |                               |             | -                                                                                                                                  |
|                         | -                                                                                  | 0  |                                                                                                                                                                                                                             |                               |             | -                                                                                                                                  |
| Caenorhabditis brenneri | f-box lrr-repeat protein 20                                                        | 0  |                                                                                                                                                                                                                             | F:GO:0005515;<br>C:GO:0005575 |             | G3DSA:3.80.10.10 (GENE3D),<br>PTHR23125 (PANTHER),<br>PTHR23125:SF32 (PANTHER),<br>SSF52047 (SUPERFAMILY)                          |
|                         | -                                                                                  | 0  |                                                                                                                                                                                                                             |                               |             | -                                                                                                                                  |
|                         | -                                                                                  | 0  |                                                                                                                                                                                                                             |                               |             | -                                                                                                                                  |
| Caenorhabditis elegans  | elegans protein confirmed by transcript evidence                                   | 0  |                                                                                                                                                                                                                             |                               |             | -                                                                                                                                  |
|                         | -                                                                                  | 0  |                                                                                                                                                                                                                             |                               |             | SignalP (SIGNALP)                                                                                                                  |
|                         | -                                                                                  | 0  |                                                                                                                                                                                                                             |                               |             | SignalP (SIGNALP)                                                                                                                  |
| Caenorhabditis elegans  | hypothetical protein F32B5.6 [Caenorhabditis elegans]                              | 0  |                                                                                                                                                                                                                             |                               |             | -                                                                                                                                  |
| Caenorhabditis elegans  | hypothetical protein F32B5.6 [Caenorhabditis elegans]                              | 0  |                                                                                                                                                                                                                             |                               |             | -                                                                                                                                  |
| Caenorhabditis elegans  | elegans protein partially confirmed by transcript evidence                         | 2  | F:GO:0005488;<br>F:GO:0016301                                                                                                                                                                                               |                               |             | IPR000719; IPR011009; IPR017441;<br>IPR017442; G3DSA:3.30.200.20<br>(GENE3D), PTHR22971 (PANTHER)                                  |
|                         | -                                                                                  | 0  |                                                                                                                                                                                                                             |                               |             | SignalP (SIGNALP)                                                                                                                  |
| Caenorhabditis elegans  | ethanolamine-phosphate cytidyltransferase                                          | 3  | P:GO:0006646;<br>3 F:GO:0005515;<br>F:GO:0004306                                                                                                                                                                            |                               | EC:2.7.7.14 | -                                                                                                                                  |



|                         |                                                                    |    |                                                                                                                                                                                                         |              |             |                                                                                                                                    |
|-------------------------|--------------------------------------------------------------------|----|---------------------------------------------------------------------------------------------------------------------------------------------------------------------------------------------------------|--------------|-------------|------------------------------------------------------------------------------------------------------------------------------------|
| Caenorhabditis briggsae | Hypothetical protein CBG12107 [Caenorhabditis briggsae]            | 0  |                                                                                                                                                                                                         |              |             | -                                                                                                                                  |
| Ostertagia ostertagi    | two-domain activation associated secreted protein asp4 precursor   | 0  |                                                                                                                                                                                                         | C:GO:0005576 |             | -                                                                                                                                  |
| Caenorhabditis briggsae | small nuclear ribonucleoprotein e                                  | 8  | C:GO:0005683;<br>C:GO:0005654;<br>P:GO:0000387;<br>C:GO:0005681;<br>F:GO:0003723;<br>F:GO:0005515;<br>C:GO:0005829;<br>P:GO:0000245                                                                     | -            |             | IPR001163; IPR006649; IPR010920;<br>G3DSA:2.30.30.100 (GENE3D),<br>PTHR11193 (PANTHER)                                             |
| Loa loa                 | 3-phosphoinositide dependent protein ki-se-1                       | 1  | F:GO:0016301                                                                                                                                                                                            | -            |             | IPR000719; IPR011009; IPR015746;<br>IPR017442; G3DSA:1.10.510.10<br>(GENE3D), PTHR22985 (PANTHER)                                  |
|                         | -                                                                  | 0  |                                                                                                                                                                                                         |              |             | SignalP (SIGNALP)                                                                                                                  |
|                         | -                                                                  | 0  |                                                                                                                                                                                                         |              |             | SignalP (SIGNALP)                                                                                                                  |
|                         | -                                                                  | 0  |                                                                                                                                                                                                         |              |             | -                                                                                                                                  |
| Loa loa                 | nuclear receptor nhr-88                                            | 6  | F:GO:0046872;<br>F:GO:0004879;<br>F:GO:0003677;<br>P:GO:0045449;<br>F:GO:0005515;<br>P:GO:0019915                                                                                                       | -            |             | IPR001628; IPR008946; IPR013088;<br>PRO0350 (PRINTS), PTHR11865<br>(PANTHER), PTHR11865:SF197<br>(PANTHER), SSF57716 (SUPERFAMILY) |
| Caenorhabditis elegans  | elegans protein confirmed by transcript evidence                   | 1  | C:GO:0044425                                                                                                                                                                                            | -            |             | IPR002490; PTHR11629:SF23<br>(PANTHER)                                                                                             |
| Caenorhabditis elegans  | glycyl-tr- synthetase                                              | 7  | C:GO:0016021;<br>P:GO:0006426;<br>P:GO:0015966;<br>F:GO:0005524;<br>F:GO:0046983;<br>C:GO:0005737;<br>F:GO:0004820                                                                                      | -            | EC:6.1.1.14 | IPR000738; IPR002314; IPR002315;<br>IPR009068; G3DSA:3.30.930.10<br>(GENE3D), SSF55681 (SUPERFAMILY)                               |
| Caenorhabditis elegans  | vamp (vesicle-associated membrane protein)-associated protein like | 8  | C:GO:0005923;<br>F:GO:0004871;<br>P:GO:0043123;<br>C:GO:0031982;<br>P:GO:0006944;<br>C:GO:0048471;<br>F:GO:0046982;<br>C:GO:0005789                                                                     | -            |             | IPR000535; IPR008962; PTHR10809<br>(PANTHER)                                                                                       |
| Brugia malayi           | hypothetical protein Bm1_31440 [Brugia malayi]                     | 0  |                                                                                                                                                                                                         |              |             | -                                                                                                                                  |
|                         | -                                                                  | 0  |                                                                                                                                                                                                         |              |             | -                                                                                                                                  |
| Haemonchus contortus    | atp-binding sub-family b (mdr tap) member 4                        | 12 | P:GO:0055085;<br>P:GO:0006629;<br>F:GO:0008559;<br>C:GO:0046581;<br>C:GO:0000139;<br>C:GO:0005624;<br>F:GO:0005524;<br>P:GO:0051384;<br>F:GO:0005515;<br>P:GO:0042493;<br>C:GO:0016324;<br>C:GO:0005887 | -            | EC:3.6.3.44 | -                                                                                                                                  |

|                            |                                                                         |    |                                                                                                                                                                                                                                                                             |                                                |                                           |                                                                                                                                                                                           |
|----------------------------|-------------------------------------------------------------------------|----|-----------------------------------------------------------------------------------------------------------------------------------------------------------------------------------------------------------------------------------------------------------------------------|------------------------------------------------|-------------------------------------------|-------------------------------------------------------------------------------------------------------------------------------------------------------------------------------------------|
| Caenorhabditis elegans     | mevalo-te ki-se                                                         | 16 | C:GO:0005829;<br>F:GO:0003729;<br>P:GO:0017148;<br>P:GO:0008340;<br>C:GO:0005777;<br>C:GO:0005625;<br>P:GO:0019287;<br>P:GO:0040007;<br>F:GO:0042802;<br>F:GO:0005524;<br>P:GO:0002119;<br>P:GO:0016310;<br>P:GO:0040011;<br>P:GO:0009792;<br>F:GO:0004496;<br>P:GO:0016126 | -                                              | EC:2.7.1.36                               | IPR006205; G3DSA:3.30.70.890<br>(GENE3D), PTHR10457 (PANTHER),<br>SSF55060 (SUPERFAMILY)                                                                                                  |
| Caenorhabditis elegans     | lipb_caeel ame: full=liprin-beta ame: full=lar-interacting protein beta | 0  |                                                                                                                                                                                                                                                                             |                                                |                                           | -                                                                                                                                                                                         |
|                            |                                                                         | 0  |                                                                                                                                                                                                                                                                             |                                                |                                           | -                                                                                                                                                                                         |
| Caenorhabditis elegans     | hypothetical protein C09D4.4 [Caenorhabditis elegans]                   | 0  |                                                                                                                                                                                                                                                                             | F:GO:0016788;<br>P:GO:0006886;<br>C:GO:0031227 |                                           | -                                                                                                                                                                                         |
| Gallus gallus              | PREDICTED: hypothetical protein [Gallus gallus]                         | 0  |                                                                                                                                                                                                                                                                             |                                                |                                           | -                                                                                                                                                                                         |
| Caenorhabditis briggsae    | hypothetical kda protein in chromosome                                  | 0  |                                                                                                                                                                                                                                                                             | P:GO:0000003;<br>P:GO:0006898                  |                                           | SignalP (SIGNALP)                                                                                                                                                                         |
| Caenorhabditis elegans     | kiaa0564 protein                                                        | 3  | C:GO:0005622;<br>F:GO:0017111;<br>F:GO:0000166                                                                                                                                                                                                                              | -                                              | EC:3.6.1.15                               | PTHR21610 (PANTHER),<br>PTHR21610:SF3 (PANTHER), SignalP<br>(SIGNALP)                                                                                                                     |
| Caenorhabditis briggsae    | propionyl- carboxylase                                                  | 9  | P:GO:0009792;<br>P:GO:0002119;<br>F:GO:0003723;<br>F:GO:0004485;<br>P:GO:0040010;<br>F:GO:0004525;<br>F:GO:0016740;<br>F:GO:0004658;<br>P:GO:0006396                                                                                                                        | -                                              | EC:6.4.1.4;<br>EC:3.1.26.3;<br>EC:6.4.1.3 | IPR000022; IPR011763;<br>G3DSA:3.90.226.10 (GENE3D),<br>PTHR22855 (PANTHER),<br>PTHR22855:SF13 (PANTHER),<br>SSF52096 (SUPERFAMILY)                                                       |
| Brugia malayi              | bromodomain containing protein                                          | 0  |                                                                                                                                                                                                                                                                             |                                                |                                           | PTHR22880 (PANTHER),<br>PTHR22880:SF21 (PANTHER)                                                                                                                                          |
|                            |                                                                         | 0  |                                                                                                                                                                                                                                                                             |                                                |                                           | -                                                                                                                                                                                         |
| Laccaria bicolor S238N-H82 | protein                                                                 | 0  |                                                                                                                                                                                                                                                                             |                                                |                                           | -                                                                                                                                                                                         |
| Caenorhabditis elegans     | -d dehydroge-se                                                         | 4  | C:GO:0005737;<br>P:GO:0006546;<br>F:GO:0016491;<br>F:GO:0004047                                                                                                                                                                                                             | -                                              | EC:2.1.2.10                               | IPR006076; IPR006222;<br>G3DSA:3.50.50.60 (GENE3D),<br>PTHR13847 (PANTHER),<br>PTHR13847:SF16 (PANTHER),<br>SSF103025 (SUPERFAMILY), SSF51905<br>(SUPERFAMILY), SSF54373<br>(SUPERFAMILY) |
| Caenorhabditis elegans     | hypothetical protein T27C4.1 [Caenorhabditis elegans]                   | 0  |                                                                                                                                                                                                                                                                             |                                                |                                           | SignalP (SIGNALP)                                                                                                                                                                         |
| Caenorhabditis elegans     | a in (actin filament binding protein) homolog family member (afd-1)     | 3  | C:GO:0030054;<br>F:GO:0005515;<br>P:GO:0040010                                                                                                                                                                                                                              | -                                              |                                           | IPR000253; IPR001478; IPR002710;<br>IPR008984; IPR018444;<br>G3DSA:2.30.42.10 (GENE3D),<br>PTHR10398 (PANTHER)                                                                            |
| Caenorhabditis elegans     | a in (actin filament binding protein) homolog family member (afd-1)     | 3  | C:GO:0030054;<br>F:GO:0005515;<br>P:GO:0040010                                                                                                                                                                                                                              | -                                              |                                           | IPR000253; IPR001478; IPR002710;<br>IPR008984; IPR018444;<br>G3DSA:2.30.42.10 (GENE3D),<br>PTHR10398 (PANTHER)                                                                            |

|                             |                                                                     |   |                                                                                                                                                      |                                                                                  |                                                                                                                                                                                  |
|-----------------------------|---------------------------------------------------------------------|---|------------------------------------------------------------------------------------------------------------------------------------------------------|----------------------------------------------------------------------------------|----------------------------------------------------------------------------------------------------------------------------------------------------------------------------------|
| Caenorhabditis elegans      | a in (actin filament binding protein) homolog family member (afd-1) | 3 | C:GO:0030054;<br>F:GO:0005515;<br>P:GO:0040010                                                                                                       | -                                                                                | IPR000253; IPR001478; IPR002710;<br>IPR008984; IPR018444;<br>G3DSA:2.30.42.10 (GENE3D),<br>PTHR10398 (PANTHER)                                                                   |
| Caenorhabditis elegans      | a in (actin filament binding protein) homolog family member (afd-1) | 3 | C:GO:0030054;<br>F:GO:0005515;<br>P:GO:0040010                                                                                                       | -                                                                                | IPR000253; IPR001478; IPR002710;<br>IPR008984; IPR018444;<br>G3DSA:2.30.42.10 (GENE3D),<br>PTHR10398 (PANTHER)                                                                   |
| Caenorhabditis elegans      | a in (actin filament binding protein) homolog family member (afd-1) | 3 | C:GO:0030054;<br>F:GO:0005515;<br>P:GO:0040010                                                                                                       | -                                                                                | IPR000253; IPR001478; IPR002710;<br>IPR008984; IPR018444;<br>G3DSA:2.30.42.10 (GENE3D),<br>PTHR10398 (PANTHER)                                                                   |
| Caenorhabditis elegans      | a in (actin filament binding protein) homolog family member (afd-1) | 3 | C:GO:0030054;<br>F:GO:0005515;<br>P:GO:0040010                                                                                                       | -                                                                                | IPR000253; IPR001478; IPR002710;<br>IPR008984; IPR018444;<br>G3DSA:2.30.42.10 (GENE3D),<br>PTHR10398 (PANTHER)                                                                   |
| Caenorhabditis briggsae     | te-scin precursor                                                   | 2 | P:GO:0032501;<br>C:GO:0044421                                                                                                                        | -                                                                                | IPR000742; IPR002049; IPR006210;<br>IPR013032; PR00011 (PRINTS),<br>G3DSA:2.170.300.10 (GENE3D),<br>PTHR11201 (PANTHER),<br>PTHR11201:SF147 (PANTHER),<br>SSF57196 (SUPERFAMILY) |
| Caenorhabditis elegans      | beta chain spectrin                                                 | 2 | F:GO:0003779;<br>C:GO:0044444                                                                                                                        | -                                                                                | IPR001452; IPR002017; IPR018159;<br>G3DSA:1.20.58.60 (GENE3D),<br>G3DSA:2.30.30.40 (GENE3D),<br>PTHR11915 (PANTHER),<br>PTHR11915:SF48 (PANTHER),<br>SSF46966 (SUPERFAMILY)      |
| Loa loa                     | transmembrane protein 106b                                          | 0 |                                                                                                                                                      | F:GO:0003674;<br>C:GO:0016021;<br>C:GO:0016020;<br>P:GO:0008150;<br>C:GO:0005575 | IPR009790                                                                                                                                                                        |
| Loa loa                     | transmembrane protein 106b                                          | 0 |                                                                                                                                                      | F:GO:0003674;<br>C:GO:0016021;<br>C:GO:0016020;<br>P:GO:0008150;<br>C:GO:0005575 | IPR009790                                                                                                                                                                        |
| Angiostrongylus cantonensis | hypothetical protein [Angiostrongylus cantonensis]                  | 0 |                                                                                                                                                      |                                                                                  | SignalP (SIGNALP)                                                                                                                                                                |
|                             |                                                                     | 0 |                                                                                                                                                      |                                                                                  | -                                                                                                                                                                                |
|                             |                                                                     | 0 |                                                                                                                                                      |                                                                                  | -                                                                                                                                                                                |
| Macaca mulatta              | translocon-associated protein subunit beta precursor                | 4 | C:GO:0005789;<br>F:GO:0005048;<br>P:GO:0006613;<br>C:GO:0016021                                                                                      | -                                                                                | IPR008856                                                                                                                                                                        |
|                             |                                                                     | 0 |                                                                                                                                                      |                                                                                  | -                                                                                                                                                                                |
| Caenorhabditis elegans      | insulin-degrading enzyme                                            | 9 | P:GO:0010815;<br>F:GO:0008270;<br>C:GO:0005777;<br>F:GO:0004222;<br>P:GO:0050435;<br>P:GO:0006508;<br>P:GO:0065007;<br>F:GO:0042803;<br>F:GO:0005524 | -                                                                                | EC:3.4.24.0<br>IPR007863; IPR011249; PTHR11851<br>(PANTHER), PTHR11851:SF64<br>(PANTHER)                                                                                         |

|                         |                                                  |    |                                                                                                                                                                                                                                                                                                               |   |                                                                                                                                                                                                                  |
|-------------------------|--------------------------------------------------|----|---------------------------------------------------------------------------------------------------------------------------------------------------------------------------------------------------------------------------------------------------------------------------------------------------------------|---|------------------------------------------------------------------------------------------------------------------------------------------------------------------------------------------------------------------|
| Caenorhabditis briggsae | ap-2 complex subunit mu-1                        | 9  | P:GO:0016192;<br>C:GO:0005829;<br>F:GO:0008289;<br>C:GO:0005778;<br>P:GO:0005690;<br>C:GO:0030122;<br>F:GO:0005515;<br>F:GO:0005215;<br>P:GO:0006886                                                                                                                                                          | - | IPR001392; IPR008968; IPR015629;<br>IPR018240; G3DSA:2.60.40.1170<br>(GENE3D), PTHR11998 (PANTHER)                                                                                                               |
| Caenorhabditis briggsae | adenylosucce-te lyase                            | 18 | C:GO:0005829;<br>F:GO:0004018;<br>P:GO:0040010;<br>P:GO:0018991;<br>C:GO:0005625;<br>C:GO:0005739;<br>P:GO:0007584;<br>P:GO:0040035;<br>P:GO:0009168;<br>P:GO:0010171;<br>P:GO:0009060;<br>P:GO:0002119;<br>F:GO:0070626;<br>P:GO:0040011;<br>P:GO:0006997;<br>P:GO:0006898;<br>P:GO:0002009;<br>P:GO:0009792 | - | EC:4.3.2.2<br>IPR000362; IPR008948; IPR019468;<br>IPR020557; IPR022761;<br>G3DSA:1.20.200.10 (GENE3D),<br>PTHR11444 (PANTHER),<br>PTHR11444:SF2 (PANTHER)                                                        |
| Xenopus laevis          | member ras oncogene family                       | 15 | C:GO:0005768;<br>C:GO:0031410;<br>F:GO:0019003;<br>C:GO:0044446;<br>F:GO:0005515;<br>C:GO:0031090;<br>P:GO:0046907;<br>F:GO:0003924;<br>P:GO:0007165;<br>C:GO:0012505;<br>P:GO:0009792;<br>P:GO:0015031;<br>C:GO:0005794;<br>C:GO:0005783;<br>F:GO:0005525                                                    | - | EC:3.6.5.1;<br>EC:3.6.5.2;<br>EC:3.6.5.3;<br>EC:3.6.5.4<br>IPR001806; IPR003579; IPR005225;<br>IPR013753; IPR015601; IPR020851;<br>G3DSA:3.40.50.300 (GENE3D),<br>PTHR11708 (PANTHER), SSF52540<br>(SUPERFAMILY) |
| Oryctolagus cuniculus   | zinc finger protein 384                          | 0  | C:GO:0005925;<br>F:GO:0003677;<br>C:GO:0005634;<br>F:GO:0003676;<br>P:GO:0045941;<br>F:GO:0008270;<br>P:GO:0006913;<br>C:GO:0005730;<br>C:GO:0005622;<br>F:GO:0046872;<br>F:GO:0042156;<br>P:GO:0045449;<br>F:GO:0017124                                                                                      | - | -                                                                                                                                                                                                                |
| -                       | -                                                | 0  | -                                                                                                                                                                                                                                                                                                             | - | -                                                                                                                                                                                                                |
| Caenorhabditis briggsae | lin-48 expression abnormal family member (lex-1) | 1  | P:GO:0009987                                                                                                                                                                                                                                                                                                  | - | -                                                                                                                                                                                                                |
| Caenorhabditis elegans  | elegans protein confirmed by transcript evidence | 0  | -                                                                                                                                                                                                                                                                                                             | - | IPR009673; SignalP (SIGNALP)                                                                                                                                                                                     |

|                         |                                                                                                     |    |                                                                                                                                                                                        |                                                                                                   |             |                                                                                                                                     |
|-------------------------|-----------------------------------------------------------------------------------------------------|----|----------------------------------------------------------------------------------------------------------------------------------------------------------------------------------------|---------------------------------------------------------------------------------------------------|-------------|-------------------------------------------------------------------------------------------------------------------------------------|
| Caenorhabditis briggsae | Hypothetical protein CBG01085 [Caenorhabditis briggsae]                                             | 0  |                                                                                                                                                                                        | C:GO:0016021;<br>C:GO:0016020                                                                     |             | IPR007514                                                                                                                           |
| Loa loa                 | deoxycytidylate deami-se                                                                            | 2  | F:GO:0008270;<br>F:GO:0004132                                                                                                                                                          | -                                                                                                 | EC:3.5.4.12 | IPR002125; IPR015517; IPR016192;<br>IPR016193; G3DSA:3.40.140.10<br>(GENE3D), PTHR11086:SF2 (PANTHER)                               |
| Caenorhabditis elegans  | protein-tyrosine phosphatase containing protein                                                     | 3  | F:GO:0004725;<br>P:GO:0006470;<br>F:GO:0008138                                                                                                                                         | -                                                                                                 | EC:3.1.3.48 | IPR000242; IPR000387;<br>G3DSA:3.90.190.10 (GENE3D),<br>PTHR19134 (PANTHER),<br>PTHR19134:SF26 (PANTHER),<br>SSF52799 (SUPERFAMILY) |
| -                       | -                                                                                                   | 0  |                                                                                                                                                                                        |                                                                                                   |             | SignalP (SIGNALP)                                                                                                                   |
| Caenorhabditis elegans  | swi snf-related matrix-associated actin-dependent regulator of chromatin subfamily a-like protein 1 | 8  | P:GO:0016568;<br>F:GO:0003678;<br>P:GO:0006357;<br>P:GO:0006259;<br>F:GO:0003677;<br>F:GO:0005524;<br>F:GO:0008094;<br>C:GO:0005634                                                    | -                                                                                                 |             | -                                                                                                                                   |
| Caenorhabditis elegans  | swi snf-related matrix-associated actin-dependent regulator of chromatin subfamily a-like protein 1 | 8  | P:GO:0016568;<br>F:GO:0003678;<br>P:GO:0006357;<br>P:GO:0006259;<br>F:GO:0003677;<br>F:GO:0005524;<br>F:GO:0008094;<br>C:GO:0005634                                                    | -                                                                                                 |             | PTHR10799 (PANTHER),<br>PTHR10799:SF43 (PANTHER),<br>SSF52540 (SUPERFAMILY)                                                         |
| -                       | -                                                                                                   | 0  |                                                                                                                                                                                        |                                                                                                   |             | IPR000436; IPR016060; SignalP (SIGNALP)                                                                                             |
| Brugia malayi           | ubiquitin-conjugating enzyme e2q family member 1                                                    | 3  | F:GO:0005515;<br>P:GO:0070936;<br>F:GO:0004842                                                                                                                                         | -                                                                                                 | EC:6.3.2.19 | IPR016135; PTHR11621 (PANTHER),<br>PTHR11621:SF6 (PANTHER)                                                                          |
| -                       | -                                                                                                   | 0  |                                                                                                                                                                                        |                                                                                                   |             | -                                                                                                                                   |
| Caenorhabditis briggsae | briggsae cbr-ego-1 protein                                                                          | 1  | F:GO:0005515                                                                                                                                                                           | -                                                                                                 |             | -                                                                                                                                   |
| Caenorhabditis elegans  | galactoside- 9                                                                                      | 0  |                                                                                                                                                                                        | C:GO:0005737;<br>F:GO:0005534;<br>P:GO:0043123;<br>F:GO:0004871;<br>F:GO:0005529;<br>C:GO:0005576 |             | IPR001079; IPR008985; IPR013320                                                                                                     |
| Caenorhabditis elegans  | galactoside- 9                                                                                      | 0  |                                                                                                                                                                                        | C:GO:0005737;<br>F:GO:0005534;<br>P:GO:0043123;<br>F:GO:0004871;<br>F:GO:0005529;<br>C:GO:0005576 |             | IPR001079; IPR008985; IPR013320                                                                                                     |
| Caenorhabditis elegans  | arp2 3 complex 20 kd subunit                                                                        | 11 | P:GO:0043652;<br>P:GO:0040010;<br>C:GO:0005856;<br>P:GO:0008360;<br>P:GO:0016331;<br>P:GO:0010631;<br>P:GO:0030041;<br>P:GO:0030866;<br>F:GO:0003779;<br>P:GO:0009792;<br>P:GO:0030031 | -                                                                                                 |             | IPR008384; G3DSA:3.30.1460.20<br>(GENE3D), SSF69645 (SUPERFAMILY)                                                                   |

|                         |                                                           |    |                                                                                                                                                                                                         |                                                                                                   |                                                         |                                                                                                                                            |
|-------------------------|-----------------------------------------------------------|----|---------------------------------------------------------------------------------------------------------------------------------------------------------------------------------------------------------|---------------------------------------------------------------------------------------------------|---------------------------------------------------------|--------------------------------------------------------------------------------------------------------------------------------------------|
| Caenorhabditis elegans  | arp2 3 complex 20 kd subunit                              | 11 | P:GO:0043652;<br>P:GO:0040010;<br>C:GO:0005856;<br>P:GO:0008360;<br>P:GO:0016331;<br>P:GO:0010631;<br>P:GO:0030041;<br>P:GO:0030866;<br>F:GO:0003779;<br>P:GO:0009792;<br>P:GO:0030031                  | -                                                                                                 |                                                         | IPR008384; G3DSA:3.30.1460.20 (GENE3D), SSF69645 (SUPERFAMILY)                                                                             |
| Loa loa                 | enhancer of yellow 2 transcription factor homolog         | 5  | P:GO:0006810;<br>C:GO:0000124;<br>F:GO:0030374;<br>P:GO:0016578;<br>P:GO:0045893                                                                                                                        | -                                                                                                 |                                                         | IPR018783                                                                                                                                  |
| Loa loa                 | sphingomyelin synthase-related 1                          | 2  | C:GO:0016021;<br>P:GO:0006686                                                                                                                                                                           | -                                                                                                 |                                                         | PTHR21290 (PANTHER),<br>PTHR21290:SF7 (PANTHER)                                                                                            |
|                         | -                                                         | 0  |                                                                                                                                                                                                         |                                                                                                   |                                                         | -                                                                                                                                          |
|                         | -                                                         | 0  |                                                                                                                                                                                                         |                                                                                                   |                                                         | -                                                                                                                                          |
| Caenorhabditis briggsae | thioredoxin domain-containing protein 15                  | 0  |                                                                                                                                                                                                         | F:GO:0003674;<br>P:GO:0045454;<br>C:GO:0016021;<br>C:GO:0016020;<br>C:GO:0005575;<br>F:GO:0016853 |                                                         | IPR005746; IPR012335; IPR012336;<br>IPR013766; PTHR10438:SF5 (PANTHER)                                                                     |
| Caenorhabditis elegans  | elegans protein confirmed by transcript evidence          | 3  | C:GO:0016021;<br>F:GO:0005272;<br>P:GO:0006814                                                                                                                                                          | -                                                                                                 |                                                         | -                                                                                                                                          |
| Caenorhabditis elegans  | sig-I recognition particle receptor alpha subunit         | 12 | F:GO:0003729;<br>C:GO:0005785;<br>C:GO:0016021;<br>F:GO:0004872;<br>P:GO:0050708;<br>F:GO:0005515;<br>P:GO:0007409;<br>F:GO:0003924;<br>P:GO:0006614;<br>C:GO:0005811;<br>F:GO:0005525;<br>F:GO:0005047 | -                                                                                                 | EC:3.6.5.1;<br>EC:3.6.5.2;<br>EC:3.6.5.3;<br>EC:3.6.5.4 | IPR000897; IPR003593; IPR013822;<br>G3DSA:3.40.50.300 (GENE3D),<br>PTHR11564 (PANTHER),<br>PTHR11564:SF8 (PANTHER), SSF52540 (SUPERFAMILY) |
| Caenorhabditis elegans  | cleavage and polyadenylation specificity factor subunit 1 | 4  | P:GO:0006378;<br>C:GO:0005847;<br>F:GO:0003723;<br>P:GO:0006379                                                                                                                                         | -                                                                                                 |                                                         | PTHR10644 (PANTHER),<br>PTHR10644:SF2 (PANTHER)                                                                                            |
| Loa loa                 | der1-like domain member 1                                 | 7  | P:GO:0030433;<br>C:GO:0030176;<br>F:GO:0042288;<br>F:GO:0004872;<br>P:GO:0019060;<br>P:GO:0030968;<br>P:GO:0030970                                                                                      | -                                                                                                 |                                                         | IPR007599                                                                                                                                  |
| Caenorhabditis briggsae | elegans protein confirmed by transcript evidence          | 0  |                                                                                                                                                                                                         | P:GO:0045132;<br>F:GO:0003677;<br>C:GO:0005634                                                    |                                                         | PTHR19932 (PANTHER),<br>PTHR19932:SF2 (PANTHER)                                                                                            |
| Caenorhabditis briggsae | elegans protein confirmed by transcript evidence          | 0  |                                                                                                                                                                                                         | P:GO:0045132;<br>F:GO:0003677;<br>C:GO:0005634                                                    |                                                         | PTHR19932 (PANTHER),<br>PTHR19932:SF2 (PANTHER)                                                                                            |

|                        |                                                                 |    |                                                                                                                                                                                                                                                                                                               |   |                                                                                                            |
|------------------------|-----------------------------------------------------------------|----|---------------------------------------------------------------------------------------------------------------------------------------------------------------------------------------------------------------------------------------------------------------------------------------------------------------|---|------------------------------------------------------------------------------------------------------------|
| Caenorhabditis elegans | serine threonine-protein phosphatase pp1-beta catalytic subunit | 18 | P:GO:0005981;<br>P:GO:0000003;<br>F:GO:0005515;<br>F:GO:0017018;<br>P:GO:0051301;<br>C:GO:0000164;<br>C:GO:0005730;<br>F:GO:0046872;<br>P:GO:0009792;<br>P:GO:0007067;<br>P:GO:0005979;<br>P:GO:0007126;<br>P:GO:0002119;<br>C:GO:0070688;<br>P:GO:0006470;<br>P:GO:0001889;<br>P:GO:0016568;<br>C:GO:0042587 | - | IPR004843; IPR006186;<br>G3DSA:3.60.21.10 (GENE3D),<br>PTHR11668:SF19 (PANTHER),<br>SSF56300 (SUPERFAMILY) |
| Caenorhabditis elegans | serine threonine-protein phosphatase pp1-beta catalytic subunit | 18 | P:GO:0005981;<br>P:GO:0000003;<br>F:GO:0005515;<br>F:GO:0017018;<br>P:GO:0051301;<br>C:GO:0000164;<br>C:GO:0005730;<br>F:GO:0046872;<br>P:GO:0009792;<br>P:GO:0007067;<br>P:GO:0005979;<br>P:GO:0007126;<br>P:GO:0002119;<br>C:GO:0070688;<br>P:GO:0006470;<br>P:GO:0001889;<br>P:GO:0016568;<br>C:GO:0042587 | - | SignalP (SIGNALP)                                                                                          |
| Caenorhabditis elegans | serine threonine-protein phosphatase pp1-beta catalytic subunit | 18 | P:GO:0005981;<br>P:GO:0000003;<br>F:GO:0005515;<br>F:GO:0017018;<br>P:GO:0051301;<br>C:GO:0000164;<br>C:GO:0005730;<br>F:GO:0046872;<br>P:GO:0009792;<br>P:GO:0007067;<br>P:GO:0005979;<br>P:GO:0007126;<br>P:GO:0002119;<br>C:GO:0070688;<br>P:GO:0006470;<br>P:GO:0001889;<br>P:GO:0016568;<br>C:GO:0042587 | - | IPR004843; IPR006186;<br>G3DSA:3.60.21.10 (GENE3D),<br>PTHR11668:SF19 (PANTHER),<br>SSF56300 (SUPERFAMILY) |

|                             |                                                                     |   |                                                                                                                                     |   |                                                |                                                                                                                                            |
|-----------------------------|---------------------------------------------------------------------|---|-------------------------------------------------------------------------------------------------------------------------------------|---|------------------------------------------------|--------------------------------------------------------------------------------------------------------------------------------------------|
| Caenorhabditis elegans      | rap ran-gap family protein                                          |   | F:GO:0005099;<br>C:GO:0005622;<br>5 P:GO:0051056;<br>F:GO:0005515;<br>P:GO:0007265                                                  | - |                                                | IPR000331; PTHR15711 (PANTHER),<br>SSF111347 (SUPERFAMILY)                                                                                 |
| Caenorhabditis elegans      | elegans protein confirmed by transcript evidence                    | 0 |                                                                                                                                     |   | F:GO:0003674;<br>P:GO:0008150;<br>C:GO:0005575 | IPR010342                                                                                                                                  |
| Angiostrongylus cantonensis | osta2_caeel ame: full=organic solute transporter alpha-like protein | 3 | C:GO:0016021;<br>P:GO:0006810;<br>F:GO:0005215                                                                                      | - |                                                | -                                                                                                                                          |
| Angiostrongylus cantonensis | organic solute transporter subunit alpha-like                       | 3 | C:GO:0016021;<br>P:GO:0006810;<br>F:GO:0005215                                                                                      | - |                                                | -                                                                                                                                          |
| Angiostrongylus cantonensis | organic solute transporter subunit alpha-like                       | 3 | C:GO:0016021;<br>P:GO:0006810;<br>F:GO:0005215                                                                                      | - |                                                | -                                                                                                                                          |
| Angiostrongylus cantonensis | organic solute transporter subunit alpha-like                       | 3 | C:GO:0016021;<br>P:GO:0006810;<br>F:GO:0005215                                                                                      | - |                                                | -                                                                                                                                          |
|                             | -                                                                   | 0 |                                                                                                                                     |   |                                                | SignalP (SIGNALP)                                                                                                                          |
|                             | -                                                                   | 0 |                                                                                                                                     |   |                                                | -                                                                                                                                          |
|                             | -                                                                   | 0 |                                                                                                                                     |   |                                                | -                                                                                                                                          |
| Caenorhabditis elegans      | steroid dehydroge-se                                                | 8 | F:GO:0001968;<br>F:GO:0016491;<br>P:GO:0010811;<br>F:GO:0005518;<br>P:GO:0008152;<br>C:GO:0031012;<br>F:GO:0008201;<br>P:GO:0030198 | - |                                                | IPR002198; IPR002347; IPR016040;<br>IPR020904; PTHR19410:SF38<br>(PANTHER), SSF51735 (SUPERFAMILY)                                         |
| Caenorhabditis elegans      | elegans protein confirmed by transcript evidence                    | 2 | P:GO:0006810;<br>C:GO:0016020                                                                                                       | - |                                                | IPR011701; IPR016196; IPR020846;<br>G3DSA:1.20.1250.20 (GENE3D),<br>PTHR11662 (PANTHER),<br>PTHR11662:SF11 (PANTHER)                       |
| Caenorhabditis elegans      | briggsae cbr-swan-1 protein                                         | 0 |                                                                                                                                     |   |                                                | IPR001680; IPR011046; IPR015943;<br>IPR017986; IPR019775; IPR019781;<br>IPR019782; PTHR19919 (PANTHER)                                     |
| Dictyocaulus viviparus      | acetylcholinesterase 2                                              | 6 | F:GO:0004104;<br>P:GO:0001507;<br>F:GO:0003990;<br>C:GO:0005623;<br>P:GO:0040012;<br>F:GO:0042803                                   | - | EC:3.1.1.8;<br>EC:3.1.1.7                      | IPR000997; IPR002018; IPR019826;<br>G3DSA:3.40.50.1820 (GENE3D),<br>PTHR11559:SF33 (PANTHER), SignalP<br>(SIGNALP), SSF53474 (SUPERFAMILY) |



|                         |                                                  |    |                                                                                                                                                                                                                                                                                                                                                 |              |            |                                                                                                                                                |
|-------------------------|--------------------------------------------------|----|-------------------------------------------------------------------------------------------------------------------------------------------------------------------------------------------------------------------------------------------------------------------------------------------------------------------------------------------------|--------------|------------|------------------------------------------------------------------------------------------------------------------------------------------------|
| Caenorhabditis elegans  | d- polymerase alpha catalytic subunit            | 20 | C:GO:0016363;<br>P:GO:0000084;<br>C:GO:0005730;<br>F:GO:0003887;<br>P:GO:0006303;<br>F:GO:0003896;<br>F:GO:0003677;<br>P:GO:0006272;<br>P:GO:0000731;<br>C:GO:0000785;<br>F:GO:0005515;<br>P:GO:0006270;<br>F:GO:0000166;<br>C:GO:0005635;<br>C:GO:0005658;<br>P:GO:0006273;<br>C:GO:0005654;<br>P:GO:0008283;<br>C:GO:0005737;<br>F:GO:0003682 | -            | EC:2.7.7.7 | IPR006134; IPR015088; IPR017964;<br>G3DSA:3.90.1600.10 (GENE3D),<br>PTHR10322 (PANTHER),<br>PTHR10322:SF3 (PANTHER), SSF56672<br>(SUPERFAMILY) |
| Caenorhabditis elegans  | ys44_caeel ame: full=uncharacterized protein     | 0  |                                                                                                                                                                                                                                                                                                                                                 |              |            | IPR017969                                                                                                                                      |
| Caenorhabditis elegans  | ys44_caeel ame: full=uncharacterized protein     | 0  |                                                                                                                                                                                                                                                                                                                                                 |              |            | IPR017969                                                                                                                                      |
| Caenorhabditis elegans  | tbc1 domain member 9 (with gram domain)          | 4  | F:GO:0005097;<br>F:GO:0005509;<br>C:GO:0005622;<br>P:GO:0032313                                                                                                                                                                                                                                                                                 | -            |            | IPR000195; IPR011992; IPR018247;<br>G3DSA:1.10.8.270 (GENE3D),<br>PTHR22957 (PANTHER),<br>PTHR22957:SF48 (PANTHER)                             |
| Caenorhabditis elegans  | ancient ubiquitous protein 1                     | 1  | C:GO:0016020                                                                                                                                                                                                                                                                                                                                    | -            |            | IPR002123; PTHR15486 (PANTHER),<br>SignalP (SIGNALP)                                                                                           |
|                         | -                                                | 0  |                                                                                                                                                                                                                                                                                                                                                 |              |            | SignalP (SIGNALP)                                                                                                                              |
|                         | -                                                | 0  |                                                                                                                                                                                                                                                                                                                                                 |              |            | SignalP (SIGNALP)                                                                                                                              |
| Caenorhabditis elegans  | elegans protein confirmed by transcript evidence | 0  |                                                                                                                                                                                                                                                                                                                                                 | F:GO:0005515 |            | -                                                                                                                                              |
| Caenorhabditis elegans  | chaperonin containing subunit 4                  | 13 | C:GO:0005737;<br>P:GO:0009792;<br>P:GO:0002119;<br>P:GO:0006457;<br>F:GO:0005524;<br>P:GO:0000003;<br>P:GO:0008340;<br>F:GO:0051082;<br>P:GO:0001666;<br>P:GO:0040007;<br>P:GO:0006898;<br>P:GO:0040032;<br>P:GO:0002009                                                                                                                        | -            |            | IPR002423; IPR012717; IPR017998;<br>G3DSA:1.10.560.10 (GENE3D),<br>G3DSA:3.50.7.10 (GENE3D), SSF52029<br>(SUPERFAMILY)                         |
| Brugia malayi           | germ cell-less homolog 1                         | 3  | P:GO:0009987;<br>F:GO:0042802;<br>C:GO:0044428                                                                                                                                                                                                                                                                                                  | -            |            | IPR011333; IPR011705; IPR013069;<br>PTHR23231 (PANTHER),<br>PTHR23231:SF2 (PANTHER)                                                            |
| Caenorhabditis briggsae | n-acetylglucosamine-6-phosphate deacetylase      | 3  | P:GO:0005975;<br>F:GO:0016810;<br>F:GO:0005515                                                                                                                                                                                                                                                                                                  | -            |            | IPR006680; IPR011059;<br>G3DSA:2.30.40.10 (GENE3D),<br>G3DSA:3.20.20.140 (GENE3D),<br>PTHR11113 (PANTHER), SSF51556<br>(SUPERFAMILY)           |
| Callithrix jacchus      | 60s ribosomal protein l37a                       | 6  | C:GO:0005840;<br>F:GO:0046872;<br>F:GO:0003735;<br>F:GO:0005515;<br>C:GO:0005829;<br>P:GO:0006414                                                                                                                                                                                                                                               | -            |            | -                                                                                                                                              |

|                         |                                                                                                                   |    |                                                                                                                                                                                                                                                            |                                                |                           |                                                                                                                                                |
|-------------------------|-------------------------------------------------------------------------------------------------------------------|----|------------------------------------------------------------------------------------------------------------------------------------------------------------------------------------------------------------------------------------------------------------|------------------------------------------------|---------------------------|------------------------------------------------------------------------------------------------------------------------------------------------|
| Caenorhabditis elegans  | major allergen                                                                                                    | 0  |                                                                                                                                                                                                                                                            |                                                |                           | -                                                                                                                                              |
| Brugia malayi           | zinc c2h2 type family protein                                                                                     | 1  | F:GO:0005488                                                                                                                                                                                                                                               | -                                              |                           | IPR007087; IPR015880                                                                                                                           |
| Brugia malayi           | paz piwi domain-containing family member (ppw-1)                                                                  | 1  | P:GO:0000003                                                                                                                                                                                                                                               | -                                              |                           | -                                                                                                                                              |
| Brugia malayi           | briggsae cbr-pqn-85 protein                                                                                       | 0  |                                                                                                                                                                                                                                                            | F:GO:0005488;<br>P:GO:0034088;<br>C:GO:0032116 |                           | -                                                                                                                                              |
| Ostertagia ostertagi    | cysteine synthase                                                                                                 | 12 | C:GO:0005829;<br>P:GO:0006565;<br>P:GO:0019448;<br>P:GO:0043418;<br>C:GO:0005730;<br>F:GO:0031625;<br>F:GO:0004122;<br>F:GO:0020037;<br>P:GO:0070814;<br>F:GO:0042803;<br>F:GO:0030170;<br>P:GO:0019344                                                    | -                                              | EC:4.2.1.22               | IPR001926; G3DSA:3.40.50.1100 (GENE3D), PTHR10314 (PANTHER), PTHR10314:SF8 (PANTHER)                                                           |
|                         | -                                                                                                                 | 0  |                                                                                                                                                                                                                                                            |                                                |                           | -                                                                                                                                              |
| Homo sapiens            | glutathione s-transferase pi                                                                                      | 10 | C:GO:0005737;<br>P:GO:0007417;<br>F:GO:0004364;<br>P:GO:0006805;<br>F:GO:0005515;<br>P:GO:0006749;<br>F:GO:0008144;<br>P:GO:0006916;<br>C:GO:0005634;<br>F:GO:0043295                                                                                      | -                                              | EC:2.5.1.18               | IPR004046; IPR010987; IPR017933; PTHR11571 (PANTHER), PTHR11571:SF2 (PANTHER)                                                                  |
| Brugia malayi           | elegans protein partially confirmed by transcript evidence                                                        | 6  | P:GO:0040010;<br>F:GO:0005488;<br>P:GO:0008340;<br>F:GO:0004672;<br>P:GO:0040017;<br>C:GO:0016020                                                                                                                                                          | -                                              |                           | IPR000719; IPR001245; IPR008266; IPR011009; IPR017441; IPR020635; IPR020685; IPR020733; G3DSA:1.10.510.10 (GENE3D), G3DSA:3.30.200.20 (GENE3D) |
| Caenorhabditis elegans  | b chain reactivity modulation of human branched-chain alpha- ketoacid dehydroge-se by an inter-I molecular switch | 15 | F:GO:0003826;<br>P:GO:0040010;<br>P:GO:0009083;<br>C:GO:0005743;<br>F:GO:0003863;<br>P:GO:0055114;<br>P:GO:0007584;<br>P:GO:0000003;<br>F:GO:0032403;<br>P:GO:0051384;<br>P:GO:0040011;<br>C:GO:0005947;<br>P:GO:0009792;<br>F:GO:0016831;<br>P:GO:0051591 | -                                              | EC:1.2.4.4;<br>EC:4.1.1.0 | IPR005475; IPR005476; IPR009014; IPR015941; G3DSA:3.40.50.970 (GENE3D), PTHR11624 (PANTHER), PTHR11624:SF21 (PANTHER), SSF52518 (SUPERFAMILY)  |
| Caenorhabditis briggsae | zinc finger protein 706                                                                                           | 3  | C:GO:0005622;<br>P:GO:0040010;<br>F:GO:0008270                                                                                                                                                                                                             | -                                              |                           | -                                                                                                                                              |
| Caenorhabditis elegans  | gpi mannosyltransferase 1                                                                                         | 5  | P:GO:0000003;<br>P:GO:0016254;<br>F:GO:0016758;<br>C:GO:0005783;<br>C:GO:0044425                                                                                                                                                                           | -                                              | EC:2.4.1.0                | IPR007704; SignalP (SIGNALP)                                                                                                                   |

|                         |                                                                |    |                                                                                                                                                                                        |                                                                                  |              |                                                                                                                           |
|-------------------------|----------------------------------------------------------------|----|----------------------------------------------------------------------------------------------------------------------------------------------------------------------------------------|----------------------------------------------------------------------------------|--------------|---------------------------------------------------------------------------------------------------------------------------|
|                         | -                                                              | 0  |                                                                                                                                                                                        |                                                                                  |              | SignalP (SIGNALP)                                                                                                         |
| Brugia malayi           | hypothetical protein [Brugia malayi]                           | 4  | P:GO:0040007;<br>P:GO:0006898;<br>P:GO:0002119;<br>P:GO:0040011                                                                                                                        | -                                                                                |              | PTHR21663 (PANTHER)                                                                                                       |
| Brugia malayi           | family with sequence similarity member a                       | 2  | P:GO:0000003;<br>P:GO:0008340                                                                                                                                                          | -                                                                                |              | IPR018797                                                                                                                 |
| Caenorhabditis briggsae | elegans protein partially confirmed by transcript evidence     | 1  | F:GO:0005515                                                                                                                                                                           | -                                                                                |              | -                                                                                                                         |
| Brugia malayi           | t-complex 11 like 1                                            | 0  |                                                                                                                                                                                        |                                                                                  |              | IPR008862; PTHR12832:SF6 (PANTHER)                                                                                        |
| Brugia malayi           | cell division protein ki-se 13-like                            | 6  | P:GO:0006468;<br>P:GO:0008284;<br>P:GO:0007275;<br>P:GO:0007088;<br>F:GO:0005524;<br>F:GO:0004693                                                                                      | -                                                                                | EC:2.7.11.22 | IPR000719; IPR008271; IPR011009;<br>IPR017442; G3DSA:1.10.510.10 (GENE3D), PTHR11295 (PANTHER), PTHR11295:SF112 (PANTHER) |
| Brugia malayi           | microtubule binding protein                                    | 1  | F:GO:0008017                                                                                                                                                                           | -                                                                                |              | IPR001715; PTHR10623 (PANTHER)                                                                                            |
|                         | -                                                              | 0  |                                                                                                                                                                                        |                                                                                  |              | SignalP (SIGNALP)                                                                                                         |
| Caenorhabditis briggsae | tubulin folding cofactor e-like protein family member (coel-1) | 0  |                                                                                                                                                                                        |                                                                                  |              | -                                                                                                                         |
| Caenorhabditis elegans  | tubulin folding cofactor e-like                                | 0  |                                                                                                                                                                                        | F:GO:0003674;<br>C:GO:0005737;<br>C:GO:0005856;<br>P:GO:0008150;<br>C:GO:0005575 |              | G3DSA:3.80.10.10 (GENE3D), PTHR15140 (PANTHER), SSF52058 (SUPERFAMILY)                                                    |
| Caenorhabditis elegans  | arginine ki-se                                                 | 3  | C:GO:0016021;<br>F:GO:0005524;<br>F:GO:0004054                                                                                                                                         | -                                                                                | EC:2.7.3.3   | IPR000749; IPR014746; IPR022413;<br>IPR022414; PTHR11547:SF13 (PANTHER), SignalP (SIGNALP), SSF55931 (SUPERFAMILY)        |
| Caenorhabditis briggsae | trafficking protein particle complex 3                         | 11 | C:GO:0005829;<br>F:GO:0004383;<br>C:GO:0000139;<br>C:GO:0030008;<br>P:GO:0000003;<br>F:GO:0005515;<br>P:GO:0006888;<br>F:GO:0020037;<br>P:GO:0009792;<br>C:GO:0005783;<br>P:GO:0006182 | -                                                                                | EC:4.6.1.2   | IPR007194; IPR011644;<br>G3DSA:3.30.1380.20 (GENE3D), PTHR13048 (PANTHER)                                                 |
| Caenorhabditis elegans  | cardiac calsequestrin                                          | 1  | F:GO:0005509                                                                                                                                                                           | -                                                                                |              | IPR001393; IPR012335; IPR012336                                                                                           |
| Caenorhabditis elegans  | wd40 protein                                                   | 3  | P:GO:0009792;<br>P:GO:0040035;<br>F:GO:0005515                                                                                                                                         | -                                                                                |              | IPR001680; IPR011046; IPR015943;<br>IPR017986; IPR019781; IPR019782;<br>PTHR22847 (PANTHER), PTHR22847:SF44 (PANTHER)     |
| Caenorhabditis elegans  | wd40 protein                                                   | 3  | P:GO:0009792;<br>P:GO:0040035;<br>F:GO:0005515                                                                                                                                         | -                                                                                |              | IPR001680; IPR011046; IPR015943;<br>IPR017986; IPR019781; IPR019782;<br>PTHR22847 (PANTHER), PTHR22847:SF44 (PANTHER)     |
| Caenorhabditis elegans  | wd40 protein                                                   | 3  | P:GO:0009792;<br>P:GO:0040035;<br>F:GO:0005515                                                                                                                                         | -                                                                                |              | IPR001680; IPR011046; IPR015943;<br>IPR017986; IPR019781; IPR019782;<br>PTHR22847 (PANTHER), PTHR22847:SF44 (PANTHER)     |
|                         | -                                                              | 0  |                                                                                                                                                                                        |                                                                                  |              | -                                                                                                                         |
|                         | -                                                              | 0  |                                                                                                                                                                                        |                                                                                  |              | -                                                                                                                         |

|                           |                                                            |    |                                                                                                                                                                                                                                           |                                                                 |                                                         |                                                                                                                                |
|---------------------------|------------------------------------------------------------|----|-------------------------------------------------------------------------------------------------------------------------------------------------------------------------------------------------------------------------------------------|-----------------------------------------------------------------|---------------------------------------------------------|--------------------------------------------------------------------------------------------------------------------------------|
| Caenorhabditis briggsae   | briggsae cbr-fhod-1 protein                                | 0  |                                                                                                                                                                                                                                           | F:GO:0005488;<br>F:GO:0003779;<br>P:GO:0016043;<br>P:GO:0030036 |                                                         | PTHR23213 (PANTHER),<br>PTHR23213:SF3 (PANTHER)                                                                                |
| -                         | -                                                          | 0  |                                                                                                                                                                                                                                           |                                                                 |                                                         | -                                                                                                                              |
| Loa loa                   | elegans protein partially confirmed by transcript evidence | 1  | F:GO:0005515                                                                                                                                                                                                                              | -                                                               |                                                         | PTHR13976 (PANTHER),<br>PTHR13976:SF1 (PANTHER)                                                                                |
| Brugia malayi             | ran gtpase activating protein 1                            | 4  | C:GO:0005643;<br>C:GO:0005625;<br>C:GO:0000776;<br>F:GO:0005515                                                                                                                                                                           | -                                                               |                                                         | G3DSA:3.80.10.10 (GENE3D),<br>PTHR13824 (PANTHER),<br>PTHR13824:SF8 (PANTHER), SSF52047<br>(SUPERFAMILY)                       |
| Brugia malayi             | ran gtpase activating protein 1                            | 4  | C:GO:0005643;<br>C:GO:0005625;<br>C:GO:0000776;<br>F:GO:0005515                                                                                                                                                                           | -                                                               |                                                         | G3DSA:3.80.10.10 (GENE3D),<br>PTHR13824 (PANTHER),<br>PTHR13824:SF8 (PANTHER), SSF52047<br>(SUPERFAMILY)                       |
| synthetic construct       | beta-2-microglobulin                                       | 12 | C:GO:0031901;<br>P:GO:0002474;<br>C:GO:0009897;<br>C:GO:0000139;<br>C:GO:0005615;<br>P:GO:0002481;<br>F:GO:0005515;<br>P:GO:0002237;<br>P:GO:0001916;<br>P:GO:0042493;<br>P:GO:0046686;<br>C:GO:0042612                                   | -                                                               |                                                         | IPR003006; IPR003597; IPR007110;<br>IPR013783; IPR015707; PTHR19944<br>(PANTHER), SignalP (SIGNALP),<br>SSF48726 (SUPERFAMILY) |
| Caenorhabditis briggsae   | polymerase iii (d- directed) polypeptide e                 | 7  | P:GO:0040010;<br>P:GO:0000003;<br>P:GO:0002119;<br>P:GO:0040011;<br>P:GO:0006898;<br>P:GO:0009792;<br>P:GO:0016246                                                                                                                        | -                                                               |                                                         | IPR006886; PTHR12069 (PANTHER)                                                                                                 |
| Caenorhabditis elegans    | hypothetical protein C04E6.11 [Caenorhabditis elegans]     | 0  |                                                                                                                                                                                                                                           |                                                                 |                                                         | -                                                                                                                              |
| Caenorhabditis briggsae   | conserved hypothetical atp binding protein                 | 2  | F:GO:0005515;<br>F:GO:0000166                                                                                                                                                                                                             | -                                                               |                                                         | -                                                                                                                              |
| Caenorhabditis sp. PS1010 | gtp-binding protein alpha g-                               | 14 | P:GO:0016199;<br>F:GO:0004871;<br>P:GO:0043052;<br>P:GO:0007602;<br>P:GO:0002385;<br>P:GO:0007202;<br>C:GO:0005834;<br>P:GO:0016056;<br>C:GO:0016027;<br>F:GO:0005525;<br>P:GO:0006471;<br>P:GO:0046673;<br>F:GO:0003924;<br>P:GO:0007608 | -                                                               | EC:3.6.5.1;<br>EC:3.6.5.2;<br>EC:3.6.5.3;<br>EC:3.6.5.4 | IPR000654; IPR001019; IPR011025;<br>G3DSA:3.40.50.300 (GENE3D),<br>PTHR10218:SF84 (PANTHER),<br>SSF52540 (SUPERFAMILY)         |
| -                         | -                                                          | 0  |                                                                                                                                                                                                                                           |                                                                 |                                                         | -                                                                                                                              |
| Caenorhabditis briggsae   | heat shock 10kd protein 1                                  | 5  | P:GO:0009792;<br>P:GO:0006457;<br>P:GO:0006950;<br>C:GO:0005759;<br>F:GO:0005524                                                                                                                                                          | -                                                               |                                                         | IPR011032; IPR018369; IPR020818                                                                                                |

|                         |                                                                                         |    |                                                                                                                                                                                        |                                                                                                   |            |                                                                                                                                                    |
|-------------------------|-----------------------------------------------------------------------------------------|----|----------------------------------------------------------------------------------------------------------------------------------------------------------------------------------------|---------------------------------------------------------------------------------------------------|------------|----------------------------------------------------------------------------------------------------------------------------------------------------|
| Loa loa                 | atp synthase subunit mitochondrial                                                      |    | P:GO:0040010;<br>P:GO:0000003;<br>5 P:GO:0002119;<br>P:GO:0040039;<br>P:GO:0009792                                                                                                     | -                                                                                                 | -          |                                                                                                                                                    |
| Caenorhabditis elegans  | elegans protein confirmed by transcript evidence                                        | 0  |                                                                                                                                                                                        |                                                                                                   |            | IPR000859; PTHR10127 (PANTHER),<br>PTHR10127:SF33 (PANTHER)                                                                                        |
| Caenorhabditis elegans  | calcineurin b                                                                           | 11 | P:GO:0006470;<br>C:GO:0005829;<br>P:GO:0008633;<br>F:GO:0005516;<br>P:GO:0001837;<br>P:GO:0060487;<br>F:GO:0005509;<br>P:GO:0034504;<br>P:GO:0007507;<br>C:GO:0005955;<br>F:GO:0004723 | -                                                                                                 |            | IPR001125; IPR002048; IPR011992;<br>IPR018247; IPR018248; IPR018249;<br>PTHR23056 (PANTHER),<br>PTHR23056:SF4 (PANTHER), SSF47473<br>(SUPERFAMILY) |
| Caenorhabditis briggsae | briggsae cbr-npp-19 protein                                                             | 0  |                                                                                                                                                                                        |                                                                                                   |            | PTHR21527 (PANTHER),<br>PTHR21527:SF1 (PANTHER)                                                                                                    |
|                         | -                                                                                       | 0  |                                                                                                                                                                                        |                                                                                                   |            | -                                                                                                                                                  |
| Brugia malayi           | cytoplasmic polyadenylation element binding protein                                     | 0  |                                                                                                                                                                                        | F:GO:0003723;<br>F:GO:0003676;<br>P:GO:0030154;<br>P:GO:0007275;<br>F:GO:0000166;<br>P:GO:0007283 |            | IPR000504; IPR012677; PTHR12566<br>(PANTHER), SSF54928 (SUPERFAMILY)                                                                               |
| Tribolium castaneum     | chromobox protein                                                                       | 0  |                                                                                                                                                                                        | F:GO:0003682;<br>C:GO:0000785;<br>P:GO:0006333;<br>C:GO:0005634                                   |            | G3DSA:2.40.50.40 (GENE3D)                                                                                                                          |
|                         | -                                                                                       | 0  |                                                                                                                                                                                        |                                                                                                   |            | G3DSA:2.40.50.40 (GENE3D)                                                                                                                          |
| Tribolium castaneum     | chromobox protein                                                                       | 0  |                                                                                                                                                                                        | F:GO:0003682;<br>C:GO:0000785;<br>P:GO:0006333;<br>C:GO:0005634                                   |            | G3DSA:2.40.50.40 (GENE3D)                                                                                                                          |
| Loa loa                 | briggsae cbr-sym-2 protein                                                              | 2  | F:GO:0003676;<br>P:GO:0006396                                                                                                                                                          | -                                                                                                 |            | IPR000504; IPR012677; PTHR13976<br>(PANTHER), PTHR13976:SF2<br>(PANTHER), SSF54928 (SUPERFAMILY)                                                   |
| Ostertagia ostertagi    | l3 es protein                                                                           | 0  |                                                                                                                                                                                        |                                                                                                   |            | SignalP (SIGNALP)                                                                                                                                  |
|                         | -                                                                                       | 0  |                                                                                                                                                                                        |                                                                                                   |            | -                                                                                                                                                  |
| Danio rerio             | hla-b-associated transcript 3-like                                                      | 0  |                                                                                                                                                                                        | F:GO:0005515                                                                                      |            | -                                                                                                                                                  |
|                         | -                                                                                       | 0  |                                                                                                                                                                                        |                                                                                                   |            | -                                                                                                                                                  |
| Caenorhabditis elegans  | aminopeptidase n                                                                        | 0  |                                                                                                                                                                                        | C:GO:0043231;<br>F:GO:0051537                                                                     |            | IPR006622; IPR018967                                                                                                                               |
| Drosophila ananassae    | b chain crystal structure of a pyrimidine degrading enzyme from drosophila melanogaster | 3  | F:GO:0003837;<br>P:GO:0006208;<br>P:GO:0006207                                                                                                                                         | -                                                                                                 | EC:3.5.1.6 | -                                                                                                                                                  |

|                         |                                                            |    |                                                                                                                                                                                                                          |   |                                                         |                                                                                                                                                                                                                                                                                  |
|-------------------------|------------------------------------------------------------|----|--------------------------------------------------------------------------------------------------------------------------------------------------------------------------------------------------------------------------|---|---------------------------------------------------------|----------------------------------------------------------------------------------------------------------------------------------------------------------------------------------------------------------------------------------------------------------------------------------|
| Caenorhabditis elegans  | member of ras oncogene family                              | 11 | P:GO:0030336;<br>C:GO:0055038;<br>F:GO:0005515;<br>P:GO:0034613;<br>C:GO:0005829;<br>P:GO:0045184;<br>P:GO:0031954;<br>P:GO:0031532;<br>F:GO:0003924;<br>P:GO:0048814;<br>P:GO:0046328                                   | - | EC:3.6.5.1;<br>EC:3.6.5.2;<br>EC:3.6.5.3;<br>EC:3.6.5.4 | IPR001806; IPR013753; IPR020849;<br>G3DSA:3.40.50.300 (GENE3D),<br>PTHR11708 (PANTHER),<br>PTHR11708:SF304 (PANTHER), SignalP<br>(SIGNALP), SSF52540 (SUPERFAMILY)                                                                                                               |
| Caenorhabditis elegans  | elegans protein partially confirmed by transcript evidence | 3  | P:GO:0019915;<br>P:GO:0008152;<br>F:GO:0016740                                                                                                                                                                           | - |                                                         | IPR002213; G3DSA:3.40.50.2000<br>(GENE3D), PTHR11926:SF3<br>(PANTHER), SSF53756 (SUPERFAMILY)                                                                                                                                                                                    |
| Ixodes scapularis       | f-box only protein 28                                      | 0  |                                                                                                                                                                                                                          |   |                                                         | IPR001810; IPR022364;<br>G3DSA:1.20.1280.50 (GENE3D),<br>PTHR13252 (PANTHER),<br>PTHR13252:SF2 (PANTHER)                                                                                                                                                                         |
| Caenorhabditis briggsae | Hypothetical protein CBG11709 [Caenorhabditis briggsae]    | 0  |                                                                                                                                                                                                                          |   |                                                         | -                                                                                                                                                                                                                                                                                |
| Caenorhabditis elegans  | hypothetical protein F09E10.6 [Caenorhabditis elegans]     | 0  |                                                                                                                                                                                                                          |   |                                                         | -                                                                                                                                                                                                                                                                                |
| Caenorhabditis briggsae | briggsae cbr-sdn-1 protein                                 | 2  | F:GO:0008092;<br>C:GO:0016021                                                                                                                                                                                            | - |                                                         | SignalP (SIGNALP)                                                                                                                                                                                                                                                                |
| Caenorhabditis briggsae | u4 tri-snrnp-associated protein 2                          | 13 | P:GO:0006396;<br>P:GO:0006511;<br>F:GO:0004221;<br>F:GO:0008270;<br>C:GO:0005622;<br>P:GO:0040007;<br>P:GO:0040035;<br>P:GO:0002119;<br>F:GO:0005515;<br>P:GO:0040011;<br>P:GO:0006898;<br>P:GO:0002009;<br>P:GO:0009792 | - | EC:3.1.2.15                                             | -                                                                                                                                                                                                                                                                                |
| Caenorhabditis elegans  | calcium atpase                                             | 6  | F:GO:0005388;<br>P:GO:0006754;<br>F:GO:0005524;<br>F:GO:0005515;<br>P:GO:0006816;<br>C:GO:0005887                                                                                                                        | - | EC:3.6.3.8                                              | -                                                                                                                                                                                                                                                                                |
|                         |                                                            | 0  |                                                                                                                                                                                                                          |   |                                                         |                                                                                                                                                                                                                                                                                  |
| Caenorhabditis elegans  | er degradation mannosidase alpha-like 1                    | 7  | P:GO:0030433;<br>C:GO:0030176;<br>F:GO:0005509;<br>F:GO:0051787;<br>F:GO:0004571;<br>P:GO:0006986;<br>F:GO:0004559                                                                                                       | - | EC:3.2.1.113<br>; EC:3.2.1.24                           | IPR001382; PTHR11742:SF11<br>(PANTHER), SignalP (SIGNALP)                                                                                                                                                                                                                        |
| Caenorhabditis briggsae | -dph-cytochrome p450 reductase                             | 6  | F:GO:0005488;<br>F:GO:0003958;<br>P:GO:0044237;<br>P:GO:0032770;<br>P:GO:0055114;<br>C:GO:0005783                                                                                                                        | - | EC:1.6.2.4                                              | IPR001094; IPR001433; IPR001709;<br>IPR003097; IPR008254; IPR015702;<br>IPR017927; IPR017938; IPR023173;<br>G3DSA:2.40.30.10 (GENE3D),<br>G3DSA:3.40.50.360 (GENE3D),<br>G3DSA:3.40.50.80 (GENE3D),<br>PTHR19384 (PANTHER), SSF52218<br>(SUPERFAMILY), SSF52343<br>(SUPERFAMILY) |

|                             |                                                            |    |                                                                                                                                                                                                                                           |                                                                                                                                                                                                                          |                                                                                                                      |                   |
|-----------------------------|------------------------------------------------------------|----|-------------------------------------------------------------------------------------------------------------------------------------------------------------------------------------------------------------------------------------------|--------------------------------------------------------------------------------------------------------------------------------------------------------------------------------------------------------------------------|----------------------------------------------------------------------------------------------------------------------|-------------------|
| Caenorhabditis elegans      | elegans protein partially confirmed by transcript evidence | 0  |                                                                                                                                                                                                                                           |                                                                                                                                                                                                                          | PTHR13167 (PANTHER),<br>PTHR13167:SF6 (PANTHER)                                                                      |                   |
| Caenorhabditis elegans      | variable abnormal morphology family member (vab-10)        | 11 | P:GO:0000226;<br>P:GO:0007424;<br>P:GO:0065008;<br>P:GO:0007409;<br>P:GO:0007517;<br>C:GO:0005874;<br>F:GO:0008092;<br>P:GO:0035239;<br>P:GO:0051128;<br>P:GO:0048523;<br>C:GO:0044444                                                    | -                                                                                                                                                                                                                        | G3DSA:1.20.58.60 (GENE3D),<br>SSF46966 (SUPERFAMILY)                                                                 |                   |
|                             | -                                                          | 0  |                                                                                                                                                                                                                                           |                                                                                                                                                                                                                          | -                                                                                                                    |                   |
| Caenorhabditis elegans      | wd-40 repeat protein                                       | 0  |                                                                                                                                                                                                                                           | F:GO:0004252;<br>P:GO:0006952;<br>C:GO:0016020;<br>F:GO:0043565;<br>F:GO:0003677;<br>C:GO:0005634;<br>F:GO:0030528;<br>P:GO:0006915;<br>F:GO:0005524;<br>F:GO:0003824;<br>P:GO:0006508;<br>F:GO:0003743;<br>P:GO:0045449 |                                                                                                                      | SignalP (SIGNALP) |
| Loa loa                     | transcriptio-l sir2 family protein                         | 14 | F:GO:0070403;<br>F:GO:0008270;<br>P:GO:0045843;<br>P:GO:0007049;<br>P:GO:0006476;<br>F:GO:0035035;<br>C:GO:0005874;<br>F:GO:0042903;<br>F:GO:0043130;<br>F:GO:0017136;<br>F:GO:0008134;<br>P:GO:0016481;<br>C:GO:0005737;<br>F:GO:0042826 | -                                                                                                                                                                                                                        | IPR003000; G3DSA:3.30.1600.10<br>(GENE3D), G3DSA:3.40.50.1220<br>(GENE3D), SSF52467 (SUPERFAMILY)                    |                   |
|                             | -                                                          | 0  |                                                                                                                                                                                                                                           |                                                                                                                                                                                                                          | -                                                                                                                    |                   |
|                             | -                                                          | 0  |                                                                                                                                                                                                                                           |                                                                                                                                                                                                                          | -                                                                                                                    |                   |
|                             | -                                                          | 0  |                                                                                                                                                                                                                                           |                                                                                                                                                                                                                          | -                                                                                                                    |                   |
| Caenorhabditis elegans      | briggsae cbr-cul-5 protein                                 | 6  | P:GO:0006511;<br>P:GO:0007528;<br>C:GO:0031461;<br>F:GO:0031625;<br>P:GO:0016360;<br>F:GO:0016931                                                                                                                                         | -                                                                                                                                                                                                                        | IPR001373; IPR011991; IPR016158;<br>G3DSA:4.10.1030.10 (GENE3D),<br>PTHR11932 (PANTHER),<br>PTHR11932:SF16 (PANTHER) |                   |
| Caenorhabditis briggsae     | tb2 hva22 family protein                                   | 1  | F:GO:0005515                                                                                                                                                                                                                              | -                                                                                                                                                                                                                        | IPR004345; PTHR12300:SF13<br>(PANTHER)                                                                               |                   |
| Angiostrongylus cantonensis | hypothetical protein [Angiostrongylus cantonensis]         | 0  |                                                                                                                                                                                                                                           |                                                                                                                                                                                                                          | -                                                                                                                    |                   |
| Angiostrongylus cantonensis | hypothetical protein [Angiostrongylus cantonensis]         | 0  |                                                                                                                                                                                                                                           |                                                                                                                                                                                                                          | -                                                                                                                    |                   |
|                             | -                                                          | 0  |                                                                                                                                                                                                                                           |                                                                                                                                                                                                                          | -                                                                                                                    |                   |

|                         |                                                                             |    |                                                                                                                                                                       |                                                |             |                                                                                                                                         |
|-------------------------|-----------------------------------------------------------------------------|----|-----------------------------------------------------------------------------------------------------------------------------------------------------------------------|------------------------------------------------|-------------|-----------------------------------------------------------------------------------------------------------------------------------------|
| Caenorhabditis elegans  | neurotransmitter-gated ion-channel ligand binding domain containing protein |    | C:GO:0016021;<br>C:GO:0030054;<br>5 C:GO:0045211;<br>F:GO:0005230;<br>P:GO:0006811                                                                                    | -                                              |             | IPR006028; IPR006029; IPR006201;<br>IPR006202; IPR018000;<br>G3DSA:1.20.120.370 (GENE3D),<br>PTHR18945:SF12 (PANTHER)                   |
|                         | -                                                                           |    | 0                                                                                                                                                                     |                                                |             | -                                                                                                                                       |
|                         | -                                                                           |    | 0                                                                                                                                                                     |                                                |             | SignalP (SIGNALP)                                                                                                                       |
|                         | -                                                                           |    | 0                                                                                                                                                                     |                                                |             | SignalP (SIGNALP)                                                                                                                       |
| Caenorhabditis elegans  | sb:cb283 protein                                                            |    | 0                                                                                                                                                                     | P:GO:0006508;<br>F:GO:0004177;<br>C:GO:0005622 |             | IPR000819; G3DSA:3.40.630.10<br>(GENE3D), PTHR11963 (PANTHER),<br>PTHR11963:SF2 (PANTHER), SignalP<br>(SIGNALP), SSF53187 (SUPERFAMILY) |
| Caenorhabditis elegans  | sb:cb283 protein                                                            |    | 0                                                                                                                                                                     | P:GO:0006508;<br>F:GO:0004177;<br>C:GO:0005622 |             | IPR000819; G3DSA:3.40.630.10<br>(GENE3D), PTHR11963 (PANTHER),<br>PTHR11963:SF2 (PANTHER), SignalP<br>(SIGNALP), SSF53187 (SUPERFAMILY) |
| Caenorhabditis elegans  | sb:cb283 protein                                                            |    | 0                                                                                                                                                                     | P:GO:0006508;<br>F:GO:0004177;<br>C:GO:0005622 |             | IPR000819; G3DSA:3.40.630.10<br>(GENE3D), PTHR11963 (PANTHER),<br>PTHR11963:SF2 (PANTHER), SignalP<br>(SIGNALP), SSF53187 (SUPERFAMILY) |
|                         | -                                                                           |    | 0                                                                                                                                                                     |                                                |             | -                                                                                                                                       |
|                         | -                                                                           |    | 0                                                                                                                                                                     |                                                |             | -                                                                                                                                       |
| Tribolium castaneum     | r- polymerase-associated protein leo1                                       | 10 | P:GO:0030318;<br>P:GO:0033523;<br>P:GO:0010390;<br>P:GO:0007507;<br>C:GO:0016593;<br>P:GO:0050936;<br>P:GO:0021782;<br>P:GO:0014032;<br>F:GO:0005515;<br>P:GO:0006350 | -                                              |             | IPR007149; PTHR23146 (PANTHER)                                                                                                          |
| Caenorhabditis brenneri | myelinprotein expression factor                                             |    | F:GO:0003729;<br>3 F:GO:0005515;<br>C:GO:0044424                                                                                                                      | -                                              |             | -                                                                                                                                       |
| Caenorhabditis elegans  | leucine-rich repeat serine threonine-protein ki-se 1                        |    | F:GO:0016301;<br>F:GO:0000166                                                                                                                                         | -                                              |             | -                                                                                                                                       |
| Caenorhabditis briggsae | protein ki-se domain containing protein                                     |    | P:GO:0006468;<br>F:GO:0005524;<br>P:GO:0040011;<br>F:GO:0004674                                                                                                       | -                                              | EC:2.7.11.0 | IPR000719; IPR008271; IPR011009;<br>G3DSA:1.10.510.10 (GENE3D),<br>PTHR11909 (PANTHER),<br>PTHR11909:SF19 (PANTHER)                     |
|                         | -                                                                           |    | 0                                                                                                                                                                     |                                                |             | -                                                                                                                                       |
| Caenorhabditis elegans  | hypothetical protein F52E1.9 [Caenorhabditis elegans]                       |    | 0                                                                                                                                                                     |                                                |             | -                                                                                                                                       |
| Equus caballus          | fibrous sheath cabyr binding protein                                        |    | 0                                                                                                                                                                     | C:GO:0005882                                   |             | -                                                                                                                                       |
|                         | -                                                                           |    | 0                                                                                                                                                                     |                                                |             | -                                                                                                                                       |
|                         | -                                                                           |    | 0                                                                                                                                                                     |                                                |             | -                                                                                                                                       |
| Caenorhabditis briggsae | ph domain containing protein                                                |    | C:GO:0005886;<br>F:GO:0005488                                                                                                                                         | -                                              |             | IPR001849; IPR011993; SSF50729<br>(SUPERFAMILY)                                                                                         |



|                         |                                             |    |                                                                                                                                                                                                                                                                                                                                                                  |   |                             |                                                                                                                                                                             |
|-------------------------|---------------------------------------------|----|------------------------------------------------------------------------------------------------------------------------------------------------------------------------------------------------------------------------------------------------------------------------------------------------------------------------------------------------------------------|---|-----------------------------|-----------------------------------------------------------------------------------------------------------------------------------------------------------------------------|
| Caenorhabditis elegans  | briggsae cbr-apb-1 protein                  | 21 | P:GO:0000003;<br>P:GO:0007522;<br>F:GO:0005515;<br>P:GO:0040007;<br>P:GO:0006898;<br>P:GO:0007269;<br>F:GO:0008565;<br>P:GO:0007507;<br>P:GO:0016183;<br>P:GO:0007494;<br>P:GO:0006886;<br>P:GO:0009792;<br>F:GO:0003705;<br>F:GO:0043565;<br>P:GO:0010551;<br>P:GO:0002119;<br>C:GO:0008021;<br>P:GO:0007501;<br>C:GO:0030121;<br>C:GO:0005886;<br>C:GO:0005634 | - |                             | IPR002553; IPR011989; IPR016024;<br>PTHR11134 (PANTHER),<br>PTHR11134:SF3 (PANTHER)                                                                                         |
| Caenorhabditis briggsae | rain ki-se homolog family member (mbk-2)    | 9  | P:GO:0006468;<br>P:GO:0050896;<br>F:GO:0005515;<br>P:GO:0007275;<br>F:GO:0004713;<br>C:GO:0005938;<br>F:GO:0005524;<br>P:GO:0007608;<br>F:GO:0004674                                                                                                                                                                                                             | - | EC:2.7.10.0;<br>EC:2.7.11.0 | IPR000719; IPR008271; IPR011009;<br>IPR017441; IPR017442;<br>G3DSA:1.10.510.10 (GENE3D),<br>G3DSA:3.30.200.20 (GENE3D),<br>PTHR11295 (PANTHER),<br>PTHR11295:SF22 (PANTHER) |
| Caenorhabditis briggsae | rain ki-se homolog family member (mbk-2)    | 13 | F:GO:0030145;<br>P:GO:0006468;<br>P:GO:0045725;<br>F:GO:0005515;<br>P:GO:0007275;<br>F:GO:0004713;<br>P:GO:0042771;<br>F:GO:0004674;<br>F:GO:0000287;<br>C:GO:0005634;<br>F:GO:0005524;<br>P:GO:0007608;<br>C:GO:0005938                                                                                                                                         | - | EC:2.7.10.0;<br>EC:2.7.11.0 | IPR000719; IPR008271; IPR011009;<br>IPR017441; IPR017442;<br>G3DSA:1.10.510.10 (GENE3D),<br>G3DSA:3.30.200.20 (GENE3D),<br>PTHR11295 (PANTHER),<br>PTHR11295:SF22 (PANTHER) |
| Caenorhabditis briggsae | rain ki-se homolog family member (mbk-2)    | 9  | P:GO:0006468;<br>P:GO:0050896;<br>F:GO:0005515;<br>P:GO:0007275;<br>F:GO:0004713;<br>C:GO:0005938;<br>F:GO:0005524;<br>P:GO:0007608;<br>F:GO:0004674                                                                                                                                                                                                             | - | EC:2.7.10.0;<br>EC:2.7.11.0 | IPR000719; IPR008271; IPR011009;<br>IPR017441; IPR017442;<br>G3DSA:1.10.510.10 (GENE3D),<br>G3DSA:3.30.200.20 (GENE3D),<br>PTHR11295 (PANTHER),<br>PTHR11295:SF22 (PANTHER) |
| Caenorhabditis elegans  | glycosylation related family member (gly-5) | 1  | F:GO:0005515                                                                                                                                                                                                                                                                                                                                                     | - |                             | SignalP (SIGNALP)                                                                                                                                                           |

|                         |                                                         |   |                                                                                                                                     |                                                                                                                    |             |                                                                                                                                                                                                                     |
|-------------------------|---------------------------------------------------------|---|-------------------------------------------------------------------------------------------------------------------------------------|--------------------------------------------------------------------------------------------------------------------|-------------|---------------------------------------------------------------------------------------------------------------------------------------------------------------------------------------------------------------------|
| Caenorhabditis elegans  | nucleolar protein 14                                    | 8 | P:GO:0000462;<br>C:GO:0005730;<br>P:GO:0000479;<br>C:GO:0030686;<br>P:GO:0002119;<br>C:GO:0044444;<br>P:GO:0006898;<br>P:GO:0009792 | -                                                                                                                  |             | IPR007276                                                                                                                                                                                                           |
| Caenorhabditis elegans  | protein ki-se                                           | 5 | P:GO:0009987;<br>F:GO:0004674;<br>F:GO:0005515;<br>F:GO:0000166;<br>C:GO:0044424                                                    | -                                                                                                                  | EC:2.7.11.0 | IPR000719; IPR008266; IPR011009;<br>IPR017442; G3DSA:1.10.510.10<br>(GENE3D), PTHR11042 (PANTHER),<br>PTHR11042:SF4 (PANTHER)                                                                                       |
| Caenorhabditis elegans  | ring finger-containing                                  | 2 | F:GO:0046872;<br>C:GO:0005622                                                                                                       | -                                                                                                                  |             | IPR000315; IPR001298; IPR001841;<br>IPR011042; IPR013083; IPR013783;<br>IPR014756; IPR017868; IPR017907;<br>PTHR13712 (PANTHER),<br>PTHR13712:SF61 (PANTHER),<br>SSF101898 (SUPERFAMILY), SSF57850<br>(SUPERFAMILY) |
|                         | -                                                       | 0 |                                                                                                                                     |                                                                                                                    |             | PR01217 (PRINTS), SignalP (SIGNALP)                                                                                                                                                                                 |
|                         | -                                                       | 0 |                                                                                                                                     |                                                                                                                    |             | PR01217 (PRINTS), SignalP (SIGNALP)                                                                                                                                                                                 |
| Loa loa                 | homeodomain interacting protein ki-se protein isoform   | 0 |                                                                                                                                     | F:GO:0016301;<br>F:GO:0004672;<br>F:GO:0005524;<br>F:GO:0000166;<br>P:GO:0006468;<br>F:GO:0003677;<br>F:GO:0004674 |             | -                                                                                                                                                                                                                   |
| Loa loa                 | hypothetical protein LOAG_00607 [Loa loa]               | 0 |                                                                                                                                     |                                                                                                                    |             | -                                                                                                                                                                                                                   |
| Caenorhabditis briggsae | transmembrane and coiled-coil domains 4                 | 1 | C:GO:0016020                                                                                                                        | -                                                                                                                  |             | IPR007941; G3DSA:3.40.50.1820<br>(GENE3D), SignalP (SIGNALP)                                                                                                                                                        |
| Caenorhabditis briggsae | briggsae cbr-mog-4 protein                              | 7 | F:GO:0004004;<br>F:GO:0003676;<br>F:GO:0005515;<br>C:GO:0071011;<br>F:GO:0005524;<br>P:GO:0000398;<br>C:GO:0071013                  | -                                                                                                                  |             | -                                                                                                                                                                                                                   |
| Caenorhabditis elegans  | acyl hydroge-se family member (acdh-13)                 | 6 | P:GO:0009792;<br>F:GO:0016491;<br>P:GO:0040010;<br>P:GO:0000003;<br>P:GO:0008152;<br>P:GO:0006898                                   | -                                                                                                                  |             | IPR009075; IPR009100; PTHR10909<br>(PANTHER), PTHR10909:SF9<br>(PANTHER)                                                                                                                                            |
| Loa loa                 | small family member (sma-9)                             | 1 | F:GO:0005515                                                                                                                        | -                                                                                                                  |             | IPR007087; IPR013087; IPR015880;<br>PTHR23233 (PANTHER),<br>PTHR23233:SF13 (PANTHER),<br>SSF57667 (SUPERFAMILY)                                                                                                     |
| Caenorhabditis briggsae | Hypothetical protein CBG18472 [Caenorhabditis briggsae] | 0 |                                                                                                                                     |                                                                                                                    |             | -                                                                                                                                                                                                                   |
|                         | -                                                       | 0 |                                                                                                                                     |                                                                                                                    |             | SignalP (SIGNALP)                                                                                                                                                                                                   |
|                         | -                                                       | 0 |                                                                                                                                     |                                                                                                                    |             | IPR003582                                                                                                                                                                                                           |
| Caenorhabditis elegans  | gastric cancer antigen zg14 homolog                     | 0 |                                                                                                                                     | F:GO:0003723;<br>F:GO:0003676;<br>C:GO:0005737;<br>F:GO:0000166;<br>C:GO:0005634                                   |             | PTHR13191 (PANTHER), SignalP<br>(SIGNALP)                                                                                                                                                                           |
|                         | -                                                       | 0 |                                                                                                                                     |                                                                                                                    |             | -                                                                                                                                                                                                                   |

|                             |                                                                     |    |                                                                                                                                                                                        |                                                                                  |             |                                                                                        |
|-----------------------------|---------------------------------------------------------------------|----|----------------------------------------------------------------------------------------------------------------------------------------------------------------------------------------|----------------------------------------------------------------------------------|-------------|----------------------------------------------------------------------------------------|
| Ancylostoma ceylanicum      | tissue factor pathway inhibitor                                     | 1  | F:GO:0030414                                                                                                                                                                           | -                                                                                |             | IPR002223; IPR020901; PTHR10083 (PANTHER), PTHR10083:SF39 (PANTHER), SignalP (SIGNALP) |
| Caenorhabditis briggsae     | briggsae cbr-csn-3 protein                                          | 0  |                                                                                                                                                                                        |                                                                                  |             | -                                                                                      |
|                             |                                                                     | 0  |                                                                                                                                                                                        |                                                                                  |             |                                                                                        |
| Necator americanus          | briggsae cbr-gst- protein                                           | 4  | P:GO:0008340;<br>P:GO:0040010;<br>F:GO:0005515;<br>F:GO:0016740                                                                                                                        | -                                                                                |             | IPR004045; IPR012335; IPR012336; PTHR11571 (PANTHER), PTHR11571:SF6 (PANTHER)          |
|                             |                                                                     | 0  |                                                                                                                                                                                        |                                                                                  |             | -                                                                                      |
| Caenorhabditis elegans      | prion-like-(q n-rich)-domain-bearing protein family member (pqn-52) | 0  |                                                                                                                                                                                        |                                                                                  |             | -                                                                                      |
|                             |                                                                     | 0  |                                                                                                                                                                                        |                                                                                  |             | SignalP (SIGNALP)                                                                      |
| Caenorhabditis elegans      | prion-like-(q n-rich)-domain-bearing protein family member (pqn-52) | 0  |                                                                                                                                                                                        |                                                                                  |             | -                                                                                      |
| Caenorhabditis elegans      | elegans protein confirmed by transcript evidence                    | 0  |                                                                                                                                                                                        |                                                                                  |             | SignalP (SIGNALP)                                                                      |
| Ornithorhynchus anatinus    | ribosomal protein s15                                               | 11 | F:GO:0003723;<br>P:GO:0006364;<br>F:GO:0003735;<br>P:GO:0006414;<br>C:GO:0022627;<br>P:GO:0000056;<br>F:GO:0003677;<br>F:GO:0005515;<br>P:GO:0000028;<br>C:GO:0005654;<br>P:GO:0009790 | -                                                                                |             | -                                                                                      |
|                             |                                                                     | 0  |                                                                                                                                                                                        |                                                                                  |             | -                                                                                      |
| Micromonas pusilla CCMP1545 | mkiaa0176 protein                                                   | 0  |                                                                                                                                                                                        | F:GO:0005249;<br>C:GO:0016020;<br>P:GO:0006813;<br>F:GO:0005515;<br>C:GO:0008076 |             | IPR003131; IPR011333; PTHR11145 (PANTHER)                                              |
| Caenorhabditis elegans      | epsin 2                                                             | 9  | P:GO:0009792;<br>P:GO:0002119;<br>F:GO:0005515;<br>P:GO:0040017;<br>P:GO:0040010;<br>P:GO:0000003;<br>P:GO:0019915;<br>P:GO:0006898;<br>P:GO:0051729                                   | -                                                                                |             | -                                                                                      |
| Caenorhabditis elegans      | elegans protein confirmed by transcript evidence                    | 0  |                                                                                                                                                                                        |                                                                                  |             | IPR016181                                                                              |
| Caenorhabditis briggsae     | iator family member (mdt-28)                                        | 0  |                                                                                                                                                                                        |                                                                                  |             | IPR021640                                                                              |
| Caenorhabditis elegans      | lysozyme                                                            | 5  | C:GO:0005576;<br>P:GO:0050830;<br>P:GO:0009792;<br>F:GO:0003796;<br>P:GO:0050829                                                                                                       | -                                                                                | EC:3.2.1.17 | IPR008597; PTHR11195:SF7 (PANTHER), SignalP (SIGNALP), SSF53955 (SUPERFAMILY)          |
| Caenorhabditis elegans      | briggsae cbr-tag-141 protein                                        | 0  |                                                                                                                                                                                        | C:GO:0016021;<br>C:GO:0016020;<br>P:GO:0055085;<br>P:GO:0030001;<br>F:GO:0046873 |             | IPR003689; PTHR16950 (PANTHER), PTHR16950:SF1 (PANTHER), SignalP (SIGNALP)             |
| Caenorhabditis briggsae     | zinc transporter zip6-like                                          | 3  | C:GO:0005768;<br>C:GO:0016020;<br>P:GO:0030001                                                                                                                                         | -                                                                                |             | IPR003689; PTHR16950 (PANTHER), PTHR16950:SF1 (PANTHER), SignalP (SIGNALP)             |
|                             |                                                                     | 0  |                                                                                                                                                                                        |                                                                                  |             | -                                                                                      |

|                              |                                                               |    |                                                                                                                                                                                                                                                                                              |                               |                                                                                                                                                                                    |
|------------------------------|---------------------------------------------------------------|----|----------------------------------------------------------------------------------------------------------------------------------------------------------------------------------------------------------------------------------------------------------------------------------------------|-------------------------------|------------------------------------------------------------------------------------------------------------------------------------------------------------------------------------|
|                              | -                                                             | 0  |                                                                                                                                                                                                                                                                                              |                               | -                                                                                                                                                                                  |
| Saccoglossus kowalevskii     | cyclin-dependent ki-se 3                                      | 17 | P:GO:0000278;<br>P:GO:0000003;<br>F:GO:0005515;<br>F:GO:0000166;<br>P:GO:0040018;<br>P:GO:0040011;<br>P:GO:0008283;<br>P:GO:0040002;<br>P:GO:0018996;<br>P:GO:0009792;<br>P:GO:0002009;<br>F:GO:0004674;<br>P:GO:0002119;<br>C:GO:0043229;<br>P:GO:0022403;<br>P:GO:0010171;<br>P:GO:0048523 | -                             | EC:2.7.11.0<br><br>IPR000719; IPR008271; IPR011009;<br>IPR017442; G3DSA:1.10.510.10<br>(GENE3D), G3DSA:3.30.200.20<br>(GENE3D), PTHR11295 (PANTHER),<br>PTHR11295:SF109 (PANTHER)  |
| Ciona intestinalis           | PREDICTED: similar to F36H2.3 [Cio- intesti-lis]              | 0  |                                                                                                                                                                                                                                                                                              |                               | IPR000436; IPR016060                                                                                                                                                               |
| Caenorhabditis elegans       | trimethylguanosine synthase-like                              | 12 | C:GO:0030532;<br>P:GO:0001510;<br>P:GO:0040010;<br>P:GO:0000387;<br>P:GO:0002119;<br>F:GO:0005515;<br>P:GO:0040011;<br>P:GO:0071167;<br>F:GO:0071164;<br>P:GO:0009792;<br>C:GO:0005737;<br>P:GO:0016246                                                                                      | -                             | IPR019012; G3DSA:3.40.50.150<br>(GENE3D), PTHR14741 (PANTHER),<br>PTHR14741:SF4 (PANTHER), SSF53335<br>(SUPERFAMILY)                                                               |
|                              | -                                                             | 0  |                                                                                                                                                                                                                                                                                              |                               | -                                                                                                                                                                                  |
| Burkholderia phymatum STM815 | hypothetical protein Bphy_1520 [Burkholderia phymatum STM815] | 0  |                                                                                                                                                                                                                                                                                              |                               | -                                                                                                                                                                                  |
|                              | -                                                             | 0  |                                                                                                                                                                                                                                                                                              |                               | -                                                                                                                                                                                  |
| Caenorhabditis elegans       | pq-loop repeat-containing protein 1                           | 1  | P:GO:0019915                                                                                                                                                                                                                                                                                 | -                             | PTHR14856 (PANTHER),<br>PTHR14856:SF5 (PANTHER), PF04193<br>(PFAM), SignalP (SIGNALP)                                                                                              |
| Homo sapiens                 | PREDICTED: hypothetical protein [Homo sapiens]                | 0  |                                                                                                                                                                                                                                                                                              |                               | -                                                                                                                                                                                  |
|                              | -                                                             | 0  |                                                                                                                                                                                                                                                                                              |                               | -                                                                                                                                                                                  |
|                              | -                                                             | 0  |                                                                                                                                                                                                                                                                                              |                               | IPR016186                                                                                                                                                                          |
| Angiostrongylus cantonensis  | trafficking protein particle complex subunit 6b               | 3  | P:GO:0006182;<br>F:GO:0020037;<br>F:GO:0004383                                                                                                                                                                                                                                               | -                             | EC:4.6.1.2<br><br>IPR007194; IPR011644;<br>G3DSA:3.30.1380.20 (GENE3D),<br>PTHR12817 (PANTHER)                                                                                     |
| Loa loa                      | hypothetical protein LOAG_09794 [Loa loa]                     | 0  |                                                                                                                                                                                                                                                                                              |                               | SignalP (SIGNALP)                                                                                                                                                                  |
| Caenorhabditis elegans       | acyl- synthetase long-chain family member 4                   | 7  | P:GO:0060136;<br>P:GO:0050896;<br>P:GO:0006631;<br>F:GO:0004467;<br>C:GO:0031090;<br>C:GO:0044446;<br>C:GO:0005739                                                                                                                                                                           | -                             | EC:6.2.1.3<br><br>IPR000873; IPR020459; IPR020845;<br>G3DSA:3.40.50.980 (GENE3D),<br>PTHR11968 (PANTHER),<br>PTHR11968:SF8 (PANTHER), SignalP<br>(SIGNALP), SSF56801 (SUPERFAMILY) |
| Caenorhabditis briggsae      | Hypothetical protein CBG18375 [Caenorhabditis briggsae]       | 0  |                                                                                                                                                                                                                                                                                              | C:GO:0016020;<br>F:GO:0008158 | -                                                                                                                                                                                  |
| Caenorhabditis briggsae      | resistance-nodulation-cell division superfamily transporter   | 2  | F:GO:0008158;<br>C:GO:0016020                                                                                                                                                                                                                                                                | -                             | PTHR10796 (PANTHER),<br>PTHR10796:SF13 (PANTHER),<br>SSF82866 (SUPERFAMILY)                                                                                                        |
|                              | -                                                             | 0  |                                                                                                                                                                                                                                                                                              |                               | -                                                                                                                                                                                  |

|                         |                                                             |    |                                                                                                                                                                                                                          |                                                                                                                                                                                                         |             |                                                                                                        |
|-------------------------|-------------------------------------------------------------|----|--------------------------------------------------------------------------------------------------------------------------------------------------------------------------------------------------------------------------|---------------------------------------------------------------------------------------------------------------------------------------------------------------------------------------------------------|-------------|--------------------------------------------------------------------------------------------------------|
| Caenorhabditis briggsae | Hypothetical protein CBG18375 [Caenorhabditis briggsae]     | 0  |                                                                                                                                                                                                                          | C:GO:0016020;<br>F:GO:0008158                                                                                                                                                                           |             | -                                                                                                      |
| Caenorhabditis briggsae | resistance-nodulation-cell division superfamily transporter | 0  |                                                                                                                                                                                                                          | C:GO:0016021;<br>P:GO:0051301;<br>C:GO:0016020;<br>F:GO:0005215;<br>P:GO:0006810;<br>F:GO:0008158                                                                                                       |             | PTHR10796 (PANTHER),<br>PTHR10796:SF13 (PANTHER),<br>SSF82866 (SUPERFAMILY)                            |
| Caenorhabditis briggsae | Hypothetical protein CBG18375 [Caenorhabditis briggsae]     | 0  |                                                                                                                                                                                                                          | C:GO:0016020;<br>F:GO:0008158                                                                                                                                                                           |             | -                                                                                                      |
| Loa loa                 | cxxc zinc finger family protein                             | 8  | P:GO:0016568;<br>F:GO:0046872;<br>P:GO:0006355;<br>F:GO:0018024;<br>P:GO:0040029;<br>F:GO:0005515;<br>P:GO:0043414;<br>C:GO:0005634                                                                                      | -                                                                                                                                                                                                       | EC:2.1.1.43 | IPR001525; IPR002857;<br>PTHR10629:SF6 (PANTHER)                                                       |
|                         | -                                                           | 0  |                                                                                                                                                                                                                          |                                                                                                                                                                                                         |             | -                                                                                                      |
|                         | -                                                           | 0  |                                                                                                                                                                                                                          |                                                                                                                                                                                                         |             | -                                                                                                      |
| Caenorhabditis briggsae | protein geranylgeranyltransferase type beta subunit         | 13 | F:GO:0004662;<br>F:GO:0008144;<br>F:GO:0042277;<br>P:GO:0045787;<br>P:GO:0051789;<br>F:GO:0008270;<br>P:GO:0051774;<br>C:GO:0005953;<br>F:GO:0005515;<br>P:GO:0034097;<br>P:GO:0008284;<br>P:GO:0018348;<br>F:GO:0019840 | -                                                                                                                                                                                                       | EC:2.5.1.59 | IPR001330; IPR008930;<br>G3DSA:1.50.10.20 (GENE3D),<br>PTHR11774 (PANTHER),<br>PTHR11774:SF4 (PANTHER) |
|                         | -                                                           | 0  |                                                                                                                                                                                                                          |                                                                                                                                                                                                         |             | SignalP (SIGNALP)                                                                                      |
| Caenorhabditis briggsae | briggsae cbr-ani-2 protein                                  | 0  |                                                                                                                                                                                                                          | F:GO:0005515                                                                                                                                                                                            |             | -                                                                                                      |
| Caenorhabditis briggsae | briggsae cbr-ani-2 protein                                  | 0  |                                                                                                                                                                                                                          | F:GO:0005515                                                                                                                                                                                            |             | -                                                                                                      |
| Caenorhabditis briggsae | briggsae cbr-ani-2 protein                                  | 0  |                                                                                                                                                                                                                          | F:GO:0005515                                                                                                                                                                                            |             | -                                                                                                      |
| Caenorhabditis elegans  | survival of motor neuron-related-splicing factor 30         | 1  | P:GO:0000003                                                                                                                                                                                                             | -                                                                                                                                                                                                       |             | PTHR12664 (PANTHER)                                                                                    |
|                         | -                                                           | 0  |                                                                                                                                                                                                                          |                                                                                                                                                                                                         |             | SignalP (SIGNALP)                                                                                      |
| Caenorhabditis elegans  | 4930438o05rik protein                                       | 0  |                                                                                                                                                                                                                          | F:GO:0003674;<br>F:GO:0005488;<br>P:GO:0008150;<br>C:GO:0005575                                                                                                                                         |             | -                                                                                                      |
|                         | -                                                           | 0  |                                                                                                                                                                                                                          |                                                                                                                                                                                                         |             | -                                                                                                      |
| Caenorhabditis elegans  | set and mynd domain-containing protein 1                    | 0  |                                                                                                                                                                                                                          | P:GO:0006338;<br>F:GO:0003677;<br>C:GO:0005634;<br>C:GO:0005737;<br>F:GO:0008270;<br>P:GO:0007507;<br>F:GO:0005515;<br>F:GO:0003714;<br>F:GO:0046872;<br>P:GO:0006350;<br>P:GO:0016481;<br>P:GO:0045449 |             | PTHR12197 (PANTHER),<br>PTHR12197:SF9 (PANTHER)                                                        |

|                         |                                                            |    |                                                                                                                                                                                        |                                                                 |                                             |                                                                                                                                                                                                                                            |
|-------------------------|------------------------------------------------------------|----|----------------------------------------------------------------------------------------------------------------------------------------------------------------------------------------|-----------------------------------------------------------------|---------------------------------------------|--------------------------------------------------------------------------------------------------------------------------------------------------------------------------------------------------------------------------------------------|
| Loa loa                 | ero1-like beta ( cerevisiae)                               | 10 | C:GO:0005789;<br>P:GO:0006467;<br>P:GO:0002119;<br>F:GO:0016671;<br>F:GO:0005515;<br>P:GO:0055114;<br>P:GO:0000003;<br>P:GO:0008340;<br>F:GO:0050660;<br>P:GO:0040007                  | -                                                               | EC:1.8.4.0                                  | IPR007266                                                                                                                                                                                                                                  |
| -                       | -                                                          | 0  | -                                                                                                                                                                                      | -                                                               | -                                           | -                                                                                                                                                                                                                                          |
| -                       | -                                                          | 0  | -                                                                                                                                                                                      | -                                                               | -                                           | -                                                                                                                                                                                                                                          |
| Caenorhabditis briggsae | elegans protein partially confirmed by transcript evidence | 2  | P:GO:0008104;<br>F:GO:0003676                                                                                                                                                          | -                                                               | -                                           | SignalP (SIGNALP)                                                                                                                                                                                                                          |
| Caenorhabditis briggsae | atp-binding cassette sub-family e member 1                 | 11 | P:GO:0040035;<br>P:GO:0009792;<br>P:GO:0010171;<br>P:GO:0002119;<br>F:GO:0016887;<br>F:GO:0051536;<br>F:GO:0009055;<br>P:GO:0040010;<br>F:GO:0005524;<br>P:GO:0040011;<br>C:GO:0005739 | -                                                               | -                                           | IPR001450; IPR003439; IPR003593;<br>IPR013283; IPR017896; IPR017900;<br>G3DSA:3.30.70.20 (GENE3D),<br>G3DSA:3.40.50.300 (GENE3D),<br>PTHR19248 (PANTHER),<br>PTHR19248:SF5 (PANTHER), SSF52540<br>(SUPERFAMILY), SSF54862<br>(SUPERFAMILY) |
| Loa loa                 | elegans protein confirmed by transcript evidence           | 2  | P:GO:0040010;<br>P:GO:0002119                                                                                                                                                          | -                                                               | -                                           | -                                                                                                                                                                                                                                          |
| Brugia malayi           | denn domain-containing protein 2a-like                     | 0  | -                                                                                                                                                                                      | F:GO:0003674;<br>P:GO:0008150                                   | -                                           | IPR001194; IPR005112; IPR005113;<br>PTHR15288 (PANTHER)                                                                                                                                                                                    |
| -                       | -                                                          | 0  | -                                                                                                                                                                                      | -                                                               | -                                           | -                                                                                                                                                                                                                                          |
| Caenorhabditis elegans  | yuqp_caee1_ame: full=cral-trio domain-containing protein   | 0  | -                                                                                                                                                                                      | -                                                               | -                                           | PTHR23324 (PANTHER),<br>PTHR23324:SF3 (PANTHER)                                                                                                                                                                                            |
| Caenorhabditis elegans  | elegans protein partially confirmed by transcript evidence | 0  | -                                                                                                                                                                                      | -                                                               | -                                           | PTHR23324 (PANTHER),<br>PTHR23324:SF3 (PANTHER)                                                                                                                                                                                            |
| Caenorhabditis elegans  | ric1 protein                                               | 1  | C:GO:0016021                                                                                                                                                                           | -                                                               | -                                           | -                                                                                                                                                                                                                                          |
| Caenorhabditis elegans  | cysteine synthase                                          | 6  | C:GO:0005737;<br>F:GO:0050461;<br>F:GO:0030170;<br>F:GO:0004124;<br>P:GO:0006535;<br>F:GO:0047458                                                                                      | -                                                               | EC:2.5.1.52;<br>EC:2.5.1.47;<br>EC:2.5.1.51 | IPR001216; IPR001926; IPR005856;<br>IPR005859; G3DSA:3.40.50.1100<br>(GENE3D), PTHR10314 (PANTHER),<br>PTHR10314:SF8 (PANTHER)                                                                                                             |
| Caenorhabditis elegans  | transmembrane 9 superfamily protein member 4               | 3  | P:GO:0035010;<br>P:GO:0050829;<br>P:GO:0006911                                                                                                                                         | -                                                               | -                                           | IPR004240; PTHR10766:SF12<br>(PANTHER), SignalP (SIGNALP)                                                                                                                                                                                  |
| Caenorhabditis elegans  | -dph:adrenodoxin mitochondrial                             | 0  | -                                                                                                                                                                                      | P:GO:0055114;<br>F:GO:0005488;<br>P:GO:0008152;<br>F:GO:0003824 | -                                           | IPR016040; PTHR11938 (PANTHER),<br>PTHR11938:SF4 (PANTHER)                                                                                                                                                                                 |
| Caenorhabditis briggsae | elegans protein partially confirmed by transcript evidence | 0  | -                                                                                                                                                                                      | -                                                               | -                                           | SignalP (SIGNALP)                                                                                                                                                                                                                          |
| Caenorhabditis elegans  | elegans protein partially confirmed by transcript evidence | 1  | F:GO:0005515                                                                                                                                                                           | -                                                               | -                                           | -                                                                                                                                                                                                                                          |
| -                       | -                                                          | 0  | -                                                                                                                                                                                      | -                                                               | -                                           | -                                                                                                                                                                                                                                          |
| -                       | -                                                          | 0  | -                                                                                                                                                                                      | -                                                               | -                                           | -                                                                                                                                                                                                                                          |
| Caenorhabditis elegans  | novel trtraspanin family protein                           | 0  | -                                                                                                                                                                                      | C:GO:0016021;<br>C:GO:0016020;<br>F:GO:0005515                  | -                                           | IPR000301; IPR008952; IPR018499;<br>PTHR19282 (PANTHER),<br>PTHR19282:SF38 (PANTHER), SignalP<br>(SIGNALP)                                                                                                                                 |

|                         |                                           |   |                                                                                                                                                      |                               |                                                                                                                                                                                           |
|-------------------------|-------------------------------------------|---|------------------------------------------------------------------------------------------------------------------------------------------------------|-------------------------------|-------------------------------------------------------------------------------------------------------------------------------------------------------------------------------------------|
| Caenorhabditis briggsae | cytochrome b5                             | 8 | F:GO:0005488;<br>C:GO:0005625;<br>P:GO:0040007;<br>C:GO:0005792;<br>P:GO:0002119;<br>P:GO:0009792;<br>P:GO:0046686;<br>C:GO:0005789                  | -                             | IPR001199; IPR018506; PTHR19359 (PANTHER)                                                                                                                                                 |
| Caenorhabditis briggsae | armet-like protein precursor              | 0 |                                                                                                                                                      | P:GO:0007275;<br>C:GO:0005576 | IPR019345; SignalP (SIGNALP), SSF68906 (SUPERFAMILY)                                                                                                                                      |
| Caenorhabditis briggsae | adp-ribosylation factor                   | 7 | C:GO:0005737;<br>F:GO:0005525;<br>F:GO:0004871;<br>P:GO:0006886;<br>P:GO:0007186;<br>C:GO:0005634;<br>P:GO:0007264                                   | -                             | -                                                                                                                                                                                         |
| Caenorhabditis briggsae | cg7039 protein                            | 7 | C:GO:0005737;<br>F:GO:0005525;<br>F:GO:0004871;<br>P:GO:0006886;<br>P:GO:0007186;<br>C:GO:0005634;<br>P:GO:0007264                                   | -                             | IPR006689; G3DSA:3.40.50.300 (GENE3D), PTHR11711:SF19 (PANTHER), PS51417 (PROFILE), SSF52540 (SUPERFAMILY)                                                                                |
| Caenorhabditis briggsae | cg7039 protein                            | 7 | C:GO:0005737;<br>F:GO:0005525;<br>F:GO:0004871;<br>P:GO:0006886;<br>P:GO:0007186;<br>C:GO:0005634;<br>P:GO:0007264                                   | -                             | -                                                                                                                                                                                         |
|                         | -                                         | 0 |                                                                                                                                                      |                               | -                                                                                                                                                                                         |
| Caenorhabditis elegans  | s4 domain containing protein              | 0 |                                                                                                                                                      | F:GO:0003723                  | IPR002942; G3DSA:3.10.290.10 (GENE3D), SSF55174 (SUPERFAMILY)                                                                                                                             |
|                         | -                                         | 0 |                                                                                                                                                      |                               | -                                                                                                                                                                                         |
| Caenorhabditis elegans  | talin 2                                   | 5 | F:GO:0005200;<br>P:GO:0007016;<br>F:GO:0005515;<br>C:GO:0005925;<br>C:GO:0001726                                                                     | -                             | IPR015710; G3DSA:1.20.1410.10 (GENE3D), SSF109885 (SUPERFAMILY)                                                                                                                           |
|                         | -                                         | 0 |                                                                                                                                                      |                               | -                                                                                                                                                                                         |
|                         | -                                         | 0 |                                                                                                                                                      |                               | -                                                                                                                                                                                         |
| Caenorhabditis briggsae | sec24 related gene member c ( cerevisiae) | 9 | F:GO:0008270;<br>P:GO:0040007;<br>P:GO:0000003;<br>P:GO:0002119;<br>F:GO:0005515;<br>C:GO:0030127;<br>P:GO:0006888;<br>P:GO:0006898;<br>P:GO:0006886 | -                             | IPR006895; IPR006896; IPR006900; IPR007123; IPR012990; IPR015880; G3DSA:3.40.50.410 (GENE3D), PTHR13803 (PANTHER), SSF53300 (SUPERFAMILY), SSF81995 (SUPERFAMILY), SSF82754 (SUPERFAMILY) |

|                         |                                          |    |                                                                                                                                                                                                                                                                                                                                                                                                                                                                        |   |                           |                                                                                                                                |
|-------------------------|------------------------------------------|----|------------------------------------------------------------------------------------------------------------------------------------------------------------------------------------------------------------------------------------------------------------------------------------------------------------------------------------------------------------------------------------------------------------------------------------------------------------------------|---|---------------------------|--------------------------------------------------------------------------------------------------------------------------------|
| Caenorhabditis elegans  | carbamoyl-phosphate synthase large chain | 8  | F:GO:0004086;<br>P:GO:0006541;<br>F:GO:0016812;<br>F:GO:0005524;<br>F:GO:0004070;<br>F:GO:0016597;<br>P:GO:0060041;<br>P:GO:0006207                                                                                                                                                                                                                                                                                                                                    | - | EC:3.5.2.0;<br>EC:2.1.3.2 | IPR002082; IPR006130; IPR006131;<br>IPR006132; G3DSA:3.40.50.1370<br>(GENE3D), PTHR11405 (PANTHER),<br>PTHR11405:SF3 (PANTHER) |
| Caenorhabditis elegans  | sorting nexin                            | 3  | F:GO:0035091;<br>F:GO:0005515;<br>P:GO:0007154                                                                                                                                                                                                                                                                                                                                                                                                                         | - |                           | IPR001683; PTHR10555 (PANTHER)                                                                                                 |
| Caenorhabditis briggsae | briggsae cbr-vit-6 protein               | 3  | P:GO:0006810;<br>F:GO:0022892;<br>P:GO:0033036                                                                                                                                                                                                                                                                                                                                                                                                                         | - |                           | -                                                                                                                              |
| Caenorhabditis briggsae | briggsae cbr-vit-6 protein               | 3  | P:GO:0006810;<br>F:GO:0022892;<br>P:GO:0033036                                                                                                                                                                                                                                                                                                                                                                                                                         | - |                           | -                                                                                                                              |
| Caenorhabditis briggsae | briggsae cbr-vit-6 protein               | 3  | P:GO:0006810;<br>F:GO:0022892;<br>P:GO:0033036                                                                                                                                                                                                                                                                                                                                                                                                                         | - |                           | -                                                                                                                              |
| Apis mellifera          | forkhead box n4                          | 27 | F:GO:0016566;<br>C:GO:0000785;<br>P:GO:0008016;<br>P:GO:0048813;<br>P:GO:0043193;<br>C:GO:0005701;<br>P:GO:0007389;<br>P:GO:0007517;<br>P:GO:0007400;<br>F:GO:0003704;<br>C:GO:0005730;<br>F:GO:0016563;<br>C:GO:0005667;<br>P:GO:0007391;<br>P:GO:0048663;<br>P:GO:0008105;<br>F:GO:0003705;<br>P:GO:0010551;<br>P:GO:0048749;<br>P:GO:0051090;<br>F:GO:0003690;<br>F:GO:0003682;<br>F:GO:0008301;<br>F:GO:0010843;<br>F:GO:0008134;<br>P:GO:0007476;<br>P:GO:0006325 | - |                           | IPR001766; IPR011991; IPR018122;<br>SSF46785 (SUPERFAMILY)                                                                     |
| Caenorhabditis briggsae | filamin-b isoform 3                      | 10 | P:GO:0007016;<br>C:GO:0016021;<br>P:GO:0030036;<br>F:GO:0003779;<br>C:GO:0015629;<br>C:GO:0044444;<br>P:GO:0007165;<br>P:GO:0007275;<br>F:GO:0016787;<br>C:GO:0005886                                                                                                                                                                                                                                                                                                  | - |                           | IPR001715; PTHR11915 (PANTHER),<br>PTHR11915:SF24 (PANTHER), SignalP<br>(SIGNALP)                                              |



|                             |                                                        |    |                                                                                                                                                                                                                                                                             |                                                                                  |            |                                                                                                                                                                                                  |
|-----------------------------|--------------------------------------------------------|----|-----------------------------------------------------------------------------------------------------------------------------------------------------------------------------------------------------------------------------------------------------------------------------|----------------------------------------------------------------------------------|------------|--------------------------------------------------------------------------------------------------------------------------------------------------------------------------------------------------|
| Caenorhabditis briggsae     | nedd8-activating enzyme e1 catalytic subunit           | 4  | F:GO:0008641;<br>P:GO:0045116;<br>F:GO:0016881;<br>F:GO:0005524                                                                                                                                                                                                             | -                                                                                | EC:6.3.2.0 | IPR000127; IPR000594; IPR009036;<br>IPR014929; IPR016040; IPR018074;<br>IPR019572; G3DSA:1.10.10.520<br>(GENE3D), G3DSA:3.10.20.260<br>(GENE3D), PTHR10953 (PANTHER),<br>PTHR10953:SF6 (PANTHER) |
| Ancylostoma duodenale       | ancylostoma-secreted protein 1 precursor               | 0  |                                                                                                                                                                                                                                                                             | C:GO:0005576                                                                     |            | IPR014044                                                                                                                                                                                        |
| Brugia malayi               | hypothetical protein Bm1_56010 [Brugia malayi]         | 0  |                                                                                                                                                                                                                                                                             |                                                                                  |            | SignalP (SIGNALP)                                                                                                                                                                                |
| Harpegnathos saltator       | pantothe-te ki-se 4                                    | 1  | F:GO:0016740                                                                                                                                                                                                                                                                | -                                                                                |            | IPR011602; PTHR12280 (PANTHER),<br>PTHR12280:SF10 (PANTHER)                                                                                                                                      |
| Caenorhabditis elegans      | Hypothetical protein ZC404.15 [Caenorhabditis elegans] | 0  |                                                                                                                                                                                                                                                                             |                                                                                  |            | SignalP (SIGNALP)                                                                                                                                                                                |
| Hyalomma marginatum rufipes | ubiquitin c                                            | 2  | C:GO:0005634;<br>C:GO:0005737                                                                                                                                                                                                                                               | -                                                                                |            | IPR000626; IPR019954; IPR019955;<br>IPR019956; G3DSA:3.10.20.90<br>(GENE3D), PTHR10666 (PANTHER),<br>PTHR10666:SF9 (PANTHER), SSF54236<br>(SUPERFAMILY)                                          |
| Homo sapiens                | ubiquitin c                                            | 2  | C:GO:0005634;<br>C:GO:0005737                                                                                                                                                                                                                                               | -                                                                                |            | IPR000626; IPR019955; IPR019956;<br>G3DSA:3.10.20.90 (GENE3D),<br>PTHR10666 (PANTHER),<br>PTHR10666:SF9 (PANTHER), SSF54236<br>(SUPERFAMILY)                                                     |
| -                           | -                                                      | 0  |                                                                                                                                                                                                                                                                             |                                                                                  |            | -                                                                                                                                                                                                |
| -                           | -                                                      | 0  |                                                                                                                                                                                                                                                                             |                                                                                  |            | -                                                                                                                                                                                                |
| Caenorhabditis elegans      | db module family protein                               | 0  |                                                                                                                                                                                                                                                                             |                                                                                  |            | IPR002602; PTHR21679 (PANTHER)                                                                                                                                                                   |
| Caenorhabditis briggsae     | briggsae cbr-lpd-6 protein                             | 2  | P:GO:0009987;<br>C:GO:0044464                                                                                                                                                                                                                                               | -                                                                                |            | IPR007109; PTHR12661 (PANTHER),<br>PTHR12661:SF1 (PANTHER)                                                                                                                                       |
| -                           | -                                                      | 0  |                                                                                                                                                                                                                                                                             |                                                                                  |            | -                                                                                                                                                                                                |
| -                           | -                                                      | 0  |                                                                                                                                                                                                                                                                             |                                                                                  |            | -                                                                                                                                                                                                |
| Caenorhabditis elegans      | briggsae cbr-pqn-55 protein                            | 0  |                                                                                                                                                                                                                                                                             | F:GO:0008270                                                                     |            | -                                                                                                                                                                                                |
| Caenorhabditis briggsae     | briggsae cbr-sym-3 protein                             | 0  |                                                                                                                                                                                                                                                                             | F:GO:0003674;<br>C:GO:0005575                                                    |            | IPR019448; PTHR21456 (PANTHER)                                                                                                                                                                   |
| Loa loa                     | rap ran-gap family protein                             | 0  |                                                                                                                                                                                                                                                                             | F:GO:0005096;<br>P:GO:0051056;<br>F:GO:0005488;<br>C:GO:0005622;<br>P:GO:0043547 |            | IPR018515                                                                                                                                                                                        |
| Caenorhabditis elegans      | vps53- n-termi-l family protein                        | 0  |                                                                                                                                                                                                                                                                             |                                                                                  |            | IPR007234; PTHR12820 (PANTHER)                                                                                                                                                                   |
| Caenorhabditis brenneri     | ubiquitin                                              | 16 | P:GO:0006412;<br>C:GO:0005875;<br>P:GO:0006511;<br>P:GO:0006355;<br>P:GO:0040007;<br>F:GO:0003735;<br>P:GO:0000003;<br>P:GO:0002119;<br>P:GO:0042254;<br>F:GO:0005515;<br>P:GO:0006325;<br>C:GO:0005811;<br>P:GO:0006950;<br>C:GO:0022625;<br>C:GO:0005634;<br>P:GO:0006464 | -                                                                                | EC:3.6.5.3 | IPR000626; IPR001975; IPR019954;<br>IPR019955; IPR019956;<br>G3DSA:3.10.20.90 (GENE3D),<br>PTHR10666 (PANTHER),<br>PTHR10666:SF9 (PANTHER), SSF54236<br>(SUPERFAMILY)                            |

|                             |                                                                 |    |                                                                                                                                                                                                                                                                             |   |            |                                                                                                                                                                       |
|-----------------------------|-----------------------------------------------------------------|----|-----------------------------------------------------------------------------------------------------------------------------------------------------------------------------------------------------------------------------------------------------------------------------|---|------------|-----------------------------------------------------------------------------------------------------------------------------------------------------------------------|
| Caenorhabditis brenneri     | ubiquitin                                                       | 16 | P:GO:0006412;<br>C:GO:0005875;<br>P:GO:0006511;<br>P:GO:0006355;<br>P:GO:0040007;<br>F:GO:0003735;<br>P:GO:0000003;<br>P:GO:0002119;<br>P:GO:0042254;<br>F:GO:0005515;<br>P:GO:0006325;<br>C:GO:0005811;<br>P:GO:0006950;<br>C:GO:0022625;<br>C:GO:0005634;<br>P:GO:0006464 | - | EC:3.6.5.3 | IPR000626; IPR001975; IPR019954;<br>IPR019955; IPR019956;<br>G3DSA:3.10.20.90 (GENE3D),<br>PTHR10666 (PANTHER),<br>PTHR10666:SF9 (PANTHER), SSF54236<br>(SUPERFAMILY) |
| -                           | -                                                               | 0  |                                                                                                                                                                                                                                                                             |   |            | -                                                                                                                                                                     |
| -                           | -                                                               | 0  |                                                                                                                                                                                                                                                                             |   |            | SignalP (SIGNALP)                                                                                                                                                     |
| -                           | -                                                               | 0  |                                                                                                                                                                                                                                                                             |   |            | -                                                                                                                                                                     |
| Caenorhabditis elegans      | protein-tyrosine phosphatase containing protein                 | 2  | F:GO:0016791;<br>P:GO:0040011                                                                                                                                                                                                                                               | - | EC:3.1.3.0 | -                                                                                                                                                                     |
| Caenorhabditis elegans      | carnitine o-acyltransferase                                     | 1  | F:GO:0008415                                                                                                                                                                                                                                                                | - |            | -                                                                                                                                                                     |
| Caenorhabditis elegans      | protein kiaa0103 homolog                                        | 6  | C:GO:0005875;<br>F:GO:0005515;<br>P:GO:0040017;<br>P:GO:0040010;<br>P:GO:0000003;<br>P:GO:0006898                                                                                                                                                                           | - |            | IPR011990; IPR013026; PTHR12760<br>(PANTHER), SSF48452 (SUPERFAMILY)                                                                                                  |
| Angiostrongylus cantonensis | galectin protein 10                                             | 2  | F:GO:0005515;<br>P:GO:0009792                                                                                                                                                                                                                                               | - |            | IPR001079; IPR008985; IPR013320;<br>PTHR11346:SF4 (PANTHER)                                                                                                           |
| -                           | -                                                               | 0  |                                                                                                                                                                                                                                                                             |   |            | -                                                                                                                                                                     |
| Caenorhabditis elegans      | delta chain (clathrin associated complex) family member (apd-3) | 16 | C:GO:0030117;<br>C:GO:0005802;<br>C:GO:0000139;<br>F:GO:0005515;<br>P:GO:0006726;<br>P:GO:0040007;<br>F:GO:0008565;<br>P:GO:0061088;<br>P:GO:0006886;<br>P:GO:0016192;<br>P:GO:0009792;<br>P:GO:0002119;<br>P:GO:0048007;<br>P:GO:0006829;<br>P:GO:0010171;<br>P:GO:0051138 | - |            | -                                                                                                                                                                     |
| Caenorhabditis briggsae     | gns1 sur4 family protein                                        | 2  | P:GO:0040010;<br>C:GO:0016021                                                                                                                                                                                                                                               | - |            | -                                                                                                                                                                     |
| -                           | -                                                               | 0  |                                                                                                                                                                                                                                                                             |   |            | SignalP (SIGNALP)                                                                                                                                                     |
| -                           | -                                                               | 0  |                                                                                                                                                                                                                                                                             |   |            |                                                                                                                                                                       |
| Caenorhabditis briggsae     | inositol polyphosphate-4- type 1 isoform 2                      | 0  |                                                                                                                                                                                                                                                                             |   |            | PTHR12187 (PANTHER),<br>PTHR12187:SF2 (PANTHER)                                                                                                                       |
| -                           | -                                                               | 0  |                                                                                                                                                                                                                                                                             |   |            | SignalP (SIGNALP)                                                                                                                                                     |

|                         |                                                                            |   |                                                                                                                    |                               |                                                                                                                                      |
|-------------------------|----------------------------------------------------------------------------|---|--------------------------------------------------------------------------------------------------------------------|-------------------------------|--------------------------------------------------------------------------------------------------------------------------------------|
| Haemonchus contortus    | briggsae cbr-vit-2 protein                                                 | 6 | P:GO:0006869;<br>F:GO:0005319;<br>P:GO:0009792;<br>P:GO:0008340;<br>P:GO:0040010;<br>F:GO:0005515                  | -                             | IPR000372                                                                                                                            |
| Haemonchus contortus    | briggsae cbr-vit-2 protein                                                 | 6 | P:GO:0006869;<br>F:GO:0005319;<br>P:GO:0009792;<br>P:GO:0008340;<br>P:GO:0040010;<br>F:GO:0005515                  | -                             | IPR000372                                                                                                                            |
| Haemonchus contortus    | briggsae cbr-vit-6 protein                                                 | 6 | P:GO:0009792;<br>F:GO:0005319;<br>F:GO:0005515;<br>P:GO:0040010;<br>P:GO:0006869;<br>P:GO:0008340                  | -                             | IPR015255                                                                                                                            |
| Haemonchus contortus    | briggsae cbr-vit-6 protein                                                 | 3 | P:GO:0006869;<br>F:GO:0005319;<br>F:GO:0005515                                                                     | -                             | -                                                                                                                                    |
| Caenorhabditis elegans  | elegans protein partially confirmed by transcript evidence                 | 0 |                                                                                                                    | F:GO:0016301;<br>F:GO:0005515 | IPR001202; IPR001478;<br>G3DSA:2.20.70.10 (GENE3D),<br>G3DSA:2.30.42.10 (GENE3D),<br>PTHR10316 (PANTHER),<br>PTHR10316:SF7 (PANTHER) |
| Loa loa                 | nurf (nucleosome remodeling factor) complex homolog family member (nurf-1) | 7 | P:GO:0009987;<br>P:GO:0040010;<br>F:GO:0005488;<br>P:GO:0000003;<br>P:GO:0007492;<br>P:GO:0001892;<br>P:GO:0009952 | -                             | IPR001487; IPR018359; PTHR22880 (PANTHER), PTHR22880:SF6 (PANTHER)                                                                   |
| Caenorhabditis elegans  | briggsae cbr-acy-4 protein                                                 | 1 | F:GO:0016849                                                                                                       | -                             | IPR001054; IPR018297; PTHR11920 (PANTHER), PTHR11920:SF14 (PANTHER)                                                                  |
| Dictyocaulus viviparus  | elegans protein confirmed by transcript evidence                           | 0 |                                                                                                                    |                               | SignalP (SIGNALP)                                                                                                                    |
|                         | -                                                                          | 0 |                                                                                                                    |                               | -                                                                                                                                    |
| Caenorhabditis elegans  | cofactor required for sp1 transcriptio-l subunit 3                         | 3 | P:GO:0044260;<br>P:GO:0090304;<br>P:GO:0010467                                                                     | -                             | IPR021629; PTHR12691 (PANTHER), PTHR12691:SF3 (PANTHER)                                                                              |
| Caenorhabditis elegans  | histone deacetylase                                                        | 6 | F:GO:0004407;<br>P:GO:0045449;<br>P:GO:0016575;<br>P:GO:0006099;<br>P:GO:0022904;<br>C:GO:0005737                  | -                             | IPR000286; IPR001607; IPR013083; PTHR10625:SF19 (PANTHER), SSF52768 (SUPERFAMILY)                                                    |
| Caenorhabditis briggsae | transmembrane protein 120b                                                 | 0 |                                                                                                                    | C:GO:0016021                  | IPR012926                                                                                                                            |
| Caenorhabditis elegans  | myelin proteolipid                                                         | 0 |                                                                                                                    |                               | IPR001614; PTHR11683:SF1 (PANTHER)                                                                                                   |
|                         | -                                                                          | 0 |                                                                                                                    |                               | -                                                                                                                                    |
|                         | -                                                                          | 0 |                                                                                                                    |                               | -                                                                                                                                    |
| Caenorhabditis elegans  | msh-domain protein 1 variant                                               | 6 | C:GO:0044297;<br>P:GO:0019915;<br>P:GO:0040018;<br>P:GO:0000003;<br>F:GO:0005198;<br>C:GO:0031143                  | -                             | IPR000535; IPR008962; PTHR22947 (PANTHER)                                                                                            |

|                         |                                      |    |                                                                                                                                                                       |   |  |                                                                                                                                                                       |
|-------------------------|--------------------------------------|----|-----------------------------------------------------------------------------------------------------------------------------------------------------------------------|---|--|-----------------------------------------------------------------------------------------------------------------------------------------------------------------------|
| Caenorhabditis elegans  | alkylation repair homolog 1          | 0  |                                                                                                                                                                       |   |  | -                                                                                                                                                                     |
| Caenorhabditis briggsae | transmembrane protein 194a           | 1  | F:GO:0005515                                                                                                                                                          | - |  | IPR019358; PTHR13598 (PANTHER), SignalP (SIGNALP)                                                                                                                     |
| Caenorhabditis briggsae | transmembrane protein 194a           | 1  | F:GO:0005515                                                                                                                                                          | - |  | IPR019358; PTHR13598 (PANTHER), SignalP (SIGNALP)                                                                                                                     |
| Caenorhabditis elegans  | glycosyltransferase 25 family member | 5  | P:GO:0040035;<br>F:GO:0005515;<br>P:GO:0040010;<br>P:GO:0040011;<br>P:GO:0002009                                                                                      | - |  | SignalP (SIGNALP)                                                                                                                                                     |
| -                       | -                                    | 0  |                                                                                                                                                                       |   |  | -                                                                                                                                                                     |
| -                       | -                                    | 0  |                                                                                                                                                                       |   |  | -                                                                                                                                                                     |
| Caenorhabditis briggsae | briggsae cbr-png-1 protein           | 3  | F:GO:0005488;<br>F:GO:0016787;<br>C:GO:0044444                                                                                                                        | - |  | IPR006588; IPR008979; PTHR12143 (PANTHER)                                                                                                                             |
| Caenorhabditis briggsae | briggsae cbr-png-1 protein           | 3  | F:GO:0005488;<br>F:GO:0016787;<br>C:GO:0044444                                                                                                                        | - |  | IPR006588; IPR008979; PTHR12143 (PANTHER)                                                                                                                             |
| Caenorhabditis briggsae | briggsae cbr-png-1 protein           | 3  | F:GO:0005488;<br>F:GO:0016787;<br>C:GO:0044444                                                                                                                        | - |  | IPR006588; IPR008979; PTHR12143 (PANTHER)                                                                                                                             |
| -                       | -                                    | 0  |                                                                                                                                                                       |   |  | -                                                                                                                                                                     |
| -                       | -                                    | 0  |                                                                                                                                                                       |   |  | -                                                                                                                                                                     |
| -                       | -                                    | 0  |                                                                                                                                                                       |   |  | -                                                                                                                                                                     |
| -                       | -                                    | 0  |                                                                                                                                                                       |   |  | -                                                                                                                                                                     |
| Caenorhabditis briggsae | briggsae cbr-try-10 protein          | 1  | P:GO:0019915                                                                                                                                                          | - |  | IPR007621                                                                                                                                                             |
| Homo sapiens            | mhc class ii antigen                 | 10 | C:GO:0005789;<br>C:GO:0005887;<br>C:GO:0042613;<br>C:GO:0005794;<br>P:GO:0002504;<br>C:GO:0031902;<br>P:GO:0007165;<br>C:GO:0005765;<br>F:GO:0032395;<br>P:GO:0006955 | - |  | SignalP (SIGNALP)                                                                                                                                                     |
| Homo sapiens            | mhc class ii antigen                 | 10 | C:GO:0005789;<br>C:GO:0005887;<br>C:GO:0042613;<br>C:GO:0005794;<br>P:GO:0002504;<br>C:GO:0031902;<br>P:GO:0007165;<br>C:GO:0005765;<br>F:GO:0032395;<br>P:GO:0006955 | - |  | IPR000353; IPR003006; IPR003597; IPR007110; IPR011162; IPR013783; IPR014745; PTHR19944 (PANTHER), PTHR19944:SF26 (PANTHER), SignalP (SIGNALP), SSF48726 (SUPERFAMILY) |
| Homo sapiens            | mhc class ii antigen                 | 10 | C:GO:0005789;<br>C:GO:0005887;<br>C:GO:0042613;<br>C:GO:0005794;<br>P:GO:0002504;<br>C:GO:0031902;<br>P:GO:0007165;<br>C:GO:0005765;<br>F:GO:0032395;<br>P:GO:0006955 | - |  | IPR000353; IPR003006; IPR003597; IPR007110; IPR011162; IPR013783; IPR014745; PTHR19944 (PANTHER), PTHR19944:SF26 (PANTHER), SSF48726 (SUPERFAMILY)                    |

|                         |                                                     |    |                                                                                                                                                                                                                                                                                                                                                                                                                                                                        |                                                                                  |                                                                                                                                                                |
|-------------------------|-----------------------------------------------------|----|------------------------------------------------------------------------------------------------------------------------------------------------------------------------------------------------------------------------------------------------------------------------------------------------------------------------------------------------------------------------------------------------------------------------------------------------------------------------|----------------------------------------------------------------------------------|----------------------------------------------------------------------------------------------------------------------------------------------------------------|
| Homo sapiens            | mhc class ii antigen                                | 10 | C:GO:0005789;<br>C:GO:0005887;<br>C:GO:0042613;<br>C:GO:0005794;<br>P:GO:0002504;<br>C:GO:0031902;<br>P:GO:0007165;<br>C:GO:0005765;<br>F:GO:0032395;<br>P:GO:0006955                                                                                                                                                                                                                                                                                                  | -                                                                                | IPR000353; IPR003006; IPR003597;<br>IPR007110; IPR011162; IPR013783;<br>IPR014745; PTHR19944 (PANTHER),<br>PTHR19944:SF26 (PANTHER),<br>SSF48726 (SUPERFAMILY) |
| -                       | -                                                   | 0  | -                                                                                                                                                                                                                                                                                                                                                                                                                                                                      | -                                                                                | -                                                                                                                                                              |
| Caenorhabditis briggsae | zinc finger swim domain-containing protein kiaa0913 | 0  | -                                                                                                                                                                                                                                                                                                                                                                                                                                                                      | F:GO:0046872;<br>F:GO:0003674;<br>P:GO:0008150;<br>F:GO:0008270;<br>C:GO:0005575 | PTHR22619 (PANTHER)                                                                                                                                            |
| Caenorhabditis elegans  | aquarius homolog                                    | 5  | F:GO:0008026;<br>F:GO:0003676;<br>F:GO:0005524;<br>C:GO:0005634;<br>P:GO:0006396                                                                                                                                                                                                                                                                                                                                                                                       | -                                                                                | G3DSA:3.40.50.300 (GENE3D),<br>PTHR10887 (PANTHER),<br>PTHR10887:SF5 (PANTHER), SSF52540<br>(SUPERFAMILY)                                                      |
| Caenorhabditis elegans  | formin homology 2 domain containing 1               | 2  | P:GO:0030036;<br>F:GO:0003779                                                                                                                                                                                                                                                                                                                                                                                                                                          | -                                                                                | IPR015425; PTHR23213 (PANTHER),<br>PTHR23213:SF3 (PANTHER)                                                                                                     |
| -                       | -                                                   | 0  | -                                                                                                                                                                                                                                                                                                                                                                                                                                                                      | -                                                                                | -                                                                                                                                                              |
| Brugia malayi           | nonmuscle myosin-ii heavy chain                     | 32 | P:GO:0045200;<br>C:GO:0016461;<br>P:GO:0035159;<br>P:GO:0031036;<br>C:GO:0016460;<br>P:GO:0007409;<br>P:GO:0035072;<br>P:GO:0007443;<br>P:GO:0007395;<br>P:GO:0045214;<br>P:GO:0035017;<br>C:GO:0016021;<br>P:GO:0006936;<br>P:GO:0007297;<br>P:GO:0046663;<br>F:GO:0003779;<br>P:GO:0001736;<br>F:GO:0032027;<br>P:GO:0008258;<br>P:GO:0051259;<br>P:GO:0016203;<br>C:GO:0032154;<br>C:GO:0045179;<br>F:GO:0003774;<br>P:GO:0045184;<br>P:GO:0035317;<br>C:GO:0030018 | -                                                                                | IPR000048; IPR001609;<br>G3DSA:4.10.270.10 (GENE3D),<br>PTHR13140 (PANTHER),<br>PTHR13140:SF23 (PANTHER),<br>SSF52540 (SUPERFAMILY)                            |

|                             |                                                                  |   |                                                                                                                                     |              |             |                                                                                                          |
|-----------------------------|------------------------------------------------------------------|---|-------------------------------------------------------------------------------------------------------------------------------------|--------------|-------------|----------------------------------------------------------------------------------------------------------|
| Pongo abelii                | glycosylphosphatidylinositol anchor attachment protein 1 homolog | 8 | C:GO:0042765;<br>P:GO:0016255;<br>P:GO:0006461;<br>F:GO:0034235;<br>F:GO:0015631;<br>P:GO:0006621;<br>C:GO:0005887;<br>F:GO:0003923 | -            | -           | -                                                                                                        |
| -                           | -                                                                | 0 | -                                                                                                                                   | -            | -           | -                                                                                                        |
| Caenorhabditis elegans      | elegans protein confirmed by transcript evidence                 | 1 | P:GO:0040010                                                                                                                        | -            | -           | -                                                                                                        |
| Caenorhabditis elegans      | elegans protein confirmed by transcript evidence                 | 1 | P:GO:0040010                                                                                                                        | -            | -           | -                                                                                                        |
| Caenorhabditis elegans      | elegans protein confirmed by transcript evidence                 | 0 | -                                                                                                                                   | P:GO:0040010 | -           | -                                                                                                        |
| Caenorhabditis elegans      | elegans protein confirmed by transcript evidence                 | 0 | -                                                                                                                                   | P:GO:0040010 | -           | -                                                                                                        |
| Caenorhabditis elegans      | cdc45 cell division cycle 45-like ( cerevisiae)                  | 2 | C:GO:0043229;<br>P:GO:0006260                                                                                                       | -            | -           | -                                                                                                        |
| Brugia malayi               | dead box atp-dependent r- helicase                               | 7 | F:GO:0003676;<br>F:GO:0008026;<br>P:GO:0000245;<br>P:GO:0001700;<br>P:GO:0042254;<br>F:GO:0000166;<br>P:GO:0006446                  | -            | -           | IPR008985; IPR011545;<br>G3DSA:3.40.50.300 (GENE3D),<br>PTHR10967 (PANTHER),<br>PTHR10967:SF44 (PANTHER) |
| Caenorhabditis briggsae     | briggsae cbr-unc-5 protein                                       | 4 | P:GO:0009987;<br>P:GO:0050789;<br>P:GO:0048856;<br>P:GO:0007275                                                                     | -            | -           | IPR000488; IPR011029; PTHR12582 (PANTHER), PTHR12582:SF2 (PANTHER)                                       |
| Caenorhabditis elegans      | carnitine palmitoyltransferase ii                                | 5 | P:GO:0006853;<br>P:GO:0046320;<br>C:GO:0005743;<br>F:GO:0004095;<br>P:GO:0009792                                                    | -            | EC:2.3.1.21 | IPR000542; PTHR22589:SF16 (PANTHER), SSF52777 (SUPERFAMILY)                                              |
| Caenorhabditis briggsae     | d- directed r- polymerase ii polypeptide d                       | 5 | F:GO:0003899;<br>C:GO:0005665;<br>F:GO:0004672;<br>P:GO:0006366;<br>F:GO:0000166                                                    | -            | EC:2.7.7.6  | IPR005574; IPR006590; IPR010997; PTHR21297 (PANTHER)                                                     |
| -                           | -                                                                | 0 | -                                                                                                                                   | -            | -           | -                                                                                                        |
| -                           | -                                                                | 0 | -                                                                                                                                   | -            | -           | -                                                                                                        |
| Angiostrongylus cantonensis | nematode cuticle collagen n-termi-l domain containing protein    | 2 | F:GO:0042302;<br>C:GO:0016021                                                                                                       | -            | -           | IPR002486; IPR008160; PTHR10499 (PANTHER), PTHR10499:SF58 (PANTHER), SignalP (SIGNALP)                   |
| Caenorhabditis briggsae     | briggsae cbr-cht-1 protein                                       | 3 | P:GO:0009792;<br>F:GO:0016787;<br>P:GO:0008152                                                                                      | -            | -           | IPR002557; G3DSA:2.170.140.10 (GENE3D), PTHR11177 (PANTHER), PTHR11177:SF31 (PANTHER)                    |
| Ciona intestinalis          | transcription factor ap-2 gamma                                  | 8 | P:GO:0006357;<br>P:GO:0007267;<br>P:GO:0008584;<br>F:GO:0003677;<br>P:GO:0030154;<br>F:GO:0046983;<br>F:GO:0003700;<br>C:GO:0005634 | -            | -           | -                                                                                                        |
| Caenorhabditis briggsae     | upf0493 protein kiaa1632-like                                    | 1 | P:GO:0040017                                                                                                                        | -            | -           | -                                                                                                        |

|                         |                                                            |   |  |                                                                                                                                     |   |                                                                                                                                |
|-------------------------|------------------------------------------------------------|---|--|-------------------------------------------------------------------------------------------------------------------------------------|---|--------------------------------------------------------------------------------------------------------------------------------|
| Brugia malayi           | coiled-coil domain-containing protein 6                    | 0 |  | F:GO:0003674;<br>F:GO:0005515;<br>C:GO:0005575                                                                                      |   | IPR019152; PD968187 (PRODOM)                                                                                                   |
| -                       | -                                                          | 0 |  |                                                                                                                                     |   | -                                                                                                                              |
| -                       | -                                                          | 0 |  |                                                                                                                                     |   | -                                                                                                                              |
| -                       | -                                                          | 0 |  |                                                                                                                                     |   | -                                                                                                                              |
| -                       | -                                                          | 0 |  |                                                                                                                                     |   | -                                                                                                                              |
| Loa loa                 | pab-dependent poly -specific ribonuclease subunit 3        | 8 |  | C:GO:0005737;<br>P:GO:0006468;<br>F:GO:0003676;<br>F:GO:0005515;<br>F:GO:0004672;<br>P:GO:0006397;<br>F:GO:0005524;<br>F:GO:0008270 | - | SignalP (SIGNALP)                                                                                                              |
| Caenorhabditis briggsae | alpha mannosidase                                          | 5 |  | C:GO:0000139;<br>F:GO:0004571;<br>P:GO:0006487;<br>P:GO:0008340;<br>P:GO:0042221                                                    | - | EC:3.2.1.113<br>IPR001382; PTHR11742:SF6 (PANTHER), SignalP (SIGNALP)                                                          |
| Caenorhabditis briggsae | adp-ribosylation factor                                    | 1 |  | F:GO:0005488                                                                                                                        | - | IPR005225; IPR006689;<br>G3DSA:3.40.50.300 (GENE3D),<br>PTHR11711:SF17 (PANTHER), PS51417 (PROFILE), SSF52540 (SUPERFAMILY)    |
| Caenorhabditis elegans  | ring finger protein 139                                    | 1 |  | F:GO:0046872                                                                                                                        | - | IPR001841; IPR013083; IPR018957;<br>PTHR12477 (PANTHER),<br>PTHR12477:SF9 (PANTHER), SSF57850 (SUPERFAMILY)                    |
| -                       | -                                                          | 0 |  |                                                                                                                                     |   | -                                                                                                                              |
| -                       | -                                                          | 0 |  |                                                                                                                                     |   | -                                                                                                                              |
| -                       | -                                                          | 0 |  |                                                                                                                                     |   | -                                                                                                                              |
| Caenorhabditis briggsae | pre-mr--splicing factor syf2                               | 3 |  | P:GO:0006397;<br>C:GO:0005634;<br>P:GO:0008380                                                                                      | - | IPR013260                                                                                                                      |
| Caenorhabditis elegans  | elegans protein confirmed by transcript evidence           | 4 |  | P:GO:0002119;<br>P:GO:0009792;<br>P:GO:0000003;<br>P:GO:0040007                                                                     | - | SignalP (SIGNALP)                                                                                                              |
| -                       | -                                                          | 0 |  |                                                                                                                                     |   | -                                                                                                                              |
| Caenorhabditis briggsae | elegans protein confirmed by transcript evidence           | 3 |  | P:GO:0040017;<br>F:GO:0005198;<br>F:GO:0005515                                                                                      | - | IPR000535; IPR008962; PTHR22947 (PANTHER)                                                                                      |
| Caenorhabditis elegans  | elegans protein partially confirmed by transcript evidence | 3 |  | C:GO:0034703;<br>F:GO:0005261;<br>P:GO:0055080                                                                                      | - | -                                                                                                                              |
| Caenorhabditis elegans  | aldo keto reductase family protein                         | 2 |  | P:GO:0043050;<br>P:GO:0040011                                                                                                       | - | SignalP (SIGNALP)                                                                                                              |
| Caenorhabditis elegans  | briggsae cbr-nlp-14 protein                                | 4 |  | C:GO:0005576;<br>C:GO:0016020;<br>F:GO:0005488;<br>P:GO:0055085                                                                     | - | PTHR22283 (PANTHER)                                                                                                            |
| Caenorhabditis elegans  | ring finger protein 43                                     | 2 |  | F:GO:0046872;<br>C:GO:0044464                                                                                                       | - | IPR001841; IPR013083; IPR018957;<br>PTHR14155 (PANTHER),<br>PTHR14155:SF2 (PANTHER), SignalP (SIGNALP), SSF57850 (SUPERFAMILY) |

|                         |                                                            |   |                                                                                                                                                      |                                                                                                                                     |                                                                        |                                                                                                                          |
|-------------------------|------------------------------------------------------------|---|------------------------------------------------------------------------------------------------------------------------------------------------------|-------------------------------------------------------------------------------------------------------------------------------------|------------------------------------------------------------------------|--------------------------------------------------------------------------------------------------------------------------|
| Caenorhabditis elegans  | ring finger protein 43                                     | 1 | F:GO:0046872                                                                                                                                         | -                                                                                                                                   |                                                                        | IPR001841; IPR013083; IPR018957; PTHR14155 (PANTHER), PTHR14155:SF2 (PANTHER), SignalP (SIGNALP), SSF57850 (SUPERFAMILY) |
| Caenorhabditis elegans  | ring finger protein 43                                     | 2 | F:GO:0046872;<br>C:GO:0044464                                                                                                                        | -                                                                                                                                   |                                                                        | IPR001841; IPR013083; IPR018957; PTHR14155 (PANTHER), PTHR14155:SF2 (PANTHER), SignalP (SIGNALP), SSF57850 (SUPERFAMILY) |
|                         | -                                                          | 0 |                                                                                                                                                      |                                                                                                                                     |                                                                        | SignalP (SIGNALP)                                                                                                        |
| Caenorhabditis elegans  | briggsae cbr-tw-25 protein                                 | 1 | P:GO:0006810                                                                                                                                         | -                                                                                                                                   |                                                                        | IPR013099; G3DSA:1.10.287.70 (GENE3D), PTHR11003 (PANTHER), PTHR11003:SF7 (PANTHER), SSF81324 (SUPERFAMILY)              |
| Caenorhabditis elegans  | autophagy-related protein 3                                | 3 | P:GO:0015031;<br>C:GO:0005737;<br>P:GO:0006914                                                                                                       | -                                                                                                                                   |                                                                        | -                                                                                                                        |
| Caenorhabditis briggsae | elegans protein confirmed by transcript evidence           | 0 |                                                                                                                                                      | P:GO:0000003;<br>P:GO:0016311;<br>F:GO:0016791;<br>P:GO:0006470;<br>F:GO:0016787;<br>F:GO:0008138;<br>F:GO:0004725;<br>F:GO:0004721 |                                                                        | -                                                                                                                        |
| Caenorhabditis briggsae | briggsae cbr-tag-301 protein                               | 4 | P:GO:0016337;<br>C:GO:0005913;<br>P:GO:0035147;<br>P:GO:0035156                                                                                      | -                                                                                                                                   |                                                                        | IPR008144; G3DSA:3.40.50.300 (GENE3D), PTHR13865 (PANTHER), PTHR13865:SF7 (PANTHER)                                      |
|                         | -                                                          | 0 |                                                                                                                                                      |                                                                                                                                     |                                                                        | -                                                                                                                        |
| Caenorhabditis briggsae | g1 to s phase transition 1                                 | 8 | F:GO:0003746;<br>P:GO:0006479;<br>P:GO:0006415;<br>F:GO:0005525;<br>F:GO:0004781;<br>F:GO:0005515;<br>F:GO:0003747;<br>F:GO:0003924                  | -                                                                                                                                   | EC:2.7.7.4;<br>EC:3.6.5.1;<br>EC:3.6.5.2;<br>EC:3.6.5.3;<br>EC:3.6.5.4 | IPR004160; IPR009001; G3DSA:2.40.30.10 (GENE3D)                                                                          |
| Caenorhabditis briggsae | regulator of g-protein sig-ling 7                          | 6 | F:GO:0004871;<br>P:GO:0007186;<br>C:GO:0005834;<br>F:GO:0005515;<br>P:GO:0050794;<br>F:GO:0005096                                                    | -                                                                                                                                   | EC:3.6.5.1                                                             | IPR000342; IPR015898; IPR016137; G3DSA:1.10.196.10 (GENE3D), PTHR10845 (PANTHER), PTHR10845:SF22 (PANTHER)               |
| Caenorhabditis briggsae | protein phosphatase 2 (formerly 2a) regulatory subunit     | 1 | F:GO:0005515                                                                                                                                         | -                                                                                                                                   |                                                                        | IPR011992; IPR018247; PTHR14095 (PANTHER), SSF47473 (SUPERFAMILY)                                                        |
| Macaca mulatta          | ribosomal protein l7                                       | 9 | P:GO:0042273;<br>F:GO:0003729;<br>F:GO:0030528;<br>F:GO:0003677;<br>F:GO:0003735;<br>P:GO:0006364;<br>C:GO:0022625;<br>F:GO:0042803;<br>P:GO:0006414 | -                                                                                                                                   |                                                                        | IPR005998; IPR012988; IPR016082; IPR018038; PTHR11524 (PANTHER)                                                          |
|                         | -                                                          | 0 |                                                                                                                                                      |                                                                                                                                     |                                                                        | -                                                                                                                        |
|                         | -                                                          | 0 |                                                                                                                                                      |                                                                                                                                     |                                                                        | -                                                                                                                        |
| Caenorhabditis briggsae | briggsae cbr-ztf-8 protein                                 | 1 | F:GO:0005488                                                                                                                                         | -                                                                                                                                   |                                                                        | -                                                                                                                        |
| Caenorhabditis elegans  | elegans protein partially confirmed by transcript evidence | 0 |                                                                                                                                                      | F:GO:0005515                                                                                                                        |                                                                        | -                                                                                                                        |



|                         |                                                                        |   |                                                                                                   |                                                                                                                                     |             |                                                                                                       |
|-------------------------|------------------------------------------------------------------------|---|---------------------------------------------------------------------------------------------------|-------------------------------------------------------------------------------------------------------------------------------------|-------------|-------------------------------------------------------------------------------------------------------|
|                         | -                                                                      | 0 |                                                                                                   |                                                                                                                                     |             | -                                                                                                     |
| Caenorhabditis elegans  | transmembrane protein 180-like                                         | 1 | P:GO:0008340                                                                                      | -                                                                                                                                   |             | IPR016196; SignalP (SIGNALP)                                                                          |
| Brugia malayi           | threonine aspartase 1                                                  | 1 | F:GO:0016787                                                                                      | -                                                                                                                                   |             | IPR000246; PTHR10188:SF8 (PANTHER), SSF56235 (SUPERFAMILY)                                            |
| Brugia malayi           | thyroid hormone receptor interactor 10                                 | 3 | F:GO:0005488;<br>C:GO:0044444;<br>P:GO:0009987                                                    | -                                                                                                                                   |             | IPR001060; IPR001452; G3DSA:2.30.30.40 (GENE3D), PTHR12602 (PANTHER), PTHR12602:SF4 (PANTHER)         |
| Caenorhabditis elegans  | uncharacterized protein cg1161                                         | 0 |                                                                                                   | C:GO:0016021                                                                                                                        |             | IPR008853; PTHR13064:SF4 (PANTHER), SignalP (SIGNALP)                                                 |
| Caenorhabditis elegans  | uncharacterized protein cg1161                                         | 0 |                                                                                                   | C:GO:0016021                                                                                                                        |             | IPR008853; PTHR13064:SF4 (PANTHER), SignalP (SIGNALP)                                                 |
| Brugia malayi           | ubiquitin fusion degradation (yeast ufd homolog) family member (ufd-2) | 6 | P:GO:0006915;<br>P:GO:0042787;<br>F:GO:0005515;<br>F:GO:0004842;<br>P:GO:0009411;<br>C:GO:0000151 | -                                                                                                                                   | EC:6.3.2.19 | IPR003613; IPR013083; IPR019474; PTHR13931 (PANTHER), PTHR13931:SF2 (PANTHER), SSF57850 (SUPERFAMILY) |
| Brugia malayi           | ubiquitin fusion degradation (yeast ufd homolog) family member (ufd-2) | 6 | P:GO:0006915;<br>P:GO:0042787;<br>F:GO:0005515;<br>F:GO:0004842;<br>P:GO:0009411;<br>C:GO:0000151 | -                                                                                                                                   | EC:6.3.2.19 | IPR003613; IPR013083; IPR019474; PTHR13931 (PANTHER), PTHR13931:SF2 (PANTHER), SSF57850 (SUPERFAMILY) |
| Brugia malayi           | ubiquitin conjugation factor e4 b                                      | 5 | P:GO:0006915;<br>P:GO:0016567;<br>P:GO:0006511;<br>P:GO:0009411;<br>C:GO:0044424                  | -                                                                                                                                   |             | IPR003613; IPR013083; IPR019474; PTHR13931 (PANTHER), PTHR13931:SF2 (PANTHER), SSF57850 (SUPERFAMILY) |
| Brugia malayi           | ubiquitin conjugation factor e4 b                                      | 5 | P:GO:0006915;<br>P:GO:0016567;<br>P:GO:0006511;<br>P:GO:0009411;<br>C:GO:0044424                  | -                                                                                                                                   |             | IPR003613; IPR013083; IPR019474; PTHR13931 (PANTHER), PTHR13931:SF2 (PANTHER), SSF57850 (SUPERFAMILY) |
| Bos taurus              | PREDICTED: hypothetical protein [Bos taurus]                           | 0 |                                                                                                   |                                                                                                                                     |             | -                                                                                                     |
| Caenorhabditis briggsae | subfamily member 9                                                     | 2 | F:GO:0005515;<br>P:GO:0040011                                                                     | -                                                                                                                                   |             | IPR001623; IPR015609; IPR018253; PTHR11821:SF31 (PANTHER)                                             |
| Bos taurus              | PREDICTED: hypothetical protein [Bos taurus]                           | 0 |                                                                                                   |                                                                                                                                     |             | -                                                                                                     |
| Monodelphis domestica   | subfamily member 9                                                     | 2 | F:GO:0005515;<br>P:GO:0040011                                                                     | -                                                                                                                                   |             | IPR001623; IPR015609; IPR018253; PTHR11821:SF31 (PANTHER)                                             |
| Bos taurus              | PREDICTED: hypothetical protein [Bos taurus]                           | 0 |                                                                                                   |                                                                                                                                     |             | -                                                                                                     |
| Ascaris suum            | MFP3 [Ascaris suum]                                                    | 0 |                                                                                                   |                                                                                                                                     |             | SignalP (SIGNALP)                                                                                     |
| Caenorhabditis elegans  | briggsae cbr-swm-1 protein                                             | 0 |                                                                                                   |                                                                                                                                     |             | PTHR23259 (PANTHER)                                                                                   |
| Caenorhabditis elegans  | briggsae cbr-swm-1 protein                                             | 0 |                                                                                                   |                                                                                                                                     |             | -                                                                                                     |
| Caenorhabditis elegans  | briggsae cbr-swm-1 protein                                             | 0 |                                                                                                   | C:GO:0031093;<br>P:GO:0010951;<br>F:GO:0004869;<br>P:GO:0008150;<br>F:GO:0004867;<br>C:GO:0005576;<br>P:GO:0051918;<br>C:GO:0005575 |             | -                                                                                                     |
| Caenorhabditis elegans  | briggsae cbr-swm-1 protein                                             | 0 |                                                                                                   |                                                                                                                                     |             | -                                                                                                     |
| Caenorhabditis elegans  | briggsae cbr-swm-1 protein                                             | 0 |                                                                                                   |                                                                                                                                     |             | -                                                                                                     |

|                         |                                                            |    |                                                                                                                                                                                                                                           |                                                                                                                                     |                                                         |                                                                                                                                                 |
|-------------------------|------------------------------------------------------------|----|-------------------------------------------------------------------------------------------------------------------------------------------------------------------------------------------------------------------------------------------|-------------------------------------------------------------------------------------------------------------------------------------|---------------------------------------------------------|-------------------------------------------------------------------------------------------------------------------------------------------------|
| Caenorhabditis elegans  | briggsae cbr-swm-1 protein                                 | 0  |                                                                                                                                                                                                                                           | C:GO:0031093;<br>P:GO:0010951;<br>F:GO:0004869;<br>P:GO:0008150;<br>F:GO:0004867;<br>C:GO:0005576;<br>P:GO:0051918;<br>C:GO:0005575 | -                                                       |                                                                                                                                                 |
| Caenorhabditis elegans  | briggsae cbr-swm-1 protein                                 | 0  |                                                                                                                                                                                                                                           |                                                                                                                                     |                                                         | PTHR23259 (PANTHER)                                                                                                                             |
| Caenorhabditis elegans  | briggsae cbr-swm-1 protein                                 | 0  |                                                                                                                                                                                                                                           |                                                                                                                                     |                                                         | -                                                                                                                                               |
| Caenorhabditis elegans  | elegans protein confirmed by transcript evidence           | 0  |                                                                                                                                                                                                                                           |                                                                                                                                     |                                                         | -                                                                                                                                               |
| Brugia malayi           | alkbh protein                                              | 0  |                                                                                                                                                                                                                                           |                                                                                                                                     |                                                         | -                                                                                                                                               |
| Caenorhabditis elegans  | histone-lysine n-                                          | 7  | F:GO:0005488;<br>P:GO:0048856;<br>F:GO:0018024;<br>P:GO:0007275;<br>C:GO:0005694;<br>P:GO:0048477;<br>P:GO:0016571                                                                                                                        | -                                                                                                                                   | EC:2.1.1.43                                             | IPR001739; IPR007728; IPR016177;<br>G3DSA:2.170.270.10 (GENE3D),<br>PTHR22884 (PANTHER),<br>PTHR22884:SF24 (PANTHER),<br>SSF82199 (SUPERFAMILY) |
| Caenorhabditis briggsae | briggsae cbr-ced-12 protein                                | 14 | P:GO:0043652;<br>F:GO:0070064;<br>P:GO:0007015;<br>P:GO:0031532;<br>F:GO:0032403;<br>F:GO:0019899;<br>P:GO:0030334;<br>P:GO:0060097;<br>P:GO:0040025;<br>C:GO:0044444;<br>P:GO:0040039;<br>P:GO:0009792;<br>P:GO:0035262;<br>C:GO:0005886 | -                                                                                                                                   |                                                         | IPR006816; PTHR12771 (PANTHER),<br>PTHR12771:SF5 (PANTHER)                                                                                      |
| Caenorhabditis briggsae | elegans protein partially confirmed by transcript evidence | 0  |                                                                                                                                                                                                                                           | P:GO:0006355;<br>F:GO:0043565;<br>F:GO:0046983;<br>F:GO:0003677;<br>F:GO:0003700;<br>C:GO:0005634                                   |                                                         | IPR004827; IPR011700;<br>G3DSA:1.20.5.170 (GENE3D), PS51257<br>(PROFILE)                                                                        |
|                         | -                                                          | 0  |                                                                                                                                                                                                                                           |                                                                                                                                     |                                                         | -                                                                                                                                               |
| Caenorhabditis elegans  | elegans protein partially confirmed by transcript evidence | 4  | F:GO:0005525;<br>P:GO:0044237;<br>P:GO:0044238;<br>F:GO:0003924                                                                                                                                                                           | -                                                                                                                                   | EC:3.6.5.1;<br>EC:3.6.5.2;<br>EC:3.6.5.3;<br>EC:3.6.5.4 | IPR000640; IPR005517; IPR009022;<br>IPR014721; IPR020568; PTHR23115<br>(PANTHER), PTHR23115:SF3<br>(PANTHER)                                    |
|                         | -                                                          | 0  |                                                                                                                                                                                                                                           |                                                                                                                                     |                                                         | -                                                                                                                                               |
| Caenorhabditis briggsae | briggsae cbr-mtm-3 protein                                 | 0  |                                                                                                                                                                                                                                           | F:GO:0046872;<br>P:GO:0016311;<br>F:GO:0016791;<br>F:GO:0004725;<br>F:GO:0008270                                                    |                                                         | IPR000306; IPR011011; IPR013083;<br>IPR017455; PTHR10807 (PANTHER),<br>PTHR10807:SF6 (PANTHER)                                                  |
|                         | -                                                          | 0  |                                                                                                                                                                                                                                           |                                                                                                                                     |                                                         | SignalP (SIGNALP)                                                                                                                               |
|                         | -                                                          | 0  |                                                                                                                                                                                                                                           |                                                                                                                                     |                                                         | -                                                                                                                                               |

|                         |                                            |    |                                                                                                                                                                                                                                                                                                               |                                                                 |             |                                                                                                                                          |
|-------------------------|--------------------------------------------|----|---------------------------------------------------------------------------------------------------------------------------------------------------------------------------------------------------------------------------------------------------------------------------------------------------------------|-----------------------------------------------------------------|-------------|------------------------------------------------------------------------------------------------------------------------------------------|
| Brugia malayi           | talin 1                                    | 18 | C:GO:0005829;<br>F:GO:0005158;<br>C:GO:0043231;<br>C:GO:0001726;<br>P:GO:0007016;<br>F:GO:0017166;<br>F:GO:0030274;<br>P:GO:0007044;<br>C:GO:0005813;<br>P:GO:0007155;<br>C:GO:0005925;<br>P:GO:0030866;<br>F:GO:0003779;<br>C:GO:0015629;<br>F:GO:0005178;<br>F:GO:0005200;<br>C:GO:0005576;<br>P:GO:0006936 | -                                                               |             | IPR002558; IPR015710; IPR015711;<br>G3DSA:1.20.1410.10 (GENE3D),<br>SSF109885 (SUPERFAMILY)                                              |
| Caenorhabditis elegans  | small ubiquitin-related modifier precursor | 1  | F:GO:0005515                                                                                                                                                                                                                                                                                                  | -                                                               |             | IPR019955; IPR022617;<br>G3DSA:3.10.20.90 (GENE3D),<br>PTHR10562 (PANTHER), SSF54236<br>(SUPERFAMILY)                                    |
| Caenorhabditis elegans  | deoxyhypusine synthase                     | 6  | P:GO:0009792;<br>F:GO:0034038;<br>F:GO:0005515;<br>P:GO:0008612;<br>P:GO:0050983;<br>P:GO:0051289                                                                                                                                                                                                             | -                                                               | EC:2.5.1.46 | -                                                                                                                                        |
| Caenorhabditis elegans  | deoxyhypusine synthase                     | 6  | P:GO:0009792;<br>F:GO:0034038;<br>F:GO:0005515;<br>P:GO:0008612;<br>P:GO:0050983;<br>P:GO:0051289                                                                                                                                                                                                             | -                                                               | EC:2.5.1.46 | -                                                                                                                                        |
|                         | -                                          | 0  |                                                                                                                                                                                                                                                                                                               |                                                                 |             | -                                                                                                                                        |
| Caenorhabditis briggsae | lipase maturation factor 2                 | 0  |                                                                                                                                                                                                                                                                                                               |                                                                 |             | -                                                                                                                                        |
| Caenorhabditis elegans  | dedicator of cytokinesis family protein    | 0  |                                                                                                                                                                                                                                                                                                               | F:GO:0005525;<br>F:GO:0051020;<br>F:GO:0005488;<br>F:GO:0005085 |             | PTHR23317 (PANTHER),<br>PTHR23317:SF26 (PANTHER)                                                                                         |
|                         | -                                          | 0  |                                                                                                                                                                                                                                                                                                               |                                                                 |             | -                                                                                                                                        |
| Caenorhabditis briggsae | hira_caeel_ame: full=protein hira homolog  | 1  | P:GO:0050789                                                                                                                                                                                                                                                                                                  | -                                                               |             | -                                                                                                                                        |
| Caenorhabditis elegans  | loechrig isoform vii                       | 4  | P:GO:0042632;<br>P:GO:0006468;<br>P:GO:0045787;<br>F:GO:0004679                                                                                                                                                                                                                                               | -                                                               |             | -                                                                                                                                        |
| Caenorhabditis elegans  | nuclear receptor binding protein           | 6  | F:GO:0004672;<br>F:GO:0005524;<br>P:GO:0006888;<br>C:GO:0012505;<br>C:GO:0048471;<br>F:GO:0042803                                                                                                                                                                                                             | -                                                               |             | IPR000719; IPR011009; IPR017442;<br>G3DSA:1.10.510.10 (GENE3D),<br>PTHR13902 (PANTHER),<br>PTHR13902:SF9 (PANTHER), SignalP<br>(SIGNALP) |
| Caenorhabditis elegans  | nuclear receptor binding protein           | 3  | C:GO:0012505;<br>F:GO:0005515;<br>P:GO:0006888                                                                                                                                                                                                                                                                | -                                                               |             | IPR000719; IPR011009; IPR017442;<br>G3DSA:1.10.510.10 (GENE3D),<br>PTHR13902 (PANTHER),<br>PTHR13902:SF9 (PANTHER), SignalP<br>(SIGNALP) |

|                      |                       |   |                                                                                                                    |   |   |                                                                     |
|----------------------|-----------------------|---|--------------------------------------------------------------------------------------------------------------------|---|---|---------------------------------------------------------------------|
| Haemonchus contortus | heat shock protein 90 | 7 | F:GO:0042802;<br>P:GO:0006457;<br>P:GO:0006950;<br>P:GO:0007049;<br>F:GO:0005524;<br>F:GO:0051082;<br>C:GO:0048471 | - | - |                                                                     |
| Haemonchus contortus | heat shock protein 90 | 7 | F:GO:0042802;<br>P:GO:0006457;<br>P:GO:0006950;<br>P:GO:0007049;<br>F:GO:0005524;<br>F:GO:0051082;<br>C:GO:0048471 | - | - |                                                                     |
| Haemonchus contortus | heat shock protein 90 | 7 | F:GO:0042802;<br>P:GO:0006457;<br>P:GO:0006950;<br>P:GO:0007049;<br>F:GO:0005524;<br>F:GO:0051082;<br>C:GO:0048471 | - |   | IPR001404; IPR003594; IPR019805;<br>IPR020575; IPR020576            |
| Haemonchus contortus | heat shock protein 90 | 7 | F:GO:0042802;<br>P:GO:0006457;<br>P:GO:0006950;<br>P:GO:0007049;<br>F:GO:0005524;<br>F:GO:0051082;<br>C:GO:0048471 | - |   | IPR001404; IPR003594; IPR019805;<br>IPR020575; IPR020576            |
| Haemonchus contortus | heat shock protein 90 | 7 | F:GO:0042802;<br>P:GO:0006457;<br>P:GO:0006950;<br>P:GO:0007049;<br>F:GO:0005524;<br>F:GO:0051082;<br>C:GO:0048471 | - |   | IPR001404; IPR003594; IPR019805;<br>IPR020568; IPR020575; IPR020576 |
| Haemonchus contortus | heat shock protein 90 | 7 | F:GO:0042802;<br>P:GO:0006457;<br>P:GO:0006950;<br>P:GO:0007049;<br>F:GO:0005524;<br>F:GO:0051082;<br>C:GO:0048471 | - |   | IPR001404; IPR003594; IPR019805;<br>IPR020568; IPR020575; IPR020576 |
| Haemonchus contortus | heat shock protein 90 | 7 | F:GO:0042802;<br>P:GO:0006457;<br>P:GO:0006950;<br>P:GO:0007049;<br>F:GO:0005524;<br>F:GO:0051082;<br>C:GO:0048471 | - | - |                                                                     |
| Haemonchus contortus | heat shock protein 90 | 7 | F:GO:0042802;<br>P:GO:0006457;<br>P:GO:0006950;<br>P:GO:0007049;<br>F:GO:0005524;<br>F:GO:0051082;<br>C:GO:0048471 | - | - |                                                                     |

|                         |                                                                                    |    |                                                                                                                                                                                                                                                                                              |              |             |                                                                                                         |
|-------------------------|------------------------------------------------------------------------------------|----|----------------------------------------------------------------------------------------------------------------------------------------------------------------------------------------------------------------------------------------------------------------------------------------------|--------------|-------------|---------------------------------------------------------------------------------------------------------|
| Loa loa                 | d- repair protein rad51 homolog 1                                                  | 17 | F:GO:0043142;<br>F:GO:0003684;<br>F:GO:0003690;<br>P:GO:0006268;<br>P:GO:0051106;<br>C:GO:0005739;<br>P:GO:0051260;<br>F:GO:0008022;<br>P:GO:0000724;<br>F:GO:0042802;<br>P:GO:0006312;<br>F:GO:0005524;<br>C:GO:0016605;<br>P:GO:0007131;<br>C:GO:0048471;<br>F:GO:0003697;<br>C:GO:0000800 | -            | -           |                                                                                                         |
| Caenorhabditis elegans  | angiopoietin-like 6                                                                | 4  | P:GO:0009792;<br>F:GO:0005488;<br>P:GO:0009987;<br>C:GO:0005576                                                                                                                                                                                                                              | -            |             | IPR002181; IPR014715; IPR014716;<br>IPR020837; PTHR19143 (PANTHER),<br>PTHR19143:SF28 (PANTHER)         |
| Caenorhabditis elegans  | alix (apoptosis-linked gene 2 interacting protein x) homolog family member (alx-1) | 0  |                                                                                                                                                                                                                                                                                              |              |             | -                                                                                                       |
| Brugia malayi           | numb related family member (num-1)                                                 | 6  | C:GO:0005737;<br>C:GO:0005887;<br>F:GO:0019904;<br>F:GO:0005069;<br>F:GO:0005080;<br>P:GO:0006612                                                                                                                                                                                            | -            |             | IPR006020; IPR011993; PTHR11232<br>(PANTHER), PTHR11232:SF1<br>(PANTHER), SSF50729 (SUPERFAMILY)        |
|                         | -                                                                                  | 0  |                                                                                                                                                                                                                                                                                              |              |             | SignalP (SIGNALP)                                                                                       |
| Caenorhabditis briggsae | isoform b                                                                          | 0  |                                                                                                                                                                                                                                                                                              | C:GO:0016021 |             | IPR006838; PTHR10989 (PANTHER),<br>SignalP (SIGNALP)                                                    |
| Homo sapiens            | histone acetyltransferase myst3                                                    | 11 | P:GO:0045941;<br>F:GO:0004402;<br>P:GO:0006323;<br>P:GO:0035162;<br>C:GO:0070776;<br>P:GO:0035019;<br>F:GO:0046872;<br>F:GO:0003713;<br>P:GO:0030099;<br>P:GO:0043966;<br>P:GO:0016481                                                                                                       | -            | EC:2.3.1.48 | IPR002717; IPR016181;<br>G3DSA:3.30.60.60 (GENE3D),<br>PTHR10615 (PANTHER),<br>PTHR10615:SF26 (PANTHER) |
| Brugia malayi           | nitric oxide synthase-interacting protein                                          | 4  | P:GO:0051001;<br>C:GO:0005829;<br>C:GO:0005634;<br>F:GO:0005515                                                                                                                                                                                                                              | -            |             | IPR013083; PTHR13063 (PANTHER),<br>PTHR13063:SF4 (PANTHER), SSF57850<br>(SUPERFAMILY)                   |
| Brugia malayi           | prp39 pre-mr- processing factor 39 homolog                                         | 0  |                                                                                                                                                                                                                                                                                              |              |             | PTHR17204 (PANTHER),<br>PTHR17204:SF9 (PANTHER)                                                         |
|                         | -                                                                                  | 0  |                                                                                                                                                                                                                                                                                              |              |             | -                                                                                                       |
| Brugia malayi           | associated with tfs and helicases family protein                                   | 1  | F:GO:0005488                                                                                                                                                                                                                                                                                 | -            |             | IPR006576                                                                                               |
| Caenorhabditis briggsae | ubiquitin associated and sh3 domain a short form                                   | 1  | C:GO:0005737                                                                                                                                                                                                                                                                                 | -            |             | -                                                                                                       |

|                         |                                                         |    |                                                                                                                                                                                                                                                                                                                                                                  |                                                                                                                    |                                                                                                                                                                                               |
|-------------------------|---------------------------------------------------------|----|------------------------------------------------------------------------------------------------------------------------------------------------------------------------------------------------------------------------------------------------------------------------------------------------------------------------------------------------------------------|--------------------------------------------------------------------------------------------------------------------|-----------------------------------------------------------------------------------------------------------------------------------------------------------------------------------------------|
| Caenorhabditis elegans  | slit-robo rho gtpase-activating protein 1               | 6  | F:GO:0005100;<br>P:GO:0016477;<br>P:GO:0007266;<br>C:GO:0005622;<br>P:GO:0045132;<br>F:GO:0017048                                                                                                                                                                                                                                                                | -                                                                                                                  | IPR001060; PTHR14166 (PANTHER),<br>PTHR14166:SF1 (PANTHER)                                                                                                                                    |
| Caenorhabditis briggsae | probable nucleolar gtp-binding protein                  | 21 | P:GO:0008156;<br>P:GO:0000003;<br>P:GO:0030336;<br>F:GO:0005515;<br>F:GO:0015093;<br>P:GO:0015684;<br>P:GO:0040010;<br>P:GO:0050821;<br>F:GO:0005525;<br>C:GO:0016021;<br>P:GO:0000079;<br>C:GO:0005730;<br>P:GO:0008285;<br>P:GO:0022408;<br>P:GO:0009792;<br>P:GO:0002119;<br>P:GO:0031397;<br>C:GO:0048471;<br>F:GO:0003924;<br>P:GO:0033342;<br>P:GO:0042254 | -                                                                                                                  | EC:3.6.5.1;<br>EC:3.6.5.2;<br>EC:3.6.5.3;<br>EC:3.6.5.4<br>IPR006073; IPR010674;<br>G3DSA:3.40.50.300 (GENE3D),<br>PTHR11702 (PANTHER),<br>PTHR11702:SF4 (PANTHER), SSF52540<br>(SUPERFAMILY) |
| Loa loa                 | tb2 hva22 family protein                                | 0  |                                                                                                                                                                                                                                                                                                                                                                  | C:GO:0005856;<br>F:GO:0005198                                                                                      | IPR000535; IPR008962                                                                                                                                                                          |
| Caenorhabditis briggsae | ph domain containing protein                            | 0  |                                                                                                                                                                                                                                                                                                                                                                  | F:GO:0016740;<br>P:GO:0008152;<br>F:GO:0016758;<br>F:GO:0016757                                                    | IPR001849; IPR011993; SSF50729<br>(SUPERFAMILY)                                                                                                                                               |
| Caenorhabditis elegans  | lim domain containing protein                           | 2  | F:GO:0046872;<br>C:GO:0043232                                                                                                                                                                                                                                                                                                                                    | -                                                                                                                  | IPR001781; PTHR18973 (PANTHER),<br>PTHR18973:SF98 (PANTHER),<br>SSF57716 (SUPERFAMILY)                                                                                                        |
|                         | -                                                       | 0  |                                                                                                                                                                                                                                                                                                                                                                  |                                                                                                                    | SignalP (SIGNALP)                                                                                                                                                                             |
|                         | -                                                       | 0  |                                                                                                                                                                                                                                                                                                                                                                  |                                                                                                                    | -                                                                                                                                                                                             |
|                         | -                                                       | 0  |                                                                                                                                                                                                                                                                                                                                                                  |                                                                                                                    | SignalP (SIGNALP)                                                                                                                                                                             |
|                         | -                                                       | 0  |                                                                                                                                                                                                                                                                                                                                                                  |                                                                                                                    | SignalP (SIGNALP)                                                                                                                                                                             |
| Caenorhabditis briggsae | Hypothetical protein CBG02308 [Caenorhabditis briggsae] | 0  |                                                                                                                                                                                                                                                                                                                                                                  | F:GO:0003824;<br>F:GO:0004721                                                                                      | -                                                                                                                                                                                             |
| Loa loa                 | tbcl domain member 7                                    | 0  |                                                                                                                                                                                                                                                                                                                                                                  | F:GO:0005096;<br>F:GO:0003674;<br>P:GO:0032313;<br>P:GO:0008150;<br>C:GO:0005575;<br>F:GO:0005097;<br>C:GO:0005622 | IPR013090                                                                                                                                                                                     |

|                             |                                                                          |    |                                                                                                                                                                                        |              |             |                                                                                                                                                                    |
|-----------------------------|--------------------------------------------------------------------------|----|----------------------------------------------------------------------------------------------------------------------------------------------------------------------------------------|--------------|-------------|--------------------------------------------------------------------------------------------------------------------------------------------------------------------|
| Caenorhabditis elegans      | c family member (clr-1)                                                  | 11 | P:GO:0006470;<br>P:GO:0040037;<br>P:GO:0040010;<br>P:GO:0018991;<br>P:GO:0040002;<br>P:GO:0010171;<br>P:GO:0002119;<br>P:GO:0040017;<br>F:GO:0005001;<br>P:GO:0002009;<br>C:GO:0005886 | -            |             | IPR000242; IPR000387;<br>G3DSA:3.90.190.10 (GENE3D),<br>PTHR19134 (PANTHER),<br>PTHR19134:SF43 (PANTHER),<br>SSF52799 (SUPERFAMILY)                                |
| Caenorhabditis elegans      | aspartyl protease family member (asp-2)                                  | 4  | P:GO:0008219;<br>F:GO:0016787;<br>F:GO:0005515;<br>P:GO:0040011                                                                                                                        | -            |             | -                                                                                                                                                                  |
| Caenorhabditis briggsae     | briggsae cbr-asp-2 protein                                               | 6  | C:GO:0016021;<br>P:GO:0008219;<br>P:GO:0006508;<br>F:GO:0004190;<br>F:GO:0005515;<br>P:GO:0040011                                                                                      | -            | EC:3.4.23.0 | -                                                                                                                                                                  |
| Caenorhabditis elegans      | aspartyl protease family member (asp-2)                                  | 4  | P:GO:0008219;<br>F:GO:0005515;<br>P:GO:0040011;<br>F:GO:0008233                                                                                                                        | -            |             | -                                                                                                                                                                  |
| -                           | -                                                                        | 0  |                                                                                                                                                                                        |              |             | SignalP (SIGNALP)                                                                                                                                                  |
| Caenorhabditis briggsae     | protein phosphatase 2a (two a) regulatory subunit family member (pptr-2) | 7  | P:GO:0009792;<br>C:GO:0000159;<br>P:GO:0007165;<br>P:GO:0040007;<br>F:GO:0005488;<br>F:GO:0008601;<br>P:GO:0002119                                                                     | -            |             | IPR002554; IPR016024                                                                                                                                               |
| Caenorhabditis briggsae     | protein phosphatase 2a (two a) regulatory subunit family member (pptr-2) | 3  | P:GO:0009792;<br>P:GO:0040007;<br>P:GO:0002119                                                                                                                                         | -            |             | -                                                                                                                                                                  |
| Brugia malayi               | pecanex-like protein 1                                                   | 2  | C:GO:0016020;<br>P:GO:0040011                                                                                                                                                          | -            |             | PTHR12372 (PANTHER)                                                                                                                                                |
| Brugia malayi               | pecanex-like protein 1                                                   | 2  | C:GO:0016020;<br>P:GO:0040011                                                                                                                                                          | -            |             | PTHR12372 (PANTHER)                                                                                                                                                |
| -                           | -                                                                        | 0  |                                                                                                                                                                                        |              |             | -                                                                                                                                                                  |
| Angiostrongylus cantonensis | copper chaperone                                                         | 2  | F:GO:0046872;<br>P:GO:0030001                                                                                                                                                          | -            |             | -                                                                                                                                                                  |
| Caenorhabditis elegans      | elegans protein confirmed by transcript evidence                         | 3  | F:GO:0016757;<br>F:GO:0005515;<br>C:GO:0016020                                                                                                                                         | -            |             | IPR000772; IPR001173; IPR008997;<br>G3DSA:2.80.10.50 (GENE3D),<br>G3DSA:3.90.550.10 (GENE3D),<br>PTHR11675 (PANTHER), SignalP<br>(SIGNALP), SSF53448 (SUPERFAMILY) |
| Loa loa                     | hypothetical protein LOAG_05685 [Loa loa]                                | 0  |                                                                                                                                                                                        |              |             | -                                                                                                                                                                  |
| -                           | -                                                                        | 0  |                                                                                                                                                                                        |              |             | -                                                                                                                                                                  |
| -                           | -                                                                        | 0  |                                                                                                                                                                                        |              |             | -                                                                                                                                                                  |
| -                           | -                                                                        | 0  |                                                                                                                                                                                        |              |             | -                                                                                                                                                                  |
| Caenorhabditis elegans      | leukocyte receptor cluster member                                        | 0  |                                                                                                                                                                                        | F:GO:0004872 |             | IPR005062; PTHR12436 (PANTHER),<br>PTHR12436:SF4 (PANTHER)                                                                                                         |
| -                           | -                                                                        | 0  |                                                                                                                                                                                        |              |             | -                                                                                                                                                                  |

|                         |                                                                                                                                    |    |                                                                                                                                                                                                                                                                                                               |                                                                                                                                                                                                         |                                                                               |                                                                                                          |
|-------------------------|------------------------------------------------------------------------------------------------------------------------------------|----|---------------------------------------------------------------------------------------------------------------------------------------------------------------------------------------------------------------------------------------------------------------------------------------------------------------|---------------------------------------------------------------------------------------------------------------------------------------------------------------------------------------------------------|-------------------------------------------------------------------------------|----------------------------------------------------------------------------------------------------------|
| Brugia malayi           | myosin xviiiia                                                                                                                     | 4  | F:GO:0005515;<br>C:GO:0016459;<br>F:GO:0005524;<br>F:GO:0003774                                                                                                                                                                                                                                               | -                                                                                                                                                                                                       |                                                                               | PTHR13140 (PANTHER),<br>PTHR13140:SF10 (PANTHER)                                                         |
| Caenorhabditis briggsae | hydroxyacyl-coenzyme a dehydroge-se 3-ketoacyl-coenzyme a thiolase enoyl-coenzyme a hydratase (trifunctio-l protein) alpha subunit | 18 | F:GO:0016508;<br>F:GO:0000062;<br>F:GO:0003988;<br>C:GO:0005743;<br>P:GO:0055114;<br>P:GO:0040007;<br>C:GO:0016507;<br>C:GO:0042645;<br>F:GO:0051287;<br>P:GO:0019915;<br>F:GO:0003857;<br>P:GO:0002119;<br>P:GO:0006635;<br>P:GO:0042493;<br>P:GO:0006898;<br>F:GO:0016509;<br>P:GO:0009792;<br>F:GO:0004300 | -                                                                                                                                                                                                       | EC:4.2.1.74;<br>EC:2.3.1.16;<br>EC:1.1.1.35;<br>EC:1.1.1.211<br>; EC:4.2.1.17 | IPR006108; IPR006176; IPR008927;<br>IPR013328; IPR016040; PTHR23309<br>(PANTHER), SSF51735 (SUPERFAMILY) |
| Caenorhabditis elegans  | mitochondrial ribosomal protein s35                                                                                                | 3  | P:GO:0009792;<br>P:GO:0040007;<br>P:GO:0002119                                                                                                                                                                                                                                                                | -                                                                                                                                                                                                       |                                                                               | -                                                                                                        |
| Caenorhabditis briggsae | elegans protein partially confirmed by transcript evidence                                                                         | 0  |                                                                                                                                                                                                                                                                                                               | F:GO:0004500;<br>P:GO:0006548                                                                                                                                                                           |                                                                               | IPR005018; PTHR23130 (PANTHER),<br>PTHR23130:SF8 (PANTHER), SignalP<br>(SIGNALP)                         |
| Loa loa                 | alpha- -mannosyl-glycoprotein 2-beta-n-acetylglucosaminyltransferase                                                               | 2  | P:GO:0009792;<br>F:GO:0016740                                                                                                                                                                                                                                                                                 | -                                                                                                                                                                                                       |                                                                               | IPR004139; G3DSA:3.90.550.10<br>(GENE3D), SSF53448 (SUPERFAMILY)                                         |
|                         | -                                                                                                                                  | 0  |                                                                                                                                                                                                                                                                                                               |                                                                                                                                                                                                         |                                                                               | -                                                                                                        |
|                         | -                                                                                                                                  | 0  |                                                                                                                                                                                                                                                                                                               |                                                                                                                                                                                                         |                                                                               | -                                                                                                        |
|                         | -                                                                                                                                  | 0  |                                                                                                                                                                                                                                                                                                               |                                                                                                                                                                                                         |                                                                               | -                                                                                                        |
|                         | -                                                                                                                                  | 0  |                                                                                                                                                                                                                                                                                                               |                                                                                                                                                                                                         |                                                                               | -                                                                                                        |
| Caenorhabditis briggsae | fructose-bisphosphate aldolase                                                                                                     | 3  | P:GO:0006096;<br>F:GO:0004332;<br>F:GO:0042802                                                                                                                                                                                                                                                                | -                                                                                                                                                                                                       | EC:4.1.2.13                                                                   | IPR000741; IPR013785; SignalP<br>(SIGNALP), SSF51569 (SUPERFAMILY)                                       |
|                         | -                                                                                                                                  | 0  |                                                                                                                                                                                                                                                                                                               |                                                                                                                                                                                                         |                                                                               | -                                                                                                        |
|                         | -                                                                                                                                  | 0  |                                                                                                                                                                                                                                                                                                               |                                                                                                                                                                                                         |                                                                               | -                                                                                                        |
| Loa loa                 | smoothened protein                                                                                                                 | 0  |                                                                                                                                                                                                                                                                                                               | F:GO:0004888;<br>C:GO:0016021;<br>C:GO:0016020;<br>F:GO:0004930;<br>F:GO:0004926;<br>P:GO:0007275;<br>P:GO:0007166;<br>P:GO:0007165;<br>F:GO:0004872;<br>F:GO:0004871;<br>P:GO:0007186;<br>P:GO:0016055 |                                                                               | SignalP (SIGNALP)                                                                                        |
|                         | -                                                                                                                                  | 0  |                                                                                                                                                                                                                                                                                                               |                                                                                                                                                                                                         |                                                                               | -                                                                                                        |
| Caenorhabditis briggsae | sy-ptojanin 2 binding protein                                                                                                      | 6  | F:GO:0008022;<br>P:GO:0006605;<br>C:GO:0031307;<br>P:GO:0030100;<br>P:GO:0048312;<br>P:GO:0007266                                                                                                                                                                                                             | -                                                                                                                                                                                                       |                                                                               | -                                                                                                        |



|                             |                                                    |    |                                                                                                                                                                                                                                           |                                                |             |                                                                                                                                                                 |
|-----------------------------|----------------------------------------------------|----|-------------------------------------------------------------------------------------------------------------------------------------------------------------------------------------------------------------------------------------------|------------------------------------------------|-------------|-----------------------------------------------------------------------------------------------------------------------------------------------------------------|
| Angiostrongylus cantonensis | hypothetical protein [Angiostrongylus cantonensis] | 0  |                                                                                                                                                                                                                                           |                                                |             | -                                                                                                                                                               |
| Caenorhabditis elegans      | sideroflexin 1                                     | 5  | F:GO:0008324;<br>P:GO:0055085;<br>P:GO:0006812;<br>C:GO:0016021;<br>C:GO:0031966                                                                                                                                                          | -                                              |             | IPR004686; PTHR11153:SF9<br>(PANTHER)                                                                                                                           |
| -                           | -                                                  | 0  |                                                                                                                                                                                                                                           |                                                |             | -                                                                                                                                                               |
| Caenorhabditis briggsae     | helicase ski2w                                     | 4  | F:GO:0008026;<br>F:GO:0003676;<br>F:GO:0005515;<br>F:GO:0000166                                                                                                                                                                           | -                                              |             | -                                                                                                                                                               |
| Caenorhabditis briggsae     | antiviral helicase ski2                            | 4  | F:GO:0004004;<br>F:GO:0003676;<br>F:GO:0005515;<br>F:GO:0000166                                                                                                                                                                           | -                                              |             | -                                                                                                                                                               |
| -                           | -                                                  | 0  |                                                                                                                                                                                                                                           |                                                |             | -                                                                                                                                                               |
| -                           | -                                                  | 0  |                                                                                                                                                                                                                                           |                                                |             | -                                                                                                                                                               |
| Caenorhabditis briggsae     | intersectin 1 (sh3 domain protein)                 | 9  | F:GO:0005488;<br>P:GO:0007264;<br>P:GO:0042981;<br>F:GO:0030234;<br>P:GO:0048522;<br>C:GO:0042995;<br>C:GO:0044444;<br>P:GO:0009966;<br>P:GO:0035466                                                                                      | -                                              |             | IPR000261; IPR002048; IPR011992;<br>IPR018247; IPR018249; PTHR11216<br>(PANTHER), PTHR11216:SF24<br>(PANTHER), SSF47473 (SUPERFAMILY)                           |
| Caenorhabditis briggsae     | intersectin 1 (sh3 domain protein)                 | 9  | F:GO:0005488;<br>P:GO:0007264;<br>P:GO:0042981;<br>F:GO:0030234;<br>P:GO:0048522;<br>C:GO:0042995;<br>C:GO:0044444;<br>P:GO:0009966;<br>P:GO:0035466                                                                                      | -                                              |             | IPR000261; IPR002048; IPR011992;<br>IPR018247; IPR018249; PTHR11216<br>(PANTHER), PTHR11216:SF24<br>(PANTHER), SSF47473 (SUPERFAMILY)                           |
| Caenorhabditis briggsae     | elegans protein confirmed by transcript evidence   | 0  |                                                                                                                                                                                                                                           | F:GO:0008276;<br>C:GO:0005737;<br>P:GO:0006479 |             | -                                                                                                                                                               |
| Brugia malayi               | peptidase m16 i-ctive domain containing protein    | 5  | F:GO:0004222;<br>P:GO:0016485;<br>C:GO:0005759;<br>P:GO:0006508;<br>F:GO:0008270                                                                                                                                                          | -                                              | EC:3.4.24.0 | IPR011237; IPR011765                                                                                                                                            |
| Caenorhabditis briggsae     | proteasome subunit beta type                       | 14 | P:GO:0008340;<br>P:GO:0009401;<br>P:GO:0040007;<br>P:GO:0000003;<br>F:GO:0004298;<br>P:GO:0018996;<br>P:GO:0051603;<br>P:GO:0002119;<br>P:GO:0040011;<br>P:GO:0009792;<br>C:GO:0005737;<br>F:GO:0005351;<br>C:GO:0005839;<br>C:GO:0005634 | -                                              | EC:3.4.25.0 | IPR000243; IPR001353; IPR002114;<br>G3DSA:3.60.20.10 (GENE3D),<br>PTHR11599 (PANTHER),<br>PTHR11599:SF3 (PANTHER), PSS1476<br>(PROFILE), SSF56235 (SUPERFAMILY) |
| -                           | -                                                  | 0  |                                                                                                                                                                                                                                           |                                                |             | -                                                                                                                                                               |

|                           |                                                      |    |                                                                                                                                                                                                                                                                                                                                |                                                |                                                                                                              |
|---------------------------|------------------------------------------------------|----|--------------------------------------------------------------------------------------------------------------------------------------------------------------------------------------------------------------------------------------------------------------------------------------------------------------------------------|------------------------------------------------|--------------------------------------------------------------------------------------------------------------|
| Homo sapiens              | eukaryotic translation initiation factor 3 subunit k | 8  | C:GO:0005852;<br>F:GO:0003723;<br>F:GO:0005515;<br>P:GO:0045948;<br>F:GO:0003743;<br>C:GO:0005634;<br>C:GO:0005829;<br>F:GO:0043022                                                                                                                                                                                            | -                                              | IPR009374; IPR011991; IPR019280;<br>SSF46785 (SUPERFAMILY)                                                   |
| Caenorhabditis elegans    | kr1 small subunit processome component homolog       | 5  | P:GO:0018991;<br>F:GO:0003723;<br>P:GO:0040007;<br>P:GO:0010171;<br>P:GO:0002119                                                                                                                                                                                                                                               | -                                              | IPR004087; G3DSA:3.30.1370.10<br>(GENE3D), PTHR12581 (PANTHER),<br>SSF54791 (SUPERFAMILY)                    |
| Loa loa                   | ruvb-like 1                                          | 19 | P:GO:0043967;<br>P:GO:0010628;<br>P:GO:0042127;<br>F:GO:0017025;<br>P:GO:0006310;<br>P:GO:0051301;<br>P:GO:0030111;<br>F:GO:0003713;<br>C:GO:0031011;<br>C:GO:0005875;<br>P:GO:0045449;<br>C:GO:0035267;<br>P:GO:0043968;<br>F:GO:0008013;<br>C:GO:0035060;<br>F:GO:0005524;<br>F:GO:0003678;<br>P:GO:0007049;<br>C:GO:0071339 | -                                              | IPR010339; IPR016027;<br>G3DSA:3.40.50.300 (GENE3D),<br>PTHR11093 (PANTHER), SSF52540<br>(SUPERFAMILY)       |
| Loa loa                   | hypothetical protein LOAG_08700 [Loa loa]            | 0  |                                                                                                                                                                                                                                                                                                                                |                                                | -                                                                                                            |
| Heligmosomoides polygyrus | briggsae cbr-gst- protein                            | 2  | F:GO:0005515;<br>P:GO:0008340                                                                                                                                                                                                                                                                                                  | -                                              | IPR004045; IPR010987; IPR012335;<br>IPR012336; IPR017933; PTHR11571<br>(PANTHER), PTHR11571:SF6<br>(PANTHER) |
| Heligmosomoides polygyrus | briggsae cbr-gst- protein                            | 2  | F:GO:0005515;<br>P:GO:0008340                                                                                                                                                                                                                                                                                                  | -                                              | IPR004045; IPR010987; IPR012335;<br>IPR012336; IPR017933; PTHR11571<br>(PANTHER), PTHR11571:SF6<br>(PANTHER) |
| Caenorhabditis briggsae   | peptidoglycan- domain containing 3                   | 1  | C:GO:0016020                                                                                                                                                                                                                                                                                                                   | -                                              | IPR002482; IPR018392;<br>G3DSA:3.10.350.10 (GENE3D),<br>PTHR20932 (PANTHER), SSF54106<br>(SUPERFAMILY)       |
|                           |                                                      | 0  |                                                                                                                                                                                                                                                                                                                                |                                                | SignalP (SIGNALP)                                                                                            |
| Haemonchus contortus      | cytochrome c oxidase subunit ii                      | 9  | C:GO:0005743;<br>F:GO:0005507;<br>C:GO:0070469;<br>F:GO:0009055;<br>F:GO:0020037;<br>P:GO:0006810;<br>C:GO:0016021;<br>P:GO:0022904;<br>F:GO:0004129                                                                                                                                                                           | -                                              | EC:1.9.3.1<br>IPR002429; IPR008972                                                                           |
| Loa loa                   | exchange factor for arf family member (efa-6)        | 0  |                                                                                                                                                                                                                                                                                                                                | P:GO:0032012;<br>F:GO:0005086;<br>C:GO:0005622 | -                                                                                                            |

|                         |                                                                                                |    |                                                                                                                                                                       |                                                |                                                                                                           |
|-------------------------|------------------------------------------------------------------------------------------------|----|-----------------------------------------------------------------------------------------------------------------------------------------------------------------------|------------------------------------------------|-----------------------------------------------------------------------------------------------------------|
| Loa loa                 | exchange factor for arf family member (efa-6)                                                  | 0  |                                                                                                                                                                       | P:GO:0032012;<br>F:GO:0005086;<br>C:GO:0005622 | -                                                                                                         |
|                         |                                                                                                | 0  |                                                                                                                                                                       |                                                | -                                                                                                         |
|                         |                                                                                                | 0  |                                                                                                                                                                       |                                                | -                                                                                                         |
| Caenorhabditis elegans  | f-box and leucine-rich repeat protein 20                                                       | 2  | F:GO:0005515;<br>C:GO:0005737                                                                                                                                         | -                                              | IPR001810; IPR022364;<br>G3DSA:1.20.1280.50 (GENE3D),<br>PTHR23125 (PANTHER),<br>PTHR23125:SF69 (PANTHER) |
|                         |                                                                                                | 0  |                                                                                                                                                                       |                                                | -                                                                                                         |
|                         |                                                                                                | 0  |                                                                                                                                                                       |                                                | -                                                                                                         |
|                         |                                                                                                | 0  |                                                                                                                                                                       |                                                | -                                                                                                         |
|                         |                                                                                                | 0  |                                                                                                                                                                       |                                                | -                                                                                                         |
| Caenorhabditis elegans  | ctn-2 protein                                                                                  | 10 | P:GO:0050789;<br>C:GO:0005912;<br>P:GO:0048667;<br>P:GO:0007420;<br>P:GO:0048812;<br>P:GO:0007155;<br>C:GO:0042995;<br>F:GO:0005515;<br>P:GO:0050877;<br>C:GO:0044424 | -                                              | IPR001033; IPR006077;<br>G3DSA:1.20.120.230 (GENE3D),<br>PTHR18914 (PANTHER),<br>PTHR18914:SF9 (PANTHER)  |
| Loa loa                 | inhibitor of growth ing4                                                                       | 2  | F:GO:0046872;<br>P:GO:0009987                                                                                                                                         | -                                              | IPR001965; IPR011011; IPR013083;<br>IPR019786; IPR019787; PTHR10333<br>(PANTHER)                          |
| Caenorhabditis briggsae | eukaryotic translation initiation factor 6                                                     | 10 | F:GO:0003743;<br>P:GO:0040010;<br>P:GO:0007229;<br>C:GO:0005638;<br>F:GO:0043022;<br>P:GO:0002119;<br>F:GO:0005515;<br>P:GO:0006898;<br>P:GO:0009792;<br>P:GO:0042256 | -                                              | IPR002769; G3DSA:3.75.10.10<br>(GENE3D), SSF55909 (SUPERFAMILY)                                           |
| Caenorhabditis briggsae | eukaryotic translation initiation factor 6                                                     | 10 | F:GO:0003743;<br>P:GO:0040010;<br>P:GO:0007229;<br>C:GO:0005638;<br>F:GO:0043022;<br>P:GO:0002119;<br>F:GO:0005515;<br>P:GO:0006898;<br>P:GO:0009792;<br>P:GO:0042256 | -                                              | IPR002769; G3DSA:3.75.10.10<br>(GENE3D), SSF55909 (SUPERFAMILY)                                           |
|                         |                                                                                                | 0  |                                                                                                                                                                       |                                                | -                                                                                                         |
|                         |                                                                                                | 0  |                                                                                                                                                                       |                                                | -                                                                                                         |
|                         |                                                                                                | 0  |                                                                                                                                                                       |                                                | -                                                                                                         |
|                         |                                                                                                | 0  |                                                                                                                                                                       |                                                | -                                                                                                         |
|                         |                                                                                                | 0  |                                                                                                                                                                       |                                                | -                                                                                                         |
| Caenorhabditis elegans  | orai (store-operated calcium channel) homolog protein isoform confirmed by transcript evidence | 1  | C:GO:0016021                                                                                                                                                          | -                                              | IPR012446                                                                                                 |
| Caenorhabditis elegans  | orai (store-operated calcium channel) homolog protein isoform confirmed by transcript evidence | 1  | C:GO:0016021                                                                                                                                                          | -                                              | IPR012446                                                                                                 |
| Caenorhabditis elegans  | orai (store-operated calcium channel) homolog protein isoform confirmed by transcript evidence | 1  | C:GO:0016021                                                                                                                                                          | -                                              | IPR012446                                                                                                 |

|                         |                                                                     |    |                                                                                                                                                                       |                                                |             |                                                                                                                          |
|-------------------------|---------------------------------------------------------------------|----|-----------------------------------------------------------------------------------------------------------------------------------------------------------------------|------------------------------------------------|-------------|--------------------------------------------------------------------------------------------------------------------------|
| Caenorhabditis briggsae | caax prenyl protease 1 homolog                                      | 6  | P:GO:0006998;<br>F:GO:0004222;<br>P:GO:0030327;<br>C:GO:0043231;<br>C:GO:0044444;<br>C:GO:0016021                                                                     | -                                              | EC:3.4.24.0 | IPR001915; PTHR10120 (PANTHER), PTHR10120:SF1 (PANTHER), SignalP (SIGNALP)                                               |
| Caenorhabditis elegans  | endothelin converting enzyme 2                                      | 10 | P:GO:0009987;<br>C:GO:0030659;<br>F:GO:0005488;<br>P:GO:0016486;<br>P:GO:0023052;<br>F:GO:0004222;<br>F:GO:0016740;<br>P:GO:0048513;<br>P:GO:0009792;<br>C:GO:0005794 | -                                              | EC:3.4.24.0 | IPR013216; G3DSA:3.40.50.150 (GENE3D), PTHR12176 (PANTHER), SSF53335 (SUPERFAMILY)                                       |
| Caenorhabditis elegans  | yp62_caee1_ame: full= serine threonine-protein ki-se                | 0  |                                                                                                                                                                       |                                                |             | -                                                                                                                        |
| Brugia malayi           | protein ki-se domain containing protein                             | 3  | P:GO:0006468;<br>F:GO:0005524;<br>F:GO:0004674                                                                                                                        | -                                              | EC:2.7.11.0 | PTHR11295 (PANTHER), PTHR11295:SF86 (PANTHER)                                                                            |
| Caenorhabditis briggsae | n-acetylglucosaminyl-phosphatidylinositol biosynthetic              | 4  | C:GO:0044432;<br>P:GO:0045132;<br>P:GO:0006506;<br>C:GO:0016021                                                                                                       | -                                              |             | IPR001296; PTHR12526 (PANTHER), PTHR12526:SF37 (PANTHER), SSF53756 (SUPERFAMILY)                                         |
| Caenorhabditis briggsae | n-acetylglucosaminyl-phosphatidylinositol biosynthetic              | 4  | F:GO:0016757;<br>P:GO:0006506;<br>C:GO:0016021;<br>P:GO:0045132                                                                                                       | -                                              |             | IPR001296; PTHR12526 (PANTHER), PTHR12526:SF37 (PANTHER), SSF53756 (SUPERFAMILY)                                         |
| Brugia malayi           | zinc c2h2 type family protein                                       | 7  | F:GO:0008270;<br>F:GO:0003676;<br>P:GO:0046672;<br>P:GO:0006099;<br>P:GO:0046580;<br>P:GO:0030536;<br>C:GO:0005634                                                    | -                                              |             | IPR007087; IPR013087; IPR015880; PR00048 (PRINTS), PTHR23229 (PANTHER), PTHR23229:SF13 (PANTHER), SSF57667 (SUPERFAMILY) |
| -                       | -                                                                   | 0  |                                                                                                                                                                       |                                                |             | -                                                                                                                        |
| -                       | -                                                                   | 0  |                                                                                                                                                                       |                                                |             | IPR008160; PTHR10499 (PANTHER), PTHR10499:SF112 (PANTHER)                                                                |
| Caenorhabditis elegans  | a in (actin filament binding protein) homolog family member (afd-1) | 2  | P:GO:0040010;<br>F:GO:0005515                                                                                                                                         | -                                              |             | PTHR10398 (PANTHER)                                                                                                      |
| Caenorhabditis elegans  | a in (actin filament binding protein) homolog family member (afd-1) | 2  | P:GO:0040010;<br>F:GO:0005515                                                                                                                                         | -                                              |             | PTHR10398 (PANTHER)                                                                                                      |
| Caenorhabditis elegans  | a in (actin filament binding protein) homolog family member (afd-1) | 2  | P:GO:0040010;<br>F:GO:0005515                                                                                                                                         | -                                              |             | PTHR10398 (PANTHER)                                                                                                      |
| Caenorhabditis briggsae | coiled-coil domain-containing protein 47                            | 1  | F:GO:0005515                                                                                                                                                          | -                                              |             | IPR012879                                                                                                                |
| -                       | -                                                                   | 0  |                                                                                                                                                                       |                                                |             | -                                                                                                                        |
| Caenorhabditis elegans  | nudix (nucleoside diphosphate linked moiety x)-type motif 3         | 5  | P:GO:0044282;<br>P:GO:0044238;<br>F:GO:0046872;<br>F:GO:0016787;<br>P:GO:0044237                                                                                      | -                                              |             | IPR000086; IPR015797; IPR020084; IPR020476; PTHR12629 (PANTHER), PS51462 (PROFILE), SignalP (SIGNALP)                    |
| Caenorhabditis briggsae | ankle2 protein                                                      | 0  |                                                                                                                                                                       | C:GO:0016021;<br>C:GO:0016020;<br>C:GO:0005635 |             | PTHR20976 (PANTHER)                                                                                                      |
| Caenorhabditis briggsae | prominin protein                                                    | 0  |                                                                                                                                                                       | C:GO:0016021                                   |             | IPR008795; SignalP (SIGNALP)                                                                                             |

|                         |                                                             |    |                                                                                                                                                                                                                                                                                                               |   |             |                                                                                              |
|-------------------------|-------------------------------------------------------------|----|---------------------------------------------------------------------------------------------------------------------------------------------------------------------------------------------------------------------------------------------------------------------------------------------------------------|---|-------------|----------------------------------------------------------------------------------------------|
| Caenorhabditis briggsae | mitotic spindle assembly checkpoint protein mad1            | 8  | C:GO:0016020;<br>C:GO:0043231;<br>C:GO:0005694;<br>C:GO:0043234;<br>C:GO:0044446;<br>F:GO:0005488;<br>C:GO:0044444;<br>P:GO:0007049                                                                                                                                                                           | - |             | IPR008672; PD936484 (PRODOM),<br>PTHR23168 (PANTHER)                                         |
| Caenorhabditis briggsae | mitotic spindle assembly checkpoint protein mad1            | 5  | C:GO:0005737;<br>C:GO:0044446;<br>C:GO:0043232;<br>F:GO:0005488;<br>P:GO:0007049                                                                                                                                                                                                                              | - |             | IPR008672; PTHR23168 (PANTHER)                                                               |
| Caenorhabditis briggsae | mitotic spindle assembly checkpoint protein mad1            | 5  | C:GO:0005737;<br>C:GO:0044446;<br>C:GO:0043232;<br>F:GO:0005488;<br>P:GO:0007049                                                                                                                                                                                                                              | - |             | IPR008672; PD936484 (PRODOM),<br>PTHR23168 (PANTHER)                                         |
| Caenorhabditis briggsae | mitotic spindle assembly checkpoint protein mad1            | 5  | C:GO:0005737;<br>C:GO:0044446;<br>C:GO:0043232;<br>F:GO:0005488;<br>P:GO:0007049                                                                                                                                                                                                                              | - |             | IPR008672; PD936484 (PRODOM),<br>PTHR23168 (PANTHER)                                         |
| -                       | -                                                           | 0  |                                                                                                                                                                                                                                                                                                               |   |             | -                                                                                            |
| -                       | -                                                           | 0  |                                                                                                                                                                                                                                                                                                               |   |             | -                                                                                            |
| -                       | -                                                           | 0  |                                                                                                                                                                                                                                                                                                               |   |             | -                                                                                            |
| Caenorhabditis briggsae | nuclear receptor nhr-31                                     | 5  | F:GO:0046872;<br>F:GO:0004879;<br>F:GO:0003677;<br>P:GO:0045449;<br>F:GO:0005515                                                                                                                                                                                                                              | - |             | IPR001628; IPR008946; IPR015619;<br>PTHR11865 (PANTHER), SSF57716<br>(SUPERFAMILY)           |
| Caenorhabditis elegans  | ubiquitin-conjugating enzyme e2n                            | 18 | P:GO:0070534;<br>P:GO:0033182;<br>P:GO:0000724;<br>F:GO:0043130;<br>C:GO:0005829;<br>P:GO:0006511;<br>C:GO:0031372;<br>P:GO:0043123;<br>F:GO:0004842;<br>P:GO:0031058;<br>P:GO:0050852;<br>P:GO:0051443;<br>P:GO:0000729;<br>P:GO:0006301;<br>P:GO:0051092;<br>C:GO:0005634;<br>F:GO:0005524;<br>P:GO:0045739 | - | EC:6.3.2.19 | IPR000608; IPR016135; PTHR11621<br>(PANTHER), PTHR11621:SF30<br>(PANTHER)                    |
| Brugia malayi           | ankyrin repeat and sterile alpha motif domain containing 1a | 1  | F:GO:0005515                                                                                                                                                                                                                                                                                                  | - |             | IPR002110; IPR020683; PR01415<br>(PRINTS), PTHR18958 (PANTHER),<br>PTHR18958:SF212 (PANTHER) |
| -                       | -                                                           | 0  |                                                                                                                                                                                                                                                                                                               |   |             | -                                                                                            |

|                         |                                          |    |                                                                                                                                                                                                                                                                                                                                |   |                           |                                                                                                                                                                                                                                                                           |
|-------------------------|------------------------------------------|----|--------------------------------------------------------------------------------------------------------------------------------------------------------------------------------------------------------------------------------------------------------------------------------------------------------------------------------|---|---------------------------|---------------------------------------------------------------------------------------------------------------------------------------------------------------------------------------------------------------------------------------------------------------------------|
| Brugia malayi           | transducin -like 1 x-linked              | 19 | P:GO:0060070;<br>F:GO:0042393;<br>F:GO:0003714;<br>P:GO:0007605;<br>P:GO:0043161;<br>F:GO:0008022;<br>C:GO:0017053;<br>P:GO:0043627;<br>F:GO:0016563;<br>P:GO:0045444;<br>C:GO:0005667;<br>F:GO:0019904;<br>P:GO:0010553;<br>C:GO:0000118;<br>P:GO:0045944;<br>C:GO:0005876;<br>F:GO:0003682;<br>F:GO:0008013;<br>F:GO:0010843 | - | -                         |                                                                                                                                                                                                                                                                           |
| Caenorhabditis briggsae | protein                                  | 9  | P:GO:0009792;<br>P:GO:0010171;<br>P:GO:0002119;<br>C:GO:0005840;<br>P:GO:0042254;<br>P:GO:0000003;<br>P:GO:0040007;<br>P:GO:0006898;<br>P:GO:0006412                                                                                                                                                                           | - | EC:3.6.5.3                | IPR002415; IPR004037; IPR004038;<br>IPR018492; G3DSA:3.30.1330.30<br>(GENE3D), PTHR23105 (PANTHER),<br>PTHR23105:SF11 (PANTHER),<br>SSF55315 (SUPERFAMILY)                                                                                                                |
|                         | -                                        | 0  |                                                                                                                                                                                                                                                                                                                                |   |                           | -                                                                                                                                                                                                                                                                         |
| Caenorhabditis elegans  | phosphoenolpyruvate carboxy-kinase       | 6  | C:GO:0005737;<br>P:GO:0006094;<br>F:GO:0046872;<br>F:GO:0005525;<br>F:GO:0016301;<br>F:GO:0004613                                                                                                                                                                                                                              | - | EC:4.1.1.32               | IPR008209; IPR008210; IPR013035;<br>IPR018091; G3DSA:2.170.8.10<br>(GENE3D), SSF53795 (SUPERFAMILY)                                                                                                                                                                       |
| Caenorhabditis briggsae | carbamoyl-phosphate synthase large chain | 8  | F:GO:0004086;<br>P:GO:0006541;<br>F:GO:0016812;<br>F:GO:0005524;<br>F:GO:0004070;<br>F:GO:0016597;<br>P:GO:0060041;<br>P:GO:0006207                                                                                                                                                                                            | - | EC:3.5.2.0;<br>EC:2.1.3.2 | IPR002195; IPR005479; IPR005481;<br>IPR005483; IPR006680; IPR011607;<br>IPR011761; IPR013815; IPR013816;<br>IPR013817; IPR016185;<br>G3DSA:3.20.20.140 (GENE3D),<br>PTHR11405 (PANTHER),<br>PTHR11405:SF3 (PANTHER), SSF51556<br>(SUPERFAMILY), SSF56059<br>(SUPERFAMILY) |
|                         | -                                        | 0  |                                                                                                                                                                                                                                                                                                                                |   |                           | -                                                                                                                                                                                                                                                                         |
| Caenorhabditis briggsae | rrp12-like protein                       | 0  |                                                                                                                                                                                                                                                                                                                                |   |                           | PTHR21576 (PANTHER),<br>PTHR21576:SF2 (PANTHER)                                                                                                                                                                                                                           |
| Brugia malayi           | uncharacterized protein kiaa0467         | 0  |                                                                                                                                                                                                                                                                                                                                |   |                           | -                                                                                                                                                                                                                                                                         |

|                         |                                                            |   |                                                                                                                                     |                                                                                                                                                      |              |                                                                                                                      |
|-------------------------|------------------------------------------------------------|---|-------------------------------------------------------------------------------------------------------------------------------------|------------------------------------------------------------------------------------------------------------------------------------------------------|--------------|----------------------------------------------------------------------------------------------------------------------|
| Caenorhabditis briggsae | kow motif family protein                                   | 8 | P:GO:0009792;<br>P:GO:0010171;<br>P:GO:0002119;<br>F:GO:0005515;<br>P:GO:0040010;<br>P:GO:0000003;<br>P:GO:0040011;<br>P:GO:0006898 | -                                                                                                                                                    | -            |                                                                                                                      |
|                         | -                                                          | 0 |                                                                                                                                     |                                                                                                                                                      |              | SignalP (SIGNALP)                                                                                                    |
|                         | -                                                          | 0 |                                                                                                                                     |                                                                                                                                                      |              | -                                                                                                                    |
|                         | -                                                          | 0 |                                                                                                                                     |                                                                                                                                                      |              | -                                                                                                                    |
| Necator americanus      | zinc metalloproteinase                                     | 2 | P:GO:0008152;<br>F:GO:0008237                                                                                                       | -                                                                                                                                                    |              | IPR000718; IPR008753;<br>G3DSA:1.10.1380.10 (GENE3D),<br>PTHR11733:SF15 (PANTHER),<br>SSF55486 (SUPERFAMILY)         |
| Caenorhabditis elegans  | yip1 interacting factor homolog a ( cerevisiae)            | 3 | C:GO:0005793;<br>C:GO:0005794;<br>C:GO:0016021                                                                                      | -                                                                                                                                                    |              | IPR005578; SignalP (SIGNALP)                                                                                         |
| Caenorhabditis elegans  | yip1 interacting factor homolog a ( cerevisiae)            | 3 | C:GO:0005793;<br>C:GO:0005794;<br>C:GO:0016021                                                                                      | -                                                                                                                                                    |              | SignalP (SIGNALP)                                                                                                    |
| Caenorhabditis elegans  | yip1 interacting factor homolog a ( cerevisiae)            | 3 | C:GO:0005793;<br>C:GO:0005794;<br>C:GO:0016021                                                                                      | -                                                                                                                                                    |              | -                                                                                                                    |
| Caenorhabditis briggsae | atp synthase subunit s-like protein                        | 0 |                                                                                                                                     | P:GO:0006355;<br>F:GO:0003700                                                                                                                        |              | G3DSA:3.80.10.10 (GENE3D),<br>PTHR13318 (PANTHER), SSF52047<br>(SUPERFAMILY)                                         |
| Caenorhabditis briggsae | midasin (midas-containing protein)                         | 0 |                                                                                                                                     | C:GO:0005634;<br>F:GO:0000166;<br>F:GO:0008134;<br>F:GO:0017111;<br>F:GO:0005524;<br>F:GO:0016887;<br>P:GO:0006355;<br>C:GO:0005622;<br>P:GO:0043254 |              | PTHR22908 (PANTHER),<br>PTHR22908:SF13 (PANTHER)                                                                     |
| Caenorhabditis briggsae | Hypothetical protein CBG15276 [Caenorhabditis briggsae]    | 0 |                                                                                                                                     |                                                                                                                                                      |              | -                                                                                                                    |
| Caenorhabditis briggsae | cgmp-dependent protein ki-se egl-4                         | 3 | P:GO:0006468;<br>F:GO:0005524;<br>F:GO:0004692                                                                                      | -                                                                                                                                                    | EC:2.7.11.12 | -                                                                                                                    |
| Caenorhabditis elegans  | elegans protein confirmed by transcript evidence           | 2 | C:GO:0016021;<br>F:GO:0005488                                                                                                       | -                                                                                                                                                    |              | IPR005301; PTHR22599:SF3<br>(PANTHER)                                                                                |
| Caenorhabditis elegans  | ferm domain ( -ezrin-radixin-moesin) family member (frm-1) | 1 | F:GO:0005488                                                                                                                        | -                                                                                                                                                    |              | -                                                                                                                    |
| Caenorhabditis briggsae | pecanex-like protein 1                                     | 0 |                                                                                                                                     | C:GO:0016021                                                                                                                                         |              | -                                                                                                                    |
| Caenorhabditis elegans  | d- repair protein rad4 containing protein                  | 0 |                                                                                                                                     | F:GO:0003684;<br>P:GO:0006289;<br>C:GO:0005634                                                                                                       |              | -                                                                                                                    |
| Caenorhabditis briggsae | lethal 37bb                                                | 7 | F:GO:0008115;<br>C:GO:0016020;<br>P:GO:0009792;<br>P:GO:0055114;<br>P:GO:0000003;<br>F:GO:0005488;<br>P:GO:0040010                  | -                                                                                                                                                    | EC:1.5.3.1   | IPR006076; G3DSA:3.50.50.60<br>(GENE3D), PTHR13847 (PANTHER),<br>PTHR13847:SF12 (PANTHER),<br>SSF51905 (SUPERFAMILY) |

|                         |                                                   |    |                                                                                                                                                                                                                          |   |             |                                                                                                               |
|-------------------------|---------------------------------------------------|----|--------------------------------------------------------------------------------------------------------------------------------------------------------------------------------------------------------------------------|---|-------------|---------------------------------------------------------------------------------------------------------------|
| Caenorhabditis elegans  | mitogen activated protein ki-se ki-se ki-se mekk5 | 4  | P:GO:0006468;<br>F:GO:0005515;<br>F:GO:0005524;<br>F:GO:0004674                                                                                                                                                          | - | EC:2.7.11.0 | -                                                                                                             |
|                         |                                                   | 0  |                                                                                                                                                                                                                          |   |             |                                                                                                               |
| Loa loa                 | endoribonuclease dicer                            | 5  | F:GO:0003676;<br>C:GO:0005622;<br>P:GO:0035279;<br>P:GO:0031054;<br>F:GO:0016787                                                                                                                                         | - |             | IPR005034; PTHR14950 (PANTHER),<br>PTHR14950:SF3 (PANTHER)                                                    |
| Caenorhabditis briggsae | dihydroorotate dehydroge-se                       | 7  | P:GO:0043065;<br>F:GO:0004158;<br>C:GO:0005743;<br>P:GO:0055114;<br>P:GO:0006222;<br>P:GO:0090140;<br>P:GO:0006207                                                                                                       | - | EC:1.3.3.1  | IPR013785; PTHR11938 (PANTHER),<br>PTHR11938:SF7 (PANTHER), SSF51395<br>(SUPERFAMILY)                         |
| Caenorhabditis elegans  | fructose- -bisphosphatase                         | 3  | P:GO:0016051;<br>C:GO:0005737;<br>F:GO:0042132                                                                                                                                                                           | - | EC:3.1.3.11 | IPR000146; IPR020548;<br>G3DSA:3.30.540.10 (GENE3D),<br>G3DSA:3.40.190.80 (GENE3D),<br>SSF56655 (SUPERFAMILY) |
| Caenorhabditis briggsae | briggsae cbr-atp-3 protein                        | 13 | P:GO:0008340;<br>P:GO:0000003;<br>F:GO:0005515;<br>P:GO:0040010;<br>F:GO:0046933;<br>P:GO:0019915;<br>C:GO:0045261;<br>P:GO:0009792;<br>P:GO:0015986;<br>P:GO:0002119;<br>C:GO:0005811;<br>F:GO:0003824;<br>C:GO:0005886 | - | EC:3.6.3.14 | IPR000711                                                                                                     |
| Caenorhabditis briggsae | briggsae cbr-atp-3 protein                        | 13 | P:GO:0008340;<br>P:GO:0000003;<br>F:GO:0005515;<br>P:GO:0040010;<br>F:GO:0046933;<br>P:GO:0019915;<br>C:GO:0045261;<br>P:GO:0009792;<br>P:GO:0015986;<br>P:GO:0002119;<br>C:GO:0005811;<br>F:GO:0003824;<br>C:GO:0005886 | - | EC:3.6.3.14 | IPR000711                                                                                                     |



|                         |                                                                 |    |                                                                                                                                                                                                                                                                                                                                                                                                                                                                        |              |             |                                                                                                                                     |
|-------------------------|-----------------------------------------------------------------|----|------------------------------------------------------------------------------------------------------------------------------------------------------------------------------------------------------------------------------------------------------------------------------------------------------------------------------------------------------------------------------------------------------------------------------------------------------------------------|--------------|-------------|-------------------------------------------------------------------------------------------------------------------------------------|
| Caenorhabditis briggsae | briggsae cbr-atp-3 protein                                      | 13 | P:GO:0008340;<br>P:GO:0000003;<br>F:GO:0005515;<br>P:GO:0040010;<br>F:GO:0046933;<br>P:GO:0019915;<br>C:GO:0045261;<br>P:GO:0009792;<br>P:GO:0015986;<br>P:GO:0002119;<br>C:GO:0005811;<br>F:GO:0003824;<br>C:GO:0005886                                                                                                                                                                                                                                               | -            | EC:3.6.3.14 | IPR000711                                                                                                                           |
| Pongo abelii            | filamin a                                                       | 28 | F:GO:0004871;<br>C:GO:0005802;<br>P:GO:0043433;<br>P:GO:0034394;<br>C:GO:0015629;<br>P:GO:0050821;<br>P:GO:0051220;<br>C:GO:0005576;<br>C:GO:0005829;<br>F:GO:0001948;<br>P:GO:0051764;<br>P:GO:0043123;<br>F:GO:0051015;<br>F:GO:0048365;<br>P:GO:0045022;<br>P:GO:0007195;<br>F:GO:0042803;<br>F:GO:0034989;<br>P:GO:0031532;<br>F:GO:0034988;<br>C:GO:0005886;<br>F:GO:0008134;<br>P:GO:0042177;<br>C:GO:0005634;<br>P:GO:0042993;<br>C:GO:0005938;<br>P:GO:0043113 | -            |             | IPR013783; IPR014756; IPR017868;<br>PTHR11915 (PANTHER),<br>PTHR11915:SF24 (PANTHER)                                                |
| -                       | -                                                               | 0  |                                                                                                                                                                                                                                                                                                                                                                                                                                                                        |              |             | IPR010579; PTHR16675 (PANTHER),<br>PTHR16675:SF53 (PANTHER), SignalP<br>(SIGNALP)                                                   |
| -                       | -                                                               | 0  |                                                                                                                                                                                                                                                                                                                                                                                                                                                                        |              |             | -                                                                                                                                   |
| -                       | -                                                               | 0  |                                                                                                                                                                                                                                                                                                                                                                                                                                                                        |              |             | -                                                                                                                                   |
| Caenorhabditis elegans  | egf-like domain containing protein                              | 0  |                                                                                                                                                                                                                                                                                                                                                                                                                                                                        | F:GO:0005509 |             | IPR003582                                                                                                                           |
| Caenorhabditis briggsae | atp-binding cassette subfamily member 1                         | 7  | C:GO:0005875;<br>C:GO:0005811;<br>C:GO:0005759;<br>P:GO:0055114;<br>P:GO:0006635;<br>F:GO:0003995;<br>F:GO:0050660                                                                                                                                                                                                                                                                                                                                                     | -            | EC:1.3.99.3 | IPR006089; IPR006090; IPR006091;<br>IPR006092; IPR009075; IPR009100;<br>IPR013786; PTHR10909 (PANTHER),<br>PTHR10909:SF10 (PANTHER) |
| Caenorhabditis briggsae | autophagocytosis associated c-termi-l domain containing protein | 1  | P:GO:0006810                                                                                                                                                                                                                                                                                                                                                                                                                                                           | -            |             | IPR007135; PTHR12866 (PANTHER)                                                                                                      |

|                         |                                                                  |    |                                                                                                                                                                                                                                                            |                                                                                                                                     |             |                                                                                                                          |
|-------------------------|------------------------------------------------------------------|----|------------------------------------------------------------------------------------------------------------------------------------------------------------------------------------------------------------------------------------------------------------|-------------------------------------------------------------------------------------------------------------------------------------|-------------|--------------------------------------------------------------------------------------------------------------------------|
| Caenorhabditis elegans  | elegans protein confirmed by transcript evidence                 | 0  |                                                                                                                                                                                                                                                            | C:GO:0016021;<br>P:GO:0016042;<br>P:GO:0006644                                                                                      |             | IPR013090; IPR016090; SignalP (SIGNALP)                                                                                  |
| Caenorhabditis elegans  | elegans protein confirmed by transcript evidence                 | 3  | P:GO:0040010;<br>P:GO:0002119;<br>P:GO:0040011                                                                                                                                                                                                             | -                                                                                                                                   |             | SignalP (SIGNALP)                                                                                                        |
| Caenorhabditis elegans  | briggsae cbr-dut-1 protein                                       | 5  | P:GO:0009792;<br>F:GO:0004170;<br>P:GO:0000910;<br>P:GO:0000003;<br>P:GO:0046080                                                                                                                                                                           | -                                                                                                                                   | EC:3.6.1.23 | IPR008180; IPR008181;<br>G3DSA:2.70.40.10 (GENE3D),<br>PTHR11241 (PANTHER), SSF51283 (SUPERFAMILY)                       |
| Caenorhabditis briggsae | downstream of daf-16 (regulated by daf-16) family member (dod-3) | 1  | P:GO:0008340                                                                                                                                                                                                                                               | -                                                                                                                                   |             | -                                                                                                                        |
| Caenorhabditis elegans  | nfs1 nitrogen fixation 1 homolog                                 | 10 | C:GO:0005829;<br>P:GO:0006777;<br>P:GO:0018283;<br>P:GO:0006461;<br>F:GO:0031071;<br>C:GO:0005759;<br>F:GO:0042803;<br>F:GO:0030170;<br>C:GO:0005634;<br>P:GO:0006534                                                                                      | -                                                                                                                                   | EC:2.8.1.7  | IPR000192; IPR015421; IPR015424;<br>PTHR11601 (PANTHER)                                                                  |
| Caenorhabditis briggsae | elegans protein confirmed by transcript evidence                 | 0  |                                                                                                                                                                                                                                                            |                                                                                                                                     |             | -                                                                                                                        |
| Caenorhabditis briggsae | elegans protein confirmed by transcript evidence                 | 0  |                                                                                                                                                                                                                                                            |                                                                                                                                     |             | -                                                                                                                        |
| Xenopus laevis          | 5 - cytosolic iii-like                                           | 0  |                                                                                                                                                                                                                                                            | F:GO:0008253;<br>P:GO:0009117;<br>F:GO:0046872;<br>C:GO:0005737;<br>F:GO:0000287;<br>F:GO:0016740;<br>F:GO:0000166;<br>F:GO:0016787 |             | IPR006434; PF05822 (PFAM), SignalP (SIGNALP), SSF56784 (SUPERFAMILY)                                                     |
| Caenorhabditis briggsae | -dh dehydroge-se                                                 | 15 | P:GO:0006979;<br>P:GO:0006810;<br>P:GO:0040010;<br>P:GO:0008340;<br>P:GO:0019684;<br>F:GO:0008137;<br>C:GO:0005747;<br>F:GO:0009055;<br>F:GO:0051539;<br>P:GO:0006120;<br>P:GO:0002119;<br>P:GO:0042493;<br>P:GO:0032981;<br>P:GO:0009792;<br>F:GO:0005506 | -                                                                                                                                   | EC:1.6.5.3  | IPR001450; IPR010226; IPR012285;<br>IPR017896; IPR017900; PTHR10849 (PANTHER), SignalP (SIGNALP), SSF54862 (SUPERFAMILY) |
| Caenorhabditis elegans  | ankyrin repeat domain-containing protein 17                      | 0  |                                                                                                                                                                                                                                                            |                                                                                                                                     |             | IPR002110; IPR020683; PR01415 (PRINTS), PTHR18958 (PANTHER), PTHR18958:SF263 (PANTHER)                                   |
| Haemonchus contortus    | af305962_1 protein                                               | 2  | P:GO:0009790;<br>P:GO:0009653                                                                                                                                                                                                                              | -                                                                                                                                   |             | SignalP (SIGNALP)                                                                                                        |

|                          |                                                            |    |                                                                                                                                                                                                                                                                                              |                                                                                                                                                                                                                                                                                                                                                                                   |            |                                                                                                              |
|--------------------------|------------------------------------------------------------|----|----------------------------------------------------------------------------------------------------------------------------------------------------------------------------------------------------------------------------------------------------------------------------------------------|-----------------------------------------------------------------------------------------------------------------------------------------------------------------------------------------------------------------------------------------------------------------------------------------------------------------------------------------------------------------------------------|------------|--------------------------------------------------------------------------------------------------------------|
| Saccoglossus kowalevskii | neurogenic locus notch homolog protein 2-like              | 0  |                                                                                                                                                                                                                                                                                              | P:GO:0006508;<br>F:GO:0005488;<br>F:GO:0004252;<br>P:GO:0007155;<br>F:GO:0003824;<br>F:GO:0008233                                                                                                                                                                                                                                                                                 |            | IPR000436; IPR016060; SignalP (SIGNALP)                                                                      |
| Loa loa                  | elegans protein partially confirmed by transcript evidence | 0  |                                                                                                                                                                                                                                                                                              | F:GO:0016787;<br>P:GO:0001701;<br>F:GO:0043499;<br>C:GO:0005634;<br>C:GO:0016021;<br>P:GO:0007155;<br>C:GO:0016020;<br>P:GO:0030449;<br>F:GO:0008201;<br>C:GO:0005615;<br>F:GO:0004872;<br>P:GO:0006958;<br>P:GO:0045916;<br>P:GO:0007275;<br>P:GO:0006956;<br>C:GO:0005737;<br>F:GO:0005488;<br>C:GO:0009897;<br>F:GO:0005515;<br>P:GO:0007565;<br>C:GO:0005886;<br>P:GO:0045087 |            | IPR000436; IPR016060; PTHR19325 (PANTHER), PTHR19325:SF25 (PANTHER)                                          |
| Caenorhabditis elegans   | complement factor h                                        | 2  | P:GO:0006956;<br>C:GO:0044464                                                                                                                                                                                                                                                                | -                                                                                                                                                                                                                                                                                                                                                                                 |            | -                                                                                                            |
| Loa loa                  | complement factor h                                        | 2  | P:GO:0006956;<br>C:GO:0044464                                                                                                                                                                                                                                                                | -                                                                                                                                                                                                                                                                                                                                                                                 |            | IPR000436; IPR016060; PTHR19325 (PANTHER), PTHR19325:SF25 (PANTHER), SignalP (SIGNALP)                       |
| Caenorhabditis elegans   | complement factor h                                        | 2  | P:GO:0006956;<br>C:GO:0044464                                                                                                                                                                                                                                                                | -                                                                                                                                                                                                                                                                                                                                                                                 |            | IPR000436; IPR016060; PTHR19325 (PANTHER), PTHR19325:SF25 (PANTHER), SignalP (SIGNALP)                       |
| Caenorhabditis briggsae  | dehydroge-se e1 and transketolase domain containing 1      | 5  | F:GO:0004591;<br>P:GO:0055114;<br>P:GO:0006096;<br>F:GO:0030976;<br>C:GO:0005739                                                                                                                                                                                                             | -                                                                                                                                                                                                                                                                                                                                                                                 | EC:1.2.4.2 | IPR005475; IPR011603; G3DSA:3.40.50.970 (GENE3D), SSF52518 (SUPERFAMILY)                                     |
| Brugia malayi            | -like 1                                                    | 17 | P:GO:0043967;<br>F:GO:0005515;<br>C:GO:0016020;<br>C:GO:0005815;<br>P:GO:0006357;<br>P:GO:0006310;<br>P:GO:0007283;<br>P:GO:0051301;<br>P:GO:0040008;<br>P:GO:0007067;<br>C:GO:0016363;<br>C:GO:0035267;<br>F:GO:0016887;<br>P:GO:0043968;<br>F:GO:0005524;<br>F:GO:0003678;<br>C:GO:0071339 | -                                                                                                                                                                                                                                                                                                                                                                                 |            | IPR010339; G3DSA:1.10.8.60 (GENE3D), G3DSA:3.40.50.300 (GENE3D), PTHR11093 (PANTHER), SSF52540 (SUPERFAMILY) |

|                         |                                                  |    |                                                                                                                                                                                                                                                                                                                                                                                                                                                                        |                                                |             |                                                                                                  |
|-------------------------|--------------------------------------------------|----|------------------------------------------------------------------------------------------------------------------------------------------------------------------------------------------------------------------------------------------------------------------------------------------------------------------------------------------------------------------------------------------------------------------------------------------------------------------------|------------------------------------------------|-------------|--------------------------------------------------------------------------------------------------|
| Pan troglodytes         | heavy polypeptide 1                              | 12 | C:GO:0008043;<br>C:GO:0005829;<br>F:GO:0008199;<br>P:GO:0006892;<br>P:GO:0055114;<br>F:GO:0004322;<br>P:GO:0016044;<br>P:GO:0006955;<br>P:GO:0008285;<br>P:GO:0006880;<br>P:GO:0006826;<br>F:GO:0005515                                                                                                                                                                                                                                                                | -                                              | EC:1.16.3.1 | IPR001519; IPR008331; IPR009040;<br>IPR009078; IPR012347; IPR014034;<br>PTHR11431:SF14 (PANTHER) |
| -                       | -                                                | 0  | -                                                                                                                                                                                                                                                                                                                                                                                                                                                                      | -                                              | -           | -                                                                                                |
| Caenorhabditis elegans  | elegans protein confirmed by transcript evidence | 0  | -                                                                                                                                                                                                                                                                                                                                                                                                                                                                      | F:GO:0003674;<br>P:GO:0008150                  | -           | IPR007529; PTHR15555 (PANTHER)                                                                   |
| Caenorhabditis elegans  | major facilitator superfamily protein            | 5  | C:GO:0016021;<br>P:GO:0000003;<br>P:GO:0040010;<br>P:GO:0006898;<br>P:GO:0055085                                                                                                                                                                                                                                                                                                                                                                                       | -                                              | -           | PTHR10924 (PANTHER), SignalP (SIGNALP)                                                           |
| Caenorhabditis briggsae | aha-1                                            | 28 | P:GO:0001938;<br>F:GO:0004871;<br>P:GO:0040010;<br>P:GO:0001892;<br>P:GO:0009410;<br>P:GO:0043193;<br>P:GO:0040017;<br>F:GO:0017162;<br>C:GO:0005737;<br>P:GO:0043619;<br>F:GO:0046982;<br>C:GO:0005667;<br>P:GO:0045821;<br>F:GO:0003705;<br>F:GO:0003713;<br>P:GO:0001666;<br>F:GO:0043565;<br>P:GO:0007165;<br>P:GO:0002119;<br>P:GO:0010575;<br>P:GO:0033235;<br>P:GO:0030522;<br>P:GO:0045648;<br>P:GO:0010171;<br>P:GO:0045944;<br>P:GO:0046886;<br>P:GO:0030949 | -                                              | -           | IPR011598; PTHR23042 (PANTHER),<br>PTHR23042:SF7 (PANTHER)                                       |
| Caenorhabditis briggsae | leukocyte receptor cluster member 1              | 0  | -                                                                                                                                                                                                                                                                                                                                                                                                                                                                      | F:GO:0003674;<br>F:GO:0004872;<br>P:GO:0008150 | -           | IPR019339; PTHR22093 (PANTHER)                                                                   |
| -                       | -                                                | 0  | -                                                                                                                                                                                                                                                                                                                                                                                                                                                                      | -                                              | -           | -                                                                                                |

|                        |                                     |    |                                                                                                                                                                                                                                                                                                                                                 |   |                             |                                                                                                                                                                                   |
|------------------------|-------------------------------------|----|-------------------------------------------------------------------------------------------------------------------------------------------------------------------------------------------------------------------------------------------------------------------------------------------------------------------------------------------------|---|-----------------------------|-----------------------------------------------------------------------------------------------------------------------------------------------------------------------------------|
| Caenorhabditis elegans | briggsae cbr-csnk-1 protein         | 11 | P:GO:0040010;<br>P:GO:0018991;<br>F:GO:0004674;<br>P:GO:0040035;<br>F:GO:0005524;<br>P:GO:0010171;<br>P:GO:0002119;<br>P:GO:0040011;<br>P:GO:0009792;<br>P:GO:0040018;<br>P:GO:0006468                                                                                                                                                          | - | EC:2.7.11.0                 | G3DSA:3.30.200.20 (GENE3D)                                                                                                                                                        |
| Caenorhabditis elegans | vacuolar assembly sorting protein   | 1  | C:GO:0005737                                                                                                                                                                                                                                                                                                                                    | - | -                           | -                                                                                                                                                                                 |
|                        |                                     | 0  |                                                                                                                                                                                                                                                                                                                                                 |   |                             |                                                                                                                                                                                   |
| Caenorhabditis elegans | polynucleotide ki-se 3 -phosphatase | 20 | P:GO:0009314;<br>P:GO:0000718;<br>P:GO:0006979;<br>F:GO:0046404;<br>P:GO:0046939;<br>F:GO:0019201;<br>F:GO:0003684;<br>F:GO:0003690;<br>P:GO:0008340;<br>P:GO:0042769;<br>F:GO:0004519;<br>C:GO:0005730;<br>P:GO:0016311;<br>P:GO:0040007;<br>F:GO:0046403;<br>P:GO:0006261;<br>F:GO:0005524;<br>P:GO:0019915;<br>P:GO:0002119;<br>F:GO:0005515 | - | EC:2.7.1.78;<br>EC:3.1.3.32 | IPR013954; IPR015636;<br>G3DSA:3.40.50.1000 (GENE3D),<br>SSF56784 (SUPERFAMILY)                                                                                                   |
| Caenorhabditis elegans | briggsae cbr-cgh-1 protein          | 20 | P:GO:0008340;<br>P:GO:0017148;<br>F:GO:0005515;<br>P:GO:0040010;<br>P:GO:0006898;<br>P:GO:0006916;<br>P:GO:0009792;<br>P:GO:0002009;<br>C:GO:0043186;<br>P:GO:0002119;<br>C:GO:0005875;<br>F:GO:0003723;<br>P:GO:0007276;<br>C:GO:0000932;<br>P:GO:0051729;<br>P:GO:0016071;<br>F:GO:0004004;<br>F:GO:0005524;<br>P:GO:0033962;<br>P:GO:0040035 | - |                             | IPR000629; IPR001650; IPR011545;<br>IPR014001; IPR014014; IPR014021;<br>G3DSA:3.40.50.300 (GENE3D),<br>PTHR10967 (PANTHER),<br>PTHR10967:SF6 (PANTHER), SSF52540<br>(SUPERFAMILY) |
| Loa loa                | gro-1 operon gene protein 1         | 0  |                                                                                                                                                                                                                                                                                                                                                 |   |                             | IPR019155; PTHR21481 (PANTHER)                                                                                                                                                    |

|                         |                                                         |   |                                                                                                                                     |              |            |                                                                                                                                      |
|-------------------------|---------------------------------------------------------|---|-------------------------------------------------------------------------------------------------------------------------------------|--------------|------------|--------------------------------------------------------------------------------------------------------------------------------------|
| Caenorhabditis elegans  | cytokine induced apoptosis inhibitor 1                  | 7 | P:GO:0030097;<br>C:GO:0005737;<br>C:GO:0005730;<br>P:GO:0009792;<br>P:GO:0000003;<br>P:GO:0006916;<br>P:GO:0006898                  | -            |            | IPR007785; PTHR13273:SF10 (PANTHER)                                                                                                  |
|                         | -                                                       | 0 |                                                                                                                                     |              |            | SignalP (SIGNALP)                                                                                                                    |
| Caenorhabditis elegans  | zinc cchc domain containing 11                          | 8 | F:GO:0016779;<br>P:GO:0016070;<br>P:GO:0010468;<br>F:GO:0005515;<br>P:GO:0050794;<br>P:GO:0007166;<br>C:GO:0044424;<br>P:GO:0001816 | -            | EC:2.7.7.0 | IPR001878; G3DSA:3.30.460.10 (GENE3D), PTHR12271 (PANTHER), PTHR12271:SF15 (PANTHER), SSF81301 (SUPERFAMILY), SSF81631 (SUPERFAMILY) |
| Caenorhabditis elegans  | zinc cchc domain containing 11                          | 8 | F:GO:0016779;<br>P:GO:0016070;<br>P:GO:0010468;<br>F:GO:0005515;<br>P:GO:0050794;<br>P:GO:0007166;<br>C:GO:0044424;<br>P:GO:0001816 | -            | EC:2.7.7.0 | IPR001878; G3DSA:3.30.460.10 (GENE3D), PTHR12271 (PANTHER), PTHR12271:SF15 (PANTHER), SSF81301 (SUPERFAMILY), SSF81631 (SUPERFAMILY) |
| Loa loa                 | protein                                                 | 0 |                                                                                                                                     | P:GO:0051301 |            | IPR001680; IPR011046; IPR015943; IPR017986; IPR019781; IPR019782; PTHR19918 (PANTHER)                                                |
| Caenorhabditis elegans  | ring finger protein 157                                 | 7 | P:GO:0040035;<br>P:GO:0010171;<br>F:GO:0046872;<br>P:GO:0018996;<br>P:GO:0040010;<br>P:GO:0008340;<br>P:GO:0040011                  | -            |            | SignalP (SIGNALP)                                                                                                                    |
| Caenorhabditis briggsae | Hypothetical protein CBG19140 [Caenorhabditis briggsae] | 2 | P:GO:0040010;<br>P:GO:0040017                                                                                                       | -            |            | -                                                                                                                                    |
| Brugia malayi           | d--directed r- polymerase iii subunit rpc8              | 7 | F:GO:0003899;<br>P:GO:0040010;<br>P:GO:0006383;<br>P:GO:0040035;<br>P:GO:0002119;<br>P:GO:0006898;<br>C:GO:0005666                  | -            | EC:2.7.7.6 | PS51257 (PROFILE)                                                                                                                    |
| Caenorhabditis elegans  | elegans protein confirmed by transcript evidence        | 4 | F:GO:0016788;<br>P:GO:0019915;<br>C:GO:0016020;<br>P:GO:0006629                                                                     | -            |            | IPR001087; PTHR21325 (PANTHER)                                                                                                       |

|                           |                                                        |    |                                                                                                                                                                                                         |   |             |                                                                                                                                                |
|---------------------------|--------------------------------------------------------|----|---------------------------------------------------------------------------------------------------------------------------------------------------------------------------------------------------------|---|-------------|------------------------------------------------------------------------------------------------------------------------------------------------|
| Caenorhabditis briggsae   | atp-binding sub-family d member 2                      | 12 | P:GO:0055085;<br>C:GO:0005779;<br>P:GO:0007031;<br>F:GO:0005325;<br>C:GO:0005739;<br>F:GO:0042626;<br>P:GO:0033540;<br>F:GO:0042802;<br>C:GO:0043190;<br>F:GO:0005524;<br>P:GO:0015919;<br>C:GO:0005887 | - | EC:3.6.3.47 | IPR003439; IPR003593; IPR017871;<br>G3DSA:3.40.50.300 (GENE3D),<br>PTHR11384 (PANTHER),<br>PTHR11384:SF12 (PANTHER),<br>SSF52540 (SUPERFAMILY) |
| Caenorhabditis elegans    | hypothetical protein F29B9.11 [Caenorhabditis elegans] | 5  | P:GO:0019915;<br>P:GO:0009792;<br>P:GO:0000003;<br>P:GO:0040010;<br>P:GO:0002119                                                                                                                        | - |             | SignalP (SIGNALP)                                                                                                                              |
| Caenorhabditis briggsae   | transmembrane and coiled-coil domain family 1          | 1  | F:GO:0005515                                                                                                                                                                                            | - |             | IPR019394; PTHR17613 (PANTHER)                                                                                                                 |
|                           | -                                                      | 0  |                                                                                                                                                                                                         |   |             | -                                                                                                                                              |
|                           | -                                                      | 0  |                                                                                                                                                                                                         |   |             | PTHR10499 (PANTHER)                                                                                                                            |
| Caenorhabditis briggsae   | nucleotide-sugar transporter                           | 6  | C:GO:0000139;<br>P:GO:0006047;<br>P:GO:0015788;<br>F:GO:0005351;<br>C:GO:0016021;<br>F:GO:0005462                                                                                                       | - |             | IPR007271; PTHR10231:SF15<br>(PANTHER)                                                                                                         |
|                           | -                                                      | 0  |                                                                                                                                                                                                         |   |             | -                                                                                                                                              |
| Heligmosomoides polygyrus | glutathione s-transferase                              | 3  | P:GO:0008340;<br>P:GO:0040010;<br>F:GO:0016740                                                                                                                                                          | - |             | IPR004045; IPR012335; IPR012336;<br>PTHR11571 (PANTHER),<br>PTHR11571:SF6 (PANTHER)                                                            |
| Caenorhabditis elegans    | family with sequence similarity member a               | 4  | P:GO:0040035;<br>P:GO:0002119;<br>P:GO:0008340;<br>P:GO:0040039                                                                                                                                         | - |             | IPR018619                                                                                                                                      |
|                           | -                                                      | 0  |                                                                                                                                                                                                         |   |             | SignalP (SIGNALP)                                                                                                                              |
| Caenorhabditis briggsae   | tumor suppressor candidate 3                           | 8  | P:GO:0040035;<br>P:GO:0009792;<br>P:GO:0002119;<br>P:GO:0018996;<br>C:GO:0008250;<br>P:GO:0040007;<br>P:GO:0006898;<br>C:GO:0005739                                                                     | - |             | IPR006844; IPR012335; IPR012336;<br>IPR021149; SignalP (SIGNALP)                                                                               |
| Brugia malayi             | beta -galactosyltransferase-like                       | 1  | C:GO:0044464                                                                                                                                                                                            | - |             | IPR003378; PTHR10811 (PANTHER),<br>PTHR10811:SF2 (PANTHER)                                                                                     |
| Caenorhabditis briggsae   | d- repair protein rad50                                | 5  | P:GO:0040010;<br>P:GO:0045132;<br>P:GO:0006915;<br>P:GO:0000003;<br>P:GO:0009792                                                                                                                        | - |             | G3DSA:3.40.50.300 (GENE3D),<br>PTHR18867 (PANTHER),<br>PTHR18867:SF11 (PANTHER),<br>SSF52540 (SUPERFAMILY)                                     |
| Caenorhabditis briggsae   | elegans protein confirmed by transcript evidence       | 0  |                                                                                                                                                                                                         |   |             | -                                                                                                                                              |
|                           | -                                                      | 0  |                                                                                                                                                                                                         |   |             | -                                                                                                                                              |

|                                    |                                                  |    |                                                                                                                                                                                                                                           |   |             |                                                                                       |
|------------------------------------|--------------------------------------------------|----|-------------------------------------------------------------------------------------------------------------------------------------------------------------------------------------------------------------------------------------------|---|-------------|---------------------------------------------------------------------------------------|
| Caenorhabditis briggsae            | d- polymerase delta catalytic subunit            | 14 | C:GO:0005875;<br>P:GO:0000910;<br>F:GO:0003887;<br>F:GO:0008310;<br>C:GO:0043625;<br>F:GO:0003677;<br>P:GO:0006272;<br>P:GO:0035188;<br>P:GO:0002119;<br>F:GO:0000166;<br>P:GO:0006898;<br>P:GO:0006273;<br>P:GO:0009792;<br>P:GO:0006974 | - | EC:2.7.7.7  | IPR006134; PTHR10322 (PANTHER),<br>PTHR10322:SF4 (PANTHER), SSF56672<br>(SUPERFAMILY) |
| -                                  | -                                                | 0  |                                                                                                                                                                                                                                           |   |             | -                                                                                     |
| -                                  | -                                                | 0  |                                                                                                                                                                                                                                           |   |             | SignalP (SIGNALP)                                                                     |
| NADP, mitochondrial-like isoform 3 | isocitrate dehydroge-se                          | 9  | F:GO:0051287;<br>F:GO:0004450;<br>P:GO:0006103;<br>P:GO:0055114;<br>F:GO:0000287;<br>P:GO:0006099;<br>P:GO:0006102;<br>C:GO:0005739;<br>P:GO:0006097                                                                                      | - | EC:1.1.1.42 | -                                                                                     |
| Brugia malayi                      | centromere kinetochore protein zw10 homolog      | 9  | P:GO:0051649;<br>P:GO:0006996;<br>P:GO:0016192;<br>C:GO:0005694;<br>C:GO:0005856;<br>P:GO:0050789;<br>C:GO:0044446;<br>P:GO:0000087;<br>F:GO:0005488                                                                                      | - |             | IPR009361; PTHR12205 (PANTHER)                                                        |
| -                                  | -                                                | 0  |                                                                                                                                                                                                                                           |   |             | -                                                                                     |
| Caenorhabditis elegans             | transmembrane protein 53                         | 1  | F:GO:0005515                                                                                                                                                                                                                              | - |             | IPR008547                                                                             |
| Caenorhabditis elegans             | elegans protein confirmed by transcript evidence | 1  | F:GO:0005515                                                                                                                                                                                                                              | - |             | SignalP (SIGNALP)                                                                     |
| Caenorhabditis briggsae            | bed zinc finger family protein                   | 2  | F:GO:0005515;<br>F:GO:0003677                                                                                                                                                                                                             | - |             | IPR003656; PTHR21709 (PANTHER)                                                        |
| Homo sapiens                       | ribosomal p0                                     | 7  | F:GO:0003735;<br>F:GO:0003723;<br>F:GO:0005515;<br>P:GO:0042254;<br>C:GO:0022625;<br>P:GO:0044419;<br>P:GO:0006414                                                                                                                        | - |             | IPR001790; IPR001813; PTHR21141<br>(PANTHER)                                          |
| Canis familiaris                   | rplp0 protein                                    | 7  | F:GO:0003735;<br>F:GO:0003723;<br>F:GO:0005515;<br>P:GO:0042254;<br>C:GO:0022625;<br>P:GO:0044419;<br>P:GO:0006414                                                                                                                        | - |             | IPR001790; IPR001813; PTHR21141<br>(PANTHER)                                          |
| -                                  | -                                                | 0  |                                                                                                                                                                                                                                           |   |             | SignalP (SIGNALP)                                                                     |



|                         |                                                  |    |                                                                                                                                                                                                                                           |                                                                                                   |             |                                                                                                                                                                             |
|-------------------------|--------------------------------------------------|----|-------------------------------------------------------------------------------------------------------------------------------------------------------------------------------------------------------------------------------------------|---------------------------------------------------------------------------------------------------|-------------|-----------------------------------------------------------------------------------------------------------------------------------------------------------------------------|
| Caenorhabditis elegans  | casein ki-se                                     | 14 | P:GO:0040010;<br>P:GO:0016055;<br>P:GO:0018991;<br>F:GO:0004674;<br>P:GO:0008347;<br>P:GO:0040035;<br>P:GO:0007283;<br>F:GO:0005524;<br>P:GO:0010171;<br>P:GO:0002119;<br>P:GO:0009792;<br>P:GO:0040018;<br>C:GO:0005886;<br>P:GO:0006468 | -                                                                                                 | EC:2.7.11.0 | IPR000719; IPR008271; IPR011009;<br>IPR017441; IPR017442;<br>G3DSA:1.10.510.10 (GENE3D),<br>G3DSA:3.30.200.20 (GENE3D),<br>PTHR11909 (PANTHER),<br>PTHR11909:SF18 (PANTHER) |
| -                       | -                                                | 0  |                                                                                                                                                                                                                                           |                                                                                                   |             | SSF56672 (SUPERFAMILY)                                                                                                                                                      |
| Caenorhabditis elegans  | osteoclast stimulating factor 1                  | 2  | F:GO:0017124;<br>F:GO:0042802                                                                                                                                                                                                             | -                                                                                                 |             | IPR000108; IPR001452; IPR002110;<br>IPR020683; G3DSA:2.30.30.40<br>(GENE3D), PTHR18958 (PANTHER),<br>PTHR18958:SF213 (PANTHER)                                              |
| -                       | -                                                | 0  |                                                                                                                                                                                                                                           |                                                                                                   |             | -                                                                                                                                                                           |
| -                       | -                                                | 0  |                                                                                                                                                                                                                                           |                                                                                                   |             | -                                                                                                                                                                           |
| Bos taurus              | family with sequence similarity member a1        | 0  |                                                                                                                                                                                                                                           | F:GO:0003674;<br>C:GO:0005575                                                                     |             | -                                                                                                                                                                           |
| Caenorhabditis elegans  | serine active site containing 1                  | 4  | P:GO:0009792;<br>F:GO:0016788;<br>P:GO:0006886;<br>C:GO:0031227                                                                                                                                                                           | -                                                                                                 |             | IPR012908; G3DSA:3.40.50.1820<br>(GENE3D), PTHR22731 (PANTHER),<br>SSF53474 (SUPERFAMILY)                                                                                   |
| Caenorhabditis briggsae | elegans protein confirmed by transcript evidence | 4  | F:GO:0005515;<br>P:GO:0044237;<br>P:GO:0040010;<br>F:GO:0003824                                                                                                                                                                           | -                                                                                                 |             | IPR002198; IPR002347; IPR016040;<br>IPR020904; PTHR19410:SF76<br>(PANTHER), SSF51735 (SUPERFAMILY)                                                                          |
| Caenorhabditis elegans  | c-type lectin family member (clec-88)            | 0  |                                                                                                                                                                                                                                           | F:GO:0005488;<br>F:GO:0003674;<br>C:GO:0016021;<br>F:GO:0005529;<br>P:GO:0008150;<br>C:GO:0005575 |             | -                                                                                                                                                                           |
| Caenorhabditis elegans  | c-type lectin family member (clec-88)            | 0  |                                                                                                                                                                                                                                           | F:GO:0005488;<br>F:GO:0003674;<br>C:GO:0016021;<br>F:GO:0005529;<br>P:GO:0008150;<br>C:GO:0005575 |             | -                                                                                                                                                                           |

|                           |                                                            |    |                                                                                                                                                                                                                                                                                              |   |  |                                                                                     |
|---------------------------|------------------------------------------------------------|----|----------------------------------------------------------------------------------------------------------------------------------------------------------------------------------------------------------------------------------------------------------------------------------------------|---|--|-------------------------------------------------------------------------------------|
| Caenorhabditis briggsae   | laminin receptor 1                                         | 17 | P:GO:0040010;<br>P:GO:0016337;<br>F:GO:0003735;<br>C:GO:0005604;<br>F:GO:0005055;<br>P:GO:0040035;<br>P:GO:0006414;<br>P:GO:0018996;<br>C:GO:0022627;<br>F:GO:0043022;<br>C:GO:0005624;<br>P:GO:0002119;<br>F:GO:0043236;<br>P:GO:0030855;<br>C:GO:0043025;<br>P:GO:0009792;<br>C:GO:0016020 | - |  | IPR001865; IPR005707; IPR018130                                                     |
| Caenorhabditis briggsae   | laminin receptor 1                                         | 17 | P:GO:0040010;<br>P:GO:0016337;<br>F:GO:0003735;<br>C:GO:0005604;<br>F:GO:0005055;<br>P:GO:0040035;<br>P:GO:0006414;<br>P:GO:0018996;<br>C:GO:0022627;<br>F:GO:0043022;<br>C:GO:0005624;<br>P:GO:0002119;<br>F:GO:0043236;<br>P:GO:0030855;<br>C:GO:0043025;<br>P:GO:0009792;<br>C:GO:0016020 | - |  | IPR001865; IPR005707; IPR018130                                                     |
|                           | -                                                          | 0  |                                                                                                                                                                                                                                                                                              |   |  | -                                                                                   |
| Teladorsagia circumcincta | calcium activated nucleotidase isoform cra_b               | 9  | P:GO:0040010;<br>C:GO:0043231;<br>P:GO:0008340;<br>F:GO:0004871;<br>P:GO:0043123;<br>F:GO:0005515;<br>C:GO:0044444;<br>F:GO:0016787;<br>C:GO:0016020                                                                                                                                         | - |  | IPR009283; SignalP (SIGNALP)                                                        |
| Caenorhabditis briggsae   | elegans protein partially confirmed by transcript evidence | 4  | F:GO:0005097;<br>C:GO:0005622;<br>P:GO:0000003;<br>P:GO:0032313                                                                                                                                                                                                                              | - |  | IPR000195; G3DSA:1.10.8.270 (GENE3D), PTHR22957 (PANTHER), PTHR22957:SF46 (PANTHER) |
| Caenorhabditis briggsae   | elegans protein partially confirmed by transcript evidence | 4  | F:GO:0005097;<br>C:GO:0005622;<br>P:GO:0000003;<br>P:GO:0032313                                                                                                                                                                                                                              | - |  | IPR000195; G3DSA:1.10.8.270 (GENE3D), PTHR22957 (PANTHER), PTHR22957:SF46 (PANTHER) |

|                         |                                                          |    |                                                                                                                                                                                                                          |   |                                                         |                                                                                                                                                      |
|-------------------------|----------------------------------------------------------|----|--------------------------------------------------------------------------------------------------------------------------------------------------------------------------------------------------------------------------|---|---------------------------------------------------------|------------------------------------------------------------------------------------------------------------------------------------------------------|
| Tribolium castaneum     | ubiquitin carboxyl-termini hydrolase 14                  | 13 | F:GO:0004221;<br>N:GO:0061136;<br>F:GO:0004866;<br>C:GO:0005625;<br>P:GO:0050920;<br>C:GO:0009986;<br>F:GO:0004197;<br>C:GO:0016023;<br>F:GO:0004843;<br>P:GO:0007268;<br>F:GO:0070628;<br>C:GO:0019717;<br>F:GO:0008193 | - | EC:3.1.2.15;<br>EC:3.4.22.0                             | SignalP (SIGNALP)                                                                                                                                    |
| Loa loa                 | ubiquitin-conjugating enzyme e2 j2                       | 3  | P:GO:0051246;<br>F:GO:0019787;<br>P:GO:0043687                                                                                                                                                                           | - |                                                         | IPR000608; IPR016135; PTHR11621 (PANTHER), PTHR11621:SF14 (PANTHER)                                                                                  |
|                         | -                                                        | 0  |                                                                                                                                                                                                                          |   |                                                         | SignalP (SIGNALP)                                                                                                                                    |
| Caenorhabditis elegans  | abhydrolase domain containing 5                          | 4  | P:GO:0050789;<br>P:GO:0008152;<br>C:GO:0005811;<br>F:GO:0016787                                                                                                                                                          | - |                                                         | IPR000073; G3DSA:3.40.50.1820 (GENE3D), PTHR10992 (PANTHER), PTHR10992:SF19 (PANTHER), SSF53474 (SUPERFAMILY)                                        |
|                         | -                                                        | 0  |                                                                                                                                                                                                                          |   |                                                         | -                                                                                                                                                    |
| Caenorhabditis elegans  | ubiquinol-cytochrome c reductase hinge protein variant 1 | 2  | P:GO:0006122;<br>F:GO:0008121                                                                                                                                                                                            | - | EC:1.10.2.2                                             | IPR003422; IPR023184                                                                                                                                 |
| Caenorhabditis elegans  | illin homolo family member (pxl-1)                       | 3  | P:GO:0009792;<br>P:GO:0040010;<br>P:GO:0002119                                                                                                                                                                           | - |                                                         | -                                                                                                                                                    |
| Caenorhabditis briggsae | cytoplasmic dynein 1 intermediate chain 2                | 7  | P:GO:0002119;<br>P:GO:0035046;<br>C:GO:0005869;<br>F:GO:0005515;<br>P:GO:0040007;<br>P:GO:0006898;<br>C:GO:0005868                                                                                                       | - |                                                         | IPR001680; IPR011046; IPR015943; IPR017986; IPR019775; IPR019781; IPR019782; PTHR12442 (PANTHER), PTHR12442:SF22 (PANTHER)                           |
| Caenorhabditis briggsae | cytoplasmic dynein 1 intermediate chain 2                | 7  | P:GO:0002119;<br>P:GO:0035046;<br>C:GO:0005869;<br>F:GO:0005515;<br>P:GO:0040007;<br>P:GO:0006898;<br>C:GO:0005868                                                                                                       | - |                                                         | IPR001680; IPR011046; IPR015943; IPR017986; IPR019775; IPR019781; IPR019782; PTHR12442 (PANTHER), PTHR12442:SF22 (PANTHER)                           |
| Caenorhabditis briggsae | member ras oncogene family                               | 13 | P:GO:0007049;<br>C:GO:0005739;<br>P:GO:0007264;<br>P:GO:0048169;<br>C:GO:0030133;<br>P:GO:0051223;<br>F:GO:0019003;<br>P:GO:0006184;<br>C:GO:0055037;<br>C:GO:0005802;<br>F:GO:0003924;<br>F:GO:0005525;<br>C:GO:0005886 | - | EC:3.6.5.1;<br>EC:3.6.5.2;<br>EC:3.6.5.3;<br>EC:3.6.5.4 | IPR001806; IPR002078; IPR003579; IPR005225; IPR013753; IPR015595; IPR020851; G3DSA:3.40.50.300 (GENE3D), PTHR11708 (PANTHER), SSF52540 (SUPERFAMILY) |
|                         | -                                                        | 0  |                                                                                                                                                                                                                          |   |                                                         | -                                                                                                                                                    |

|                         |                                                          |    |                                                                                                                                                                                                                                                                                              |                                                                 |             |                                                                                                              |
|-------------------------|----------------------------------------------------------|----|----------------------------------------------------------------------------------------------------------------------------------------------------------------------------------------------------------------------------------------------------------------------------------------------|-----------------------------------------------------------------|-------------|--------------------------------------------------------------------------------------------------------------|
| Caenorhabditis elegans  | excitatory amino acid transporter 2                      | 17 | P:GO:0031668;<br>C:GO:0016021;<br>P:GO:0009611;<br>P:GO:0046326;<br>P:GO:0051938;<br>P:GO:0007632;<br>P:GO:0035264;<br>P:GO:0010259;<br>P:GO:0070779;<br>F:GO:0015501;<br>P:GO:0021537;<br>F:GO:0017153;<br>P:GO:0006835;<br>P:GO:0042493;<br>C:GO:0030673;<br>P:GO:0043200;<br>P:GO:0030534 | -                                                               |             | IPR001991; IPR018107;<br>PTHR11958:SF23 (PANTHER), SignalP (SIGNALP), SSF118215 (SUPERFAMILY)                |
| Caenorhabditis elegans  | yol4_caeeel ame: full=uncharacterized nte family protein | 0  |                                                                                                                                                                                                                                                                                              | C:GO:0005789;<br>P:GO:0006629;<br>C:GO:0016021;<br>P:GO:0046470 |             | SignalP (SIGNALP)                                                                                            |
|                         |                                                          | 0  |                                                                                                                                                                                                                                                                                              |                                                                 |             |                                                                                                              |
| Caenorhabditis elegans  | katanin p80 wd40-containing subunit b1                   | 5  | F:GO:0005515;<br>C:GO:0044430;<br>C:GO:0015630;<br>P:GO:0016043;<br>P:GO:0050794                                                                                                                                                                                                             | -                                                               |             | IPR001680; IPR011046; IPR015943;<br>IPR017986; IPR019781; PTHR19845 (PANTHER)                                |
| Caenorhabditis elegans  | katanin p80 wd40-containing subunit b1                   | 5  | F:GO:0005515;<br>C:GO:0044430;<br>C:GO:0015630;<br>P:GO:0016043;<br>P:GO:0050794                                                                                                                                                                                                             | -                                                               |             | IPR001680; IPR011046; IPR015943;<br>IPR017986; IPR019781; PTHR19845 (PANTHER)                                |
| Caenorhabditis briggsae | briggsae cbr-smf-1 protein                               | 3  | P:GO:0010467;<br>C:GO:0016020;<br>P:GO:0019725                                                                                                                                                                                                                                               | -                                                               |             | IPR001046; PTHR11706:SF7 (PANTHER), SignalP (SIGNALP)                                                        |
| Loa loa                 | n-termi-l acetyltransferase complex ard1 subunit         | 9  | C:GO:0005737;<br>P:GO:0009792;<br>P:GO:0002119;<br>P:GO:0006474;<br>F:GO:0005515;<br>F:GO:0004596;<br>P:GO:0000003;<br>C:GO:0005634;<br>F:GO:0043022                                                                                                                                         | -                                                               | EC:2.3.1.88 | IPR000182; IPR016181; PTHR23091 (PANTHER), PTHR23091:SF4 (PANTHER)                                           |
| Caenorhabditis briggsae | methionine gamma-lyase                                   | 4  | F:GO:0030170;<br>F:GO:0016769;<br>P:GO:0006520;<br>P:GO:0009058                                                                                                                                                                                                                              | -                                                               |             | IPR000277; IPR015421; IPR015424;<br>PTHR11808:SF19 (PANTHER)                                                 |
| Caenorhabditis briggsae | apoptosis-linked protein 2                               | 1  | F:GO:0005509                                                                                                                                                                                                                                                                                 | -                                                               |             | -                                                                                                            |
| Caenorhabditis briggsae | apoptosis-linked protein 2                               | 1  | F:GO:0005509                                                                                                                                                                                                                                                                                 | -                                                               |             | -                                                                                                            |
| Caenorhabditis elegans  | hypothetical protein F40B5.2 [Caenorhabditis elegans]    | 0  |                                                                                                                                                                                                                                                                                              | F:GO:0016787;<br>C:GO:0016021                                   |             | SignalP (SIGNALP)                                                                                            |
| Caenorhabditis elegans  | leucine rich repeat family protein                       | 6  | P:GO:0009792;<br>P:GO:0002119;<br>F:GO:0005488;<br>P:GO:0018996;<br>P:GO:0040017;<br>P:GO:0040007                                                                                                                                                                                            | -                                                               |             | IPR001611; G3DSA:3.80.10.10 (GENE3D), PTHR23154 (PANTHER), PTHR23154:SF116 (PANTHER), SSF52058 (SUPERFAMILY) |

|                         |                                       |   |                                                                                                                    |                                                                                                                                                                                                                                                                                              |                             |                                                                                                                                                                   |
|-------------------------|---------------------------------------|---|--------------------------------------------------------------------------------------------------------------------|----------------------------------------------------------------------------------------------------------------------------------------------------------------------------------------------------------------------------------------------------------------------------------------------|-----------------------------|-------------------------------------------------------------------------------------------------------------------------------------------------------------------|
| Caenorhabditis briggsae | n-acetyltransferase 5                 | 2 | P:GO:0008152;<br>F:GO:0004596                                                                                      | -                                                                                                                                                                                                                                                                                            | EC:2.3.1.88                 | -                                                                                                                                                                 |
| Tribolium castaneum     | coagulation factor xi                 | 0 |                                                                                                                    | F:GO:0004252;<br>C:GO:0001669;<br>C:GO:0016020;<br>F:GO:0016787;<br>F:GO:0008236;<br>C:GO:0043234;<br>F:GO:0003824;<br>C:GO:0005575;<br>F:GO:0008233;<br>P:GO:0006508;<br>F:GO:0005515;<br>P:GO:0007190;<br>P:GO:0007339;<br>P:GO:0007341;<br>F:GO:0005537;<br>P:GO:0007338;<br>P:GO:0007340 |                             | IPR001254; IPR001314; IPR005514;<br>IPR009003; IPR018114;<br>G3DSA:2.40.10.10 (GENE3D),<br>PTHR19355 (PANTHER),<br>PTHR19355:SF82 (PANTHER), SignalP<br>(SIGNALP) |
|                         |                                       | 0 |                                                                                                                    |                                                                                                                                                                                                                                                                                              |                             |                                                                                                                                                                   |
| Caenorhabditis elegans  | gpn-loop gtpase 1                     | 7 | P:GO:0040010;<br>P:GO:0040035;<br>P:GO:0002119;<br>F:GO:0005515;<br>P:GO:0006898;<br>P:GO:0009792;<br>F:GO:0005525 | -                                                                                                                                                                                                                                                                                            |                             | IPR004130; G3DSA:3.40.50.300<br>(GENE3D), PTHR21231 (PANTHER),<br>PTHR21231:SF1 (PANTHER), SSF52540<br>(SUPERFAMILY)                                              |
|                         |                                       | 0 |                                                                                                                    |                                                                                                                                                                                                                                                                                              |                             |                                                                                                                                                                   |
| Homo sapiens            | transmembrane protein 147             | 2 | F:GO:0005515;<br>C:GO:0016021                                                                                      | -                                                                                                                                                                                                                                                                                            |                             | IPR019164; PTHR12869 (PANTHER)                                                                                                                                    |
|                         |                                       | 0 |                                                                                                                    |                                                                                                                                                                                                                                                                                              |                             |                                                                                                                                                                   |
| Loa loa                 | lethal isoform k                      | 6 | F:GO:0000827;<br>F:GO:0003993;<br>F:GO:0000832;<br>P:GO:0006020;<br>F:GO:0033857;<br>C:GO:0005829                  | -                                                                                                                                                                                                                                                                                            | EC:3.1.3.2;<br>EC:2.7.4.24  | PTHR12750 (PANTHER),<br>PTHR12750:SF5 (PANTHER)                                                                                                                   |
| Caenorhabditis briggsae | phospholipase plb1                    | 0 |                                                                                                                    | P:GO:0006629;<br>F:GO:0016788;<br>F:GO:0016787                                                                                                                                                                                                                                               |                             | PTHR21325 (PANTHER)                                                                                                                                               |
| Caenorhabditis briggsae | peptidase d                           | 6 | F:GO:0030145;<br>F:GO:0004181;<br>P:GO:0007281;<br>F:GO:0004177;<br>P:GO:0006520;<br>P:GO:0006508                  | -                                                                                                                                                                                                                                                                                            | EC:3.4.17.0;<br>EC:3.4.11.0 | IPR000994; IPR001131; IPR007865;<br>G3DSA:3.40.350.10 (GENE3D),<br>PTHR10804:SF17 (PANTHER),<br>SSF53092 (SUPERFAMILY)                                            |
| Brugia malayi           | peptidase d                           | 5 | F:GO:0030145;<br>F:GO:0008235;<br>P:GO:0007281;<br>F:GO:0004177;<br>P:GO:0006508                                   | -                                                                                                                                                                                                                                                                                            | EC:3.4.11.0                 | IPR007865; G3DSA:3.40.350.10<br>(GENE3D), SSF53092 (SUPERFAMILY)                                                                                                  |
| Ancylostoma ceylanicum  | kunitz type serine protease inhibitor | 0 |                                                                                                                    | F:GO:0008233;<br>F:GO:0004867                                                                                                                                                                                                                                                                |                             | IPR002223; PTHR10083 (PANTHER),<br>PTHR10083:SF17 (PANTHER)                                                                                                       |

|                         |                                                  |    |                                                                                                                                                                                                                                                                                                                                                                                                                                                                        |                                                         |                                                                                                                                |
|-------------------------|--------------------------------------------------|----|------------------------------------------------------------------------------------------------------------------------------------------------------------------------------------------------------------------------------------------------------------------------------------------------------------------------------------------------------------------------------------------------------------------------------------------------------------------------|---------------------------------------------------------|--------------------------------------------------------------------------------------------------------------------------------|
| Loa loa                 | adp-ribosylation factor 1                        | 27 | F:GO:0004871;<br>P:GO:0008360;<br>F:GO:0005515;<br>P:GO:0007155;<br>P:GO:0040010;<br>P:GO:0007269;<br>P:GO:0040011;<br>F:GO:0005525;<br>C:GO:0005794;<br>P:GO:0006886;<br>C:GO:0005829;<br>P:GO:0006471;<br>P:GO:0007264;<br>P:GO:0009792;<br>P:GO:0002009;<br>P:GO:0016197;<br>P:GO:0002119;<br>P:GO:0007186;<br>P:GO:0010883;<br>C:GO:0012505;<br>C:GO:0005783;<br>P:GO:0048599;<br>F:GO:0003924;<br>C:GO:0005634;<br>P:GO:0040035;<br>C:GO:0030017;<br>P:GO:0048488 | EC:3.6.5.1;<br>EC:3.6.5.2;<br>EC:3.6.5.3;<br>EC:3.6.5.4 | IPR006688; IPR006689;<br>G3DSA:3.40.50.300 (GENE3D),<br>PTHR11711:SF30 (PANTHER), PSS1417<br>(PROFILE), SSF52540 (SUPERFAMILY) |
| Loa loa                 | adp-ribosylation factor 1                        | 27 | F:GO:0004871;<br>P:GO:0008360;<br>F:GO:0005515;<br>P:GO:0007155;<br>P:GO:0040010;<br>P:GO:0007269;<br>P:GO:0040011;<br>F:GO:0005525;<br>C:GO:0005794;<br>P:GO:0006886;<br>C:GO:0005829;<br>P:GO:0006471;<br>P:GO:0007264;<br>P:GO:0009792;<br>P:GO:0002009;<br>P:GO:0016197;<br>P:GO:0002119;<br>P:GO:0007186;<br>P:GO:0010883;<br>C:GO:0012505;<br>C:GO:0005783;<br>P:GO:0048599;<br>F:GO:0003924;<br>C:GO:0005634;<br>P:GO:0040035;<br>C:GO:0030017;<br>P:GO:0048488 | EC:3.6.5.1;<br>EC:3.6.5.2;<br>EC:3.6.5.3;<br>EC:3.6.5.4 | IPR006688; IPR006689;<br>G3DSA:3.40.50.300 (GENE3D),<br>PTHR11711:SF30 (PANTHER), PSS1417<br>(PROFILE), SSF52540 (SUPERFAMILY) |
| Caenorhabditis brenneri | elegans protein confirmed by transcript evidence | 0  |                                                                                                                                                                                                                                                                                                                                                                                                                                                                        |                                                         | IPR021869                                                                                                                      |
| Caenorhabditis briggsae | transmembrane protein 115                        | 1  | C:GO:0044464                                                                                                                                                                                                                                                                                                                                                                                                                                                           |                                                         | IPR013861; PTHR13377 (PANTHER),<br>SignalP (SIGNALP)                                                                           |

|                         |                                       |    |  |                                                                                                                                                                                                                                                                                                                                                                  |   |                                                                                                                                                     |
|-------------------------|---------------------------------------|----|--|------------------------------------------------------------------------------------------------------------------------------------------------------------------------------------------------------------------------------------------------------------------------------------------------------------------------------------------------------------------|---|-----------------------------------------------------------------------------------------------------------------------------------------------------|
| Caenorhabditis briggsae | transmembrane protein 115             | 0  |  | F:GO:0003674;<br>C:GO:0016021;<br>C:GO:0016020;<br>P:GO:0008150;<br>C:GO:0005575                                                                                                                                                                                                                                                                                 |   | IPR013861; PTHR13377 (PANTHER),<br>SignalP (SIGNALP)                                                                                                |
| Caenorhabditis elegans  | chromatin modifying protein 5         | 8  |  | C:GO:0005768;<br>P:GO:0008333;<br>F:GO:0005515;<br>P:GO:0007040;<br>C:GO:0016020;<br>C:GO:0005634;<br>P:GO:0001919;<br>P:GO:0015031                                                                                                                                                                                                                              | - | IPR005024; PTHR22761 (PANTHER)                                                                                                                      |
|                         | -                                     | 0  |  |                                                                                                                                                                                                                                                                                                                                                                  |   | -                                                                                                                                                   |
| Caenorhabditis briggsae | gamma-secretase subunit pen-2         | 21 |  | F:GO:0004175;<br>F:GO:0005515;<br>P:GO:0043085;<br>P:GO:0048542;<br>P:GO:0016482;<br>P:GO:0042332;<br>P:GO:0031293;<br>C:GO:0005794;<br>P:GO:0008624;<br>P:GO:0007291;<br>P:GO:0006509;<br>P:GO:0016485;<br>P:GO:0007220;<br>P:GO:0007301;<br>C:GO:0005875;<br>C:GO:0012505;<br>P:GO:0042987;<br>C:GO:0005783;<br>C:GO:0005811;<br>C:GO:0005887;<br>P:GO:0006606 | - | IPR019379; PTHR16318 (PANTHER),<br>SignalP (SIGNALP)                                                                                                |
| Caenorhabditis elegans  | had-superfamily hydrolase             | 0  |  | C:GO:0009507;<br>F:GO:0016787;<br>P:GO:0008152;<br>F:GO:0003824                                                                                                                                                                                                                                                                                                  |   | IPR005834; G3DSA:3.40.50.1000<br>(GENE3D), PTHR18901 (PANTHER),<br>SSF56784 (SUPERFAMILY)                                                           |
| Apis mellifera          | protein tyrosine receptor a isoform 2 | 5  |  | F:GO:0032403;<br>P:GO:0048714;<br>F:GO:0004725;<br>C:GO:0005792;<br>C:GO:0005886                                                                                                                                                                                                                                                                                 | - | EC:3.1.3.48<br>IPR000242; IPR000387; IPR016130;<br>G3DSA:3.90.190.10 (GENE3D),<br>PTHR19134 (PANTHER), SignalP<br>(SIGNALP), SSF52799 (SUPERFAMILY) |
|                         | -                                     | 0  |  |                                                                                                                                                                                                                                                                                                                                                                  |   | IPR003195; PTHR11380:SF3<br>(PANTHER)                                                                                                               |
|                         | -                                     | 0  |  |                                                                                                                                                                                                                                                                                                                                                                  |   | -                                                                                                                                                   |
|                         | -                                     | 0  |  |                                                                                                                                                                                                                                                                                                                                                                  |   | -                                                                                                                                                   |
| Oigolaimella attenuata  | large subunit ribosomal protein 29    | 3  |  | C:GO:0005840;<br>F:GO:0003735;<br>P:GO:0006412                                                                                                                                                                                                                                                                                                                   | - | EC:3.6.5.3<br>-                                                                                                                                     |
| Loa loa                 | protein lsm12 homolog                 | 0  |  | F:GO:0003674;<br>P:GO:0008150;<br>F:GO:0005515;<br>C:GO:0005575                                                                                                                                                                                                                                                                                                  |   | IPR019181                                                                                                                                           |

|                         |                                                            |    |                                                                                                                                                                                                                                                                             |   |             |                                                                                                                |
|-------------------------|------------------------------------------------------------|----|-----------------------------------------------------------------------------------------------------------------------------------------------------------------------------------------------------------------------------------------------------------------------------|---|-------------|----------------------------------------------------------------------------------------------------------------|
| Caenorhabditis elegans  | subfamily member 10                                        | 5  | P:GO:0006457;<br>P:GO:0045454;<br>F:GO:0031072;<br>F:GO:0051082;<br>C:GO:0005783                                                                                                                                                                                            | - |             | IPR001623; IPR012335; IPR012336;<br>IPR013766; IPR015609; IPR017936;<br>IPR018253; PTHR11821:SF16<br>(PANTHER) |
| Caenorhabditis elegans  | u4 u6 small nuclear ribonucleoprotein prp3                 | 4  | C:GO:0044428;<br>P:GO:0006898;<br>C:GO:0030529;<br>P:GO:0006396                                                                                                                                                                                                             | - |             | IPR010541; IPR013881; PTHR14212<br>(PANTHER)                                                                   |
| Caenorhabditis elegans  | protein phosphatase pp2a regulatory subunit b              | 16 | P:GO:0006470;<br>F:GO:0008601;<br>P:GO:0016055;<br>P:GO:0007447;<br>C:GO:0005875;<br>P:GO:0007423;<br>P:GO:0007088;<br>P:GO:0007406;<br>F:GO:0004722;<br>P:GO:0001700;<br>P:GO:0000090;<br>P:GO:0045201;<br>P:GO:0007165;<br>C:GO:0000159;<br>C:GO:0005737;<br>C:GO:0005634 | - |             | IPR000009; IPR001680; IPR011046;<br>IPR015943; IPR018067; IPR019781                                            |
| Caenorhabditis elegans  | cohesin loading complex subunit scc4 homolog               | 3  | P:GO:0007049;<br>C:GO:0005634;<br>C:GO:0044446                                                                                                                                                                                                                              | - |             | IPR019440; PTHR21394 (PANTHER)                                                                                 |
| Caenorhabditis elegans  | hypothetical protein T23F2.2 [Caenorhabditis elegans]      | 0  |                                                                                                                                                                                                                                                                             |   |             | -                                                                                                              |
| Caenorhabditis briggsae | sodium hydrogen exchanger 8                                | 5  | F:GO:0015385;<br>P:GO:0055085;<br>P:GO:0006812;<br>P:GO:0006885;<br>C:GO:0016021                                                                                                                                                                                            | - |             | IPR004709; IPR006153; IPR018407;<br>IPR018422; SignalP (SIGNALP)                                               |
| Caenorhabditis elegans  | apurinic endonuclease apn1                                 | 7  | P:GO:0009792;<br>F:GO:0003677;<br>C:GO:0005622;<br>F:GO:0008833;<br>F:GO:0016829;<br>F:GO:0008270;<br>P:GO:0006281                                                                                                                                                          | - | EC:3.1.21.2 | IPR001719; IPR012307; IPR013022;<br>IPR018246                                                                  |
| Caenorhabditis briggsae | elegans protein partially confirmed by transcript evidence | 2  | P:GO:0006810;<br>C:GO:0016020                                                                                                                                                                                                                                               | - |             | -                                                                                                              |
|                         | -                                                          | 0  |                                                                                                                                                                                                                                                                             |   |             | -                                                                                                              |
| Ascaris lumbricoides    | cytoplasmic intermediate filament protein                  | 9  | P:GO:0009792;<br>P:GO:0010171;<br>P:GO:0002119;<br>P:GO:0018991;<br>P:GO:0018996;<br>F:GO:0005515;<br>P:GO:0040010;<br>P:GO:0040011;<br>P:GO:0006898                                                                                                                        | - |             | IPR001664; IPR016044; PD936484<br>(PRODOM), PTHR23239:SF13<br>(PANTHER)                                        |
| Caenorhabditis briggsae | novel protein                                              | 2  | P:GO:0040018;<br>P:GO:0002119                                                                                                                                                                                                                                               | - |             | IPR003890; IPR016021; PTHR18034<br>(PANTHER), PTHR18034:SF4<br>(PANTHER)                                       |



|                         |                                                                |    |                                                                                                                                                                                        |                                                                                                                                                                                        |                            |                                                                                                                                  |
|-------------------------|----------------------------------------------------------------|----|----------------------------------------------------------------------------------------------------------------------------------------------------------------------------------------|----------------------------------------------------------------------------------------------------------------------------------------------------------------------------------------|----------------------------|----------------------------------------------------------------------------------------------------------------------------------|
| Caenorhabditis elegans  | zinc carboxypeptidase family protein                           | 0  |                                                                                                                                                                                        | P:GO:0006508;<br>F:GO:0004181;<br>F:GO:0004180;<br>F:GO:0008270                                                                                                                        |                            | -                                                                                                                                |
| Caenorhabditis elegans  | hypothetical protein T23E7.2 [Caenorhabditis elegans]          | 0  |                                                                                                                                                                                        |                                                                                                                                                                                        |                            | -                                                                                                                                |
| Caenorhabditis briggsae | Hypothetical protein CBG01887 [Caenorhabditis briggsae]        | 0  |                                                                                                                                                                                        |                                                                                                                                                                                        |                            | -                                                                                                                                |
| Caenorhabditis elegans  | hypothetical protein T23E7.2 [Caenorhabditis elegans]          | 0  |                                                                                                                                                                                        |                                                                                                                                                                                        |                            | -                                                                                                                                |
| Caenorhabditis elegans  | hypothetical protein T23E7.2 [Caenorhabditis elegans]          | 0  |                                                                                                                                                                                        |                                                                                                                                                                                        |                            | -                                                                                                                                |
| Caenorhabditis elegans  | briggsae cbr-unc-14 protein                                    | 0  |                                                                                                                                                                                        |                                                                                                                                                                                        |                            | -                                                                                                                                |
| Pan troglodytes         | ribosomal protein l12                                          | 7  | C:GO:0005730;<br>C:GO:0005840;<br>F:GO:0003735;<br>F:GO:0003723;<br>F:GO:0005515;<br>C:GO:0005829;<br>P:GO:0006414                                                                     | -                                                                                                                                                                                      |                            | IPR000911; IPR020783; IPR020784;<br>IPR020785; PTHR11661:SF2<br>(PANTHER)                                                        |
|                         |                                                                | 0  |                                                                                                                                                                                        |                                                                                                                                                                                        |                            | -                                                                                                                                |
| Loa loa                 | taf3 r- polymerase tata box binding protein -associated factor | 8  | P:GO:0051457;<br>F:GO:0008270;<br>F:GO:0010843;<br>P:GO:0030097;<br>F:GO:0008134;<br>C:GO:0005669;<br>F:GO:0003702;<br>P:GO:0006366                                                    | -                                                                                                                                                                                      |                            | IPR001965; IPR011011; IPR013083;<br>IPR019786; IPR019787; PTHR12321<br>(PANTHER)                                                 |
| Caenorhabditis briggsae | chid1 protein                                                  | 0  |                                                                                                                                                                                        | F:GO:0004568;<br>F:GO:0043169;<br>F:GO:0003674;<br>C:GO:0005764;<br>P:GO:0005975;<br>C:GO:0005576;<br>F:GO:0003824;<br>C:GO:0005575;<br>F:GO:0004553;<br>P:GO:0006032;<br>P:GO:0008150 |                            | IPR001223; IPR013781; IPR017853;<br>PTHR11177 (PANTHER),<br>PTHR11177:SF6 (PANTHER)                                              |
|                         |                                                                | 0  |                                                                                                                                                                                        |                                                                                                                                                                                        |                            | -                                                                                                                                |
| Salmo salar             | ribosomal protein l38                                          | 6  | P:GO:0009790;<br>F:GO:0003735;<br>F:GO:0003723;<br>F:GO:0005515;<br>C:GO:0022625;<br>P:GO:0006414                                                                                      | -                                                                                                                                                                                      |                            | -                                                                                                                                |
| Caenorhabditis briggsae | aldehyde dehydroge-se 4 member a1                              | 11 | P:GO:0040010;<br>P:GO:0055114;<br>P:GO:0000003;<br>F:GO:0009055;<br>P:GO:0040017;<br>F:GO:0003842;<br>C:GO:0005759;<br>P:GO:0006898;<br>P:GO:0006561;<br>P:GO:0006562;<br>F:GO:0004029 | -                                                                                                                                                                                      | EC:1.5.1.12;<br>EC:1.2.1.3 | IPR005931; IPR015590; IPR016160;<br>IPR016161; IPR016162; IPR016163;<br>PTHR11699:SF52 (PANTHER)                                 |
| Caenorhabditis briggsae | cathepsin f (c01 family)                                       | 4  | F:GO:0004869;<br>F:GO:0005515;<br>F:GO:0004197;<br>P:GO:0006508                                                                                                                        | -                                                                                                                                                                                      | EC:3.4.22.0                | IPR000169; IPR000668; IPR013128;<br>IPR013201; G3DSA:3.90.70.10<br>(GENE3D), PTHR12411:SF43<br>(PANTHER), SSF54001 (SUPERFAMILY) |

|                             |                                                                                 |    |                                                                                                                                                                                                         |                               |                             |                                                                                                        |
|-----------------------------|---------------------------------------------------------------------------------|----|---------------------------------------------------------------------------------------------------------------------------------------------------------------------------------------------------------|-------------------------------|-----------------------------|--------------------------------------------------------------------------------------------------------|
| Loa loa                     | c-termi-l binding protein                                                       | 4  | P:GO:0044238;<br>F:GO:0016616;<br>F:GO:0051287;<br>F:GO:0016787                                                                                                                                         | -                             | EC:1.1.1.0                  | IPR006140; IPR016040; PTHR10996 (PANTHER), PTHR10996:SF11 (PANTHER)                                    |
| Caenorhabditis elegans      | wd repeat-containing protein 91                                                 | 0  |                                                                                                                                                                                                         | F:GO:0003674;<br>P:GO:0008150 |                             | -                                                                                                      |
|                             | -                                                                               | 0  |                                                                                                                                                                                                         |                               |                             | -                                                                                                      |
| Caenorhabditis briggsae     | ump synthase                                                                    | 6  | F:GO:0004590;<br>P:GO:0006222;<br>P:GO:0009792;<br>C:GO:0005737;<br>C:GO:0005634;<br>F:GO:0004588                                                                                                       | -                             | EC:4.1.1.23;<br>EC:2.4.2.10 | IPR000836; IPR004467;<br>G3DSA:3.40.50.2020 (GENE3D),<br>SSF53271 (SUPERFAMILY)                        |
| Caenorhabditis briggsae     | elegans protein partially confirmed by transcript evidence                      | 2  | P:GO:0040010;<br>C:GO:0016020                                                                                                                                                                           | -                             |                             | G3DSA:1.20.1250.20 (GENE3D),<br>PTHR11662 (PANTHER),<br>PTHR11662:SF9 (PANTHER)                        |
| Caenorhabditis elegans      | heat repeat containing 5b                                                       | 4  | P:GO:0040007;<br>P:GO:0006898;<br>P:GO:0002119;<br>P:GO:0040011                                                                                                                                         | -                             |                             | IPR011989; IPR016024; PTHR21663 (PANTHER)                                                              |
| Caenorhabditis elegans      | heat repeat-containing protein 5b                                               | 4  | P:GO:0040007;<br>P:GO:0006898;<br>P:GO:0002119;<br>P:GO:0040011                                                                                                                                         | -                             |                             | IPR011989; IPR016024; PTHR21663 (PANTHER)                                                              |
| Caenorhabditis briggsae     | shwachman-bodian-diamond syndrome protein                                       | 9  | F:GO:0005515;<br>P:GO:0048513;<br>P:GO:0007610;<br>N:GO:0071840;<br>P:GO:0002376;<br>C:GO:0044446;<br>C:GO:0043232;<br>P:GO:0009987;<br>C:GO:0005634                                                    | -                             |                             | IPR002140; IPR018023; IPR018978;<br>IPR019783; G3DSA:3.30.1250.10 (GENE3D),<br>SSF109728 (SUPERFAMILY) |
|                             | -                                                                               | 0  |                                                                                                                                                                                                         |                               |                             | SignalP (SIGNALP)                                                                                      |
| Homo sapiens                | s100 calcium binding protein a1                                                 | 12 | C:GO:0016529;<br>C:GO:0005829;<br>P:GO:0008016;<br>C:GO:0043234;<br>P:GO:0023034;<br>F:GO:0005509;<br>F:GO:0048154;<br>F:GO:0048155;<br>P:GO:0000122;<br>F:GO:0051117;<br>F:GO:0042803;<br>C:GO:0005634 | -                             |                             | SignalP (SIGNALP)                                                                                      |
| Angiostrongylus cantonensis | msh-domain protein 4                                                            | 3  | C:GO:0005856;<br>F:GO:0005198;<br>P:GO:0040011                                                                                                                                                          | -                             |                             | IPR000535; IPR008962; PTHR22947 (PANTHER)                                                              |
|                             | -                                                                               | 0  |                                                                                                                                                                                                         |                               |                             | -                                                                                                      |
| Caenorhabditis briggsae     | mgc84524 protein                                                                | 0  |                                                                                                                                                                                                         | C:GO:0016021;<br>C:GO:0016020 |                             | IPR018795                                                                                              |
| Caenorhabditis elegans      | k2013_xentr ame: full=uncharacterized protein kiaa2013 homolog flags: precursor | 0  |                                                                                                                                                                                                         | C:GO:0016021;<br>C:GO:0016020 |                             | IPR018795                                                                                              |
| Caenorhabditis briggsae     | mgc84524 protein                                                                | 0  |                                                                                                                                                                                                         | C:GO:0016021;<br>C:GO:0016020 |                             | IPR018795                                                                                              |

|                          |                                                         |   |                               |                                                                                                                                                                                                                                                                                                                                                                                                                     |                                                                                                                       |
|--------------------------|---------------------------------------------------------|---|-------------------------------|---------------------------------------------------------------------------------------------------------------------------------------------------------------------------------------------------------------------------------------------------------------------------------------------------------------------------------------------------------------------------------------------------------------------|-----------------------------------------------------------------------------------------------------------------------|
| Saccoglossus kowalevskii | forkhead box n1                                         | 0 |                               | C:GO:0005667;<br>F:GO:0003677;<br>C:GO:0005634;<br>P:GO:0010551;<br>P:GO:0006355;<br>P:GO:0030216;<br>F:GO:0016566;<br>F:GO:0003705;<br>P:GO:0007389;<br>F:GO:0003704;<br>P:GO:0006350;<br>F:GO:0016563;<br>P:GO:0009790;<br>P:GO:0048538;<br>P:GO:0051090;<br>F:GO:0003700;<br>F:GO:0010843;<br>P:GO:0007275;<br>P:GO:0045449;<br>F:GO:0043565;<br>F:GO:0008134;<br>C:GO:0005575;<br>F:GO:0003690;<br>F:GO:0008301 | -                                                                                                                     |
| Caenorhabditis elegans   | isoform a                                               | 0 |                               |                                                                                                                                                                                                                                                                                                                                                                                                                     | IPR011993; PTHR11232 (PANTHER),<br>PTHR11232:SF2 (PANTHER), SSF50729<br>(SUPERFAMILY)                                 |
|                          | -                                                       | 0 |                               |                                                                                                                                                                                                                                                                                                                                                                                                                     | -                                                                                                                     |
| Caenorhabditis elegans   | zinc finger transcription factor family member (ztf-23) | 2 | P:GO:0040015;<br>F:GO:0005515 | -                                                                                                                                                                                                                                                                                                                                                                                                                   | IPR007087; IPR015880                                                                                                  |
|                          | -                                                       | 0 |                               |                                                                                                                                                                                                                                                                                                                                                                                                                     | -                                                                                                                     |
| Caenorhabditis briggsae  | briggsae cbr-frm-10 protein                             | 0 |                               | P:GO:0030178;<br>F:GO:0005488;<br>C:GO:0005856                                                                                                                                                                                                                                                                                                                                                                      | IPR000299; IPR014352; IPR019748;<br>PTHR13283 (PANTHER),<br>PTHR13283:SF1 (PANTHER)                                   |
| Caenorhabditis briggsae  | high choriolytic enzyme 1 precursor                     | 2 | F:GO:0008233;<br>P:GO:0007413 | -                                                                                                                                                                                                                                                                                                                                                                                                                   | IPR001506; G3DSA:3.40.390.10<br>(GENE3D), PTHR10127 (PANTHER),<br>PTHR10127:SF73 (PANTHER),<br>SSF55486 (SUPERFAMILY) |
| Caenorhabditis briggsae  | pet191 polypeptide                                      | 0 |                               |                                                                                                                                                                                                                                                                                                                                                                                                                     | IPR018793                                                                                                             |
| Caenorhabditis briggsae  | pet191 polypeptide                                      | 0 |                               |                                                                                                                                                                                                                                                                                                                                                                                                                     | IPR018793                                                                                                             |
| Caenorhabditis briggsae  | elegans protein confirmed by transcript evidence        | 0 |                               |                                                                                                                                                                                                                                                                                                                                                                                                                     | -                                                                                                                     |
| Caenorhabditis briggsae  | elegans protein confirmed by transcript evidence        | 0 |                               |                                                                                                                                                                                                                                                                                                                                                                                                                     | -                                                                                                                     |
| Caenorhabditis briggsae  | elegans protein confirmed by transcript evidence        | 0 |                               |                                                                                                                                                                                                                                                                                                                                                                                                                     | -                                                                                                                     |

|                         |                                                  |    |                                                                                                                                                                                                                                                                                                                                                                                                                                                                        |   |                                                         |                                                                                                                      |
|-------------------------|--------------------------------------------------|----|------------------------------------------------------------------------------------------------------------------------------------------------------------------------------------------------------------------------------------------------------------------------------------------------------------------------------------------------------------------------------------------------------------------------------------------------------------------------|---|---------------------------------------------------------|----------------------------------------------------------------------------------------------------------------------|
| Caenorhabditis elegans  | eukaryotic translation initiation factor 2 gamma | 27 | P:GO:0006413;<br>F:GO:0005515;<br>F:GO:0008270;<br>P:GO:0030702;<br>P:GO:0051567;<br>P:GO:0040010;<br>F:GO:0046974;<br>P:GO:0048132;<br>P:GO:0040018;<br>P:GO:0040011;<br>F:GO:0005525;<br>F:GO:0003743;<br>C:GO:0005829;<br>P:GO:0006306;<br>C:GO:0000775;<br>P:GO:0009792;<br>C:GO:0000792;<br>P:GO:0031507;<br>P:GO:0002119;<br>C:GO:0005850;<br>P:GO:0010171;<br>F:GO:0000049;<br>P:GO:0070868;<br>F:GO:0003682;<br>F:GO:0003924;<br>C:GO:0005634;<br>P:GO:0006348 | - | EC:3.6.5.1;<br>EC:3.6.5.2;<br>EC:3.6.5.3;<br>EC:3.6.5.4 | IPR000795; G3DSA:3.40.50.300<br>(GENE3D), PTHR23115 (PANTHER),<br>PTHR23115:SF9 (PANTHER), SSF52540<br>(SUPERFAMILY) |
| Caenorhabditis briggsae | briggsae cbr-mtk-1 protein                       | 2  | P:GO:0009987;<br>P:GO:0043170                                                                                                                                                                                                                                                                                                                                                                                                                                          | - | -                                                       | -                                                                                                                    |
| -                       | -                                                | 0  |                                                                                                                                                                                                                                                                                                                                                                                                                                                                        |   |                                                         | SignalP (SIGNALP)                                                                                                    |
| Brugia malayi           | hypothetical protein Bm1_28665 [Brugia malayi]   | 0  |                                                                                                                                                                                                                                                                                                                                                                                                                                                                        |   |                                                         | -                                                                                                                    |
| -                       | -                                                | 0  |                                                                                                                                                                                                                                                                                                                                                                                                                                                                        |   |                                                         | -                                                                                                                    |
| Callithrix jacchus      | heat shock protein 90kda beta member 1           | 23 | P:GO:0030433;<br>P:GO:0006457;<br>C:GO:0005788;<br>F:GO:0050750;<br>P:GO:0031247;<br>C:GO:0005792;<br>C:GO:0042470;<br>F:GO:0046790;<br>F:GO:0005509;<br>P:GO:0015031;<br>C:GO:0005789;<br>C:GO:0005829;<br>P:GO:0006916;<br>P:GO:0001666;<br>F:GO:0051082;<br>F:GO:0019903;<br>F:GO:0003723;<br>P:GO:0051208;<br>C:GO:0048471;<br>C:GO:0044459;<br>P:GO:0071318;<br>F:GO:0005524;<br>P:GO:0043666                                                                     | - |                                                         | SignalP (SIGNALP)                                                                                                    |

|                           |                                                            |    |                                                                                                                                                                                                                                           |   |             |                                                                                                                                                                    |
|---------------------------|------------------------------------------------------------|----|-------------------------------------------------------------------------------------------------------------------------------------------------------------------------------------------------------------------------------------------|---|-------------|--------------------------------------------------------------------------------------------------------------------------------------------------------------------|
| Caenorhabditis briggsae   | abnormal go-d development family member (gon-2)            | 6  | P:GO:0007067;<br>P:GO:0055085;<br>P:GO:0006811;<br>C:GO:0016021;<br>P:GO:0008406;<br>F:GO:0005216                                                                                                                                         | - |             | PTHR13800 (PANTHER)                                                                                                                                                |
| Caenorhabditis sp. PS1010 | uncoordinated family member (unc-73)                       | 1  | F:GO:0005085                                                                                                                                                                                                                              | - |             | IPR001251; PTHR22826 (PANTHER),<br>PTHR22826:SF39 (PANTHER)                                                                                                        |
| Caenorhabditis briggsae   | spectrin beta                                              | 1  | F:GO:0003779                                                                                                                                                                                                                              | - |             | IPR001589; IPR001715; PTHR11915<br>(PANTHER), PTHR11915:SF48<br>(PANTHER)                                                                                          |
| Caenorhabditis elegans    | snf related ki-se                                          | 5  | P:GO:0006468;<br>F:GO:0005524;<br>F:GO:0000287;<br>C:GO:0005634;<br>F:GO:0004674                                                                                                                                                          | - | EC:2.7.11.0 | IPR000719; IPR008271; IPR011009;<br>IPR017441; IPR017442; IPR020636;<br>IPR020661; G3DSA:1.10.510.10<br>(GENE3D), G3DSA:3.30.200.20<br>(GENE3D), SignalP (SIGNALP) |
| Caenorhabditis briggsae   | cdc42 binding protein ki-se beta (dmpk-like)               | 10 | F:GO:0005083;<br>F:GO:0004674;<br>C:GO:0005856;<br>P:GO:0007163;<br>F:GO:0046872;<br>P:GO:0007010;<br>F:GO:0005524;<br>F:GO:0005515;<br>P:GO:0007165;<br>P:GO:0006468                                                                     | - | EC:2.7.11.0 | IPR000719; IPR000961; IPR011009;<br>IPR011993; IPR017442; IPR017892;<br>G3DSA:1.10.510.10 (GENE3D),<br>PTHR22988 (PANTHER),<br>PTHR22988:SF2 (PANTHER)             |
| Caenorhabditis elegans    | hypothetical protein C15F1.2 [Caenorhabditis elegans]      | 0  |                                                                                                                                                                                                                                           |   |             | SignalP (SIGNALP)                                                                                                                                                  |
| Caenorhabditis elegans    | golgi associated pdz and coiled-coil motif containing      | 14 | C:GO:0044456;<br>P:GO:0045176;<br>C:GO:0030140;<br>P:GO:0043004;<br>C:GO:0019717;<br>F:GO:0005083;<br>P:GO:0007289;<br>F:GO:0042802;<br>P:GO:0006888;<br>P:GO:0006914;<br>C:GO:0042995;<br>P:GO:0051260;<br>C:GO:0005886;<br>F:GO:0042980 | - |             | IPR000408; G3DSA:2.30.42.10<br>(GENE3D), PTHR16528 (PANTHER)                                                                                                       |
| Caenorhabditis sp. PS1010 | elegans protein confirmed by transcript evidence           | 0  |                                                                                                                                                                                                                                           |   |             | SignalP (SIGNALP)                                                                                                                                                  |
|                           | -                                                          | 0  |                                                                                                                                                                                                                                           |   |             | IPR001611; PRO0019 (PRINTS),<br>G3DSA:3.80.10.10 (GENE3D),<br>SSF52075 (SUPERFAMILY)                                                                               |
|                           | -                                                          | 0  |                                                                                                                                                                                                                                           |   |             | -                                                                                                                                                                  |
| Pan troglodytes           | ribosomal protein l18                                      | 4  | F:GO:0003735;<br>F:GO:0003723;<br>C:GO:0022625;<br>P:GO:0006414                                                                                                                                                                           | - |             | IPR000039; IPR021131; IPR021132;<br>G3DSA:3.100.10.10 (GENE3D)                                                                                                     |
|                           | -                                                          | 0  |                                                                                                                                                                                                                                           |   |             | SignalP (SIGNALP)                                                                                                                                                  |
|                           | -                                                          | 0  |                                                                                                                                                                                                                                           |   |             | SignalP (SIGNALP)                                                                                                                                                  |
|                           | -                                                          | 0  |                                                                                                                                                                                                                                           |   |             | SignalP (SIGNALP)                                                                                                                                                  |
| Caenorhabditis elegans    | elegans protein partially confirmed by transcript evidence | 4  | P:GO:0002009;<br>P:GO:0040010;<br>P:GO:0040035;<br>P:GO:0040011                                                                                                                                                                           | - |             | -                                                                                                                                                                  |

|                         |                                                            |    |                                                                                                                                                                                                                          |                                                                 |                                                                                                                         |
|-------------------------|------------------------------------------------------------|----|--------------------------------------------------------------------------------------------------------------------------------------------------------------------------------------------------------------------------|-----------------------------------------------------------------|-------------------------------------------------------------------------------------------------------------------------|
| Caenorhabditis elegans  | beige beach domain containing protein                      | 0  |                                                                                                                                                                                                                          | F:GO:0046872;<br>F:GO:0005488;<br>F:GO:0008270                  | -                                                                                                                       |
| Caenorhabditis elegans  | hypothetical protein CC8.1 [Caenorhabditis elegans]        | 0  |                                                                                                                                                                                                                          | F:GO:0005515                                                    | -                                                                                                                       |
| Caenorhabditis elegans  | wd repeat phosphoinositide interacting 1                   | 5  | C:GO:0043231;<br>F:GO:0005102;<br>C:GO:0016020;<br>C:GO:0000407;<br>C:GO:0044446                                                                                                                                         | -                                                               | PTHR11227 (PANTHER),<br>PTHR11227:SF17 (PANTHER)                                                                        |
| Caenorhabditis elegans  | wd repeat phosphoinositide interacting 1                   | 5  | C:GO:0043231;<br>F:GO:0005102;<br>C:GO:0016020;<br>C:GO:0000407;<br>C:GO:0044446                                                                                                                                         | -                                                               | PTHR11227 (PANTHER),<br>PTHR11227:SF17 (PANTHER)                                                                        |
| Caenorhabditis elegans  | wd repeat phosphoinositide interacting 1                   | 5  | C:GO:0043231;<br>F:GO:0005102;<br>C:GO:0016020;<br>C:GO:0000407;<br>C:GO:0044446                                                                                                                                         | -                                                               | PTHR11227 (PANTHER),<br>PTHR11227:SF17 (PANTHER)                                                                        |
| Caenorhabditis briggsae | ykq9_caee1_ame: full=uncharacterized protein               | 0  |                                                                                                                                                                                                                          | F:GO:0004553;<br>P:GO:0005975;<br>F:GO:0003824;<br>F:GO:0043169 | IPR003892; IPR009060                                                                                                    |
| Caenorhabditis briggsae | elegans protein partially confirmed by transcript evidence | 4  | F:GO:0005097;<br>C:GO:0005622;<br>P:GO:0000003;<br>P:GO:0032313                                                                                                                                                          | -                                                               | -                                                                                                                       |
| Caenorhabditis briggsae | elegans protein partially confirmed by transcript evidence | 4  | F:GO:0005097;<br>C:GO:0005622;<br>P:GO:0000003;<br>P:GO:0032313                                                                                                                                                          | -                                                               | PTHR22957 (PANTHER),<br>PTHR22957:SF46 (PANTHER)                                                                        |
| Caenorhabditis elegans  | nuclear receptor subfamily group member 3                  | 13 | P:GO:0060005;<br>F:GO:0008270;<br>P:GO:0045944;<br>P:GO:0050885;<br>P:GO:0048752;<br>F:GO:0043565;<br>F:GO:0016563;<br>F:GO:0005515;<br>F:GO:0003700;<br>F:GO:0003707;<br>P:GO:0001707;<br>P:GO:0030534;<br>C:GO:0005634 | -                                                               | IPR001628; IPR013088; PRO0350<br>(PRINTS), PTHR11865 (PANTHER),<br>PTHR11865:SF168 (PANTHER),<br>SSF57716 (SUPERFAMILY) |
| Caenorhabditis elegans  | nuclear receptor subfamily group member 3                  | 7  | F:GO:0003700;<br>F:GO:0043565;<br>F:GO:0005515;<br>F:GO:0003707;<br>C:GO:0005634;<br>F:GO:0008270;<br>P:GO:0006355                                                                                                       | -                                                               | IPR001628; IPR013088; PRO0350<br>(PRINTS), PTHR11865 (PANTHER),<br>PTHR11865:SF168 (PANTHER),<br>SSF57716 (SUPERFAMILY) |
| synthetic construct     | parathymosin [synthetic construct]                         | 4  | C:GO:0005829;<br>C:GO:0005634;<br>C:GO:0005625;<br>P:GO:0006260                                                                                                                                                          | -                                                               | -                                                                                                                       |
|                         | -                                                          | 0  |                                                                                                                                                                                                                          |                                                                 | -                                                                                                                       |
| Ancylostoma duodenale   | ancylostoma-secreted protein 1 precursor                   | 0  |                                                                                                                                                                                                                          | C:GO:0005576                                                    | IPR014044; SignalP (SIGNALP)                                                                                            |
| Caenorhabditis elegans  | elegans protein partially confirmed by transcript evidence | 0  |                                                                                                                                                                                                                          |                                                                 | IPR004988; SignalP (SIGNALP)                                                                                            |

|                         |                                                            |   |                                                                                                                                                      |                                                                                  |                                                                                                                                      |
|-------------------------|------------------------------------------------------------|---|------------------------------------------------------------------------------------------------------------------------------------------------------|----------------------------------------------------------------------------------|--------------------------------------------------------------------------------------------------------------------------------------|
|                         | -                                                          | 0 |                                                                                                                                                      |                                                                                  | G3DSA:3.10.370.10 (GENE3D)                                                                                                           |
| Caenorhabditis elegans  | abnormal embryogenesis family member (emb-27)              | 0 |                                                                                                                                                      | P:GO:0000003;<br>P:GO:0040035;<br>P:GO:0009792;<br>P:GO:0007126;<br>P:GO:0007067 | -                                                                                                                                    |
| Caenorhabditis elegans  | yqoa_caeel ame: full= r-binding protein                    | 1 | F:GO:0005488                                                                                                                                         | -                                                                                | -                                                                                                                                    |
| Caenorhabditis briggsae | elegans protein confirmed by transcript evidence           | 5 | P:GO:0006732;<br>F:GO:0005515;<br>C:GO:0044444;<br>P:GO:0006631;<br>F:GO:0016291                                                                     | -                                                                                | IPR006862                                                                                                                            |
|                         | -                                                          | 0 |                                                                                                                                                      |                                                                                  | -                                                                                                                                    |
|                         | -                                                          | 0 |                                                                                                                                                      |                                                                                  | PR01503 (PRINTS)                                                                                                                     |
| Caenorhabditis elegans  | elegans protein partially confirmed by transcript evidence | 0 |                                                                                                                                                      |                                                                                  | IPR005069                                                                                                                            |
| Caenorhabditis briggsae | enoyl- mitochondrial                                       | 8 | P:GO:0040010;<br>C:GO:0005875;<br>P:GO:0002119;<br>P:GO:0006635;<br>F:GO:0005515;<br>C:GO:0005759;<br>F:GO:0003824;<br>C:GO:0005811                  | -                                                                                | IPR001753; IPR014748; IPR018376;<br>G3DSA:3.90.226.10 (GENE3D),<br>PTHR11941 (PANTHER), SignalP<br>(SIGNALP), SSF52096 (SUPERFAMILY) |
| Caenorhabditis briggsae | enoyl- mitochondrial                                       | 8 | P:GO:0040010;<br>C:GO:0005875;<br>P:GO:0002119;<br>P:GO:0006635;<br>F:GO:0005515;<br>C:GO:0005759;<br>F:GO:0003824;<br>C:GO:0005811                  | -                                                                                | IPR001753; IPR014748; IPR018376;<br>G3DSA:3.90.226.10 (GENE3D),<br>PTHR11941 (PANTHER), SignalP<br>(SIGNALP), SSF52096 (SUPERFAMILY) |
|                         | -                                                          | 0 |                                                                                                                                                      |                                                                                  | -                                                                                                                                    |
|                         | -                                                          | 0 |                                                                                                                                                      |                                                                                  | -                                                                                                                                    |
| Caenorhabditis briggsae | d-j homolog subfamily c member 2                           | 9 | P:GO:0040010;<br>P:GO:0034645;<br>P:GO:0090304;<br>P:GO:0000003;<br>F:GO:0005515;<br>P:GO:0008356;<br>P:GO:0050794;<br>P:GO:0010467;<br>P:GO:0009792 | -                                                                                | IPR001005; IPR009057; IPR012287;<br>IPR014778; IPR015609; IPR017877;<br>PTHR11821:SF29 (PANTHER)                                     |
| Caenorhabditis briggsae | tbc1 domain family member 2b                               | 2 | F:GO:0005515;<br>F:GO:0005096                                                                                                                        | -                                                                                | IPR000195; G3DSA:1.10.8.270<br>(GENE3D), PTHR22957 (PANTHER),<br>PTHR22957:SF55 (PANTHER)                                            |

|                         |                                                                |    |                                                                                                                                                                                                                                                            |                                                                                                                                                                                                         |            |                                                                                                                               |
|-------------------------|----------------------------------------------------------------|----|------------------------------------------------------------------------------------------------------------------------------------------------------------------------------------------------------------------------------------------------------------|---------------------------------------------------------------------------------------------------------------------------------------------------------------------------------------------------------|------------|-------------------------------------------------------------------------------------------------------------------------------|
| Caenorhabditis briggsae | purine nucleoside phosphorylase inosine and guanosine-specific | 15 | P:GO:0046124;<br>P:GO:0006955;<br>P:GO:0009165;<br>P:GO:0042981;<br>C:GO:0005737;<br>P:GO:0043101;<br>F:GO:0004731;<br>P:GO:0045621;<br>P:GO:0046130;<br>P:GO:0050870;<br>C:GO:0005634;<br>F:GO:0005488;<br>P:GO:0048584;<br>P:GO:0009144;<br>C:GO:0005576 | -                                                                                                                                                                                                       | EC:2.4.2.1 | -                                                                                                                             |
| Caenorhabditis briggsae | ww domain-containing oxidoreductase                            | 7  | P:GO:0055114;<br>P:GO:0030178;<br>F:GO:0016491;<br>F:GO:0046983;<br>F:GO:0050662;<br>P:GO:0008202;<br>C:GO:0005794                                                                                                                                         | -                                                                                                                                                                                                       |            | IPR002198; IPR016040;<br>PTHR19410:SF99 (PANTHER),<br>SSF51735 (SUPERFAMILY)                                                  |
| Brugia malayi           | rab gtpase activating protein 1                                | 0  |                                                                                                                                                                                                                                                            | C:GO:0005875;<br>F:GO:0015631;<br>C:GO:0005815;<br>C:GO:0005737;<br>C:GO:0005813;<br>C:GO:0005622;<br>F:GO:0005097;<br>F:GO:0005096;<br>C:GO:0005829;<br>P:GO:0007049;<br>P:GO:0032313;<br>C:GO:0005856 |            | IPR000195; PTHR22957 (PANTHER),<br>PTHR22957:SF44 (PANTHER)                                                                   |
| Caenorhabditis elegans  | translation initiation factor sui1 family protein              | 1  | F:GO:0003676                                                                                                                                                                                                                                               | -                                                                                                                                                                                                       |            | IPR001950; PTHR12217 (PANTHER),<br>PTHR12217:SF2 (PANTHER)                                                                    |
| Caenorhabditis elegans  | ligatin                                                        | 1  | F:GO:0005488                                                                                                                                                                                                                                               | -                                                                                                                                                                                                       |            | IPR001950; IPR002478; IPR004521;<br>IPR015947; G3DSA:2.30.130.10<br>(GENE3D), PTHR12217 (PANTHER),<br>PTHR12217:SF2 (PANTHER) |
| Caenorhabditis elegans  | ligatin                                                        | 1  | F:GO:0005488                                                                                                                                                                                                                                               | -                                                                                                                                                                                                       |            | IPR001950; IPR002478; IPR004521;<br>IPR015947; G3DSA:2.30.130.10<br>(GENE3D), PTHR12217 (PANTHER),<br>PTHR12217:SF2 (PANTHER) |
| Caenorhabditis elegans  | ligatin                                                        | 1  | F:GO:0005488                                                                                                                                                                                                                                               | -                                                                                                                                                                                                       |            | IPR001950; IPR002478; IPR004521;<br>IPR015947; G3DSA:2.30.130.10<br>(GENE3D), PTHR12217 (PANTHER),<br>PTHR12217:SF2 (PANTHER) |
|                         | -                                                              | 0  |                                                                                                                                                                                                                                                            |                                                                                                                                                                                                         |            | -                                                                                                                             |
| Caenorhabditis briggsae | apolipoprotein a-i binding protein                             | 0  |                                                                                                                                                                                                                                                            | C:GO:0005739;<br>F:GO:0005515;<br>C:GO:0005576                                                                                                                                                          |            | IPR004443; G3DSA:3.40.50.10260<br>(GENE3D), PTHR13232 (PANTHER),<br>PTHR13232:SF3 (PANTHER)                                   |
| Brugia malayi           | lethal essential for life l2efl                                | 1  | F:GO:0042802                                                                                                                                                                                                                                               | -                                                                                                                                                                                                       |            | PS51257 (PROFILE)                                                                                                             |
| Caenorhabditis elegans  | homeobox family member (ceh-44)                                | 5  | F:GO:0005488;<br>P:GO:0045449;<br>P:GO:0007275;<br>C:GO:0016020;<br>C:GO:0005794                                                                                                                                                                           | -                                                                                                                                                                                                       |            | IPR012955; PD936484 (PRODOM),<br>PTHR14043 (PANTHER),<br>PTHR14043:SF2 (PANTHER)                                              |



|                                  |                                                                                  |    |                                                                                                                                                                                                                                           |                                                                                                                                                                                                                          |            |                                                                                                            |
|----------------------------------|----------------------------------------------------------------------------------|----|-------------------------------------------------------------------------------------------------------------------------------------------------------------------------------------------------------------------------------------------|--------------------------------------------------------------------------------------------------------------------------------------------------------------------------------------------------------------------------|------------|------------------------------------------------------------------------------------------------------------|
| Caenorhabditis elegans           | cut-like 1                                                                       | 6  | F:GO:0030528;<br>P:GO:0006355;<br>F:GO:0003677;<br>P:GO:0048513;<br>C:GO:0016020;<br>C:GO:0005794                                                                                                                                         | -                                                                                                                                                                                                                        |            | IPR012955; PTHR14043 (PANTHER),<br>PTHR14043:SF2 (PANTHER)                                                 |
| Caenorhabditis elegans           | alpha beta hydrolase fold-1 domain-containing protein                            | 2  | F:GO:0005488;<br>C:GO:0044464                                                                                                                                                                                                             | -                                                                                                                                                                                                                        |            | -                                                                                                          |
| Caenorhabditis briggsae          | sorting nexin 13                                                                 | 2  | F:GO:0005515;<br>P:GO:0007154                                                                                                                                                                                                             | -                                                                                                                                                                                                                        |            | IPR000342; IPR016137;<br>G3DSA:1.10.167.10 (GENE3D),<br>PTHR22775 (PANTHER),<br>PTHR22775:SF8 (PANTHER)    |
| Caenorhabditis briggsae          | isoform b                                                                        | 5  | F:GO:0008607;<br>F:GO:0016301;<br>F:GO:0004339;<br>P:GO:0005977;<br>F:GO:0005516                                                                                                                                                          | -                                                                                                                                                                                                                        | EC:3.2.1.3 | IPR008734; IPR008928; IPR011613;<br>IPR012341; PTHR10749:SF3<br>(PANTHER), SignalP (SIGNALP)               |
| Clavospora lusitaniae ATCC 42720 | essential component of the nuclear pore which mediates nuclear import and export | 0  |                                                                                                                                                                                                                                           | C:GO:0005643;<br>F:GO:0043169;<br>P:GO:0046907;<br>P:GO:0016998;<br>P:GO:0006810;<br>F:GO:0008270;<br>P:GO:0005975;<br>F:GO:0003824;<br>F:GO:0017056;<br>C:GO:0005622;<br>P:GO:0009253;<br>F:GO:0003796;<br>F:GO:0005488 |            |                                                                                                            |
| Caenorhabditis briggsae          | leukotriene a4 hydrolase                                                         | 5  | P:GO:0006954;<br>P:GO:0019370;<br>P:GO:0006508;<br>F:GO:0008270;<br>F:GO:0008237                                                                                                                                                          | -                                                                                                                                                                                                                        |            | IPR001930; IPR014782;<br>PTHR11533:SF4 (PANTHER), SSF55486<br>(SUPERFAMILY), SSF63737<br>(SUPERFAMILY)     |
| Caenorhabditis elegans           | serine threonine-protein phosphatase 5                                           | 14 | P:GO:0006470;<br>C:GO:0005829;<br>P:GO:0051291;<br>C:GO:0043005;<br>F:GO:0004871;<br>F:GO:0046872;<br>P:GO:0043123;<br>F:GO:0004722;<br>P:GO:0007067;<br>C:GO:0043025;<br>F:GO:0019904;<br>P:GO:0006350;<br>P:GO:0043278;<br>C:GO:0005634 | -                                                                                                                                                                                                                        |            | IPR004843; IPR006186;<br>G3DSA:3.60.21.10 (GENE3D),<br>PTHR11668:SF12 (PANTHER),<br>SSF56300 (SUPERFAMILY) |
| Angiostrongylus cantonensis      | hypothetical protein [Angiostrongylus cantonensis]                               | 0  |                                                                                                                                                                                                                                           |                                                                                                                                                                                                                          |            |                                                                                                            |
| Angiostrongylus cantonensis      | hypothetical protein [Angiostrongylus cantonensis]                               | 0  |                                                                                                                                                                                                                                           |                                                                                                                                                                                                                          |            | -                                                                                                          |

|                         |                                                                  |    |                                                                                                                                                                                                                          |                                                                                                   |              |                                                                                                       |
|-------------------------|------------------------------------------------------------------|----|--------------------------------------------------------------------------------------------------------------------------------------------------------------------------------------------------------------------------|---------------------------------------------------------------------------------------------------|--------------|-------------------------------------------------------------------------------------------------------|
| Caenorhabditis briggsae | transformation transcription domain-associated protein           | 9  | P:GO:0043967;<br>P:GO:0043968;<br>P:GO:0016578;<br>P:GO:0045449;<br>C:GO:0035267;<br>C:GO:0033276;<br>C:GO:0030914;<br>F:GO:0003713;<br>P:GO:0007093                                                                     | -                                                                                                 | -            |                                                                                                       |
| Caenorhabditis briggsae | briggsae cbr-apt-10 protein                                      | 1  | P:GO:0016192                                                                                                                                                                                                             | -                                                                                                 | -            | -                                                                                                     |
| Loa loa                 | hypothetical protein LOAG_08693 [Loa loa]                        | 0  |                                                                                                                                                                                                                          |                                                                                                   |              | -                                                                                                     |
|                         | -                                                                | 0  |                                                                                                                                                                                                                          |                                                                                                   |              | -                                                                                                     |
| Loa loa                 | heavy unconvectio-I myosin family member (hum-2)                 | 4  | C:GO:0016459;<br>F:GO:0005515;<br>F:GO:0005524;<br>F:GO:0003774                                                                                                                                                          | -                                                                                                 |              | IPR002710; IPR010916; IPR018444;<br>PTHR13140 (PANTHER),<br>PTHR13140:SF15 (PANTHER)                  |
| Caenorhabditis briggsae | heavy unconvectio-I myosin family member (hum-2)                 | 4  | C:GO:0016459;<br>F:GO:0005515;<br>F:GO:0005524;<br>F:GO:0003774                                                                                                                                                          | -                                                                                                 |              | -                                                                                                     |
| Brugia malayi           | ftsj methyltransferase domain-containing protein 1               | 0  |                                                                                                                                                                                                                          | F:GO:0003676;<br>F:GO:0008168;<br>F:GO:0016740;<br>C:GO:0016021;<br>C:GO:0016020;<br>P:GO:0032259 |              | IPR002877; G3DSA:3.40.50.150<br>(GENE3D), PTHR16121 (PANTHER),<br>SSF53335 (SUPERFAMILY)              |
| Caenorhabditis elegans  | adp-dependent glucoki-se                                         | 3  | P:GO:0005975;<br>F:GO:0016773;<br>F:GO:0016301                                                                                                                                                                           | -                                                                                                 | EC:2.7.1.0   | IPR007666; IPR019793;<br>G3DSA:3.40.1190.20 (GENE3D),<br>SignalP (SIGNALP), SSF53613<br>(SUPERFAMILY) |
|                         | -                                                                | 0  |                                                                                                                                                                                                                          |                                                                                                   |              | SignalP (SIGNALP)                                                                                     |
| Caenorhabditis briggsae | vacuolar protein sorting 11                                      | 8  | P:GO:0009792;<br>P:GO:0010171;<br>F:GO:0005488;<br>P:GO:0040018;<br>P:GO:0018996;<br>P:GO:0040010;<br>P:GO:0000003;<br>P:GO:0008219                                                                                      | -                                                                                                 |              | IPR015943; PTHR23323 (PANTHER),<br>PTHR23323:SF24 (PANTHER)                                           |
|                         | -                                                                | 0  |                                                                                                                                                                                                                          |                                                                                                   |              | IPR009539; PTHR20886:SF1<br>(PANTHER), SignalP (SIGNALP)                                              |
| Loa loa                 | dolichyl-diphosphooligosaccharide-protein<br>glycosyltransferase | 13 | P:GO:0040010;<br>C:GO:0008250;<br>P:GO:0018279;<br>C:GO:0005792;<br>P:GO:0002119;<br>F:GO:0005515;<br>P:GO:0040011;<br>P:GO:0034097;<br>P:GO:0042110;<br>P:GO:0006496;<br>P:GO:0009792;<br>F:GO:0004579;<br>P:GO:0040015 | -                                                                                                 | EC:2.4.1.119 | IPR005013; SignalP (SIGNALP)                                                                          |
| Caenorhabditis briggsae | phosphatidylinositol glycan anchor class q                       | 2  | F:GO:0016740;<br>P:GO:0016254                                                                                                                                                                                            | -                                                                                                 |              | IPR007720; PTHR21329 (PANTHER),<br>PTHR21329:SF5 (PANTHER)                                            |

|                         |                                                                    |    |                                                                                                                                                                       |                               |                                                                                                |
|-------------------------|--------------------------------------------------------------------|----|-----------------------------------------------------------------------------------------------------------------------------------------------------------------------|-------------------------------|------------------------------------------------------------------------------------------------|
| Caenorhabditis elegans  | retinol dehydroge-se 12-like                                       | 2  | P:GO:0008152;<br>F:GO:0003824                                                                                                                                         | -                             | IPR002198; IPR016040;<br>PTHR19410:SF8 (PANTHER), SignalP (SIGNALP), SSF51735 (SUPERFAMILY)    |
| Caenorhabditis elegans  | hypothetical protein Y48G1A.1 [Caenorhabditis elegans]             | 0  |                                                                                                                                                                       |                               | IPR009091; SignalP (SIGNALP)                                                                   |
| Caenorhabditis briggsae | briggsae cbr-apt-3 protein                                         | 10 | P:GO:0009792;<br>P:GO:0010171;<br>P:GO:0002119;<br>C:GO:0005794;<br>F:GO:0005515;<br>C:GO:0030117;<br>F:GO:0008565;<br>P:GO:0016192;<br>P:GO:0006886;<br>P:GO:0040007 | -                             | IPR000408; IPR002553; IPR011989;<br>IPR016024; PTHR22781 (PANTHER),<br>PTHR22781:SF9 (PANTHER) |
| Caenorhabditis briggsae | briggsae cbr-apt-3 protein                                         | 10 | P:GO:0009792;<br>P:GO:0010171;<br>P:GO:0002119;<br>C:GO:0005794;<br>F:GO:0005515;<br>C:GO:0030117;<br>F:GO:0008565;<br>P:GO:0016192;<br>P:GO:0006886;<br>P:GO:0040007 | -                             | IPR000408; IPR002553; IPR011989;<br>IPR016024; PTHR22781 (PANTHER),<br>PTHR22781:SF9 (PANTHER) |
| Caenorhabditis briggsae | universal minicircle sequence binding protein                      | 2  | F:GO:0005488;<br>F:GO:0003824                                                                                                                                         | -                             | -                                                                                              |
| Brugia malayi           | universal minicircle sequence binding protein                      | 7  | F:GO:0005488;<br>P:GO:0040007;<br>P:GO:0000003;<br>P:GO:0002119;<br>P:GO:0040011;<br>P:GO:0009792;<br>F:GO:0016787                                                    | -                             | -                                                                                              |
| Caenorhabditis elegans  | briggsae cbr-unc-36 protein                                        | 4  | C:GO:0016021;<br>F:GO:0005262;<br>P:GO:0006816;<br>F:GO:0005244                                                                                                       | -                             | PTHR10166 (PANTHER),<br>PTHR10166:SF5 (PANTHER)                                                |
| Homo sapiens            | ribosomal protein l4 variant                                       | 5  | F:GO:0003735;<br>F:GO:0003723;<br>F:GO:0005515;<br>C:GO:0022625;<br>P:GO:0006414                                                                                      | -                             | IPR016160; PTHR19431 (PANTHER),<br>SignalP (SIGNALP)                                           |
| Caenorhabditis elegans  | abnormal embryonic partitioning of cytoplasm family member (par-3) | 8  | C:GO:0005737;<br>P:GO:0007163;<br>P:GO:0040001;<br>F:GO:0005515;<br>P:GO:0007155;<br>P:GO:0007369;<br>C:GO:0016021;<br>P:GO:0008406                                   | -                             | IPR001478; G3DSA:2.30.42.10 (GENE3D), PTHR16484 (PANTHER),<br>PTHR16484:SF2 (PANTHER)          |
| Caenorhabditis elegans  | abnormal embryonic partitioning of cytoplasm family member (par-3) | 1  | P:GO:0009987                                                                                                                                                          | -                             | PTHR16484 (PANTHER),<br>PTHR16484:SF2 (PANTHER)                                                |
| -                       | -                                                                  | 0  |                                                                                                                                                                       |                               | -                                                                                              |
| -                       | -                                                                  | 0  |                                                                                                                                                                       |                               | SignalP (SIGNALP)                                                                              |
| Caenorhabditis briggsae | elegans protein confirmed by transcript evidence                   | 0  |                                                                                                                                                                       | P:GO:0045132;<br>P:GO:0007126 | -                                                                                              |

|                         |                                                         |    |                                                                                                                                                                                        |   |            |                                                                                                                                                  |
|-------------------------|---------------------------------------------------------|----|----------------------------------------------------------------------------------------------------------------------------------------------------------------------------------------|---|------------|--------------------------------------------------------------------------------------------------------------------------------------------------|
| Caenorhabditis elegans  | briggsae cbr-nmy-1 protein                              | 4  | F:GO:0003779;<br>C:GO:0016459;<br>F:GO:0005524;<br>F:GO:0003774                                                                                                                        | - |            | IPR001609; IPR004009; PTHR13140 (PANTHER), PTHR13140:SF23 (PANTHER), SignalP (SIGNALP), SSF52540 (SUPERFAMILY)                                   |
| Caenorhabditis elegans  | briggsae cbr-gst-42 protein                             | 2  | F:GO:0042802;<br>F:GO:0003824                                                                                                                                                          | - |            | IPR004045; IPR005955; IPR010987; IPR012335; IPR012336; IPR017933; PTHR11260 (PANTHER), PTHR11260:SF8 (PANTHER), SignalP (SIGNALP)                |
| Caenorhabditis elegans  | briggsae cbr-gst-42 protein                             | 2  | F:GO:0042802;<br>F:GO:0003824                                                                                                                                                          | - |            | -                                                                                                                                                |
|                         | -                                                       | 0  |                                                                                                                                                                                        |   |            | SignalP (SIGNALP)                                                                                                                                |
| Brugia malayi           | subfamily member 3                                      | 8  | F:GO:0004860;<br>C:GO:0005829;<br>F:GO:0051087;<br>F:GO:0051787;<br>P:GO:0051603;<br>C:GO:0031205;<br>C:GO:0005788;<br>P:GO:0030968                                                    | - |            | IPR001440; IPR001623; IPR011990; IPR013026; IPR013105; IPR015609; IPR019734; PTHR11821:SF68 (PANTHER), SignalP (SIGNALP), SSF48452 (SUPERFAMILY) |
|                         | -                                                       | 0  |                                                                                                                                                                                        |   |            | -                                                                                                                                                |
| Caenorhabditis briggsae | Hypothetical protein CBG02464 [Caenorhabditis briggsae] | 0  |                                                                                                                                                                                        |   |            | -                                                                                                                                                |
|                         | -                                                       | 0  |                                                                                                                                                                                        |   |            | -                                                                                                                                                |
| Caenorhabditis elegans  | spastin isoform 2                                       | 11 | P:GO:0051013;<br>P:GO:0031117;<br>C:GO:0043231;<br>P:GO:0034214;<br>C:GO:0005874;<br>P:GO:0051260;<br>P:GO:0051301;<br>F:GO:0005524;<br>F:GO:0008568;<br>C:GO:0048471;<br>F:GO:0015631 | - | EC:3.6.4.3 | G3DSA:3.40.50.300 (GENE3D), PTHR23074 (PANTHER), PTHR23074:SF1 (PANTHER), SSF52540 (SUPERFAMILY)                                                 |
| Caenorhabditis elegans  | hypothetical protein F31A3.5 [Caenorhabditis elegans]   | 0  |                                                                                                                                                                                        |   |            | SignalP (SIGNALP)                                                                                                                                |
| Brugia malayi           | transcription initiation factor iia gamma chain         | 4  | P:GO:0006357;<br>P:GO:0006367;<br>C:GO:0005672;<br>F:GO:0016251                                                                                                                        | - |            | IPR003194; IPR009083; IPR009088; IPR015871; IPR015872                                                                                            |
| Caenorhabditis briggsae | ubiquitin specific peptidase 19                         | 3  | P:GO:0051726;<br>F:GO:0016787;<br>C:GO:0005829                                                                                                                                         | - |            | IPR001394; IPR018200; PTHR10420 (PANTHER), PTHR10420:SF73 (PANTHER), SSF54001 (SUPERFAMILY)                                                      |
| Caenorhabditis briggsae | ubiquitin specific peptidase 19                         | 3  | P:GO:0051726;<br>F:GO:0016787;<br>C:GO:0005829                                                                                                                                         | - |            | IPR001394; IPR002893; IPR018200; PTHR10420 (PANTHER), PTHR10420:SF73 (PANTHER), SSF144232 (SUPERFAMILY), SSF54001 (SUPERFAMILY)                  |
|                         | -                                                       | 0  |                                                                                                                                                                                        |   |            | SignalP (SIGNALP)                                                                                                                                |
| Brugia malayi           | dedicator of cytokinesis 7                              | 1  | F:GO:0005488                                                                                                                                                                           | - |            | -                                                                                                                                                |
|                         | -                                                       | 0  |                                                                                                                                                                                        |   |            | PRO1217 (PRINTS)                                                                                                                                 |
|                         | -                                                       | 0  |                                                                                                                                                                                        |   |            | -                                                                                                                                                |
| Caenorhabditis briggsae | Imbr1 domain containing 2                               | 1  | C:GO:0016021                                                                                                                                                                           | - |            | IPR006876; PTHR21355 (PANTHER), SignalP (SIGNALP)                                                                                                |
| Brugia malayi           | stromal antigen                                         | 1  | F:GO:0005515                                                                                                                                                                           | - |            | PTHR11199 (PANTHER)                                                                                                                              |

|                         |                                                            |    |                                                                                                                                                                                                                                           |   |                                                                                                                                               |
|-------------------------|------------------------------------------------------------|----|-------------------------------------------------------------------------------------------------------------------------------------------------------------------------------------------------------------------------------------------|---|-----------------------------------------------------------------------------------------------------------------------------------------------|
| Caenorhabditis briggsae | novel protein                                              | 0  | C:GO:0005739;<br>P:GO:0006200;<br>F:GO:0000166;<br>F:GO:0017111;<br>F:GO:0003674;<br>F:GO:0005524;<br>F:GO:0016887;<br>C:GO:0005576;<br>P:GO:0008152;<br>P:GO:0008150                                                                     | - | -                                                                                                                                             |
| Brugia malayi           | eif4-gamma eif5 eif2-epsilon family protein                | 4  | P:GO:0048856;<br>P:GO:0000003;<br>P:GO:0045927;<br>P:GO:0007275                                                                                                                                                                           | - | IPR001451; IPR011004;<br>G3DSA:2.160.10.10 (GENE3D),<br>PTHR22572 (PANTHER),<br>PTHR22572:SF7 (PANTHER)                                       |
|                         | -                                                          | 0  |                                                                                                                                                                                                                                           |   | -                                                                                                                                             |
|                         | -                                                          | 0  |                                                                                                                                                                                                                                           |   | -                                                                                                                                             |
| Loa loa                 | elegans protein confirmed by transcript evidence           | 7  | F:GO:0003676;<br>F:GO:0008026;<br>F:GO:0005524;<br>F:GO:0005515;<br>P:GO:0006406;<br>C:GO:0016020;<br>C:GO:0005634                                                                                                                        | - | IPR001650; IPR011545; IPR014021;<br>G3DSA:3.40.50.300 (GENE3D),<br>PTHR10967 (PANTHER),<br>PTHR10967:SF3 (PANTHER), SSF52540<br>(SUPERFAMILY) |
| Loa loa                 | elegans protein confirmed by transcript evidence           | 7  | F:GO:0003676;<br>F:GO:0008026;<br>F:GO:0005524;<br>F:GO:0005515;<br>P:GO:0006406;<br>C:GO:0016020;<br>C:GO:0005634                                                                                                                        | - | -                                                                                                                                             |
| Loa loa                 | elegans protein confirmed by transcript evidence           | 7  | F:GO:0003676;<br>F:GO:0008026;<br>F:GO:0005524;<br>F:GO:0005515;<br>P:GO:0006406;<br>C:GO:0016020;<br>C:GO:0005634                                                                                                                        | - | IPR001650; IPR011545; IPR014021;<br>G3DSA:3.40.50.300 (GENE3D),<br>PTHR10967 (PANTHER),<br>PTHR10967:SF3 (PANTHER), SSF52540<br>(SUPERFAMILY) |
|                         | -                                                          | 0  |                                                                                                                                                                                                                                           |   | -                                                                                                                                             |
| Caenorhabditis elegans  | pinin sdk mema protein conserved region containing protein | 0  |                                                                                                                                                                                                                                           |   | -                                                                                                                                             |
| Caenorhabditis elegans  | vacuolar protein sorting 16                                | 14 | P:GO:0006810;<br>P:GO:0048565;<br>P:GO:0008340;<br>P:GO:0008219;<br>P:GO:0040007;<br>C:GO:0005768;<br>P:GO:0010171;<br>P:GO:0002119;<br>C:GO:0044446;<br>F:GO:0005515;<br>C:GO:0031090;<br>P:GO:0040011;<br>P:GO:0009792;<br>C:GO:0005773 | - | IPR006926; PTHR12811 (PANTHER),<br>SignalP (SIGNALP)                                                                                          |

|                         |                                           |    |                                                                                                                                                                                                                                                                                                               |   |                                                                                                                                                               |
|-------------------------|-------------------------------------------|----|---------------------------------------------------------------------------------------------------------------------------------------------------------------------------------------------------------------------------------------------------------------------------------------------------------------|---|---------------------------------------------------------------------------------------------------------------------------------------------------------------|
| Caenorhabditis briggsae | briggsae cbr-mom-4 protein                | 2  | F:GO:0005488;<br>F:GO:0016740                                                                                                                                                                                                                                                                                 | - | IPR000719; IPR001245; IPR011009;<br>IPR017442; G3DSA:1.10.510.10<br>(GENE3D), G3DSA:3.30.200.20<br>(GENE3D), PTHR23257 (PANTHER),<br>PTHR23257:SF11 (PANTHER) |
| Caenorhabditis elegans  | kiaa0020 protein                          | 4  | C:GO:0005730;<br>F:GO:0003723;<br>P:GO:0018991;<br>C:GO:0005783                                                                                                                                                                                                                                               | - | IPR001313; IPR011989; IPR016024;<br>PTHR13389 (PANTHER)                                                                                                       |
| synthetic construct     | matrix gla protein                        | 18 | P:GO:0030324;<br>C:GO:0043234;<br>P:GO:0009725;<br>F:GO:0005509;<br>F:GO:0008147;<br>P:GO:0007584;<br>C:GO:0005615;<br>P:GO:0030500;<br>P:GO:0006461;<br>P:GO:0030154;<br>F:GO:0048306;<br>P:GO:0001502;<br>C:GO:0005578;<br>F:GO:0005201;<br>P:GO:0048754;<br>C:GO:0005783;<br>P:GO:0051592;<br>P:GO:0009612 | - | IPR000294; IPR002384; PTHR10109<br>(PANTHER), SignalP (SIGNALP)                                                                                               |
| Caenorhabditis briggsae | motor axon guidance family member (max-2) | 16 | C:GO:0005925;<br>P:GO:0007411;<br>P:GO:0008340;<br>P:GO:0006468;<br>F:GO:0004702;<br>P:GO:0008360;<br>F:GO:0008270;<br>P:GO:0050803;<br>P:GO:0007155;<br>F:GO:0003676;<br>P:GO:0007391;<br>P:GO:0007254;<br>C:GO:0005856;<br>P:GO:0016601;<br>F:GO:0005524;<br>P:GO:0050770                                   | - | IPR000719; IPR011009; IPR015750;<br>IPR017442; G3DSA:1.10.510.10<br>(GENE3D), PTHR22986 (PANTHER)                                                             |
| Camponotus floridanus   | metastasis-associated protein mta1        | 6  | C:GO:0005737;<br>F:GO:0003700;<br>F:GO:0043565;<br>C:GO:0005634;<br>F:GO:0008270;<br>P:GO:0006355                                                                                                                                                                                                             | - | -                                                                                                                                                             |

|                         |                                                      |    |                                                                                                                                                                       |                                                                 |                                                                                                 |
|-------------------------|------------------------------------------------------|----|-----------------------------------------------------------------------------------------------------------------------------------------------------------------------|-----------------------------------------------------------------|-------------------------------------------------------------------------------------------------|
| Caenorhabditis elegans  | at rich interactive domain 2 ( rfx-like)             | 10 | F:GO:0008270;<br>C:GO:0005622;<br>P:GO:0040007;<br>P:GO:0040035;<br>F:GO:0003677;<br>P:GO:0010171;<br>P:GO:0002119;<br>F:GO:0005515;<br>P:GO:0006898;<br>P:GO:0009792 | -                                                               | IPR001606; PTHR22970 (PANTHER),<br>PTHR22970:SF1 (PANTHER)                                      |
| Caenorhabditis briggsae | transmembrane 9 superfamily member 2 precursor       | 3  | C:GO:0005887;<br>C:GO:0010008;<br>P:GO:0006810                                                                                                                        | -                                                               | IPR004240; PTHR10766:SF13<br>(PANTHER), SignalP (SIGNALP)                                       |
| Caenorhabditis briggsae | inosine-5 -monophosphate dehydroge-se family protein | 2  | P:GO:0016070;<br>F:GO:0003824                                                                                                                                         | -                                                               | IPR020094; IPR020103                                                                            |
| Caenorhabditis elegans  | s-re domain containing protein                       | 8  | P:GO:0040010;<br>P:GO:0040035;<br>P:GO:0018996;<br>P:GO:0002119;<br>P:GO:0040011;<br>P:GO:0006898;<br>P:GO:0009792;<br>P:GO:0016246                                   | -                                                               | -                                                                                               |
| -                       | -                                                    | 0  | -                                                                                                                                                                     | -                                                               | -                                                                                               |
| Caenorhabditis elegans  | ventricular zone expressed ph domain protein         | 3  | P:GO:0007420;<br>F:GO:0005488;<br>C:GO:0005886                                                                                                                        | -                                                               | IPR011989; PTHR21630 (PANTHER),<br>PTHR21630:SF6 (PANTHER)                                      |
| Caenorhabditis elegans  | heat repeat-containing protein 5b                    | 4  | P:GO:0040007;<br>P:GO:0006898;<br>P:GO:0002119;<br>P:GO:0040011                                                                                                       | -                                                               | PTHR21663 (PANTHER)                                                                             |
| Caenorhabditis briggsae | vacuolar protein sorting-associated protein 13d-like | 0  | -                                                                                                                                                                     | P:GO:0008104                                                    | -                                                                                               |
| -                       | -                                                    | 0  | -                                                                                                                                                                     | -                                                               | -                                                                                               |
| Caenorhabditis elegans  | tr- (nuclear export receptor for tr-s)               | 4  | P:GO:0046907;<br>F:GO:0003723;<br>C:GO:0044428;<br>P:GO:0033036                                                                                                       | -                                                               | IPR011989; IPR013598; IPR016024;<br>IPR018247; PTHR15952 (PANTHER),<br>PTHR15952:SF11 (PANTHER) |
| Caenorhabditis elegans  | briggsae cbr-smg-7 protein                           | 0  | -                                                                                                                                                                     | F:GO:0005488                                                    | -                                                                                               |
| Loa loa                 | 3 -5 exonuclease family protein                      | 1  | F:GO:0005515                                                                                                                                                          | -                                                               | IPR002562; IPR012337;<br>G3DSA:3.30.420.10 (GENE3D)                                             |
| Brugia malayi           | protein angel homolog 2                              | 0  | -                                                                                                                                                                     | F:GO:0004527;<br>F:GO:0003674;<br>F:GO:0004519;<br>C:GO:0005575 | -                                                                                               |
| Brugia malayi           | protein angel homolog 2                              | 0  | -                                                                                                                                                                     | F:GO:0004527;<br>F:GO:0003674;<br>F:GO:0004519;<br>C:GO:0005575 | -                                                                                               |
| -                       | -                                                    | 0  | -                                                                                                                                                                     | -                                                               | -                                                                                               |
| Caenorhabditis elegans  | vacuolar-sorting protein snf8                        | 8  | P:GO:0006810;<br>P:GO:0040010;<br>P:GO:0008340;<br>P:GO:0006357;<br>C:GO:0005667;<br>P:GO:0000003;<br>F:GO:0008134;<br>C:GO:0005737                                   | -                                                               | IPR007286; IPR016689; SSF46785<br>(SUPERFAMILY)                                                 |

|                         |                                               |   |                                                                                                                                     |                                                                                                                                     |             |                                                                                                                   |
|-------------------------|-----------------------------------------------|---|-------------------------------------------------------------------------------------------------------------------------------------|-------------------------------------------------------------------------------------------------------------------------------------|-------------|-------------------------------------------------------------------------------------------------------------------|
| Caenorhabditis elegans  | vacuolar-sorting protein snf8                 | 8 | P:GO:0006810;<br>P:GO:0040010;<br>P:GO:0008340;<br>P:GO:0006357;<br>C:GO:0005667;<br>P:GO:0000003;<br>F:GO:0008134;<br>C:GO:0005737 | -                                                                                                                                   |             | IPR007286; IPR016689; SSF46785<br>(SUPERFAMILY)                                                                   |
| Loa loa                 | briggsae cbr-tag-203 protein                  | 6 | C:GO:0005686;<br>F:GO:0003676;<br>P:GO:0007052;<br>C:GO:0071011;<br>P:GO:0000398;<br>C:GO:0071013                                   | -                                                                                                                                   |             | PTHR10644 (PANTHER),<br>PTHR10644:SF1 (PANTHER)                                                                   |
| Caenorhabditis briggsae | dead deah box helicase family protein         | 7 | C:GO:0005737;<br>F:GO:0008026;<br>F:GO:0003677;<br>F:GO:0005524;<br>F:GO:0000287;<br>F:GO:0004427;<br>P:GO:0006796                  | -                                                                                                                                   | EC:3.6.1.1  | -                                                                                                                 |
| Caenorhabditis briggsae | ym65_caeeel ame: full=uncharacterized protein | 7 | P:GO:0040035;<br>P:GO:0009792;<br>P:GO:0002119;<br>P:GO:0016246;<br>P:GO:0040010;<br>P:GO:0008340;<br>P:GO:0006898                  | -                                                                                                                                   |             | -                                                                                                                 |
| -                       | -                                             | 0 |                                                                                                                                     |                                                                                                                                     |             | SignalP (SIGNALP)                                                                                                 |
| Loa loa                 | briggsae cbr-daf-15 protein                   | 0 |                                                                                                                                     | F:GO:0005488                                                                                                                        |             | IPR004083; PTHR12848:SF2<br>(PANTHER)                                                                             |
| Caenorhabditis elegans  | integrator complex subunit 5                  | 0 |                                                                                                                                     | C:GO:0032039;<br>P:GO:0016180;<br>C:GO:0016021;<br>C:GO:0016020;<br>P:GO:0055085;<br>F:GO:0005515;<br>P:GO:0006810;<br>F:GO:0005215 |             | -                                                                                                                 |
| Caenorhabditis briggsae | yot5_caeeel ame: full=uncharacterized protein | 0 |                                                                                                                                     |                                                                                                                                     |             | -                                                                                                                 |
| Caenorhabditis elegans  | caax beta                                     | 5 | P:GO:0018347;<br>C:GO:0005875;<br>P:GO:0008284;<br>F:GO:0004660;<br>F:GO:0005515                                                    | -                                                                                                                                   | EC:2.5.1.58 | IPR000169; IPR001330; IPR008930;<br>G3DSA:1.50.10.20 (GENE3D),<br>PTHR11774 (PANTHER),<br>PTHR11774:SF6 (PANTHER) |
| -                       | -                                             | 0 |                                                                                                                                     |                                                                                                                                     |             | -                                                                                                                 |



|                         |                                                                        |    |                                                                                                                                                                                                                                                                                                                                                                                                                     |                                                                                                                    |                                                                                                                                                          |
|-------------------------|------------------------------------------------------------------------|----|---------------------------------------------------------------------------------------------------------------------------------------------------------------------------------------------------------------------------------------------------------------------------------------------------------------------------------------------------------------------------------------------------------------------|--------------------------------------------------------------------------------------------------------------------|----------------------------------------------------------------------------------------------------------------------------------------------------------|
| Caenorhabditis elegans  | brf1 subunit of r- polymerase iii transcription initiation factor iiib | 24 | P:GO:0006413;<br>P:GO:0000003;<br>P:GO:0045941;<br>F:GO:0005515;<br>F:GO:0008270;<br>P:GO:0040007;<br>P:GO:0006898;<br>F:GO:0017091;<br>P:GO:0006355;<br>C:GO:0000126;<br>P:GO:0000288;<br>P:GO:0043488;<br>F:GO:0003743;<br>F:GO:0016563;<br>C:GO:0005829;<br>P:GO:0009303;<br>P:GO:0006384;<br>F:GO:0003709;<br>P:GO:0006417;<br>P:GO:0002119;<br>P:GO:0009304;<br>F:GO:0003700;<br>F:GO:0003729;<br>P:GO:0001570 |                                                                                                                    | IPR000812; IPR006670; IPR011028;<br>IPR013137; IPR013150; IPR013763;<br>G3DSA:2.20.25.10 (GENE3D),<br>PTHR11618:SF4 (PANTHER), SSF57783<br>(SUPERFAMILY) |
|                         | -                                                                      | 0  |                                                                                                                                                                                                                                                                                                                                                                                                                     |                                                                                                                    | -                                                                                                                                                        |
| Necator americanus      | glutathione s-transferase                                              | 3  | F:GO:0016740;<br>F:GO:0005515;<br>P:GO:0008340                                                                                                                                                                                                                                                                                                                                                                      |                                                                                                                    | IPR004046; IPR010987; IPR017933;<br>PTHR11571 (PANTHER),<br>PTHR11571:SF6 (PANTHER)                                                                      |
|                         | -                                                                      | 0  |                                                                                                                                                                                                                                                                                                                                                                                                                     |                                                                                                                    | -                                                                                                                                                        |
|                         | -                                                                      | 0  |                                                                                                                                                                                                                                                                                                                                                                                                                     |                                                                                                                    | -                                                                                                                                                        |
| Caenorhabditis briggsae | proteasome a-type and b-type family protein                            | 13 | P:GO:0008340;<br>P:GO:0051436;<br>P:GO:0051437;<br>P:GO:0040007;<br>P:GO:0000003;<br>F:GO:0004298;<br>P:GO:0031145;<br>P:GO:0002119;<br>P:GO:0040011;<br>P:GO:0009792;<br>C:GO:0005737;<br>C:GO:0005839;<br>C:GO:0005634                                                                                                                                                                                            | EC:3.4.25.0                                                                                                        | IPR000243; IPR001353;<br>G3DSA:3.60.20.10 (GENE3D),<br>PTHR11599 (PANTHER),<br>PTHR11599:SF1 (PANTHER), PS51476<br>(PROFILE), SSF56235 (SUPERFAMILY)     |
| Caenorhabditis elegans  | elegans protein partially confirmed by transcript evidence             | 0  |                                                                                                                                                                                                                                                                                                                                                                                                                     | F:GO:0005524;<br>C:GO:0005856;<br>C:GO:0016459;<br>F:GO:0003774                                                    | IPR001452; IPR011511;<br>G3DSA:2.30.30.40 (GENE3D)                                                                                                       |
| Caenorhabditis briggsae | protein ki-se domain containing protein                                | 0  |                                                                                                                                                                                                                                                                                                                                                                                                                     | F:GO:0016301;<br>F:GO:0004672;<br>F:GO:0005524;<br>F:GO:0000166;<br>P:GO:0006468;<br>P:GO:0040010;<br>F:GO:0004674 | PTHR11909 (PANTHER),<br>PTHR11909:SF19 (PANTHER)                                                                                                         |

|                             |                                                            |    |                                                                                                                                                                       |                                                                                                   |                                                                                                                             |
|-----------------------------|------------------------------------------------------------|----|-----------------------------------------------------------------------------------------------------------------------------------------------------------------------|---------------------------------------------------------------------------------------------------|-----------------------------------------------------------------------------------------------------------------------------|
| Caenorhabditis briggsae     | ef-1 guanine nucleotide exchange domain containing protein | 5  | F:GO:0005488;<br>P:GO:0044238;<br>P:GO:0044260;<br>P:GO:0019915;<br>P:GO:0010467                                                                                      | -                                                                                                 | IPR002319; IPR019446;<br>PTHR11538:SF1 (PANTHER)                                                                            |
| Caenorhabditis briggsae     | alveolar soft part sarcoma chromosome candidate 1          | 6  | P:GO:0009987;<br>P:GO:0006810;<br>P:GO:0050789;<br>C:GO:0005624;<br>C:GO:0044425;<br>C:GO:0044444                                                                     | -                                                                                                 | IPR021569; PTHR23153 (PANTHER),<br>PTHR23153:SF1 (PANTHER), SSF54236<br>(SUPERFAMILY)                                       |
| Caenorhabditis elegans      | yse2_caee1 ame: full=uncharacterized protein               | 0  |                                                                                                                                                                       |                                                                                                   | -                                                                                                                           |
| Caenorhabditis elegans      | guanine nucleotide exchange factor                         | 1  | P:GO:0000003                                                                                                                                                          | -                                                                                                 | IPR000219; IPR001452; IPR001849;<br>IPR011993; G3DSA:2.30.30.40<br>(GENE3D), PTHR12845 (PANTHER),<br>SSF50729 (SUPERFAMILY) |
| Brugia malayi               | elegans protein confirmed by transcript evidence           | 10 | P:GO:0009948;<br>P:GO:0007411;<br>F:GO:0070016;<br>P:GO:0032880;<br>F:GO:0008022;<br>P:GO:0030178;<br>P:GO:0060070;<br>C:GO:0005737;<br>C:GO:0016020;<br>C:GO:0005634 | -                                                                                                 | IPR000342; IPR001158; IPR016137;<br>PTHR10845 (PANTHER),<br>PTHR10845:SF10 (PANTHER)                                        |
|                             | -                                                          | 0  |                                                                                                                                                                       |                                                                                                   | -                                                                                                                           |
|                             | -                                                          | 0  |                                                                                                                                                                       |                                                                                                   | -                                                                                                                           |
|                             | -                                                          | 0  |                                                                                                                                                                       |                                                                                                   | -                                                                                                                           |
| Caenorhabditis briggsae     | vesicle-associated membrane protein 8                      | 2  | C:GO:0016020;<br>P:GO:0016192                                                                                                                                         | -                                                                                                 | -                                                                                                                           |
| Angiostrongylus cantonensis | rho guanine nucleotide exchange factor 1                   | 5  | F:GO:0005089;<br>C:GO:0005622;<br>P:GO:0000003;<br>P:GO:0035023;<br>P:GO:0016043                                                                                      | -                                                                                                 | IPR000219; IPR001849; IPR011993;<br>SSF50729 (SUPERFAMILY)                                                                  |
|                             | -                                                          | 0  |                                                                                                                                                                       |                                                                                                   | -                                                                                                                           |
| Loa loa                     | lanthionine synthetase c-like protein                      | 0  |                                                                                                                                                                       | F:GO:0003674;<br>F:GO:0004872;<br>F:GO:0003824;<br>P:GO:0008150;<br>P:GO:0007186;<br>C:GO:0005575 | IPR007822; IPR008928; IPR012341;<br>IPR020464; PTHR12736 (PANTHER),<br>PTHR12736:SF3 (PANTHER)                              |
| Loa loa                     | lanthionine synthetase c-like protein                      | 0  |                                                                                                                                                                       | F:GO:0003674;<br>F:GO:0004872;<br>F:GO:0003824;<br>P:GO:0008150;<br>P:GO:0007186;<br>C:GO:0005575 | IPR007822; IPR008928; IPR012341;<br>IPR020464; PTHR12736 (PANTHER),<br>PTHR12736:SF3 (PANTHER)                              |
| Caenorhabditis briggsae     | ecotropic viral integration site                           | 4  | F:GO:0005097;<br>C:GO:0005622;<br>F:GO:0016491;<br>P:GO:0032313                                                                                                       | -                                                                                                 | IPR000195; PTHR22957 (PANTHER),<br>PTHR22957:SF44 (PANTHER)                                                                 |
| Loa loa                     | briggsae cbr-pqn-27 protein                                | 0  |                                                                                                                                                                       | F:GO:0005488;<br>P:GO:0016070;<br>F:GO:0005515                                                    | -                                                                                                                           |

|                          |                                                         |    |                                                                                                                                                                       |                                                                                                   |             |                                                                                     |
|--------------------------|---------------------------------------------------------|----|-----------------------------------------------------------------------------------------------------------------------------------------------------------------------|---------------------------------------------------------------------------------------------------|-------------|-------------------------------------------------------------------------------------|
| Caenorhabditis briggsae  | endonuclease exonuclease phosphatase family protein     | 1  | P:GO:0000003                                                                                                                                                          | -                                                                                                 |             | IPR005135; G3DSA:3.60.10.10 (GENE3D), PTHR11200 (PANTHER), PTHR11200:SF15 (PANTHER) |
|                          |                                                         | 0  |                                                                                                                                                                       |                                                                                                   |             |                                                                                     |
| Brugia malayi            | mortality factor 4-like protein 1                       | 0  |                                                                                                                                                                       | F:GO:0003682;<br>C:GO:0000785;<br>P:GO:0006333;<br>C:GO:0005634                                   |             | IPR008676                                                                           |
|                          |                                                         | 0  |                                                                                                                                                                       |                                                                                                   |             |                                                                                     |
| Caenorhabditis elegans   | hypothetical protein Y42H9AR.4 [Caenorhabditis elegans] | 0  |                                                                                                                                                                       |                                                                                                   |             |                                                                                     |
| Oesophagostomum dentatum | elegans protein confirmed by transcript evidence        | 1  | P:GO:0007218                                                                                                                                                          | -                                                                                                 |             | IPR002544; PTHR20986 (PANTHER), SignalP (SIGNALP)                                   |
|                          |                                                         | 0  |                                                                                                                                                                       |                                                                                                   |             |                                                                                     |
| Loa loa                  | transcription elongation factor b polypeptide 1         | 10 | C:GO:0005829;<br>F:GO:0003746;<br>P:GO:0006511;<br>P:GO:0006357;<br>F:GO:0004842;<br>F:GO:0005515;<br>F:GO:0003711;<br>P:GO:0044419;<br>C:GO:0005654;<br>C:GO:0030891 | -                                                                                                 | EC:6.3.2.19 | IPR001232; IPR011333; IPR016073; PTHR20648 (PANTHER), SignalP (SIGNALP)             |
| Brugia malayi            | alter-tive splicing defective family member (asd-2)     | 10 | F:GO:0003730;<br>P:GO:0008366;<br>P:GO:0008078;<br>P:GO:0007525;<br>P:GO:0000381;<br>P:GO:0008347;<br>F:GO:0005515;<br>P:GO:0007475;<br>C:GO:0005634;<br>P:GO:0007438 | -                                                                                                 |             |                                                                                     |
|                          |                                                         | 0  |                                                                                                                                                                       |                                                                                                   |             |                                                                                     |
| Brugia malayi            | elegans protein confirmed by transcript evidence        | 0  |                                                                                                                                                                       | F:GO:0005515;<br>F:GO:0003677                                                                     |             | IPR006578                                                                           |
|                          |                                                         | 0  |                                                                                                                                                                       |                                                                                                   |             |                                                                                     |
|                          |                                                         | 0  |                                                                                                                                                                       |                                                                                                   |             |                                                                                     |
| Loa loa                  | cation efflux family protein                            | 9  | P:GO:0046579;<br>P:GO:0040010;<br>F:GO:0016491;<br>F:GO:0008324;<br>P:GO:0019915;<br>P:GO:0040026;<br>P:GO:0010043;<br>P:GO:0006812;<br>C:GO:0005886                  | -                                                                                                 |             | IPR002524; G3DSA:1.20.1510.10 (GENE3D), SignalP (SIGNALP)                           |
| Loa loa                  | heat shock transcription factor                         | 0  |                                                                                                                                                                       | P:GO:0006355;<br>P:GO:0006950;<br>F:GO:0043565;<br>F:GO:0003677;<br>F:GO:0003700;<br>C:GO:0005634 |             | PTHR10015 (PANTHER), PTHR10015:SF17 (PANTHER)                                       |
| Caenorhabditis briggsae  | downstream neighbor of son                              | 3  | P:GO:0009653;<br>P:GO:0007275;<br>P:GO:0000003                                                                                                                        | -                                                                                                 |             | PTHR12972 (PANTHER)                                                                 |

|                             |                                                         |    |                                                                                                                                                                       |   |             |                                                                                                             |
|-----------------------------|---------------------------------------------------------|----|-----------------------------------------------------------------------------------------------------------------------------------------------------------------------|---|-------------|-------------------------------------------------------------------------------------------------------------|
| Caenorhabditis elegans      | vesicle-fusing atpase                                   | 10 | P:GO:0009792;<br>P:GO:0002119;<br>F:GO:0005515;<br>P:GO:0032940;<br>F:GO:0005524;<br>P:GO:0000003;<br>P:GO:0040011;<br>F:GO:0017111;<br>P:GO:0040007;<br>P:GO:0006898 | - | EC:3.6.1.15 | IPR003959; G3DSA:3.40.50.300 (GENE3D), PTHR23078 (PANTHER), SSF52540 (SUPERFAMILY)                          |
| Caenorhabditis briggsae     | vesicular glutamate transporter 1                       | 6  | P:GO:0055085;<br>C:GO:0016021;<br>F:GO:0015319;<br>C:GO:0045202;<br>F:GO:0015321;<br>P:GO:0006817                                                                     | - |             | IPR011701; IPR016196; IPR020846; G3DSA:1.20.1250.20 (GENE3D), PTHR11662 (PANTHER), PTHR11662:SF29 (PANTHER) |
| Caenorhabditis elegans      | zinc c2h2 type family protein                           | 2  | P:GO:0009792;<br>F:GO:0005515                                                                                                                                         | - |             | IPR007087; IPR013087; IPR015880; PTHR11389 (PANTHER), SSF57667 (SUPERFAMILY)                                |
| Caenorhabditis elegans      | zinc c2h2 type family protein                           | 2  | P:GO:0009792;<br>F:GO:0005515                                                                                                                                         | - |             | IPR007087; IPR013087; IPR015880; PTHR11389 (PANTHER), SSF57667 (SUPERFAMILY)                                |
| Caenorhabditis briggsae     | ubiquitin-conjugating enzyme e2 g2                      | 8  | F:GO:0005515;<br>F:GO:0005524;<br>P:GO:0070936;<br>F:GO:0004842;<br>P:GO:0030433;<br>P:GO:0051246;<br>C:GO:0005829;<br>C:GO:0005783                                   | - | EC:6.3.2.19 | IPR000608; IPR016135; PTHR11621 (PANTHER), PTHR11621:SF36 (PANTHER)                                         |
| Caenorhabditis briggsae     | briggsae cbr-noah-1 protein                             | 0  |                                                                                                                                                                       |   |             | PTHR22963 (PANTHER), PTHR22963:SF1 (PANTHER)                                                                |
| Caenorhabditis briggsae     | Hypothetical protein CBG16187 [Caenorhabditis briggsae] | 0  |                                                                                                                                                                       |   |             | -                                                                                                           |
| Caenorhabditis elegans      | serine long chain base subunit 2                        | 9  | P:GO:0046511;<br>C:GO:0005739;<br>P:GO:0046512;<br>F:GO:0004758;<br>P:GO:0006686;<br>F:GO:0016769;<br>P:GO:0019915;<br>C:GO:0017059;<br>F:GO:0030170                  | - | EC:2.3.1.50 | IPR001917; IPR004839; IPR015421; IPR015422; IPR015424; PTHR13693 (PANTHER), PTHR13693:SF3 (PANTHER)         |
| Caenorhabditis elegans      | 60s acidic ribosomal protein p2                         | 3  | F:GO:0005515;<br>C:GO:0030529;<br>P:GO:0006412                                                                                                                        | - | EC:3.6.5.3  | IPR001813; IPR001859; PTHR21141 (PANTHER), PTHR21141:SF5 (PANTHER)                                          |
| Angiostrongylus cantonensis | iq calmodulin-binding motif domain protein              | 0  |                                                                                                                                                                       |   |             | SignalP (SIGNALP)                                                                                           |
| -                           | -                                                       | 0  |                                                                                                                                                                       |   |             | -                                                                                                           |
| Caenorhabditis elegans      | kex-2 proprotein convertase family member (kpc-1)       | 3  | P:GO:0000003;<br>P:GO:0006508;<br>F:GO:0004252                                                                                                                        | - | EC:3.4.21.0 | IPR000209; IPR009020; IPR015500; IPR022398; G3DSA:3.30.70.850 (GENE3D), PTHR10795:SF14 (PANTHER)            |
| Caenorhabditis elegans      | amop domain containing protein                          | 2  | C:GO:0016021;<br>P:GO:0007160                                                                                                                                         | - |             | IPR003886                                                                                                   |
| Caenorhabditis elegans      | amop domain containing protein                          | 2  | C:GO:0016021;<br>P:GO:0007160                                                                                                                                         | - |             | IPR003886                                                                                                   |

|                         |                                                |    |                                                                                                                                                                                                                                                                                                                                                                                                                                                       |   |                                                                                                                              |
|-------------------------|------------------------------------------------|----|-------------------------------------------------------------------------------------------------------------------------------------------------------------------------------------------------------------------------------------------------------------------------------------------------------------------------------------------------------------------------------------------------------------------------------------------------------|---|------------------------------------------------------------------------------------------------------------------------------|
| Caenorhabditis elegans  | gtp-binding gtp1 obg domain containing protein | 3  | C:GO:0005622;<br>P:GO:0000003;<br>F:GO:0000166                                                                                                                                                                                                                                                                                                                                                                                                        | - | IPR002917; IPR006073; IPR006169;<br>IPR014100; G3DSA:3.40.50.300<br>(GENE3D), PTHR11702 (PANTHER),<br>SSF52540 (SUPERFAMILY) |
| Caenorhabditis briggsae | briggsae cbr-hmp-2 protein                     | 26 | P:GO:0048526;<br>P:GO:0003006;<br>P:GO:0000902;<br>P:GO:0014019;<br>P:GO:0010552;<br>P:GO:0007370;<br>P:GO:0045186;<br>C:GO:0016324;<br>P:GO:0001709;<br>P:GO:0035019;<br>P:GO:0051179;<br>F:GO:0003713;<br>P:GO:0035153;<br>C:GO:0005737;<br>P:GO:0060232;<br>P:GO:0003136;<br>P:GO:0035147;<br>P:GO:0046530;<br>P:GO:0035017;<br>P:GO:0060914;<br>P:GO:0007391;<br>P:GO:0008360;<br>C:GO:0005634;<br>P:GO:0048477;<br>P:GO:0046667;<br>C:GO:0005915 | - | IPR000225; IPR011989; IPR013284;<br>IPR016024; PTHR23315 (PANTHER),<br>PTHR23315:SF10 (PANTHER)                              |
| Caenorhabditis briggsae | briggsae cbr-hmp-2 protein                     | 26 | P:GO:0048526;<br>P:GO:0003006;<br>P:GO:0000902;<br>P:GO:0014019;<br>P:GO:0010552;<br>P:GO:0007370;<br>P:GO:0045186;<br>C:GO:0016324;<br>P:GO:0001709;<br>P:GO:0035019;<br>P:GO:0051179;<br>F:GO:0003713;<br>P:GO:0035153;<br>C:GO:0005737;<br>P:GO:0060232;<br>P:GO:0003136;<br>P:GO:0035147;<br>P:GO:0046530;<br>P:GO:0035017;<br>P:GO:0060914;<br>P:GO:0007391;<br>P:GO:0008360;<br>C:GO:0005634;<br>P:GO:0048477;<br>P:GO:0046667;<br>C:GO:0005915 | - | IPR000225; IPR011989; IPR013284;<br>IPR016024; PTHR23315 (PANTHER),<br>PTHR23315:SF10 (PANTHER)                              |
| Caenorhabditis briggsae | golgi golgin subfamily 7                       | 1  | C:GO:0044464                                                                                                                                                                                                                                                                                                                                                                                                                                          | - | IPR019383; PTHR13254 (PANTHER)                                                                                               |

|                             |                                                         |    |                                                                                                                                                                                        |                                                                                                                                     |             |                                                                                     |
|-----------------------------|---------------------------------------------------------|----|----------------------------------------------------------------------------------------------------------------------------------------------------------------------------------------|-------------------------------------------------------------------------------------------------------------------------------------|-------------|-------------------------------------------------------------------------------------|
| Caenorhabditis elegans      | sulfate transporter                                     | 0  |                                                                                                                                                                                        | P:GO:0008272;<br>C:GO:0016021;<br>F:GO:0008271;<br>C:GO:0016020;<br>P:GO:0055085;<br>F:GO:0015116;<br>F:GO:0005215;<br>P:GO:0006810 | -           |                                                                                     |
|                             | -                                                       | 0  |                                                                                                                                                                                        |                                                                                                                                     |             | SignalP (SIGNALP)                                                                   |
|                             | -                                                       | 0  |                                                                                                                                                                                        |                                                                                                                                     |             | -                                                                                   |
| Caenorhabditis elegans      | novel protein containing mif4g and ma3 domains          | 7  | F:GO:0003723;<br>C:GO:0005681;<br>P:GO:0048024;<br>F:GO:0004713;<br>F:GO:0005524;<br>F:GO:0005515;<br>P:GO:0006468                                                                     | -                                                                                                                                   | EC:2.7.10.0 | IPR003890; IPR016021; IPR016024;<br>PTHR18034 (PANTHER),<br>PTHR18034:SF3 (PANTHER) |
| Caenorhabditis elegans      | novel protein containing mif4g and ma3 domains          | 7  | F:GO:0003723;<br>C:GO:0005681;<br>P:GO:0048024;<br>F:GO:0004713;<br>F:GO:0005524;<br>F:GO:0005515;<br>P:GO:0006468                                                                     | -                                                                                                                                   | EC:2.7.10.0 | IPR003890; IPR016021; IPR016024;<br>PTHR18034 (PANTHER),<br>PTHR18034:SF3 (PANTHER) |
| Caenorhabditis elegans      | elegans protein confirmed by transcript evidence        | 4  | P:GO:0010171;<br>P:GO:0040010;<br>P:GO:0002119;<br>P:GO:0040011                                                                                                                        | -                                                                                                                                   |             | IPR019013                                                                           |
| Pongo abelii                | protein phosphatase 1 regulatory subunit 14b            | 11 | P:GO:0006468;<br>F:GO:0005515;<br>F:GO:0008599;<br>F:GO:0004864;<br>F:GO:0005524;<br>P:GO:0050790;<br>C:GO:0005634;<br>F:GO:0008270;<br>F:GO:0004674;<br>P:GO:0042325;<br>C:GO:0005739 | -                                                                                                                                   | EC:2.7.11.0 | -                                                                                   |
| Caenorhabditis elegans      | a ki-se anchor protein family member (aka-1)            | 0  |                                                                                                                                                                                        | F:GO:0046872;<br>F:GO:0008270                                                                                                       |             | IPR022557; PTHR22835 (PANTHER),<br>PTHR22835:SF12 (PANTHER)                         |
| Loa loa                     | importin-beta n-termi-l domain containing protein       | 1  | F:GO:0005488                                                                                                                                                                           | -                                                                                                                                   |             | IPR011989; IPR016024; PTHR10997<br>(PANTHER), PTHR10997:SF18<br>(PANTHER)           |
| Loa loa                     | importin-beta n-termi-l domain containing protein       | 1  | F:GO:0005488                                                                                                                                                                           | -                                                                                                                                   |             | IPR011989; IPR016024; PTHR10997<br>(PANTHER), PTHR10997:SF18<br>(PANTHER)           |
| Angiostrongylus cantonensis | glycolipid transfer protein domain-containing protein 1 | 4  | F:GO:0017089;<br>C:GO:0005737;<br>F:GO:0051861;<br>P:GO:0046836                                                                                                                        | -                                                                                                                                   |             | SignalP (SIGNALP)                                                                   |
| Caenorhabditis briggsae     | exportin 7                                              | 4  | C:GO:0005737;<br>C:GO:0005643;<br>F:GO:0005049;<br>P:GO:0006611                                                                                                                        | -                                                                                                                                   |             | PTHR12596 (PANTHER),<br>PTHR12596:SF2 (PANTHER)                                     |
| Caenorhabditis elegans      | aar2 protein                                            | 1  | F:GO:0005515                                                                                                                                                                           | -                                                                                                                                   |             | IPR007946                                                                           |
| Caenorhabditis elegans      | aar2 protein                                            | 1  | F:GO:0005515                                                                                                                                                                           | -                                                                                                                                   |             | IPR007946                                                                           |
| Caenorhabditis elegans      | hypothetical protein C52E12.4 [Caenorhabditis elegans]  | 0  |                                                                                                                                                                                        |                                                                                                                                     |             | -                                                                                   |

|                        |                                                            |    |                                                                                                                                                                                        |                               |                                          |                                                                                                                                |
|------------------------|------------------------------------------------------------|----|----------------------------------------------------------------------------------------------------------------------------------------------------------------------------------------|-------------------------------|------------------------------------------|--------------------------------------------------------------------------------------------------------------------------------|
|                        | -                                                          | 0  |                                                                                                                                                                                        |                               |                                          | IPR001357; G3DSA:3.40.50.10190 (GENE3D)                                                                                        |
| Caenorhabditis elegans | elegans protein partially confirmed by transcript evidence | 0  |                                                                                                                                                                                        |                               |                                          | IPR003582; PTHR21724 (PANTHER), SignalP (SIGNALP)                                                                              |
| Caenorhabditis elegans | succinyl- ligase                                           | 11 | C:GO:0045244;<br>P:GO:0006105;<br>C:GO:0005743;<br>F:GO:0003878;<br>P:GO:0006104;<br>P:GO:0006099;<br>F:GO:0019003;<br>F:GO:0004775;<br>F:GO:0046982;<br>F:GO:0004776;<br>F:GO:0005525 | -                             | EC:2.3.3.8;<br>EC:6.2.1.5;<br>EC:6.2.1.4 | -                                                                                                                              |
|                        | -                                                          | 0  |                                                                                                                                                                                        |                               |                                          | -                                                                                                                              |
| Caenorhabditis elegans | pyruvate dehydroge-se                                      | 8  | F:GO:0004739;<br>P:GO:0040010;<br>P:GO:0055114;<br>P:GO:0006096;<br>C:GO:0005759;<br>P:GO:0006898;<br>P:GO:0048477;<br>P:GO:0009792                                                    | -                             | EC:1.2.4.1                               | IPR001017; G3DSA:3.40.50.970 (GENE3D), PTHR11516 (PANTHER), PTHR11516:SF3 (PANTHER), SignalP (SIGNALP), SSF52518 (SUPERFAMILY) |
|                        | -                                                          | 0  |                                                                                                                                                                                        |                               |                                          | -                                                                                                                              |
| Caenorhabditis elegans | spermatogenesis associated 11                              | 0  |                                                                                                                                                                                        | F:GO:0016491                  |                                          | G3DSA:2.60.120.590 (GENE3D), PTHR21052 (PANTHER), SSF51197 (SUPERFAMILY)                                                       |
| Caenorhabditis elegans | sushi domain                                               | 0  |                                                                                                                                                                                        | F:GO:0030414;<br>C:GO:0005576 |                                          | IPR000436; IPR016060; PTHR19325 (PANTHER), PTHR19325:SF37 (PANTHER)                                                            |
| Haemonchus contortus   | superoxide dismutase                                       | 5  | F:GO:0046872;<br>C:GO:0005615;<br>P:GO:0055114;<br>P:GO:0006801;<br>F:GO:0004784                                                                                                       | -                             | EC:1.15.1.1                              | IPR001424; IPR018152; PTHR10003:SF12 (PANTHER), SignalP (SIGNALP)                                                              |
| Brugia malayi          | hypothetical protein Bm1_50915 [Brugia malayi]             | 0  |                                                                                                                                                                                        |                               |                                          | SignalP (SIGNALP)                                                                                                              |
| Haemonchus contortus   | heat shock protein family member (hsp- )                   | 0  |                                                                                                                                                                                        | P:GO:0006950;<br>P:GO:0009408 |                                          | IPR001436; IPR002068; IPR008978; G3DSA:2.60.40.790 (GENE3D), PTHR11527 (PANTHER), PTHR11527:SF28 (PANTHER)                     |
| Haemonchus contortus   | heat shock protein family member (hsp- )                   | 0  |                                                                                                                                                                                        | P:GO:0006950;<br>P:GO:0009408 |                                          | IPR001436; IPR002068; IPR008978; G3DSA:2.60.40.790 (GENE3D), PTHR11527 (PANTHER), PTHR11527:SF28 (PANTHER)                     |
| Caenorhabditis elegans | protein transport protein sec61 subunit gamma              | 5  | C:GO:0005789;<br>F:GO:0015450;<br>P:GO:0045047;<br>P:GO:0055085;<br>C:GO:0016021                                                                                                       | -                             |                                          | -                                                                                                                              |
| Caenorhabditis elegans | zinc finger fyve domain-containing protein 28              | 3  | C:GO:0005737;<br>F:GO:0008270;<br>F:GO:0016740                                                                                                                                         | -                             |                                          | PTHR22835 (PANTHER), PTHR22835:SF41 (PANTHER)                                                                                  |

|                        |                                                                |    |                                                                                                                                                                                                                                                                                                                                                                                                                     |   |                                                                                      |
|------------------------|----------------------------------------------------------------|----|---------------------------------------------------------------------------------------------------------------------------------------------------------------------------------------------------------------------------------------------------------------------------------------------------------------------------------------------------------------------------------------------------------------------|---|--------------------------------------------------------------------------------------|
| Brugia malayi          | notch domain-containing protein                                | 0  | P:GO:0043065;<br>P:GO:0008285;<br>C:GO:0009986;<br>P:GO:0050793;<br>C:GO:0005634;<br>P:GO:0030154;<br>P:GO:0030326;<br>C:GO:0016021;<br>C:GO:0016020;<br>P:GO:0007219;<br>F:GO:0005509;<br>P:GO:0046579;<br>P:GO:0009887;<br>F:GO:0004872;<br>P:GO:0007275;<br>P:GO:0007368;<br>P:GO:0002011;<br>F:GO:0003976;<br>P:GO:0016049;<br>F:GO:0016740;<br>F:GO:0005515;<br>C:GO:0005887;<br>P:GO:0007050;<br>P:GO:0042060 | - |                                                                                      |
| Caenorhabditis elegans | ap-1 complex subunit gamma-1                                   | 10 | P:GO:0040010;<br>P:GO:0009306;<br>P:GO:0000003;<br>P:GO:0002119;<br>C:GO:0030117;<br>F:GO:0005515;<br>P:GO:0040011;<br>C:GO:0044431;<br>P:GO:0009792;<br>P:GO:0001703                                                                                                                                                                                                                                               | - | IPR002553; IPR011989; IPR016024;<br>PTHR22780 (PANTHER),<br>PTHR22780:SF5 (PANTHER)  |
| Brugia malayi          | tm2 domain containing protein                                  | 14 | P:GO:0035314;<br>P:GO:0035168;<br>F:GO:0000166;<br>F:GO:0004672;<br>C:GO:0044464;<br>F:GO:0003702;<br>P:GO:0046672;<br>F:GO:0043565;<br>P:GO:0042675;<br>P:GO:0035165;<br>P:GO:0001709;<br>P:GO:0045944;<br>P:GO:0045467;<br>P:GO:0042981                                                                                                                                                                           | - | IPR007829; PTHR21016 (PANTHER),<br>SignalP (SIGNALP)                                 |
| Caenorhabditis elegans | hypothetical protein Y92H12A.3 [Caenorhabditis elegans]        | 0  |                                                                                                                                                                                                                                                                                                                                                                                                                     |   | IPR001368                                                                            |
| Caenorhabditis elegans | electron transfer flavoprotein subunit mitochondrial precursor | 4  | F:GO:0050660;<br>P:GO:0009792;<br>P:GO:0000003;<br>F:GO:0009055                                                                                                                                                                                                                                                                                                                                                     | - | -                                                                                    |
| Caenorhabditis elegans | uncoordi-ted family member (unc-103)                           | 4  | F:GO:0005249;<br>P:GO:0055085;<br>P:GO:0006813;<br>C:GO:0016021                                                                                                                                                                                                                                                                                                                                                     | - | IPR000595; IPR014710; IPR018490;<br>PTHR10217 (PANTHER),<br>PTHR10217:SF15 (PANTHER) |



|                             |                                                  |    |                                                                                                                                                                                                         |                                                                                                   |                             |                                                                                                                                                                              |
|-----------------------------|--------------------------------------------------|----|---------------------------------------------------------------------------------------------------------------------------------------------------------------------------------------------------------|---------------------------------------------------------------------------------------------------|-----------------------------|------------------------------------------------------------------------------------------------------------------------------------------------------------------------------|
| Caenorhabditis elegans      | briggsae cbr-mup-4 protein                       | 2  | F:GO:0005509;<br>F:GO:0005515                                                                                                                                                                           | -                                                                                                 |                             | IPR002035; IPR006210; IPR013032;<br>G3DSA:2.10.25.10 (GENE3D),<br>G3DSA:3.40.50.410 (GENE3D),<br>PTHR22992 (PANTHER),<br>PTHR22992:SF12 (PANTHER),<br>SSF53300 (SUPERFAMILY) |
| Caenorhabditis briggsae     | ribosome biogenesis protein rlp24                | 9  | P:GO:0040035;<br>P:GO:0009792;<br>P:GO:0010171;<br>P:GO:0002119;<br>C:GO:0005840;<br>F:GO:0003735;<br>P:GO:0040010;<br>P:GO:0006898;<br>P:GO:0006412                                                    | -                                                                                                 | EC:3.6.5.3                  | IPR000988; IPR011017;<br>PTHR10792:SF2 (PANTHER), SSF57716<br>(SUPERFAMILY)                                                                                                  |
| Brugia malayi               | rap ran-gap family protein                       | 12 | P:GO:0051234;<br>P:GO:0035467;<br>P:GO:0008104;<br>P:GO:0051128;<br>C:GO:0005737;<br>P:GO:0031323;<br>P:GO:0050790;<br>F:GO:0005515;<br>P:GO:0009968;<br>P:GO:0007166;<br>N:GO:0035556;<br>P:GO:0050896 | -                                                                                                 |                             | PTHR10063 (PANTHER), PF11864<br>(PFAM)                                                                                                                                       |
| Caenorhabditis elegans      | elegans protein confirmed by transcript evidence | 0  |                                                                                                                                                                                                         |                                                                                                   |                             | -                                                                                                                                                                            |
| Caenorhabditis briggsae     | elegans protein confirmed by transcript evidence | 0  |                                                                                                                                                                                                         |                                                                                                   |                             | -                                                                                                                                                                            |
| -                           | -                                                | 0  |                                                                                                                                                                                                         |                                                                                                   |                             | -                                                                                                                                                                            |
| Caenorhabditis briggsae     | thump domain containing 1                        | 0  |                                                                                                                                                                                                         |                                                                                                   |                             | PTHR13452 (PANTHER)                                                                                                                                                          |
| Caenorhabditis briggsae     | large subunit ribosomal protein 9                | 5  | C:GO:0005840;<br>F:GO:0003735;<br>F:GO:0005515;<br>P:GO:0006412;<br>F:GO:0019843                                                                                                                        | -                                                                                                 | EC:3.6.5.3                  | IPR000702; IPR002359; IPR020040;<br>PTHR11655:SF2 (PANTHER)                                                                                                                  |
| Caenorhabditis briggsae     | briggsae cbr-pad-1 protein                       | 0  |                                                                                                                                                                                                         | F:GO:0003674;<br>P:GO:0007275;<br>P:GO:0008150;<br>C:GO:0005575;<br>P:GO:0006810;<br>P:GO:0015031 |                             | PTHR14042 (PANTHER)                                                                                                                                                          |
| Caenorhabditis briggsae     | elegans protein confirmed by transcript evidence | 9  | P:GO:0040010;<br>C:GO:0005743;<br>P:GO:0055114;<br>F:GO:0004350;<br>P:GO:0006898;<br>P:GO:0006561;<br>F:GO:0004349;<br>C:GO:0005811;<br>F:GO:0017084                                                    | -                                                                                                 | EC:1.2.1.41;<br>EC:2.7.2.11 | IPR016161; IPR016162; IPR016163;<br>IPR020593; PTHR11063 (PANTHER),<br>PTHR11063:SF2 (PANTHER)                                                                               |
| -                           | -                                                | 0  |                                                                                                                                                                                                         |                                                                                                   |                             | -                                                                                                                                                                            |
| Angiostrongylus cantonensis | tnf receptor-associated protein 1                | 6  | P:GO:0006457;<br>P:GO:0034599;<br>P:GO:0040010;<br>F:GO:0005524;<br>F:GO:0051082;<br>C:GO:0005739                                                                                                       | -                                                                                                 |                             | IPR001404; IPR003594; IPR020568;<br>IPR020576; PTHR11528:SF24<br>(PANTHER)                                                                                                   |

|                             |                                                       |    |                                                                                                                                                                                                                                                                             |   |                                                                                                                                                              |
|-----------------------------|-------------------------------------------------------|----|-----------------------------------------------------------------------------------------------------------------------------------------------------------------------------------------------------------------------------------------------------------------------------|---|--------------------------------------------------------------------------------------------------------------------------------------------------------------|
| Angiostrongylus cantonensis | tnf receptor-associated protein 1                     | 7  | P:GO:0006457;<br>P:GO:0034599;<br>P:GO:0040010;<br>F:GO:0005524;<br>F:GO:0051082;<br>F:GO:0005164;<br>C:GO:0005739                                                                                                                                                          | - | IPR001404; IPR020568; IPR020576;<br>PTHR11528:SF24 (PANTHER)                                                                                                 |
| Caenorhabditis elegans      | cd36 antigen                                          | 16 | F:GO:0030169;<br>P:GO:0007155;<br>C:GO:0043231;<br>P:GO:0006869;<br>P:GO:0010033;<br>P:GO:0034381;<br>P:GO:0019915;<br>C:GO:0009986;<br>C:GO:0044425;<br>P:GO:0048522;<br>P:GO:0051704;<br>F:GO:0004872;<br>C:GO:0005886;<br>C:GO:0044444;<br>P:GO:0040035;<br>N:GO:0035556 | - | IPR002159; PTHR11923:SF8<br>(PANTHER)                                                                                                                        |
| -                           | -                                                     | 0  | -                                                                                                                                                                                                                                                                           | - | -                                                                                                                                                            |
| Caenorhabditis briggsae     | protein disulfide                                     | 1  | C:GO:0044464                                                                                                                                                                                                                                                                | - | -                                                                                                                                                            |
| Caenorhabditis elegans      | briggsae cbr-nlp-40 protein                           | 1  | P:GO:0000003                                                                                                                                                                                                                                                                | - | SignalP (SIGNALP)                                                                                                                                            |
| -                           | -                                                     | 0  | -                                                                                                                                                                                                                                                                           | - | IPR011009; G3DSA:1.10.510.10<br>(GENE3D)                                                                                                                     |
| Macaca mulatta              | 40s ribosomal protein s2-like isoform 2               | 0  | -                                                                                                                                                                                                                                                                           | - | IPR000851                                                                                                                                                    |
| Caenorhabditis elegans      | sterile alpha motif domain containing isoform cra_a   | 1  | C:GO:0044464                                                                                                                                                                                                                                                                | - | IPR001660; IPR010993; IPR013761;<br>IPR015327; IPR021129; PTHR12515<br>(PANTHER), PTHR12515:SF1<br>(PANTHER)                                                 |
| Caenorhabditis briggsae     | potassium channel tetramerisation domain containing 2 | 3  | F:GO:0042802;<br>P:GO:0006811;<br>C:GO:0016020                                                                                                                                                                                                                              | - | -                                                                                                                                                            |
| -                           | -                                                     | 0  | -                                                                                                                                                                                                                                                                           | - | -                                                                                                                                                            |
| Caenorhabditis elegans      | dipeptidylpeptidase 3                                 | 3  | C:GO:0005737;<br>P:GO:0006508;<br>F:GO:0008239                                                                                                                                                                                                                              | - | IPR005317; PTHR23422 (PANTHER),<br>SignalP (SIGNALP)                                                                                                         |
| Brugia malayi               | leucine rich repeat family protein                    | 6  | P:GO:0040035;<br>P:GO:0009792;<br>P:GO:0016336;<br>P:GO:0040011;<br>P:GO:0006898;<br>P:GO:0016334                                                                                                                                                                           | - | IPR001611; PRO0019 (PRINTS),<br>G3DSA:3.80.10.10 (GENE3D),<br>PTHR10588 (PANTHER),<br>PTHR10588:SF23 (PANTHER), PSS1450<br>(PROFILE), SSF52058 (SUPERFAMILY) |
| Caenorhabditis elegans      | selenocysteine-specific elongation factor             | 1  | F:GO:0005488                                                                                                                                                                                                                                                                | - | IPR000795; G3DSA:2.40.30.10<br>(GENE3D), G3DSA:3.40.50.300<br>(GENE3D), PTHR23115 (PANTHER),<br>PTHR23115:SF25 (PANTHER),<br>SSF52540 (SUPERFAMILY)          |
| -                           | -                                                     | 0  | -                                                                                                                                                                                                                                                                           | - | SignalP (SIGNALP)                                                                                                                                            |
| -                           | -                                                     | 0  | -                                                                                                                                                                                                                                                                           | - | SignalP (SIGNALP)                                                                                                                                            |
| Caenorhabditis elegans      | elegans protein confirmed by transcript evidence      | 0  | -                                                                                                                                                                                                                                                                           | - | -                                                                                                                                                            |

|                             |                                                        |    |                                                                                                                                                                                                                                                                                                                                                                                                                                                                        |                                                                                  |  |                                                                                                   |
|-----------------------------|--------------------------------------------------------|----|------------------------------------------------------------------------------------------------------------------------------------------------------------------------------------------------------------------------------------------------------------------------------------------------------------------------------------------------------------------------------------------------------------------------------------------------------------------------|----------------------------------------------------------------------------------|--|---------------------------------------------------------------------------------------------------|
| Loa loa                     | myotubularin related protein 9                         | 0  |                                                                                                                                                                                                                                                                                                                                                                                                                                                                        | P:GO:0016311;<br>F:GO:0016791;<br>C:GO:0005737;<br>F:GO:0030234;<br>F:GO:0005515 |  | PTHR10807 (PANTHER),<br>PTHR10807:SF9 (PANTHER)                                                   |
| Caenorhabditis elegans      | sh3-domain grb2-like 2                                 | 2  | C:GO:0005737;<br>F:GO:0005515                                                                                                                                                                                                                                                                                                                                                                                                                                          | -                                                                                |  | IPR001452; G3DSA:2.30.30.40<br>(GENE3D), PTHR10661 (PANTHER),<br>PTHR10661:SF23 (PANTHER)         |
| Loa loa                     | ring finger protein 126                                | 1  | F:GO:0005515                                                                                                                                                                                                                                                                                                                                                                                                                                                           | -                                                                                |  | IPR001841; IPR013083; PTHR22763<br>(PANTHER), SSF57850 (SUPERFAMILY)                              |
|                             | -                                                      | 0  |                                                                                                                                                                                                                                                                                                                                                                                                                                                                        |                                                                                  |  | -                                                                                                 |
| Angiostrongylus cantonensis | general transcription factor 1-like                    | 4  | P:GO:0016192;<br>P:GO:0006367;<br>C:GO:0005672;<br>F:GO:0003702                                                                                                                                                                                                                                                                                                                                                                                                        | -                                                                                |  | IPR004855; IPR009083; IPR009088;<br>IPR013028; PTHR12694:SF7<br>(PANTHER)                         |
| Angiostrongylus cantonensis | general transcription factor 1-like                    | 4  | P:GO:0016192;<br>P:GO:0006367;<br>C:GO:0005672;<br>F:GO:0003702                                                                                                                                                                                                                                                                                                                                                                                                        | -                                                                                |  | IPR004855; IPR009083; IPR009088;<br>IPR013028; PTHR12694:SF7<br>(PANTHER)                         |
|                             | -                                                      | 0  |                                                                                                                                                                                                                                                                                                                                                                                                                                                                        |                                                                                  |  | -                                                                                                 |
| Caenorhabditis elegans      | hypothetical protein C14C10.6 [Caenorhabditis elegans] | 0  |                                                                                                                                                                                                                                                                                                                                                                                                                                                                        |                                                                                  |  | SignalP (SIGNALP)                                                                                 |
|                             | -                                                      | 0  |                                                                                                                                                                                                                                                                                                                                                                                                                                                                        |                                                                                  |  | -                                                                                                 |
| Caenorhabditis elegans      | dystrophin-like protein                                | 37 | C:GO:0005856;<br>P:GO:0060025;<br>P:GO:0010552;<br>F:GO:0005277;<br>P:GO:0030010;<br>P:GO:0007314;<br>P:GO:0007411;<br>C:GO:0009925;<br>P:GO:0007474;<br>C:GO:0031594;<br>F:GO:0005200;<br>P:GO:0015870;<br>F:GO:0050699;<br>C:GO:0030315;<br>P:GO:0007427;<br>P:GO:0007271;<br>P:GO:0045214;<br>P:GO:0007274;<br>P:GO:0016334;<br>F:GO:0008270;<br>F:GO:0016563;<br>C:GO:0016011;<br>P:GO:0045197;<br>P:GO:0046716;<br>F:GO:0046982;<br>P:GO:0035147;<br>P:GO:0007016 | -                                                                                |  | IPR000433; IPR015154; PTHR11915<br>(PANTHER), PTHR11915:SF57<br>(PANTHER), SSF47473 (SUPERFAMILY) |
|                             | -                                                      | 0  |                                                                                                                                                                                                                                                                                                                                                                                                                                                                        |                                                                                  |  | -                                                                                                 |
| Caenorhabditis elegans      | protection of telomeres 1                              | 0  |                                                                                                                                                                                                                                                                                                                                                                                                                                                                        | P:GO:0040010;<br>P:GO:0000723;<br>C:GO:0000784;<br>F:GO:0003677                  |  | IPR011564; IPR012340; IPR016027                                                                   |
| Caenorhabditis elegans      | protection of telomeres 1                              | 0  |                                                                                                                                                                                                                                                                                                                                                                                                                                                                        | P:GO:0040010;<br>P:GO:0000723;<br>C:GO:0000784;<br>F:GO:0003677                  |  | IPR011564; IPR012340; IPR016027                                                                   |

|                        |                                                                         |    |                                                                                                                                                                                                         |   |   |                                                                                                                                                                                                                                           |                                              |
|------------------------|-------------------------------------------------------------------------|----|---------------------------------------------------------------------------------------------------------------------------------------------------------------------------------------------------------|---|---|-------------------------------------------------------------------------------------------------------------------------------------------------------------------------------------------------------------------------------------------|----------------------------------------------|
| Caenorhabditis elegans | exocyst complex component 5                                             | 12 | C:GO:0005737;<br>P:GO:0040035;<br>P:GO:0009792;<br>P:GO:0010171;<br>P:GO:0002119;<br>P:GO:0040018;<br>P:GO:0048278;<br>P:GO:0018991;<br>P:GO:0006887;<br>P:GO:0040010;<br>P:GO:0040011;<br>P:GO:0002009 | - | - | -                                                                                                                                                                                                                                         |                                              |
| Loa loa                | round spermatid basic protein 1                                         | 0  |                                                                                                                                                                                                         |   |   | -                                                                                                                                                                                                                                         |                                              |
| Caenorhabditis elegans | elegans protein confirmed by transcript evidence                        | 2  | F:GO:0005515;<br>P:GO:0009792                                                                                                                                                                           | - |   | PTHR15836 (PANTHER)                                                                                                                                                                                                                       |                                              |
| Caenorhabditis elegans | elegans protein confirmed by transcript evidence                        | 2  | F:GO:0005515;<br>P:GO:0009792                                                                                                                                                                           | - |   | PTHR15836 (PANTHER)                                                                                                                                                                                                                       |                                              |
| Caenorhabditis elegans | related to yeast vacuolar protein sorting factor family member (vps-39) | 9  | P:GO:0009792;<br>P:GO:0010171;<br>F:GO:0005515;<br>P:GO:0016192;<br>P:GO:0000003;<br>C:GO:0030897;<br>P:GO:0008219;<br>P:GO:0048066;<br>P:GO:0002009                                                    | - |   | IPR019453; PTHR12894 (PANTHER),<br>PTHR12894:SF10 (PANTHER)                                                                                                                                                                               |                                              |
| Caenorhabditis elegans | high mobility group protein                                             | 7  | P:GO:0040035;<br>P:GO:0009792;<br>P:GO:0002119;<br>F:GO:0003677;<br>P:GO:0040010;<br>P:GO:0040011;<br>C:GO:0005634                                                                                      | - |   | PD936484 (PRODOM)                                                                                                                                                                                                                         |                                              |
| Caenorhabditis elegans | massive surface protein                                                 | 2  | F:GO:0005488;<br>C:GO:0016020                                                                                                                                                                           | - |   | IPR012315                                                                                                                                                                                                                                 |                                              |
| Caenorhabditis elegans | viral a-type inclusion protein                                          | 0  |                                                                                                                                                                                                         |   |   | C:GO:0016020;<br>F:GO:0043565;<br>F:GO:0008565;<br>F:GO:0003700;<br>C:GO:0000139;<br>F:GO:0003677;<br>C:GO:0005737;<br>F:GO:0046983;<br>P:GO:0006886;<br>P:GO:0006355;<br>P:GO:0048280;<br>C:GO:0005622;<br>F:GO:0005488;<br>F:GO:0003899 | PD968187 (PRODOM), SSF46966<br>(SUPERFAMILY) |

|                         |                                                 |    |                                                                                                                                                                                                                                                            |  |                            |                                                                                                                     |
|-------------------------|-------------------------------------------------|----|------------------------------------------------------------------------------------------------------------------------------------------------------------------------------------------------------------------------------------------------------------|--|----------------------------|---------------------------------------------------------------------------------------------------------------------|
| Caenorhabditis elegans  | tyrosyl-tr- synthetase                          | 15 | P:GO:0006915;<br>C:GO:0005625;<br>F:GO:0004871;<br>P:GO:0000003;<br>C:GO:0005615;<br>F:GO:0004825;<br>F:GO:0005524;<br>P:GO:0006437;<br>F:GO:0005153;<br>F:GO:0000049;<br>F:GO:0004831;<br>P:GO:0009792;<br>C:GO:0005737;<br>C:GO:0005634;<br>P:GO:0006431 |  | EC:6.1.1.10;<br>EC:6.1.1.1 | IPR002305; IPR002307; IPR014729;<br>IPR015624; PTHR11946 (PANTHER),<br>SSF52374 (SUPERFAMILY)                       |
| Caenorhabditis elegans  | tyrosyl-tr- synthetase                          | 15 | P:GO:0006915;<br>C:GO:0005625;<br>F:GO:0004871;<br>P:GO:0000003;<br>C:GO:0005615;<br>F:GO:0004825;<br>F:GO:0005524;<br>P:GO:0006437;<br>F:GO:0005153;<br>F:GO:0000049;<br>F:GO:0004831;<br>P:GO:0009792;<br>C:GO:0005737;<br>C:GO:0005634;<br>P:GO:0006431 |  | EC:6.1.1.10;<br>EC:6.1.1.1 | IPR002305; IPR002307; IPR014729;<br>IPR015624; PTHR11946 (PANTHER),<br>SSF52374 (SUPERFAMILY)                       |
| Caenorhabditis elegans  | tyrosyl-tr- synthetase                          | 15 | P:GO:0006915;<br>C:GO:0005625;<br>F:GO:0004871;<br>P:GO:0000003;<br>C:GO:0005615;<br>F:GO:0004825;<br>F:GO:0005524;<br>P:GO:0006437;<br>F:GO:0005153;<br>F:GO:0000049;<br>F:GO:0004831;<br>P:GO:0009792;<br>C:GO:0005737;<br>C:GO:0005634;<br>P:GO:0006431 |  | EC:6.1.1.10;<br>EC:6.1.1.1 | IPR002305; IPR002307; IPR014729;<br>IPR015624; PTHR11946 (PANTHER),<br>SSF52374 (SUPERFAMILY)                       |
| Caenorhabditis briggsae | briggsae cbr-pcp- protein                       | 3  | P:GO:0009792;<br>P:GO:0008152;<br>F:GO:0070011                                                                                                                                                                                                             |  |                            | IPR008758; G3DSA:3.40.50.1820<br>(GENE3D), PTHR11010:SF6<br>(PANTHER), SignalP (SIGNALP),<br>SSF53474 (SUPERFAMILY) |
| Brugia malayi           | polymerase iii (d- directed) polypeptide 155kda | 8  | F:GO:0003899;<br>F:GO:0008270;<br>P:GO:0032728;<br>P:GO:0045087;<br>F:GO:0003677;<br>F:GO:0032549;<br>P:GO:0006351;<br>C:GO:0005666                                                                                                                        |  | EC:2.7.7.6                 | IPR000722; IPR006592; IPR007066;<br>IPR007080; IPR015700; PTHR19376<br>(PANTHER), SSF64484 (SUPERFAMILY)            |

|                           |                                                                   |    |                                                                                                                                                                       |                                                                 |                            |                                                                                                                                                                                               |
|---------------------------|-------------------------------------------------------------------|----|-----------------------------------------------------------------------------------------------------------------------------------------------------------------------|-----------------------------------------------------------------|----------------------------|-----------------------------------------------------------------------------------------------------------------------------------------------------------------------------------------------|
| Loa loa                   | transportin 3                                                     | 1  | F:GO:0005515                                                                                                                                                          | -                                                               |                            | IPR016024; PTHR12363 (PANTHER), PTHR12363:SF5 (PANTHER), SignalP (SIGNALP)                                                                                                                    |
| Caenorhabditis elegans    | methylthioribose-1-phosphate isomerase                            | 2  | F:GO:0042802;<br>P:GO:0044249                                                                                                                                         | -                                                               |                            | IPR000649; G3DSA:3.40.50.10470 (GENE3D), PTHR10233:SF6 (PANTHER), SignalP (SIGNALP), SSF100950 (SUPERFAMILY)                                                                                  |
| Loa loa                   | d- damage-binding protein 1                                       | 10 | P:GO:0043161;<br>P:GO:0000718;<br>P:GO:0000075;<br>F:GO:0003684;<br>C:GO:0031464;<br>C:GO:0031465;<br>P:GO:0042787;<br>F:GO:0005515;<br>C:GO:0005654;<br>C:GO:0005737 | -                                                               |                            | IPR004871; IPR011046; PTHR10644 (PANTHER), PTHR10644:SF3 (PANTHER)                                                                                                                            |
| Brugia malayi             | ttk protein ki-se                                                 | 7  | P:GO:0016321;<br>F:GO:0005488;<br>P:GO:0060249;<br>F:GO:0004672;<br>P:GO:0031101;<br>P:GO:0007093;<br>P:GO:0009790                                                    | -                                                               |                            | IPR000719; IPR008271; IPR011009; IPR017442; G3DSA:1.10.510.10 (GENE3D), PTHR22974 (PANTHER), PTHR22974:SF4 (PANTHER)                                                                          |
| Caenorhabditis elegans    | wasp (actin cytoskeleton modulator) homolog family member (wsp-1) | 2  | F:GO:0005515;<br>P:GO:0043933                                                                                                                                         | -                                                               |                            | IPR003124; PTHR12779 (PANTHER)                                                                                                                                                                |
| Caenorhabditis elegans    | lethal isoform k                                                  | 6  | F:GO:0000827;<br>F:GO:0003993;<br>F:GO:0000832;<br>P:GO:0006020;<br>F:GO:0033857;<br>C:GO:0005829                                                                     | -                                                               | EC:3.1.3.2;<br>EC:2.7.4.24 | PTHR12750 (PANTHER), PTHR12750:SF5 (PANTHER)                                                                                                                                                  |
| Necator americanus        | elegans protein partially confirmed by transcript evidence        | 1  | F:GO:0005488                                                                                                                                                          | -                                                               |                            | IPR001304; IPR002035; IPR016186; IPR016187; IPR018378; PR00453 (PRINTS), G3DSA:3.40.50.410 (GENE3D), PTHR22992 (PANTHER), PTHR22992:SF10 (PANTHER), SignalP (SIGNALP), SSF53300 (SUPERFAMILY) |
|                           |                                                                   | 0  |                                                                                                                                                                       |                                                                 |                            |                                                                                                                                                                                               |
| Branchiostoma floridae    | gastric mucin                                                     | 0  |                                                                                                                                                                       | F:GO:0016301;<br>F:GO:0005524;<br>P:GO:0015937;<br>F:GO:0004594 |                            |                                                                                                                                                                                               |
| Branchiostoma floridae    | gastric mucin                                                     | 0  |                                                                                                                                                                       | F:GO:0016301;<br>F:GO:0005524;<br>P:GO:0015937;<br>F:GO:0004594 |                            |                                                                                                                                                                                               |
| Trichostrongylus vitrinus | serine protease inhibitor-like protein                            | 3  | F:GO:0005488;<br>P:GO:0007275;<br>C:GO:0005634                                                                                                                        | -                                                               |                            | IPR000215; G3DSA:3.30.497.10 (GENE3D), PTHR11461:SF25 (PANTHER)                                                                                                                               |

|                        |                                           |    |                                                                                                                                                                                                                                                                                                                                                                                                                                                                         |                                                                                  |                                            |                                                                      |
|------------------------|-------------------------------------------|----|-------------------------------------------------------------------------------------------------------------------------------------------------------------------------------------------------------------------------------------------------------------------------------------------------------------------------------------------------------------------------------------------------------------------------------------------------------------------------|----------------------------------------------------------------------------------|--------------------------------------------|----------------------------------------------------------------------|
| Homo sapiens           | uncharacterized protein cxorf62-like      | 31 | F:GO:0047058;<br>P:GO:0001659;<br>F:GO:0000166;<br>P:GO:0046677;<br>N:GO:0035553;<br>P:GO:0010243;<br>F:GO:0047057;<br>C:GO:0005792;<br>P:GO:0030193;<br>P:GO:0042245;<br>C:GO:0016021;<br>C:GO:0005789;<br>N:GO:0035516;<br>N:GO:0035515;<br>P:GO:0014070;<br>P:GO:0044065;<br>P:GO:0070350;<br>F:GO:0016702;<br>C:GO:0005829;<br>F:GO:0043734;<br>P:GO:0006307;<br>N:GO:0035552;<br>C:GO:0005856;<br>P:GO:0050820;<br>P:GO:0060612;<br>F:GO:0008198;<br>P:GO:0010883; | -                                                                                | EC:1.1.4.2;<br>EC:1.1.4.1;<br>EC:1.13.11.0 | PTHR12138 (PANTHER)                                                  |
| -                      | -                                         | 0  |                                                                                                                                                                                                                                                                                                                                                                                                                                                                         |                                                                                  |                                            | -                                                                    |
| -                      | -                                         | 0  |                                                                                                                                                                                                                                                                                                                                                                                                                                                                         |                                                                                  |                                            | -                                                                    |
| Caenorhabditis elegans | tubulointerstitial nephritis antigen      | 6  | P:GO:0007443;<br>P:GO:0007155;<br>F:GO:0004197;<br>P:GO:0006508;<br>C:GO:0005604;<br>F:GO:0000166                                                                                                                                                                                                                                                                                                                                                                       | -                                                                                | EC:3.4.22.0                                | IPR013128; PTHR12411:SF15 (PANTHER)                                  |
| Brugia malayi          | protein ki-se c inhibitor aswz variant 5  | 4  | C:GO:0005856;<br>P:GO:0007165;<br>F:GO:0003824;<br>F:GO:0005080                                                                                                                                                                                                                                                                                                                                                                                                         | -                                                                                |                                            | IPR001310; IPR011146; IPR011151; SignalP (SIGNALP)                   |
| Harpegnathos saltator  | d- damage-binding protein 1               | 10 | P:GO:0043161;<br>P:GO:0000718;<br>P:GO:0000075;<br>F:GO:0003684;<br>C:GO:0031464;<br>C:GO:0031465;<br>P:GO:0042787;<br>F:GO:0005515;<br>C:GO:0005654;<br>C:GO:0005737                                                                                                                                                                                                                                                                                                   | -                                                                                |                                            | IPR004871; PTHR10644 (PANTHER), PTHR10644:SF3 (PANTHER)              |
| Loa loa                | briggsae cbr-syn-1 protein                | 0  |                                                                                                                                                                                                                                                                                                                                                                                                                                                                         | P:GO:0016192;<br>F:GO:0005484;<br>C:GO:0016020;<br>P:GO:0006886;<br>F:GO:0005515 |                                            | IPR006011; IPR010989; G3DSA:1.20.58.70 (GENE3D), PTHR19957 (PANTHER) |
| -                      | -                                         | 0  |                                                                                                                                                                                                                                                                                                                                                                                                                                                                         |                                                                                  |                                            | -                                                                    |
| -                      | -                                         | 0  |                                                                                                                                                                                                                                                                                                                                                                                                                                                                         |                                                                                  |                                            | -                                                                    |
| Loa loa                | hypothetical protein LOAG_04211 [Loa loa] | 0  |                                                                                                                                                                                                                                                                                                                                                                                                                                                                         | C:GO:0016021;<br>C:GO:0016020                                                    |                                            | -                                                                    |

|                         |                                                                     |    |                                                                                                                                                                                        |                                                                 |             |                                                                                        |
|-------------------------|---------------------------------------------------------------------|----|----------------------------------------------------------------------------------------------------------------------------------------------------------------------------------------|-----------------------------------------------------------------|-------------|----------------------------------------------------------------------------------------|
|                         | -                                                                   | 0  |                                                                                                                                                                                        |                                                                 |             | SignalP (SIGNALP)                                                                      |
| Caenorhabditis briggsae | elegans protein confirmed by transcript evidence                    | 0  |                                                                                                                                                                                        | F:GO:0005515                                                    |             | SignalP (SIGNALP)                                                                      |
| Caenorhabditis elegans  | hypothetical protein H20J04.3 [Caenorhabditis elegans]              | 0  |                                                                                                                                                                                        | F:GO:0046872;<br>F:GO:0008270;<br>F:GO:0005515;<br>F:GO:0003677 |             | -                                                                                      |
| Caenorhabditis elegans  | hypothetical protein H20J04.3 [Caenorhabditis elegans]              | 0  |                                                                                                                                                                                        | F:GO:0046872;<br>F:GO:0008270;<br>F:GO:0005515;<br>F:GO:0003677 |             | -                                                                                      |
| Brugia malayi           | hyaluronidase family protein                                        | 0  |                                                                                                                                                                                        | F:GO:0004415;<br>P:GO:0008152;<br>F:GO:0016787;<br>F:GO:0016798 |             | PTHR13170 (PANTHER),<br>PTHR13170:SF7 (PANTHER)                                        |
| Loa loa                 | subtilase family protein                                            | 3  | P:GO:0019915;<br>P:GO:0006508;<br>F:GO:0004252                                                                                                                                         | -                                                               | EC:3.4.21.0 | -                                                                                      |
|                         | -                                                                   | 0  |                                                                                                                                                                                        |                                                                 |             | -                                                                                      |
|                         | -                                                                   | 0  |                                                                                                                                                                                        |                                                                 |             | SignalP (SIGNALP)                                                                      |
| Caenorhabditis elegans  | alp enigma encoding family member (alp-1)                           | 5  | F:GO:0042802;<br>F:GO:0051371;<br>P:GO:0001952;<br>F:GO:0008270;<br>C:GO:0015629                                                                                                       | -                                                               |             | IPR001781; PTHR18973 (PANTHER),<br>PTHR18973:SF57 (PANTHER),<br>SSF57716 (SUPERFAMILY) |
| Caenorhabditis elegans  | alp enigma encoding family member (alp-1)                           | 5  | F:GO:0042802;<br>F:GO:0051371;<br>P:GO:0001952;<br>F:GO:0008270;<br>C:GO:0015629                                                                                                       | -                                                               |             | IPR001781; PTHR18973 (PANTHER),<br>PTHR18973:SF57 (PANTHER),<br>SSF57716 (SUPERFAMILY) |
| Caenorhabditis elegans  | prion-like-(q n-rich)-domain-bearing protein family member (pqn-22) | 1  | P:GO:0009792                                                                                                                                                                           | -                                                               |             | PTHR18973 (PANTHER),<br>PTHR18973:SF57 (PANTHER)                                       |
| Caenorhabditis briggsae | ribosomal protein l37 variant 1                                     | 11 | P:GO:0000022;<br>P:GO:0006412;<br>P:GO:0040010;<br>F:GO:0046872;<br>F:GO:0019843;<br>F:GO:0003735;<br>P:GO:0040035;<br>P:GO:0002119;<br>P:GO:0009792;<br>P:GO:0040018;<br>C:GO:0022625 | -                                                               | EC:3.6.5.3  | IPR001569; IPR011331; IPR011332;<br>IPR018267                                          |
| Caenorhabditis briggsae | wd repeat domain 12                                                 | 7  | P:GO:0040010;<br>C:GO:0070545;<br>P:GO:0040035;<br>P:GO:0000463;<br>P:GO:0002119;<br>P:GO:0009792;<br>P:GO:0040019                                                                     | -                                                               |             | -                                                                                      |
| Caenorhabditis briggsae | wd repeat domain 12                                                 | 7  | P:GO:0040010;<br>C:GO:0070545;<br>P:GO:0040035;<br>P:GO:0000463;<br>P:GO:0002119;<br>P:GO:0009792;<br>P:GO:0040019                                                                     | -                                                               |             | -                                                                                      |



|                         |                                                          |    |                                                                                                                                                                                                                                                                                                                                                                  |                                                                                                                                                                                        |   |                                                                                 |
|-------------------------|----------------------------------------------------------|----|------------------------------------------------------------------------------------------------------------------------------------------------------------------------------------------------------------------------------------------------------------------------------------------------------------------------------------------------------------------|----------------------------------------------------------------------------------------------------------------------------------------------------------------------------------------|---|---------------------------------------------------------------------------------|
| Caenorhabditis briggsae | wd repeat domain 12                                      | 7  | P:GO:0040010;<br>C:GO:0070545;<br>P:GO:0040035;<br>P:GO:0000463;<br>P:GO:0002119;<br>P:GO:0009792;<br>P:GO:0040019                                                                                                                                                                                                                                               | -                                                                                                                                                                                      | - |                                                                                 |
| Caenorhabditis elegans  | thiamine pyrophosphate central domain containing protein | 5  | F:GO:0030976;<br>C:GO:0016021;<br>P:GO:0009792;<br>F:GO:0000287;<br>F:GO:0016740                                                                                                                                                                                                                                                                                 | -                                                                                                                                                                                      | - |                                                                                 |
|                         | -                                                        | 0  |                                                                                                                                                                                                                                                                                                                                                                  |                                                                                                                                                                                        |   | -                                                                               |
|                         | -                                                        | 0  |                                                                                                                                                                                                                                                                                                                                                                  |                                                                                                                                                                                        |   | -                                                                               |
| Caenorhabditis elegans  | hypothetical protein T19A5.1 [Caenorhabditis elegans]    | 2  | P:GO:0040010;<br>P:GO:0040017                                                                                                                                                                                                                                                                                                                                    | -                                                                                                                                                                                      | - |                                                                                 |
| Brugia malayi           | tr--splicing endonuclease subunit sen34                  | 0  |                                                                                                                                                                                                                                                                                                                                                                  | P:GO:0008033;<br>F:GO:0016787;<br>P:GO:0000379;<br>F:GO:0003676;<br>C:GO:0000214;<br>F:GO:0003674;<br>F:GO:0000213;<br>P:GO:0006388;<br>C:GO:0005575;<br>F:GO:0004519;<br>F:GO:0004518 |   | IPR006677; IPR011856                                                            |
| Caenorhabditis elegans  | major allergen                                           | 0  |                                                                                                                                                                                                                                                                                                                                                                  |                                                                                                                                                                                        |   | IPR002499                                                                       |
| Caenorhabditis elegans  | elegans protein confirmed by transcript evidence         | 0  |                                                                                                                                                                                                                                                                                                                                                                  | P:GO:0000003;<br>P:GO:0040011;<br>P:GO:0019915                                                                                                                                         |   | IPR013090; G3DSA:2.10.60.10 (GENE3D), SignalP (SIGNALP), SSF57302 (SUPERFAMILY) |
| Caenorhabditis elegans  | elegans protein confirmed by transcript evidence         | 0  |                                                                                                                                                                                                                                                                                                                                                                  | P:GO:0000003;<br>P:GO:0040011;<br>P:GO:0019915                                                                                                                                         |   | IPR013090; SignalP (SIGNALP), SSF57302 (SUPERFAMILY)                            |
| Caenorhabditis elegans  | elegans protein confirmed by transcript evidence         | 0  |                                                                                                                                                                                                                                                                                                                                                                  | P:GO:0000003;<br>P:GO:0040011;<br>P:GO:0019915                                                                                                                                         |   | IPR013090; SignalP (SIGNALP), SSF57302 (SUPERFAMILY)                            |
| Caenorhabditis briggsae | myh9 protein                                             | 21 | C:GO:0030863;<br>P:GO:0008360;<br>C:GO:0031594;<br>P:GO:0051295;<br>P:GO:0006928;<br>C:GO:0005913;<br>P:GO:0016337;<br>C:GO:0001772;<br>P:GO:0007520;<br>F:GO:0003779;<br>C:GO:0005819;<br>P:GO:0007132;<br>F:GO:0032559;<br>F:GO:0003774;<br>P:GO:0000904;<br>P:GO:0001768;<br>C:GO:0001725;<br>C:GO:0001931;<br>P:GO:0001701;<br>C:GO:0016459;<br>P:GO:0000212 | -                                                                                                                                                                                      |   | IPR002928; PTHR13140 (PANTHER), PTHR13140:SF23 (PANTHER)                        |

|                         |                                           |    |                                                                                                                                                                                        |   |            |                                                                                                                                                                                    |
|-------------------------|-------------------------------------------|----|----------------------------------------------------------------------------------------------------------------------------------------------------------------------------------------|---|------------|------------------------------------------------------------------------------------------------------------------------------------------------------------------------------------|
| Ailuropoda melanoleuca  | fibrillarlin                              | 11 | C:GO:0001651;<br>C:GO:0001652;<br>C:GO:0031428;<br>C:GO:0015030;<br>F:GO:0030515;<br>F:GO:0005515;<br>P:GO:0016074;<br>P:GO:0006364;<br>P:GO:0032259;<br>F:GO:0008168;<br>P:GO:0008033 | - | EC:2.1.1.0 | -                                                                                                                                                                                  |
| Caenorhabditis briggsae | dead (asp-glu-ala-asp) box polypeptide 47 | 11 | P:GO:0040010;<br>F:GO:0003723;<br>C:GO:0005730;<br>F:GO:0008026;<br>P:GO:0006200;<br>P:GO:0040035;<br>F:GO:0005524;<br>P:GO:0010171;<br>P:GO:0002119;<br>F:GO:0005515;<br>P:GO:0009792 | - |            | IPR000629; IPR001650; IPR011545;<br>IPR014001; IPR014014; IPR014021;<br>G3DSA:3.40.50.300 (GENE3D),<br>PTHR10967 (PANTHER),<br>PTHR10967:SF11 (PANTHER),<br>SSF52540 (SUPERFAMILY) |
| Brugia malayi           | trehalase family protein                  | 5  | P:GO:0009792;<br>P:GO:0002119;<br>F:GO:0016798;<br>P:GO:0008152;<br>P:GO:0040007                                                                                                       | - |            | IPR001661; IPR008928;<br>PTHR23403:SF1 (PANTHER)                                                                                                                                   |
|                         | -                                         | 0  |                                                                                                                                                                                        |   |            | -                                                                                                                                                                                  |
| Caenorhabditis elegans  | illin homolo family member (pxl-1)        | 6  | P:GO:0009792;<br>P:GO:0002119;<br>C:GO:0030054;<br>P:GO:0040010;<br>C:GO:0005634;<br>F:GO:0008270                                                                                      | - |            | -                                                                                                                                                                                  |
| Caenorhabditis elegans  | alg2 protein                              | 8  | P:GO:0040010;<br>P:GO:0009058;<br>P:GO:0002119;<br>F:GO:0005515;<br>F:GO:0004376;<br>P:GO:0009792;<br>P:GO:0040015;<br>C:GO:0005634                                                    | - |            | IPR001296; PTHR12526 (PANTHER),<br>PTHR12526:SF22 (PANTHER),<br>SSF53756 (SUPERFAMILY)                                                                                             |
| Caenorhabditis elegans  | alg2 protein                              | 8  | P:GO:0040010;<br>P:GO:0009058;<br>P:GO:0002119;<br>F:GO:0005515;<br>F:GO:0004376;<br>P:GO:0009792;<br>P:GO:0040015;<br>C:GO:0005634                                                    | - |            | IPR001296; PTHR12526 (PANTHER),<br>PTHR12526:SF22 (PANTHER),<br>SSF53756 (SUPERFAMILY)                                                                                             |
|                         | -                                         | 0  |                                                                                                                                                                                        |   |            | -                                                                                                                                                                                  |
| Loa loa                 | ph domain containing protein              | 1  | F:GO:0005515                                                                                                                                                                           | - |            | IPR001849; IPR011993; PTHR21538<br>(PANTHER), PTHR21538:SF10<br>(PANTHER), SignalP (SIGNALP),<br>SSF50729 (SUPERFAMILY)                                                            |

|                         |                                                  |    |                                                                                                                                                                                                                          |                                                                                                                                                      |             |                                                                                                |
|-------------------------|--------------------------------------------------|----|--------------------------------------------------------------------------------------------------------------------------------------------------------------------------------------------------------------------------|------------------------------------------------------------------------------------------------------------------------------------------------------|-------------|------------------------------------------------------------------------------------------------|
| Caenorhabditis elegans  | cbp p300 homolog family member (cbp-1)           | 13 | F:GO:0008270;<br>F:GO:0004402;<br>P:GO:0040010;<br>F:GO:0003712;<br>P:GO:0040026;<br>P:GO:0007283;<br>P:GO:0018996;<br>C:GO:0005737;<br>P:GO:0040039;<br>P:GO:0009792;<br>P:GO:0045944;<br>C:GO:0005634;<br>P:GO:0040035 | -                                                                                                                                                    | EC:2.3.1.48 | IPR000197; IPR000315; IPR000433;<br>PTHR13808 (PANTHER)                                        |
| Caenorhabditis elegans  | protein phosphatase                              | 4  | P:GO:0006470;<br>F:GO:0046872;<br>F:GO:0004722;<br>C:GO:0008287                                                                                                                                                          | -                                                                                                                                                    |             | IPR000222; IPR001932; IPR014045;<br>IPR015655; PTHR13832:SF91<br>(PANTHER)                     |
| Caenorhabditis briggsae | briggsae cbr-epc-1 protein                       | 8  | P:GO:0009792;<br>P:GO:0040027;<br>P:GO:0040018;<br>P:GO:0040010;<br>P:GO:0000003;<br>P:GO:0008340;<br>P:GO:0040011;<br>P:GO:0006898                                                                                      | -                                                                                                                                                    |             | PTHR14898 (PANTHER)                                                                            |
| -                       | -                                                | 0  |                                                                                                                                                                                                                          |                                                                                                                                                      |             | IPR020857                                                                                      |
| -                       | -                                                | 0  |                                                                                                                                                                                                                          |                                                                                                                                                      |             | -                                                                                              |
| Caenorhabditis briggsae | proline-serine-threonine phosphatase interacting | 0  |                                                                                                                                                                                                                          | C:GO:0030131;<br>P:GO:0016192;<br>P:GO:0006886;<br>F:GO:0005515                                                                                      |             | IPR018808                                                                                      |
| Caenorhabditis briggsae | proline-serine-threonine phosphatase interacting | 0  |                                                                                                                                                                                                                          | C:GO:0030131;<br>P:GO:0016192;<br>P:GO:0006886;<br>F:GO:0005515                                                                                      |             | IPR018808                                                                                      |
| Caenorhabditis briggsae | proline-serine-threonine phosphatase interacting | 0  |                                                                                                                                                                                                                          | C:GO:0030131;<br>P:GO:0016192;<br>P:GO:0006886;<br>F:GO:0005515                                                                                      |             | IPR018808                                                                                      |
| Caenorhabditis briggsae | proline-serine-threonine phosphatase interacting | 0  |                                                                                                                                                                                                                          | C:GO:0030131;<br>P:GO:0016192;<br>P:GO:0006886;<br>F:GO:0005515                                                                                      |             | IPR018808                                                                                      |
| Caenorhabditis elegans  | n-acetylglucosamine-phosphate mutase             | 3  | P:GO:0009792;<br>F:GO:0004610;<br>P:GO:0005996                                                                                                                                                                           | -                                                                                                                                                    | EC:5.4.2.3  | IPR005844; IPR005845; IPR016055;<br>IPR016066; PTHR22573 (PANTHER),<br>PTHR22573:SF3 (PANTHER) |
| Caenorhabditis elegans  | atp synthase subunit mitochondrial precursor     | 0  |                                                                                                                                                                                                                          | C:GO:0045263;<br>C:GO:0016020;<br>C:GO:0005743;<br>P:GO:0006811;<br>C:GO:0005739;<br>P:GO:0006810;<br>F:GO:0015078;<br>P:GO:0006754;<br>P:GO:0015992 |             | G3DSA:3.80.10.10 (GENE3D),<br>PTHR13382 (PANTHER)                                              |
| -                       | -                                                | 0  |                                                                                                                                                                                                                          |                                                                                                                                                      |             | SignalP (SIGNALP)                                                                              |
| -                       | -                                                | 0  |                                                                                                                                                                                                                          |                                                                                                                                                      |             | -                                                                                              |

|                         |                                                                                                         |   |                                                                                                                    |                                                                                                                    |             |                                                                                                  |
|-------------------------|---------------------------------------------------------------------------------------------------------|---|--------------------------------------------------------------------------------------------------------------------|--------------------------------------------------------------------------------------------------------------------|-------------|--------------------------------------------------------------------------------------------------|
| Caenorhabditis elegans  | briggsae cbr-eat-2 protein                                                                              | 7 | P:GO:0043050;<br>P:GO:0007274;<br>P:GO:0048609;<br>P:GO:0008340;<br>C:GO:0045203;<br>F:GO:0004889;<br>C:GO:0005892 | -                                                                                                                  |             | SignalP (SIGNALP)                                                                                |
| Caenorhabditis briggsae | major facilitator superfamily protein                                                                   | 0 |                                                                                                                    | C:GO:0016021;<br>C:GO:0016020;<br>P:GO:0055085;<br>F:GO:0005215;<br>P:GO:0006810                                   |             | PTHR11600 (PANTHER),<br>PTHR11600:SF28 (PANTHER)                                                 |
| Caenorhabditis briggsae | major facilitator superfamily protein                                                                   | 0 |                                                                                                                    | C:GO:0016021;<br>C:GO:0016020;<br>P:GO:0055085;<br>F:GO:0005215;<br>P:GO:0006810                                   |             | PTHR11600 (PANTHER),<br>PTHR11600:SF28 (PANTHER)                                                 |
| Caenorhabditis elegans  | human krit 1 (krev interaction trapped cerebral cavernous malformation 1) homolog family member (kri-1) | 0 |                                                                                                                    |                                                                                                                    |             | PTHR13283 (PANTHER),<br>PTHR13283:SF1 (PANTHER)                                                  |
| Caenorhabditis elegans  | aspartyl-tr- synthetase                                                                                 | 6 | C:GO:0005737;<br>F:GO:0003676;<br>P:GO:0006422;<br>F:GO:0005515;<br>F:GO:0005524;<br>F:GO:0004815                  | -                                                                                                                  | EC:6.1.1.12 | -                                                                                                |
|                         | -                                                                                                       | 0 |                                                                                                                    |                                                                                                                    |             | -                                                                                                |
| Caenorhabditis elegans  | hiv tat specific factor 1                                                                               | 4 | F:GO:0003676;<br>F:GO:0000166;<br>P:GO:0040011;<br>P:GO:0010171                                                    | -                                                                                                                  |             | -                                                                                                |
| Caenorhabditis briggsae | lagen with endostatin domain family member (cle-1)                                                      | 0 |                                                                                                                    | F:GO:0005488;<br>C:GO:0005604;<br>C:GO:0030054;<br>F:GO:0005198;<br>P:GO:0007155;<br>P:GO:0040035;<br>C:GO:0031012 |             | -                                                                                                |
|                         | -                                                                                                       | 0 |                                                                                                                    |                                                                                                                    |             | SignalP (SIGNALP)                                                                                |
|                         | -                                                                                                       | 0 |                                                                                                                    |                                                                                                                    |             | -                                                                                                |
| Caenorhabditis briggsae | retinol dehydroge-se 12                                                                                 | 3 | F:GO:0016491;<br>P:GO:0055114;<br>F:GO:0005488                                                                     | -                                                                                                                  |             | IPR002198; IPR002347; IPR016040;<br>PTHR19410:SF103 (PANTHER),<br>SSF51735 (SUPERFAMILY)         |
| Caenorhabditis elegans  | dihydrouridine synthase 4-like                                                                          | 4 | F:GO:0050660;<br>P:GO:0055114;<br>F:GO:0017150;<br>P:GO:0008033                                                    | -                                                                                                                  |             | IPR001269; IPR013785; IPR018517;<br>PTHR11082:SF6 (PANTHER), SSF51395<br>(SUPERFAMILY)           |
| Caenorhabditis briggsae | dual specificity catalytic domain containing protein                                                    | 4 | F:GO:0004725;<br>P:GO:0006470;<br>P:GO:0008340;<br>F:GO:0008138                                                    | -                                                                                                                  | EC:3.1.3.48 | PTHR10159 (PANTHER),<br>PTHR10159:SF21 (PANTHER)                                                 |
| Caenorhabditis elegans  | larp (r- binding la related protein) homolog protein isoform partially confirmed by transcript evidence | 2 | F:GO:0003676;<br>F:GO:0005515                                                                                      | -                                                                                                                  |             | IPR006630; IPR011991; PTHR22792<br>(PANTHER), PTHR22792:SF6<br>(PANTHER), SSF46785 (SUPERFAMILY) |
| Caenorhabditis elegans  | larp (r- binding la related protein) homolog protein isoform partially confirmed by transcript evidence | 2 | F:GO:0003676;<br>F:GO:0005515                                                                                      | -                                                                                                                  |             | IPR006630; IPR011991; PTHR22792<br>(PANTHER), PTHR22792:SF6<br>(PANTHER), SSF46785 (SUPERFAMILY) |

|                             |                                                                                                        |    |  |                                                                                                                                                                                                         |             |                                                                                                                                                                                         |
|-----------------------------|--------------------------------------------------------------------------------------------------------|----|--|---------------------------------------------------------------------------------------------------------------------------------------------------------------------------------------------------------|-------------|-----------------------------------------------------------------------------------------------------------------------------------------------------------------------------------------|
| Caenorhabditis elegans      | ubiquitin protein ligase e3b                                                                           | 0  |  | F:GO:0016874;<br>F:GO:0016881;<br>C:GO:0005622;<br>P:GO:0006464                                                                                                                                         |             | IPR000048                                                                                                                                                                               |
| Brugia malayi               | pan domain containing protein                                                                          | 0  |  |                                                                                                                                                                                                         |             | -                                                                                                                                                                                       |
| Caenorhabditis elegans      | possible sd repeat-containing cell surface protein precursor                                           | 0  |  |                                                                                                                                                                                                         |             | -                                                                                                                                                                                       |
| Caenorhabditis elegans      | ly1 antibody reactive homolog                                                                          | 0  |  |                                                                                                                                                                                                         |             | -                                                                                                                                                                                       |
| Caenorhabditis elegans      | myosin-rhogap myr                                                                                      | 6  |  | F:GO:0046872;<br>C:GO:0016459;<br>F:GO:0005524;<br>P:GO:0007165;<br>F:GO:0003774;<br>F:GO:0016740                                                                                                       |             | IPR001609; PTHR13140 (PANTHER),<br>PTHR13140:SF30 (PANTHER),<br>SSF52540 (SUPERFAMILY)                                                                                                  |
| Caenorhabditis elegans      | dihydrolipoylysine-residue succinyltransferase component of 2-oxoglutarate dehydrogenase mitochondrial | 3  |  | C:GO:0045252;<br>F:GO:0004149;<br>P:GO:0006099                                                                                                                                                          | EC:2.3.1.61 | IPR000089; IPR001078; IPR003016;<br>IPR011053; G3DSA:2.40.50.100<br>(GENE3D), G3DSA:3.30.559.10<br>(GENE3D), PTHR23151 (PANTHER),<br>PTHR23151:SF8 (PANTHER), SSF52777<br>(SUPERFAMILY) |
|                             | -                                                                                                      | 0  |  |                                                                                                                                                                                                         |             | -                                                                                                                                                                                       |
| Caenorhabditis elegans      | transbilayer amphipath transporters (subfamily iv p-type atpase) family member (tat-2)                 | 7  |  | C:GO:0016021;<br>F:GO:0015662;<br>P:GO:0006754;<br>F:GO:0005524;<br>P:GO:0015914;<br>F:GO:0000287;<br>F:GO:0004012                                                                                      | EC:3.6.3.1  | IPR001757; PTHR11939:SF3<br>(PANTHER), SignalP (SIGNALP)                                                                                                                                |
| Brugia malayi               | zinc c2h2 type family protein                                                                          | 0  |  | F:GO:0008270;<br>C:GO:0005622                                                                                                                                                                           |             | IPR015880                                                                                                                                                                               |
| Brugia malayi               | zinc c2h2 type family protein                                                                          | 0  |  | F:GO:0008270;<br>C:GO:0005622                                                                                                                                                                           |             | IPR015880                                                                                                                                                                               |
| Brugia malayi               | cysteine-rich protein 1                                                                                | 4  |  | F:GO:0008270;<br>F:GO:0005515;<br>C:GO:0005737;<br>P:GO:0008283                                                                                                                                         |             | IPR001781; PTHR18973 (PANTHER),<br>PTHR18973:SF74 (PANTHER),<br>SSF57716 (SUPERFAMILY)                                                                                                  |
| Caenorhabditis briggsae     | ubr4 protein                                                                                           | 2  |  | F:GO:0005488;<br>P:GO:0008152                                                                                                                                                                           |             | PTHR21725 (PANTHER)                                                                                                                                                                     |
|                             | -                                                                                                      | 0  |  |                                                                                                                                                                                                         |             | -                                                                                                                                                                                       |
| Caenorhabditis briggsae     | fatty acid-binding protein homolog                                                                     | 4  |  | P:GO:0006810;<br>F:GO:0005515;<br>F:GO:0008289;<br>F:GO:0005215                                                                                                                                         |             | IPR000463; IPR011038; IPR012674;<br>PTHR22725 (PANTHER), SignalP<br>(SIGNALP)                                                                                                           |
|                             | -                                                                                                      | 0  |  |                                                                                                                                                                                                         |             | -                                                                                                                                                                                       |
| Caenorhabditis briggsae     | briggsae cbr-dct-6 protein                                                                             | 0  |  |                                                                                                                                                                                                         |             | -                                                                                                                                                                                       |
| Caenorhabditis elegans      | c family member (clr-1)                                                                                | 12 |  | P:GO:0006470;<br>P:GO:0040037;<br>P:GO:0040010;<br>P:GO:0018991;<br>P:GO:0040002;<br>F:GO:0004872;<br>F:GO:0004725;<br>P:GO:0010171;<br>P:GO:0002119;<br>P:GO:0040017;<br>P:GO:0002009;<br>C:GO:0005886 | EC:3.1.3.48 | IPR003599; IPR003961; IPR007110;<br>IPR013783; PTHR19831 (PANTHER),<br>PTHR19831:SF16 (PANTHER), SignalP<br>(SIGNALP), SSF48726 (SUPERFAMILY)                                           |
|                             | -                                                                                                      | 0  |  |                                                                                                                                                                                                         |             | SignalP (SIGNALP)                                                                                                                                                                       |
| Angiostrongylus cantonensis | hypothetical protein [Angiostrongylus cantonensis]                                                     | 0  |  |                                                                                                                                                                                                         |             | -                                                                                                                                                                                       |

|                                    |                                                            |    |                                                                                                                                                                                                                          |                                                                                                   |             |                                                                                                                                               |
|------------------------------------|------------------------------------------------------------|----|--------------------------------------------------------------------------------------------------------------------------------------------------------------------------------------------------------------------------|---------------------------------------------------------------------------------------------------|-------------|-----------------------------------------------------------------------------------------------------------------------------------------------|
| Angiostrongylus cantonensis        | nuclear localized metal responsive family member (numr-1)  | 0  |                                                                                                                                                                                                                          | F:GO:0005515                                                                                      |             | -                                                                                                                                             |
|                                    | -                                                          | 0  |                                                                                                                                                                                                                          |                                                                                                   |             | SignalP (SIGNALP)                                                                                                                             |
| Caenorhabditis briggsae            | elegans protein confirmed by transcript evidence           | 0  |                                                                                                                                                                                                                          |                                                                                                   |             | IPR001534; SignalP (SIGNALP)                                                                                                                  |
| Brugia malayi                      | plus-3 domain containing protein                           | 13 | P:GO:0040010;<br>P:GO:0006898;<br>P:GO:0040011;<br>P:GO:0045747;<br>P:GO:0051571;<br>P:GO:0009792;<br>F:GO:0003677;<br>P:GO:0002119;<br>F:GO:0042800;<br>P:GO:0010171;<br>P:GO:0006352;<br>C:GO:0005634;<br>P:GO:0040035 | -                                                                                                 |             | -                                                                                                                                             |
| Brugia malayi                      | spry domain containing protein                             | 8  | P:GO:0040010;<br>P:GO:0008380;<br>P:GO:0019915;<br>P:GO:0002119;<br>F:GO:0005515;<br>P:GO:0040011;<br>P:GO:0002009;<br>P:GO:0009792                                                                                      | -                                                                                                 |             | IPR001870; IPR003877; IPR008985;<br>G3DSA:3.40.50.300 (GENE3D),<br>PTHR12381 (PANTHER),<br>PTHR12381:SF7 (PANTHER), SSF52540<br>(SUPERFAMILY) |
| Brugia malayi                      | hypothetical protein [Brugia malayi]                       | 0  |                                                                                                                                                                                                                          | F:GO:0046872;<br>F:GO:0004325;<br>C:GO:0005737;<br>P:GO:0006783;<br>P:GO:0006779;<br>F:GO:0016829 |             | IPR001015; G3DSA:3.40.50.1400<br>(GENE3D), SSF53800 (SUPERFAMILY)                                                                             |
| Caenorhabditis elegans             | briggsae cbr-bam-2 protein                                 | 1  | C:GO:0005887                                                                                                                                                                                                             | -                                                                                                 |             | IPR001791; IPR006210; IPR008985;<br>IPR013320                                                                                                 |
| Caenorhabditis elegans             | uncoordi-ted family member (unc-22)                        | 3  | P:GO:0006468;<br>F:GO:0005524;<br>F:GO:0004674                                                                                                                                                                           | -                                                                                                 | EC:2.7.11.0 | IPR000719; IPR008271; IPR011009;<br>IPR015730; IPR017442; IPR020636;<br>G3DSA:1.10.510.10 (GENE3D)                                            |
| Paramecium tetraurelia strain d4-2 | hypothetical protein [Paramecium tetraurelia strain d4-2]  | 0  |                                                                                                                                                                                                                          |                                                                                                   |             | -                                                                                                                                             |
|                                    | -                                                          | 0  |                                                                                                                                                                                                                          |                                                                                                   |             | -                                                                                                                                             |
| Caenorhabditis elegans             | briggsae cbr-gly-3 protein                                 | 5  | F:GO:0004653;<br>F:GO:0005529;<br>C:GO:0005794;<br>P:GO:0009312;<br>C:GO:0016021                                                                                                                                         | -                                                                                                 | EC:2.4.1.41 | IPR000772; IPR008997;<br>G3DSA:2.80.10.50 (GENE3D),<br>G3DSA:3.90.550.10 (GENE3D),<br>PTHR11675 (PANTHER), SSF53448<br>(SUPERFAMILY)          |
| Loa loa                            | kh domain containing protein                               | 4  | F:GO:0003723;<br>P:GO:0044419;<br>C:GO:0005737;<br>C:GO:0005634                                                                                                                                                          | -                                                                                                 |             | IPR002110; IPR020683; PRO1415<br>(PRINTS), PTHR18958 (PANTHER),<br>PTHR18958:SF277 (PANTHER)                                                  |
| Caenorhabditis elegans             | elegans protein partially confirmed by transcript evidence | 4  | F:GO:0003723;<br>P:GO:0044419;<br>C:GO:0005737;<br>C:GO:0005634                                                                                                                                                          | -                                                                                                 |             | IPR002110; IPR020683; PRO1415<br>(PRINTS), PTHR18958 (PANTHER),<br>PTHR18958:SF275 (PANTHER)                                                  |
| Loa loa                            | kh domain containing protein                               | 4  | F:GO:0003723;<br>P:GO:0044419;<br>C:GO:0005737;<br>C:GO:0005634                                                                                                                                                          | -                                                                                                 |             | IPR002110; IPR020683; PRO1415<br>(PRINTS), PTHR18958 (PANTHER),<br>PTHR18958:SF277 (PANTHER)                                                  |
| Loa loa                            | kh domain containing protein                               | 4  | F:GO:0003723;<br>P:GO:0044419;<br>C:GO:0005737;<br>C:GO:0005634                                                                                                                                                          | -                                                                                                 |             | IPR002110; IPR020683; PRO1415<br>(PRINTS), PTHR18958 (PANTHER),<br>PTHR18958:SF277 (PANTHER)                                                  |

|                           |                                                  |    |                                                                                                                                                                                        |              |             |                                                                                                                                         |
|---------------------------|--------------------------------------------------|----|----------------------------------------------------------------------------------------------------------------------------------------------------------------------------------------|--------------|-------------|-----------------------------------------------------------------------------------------------------------------------------------------|
|                           | -                                                | 0  |                                                                                                                                                                                        |              |             | SignalP (SIGNALP)                                                                                                                       |
| Caenorhabditis elegans    | regulator of g protein sig-ling                  | 5  | P:GO:0007186;<br>F:GO:0005096;<br>F:GO:0004871;<br>C:GO:0005737;<br>C:GO:0005834                                                                                                       | -            | EC:3.6.5.1  | IPR000342; IPR016137;<br>G3DSA:1.10.167.10 (GENE3D),<br>G3DSA:1.10.196.10 (GENE3D),<br>PTHR10845 (PANTHER),<br>PTHR10845:SF22 (PANTHER) |
|                           | -                                                | 0  |                                                                                                                                                                                        |              |             | -                                                                                                                                       |
|                           | -                                                | 0  |                                                                                                                                                                                        |              |             | -                                                                                                                                       |
|                           | -                                                | 0  |                                                                                                                                                                                        |              |             | -                                                                                                                                       |
|                           | -                                                | 0  |                                                                                                                                                                                        |              |             | -                                                                                                                                       |
|                           | -                                                | 0  |                                                                                                                                                                                        |              |             | SignalP (SIGNALP)                                                                                                                       |
|                           | -                                                | 0  |                                                                                                                                                                                        |              |             | -                                                                                                                                       |
| Heligmosomoides polygyrus | elegans protein confirmed by transcript evidence | 2  | F:GO:0005515;<br>F:GO:0008289                                                                                                                                                          | -            |             | IPR008632; SignalP (SIGNALP)                                                                                                            |
| Caenorhabditis elegans    | coiled-coil domain-containing                    | 7  | P:GO:0040035;<br>P:GO:0002119;<br>P:GO:0040011;<br>P:GO:0006898;<br>P:GO:0040007;<br>P:GO:0045132;<br>P:GO:0002009                                                                     | -            |             | -                                                                                                                                       |
| Brugia malayi             | at-rich interactive domain-containing protein 2  | 7  | F:GO:0005488;<br>P:GO:0040007;<br>P:GO:0040035;<br>P:GO:0010171;<br>P:GO:0002119;<br>P:GO:0006898;<br>P:GO:0009792                                                                     | -            |             | -                                                                                                                                       |
| Canis familiaris          | protein nef1                                     | 1  | C:GO:0016021                                                                                                                                                                           | -            |             | IPR007915; SignalP (SIGNALP)                                                                                                            |
| Culex quinquefasciatus    | wolf-hirschhorn syndrome candidate 1             | 11 | P:GO:0000122;<br>P:GO:0003289;<br>P:GO:0003290;<br>P:GO:0060348;<br>F:GO:0018024;<br>C:GO:0031965;<br>C:GO:0005730;<br>P:GO:0003149;<br>P:GO:0032259;<br>F:GO:0003682;<br>P:GO:0016568 | -            | EC:2.1.1.43 | IPR006560; G3DSA:2.170.270.10<br>(GENE3D), PTHR22884 (PANTHER),<br>PTHR22884:SF33 (PANTHER),<br>SSF82199 (SUPERFAMILY)                  |
| Caenorhabditis elegans    | elegans protein confirmed by transcript evidence | 0  |                                                                                                                                                                                        |              |             | -                                                                                                                                       |
|                           | -                                                | 0  |                                                                                                                                                                                        |              |             | -                                                                                                                                       |
|                           | -                                                | 0  |                                                                                                                                                                                        |              |             | -                                                                                                                                       |
|                           | -                                                | 0  |                                                                                                                                                                                        |              |             | SignalP (SIGNALP)                                                                                                                       |
| Haemonchus contortus      | collagen family member (col-166)                 | 5  | C:GO:0016021;<br>F:GO:0042302;<br>P:GO:0010171;<br>P:GO:0040010;<br>P:GO:0040011                                                                                                       | -            |             | IPR002486; PTHR10499 (PANTHER),<br>PTHR10499:SF58 (PANTHER), SignalP<br>(SIGNALP)                                                       |
|                           | -                                                | 0  |                                                                                                                                                                                        |              |             | -                                                                                                                                       |
| Caenorhabditis elegans    | breast carcinoma amplified sequence              | 0  |                                                                                                                                                                                        | F:GO:0005515 |             | IPR022175; PTHR13268 (PANTHER)                                                                                                          |

|                        |                                                                                           |   |                                                                                                                    |                                                                                                                                                                       |   |                                                                                                                   |
|------------------------|-------------------------------------------------------------------------------------------|---|--------------------------------------------------------------------------------------------------------------------|-----------------------------------------------------------------------------------------------------------------------------------------------------------------------|---|-------------------------------------------------------------------------------------------------------------------|
| Caenorhabditis elegans | hot_caee1 ame: full=probable hydroxyacid-oxoacid mitochondrial short=hot flags: precursor | 0 |                                                                                                                    | F:GO:0047988;<br>F:GO:0046872;<br>C:GO:0005739;<br>P:GO:0055114;<br>P:GO:0015993;<br>P:GO:0009073;<br>F:GO:0003856                                                    | - |                                                                                                                   |
| Loa loa                | mediator of r- polymerase ii transcription subunit 11                                     | 7 | P:GO:0040010;<br>P:GO:0045449;<br>P:GO:0010171;<br>P:GO:0002119;<br>F:GO:0005515;<br>C:GO:0016592;<br>P:GO:0009792 | -                                                                                                                                                                     |   | IPR019404; PTHR22890 (PANTHER)                                                                                    |
| Brugia malayi          | gyf domain containing protein                                                             | 0 |                                                                                                                    | P:GO:0008219;<br>F:GO:0005515                                                                                                                                         |   | PTHR14445 (PANTHER),<br>PTHR14445:SF4 (PANTHER)                                                                   |
| Caenorhabditis elegans | complement regulator factor h                                                             | 0 |                                                                                                                    | F:GO:0001848;<br>C:GO:0016021;<br>P:GO:0045916                                                                                                                        |   | -                                                                                                                 |
| Loa loa                | yth domain containing 2                                                                   | 1 | F:GO:0003824                                                                                                       | -                                                                                                                                                                     |   | IPR001650; IPR007502; IPR011709;<br>G3DSA:3.40.50.300 (GENE3D),<br>PTHR18934 (PANTHER), SSF52540<br>(SUPERFAMILY) |
| Loa loa                | yth domain containing 2                                                                   | 1 | F:GO:0003824                                                                                                       | -                                                                                                                                                                     |   | IPR001650; IPR007502; IPR011709;<br>G3DSA:3.40.50.300 (GENE3D),<br>PTHR18934 (PANTHER), SSF52540<br>(SUPERFAMILY) |
| Loa loa                | yth domain containing 2                                                                   | 1 | F:GO:0003824                                                                                                       | -                                                                                                                                                                     |   | IPR001650; IPR007502; IPR011709;<br>G3DSA:3.40.50.300 (GENE3D),<br>PTHR18934 (PANTHER), SSF52540<br>(SUPERFAMILY) |
| Caenorhabditis elegans | hypothetical protein Y37E11AM.3 [Caenorhabditis elegans]                                  | 0 |                                                                                                                    |                                                                                                                                                                       |   | -                                                                                                                 |
|                        | -                                                                                         | 0 |                                                                                                                    |                                                                                                                                                                       |   | SignalP (SIGNALP)                                                                                                 |
| Brugia malayi          | pab-dependent poly -specific ribonuclease subunit                                         | 0 |                                                                                                                    | F:GO:0004221;<br>P:GO:0006397;<br>F:GO:0016787;<br>F:GO:0004535;<br>F:GO:0003676;<br>C:GO:0005737;<br>F:GO:0004527;<br>P:GO:0006511;<br>C:GO:0005622;<br>F:GO:0004518 |   | -                                                                                                                 |
| Brugia malayi          | mrg family protein                                                                        | 0 |                                                                                                                    | F:GO:0005488;<br>F:GO:0003682;<br>C:GO:0000785;<br>P:GO:0006333;<br>C:GO:0005634                                                                                      |   | IPR000953; IPR008676; IPR016197;<br>G3DSA:2.30.30.270 (GENE3D),<br>PF11717 (PFAM)                                 |
|                        | -                                                                                         | 0 |                                                                                                                    |                                                                                                                                                                       |   | SignalP (SIGNALP)                                                                                                 |
| Caenorhabditis elegans | ufm1-conjugating enzyme 1                                                                 | 1 | F:GO:0005515                                                                                                       | -                                                                                                                                                                     |   | IPR014806; IPR016135                                                                                              |



|                        |                                                            |    |                                                                                                                                                                                                         |   |            |                                                                                                         |
|------------------------|------------------------------------------------------------|----|---------------------------------------------------------------------------------------------------------------------------------------------------------------------------------------------------------|---|------------|---------------------------------------------------------------------------------------------------------|
| Caenorhabditis elegans | mediator of r- polymerase ii transcription subunit 12-like | 9  | P:GO:0040010;<br>P:GO:0018991;<br>P:GO:0040035;<br>P:GO:0010171;<br>P:GO:0040026;<br>P:GO:0040011;<br>P:GO:0009792;<br>P:GO:0040018;<br>P:GO:0006350                                                    | - |            | PTHR12796 (PANTHER)                                                                                     |
| Brugia malayi          | cdc37                                                      | 10 | P:GO:0023033;<br>P:GO:0040035;<br>P:GO:0010171;<br>F:GO:0005515;<br>P:GO:0040011;<br>P:GO:0006898;<br>P:GO:0002009;<br>P:GO:0009792;<br>C:GO:0005737;<br>P:GO:0040015                                   | - |            | IPR004918; IPR013855; IPR013873;<br>IPR013874; SSF101391 (SUPERFAMILY)                                  |
| Caenorhabditis elegans | dihydropyrimidi-se                                         | 12 | C:GO:0005829;<br>F:GO:0004157;<br>F:GO:0008270;<br>C:GO:0005625;<br>P:GO:0006212;<br>P:GO:0019482;<br>P:GO:0006210;<br>F:GO:0016597;<br>P:GO:0051289;<br>F:GO:0002058;<br>C:GO:0005634;<br>F:GO:0002059 | - | EC:3.5.2.2 | SignalP (SIGNALP)                                                                                       |
| Caenorhabditis elegans | briggsae cbr-skp-1 protein                                 | 7  | P:GO:0001700;<br>F:GO:0005515;<br>C:GO:0071011;<br>P:GO:0000398;<br>P:GO:0035214;<br>C:GO:0071013;<br>C:GO:0000790                                                                                      | - |            | IPR004015; IPR017862                                                                                    |
| Caenorhabditis elegans | briggsae cbr-skp-1 protein                                 | 7  | P:GO:0001700;<br>F:GO:0005515;<br>C:GO:0071011;<br>P:GO:0000398;<br>P:GO:0035214;<br>C:GO:0071013;<br>C:GO:0000790                                                                                      | - |            | IPR004015; IPR017862                                                                                    |
|                        | -                                                          | 0  |                                                                                                                                                                                                         |   |            | SignalP (SIGNALP)                                                                                       |
|                        | -                                                          | 0  |                                                                                                                                                                                                         |   |            | -                                                                                                       |
| Caenorhabditis elegans | smek homolog suppressor of mek1                            | 2  | C:GO:0043229;<br>F:GO:0005515                                                                                                                                                                           | - |            | IPR006887; IPR011989; IPR011993;<br>IPR016024; PTHR23318 (PANTHER),<br>SSF50729 (SUPERFAMILY)           |
|                        | -                                                          | 0  |                                                                                                                                                                                                         |   |            | -                                                                                                       |
| Caenorhabditis elegans | hypothetical protein Y92H12A.5 [Caenorhabditis elegans]    | 0  |                                                                                                                                                                                                         |   |            | -                                                                                                       |
|                        |                                                            | 0  |                                                                                                                                                                                                         |   |            | IPR014044                                                                                               |
| Caenorhabditis elegans | d- polymerase zeta catalytic subunit                       | 2  | P:GO:0006259;<br>P:GO:0006974                                                                                                                                                                           | - |            | IPR006133; IPR012337;<br>G3DSA:3.30.420.10 (GENE3D),<br>PTHR10322 (PANTHER),<br>PTHR10322:SF5 (PANTHER) |

|                         |                                                  |    |                                                                                                                                                                                                                          |                                                                 |             |                                                                                                                                    |
|-------------------------|--------------------------------------------------|----|--------------------------------------------------------------------------------------------------------------------------------------------------------------------------------------------------------------------------|-----------------------------------------------------------------|-------------|------------------------------------------------------------------------------------------------------------------------------------|
| Caenorhabditis briggsae | phosphoglycerate mutase family member 5          | 4  | F:GO:0004721;<br>P:GO:0006470;<br>C:GO:0016020;<br>C:GO:0005739                                                                                                                                                          | -                                                               | EC:3.1.3.16 | SignalP (SIGNALP)                                                                                                                  |
| -                       | -                                                | 0  | -                                                                                                                                                                                                                        | -                                                               | -           | -                                                                                                                                  |
| -                       | -                                                | 0  | -                                                                                                                                                                                                                        | -                                                               | -           | -                                                                                                                                  |
| -                       | -                                                | 0  | -                                                                                                                                                                                                                        | -                                                               | -           | SignalP (SIGNALP)                                                                                                                  |
| Caenorhabditis briggsae | alpha 1                                          | 13 | P:GO:0030155;<br>P:GO:0060441;<br>P:GO:0060445;<br>P:GO:0045198;<br>P:GO:0045995;<br>C:GO:0005606;<br>P:GO:0031175;<br>P:GO:0002011;<br>F:GO:0043208;<br>P:GO:0030334;<br>F:GO:0005102;<br>F:GO:0005201;<br>P:GO:0007166 | -                                                               | -           | IPR002049; IPR013032;<br>G3DSA:2.10.25.10 (GENE3D),<br>PTHR10574 (PANTHER),<br>PTHR10574:SF54 (PANTHER),<br>SSF57196 (SUPERFAMILY) |
| Caenorhabditis briggsae | leucine rich repeat family protein               | 0  | -                                                                                                                                                                                                                        | F:GO:0005515                                                    | -           | G3DSA:3.80.10.10 (GENE3D),<br>PTHR23154 (PANTHER), SignalP<br>(SIGNALP), SSF52058 (SUPERFAMILY)                                    |
| Caenorhabditis elegans  | eukaryotic translation initiation factor 5a      | 9  | F:GO:0003743;<br>F:GO:0003746;<br>F:GO:0003723;<br>P:GO:0006452;<br>P:GO:0008612;<br>P:GO:0045905;<br>F:GO:0043022;<br>F:GO:0005515;<br>P:GO:0045901                                                                     | -                                                               | -           | IPR001884; IPR005824; IPR008991;<br>IPR012340; IPR014722; IPR016027;<br>IPR019769; IPR020189;<br>PTHR11673:SF2 (PANTHER)           |
| Caenorhabditis elegans  | elegans protein confirmed by transcript evidence | 0  | -                                                                                                                                                                                                                        | -                                                               | -           | PTHR19282 (PANTHER),<br>PTHR19282:SF33 (PANTHER), SignalP<br>(SIGNALP)                                                             |
| Caenorhabditis elegans  | elegans protein confirmed by transcript evidence | 0  | -                                                                                                                                                                                                                        | -                                                               | -           | PTHR19282 (PANTHER),<br>PTHR19282:SF33 (PANTHER), SignalP<br>(SIGNALP)                                                             |
| Caenorhabditis briggsae | ubiquitin specific peptidase 47                  | 1  | F:GO:0016787                                                                                                                                                                                                             | -                                                               | -           | IPR001394; IPR018200; PTHR10420<br>(PANTHER), PTHR10420:SF44<br>(PANTHER), SSF54001 (SUPERFAMILY)                                  |
| Caenorhabditis briggsae | elegans protein confirmed by transcript evidence | 0  | -                                                                                                                                                                                                                        | F:GO:0008270;<br>F:GO:0005515                                   | -           | SignalP (SIGNALP)                                                                                                                  |
| Caenorhabditis briggsae | abnormal dauer formation family member (daf-36)  | 5  | F:GO:0046872;<br>F:GO:0016491;<br>P:GO:0002165;<br>P:GO:0055114;<br>F:GO:0051537                                                                                                                                         | -                                                               | -           | -                                                                                                                                  |
| Caenorhabditis elegans  | beige beach domain containing protein            | 1  | F:GO:0005488                                                                                                                                                                                                             | -                                                               | -           | SignalP (SIGNALP)                                                                                                                  |
| Loa loa                 | briggsae cbr-spe-10 protein                      | 0  | -                                                                                                                                                                                                                        | F:GO:0046872;<br>F:GO:0016740;<br>F:GO:0008270;<br>C:GO:0005575 | -           | IPR001594; PTHR22883 (PANTHER),<br>SignalP (SIGNALP)                                                                               |

|                         |                                                 |    |                                                                                                                                                                                                                                                            |   |                                                                                                                                                      |                                                                                                                                     |
|-------------------------|-------------------------------------------------|----|------------------------------------------------------------------------------------------------------------------------------------------------------------------------------------------------------------------------------------------------------------|---|------------------------------------------------------------------------------------------------------------------------------------------------------|-------------------------------------------------------------------------------------------------------------------------------------|
| Brugia malayi           | transcription elongation factor b polypeptide 2 | 11 | C:GO:0005829;<br>P:GO:0018991;<br>P:GO:0045944;<br>P:GO:0040007;<br>C:GO:0005667;<br>P:GO:0040035;<br>P:GO:0010171;<br>P:GO:0002119;<br>F:GO:0005515;<br>P:GO:0040011;<br>C:GO:0030891                                                                     | - |                                                                                                                                                      | G3DSA:3.10.20.90 (GENE3D),<br>PTHR13248 (PANTHER), SSF54236<br>(SUPERFAMILY)                                                        |
| Caenorhabditis briggsae | rab6                                            | 15 | P:GO:0007293;<br>P:GO:0007264;<br>P:GO:0001745;<br>P:GO:0006887;<br>P:GO:0006913;<br>F:GO:0004767;<br>P:GO:0045451;<br>P:GO:0008103;<br>F:GO:0005515;<br>F:GO:0003924;<br>P:GO:0006886;<br>P:GO:0009792;<br>C:GO:0005737;<br>C:GO:0005634;<br>F:GO:0005525 | - | EC:3.1.4.12;<br>EC:3.6.5.1;<br>EC:3.6.5.2;<br>EC:3.6.5.3;<br>EC:3.6.5.4                                                                              | SignalP (SIGNALP)                                                                                                                   |
| Caenorhabditis elegans  | briggsae cbr-cyp-36a1 protein                   | 0  |                                                                                                                                                                                                                                                            |   | F:GO:0020037;<br>F:GO:0005506;<br>C:GO:0016021;<br>F:GO:0009055;<br>P:GO:0055114;<br>F:GO:0016491;<br>F:GO:0005515;<br>F:GO:0046872;<br>F:GO:0004497 | IPR001128; PTHR19383:SF66<br>(PANTHER)                                                                                              |
| Caenorhabditis elegans  | briggsae cbr-eel-1 protein                      | 5  | C:GO:0005622;<br>F:GO:0016881;<br>F:GO:0005488;<br>P:GO:0006464;<br>P:GO:0033227                                                                                                                                                                           | - | EC:6.3.2.0                                                                                                                                           | IPR000569; PTHR11254 (PANTHER),<br>PTHR11254:SF67 (PANTHER)                                                                         |
| Caenorhabditis elegans  | briggsae cbr-npp-15 protein                     | 1  | P:GO:0040010                                                                                                                                                                                                                                               | - |                                                                                                                                                      | IPR015943; PTHR13405 (PANTHER),<br>PTHR13405:SF6 (PANTHER),<br>SSF117289 (SUPERFAMILY)                                              |
| Caenorhabditis briggsae | gtp-binding protein guf1 homolog                | 4  | F:GO:0003746;<br>F:GO:0005525;<br>C:GO:0005739;<br>F:GO:0003924                                                                                                                                                                                            | - | EC:3.6.5.1;<br>EC:3.6.5.2;<br>EC:3.6.5.3;<br>EC:3.6.5.4                                                                                              | IPR000795; IPR005225;<br>G3DSA:3.40.50.300 (GENE3D),<br>PTHR23115 (PANTHER),<br>PTHR23115:SF40 (PANTHER),<br>SSF52540 (SUPERFAMILY) |
| -                       | -                                               | 0  |                                                                                                                                                                                                                                                            |   |                                                                                                                                                      | -                                                                                                                                   |
| -                       | -                                               | 0  |                                                                                                                                                                                                                                                            |   |                                                                                                                                                      | SignalP (SIGNALP)                                                                                                                   |

|                         |                                                     |    |                                                                                                                                                                                                                                                                                                                                |   |                                                                                                                                                            |
|-------------------------|-----------------------------------------------------|----|--------------------------------------------------------------------------------------------------------------------------------------------------------------------------------------------------------------------------------------------------------------------------------------------------------------------------------|---|------------------------------------------------------------------------------------------------------------------------------------------------------------|
| Caenorhabditis elegans  | importin (ran-binding protein)                      | 10 | F:GO:0008565;<br>P:GO:0040010;<br>P:GO:0040035;<br>P:GO:0002119;<br>F:GO:0005515;<br>P:GO:0040039;<br>P:GO:0006898;<br>P:GO:0009792;<br>C:GO:0044424;<br>P:GO:0016246                                                                                                                                                          | - | IPR005043; IPR011989; IPR013713;<br>IPR016024; PTHR10997 (PANTHER),<br>PTHR10997:SF8 (PANTHER)                                                             |
| Caenorhabditis elegans  | importin (ran-binding protein)                      | 10 | F:GO:0008565;<br>P:GO:0040010;<br>P:GO:0040035;<br>P:GO:0002119;<br>F:GO:0005515;<br>P:GO:0040039;<br>P:GO:0006898;<br>P:GO:0009792;<br>C:GO:0044424;<br>P:GO:0016246                                                                                                                                                          | - | IPR005043; IPR011989; IPR013713;<br>IPR016024; PTHR10997 (PANTHER),<br>PTHR10997:SF8 (PANTHER)                                                             |
| Loa loa                 | protein vprbp-like                                  | 2  | C:GO:0005634;<br>F:GO:0005515                                                                                                                                                                                                                                                                                                  | - | PTHR13129 (PANTHER)                                                                                                                                        |
| Caenorhabditis elegans  | sig-l peptide peptidase-like 2b                     | 1  | F:GO:0005515                                                                                                                                                                                                                                                                                                                   | - | IPR007369; PTHR12174:SF21<br>(PANTHER)                                                                                                                     |
| Caenorhabditis briggsae | spaghetti squash                                    | 19 | C:GO:0016461;<br>P:GO:0035159;<br>P:GO:0007349;<br>F:GO:0005509;<br>P:GO:0060288;<br>C:GO:0005737;<br>F:GO:0032036;<br>P:GO:0001736;<br>P:GO:0090254;<br>P:GO:0032956;<br>C:GO:0051233;<br>C:GO:0032154;<br>C:GO:0030496;<br>P:GO:0035317;<br>F:GO:0042623;<br>P:GO:0007300;<br>P:GO:0035191;<br>P:GO:0007298;<br>P:GO:0000910 | - | IPR002048; IPR011992; IPR018247;<br>IPR018248; IPR018249; PTHR23049<br>(PANTHER), PTHR23049:SF6<br>(PANTHER), SignalP (SIGNALP),<br>SSF47473 (SUPERFAMILY) |
| Caenorhabditis elegans  | tbc (tre-2 bub2 cdc16) domain family member (tbc-7) | 2  | P:GO:0008340;<br>P:GO:0000003                                                                                                                                                                                                                                                                                                  | - | IPR000195; IPR006571; PTHR23353<br>(PANTHER), PF07534 (PFAM)                                                                                               |
| Ailuropoda melanoleuca  | polyadenylate-binding protein 1-like                | 9  | P:GO:0006378;<br>P:GO:0008380;<br>P:GO:0048255;<br>C:GO:0005681;<br>F:GO:0008494;<br>F:GO:0008022;<br>C:GO:0005829;<br>F:GO:0000166;<br>F:GO:0008143                                                                                                                                                                           | - | IPR000504; IPR012677; PTHR10432<br>(PANTHER), PTHR10432:SF69<br>(PANTHER), SSF54928 (SUPERFAMILY)                                                          |
| -                       | -                                                   | 0  | -                                                                                                                                                                                                                                                                                                                              | - | -                                                                                                                                                          |
| -                       | -                                                   | 0  | -                                                                                                                                                                                                                                                                                                                              | - | -                                                                                                                                                          |

|                         |                                                            |   |                                                                                                                                     |                                                                                                                                                                                                         |                                                                                                                                                                                   |
|-------------------------|------------------------------------------------------------|---|-------------------------------------------------------------------------------------------------------------------------------------|---------------------------------------------------------------------------------------------------------------------------------------------------------------------------------------------------------|-----------------------------------------------------------------------------------------------------------------------------------------------------------------------------------|
| Caenorhabditis elegans  | briggsae cbr-lea-1 protein                                 | 0 |                                                                                                                                     | C:GO:0005811;<br>F:GO:0005488;<br>C:GO:0005737;<br>F:GO:0004871;<br>C:GO:0016020;<br>P:GO:0007165;<br>F:GO:0005515;<br>C:GO:0005886                                                                     | IPR008611; PTHR23241 (PANTHER)                                                                                                                                                    |
| Caenorhabditis elegans  | briggsae cbr-lea-1 protein                                 | 0 |                                                                                                                                     | C:GO:0005811;<br>F:GO:0005488;<br>C:GO:0005737;<br>F:GO:0005515;<br>C:GO:0005886                                                                                                                        | IPR008611; PTHR23241 (PANTHER)                                                                                                                                                    |
|                         | -                                                          | 0 |                                                                                                                                     |                                                                                                                                                                                                         | SignalP (SIGNALP)                                                                                                                                                                 |
| Caenorhabditis elegans  | briggsae cbr-cku-80 protein                                | 3 | P:GO:0009628;<br>F:GO:0005488;<br>P:GO:0006281                                                                                      | -                                                                                                                                                                                                       | IPR005160; IPR006164; IPR016194;<br>G3DSA:2.40.290.10 (GENE3D),<br>PTHR12604 (PANTHER),<br>PTHR12604:SF3 (PANTHER)                                                                |
| Loa loa                 | centromere protein f                                       | 0 |                                                                                                                                     |                                                                                                                                                                                                         | -                                                                                                                                                                                 |
| Caenorhabditis elegans  | te-scin r                                                  | 8 | P:GO:0008340;<br>P:GO:0000003;<br>P:GO:0018996;<br>P:GO:0002119;<br>F:GO:0005515;<br>P:GO:0040011;<br>P:GO:0006898;<br>P:GO:0009792 | -                                                                                                                                                                                                       | IPR003961; IPR008957; IPR013783;<br>PTHR10489 (PANTHER)                                                                                                                           |
|                         | -                                                          | 0 |                                                                                                                                     |                                                                                                                                                                                                         | -                                                                                                                                                                                 |
|                         | -                                                          | 0 |                                                                                                                                     |                                                                                                                                                                                                         | -                                                                                                                                                                                 |
| Caenorhabditis briggsae | meiotic checkpoint regulator cut4                          | 1 | F:GO:0005515                                                                                                                        | -                                                                                                                                                                                                       | -                                                                                                                                                                                 |
| Brugia malayi           | chloride channel protein 3                                 | 5 | F:GO:0005247;<br>P:GO:0055085;<br>P:GO:0000003;<br>C:GO:0016021;<br>P:GO:0006821                                                    | -                                                                                                                                                                                                       | IPR001807; IPR014743;<br>PTHR11689:SF21 (PANTHER), SignalP (SIGNALP)                                                                                                              |
|                         | -                                                          | 0 |                                                                                                                                     |                                                                                                                                                                                                         | SignalP (SIGNALP)                                                                                                                                                                 |
| Caenorhabditis elegans  | elegans protein partially confirmed by transcript evidence | 1 | F:GO:0005515                                                                                                                        | -                                                                                                                                                                                                       | IPR009771; PTHR22746 (PANTHER),<br>PTHR22746:SF6 (PANTHER)                                                                                                                        |
| Caenorhabditis briggsae | mechanosensory abnormality family member (mec-1)           | 4 | P:GO:0040010;<br>F:GO:0005488;<br>C:GO:0005578;<br>P:GO:0030326                                                                     | -                                                                                                                                                                                                       | IPR000152; IPR000742; IPR001881;<br>IPR013032; IPR013091; IPR018097;<br>G3DSA:2.10.25.10 (GENE3D),<br>PTHR11201 (PANTHER),<br>PTHR11201:SF84 (PANTHER),<br>SSF57196 (SUPERFAMILY) |
| Brugia malayi           | leucine zipper transcription regulator 2                   | 0 |                                                                                                                                     | P:GO:0015031;<br>C:GO:0016020;<br>C:GO:0000139;<br>P:GO:0006810;<br>F:GO:0003674;<br>C:GO:0005794;<br>C:GO:0005789;<br>C:GO:0005575;<br>F:GO:0005515;<br>C:GO:0005783;<br>P:GO:0016192;<br>P:GO:0008150 | PTHR13402 (PANTHER)                                                                                                                                                               |
|                         | -                                                          | 0 |                                                                                                                                     |                                                                                                                                                                                                         | PTHR23194 (PANTHER),<br>PTHR23194:SF1 (PANTHER)                                                                                                                                   |

|                         |                                                        |    |                                                                                                                                                                                        |                                                                                                                                     |                                                                                                             |
|-------------------------|--------------------------------------------------------|----|----------------------------------------------------------------------------------------------------------------------------------------------------------------------------------------|-------------------------------------------------------------------------------------------------------------------------------------|-------------------------------------------------------------------------------------------------------------|
|                         | -                                                      | 0  |                                                                                                                                                                                        |                                                                                                                                     | -                                                                                                           |
| Caenorhabditis briggsae | polyribonucleotide nucleotidyltransferase 1            | 3  | C:GO:0005758;<br>F:GO:0016779;<br>P:GO:0016070                                                                                                                                         | -                                                                                                                                   | EC:2.7.7.0<br>IPR001247; IPR012162; IPR015848;<br>IPR020568                                                 |
| Caenorhabditis elegans  | hypothetical protein Y50D4A.1 [Caenorhabditis elegans] | 0  |                                                                                                                                                                                        | P:GO:0006412;<br>C:GO:0005840;<br>C:GO:0005622                                                                                      | -                                                                                                           |
| Loa loa                 | dedicator of cytokinesis family protein                | 0  |                                                                                                                                                                                        | F:GO:0005525;<br>F:GO:0051020;<br>F:GO:0005085                                                                                      | IPR001849                                                                                                   |
| Brugia malayi           | cg9915-pa                                              | 1  | P:GO:0000003                                                                                                                                                                           | -                                                                                                                                   | -                                                                                                           |
| Caenorhabditis elegans  | methionine synthase                                    | 9  | P:GO:0042558;<br>F:GO:0008705;<br>C:GO:0005622;<br>F:GO:0031419;<br>F:GO:0005515;<br>P:GO:0032940;<br>F:GO:0008898;<br>P:GO:0009086;<br>F:GO:0008270                                   | -                                                                                                                                   | EC:2.1.1.13;<br>EC:2.1.1.10<br>IPR004223; PTHR21091 (PANTHER),<br>PTHR21091:SF18 (PANTHER)                  |
|                         | -                                                      | 0  |                                                                                                                                                                                        |                                                                                                                                     | -                                                                                                           |
| Loa loa                 | ubx domain containing 8                                | 0  |                                                                                                                                                                                        | C:GO:0005811;<br>F:GO:0003674;<br>P:GO:0006986;<br>C:GO:0005737;<br>C:GO:0005783;<br>P:GO:0008150;<br>F:GO:0005515;<br>C:GO:0005575 | -                                                                                                           |
| Loa loa                 | ubx domain containing 8                                | 0  |                                                                                                                                                                                        | C:GO:0005811;<br>F:GO:0003674;<br>P:GO:0006986;<br>C:GO:0005737;<br>C:GO:0005783;<br>P:GO:0008150;<br>F:GO:0005515;<br>C:GO:0005575 | -                                                                                                           |
| Caenorhabditis briggsae | variable abnormal morphology family member (vab-10)    | 0  |                                                                                                                                                                                        | F:GO:0005509;<br>P:GO:0007050;<br>F:GO:0003779                                                                                      | G3DSA:3.90.1290.10 (GENE3D),<br>PTHR11915 (PANTHER),<br>PTHR11915:SF49 (PANTHER),<br>SSF75399 (SUPERFAMILY) |
| Brugia malayi           | uncoordi-ated family member (unc-44)                   | 11 | F:GO:0008092;<br>P:GO:0048675;<br>P:GO:0007016;<br>P:GO:0007528;<br>C:GO:0043195;<br>P:GO:0000226;<br>C:GO:0042734;<br>C:GO:0031594;<br>P:GO:0007165;<br>F:GO:0005200;<br>C:GO:0005886 | -                                                                                                                                   | -                                                                                                           |

|                               |                                                           |    |                                                                                                                                                                       |                               |                                                                                                     |
|-------------------------------|-----------------------------------------------------------|----|-----------------------------------------------------------------------------------------------------------------------------------------------------------------------|-------------------------------|-----------------------------------------------------------------------------------------------------|
| Caenorhabditis brenneri       | calsyntenin 1                                             | 9  | P:GO:0009792;<br>C:GO:0005615;<br>P:GO:0007156;<br>F:GO:0005515;<br>C:GO:0032809;<br>P:GO:0008355;<br>C:GO:0043231;<br>F:GO:0005509;<br>C:GO:0016021                  | -                             | SignalP (SIGNALP)                                                                                   |
|                               | -                                                         | 0  |                                                                                                                                                                       |                               | -                                                                                                   |
| Loa loa                       | fumarylacetoacetate hydrolase domain-containing protein 1 | 6  | P:GO:0009792;<br>P:GO:0008152;<br>F:GO:0016787;<br>P:GO:0040007;<br>F:GO:0016853;<br>P:GO:0002119                                                                     | -                             | IPR002529; IPR011234; PTHR11820 (PANTHER), PTHR11820:SF7 (PANTHER)                                  |
|                               | -                                                         | 0  |                                                                                                                                                                       |                               | SignalP (SIGNALP)                                                                                   |
|                               | -                                                         | 0  |                                                                                                                                                                       |                               | -                                                                                                   |
|                               | -                                                         | 0  |                                                                                                                                                                       |                               | -                                                                                                   |
| Strongylocentrotus purpuratus | d- damage-binding protein 1                               | 10 | P:GO:0043161;<br>P:GO:0000718;<br>P:GO:0000075;<br>F:GO:0003684;<br>C:GO:0031464;<br>C:GO:0031465;<br>P:GO:0042787;<br>F:GO:0005515;<br>C:GO:0005654;<br>C:GO:0005737 | -                             | PTHR10644 (PANTHER), PTHR10644:SF3 (PANTHER)                                                        |
|                               | -                                                         | 0  |                                                                                                                                                                       |                               | -                                                                                                   |
| Caenorhabditis elegans        | uncoordinated family member (unc-79)                      | 0  |                                                                                                                                                                       |                               | -                                                                                                   |
|                               | -                                                         | 0  |                                                                                                                                                                       |                               | -                                                                                                   |
|                               | -                                                         | 0  |                                                                                                                                                                       |                               | -                                                                                                   |
|                               | -                                                         | 0  |                                                                                                                                                                       |                               | -                                                                                                   |
| Cooperia oncophora            | latrophilin-like protein 2                                | 6  | P:GO:0007218;<br>C:GO:0016021;<br>P:GO:0007165;<br>C:GO:0005886;<br>F:GO:0005529;<br>F:GO:0004930                                                                     | -                             | IPR016186; IPR016187; PTHR22802 (PANTHER), PTHR22802:SF16 (PANTHER)                                 |
| Dictyocaulus viviparus        | acetylcholinesterase 2                                    | 6  | F:GO:0004104;<br>P:GO:0001507;<br>F:GO:0003990;<br>C:GO:0005623;<br>P:GO:0040012;<br>F:GO:0042803                                                                     | EC:3.1.1.8;<br>EC:3.1.1.7     | IPR000997; IPR002018; G3DSA:3.40.50.1820 (GENE3D), PTHR11559:SF33 (PANTHER), SSF53474 (SUPERFAMILY) |
|                               | -                                                         | 0  |                                                                                                                                                                       |                               | SignalP (SIGNALP)                                                                                   |
|                               | -                                                         | 0  |                                                                                                                                                                       |                               | -                                                                                                   |
|                               | -                                                         | 0  |                                                                                                                                                                       |                               | -                                                                                                   |
|                               | -                                                         | 0  |                                                                                                                                                                       |                               | -                                                                                                   |
| Angiostrongylus cantonensis   | cell wall protein awa1p                                   | 0  |                                                                                                                                                                       |                               | -                                                                                                   |
| Angiostrongylus cantonensis   | hypothetical protein [Angiostrongylus cantonensis]        | 0  |                                                                                                                                                                       |                               | -                                                                                                   |
|                               | -                                                         | 0  |                                                                                                                                                                       |                               | -                                                                                                   |
| Caenorhabditis elegans        | transmembrane protein 161b                                | 0  |                                                                                                                                                                       | F:GO:0008270;<br>F:GO:0005515 | IPR019395; PTHR13624 (PANTHER), PTHR13624:SF1 (PANTHER), SignalP (SIGNALP)                          |

|                         |                                                               |  |   |                                                                                                   |   |                                                                 |                                                                                                                                   |
|-------------------------|---------------------------------------------------------------|--|---|---------------------------------------------------------------------------------------------------|---|-----------------------------------------------------------------|-----------------------------------------------------------------------------------------------------------------------------------|
| Brugia malayi           | domain containing protein                                     |  | 3 | P:GO:0018991;<br>P:GO:0040011;<br>P:GO:0006898                                                    | - |                                                                 | SignalP (SIGNALP)                                                                                                                 |
| Osmerus mordax          | acidic leucine-rich nuclear phosphoprotein 32 family member a |  | 4 | C:GO:0005737;<br>F:GO:0005515;<br>C:GO:0016363;<br>P:GO:0009987                                   | - |                                                                 | IPR003603; G3DSA:3.80.10.10 (GENE3D), PTHR11375 (PANTHER), PSS1450 (PROFILE), SSF52058 (SUPERFAMILY)                              |
| Caenorhabditis elegans  | human a1 homolog family member (hrp-1)                        |  | 6 | F:GO:0003676;<br>F:GO:0005515;<br>C:GO:0030529;<br>C:GO:0031981;<br>F:GO:0000166;<br>P:GO:0006396 | - |                                                                 | IPR000504; IPR012677; PTHR10432 (PANTHER), PTHR10432:SF13 (PANTHER), SSF54928 (SUPERFAMILY)                                       |
| Caenorhabditis elegans  | human a1 homolog family member (hrp-1)                        |  | 6 | F:GO:0003676;<br>F:GO:0005515;<br>C:GO:0030529;<br>C:GO:0031981;<br>F:GO:0000166;<br>P:GO:0006396 | - |                                                                 | IPR000504; IPR012677; PTHR10432 (PANTHER), PTHR10432:SF13 (PANTHER), SSF54928 (SUPERFAMILY)                                       |
| Caenorhabditis elegans  | human a1 homolog family member (hrp-1)                        |  | 5 | F:GO:0003676;<br>C:GO:0030529;<br>C:GO:0031981;<br>F:GO:0000166;<br>P:GO:0006396                  | - |                                                                 | IPR000504; IPR012677; PTHR10432 (PANTHER), PTHR10432:SF13 (PANTHER), SSF54928 (SUPERFAMILY)                                       |
| Caenorhabditis elegans  | human a1 homolog family member (hrp-1)                        |  | 6 | F:GO:0003676;<br>F:GO:0005515;<br>C:GO:0030529;<br>C:GO:0031981;<br>F:GO:0000166;<br>P:GO:0006396 | - |                                                                 | IPR000504; IPR012677; PTHR10432 (PANTHER), PTHR10432:SF13 (PANTHER), SSF54928 (SUPERFAMILY)                                       |
| Caenorhabditis briggsae | t-complex protein 11                                          |  | 0 |                                                                                                   |   | P:GO:0030154;<br>C:GO:0016021;<br>P:GO:0007275;<br>P:GO:0007283 | IPR008862; PTHR12832:SF6 (PANTHER)                                                                                                |
| Caenorhabditis elegans  | ubiquitin-conjugating enzyme e2 j1                            |  | 6 | C:GO:0005789;<br>P:GO:0016567;<br>F:GO:0005524;<br>F:GO:0004842;<br>C:GO:0016021;<br>P:GO:0051246 | - | EC:6.3.2.19                                                     | IPR000608; IPR016135; PTHR11621 (PANTHER), PTHR11621:SF15 (PANTHER)                                                               |
| -                       | -                                                             |  | 0 |                                                                                                   |   |                                                                 | SignalP (SIGNALP)                                                                                                                 |
| Caenorhabditis brenneri | nuclear and cytoplasmic polyadenylated r--binding protein     |  | 5 | C:GO:0005730;<br>C:GO:0005794;<br>F:GO:0003676;<br>F:GO:0005515;<br>F:GO:0000166                  | - |                                                                 | IPR000504; IPR012677; PTHR23003 (PANTHER), PTHR23003:SF2 (PANTHER), SSF54928 (SUPERFAMILY)                                        |
| -                       | -                                                             |  | 0 |                                                                                                   |   |                                                                 | -                                                                                                                                 |
| -                       | -                                                             |  | 0 |                                                                                                   |   |                                                                 | -                                                                                                                                 |
| Dictyocaulus viviparus  | acetylcholinesterase 2                                        |  | 5 | P:GO:0001507;<br>F:GO:0003990;<br>C:GO:0005623;<br>P:GO:0040012;<br>F:GO:0042803                  | - | EC:3.1.1.7                                                      | IPR000997; IPR002018; IPR019826; G3DSA:3.40.50.1820 (GENE3D), PTHR11559:SF33 (PANTHER), SignalP (SIGNALP), SSF53474 (SUPERFAMILY) |



|                         |                                                            |    |                                                                                                                                                                                        |                                                                                                   |            |                                                                                                                                                                                        |
|-------------------------|------------------------------------------------------------|----|----------------------------------------------------------------------------------------------------------------------------------------------------------------------------------------|---------------------------------------------------------------------------------------------------|------------|----------------------------------------------------------------------------------------------------------------------------------------------------------------------------------------|
| Homo sapiens            | ribosomal protein s28                                      | 6  | F:GO:0003735;<br>F:GO:0005515;<br>P:GO:0006364;<br>C:GO:0022627;<br>P:GO:0042274;<br>P:GO:0006414                                                                                      | -                                                                                                 | -          |                                                                                                                                                                                        |
| -                       | -                                                          | 0  |                                                                                                                                                                                        |                                                                                                   |            | SignalP (SIGNALP)                                                                                                                                                                      |
| -                       | -                                                          | 0  |                                                                                                                                                                                        |                                                                                                   |            | -                                                                                                                                                                                      |
| Caenorhabditis briggsae | helix-loop-helix d--binding domain containing protein      | 8  | F:GO:0030528;<br>P:GO:0045941;<br>F:GO:0005515;<br>P:GO:0006355;<br>F:GO:0044212;<br>P:GO:0051726;<br>F:GO:0043565;<br>P:GO:0016481                                                    | -                                                                                                 |            | IPR001092; IPR011598; PTHR15741 (PANTHER), PTHR15741:SF4 (PANTHER)                                                                                                                     |
| Brugia malayi           | protein phosphatase regulatory subunit                     | 4  | C:GO:0000159;<br>P:GO:0007165;<br>F:GO:0005515;<br>F:GO:0008601                                                                                                                        | -                                                                                                 |            | IPR002554; IPR016024                                                                                                                                                                   |
| -                       | -                                                          | 0  |                                                                                                                                                                                        |                                                                                                   |            | -                                                                                                                                                                                      |
| -                       | -                                                          | 0  |                                                                                                                                                                                        |                                                                                                   |            | -                                                                                                                                                                                      |
| -                       | -                                                          | 0  |                                                                                                                                                                                        |                                                                                                   |            | -                                                                                                                                                                                      |
| Loa loa                 | ferm domain containing 4a                                  | 0  |                                                                                                                                                                                        | F:GO:0003674;<br>F:GO:0005488;<br>C:GO:0005737;<br>C:GO:0005856;<br>P:GO:0008150;<br>C:GO:0005575 |            | IPR000299; IPR011993; IPR014352; IPR018979; IPR018980; IPR019748; IPR019749; IPR021774; G3DSA:3.10.20.90 (GENE3D), PTHR23280 (PANTHER), SSF50729 (SUPERFAMILY), SSF54236 (SUPERFAMILY) |
| Caenorhabditis elegans  | elegans protein partially confirmed by transcript evidence | 9  | P:GO:0009792;<br>F:GO:0016491;<br>P:GO:0040018;<br>P:GO:0019373;<br>F:GO:0005506;<br>P:GO:0040017;<br>P:GO:0040010;<br>P:GO:0000003;<br>P:GO:0008340                                   | -                                                                                                 |            | IPR001128; IPR002401; IPR017972; PTHR19383:SF176 (PANTHER)                                                                                                                             |
| -                       | -                                                          | 0  |                                                                                                                                                                                        |                                                                                                   |            | -                                                                                                                                                                                      |
| Caenorhabditis elegans  | adenylate cyclase type ix                                  | 11 | P:GO:0006952;<br>P:GO:0008219;<br>C:GO:0016021;<br>F:GO:0004016;<br>P:GO:0007188;<br>P:GO:0042221;<br>P:GO:0002119;<br>P:GO:0040017;<br>P:GO:0006171;<br>C:GO:0005886;<br>P:GO:0030431 | -                                                                                                 | EC:4.6.1.1 | IPR001054; PTHR11920 (PANTHER), PTHR11920:SF10 (PANTHER), SignalP (SIGNALP)                                                                                                            |
| Caenorhabditis elegans  | phd finger protein 10-like                                 | 2  | F:GO:0046872;<br>C:GO:0005634                                                                                                                                                          | -                                                                                                 |            | PTHR10615 (PANTHER), PTHR10615:SF18 (PANTHER)                                                                                                                                          |
| -                       | -                                                          | 0  |                                                                                                                                                                                        |                                                                                                   |            | SignalP (SIGNALP)                                                                                                                                                                      |
| Caenorhabditis elegans  | protein unc-79 homolog                                     | 0  |                                                                                                                                                                                        | C:GO:0016021;<br>C:GO:0016020                                                                     |            | PTHR21696 (PANTHER), SignalP (SIGNALP)                                                                                                                                                 |
| -                       | -                                                          | 0  |                                                                                                                                                                                        |                                                                                                   |            | -                                                                                                                                                                                      |
| -                       | -                                                          | 0  |                                                                                                                                                                                        |                                                                                                   |            | -                                                                                                                                                                                      |

|                            |                                                            |   |                                                                                  |   |                                                                                                                                                  |
|----------------------------|------------------------------------------------------------|---|----------------------------------------------------------------------------------|---|--------------------------------------------------------------------------------------------------------------------------------------------------|
|                            | -                                                          | 0 |                                                                                  |   | -                                                                                                                                                |
| Heliconius melpomene       | endonuclease-reverse transcriptase                         | 1 | F:GO:0016787                                                                     | - | IPR005135; G3DSA:3.60.10.10 (GENE3D), PTHR23227 (PANTHER), PTHR23227:SF14 (PANTHER)                                                              |
| Heliconius melpomene       | endonuclease-reverse transcriptase                         | 1 | F:GO:0003824                                                                     | - | -                                                                                                                                                |
| Heliconius melpomene       | endonuclease-reverse transcriptase                         | 1 | F:GO:0016787                                                                     | - | IPR005135; G3DSA:3.60.10.10 (GENE3D), PTHR23227 (PANTHER), PTHR23227:SF14 (PANTHER)                                                              |
| Caenorhabditis elegans     | phosphorylase beta                                         | 4 | P:GO:0005976;<br>P:GO:0044237;<br>C:GO:0044464;<br>F:GO:0003824                  | - | IPR008734; PTHR10749:SF1 (PANTHER)                                                                                                               |
| Caenorhabditis briggsae    | briggsae cbr-unc-97 protein                                | 4 | C:GO:0005829;<br>C:GO:0030054;<br>F:GO:0017022;<br>F:GO:0008270                  | - | IPR001781; PTHR18973 (PANTHER), PTHR18973:SF93 (PANTHER), SSF57716 (SUPERFAMILY)                                                                 |
| Caenorhabditis briggsae    | elegans protein partially confirmed by transcript evidence | 5 | P:GO:0048856;<br>F:GO:0005515;<br>P:GO:0007275;<br>P:GO:0000003;<br>P:GO:0040007 | - | -                                                                                                                                                |
| Laccaria bicolor S238N-H82 | set domain-containing protein                              | 5 | C:GO:0043229;<br>P:GO:0044238;<br>P:GO:0044260;<br>P:GO:0006325;<br>F:GO:0003824 | - | IPR001214; IPR001917; IPR007728; G3DSA:2.170.270.10 (GENE3D), PTHR22884 (PANTHER), PTHR22884:SF25 (PANTHER), SSF82199 (SUPERFAMILY)              |
| Caenorhabditis elegans     | elegans protein confirmed by transcript evidence           | 0 |                                                                                  |   | IPR015915; SSF117281 (SUPERFAMILY)                                                                                                               |
| Caenorhabditis elegans     | down syndrome critical region gene 1-like 2                | 3 | F:GO:0031013;<br>P:GO:0019722;<br>F:GO:0000166                                   | - | IPR006931; PTHR10300:SF2 (PANTHER), SSF54928 (SUPERFAMILY)                                                                                       |
| Caenorhabditis briggsae    | propionyl coenzyme a beta polypeptide                      | 4 | F:GO:0005515;<br>C:GO:0005759;<br>F:GO:0005524;<br>F:GO:0004658                  | - | EC:6.4.1.3<br>IPR000022; IPR011762; IPR011763; G3DSA:3.90.226.10 (GENE3D), PTHR22855 (PANTHER), PTHR22855:SF14 (PANTHER), SSF52096 (SUPERFAMILY) |
|                            | -                                                          | 0 |                                                                                  |   | -                                                                                                                                                |

|                         |                                                         |    |                                                                                                                                                                                                                                                                                                                                                                  |                                                                                                   |             |                                                                                                                      |
|-------------------------|---------------------------------------------------------|----|------------------------------------------------------------------------------------------------------------------------------------------------------------------------------------------------------------------------------------------------------------------------------------------------------------------------------------------------------------------|---------------------------------------------------------------------------------------------------|-------------|----------------------------------------------------------------------------------------------------------------------|
| Caenorhabditis briggsae | huntingtin interacting protein 1                        | 21 | F:GO:0035091;<br>P:GO:0030324;<br>P:GO:0006919;<br>P:GO:0048268;<br>C:GO:0005624;<br>P:GO:0007405;<br>C:GO:0005794;<br>C:GO:0009986;<br>F:GO:0003779;<br>F:GO:0030276;<br>P:GO:0006917;<br>P:GO:0048260;<br>C:GO:0005856;<br>P:GO:0007165;<br>P:GO:0040036;<br>P:GO:0009887;<br>P:GO:0009953;<br>C:GO:0030136;<br>C:GO:0005887;<br>F:GO:0005200;<br>P:GO:0045879 | -                                                                                                 |             | IPR008942; IPR011417; IPR013809;<br>PTHR10407 (PANTHER),<br>PTHR10407:SF4 (PANTHER)                                  |
| Loa loa                 | elegans protein confirmed by transcript evidence        | 2  | P:GO:0009987;<br>P:GO:0043170                                                                                                                                                                                                                                                                                                                                    | -                                                                                                 |             | SignalP (SIGNALP)                                                                                                    |
|                         | -                                                       | 0  |                                                                                                                                                                                                                                                                                                                                                                  |                                                                                                   |             | SignalP (SIGNALP)                                                                                                    |
|                         | -                                                       | 0  |                                                                                                                                                                                                                                                                                                                                                                  |                                                                                                   |             | -                                                                                                                    |
| Caenorhabditis briggsae | rhomboid family protein                                 | 0  |                                                                                                                                                                                                                                                                                                                                                                  | F:GO:0004252;<br>F:GO:0005509;<br>F:GO:0008236;<br>C:GO:0016021;<br>P:GO:0007165;<br>C:GO:0005886 |             | SignalP (SIGNALP)                                                                                                    |
|                         | -                                                       | 0  |                                                                                                                                                                                                                                                                                                                                                                  |                                                                                                   |             | -                                                                                                                    |
| Caenorhabditis briggsae | Hypothetical protein CBG21915 [Caenorhabditis briggsae] | 0  |                                                                                                                                                                                                                                                                                                                                                                  |                                                                                                   |             | -                                                                                                                    |
| Caenorhabditis briggsae | briggsae cbr-fli-1 protein                              | 7  | C:GO:0005730;<br>P:GO:0051014;<br>C:GO:0005813;<br>P:GO:0030036;<br>F:GO:0003779;<br>P:GO:0007275;<br>P:GO:0006936                                                                                                                                                                                                                                               | -                                                                                                 |             | IPR007122; G3DSA:3.40.20.10<br>(GENE3D), PTHR11977:SF6 (PANTHER)                                                     |
| Caenorhabditis elegans  | zinc finger protein 236                                 | 3  | P:GO:0016070;<br>F:GO:0003676;<br>C:GO:0005622                                                                                                                                                                                                                                                                                                                   | -                                                                                                 |             | -                                                                                                                    |
| Caenorhabditis briggsae | dimethylglycine mitochondrial                           | 7  | P:GO:0055085;<br>F:GO:0004047;<br>F:GO:0005488;<br>C:GO:0005739;<br>P:GO:0006546;<br>F:GO:0016491;<br>C:GO:0016020                                                                                                                                                                                                                                               | -                                                                                                 | EC:2.1.2.10 | IPR006076; G3DSA:3.50.50.60<br>(GENE3D), PTHR13847 (PANTHER),<br>PTHR13847:SF15 (PANTHER),<br>SSF51905 (SUPERFAMILY) |
|                         | -                                                       | 0  |                                                                                                                                                                                                                                                                                                                                                                  |                                                                                                   |             | -                                                                                                                    |
| Caenorhabditis elegans  | transformation transcription domain-associated protein  | 3  | C:GO:0070461;<br>F:GO:0005515;<br>P:GO:0016573                                                                                                                                                                                                                                                                                                                   | -                                                                                                 |             | IPR003151; IPR014009                                                                                                 |

|                         |                                                            |    |                                                                                                                                                                                        |   |                              |                                                                                                                                                   |
|-------------------------|------------------------------------------------------------|----|----------------------------------------------------------------------------------------------------------------------------------------------------------------------------------------|---|------------------------------|---------------------------------------------------------------------------------------------------------------------------------------------------|
| Caenorhabditis elegans  | transformation transcription domain-associated protein     | 6  | F:GO:0003712;<br>C:GO:0070461;<br>C:GO:0005667;<br>P:GO:0050794;<br>P:GO:0016573;<br>P:GO:0006350                                                                                      | - |                              | IPR003151                                                                                                                                         |
| Caenorhabditis elegans  | transformation transcription domain-associated protein     | 3  | C:GO:0070461;<br>F:GO:0005515;<br>P:GO:0016573                                                                                                                                         | - |                              | IPR003151; IPR014009                                                                                                                              |
| Caenorhabditis elegans  | transformation transcription domain-associated protein     | 3  | C:GO:0070461;<br>F:GO:0005515;<br>P:GO:0016573                                                                                                                                         | - |                              | IPR003151; IPR014009                                                                                                                              |
| Caenorhabditis elegans  | g patch domain containing 3                                | 3  | F:GO:0003676;<br>C:GO:0005622;<br>F:GO:0000166                                                                                                                                         | - |                              | SignalP (SIGNALP)                                                                                                                                 |
| Caenorhabditis briggsae | briggsae cbr-rnt-1 protein                                 | 11 | F:GO:0005509;<br>P:GO:0045944;<br>P:GO:0030853;<br>F:GO:0003677;<br>P:GO:0030854;<br>F:GO:0016563;<br>F:GO:0003700;<br>F:GO:0008134;<br>F:GO:0046982;<br>F:GO:0042803;<br>C:GO:0005634 | - |                              | -                                                                                                                                                 |
|                         |                                                            |    |                                                                                                                                                                                        |   |                              | IPR002017; IPR018159;<br>G3DSA:1.20.58.60 (GENE3D),<br>PTHR11915 (PANTHER),<br>PTHR11915:SF48 (PANTHER),<br>SSF46966 (SUPERFAMILY)                |
| Caenorhabditis elegans  | briggsae cbr-npp-17 protein                                | 6  | P:GO:0040035;<br>P:GO:0009792;<br>P:GO:0040010;<br>P:GO:0040011;<br>P:GO:0006898;<br>P:GO:0002009                                                                                      | - |                              | IPR001680; IPR011046; IPR015943;<br>IPR017986; IPR019775; IPR019781;<br>IPR019782; IPR020472; PTHR10971<br>(PANTHER), PTHR10971:SF11<br>(PANTHER) |
| Caenorhabditis elegans  | kiaa1699 protein                                           | 5  | P:GO:0016192;<br>F:GO:0047485;<br>C:GO:0044444;<br>P:GO:0015031;<br>P:GO:0051649                                                                                                       | - |                              | PTHR14146 (PANTHER)                                                                                                                               |
|                         | -                                                          | 0  |                                                                                                                                                                                        |   |                              | PTHR22576 (PANTHER),<br>PTHR22576:SF1 (PANTHER)                                                                                                   |
| Caenorhabditis briggsae | 6-phosphofructo-2- isoform a                               | 4  | F:GO:0004331;<br>F:GO:0003873;<br>P:GO:0006003;<br>F:GO:0005524                                                                                                                        | - | EC:3.1.3.46;<br>EC:2.7.1.105 | IPR003094; IPR013079;<br>G3DSA:3.40.50.300 (GENE3D),<br>PTHR10606:SF11 (PANTHER),<br>SSF52540 (SUPERFAMILY)                                       |
|                         | -                                                          | 0  |                                                                                                                                                                                        |   |                              | SignalP (SIGNALP)                                                                                                                                 |
|                         | -                                                          | 0  |                                                                                                                                                                                        |   |                              | -                                                                                                                                                 |
| Caenorhabditis briggsae | u3 small nucleolar r--interacting protein 2                | 0  |                                                                                                                                                                                        |   |                              | IPR001680; IPR011046; IPR015943;<br>IPR017986; IPR019775; IPR019781;<br>IPR019782; IPR020472; PTHR19865<br>(PANTHER)                              |
| Brugia malayi           | elegans protein partially confirmed by transcript evidence | 0  |                                                                                                                                                                                        |   |                              | IPR001680; IPR011046; IPR015943;<br>IPR019775                                                                                                     |

|                         |                                                  |    |                                                                                                                                                                                                                                                                                                                                                                                                                                                                        |                                                                                                                                     |                                                                                                                                                      |
|-------------------------|--------------------------------------------------|----|------------------------------------------------------------------------------------------------------------------------------------------------------------------------------------------------------------------------------------------------------------------------------------------------------------------------------------------------------------------------------------------------------------------------------------------------------------------------|-------------------------------------------------------------------------------------------------------------------------------------|------------------------------------------------------------------------------------------------------------------------------------------------------|
| Caenorhabditis briggsae | patatin-like phospholipase family protein        | 1  | P:GO:0008152                                                                                                                                                                                                                                                                                                                                                                                                                                                           | -                                                                                                                                   | IPR002641; IPR016035; PTHR12406 (PANTHER), PTHR12406:SF3 (PANTHER)                                                                                   |
| -                       | -                                                | 0  | -                                                                                                                                                                                                                                                                                                                                                                                                                                                                      | -                                                                                                                                   | -                                                                                                                                                    |
| -                       | -                                                | 0  | -                                                                                                                                                                                                                                                                                                                                                                                                                                                                      | -                                                                                                                                   | -                                                                                                                                                    |
| Caenorhabditis elegans  | spectrin alpha                                   | 28 | P:GO:0007026;<br>P:GO:0008360;<br>C:GO:0031594;<br>P:GO:0030721;<br>P:GO:0007417;<br>P:GO:0007009;<br>P:GO:0016337;<br>C:GO:0016323;<br>F:GO:0005509;<br>P:GO:0008302;<br>C:GO:0008091;<br>C:GO:0005794;<br>C:GO:0045170;<br>P:GO:0002168;<br>F:GO:0003779;<br>F:GO:0008017;<br>P:GO:0030707;<br>C:GO:0045169;<br>P:GO:0007308;<br>P:GO:0045478;<br>P:GO:0042062;<br>P:GO:0007274;<br>C:GO:0005811;<br>P:GO:0030727;<br>P:GO:0048790;<br>F:GO:0005516;<br>P:GO:0007294 | -                                                                                                                                   | IPR002017; IPR018159;<br>G3DSA:1.20.58.60 (GENE3D),<br>PTHR11915 (PANTHER),<br>PTHR11915:SF6 (PANTHER), SSF46966 (SUPERFAMILY)                       |
| -                       | -                                                | 0  | -                                                                                                                                                                                                                                                                                                                                                                                                                                                                      | -                                                                                                                                   | -                                                                                                                                                    |
| Caenorhabditis elegans  | d330012f22rik protein                            | 0  | -                                                                                                                                                                                                                                                                                                                                                                                                                                                                      | F:GO:0003674;<br>P:GO:0008150                                                                                                       | PTHR20884 (PANTHER),<br>PTHR20884:SF5 (PANTHER)                                                                                                      |
| Caenorhabditis briggsae | d330012f22rik protein                            | 0  | -                                                                                                                                                                                                                                                                                                                                                                                                                                                                      | F:GO:0003674;<br>P:GO:0008150;<br>C:GO:0005575                                                                                      | PTHR20884 (PANTHER),<br>PTHR20884:SF5 (PANTHER)                                                                                                      |
| -                       | -                                                | 0  | -                                                                                                                                                                                                                                                                                                                                                                                                                                                                      | -                                                                                                                                   | -                                                                                                                                                    |
| Loa loa                 | protein ki-se domain containing protein          | 1  | P:GO:0040010                                                                                                                                                                                                                                                                                                                                                                                                                                                           | -                                                                                                                                   | IPR000719; IPR011009; IPR017441;<br>IPR017442; G3DSA:1.10.510.10 (GENE3D), G3DSA:3.30.200.20 (GENE3D), PTHR11909 (PANTHER), PTHR11909:SF19 (PANTHER) |
| Caenorhabditis elegans  | elegans protein confirmed by transcript evidence | 0  | -                                                                                                                                                                                                                                                                                                                                                                                                                                                                      | P:GO:0006355;<br>F:GO:0005509;<br>F:GO:0004871;<br>P:GO:0045449;<br>P:GO:0007165;<br>F:GO:0005515;<br>F:GO:0003700;<br>C:GO:0005634 | IPR011992                                                                                                                                            |
| Caenorhabditis briggsae | patterned expression site family member (pes-22) | 0  | -                                                                                                                                                                                                                                                                                                                                                                                                                                                                      | C:GO:0016021;<br>P:GO:0055085                                                                                                       | -                                                                                                                                                    |

|                         |                                                            |    |                                                                                                                                                                                                                                                                             |                                                |                                                                                                                                                |
|-------------------------|------------------------------------------------------------|----|-----------------------------------------------------------------------------------------------------------------------------------------------------------------------------------------------------------------------------------------------------------------------------|------------------------------------------------|------------------------------------------------------------------------------------------------------------------------------------------------|
| Caenorhabditis elegans  | r- binding motif protein 34                                | 7  | P:GO:0040035;<br>P:GO:0009792;<br>P:GO:0002119;<br>P:GO:0040011;<br>P:GO:0040007;<br>P:GO:0006898;<br>P:GO:0002009                                                                                                                                                          | -                                              | IPR000504; IPR012677; PTHR10432 (PANTHER), PTHR10432:SF57 (PANTHER), SSF54928 (SUPERFAMILY)                                                    |
| -                       | -                                                          | 0  |                                                                                                                                                                                                                                                                             |                                                | -                                                                                                                                              |
| Caenorhabditis elegans  | otu ubiquitin aldehyde binding 1                           | 4  | F:GO:0004843;<br>P:GO:0071108;<br>F:GO:0019784;<br>F:GO:0043130                                                                                                                                                                                                             | -                                              | IPR003323; IPR019400; PTHR12931 (PANTHER), PTHR12931:SF2 (PANTHER), SSF54001 (SUPERFAMILY)                                                     |
| Caenorhabditis briggsae | elegans protein partially confirmed by transcript evidence | 3  | P:GO:0000003;<br>F:GO:0005488;<br>P:GO:0040010                                                                                                                                                                                                                              | -                                              | IPR001965; IPR011011; IPR013083; IPR019786; IPR019787; PTHR22880 (PANTHER), PTHR22880:SF1 (PANTHER)                                            |
| Loa loa                 | polo-like ki-se 1                                          | 16 | P:GO:0031572;<br>P:GO:0040038;<br>C:GO:0005654;<br>P:GO:0051437;<br>F:GO:0042801;<br>P:GO:0046677;<br>P:GO:0000236;<br>F:GO:0019901;<br>C:GO:0000942;<br>C:GO:0005829;<br>P:GO:0032436;<br>C:GO:0051233;<br>C:GO:0005813;<br>F:GO:0010997;<br>P:GO:0007346;<br>C:GO:0000922 | -                                              | IPR000719; IPR002290; IPR008271; IPR011009; IPR015728; IPR017441; IPR017442; IPR020636; G3DSA:1.10.510.10 (GENE3D), G3DSA:3.30.200.20 (GENE3D) |
| -                       | -                                                          | 0  |                                                                                                                                                                                                                                                                             |                                                | -                                                                                                                                              |
| Loa loa                 | hypothetical protein LOAG_05084 [Loa loa]                  | 0  |                                                                                                                                                                                                                                                                             |                                                | -                                                                                                                                              |
| Pongo abelii            | hsp90aa1 protein                                           | 14 | C:GO:0005829;<br>P:GO:0042026;<br>P:GO:0006839;<br>F:GO:0030235;<br>P:GO:0070096;<br>C:GO:0042470;<br>F:GO:0005524;<br>F:GO:0030911;<br>P:GO:0007165;<br>F:GO:0051082;<br>P:GO:0006986;<br>P:GO:0045429;<br>F:GO:0042803;<br>P:GO:0034619                                   | -                                              | IPR001404                                                                                                                                      |
| -                       | -                                                          | 0  |                                                                                                                                                                                                                                                                             |                                                | -                                                                                                                                              |
| Caenorhabditis elegans  | briggsae cbr-gei-13 protein                                | 0  |                                                                                                                                                                                                                                                                             | F:GO:0005515;<br>F:GO:0003677;<br>C:GO:0005575 | -                                                                                                                                              |
| Loa loa                 | zinc dhhc-type containing 14                               | 5  | F:GO:0015450;<br>P:GO:0006886;<br>C:GO:0005744;<br>F:GO:0016740;<br>F:GO:0008270                                                                                                                                                                                            | -                                              | -                                                                                                                                              |
| -                       | -                                                          | 0  |                                                                                                                                                                                                                                                                             |                                                | -                                                                                                                                              |

|                         |                                                       |    |                                                                                                                                                                                                                                                            |                                                |                                                                                                                                                                                                                                                                                |
|-------------------------|-------------------------------------------------------|----|------------------------------------------------------------------------------------------------------------------------------------------------------------------------------------------------------------------------------------------------------------|------------------------------------------------|--------------------------------------------------------------------------------------------------------------------------------------------------------------------------------------------------------------------------------------------------------------------------------|
| Caenorhabditis elegans  | eukaryotic peptide chain release factor subunit       | 15 | C:GO:0005829;<br>P:GO:0007224;<br>C:GO:0016021;<br>F:GO:0016149;<br>P:GO:0035071;<br>P:GO:0040007;<br>F:GO:0008236;<br>P:GO:0000003;<br>P:GO:0006605;<br>P:GO:0002119;<br>P:GO:0040011;<br>C:GO:0018444;<br>P:GO:0006415;<br>P:GO:0006898;<br>P:GO:0009792 | -                                              | IPR004403; IPR005140; IPR005141;<br>IPR005142; G3DSA:3.30.1330.30<br>(GENE3D), G3DSA:3.30.420.60<br>(GENE3D), G3DSA:3.30.960.10<br>(GENE3D), PTHR10113:SF1<br>(PANTHER), TIGR00108 (TIGRFAMs),<br>SSF53137 (SUPERFAMILY), SSF55315<br>(SUPERFAMILY), SSF55481<br>(SUPERFAMILY) |
| Homo sapiens            | fibronectin 1 protein                                 | 13 | P:GO:0018149;<br>P:GO:0016477;<br>P:GO:0001525;<br>P:GO:0008360;<br>C:GO:0005793;<br>C:GO:0031093;<br>P:GO:0034446;<br>F:GO:0005518;<br>C:GO:0005577;<br>F:GO:0008201;<br>C:GO:0005578;<br>F:GO:0005201;<br>P:GO:0006953                                   | -                                              | IPR000083; IPR013032; IPR016060;<br>PTHR19143 (PANTHER),<br>PTHR19143:SF6 (PANTHER), SSF57603<br>(SUPERFAMILY)                                                                                                                                                                 |
| Caenorhabditis elegans  | hypothetical protein T12C9.7 [Caenorhabditis elegans] | 0  |                                                                                                                                                                                                                                                            | P:GO:0000003;<br>C:GO:0005634;<br>P:GO:0040018 | IPR004367; IPR011028; IPR013763;<br>PTHR10177 (PANTHER)                                                                                                                                                                                                                        |
| Caenorhabditis elegans  | (d- helicase q1-like) isoform cra_a                   | 4  | P:GO:0000733;<br>F:GO:0005515;<br>F:GO:0004003;<br>F:GO:0000739                                                                                                                                                                                            | -                                              | IPR004589; IPR011545; IPR014021;<br>G3DSA:3.40.50.300 (GENE3D),<br>PTHR13710:SF12 (PANTHER),<br>SSF52540 (SUPERFAMILY)                                                                                                                                                         |
| Caenorhabditis briggsae | briggsae cbr-vps-54 protein                           | 3  | C:GO:0005622;<br>P:GO:0006810;<br>P:GO:0007291                                                                                                                                                                                                             | -                                              | IPR015880                                                                                                                                                                                                                                                                      |
| Caenorhabditis elegans  | patched family protein                                | 8  | P:GO:0040025;<br>P:GO:0040018;<br>P:GO:0018996;<br>P:GO:0040002;<br>P:GO:0000003;<br>P:GO:0008340;<br>P:GO:0040011;<br>P:GO:0019915                                                                                                                        | -                                              | IPR003392; PTHR10796 (PANTHER),<br>PTHR10796:SF14 (PANTHER), SignalP<br>(SIGNALP), SSF82866 (SUPERFAMILY)                                                                                                                                                                      |
| Caenorhabditis elegans  | cytosolic fe-s cluster assembly factor -rf1           | 5  | F:GO:0005488;<br>P:GO:0032364;<br>P:GO:0016226;<br>P:GO:0045449;<br>P:GO:0001666                                                                                                                                                                           | -                                              | IPR004108; IPR009016;<br>G3DSA:3.40.50.1780 (GENE3D),<br>PTHR11615 (PANTHER),<br>PTHR11615:SF31 (PANTHER), SignalP<br>(SIGNALP)                                                                                                                                                |
| Caenorhabditis briggsae | briggsae cbr-npp-14 protein                           | 0  |                                                                                                                                                                                                                                                            |                                                | PTHR23193 (PANTHER),<br>PTHR23193:SF1 (PANTHER)                                                                                                                                                                                                                                |
| -                       | -                                                     | 0  |                                                                                                                                                                                                                                                            |                                                | SignalP (SIGNALP)                                                                                                                                                                                                                                                              |
| -                       | -                                                     | 0  |                                                                                                                                                                                                                                                            |                                                | -                                                                                                                                                                                                                                                                              |
| -                       | -                                                     | 0  |                                                                                                                                                                                                                                                            |                                                | -                                                                                                                                                                                                                                                                              |

|                        |                             |    |                                                                                                                                                                                                                                           |                                                                                  |                                                                                                                                                                                      |
|------------------------|-----------------------------|----|-------------------------------------------------------------------------------------------------------------------------------------------------------------------------------------------------------------------------------------------|----------------------------------------------------------------------------------|--------------------------------------------------------------------------------------------------------------------------------------------------------------------------------------|
| Caenorhabditis elegans | dynein heavy chain          | 5  | P:GO:0007018;<br>C:GO:0030286;<br>F:GO:0016887;<br>F:GO:0005524;<br>F:GO:0003777                                                                                                                                                          | -                                                                                | G3DSA:3.40.50.300 (GENE3D),<br>PTHR10676 (PANTHER),<br>PTHR10676:SF28 (PANTHER),<br>SSF52540 (SUPERFAMILY)                                                                           |
| Caenorhabditis elegans | fk506 binding protein 4     | 14 | P:GO:0048731;<br>F:GO:0005528;<br>P:GO:0040011;<br>F:GO:0016853;<br>C:GO:0005737;<br>C:GO:0005730;<br>F:GO:0030674;<br>F:GO:0031072;<br>N:GO:0071842;<br>P:GO:0009792;<br>P:GO:0002009;<br>P:GO:0048523;<br>P:GO:0022414;<br>P:GO:0051129 | -                                                                                | IPR001179; IPR001440; IPR011990;<br>IPR013026; IPR019734; IPR023114;<br>G3DSA:3.10.50.40 (GENE3D),<br>PTHR10516:SF23 (PANTHER),<br>SSF48452 (SUPERFAMILY), SSF54534<br>(SUPERFAMILY) |
| Caenorhabditis elegans | exocyst complex component 7 | 0  |                                                                                                                                                                                                                                           | C:GO:0000145;<br>P:GO:0006887;<br>C:GO:0016020;<br>P:GO:0006886;<br>C:GO:0005801 | IPR004140; IPR016159;<br>PTHR12542:SF7 (PANTHER)                                                                                                                                     |
| Caenorhabditis elegans | sec13-like 1                | 13 | P:GO:0040007;<br>P:GO:0000003;<br>P:GO:0032940;<br>P:GO:0010171;<br>C:GO:0000776;<br>P:GO:0002119;<br>F:GO:0005515;<br>P:GO:0006888;<br>P:GO:0040011;<br>P:GO:0006997;<br>P:GO:0006898;<br>P:GO:0009792;<br>C:GO:0031080                  | -                                                                                | IPR001680; IPR011046; IPR015943;<br>IPR017986; IPR019781; PTHR11024<br>(PANTHER), PTHR11024:SF2<br>(PANTHER)                                                                         |
| Caenorhabditis elegans | protein sec13 homolog       | 13 | P:GO:0040007;<br>P:GO:0000003;<br>P:GO:0032940;<br>P:GO:0010171;<br>C:GO:0000776;<br>P:GO:0002119;<br>F:GO:0005515;<br>P:GO:0006888;<br>P:GO:0040011;<br>P:GO:0006997;<br>P:GO:0006898;<br>P:GO:0009792;<br>C:GO:0031080                  | -                                                                                | IPR001680; IPR011046; IPR015943;<br>IPR017986; IPR019781; PTHR11024<br>(PANTHER), PTHR11024:SF2<br>(PANTHER)                                                                         |



|                           |                                                                    |    |                                                                                                                                                                                                                          |                                                |                               |                                                                                                                        |
|---------------------------|--------------------------------------------------------------------|----|--------------------------------------------------------------------------------------------------------------------------------------------------------------------------------------------------------------------------|------------------------------------------------|-------------------------------|------------------------------------------------------------------------------------------------------------------------|
| Caenorhabditis elegans    | sec13-like 1                                                       | 13 | P:GO:0040007;<br>P:GO:0000003;<br>P:GO:0032940;<br>P:GO:0010171;<br>C:GO:0000776;<br>P:GO:0002119;<br>F:GO:0005515;<br>P:GO:0006888;<br>P:GO:0040011;<br>P:GO:0006997;<br>P:GO:0006898;<br>P:GO:0009792;<br>C:GO:0031080 | -                                              |                               | IPR001680; IPR011046; IPR015943;<br>IPR017986; IPR019781; PTHR11024<br>(PANTHER), PTHR11024:SF2<br>(PANTHER)           |
| -                         | -                                                                  | 0  |                                                                                                                                                                                                                          |                                                |                               | -                                                                                                                      |
| Caenorhabditis briggsae   | metallo-beta-lactamase superfamily protein                         | 2  | F:GO:0005515;<br>F:GO:0016787                                                                                                                                                                                            | -                                              |                               | G3DSA:3.60.15.10 (GENE3D),<br>PTHR12553 (PANTHER),<br>PTHR12553:SF3 (PANTHER), SSF56281<br>(SUPERFAMILY)               |
| Caenorhabditis briggsae   | metallo-beta-lactamase superfamily protein                         | 2  | F:GO:0005515;<br>F:GO:0016787                                                                                                                                                                                            | -                                              |                               | G3DSA:3.60.15.10 (GENE3D),<br>PTHR12553 (PANTHER),<br>PTHR12553:SF3 (PANTHER), SSF56281<br>(SUPERFAMILY)               |
| Loa loa                   | elegans protein confirmed by transcript evidence                   | 0  |                                                                                                                                                                                                                          |                                                |                               | IPR011989                                                                                                              |
| Loa loa                   | elegans protein confirmed by transcript evidence                   | 0  |                                                                                                                                                                                                                          | F:GO:0005488                                   |                               | IPR011989                                                                                                              |
| Caenorhabditis briggsae   | nedd8-activating enzyme e1 regulatory subunit                      | 0  |                                                                                                                                                                                                                          | F:GO:0005488;<br>P:GO:0008152;<br>F:GO:0003824 |                               | IPR009036; IPR016040; PTHR10953<br>(PANTHER), PTHR10953:SF4<br>(PANTHER)                                               |
| -                         | -                                                                  | 0  |                                                                                                                                                                                                                          |                                                |                               | -                                                                                                                      |
| -                         | -                                                                  | 0  |                                                                                                                                                                                                                          |                                                |                               | -                                                                                                                      |
| Caenorhabditis sp. PS1010 | transmembrane protein 120a                                         | 1  | C:GO:0016020                                                                                                                                                                                                             | -                                              |                               | IPR012926                                                                                                              |
| Caenorhabditis briggsae   | briggsae cbr-dnj-9 protein                                         | 0  |                                                                                                                                                                                                                          | F:GO:0031072                                   |                               | IPR015609; PTHR11821:SF15<br>(PANTHER), PF11875 (PFAM)                                                                 |
| -                         | -                                                                  | 0  |                                                                                                                                                                                                                          |                                                |                               | SignalP (SIGNALP)                                                                                                      |
| Caenorhabditis elegans    | tsa family protein                                                 | 5  | P:GO:0045454;<br>F:GO:0051920;<br>C:GO:0005737;<br>P:GO:0055114;<br>F:GO:0004601                                                                                                                                         | -                                              | EC:1.11.1.15<br>; EC:1.11.1.7 | IPR000866; IPR012335; IPR012336;<br>IPR017936; PTHR10681 (PANTHER),<br>PTHR10681:SF8 (PANTHER)                         |
| Caenorhabditis briggsae   | elegans protein confirmed by transcript evidence                   | 0  |                                                                                                                                                                                                                          |                                                |                               | -                                                                                                                      |
| Caenorhabditis elegans    | phenylalanyl-tr- alpha subunit                                     | 5  | C:GO:0005737;<br>F:GO:0004826;<br>F:GO:0005524;<br>P:GO:0006432;<br>F:GO:0000049                                                                                                                                         | -                                              | EC:6.1.1.20                   | IPR002319; IPR006195; IPR011991;<br>G3DSA:3.30.930.10 (GENE3D),<br>PTHR11538:SF15 (PANTHER),<br>SSF55681 (SUPERFAMILY) |
| Loa loa                   | nf-yc3 (nuclear factor subunit c3) d- binding transcription factor | 11 | P:GO:0040007;<br>P:GO:0040035;<br>F:GO:0003677;<br>P:GO:0002119;<br>F:GO:0016563;<br>C:GO:0016602;<br>F:GO:0005515;<br>P:GO:0043193;<br>F:GO:0003700;<br>P:GO:0006898;<br>C:GO:0005737                                   | -                                              |                               | -                                                                                                                      |

|                               |                                                                    |    |                                                                                                                                                                                        |                               |             |                                                                                                                                                                                                                                             |
|-------------------------------|--------------------------------------------------------------------|----|----------------------------------------------------------------------------------------------------------------------------------------------------------------------------------------|-------------------------------|-------------|---------------------------------------------------------------------------------------------------------------------------------------------------------------------------------------------------------------------------------------------|
| Loa loa                       | nf-yc3 (nuclear factor subunit c3) d- binding transcription factor | 11 | P:GO:0040007;<br>P:GO:0040035;<br>F:GO:0003677;<br>P:GO:0002119;<br>F:GO:0016563;<br>C:GO:0016602;<br>F:GO:0005515;<br>P:GO:0043193;<br>F:GO:0003700;<br>P:GO:0006898;<br>C:GO:0005737 | -                             |             | IPR003958; IPR009072; PTHR10252 (PANTHER), PTHR10252:SF6 (PANTHER)                                                                                                                                                                          |
| Caenorhabditis elegans        | hypothetical protein C33A11.1 [Caenorhabditis elegans]             | 0  |                                                                                                                                                                                        |                               |             | -                                                                                                                                                                                                                                           |
| Caenorhabditis briggsae       | briggsae cbr-acl-6 protein                                         | 0  |                                                                                                                                                                                        | F:GO:0008415;<br>P:GO:0008152 |             | PTHR12563 (PANTHER), PTHR12563:SF3 (PANTHER)                                                                                                                                                                                                |
| Caenorhabditis elegans        | s-re-associated protein s-pin                                      | 0  |                                                                                                                                                                                        |                               |             | -                                                                                                                                                                                                                                           |
|                               | -                                                                  | 0  |                                                                                                                                                                                        |                               |             | -                                                                                                                                                                                                                                           |
|                               | -                                                                  | 0  |                                                                                                                                                                                        |                               |             | -                                                                                                                                                                                                                                           |
| Caenorhabditis elegans        | hypothetical protein F26F12.3 [Caenorhabditis elegans]             | 0  |                                                                                                                                                                                        |                               |             | -                                                                                                                                                                                                                                           |
| Caenorhabditis elegans        | methionyl-tr- synthetase                                           | 5  | F:GO:0005515;<br>P:GO:0006418;<br>F:GO:0004825;<br>C:GO:0005829;<br>F:GO:0000166                                                                                                       | -                             | EC:6.1.1.10 | IPR001412; IPR002547; IPR009080; IPR012340; IPR014729; IPR014758; IPR015413; IPR016027; G3DSA:1.10.730.10 (GENE3D), G3DSA:2.20.28.20 (GENE3D), PTHR11946 (PANTHER), PTHR11946:SF1 (PANTHER), SSF52374 (SUPERFAMILY), SSF57770 (SUPERFAMILY) |
| Pan troglodytes               | ribosomal protein l28                                              | 5  | F:GO:0003735;<br>F:GO:0003723;<br>F:GO:0005515;<br>C:GO:0022625;<br>P:GO:0006414                                                                                                       | -                             |             | -                                                                                                                                                                                                                                           |
| Caenorhabditis briggsae       | briggsae cbr-tag-250 protein                                       | 1  | F:GO:0003676                                                                                                                                                                           | -                             |             | IPR008191; G3DSA:2.30.30.140 (GENE3D), SSF63748 (SUPERFAMILY)                                                                                                                                                                               |
|                               | -                                                                  | 0  |                                                                                                                                                                                        |                               |             | IPR013585                                                                                                                                                                                                                                   |
| Heterorhabditis bacteriophora | sparc                                                              | 6  | P:GO:0009792;<br>P:GO:0040018;<br>P:GO:0000003;<br>P:GO:0040010;<br>F:GO:0005509;<br>P:GO:0002119                                                                                      | -                             |             | IPR001999; IPR002350; IPR003645; IPR011497; IPR011992; IPR018247; IPR019577; G3DSA:3.30.60.30 (GENE3D), PTHR13866 (PANTHER), PTHR13866:SF5 (PANTHER), SSF100895 (SUPERFAMILY), SSF47473 (SUPERFAMILY)                                       |
| Caenorhabditis briggsae       | peroxin 2                                                          | 1  | F:GO:0046872                                                                                                                                                                           | -                             |             | IPR006845; PTHR12590 (PANTHER)                                                                                                                                                                                                              |
|                               | -                                                                  | 0  |                                                                                                                                                                                        |                               |             | -                                                                                                                                                                                                                                           |
| Loa loa                       | briggsae cbr-taf- protein                                          | 2  | P:GO:0006350;<br>C:GO:0005634                                                                                                                                                          | -                             |             | SignalP (SIGNALP)                                                                                                                                                                                                                           |
| Loa loa                       | briggsae cbr-taf- protein                                          | 2  | P:GO:0006350;<br>C:GO:0005634                                                                                                                                                          | -                             |             | SignalP (SIGNALP)                                                                                                                                                                                                                           |
| Loa loa                       | briggsae cbr-taf- protein                                          | 2  | P:GO:0006350;<br>C:GO:0005634                                                                                                                                                          | -                             |             | SignalP (SIGNALP)                                                                                                                                                                                                                           |
|                               | -                                                                  | 0  |                                                                                                                                                                                        |                               |             | SignalP (SIGNALP)                                                                                                                                                                                                                           |
|                               | -                                                                  | 0  |                                                                                                                                                                                        |                               |             | -                                                                                                                                                                                                                                           |
|                               | -                                                                  | 0  |                                                                                                                                                                                        |                               |             | -                                                                                                                                                                                                                                           |
| Brugia malayi                 | hypothetical protein [Brugia malayi]                               | 0  |                                                                                                                                                                                        |                               |             | IPR012816; SSF143990 (SUPERFAMILY)                                                                                                                                                                                                          |

|                         |                                                       |    |                                                                                                                                                                       |                                                                                                   |             |                                                                                                                                     |
|-------------------------|-------------------------------------------------------|----|-----------------------------------------------------------------------------------------------------------------------------------------------------------------------|---------------------------------------------------------------------------------------------------|-------------|-------------------------------------------------------------------------------------------------------------------------------------|
| Caenorhabditis briggsae | elegans protein confirmed by transcript evidence      | 10 | P:GO:0009792;<br>P:GO:0010171;<br>P:GO:0002119;<br>P:GO:0040002;<br>P:GO:0040011;<br>C:GO:0005576;<br>P:GO:0019915;<br>P:GO:0040007;<br>P:GO:0006898;<br>F:GO:0042302 | -                                                                                                 |             | SignalP (SIGNALP)                                                                                                                   |
| Caenorhabditis elegans  | elegans protein confirmed by transcript evidence      | 0  |                                                                                                                                                                       | P:GO:0042773;<br>P:GO:0006120;<br>F:GO:0008137;<br>F:GO:0003954;<br>C:GO:0005743                  |             | IPR009947                                                                                                                           |
| Caenorhabditis briggsae | multidrug resistance protein family member (mrp-1)    | 6  | F:GO:0042626;<br>P:GO:0055085;<br>P:GO:0055114;<br>F:GO:0005524;<br>C:GO:0016021;<br>F:GO:0032440                                                                     | -                                                                                                 | EC:1.3.1.74 | IPR003439; IPR017871;<br>G3DSA:3.40.50.300 (GENE3D),<br>PTHR19242 (PANTHER),<br>PTHR19242:SF35 (PANTHER),<br>SSF52540 (SUPERFAMILY) |
| Caenorhabditis elegans  | fatty acid amide hydrolase 2                          | 0  |                                                                                                                                                                       | F:GO:0016884;<br>F:GO:0016787;<br>C:GO:0016021;<br>C:GO:0016020                                   |             | IPR000120; IPR020556;<br>PTHR11895:SF5 (PANTHER), SignalP<br>(SIGNALP)                                                              |
| Caenorhabditis briggsae | patched family protein                                | 6  | P:GO:0048856;<br>P:GO:0040018;<br>P:GO:0018996;<br>P:GO:0007275;<br>P:GO:0040011;<br>P:GO:0051179                                                                     | -                                                                                                 |             | IPR003392; PTHR10796 (PANTHER),<br>PTHR10796:SF14 (PANTHER)                                                                         |
| -                       | -                                                     | 0  |                                                                                                                                                                       |                                                                                                   |             | -                                                                                                                                   |
| Caenorhabditis elegans  | g in family member (glb-8)                            | 4  | F:GO:0020037;<br>F:GO:0005344;<br>P:GO:0015671;<br>F:GO:0019825                                                                                                       | -                                                                                                 |             | -                                                                                                                                   |
| -                       | -                                                     | 0  |                                                                                                                                                                       |                                                                                                   |             | PR00021 (PRINTS), PR01217 (PRINTS)                                                                                                  |
| Caenorhabditis elegans  | hypothetical protein F40A3.6 [Caenorhabditis elegans] | 0  |                                                                                                                                                                       |                                                                                                   |             | -                                                                                                                                   |
| Caenorhabditis elegans  | hypothetical protein F40A3.6 [Caenorhabditis elegans] | 0  |                                                                                                                                                                       |                                                                                                   |             | -                                                                                                                                   |
| Caenorhabditis briggsae | atp-dependent r- helicase ddx54                       | 5  | F:GO:0004386;<br>F:GO:0003676;<br>P:GO:0040010;<br>C:GO:0044464;<br>F:GO:0000166                                                                                      | -                                                                                                 |             | IPR012541; PTHR10967 (PANTHER),<br>PTHR10967:SF17 (PANTHER)                                                                         |
| Caenorhabditis briggsae | transmembrane protein 30a                             | 3  | C:GO:0016020;<br>P:GO:0000003;<br>P:GO:0040010                                                                                                                        | -                                                                                                 |             | -                                                                                                                                   |
| Caenorhabditis briggsae | briggsae cbr-sun-1 protein                            | 0  |                                                                                                                                                                       | P:GO:0006355;<br>C:GO:0005783;<br>P:GO:0007165;<br>P:GO:0008150;<br>C:GO:0005635;<br>F:GO:0005515 |             | IPR012919; PTHR12911 (PANTHER),<br>PSS1469 (PROFILE)                                                                                |
| Caenorhabditis elegans  | yo25_caee1: full=uncharacterized protein              | 0  |                                                                                                                                                                       | P:GO:0000003;<br>P:GO:0007165                                                                     |             | IPR021925                                                                                                                           |
| Caenorhabditis briggsae | briggsae cbr-cua-1 protein                            | 3  | F:GO:0005488;<br>F:GO:0022857;<br>F:GO:0016787                                                                                                                        | -                                                                                                 |             | -                                                                                                                                   |

|                         |                                                                  |   |                                                                                                   |                                                |                                                                        |                                                                                                                                                         |
|-------------------------|------------------------------------------------------------------|---|---------------------------------------------------------------------------------------------------|------------------------------------------------|------------------------------------------------------------------------|---------------------------------------------------------------------------------------------------------------------------------------------------------|
| Caenorhabditis briggsae | copper-transporting atpase 1                                     | 6 | P:GO:0006825;<br>F:GO:0004008;<br>C:GO:0016021;<br>F:GO:0046872;<br>P:GO:0006754;<br>F:GO:0005524 | -                                              | EC:3.6.3.4                                                             | IPR000695; IPR001757; IPR005834;<br>G3DSA:3.40.1110.10 (GENE3D),<br>G3DSA:3.40.50.1000 (GENE3D),<br>PTHR11939:SF38 (PANTHER),<br>SSF56784 (SUPERFAMILY) |
| Loa loa                 | elongation factor tu c-termi-l domain containing protein         | 5 | F:GO:0003746;<br>F:GO:0005525;<br>F:GO:0004781;<br>F:GO:0005515;<br>F:GO:0003924                  | -                                              | EC:2.7.7.4;<br>EC:3.6.5.1;<br>EC:3.6.5.2;<br>EC:3.6.5.3;<br>EC:3.6.5.4 | IPR004160; IPR009001;<br>G3DSA:2.40.30.10 (GENE3D),<br>PTHR23115 (PANTHER),<br>PTHR23115:SF36 (PANTHER)                                                 |
| Loa loa                 | calpain d                                                        | 2 | F:GO:0008233;<br>P:GO:0007399                                                                     | -                                              |                                                                        | IPR001300; IPR022684;<br>G3DSA:3.90.70.10 (GENE3D),<br>PTHR10183 (PANTHER),<br>PTHR10183:SF26 (PANTHER),<br>SSF54001 (SUPERFAMILY)                      |
| Loa loa                 | calpain d                                                        | 2 | P:GO:0007399;<br>F:GO:0008234                                                                     | -                                              |                                                                        | IPR001300; IPR022684;<br>G3DSA:3.90.70.10 (GENE3D),<br>PTHR10183 (PANTHER),<br>PTHR10183:SF26 (PANTHER),<br>SSF54001 (SUPERFAMILY)                      |
| -                       | -                                                                | 0 |                                                                                                   |                                                |                                                                        | -                                                                                                                                                       |
| Caenorhabditis briggsae | briggsae cbr-rsks-1 protein                                      | 5 | P:GO:0006468;<br>C:GO:0005840;<br>F:GO:0005524;<br>P:GO:0007165;<br>F:GO:0004674                  | -                                              | EC:2.7.11.0                                                            | IPR000719; IPR000961; IPR008271;<br>IPR011009; IPR017442; IPR017892;<br>G3DSA:1.10.510.10 (GENE3D),<br>PTHR22985 (PANTHER),<br>PTHR22985:SF83 (PANTHER) |
| Caenorhabditis elegans  | briggsae cbr-rsks-1 protein                                      | 5 | P:GO:0006468;<br>C:GO:0005840;<br>F:GO:0005524;<br>P:GO:0007165;<br>F:GO:0004674                  | -                                              | EC:2.7.11.0                                                            | -                                                                                                                                                       |
| -                       | -                                                                | 0 |                                                                                                   |                                                |                                                                        | -                                                                                                                                                       |
| -                       | -                                                                | 0 |                                                                                                   |                                                |                                                                        | -                                                                                                                                                       |
| Caenorhabditis elegans  | trafficking protein particle complex 9                           | 0 |                                                                                                   | P:GO:0030154;<br>C:GO:0005783;<br>C:GO:0005794 |                                                                        | PTHR21512 (PANTHER),<br>PTHR21512:SF6 (PANTHER)                                                                                                         |
| Caenorhabditis elegans  | trafficking protein particle complex 9                           | 0 |                                                                                                   | P:GO:0030154;<br>C:GO:0005783;<br>C:GO:0005794 |                                                                        | PTHR21512 (PANTHER),<br>PTHR21512:SF6 (PANTHER)                                                                                                         |
| Caenorhabditis elegans  | nik- and ikkb-binding protein                                    | 0 |                                                                                                   |                                                |                                                                        | PTHR21512 (PANTHER),<br>PTHR21512:SF6 (PANTHER), SignalP<br>(SIGNALP)                                                                                   |
| Caenorhabditis briggsae | splicing factor                                                  | 1 | F:GO:0019899                                                                                      | -                                              |                                                                        | -                                                                                                                                                       |
| -                       | -                                                                | 0 |                                                                                                   |                                                |                                                                        | SignalP (SIGNALP)                                                                                                                                       |
| Caenorhabditis briggsae | yso2_caee1_ame: full=uncharacterized protein flags:<br>precursor | 1 | P:GO:0000003                                                                                      | -                                              |                                                                        | -                                                                                                                                                       |

|                             |                                                                    |    |                                                                                                                                                                                                         |                               |                                                                                                                                                                                          |
|-----------------------------|--------------------------------------------------------------------|----|---------------------------------------------------------------------------------------------------------------------------------------------------------------------------------------------------------|-------------------------------|------------------------------------------------------------------------------------------------------------------------------------------------------------------------------------------|
| Loa loa                     | activating sig-l cointegrator 1 complex subunit 3-like 1           | 12 | P:GO:0018991;<br>C:GO:0005681;<br>F:GO:0008026;<br>P:GO:0040007;<br>F:GO:0003677;<br>F:GO:0005524;<br>P:GO:0007601;<br>P:GO:0002119;<br>F:GO:0005515;<br>P:GO:0000354;<br>C:GO:0005682;<br>P:GO:0009792 | -                             | IPR004179; IPR011545; IPR014001;<br>IPR014021; G3DSA:1.10.3380.10<br>(GENE3D), G3DSA:3.40.50.300<br>(GENE3D), PTHR11752 (PANTHER),<br>PTHR11752:SF7 (PANTHER), SSF52540<br>(SUPERFAMILY) |
| Loa loa                     | activating sig-l cointegrator 1 complex subunit 3-like 1 isoform 1 | 9  | P:GO:0018991;<br>C:GO:0005681;<br>F:GO:0008026;<br>P:GO:0040007;<br>P:GO:0008380;<br>F:GO:0003677;<br>F:GO:0005524;<br>P:GO:0002119;<br>P:GO:0009792                                                    | -                             | IPR011545; IPR014001; IPR014021;<br>G3DSA:3.40.50.300 (GENE3D),<br>PTHR11752 (PANTHER),<br>PTHR11752:SF7 (PANTHER), SSF52540<br>(SUPERFAMILY)                                            |
| Loa loa                     | heterotrimeric g protein alpha subunit                             | 5  | P:GO:0007186;<br>F:GO:0004871;<br>P:GO:0007165;<br>F:GO:0005515;<br>F:GO:0005525                                                                                                                        | -                             | IPR001019; IPR001408;<br>G3DSA:3.40.50.300 (GENE3D),<br>PTHR10218:SF76 (PANTHER),<br>SSF52540 (SUPERFAMILY)                                                                              |
| Angiostrongylus cantonensis | hypothetical protein [Angiostrongylus cantonensis]                 | 0  |                                                                                                                                                                                                         | F:GO:0003725;<br>C:GO:0005622 | -                                                                                                                                                                                        |
| Pan troglodytes             | fxyd domain containing ion transport regulator 3                   | 5  | C:GO:0005887;<br>P:GO:0034220;<br>F:GO:0005254;<br>P:GO:0006821;<br>C:GO:0034707                                                                                                                        | -                             | -                                                                                                                                                                                        |
|                             |                                                                    | 0  |                                                                                                                                                                                                         |                               | -                                                                                                                                                                                        |
| Caenorhabditis elegans      | transcription initiation factor iif alpha subunit                  | 8  | F:GO:0030528;<br>P:GO:0008340;<br>F:GO:0003676;<br>P:GO:0040035;<br>P:GO:0050794;<br>P:GO:0006898;<br>P:GO:0009792;<br>P:GO:0006350                                                                     | -                             | IPR008851; IPR011991; SSF46785<br>(SUPERFAMILY)                                                                                                                                          |
| Caenorhabditis elegans      | lipid phosphate phosphohydrolase 1                                 | 2  | F:GO:0016787;<br>C:GO:0016020                                                                                                                                                                           | -                             | IPR000326; IPR016118; PTHR10165<br>(PANTHER), PTHR10165:SF20<br>(PANTHER), SignalP (SIGNALP)                                                                                             |
| Caenorhabditis briggsae     | crossover junction endonuclease mus81                              | 6  | P:GO:0006259;<br>F:GO:0005488;<br>P:GO:0040010;<br>F:GO:0016787;<br>F:GO:0016740;<br>P:GO:0019725                                                                                                       | -                             | IPR006166; IPR011335; IPR020819;<br>PTHR13451 (PANTHER)                                                                                                                                  |
| Caenorhabditis briggsae     | crossover junction endonuclease mus81                              | 3  | P:GO:0040010;<br>F:GO:0016740;<br>P:GO:0019725                                                                                                                                                          | -                             | IPR006166; IPR011335; IPR020819;<br>PTHR13451 (PANTHER)                                                                                                                                  |
| Caenorhabditis briggsae     | crossover junction endonuclease mus81                              | 3  | P:GO:0040010;<br>P:GO:0019725;<br>F:GO:0003824                                                                                                                                                          | -                             | IPR006166; IPR010996; IPR011335;<br>IPR020819; PTHR13451 (PANTHER)                                                                                                                       |

|                         |                                            |    |                                                                                                                                                                                                                                                                                              |                                                                 |            |                                                                                                                                                                              |                                                                                                                                 |
|-------------------------|--------------------------------------------|----|----------------------------------------------------------------------------------------------------------------------------------------------------------------------------------------------------------------------------------------------------------------------------------------------|-----------------------------------------------------------------|------------|------------------------------------------------------------------------------------------------------------------------------------------------------------------------------|---------------------------------------------------------------------------------------------------------------------------------|
| Loa loa                 | mitochondrial trans-2-enoyl- reductase     | 6  | P:GO:0006631;<br>P:GO:0008340;<br>C:GO:0005739;<br>N:GO:0039020;<br>F:GO:0016491;<br>F:GO:0005102                                                                                                                                                                                            |                                                                 |            | IPR002085; IPR013149; IPR016040;<br>PTHR11695:SF15 (PANTHER),<br>SSF51735 (SUPERFAMILY)                                                                                      |                                                                                                                                 |
| Caenorhabditis briggsae | crooked neck-like protein 1                | 9  | P:GO:0009792;<br>P:GO:0002119;<br>C:GO:0005681;<br>F:GO:0003723;<br>P:GO:0018996;<br>P:GO:0000003;<br>P:GO:0040011;<br>P:GO:0040007;<br>P:GO:0000245                                                                                                                                         |                                                                 |            | -                                                                                                                                                                            |                                                                                                                                 |
| Caenorhabditis elegans  | briggsae cbr-csn-3 protein                 | 0  |                                                                                                                                                                                                                                                                                              |                                                                 |            | -                                                                                                                                                                            |                                                                                                                                 |
|                         | -                                          | 0  |                                                                                                                                                                                                                                                                                              |                                                                 |            | IPR007087; IPR015880                                                                                                                                                         |                                                                                                                                 |
|                         | -                                          | 0  |                                                                                                                                                                                                                                                                                              |                                                                 |            | IPR007087; IPR015880                                                                                                                                                         |                                                                                                                                 |
| Caenorhabditis briggsae | origin recognition complex subunit 3       | 0  |                                                                                                                                                                                                                                                                                              | P:GO:0006260;<br>C:GO:0005664;<br>F:GO:0003677                  |            | IPR010748; IPR020795; IPR022357;<br>SignalP (SIGNALP)                                                                                                                        |                                                                                                                                 |
| Brugia malayi           | initiation factor 4g family member (ifg-1) | 0  |                                                                                                                                                                                                                                                                                              | F:GO:0005488;<br>P:GO:0016070;<br>F:GO:0005515                  |            | IPR018271; SignalP (SIGNALP)                                                                                                                                                 |                                                                                                                                 |
| Caenorhabditis briggsae | calmodulin binding protein 3               | 17 | P:GO:0033147;<br>F:GO:0051721;<br>C:GO:0005654;<br>P:GO:0000122;<br>C:GO:0000159;<br>F:GO:0016740;<br>C:GO:0005794;<br>F:GO:0070016;<br>C:GO:0030425;<br>C:GO:0043025;<br>F:GO:0003700;<br>P:GO:0045944;<br>F:GO:0032403;<br>C:GO:0005886;<br>F:GO:0005516;<br>P:GO:0032355;<br>F:GO:0016564 |                                                                 |            |                                                                                                                                                                              | IPR001680; IPR011046; IPR013258;<br>IPR015943; IPR017986; IPR019775;<br>IPR019781; IPR019782; IPR020472;<br>PTHR15653 (PANTHER) |
| Caenorhabditis elegans  | pyruvate dehydroge-se                      | 6  | P:GO:0009792;<br>F:GO:0005515;<br>F:GO:0004739;<br>P:GO:0040010;<br>P:GO:0055114;<br>C:GO:0005739                                                                                                                                                                                            |                                                                 | EC:1.2.4.1 | IPR005475; IPR005476; IPR009014;<br>IPR015941; G3DSA:3.40.50.970<br>(GENE3D), PTHR11624 (PANTHER),<br>PTHR11624:SF11 (PANTHER), SignalP<br>(SIGNALP), SSF52518 (SUPERFAMILY) |                                                                                                                                 |
|                         | -                                          | 0  |                                                                                                                                                                                                                                                                                              |                                                                 |            | -                                                                                                                                                                            |                                                                                                                                 |
| Caenorhabditis elegans  | wd repeat-containing protein 37            | 0  |                                                                                                                                                                                                                                                                                              | F:GO:0003674;<br>F:GO:0016740;<br>F:GO:0016905;<br>P:GO:0008150 |            | IPR001680; IPR011046; IPR015943;<br>IPR017986; IPR019775; IPR019781;<br>IPR019782; IPR020472; PTHR19855<br>(PANTHER), PTHR19855:SF12<br>(PANTHER)                            |                                                                                                                                 |
|                         | -                                          | 0  |                                                                                                                                                                                                                                                                                              |                                                                 |            | SignalP (SIGNALP)                                                                                                                                                            |                                                                                                                                 |

|                         |                                                             |    |                                                                                                                                                                                        |   |             |                                                                                      |
|-------------------------|-------------------------------------------------------------|----|----------------------------------------------------------------------------------------------------------------------------------------------------------------------------------------|---|-------------|--------------------------------------------------------------------------------------|
| Haemonchus contortus    | ilin (drosophila ecm protein) homolog family member (ppn-1) | 8  | F:GO:0004867;<br>F:GO:0004222;<br>F:GO:0005201;<br>F:GO:0005515;<br>C:GO:0005634;<br>F:GO:0008270;<br>P:GO:0030198;<br>C:GO:0005604                                                    | - | EC:3.4.24.0 | IPR000884; G3DSA:2.20.100.10 (GENE3D), PTHR13723 (PANTHER), PTHR13723:SF18 (PANTHER) |
| Caenorhabditis briggsae | briggsae cbr-age-1 protein                                  | 8  | P:GO:0008340;<br>P:GO:0007611;<br>P:GO:0000003;<br>P:GO:0050920;<br>F:GO:0016773;<br>P:GO:0043053;<br>F:GO:0004428;<br>P:GO:0009792                                                    | - | EC:2.7.1.0  | IPR000341; IPR003113; G3DSA:3.10.20.90 (GENE3D), SSF54236 (SUPERFAMILY)              |
| Caenorhabditis elegans  | charged multivesicular body protein 6                       | 8  | P:GO:0010171;<br>P:GO:0002119;<br>P:GO:0032940;<br>P:GO:0040010;<br>C:GO:0044464;<br>P:GO:0008340;<br>P:GO:0040011;<br>P:GO:0015031                                                    | - |             | IPR005024; PTHR22761 (PANTHER)                                                       |
| Caenorhabditis elegans  | mitotic spindle assembly checkpoint protein mad2a           | 11 | P:GO:0007094;<br>P:GO:0051436;<br>C:GO:0000777;<br>P:GO:0051301;<br>C:GO:0005829;<br>C:GO:0005643;<br>P:GO:0000070;<br>C:GO:0005816;<br>C:GO:0048471;<br>P:GO:0031145;<br>F:GO:0042803 | - |             | IPR003511; G3DSA:3.30.900.10 (GENE3D), PTHR11842 (PANTHER), PTHR11842:SF11 (PANTHER) |
| Caenorhabditis elegans  | abnormal go-d development family member (gon-2)             | 3  | P:GO:0007067;<br>P:GO:0006810;<br>P:GO:0008406                                                                                                                                         | - |             | IPR005821; PTHR13800 (PANTHER)                                                       |
| Caenorhabditis elegans  | abnormal go-d development family member (gon-2)             | 4  | P:GO:0007067;<br>P:GO:0006810;<br>C:GO:0016020;<br>P:GO:0008406                                                                                                                        | - |             | IPR005821; PTHR13800 (PANTHER)                                                       |
| Brugia malayi           | ubiquitin-protein ligase e3c                                | 2  | P:GO:0000003;<br>F:GO:0016881                                                                                                                                                          | - | EC:6.3.2.0  | IPR000569; PTHR11254 (PANTHER), PTHR11254:SF31 (PANTHER)                             |
| Caenorhabditis briggsae | briggsae cbr-clc-1 protein                                  | 1  | C:GO:0016020                                                                                                                                                                           | - |             | -                                                                                    |
| Caenorhabditis elegans  | eukaryotic translation initiation factor 1b                 | 10 | F:GO:0003743;<br>P:GO:0040010;<br>P:GO:0008340;<br>P:GO:0045948;<br>P:GO:0000003;<br>P:GO:0010171;<br>P:GO:0002119;<br>F:GO:0005515;<br>P:GO:0040011;<br>P:GO:0009792                  | - |             | IPR001950; G3DSA:3.30.780.10 (GENE3D), PTHR10388 (PANTHER)                           |

|                         |                                                            |    |                                                                                                                                                                                                         |                                                                                                                                     |             |                                                                                                                                               |
|-------------------------|------------------------------------------------------------|----|---------------------------------------------------------------------------------------------------------------------------------------------------------------------------------------------------------|-------------------------------------------------------------------------------------------------------------------------------------|-------------|-----------------------------------------------------------------------------------------------------------------------------------------------|
| Caenorhabditis brenneri | plasmid maintenance protein containing protein             | 12 | F:GO:0003743;<br>P:GO:0006413;<br>P:GO:0040010;<br>P:GO:0008340;<br>P:GO:0006506;<br>C:GO:0031227;<br>P:GO:0000003;<br>P:GO:0010171;<br>P:GO:0002119;<br>P:GO:0040011;<br>P:GO:0009792;<br>F:GO:0016757 | -                                                                                                                                   | -           |                                                                                                                                               |
| Caenorhabditis elegans  | elegans protein partially confirmed by transcript evidence | 1  | P:GO:0007160                                                                                                                                                                                            | -                                                                                                                                   | -           |                                                                                                                                               |
| Caenorhabditis briggsae | microtubule associated serine threonine kinase 2           | 11 | F:GO:0008017;<br>C:GO:0015630;<br>F:GO:0004674;<br>P:GO:0048515;<br>F:GO:0019902;<br>F:GO:0005524;<br>F:GO:0000287;<br>P:GO:0009792;<br>P:GO:0045075;<br>C:GO:0005886;<br>P:GO:0006468                  | -                                                                                                                                   | EC:2.7.11.0 | IPR000719; IPR000961; IPR008271;<br>IPR011009; IPR017442;<br>G3DSA:1.10.510.10 (GENE3D),<br>PTHR22985 (PANTHER),<br>PTHR22985:SF42 (PANTHER)  |
| Brugia malayi           | related to oncogene abl family member (abl-1)              | 2  | F:GO:0005488;<br>F:GO:0016301                                                                                                                                                                           | -                                                                                                                                   |             | G3DSA:1.20.120.330 (GENE3D)                                                                                                                   |
|                         | -                                                          | 0  |                                                                                                                                                                                                         |                                                                                                                                     |             |                                                                                                                                               |
| Brugia malayi           | protein arginine n-methyltransferase 5                     | 3  | P:GO:0044238;<br>P:GO:0044260;<br>F:GO:0008168                                                                                                                                                          | -                                                                                                                                   | EC:2.1.1.0  | IPR007857                                                                                                                                     |
| Caenorhabditis elegans  | leucine-zipper-containing transcription factor lzf         | 2  | P:GO:0040010;<br>P:GO:0006974                                                                                                                                                                           | -                                                                                                                                   |             | IPR019386; PF10259 (PFAM)                                                                                                                     |
|                         | -                                                          | 0  |                                                                                                                                                                                                         |                                                                                                                                     |             |                                                                                                                                               |
| Caenorhabditis elegans  | leucine-rich transmembrane protein                         | 0  |                                                                                                                                                                                                         | F:GO:0004623;<br>F:GO:0016787;<br>C:GO:0016021;<br>P:GO:0008150;<br>P:GO:0016042;<br>F:GO:0005515;<br>P:GO:0006644;<br>F:GO:0004721 |             | IPR000483; IPR001611; IPR003591;<br>G3DSA:3.80.10.10 (GENE3D),<br>PTHR23154 (PANTHER),<br>PTHR23154:SF47 (PANTHER),<br>SSF52058 (SUPERFAMILY) |
| Loa loa                 | cytochrome p450                                            | 2  | F:GO:0046872;<br>F:GO:0016491                                                                                                                                                                           | -                                                                                                                                   |             | IPR001128; IPR002401                                                                                                                          |
|                         | -                                                          | 0  |                                                                                                                                                                                                         |                                                                                                                                     |             |                                                                                                                                               |
| Caenorhabditis elegans  | ret-1 degeneration isoform h                               | 12 | F:GO:0008526;<br>F:GO:0005388;<br>P:GO:0006810;<br>F:GO:0005509;<br>P:GO:0030384;<br>P:GO:0045494;<br>P:GO:0007608;<br>F:GO:0008525;<br>C:GO:0016029;<br>F:GO:0035091;<br>P:GO:0016059;<br>C:GO:0005887 | -                                                                                                                                   | EC:3.6.3.8  | IPR001666; G3DSA:3.30.530.20<br>(GENE3D), PTHR10658:SF6<br>(PANTHER), SSF55961 (SUPERFAMILY)                                                  |



|                             |                                                            |   |                                                                                                                                     |   |             |                                                                                                             |
|-----------------------------|------------------------------------------------------------|---|-------------------------------------------------------------------------------------------------------------------------------------|---|-------------|-------------------------------------------------------------------------------------------------------------|
| Caenorhabditis elegans      | sec14-like 1 ( cerevisiae)                                 | 1 | C:GO:0005622                                                                                                                        | - |             | PTHR23324 (PANTHER),<br>PTHR23324:SF8 (PANTHER),<br>SSF101576 (SUPERFAMILY)                                 |
|                             | -                                                          | 0 |                                                                                                                                     |   |             | -                                                                                                           |
|                             | -                                                          | 0 |                                                                                                                                     |   |             | SignalP (SIGNALP)                                                                                           |
| Caenorhabditis elegans      | ww domain-binding protein 2                                | 3 | P:GO:0000003;<br>F:GO:0005515;<br>P:GO:0006898                                                                                      | - |             | IPR004182; IPR018826; SSF50729<br>(SUPERFAMILY)                                                             |
|                             | -                                                          | 0 |                                                                                                                                     |   |             | -                                                                                                           |
| Caenorhabditis elegans      | basic helix-loop-helix zip transcription factor            | 7 | P:GO:0040010;<br>P:GO:0044260;<br>P:GO:0090304;<br>P:GO:0002119;<br>P:GO:0050794;<br>P:GO:0006898;<br>P:GO:0009792                  | - |             | IPR001092; IPR011598; PTHR15741<br>(PANTHER), PTHR15741:SF13<br>(PANTHER)                                   |
| Caenorhabditis elegans      | briggsae cbr-rbc-1 protein                                 | 0 |                                                                                                                                     |   |             | PTHR13950 (PANTHER),<br>PTHR13950:SF1 (PANTHER)                                                             |
|                             | -                                                          | 0 |                                                                                                                                     |   |             | -                                                                                                           |
| Caenorhabditis elegans      | immunoglobulin i-set domain containing protein             | 0 |                                                                                                                                     |   |             | IPR013783; PTHR10489 (PANTHER),<br>PTHR10489:SF39 (PANTHER),<br>SSF48726 (SUPERFAMILY)                      |
| Brugia malayi               | myb-like d--binding domain containing protein              | 5 | P:GO:0009792;<br>P:GO:0002119;<br>P:GO:0040010;<br>P:GO:0000003;<br>P:GO:0006898                                                    | - |             | IPR001005; IPR009057; PTHR22929<br>(PANTHER)                                                                |
| Caenorhabditis elegans      | beta-lactamase family protein                              | 0 |                                                                                                                                     |   |             | IPR001466; IPR012338;<br>G3DSA:3.40.710.10 (GENE3D),<br>PTHR10566 (PANTHER),<br>PTHR10566:SF6 (PANTHER)     |
| Caenorhabditis briggsae     | briggsae cbr-afd-3 protein                                 | 8 | P:GO:0009792;<br>P:GO:0010171;<br>P:GO:0002119;<br>F:GO:0005488;<br>C:GO:0044444;<br>P:GO:0009987;<br>P:GO:0040007;<br>P:GO:0015031 | - |             | -                                                                                                           |
| Angiostrongylus cantonensis | hypothetical protein [Angiostrongylus cantonensis]         | 0 |                                                                                                                                     |   |             | -                                                                                                           |
| Caenorhabditis elegans      | phosphorylase b ki-se kpbb                                 | 2 | F:GO:0004339;<br>P:GO:0005976                                                                                                       | - | EC:3.2.1.3  | IPR008734; IPR011613;<br>PTHR10749:SF1 (PANTHER)                                                            |
|                             | -                                                          | 0 |                                                                                                                                     |   |             | -                                                                                                           |
| Caenorhabditis elegans      | ferm domain ( -ezrin-radixin-moesin) family member (frm-1) | 1 | F:GO:0005488                                                                                                                        | - |             | -                                                                                                           |
| Caenorhabditis briggsae     | briggsae cbr-nep-1 protein                                 | 2 | F:GO:0004222;<br>P:GO:0006508                                                                                                       | - | EC:3.4.24.0 | IPR000718; IPR018497;<br>G3DSA:3.40.390.10 (GENE3D),<br>PTHR11733:SF24 (PANTHER),<br>SSF55486 (SUPERFAMILY) |
|                             | -                                                          | 0 |                                                                                                                                     |   |             | -                                                                                                           |
|                             | -                                                          | 0 |                                                                                                                                     |   |             | -                                                                                                           |
| Caenorhabditis briggsae     | zinc finger protein 277                                    | 3 | C:GO:0005622;<br>F:GO:0005515;<br>F:GO:0008270                                                                                      | - |             | -                                                                                                           |
| Caenorhabditis briggsae     | zinc finger protein 277                                    | 3 | C:GO:0005622;<br>F:GO:0005515;<br>F:GO:0008270                                                                                      | - |             | -                                                                                                           |

|                         |                                                            |  |   |                                                                                                                                     |                                                                                                   |            |                                                                                                                                 |
|-------------------------|------------------------------------------------------------|--|---|-------------------------------------------------------------------------------------------------------------------------------------|---------------------------------------------------------------------------------------------------|------------|---------------------------------------------------------------------------------------------------------------------------------|
| Caenorhabditis briggsae | zinc finger protein 277                                    |  | 3 | C:GO:0005622;<br>F:GO:0005515;<br>F:GO:0008270                                                                                      | -                                                                                                 |            | -                                                                                                                               |
| Caenorhabditis briggsae | zinc finger protein 277                                    |  | 3 | C:GO:0005622;<br>F:GO:0005515;<br>F:GO:0008270                                                                                      | -                                                                                                 |            | -                                                                                                                               |
| Caenorhabditis elegans  | methyltransferase type 11                                  |  | 2 | P:GO:0008152;<br>F:GO:0008168                                                                                                       | -                                                                                                 | EC:2.1.1.0 | IPR013216; G3DSA:3.40.50.150 (GENE3D), PTHR10108 (PANTHER), PTHR10108:SF17 (PANTHER), SSF53335 (SUPERFAMILY)                    |
| Ostertagia ostertagi    | secreted protein asp-2                                     |  | 1 | P:GO:0040011                                                                                                                        | -                                                                                                 |            | IPR001283; IPR002413; IPR014044; IPR018244; PTHR10334:SF11 (PANTHER), SignalP (SIGNALP)                                         |
| Danio rerio             | morc family cw-type zinc finger 2                          |  | 0 |                                                                                                                                     | F:GO:0046872;<br>F:GO:0005524;<br>F:GO:0003674;<br>P:GO:0008150;<br>F:GO:0008270;<br>C:GO:0005575 |            | IPR003594; IPR011124; PTHR23337 (PANTHER)                                                                                       |
| Brugia malayi           | d- primase large subunit                                   |  | 7 | F:GO:0003899;<br>P:GO:0000910;<br>P:GO:0006260;<br>P:GO:0040035;<br>P:GO:0006997;<br>P:GO:0006898;<br>P:GO:0009792                  | -                                                                                                 | EC:2.7.7.6 | IPR007238                                                                                                                       |
| Caenorhabditis elegans  | sorting nexin                                              |  | 4 | F:GO:0005488;<br>P:GO:0040010;<br>P:GO:0009987;<br>F:GO:0016740                                                                     | -                                                                                                 |            | -                                                                                                                               |
|                         | -                                                          |  | 0 |                                                                                                                                     |                                                                                                   |            | -                                                                                                                               |
| Caenorhabditis briggsae | elegans protein partially confirmed by transcript evidence |  | 0 |                                                                                                                                     | F:GO:0003674;<br>P:GO:0045449;<br>P:GO:0008150;<br>C:GO:0005576;<br>F:GO:0003700                  |            | PTHR13029 (PANTHER), PTHR13029:SF7 (PANTHER)                                                                                    |
|                         | -                                                          |  | 0 |                                                                                                                                     |                                                                                                   |            | -                                                                                                                               |
| Brugia malayi           | myc associated factor x                                    |  | 8 | P:GO:0006351;<br>P:GO:0051716;<br>F:GO:0003712;<br>C:GO:0005737;<br>F:GO:0003677;<br>P:GO:0045449;<br>P:GO:0006950;<br>C:GO:0071339 | -                                                                                                 |            | SignalP (SIGNALP)                                                                                                               |
| Monodelphis domestica   | myc associated factor x                                    |  | 6 | F:GO:0030528;<br>F:GO:0005515;<br>P:GO:0050896;<br>F:GO:0003677;<br>P:GO:0045449;<br>C:GO:0044451                                   | -                                                                                                 |            | -                                                                                                                               |
| Caenorhabditis briggsae | lmb1 domain containing 2                                   |  | 1 | C:GO:0016020                                                                                                                        | -                                                                                                 |            | PTHR21355 (PANTHER)                                                                                                             |
| Canis familiaris        | haloacid dehaloge-se-like hydrolase domain containing 2    |  | 2 | F:GO:0003824;<br>C:GO:0044425                                                                                                       | -                                                                                                 |            | G3DSA:3.40.50.1000 (GENE3D), G3DSA:3.40.50.10410 (GENE3D), PTHR19288 (PANTHER), PTHR19288:SF1 (PANTHER), SSF56784 (SUPERFAMILY) |

|                         |                                                            |    |                                                                                                                                                                                        |                                                                                                                                                      |                                                                                                                                                        |
|-------------------------|------------------------------------------------------------|----|----------------------------------------------------------------------------------------------------------------------------------------------------------------------------------------|------------------------------------------------------------------------------------------------------------------------------------------------------|--------------------------------------------------------------------------------------------------------------------------------------------------------|
| Caenorhabditis elegans  | voltage-dependent anion channel 2                          | 6  | P:GO:0006820;<br>F:GO:0008308;<br>P:GO:0055085;<br>P:GO:0000003;<br>C:GO:0016021;<br>C:GO:0005741                                                                                      | -                                                                                                                                                    | IPR001925; PTHR11743 (PANTHER),<br>PTHR11743:SF8 (PANTHER)                                                                                             |
| Caenorhabditis elegans  | hypothetical protein C06A6.2 [Caenorhabditis elegans]      | 2  | F:GO:0005515;<br>P:GO:0009792                                                                                                                                                          | -                                                                                                                                                    | -                                                                                                                                                      |
| Caenorhabditis briggsae | mammalian fe65 homolog family member (feh-1)               | 11 | P:GO:0007411;<br>P:GO:0001764;<br>P:GO:0007050;<br>P:GO:0043065;<br>P:GO:0030308;<br>P:GO:0045749;<br>F:GO:0008134;<br>P:GO:0043066;<br>C:GO:0005737;<br>P:GO:0030198;<br>C:GO:0005634 | -                                                                                                                                                    | IPR003006; IPR006020; IPR011993;<br>PTHR14058 (PANTHER),<br>PTHR14058:SF9 (PANTHER), SSF50729<br>(SUPERFAMILY)                                         |
| Caenorhabditis elegans  | isoform a                                                  | 0  |                                                                                                                                                                                        |                                                                                                                                                      | IPR002172; PTHR20967 (PANTHER),<br>SignalP (SIGNALP)                                                                                                   |
| Caenorhabditis briggsae | elegans protein partially confirmed by transcript evidence | 0  |                                                                                                                                                                                        | F:GO:0003677;<br>C:GO:0005634                                                                                                                        | -                                                                                                                                                      |
| Caenorhabditis elegans  | dual specificity tyrosine-phosphorylation-regulated ki-se  | 4  | F:GO:0016301;<br>F:GO:0005515;<br>P:GO:0040010;<br>P:GO:0040011                                                                                                                        | -                                                                                                                                                    | PTHR11295 (PANTHER),<br>PTHR11295:SF116 (PANTHER)                                                                                                      |
| Caenorhabditis briggsae | importin alpha                                             | 0  |                                                                                                                                                                                        | P:GO:0006606;<br>C:GO:0005643;<br>P:GO:0015031;<br>F:GO:0008565;<br>C:GO:0005634;<br>P:GO:0006810;<br>C:GO:0005737;<br>P:GO:0006886;<br>F:GO:0005488 | IPR002652; IPR011989; IPR016024;<br>PTHR23316 (PANTHER)                                                                                                |
| Caenorhabditis briggsae | set domain protein                                         | 3  | F:GO:0046872;<br>F:GO:0016740;<br>P:GO:0006911                                                                                                                                         | -                                                                                                                                                    | IPR001965; IPR011011; IPR013083;<br>IPR019786; IPR019787; PTHR10615<br>(PANTHER), PTHR10615:SF7<br>(PANTHER)                                           |
| Caenorhabditis briggsae | g protein-coupled receptor                                 | 2  | P:GO:0007186;<br>C:GO:0016021                                                                                                                                                          | -                                                                                                                                                    | IPR000276; IPR017452;<br>G3DSA:1.20.1070.10 (GENE3D),<br>PTHR22751 (PANTHER),<br>PTHR22751:SF8 (PANTHER), SignalP<br>(SIGNALP), SSF81321 (SUPERFAMILY) |
| Loa loa                 | i lweq domain containing protein                           | 4  | F:GO:0003779;<br>P:GO:0007155;<br>C:GO:0015629;<br>F:GO:0005198                                                                                                                        | -                                                                                                                                                    | IPR015710; IPR015711;<br>G3DSA:1.20.1410.10 (GENE3D)                                                                                                   |

|                              |                                                  |    |                                                                                                                                                                                                                                                                                                                                                 |                                                                                                                                                      |                             |                                                                                                                      |
|------------------------------|--------------------------------------------------|----|-------------------------------------------------------------------------------------------------------------------------------------------------------------------------------------------------------------------------------------------------------------------------------------------------------------------------------------------------|------------------------------------------------------------------------------------------------------------------------------------------------------|-----------------------------|----------------------------------------------------------------------------------------------------------------------|
| Patiria pectinifera          | aurora ki-se a                                   | 20 | P:GO:0031991;<br>F:GO:0000166;<br>P:GO:0007052;<br>F:GO:0004713;<br>P:GO:0040011;<br>F:GO:0019894;<br>P:GO:0030261;<br>C:GO:0005737;<br>F:GO:0051117;<br>P:GO:0009792;<br>F:GO:0004674;<br>C:GO:0051233;<br>P:GO:0007059;<br>P:GO:0007126;<br>P:GO:0045184;<br>P:GO:0018108;<br>C:GO:0000794;<br>P:GO:0007109;<br>P:GO:0051256;<br>P:GO:0040035 | -                                                                                                                                                    | EC:2.7.10.0;<br>EC:2.7.11.0 | IPR000719; IPR011009; IPR017442;<br>IPR020636; IPR020663;<br>G3DSA:1.10.510.10 (GENE3D)                              |
| -                            | -                                                | 0  | -                                                                                                                                                                                                                                                                                                                                               | -                                                                                                                                                    | -                           | -                                                                                                                    |
| Caenorhabditis elegans       | elegans protein confirmed by transcript evidence | 0  | -                                                                                                                                                                                                                                                                                                                                               | -                                                                                                                                                    | -                           | IPR021010; SSF141739 (SUPERFAMILY)                                                                                   |
| Caenorhabditis elegans       | elegans protein confirmed by transcript evidence | 0  | -                                                                                                                                                                                                                                                                                                                                               | -                                                                                                                                                    | -                           | IPR021010; SSF141739 (SUPERFAMILY)                                                                                   |
| Nippostrongylus brasiliensis | globin                                           | 6  | F:GO:0020037;<br>C:GO:0005615;<br>C:GO:0005737;<br>F:GO:0005344;<br>P:GO:0015671;<br>F:GO:0019825                                                                                                                                                                                                                                               | -                                                                                                                                                    | -                           | -                                                                                                                    |
| Caenorhabditis briggsae      | vit-2                                            | 0  | -                                                                                                                                                                                                                                                                                                                                               | F:GO:0045735;<br>F:GO:0005319;<br>F:GO:0008565;<br>P:GO:0006869;<br>P:GO:0009792;<br>C:GO:0005576;<br>P:GO:0006886;<br>P:GO:0008340;<br>P:GO:0040010 | -                           | -                                                                                                                    |
| Caenorhabditis elegans       | coatomer subunit gamma-2                         | 12 | C:GO:0030126;<br>P:GO:0040010;<br>P:GO:0006890;<br>P:GO:0000003;<br>P:GO:0032940;<br>P:GO:0006891;<br>P:GO:0002119;<br>F:GO:0005515;<br>P:GO:0040011;<br>P:GO:0006898;<br>P:GO:0006886;<br>F:GO:0005198                                                                                                                                         | -                                                                                                                                                    | -                           | IPR002553; IPR009028; IPR011989;<br>IPR013040; IPR013041; IPR014863;<br>IPR015873; IPR016024; PTHR10261<br>(PANTHER) |

|                         |                                                    |    |                                                                                                                                                                                                                          |   |                             |                                                                                                                                                                                                        |
|-------------------------|----------------------------------------------------|----|--------------------------------------------------------------------------------------------------------------------------------------------------------------------------------------------------------------------------|---|-----------------------------|--------------------------------------------------------------------------------------------------------------------------------------------------------------------------------------------------------|
| Caenorhabditis elegans  | paraplegin                                         | 13 | F:GO:0017111;<br>P:GO:0030155;<br>F:GO:0008270;<br>C:GO:0005739;<br>C:GO:0016021;<br>F:GO:0004222;<br>P:GO:0006508;<br>F:GO:0005524;<br>P:GO:0007399;<br>P:GO:0007005;<br>P:GO:0008089;<br>F:GO:0051082;<br>P:GO:0030163 | - | EC:3.6.1.15;<br>EC:3.4.24.0 | IPR000642; IPR003959;<br>G3DSA:1.10.8.60 (GENE3D),<br>G3DSA:3.40.50.300 (GENE3D),<br>PTHR23076 (PANTHER),<br>PTHR23076:SF7 (PANTHER),<br>SSF140990 (SUPERFAMILY), SSF52540<br>(SUPERFAMILY)            |
| Caenorhabditis elegans  | paraplegin                                         | 13 | F:GO:0017111;<br>P:GO:0030155;<br>F:GO:0008270;<br>C:GO:0005739;<br>C:GO:0016021;<br>F:GO:0004222;<br>P:GO:0006508;<br>F:GO:0005524;<br>P:GO:0007399;<br>P:GO:0007005;<br>P:GO:0008089;<br>F:GO:0051082;<br>P:GO:0030163 | - | EC:3.6.1.15;<br>EC:3.4.24.0 | IPR000642; IPR001315; IPR003959;<br>G3DSA:1.10.8.60 (GENE3D),<br>G3DSA:3.40.50.300 (GENE3D),<br>PTHR23076 (PANTHER),<br>PTHR23076:SF7 (PANTHER),<br>SSF140990 (SUPERFAMILY), SSF52540<br>(SUPERFAMILY) |
| Caenorhabditis elegans  | paraplegin                                         | 13 | F:GO:0017111;<br>P:GO:0030155;<br>F:GO:0008270;<br>C:GO:0005739;<br>C:GO:0016021;<br>F:GO:0004222;<br>P:GO:0006508;<br>F:GO:0005524;<br>P:GO:0007399;<br>P:GO:0007005;<br>P:GO:0008089;<br>F:GO:0051082;<br>P:GO:0030163 | - | EC:3.6.1.15;<br>EC:3.4.24.0 | IPR000642; IPR001315; IPR003959;<br>G3DSA:1.10.8.60 (GENE3D),<br>G3DSA:3.40.50.300 (GENE3D),<br>PTHR23076 (PANTHER),<br>PTHR23076:SF7 (PANTHER),<br>SSF140990 (SUPERFAMILY), SSF52540<br>(SUPERFAMILY) |
| Caenorhabditis elegans  | apical junction molecule family member (ajm-1)     | 9  | P:GO:0009792;<br>C:GO:0043296;<br>P:GO:0045216;<br>F:GO:0008092;<br>C:GO:0005913;<br>P:GO:0040010;<br>P:GO:0040011;<br>C:GO:0016021;<br>F:GO:0008270                                                                     | - |                             |                                                                                                                                                                                                        |
| Caenorhabditis briggsae | low-density lipoprotein receptor-related protein 2 | 2  | C:GO:0016021;<br>F:GO:0005509                                                                                                                                                                                            | - |                             | IPR000033; IPR000742; IPR006210;<br>IPR011042; IPR013032;<br>G3DSA:2.170.300.10 (GENE3D),<br>PTHR10529 (PANTHER), SSF63825<br>(SUPERFAMILY)                                                            |
| Caenorhabditis briggsae | elegans protein confirmed by transcript evidence   | 3  | P:GO:0006952;<br>P:GO:0008152;<br>F:GO:0003824                                                                                                                                                                           | - |                             | IPR002198; IPR002347; IPR016040;<br>PTHR19410:SF18 (PANTHER),<br>SSF51735 (SUPERFAMILY)                                                                                                                |

|                         |                                                        |    |                                                                                                                                                                                                                                                                                                                                                                                                                                                                        |   |                                                           |
|-------------------------|--------------------------------------------------------|----|------------------------------------------------------------------------------------------------------------------------------------------------------------------------------------------------------------------------------------------------------------------------------------------------------------------------------------------------------------------------------------------------------------------------------------------------------------------------|---|-----------------------------------------------------------|
| Caenorhabditis elegans  | hypothetical protein Y67D8A.2 [Caenorhabditis elegans] | 0  | P:GO:0006418;<br>C:GO:0016021;<br>C:GO:0005737;<br>P:GO:0006412;<br>P:GO:0005977;<br>F:GO:0005524;<br>P:GO:0005976;<br>F:GO:0003824;<br>F:GO:0005516;<br>F:GO:0004339;<br>F:GO:0004812                                                                                                                                                                                                                                                                                 | - |                                                           |
| Caenorhabditis briggsae | sentrin-specific protease 1                            | 7  | C:GO:0005737;<br>F:GO:0004175;<br>P:GO:0006919;<br>P:GO:0008624;<br>P:GO:0016926;<br>F:GO:0016929;<br>C:GO:0005634                                                                                                                                                                                                                                                                                                                                                     | - | IPR003653; PTHR12606 (PANTHER),<br>SSF54001 (SUPERFAMILY) |
| Caenorhabditis elegans  | specifically rac-associated                            | 12 | P:GO:0016477;<br>P:GO:0007411;<br>P:GO:0050807;<br>P:GO:0008360;<br>C:GO:0045202;<br>P:GO:0006911;<br>P:GO:0022416;<br>C:GO:0031209;<br>P:GO:0030866;<br>F:GO:0005515;<br>P:GO:0010172;<br>P:GO:0030031                                                                                                                                                                                                                                                                | - | IPR008081; PF07159 (PFAM)                                 |
| Caenorhabditis elegans  | casein ki-se beta polypeptide                          | 35 | P:GO:0016246;<br>C:GO:0005929;<br>F:GO:0005102;<br>F:GO:0004252;<br>P:GO:0033211;<br>P:GO:0040010;<br>C:GO:0005956;<br>P:GO:0040011;<br>C:GO:0005576;<br>P:GO:0034606;<br>C:GO:0005737;<br>P:GO:0008285;<br>C:GO:0030425;<br>F:GO:0019904;<br>C:GO:0043025;<br>P:GO:0009792;<br>P:GO:0002009;<br>P:GO:0007249;<br>F:GO:0004674;<br>F:GO:0042802;<br>P:GO:0042325;<br>C:GO:0030424;<br>P:GO:0006956;<br>P:GO:0002119;<br>P:GO:0050790;<br>F:GO:0019887;<br>P:GO:0043623 | - | EC:3.4.21.0;<br>EC:2.7.11.0                               |

|                         |                                       |    |                                                                                                                                                                                                         |              |                                                                                                                                                                        |
|-------------------------|---------------------------------------|----|---------------------------------------------------------------------------------------------------------------------------------------------------------------------------------------------------------|--------------|------------------------------------------------------------------------------------------------------------------------------------------------------------------------|
|                         | -                                     | 0  |                                                                                                                                                                                                         |              | IPR000215; G3DSA:2.30.39.10 (GENE3D)                                                                                                                                   |
| Drosophila yakuba       | GE11922 [Drosophila yakuba]           | 0  |                                                                                                                                                                                                         | F:GO:0004867 | IPR000215; G3DSA:2.30.39.10 (GENE3D)                                                                                                                                   |
| Caenorhabditis briggsae | serine or cysteine protease inhibitor | 2  | F:GO:0005488;<br>P:GO:0010955                                                                                                                                                                           | -            | IPR000215; G3DSA:2.30.39.10 (GENE3D), G3DSA:3.30.497.10 (GENE3D)                                                                                                       |
| Caenorhabditis elegans  | isoform cra_a                         | 2  | P:GO:0040015;<br>F:GO:0005515                                                                                                                                                                           | -            | IPR007087; IPR013087; IPR015880; PTHR23229 (PANTHER), PTHR23229:SF13 (PANTHER), SSF57667 (SUPERFAMILY)                                                                 |
| Caenorhabditis elegans  | fumarate hydratase                    | 12 | P:GO:0040010;<br>P:GO:0048873;<br>P:GO:0000003;<br>P:GO:0006108;<br>P:GO:0006099;<br>F:GO:0004333;<br>F:GO:0005515;<br>C:GO:0045239;<br>C:GO:0005759;<br>P:GO:0006898;<br>P:GO:0009792;<br>P:GO:0006106 | -            | EC:4.2.1.2<br>IPR000362; IPR008948; IPR022761; G3DSA:1.10.275.10 (GENE3D), G3DSA:1.20.200.10 (GENE3D), PTHR11444 (PANTHER), PTHR11444:SF1 (PANTHER), SignalP (SIGNALP) |
| Caenorhabditis elegans  | fumarate hydratase                    | 12 | P:GO:0040010;<br>P:GO:0048873;<br>P:GO:0000003;<br>P:GO:0006108;<br>P:GO:0006099;<br>F:GO:0004333;<br>F:GO:0005515;<br>C:GO:0045239;<br>C:GO:0005759;<br>P:GO:0006898;<br>P:GO:0009792;<br>P:GO:0006106 | -            | EC:4.2.1.2<br>IPR000362; IPR008948; IPR022761; G3DSA:1.10.275.10 (GENE3D), G3DSA:1.20.200.10 (GENE3D), PTHR11444 (PANTHER), PTHR11444:SF1 (PANTHER), SignalP (SIGNALP) |
| Caenorhabditis elegans  | fumarate hydratase                    | 12 | P:GO:0040010;<br>P:GO:0048873;<br>P:GO:0000003;<br>P:GO:0006108;<br>P:GO:0006099;<br>F:GO:0004333;<br>F:GO:0005515;<br>C:GO:0045239;<br>C:GO:0005759;<br>P:GO:0006898;<br>P:GO:0009792;<br>P:GO:0006106 | -            | EC:4.2.1.2<br>IPR000362; IPR008948; IPR022761; G3DSA:1.10.275.10 (GENE3D), G3DSA:1.20.200.10 (GENE3D), PTHR11444 (PANTHER), PTHR11444:SF1 (PANTHER), SignalP (SIGNALP) |
|                         | -                                     | 0  |                                                                                                                                                                                                         |              | -                                                                                                                                                                      |
|                         | -                                     | 0  |                                                                                                                                                                                                         |              | -                                                                                                                                                                      |
| Caenorhabditis briggsae | 28s ribosomal protein s5              | 9  | P:GO:0009792;<br>P:GO:0002119;<br>C:GO:0005840;<br>F:GO:0003735;<br>F:GO:0003723;<br>P:GO:0040010;<br>P:GO:0006898;<br>P:GO:0006412;<br>C:GO:0005739                                                    | -            | EC:3.6.5.3<br>IPR000851; PTHR13718:SF3 (PANTHER)                                                                                                                       |

|                           |                                                  |    |                                                                                                                                                                                                                                                                             |   |              |                                                                                                                                                                         |
|---------------------------|--------------------------------------------------|----|-----------------------------------------------------------------------------------------------------------------------------------------------------------------------------------------------------------------------------------------------------------------------------|---|--------------|-------------------------------------------------------------------------------------------------------------------------------------------------------------------------|
| Brugia malayi             | (d- helicase q1-like) isoform cra_a              | 5  | P:GO:000733;<br>F:GO:0005515;<br>F:GO:0004003;<br>F:GO:0000739;<br>F:GO:0000166                                                                                                                                                                                             | - |              | IPR001650; IPR004589;<br>G3DSA:3.40.50.300 (GENE3D),<br>PTHR13710:SF12 (PANTHER),<br>SSF52540 (SUPERFAMILY)                                                             |
| Heligmosomoides polygyrus | transforming growth protein 2-like protein       | 2  | P:GO:0040007;<br>F:GO:0008083                                                                                                                                                                                                                                               | - |              | IPR001839; IPR015615; IPR017948;<br>G3DSA:2.10.90.10 (GENE3D),<br>PTHR11848:SF3 (PANTHER), SignalP<br>(SIGNALP), SSF57501 (SUPERFAMILY)                                 |
| Loa loa                   | nipped-b homolog                                 | 5  | F:GO:0005488;<br>P:GO:0034088;<br>P:GO:0051240;<br>P:GO:0048701;<br>C:GO:0032116                                                                                                                                                                                            | - |              | PTHR21704 (PANTHER),<br>PTHR21704:SF5 (PANTHER)                                                                                                                         |
|                           | -                                                | 0  |                                                                                                                                                                                                                                                                             |   |              | -                                                                                                                                                                       |
|                           | -                                                | 0  |                                                                                                                                                                                                                                                                             |   |              | -                                                                                                                                                                       |
| synthetic construct       | ribosomal protein l30                            | 4  | F:GO:0003735;<br>F:GO:0003723;<br>C:GO:0022625;<br>P:GO:0006414                                                                                                                                                                                                             | - |              | IPR000231; IPR004038; IPR022991;<br>G3DSA:3.30.1330.30 (GENE3D),<br>PTHR11449:SF1 (PANTHER), SSF55315<br>(SUPERFAMILY)                                                  |
|                           | -                                                | 0  |                                                                                                                                                                                                                                                                             |   |              | -                                                                                                                                                                       |
| Caenorhabditis elegans    | protein ki-se theta                              | 16 | P:GO:0090066;<br>F:GO:0046872;<br>F:GO:0004697;<br>P:GO:0008340;<br>P:GO:0051128;<br>P:GO:0040007;<br>P:GO:0010033;<br>P:GO:0009792;<br>P:GO:0000003;<br>F:GO:0005515;<br>P:GO:0006468;<br>F:GO:0005524;<br>P:GO:0048522;<br>P:GO:0033554;<br>P:GO:0023034;<br>C:GO:0005622 | - | EC:2.7.11.13 | IPR002219; IPR008973; IPR015727;<br>IPR020454; G3DSA:2.60.40.150<br>(GENE3D), G3DSA:3.30.60.20<br>(GENE3D), SSF57889 (SUPERFAMILY)                                      |
| Loa loa                   | taf3 protein                                     | 3  | P:GO:0051457;<br>F:GO:0005515;<br>C:GO:0005669                                                                                                                                                                                                                              | - |              | IPR006565; IPR009072                                                                                                                                                    |
| Haemonchus contortus      | astacin metalloprotease b                        | 4  | F:GO:0004222;<br>P:GO:0009792;<br>P:GO:0006508;<br>F:GO:0008270                                                                                                                                                                                                             | - | EC:3.4.24.0  | IPR000859; IPR001506; IPR006026;<br>IPR006210; IPR013032;<br>G3DSA:3.40.390.10 (GENE3D),<br>PTHR10127 (PANTHER),<br>PTHR10127:SF65 (PANTHER),<br>SSF55486 (SUPERFAMILY) |
|                           | -                                                | 0  |                                                                                                                                                                                                                                                                             |   |              | -                                                                                                                                                                       |
|                           | -                                                | 0  |                                                                                                                                                                                                                                                                             |   |              | -                                                                                                                                                                       |
| Caenorhabditis briggsae   | elegans protein confirmed by transcript evidence | 0  |                                                                                                                                                                                                                                                                             |   |              | -                                                                                                                                                                       |
|                           | -                                                | 0  |                                                                                                                                                                                                                                                                             |   |              | -                                                                                                                                                                       |
|                           | -                                                | 0  |                                                                                                                                                                                                                                                                             |   |              | -                                                                                                                                                                       |
| Caenorhabditis elegans    | briggsae cbr-pfd-1 protein                       | 7  | P:GO:0040035;<br>P:GO:0009792;<br>P:GO:0010171;<br>P:GO:0040018;<br>P:GO:0040010;<br>P:GO:0040011;<br>P:GO:0007020                                                                                                                                                          | - |              | -                                                                                                                                                                       |



|                         |                                                  |    |                                                                                                                                                                       |                                                                                                                                                                       |              |                                                                                                                                                                                         |
|-------------------------|--------------------------------------------------|----|-----------------------------------------------------------------------------------------------------------------------------------------------------------------------|-----------------------------------------------------------------------------------------------------------------------------------------------------------------------|--------------|-----------------------------------------------------------------------------------------------------------------------------------------------------------------------------------------|
| Loa loa                 | domain containing protein                        | 0  |                                                                                                                                                                       | P:GO:0007165;<br>C:GO:0005622                                                                                                                                         |              | -                                                                                                                                                                                       |
| Caenorhabditis briggsae | ribosomal r-                                     | 10 | F:GO:0008649;<br>P:GO:0040010;<br>P:GO:0031167;<br>F:GO:0003676;<br>C:GO:0005730;<br>P:GO:0000003;<br>P:GO:0002119;<br>P:GO:0040039;<br>P:GO:0006898;<br>P:GO:0009792 | -                                                                                                                                                                     |              | IPR002877; IPR015507;<br>G3DSA:3.40.50.150 (GENE3D),<br>PF11861 (PFAM), SSF53335<br>(SUPERFAMILY)                                                                                       |
| Loa loa                 | mr- cleavage factor complex component            | 2  | P:GO:0009987;<br>P:GO:0007275                                                                                                                                         | -                                                                                                                                                                     |              | -                                                                                                                                                                                       |
| Caenorhabditis briggsae | elegans protein confirmed by transcript evidence | 0  |                                                                                                                                                                       |                                                                                                                                                                       |              | IPR001810                                                                                                                                                                               |
| Caenorhabditis elegans  | tripartite motif-containing 71                   | 3  | P:GO:0045138;<br>C:GO:0005737;<br>P:GO:0009957                                                                                                                        | -                                                                                                                                                                     |              | IPR000315; IPR001841; PTHR13712<br>(PANTHER), PTHR13712:SF59<br>(PANTHER)                                                                                                               |
| Caenorhabditis elegans  | tripartite motif-containing 71                   | 3  | P:GO:0045138;<br>C:GO:0005737;<br>P:GO:0009957                                                                                                                        | -                                                                                                                                                                     |              | IPR000315; IPR001258; IPR001298;<br>IPR001841; IPR011042; IPR013017;<br>IPR013783; IPR014756; IPR017868;<br>PTHR13712 (PANTHER),<br>PTHR13712:SF5 (PANTHER),<br>SSF101898 (SUPERFAMILY) |
| Caenorhabditis elegans  | briggsae cbr-emb-30 protein                      | 0  |                                                                                                                                                                       | F:GO:0020037;<br>F:GO:0005506;<br>F:GO:0004725;<br>P:GO:0016311;<br>F:GO:0009055;<br>F:GO:0016791;<br>F:GO:0008138;<br>F:GO:0016787;<br>P:GO:0006470;<br>F:GO:0005515 |              | IPR015943                                                                                                                                                                               |
| Caenorhabditis briggsae | briggsae cbr-emb-30 protein                      | 1  | F:GO:0005515                                                                                                                                                          | -                                                                                                                                                                     |              | -                                                                                                                                                                                       |
|                         |                                                  | 0  |                                                                                                                                                                       |                                                                                                                                                                       |              | IPR003582; SignalP (SIGNALP)                                                                                                                                                            |
| Caenorhabditis elegans  | pqq enzyme repeat family protein                 | 2  | F:GO:0005515;<br>P:GO:0006898                                                                                                                                         | -                                                                                                                                                                     |              | IPR011678; PTHR21573 (PANTHER)                                                                                                                                                          |
| Caenorhabditis elegans  | protein                                          | 4  | F:GO:0003676;<br>P:GO:0009792;<br>C:GO:0030529;<br>P:GO:0040010                                                                                                       | -                                                                                                                                                                     |              | SignalP (SIGNALP)                                                                                                                                                                       |
|                         |                                                  | 0  |                                                                                                                                                                       |                                                                                                                                                                       |              | -                                                                                                                                                                                       |
| Caenorhabditis elegans  | adaptor-related protein complex mu 2 subunit     | 9  | F:GO:0009982;<br>F:GO:0030515;<br>C:GO:0005794;<br>F:GO:0005515;<br>C:GO:0031429;<br>P:GO:0016192;<br>P:GO:0006886;<br>C:GO:0031410;<br>C:GO:0030131                  | -                                                                                                                                                                     | EC:5.4.99.12 | IPR008968; PTHR11998 (PANTHER),<br>PTHR11998:SF4 (PANTHER)                                                                                                                              |

|                         |                                                        |    |                                                                                                                                                                                                         |                                                                                  |                                                                                                                       |
|-------------------------|--------------------------------------------------------|----|---------------------------------------------------------------------------------------------------------------------------------------------------------------------------------------------------------|----------------------------------------------------------------------------------|-----------------------------------------------------------------------------------------------------------------------|
| Caenorhabditis elegans  | actin-related protein 2 3 complex subunit 3            | 12 | P:GO:0030833;<br>C:GO:0005885;<br>P:GO:0040010;<br>P:GO:0018991;<br>P:GO:0045132;<br>P:GO:0016331;<br>P:GO:0010631;<br>P:GO:0040027;<br>F:GO:0005515;<br>F:GO:0005200;<br>P:GO:0009792;<br>C:GO:0030027 | -                                                                                | IPR007204                                                                                                             |
| Loa loa                 | tk fer protein ki-se                                   | 0  |                                                                                                                                                                                                         |                                                                                  | -                                                                                                                     |
| Caenorhabditis briggsae | xeroderma complementation group a                      | 6  | P:GO:0009411;<br>P:GO:0006979;<br>P:GO:0006289;<br>F:GO:0005488;<br>P:GO:0009636;<br>P:GO:0008630                                                                                                       | -                                                                                | IPR000465; IPR009061; IPR022652;<br>IPR022656; G3DSA:3.90.530.10<br>(GENE3D), SSF57716 (SUPERFAMILY)                  |
| Caenorhabditis elegans  | hypothetical protein Y55D5A.3 [Caenorhabditis elegans] | 0  |                                                                                                                                                                                                         | P:GO:0006629;<br>C:GO:0005764                                                    | -                                                                                                                     |
|                         | -                                                      | 0  |                                                                                                                                                                                                         |                                                                                  | -                                                                                                                     |
| Brugia malayi           | hypothetical protein Bm1_39710 [Brugia malayi]         | 0  |                                                                                                                                                                                                         |                                                                                  | -                                                                                                                     |
|                         | -                                                      | 0  |                                                                                                                                                                                                         |                                                                                  | -                                                                                                                     |
| Caenorhabditis briggsae | initiation factor 2 subunit family protein             | 1  | P:GO:0044237                                                                                                                                                                                            | -                                                                                | IPR000649; G3DSA:3.40.50.10470<br>(GENE3D), PTHR10233:SF5<br>(PANTHER), SignalP (SIGNALP),<br>SSF100950 (SUPERFAMILY) |
| Caenorhabditis elegans  | briggsae cbr-eel-1 protein                             | 0  |                                                                                                                                                                                                         | P:GO:0033227;<br>F:GO:0005488;<br>F:GO:0016881;<br>C:GO:0005622;<br>P:GO:0006464 | -                                                                                                                     |
| Caenorhabditis elegans  | briggsae cbr-eel-1 protein                             | 0  |                                                                                                                                                                                                         | P:GO:0033227;<br>F:GO:0005488;<br>F:GO:0016881;<br>C:GO:0005622;<br>P:GO:0006464 | -                                                                                                                     |
|                         | -                                                      | 0  |                                                                                                                                                                                                         |                                                                                  | SignalP (SIGNALP)                                                                                                     |
| Caenorhabditis briggsae | n-acetyltransferase 15                                 | 1  | F:GO:0016740                                                                                                                                                                                            | -                                                                                | IPR000182; IPR016181; PTHR14744<br>(PANTHER), PTHR14744:SF2<br>(PANTHER)                                              |
| Caenorhabditis elegans  | mitochondrial ribosomal protein l45                    | 3  | P:GO:0009987;<br>C:GO:0005739;<br>C:GO:0030529                                                                                                                                                          | -                                                                                | IPR007379; SSF54427 (SUPERFAMILY)                                                                                     |
| Caenorhabditis briggsae | potassium channel modulatory factor 1                  | 1  | F:GO:0005515                                                                                                                                                                                            | -                                                                                | IPR000433; IPR008598; IPR015880;<br>PTHR12268 (PANTHER),<br>PTHR12268:SF3 (PANTHER)                                   |
|                         | -                                                      | 0  |                                                                                                                                                                                                         |                                                                                  | -                                                                                                                     |
| Caenorhabditis elegans  | hed family member (ptc-3)                              | 8  | P:GO:0009792;<br>P:GO:0002119;<br>F:GO:0008158;<br>P:GO:0040018;<br>P:GO:0018996;<br>P:GO:0000003;<br>P:GO:0040011;<br>C:GO:0016021                                                                     | -                                                                                | PTHR10796 (PANTHER),<br>PTHR10796:SF34 (PANTHER)                                                                      |

|                                |                                                         |    |                                                                                                                                                                                                                                                                                                                                                                                                                                                                                         |              |                                                                                                                         |
|--------------------------------|---------------------------------------------------------|----|-----------------------------------------------------------------------------------------------------------------------------------------------------------------------------------------------------------------------------------------------------------------------------------------------------------------------------------------------------------------------------------------------------------------------------------------------------------------------------------------|--------------|-------------------------------------------------------------------------------------------------------------------------|
| Caenorhabditis elegans         | hed family member (ptc-3)                               | 8  | P:GO:0009792;<br>P:GO:0002119;<br>F:GO:0008158;<br>P:GO:0040018;<br>P:GO:0018996;<br>P:GO:0000003;<br>P:GO:0040011;<br>C:GO:0016021                                                                                                                                                                                                                                                                                                                                                     | -            | PTHR10796 (PANTHER),<br>PTHR10796:SF34 (PANTHER)                                                                        |
| -                              | -                                                       | 0  | -                                                                                                                                                                                                                                                                                                                                                                                                                                                                                       | -            | -                                                                                                                       |
| Loa loa                        | dedicator of cytokinesis 7                              | 7  | P:GO:0000226;<br>C:GO:0043005;<br>P:GO:0045200;<br>P:GO:0032863;<br>P:GO:0033138;<br>P:GO:0007409;<br>F:GO:0048365                                                                                                                                                                                                                                                                                                                                                                      | -            | PTHR23317 (PANTHER),<br>PTHR23317:SF27 (PANTHER)                                                                        |
| Polysphondylium pallidum PN500 | transmembrane protein                                   | 0  | -                                                                                                                                                                                                                                                                                                                                                                                                                                                                                       | C:GO:0016021 | -                                                                                                                       |
| Caenorhabditis elegans         | yl54_caeel ame: full=uncharacterized protein            | 0  | -                                                                                                                                                                                                                                                                                                                                                                                                                                                                                       | -            | -                                                                                                                       |
| Caenorhabditis elegans         | yl54_caeel ame: full=uncharacterized protein            | 0  | -                                                                                                                                                                                                                                                                                                                                                                                                                                                                                       | -            | -                                                                                                                       |
| Caenorhabditis elegans         | hypothetical protein Y71G12A.2 [Caenorhabditis elegans] | 0  | -                                                                                                                                                                                                                                                                                                                                                                                                                                                                                       | -            | SignalP (SIGNALP)                                                                                                       |
| -                              | -                                                       | 0  | -                                                                                                                                                                                                                                                                                                                                                                                                                                                                                       | -            | -                                                                                                                       |
| Caenorhabditis briggsae        | tomosyn sy-ptic protein family member (tom-1)           | 1  | P:GO:0006810                                                                                                                                                                                                                                                                                                                                                                                                                                                                            | -            | IPR000664; IPR001680; IPR011046;<br>IPR013577; IPR015943; IPR019781;<br>PTHR10241 (PANTHER),<br>PTHR10241:SF7 (PANTHER) |
| Caenorhabditis elegans         | briggsae cbr-gei-13 protein                             | 1  | F:GO:0005515                                                                                                                                                                                                                                                                                                                                                                                                                                                                            | -            | IPR003656; SSF57667 (SUPERFAMILY)                                                                                       |
| Caenorhabditis briggsae        | dipeptidyl aminopeptidase                               | 1  | F:GO:0008236                                                                                                                                                                                                                                                                                                                                                                                                                                                                            | -            | G3DSA:3.40.50.1820 (GENE3D),<br>PTHR11731 (PANTHER),<br>PTHR11731:SF7 (PANTHER), SSF53474<br>(SUPERFAMILY)              |
| Brugia malayi                  | mothers against decapentaplegic homolog 2 isoform 2     | 74 | P:GO:0009792;<br>F:GO:0034713;<br>P:GO:0030878;<br>P:GO:0016202;<br>F:GO:0042803;<br>P:GO:0031016;<br>P:GO:0035265;<br>P:GO:0032909;<br>P:GO:0060039;<br>P:GO:0070306;<br>P:GO:0001701;<br>F:GO:0070411;<br>P:GO:0050678;<br>P:GO:0050776;<br>F:GO:0003690;<br>F:GO:0031625;<br>P:GO:0009749;<br>P:GO:0002520;<br>P:GO:0070723;<br>P:GO:0042993;<br>P:GO:0007182;<br>C:GO:0005829;<br>P:GO:0001707;<br>P:GO:0045930;<br>P:GO:0048701;<br>P:GO:0009791;<br>F:GO:0008134;<br>P:GO:0001889 | -            | IPR001132; IPR008984; IPR013790;<br>IPR017855; PTHR13703:SF19<br>(PANTHER)                                              |

|                         |                                                     |    |                                                                                                                                                                                        |   |                            |                                                                                                                                            |
|-------------------------|-----------------------------------------------------|----|----------------------------------------------------------------------------------------------------------------------------------------------------------------------------------------|---|----------------------------|--------------------------------------------------------------------------------------------------------------------------------------------|
| Caenorhabditis briggsae | briggsae cbr-rga-2 protein                          | 6  | P:GO:0009792;<br>F:GO:0005096;<br>C:GO:0005622;<br>P:GO:0040010;<br>P:GO:0000003;<br>P:GO:0007165                                                                                      | - |                            | IPR001849; IPR011993; PTHR23179<br>(PANTHER), PTHR23179:SF2<br>(PANTHER), SSF50729 (SUPERFAMILY)                                           |
| Caenorhabditis elegans  | integrin beta pat-3                                 | 6  | C:GO:0008305;<br>P:GO:0007160;<br>F:GO:0004872;<br>P:GO:0007275;<br>F:GO:0005488;<br>P:GO:0007229                                                                                      | - |                            | IPR001169; IPR002369; IPR013032;<br>IPR015812; PTHR10082:SF12<br>(PANTHER), SSF53300 (SUPERFAMILY)                                         |
|                         | -                                                   | 0  |                                                                                                                                                                                        |   |                            | -                                                                                                                                          |
|                         | -                                                   | 0  |                                                                                                                                                                                        |   |                            | -                                                                                                                                          |
|                         | -                                                   | 0  |                                                                                                                                                                                        |   |                            | -                                                                                                                                          |
| Caenorhabditis briggsae | decapping protein 1                                 | 0  |                                                                                                                                                                                        |   |                            | IPR010334; SSF50729 (SUPERFAMILY)                                                                                                          |
| Caenorhabditis elegans  | abnormal cell migration family member (mig-10)      | 2  | F:GO:0005515;<br>P:GO:0007165                                                                                                                                                          | - |                            | IPR000159; IPR001849; IPR011993;<br>PTHR11243 (PANTHER),<br>PTHR11243:SF11 (PANTHER),<br>SSF50729 (SUPERFAMILY), SSF54236<br>(SUPERFAMILY) |
| Caenorhabditis elegans  | abnormal cell migration family member (mig-10)      | 2  | F:GO:0005515;<br>P:GO:0007165                                                                                                                                                          | - |                            | IPR000159; IPR001849; IPR011993;<br>PTHR11243 (PANTHER),<br>PTHR11243:SF11 (PANTHER),<br>SSF50729 (SUPERFAMILY), SSF54236<br>(SUPERFAMILY) |
| Caenorhabditis briggsae | elegans protein confirmed by transcript evidence    | 2  | F:GO:0005515;<br>P:GO:0009792                                                                                                                                                          | - |                            | G3DSA:2.30.42.10 (GENE3D),<br>PTHR15963 (PANTHER),<br>PTHR15963:SF4 (PANTHER)                                                              |
| Caenorhabditis elegans  | elegans protein confirmed by transcript evidence    | 2  | F:GO:0005515;<br>P:GO:0009792                                                                                                                                                          | - |                            | IPR001478; G3DSA:2.30.42.10<br>(GENE3D), PTHR15963 (PANTHER),<br>PTHR15963:SF4 (PANTHER)                                                   |
| Caenorhabditis elegans  | endothelial differentiation-related factor 1        | 11 | P:GO:0019216;<br>P:GO:0043388;<br>P:GO:0006355;<br>F:GO:0043565;<br>F:GO:0003700;<br>P:GO:0045446;<br>F:GO:0004402;<br>F:GO:0003713;<br>C:GO:0005669;<br>C:GO:0005737;<br>F:GO:0008168 | - | EC:2.3.1.48;<br>EC:2.1.1.0 | -                                                                                                                                          |
|                         | -                                                   | 0  |                                                                                                                                                                                        |   |                            | -                                                                                                                                          |
| Caenorhabditis elegans  | briggsae cbr-tac-1 protein                          | 1  | F:GO:0005515                                                                                                                                                                           | - |                            | -                                                                                                                                          |
| Caenorhabditis briggsae | adp-ribosylation factor gtpase activating protein 3 | 3  | C:GO:0044444;<br>P:GO:0015031;<br>P:GO:0051649                                                                                                                                         | - |                            | -                                                                                                                                          |
| Caenorhabditis briggsae | adp-ribosylation factor gtpase activating protein 3 | 3  | C:GO:0044444;<br>P:GO:0015031;<br>P:GO:0051649                                                                                                                                         | - |                            | IPR001164; PTHR23180 (PANTHER),<br>PTHR23180:SF16 (PANTHER)                                                                                |

|                                     |                                                            |    |                                                                                                                                                                                                                                                                                                                                                                                                                                                                                          |                                                                                  |                            |                                                                             |
|-------------------------------------|------------------------------------------------------------|----|------------------------------------------------------------------------------------------------------------------------------------------------------------------------------------------------------------------------------------------------------------------------------------------------------------------------------------------------------------------------------------------------------------------------------------------------------------------------------------------|----------------------------------------------------------------------------------|----------------------------|-----------------------------------------------------------------------------|
| Loa loa                             | elegans protein partially confirmed by transcript evidence | 12 | F:GO:0030528;<br>P:GO:0007420;<br>P:GO:0007492;<br>P:GO:0000122;<br>F:GO:0043565;<br>P:GO:0001892;<br>P:GO:0043193;<br>F:GO:0008134;<br>F:GO:0008094;<br>P:GO:0009952;<br>P:GO:0006338;<br>C:GO:0005634                                                                                                                                                                                                                                                                                  | -                                                                                |                            | PTHR22880 (PANTHER),<br>PTHR22880:SF1 (PANTHER)                             |
| Ixodes scapularis                   | pab-dependent poly -specific ribonuclease subunit 2        | 4  | F:GO:0004527;<br>P:GO:0044260;<br>C:GO:0005622;<br>P:GO:0044238                                                                                                                                                                                                                                                                                                                                                                                                                          | -                                                                                |                            | -                                                                           |
| Trypanosoma brucei gambiense DAL972 | pab-dependent poly -specific ribonuclease subunit 2        | 1  | F:GO:0004527                                                                                                                                                                                                                                                                                                                                                                                                                                                                             | -                                                                                |                            | -                                                                           |
|                                     | -                                                          | 0  |                                                                                                                                                                                                                                                                                                                                                                                                                                                                                          |                                                                                  |                            | -                                                                           |
| Caenorhabditis briggsae             | Hypothetical protein CBG06657 [Caenorhabditis briggsae]    | 0  |                                                                                                                                                                                                                                                                                                                                                                                                                                                                                          | F:GO:0005515                                                                     |                            | -                                                                           |
|                                     | -                                                          | 0  |                                                                                                                                                                                                                                                                                                                                                                                                                                                                                          |                                                                                  |                            | SignalP (SIGNALP)                                                           |
| Homo sapiens                        | macrophage migration inhibitory factor                     | 44 | C:GO:0009906;<br>P:GO:0006954;<br>P:GO:0033138;<br>P:GO:0048146;<br>P:GO:0007506;<br>P:GO:0007530;<br>P:GO:0090238;<br>P:GO:0070374;<br>P:GO:0001546;<br>P:GO:0031666;<br>P:GO:0043030;<br>P:GO:0043406;<br>F:GO:0008083;<br>C:GO:0005615;<br>P:GO:0007569;<br>P:GO:0061081;<br>F:GO:0005160;<br>P:GO:0071157;<br>P:GO:0043518;<br>P:GO:0050731;<br>P:GO:0030890;<br>P:GO:0045087;<br>P:GO:0001516;<br>F:GO:0005125;<br>P:GO:0032269;<br>C:GO:0005737;<br>P:GO:0010629;<br>P:GO:0051092; | -                                                                                | EC:5.3.3.12;<br>EC:5.3.2.1 | IPR001398; IPR014347;<br>PTHR11954:SF4 (PANTHER), SSF55331<br>(SUPERFAMILY) |
| Caenorhabditis elegans              | sodium-coupled neutral amino acid transporter 9            | 2  | C:GO:0016021;<br>P:GO:0006810                                                                                                                                                                                                                                                                                                                                                                                                                                                            | -                                                                                |                            | IPR013057; PTHR22950 (PANTHER),<br>SignalP (SIGNALP)                        |
| Caenorhabditis elegans              | vps53- n-termi-I family protein                            | 0  |                                                                                                                                                                                                                                                                                                                                                                                                                                                                                          | C:GO:0010008;<br>C:GO:0016020;<br>C:GO:0005794;<br>C:GO:0005768;<br>P:GO:0015031 |                            | IPR007234; PTHR12820 (PANTHER)                                              |
| Brugia malayi                       | Imbr1 domain containing 2                                  | 1  | C:GO:0016020                                                                                                                                                                                                                                                                                                                                                                                                                                                                             | -                                                                                |                            | IPR006876; PTHR21355 (PANTHER),<br>SignalP (SIGNALP)                        |
| Brugia malayi                       | transmembrane 9 superfamily member 2                       | 2  | C:GO:0016021;<br>C:GO:0005768                                                                                                                                                                                                                                                                                                                                                                                                                                                            | -                                                                                |                            | IPR004240; PTHR10766:SF13<br>(PANTHER)                                      |

|                         |                                                       |  |                                                  |                                                                                                                    |                             |                                                                                                                                    |
|-------------------------|-------------------------------------------------------|--|--------------------------------------------------|--------------------------------------------------------------------------------------------------------------------|-----------------------------|------------------------------------------------------------------------------------------------------------------------------------|
| Caenorhabditis briggsae | beta chain spectrin                                   |  | F:GO:0005200;<br>3 C:GO:0008091;<br>F:GO:0003779 | -                                                                                                                  |                             | IPR002017; IPR018159;<br>G3DSA:1.20.58.60 (GENE3D),<br>PTHR11915 (PANTHER),<br>PTHR11915:SF48 (PANTHER),<br>SSF46966 (SUPERFAMILY) |
|                         | -                                                     |  | 0                                                |                                                                                                                    |                             | -                                                                                                                                  |
| Caenorhabditis elegans  | major facilitator superfamily                         |  | 0                                                | C:GO:0016021;<br>F:GO:0022891;<br>C:GO:0016020;<br>P:GO:0055085;<br>F:GO:0005215;<br>P:GO:0006810                  |                             | -                                                                                                                                  |
|                         | -                                                     |  | 0                                                |                                                                                                                    |                             | SignalP (SIGNALP)                                                                                                                  |
|                         | -                                                     |  | 0                                                |                                                                                                                    |                             | -                                                                                                                                  |
| Caenorhabditis elegans  | potassium channel tetramerisation domain containing 3 |  | 0                                                | F:GO:0005249;<br>C:GO:0016020;<br>P:GO:0006813;<br>F:GO:0005515;<br>C:GO:0008076                                   |                             | -                                                                                                                                  |
| Caenorhabditis briggsae | branched chain aminotransferase cytosolic             |  | 6                                                | C:GO:0005829;<br>P:GO:0009083;<br>C:GO:0005739;<br>P:GO:0008652;<br>F:GO:0004084;<br>P:GO:0051716                  | EC:2.6.1.42                 | IPR001544; IPR005786; IPR018300;<br>G3DSA:3.20.10.10 (GENE3D),<br>G3DSA:3.30.470.10 (GENE3D)                                       |
| Caenorhabditis elegans  | transmembrane protein 104                             |  | 1                                                | C:GO:0016020                                                                                                       | -                           | PTHR16189 (PANTHER)                                                                                                                |
| Caenorhabditis elegans  | lethal 07882                                          |  | 3                                                | P:GO:0009792;<br>P:GO:0006898;<br>P:GO:0002119                                                                     | -                           | IPR007276                                                                                                                          |
| Caenorhabditis briggsae | rap ran-gap family protein                            |  | 0                                                | F:GO:0005096;<br>P:GO:0051056;<br>C:GO:0005622                                                                     |                             | -                                                                                                                                  |
| Caenorhabditis briggsae | rap ran-gap family protein                            |  | 0                                                | F:GO:0005096;<br>P:GO:0051056;<br>C:GO:0005622                                                                     |                             | IPR000331; PTHR10063 (PANTHER),<br>SSF111347 (SUPERFAMILY)                                                                         |
| Caenorhabditis elegans  | loc553384 protein                                     |  | 4                                                | P:GO:0048034;<br>F:GO:0008495;<br>C:GO:0016021;<br>C:GO:0031966                                                    | -                           | IPR000537; IPR006369; PTHR11048<br>(PANTHER)                                                                                       |
| Caenorhabditis elegans  | briggsae cbr-trm-1 protein                            |  | 2                                                | F:GO:0003676;<br>F:GO:0008168                                                                                      | EC:2.1.1.0                  | -                                                                                                                                  |
| Caenorhabditis elegans  | asparaginyl-tr- cytoplasmic                           |  | 7                                                | C:GO:0005737;<br>F:GO:0003676;<br>P:GO:0006422;<br>F:GO:0004816;<br>F:GO:0005524;<br>P:GO:0006421;<br>F:GO:0004815 | EC:6.1.1.22;<br>EC:6.1.1.12 | IPR004365; IPR012340; IPR016027                                                                                                    |
| Loa loa                 | iesterase family member (pde-2)                       |  | 3                                                | F:GO:0046872;<br>P:GO:0007165;<br>F:GO:0004114                                                                     | EC:3.1.4.17                 | IPR002073; IPR003607; IPR023088;<br>IPR023174; PTHR11347 (PANTHER),<br>PTHR11347:SF17 (PANTHER),<br>SSF109604 (SUPERFAMILY)        |
|                         | -                                                     |  | 0                                                |                                                                                                                    |                             | -                                                                                                                                  |
|                         | -                                                     |  | 0                                                |                                                                                                                    |                             | -                                                                                                                                  |

|                           |                                                                |  |   |                                                                                                                                                      |   |                                                                                                                                     |                                                                                                        |
|---------------------------|----------------------------------------------------------------|--|---|------------------------------------------------------------------------------------------------------------------------------------------------------|---|-------------------------------------------------------------------------------------------------------------------------------------|--------------------------------------------------------------------------------------------------------|
| Caenorhabditis elegans    | 28s ribosomal protein mitochondrial                            |  | 9 | P:GO:0006412;<br>C:GO:0005840;<br>C:GO:0005739;<br>F:GO:0003735;<br>P:GO:0040035;<br>P:GO:0002119;<br>P:GO:0040039;<br>P:GO:0040018;<br>P:GO:0006974 | - | EC:3.6.5.3                                                                                                                          | IPR007087                                                                                              |
| -                         | -                                                              |  | 0 |                                                                                                                                                      |   |                                                                                                                                     | SignalP (SIGNALP)                                                                                      |
| Caenorhabditis briggsae   | ankyrin repeat domain 13c                                      |  | 1 | C:GO:0005783                                                                                                                                         | - |                                                                                                                                     | IPR002110; IPR020683; PTHR12447 (PANTHER)                                                              |
| Caenorhabditis elegans    | wd repeat domain 68                                            |  | 6 | C:GO:0005737;<br>F:GO:0005515;<br>P:GO:0016567;<br>C:GO:0080008;<br>C:GO:0005634;<br>P:GO:0051216                                                    | - |                                                                                                                                     | IPR001680; IPR011046; IPR015943;<br>IPR017986; IPR019775; IPR019781;<br>IPR019782; PTHR19919 (PANTHER) |
| Caenorhabditis elegans    | briggsae cbr-casy-1 protein                                    |  | 9 | P:GO:0009792;<br>C:GO:0005615;<br>P:GO:0007156;<br>F:GO:0005515;<br>C:GO:0032809;<br>P:GO:0008355;<br>C:GO:0043231;<br>F:GO:0005509;<br>C:GO:0016021 | - |                                                                                                                                     | -                                                                                                      |
| Caenorhabditis sp. PS1010 | hypothetical protein Csp3_JD07.006 [Caenorhabditis sp. PS1010] |  | 0 |                                                                                                                                                      |   |                                                                                                                                     | -                                                                                                      |
| Caenorhabditis elegans    | uba and wwe domain containing 1                                |  | 0 |                                                                                                                                                      |   | P:GO:0030154;<br>F:GO:0016874;<br>F:GO:0005488;<br>F:GO:0016881;<br>C:GO:0005634;<br>F:GO:0003677;<br>C:GO:0005622;<br>P:GO:0006464 | -                                                                                                      |
| Caenorhabditis briggsae   | uba and wwe domain containing 1                                |  | 0 |                                                                                                                                                      |   | P:GO:0030154;<br>F:GO:0016874;<br>F:GO:0005488;<br>F:GO:0016881;<br>C:GO:0005634;<br>F:GO:0003677;<br>C:GO:0005622;<br>P:GO:0006464 | -                                                                                                      |
| Caenorhabditis elegans    | protein fat-free homolog                                       |  | 1 | F:GO:0005515                                                                                                                                         |   |                                                                                                                                     | IPR014812; PTHR15954 (PANTHER)                                                                         |
| Caenorhabditis briggsae   | ets homologous factor                                          |  | 4 | P:GO:0006355;<br>F:GO:0043565;<br>F:GO:0003700;<br>C:GO:0005634                                                                                      | - |                                                                                                                                     | IPR000418; IPR011991; PTHR11849 (PANTHER), PTHR11849:SF18 (PANTHER), SSF46785 (SUPERFAMILY)            |
| -                         | -                                                              |  | 0 |                                                                                                                                                      |   |                                                                                                                                     | -                                                                                                      |
| Loa loa                   | cerebral cavernous malformation 2                              |  | 0 |                                                                                                                                                      |   | P:GO:0051403;<br>P:GO:0007229;<br>C:GO:0005737;<br>P:GO:0001570;<br>F:GO:0005515;<br>P:GO:0007043                                   | -                                                                                                      |
| -                         | -                                                              |  | 0 |                                                                                                                                                      |   |                                                                                                                                     | -                                                                                                      |

|                         |                                                              |  |   |                                                                                                                    |   |              |                                                                                                                                         |
|-------------------------|--------------------------------------------------------------|--|---|--------------------------------------------------------------------------------------------------------------------|---|--------------|-----------------------------------------------------------------------------------------------------------------------------------------|
| Loa loa                 | vesicle transport-related protein                            |  | 5 | P:GO:0031101;<br>P:GO:0018996;<br>P:GO:0006904;<br>P:GO:0000003;<br>P:GO:0006898                                   | - | -            |                                                                                                                                         |
| Caenorhabditis elegans  | suppressor of ypt1                                           |  | 5 | P:GO:0031101;<br>P:GO:0018996;<br>P:GO:0006904;<br>P:GO:0000003;<br>P:GO:0006898                                   | - |              | IPR001619; G3DSA:3.40.50.1910 (GENE3D), PTHR11679:SF2 (PANTHER)                                                                         |
| Caenorhabditis elegans  | s head family member (skn-1)                                 |  | 4 | F:GO:0003700;<br>F:GO:0005515;<br>P:GO:0007275;<br>C:GO:0005634                                                    | - |              | IPR004827; IPR008917; IPR013089; G3DSA:1.10.880.10 (GENE3D), PTHR23230:SF19 (PANTHER)                                                   |
| Caenorhabditis elegans  | stromal cell-derived factor 2-like 1                         |  | 2 | C:GO:0044464;<br>F:GO:0016740                                                                                      | - |              | IPR003608; IPR016093; G3DSA:2.80.10.50 (GENE3D), PTHR10050 (PANTHER), PTHR10050:SF6 (PANTHER), SignalP (SIGNALP)                        |
| Ancylostoma ceylanicum  | tissue factor pathway inhibitor                              |  | 1 | F:GO:0030414                                                                                                       | - |              | IPR002223; IPR020901; PTHR10083 (PANTHER), PTHR10083:SF39 (PANTHER), SignalP (SIGNALP)                                                  |
|                         | -                                                            |  | 0 |                                                                                                                    |   |              | -                                                                                                                                       |
| Caenorhabditis brenneri | hypothetical protein Cbre_JD09.010 [Caenorhabditis brenneri] |  | 0 |                                                                                                                    |   |              | -                                                                                                                                       |
| Loa loa                 | hypothetical protein LOAG_05660 [Loa loa]                    |  | 0 |                                                                                                                    |   |              | -                                                                                                                                       |
| Loa loa                 | hypothetical protein LOAG_05660 [Loa loa]                    |  | 0 |                                                                                                                    |   |              | -                                                                                                                                       |
| Caenorhabditis elegans  | briggsae cbr-edc-3 protein                                   |  | 0 |                                                                                                                    |   | F:GO:0005515 | -                                                                                                                                       |
| Caenorhabditis elegans  | excretory ca-I abnormal family member (exc-5)                |  | 4 | F:GO:0005089;<br>C:GO:0005622;<br>P:GO:0035023;<br>F:GO:0008270                                                    | - |              | -                                                                                                                                       |
| synthetic construct     | fxyd domain containing ion transport regulator 5             |  | 7 | P:GO:0030033;<br>F:GO:0003779;<br>P:GO:0046588;<br>P:GO:0006811;<br>C:GO:0016021;<br>F:GO:0045296;<br>F:GO:0005216 | - |              | -                                                                                                                                       |
| Macaca mulatta          | 40s ribosomal protein s2-like isoform 2                      |  | 4 | F:GO:0003735;<br>F:GO:0003723;<br>C:GO:0015935;<br>P:GO:0006412                                                    | - | EC:3.6.5.3   | IPR000851; IPR005324; IPR005711; IPR013810; IPR014720; IPR014721; IPR018192; IPR020568; PTHR13718:SF4 (PANTHER), SSF54768 (SUPERFAMILY) |
| Caenorhabditis briggsae | mgc68950 protein                                             |  | 5 | C:GO:0000776;<br>F:GO:0005515;<br>P:GO:0009987;<br>C:GO:0000922;<br>C:GO:0005829                                   | - |              | PTHR18916 (PANTHER), PTHR18916:SF2 (PANTHER)                                                                                            |
| Caenorhabditis briggsae | mgc68950 protein                                             |  | 5 | C:GO:0000776;<br>F:GO:0005515;<br>P:GO:0009987;<br>C:GO:0000922;<br>C:GO:0005829                                   | - |              | PTHR18916 (PANTHER), PTHR18916:SF2 (PANTHER)                                                                                            |



|                         |                                                                  |    |                                                                                                                                                                                                         |                                                                                                                                                                       |             |                                                                                                                                                |
|-------------------------|------------------------------------------------------------------|----|---------------------------------------------------------------------------------------------------------------------------------------------------------------------------------------------------------|-----------------------------------------------------------------------------------------------------------------------------------------------------------------------|-------------|------------------------------------------------------------------------------------------------------------------------------------------------|
| Caenorhabditis briggsae | mgc68950 protein                                                 |    | C:GO:0000776;<br>F:GO:0005515;<br>P:GO:0009987;<br>C:GO:0000922;<br>C:GO:0005829                                                                                                                        | -                                                                                                                                                                     |             | PTHR18916 (PANTHER),<br>PTHR18916:SF2 (PANTHER)                                                                                                |
|                         | -                                                                | 0  |                                                                                                                                                                                                         |                                                                                                                                                                       |             | -                                                                                                                                              |
|                         | -                                                                | 0  |                                                                                                                                                                                                         |                                                                                                                                                                       |             | IPR006578                                                                                                                                      |
| Caenorhabditis elegans  | calcineurin binding protein 1                                    | 0  |                                                                                                                                                                                                         | F:GO:0030346;<br>C:GO:0005634;<br>P:GO:0006916;<br>C:GO:0005737;<br>P:GO:0016568;<br>P:GO:0007166;<br>P:GO:0007165;<br>F:GO:0005515;<br>F:GO:0005488;<br>F:GO:0004864 |             | -                                                                                                                                              |
| Caenorhabditis elegans  | tpr domain containing protein                                    | 0  |                                                                                                                                                                                                         | F:GO:0008312;<br>F:GO:0005488;<br>P:GO:0006614;<br>C:GO:0048500                                                                                                       |             | PTHR14094 (PANTHER),<br>PTHR14094:SF9 (PANTHER)                                                                                                |
|                         | -                                                                | 0  |                                                                                                                                                                                                         |                                                                                                                                                                       |             | -                                                                                                                                              |
| Brugia malayi           | r- polymerase ii:subunit=                                        | 2  | F:GO:0005488;<br>P:GO:0006350                                                                                                                                                                           | -                                                                                                                                                                     |             | IPR017923; PTHR15141 (PANTHER),<br>PTHR15141:SF12 (PANTHER)                                                                                    |
| Caenorhabditis briggsae | elegans protein partially confirmed by transcript evidence       | 0  |                                                                                                                                                                                                         | P:GO:0055114;<br>F:GO:0005488;<br>F:GO:0016491;<br>P:GO:0008152;<br>F:GO:0003824                                                                                      |             | IPR012877; G3DSA:3.90.1200.10<br>(GENE3D)                                                                                                      |
|                         | -                                                                | 0  |                                                                                                                                                                                                         |                                                                                                                                                                       |             | -                                                                                                                                              |
| Caenorhabditis briggsae | 26s protease regulatory subunit 4                                | 6  | C:GO:0005737;<br>F:GO:0008233;<br>P:GO:0030163;<br>F:GO:0005524;<br>C:GO:0000502;<br>F:GO:0017111                                                                                                       | -                                                                                                                                                                     | EC:3.6.1.15 | IPR003959; G3DSA:3.40.50.300<br>(GENE3D), PTHR23073 (PANTHER),<br>PTHR23073:SF9 (PANTHER), SSF52540<br>(SUPERFAMILY)                           |
| Caenorhabditis elegans  | yfe5_caeel ame: full=uncharacterized protein flags:<br>precursor | 0  |                                                                                                                                                                                                         |                                                                                                                                                                       |             | -                                                                                                                                              |
| Caenorhabditis elegans  | high density lipoprotein binding protein vigilin                 | 7  | P:GO:0040010;<br>P:GO:0018991;<br>P:GO:0040035;<br>P:GO:0010171;<br>P:GO:0002119;<br>P:GO:0040017;<br>P:GO:0009792                                                                                      | -                                                                                                                                                                     |             | IPR004087; IPR004088; IPR018111;<br>G3DSA:3.30.1370.10 (GENE3D),<br>PTHR10627 (PANTHER),<br>PTHR10627:SF9 (PANTHER), SSF54791<br>(SUPERFAMILY) |
| Branchiostoma floridae  | abc transporter c family protein                                 | 12 | F:GO:0016772;<br>F:GO:0015238;<br>C:GO:0016021;<br>F:GO:0042626;<br>P:GO:0006855;<br>C:GO:0031088;<br>P:GO:0006811;<br>C:GO:0005624;<br>F:GO:0005524;<br>C:GO:0016323;<br>F:GO:0005254;<br>P:GO:0048661 | -                                                                                                                                                                     |             | IPR003439; IPR003593; IPR017871;<br>G3DSA:3.40.50.300 (GENE3D),<br>PTHR19242 (PANTHER),<br>PTHR19242:SF97 (PANTHER),<br>SSF52540 (SUPERFAMILY) |

|                         |                                          |    |                                                                                                                                                                                                                                                                                              |                                                |                                                                                                            |
|-------------------------|------------------------------------------|----|----------------------------------------------------------------------------------------------------------------------------------------------------------------------------------------------------------------------------------------------------------------------------------------------|------------------------------------------------|------------------------------------------------------------------------------------------------------------|
| Loa loa                 | mutator family member (mut-7)            | 0  | F:GO:0003676;<br>P:GO:0006139;<br>F:GO:0004527;<br>F:GO:0016787;<br>F:GO:0004518;<br>F:GO:0005515;<br>C:GO:0005622;<br>F:GO:0008408                                                                                                                                                          | -                                              | -                                                                                                          |
|                         | -                                        | 0  |                                                                                                                                                                                                                                                                                              |                                                | SignalP (SIGNALP)                                                                                          |
|                         | -                                        | 0  |                                                                                                                                                                                                                                                                                              |                                                | SignalP (SIGNALP)                                                                                          |
| Caenorhabditis elegans  | pole2 protein                            | 3  | P:GO:0006260;<br>F:GO:0016779;<br>C:GO:0005634                                                                                                                                                                                                                                               | -                                              | EC:2.7.7.0<br>IPR007185; PTHR12708 (PANTHER)                                                               |
| Caenorhabditis elegans  | acylglycerol mitochondrial               | 2  | F:GO:0016301;<br>P:GO:0044237                                                                                                                                                                                                                                                                | -                                              | -                                                                                                          |
| Pongo abelii            | collagen alpha-2 chain-like              | 17 | P:GO:0042476;<br>F:GO:0030674;<br>P:GO:0070208;<br>P:GO:0043589;<br>P:GO:0008217;<br>F:GO:0042802;<br>C:GO:0005615;<br>F:GO:0046332;<br>P:GO:0001501;<br>F:GO:0048407;<br>C:GO:0005584;<br>P:GO:0030199;<br>P:GO:0007179;<br>F:GO:0005201;<br>P:GO:0001568;<br>P:GO:0007266;<br>C:GO:0005886 | -                                              | -                                                                                                          |
| Caenorhabditis briggsae | sh2 domain containing 4b                 | 1  | F:GO:0005515                                                                                                                                                                                                                                                                                 | -                                              | IPR000980; PTHR14388 (PANTHER),<br>SSF55550 (SUPERFAMILY)                                                  |
| Loa loa                 | probable d- mismatch repair protein msh6 | 2  | F:GO:0003677;<br>P:GO:0000710                                                                                                                                                                                                                                                                | -                                              | -                                                                                                          |
| Caenorhabditis briggsae | testis expressed sequence 2 isoform 1    | 0  |                                                                                                                                                                                                                                                                                              | C:GO:0016020;<br>P:GO:0008150;<br>C:GO:0005575 | IPR001849; PTHR13466 (PANTHER)                                                                             |
| Caenorhabditis briggsae | testis expressed sequence 2 isoform 1    | 0  |                                                                                                                                                                                                                                                                                              | C:GO:0016020;<br>P:GO:0008150;<br>C:GO:0005575 | IPR001849; PTHR13466 (PANTHER)                                                                             |
| Caenorhabditis briggsae | ribosome biogenesis protein bms1 homolog | 4  | F:GO:0003924;<br>C:GO:0005634;<br>P:GO:0042254;<br>F:GO:0005525                                                                                                                                                                                                                              | -                                              | EC:3.6.5.1;<br>EC:3.6.5.2;<br>EC:3.6.5.3;<br>EC:3.6.5.4<br>PTHR12858 (PANTHER),<br>PTHR12858:SF2 (PANTHER) |
| Caenorhabditis briggsae | tight junction protein                   | 0  |                                                                                                                                                                                                                                                                                              | F:GO:0005515                                   | IPR001478; G3DSA:2.30.42.10<br>(GENE3D), PTHR13865 (PANTHER),<br>PTHR13865:SF7 (PANTHER)                   |

|                         |                                                            |    |                                                                                                                                                                                        |                                                |             |                                                                                                                                              |
|-------------------------|------------------------------------------------------------|----|----------------------------------------------------------------------------------------------------------------------------------------------------------------------------------------|------------------------------------------------|-------------|----------------------------------------------------------------------------------------------------------------------------------------------|
| Caenorhabditis elegans  | u4 u6 small nuclear ribonucleoprotein                      | 11 | P:GO:0040035;<br>P:GO:0009792;<br>P:GO:0002119;<br>P:GO:0008380;<br>F:GO:0003676;<br>P:GO:0001703;<br>F:GO:0005515;<br>P:GO:0040010;<br>P:GO:0040011;<br>F:GO:0016740;<br>C:GO:0030529 | -                                              |             | IPR001680; IPR011046; IPR015943;<br>IPR017986; IPR019775; IPR019781;<br>IPR019782; IPR020472; PTHR19846<br>(PANTHER)                         |
| Brugia malayi           | rab3 gtpase-activating protein                             | 4  | F:GO:0005097;<br>F:GO:0017137;<br>C:GO:0005625;<br>P:GO:0043087                                                                                                                        | -                                              |             | PTHR21422 (PANTHER)                                                                                                                          |
| Caenorhabditis elegans  | tubulointerstitial nephritis antigen-like                  | 4  | C:GO:0031012;<br>P:GO:0016197;<br>F:GO:0004197;<br>P:GO:0006508                                                                                                                        | -                                              | EC:3.4.22.0 | -                                                                                                                                            |
| Caenorhabditis briggsae | zinc finger protein                                        | 0  |                                                                                                                                                                                        | F:GO:0003676;<br>F:GO:0008270;<br>C:GO:0005622 |             | IPR007087; IPR015880                                                                                                                         |
|                         | -                                                          | 0  |                                                                                                                                                                                        |                                                |             | -                                                                                                                                            |
| Caenorhabditis elegans  | hypothetical tyrosi-se-like protein in chromosome          | 4  | F:GO:0005515;<br>F:GO:0046872;<br>P:GO:0008152;<br>F:GO:0016491                                                                                                                        | -                                              |             | IPR002227; IPR008922; PTHR11474<br>(PANTHER)                                                                                                 |
| Caenorhabditis elegans  | hypothetical protein Y73B6BL.1 [Caenorhabditis elegans]    | 0  |                                                                                                                                                                                        | F:GO:0046872;<br>F:GO:0016491;<br>P:GO:0008152 |             | -                                                                                                                                            |
|                         | -                                                          | 0  |                                                                                                                                                                                        |                                                |             | -                                                                                                                                            |
| Caenorhabditis elegans  | abnormal cell lineage family member (lin-10)               | 1  | F:GO:0005515                                                                                                                                                                           | -                                              |             | IPR001478; IPR006020; IPR011993;<br>G3DSA:2.30.42.10 (GENE3D),<br>PTHR12345 (PANTHER),<br>PTHR12345:SF2 (PANTHER), SSF50729<br>(SUPERFAMILY) |
| Caenorhabditis briggsae | a-phase promoting complex subunit 1                        | 3  | P:GO:0051439;<br>F:GO:0005515;<br>C:GO:0044428                                                                                                                                         | -                                              |             | -                                                                                                                                            |
| Brugia malayi           | subfamily member 1                                         | 6  | P:GO:0040035;<br>F:GO:0005515;<br>P:GO:0051085;<br>P:GO:0006986;<br>P:GO:0070389;<br>C:GO:0044424                                                                                      | -                                              |             | IPR001623; IPR002939; IPR003095;<br>IPR008971; IPR015609; IPR018253;<br>G3DSA:2.60.260.20 (GENE3D),<br>PTHR11821:SF88 (PANTHER)              |
|                         | -                                                          | 0  |                                                                                                                                                                                        |                                                |             | -                                                                                                                                            |
| Loa loa                 | heavy unconvectio-l myosin family member (hum-2)           | 4  | C:GO:0016459;<br>F:GO:0005515;<br>F:GO:0005524;<br>F:GO:0003774                                                                                                                        | -                                              |             | IPR002710; IPR018444; PTHR13140<br>(PANTHER), PTHR13140:SF15<br>(PANTHER)                                                                    |
| Caenorhabditis elegans  | elegans protein partially confirmed by transcript evidence | 1  | F:GO:0003824                                                                                                                                                                           | -                                              |             | -                                                                                                                                            |
| Loa loa                 | fizzy-related protein                                      | 6  | P:GO:0007126;<br>P:GO:0045449;<br>P:GO:0051301;<br>P:GO:0007067;<br>F:GO:0004402;<br>P:GO:0009792                                                                                      | -                                              | EC:2.3.1.48 | IPR001680; IPR015943; IPR017986;<br>IPR019781; IPR019782; PTHR19918<br>(PANTHER), SSF117289 (SUPERFAMILY)                                    |

|                                  |                                                          |    |                                                                                                                                                                                        |                                                                                                                                                                                                                          |             |                                                                                                                                        |
|----------------------------------|----------------------------------------------------------|----|----------------------------------------------------------------------------------------------------------------------------------------------------------------------------------------|--------------------------------------------------------------------------------------------------------------------------------------------------------------------------------------------------------------------------|-------------|----------------------------------------------------------------------------------------------------------------------------------------|
| Caenorhabditis briggsae          | elegans protein confirmed by transcript evidence         | 11 | C:GO:0005737;<br>P:GO:0008272;<br>C:GO:0005886;<br>P:GO:0042391;<br>P:GO:0055085;<br>P:GO:0019532;<br>C:GO:0016021;<br>F:GO:0019531;<br>F:GO:0015380;<br>F:GO:0008271;<br>P:GO:0006821 | -                                                                                                                                                                                                                        |             | IPR011547; PTHR11814 (PANTHER),<br>PTHR11814:SF25 (PANTHER)                                                                            |
| Caenorhabditis elegans           | proteasome ( macropain) beta 2                           | 10 | P:GO:0008340;<br>P:GO:0010243;<br>P:GO:0051436;<br>P:GO:0051437;<br>P:GO:0000003;<br>F:GO:0004298;<br>P:GO:0031145;<br>P:GO:0014070;<br>P:GO:0009792;<br>C:GO:0005839                  | -                                                                                                                                                                                                                        | EC:3.4.25.0 | IPR001353; G3DSA:3.60.20.10<br>(GENE3D), PTHR11599 (PANTHER),<br>PTHR11599:SF6 (PANTHER), PSS1476<br>(PROFILE), SSF56235 (SUPERFAMILY) |
|                                  | -                                                        | 0  |                                                                                                                                                                                        |                                                                                                                                                                                                                          |             | SignalP (SIGNALP)                                                                                                                      |
| Caenorhabditis elegans           | elegans protein confirmed by transcript evidence         | 2  | F:GO:0051537;<br>C:GO:0043231                                                                                                                                                          | -                                                                                                                                                                                                                        |             | IPR006622; IPR018967; SignalP<br>(SIGNALP)                                                                                             |
| Coprinopsis cinerea okayama7#130 | 200 kda antigen p200                                     | 0  |                                                                                                                                                                                        | P:GO:0007018;<br>C:GO:0005874;<br>F:GO:0000166;<br>F:GO:0005525;<br>F:GO:0008270;<br>F:GO:0005524;<br>F:GO:0003777;<br>C:GO:0016459;<br>F:GO:0003774;<br>F:GO:0046872;<br>C:GO:0032982;<br>F:GO:0005488;<br>F:GO:0003950 | -           |                                                                                                                                        |
| Caenorhabditis elegans           | nitrilase and fragile histidine triad fusion protein hit | 4  | F:GO:0016810;<br>P:GO:0006139;<br>F:GO:0047710;<br>F:GO:0005515                                                                                                                        | -                                                                                                                                                                                                                        | EC:3.6.1.29 | IPR001310; IPR003010; IPR011146;<br>IPR011151; IPR019808; PTHR23088<br>(PANTHER)                                                       |
|                                  | -                                                        | 0  |                                                                                                                                                                                        |                                                                                                                                                                                                                          |             | -                                                                                                                                      |
| Caenorhabditis elegans           | briggsae cbr-prmt-5 protein                              | 0  |                                                                                                                                                                                        | F:GO:0016740;<br>P:GO:0030719;<br>F:GO:0008276;<br>F:GO:0008168;<br>P:GO:0007067;<br>C:GO:0005737;<br>P:GO:0008298;<br>F:GO:0016301;<br>P:GO:0007318;<br>P:GO:0007315                                                    |             | IPR007857                                                                                                                              |
| Caenorhabditis elegans           | spingomyelin synthetase                                  | 3  | F:GO:0047493;<br>P:GO:0006686;<br>C:GO:0030173                                                                                                                                         | -                                                                                                                                                                                                                        | EC:2.7.8.3  | IPR000326; PTHR21290 (PANTHER),<br>PTHR21290:SF5 (PANTHER)                                                                             |
| Caenorhabditis briggsae          | Hypothetical protein CBG12154 [Caenorhabditis briggsae]  | 0  |                                                                                                                                                                                        |                                                                                                                                                                                                                          |             | -                                                                                                                                      |

|                         |                                               |    |                                                                                                                                                                                                                                                                                                                                                                  |                                                                 |             |                                                                     |
|-------------------------|-----------------------------------------------|----|------------------------------------------------------------------------------------------------------------------------------------------------------------------------------------------------------------------------------------------------------------------------------------------------------------------------------------------------------------------|-----------------------------------------------------------------|-------------|---------------------------------------------------------------------|
| Loa loa                 | zinc finger in n-recognin family protein      | 5  | P:GO:0042066;<br>P:GO:0007291;<br>F:GO:0005516;<br>F:GO:0008270;<br>F:GO:0004842                                                                                                                                                                                                                                                                                 | -                                                               | EC:6.3.2.19 | IPR003126; PTHR21725 (PANTHER)                                      |
| Caenorhabditis elegans  | briggsae cbr-snx-1 protein                    | 9  | P:GO:0016192;<br>C:GO:0043231;<br>P:GO:0007126;<br>P:GO:0018991;<br>F:GO:0005515;<br>C:GO:0044444;<br>P:GO:0007154;<br>F:GO:0035091;<br>P:GO:0009792                                                                                                                                                                                                             | -                                                               |             | IPR001683; IPR015404; PTHR10555 (PANTHER), PTHR10555-SF28 (PANTHER) |
| Caenorhabditis briggsae | choline dehydroge-se                          | 4  | P:GO:0006066;<br>P:GO:0000003;<br>F:GO:0016614;<br>F:GO:0050660                                                                                                                                                                                                                                                                                                  | -                                                               |             | -                                                                   |
| -                       | -                                             | 0  |                                                                                                                                                                                                                                                                                                                                                                  |                                                                 |             | -                                                                   |
| Loa loa                 | myosin xviiiia                                | 2  | C:GO:0005856;<br>F:GO:0005488                                                                                                                                                                                                                                                                                                                                    | -                                                               |             | -                                                                   |
| Loa loa                 | af153723_1novel immunogenic protein nip-2     | 0  |                                                                                                                                                                                                                                                                                                                                                                  | F:GO:0003735;<br>C:GO:0005739;<br>P:GO:0006412;<br>C:GO:0005840 |             | -                                                                   |
| -                       | -                                             | 0  |                                                                                                                                                                                                                                                                                                                                                                  |                                                                 |             | -                                                                   |
| Brugia malayi           | d- mismatch repair protein containing protein | 21 | P:GO:0051257;<br>F:GO:0032407;<br>P:GO:0045950;<br>P:GO:0043060;<br>P:GO:0007283;<br>C:GO:0005712;<br>P:GO:0000712;<br>P:GO:0006303;<br>P:GO:0008630;<br>F:GO:0003697;<br>P:GO:0007060;<br>C:GO:0000795;<br>P:GO:0016446;<br>C:GO:0001673;<br>P:GO:0000239;<br>P:GO:0048477;<br>F:GO:0032137;<br>P:GO:0000289;<br>C:GO:0032389;<br>P:GO:0006298;<br>P:GO:0045190 | -                                                               |             | IPR002099; IPR011186                                                |
| Caenorhabditis elegans  | briggsae cbr-lpd-7 protein                    | 2  | P:GO:0042254;<br>C:GO:0031981                                                                                                                                                                                                                                                                                                                                    | -                                                               |             | -                                                                   |
| -                       | -                                             | 0  |                                                                                                                                                                                                                                                                                                                                                                  |                                                                 |             | SignalP (SIGNALP)                                                   |
| -                       | -                                             | 0  |                                                                                                                                                                                                                                                                                                                                                                  |                                                                 |             | -                                                                   |

|                         |                                                   |    |                                                                                                                                                                       |                                                                                  |             |                                                                                                                                            |
|-------------------------|---------------------------------------------------|----|-----------------------------------------------------------------------------------------------------------------------------------------------------------------------|----------------------------------------------------------------------------------|-------------|--------------------------------------------------------------------------------------------------------------------------------------------|
| Caenorhabditis elegans  | d--directed r- polymerases and iii subunit rpabc4 | 10 | F:GO:0003899;<br>F:GO:0046872;<br>P:GO:0040035;<br>F:GO:0003677;<br>P:GO:0002119;<br>P:GO:0040017;<br>P:GO:0009792;<br>P:GO:0040015;<br>P:GO:0006350;<br>C:GO:0005634 | -                                                                                | EC:2.7.7.6  | -                                                                                                                                          |
| Caenorhabditis briggsae | glycyl-tr- synthetase                             | 6  | P:GO:0015966;<br>F:GO:0046983;<br>F:GO:0000166;<br>P:GO:0006418;<br>C:GO:0044464;<br>F:GO:0004820                                                                     | -                                                                                | EC:6.1.1.14 | -                                                                                                                                          |
| Caenorhabditis briggsae | ring finger protein 14                            | 0  |                                                                                                                                                                       | F:GO:0046872;<br>F:GO:0008270;<br>F:GO:0005515                                   |             | IPR001841; IPR002867; IPR006575;<br>IPR016135; IPR017907; PTHR11685<br>(PANTHER), PTHR11685:SF7<br>(PANTHER), SSF57850 (SUPERFAMILY)       |
| Drosophila sechellia    | cg4299                                            | 4  | F:GO:0004864;<br>F:GO:0030332;<br>P:GO:0035308;<br>C:GO:0005634                                                                                                       | -                                                                                |             | IPR002164; PTHR11875:SF9<br>(PANTHER), SSF143113 (SUPERFAMILY)                                                                             |
| Brugia malayi           | enth domain containing protein                    | 0  |                                                                                                                                                                       | F:GO:0003674;<br>P:GO:0008283;<br>P:GO:0048488;<br>C:GO:0005794;<br>P:GO:0007269 |             | IPR001026; IPR008942; IPR013809;<br>PTHR12276 (PANTHER),<br>PTHR12276:SF12 (PANTHER)                                                       |
| Caenorhabditis elegans  | atp-binding sub-family b (mdr tap) member 10      | 5  | F:GO:0042626;<br>P:GO:0055085;<br>F:GO:0005524;<br>C:GO:0016021;<br>C:GO:0031966                                                                                      | -                                                                                |             | IPR001140; IPR011527; IPR017940;<br>G3DSA:1.20.1560.10 (GENE3D),<br>PTHR19242 (PANTHER),<br>PTHR19242:SF76 (PANTHER), SignalP<br>(SIGNALP) |
| Loa loa                 | si:busm1- protein                                 | 0  |                                                                                                                                                                       |                                                                                  |             | -                                                                                                                                          |
| Danio rerio             | si:busm1- protein                                 | 0  |                                                                                                                                                                       | F:GO:0003677                                                                     |             | -                                                                                                                                          |
|                         |                                                   | 0  |                                                                                                                                                                       |                                                                                  |             | -                                                                                                                                          |
| Caenorhabditis briggsae | d- repair transcription protein met18 mms19       | 0  |                                                                                                                                                                       | F:GO:0005488                                                                     |             | PTHR12891 (PANTHER), SignalP<br>(SIGNALP)                                                                                                  |
| Caenorhabditis elegans  | ribosome recycling factor family protein          | 3  | P:GO:0034645;<br>P:GO:0010467;<br>P:GO:0044238                                                                                                                        | -                                                                                |             | IPR002661; IPR016001;<br>G3DSA:1.10.132.20 (GENE3D)                                                                                        |
| Loa loa                 | suppression of tumorigenicity                     | 6  | C:GO:0016020;<br>P:GO:0040018;<br>P:GO:0000003;<br>F:GO:0005488;<br>P:GO:0010171;<br>P:GO:0002119                                                                     | -                                                                                |             | IPR007311                                                                                                                                  |
|                         |                                                   | 0  |                                                                                                                                                                       |                                                                                  |             | -                                                                                                                                          |
| Caenorhabditis elegans  | e1a binding protein p400                          | 5  | P:GO:0040035;<br>P:GO:0009792;<br>P:GO:0002119;<br>P:GO:0040010;<br>P:GO:0040011                                                                                      | -                                                                                |             | -                                                                                                                                          |

|                         |                                                    |    |                                                                                                                                                                                                                                                                                                                                                                                   |                                                                                                                                     |             |                                                                                                                                                                    |
|-------------------------|----------------------------------------------------|----|-----------------------------------------------------------------------------------------------------------------------------------------------------------------------------------------------------------------------------------------------------------------------------------------------------------------------------------------------------------------------------------|-------------------------------------------------------------------------------------------------------------------------------------|-------------|--------------------------------------------------------------------------------------------------------------------------------------------------------------------|
| Loa loa                 | suppressor of t-cell receptor sig-ling 1           | 0  |                                                                                                                                                                                                                                                                                                                                                                                   | F:GO:0004619;<br>F:GO:0004872;<br>P:GO:0016070;<br>F:GO:0003824;<br>C:GO:0005622;<br>F:GO:0016853                                   |             | IPR013078; G3DSA:3.40.50.1240 (GENE3D), PTHR16469 (PANTHER), SSF53254 (SUPERFAMILY)                                                                                |
| Caenorhabditis briggsae | upf0487 protein c17orf71-like protein              | 1  | P:GO:0000184                                                                                                                                                                                                                                                                                                                                                                      |                                                                                                                                     |             | IPR019354; PTHR13091 (PANTHER)                                                                                                                                     |
| Caenorhabditis briggsae | cg6729 cg6729-pa                                   | 1  | P:GO:0000184                                                                                                                                                                                                                                                                                                                                                                      | -                                                                                                                                   |             | IPR019354; PTHR13091 (PANTHER)                                                                                                                                     |
| Drosophila sechellia    | middle molecular weight neurofilament protein nf-m | 0  |                                                                                                                                                                                                                                                                                                                                                                                   | F:GO:0003676;<br>F:GO:0005524;<br>C:GO:0005882;<br>F:GO:0000166;<br>F:GO:0005198;<br>F:GO:0008270;<br>P:GO:0006298;<br>F:GO:0030983 |             | -                                                                                                                                                                  |
| Caenorhabditis briggsae | eukaryotic initiation factor 4a-iii                | 22 | P:GO:0000184;<br>P:GO:0017148;<br>P:GO:0051028;<br>F:GO:0005515;<br>C:GO:0016607;<br>P:GO:0040010;<br>F:GO:0008143;<br>P:GO:0006397;<br>F:GO:0003743;<br>P:GO:0045727;<br>C:GO:0005737;<br>P:GO:0018996;<br>C:GO:0005681;<br>P:GO:0009792;<br>P:GO:0008380;<br>P:GO:0002119;<br>P:GO:0001703;<br>F:GO:0004004;<br>P:GO:0006364;<br>F:GO:0005524;<br>P:GO:0040035;<br>P:GO:0000910 | -                                                                                                                                   |             | IPR000629; IPR001650; IPR011545; IPR014001; IPR014014; IPR014021; G3DSA:3.40.50.300 (GENE3D), PTHR10967 (PANTHER), PTHR10967:SF2 (PANTHER), SSF52540 (SUPERFAMILY) |
| Caenorhabditis briggsae | protein phosphatase regulatory subunit 3c          | 5  | P:GO:0070873;<br>F:GO:0005515;<br>C:GO:0000267;<br>F:GO:0004721;<br>P:GO:0005978                                                                                                                                                                                                                                                                                                  | -                                                                                                                                   | EC:3.1.3.16 | IPR005036; PTHR12307 (PANTHER)                                                                                                                                     |

|                         |                                  |    |                                                                                                                                                                                                                                                                                                                                                                                                    |   |                                                         |                                                                                                                                                                          |
|-------------------------|----------------------------------|----|----------------------------------------------------------------------------------------------------------------------------------------------------------------------------------------------------------------------------------------------------------------------------------------------------------------------------------------------------------------------------------------------------|---|---------------------------------------------------------|--------------------------------------------------------------------------------------------------------------------------------------------------------------------------|
| Loa loa                 | d- mismatch repair protein msh6  | 23 | F:GO:0032357;<br>P:GO:0045910;<br>P:GO:0008340;<br>F:GO:0032405;<br>F:GO:0000400;<br>F:GO:0043531;<br>P:GO:0008630;<br>P:GO:0009411;<br>F:GO:0032142;<br>F:GO:0032143;<br>P:GO:0016446;<br>F:GO:0000287;<br>P:GO:0051096;<br>C:GO:0000790;<br>F:GO:0016887;<br>F:GO:0042803;<br>F:GO:0003682;<br>F:GO:0032137;<br>P:GO:0006298;<br>F:GO:0005524;<br>C:GO:0032301;<br>P:GO:0043570;<br>P:GO:0045190 | - |                                                         | IPR000432; IPR007695; IPR007696;<br>IPR007860; IPR007861; IPR015536;<br>IPR016151; G3DSA:1.10.1420.10<br>(GENE3D), G3DSA:3.40.50.300<br>(GENE3D), SSF52540 (SUPERFAMILY) |
| Loa loa                 | phd finger protein 14            | 1  | F:GO:0046872                                                                                                                                                                                                                                                                                                                                                                                       | - |                                                         | IPR001965; IPR011011; IPR013083;<br>IPR019786; PTHR13793 (PANTHER),<br>PTHR13793:SF9 (PANTHER)                                                                           |
| Caenorhabditis elegans  | member ras oncogene family       | 23 | C:GO:0001750;<br>C:GO:0070382;<br>P:GO:0032402;<br>P:GO:0043320;<br>P:GO:0040007;<br>P:GO:0006913;<br>P:GO:0006605;<br>C:GO:0042470;<br>F:GO:0005525;<br>C:GO:0005764;<br>C:GO:0005794;<br>C:GO:0005770;<br>P:GO:0030318;<br>C:GO:0030425;<br>P:GO:0007264;<br>P:GO:0007596;<br>C:GO:0030667;<br>P:GO:0002119;<br>F:GO:0003924;<br>F:GO:0031489;<br>P:GO:0043316;<br>P:GO:0040035;<br>C:GO:0016324 | - | EC:3.6.5.1;<br>EC:3.6.5.2;<br>EC:3.6.5.3;<br>EC:3.6.5.4 |                                                                                                                                                                          |
| Caenorhabditis briggsae | methionine-r-sulfoxide reductase | 2  | P:GO:0055114;<br>F:GO:0008113                                                                                                                                                                                                                                                                                                                                                                      | - | EC:1.8.4.11                                             | IPR002579; IPR011057; PTHR10173<br>(PANTHER)                                                                                                                             |
|                         | -                                | 0  |                                                                                                                                                                                                                                                                                                                                                                                                    |   |                                                         | SignalP (SIGNALP)                                                                                                                                                        |



|                         |                                                           |    |                                                                                                                                                                       |   |             |                                                                                                                                                        |
|-------------------------|-----------------------------------------------------------|----|-----------------------------------------------------------------------------------------------------------------------------------------------------------------------|---|-------------|--------------------------------------------------------------------------------------------------------------------------------------------------------|
| Loa loa                 | zygote defective: embryonic lethal family member (zyg-12) | 10 | P:GO:0006810;<br>P:GO:0006996;<br>C:GO:0043231;<br>C:GO:0043234;<br>C:GO:0005856;<br>C:GO:0044446;<br>F:GO:0005515;<br>C:GO:0044444;<br>P:GO:0051641;<br>C:GO:0016020 | - |             | IPR008636; PTHR18947 (PANTHER),<br>PTHR18947:SF5 (PANTHER)                                                                                             |
| Loa loa                 | zygote defective: embryonic lethal family member (zyg-12) | 10 | C:GO:0043234;<br>C:GO:0015630;<br>P:GO:0051640;<br>P:GO:0000226;<br>C:GO:0044425;<br>F:GO:0005515;<br>C:GO:0031090;<br>P:GO:0016197;<br>C:GO:0044430;<br>C:GO:0005794 | - |             | IPR008636                                                                                                                                              |
| Caenorhabditis elegans  | gamma-glutamyltranspeptidase 1                            | 1  | F:GO:0003840                                                                                                                                                          |   | EC:2.3.2.2  | IPR000101; SSF56235 (SUPERFAMILY)                                                                                                                      |
| Caenorhabditis elegans  | p-type had subfamily ic                                   | 5  | C:GO:0016021;<br>F:GO:0015662;<br>P:GO:0006754;<br>F:GO:0005524;<br>P:GO:0006812                                                                                      | - |             | IPR001757; IPR006068;<br>G3DSA:1.20.1110.10 (GENE3D),<br>PTHR11939:SF63 (PANTHER), SignalP<br>(SIGNALP), SSF81665 (SUPERFAMILY)                        |
|                         | -                                                         | 0  |                                                                                                                                                                       |   |             | -                                                                                                                                                      |
|                         | -                                                         | 0  |                                                                                                                                                                       |   |             | -                                                                                                                                                      |
|                         | -                                                         | 0  |                                                                                                                                                                       |   |             | -                                                                                                                                                      |
| Rattus norvegicus       | ribosomal protein s10                                     | 4  | C:GO:0005730;<br>F:GO:0005515;<br>C:GO:0022627;<br>P:GO:0006414                                                                                                       | - |             | IPR005326; PTHR12146 (PANTHER)                                                                                                                         |
| Brugia malayi           | methylenetetrahydrofolate reductase                       | 7  | P:GO:0008015;<br>F:GO:0005515;<br>P:GO:0040010;<br>P:GO:0055114;<br>C:GO:0005829;<br>F:GO:0004489;<br>P:GO:0006555                                                    | - | EC:1.5.1.20 | IPR003171; G3DSA:3.20.20.220<br>(GENE3D), PTHR21091 (PANTHER),<br>PTHR21091:SF1 (PANTHER), SSF51730<br>(SUPERFAMILY)                                   |
|                         | -                                                         | 0  |                                                                                                                                                                       |   |             | -                                                                                                                                                      |
| Caenorhabditis elegans  | hatching enzyme                                           | 3  | F:GO:0008233;<br>P:GO:0000003;<br>P:GO:0007413                                                                                                                        | - |             | IPR001506; IPR006026;<br>G3DSA:3.40.390.10 (GENE3D),<br>PTHR10127 (PANTHER),<br>PTHR10127:SF73 (PANTHER), SignalP<br>(SIGNALP), SSF55486 (SUPERFAMILY) |
| Haemonchus contortus    | peptidyl-prolyl cis-trans isomerase e                     | 9  | P:GO:0006457;<br>P:GO:0045449;<br>F:GO:0003723;<br>F:GO:0005515;<br>F:GO:0016018;<br>C:GO:0005634;<br>F:GO:0003755;<br>F:GO:0000166;<br>P:GO:0006396                  | - | EC:5.2.1.8  | IPR000504; IPR002130; IPR012677;<br>IPR015891; IPR020892; PTHR11071<br>(PANTHER), PTHR11071:SF68<br>(PANTHER), SSF54928 (SUPERFAMILY)                  |
| Caenorhabditis briggsae | Hypothetical protein CBG03410 [Caenorhabditis briggsae]   | 0  |                                                                                                                                                                       |   |             | SignalP (SIGNALP)                                                                                                                                      |

|                         |                                                       |    |                                                                                                                                                                                                                                                                                              |   |                                                                                                                                                                    |
|-------------------------|-------------------------------------------------------|----|----------------------------------------------------------------------------------------------------------------------------------------------------------------------------------------------------------------------------------------------------------------------------------------------|---|--------------------------------------------------------------------------------------------------------------------------------------------------------------------|
| Caenorhabditis briggsae | integrin alpha-5                                      | 17 | C:GO:0005925;<br>C:GO:0005911;<br>P:GO:0018991;<br>C:GO:0032587;<br>P:GO:0007155;<br>P:GO:0040007;<br>P:GO:0006898;<br>P:GO:0007229;<br>P:GO:0040039;<br>C:GO:0008305;<br>P:GO:0009792;<br>F:GO:0070851;<br>P:GO:0050731;<br>P:GO:0002119;<br>P:GO:0035313;<br>F:GO:0004872;<br>P:GO:0032940 | - | IPR000413; IPR013517; IPR013519;<br>G3DSA:2.130.10.130 (GENE3D),<br>PTHR23220 (PANTHER),<br>PTHR23220:SF11 (PANTHER), PSS1470<br>(PROFILE), SSF69318 (SUPERFAMILY) |
| Caenorhabditis elegans  | jmjc domain containing protein                        | 5  | F:GO:0046872;<br>P:GO:0000003;<br>F:GO:0016491;<br>P:GO:0008152;<br>P:GO:0006974                                                                                                                                                                                                             | - | IPR003347; PTHR23123 (PANTHER),<br>SSF51197 (SUPERFAMILY)                                                                                                          |
| Caenorhabditis remanei  | ubiquitin-conjugating enzyme e2i                      | 16 | F:GO:0016566;<br>P:GO:0007275;<br>C:GO:0016605;<br>F:GO:0019789;<br>P:GO:0051246;<br>P:GO:0051301;<br>P:GO:0045892;<br>P:GO:0006511;<br>P:GO:0007088;<br>C:GO:0000795;<br>P:GO:0007059;<br>P:GO:0016925;<br>F:GO:0019899;<br>F:GO:0008134;<br>F:GO:0005524;<br>P:GO:0044419                  | - | -                                                                                                                                                                  |
| -                       | -                                                     | 0  |                                                                                                                                                                                                                                                                                              |   | -                                                                                                                                                                  |
| Caenorhabditis briggsae | endoplasmic reticulum multispan transmembrane protein | 3  | P:GO:0040015;<br>P:GO:0040017;<br>P:GO:0040010                                                                                                                                                                                                                                               | - | IPR007594; SignalP (SIGNALP)                                                                                                                                       |
| -                       | -                                                     | 0  |                                                                                                                                                                                                                                                                                              |   | SignalP (SIGNALP)                                                                                                                                                  |
| -                       | -                                                     | 0  |                                                                                                                                                                                                                                                                                              |   | -                                                                                                                                                                  |
| -                       | -                                                     | 0  |                                                                                                                                                                                                                                                                                              |   | -                                                                                                                                                                  |
| -                       | -                                                     | 0  |                                                                                                                                                                                                                                                                                              |   | -                                                                                                                                                                  |

|                         |                                                           |    |                                                                                                                                                                                                                                                            |                                                                 |                                   |                                                                                                                                                                      |
|-------------------------|-----------------------------------------------------------|----|------------------------------------------------------------------------------------------------------------------------------------------------------------------------------------------------------------------------------------------------------------|-----------------------------------------------------------------|-----------------------------------|----------------------------------------------------------------------------------------------------------------------------------------------------------------------|
| Caenorhabditis briggsae | alpha gamma epsilon                                       | 15 | F:GO:0008565;<br>P:GO:0040010;<br>P:GO:0009306;<br>P:GO:0016183;<br>C:GO:0008021;<br>P:GO:0000003;<br>C:GO:0030131;<br>P:GO:0002119;<br>P:GO:0007269;<br>F:GO:0005515;<br>P:GO:0040011;<br>P:GO:0006886;<br>C:GO:0044431;<br>P:GO:0009792;<br>P:GO:0001703 | -                                                               |                                   | IPR002553; IPR011989; IPR016024;<br>PTHR22780 (PANTHER),<br>PTHR22780:SF5 (PANTHER)                                                                                  |
| Caenorhabditis elegans  | 4-hydroxyphenylpyruvate dioxyge-se                        | 7  | F:GO:0046872;<br>P:GO:0006572;<br>P:GO:0040010;<br>P:GO:0055114;<br>F:GO:0003868;<br>P:GO:0006559;<br>F:GO:0004462                                                                                                                                         | -                                                               | EC:1.13.11.2<br>7; EC:4.4.1.5     | IPR004360; IPR005956;<br>G3DSA:3.10.180.10 (GENE3D),<br>SSF54593 (SUPERFAMILY)                                                                                       |
| Caenorhabditis briggsae | elegans protein confirmed by transcript evidence          | 0  |                                                                                                                                                                                                                                                            |                                                                 |                                   | PTHR22739 (PANTHER)                                                                                                                                                  |
| Caenorhabditis briggsae | hypothetical kda protein in chromosome                    | 0  |                                                                                                                                                                                                                                                            |                                                                 |                                   | -                                                                                                                                                                    |
| Ectocarpus siliculosus  | conserved unknown protein [Ectocarpus siliculosus]        | 0  |                                                                                                                                                                                                                                                            | F:GO:0016810;<br>F:GO:0016787;<br>F:GO:0003824;<br>F:GO:0008270 |                                   | IPR015517                                                                                                                                                            |
| Adineta vaga            | transposase                                               | 0  |                                                                                                                                                                                                                                                            |                                                                 |                                   | -                                                                                                                                                                    |
|                         | -                                                         | 0  |                                                                                                                                                                                                                                                            |                                                                 |                                   | -                                                                                                                                                                    |
|                         | -                                                         | 0  |                                                                                                                                                                                                                                                            |                                                                 |                                   | IPR001202; PRO1217 (PRINTS),<br>G3DSA:2.20.70.10 (GENE3D)                                                                                                            |
| Caenorhabditis elegans  | camp-dependent protein ki-se catalytic                    | 11 | F:GO:0004872;<br>P:GO:0006468;<br>F:GO:0047696;<br>C:GO:0043197;<br>C:GO:0043198;<br>C:GO:0030424;<br>F:GO:0005524;<br>P:GO:0007165;<br>F:GO:0004703;<br>C:GO:0005634;<br>C:GO:0045202                                                                     | -                                                               | EC:2.7.11.15<br>;<br>EC:2.7.11.16 | IPR000239; IPR000342; IPR000719;<br>IPR011009; IPR015743; IPR016137;<br>IPR017441; IPR017442;<br>G3DSA:3.30.200.20 (GENE3D),<br>PTHR22985 (PANTHER)                  |
|                         | -                                                         | 0  |                                                                                                                                                                                                                                                            |                                                                 |                                   | SignalP (SIGNALP)                                                                                                                                                    |
| Caenorhabditis elegans  | dihydroliipoamide branched chain transacylase e2          | 4  | P:GO:0009792;<br>F:GO:0005515;<br>F:GO:0016740;<br>C:GO:0042645                                                                                                                                                                                            | -                                                               |                                   | IPR000089; IPR003016; IPR004167;<br>IPR011053; IPR015761;<br>G3DSA:2.40.50.100 (GENE3D),<br>G3DSA:3.30.559.10 (GENE3D),<br>PTHR23151 (PANTHER), SignalP<br>(SIGNALP) |
|                         | -                                                         | 0  |                                                                                                                                                                                                                                                            |                                                                 |                                   | SignalP (SIGNALP)                                                                                                                                                    |
| Brugia malayi           | telomere length regulation protein tel2 homolog isoform 1 | 4  | P:GO:0009314;<br>P:GO:0065007;<br>C:GO:0044424;<br>P:GO:0006974                                                                                                                                                                                            | -                                                               |                                   | PTHR15830 (PANTHER),<br>PTHR15830:SF7 (PANTHER), SignalP<br>(SIGNALP)                                                                                                |
| Caenorhabditis elegans  | immunoglobulin i-set domain containing protein            | 0  |                                                                                                                                                                                                                                                            |                                                                 |                                   | IPR007110; IPR013783; PTHR10075<br>(PANTHER), PTHR10075:SF2<br>(PANTHER), SignalP (SIGNALP)                                                                          |

|                         |                                                       |    |                                                                                                                                                                                                                                                                                                                                                                                   |                                                |                                                                                                                                                                             |
|-------------------------|-------------------------------------------------------|----|-----------------------------------------------------------------------------------------------------------------------------------------------------------------------------------------------------------------------------------------------------------------------------------------------------------------------------------------------------------------------------------|------------------------------------------------|-----------------------------------------------------------------------------------------------------------------------------------------------------------------------------|
| Caenorhabditis briggsae | coatomer subunit beta                                 | 11 | C:GO:0030126;<br>C:GO:0005829;<br>P:GO:0008340;<br>P:GO:0006890;<br>P:GO:0000003;<br>P:GO:0032940;<br>P:GO:0006891;<br>F:GO:0005515;<br>P:GO:0048205;<br>P:GO:0006886;<br>F:GO:0005198                                                                                                                                                                                            | -                                              | IPR002553; IPR011989; IPR016024;<br>PTHR10635 (PANTHER)                                                                                                                     |
| Caenorhabditis briggsae | sinc finger protein ci-zf -148                        | 0  |                                                                                                                                                                                                                                                                                                                                                                                   | F:GO:0008270;<br>F:GO:0005515;<br>C:GO:0005622 | IPR007087; IPR015880                                                                                                                                                        |
| Caenorhabditis briggsae | temporarily assigned gene -me family member (tag-333) | 2  | F:GO:0005488;<br>P:GO:0007165                                                                                                                                                                                                                                                                                                                                                     | -                                              | PTHR23101 (PANTHER),<br>PTHR23101:SF1 (PANTHER)                                                                                                                             |
| -                       | -                                                     | 0  |                                                                                                                                                                                                                                                                                                                                                                                   |                                                | -                                                                                                                                                                           |
| Caenorhabditis briggsae | exocyst complex component 6                           | 2  | C:GO:0000145;<br>P:GO:0006904                                                                                                                                                                                                                                                                                                                                                     | -                                              | IPR007225                                                                                                                                                                   |
| Brugia malayi           | protein ki-se domain containing protein               | 22 | P:GO:0001501;<br>P:GO:0009888;<br>P:GO:0006984;<br>P:GO:0031016;<br>F:GO:0005515;<br>P:GO:0065008;<br>P:GO:0046777;<br>P:GO:0010646;<br>P:GO:0071216;<br>P:GO:0032057;<br>P:GO:0001503;<br>F:GO:0004694;<br>P:GO:0034976;<br>C:GO:0044425;<br>P:GO:0006915;<br>P:GO:0007165;<br>P:GO:0044093;<br>P:GO:0016043;<br>P:GO:0030154;<br>C:GO:0005783;<br>P:GO:0046903;<br>P:GO:0006986 | -                                              | IPR000719; IPR008271; IPR011009;<br>IPR017441; IPR017442;<br>G3DSA:1.10.510.10 (GENE3D),<br>G3DSA:3.30.200.20 (GENE3D),<br>PTHR11042 (PANTHER),<br>PTHR11042:SF12 (PANTHER) |
| Homo sapiens            | immunoglobulin lambda 3 light chain                   | 1  | F:GO:0003823                                                                                                                                                                                                                                                                                                                                                                      | -                                              | IPR003006; IPR003597; IPR007110;<br>IPR013106; IPR013783; PTHR23267<br>(PANTHER), PTHR23267:SF1<br>(PANTHER), SSF48726 (SUPERFAMILY)                                        |
| Homo sapiens            | immunoglobulin lambda light chain                     | 0  |                                                                                                                                                                                                                                                                                                                                                                                   |                                                | IPR003006; IPR003597; IPR007110;<br>IPR013106; IPR013783; PTHR23267<br>(PANTHER), PTHR23267:SF1<br>(PANTHER), SSF48726 (SUPERFAMILY)                                        |
| Brugia malayi           | abhydrolase domain containing 2                       | 4  | P:GO:0006629;<br>P:GO:0009611;<br>F:GO:0016298;<br>C:GO:0016020                                                                                                                                                                                                                                                                                                                   | -                                              | IPR000073; G3DSA:3.40.50.1820<br>(GENE3D), PTHR10794 (PANTHER),<br>PTHR10794:SF9 (PANTHER), SSF53474<br>(SUPERFAMILY)                                                       |
| Caenorhabditis elegans  | o-sialoglycoprotein endopeptidase-like 1              | 2  | C:GO:0005739;<br>F:GO:0070011                                                                                                                                                                                                                                                                                                                                                     | -                                              | IPR000905; IPR017861; SSF53067<br>(SUPERFAMILY)                                                                                                                             |
| Caenorhabditis elegans  | sjchgc00146 partial                                   | 0  |                                                                                                                                                                                                                                                                                                                                                                                   |                                                | -                                                                                                                                                                           |
| -                       | -                                                     | 0  |                                                                                                                                                                                                                                                                                                                                                                                   |                                                | -                                                                                                                                                                           |

|                         |                                                       |    |                                                                                                                                                                                        |   |            |                                                                                                                                             |
|-------------------------|-------------------------------------------------------|----|----------------------------------------------------------------------------------------------------------------------------------------------------------------------------------------|---|------------|---------------------------------------------------------------------------------------------------------------------------------------------|
| Caenorhabditis briggsae | dead (asp-glu-ala-asp) box polypeptide 20             | 11 | C:GO:0032991;<br>P:GO:0000003;<br>F:GO:0005515;<br>P:GO:0040010;<br>P:GO:0006898;<br>P:GO:0006397;<br>F:GO:0004386;<br>P:GO:0008380;<br>P:GO:0016481;<br>C:GO:0044451;<br>P:GO:0043065 | - |            | IPR001650; G3DSA:3.40.50.300 (GENE3D), PTHR10967 (PANTHER), PTHR10967:SF13 (PANTHER), SSF52540 (SUPERFAMILY)                                |
| Caenorhabditis elegans  | dead (asp-glu-ala-asp) box polypeptide 20             | 8  | C:GO:0032991;<br>F:GO:0005515;<br>C:GO:0005737;<br>F:GO:0004386;<br>P:GO:0016481;<br>C:GO:0044451;<br>P:GO:0043065;<br>P:GO:0000387                                                    | - |            | IPR001650; G3DSA:3.40.50.300 (GENE3D), PTHR10967 (PANTHER), PTHR10967:SF13 (PANTHER), SSF52540 (SUPERFAMILY)                                |
| Caenorhabditis elegans  | dead (asp-glu-ala-asp) box polypeptide 20             | 8  | C:GO:0032991;<br>F:GO:0005515;<br>C:GO:0005737;<br>F:GO:0004386;<br>P:GO:0016481;<br>C:GO:0044451;<br>P:GO:0043065;<br>P:GO:0000387                                                    | - |            | IPR001650; G3DSA:3.40.50.300 (GENE3D), PTHR10967 (PANTHER), PTHR10967:SF13 (PANTHER), SSF52540 (SUPERFAMILY)                                |
| Caenorhabditis elegans  | subfamily member 13                                   | 1  | F:GO:0031072                                                                                                                                                                           | - |            | -                                                                                                                                           |
| Caenorhabditis briggsae | temporarily assigned gene -me family member (tag-163) | 1  | F:GO:0005515                                                                                                                                                                           | - |            | PTHR12583 (PANTHER), PTHR12583:SF1 (PANTHER)                                                                                                |
| Caenorhabditis elegans  | coenzyme q6 homolog                                   | 3  | F:GO:0016491;<br>P:GO:0008152;<br>C:GO:0005739                                                                                                                                         | - |            | IPR002938; IPR003042; IPR010971; IPR018168; G3DSA:3.50.50.60 (GENE3D), PTHR13789 (PANTHER), PTHR13789:SF5 (PANTHER), SSF51905 (SUPERFAMILY) |
|                         | -                                                     | 0  |                                                                                                                                                                                        |   |            | -                                                                                                                                           |
| Caenorhabditis briggsae | d--directed r- polymerase ii largest subunit          | 10 | F:GO:0003899;<br>F:GO:0004672;<br>P:GO:0006367;<br>C:GO:0005730;<br>F:GO:0046872;<br>F:GO:0031625;<br>P:GO:0008380;<br>C:GO:0005665;<br>F:GO:0003677;<br>P:GO:0006368                  | - | EC:2.7.7.6 | IPR000722; IPR006592; IPR007066; IPR007080; IPR007081; IPR007083; PTHR19376 (PANTHER), PTHR19376:SF14 (PANTHER), SSF64484 (SUPERFAMILY)     |
| Caenorhabditis briggsae | d--directed r- polymerase ii largest subunit          | 10 | F:GO:0003899;<br>F:GO:0004672;<br>P:GO:0006367;<br>C:GO:0005730;<br>F:GO:0046872;<br>F:GO:0031625;<br>P:GO:0008380;<br>C:GO:0005665;<br>F:GO:0003677;<br>P:GO:0006368                  | - | EC:2.7.7.6 | IPR000722; IPR006592; IPR007066; IPR007080; IPR007081; IPR007083; PTHR19376 (PANTHER), PTHR19376:SF14 (PANTHER), SSF64484 (SUPERFAMILY)     |

|                         |                                        |    |                                                                                                                                                                       |   |            |                                                                                                                                                                        |
|-------------------------|----------------------------------------|----|-----------------------------------------------------------------------------------------------------------------------------------------------------------------------|---|------------|------------------------------------------------------------------------------------------------------------------------------------------------------------------------|
| Caenorhabditis briggsae | d--directed r- polymerase ii largest   | 10 | F:GO:0003899;<br>F:GO:0004672;<br>P:GO:0006367;<br>C:GO:0005730;<br>F:GO:0046872;<br>F:GO:0031625;<br>P:GO:0008380;<br>C:GO:0005665;<br>F:GO:0003677;<br>P:GO:0006368 | - | EC:2.7.7.6 | IPR000722; IPR006592; IPR007066;<br>IPR007080; IPR007083; PTHR19376<br>(PANTHER), PTHR19376:SF14<br>(PANTHER), SSF64484 (SUPERFAMILY)                                  |
| Caenorhabditis briggsae | d--directed r- polymerase ii largest   | 10 | F:GO:0003899;<br>F:GO:0004672;<br>P:GO:0006367;<br>C:GO:0005730;<br>F:GO:0046872;<br>F:GO:0031625;<br>P:GO:0008380;<br>C:GO:0005665;<br>F:GO:0003677;<br>P:GO:0006368 | - | EC:2.7.7.6 | IPR000722; IPR006592; IPR007066;<br>IPR007080; IPR007081; IPR007083;<br>PTHR19376 (PANTHER),<br>PTHR19376:SF14 (PANTHER),<br>SSF64484 (SUPERFAMILY)                    |
| Caenorhabditis briggsae | zinc finger protein 183                | 6  | F:GO:0003676;<br>P:GO:0009792;<br>P:GO:0040007;<br>F:GO:0008270;<br>F:GO:0005515;<br>P:GO:0002119                                                                     | - |            | SignalIP (SIGNALP)                                                                                                                                                     |
| Caenorhabditis briggsae | zinc finger protein 183                | 6  | F:GO:0003676;<br>P:GO:0009792;<br>P:GO:0040007;<br>F:GO:0008270;<br>F:GO:0005515;<br>P:GO:0002119                                                                     | - |            | SignalIP (SIGNALP)                                                                                                                                                     |
| Caenorhabditis briggsae | zinc finger protein 183                | 6  | F:GO:0003676;<br>P:GO:0009792;<br>P:GO:0040007;<br>F:GO:0008270;<br>F:GO:0005515;<br>P:GO:0002119                                                                     | - |            | IPR000571; IPR001841; IPR013083;<br>IPR017907; IPR018957;<br>G3DSA:4.10.1000.10 (GENE3D),<br>PTHR12930 (PANTHER), SSF57850<br>(SUPERFAMILY), SSF90229<br>(SUPERFAMILY) |
| Caenorhabditis elegans  | zinc finger protein 183                | 5  | F:GO:0046872;<br>P:GO:0009792;<br>P:GO:0040007;<br>F:GO:0005515;<br>P:GO:0002119                                                                                      | - |            | SignalIP (SIGNALP)                                                                                                                                                     |
| Caenorhabditis briggsae | zinc finger protein 183                | 6  | F:GO:0003676;<br>P:GO:0009792;<br>P:GO:0040007;<br>F:GO:0008270;<br>F:GO:0005515;<br>P:GO:0002119                                                                     | - |            | SignalIP (SIGNALP)                                                                                                                                                     |
| Caenorhabditis elegans  | probable inner membrane protein oxa1l2 | 1  | C:GO:0016020                                                                                                                                                          | - |            | SignalIP (SIGNALP)                                                                                                                                                     |

|                         |                                                         |    |                                                                                                                                                                       |   |             |                                                                                                                                                          |
|-------------------------|---------------------------------------------------------|----|-----------------------------------------------------------------------------------------------------------------------------------------------------------------------|---|-------------|----------------------------------------------------------------------------------------------------------------------------------------------------------|
| Brugia malayi           | amine oxidase (flavin containing) domain 1              | 10 | F:GO:0034649;<br>P:GO:0034720;<br>F:GO:0008270;<br>F:GO:0034647;<br>P:GO:0006349;<br>P:GO:0044030;<br>F:GO:0034648;<br>P:GO:0043046;<br>F:GO:0050660;<br>C:GO:0005634 | - |             | IPR002937; IPR007526; IPR009057;<br>IPR011991; G3DSA:3.50.50.60<br>(GENE3D), PTHR10742 (PANTHER),<br>PTHR10742:SF33 (PANTHER),<br>SSF51905 (SUPERFAMILY) |
| Brugia malayi           | loc494846 protein                                       | 1  | C:GO:0044464                                                                                                                                                          | - |             | PD968187 (PRODOM), PTHR23161<br>(PANTHER), PTHR23161:SF2<br>(PANTHER)                                                                                    |
| Brugia malayi           | protein cip2a                                           | 1  | C:GO:0044464                                                                                                                                                          | - |             | PD968187 (PRODOM), PTHR23161<br>(PANTHER), PTHR23161:SF2<br>(PANTHER)                                                                                    |
| Caenorhabditis briggsae | briggsae cbr-cyp-33c9 protein                           | 5  | F:GO:0020037;<br>P:GO:0055114;<br>F:GO:0016491;<br>F:GO:0009055;<br>P:GO:0040010                                                                                      | - |             | -                                                                                                                                                        |
| Caenorhabditis elegans  | gtp-binding protein ard-1                               | 5  | C:GO:0043231;<br>F:GO:0046872;<br>P:GO:0043687;<br>C:GO:0044444;<br>F:GO:0005525                                                                                      | - |             | IPR000315; IPR001841; IPR007087;<br>IPR013083; IPR017907; PTHR13712<br>(PANTHER), PTHR13712:SF58<br>(PANTHER), SSF57850 (SUPERFAMILY)                    |
| Caenorhabditis briggsae | prefoldin subunit 3                                     | 8  | P:GO:0040035;<br>P:GO:0009792;<br>P:GO:0006457;<br>P:GO:0035046;<br>F:GO:0051082;<br>P:GO:0006898;<br>C:GO:0016272;<br>P:GO:0002009                                   | - |             | IPR004127; IPR009053; PTHR12409<br>(PANTHER)                                                                                                             |
| Caenorhabditis elegans  | ain family member (clp-1)                               | 3  | C:GO:0044464;<br>P:GO:0008219;<br>F:GO:0004197                                                                                                                        | - | EC:3.4.22.0 | -                                                                                                                                                        |
| Caenorhabditis briggsae | mitochondrial import inner membrane translocase subunit | 8  | C:GO:0005743;<br>F:GO:0046872;<br>P:GO:0045039;<br>P:GO:0040035;<br>C:GO:0042719;<br>P:GO:0040011;<br>P:GO:0009792;<br>P:GO:0040018                                   | - |             | IPR004217; PTHR11038 (PANTHER),<br>PTHR11038:SF8 (PANTHER),<br>SSF144122 (SUPERFAMILY)                                                                   |

|                             |                                                    |    |                                                                                                                                                                                                                                                                                                                                                                                                                                                                                          |   |            |   |
|-----------------------------|----------------------------------------------------|----|------------------------------------------------------------------------------------------------------------------------------------------------------------------------------------------------------------------------------------------------------------------------------------------------------------------------------------------------------------------------------------------------------------------------------------------------------------------------------------------|---|------------|---|
| Brugia malayi               | myh9 protein                                       | 41 | F:GO:0051295;<br>C:GO:0030863;<br>P:GO:0008360;<br>C:GO:0031594;<br>P:GO:0030048;<br>F:GO:0030898;<br>P:GO:0051295;<br>C:GO:0005913;<br>P:GO:0016337;<br>F:GO:0043531;<br>P:GO:0032796;<br>P:GO:0015031;<br>C:GO:0001772;<br>C:GO:0005829;<br>P:GO:0007520;<br>F:GO:0000146;<br>P:GO:0006509;<br>P:GO:0043534;<br>C:GO:0008305;<br>C:GO:0005819;<br>C:GO:0001726;<br>P:GO:0007132;<br>F:GO:0005391;<br>C:GO:0032154;<br>P:GO:0000904;<br>P:GO:0001768;<br>F:GO:0043495;<br>F:GO:0051015; | - | EC:3.6.3.9 | - |
| Brugia malayi               | myh9 protein                                       | 41 | C:GO:0030863;<br>P:GO:0008360;<br>C:GO:0031594;<br>P:GO:0030048;<br>F:GO:0030898;<br>P:GO:0051295;<br>C:GO:0005913;<br>P:GO:0016337;<br>F:GO:0043531;<br>P:GO:0032796;<br>P:GO:0015031;<br>C:GO:0001772;<br>C:GO:0005829;<br>P:GO:0007520;<br>F:GO:0000146;<br>P:GO:0006509;<br>P:GO:0043534;<br>C:GO:0008305;<br>C:GO:0005819;<br>C:GO:0001726;<br>P:GO:0007132;<br>F:GO:0005391;<br>C:GO:0032154;<br>P:GO:0000904;<br>P:GO:0001768;<br>F:GO:0043495;<br>F:GO:0051015;                  | - | EC:3.6.3.9 | - |
| Angiostrongylus cantonensis | hypothetical protein [Angiostrongylus cantonensis] | 0  |                                                                                                                                                                                                                                                                                                                                                                                                                                                                                          |   |            | - |



|                         |                                                                    |    |                                                                                                                                                                       |                                                                                                   |                                                         |                                                                                                                                                                                                 |
|-------------------------|--------------------------------------------------------------------|----|-----------------------------------------------------------------------------------------------------------------------------------------------------------------------|---------------------------------------------------------------------------------------------------|---------------------------------------------------------|-------------------------------------------------------------------------------------------------------------------------------------------------------------------------------------------------|
| Caenorhabditis elegans  | tbc (tre-2 bub2 cdc16) domain family member (tbc-9)                | 0  |                                                                                                                                                                       | P:GO:0032313;<br>F:GO:0005509;<br>P:GO:0008150;<br>C:GO:0005575;<br>F:GO:0005097;<br>C:GO:0005622 |                                                         | PTHR22957 (PANTHER),<br>PTHR22957:SF48 (PANTHER)                                                                                                                                                |
| Caenorhabditis elegans  | pseudouridylate synthase 7 homolog                                 | 1  | P:GO:0009451                                                                                                                                                          | -                                                                                                 |                                                         | IPR001656; IPR011760; IPR020103;<br>IPR020119                                                                                                                                                   |
| Caenorhabditis elegans  | pseudouridylate synthase 7 homolog                                 | 1  | P:GO:0009451                                                                                                                                                          | -                                                                                                 |                                                         | IPR001656; IPR011760; IPR020103;<br>IPR020119                                                                                                                                                   |
| Caenorhabditis elegans  | pseudouridylate synthase 7 homolog                                 | 1  | P:GO:0009451                                                                                                                                                          | -                                                                                                 |                                                         | IPR001656; IPR011760; IPR020103;<br>IPR020119                                                                                                                                                   |
|                         | -                                                                  | 0  |                                                                                                                                                                       |                                                                                                   |                                                         | -                                                                                                                                                                                               |
|                         | -                                                                  | 0  |                                                                                                                                                                       |                                                                                                   |                                                         | -                                                                                                                                                                                               |
| Caenorhabditis briggsae | r--binding protein                                                 | 5  | P:GO:0008340;<br>P:GO:0040007;<br>P:GO:0040035;<br>P:GO:0006898;<br>P:GO:0002119                                                                                      | -                                                                                                 |                                                         | -                                                                                                                                                                                               |
| Caenorhabditis elegans  | suppressor of g2 allele of skp1 homolog                            | 3  | P:GO:0040035;<br>C:GO:0043234;<br>C:GO:0044424                                                                                                                        | -                                                                                                 |                                                         | SignalP (SIGNALP)                                                                                                                                                                               |
|                         | -                                                                  | 0  |                                                                                                                                                                       |                                                                                                   |                                                         | -                                                                                                                                                                                               |
|                         | -                                                                  | 0  |                                                                                                                                                                       |                                                                                                   |                                                         | SignalP (SIGNALP)                                                                                                                                                                               |
|                         | -                                                                  | 0  |                                                                                                                                                                       |                                                                                                   |                                                         | IPR010800; SignalP (SIGNALP)                                                                                                                                                                    |
| Caenorhabditis elegans  | dual specificity phosphatase 11 (r- rnp complex 1-<br>interacting) | 7  | F:GO:0004725;<br>P:GO:0009792;<br>F:GO:0008138;<br>P:GO:0006470;<br>P:GO:0000003;<br>P:GO:0002009;<br>P:GO:0006396                                                    | -                                                                                                 | EC:3.1.3.48                                             | IPR000340; IPR000387; IPR016130;<br>IPR020422; G3DSA:3.90.190.10<br>(GENE3D), PTHR10367 (PANTHER),<br>SSF52799 (SUPERFAMILY)                                                                    |
| Ostertagia ostertagi    | metalloprotease 1 precursor                                        | 3  | F:GO:0046872;<br>P:GO:0000003;<br>F:GO:0008237                                                                                                                        | -                                                                                                 |                                                         | IPR000859; IPR001506; IPR006026;<br>IPR013032; G3DSA:3.40.390.10<br>(GENE3D), PTHR10127 (PANTHER),<br>PTHR10127:SF65 (PANTHER),<br>SSF55486 (SUPERFAMILY)                                       |
| Caenorhabditis elegans  | spindle and kinetochore-associated protein 1                       | 5  | F:GO:0005515;<br>P:GO:0007067;<br>C:GO:0005819;<br>C:GO:0000777;<br>C:GO:0005874                                                                                      | -                                                                                                 |                                                         | IPR009829                                                                                                                                                                                       |
| Caenorhabditis briggsae | gamma-inducible protein 30                                         | 0  |                                                                                                                                                                       |                                                                                                   |                                                         | IPR004911; PTHR13234:SF5<br>(PANTHER)                                                                                                                                                           |
| Caenorhabditis briggsae | g elongation mitochondrial 1                                       | 10 | F:GO:0003746;<br>P:GO:0040010;<br>P:GO:0070125;<br>C:GO:0005739;<br>P:GO:0000003;<br>P:GO:0002119;<br>F:GO:0003924;<br>P:GO:0006898;<br>P:GO:0009792;<br>F:GO:0005525 | -                                                                                                 | EC:3.6.5.1;<br>EC:3.6.5.2;<br>EC:3.6.5.3;<br>EC:3.6.5.4 | IPR000795; IPR005225; IPR009000;<br>G3DSA:2.40.30.10 (GENE3D),<br>G3DSA:3.40.50.300 (GENE3D),<br>PTHR23115 (PANTHER),<br>PTHR23115:SF13 (PANTHER), SignalP<br>(SIGNALP), SSF52540 (SUPERFAMILY) |
|                         | -                                                                  | 0  |                                                                                                                                                                       |                                                                                                   |                                                         | -                                                                                                                                                                                               |
| Caenorhabditis elegans  | briggsae cbr-brd-1 protein                                         | 0  |                                                                                                                                                                       |                                                                                                   |                                                         | IPR001357; G3DSA:3.40.50.10190<br>(GENE3D)                                                                                                                                                      |

|                         |                                                                     |    |                                                                                                                                                                       |                                                                 |            |                                                                                           |
|-------------------------|---------------------------------------------------------------------|----|-----------------------------------------------------------------------------------------------------------------------------------------------------------------------|-----------------------------------------------------------------|------------|-------------------------------------------------------------------------------------------|
| Cooperia oncophora      | calcium-activated potassium channel alpha chain                     | 10 | P:GO:0009790;<br>P:GO:0000278;<br>C:GO:0008076;<br>F:GO:0005488;<br>F:GO:0005249;<br>F:GO:0015269;<br>P:GO:0055085;<br>P:GO:0006813;<br>P:GO:0008152;<br>F:GO:0003824 | -                                                               |            | PTHR10027 (PANTHER),<br>PTHR10027:SF3 (PANTHER)                                           |
| Caenorhabditis briggsae | transmembrane protein 49                                            | 2  | C:GO:0016020;<br>C:GO:0005783                                                                                                                                         | -                                                               |            | PTHR10281 (PANTHER),<br>PTHR10281:SF1 (PANTHER)                                           |
| Caenorhabditis briggsae | -dh dehydroge-se 1 beta subcomplex subunit mitochondrial precursor  | 4  | P:GO:0009792;<br>F:GO:0008137;<br>P:GO:0018996;<br>C:GO:0005739                                                                                                       | -                                                               | EC:1.6.5.3 | IPR008699; PF05821 (PFAM)                                                                 |
| Caenorhabditis briggsae | -dh dehydroge-se 1 beta subcomplex subunit mitochondrial precursor  | 4  | P:GO:0009792;<br>F:GO:0008137;<br>P:GO:0018996;<br>C:GO:0005739                                                                                                       | -                                                               | EC:1.6.5.3 | IPR008699; PF05821 (PFAM)                                                                 |
| Caenorhabditis elegans  | protein                                                             | 0  |                                                                                                                                                                       |                                                                 |            | SignalP (SIGNALP)                                                                         |
|                         | -                                                                   | 0  |                                                                                                                                                                       |                                                                 |            | -                                                                                         |
| Caenorhabditis elegans  | coiled-coil-helix-coiled-coil-helix domain-containing protein 8     | 0  |                                                                                                                                                                       | P:GO:0006412;<br>F:GO:0004045                                   |            | IPR011990                                                                                 |
| Caenorhabditis briggsae | prion-like-(q n-rich)-domain-bearing protein family member (pqn-52) | 0  |                                                                                                                                                                       |                                                                 |            | SignalP (SIGNALP)                                                                         |
| Caenorhabditis elegans  | peptidase c19 family protein                                        | 1  | F:GO:0016787                                                                                                                                                          | -                                                               |            | IPR006615; SSF143791 (SUPERFAMILY)                                                        |
| Caenorhabditis elegans  | gtp-ase activating protein for arf containing protein               | 4  | P:GO:0040010;<br>F:GO:0046872;<br>P:GO:0019915;<br>P:GO:0002119                                                                                                       | -                                                               |            | IPR001164; PTHR23180 (PANTHER),<br>PTHR23180:SF30 (PANTHER)                               |
|                         | -                                                                   | 0  |                                                                                                                                                                       |                                                                 |            | IPR000408                                                                                 |
|                         | -                                                                   | 0  |                                                                                                                                                                       |                                                                 |            | IPR003582                                                                                 |
| Caenorhabditis elegans  | ankyrin repeat and sam domain-containing protein 3                  | 3  | P:GO:0040007;<br>P:GO:0008340;<br>P:GO:0040011                                                                                                                        | -                                                               |            | IPR002110; IPR020683; PR01415 (PRINTS), PTHR18958 (PANTHER),<br>PTHR18958:SF183 (PANTHER) |
| Caenorhabditis briggsae | a-phase-promoting complex subunit 2                                 | 4  | P:GO:0051239;<br>P:GO:0007268;<br>F:GO:0005515;<br>P:GO:0050794                                                                                                       | -                                                               |            | PTHR11932 (PANTHER),<br>PTHR11932:SF5 (PANTHER)                                           |
| Caenorhabditis briggsae | a-phase-promoting complex subunit 2                                 | 4  | P:GO:0051239;<br>P:GO:0007268;<br>F:GO:0005515;<br>P:GO:0050794                                                                                                       | -                                                               |            | PTHR11932 (PANTHER),<br>PTHR11932:SF5 (PANTHER)                                           |
| Caenorhabditis briggsae | tuftelin-interacting protein 11                                     | 7  | C:GO:0005681;<br>P:GO:0040007;<br>P:GO:0040035;<br>P:GO:0002119;<br>F:GO:0005515;<br>P:GO:0040011;<br>P:GO:0009792                                                    | -                                                               |            | IPR022783; PTHR23329 (PANTHER),<br>PTHR23329:SF1 (PANTHER)                                |
| Caenorhabditis elegans  | tetratricopeptide repeat protein 15                                 | 0  |                                                                                                                                                                       | F:GO:0003674;<br>F:GO:0005488;<br>P:GO:0008150;<br>C:GO:0005575 |            | IPR011990; SignalP (SIGNALP)                                                              |

|                         |                                                         |  |                                                                                                                                                        |   |                                                                                                                                                                                                                                                                                                                                                                  |                                                                                                                     |                                                                                        |
|-------------------------|---------------------------------------------------------|--|--------------------------------------------------------------------------------------------------------------------------------------------------------|---|------------------------------------------------------------------------------------------------------------------------------------------------------------------------------------------------------------------------------------------------------------------------------------------------------------------------------------------------------------------|---------------------------------------------------------------------------------------------------------------------|----------------------------------------------------------------------------------------|
| Loa loa                 | adaptor-related protein complex beta 1 subunit          |  | P:GO:0009792;<br>P:GO:0002119;<br>F:GO:0005515;<br>F:GO:0008565;<br>9 P:GO:0000003;<br>P:GO:0006886;<br>P:GO:0040007;<br>P:GO:0006898;<br>C:GO:0030131 | - |                                                                                                                                                                                                                                                                                                                                                                  | IPR009028; IPR012295; IPR015151;<br>PTHR11134 (PANTHER),<br>PTHR11134:SF2 (PANTHER)                                 |                                                                                        |
|                         | -                                                       |  | 0                                                                                                                                                      |   |                                                                                                                                                                                                                                                                                                                                                                  | SignalP (SIGNALP)                                                                                                   |                                                                                        |
|                         | -                                                       |  | 0                                                                                                                                                      |   |                                                                                                                                                                                                                                                                                                                                                                  | -                                                                                                                   |                                                                                        |
| Caenorhabditis elegans  | dynein light chain                                      |  | F:GO:0003777;<br>C:GO:0005829;<br>C:GO:0030286;<br>8 F:GO:0005515;<br>P:GO:0007017;<br>C:GO:0043186;<br>C:GO:0005634;<br>C:GO:0005886                  | - |                                                                                                                                                                                                                                                                                                                                                                  | IPR001372; IPR019763                                                                                                |                                                                                        |
| Caenorhabditis briggsae | protein disulfide-isomerase 1                           |  | F:GO:0016491;<br>4 P:GO:0040017;<br>P:GO:0040010;<br>C:GO:0016020                                                                                      | - |                                                                                                                                                                                                                                                                                                                                                                  | IPR006863; IPR017905; PTHR22897<br>(PANTHER), PTHR22897:SF4<br>(PANTHER)                                            |                                                                                        |
| Caenorhabditis briggsae | protein disulfide-isomerase 1                           |  | F:GO:0016491;<br>4 P:GO:0040017;<br>P:GO:0040010;<br>C:GO:0016020                                                                                      | - |                                                                                                                                                                                                                                                                                                                                                                  | IPR006863; IPR017905; PTHR22897<br>(PANTHER), PTHR22897:SF4<br>(PANTHER)                                            |                                                                                        |
| Caenorhabditis briggsae | type xxviii                                             |  |                                                                                                                                                        |   | F:GO:0004867;<br>C:GO:0019031;<br>C:GO:0005604;<br>P:GO:0007267;<br>F:GO:0003674;<br>P:GO:0007156;<br>C:GO:0016021;<br>P:GO:0007155;<br>C:GO:0016020;<br>P:GO:0010951;<br>F:GO:0005509;<br>F:GO:0030414;<br>P:GO:0007275;<br>P:GO:0008150;<br>P:GO:0016032;<br>P:GO:0006952;<br>C:GO:0005578;<br>P:GO:0010466;<br>F:GO:0005515;<br>C:GO:0005886;<br>C:GO:0005576 |                                                                                                                     | IPR002035; G3DSA:3.40.50.410<br>(GENE3D), SignalP (SIGNALP),<br>SSF53300 (SUPERFAMILY) |
| Caenorhabditis briggsae | Hypothetical protein CBG02513 [Caenorhabditis briggsae] |  | 0                                                                                                                                                      |   |                                                                                                                                                                                                                                                                                                                                                                  | -                                                                                                                   |                                                                                        |
| Caenorhabditis elegans  | c2 domain containing protein                            |  | 1 F:GO:0005515                                                                                                                                         | - |                                                                                                                                                                                                                                                                                                                                                                  | IPR000008; IPR008973; IPR018029;<br>G3DSA:2.60.40.150 (GENE3D),<br>PTHR10024 (PANTHER),<br>PTHR10024:SF27 (PANTHER) |                                                                                        |

|                         |                                                         |    |                                                                                                                                                                                                                                                                                                                                                                                                                                                                                         |                               |                            |                                                                                           |
|-------------------------|---------------------------------------------------------|----|-----------------------------------------------------------------------------------------------------------------------------------------------------------------------------------------------------------------------------------------------------------------------------------------------------------------------------------------------------------------------------------------------------------------------------------------------------------------------------------------|-------------------------------|----------------------------|-------------------------------------------------------------------------------------------|
| Caenorhabditis elegans  | sphingosine-1-phosphate lyase 1                         | 9  | P:GO:0009653;<br>P:GO:0008340;<br>P:GO:0006672;<br>P:GO:0040010;<br>P:GO:0008406;<br>C:GO:0044425;<br>P:GO:0006915;<br>F:GO:0016829;<br>C:GO:0005783                                                                                                                                                                                                                                                                                                                                    | -                             |                            | IPR002129; IPR015421; IPR015424;<br>PTHR11999:SF5 (PANTHER)                               |
| -                       | -                                                       | 0  |                                                                                                                                                                                                                                                                                                                                                                                                                                                                                         |                               |                            | -                                                                                         |
| Caenorhabditis briggsae | Hypothetical protein CBG11506 [Caenorhabditis briggsae] | 3  | F:GO:0005509;<br>C:GO:0016020;<br>P:GO:0007156                                                                                                                                                                                                                                                                                                                                                                                                                                          | -                             |                            | SignalP (SIGNALP)                                                                         |
| Caenorhabditis elegans  | protein fam113b-like                                    | 0  |                                                                                                                                                                                                                                                                                                                                                                                                                                                                                         | F:GO:0016787;<br>P:GO:0008150 |                            | IPR013830; IPR013831; PTHR14469<br>(PANTHER)                                              |
| Caenorhabditis briggsae | d- helicase hel308                                      | 2  | F:GO:0005488;<br>F:GO:0004386                                                                                                                                                                                                                                                                                                                                                                                                                                                           | -                             |                            | G3DSA:3.40.50.300 (GENE3D),<br>PTHR11752 (PANTHER),<br>PTHR11752:SF3 (PANTHER)            |
| Brugia malayi           | hypothetical protein Bm1_51405 [Brugia malayi]          | 0  |                                                                                                                                                                                                                                                                                                                                                                                                                                                                                         |                               |                            | -                                                                                         |
| Caenorhabditis elegans  | syntaxin 12                                             | 7  | C:GO:0045335;<br>F:GO:0005515;<br>P:GO:0033344;<br>C:GO:0045121;<br>P:GO:0050821;<br>P:GO:0009987;<br>P:GO:0015031                                                                                                                                                                                                                                                                                                                                                                      | -                             |                            | -                                                                                         |
| -                       | -                                                       | 0  |                                                                                                                                                                                                                                                                                                                                                                                                                                                                                         |                               |                            | -                                                                                         |
| Caenorhabditis elegans  | glucoki-se                                              | 30 | P:GO:0009627;<br>P:GO:0046835;<br>P:GO:0032811;<br>P:GO:0051156;<br>P:GO:0007204;<br>F:GO:0004674;<br>P:GO:0019932;<br>C:GO:0005884;<br>C:GO:0030141;<br>P:GO:0007243;<br>C:GO:0005829;<br>P:GO:0001678;<br>P:GO:0045725;<br>C:GO:0005654;<br>F:GO:0000287;<br>P:GO:0051594;<br>P:GO:0045821;<br>F:GO:0004340;<br>P:GO:0045721;<br>C:GO:0005739;<br>P:GO:0042149;<br>P:GO:0060361;<br>F:GO:0005536;<br>P:GO:0006468;<br>F:GO:0005524;<br>F:GO:0019903;<br>C:GO:0044448;<br>P:GO:0006003 | -                             | EC:2.7.11.0;<br>EC:2.7.1.2 | IPR001312; IPR022672; IPR022673;<br>G3DSA:3.40.367.20 (GENE3D),<br>SSF53067 (SUPERFAMILY) |

|                         |                                                 |    |                                                                                                                                                                                                                                                                                                                                |                                                                 |              |                                                                                                                           |
|-------------------------|-------------------------------------------------|----|--------------------------------------------------------------------------------------------------------------------------------------------------------------------------------------------------------------------------------------------------------------------------------------------------------------------------------|-----------------------------------------------------------------|--------------|---------------------------------------------------------------------------------------------------------------------------|
| Loa loa                 | variant sh3 domain containing protein           | 19 | C:GO:0045121;<br>P:GO:0045725;<br>P:GO:0008286;<br>F:GO:0019901;<br>C:GO:0005913;<br>P:GO:0006936;<br>P:GO:0048041;<br>C:GO:0005829;<br>F:GO:0008092;<br>C:GO:0005924;<br>C:GO:0005899;<br>P:GO:0090004;<br>P:GO:0043149;<br>C:GO:0001725;<br>F:GO:0005070;<br>C:GO:0005634;<br>P:GO:0046889;<br>F:GO:0005158;<br>P:GO:0046326 | -                                                               |              | IPR000108; IPR001452; IPR011511;<br>G3DSA:2.30.30.40 (GENE3D),<br>PTHR10661 (PANTHER),<br>PTHR10661:SF5 (PANTHER)         |
| -                       | -                                               | 0  |                                                                                                                                                                                                                                                                                                                                |                                                                 |              | SignalP (SIGNALP)                                                                                                         |
| Caenorhabditis briggsae | zinc finger cchc domain-containing protein 4    | 1  | F:GO:0005488                                                                                                                                                                                                                                                                                                                   | -                                                               |              | IPR001594; PTHR13493 (PANTHER)                                                                                            |
| -                       | -                                               | 0  |                                                                                                                                                                                                                                                                                                                                |                                                                 |              | -                                                                                                                         |
| Drosophila ananassae    | transmembrane protein 167 precursor             | 2  | C:GO:0000139;<br>C:GO:0016021                                                                                                                                                                                                                                                                                                  | -                                                               |              | SignalP (SIGNALP)                                                                                                         |
| -                       | -                                               | 0  |                                                                                                                                                                                                                                                                                                                                |                                                                 |              | -                                                                                                                         |
| Caenorhabditis elegans  | dihydrolipoamide branched chain transacylase e2 | 12 | F:GO:0008415;<br>F:GO:0004672;<br>C:GO:0042645;<br>F:GO:0043754;<br>F:GO:0000166;<br>P:GO:0032436;<br>C:GO:0005576;<br>F:GO:0005179;<br>P:GO:0009792;<br>P:GO:0046949;<br>F:GO:0048037;<br>P:GO:0006468                                                                                                                        | -                                                               | EC:2.3.1.168 | IPR001078; IPR015761;<br>G3DSA:3.30.559.10 (GENE3D),<br>PTHR23151 (PANTHER), SignalP<br>(SIGNALP), SSF52777 (SUPERFAMILY) |
| Caenorhabditis briggsae | briggsae cbr-ril-1 protein                      | 5  | P:GO:0009792;<br>P:GO:0008340;<br>P:GO:0000003;<br>P:GO:0040010;<br>P:GO:0002119                                                                                                                                                                                                                                               | -                                                               |              | -                                                                                                                         |
| Caenorhabditis briggsae | alpha-amylase                                   | 1  | F:GO:0003824                                                                                                                                                                                                                                                                                                                   | -                                                               |              | IPR006048; IPR013780; IPR017853;<br>PTHR10357 (PANTHER),<br>PTHR10357:SF26 (PANTHER),<br>SSF51011 (SUPERFAMILY)           |
| Loa loa                 | beta-lactamase-like protein 2                   | 0  |                                                                                                                                                                                                                                                                                                                                | F:GO:0046872;<br>C:GO:0005739;<br>F:GO:0016787;<br>C:GO:0005575 |              | IPR001279; G3DSA:3.60.15.10<br>(GENE3D), PTHR23131 (PANTHER),<br>SignalP (SIGNALP), SSF56281<br>(SUPERFAMILY)             |
| Caenorhabditis briggsae | briggsae cbr-chs-1 protein                      | 5  | P:GO:0009792;<br>P:GO:0000003;<br>C:GO:0005887;<br>P:GO:0040010;<br>F:GO:0016740                                                                                                                                                                                                                                               | -                                                               |              | -                                                                                                                         |
| -                       | -                                               | 0  |                                                                                                                                                                                                                                                                                                                                |                                                                 |              | SignalP (SIGNALP)                                                                                                         |
| -                       | -                                               | 0  |                                                                                                                                                                                                                                                                                                                                |                                                                 |              | -                                                                                                                         |

|                               |                                                    |    |                                                                                                                                                                       |                                                                                                                                     |  |                                                                                                                                                  |
|-------------------------------|----------------------------------------------------|----|-----------------------------------------------------------------------------------------------------------------------------------------------------------------------|-------------------------------------------------------------------------------------------------------------------------------------|--|--------------------------------------------------------------------------------------------------------------------------------------------------|
| Caenorhabditis elegans        | tr- guanosine-2 -o-methyltransferase trm11 homolog | 0  |                                                                                                                                                                       | F:GO:0003676;<br>F:GO:0008168;<br>F:GO:0003674;<br>P:GO:0008033;<br>F:GO:0016740;<br>P:GO:0008150;<br>P:GO:0032259;<br>C:GO:0005575 |  | IPR000241; IPR002052;<br>G3DSA:3.40.50.150 (GENE3D),<br>PTHR13370 (PANTHER), SSF53335<br>(SUPERFAMILY)                                           |
| Loa loa                       | zinc c2h2 type family protein                      | 0  |                                                                                                                                                                       | F:GO:0003676;<br>F:GO:0008270;<br>C:GO:0005622                                                                                      |  | IPR007087; IPR015880; PTHR14596<br>(PANTHER)                                                                                                     |
| Caenorhabditis elegans        | patched family protein                             | 8  | P:GO:0040025;<br>F:GO:0008158;<br>P:GO:0040018;<br>P:GO:0018996;<br>P:GO:0000003;<br>P:GO:0008340;<br>P:GO:0040011;<br>C:GO:0016021                                   | -                                                                                                                                   |  | -                                                                                                                                                |
| Caenorhabditis elegans        | immunoglobulin i-set domain containing protein     | 0  |                                                                                                                                                                       |                                                                                                                                     |  | IPR002602; IPR003599; IPR003961;<br>IPR007110; IPR008957; IPR013098;<br>IPR013783; PTHR19897 (PANTHER),<br>SSF48726 (SUPERFAMILY)                |
| Xenopus (Silurana) tropicalis | lyr motif-containing protein 5                     | 1  | C:GO:0005739                                                                                                                                                          | -                                                                                                                                   |  | -                                                                                                                                                |
|                               | -                                                  | 0  |                                                                                                                                                                       |                                                                                                                                     |  | SignalP (SIGNALP)                                                                                                                                |
| Caenorhabditis elegans        | nucleolar protein 14-like                          | 3  | P:GO:0009792;<br>P:GO:0006898;<br>P:GO:0002119                                                                                                                        | -                                                                                                                                   |  | IPR007276                                                                                                                                        |
| Caenorhabditis elegans        | mitotic checkpoint protein bub3                    | 10 | C:GO:0005829;<br>P:GO:0008608;<br>P:GO:0000070;<br>C:GO:0005730;<br>P:GO:0051436;<br>P:GO:0031145;<br>P:GO:0071173;<br>C:GO:0000776;<br>F:GO:0005515;<br>P:GO:0051983 | -                                                                                                                                   |  | IPR001680; IPR011046; IPR015943;<br>IPR017986; IPR019775; IPR019781;<br>IPR019782; IPR020472; PTHR10971<br>(PANTHER), PTHR10971:SF5<br>(PANTHER) |

|                         |                                                         |    |                                                                                                                                                                                                                                                                                                                                                 |                                                                                  |             |                                                                                                                               |
|-------------------------|---------------------------------------------------------|----|-------------------------------------------------------------------------------------------------------------------------------------------------------------------------------------------------------------------------------------------------------------------------------------------------------------------------------------------------|----------------------------------------------------------------------------------|-------------|-------------------------------------------------------------------------------------------------------------------------------|
| Haemonchus contortus    | catalase                                                | 20 | P:GO:0007411;<br>P:GO:0008340;<br>P:GO:0009650;<br>P:GO:0042744;<br>F:GO:0020037;<br>F:GO:0050661;<br>F:GO:0004096;<br>P:GO:0006629;<br>P:GO:0006637;<br>P:GO:0048522;<br>F:GO:0008415;<br>P:GO:0051090;<br>P:GO:0044281;<br>P:GO:0009636;<br>P:GO:0055114;<br>F:GO:0042803;<br>P:GO:0051262;<br>C:GO:0005778;<br>P:GO:0043066;<br>C:GO:0005739 | -                                                                                | EC:1.11.1.6 | IPR002226; IPR010582; IPR011614;<br>IPR018028; IPR020835                                                                      |
| Caenorhabditis elegans  | ribosomal protein l15                                   | 11 | P:GO:0009792;<br>P:GO:0002119;<br>C:GO:0005840;<br>P:GO:0040018;<br>F:GO:0003735;<br>F:GO:0003723;<br>P:GO:0018996;<br>P:GO:0040010;<br>P:GO:0000003;<br>C:GO:0005829;<br>P:GO:0006414                                                                                                                                                          | -                                                                                |             | IPR000439; IPR012678                                                                                                          |
| Homo sapiens            | poly                                                    | 5  | C:GO:0005730;<br>P:GO:0006284;<br>C:GO:0005654;<br>F:GO:0005515;<br>F:GO:0003950                                                                                                                                                                                                                                                                | -                                                                                | EC:2.4.2.30 | IPR004102; IPR008893; IPR012317;<br>IPR016129; G3DSA:3.90.228.10<br>(GENE3D), PTHR15447 (PANTHER),<br>SSF142921 (SUPERFAMILY) |
| Caenorhabditis elegans  | short chain dehydroge-se reductase family protein       | 0  |                                                                                                                                                                                                                                                                                                                                                 | P:GO:0055114;<br>F:GO:0005488;<br>F:GO:0016491;<br>P:GO:0008152;<br>F:GO:0003824 |             | -                                                                                                                             |
| -                       | -                                                       | 0  |                                                                                                                                                                                                                                                                                                                                                 |                                                                                  |             | -                                                                                                                             |
| Caenorhabditis briggsae | Hypothetical protein CBG04540 [Caenorhabditis briggsae] | 0  |                                                                                                                                                                                                                                                                                                                                                 |                                                                                  |             | -                                                                                                                             |
| Caenorhabditis briggsae | briggsae cbr-spe-39 protein                             | 1  | F:GO:0005515                                                                                                                                                                                                                                                                                                                                    | -                                                                                |             | IPR019177                                                                                                                     |
| Caenorhabditis elegans  | protein ki-se c                                         | 7  | P:GO:0006468;<br>F:GO:0046872;<br>P:GO:0023034;<br>F:GO:0019992;<br>F:GO:0004698;<br>F:GO:0005524;<br>C:GO:0016020                                                                                                                                                                                                                              | -                                                                                |             | IPR000719; IPR011009; IPR015745;<br>IPR017441; IPR017442;<br>G3DSA:3.30.200.20 (GENE3D),<br>PTHR22985 (PANTHER)               |
| Caenorhabditis elegans  | phosphatidylcholine:ceramide cholinephosphotransferase  | 3  | F:GO:0047493;<br>C:GO:0016021;<br>P:GO:0006686                                                                                                                                                                                                                                                                                                  | -                                                                                | EC:2.7.8.3  | PTHR21290 (PANTHER),<br>PTHR21290:SF3 (PANTHER), SignalP<br>(SIGNALP)                                                         |
| -                       | -                                                       | 0  |                                                                                                                                                                                                                                                                                                                                                 |                                                                                  |             | -                                                                                                                             |
| -                       | -                                                       | 0  |                                                                                                                                                                                                                                                                                                                                                 |                                                                                  |             | -                                                                                                                             |
| -                       | -                                                       | 0  |                                                                                                                                                                                                                                                                                                                                                 |                                                                                  |             | -                                                                                                                             |

|                         |                                                               |    |                                                                                                                                                                                        |                                                                                                                                                      |             |                                                                                                                                                                                                   |
|-------------------------|---------------------------------------------------------------|----|----------------------------------------------------------------------------------------------------------------------------------------------------------------------------------------|------------------------------------------------------------------------------------------------------------------------------------------------------|-------------|---------------------------------------------------------------------------------------------------------------------------------------------------------------------------------------------------|
| Caenorhabditis briggsae | sorting nexin-13                                              | 2  | F:GO:0005515;<br>P:GO:0007154                                                                                                                                                          | -                                                                                                                                                    |             | IPR001683; PTHR22775 (PANTHER),<br>PTHR22775:SF8 (PANTHER)                                                                                                                                        |
| Caenorhabditis elegans  | elegans protein confirmed by transcript evidence              | 6  | P:GO:0009792;<br>P:GO:0002119;<br>P:GO:0040010;<br>P:GO:0000003;<br>P:GO:0006898;<br>P:GO:0002009                                                                                      | -                                                                                                                                                    |             | IPR013870                                                                                                                                                                                         |
| Loa loa                 | transmembrane protein 185b                                    | 0  |                                                                                                                                                                                        | F:GO:0003676                                                                                                                                         |             | -                                                                                                                                                                                                 |
| Caenorhabditis elegans  | mitochondrial import inner membrane translocase subunit tim16 | 7  | P:GO:0040035;<br>P:GO:0002119;<br>C:GO:0005743;<br>F:GO:0031072;<br>P:GO:0055085;<br>P:GO:0040007;<br>P:GO:0015031                                                                     | -                                                                                                                                                    |             | IPR005341                                                                                                                                                                                         |
| Caenorhabditis briggsae | cell division protein ftsj                                    | 11 | P:GO:0055085;<br>F:GO:0005488;<br>C:GO:0005730;<br>C:GO:0005743;<br>P:GO:0006364;<br>P:GO:0040007;<br>P:GO:0040035;<br>P:GO:0032259;<br>P:GO:0002119;<br>F:GO:0008168;<br>P:GO:0015031 | -                                                                                                                                                    | EC:2.1.1.0  | IPR002877; IPR015507;<br>G3DSA:3.40.50.150 (GENE3D),<br>SSF53335 (SUPERFAMILY)                                                                                                                    |
| Caenorhabditis elegans  | glutaminyl-tr- synthetase                                     | 4  | F:GO:0004819;<br>C:GO:0005875;<br>P:GO:0006425;<br>F:GO:0005524                                                                                                                        | -                                                                                                                                                    | EC:6.1.1.18 | IPR000924; IPR001412; IPR004514;<br>IPR007638; IPR007639; IPR014729;<br>IPR020058; G3DSA:3.90.800.10<br>(GENE3D), SSF52374 (SUPERFAMILY)                                                          |
| Brugia malayi           | serine threonine-protein ki-se 16                             | 0  |                                                                                                                                                                                        | F:GO:0016301;<br>F:GO:0004672;<br>F:GO:0005524;<br>P:GO:0006468;<br>F:GO:0004674                                                                     |             | -                                                                                                                                                                                                 |
| Brugia malayi           | integrator complex subunit 12                                 | 0  |                                                                                                                                                                                        | C:GO:0005634;<br>P:GO:0016180;<br>C:GO:0032039;<br>F:GO:0008270;<br>F:GO:0003674;<br>C:GO:0005575;<br>F:GO:0005515;<br>F:GO:0046872;<br>P:GO:0008150 |             | IPR001965; IPR011011; IPR013083;<br>IPR019786; IPR019787; PTHR12628<br>(PANTHER)                                                                                                                  |
| -                       | -                                                             | 0  |                                                                                                                                                                                        |                                                                                                                                                      |             | -                                                                                                                                                                                                 |
| -                       | -                                                             | 0  |                                                                                                                                                                                        |                                                                                                                                                      |             | SignalP (SIGNALP)                                                                                                                                                                                 |
| -                       | -                                                             | 0  |                                                                                                                                                                                        |                                                                                                                                                      |             | -                                                                                                                                                                                                 |
| Caenorhabditis briggsae | dicer-1                                                       | 1  | F:GO:0005515                                                                                                                                                                           | -                                                                                                                                                    |             | PTHR14950 (PANTHER),<br>PTHR14950:SF3 (PANTHER)                                                                                                                                                   |
| Caenorhabditis elegans  | elongation factor tu gtp-binding domain-containing protein 1  | 1  | F:GO:0000166                                                                                                                                                                           | -                                                                                                                                                    |             | IPR000795; IPR009000;<br>G3DSA:2.40.30.10 (GENE3D),<br>G3DSA:3.40.50.300 (GENE3D),<br>G3DSA:3.90.1430.10 (GENE3D),<br>PTHR23115 (PANTHER),<br>PTHR23115:SF15 (PANTHER),<br>SSF52540 (SUPERFAMILY) |



|                         |                                                            |   |                                                                                                                                                      |                                                |                                                         |                                                                                                                                                                                   |
|-------------------------|------------------------------------------------------------|---|------------------------------------------------------------------------------------------------------------------------------------------------------|------------------------------------------------|---------------------------------------------------------|-----------------------------------------------------------------------------------------------------------------------------------------------------------------------------------|
| Caenorhabditis elegans  | ras-related protein m-ras                                  | 9 | P:GO:0007264;<br>C:GO:0005622;<br>P:GO:0006913;<br>P:GO:0006184;<br>F:GO:0030742;<br>F:GO:0003924;<br>P:GO:0006886;<br>F:GO:0005525;<br>C:GO:0005886 | -                                              | EC:3.6.5.1;<br>EC:3.6.5.2;<br>EC:3.6.5.3;<br>EC:3.6.5.4 | IPR001806; IPR003577; IPR005225;<br>IPR013753; IPR020849;<br>G3DSA:3.40.50.300 (GENE3D),<br>PTHR11708 (PANTHER),<br>PTHR11708:SF273 (PANTHER),<br>SSF52540 (SUPERFAMILY)          |
| Brugia malayi           | rho gtpase-activating protein 26                           | 7 | F:GO:0005096;<br>C:GO:0005622;<br>P:GO:0046847;<br>P:GO:0007165;<br>P:GO:0019915;<br>F:GO:0017124;<br>F:GO:0008093                                   | -                                              |                                                         | IPR013606; PTHR12552 (PANTHER),<br>PTHR12552:SF1 (PANTHER),<br>SSF103657 (SUPERFAMILY)                                                                                            |
| Caenorhabditis elegans  | transketolase                                              | 2 | F:GO:0004802;<br>P:GO:0008152                                                                                                                        | -                                              | EC:2.2.1.1                                              | IPR005474; IPR005475; IPR005476;<br>IPR009014; IPR015941; IPR020826;<br>G3DSA:3.40.50.970 (GENE3D),<br>PTHR11624 (PANTHER),<br>PTHR11624:SF2 (PANTHER), SSF52518<br>(SUPERFAMILY) |
| Caenorhabditis elegans  | transketolase                                              | 2 | F:GO:0004802;<br>P:GO:0008152                                                                                                                        | -                                              | EC:2.2.1.1                                              | IPR005474; IPR005475; IPR005476;<br>IPR009014; IPR015941; IPR020826;<br>G3DSA:3.40.50.970 (GENE3D),<br>PTHR11624 (PANTHER),<br>PTHR11624:SF2 (PANTHER), SSF52518<br>(SUPERFAMILY) |
| -                       | -                                                          | 0 |                                                                                                                                                      |                                                |                                                         | -                                                                                                                                                                                 |
| Caenorhabditis elegans  | briggsae cbr-lir-3 protein                                 | 0 |                                                                                                                                                      | F:GO:0008270;<br>C:GO:0005622                  |                                                         | -                                                                                                                                                                                 |
| Caenorhabditis briggsae | taxilin alpha                                              | 0 |                                                                                                                                                      | F:GO:0003674;<br>C:GO:0005737;<br>C:GO:0005575 |                                                         | IPR019132; PTHR16127 (PANTHER),<br>PTHR16127:SF8 (PANTHER)                                                                                                                        |
| Brugia malayi           | bromodomain containing protein                             | 6 | P:GO:0016570;<br>P:GO:0040011;<br>P:GO:0007399;<br>F:GO:0005488;<br>C:GO:0005634;<br>F:GO:0008080                                                    | -                                              |                                                         | IPR001487; IPR018359; PTHR22880<br>(PANTHER), PTHR22880:SF31<br>(PANTHER)                                                                                                         |
| -                       | -                                                          | 0 |                                                                                                                                                      |                                                |                                                         | -                                                                                                                                                                                 |
| -                       | -                                                          | 0 |                                                                                                                                                      |                                                |                                                         | SignalP (SIGNALP)                                                                                                                                                                 |
| Caenorhabditis elegans  | elegans protein partially confirmed by transcript evidence | 0 |                                                                                                                                                      |                                                |                                                         | -                                                                                                                                                                                 |
| Caenorhabditis elegans  | elegans protein partially confirmed by transcript evidence | 0 |                                                                                                                                                      |                                                |                                                         | -                                                                                                                                                                                 |
| Caenorhabditis briggsae | proteasome ( macropain) 26s non- 1                         | 5 | P:GO:0051436;<br>P:GO:0051437;<br>C:GO:0005838;<br>P:GO:0031145;<br>F:GO:0005515                                                                     | -                                              |                                                         | IPR002015; IPR011989; IPR016024;<br>IPR016642; PTHR10943 (PANTHER),<br>PTHR10943:SF2 (PANTHER)                                                                                    |
| Caenorhabditis briggsae | proteasome ( macropain) 26s non- 1                         | 5 | P:GO:0051436;<br>P:GO:0051437;<br>C:GO:0005838;<br>P:GO:0031145;<br>F:GO:0005515                                                                     | -                                              |                                                         | IPR002015; IPR011989; IPR016024;<br>IPR016642; PTHR10943 (PANTHER),<br>PTHR10943:SF2 (PANTHER)                                                                                    |
| -                       | -                                                          | 0 |                                                                                                                                                      |                                                |                                                         | -                                                                                                                                                                                 |
| Caenorhabditis briggsae | briggsae cbr-ida-1 protein                                 | 2 | P:GO:0016311;<br>F:GO:0004721                                                                                                                        | -                                              | EC:3.1.3.16                                             | SignalP (SIGNALP)                                                                                                                                                                 |

|                        |                                                            |    |                                                                                                                                                                                        |                               |             |                                                                                                                                     |
|------------------------|------------------------------------------------------------|----|----------------------------------------------------------------------------------------------------------------------------------------------------------------------------------------|-------------------------------|-------------|-------------------------------------------------------------------------------------------------------------------------------------|
| Caenorhabditis elegans | variable abnormal morphology family member (vab-10)        | 11 | P:GO:0000226;<br>P:GO:0007424;<br>P:GO:0065008;<br>P:GO:0007409;<br>P:GO:0007517;<br>C:GO:0005874;<br>F:GO:0008092;<br>P:GO:0035239;<br>P:GO:0051128;<br>P:GO:0048523;<br>C:GO:0044444 | -                             |             | IPR002017; IPR018159;<br>G3DSA:1.20.58.60 (GENE3D),<br>SSF46966 (SUPERFAMILY)                                                       |
|                        | -                                                          | 0  |                                                                                                                                                                                        |                               |             | -                                                                                                                                   |
| Branchiostoma floridae | serine arginine repetitive matrix protein 1                | 2  | F:GO:0005488;<br>C:GO:0044428                                                                                                                                                          | -                             |             | -                                                                                                                                   |
| Caenorhabditis elegans | elegans protein partially confirmed by transcript evidence | 5  | F:GO:0004222;<br>P:GO:0000003;<br>P:GO:0006508;<br>F:GO:0008270;<br>P:GO:0007413                                                                                                       | -                             | EC:3.4.24.0 | IPR001506; G3DSA:3.40.390.10<br>(GENE3D), PTHR10127 (PANTHER),<br>PTHR10127:SF80 (PANTHER),<br>SSF55486 (SUPERFAMILY)               |
| Caenorhabditis elegans | briggsae cbr--s-1 protein                                  | 5  | F:GO:0004222;<br>P:GO:0000003;<br>P:GO:0006508;<br>F:GO:0008270;<br>P:GO:0007413                                                                                                       | -                             | EC:3.4.24.0 | IPR001506; IPR006026;<br>G3DSA:3.40.390.10 (GENE3D),<br>PTHR10127 (PANTHER),<br>PTHR10127:SF80 (PANTHER),<br>SSF55486 (SUPERFAMILY) |
| Caenorhabditis elegans | elegans protein partially confirmed by transcript evidence | 5  | F:GO:0004222;<br>P:GO:0000003;<br>P:GO:0006508;<br>F:GO:0008270;<br>P:GO:0007413                                                                                                       | -                             | EC:3.4.24.0 | IPR001506; G3DSA:3.40.390.10<br>(GENE3D), PTHR10127 (PANTHER),<br>PTHR10127:SF80 (PANTHER),<br>SSF55486 (SUPERFAMILY)               |
| Homo sapiens           | glucose phosphate isomerase                                | 10 | P:GO:0001525;<br>F:GO:0005125;<br>C:GO:0005615;<br>F:GO:0004347;<br>P:GO:0006959;<br>P:GO:0006096;<br>P:GO:0007599;<br>P:GO:0006094;<br>C:GO:0005737;<br>F:GO:0008083                  | -                             | EC:5.3.1.9  | IPR001672; IPR018189;<br>G3DSA:3.40.50.10490 (GENE3D),<br>PSS1463 (PROFILE), SSF53697<br>(SUPERFAMILY)                              |
| Brugia malayi          | sap domain containing protein                              | 0  |                                                                                                                                                                                        | F:GO:0003676;<br>F:GO:0000166 |             | IPR003034                                                                                                                           |
|                        | -                                                          | 0  |                                                                                                                                                                                        |                               |             | -                                                                                                                                   |
| Caenorhabditis elegans | elegans protein partially confirmed by transcript evidence | 0  |                                                                                                                                                                                        |                               |             | SignalP (SIGNALP)                                                                                                                   |
| Loa loa                | actin                                                      | 4  | C:GO:0005856;<br>C:GO:0005737;<br>F:GO:0005524;<br>F:GO:0005515                                                                                                                        | -                             |             | SignalP (SIGNALP)                                                                                                                   |
| Loa loa                | cytoplasmic 2-like isoform 1                               | 4  | C:GO:0005856;<br>C:GO:0005737;<br>F:GO:0005524;<br>F:GO:0005515                                                                                                                        | -                             |             | -                                                                                                                                   |
| Caenorhabditis elegans | transmembrane protein 50b                                  | 2  | C:GO:0005783;<br>C:GO:0005886                                                                                                                                                          | -                             |             | IPR007919; SignalP (SIGNALP)                                                                                                        |
|                        | -                                                          | 0  |                                                                                                                                                                                        |                               |             | -                                                                                                                                   |
| Caenorhabditis elegans | hypothetical protein C10B5.3 [Caenorhabditis elegans]      | 0  |                                                                                                                                                                                        |                               |             | -                                                                                                                                   |

|                         |                                               |    |                                                                                                                                                                       |                                                                                                                                                                                                                          |                                                                                                                                     |
|-------------------------|-----------------------------------------------|----|-----------------------------------------------------------------------------------------------------------------------------------------------------------------------|--------------------------------------------------------------------------------------------------------------------------------------------------------------------------------------------------------------------------|-------------------------------------------------------------------------------------------------------------------------------------|
| Caenorhabditis elegans  | pdf receptor homolog family member (pdfr-1)   | 6  | F:GO:0004930;<br>F:GO:0005488;<br>P:GO:0007186;<br>C:GO:0016020;<br>P:GO:0042745;<br>P:GO:0050789                                                                     | -                                                                                                                                                                                                                        | IPR000832; IPR001879; IPR017981;<br>IPR017983; PTHR12011 (PANTHER),<br>PTHR12011:SF14 (PANTHER),<br>SSF111418 (SUPERFAMILY)         |
| Loa loa                 | zinc finger protein zfat isoform 2            | 0  |                                                                                                                                                                       | C:GO:0005634;<br>F:GO:0003677;<br>F:GO:0003676;<br>C:GO:0005737;<br>F:GO:0008270;<br>F:GO:0003674;<br>C:GO:0005575;<br>C:GO:0005622;<br>F:GO:0046872;<br>C:GO:0005829;<br>P:GO:0006350;<br>P:GO:0008150;<br>P:GO:0045449 | IPR015880                                                                                                                           |
| Loa loa                 | zinc finger protein                           | 0  |                                                                                                                                                                       | C:GO:0005634;<br>F:GO:0003677;<br>F:GO:0003676;<br>C:GO:0005737;<br>F:GO:0003674;<br>F:GO:0008270;<br>C:GO:0005575;<br>C:GO:0005622;<br>F:GO:0046872;<br>P:GO:0006350;<br>C:GO:0005829;<br>P:GO:0008150;<br>P:GO:0045449 | IPR015880                                                                                                                           |
| Caenorhabditis briggsae | pescadillo homolog                            | 10 | P:GO:0051726;<br>P:GO:0042273;<br>C:GO:0070545;<br>P:GO:0000463;<br>F:GO:0005515;<br>C:GO:0030687;<br>C:GO:0005694;<br>C:GO:0005654;<br>P:GO:0008283;<br>P:GO:0000466 | -                                                                                                                                                                                                                        | IPR001357; IPR010613;<br>G3DSA:3.40.50.10190 (GENE3D),<br>PTHR12221 (PANTHER)                                                       |
| Ancylostoma caninum     | metalloprotease 1 precursor                   | 2  | F:GO:0046872;<br>F:GO:0008237                                                                                                                                         | -                                                                                                                                                                                                                        | IPR001506; IPR006026;<br>G3DSA:3.40.390.10 (GENE3D),<br>PTHR10127 (PANTHER),<br>PTHR10127:SF65 (PANTHER),<br>SSF55486 (SUPERFAMILY) |
| -                       | -                                             | 0  |                                                                                                                                                                       |                                                                                                                                                                                                                          | -                                                                                                                                   |
| -                       | -                                             | 0  |                                                                                                                                                                       |                                                                                                                                                                                                                          | SignalP (SIGNALP)                                                                                                                   |
| -                       | -                                             | 0  |                                                                                                                                                                       |                                                                                                                                                                                                                          | -                                                                                                                                   |
| -                       | -                                             | 0  |                                                                                                                                                                       |                                                                                                                                                                                                                          | IPR014893                                                                                                                           |
| -                       | -                                             | 0  |                                                                                                                                                                       |                                                                                                                                                                                                                          | -                                                                                                                                   |
| Loa loa                 | 28s ribosomal protein mitochondrial precursor | 5  | P:GO:0009792;<br>C:GO:0005763;<br>F:GO:0003735;<br>F:GO:0005515;<br>P:GO:0006412                                                                                      | -                                                                                                                                                                                                                        | EC:3.6.5.3 -                                                                                                                        |

|                                      |                                                         |    |                                                                                                                                                                                                         |                                                |             |                                                                                                                                                        |
|--------------------------------------|---------------------------------------------------------|----|---------------------------------------------------------------------------------------------------------------------------------------------------------------------------------------------------------|------------------------------------------------|-------------|--------------------------------------------------------------------------------------------------------------------------------------------------------|
| Caenorhabditis elegans               | myotubularin-related family protein                     | 0  |                                                                                                                                                                                                         | P:GO:0016311;<br>F:GO:0016791                  |             | -                                                                                                                                                      |
|                                      |                                                         | 0  |                                                                                                                                                                                                         |                                                |             |                                                                                                                                                        |
| Caenorhabditis elegans               | uncoordinated family member (unc-22)                    | 6  | C:GO:0030018;<br>P:GO:0006468;<br>F:GO:0008307;<br>P:GO:0007498;<br>F:GO:0005524;<br>F:GO:0004674                                                                                                       | -                                              | EC:2.7.11.0 | -                                                                                                                                                      |
| Chromobacterium violaceum ATCC 12472 | hydroxymethylglutaryl- lyase                            | 3  | F:GO:0004419;<br>F:GO:0016740;<br>P:GO:0006629                                                                                                                                                          | -                                              | EC:4.1.3.4  | PTHR10277 (PANTHER),<br>PTHR10277:SF1 (PANTHER)                                                                                                        |
| Caenorhabditis briggsae              | Hypothetical protein CBG19140 [Caenorhabditis briggsae] | 0  |                                                                                                                                                                                                         | P:GO:0040017;<br>F:GO:0005488;<br>P:GO:0040010 |             | IPR011990                                                                                                                                              |
| Caenorhabditis elegans               | translocase of inner mitochondrial membrane 44 homolog  | 11 | P:GO:0040010;<br>F:GO:0008270;<br>F:GO:0015450;<br>C:GO:0005744;<br>P:GO:0000003;<br>P:GO:0006626;<br>P:GO:0002119;<br>F:GO:0005515;<br>C:GO:0005759;<br>P:GO:0006898;<br>P:GO:0009792                  | -                                              |             | PTHR10721 (PANTHER),<br>PTHR10721:SF1 (PANTHER)                                                                                                        |
|                                      |                                                         | 0  |                                                                                                                                                                                                         |                                                |             | -                                                                                                                                                      |
|                                      |                                                         | 0  |                                                                                                                                                                                                         |                                                |             | -                                                                                                                                                      |
| Homo sapiens                         | cytochrome c oxidase subunit viii liver form            | 4  | C:GO:0005743;<br>C:GO:0016021;<br>F:GO:0004129;<br>P:GO:0006091                                                                                                                                         | -                                              | EC:1.9.3.1  | -                                                                                                                                                      |
|                                      |                                                         | 0  |                                                                                                                                                                                                         |                                                |             | -                                                                                                                                                      |
| Caenorhabditis briggsae              | d- mismatch repair protein msh-2                        | 3  | F:GO:0003677;<br>C:GO:0044428;<br>C:GO:0032300                                                                                                                                                          | -                                              |             | IPR000432; G3DSA:3.40.50.300<br>(GENE3D), PTHR11361:SF28<br>(PANTHER), SignalP (SIGNALP),<br>SSF52540 (SUPERFAMILY)                                    |
| Caenorhabditis elegans               | fmrifamide receptor                                     | 3  | P:GO:0007186;<br>C:GO:0016021;<br>F:GO:0001653                                                                                                                                                          | -                                              |             | IPR000276; IPR017452;<br>G3DSA:1.20.1070.10 (GENE3D),<br>PTHR22751 (PANTHER),<br>PTHR22751:SF8 (PANTHER), SignalP<br>(SIGNALP), SSF81321 (SUPERFAMILY) |
| Caenorhabditis briggsae              | carboxypeptidase d                                      | 12 | F:GO:0004181;<br>F:GO:0035256;<br>F:GO:0008270;<br>P:GO:0071352;<br>C:GO:0016021;<br>P:GO:0006508;<br>C:GO:0005792;<br>F:GO:0003779;<br>P:GO:0007216;<br>C:GO:0005802;<br>F:GO:0030160;<br>C:GO:0005634 | -                                              | EC:3.4.17.0 | IPR000834; G3DSA:3.40.630.10<br>(GENE3D), PTHR11532 (PANTHER),<br>PTHR11532:SF2 (PANTHER), SSF53187<br>(SUPERFAMILY)                                   |

|                         |                                           |    |                                                                                                                                                                                                                                                            |                                                                                                                    |              |                                                                                            |
|-------------------------|-------------------------------------------|----|------------------------------------------------------------------------------------------------------------------------------------------------------------------------------------------------------------------------------------------------------------|--------------------------------------------------------------------------------------------------------------------|--------------|--------------------------------------------------------------------------------------------|
| Caenorhabditis briggsae | briggsae cbr-chs-1 protein                | 5  | P:GO:0009792;<br>P:GO:0000003;<br>C:GO:0005887;<br>F:GO:0016758;<br>P:GO:0040010                                                                                                                                                                           | -                                                                                                                  | EC:2.4.1.0   | PTHR22914 (PANTHER)                                                                        |
| Caenorhabditis briggsae | protein fat-free homolog                  | 4  | C:GO:0016021;<br>C:GO:0005737;<br>F:GO:0005515;<br>C:GO:0043231                                                                                                                                                                                            | -                                                                                                                  |              | PTHR15954 (PANTHER), SignalP (SIGNALP)                                                     |
| Caenorhabditis briggsae | briggsae cbr-sgo-1 protein                | 0  |                                                                                                                                                                                                                                                            | C:GO:0005694;<br>P:GO:0045132;<br>P:GO:0007049;<br>P:GO:0007059;<br>C:GO:0000775;<br>P:GO:0051301;<br>C:GO:0005634 |              | IPR011515                                                                                  |
| Caenorhabditis elegans  | die-1                                     | 0  |                                                                                                                                                                                                                                                            | F:GO:0008270;<br>C:GO:0005622                                                                                      |              | IPR007087; IPR015880; IPR017900                                                            |
|                         | -                                         | 0  |                                                                                                                                                                                                                                                            |                                                                                                                    |              | -                                                                                          |
|                         | -                                         | 0  |                                                                                                                                                                                                                                                            |                                                                                                                    |              | -                                                                                          |
| Caenorhabditis elegans  | programmed cell death                     | 1  | F:GO:0005515                                                                                                                                                                                                                                               | -                                                                                                                  |              | IPR009652                                                                                  |
|                         | -                                         | 0  |                                                                                                                                                                                                                                                            |                                                                                                                    |              | -                                                                                          |
|                         | -                                         | 0  |                                                                                                                                                                                                                                                            |                                                                                                                    |              | -                                                                                          |
|                         | -                                         | 0  |                                                                                                                                                                                                                                                            |                                                                                                                    |              | -                                                                                          |
|                         | -                                         | 0  |                                                                                                                                                                                                                                                            |                                                                                                                    |              | -                                                                                          |
|                         | -                                         | 0  |                                                                                                                                                                                                                                                            |                                                                                                                    |              | -                                                                                          |
|                         | -                                         | 0  |                                                                                                                                                                                                                                                            |                                                                                                                    |              | -                                                                                          |
| Caenorhabditis elegans  | adp atp translocase                       | 15 | P:GO:0055085;<br>P:GO:0040010;<br>P:GO:0008340;<br>C:GO:0016021;<br>C:GO:0005743;<br>P:GO:0040002;<br>P:GO:0040035;<br>P:GO:0010171;<br>P:GO:0002119;<br>F:GO:0005515;<br>P:GO:0040017;<br>F:GO:0005215;<br>P:GO:0006898;<br>P:GO:0002009;<br>P:GO:0009792 | -                                                                                                                  |              | IPR001993; IPR002113; IPR018108;<br>G3DSA:1.50.40.10 (GENE3D),<br>PTHR11896:SF35 (PANTHER) |
|                         | -                                         | 0  |                                                                                                                                                                                                                                                            |                                                                                                                    |              | -                                                                                          |
| Loa loa                 | autophagy protein apg5 containing protein | 11 | C:GO:0034045;<br>P:GO:0000045;<br>P:GO:0055015;<br>F:GO:0005515;<br>P:GO:0001974;<br>P:GO:0060047;<br>C:GO:0005776;<br>P:GO:0031397;<br>P:GO:0042493;<br>P:GO:0043066;<br>P:GO:0042311                                                                     | -                                                                                                                  |              | -                                                                                          |
| Loa loa                 | class member 2                            | 4  | C:GO:0016020;<br>P:GO:0008340;<br>F:GO:0004571;<br>F:GO:0005509                                                                                                                                                                                            | -                                                                                                                  | EC:3.2.1.113 | IPR001382; PTHR11742:SF6 (PANTHER)                                                         |

|                         |                                                                |   |                                                                                                                                                      |                                                                                                                    |             |                                                                                                                                                             |
|-------------------------|----------------------------------------------------------------|---|------------------------------------------------------------------------------------------------------------------------------------------------------|--------------------------------------------------------------------------------------------------------------------|-------------|-------------------------------------------------------------------------------------------------------------------------------------------------------------|
| Caenorhabditis elegans  | elegans protein confirmed by transcript evidence               | 0 |                                                                                                                                                      |                                                                                                                    |             | -                                                                                                                                                           |
| Caenorhabditis elegans  | mitochondrial import inner membrane translocase subunit tim8 a | 4 | F:GO:0046872;<br>P:GO:0045039;<br>C:GO:0005743;<br>C:GO:0042719                                                                                      |                                                                                                                    |             | -                                                                                                                                                           |
| Brugia malayi           | elegans protein confirmed by transcript evidence               | 9 | P:GO:0010171;<br>P:GO:0002119;<br>P:GO:0040002;<br>P:GO:0040011;<br>C:GO:0016021;<br>C:GO:0005576;<br>P:GO:0019915;<br>P:GO:0006898;<br>F:GO:0042302 |                                                                                                                    |             | -                                                                                                                                                           |
|                         |                                                                | 0 |                                                                                                                                                      |                                                                                                                    |             | -                                                                                                                                                           |
| Caenorhabditis elegans  | zinc finger cchc domain-containing protein 9                   | 4 | P:GO:0040035;<br>P:GO:0040010;<br>P:GO:0040011;<br>P:GO:0006898                                                                                      |                                                                                                                    |             | -                                                                                                                                                           |
| Brugia malayi           | leucine rich repeat family protein                             | 0 |                                                                                                                                                      | F:GO:0005515                                                                                                       |             | IPR001611; IPR003591; PR00019 (PRINTS), G3DSA:3.80.10.10 (GENE3D), PTHR23155 (PANTHER), PTHR23155:SF26 (PANTHER), PSS1450 (PROFILE), SSF52058 (SUPERFAMILY) |
| Caenorhabditis elegans  | gpi-anchor transamidase                                        | 6 | F:GO:0003923;<br>F:GO:0005515;<br>C:GO:0042765;<br>F:GO:0004197;<br>P:GO:0006508;<br>P:GO:0050976                                                    |                                                                                                                    | EC:3.4.22.0 | -                                                                                                                                                           |
| Caenorhabditis briggsae | gpi-anchor transamidase                                        | 7 | F:GO:0003676;<br>F:GO:0003923;<br>F:GO:0005515;<br>C:GO:0042765;<br>F:GO:0004197;<br>P:GO:0006508;<br>F:GO:0008270                                   |                                                                                                                    | EC:3.4.22.0 | IPR001096; PTHR12000:SF1 (PANTHER), SignalP (SIGNALP)                                                                                                       |
| Caenorhabditis elegans  | hypothetical protein F55F10.1 [Caenorhabditis elegans]         | 4 | F:GO:0017111;<br>P:GO:0050789;<br>C:GO:0005622;<br>F:GO:0000166                                                                                      |                                                                                                                    | EC:3.6.1.15 | PTHR22908 (PANTHER), PTHR22908:SF13 (PANTHER)                                                                                                               |
| Brugia malayi           | zinc finger                                                    | 0 |                                                                                                                                                      | F:GO:0046872;<br>P:GO:0055114;<br>F:GO:0016491;<br>C:GO:0016021;<br>F:GO:0032440;<br>F:GO:0008270;<br>C:GO:0005575 |             | IPR001594; PTHR22883 (PANTHER), SignalP (SIGNALP)                                                                                                           |
| Caenorhabditis elegans  | gns1 sur4 family protein                                       | 2 | C:GO:0016021;<br>P:GO:0007283                                                                                                                        |                                                                                                                    |             | IPR002076                                                                                                                                                   |
| Caenorhabditis briggsae | sjchgc05781 protein                                            | 0 |                                                                                                                                                      |                                                                                                                    |             | -                                                                                                                                                           |
| Caenorhabditis briggsae | sjchgc05781 protein                                            | 0 |                                                                                                                                                      |                                                                                                                    |             | IPR013869                                                                                                                                                   |
| Caenorhabditis briggsae | sjchgc05781 protein                                            | 0 |                                                                                                                                                      |                                                                                                                    |             | IPR013869                                                                                                                                                   |
| Caenorhabditis elegans  | cation efflux protein zinc transporter                         | 4 | C:GO:0016020;<br>P:GO:0040010;<br>F:GO:0005515;<br>P:GO:0006810                                                                                      |                                                                                                                    |             | -                                                                                                                                                           |

|                         |                                                            |    |                                                                                                                                                                                                                                                                                              |                                                                 |                                                                                                                         |
|-------------------------|------------------------------------------------------------|----|----------------------------------------------------------------------------------------------------------------------------------------------------------------------------------------------------------------------------------------------------------------------------------------------|-----------------------------------------------------------------|-------------------------------------------------------------------------------------------------------------------------|
|                         | -                                                          | 0  |                                                                                                                                                                                                                                                                                              |                                                                 | -                                                                                                                       |
| Caenorhabditis elegans  | translatio-l activator gcn1                                | 4  | P:GO:0009987;<br>P:GO:0000003;<br>F:GO:0005488;<br>P:GO:0006810                                                                                                                                                                                                                              | -                                                               | IPR011989                                                                                                               |
| Ascaris suum            | elegans protein partially confirmed by transcript evidence | 3  | P:GO:0006032;<br>P:GO:0016998;<br>F:GO:0004568                                                                                                                                                                                                                                               | -                                                               | EC:3.2.1.14<br>IPR000726; G3DSA:1.10.530.10<br>(GENE3D), SignalP (SIGNALP),<br>SSF53955 (SUPERFAMILY)                   |
| Ascaris suum            | elegans protein partially confirmed by transcript evidence | 3  | P:GO:0006032;<br>P:GO:0016998;<br>F:GO:0004568                                                                                                                                                                                                                                               | -                                                               | EC:3.2.1.14<br>IPR000726; G3DSA:1.10.530.10<br>(GENE3D), SignalP (SIGNALP),<br>SSF53955 (SUPERFAMILY)                   |
|                         | -                                                          | 0  |                                                                                                                                                                                                                                                                                              |                                                                 | -                                                                                                                       |
| Brugia malayi           | ring finger-h2 protein                                     | 4  | F:GO:0046872;<br>F:GO:0004842;<br>F:GO:0005515;<br>P:GO:0045941                                                                                                                                                                                                                              | -                                                               | EC:6.3.2.19<br>IPR001841; IPR002350; IPR013083;<br>IPR018957; PTHR13644 (PANTHER),<br>SSF57850 (SUPERFAMILY)            |
| Brugia malayi           | ring finger-h2 protein                                     | 4  | F:GO:0046872;<br>F:GO:0004842;<br>F:GO:0005515;<br>P:GO:0045941                                                                                                                                                                                                                              | -                                                               | EC:6.3.2.19<br>IPR001841; IPR002350; IPR013083;<br>IPR018957; PTHR13644 (PANTHER),<br>SSF57850 (SUPERFAMILY)            |
| Caenorhabditis elegans  | aldehyde dehydroge-se 2 family                             | 17 | F:GO:0004030;<br>P:GO:0033574;<br>P:GO:0006066;<br>P:GO:0001889;<br>P:GO:0055114;<br>P:GO:0071398;<br>P:GO:0005975;<br>F:GO:0042802;<br>F:GO:0009055;<br>F:GO:0001758;<br>P:GO:0035094;<br>P:GO:0032870;<br>C:GO:0005759;<br>P:GO:0032496;<br>P:GO:0032570;<br>F:GO:0004029;<br>P:GO:0055093 | -                                                               | EC:1.2.1.5;<br>EC:1.2.1.36;<br>EC:1.2.1.3<br>IPR015590; IPR016160; IPR016161;<br>IPR016162; PTHR11699:SF46<br>(PANTHER) |
| Caenorhabditis elegans  | aldehyde dehydroge-se 2 family                             | 17 | F:GO:0004030;<br>P:GO:0033574;<br>P:GO:0006066;<br>P:GO:0001889;<br>P:GO:0055114;<br>P:GO:0071398;<br>P:GO:0005975;<br>F:GO:0042802;<br>F:GO:0009055;<br>F:GO:0001758;<br>P:GO:0035094;<br>P:GO:0032870;<br>C:GO:0005759;<br>P:GO:0032496;<br>P:GO:0032570;<br>F:GO:0004029;<br>P:GO:0055093 | -                                                               | EC:1.2.1.5;<br>EC:1.2.1.36;<br>EC:1.2.1.3<br>IPR015590; IPR016160; IPR016161;<br>IPR016162; PTHR11699:SF46<br>(PANTHER) |
| Caenorhabditis briggsae | briggsae cbr-mat-2 protein                                 | 0  |                                                                                                                                                                                                                                                                                              | P:GO:0000003;<br>P:GO:0040039;<br>P:GO:0040035;<br>P:GO:0006898 | -                                                                                                                       |

|                          |                                                         |   |                                                                                                                                                                                                                                                                             |   |                                                                                                                       |
|--------------------------|---------------------------------------------------------|---|-----------------------------------------------------------------------------------------------------------------------------------------------------------------------------------------------------------------------------------------------------------------------------|---|-----------------------------------------------------------------------------------------------------------------------|
| Caenorhabditis briggsae  | a-phase promoting complex subunit 1                     | 0 | P:GO:0070979;<br>P:GO:0006898;<br>C:GO:0005634;<br>P:GO:0007067;<br>P:GO:0051437;<br>P:GO:0051436;<br>P:GO:0000003;<br>P:GO:0051301;<br>C:GO:0005654;<br>P:GO:0031145;<br>F:GO:0005515;<br>C:GO:0005680;<br>P:GO:0040039;<br>C:GO:0005829;<br>P:GO:0007049;<br>P:GO:0040035 | - | -                                                                                                                     |
| -                        | -                                                       | 0 | -                                                                                                                                                                                                                                                                           | - | -                                                                                                                     |
| Caenorhabditis briggsae  | receptor expression-enhancing protein 4                 | 0 | C:GO:0016021;<br>C:GO:0016020                                                                                                                                                                                                                                               | - | IPR004345; SignalP (SIGNALP)                                                                                          |
| Saccoglossus kowalevskii | d--directed r- polymerases and iii subunit rpabc5       | 9 | F:GO:0003899;<br>F:GO:0008270;<br>P:GO:0006356;<br>F:GO:0004672;<br>P:GO:0006367;<br>P:GO:0008380;<br>C:GO:0005665;<br>F:GO:0003677;<br>P:GO:0006368                                                                                                                        | - | EC:2.7.7.6                                                                                                            |
| Brugia malayi            | atp-binding sub-family c (cfr mrp) member isoform cra_a | 2 | C:GO:0016020;<br>P:GO:0010033                                                                                                                                                                                                                                               | - | G3DSA:3.40.50.300 (GENE3D),<br>PTHR19242 (PANTHER),<br>PTHR19242:SF14 (PANTHER),<br>SSF52540 (SUPERFAMILY)            |
| -                        | -                                                       | 0 | -                                                                                                                                                                                                                                                                           | - | IPR001005; IPR009057; IPR012287;<br>IPR017930                                                                         |
| Branchiostoma floridae   | nicoti-mide nucleotide transhydroge-se                  | 4 | F:GO:0005488;<br>P:GO:0010467;<br>F:GO:0008746;<br>C:GO:0016020                                                                                                                                                                                                             | - | IPR007886; G3DSA:3.40.50.1770<br>(GENE3D), PTHR10160 (PANTHER),<br>PTHR10160:SF2 (PANTHER), SSF52283<br>(SUPERFAMILY) |
| Caenorhabditis briggsae  | inositol polyphosphate-5-phosphatase b                  | 6 | P:GO:0040013;<br>P:GO:0007283;<br>F:GO:0016788;<br>C:GO:0016021;<br>C:GO:0005829;<br>P:GO:0030317                                                                                                                                                                           | - | IPR000300; IPR005135;<br>G3DSA:3.60.10.10 (GENE3D),<br>PTHR11200 (PANTHER),<br>PTHR11200:SF26 (PANTHER)               |
| Caenorhabditis elegans   | elegans protein confirmed by transcript evidence        | 0 | P:GO:0051301;<br>P:GO:0009792;<br>P:GO:0007126                                                                                                                                                                                                                              | - | IPR008574                                                                                                             |
| Loa loa                  | wd-repeat protein                                       | 0 | P:GO:0009725;<br>P:GO:0045449;<br>F:GO:0003677;<br>C:GO:0005634                                                                                                                                                                                                             | - | IPR001487; PTHR16266 (PANTHER),<br>PTHR16266:SF3 (PANTHER)                                                            |
| Brugia malayi            | pleckstrin homology domain interacting protein          | 4 | P:GO:0080090;<br>P:GO:0031323;<br>P:GO:0006350;<br>P:GO:0060255                                                                                                                                                                                                             | - | IPR001487; PTHR16266 (PANTHER),<br>PTHR16266:SF4 (PANTHER)                                                            |
| Caenorhabditis briggsae  | leucine rich repeat family protein                      | 1 | P:GO:0009792                                                                                                                                                                                                                                                                | - | -                                                                                                                     |



|                         |                                                        |    |                                                                                                                                                                       |                               |             |                                                                                                                                                                                                          |
|-------------------------|--------------------------------------------------------|----|-----------------------------------------------------------------------------------------------------------------------------------------------------------------------|-------------------------------|-------------|----------------------------------------------------------------------------------------------------------------------------------------------------------------------------------------------------------|
| Caenorhabditis briggsae | leucine rich repeat family protein                     | 2  | C:GO:0044464;<br>P:GO:0009792                                                                                                                                         | -                             | -           | IPR000483; IPR001611; IPR003591;<br>PR00019 (PRINTS), G3DSA:3.80.10.10<br>(GENE3D), PTHR23154 (PANTHER),<br>PTHR23154:SF51 (PANTHER), PSS1450<br>(PROFILE), SignalP (SIGNALP),<br>SSF52058 (SUPERFAMILY) |
| Caenorhabditis briggsae | leucine-rich repeats and immunoglobulin-like domains 2 | 2  | P:GO:0009792;<br>C:GO:0016020                                                                                                                                         | -                             | -           | IPR000483; IPR001611; IPR003591;<br>G3DSA:3.80.10.10 (GENE3D),<br>PTHR23154 (PANTHER),<br>PTHR23154:SF51 (PANTHER), PSS1450<br>(PROFILE), SSF52058 (SUPERFAMILY)                                         |
| Caenorhabditis elegans  | eukaryotic translation initiation factor 3 subunit i   | 5  | C:GO:0005852;<br>P:GO:0006413;<br>F:GO:0005515;<br>F:GO:0003743;<br>C:GO:0005829                                                                                      | -                             | -           | -                                                                                                                                                                                                        |
| -                       | -                                                      | 0  | -                                                                                                                                                                     | -                             | -           | -                                                                                                                                                                                                        |
| Brugia malayi           | Conserved hypothetical protein [Brugia malayi]         | 0  | -                                                                                                                                                                     | -                             | -           | IPR019481                                                                                                                                                                                                |
| Caenorhabditis elegans  | myotubularin-related family protein                    | 0  | -                                                                                                                                                                     | P:GO:0016311;<br>F:GO:0016791 | -           | IPR010569; IPR017906; PTHR10807<br>(PANTHER), PTHR10807:SF3<br>(PANTHER), SSF52799 (SUPERFAMILY)                                                                                                         |
| Caenorhabditis briggsae | rad25 xp-b d- repair helicase                          | 10 | P:GO:0009411;<br>P:GO:0006289;<br>P:GO:0006367;<br>F:GO:0004003;<br>P:GO:0000381;<br>F:GO:0016251;<br>F:GO:0003677;<br>F:GO:0005524;<br>C:GO:0005675;<br>P:GO:0009792 | -                             | -           | PTHR11274 (PANTHER)                                                                                                                                                                                      |
| Caenorhabditis elegans  | cyclin e                                               | 5  | P:GO:0000082;<br>F:GO:0016301;<br>P:GO:0007088;<br>F:GO:0016538;<br>C:GO:0005634                                                                                      | -                             | -           | IPR004367; IPR013763; PTHR10177<br>(PANTHER), PTHR10177:SF15<br>(PANTHER), SignalP (SIGNALP)                                                                                                             |
| Brugia malayi           | isoform c                                              | 1  | C:GO:0016020                                                                                                                                                          | -                             | -           | -                                                                                                                                                                                                        |
| Caenorhabditis elegans  | oligopeptidase a                                       | 6  | F:GO:0004222;<br>P:GO:0045449;<br>F:GO:0003702;<br>P:GO:0006367;<br>P:GO:0006508;<br>F:GO:0008270                                                                     | -                             | EC:3.4.24.0 | IPR001567; G3DSA:1.10.1370.10<br>(GENE3D), G3DSA:3.40.390.10<br>(GENE3D), PTHR11804 (PANTHER),<br>PTHR11804:SF4 (PANTHER), SSF55486<br>(SUPERFAMILY)                                                     |
| -                       | -                                                      | 0  | -                                                                                                                                                                     | -                             | -           | -                                                                                                                                                                                                        |
| Caenorhabditis elegans  | bhlhzip transcription factor bigmax                    | 2  | P:GO:0040010;<br>P:GO:0008340                                                                                                                                         | -                             | -           | -                                                                                                                                                                                                        |

|                         |                                      |    |                                                                                                                                                                                                                                                                                                                                                                                   |   |            |                                                                                                              |
|-------------------------|--------------------------------------|----|-----------------------------------------------------------------------------------------------------------------------------------------------------------------------------------------------------------------------------------------------------------------------------------------------------------------------------------------------------------------------------------|---|------------|--------------------------------------------------------------------------------------------------------------|
| Caenorhabditis briggsae | homeobox protein abdomi-l-b          | 22 | P:GO:0035225;<br>F:GO:0030528;<br>F:GO:0005515;<br>P:GO:0008354;<br>F:GO:0004000;<br>P:GO:0035263;<br>P:GO:0006355;<br>P:GO:0008584;<br>P:GO:0007506;<br>F:GO:0043565;<br>P:GO:0007486;<br>P:GO:0035261;<br>P:GO:0007385;<br>F:GO:0003700;<br>P:GO:0030539;<br>P:GO:0007431;<br>P:GO:0009997;<br>P:GO:0035224;<br>C:GO:0005634;<br>P:GO:0035277;<br>P:GO:0045843;<br>P:GO:0048066 | - | EC:3.5.4.4 | -                                                                                                            |
| Caenorhabditis briggsae | isoform b                            | 3  | C:GO:0043231;<br>C:GO:0031410;<br>C:GO:0044446                                                                                                                                                                                                                                                                                                                                    | - |            | IPR001680; IPR011046; IPR015943;<br>IPR017986; IPR019782; PTHR13923<br>(PANTHER), PTHR13923:SF1<br>(PANTHER) |
| Caenorhabditis briggsae | isoform b                            | 3  | C:GO:0043231;<br>C:GO:0031410;<br>C:GO:0044446                                                                                                                                                                                                                                                                                                                                    | - |            | IPR001680; IPR011046; IPR015943;<br>IPR017986; IPR019782; PTHR13923<br>(PANTHER), PTHR13923:SF1<br>(PANTHER) |
|                         | -                                    | 0  |                                                                                                                                                                                                                                                                                                                                                                                   |   |            | SignalP (SIGNALP)                                                                                            |
| Caenorhabditis elegans  | pre-mr--processing-splicing factor 8 | 17 | P:GO:0050896;<br>F:GO:0003723;<br>C:GO:0005681;<br>P:GO:0045132;<br>P:GO:0040007;<br>C:GO:0016607;<br>P:GO:0040027;<br>P:GO:0040035;<br>P:GO:0018996;<br>P:GO:0007601;<br>F:GO:0005515;<br>P:GO:0040011;<br>P:GO:0000398;<br>C:GO:0005682;<br>P:GO:0006898;<br>P:GO:0002009;<br>P:GO:0009792                                                                                      | - |            | IPR012592; IPR019580; IPR019581;<br>IPR019582; PTHR11140 (PANTHER)                                           |

|                           |                                      |    |                                                                                                                                                                                                                                                                                                                                                                                                                                                                        |   |              |                                                                                                                                                                                           |
|---------------------------|--------------------------------------|----|------------------------------------------------------------------------------------------------------------------------------------------------------------------------------------------------------------------------------------------------------------------------------------------------------------------------------------------------------------------------------------------------------------------------------------------------------------------------|---|--------------|-------------------------------------------------------------------------------------------------------------------------------------------------------------------------------------------|
| synthetic construct       | filamin a                            | 28 | F:GO:0004871;<br>C:GO:0005802;<br>P:GO:0043433;<br>P:GO:0034394;<br>C:GO:0015629;<br>P:GO:0050821;<br>P:GO:0051220;<br>C:GO:0005576;<br>C:GO:0005829;<br>F:GO:0001948;<br>P:GO:0051764;<br>P:GO:0043123;<br>F:GO:0051015;<br>F:GO:0048365;<br>P:GO:0045022;<br>P:GO:0007195;<br>F:GO:0042803;<br>F:GO:0034989;<br>P:GO:0031532;<br>F:GO:0034988;<br>C:GO:0005886;<br>F:GO:0008134;<br>P:GO:0042177;<br>C:GO:0005634;<br>P:GO:0042993;<br>C:GO:0005938;<br>P:GO:0043113 | - |              | IPR001298; IPR013783; IPR014756;<br>IPR017868; PTHR11915 (PANTHER),<br>PTHR11915:SF24 (PANTHER)                                                                                           |
| Caenorhabditis briggsae   | phosphatidylserine decarboxylase     | 4  | F:GO:0004609;<br>P:GO:0040010;<br>P:GO:0008654;<br>C:GO:0005739                                                                                                                                                                                                                                                                                                                                                                                                        | - | EC:4.1.1.65  | IPR003817; IPR005221                                                                                                                                                                      |
| Caenorhabditis sp. PS1010 | betaine aldehyde dehydroge-se        | 3  | C:GO:0005737;<br>P:GO:0055114;<br>F:GO:0008802                                                                                                                                                                                                                                                                                                                                                                                                                         | - | EC:1.2.1.8   | IPR015590; IPR016160; IPR016161;<br>IPR016162; IPR016163;<br>PTHR11699:SF47 (PANTHER)                                                                                                     |
| Caenorhabditis briggsae   | d ki-se family family member (dkf-2) | 7  | C:GO:0005737;<br>P:GO:0006468;<br>F:GO:0046872;<br>P:GO:0045087;<br>F:GO:0004697;<br>F:GO:0005524;<br>C:GO:0016020                                                                                                                                                                                                                                                                                                                                                     | - | EC:2.7.11.13 | -                                                                                                                                                                                         |
| Caenorhabditis elegans    | glutathione reductase                | 13 | C:GO:0005829;<br>C:GO:0009897;<br>C:GO:0005625;<br>C:GO:0005739;<br>P:GO:0045454;<br>P:GO:0055114;<br>P:GO:0007283;<br>P:GO:0006749;<br>F:GO:0004362;<br>F:GO:0043295;<br>F:GO:0042803;<br>F:GO:0050660;<br>F:GO:0050661                                                                                                                                                                                                                                               | - | EC:1.8.1.7   | IPR000815; IPR001327; IPR004099;<br>IPR013027; IPR016156; PIR00411<br>(PRINTS), G3DSA:3.50.50.60<br>(GENE3D), PTHR22912 (PANTHER),<br>PTHR22912:SF27 (PANTHER),<br>SSF51905 (SUPERFAMILY) |
| Caenorhabditis briggsae   | trehalase family protein             | 4  | P:GO:0009792;<br>F:GO:0003824;<br>P:GO:0040007;<br>P:GO:0002119                                                                                                                                                                                                                                                                                                                                                                                                        | - |              | IPR001661; PTHR23403:SF1<br>(PANTHER)                                                                                                                                                     |

|                         |                                           |    |                                                                                                                                                                       |                                                                                                                                                                                                                                                                             |                                                                                                                            |                   |
|-------------------------|-------------------------------------------|----|-----------------------------------------------------------------------------------------------------------------------------------------------------------------------|-----------------------------------------------------------------------------------------------------------------------------------------------------------------------------------------------------------------------------------------------------------------------------|----------------------------------------------------------------------------------------------------------------------------|-------------------|
|                         | -                                         | 0  |                                                                                                                                                                       |                                                                                                                                                                                                                                                                             | -                                                                                                                          |                   |
| Caenorhabditis briggsae | msp-domain protein 1 variant              | 7  | C:GO:0044297;<br>P:GO:0019915;<br>C:GO:0005856;<br>P:GO:0040018;<br>P:GO:0000003;<br>F:GO:0005198;<br>C:GO:0031143                                                    | -                                                                                                                                                                                                                                                                           | IPR000535; IPR008962; PTHR22947 (PANTHER)                                                                                  |                   |
| Caenorhabditis elegans  | saposin-like type region 1 family protein | 3  | C:GO:0005764;<br>F:GO:0005488;<br>P:GO:0006665                                                                                                                        | -                                                                                                                                                                                                                                                                           | IPR007856; IPR008138; IPR008139; IPR011001; PTHR11480 (PANTHER), PTHR11480:SF2 (PANTHER)                                   |                   |
| Caenorhabditis elegans  | saposin-like type region 1 family protein | 3  | C:GO:0005764;<br>F:GO:0005488;<br>P:GO:0006665                                                                                                                        | -                                                                                                                                                                                                                                                                           | IPR007856; IPR008138; IPR008139; IPR011001; PTHR11480 (PANTHER), PTHR11480:SF2 (PANTHER)                                   |                   |
| Caenorhabditis elegans  | saposin-like type region 1 family protein | 3  | C:GO:0005764;<br>F:GO:0005488;<br>P:GO:0006665                                                                                                                        | -                                                                                                                                                                                                                                                                           | IPR007856; IPR008138; IPR008139; IPR011001; PTHR11480 (PANTHER), PTHR11480:SF2 (PANTHER)                                   |                   |
|                         | -                                         | 0  |                                                                                                                                                                       |                                                                                                                                                                                                                                                                             | -                                                                                                                          |                   |
|                         | -                                         | 0  |                                                                                                                                                                       |                                                                                                                                                                                                                                                                             | -                                                                                                                          |                   |
|                         | -                                         | 0  |                                                                                                                                                                       |                                                                                                                                                                                                                                                                             | -                                                                                                                          |                   |
|                         | -                                         | 0  |                                                                                                                                                                       |                                                                                                                                                                                                                                                                             | SignalP (SIGNALP)                                                                                                          |                   |
|                         | -                                         | 0  |                                                                                                                                                                       |                                                                                                                                                                                                                                                                             | -                                                                                                                          |                   |
| Caenorhabditis briggsae | lysocardiolipin acyltransferase 1         | 3  | F:GO:0005515;<br>C:GO:0044464;<br>F:GO:0016740                                                                                                                        | -                                                                                                                                                                                                                                                                           | PTHR10983 (PANTHER), PTHR10983:SF1 (PANTHER), SignalP (SIGNALP)                                                            |                   |
| Caenorhabditis briggsae | smad anchor for receptor activation       | 1  | F:GO:0046872                                                                                                                                                          | -                                                                                                                                                                                                                                                                           | IPR000306; IPR011011; IPR013083; PTHR22835 (PANTHER), PTHR22835:SF12 (PANTHER)                                             |                   |
| Brugia malayi           | structural maintenance of chromosomes 2   | 10 | C:GO:0005737;<br>P:GO:0044403;<br>C:GO:0000796;<br>P:GO:0007076;<br>P:GO:0055114;<br>F:GO:0005524;<br>C:GO:0005634;<br>F:GO:0046982;<br>P:GO:0051301;<br>F:GO:0032440 | -                                                                                                                                                                                                                                                                           | EC:1.3.1.74<br>IPR003395; G3DSA:3.40.50.300 (GENE3D), PTHR18937 (PANTHER), PTHR18937:SF9 (PANTHER), SSF52540 (SUPERFAMILY) |                   |
| Macaca mulatta          | loc400590 protein                         | 0  |                                                                                                                                                                       |                                                                                                                                                                                                                                                                             | -                                                                                                                          |                   |
| Brugia malayi           | nucleotide-binding head-stalk             | 0  |                                                                                                                                                                       | P:GO:0007018;<br>F:GO:0030246;<br>C:GO:0016020;<br>F:GO:0008565;<br>C:GO:0000139;<br>C:GO:0005874;<br>F:GO:0000166;<br>C:GO:0005737;<br>F:GO:0005524;<br>F:GO:0003777;<br>P:GO:0005975;<br>F:GO:0003824;<br>F:GO:0003774;<br>P:GO:0006886;<br>P:GO:0048280;<br>F:GO:0005488 |                                                                                                                            | PD936484 (PRODOM) |

|                              |                                                  |    |                                                                                                                                                                                                                                                            |                                                                                                                                     |                                                                                            |
|------------------------------|--------------------------------------------------|----|------------------------------------------------------------------------------------------------------------------------------------------------------------------------------------------------------------------------------------------------------------|-------------------------------------------------------------------------------------------------------------------------------------|--------------------------------------------------------------------------------------------|
| Loa loa                      | dicer-1                                          | 15 | P:GO:0007279;<br>F:GO:0005515;<br>C:GO:0016442;<br>P:GO:0033227;<br>P:GO:0042078;<br>P:GO:0048813;<br>P:GO:0035087;<br>P:GO:0030422;<br>C:GO:0005737;<br>P:GO:0007367;<br>F:GO:0003723;<br>P:GO:0045448;<br>F:GO:0016443;<br>P:GO:0031054;<br>C:GO:0005634 | -                                                                                                                                   | IPR000999; IPR001159; PTHR14950 (PANTHER), PTHR14950:SF3 (PANTHER), SSF54768 (SUPERFAMILY) |
| Caenorhabditis elegans       | protein                                          | 0  |                                                                                                                                                                                                                                                            |                                                                                                                                     | IPR012936; PTHR10984 (PANTHER), PTHR10984:SF1 (PANTHER)                                    |
|                              | -                                                | 0  |                                                                                                                                                                                                                                                            |                                                                                                                                     | -                                                                                          |
| Caenorhabditis elegans       | rhodanese domain protein                         | 0  |                                                                                                                                                                                                                                                            | C:GO:0005739;<br>F:GO:0004792;<br>C:GO:0009507;<br>F:GO:0016740;<br>P:GO:0008272;<br>F:GO:0016784;<br>F:GO:0016783;<br>P:GO:0007568 | IPR001763; PTHR11364 (PANTHER)                                                             |
| Caenorhabditis briggsae      | protein sidekick                                 | 3  | C:GO:0016021;<br>P:GO:0007155;<br>F:GO:0016740                                                                                                                                                                                                             | -                                                                                                                                   | -                                                                                          |
|                              | -                                                | 0  |                                                                                                                                                                                                                                                            |                                                                                                                                     | -                                                                                          |
| Drosophila willistoni        | zinc finger protein                              | 0  |                                                                                                                                                                                                                                                            | F:GO:0003676;<br>P:GO:0045449;<br>F:GO:0008270;<br>F:GO:0030528;<br>C:GO:0005634;<br>C:GO:0005622                                   | IPR007087; IPR013087; IPR015880; PTHR11389 (PANTHER), SSF57667 (SUPERFAMILY)               |
| Drosophila willistoni        | zinc finger protein                              | 0  |                                                                                                                                                                                                                                                            | F:GO:0003676;<br>P:GO:0045449;<br>F:GO:0008270;<br>F:GO:0030528;<br>C:GO:0005634;<br>C:GO:0005622                                   | IPR007087; IPR013087; IPR015880; PTHR11389 (PANTHER), SSF57667 (SUPERFAMILY)               |
|                              | -                                                | 0  |                                                                                                                                                                                                                                                            |                                                                                                                                     | SignalP (SIGNALP)                                                                          |
|                              | -                                                | 0  |                                                                                                                                                                                                                                                            |                                                                                                                                     | -                                                                                          |
| Nippostrongylus brasiliensis | elegans protein confirmed by transcript evidence | 1  | P:GO:0009792                                                                                                                                                                                                                                               |                                                                                                                                     | IPR003677; PTHR21593 (PANTHER)                                                             |
|                              | -                                                | 0  |                                                                                                                                                                                                                                                            |                                                                                                                                     | -                                                                                          |

|                         |                                                         |    |                                                                                                                                                                                                                                                                             |                               |                                                                                                                                                |
|-------------------------|---------------------------------------------------------|----|-----------------------------------------------------------------------------------------------------------------------------------------------------------------------------------------------------------------------------------------------------------------------------|-------------------------------|------------------------------------------------------------------------------------------------------------------------------------------------|
| Caenorhabditis elegans  | iator family member (mdt-15)                            | 16 | P:GO:0030730;<br>P:GO:0040010;<br>P:GO:0008340;<br>P:GO:0006357;<br>P:GO:0000003;<br>F:GO:0016455;<br>P:GO:0002119;<br>P:GO:0019217;<br>P:GO:0040011;<br>P:GO:0006898;<br>C:GO:0016592;<br>F:GO:0035257;<br>F:GO:0003713;<br>P:GO:0045893;<br>P:GO:0009792;<br>P:GO:0040014 | -                             | IPR019087; PTHR23189 (PANTHER),<br>PTHR23189:SF1 (PANTHER)                                                                                     |
| Caenorhabditis elegans  | iator family member (mdt-15)                            | 16 | P:GO:0030730;<br>P:GO:0040010;<br>P:GO:0008340;<br>P:GO:0006357;<br>P:GO:0000003;<br>F:GO:0016455;<br>P:GO:0002119;<br>P:GO:0019217;<br>P:GO:0040011;<br>P:GO:0006898;<br>C:GO:0016592;<br>F:GO:0035257;<br>F:GO:0003713;<br>P:GO:0045893;<br>P:GO:0009792;<br>P:GO:0040014 | -                             | IPR019087; PTHR23189 (PANTHER),<br>PTHR23189:SF1 (PANTHER)                                                                                     |
| Haemonchus contortus    | metalloprotease 1 precursor                             | 2  | F:GO:0046872;<br>F:GO:0008237                                                                                                                                                                                                                                               | -                             | IPR001506; IPR006026; IPR013032;<br>G3DSA:3.40.390.10 (GENE3D),<br>PTHR10127 (PANTHER),<br>PTHR10127:SF65 (PANTHER),<br>SSF55486 (SUPERFAMILY) |
| Caenorhabditis briggsae | Hypothetical protein CBG07208 [Caenorhabditis briggsae] | 0  |                                                                                                                                                                                                                                                                             |                               | -                                                                                                                                              |
| Caenorhabditis elegans  | klraq motif-containing protein 1                        | 0  |                                                                                                                                                                                                                                                                             | F:GO:0003674;<br>C:GO:0005575 | IPR019343; PTHR21448 (PANTHER)                                                                                                                 |
| Loa loa                 | mgc81609 protein                                        | 3  | P:GO:0050873;<br>C:GO:0016020;<br>C:GO:0005737                                                                                                                                                                                                                              | -                             | IPR019144; PTHR21650 (PANTHER),<br>PTHR21650:SF3 (PANTHER), SignalP<br>(SIGNALP)                                                               |
| Caenorhabditis elegans  | carbonic anhydrase 2                                    | 4  | P:GO:0006950;<br>P:GO:0000003;<br>P:GO:0040011;<br>F:GO:0016829                                                                                                                                                                                                             | -                             | IPR001148; IPR018425                                                                                                                           |

|                          |                                               |    |                                                                                                                                                                                                                                                                                                                                |   |                                             |                                                                                                                  |
|--------------------------|-----------------------------------------------|----|--------------------------------------------------------------------------------------------------------------------------------------------------------------------------------------------------------------------------------------------------------------------------------------------------------------------------------|---|---------------------------------------------|------------------------------------------------------------------------------------------------------------------|
| Caenorhabditis elegans   | hydroxysteroid (17-beta) dehydroge-se 10      | 19 | F:GO:0008667;<br>C:GO:0005743;<br>P:GO:0033327;<br>P:GO:0055114;<br>P:GO:0040007;<br>F:GO:0018454;<br>P:GO:0040035;<br>F:GO:0042802;<br>F:GO:0001540;<br>F:GO:0005496;<br>P:GO:0006508;<br>P:GO:0007569;<br>F:GO:0051287;<br>P:GO:0002119;<br>P:GO:0040017;<br>F:GO:0004303;<br>P:GO:0009239;<br>P:GO:0051289;<br>C:GO:0005783 | - | EC:1.3.1.28;<br>EC:1.1.1.36;<br>EC:1.1.1.62 | IPR000169; IPR002198; IPR002347;<br>IPR016040; IPR020904;<br>PTHR19410:SF78 (PANTHER),<br>SSF51735 (SUPERFAMILY) |
| Caenorhabditis elegans   | hydroxysteroid (17-beta) dehydroge-se 10      | 19 | F:GO:0008667;<br>C:GO:0005743;<br>P:GO:0033327;<br>P:GO:0055114;<br>P:GO:0040007;<br>F:GO:0018454;<br>P:GO:0040035;<br>F:GO:0042802;<br>F:GO:0001540;<br>F:GO:0005496;<br>P:GO:0006508;<br>P:GO:0007569;<br>F:GO:0051287;<br>P:GO:0002119;<br>P:GO:0040017;<br>F:GO:0004303;<br>P:GO:0009239;<br>P:GO:0051289;<br>C:GO:0005783 | - | EC:1.3.1.28;<br>EC:1.1.1.36;<br>EC:1.1.1.62 | IPR000169; IPR002198; IPR002347;<br>IPR016040; IPR020904;<br>PTHR19410:SF78 (PANTHER),<br>SSF51735 (SUPERFAMILY) |
| Trichomonas vaginalis G3 | hypothetical protein [Trichomo-s vagi-lis G3] | 0  |                                                                                                                                                                                                                                                                                                                                |   |                                             | -                                                                                                                |
| synthetic construct      | histone-lysine n-methyltransferase setmar     | 10 | P:GO:0016568;<br>F:GO:0004519;<br>P:GO:0006313;<br>F:GO:0003677;<br>F:GO:0018024;<br>C:GO:0005634;<br>F:GO:0008270;<br>F:GO:0004803;<br>P:GO:0015074;<br>P:GO:0006281                                                                                                                                                          | - | EC:2.1.1.43                                 | IPR001888; IPR002622; IPR012287;<br>PTHR23016 (PANTHER)                                                          |
| synthetic construct      | histone-lysine n-methyltransferase setmar     | 5  | F:GO:0046872;<br>P:GO:0006313;<br>F:GO:0016787;<br>F:GO:0008168;<br>F:GO:0004803                                                                                                                                                                                                                                               | - | EC:2.1.1.0                                  | -                                                                                                                |

|                         |                                           |    |                                                                                                                                                                                                                                                                                                                                |   |              |                                                                                                                                                                                                             |
|-------------------------|-------------------------------------------|----|--------------------------------------------------------------------------------------------------------------------------------------------------------------------------------------------------------------------------------------------------------------------------------------------------------------------------------|---|--------------|-------------------------------------------------------------------------------------------------------------------------------------------------------------------------------------------------------------|
| Ascaris lumbricoides    | cytoplasmic intermediate filament protein | 13 | C:GO:0005737;<br>P:GO:0009792;<br>P:GO:0010171;<br>P:GO:0002119;<br>P:GO:0018996;<br>F:GO:0005515;<br>P:GO:0040002;<br>C:GO:0005882;<br>P:GO:0008340;<br>P:GO:0040011;<br>P:GO:0040007;<br>P:GO:0006898;<br>F:GO:0005198                                                                                                       | - | -            |                                                                                                                                                                                                             |
| Caenorhabditis elegans  | tyrosine-protein ki-se csk                | 6  | F:GO:0035014;<br>P:GO:0006468;<br>F:GO:0004715;<br>C:GO:0005942;<br>F:GO:0005515;<br>F:GO:0005524                                                                                                                                                                                                                              | - | EC:2.7.10.2  | IPR000719; IPR000980; IPR001245;<br>IPR001720; IPR008266; IPR011009;<br>IPR015778; IPR017441; IPR020635;<br>IPR020685; G3DSA:1.10.510.10<br>(GENE3D), G3DSA:3.30.200.20<br>(GENE3D), SSF55550 (SUPERFAMILY) |
| Caenorhabditis elegans  | small subunit ribosomal protein 20        | 4  | F:GO:0003735;<br>F:GO:0003723;<br>C:GO:0015935;<br>P:GO:0006412                                                                                                                                                                                                                                                                | - | EC:3.6.5.3   | -                                                                                                                                                                                                           |
| -                       | -                                         | 0  |                                                                                                                                                                                                                                                                                                                                |   |              |                                                                                                                                                                                                             |
| Caenorhabditis briggsae | b-box zinc finger family protein          | 3  | F:GO:0046872;<br>P:GO:0050794;<br>C:GO:0005634                                                                                                                                                                                                                                                                                 | - |              | IPR000408; IPR009091; PTHR12846<br>(PANTHER), PTHR12846:SF2<br>(PANTHER)                                                                                                                                    |
| -                       | -                                         | 0  |                                                                                                                                                                                                                                                                                                                                |   |              |                                                                                                                                                                                                             |
| Caenorhabditis briggsae | briggsae cbr-ctns-1 protein               | 4  | P:GO:0006810;<br>C:GO:0043231;<br>C:GO:0044444;<br>C:GO:0016020                                                                                                                                                                                                                                                                | - |              | IPR006603; PTHR13131 (PANTHER),<br>PF04193 (PFAM), SignalP (SIGNALP)                                                                                                                                        |
| Caenorhabditis elegans  | me-ge a trois 1                           | 19 | P:GO:0006367;<br>P:GO:0000718;<br>P:GO:0044236;<br>F:GO:0008094;<br>P:GO:0051592;<br>F:GO:0047485;<br>C:GO:0005737;<br>F:GO:0046872;<br>P:GO:0021591;<br>C:GO:0005675;<br>P:GO:0048661;<br>P:GO:0006368;<br>P:GO:0050790;<br>P:GO:0045944;<br>F:GO:0008353;<br>F:GO:0008080;<br>P:GO:0043066;<br>P:GO:0007049;<br>P:GO:0007512 | - | EC:2.7.11.23 | SignalP (SIGNALP)                                                                                                                                                                                           |



|                         |                                                          |    |                                                                                                                                                                                                                                                                                                                                |                                                                 |              |                                                                                                                 |
|-------------------------|----------------------------------------------------------|----|--------------------------------------------------------------------------------------------------------------------------------------------------------------------------------------------------------------------------------------------------------------------------------------------------------------------------------|-----------------------------------------------------------------|--------------|-----------------------------------------------------------------------------------------------------------------|
| Caenorhabditis elegans  | me-ge a trois 1                                          | 17 | P:GO:0006367;<br>P:GO:0000718;<br>P:GO:0044236;<br>F:GO:0008094;<br>P:GO:0051592;<br>F:GO:0047485;<br>C:GO:0005737;<br>P:GO:0000079;<br>P:GO:0021591;<br>C:GO:0005675;<br>P:GO:0048661;<br>P:GO:0006368;<br>P:GO:0045944;<br>F:GO:0008353;<br>F:GO:0008080;<br>P:GO:0043066;<br>P:GO:0007512                                   | -                                                               | EC:2.7.11.23 | IPR001841; IPR004575; IPR013083;<br>IPR015877; IPR017907;<br>PTHR12683:SF5 (PANTHER), SSF57850<br>(SUPERFAMILY) |
| Caenorhabditis elegans  | me-ge a trois 1                                          | 19 | P:GO:0006367;<br>P:GO:0000718;<br>P:GO:0044236;<br>F:GO:0008094;<br>P:GO:0051592;<br>F:GO:0047485;<br>C:GO:0005737;<br>F:GO:0046872;<br>P:GO:0021591;<br>C:GO:0005675;<br>P:GO:0048661;<br>P:GO:0006368;<br>P:GO:0050790;<br>P:GO:0045944;<br>F:GO:0008353;<br>F:GO:0008080;<br>P:GO:0043066;<br>P:GO:0007049;<br>P:GO:0007512 | -                                                               | EC:2.7.11.23 | SignalP (SIGNALP)                                                                                               |
| Caenorhabditis elegans  | hypothetical protein Y37E11AL.3 [Caenorhabditis elegans] | 0  |                                                                                                                                                                                                                                                                                                                                |                                                                 |              | -                                                                                                               |
| Caenorhabditis elegans  | hypothetical protein Y37E11AL.3 [Caenorhabditis elegans] | 0  |                                                                                                                                                                                                                                                                                                                                |                                                                 |              | -                                                                                                               |
| Caenorhabditis briggsae | briggsae cbr-pqn-85 protein                              | 2  | C:GO:0032116;<br>P:GO:0034088                                                                                                                                                                                                                                                                                                  | -                                                               |              | IPR011989; IPR016024; PTHR21704<br>(PANTHER), PTHR21704:SF5<br>(PANTHER)                                        |
| Caenorhabditis elegans  | briggsae cbr-nsy-1 protein                               | 4  | P:GO:0006468;<br>F:GO:0005515;<br>F:GO:0005524;<br>F:GO:0004674                                                                                                                                                                                                                                                                | -                                                               | EC:2.7.11.0  | -                                                                                                               |
| Ostertagia ostertagi    | secreted protein 5 precursor                             | 0  |                                                                                                                                                                                                                                                                                                                                | P:GO:0040011;<br>P:GO:0006898;<br>C:GO:0005576                  |              | IPR001283; IPR014044;<br>PTHR10334:SF5 (PANTHER), SignalP<br>(SIGNALP)                                          |
|                         | -                                                        | 0  |                                                                                                                                                                                                                                                                                                                                |                                                                 |              | -                                                                                                               |
| Loa loa                 | briggsae cbr-tre-2 protein                               | 3  | P:GO:0005991;<br>C:GO:0005886;<br>F:GO:0004555                                                                                                                                                                                                                                                                                 | -                                                               | EC:3.2.1.28  | IPR001661; IPR008928; IPR018232;<br>PTHR23403:SF1 (PANTHER)                                                     |
| Pongo abelii            | interferon regulatory factor 2 binding protein 2         | 0  |                                                                                                                                                                                                                                                                                                                                | P:GO:0000122;<br>P:GO:0045449;<br>F:GO:0003714;<br>C:GO:0005634 |              | IPR022750                                                                                                       |
| Loa loa                 | gyf domain containing protein                            | 0  |                                                                                                                                                                                                                                                                                                                                |                                                                 |              | PTHR14445 (PANTHER),<br>PTHR14445:SF9 (PANTHER)                                                                 |

|                             |                                                                |   |                                                                                  |                                                                                                                                                                                                         |             |                                                                                                                                            |
|-----------------------------|----------------------------------------------------------------|---|----------------------------------------------------------------------------------|---------------------------------------------------------------------------------------------------------------------------------------------------------------------------------------------------------|-------------|--------------------------------------------------------------------------------------------------------------------------------------------|
| Loa loa                     | gyf domain containing protein                                  | 0 |                                                                                  |                                                                                                                                                                                                         |             | PTHR14445 (PANTHER),<br>PTHR14445:SF9 (PANTHER)                                                                                            |
| Caenorhabditis elegans      | adenine phosphoribosyltransferase                              | 4 | C:GO:0005737;<br>F:GO:0003999;<br>P:GO:0009116;<br>P:GO:0006168                  | -                                                                                                                                                                                                       | EC:2.4.2.7  | IPR000836; G3DSA:3.40.50.2020<br>(GENE3D), SignalP (SIGNALP),<br>SSF53271 (SUPERFAMILY)                                                    |
|                             | -                                                              | 0 |                                                                                  |                                                                                                                                                                                                         |             | -                                                                                                                                          |
|                             | -                                                              | 0 |                                                                                  |                                                                                                                                                                                                         |             | SignalP (SIGNALP)                                                                                                                          |
| Mus musculus                | ribosomal protein l15                                          | 5 | C:GO:0005840;<br>F:GO:0003735;<br>F:GO:0003723;<br>C:GO:0005829;<br>P:GO:0006414 | -                                                                                                                                                                                                       |             | IPR000439; IPR012678; IPR020925                                                                                                            |
| Caenorhabditis elegans      | beta-lactamase family protein                                  | 0 |                                                                                  |                                                                                                                                                                                                         |             | IPR001466; IPR012338;<br>G3DSA:3.40.710.10 (GENE3D),<br>PTHR10566 (PANTHER),<br>PTHR10566:SF6 (PANTHER)                                    |
|                             | -                                                              | 0 |                                                                                  |                                                                                                                                                                                                         |             | -                                                                                                                                          |
| Caenorhabditis briggsae     | briggsae cbr-gly-10 protein                                    | 0 |                                                                                  | F:GO:0016740;<br>C:GO:0016021;<br>C:GO:0016020;<br>F:GO:0005529;<br>C:GO:0000139;<br>F:GO:0016757;<br>F:GO:0003674;<br>C:GO:0005794;<br>C:GO:0005575;<br>F:GO:0046872;<br>P:GO:0008150;<br>F:GO:0004653 |             | SignalP (SIGNALP)                                                                                                                          |
| Angiostrongylus cantonensis | briggsae cbr-npp-4 protein                                     | 0 |                                                                                  | C:GO:0005643;<br>F:GO:0003735;<br>P:GO:0015031;<br>P:GO:0006810;<br>F:GO:0003676;<br>P:GO:0006412;<br>F:GO:0008270;<br>C:GO:0005840;<br>F:GO:0017056;<br>C:GO:0005622;<br>F:GO:0005515;<br>P:GO:0008150 |             | PTHR13437 (PANTHER)                                                                                                                        |
| Caenorhabditis elegans      | heterotrimeric guanine nucleotide-binding protein beta subunit | 3 | F:GO:0004871;<br>P:GO:0007165;<br>F:GO:0004402                                   | -                                                                                                                                                                                                       | EC:2.3.1.48 | IPR001632; IPR001680; IPR011046;<br>IPR015943; IPR016346; IPR017986;<br>IPR019775; IPR019781; IPR019782;<br>IPR020472; PTHR19850 (PANTHER) |
| Caenorhabditis elegans      | udp-galactose transporter family protein                       | 5 | C:GO:0000139;<br>P:GO:0015780;<br>F:GO:0005338;<br>F:GO:0005351;<br>C:GO:0016021 | -                                                                                                                                                                                                       |             | IPR007271; PTHR10231:SF13<br>(PANTHER), SignalP (SIGNALP)                                                                                  |
|                             | -                                                              | 0 |                                                                                  |                                                                                                                                                                                                         |             | -                                                                                                                                          |
| Caenorhabditis elegans      | dehydroge-se reductase sdr family member 1                     | 4 | P:GO:0055114;<br>P:GO:0040010;<br>F:GO:0016491;<br>F:GO:0005488                  | -                                                                                                                                                                                                       |             | IPR002198; IPR002347; IPR016040;<br>IPR020904; PTHR19410:SF32<br>(PANTHER), SSF51735 (SUPERFAMILY)                                         |

|                         |                                                       |    |                                                                                                                                                                                                                                           |   |                                                                                                                                                 |
|-------------------------|-------------------------------------------------------|----|-------------------------------------------------------------------------------------------------------------------------------------------------------------------------------------------------------------------------------------------|---|-------------------------------------------------------------------------------------------------------------------------------------------------|
| Caenorhabditis elegans  | short-chain dehydroge-se reductase sdr                | 4  | P:GO:0055114;<br>F:GO:0016491;<br>F:GO:0005488;<br>P:GO:0040010                                                                                                                                                                           | - | IPR002198; IPR002347; IPR016040;<br>PTHR19410:SF32 (PANTHER),<br>SSF51735 (SUPERFAMILY)                                                         |
| Caenorhabditis elegans  | dehydroge-se reductase sdr family member 1            | 3  | P:GO:0040010;<br>P:GO:0008152;<br>F:GO:0003824                                                                                                                                                                                            | - | IPR002198; IPR002347; IPR016040;<br>IPR020904; PTHR19410:SF32<br>(PANTHER), SSF51735 (SUPERFAMILY)                                              |
| Loa loa                 | notch sig-ling pathway homolog protein 1              | 1  | F:GO:0005488                                                                                                                                                                                                                              | - | IPR001650; PTHR12706 (PANTHER),<br>SSF52540 (SUPERFAMILY)                                                                                       |
| Loa loa                 | notch sig-ling pathway homolog protein 1              | 1  | F:GO:0005488                                                                                                                                                                                                                              | - | IPR001650; PTHR12706 (PANTHER),<br>SSF52540 (SUPERFAMILY)                                                                                       |
| Caenorhabditis elegans  | hypothetical protein F25F8.1 [Caenorhabditis elegans] | 0  |                                                                                                                                                                                                                                           |   | IPR011042; SSF101898 (SUPERFAMILY)                                                                                                              |
|                         |                                                       | 0  |                                                                                                                                                                                                                                           |   |                                                                                                                                                 |
|                         |                                                       | 0  |                                                                                                                                                                                                                                           |   |                                                                                                                                                 |
|                         |                                                       | 0  |                                                                                                                                                                                                                                           |   |                                                                                                                                                 |
| Caenorhabditis elegans  | hypothetical protein E04F6.6 [Caenorhabditis elegans] | 0  |                                                                                                                                                                                                                                           |   |                                                                                                                                                 |
| Caenorhabditis briggsae | zip zinc transporter family protein                   | 3  | P:GO:0009792;<br>C:GO:0016020;<br>P:GO:0030001                                                                                                                                                                                            | - | IPR003689; PTHR11040 (PANTHER),<br>PTHR11040:SF8 (PANTHER), SignalP<br>(SIGNALP)                                                                |
|                         |                                                       | 0  |                                                                                                                                                                                                                                           |   |                                                                                                                                                 |
|                         |                                                       | 0  |                                                                                                                                                                                                                                           |   |                                                                                                                                                 |
| Caenorhabditis briggsae | protein ki-se c alpha binding protein                 | 1  | F:GO:0005515                                                                                                                                                                                                                              | - | IPR010504; PTHR12141 (PANTHER),<br>PTHR12141:SF2 (PANTHER),<br>SSF103657 (SUPERFAMILY)                                                          |
| Caenorhabditis briggsae | nedd8 activating enzyme e1 subunit 1                  | 6  | C:GO:0005626;<br>P:GO:0006917;<br>P:GO:0031574;<br>F:GO:0019781;<br>P:GO:0045116;<br>F:GO:0046982                                                                                                                                         | - | IPR009036; IPR016040; PTHR10953<br>(PANTHER), PTHR10953:SF29<br>(PANTHER), SignalP (SIGNALP)                                                    |
|                         |                                                       | 0  |                                                                                                                                                                                                                                           |   | SignalP (SIGNALP)                                                                                                                               |
| Caenorhabditis elegans  | motor axon guidance family member (max-1)             | 2  | P:GO:0008340;<br>P:GO:0040010                                                                                                                                                                                                             | - | IPR001849; IPR011993; PTHR22903<br>(PANTHER), PTHR22903:SF2<br>(PANTHER), SSF50729 (SUPERFAMILY)                                                |
| Macaca mulatta          | ribosomal protein l37                                 | 6  | F:GO:0046872;<br>F:GO:0003735;<br>F:GO:0005515;<br>C:GO:0022625;<br>F:GO:0019843;<br>P:GO:0006414                                                                                                                                         | - | IPR001569; IPR011331; IPR011332;<br>IPR018267                                                                                                   |
| Caenorhabditis briggsae | serine threonine-protein ki-se chk1                   | 14 | P:GO:0040010;<br>P:GO:0006281;<br>F:GO:0004672;<br>P:GO:0000086;<br>P:GO:0006975;<br>P:GO:0000003;<br>P:GO:0010171;<br>P:GO:0002119;<br>F:GO:0005515;<br>C:GO:0005657;<br>P:GO:0040011;<br>C:GO:0005654;<br>P:GO:0009792;<br>P:GO:0031572 | - | IPR000719; IPR008271; IPR011009;<br>IPR015729; IPR017441; IPR017442;<br>IPR020636; G3DSA:1.10.510.10<br>(GENE3D), G3DSA:3.30.200.20<br>(GENE3D) |
| Caenorhabditis briggsae | briggsae cbr-him-17 protein                           | 0  |                                                                                                                                                                                                                                           |   |                                                                                                                                                 |
|                         |                                                       | 0  |                                                                                                                                                                                                                                           |   |                                                                                                                                                 |

|                         |                                                     |   |                                                                                                                                     |   |             |                                                                                                                                    |
|-------------------------|-----------------------------------------------------|---|-------------------------------------------------------------------------------------------------------------------------------------|---|-------------|------------------------------------------------------------------------------------------------------------------------------------|
| Caenorhabditis elegans  | cysteinylnl-tr- cytoplasmic                         | 6 | P:GO:0006423;<br>F:GO:0005524;<br>C:GO:0005829;<br>F:GO:0000049;<br>F:GO:0042803;<br>F:GO:0004817                                   | - | EC:6.1.1.16 | IPR009080; IPR014729; IPR015803;<br>SSF52374 (SUPERFAMILY)                                                                         |
| Brugia malayi           | cysteinylnl-tr- synthetase                          | 3 | F:GO:0004812;<br>P:GO:0006418;<br>F:GO:0000166                                                                                      | - |             | IPR009080; IPR015803                                                                                                               |
| Caenorhabditis elegans  | cysteinylnl-tr- synthetase                          | 5 | C:GO:0005737;<br>P:GO:0006423;<br>F:GO:0005524;<br>F:GO:0000049;<br>F:GO:0004817                                                    | - | EC:6.1.1.16 | IPR009080; IPR014729; IPR015803;<br>SSF52374 (SUPERFAMILY)                                                                         |
| Caenorhabditis briggsae | nuclear prelamin a recognition factor-like          | 5 | F:GO:0005488;<br>P:GO:0032364;<br>P:GO:0016226;<br>P:GO:0045449;<br>P:GO:0001666                                                    | - |             | IPR004108; IPR009016;<br>G3DSA:3.40.50.1780 (GENE3D),<br>PTHR11615 (PANTHER),<br>PTHR11615:SF31 (PANTHER)                          |
| Ixodes scapularis       | fun14 domain containing 1                           | 1 | P:GO:0009792                                                                                                                        | - |             | IPR007014; PTHR21346 (PANTHER),<br>SignalP (SIGNALP)                                                                               |
| Caenorhabditis elegans  | adp-ribosylation factor gtpase activating protein 1 | 5 | F:GO:0046872;<br>P:GO:0016044;<br>P:GO:0048193;<br>F:GO:0005096;<br>C:GO:0005794                                                    | - |             | IPR001164; PTHR23180 (PANTHER),<br>PTHR23180:SF16 (PANTHER), SignalP<br>(SIGNALP)                                                  |
| Caenorhabditis elegans  | adp-ribosylation factor gtpase activating protein 1 | 4 | P:GO:0016044;<br>P:GO:0048193;<br>F:GO:0005096;<br>C:GO:0005794                                                                     | - |             | -                                                                                                                                  |
| Caenorhabditis elegans  | hypothetical kda protein in chromosome              | 0 |                                                                                                                                     |   |             | SignalP (SIGNALP)                                                                                                                  |
| Caenorhabditis elegans  | elegans protein confirmed by transcript evidence    | 0 |                                                                                                                                     |   |             | SignalP (SIGNALP)                                                                                                                  |
|                         | -                                                   | 0 |                                                                                                                                     |   |             | -                                                                                                                                  |
|                         | -                                                   | 0 |                                                                                                                                     |   |             | -                                                                                                                                  |
| Caenorhabditis elegans  | gpn-loop gtpase 3                                   | 4 | P:GO:0009792;<br>C:GO:0043234;<br>F:GO:0032555;<br>F:GO:0005515                                                                     | - |             | IPR004130; G3DSA:3.40.50.300<br>(GENE3D), PTHR21231 (PANTHER),<br>PTHR21231:SF4 (PANTHER), SSF52540<br>(SUPERFAMILY)               |
| Brugia malayi           | protein ki-se domain containing protein             | 3 | F:GO:0005488;<br>F:GO:0004672;<br>P:GO:0000003                                                                                      | - |             | -                                                                                                                                  |
| Brugia malayi           | protein ki-se domain containing protein             | 8 | C:GO:0005929;<br>C:GO:0030425;<br>F:GO:0005515;<br>P:GO:0034606;<br>F:GO:0004672;<br>C:GO:0030424;<br>P:GO:0034608;<br>C:GO:0043025 | - |             | -                                                                                                                                  |
| Caenorhabditis elegans  | udp-glucuronic acid decarboxylase                   | 6 | C:GO:0032580;<br>F:GO:0048040;<br>P:GO:0044237;<br>C:GO:0016021;<br>F:GO:0050662;<br>C:GO:0005739                                   | - | EC:4.1.1.35 | IPR001509; IPR016040;<br>G3DSA:3.90.25.10 (GENE3D),<br>PTHR10366 (PANTHER),<br>PTHR10366:SF35 (PANTHER),<br>SSF51735 (SUPERFAMILY) |

|                         |                                                             |    |                                                                                                                                                                                                         |   |                                                         |                                                                                                                                                                                                      |
|-------------------------|-------------------------------------------------------------|----|---------------------------------------------------------------------------------------------------------------------------------------------------------------------------------------------------------|---|---------------------------------------------------------|------------------------------------------------------------------------------------------------------------------------------------------------------------------------------------------------------|
| Caenorhabditis elegans  | briggsae cbr-tol-1 protein                                  | 5  | C:GO:0016021;<br>P:GO:0007165;<br>P:GO:0045087;<br>F:GO:0005515;<br>F:GO:0004888                                                                                                                        | - | -                                                       | -                                                                                                                                                                                                    |
| Caenorhabditis elegans  | proteasome ( macropain) activator subunit 3 (pa28 gamma ki) | 12 | F:GO:0002039;<br>N:GO:0061136;<br>P:GO:0051436;<br>P:GO:0042981;<br>P:GO:0051437;<br>F:GO:0070215;<br>C:GO:0008537;<br>F:GO:0042802;<br>P:GO:0031145;<br>F:GO:0003824;<br>N:GO:0061133;<br>C:GO:0016020 | - | -                                                       | SignalP (SIGNALP)                                                                                                                                                                                    |
| Caenorhabditis elegans  | proteasome ( macropain) activator subunit 3 (pa28 gamma ki) | 12 | F:GO:0002039;<br>N:GO:0061136;<br>P:GO:0051436;<br>P:GO:0042981;<br>P:GO:0051437;<br>F:GO:0070215;<br>C:GO:0008537;<br>F:GO:0042802;<br>P:GO:0031145;<br>F:GO:0003824;<br>N:GO:0061133;<br>C:GO:0016020 | - | -                                                       | SignalP (SIGNALP)                                                                                                                                                                                    |
| -                       | -                                                           | 0  | -                                                                                                                                                                                                       | - | -                                                       | SignalP (SIGNALP)                                                                                                                                                                                    |
| Ancylostoma Ceylanicum  | macrophage migration inhibitory factor                      | 1  | F:GO:0003824                                                                                                                                                                                            | - | -                                                       | -                                                                                                                                                                                                    |
| Caenorhabditis elegans  | amidinotransferase                                          | 2  | C:GO:0005737;<br>F:GO:0016813                                                                                                                                                                           | - | EC:3.5.3.0                                              | G3DSA:3.75.10.10 (GENE3D),<br>PTHR12737 (PANTHER),<br>PTHR12737:SF1 (PANTHER), SSF55909<br>(SUPERFAMILY)                                                                                             |
| Caenorhabditis elegans  | amidinotransferase                                          | 2  | C:GO:0005737;<br>F:GO:0016813                                                                                                                                                                           | - | EC:3.5.3.0                                              | IPR003198; G3DSA:3.75.10.10<br>(GENE3D), PTHR12737 (PANTHER),<br>PTHR12737:SF1 (PANTHER), SSF55909<br>(SUPERFAMILY)                                                                                  |
| Caenorhabditis elegans  | lor sdh bifunctio-l protein conserved domain protein        | 2  | C:GO:0005737;<br>F:GO:0016813                                                                                                                                                                           | - | EC:3.5.3.0                                              | IPR003198; G3DSA:3.75.10.10<br>(GENE3D), PTHR12737 (PANTHER),<br>PTHR12737:SF1 (PANTHER), SSF55909<br>(SUPERFAMILY)                                                                                  |
| Caenorhabditis briggsae | gtp binding protein 1                                       | 5  | F:GO:0005525;<br>P:GO:0007165;<br>C:GO:0030529;<br>P:GO:0006955;<br>F:GO:0003924                                                                                                                        | - | EC:3.6.5.1;<br>EC:3.6.5.2;<br>EC:3.6.5.3;<br>EC:3.6.5.4 | IPR000795; IPR004160; IPR004161;<br>IPR009000; IPR009001;<br>G3DSA:2.40.30.10 (GENE3D),<br>G3DSA:3.40.50.300 (GENE3D),<br>PTHR23115 (PANTHER),<br>PTHR23115:SF6 (PANTHER), SSF52540<br>(SUPERFAMILY) |
| Caenorhabditis briggsae | gtp binding protein 1                                       | 5  | F:GO:0005525;<br>P:GO:0007165;<br>C:GO:0030529;<br>P:GO:0006955;<br>F:GO:0003924                                                                                                                        | - | EC:3.6.5.1;<br>EC:3.6.5.2;<br>EC:3.6.5.3;<br>EC:3.6.5.4 | IPR000795; IPR004160; IPR004161;<br>IPR009000; IPR009001;<br>G3DSA:2.40.30.10 (GENE3D),<br>G3DSA:3.40.50.300 (GENE3D),<br>PTHR23115 (PANTHER),<br>PTHR23115:SF6 (PANTHER), SSF52540<br>(SUPERFAMILY) |

|                         |                                                        |    |                                                                                                                                                                                                                                                                                                                                                                                                    |   |             |                                                                                                                                              |
|-------------------------|--------------------------------------------------------|----|----------------------------------------------------------------------------------------------------------------------------------------------------------------------------------------------------------------------------------------------------------------------------------------------------------------------------------------------------------------------------------------------------|---|-------------|----------------------------------------------------------------------------------------------------------------------------------------------|
| Caenorhabditis briggsae | protein couch potato                                   | 3  | F:GO:0005515;<br>F:GO:0003676;<br>F:GO:0000166                                                                                                                                                                                                                                                                                                                                                     | - |             | IPR000504; IPR012677; PTHR12742 (PANTHER), SSF54928 (SUPERFAMILY)                                                                            |
| Caenorhabditis briggsae | protein couch potato                                   | 3  | F:GO:0005515;<br>F:GO:0003676;<br>F:GO:0000166                                                                                                                                                                                                                                                                                                                                                     | - |             | IPR000504; IPR012677; PTHR12742 (PANTHER), SSF54928 (SUPERFAMILY)                                                                            |
|                         | -                                                      | 0  |                                                                                                                                                                                                                                                                                                                                                                                                    |   |             | -                                                                                                                                            |
|                         | -                                                      | 0  |                                                                                                                                                                                                                                                                                                                                                                                                    |   |             | -                                                                                                                                            |
|                         | -                                                      | 0  |                                                                                                                                                                                                                                                                                                                                                                                                    |   |             | -                                                                                                                                            |
| Brugia malayi           | protein ki-se domain containing protein                | 4  | P:GO:0001700;<br>P:GO:0007283;<br>F:GO:0005488;<br>F:GO:0004674                                                                                                                                                                                                                                                                                                                                    | - | EC:2.7.11.0 | IPR000719; IPR008266; IPR011009; IPR017441; IPR017442; G3DSA:1.10.510.10 (GENE3D), G3DSA:3.30.200.20 (GENE3D), PTHR23257 (PANTHER)           |
| Caenorhabditis elegans  | protein ki-se family member (kin-32)                   | 23 | F:GO:0004713;<br>P:GO:0032879;<br>P:GO:0051234;<br>P:GO:0050767;<br>P:GO:0007268;<br>P:GO:0043062;<br>C:GO:0043232;<br>C:GO:0016323;<br>P:GO:0051129;<br>C:GO:0030054;<br>P:GO:0016477;<br>P:GO:0007409;<br>F:GO:0000166;<br>P:GO:0040008;<br>F:GO:0005515;<br>P:GO:0006468;<br>P:GO:0048523;<br>N:GO:0071844;<br>P:GO:0048522;<br>P:GO:0065008;<br>P:GO:0007166;<br>P:GO:0048514;<br>P:GO:0051093 | - | EC:2.7.10.0 | IPR000299; IPR019748; IPR019749; IPR020685; IPR020773; SSF50729 (SUPERFAMILY), SSF54236 (SUPERFAMILY)                                        |
| Brugia malayi           | transformation transcription domain-associated protein | 3  | C:GO:0005700;<br>P:GO:0050794;<br>C:GO:0000123                                                                                                                                                                                                                                                                                                                                                     | - |             | IPR010916                                                                                                                                    |
|                         | -                                                      | 0  |                                                                                                                                                                                                                                                                                                                                                                                                    |   |             | SignalP (SIGNALP)                                                                                                                            |
| Caenorhabditis briggsae | superkiller viralicidic activity 2-like                | 3  | F:GO:0003676;<br>F:GO:0005524;<br>F:GO:0008026                                                                                                                                                                                                                                                                                                                                                     | - |             | IPR001650; IPR011545; IPR014001; IPR014021; G3DSA:3.40.50.300 (GENE3D), PTHR11752 (PANTHER), PTHR11752:SF2 (PANTHER), SSF52540 (SUPERFAMILY) |
| Caenorhabditis briggsae | superkiller viralicidic activity 2-like                | 3  | F:GO:0003676;<br>F:GO:0005524;<br>F:GO:0008026                                                                                                                                                                                                                                                                                                                                                     | - |             | IPR001650; IPR011545; IPR014001; IPR014021; G3DSA:3.40.50.300 (GENE3D), PTHR11752 (PANTHER), PTHR11752:SF2 (PANTHER), SSF52540 (SUPERFAMILY) |
|                         | -                                                      | 0  |                                                                                                                                                                                                                                                                                                                                                                                                    |   |             | -                                                                                                                                            |
| Caenorhabditis elegans  | adipor-like receptor                                   | 6  | F:GO:0042562;<br>C:GO:0016021;<br>P:GO:0006355;<br>P:GO:0009755;<br>P:GO:0007165;<br>P:GO:0019395                                                                                                                                                                                                                                                                                                  | - |             | IPR004254; PTHR20855:SF13 (PANTHER)                                                                                                          |

|                         |                                                                                                        |    |                                                                                                                                                                                        |                                                                 |             |                                                                                                            |
|-------------------------|--------------------------------------------------------------------------------------------------------|----|----------------------------------------------------------------------------------------------------------------------------------------------------------------------------------------|-----------------------------------------------------------------|-------------|------------------------------------------------------------------------------------------------------------|
| Caenorhabditis elegans  | d-k protein                                                                                            | 2  | C:GO:0044464;<br>F:GO:0000166                                                                                                                                                          | -                                                               |             | IPR001023; IPR013126;<br>G3DSA:3.30.420.40 (GENE3D),<br>PTHR19375:SF7 (PANTHER), SSF53067<br>(SUPERFAMILY) |
| Caenorhabditis elegans  | d-k protein                                                                                            | 2  | C:GO:0044464;<br>F:GO:0000166                                                                                                                                                          | -                                                               |             | IPR001023; IPR013126;<br>G3DSA:3.30.420.40 (GENE3D),<br>PTHR19375:SF7 (PANTHER), SSF53067<br>(SUPERFAMILY) |
| Caenorhabditis elegans  | d-k protein                                                                                            | 2  | C:GO:0044464;<br>F:GO:0000166                                                                                                                                                          | -                                                               |             | IPR001023; IPR013126;<br>G3DSA:3.30.420.40 (GENE3D),<br>PTHR19375:SF7 (PANTHER), SSF53067<br>(SUPERFAMILY) |
| Homo sapiens            | ribosomal protein l4                                                                                   | 5  | F:GO:0003735;<br>F:GO:0003723;<br>F:GO:0005515;<br>C:GO:0022625;<br>P:GO:0006414                                                                                                       | -                                                               |             | PTHR19431 (PANTHER)                                                                                        |
|                         | -                                                                                                      | 0  |                                                                                                                                                                                        |                                                                 |             | -                                                                                                          |
|                         | -                                                                                                      | 0  |                                                                                                                                                                                        |                                                                 |             | SignalP (SIGNALP)                                                                                          |
| Caenorhabditis elegans  | nucleoporin 210kda-like                                                                                | 0  |                                                                                                                                                                                        | C:GO:0016021;<br>C:GO:0016020                                   |             | PTHR23019 (PANTHER)                                                                                        |
| Ancylostoma duodenale   | manganese superoxide dismutase                                                                         | 6  | P:GO:0046686;<br>F:GO:0046872;<br>P:GO:0055114;<br>P:GO:0006801;<br>F:GO:0004784;<br>P:GO:0051597                                                                                      | -                                                               | EC:1.15.1.1 | IPR001189; IPR019831; IPR019832;<br>IPR019833; PTHR11404:SF5<br>(PANTHER)                                  |
| Caenorhabditis briggsae | cell division control protein                                                                          | 11 | P:GO:0000910;<br>P:GO:0040007;<br>P:GO:0045449;<br>P:GO:0000003;<br>P:GO:0018996;<br>F:GO:0003677;<br>P:GO:0002119;<br>P:GO:0009792;<br>P:GO:0001703;<br>C:GO:0005634;<br>P:GO:0006974 | -                                                               |             | IPR001005; IPR009057; IPR012287;<br>IPR014778; IPR015495; IPR017930;<br>PTHR10641:SF17 (PANTHER)           |
|                         | -                                                                                                      | 0  |                                                                                                                                                                                        |                                                                 |             | SignalP (SIGNALP)                                                                                          |
| Caenorhabditis elegans  | elegans protein partially confirmed by transcript evidence                                             | 0  |                                                                                                                                                                                        |                                                                 |             | SignalP (SIGNALP)                                                                                          |
| Caenorhabditis briggsae | Hypothetical protein CBG14950 [Caenorhabditis briggsae]                                                | 0  |                                                                                                                                                                                        | P:GO:0040035;<br>P:GO:0002119;<br>P:GO:0040007;<br>P:GO:0040018 |             | -                                                                                                          |
| Caenorhabditis elegans  | Hypothetical protein W05F2.4a [Caenorhabditis elegans]                                                 | 1  | P:GO:0032501                                                                                                                                                                           | -                                                               |             | -                                                                                                          |
| Caenorhabditis brenneri | calsyntenin 1                                                                                          | 9  | C:GO:0043231;<br>C:GO:0032809;<br>C:GO:0016021;<br>C:GO:0005615;<br>P:GO:0007155;<br>F:GO:0005515;<br>C:GO:0045211;<br>P:GO:0008355;<br>P:GO:0009792                                   | -                                                               |             | PTHR14139 (PANTHER)                                                                                        |
| Caenorhabditis elegans  | rt15_caee1 ame: full=28s ribosomal protein mitochondrial<br>short=mrp-s15 short=s15mt flags: precursor | 0  |                                                                                                                                                                                        |                                                                 |             | -                                                                                                          |

|                                    |                                                          |   |                                                                                  |                               |             |                                                                                                                                                     |
|------------------------------------|----------------------------------------------------------|---|----------------------------------------------------------------------------------|-------------------------------|-------------|-----------------------------------------------------------------------------------------------------------------------------------------------------|
| Caenorhabditis elegans             | fbxo11 protein                                           | 5 | P:GO:0007605;<br>F:GO:0005515;<br>P:GO:0016567;<br>F:GO:0004842;<br>F:GO:0008270 | -                             | EC:6.3.2.19 | IPR006626; IPR011050; IPR012334;<br>IPR022441; PTHR22990 (PANTHER),<br>PTHR22990:SF6 (PANTHER)                                                      |
| Loa loa                            | amp-activated protein gamma regulatory subunit           | 2 | P:GO:0040035;<br>P:GO:0040011                                                    | -                             |             | IPR000644; IPR013785; PTHR13780<br>(PANTHER), SSF54631 (SUPERFAMILY)                                                                                |
| Brugia malayi                      | ph domain containing protein                             | 0 |                                                                                  |                               |             | -                                                                                                                                                   |
| Caenorhabditis elegans             | mitochondrial 28s ribosomal protein s33                  | 5 | P:GO:0009792;<br>P:GO:0002119;<br>C:GO:0005840;<br>P:GO:0008340;<br>P:GO:0040007 | -                             |             | -                                                                                                                                                   |
| Caenorhabditis briggsae            | briggsae cbr-elpc-2 protein                              | 1 | C:GO:0031981                                                                     | -                             |             | IPR001680; IPR007087; IPR011046;<br>IPR015943; IPR017986; IPR019781;<br>IPR019782; PTHR13729 (PANTHER)                                              |
|                                    | -                                                        | 0 |                                                                                  |                               |             | -                                                                                                                                                   |
| Loa loa                            | zinc c2h2 type family protein                            | 1 | F:GO:0005488                                                                     | -                             |             | IPR000210; IPR007087; IPR011333;<br>IPR013069; IPR013087; IPR015880;<br>PTHR23229 (PANTHER),<br>PTHR23229:SF13 (PANTHER),<br>SSF57667 (SUPERFAMILY) |
| Loa loa                            | zinc c2h2 type family protein                            | 1 | F:GO:0005488                                                                     | -                             |             | IPR000210; IPR007087; IPR011333;<br>IPR013069; IPR013087; IPR015880;<br>PTHR23229 (PANTHER),<br>PTHR23229:SF13 (PANTHER),<br>SSF57667 (SUPERFAMILY) |
| Brugia malayi                      | fragile site-associated protein                          | 0 |                                                                                  |                               |             | IPR018863                                                                                                                                           |
| Caenorhabditis briggsae            | hypothetical tyrosi-se-like protein in chromosome        | 4 | F:GO:0005515;<br>F:GO:0046872;<br>P:GO:0008152;<br>F:GO:0016491                  | -                             |             | IPR002227; IPR008922; PTHR11474<br>(PANTHER)                                                                                                        |
| Caenorhabditis briggsae            | mitochondrial glutamate                                  | 4 | F:GO:0005488;<br>P:GO:0055085;<br>P:GO:0008340;<br>C:GO:0016021                  | -                             |             | IPR001993; IPR018108;<br>G3DSA:1.50.40.10 (GENE3D),<br>PTHR11896:SF23 (PANTHER)                                                                     |
|                                    | -                                                        | 0 |                                                                                  |                               |             | -                                                                                                                                                   |
|                                    | -                                                        | 0 |                                                                                  |                               |             | -                                                                                                                                                   |
| Trypanosoma cruzi strain CL Brener | abc permease atp-binding protein                         | 0 |                                                                                  | F:GO:0005524;<br>P:GO:0006397 |             | -                                                                                                                                                   |
| Nematostella vectensis             | abc permease atp-binding protein                         | 0 |                                                                                  | F:GO:0005524                  |             | -                                                                                                                                                   |
|                                    | -                                                        | 0 |                                                                                  |                               |             | -                                                                                                                                                   |
| Caenorhabditis briggsae            | catechol-o-methyltransferase domain-containing protein 1 | 1 | F:GO:0008171                                                                     | -                             |             | IPR002935; G3DSA:3.40.50.150<br>(GENE3D), SSF53335 (SUPERFAMILY)                                                                                    |
| Brugia malayi                      | disorganized muscle protein 1                            | 5 | C:GO:0030018;<br>F:GO:0008307;<br>P:GO:0007498;<br>F:GO:0005515;<br>F:GO:0004672 | -                             |             | IPR003598; IPR007110; IPR013098;<br>IPR013783; PTHR19897 (PANTHER),<br>PTHR19897:SF7 (PANTHER), SSF48726<br>(SUPERFAMILY)                           |
|                                    | -                                                        | 0 |                                                                                  |                               |             | -                                                                                                                                                   |
| Loa loa                            | serine threonine-protein phosphatase dullard-a           | 5 | C:GO:0005789;<br>P:GO:0006998;<br>F:GO:0004722;<br>C:GO:0005635;<br>C:GO:0016021 | -                             |             | -                                                                                                                                                   |



|                         |                                                                                                                                                              |   |                                                                                                                    |                                                                                                                                                                                                         |            |                                                                                                                |
|-------------------------|--------------------------------------------------------------------------------------------------------------------------------------------------------------|---|--------------------------------------------------------------------------------------------------------------------|---------------------------------------------------------------------------------------------------------------------------------------------------------------------------------------------------------|------------|----------------------------------------------------------------------------------------------------------------|
| Ixodes scapularis       | nuclear hormone receptor                                                                                                                                     | 0 |                                                                                                                    | F:GO:0043565;<br>F:GO:0003700;<br>F:GO:0003677;<br>C:GO:0005634;<br>F:GO:0004879;<br>F:GO:0008270;<br>P:GO:0006355;<br>F:GO:0004872;<br>F:GO:0046872;<br>P:GO:0006350;<br>F:GO:0003707;<br>P:GO:0045449 |            | SignalP (SIGNALP)                                                                                              |
| Caenorhabditis elegans  | family with sequence similarity member a                                                                                                                     | 0 |                                                                                                                    | C:GO:0005789;<br>F:GO:0003674;<br>C:GO:0033116;<br>C:GO:0016021;<br>C:GO:0016020;<br>P:GO:0008150                                                                                                       |            | PTHR13167 (PANTHER)                                                                                            |
| Caenorhabditis elegans  | alpha-glucosidase ii                                                                                                                                         | 7 | F:GO:0004553;<br>P:GO:0005975;<br>P:GO:0009792;<br>F:GO:0030246;<br>P:GO:0040007;<br>F:GO:0005515;<br>P:GO:0002119 | -                                                                                                                                                                                                       | EC:3.2.1.0 | IPR000322; IPR017853;<br>PTHR22762:SF7 (PANTHER), SSF51011 (SUPERFAMILY)                                       |
| Caenorhabditis briggsae | briggsae cbr-apt-10 protein                                                                                                                                  | 0 |                                                                                                                    | C:GO:0030131;<br>F:GO:0008060;<br>P:GO:0032312;<br>P:GO:0016192;<br>F:GO:0008270;<br>P:GO:0006886;<br>P:GO:0006897;<br>F:GO:0005515                                                                     |            | -                                                                                                              |
| Caenorhabditis elegans  | sel1l protein                                                                                                                                                | 2 | C:GO:0016020;<br>F:GO:0005515                                                                                      | -                                                                                                                                                                                                       |            | IPR006597; IPR011990; PTHR11102 (PANTHER), PTHR11102:SF11 (PANTHER), SignalP (SIGNALP), SSF81901 (SUPERFAMILY) |
| Caenorhabditis elegans  | endou_caeel ame: full=poly -specific endoribonuclease homolog ame: full=protein endou ame: full=uridylate-specific endoribonuclease homolog flags: precursor | 2 | F:GO:0004521;<br>F:GO:0003723                                                                                      | -                                                                                                                                                                                                       |            | IPR018998; SSF142877 (SUPERFAMILY)                                                                             |
| Caenorhabditis elegans  | methylmalonic aciduria (cobalamin deficiency) cblc with homocystinuria                                                                                       | 0 |                                                                                                                    | C:GO:0005739;<br>F:GO:0031419;<br>P:GO:0008150                                                                                                                                                          |            | -                                                                                                              |
| -                       | -                                                                                                                                                            | 0 |                                                                                                                    |                                                                                                                                                                                                         |            | -                                                                                                              |
| -                       | -                                                                                                                                                            | 0 |                                                                                                                    |                                                                                                                                                                                                         |            | -                                                                                                              |
| -                       | -                                                                                                                                                            | 0 |                                                                                                                    |                                                                                                                                                                                                         |            | -                                                                                                              |
| Caenorhabditis elegans  | r- binding homolog 1                                                                                                                                         | 2 | P:GO:0007126;<br>P:GO:0009792                                                                                      | -                                                                                                                                                                                                       |            | IPR001159; IPR014720; PTHR10910 (PANTHER), PTHR10910:SF2 (PANTHER), SSF54768 (SUPERFAMILY)                     |
| -                       | -                                                                                                                                                            | 0 |                                                                                                                    |                                                                                                                                                                                                         |            | -                                                                                                              |
| -                       | -                                                                                                                                                            | 0 |                                                                                                                    |                                                                                                                                                                                                         |            | -                                                                                                              |
| -                       | -                                                                                                                                                            | 0 |                                                                                                                    |                                                                                                                                                                                                         |            | -                                                                                                              |
| -                       | -                                                                                                                                                            | 0 |                                                                                                                    |                                                                                                                                                                                                         |            | SignalP (SIGNALP)                                                                                              |
| -                       | -                                                                                                                                                            | 0 |                                                                                                                    |                                                                                                                                                                                                         |            | -                                                                                                              |
| -                       | -                                                                                                                                                            | 0 |                                                                                                                    |                                                                                                                                                                                                         |            | SignalP (SIGNALP)                                                                                              |
| -                       | -                                                                                                                                                            | 0 |                                                                                                                    |                                                                                                                                                                                                         |            | SignalP (SIGNALP)                                                                                              |
| -                       | -                                                                                                                                                            | 0 |                                                                                                                    |                                                                                                                                                                                                         |            | SignalP (SIGNALP)                                                                                              |
| -                       | -                                                                                                                                                            | 0 |                                                                                                                    |                                                                                                                                                                                                         |            | SignalP (SIGNALP)                                                                                              |
| -                       | -                                                                                                                                                            | 0 |                                                                                                                    |                                                                                                                                                                                                         |            | -                                                                                                              |

|                        |                                                               |    |                                                                                                                                                                                                                                                                                                                                |   |                                                                                                                                                                                            |
|------------------------|---------------------------------------------------------------|----|--------------------------------------------------------------------------------------------------------------------------------------------------------------------------------------------------------------------------------------------------------------------------------------------------------------------------------|---|--------------------------------------------------------------------------------------------------------------------------------------------------------------------------------------------|
|                        | -                                                             | 0  |                                                                                                                                                                                                                                                                                                                                |   | -                                                                                                                                                                                          |
|                        | -                                                             | 0  |                                                                                                                                                                                                                                                                                                                                |   | -                                                                                                                                                                                          |
| Caenorhabditis elegans | elegans protein confirmed by transcript evidence              | 0  |                                                                                                                                                                                                                                                                                                                                |   | IPR011680; PTHR12394:SF1 (PANTHER)                                                                                                                                                         |
| Caenorhabditis elegans | elegans protein confirmed by transcript evidence              | 0  |                                                                                                                                                                                                                                                                                                                                |   | IPR011680; PTHR12394:SF1 (PANTHER)                                                                                                                                                         |
| Caenorhabditis elegans | metal-dependent phosphohydrolase hd domain-containing protein | 1  | F:GO:0003824                                                                                                                                                                                                                                                                                                                   | - | IPR003607; IPR006674; G3DSA:1.10.3210.10 (GENE3D), PTHR11845 (PANTHER), SSF109604 (SUPERFAMILY)                                                                                            |
| Caenorhabditis elegans | cgmp-dependent protein ki-se                                  | 4  | P:GO:0006468;<br>F:GO:0005524;<br>P:GO:0000003;<br>F:GO:0004674                                                                                                                                                                                                                                                                | - | EC:2.7.11.0<br>IPR000719; IPR008271; IPR011009;<br>IPR017441; IPR017442;<br>G3DSA:3.30.200.20 (GENE3D),<br>PTHR22985 (PANTHER),<br>PTHR22985:SF90 (PANTHER)                                |
| Caenorhabditis elegans | cgmp-dependent protein ki-se                                  | 4  | P:GO:0006468;<br>F:GO:0005524;<br>P:GO:0000003;<br>F:GO:0004674                                                                                                                                                                                                                                                                | - | EC:2.7.11.0<br>IPR000719; IPR008271; IPR011009;<br>IPR017441; IPR017442;<br>G3DSA:1.10.510.10 (GENE3D),<br>G3DSA:3.30.200.20 (GENE3D),<br>PTHR22985 (PANTHER),<br>PTHR22985:SF90 (PANTHER) |
| Caenorhabditis elegans | formin homology 2 domain containing 3                         | 2  | P:GO:0030036;<br>F:GO:0003779                                                                                                                                                                                                                                                                                                  | - | IPR010472; IPR014768; IPR016024;<br>PTHR23213 (PANTHER),<br>PTHR23213:SF3 (PANTHER)                                                                                                        |
| Caenorhabditis elegans | formin homology 2 domain containing 3                         | 3  | P:GO:0030036;<br>C:GO:0044424;<br>F:GO:0003779                                                                                                                                                                                                                                                                                 | - | IPR014768; IPR016024; PTHR23213 (PANTHER), PTHR23213:SF3 (PANTHER)                                                                                                                         |
|                        | -                                                             | 0  |                                                                                                                                                                                                                                                                                                                                |   | -                                                                                                                                                                                          |
| Ancylostoma ceylanicum | glutamate cysteine ligase                                     | 19 | F:GO:0005515;<br>F:GO:0043531;<br>P:GO:0006916;<br>P:GO:0006534;<br>P:GO:0045454;<br>F:GO:0016595;<br>F:GO:0050662;<br>F:GO:0000287;<br>P:GO:0009408;<br>P:GO:0016481;<br>P:GO:0006536;<br>P:GO:0032268;<br>P:GO:0006750;<br>P:GO:0009725;<br>P:GO:0050880;<br>C:GO:0044444;<br>F:GO:0005524;<br>P:GO:0006979;<br>F:GO:0004357 | - | EC:6.3.2.2<br>IPR004308; SSF55931 (SUPERFAMILY)                                                                                                                                            |
| Caenorhabditis elegans | mitochondrial aminomethyltransferase                          | 5  | P:GO:0006546;<br>F:GO:0004047;<br>C:GO:0005811;<br>F:GO:0008483;<br>C:GO:0005960                                                                                                                                                                                                                                               | - | EC:2.1.2.10;<br>EC:2.6.1.0<br>IPR006222; PTHR13847 (PANTHER),<br>PTHR13847:SF5 (PANTHER),<br>SSF103025 (SUPERFAMILY)                                                                       |
|                        | -                                                             | 0  |                                                                                                                                                                                                                                                                                                                                |   | -                                                                                                                                                                                          |
|                        | -                                                             | 0  |                                                                                                                                                                                                                                                                                                                                |   | -                                                                                                                                                                                          |

|                         |                                                       |    |                                                                                                                                                                       |             |                                                                                                                                                           |
|-------------------------|-------------------------------------------------------|----|-----------------------------------------------------------------------------------------------------------------------------------------------------------------------|-------------|-----------------------------------------------------------------------------------------------------------------------------------------------------------|
| Harpegnathos saltator   | dehydroge-se reductase (sdr family) member 7          | 0  | P:GO:0055114;<br>F:GO:0005488;<br>F:GO:0016491;<br>P:GO:0008152;<br>F:GO:0003824;<br>C:GO:0005575                                                                     |             | IPR002198; IPR002347; IPR016040;<br>IPR020904; PTHR19410:SF44<br>(PANTHER), SSF51735 (SUPERFAMILY)                                                        |
| Xenopus laevis          | dehydroge-se reductase (sdr family) member 7          | 0  | P:GO:0055114;<br>F:GO:0005488;<br>F:GO:0016491;<br>P:GO:0008152;<br>F:GO:0003824;<br>C:GO:0005575                                                                     |             | IPR002198; IPR002347; IPR016040;<br>IPR020904; PTHR19410:SF44<br>(PANTHER), SSF51735 (SUPERFAMILY)                                                        |
| Loa loa                 | nuclear factor i                                      | 3  | P:GO:0010552;<br>P:GO:0010553;<br>F:GO:0003700                                                                                                                        | -           | IPR000647; IPR020604                                                                                                                                      |
| Brugia malayi           | nuclear factor i                                      | 3  | P:GO:0010552;<br>P:GO:0010553;<br>F:GO:0003700                                                                                                                        | -           | IPR000647; IPR020604                                                                                                                                      |
| Caenorhabditis elegans  | briggsae cbr-tag-264 protein                          | 7  | C:GO:0043229;<br>P:GO:0040035;<br>P:GO:0002119;<br>C:GO:0044444;<br>P:GO:0040039;<br>P:GO:0040018;<br>P:GO:0006974                                                    | -           | IPR010793                                                                                                                                                 |
| -                       | -                                                     | 0  |                                                                                                                                                                       |             | -                                                                                                                                                         |
| Caenorhabditis elegans  | Hypothetical protein D1014.2 [Caenorhabditis elegans] | 2  | P:GO:0007186;<br>C:GO:0016021                                                                                                                                         | -           | -                                                                                                                                                         |
| Caenorhabditis elegans  | variant sh3 domain containing protein                 | 10 | P:GO:0051239;<br>P:GO:0048514;<br>F:GO:0004435;<br>F:GO:0004871;<br>P:GO:0009395;<br>P:GO:0048646;<br>P:GO:0030154;<br>F:GO:0005515;<br>P:GO:0007165;<br>P:GO:0007275 | EC:3.1.4.11 | IPR011993; PTHR10336 (PANTHER),<br>PTHR10336:SF22 (PANTHER)                                                                                               |
| Loa loa                 | dead (asp-glu-ala-asp) box polypeptide 52             | 4  | F:GO:0004386;<br>F:GO:0003676;<br>P:GO:0006364;<br>F:GO:0000166                                                                                                       | -           | IPR001650; IPR011545; IPR014001;<br>IPR014021; G3DSA:3.40.50.300<br>(GENE3D), PTHR10967 (PANTHER),<br>PTHR10967:SF21 (PANTHER),<br>SSF52540 (SUPERFAMILY) |
| Caenorhabditis elegans  | calponin transgelin                                   | 4  | F:GO:0003779;<br>P:GO:0040007;<br>P:GO:0006939;<br>P:GO:0002119                                                                                                       | -           | -                                                                                                                                                         |
| Caenorhabditis briggsae | diphthamide biosynthesis protein 2                    | 1  | P:GO:0040002                                                                                                                                                          | -           | IPR002728; IPR010014                                                                                                                                      |
| Caenorhabditis elegans  | diphthamide biosynthesis protein 2                    | 1  | P:GO:0040002                                                                                                                                                          | -           | IPR002728; IPR010014                                                                                                                                      |
| -                       | -                                                     | 0  |                                                                                                                                                                       |             | SignalP (SIGNALP)                                                                                                                                         |
| -                       | -                                                     | 0  |                                                                                                                                                                       |             | -                                                                                                                                                         |

|               |                                           |   |                                                                                                                                                                                                                                                            |                                                                                                                          |
|---------------|-------------------------------------------|---|------------------------------------------------------------------------------------------------------------------------------------------------------------------------------------------------------------------------------------------------------------|--------------------------------------------------------------------------------------------------------------------------|
| Loa loa       | protein jade-1                            | 0 | F:GO:0016740;<br>F:GO:0008168;<br>C:GO:0005634;<br>P:GO:0006915;<br>C:GO:0005737;<br>P:GO:0000003;<br>F:GO:0003674;<br>F:GO:0008270;<br>F:GO:0018024;<br>C:GO:0005575;<br>F:GO:0005515;<br>F:GO:0046872;<br>P:GO:0006350;<br>P:GO:0008150;<br>P:GO:0045449 | IPR001965; IPR011011; IPR013083;<br>IPR017956; IPR019786; IPR019787;<br>PTHR13793 (PANTHER),<br>PTHR13793:SF24 (PANTHER) |
| Loa loa       | protein jade-1                            | 0 | F:GO:0016740;<br>F:GO:0008168;<br>C:GO:0005634;<br>P:GO:0006915;<br>C:GO:0005737;<br>P:GO:0000003;<br>F:GO:0003674;<br>F:GO:0008270;<br>F:GO:0018024;<br>C:GO:0005575;<br>F:GO:0005515;<br>F:GO:0046872;<br>P:GO:0006350;<br>P:GO:0008150;<br>P:GO:0045449 | IPR001965; IPR011011; IPR013083;<br>IPR017956; IPR019786; IPR019787;<br>PTHR13793 (PANTHER),<br>PTHR13793:SF24 (PANTHER) |
| Brugia malayi | immunosuppressive ovarian message protein | 0 | P:GO:0000281;<br>F:GO:0008061;<br>P:GO:0051301;<br>P:GO:0009792;<br>P:GO:0007275;<br>P:GO:0009790;<br>C:GO:0005576;<br>P:GO:0030703;<br>F:GO:0005515;<br>P:GO:0007049;<br>P:GO:0006030                                                                     | IPR002557; G3DSA:2.170.140.10<br>(GENE3D), PTHR23301 (PANTHER)                                                           |
| Brugia malayi | immunosuppressive ovarian message protein | 0 | P:GO:0000281;<br>F:GO:0008061;<br>P:GO:0051301;<br>P:GO:0009792;<br>P:GO:0007275;<br>P:GO:0009790;<br>C:GO:0005576;<br>P:GO:0030703;<br>F:GO:0005515;<br>P:GO:0007049;<br>P:GO:0006030                                                                     | -                                                                                                                        |

|                         |                                                           |   |                                                                                                                                     |                                                                                                                                                                                        |             |                                                                                                   |
|-------------------------|-----------------------------------------------------------|---|-------------------------------------------------------------------------------------------------------------------------------------|----------------------------------------------------------------------------------------------------------------------------------------------------------------------------------------|-------------|---------------------------------------------------------------------------------------------------|
| Brugia malayi           | immunosuppressive ovarian message protein                 | 0 |                                                                                                                                     | P:GO:0000281;<br>F:GO:0008061;<br>P:GO:0051301;<br>P:GO:0009792;<br>P:GO:0007275;<br>P:GO:0009790;<br>C:GO:0005576;<br>P:GO:0030703;<br>F:GO:0005515;<br>P:GO:0007049;<br>P:GO:0006030 |             | IPR002557; G3DSA:2.170.140.10 (GENE3D), PTHR23301 (PANTHER)                                       |
| Caenorhabditis briggsae | uncoordinated family member (unc-11)                      | 4 | F:GO:0005545;<br>C:GO:0005905;<br>F:GO:0005515;<br>P:GO:0006898                                                                     | -                                                                                                                                                                                      |             | PTHR22951 (PANTHER), PTHR22951:SF3 (PANTHER)                                                      |
| Caenorhabditis elegans  | zygote defective: embryonic lethal family member (zyg-11) | 0 |                                                                                                                                     | F:GO:0005515                                                                                                                                                                           |             | G3DSA:3.80.10.10 (GENE3D), SSF52047 (SUPERFAMILY)                                                 |
| Caenorhabditis elegans  | 40s ribosomal protein s3a                                 | 3 | P:GO:0044267;<br>C:GO:0005622;<br>F:GO:0016787                                                                                      | -                                                                                                                                                                                      |             | IPR000938; IPR001394; IPR001593; SSF54001 (SUPERFAMILY)                                           |
|                         | -                                                         | 0 |                                                                                                                                     |                                                                                                                                                                                        |             | SignalP (SIGNALP)                                                                                 |
| Loa loa                 | isoform b                                                 | 5 | P:GO:0007274;<br>P:GO:0046785;<br>P:GO:0007021;<br>P:GO:0008582;<br>C:GO:0005737                                                    | -                                                                                                                                                                                      |             | IPR000938; PTHR18916 (PANTHER), PTHR18916:SF6 (PANTHER), SignalP (SIGNALP)                        |
|                         | -                                                         | 0 |                                                                                                                                     |                                                                                                                                                                                        |             | -                                                                                                 |
|                         | -                                                         | 0 |                                                                                                                                     |                                                                                                                                                                                        |             | -                                                                                                 |
|                         | -                                                         | 0 |                                                                                                                                     |                                                                                                                                                                                        |             | -                                                                                                 |
|                         | -                                                         | 0 |                                                                                                                                     |                                                                                                                                                                                        |             | -                                                                                                 |
| Caenorhabditis elegans  | d- polymerase eta                                         | 8 | F:GO:0003887;<br>P:GO:0006468;<br>P:GO:0010224;<br>F:GO:0005515;<br>F:GO:0004672;<br>F:GO:0005524;<br>F:GO:0003684;<br>P:GO:0042276 | -                                                                                                                                                                                      | EC:2.7.7.7  | IPR001126; IPR017963; PTHR11076:SF11 (PANTHER), SSF56672 (SUPERFAMILY)                            |
|                         | -                                                         | 0 |                                                                                                                                     |                                                                                                                                                                                        |             | -                                                                                                 |
| Caenorhabditis elegans  | udp-n-acetylglucosamine transferase subunit alg14 homolog | 1 | C:GO:0016020                                                                                                                        | -                                                                                                                                                                                      |             | IPR013969; G3DSA:3.40.50.2000 (GENE3D), SignalP (SIGNALP)                                         |
| Caenorhabditis elegans  | udp-n-acetylglucosamine transferase subunit alg14 homolog | 1 | C:GO:0016020                                                                                                                        | -                                                                                                                                                                                      |             | IPR013969; G3DSA:3.40.50.2000 (GENE3D), SignalP (SIGNALP)                                         |
|                         | -                                                         | 0 |                                                                                                                                     |                                                                                                                                                                                        |             | -                                                                                                 |
| Caenorhabditis elegans  | probable o-sialoglycoprotein endopeptidase                | 4 | F:GO:0004222;<br>P:GO:0006508;<br>F:GO:0008270;<br>F:GO:0005515                                                                     | -                                                                                                                                                                                      | EC:3.4.24.0 | IPR000905; IPR017861; SSF53067 (SUPERFAMILY)                                                      |
| Caenorhabditis briggsae | abhydrolase domain-containing protein fam108b1            | 1 | F:GO:0016787                                                                                                                        | -                                                                                                                                                                                      |             | G3DSA:3.40.50.1820 (GENE3D), PTHR12277 (PANTHER), PTHR12277:SF8 (PANTHER), SSF53474 (SUPERFAMILY) |
|                         | -                                                         | 0 |                                                                                                                                     |                                                                                                                                                                                        |             | -                                                                                                 |
| Ancylostoma caninum     | secreted protein 5 precursor                              | 0 |                                                                                                                                     | P:GO:0040011;<br>P:GO:0006898;<br>C:GO:0005576                                                                                                                                         |             | IPR001283; IPR014044; IPR022407; PTHR10334:SF11 (PANTHER)                                         |
|                         | -                                                         | 0 |                                                                                                                                     |                                                                                                                                                                                        |             | -                                                                                                 |

|                         |                                                            |   |                                                                                                                    |                                                |            |                                                                                                                      |
|-------------------------|------------------------------------------------------------|---|--------------------------------------------------------------------------------------------------------------------|------------------------------------------------|------------|----------------------------------------------------------------------------------------------------------------------|
| Caenorhabditis briggsae | leucine zipper-ef-hand containing transmembrane protein 1  | 7 | P:GO:0009792;<br>P:GO:0042407;<br>C:GO:0005743;<br>P:GO:0040018;<br>F:GO:0005515;<br>P:GO:0000003;<br>P:GO:0006898 | -                                              |            | IPR011685; PTHR14009 (PANTHER),<br>PTHR14009:SF1 (PANTHER)                                                           |
| Caenorhabditis elegans  | leucine zipper-ef-hand containing transmembrane protein 1  | 7 | P:GO:0009792;<br>P:GO:0042407;<br>C:GO:0005743;<br>P:GO:0040018;<br>F:GO:0005515;<br>P:GO:0000003;<br>P:GO:0006898 | -                                              |            | IPR011685; PTHR14009 (PANTHER),<br>PTHR14009:SF1 (PANTHER)                                                           |
| Caenorhabditis briggsae | group ii plp decarboxylase                                 | 3 | F:GO:0030170;<br>P:GO:0019752;<br>F:GO:0016831                                                                     | -                                              | EC:4.1.1.0 | IPR002129; IPR015421; IPR015424;<br>PTHR11999:SF15 (PANTHER)                                                         |
| Caenorhabditis briggsae | mgc84609 protein                                           | 3 | F:GO:0030170;<br>P:GO:0019752;<br>F:GO:0016831                                                                     | -                                              | EC:4.1.1.0 | IPR002129; IPR015421; IPR015424;<br>PTHR11999:SF15 (PANTHER)                                                         |
| Loa loa                 | elegans protein partially confirmed by transcript evidence | 0 |                                                                                                                    | F:GO:0005515                                   |            | -                                                                                                                    |
| Caenorhabditis briggsae | beta chain spectrin                                        | 5 | F:GO:0008017;<br>C:GO:0016324;<br>F:GO:0003779;<br>P:GO:0000910;<br>P:GO:0006897                                   | -                                              |            | IPR002017; G3DSA:1.20.58.60<br>(GENE3D), PTHR11915 (PANTHER),<br>PTHR11915:SF48 (PANTHER),<br>SSF46966 (SUPERFAMILY) |
|                         | -                                                          | 0 |                                                                                                                    |                                                |            | -                                                                                                                    |
| Caenorhabditis elegans  | briggsae cbr-scp-1 protein                                 | 0 |                                                                                                                    | C:GO:0016021;<br>C:GO:0016020;<br>P:GO:0009792 |            | SignalP (SIGNALP)                                                                                                    |
| Loa loa                 | guanine nucleotide-binding protein g alpha subunit         | 7 | F:GO:0005525;<br>F:GO:0004871;<br>C:GO:0005794;<br>F:GO:0005515;<br>F:GO:0016787;<br>P:GO:0007165;<br>P:GO:0007186 | -                                              |            | -                                                                                                                    |
| Loa loa                 | ser thr protein phosphatase family protein                 | 2 | F:GO:0016787;<br>P:GO:0000003                                                                                      | -                                              |            | IPR004843; IPR006186;<br>G3DSA:3.60.21.10 (GENE3D),<br>PTHR11668:SF16 (PANTHER),<br>SSF56300 (SUPERFAMILY)           |
|                         | -                                                          | 0 |                                                                                                                    |                                                |            | -                                                                                                                    |
| Caenorhabditis elegans  | hypothetical protein F10G8.8 [Caenorhabditis elegans]      | 1 | F:GO:0005515                                                                                                       | -                                              |            | -                                                                                                                    |
| Caenorhabditis elegans  | briggsae cbr-pgp-9 protein                                 | 5 | P:GO:0009792;<br>F:GO:0016887;<br>P:GO:0006810;<br>C:GO:0016020;<br>F:GO:0000166                                   | -                                              |            | IPR001140; IPR011527; IPR017940;<br>G3DSA:1.20.1560.10 (GENE3D),<br>PTHR19242 (PANTHER),<br>PTHR19242:SF96 (PANTHER) |
| Caenorhabditis elegans  | multidrug resistance p-glycoprotein                        | 5 | P:GO:0009792;<br>F:GO:0042626;<br>P:GO:0055085;<br>F:GO:0005524;<br>C:GO:0016021                                   | -                                              |            | IPR001140; IPR011527; IPR017940;<br>G3DSA:1.20.1560.10 (GENE3D),<br>PTHR19242 (PANTHER),<br>PTHR19242:SF96 (PANTHER) |

|                         |                                                  |    |                                                                                                                                                                                                                          |   |                             |                                                                                                                                    |
|-------------------------|--------------------------------------------------|----|--------------------------------------------------------------------------------------------------------------------------------------------------------------------------------------------------------------------------|---|-----------------------------|------------------------------------------------------------------------------------------------------------------------------------|
| Caenorhabditis briggsae | carboxypeptidase polypeptide 1                   | 11 | P:GO:0006629;<br>C:GO:0005615;<br>F:GO:0004181;<br>F:GO:0005515;<br>F:GO:0001786;<br>P:GO:0051384;<br>P:GO:0016192;<br>P:GO:0006508;<br>F:GO:0008270;<br>F:GO:0005544;<br>F:GO:0005215                                   | - | EC:3.4.17.0                 | IPR000834; G3DSA:3.40.630.10 (GENE3D), PTHR11532 (PANTHER), PTHR11532:SF5 (PANTHER), SignalP (SIGNALP), SSF53187 (SUPERFAMILY)     |
| Caenorhabditis briggsae | troponin t                                       | 3  | P:GO:0043050;<br>P:GO:0006952;<br>P:GO:0040017                                                                                                                                                                           | - |                             | IPR001978; G3DSA:1.20.5.350 (GENE3D), PTHR11521 (PANTHER), PTHR11521:SF1 (PANTHER)                                                 |
| Caenorhabditis elegans  | mevalo-te ki-se                                  | 10 | P:GO:0008340;<br>P:GO:0040007;<br>F:GO:0005524;<br>P:GO:0002119;<br>P:GO:0016310;<br>P:GO:0040011;<br>P:GO:0009792;<br>C:GO:0005737;<br>F:GO:0004496;<br>P:GO:0008299                                                    | - | EC:2.7.1.36                 | IPR006205; IPR013750; G3DSA:3.30.70.890 (GENE3D), PTHR10457 (PANTHER), SSF55060 (SUPERFAMILY)                                      |
|                         | -                                                | 0  |                                                                                                                                                                                                                          |   |                             | -                                                                                                                                  |
| Caenorhabditis briggsae | sodium:neurotransmitter symporter family protein | 13 | P:GO:0055085;<br>P:GO:0007274;<br>F:GO:0005277;<br>F:GO:0005328;<br>F:GO:0015187;<br>P:GO:0001504;<br>P:GO:0015870;<br>P:GO:0015871;<br>F:GO:0030165;<br>P:GO:0040017;<br>C:GO:0045211;<br>P:GO:0015816;<br>C:GO:0005887 | - |                             | IPR000175; PTHR11616:SF17 (PANTHER), SignalP (SIGNALP)                                                                             |
| Caenorhabditis briggsae | atp-binding cassette sub-family f member 2       | 4  | F:GO:0005524;<br>F:GO:0015417;<br>F:GO:0015439;<br>C:GO:0043190                                                                                                                                                          | - | EC:3.6.3.31;<br>EC:3.6.3.41 | IPR003439; IPR007406; PTHR19211 (PANTHER), PTHR19211:SF15 (PANTHER), SSF52540 (SUPERFAMILY)                                        |
| Caenorhabditis briggsae | atp-binding cassette sub-family f member 2       | 4  | F:GO:0005524;<br>F:GO:0015417;<br>F:GO:0015439;<br>C:GO:0043190                                                                                                                                                          | - | EC:3.6.3.31;<br>EC:3.6.3.41 | IPR003439; G3DSA:3.40.50.300 (GENE3D), PTHR19211 (PANTHER), PTHR19211:SF15 (PANTHER), SSF52540 (SUPERFAMILY)                       |
| Caenorhabditis briggsae | atp-binding cassette sub-family f member 2       | 3  | F:GO:0005524;<br>F:GO:0015417;<br>F:GO:0015439                                                                                                                                                                           | - | EC:3.6.3.31;<br>EC:3.6.3.41 | IPR003439; IPR003593; IPR017871; G3DSA:3.40.50.300 (GENE3D), PTHR19211 (PANTHER), PTHR19211:SF15 (PANTHER), SSF52540 (SUPERFAMILY) |
| Caenorhabditis briggsae | atp-binding cassette sub-family f member 2       | 3  | F:GO:0005524;<br>F:GO:0015417;<br>F:GO:0015439                                                                                                                                                                           | - | EC:3.6.3.31;<br>EC:3.6.3.41 | IPR003439; IPR003593; IPR017871; G3DSA:3.40.50.300 (GENE3D), PTHR19211 (PANTHER), PTHR19211:SF15 (PANTHER), SSF52540 (SUPERFAMILY) |

|                         |                                                      |  |                                                                                                                                                                                                                                                                                |                                                                                                                    |             |                                                                                                                                                                         |
|-------------------------|------------------------------------------------------|--|--------------------------------------------------------------------------------------------------------------------------------------------------------------------------------------------------------------------------------------------------------------------------------|--------------------------------------------------------------------------------------------------------------------|-------------|-------------------------------------------------------------------------------------------------------------------------------------------------------------------------|
| Caenorhabditis briggsae | ras-related gtp-binding protein d                    |  | F:GO:0046982;<br>P:GO:0009792;<br>5 C:GO:0005737;<br>C:GO:0005634;<br>F:GO:0005525                                                                                                                                                                                             | -                                                                                                                  |             | IPR006762; G3DSA:3.40.50.300<br>(GENE3D), PTHR11259:SF2<br>(PANTHER), SSF52540 (SUPERFAMILY)                                                                            |
|                         |                                                      |  | 0                                                                                                                                                                                                                                                                              |                                                                                                                    |             | -                                                                                                                                                                       |
|                         |                                                      |  | 0                                                                                                                                                                                                                                                                              |                                                                                                                    |             | -                                                                                                                                                                       |
|                         |                                                      |  | 0                                                                                                                                                                                                                                                                              |                                                                                                                    |             | -                                                                                                                                                                       |
|                         |                                                      |  | 0                                                                                                                                                                                                                                                                              |                                                                                                                    |             | -                                                                                                                                                                       |
| Caenorhabditis briggsae | lor sdh bifunctio-l protein conserved domain protein |  | 2 C:GO:0005737;<br>F:GO:0016813                                                                                                                                                                                                                                                | -                                                                                                                  | EC:3.5.3.0  | IPR003198; G3DSA:3.75.10.10<br>(GENE3D), PTHR12737 (PANTHER),<br>PTHR12737:SF1 (PANTHER), SSF55909<br>(SUPERFAMILY)                                                     |
| Loa loa                 | dead (asp-glu-ala-asp) box polypeptide 28            |  | 1 C:GO:0043231                                                                                                                                                                                                                                                                 | -                                                                                                                  |             | IPR001650; IPR011545; IPR014001;<br>IPR014014; IPR014021;<br>G3DSA:3.40.50.300 (GENE3D),<br>PTHR10967 (PANTHER),<br>PTHR10967:SF44 (PANTHER),<br>SSF52540 (SUPERFAMILY) |
| Uncinaria stenocephala  | cathepsin d-like aspartic protease                   |  | 4 P:GO:0012502;<br>C:GO:0005764;<br>F:GO:0004190;<br>P:GO:0006508                                                                                                                                                                                                              | -                                                                                                                  | EC:3.4.23.0 | IPR001461; IPR001969; IPR009007;<br>IPR021109; PTHR13683:SF84<br>(PANTHER)                                                                                              |
| Brugia malayi           | dedicator of cytokinesis protein 6                   |  | 0                                                                                                                                                                                                                                                                              | F:GO:0005525;<br>P:GO:0050790;<br>F:GO:0051020;<br>F:GO:0004872;<br>P:GO:0008150;<br>C:GO:0005575;<br>F:GO:0005085 |             | PTHR23317 (PANTHER),<br>PTHR23317:SF27 (PANTHER)                                                                                                                        |
| Pongo abelii            | histone                                              |  | 16 P:GO:0040010;<br>C:GO:0000786;<br>P:GO:0008340;<br>P:GO:0009725;<br>P:GO:0008360;<br>P:GO:0007420;<br>F:GO:0003677;<br>C:GO:0005700;<br>P:GO:0010171;<br>P:GO:0007155;<br>P:GO:0002119;<br>P:GO:0006334;<br>P:GO:0009792;<br>P:GO:0007140;<br>C:GO:0005634;<br>P:GO:0006974 | -                                                                                                                  |             | IPR000164; IPR007125; IPR009072                                                                                                                                         |



|                           |                                      |    |                                                                                                                                                                                                                                                                                                               |  |            |                                                                                                                 |
|---------------------------|--------------------------------------|----|---------------------------------------------------------------------------------------------------------------------------------------------------------------------------------------------------------------------------------------------------------------------------------------------------------------|--|------------|-----------------------------------------------------------------------------------------------------------------|
| Caenorhabditis sp. PS1010 | secretory carrier membrane protein 5 | 13 | P:GO:0051047;<br>C:GO:0016021;<br>P:GO:0055114;<br>P:GO:0006887;<br>F:GO:0016491;<br>P:GO:0048522;<br>P:GO:0060341;<br>C:GO:0044446;<br>C:GO:0031090;<br>C:GO:0012505;<br>P:GO:0015031;<br>C:GO:0005794;<br>C:GO:0005886                                                                                      |  |            | IPR007273; PTHR10687:SF3 (PANTHER), SignalP (SIGNALP)                                                           |
| Caenorhabditis briggsae   | kinesin heavy chain                  | 18 | P:GO:0007411;<br>F:GO:0008574;<br>P:GO:0008103;<br>P:GO:0007317;<br>P:GO:0007310;<br>C:GO:0005874;<br>P:GO:0048311;<br>P:GO:0007303;<br>F:GO:0008017;<br>P:GO:0008088;<br>P:GO:0019226;<br>P:GO:0047497;<br>F:GO:0032403;<br>C:GO:0033267;<br>C:GO:0005871;<br>F:GO:0005524;<br>P:GO:0001754;<br>C:GO:0005739 |  | EC:3.6.4.4 | IPR001752; IPR019821; PD936484 (PRODOM), PTHR16012 (PANTHER), PTHR16012:SF131 (PANTHER), SSF52540 (SUPERFAMILY) |
| Caenorhabditis briggsae   | kinesin heavy chain                  | 18 | P:GO:0007411;<br>F:GO:0008574;<br>P:GO:0008103;<br>P:GO:0007317;<br>P:GO:0007310;<br>C:GO:0005874;<br>P:GO:0048311;<br>P:GO:0007303;<br>F:GO:0008017;<br>P:GO:0008088;<br>P:GO:0019226;<br>P:GO:0047497;<br>F:GO:0032403;<br>C:GO:0033267;<br>C:GO:0005871;<br>F:GO:0005524;<br>P:GO:0001754;<br>C:GO:0005739 |  | EC:3.6.4.4 | IPR001752; IPR019821; PD936484 (PRODOM), PTHR16012 (PANTHER), PTHR16012:SF131 (PANTHER), SSF52540 (SUPERFAMILY) |

|                         |                                           |    |                                                                                                                                                                                                                                                                                                               |   |            |                                                                                                                        |
|-------------------------|-------------------------------------------|----|---------------------------------------------------------------------------------------------------------------------------------------------------------------------------------------------------------------------------------------------------------------------------------------------------------------|---|------------|------------------------------------------------------------------------------------------------------------------------|
| Caenorhabditis briggsae | kinesin heavy chain                       | 18 | P:GO:0007411;<br>F:GO:0008574;<br>P:GO:0008103;<br>P:GO:0007317;<br>P:GO:0007310;<br>C:GO:0005874;<br>P:GO:0048311;<br>P:GO:0007303;<br>F:GO:0008017;<br>P:GO:0008088;<br>P:GO:0019226;<br>P:GO:0047497;<br>F:GO:0032403;<br>C:GO:0033267;<br>C:GO:0005871;<br>F:GO:0005524;<br>P:GO:0001754;<br>C:GO:0005739 | - | EC:3.6.4.4 | IPR001752; IPR019821; PD936484 (PRODOM), PTHR16012 (PANTHER), PTHR16012:SF131 (PANTHER), SSF52540 (SUPERFAMILY)        |
| Caenorhabditis elegans  | transcriptio-I regulator                  | 0  |                                                                                                                                                                                                                                                                                                               |   |            | IPR002634; PTHR12735:SF3 (PANTHER)                                                                                     |
| Caenorhabditis elegans  | briggsae cbr-unc-59 protein               | 11 | P:GO:0051291;<br>P:GO:0000910;<br>P:GO:0007049;<br>C:GO:0031105;<br>C:GO:0001725;<br>F:GO:0005515;<br>C:GO:0019717;<br>C:GO:0005694;<br>F:GO:0005198;<br>C:GO:0005634;<br>F:GO:0005525                                                                                                                        | - |            | IPR000038; IPR016491; G3DSA:3.40.50.300 (GENE3D), PTHR18884:SF29 (PANTHER), SSF52540 (SUPERFAMILY)                     |
|                         | -                                         | 0  |                                                                                                                                                                                                                                                                                                               |   |            | SignalP (SIGNALP)                                                                                                      |
| Loa loa                 | briggsae cbr-taf-9 protein                | 3  | C:GO:0043234;<br>F:GO:0005515;<br>C:GO:0044451                                                                                                                                                                                                                                                                | - |            | -                                                                                                                      |
|                         | -                                         | 0  |                                                                                                                                                                                                                                                                                                               |   |            | -                                                                                                                      |
| Caenorhabditis elegans  | coiled-coil domain-containing protein 101 | 0  |                                                                                                                                                                                                                                                                                                               |   |            | -                                                                                                                      |
| Brugia malayi           | cre-                                      | 2  | F:GO:0016787;<br>P:GO:0006629                                                                                                                                                                                                                                                                                 | - |            | IPR002641; IPR016035; G3DSA:3.40.1090.10 (GENE3D), PTHR18958 (PANTHER), PTHR18958:SF81 (PANTHER)                       |
|                         | -                                         | 0  |                                                                                                                                                                                                                                                                                                               |   |            | -                                                                                                                      |
| Brugia malayi           | dj-1 family protein                       | 2  | P:GO:0008344;<br>P:GO:0006979                                                                                                                                                                                                                                                                                 | - |            | IPR002818; IPR006287; G3DSA:3.40.50.880 (GENE3D), PTHR11019 (PANTHER), PTHR11019:SF5 (PANTHER), SSF52317 (SUPERFAMILY) |
| Caenorhabditis elegans  | mitochondrial ribosomal protein l41       | 7  | P:GO:0009792;<br>P:GO:0002119;<br>C:GO:0005762;<br>F:GO:0003735;<br>P:GO:0040010;<br>P:GO:0000003;<br>P:GO:0006412                                                                                                                                                                                            | - | EC:3.6.5.3 | IPR019189; PTHR21338 (PANTHER)                                                                                         |

|                         |                                                        |   |                                                                                                                                                      |                                                                                                                    |            |                                                                                                                    |
|-------------------------|--------------------------------------------------------|---|------------------------------------------------------------------------------------------------------------------------------------------------------|--------------------------------------------------------------------------------------------------------------------|------------|--------------------------------------------------------------------------------------------------------------------|
| Caenorhabditis briggsae | briggsae cbr-syn-1 protein                             | 6 | F:GO:0005515;<br>P:GO:0050796;<br>P:GO:0016081;<br>C:GO:0044425;<br>C:GO:0043229;<br>C:GO:0005886                                                    | -                                                                                                                  |            | IPR000727; IPR006012; IPR010989;<br>G3DSA:1.20.58.70 (GENE3D),<br>PTHR19957 (PANTHER),<br>PTHR19957:SF25 (PANTHER) |
| Loa loa                 | symplekin                                              | 2 | F:GO:0005488;<br>C:GO:0005634                                                                                                                        | -                                                                                                                  |            | PTHR15245 (PANTHER),<br>PTHR15245:SF2 (PANTHER)                                                                    |
| Caenorhabditis elegans  | wd40 repeat domain 11 partial                          | 0 |                                                                                                                                                      | F:GO:0003674;<br>P:GO:0008286;<br>C:GO:0016021;<br>C:GO:0016020;<br>P:GO:0008150;<br>C:GO:0005575;<br>C:GO:0005634 |            | IPR011046; IPR015943                                                                                               |
| Caenorhabditis elegans  | hypothetical protein T19D12.9 [Caenorhabditis elegans] | 1 | P:GO:0019915                                                                                                                                         | -                                                                                                                  |            | PTHR11662 (PANTHER),<br>PTHR11662:SF17 (PANTHER), SignalP<br>(SIGNALP)                                             |
| Caenorhabditis elegans  | muts homolog 5 ( coli)                                 | 4 | F:GO:0005515;<br>P:GO:0007131;<br>P:GO:0007136;<br>C:GO:0005634                                                                                      | -                                                                                                                  |            | IPR000432; G3DSA:3.40.50.300<br>(GENE3D), PTHR11361:SF20<br>(PANTHER), SSF52540 (SUPERFAMILY)                      |
| Caenorhabditis briggsae | complement factor h-related 5                          | 0 |                                                                                                                                                      | P:GO:0006957;<br>C:GO:0005576                                                                                      |            | IPR000436; IPR016060; PTHR19325<br>(PANTHER), PTHR19325:SF25<br>(PANTHER), SignalP (SIGNALP)                       |
| Caenorhabditis briggsae | complement factor h-like                               | 0 |                                                                                                                                                      |                                                                                                                    |            | IPR000436; IPR016060; PTHR19325<br>(PANTHER), PTHR19325:SF25<br>(PANTHER), SignalP (SIGNALP)                       |
| Caenorhabditis briggsae | complement binding protein                             | 0 |                                                                                                                                                      |                                                                                                                    |            | IPR000436; IPR016060; PTHR19325<br>(PANTHER), PTHR19325:SF25<br>(PANTHER), SignalP (SIGNALP)                       |
| Caenorhabditis briggsae | udp-glucuronosyltransferase 2a1 precursor              | 1 | F:GO:0016758                                                                                                                                         | -                                                                                                                  | EC:2.4.1.0 | IPR002213; SignalP (SIGNALP),<br>SSF53756 (SUPERFAMILY)                                                            |
| Caenorhabditis elegans  | briggsae cbr-nlp-11 protein                            | 0 |                                                                                                                                                      |                                                                                                                    |            | SignalP (SIGNALP)                                                                                                  |
| Pristionchus pacificus  | phosphopantetheine attachment site family protein      | 6 | P:GO:0006120;<br>P:GO:0006633;<br>F:GO:0000036;<br>F:GO:0048037;<br>F:GO:0031177;<br>C:GO:0005739                                                    | -                                                                                                                  |            | IPR006163; IPR009081; PD000887<br>(PRODOM), PTHR20863 (PANTHER),<br>PTHR20863:SF5 (PANTHER)                        |
| -                       | -                                                      | 0 |                                                                                                                                                      |                                                                                                                    |            | -                                                                                                                  |
| Caenorhabditis briggsae | probable ribosome biogenesis protein rlp24-like        | 9 | P:GO:0006412;<br>P:GO:0040010;<br>C:GO:0005840;<br>F:GO:0003735;<br>P:GO:0040035;<br>P:GO:0010171;<br>P:GO:0002119;<br>P:GO:0006898;<br>P:GO:0009792 | -                                                                                                                  | EC:3.6.5.3 | P551257 (PROFILE)                                                                                                  |
| -                       | -                                                      | 0 |                                                                                                                                                      |                                                                                                                    |            | -                                                                                                                  |

|                         |                                                                                                                                                                                                                                 |    |                                                                                                                                                                       |                                                                                                                                     |  |                                                                                              |
|-------------------------|---------------------------------------------------------------------------------------------------------------------------------------------------------------------------------------------------------------------------------|----|-----------------------------------------------------------------------------------------------------------------------------------------------------------------------|-------------------------------------------------------------------------------------------------------------------------------------|--|----------------------------------------------------------------------------------------------|
| Caenorhabditis elegans  | proteasome activator complex subunit 4                                                                                                                                                                                          | 0  |                                                                                                                                                                       | P:GO:0030154;<br>F:GO:0005488;<br>C:GO:0000502;<br>C:GO:0016607;<br>P:GO:0007275;<br>P:GO:0007283;<br>C:GO:0005634                  |  | IPR011989; IPR016024; IPR021843                                                              |
|                         | -                                                                                                                                                                                                                               | 0  |                                                                                                                                                                       |                                                                                                                                     |  | -                                                                                            |
| Caenorhabditis elegans  | r- and export factor binding protein                                                                                                                                                                                            | 5  | P:GO:0016070;<br>F:GO:0005515;<br>P:GO:0040011;<br>C:GO:0044428;<br>P:GO:0010467                                                                                      | -                                                                                                                                   |  | -                                                                                            |
| Caenorhabditis elegans  | r- and export factor binding protein                                                                                                                                                                                            | 4  | P:GO:0009987;<br>F:GO:0005515;<br>P:GO:0040011;<br>C:GO:0044428                                                                                                       | -                                                                                                                                   |  | IPR000504; IPR012677; PTHR19965 (PANTHER), PTHR19965:SF8 (PANTHER), SSF54928 (SUPERFAMILY)   |
| Caenorhabditis elegans  | hypothetical protein F26F12.3 [Caenorhabditis elegans]                                                                                                                                                                          | 0  |                                                                                                                                                                       | F:GO:0005515                                                                                                                        |  | -                                                                                            |
| Caenorhabditis briggsae | chromosome 9 open reading frame 64                                                                                                                                                                                              | 0  |                                                                                                                                                                       | F:GO:0003723;<br>F:GO:0003674;<br>P:GO:0008150;<br>C:GO:0005575                                                                     |  | IPR000834; IPR019438; PTHR21314 (PANTHER)                                                    |
|                         | -                                                                                                                                                                                                                               | 0  |                                                                                                                                                                       |                                                                                                                                     |  | -                                                                                            |
| Caenorhabditis briggsae | casein ki-se gamma 2                                                                                                                                                                                                            | 10 | P:GO:0040010;<br>P:GO:0018991;<br>F:GO:0004672;<br>P:GO:0040035;<br>P:GO:0010171;<br>P:GO:0002119;<br>F:GO:0000166;<br>P:GO:0040011;<br>P:GO:0009792;<br>P:GO:0040018 | -                                                                                                                                   |  | -                                                                                            |
| Brugia malayi           | nsfl1 cofactor p47                                                                                                                                                                                                              | 2  | F:GO:0005515;<br>C:GO:0043229                                                                                                                                         | -                                                                                                                                   |  | IPR001012; IPR012989; G3DSA:3.10.20.90 (GENE3D), PTHR23333 (PANTHER), SSF54236 (SUPERFAMILY) |
| Loa loa                 | nsfl1 cofactor p47                                                                                                                                                                                                              | 2  | F:GO:0005515;<br>C:GO:0043229                                                                                                                                         | -                                                                                                                                   |  | IPR001012; IPR012989; G3DSA:3.10.20.90 (GENE3D), PTHR23333 (PANTHER), SSF54236 (SUPERFAMILY) |
| Caenorhabditis briggsae | briggsae cbr-sep-1 protein                                                                                                                                                                                                      | 0  |                                                                                                                                                                       | P:GO:0006508;<br>P:GO:0045143;<br>P:GO:0000212;<br>F:GO:0008233;<br>P:GO:0007127;<br>F:GO:0005515;<br>C:GO:0005813;<br>C:GO:0005634 |  | IPR005314                                                                                    |
| Caenorhabditis elegans  | alg6_caeel ame: full=probable dolichyl pyrophosphate man9<br>c2 alpha- -glucosyltransferase ame: full=asparagine-linked<br>glycosylation protein 6 homolog ame: full=dolichyl-p-<br>glc:man9 c2-pp-dolichyl glucosyltransferase | 1  | P:GO:0000003                                                                                                                                                          | -                                                                                                                                   |  | IPR004856; SignalP (SIGNALP)                                                                 |

|                         |                                                        |    |                                                                                                                                                                                                         |                                                                                                                    |             |                                                                                                                 |
|-------------------------|--------------------------------------------------------|----|---------------------------------------------------------------------------------------------------------------------------------------------------------------------------------------------------------|--------------------------------------------------------------------------------------------------------------------|-------------|-----------------------------------------------------------------------------------------------------------------|
| Caenorhabditis elegans  | cytochrome c-type heme                                 | 12 | P:GO:0040010;<br>P:GO:0008340;<br>C:GO:0005743;<br>P:GO:0055114;<br>P:GO:0000003;<br>P:GO:0018996;<br>F:GO:0016491;<br>P:GO:0002119;<br>F:GO:0004408;<br>P:GO:0006898;<br>P:GO:0009792;<br>P:GO:0018063 | -                                                                                                                  | EC:4.4.1.17 | -                                                                                                               |
| -                       | -                                                      | 0  |                                                                                                                                                                                                         |                                                                                                                    |             | -                                                                                                               |
| Brugia malayi           | heterogeneous nuclear ribonucleoprotein r              | 4  | P:GO:0008380;<br>C:GO:0030530;<br>F:GO:0003676;<br>F:GO:0005515                                                                                                                                         | -                                                                                                                  |             | IPR000504; IPR006535; IPR012677;<br>PTHR10432 (PANTHER),<br>PTHR10432:SF42 (PANTHER),<br>SSF54928 (SUPERFAMILY) |
| Caenorhabditis briggsae | cathepsin a                                            | 3  | P:GO:0019915;<br>F:GO:0004185;<br>P:GO:0006508                                                                                                                                                          | -                                                                                                                  | EC:3.4.16.0 | IPR001563; G3DSA:3.40.50.1820<br>(GENE3D), PTHR11802:SF9<br>(PANTHER), SSF53474 (SUPERFAMILY)                   |
| -                       | -                                                      | 0  |                                                                                                                                                                                                         |                                                                                                                    |             | -                                                                                                               |
| Brugia malayi           | yfm7_caeel ame: full=uncharacterized protein           | 0  |                                                                                                                                                                                                         | F:GO:0046872;<br>F:GO:0003676;<br>P:GO:0007049;<br>F:GO:0008270;<br>F:GO:0003677;<br>C:GO:0005634                  |             | -                                                                                                               |
| -                       | -                                                      | 0  |                                                                                                                                                                                                         |                                                                                                                    |             | SignalP (SIGNALP)                                                                                               |
| Caenorhabditis briggsae | usp4 protein                                           | 2  | F:GO:0005515;<br>F:GO:0016787                                                                                                                                                                           | -                                                                                                                  |             | IPR001394; IPR003006; IPR018200;<br>PTHR10420 (PANTHER),<br>PTHR10420:SF72 (PANTHER),<br>SSF54001 (SUPERFAMILY) |
| Caenorhabditis briggsae | loc398480 protein                                      | 4  | F:GO:0046872;<br>P:GO:0006511;<br>F:GO:0004221;<br>F:GO:0008234                                                                                                                                         | -                                                                                                                  | EC:3.1.2.15 | IPR001394; IPR018200; PTHR10420<br>(PANTHER), PTHR10420:SF72<br>(PANTHER), SSF54001 (SUPERFAMILY)               |
| Caenorhabditis briggsae | usp4 protein                                           | 2  | F:GO:0005515;<br>F:GO:0016787                                                                                                                                                                           | -                                                                                                                  |             | IPR001394; IPR003006; IPR018200;<br>PTHR10420 (PANTHER),<br>PTHR10420:SF72 (PANTHER),<br>SSF54001 (SUPERFAMILY) |
| -                       | -                                                      | 0  |                                                                                                                                                                                                         |                                                                                                                    |             | -                                                                                                               |
| -                       | -                                                      | 0  |                                                                                                                                                                                                         |                                                                                                                    |             | -                                                                                                               |
| Caenorhabditis elegans  | hypothetical protein Y23H5A.3 [Caenorhabditis elegans] | 1  | P:GO:0007369                                                                                                                                                                                            | -                                                                                                                  |             | SSF54928 (SUPERFAMILY)                                                                                          |
| -                       | -                                                      | 0  |                                                                                                                                                                                                         |                                                                                                                    |             | -                                                                                                               |
| -                       | -                                                      | 0  |                                                                                                                                                                                                         |                                                                                                                    |             | -                                                                                                               |
| -                       | -                                                      | 0  |                                                                                                                                                                                                         |                                                                                                                    |             | -                                                                                                               |
| -                       | -                                                      | 0  |                                                                                                                                                                                                         |                                                                                                                    |             | -                                                                                                               |
| -                       | -                                                      | 0  |                                                                                                                                                                                                         |                                                                                                                    |             | -                                                                                                               |
| -                       | -                                                      | 0  |                                                                                                                                                                                                         |                                                                                                                    |             | -                                                                                                               |
| -                       | -                                                      | 0  |                                                                                                                                                                                                         |                                                                                                                    |             | -                                                                                                               |
| Caenorhabditis elegans  | nuclear pore complex protein family member (npp-7)     | 0  |                                                                                                                                                                                                         | C:GO:0005643;<br>F:GO:0017056;<br>P:GO:0006997;<br>F:GO:0008270;<br>P:GO:0009792;<br>P:GO:0002119;<br>P:GO:0040007 |             | IPR001876; SSF90209 (SUPERFAMILY)                                                                               |

|                             |                                                         |   |                                                                                                   |   |                                                                                                                                      |
|-----------------------------|---------------------------------------------------------|---|---------------------------------------------------------------------------------------------------|---|--------------------------------------------------------------------------------------------------------------------------------------|
| Angiostrongylus cantonensis | ef hand family protein                                  | 4 | F:GO:0005515;<br>F:GO:0005509;<br>C:GO:0005625;<br>C:GO:0005626                                   | - | IPR002048; IPR011992; IPR018247;<br>IPR018248; IPR018249; PTHR23050<br>(PANTHER), PTHR23050:SF9<br>(PANTHER), SSF47473 (SUPERFAMILY) |
| Caenorhabditis briggsae     | dihydrofolate reductase                                 | 6 | P:GO:0044238;<br>P:GO:0000003;<br>F:GO:0016491;<br>P:GO:0044271;<br>P:GO:0009792;<br>P:GO:0044283 | - | IPR001796; IPR012259; IPR017925;<br>G3DSA:3.40.430.10 (GENE3D),<br>PTHR11549 (PANTHER), SSF53597<br>(SUPERFAMILY)                    |
| -                           | -                                                       | 0 |                                                                                                   |   | SignalP (SIGNALP)                                                                                                                    |
| -                           | -                                                       | 0 |                                                                                                   |   | SignalP (SIGNALP)                                                                                                                    |
| Caenorhabditis elegans      | protein regulator of cytokinesis 1                      | 1 | C:GO:0005856                                                                                      | - | IPR007145                                                                                                                            |
| Caenorhabditis elegans      | protein regulator of cytokinesis 1                      | 1 | C:GO:0005856                                                                                      | - | IPR007145                                                                                                                            |
| Caenorhabditis elegans      | protein regulator of cytokinesis 1                      | 1 | C:GO:0005856                                                                                      | - | IPR007145                                                                                                                            |
| Caenorhabditis briggsae     | Hypothetical protein CBG22064 [Caenorhabditis briggsae] | 3 | P:GO:0009792;<br>P:GO:0006898;<br>P:GO:0002119                                                    | - | -                                                                                                                                    |
| Caenorhabditis briggsae     | briggsae cbr-pld-1 protein                              | 3 | P:GO:0009987;<br>F:GO:0005488;<br>F:GO:0003824                                                    | - | IPR001683; IPR015679;<br>PTHR18896:SF6 (PANTHER)                                                                                     |
| Loa loa                     | subfamily member 4                                      | 6 | P:GO:0008340;<br>P:GO:0007052;<br>F:GO:0005515;<br>C:GO:0044464;<br>P:GO:0009792;<br>P:GO:0006950 | - | -                                                                                                                                    |
| Loa loa                     | subfamily member 4                                      | 6 | P:GO:0008340;<br>P:GO:0007052;<br>F:GO:0005515;<br>C:GO:0044464;<br>P:GO:0009792;<br>P:GO:0006950 | - | -                                                                                                                                    |
| Loa loa                     | subfamily member 4                                      | 6 | P:GO:0008340;<br>P:GO:0007052;<br>F:GO:0005515;<br>C:GO:0044464;<br>P:GO:0009792;<br>P:GO:0006950 | - | -                                                                                                                                    |
| Loa loa                     | subfamily member 4                                      | 6 | P:GO:0008340;<br>P:GO:0007052;<br>F:GO:0005515;<br>C:GO:0044464;<br>P:GO:0009792;<br>P:GO:0006950 | - | -                                                                                                                                    |
| Loa loa                     | subfamily member 4                                      | 6 | P:GO:0008340;<br>P:GO:0007052;<br>F:GO:0005515;<br>C:GO:0044464;<br>P:GO:0009792;<br>P:GO:0006950 | - | -                                                                                                                                    |
| Loa loa                     | subfamily member 4                                      | 6 | P:GO:0008340;<br>P:GO:0007052;<br>F:GO:0005515;<br>C:GO:0044464;<br>P:GO:0009792;<br>P:GO:0006950 | - | -                                                                                                                                    |
| -                           | -                                                       | 0 |                                                                                                   |   | -                                                                                                                                    |

|                             |                                                                          |    |                                                                                                                                                                                                         |                                                                                                                                     |              |                                                                                                                      |
|-----------------------------|--------------------------------------------------------------------------|----|---------------------------------------------------------------------------------------------------------------------------------------------------------------------------------------------------------|-------------------------------------------------------------------------------------------------------------------------------------|--------------|----------------------------------------------------------------------------------------------------------------------|
| Caenorhabditis elegans      | wd repeat-containing protein 81                                          | 0  |                                                                                                                                                                                                         | F:GO:0003674;<br>P:GO:0008150                                                                                                       |              | IPR000409                                                                                                            |
|                             | -                                                                        | 0  |                                                                                                                                                                                                         |                                                                                                                                     |              | -                                                                                                                    |
|                             | -                                                                        | 0  |                                                                                                                                                                                                         |                                                                                                                                     |              | -                                                                                                                    |
|                             | -                                                                        | 0  |                                                                                                                                                                                                         |                                                                                                                                     |              | -                                                                                                                    |
| Loa loa                     | protein smg9                                                             | 0  |                                                                                                                                                                                                         | P:GO:0000184;<br>F:GO:0003674;<br>P:GO:0008150;<br>F:GO:0005515;<br>C:GO:0005575;<br>C:GO:0005622                                   |              | G3DSA:3.40.50.300 (GENE3D),<br>PTHR14270 (PANTHER)                                                                   |
| Angiostrongylus cantonensis | temporarily assigned gene -me family member                              | 4  | F:GO:0017089;<br>C:GO:0005737;<br>F:GO:0051861;<br>P:GO:0046836                                                                                                                                         | -                                                                                                                                   |              | IPR014830; PTHR10219 (PANTHER),<br>PTHR10219:SF1 (PANTHER)                                                           |
|                             | -                                                                        | 0  |                                                                                                                                                                                                         |                                                                                                                                     |              | -                                                                                                                    |
| Pongo abelii                | heterogeneous nuclear ribonucleoprotein u (scaffold attachment factor a) | 12 | F:GO:0003723;<br>C:GO:0005681;<br>C:GO:0070937;<br>P:GO:0070934;<br>P:GO:0001906;<br>P:GO:0008380;<br>C:GO:0009986;<br>F:GO:0003677;<br>F:GO:0005524;<br>C:GO:0030530;<br>F:GO:0005515;<br>P:GO:0006397 | -                                                                                                                                   |              | -                                                                                                                    |
| Caenorhabditis briggsae     | elegans protein partially confirmed by transcript evidence               | 0  |                                                                                                                                                                                                         | C:GO:0005777;<br>P:GO:0055114;<br>F:GO:0005488;<br>C:GO:0005737;<br>F:GO:0016491;<br>F:GO:0046592;<br>P:GO:0008152;<br>P:GO:0006598 |              | IPR002937; G3DSA:3.50.50.60<br>(GENE3D), PTHR10742 (PANTHER),<br>PTHR10742:SF23 (PANTHER),<br>SSF54373 (SUPERFAMILY) |
|                             | -                                                                        | 0  |                                                                                                                                                                                                         |                                                                                                                                     |              | -                                                                                                                    |
|                             | -                                                                        | 0  |                                                                                                                                                                                                         |                                                                                                                                     |              | -                                                                                                                    |
| Caenorhabditis briggsae     | dr1-associated corepressor                                               | 5  | F:GO:0003677;<br>P:GO:0000122;<br>F:GO:0003714;<br>F:GO:0003700;<br>C:GO:0005634                                                                                                                        | -                                                                                                                                   |              | IPR003958; IPR009072; PTHR10252<br>(PANTHER), PTHR10252:SF1<br>(PANTHER)                                             |
| Loa loa                     | er degradation mannosidase alpha-like 2                                  | 9  | F:GO:0046873;<br>C:GO:0005788;<br>F:GO:0004571;<br>P:GO:0055085;<br>F:GO:0005509;<br>P:GO:0006986;<br>C:GO:0005576;<br>C:GO:0016020;<br>P:GO:0030001                                                    | -                                                                                                                                   | EC:3.2.1.113 | IPR001382; PTHR11742:SF10<br>(PANTHER), SignalP (SIGNALP)                                                            |
|                             | -                                                                        | 0  |                                                                                                                                                                                                         |                                                                                                                                     |              | -                                                                                                                    |
|                             | -                                                                        | 0  |                                                                                                                                                                                                         |                                                                                                                                     |              | -                                                                                                                    |
| Caenorhabditis elegans      | suppressor with morphological effect on genitalia family member (smg-3)  | 0  |                                                                                                                                                                                                         |                                                                                                                                     |              | IPR007193                                                                                                            |

|                          |                                      |    |                                                                                                                                                                       |                                                                                                                                                                                                         |                                                                                                                                                           |
|--------------------------|--------------------------------------|----|-----------------------------------------------------------------------------------------------------------------------------------------------------------------------|---------------------------------------------------------------------------------------------------------------------------------------------------------------------------------------------------------|-----------------------------------------------------------------------------------------------------------------------------------------------------------|
| Caenorhabditis briggsae  | atp-dependent r- helicase ddx51-like | 7  | P:GO:0040010;<br>P:GO:0008340;<br>F:GO:0003676;<br>C:GO:0005622;<br>P:GO:0002119;<br>P:GO:0006898;<br>F:GO:0016787                                                    | -                                                                                                                                                                                                       | IPR000629; IPR011545; IPR014001;<br>IPR014021; G3DSA:3.40.50.300<br>(GENE3D), PTHR10967 (PANTHER),<br>PTHR10967:SF34 (PANTHER),<br>SSF52540 (SUPERFAMILY) |
| Caenorhabditis briggsae  | spectrin beta chain                  | 4  | F:GO:0005200;<br>C:GO:0008091;<br>F:GO:0003779;<br>F:GO:0016787                                                                                                       | -                                                                                                                                                                                                       | IPR002017; IPR018159;<br>G3DSA:1.20.58.60 (GENE3D),<br>PTHR11915 (PANTHER),<br>PTHR11915:SF48 (PANTHER),<br>SSF46966 (SUPERFAMILY)                        |
| Caenorhabditis briggsae  | acyl carrier protein                 | 10 | P:GO:0040010;<br>F:GO:0031177;<br>P:GO:0006633;<br>P:GO:0008340;<br>C:GO:0005739;<br>F:GO:0000036;<br>P:GO:0006120;<br>P:GO:0002119;<br>P:GO:0006898;<br>F:GO:0048037 | -                                                                                                                                                                                                       | -                                                                                                                                                         |
| -                        | -                                    | 0  |                                                                                                                                                                       |                                                                                                                                                                                                         | -                                                                                                                                                         |
| -                        | -                                    | 0  |                                                                                                                                                                       |                                                                                                                                                                                                         | -                                                                                                                                                         |
| Trichomonas vaginalis G3 | viral a-type inclusion protein       | 0  |                                                                                                                                                                       | F:GO:0043565;<br>C:GO:0016020;<br>F:GO:0008565;<br>F:GO:0003700;<br>C:GO:0000139;<br>C:GO:0005737;<br>F:GO:0046983;<br>P:GO:0006355;<br>P:GO:0006886;<br>F:GO:0005515;<br>P:GO:0048280;<br>F:GO:0005488 | IPR009053; PD936484 (PRODOM)                                                                                                                              |
| -                        | -                                    | 0  |                                                                                                                                                                       |                                                                                                                                                                                                         | -                                                                                                                                                         |
| Brugia malayi            | briggsae cbr-evl-14 protein          | 2  | F:GO:0005488;<br>P:GO:0007049                                                                                                                                         | -                                                                                                                                                                                                       | IPR011989; IPR016024; PTHR12663<br>(PANTHER)                                                                                                              |



|                         |                                                              |    |                                                                                                                                                                                                                                                                                                                                                                  |   |                                                                                                        |
|-------------------------|--------------------------------------------------------------|----|------------------------------------------------------------------------------------------------------------------------------------------------------------------------------------------------------------------------------------------------------------------------------------------------------------------------------------------------------------------|---|--------------------------------------------------------------------------------------------------------|
| Brugia malayi           | rnp (rrm r- binding domain) containing family member (rnp-6) | 21 | P:GO:0007411;<br>P:GO:0000381;<br>P:GO:0018991;<br>F:GO:0005515;<br>F:GO:0000166;<br>P:GO:0040010;<br>P:GO:0006898;<br>P:GO:0006376;<br>C:GO:0071011;<br>P:GO:0040011;<br>C:GO:0071013;<br>P:GO:0007282;<br>P:GO:0009792;<br>P:GO:0002009;<br>P:GO:0051726;<br>C:GO:0043234;<br>P:GO:0002119;<br>P:GO:0007413;<br>F:GO:0008266;<br>P:GO:0040035;<br>F:GO:0003729 | - | IPR000504; IPR012677; PTHR10432 (PANTHER), PTHR10432:SF70 (PANTHER), SSF54928 (SUPERFAMILY)            |
| Brugia malayi           | rnp (rrm r- binding domain) containing family member (rnp-6) | 21 | P:GO:0007411;<br>P:GO:0000381;<br>P:GO:0018991;<br>F:GO:0005515;<br>F:GO:0000166;<br>P:GO:0040010;<br>P:GO:0006898;<br>P:GO:0006376;<br>C:GO:0071011;<br>P:GO:0040011;<br>C:GO:0071013;<br>P:GO:0007282;<br>P:GO:0009792;<br>P:GO:0002009;<br>P:GO:0051726;<br>C:GO:0043234;<br>P:GO:0002119;<br>P:GO:0007413;<br>F:GO:0008266;<br>P:GO:0040035;<br>F:GO:0003729 | - | IPR000504; IPR006532; IPR012677; PTHR10432 (PANTHER), PTHR10432:SF70 (PANTHER), SSF54928 (SUPERFAMILY) |
| Caenorhabditis briggsae | Hypothetical protein CBG15698 [Caenorhabditis briggsae]      | 0  |                                                                                                                                                                                                                                                                                                                                                                  |   | SignalP (SIGNALP)                                                                                      |
| -                       | -                                                            | 0  |                                                                                                                                                                                                                                                                                                                                                                  |   | -                                                                                                      |
| -                       | -                                                            | 0  |                                                                                                                                                                                                                                                                                                                                                                  |   | -                                                                                                      |
| -                       | -                                                            | 0  |                                                                                                                                                                                                                                                                                                                                                                  |   | -                                                                                                      |
| Caenorhabditis briggsae | tar-binding protein                                          | 1  | F:GO:0042802                                                                                                                                                                                                                                                                                                                                                     | - | PTHR10432 (PANTHER), PTHR10432:SF6 (PANTHER)                                                           |
| -                       | -                                                            | 0  |                                                                                                                                                                                                                                                                                                                                                                  |   | SignalP (SIGNALP)                                                                                      |
| -                       | -                                                            | 0  |                                                                                                                                                                                                                                                                                                                                                                  |   | SignalP (SIGNALP)                                                                                      |
| Caenorhabditis briggsae | pctp-like protein                                            | 0  |                                                                                                                                                                                                                                                                                                                                                                  |   | IPR002913; G3DSA:3.30.530.20 (GENE3D), PTHR19308 (PANTHER), SSF55961 (SUPERFAMILY)                     |

|                           |                                                  |    |                                                                                                                                                                                                                                           |                                                                                                                                                                       |             |                                                                                                                                                                           |
|---------------------------|--------------------------------------------------|----|-------------------------------------------------------------------------------------------------------------------------------------------------------------------------------------------------------------------------------------------|-----------------------------------------------------------------------------------------------------------------------------------------------------------------------|-------------|---------------------------------------------------------------------------------------------------------------------------------------------------------------------------|
| Homo sapiens              | antigen cd18                                     | 14 | C:GO:0008305;<br>P:GO:0006915;<br>P:GO:0007267;<br>P:GO:0006954;<br>P:GO:0008360;<br>P:GO:0007229;<br>F:GO:0001948;<br>F:GO:0004872;<br>P:GO:0007160;<br>P:GO:0050730;<br>F:GO:0019901;<br>P:GO:0007159;<br>P:GO:0007275;<br>P:GO:0030593 | -                                                                                                                                                                     | -           |                                                                                                                                                                           |
|                           | -                                                | 0  |                                                                                                                                                                                                                                           |                                                                                                                                                                       |             | -                                                                                                                                                                         |
| Caenorhabditis elegans    | d- polymerase i                                  | 2  | F:GO:0004518;<br>P:GO:0009987                                                                                                                                                                                                             | -                                                                                                                                                                     |             | -                                                                                                                                                                         |
| Caenorhabditis sp. PS1010 | transmembrane protein 120b                       | 1  | C:GO:0016021                                                                                                                                                                                                                              | -                                                                                                                                                                     |             | IPR012926                                                                                                                                                                 |
| Caenorhabditis elegans    | iesterase family member (pde-4)                  | 8  | F:GO:0004115;<br>C:GO:0005625;<br>F:GO:0046872;<br>C:GO:0005815;<br>P:GO:0007165;<br>C:GO:0005626;<br>C:GO:0016020;<br>C:GO:0005829                                                                                                       | -                                                                                                                                                                     |             | IPR002073; IPR023088; PTHR11347 (PANTHER), PTHR11347:SF37 (PANTHER), SSF109604 (SUPERFAMILY)                                                                              |
| Haemonchus contortus      | elegans protein confirmed by transcript evidence | 4  | P:GO:0040019;<br>P:GO:0009792;<br>P:GO:0040010;<br>P:GO:0002119                                                                                                                                                                           | -                                                                                                                                                                     |             | -                                                                                                                                                                         |
| Callithrix jacchus        | ribosomal protein l3                             | 6  | C:GO:0005730;<br>F:GO:0003735;<br>F:GO:0003723;<br>F:GO:0005515;<br>C:GO:0022625;<br>P:GO:0006414                                                                                                                                         | -                                                                                                                                                                     |             | IPR000597; IPR009000;<br>G3DSA:2.40.30.10 (GENE3D),<br>PTHR11363 (PANTHER)                                                                                                |
| Trichomonas vaginalis G3  | small gtp-binding protein                        | 0  |                                                                                                                                                                                                                                           | C:GO:0016020;<br>F:GO:0000166;<br>F:GO:0005525;<br>F:GO:0008270;<br>P:GO:0007165;<br>F:GO:0005515;<br>C:GO:0005622;<br>F:GO:0003924;<br>F:GO:0046872;<br>P:GO:0007264 |             | SignalP (SIGNALP)                                                                                                                                                         |
| Caenorhabditis elegans    | iesterase family member (pde-6)                  | 5  | P:GO:0007411;<br>F:GO:0004871;<br>F:GO:0046872;<br>F:GO:0004114;<br>P:GO:0007165                                                                                                                                                          | -                                                                                                                                                                     | EC:3.1.4.17 | IPR000014; IPR002073; IPR013767;<br>IPR023088; G3DSA:3.30.450.20 (GENE3D), PTHR11347 (PANTHER), PTHR11347:SF38 (PANTHER), SSF109604 (SUPERFAMILY), SSF55785 (SUPERFAMILY) |

|                         |                                                                 |    |                                                                                                                                                                                                                                                                                                                                                                                                                                      |                               |                                                                                                                                                                         |
|-------------------------|-----------------------------------------------------------------|----|--------------------------------------------------------------------------------------------------------------------------------------------------------------------------------------------------------------------------------------------------------------------------------------------------------------------------------------------------------------------------------------------------------------------------------------|-------------------------------|-------------------------------------------------------------------------------------------------------------------------------------------------------------------------|
| Caenorhabditis elegans  | werner syndrome atp-dependent helicase homolog                  | 25 | F:GO:0030145;<br>C:GO:0005654;<br>F:GO:0000403;<br>P:GO:0000731;<br>P:GO:0007569;<br>P:GO:0010259;<br>P:GO:0031297;<br>C:GO:0005730;<br>P:GO:0051345;<br>P:GO:0010225;<br>C:GO:0005813;<br>P:GO:0006284;<br>F:GO:0000287;<br>F:GO:0051880;<br>P:GO:0000723;<br>F:GO:0032403;<br>F:GO:0042803;<br>F:GO:0004003;<br>P:GO:0042981;<br>C:GO:0032389;<br>F:GO:0000405;<br>F:GO:0009378;<br>P:GO:0006979;<br>F:GO:0008408;<br>F:GO:0043138 | -                             | IPR001650; IPR004589;<br>G3DSA:3.40.50.300 (GENE3D),<br>PTHR13710:SF16 (PANTHER),<br>SSF52540 (SUPERFAMILY)                                                             |
|                         |                                                                 | 0  |                                                                                                                                                                                                                                                                                                                                                                                                                                      |                               | SignalP (SIGNALP)                                                                                                                                                       |
|                         |                                                                 | 0  |                                                                                                                                                                                                                                                                                                                                                                                                                                      |                               | -                                                                                                                                                                       |
| Caenorhabditis elegans  | dead (asp-glu-ala-asp) box polypeptide 27                       | 5  | P:GO:0040010;<br>P:GO:0002119;<br>F:GO:0005515;<br>F:GO:0000166;<br>F:GO:0004386                                                                                                                                                                                                                                                                                                                                                     | -                             | IPR000629; IPR011545; IPR014001;<br>IPR014014; IPR014021;<br>G3DSA:3.40.50.300 (GENE3D),<br>PTHR10967 (PANTHER),<br>PTHR10967:SF19 (PANTHER),<br>SSF52540 (SUPERFAMILY) |
| Brugia malayi           | rr- promoter binding protein                                    | 0  |                                                                                                                                                                                                                                                                                                                                                                                                                                      |                               | -                                                                                                                                                                       |
| Brugia malayi           | rr- promoter binding protein                                    | 0  |                                                                                                                                                                                                                                                                                                                                                                                                                                      |                               | -                                                                                                                                                                       |
| Caenorhabditis elegans  | hypothetical wd-repeat protein in chromosome                    | 0  |                                                                                                                                                                                                                                                                                                                                                                                                                                      | P:GO:0016567;<br>C:GO:0080008 | -                                                                                                                                                                       |
| Caenorhabditis elegans  | hypothetical wd-repeat protein in chromosome                    | 0  |                                                                                                                                                                                                                                                                                                                                                                                                                                      | P:GO:0016567;<br>C:GO:0080008 | IPR011046; IPR015943                                                                                                                                                    |
|                         |                                                                 | 0  |                                                                                                                                                                                                                                                                                                                                                                                                                                      |                               | -                                                                                                                                                                       |
|                         |                                                                 | 0  |                                                                                                                                                                                                                                                                                                                                                                                                                                      |                               | -                                                                                                                                                                       |
|                         |                                                                 | 0  |                                                                                                                                                                                                                                                                                                                                                                                                                                      |                               | -                                                                                                                                                                       |
|                         |                                                                 | 0  |                                                                                                                                                                                                                                                                                                                                                                                                                                      |                               | -                                                                                                                                                                       |
| Caenorhabditis briggsae | r- polymerase rpb3 rpb11 dimerisation domain containing protein | 9  | C:GO:0005666;<br>P:GO:0006383;<br>F:GO:0003899;<br>C:GO:0005875;<br>F:GO:0016757;<br>F:GO:0003677;<br>C:GO:0005736;<br>F:GO:0046983;<br>P:GO:0006360                                                                                                                                                                                                                                                                                 | -                             | EC:2.7.7.6<br>IPR009025; IPR011261;<br>G3DSA:3.30.1360.10 (GENE3D),<br>PTHR11800 (PANTHER),<br>PTHR11800:SF13 (PANTHER)                                                 |
| Caenorhabditis briggsae | chloride channel protein 7                                      | 5  | F:GO:0005488;<br>F:GO:0005247;<br>P:GO:0055085;<br>C:GO:0016021;<br>P:GO:0006821                                                                                                                                                                                                                                                                                                                                                     | -                             | IPR000644; IPR001807; IPR014743;<br>G3DSA:3.10.580.10 (GENE3D),<br>PTHR11689:SF15 (PANTHER), SignalP<br>(SIGNALP), SSF54631 (SUPERFAMILY)                               |

|                         |                                                  |    |                                                                                                                                                                                                                                                                             |                                                                                                                    |              |                                                                                                                                  |
|-------------------------|--------------------------------------------------|----|-----------------------------------------------------------------------------------------------------------------------------------------------------------------------------------------------------------------------------------------------------------------------------|--------------------------------------------------------------------------------------------------------------------|--------------|----------------------------------------------------------------------------------------------------------------------------------|
| Caenorhabditis elegans  | nucleoporin 98-96                                | 0  |                                                                                                                                                                                                                                                                             | C:GO:0005643;<br>P:GO:0006810                                                                                      |              | IPR021967; PTHR23198 (PANTHER)                                                                                                   |
| Caenorhabditis elegans  | pyrroline-5-carboxylate reductase                | 1  | P:GO:0008152                                                                                                                                                                                                                                                                | -                                                                                                                  |              | IPR000304; IPR016040; SSF51735 (SUPERFAMILY)                                                                                     |
|                         | -                                                | 0  |                                                                                                                                                                                                                                                                             |                                                                                                                    |              | SignalP (SIGNALP)                                                                                                                |
| Caenorhabditis briggsae | lycerol ki-se family member (dgg-1)              | 8  | F:GO:0003676;<br>P:GO:0007205;<br>F:GO:0019992;<br>F:GO:0005515;<br>P:GO:0007165;<br>F:GO:0008270;<br>F:GO:0004143;<br>F:GO:0000166                                                                                                                                         | -                                                                                                                  | EC:2.7.1.107 | IPR001965; IPR002219; IPR020454; G3DSA:3.30.60.20 (GENE3D), PTHR11255 (PANTHER), PTHR11255:SF8 (PANTHER), SSF57889 (SUPERFAMILY) |
| Brugia malayi           | hypothetical protein Bm1_08910 [Brugia malayi]   | 0  |                                                                                                                                                                                                                                                                             |                                                                                                                    |              | SignalP (SIGNALP)                                                                                                                |
| Caenorhabditis briggsae | subfamily member 10                              | 0  |                                                                                                                                                                                                                                                                             | F:GO:0051082;<br>C:GO:0005788;<br>P:GO:0045454;<br>P:GO:0006457;<br>C:GO:0005783;<br>F:GO:0031072;<br>C:GO:0005576 |              | IPR015609; PTHR11821:SF16 (PANTHER)                                                                                              |
|                         | -                                                | 0  |                                                                                                                                                                                                                                                                             |                                                                                                                    |              | -                                                                                                                                |
| Caenorhabditis briggsae | elegans protein confirmed by transcript evidence | 0  |                                                                                                                                                                                                                                                                             |                                                                                                                    |              | -                                                                                                                                |
| Caenorhabditis elegans  | elegans protein confirmed by transcript evidence | 0  |                                                                                                                                                                                                                                                                             |                                                                                                                    |              | PTHR13243 (PANTHER)                                                                                                              |
| Caenorhabditis elegans  | elegans protein confirmed by transcript evidence | 0  |                                                                                                                                                                                                                                                                             |                                                                                                                    |              | IPR019002; PTHR13243 (PANTHER)                                                                                                   |
|                         | -                                                | 0  |                                                                                                                                                                                                                                                                             |                                                                                                                    |              | -                                                                                                                                |
|                         | -                                                | 0  |                                                                                                                                                                                                                                                                             |                                                                                                                    |              | -                                                                                                                                |
| Caenorhabditis elegans  | fatty acid binding protein 4                     | 16 | P:GO:0050872;<br>P:GO:0008340;<br>F:GO:0005515;<br>P:GO:0006469;<br>P:GO:0050873;<br>C:GO:0005829;<br>P:GO:0051384;<br>P:GO:0001816;<br>P:GO:0008284;<br>P:GO:0006631;<br>P:GO:0071285;<br>P:GO:0042493;<br>F:GO:0008289;<br>P:GO:0016481;<br>P:GO:0050729;<br>P:GO:0042632 | -                                                                                                                  |              | -                                                                                                                                |

|                         |                                                         |    |                                                                                                                                                                                                         |                                                                                                                                                                                                                          |  |                                                                                                                                                 |
|-------------------------|---------------------------------------------------------|----|---------------------------------------------------------------------------------------------------------------------------------------------------------------------------------------------------------|--------------------------------------------------------------------------------------------------------------------------------------------------------------------------------------------------------------------------|--|-------------------------------------------------------------------------------------------------------------------------------------------------|
| Caenorhabditis brenneri | ubiquitin protein ligase e3 component n-recognin 4      | 0  |                                                                                                                                                                                                         | F:GO:0016874;<br>C:GO:0016021;<br>C:GO:0016020;<br>C:GO:0005634;<br>P:GO:0006260;<br>F:GO:0008270;<br>P:GO:0016567;<br>F:GO:0005516;<br>F:GO:0004842;<br>F:GO:0046872;<br>P:GO:0008152;<br>C:GO:0005856;<br>F:GO:0005488 |  | PTHR21725 (PANTHER), SignalP (SIGNALP)                                                                                                          |
| Caenorhabditis brenneri | ubiquitin protein ligase e3 component n-recognin 4      | 1  | F:GO:0005488                                                                                                                                                                                            | -                                                                                                                                                                                                                        |  | PTHR21725 (PANTHER), SignalP (SIGNALP)                                                                                                          |
| Caenorhabditis elegans  | histone h4 transcription factor                         | 12 | P:GO:0051234;<br>C:GO:0031981;<br>P:GO:0000003;<br>F:GO:0030528;<br>P:GO:0010628;<br>F:GO:0005515;<br>P:GO:0048519;<br>F:GO:0003676;<br>P:GO:0009792;<br>P:GO:0048856;<br>P:GO:0022402;<br>P:GO:0045449 | -                                                                                                                                                                                                                        |  | IPR007087; IPR013087; IPR015880;<br>PTHR23224 (PANTHER),<br>PTHR23224:SF469 (PANTHER),<br>SSF57667 (SUPERFAMILY)                                |
|                         | -                                                       | 0  |                                                                                                                                                                                                         |                                                                                                                                                                                                                          |  | -                                                                                                                                               |
|                         | -                                                       | 0  |                                                                                                                                                                                                         |                                                                                                                                                                                                                          |  | -                                                                                                                                               |
| Loa loa                 | udp-galactopyranose mutase                              | 0  |                                                                                                                                                                                                         | F:GO:0008767;<br>F:GO:0016491;<br>P:GO:0008152;<br>F:GO:0016853                                                                                                                                                          |  | IPR002937; G3DSA:3.50.50.60 (GENE3D),<br>SSF51971 (SUPERFAMILY)                                                                                 |
|                         | -                                                       | 0  |                                                                                                                                                                                                         |                                                                                                                                                                                                                          |  | -                                                                                                                                               |
|                         |                                                         |    |                                                                                                                                                                                                         |                                                                                                                                                                                                                          |  | IPR003598; IPR007110; IPR013098;<br>IPR013783; PTHR19897 (PANTHER),<br>SSF48726 (SUPERFAMILY)                                                   |
| Caenorhabditis elegans  | ribosomal protein s18                                   | 9  | P:GO:0006417;<br>P:GO:0051726;<br>F:GO:0019843;<br>F:GO:0003735;<br>P:GO:0000003;<br>P:GO:0006414;<br>C:GO:0022627;<br>P:GO:0006898;<br>P:GO:0007275                                                    | -                                                                                                                                                                                                                        |  | IPR001892; IPR010979; IPR018269;<br>G3DSA:1.10.8.50 (GENE3D),<br>G3DSA:4.10.910.10 (GENE3D),<br>PTHR10871 (PANTHER),<br>PTHR10871:SF2 (PANTHER) |
| Caenorhabditis briggsae | Hypothetical protein CBG14752 [Caenorhabditis briggsae] | 0  |                                                                                                                                                                                                         |                                                                                                                                                                                                                          |  | -                                                                                                                                               |
|                         | -                                                       | 0  |                                                                                                                                                                                                         |                                                                                                                                                                                                                          |  | -                                                                                                                                               |
| Caenorhabditis briggsae | nuclear transport factor 2-like export factor 2         | 7  | P:GO:0040035;<br>P:GO:0009792;<br>P:GO:0002119;<br>C:GO:0005622;<br>P:GO:0040011;<br>P:GO:0040007;<br>P:GO:0006898                                                                                      | -                                                                                                                                                                                                                        |  | IPR002075; IPR018222;<br>G3DSA:3.10.450.50 (GENE3D),<br>PTHR12612 (PANTHER),<br>SSF54427 (SUPERFAMILY)                                          |

|                         |                                                                |    |                                                                                                                                                                                                                          |   |            |                                                                                                                       |
|-------------------------|----------------------------------------------------------------|----|--------------------------------------------------------------------------------------------------------------------------------------------------------------------------------------------------------------------------|---|------------|-----------------------------------------------------------------------------------------------------------------------|
| Caenorhabditis briggsae | briggsae cbr-elt-3 protein                                     | 13 | P:GO:0030097;<br>F:GO:0030528;<br>P:GO:0045941;<br>F:GO:0008270;<br>P:GO:0048729;<br>P:GO:0048542;<br>P:GO:0006355;<br>P:GO:0045165;<br>P:GO:0051179;<br>P:GO:0001700;<br>F:GO:0043565;<br>P:GO:0042386;<br>P:GO:0001704 | - |            | IPR000679; IPR013088; PTHR10071 (PANTHER), PTHR10071:SF15 (PANTHER), SSF57716 (SUPERFAMILY)                           |
| Caenorhabditis briggsae | briggsae cbr-cal-1 protein                                     | 8  | P:GO:0002009;<br>P:GO:0018996;<br>P:GO:0008340;<br>P:GO:0000003;<br>P:GO:0040007;<br>P:GO:0010171;<br>P:GO:0002119;<br>P:GO:0040011                                                                                      | - |            | SignalIP (SIGNALP)                                                                                                    |
| Caenorhabditis elegans  | transmembrane protein 55b                                      | 0  |                                                                                                                                                                                                                          |   |            | IPR019178                                                                                                             |
| Caenorhabditis briggsae | immature colon carcinoma transcript 1 protein                  | 1  | P:GO:0006415                                                                                                                                                                                                             | - |            | IPR000352; G3DSA:3.30.160.200 (GENE3D), PTHR11075 (PANTHER), PTHR11075:SF12 (PANTHER), SSF110916 (SUPERFAMILY)        |
| Caenorhabditis elegans  | transcription factor tfb2 family protein                       | 2  | P:GO:0006351;<br>C:GO:0005634                                                                                                                                                                                            | - |            | IPR004598; SignalIP (SIGNALP)                                                                                         |
|                         | -                                                              | 0  |                                                                                                                                                                                                                          |   |            | -                                                                                                                     |
|                         | -                                                              | 0  |                                                                                                                                                                                                                          |   |            | -                                                                                                                     |
| Caenorhabditis elegans  | endoplasmic reticulum-golgi intermediate compartment protein 3 | 4  | C:GO:0043227;<br>F:GO:0005515;<br>C:GO:0044444;<br>C:GO:0016020                                                                                                                                                          | - |            | SignalIP (SIGNALP)                                                                                                    |
|                         | -                                                              | 0  |                                                                                                                                                                                                                          |   |            | -                                                                                                                     |
| Caenorhabditis briggsae | kh domain containing protein                                   | 7  | C:GO:0005730;<br>C:GO:0030530;<br>P:GO:0008380;<br>F:GO:0003723;<br>F:GO:0005515;<br>F:GO:0003697;<br>P:GO:0007165                                                                                                       | - |            | SignalIP (SIGNALP)                                                                                                    |
|                         | -                                                              | 0  |                                                                                                                                                                                                                          |   |            | -                                                                                                                     |
| Caenorhabditis briggsae | kh domain containing protein                                   | 6  | C:GO:0005730;<br>C:GO:0030530;<br>P:GO:0008380;<br>F:GO:0003723;<br>F:GO:0005515;<br>P:GO:0007165                                                                                                                        | - |            | SignalIP (SIGNALP)                                                                                                    |
| Nematostella vectensis  | hydroxyacyl glutathione hydrolase                              | 4  | P:GO:0005975;<br>C:GO:0005759;<br>F:GO:0004416;<br>P:GO:0006750                                                                                                                                                          | - | EC:3.1.2.6 | IPR001279; IPR017782; G3DSA:3.60.15.10 (GENE3D), PTHR11935 (PANTHER), PTHR11935:SF7 (PANTHER), SSF56281 (SUPERFAMILY) |

|                               |                                               |    |                                                                                                                                                                                                                                                                                                                                                                  |                                                |              |                                                                                                            |
|-------------------------------|-----------------------------------------------|----|------------------------------------------------------------------------------------------------------------------------------------------------------------------------------------------------------------------------------------------------------------------------------------------------------------------------------------------------------------------|------------------------------------------------|--------------|------------------------------------------------------------------------------------------------------------|
| Xenopus (Silurana) tropicalis | hydroxyacylglutathione hydrolase              | 5  | P:GO:0006750;<br>C:GO:0005739;<br>P:GO:0005975;<br>P:GO:0019853;<br>F:GO:0004416                                                                                                                                                                                                                                                                                 | -                                              | EC:3.1.2.6   | IPR001279; G3DSA:3.60.15.10 (GENE3D), PTHR11935 (PANTHER), PTHR11935:SF7 (PANTHER), SSF56281 (SUPERFAMILY) |
|                               | -                                             | 0  |                                                                                                                                                                                                                                                                                                                                                                  |                                                |              | -                                                                                                          |
| Caenorhabditis elegans        | serine threonine protein ki-se braf           | 5  | F:GO:0005515;<br>F:GO:0004672;<br>P:GO:0009987;<br>P:GO:0023052;<br>F:GO:0000166                                                                                                                                                                                                                                                                                 | -                                              |              | -                                                                                                          |
| Caenorhabditis elegans        | o ant response abnormal family member (odr-4) | 0  |                                                                                                                                                                                                                                                                                                                                                                  | P:GO:0055114;<br>F:GO:0016491;<br>F:GO:0008270 |              | IPR002085; PTHR11695:SF3 (PANTHER)                                                                         |
| Caenorhabditis briggsae       | wd repeat and hmg-box d- binding protein 1    | 1  | C:GO:0005634                                                                                                                                                                                                                                                                                                                                                     | -                                              |              | IPR001680; IPR011044; IPR011046; IPR015943; IPR019781; PTHR19932 (PANTHER), PTHR19932:SF2 (PANTHER)        |
| Caenorhabditis briggsae       | uncoordi- ted family member (unc-43)          | 21 | P:GO:0006468;<br>F:GO:0004683;<br>P:GO:0040018;<br>P:GO:0040017;<br>C:GO:0048786;<br>P:GO:0008049;<br>P:GO:0007616;<br>C:GO:0005737;<br>C:GO:0045211;<br>F:GO:0046872;<br>C:GO:0030425;<br>P:GO:0007528;<br>P:GO:0007067;<br>C:GO:0030424;<br>P:GO:0051932;<br>C:GO:0005886;<br>P:GO:0006952;<br>F:GO:0005516;<br>F:GO:0005524;<br>P:GO:0051489;<br>C:GO:0005954 | -                                              | EC:2.7.11.17 | IPR013543; IPR015742; IPR020636; G3DSA:3.10.450.50 (GENE3D), SSF54427 (SUPERFAMILY)                        |
| Caenorhabditis briggsae       | uncoordi- ted family member (unc-43)          | 18 | P:GO:0006468;<br>C:GO:0005654;<br>P:GO:0000003;<br>C:GO:0030666;<br>F:GO:0004683;<br>P:GO:0040018;<br>P:GO:0040017;<br>C:GO:0005829;<br>F:GO:0046872;<br>P:GO:0007067;<br>P:GO:0051932;<br>P:GO:0051092;<br>C:GO:0005886;<br>P:GO:0006952;<br>F:GO:0005516;<br>F:GO:0005524;<br>C:GO:0045202;<br>C:GO:0005954                                                    | -                                              | EC:2.7.11.17 | IPR013543; IPR015742; IPR020636; G3DSA:3.10.450.50 (GENE3D), SSF54427 (SUPERFAMILY)                        |

|                                     |                                                                                        |   |                                                                                                                                                      |                                                                 |                                                                                                                                                                 |
|-------------------------------------|----------------------------------------------------------------------------------------|---|------------------------------------------------------------------------------------------------------------------------------------------------------|-----------------------------------------------------------------|-----------------------------------------------------------------------------------------------------------------------------------------------------------------|
| Caenorhabditis elegans              | elegans protein partially confirmed by transcript evidence                             | 2 | P:GO:0000003;<br>P:GO:0040010                                                                                                                        | -                                                               | PTHR22880 (PANTHER),<br>PTHR22880:SF1 (PANTHER)                                                                                                                 |
| Trypanosoma brucei gambiense DAL972 | hypothetical protein, conserved, (fragment) [Trypanosoma brucei gambiense DAL972]      | 0 |                                                                                                                                                      |                                                                 | SignalP (SIGNALP)                                                                                                                                               |
|                                     | -                                                                                      | 0 |                                                                                                                                                      |                                                                 | SignalP (SIGNALP)                                                                                                                                               |
| Caenorhabditis elegans              | guanine nucleotide exchange factor for ras-like gtpases n-termi-l motif family protein | 0 |                                                                                                                                                      | P:GO:0051056;<br>P:GO:0007264;<br>F:GO:0005085;<br>C:GO:0005622 | -                                                                                                                                                               |
| Caenorhabditis elegans              | inositol-1(or 4)-monophosphatase                                                       | 4 | F:GO:0004437;<br>F:GO:0005488;<br>P:GO:0016311;<br>P:GO:0006020                                                                                      | -                                                               | IPR000760; IPR020550; IPR020552;<br>IPR020583; G3DSA:3.30.540.10<br>(GENE3D), G3DSA:3.40.190.80<br>(GENE3D), PTHR20854:SF4<br>(PANTHER), SSF56655 (SUPERFAMILY) |
| Caenorhabditis elegans              | inositol-1(or 4)-monophosphatase                                                       | 4 | F:GO:0004437;<br>F:GO:0005488;<br>P:GO:0016311;<br>P:GO:0006020                                                                                      | -                                                               | IPR000760; IPR020552; IPR020583;<br>G3DSA:3.30.540.10 (GENE3D),<br>PTHR20854:SF4 (PANTHER), SSF56655<br>(SUPERFAMILY)                                           |
| Caenorhabditis elegans              | josephin-like protein                                                                  | 0 |                                                                                                                                                      |                                                                 | IPR006155; PTHR13291 (PANTHER)                                                                                                                                  |
|                                     | -                                                                                      | 0 |                                                                                                                                                      |                                                                 | -                                                                                                                                                               |
| Caenorhabditis elegans              | uncoordi- ted family member (unc-16)                                                   | 6 | C:GO:0005737;<br>F:GO:0005078;<br>F:GO:0019894;<br>P:GO:0046328;<br>P:GO:0016192;<br>F:GO:0019901                                                    | -                                                               | IPR019143; PTHR13886 (PANTHER)                                                                                                                                  |
| Caenorhabditis elegans              | uncoordi- ted family member (unc-16)                                                   | 6 | C:GO:0005737;<br>F:GO:0005078;<br>F:GO:0019894;<br>P:GO:0046328;<br>P:GO:0016192;<br>F:GO:0019901                                                    | -                                                               | IPR019143; PTHR13886 (PANTHER)                                                                                                                                  |
|                                     | -                                                                                      | 0 |                                                                                                                                                      |                                                                 | -                                                                                                                                                               |
| Caenorhabditis elegans              | briggsae cbr-exoc-8 protein                                                            | 9 | P:GO:0006810;<br>P:GO:0000003;<br>P:GO:0010171;<br>P:GO:0002119;<br>P:GO:0040011;<br>P:GO:0009792;<br>P:GO:0033206;<br>P:GO:0040018;<br>P:GO:0051649 | -                                                               | IPR016159; PTHR21426 (PANTHER),<br>PTHR21426:SF9 (PANTHER)                                                                                                      |
| Caenorhabditis elegans              | briggsae cbr-exoc-8 protein                                                            | 9 | P:GO:0006810;<br>P:GO:0000003;<br>P:GO:0010171;<br>P:GO:0002119;<br>P:GO:0040011;<br>P:GO:0009792;<br>P:GO:0033206;<br>P:GO:0040018;<br>P:GO:0051649 | -                                                               | IPR016159; PTHR21426 (PANTHER),<br>PTHR21426:SF9 (PANTHER)                                                                                                      |
|                                     | -                                                                                      | 0 |                                                                                                                                                      |                                                                 | -                                                                                                                                                               |
| Caenorhabditis elegans              | hypothetical protein W05F2.4 [Caenorhabditis elegans]                                  | 3 | P:GO:0040018;<br>P:GO:0040035;<br>P:GO:0002119                                                                                                       | -                                                               | -                                                                                                                                                               |
|                                     | -                                                                                      | 0 |                                                                                                                                                      |                                                                 | IPR007087; IPR015880                                                                                                                                            |



|                                   |                                                            |    |                                                                                                                                                                                        |                                                                                                                    |             |                                                                                                                                                                         |
|-----------------------------------|------------------------------------------------------------|----|----------------------------------------------------------------------------------------------------------------------------------------------------------------------------------------|--------------------------------------------------------------------------------------------------------------------|-------------|-------------------------------------------------------------------------------------------------------------------------------------------------------------------------|
| Anisakis simplex                  | nucleosome assembly protein 1-like 1                       | 11 | P:GO:0040010;<br>P:GO:0040035;<br>P:GO:0010171;<br>P:GO:0002119;<br>P:GO:0040011;<br>P:GO:0006334;<br>P:GO:0002009;<br>P:GO:0009792;<br>P:GO:0040018;<br>C:GO:0005634;<br>P:GO:0016246 | -                                                                                                                  |             | IPR002164; PTHR11875:SF7<br>(PANTHER), SSF143113 (SUPERFAMILY)                                                                                                          |
| Caenorhabditis elegans            | elegans protein partially confirmed by transcript evidence | 0  |                                                                                                                                                                                        | C:GO:0016021;<br>C:GO:0016020;<br>F:GO:0008375                                                                     |             | SignalP (SIGNALP)                                                                                                                                                       |
|                                   | -                                                          | 0  |                                                                                                                                                                                        |                                                                                                                    |             | SignalP (SIGNALP)                                                                                                                                                       |
| Caenorhabditis briggsae           | chloride channel protein 3                                 | 8  | F:GO:0005247;<br>C:GO:0016021;<br>P:GO:0000003;<br>P:GO:0006821;<br>F:GO:0000166;<br>C:GO:0010008;<br>P:GO:0034220;<br>P:GO:0043269                                                    | -                                                                                                                  |             | IPR000644; IPR001807; IPR014743;<br>G3DSA:3.10.580.10 (GENE3D),<br>PTHR11689:SF21 (PANTHER), SignalP<br>(SIGNALP), SSF54631 (SUPERFAMILY)                               |
| Loa loa                           | myotubularin-related protein 13                            | 0  |                                                                                                                                                                                        | F:GO:0046872;<br>P:GO:0006508;<br>F:GO:0008239;<br>P:GO:0016311;<br>F:GO:0016791;<br>F:GO:0008235;<br>F:GO:0016805 |             | IPR001849; IPR002219; IPR011993;<br>G3DSA:3.30.60.20 (GENE3D),<br>PTHR10807 (PANTHER),<br>PTHR10807:SF4 (PANTHER), SSF50729<br>(SUPERFAMILY), SSF57889<br>(SUPERFAMILY) |
| Caenorhabditis briggsae           | briggsae cbr-lin-59 protein                                | 0  |                                                                                                                                                                                        |                                                                                                                    |             | -                                                                                                                                                                       |
| Caenorhabditis elegans            | briggsae cbr-dis-3 protein                                 | 4  | C:GO:0000176;<br>F:GO:0003723;<br>F:GO:0004540;<br>C:GO:0005652                                                                                                                        | -                                                                                                                  |             | PTHR23355 (PANTHER),<br>PTHR23355:SF13 (PANTHER)                                                                                                                        |
| Caenorhabditis elegans            | nuclear hormone receptor family member (nhr-11)            | 3  | F:GO:0004872;<br>F:GO:0005515;<br>P:GO:0006350                                                                                                                                         | -                                                                                                                  |             | PTHR11865 (PANTHER),<br>PTHR11865:SF235 (PANTHER)                                                                                                                       |
| Caenorhabditis briggsae           | Hypothetical protein CBG00701 [Caenorhabditis briggsae]    | 0  |                                                                                                                                                                                        |                                                                                                                    |             | -                                                                                                                                                                       |
| Caenorhabditis elegans            | tbc (tre-2 bub2 cdc16) domain family member (tbc-11)       | 5  | F:GO:0005097;<br>C:GO:0015630;<br>P:GO:0032313;<br>C:GO:0044444;<br>C:GO:0044430                                                                                                       | -                                                                                                                  |             | -                                                                                                                                                                       |
| Caenorhabditis briggsae           | pyruvate ki-se                                             | 9  | P:GO:0009792;<br>F:GO:0004743;<br>F:GO:0016830;<br>P:GO:0006725;<br>F:GO:0005515;<br>F:GO:0030955;<br>F:GO:0000287;<br>P:GO:0006096;<br>F:GO:0000166                                   | -                                                                                                                  | EC:2.7.1.40 | IPR001697; IPR011037; IPR015793;<br>IPR015806; IPR015813                                                                                                                |
| Ktedonobacter racemifer DSM 44963 | penicillin-binding 1a                                      | 1  | F:GO:0005488                                                                                                                                                                           |                                                                                                                    |             | -                                                                                                                                                                       |

|                                   |                                                  |    |                                                                                                                                                                                                                                                                                                                                                                                                                                                                                         |   |                                                       |
|-----------------------------------|--------------------------------------------------|----|-----------------------------------------------------------------------------------------------------------------------------------------------------------------------------------------------------------------------------------------------------------------------------------------------------------------------------------------------------------------------------------------------------------------------------------------------------------------------------------------|---|-------------------------------------------------------|
| Ktedonobacter racemifer DSM 44963 | penicillin-binding 1a                            | 0  | F:GO:0004871;<br>P:GO:0006869;<br>P:GO:0007047;<br>P:GO:0008152;<br>C:GO:0016021;<br>C:GO:0016020;<br>F:GO:0016820;<br>F:GO:0003824;<br>P:GO:0009190;<br>F:GO:0016787;<br>F:GO:0003723;<br>P:GO:0007165;<br>F:GO:0008270;<br>F:GO:0005524;<br>P:GO:0009252;<br>F:GO:0016301;<br>F:GO:0016818;<br>F:GO:0005261;<br>F:GO:0000166;<br>F:GO:0016849;<br>F:GO:0008658;<br>P:GO:0000160;<br>P:GO:0006754;<br>P:GO:0008360;<br>C:GO:0005643;<br>F:GO:0008233;<br>F:GO:0016740;<br>P:GO:0009792 | - |                                                       |
| Caenorhabditis briggsae           | elegans protein confirmed by transcript evidence | 0  |                                                                                                                                                                                                                                                                                                                                                                                                                                                                                         |   | IPR003677; PTHR21593 (PANTHER), SignalP (SIGNALP)     |
|                                   | -                                                | 0  |                                                                                                                                                                                                                                                                                                                                                                                                                                                                                         |   | -                                                     |
|                                   | -                                                | 0  |                                                                                                                                                                                                                                                                                                                                                                                                                                                                                         |   | -                                                     |
|                                   | -                                                | 0  |                                                                                                                                                                                                                                                                                                                                                                                                                                                                                         |   | IPR009281; PTHR15756:SF1 (PANTHER), SignalP (SIGNALP) |
| Caenorhabditis elegans            | gram domain-containing protein 1b                | 1  | P:GO:0009792                                                                                                                                                                                                                                                                                                                                                                                                                                                                            |   | -                                                     |
| Caenorhabditis briggsae           | tubulin-specific chaperone d                     | 5  | P:GO:0006457;<br>P:GO:0000003;<br>P:GO:0007275;<br>P:GO:0009653;<br>C:GO:0044424                                                                                                                                                                                                                                                                                                                                                                                                        |   | IPR011989; IPR016024; PTHR12658 (PANTHER)             |
| Caenorhabditis elegans            | malate dehydroge-se                              | 4  | P:GO:0018991;<br>P:GO:0055114;<br>F:GO:0016491;<br>P:GO:0040011                                                                                                                                                                                                                                                                                                                                                                                                                         |   | SignalP (SIGNALP)                                     |
| Caenorhabditis briggsae           | pre-mr--splicing factor 38a                      | 10 | P:GO:0009792;<br>P:GO:0002119;<br>P:GO:0008380;<br>C:GO:0005681;<br>P:GO:0006397;<br>P:GO:0000003;<br>P:GO:0008340;<br>P:GO:0040007;<br>P:GO:0006898;<br>P:GO:0045132                                                                                                                                                                                                                                                                                                                   |   | IPR005037                                             |
| Trichoplax adhaerens              | zinc finger protein 330                          | 4  | F:GO:0046872;<br>C:GO:0005634;<br>C:GO:0044446;<br>C:GO:0043232                                                                                                                                                                                                                                                                                                                                                                                                                         |   | -                                                     |

|                             |                                                            |    |                                                                                                                                                                                                                                                                                                               |                                                                                  |                                                                                                                                              |
|-----------------------------|------------------------------------------------------------|----|---------------------------------------------------------------------------------------------------------------------------------------------------------------------------------------------------------------------------------------------------------------------------------------------------------------|----------------------------------------------------------------------------------|----------------------------------------------------------------------------------------------------------------------------------------------|
| Caenorhabditis briggsae     | malig-nt t cell amplified sequence 1                       | 8  | C:GO:0005737;<br>P:GO:0008284;<br>P:GO:0045449;<br>F:GO:0003723;<br>P:GO:0007049;<br>P:GO:0000003;<br>P:GO:0006974;<br>P:GO:0040008                                                                                                                                                                           | -                                                                                | IPR002478; IPR004521; IPR015947;<br>G3DSA:2.30.130.10 (GENE3D),<br>PTHR22798 (PANTHER)                                                       |
| Caenorhabditis elegans      | elegans protein confirmed by transcript evidence           | 6  | P:GO:0002009;<br>P:GO:0018996;<br>P:GO:0008340;<br>P:GO:0000003;<br>P:GO:0040010;<br>P:GO:0002119                                                                                                                                                                                                             | -                                                                                | SignalP (SIGNALP)                                                                                                                            |
| -                           | -                                                          | 0  |                                                                                                                                                                                                                                                                                                               |                                                                                  | -                                                                                                                                            |
| -                           | -                                                          | 0  |                                                                                                                                                                                                                                                                                                               |                                                                                  | -                                                                                                                                            |
| Caenorhabditis briggsae     | trp channel protein -nchung                                | 1  | P:GO:0006810                                                                                                                                                                                                                                                                                                  | -                                                                                | PTHR10582 (PANTHER),<br>PTHR10582:SF2 (PANTHER)                                                                                              |
| Brugia malayi               | selenocysteine-specific elongation factor                  | 1  | F:GO:0005488                                                                                                                                                                                                                                                                                                  | -                                                                                | -                                                                                                                                            |
| -                           | -                                                          | 0  |                                                                                                                                                                                                                                                                                                               |                                                                                  | -                                                                                                                                            |
| Caenorhabditis briggsae     | elegans protein confirmed by transcript evidence           | 0  |                                                                                                                                                                                                                                                                                                               | P:GO:0006685;<br>C:GO:0005783;<br>C:GO:0005794;<br>C:GO:0005802;<br>F:GO:0050290 | -                                                                                                                                            |
| -                           | -                                                          | 0  |                                                                                                                                                                                                                                                                                                               |                                                                                  | -                                                                                                                                            |
| Caenorhabditis elegans      | bladder cancer-associated protein                          | 0  |                                                                                                                                                                                                                                                                                                               |                                                                                  | -                                                                                                                                            |
| Angiostrongylus cantonensis | major allergen                                             | 0  |                                                                                                                                                                                                                                                                                                               |                                                                                  | -                                                                                                                                            |
| Homo sapiens                | major facilitator superfamily domain-containing protein 10 | 4  | P:GO:0006915;<br>C:GO:0016021;<br>F:GO:0008493;<br>P:GO:0055085                                                                                                                                                                                                                                               | -                                                                                | -                                                                                                                                            |
| Caenorhabditis elegans      | elegans protein partially confirmed by transcript evidence | 0  |                                                                                                                                                                                                                                                                                                               |                                                                                  | -                                                                                                                                            |
| Caenorhabditis briggsae     | tpa: contactin-associated protein 5                        | 2  | C:GO:0016021;<br>P:GO:0048666                                                                                                                                                                                                                                                                                 | -                                                                                | IPR000152; IPR000742; IPR006210;<br>G3DSA:2.10.25.10 (GENE3D),<br>PTHR10127 (PANTHER),<br>PTHR10127:SF2 (PANTHER), SSF57196<br>(SUPERFAMILY) |
| Caenorhabditis elegans      | small family member (sma-1)                                | 18 | P:GO:0016199;<br>P:GO:0007026;<br>C:GO:0031594;<br>P:GO:0007417;<br>C:GO:0016323;<br>C:GO:0005794;<br>C:GO:0045170;<br>F:GO:0003779;<br>F:GO:0008017;<br>C:GO:0045169;<br>P:GO:0007308;<br>P:GO:0042062;<br>P:GO:0007274;<br>C:GO:0005811;<br>P:GO:0030727;<br>P:GO:0048790;<br>P:GO:0007294;<br>C:GO:0005938 | -                                                                                | IPR002017; IPR018159;<br>G3DSA:1.20.58.60 (GENE3D),<br>PTHR11915 (PANTHER),<br>PTHR11915:SF6 (PANTHER), SSF46966<br>(SUPERFAMILY)            |
| -                           | -                                                          | 0  |                                                                                                                                                                                                                                                                                                               |                                                                                  | -                                                                                                                                            |

|                         |                                                            |   |                                                                                                   |                                                                 |            |                                                                                                                        |
|-------------------------|------------------------------------------------------------|---|---------------------------------------------------------------------------------------------------|-----------------------------------------------------------------|------------|------------------------------------------------------------------------------------------------------------------------|
|                         | -                                                          | 0 |                                                                                                   |                                                                 |            | -                                                                                                                      |
|                         |                                                            |   |                                                                                                   |                                                                 |            | IPR003961; IPR008957; IPR013783; PR00014 (PRINTS), PTHR19900 (PANTHER), PTHR19900:SF7 (PANTHER)                        |
| Caenorhabditis briggsae | uncharacterized protein cZorf34-like                       | 0 |                                                                                                   | F:GO:0003677                                                    |            | IPR019410; G3DSA:3.40.50.150 (GENE3D), PTHR13539 (PANTHER), SSF53335 (SUPERFAMILY)                                     |
| Caenorhabditis elegans  | sig-I recognition particle                                 | 6 | P:GO:0040035;<br>P:GO:0009792;<br>P:GO:0002119;<br>P:GO:0040018;<br>P:GO:0040002;<br>P:GO:0006898 | -                                                               |            | IPR004328; G3DSA:1.25.40.280 (GENE3D), PTHR12860 (PANTHER)                                                             |
| Pongo abelii            | fau                                                        | 5 | F:GO:0003735;<br>F:GO:0003723;<br>F:GO:0005515;<br>C:GO:0022627;<br>P:GO:0006414                  | -                                                               |            | IPR000626; IPR006846; IPR019954; IPR019955; G3DSA:3.10.20.90 (GENE3D), PTHR12650:SF5 (PANTHER), SSF54236 (SUPERFAMILY) |
| Caenorhabditis briggsae | cytochrome b561                                            | 0 |                                                                                                   | F:GO:0009055;<br>C:GO:0016021                                   |            | IPR004877; IPR006593; PTHR10106 (PANTHER), SignalP (SIGNALP)                                                           |
| Caenorhabditis elegans  | polymerase (d- directed) alpha 2 (70kd subunit)            | 1 | P:GO:0007275                                                                                      | -                                                               |            | IPR007185; IPR013627; PTHR23061 (PANTHER), PTHR23061:SF2 (PANTHER)                                                     |
| Caenorhabditis elegans  | sodium hydrogen exchanger 9 ( nhe9)                        | 5 | F:GO:0015385;<br>P:GO:0055085;<br>P:GO:0006885;<br>C:GO:0016021;<br>P:GO:0006814                  | -                                                               |            | -                                                                                                                      |
| Caenorhabditis elegans  | elegans protein confirmed by transcript evidence           | 1 | C:GO:0016021                                                                                      | -                                                               |            | IPR005578                                                                                                              |
| Schistosoma mansoni     | hypothetical protein [Schistosoma mansoni]                 | 0 |                                                                                                   |                                                                 |            | -                                                                                                                      |
| Brugia malayi           | ferm domain ( -ezrin-radixin-moesin) family member (frm-1) | 0 |                                                                                                   | F:GO:0005488;<br>C:GO:0019898;<br>F:GO:0008092;<br>F:GO:0005515 |            | -                                                                                                                      |
| Brugia malayi           | ferm domain ( -ezrin-radixin-moesin) family member (frm-1) | 0 |                                                                                                   | F:GO:0005488;<br>C:GO:0019898;<br>F:GO:0008092;<br>F:GO:0005515 |            | -                                                                                                                      |
| Schistosoma mansoni     | ferm domain ( -ezrin-radixin-moesin) family member (frm-1) | 0 |                                                                                                   | F:GO:0005488;<br>C:GO:0019898;<br>F:GO:0008092;<br>F:GO:0005515 |            | -                                                                                                                      |
| Caenorhabditis elegans  | vps20-associated 1 like 1                                  | 1 | C:GO:0005622                                                                                      | -                                                               |            | IPR006745; IPR009003; IPR023175; G3DSA:1.20.5.420 (GENE3D), PTHR12741 (PANTHER)                                        |
| Caenorhabditis elegans  | vps20-associated 1 like 1                                  | 2 | C:GO:0005622;<br>F:GO:0005515                                                                     | -                                                               |            | IPR006745; IPR009003; IPR023175; G3DSA:1.20.5.420 (GENE3D), PTHR12741 (PANTHER)                                        |
|                         | -                                                          | 0 |                                                                                                   |                                                                 |            | IPR021917                                                                                                              |
| synthetic construct     | histone-lysine n-methyltransferase setmar                  | 5 | F:GO:0046872;<br>P:GO:0006313;<br>F:GO:0016787;<br>F:GO:0008168;<br>F:GO:0004803                  | -                                                               | EC:2.1.1.0 | IPR002622; PTHR23016 (PANTHER)                                                                                         |
| Caenorhabditis briggsae | elegans protein confirmed by transcript evidence           | 1 | C:GO:0016021                                                                                      | -                                                               |            | IPR013057; PTHR22950 (PANTHER)                                                                                         |
| Caenorhabditis briggsae | elegans protein confirmed by transcript evidence           | 1 | C:GO:0016021                                                                                      | -                                                               |            | IPR013057; PTHR22950 (PANTHER)                                                                                         |

|                         |                                                            |   |                                                                                                                                                      |                                                                 |             |                                                                                                                                                           |
|-------------------------|------------------------------------------------------------|---|------------------------------------------------------------------------------------------------------------------------------------------------------|-----------------------------------------------------------------|-------------|-----------------------------------------------------------------------------------------------------------------------------------------------------------|
| Caenorhabditis elegans  | elegans protein confirmed by transcript evidence           | 5 | P:GO:0009792;<br>F:GO:0046872;<br>F:GO:0016301;<br>F:GO:0005515;<br>P:GO:0044237                                                                     | -                                                               | -           | -                                                                                                                                                         |
| Caenorhabditis briggsae | sluggish isoform c                                         | 5 | F:GO:0004657;<br>P:GO:0006537;<br>P:GO:0042331;<br>C:GO:0005759;<br>P:GO:0006562                                                                     | -                                                               | EC:1.5.99.8 | IPR002872; IPR015659;<br>G3DSA:3.20.20.220 (GENE3D),<br>SSF51730 (SUPERFAMILY)                                                                            |
| Caenorhabditis elegans  | peptidylglycine alpha-amidating isoform cra_c              | 9 | P:GO:0009987;<br>P:GO:0048545;<br>F:GO:0016829;<br>F:GO:0046872;<br>F:GO:0004497;<br>C:GO:0016023;<br>P:GO:0048513;<br>P:GO:0008152;<br>C:GO:0016020 | -                                                               | -           | IPR000323; IPR000720; IPR008977;<br>IPR014783; IPR014784; PTHR10680<br>(PANTHER), PF03712 (PFAM), SignalP<br>(SIGNALP)                                    |
| Ancylostoma caninum     | metalloprotease 1 precursor                                | 1 | F:GO:0008233                                                                                                                                         | -                                                               | -           | IPR001506; IPR006026; IPR013032;<br>G3DSA:3.40.390.10 (GENE3D),<br>PTHR10127 (PANTHER),<br>PTHR10127:SF65 (PANTHER),<br>SSF55486 (SUPERFAMILY)            |
| Ancylostoma ceylanicum  | metalloprotease 1 precursor                                | 1 | F:GO:0008233                                                                                                                                         | -                                                               | -           | IPR001506; IPR003582; IPR006026;<br>IPR013032; G3DSA:3.40.390.10<br>(GENE3D), PTHR10127 (PANTHER),<br>PTHR10127:SF65 (PANTHER),<br>SSF55486 (SUPERFAMILY) |
| Ancylostoma caninum     | metalloprotease 1 precursor                                | 1 | F:GO:0008233                                                                                                                                         | -                                                               | -           | IPR001506; IPR006026; IPR013032;<br>G3DSA:3.40.390.10 (GENE3D),<br>PTHR10127 (PANTHER),<br>PTHR10127:SF65 (PANTHER),<br>SSF55486 (SUPERFAMILY)            |
| -                       | -                                                          | 0 | -                                                                                                                                                    | -                                                               | -           | -                                                                                                                                                         |
| Caenorhabditis elegans  | briggsae cbr-him-10 protein                                | 1 | F:GO:0005515                                                                                                                                         | -                                                               | -           | IPR005549; PD968187 (PRODOM),<br>PTHR21650 (PANTHER)                                                                                                      |
| Caenorhabditis briggsae | Hypothetical protein CBG05378 [Caenorhabditis briggsae]    | 0 | -                                                                                                                                                    | P:GO:0008152;<br>F:GO:0008080                                   | -           | -                                                                                                                                                         |
| Caenorhabditis elegans  | isoform c                                                  | 0 | -                                                                                                                                                    | -                                                               | -           | IPR001849; IPR011993; PTHR22902<br>(PANTHER), PTHR22902:SF8<br>(PANTHER), SSF50729 (SUPERFAMILY)                                                          |
| Loa loa                 | elegans protein partially confirmed by transcript evidence | 0 | -                                                                                                                                                    | -                                                               | -           | -                                                                                                                                                         |
| Loa loa                 | elegans protein partially confirmed by transcript evidence | 0 | -                                                                                                                                                    | F:GO:0005515                                                    | -           | -                                                                                                                                                         |
| -                       | -                                                          | 0 | -                                                                                                                                                    | -                                                               | -           | -                                                                                                                                                         |
| Caenorhabditis elegans  | d- replication complex gins protein sld5                   | 4 | C:GO:0005737;<br>F:GO:0005515;<br>P:GO:0009987;<br>C:GO:0005634                                                                                      | -                                                               | -           | IPR008591                                                                                                                                                 |
| Mus musculus            | yippee-like 5                                              | 0 | -                                                                                                                                                    | P:GO:0055114;<br>F:GO:0003674;<br>F:GO:0008113;<br>C:GO:0005575 | -           | -                                                                                                                                                         |
| Caenorhabditis elegans  | chromosome partition protein smc                           | 0 | -                                                                                                                                                    | C:GO:0005694;<br>F:GO:0005524;<br>P:GO:0051276;<br>F:GO:0005515 | -           | PD936484 (PRODOM)                                                                                                                                         |

|                           |                                                         |    |                                                                                                                                                                                                                                                                                              |                                                                                                                                                      |                                                         |                                                                                                                                                        |
|---------------------------|---------------------------------------------------------|----|----------------------------------------------------------------------------------------------------------------------------------------------------------------------------------------------------------------------------------------------------------------------------------------------|------------------------------------------------------------------------------------------------------------------------------------------------------|---------------------------------------------------------|--------------------------------------------------------------------------------------------------------------------------------------------------------|
| Haemaphysalis longicornis | protein disulfide isomerase                             | 2  | C:GO:0005783;<br>C:GO:0044446                                                                                                                                                                                                                                                                | -                                                                                                                                                    |                                                         | IPR012335; IPR012336; PTHR18929 (PANTHER)                                                                                                              |
| Caenorhabditis elegans    | ras-related protein 2                                   | 8  | P:GO:0032486;<br>F:GO:0019904;<br>F:GO:0003924;<br>C:GO:0055038;<br>F:GO:0005525;<br>P:GO:0061097;<br>C:GO:0005886;<br>P:GO:0030718                                                                                                                                                          | -                                                                                                                                                    | EC:3.6.5.1;<br>EC:3.6.5.2;<br>EC:3.6.5.3;<br>EC:3.6.5.4 | -                                                                                                                                                      |
| -                         | -                                                       | 0  |                                                                                                                                                                                                                                                                                              |                                                                                                                                                      |                                                         | -                                                                                                                                                      |
| -                         | -                                                       | 0  |                                                                                                                                                                                                                                                                                              |                                                                                                                                                      |                                                         | -                                                                                                                                                      |
| -                         | -                                                       | 0  |                                                                                                                                                                                                                                                                                              |                                                                                                                                                      |                                                         | -                                                                                                                                                      |
| Caenorhabditis elegans    | elegans protein confirmed by transcript evidence        | 0  |                                                                                                                                                                                                                                                                                              |                                                                                                                                                      |                                                         | IPR001466; IPR012338;<br>G3DSA:3.40.710.10 (GENE3D),<br>PTHR10566 (PANTHER),<br>PTHR10566:SF6 (PANTHER)                                                |
| Caenorhabditis elegans    | thymidine ki-se                                         | 6  | F:GO:0004797;<br>P:GO:0006260;<br>F:GO:0003677;<br>F:GO:0005524;<br>F:GO:0016853;<br>P:GO:0009792                                                                                                                                                                                            | -                                                                                                                                                    | EC:2.7.1.21                                             | IPR001267; IPR020633; SSF52540 (SUPERFAMILY), SSF57716 (SUPERFAMILY)                                                                                   |
| Ancylostoma ceylanicum    | tissue factor pathway inhibitor isoform b precursor     | 2  | F:GO:0004867;<br>F:GO:0008233                                                                                                                                                                                                                                                                | -                                                                                                                                                    |                                                         | SignalP (SIGNALP)                                                                                                                                      |
| -                         | -                                                       | 0  |                                                                                                                                                                                                                                                                                              |                                                                                                                                                      |                                                         | -                                                                                                                                                      |
| Caenorhabditis briggsae   | acetyl- carboxylase partial                             | 2  | F:GO:0005488;<br>F:GO:0003824                                                                                                                                                                                                                                                                | -                                                                                                                                                    |                                                         | IPR013537; IPR022398                                                                                                                                   |
| Caenorhabditis briggsae   | briggsae cbr-ttr-5 protein                              | 0  |                                                                                                                                                                                                                                                                                              |                                                                                                                                                      |                                                         | IPR001534; SignalP (SIGNALP)                                                                                                                           |
| Ancylostoma caninum       | c-type lectin family member (clec-266)                  | 0  |                                                                                                                                                                                                                                                                                              | C:GO:0016021;<br>F:GO:0005529;<br>P:GO:0006897;<br>F:GO:0003674;<br>C:GO:0005575;<br>P:GO:0045087;<br>C:GO:0005886;<br>P:GO:0008150;<br>F:GO:0005488 |                                                         | IPR001304; IPR016186; IPR016187;<br>PTHR22802 (PANTHER),<br>PTHR22802:SF15 (PANTHER), SignalP (SIGNALP)                                                |
| Caenorhabditis elegans    | alcohol dehydroge-se class-3                            | 17 | P:GO:0003016;<br>F:GO:0008270;<br>P:GO:0006069;<br>F:GO:0018467;<br>P:GO:0001523;<br>C:GO:0005739;<br>F:GO:0051903;<br>P:GO:0055114;<br>P:GO:0051409;<br>P:GO:0051775;<br>P:GO:0046294;<br>P:GO:0045777;<br>F:GO:0004024;<br>F:GO:0042803;<br>P:GO:0032496;<br>P:GO:0018119;<br>F:GO:0005504 | -                                                                                                                                                    | EC:1.2.1.46;<br>EC:1.1.1.284                            | IPR002085; IPR002328; IPR011032;<br>IPR013149; IPR013154; IPR016040;<br>G3DSA:3.90.180.10 (GENE3D),<br>PTHR11695:SF4 (PANTHER), SSF51735 (SUPERFAMILY) |
| Caenorhabditis briggsae   | Hypothetical protein CBG16801 [Caenorhabditis briggsae] | 0  |                                                                                                                                                                                                                                                                                              |                                                                                                                                                      |                                                         | -                                                                                                                                                      |
| Caenorhabditis briggsae   | briggsae cbr-ugt-49 protein                             | 2  | F:GO:0016758;<br>P:GO:0008152                                                                                                                                                                                                                                                                | -                                                                                                                                                    | EC:2.4.1.0                                              | -                                                                                                                                                      |

|                         |                                                        |   |                                                                                                                    |                                                                                                                                                                                                                                                                                                                                                                                   |                                                                               |  |
|-------------------------|--------------------------------------------------------|---|--------------------------------------------------------------------------------------------------------------------|-----------------------------------------------------------------------------------------------------------------------------------------------------------------------------------------------------------------------------------------------------------------------------------------------------------------------------------------------------------------------------------|-------------------------------------------------------------------------------|--|
|                         | -                                                      | 0 |                                                                                                                    |                                                                                                                                                                                                                                                                                                                                                                                   | SignalP (SIGNALP)                                                             |  |
| Caenorhabditis briggsae | briggsae cbr-pme-5 protein                             | 0 |                                                                                                                    | F:GO:0003676;<br>F:GO:0003950;<br>P:GO:0006471                                                                                                                                                                                                                                                                                                                                    | IPR008893; IPR012317;<br>G3DSA:3.90.228.10 (GENE3D),<br>PTHR15447 (PANTHER)   |  |
| Caenorhabditis briggsae | ubiquitin carboxyl-termi-l hydrolase isozyme I5        | 6 | F:GO:0004175;<br>P:GO:0016579;<br>F:GO:0005515;<br>C:GO:0005838;<br>F:GO:0004221;<br>P:GO:0006508                  | -                                                                                                                                                                                                                                                                                                                                                                                 | EC:3.1.2.15<br>IPR001578; PTHR10589:SF16<br>(PANTHER), SSF54001 (SUPERFAMILY) |  |
| Caenorhabditis briggsae | ubiquitin c-termi-l hydrolase                          | 7 | C:GO:0005737;<br>F:GO:0004175;<br>P:GO:0016579;<br>F:GO:0005515;<br>C:GO:0005838;<br>F:GO:0004221;<br>P:GO:0006508 | -                                                                                                                                                                                                                                                                                                                                                                                 | EC:3.1.2.15<br>IPR001578; PTHR10589:SF16<br>(PANTHER), SSF54001 (SUPERFAMILY) |  |
| Caenorhabditis briggsae | ubiquitin carboxyl-termi-l hydrolase isozyme I5        | 6 | F:GO:0004175;<br>P:GO:0016579;<br>F:GO:0005515;<br>C:GO:0005838;<br>F:GO:0004221;<br>P:GO:0006508                  | -                                                                                                                                                                                                                                                                                                                                                                                 | EC:3.1.2.15<br>IPR001578; PTHR10589:SF16<br>(PANTHER), SSF54001 (SUPERFAMILY) |  |
| Caenorhabditis briggsae | ubiquitin carboxyl-termi-l hydrolase isozyme I5        | 7 | C:GO:0005737;<br>F:GO:0004175;<br>P:GO:0016579;<br>F:GO:0005515;<br>C:GO:0005838;<br>F:GO:0004221;<br>P:GO:0006508 | -                                                                                                                                                                                                                                                                                                                                                                                 | EC:3.1.2.15<br>IPR001578; PTHR10589:SF16<br>(PANTHER), SSF54001 (SUPERFAMILY) |  |
|                         | -                                                      | 0 |                                                                                                                    |                                                                                                                                                                                                                                                                                                                                                                                   | IPR004987; PTHR21516 (PANTHER)                                                |  |
| Mus musculus            | eukaryotic translation initiation factor isoform cra_i | 0 |                                                                                                                    | F:GO:0003723;<br>P:GO:0051149;<br>C:GO:0005634;<br>F:GO:0003674;<br>P:GO:0045905;<br>P:GO:0006915;<br>P:GO:0045901;<br>C:GO:0016020;<br>C:GO:0005783;<br>P:GO:0015031;<br>C:GO:0005643;<br>P:GO:0006412;<br>P:GO:0055085;<br>C:GO:0043025;<br>C:GO:0005737;<br>F:GO:0003746;<br>F:GO:0043022;<br>C:GO:0030425;<br>P:GO:0051028;<br>P:GO:0006452;<br>P:GO:0008612;<br>P:GO:0043066 | -                                                                             |  |
| Caenorhabditis elegans  | serine threonine-protein ki-se smg1                    | 2 | F:GO:0005488;<br>F:GO:0016772                                                                                      | -                                                                                                                                                                                                                                                                                                                                                                                 | IPR011989; IPR014009; PTHR11139<br>(PANTHER), PTHR11139:SF9<br>(PANTHER)      |  |
|                         | -                                                      | 0 |                                                                                                                    |                                                                                                                                                                                                                                                                                                                                                                                   | -                                                                             |  |

|                         |                                                            |    |                                                                                                                                                                                        |                                                                                  |             |                                                                                                                                                           |
|-------------------------|------------------------------------------------------------|----|----------------------------------------------------------------------------------------------------------------------------------------------------------------------------------------|----------------------------------------------------------------------------------|-------------|-----------------------------------------------------------------------------------------------------------------------------------------------------------|
| Haemonchus contortus    | zinc metallopeptidase                                      | 1  | F:GO:0003824                                                                                                                                                                           | -                                                                                |             | IPR000718; IPR008753;<br>G3DSA:1.10.1380.10 (GENE3D),<br>PTHR11733:SF15 (PANTHER), SignalP<br>(SIGNALP), SSF55486 (SUPERFAMILY)                           |
|                         | -                                                          | 0  |                                                                                                                                                                                        |                                                                                  |             | -                                                                                                                                                         |
|                         | -                                                          | 0  |                                                                                                                                                                                        |                                                                                  |             | -                                                                                                                                                         |
| Caenorhabditis briggsae | mitochondrial ribosomal l23                                | 11 | P:GO:0006412;<br>P:GO:0040010;<br>C:GO:0005840;<br>C:GO:0005739;<br>F:GO:0003735;<br>P:GO:0040035;<br>P:GO:0002119;<br>F:GO:0000166;<br>P:GO:0006898;<br>P:GO:0002009;<br>P:GO:0009792 | -                                                                                | EC:3.6.5.3  | IPR012677; IPR012678; IPR013025                                                                                                                           |
| Caenorhabditis elegans  | elegans protein confirmed by transcript evidence           | 0  |                                                                                                                                                                                        | F:GO:0046872;<br>F:GO:0008236;<br>C:GO:0016021;<br>F:GO:0008270;<br>F:GO:0005515 |             | -                                                                                                                                                         |
| Loa loa                 | short-chain dehydroge-se                                   | 2  | P:GO:0008152;<br>F:GO:0016491                                                                                                                                                          | -                                                                                |             | IPR002198; IPR002347; IPR016040;<br>PTHR19410:SF36 (PANTHER),<br>SSF51735 (SUPERFAMILY)                                                                   |
|                         | -                                                          | 0  |                                                                                                                                                                                        |                                                                                  |             | SignalP (SIGNALP)                                                                                                                                         |
| Ancylostoma ceylanicum  | metalloprotease 1 precursor                                | 2  | F:GO:0046872;<br>F:GO:0008237                                                                                                                                                          | -                                                                                |             | IPR000859; IPR001506; IPR013032;<br>G3DSA:3.40.390.10 (GENE3D),<br>PTHR10127 (PANTHER),<br>PTHR10127:SF65 (PANTHER),<br>SSF55486 (SUPERFAMILY)            |
| Ancylostoma ceylanicum  | metalloprotease 1 precursor                                | 2  | F:GO:0046872;<br>F:GO:0008237                                                                                                                                                          | -                                                                                |             | IPR000859; IPR001506; IPR003582;<br>IPR013032; G3DSA:3.40.390.10<br>(GENE3D), PTHR10127 (PANTHER),<br>PTHR10127:SF65 (PANTHER),<br>SSF55486 (SUPERFAMILY) |
| Ancylostoma ceylanicum  | metalloprotease 1 precursor                                | 2  | F:GO:0046872;<br>F:GO:0008237                                                                                                                                                          | -                                                                                |             | IPR000859; IPR001506; IPR003582;<br>IPR013032; G3DSA:3.40.390.10<br>(GENE3D), PTHR10127 (PANTHER),<br>PTHR10127:SF65 (PANTHER),<br>SSF55486 (SUPERFAMILY) |
| Loa loa                 | protein ki-se domain containing protein                    | 4  | P:GO:0006468;<br>F:GO:0005524;<br>P:GO:0040011;<br>F:GO:0004674                                                                                                                        | -                                                                                | EC:2.7.11.0 | IPR011009; G3DSA:1.10.510.10<br>(GENE3D), PTHR11909 (PANTHER),<br>PTHR11909:SF19 (PANTHER)                                                                |
| Caenorhabditis briggsae | protein ki-se domain containing protein                    | 4  | P:GO:0006468;<br>F:GO:0005524;<br>P:GO:0040011;<br>F:GO:0004674                                                                                                                        | -                                                                                | EC:2.7.11.0 | IPR000719; IPR008271; IPR011009;<br>IPR017442; G3DSA:1.10.510.10<br>(GENE3D), PTHR11909 (PANTHER),<br>PTHR11909:SF19 (PANTHER), SignalP<br>(SIGNALP)      |
|                         | -                                                          | 0  |                                                                                                                                                                                        |                                                                                  |             | -                                                                                                                                                         |
|                         | -                                                          | 0  |                                                                                                                                                                                        |                                                                                  |             | -                                                                                                                                                         |
|                         | -                                                          | 0  |                                                                                                                                                                                        |                                                                                  |             | -                                                                                                                                                         |
| Caenorhabditis elegans  | elegans protein partially confirmed by transcript evidence | 3  | P:GO:0044238;<br>P:GO:0019915;<br>F:GO:0016757                                                                                                                                         | -                                                                                |             | IPR002213; G3DSA:3.40.50.2000<br>(GENE3D), PTHR11926:SF3<br>(PANTHER), SSF53756 (SUPERFAMILY)                                                             |



|                         |                                                                         |    |                                                                                                                                                                                                                          |   |             |                                                                                                                                                                                                           |
|-------------------------|-------------------------------------------------------------------------|----|--------------------------------------------------------------------------------------------------------------------------------------------------------------------------------------------------------------------------|---|-------------|-----------------------------------------------------------------------------------------------------------------------------------------------------------------------------------------------------------|
| Brugia malayi           | mitochondrial ribosomal protein l30                                     | 4  | P:GO:0002119;<br>P:GO:0009792;<br>P:GO:0000003;<br>P:GO:0040007                                                                                                                                                          | - |             | PTHR15892 (PANTHER)                                                                                                                                                                                       |
| -                       | -                                                                       | 0  |                                                                                                                                                                                                                          |   |             | -                                                                                                                                                                                                         |
| Loa loa                 | hypothetical protein LOAG_00426 [Loa loa]                               | 0  |                                                                                                                                                                                                                          |   |             | -                                                                                                                                                                                                         |
| Caenorhabditis briggsae | briggsae cbr-cst-1 protein                                              | 5  | F:GO:0004674;<br>F:GO:0005524;<br>F:GO:0005515;<br>P:GO:0035329;<br>P:GO:0006468                                                                                                                                         | - | EC:2.7.11.0 | IPR000719; IPR002290; IPR011009;<br>IPR011524; IPR017441; IPR017442;<br>G3DSA:1.10.510.10 (GENE3D),<br>G3DSA:3.30.200.20 (GENE3D),<br>PTHR22986 (PANTHER),<br>PTHR22986:SF89 (PANTHER), PF11629<br>(PFAM) |
| Caenorhabditis briggsae | serine threonine ki-se 4                                                | 13 | P:GO:0018105;<br>P:GO:0043065;<br>P:GO:0007243;<br>F:GO:0004674;<br>P:GO:0000902;<br>F:GO:0005524;<br>F:GO:0000287;<br>P:GO:0035329;<br>F:GO:0008134;<br>F:GO:0042803;<br>P:GO:0046777;<br>C:GO:0005737;<br>C:GO:0005634 | - | EC:2.7.11.0 | IPR000719; IPR002290; IPR011009;<br>IPR017441; IPR017442;<br>G3DSA:1.10.510.10 (GENE3D),<br>G3DSA:3.30.200.20 (GENE3D),<br>PTHR22986 (PANTHER),<br>PTHR22986:SF89 (PANTHER)                               |
| Caenorhabditis elegans  | ran binding protein 17                                                  | 5  | C:GO:0005737;<br>C:GO:0005643;<br>F:GO:0005049;<br>F:GO:0008536;<br>P:GO:0006611                                                                                                                                         | - |             | PTHR12596 (PANTHER),<br>PTHR12596:SF2 (PANTHER)                                                                                                                                                           |
| Caenorhabditis elegans  | growth hormone inducible transmembrane protein                          | 1  | C:GO:0016020                                                                                                                                                                                                             | - |             | -                                                                                                                                                                                                         |
| Loa loa                 | vcell division cycle paf1 r- polymerase ii complex homolog (cerevisiae) | 0  |                                                                                                                                                                                                                          |   |             | IPR007852; PTHR12466:SF7<br>(PANTHER)                                                                                                                                                                     |
| Loa loa                 | vcell division cycle paf1 r- polymerase ii complex homolog (cerevisiae) | 0  |                                                                                                                                                                                                                          |   |             | IPR007852; PTHR12466:SF7<br>(PANTHER)                                                                                                                                                                     |
| Loa loa                 | vcell division cycle paf1 r- polymerase ii complex homolog (cerevisiae) | 0  |                                                                                                                                                                                                                          |   |             | IPR007852; PTHR12466:SF7<br>(PANTHER)                                                                                                                                                                     |
| Caenorhabditis elegans  | briggsae cbr-vab-2 protein                                              | 2  | P:GO:0048856;<br>C:GO:0016020                                                                                                                                                                                            | - |             | IPR001799; IPR008972;<br>PTHR11304:SF23 (PANTHER)                                                                                                                                                         |
| Caenorhabditis elegans  | ephrin-b2                                                               | 2  | P:GO:0048856;<br>C:GO:0016020                                                                                                                                                                                            | - |             | IPR001799; IPR008972;<br>PTHR11304:SF23 (PANTHER)                                                                                                                                                         |
| Caenorhabditis briggsae | amop domain containing protein                                          | 1  | P:GO:0007160                                                                                                                                                                                                             | - |             | -                                                                                                                                                                                                         |
| Caenorhabditis briggsae | elegans protein confirmed by transcript evidence                        | 9  | P:GO:0002009;<br>P:GO:0019915;<br>C:GO:0016021;<br>P:GO:0008340;<br>P:GO:0040007;<br>P:GO:0010171;<br>F:GO:0042302;<br>P:GO:0002119;<br>P:GO:0040011                                                                     | - |             | -                                                                                                                                                                                                         |
| Loa loa                 | major facilitator superfamily protein                                   | 1  | C:GO:0016020                                                                                                                                                                                                             | - |             | -                                                                                                                                                                                                         |
| Caenorhabditis briggsae | Hypothetical protein CBG14951 [Caenorhabditis briggsae]                 | 3  | P:GO:0040018;<br>P:GO:0040035;<br>P:GO:0002119                                                                                                                                                                           | - |             | -                                                                                                                                                                                                         |

|                             |                                                  |    |                                                                                                                                                                                                                                                                                                                                                                                                                                                                        |                                                                 |             |                                                  |
|-----------------------------|--------------------------------------------------|----|------------------------------------------------------------------------------------------------------------------------------------------------------------------------------------------------------------------------------------------------------------------------------------------------------------------------------------------------------------------------------------------------------------------------------------------------------------------------|-----------------------------------------------------------------|-------------|--------------------------------------------------|
| Brugia malayi               | protein ki-se domain containing protein          |    | P:GO:0006468;<br>P:GO:0040022;<br>5 F:GO:0005524;<br>P:GO:0051729;<br>F:GO:0004674                                                                                                                                                                                                                                                                                                                                                                                     | -                                                               | EC:2.7.11.0 | -                                                |
| Caenorhabditis elegans      | yqc2_caee1: full=uncharacterized protein         | 0  |                                                                                                                                                                                                                                                                                                                                                                                                                                                                        |                                                                 |             | -                                                |
| Caenorhabditis briggsae     | briggsae cbr-clc-1 protein                       | 2  | P:GO:0018996;<br>C:GO:0005911                                                                                                                                                                                                                                                                                                                                                                                                                                          | -                                                               |             | IPR004031; SignalP (SIGNALP)                     |
|                             | -                                                | 0  |                                                                                                                                                                                                                                                                                                                                                                                                                                                                        |                                                                 |             | -                                                |
| Caenorhabditis briggsae     | glutamine synthetase 2 (glutamate-amonia ligase) | 5  | P:GO:0009792;<br>F:GO:0004356;<br>F:GO:0005515;<br>F:GO:0005524;<br>P:GO:0006542                                                                                                                                                                                                                                                                                                                                                                                       | -                                                               | EC:6.3.1.2  | -                                                |
| Caenorhabditis briggsae     | glutamine synthetase 2 (glutamate-amonia ligase) | 5  | P:GO:0009792;<br>F:GO:0004356;<br>F:GO:0005515;<br>F:GO:0005524;<br>P:GO:0006542                                                                                                                                                                                                                                                                                                                                                                                       | -                                                               | EC:6.3.1.2  | -                                                |
| Caenorhabditis briggsae     | elegans protein confirmed by transcript evidence | 0  |                                                                                                                                                                                                                                                                                                                                                                                                                                                                        |                                                                 |             | SignalP (SIGNALP)                                |
| Caenorhabditis briggsae     | elegans protein confirmed by transcript evidence | 0  |                                                                                                                                                                                                                                                                                                                                                                                                                                                                        |                                                                 |             | SignalP (SIGNALP)                                |
|                             | -                                                | 0  |                                                                                                                                                                                                                                                                                                                                                                                                                                                                        |                                                                 |             | -                                                |
| Ciona intestinalis          | coiled-coil domain containing 53                 | 0  |                                                                                                                                                                                                                                                                                                                                                                                                                                                                        | F:GO:0003674;<br>P:GO:0008150;<br>F:GO:0005515;<br>C:GO:0071203 |             | -                                                |
|                             | -                                                | 0  |                                                                                                                                                                                                                                                                                                                                                                                                                                                                        |                                                                 |             | -                                                |
|                             | -                                                | 0  |                                                                                                                                                                                                                                                                                                                                                                                                                                                                        |                                                                 |             | -                                                |
| Angiostrongylus cantonensis | myosin vi                                        | 27 | C:GO:0012506;<br>P:GO:0051046;<br>C:GO:0016461;<br>C:GO:0031941;<br>P:GO:0030048;<br>C:GO:0031965;<br>F:GO:0060001;<br>F:GO:0043531;<br>C:GO:0005794;<br>P:GO:0006886;<br>C:GO:0005829;<br>C:GO:0001726;<br>P:GO:0048839;<br>C:GO:0044425;<br>P:GO:0006897;<br>P:GO:0007268;<br>F:GO:0051015;<br>P:GO:0030330;<br>C:GO:0016591;<br>P:GO:0045944;<br>C:GO:0048471;<br>C:GO:0005886;<br>F:GO:0005516;<br>F:GO:0005524;<br>C:GO:0005938;<br>P:GO:0030182;<br>C:GO:0045334 | -                                                               |             | PTHR13140 (PANTHER),<br>PTHR13140:SF26 (PANTHER) |
|                             | -                                                | 0  |                                                                                                                                                                                                                                                                                                                                                                                                                                                                        |                                                                 |             | -                                                |
|                             | -                                                | 0  |                                                                                                                                                                                                                                                                                                                                                                                                                                                                        |                                                                 |             | -                                                |

|                         |                                      |    |                                                                                                                                                                                                                          |   |                                                                     |
|-------------------------|--------------------------------------|----|--------------------------------------------------------------------------------------------------------------------------------------------------------------------------------------------------------------------------|---|---------------------------------------------------------------------|
| Caenorhabditis elegans  | nedd8-conjugating enzyme ube2f       | 13 | P:GO:0040010;<br>P:GO:0008340;<br>P:GO:0000910;<br>P:GO:0051246;<br>P:GO:0040035;<br>P:GO:0045116;<br>F:GO:0019788;<br>P:GO:0040025;<br>F:GO:0000166;<br>P:GO:0040011;<br>P:GO:0002009;<br>P:GO:0009792;<br>P:GO:0016246 | - | IPR000608; IPR016135; PTHR11621 (PANTHER), PTHR11621:SF18 (PANTHER) |
| Caenorhabditis elegans  | nedd8-conjugating enzyme ube2f       | 13 | P:GO:0040010;<br>P:GO:0008340;<br>P:GO:0000910;<br>P:GO:0051246;<br>P:GO:0040035;<br>P:GO:0045116;<br>F:GO:0019788;<br>P:GO:0040025;<br>F:GO:0000166;<br>P:GO:0040011;<br>P:GO:0002009;<br>P:GO:0009792;<br>P:GO:0016246 | - | IPR000608; IPR016135; PTHR11621 (PANTHER), PTHR11621:SF18 (PANTHER) |
| Caenorhabditis elegans  | nedd8-conjugating enzyme ube2f       | 13 | P:GO:0040010;<br>P:GO:0008340;<br>P:GO:0000910;<br>P:GO:0051246;<br>P:GO:0040035;<br>P:GO:0045116;<br>F:GO:0019788;<br>P:GO:0040025;<br>F:GO:0000166;<br>P:GO:0040011;<br>P:GO:0002009;<br>P:GO:0009792;<br>P:GO:0016246 | - | IPR000608; IPR016135; PTHR11621 (PANTHER), PTHR11621:SF18 (PANTHER) |
| Caenorhabditis elegans  | transmembrane 9 superfamily member 3 | 2  | C:GO:0016021;<br>F:GO:0005488                                                                                                                                                                                            | - | -                                                                   |
| Drosophila melanogaster | isoform a                            | 0  | F:GO:0004674;<br>F:GO:0004672;<br>P:GO:0006468;<br>F:GO:0000166;<br>P:GO:0006412;<br>F:GO:0005524;<br>F:GO:0016301;<br>C:GO:0005730;<br>F:GO:0003743;<br>F:GO:0004812;<br>P:GO:0008152                                   | - | -                                                                   |
| -                       | -                                    | 0  | -                                                                                                                                                                                                                        | - | -                                                                   |
| Caenorhabditis briggsae | briggsae cbr-scd-1 protein           | 1  | P:GO:0040010                                                                                                                                                                                                             | - | -                                                                   |
| Caenorhabditis elegans  | beta                                 | 3  | C:GO:0005886;<br>F:GO:0005515;<br>C:GO:0005829                                                                                                                                                                           | - | IPR001715; PTHR12114 (PANTHER), PTHR12114:SF4 (PANTHER)             |
| -                       | -                                    | 0  | -                                                                                                                                                                                                                        | - | SignalP (SIGNALP)                                                   |

|                         |                                                         |    |                                                                                                                                                                                        |                                                                                                                                     |                            |                                                                                                                                     |
|-------------------------|---------------------------------------------------------|----|----------------------------------------------------------------------------------------------------------------------------------------------------------------------------------------|-------------------------------------------------------------------------------------------------------------------------------------|----------------------------|-------------------------------------------------------------------------------------------------------------------------------------|
| Caenorhabditis elegans  | briggsae cbr-cpg-3 protein                              | 0  |                                                                                                                                                                                        | F:GO:0016740;<br>F:GO:0004714;<br>F:GO:0016787;<br>F:GO:0003944                                                                     |                            | SignalP (SIGNALP)                                                                                                                   |
| Caenorhabditis briggsae | loc443608 protein                                       | 3  | C:GO:0005737;<br>C:GO:0043231;<br>F:GO:0005102                                                                                                                                         | -                                                                                                                                   |                            | -                                                                                                                                   |
| Caenorhabditis elegans  | elegans protein confirmed by transcript evidence        | 6  | P:GO:0050789;<br>P:GO:0040007;<br>F:GO:0004872;<br>P:GO:0032501;<br>F:GO:0005515;<br>P:GO:0006350                                                                                      | -                                                                                                                                   |                            | IPR000536; IPR001723; IPR008946;<br>PTHR11865 (PANTHER),<br>PTHR11865:SF238 (PANTHER)                                               |
| Caenorhabditis elegans  | ylpd_caeel ame: full=uncharacterized protein            | 0  |                                                                                                                                                                                        | F:GO:0003723;<br>F:GO:0004525;<br>P:GO:0006396                                                                                      |                            | -                                                                                                                                   |
| Caenorhabditis briggsae | methylcrotonoyl-coenzyme a carboxylase 2                | 10 | P:GO:0015936;<br>P:GO:0040010;<br>F:GO:0004525;<br>F:GO:0003723;<br>P:GO:0006396;<br>C:GO:0005739;<br>P:GO:0002119;<br>F:GO:0000166;<br>F:GO:0004485;<br>P:GO:0009792                  | -                                                                                                                                   | EC:3.1.26.3;<br>EC:6.4.1.4 | IPR000022; IPR011762;<br>G3DSA:3.90.226.10 (GENE3D),<br>PTHR22855 (PANTHER),<br>PTHR22855:SF13 (PANTHER),<br>SSF52096 (SUPERFAMILY) |
| Caenorhabditis elegans  | 39s ribosomal protein                                   | 0  |                                                                                                                                                                                        | F:GO:0003735;<br>F:GO:0003723;<br>F:GO:0004525;<br>F:GO:0016787;<br>P:GO:0006396;<br>C:GO:0005840;<br>F:GO:0003725;<br>C:GO:0005622 |                            | IPR000999                                                                                                                           |
| Caenorhabditis briggsae | tubulin tyrosine ligase-like member 4                   | 1  | F:GO:0016874                                                                                                                                                                           | -                                                                                                                                   |                            | -                                                                                                                                   |
|                         | -                                                       | 0  |                                                                                                                                                                                        |                                                                                                                                     |                            | SignalP (SIGNALP)                                                                                                                   |
| Brugia malayi           | splicing factor                                         | 11 | P:GO:0040010;<br>F:GO:0003729;<br>P:GO:0008340;<br>C:GO:0071011;<br>P:GO:0000381;<br>P:GO:0040035;<br>P:GO:0002119;<br>P:GO:0040011;<br>C:GO:0071013;<br>P:GO:0002009;<br>P:GO:0009792 | -                                                                                                                                   |                            | IPR000504; IPR006509; IPR012677;<br>PTHR10432 (PANTHER), SSF54928<br>(SUPERFAMILY)                                                  |
|                         | -                                                       | 0  |                                                                                                                                                                                        |                                                                                                                                     |                            | -                                                                                                                                   |
| Caenorhabditis briggsae | Hypothetical protein CBG03790 [Caenorhabditis briggsae] | 0  |                                                                                                                                                                                        | F:GO:0005515                                                                                                                        |                            | -                                                                                                                                   |
| Caenorhabditis briggsae | Hypothetical protein CBG03790 [Caenorhabditis briggsae] | 0  |                                                                                                                                                                                        | F:GO:0005515                                                                                                                        |                            | -                                                                                                                                   |

|                         |                                                                                                 |    |                                                                                                                                                                                                                                           |   |             |                                                                                                                  |
|-------------------------|-------------------------------------------------------------------------------------------------|----|-------------------------------------------------------------------------------------------------------------------------------------------------------------------------------------------------------------------------------------------|---|-------------|------------------------------------------------------------------------------------------------------------------|
| Brugia malayi           | splicing factor                                                                                 | 11 | P:GO:0040010;<br>F:GO:0003729;<br>P:GO:0008340;<br>C:GO:0071011;<br>P:GO:0000381;<br>P:GO:0040035;<br>P:GO:0002119;<br>P:GO:0040011;<br>C:GO:0071013;<br>P:GO:0002009;<br>P:GO:0009792                                                    | - |             | IPR000504; IPR006509; IPR012677;<br>PTHR10432 (PANTHER), SSF54928<br>(SUPERFAMILY)                               |
| Caenorhabditis briggsae | briggsae cbr-nsf-1 protein                                                                      | 14 | F:GO:0017111;<br>P:GO:0007274;<br>P:GO:0000003;<br>P:GO:0006891;<br>F:GO:0005524;<br>P:GO:0002119;<br>F:GO:0005515;<br>P:GO:0016082;<br>P:GO:0006888;<br>P:GO:0040011;<br>P:GO:0006898;<br>P:GO:0008582;<br>P:GO:0009792;<br>C:GO:0005737 | - | EC:3.6.1.15 | IPR003959; G3DSA:3.40.50.300<br>(GENE3D), PTHR23078 (PANTHER),<br>SSF52540 (SUPERFAMILY)                         |
| Caenorhabditis briggsae | pik3r4 protein                                                                                  | 3  | F:GO:0004672;<br>P:GO:0019915;<br>F:GO:0000166                                                                                                                                                                                            | - |             | IPR000719; IPR011009; IPR011989;<br>IPR016024; IPR017442; IPR020636;<br>IPR021133; G3DSA:1.10.510.10<br>(GENE3D) |
| Caenorhabditis elegans  | isoform cra_a                                                                                   | 9  | P:GO:0016044;<br>C:GO:0005737;<br>P:GO:0048513;<br>P:GO:0031401;<br>F:GO:0008641;<br>P:GO:0006914;<br>P:GO:0007399;<br>F:GO:0042803;<br>P:GO:0006497                                                                                      | - |             | IPR000594; IPR006285; IPR009036;<br>IPR016040; PTHR10953 (PANTHER),<br>PTHR10953:SF3 (PANTHER)                   |
| Caenorhabditis elegans  | prion-like-(q n-rich)-domain-bearing protein protein partially confirmed by transcript evidence | 1  | F:GO:0005515                                                                                                                                                                                                                              | - |             | -                                                                                                                |
|                         | -                                                                                               | 0  |                                                                                                                                                                                                                                           |   |             | -                                                                                                                |
|                         | -                                                                                               | 0  |                                                                                                                                                                                                                                           |   |             | IPR002544                                                                                                        |
|                         | -                                                                                               | 0  |                                                                                                                                                                                                                                           |   |             | -                                                                                                                |
|                         | -                                                                                               | 0  |                                                                                                                                                                                                                                           |   |             | SignalP (SIGNALP)                                                                                                |
| Caenorhabditis elegans  | briggsae cbr-pink-1 protein                                                                     | 1  | F:GO:0005488                                                                                                                                                                                                                              | - |             | IPR011422                                                                                                        |
|                         | -                                                                                               | 0  |                                                                                                                                                                                                                                           |   |             | -                                                                                                                |
|                         | -                                                                                               | 0  |                                                                                                                                                                                                                                           |   |             | -                                                                                                                |
| Brugia malayi           | alter-tive splicing defective family member (asd-2)                                             | 1  | F:GO:0005515                                                                                                                                                                                                                              | - |             | -                                                                                                                |

|                         |                                                                                |    |                                                                                                                                                                                                                                                                                              |                                                |                                                         |                                                                                                                              |
|-------------------------|--------------------------------------------------------------------------------|----|----------------------------------------------------------------------------------------------------------------------------------------------------------------------------------------------------------------------------------------------------------------------------------------------|------------------------------------------------|---------------------------------------------------------|------------------------------------------------------------------------------------------------------------------------------|
| Brugia malayi           | structural maintenance of chromosomes protein 3                                | 17 | C:GO:0000785;<br>F:GO:0045502;<br>C:GO:0005604;<br>F:GO:0000166;<br>P:GO:0007052;<br>F:GO:0005201;<br>C:GO:0005737;<br>F:GO:0046982;<br>P:GO:0009294;<br>F:GO:0042802;<br>P:GO:0007126;<br>P:GO:0007165;<br>C:GO:0000800;<br>C:GO:0016363;<br>P:GO:0007062;<br>P:GO:0032876;<br>C:GO:0000922 | -                                              |                                                         | SignalIP (SIGNALP)                                                                                                           |
| -                       | -                                                                              | 0  |                                                                                                                                                                                                                                                                                              |                                                |                                                         | -                                                                                                                            |
| -                       | -                                                                              | 0  |                                                                                                                                                                                                                                                                                              |                                                |                                                         | -                                                                                                                            |
| Caenorhabditis elegans  | tr--splicing endonuclease subunit                                              | 1  | F:GO:0016787                                                                                                                                                                                                                                                                                 | -                                              |                                                         | IPR006677; IPR006678; IPR011856;<br>PTHR21227 (PANTHER)                                                                      |
| -                       | -                                                                              | 0  |                                                                                                                                                                                                                                                                                              |                                                |                                                         | -                                                                                                                            |
| Loa loa                 | acidic repeat-containing protein                                               | 1  | P:GO:0045132                                                                                                                                                                                                                                                                                 | -                                              |                                                         | IPR006640; PTHR23099 (PANTHER)                                                                                               |
| Caenorhabditis elegans  | temporarily assigned gene -me protein isoform confirmed by transcript evidence | 0  |                                                                                                                                                                                                                                                                                              | F:GO:0003676                                   |                                                         | IPR008191; IPR018247;<br>G3DSA:2.30.30.140 (GENE3D),<br>SSF63748 (SUPERFAMILY)                                               |
| Caenorhabditis elegans  | temporarily assigned gene -me protein isoform confirmed by transcript evidence | 0  |                                                                                                                                                                                                                                                                                              | F:GO:0003676                                   |                                                         | IPR008191; IPR018247;<br>G3DSA:2.30.30.140 (GENE3D),<br>SSF63748 (SUPERFAMILY)                                               |
| Caenorhabditis briggsae | elegans protein partially confirmed by transcript evidence                     | 0  |                                                                                                                                                                                                                                                                                              | F:GO:0005488;<br>F:GO:0005044;<br>C:GO:0016020 |                                                         | -                                                                                                                            |
| Caenorhabditis elegans  | ribosome biogenesis protein bms1                                               | 4  | F:GO:0005525;<br>P:GO:0042254;<br>C:GO:0005634;<br>F:GO:0003924                                                                                                                                                                                                                              | -                                              | EC:3.6.5.1;<br>EC:3.6.5.2;<br>EC:3.6.5.3;<br>EC:3.6.5.4 | G3DSA:3.40.50.300 (GENE3D),<br>PTHR12858 (PANTHER),<br>PTHR12858:SF2 (PANTHER),<br>PF03205 (PFAM),<br>SSF52540 (SUPERFAMILY) |
| -                       | -                                                                              | 0  |                                                                                                                                                                                                                                                                                              |                                                |                                                         | -                                                                                                                            |
| -                       | -                                                                              | 0  |                                                                                                                                                                                                                                                                                              |                                                |                                                         | -                                                                                                                            |
| -                       | -                                                                              | 0  |                                                                                                                                                                                                                                                                                              |                                                |                                                         | -                                                                                                                            |
| Caenorhabditis elegans  | adenylosuccinate synthetase                                                    | 11 | P:GO:0040010;<br>F:GO:0004019;<br>P:GO:0006164;<br>P:GO:0040027;<br>P:GO:0040035;<br>F:GO:0000287;<br>P:GO:0040011;<br>P:GO:0006898;<br>P:GO:0009792;<br>C:GO:0005737;<br>F:GO:0005525                                                                                                       | -                                              | EC:6.3.4.4                                              | IPR001114; G3DSA:3.90.170.10<br>(GENE3D),<br>SSF52540 (SUPERFAMILY)                                                          |
| Caenorhabditis elegans  | elegans protein confirmed by transcript evidence                               | 1  | F:GO:0005488                                                                                                                                                                                                                                                                                 | -                                              |                                                         | IPR000536; IPR001723; IPR008946;<br>PTHR11865 (PANTHER),<br>PTHR11865:SF35 (PANTHER)                                         |
| Loa loa                 | elegans protein partially confirmed by transcript evidence                     | 0  |                                                                                                                                                                                                                                                                                              |                                                |                                                         | -                                                                                                                            |
| -                       | -                                                                              | 0  |                                                                                                                                                                                                                                                                                              |                                                |                                                         | SignalIP (SIGNALP)                                                                                                           |
| -                       | -                                                                              | 0  |                                                                                                                                                                                                                                                                                              |                                                |                                                         | SignalIP (SIGNALP)                                                                                                           |
| -                       | -                                                                              | 0  |                                                                                                                                                                                                                                                                                              |                                                |                                                         | -                                                                                                                            |
| -                       | -                                                                              | 0  |                                                                                                                                                                                                                                                                                              |                                                |                                                         | -                                                                                                                            |

|                         |                                                         |  |                                                                                                                                                                                                                                                               |   |   |                                                                  |
|-------------------------|---------------------------------------------------------|--|---------------------------------------------------------------------------------------------------------------------------------------------------------------------------------------------------------------------------------------------------------------|---|---|------------------------------------------------------------------|
| Brugia malayi           | pdz domain containing protein                           |  | P:GO:0009792;<br>P:GO:0040007;<br>5 P:GO:0040035;<br>F:GO:0005515;<br>P:GO:0002119                                                                                                                                                                            | - | - |                                                                  |
| Caenorhabditis briggsae | pdz domain containing protein                           |  | P:GO:0009792;<br>P:GO:0040007;<br>5 P:GO:0040035;<br>F:GO:0005515;<br>P:GO:0002119                                                                                                                                                                            | - | - |                                                                  |
|                         | -                                                       |  | 0                                                                                                                                                                                                                                                             |   |   |                                                                  |
| Caenorhabditis elegans  | ercc4 domain containing protein                         |  | P:GO:0006310;<br>P:GO:0006281;<br>6 F:GO:0003677;<br>P:GO:0007127;<br>F:GO:0004518;<br>P:GO:0009792                                                                                                                                                           | - | - |                                                                  |
| Loa loa                 | uncoordi-ted family member (unc-13)                     |  | F:GO:0001566;<br>3 P:GO:0016082;<br>C:GO:0016020                                                                                                                                                                                                              | - | - |                                                                  |
| Caenorhabditis elegans  | amino acid transporter                                  |  | 1 C:GO:0016021                                                                                                                                                                                                                                                | - |   | IPR013057; PTHR22950 (PANTHER)                                   |
| Caenorhabditis briggsae | Hypothetical protein CBG22147 [Caenorhabditis briggsae] |  | 0                                                                                                                                                                                                                                                             |   |   | IPR009496                                                        |
|                         | -                                                       |  | 0                                                                                                                                                                                                                                                             |   |   | SignalP (SIGNALP)                                                |
| Caenorhabditis elegans  | hypothetical protein C39H7.4 [Caenorhabditis elegans]   |  | 0                                                                                                                                                                                                                                                             |   |   | SignalP (SIGNALP)                                                |
| Caenorhabditis brenneri | elegans protein confirmed by transcript evidence        |  | 0                                                                                                                                                                                                                                                             |   |   | IPR021010; SSF141739 (SUPERFAMILY)                               |
| Caenorhabditis brenneri | elegans protein confirmed by transcript evidence        |  | 0                                                                                                                                                                                                                                                             |   |   | IPR021010; SSF141739 (SUPERFAMILY)                               |
| Loa loa                 | d- repair protein                                       |  | 2 P:GO:0050789;<br>P:GO:0007126                                                                                                                                                                                                                               | - |   | PD936484 (PRODOM), PTHR18867 (PANTHER), PTHR18867:SF11 (PANTHER) |
| Loa loa                 | cyclin m4                                               |  | 2 P:GO:0032501;<br>C:GO:0016020                                                                                                                                                                                                                               | - |   | IPR002550; PTHR12064 (PANTHER), PTHR12064:SF6 (PANTHER)          |
| Brugia malayi           | autophagy protein apg6 containing protein               |  | 15 P:GO:0035121;<br>P:GO:0040010;<br>P:GO:0008340;<br>P:GO:0009267;<br>P:GO:0035071;<br>P:GO:0040024;<br>P:GO:0040027;<br>P:GO:0040035;<br>C:GO:0031410;<br>P:GO:0040011;<br>P:GO:0030163;<br>P:GO:0009792;<br>P:GO:0040018;<br>P:GO:0006914;<br>C:GO:0005634 | - |   | IPR007243; PTHR12768:SF2 (PANTHER)                               |

|                           |                                               |    |                                                                                                                                                                                                                                                                                                                                                                                                                                                                        |   |                                                                                                                |
|---------------------------|-----------------------------------------------|----|------------------------------------------------------------------------------------------------------------------------------------------------------------------------------------------------------------------------------------------------------------------------------------------------------------------------------------------------------------------------------------------------------------------------------------------------------------------------|---|----------------------------------------------------------------------------------------------------------------|
| Caenorhabditis elegans    | nonmuscle myosin-ii heavy chain               | 27 | P:GO:0046664;<br>P:GO:0045200;<br>P:GO:0035159;<br>P:GO:0031036;<br>C:GO:0016460;<br>P:GO:0007443;<br>P:GO:0007395;<br>P:GO:0045214;<br>P:GO:0035017;<br>P:GO:0006936;<br>P:GO:0007297;<br>P:GO:0046663;<br>F:GO:0003779;<br>F:GO:0032027;<br>P:GO:0008258;<br>P:GO:0051259;<br>P:GO:0016203;<br>C:GO:0032154;<br>C:GO:0045179;<br>F:GO:0003774;<br>P:GO:0045184;<br>P:GO:0035317;<br>C:GO:0030018;<br>C:GO:0005886;<br>F:GO:0005524;<br>P:GO:0007435;<br>P:GO:0000910 | - | IPR002928; PTHR13140 (PANTHER),<br>PTHR13140:SF23 (PANTHER)                                                    |
| Caenorhabditis briggsae   | zinc c2h2 type family protein                 | 4  | F:GO:0005488;<br>P:GO:0040010;<br>P:GO:0040011;<br>P:GO:0001703                                                                                                                                                                                                                                                                                                                                                                                                        | - | IPR007087; IPR013087; IPR015880;<br>PTHR23233 (PANTHER),<br>PTHR23233:SF1 (PANTHER), SSF57667<br>(SUPERFAMILY) |
| Harpegnathos saltator     | heterochromatin protein 1-beta-like           | 3  | C:GO:0000785;<br>F:GO:0005515;<br>C:GO:0005634                                                                                                                                                                                                                                                                                                                                                                                                                         | - | IPR000953; IPR016197;<br>G3DSA:2.40.50.40 (GENE3D),<br>PTHR22812 (PANTHER),<br>PTHR22812:SF4 (PANTHER)         |
| Heligmosomoides polygyrus | mannose c type 1                              | 3  | C:GO:0009986;<br>F:GO:0005537;<br>F:GO:0004888                                                                                                                                                                                                                                                                                                                                                                                                                         | - | IPR001304; IPR016186; IPR016187;<br>PTHR22801 (PANTHER),<br>PTHR22801:SF9 (PANTHER), SignalP<br>(SIGNALP)      |
| Heligmosomoides polygyrus | venom c-type lectin mannose binding isoform 3 | 1  | F:GO:0005529                                                                                                                                                                                                                                                                                                                                                                                                                                                           | - | IPR001304; IPR016186; IPR016187;<br>PTHR22801 (PANTHER),<br>PTHR22801:SF9 (PANTHER), SignalP<br>(SIGNALP)      |
| Heligmosomoides polygyrus | c-type lectin-1                               | 1  | F:GO:0005529                                                                                                                                                                                                                                                                                                                                                                                                                                                           | - | IPR001304; IPR016186; IPR016187;<br>PTHR22801 (PANTHER),<br>PTHR22801:SF9 (PANTHER), SignalP<br>(SIGNALP)      |
| -                         | -                                             | 0  | -                                                                                                                                                                                                                                                                                                                                                                                                                                                                      | - | -                                                                                                              |
| -                         | -                                             | 0  | -                                                                                                                                                                                                                                                                                                                                                                                                                                                                      | - | -                                                                                                              |
| Caenorhabditis elegans    | subtilisin-like serine protease               | 8  | P:GO:0018996;<br>P:GO:0009792;<br>P:GO:0008340;<br>P:GO:0000003;<br>F:GO:0005515;<br>P:GO:0006898;<br>P:GO:0002119;<br>P:GO:0040011                                                                                                                                                                                                                                                                                                                                    | - | -                                                                                                              |



|                         |                                                          |   |                                                                                                                                                      |                                                                                                                                                                       |                                                                    |                                                                                                                                                                                  |
|-------------------------|----------------------------------------------------------|---|------------------------------------------------------------------------------------------------------------------------------------------------------|-----------------------------------------------------------------------------------------------------------------------------------------------------------------------|--------------------------------------------------------------------|----------------------------------------------------------------------------------------------------------------------------------------------------------------------------------|
| Caenorhabditis briggsae | Hypothetical protein CBG14981 [Caenorhabditis briggsae]  | 2 | P:GO:0040039;<br>P:GO:0000003                                                                                                                        | -                                                                                                                                                                     | -                                                                  |                                                                                                                                                                                  |
| Caenorhabditis briggsae | zyg-9 protein                                            | 0 |                                                                                                                                                      | F:GO:0005488;<br>F:GO:0005515                                                                                                                                         | -                                                                  |                                                                                                                                                                                  |
| Caenorhabditis briggsae | zyg-9 protein                                            | 0 |                                                                                                                                                      | F:GO:0005488;<br>F:GO:0005515                                                                                                                                         | -                                                                  |                                                                                                                                                                                  |
| Caenorhabditis elegans  | laminin sub domain 2                                     | 0 |                                                                                                                                                      | P:GO:0006606;<br>C:GO:0000786;<br>F:GO:0016740;<br>C:GO:0005643;<br>C:GO:0016020;<br>C:GO:0005694;<br>C:GO:0005634;<br>F:GO:0003677;<br>P:GO:0006334;<br>C:GO:0019861 | PTHR12609 (PANTHER), SignalP (SIGNALP)                             |                                                                                                                                                                                  |
| Caenorhabditis elegans  | laminin sub domain 2                                     | 0 |                                                                                                                                                      | P:GO:0006606;<br>C:GO:0005643;<br>C:GO:0000786;<br>F:GO:0016740;<br>C:GO:0016020;<br>C:GO:0005694;<br>C:GO:0005634;<br>F:GO:0003677;<br>P:GO:0016998;<br>P:GO:0006334 | PTHR12609 (PANTHER), SignalP (SIGNALP)                             |                                                                                                                                                                                  |
| Loa loa                 | briggsae cbr-set-16 protein                              | 1 | F:GO:0005515                                                                                                                                         | -                                                                                                                                                                     | -                                                                  |                                                                                                                                                                                  |
|                         | -                                                        | 0 |                                                                                                                                                      |                                                                                                                                                                       | PTHR10721 (PANTHER),<br>PTHR10721:SF2 (PANTHER), SignalP (SIGNALP) |                                                                                                                                                                                  |
| Caenorhabditis elegans  | oxidative stress induced growth inhibitor 1              | 0 |                                                                                                                                                      | P:GO:0030308;<br>F:GO:0003674;<br>F:GO:0005488;<br>F:GO:0008083;<br>P:GO:0008152;<br>F:GO:0003824;<br>P:GO:0008150                                                    | SSF51971 (SUPERFAMILY)                                             |                                                                                                                                                                                  |
| Caenorhabditis elegans  | electron transfer flavoprotein-ubiquinone oxidoreductase | 9 | P:GO:0006979;<br>F:GO:0004174;<br>P:GO:0022900;<br>F:GO:0048039;<br>C:GO:0005743;<br>F:GO:0009055;<br>F:GO:0051539;<br>F:GO:0043783;<br>F:GO:0050660 | -                                                                                                                                                                     | EC:1.5.5.1;<br>EC:1.16.8.0                                         | IPR007859; IPR017896; PTHR10617 (PANTHER), PTHR10617:SF1 (PANTHER), SSF51905 (SUPERFAMILY), SSF54862 (SUPERFAMILY)                                                               |
| Caenorhabditis briggsae | electron transfer flavoprotein-ubiquinone mitochondrial  | 9 | F:GO:0004174;<br>F:GO:0046872;<br>P:GO:0006979;<br>C:GO:0005743;<br>C:GO:0017133;<br>F:GO:0009055;<br>P:GO:0006810;<br>F:GO:0051539;<br>P:GO:0022900 | -                                                                                                                                                                     | EC:1.5.5.1                                                         | IPR003953; IPR007859; IPR017896; G3DSA:3.50.50.60 (GENE3D), PTHR10617 (PANTHER), PTHR10617:SF1 (PANTHER), SSF51905 (SUPERFAMILY), SSF54373 (SUPERFAMILY), SSF54862 (SUPERFAMILY) |

|                         |                                                                                  |   |                                                                                                                                                      |                                                                 |                            |                                                                                                                                              |
|-------------------------|----------------------------------------------------------------------------------|---|------------------------------------------------------------------------------------------------------------------------------------------------------|-----------------------------------------------------------------|----------------------------|----------------------------------------------------------------------------------------------------------------------------------------------|
| Caenorhabditis elegans  | electron transfer flavoprotein-ubiquinone oxidoreductase                         | 9 | P:GO:0006979;<br>F:GO:0004174;<br>P:GO:0022900;<br>F:GO:0048039;<br>C:GO:0005743;<br>F:GO:0009055;<br>F:GO:0051539;<br>F:GO:0043783;<br>F:GO:0050660 | -                                                               | EC:1.5.5.1;<br>EC:1.16.8.0 | IPR007859; IPR017896; PTHR10617 (PANTHER), PTHR10617:SF1 (PANTHER), SSF51905 (SUPERFAMILY), SSF54862 (SUPERFAMILY)                           |
| Caenorhabditis elegans  | low-density lipoprotein receptor-related protein 2                               | 3 | C:GO:0016021;<br>F:GO:0004872;<br>F:GO:0005509                                                                                                       | -                                                               |                            | -                                                                                                                                            |
| Caenorhabditis elegans  | branched-chain-amino-acid cytosolic                                              | 3 | P:GO:0008652;<br>P:GO:0009081;<br>F:GO:0008483                                                                                                       | -                                                               | EC:2.6.1.0                 | IPR001544; IPR005786; IPR018300; G3DSA:3.20.10.10 (GENE3D), G3DSA:3.30.470.10 (GENE3D)                                                       |
| Caenorhabditis elegans  | vang (van gogh strabismus pla-r polarity protein) homolog family member (vang-1) | 1 | P:GO:0009792                                                                                                                                         | -                                                               |                            | IPR009539; PTHR20886:SF1 (PANTHER)                                                                                                           |
| Loa loa                 | protein vprbp-like                                                               | 0 |                                                                                                                                                      | F:GO:0005488;<br>F:GO:0005515;<br>C:GO:0005634                  |                            | IPR006594; IPR011046; IPR013720; IPR015943; PTHR13129 (PANTHER)                                                                              |
| Caenorhabditis elegans  | protein vprbp-like                                                               | 0 |                                                                                                                                                      | F:GO:0005488;<br>F:GO:0005515;<br>C:GO:0005634                  |                            | IPR006594; IPR011046; IPR013720; IPR015943; PTHR13129 (PANTHER)                                                                              |
| Caenorhabditis elegans  | disulfide oxidoreductase                                                         | 7 | P:GO:0006917;<br>F:GO:0051536;<br>C:GO:0005743;<br>F:GO:0008656;<br>P:GO:0008635;<br>P:GO:0051882;<br>C:GO:0005783                                   | -                                                               |                            | IPR017941                                                                                                                                    |
| -                       | -                                                                                | 0 |                                                                                                                                                      |                                                                 |                            | -                                                                                                                                            |
| -                       | -                                                                                | 0 |                                                                                                                                                      |                                                                 |                            | -                                                                                                                                            |
| -                       | -                                                                                | 0 |                                                                                                                                                      |                                                                 |                            | -                                                                                                                                            |
| Caenorhabditis briggsae | dual specificity catalytic domain containing protein                             | 5 | F:GO:0004725;<br>P:GO:0006470;<br>P:GO:0000003;<br>F:GO:0008138;<br>P:GO:0040010                                                                     | -                                                               | EC:3.1.3.48                | IPR000340; IPR000387; IPR016130; IPR020422; G3DSA:3.90.190.10 (GENE3D), PTHR10159 (PANTHER), PTHR10159:SF5 (PANTHER), SSF52799 (SUPERFAMILY) |
| Caenorhabditis briggsae | dual specificity catalytic domain containing protein                             | 5 | F:GO:0004725;<br>F:GO:0008138;<br>P:GO:0006470;<br>P:GO:0040010;<br>P:GO:0000003                                                                     | -                                                               | EC:3.1.3.48                | -                                                                                                                                            |
| Loa loa                 | variable abnormal morphology family member (vab-10)                              | 0 |                                                                                                                                                      |                                                                 |                            | G3DSA:3.90.1290.10 (GENE3D), PTHR11915 (PANTHER), PTHR11915:SF49 (PANTHER)                                                                   |
| -                       | -                                                                                | 0 |                                                                                                                                                      |                                                                 |                            | -                                                                                                                                            |
| Caenorhabditis briggsae | briggsae cbr-dnj-4 protein                                                       | 0 |                                                                                                                                                      | F:GO:0051082;<br>C:GO:0016021;<br>P:GO:0006457;<br>F:GO:0031072 |                            | -                                                                                                                                            |

|                         |                                                                                     |   |                                                                                                                                                      |                                                                                                                                                                                                                                                                             |             |                                                                                                               |
|-------------------------|-------------------------------------------------------------------------------------|---|------------------------------------------------------------------------------------------------------------------------------------------------------|-----------------------------------------------------------------------------------------------------------------------------------------------------------------------------------------------------------------------------------------------------------------------------|-------------|---------------------------------------------------------------------------------------------------------------|
| Loa loa                 | protein tyrosine non-receptor type 2                                                | 9 | P:GO:0006470;<br>C:GO:0005626;<br>C:GO:0005829;<br>F:GO:0005158;<br>F:GO:0008270;<br>C:GO:0031410;<br>F:GO:0004725;<br>P:GO:0046626;<br>C:GO:0005783 | -                                                                                                                                                                                                                                                                           | EC:3.1.3.48 | -                                                                                                             |
|                         | -                                                                                   | 0 |                                                                                                                                                      |                                                                                                                                                                                                                                                                             |             | -                                                                                                             |
| Caenorhabditis briggsae | patched family protein                                                              | 8 | P:GO:0040025;<br>F:GO:0008158;<br>P:GO:0040018;<br>P:GO:0018996;<br>P:GO:0000003;<br>P:GO:0008340;<br>P:GO:0040011;<br>C:GO:0016021                  | -                                                                                                                                                                                                                                                                           |             | -                                                                                                             |
| Caenorhabditis briggsae | hed family member (ptc-3)                                                           | 8 | P:GO:0009792;<br>P:GO:0002119;<br>F:GO:0008158;<br>P:GO:0040018;<br>P:GO:0018996;<br>P:GO:0000003;<br>P:GO:0040011;<br>C:GO:0016021                  | -                                                                                                                                                                                                                                                                           |             | SignalP (SIGNALP)                                                                                             |
| Ratus norvegicus        | muc2_rat ame: full=mucin-2 short=muc-2 ame: full=intesti-l mucin-2 flags: precursor | 0 |                                                                                                                                                      | P:GO:0032496;<br>P:GO:0006917;<br>C:GO:0005634;<br>C:GO:0070703;<br>P:GO:0071356;<br>C:GO:0070702;<br>P:GO:0006915;<br>C:GO:0005737;<br>C:GO:0005578;<br>P:GO:0033189;<br>C:GO:0005576;<br>P:GO:0030336;<br>P:GO:0071559;<br>F:GO:0046983;<br>P:GO:0009725;<br>P:GO:0008285 |             | -                                                                                                             |
| Caenorhabditis elegans  | protein phosphatase type 1                                                          | 1 | F:GO:0004721                                                                                                                                         | -                                                                                                                                                                                                                                                                           | EC:3.1.3.16 | -                                                                                                             |
| Caenorhabditis elegans  | variable abnormal morphology family member (vab-10)                                 | 1 | F:GO:0003779                                                                                                                                         | -                                                                                                                                                                                                                                                                           |             | PTHR11915 (PANTHER),<br>PTHR11915:SF49 (PANTHER)                                                              |
| Caenorhabditis briggsae | variable abnormal morphology family member (vab-10)                                 | 1 | F:GO:0003779                                                                                                                                         | -                                                                                                                                                                                                                                                                           |             | IPR001715; PTHR11915 (PANTHER),<br>PTHR11915:SF49 (PANTHER)                                                   |
| Caenorhabditis elegans  | variable abnormal morphology family member (vab-10)                                 | 1 | F:GO:0003779                                                                                                                                         | -                                                                                                                                                                                                                                                                           |             | IPR001715; PTHR11915 (PANTHER),<br>PTHR11915:SF49 (PANTHER)                                                   |
| Caenorhabditis briggsae | fibrillarlin                                                                        | 6 | C:GO:0005730;<br>F:GO:0003723;<br>P:GO:0006364;<br>C:GO:0030529;<br>F:GO:0008168;<br>P:GO:0008033                                                    | -                                                                                                                                                                                                                                                                           | EC:2.1.1.0  | IPR000692; IPR020813;<br>G3DSA:3.30.200.20 (GENE3D),<br>G3DSA:3.40.50.150 (GENE3D),<br>SSF53335 (SUPERFAMILY) |

|                         |                                                  |    |                                                                                                                                                                                                                                                            |   |                                                         |                                                                                                                                                 |
|-------------------------|--------------------------------------------------|----|------------------------------------------------------------------------------------------------------------------------------------------------------------------------------------------------------------------------------------------------------------|---|---------------------------------------------------------|-------------------------------------------------------------------------------------------------------------------------------------------------|
| Caenorhabditis briggsae | fibrillarlin                                     | 6  | C:GO:0005730;<br>F:GO:0003723;<br>P:GO:0006364;<br>C:GO:0030529;<br>F:GO:0008168;<br>P:GO:0008033                                                                                                                                                          | - | EC:2.1.1.0                                              | IPR000692; IPR020813;<br>G3DSA:3.30.200.20 (GENE3D),<br>G3DSA:3.40.50.150 (GENE3D),<br>SSF53335 (SUPERFAMILY)                                   |
| Homo sapiens            | tryptophanyl-tr- isoform cra_a                   | 8  | C:GO:0005625;<br>F:GO:0004830;<br>P:GO:0008285;<br>P:GO:0006436;<br>F:GO:0005524;<br>F:GO:0005515;<br>P:GO:0045765;<br>C:GO:0005737                                                                                                                        | - | EC:6.1.1.2                                              | -                                                                                                                                               |
|                         | -                                                | 0  |                                                                                                                                                                                                                                                            |   |                                                         | -                                                                                                                                               |
| Caenorhabditis elegans  | sphingosine-1-phosphate lyase 1                  | 15 | P:GO:0009653;<br>P:GO:0008340;<br>P:GO:0008202;<br>P:GO:0040010;<br>P:GO:0008585;<br>C:GO:0016021;<br>P:GO:0009058;<br>F:GO:0016769;<br>P:GO:0048609;<br>F:GO:0030170;<br>P:GO:0034754;<br>P:GO:0030154;<br>C:GO:0005783;<br>F:GO:0016831;<br>P:GO:0019752 | - | EC:4.1.1.0                                              | -                                                                                                                                               |
| Caenorhabditis briggsae | glutamic acid-rich protein precursor             | 4  | P:GO:0002119;<br>F:GO:0005515;<br>P:GO:0009792;<br>P:GO:0040007                                                                                                                                                                                            | - |                                                         | SignalP (SIGNALP)                                                                                                                               |
| Caenorhabditis briggsae | glutamic acid-rich protein precursor             | 4  | P:GO:0002119;<br>F:GO:0005515;<br>P:GO:0009792;<br>P:GO:0040007                                                                                                                                                                                            | - |                                                         | -                                                                                                                                               |
| Caenorhabditis briggsae | glutamic acid-rich protein precursor             | 4  | P:GO:0002119;<br>F:GO:0005515;<br>P:GO:0009792;<br>P:GO:0040007                                                                                                                                                                                            | - |                                                         | -                                                                                                                                               |
| Caenorhabditis briggsae | glutamic acid-rich protein precursor             | 4  | P:GO:0002119;<br>F:GO:0005515;<br>P:GO:0009792;<br>P:GO:0040007                                                                                                                                                                                            | - |                                                         | -                                                                                                                                               |
| Caenorhabditis elegans  | rab-related protein 3                            | 8  | C:GO:0005737;<br>F:GO:0005525;<br>F:GO:0005515;<br>P:GO:0006913;<br>P:GO:0006886;<br>C:GO:0005634;<br>P:GO:0007264;<br>F:GO:0003924                                                                                                                        | - | EC:3.6.5.1;<br>EC:3.6.5.2;<br>EC:3.6.5.3;<br>EC:3.6.5.4 | IPR001806; IPR013753; IPR020851;<br>G3DSA:3.40.50.300 (GENE3D),<br>PTHR11708 (PANTHER),<br>PTHR11708:SF242 (PANTHER),<br>SSF52540 (SUPERFAMILY) |
| Caenorhabditis briggsae | elegans protein confirmed by transcript evidence | 1  | F:GO:0005515                                                                                                                                                                                                                                               | - |                                                         | PTHR23290 (PANTHER)                                                                                                                             |

|                           |                                                         |   |                                                                                                                                     |                                                                                  |                                                         |                                                                                            |
|---------------------------|---------------------------------------------------------|---|-------------------------------------------------------------------------------------------------------------------------------------|----------------------------------------------------------------------------------|---------------------------------------------------------|--------------------------------------------------------------------------------------------|
| Homo sapiens              | serpin peptidase clade a (alpha-1 antitrypsin) member 3 | 8 | F:GO:0004867;<br>F:GO:0003677;<br>P:GO:0030277;<br>P:GO:0006953;<br>F:GO:0005515;<br>C:GO:0005576;<br>C:GO:0005634;<br>P:GO:0019216 | -                                                                                |                                                         | IPR000215; G3DSA:2.30.39.10 (GENE3D), G3DSA:3.30.497.10 (GENE3D), PTHR11461:SF44 (PANTHER) |
| Caenorhabditis briggsae   | e3 ubiquitin-protein ligase rnf19a                      | 7 | P:GO:0006464;<br>F:GO:0003676;<br>P:GO:0000226;<br>C:GO:0005813;<br>F:GO:0008134;<br>C:GO:0016020;<br>F:GO:0008270                  | -                                                                                |                                                         | IPR001878; IPR002867; PTHR11685 (PANTHER), PTHR11685:SF5 (PANTHER), SSF57850 (SUPERFAMILY) |
| Caenorhabditis elegans    | e3 ubiquitin-protein ligase rnf19a                      | 5 | C:GO:0005856;<br>C:GO:0016020;<br>F:GO:0046872;<br>C:GO:0005737;<br>F:GO:0005515                                                    | -                                                                                |                                                         | IPR001878; IPR002867; PTHR11685 (PANTHER), PTHR11685:SF5 (PANTHER), SSF57850 (SUPERFAMILY) |
| Caenorhabditis briggsae   | briggsae cbr-reps-1 protein                             | 0 |                                                                                                                                     | F:GO:0005509                                                                     |                                                         |                                                                                            |
| Ailuropoda melanoleuca    | tubulin beta-2c chain                                   | 6 | P:GO:0007018;<br>F:GO:0005525;<br>P:GO:0051258;<br>F:GO:0005198;<br>F:GO:0003924;<br>C:GO:0005874                                   | -                                                                                | EC:3.6.5.1;<br>EC:3.6.5.2;<br>EC:3.6.5.3;<br>EC:3.6.5.4 | IPR000217; IPR002453; IPR003008; IPR010916; IPR017975                                      |
| -                         | -                                                       | 0 |                                                                                                                                     |                                                                                  |                                                         | -                                                                                          |
| -                         | -                                                       | 0 |                                                                                                                                     |                                                                                  |                                                         | -                                                                                          |
| -                         | -                                                       | 0 |                                                                                                                                     |                                                                                  |                                                         | -                                                                                          |
| Caenorhabditis elegans    | spc97 spc98 family protein                              | 2 | P:GO:0007275;<br>P:GO:0000003                                                                                                       | -                                                                                |                                                         | IPR007259; IPR018483                                                                       |
| Acyrtosiphon pisum        | splicing arginine serine-rich 16                        | 0 |                                                                                                                                     | F:GO:0003676;<br>F:GO:0000166;<br>F:GO:0008270;<br>P:GO:0008150;<br>C:GO:0005575 |                                                         | -                                                                                          |
| Teladorsagia circumcincta | calcium activated nucleotidase isoform cra_b            | 8 | P:GO:0040010;<br>P:GO:0008340;<br>F:GO:0004871;<br>P:GO:0043123;<br>F:GO:0017110;<br>F:GO:0005515;<br>P:GO:0008152;<br>C:GO:0005789 | -                                                                                | EC:3.6.1.6                                              | IPR009283                                                                                  |
| Teladorsagia circumcincta | calcium-activated apyrase                               | 0 |                                                                                                                                     | F:GO:0005509;<br>F:GO:0016787;<br>F:GO:0016462                                   |                                                         | -                                                                                          |
| Sorghum bicolor           | 10 kda secreted protein                                 | 0 |                                                                                                                                     |                                                                                  |                                                         | -                                                                                          |
| Caenorhabditis elegans    | metastasis suppressor protein 1                         | 3 | N:GO:0071842;<br>F:GO:0005515;<br>C:GO:0044424                                                                                      | -                                                                                |                                                         | -                                                                                          |
| Caenorhabditis elegans    | metastasis suppressor protein 1                         | 3 | N:GO:0071842;<br>F:GO:0005515;<br>C:GO:0044424                                                                                      | -                                                                                |                                                         | -                                                                                          |

|                             |                                                          |  |    |                                                                                                                                                                                                                          |                                                                                                                                                                       |                                                                                                        |
|-----------------------------|----------------------------------------------------------|--|----|--------------------------------------------------------------------------------------------------------------------------------------------------------------------------------------------------------------------------|-----------------------------------------------------------------------------------------------------------------------------------------------------------------------|--------------------------------------------------------------------------------------------------------|
| Pongo abelii                | cuta divalent cation tolerance homolog ( coli)           |  | 3  | P:GO:0008104;<br>F:GO:0019899;<br>C:GO:0016020                                                                                                                                                                           | -                                                                                                                                                                     | IPR004323; IPR011322                                                                                   |
|                             | -                                                        |  | 0  |                                                                                                                                                                                                                          |                                                                                                                                                                       | -                                                                                                      |
| Caenorhabditis elegans      | eukaryotic translation initiation factor subunit 1 alpha |  | 13 | F:GO:0003743;<br>C:GO:0005829;<br>C:GO:0005850;<br>F:GO:0003723;<br>P:GO:0045948;<br>C:GO:0005851;<br>P:GO:0040007;<br>P:GO:0043558;<br>P:GO:0002119;<br>F:GO:0005515;<br>P:GO:0046777;<br>P:GO:0009792;<br>C:GO:0005634 | -                                                                                                                                                                     | IPR006186; SignalP (SIGNALP)                                                                           |
| Caenorhabditis elegans      | phospholipase d3                                         |  | 3  | F:GO:0016787;<br>P:GO:0008152;<br>C:GO:0044425                                                                                                                                                                           | -                                                                                                                                                                     | IPR013582; G3DSA:3.30.870.10 (GENE3D), PTHR10185 (PANTHER), SSF56024 (SUPERFAMILY)                     |
| Caenorhabditis briggsae     | rhomboid family protein                                  |  | 0  |                                                                                                                                                                                                                          | F:GO:0003676;<br>F:GO:0016787;<br>C:GO:0016021;<br>F:GO:0008270                                                                                                       | -                                                                                                      |
| Caenorhabditis briggsae     | mercaptopyruvate sulfurtransferase                       |  | 0  |                                                                                                                                                                                                                          | F:GO:0016740;<br>C:GO:0016021;<br>C:GO:0005743;<br>P:GO:0008272;<br>C:GO:0005737;<br>F:GO:0016784;<br>F:GO:0003674;<br>F:GO:0004792;<br>P:GO:0008152;<br>P:GO:0008150 | IPR001763; PTHR11364 (PANTHER)                                                                         |
| Caenorhabditis briggsae     | mercaptopyruvate sulfurtransferase                       |  | 0  |                                                                                                                                                                                                                          | F:GO:0016740;<br>C:GO:0016021;<br>C:GO:0005743;<br>P:GO:0008272;<br>C:GO:0005737;<br>F:GO:0016784;<br>F:GO:0003674;<br>F:GO:0004792;<br>P:GO:0008152;<br>P:GO:0008150 | IPR001763; PTHR11364 (PANTHER)                                                                         |
|                             |                                                          |  |    |                                                                                                                                                                                                                          |                                                                                                                                                                       | IPR010939; IPR013098; IPR013783; PTHR19897 (PANTHER), PTHR19897:SF14 (PANTHER), SSF48726 (SUPERFAMILY) |
| Angiostrongylus cantonensis | transmembrane protein 161b                               |  | 0  |                                                                                                                                                                                                                          | P:GO:0043066;<br>C:GO:0016021;<br>C:GO:0016020;<br>F:GO:0003674;<br>C:GO:0005575;<br>P:GO:0034599;<br>P:GO:0032526;<br>P:GO:0008150;<br>P:GO:0045739;<br>P:GO:0034644 | IPR019395; PTHR13624 (PANTHER), PTHR13624:SF1 (PANTHER), SignalP (SIGNALP)                             |

|                         |                                                                     |    |                                                                                                                                                                                                                                                                                                                                                                  |   |             |                                                                                                                                                        |
|-------------------------|---------------------------------------------------------------------|----|------------------------------------------------------------------------------------------------------------------------------------------------------------------------------------------------------------------------------------------------------------------------------------------------------------------------------------------------------------------|---|-------------|--------------------------------------------------------------------------------------------------------------------------------------------------------|
| Caenorhabditis elegans  | a in (actin filament binding protein) homolog family member (afd-1) | 6  | C:GO:0005911;<br>P:GO:0040010;<br>P:GO:0007267;<br>P:GO:0007165;<br>F:GO:0008022;<br>C:GO:0005829                                                                                                                                                                                                                                                                | - | -           | IPR000159; PTHR10398 (PANTHER),<br>SSF54236 (SUPERFAMILY)                                                                                              |
| -                       | -                                                                   | 0  | -                                                                                                                                                                                                                                                                                                                                                                | - | -           | -                                                                                                                                                      |
| -                       | -                                                                   | 0  | -                                                                                                                                                                                                                                                                                                                                                                | - | -           | -                                                                                                                                                      |
| Caenorhabditis briggsae | transcription factor btf3 homolog 4                                 | 1  | F:GO:0005515                                                                                                                                                                                                                                                                                                                                                     | - | -           | IPR002715; PTHR10351 (PANTHER)                                                                                                                         |
| Caenorhabditis elegans  | rad54 homolog b                                                     | 2  | F:GO:0003676;<br>F:GO:0003824                                                                                                                                                                                                                                                                                                                                    | - | -           | IPR000330; PTHR10799 (PANTHER),<br>PTHR10799:SF66 (PANTHER),<br>SSF52540 (SUPERFAMILY)                                                                 |
| Caenorhabditis briggsae | kiaa1520 splice                                                     | 16 | P:GO:0001916;<br>F:GO:0046979;<br>C:GO:0042825;<br>C:GO:0005764;<br>C:GO:0005743;<br>P:GO:0015031;<br>F:GO:0042288;<br>F:GO:0046978;<br>P:GO:0015833;<br>F:GO:0015421;<br>P:GO:0055085;<br>F:GO:0042605;<br>P:GO:0006200;<br>C:GO:0005886;<br>F:GO:0005524;<br>F:GO:0046980                                                                                      | - | EC:3.6.3.23 | IPR011527; IPR017940;<br>G3DSA:1.20.1560.10 (GENE3D),<br>PTHR19242 (PANTHER),<br>PTHR19242:SF82 (PANTHER), SignalP<br>(SIGNALP)                        |
| Caenorhabditis briggsae | actin-related protein 3                                             | 21 | P:GO:0050775;<br>C:GO:0030056;<br>C:GO:0030027;<br>C:GO:0000139;<br>P:GO:0043519;<br>C:GO:0005884;<br>P:GO:0010631;<br>P:GO:0046677;<br>P:GO:0034314;<br>F:GO:0003779;<br>P:GO:0009792;<br>C:GO:0060076;<br>P:GO:0051789;<br>C:GO:0005885;<br>P:GO:0045666;<br>P:GO:0016331;<br>P:GO:0010592;<br>P:GO:0009743;<br>F:GO:0005524;<br>C:GO:0002102;<br>P:GO:0051491 | - | -           | IPR004000; IPR015623; IPR020902;<br>G3DSA:3.30.420.40 (GENE3D),<br>G3DSA:3.90.640.10 (GENE3D),<br>SSF53067 (SUPERFAMILY)                               |
| Caenorhabditis elegans  | small conductance calcium-activated potassium isoform m             | 4  | F:GO:0015269;<br>P:GO:0006813;<br>C:GO:0016021;<br>F:GO:0005516                                                                                                                                                                                                                                                                                                  | - | -           | IPR004178; IPR011996; IPR013099;<br>IPR015449; G3DSA:1.10.287.70<br>(GENE3D), PTHR10153:SF5<br>(PANTHER), SignalP (SIGNALP),<br>SSF81324 (SUPERFAMILY) |
| -                       | -                                                                   | 0  | -                                                                                                                                                                                                                                                                                                                                                                | - | -           | PD015172 (PRODOM)                                                                                                                                      |
| -                       | -                                                                   | 0  | -                                                                                                                                                                                                                                                                                                                                                                | - | -           | -                                                                                                                                                      |

|                         |                                                                      |    |                                                                                                                                                                                                                                                                             |             |                                                                                                                 |
|-------------------------|----------------------------------------------------------------------|----|-----------------------------------------------------------------------------------------------------------------------------------------------------------------------------------------------------------------------------------------------------------------------------|-------------|-----------------------------------------------------------------------------------------------------------------|
| Loa loa                 | eukaryotic translation initiation factor 2 alpha ki-se pek           | 16 | C:GO:0016020;<br>P:GO:0065008;<br>P:GO:0046777;<br>P:GO:0031018;<br>P:GO:0001503;<br>P:GO:0006983;<br>P:GO:0032055;<br>P:GO:0007154;<br>F:GO:0004694;<br>P:GO:0023060;<br>F:GO:0042802;<br>P:GO:0006446;<br>P:GO:0006915;<br>P:GO:0051260;<br>C:GO:0005783;<br>P:GO:0030968 | -           | IPR011047; IPR018391; SignalP (SIGNALP)                                                                         |
| Caenorhabditis elegans  | choline-phosphate cytidyltransferase b                               | 15 | P:GO:0042067;<br>P:GO:0008340;<br>P:GO:0040007;<br>P:GO:0007052;<br>P:GO:0040017;<br>F:GO:0004105;<br>P:GO:0006911;<br>P:GO:0002119;<br>C:GO:0005875;<br>P:GO:0048477;<br>P:GO:0006656;<br>F:GO:0005488;<br>C:GO:0044444;<br>C:GO:0005634;<br>P:GO:0007476                  | EC:2.7.7.15 | IPR004820; IPR004821; IPR014729;<br>PTHR10739 (PANTHER),<br>PTHR10739:SF13 (PANTHER),<br>SSF52374 (SUPERFAMILY) |
| Caenorhabditis briggsae | protein tbrg4                                                        | 0  |                                                                                                                                                                                                                                                                             |             | -                                                                                                               |
| Caenorhabditis elegans  | inhibitor of nf ki-se epsilon subunit homolog family member (ikke-1) | 0  | F:GO:0004672;<br>F:GO:0005524;<br>F:GO:0000166;<br>P:GO:0006468;<br>P:GO:0019915;<br>F:GO:0005515;<br>F:GO:0004674                                                                                                                                                          |             | -                                                                                                               |
| -                       | -                                                                    | 0  |                                                                                                                                                                                                                                                                             |             | -                                                                                                               |
| -                       | -                                                                    | 0  |                                                                                                                                                                                                                                                                             |             | -                                                                                                               |
| -                       | -                                                                    | 0  |                                                                                                                                                                                                                                                                             |             | -                                                                                                               |
| -                       | -                                                                    | 0  |                                                                                                                                                                                                                                                                             |             | SignalP (SIGNALP)                                                                                               |



|                         |                                                     |   |                                                                                                                                                                                                                                                                                                                                                                                                                                                                        |                                                                                                                    |                                                                                                                                                                                    |
|-------------------------|-----------------------------------------------------|---|------------------------------------------------------------------------------------------------------------------------------------------------------------------------------------------------------------------------------------------------------------------------------------------------------------------------------------------------------------------------------------------------------------------------------------------------------------------------|--------------------------------------------------------------------------------------------------------------------|------------------------------------------------------------------------------------------------------------------------------------------------------------------------------------|
| Caenorhabditis elegans  | slit homolog 3                                      | 0 | P:GO:0035385;<br>P:GO:0070100;<br>P:GO:0008285;<br>P:GO:0007420;<br>P:GO:0032870;<br>P:GO:0030154;<br>F:GO:0003674;<br>P:GO:0050919;<br>F:GO:0005102;<br>C:GO:0005615;<br>P:GO:0048846;<br>F:GO:0005509;<br>P:GO:0030308;<br>P:GO:0009887;<br>P:GO:0010629;<br>P:GO:0007275;<br>C:GO:0005739;<br>P:GO:0021510;<br>P:GO:0001554;<br>P:GO:0007399;<br>P:GO:0007411;<br>C:GO:0005624;<br>P:GO:0051414;<br>P:GO:0021834;<br>F:GO:0005515;<br>C:GO:0005576;<br>F:GO:0048495 |                                                                                                                    | IPR000483; IPR001611; IPR003591;<br>PR00019 (PRINTS), G3DSA:3.80.10.10<br>(GENE3D), PTHR23154 (PANTHER),<br>PTHR23154:SF44 (PANTHER), PSS1450<br>(PROFILE), SSF52058 (SUPERFAMILY) |
| Caenorhabditis briggsae | vacuolar protein sorting 33a                        | 3 | F:GO:0005515;<br>P:GO:0006810;<br>P:GO:0009987                                                                                                                                                                                                                                                                                                                                                                                                                         | -                                                                                                                  | IPR001619; PTHR11679:SF1<br>(PANTHER)                                                                                                                                              |
| Caenorhabditis elegans  | attractin-like 1                                    | 5 | P:GO:0018991;<br>F:GO:0005515;<br>P:GO:0040010;<br>P:GO:0040011;<br>C:GO:0016021                                                                                                                                                                                                                                                                                                                                                                                       | -                                                                                                                  | IPR000859; IPR006210; IPR013032;<br>PTHR10574 (PANTHER),<br>PTHR10574:SF3 (PANTHER), SignalP<br>(SIGNALP)                                                                          |
| -                       | -                                                   | 0 |                                                                                                                                                                                                                                                                                                                                                                                                                                                                        |                                                                                                                    | -                                                                                                                                                                                  |
| Caenorhabditis briggsae | die-1                                               | 0 |                                                                                                                                                                                                                                                                                                                                                                                                                                                                        | F:GO:0008270;<br>C:GO:0005622                                                                                      | IPR007087; IPR015880; PTHR21190<br>(PANTHER), SSF57667 (SUPERFAMILY)                                                                                                               |
| Caenorhabditis briggsae | kinesin-like protein family member (klp-12)         | 5 | P:GO:0009792;<br>F:GO:0005515;<br>P:GO:0007067;<br>F:GO:0003824;<br>F:GO:0000166                                                                                                                                                                                                                                                                                                                                                                                       | -                                                                                                                  | IPR001680; IPR011046; IPR015943;<br>IPR017986; IPR019775; IPR019781;<br>IPR019782; PTHR22844 (PANTHER)                                                                             |
| -                       | -                                                   | 0 |                                                                                                                                                                                                                                                                                                                                                                                                                                                                        |                                                                                                                    | -                                                                                                                                                                                  |
| Caenorhabditis elegans  | prolyl carboxy peptidase like family member (pcp-3) | 0 |                                                                                                                                                                                                                                                                                                                                                                                                                                                                        | P:GO:0006508;<br>F:GO:0004180;<br>F:GO:0008236;<br>C:GO:0016021;<br>P:GO:0008150;<br>F:GO:0005515;<br>C:GO:0005575 | IPR008758; PTHR11010:SF4<br>(PANTHER)                                                                                                                                              |
| Caenorhabditis elegans  | prolyl carboxy peptidase like family member (pcp-3) | 0 |                                                                                                                                                                                                                                                                                                                                                                                                                                                                        | P:GO:0006508;<br>F:GO:0004180;<br>F:GO:0008236;<br>C:GO:0016021;<br>P:GO:0008150;<br>F:GO:0005515;<br>C:GO:0005575 | IPR008758; PTHR11010:SF4<br>(PANTHER)                                                                                                                                              |

|                         |                                                        |   |                                                                                                                    |                                                                 |            |                                                                                                               |
|-------------------------|--------------------------------------------------------|---|--------------------------------------------------------------------------------------------------------------------|-----------------------------------------------------------------|------------|---------------------------------------------------------------------------------------------------------------|
|                         | -                                                      | 0 |                                                                                                                    |                                                                 |            | -                                                                                                             |
| Caenorhabditis elegans  | ras family protein                                     | 0 |                                                                                                                    | F:GO:0005525;<br>P:GO:0007264;<br>F:GO:0000166;<br>P:GO:0015031 |            | G3DSA:3.40.50.300 (GENE3D)                                                                                    |
|                         | -                                                      | 0 |                                                                                                                    |                                                                 |            | -                                                                                                             |
| Caenorhabditis briggsae | variable abnormal morphology family member (vab-10)    | 0 |                                                                                                                    | F:GO:0005509;<br>P:GO:0007050;<br>F:GO:0003779                  |            | IPR001101; G3DSA:3.90.1290.10 (GENE3D), PTHR11915 (PANTHER), PTHR11915:SF49 (PANTHER), SSF75399 (SUPERFAMILY) |
|                         | -                                                      | 0 |                                                                                                                    |                                                                 |            | -                                                                                                             |
|                         | -                                                      | 0 |                                                                                                                    |                                                                 |            | -                                                                                                             |
| Loa loa                 | origin recognition subunit 1-like                      | 6 | C:GO:0043229;<br>F:GO:0005488;<br>P:GO:0040007;<br>P:GO:0040035;<br>P:GO:0002119;<br>P:GO:0009792                  | -                                                               |            | IPR020793; G3DSA:3.40.50.300 (GENE3D), PTHR10763 (PANTHER), SSF52540 (SUPERFAMILY)                            |
|                         | -                                                      | 0 |                                                                                                                    |                                                                 |            | -                                                                                                             |
| Caenorhabditis elegans  | nuclear receptor nhr-6                                 | 1 | F:GO:0005515                                                                                                       | -                                                               |            | IPR000536; IPR008946; PTHR11865 (PANTHER), PTHR11865:SF168 (PANTHER)                                          |
|                         | -                                                      | 0 |                                                                                                                    |                                                                 |            | -                                                                                                             |
| Caenorhabditis briggsae | briggsae cbr-kcc-3 protein                             | 4 | P:GO:0055085;<br>P:GO:0006811;<br>C:GO:0016020;<br>F:GO:0005215                                                    | -                                                               |            | IPR004841; PTHR11827 (PANTHER), PTHR11827:SF5 (PANTHER), SignalP (SIGNALP)                                    |
|                         | -                                                      | 0 |                                                                                                                    |                                                                 |            | -                                                                                                             |
| Caenorhabditis briggsae | major allergen                                         | 0 |                                                                                                                    |                                                                 |            | -                                                                                                             |
|                         | -                                                      | 0 |                                                                                                                    |                                                                 |            | -                                                                                                             |
| Ovis aries              | myl6 protein                                           | 7 | C:GO:0016461;<br>F:GO:0008307;<br>P:GO:0007519;<br>P:GO:0030049;<br>F:GO:0030898;<br>F:GO:0005509;<br>F:GO:0003774 | -                                                               |            | SignalP (SIGNALP)                                                                                             |
| Caenorhabditis elegans  | 2-oxoglutarate dehydroge-se e1 component               | 3 | F:GO:0004591;<br>F:GO:0030976;<br>P:GO:0006096                                                                     | -                                                               | EC:1.2.4.2 | IPR011603                                                                                                     |
| Caenorhabditis elegans  | hypothetical protein R12C12.9 [Caenorhabditis elegans] | 0 |                                                                                                                    |                                                                 |            | SignalP (SIGNALP)                                                                                             |
| Caenorhabditis elegans  | hypothetical protein R12C12.9 [Caenorhabditis elegans] | 0 |                                                                                                                    |                                                                 |            | SignalP (SIGNALP)                                                                                             |
| Caenorhabditis elegans  | hypothetical protein R12C12.9 [Caenorhabditis elegans] | 0 |                                                                                                                    |                                                                 |            | SignalP (SIGNALP)                                                                                             |
|                         | -                                                      | 0 |                                                                                                                    |                                                                 |            | -                                                                                                             |
| Caenorhabditis elegans  | temporarily assigned gene -me family member (tag-233)  | 5 | P:GO:0007268;<br>C:GO:0043231;<br>C:GO:0044444;<br>P:GO:0019915;<br>C:GO:0045202                                   | -                                                               |            | IPR001594; PTHR22883 (PANTHER), SignalP (SIGNALP)                                                             |

|                             |                                                      |   |                                                                                                                                                      |                                                                                                                                                                                        |             |                                                                                                                                                                               |
|-----------------------------|------------------------------------------------------|---|------------------------------------------------------------------------------------------------------------------------------------------------------|----------------------------------------------------------------------------------------------------------------------------------------------------------------------------------------|-------------|-------------------------------------------------------------------------------------------------------------------------------------------------------------------------------|
| Caenorhabditis briggsae     | lysocardiolipin acyltransferase 1                    | 0 |                                                                                                                                                      | F:GO:0016740;<br>F:GO:0003841;<br>C:GO:0016021;<br>C:GO:0016020;<br>P:GO:0007275;<br>C:GO:0005789;<br>F:GO:0005515;<br>F:GO:0008415;<br>C:GO:0005783;<br>P:GO:0008654;<br>P:GO:0008152 |             | PTHR10983 (PANTHER),<br>PTHR10983:SF1 (PANTHER)                                                                                                                               |
| Angiostrongylus cantonensis | hypothetical protein [Angiostrongylus cantonensis]   | 0 |                                                                                                                                                      |                                                                                                                                                                                        |             | -                                                                                                                                                                             |
| Caenorhabditis elegans      | solute carrier family 30 (zinc transporter) member 6 | 8 | F:GO:0005385;<br>P:GO:0055085;<br>P:GO:0040010;<br>F:GO:0005488;<br>P:GO:0018991;<br>P:GO:0006829;<br>C:GO:0016021;<br>C:GO:0000139                  | -                                                                                                                                                                                      |             | -                                                                                                                                                                             |
|                             | -                                                    | 0 |                                                                                                                                                      |                                                                                                                                                                                        |             | -                                                                                                                                                                             |
| Caenorhabditis elegans      | zinc carboxypeptidase family protein                 | 3 | P:GO:0006508;<br>F:GO:0004181;<br>F:GO:0008270                                                                                                       | -                                                                                                                                                                                      | EC:3.4.17.0 | IPR000834; IPR003146; IPR009020;<br>G3DSA:3.30.70.340 (GENE3D),<br>G3DSA:3.40.630.10 (GENE3D),<br>PTHR11705 (PANTHER),<br>PTHR11705:SF12 (PANTHER),<br>SSF53187 (SUPERFAMILY) |
|                             | -                                                    | 0 |                                                                                                                                                      |                                                                                                                                                                                        |             | -                                                                                                                                                                             |
| Caenorhabditis elegans      | nuc173 domain-containing protein                     | 0 |                                                                                                                                                      | F:GO:0005488                                                                                                                                                                           |             | PTHR21576 (PANTHER),<br>PTHR21576:SF2 (PANTHER), SignalP<br>(SIGNALP)                                                                                                         |
| Saccoglossus kowalevskii    | f-box-like wd repeat-containing protein tbl1y        | 9 | F:GO:0030528;<br>P:GO:0006357;<br>P:GO:0048545;<br>P:GO:0045892;<br>C:GO:0043234;<br>F:GO:0003677;<br>P:GO:0006508;<br>C:GO:0044451;<br>F:GO:0008134 | -                                                                                                                                                                                      |             | IPR006594; IPR013720                                                                                                                                                          |
| Caenorhabditis elegans      | dph3 homolog                                         | 7 | P:GO:0017183;<br>P:GO:0051099;<br>F:GO:0005515;<br>P:GO:0050709;<br>P:GO:0009792;<br>C:GO:0005737;<br>C:GO:0005634                                   | -                                                                                                                                                                                      |             | IPR007872; PTHR21454 (PANTHER),<br>PTHR21454:SF2 (PANTHER),<br>SSF144217 (SUPERFAMILY)                                                                                        |
| Caenorhabditis briggsae     | moving junction protein                              | 0 |                                                                                                                                                      | C:GO:0005618;<br>P:GO:0006950;<br>P:GO:0007155;<br>C:GO:0009986;<br>C:GO:0016020;<br>P:GO:0016998;<br>F:GO:0005515                                                                     |             | -                                                                                                                                                                             |
| Hydra magnipapillata        | nuclease harbi1-like                                 | 0 |                                                                                                                                                      |                                                                                                                                                                                        |             | PTHR22930 (PANTHER)                                                                                                                                                           |
|                             | -                                                    | 0 |                                                                                                                                                      |                                                                                                                                                                                        |             | -                                                                                                                                                                             |
|                             | -                                                    | 0 |                                                                                                                                                      |                                                                                                                                                                                        |             | SignalP (SIGNALP)                                                                                                                                                             |

|                         |                                                            |   |                                                                                                                                     |                                                |                                                                                                                                                               |
|-------------------------|------------------------------------------------------------|---|-------------------------------------------------------------------------------------------------------------------------------------|------------------------------------------------|---------------------------------------------------------------------------------------------------------------------------------------------------------------|
|                         | -                                                          | 0 |                                                                                                                                     |                                                | -                                                                                                                                                             |
| Caenorhabditis briggsae | phosphoribosyl pyrophosphate synthetase 1                  | 8 | P:GO:0009792;<br>F:GO:0016301;<br>P:GO:0009156;<br>F:GO:0004749;<br>F:GO:0005524;<br>F:GO:0000287;<br>P:GO:0009116;<br>F:GO:0042803 | -                                              | EC:2.7.6.1<br>IPR000836; IPR000842; IPR005946;<br>G3DSA:3.40.50.2020 (GENE3D),<br>PTHR10210 (PANTHER),<br>PTHR10210:SF14 (PANTHER),<br>SSF53271 (SUPERFAMILY) |
| Caenorhabditis elegans  | Hypothetical protein ZK355.2a [Caenorhabditis elegans]     | 0 |                                                                                                                                     |                                                | -                                                                                                                                                             |
| Caenorhabditis briggsae | briggsae cbr-dys-1 protein                                 | 7 | P:GO:0007271;<br>F:GO:0005515;<br>P:GO:0040017;<br>C:GO:0016010;<br>F:GO:0005277;<br>P:GO:0015870;<br>P:GO:0046716                  | -                                              | -                                                                                                                                                             |
|                         | -                                                          | 0 |                                                                                                                                     |                                                | SignalP (SIGNALP)                                                                                                                                             |
|                         | -                                                          | 0 |                                                                                                                                     |                                                | SignalP (SIGNALP)                                                                                                                                             |
|                         | -                                                          | 0 |                                                                                                                                     |                                                | SignalP (SIGNALP)                                                                                                                                             |
|                         | -                                                          | 0 |                                                                                                                                     |                                                | SignalP (SIGNALP)                                                                                                                                             |
| Loa loa                 | histone deacetylase 3                                      | 3 | P:GO:0016575;<br>P:GO:0006350;<br>F:GO:0004407                                                                                      | -                                              | -                                                                                                                                                             |
| Brugia malayi           | mbt repeat family protein                                  | 0 |                                                                                                                                     | P:GO:0045449;<br>F:GO:0008270;<br>C:GO:0005634 | IPR004092; G3DSA:2.30.30.160<br>(GENE3D), SSF63748 (SUPERFAMILY)                                                                                              |
| Caenorhabditis elegans  | jmjc domain containing protein                             | 5 | P:GO:0034720;<br>F:GO:0034647;<br>P:GO:0043970;<br>F:GO:0043992;<br>F:GO:0005515                                                    | -                                              | IPR011011; IPR013083; PTHR10694<br>(PANTHER), PTHR10694:SF1<br>(PANTHER)                                                                                      |
| Brugia malayi           | uncoordi-ted family member (unc-73)                        | 5 | P:GO:0023034;<br>P:GO:0031175;<br>P:GO:0050794;<br>F:GO:0005488;<br>C:GO:0044444                                                    | -                                              | IPR018159; G3DSA:1.20.58.60<br>(GENE3D), PTHR22826 (PANTHER),<br>PTHR22826:SF39 (PANTHER),<br>SSF46966 (SUPERFAMILY)                                          |
| Caenorhabditis elegans  | elegans protein partially confirmed by transcript evidence | 6 | P:GO:0018996;<br>P:GO:0009792;<br>P:GO:0040017;<br>P:GO:0040007;<br>F:GO:0005488;<br>P:GO:0002119                                   | -                                              | IPR001611; IPR003591;<br>G3DSA:3.80.10.10 (GENE3D),<br>PTHR23154 (PANTHER),<br>PTHR23154:SF116 (PANTHER),<br>PSS1450 (PROFILE), SSF52058<br>(SUPERFAMILY)     |
|                         | -                                                          | 0 |                                                                                                                                     |                                                | -                                                                                                                                                             |
| Brugia malayi           | sigma non-opioid intracellular receptor 1                  | 6 | F:GO:0005488;<br>F:GO:0004872;<br>C:GO:0044425;<br>C:GO:0044444;<br>C:GO:0005635;<br>C:GO:0005886                                   | -                                              | IPR006716; SignalP (SIGNALP)                                                                                                                                  |
|                         | -                                                          | 0 |                                                                                                                                     |                                                | -                                                                                                                                                             |
|                         | -                                                          | 0 |                                                                                                                                     |                                                | SignalP (SIGNALP)                                                                                                                                             |

|                        |                                                       |   |                                                                                                                                     |   |              |                                                                                                                                                |
|------------------------|-------------------------------------------------------|---|-------------------------------------------------------------------------------------------------------------------------------------|---|--------------|------------------------------------------------------------------------------------------------------------------------------------------------|
| Caenorhabditis elegans | clathrin-associated protein                           | 7 | P:GO:0016183;<br>C:GO:0008021;<br>P:GO:0007269;<br>C:GO:0030122;<br>F:GO:0005515;<br>P:GO:0006886;<br>P:GO:0033227                  | - |              | IPR001392; IPR008968; IPR015629;<br>IPR018240; G3DSA:2.60.40.1170<br>(GENE3D), PTHR11998 (PANTHER)                                             |
| Caenorhabditis elegans | early endosome antigen 1                              | 4 | P:GO:0016192;<br>F:GO:0005515;<br>C:GO:0044444;<br>C:GO:0016020                                                                     | - |              | IPR007087; IPR015880; PD936484<br>(PRODOM), PTHR23164 (PANTHER)                                                                                |
| Caenorhabditis elegans | mitochondrial carrier triple repeat 1                 | 4 | P:GO:0009792;<br>F:GO:0005488;<br>P:GO:0055085;<br>C:GO:0016021                                                                     | - |              | IPR001993; IPR018108;<br>G3DSA:1.50.40.10 (GENE3D),<br>PTHR11896:SF14 (PANTHER)                                                                |
| Caenorhabditis elegans | transcription termi-tion r- polymerase ii             | 5 | F:GO:0005488;<br>P:GO:0044260;<br>P:GO:0090304;<br>P:GO:0010467;<br>F:GO:0016787                                                    | - |              | IPR000330; IPR001650; IPR002464;<br>G3DSA:3.40.50.300 (GENE3D),<br>PTHR10799 (PANTHER),<br>PTHR10799:SF63 (PANTHER),<br>SSF52540 (SUPERFAMILY) |
| -                      | -                                                     | 0 |                                                                                                                                     |   |              | -                                                                                                                                              |
| Caenorhabditis elegans | transaldolase                                         | 8 | P:GO:0009052;<br>F:GO:0004801;<br>P:GO:0032231;<br>P:GO:0035107;<br>P:GO:0007424;<br>P:GO:0009792;<br>C:GO:0005737;<br>P:GO:0002064 | - | EC:2.2.1.2   | -                                                                                                                                              |
| Caenorhabditis elegans | denticleless homolog                                  | 4 | P:GO:0050896;<br>P:GO:0044238;<br>P:GO:0044260;<br>C:GO:0044424                                                                     | - |              | IPR001680; IPR011046; IPR015943;<br>IPR017986; IPR019775; IPR019781;<br>IPR019782; IPR020472; PTHR22852<br>(PANTHER)                           |
| Caenorhabditis elegans | denticleless homolog                                  | 4 | P:GO:0050896;<br>P:GO:0044238;<br>P:GO:0044260;<br>C:GO:0044424                                                                     | - |              | IPR001680; IPR011046; IPR015943;<br>IPR017986; IPR019775; IPR019781;<br>IPR019782; IPR020472; PTHR22852<br>(PANTHER)                           |
| -                      | -                                                     | 0 |                                                                                                                                     |   |              | -                                                                                                                                              |
| -                      | -                                                     | 0 |                                                                                                                                     |   |              | SignalP (SIGNALP)                                                                                                                              |
| Caenorhabditis elegans | hypothetical protein W05H9.1 [Caenorhabditis elegans] | 0 |                                                                                                                                     |   |              | -                                                                                                                                              |
| Ancylostoma caninum    | af132291_1ancylostoma-secreted protein 1 precursor    | 0 |                                                                                                                                     |   | C:GO:0005576 | -                                                                                                                                              |

|                         |                                                            |    |                                                                                                                                                                                                                                                                                                                                                                                                                                                                                                                                                                              |   |             |                                                                                                              |
|-------------------------|------------------------------------------------------------|----|------------------------------------------------------------------------------------------------------------------------------------------------------------------------------------------------------------------------------------------------------------------------------------------------------------------------------------------------------------------------------------------------------------------------------------------------------------------------------------------------------------------------------------------------------------------------------|---|-------------|--------------------------------------------------------------------------------------------------------------|
| Homo sapiens            | matrix metalloprotei-se 2                                  | 39 | P:GO:0001957;<br>P:GO:0035094;<br>P:GO:0001541;<br>P:GO:0001542;<br>P:GO:0051602;<br>P:GO:0060033;<br>F:GO:0008270;<br>P:GO:0071347;<br>P:GO:0042542;<br>P:GO:0048771;<br>P:GO:0014823;<br>P:GO:0009612;<br>P:GO:0007568;<br>P:GO:0060325;<br>C:GO:0005615;<br>P:GO:0060740;<br>P:GO:0007162;<br>P:GO:0001955;<br>P:GO:0045906;<br>P:GO:0007565;<br>F:GO:0004222;<br>C:GO:0005578;<br>P:GO:0001666;<br>P:GO:0060346;<br>P:GO:0030574;<br>P:GO:0042493;<br>P:GO:0014012;<br>P:GO:0007264;<br>C:GO:0005622;<br>P:GO:0006355;<br>F:GO:0005524;<br>F:GO:0008134;<br>P:GO:0015031 | - | EC:3.4.24.0 | IPR001818; G3DSA:3.40.390.10 (GENE3D), PTHR10201 (PANTHER), PTHR10201:SF29 (PANTHER), SSF55486 (SUPERFAMILY) |
| Caenorhabditis elegans  | ras family protein                                         | 6  | C:GO:0005622;<br>P:GO:0006355;<br>F:GO:0005524;<br>F:GO:0008134;<br>P:GO:0015031                                                                                                                                                                                                                                                                                                                                                                                                                                                                                             | - | -           | -                                                                                                            |
| Caenorhabditis elegans  | elegans protein partially confirmed by transcript evidence | 1  | C:GO:0016020                                                                                                                                                                                                                                                                                                                                                                                                                                                                                                                                                                 | - | -           | IPR000175; PTHR11616:SF16 (PANTHER), SignalP (SIGNALP)                                                       |
| Caenorhabditis briggsae | hypothetical protein                                       | 0  |                                                                                                                                                                                                                                                                                                                                                                                                                                                                                                                                                                              |   |             | IPR018943                                                                                                    |
|                         | -                                                          | 0  |                                                                                                                                                                                                                                                                                                                                                                                                                                                                                                                                                                              |   |             | -                                                                                                            |
| Caenorhabditis briggsae | Hypothetical protein CBG02063 [Caenorhabditis briggsae]    | 0  |                                                                                                                                                                                                                                                                                                                                                                                                                                                                                                                                                                              |   |             | -                                                                                                            |
|                         | -                                                          | 0  |                                                                                                                                                                                                                                                                                                                                                                                                                                                                                                                                                                              |   |             | -                                                                                                            |
|                         | -                                                          | 0  |                                                                                                                                                                                                                                                                                                                                                                                                                                                                                                                                                                              |   |             | -                                                                                                            |
| Caenorhabditis elegans  | p21-activated ki-se family member (pak-1)                  | 16 | C:GO:0005925;<br>P:GO:0007411;<br>P:GO:0006468;<br>F:GO:0004702;<br>P:GO:0008360;<br>F:GO:0005515;<br>P:GO:0050803;<br>P:GO:0007155;<br>F:GO:0005525;<br>C:GO:0016021;<br>P:GO:0007391;<br>P:GO:0007254;<br>C:GO:0005856;<br>P:GO:0016601;<br>F:GO:0005524;<br>P:GO:0050770                                                                                                                                                                                                                                                                                                  | - | -           | -                                                                                                            |
|                         | -                                                          | 0  |                                                                                                                                                                                                                                                                                                                                                                                                                                                                                                                                                                              |   |             | -                                                                                                            |

|                             |                                                        |    |                                                                                                                                                                                                                                                                                                                                |                                                                                                                                                                                        |                                                                                                                                  |
|-----------------------------|--------------------------------------------------------|----|--------------------------------------------------------------------------------------------------------------------------------------------------------------------------------------------------------------------------------------------------------------------------------------------------------------------------------|----------------------------------------------------------------------------------------------------------------------------------------------------------------------------------------|----------------------------------------------------------------------------------------------------------------------------------|
| Caenorhabditis briggsae     | muscle glycogen phosphorylase                          | 19 | P:GO:0001666;<br>F:GO:0008184;<br>C:GO:0016529;<br>F:GO:0008144;<br>C:GO:0005829;<br>C:GO:0030018;<br>P:GO:0000910;<br>P:GO:0005980;<br>C:GO:0005625;<br>F:GO:0005509;<br>P:GO:0006874;<br>F:GO:0005085;<br>P:GO:0051056;<br>F:GO:0042803;<br>F:GO:0016208;<br>P:GO:0009792;<br>F:GO:0030170;<br>P:GO:0051591;<br>F:GO:0005529 | -                                                                                                                                                                                      | IPR000811; IPR011833;<br>G3DSA:3.40.50.2000 (GENE3D),<br>SSF53756 (SUPERFAMILY)                                                  |
| Angiostrongylus cantonensis | -nos homolog 3                                         | 0  |                                                                                                                                                                                                                                                                                                                                | P:GO:0006417;<br>P:GO:0007283;<br>P:GO:0048477;<br>F:GO:0008270;<br>F:GO:0003674;<br>F:GO:0003723;<br>P:GO:0007275;<br>P:GO:0009792;<br>P:GO:0030154;<br>C:GO:0005575;<br>F:GO:0005515 | -                                                                                                                                |
|                             | -                                                      | 0  |                                                                                                                                                                                                                                                                                                                                |                                                                                                                                                                                        | SignalP (SIGNALP)                                                                                                                |
|                             | -                                                      | 0  |                                                                                                                                                                                                                                                                                                                                |                                                                                                                                                                                        | -                                                                                                                                |
| Caenorhabditis elegans      | enhancer of -1 mutant phenotype family member (eel-1)  | 0  |                                                                                                                                                                                                                                                                                                                                |                                                                                                                                                                                        | -                                                                                                                                |
| Loa loa                     | adrenocortical alacrimia ( triple-a)                   | 0  |                                                                                                                                                                                                                                                                                                                                | C:GO:0005643;<br>C:GO:0005635;<br>F:GO:0003674;<br>P:GO:0006913;<br>P:GO:0007612;<br>P:GO:0046822;<br>C:GO:0005575;<br>P:GO:0008150;<br>P:GO:0009566                                   | IPR001680; IPR015943; IPR019781;<br>PTHR14494 (PANTHER), SSF101908<br>(SUPERFAMILY)                                              |
|                             | -                                                      | 0  |                                                                                                                                                                                                                                                                                                                                |                                                                                                                                                                                        | SignalP (SIGNALP)                                                                                                                |
| Caenorhabditis elegans      | 3-oxoacyl-acyl-carrier-protein reductase               | 5  | F:GO:0008667;<br>P:GO:0009239;<br>P:GO:0055114;<br>F:GO:0005488;<br>F:GO:0004022                                                                                                                                                                                                                                               | -                                                                                                                                                                                      | EC:1.3.1.28;<br>EC:1.1.1.1<br>IPR002198; IPR002347; IPR016040;<br>IPR020904; PTHR19410:SF76<br>(PANTHER), SSF51735 (SUPERFAMILY) |
|                             | -                                                      | 0  |                                                                                                                                                                                                                                                                                                                                |                                                                                                                                                                                        | -                                                                                                                                |
| Caenorhabditis elegans      | hypothetical protein T25C12.3 [Caenorhabditis elegans] | 0  |                                                                                                                                                                                                                                                                                                                                | F:GO:0005488;<br>P:GO:0040010                                                                                                                                                          | -                                                                                                                                |
|                             | -                                                      | 0  |                                                                                                                                                                                                                                                                                                                                |                                                                                                                                                                                        | -                                                                                                                                |
| Caenorhabditis elegans      | type iii restriction res subunit family protein        | 3  | F:GO:0005524;<br>F:GO:0003677;<br>F:GO:0008026                                                                                                                                                                                                                                                                                 | -                                                                                                                                                                                      | IPR011545; G3DSA:3.40.50.300<br>(GENE3D), PTHR11752 (PANTHER),<br>PTHR11752:SF8 (PANTHER), SSF52540<br>(SUPERFAMILY)             |
|                             | -                                                      | 0  |                                                                                                                                                                                                                                                                                                                                |                                                                                                                                                                                        | SignalP (SIGNALP)                                                                                                                |

|                         |                                                        |    |  |                                                                                                                                                                                        |   |                                                                                                                |
|-------------------------|--------------------------------------------------------|----|--|----------------------------------------------------------------------------------------------------------------------------------------------------------------------------------------|---|----------------------------------------------------------------------------------------------------------------|
| Loa loa                 | hypothetical protein LOAG_03273 [Loa loa]              | 0  |  | F:GO:0008270;<br>C:GO:0005622                                                                                                                                                          |   | IPR007087; IPR015880; PTHR23224 (PANTHER), PTHR23224:SF120 (PANTHER), SSF57667 (SUPERFAMILY)                   |
| Drosophila virilis      | proteophosphoglycan 5                                  | 0  |  | F:GO:0008061;<br>P:GO:0006030;<br>C:GO:0005576                                                                                                                                         |   | -                                                                                                              |
|                         | -                                                      | 0  |  |                                                                                                                                                                                        |   | G3DSA:3.40.50.300 (GENE3D), PTHR10887 (PANTHER), SSF52540 (SUPERFAMILY)                                        |
| Caenorhabditis elegans  | calcium calmodulin-dependent protein ki-se ki-se alpha | 10 |  | C:GO:0005829;<br>F:GO:0005516;<br>P:GO:0032147;<br>C:GO:0005625;<br>P:GO:0032793;<br>F:GO:0005524;<br>P:GO:0019722;<br>F:GO:0004683;<br>C:GO:0005634;<br>P:GO:0006468                  | - | EC:2.7.11.17<br>IPR011009; IPR020636; IPR020657;<br>G3DSA:1.10.510.10 (GENE3D)                                 |
| Ixodes scapularis       | multidrug resistance-associated protein 4-like         | 6  |  | F:GO:0017111;<br>P:GO:0006810;<br>C:GO:0031088;<br>C:GO:0005624;<br>F:GO:0016491;<br>C:GO:0005886                                                                                      | - | EC:3.6.1.15<br>PTHR19242 (PANTHER),<br>PTHR19242:SF97 (PANTHER), SignalP (SIGNALP)                             |
| Caenorhabditis briggsae | metaxin 1                                              | 5  |  | P:GO:0006626;<br>F:GO:0005515;<br>P:GO:0000003;<br>C:GO:0016021;<br>C:GO:0005741                                                                                                       | - | IPR010987; IPR017933; IPR019564;<br>PTHR12289 (PANTHER),<br>PTHR12289:SF16 (PANTHER)                           |
| Caenorhabditis elegans  | aarf domain containing ki-se 1                         | 1  |  | F:GO:0016740                                                                                                                                                                           | - | PTHR10566 (PANTHER),<br>PTHR10566:SF7 (PANTHER)                                                                |
|                         | -                                                      | 0  |  |                                                                                                                                                                                        |   | -                                                                                                              |
| Brugia malayi           | hypothetical protein Bm1_01005 [Brugia malayi]         | 0  |  |                                                                                                                                                                                        |   | -                                                                                                              |
|                         | -                                                      | 0  |  |                                                                                                                                                                                        |   | SignalP (SIGNALP)                                                                                              |
| Caenorhabditis briggsae | gtp-binding protein parf                               | 2  |  | C:GO:0005622;<br>F:GO:0000166                                                                                                                                                          | - | IPR001806; IPR013753; IPR020851;<br>G3DSA:3.40.50.300 (GENE3D),<br>PTHR14932 (PANTHER), SSF52540 (SUPERFAMILY) |
| Caenorhabditis briggsae | kinesin family member 11                               | 11 |  | P:GO:0006915;<br>C:GO:0000922;<br>P:GO:0090307;<br>C:GO:0005876;<br>P:GO:0007100;<br>C:GO:0016585;<br>F:GO:0003774;<br>F:GO:0000166;<br>C:GO:0005871;<br>F:GO:0019901;<br>C:GO:0051233 | - | IPR001752; IPR019821; PTHR16012 (PANTHER), PTHR16012:SF151 (PANTHER), SSF52540 (SUPERFAMILY)                   |
| Ancylostoma caninum     | venom-allergen-like protein family member (vap-1)      | 2  |  | P:GO:0040011;<br>P:GO:0006898                                                                                                                                                          | - | -                                                                                                              |
| Brugia malayi           | fragile site-associated protein                        | 0  |  |                                                                                                                                                                                        |   | -                                                                                                              |
|                         | -                                                      | 0  |  |                                                                                                                                                                                        |   | -                                                                                                              |



|                         |                                                     |    |                                                                                                                                                                                        |                                                                 |                                                                                                        |
|-------------------------|-----------------------------------------------------|----|----------------------------------------------------------------------------------------------------------------------------------------------------------------------------------------|-----------------------------------------------------------------|--------------------------------------------------------------------------------------------------------|
| Callithrix jacchus      | dead (asp-glu-ala-asp) box polypeptide 5 isoform 1  | 11 | F:GO:0003723;<br>F:GO:0003712;<br>P:GO:0016049;<br>C:GO:0005681;<br>C:GO:0005730;<br>F:GO:0008026;<br>P:GO:0008380;<br>F:GO:0005524;<br>P:GO:0006397;<br>F:GO:0003724;<br>P:GO:0045941 | -                                                               | -                                                                                                      |
| Brugia malayi           | hypothetical protein [Brugia malayi]                | 0  |                                                                                                                                                                                        | F:GO:0005096;<br>P:GO:0051056;<br>P:GO:0007165;<br>C:GO:0005622 | -                                                                                                      |
| Caenorhabditis briggsae | wd repeat domain 3                                  | 1  | P:GO:0006898                                                                                                                                                                           | -                                                               | IPR001680; IPR011046; IPR015943;<br>IPR017986; IPR019781; IPR019782;<br>IPR020472; PTHR19853 (PANTHER) |
| Caenorhabditis briggsae | wd repeat domain 3                                  | 1  | P:GO:0006898                                                                                                                                                                           | -                                                               | IPR001680; IPR011046; IPR015943;<br>IPR017986; IPR019781; IPR019782;<br>IPR020472; PTHR19853 (PANTHER) |
| Loa loa                 | sp1070 cg9138-pa                                    | 2  | F:GO:0005488;<br>C:GO:0044425                                                                                                                                                          | -                                                               | IPR008985; IPR013032; IPR013320;<br>PTHR19277 (PANTHER)                                                |
| Caenorhabditis elegans  | uncharacterized protein c10orf58-like               | 2  | C:GO:0005739;<br>F:GO:0005515                                                                                                                                                          | -                                                               | IPR012335; SignalP (SIGNALP)                                                                           |
| Caenorhabditis elegans  | elegans protein confirmed by transcript evidence    | 0  |                                                                                                                                                                                        |                                                                 | IPR011680; PTHR12394:SF1<br>(PANTHER)                                                                  |
|                         | -                                                   | 0  |                                                                                                                                                                                        |                                                                 | SignalP (SIGNALP)                                                                                      |
| Caenorhabditis elegans  | programmed cell death 6 interacting protein         | 5  | P:GO:0006915;<br>F:GO:0046983;<br>F:GO:0048306;<br>C:GO:0005829;<br>F:GO:0017124                                                                                                       | -                                                               | IPR004328; G3DSA:1.25.40.280<br>(GENE3D), PTHR23030 (PANTHER),<br>PTHR23030:SF11 (PANTHER)             |
|                         | -                                                   | 0  |                                                                                                                                                                                        |                                                                 | -                                                                                                      |
| Caenorhabditis elegans  | briggsae cbr-gbf-1 protein                          | 0  |                                                                                                                                                                                        | P:GO:0032012;<br>F:GO:0005086;<br>C:GO:0005622                  | -                                                                                                      |
| Caenorhabditis elegans  | briggsae cbr-gbf-1 protein                          | 0  |                                                                                                                                                                                        | P:GO:0032012;<br>F:GO:0005086;<br>C:GO:0005622                  | -                                                                                                      |
| Caenorhabditis elegans  | briggsae cbr-gbf-1 protein                          | 0  |                                                                                                                                                                                        | P:GO:0032012;<br>F:GO:0005086;<br>C:GO:0005622                  | -                                                                                                      |
|                         | -                                                   | 0  |                                                                                                                                                                                        |                                                                 | -                                                                                                      |
|                         | -                                                   | 0  |                                                                                                                                                                                        |                                                                 | -                                                                                                      |
|                         | -                                                   | 0  |                                                                                                                                                                                        |                                                                 | -                                                                                                      |
| Danio rerio             | si: (novel transposase)                             | 0  |                                                                                                                                                                                        | C:GO:0009507                                                    | PTHR22930 (PANTHER)                                                                                    |
| Caenorhabditis elegans  | u3 small nucleolar r--associated protein 18 homolog | 4  | P:GO:0009792;<br>P:GO:0002119;<br>P:GO:0040010;<br>P:GO:0006898                                                                                                                        | -                                                               | IPR001680; IPR011046; IPR015943;<br>PTHR18359 (PANTHER)                                                |
|                         | -                                                   | 0  |                                                                                                                                                                                        |                                                                 | -                                                                                                      |
| Caenorhabditis elegans  | cysteine protease atg4b                             | 3  | P:GO:0006508;<br>F:GO:0005515;<br>F:GO:0008234                                                                                                                                         | -                                                               | IPR005078; PTHR22624:SF18<br>(PANTHER)                                                                 |

|                         |                                                          |    |                                                                                                                                                                                        |                                                                 |            |                                                                                                                                               |
|-------------------------|----------------------------------------------------------|----|----------------------------------------------------------------------------------------------------------------------------------------------------------------------------------------|-----------------------------------------------------------------|------------|-----------------------------------------------------------------------------------------------------------------------------------------------|
| Caenorhabditis elegans  | high-affinity copper uptake protein                      | 5  | P:GO:0010171;<br>P:GO:0040018;<br>P:GO:0040010;<br>P:GO:0000003;<br>C:GO:0016020                                                                                                       | -                                                               | -          |                                                                                                                                               |
| -                       | -                                                        | 0  |                                                                                                                                                                                        |                                                                 |            | SignalP (SIGNALP)                                                                                                                             |
| Caenorhabditis elegans  | developmentally-regulated gtp-binding protein 2          | 5  | F:GO:0005525;<br>C:GO:0016021;<br>P:GO:0015684;<br>F:GO:0015093;<br>C:GO:0005739                                                                                                       | -                                                               |            | IPR002917; IPR006073; IPR006074;<br>G3DSA:3.40.50.300 (GENE3D),<br>PTHR11702 (PANTHER),<br>PTHR11702:SF7 (PANTHER), SSF52540<br>(SUPERFAMILY) |
| Caenorhabditis briggsae | elegans protein confirmed by transcript evidence         | 0  |                                                                                                                                                                                        |                                                                 |            | IPR001534; SignalP (SIGNALP)                                                                                                                  |
| Caenorhabditis elegans  | dihydropteridine reductase                               | 3  | F:GO:0016491;<br>P:GO:0044237;<br>F:GO:0050662                                                                                                                                         | -                                                               |            | IPR002198; IPR016040; IPR020904;<br>PTHR15104 (PANTHER), SSF51735<br>(SUPERFAMILY)                                                            |
| Caenorhabditis briggsae | briggsae cbr-phat-2 protein                              | 1  | F:GO:0005515                                                                                                                                                                           | -                                                               |            | -                                                                                                                                             |
| Caenorhabditis elegans  | briggsae cbr-phat-2 protein                              | 1  | F:GO:0005515                                                                                                                                                                           | -                                                               |            | IPR003582; PTHR21724 (PANTHER)                                                                                                                |
| Caenorhabditis elegans  | briggsae cbr-phat-2 protein                              | 1  | F:GO:0005515                                                                                                                                                                           | -                                                               |            | -                                                                                                                                             |
| Brugia malayi           | briggsae cbr-sax-2 protein                               | 11 | F:GO:0005515;<br>P:GO:0048601;<br>P:GO:0016055;<br>P:GO:0042052;<br>P:GO:0008407;<br>F:GO:0016563;<br>P:GO:0045860;<br>P:GO:0048800;<br>P:GO:0035317;<br>P:GO:0048814;<br>C:GO:0005938 | -                                                               |            | PTHR12295 (PANTHER),<br>PTHR12295:SF6 (PANTHER)                                                                                               |
| -                       | -                                                        | 0  |                                                                                                                                                                                        |                                                                 |            | IPR007087; IPR015880                                                                                                                          |
| Caenorhabditis briggsae | non-specific lipid-transfer protein                      | 6  | F:GO:0016747;<br>F:GO:0008289;<br>C:GO:0005777;<br>F:GO:0005515;<br>P:GO:0019915;<br>P:GO:0008152                                                                                      | -                                                               | EC:2.3.1.0 | IPR002155; IPR016038; IPR016039;<br>IPR020615; IPR020616;<br>PTHR18919:SF9 (PANTHER)                                                          |
| Caenorhabditis briggsae | non-specific lipid-transfer protein                      | 6  | F:GO:0016747;<br>F:GO:0008289;<br>C:GO:0005777;<br>F:GO:0005515;<br>P:GO:0019915;<br>P:GO:0008152                                                                                      | -                                                               | EC:2.3.1.0 | IPR002155; IPR016038; IPR016039;<br>IPR020615; IPR020616;<br>PTHR18919:SF9 (PANTHER)                                                          |
| Caenorhabditis briggsae | ankyrin repeat domain protein                            | 0  |                                                                                                                                                                                        | F:GO:0016740;<br>F:GO:0008270;<br>F:GO:0005515;<br>C:GO:0005622 |            | -                                                                                                                                             |
| Caenorhabditis elegans  | testis derived transcript                                | 1  | P:GO:0008340                                                                                                                                                                           | -                                                               |            | IPR007087; IPR010442; PTHR18973<br>(PANTHER), PTHR18973:SF81<br>(PANTHER)                                                                     |
| -                       | -                                                        | 0  |                                                                                                                                                                                        |                                                                 |            | -                                                                                                                                             |
| Caenorhabditis elegans  | hypothetical protein Y45F10B.13 [Caenorhabditis elegans] | 1  | P:GO:0009792                                                                                                                                                                           | -                                                               |            | -                                                                                                                                             |
| Caenorhabditis elegans  | hypothetical protein Y45F10B.13 [Caenorhabditis elegans] | 1  | P:GO:0009792                                                                                                                                                                           | -                                                               |            | -                                                                                                                                             |
| Caenorhabditis elegans  | briggsae cbr-vha-19 protein                              | 4  | P:GO:0000003;<br>P:GO:0018996;<br>P:GO:0002119;<br>P:GO:0006898                                                                                                                        | -                                                               |            | IPR008388; PF05827 (PFAM)                                                                                                                     |
| -                       | -                                                        | 0  |                                                                                                                                                                                        |                                                                 |            | SignalP (SIGNALP)                                                                                                                             |
| Brugia malayi           | synthetic lethal with mec family member (sym-4)          | 1  | P:GO:0040011                                                                                                                                                                           | -                                                               |            | -                                                                                                                                             |

|                         |                                                            |    |                                                                                                                                                                                                                                                                                                                                                                                                                                                                                         |                                                                 |                                                                                                                                           |
|-------------------------|------------------------------------------------------------|----|-----------------------------------------------------------------------------------------------------------------------------------------------------------------------------------------------------------------------------------------------------------------------------------------------------------------------------------------------------------------------------------------------------------------------------------------------------------------------------------------|-----------------------------------------------------------------|-------------------------------------------------------------------------------------------------------------------------------------------|
| Brugia malayi           | synthetic lethal with mec family member (sym-4)            | 0  |                                                                                                                                                                                                                                                                                                                                                                                                                                                                                         | P:GO:0040011                                                    | -                                                                                                                                         |
| Caenorhabditis briggsae | tumor protein d52                                          | 6  | F:GO:0005509;<br>F:GO:0046982;<br>C:GO:0005783;<br>F:GO:0042803;<br>C:GO:0048471;<br>P:GO:0030183                                                                                                                                                                                                                                                                                                                                                                                       | -                                                               | -                                                                                                                                         |
| Caenorhabditis briggsae | cg30118 cg30118-pb                                         | 0  |                                                                                                                                                                                                                                                                                                                                                                                                                                                                                         | C:GO:0031533;<br>F:GO:0004651;<br>F:GO:0005515;<br>P:GO:0006370 | IPR004206; SSF52540 (SUPERFAMILY)                                                                                                         |
| Homo sapiens            | t cell receptor beta chain                                 | 0  |                                                                                                                                                                                                                                                                                                                                                                                                                                                                                         |                                                                 | SignalP (SIGNALP)                                                                                                                         |
| Caenorhabditis elegans  | g in family member (glb-8)                                 | 4  | F:GO:0020037;<br>F:GO:0005344;<br>P:GO:0015671;<br>F:GO:0019825                                                                                                                                                                                                                                                                                                                                                                                                                         | -                                                               | IPR000971; IPR009050; IPR012292                                                                                                           |
| Loa loa                 | hypothetical protein LOAG_02232 [Loa loa]                  | 0  |                                                                                                                                                                                                                                                                                                                                                                                                                                                                                         |                                                                 | -                                                                                                                                         |
|                         |                                                            | 0  |                                                                                                                                                                                                                                                                                                                                                                                                                                                                                         |                                                                 | -                                                                                                                                         |
| Pristionchus pacificus  | armadillo beta-catenin-like repeat family protein          | 39 | F:GO:0002921;<br>P:GO:0009887;<br>P:GO:0016055;<br>P:GO:0048754;<br>P:GO:0060562;<br>P:GO:0007154;<br>N:GO:0061138;<br>C:GO:0043234;<br>P:GO:0001822;<br>C:GO:0044463;<br>P:GO:0030324;<br>P:GO:0045944;<br>P:GO:0030334;<br>P:GO:0003002;<br>C:GO:0005913;<br>P:GO:0007399;<br>P:GO:0048523;<br>C:GO:0005634;<br>P:GO:0048598;<br>P:GO:0042659;<br>P:GO:0048646;<br>P:GO:0042127;<br>P:GO:0040010;<br>P:GO:0007155;<br>P:GO:0030855;<br>P:GO:0040026;<br>F:GO:0003713;<br>C:GO:0005624 | -                                                               | IPR000225; IPR011989; IPR016024;<br>PTHR23315 (PANTHER),<br>PTHR23315:SF3 (PANTHER)                                                       |
| Dictyocaulus viviparus  | elegans protein partially confirmed by transcript evidence | 0  |                                                                                                                                                                                                                                                                                                                                                                                                                                                                                         |                                                                 | -                                                                                                                                         |
|                         |                                                            | 0  |                                                                                                                                                                                                                                                                                                                                                                                                                                                                                         |                                                                 | -                                                                                                                                         |
| Caenorhabditis elegans  | acid phosphatase                                           | 3  | F:GO:0046872;<br>C:GO:0016021;<br>F:GO:0003993                                                                                                                                                                                                                                                                                                                                                                                                                                          | -                                                               | EC:3.1.3.2<br>IPR003961; IPR004843; IPR008963;<br>IPR015914; G3DSA:3.60.21.10<br>(GENE3D), PTHR22953 (PANTHER),<br>SSF56300 (SUPERFAMILY) |
|                         |                                                            | 0  |                                                                                                                                                                                                                                                                                                                                                                                                                                                                                         |                                                                 | -                                                                                                                                         |
| Caenorhabditis elegans  | zinc carboxypeptidase family protein                       | 3  | P:GO:0006508;<br>F:GO:0004181;<br>F:GO:0008270                                                                                                                                                                                                                                                                                                                                                                                                                                          | -                                                               | EC:3.4.17.0<br>IPR000834; G3DSA:3.40.630.10<br>(GENE3D), PTHR11705 (PANTHER),<br>PTHR11705:SF10 (PANTHER),<br>SSF53187 (SUPERFAMILY)      |
|                         |                                                            | 0  |                                                                                                                                                                                                                                                                                                                                                                                                                                                                                         |                                                                 | -                                                                                                                                         |

|                            |                                                              |    |                                                                                                                                                                                                                                           |                                                |                                                                                                                                      |
|----------------------------|--------------------------------------------------------------|----|-------------------------------------------------------------------------------------------------------------------------------------------------------------------------------------------------------------------------------------------|------------------------------------------------|--------------------------------------------------------------------------------------------------------------------------------------|
| Caenorhabditis briggsae    | glutamate-rich wd repeat containing 1                        | 1  | F:GO:0016740                                                                                                                                                                                                                              | -                                              | IPR001680; IPR011046; IPR015943; IPR017986; IPR019775; IPR019781; IPR019782; IPR020472; PTHR22850 (PANTHER), PTHR22850:SF6 (PANTHER) |
| Caenorhabditis elegans     | mitochondrial ribosomal protein s17                          | 7  | P:GO:0009792;<br>P:GO:0002119;<br>F:GO:0005515;<br>C:GO:0044444;<br>P:GO:0000003;<br>C:GO:0043229;<br>P:GO:0040007                                                                                                                        | -                                              | IPR001993; IPR016027; PTHR11896:SF2 (PANTHER)                                                                                        |
|                            | -                                                            | 0  |                                                                                                                                                                                                                                           |                                                | SignalP (SIGNALP)                                                                                                                    |
| Caenorhabditis elegans     | ke (drosophila actin-binding) homolog family member (ketn-1) | 1  | P:GO:0000003                                                                                                                                                                                                                              | -                                              | SignalP (SIGNALP)                                                                                                                    |
| Loa loa                    | msp domain protein with glu-rich domain                      | 2  | C:GO:0005856;<br>F:GO:0005198                                                                                                                                                                                                             | -                                              | IPR000535; IPR008962; PTHR21513 (PANTHER), PTHR21513:SF1 (PANTHER)                                                                   |
| Caenorhabditis elegans     | thioredoxin                                                  | 3  | C:GO:0005737;<br>P:GO:0006516;<br>F:GO:0003824                                                                                                                                                                                            | -                                              | -                                                                                                                                    |
| Caenorhabditis elegans     | briggsae cbr-unc-71 protein                                  | 0  |                                                                                                                                                                                                                                           | P:GO:0006508;<br>F:GO:0008270;<br>F:GO:0004222 | SignalP (SIGNALP)                                                                                                                    |
| Pediculus humanus corporis | mitogen-activated protein ki-se ki-se 7                      | 2  | F:GO:0016301;<br>F:GO:0005515                                                                                                                                                                                                             | -                                              | IPR000719; IPR008271; IPR011009; IPR017442; G3DSA:1.10.510.10 (GENE3D), PTHR22986 (PANTHER), PTHR22986:SF34 (PANTHER)                |
| Caenorhabditis elegans     | mboat family protein                                         | 2  | C:GO:0016020;<br>F:GO:0016740                                                                                                                                                                                                             | -                                              | SignalP (SIGNALP)                                                                                                                    |
| Brugia malayi              | elegans protein partially confirmed by transcript evidence   | 0  |                                                                                                                                                                                                                                           | F:GO:0008270;<br>C:GO:0005622                  | -                                                                                                                                    |
|                            | -                                                            | 0  |                                                                                                                                                                                                                                           |                                                |                                                                                                                                      |
| Nematostella vectensis     | ribosomal protein s5                                         | 14 | P:GO:0006413;<br>F:GO:0003729;<br>P:GO:0008340;<br>F:GO:0008270;<br>P:GO:0006355;<br>P:GO:0040007;<br>F:GO:0003735;<br>P:GO:0006450;<br>P:GO:0000003;<br>C:GO:0022627;<br>P:GO:0002119;<br>F:GO:0005515;<br>P:GO:0009792;<br>C:GO:0005634 | -                                              | IPR000235; IPR005716; IPR020606                                                                                                      |
| Caenorhabditis elegans     | abnormal cell lineage family member (lin-54)                 | 1  | C:GO:0070176                                                                                                                                                                                                                              | -                                              | IPR005172; PTHR12446 (PANTHER), PTHR12446:SF6 (PANTHER)                                                                              |
|                            | -                                                            | 0  |                                                                                                                                                                                                                                           |                                                |                                                                                                                                      |
|                            | -                                                            | 0  |                                                                                                                                                                                                                                           |                                                | -                                                                                                                                    |

|                             |                                            |   |                                                                                                                                     |                               |                                   |                                                                                                                                                        |
|-----------------------------|--------------------------------------------|---|-------------------------------------------------------------------------------------------------------------------------------------|-------------------------------|-----------------------------------|--------------------------------------------------------------------------------------------------------------------------------------------------------|
| Caenorhabditis elegans      | aldehyde dehydroge-se                      | 8 | F:GO:0004029;<br>F:GO:0003676;<br>F:GO:0001758;<br>P:GO:0055114;<br>F:GO:0004028;<br>C:GO:0005622;<br>P:GO:0006081;<br>F:GO:0008270 | -                             | EC:1.2.1.3;<br>EC:1.2.1.36        | IPR015590; IPR016161; IPR016163;<br>PTHR11699:SF46 (PANTHER)                                                                                           |
| Caenorhabditis elegans      | aldehyde dehydroge-se                      | 8 | F:GO:0004029;<br>F:GO:0003676;<br>F:GO:0001758;<br>P:GO:0055114;<br>F:GO:0004028;<br>C:GO:0005622;<br>P:GO:0006081;<br>F:GO:0008270 | -                             | EC:1.2.1.3;<br>EC:1.2.1.36        | IPR015590; IPR016161; IPR016163;<br>PTHR11699:SF46 (PANTHER)                                                                                           |
| Caenorhabditis elegans      | aldehyde dehydroge-se                      | 8 | F:GO:0004029;<br>F:GO:0003676;<br>F:GO:0001758;<br>P:GO:0055114;<br>F:GO:0004028;<br>C:GO:0005622;<br>P:GO:0006081;<br>F:GO:0008270 | -                             | EC:1.2.1.3;<br>EC:1.2.1.36        | IPR015590; IPR016161; IPR016163;<br>PTHR11699:SF46 (PANTHER)                                                                                           |
| -                           | -                                          | 0 |                                                                                                                                     |                               |                                   | -                                                                                                                                                      |
| Caenorhabditis elegans      | lactb protein                              | 3 | P:GO:0009792;<br>P:GO:0040007;<br>P:GO:0002119                                                                                      | -                             |                                   | SignalP (SIGNALP)                                                                                                                                      |
| Caenorhabditis elegans      | isoform a                                  | 0 |                                                                                                                                     |                               |                                   | SignalP (SIGNALP)                                                                                                                                      |
| Caenorhabditis briggsae     | progesterone receptor membrane component 1 | 8 | P:GO:0007411;<br>C:GO:0005730;<br>F:GO:0008289;<br>C:GO:0009986;<br>F:GO:0005515;<br>C:GO:0044425;<br>F:GO:0020037;<br>C:GO:0005783 | -                             |                                   | IPR001199; PTHR10281 (PANTHER),<br>PTHR10281:SF5 (PANTHER), SignalP<br>(SIGNALP)                                                                       |
| Caenorhabditis briggsae     | d- cross-link repair 1b (pso2 cerevisiae)  | 6 | F:GO:0005488;<br>P:GO:0006281;<br>P:GO:0016233;<br>C:GO:0044446;<br>F:GO:0004527;<br>C:GO:0005694                                   | -                             |                                   | -                                                                                                                                                      |
| -                           | -                                          | 0 |                                                                                                                                     |                               |                                   | SignalP (SIGNALP)                                                                                                                                      |
| Caenorhabditis elegans      | fragile site-associated protein            | 0 |                                                                                                                                     | C:GO:0016021;<br>C:GO:0016020 |                                   | -                                                                                                                                                      |
| Angiostrongylus cantonensis | briggsae cbr-gbh-1 protein                 | 5 | F:GO:0005506;<br>P:GO:0055114;<br>F:GO:0016702;<br>F:GO:0008336;<br>P:GO:0045329                                                    | -                             | EC:1.13.11.0<br>;<br>EC:1.14.11.1 | PTHR10696 (PANTHER),<br>PTHR10696:SF3 (PANTHER)                                                                                                        |
| -                           | -                                          | 0 |                                                                                                                                     |                               |                                   | -                                                                                                                                                      |
| -                           | -                                          | 0 |                                                                                                                                     |                               |                                   | -                                                                                                                                                      |
| Caenorhabditis elegans      | plexin a                                   | 4 | P:GO:0016199;<br>F:GO:0005515;<br>C:GO:0016020;<br>F:GO:0004888                                                                     | -                             |                                   | IPR000215; IPR002909; IPR008936;<br>IPR013548; IPR013783; IPR014756;<br>G3DSA:3.10.20.90 (GENE3D),<br>PTHR22625 (PANTHER),<br>PTHR22625:SF11 (PANTHER) |

|                        |                             |   |                                                                                                                                                      |   |                                                                                                                                                        |
|------------------------|-----------------------------|---|------------------------------------------------------------------------------------------------------------------------------------------------------|---|--------------------------------------------------------------------------------------------------------------------------------------------------------|
| Caenorhabditis elegans | plexin a                    | 4 | P:GO:0016199;<br>F:GO:0005515;<br>C:GO:0016020;<br>F:GO:0004888                                                                                      | - | IPR000215; IPR002909; IPR008936;<br>IPR013548; IPR013783; IPR014756;<br>G3DSA:3.10.20.90 (GENE3D),<br>PTHR22625 (PANTHER),<br>PTHR22625:SF11 (PANTHER) |
| Caenorhabditis elegans | plexin a                    | 4 | P:GO:0016199;<br>F:GO:0005515;<br>C:GO:0016020;<br>F:GO:0004888                                                                                      | - | IPR000215; IPR002909; IPR008936;<br>IPR013548; IPR013783; IPR014756;<br>G3DSA:3.10.20.90 (GENE3D),<br>PTHR22625 (PANTHER),<br>PTHR22625:SF11 (PANTHER) |
| Caenorhabditis elegans | plexin a                    | 4 | P:GO:0016199;<br>F:GO:0005515;<br>C:GO:0016020;<br>F:GO:0004888                                                                                      | - | IPR000215; IPR002909; IPR008936;<br>IPR013548; IPR013783; IPR014756;<br>G3DSA:3.10.20.90 (GENE3D),<br>PTHR22625 (PANTHER),<br>PTHR22625:SF11 (PANTHER) |
| Caenorhabditis elegans | plexin a                    | 4 | P:GO:0016199;<br>F:GO:0005515;<br>C:GO:0016020;<br>F:GO:0004888                                                                                      | - | IPR000215; IPR002909; IPR008936;<br>IPR013548; IPR013783; IPR014756;<br>G3DSA:3.10.20.90 (GENE3D),<br>PTHR22625 (PANTHER),<br>PTHR22625:SF11 (PANTHER) |
| Caenorhabditis elegans | briggsae cbr-skr-18 protein | 4 | P:GO:0002009;<br>P:GO:0040035;<br>P:GO:0006898;<br>P:GO:0040011                                                                                      | - | -                                                                                                                                                      |
| Caenorhabditis elegans | hypocretin receptor 2       | 3 | F:GO:0042277;<br>F:GO:0004930;<br>P:GO:0023052                                                                                                       | - | IPR000276; IPR017452;<br>G3DSA:1.20.1070.10 (GENE3D),<br>PTHR19264 (PANTHER),<br>PTHR19264:SF105 (PANTHER),<br>SSF81321 (SUPERFAMILY)                  |
| -                      | -                           | 0 | -                                                                                                                                                    | - | -                                                                                                                                                      |
| -                      | -                           | 0 | -                                                                                                                                                    | - | -                                                                                                                                                      |
| -                      | -                           | 0 | -                                                                                                                                                    | - | -                                                                                                                                                      |
| Caenorhabditis elegans | briggsae cbr-acy-1 protein  | 9 | P:GO:0006952;<br>P:GO:0008219;<br>P:GO:0007188;<br>F:GO:0016849;<br>P:GO:0042221;<br>P:GO:0002119;<br>P:GO:0040017;<br>C:GO:0005886;<br>P:GO:0030431 | - | -                                                                                                                                                      |

|                        |                                                       |    |                                                                                                                                                                                                                                                                                                                                                                                                                                      |   |                                                                                   |                                                                                                                                                                                                                                                                                                            |
|------------------------|-------------------------------------------------------|----|--------------------------------------------------------------------------------------------------------------------------------------------------------------------------------------------------------------------------------------------------------------------------------------------------------------------------------------------------------------------------------------------------------------------------------------|---|-----------------------------------------------------------------------------------|------------------------------------------------------------------------------------------------------------------------------------------------------------------------------------------------------------------------------------------------------------------------------------------------------------|
| Caenorhabditis elegans | 3-hydroxyacyl- dehydroge-se type ii                   | 25 | P:GO:0051289;<br>P:GO:0040007;<br>P:GO:0008210;<br>P:GO:0008209;<br>P:GO:0040017;<br>F:GO:0047035;<br>C:GO:0005743;<br>F:GO:0004303;<br>P:GO:0007569;<br>F:GO:0018454;<br>P:GO:0008205;<br>F:GO:0050327;<br>P:GO:0006631;<br>F:GO:0042802;<br>P:GO:0006637;<br>F:GO:0051287;<br>F:GO:0005496;<br>P:GO:0002119;<br>F:GO:0047022;<br>C:GO:0005875;<br>P:GO:0043170;<br>C:GO:0005783;<br>C:GO:0005811;<br>P:GO:0033327;<br>P:GO:0040035 | - | EC:1.1.1.239<br>;<br>EC:1.1.1.62;<br>EC:1.1.1.36;<br>EC:1.1.1.63;<br>EC:1.1.1.201 | IPR002198; IPR002347; IPR016040;<br>IPR020904; PTHR19410:SF78<br>(PANTHER), SSF51735 (SUPERFAMILY)                                                                                                                                                                                                         |
| Caenorhabditis elegans | gmp synthase                                          | 6  | F:GO:0016884;<br>P:GO:0009168;<br>P:GO:0006520;<br>F:GO:0005515;<br>F:GO:0000166;<br>P:GO:0009113                                                                                                                                                                                                                                                                                                                                    | - | EC:6.3.5.0                                                                        | IPR000991; IPR001317; IPR001674;<br>IPR001962; IPR004739; IPR006220;<br>IPR011702; IPR014729; IPR017926;<br>G3DSA:3.30.300.10 (GENE3D),<br>G3DSA:3.40.50.880 (GENE3D),<br>PTHR11922 (PANTHER),<br>PTHR11922:SF2 (PANTHER), SSF52317<br>(SUPERFAMILY), SSF52402<br>(SUPERFAMILY), SSF54810<br>(SUPERFAMILY) |
| Caenorhabditis elegans | sy-ptotagmin xvi                                      | 1  | F:GO:0005515                                                                                                                                                                                                                                                                                                                                                                                                                         | - |                                                                                   | IPR000008; IPR008973;<br>G3DSA:2.60.40.150 (GENE3D),<br>PTHR10024 (PANTHER),<br>PTHR10024:SF14 (PANTHER)                                                                                                                                                                                                   |
| Caenorhabditis elegans | sy-ptotagmin xvi                                      | 1  | F:GO:0005515                                                                                                                                                                                                                                                                                                                                                                                                                         | - |                                                                                   | IPR000008; IPR008973;<br>G3DSA:2.60.40.150 (GENE3D),<br>PTHR10024 (PANTHER),<br>PTHR10024:SF14 (PANTHER)                                                                                                                                                                                                   |
| Caenorhabditis elegans | caseinolytic atp- proteolytic subunit homolog ( coli) | 14 | P:GO:0040010;<br>P:GO:0051260;<br>P:GO:0040035;<br>F:GO:0042802;<br>F:GO:0005524;<br>P:GO:0010171;<br>P:GO:0002119;<br>P:GO:0040017;<br>C:GO:0005759;<br>P:GO:0006898;<br>F:GO:0004252;<br>P:GO:0009792;<br>P:GO:0040018;<br>P:GO:0006515                                                                                                                                                                                            | - | EC:3.4.21.0                                                                       | IPR001907; IPR018215;<br>G3DSA:3.90.226.10 (GENE3D),<br>SSF52096 (SUPERFAMILY)                                                                                                                                                                                                                             |
| -                      | -                                                     | 0  |                                                                                                                                                                                                                                                                                                                                                                                                                                      |   |                                                                                   | SignalP (SIGNALP)                                                                                                                                                                                                                                                                                          |

|                         |                                                         |   |                                                                                                                    |                                                                                                                    |                                                                                                       |
|-------------------------|---------------------------------------------------------|---|--------------------------------------------------------------------------------------------------------------------|--------------------------------------------------------------------------------------------------------------------|-------------------------------------------------------------------------------------------------------|
| Caenorhabditis elegans  | ophagy (yeast atg homolog) family member (atg-9)        | 1 | P:GO:0009792                                                                                                       | -                                                                                                                  | IPR007241; PTHR13038:SF1 (PANTHER), SignalP (SIGNALP)                                                 |
| -                       | -                                                       | 0 | -                                                                                                                  | -                                                                                                                  | -                                                                                                     |
| Loa loa                 | hypothetical protein LOAG_05238 [Loa loa]               | 0 | -                                                                                                                  | -                                                                                                                  | SignalP (SIGNALP)                                                                                     |
| Caenorhabditis briggsae | coiled-coil and c2 domain containing 1b                 | 1 | F:GO:0005515                                                                                                       | -                                                                                                                  | IPR000008; IPR008973; G3DSA:2.60.40.150 (GENE3D), PTHR13076 (PANTHER)                                 |
| Danio rerio             | zinc finger                                             | 0 | -                                                                                                                  | F:GO:0003676;<br>F:GO:0004803;<br>P:GO:0015074;<br>P:GO:0006313;<br>F:GO:0046983;<br>F:GO:0003677                  | IPR012337                                                                                             |
| Caenorhabditis elegans  | erv1 alr family protein                                 | 0 | -                                                                                                                  | F:GO:0016972;<br>P:GO:0055114;<br>P:GO:0045454                                                                     | -                                                                                                     |
| Haemonchus contortus    | nefa-interacting nuclear protein nip30                  | 0 | -                                                                                                                  | F:GO:0003674;<br>P:GO:0008150;<br>C:GO:0005634;<br>C:GO:0005575                                                    | IPR019331; PTHR13495 (PANTHER)                                                                        |
| Haemonchus contortus    | nefa-interacting nuclear protein nip30                  | 0 | -                                                                                                                  | P:GO:0008150;<br>C:GO:0005575                                                                                      | IPR019331; PTHR13495 (PANTHER)                                                                        |
| -                       | -                                                       | 0 | -                                                                                                                  | -                                                                                                                  | SignalP (SIGNALP)                                                                                     |
| Loa loa                 | hypothetical protein LOAG_03848 [Loa loa]               | 0 | -                                                                                                                  | -                                                                                                                  | -                                                                                                     |
| Loa loa                 | hypothetical protein LOAG_03848 [Loa loa]               | 0 | -                                                                                                                  | -                                                                                                                  | -                                                                                                     |
| -                       | -                                                       | 0 | -                                                                                                                  | -                                                                                                                  | -                                                                                                     |
| -                       | -                                                       | 0 | -                                                                                                                  | -                                                                                                                  | -                                                                                                     |
| -                       | -                                                       | 0 | -                                                                                                                  | -                                                                                                                  | -                                                                                                     |
| -                       | -                                                       | 0 | -                                                                                                                  | -                                                                                                                  | -                                                                                                     |
| -                       | -                                                       | 0 | -                                                                                                                  | -                                                                                                                  | SignalP (SIGNALP)                                                                                     |
| Caenorhabditis briggsae | nucleolar protein 9                                     | 0 | -                                                                                                                  | P:GO:0000003;<br>F:GO:0003674;<br>P:GO:0006974;<br>P:GO:0008150;<br>C:GO:0005634;<br>C:GO:0005730;<br>C:GO:0005575 | IPR010655                                                                                             |
| -                       | -                                                       | 0 | -                                                                                                                  | -                                                                                                                  | -                                                                                                     |
| Caenorhabditis elegans  | hypothetical protein T14G10.7 [Caenorhabditis elegans]  | 1 | P:GO:0006898                                                                                                       | -                                                                                                                  | PTHR21072 (PANTHER), PTHR21072:SF1 (PANTHER)                                                          |
| Caenorhabditis elegans  | abnormal cell migration family member (mig-5)           | 1 | F:GO:0042802                                                                                                       | -                                                                                                                  | IPR015506; PTHR10878:SF1 (PANTHER)                                                                    |
| Caenorhabditis briggsae | loc398196 protein                                       | 0 | -                                                                                                                  | P:GO:0006260;<br>F:GO:0046872;<br>C:GO:0005654;<br>C:GO:0005634                                                    | IPR015408; IPR015411; PTHR13454 (PANTHER), PTHR13454:SF6 (PANTHER)                                    |
| Caenorhabditis briggsae | phosphatidylinositol-5-phosphate 4- type alpha          | 7 | P:GO:0046488;<br>P:GO:0008360;<br>P:GO:0007015;<br>P:GO:0016310;<br>F:GO:0016308;<br>P:GO:0007155;<br>F:GO:0000166 | -                                                                                                                  | EC:2.7.1.68<br>IPR002498; G3DSA:3.30.800.10 (GENE3D), PTHR23086:SF3 (PANTHER), SSF56104 (SUPERFAMILY) |
| Caenorhabditis briggsae | Hypothetical protein CBG12578 [Caenorhabditis briggsae] | 0 | -                                                                                                                  | -                                                                                                                  | -                                                                                                     |
| Caenorhabditis briggsae | initiation factor 2 subunit family protein              | 0 | -                                                                                                                  | F:GO:0003743;<br>P:GO:0044237;<br>C:GO:0005575                                                                     | IPR000649; PTHR10233:SF5 (PANTHER), SSF100950 (SUPERFAMILY)                                           |



|                         |                                                         |   |                                                                                                                                     |                                                                                                                                     |                             |                                                                                                  |
|-------------------------|---------------------------------------------------------|---|-------------------------------------------------------------------------------------------------------------------------------------|-------------------------------------------------------------------------------------------------------------------------------------|-----------------------------|--------------------------------------------------------------------------------------------------|
| Caenorhabditis briggsae | uncoordinated family member (unc-89)                    | 0 |                                                                                                                                     |                                                                                                                                     |                             | PTHR19897 (PANTHER),<br>PTHR19897:SF5 (PANTHER)                                                  |
| Caenorhabditis brenneri | mgc68650 protein                                        | 0 |                                                                                                                                     | F:GO:0005524;<br>C:GO:0005739;<br>F:GO:0004658;<br>F:GO:0016874;<br>F:GO:0000166;<br>C:GO:0005759                                   |                             | SignalP (SIGNALP)                                                                                |
| Caenorhabditis brenneri | mgc68650 protein                                        | 0 |                                                                                                                                     | F:GO:0005524;<br>C:GO:0005739;<br>F:GO:0004658;<br>F:GO:0016874;<br>F:GO:0000166;<br>C:GO:0005759                                   |                             | SignalP (SIGNALP)                                                                                |
|                         | -                                                       | 0 |                                                                                                                                     |                                                                                                                                     |                             | -                                                                                                |
|                         | -                                                       | 0 |                                                                                                                                     |                                                                                                                                     |                             | -                                                                                                |
| Sus scrofa              | propionyl coenzyme a beta polypeptide                   | 0 |                                                                                                                                     | F:GO:0005524;<br>C:GO:0005739;<br>F:GO:0004658;<br>F:GO:0016874;<br>F:GO:0000166;<br>C:GO:0005759;<br>P:GO:0009063;<br>P:GO:0009062 |                             | SignalP (SIGNALP)                                                                                |
| Caenorhabditis briggsae | #NAME?                                                  | 3 | P:GO:0009086;<br>F:GO:0016787;<br>C:GO:0044424                                                                                      | -                                                                                                                                   |                             | -                                                                                                |
| Caenorhabditis briggsae | tyrosine-protein kinase pr2                             | 8 | F:GO:0004674;<br>P:GO:0042059;<br>P:GO:0040027;<br>F:GO:0004713;<br>F:GO:0005524;<br>F:GO:0005515;<br>P:GO:0009792;<br>P:GO:0006468 | -                                                                                                                                   | EC:2.7.11.0;<br>EC:2.7.10.0 | -                                                                                                |
|                         | -                                                       | 0 |                                                                                                                                     |                                                                                                                                     |                             | SignalP (SIGNALP)                                                                                |
| Caenorhabditis elegans  | mps one binder kinase activator-like 3                  | 7 | C:GO:0032580;<br>F:GO:0046872;<br>C:GO:0005624;<br>F:GO:0005515;<br>P:GO:0006810;<br>C:GO:0005813;<br>C:GO:0048471                  | -                                                                                                                                   |                             | IPR005301; PTHR22599:SF1<br>(PANTHER)                                                            |
|                         | -                                                       | 0 |                                                                                                                                     |                                                                                                                                     |                             | PSS1257 (PROFILE), SignalP (SIGNALP)                                                             |
| Caenorhabditis briggsae | Hypothetical protein CBG09343 [Caenorhabditis briggsae] | 0 |                                                                                                                                     |                                                                                                                                     |                             | IPR018627                                                                                        |
| Caenorhabditis briggsae | -dh oxidase                                             | 1 | F:GO:0003824                                                                                                                        | -                                                                                                                                   |                             | IPR001155; IPR013785; PTHR22893<br>(PANTHER), PTHR22893:SF6<br>(PANTHER), SSF51395 (SUPERFAMILY) |
| Caenorhabditis elegans  | eukaryotic translation initiation factor 3 subunit f-1  | 6 | P:GO:0040035;<br>P:GO:0010171;<br>P:GO:0002119;<br>P:GO:0040010;<br>P:GO:0008340;<br>P:GO:0006898                                   | -                                                                                                                                   |                             | PTHR10540 (PANTHER),<br>PTHR10540:SF6 (PANTHER)                                                  |

|                         |                                                                  |    |                                                                                                                                                                                                                                                                                                                                                                                                                                                                         |   |            |                                                                                           |
|-------------------------|------------------------------------------------------------------|----|-------------------------------------------------------------------------------------------------------------------------------------------------------------------------------------------------------------------------------------------------------------------------------------------------------------------------------------------------------------------------------------------------------------------------------------------------------------------------|---|------------|-------------------------------------------------------------------------------------------|
| Homo sapiens            | type alpha 1                                                     | 31 | P:GO:0060351;<br>P:GO:0001957;<br>P:GO:0071363;<br>P:GO:0007605;<br>P:GO:0034505;<br>P:GO:0042542;<br>P:GO:0001649;<br>P:GO:0009612;<br>P:GO:0001568;<br>P:GO:0060325;<br>F:GO:0005201;<br>C:GO:0005615;<br>P:GO:0048706;<br>P:GO:0015031;<br>F:GO:0048407;<br>C:GO:0005737;<br>P:GO:0043434;<br>P:GO:0071300;<br>P:GO:0007601;<br>P:GO:0010812;<br>C:GO:0005584;<br>F:GO:0042802;<br>P:GO:0060346;<br>P:GO:0032964;<br>P:GO:0030199;<br>P:GO:0051591;<br>P:GO:0031960; | - |            | IPR000885; IPR008160; PTHR10499 (PANTHER), PTHR10499:SF71 (PANTHER), PS51461 (PROFILE)    |
| Caenorhabditis briggsae | elegans fln-1 isoform partially confirmed by transcript evidence | 5  | P:GO:0051179;<br>P:GO:0007293;<br>P:GO:0048610;<br>P:GO:0030725;<br>P:GO:0030154                                                                                                                                                                                                                                                                                                                                                                                        | - |            | IPR001298; IPR013783; IPR014756; IPR017868; PTHR11915 (PANTHER), PTHR11915:SF24 (PANTHER) |
| Caenorhabditis briggsae | elegans fln-1 isoform partially confirmed by transcript evidence | 4  | P:GO:0051179;<br>P:GO:0007293;<br>P:GO:0048610;<br>P:GO:0030725                                                                                                                                                                                                                                                                                                                                                                                                         | - |            | IPR001298; IPR013783; IPR014756; IPR017868                                                |
| Caenorhabditis briggsae | filamin gamma                                                    | 1  | C:GO:0044464                                                                                                                                                                                                                                                                                                                                                                                                                                                            | - |            | IPR001298; IPR013783; IPR014756; IPR017868; PTHR11915 (PANTHER), PTHR11915:SF24 (PANTHER) |
| Caenorhabditis briggsae | elegans fln-1 isoform partially confirmed by transcript evidence | 5  | P:GO:0051179;<br>P:GO:0007293;<br>P:GO:0048610;<br>P:GO:0030725;<br>P:GO:0030154                                                                                                                                                                                                                                                                                                                                                                                        | - |            | IPR001298; IPR013783; IPR014756; IPR017868                                                |
| Caenorhabditis briggsae | glutamyl-tr- amidotransferase subunit a                          | 2  | F:GO:0016884;<br>P:GO:0019915                                                                                                                                                                                                                                                                                                                                                                                                                                           | - | EC:6.3.5.0 | IPR000120; PTHR11895:SF7 (PANTHER)                                                        |
| Caenorhabditis briggsae | Hypothetical protein CBG19188 [Caenorhabditis briggsae]          | 0  |                                                                                                                                                                                                                                                                                                                                                                                                                                                                         |   |            | PTHR10024 (PANTHER)                                                                       |
| Caenorhabditis briggsae | major facilitator superfamily domain-containing protein 7        | 5  | C:GO:0016021;<br>P:GO:0000003;<br>P:GO:0040010;<br>P:GO:0006898;<br>P:GO:0055085                                                                                                                                                                                                                                                                                                                                                                                        | - |            | IPR005828; IPR016196; PTHR10924 (PANTHER), SignalP (SIGNALP)                              |
| -                       | -                                                                | 0  |                                                                                                                                                                                                                                                                                                                                                                                                                                                                         |   |            | -                                                                                         |

|                         |                                           |    |                                                                                                                                                                                                                                                            |   |             |                                                                                                                                                           |
|-------------------------|-------------------------------------------|----|------------------------------------------------------------------------------------------------------------------------------------------------------------------------------------------------------------------------------------------------------------|---|-------------|-----------------------------------------------------------------------------------------------------------------------------------------------------------|
| Caenorhabditis elegans  | autophagy protein apg6 containing protein | 15 | P:GO:0035121;<br>P:GO:0040010;<br>P:GO:0008340;<br>P:GO:0009267;<br>P:GO:0035071;<br>P:GO:0040024;<br>P:GO:0040027;<br>P:GO:0040035;<br>C:GO:0031410;<br>P:GO:0040011;<br>P:GO:0030163;<br>P:GO:0009792;<br>P:GO:0040018;<br>P:GO:0006914;<br>C:GO:0005634 | - |             | IPR007243; PTHR12768:SF2 (PANTHER)                                                                                                                        |
| Caenorhabditis elegans  | 39s ribosomal protein l43                 | 1  | C:GO:0005840                                                                                                                                                                                                                                               | - |             | IPR007741; IPR012336; PTHR21396 (PANTHER), PTHR21396:SF1 (PANTHER)                                                                                        |
|                         |                                           | 0  |                                                                                                                                                                                                                                                            |   |             | -                                                                                                                                                         |
|                         |                                           | 0  |                                                                                                                                                                                                                                                            |   |             | -                                                                                                                                                         |
| Caenorhabditis briggsae | timeless interacting protein              | 8  | P:GO:0009411;<br>C:GO:0000790;<br>P:GO:0000076;<br>P:GO:0031573;<br>F:GO:0005515;<br>P:GO:0033262;<br>P:GO:0008284;<br>C:GO:0005737                                                                                                                        | - |             | -                                                                                                                                                         |
| Loa loa                 | cullin 3                                  | 15 | P:GO:0008054;<br>P:GO:0007369;<br>P:GO:0035024;<br>C:GO:0005794;<br>F:GO:0004842;<br>P:GO:0016567;<br>P:GO:0001831;<br>C:GO:0005827;<br>P:GO:0043149;<br>P:GO:0000090;<br>F:GO:0030332;<br>C:GO:0005634;<br>P:GO:0016477;<br>C:GO:0031463;<br>P:GO:0000910 | - | EC:6.3.2.19 | IPR001373; IPR011991; IPR016157; IPR016158; IPR019559; G3DSA:4.10.1030.10 (GENE3D), PTHR11932 (PANTHER), PTHR11932:SF23 (PANTHER), SSF46785 (SUPERFAMILY) |

|                         |                                                    |    |                                                                                                                                                                                                                                                                                                                                |   |             |                                                                                                                                                                                                                     |
|-------------------------|----------------------------------------------------|----|--------------------------------------------------------------------------------------------------------------------------------------------------------------------------------------------------------------------------------------------------------------------------------------------------------------------------------|---|-------------|---------------------------------------------------------------------------------------------------------------------------------------------------------------------------------------------------------------------|
| Loa loa                 | cullin 3                                           | 16 | P:GO:0008054;<br>P:GO:0007369;<br>P:GO:0035024;<br>C:GO:0005794;<br>F:GO:0004842;<br>F:GO:0031625;<br>P:GO:0016567;<br>P:GO:0001831;<br>C:GO:0005827;<br>P:GO:0043149;<br>P:GO:0000090;<br>F:GO:0030332;<br>C:GO:0005634;<br>P:GO:0016477;<br>C:GO:0031463;<br>P:GO:0000910                                                    | - | EC:6.3.2.19 | IPR001373; IPR011991; IPR016157;<br>IPR016158; IPR019559;<br>G3DSA:4.10.1030.10 (GENE3D),<br>PTHR11932 (PANTHER),<br>PTHR11932:SF23 (PANTHER),<br>SSF46785 (SUPERFAMILY)                                            |
| Loa loa                 | cullin 3                                           | 19 | P:GO:0008054;<br>P:GO:0007369;<br>P:GO:0008629;<br>P:GO:0035024;<br>C:GO:0005794;<br>P:GO:0007050;<br>P:GO:0008284;<br>F:GO:0004842;<br>P:GO:0016567;<br>P:GO:0001831;<br>C:GO:0005827;<br>P:GO:0000082;<br>P:GO:0043149;<br>P:GO:0000090;<br>F:GO:0030332;<br>C:GO:0005634;<br>P:GO:0016477;<br>C:GO:0031463;<br>P:GO:0000910 | - | EC:6.3.2.19 | IPR001373; IPR011991; IPR016157;<br>IPR016158; IPR016159; IPR019559;<br>G3DSA:1.20.1310.10 (GENE3D),<br>G3DSA:4.10.1030.10 (GENE3D),<br>PTHR11932 (PANTHER),<br>PTHR11932:SF23 (PANTHER),<br>SSF46785 (SUPERFAMILY) |
| Loa loa                 | ring finger protein 207                            | 1  | F:GO:0005488                                                                                                                                                                                                                                                                                                                   | - |             | IPR000315; IPR001841; IPR013083;<br>G3DSA:4.10.45.10 (GENE3D),<br>PTHR13712 (PANTHER),<br>PTHR13712:SF62 (PANTHER)                                                                                                  |
|                         | -                                                  | 0  |                                                                                                                                                                                                                                                                                                                                |   |             | -                                                                                                                                                                                                                   |
|                         | -                                                  | 0  |                                                                                                                                                                                                                                                                                                                                |   |             | SignalP (SIGNALP)                                                                                                                                                                                                   |
| Caenorhabditis briggsae | thioredoxin domain-containing protein 12 precursor | 0  | C:GO:0005788;<br>P:GO:0055114;<br>P:GO:0045454;<br>F:GO:0016491;<br>F:GO:0019153                                                                                                                                                                                                                                               |   |             | IPR004879; IPR012335; IPR012336;<br>PTHR15337 (PANTHER),<br>PTHR15337:SF2 (PANTHER)                                                                                                                                 |
|                         | -                                                  | 0  |                                                                                                                                                                                                                                                                                                                                |   |             | -                                                                                                                                                                                                                   |

|                              |                                                    |    |                                                                                                                                                                                                                                                                                                                                                                                                                                                                                                                                                       |              |                                                                      |                                                                                                                                     |
|------------------------------|----------------------------------------------------|----|-------------------------------------------------------------------------------------------------------------------------------------------------------------------------------------------------------------------------------------------------------------------------------------------------------------------------------------------------------------------------------------------------------------------------------------------------------------------------------------------------------------------------------------------------------|--------------|----------------------------------------------------------------------|-------------------------------------------------------------------------------------------------------------------------------------|
| synthetic construct          | g-s complex locus                                  | 32 | <p>P:GO:0048701;<br/> C:GO:0030133;<br/> P:GO:0007191;<br/> P:GO:0035116;<br/> C:GO:0005624;<br/> C:GO:0005834;<br/> P:GO:0009306;<br/> P:GO:0009755;<br/> C:GO:0032588;<br/> P:GO:0051216;<br/> P:GO:0048701;<br/> P:GO:0006112;<br/> F:GO:0005525;<br/> C:GO:0005576;<br/> F:GO:0035255;<br/> P:GO:0007565;<br/> C:GO:0001726;<br/> C:GO:0042383;<br/> C:GO:0031224;<br/> F:GO:0042802;<br/> P:GO:0040032;<br/> P:GO:0042493;<br/> C:GO:0005768;<br/> C:GO:0008021;<br/> C:GO:0030054;<br/> P:GO:0045672;<br/> P:GO:0046907;<br/> P:GO:0045669;</p> |              | <p>EC:3.6.5.1;<br/> EC:3.6.5.2;<br/> EC:3.6.5.3;<br/> EC:3.6.5.4</p> | <p>IPR000367; IPR001019; IPR011025;<br/> G3DSA:3.40.50.300 (GENE3D),<br/> PTHR10218:SF36 (PANTHER),<br/> SSF52540 (SUPERFAMILY)</p> |
| Caenorhabditis briggsae      | poly polymerase cid (cafein-induced death protein) | 0  |                                                                                                                                                                                                                                                                                                                                                                                                                                                                                                                                                       | F:GO:0016779 |                                                                      | <p>PTHR12271 (PANTHER),<br/> PTHR12271:SF12 (PANTHER),<br/> SSF81631 (SUPERFAMILY)</p>                                              |
| Glossina morsitans morsitans | ring finger protein 185                            | 6  | <p>C:GO:0016021;<br/> P:GO:0055114;<br/> F:GO:0008270;<br/> F:GO:0005515;<br/> F:GO:0032440;<br/> F:GO:0016874</p>                                                                                                                                                                                                                                                                                                                                                                                                                                    |              | EC:1.3.1.74                                                          | <p>IPR001841; IPR013083; IPR017907;<br/> IPR018957; PTHR12313 (PANTHER),<br/> SSF57850 (SUPERFAMILY)</p>                            |
| Caenorhabditis briggsae      | briggsae cbr-mfb-1 protein                         | 3  | <p>P:GO:0043053;<br/> P:GO:0006508;<br/> F:GO:0005515</p>                                                                                                                                                                                                                                                                                                                                                                                                                                                                                             |              |                                                                      | -                                                                                                                                   |
| Caenorhabditis briggsae      | proteasome ( macropain) 26s non- 6                 | 9  | <p>P:GO:0008340;<br/> C:GO:0000502;<br/> P:GO:0051436;<br/> P:GO:0051437;<br/> P:GO:0000003;<br/> P:GO:0018996;<br/> P:GO:0031145;<br/> P:GO:0002119;<br/> F:GO:0005515</p>                                                                                                                                                                                                                                                                                                                                                                           |              |                                                                      | <p>IPR000717; IPR011991; IPR019585;<br/> PTHR14145 (PANTHER),<br/> PTHR14145:SF1 (PANTHER), SSF46785<br/> (SUPERFAMILY)</p>         |
|                              | -                                                  | 0  |                                                                                                                                                                                                                                                                                                                                                                                                                                                                                                                                                       |              |                                                                      | -                                                                                                                                   |
| Caenorhabditis elegans       | choline ki-se a family member (cka-1)              | 4  | <p>F:GO:0005515;<br/> F:GO:0016301;<br/> C:GO:0005737;<br/> P:GO:0008654</p>                                                                                                                                                                                                                                                                                                                                                                                                                                                                          |              |                                                                      | <p>IPR002573; IPR011009;<br/> G3DSA:3.10.450.110 (GENE3D),<br/> G3DSA:3.90.1200.10 (GENE3D),<br/> PTHR22603:SF7 (PANTHER)</p>       |
| Caenorhabditis elegans       | briggsae cbr-eel-1 protein                         | 2  | <p>F:GO:0016874;<br/> P:GO:0033227</p>                                                                                                                                                                                                                                                                                                                                                                                                                                                                                                                |              |                                                                      | <p>PTHR11254 (PANTHER),<br/> PTHR11254:SF67 (PANTHER)</p>                                                                           |

|                         |                                         |    |                                                                                                                                                                                                                                                                                                                                                 |   |             |                                                                     |
|-------------------------|-----------------------------------------|----|-------------------------------------------------------------------------------------------------------------------------------------------------------------------------------------------------------------------------------------------------------------------------------------------------------------------------------------------------|---|-------------|---------------------------------------------------------------------|
| Caenorhabditis briggsae | casein ki-se alpha 1 polypeptide        | 20 | F:GO:0047485;<br>P:GO:0040010;<br>P:GO:0016055;<br>F:GO:0008013;<br>C:GO:0030424;<br>F:GO:0004674;<br>C:GO:0030425;<br>F:GO:0019888;<br>P:GO:0040035;<br>F:GO:0005524;<br>C:GO:0005929;<br>C:GO:0016581;<br>C:GO:0043025;<br>P:GO:0007165;<br>P:GO:0034608;<br>P:GO:0034606;<br>P:GO:0009792;<br>C:GO:0016580;<br>C:GO:0005886;<br>P:GO:0006468 | - | EC:2.7.11.0 | SignalP (SIGNALP)                                                   |
| Caenorhabditis briggsae | casein ki-se alpha 1 polypeptide        | 20 | F:GO:0047485;<br>P:GO:0040010;<br>P:GO:0016055;<br>F:GO:0008013;<br>C:GO:0030424;<br>F:GO:0004674;<br>C:GO:0030425;<br>F:GO:0019888;<br>P:GO:0040035;<br>F:GO:0005524;<br>C:GO:0005929;<br>C:GO:0016581;<br>C:GO:0043025;<br>P:GO:0007165;<br>P:GO:0034608;<br>P:GO:0034606;<br>P:GO:0009792;<br>C:GO:0016580;<br>C:GO:0005886;<br>P:GO:0006468 | - | EC:2.7.11.0 | SignalP (SIGNALP)                                                   |
| Caenorhabditis elegans  | kiaa1833 partial                        | 1  | F:GO:0005488                                                                                                                                                                                                                                                                                                                                    | - |             | IPR011989                                                           |
| Loa loa                 | heat repeat-containing protein 5b       | 4  | P:GO:0040007;<br>P:GO:0006898;<br>P:GO:0002119;<br>P:GO:0040011                                                                                                                                                                                                                                                                                 | - |             | IPR011989; IPR016024; PTHR21663 (PANTHER)                           |
| Caenorhabditis briggsae | ubiquitin-conjugating enzyme e2 j2-like | 3  | P:GO:0019538;<br>C:GO:0044464;<br>F:GO:0019787                                                                                                                                                                                                                                                                                                  | - |             | IPR000608; IPR016135; PTHR11621 (PANTHER), PTHR11621:SF14 (PANTHER) |
| Caenorhabditis elegans  | transmembrane protein 33                | 2  | C:GO:0016020;<br>F:GO:0005515                                                                                                                                                                                                                                                                                                                   | - |             | IPR005344; PTHR12703 (PANTHER), SignalP (SIGNALP)                   |
| Caenorhabditis elegans  | transmembrane protein isoform cra_a     | 3  | C:GO:0016020;<br>C:GO:0042470;<br>F:GO:0005515                                                                                                                                                                                                                                                                                                  | - |             | IPR005344                                                           |
| Caenorhabditis elegans  | transmembrane protein 33                | 3  | C:GO:0016020;<br>C:GO:0042470;<br>F:GO:0005515                                                                                                                                                                                                                                                                                                  | - |             | IPR005344; PTHR12703 (PANTHER)                                      |
|                         | -                                       | 0  |                                                                                                                                                                                                                                                                                                                                                 |   |             | -                                                                   |
|                         | -                                       | 0  |                                                                                                                                                                                                                                                                                                                                                 |   |             | -                                                                   |

|                         |                                                          |   |                                                                                                                    |                                                |                            |                                                                                                                                      |
|-------------------------|----------------------------------------------------------|---|--------------------------------------------------------------------------------------------------------------------|------------------------------------------------|----------------------------|--------------------------------------------------------------------------------------------------------------------------------------|
| Caenorhabditis elegans  | sterol regulatory element binding transcription factor 2 | 1 | F:GO:0005515                                                                                                       | -                                              |                            | PTHR12565 (PANTHER),<br>PTHR12565:SF3 (PANTHER)                                                                                      |
| Caenorhabditis briggsae | cop9 sig-losome complex subunit 5                        | 3 | C:GO:0005634;<br>F:GO:0005515;<br>F:GO:0008233                                                                     | -                                              |                            | IPR000555; G3DSA:3.40.140.10<br>(GENE3D), PTHR10410 (PANTHER),<br>PTHR10410:SF6 (PANTHER),<br>SSF102712 (SUPERFAMILY)                |
| Caenorhabditis elegans  | elegans protein confirmed by transcript evidence         | 0 |                                                                                                                    |                                                |                            | IPR001660; IPR010993; IPR013761;<br>IPR021129; PTHR10627 (PANTHER),<br>PTHR10627:SF2 (PANTHER)                                       |
| Caenorhabditis elegans  | zinc finger protein                                      | 0 |                                                                                                                    | F:GO:0003676;<br>F:GO:0008270;<br>C:GO:0005622 |                            | IPR003006; IPR007087; IPR015880                                                                                                      |
| Loa loa                 | r- polymerase-associated protein ctr9 homolog            | 4 | C:GO:0016593;<br>P:GO:0010390;<br>F:GO:0005515;<br>P:GO:0033523                                                    | -                                              |                            | IPR001440; IPR011990; IPR013026;<br>IPR013105; IPR019734; PTHR14027<br>(PANTHER), PTHR14027:SF2<br>(PANTHER), SSF48452 (SUPERFAMILY) |
| Caenorhabditis elegans  | 6-phosphofructo-2-ki-se fructose- -biphosphate 3         | 4 | F:GO:0003873;<br>P:GO:0006003;<br>F:GO:0016787;<br>F:GO:0005524                                                    | -                                              | EC:2.7.1.105               | -                                                                                                                                    |
| Caenorhabditis briggsae | elegans protein confirmed by transcript evidence         | 3 | P:GO:0006457;<br>P:GO:0009792;<br>F:GO:0003755                                                                     | -                                              | EC:5.2.1.8                 | SignalP (SIGNALP)                                                                                                                    |
| Caenorhabditis briggsae | elegans protein confirmed by transcript evidence         | 3 | P:GO:0006457;<br>P:GO:0009792;<br>F:GO:0003755                                                                     | -                                              | EC:5.2.1.8                 | -                                                                                                                                    |
| Caenorhabditis elegans  | lethal isoform i                                         | 6 | F:GO:0000827;<br>F:GO:0003993;<br>F:GO:0000832;<br>P:GO:0006020;<br>F:GO:0033857;<br>C:GO:0005829                  | -                                              | EC:3.1.3.2;<br>EC:2.7.4.24 | IPR000560; G3DSA:3.40.50.1240<br>(GENE3D), PTHR12750 (PANTHER),<br>PTHR12750:SF5 (PANTHER), SSF53254<br>(SUPERFAMILY)                |
| Caenorhabditis elegans  | lethal isoform i                                         | 6 | F:GO:0000827;<br>F:GO:0003993;<br>F:GO:0000832;<br>P:GO:0006020;<br>F:GO:0033857;<br>C:GO:0005829                  | -                                              | EC:3.1.3.2;<br>EC:2.7.4.24 | IPR000560; G3DSA:3.40.50.1240<br>(GENE3D), PTHR12750 (PANTHER),<br>PTHR12750:SF5 (PANTHER), SSF53254<br>(SUPERFAMILY)                |
| Caenorhabditis elegans  | lethal isoform i                                         | 6 | F:GO:0000827;<br>F:GO:0003993;<br>F:GO:0000832;<br>P:GO:0006020;<br>F:GO:0033857;<br>C:GO:0005829                  | -                                              | EC:3.1.3.2;<br>EC:2.7.4.24 | IPR000560; G3DSA:3.40.50.1240<br>(GENE3D), PTHR12750 (PANTHER),<br>PTHR12750:SF5 (PANTHER), SSF53254<br>(SUPERFAMILY)                |
| Homo sapiens            | ubiquitin b                                              | 7 | F:GO:0030528;<br>F:GO:0003735;<br>C:GO:0022627;<br>P:GO:0016567;<br>F:GO:0005515;<br>C:GO:0005634;<br>P:GO:0045941 | -                                              |                            | -                                                                                                                                    |
| Homo sapiens            | os05g0242100 isoform 2                                   | 2 | C:GO:0005840;<br>C:GO:0005634                                                                                      | -                                              |                            | -                                                                                                                                    |

|                         |                                                              |    |                                                                                                                                                                                        |                                                                                                                    |                               |                                                                                                              |
|-------------------------|--------------------------------------------------------------|----|----------------------------------------------------------------------------------------------------------------------------------------------------------------------------------------|--------------------------------------------------------------------------------------------------------------------|-------------------------------|--------------------------------------------------------------------------------------------------------------|
| Brugia malayi           | ring zinc finger-containing protein                          | 0  |                                                                                                                                                                                        | F:GO:0046872;<br>F:GO:0004383;<br>F:GO:0020037;<br>P:GO:0006397;<br>P:GO:0006182;<br>F:GO:0008270;<br>F:GO:0005515 |                               | IPR001841; IPR013083; IPR018957;<br>PTHR23350 (PANTHER), SSF57850<br>(SUPERFAMILY)                           |
| Brugia malayi           | ring zinc finger-containing protein                          | 0  |                                                                                                                                                                                        | F:GO:0046872;<br>F:GO:0004383;<br>F:GO:0020037;<br>P:GO:0006397;<br>P:GO:0006182;<br>F:GO:0008270;<br>F:GO:0005515 |                               | IPR001841; IPR013083; IPR018957;<br>PTHR23350 (PANTHER), SSF57850<br>(SUPERFAMILY)                           |
| Caenorhabditis elegans  | 3-hydroxyisobutyryl- mitochondrial precursor                 | 6  | P:GO:0009792;<br>F:GO:0005515;<br>C:GO:0005759;<br>P:GO:0040010;<br>P:GO:0008152;<br>F:GO:0003860                                                                                      | -                                                                                                                  | EC:3.1.2.4                    | IPR001753; G3DSA:3.90.226.10<br>(GENE3D), PTHR11941 (PANTHER),<br>SSF52096 (SUPERFAMILY)                     |
| Caenorhabditis briggsae | basic leucine zipper nuclear factor 1                        | 0  |                                                                                                                                                                                        | P:GO:0043001;<br>P:GO:0007030                                                                                      |                               | PTHR13066 (PANTHER)                                                                                          |
| Caenorhabditis elegans  | 6-phosphofructo-2-ki-se fructose- -bisphosphatase short form | 11 | F:GO:0003873;<br>C:GO:0043540;<br>F:GO:0019900;<br>P:GO:0016311;<br>F:GO:0004331;<br>F:GO:0070095;<br>F:GO:0042802;<br>P:GO:0046835;<br>F:GO:0005524;<br>P:GO:0033133;<br>P:GO:0006003 | -                                                                                                                  | EC:2.7.1.105<br>; EC:3.1.3.46 | IPR003094; IPR013078;<br>G3DSA:3.40.50.1240 (GENE3D),<br>PTHR10606:SF11 (PANTHER),<br>SSF53254 (SUPERFAMILY) |
| Caenorhabditis elegans  | peptidyl-prolyl cis-trans isomerase 5                        | 2  | F:GO:0003755;<br>P:GO:0006457                                                                                                                                                          | -                                                                                                                  | EC:5.2.1.8                    | IPR002130; IPR015891; IPR020892;<br>PTHR11071 (PANTHER),<br>PTHR11071:SF62 (PANTHER), SignalP<br>(SIGNALP)   |
|                         | -                                                            | 0  |                                                                                                                                                                                        |                                                                                                                    |                               | -                                                                                                            |
| Caenorhabditis elegans  | membrane-associated protein gex-3                            | 4  | P:GO:0018991;<br>P:GO:0016477;<br>P:GO:0010172;<br>F:GO:0005515                                                                                                                        | -                                                                                                                  |                               | SignalP (SIGNALP)                                                                                            |
|                         | -                                                            | 0  |                                                                                                                                                                                        |                                                                                                                    |                               | PTHR18937 (PANTHER),<br>PTHR18937:SF13 (PANTHER)                                                             |
| Ancylostoma caninum     | zinc metallopeptidase                                        | 1  | F:GO:0008233                                                                                                                                                                           | -                                                                                                                  |                               | IPR000718; IPR018497;<br>G3DSA:3.40.390.10 (GENE3D),<br>PTHR11733:SF15 (PANTHER),<br>SSF55486 (SUPERFAMILY)  |
| Loa loa                 | tata binding protein associated factor                       | 6  | F:GO:0008270;<br>P:GO:0006367;<br>P:GO:0006355;<br>F:GO:0016251;<br>F:GO:0008237;<br>C:GO:0005669                                                                                      | -                                                                                                                  |                               | PTHR15137 (PANTHER),<br>PTHR15137:SF7 (PANTHER), SSF55486<br>(SUPERFAMILY)                                   |



|                         |                                                            |    |                                                                                                                                                                                                         |                                                                                                                                                                                                                                                                                                                                |                                                                                                                                    |   |
|-------------------------|------------------------------------------------------------|----|---------------------------------------------------------------------------------------------------------------------------------------------------------------------------------------------------------|--------------------------------------------------------------------------------------------------------------------------------------------------------------------------------------------------------------------------------------------------------------------------------------------------------------------------------|------------------------------------------------------------------------------------------------------------------------------------|---|
| Caenorhabditis briggsae | briggsae cbr-gop-3 protein                                 | 6  | P:GO:0009792;<br>P:GO:0002119;<br>P:GO:0040010;<br>P:GO:0000003;<br>C:GO:0019867;<br>P:GO:0006898                                                                                                       | -                                                                                                                                                                                                                                                                                                                              | -                                                                                                                                  |   |
| Caenorhabditis briggsae | Hypothetical protein CBG14931 [Caenorhabditis briggsae]    | 0  |                                                                                                                                                                                                         |                                                                                                                                                                                                                                                                                                                                | -                                                                                                                                  |   |
| -                       | -                                                          | 0  |                                                                                                                                                                                                         |                                                                                                                                                                                                                                                                                                                                | -                                                                                                                                  |   |
| Canis familiaris        | ribosomal protein s19                                      | 12 | F:GO:0003723;<br>P:GO:0015669;<br>C:GO:0005730;<br>P:GO:0006364;<br>F:GO:0003735;<br>P:GO:0006414;<br>C:GO:0022627;<br>P:GO:0051272;<br>P:GO:0030218;<br>P:GO:0042274;<br>P:GO:0009991;<br>F:GO:0005515 | -                                                                                                                                                                                                                                                                                                                              | IPR001266                                                                                                                          |   |
| Caenorhabditis briggsae | briggsae cbr-adr-2 protein                                 | 0  |                                                                                                                                                                                                         | P:GO:0000003;<br>F:GO:0003723;<br>F:GO:0004000;<br>P:GO:0006396;<br>F:GO:0005515;<br>F:GO:0003725;<br>C:GO:0005622                                                                                                                                                                                                             | -                                                                                                                                  |   |
| -                       | -                                                          | 0  |                                                                                                                                                                                                         |                                                                                                                                                                                                                                                                                                                                | -                                                                                                                                  |   |
| -                       | -                                                          | 0  |                                                                                                                                                                                                         |                                                                                                                                                                                                                                                                                                                                | -                                                                                                                                  |   |
| Caenorhabditis elegans  | domain containing protein                                  | 2  | P:GO:0016998;<br>F:GO:0005515                                                                                                                                                                           | -                                                                                                                                                                                                                                                                                                                              | IPR002482; IPR018392;<br>G3DSA:3.10.350.10 (GENE3D),<br>PTHR23354 (PANTHER),<br>PTHR23354:SF4 (PANTHER), SSF54106<br>(SUPERFAMILY) |   |
| Caenorhabditis elegans  | elegans protein partially confirmed by transcript evidence | 0  |                                                                                                                                                                                                         | F:GO:0008565;<br>P:GO:0006886;<br>P:GO:0005975;<br>F:GO:0005524;<br>C:GO:0016020;<br>F:GO:0030246;<br>C:GO:0016459;<br>F:GO:0005509;<br>P:GO:0016998;<br>C:GO:0000139;<br>F:GO:0003824;<br>F:GO:0000166;<br>P:GO:0048280;<br>C:GO:0005737;<br>F:GO:0005488;<br>F:GO:0003779;<br>F:GO:0003774;<br>F:GO:0016740;<br>P:GO:0031424 | -                                                                                                                                  | - |
| -                       | -                                                          | 0  |                                                                                                                                                                                                         |                                                                                                                                                                                                                                                                                                                                | -                                                                                                                                  |   |

|                           |                                                      |    |                                                                                                                                                                                                                                           |   |                                                                                  |                                                                                                                                            |
|---------------------------|------------------------------------------------------|----|-------------------------------------------------------------------------------------------------------------------------------------------------------------------------------------------------------------------------------------------|---|----------------------------------------------------------------------------------|--------------------------------------------------------------------------------------------------------------------------------------------|
| Caenorhabditis briggsae   | prolyl 4-hydroxylase                                 | 6  | F:GO:0031418;<br>F:GO:0005506;<br>F:GO:0004656;<br>P:GO:0055114;<br>F:GO:0016702;<br>C:GO:0005783                                                                                                                                         | - | EC:1.14.11.2<br>;<br>EC:1.13.11.0                                                | IPR005123; IPR006620; PTHR10869<br>(PANTHER), PTHR10869:SF13<br>(PANTHER), PSS1471 (PROFILE)                                               |
| Caenorhabditis briggsae   | monocarboxylate transporter                          | 3  | P:GO:0000003;<br>P:GO:0040007;<br>P:GO:0002119                                                                                                                                                                                            | - |                                                                                  | IPR011701; IPR016196; IPR020846;<br>G3DSA:1.20.1250.20 (GENE3D),<br>PTHR11360 (PANTHER),<br>PTHR11360:SF15 (PANTHER), SignalP<br>(SIGNALP) |
| Heligmosomoides polygyrus | c-type lectin-1                                      | 1  | F:GO:0005488                                                                                                                                                                                                                              | - |                                                                                  | IPR001304; IPR016186; IPR016187;<br>PTHR22801 (PANTHER),<br>PTHR22801:SF9 (PANTHER)                                                        |
| Danio rerio               | regulatory associated protein of complex 1 isoform 1 | 11 | C:GO:0005829;<br>P:GO:0001938;<br>P:GO:0031669;<br>C:GO:0030425;<br>P:GO:0042325;<br>F:GO:0032403;<br>P:GO:0008361;<br>P:GO:0032008;<br>C:GO:0043025;<br>F:GO:0019901;<br>C:GO:0031931                                                    | - |                                                                                  | IPR004083; PTHR12848:SF6<br>(PANTHER)                                                                                                      |
|                           |                                                      | 0  |                                                                                                                                                                                                                                           |   |                                                                                  |                                                                                                                                            |
|                           |                                                      | 0  |                                                                                                                                                                                                                                           |   |                                                                                  |                                                                                                                                            |
| Pan troglodytes           | ribosomal protein sa                                 | 14 | P:GO:0016337;<br>F:GO:0003735;<br>C:GO:0005604;<br>F:GO:0005055;<br>P:GO:0006414;<br>C:GO:0022627;<br>F:GO:0043022;<br>C:GO:0005624;<br>F:GO:0043236;<br>P:GO:0030855;<br>C:GO:0043025;<br>P:GO:0007165;<br>C:GO:0005634;<br>C:GO:0005886 | - |                                                                                  | IPR001865; IPR005707; IPR018130                                                                                                            |
| Caenorhabditis elegans    | osteopetrosis associated transmembrane protein 1     | 0  |                                                                                                                                                                                                                                           |   | P:GO:0030316;<br>C:GO:0016021;<br>C:GO:0016020;<br>C:GO:0005829;<br>F:GO:0005515 | -                                                                                                                                          |
| Caenorhabditis elegans    | osteopetrosis associated transmembrane protein 1     | 0  |                                                                                                                                                                                                                                           |   | P:GO:0030316;<br>C:GO:0016021;<br>C:GO:0016020;<br>C:GO:0005829;<br>F:GO:0005515 | -                                                                                                                                          |
| Caenorhabditis elegans    | briggsae cbr-fox-1 protein                           | 7  | F:GO:0003729;<br>F:GO:0003677;<br>P:GO:0007399;<br>F:GO:0005515;<br>F:GO:0000166;<br>P:GO:0007474;<br>P:GO:0045941                                                                                                                        | - |                                                                                  | SignalP (SIGNALP)                                                                                                                          |

|                         |                                             |    |                                                                                                                                                                                                                                           |              |                                                                                                                                                 |
|-------------------------|---------------------------------------------|----|-------------------------------------------------------------------------------------------------------------------------------------------------------------------------------------------------------------------------------------------|--------------|-------------------------------------------------------------------------------------------------------------------------------------------------|
| Brugia malayi           | superkiller viralicidic activity 2-like 2   | 12 | P:GO:0040010;<br>P:GO:0031101;<br>P:GO:0040035;<br>P:GO:0002119;<br>P:GO:0051781;<br>F:GO:0005515;<br>F:GO:0000166;<br>F:GO:0004386;<br>P:GO:0040011;<br>P:GO:0006139;<br>P:GO:0002009;<br>P:GO:0009792                                   | -            | IPR001650; IPR012961; IPR018247;<br>G3DSA:3.40.50.300 (GENE3D),<br>PTHR11752 (PANTHER),<br>PTHR11752:SF2 (PANTHER), SSF52540<br>(SUPERFAMILY)   |
| Caenorhabditis briggsae | surfeit 4 cargo protein                     | 14 | P:GO:0040035;<br>P:GO:0009792;<br>P:GO:0002119;<br>C:GO:0012505;<br>C:GO:0005794;<br>P:GO:0032940;<br>C:GO:0031090;<br>P:GO:0040011;<br>P:GO:0019915;<br>P:GO:0040007;<br>C:GO:0005783;<br>C:GO:0044425;<br>C:GO:0044446;<br>P:GO:0002009 | -            | IPR002995; PTHR23427 (PANTHER),<br>PTHR23427:SF1 (PANTHER)                                                                                      |
| Caenorhabditis briggsae | surfeit locus protein 4                     | 13 | C:GO:0000139;<br>P:GO:0040035;<br>P:GO:0009792;<br>C:GO:0005789;<br>P:GO:0002119;<br>F:GO:0005515;<br>P:GO:0032940;<br>P:GO:0040011;<br>C:GO:0016021;<br>P:GO:0019915;<br>P:GO:0040007;<br>C:GO:0033116;<br>P:GO:0002009                  | -            | IPR002995; PTHR23427 (PANTHER),<br>PTHR23427:SF1 (PANTHER)                                                                                      |
| Caenorhabditis elegans  | glycosylation related family member (gly-5) | 3  | C:GO:0016021;<br>F:GO:0005515;<br>F:GO:0016740                                                                                                                                                                                            | -            | IPR000772; IPR008997;<br>G3DSA:2.80.10.50 (GENE3D),<br>PTHR11675 (PANTHER)                                                                      |
| Caenorhabditis elegans  | glycosylation related family member (gly-5) | 5  | C:GO:0016021;<br>C:GO:0005794;<br>F:GO:0005515;<br>F:GO:0016757;<br>F:GO:0005529                                                                                                                                                          | -            | IPR000772; IPR001173; IPR008997;<br>G3DSA:2.80.10.50 (GENE3D),<br>G3DSA:3.90.550.10 (GENE3D),<br>PTHR11675 (PANTHER), SSF53448<br>(SUPERFAMILY) |
| Caenorhabditis elegans  | glycosylation related family member (gly-5) | 5  | C:GO:0016021;<br>C:GO:0005794;<br>F:GO:0005515;<br>F:GO:0016757;<br>F:GO:0005529                                                                                                                                                          | -            | IPR000772; IPR001173; IPR008997;<br>G3DSA:2.80.10.50 (GENE3D),<br>G3DSA:3.90.550.10 (GENE3D),<br>PTHR11675 (PANTHER), SSF53448<br>(SUPERFAMILY) |
| Caenorhabditis elegans  | briggsae cbr-bam-2 protein                  | 0  |                                                                                                                                                                                                                                           | C:GO:0005887 | SignalP (SIGNALP)                                                                                                                               |

|                         |                                                            |    |                                                                                                                                                                                                                                                            |                                                                 |             |                                                                                                         |
|-------------------------|------------------------------------------------------------|----|------------------------------------------------------------------------------------------------------------------------------------------------------------------------------------------------------------------------------------------------------------|-----------------------------------------------------------------|-------------|---------------------------------------------------------------------------------------------------------|
| Caenorhabditis elegans  | eph receptor b2                                            | 9  | F:GO:0005515;<br>P:GO:0007409;<br>F:GO:0004713;<br>C:GO:0044464;<br>P:GO:0051239;<br>P:GO:0023052;<br>P:GO:0007391;<br>P:GO:0050794;<br>F:GO:0004888                                                                                                       | -                                                               | EC:2.7.10.0 | IPR003961; IPR008957; IPR011641;<br>IPR013783; IPR020685; IPR020769;<br>G3DSA:2.170.300.10 (GENE3D)     |
| Branchiostoma floridae  | cdw92 antigen                                              | 2  | P:GO:0006810;<br>C:GO:0016020                                                                                                                                                                                                                              | -                                                               |             | IPR007603; SignalP (SIGNALP)                                                                            |
| Loa loa                 | tip60                                                      | 15 | P:GO:0040010;<br>F:GO:0016747;<br>F:GO:0008270;<br>P:GO:0006333;<br>P:GO:0045449;<br>P:GO:0000003;<br>P:GO:0040027;<br>P:GO:0010171;<br>C:GO:0000785;<br>P:GO:0006898;<br>P:GO:0002009;<br>P:GO:0009792;<br>F:GO:0003682;<br>C:GO:0005634;<br>P:GO:0006974 | -                                                               | EC:2.3.1.0  | IPR002717; IPR016181;<br>G3DSA:3.30.60.60 (GENE3D),<br>PTHR10615 (PANTHER),<br>PTHR10615:SF30 (PANTHER) |
| -                       | -                                                          | 0  |                                                                                                                                                                                                                                                            |                                                                 |             |                                                                                                         |
| Caenorhabditis briggsae | briggsae cbr-lon-2 protein                                 | 0  |                                                                                                                                                                                                                                                            | C:GO:0016020;<br>C:GO:0005578;<br>F:GO:0043395                  |             | -                                                                                                       |
| -                       | -                                                          | 0  |                                                                                                                                                                                                                                                            |                                                                 |             | -                                                                                                       |
| Brugia malayi           | zgc:136346 protein                                         | 0  |                                                                                                                                                                                                                                                            | F:GO:0003676;<br>P:GO:0008150;<br>C:GO:0005575                  |             | PTHR13468 (PANTHER)                                                                                     |
| -                       | -                                                          | 0  |                                                                                                                                                                                                                                                            |                                                                 |             | -                                                                                                       |
| Caenorhabditis elegans  | protein                                                    | 0  |                                                                                                                                                                                                                                                            | F:GO:0005102;<br>C:GO:0005615;<br>C:GO:0016021;<br>P:GO:0007165 |             | IPR002181; IPR014715; IPR014716;<br>PTHR19143 (PANTHER)                                                 |
| Brugia malayi           | mediator of r- polymerase ii transcription subunit 13-like | 1  | P:GO:0009792                                                                                                                                                                                                                                               | -                                                               |             | IPR021643; PTHR12950 (PANTHER),<br>PTHR12950:SF3 (PANTHER)                                              |
| Caenorhabditis briggsae | elegans protein confirmed by transcript evidence           | 0  |                                                                                                                                                                                                                                                            |                                                                 |             | -                                                                                                       |
| Caenorhabditis elegans  | briggsae cbr-rsk-1 protein                                 | 3  | F:GO:0004672;<br>P:GO:0009987;<br>F:GO:0000166                                                                                                                                                                                                             | -                                                               |             | G3DSA:3.30.200.20 (GENE3D),<br>PTHR22985 (PANTHER),<br>PTHR22985:SF83 (PANTHER)                         |
| Caenorhabditis elegans  | hypothetical protein ZC477.5 [Caenorhabditis elegans]      | 0  |                                                                                                                                                                                                                                                            |                                                                 |             | IPR021869                                                                                               |
| Caenorhabditis elegans  | znrf2 protein                                              | 8  | F:GO:0016874;<br>C:GO:0042734;<br>C:GO:0030054;<br>F:GO:0005515;<br>C:GO:0005765;<br>P:GO:0008152;<br>F:GO:0008270;<br>C:GO:0010008                                                                                                                        | -                                                               |             | -                                                                                                       |

|                         |                                                       |    |                                                                                                                                                                                                                          |                                                                                  |                                             |                                                                                                                                                  |
|-------------------------|-------------------------------------------------------|----|--------------------------------------------------------------------------------------------------------------------------------------------------------------------------------------------------------------------------|----------------------------------------------------------------------------------|---------------------------------------------|--------------------------------------------------------------------------------------------------------------------------------------------------|
| Caenorhabditis elegans  | znrf2 protein                                         | 8  | F:GO:0016874;<br>C:GO:0042734;<br>C:GO:0030054;<br>F:GO:0005515;<br>C:GO:0005765;<br>P:GO:0008152;<br>F:GO:0008270;<br>C:GO:0010008                                                                                      | -                                                                                | -                                           |                                                                                                                                                  |
|                         | -                                                     | 0  |                                                                                                                                                                                                                          |                                                                                  |                                             | SignalP (SIGNALP)                                                                                                                                |
| Caenorhabditis briggsae | inin receptor homolog family member (ckr-2)           | 8  | F:GO:0005515;<br>C:GO:0005624;<br>C:GO:0016021;<br>P:GO:0019915;<br>P:GO:0007165;<br>P:GO:0007186;<br>P:GO:0050806;<br>F:GO:0004983                                                                                      | -                                                                                |                                             | IPR000276; IPR009126; IPR017452;<br>G3DSA:1.20.1070.10 (GENE3D),<br>PTHR19264 (PANTHER),<br>PTHR19264:SF283 (PANTHER),<br>SSF81321 (SUPERFAMILY) |
| Caenorhabditis elegans  | ecotropic viral integration site 5                    | 1  | F:GO:0005515                                                                                                                                                                                                             | -                                                                                |                                             | PTHR22957 (PANTHER),<br>PTHR22957:SF3 (PANTHER)                                                                                                  |
|                         | -                                                     | 0  |                                                                                                                                                                                                                          |                                                                                  |                                             | -                                                                                                                                                |
| Caenorhabditis elegans  | hypothetical protein F40F4.6 [Caenorhabditis elegans] | 1  | P:GO:0040010                                                                                                                                                                                                             | -                                                                                |                                             | -                                                                                                                                                |
| Loa loa                 | briggsae cbr-sas-4 protein                            | 0  |                                                                                                                                                                                                                          | C:GO:0005737;<br>P:GO:0007049;<br>C:GO:0005856;<br>P:GO:0007275;<br>C:GO:0005815 |                                             | -                                                                                                                                                |
| Caenorhabditis elegans  | bifunctio-l aminoacyl-tr- synthetase                  | 13 | C:GO:0005829;<br>F:GO:0004819;<br>F:GO:0003723;<br>C:GO:0005625;<br>P:GO:0006424;<br>C:GO:0016021;<br>F:GO:0004827;<br>P:GO:0006461;<br>F:GO:0005524;<br>F:GO:0005515;<br>P:GO:0016485;<br>F:GO:0004818;<br>P:GO:0006433 | -                                                                                | EC:6.1.1.18;<br>EC:6.1.1.15;<br>EC:6.1.1.17 | IPR000924; IPR001412; IPR014729;<br>IPR020058; IPR020061;<br>G3DSA:3.90.800.10 (GENE3D),<br>PTHR10119:SF11 (PANTHER),<br>SSF52374 (SUPERFAMILY)  |
| Caenorhabditis elegans  | brm protein                                           | 4  | P:GO:0040010;<br>F:GO:0005488;<br>P:GO:0040035;<br>P:GO:0009792                                                                                                                                                          | -                                                                                |                                             | IPR014978                                                                                                                                        |
| Caenorhabditis elegans  | elegans protein confirmed by transcript evidence      | 2  | P:GO:0006629;<br>F:GO:0016788                                                                                                                                                                                            | -                                                                                |                                             | SignalP (SIGNALP)                                                                                                                                |
|                         | -                                                     | 0  |                                                                                                                                                                                                                          |                                                                                  |                                             | -                                                                                                                                                |
|                         | -                                                     | 0  |                                                                                                                                                                                                                          |                                                                                  |                                             | -                                                                                                                                                |
| Caenorhabditis briggsae | elegans protein confirmed by transcript evidence      | 0  |                                                                                                                                                                                                                          |                                                                                  |                                             | -                                                                                                                                                |
| Caenorhabditis elegans  | atp gtp binding protein 1                             | 3  | F:GO:0046872;<br>F:GO:0008237;<br>F:GO:0004180                                                                                                                                                                           | -                                                                                |                                             | -                                                                                                                                                |
| Brugia malayi           | thioredoxin family protein                            | 4  | P:GO:0040035;<br>P:GO:0040010;<br>P:GO:0019915;<br>P:GO:0006898                                                                                                                                                          | -                                                                                |                                             | IPR012335; IPR012336; IPR013766;<br>IPR017936; PTHR18929 (PANTHER),<br>SignalP (SIGNALP)                                                         |

|                         |                                               |    |                                                                                                                                                                                                                                                                                              |   |                                   |                                                                                                                                                       |
|-------------------------|-----------------------------------------------|----|----------------------------------------------------------------------------------------------------------------------------------------------------------------------------------------------------------------------------------------------------------------------------------------------|---|-----------------------------------|-------------------------------------------------------------------------------------------------------------------------------------------------------|
| Brugia malayi           | thioredoxin family protein                    | 4  | P:GO:0040035;<br>P:GO:0040010;<br>P:GO:0019915;<br>P:GO:0006898                                                                                                                                                                                                                              | - |                                   | IPR012335; IPR012336; IPR013766;<br>IPR017936; PTHR18929 (PANTHER),<br>SignalP (SIGNALP)                                                              |
| Caenorhabditis briggsae | yl53_caeeel ame: full=uncharacterized protein | 0  |                                                                                                                                                                                                                                                                                              |   |                                   | -                                                                                                                                                     |
|                         | -                                             | 0  |                                                                                                                                                                                                                                                                                              |   |                                   | SignalP (SIGNALP)                                                                                                                                     |
| Caenorhabditis elegans  | solute carrier family member f1               | 1  | C:GO:0016020                                                                                                                                                                                                                                                                                 | - |                                   | IPR009262; PTHR14233:SF2<br>(PANTHER), PF06027 (PFAM),<br>SSF103481 (SUPERFAMILY)                                                                     |
|                         | -                                             | 0  |                                                                                                                                                                                                                                                                                              |   |                                   | -                                                                                                                                                     |
| Caenorhabditis elegans  | leucine-rich ppr-motif containing             | 1  | P:GO:0007275                                                                                                                                                                                                                                                                                 | - |                                   | -                                                                                                                                                     |
|                         | -                                             | 0  |                                                                                                                                                                                                                                                                                              |   |                                   | SignalP (SIGNALP)                                                                                                                                     |
| Caenorhabditis elegans  | cation-transporting atpase                    | 7  | C:GO:0016021;<br>F:GO:0015662;<br>P:GO:0006754;<br>F:GO:0005524;<br>P:GO:0015914;<br>F:GO:0000287;<br>F:GO:0004012                                                                                                                                                                           | - | EC:3.6.3.1                        | -                                                                                                                                                     |
|                         | -                                             | 0  |                                                                                                                                                                                                                                                                                              |   |                                   | -                                                                                                                                                     |
|                         | -                                             | 0  |                                                                                                                                                                                                                                                                                              |   |                                   | -                                                                                                                                                     |
| Brugia malayi           | uncoordi-ted family member (unc-22)           | 7  | C:GO:0030018;<br>F:GO:0005200;<br>P:GO:0006468;<br>F:GO:0008307;<br>F:GO:0004687;<br>P:GO:0007498;<br>F:GO:0005524                                                                                                                                                                           | - | EC:2.7.11.18                      | IPR000719; IPR011009; IPR017442;<br>IPR020675; G3DSA:3.30.200.20<br>(GENE3D)                                                                          |
| Caenorhabditis elegans  | phenylalanine hydroxylase                     | 17 | P:GO:0006979;<br>P:GO:0008340;<br>P:GO:0040002;<br>P:GO:0055114;<br>P:GO:0042438;<br>P:GO:0006559;<br>P:GO:0000003;<br>F:GO:0004510;<br>P:GO:0006911;<br>F:GO:0005515;<br>P:GO:0006569;<br>F:GO:0016597;<br>P:GO:0009792;<br>C:GO:0005811;<br>F:GO:0004505;<br>P:GO:0006726;<br>F:GO:0005506 | - | EC:1.14.16.4<br>;<br>EC:1.14.16.1 | IPR001273; IPR018301; IPR019774;<br>PSS1410 (PROFILE)                                                                                                 |
| Brugia malayi           | uncoordi-ted family member (unc-52)           | 2  | P:GO:0030239;<br>C:GO:0005578                                                                                                                                                                                                                                                                | - |                                   | IPR002049; IPR006210;<br>G3DSA:2.10.25.10 (GENE3D),<br>PTHR10574 (PANTHER),<br>PTHR10574:SF20 (PANTHER), SignalP<br>(SIGNALP), SSF57196 (SUPERFAMILY) |
| Loa loa                 | denn domain-containing                        | 0  |                                                                                                                                                                                                                                                                                              |   |                                   | IPR001194; PTHR13196 (PANTHER),<br>PTHR13196:SF2 (PANTHER)                                                                                            |
|                         | -                                             | 0  |                                                                                                                                                                                                                                                                                              |   |                                   | SignalP (SIGNALP)                                                                                                                                     |
| Caenorhabditis elegans  | briggsae cbr-hex-3 protein                    | 3  | F:GO:0004553;<br>F:GO:0005488;<br>P:GO:0044238                                                                                                                                                                                                                                               | - | EC:3.2.1.0                        | IPR017853; SignalP (SIGNALP)                                                                                                                          |

|                         |                                                            |    |                                                                                                                                                                                                                                                                                                                                |                                                                                                                    |                                                                                                                              |
|-------------------------|------------------------------------------------------------|----|--------------------------------------------------------------------------------------------------------------------------------------------------------------------------------------------------------------------------------------------------------------------------------------------------------------------------------|--------------------------------------------------------------------------------------------------------------------|------------------------------------------------------------------------------------------------------------------------------|
| Caenorhabditis elegans  | elegans protein partially confirmed by transcript evidence | 4  | P:GO:0055085;<br>P:GO:0008643;<br>C:GO:0016021;<br>F:GO:0005215                                                                                                                                                                                                                                                                |                                                                                                                    | IPR005828; IPR016196; PTHR11600 (PANTHER)                                                                                    |
| -                       | -                                                          | 0  |                                                                                                                                                                                                                                                                                                                                |                                                                                                                    | SignalP (SIGNALP)                                                                                                            |
| -                       | -                                                          | 0  |                                                                                                                                                                                                                                                                                                                                |                                                                                                                    | -                                                                                                                            |
| -                       | -                                                          | 0  |                                                                                                                                                                                                                                                                                                                                |                                                                                                                    | -                                                                                                                            |
| -                       | -                                                          | 0  |                                                                                                                                                                                                                                                                                                                                |                                                                                                                    | -                                                                                                                            |
| -                       | -                                                          | 0  |                                                                                                                                                                                                                                                                                                                                |                                                                                                                    | -                                                                                                                            |
| Caenorhabditis elegans  | elegans protein partially confirmed by transcript evidence | 5  | P:GO:0048856;<br>P:GO:0007275;<br>P:GO:0000003;<br>P:GO:0009987;<br>P:GO:0016043                                                                                                                                                                                                                                               |                                                                                                                    | -                                                                                                                            |
| -                       | -                                                          | 0  |                                                                                                                                                                                                                                                                                                                                |                                                                                                                    | -                                                                                                                            |
| Caenorhabditis briggsae | Hypothetical protein CBG21170 [Caenorhabditis briggsae]    | 0  |                                                                                                                                                                                                                                                                                                                                |                                                                                                                    | PTHR21035 (PANTHER)                                                                                                          |
| -                       | -                                                          | 0  |                                                                                                                                                                                                                                                                                                                                |                                                                                                                    | -                                                                                                                            |
| Caenorhabditis elegans  | nuclear receptor nhr-31                                    | 8  | F:GO:0003700;<br>F:GO:0043565;<br>F:GO:0005515;<br>F:GO:0003707;<br>P:GO:0019915;<br>C:GO:0005634;<br>F:GO:0008270;<br>P:GO:0006355                                                                                                                                                                                            |                                                                                                                    | IPR000536; IPR008946; IPR015619; PTHR11865 (PANTHER)                                                                         |
| Ciona intestinalis      | microspherule protein 1                                    | 0  |                                                                                                                                                                                                                                                                                                                                | C:GO:0005654;<br>C:GO:0005737;<br>C:GO:0071339;<br>F:GO:0005515;<br>C:GO:0005730;<br>C:GO:0005634;<br>P:GO:0006464 | -                                                                                                                            |
| Ciona intestinalis      | microspherule protein 1                                    | 0  |                                                                                                                                                                                                                                                                                                                                | C:GO:0005654;<br>C:GO:0005737;<br>C:GO:0071339;<br>F:GO:0005515;<br>C:GO:0005730;<br>C:GO:0005634;<br>P:GO:0006464 | -                                                                                                                            |
| Pan troglodytes         | s100 calcium binding protein a6                            | 19 | C:GO:0005829;<br>F:GO:0047485;<br>P:GO:0048146;<br>C:GO:0001726;<br>C:GO:0031234;<br>F:GO:0008270;<br>P:GO:0007049;<br>F:GO:0005509;<br>F:GO:0048154;<br>P:GO:0051781;<br>P:GO:0007409;<br>F:GO:0048306;<br>P:GO:0007165;<br>C:GO:0048471;<br>F:GO:0042803;<br>C:GO:0005635;<br>P:GO:0034220;<br>F:GO:0015075;<br>F:GO:0005523 |                                                                                                                    | IPR001751; IPR011992; IPR013787; IPR018247; IPR018249; PTHR11639 (PANTHER), PTHR11639:SF13 (PANTHER), SSF47473 (SUPERFAMILY) |

|                              |                                                            |    |                                                                                                                                                                                                                                                                                                                                                                                                                                                                        |                               |  |                                                                                                           |
|------------------------------|------------------------------------------------------------|----|------------------------------------------------------------------------------------------------------------------------------------------------------------------------------------------------------------------------------------------------------------------------------------------------------------------------------------------------------------------------------------------------------------------------------------------------------------------------|-------------------------------|--|-----------------------------------------------------------------------------------------------------------|
| Caenorhabditis elegans       | elegans protein partially confirmed by transcript evidence | 0  |                                                                                                                                                                                                                                                                                                                                                                                                                                                                        | F:GO:0005524;<br>P:GO:0006468 |  | IPR012877                                                                                                 |
| Demansia vestigiata          | venom c-type lectin galactose binding isoform variant 1    | 1  | F:GO:0005488                                                                                                                                                                                                                                                                                                                                                                                                                                                           | -                             |  | IPR001304; IPR016186; IPR016187;<br>PTHR22801 (PANTHER),<br>PTHR22801:SF9 (PANTHER), SignalP<br>(SIGNALP) |
|                              | -                                                          | 0  |                                                                                                                                                                                                                                                                                                                                                                                                                                                                        |                               |  | -                                                                                                         |
| Nippostrongylus brasiliensis | elegans protein partially confirmed by transcript evidence | 2  | P:GO:0009792;<br>F:GO:0005515                                                                                                                                                                                                                                                                                                                                                                                                                                          | -                             |  | IPR003677; PTHR21593 (PANTHER)                                                                            |
| Nippostrongylus brasiliensis | elegans protein partially confirmed by transcript evidence | 2  | P:GO:0009792;<br>F:GO:0005515                                                                                                                                                                                                                                                                                                                                                                                                                                          | -                             |  | IPR003677; PTHR21593 (PANTHER),<br>SignalP (SIGNALP)                                                      |
| Loa loa                      | protein tyrosine non-receptor type 11-like                 | 31 | P:GO:0046825;<br>P:GO:0035265;<br>P:GO:0042445;<br>P:GO:0007409;<br>F:GO:0004726;<br>C:GO:0005624;<br>P:GO:0009755;<br>F:GO:0043274;<br>P:GO:0046676;<br>C:GO:0005829;<br>P:GO:0046887;<br>F:GO:0019904;<br>P:GO:0048609;<br>F:GO:0043560;<br>P:GO:0051463;<br>P:GO:0000077;<br>P:GO:0009967;<br>C:GO:0043234;<br>C:GO:0001725;<br>P:GO:0006470;<br>C:GO:0030054;<br>P:GO:0060125;<br>P:GO:0006641;<br>F:GO:0051428;<br>P:GO:0040014;<br>C:GO:0005625;<br>P:GO:0000187 | -                             |  | -                                                                                                         |



|                         |                                                  |    |                                                                                                                                                                                                                                                                                                                                                                                                                                                                                        |                                                |             |                                                   |
|-------------------------|--------------------------------------------------|----|----------------------------------------------------------------------------------------------------------------------------------------------------------------------------------------------------------------------------------------------------------------------------------------------------------------------------------------------------------------------------------------------------------------------------------------------------------------------------------------|------------------------------------------------|-------------|---------------------------------------------------|
| Caenorhabditis elegans  | casein ki-se beta polypeptide                    | 31 | F:GO:005126;<br>P:GO:0016246;<br>C:GO:0005929;<br>F:GO:0005102;<br>P:GO:0033211;<br>P:GO:0040010;<br>C:GO:0005956;<br>P:GO:0040011;<br>P:GO:0034606;<br>C:GO:0005737;<br>P:GO:0008285;<br>C:GO:0030425;<br>F:GO:0019904;<br>C:GO:0043025;<br>P:GO:0009792;<br>P:GO:0002009;<br>P:GO:0007249;<br>F:GO:0004674;<br>F:GO:0042802;<br>C:GO:0030424;<br>P:GO:0002119;<br>F:GO:0019887;<br>P:GO:0043623;<br>P:GO:0010171;<br>F:GO:0008233;<br>C:GO:0005886;<br>F:GO:0008134;<br>P:GO:0034608 | -                                              | EC:2.7.11.0 | IPR000704; IPR016149                              |
|                         | -                                                | 0  |                                                                                                                                                                                                                                                                                                                                                                                                                                                                                        |                                                |             | -                                                 |
| Caenorhabditis elegans  | protein isoform cra_a                            | 0  |                                                                                                                                                                                                                                                                                                                                                                                                                                                                                        | F:GO:0003674;<br>P:GO:0008150;<br>C:GO:0005575 |             | -                                                 |
| Loa loa                 | hypothetical protein LOAG_00508 [Loa loa]        | 0  |                                                                                                                                                                                                                                                                                                                                                                                                                                                                                        |                                                |             | IPR000210; IPR011333                              |
| Caenorhabditis briggsae | elegans protein confirmed by transcript evidence | 0  |                                                                                                                                                                                                                                                                                                                                                                                                                                                                                        |                                                |             | -                                                 |
| Caenorhabditis elegans  | chloride channel protein 3                       | 4  | P:GO:0006810;<br>P:GO:0000003;<br>C:GO:0016020;<br>F:GO:0005216                                                                                                                                                                                                                                                                                                                                                                                                                        | -                                              |             | IPR001807; IPR014743;<br>PTHR11689:SF21 (PANTHER) |
| Caenorhabditis elegans  | chloride channel protein 3                       | 4  | P:GO:0006810;<br>P:GO:0000003;<br>C:GO:0016020;<br>F:GO:0005216                                                                                                                                                                                                                                                                                                                                                                                                                        | -                                              |             | IPR001807; IPR014743;<br>PTHR11689:SF21 (PANTHER) |
|                         | -                                                | 0  |                                                                                                                                                                                                                                                                                                                                                                                                                                                                                        |                                                |             | -                                                 |

|                         |                                                            |    |                                                                                                                                                                                                                                                                                                                                                                                                                                      |   |                                                                                                                                                                  |
|-------------------------|------------------------------------------------------------|----|--------------------------------------------------------------------------------------------------------------------------------------------------------------------------------------------------------------------------------------------------------------------------------------------------------------------------------------------------------------------------------------------------------------------------------------|---|------------------------------------------------------------------------------------------------------------------------------------------------------------------|
| Brugia malayi           | retinoic acid receptor beta                                | 25 | F:GO:0003700;<br>P:GO:0008284;<br>F:GO:0003708;<br>F:GO:0046872;<br>P:GO:0007283;<br>P:GO:0045596;<br>P:GO:0030852;<br>P:GO:0007165;<br>P:GO:0045944;<br>F:GO:0010843;<br>P:GO:0071222;<br>C:GO:0005737;<br>P:GO:0007399;<br>F:GO:0016564;<br>F:GO:0005515;<br>P:GO:0000122;<br>P:GO:0001657;<br>P:GO:0055012;<br>C:GO:0030425;<br>P:GO:0060591;<br>C:GO:0005634;<br>C:GO:0043025;<br>P:GO:0061037;<br>P:GO:0032526;<br>P:GO:0045947 | - | IPR001628; IPR003078; IPR008946;<br>PTHR11865 (PANTHER), SSF57716<br>(SUPERFAMILY)                                                                               |
| Caenorhabditis elegans  | transmembrane protein 144                                  | 2  | P:GO:0009792;<br>P:GO:0000003                                                                                                                                                                                                                                                                                                                                                                                                        | - | IPR010651; SignalP (SIGNALP)                                                                                                                                     |
| Caenorhabditis briggsae | elegans protein confirmed by transcript evidence           | 2  | P:GO:0009792;<br>P:GO:0000003                                                                                                                                                                                                                                                                                                                                                                                                        | - | SignalP (SIGNALP)                                                                                                                                                |
| Caenorhabditis briggsae | guanylate ki-se family protein                             | 16 | C:GO:0043296;<br>P:GO:0008078;<br>P:GO:0045176;<br>P:GO:0016337;<br>P:GO:0007420;<br>P:GO:0001841;<br>P:GO:0002011;<br>P:GO:0060059;<br>P:GO:0045199;<br>P:GO:0016332;<br>F:GO:0030165;<br>P:GO:0035050;<br>C:GO:0001917;<br>C:GO:0031226;<br>P:GO:0055008;<br>C:GO:0005634                                                                                                                                                          | - | IPR008144; IPR008145;<br>G3DSA:3.30.63.10 (GENE3D),<br>G3DSA:3.40.50.300 (GENE3D),<br>PTHR23122 (PANTHER),<br>PTHR23122:SF4 (PANTHER), SSF52540<br>(SUPERFAMILY) |
|                         | -                                                          | 0  |                                                                                                                                                                                                                                                                                                                                                                                                                                      |   | -                                                                                                                                                                |
| Caenorhabditis elegans  | elegans protein partially confirmed by transcript evidence | 4  | C:GO:0016021;<br>P:GO:0007160;<br>P:GO:0040010;<br>F:GO:0005509                                                                                                                                                                                                                                                                                                                                                                      | - | IPR003886                                                                                                                                                        |

|                          |                                                            |    |                                                                                                                                                                       |                                                                                                                                     |              |                                                                                                                                    |
|--------------------------|------------------------------------------------------------|----|-----------------------------------------------------------------------------------------------------------------------------------------------------------------------|-------------------------------------------------------------------------------------------------------------------------------------|--------------|------------------------------------------------------------------------------------------------------------------------------------|
| Loa loa                  | transcription initiation factor tfiid subunit 11           | 9  | F:GO:0047485;<br>P:GO:0043923;<br>P:GO:0006367;<br>F:GO:0003677;<br>P:GO:0006368;<br>F:GO:0046966;<br>F:GO:0003713;<br>C:GO:0005669;<br>F:GO:0042809                  | -                                                                                                                                   |              | IPR006809; IPR009072;<br>PTHR13218:SF7 (PANTHER)                                                                                   |
|                          | -                                                          | 0  |                                                                                                                                                                       |                                                                                                                                     |              | -                                                                                                                                  |
| Caenorhabditis elegans   | transmembrane emp24 domain-containing protein 10 precursor | 3  | C:GO:0016021;<br>P:GO:0009792;<br>P:GO:0006810                                                                                                                        | -                                                                                                                                   |              | IPR000348; IPR009038; IPR015720;<br>PTHR22811 (PANTHER), SignalP (SIGNALP)                                                         |
|                          | -                                                          | 0  |                                                                                                                                                                       |                                                                                                                                     |              | SignalP (SIGNALP)                                                                                                                  |
|                          | -                                                          | 0  |                                                                                                                                                                       |                                                                                                                                     |              | -                                                                                                                                  |
| Caenorhabditis briggsae  | briggsae cbr-npp-12 protein                                | 3  | F:GO:0005515;<br>C:GO:0005635;<br>C:GO:0016020                                                                                                                        | -                                                                                                                                   |              | PTHR23019 (PANTHER)                                                                                                                |
| Caenorhabditis elegans   | beta-carotene -dioxyge-se                                  | 3  | F:GO:0005515;<br>F:GO:0016702;<br>P:GO:0006721                                                                                                                        | -                                                                                                                                   | EC:1.13.11.0 | IPR004294; PTHR10543:SF4 (PANTHER)                                                                                                 |
| Caenorhabditis briggsae  | Hypothetical protein CBG20775 [Caenorhabditis briggsae]    | 0  |                                                                                                                                                                       |                                                                                                                                     |              |                                                                                                                                    |
|                          | -                                                          | 0  |                                                                                                                                                                       |                                                                                                                                     |              | -                                                                                                                                  |
| Brugia malayi            | cell division cycle related family member (cdc-14)         | 10 | P:GO:0040010;<br>P:GO:0000910;<br>C:GO:0030496;<br>P:GO:0060284;<br>F:GO:0004725;<br>C:GO:0005819;<br>P:GO:0045786;<br>P:GO:0009792;<br>C:GO:0005737;<br>P:GO:0006974 | -                                                                                                                                   | EC:3.1.3.48  | G3DSA:3.90.190.10 (GENE3D),<br>SSF52799 (SUPERFAMILY)                                                                              |
| Caenorhabditis elegans   | variable abnormal morphology family member (vab-10)        | 0  |                                                                                                                                                                       | F:GO:0005509;<br>P:GO:0007050;<br>F:GO:0003779                                                                                      |              | IPR002017; IPR018159;<br>G3DSA:1.20.58.60 (GENE3D),<br>PTHR11915 (PANTHER),<br>PTHR11915:SF38 (PANTHER),<br>SSF46966 (SUPERFAMILY) |
|                          | -                                                          | 0  |                                                                                                                                                                       |                                                                                                                                     |              | -                                                                                                                                  |
| Caenorhabditis elegans   | adenylyl cyclase-associated protein 1                      | 6  | P:GO:0008078;<br>P:GO:0007190;<br>P:GO:0007163;<br>F:GO:0003779;<br>P:GO:0007165;<br>P:GO:0016043                                                                     | -                                                                                                                                   |              | -                                                                                                                                  |
| Ornithorhynchus anatinus | ribosomal protein l19                                      | 4  | F:GO:0003735;<br>F:GO:0003723;<br>C:GO:0022625;<br>P:GO:0006414                                                                                                       | -                                                                                                                                   |              | IPR000196; IPR015972; IPR015974;<br>PTHR10722 (PANTHER)                                                                            |
|                          | -                                                          | 0  |                                                                                                                                                                       |                                                                                                                                     |              | SignalP (SIGNALP)                                                                                                                  |
| Caenorhabditis elegans   | apolipoprotein o-like                                      | 0  |                                                                                                                                                                       | C:GO:0005739;<br>F:GO:0005524;<br>P:GO:0006412;<br>F:GO:0004812;<br>C:GO:0005737;<br>P:GO:0006418;<br>C:GO:0005743;<br>C:GO:0005576 |              | IPR001412; IPR019166; PTHR14564 (PANTHER)                                                                                          |

|                             |                                                            |    |                                                                                                                                                                                                         |                                                |                                                                                                                                                                                                                  |
|-----------------------------|------------------------------------------------------------|----|---------------------------------------------------------------------------------------------------------------------------------------------------------------------------------------------------------|------------------------------------------------|------------------------------------------------------------------------------------------------------------------------------------------------------------------------------------------------------------------|
|                             | -                                                          | 0  |                                                                                                                                                                                                         |                                                | SignalP (SIGNALP)                                                                                                                                                                                                |
| Caenorhabditis briggsae     | briggsae cbr-frk-1 protein                                 | 2  | F:GO:0004672;<br>C:GO:0005829                                                                                                                                                                           |                                                | IPR001245; IPR011009; IPR020685;<br>IPR020764; G3DSA:3.30.200.20<br>(GENE3D)                                                                                                                                     |
|                             | -                                                          | 0  |                                                                                                                                                                                                         |                                                | SignalP (SIGNALP)                                                                                                                                                                                                |
|                             | -                                                          | 0  |                                                                                                                                                                                                         |                                                | -                                                                                                                                                                                                                |
| Caenorhabditis elegans      | briggsae cbr-dys-1 protein                                 | 2  | P:GO:0065007;<br>P:GO:0009987                                                                                                                                                                           |                                                | -                                                                                                                                                                                                                |
| Caenorhabditis elegans      | udp-n-acetylglucosamine transporter                        | 12 | C:GO:0000139;<br>F:GO:0005461;<br>F:GO:0005464;<br>F:GO:0005463;<br>F:GO:0005456;<br>P:GO:0015757;<br>P:GO:0015785;<br>F:GO:0005351;<br>P:GO:0015789;<br>C:GO:0016021;<br>P:GO:0015782;<br>F:GO:0005459 |                                                | IPR007271; PTHR10231:SF13<br>(PANTHER)                                                                                                                                                                           |
| Caenorhabditis elegans      | transmembrane protein 134                                  | 0  |                                                                                                                                                                                                         | F:GO:0003674;<br>C:GO:0016021;<br>C:GO:0005575 | -                                                                                                                                                                                                                |
| Angiostrongylus cantonensis | pre-mr- splicing protein                                   | 10 | P:GO:0007030;<br>P:GO:0002119;<br>P:GO:0018996;<br>C:GO:0071011;<br>P:GO:0000003;<br>P:GO:0040011;<br>P:GO:0040007;<br>C:GO:0005829;<br>P:GO:0000398;<br>C:GO:0071013                                   |                                                | PTHR19923 (PANTHER)                                                                                                                                                                                              |
| Loa loa                     | structural maintenance of chromosome protein               | 2  | P:GO:0009792;<br>P:GO:0045132                                                                                                                                                                           |                                                | IPR003395; G3DSA:3.40.50.300<br>(GENE3D), PTHR19306 (PANTHER),<br>PTHR19306:SF1 (PANTHER), SSF52540<br>(SUPERFAMILY)                                                                                             |
| Caenorhabditis briggsae     | elegans protein partially confirmed by transcript evidence | 5  | P:GO:0007160;<br>P:GO:0008218;<br>F:GO:0005509;<br>P:GO:0018298;<br>C:GO:0016020                                                                                                                        |                                                | IPR000742; IPR002919; IPR006209;<br>IPR006210; IPR011042; IPR013032;<br>G3DSA:2.10.25.10 (GENE3D),<br>G3DSA:2.170.300.10 (GENE3D),<br>PTHR10529 (PANTHER),<br>PTHR10529:SF4 (PANTHER), SSF57196<br>(SUPERFAMILY) |
| Brugia malayi               | ubiquitin carboxyl-terminal hydrolase 22                   | 8  | P:GO:0016579;<br>P:GO:0016570;<br>F:GO:0008234;<br>F:GO:0003713;<br>P:GO:0048522;<br>P:GO:0045449;<br>C:GO:0005634;<br>P:GO:0007049                                                                     |                                                | IPR001394; IPR001607; IPR013083;<br>IPR018200; PTHR10420 (PANTHER),<br>PTHR10420:SF57 (PANTHER),<br>SSF54001 (SUPERFAMILY)                                                                                       |
| Caenorhabditis elegans      | hypothetical protein Y71G10AL.1 [Caenorhabditis elegans]   | 0  |                                                                                                                                                                                                         |                                                | -                                                                                                                                                                                                                |
| Caenorhabditis elegans      | hypothetical protein Y71G10AL.1 [Caenorhabditis elegans]   | 0  |                                                                                                                                                                                                         |                                                | -                                                                                                                                                                                                                |

|                        |                                                                                                      |   |                                                                                                   |                                                                                                                                                                                        |              |                                                                                                  |
|------------------------|------------------------------------------------------------------------------------------------------|---|---------------------------------------------------------------------------------------------------|----------------------------------------------------------------------------------------------------------------------------------------------------------------------------------------|--------------|--------------------------------------------------------------------------------------------------|
| Loa loa                | cop9 sig-losome complex subunit 3                                                                    | 0 |                                                                                                   | F:GO:0005488;<br>C:GO:0008180;<br>C:GO:0005737;<br>C:GO:0000502;<br>P:GO:0001701;<br>F:GO:0005515;<br>C:GO:0005634                                                                     | -            |                                                                                                  |
|                        | -                                                                                                    | 0 |                                                                                                   |                                                                                                                                                                                        |              | SignalP (SIGNALP)                                                                                |
|                        | -                                                                                                    | 0 |                                                                                                   |                                                                                                                                                                                        |              | -                                                                                                |
|                        | -                                                                                                    | 0 |                                                                                                   |                                                                                                                                                                                        |              | -                                                                                                |
| Loa loa                | e3 ubiquitin                                                                                         | 0 |                                                                                                   | F:GO:0046872;<br>F:GO:0016874;<br>P:GO:0008150;<br>F:GO:0008270;<br>F:GO:0005515;<br>C:GO:0005575                                                                                      |              | IPR006595; PTHR12170 (PANTHER),<br>PTHR12170:SF3 (PANTHER)                                       |
| Caenorhabditis elegans | prion-like-(q n-rich)-domain-bearing protein family member (pqn-89)                                  | 0 |                                                                                                   |                                                                                                                                                                                        |              | -                                                                                                |
| Caenorhabditis elegans | l80003_1guanylyl cyclase                                                                             | 0 |                                                                                                   |                                                                                                                                                                                        |              | -                                                                                                |
| Caenorhabditis elegans | protein fam173b                                                                                      | 0 |                                                                                                   | F:GO:0003674;<br>C:GO:0016021;<br>C:GO:0016020;<br>P:GO:0008150;<br>C:GO:0005575                                                                                                       |              | G3DSA:3.40.50.150 (GENE3D),<br>PTHR13610 (PANTHER), SignalP<br>(SIGNALP), SSF53335 (SUPERFAMILY) |
|                        | -                                                                                                    | 0 |                                                                                                   |                                                                                                                                                                                        |              | -                                                                                                |
| Brugia malayi          | dead h                                                                                               | 0 |                                                                                                   |                                                                                                                                                                                        |              | PTHR12957 (PANTHER),<br>PTHR12957:SF3 (PANTHER)                                                  |
| Caenorhabditis elegans | caax prenyl protease 2                                                                               | 0 |                                                                                                   | P:GO:0006508;<br>C:GO:0030176;<br>C:GO:0016021;<br>C:GO:0016020;<br>F:GO:0004222;<br>F:GO:0008233                                                                                      |              | IPR003675; PTHR13046 (PANTHER),<br>SignalP (SIGNALP)                                             |
| Caenorhabditis elegans | caax prenyl protease 2                                                                               | 0 |                                                                                                   | P:GO:0006508;<br>C:GO:0030176;<br>C:GO:0016021;<br>C:GO:0016020;<br>F:GO:0004222;<br>F:GO:0008233                                                                                      |              | IPR003675; PTHR13046 (PANTHER),<br>SignalP (SIGNALP)                                             |
|                        | -                                                                                                    | 0 |                                                                                                   |                                                                                                                                                                                        |              | -                                                                                                |
|                        | -                                                                                                    | 0 |                                                                                                   |                                                                                                                                                                                        |              | -                                                                                                |
| Caenorhabditis elegans | a chain golgi alpha-mannosidase ii in complex with 5-substituted swainsonine a-log: 5- - swainsonine | 6 | C:GO:0000139;<br>F:GO:0043169;<br>C:GO:0005795;<br>P:GO:0006487;<br>F:GO:0004572;<br>C:GO:0005783 | -                                                                                                                                                                                      | EC:3.2.1.114 | IPR000602; IPR011330; PTHR11607<br>(PANTHER), PTHR11607:SF4<br>(PANTHER)                         |
| Brugia malayi          | tr--splicing endonuclease subunit sen34                                                              | 0 |                                                                                                   | P:GO:0006397;<br>C:GO:0005634;<br>F:GO:0016787;<br>P:GO:0000379;<br>F:GO:0003676;<br>C:GO:0000214;<br>F:GO:0000213;<br>P:GO:0006388;<br>C:GO:0005730;<br>F:GO:0004519;<br>F:GO:0004518 |              | IPR006676; IPR006677; IPR011856;<br>PTHR13070 (PANTHER)                                          |

|                           |                                                                                |    |                                                                                                                                                                                                                                           |                                                                                                                                                                       |            |                                                                                                                 |
|---------------------------|--------------------------------------------------------------------------------|----|-------------------------------------------------------------------------------------------------------------------------------------------------------------------------------------------------------------------------------------------|-----------------------------------------------------------------------------------------------------------------------------------------------------------------------|------------|-----------------------------------------------------------------------------------------------------------------|
| Caenorhabditis briggsae   | gpi inositol deacylase pgap1                                                   | 1  | P:GO:0009792                                                                                                                                                                                                                              | -                                                                                                                                                                     |            | IPR012908; PTHR15495 (PANTHER), PTHR15495:SF2 (PANTHER)                                                         |
| Caenorhabditis elegans    | gdnf family receptor alpha-3                                                   | 0  |                                                                                                                                                                                                                                           |                                                                                                                                                                       |            | -                                                                                                               |
| Caenorhabditis elegans    | par-6 at contacts (abnormal early localization of par-6) family member (pac-1) | 3  | C:GO:0005737;<br>F:GO:0005100;<br>P:GO:0007266                                                                                                                                                                                            | -                                                                                                                                                                     |            | -                                                                                                               |
| Caenorhabditis briggsae   | elegans protein partially confirmed by transcript evidence                     | 0  |                                                                                                                                                                                                                                           | F:GO:0008061;<br>P:GO:0006030;<br>P:GO:0040011;<br>P:GO:0002119;<br>C:GO:0005576;<br>F:GO:0005515;<br>P:GO:0009405                                                    |            | IPR006150; IPR006210; IPR013032; SignalP (SIGNALP)                                                              |
| Caenorhabditis briggsae   | dep domain-containing protein 5                                                | 1  | P:GO:0040010                                                                                                                                                                                                                              | -                                                                                                                                                                     |            | IPR022046; PTHR13179 (PANTHER)                                                                                  |
| Caenorhabditis sp. PS1010 | uncoordinated family member (unc-73)                                           | 5  | P:GO:0023034;<br>P:GO:0031175;<br>P:GO:0050794;<br>F:GO:0005488;<br>C:GO:0044444                                                                                                                                                          | -                                                                                                                                                                     |            | PTHR22826 (PANTHER), PTHR22826:SF39 (PANTHER), SSF46966 (SUPERFAMILY)                                           |
| Apis mellifera            | set domain and mariner transposase fusion                                      | 0  |                                                                                                                                                                                                                                           | F:GO:0016740;<br>F:GO:0004803;<br>P:GO:0006313;<br>F:GO:0008168;<br>C:GO:0005634;<br>F:GO:0003677;<br>F:GO:0008270;<br>F:GO:0018024;<br>P:GO:0015074;<br>P:GO:0016568 |            | -                                                                                                               |
| Caenorhabditis briggsae   | trans-golgi network protein 2                                                  | 2  | C:GO:0043231;<br>C:GO:0044444                                                                                                                                                                                                             | -                                                                                                                                                                     |            | PTHR23211 (PANTHER), SignalP (SIGNALP)                                                                          |
| Caenorhabditis briggsae   | elegans protein partially confirmed by transcript evidence                     | 3  | F:GO:0005044;<br>F:GO:0005488;<br>C:GO:0016020                                                                                                                                                                                            | -                                                                                                                                                                     |            | -                                                                                                               |
| Caenorhabditis elegans    | r- binding homolog 2                                                           | 5  | P:GO:0009792;<br>P:GO:0008354;<br>P:GO:0007126;<br>P:GO:0007281;<br>C:GO:0043231                                                                                                                                                          | -                                                                                                                                                                     |            | IPR001159; IPR014720; PTHR10910 (PANTHER), PTHR10910:SF6 (PANTHER), SSF54768 (SUPERFAMILY)                      |
| Homo sapiens              | -dh dehydroge-se                                                               | 14 | C:GO:0005654;<br>P:GO:0017148;<br>F:GO:0005515;<br>F:GO:0008137;<br>P:GO:0030262;<br>C:GO:0016021;<br>P:GO:0045892;<br>P:GO:0022900;<br>P:GO:0008624;<br>C:GO:0005747;<br>P:GO:0030308;<br>P:GO:0006606;<br>F:GO:0005524;<br>P:GO:0006800 | -                                                                                                                                                                     | EC:1.6.5.3 | -                                                                                                               |
| Brugia malayi             | coronin 2a                                                                     | 0  |                                                                                                                                                                                                                                           |                                                                                                                                                                       |            | IPR001680; IPR015048; IPR015505; IPR015943; IPR017986; IPR019775; IPR019781; IPR019782; SSF117289 (SUPERFAMILY) |

|                             |                                                  |    |                                                                                                                                                                                                                                                                                                                                                 |   |            |                                                                                                                                                         |
|-----------------------------|--------------------------------------------------|----|-------------------------------------------------------------------------------------------------------------------------------------------------------------------------------------------------------------------------------------------------------------------------------------------------------------------------------------------------|---|------------|---------------------------------------------------------------------------------------------------------------------------------------------------------|
| Cyathostominae sp. JM-2007a | briggsae cbr-tag-273 protein                     | 2  | F:GO:0008270;<br>P:GO:0000003                                                                                                                                                                                                                                                                                                                   | - | -          | -                                                                                                                                                       |
| Caenorhabditis elegans      | aspartyl glutamyl-tr- amidotransferase subunit b | 1  | F:GO:0016874                                                                                                                                                                                                                                                                                                                                    | - | -          | IPR006075; IPR010916; IPR017958;<br>IPR017959; IPR018027; SSF55931<br>(SUPERFAMILY)                                                                     |
| -                           | -                                                | 0  | -                                                                                                                                                                                                                                                                                                                                               | - | -          | SignalP (SIGNALP)                                                                                                                                       |
| -                           | -                                                | 0  | -                                                                                                                                                                                                                                                                                                                                               | - | -          | SignalP (SIGNALP)                                                                                                                                       |
| -                           | -                                                | 0  | -                                                                                                                                                                                                                                                                                                                                               | - | -          | -                                                                                                                                                       |
| Caenorhabditis briggsae     | adipokinetic hormone receptor                    | 4  | P:GO:0007186;<br>C:GO:0016021;<br>P:GO:0007165;<br>F:GO:0005000                                                                                                                                                                                                                                                                                 | - | -          | IPR000276; IPR017452;<br>G3DSA:1.20.1070.10 (GENE3D),<br>PTHR19264 (PANTHER),<br>PTHR19264:SF50 (PANTHER), SignalP<br>(SIGNALP), SSF81321 (SUPERFAMILY) |
| -                           | -                                                | 0  | -                                                                                                                                                                                                                                                                                                                                               | - | -          | -                                                                                                                                                       |
| -                           | -                                                | 0  | -                                                                                                                                                                                                                                                                                                                                               | - | -          | -                                                                                                                                                       |
| Loa loa                     | patched family protein                           | 4  | P:GO:0018996;<br>C:GO:0016020;<br>P:GO:0040018;<br>P:GO:0040011                                                                                                                                                                                                                                                                                 | - | -          | -                                                                                                                                                       |
| -                           | -                                                | 0  | -                                                                                                                                                                                                                                                                                                                                               | - | -          | -                                                                                                                                                       |
| Caenorhabditis elegans      | cytosolic phosphoglucomutase                     | 13 | C:GO:0005829;<br>P:GO:0019388;<br>P:GO:0006874;<br>P:GO:0019255;<br>P:GO:0006011;<br>F:GO:0000287;<br>P:GO:0005992;<br>F:GO:0004614;<br>C:GO:0009507;<br>P:GO:0046686;<br>C:GO:0005634;<br>C:GO:0005886;<br>P:GO:0005978                                                                                                                        | - | EC:5.4.2.2 | G3DSA:3.30.310.50 (GENE3D),<br>SSF55957 (SUPERFAMILY)                                                                                                   |
| Camponotus floridanus       | uncharacterized transposase-like protein         | 0  | -                                                                                                                                                                                                                                                                                                                                               | - | -          | IPR007087; IPR015880                                                                                                                                    |
| Caenorhabditis elegans      | mothers against decapentaplegic homolog 4        | 20 | P:GO:0007179;<br>P:GO:0006357;<br>P:GO:0051246;<br>P:GO:0007369;<br>P:GO:0043009;<br>P:GO:0090100;<br>P:GO:0072131;<br>P:GO:0051128;<br>P:GO:0040007;<br>P:GO:0042127;<br>C:GO:0005737;<br>P:GO:0048646;<br>P:GO:0009952;<br>C:GO:0005667;<br>F:GO:0003677;<br>P:GO:0030154;<br>P:GO:0048523;<br>P:GO:0045893;<br>P:GO:0051239;<br>F:GO:0046332 | - | -          | IPR001132; IPR003619; IPR008984;<br>IPR013019; IPR013790; IPR017855                                                                                     |
| -                           | -                                                | 0  | -                                                                                                                                                                                                                                                                                                                                               | - | -          | -                                                                                                                                                       |
| -                           | -                                                | 0  | -                                                                                                                                                                                                                                                                                                                                               | - | -          | -                                                                                                                                                       |

|                         |                                                   |    |                                                                                                                                                                                                                                           |                                                                                                                                                                       |             |                                                                                           |
|-------------------------|---------------------------------------------------|----|-------------------------------------------------------------------------------------------------------------------------------------------------------------------------------------------------------------------------------------------|-----------------------------------------------------------------------------------------------------------------------------------------------------------------------|-------------|-------------------------------------------------------------------------------------------|
| Caenorhabditis elegans  | cell division cycle related family member (cdc- ) | 14 | P:GO:0040010;<br>P:GO:0007126;<br>P:GO:0000212;<br>P:GO:0000003;<br>P:GO:0051301;<br>F:GO:0004725;<br>P:GO:0010171;<br>P:GO:0002119;<br>P:GO:0006898;<br>P:GO:0009792;<br>P:GO:0008283;<br>P:GO:0051729;<br>C:GO:0005634;<br>P:GO:0007346 | -                                                                                                                                                                     | EC:3.1.3.48 | IPR000751; IPR001763;<br>PTHR10828:SF14 (PANTHER)                                         |
| Caenorhabditis elegans  | neuropeptide-like protein family member (nlp-21)  | 0  |                                                                                                                                                                                                                                           |                                                                                                                                                                       |             | SignalP (SIGNALP)                                                                         |
| Brugia malayi           | gtpase activating protein and vps9 domains 1      | 3  | P:GO:0009987;<br>P:GO:0050789;<br>C:GO:0044444                                                                                                                                                                                            | -                                                                                                                                                                     |             | -                                                                                         |
| Brugia malayi           | hypothetical protein Bm1_22765 [Brugia malayi]    | 0  |                                                                                                                                                                                                                                           | P:GO:0000003                                                                                                                                                          |             | -                                                                                         |
| Brugia malayi           | hypothetical protein Bm1_52845 [Brugia malayi]    | 0  |                                                                                                                                                                                                                                           |                                                                                                                                                                       |             | -                                                                                         |
| Brugia malayi           | hypothetical protein Bm1_52845 [Brugia malayi]    | 0  |                                                                                                                                                                                                                                           |                                                                                                                                                                       |             | -                                                                                         |
| Caenorhabditis briggsae | traf and tnfr receptor associated protein         | 6  | P:GO:0030512;<br>F:GO:0005515;<br>F:GO:0004518;<br>P:GO:0007368;<br>P:GO:0060027;<br>P:GO:0006974                                                                                                                                         | -                                                                                                                                                                     |             | IPR005135; IPR009060;<br>G3DSA:1.10.8.10 (GENE3D),<br>G3DSA:3.60.10.10 (GENE3D)           |
| Caenorhabditis elegans  | mit domain-containing protein 1                   | 0  |                                                                                                                                                                                                                                           | F:GO:0003674;<br>C:GO:0031902;<br>C:GO:0016020;<br>P:GO:0008150;<br>C:GO:0005768;<br>P:GO:0006810;<br>C:GO:0005575;<br>P:GO:0015031                                   |             | IPR007330; G3DSA:1.20.58.280<br>(GENE3D), PTHR21222 (PANTHER),<br>SSF116846 (SUPERFAMILY) |
| Caenorhabditis elegans  | elegans protein confirmed by transcript evidence  | 1  | P:GO:0006952                                                                                                                                                                                                                              | -                                                                                                                                                                     |             | -                                                                                         |
| Loa loa                 | briggsae cbr-pqn-21 protein                       | 0  |                                                                                                                                                                                                                                           | C:GO:0016021;<br>C:GO:0016020;<br>P:GO:0051973;<br>C:GO:0005768;<br>F:GO:0003676;<br>F:GO:0008270;<br>C:GO:0005794;<br>C:GO:0005575;<br>C:GO:0005622;<br>C:GO:0005886 |             | IPR007087; IPR008162; IPR015880                                                           |
| Loa loa                 | briggsae cbr-pqn-21 protein                       | 0  |                                                                                                                                                                                                                                           | C:GO:0016021;<br>C:GO:0016020;<br>P:GO:0051973;<br>C:GO:0005768;<br>F:GO:0003676;<br>F:GO:0008270;<br>C:GO:0005794;<br>C:GO:0005575;<br>C:GO:0005622;<br>C:GO:0005886 |             | IPR007087; IPR008162; IPR015880                                                           |
| Caenorhabditis briggsae | kiaa1738 protein                                  | 1  | C:GO:0016020                                                                                                                                                                                                                              | -                                                                                                                                                                     |             | IPR019411; PTHR13466 (PANTHER)                                                            |



|                         |                                                                                      |  |                                                  |                                                |                                                                                                                                                                                                                                                                                                                                                                                                                                                                                       |                                                                                                                                    |                                                                                        |
|-------------------------|--------------------------------------------------------------------------------------|--|--------------------------------------------------|------------------------------------------------|---------------------------------------------------------------------------------------------------------------------------------------------------------------------------------------------------------------------------------------------------------------------------------------------------------------------------------------------------------------------------------------------------------------------------------------------------------------------------------------|------------------------------------------------------------------------------------------------------------------------------------|----------------------------------------------------------------------------------------|
| Caenorhabditis elegans  | elegans protein confirmed by transcript evidence                                     |  | F:GO:0004872;<br>3 F:GO:0005515;<br>P:GO:0006350 | -                                              |                                                                                                                                                                                                                                                                                                                                                                                                                                                                                       | IPR001628; IPR008946; IPR013088;<br>PR00350 (PRINTS), PTHR11865<br>(PANTHER), PTHR11865:SF218<br>(PANTHER), SSF57716 (SUPERFAMILY) |                                                                                        |
| Caenorhabditis briggsae | elegans protein confirmed by transcript evidence                                     |  | 1 F:GO:0005515                                   | -                                              |                                                                                                                                                                                                                                                                                                                                                                                                                                                                                       | IPR002549                                                                                                                          |                                                                                        |
| Caenorhabditis briggsae | elegans protein confirmed by transcript evidence                                     |  | 1 F:GO:0005515                                   | -                                              |                                                                                                                                                                                                                                                                                                                                                                                                                                                                                       | IPR002549                                                                                                                          |                                                                                        |
| Caenorhabditis briggsae | elegans protein confirmed by transcript evidence                                     |  | 1 F:GO:0005515                                   | -                                              |                                                                                                                                                                                                                                                                                                                                                                                                                                                                                       | IPR002549                                                                                                                          |                                                                                        |
| Caenorhabditis briggsae | elegans protein confirmed by transcript evidence                                     |  | 1 F:GO:0005515                                   | -                                              |                                                                                                                                                                                                                                                                                                                                                                                                                                                                                       | IPR002549                                                                                                                          |                                                                                        |
| Caenorhabditis elegans  | rap ran-gap family protein                                                           |  | 0                                                |                                                | F:GO:0005096;<br>P:GO:0051056;<br>C:GO:0005622                                                                                                                                                                                                                                                                                                                                                                                                                                        | -                                                                                                                                  |                                                                                        |
| Caenorhabditis briggsae | excision repair cross-complementing rodent repair deficiency complementation group 1 |  | 33                                               |                                                | P:GO:000718;<br>P:GO:000718;<br>C:GO:0005654;<br>P:GO:0009650;<br>P:GO:0006312;<br>P:GO:0010165;<br>P:GO:0009744;<br>P:GO:0032205;<br>P:GO:0048568;<br>F:GO:0003684;<br>F:GO:0008022;<br>P:GO:0035166;<br>P:GO:0006949;<br>C:GO:0000784;<br>P:GO:0001302;<br>P:GO:0007283;<br>P:GO:0008283;<br>P:GO:0008584;<br>P:GO:0010259;<br>F:GO:0003697;<br>P:GO:0006302;<br>F:GO:0019904;<br>P:GO:0006296;<br>C:GO:0000109;<br>P:GO:0007281;<br>P:GO:0048477;<br>P:GO:0006295;<br>P:GO:0035264 | -                                                                                                                                  | IPR004579; IPR010994; IPR011335;<br>G3DSA:1.10.150.20 (GENE3D),<br>PTHR12749 (PANTHER) |
| Caenorhabditis elegans  | zinc metalloprotease                                                                 |  | 0                                                |                                                | P:GO:0006508;<br>F:GO:0008237;<br>F:GO:0004222                                                                                                                                                                                                                                                                                                                                                                                                                                        | IPR000718; IPR008753;<br>G3DSA:1.10.1380.10 (GENE3D),<br>PTHR11733:SF24 (PANTHER),<br>SSF55486 (SUPERFAMILY)                       |                                                                                        |
| Caenorhabditis elegans  | peptidase family m3 containing protein                                               |  | 3                                                | F:GO:0008233;<br>P:GO:0043170;<br>P:GO:0044238 | -                                                                                                                                                                                                                                                                                                                                                                                                                                                                                     | IPR001567; G3DSA:3.40.390.10<br>(GENE3D), PTHR11804 (PANTHER),<br>PTHR11804:SF4 (PANTHER)                                          |                                                                                        |
|                         | -                                                                                    |  | 0                                                |                                                |                                                                                                                                                                                                                                                                                                                                                                                                                                                                                       | -                                                                                                                                  |                                                                                        |
| Caenorhabditis briggsae | btb poz domain containing protein                                                    |  | 2                                                | F:GO:0005515;<br>C:GO:0016021                  | -                                                                                                                                                                                                                                                                                                                                                                                                                                                                                     | -                                                                                                                                  |                                                                                        |

|                         |                                                   |    |                                                                                                                                                                                                                                                            |   |             |                                                                                       |
|-------------------------|---------------------------------------------------|----|------------------------------------------------------------------------------------------------------------------------------------------------------------------------------------------------------------------------------------------------------------|---|-------------|---------------------------------------------------------------------------------------|
| Caenorhabditis briggsae | translocating chain-associated membrane protein 1 | 15 | F:GO:0046966;<br>F:GO:0004402;<br>C:GO:0043231;<br>F:GO:0047485;<br>P:GO:0030521;<br>P:GO:0019915;<br>F:GO:0016922;<br>F:GO:0003713;<br>C:GO:0044425;<br>P:GO:0045944;<br>F:GO:0004872;<br>P:GO:0006613;<br>C:GO:0044444;<br>P:GO:0032502;<br>F:GO:0050681 | - | EC:2.3.1.48 | IPR013599; PTHR12371 (PANTHER), SignalP (SIGNALP)                                     |
| Caenorhabditis briggsae | translocation associated membrane protein 1       | 13 | F:GO:0004402;<br>C:GO:0043231;<br>P:GO:0030518;<br>F:GO:0047485;<br>C:GO:0005737;<br>P:GO:0019915;<br>F:GO:0016922;<br>F:GO:0003713;<br>C:GO:0044425;<br>F:GO:0035258;<br>P:GO:0045944;<br>F:GO:0004872;<br>P:GO:0006613                                   | - | EC:2.3.1.48 | IPR006634; IPR013599; PTHR12371 (PANTHER), PTHR12371:SF1 (PANTHER), SignalP (SIGNALP) |
| Caenorhabditis briggsae | translocation associated membrane protein 1       | 13 | F:GO:0004402;<br>C:GO:0043231;<br>P:GO:0030518;<br>F:GO:0047485;<br>C:GO:0005737;<br>P:GO:0019915;<br>F:GO:0016922;<br>F:GO:0003713;<br>C:GO:0044425;<br>F:GO:0035258;<br>P:GO:0045944;<br>F:GO:0004872;<br>P:GO:0006613                                   | - | EC:2.3.1.48 | IPR006634; IPR013599; PTHR12371 (PANTHER), PTHR12371:SF1 (PANTHER), SignalP (SIGNALP) |
| -                       | -                                                 | 0  |                                                                                                                                                                                                                                                            |   |             | -                                                                                     |
| -                       | -                                                 | 0  |                                                                                                                                                                                                                                                            |   |             | -                                                                                     |
| -                       | -                                                 | 0  |                                                                                                                                                                                                                                                            |   |             | -                                                                                     |
| -                       | -                                                 | 0  |                                                                                                                                                                                                                                                            |   |             | -                                                                                     |
| -                       | -                                                 | 0  |                                                                                                                                                                                                                                                            |   |             | IPR013032; G3DSA:2.170.300.10 (GENE3D), SSF57196 (SUPERFAMILY)                        |
| Caenorhabditis briggsae | triosephosphate isomerase                         | 6  | F:GO:0004807;<br>P:GO:0044283;<br>P:GO:0044249;<br>P:GO:0032787;<br>P:GO:0008610;<br>P:GO:0006007                                                                                                                                                          | - | EC:5.3.1.1  | IPR000652; IPR013785; IPR020861                                                       |

|                         |                                                                    |    |                                                                                                                                                                                                                                                                                                               |                                                |                            |                                                                                     |
|-------------------------|--------------------------------------------------------------------|----|---------------------------------------------------------------------------------------------------------------------------------------------------------------------------------------------------------------------------------------------------------------------------------------------------------------|------------------------------------------------|----------------------------|-------------------------------------------------------------------------------------|
| Caenorhabditis briggsae | ump-cmp ki-se                                                      | 7  | C:GO:0005737;<br>P:GO:0009792;<br>F:GO:0004017;<br>P:GO:0009165;<br>F:GO:0009041;<br>F:GO:0005524;<br>F:GO:0004127                                                                                                                                                                                            | -                                              | EC:2.7.4.3;<br>EC:2.7.4.14 | -                                                                                   |
| Ancylostoma caninum     | secreted protein 5 precursor                                       | 0  |                                                                                                                                                                                                                                                                                                               | P:GO:0006898;<br>C:GO:0005576                  |                            | IPR014044                                                                           |
| Caenorhabditis elegans  | protein phosphatase methylesterase 1                               | 10 | F:GO:0008601;<br>P:GO:0009792;<br>P:GO:0002119;<br>F:GO:0051721;<br>F:GO:0051722;<br>P:GO:0006482;<br>F:GO:0004864;<br>P:GO:0000003;<br>P:GO:0008340;<br>P:GO:0040007                                                                                                                                         | -                                              |                            | -                                                                                   |
| Cooperia oncophora      | low-density lipoprotein receptor domain class a containing protein | 1  | F:GO:0004872                                                                                                                                                                                                                                                                                                  | -                                              |                            | IPR002172; PTHR10529 (PANTHER),<br>PTHR10529:SF2 (PANTHER)                          |
|                         |                                                                    | 0  |                                                                                                                                                                                                                                                                                                               |                                                |                            |                                                                                     |
|                         |                                                                    | 0  |                                                                                                                                                                                                                                                                                                               |                                                |                            |                                                                                     |
| Loa loa                 | s-p25 fusion protein                                               | 9  | F:GO:0005483;<br>C:GO:0045202;<br>F:GO:0005484;<br>P:GO:0048172;<br>C:GO:0019717;<br>P:GO:0016082;<br>P:GO:0016081;<br>P:GO:0006893;<br>C:GO:0005886                                                                                                                                                          | -                                              |                            | SignalP (SIGNALP)                                                                   |
|                         |                                                                    | 0  |                                                                                                                                                                                                                                                                                                               |                                                |                            |                                                                                     |
| Caenorhabditis elegans  | neurofibromin 2 (bilateral acoustic neuroma)                       | 18 | C:GO:0044446;<br>P:GO:0042325;<br>P:GO:0031324;<br>C:GO:0043232;<br>P:GO:0046426;<br>P:GO:0044260;<br>P:GO:0010605;<br>C:GO:0043231;<br>C:GO:0042995;<br>C:GO:0005886;<br>C:GO:0044425;<br>P:GO:0080090;<br>P:GO:0009792;<br>F:GO:0005515;<br>P:GO:0007155;<br>P:GO:0030036;<br>C:GO:0044444;<br>P:GO:0048731 | -                                              |                            | IPR000798; IPR008954; IPR011259;<br>PTHR23281 (PANTHER),<br>PTHR23281:SF1 (PANTHER) |
| Caenorhabditis elegans  | briggsae cbr-pad-1 protein                                         | 0  |                                                                                                                                                                                                                                                                                                               | P:GO:0007275;<br>P:GO:0006810;<br>P:GO:0015031 |                            | SignalP (SIGNALP)                                                                   |
| Caenorhabditis briggsae | 7 transmembrane                                                    | 4  | P:GO:0007186;<br>C:GO:0016021;<br>P:GO:0007165;<br>F:GO:0004930                                                                                                                                                                                                                                               | -                                              |                            | -                                                                                   |

|                         |                                                                  |   |  |                                                                                                                                                      |                             |                                                                                                                                                                                            |
|-------------------------|------------------------------------------------------------------|---|--|------------------------------------------------------------------------------------------------------------------------------------------------------|-----------------------------|--------------------------------------------------------------------------------------------------------------------------------------------------------------------------------------------|
| Ancylostoma caninum     | venom-allergen-like protein family member (vap-1)                | 0 |  | P:GO:0040011;<br>C:GO:0005576                                                                                                                        |                             | IPR001283; IPR014044                                                                                                                                                                       |
| Caenorhabditis elegans  | elegans protein confirmed by transcript evidence                 | 0 |  |                                                                                                                                                      |                             | -                                                                                                                                                                                          |
| Caenorhabditis elegans  | d domain (prokaryotic heat shock protein) family member (dnj-29) | 4 |  | P:GO:0006457;<br>C:GO:0016021;<br>F:GO:0051082;<br>F:GO:0031072                                                                                      |                             | IPR001623; IPR003095; IPR004179;<br>IPR015609; G3DSA:1.10.150.20<br>(GENE3D), G3DSA:1.10.3380.10<br>(GENE3D), G3DSA:2.60.40.150<br>(GENE3D), PTHR11821:SF7<br>(PANTHER), SignalP (SIGNALP) |
| Caenorhabditis elegans  | d domain (prokaryotic heat shock protein) family member (dnj-29) | 3 |  | P:GO:0006457;<br>C:GO:0016021;<br>F:GO:0051082                                                                                                       |                             | IPR001623; IPR003095; IPR004179;<br>IPR015609; G3DSA:1.10.150.20<br>(GENE3D), G3DSA:1.10.3380.10<br>(GENE3D), G3DSA:2.60.40.150<br>(GENE3D), PTHR11821:SF7<br>(PANTHER), SignalP (SIGNALP) |
|                         | -                                                                | 0 |  |                                                                                                                                                      |                             | SignalP (SIGNALP)                                                                                                                                                                          |
|                         | -                                                                | 0 |  |                                                                                                                                                      |                             | -                                                                                                                                                                                          |
|                         | -                                                                | 0 |  |                                                                                                                                                      |                             | -                                                                                                                                                                                          |
|                         | -                                                                | 0 |  |                                                                                                                                                      |                             | -                                                                                                                                                                                          |
| Caenorhabditis elegans  | actin binding lim protein 1                                      | 6 |  | P:GO:0007411;<br>F:GO:0008270;<br>P:GO:0045944;<br>P:GO:0007010;<br>F:GO:0003779;<br>C:GO:0015629                                                    |                             | IPR001781; PTHR18973 (PANTHER),<br>PTHR18973:SF90 (PANTHER),<br>SSF57716 (SUPERFAMILY)                                                                                                     |
| Caenorhabditis briggsae | Hypothetical protein CBG02376 [Caenorhabditis briggsae]          | 0 |  |                                                                                                                                                      |                             | IPR021013                                                                                                                                                                                  |
| Caenorhabditis briggsae | small nuclear ribonucleoprotein g                                | 2 |  | F:GO:0003676;<br>C:GO:0030529                                                                                                                        |                             | IPR001163; IPR006649; IPR010920;<br>G3DSA:2.30.30.100 (GENE3D),<br>PTHR10553 (PANTHER),<br>PTHR10553:SF2 (PANTHER)                                                                         |
| Caenorhabditis elegans  | pctaire class cell cycle ki-se family member (pct-1)             | 4 |  | P:GO:0006468;<br>F:GO:0005515;<br>F:GO:0005524;<br>F:GO:0004674                                                                                      | EC:2.7.11.0                 | IPR000719; IPR008271; IPR011009;<br>IPR017441; IPR017442;<br>G3DSA:1.10.510.10 (GENE3D),<br>G3DSA:3.30.200.20 (GENE3D),<br>PTHR11295 (PANTHER),<br>PTHR11295:SF103 (PANTHER)               |
|                         | -                                                                | 0 |  |                                                                                                                                                      |                             | -                                                                                                                                                                                          |
| Caenorhabditis briggsae | cg3714 cg3714-pa                                                 | 9 |  | P:GO:0006979;<br>C:GO:0005829;<br>F:GO:0004514;<br>P:GO:0009435;<br>P:GO:0040007;<br>P:GO:0040035;<br>F:GO:0004516;<br>P:GO:0002119;<br>P:GO:0009792 | EC:2.4.2.19;<br>EC:2.4.2.11 | IPR002638; IPR006405; IPR007229;<br>IPR015977; G3DSA:3.20.140.10<br>(GENE3D), PTHR11098 (PANTHER),<br>SSF54675 (SUPERFAMILY)                                                               |
| Caenorhabditis briggsae | cg3714 cg3714-pa                                                 | 9 |  | P:GO:0006979;<br>C:GO:0005829;<br>F:GO:0004514;<br>P:GO:0009435;<br>P:GO:0040007;<br>P:GO:0040035;<br>F:GO:0004516;<br>P:GO:0002119;<br>P:GO:0009792 | EC:2.4.2.19;<br>EC:2.4.2.11 | -                                                                                                                                                                                          |

|                         |                                                                  |    |                                                                                                                                                                                                         |   |                            |                                                                                                                                                                                                                                           |
|-------------------------|------------------------------------------------------------------|----|---------------------------------------------------------------------------------------------------------------------------------------------------------------------------------------------------------|---|----------------------------|-------------------------------------------------------------------------------------------------------------------------------------------------------------------------------------------------------------------------------------------|
| Caenorhabditis briggsae | briggsae cbr-tag-192 protein                                     | 12 | P:GO:0009653;<br>C:GO:0000785;<br>P:GO:0007423;<br>P:GO:0006333;<br>F:GO:0004386;<br>F:GO:0003677;<br>P:GO:0009790;<br>P:GO:0050789;<br>F:GO:0003682;<br>C:GO:0005634;<br>F:GO:0005524;<br>P:GO:0003008 | - |                            | IPR000330; IPR000953; IPR001005;<br>IPR001650; IPR006576; IPR014001;<br>IPR014021; IPR016197;<br>G3DSA:2.40.50.40 (GENE3D),<br>G3DSA:3.40.50.300 (GENE3D),<br>PTHR10799 (PANTHER),<br>PTHR10799:SF70 (PANTHER),<br>SSF52540 (SUPERFAMILY) |
| Caenorhabditis briggsae | chromodomain helicase d- binding protein 6                       | 12 | P:GO:0009653;<br>C:GO:0000785;<br>P:GO:0007423;<br>P:GO:0006333;<br>F:GO:0004386;<br>F:GO:0003677;<br>P:GO:0009790;<br>P:GO:0050789;<br>F:GO:0003682;<br>C:GO:0005634;<br>F:GO:0005524;<br>P:GO:0003008 | - |                            | IPR000330; IPR000953; IPR001650;<br>IPR006576; IPR014001; IPR014021;<br>IPR016197; G3DSA:2.40.50.40<br>(GENE3D), G3DSA:3.40.50.300<br>(GENE3D), PTHR10799 (PANTHER),<br>PTHR10799:SF70 (PANTHER),<br>SSF52540 (SUPERFAMILY)               |
| Loa loa                 | anion exchange protein                                           | 3  | C:GO:0016021;<br>F:GO:0005452;<br>P:GO:0006820                                                                                                                                                          | - |                            | IPR003020; IPR011531                                                                                                                                                                                                                      |
|                         | -                                                                | 0  |                                                                                                                                                                                                         |   |                            | SignalP (SIGNALP)                                                                                                                                                                                                                         |
| Caenorhabditis briggsae | briggsae cbr-unc-95 protein                                      | 1  | F:GO:0008270                                                                                                                                                                                            | - |                            | IPR001781; PTHR18973 (PANTHER),<br>PTHR18973:SF94 (PANTHER)                                                                                                                                                                               |
| Loa loa                 | probable cation-transporting atpase in chromosome                | 5  | F:GO:0016820;<br>F:GO:0016887;<br>F:GO:0000166;<br>P:GO:0008152;<br>C:GO:0016020                                                                                                                        | - | EC:3.6.3.0                 | -                                                                                                                                                                                                                                         |
|                         | -                                                                | 0  |                                                                                                                                                                                                         |   |                            |                                                                                                                                                                                                                                           |
| Caenorhabditis elegans  | alanine aminotransferase                                         | 7  | F:GO:0030170;<br>P:GO:0042851;<br>F:GO:0004021;<br>P:GO:0009058;<br>P:GO:0006103;<br>P:GO:0000003;<br>F:GO:0016847                                                                                      | - | EC:2.6.1.2;<br>EC:4.4.1.14 | IPR015422; IPR015424; PTHR11751<br>(PANTHER), PTHR11751:SF29<br>(PANTHER)                                                                                                                                                                 |
|                         | -                                                                | 0  |                                                                                                                                                                                                         |   |                            |                                                                                                                                                                                                                                           |
| Caenorhabditis elegans  | ylu4_caee1 ame: full=uncharacterized protein                     | 0  |                                                                                                                                                                                                         |   |                            | P:GO:0006898;<br>P:GO:0002119;<br>P:GO:0040007                                                                                                                                                                                            |
| Caenorhabditis elegans  | deah (asp-glu-ala-his) box polypeptide 8                         | 5  | P:GO:0006396;<br>F:GO:0004004;<br>F:GO:0003676;<br>F:GO:0005515;<br>F:GO:0000166                                                                                                                        | - |                            | IPR003029; IPR012340; IPR016027;<br>IPR022967; PTHR15838 (PANTHER)                                                                                                                                                                        |
| Caenorhabditis briggsae | minichromosome mainte-nce complex component 3 associated protein | 5  | P:GO:0019915;<br>P:GO:0000003;<br>P:GO:0010171;<br>C:GO:0005634;<br>P:GO:0002119                                                                                                                        | - |                            | IPR005062; PTHR12436 (PANTHER),<br>PTHR12436:SF3 (PANTHER)                                                                                                                                                                                |

|                         |                                                                   |    |                                                                                                                                                                                                                                                                                              |                                                                                  |                                                                                                                                                                                         |
|-------------------------|-------------------------------------------------------------------|----|----------------------------------------------------------------------------------------------------------------------------------------------------------------------------------------------------------------------------------------------------------------------------------------------|----------------------------------------------------------------------------------|-----------------------------------------------------------------------------------------------------------------------------------------------------------------------------------------|
| Caenorhabditis briggsae | minichromosome maintenance complex component 3 associated protein | 5  | P:GO:0019915;<br>P:GO:0000003;<br>P:GO:0010171;<br>C:GO:0005634;<br>P:GO:0002119                                                                                                                                                                                                             |                                                                                  | IPR005062; PTHR12436 (PANTHER),<br>PTHR12436:SF3 (PANTHER)                                                                                                                              |
| Caenorhabditis elegans  | hypothetical protein H14E04.2 [Caenorhabditis elegans]            | 0  |                                                                                                                                                                                                                                                                                              |                                                                                  | -                                                                                                                                                                                       |
| Caenorhabditis briggsae | serine threonine kinase cdc2                                      | 17 | P:GO:0001556;<br>F:GO:0008353;<br>P:GO:0040002;<br>P:GO:0045836;<br>P:GO:0040035;<br>P:GO:0035046;<br>P:GO:0051446;<br>P:GO:0051301;<br>F:GO:0005524;<br>P:GO:0007067;<br>P:GO:0040011;<br>F:GO:0019901;<br>F:GO:0004693;<br>P:GO:0009792;<br>C:GO:0005737;<br>C:GO:0005634;<br>P:GO:0006468 | EC:2.7.11.23<br>;<br>EC:2.7.11.22                                                | IPR000719; IPR002290; IPR008271;<br>IPR011009; IPR017441; IPR017442;<br>G3DSA:1.10.510.10 (GENE3D),<br>G3DSA:3.30.200.20 (GENE3D),<br>PTHR11295 (PANTHER),<br>PTHR11295:SF109 (PANTHER) |
| -                       | -                                                                 | 0  |                                                                                                                                                                                                                                                                                              |                                                                                  | -                                                                                                                                                                                       |
| -                       | -                                                                 | 0  |                                                                                                                                                                                                                                                                                              |                                                                                  | -                                                                                                                                                                                       |
| Caenorhabditis elegans  | nucleoporin 205                                                   | 0  |                                                                                                                                                                                                                                                                                              | C:GO:0046930;<br>F:GO:0003674;<br>F:GO:0015288;<br>C:GO:0005635;<br>C:GO:0005575 | IPR021827                                                                                                                                                                               |
| Caenorhabditis briggsae | polynucleotide kinase-3-phosphatase                               | 4  | P:GO:0008340;<br>P:GO:0040007;<br>P:GO:0019915;<br>P:GO:0002119                                                                                                                                                                                                                              |                                                                                  | IPR010488; IPR013954; IPR015636;<br>G3DSA:3.40.50.300 (GENE3D),<br>SSF52540 (SUPERFAMILY), SSF56784<br>(SUPERFAMILY)                                                                    |
| -                       | -                                                                 | 0  |                                                                                                                                                                                                                                                                                              |                                                                                  | -                                                                                                                                                                                       |
| -                       | -                                                                 | 0  |                                                                                                                                                                                                                                                                                              |                                                                                  | -                                                                                                                                                                                       |
| Caenorhabditis elegans  | breast cancer early onset                                         | 4  | F:GO:0005515;<br>P:GO:0006259;<br>P:GO:0016567;<br>P:GO:0019222                                                                                                                                                                                                                              |                                                                                  | IPR001357; IPR001841; IPR011364;<br>IPR013083; IPR017907; IPR018957;<br>G3DSA:3.40.50.10190 (GENE3D),<br>SSF57850 (SUPERFAMILY)                                                         |
| Caenorhabditis elegans  | breast cancer early onset                                         | 4  | F:GO:0005515;<br>P:GO:0006259;<br>P:GO:0016567;<br>P:GO:0019222                                                                                                                                                                                                                              |                                                                                  | IPR001357; IPR001841; IPR011364;<br>IPR013083; IPR017907; IPR018957;<br>G3DSA:3.40.50.10190 (GENE3D),<br>SSF57850 (SUPERFAMILY)                                                         |
| Caenorhabditis elegans  | adenylosuccinate synthetase                                       | 11 | P:GO:0040010;<br>F:GO:0004019;<br>P:GO:0006164;<br>P:GO:0040027;<br>P:GO:0040035;<br>F:GO:0000287;<br>P:GO:0040011;<br>P:GO:0006898;<br>P:GO:0009792;<br>C:GO:0005737;<br>F:GO:0005525                                                                                                       | EC:6.3.4.4                                                                       | IPR001114; G3DSA:3.90.170.10<br>(GENE3D), SSF52540 (SUPERFAMILY)                                                                                                                        |
| Caenorhabditis elegans  | ysyf_caeel_ame: full=uncharacterized f-box protein                | 0  |                                                                                                                                                                                                                                                                                              |                                                                                  | -                                                                                                                                                                                       |

|                         |                                                         |    |                                                                                                                                                                                                                          |                                                                                                                                                      |             |                   |                                                                                                                                                              |
|-------------------------|---------------------------------------------------------|----|--------------------------------------------------------------------------------------------------------------------------------------------------------------------------------------------------------------------------|------------------------------------------------------------------------------------------------------------------------------------------------------|-------------|-------------------|--------------------------------------------------------------------------------------------------------------------------------------------------------------|
| Caenorhabditis briggsae | Hypothetical protein CBG01593 [Caenorhabditis briggsae] | 4  | P:GO:0007186;<br>C:GO:0016021;<br>P:GO:0007165;<br>F:GO:0004930                                                                                                                                                          | -                                                                                                                                                    | -           | -                 |                                                                                                                                                              |
|                         |                                                         | 0  |                                                                                                                                                                                                                          |                                                                                                                                                      |             |                   |                                                                                                                                                              |
| Caenorhabditis briggsae | briggsae cbr-pqn-89 protein                             | 0  |                                                                                                                                                                                                                          |                                                                                                                                                      |             | SignalP (SIGNALP) |                                                                                                                                                              |
| Caenorhabditis briggsae | briggsae cbr-pqn-89 protein                             | 0  |                                                                                                                                                                                                                          |                                                                                                                                                      |             | SignalP (SIGNALP) |                                                                                                                                                              |
| Toxoplasma gondii GT1   | camp-dependent protein ki-se regulatory                 | 0  |                                                                                                                                                                                                                          | F:GO:0016740;<br>F:GO:0045735;<br>F:GO:0016787;<br>F:GO:0003676;<br>F:GO:0000166;<br>F:GO:0004715;<br>F:GO:0016301;<br>F:GO:0004692;<br>F:GO:0005509 |             |                   | -                                                                                                                                                            |
|                         |                                                         | 0  |                                                                                                                                                                                                                          |                                                                                                                                                      |             |                   | -                                                                                                                                                            |
| Caenorhabditis elegans  | sh3bgr protein                                          | 1  | F:GO:0005515                                                                                                                                                                                                             | -                                                                                                                                                    |             |                   | -                                                                                                                                                            |
| Caenorhabditis elegans  | sh3bgr protein                                          | 1  | F:GO:0005515                                                                                                                                                                                                             | -                                                                                                                                                    |             |                   | -                                                                                                                                                            |
| Caenorhabditis elegans  | g in family member (glb-10)                             | 4  | F:GO:0020037;<br>F:GO:0005344;<br>P:GO:0015671;<br>F:GO:0019825                                                                                                                                                          | -                                                                                                                                                    |             |                   | IPR000971; IPR009050; IPR012292                                                                                                                              |
| Caenorhabditis briggsae | amine oxidase                                           | 0  |                                                                                                                                                                                                                          | P:GO:0055114;<br>F:GO:0005488;<br>F:GO:0016491;<br>P:GO:0008152                                                                                      |             |                   | IPR002937; PRO0419 (PRINTS),<br>G3DSA:3.50.50.60 (GENE3D),<br>PTHR10742 (PANTHER),<br>PTHR10742:SF22 (PANTHER), SignalP<br>(SIGNALP), SSF51905 (SUPERFAMILY) |
| Loa loa                 | phosphatidylinositol glycan anchor class v              | 4  | P:GO:0000003;<br>F:GO:0016740;<br>P:GO:0007275;<br>C:GO:0044464                                                                                                                                                          | -                                                                                                                                                    |             |                   | IPR007315; PTHR12468:SF1<br>(PANTHER), PF04188 (PFAM)                                                                                                        |
| Caenorhabditis briggsae | neurogenic locus notch protein                          | 0  |                                                                                                                                                                                                                          | F:GO:0005488;<br>P:GO:0040010                                                                                                                        |             |                   | -                                                                                                                                                            |
| Ancylostoma ceylanicum  | gamma-glutamylcysteine synthetase                       | 4  | F:GO:0004357;<br>F:GO:0005515;<br>P:GO:0006750;<br>F:GO:0000166                                                                                                                                                          | -                                                                                                                                                    | EC:6.3.2.2  |                   | SignalP (SIGNALP)                                                                                                                                            |
|                         |                                                         | 0  |                                                                                                                                                                                                                          |                                                                                                                                                      |             |                   | SignalP (SIGNALP)                                                                                                                                            |
| Caenorhabditis elegans  | amp-activated ki-se family member (aak-2)               | 4  | P:GO:0006468;<br>F:GO:0005515;<br>F:GO:0005524;<br>F:GO:0004674                                                                                                                                                          | -                                                                                                                                                    | EC:2.7.11.0 |                   | IPR000719; IPR008271; IPR011009;<br>IPR015741; IPR017442; IPR020636;<br>G3DSA:1.10.510.10 (GENE3D)                                                           |
| Macaca mulatta          | peptidylprolyl isomerase a                              | 13 | P:GO:0006457;<br>P:GO:0019047;<br>P:GO:0045069;<br>F:GO:0042277;<br>F:GO:0046790;<br>F:GO:0051082;<br>C:GO:0005576;<br>C:GO:0005634;<br>F:GO:0008270;<br>C:GO:0005829;<br>F:GO:0003755;<br>P:GO:0044419;<br>P:GO:0019059 | -                                                                                                                                                    | EC:5.2.1.8  |                   | IPR002130; IPR015891; IPR020892;<br>PTHR11071 (PANTHER),<br>PTHR11071:SF74 (PANTHER)                                                                         |
| Caenorhabditis briggsae | phospholipase b1                                        | 2  | F:GO:0016788;<br>P:GO:0006629                                                                                                                                                                                            | -                                                                                                                                                    |             |                   | IPR001087; IPR013830; IPR013831;<br>PTHR21325 (PANTHER)                                                                                                      |

|                         |                                                            |    |                                                                                                                                                                                                                                                                                              |                                                                                                                                                      |            |                                                                                                                                             |
|-------------------------|------------------------------------------------------------|----|----------------------------------------------------------------------------------------------------------------------------------------------------------------------------------------------------------------------------------------------------------------------------------------------|------------------------------------------------------------------------------------------------------------------------------------------------------|------------|---------------------------------------------------------------------------------------------------------------------------------------------|
| Caenorhabditis briggsae | phospholipase b1                                           | 2  | F:GO:0016788;<br>P:GO:0006629                                                                                                                                                                                                                                                                | -                                                                                                                                                    |            | IPR001087; IPR013830; IPR013831;<br>PTHR21325 (PANTHER)                                                                                     |
| Caenorhabditis briggsae | phospholipase b1                                           | 2  | F:GO:0016788;<br>P:GO:0006629                                                                                                                                                                                                                                                                | -                                                                                                                                                    |            | IPR001087; IPR013830; IPR013831;<br>PTHR21325 (PANTHER)                                                                                     |
|                         |                                                            | 0  |                                                                                                                                                                                                                                                                                              |                                                                                                                                                      |            |                                                                                                                                             |
| Caenorhabditis briggsae | ligase atp-dependent                                       | 2  | P:GO:0006259;<br>F:GO:0005488                                                                                                                                                                                                                                                                | -                                                                                                                                                    |            | IPR001510; PTHR10459 (PANTHER),<br>PTHR10459:SF2 (PANTHER), SSF57716<br>(SUPERFAMILY)                                                       |
|                         | -                                                          | 0  |                                                                                                                                                                                                                                                                                              |                                                                                                                                                      |            | -                                                                                                                                           |
|                         | -                                                          | 0  |                                                                                                                                                                                                                                                                                              |                                                                                                                                                      |            | -                                                                                                                                           |
|                         | -                                                          | 0  |                                                                                                                                                                                                                                                                                              |                                                                                                                                                      |            | -                                                                                                                                           |
|                         | -                                                          | 0  |                                                                                                                                                                                                                                                                                              |                                                                                                                                                      |            | -                                                                                                                                           |
| Brugia malayi           | abhydrolase domain containing 2                            | 0  |                                                                                                                                                                                                                                                                                              | P:GO:0009611;<br>C:GO:0016021;<br>C:GO:0016020;<br>F:GO:0004091;<br>F:GO:0016787;<br>F:GO:0003674;<br>P:GO:0030336;<br>P:GO:0008152;<br>P:GO:0008150 |            | PTHR10794 (PANTHER),<br>PTHR10794:SF9 (PANTHER)                                                                                             |
| Brugia malayi           | mediator of r- polymerase ii transcription subunit 12      | 5  | P:GO:0051239;<br>P:GO:0002119;<br>P:GO:0048513;<br>P:GO:0045927;<br>P:GO:0022414                                                                                                                                                                                                             | -                                                                                                                                                    |            | -                                                                                                                                           |
| Caenorhabditis elegans  | ck1 worm6 protein ki-se                                    | 0  |                                                                                                                                                                                                                                                                                              | F:GO:0016301;<br>F:GO:0005524;<br>F:GO:0004672;<br>F:GO:0000166;<br>P:GO:0006468                                                                     |            | PTHR11909 (PANTHER),<br>PTHR11909:SF19 (PANTHER)                                                                                            |
| Caenorhabditis elegans  | elegans protein partially confirmed by transcript evidence | 4  | F:GO:0016787;<br>P:GO:0000003;<br>F:GO:0005488;<br>P:GO:0040010                                                                                                                                                                                                                              | -                                                                                                                                                    |            | -                                                                                                                                           |
| Caenorhabditis briggsae | exostoses -like 3                                          | 6  | F:GO:0005515;<br>P:GO:0001558;<br>F:GO:0016758;<br>P:GO:0035138;<br>P:GO:0048522;<br>C:GO:0031227                                                                                                                                                                                            | -                                                                                                                                                    | EC:2.4.1.0 | IPR015338; G3DSA:3.90.550.10<br>(GENE3D), PTHR11062 (PANTHER),<br>PTHR11062:SF5 (PANTHER), SSF53448<br>(SUPERFAMILY)                        |
| Brugia malayi           | cut domain containing protein                              | 17 | P:GO:0007492;<br>P:GO:0000003;<br>P:GO:0030512;<br>P:GO:0001952;<br>P:GO:0010552;<br>P:GO:0030183;<br>P:GO:0045165;<br>P:GO:0031018;<br>F:GO:0016563;<br>F:GO:0043565;<br>P:GO:0006006;<br>P:GO:0042384;<br>F:GO:0003700;<br>P:GO:0030335;<br>C:GO:0005634;<br>P:GO:0048536;<br>P:GO:0002064 | -                                                                                                                                                    |            | IPR001356; IPR003350; IPR009057;<br>IPR010982; IPR012287;<br>G3DSA:1.10.260.40 (GENE3D),<br>PTHR14057 (PANTHER),<br>PTHR14057:SF3 (PANTHER) |



|                           |                                                          |    |                                                                                                                                                                                                                                           |                                                                                                                                     |                                                                                                                                  |
|---------------------------|----------------------------------------------------------|----|-------------------------------------------------------------------------------------------------------------------------------------------------------------------------------------------------------------------------------------------|-------------------------------------------------------------------------------------------------------------------------------------|----------------------------------------------------------------------------------------------------------------------------------|
|                           | -                                                        | 0  |                                                                                                                                                                                                                                           |                                                                                                                                     | -                                                                                                                                |
|                           | -                                                        | 0  |                                                                                                                                                                                                                                           |                                                                                                                                     | -                                                                                                                                |
| Apis mellifera            | serine-type protease inhibitor                           | 0  |                                                                                                                                                                                                                                           | C:GO:0016020;<br>C:GO:0005886                                                                                                       | IPR000601; IPR001000; IPR002859;<br>IPR013032; IPR022409; PTHR10083<br>(PANTHER), PTHR10083:SF14<br>(PANTHER), SignalP (SIGNALP) |
| Apis mellifera            | serine-type protease inhibitor                           | 0  |                                                                                                                                                                                                                                           | C:GO:0016020;<br>C:GO:0005886                                                                                                       | IPR000601; IPR001000; IPR002859;<br>IPR013032; IPR022409; PTHR10083<br>(PANTHER), PTHR10083:SF14<br>(PANTHER), SignalP (SIGNALP) |
|                           | -                                                        | 0  |                                                                                                                                                                                                                                           |                                                                                                                                     | -                                                                                                                                |
| Caenorhabditis elegans    | major allergen                                           | 0  |                                                                                                                                                                                                                                           |                                                                                                                                     | IPR002499                                                                                                                        |
| Caenorhabditis briggsae   | zinc finger protein                                      | 1  | F:GO:0008270                                                                                                                                                                                                                              |                                                                                                                                     | IPR004457; PTHR10876 (PANTHER)                                                                                                   |
| Caenorhabditis elegans    | briggsae cbr-unc-97 protein                              | 2  | F:GO:0008270;<br>F:GO:0017022                                                                                                                                                                                                             | -                                                                                                                                   | IPR001781; PTHR18973 (PANTHER),<br>PTHR18973:SF93 (PANTHER),<br>SSF57716 (SUPERFAMILY)                                           |
| Caenorhabditis elegans    | histidine triad protein member 5                         | 3  | P:GO:0000290;<br>F:GO:0016787;<br>F:GO:0005515                                                                                                                                                                                            | -                                                                                                                                   | IPR008594; IPR011145; IPR011146;<br>PF11969 (PFAM)                                                                               |
| Caenorhabditis elegans    | eukaryotic translation initiation factor 3 subunit 6     | 14 | P:GO:0000184;<br>C:GO:0000785;<br>C:GO:0005852;<br>P:GO:0043473;<br>P:GO:0040007;<br>P:GO:0006898;<br>C:GO:0016605;<br>F:GO:0047485;<br>P:GO:0045947;<br>F:GO:0003743;<br>C:GO:0005829;<br>P:GO:0048703;<br>P:GO:0002119;<br>P:GO:0040035 | -                                                                                                                                   | IPR000717; IPR011991; IPR016650;<br>IPR019010; PTHR10317 (PANTHER),<br>SSF46785 (SUPERFAMILY)                                    |
|                           | -                                                        | 0  |                                                                                                                                                                                                                                           |                                                                                                                                     | -                                                                                                                                |
|                           | -                                                        | 0  |                                                                                                                                                                                                                                           |                                                                                                                                     | -                                                                                                                                |
|                           | -                                                        | 0  |                                                                                                                                                                                                                                           |                                                                                                                                     | -                                                                                                                                |
| Caenorhabditis elegans    | suppressor of activated let-60 ras family member (sur-7) | 0  |                                                                                                                                                                                                                                           | F:GO:0008324;<br>P:GO:0040027;<br>P:GO:0010043;<br>P:GO:0032502;<br>C:GO:0016020;<br>P:GO:0055085;<br>P:GO:0040010;<br>P:GO:0006812 | IPR002524; SignalP (SIGNALP)                                                                                                     |
| Caenorhabditis briggsae   | zinc finger                                              | 4  | F:GO:0008270;<br>C:GO:0005622;<br>F:GO:0005515;<br>F:GO:0003677                                                                                                                                                                           | -                                                                                                                                   | IPR011705; IPR013089                                                                                                             |
| Loa loa                   | aqr protein                                              | 6  | P:GO:0008380;<br>F:GO:0008026;<br>C:GO:0005681;<br>F:GO:0003723;<br>P:GO:0006397;<br>F:GO:0005524                                                                                                                                         | -                                                                                                                                   | PTHR10887 (PANTHER),<br>PTHR10887:SF5 (PANTHER), SSF52540<br>(SUPERFAMILY)                                                       |
| Phragmatopoma californica | cement precursor protein 3b variant 1                    | 0  |                                                                                                                                                                                                                                           | P:GO:0016068                                                                                                                        | -                                                                                                                                |

|                        |                                                            |    |                                                                                                                                                                       |   |                                                                                                                           |
|------------------------|------------------------------------------------------------|----|-----------------------------------------------------------------------------------------------------------------------------------------------------------------------|---|---------------------------------------------------------------------------------------------------------------------------|
| Taeniopygia guttata    | death inducer-obliterator 1                                | 0  | F:GO:0046872;<br>P:GO:0006915;<br>C:GO:0005737;<br>P:GO:0006350;<br>F:GO:0008270;<br>F:GO:0005515;<br>C:GO:0005634                                                    | - | -                                                                                                                         |
| -                      | -                                                          | 0  | -                                                                                                                                                                     | - | -                                                                                                                         |
| Loa loa                | cleavage and polyadenylation specificity factor            | 10 | F:GO:0003730;<br>P:GO:0006379;<br>P:GO:0000910;<br>P:GO:0006378;<br>P:GO:0040035;<br>P:GO:0006398;<br>P:GO:0009792;<br>F:GO:0016787;<br>P:GO:0016246;<br>C:GO:0005847 | - | IPR022712; PTHR11203 (PANTHER),<br>PTHR11203:SF5 (PANTHER)                                                                |
| Caenorhabditis elegans | abnormal embryogenesis family member (emb-9)               | 3  | F:GO:0005515;<br>C:GO:0005581;<br>F:GO:0005201                                                                                                                        | - | PTHR10499 (PANTHER)                                                                                                       |
| Brugia malayi          | ring finger protein 2                                      | 7  | P:GO:0000278;<br>P:GO:0009948;<br>C:GO:0071339;<br>C:GO:0016604;<br>F:GO:0046872;<br>P:GO:0006350;<br>F:GO:0003682                                                    | - | IPR001841; IPR013083; IPR017907;<br>IPR018957; PTHR10825 (PANTHER),<br>PTHR10825:SF5 (PANTHER), SSF57850<br>(SUPERFAMILY) |
| Ancylostoma ceylanicum | serine protei-se                                           | 2  | F:GO:0004867;<br>F:GO:0008233                                                                                                                                         | - | IPR002223; IPR020901; PTHR10083<br>(PANTHER), PTHR10083:SF39<br>(PANTHER)                                                 |
| -                      | -                                                          | 0  | -                                                                                                                                                                     | - | -                                                                                                                         |
| Homo sapiens           | PREDICTED: hypothetical protein [Homo sapiens]             | 0  | -                                                                                                                                                                     | - | IPR016160; PTHR16484 (PANTHER),<br>PTHR16484:SF2 (PANTHER)                                                                |
| Caenorhabditis elegans | tbc1 domain member 15                                      | 2  | C:GO:0005622;<br>P:GO:0032313                                                                                                                                         | - | IPR000195; G3DSA:1.10.8.270<br>(GENE3D), PTHR22957 (PANTHER),<br>PTHR22957:SF34 (PANTHER)                                 |
| Caenorhabditis elegans | tbc1 domain family member 15                               | 2  | C:GO:0005622;<br>P:GO:0032313                                                                                                                                         | - | IPR000195; G3DSA:1.10.8.270<br>(GENE3D), PTHR22957 (PANTHER),<br>PTHR22957:SF34 (PANTHER)                                 |
| Ancylostoma caninum    | elegans protein partially confirmed by transcript evidence | 2  | P:GO:0008152;<br>F:GO:0008237                                                                                                                                         | - | IPR000718; IPR008753;<br>G3DSA:3.40.390.10 (GENE3D),<br>PTHR11733:SF15 (PANTHER),<br>SSF55486 (SUPERFAMILY)               |
| -                      | -                                                          | 0  | -                                                                                                                                                                     | - | -                                                                                                                         |
| Caenorhabditis elegans | hypothetical protein F35H10.10 [Caenorhabditis elegans]    | 4  | P:GO:0007186;<br>C:GO:0016021;<br>P:GO:0007165;<br>F:GO:0004930                                                                                                       | - | G3DSA:3.40.50.2300 (GENE3D),<br>SignalP (SIGNALP), SSF53822<br>(SUPERFAMILY)                                              |
| Caenorhabditis elegans | glucose-6-phosphate dehydroge-se                           | 7  | P:GO:0006071;<br>F:GO:0008889;<br>P:GO:0006006;<br>F:GO:0004345;<br>P:GO:0055114;<br>F:GO:0005488;<br>P:GO:0006629                                                    | - | EC:3.1.4.46;<br>EC:1.1.1.49                                                                                               |

|                         |                                                    |  |                                                                                                                                                                                                            |   |                                                |                                                                                                                                               |
|-------------------------|----------------------------------------------------|--|------------------------------------------------------------------------------------------------------------------------------------------------------------------------------------------------------------|---|------------------------------------------------|-----------------------------------------------------------------------------------------------------------------------------------------------|
| Loa loa                 | bromodomain-containing protein 8                   |  | C:GO:0031981;<br>3 P:GO:0050794;<br>P:GO:0016573                                                                                                                                                           | - |                                                | IPR001487; PTHR15398 (PANTHER)                                                                                                                |
| Loa loa                 | bromodomain-containing protein 8                   |  | C:GO:0031981;<br>3 P:GO:0050794;<br>P:GO:0016573                                                                                                                                                           | - |                                                | IPR001487; PTHR15398 (PANTHER)                                                                                                                |
| Loa loa                 | briggsae cbr-vab-9 protein                         |  | 2 P:GO:0060857;<br>C:GO:0044425                                                                                                                                                                            | - |                                                | -                                                                                                                                             |
|                         | -                                                  |  | 0                                                                                                                                                                                                          |   |                                                | -                                                                                                                                             |
|                         | -                                                  |  | 0                                                                                                                                                                                                          |   |                                                | -                                                                                                                                             |
|                         | -                                                  |  | 0                                                                                                                                                                                                          |   |                                                | SignalP (SIGNALP)                                                                                                                             |
|                         | -                                                  |  | 0                                                                                                                                                                                                          |   |                                                | SignalP (SIGNALP)                                                                                                                             |
| Loa loa                 | zinc c2h2 type family protein                      |  | 0                                                                                                                                                                                                          |   | F:GO:0008270;<br>C:GO:0005622                  | -                                                                                                                                             |
| Loa loa                 | zinc c2h2 type family protein                      |  | 0                                                                                                                                                                                                          |   | F:GO:0008270;<br>C:GO:0005622                  | -                                                                                                                                             |
|                         | -                                                  |  | 0                                                                                                                                                                                                          |   |                                                | -                                                                                                                                             |
| Brugia malayi           | bromodomain containing protein                     |  | 0                                                                                                                                                                                                          |   |                                                | -                                                                                                                                             |
| Caenorhabditis briggsae | sumo-activating enzyme subunit 1                   |  | 8 P:GO:0009792;<br>P:GO:0002119;<br>F:GO:0005488;<br>P:GO:0016925;<br>P:GO:0040019;<br>P:GO:0040007;<br>F:GO:0019948;<br>P:GO:0048477                                                                      | - |                                                | -                                                                                                                                             |
|                         | -                                                  |  | 0                                                                                                                                                                                                          |   |                                                | SignalP (SIGNALP)                                                                                                                             |
|                         | -                                                  |  | 0                                                                                                                                                                                                          |   |                                                | -                                                                                                                                             |
|                         | -                                                  |  | 0                                                                                                                                                                                                          |   |                                                | -                                                                                                                                             |
|                         | -                                                  |  | 0                                                                                                                                                                                                          |   |                                                | -                                                                                                                                             |
| Caenorhabditis elegans  | multidrug resistance protein family member (mrp-1) |  | 4 F:GO:0042626;<br>P:GO:0055085;<br>F:GO:0005524;<br>C:GO:0016021                                                                                                                                          | - |                                                | IPR017940; G3DSA:1.20.1560.10 (GENE3D), PTHR19242 (PANTHER), PTHR19242:SF15 (PANTHER)                                                         |
|                         | -                                                  |  | 0                                                                                                                                                                                                          |   |                                                | -                                                                                                                                             |
|                         | -                                                  |  | 0                                                                                                                                                                                                          |   |                                                | -                                                                                                                                             |
| Caenorhabditis elegans  | ef hand family protein                             |  | 12 P:GO:0047497;<br>P:GO:0006915;<br>F:GO:0005509;<br>C:GO:0005743;<br>P:GO:0007264;<br>P:GO:0019725;<br>P:GO:0002119;<br>F:GO:0005515;<br>C:GO:0031307;<br>F:GO:0016787;<br>P:GO:0015031;<br>F:GO:0005525 | - |                                                | IPR001806; IPR005225; IPR013753; IPR020860; G3DSA:3.40.50.300 (GENE3D), PTHR11708 (PANTHER), PTHR11708:SF13 (PANTHER), SSF52540 (SUPERFAMILY) |
| Drosophila sechellia    | isoform a                                          |  | 0                                                                                                                                                                                                          |   | F:GO:0003674;<br>F:GO:0008270;<br>C:GO:0005575 | IPR006578                                                                                                                                     |
| Drosophila sechellia    | isoform a                                          |  | 0                                                                                                                                                                                                          |   | F:GO:0003674;<br>F:GO:0008270;<br>C:GO:0005575 | IPR006578                                                                                                                                     |

|                         |                                                            |    |                                                                                                                                                                       |                                                                                  |            |                                                                                                                                                |
|-------------------------|------------------------------------------------------------|----|-----------------------------------------------------------------------------------------------------------------------------------------------------------------------|----------------------------------------------------------------------------------|------------|------------------------------------------------------------------------------------------------------------------------------------------------|
| Caenorhabditis briggsae | elegans protein partially confirmed by transcript evidence | 0  |                                                                                                                                                                       | C:GO:0016021;<br>C:GO:0016020;<br>P:GO:0055085;<br>F:GO:0005215;<br>P:GO:0006810 |            | SignalP (SIGNALP)                                                                                                                              |
| Caenorhabditis elegans  | elegans protein partially confirmed by transcript evidence | 0  |                                                                                                                                                                       | C:GO:0016021;<br>C:GO:0016020;<br>P:GO:0055085;<br>F:GO:0005215;<br>P:GO:0006810 |            | IPR005828; IPR016196;<br>G3DSA:1.20.1250.20 (GENE3D),<br>PTHR11600 (PANTHER),<br>PTHR11600:SF27 (PANTHER), SignalP<br>(SIGNALP)                |
| Caenorhabditis elegans  | elegans protein confirmed by transcript evidence           | 1  | P:GO:0007409                                                                                                                                                          | -                                                                                |            | SignalP (SIGNALP)                                                                                                                              |
| Caenorhabditis briggsae | ww domain containing protein                               | 9  | P:GO:0040008;<br>P:GO:0048519;<br>P:GO:0006915;<br>N:GO:2000026;<br>P:GO:0048592;<br>P:GO:0007444;<br>P:GO:0042127;<br>P:GO:0048468;<br>P:GO:0030182                  | -                                                                                |            | IPR001202; IPR011524;<br>G3DSA:2.20.70.10 (GENE3D),<br>PTHR10316 (PANTHER),<br>PTHR10316:SF13 (PANTHER)                                        |
| Danio rerio             | transmembrane receptor notch1 partial                      | 10 | P:GO:0031016;<br>P:GO:0048729;<br>P:GO:0009952;<br>P:GO:0042659;<br>P:GO:0043009;<br>P:GO:0016043;<br>P:GO:0010470;<br>P:GO:0060795;<br>P:GO:0030182;<br>P:GO:0021515 | -                                                                                |            | IPR000742; IPR006210; IPR013032;<br>G3DSA:2.10.25.10 (GENE3D),<br>PTHR11201 (PANTHER),<br>PTHR11201:SF219 (PANTHER),<br>SSF57196 (SUPERFAMILY) |
|                         |                                                            | 0  |                                                                                                                                                                       |                                                                                  |            | -                                                                                                                                              |
|                         |                                                            | 0  |                                                                                                                                                                       |                                                                                  |            | -                                                                                                                                              |
|                         |                                                            | 0  |                                                                                                                                                                       |                                                                                  |            | SignalP (SIGNALP)                                                                                                                              |
| Caenorhabditis briggsae | kinesin family member 3a                                   | 4  | P:GO:0007018;<br>F:GO:0005524;<br>F:GO:0003777;<br>C:GO:0005874                                                                                                       | -                                                                                |            | IPR001752; PTHR16012 (PANTHER),<br>PTHR16012:SF160 (PANTHER),<br>SSF52540 (SUPERFAMILY)                                                        |
| Loa loa                 | zinc c2h2 type family protein                              | 1  | F:GO:0005515                                                                                                                                                          | -                                                                                |            | IPR015880                                                                                                                                      |
|                         |                                                            | 0  |                                                                                                                                                                       |                                                                                  |            | -                                                                                                                                              |
| Caenorhabditis elegans  | pp-loop atpase superfamily                                 | 10 | P:GO:0006412;<br>C:GO:0005829;<br>P:GO:0034227;<br>P:GO:0048598;<br>P:GO:0048599;<br>P:GO:0007283;<br>P:GO:0040025;<br>P:GO:0002098;<br>F:GO:0000049;<br>P:GO:0006974 | -                                                                                | EC:3.6.5.3 | IPR014729; SSF52402 (SUPERFAMILY)                                                                                                              |
|                         |                                                            | 0  |                                                                                                                                                                       |                                                                                  |            | -                                                                                                                                              |
| Ailuropoda melanoleuca  | ribosomal protein l31                                      | 5  | F:GO:0003735;<br>F:GO:0003723;<br>F:GO:0005515;<br>C:GO:0022625;<br>P:GO:0006414                                                                                      | -                                                                                |            | IPR000054; IPR020052                                                                                                                           |

|                           |                                                            |  |                                                                                                                                                                                                                             |                                                                                                   |             |                                                                                                                                                      |
|---------------------------|------------------------------------------------------------|--|-----------------------------------------------------------------------------------------------------------------------------------------------------------------------------------------------------------------------------|---------------------------------------------------------------------------------------------------|-------------|------------------------------------------------------------------------------------------------------------------------------------------------------|
| Caenorhabditis briggsae   | ferm domain ( -ezrin-radixin-moesin) family member (frm-1) |  | C:GO:0008091;<br>3 F:GO:0008092;<br>C:GO:0005886                                                                                                                                                                            | -                                                                                                 |             | IPR000299; IPR014352; IPR018979;<br>IPR019748; IPR019749; IPR019750;<br>G3DSA:3.10.20.90 (GENE3D),<br>PTHR23280 (PANTHER), SSF54236<br>(SUPERFAMILY) |
|                           | -                                                          |  | 0                                                                                                                                                                                                                           |                                                                                                   |             | -                                                                                                                                                    |
|                           | -                                                          |  | 0                                                                                                                                                                                                                           |                                                                                                   |             | -                                                                                                                                                    |
| Caenorhabditis briggsae   | protein arginine n-methyltransferase                       |  | 1 F:GO:0008168                                                                                                                                                                                                              | -                                                                                                 | EC:2.1.1.0  | G3DSA:2.70.160.11 (GENE3D),<br>G3DSA:3.40.50.150 (GENE3D),<br>PTHR11006 (PANTHER),<br>PTHR11006:SF4 (PANTHER), SSF53335<br>(SUPERFAMILY)             |
| Dictyocaulus viviparus    | elegans protein partially confirmed by transcript evidence |  | 0                                                                                                                                                                                                                           |                                                                                                   |             | -                                                                                                                                                    |
| Caenorhabditis elegans    | elegans protein partially confirmed by transcript evidence |  | 2 P:GO:0019915;<br>P:GO:0040010                                                                                                                                                                                             | -                                                                                                 |             | PTHR11161 (PANTHER), SignalP<br>(SIGNALP)                                                                                                            |
|                           | -                                                          |  | 0                                                                                                                                                                                                                           |                                                                                                   |             | -                                                                                                                                                    |
| Pan troglodytes           | zinc finger protein 91-like                                |  | 7 P:GO:0045730;<br>P:GO:0006952;<br>C:GO:0005625;<br>P:GO:0006955;<br>P:GO:0007204;<br>C:GO:0045121;<br>C:GO:0005887                                                                                                        | -                                                                                                 |             | SignalP (SIGNALP)                                                                                                                                    |
| Loa loa                   | elegans protein confirmed by transcript evidence           |  | 0                                                                                                                                                                                                                           | F:GO:0003676;<br>P:GO:0000398;<br>F:GO:0000166;<br>F:GO:0008270;<br>C:GO:0005634;<br>C:GO:0005622 |             | PTHR23106 (PANTHER),<br>PTHR23106:SF1 (PANTHER)                                                                                                      |
| Caenorhabditis elegans    | r- polymerase 1-2                                          |  | 13 F:GO:0003899;<br>P:GO:0009303;<br>P:GO:0017126;<br>P:GO:0007566;<br>C:GO:0005736;<br>P:GO:0040007;<br>P:GO:0040035;<br>F:GO:0003677;<br>P:GO:0002119;<br>F:GO:0005515;<br>F:GO:0032549;<br>C:GO:0005654;<br>P:GO:0009792 | -                                                                                                 | EC:2.7.7.6  | IPR007120; IPR007641; IPR015712;<br>G3DSA:2.40.270.10 (GENE3D),<br>PTHR20856:SF5 (PANTHER), SSF64484<br>(SUPERFAMILY)                                |
| Caenorhabditis elegans    | px domain containing protein                               |  | 1 F:GO:0005488                                                                                                                                                                                                              | -                                                                                                 |             | IPR001683                                                                                                                                            |
| Caenorhabditis sp. PS1010 | seryl-tr- synthetase                                       |  | 7 C:GO:0005829;<br>F:GO:0004828;<br>C:GO:0005739;<br>P:GO:0006434;<br>F:GO:0005524;<br>F:GO:0005515;<br>P:GO:0001569                                                                                                        | -                                                                                                 | EC:6.1.1.11 | IPR010978; IPR015866                                                                                                                                 |

|                         |                                                                                 |    |                                                                                                                                                                                                                                                                                                                                                 |                                                                                  |              |                                                                                                                                                                             |
|-------------------------|---------------------------------------------------------------------------------|----|-------------------------------------------------------------------------------------------------------------------------------------------------------------------------------------------------------------------------------------------------------------------------------------------------------------------------------------------------|----------------------------------------------------------------------------------|--------------|-----------------------------------------------------------------------------------------------------------------------------------------------------------------------------|
| Caenorhabditis elegans  | acyl- synthetase long-chain family member 5                                     | 17 | P:GO:0009749;<br>P:GO:0009744;<br>P:GO:0032869;<br>P:GO:0042178;<br>C:GO:0005743;<br>P:GO:0010867;<br>C:GO:0005741;<br>F:GO:0004467;<br>P:GO:0070723;<br>P:GO:0010747;<br>P:GO:0032000;<br>C:GO:0005783;<br>P:GO:0008654;<br>C:GO:0005886;<br>C:GO:0005625;<br>P:GO:0007584;<br>C:GO:0005778                                                    | -                                                                                | EC:6.2.1.3   | IPR000873; IPR020459; IPR020845;<br>G3DSA:2.30.38.10 (GENE3D),<br>G3DSA:3.40.50.980 (GENE3D),<br>PTHR11968 (PANTHER),<br>PTHR11968:SF8 (PANTHER), SSF56801<br>(SUPERFAMILY) |
| Caenorhabditis elegans  | ibr domain containing protein                                                   | 0  |                                                                                                                                                                                                                                                                                                                                                 | F:GO:0003676;<br>F:GO:0046872;<br>F:GO:0008270;<br>F:GO:0005515;<br>C:GO:0005622 |              | SSF57850 (SUPERFAMILY)                                                                                                                                                      |
| Caenorhabditis elegans  | lim domain family member (lim-9)                                                | 0  |                                                                                                                                                                                                                                                                                                                                                 |                                                                                  |              | -                                                                                                                                                                           |
|                         | -                                                                               | 0  |                                                                                                                                                                                                                                                                                                                                                 |                                                                                  |              | SignalP (SIGNALP)                                                                                                                                                           |
| Caenorhabditis briggsae | n-acetyltransferase 9-like                                                      | 1  | F:GO:0016740                                                                                                                                                                                                                                                                                                                                    | -                                                                                |              | IPR016181; PTHR13256 (PANTHER)                                                                                                                                              |
|                         | -                                                                               | 0  |                                                                                                                                                                                                                                                                                                                                                 |                                                                                  |              | -                                                                                                                                                                           |
| Caenorhabditis elegans  | diacylglycerol ki-se protein isoform partially confirmed by transcript evidence | 20 | F:GO:0004143;<br>P:GO:0016049;<br>C:GO:0005856;<br>P:GO:0019932;<br>F:GO:0046872;<br>P:GO:0051260;<br>C:GO:0016023;<br>F:GO:0005524;<br>P:GO:0046339;<br>F:GO:0019992;<br>P:GO:0006897;<br>F:GO:0046982;<br>P:GO:0007275;<br>F:GO:0042803;<br>P:GO:0007205;<br>P:GO:0015031;<br>C:GO:0005634;<br>P:GO:0007173;<br>P:GO:0010033;<br>C:GO:0005886 | -                                                                                | EC:2.7.1.107 | IPR000756; IPR001206; PTHR11255<br>(PANTHER), PTHR11255:SF10<br>(PANTHER)                                                                                                   |

|                         |                                                                                 |    |                                                                                                                                                                                                                                                                                                                                                 |   |              |                                                                                              |
|-------------------------|---------------------------------------------------------------------------------|----|-------------------------------------------------------------------------------------------------------------------------------------------------------------------------------------------------------------------------------------------------------------------------------------------------------------------------------------------------|---|--------------|----------------------------------------------------------------------------------------------|
| Caenorhabditis elegans  | diacylglycerol ki-se protein isoform partially confirmed by transcript evidence | 20 | F:GO:0004143;<br>P:GO:0016049;<br>C:GO:0005856;<br>P:GO:0019932;<br>F:GO:0046872;<br>P:GO:0051260;<br>C:GO:0016023;<br>F:GO:0005524;<br>P:GO:0046339;<br>F:GO:0019992;<br>P:GO:0006897;<br>F:GO:0046982;<br>P:GO:0007275;<br>F:GO:0042803;<br>P:GO:0007205;<br>P:GO:0015031;<br>C:GO:0005634;<br>P:GO:0007173;<br>P:GO:0010033;<br>C:GO:0005886 | - | EC:2.7.1.107 | IPR000756; IPR001206; PTHR11255 (PANTHER), PTHR11255:SF10 (PANTHER)                          |
|                         | -                                                                               | 0  |                                                                                                                                                                                                                                                                                                                                                 |   |              | -                                                                                            |
|                         | -                                                                               | 0  |                                                                                                                                                                                                                                                                                                                                                 |   |              | -                                                                                            |
| Caenorhabditis briggsae | dehydroge-se reductase (sdr family) member 1                                    | 5  | C:GO:0043231;<br>P:GO:0040010;<br>C:GO:0044444;<br>P:GO:0008152;<br>F:GO:0003824                                                                                                                                                                                                                                                                | - |              | IPR002198; IPR002347; IPR016040; IPR020904; PTHR19410:SF32 (PANTHER), SSF51735 (SUPERFAMILY) |
| Caenorhabditis elegans  | exportin 4                                                                      | 1  | F:GO:0005488                                                                                                                                                                                                                                                                                                                                    | - |              | PTHR12596 (PANTHER), PTHR12596:SF3 (PANTHER)                                                 |
|                         | -                                                                               | 0  |                                                                                                                                                                                                                                                                                                                                                 |   |              | -                                                                                            |
| Caenorhabditis briggsae | briggsae cbr-lss-4 protein                                                      | 9  | P:GO:0040035;<br>P:GO:0009792;<br>P:GO:0010171;<br>P:GO:0002119;<br>P:GO:0001703;<br>P:GO:0018991;<br>P:GO:0040010;<br>P:GO:0006898;<br>P:GO:0002009                                                                                                                                                                                            | - |              | IPR021906; PTHR12656 (PANTHER)                                                               |
| Caenorhabditis briggsae | atp-dependent r- helicase ddx42                                                 | 10 | P:GO:0045767;<br>P:GO:0040010;<br>F:GO:0003676;<br>F:GO:0008026;<br>P:GO:0000003;<br>F:GO:0005524;<br>F:GO:0005515;<br>C:GO:0005737;<br>P:GO:0008104;<br>C:GO:0005634                                                                                                                                                                           | - |              | IPR014014; PTHR10967 (PANTHER), PTHR10967:SF48 (PANTHER)                                     |
|                         |                                                                                 | 0  |                                                                                                                                                                                                                                                                                                                                                 |   |              |                                                                                              |
| Caenorhabditis elegans  | yma7_caeel ame: full=uncharacterized protein                                    | 1  | P:GO:0040011                                                                                                                                                                                                                                                                                                                                    | - |              | -                                                                                            |

|                             |                                                  |   |                                                                                                                                     |                                                                                                                                                                                                                                                                                              |                                                                                                                                                                                    |           |
|-----------------------------|--------------------------------------------------|---|-------------------------------------------------------------------------------------------------------------------------------------|----------------------------------------------------------------------------------------------------------------------------------------------------------------------------------------------------------------------------------------------------------------------------------------------|------------------------------------------------------------------------------------------------------------------------------------------------------------------------------------|-----------|
| Brugia malayi               | g protein-coupled receptor ki-se interacting 2   | 8 | F:GO:0048365;<br>F:GO:0008060;<br>P:GO:0032312;<br>C:GO:0043234;<br>F:GO:0008270;<br>C:GO:0016023;<br>F:GO:0019901;<br>C:GO:0005634 | -                                                                                                                                                                                                                                                                                            | IPR001164; IPR002110; IPR020683;<br>PTHR23180 (PANTHER),<br>PTHR23180:SF18 (PANTHER)                                                                                               |           |
| Angiostrongylus cantonensis | tho complex subunit 2                            | 7 | P:GO:0010171;<br>P:GO:0002119;<br>F:GO:0005515;<br>P:GO:0000003;<br>P:GO:0040011;<br>P:GO:0040007;<br>P:GO:0045132                  | -                                                                                                                                                                                                                                                                                            | IPR021418; PTHR21597 (PANTHER)                                                                                                                                                     |           |
| Caenorhabditis brenneri     | elegans protein confirmed by transcript evidence | 0 |                                                                                                                                     | P:GO:0009792                                                                                                                                                                                                                                                                                 | -                                                                                                                                                                                  |           |
| Loa loa                     | lim domain containing protein                    | 0 |                                                                                                                                     | P:GO:0007411;<br>F:GO:0009055;<br>C:GO:0043195;<br>P:GO:0048813;<br>F:GO:0003779;<br>F:GO:0008270;<br>P:GO:0055114;<br>F:GO:0016491;<br>F:GO:0003824;<br>P:GO:0016322;<br>P:GO:0045214;<br>P:GO:0008152;<br>F:GO:0046872;<br>C:GO:0005829;<br>C:GO:0005886;<br>F:GO:0004497;<br>F:GO:0005488 |                                                                                                                                                                                    | IPR022735 |
| Caenorhabditis briggsae     | programmed cell death protein 5                  | 1 | F:GO:0003677                                                                                                                        | -                                                                                                                                                                                                                                                                                            | IPR002836                                                                                                                                                                          |           |
|                             | -                                                | 0 |                                                                                                                                     |                                                                                                                                                                                                                                                                                              | -                                                                                                                                                                                  |           |
| Caenorhabditis elegans      | dead box atp-dependent r- helicase               | 7 | C:GO:0005682;<br>F:GO:0004004;<br>F:GO:0003676;<br>C:GO:0071011;<br>F:GO:0005524;<br>P:GO:0000398;<br>C:GO:0071013                  | -                                                                                                                                                                                                                                                                                            | IPR000629; IPR001650; IPR011545;<br>IPR014001; IPR014014; IPR014021;<br>G3DSA:3.40.50.300 (GENE3D),<br>PTHR10967 (PANTHER),<br>PTHR10967:SF47 (PANTHER),<br>SSF52540 (SUPERFAMILY) |           |
| Caenorhabditis elegans      | map ki-se ki-se ki-se                            | 4 | P:GO:0009792;<br>F:GO:0005488;<br>F:GO:0016301;<br>P:GO:0016246                                                                     | -                                                                                                                                                                                                                                                                                            | IPR000719; IPR011009; IPR015747;<br>IPR017442; G3DSA:3.30.200.20<br>(GENE3D), PTHR22986 (PANTHER)                                                                                  |           |
|                             | -                                                | 0 |                                                                                                                                     |                                                                                                                                                                                                                                                                                              | -                                                                                                                                                                                  |           |
| Caenorhabditis elegans      | tetratricopeptide repeat protein 15              | 0 |                                                                                                                                     | F:GO:0003674;<br>F:GO:0005488;<br>P:GO:0008150;<br>C:GO:0005575                                                                                                                                                                                                                              | -                                                                                                                                                                                  |           |



|                         |                                                        |   |                                                                                                                                     |   |             |                                                                                                                                                |
|-------------------------|--------------------------------------------------------|---|-------------------------------------------------------------------------------------------------------------------------------------|---|-------------|------------------------------------------------------------------------------------------------------------------------------------------------|
| Caenorhabditis elegans  | kinetochore I family member (knl-1)                    | 8 | C:GO:0000785;<br>P:GO:0007059;<br>P:GO:0030953;<br>P:GO:0045184;<br>F:GO:0032403;<br>C:GO:0000940;<br>P:GO:0051382;<br>P:GO:0051301 | - | -           |                                                                                                                                                |
| -                       | -                                                      | 0 |                                                                                                                                     |   |             |                                                                                                                                                |
| Caenorhabditis briggsae | adenylate ki-se 3-like 1                               | 4 | C:GO:0005737;<br>F:GO:0004017;<br>P:GO:0009165;<br>F:GO:0005524                                                                     | - | EC:2.7.4.3  | IPR000850; IPR007862;<br>G3DSA:3.40.50.300 (GENE3D),<br>PTHR23359:SF22 (PANTHER),<br>SSF52540 (SUPERFAMILY)                                    |
| Caenorhabditis elegans  | adenylate ki-se 3-like 1                               | 4 | C:GO:0005737;<br>F:GO:0004017;<br>P:GO:0009165;<br>F:GO:0005524                                                                     | - | EC:2.7.4.3  | -                                                                                                                                              |
| Caenorhabditis elegans  | adenylate ki-se 3-like 1                               | 4 | C:GO:0005737;<br>F:GO:0004017;<br>P:GO:0009165;<br>F:GO:0005524                                                                     | - | EC:2.7.4.3  | IPR000850; IPR007862;<br>G3DSA:3.40.50.300 (GENE3D),<br>PTHR23359:SF22 (PANTHER),<br>SSF52540 (SUPERFAMILY)                                    |
| -                       | -                                                      | 0 |                                                                                                                                     |   |             |                                                                                                                                                |
| -                       | -                                                      | 0 |                                                                                                                                     |   |             | SignalP (SIGNALP)                                                                                                                              |
| Caenorhabditis briggsae | troponin t                                             | 3 | P:GO:0043050;<br>P:GO:0006952;<br>P:GO:0040017                                                                                      | - |             | IPR001978; G3DSA:1.20.5.350<br>(GENE3D), PTHR11521 (PANTHER),<br>PTHR11521:SF1 (PANTHER)                                                       |
| Caenorhabditis briggsae | troponin t                                             | 3 | P:GO:0043050;<br>P:GO:0006952;<br>P:GO:0040017                                                                                      | - |             | IPR001978; G3DSA:1.20.5.350<br>(GENE3D), PTHR11521 (PANTHER),<br>PTHR11521:SF1 (PANTHER)                                                       |
| -                       | -                                                      | 0 |                                                                                                                                     |   |             |                                                                                                                                                |
| Caenorhabditis briggsae | sym-4                                                  | 4 | C:GO:0044444;<br>P:GO:0040011;<br>C:GO:0044446;<br>P:GO:0050789                                                                     | - |             | IPR001680; IPR011046; IPR015943;<br>IPR017986; IPR019781; IPR019782;<br>PTHR14221 (PANTHER)                                                    |
| Caenorhabditis elegans  | hypothetical protein F42A10.7 [Caenorhabditis elegans] | 0 |                                                                                                                                     |   |             | SignalP (SIGNALP)                                                                                                                              |
| Caenorhabditis elegans  | hypothetical protein F42A10.7 [Caenorhabditis elegans] | 0 |                                                                                                                                     |   |             | SignalP (SIGNALP)                                                                                                                              |
| Caenorhabditis elegans  | elegans protein confirmed by transcript evidence       | 0 |                                                                                                                                     |   |             | IPR001466; IPR012338;<br>G3DSA:3.40.710.10 (GENE3D),<br>PTHR10566 (PANTHER),<br>PTHR10566:SF6 (PANTHER)                                        |
| Caenorhabditis elegans  | -d-dependent epimerase dehydratase                     | 3 | P:GO:0008152;<br>F:GO:0005488;<br>F:GO:0016616                                                                                      | - | EC:1.1.1.0  | IPR001509; IPR016040; PTHR10366<br>(PANTHER), PTHR10366:SF10<br>(PANTHER), SSF51735 (SUPERFAMILY)                                              |
| -                       | -                                                      | 0 |                                                                                                                                     |   |             |                                                                                                                                                |
| Caenorhabditis briggsae | atp-binding sub-family b (mdr tap) member 9 isoform 1  | 7 | P:GO:0055085;<br>F:GO:0015421;<br>C:GO:0016021;<br>F:GO:0005102;<br>P:GO:0015833;<br>F:GO:0005524;<br>P:GO:0007165                  | - | EC:3.6.3.23 | IPR003439; IPR003593; IPR017871;<br>G3DSA:3.40.50.300 (GENE3D),<br>PTHR19242 (PANTHER),<br>PTHR19242:SF82 (PANTHER),<br>SSF52540 (SUPERFAMILY) |

|                         |                                                            |    |                                                                                                                                                                                                                                                            |                                                                                  |             |                                                                                                                   |
|-------------------------|------------------------------------------------------------|----|------------------------------------------------------------------------------------------------------------------------------------------------------------------------------------------------------------------------------------------------------------|----------------------------------------------------------------------------------|-------------|-------------------------------------------------------------------------------------------------------------------|
| Caenorhabditis briggsae | tap-like abc transporter                                   | 15 | P:GO:0055085;<br>P:GO:0006629;<br>P:GO:0040010;<br>P:GO:0007041;<br>P:GO:0009851;<br>C:GO:0005765;<br>P:GO:0009792;<br>C:GO:0016021;<br>F:GO:0042626;<br>P:GO:0035264;<br>C:GO:0005624;<br>P:GO:0015833;<br>F:GO:0005524;<br>F:GO:0015197;<br>P:GO:0016246 | -                                                                                |             | G3DSA:3.40.50.300 (GENE3D),<br>PTHR19242 (PANTHER),<br>PTHR19242:SF82 (PANTHER),<br>SSF52540 (SUPERFAMILY)        |
| Caenorhabditis elegans  | cg10174 protein                                            | 9  | P:GO:0018996;<br>P:GO:0009792;<br>P:GO:0000003;<br>C:GO:0005622;<br>P:GO:0040010;<br>P:GO:0006810;<br>P:GO:0002119;<br>P:GO:0040011;<br>P:GO:0060465                                                                                                       | -                                                                                |             | -                                                                                                                 |
| Caenorhabditis briggsae | viral a-type inclusion protein                             | 6  | C:GO:0044422;<br>C:GO:0005737;<br>N:GO:0071842;<br>P:GO:0009792;<br>C:GO:0043232;<br>F:GO:0005488                                                                                                                                                          | -                                                                                |             | PD936484 (PRODOM)                                                                                                 |
| Caenorhabditis elegans  | elegans protein partially confirmed by transcript evidence | 0  |                                                                                                                                                                                                                                                            | F:GO:0003676;<br>F:GO:0004523                                                    |             | -                                                                                                                 |
| Caenorhabditis elegans  | elegans protein partially confirmed by transcript evidence | 0  |                                                                                                                                                                                                                                                            | F:GO:0003676;<br>F:GO:0004523                                                    |             | -                                                                                                                 |
| Caenorhabditis briggsae | golgi resident protein gcp60                               | 2  | C:GO:0005794;<br>F:GO:0005515                                                                                                                                                                                                                              | -                                                                                |             | IPR000582; IPR014352; PTHR22973 (PANTHER), PTHR22973:SF4 (PANTHER)                                                |
| Caenorhabditis elegans  | ubiquitin carboxyl-termini hydrolase 5                     | 1  | F:GO:0004221                                                                                                                                                                                                                                               | -                                                                                | EC:3.1.2.15 | IPR001394; IPR001607; IPR013083; IPR018200; PTHR10420 (PANTHER), PTHR10420:SF36 (PANTHER), SSF54001 (SUPERFAMILY) |
| Caenorhabditis elegans  | ubiquitin carboxyl-termini hydrolase family protein        | 1  | F:GO:0004221                                                                                                                                                                                                                                               | -                                                                                | EC:3.1.2.15 | IPR001394; IPR001607; IPR013083; IPR018200; PTHR10420 (PANTHER), PTHR10420:SF36 (PANTHER), SSF54001 (SUPERFAMILY) |
| Brugia malayi           | hypothetical protein [Brugia malayi]                       | 0  |                                                                                                                                                                                                                                                            | C:GO:0030117;<br>F:GO:0005488;<br>P:GO:0016192;<br>P:GO:0006886;<br>F:GO:0005515 |             | -                                                                                                                 |
|                         |                                                            | 0  |                                                                                                                                                                                                                                                            |                                                                                  |             | IPR013854                                                                                                         |
| Brugia malayi           | f-box wd repeat-containing protein 9                       | 0  |                                                                                                                                                                                                                                                            | F:GO:0003674;<br>P:GO:0008150;<br>F:GO:0005515                                   |             | -                                                                                                                 |
| Brugia malayi           | serine threonine protein ki-se                             | 4  | F:GO:0004672;<br>P:GO:0040010;<br>P:GO:0019915;<br>F:GO:0000166                                                                                                                                                                                            | -                                                                                |             | -                                                                                                                 |

|                         |                                                                                |    |                                                                                                                                                                       |   |                                                                                            |
|-------------------------|--------------------------------------------------------------------------------|----|-----------------------------------------------------------------------------------------------------------------------------------------------------------------------|---|--------------------------------------------------------------------------------------------|
|                         | -                                                                              | 0  |                                                                                                                                                                       |   | -                                                                                          |
|                         | -                                                                              | 0  |                                                                                                                                                                       |   | SignalP (SIGNALP)                                                                          |
| Argas monolakensis      | 10 kda secreted protein                                                        | 0  |                                                                                                                                                                       |   | -                                                                                          |
| Caenorhabditis briggsae | par-6 at contacts (abnormal early localization of par-6) family member (pac-1) | 3  | C:GO:0005737;<br>F:GO:0005100;<br>P:GO:0007266                                                                                                                        | - | IPR001849; IPR011993; PTHR23175 (PANTHER), PTHR23175:SF3 (PANTHER), SSF50729 (SUPERFAMILY) |
| Caenorhabditis briggsae | ran binding protein 3                                                          | 4  | P:GO:0009792;<br>P:GO:0010171;<br>P:GO:0006810;<br>P:GO:0040011                                                                                                       | - | IPR000156; IPR011993; PTHR23138 (PANTHER), PTHR23138:SF4 (PANTHER), SSF50729 (SUPERFAMILY) |
| Caenorhabditis elegans  | erk1 2 map ki-se                                                               | 6  | F:GO:0004707;<br>P:GO:0006468;<br>P:GO:0040025;<br>F:GO:0005515;<br>F:GO:0004713;<br>F:GO:0005524                                                                     | - | EC:2.7.11.24<br>; EC:2.7.10.0                                                              |
| Caenorhabditis briggsae | ww domain containing protein                                                   | 1  | F:GO:0016874                                                                                                                                                          | - | -                                                                                          |
|                         | -                                                                              | 0  |                                                                                                                                                                       |   | -                                                                                          |
| Caenorhabditis elegans  | elegans protein partially confirmed by transcript evidence                     | 9  | P:GO:0040010;<br>P:GO:0040035;<br>P:GO:0040025;<br>F:GO:0005515;<br>P:GO:0042127;<br>P:GO:0007098;<br>P:GO:0040020;<br>C:GO:0005634;<br>P:GO:0009790                  | - | -                                                                                          |
| Loa loa                 | methyltransferase 10 domain containing                                         | 10 | P:GO:0040010;<br>P:GO:0040035;<br>F:GO:0016740;<br>P:GO:0040025;<br>F:GO:0005515;<br>P:GO:0007098;<br>P:GO:0042127;<br>P:GO:0040020;<br>C:GO:0005634;<br>P:GO:0009790 | - | IPR010286; G3DSA:3.40.50.150 (GENE3D), SSF53335 (SUPERFAMILY)                              |
| Loa loa                 | methyltransferase 10 domain containing                                         | 9  | P:GO:0040010;<br>P:GO:0040035;<br>P:GO:0040025;<br>F:GO:0005515;<br>P:GO:0007098;<br>P:GO:0042127;<br>P:GO:0040020;<br>C:GO:0005634;<br>P:GO:0009790                  | - | IPR010286; G3DSA:3.40.50.150 (GENE3D), SSF53335 (SUPERFAMILY)                              |

|                         |                                                             |    |                                                                                                                                                                                                                                                            |                                                                                                   |                                                                                                             |
|-------------------------|-------------------------------------------------------------|----|------------------------------------------------------------------------------------------------------------------------------------------------------------------------------------------------------------------------------------------------------------|---------------------------------------------------------------------------------------------------|-------------------------------------------------------------------------------------------------------------|
| Caenorhabditis elegans  | solute carrier family 6 (neurotransmitter glycine) member 5 | 15 | P:GO:0007274;<br>F:GO:0005277;<br>F:GO:0005328;<br>F:GO:0015187;<br>P:GO:0001504;<br>P:GO:0015870;<br>P:GO:0015871;<br>P:GO:0048265;<br>F:GO:0030165;<br>P:GO:0040017;<br>C:GO:0045211;<br>P:GO:0015816;<br>F:GO:0005333;<br>C:GO:0005887;<br>P:GO:0015844 | -                                                                                                 | SignalP (SIGNALP)                                                                                           |
| Caenorhabditis elegans  | mkiaa1386 protein                                           | 0  |                                                                                                                                                                                                                                                            | F:GO:0003676;<br>F:GO:0003723;<br>F:GO:0046872;<br>F:GO:0000166;<br>F:GO:0008270;<br>F:GO:0005515 | IPR001878; IPR013032; SSF57850 (SUPERFAMILY)                                                                |
|                         | -                                                           | 0  |                                                                                                                                                                                                                                                            |                                                                                                   | -                                                                                                           |
|                         | -                                                           | 0  |                                                                                                                                                                                                                                                            |                                                                                                   | SignalP (SIGNALP)                                                                                           |
| Caenorhabditis elegans  | hypothetical protein Y49F6B.2 [Caenorhabditis elegans]      | 0  |                                                                                                                                                                                                                                                            | P:GO:0000003;<br>P:GO:0006898;<br>P:GO:0002119;<br>P:GO:0009792;<br>P:GO:0040007;<br>P:GO:0002009 | -                                                                                                           |
| Loa loa                 | elegans protein partially confirmed by transcript evidence  | 0  |                                                                                                                                                                                                                                                            | F:GO:0003676;<br>F:GO:0035091;<br>P:GO:0007154;<br>F:GO:0008270;<br>F:GO:0005515                  | IPR001683                                                                                                   |
| Caenorhabditis elegans  | wd-repeat protein                                           | 6  | P:GO:0018996;<br>C:GO:0044428;<br>P:GO:0000003;<br>P:GO:0040010;<br>P:GO:0002119;<br>P:GO:0040011                                                                                                                                                          | -                                                                                                 | IPR001680; IPR015943; PTHR22836 (PANTHER)                                                                   |
| Brugia malayi           | isoform a                                                   | 6  | P:GO:0018996;<br>C:GO:0044428;<br>P:GO:0000003;<br>P:GO:0040010;<br>P:GO:0002119;<br>P:GO:0040011                                                                                                                                                          | -                                                                                                 | IPR001680; IPR011046; IPR015943; IPR017986; IPR019775; IPR019781; IPR019782; IPR020472; PTHR22836 (PANTHER) |
|                         | -                                                           | 0  |                                                                                                                                                                                                                                                            |                                                                                                   | -                                                                                                           |
| Sporobolus stapfianus   | group 3 lea protein                                         | 0  |                                                                                                                                                                                                                                                            | C:GO:0016023;<br>P:GO:0006950;<br>F:GO:0005515                                                    | PTHR23241 (PANTHER), PTHR23241:SF11 (PANTHER)                                                               |
| Caenorhabditis elegans  | tol-pal system protein                                      | 0  |                                                                                                                                                                                                                                                            | C:GO:0016023;<br>F:GO:0005515                                                                     | PTHR23241 (PANTHER), PTHR23241:SF11 (PANTHER)                                                               |
| Caenorhabditis briggsae | c3orf33 protein                                             | 2  | F:GO:0003676;<br>F:GO:0016788                                                                                                                                                                                                                              | -                                                                                                 | -                                                                                                           |
| Caenorhabditis elegans  | elegans protein confirmed by transcript evidence            | 0  |                                                                                                                                                                                                                                                            | F:GO:0003676;<br>F:GO:0016788                                                                     | -                                                                                                           |

|                         |                                            |    |                                                                                                                                                                                                                                                            |                                                                                  |            |                                                                                                          |
|-------------------------|--------------------------------------------|----|------------------------------------------------------------------------------------------------------------------------------------------------------------------------------------------------------------------------------------------------------------|----------------------------------------------------------------------------------|------------|----------------------------------------------------------------------------------------------------------|
| Caenorhabditis briggsae | integrator complex subunit 8               | 0  |                                                                                                                                                                                                                                                            | P:GO:0006869;<br>C:GO:0032039;<br>F:GO:0005488;<br>P:GO:0016180;<br>F:GO:0005515 | -          | -                                                                                                        |
| Caenorhabditis elegans  | golgi golgin subfamily 2                   | 1  | F:GO:0005515                                                                                                                                                                                                                                               | -                                                                                | -          | -                                                                                                        |
| Caenorhabditis elegans  | golgi golgin subfamily 2                   | 1  | F:GO:0005515                                                                                                                                                                                                                                               | -                                                                                | -          | -                                                                                                        |
| Caenorhabditis elegans  | golgi golgin subfamily 2                   | 1  | F:GO:0005515                                                                                                                                                                                                                                               | -                                                                                | -          | -                                                                                                        |
| Tribolium castaneum     | adp atp translocase                        | 15 | P:GO:0055085;<br>P:GO:0040010;<br>F:GO:0005488;<br>P:GO:0008340;<br>C:GO:0016021;<br>C:GO:0005743;<br>P:GO:0000003;<br>F:GO:0005471;<br>P:GO:0015867;<br>P:GO:0002119;<br>P:GO:0040017;<br>P:GO:0015866;<br>P:GO:0006898;<br>P:GO:0009792;<br>C:GO:0005811 | -                                                                                |            | IPR001993; IPR002067; IPR002113;<br>IPR018108; G3DSA:1.50.40.10<br>(GENE3D), PTHR11896:SF35<br>(PANTHER) |
| Nematostella vectensis  | phosphoglucose isomerase                   | 7  | C:GO:0005737;<br>P:GO:0009792;<br>P:GO:0006094;<br>F:GO:0004347;<br>F:GO:0005515;<br>P:GO:0008340;<br>P:GO:0006096                                                                                                                                         | -                                                                                | EC:5.3.1.9 | -                                                                                                        |
| Loa loa                 | zinc c2h2 type family protein              | 0  |                                                                                                                                                                                                                                                            | F:GO:0008270;<br>C:GO:0005622                                                    |            | IPR007087; IPR015880                                                                                     |
| Caenorhabditis elegans  | protein mon2-like protein                  | 1  | P:GO:0006810                                                                                                                                                                                                                                               | -                                                                                |            | -                                                                                                        |
| Caenorhabditis briggsae | -dh dehydroge-se 1 alpha assembly factor 1 | 2  | C:GO:0005739;<br>F:GO:0005488                                                                                                                                                                                                                              | -                                                                                |            | IPR008979; IPR013857; PTHR13194<br>(PANTHER), PTHR13194:SF8<br>(PANTHER)                                 |
| Callithrix jacchus      | 40s ribosomal protein s24-like             | 10 | P:GO:0006413;<br>F:GO:0003735;<br>F:GO:0031369;<br>P:GO:0006364;<br>F:GO:0003743;<br>C:GO:0022627;<br>P:GO:0042274;<br>P:GO:0034101;<br>F:GO:0000166;<br>P:GO:0006414                                                                                      | -                                                                                |            | IPR001976; IPR012677; IPR012678;<br>IPR018098                                                            |
| Loa loa                 | mediator complex subunit 20                | 1  | P:GO:0006350                                                                                                                                                                                                                                               | -                                                                                |            | IPR013921; PTHR12465 (PANTHER)                                                                           |

|                         |                                           |    |                                                                                                                                                                                                                          |   |             |                                                                                     |
|-------------------------|-------------------------------------------|----|--------------------------------------------------------------------------------------------------------------------------------------------------------------------------------------------------------------------------|---|-------------|-------------------------------------------------------------------------------------|
| Caenorhabditis elegans  | serine long chain base subunit 1          | 13 | P:GO:0046511;<br>P:GO:0040010;<br>C:GO:0016021;<br>P:GO:0046512;<br>F:GO:0004758;<br>P:GO:0006686;<br>F:GO:0016769;<br>P:GO:0040027;<br>C:GO:0035339;<br>F:GO:0005515;<br>P:GO:0040011;<br>P:GO:0009792;<br>F:GO:0030170 | - | EC:2.3.1.50 | IPR004839; IPR015421; IPR015424;<br>PTHR13693 (PANTHER),<br>PTHR13693:SF2 (PANTHER) |
| Mus musculus            | myosin light polypeptide 6                | 8  | C:GO:0016461;<br>F:GO:0000146;<br>F:GO:0008307;<br>P:GO:0007519;<br>P:GO:0030049;<br>F:GO:0030898;<br>F:GO:0005515;<br>F:GO:0005509                                                                                      | - | -           | -                                                                                   |
| Caenorhabditis elegans  | briggsae cbr-opt-2 protein                | 5  | P:GO:0015833;<br>F:GO:0005515;<br>F:GO:0015198;<br>C:GO:0016021;<br>F:GO:0015293                                                                                                                                         | - | -           | IPR000109; PTHR11654 (PANTHER),<br>PTHR11654:SF11 (PANTHER)                         |
| -                       | -                                         | 0  |                                                                                                                                                                                                                          |   |             | SignalP (SIGNALP)                                                                   |
| -                       | -                                         | 0  |                                                                                                                                                                                                                          |   |             | SignalP (SIGNALP)                                                                   |
| Caenorhabditis briggsae | cdc28 protein ki-se regulatory subunit 1b | 12 | P:GO:0007126;<br>F:GO:0016538;<br>P:GO:0009794;<br>P:GO:0000003;<br>P:GO:0051301;<br>P:GO:0007067;<br>F:GO:0016301;<br>F:GO:0019901;<br>C:GO:0005654;<br>P:GO:0000079;<br>P:GO:0009792;<br>P:GO:0008283                  | - | -           | IPR000789; PTHR23415 (PANTHER)                                                      |
| Caenorhabditis briggsae | cdc28 protein ki-se regulatory subunit 1b | 12 | P:GO:0007126;<br>F:GO:0016538;<br>P:GO:0009794;<br>P:GO:0000003;<br>P:GO:0051301;<br>P:GO:0007067;<br>F:GO:0016301;<br>F:GO:0019901;<br>C:GO:0005654;<br>P:GO:0000079;<br>P:GO:0009792;<br>P:GO:0008283                  | - | -           | IPR000789; PTHR23415 (PANTHER),<br>PTHR23415:SF1 (PANTHER)                          |
| Pristionchus pacificus  | daf-12 c4                                 | 6  | F:GO:0003700;<br>F:GO:0043565;<br>F:GO:0003707;<br>C:GO:0005634;<br>F:GO:0008270;<br>P:GO:0006355                                                                                                                        | - | -           | -                                                                                   |

|                            |                                                             |    |                                                                                                                                                                                                                                                            |                                                                                                   |                                                                                                                         |
|----------------------------|-------------------------------------------------------------|----|------------------------------------------------------------------------------------------------------------------------------------------------------------------------------------------------------------------------------------------------------------|---------------------------------------------------------------------------------------------------|-------------------------------------------------------------------------------------------------------------------------|
| Caenorhabditis elegans     | sterol o-acyltransferase                                    | 2  | C:GO:0016021;<br>F:GO:0008415                                                                                                                                                                                                                              | -                                                                                                 | IPR004299; PTHR10408 (PANTHER),<br>SignalP (SIGNALP)                                                                    |
| Vibrio parahaemolyticus 16 | peptidase s1 and chymotrypsin hap                           | 0  |                                                                                                                                                                                                                                                            | P:GO:0006508;<br>F:GO:0004252;<br>F:GO:0008236;<br>F:GO:0016787;<br>F:GO:0003824;<br>F:GO:0008233 | IPR001254; IPR009003; IPR018114;<br>G3DSA:2.40.10.10 (GENE3D),<br>PTHR19355 (PANTHER)                                   |
| Homo sapiens               | enolase 1                                                   | 15 | P:GO:0009615;<br>C:GO:0000015;<br>P:GO:0000122;<br>F:GO:0003714;<br>F:GO:0004252;<br>C:GO:0031430;<br>C:GO:0009986;<br>F:GO:0004634;<br>P:GO:0006096;<br>F:GO:0003677;<br>P:GO:0030308;<br>F:GO:0000287;<br>F:GO:0003700;<br>C:GO:0005886;<br>C:GO:0005634 | -                                                                                                 | EC:3.4.21.0;<br>EC:4.2.1.11<br>IPR020810; G3DSA:3.20.20.120<br>(GENE3D), PTHR11902 (PANTHER),<br>SSF51604 (SUPERFAMILY) |
| Brugia malayi              | cd- sequence                                                | 0  |                                                                                                                                                                                                                                                            | P:GO:0055114;<br>F:GO:0016491                                                                     | IPR013027; G3DSA:3.50.50.60<br>(GENE3D), PTHR22912 (PANTHER),<br>PTHR22912:SF31 (PANTHER),<br>SSF51905 (SUPERFAMILY)    |
| Caenorhabditis elegans     | briggsae cbr-aat-3 protein                                  | 6  | P:GO:0019915;<br>C:GO:0016021;<br>P:GO:0006865;<br>F:GO:0015171;<br>C:GO:0005886;<br>P:GO:0055085                                                                                                                                                          | -                                                                                                 | IPR002293; PTHR11785:SF74<br>(PANTHER)                                                                                  |
| Caenorhabditis elegans     | c7orf55 protein                                             | 0  |                                                                                                                                                                                                                                                            |                                                                                                   | -                                                                                                                       |
| Caenorhabditis elegans     | x-prolyl aminopeptidase (aminopeptidase p)                  | 1  | C:GO:0005739                                                                                                                                                                                                                                               | -                                                                                                 | IPR000994; IPR001714; IPR007865;<br>G3DSA:3.40.350.10 (GENE3D),<br>PTHR10804:SF18 (PANTHER),<br>SSF53092 (SUPERFAMILY)  |
| Pongo abelii               | PREDICTED: hypothetical protein LOC100433574 [Pongo abelii] | 0  |                                                                                                                                                                                                                                                            |                                                                                                   | -                                                                                                                       |
| Caenorhabditis elegans     | mitochondrial carnitine acylcarnitine carrier protein       | 7  | P:GO:0009792;<br>F:GO:0005488;<br>C:GO:0005743;<br>P:GO:0055085;<br>P:GO:0006839;<br>C:GO:0016021;<br>F:GO:0005215                                                                                                                                         | -                                                                                                 | IPR001993; IPR002113; IPR018108;<br>G3DSA:1.50.40.10 (GENE3D),<br>PTHR11896:SF61 (PANTHER)                              |
| -                          | -                                                           | 0  |                                                                                                                                                                                                                                                            |                                                                                                   | -                                                                                                                       |
| -                          | -                                                           | 0  |                                                                                                                                                                                                                                                            |                                                                                                   | -                                                                                                                       |
| Caenorhabditis briggsae    | coiled-coil-helix-coiled-coil-helix domain containing 3     | 0  |                                                                                                                                                                                                                                                            | C:GO:0005739;<br>F:GO:0005515                                                                     | IPR009069                                                                                                               |
| -                          | -                                                           | 0  |                                                                                                                                                                                                                                                            |                                                                                                   | -                                                                                                                       |

|                        |                                                         |    |                                                                                                                                                                                                         |                                                                                  |                            |                                                                                                                                                                         |
|------------------------|---------------------------------------------------------|----|---------------------------------------------------------------------------------------------------------------------------------------------------------------------------------------------------------|----------------------------------------------------------------------------------|----------------------------|-------------------------------------------------------------------------------------------------------------------------------------------------------------------------|
| Caenorhabditis elegans | vacuolar h                                              | 12 | F:GO:0046961;<br>F:GO:0005515;<br>F:GO:0008553;<br>P:GO:0007557;<br>C:GO:0031410;<br>P:GO:0009790;<br>P:GO:0015986;<br>C:GO:0000221;<br>C:GO:0045177;<br>P:GO:0006200;<br>P:GO:0030728;<br>C:GO:0005886 | -                                                                                | EC:3.6.3.14;<br>EC:3.6.3.6 | IPR004907; G3DSA:1.20.1460.10<br>(GENE3D), SSF118203 (SUPERFAMILY)                                                                                                      |
| Caenorhabditis elegans | sec24 member b ( cerevisiae)                            | 11 | C:GO:0043231;<br>P:GO:0016044;<br>C:GO:0044446;<br>F:GO:0005515;<br>C:GO:0044425;<br>C:GO:0044444;<br>C:GO:0031090;<br>P:GO:0006888;<br>C:GO:0012505;<br>F:GO:0005215;<br>P:GO:0015031                  | -                                                                                |                            | IPR006896; IPR006900; IPR012990;<br>G3DSA:3.40.50.410 (GENE3D),<br>PTHR13803 (PANTHER), SSF53300<br>(SUPERFAMILY), SSF81995<br>(SUPERFAMILY), SSF82754<br>(SUPERFAMILY) |
|                        | -                                                       | 0  |                                                                                                                                                                                                         |                                                                                  |                            | -                                                                                                                                                                       |
| synthetic construct    | serine peptidase kunitz 2                               | 7  | C:GO:0005737;<br>C:GO:0005625;<br>P:GO:0010951;<br>P:GO:0006928;<br>F:GO:0004867;<br>C:GO:0016021;<br>C:GO:0005576                                                                                      | -                                                                                |                            | IPR002223; IPR020901; PTHR10083<br>(PANTHER), PTHR10083:SF19<br>(PANTHER), SignalP (SIGNALP)                                                                            |
| Caenorhabditis elegans | atp synthase mitochondrial f1 complex assembly factor 2 | 0  |                                                                                                                                                                                                         | F:GO:0003674;<br>P:GO:0043461;<br>P:GO:0008150;<br>F:GO:0005515;<br>C:GO:0005575 |                            | IPR011419; G3DSA:1.10.3580.10<br>(GENE3D), PTHR21013:SF9 (PANTHER)                                                                                                      |
| Caenorhabditis elegans | kiaa1310 protein                                        | 0  |                                                                                                                                                                                                         | F:GO:0003674;<br>P:GO:0008150                                                    |                            | PTHR13136 (PANTHER)                                                                                                                                                     |
| Caenorhabditis elegans | cg14224 cg14224-pa                                      | 0  |                                                                                                                                                                                                         | P:GO:0043161;<br>F:GO:0003684;<br>P:GO:0006289                                   |                            | -                                                                                                                                                                       |



|                         |                                                         |    |                                                                                                                                                                                                                                                                                                                                                                                                                                                                                          |  |                                          |                                                                                                                                                                                                       |
|-------------------------|---------------------------------------------------------|----|------------------------------------------------------------------------------------------------------------------------------------------------------------------------------------------------------------------------------------------------------------------------------------------------------------------------------------------------------------------------------------------------------------------------------------------------------------------------------------------|--|------------------------------------------|-------------------------------------------------------------------------------------------------------------------------------------------------------------------------------------------------------|
| Caenorhabditis briggsae | briggsae cbr-pyr-1 protein                              | 29 | P:GO:0042052;<br>F:GO:0004088;<br>C:GO:0005771;<br>C:GO:0005791;<br>P:GO:0046673;<br>P:GO:0008594;<br>C:GO:0016027;<br>F:GO:0070406;<br>F:GO:0004151;<br>P:GO:0007602;<br>P:GO:0006541;<br>P:GO:0030713;<br>P:GO:0046328;<br>P:GO:0009642;<br>C:GO:0016029;<br>C:GO:0016023;<br>P:GO:0016476;<br>C:GO:0005811;<br>P:GO:0008344;<br>F:GO:0005515;<br>F:GO:0005524;<br>P:GO:0007155;<br>P:GO:0006930;<br>P:GO:0035099;<br>P:GO:0007391;<br>F:GO:0004070;<br>C:GO:0005767;<br>P:GO:0040035; |  | EC:6.3.5.5;<br>EC:3.5.2.3;<br>EC:2.1.3.2 | IPR002082; IPR002195; IPR006130;<br>IPR006132; IPR011059;<br>G3DSA:2.30.40.10 (GENE3D),<br>G3DSA:3.40.50.1370 (GENE3D),<br>PTHR11405 (PANTHER),<br>PTHR11405:SF3 (PANTHER), SSF51556<br>(SUPERFAMILY) |
| Caenorhabditis elegans  | protein phosphatase 1 regulatory inhibitor subunit 16a  | 8  | P:GO:0009792;<br>P:GO:0010171;<br>P:GO:0002119;<br>P:GO:0040018;<br>P:GO:0040010;<br>P:GO:0008340;<br>P:GO:0006898                                                                                                                                                                                                                                                                                                                                                                       |  |                                          | IPR002110; IPR020683; PR01415<br>(PRINTS), PTHR18958 (PANTHER),<br>PTHR18958:SF165 (PANTHER)                                                                                                          |
| Caenorhabditis briggsae | Hypothetical protein CBG15312 [Caenorhabditis briggsae] | 0  |                                                                                                                                                                                                                                                                                                                                                                                                                                                                                          |  |                                          | SignalP (SIGNALP)                                                                                                                                                                                     |
| Caenorhabditis briggsae | wd repeats and sof1 domain containing                   | 8  | C:GO:0080008;<br>P:GO:0040010;<br>P:GO:0040035;<br>P:GO:0016567;<br>F:GO:0016740;<br>P:GO:0002119;<br>P:GO:0040039;<br>P:GO:0006898                                                                                                                                                                                                                                                                                                                                                      |  |                                          | IPR001680; IPR011046; IPR015943;<br>IPR017986; IPR019781; IPR019782;<br>PTHR22851 (PANTHER)                                                                                                           |
| Caenorhabditis elegans  | vacuolar protein sorting-associated protein 52 homolog  | 2  | C:GO:0044464;<br>F:GO:0005515                                                                                                                                                                                                                                                                                                                                                                                                                                                            |  |                                          | IPR007258; PTHR14190:SF5<br>(PANTHER)                                                                                                                                                                 |
| Haemonchus contortus    | nicotinic acetylcholine receptor alpha subunit 38       | 6  | F:GO:0004872;<br>C:GO:0045211;<br>C:GO:0030054;<br>P:GO:0006811;<br>C:GO:0016021;<br>F:GO:0004889                                                                                                                                                                                                                                                                                                                                                                                        |  |                                          | -                                                                                                                                                                                                     |
|                         |                                                         | 0  |                                                                                                                                                                                                                                                                                                                                                                                                                                                                                          |  |                                          |                                                                                                                                                                                                       |
| Caenorhabditis elegans  | hsp20 alpha crystallin family protein                   | 1  | F:GO:0042802                                                                                                                                                                                                                                                                                                                                                                                                                                                                             |  |                                          | IPR001436; IPR002068; IPR008978;<br>G3DSA:2.60.40.790 (GENE3D),<br>PTHR11527 (PANTHER),<br>PTHR11527:SF28 (PANTHER)                                                                                   |

|                         |                                         |    |                                                                                                                                                                                                         |                                                                                                                                     |                                                                                                                                                                                                                                         |
|-------------------------|-----------------------------------------|----|---------------------------------------------------------------------------------------------------------------------------------------------------------------------------------------------------------|-------------------------------------------------------------------------------------------------------------------------------------|-----------------------------------------------------------------------------------------------------------------------------------------------------------------------------------------------------------------------------------------|
| Caenorhabditis elegans  | hsp20 alpha crystallin family protein   | 1  | F:GO:0042802                                                                                                                                                                                            | -                                                                                                                                   | IPR001436; IPR002068; IPR008978; G3DSA:2.60.40.790 (GENE3D), PTHR11527 (PANTHER), PTHR11527:SF28 (PANTHER)                                                                                                                              |
| Caenorhabditis elegans  | chromaffin granule amine transporter    | 2  | P:GO:0055085;<br>P:GO:0042221                                                                                                                                                                           | -                                                                                                                                   | IPR011701; IPR016196; IPR020846; G3DSA:1.20.1250.20 (GENE3D), PTHR10074 (PANTHER), PTHR10074:SF32 (PANTHER)                                                                                                                             |
| Ailuropoda melanoleuca  | nucleobindin 1                          | 6  | C:GO:0016020;<br>C:GO:0005615;<br>C:GO:0005793;<br>C:GO:0005794;<br>F:GO:0003677;<br>F:GO:0005509                                                                                                       | -                                                                                                                                   | -                                                                                                                                                                                                                                       |
| Caenorhabditis elegans  | blistered cuticle family member (bli-4) | 12 | C:GO:0016021;<br>P:GO:0040002;<br>P:GO:0040007;<br>P:GO:0018996;<br>P:GO:0006508;<br>P:GO:0010171;<br>P:GO:0002119;<br>F:GO:0005515;<br>P:GO:0040011;<br>F:GO:0004252;<br>P:GO:0009792;<br>C:GO:0005634 | -                                                                                                                                   | EC:3.4.21.0<br>IPR000209; IPR002884; IPR008979; IPR009020; IPR015500; IPR022398; G3DSA:2.60.120.260 (GENE3D), G3DSA:3.30.70.850 (GENE3D), PTHR10795:SF13 (PANTHER), SignalP (SIGNALP)                                                   |
| Caenorhabditis elegans  | blistered cuticle family member (bli-4) | 12 | C:GO:0016021;<br>P:GO:0040002;<br>P:GO:0040007;<br>P:GO:0018996;<br>P:GO:0006508;<br>P:GO:0010171;<br>P:GO:0002119;<br>F:GO:0005515;<br>P:GO:0040011;<br>F:GO:0004252;<br>P:GO:0009792;<br>C:GO:0005634 | -                                                                                                                                   | EC:3.4.21.0<br>IPR000209; IPR002884; IPR006212; IPR008979; IPR009020; IPR009030; IPR015500; IPR022398; G3DSA:2.10.220.10 (GENE3D), G3DSA:2.60.120.260 (GENE3D), G3DSA:3.30.70.850 (GENE3D), PTHR10795:SF13 (PANTHER), SignalP (SIGNALP) |
|                         |                                         | 0  |                                                                                                                                                                                                         |                                                                                                                                     |                                                                                                                                                                                                                                         |
| Caenorhabditis elegans  | leucine-rich ppr-motif containing       | 0  |                                                                                                                                                                                                         | F:GO:0003723;<br>C:GO:0005739;<br>F:GO:0005488;<br>P:GO:0006350;<br>P:GO:0045449;<br>F:GO:0003677;<br>C:GO:0005634;<br>P:GO:0006810 | PTHR10483 (PANTHER), PTHR10483:SF3 (PANTHER)                                                                                                                                                                                            |
| Caenorhabditis briggsae | zinc finger protein 598                 | 1  | F:GO:0005488                                                                                                                                                                                            | -                                                                                                                                   | IPR001841; IPR007087; IPR013083; IPR015880; IPR017907; PTHR22938 (PANTHER), SSF57850 (SUPERFAMILY)                                                                                                                                      |
| Caenorhabditis briggsae | zinc finger protein 598                 | 0  |                                                                                                                                                                                                         | F:GO:0046872;<br>F:GO:0008270;<br>F:GO:0005515;<br>C:GO:0005622                                                                     | IPR001841; IPR007087; IPR013083; IPR015880; IPR017907; PTHR22938 (PANTHER), SSF57850 (SUPERFAMILY)                                                                                                                                      |
| Caenorhabditis briggsae | zinc finger protein 598                 | 1  | F:GO:0005488                                                                                                                                                                                            | -                                                                                                                                   | IPR001841; IPR007087; IPR013083; IPR015880; IPR017907; PTHR22938 (PANTHER), SSF57850 (SUPERFAMILY)                                                                                                                                      |

|                         |                                                    |    |                                                                                                                                                                       |                                                                 |             |                                                                                                                                                                                                                     |
|-------------------------|----------------------------------------------------|----|-----------------------------------------------------------------------------------------------------------------------------------------------------------------------|-----------------------------------------------------------------|-------------|---------------------------------------------------------------------------------------------------------------------------------------------------------------------------------------------------------------------|
| Caenorhabditis briggsae | immunoglobulin domain containing protein           | 0  |                                                                                                                                                                       |                                                                 |             | IPR003598; IPR007110; IPR013098; IPR013783; PTHR10489 (PANTHER), SSF48726 (SUPERFAMILY)                                                                                                                             |
| Caenorhabditis briggsae | uncoordinated family member (unc-22)               | 6  | C:GO:0030018;<br>P:GO:0006468;<br>F:GO:0008307;<br>P:GO:0007498;<br>F:GO:0005524;<br>F:GO:0004674                                                                     | -                                                               | EC:2.7.11.0 | SignalP (SIGNALP)                                                                                                                                                                                                   |
| Caenorhabditis elegans  | variable abnormal morphology family member (vab-1) | 5  | F:GO:0004672;<br>P:GO:0007391;<br>P:GO:0007399;<br>F:GO:0005515;<br>C:GO:0016020                                                                                      | -                                                               |             | IPR001090; IPR008979; IPR020685; G3DSA:2.60.120.260 (GENE3D), PTHR23256:SF59 (PANTHER), SignalP (SIGNALP)                                                                                                           |
|                         |                                                    | 0  |                                                                                                                                                                       |                                                                 |             | -                                                                                                                                                                                                                   |
| Loa loa                 | hypothetical protein LOAG_00970 [Loa loa]          | 0  |                                                                                                                                                                       |                                                                 |             | -                                                                                                                                                                                                                   |
|                         |                                                    | 0  |                                                                                                                                                                       |                                                                 |             | SignalP (SIGNALP)                                                                                                                                                                                                   |
| Caenorhabditis briggsae | osteoclast stimulating factor 1                    | 1  | F:GO:0017124                                                                                                                                                          | -                                                               |             | IPR002110; IPR020683; PTHR18958 (PANTHER), PTHR18958:SF214 (PANTHER)                                                                                                                                                |
| Caenorhabditis briggsae | chromosome 19 open reading frame 29                | 0  |                                                                                                                                                                       |                                                                 |             | IPR018816; IPR019134; PTHR21737 (PANTHER), PTHR21737:SF4 (PANTHER)                                                                                                                                                  |
| Caenorhabditis briggsae | chromosome 19 open reading frame 29                | 0  |                                                                                                                                                                       |                                                                 |             | IPR018816; IPR019134; PTHR21737 (PANTHER), PTHR21737:SF4 (PANTHER)                                                                                                                                                  |
| Caenorhabditis briggsae | chromosome 19 open reading frame 29                | 0  |                                                                                                                                                                       |                                                                 |             | IPR018816; IPR019134; PTHR21737 (PANTHER), PTHR21737:SF4 (PANTHER)                                                                                                                                                  |
| Ancylostoma ceylanicum  | spindle assembly abnormal protein sas-5            | 0  |                                                                                                                                                                       |                                                                 |             | -                                                                                                                                                                                                                   |
|                         |                                                    | 0  |                                                                                                                                                                       |                                                                 |             | -                                                                                                                                                                                                                   |
| Aurelia aurita          | serine protease 1                                  | 0  |                                                                                                                                                                       | P:GO:0006508;<br>F:GO:0004252;<br>F:GO:0003824;<br>F:GO:0008233 |             | IPR003582; SignalP (SIGNALP)                                                                                                                                                                                        |
| Caenorhabditis briggsae | multidrug resistance protein family member (mrp-5) | 10 | P:GO:0055085;<br>P:GO:0040010;<br>F:GO:0042626;<br>P:GO:0040002;<br>F:GO:0008514;<br>C:GO:0005624;<br>F:GO:0005524;<br>P:GO:0002119;<br>P:GO:0040017;<br>C:GO:0005887 | -                                                               |             | IPR001140; IPR011527; IPR017940; G3DSA:1.20.1560.10 (GENE3D), G3DSA:3.40.50.300 (GENE3D), PTHR19242 (PANTHER), PTHR19242:SF14 (PANTHER), SignalP (SIGNALP), SSF52540 (SUPERFAMILY)                                  |
| Caenorhabditis elegans  | briggsae cbr-haf-2 protein                         | 5  | F:GO:0016887;<br>P:GO:0006810;<br>C:GO:0016020;<br>F:GO:0000166;<br>F:GO:0005215                                                                                      | -                                                               |             | IPR001140; IPR003439; IPR003593; IPR011527; IPR017871; IPR017940; G3DSA:1.20.1560.10 (GENE3D), G3DSA:3.40.50.300 (GENE3D), PTHR19242 (PANTHER), PTHR19242:SF82 (PANTHER), SignalP (SIGNALP), SSF52540 (SUPERFAMILY) |

|                         |                                                            |    |                                                                                                                                                                                        |                                                                                  |                             |                                                                                                                                                                                                                                       |
|-------------------------|------------------------------------------------------------|----|----------------------------------------------------------------------------------------------------------------------------------------------------------------------------------------|----------------------------------------------------------------------------------|-----------------------------|---------------------------------------------------------------------------------------------------------------------------------------------------------------------------------------------------------------------------------------|
| Caenorhabditis elegans  | briggsae cbr-haf-2 protein                                 | 5  | F:GO:0016887;<br>P:GO:0006810;<br>C:GO:0016020;<br>F:GO:0000166;<br>F:GO:0005215                                                                                                       | -                                                                                |                             | IPR001140; IPR003439; IPR003593;<br>IPR011527; IPR017871; IPR017940;<br>G3DSA:1.20.1560.10 (GENE3D),<br>G3DSA:3.40.50.300 (GENE3D),<br>PTHR19242 (PANTHER),<br>PTHR19242:SF82 (PANTHER), SignalP<br>(SIGNALP), SSF52540 (SUPERFAMILY) |
| Caenorhabditis briggsae | wd repeat domain 3                                         | 1  | P:GO:0006898                                                                                                                                                                           | -                                                                                |                             | IPR007148; PTHR19853 (PANTHER)                                                                                                                                                                                                        |
| Caenorhabditis briggsae | wd repeat-containing protein 3                             | 1  | P:GO:0006898                                                                                                                                                                           | -                                                                                |                             | IPR007148; PTHR19853 (PANTHER)                                                                                                                                                                                                        |
| Caenorhabditis elegans  | elegans protein partially confirmed by transcript evidence | 0  |                                                                                                                                                                                        | C:GO:0016021;<br>C:GO:0016020;<br>P:GO:0055085;<br>F:GO:0005215;<br>P:GO:0006810 |                             | IPR004156; PTHR11388:SF7<br>(PANTHER), SignalP (SIGNALP)                                                                                                                                                                              |
| Caenorhabditis elegans  | briggsae cbr-ife- protein                                  | 6  | F:GO:0003723;<br>P:GO:0009792;<br>C:GO:0005737;<br>F:GO:0005515;<br>P:GO:0006413;<br>F:GO:0003743                                                                                      | -                                                                                |                             | IPR001040; IPR019770                                                                                                                                                                                                                  |
| Caenorhabditis elegans  | transcription initiation factor iia subunit 2              | 11 | P:GO:0010552;<br>P:GO:0051091;<br>C:GO:0005672;<br>F:GO:0016251;<br>P:GO:0006368;<br>F:GO:0017025;<br>P:GO:0051123;<br>F:GO:0046982;<br>F:GO:0003713;<br>F:GO:0042803;<br>P:GO:0032568 | -                                                                                |                             | IPR003194; IPR009083; IPR009088;<br>IPR015871; IPR015872                                                                                                                                                                              |
|                         | -                                                          | 0  |                                                                                                                                                                                        |                                                                                  |                             | -                                                                                                                                                                                                                                     |
| Caenorhabditis elegans  | #NAME?                                                     | 10 | P:GO:0006952;<br>F:GO:0008667;<br>C:GO:0005739;<br>P:GO:0055114;<br>F:GO:0008670;<br>P:GO:0019915;<br>P:GO:0006635;<br>F:GO:0070402;<br>P:GO:0051289;<br>P:GO:0009239                  | -                                                                                | EC:1.3.1.28;<br>EC:1.3.1.34 | IPR002198; IPR002347; IPR016040;<br>PTHR19410:SF117 (PANTHER),<br>SSF51735 (SUPERFAMILY)                                                                                                                                              |
| Caenorhabditis briggsae | briggsae cbr-elo-8 protein                                 | 0  |                                                                                                                                                                                        | C:GO:0016021                                                                     |                             | SignalP (SIGNALP)                                                                                                                                                                                                                     |
| Loa loa                 | atp-dependent r- helicase an3                              | 8  | P:GO:0009792;<br>P:GO:0002119;<br>F:GO:0008026;<br>C:GO:0043186;<br>P:GO:0042006;<br>F:GO:0003723;<br>F:GO:0005524;<br>P:GO:0040007                                                    | -                                                                                |                             | -                                                                                                                                                                                                                                     |

|                               |                                                       |    |                                                                                                                                                                                                         |                                                                                                                                     |                                                             |
|-------------------------------|-------------------------------------------------------|----|---------------------------------------------------------------------------------------------------------------------------------------------------------------------------------------------------------|-------------------------------------------------------------------------------------------------------------------------------------|-------------------------------------------------------------|
| Bombyx mori                   | ap- isoform b                                         | 11 | P:GO:0006901;<br>P:GO:0010552;<br>P:GO:0014032;<br>P:GO:0048489;<br>F:GO:0043565;<br>P:GO:0008104;<br>P:GO:0048728;<br>P:GO:0045807;<br>C:GO:0030136;<br>C:GO:0005886;<br>P:GO:0016348                  | -                                                                                                                                   | IPR004979; IPR013854;<br>PTHR10812:SF4 (PANTHER)            |
|                               | -                                                     | 0  |                                                                                                                                                                                                         |                                                                                                                                     | -                                                           |
| Pongo abelii                  | cytoplasmic dynein 1 heavy chain 1                    | 12 | F:GO:0003777;<br>C:GO:0005829;<br>P:GO:0006810;<br>C:GO:0005874;<br>F:GO:0042623;<br>P:GO:0006200;<br>P:GO:0007052;<br>C:GO:0005868;<br>F:GO:0005524;<br>P:GO:0007018;<br>F:GO:0005515;<br>C:GO:0005794 | -                                                                                                                                   | -                                                           |
| Caenorhabditis briggsae       | yl15_caeel ame: full=uncharacterized homeobox protein | 0  |                                                                                                                                                                                                         | P:GO:0006915;<br>F:GO:0030414;<br>F:GO:0004867;<br>C:GO:0005576                                                                     | -                                                           |
| Brugia malayi                 | dedicator of cytokinesis family protein               | 3  | F:GO:0005085;<br>F:GO:0005525;<br>F:GO:0051020                                                                                                                                                          | -                                                                                                                                   | IPR010703; PTHR23317 (PANTHER),<br>PTHR23317:SF27 (PANTHER) |
|                               | -                                                     | 0  |                                                                                                                                                                                                         |                                                                                                                                     | -                                                           |
| Strongylocentrotus purpuratus | cyclin b                                              | 0  |                                                                                                                                                                                                         | F:GO:0016301;<br>F:GO:0004672;<br>F:GO:0005524;<br>P:GO:0007049;<br>P:GO:0006468;<br>P:GO:0051301;<br>P:GO:0007067;<br>C:GO:0005634 | -                                                           |
| Strongylocentrotus purpuratus | cyclin b3                                             | 0  |                                                                                                                                                                                                         | F:GO:0016301;<br>F:GO:0004672;<br>F:GO:0005524;<br>P:GO:0007049;<br>P:GO:0006468;<br>P:GO:0051301;<br>P:GO:0007067;<br>C:GO:0005634 | IPR006670; IPR006671; IPR011028;<br>IPR013763               |
| Strongylocentrotus purpuratus | cyclin b                                              | 0  |                                                                                                                                                                                                         | F:GO:0016301;<br>F:GO:0004672;<br>F:GO:0005524;<br>P:GO:0007049;<br>P:GO:0006468;<br>P:GO:0051301;<br>P:GO:0007067;<br>C:GO:0005634 | IPR006670; IPR011028; IPR013763                             |

|                         |                                                  |    |                                                                                                                                                                                                                                                                                                                                                                  |                                                                 |             |                                                                                                                                                                                                                      |
|-------------------------|--------------------------------------------------|----|------------------------------------------------------------------------------------------------------------------------------------------------------------------------------------------------------------------------------------------------------------------------------------------------------------------------------------------------------------------|-----------------------------------------------------------------|-------------|----------------------------------------------------------------------------------------------------------------------------------------------------------------------------------------------------------------------|
| Caenorhabditis elegans  | filamin abp280 repeat family protein             | 0  |                                                                                                                                                                                                                                                                                                                                                                  | F:GO:0003779;<br>P:GO:0009612                                   |             | IPR001298; IPR013783; IPR014756;<br>IPR017868; PTHR11915 (PANTHER),<br>PTHR11915:SF55 (PANTHER)                                                                                                                      |
| -                       | -                                                | 0  |                                                                                                                                                                                                                                                                                                                                                                  |                                                                 |             | -                                                                                                                                                                                                                    |
| -                       | -                                                | 0  |                                                                                                                                                                                                                                                                                                                                                                  |                                                                 |             | -                                                                                                                                                                                                                    |
| Caenorhabditis elegans  | huntingtin interacting protein e                 | 4  | F:GO:0005488;<br>F:GO:0070733;<br>P:GO:0034259;<br>C:GO:0016021                                                                                                                                                                                                                                                                                                  | -                                                               |             | IPR003812; IPR011990; IPR013026;<br>G3DSA:1.10.3290.10 (GENE3D),<br>PTHR13504 (PANTHER),<br>PTHR13504:SF11 (PANTHER), PS51459<br>(PROFILE), SignalP (SIGNALP),<br>SSF140931 (SUPERFAMILY), SSF48452<br>(SUPERFAMILY) |
| Caenorhabditis briggsae | prohibitin                                       | 2  | C:GO:0005811;<br>C:GO:0016020                                                                                                                                                                                                                                                                                                                                    | -                                                               |             | IPR000163; IPR001107; SSF117892<br>(SUPERFAMILY)                                                                                                                                                                     |
| Caenorhabditis briggsae | atp-binding sub-family b (mdr tap) member 9      | 21 | P:GO:0001916;<br>F:GO:0046979;<br>C:GO:0042825;<br>C:GO:0043190;<br>P:GO:0002474;<br>C:GO:0005743;<br>P:GO:0015031;<br>F:GO:0042288;<br>C:GO:0005765;<br>C:GO:0005769;<br>F:GO:0046978;<br>P:GO:0015833;<br>F:GO:0022891;<br>F:GO:0015421;<br>P:GO:0055085;<br>F:GO:0042605;<br>F:GO:0042803;<br>P:GO:0006200;<br>C:GO:0005886;<br>F:GO:0005524;<br>F:GO:0046980 | -                                                               | EC:3.6.3.23 | IPR003439; IPR003593; IPR017871;<br>G3DSA:3.40.50.300 (GENE3D),<br>PTHR19242 (PANTHER),<br>PTHR19242:SF82 (PANTHER),<br>SSF52540 (SUPERFAMILY)                                                                       |
| -                       | -                                                | 0  |                                                                                                                                                                                                                                                                                                                                                                  |                                                                 |             | -                                                                                                                                                                                                                    |
| -                       | -                                                | 0  |                                                                                                                                                                                                                                                                                                                                                                  |                                                                 |             | -                                                                                                                                                                                                                    |
| Caenorhabditis briggsae | briggsae cbr-pcp- protein                        | 2  | P:GO:0006508;<br>F:GO:0008236                                                                                                                                                                                                                                                                                                                                    | -                                                               |             | -                                                                                                                                                                                                                    |
| Caenorhabditis briggsae | elegans protein confirmed by transcript evidence | 0  |                                                                                                                                                                                                                                                                                                                                                                  |                                                                 |             | -                                                                                                                                                                                                                    |
| -                       | -                                                | 0  |                                                                                                                                                                                                                                                                                                                                                                  |                                                                 |             | -                                                                                                                                                                                                                    |
| -                       | -                                                | 0  |                                                                                                                                                                                                                                                                                                                                                                  |                                                                 |             | -                                                                                                                                                                                                                    |
| Caenorhabditis elegans  | elegans protein confirmed by transcript evidence | 0  |                                                                                                                                                                                                                                                                                                                                                                  |                                                                 |             | -                                                                                                                                                                                                                    |
| Caenorhabditis elegans  | carkd protein                                    | 0  |                                                                                                                                                                                                                                                                                                                                                                  | C:GO:0005739;<br>F:GO:0003674;<br>P:GO:0008150;<br>C:GO:0005575 |             | IPR000631; IPR017953;<br>G3DSA:3.40.1190.20 (GENE3D),<br>PTHR12592 (PANTHER), SignalP<br>(SIGNALP), SSF53613 (SUPERFAMILY)                                                                                           |
| -                       | -                                                | 0  |                                                                                                                                                                                                                                                                                                                                                                  |                                                                 |             | -                                                                                                                                                                                                                    |
| Caenorhabditis elegans  | 14 kda phosphohistidine phosphatase              | 0  |                                                                                                                                                                                                                                                                                                                                                                  | P:GO:0008150;<br>C:GO:0005575                                   |             | -                                                                                                                                                                                                                    |
| -                       | -                                                | 0  |                                                                                                                                                                                                                                                                                                                                                                  |                                                                 |             | -                                                                                                                                                                                                                    |

|                         |                                                            |    |                                                                                                                                                                       |                                                |                            |                                                                                     |
|-------------------------|------------------------------------------------------------|----|-----------------------------------------------------------------------------------------------------------------------------------------------------------------------|------------------------------------------------|----------------------------|-------------------------------------------------------------------------------------|
| Caenorhabditis briggsae | coatomer protein subunit beta 1                            | 8  | F:GO:0005515;<br>P:GO:0032940;<br>P:GO:0016192;<br>P:GO:0000003;<br>P:GO:0008340;<br>P:GO:0006886;<br>C:GO:0030126;<br>F:GO:0005198                                   | -                                              |                            | IPR002553; IPR011989; IPR016024;<br>PTHR10635 (PANTHER)                             |
| Caenorhabditis elegans  | transmembrane protein 147                                  | 4  | C:GO:0016020;<br>P:GO:0000003;<br>P:GO:0040010;<br>F:GO:0005515                                                                                                       | -                                              |                            | IPR019164; PTHR12869 (PANTHER),<br>SignalP (SIGNALP)                                |
| Caenorhabditis elegans  | beta3 protein                                              | 7  | P:GO:0009792;<br>P:GO:0010171;<br>P:GO:0002119;<br>P:GO:0006810;<br>P:GO:0007040;<br>P:GO:0019915;<br>P:GO:0040007                                                    | -                                              |                            | IPR002553; IPR011989; IPR016024;<br>PTHR11134 (PANTHER),<br>PTHR11134:SF1 (PANTHER) |
| Caenorhabditis elegans  | beta3 protein                                              | 10 | P:GO:0009792;<br>P:GO:0010171;<br>P:GO:0002119;<br>F:GO:0005488;<br>C:GO:0044444;<br>P:GO:0016192;<br>P:GO:0007040;<br>P:GO:0019915;<br>P:GO:0040007;<br>P:GO:0015031 | -                                              |                            | IPR002553; IPR011989; PTHR11134<br>(PANTHER), PTHR11134:SF1<br>(PANTHER)            |
| -                       | -                                                          | 0  |                                                                                                                                                                       |                                                |                            | -                                                                                   |
| -                       | -                                                          | 0  |                                                                                                                                                                       |                                                |                            | -                                                                                   |
| Caenorhabditis elegans  | af17 c                                                     | 0  |                                                                                                                                                                       | F:GO:0005179;<br>P:GO:0007218;<br>C:GO:0005576 |                            | -                                                                                   |
| -                       | -                                                          | 0  |                                                                                                                                                                       |                                                |                            | -                                                                                   |
| -                       | -                                                          | 0  |                                                                                                                                                                       |                                                |                            | SignalP (SIGNALP)                                                                   |
| -                       | -                                                          | 0  |                                                                                                                                                                       |                                                |                            | -                                                                                   |
| Caenorhabditis elegans  | nucleoporin 210                                            | 3  | F:GO:0005515;<br>C:GO:0005635;<br>C:GO:0016020                                                                                                                        | -                                              |                            | IPR003343; IPR008964;<br>G3DSA:2.60.40.1080 (GENE3D),<br>PTHR23019 (PANTHER)        |
| Caenorhabditis briggsae | elegans protein partially confirmed by transcript evidence | 0  |                                                                                                                                                                       |                                                |                            | -                                                                                   |
| Ancylostoma ceylanicum  | zinc metallopeptidase                                      | 6  | C:GO:0016021;<br>F:GO:0004222;<br>F:GO:0003676;<br>P:GO:0032259;<br>P:GO:0006508;<br>F:GO:0008168                                                                     | -                                              | EC:3.4.24.0;<br>EC:2.1.1.0 | -                                                                                   |
| Loa loa                 | nuclear receptor nhr-31                                    | 6  | F:GO:0046872;<br>F:GO:0004879;<br>F:GO:0003677;<br>P:GO:0045449;<br>F:GO:0005515;<br>P:GO:0019915                                                                     | -                                              |                            | IPR000536; IPR008946; PTHR11865<br>(PANTHER), PTHR11865:SF197<br>(PANTHER)          |
| Caenorhabditis elegans  | - h exchanger family member (nhx-8)                        | 5  | F:GO:0015385;<br>P:GO:0055085;<br>P:GO:0006812;<br>P:GO:0006885;<br>C:GO:0016021                                                                                      | -                                              |                            | IPR006153; IPR018409; IPR018422;<br>SignalP (SIGNALP)                               |

|                         |                                      |    |                                                                                                                                                                                                                                                            |   |                                                                                                                                                      |                                                                                                                                                                         |
|-------------------------|--------------------------------------|----|------------------------------------------------------------------------------------------------------------------------------------------------------------------------------------------------------------------------------------------------------------|---|------------------------------------------------------------------------------------------------------------------------------------------------------|-------------------------------------------------------------------------------------------------------------------------------------------------------------------------|
| Caenorhabditis elegans  | 28s ribosomal protein mitochondrial  | 7  | P:GO:0040035;<br>P:GO:0009792;<br>P:GO:0002119;<br>C:GO:0005840;<br>F:GO:0003735;<br>P:GO:0006898;<br>P:GO:0006412                                                                                                                                         | - | EC:3.6.5.3                                                                                                                                           | -                                                                                                                                                                       |
|                         | -                                    | 0  |                                                                                                                                                                                                                                                            |   |                                                                                                                                                      | -                                                                                                                                                                       |
| Caenorhabditis briggsae | bud13_caeel ame: full=bud13 homolog  | 0  |                                                                                                                                                                                                                                                            |   | P:GO:0006898;<br>P:GO:0000003;<br>P:GO:0002119;<br>P:GO:0002009;<br>P:GO:0040011;<br>P:GO:0040007;<br>P:GO:0040035;<br>P:GO:0007126;<br>P:GO:0045132 | -                                                                                                                                                                       |
|                         | -                                    | 0  |                                                                                                                                                                                                                                                            |   |                                                                                                                                                      | -                                                                                                                                                                       |
|                         | -                                    | 0  |                                                                                                                                                                                                                                                            |   |                                                                                                                                                      | -                                                                                                                                                                       |
| Caenorhabditis elegans  | single-strand binding protein        | 2  | F:GO:0003677;<br>F:GO:0005515                                                                                                                                                                                                                              | - |                                                                                                                                                      | IPR000424; IPR011344; IPR012340;<br>IPR016027                                                                                                                           |
| Caenorhabditis briggsae | d- replication licensing factor mcm6 | 15 | P:GO:0006268;<br>F:GO:0016851;<br>F:GO:0003697;<br>P:GO:0015995;<br>P:GO:0030174;<br>P:GO:0009792;<br>F:GO:0042802;<br>C:GO:0042555;<br>P:GO:0045449;<br>F:GO:0003682;<br>F:GO:0005524;<br>F:GO:0003678;<br>P:GO:0040035;<br>P:GO:0007049;<br>P:GO:0000910 | - | EC:6.6.1.1                                                                                                                                           | IPR001208; IPR008049; IPR012340;<br>IPR016027; IPR018525;<br>G3DSA:3.40.50.300 (GENE3D),<br>PTHR11630 (PANTHER),<br>PTHR11630:SF43 (PANTHER),<br>SSF52540 (SUPERFAMILY) |
| Caenorhabditis briggsae | d- replication licensing factor mcm6 | 15 | P:GO:0006268;<br>F:GO:0016851;<br>F:GO:0003697;<br>P:GO:0015995;<br>P:GO:0030174;<br>P:GO:0009792;<br>F:GO:0042802;<br>C:GO:0042555;<br>P:GO:0045449;<br>F:GO:0003682;<br>F:GO:0005524;<br>F:GO:0003678;<br>P:GO:0040035;<br>P:GO:0007049;<br>P:GO:0000910 | - | EC:6.6.1.1                                                                                                                                           | -                                                                                                                                                                       |



|                         |                                      |    |                                                                                                                                                                                                                                                            |   |            |   |
|-------------------------|--------------------------------------|----|------------------------------------------------------------------------------------------------------------------------------------------------------------------------------------------------------------------------------------------------------------|---|------------|---|
| Caenorhabditis briggsae | d- replication licensing factor mcm6 | 15 | P:GO:0006268;<br>F:GO:0016851;<br>F:GO:0003697;<br>P:GO:0015995;<br>P:GO:0030174;<br>P:GO:0009792;<br>F:GO:0042802;<br>C:GO:0042555;<br>P:GO:0045449;<br>F:GO:0003682;<br>F:GO:0005524;<br>F:GO:0003678;<br>P:GO:0040035;<br>P:GO:0007049;<br>P:GO:0000910 | - | EC:6.6.1.1 | - |
| Caenorhabditis briggsae | d- replication licensing factor mcm6 | 15 | P:GO:0006268;<br>F:GO:0016851;<br>F:GO:0003697;<br>P:GO:0015995;<br>P:GO:0030174;<br>P:GO:0009792;<br>F:GO:0042802;<br>C:GO:0042555;<br>P:GO:0045449;<br>F:GO:0003682;<br>F:GO:0005524;<br>F:GO:0003678;<br>P:GO:0040035;<br>P:GO:0007049;<br>P:GO:0000910 | - | EC:6.6.1.1 | - |
| Caenorhabditis briggsae | d- replication licensing factor mcm6 | 15 | P:GO:0006268;<br>F:GO:0016851;<br>F:GO:0003697;<br>P:GO:0015995;<br>P:GO:0030174;<br>P:GO:0009792;<br>F:GO:0042802;<br>C:GO:0042555;<br>P:GO:0045449;<br>F:GO:0003682;<br>F:GO:0005524;<br>F:GO:0003678;<br>P:GO:0040035;<br>P:GO:0007049;<br>P:GO:0000910 | - | EC:6.6.1.1 | - |

|                         |                                           |    |                                                                                                                                                                                                                                                                                                                                                                                                                                                                                         |   |            |                                                                                                                                  |
|-------------------------|-------------------------------------------|----|-----------------------------------------------------------------------------------------------------------------------------------------------------------------------------------------------------------------------------------------------------------------------------------------------------------------------------------------------------------------------------------------------------------------------------------------------------------------------------------------|---|------------|----------------------------------------------------------------------------------------------------------------------------------|
| Caenorhabditis briggsae | d- replication licensing factor mcm6      | 15 | P:GO:0006268;<br>F:GO:0016851;<br>F:GO:0003697;<br>P:GO:0015995;<br>P:GO:0030174;<br>P:GO:0009792;<br>F:GO:0042802;<br>C:GO:0042555;<br>P:GO:0045449;<br>F:GO:0003682;<br>F:GO:0005524;<br>F:GO:0003678;<br>P:GO:0040035;<br>P:GO:0007049;<br>P:GO:0000910                                                                                                                                                                                                                              | - | EC:6.6.1.1 | -                                                                                                                                |
|                         | -                                         | 0  |                                                                                                                                                                                                                                                                                                                                                                                                                                                                                         |   |            | -                                                                                                                                |
|                         |                                           | 0  |                                                                                                                                                                                                                                                                                                                                                                                                                                                                                         |   |            |                                                                                                                                  |
| Caenorhabditis briggsae | histidine acid phosphatase family protein | 5  | P:GO:0009792;<br>P:GO:0002119;<br>P:GO:0000003;<br>P:GO:0040007;<br>P:GO:0006898                                                                                                                                                                                                                                                                                                                                                                                                        | - |            | IPR000560; G3DSA:3.40.50.1240 (GENE3D), PTHR11567 (PANTHER), PTHR11567:SF17 (PANTHER), SignalP (SIGNALP), SSF53254 (SUPERFAMILY) |
| Caenorhabditis elegans  | uncoordinated family member (unc-89)      | 0  | P:GO:0006898;<br>P:GO:0045214;<br>P:GO:0006936;<br>C:GO:0005829;<br>F:GO:0005509;<br>P:GO:0043056;<br>F:GO:0004713;<br>P:GO:0051592;<br>P:GO:0007076;<br>P:GO:0035023;<br>C:GO:0031674;<br>C:GO:0031672;<br>P:GO:0001701;<br>P:GO:0055008;<br>F:GO:0004674;<br>P:GO:0030241;<br>P:GO:0030240;<br>F:GO:0004672;<br>P:GO:0055003;<br>P:GO:0055002;<br>F:GO:0051015;<br>C:GO:0005622;<br>F:GO:0051393;<br>C:GO:0030018;<br>F:GO:0042802;<br>F:GO:0005524;<br>C:GO:0030017;<br>F:GO:0043621 |   |            | IPR007110; IPR013783; PTHR19897 (PANTHER), SSF48726 (SUPERFAMILY)                                                                |

|                                |                                                                      |    |                                                                                                                                                                                                                                                                                                               |                                                |                            |                                                                                                                                     |
|--------------------------------|----------------------------------------------------------------------|----|---------------------------------------------------------------------------------------------------------------------------------------------------------------------------------------------------------------------------------------------------------------------------------------------------------------|------------------------------------------------|----------------------------|-------------------------------------------------------------------------------------------------------------------------------------|
| Caenorhabditis elegans         | acetoacetyl- synthetase                                              | 18 | P:GO:0071394;<br>C:GO:0005829;<br>P:GO:0014074;<br>P:GO:0006629;<br>P:GO:0042594;<br>P:GO:0010243;<br>P:GO:0050872;<br>P:GO:0045471;<br>P:GO:0001889;<br>P:GO:0007584;<br>P:GO:0071333;<br>P:GO:0060612;<br>P:GO:0071397;<br>P:GO:0034201;<br>P:GO:0042493;<br>F:GO:0047760;<br>P:GO:0032024;<br>F:GO:0030729 | -                                              | EC:6.2.1.2;<br>EC:6.2.1.16 | IPR000873; IPR020845;<br>G3DSA:3.40.50.980 (GENE3D),<br>PTHR11968 (PANTHER),<br>PTHR11968:SF40 (PANTHER),<br>SSF56801 (SUPERFAMILY) |
| Caenorhabditis elegans         | n -dimethylguanosine tr- methyltransferase                           | 1  | F:GO:0008168                                                                                                                                                                                                                                                                                                  | -                                              | EC:2.1.1.0                 | IPR002905; G3DSA:3.40.50.150<br>(GENE3D), SSF53335 (SUPERFAMILY)                                                                    |
| -                              | -                                                                    | 0  | -                                                                                                                                                                                                                                                                                                             | -                                              | -                          | -                                                                                                                                   |
| -                              | -                                                                    | 0  | -                                                                                                                                                                                                                                                                                                             | -                                              | -                          | -                                                                                                                                   |
| Caenorhabditis elegans         | coenzyme q biosynthesis protein                                      | 2  | C:GO:0005743;<br>P:GO:0006744                                                                                                                                                                                                                                                                                 | -                                              | -                          | IPR007715; PTHR12922 (PANTHER),<br>SignalP (SIGNALP)                                                                                |
| -                              | -                                                                    | 0  | -                                                                                                                                                                                                                                                                                                             | -                                              | -                          | -                                                                                                                                   |
| -                              | -                                                                    | 0  | -                                                                                                                                                                                                                                                                                                             | -                                              | -                          | -                                                                                                                                   |
| Ancylostoma ceylanicum         | secreted protein 5 precursor                                         | 0  | -                                                                                                                                                                                                                                                                                                             | C:GO:0005576                                   | -                          | IPR014044                                                                                                                           |
| Ancylostoma ceylanicum         | secreted protein 5 precursor                                         | 0  | -                                                                                                                                                                                                                                                                                                             | C:GO:0005576                                   | -                          | IPR014044                                                                                                                           |
| -                              | -                                                                    | 0  | -                                                                                                                                                                                                                                                                                                             | -                                              | -                          | -                                                                                                                                   |
| Caenorhabditis elegans         | atrial -triuretic peptide clearance                                  | 8  | P:GO:0007194;<br>P:GO:0007589;<br>F:GO:0001653;<br>C:GO:0044464;<br>F:GO:0042562;<br>P:GO:0007186;<br>P:GO:0048015;<br>P:GO:0003008                                                                                                                                                                           | -                                              | -                          | IPR001170; IPR001828;<br>G3DSA:3.40.50.2300 (GENE3D),<br>PTHR11920 (PANTHER),<br>PTHR11920:SF2 (PANTHER), SSF53822<br>(SUPERFAMILY) |
| Brugia malayi                  | vacuolar protein sorting-associated protein 33b                      | 1  | F:GO:0005515                                                                                                                                                                                                                                                                                                  | -                                              | -                          | IPR001619; PTHR11679:SF1<br>(PANTHER)                                                                                               |
| Caenorhabditis elegans         | kunitz bovine pancreatic trypsin inhibitor domain containing protein | 0  | -                                                                                                                                                                                                                                                                                                             | F:GO:0004867                                   | -                          | SignalP (SIGNALP)                                                                                                                   |
| Caenorhabditis elegans         | phytanoyl- dioxyge-se domain containing 1                            | 3  | P:GO:0055114;<br>F:GO:0046872;<br>F:GO:0016702                                                                                                                                                                                                                                                                | -                                              | EC:1.13.11.0               | IPR008775; G3DSA:2.60.120.620<br>(GENE3D), PTHR20883 (PANTHER),<br>SSF51197 (SUPERFAMILY)                                           |
| Caenorhabditis elegans         | surfeit locus protein 1                                              | 4  | P:GO:0006811;<br>C:GO:0016020;<br>C:GO:0005739;<br>F:GO:0004129                                                                                                                                                                                                                                               | -                                              | EC:1.9.3.1                 | -                                                                                                                                   |
| Oceanicola granulosus HTCC2516 | helicase, putative [Oceanicola granulosus HTCC2516]                  | 0  | -                                                                                                                                                                                                                                                                                                             | F:GO:0003676;<br>F:GO:0004386;<br>F:GO:0005524 | -                          | -                                                                                                                                   |
| Oceanicola granulosus HTCC2516 | helicase, putative [Oceanicola granulosus HTCC2516]                  | 0  | -                                                                                                                                                                                                                                                                                                             | F:GO:0003676;<br>F:GO:0004386;<br>F:GO:0005524 | -                          | -                                                                                                                                   |
| -                              | -                                                                    | 0  | -                                                                                                                                                                                                                                                                                                             | -                                              | -                          | SignalP (SIGNALP)                                                                                                                   |
| -                              | -                                                                    | 0  | -                                                                                                                                                                                                                                                                                                             | -                                              | -                          | -                                                                                                                                   |
| -                              | -                                                                    | 0  | -                                                                                                                                                                                                                                                                                                             | -                                              | -                          | -                                                                                                                                   |

|                         |                                                  |    |                                                                                                                                                                                                                                                                                              |                                                                                  |                                                                                                                              |
|-------------------------|--------------------------------------------------|----|----------------------------------------------------------------------------------------------------------------------------------------------------------------------------------------------------------------------------------------------------------------------------------------------|----------------------------------------------------------------------------------|------------------------------------------------------------------------------------------------------------------------------|
| Caenorhabditis elegans  | purine-rich element binding protein b            | 17 | C:GO:0005662;<br>C:GO:0000784;<br>P:GO:0006270;<br>P:GO:0006268;<br>F:GO:0003697;<br>P:GO:0045892;<br>C:GO:0005737;<br>C:GO:0030425;<br>P:GO:0008284;<br>C:GO:0043025;<br>F:GO:0003705;<br>P:GO:0007399;<br>F:GO:0003691;<br>F:GO:0008134;<br>P:GO:0045637;<br>F:GO:0003729;<br>F:GO:0046332 | -                                                                                | SignalIP (SIGNALP)                                                                                                           |
| Loa loa                 | ssd- and r--binding protein                      | 0  |                                                                                                                                                                                                                                                                                              | F:GO:0016563;<br>F:GO:0003697                                                    | -                                                                                                                            |
| Caenorhabditis elegans  | elegans protein confirmed by transcript evidence | 0  |                                                                                                                                                                                                                                                                                              | F:GO:0004672;<br>F:GO:0005524;<br>P:GO:0006915                                   | -                                                                                                                            |
| Caenorhabditis briggsae | lysosomal phospholipase a2                       | 10 | C:GO:0005764;<br>P:GO:0006631;<br>F:GO:0004607;<br>F:GO:0047499;<br>C:GO:0005625;<br>C:GO:0005739;<br>P:GO:0046470;<br>P:GO:0019915;<br>P:GO:0006672;<br>F:GO:0004622                                                                                                                        | -                                                                                | EC:2.3.1.43;<br>EC:3.1.1.5<br>IPR003386; G3DSA:3.40.50.1820<br>(GENE3D), PTHR11440:SF15<br>(PANTHER), SSF53474 (SUPERFAMILY) |
|                         | -                                                | 0  |                                                                                                                                                                                                                                                                                              |                                                                                  | SignalIP (SIGNALP)                                                                                                           |
|                         | -                                                | 0  |                                                                                                                                                                                                                                                                                              |                                                                                  | PTHR15410 (PANTHER)                                                                                                          |
| Caenorhabditis elegans  | leucine-rich transmembrane                       | 0  |                                                                                                                                                                                                                                                                                              | F:GO:0004872;<br>F:GO:0016787;<br>C:GO:0016021;<br>F:GO:0005515;<br>F:GO:0004721 | SignalIP (SIGNALP)                                                                                                           |
| Caenorhabditis briggsae | briggsae cbr-unc-36 protein                      | 4  | C:GO:0016021;<br>F:GO:0005262;<br>P:GO:0006816;<br>F:GO:0005244                                                                                                                                                                                                                              | -                                                                                | PTHR10166 (PANTHER),<br>PTHR10166:SF5 (PANTHER)                                                                              |
|                         | -                                                | 0  |                                                                                                                                                                                                                                                                                              |                                                                                  | -                                                                                                                            |

|                             |                                                            |    |                                                                                                                                                                                                                                                                                                                                                                                                                     |                               |  |                                                                                                                                   |
|-----------------------------|------------------------------------------------------------|----|---------------------------------------------------------------------------------------------------------------------------------------------------------------------------------------------------------------------------------------------------------------------------------------------------------------------------------------------------------------------------------------------------------------------|-------------------------------|--|-----------------------------------------------------------------------------------------------------------------------------------|
| Angiostrongylus cantonensis | bzip transcription factor family protein                   | 24 | P:GO:0009648;<br>P:GO:0001666;<br>F:GO:0003690;<br>P:GO:0048146;<br>P:GO:0009409;<br>P:GO:0006355;<br>P:GO:0009636;<br>P:GO:0007565;<br>P:GO:0007623;<br>P:GO:0043434;<br>F:GO:0043565;<br>F:GO:0046983;<br>P:GO:0007568;<br>F:GO:0003700;<br>P:GO:0014070;<br>P:GO:0034097;<br>P:GO:0032355;<br>P:GO:0032570;<br>P:GO:0051591;<br>C:GO:0005634;<br>P:GO:0006366;<br>P:GO:0045941;<br>P:GO:0009612;<br>P:GO:0030431 |                               |  | IPR000837; IPR004827; IPR011616;<br>G3DSA:1.20.5.170 (GENE3D),<br>PTHR23351 (PANTHER),<br>PTHR23351:SF1 (PANTHER)                 |
| Caenorhabditis briggsae     | elegans protein partially confirmed by transcript evidence | 1  | P:GO:0040007                                                                                                                                                                                                                                                                                                                                                                                                        | -                             |  | -                                                                                                                                 |
| Caenorhabditis elegans      | autocrine motility factor receptor                         | 2  | F:GO:0005488;<br>C:GO:0044464                                                                                                                                                                                                                                                                                                                                                                                       | -                             |  | IPR001841; IPR003892; IPR013083;<br>PTHR12477 (PANTHER),<br>PTHR12477:SF2 (PANTHER), SignalP<br>(SIGNALP), SSF57850 (SUPERFAMILY) |
| Caenorhabditis briggsae     | elegans protein partially confirmed by transcript evidence | 0  |                                                                                                                                                                                                                                                                                                                                                                                                                     | F:GO:0005488                  |  | -                                                                                                                                 |
| Caenorhabditis briggsae     | elegans protein partially confirmed by transcript evidence | 0  |                                                                                                                                                                                                                                                                                                                                                                                                                     | F:GO:0005488                  |  | -                                                                                                                                 |
| Caenorhabditis briggsae     | elegans protein partially confirmed by transcript evidence | 0  |                                                                                                                                                                                                                                                                                                                                                                                                                     | F:GO:0005488                  |  | -                                                                                                                                 |
| Caenorhabditis briggsae     | integrin beta subunit (agap000815-pa)                      | 6  | C:GO:0008305;<br>P:GO:0007160;<br>F:GO:0004872;<br>P:GO:0007275;<br>F:GO:0005488;<br>P:GO:0007229                                                                                                                                                                                                                                                                                                                   | -                             |  | SignalP (SIGNALP)                                                                                                                 |
| Caenorhabditis elegans      | ylz5_caeel ame: full=uncharacterized protein               | 0  |                                                                                                                                                                                                                                                                                                                                                                                                                     | F:GO:0003676;<br>F:GO:0046983 |  | -                                                                                                                                 |
|                             | -                                                          | 0  |                                                                                                                                                                                                                                                                                                                                                                                                                     |                               |  | -                                                                                                                                 |
| Caenorhabditis elegans      | elegans protein partially confirmed by transcript evidence | 0  |                                                                                                                                                                                                                                                                                                                                                                                                                     | P:GO:0008152;<br>C:GO:0016021 |  | -                                                                                                                                 |

|                         |                                             |    |                                                                                                                                                                                                                                                                                                                                                                                                                                                                        |                                                                                                   |                                                                                                                                                                            |
|-------------------------|---------------------------------------------|----|------------------------------------------------------------------------------------------------------------------------------------------------------------------------------------------------------------------------------------------------------------------------------------------------------------------------------------------------------------------------------------------------------------------------------------------------------------------------|---------------------------------------------------------------------------------------------------|----------------------------------------------------------------------------------------------------------------------------------------------------------------------------|
| Caenorhabditis elegans  | lissencephaly-1 homolog b                   | 56 | P:GO:000235;<br>C:GO:0031512;<br>P:GO:0021766;<br>F:GO:0030234;<br>F:GO:0042803;<br>C:GO:0005869;<br>P:GO:0008090;<br>P:GO:0050885;<br>P:GO:0007312;<br>P:GO:0008298;<br>P:GO:0000132;<br>C:GO:0031252;<br>P:GO:0051301;<br>P:GO:0045494;<br>P:GO:0007268;<br>P:GO:0030381;<br>P:GO:0007405;<br>C:GO:0000776;<br>P:GO:0051081;<br>P:GO:0045176;<br>P:GO:0051383;<br>P:GO:0007611;<br>P:GO:0021540;<br>P:GO:0048135;<br>C:GO:0030424;<br>P:GO:0045478;<br>P:GO:0016319; | -                                                                                                 | IPR001680; IPR006594; IPR011046;<br>IPR013720; IPR015943; IPR017986;<br>IPR019781; IPR019782; PTHR22847<br>(PANTHER), PTHR22847:SF51<br>(PANTHER), SSF109925 (SUPERFAMILY) |
| Caenorhabditis briggsae | proteasome ( macropain) activator subunit 4 | 0  |                                                                                                                                                                                                                                                                                                                                                                                                                                                                        | P:GO:0030154;<br>F:GO:0005488;<br>C:GO:0000502;<br>P:GO:0007275;<br>P:GO:0007283;<br>C:GO:0005634 | IPR011989; IPR016024; IPR021843                                                                                                                                            |
| Caenorhabditis elegans  | transcription initiation factor small       | 10 | P:GO:0040010;<br>F:GO:0008026;<br>P:GO:0000003;<br>F:GO:0000166;<br>P:GO:0006898;<br>P:GO:0002009;<br>P:GO:0009792;<br>C:GO:0005634;<br>F:GO:0003702;<br>P:GO:0006366                                                                                                                                                                                                                                                                                                  | -                                                                                                 | IPR003196; IPR011039; IPR011991;<br>SSF46785 (SUPERFAMILY)                                                                                                                 |
| Caenorhabditis elegans  | mitochondrial gtpase 1 precursor            | 3  | C:GO:0005622;<br>F:GO:0005515;<br>F:GO:0000166                                                                                                                                                                                                                                                                                                                                                                                                                         | -                                                                                                 | IPR002917; IPR006073; IPR023179;<br>G3DSA:3.40.50.300 (GENE3D),<br>PTHR11089 (PANTHER),<br>PTHR11089:SF4 (PANTHER), SSF52540<br>(SUPERFAMILY)                              |
| Caenorhabditis elegans  | hypothetical upf0195 protein in chromosome  | 0  |                                                                                                                                                                                                                                                                                                                                                                                                                                                                        | F:GO:0003674;<br>P:GO:0008150                                                                     | IPR002744; PTHR12377 (PANTHER),<br>SSF117916 (SUPERFAMILY)                                                                                                                 |
| Loa loa                 | ring finger and wd repeat domain 3          | 1  | F:GO:0005488                                                                                                                                                                                                                                                                                                                                                                                                                                                           | -                                                                                                 | IPR001680; IPR001841; IPR011046;<br>IPR013083; IPR015943; IPR018378;<br>IPR018957; PTHR16047 (PANTHER),<br>PTHR16047:SF7 (PANTHER), SSF57850<br>(SUPERFAMILY)              |
|                         |                                             | 0  |                                                                                                                                                                                                                                                                                                                                                                                                                                                                        |                                                                                                   | -                                                                                                                                                                          |

|                         |                                      |    |                                                                                                                                                                                                                                                                                                               |   |                                                                                                                                                                                                                               |
|-------------------------|--------------------------------------|----|---------------------------------------------------------------------------------------------------------------------------------------------------------------------------------------------------------------------------------------------------------------------------------------------------------------|---|-------------------------------------------------------------------------------------------------------------------------------------------------------------------------------------------------------------------------------|
| Caenorhabditis briggsae | d- replication licensing factor mcm2 | 18 | C:GO:0000785;<br>P:GO:0008340;<br>F:GO:0005515;<br>P:GO:0006974;<br>P:GO:0040010;<br>P:GO:0006268;<br>C:GO:0005737;<br>P:GO:0030174;<br>P:GO:0006350;<br>P:GO:0009792;<br>F:GO:0003677;<br>P:GO:0042325;<br>P:GO:0002119;<br>C:GO:0042555;<br>F:GO:0016887;<br>F:GO:0003682;<br>F:GO:0005524;<br>P:GO:0040035 | - | IPR001208; IPR003593; IPR008045;<br>IPR012340; IPR016027; IPR018525;<br>IPR021092; G3DSA:3.30.1640.10<br>(GENE3D), G3DSA:3.40.50.300<br>(GENE3D), PTHR11630 (PANTHER),<br>PTHR11630:SF44 (PANTHER),<br>SSF52540 (SUPERFAMILY) |
| Caenorhabditis briggsae | d- replication licensing factor mcm2 | 18 | C:GO:0000785;<br>P:GO:0008340;<br>F:GO:0005515;<br>P:GO:0006974;<br>P:GO:0040010;<br>P:GO:0006268;<br>C:GO:0005737;<br>P:GO:0030174;<br>P:GO:0006350;<br>P:GO:0009792;<br>F:GO:0003677;<br>P:GO:0042325;<br>P:GO:0002119;<br>C:GO:0042555;<br>F:GO:0016887;<br>F:GO:0003682;<br>F:GO:0005524;<br>P:GO:0040035 | - | IPR001208; IPR003593; IPR008045;<br>IPR012340; IPR016027; IPR018525;<br>IPR021092; G3DSA:3.30.1640.10<br>(GENE3D), G3DSA:3.40.50.300<br>(GENE3D), PTHR11630 (PANTHER),<br>PTHR11630:SF44 (PANTHER),<br>SSF52540 (SUPERFAMILY) |
| Caenorhabditis briggsae | d- replication licensing factor mcm2 | 18 | C:GO:0000785;<br>P:GO:0008340;<br>F:GO:0005515;<br>P:GO:0006974;<br>P:GO:0040010;<br>P:GO:0006268;<br>C:GO:0005737;<br>P:GO:0030174;<br>P:GO:0006350;<br>P:GO:0009792;<br>F:GO:0003677;<br>P:GO:0042325;<br>P:GO:0002119;<br>C:GO:0042555;<br>F:GO:0016887;<br>F:GO:0003682;<br>F:GO:0005524;<br>P:GO:0040035 | - | IPR001208; IPR003593; IPR008045;<br>IPR012340; IPR016027; IPR018525;<br>IPR021092; G3DSA:3.30.1640.10<br>(GENE3D), G3DSA:3.40.50.300<br>(GENE3D), PTHR11630 (PANTHER),<br>PTHR11630:SF44 (PANTHER),<br>SSF52540 (SUPERFAMILY) |

|                                |                                                                              |    |                                                                                                                                                                                                                                                                                                               |   |                           |                                                                                                                                                                                                                               |
|--------------------------------|------------------------------------------------------------------------------|----|---------------------------------------------------------------------------------------------------------------------------------------------------------------------------------------------------------------------------------------------------------------------------------------------------------------|---|---------------------------|-------------------------------------------------------------------------------------------------------------------------------------------------------------------------------------------------------------------------------|
| Caenorhabditis briggsae        | d- replication licensing factor mcm2                                         | 18 | C:GO:0000785;<br>P:GO:0008340;<br>F:GO:0005515;<br>P:GO:0006974;<br>P:GO:0040010;<br>P:GO:0006268;<br>C:GO:0005737;<br>P:GO:0030174;<br>P:GO:0006350;<br>P:GO:0009792;<br>F:GO:0003677;<br>P:GO:0042325;<br>P:GO:0002119;<br>C:GO:0042555;<br>F:GO:0016887;<br>F:GO:0003682;<br>F:GO:0005524;<br>P:GO:0040035 | - | -                         | IPR001208; IPR003593; IPR008045;<br>IPR012340; IPR016027; IPR018525;<br>IPR021092; G3DSA:3.30.1640.10<br>(GENE3D), G3DSA:3.40.50.300<br>(GENE3D), PTHR11630 (PANTHER),<br>PTHR11630:SF44 (PANTHER),<br>SSF52540 (SUPERFAMILY) |
| Caenorhabditis briggsae        | d- replication licensing factor mcm2                                         | 18 | C:GO:0000785;<br>P:GO:0008340;<br>F:GO:0005515;<br>P:GO:0006974;<br>P:GO:0040010;<br>P:GO:0006268;<br>C:GO:0005737;<br>P:GO:0030174;<br>P:GO:0006350;<br>P:GO:0009792;<br>F:GO:0003677;<br>P:GO:0042325;<br>P:GO:0002119;<br>C:GO:0042555;<br>F:GO:0016887;<br>F:GO:0003682;<br>F:GO:0005524;<br>P:GO:0040035 | - | -                         | IPR001208; IPR003593; IPR008045;<br>IPR012340; IPR016027; IPR018525;<br>IPR021092; G3DSA:3.30.1640.10<br>(GENE3D), G3DSA:3.40.50.300<br>(GENE3D), PTHR11630 (PANTHER),<br>PTHR11630:SF44 (PANTHER),<br>SSF52540 (SUPERFAMILY) |
| Trichostrongylus colubriformis | glbh_trico ame: full=globin-like host-protective antigen<br>flags: precursor | 5  | F:GO:0020037;<br>C:GO:0005615;<br>F:GO:0005344;<br>P:GO:0015671;<br>F:GO:0019825                                                                                                                                                                                                                              | - | -                         | -                                                                                                                                                                                                                             |
| Caenorhabditis briggsae        | carboxylase:pyruvate acetyl-coa propionyl-coa                                | 9  | C:GO:0005875;<br>F:GO:0004736;<br>F:GO:0009374;<br>P:GO:0009252;<br>F:GO:0005524;<br>P:GO:0006094;<br>C:GO:0005759;<br>C:GO:0005811;<br>F:GO:0008716                                                                                                                                                          | - | EC:6.4.1.1;<br>EC:6.3.2.4 | IPR000891; IPR003379; IPR012287;<br>IPR013785; PTHR18866 (PANTHER),<br>PTHR18866:SF10 (PANTHER),<br>SSF51569 (SUPERFAMILY), SSF89000<br>(SUPERFAMILY)                                                                         |
| Caenorhabditis elegans         | vacuolar protein sorting 13d                                                 | 3  | P:GO:0040010;<br>P:GO:0002119;<br>P:GO:0040011                                                                                                                                                                                                                                                                | - | -                         | -                                                                                                                                                                                                                             |



|                         |                                                            |   |                                                                                                                                     |                                                |             |                                                                                                                  |
|-------------------------|------------------------------------------------------------|---|-------------------------------------------------------------------------------------------------------------------------------------|------------------------------------------------|-------------|------------------------------------------------------------------------------------------------------------------|
| Pongo abelii            | proteasome ( macropain) 26s non- 8                         | 7 | C:GO:0005730;<br>P:GO:0051436;<br>P:GO:0051437;<br>C:GO:0005838;<br>P:GO:0031145;<br>F:GO:0005515;<br>C:GO:0005737                  | -                                              | -           |                                                                                                                  |
| Loa loa                 | prolyl oligopeptidase (s09 family)                         | 0 |                                                                                                                                     | P:GO:0006508;<br>F:GO:0004252;<br>F:GO:0016787 |             | IPR002470; IPR004106;<br>G3DSA:2.130.10.120 (GENE3D),<br>PTHR11757:SF2 (PANTHER)                                 |
| Loa loa                 | major sperm protein                                        | 2 | C:GO:0005856;<br>F:GO:0005198                                                                                                       | -                                              |             | IPR000535; IPR008962; PTHR10809<br>(PANTHER)                                                                     |
| Caenorhabditis briggsae | filamin abp280 repeat family protein                       | 8 | P:GO:0009792;<br>P:GO:0010171;<br>C:GO:0005840;<br>F:GO:0003735;<br>F:GO:0003779;<br>P:GO:0007126;<br>P:GO:0000003;<br>P:GO:0006412 | -                                              | EC:3.6.5.3  | IPR001298; IPR013783; IPR014756;<br>IPR017868; PTHR11915 (PANTHER),<br>PTHR11915:SF24 (PANTHER)                  |
| Brugia malayi           | elegans protein partially confirmed by transcript evidence | 2 | P:GO:0051179;<br>P:GO:0009987                                                                                                       | -                                              |             | -                                                                                                                |
| Caenorhabditis elegans  | beta-galactosidase                                         | 2 | P:GO:0048102;<br>F:GO:0016787                                                                                                       | -                                              |             | IPR001944; IPR008979;<br>G3DSA:2.60.120.260 (GENE3D)                                                             |
| Caenorhabditis elegans  | tgf-beta resistance-associated protein trag                | 0 |                                                                                                                                     |                                                |             | SignalP (SIGNALP)                                                                                                |
| Brugia malayi           | kiaa0732 protein                                           | 6 | P:GO:0044260;<br>P:GO:0090304;<br>F:GO:0003677;<br>C:GO:0044446;<br>P:GO:0065007;<br>C:GO:0005634                                   | -                                              |             | IPR006596; G3DSA:3.40.50.1010<br>(GENE3D), SignalP (SIGNALP),<br>SSF88723 (SUPERFAMILY)                          |
|                         | -                                                          | 0 |                                                                                                                                     |                                                |             | SignalP (SIGNALP)                                                                                                |
|                         | -                                                          | 0 |                                                                                                                                     |                                                |             | -                                                                                                                |
| Brugia malayi           | kiaa1530 protein                                           | 0 |                                                                                                                                     | F:GO:0005488                                   |             | IPR018610                                                                                                        |
| Loa loa                 | wgr domain containing protein                              | 6 | F:GO:0005488;<br>P:GO:0044238;<br>P:GO:0044260;<br>F:GO:0016740;<br>C:GO:0005634;<br>P:GO:0006974                                   | -                                              |             | IPR008893; IPR012982; PTHR15447<br>(PANTHER), SSF142921 (SUPERFAMILY)                                            |
| Caenorhabditis briggsae | peptidyl-prolyl cis-trans isomerase cwc27 homolog          | 2 | F:GO:0016853;<br>C:GO:0005634                                                                                                       | -                                              |             | IPR002130; IPR015891; PTHR11071<br>(PANTHER), PTHR11071:SF33<br>(PANTHER)                                        |
| Brugia malayi           | arginine-tr--protein c terminus containing protein         | 4 | C:GO:0005737;<br>F:GO:0004057;<br>P:GO:0016598;<br>C:GO:0005634                                                                     | -                                              | EC:2.3.2.8  | IPR007472; IPR016181; PTHR21367<br>(PANTHER)                                                                     |
| Caenorhabditis briggsae | fructose- -bisphosphatase                                  | 3 | P:GO:0016051;<br>C:GO:0005737;<br>F:GO:0042132                                                                                      | -                                              | EC:3.1.3.11 | IPR000146; IPR020548;<br>G3DSA:3.30.540.10 (GENE3D),<br>G3DSA:3.40.190.80 (GENE3D),<br>SSF56655 (SUPERFAMILY)    |
| Caenorhabditis briggsae | yl4m_caeel ame: full=uncharacterized protein               | 0 |                                                                                                                                     |                                                |             | SignalP (SIGNALP)                                                                                                |
| Loa loa                 | kelch domain containing 3                                  | 5 | C:GO:0005737;<br>F:GO:0003682;<br>F:GO:0005515;<br>P:GO:0000003;<br>C:GO:0000790                                                    | -                                              |             | IPR006652; IPR011498; IPR015915;<br>PTHR23244 (PANTHER),<br>PTHR23244:SF33 (PANTHER),<br>SSF117281 (SUPERFAMILY) |

|              |                           |   |                                                                                                                                                      |   |                                                                                                                                                     |
|--------------|---------------------------|---|------------------------------------------------------------------------------------------------------------------------------------------------------|---|-----------------------------------------------------------------------------------------------------------------------------------------------------|
| Loa loa      | kelch domain containing 3 | 5 | C:GO:0005737;<br>F:GO:0003682;<br>F:GO:0005515;<br>P:GO:0000003;<br>C:GO:0000790                                                                     | - | IPR006652; IPR011498; IPR015915;<br>PTHR23244 (PANTHER),<br>PTHR23244:SF33 (PANTHER),<br>SSF117281 (SUPERFAMILY)                                    |
| Loa loa      | kelch domain containing 3 | 5 | C:GO:0005737;<br>F:GO:0003682;<br>F:GO:0005515;<br>P:GO:0000003;<br>C:GO:0000790                                                                     | - | IPR006652; IPR011498; IPR015915;<br>PTHR23244 (PANTHER),<br>PTHR23244:SF33 (PANTHER),<br>SSF117281 (SUPERFAMILY)                                    |
|              |                           | 0 |                                                                                                                                                      |   |                                                                                                                                                     |
| Homo sapiens | mhc class i antigen       | 7 | P:GO:0006955;<br>F:GO:0032393;<br>P:GO:0044419;<br>C:GO:0005887;<br>P:GO:0002474;<br>F:GO:0005515;<br>C:GO:0042612                                   | - |                                                                                                                                                     |
| Homo sapiens | mhc class i antigen       | 9 | F:GO:0032393;<br>C:GO:0005887;<br>C:GO:0005624;<br>P:GO:0006952;<br>F:GO:0005515;<br>P:GO:0002474;<br>P:GO:0006955;<br>P:GO:0044419;<br>C:GO:0042612 | - | IPR001039; IPR003597; IPR007110;<br>IPR011161; IPR011162; IPR013783;<br>PTHR16675 (PANTHER),<br>PTHR16675:SF53 (PANTHER),<br>SSF48726 (SUPERFAMILY) |
| Homo sapiens | mhc class i antigen       | 7 | P:GO:0006955;<br>F:GO:0032393;<br>C:GO:0005576;<br>P:GO:0044419;<br>C:GO:0005887;<br>P:GO:0002474;<br>C:GO:0042612                                   | - | IPR001039; IPR003597; IPR007110;<br>IPR011161; IPR011162; IPR013783;<br>PTHR16675 (PANTHER),<br>PTHR16675:SF53 (PANTHER),<br>SSF48726 (SUPERFAMILY) |
| Homo sapiens | mhc class i antigen       | 9 | C:GO:0000139;<br>F:GO:0032393;<br>C:GO:0005887;<br>F:GO:0005515;<br>C:GO:0031901;<br>P:GO:0002474;<br>P:GO:0006955;<br>P:GO:0044419;<br>C:GO:0042612 | - | IPR001039; IPR003597; IPR007110;<br>IPR011161; IPR011162; IPR013783;<br>PTHR16675 (PANTHER),<br>PTHR16675:SF53 (PANTHER),<br>SSF48726 (SUPERFAMILY) |
| Homo sapiens | mhc class i antigen       | 9 | F:GO:0032393;<br>C:GO:0005887;<br>C:GO:0005624;<br>P:GO:0006952;<br>F:GO:0005515;<br>P:GO:0002474;<br>P:GO:0006955;<br>P:GO:0044419;<br>C:GO:0042612 | - | IPR001039; IPR011161; IPR011162;<br>PTHR16675 (PANTHER),<br>PTHR16675:SF53 (PANTHER)                                                                |
| Homo sapiens | mhc class i antigen       | 0 |                                                                                                                                                      |   | IPR001039; IPR011161; IPR011162;<br>PTHR16675 (PANTHER),<br>PTHR16675:SF53 (PANTHER)                                                                |

|                         |                                 |  |                                                                                                                                                        |   |                                                                                                   |                                                                                                                                                     |
|-------------------------|---------------------------------|--|--------------------------------------------------------------------------------------------------------------------------------------------------------|---|---------------------------------------------------------------------------------------------------|-----------------------------------------------------------------------------------------------------------------------------------------------------|
| Homo sapiens            | mhc class i antigen             |  | C:GO:0000139;<br>F:GO:0032393;<br>C:GO:0005887;<br>F:GO:0005515;<br>9 C:GO:0031901;<br>P:GO:0002474;<br>P:GO:0006955;<br>P:GO:0044419;<br>C:GO:0042612 | - |                                                                                                   | IPR001039; IPR011161; IPR011162;<br>PTHR16675 (PANTHER),<br>PTHR16675:SF53 (PANTHER)                                                                |
| Homo sapiens            | mhc class i antigen             |  | F:GO:0032393;<br>C:GO:0005887;<br>C:GO:0005624;<br>P:GO:0006952;<br>9 F:GO:0005515;<br>P:GO:0002474;<br>P:GO:0006955;<br>P:GO:0044419;<br>C:GO:0042612 | - |                                                                                                   | IPR001039; IPR003597; IPR007110;<br>IPR011161; IPR011162; IPR013783;<br>PTHR16675 (PANTHER),<br>PTHR16675:SF53 (PANTHER),<br>SSF48726 (SUPERFAMILY) |
| Homo sapiens            | mhc class i antigen             |  | C:GO:0000139;<br>F:GO:0032393;<br>C:GO:0005887;<br>F:GO:0005515;<br>9 C:GO:0031901;<br>P:GO:0002474;<br>P:GO:0006955;<br>P:GO:0044419;<br>C:GO:0042612 | - |                                                                                                   | IPR001039; IPR003597; IPR007110;<br>IPR011161; IPR011162; IPR013783;<br>PTHR16675 (PANTHER),<br>PTHR16675:SF53 (PANTHER),<br>SSF48726 (SUPERFAMILY) |
| Pan troglodytes         | mhc class i antigen             |  | P:GO:0006955;<br>F:GO:0032393;<br>C:GO:0005576;<br>7 P:GO:0044419;<br>C:GO:0005887;<br>P:GO:0002474;<br>C:GO:0042612                                   | - |                                                                                                   | IPR001039; IPR011161; IPR011162;<br>PTHR16675 (PANTHER),<br>PTHR16675:SF53 (PANTHER)                                                                |
| Caenorhabditis briggsae | transmembrane protein 85        |  | P:GO:0009792;<br>4 P:GO:0000003;<br>P:GO:0040007;<br>P:GO:0002119                                                                                      | - |                                                                                                   | IPR009445; PTHR19315:SF6<br>(PANTHER)                                                                                                               |
| Ancylostoma ceylanicum  | metalloprotease 1 precursor     |  | F:GO:0046872;<br>2 F:GO:0008237                                                                                                                        | - |                                                                                                   | IPR000859; IPR013032; PTHR10127<br>(PANTHER), PTHR10127:SF60<br>(PANTHER)                                                                           |
| Caenorhabditis elegans  | wd repeat domain 74             |  | P:GO:0040035;<br>3 P:GO:0002119;<br>P:GO:0040007                                                                                                       | - |                                                                                                   | IPR001680; IPR011046; IPR015943;<br>IPR019781; PTHR16038 (PANTHER)                                                                                  |
| Caenorhabditis elegans  | wd repeat domain 74             |  | P:GO:0040035;<br>3 P:GO:0002119;<br>P:GO:0040007                                                                                                       | - |                                                                                                   | IPR001680; IPR011046; IPR015943;<br>IPR019781; PTHR16038 (PANTHER)                                                                                  |
| Dysdercus peruvianus    | facilitative hexose transporter |  | 0                                                                                                                                                      |   | C:GO:0016021;<br>F:GO:0022891;<br>C:GO:0016020;<br>P:GO:0055085;<br>F:GO:0005215;<br>P:GO:0006810 | IPR005828; PTHR11600 (PANTHER),<br>SignalP (SIGNALP)                                                                                                |
| -                       | -                               |  | 0                                                                                                                                                      |   |                                                                                                   | -                                                                                                                                                   |

|                         |                                                        |    |                                                                                                                                                                       |              |             |                                                                                                                               |
|-------------------------|--------------------------------------------------------|----|-----------------------------------------------------------------------------------------------------------------------------------------------------------------------|--------------|-------------|-------------------------------------------------------------------------------------------------------------------------------|
| Loa loa                 | cdk5 regulatory subunit associated protein 1           | 10 | P:GO:0045736;<br>P:GO:0009451;<br>F:GO:0051536;<br>P:GO:0045664;<br>P:GO:0007420;<br>P:GO:0009058;<br>F:GO:0016874;<br>F:GO:0019901;<br>P:GO:0008283;<br>F:GO:0019887 | -            |             | IPR005839; IPR013848; IPR018247                                                                                               |
| Loa loa                 | cdk5 regulatory subunit associated protein 1           | 9  | P:GO:0045736;<br>P:GO:0009451;<br>P:GO:0045664;<br>P:GO:0007420;<br>F:GO:0004326;<br>F:GO:0051539;<br>F:GO:0005524;<br>F:GO:0042808;<br>P:GO:0009396                  | -            | EC:6.3.2.17 | IPR005839; IPR006638; IPR007197;<br>IPR013848; IPR018247; IPR020612;<br>G3DSA:3.80.30.20 (GENE3D),<br>SSF102114 (SUPERFAMILY) |
| Loa loa                 | cdk5 regulatory subunit associated protein 1           | 9  | P:GO:0045736;<br>P:GO:0009451;<br>P:GO:0045664;<br>P:GO:0007420;<br>F:GO:0004326;<br>F:GO:0051539;<br>F:GO:0005524;<br>F:GO:0042808;<br>P:GO:0009396                  | -            | EC:6.3.2.17 | IPR005839; IPR006638; IPR007197;<br>IPR013848; IPR018247; IPR020612;<br>G3DSA:3.80.30.20 (GENE3D),<br>SSF102114 (SUPERFAMILY) |
| -                       | -                                                      | 0  |                                                                                                                                                                       |              |             | -                                                                                                                             |
| -                       | -                                                      | 0  |                                                                                                                                                                       |              |             | -                                                                                                                             |
| Loa loa                 | resistance to inhibitors of cholinesterase 8 homolog a | 1  | F:GO:0005488                                                                                                                                                          | -            |             | IPR008376; IPR019318; PTHR12425<br>(PANTHER)                                                                                  |
| -                       | -                                                      | 0  |                                                                                                                                                                       |              |             | -                                                                                                                             |
| Caenorhabditis briggsae | mitochondrial 39s ribosomal protein I50                | 3  | P:GO:0007275;<br>P:GO:0000003;<br>P:GO:0040007                                                                                                                        | -            |             | -                                                                                                                             |
| Caenorhabditis elegans  | host cell factor 1                                     | 6  | P:GO:0009987;<br>C:GO:0035097;<br>P:GO:0050789;<br>P:GO:0019046;<br>F:GO:0003713;<br>C:GO:0005737                                                                     | -            |             | IPR008957; IPR013783                                                                                                          |
| Caenorhabditis briggsae | elegans protein confirmed by transcript evidence       | 1  | P:GO:0002119                                                                                                                                                          | -            |             | -                                                                                                                             |
| Caenorhabditis briggsae | elegans protein confirmed by transcript evidence       | 1  | P:GO:0002119                                                                                                                                                          | -            |             | -                                                                                                                             |
| Caenorhabditis briggsae | elegans protein confirmed by transcript evidence       | 1  | P:GO:0002119                                                                                                                                                          | -            |             | -                                                                                                                             |
| Caenorhabditis elegans  | elegans protein confirmed by transcript evidence       | 0  |                                                                                                                                                                       | C:GO:0005634 |             | IPR012580                                                                                                                     |
| Caenorhabditis briggsae | organic cation transporter                             | 4  | P:GO:0006810;<br>P:GO:0009987;<br>C:GO:0016020;<br>F:GO:0005215                                                                                                       | -            |             | IPR011701; IPR016196; IPR020846;<br>G3DSA:1.20.1250.20 (GENE3D),<br>PTHR11600 (PANTHER),<br>PTHR11600:SF35 (PANTHER)          |
| -                       | -                                                      | 0  |                                                                                                                                                                       |              |             | SignalP (SIGNALP)                                                                                                             |
| Caenorhabditis elegans  | elegans protein confirmed by transcript evidence       | 0  |                                                                                                                                                                       | C:GO:0016021 |             | IPR013838; SignalP (SIGNALP)                                                                                                  |
| Caenorhabditis elegans  | dtw domain containing 1                                | 1  | C:GO:0016021                                                                                                                                                          | -            |             | IPR005636; PTHR15627 (PANTHER),<br>PTHR15627:SF8 (PANTHER)                                                                    |
| -                       | -                                                      | 0  |                                                                                                                                                                       |              |             | SignalP (SIGNALP)                                                                                                             |

|                         |                                           |    |                                                                                                                                                                                                                                                                                                                                                                                                                                                                                                                                                       |                             |                                                                                                                                              |
|-------------------------|-------------------------------------------|----|-------------------------------------------------------------------------------------------------------------------------------------------------------------------------------------------------------------------------------------------------------------------------------------------------------------------------------------------------------------------------------------------------------------------------------------------------------------------------------------------------------------------------------------------------------|-----------------------------|----------------------------------------------------------------------------------------------------------------------------------------------|
| Caenorhabditis elegans  | phosphogluco-ate dehydrogenase            | 28 | <p>P:GO:0006541;<br/> F:GO:0005515;<br/> C:GO:0005792;<br/> P:GO:0009448;<br/> P:GO:0010468;<br/> F:GO:0031406;<br/> P:GO:0031175;<br/> P:GO:0019322;<br/> C:GO:0005737;<br/> P:GO:0018996;<br/> F:GO:0050661;<br/> P:GO:0019530;<br/> P:GO:0009051;<br/> F:GO:0005529;<br/> P:GO:0006544;<br/> P:GO:0022402;<br/> F:GO:0051287;<br/> P:GO:0021510;<br/> P:GO:0002119;<br/> P:GO:0055114;<br/> F:GO:0004617;<br/> P:GO:0006566;<br/> C:GO:0005625;<br/> F:GO:0004616;<br/> P:GO:0021915;<br/> P:GO:0021782;<br/> P:GO:0019521;<br/> P:GO:0040010;</p> | EC:1.1.1.95;<br>EC:1.1.1.44 | IPR006113; IPR006114; IPR006115;<br>IPR006183; IPR006184; IPR008927;<br>IPR013328; IPR016040; PTHR11811<br>(PANTHER), SSF51735 (SUPERFAMILY) |
| Caenorhabditis elegans  | transducin-like 3                         | 6  | <p>P:GO:0045132;<br/> P:GO:0000003;<br/> P:GO:0006898;<br/> P:GO:0009792;<br/> C:GO:0044424</p>                                                                                                                                                                                                                                                                                                                                                                                                                                                       |                             | IPR001680; IPR011046; IPR015943;<br>IPR017986; IPR019781; IPR019782;<br>IPR020472; PTHR19854 (PANTHER),<br>PTHR19854:SF2 (PANTHER)           |
| Caenorhabditis briggsae | vacuolar protein sorting 52 ( cerevisiae) | 3  | <p>C:GO:0044444;<br/> F:GO:0005515;<br/> C:GO:0043231</p>                                                                                                                                                                                                                                                                                                                                                                                                                                                                                             |                             | IPR007258; PTHR14190:SF5<br>(PANTHER)                                                                                                        |

|                         |                                                  |    |                                                                                                                                                                                                                                                                                                                                                                                                                                                                                          |   |                                                                    |
|-------------------------|--------------------------------------------------|----|------------------------------------------------------------------------------------------------------------------------------------------------------------------------------------------------------------------------------------------------------------------------------------------------------------------------------------------------------------------------------------------------------------------------------------------------------------------------------------------|---|--------------------------------------------------------------------|
| Caenorhabditis briggsae | briggsae cbr-apr-1 protein                       | 30 | P:GO:0048468;<br>P:GO:0030177;<br>P:GO:0007052;<br>C:GO:0043005;<br>P:GO:0048699;<br>F:GO:0047485;<br>P:GO:0040027;<br>P:GO:0007420;<br>C:GO:0043234;<br>C:GO:0044430;<br>P:GO:0040003;<br>F:GO:0008013;<br>P:GO:0040010;<br>C:GO:0005912;<br>P:GO:0045944;<br>P:GO:0051656;<br>P:GO:0016476;<br>P:GO:0006611;<br>P:GO:0030178;<br>P:GO:0000003;<br>P:GO:0001700;<br>P:GO:0007155;<br>P:GO:0010171;<br>P:GO:0003002;<br>P:GO:0008356;<br>C:GO:0045177;<br>P:GO:0001714;<br>P:GO:0009792; | - | IPRO11989; IPR016024; PTHR12607 (PANTHER), PTHR12607:SF4 (PANTHER) |
| Caenorhabditis briggsae | elegans protein confirmed by transcript evidence | 9  | P:GO:0009792;<br>P:GO:0002119;<br>F:GO:0030528;<br>F:GO:0003676;<br>P:GO:0045449;                                                                                                                                                                                                                                                                                                                                                                                                        | - | SignalP (SIGNALP)                                                  |
| Caenorhabditis briggsae | elegans protein confirmed by transcript evidence | 9  | P:GO:0009792;<br>P:GO:0002119;<br>F:GO:0030528;<br>F:GO:0003676;<br>P:GO:0045449;<br>P:GO:0040010;<br>P:GO:0000003;<br>P:GO:0006898;<br>F:GO:0008270                                                                                                                                                                                                                                                                                                                                     | - | -                                                                  |
| Caenorhabditis briggsae | elegans protein confirmed by transcript evidence | 1  | F:GO:0005515                                                                                                                                                                                                                                                                                                                                                                                                                                                                             | - | IPR006578                                                          |

|                         |                                                           |    |                                                                                                                                                                                                                                           |                                                                 |             |                                                                                                                                                     |
|-------------------------|-----------------------------------------------------------|----|-------------------------------------------------------------------------------------------------------------------------------------------------------------------------------------------------------------------------------------------|-----------------------------------------------------------------|-------------|-----------------------------------------------------------------------------------------------------------------------------------------------------|
| Caenorhabditis elegans  | kinesin-like protein 2                                    | 14 | F:GO:0008017;<br>P:GO:0000910;<br>P:GO:0045132;<br>C:GO:0000922;<br>P:GO:0090307;<br>C:GO:0005873;<br>C:GO:0005813;<br>F:GO:0003677;<br>P:GO:0007067;<br>P:GO:0051299;<br>F:GO:0000166;<br>P:GO:0008283;<br>P:GO:0009792;<br>F:GO:0008574 | -                                                               | EC:3.6.4.4  | IPR001752; IPR019821; PTHR16012 (PANTHER), PTHR16012:SF71 (PANTHER), SSF52540 (SUPERFAMILY)                                                         |
| -                       | -                                                         | 0  |                                                                                                                                                                                                                                           |                                                                 |             | -                                                                                                                                                   |
| -                       | -                                                         | 0  |                                                                                                                                                                                                                                           |                                                                 |             | IPR013786                                                                                                                                           |
| -                       | -                                                         | 0  |                                                                                                                                                                                                                                           |                                                                 |             | -                                                                                                                                                   |
| -                       | -                                                         | 0  |                                                                                                                                                                                                                                           |                                                                 |             | -                                                                                                                                                   |
| -                       | -                                                         | 0  |                                                                                                                                                                                                                                           |                                                                 |             | -                                                                                                                                                   |
| Caenorhabditis briggsae | briggsae cbr-ekl-1 protein                                | 0  |                                                                                                                                                                                                                                           | P:GO:0000003;<br>F:GO:0003676;<br>P:GO:0016246;<br>P:GO:0009792 |             | IPR002999; IPR008191; G3DSA:2.30.30.140 (GENE3D), SSF63748 (SUPERFAMILY)                                                                            |
| Caenorhabditis elegans  | elegans protein confirmed by transcript evidence          | 3  | P:GO:0044238;<br>P:GO:0040010;<br>F:GO:0016757                                                                                                                                                                                            | -                                                               |             | IPR002213; SSF53756 (SUPERFAMILY)                                                                                                                   |
| Caenorhabditis briggsae | activating sig-I cointegrator 1 complex subunit 3         | 4  | F:GO:0008026;<br>F:GO:0003677;<br>C:GO:0005622;<br>F:GO:0005524                                                                                                                                                                           | -                                                               |             | IPR001650; IPR004179; G3DSA:1.10.3380.10 (GENE3D), G3DSA:3.40.50.300 (GENE3D), PTHR11752 (PANTHER), PTHR11752:SF8 (PANTHER), SSF52540 (SUPERFAMILY) |
| Caenorhabditis elegans  | utp11-like u3 small nucleolar ribonucleoprotein variant 1 | 7  | P:GO:0006412;<br>P:GO:0040010;<br>P:GO:0000003;<br>P:GO:0002119;<br>C:GO:0030529;<br>P:GO:0006898;<br>P:GO:0009792                                                                                                                        | -                                                               | EC:3.6.5.3  | IPR007144                                                                                                                                           |
|                         |                                                           |    |                                                                                                                                                                                                                                           |                                                                 |             | IPR003599; IPR007110; IPR013098; IPR013783; IPR018281; PTHR19897 (PANTHER), PTHR19897:SF9 (PANTHER), SSF48726 (SUPERFAMILY)                         |
| Caenorhabditis briggsae | nuclear vcp-like                                          | 2  | F:GO:0017111;<br>F:GO:0005524                                                                                                                                                                                                             | -                                                               | EC:3.6.1.15 | G3DSA:1.10.8.60 (GENE3D), PTHR23077 (PANTHER), PTHR23077:SF16 (PANTHER), SSF52540 (SUPERFAMILY)                                                     |
| Caenorhabditis elegans  | ubiquitin carboxyl-termini hydrolase 30                   | 1  | F:GO:0008233                                                                                                                                                                                                                              | -                                                               |             | IPR001394; IPR018200; PTHR10420 (PANTHER), PTHR10420:SF41 (PANTHER), SignalP (SIGNALP), SSF54001 (SUPERFAMILY)                                      |
| Caenorhabditis elegans  | ubiquitin specific protease 30                            | 1  | F:GO:0016787                                                                                                                                                                                                                              | -                                                               |             | IPR001394; IPR018200; PTHR10420 (PANTHER), PTHR10420:SF41 (PANTHER), SignalP (SIGNALP), SSF54001 (SUPERFAMILY)                                      |

|                         |                                                                  |   |                                                                                                                                                      |                                                                                                                    |             |                                                                                  |
|-------------------------|------------------------------------------------------------------|---|------------------------------------------------------------------------------------------------------------------------------------------------------|--------------------------------------------------------------------------------------------------------------------|-------------|----------------------------------------------------------------------------------|
| Caenorhabditis elegans  | mitochondrial ribosomal                                          | 9 | P:GO:0006412;<br>P:GO:0040010;<br>C:GO:0005840;<br>P:GO:0008340;<br>F:GO:0003735;<br>P:GO:0040035;<br>P:GO:0002119;<br>P:GO:0006898;<br>P:GO:0009792 | -                                                                                                                  | EC:3.6.5.3  | SignalP (SIGNALP)                                                                |
| -                       | -                                                                | 0 |                                                                                                                                                      |                                                                                                                    |             | -                                                                                |
| Loa loa                 | novel protein vertebrate ptaire protein ki-se 2                  | 6 | P:GO:0009987;<br>F:GO:0004674;<br>F:GO:0005515;<br>P:GO:0007275;<br>P:GO:0009653;<br>C:GO:0044464                                                    | -                                                                                                                  | EC:2.7.11.0 | G3DSA:1.10.510.10 (GENE3D),<br>PTHR11909 (PANTHER),<br>PTHR11909:SF7 (PANTHER)   |
| Brugia malayi           | testis-expressed sequence 2 protein                              | 1 | C:GO:0016020                                                                                                                                         | -                                                                                                                  |             | -                                                                                |
| Caenorhabditis elegans  | anillin rhotekin                                                 | 1 | P:GO:0009987                                                                                                                                         | -                                                                                                                  |             | -                                                                                |
| Caenorhabditis elegans  | anillin rhotekin                                                 | 1 | P:GO:0009987                                                                                                                                         | -                                                                                                                  |             | -                                                                                |
| Caenorhabditis elegans  | anillin rhotekin                                                 | 1 | P:GO:0009987                                                                                                                                         | -                                                                                                                  |             | -                                                                                |
| Caenorhabditis elegans  | anillin rhotekin                                                 | 1 | P:GO:0009987                                                                                                                                         | -                                                                                                                  |             | -                                                                                |
| Caenorhabditis elegans  | anillin rhotekin                                                 | 1 | P:GO:0009987                                                                                                                                         | -                                                                                                                  |             | -                                                                                |
| Caenorhabditis elegans  | surfeit locus protein 1                                          | 0 |                                                                                                                                                      | C:GO:0005739;<br>F:GO:0004129;<br>P:GO:0021522;<br>C:GO:0016021;<br>C:GO:0016020;<br>P:GO:0048568;<br>C:GO:0005743 |             | IPR002994; PTHR23427 (PANTHER),<br>PTHR23427:SF2 (PANTHER), SignalP<br>(SIGNALP) |
| Caenorhabditis briggsae | elegans protein confirmed by transcript evidence                 | 0 |                                                                                                                                                      |                                                                                                                    |             | IPR007588                                                                        |
| -                       | -                                                                | 0 |                                                                                                                                                      |                                                                                                                    |             | SignalP (SIGNALP)                                                                |
| Caenorhabditis briggsae | briggsae cbr-ttl1-12 protein                                     | 0 |                                                                                                                                                      | F:GO:0016874;<br>F:GO:0004835;<br>P:GO:0006464                                                                     |             | IPR004344; G3DSA:2.170.270.10<br>(GENE3D), PTHR12241:SF5 (PANTHER)               |
| Caenorhabditis elegans  | elegans protein partially confirmed by transcript evidence       | 6 | P:GO:0006412;<br>C:GO:0005840;<br>C:GO:0005739;<br>F:GO:0003735;<br>F:GO:0005524;<br>F:GO:0016887                                                    | -                                                                                                                  | EC:3.6.5.3  | PTHR21610 (PANTHER),<br>PTHR21610:SF4 (PANTHER), SSF53300<br>(SUPERFAMILY)       |
| -                       | -                                                                | 0 |                                                                                                                                                      |                                                                                                                    |             | -                                                                                |
| Caenorhabditis briggsae | peroxisomal membrane protein pex13                               | 7 | P:GO:0016477;<br>C:GO:0005779;<br>C:GO:0005624;<br>P:GO:0007399;<br>P:GO:0016560;<br>F:GO:0005515;<br>P:GO:0007610                                   | -                                                                                                                  |             | IPR007223; PTHR19332 (PANTHER)                                                   |
| Caenorhabditis briggsae | yms5_caeel ame: full=uncharacterized protein flags:<br>precursor | 2 | C:GO:0016021;<br>P:GO:0007160                                                                                                                        | -                                                                                                                  |             | PTHR13802 (PANTHER),<br>PTHR13802:SF1 (PANTHER)                                  |
| Caenorhabditis brenneri | elegans protein confirmed by transcript evidence                 | 0 |                                                                                                                                                      |                                                                                                                    |             | IPR001534; SignalP (SIGNALP)                                                     |
| -                       | -                                                                | 0 |                                                                                                                                                      |                                                                                                                    |             | -                                                                                |



|                         |                                       |    |                                                                                                                                                                                                                                           |              |             |                                                                                                                                                                                                 |
|-------------------------|---------------------------------------|----|-------------------------------------------------------------------------------------------------------------------------------------------------------------------------------------------------------------------------------------------|--------------|-------------|-------------------------------------------------------------------------------------------------------------------------------------------------------------------------------------------------|
| Loa loa                 | briggsae cbr-smu-1 protein            | 3  | C:GO:0071011;<br>C:GO:0071013;<br>F:GO:0016905                                                                                                                                                                                            | -            | EC:2.7.11.7 | IPR006594; IPR006595; PTHR22848 (PANTHER)                                                                                                                                                       |
| Caenorhabditis elegans  | ubiquitin associated and sh3 domain a | 0  |                                                                                                                                                                                                                                           | P:GO:0050860 |             | IPR013078; G3DSA:3.40.50.1240 (GENE3D), PTHR16469 (PANTHER), SSF53254 (SUPERFAMILY)                                                                                                             |
| Caenorhabditis briggsae | ubiquitin associated and sh3 domain a | 2  | P:GO:0050789;<br>C:GO:0044424                                                                                                                                                                                                             | -            |             | IPR013078; G3DSA:3.40.50.1240 (GENE3D), PTHR16469 (PANTHER), SSF53254 (SUPERFAMILY)                                                                                                             |
| Caenorhabditis briggsae | briggsae cbr-prpf-4 protein           | 14 | P:GO:0040010;<br>F:GO:0004674;<br>P:GO:0008360;<br>C:GO:0071011;<br>P:GO:0040035;<br>F:GO:0005524;<br>P:GO:0007155;<br>P:GO:0002119;<br>P:GO:0040011;<br>P:GO:0000398;<br>C:GO:0071013;<br>P:GO:0002009;<br>P:GO:0009792;<br>P:GO:0006468 | -            | EC:2.7.11.0 | IPR000719; IPR011009; IPR017442; G3DSA:3.30.200.20 (GENE3D), PTHR11295 (PANTHER), PTHR11295:SF17 (PANTHER)                                                                                      |
| Caenorhabditis briggsae | briggsae cbr-prpf-4 protein           | 14 | P:GO:0040010;<br>F:GO:0004674;<br>P:GO:0008360;<br>C:GO:0071011;<br>P:GO:0040035;<br>F:GO:0005524;<br>P:GO:0007155;<br>P:GO:0002119;<br>P:GO:0040011;<br>P:GO:0000398;<br>C:GO:0071013;<br>P:GO:0002009;<br>P:GO:0009792;<br>P:GO:0006468 | -            | EC:2.7.11.0 | IPR000719; IPR008271; IPR011009; IPR017442; G3DSA:1.10.510.10 (GENE3D), G3DSA:3.30.200.20 (GENE3D), PTHR11295 (PANTHER), PTHR11295:SF17 (PANTHER)                                               |
|                         |                                       | 0  |                                                                                                                                                                                                                                           |              |             |                                                                                                                                                                                                 |
| Caenorhabditis briggsae | t-complex protein 1 subunit gamma     | 4  | P:GO:0006457;<br>C:GO:0005737;<br>F:GO:0051082;<br>F:GO:0005524                                                                                                                                                                           | -            |             | IPR002194; IPR002423; IPR012719; IPR017998; G3DSA:1.10.560.10 (GENE3D), G3DSA:3.30.260.10 (GENE3D), G3DSA:3.50.7.10 (GENE3D), SignalP (SIGNALP), SSF52029 (SUPERFAMILY), SSF54849 (SUPERFAMILY) |
| Acyrtosiphon pisum      | cullin 5                              | 11 | C:GO:0005829;<br>P:GO:0048523;<br>P:GO:0022402;<br>C:GO:0031461;<br>F:GO:0004872;<br>C:GO:0005624;<br>P:GO:0006970;<br>F:GO:0005515;<br>P:GO:0008283;<br>P:GO:0051480;<br>C:GO:0005634                                                    | -            |             | IPR001373; IPR016159; G3DSA:1.20.1310.10 (GENE3D), PTHR11932 (PANTHER), PTHR11932:SF7 (PANTHER)                                                                                                 |

|                         |                              |    |                                                                                                                                                                                                                                                                                                                                                 |   |                                                                                                                                       |
|-------------------------|------------------------------|----|-------------------------------------------------------------------------------------------------------------------------------------------------------------------------------------------------------------------------------------------------------------------------------------------------------------------------------------------------|---|---------------------------------------------------------------------------------------------------------------------------------------|
| Brugia malayi           | glucosidase 2 subunit beta   | 4  | C:GO:0005622;<br>F:GO:0005509;<br>P:GO:0048793;<br>F:GO:0005080                                                                                                                                                                                                                                                                                 | - | IPR002172; PTHR12630 (PANTHER),<br>PTHR12630:SF1 (PANTHER), SignalP<br>(SIGNALP)                                                      |
| Caenorhabditis elegans  | tachykinin receptor 1        | 16 | F:GO:0005515;<br>P:GO:0065008;<br>P:GO:0009612;<br>P:GO:0010033;<br>P:GO:0044057;<br>C:GO:0016021;<br>F:GO:0004995;<br>P:GO:0019915;<br>P:GO:0007610;<br>P:GO:0007217;<br>P:GO:0007165;<br>P:GO:0048522;<br>P:GO:0050877;<br>P:GO:0051240;<br>P:GO:0006954;<br>C:GO:0005886                                                                     | - | IPR000276; IPR017452;<br>G3DSA:1.20.1070.10 (GENE3D),<br>PTHR19264 (PANTHER),<br>PTHR19264:SF235 (PANTHER),<br>SSF81321 (SUPERFAMILY) |
| Caenorhabditis briggsae | briggsae cbr-unc-104 protein | 10 | F:GO:0003777;<br>P:GO:0007411;<br>P:GO:0048490;<br>P:GO:0007528;<br>C:GO:0005874;<br>P:GO:0008345;<br>P:GO:0047496;<br>F:GO:0005524;<br>P:GO:0016188;<br>C:GO:0005871                                                                                                                                                                           | - | IPR000253; IPR001752; IPR008984;<br>IPR019821; PTHR16012 (PANTHER),<br>PTHR16012:SF104 (PANTHER),<br>SSF52540 (SUPERFAMILY)           |
| Caenorhabditis briggsae | briggsae cbr-unc-104 protein | 20 | P:GO:0007411;<br>P:GO:0048490;<br>C:GO:0030659;<br>F:GO:0005515;<br>P:GO:0008089;<br>F:GO:0016491;<br>P:GO:0008345;<br>C:GO:0005874;<br>F:GO:0003777;<br>P:GO:0047496;<br>P:GO:0007528;<br>P:GO:0016188;<br>P:GO:0047497;<br>P:GO:0007274;<br>F:GO:0016887;<br>P:GO:0006200;<br>P:GO:0007270;<br>C:GO:0005871;<br>F:GO:0005524;<br>C:GO:0005739 | - | IPR000253; IPR001752; IPR008984;<br>IPR019821; PTHR16012 (PANTHER),<br>PTHR16012:SF104 (PANTHER),<br>SSF52540 (SUPERFAMILY)           |
| -                       | -                            | 0  | -                                                                                                                                                                                                                                                                                                                                               | - | SignalP (SIGNALP)                                                                                                                     |
| -                       | -                            | 0  | -                                                                                                                                                                                                                                                                                                                                               | - | -                                                                                                                                     |
| Caenorhabditis elegans  | briggsae cbr-ctg-1 protein   | 4  | C:GO:0005829;<br>P:GO:0045542;<br>F:GO:0008047;<br>F:GO:0016765                                                                                                                                                                                                                                                                                 | - | IPR001251; PTHR23324 (PANTHER),<br>PTHR23324:SF9 (PANTHER)                                                                            |
| Brugia malayi           | frizzled homolog 10          | 2  | P:GO:0007166;<br>F:GO:0004888                                                                                                                                                                                                                                                                                                                   | - | SignalP (SIGNALP)                                                                                                                     |

|                         |                                   |   |                                                                                                                                                      |                                                                                                                                                                                        |             |                                                                                                                                         |
|-------------------------|-----------------------------------|---|------------------------------------------------------------------------------------------------------------------------------------------------------|----------------------------------------------------------------------------------------------------------------------------------------------------------------------------------------|-------------|-----------------------------------------------------------------------------------------------------------------------------------------|
| Caenorhabditis briggsae | methylase-like protein            | 0 |                                                                                                                                                      | F:GO:0008168;<br>P:GO:0008152                                                                                                                                                          |             | IPR013216; G3DSA:3.40.50.150 (GENE3D), PTHR10108 (PANTHER), PTHR10108:SF26 (PANTHER), SSF53335 (SUPERFAMILY)                            |
| Caenorhabditis briggsae | diacylglycerol ki-se epsilon      | 2 | F:GO:0005488;<br>F:GO:0016740                                                                                                                        | -                                                                                                                                                                                      |             | IPR002219; G3DSA:3.30.60.20 (GENE3D), PTHR11255 (PANTHER), PTHR11255:SF7 (PANTHER), SignalP (SIGNALP), SSF57889 (SUPERFAMILY)           |
| Caenorhabditis elegans  | cell polarity protein             | 0 |                                                                                                                                                      |                                                                                                                                                                                        |             | -                                                                                                                                       |
| Brugia malayi           | proteophosphoglycan ppg4          | 0 |                                                                                                                                                      | F:GO:0046872;<br>F:GO:0005515;<br>C:GO:0005575                                                                                                                                         |             | -                                                                                                                                       |
| Brugia malayi           | proteophosphoglycan ppg4          | 0 |                                                                                                                                                      | F:GO:0004674;<br>F:GO:0004672;<br>P:GO:0006468;<br>F:GO:0000166;<br>F:GO:0005524;<br>C:GO:0005575;<br>P:GO:0006886;<br>F:GO:0005515;<br>F:GO:0046872                                   |             | -                                                                                                                                       |
| Brugia malayi           | proteophosphoglycan ppg4          | 0 |                                                                                                                                                      | F:GO:0005515                                                                                                                                                                           |             | -                                                                                                                                       |
| Harpegnathos saltator   | dephospho- ki-se                  | 4 | C:GO:0005737;<br>P:GO:0015937;<br>F:GO:0005524;<br>F:GO:0004140                                                                                      | -                                                                                                                                                                                      | EC:2.7.1.24 | IPR001977; G3DSA:3.40.50.300 (GENE3D), SSF52540 (SUPERFAMILY)                                                                           |
| Loa loa                 | ph domain containing protein      | 0 |                                                                                                                                                      | C:GO:0005634;<br>F:GO:0005159;<br>F:GO:0005158;<br>F:GO:0042169;<br>C:GO:0005737;<br>C:GO:0005792;<br>P:GO:0007165;<br>P:GO:0048009;<br>F:GO:0004871;<br>F:GO:0043548;<br>P:GO:0008286 |             | IPR011993; PTHR10614 (PANTHER), PTHR10614:SF6 (PANTHER)                                                                                 |
|                         | -                                 | 0 |                                                                                                                                                      |                                                                                                                                                                                        |             | -                                                                                                                                       |
| Caenorhabditis briggsae | zinc cchc domain containing 11    | 2 | P:GO:0008340;<br>F:GO:0005515                                                                                                                        | -                                                                                                                                                                                      |             | -                                                                                                                                       |
| Caenorhabditis briggsae | neutral alpha-glucosidase ab-like | 9 | P:GO:0009792;<br>P:GO:0002119;<br>F:GO:0004553;<br>P:GO:0005975;<br>F:GO:0030246;<br>F:GO:0005515;<br>C:GO:0043231;<br>C:GO:0044444;<br>P:GO:0040007 | -                                                                                                                                                                                      | EC:3.2.1.0  | IPR000322; IPR011013; PTHR22762:SF7 (PANTHER)                                                                                           |
| Tetraodon nigroviridis  | phd and ring finger domains 1     | 1 | F:GO:0005488                                                                                                                                         | -                                                                                                                                                                                      |             | IPR001841; IPR001965; IPR011011; IPR013083; IPR019786; IPR019787; PTHR10615 (PANTHER), PTHR10615:SF20 (PANTHER), SSF57850 (SUPERFAMILY) |

|                             |                                                                  |   |                                                                                                                                                      |                                                                                                                    |            |                                                                                                                       |
|-----------------------------|------------------------------------------------------------------|---|------------------------------------------------------------------------------------------------------------------------------------------------------|--------------------------------------------------------------------------------------------------------------------|------------|-----------------------------------------------------------------------------------------------------------------------|
| Homo sapiens                | -dh dehydroge-se subunit 5                                       | 9 | P:GO:0001666;<br>P:GO:0006810;<br>F:GO:0008137;<br>P:GO:0010243;<br>C:GO:0005747;<br>C:GO:0016021;<br>P:GO:0006120;<br>C:GO:0019717;<br>P:GO:0042542 | -                                                                                                                  | EC:1.6.5.3 | -                                                                                                                     |
|                             |                                                                  | 0 |                                                                                                                                                      |                                                                                                                    |            |                                                                                                                       |
| Angiostrongylus cantonensis | tnf receptor-associated protein 1                                | 8 | P:GO:0006457;<br>P:GO:0034599;<br>C:GO:0043231;<br>P:GO:0040010;<br>C:GO:0044444;<br>F:GO:0005524;<br>F:GO:0051082;<br>F:GO:0005164                  | -                                                                                                                  |            | IPR001404; IPR020568; IPR020576;<br>PTHR11528:SF24 (PANTHER)                                                          |
| Loa loa                     | briggsae cbr-pqn-27 protein                                      | 0 |                                                                                                                                                      | F:GO:0005488;<br>P:GO:0016070;<br>F:GO:0005515                                                                     |            | SignalP (SIGNALP)                                                                                                     |
|                             |                                                                  | 0 |                                                                                                                                                      |                                                                                                                    |            | IPR018545                                                                                                             |
| Caenorhabditis elegans      | coiled-coil domain-containing protein 94                         | 4 | P:GO:0000003;<br>P:GO:0040010;<br>P:GO:0006898;<br>P:GO:0002119                                                                                      | -                                                                                                                  |            | IPR007590                                                                                                             |
| Caenorhabditis elegans      | coiled-coil domain-containing protein 94                         | 4 | P:GO:0000003;<br>P:GO:0040010;<br>P:GO:0006898;<br>P:GO:0002119                                                                                      | -                                                                                                                  |            | IPR007590                                                                                                             |
|                             |                                                                  | 0 |                                                                                                                                                      |                                                                                                                    |            |                                                                                                                       |
| Caenorhabditis elegans      | elegans protein confirmed by transcript evidence                 | 2 | P:GO:0040010;<br>F:GO:0005515                                                                                                                        | -                                                                                                                  |            | IPR002781; SignalP (SIGNALP)                                                                                          |
| Caenorhabditis briggsae     | elegans protein confirmed by transcript evidence                 | 2 | P:GO:0040010;<br>F:GO:0005515                                                                                                                        | -                                                                                                                  |            | IPR002781; SignalP (SIGNALP)                                                                                          |
| Caenorhabditis briggsae     | briggsae cbr-sulp-6 protein                                      | 0 |                                                                                                                                                      | P:GO:0008272;<br>C:GO:0016021;<br>F:GO:0008271;<br>C:GO:0016020;<br>P:GO:0055085;<br>P:GO:0006810;<br>F:GO:0005215 |            | IPR002645; PTHR11814 (PANTHER),<br>PTHR11814:SF10 (PANTHER)                                                           |
| Caenorhabditis elegans      | dead (asp-glu-ala-asp) box polypeptide 49                        | 3 | F:GO:0003676;<br>F:GO:0005524;<br>F:GO:0008026                                                                                                       | -                                                                                                                  |            | IPR001650; G3DSA:3.40.50.300<br>(GENE3D), PTHR10967 (PANTHER),<br>PTHR10967:SF12 (PANTHER),<br>SSF52540 (SUPERFAMILY) |
| Caenorhabditis elegans      | set (trithorax polycomb) domain containing family member (set-3) | 0 |                                                                                                                                                      | P:GO:0002119                                                                                                       |            | -                                                                                                                     |
| Caenorhabditis elegans      | elegans protein partially confirmed by transcript evidence       | 0 |                                                                                                                                                      |                                                                                                                    |            | -                                                                                                                     |
|                             |                                                                  | 0 |                                                                                                                                                      |                                                                                                                    |            | -                                                                                                                     |
| Caenorhabditis elegans      | sh2 domain containing protein                                    | 2 | F:GO:0005515;<br>P:GO:0007298                                                                                                                        | -                                                                                                                  |            | IPR000980; PTHR23101 (PANTHER),<br>PTHR23101:SF3 (PANTHER), SSF55550<br>(SUPERFAMILY)                                 |

|                               |                                                            |   |                                                                                  |                                                                                                                                                                                                                                                                                                               |                                                         |                                                                                                                         |
|-------------------------------|------------------------------------------------------------|---|----------------------------------------------------------------------------------|---------------------------------------------------------------------------------------------------------------------------------------------------------------------------------------------------------------------------------------------------------------------------------------------------------------|---------------------------------------------------------|-------------------------------------------------------------------------------------------------------------------------|
| Strongylocentrotus purpuratus | rad50-interacting protein 1                                | 0 |                                                                                  | P:GO:0007049;<br>P:GO:0016192;<br>C:GO:0005783;<br>C:GO:0016020;<br>P:GO:0006810;<br>P:GO:0015031                                                                                                                                                                                                             | -                                                       |                                                                                                                         |
| Strongylocentrotus purpuratus | rad50-interacting protein 1                                | 0 |                                                                                  | P:GO:0007049;<br>P:GO:0016192;<br>C:GO:0005783;<br>C:GO:0016020;<br>P:GO:0006810;<br>P:GO:0015031                                                                                                                                                                                                             | -                                                       |                                                                                                                         |
| Brugia malayi                 | kinetochore-associated protein 1                           | 0 |                                                                                  | P:GO:0051301;<br>P:GO:0007067;<br>P:GO:0007096;<br>C:GO:0005634;<br>P:GO:0007093;<br>C:GO:0005694;<br>F:GO:0003674;<br>C:GO:0000777;<br>P:GO:0006461;<br>C:GO:0000776;<br>P:GO:0007049;<br>P:GO:0008150;<br>C:GO:0005737;<br>C:GO:0000922;<br>C:GO:0005828;<br>C:GO:0005856;<br>F:GO:0005515;<br>C:GO:0005575 |                                                         | IPR019527                                                                                                               |
| Caenorhabditis briggsae       | elegans protein partially confirmed by transcript evidence | 0 |                                                                                  |                                                                                                                                                                                                                                                                                                               |                                                         | IPR017964                                                                                                               |
| Caenorhabditis briggsae       | ser thr protein phosphatase family protein                 | 0 |                                                                                  | F:GO:0046872;<br>C:GO:0016021;<br>F:GO:0016787;<br>C:GO:0016020;<br>P:GO:0008150                                                                                                                                                                                                                              |                                                         | IPR004843; G3DSA:3.60.21.10 (GENE3D), SignalP (SIGNALP), SSF56300 (SUPERFAMILY)                                         |
| Trypanosoma brucei            | pyruvate ki-se                                             | 2 | F:GO:0046872;<br>F:GO:0016301                                                    | -                                                                                                                                                                                                                                                                                                             |                                                         | IPR001697; IPR011037; IPR015793; IPR015806                                                                              |
|                               | -                                                          | 0 |                                                                                  |                                                                                                                                                                                                                                                                                                               |                                                         | -                                                                                                                       |
| Caenorhabditis briggsae       | small subunit processome homolog                           | 0 |                                                                                  | F:GO:0003674;<br>P:GO:0008150                                                                                                                                                                                                                                                                                 |                                                         | IPR006984                                                                                                               |
| Brugia malayi                 | mitochondrial elongation factor g2                         | 5 | F:GO:0003746;<br>P:GO:0032790;<br>F:GO:0005525;<br>P:GO:0070125;<br>F:GO:0003924 | -                                                                                                                                                                                                                                                                                                             | EC:3.6.5.1;<br>EC:3.6.5.2;<br>EC:3.6.5.3;<br>EC:3.6.5.4 | IPR000795; IPR005225; G3DSA:3.40.50.300 (GENE3D), PTHR23115 (PANTHER), PTHR23115:SF13 (PANTHER), SSF52540 (SUPERFAMILY) |
| Caenorhabditis elegans        | c-myc promoter-binding protein irlb                        | 1 | F:GO:0005515                                                                     | -                                                                                                                                                                                                                                                                                                             |                                                         | IPR001194; IPR005113; PTHR12296 (PANTHER), PTHR12296:SF3 (PANTHER)                                                      |
| Caenorhabditis briggsae       | cyclin fold protein 1 variant b                            | 0 |                                                                                  |                                                                                                                                                                                                                                                                                                               |                                                         | -                                                                                                                       |
| Haemonchus contortus          | intesti-l prolyl carboxypeptidase 2                        | 2 | F:GO:0005515;<br>F:GO:0070011                                                    | -                                                                                                                                                                                                                                                                                                             |                                                         | IPR008758; G3DSA:3.40.50.1820 (GENE3D), PTHR11010:SF4 (PANTHER), SSF53474 (SUPERFAMILY)                                 |
| Haemonchus contortus          | intesti-l prolyl carboxypeptidase 2                        | 2 | F:GO:0005515;<br>F:GO:0070011                                                    | -                                                                                                                                                                                                                                                                                                             |                                                         | IPR008758; G3DSA:3.40.50.1820 (GENE3D), PTHR11010:SF4 (PANTHER), SignalP (SIGNALP), SSF53474 (SUPERFAMILY)              |

|                         |                                                            |    |                                                                                                                                                                       |                               |              |                                                                                                            |
|-------------------------|------------------------------------------------------------|----|-----------------------------------------------------------------------------------------------------------------------------------------------------------------------|-------------------------------|--------------|------------------------------------------------------------------------------------------------------------|
| Caenorhabditis elegans  | carnitine o-octanoyltransferase                            | 8  | C:GO:0005625;<br>P:GO:0042493;<br>P:GO:0010243;<br>F:GO:0008458;<br>P:GO:0044237;<br>P:GO:0006810;<br>C:GO:0005782;<br>C:GO:0005739                                   | -                             | EC:2.3.1.137 | IPR000542; PTHR22589:SF9<br>(PANTHER), SSF52777 (SUPERFAMILY)                                              |
| Caenorhabditis elegans  | carnitine o-octanoyltransferase                            | 8  | C:GO:0005625;<br>P:GO:0042493;<br>P:GO:0010243;<br>F:GO:0008458;<br>P:GO:0044237;<br>P:GO:0006810;<br>C:GO:0005782;<br>C:GO:0005739                                   | -                             | EC:2.3.1.137 | IPR000542; PTHR22589:SF9<br>(PANTHER), SSF52777 (SUPERFAMILY)                                              |
| Caenorhabditis elegans  | breast carcinoma amplified sequence 3                      | 1  | F:GO:0005515                                                                                                                                                          | -                             |              | IPR001680; IPR015943; PTHR13268<br>(PANTHER), SSF101908 (SUPERFAMILY)                                      |
|                         |                                                            | 0  |                                                                                                                                                                       |                               |              |                                                                                                            |
| Caenorhabditis elegans  | u2 small nuclear                                           | 8  | P:GO:0040035;<br>P:GO:0009792;<br>P:GO:0002119;<br>F:GO:0005488;<br>P:GO:0040010;<br>P:GO:0008340;<br>P:GO:0040011;<br>P:GO:0006898                                   | -                             |              | PTHR12097 (PANTHER)                                                                                        |
| Caenorhabditis elegans  | bardet-biedl syndrome 7                                    | 10 | P:GO:0032402;<br>C:GO:0043005;<br>P:GO:0035058;<br>P:GO:0051877;<br>C:GO:0034464;<br>P:GO:0001947;<br>F:GO:0005515;<br>P:GO:0007368;<br>P:GO:0048546;<br>P:GO:0045444 | -                             |              | -                                                                                                          |
| Caenorhabditis elegans  | elegans protein confirmed by transcript evidence           | 0  |                                                                                                                                                                       |                               |              | -                                                                                                          |
| Caenorhabditis elegans  | elegans protein partially confirmed by transcript evidence | 0  |                                                                                                                                                                       | F:GO:0016884;<br>C:GO:0016021 |              | IPR000120; PTHR11895:SF5<br>(PANTHER)                                                                      |
|                         |                                                            | 0  |                                                                                                                                                                       |                               |              | -                                                                                                          |
|                         |                                                            | 0  |                                                                                                                                                                       |                               |              | -                                                                                                          |
|                         |                                                            | 0  |                                                                                                                                                                       |                               |              | -                                                                                                          |
| Caenorhabditis briggsae | cell death abnormality family member (ced-7)               | 6  | P:GO:0043652;<br>F:GO:0042626;<br>C:GO:0005886;<br>F:GO:0005524;<br>P:GO:0012501;<br>C:GO:0016021                                                                     | -                             |              | G3DSA:3.40.50.300 (GENE3D),<br>PTHR19229 (PANTHER),<br>PTHR19229:SF18 (PANTHER),<br>SSF52540 (SUPERFAMILY) |
| Caenorhabditis briggsae | cwf19-like protein 1                                       | 1  | F:GO:0016787                                                                                                                                                          | -                             |              | IPR006768; IPR011146; IPR011151;<br>PTHR12072 (PANTHER)                                                    |
| Caenorhabditis elegans  | mitochondrial atpase                                       | 0  |                                                                                                                                                                       | F:GO:0005524                  |              | IPR005654; G3DSA:3.40.50.300<br>(GENE3D)                                                                   |

|                         |                                                         |    |                                                                                                                                                                                                                                                                             |                                                |                                                                                             |
|-------------------------|---------------------------------------------------------|----|-----------------------------------------------------------------------------------------------------------------------------------------------------------------------------------------------------------------------------------------------------------------------------|------------------------------------------------|---------------------------------------------------------------------------------------------|
| Caenorhabditis elegans  | r--binding protein 24-b                                 | 5  | C:GO:0005737;<br>F:GO:0003676;<br>F:GO:0005515;<br>F:GO:0000166;<br>P:GO:0006396                                                                                                                                                                                            | -                                              | IPR000504; IPR012677; IPR015463;<br>PTHR10432 (PANTHER), SSF54928<br>(SUPERFAMILY)          |
| Caenorhabditis briggsae | wd repeat domain 18                                     | 2  | P:GO:0007275;<br>P:GO:0042254                                                                                                                                                                                                                                               | -                                              | IPR001680; IPR011046; IPR015943;<br>IPR017986; IPR019781; IPR019782;<br>PTHR18763 (PANTHER) |
| Caenorhabditis briggsae | wd repeat domain 18                                     | 2  | P:GO:0007275;<br>P:GO:0042254                                                                                                                                                                                                                                               | -                                              | IPR001680; IPR011046; IPR015943;<br>IPR017986; IPR019781; IPR019782;<br>PTHR18763 (PANTHER) |
| Drosophila persimilis   | GL25064 [Drosophila persimilis]                         | 0  |                                                                                                                                                                                                                                                                             | F:GO:0008061;<br>P:GO:0006030;<br>C:GO:0005576 | -                                                                                           |
| Caenorhabditis briggsae | Hypothetical protein CBG14163 [Caenorhabditis briggsae] | 1  | P:GO:0040010                                                                                                                                                                                                                                                                | -                                              | IPR000742                                                                                   |
| Caenorhabditis elegans  | hypothetical protein Y4C6B.7 [Caenorhabditis elegans]   | 0  |                                                                                                                                                                                                                                                                             |                                                | SignalP (SIGNALP)                                                                           |
| Caenorhabditis elegans  | hypothetical protein R12C12.10 [Caenorhabditis elegans] | 0  |                                                                                                                                                                                                                                                                             |                                                | -                                                                                           |
|                         | -                                                       | 0  |                                                                                                                                                                                                                                                                             |                                                | -                                                                                           |
|                         | -                                                       | 0  |                                                                                                                                                                                                                                                                             |                                                | -                                                                                           |
| Caenorhabditis elegans  | briggsae cbr-rlbp-1 protein                             | 1  | P:GO:0009987                                                                                                                                                                                                                                                                | -                                              | IPR000198; IPR008936; PTHR12783<br>(PANTHER), PTHR12783:SF1<br>(PANTHER)                    |
| Loa loa                 | briggsae cbr-apa-2 protein                              | 16 | C:GO:0005829;<br>F:GO:0008565;<br>P:GO:0040010;<br>F:GO:0008022;<br>P:GO:0000003;<br>F:GO:0008289;<br>C:GO:0030131;<br>C:GO:0005905;<br>C:GO:0030666;<br>P:GO:0050690;<br>P:GO:0040011;<br>P:GO:0006898;<br>P:GO:0006886;<br>C:GO:0030141;<br>P:GO:0009792;<br>C:GO:0005886 | -                                              | IPR002553; IPR011989; IPR016024;<br>PTHR22780 (PANTHER),<br>PTHR22780:SF4 (PANTHER)         |
| Loa loa                 | alpha gamma epsilon                                     | 15 | C:GO:0005829;<br>F:GO:0008565;<br>P:GO:0040010;<br>F:GO:0008022;<br>P:GO:0000003;<br>F:GO:0008289;<br>C:GO:0030131;<br>C:GO:0005905;<br>C:GO:0030666;<br>P:GO:0050690;<br>P:GO:0040011;<br>P:GO:0006898;<br>P:GO:0006886;<br>P:GO:0009792;<br>C:GO:0005886                  | -                                              | IPR002553; IPR011989; IPR016024;<br>PTHR22780 (PANTHER),<br>PTHR22780:SF4 (PANTHER)         |
| Caenorhabditis briggsae | hect domain and rld 3                                   | 1  | P:GO:0000003                                                                                                                                                                                                                                                                | -                                              | IPR000408; IPR009091; PTHR11254<br>(PANTHER), PTHR11254:SF8<br>(PANTHER)                    |
|                         | -                                                       | 0  |                                                                                                                                                                                                                                                                             |                                                | SignalP (SIGNALP)                                                                           |

|                         |                                                      |   |                                                                                                                                                      |                                                                                                                    |            |                                                                                     |
|-------------------------|------------------------------------------------------|---|------------------------------------------------------------------------------------------------------------------------------------------------------|--------------------------------------------------------------------------------------------------------------------|------------|-------------------------------------------------------------------------------------|
| Caenorhabditis briggsae | glycine dehydroge-se                                 | 4 | F:GO:0004375;<br>F:GO:0030170;<br>P:GO:0055114;<br>P:GO:0006544                                                                                      | -                                                                                                                  | EC:1.4.4.2 | IPR015424; IPR020580; IPR020581                                                     |
| Caenorhabditis elegans  | set domain containing 4                              | 0 |                                                                                                                                                      | F:GO:0003674;<br>P:GO:0008150                                                                                      |            | IPR001214; G3DSA:3.90.1410.10 (GENE3D), PTHR13271 (PANTHER), SSF82199 (SUPERFAMILY) |
| Caenorhabditis elegans  | death associated protein 3                           | 9 | C:GO:0015935;<br>P:GO:0040007;<br>C:GO:0005761;<br>C:GO:0045202;<br>F:GO:0001540;<br>P:GO:0008637;<br>P:GO:0002119;<br>P:GO:0009792;<br>C:GO:0016020 | -                                                                                                                  |            | IPR008092; IPR019368; PTHR12810 (PANTHER)                                           |
| Caenorhabditis briggsae | hypothetical kda protein in rnr3-arc15 intergenic    | 0 |                                                                                                                                                      | F:GO:0008168;<br>F:GO:0003674;<br>F:GO:0016740;<br>P:GO:0008152;<br>P:GO:0008150;<br>P:GO:0032259;<br>C:GO:0005575 |            | PTHR12843 (PANTHER)                                                                 |
| Caenorhabditis briggsae | hypothetical kda protein in rnr3-arc15 intergenic    | 0 |                                                                                                                                                      | F:GO:0008168;<br>F:GO:0003674;<br>F:GO:0016740;<br>P:GO:0008152;<br>P:GO:0008150;<br>P:GO:0032259;<br>C:GO:0005575 |            | -                                                                                   |
| Caenorhabditis elegans  | scavenger receptor class member 1                    | 8 | P:GO:0007155;<br>C:GO:0044425;<br>P:GO:0030301;<br>P:GO:0050789;<br>P:GO:0016043;<br>C:GO:0005886;<br>F:GO:0005488;<br>P:GO:0040035                  | -                                                                                                                  |            | IPR002159; PTHR11923:SF1 (PANTHER), SignalP (SIGNALP)                               |
| Loa loa                 | eukaryotic translation initiation factor 3 subunit 8 | 5 | C:GO:0005829;<br>P:GO:0000003;<br>P:GO:0006412;<br>C:GO:0005852;<br>F:GO:0003743                                                                     | -                                                                                                                  | EC:3.6.5.3 | IPR008905; PTHR13937 (PANTHER)                                                      |
| -                       | -                                                    | 0 |                                                                                                                                                      |                                                                                                                    |            | -                                                                                   |
| -                       | -                                                    | 0 |                                                                                                                                                      |                                                                                                                    |            | -                                                                                   |
| Caenorhabditis elegans  | mgc68765 protein                                     | 3 | C:GO:0005875;<br>F:GO:0003779;<br>P:GO:0007498                                                                                                       | -                                                                                                                  |            | IPR001715; PTHR11915 (PANTHER)                                                      |
| Caenorhabditis elegans  | isoform d                                            | 1 | C:GO:0005875                                                                                                                                         | -                                                                                                                  |            | IPR001715; PTHR11915 (PANTHER)                                                      |
| -                       | -                                                    | 0 |                                                                                                                                                      |                                                                                                                    |            | -                                                                                   |
| Caenorhabditis elegans  | roundabout 1                                         | 0 |                                                                                                                                                      |                                                                                                                    |            | -                                                                                   |
| Caenorhabditis elegans  | roundabout 1                                         | 0 |                                                                                                                                                      |                                                                                                                    |            | -                                                                                   |
| Caenorhabditis elegans  | roundabout 1                                         | 0 |                                                                                                                                                      |                                                                                                                    |            | -                                                                                   |



|                             |                                                         |    |                                                                                                                                                                                                                                                                                                                                                                  |   |             |                                                                                                   |
|-----------------------------|---------------------------------------------------------|----|------------------------------------------------------------------------------------------------------------------------------------------------------------------------------------------------------------------------------------------------------------------------------------------------------------------------------------------------------------------|---|-------------|---------------------------------------------------------------------------------------------------|
| Brugia malayi               | cap-gly domain containing protein                       | 2  | C:GO:0005737;<br>C:GO:0043229                                                                                                                                                                                                                                                                                                                                    | - |             | IPR000938; IPR023092; PTHR18916 (PANTHER), PTHR18916:SF2 (PANTHER)                                |
| Ailuropoda melanoleuca      | ubiquitin-activating enzyme e1                          | 6  | P:GO:0008219;<br>F:GO:0005524;<br>F:GO:0008641;<br>F:GO:0005515;<br>P:GO:0006464;<br>F:GO:0016874                                                                                                                                                                                                                                                                | - |             | IPR000594; IPR009036; IPR016040; PTHR10953 (PANTHER), PTHR10953:SF4 (PANTHER)                     |
| Caenorhabditis briggsae     | thymidylate synthase                                    | 11 | P:GO:0009792;<br>P:GO:0010171;<br>C:GO:0005625;<br>F:GO:0005542;<br>P:GO:0046078;<br>P:GO:0006231;<br>P:GO:0000003;<br>P:GO:0032259;<br>F:GO:0048037;<br>F:GO:0004799;<br>F:GO:0000166                                                                                                                                                                           | - | EC:2.1.1.45 | IPR000398; IPR020940; PTHR11549 (PANTHER)                                                         |
| Angiostrongylus cantonensis | elegans protein confirmed by transcript evidence        | 4  | P:GO:0019915;<br>P:GO:0006952;<br>P:GO:0010171;<br>F:GO:0005515                                                                                                                                                                                                                                                                                                  | - |             | IPR008160; PTHR10499 (PANTHER), PTHR10499:SF58 (PANTHER)                                          |
| Haemonchus contortus        | acetylcholine regulator unc-                            | 21 | P:GO:0032229;<br>P:GO:0007412;<br>F:GO:0030347;<br>P:GO:0006944;<br>P:GO:0070527;<br>P:GO:0006904;<br>F:GO:0047485;<br>P:GO:0050821;<br>P:GO:0060292;<br>P:GO:0043524;<br>C:GO:0031091;<br>F:GO:0019904;<br>P:GO:0016188;<br>F:GO:0042802;<br>C:GO:0043234;<br>P:GO:0010807;<br>P:GO:0002576;<br>F:GO:0017075;<br>P:GO:0007274;<br>C:GO:0005886;<br>C:GO:0005739 | - |             | -                                                                                                 |
|                             |                                                         | 0  |                                                                                                                                                                                                                                                                                                                                                                  |   |             | -                                                                                                 |
|                             |                                                         | 0  |                                                                                                                                                                                                                                                                                                                                                                  |   |             | -                                                                                                 |
| Caenorhabditis elegans      | hypothetical protein Y71G12B.8 [Caenorhabditis elegans] | 0  |                                                                                                                                                                                                                                                                                                                                                                  |   |             | F:GO:0004386;<br>F:GO:0005524;<br>P:GO:0040010;<br>P:GO:0002119;<br>P:GO:0040007;<br>F:GO:0008026 |

|                         |                                                            |   |                                                                                                                                     |                                                                                                                    |            |                                                                                                        |
|-------------------------|------------------------------------------------------------|---|-------------------------------------------------------------------------------------------------------------------------------------|--------------------------------------------------------------------------------------------------------------------|------------|--------------------------------------------------------------------------------------------------------|
| Loa loa                 | protein red                                                | 6 | P:GO:0006355;<br>P:GO:0051239;<br>C:GO:0005622;<br>P:GO:0048522;<br>P:GO:0002521;<br>F:GO:0005488                                   | -                                                                                                                  |            | IPR012492; IPR012916; PTHR12765 (PANTHER)                                                              |
| Loa loa                 | protein red                                                | 6 | P:GO:0006355;<br>P:GO:0051239;<br>C:GO:0005622;<br>P:GO:0048522;<br>P:GO:0002521;<br>F:GO:0005488                                   | -                                                                                                                  |            | IPR012492; IPR012916; PTHR12765 (PANTHER)                                                              |
| Loa loa                 | protein red                                                | 6 | P:GO:0006355;<br>P:GO:0051239;<br>C:GO:0005622;<br>P:GO:0048522;<br>P:GO:0002521;<br>F:GO:0005488                                   | -                                                                                                                  |            | IPR012492; IPR012916; PTHR12765 (PANTHER)                                                              |
| Caenorhabditis elegans  | hypothetical protein Y71G12B.8 [Caenorhabditis elegans]    | 2 | P:GO:0002119;<br>P:GO:0040010                                                                                                       | -                                                                                                                  |            | -                                                                                                      |
| Loa loa                 | protein red                                                | 6 | P:GO:0006355;<br>P:GO:0051239;<br>C:GO:0005622;<br>P:GO:0048522;<br>P:GO:0002521;<br>F:GO:0005488                                   | -                                                                                                                  |            | IPR012492; IPR012916; PTHR12765 (PANTHER)                                                              |
| -                       | -                                                          | 0 |                                                                                                                                     |                                                                                                                    |            | -                                                                                                      |
| Caenorhabditis briggsae | elegans protein confirmed by transcript evidence           | 0 |                                                                                                                                     |                                                                                                                    |            | -                                                                                                      |
| Caenorhabditis elegans  | rio ki-se 3                                                | 2 | F:GO:0005488;<br>F:GO:0004672                                                                                                       | -                                                                                                                  |            | -                                                                                                      |
| Caenorhabditis elegans  | hypothetical protein K02F3.9 [Caenorhabditis elegans]      | 0 |                                                                                                                                     |                                                                                                                    |            | -                                                                                                      |
| Caenorhabditis briggsae | yv31_caee1_ame: full=upf0057 membrane protein              | 1 | C:GO:0016021                                                                                                                        | -                                                                                                                  |            | IPR000612; SignalP (SIGNALP)                                                                           |
| Homo sapiens            | tryptophanyl-tr- isoform cra_a                             | 8 | C:GO:0005625;<br>F:GO:0004830;<br>P:GO:0008285;<br>P:GO:0006436;<br>F:GO:0005524;<br>F:GO:0005515;<br>P:GO:0045765;<br>C:GO:0005737 | -                                                                                                                  | EC:6.1.1.2 | IPR002306; IPR014729; SSF52374 (SUPERFAMILY)                                                           |
| Caenorhabditis briggsae | elegans protein partially confirmed by transcript evidence | 0 |                                                                                                                                     |                                                                                                                    |            | IPR004988                                                                                              |
| -                       | -                                                          | 0 |                                                                                                                                     |                                                                                                                    |            | -                                                                                                      |
| Caenorhabditis elegans  | briggsae cbr-sos-1 protein                                 | 0 |                                                                                                                                     | P:GO:0051056;<br>P:GO:0007264;<br>F:GO:0005089;<br>P:GO:0035023;<br>F:GO:0003677;<br>F:GO:0005085;<br>C:GO:0005622 |            | IPR011993                                                                                              |
| Caenorhabditis elegans  | zinc c2h2 type family protein                              | 5 | F:GO:0030528;<br>F:GO:0003676;<br>P:GO:0009790;<br>P:GO:0045449;<br>P:GO:0002521                                                    | -                                                                                                                  |            | IPR007087; IPR013087; IPR015880; PTHR23223 (PANTHER), PTHR23223:SF15 (PANTHER), SSF57667 (SUPERFAMILY) |
| Brugia malayi           | zinc c2h2 type family protein                              | 0 |                                                                                                                                     | F:GO:0003676;<br>F:GO:0008270;<br>C:GO:0005622                                                                     |            | -                                                                                                      |
| -                       | -                                                          | 0 |                                                                                                                                     |                                                                                                                    |            | -                                                                                                      |

|                         |                                                           |   |                                                                                                                                                      |                                                                 |                                                                                                                              |
|-------------------------|-----------------------------------------------------------|---|------------------------------------------------------------------------------------------------------------------------------------------------------|-----------------------------------------------------------------|------------------------------------------------------------------------------------------------------------------------------|
| Caenorhabditis elegans  | zinc c2h2 type family protein                             | 5 | F:GO:0030528;<br>F:GO:0003676;<br>P:GO:0009790;<br>P:GO:0045449;<br>P:GO:0002521                                                                     | -                                                               | IPR007087; IPR013087; IPR015880;<br>PTHR23223 (PANTHER),<br>PTHR23223:SF15 (PANTHER),<br>SSF57667 (SUPERFAMILY)              |
| -                       | -                                                         | 0 | -                                                                                                                                                    | -                                                               | -                                                                                                                            |
| Brugia malayi           | cyclin-g-associated ki-se                                 | 3 | C:GO:0005737;<br>F:GO:0016301;<br>F:GO:0030332                                                                                                       | -                                                               | IPR000719; IPR011009; IPR017442;<br>G3DSA:3.30.200.20 (GENE3D),<br>PTHR22967 (PANTHER)                                       |
| -                       | -                                                         | 0 | -                                                                                                                                                    | -                                                               | -                                                                                                                            |
| -                       | -                                                         | 0 | -                                                                                                                                                    | -                                                               | SignalP (SIGNALP)                                                                                                            |
| Caenorhabditis elegans  | actin family protein                                      | 6 | P:GO:0002119;<br>F:GO:0005515;<br>P:GO:0000003;<br>P:GO:0040007;<br>P:GO:0006898;<br>C:GO:0044424                                                    | -                                                               | IPR004000; G3DSA:3.30.420.40<br>(GENE3D), G3DSA:3.90.640.10<br>(GENE3D), PTHR11937:SF19<br>(PANTHER), SSF53067 (SUPERFAMILY) |
| Caenorhabditis elegans  | cleavage and polyadenylation specificity factor subunit 1 | 4 | P:GO:0006378;<br>C:GO:0005847;<br>F:GO:0003723;<br>P:GO:0006379                                                                                      | -                                                               | PTHR10644 (PANTHER),<br>PTHR10644:SF2 (PANTHER)                                                                              |
| Caenorhabditis briggsae | rrs1 protein                                              | 7 | P:GO:0009792;<br>P:GO:0002119;<br>P:GO:0042254;<br>P:GO:0040010;<br>P:GO:0000003;<br>P:GO:0040019;<br>C:GO:0005634                                   | -                                                               | IPR007023                                                                                                                    |
| Loa loa                 | ancient conserved domain protein 4                        | 0 | -                                                                                                                                                    | -                                                               | -                                                                                                                            |
| Brugia malayi           | retinoblastoma 1                                          | 9 | F:GO:0005515;<br>P:GO:0065009;<br>P:GO:0051329;<br>P:GO:0006355;<br>P:GO:0045786;<br>P:GO:0023052;<br>P:GO:0048856;<br>P:GO:0030154;<br>C:GO:0044451 | -                                                               | IPR002719; IPR002720; IPR011028;<br>IPR013763; PTHR13742 (PANTHER),<br>PTHR13742:SF7 (PANTHER)                               |
| -                       | -                                                         | 0 | -                                                                                                                                                    | -                                                               | IPR013032; SignalP (SIGNALP)                                                                                                 |
| Loa loa                 | creb-binding protein                                      | 5 | P:GO:0044260;<br>P:GO:0007275;<br>P:GO:0044238;<br>P:GO:0050789;<br>F:GO:0005488                                                                     | -                                                               | IPR000197; PTHR13808 (PANTHER)                                                                                               |
| -                       | -                                                         | 0 | -                                                                                                                                                    | -                                                               | -                                                                                                                            |
| -                       | -                                                         | 0 | -                                                                                                                                                    | -                                                               | IPR005018                                                                                                                    |
| Caenorhabditis briggsae | briggsae cbr-lpr-2 protein                                | 0 | -                                                                                                                                                    | F:GO:0005488;<br>C:GO:0016021                                   | -                                                                                                                            |
| Naegleria gruberi       | te-scin-x precursor                                       | 0 | -                                                                                                                                                    | F:GO:0030414;<br>F:GO:0005509;<br>F:GO:0004867;<br>C:GO:0005576 | -                                                                                                                            |
| Naegleria gruberi       | te-scin-x precursor                                       | 0 | -                                                                                                                                                    | F:GO:0030414;<br>F:GO:0005509;<br>F:GO:0004867;<br>C:GO:0005576 | -                                                                                                                            |

|                                   |                                                         |   |                                                                                                                                                      |                                                                                                                                                                                        |                           |                                                                                                                                                                                                                                                                                          |
|-----------------------------------|---------------------------------------------------------|---|------------------------------------------------------------------------------------------------------------------------------------------------------|----------------------------------------------------------------------------------------------------------------------------------------------------------------------------------------|---------------------------|------------------------------------------------------------------------------------------------------------------------------------------------------------------------------------------------------------------------------------------------------------------------------------------|
| Naegleria gruberi                 | te-scin-x precursor                                     | 0 |                                                                                                                                                      | F:GO:0030414;<br>F:GO:0005509;<br>F:GO:0004867;<br>C:GO:0005576                                                                                                                        |                           | IPR014044; SignalP (SIGNALP)                                                                                                                                                                                                                                                             |
| Naegleria gruberi                 | te-scin-x precursor                                     | 0 |                                                                                                                                                      | F:GO:0030414;<br>F:GO:0005509;<br>F:GO:0004867;<br>C:GO:0005576                                                                                                                        |                           | -                                                                                                                                                                                                                                                                                        |
| Nectria haematococca mpVI 77-13-4 | conidiospore surface protein                            | 0 |                                                                                                                                                      | F:GO:0030414;<br>F:GO:0005509;<br>F:GO:0004867;<br>C:GO:0005576                                                                                                                        |                           | SignalP (SIGNALP)                                                                                                                                                                                                                                                                        |
| Ancylostoma caninum               | scp-like extracellular protein                          | 0 |                                                                                                                                                      | C:GO:0005576                                                                                                                                                                           |                           | SignalP (SIGNALP)                                                                                                                                                                                                                                                                        |
| Ancylostoma caninum               | venom allergen antigen-like protein 1                   | 0 |                                                                                                                                                      | C:GO:0005576                                                                                                                                                                           |                           | -                                                                                                                                                                                                                                                                                        |
| Naegleria gruberi                 | te-scin-x precursor                                     | 0 |                                                                                                                                                      | F:GO:0030414;<br>F:GO:0005509;<br>F:GO:0004867;<br>C:GO:0005576                                                                                                                        |                           | -                                                                                                                                                                                                                                                                                        |
| Caenorhabditis elegans            | set domain containing 3                                 | 0 |                                                                                                                                                      | F:GO:0003674;<br>P:GO:0008150                                                                                                                                                          |                           | -                                                                                                                                                                                                                                                                                        |
| Caenorhabditis elegans            | guanine nucleotide-                                     | 2 | P:GO:0015031;<br>F:GO:0005488                                                                                                                        | -                                                                                                                                                                                      |                           | -                                                                                                                                                                                                                                                                                        |
| Caenorhabditis sp. PS1010         | fat tumor suppressor homolog 1                          | 2 | P:GO:0009987;<br>C:GO:0016020                                                                                                                        | -                                                                                                                                                                                      |                           | -                                                                                                                                                                                                                                                                                        |
| Brugia malayi                     | tm2 domain-containing protein cg10795 precursor         | 0 |                                                                                                                                                      |                                                                                                                                                                                        |                           | IPR007829; PTHR21016 (PANTHER),<br>SignalP (SIGNALP)                                                                                                                                                                                                                                     |
| Caenorhabditis elegans            | prematurely termi-ted mr- decay factor-like             | 0 |                                                                                                                                                      | F:GO:0004386;<br>C:GO:0016021;<br>C:GO:0016020;<br>F:GO:0003677;<br>F:GO:0016787;<br>F:GO:0000166;<br>C:GO:0005737;<br>F:GO:0005524;<br>F:GO:0017111;<br>F:GO:0008270;<br>P:GO:0000184 |                           | PTHR10887 (PANTHER), SSF52540<br>(SUPERFAMILY)                                                                                                                                                                                                                                           |
| Caenorhabditis elegans            | hypothetical protein Y73B6BL.1 [Caenorhabditis elegans] | 0 |                                                                                                                                                      | F:GO:0046872;<br>F:GO:0016491;<br>P:GO:0008152                                                                                                                                         |                           | -                                                                                                                                                                                                                                                                                        |
|                                   | -                                                       | 0 |                                                                                                                                                      |                                                                                                                                                                                        |                           | -                                                                                                                                                                                                                                                                                        |
| Caenorhabditis briggsae           | elegans protein confirmed by transcript evidence        | 0 |                                                                                                                                                      |                                                                                                                                                                                        |                           | -                                                                                                                                                                                                                                                                                        |
|                                   | -                                                       | 0 |                                                                                                                                                      |                                                                                                                                                                                        |                           | -                                                                                                                                                                                                                                                                                        |
| Caenorhabditis elegans            | n-acetyltransferase 6                                   | 2 | F:GO:0008415;<br>P:GO:0008152                                                                                                                        | -                                                                                                                                                                                      |                           | IPR000182; IPR016181; PTHR13538<br>(PANTHER)                                                                                                                                                                                                                                             |
|                                   | -                                                       | 0 |                                                                                                                                                      |                                                                                                                                                                                        |                           | SignalP (SIGNALP)                                                                                                                                                                                                                                                                        |
| Caenorhabditis elegans            | vab-10a protein                                         | 0 |                                                                                                                                                      | F:GO:0005509;<br>P:GO:0007050;<br>F:GO:0003779                                                                                                                                         |                           | IPR001101; G3DSA:3.90.1290.10<br>(GENE3D), SSF75399 (SUPERFAMILY)                                                                                                                                                                                                                        |
| Caenorhabditis elegans            | propionyl-coenzyme a alpha polypeptide                  | 9 | F:GO:0004658;<br>P:GO:0009062;<br>F:GO:0019899;<br>F:GO:0009374;<br>P:GO:0009252;<br>F:GO:0005524;<br>C:GO:0005759;<br>P:GO:0009063;<br>F:GO:0008716 | -                                                                                                                                                                                      | EC:6.4.1.3;<br>EC:6.3.2.4 | IPR000089; IPR001882; IPR005479;<br>IPR005481; IPR005482; IPR011053;<br>IPR011054; IPR011761; IPR011764;<br>IPR013815; IPR013816; IPR013817;<br>IPR016185; G3DSA:2.40.50.100<br>(GENE3D), PTHR18866 (PANTHER),<br>PTHR18866-SF13 (PANTHER), SignalP<br>(SIGNALP), SSF56059 (SUPERFAMILY) |

|                         |                                                            |    |                                                                                                                                                                       |   |                               |                                                                                                                                                                     |
|-------------------------|------------------------------------------------------------|----|-----------------------------------------------------------------------------------------------------------------------------------------------------------------------|---|-------------------------------|---------------------------------------------------------------------------------------------------------------------------------------------------------------------|
|                         |                                                            |    |                                                                                                                                                                       |   |                               | -                                                                                                                                                                   |
| Caenorhabditis elegans  | briggsae cbr-tgt-1 protein                                 | 3  | F:GO:0008479;<br>F:GO:0046872;<br>P:GO:0008616                                                                                                                        | - | EC:2.4.2.29                   | IPR002616                                                                                                                                                           |
|                         | -                                                          | 0  |                                                                                                                                                                       |   |                               | -                                                                                                                                                                   |
|                         | -                                                          | 0  |                                                                                                                                                                       |   |                               | -                                                                                                                                                                   |
| Caenorhabditis elegans  | zinc finger protein                                        | 2  | F:GO:0003676;<br>F:GO:0008270                                                                                                                                         | - |                               | IPR000571; G3DSA:4.10.1000.10 (GENE3D), PTHR12547 (PANTHER), PTHR12547:SF17 (PANTHER), SSF90229 (SUPERFAMILY)                                                       |
|                         | -                                                          | 0  |                                                                                                                                                                       |   |                               | -                                                                                                                                                                   |
|                         | -                                                          | 0  |                                                                                                                                                                       |   |                               | -                                                                                                                                                                   |
| Caenorhabditis elegans  | lin-5 interacting protein family member (lfi-1)            | 5  | P:GO:0009987;<br>C:GO:0043234;<br>F:GO:0005515;<br>C:GO:0005694;<br>C:GO:0044430                                                                                      | - |                               | IPR009053; PD936484 (PRODOM), PTHR18937 (PANTHER)                                                                                                                   |
|                         | -                                                          | 0  |                                                                                                                                                                       |   |                               | -                                                                                                                                                                   |
|                         | -                                                          | 0  |                                                                                                                                                                       |   |                               | -                                                                                                                                                                   |
| Caenorhabditis briggsae | glutamate synthase                                         | 10 | P:GO:0006537;<br>P:GO:0009792;<br>F:GO:0045181;<br>P:GO:0002119;<br>F:GO:0051536;<br>F:GO:0005506;<br>F:GO:0010181;<br>P:GO:0040010;<br>P:GO:0055114;<br>F:GO:0050660 | - |                               | IPR000583; IPR006982; IPR013785; IPR017932; G3DSA:3.60.20.10 (GENE3D), PTHR11938 (PANTHER), PTHR11938:SF1 (PANTHER), SSF51395 (SUPERFAMILY), SSF56235 (SUPERFAMILY) |
| synthetic construct     | glyceraldehyde-3-phosphate dehydroge-se                    | 7  | F:GO:0051287;<br>F:GO:0005515;<br>P:GO:0055114;<br>P:GO:0006096;<br>C:GO:0016020;<br>F:GO:0004365;<br>C:GO:0048471                                                    | - | EC:1.2.1.12                   | IPR006424; IPR016040; IPR020828; IPR020829; IPR020830; IPR020831; G3DSA:3.30.360.10 (GENE3D), SSF51735 (SUPERFAMILY), SSF55347 (SUPERFAMILY)                        |
| Caenorhabditis elegans  | mitochondrial intermediate peptidase                       | 1  | F:GO:0008233                                                                                                                                                          | - |                               | IPR001567; G3DSA:1.10.1370.10 (GENE3D), G3DSA:3.40.390.10 (GENE3D), PTHR11804 (PANTHER), PTHR11804:SF5 (PANTHER), SSF55486 (SUPERFAMILY)                            |
| Caenorhabditis elegans  | mitochondrial intermediate peptidase                       | 1  | F:GO:0008233                                                                                                                                                          | - |                               | IPR001567; G3DSA:1.10.1370.10 (GENE3D), G3DSA:3.40.390.10 (GENE3D), PTHR11804 (PANTHER), PTHR11804:SF5 (PANTHER), SSF55486 (SUPERFAMILY)                            |
| Caenorhabditis brenneri | williams-beuren syndrome critical region protein 20 copy a | 0  |                                                                                                                                                                       |   | F:GO:0005381;<br>P:GO:0006827 | -                                                                                                                                                                   |
| Caenorhabditis elegans  | hypothetical protein C53H9.3 [Caenorhabditis elegans]      | 0  |                                                                                                                                                                       |   |                               | -                                                                                                                                                                   |
| Caenorhabditis elegans  | elegans protein partially confirmed by transcript evidence | 0  |                                                                                                                                                                       |   |                               | PTHR11600 (PANTHER), SignalP (SIGNALP)                                                                                                                              |

|                         |                                                              |    |                                                                                                                                                                                                                                                                                                                                                                                                                     |                                                |            |                                                                                                              |
|-------------------------|--------------------------------------------------------------|----|---------------------------------------------------------------------------------------------------------------------------------------------------------------------------------------------------------------------------------------------------------------------------------------------------------------------------------------------------------------------------------------------------------------------|------------------------------------------------|------------|--------------------------------------------------------------------------------------------------------------|
| Brugia malayi           | importin beta-3                                              | 10 | C:GO:0005829;<br>P:GO:0040010;<br>C:GO:0005875;<br>P:GO:0000003;<br>P:GO:0018996;<br>P:GO:0002119;<br>F:GO:0005515;<br>P:GO:0006898;<br>P:GO:0009792;<br>P:GO:0001703                                                                                                                                                                                                                                               | -                                              |            | IPR000357; IPR001494; IPR011989;<br>IPR016024; IPR021133; PTHR10527<br>(PANTHER), PTHR10527:SF5<br>(PANTHER) |
| Caenorhabditis elegans  | hypothetical protein Y71G12A.2 [Caenorhabditis elegans]      | 0  |                                                                                                                                                                                                                                                                                                                                                                                                                     |                                                |            | -                                                                                                            |
| Caenorhabditis elegans  | runt-related transcription factor 1                          | 24 | P:GO:0001501;<br>P:GO:0048666;<br>P:GO:0001649;<br>P:GO:0007417;<br>P:GO:0045766;<br>P:GO:0032526;<br>P:GO:0035162;<br>P:GO:0030853;<br>P:GO:0048266;<br>F:GO:0070491;<br>F:GO:0005509;<br>C:GO:0005730;<br>F:GO:0016563;<br>F:GO:0046982;<br>P:GO:0060216;<br>F:GO:0003677;<br>F:GO:0003700;<br>P:GO:0016481;<br>P:GO:0030854;<br>P:GO:0045944;<br>F:GO:0042803;<br>P:GO:0001889;<br>F:GO:0008134;<br>P:GO:0001701 | -                                              |            | -                                                                                                            |
| Loa loa                 | thyroid transcription factor 1-associated protein 26 homolog | 0  |                                                                                                                                                                                                                                                                                                                                                                                                                     | P:GO:0045449;<br>F:GO:0005515;<br>C:GO:0005634 |            | IPR000169; IPR009149; IPR013730                                                                              |
| Mus musculus            | ribosomal protein l17                                        | 4  | F:GO:0003735;<br>C:GO:0015934;<br>C:GO:0005829;<br>P:GO:0006414                                                                                                                                                                                                                                                                                                                                                     | -                                              |            | IPR001063; IPR005721                                                                                         |
| Caenorhabditis elegans  | eukaryotic translation initiation factor 3 subunit I         | 4  | C:GO:0005737;<br>F:GO:0005515;<br>F:GO:0003743;<br>P:GO:0006412                                                                                                                                                                                                                                                                                                                                                     | -                                              | EC:3.6.5.3 | SignalP (SIGNALP)                                                                                            |
|                         | -                                                            | 0  |                                                                                                                                                                                                                                                                                                                                                                                                                     |                                                |            | SignalP (SIGNALP)                                                                                            |
| Caenorhabditis elegans  | transmembrane amino acid transporter protein                 | 1  | C:GO:0016020                                                                                                                                                                                                                                                                                                                                                                                                        | -                                              |            | IPR013057; PTHR22950 (PANTHER),<br>PTHR22950:SF5 (PANTHER)                                                   |
| Caenorhabditis elegans  | transmembrane amino acid transporter protein                 | 1  | C:GO:0016020                                                                                                                                                                                                                                                                                                                                                                                                        | -                                              |            | IPR013057; PTHR22950 (PANTHER),<br>PTHR22950:SF5 (PANTHER)                                                   |
| Caenorhabditis elegans  | transmembrane amino acid transporter protein                 | 1  | C:GO:0016020                                                                                                                                                                                                                                                                                                                                                                                                        | -                                              |            | IPR013057; PTHR22950 (PANTHER),<br>PTHR22950:SF5 (PANTHER)                                                   |
| Caenorhabditis briggsae | briggsae cbr-lin-25 protein                                  | 4  | P:GO:0032501;<br>C:GO:0044424;<br>P:GO:0030154;<br>P:GO:0022414                                                                                                                                                                                                                                                                                                                                                     | -                                              |            | -                                                                                                            |
| Caenorhabditis elegans  | hypothetical protein Y4C6B.1 [Caenorhabditis elegans]        | 0  |                                                                                                                                                                                                                                                                                                                                                                                                                     |                                                |            | -                                                                                                            |

|                         |                                                        |    |                                                                                                                                                                                                                                           |   |                                                |                                                                                                                   |
|-------------------------|--------------------------------------------------------|----|-------------------------------------------------------------------------------------------------------------------------------------------------------------------------------------------------------------------------------------------|---|------------------------------------------------|-------------------------------------------------------------------------------------------------------------------|
| Loa loa                 | myosin xviii                                           | 7  | P:GO:0009987;<br>F:GO:0017111;<br>C:GO:0005856;<br>C:GO:0005730;<br>F:GO:0042802;<br>F:GO:0000166;<br>C:GO:0005794                                                                                                                        | - | EC:3.6.1.15                                    | IPR001609; G3DSA:4.10.270.10 (GENE3D), PTHR13140 (PANTHER), PTHR13140:SF23 (PANTHER), SSF52540 (SUPERFAMILY)      |
| -                       | -                                                      | 0  |                                                                                                                                                                                                                                           |   |                                                | -                                                                                                                 |
| Caenorhabditis elegans  | briggsae cbr-npp-15 protein                            | 0  |                                                                                                                                                                                                                                           |   | F:GO:0003674;<br>C:GO:0016021;<br>P:GO:0040010 | IPR018247; PTHR13405 (PANTHER), PTHR13405:SF6 (PANTHER)                                                           |
| Homo sapiens            | mhc class ii antigen                                   | 14 | C:GO:0005789;<br>C:GO:0005769;<br>C:GO:0042613;<br>C:GO:0005771;<br>C:GO:0005794;<br>P:GO:0019886;<br>F:GO:0005515;<br>C:GO:0009897;<br>C:GO:0005765;<br>C:GO:0016021;<br>F:GO:0032395;<br>C:GO:0010008;<br>P:GO:0006955;<br>F:GO:0042605 | - |                                                | IPR000353; IPR003597; IPR007110; IPR013783; PTHR19944 (PANTHER), PTHR19944:SF26 (PANTHER), SSF48726 (SUPERFAMILY) |
| -                       | -                                                      | 0  |                                                                                                                                                                                                                                           |   |                                                | -                                                                                                                 |
| Caenorhabditis elegans  | hypothetical protein D1007.15 [Caenorhabditis elegans] | 0  |                                                                                                                                                                                                                                           |   |                                                | -                                                                                                                 |
| Caenorhabditis elegans  | diphthamide biosynthesis protein 1                     | 4  | C:GO:0044424;<br>P:GO:0000003;<br>P:GO:0040010;<br>P:GO:0002119                                                                                                                                                                           | - |                                                | IPR002728; PTHR10762:SF1 (PANTHER)                                                                                |
| Caenorhabditis elegans  | diphthamide biosynthesis protein 1                     | 4  | C:GO:0044424;<br>P:GO:0000003;<br>P:GO:0040010;<br>P:GO:0002119                                                                                                                                                                           | - |                                                | IPR002728; PTHR10762:SF1 (PANTHER)                                                                                |
| -                       | -                                                      | 0  |                                                                                                                                                                                                                                           |   |                                                | -                                                                                                                 |
| -                       | -                                                      | 0  |                                                                                                                                                                                                                                           |   |                                                | -                                                                                                                 |
| -                       | -                                                      | 0  |                                                                                                                                                                                                                                           |   |                                                | IPR008139; IPR011001; SignalP (SIGNALP)                                                                           |
| -                       | -                                                      | 0  |                                                                                                                                                                                                                                           |   |                                                | -                                                                                                                 |
| Caenorhabditis briggsae | microtubule associated serine threonine ki-se 2        | 14 | P:GO:0000003;<br>F:GO:0000166;<br>P:GO:0044237;<br>F:GO:0004672;<br>F:GO:0046872;<br>C:GO:0000776;<br>F:GO:0008017;<br>P:GO:0009792;<br>C:GO:0005813;<br>P:GO:0043170;<br>C:GO:0005876;<br>P:GO:0000087;<br>P:GO:0031111;<br>C:GO:0005938 | - |                                                | IPR015022; IPR023142; PTHR22985 (PANTHER), PTHR22985:SF42 (PANTHER)                                               |

|                         |                                                            |   |                                                                                                                                                      |                                                                                                                                                                                                                          |                                                                                        |
|-------------------------|------------------------------------------------------------|---|------------------------------------------------------------------------------------------------------------------------------------------------------|--------------------------------------------------------------------------------------------------------------------------------------------------------------------------------------------------------------------------|----------------------------------------------------------------------------------------|
| Caenorhabditis elegans  | microtubule associated serine threonine ki-se 2            | 9 | C:GO:0005856;<br>F:GO:0004672;<br>F:GO:0046872;<br>P:GO:0000003;<br>P:GO:0043170;<br>F:GO:0005515;<br>F:GO:0000166;<br>P:GO:0009792;<br>P:GO:0044237 | -                                                                                                                                                                                                                        | IPR015022; IPR023142; PTHR22985 (PANTHER), PTHR22985-SF42 (PANTHER)                    |
| Brugia malayi           | elegans protein confirmed by transcript evidence           | 7 | P:GO:0009792;<br>P:GO:0010171;<br>P:GO:0002119;<br>P:GO:0040011;<br>P:GO:0019915;<br>P:GO:0040007;<br>P:GO:0006898                                   | -                                                                                                                                                                                                                        | -                                                                                      |
| -                       | -                                                          | 0 |                                                                                                                                                      |                                                                                                                                                                                                                          | -                                                                                      |
| Caenorhabditis briggsae | mitochondrial ribosomal protein I37                        | 0 |                                                                                                                                                      | F:GO:0045182;<br>F:GO:0003735;<br>C:GO:0005739;<br>P:GO:0006412;<br>C:GO:0005761;<br>C:GO:0005840                                                                                                                        | -                                                                                      |
| Caenorhabditis briggsae | mitochondrial ribosomal protein I37                        | 2 | C:GO:0044444;<br>C:GO:0043229                                                                                                                        | -                                                                                                                                                                                                                        | -                                                                                      |
| Caenorhabditis elegans  | briggsae cbr-mog-5 protein                                 | 7 | F:GO:0003723;<br>F:GO:0004004;<br>C:GO:0071011;<br>P:GO:0000381;<br>F:GO:0005524;<br>F:GO:0005515;<br>C:GO:0071013                                   | -                                                                                                                                                                                                                        | -                                                                                      |
| -                       | -                                                          | 0 |                                                                                                                                                      |                                                                                                                                                                                                                          | SignalP (SIGNALP)                                                                      |
| -                       | -                                                          | 0 |                                                                                                                                                      |                                                                                                                                                                                                                          | -                                                                                      |
| Loa loa                 | fizzy cell division cycle 20 related 1                     | 6 | P:GO:0044267;<br>P:GO:0009792;<br>P:GO:0007067;<br>P:GO:0007126;<br>P:GO:0050794;<br>C:GO:0005634                                                    | -                                                                                                                                                                                                                        | -                                                                                      |
| Caenorhabditis elegans  | elegans protein partially confirmed by transcript evidence | 0 |                                                                                                                                                      | F:GO:0001851;<br>C:GO:0005634;<br>P:GO:0030449;<br>C:GO:0005737;<br>F:GO:0003674;<br>C:GO:0005576;<br>C:GO:0005575;<br>F:GO:0043499;<br>F:GO:0008201;<br>P:GO:0006957;<br>C:GO:0005886;<br>P:GO:0008150;<br>C:GO:0005615 | IPR000436; IPR016060; PTHR19325 (PANTHER), PTHR19325-SF25 (PANTHER), SignalP (SIGNALP) |
| -                       | -                                                          | 0 |                                                                                                                                                      |                                                                                                                                                                                                                          | -                                                                                      |
| -                       | -                                                          | 0 |                                                                                                                                                      |                                                                                                                                                                                                                          | -                                                                                      |
| -                       | -                                                          | 0 |                                                                                                                                                      |                                                                                                                                                                                                                          | -                                                                                      |
| -                       | -                                                          | 0 |                                                                                                                                                      |                                                                                                                                                                                                                          | -                                                                                      |



|                         |                                                                                                             |    |                                                                                                                                                                                                                                                                             |   |             |                                                                                                                                                                                                                       |
|-------------------------|-------------------------------------------------------------------------------------------------------------|----|-----------------------------------------------------------------------------------------------------------------------------------------------------------------------------------------------------------------------------------------------------------------------------|---|-------------|-----------------------------------------------------------------------------------------------------------------------------------------------------------------------------------------------------------------------|
| Caenorhabditis briggsae | briggsae cbr-cnt-1 protein                                                                                  | 5  | F:GO:0046872;<br>P:GO:0019915;<br>P:GO:0002119;<br>F:GO:0005515;<br>P:GO:0050794                                                                                                                                                                                            | - |             | SSF103657 (SUPERFAMILY)                                                                                                                                                                                               |
| Caenorhabditis elegans  | ubiquitin specific protease 32                                                                              | 3  | P:GO:0009792;<br>F:GO:0016787;<br>P:GO:0008152                                                                                                                                                                                                                              | - |             | IPR001125; IPR001394; IPR002048;<br>IPR006615; IPR011992; IPR018247;<br>IPR018249; PTHR10420 (PANTHER),<br>PTHR10420:SF70 (PANTHER),<br>SSF143791 (SUPERFAMILY), SSF47473<br>(SUPERFAMILY), SSF54001<br>(SUPERFAMILY) |
| Caenorhabditis elegans  | fatty acid synthetase family member (acs-14)                                                                | 16 | P:GO:0048666;<br>F:GO:0000166;<br>P:GO:0008610;<br>C:GO:0005792;<br>C:GO:0005741;<br>F:GO:0004467;<br>C:GO:0044425;<br>P:GO:0006637;<br>P:GO:0048522;<br>P:GO:0006641;<br>C:GO:0005783;<br>C:GO:0005886;<br>P:GO:0009725;<br>P:GO:0015908;<br>C:GO:0005778;<br>P:GO:0044249 | - | EC:6.2.1.3  |                                                                                                                                                                                                                       |
| -                       | -                                                                                                           | 0  |                                                                                                                                                                                                                                                                             |   |             | SignalP (SIGNALP)                                                                                                                                                                                                     |
| -                       | -                                                                                                           | 0  |                                                                                                                                                                                                                                                                             |   |             | IPR022353                                                                                                                                                                                                             |
| Caenorhabditis briggsae | tim44-like domain containing protein                                                                        | 2  | C:GO:0030529;<br>C:GO:0005739                                                                                                                                                                                                                                               | - |             | SignalP (SIGNALP)                                                                                                                                                                                                     |
| Caenorhabditis briggsae | deah (asp-glu-ala-his) box polypeptide 9                                                                    | 11 | F:GO:0003723;<br>C:GO:0070937;<br>P:GO:0070934;<br>C:GO:0005730;<br>P:GO:0008380;<br>C:GO:0005813;<br>F:GO:0005515;<br>F:GO:0000166;<br>F:GO:0004386;<br>C:GO:0030529;<br>P:GO:0034605                                                                                      | - |             | IPR001650; IPR002464; IPR007502;<br>IPR011709; IPR014021;<br>G3DSA:3.40.50.300 (GENE3D),<br>PTHR18934 (PANTHER), SSF52540<br>(SUPERFAMILY)                                                                            |
| Caenorhabditis elegans  | nips-p protein                                                                                              | 2  | F:GO:0016791;<br>P:GO:0008152                                                                                                                                                                                                                                               | - | EC:3.1.3.0  | IPR011008; IPR012577;<br>G3DSA:3.30.70.900 (GENE3D),<br>PTHR21017 (PANTHER),<br>PTHR21017:SF5 (PANTHER)                                                                                                               |
| Caenorhabditis elegans  | jhd1_caeel ame: full= domain-containing histone demethylation protein 1 ame: full= -lysine-36 demethylase 1 | 4  | P:GO:0000003;<br>F:GO:0016491;<br>P:GO:0008152;<br>P:GO:0006974                                                                                                                                                                                                             | - |             | -                                                                                                                                                                                                                     |
| Caenorhabditis briggsae | protein ki-se domain containing protein                                                                     | 7  | P:GO:0040010;<br>F:GO:0004674;<br>P:GO:0044260;<br>P:GO:0005975;<br>F:GO:0005515;<br>F:GO:0000166;<br>C:GO:0044464                                                                                                                                                          | - | EC:2.7.11.0 | IPR000719; IPR011009; IPR017442;<br>G3DSA:3.30.200.20 (GENE3D),<br>PTHR22686 (PANTHER)                                                                                                                                |

|                         |                                                    |    |                                                                                                                                                                                                                                                                             |                                                                                                   |                                                                                                                                                                                                         |
|-------------------------|----------------------------------------------------|----|-----------------------------------------------------------------------------------------------------------------------------------------------------------------------------------------------------------------------------------------------------------------------------|---------------------------------------------------------------------------------------------------|---------------------------------------------------------------------------------------------------------------------------------------------------------------------------------------------------------|
| Drosophila grimshawi    | GH24427 [Drosophila grimshawi]                     | 0  |                                                                                                                                                                                                                                                                             |                                                                                                   | -                                                                                                                                                                                                       |
|                         | -                                                  | 0  |                                                                                                                                                                                                                                                                             |                                                                                                   | SignalP (SIGNALP)                                                                                                                                                                                       |
| Caenorhabditis briggsae | d- replication licensing factor mcm5               | 16 | P:GO:0000278;<br>P:GO:0040010;<br>P:GO:0006268;<br>P:GO:0000910;<br>C:GO:0042555;<br>F:GO:0003677;<br>F:GO:0005524;<br>C:GO:0000785;<br>F:GO:0016887;<br>F:GO:0005515;<br>P:GO:0030174;<br>P:GO:0009792;<br>P:GO:0043066;<br>P:GO:0001703;<br>P:GO:0006350;<br>F:GO:0003682 | -                                                                                                 | IPR001208; IPR008048; IPR012340;<br>IPR016027; IPR018525;<br>G3DSA:3.30.1640.10 (GENE3D),<br>G3DSA:3.40.50.300 (GENE3D),<br>PTHR11630 (PANTHER),<br>PTHR11630:SF42 (PANTHER),<br>SSF52540 (SUPERFAMILY) |
| Caenorhabditis briggsae | d- replication licensing factor mcm5               | 16 | P:GO:0000278;<br>P:GO:0040010;<br>P:GO:0006268;<br>P:GO:0000910;<br>C:GO:0042555;<br>F:GO:0003677;<br>F:GO:0005524;<br>C:GO:0000785;<br>F:GO:0016887;<br>F:GO:0005515;<br>P:GO:0030174;<br>P:GO:0009792;<br>P:GO:0043066;<br>P:GO:0001703;<br>P:GO:0006350;<br>F:GO:0003682 | -                                                                                                 | IPR001208; IPR008048; IPR012340;<br>IPR016027; IPR018525;<br>G3DSA:3.30.1640.10 (GENE3D),<br>G3DSA:3.40.50.300 (GENE3D),<br>PTHR11630 (PANTHER),<br>PTHR11630:SF42 (PANTHER),<br>SSF52540 (SUPERFAMILY) |
|                         | -                                                  | 0  |                                                                                                                                                                                                                                                                             |                                                                                                   | SignalP (SIGNALP)                                                                                                                                                                                       |
| Caenorhabditis briggsae | metallophosphoesterase domain containing 1         | 1  | F:GO:0016787                                                                                                                                                                                                                                                                |                                                                                                   | PTHR12905 (PANTHER)                                                                                                                                                                                     |
| Caenorhabditis elegans  | elegans protein confirmed by transcript evidence   | 1  | P:GO:0019915                                                                                                                                                                                                                                                                | -                                                                                                 | SignalP (SIGNALP)                                                                                                                                                                                       |
| Caenorhabditis elegans  | sugar transporter                                  | 6  | C:GO:0016021;<br>P:GO:0009792;<br>P:GO:0040007;<br>P:GO:0055085;<br>F:GO:0005215;<br>P:GO:0002119                                                                                                                                                                           | -                                                                                                 | IPR011701; IPR016196; IPR020846;<br>G3DSA:1.20.1250.20 (GENE3D),<br>PTHR11600 (PANTHER),<br>PTHR11600:SF42 (PANTHER), SignalP<br>(SIGNALP)                                                              |
| Caenorhabditis briggsae | abnormal cell migration family member (mig-15)     | 0  |                                                                                                                                                                                                                                                                             | F:GO:0005083;<br>F:GO:0005524;<br>F:GO:0004672;<br>P:GO:0006468;<br>F:GO:0005515;<br>F:GO:0004674 | PTHR22986 (PANTHER),<br>PTHR22986:SF83 (PANTHER)                                                                                                                                                        |
|                         | -                                                  | 0  |                                                                                                                                                                                                                                                                             |                                                                                                   | SignalP (SIGNALP)                                                                                                                                                                                       |
| Caenorhabditis elegans  | catenin (cadherin-associated protein) alpha-like 1 | 7  | P:GO:0007266;<br>P:GO:0007155;<br>C:GO:0016021;<br>C:GO:0005829;<br>C:GO:0015629;<br>F:GO:0045296;<br>F:GO:0005198                                                                                                                                                          | -                                                                                                 | IPR001033; IPR006077;<br>G3DSA:1.20.120.230 (GENE3D),<br>PTHR18914 (PANTHER),<br>PTHR18914:SF8 (PANTHER)                                                                                                |

|                         |                                                                   |   |                                                                                                                                                      |                                                                                  |                                                                                                                           |
|-------------------------|-------------------------------------------------------------------|---|------------------------------------------------------------------------------------------------------------------------------------------------------|----------------------------------------------------------------------------------|---------------------------------------------------------------------------------------------------------------------------|
| Caenorhabditis elegans  | par-6 gamma                                                       | 8 | C:GO:0005737;<br>P:GO:0007163;<br>P:GO:0040001;<br>F:GO:0005515;<br>P:GO:0007155;<br>P:GO:0007369;<br>C:GO:0016021;<br>P:GO:0008406                  | -                                                                                | IPR000270; G3DSA:3.10.20.240 (GENE3D), PTHR14102 (PANTHER), PTHR14102:SF2 (PANTHER), SSF54277 (SUPERFAMILY)               |
| -                       | -                                                                 | 0 |                                                                                                                                                      |                                                                                  | -                                                                                                                         |
| Brugia malayi           | tho complex subunit 6 homolog isoform 1                           | 3 | C:GO:0000346;<br>P:GO:0006406;<br>C:GO:0000347                                                                                                       | -                                                                                | IPR001680; IPR011046; IPR015943; IPR017986; IPR019775; IPR019781; IPR019782; PTHR22847 (PANTHER), PTHR22847:SF3 (PANTHER) |
| Caenorhabditis elegans  | c2 domain containing protein                                      | 2 | P:GO:0009792;<br>C:GO:0016021                                                                                                                        | -                                                                                | PTHR10774 (PANTHER), PTHR10774:SF1 (PANTHER), SignalP (SIGNALP)                                                           |
| Caenorhabditis elegans  | c2 domain containing protein                                      | 2 | P:GO:0009792;<br>C:GO:0016021                                                                                                                        | -                                                                                | PTHR10774 (PANTHER), PTHR10774:SF1 (PANTHER), SignalP (SIGNALP)                                                           |
| Caenorhabditis elegans  | set (trithorax polycomb) domain containing family member (set-18) | 1 | F:GO:0005515                                                                                                                                         | -                                                                                | -                                                                                                                         |
| -                       | -                                                                 | 0 |                                                                                                                                                      |                                                                                  | SignalP (SIGNALP)                                                                                                         |
| Loa loa                 | hypothetical protein LOAG_02385 [Loa loa]                         | 0 |                                                                                                                                                      |                                                                                  | -                                                                                                                         |
| Caenorhabditis elegans  | elegans protein confirmed by transcript evidence                  | 0 |                                                                                                                                                      | P:GO:0000003;<br>P:GO:0006898;<br>P:GO:0009792;<br>P:GO:0002119;<br>P:GO:0040007 | -                                                                                                                         |
| Caenorhabditis elegans  | o ant response abnormal family member (odr-4)                     | 0 |                                                                                                                                                      | P:GO:0055114;<br>F:GO:0016491;<br>F:GO:0008270                                   | -                                                                                                                         |
| Caenorhabditis briggsae | gyf domain-containing protein                                     | 0 |                                                                                                                                                      | C:GO:0016021;<br>C:GO:0016020;<br>F:GO:0008158                                   | IPR003169; G3DSA:3.30.1490.40 (GENE3D), PTHR14445 (PANTHER), PTHR14445:SF4 (PANTHER)                                      |
| Caenorhabditis briggsae | gyf domain-containing protein                                     | 0 |                                                                                                                                                      |                                                                                  | IPR003169; G3DSA:3.30.1490.40 (GENE3D), PTHR14445 (PANTHER), PTHR14445:SF4 (PANTHER)                                      |
| Caenorhabditis briggsae | gyf domain-containing protein                                     | 0 |                                                                                                                                                      | C:GO:0016021;<br>C:GO:0016020;<br>F:GO:0008158                                   | IPR003169; G3DSA:3.30.1490.40 (GENE3D), PTHR14445 (PANTHER), PTHR14445:SF4 (PANTHER)                                      |
| Caenorhabditis briggsae | gyf domain-containing protein                                     | 0 |                                                                                                                                                      |                                                                                  | IPR003169; G3DSA:3.30.1490.40 (GENE3D), PTHR14445 (PANTHER), PTHR14445:SF4 (PANTHER)                                      |
| Caenorhabditis briggsae | gyf domain-containing protein                                     | 0 |                                                                                                                                                      | C:GO:0016021;<br>C:GO:0016020;<br>F:GO:0008158                                   | IPR003169; G3DSA:3.30.1490.40 (GENE3D), PTHR14445 (PANTHER), PTHR14445:SF4 (PANTHER)                                      |
| Caenorhabditis elegans  | phosphoethanolamine transferase family member (pmt-1)             | 9 | P:GO:0009792;<br>P:GO:0002119;<br>F:GO:0008757;<br>P:GO:0032940;<br>P:GO:0009058;<br>P:GO:0040017;<br>P:GO:0040010;<br>P:GO:0000003;<br>P:GO:0044238 | -                                                                                | PTHR10108 (PANTHER), PTHR10108:SF3 (PANTHER)                                                                              |
| -                       | -                                                                 | 0 |                                                                                                                                                      |                                                                                  | IPR022559; SignalP (SIGNALP)                                                                                              |

|                          |                                                         |    |                                                                                                                                                                                                                                                                                                                                                                                                                     |                                                                                                   |             |                                                                                                                            |
|--------------------------|---------------------------------------------------------|----|---------------------------------------------------------------------------------------------------------------------------------------------------------------------------------------------------------------------------------------------------------------------------------------------------------------------------------------------------------------------------------------------------------------------|---------------------------------------------------------------------------------------------------|-------------|----------------------------------------------------------------------------------------------------------------------------|
| Caenorhabditis elegans   | homolog subfamily c member 12                           | 0  |                                                                                                                                                                                                                                                                                                                                                                                                                     | F:GO:0051082;<br>P:GO:0006457;<br>F:GO:0031072                                                    |             | IPR001623; IPR015609;<br>PTHR11821:SF52 (PANTHER)                                                                          |
| Caenorhabditis briggsae  | Hypothetical protein CBG20503 [Caenorhabditis briggsae] | 0  |                                                                                                                                                                                                                                                                                                                                                                                                                     |                                                                                                   |             | -                                                                                                                          |
| Caenorhabditis elegans   | bifunctio-I protein ncoat                               | 1  | F:GO:0016798                                                                                                                                                                                                                                                                                                                                                                                                        | -                                                                                                 |             | IPR011496; IPR017853; PTHR13170<br>(PANTHER), PTHR13170:SF5<br>(PANTHER)                                                   |
| synthetic construct      | beta-galactoside-binding lectin precursor               | 24 | F:GO:0004871;<br>P:GO:0071333;<br>F:GO:0005534;<br>F:GO:0043236;<br>P:GO:0033555;<br>P:GO:0007157;<br>F:GO:0016936;<br>C:GO:0005615;<br>P:GO:0045445;<br>P:GO:0034120;<br>C:GO:0005737;<br>C:GO:0009986;<br>F:GO:0001948;<br>P:GO:0043123;<br>C:GO:0005578;<br>P:GO:0010812;<br>P:GO:0048678;<br>F:GO:0030395;<br>P:GO:0042493;<br>P:GO:0010977;<br>P:GO:0071407;<br>F:GO:0042803;<br>P:GO:0042981;<br>C:GO:0005634 | -                                                                                                 |             | SignalP (SIGNALP)                                                                                                          |
|                          | -                                                       | 0  |                                                                                                                                                                                                                                                                                                                                                                                                                     |                                                                                                   |             | IPR002223; IPR020901; PTHR10083<br>(PANTHER), PTHR10083:SF17<br>(PANTHER), SignalP (SIGNALP)                               |
| Brugia malayi            | uncoordi- ted family member (unc-89)                    | 4  | F:GO:0004674;<br>F:GO:0005524;<br>P:GO:0009792;<br>P:GO:0006468                                                                                                                                                                                                                                                                                                                                                     | -                                                                                                 | EC:2.7.11.0 | IPR013098; IPR013783; PTHR19897<br>(PANTHER), SSF48726 (SUPERFAMILY)                                                       |
| Caenorhabditis elegans   | briggsae cbr-reps-1 protein                             | 0  |                                                                                                                                                                                                                                                                                                                                                                                                                     | F:GO:0005509                                                                                      |             | IPR000261; IPR011992; IPR018247;<br>IPR018249; PTHR11216 (PANTHER),<br>PTHR11216:SF33 (PANTHER),<br>SSF47473 (SUPERFAMILY) |
| Caenorhabditis elegans   | hypothetical protein W04C9.2 [Caenorhabditis elegans]   | 0  |                                                                                                                                                                                                                                                                                                                                                                                                                     |                                                                                                   |             | SignalP (SIGNALP)                                                                                                          |
|                          | -                                                       | 0  |                                                                                                                                                                                                                                                                                                                                                                                                                     |                                                                                                   |             | -                                                                                                                          |
| Loa loa                  | round spermatid basic protein 1-like                    | 0  |                                                                                                                                                                                                                                                                                                                                                                                                                     | C:GO:0005634                                                                                      |             | PTHR13354 (PANTHER)                                                                                                        |
| Saccoglossus kowalevskii | lipophorin receptor                                     | 0  |                                                                                                                                                                                                                                                                                                                                                                                                                     | C:GO:0005905;<br>F:GO:0005509;<br>F:GO:0004872;<br>C:GO:0016021;<br>C:GO:0016020;<br>P:GO:0006897 |             | -                                                                                                                          |

|                         |                                                        |    |                                                                                                                                                                                                         |   |                             |                                                                                                                                          |
|-------------------------|--------------------------------------------------------|----|---------------------------------------------------------------------------------------------------------------------------------------------------------------------------------------------------------|---|-----------------------------|------------------------------------------------------------------------------------------------------------------------------------------|
| Caenorhabditis elegans  | cytochrome family subfamily polypeptide 24             | 12 | P:GO:0043651;<br>F:GO:0003958;<br>F:GO:0071614;<br>F:GO:0008404;<br>C:GO:0005792;<br>F:GO:0016712;<br>P:GO:0014070;<br>F:GO:0008405;<br>P:GO:0019373;<br>F:GO:0005506;<br>C:GO:0016020;<br>C:GO:0005783 | - | EC:1.6.2.4;<br>EC:1.14.14.0 | -                                                                                                                                        |
| Loa loa                 | lim domain containing protein                          | 2  | P:GO:0048468;<br>C:GO:0044464                                                                                                                                                                           | - |                             | IPR001781; PTHR18973 (PANTHER),<br>PTHR18973:SF106 (PANTHER),<br>SSF57716 (SUPERFAMILY)                                                  |
| Loa loa                 | lim domain containing protein                          | 2  | P:GO:0048468;<br>C:GO:0044464                                                                                                                                                                           | - |                             | IPR001781; PTHR18973 (PANTHER),<br>PTHR18973:SF106 (PANTHER),<br>SSF57716 (SUPERFAMILY)                                                  |
|                         | -                                                      | 0  |                                                                                                                                                                                                         |   |                             | SignalP (SIGNALP)                                                                                                                        |
|                         | -                                                      | 0  |                                                                                                                                                                                                         |   |                             | -                                                                                                                                        |
| Caenorhabditis briggsae | elegans protein confirmed by transcript evidence       | 1  | C:GO:0005634                                                                                                                                                                                            | - |                             | PTHR12202 (PANTHER)                                                                                                                      |
| Caenorhabditis briggsae | glutathione synthetase                                 | 7  | P:GO:0009792;<br>F:GO:0016874;<br>P:GO:0002119;<br>F:GO:0005515;<br>P:GO:0040010;<br>P:GO:0000003;<br>F:GO:0000166                                                                                      | - |                             | -                                                                                                                                        |
| Brugia malayi           | zinc finger                                            | 1  | P:GO:0019915                                                                                                                                                                                            | - |                             | IPR000210; IPR006652; IPR011333;<br>IPR011705; IPR013069; IPR013089;<br>IPR015916; PTHR23230:SF147<br>(PANTHER), SSF117281 (SUPERFAMILY) |
| Caenorhabditis briggsae | 5-oxoprolinase (atp-hydrolysing)                       | 3  | F:GO:0017168;<br>P:GO:0006749;<br>F:GO:0000166                                                                                                                                                          | - | EC:3.5.2.9                  | IPR003692; PTHR11365 (PANTHER)                                                                                                           |
|                         | -                                                      | 0  |                                                                                                                                                                                                         |   |                             | -                                                                                                                                        |
|                         | -                                                      | 0  |                                                                                                                                                                                                         |   |                             | SignalP (SIGNALP)                                                                                                                        |
| Caenorhabditis briggsae | mgc137510 protein                                      | 4  | F:GO:0046872;<br>P:GO:0007165;<br>C:GO:0005622;<br>F:GO:0005070                                                                                                                                         | - |                             | IPR000980; IPR015778; IPR020685;<br>SSF55550 (SUPERFAMILY)                                                                               |
| Caenorhabditis briggsae | transformation transcription domain-associated protein | 1  | P:GO:0009987                                                                                                                                                                                            | - |                             | IPR000403; IPR003152; IPR011009;<br>PTHR11139 (PANTHER),<br>PTHR11139:SF2 (PANTHER)                                                      |
| Caenorhabditis briggsae | transformation transcription domain-associated protein | 1  | P:GO:0009987                                                                                                                                                                                            | - |                             | -                                                                                                                                        |
|                         | -                                                      | 0  |                                                                                                                                                                                                         |   |                             | -                                                                                                                                        |
| Caenorhabditis elegans  | phosphoethanolamine transferase family member (pmt-1)  | 6  | P:GO:0009792;<br>P:GO:0002119;<br>P:GO:0032940;<br>P:GO:0040017;<br>P:GO:0040010;<br>P:GO:0000003                                                                                                       | - |                             | -                                                                                                                                        |
| Caenorhabditis briggsae | upf0378 protein k1aa0100                               | 0  |                                                                                                                                                                                                         |   |                             | IPR019443; PTHR15678 (PANTHER)                                                                                                           |
| Caenorhabditis briggsae | heat-responsive protein 12                             | 4  | F:GO:0004519;<br>P:GO:0006449;<br>C:GO:0005634;<br>C:GO:0005739                                                                                                                                         | - |                             | IPR006056; IPR006175; IPR013813;<br>IPR019897                                                                                            |

|                                |                                                  |    |                                                                                                                                                                                                                                                            |                               |                                                                                                        |
|--------------------------------|--------------------------------------------------|----|------------------------------------------------------------------------------------------------------------------------------------------------------------------------------------------------------------------------------------------------------------|-------------------------------|--------------------------------------------------------------------------------------------------------|
|                                | -                                                | 0  |                                                                                                                                                                                                                                                            |                               | -                                                                                                      |
| Caenorhabditis briggsae        | briggsae cbr-grl-17 protein                      | 0  |                                                                                                                                                                                                                                                            |                               | SignalP (SIGNALP)                                                                                      |
| Zea mays                       | briggsae cbr-pqn-22 protein                      | 0  |                                                                                                                                                                                                                                                            | F:GO:0005515                  |                                                                                                        |
| Zea mays                       | briggsae cbr-pqn-22 protein                      | 0  |                                                                                                                                                                                                                                                            | F:GO:0005515                  | -                                                                                                      |
|                                | -                                                | 0  |                                                                                                                                                                                                                                                            |                               | -                                                                                                      |
|                                | -                                                | 0  |                                                                                                                                                                                                                                                            |                               | -                                                                                                      |
| Caenorhabditis elegans         | c5orf44 protein                                  | 1  | F:GO:0005515                                                                                                                                                                                                                                               | -                             | -                                                                                                      |
| Caenorhabditis elegans         | enoyl- hydratase                                 | 5  | F:GO:0004872;<br>P:GO:0002119;<br>P:GO:0040010;<br>F:GO:0003824;<br>P:GO:0023052                                                                                                                                                                           | -                             | IPR001753; IPR014748;<br>G3DSA:3.90.226.10 (GENE3D),<br>PTHR11941 (PANTHER), SSF52096<br>(SUPERFAMILY) |
| Caenorhabditis elegans         | enoyl- hydratase                                 | 5  | F:GO:0004872;<br>P:GO:0002119;<br>P:GO:0040010;<br>F:GO:0003824;<br>P:GO:0023052                                                                                                                                                                           | -                             | IPR001753; IPR014748;<br>G3DSA:3.90.226.10 (GENE3D),<br>PTHR11941 (PANTHER), SSF52096<br>(SUPERFAMILY) |
| Caenorhabditis briggsae        | vesicle-fusing atpase                            | 15 | P:GO:0040007;<br>P:GO:0000003;<br>P:GO:0006911;<br>F:GO:0005524;<br>P:GO:0048172;<br>P:GO:0002119;<br>F:GO:0016887;<br>F:GO:0005515;<br>P:GO:0007030;<br>P:GO:0016082;<br>P:GO:0006888;<br>P:GO:0040011;<br>P:GO:0006898;<br>P:GO:0009792;<br>C:GO:0005737 | -                             | IPR003959; IPR003960;<br>G3DSA:3.40.50.300 (GENE3D),<br>PTHR23078 (PANTHER), SSF52540<br>(SUPERFAMILY) |
| Caenorhabditis elegans         | c9orf7 homolog                                   | 1  | F:GO:0005515                                                                                                                                                                                                                                               | -                             | IPR019365; PTHR13314 (PANTHER),<br>SignalP (SIGNALP)                                                   |
| Caenorhabditis elegans         | briggsae cbr-ltd-1 protein                       | 1  | F:GO:0008270                                                                                                                                                                                                                                               | -                             | -                                                                                                      |
| Caenorhabditis sp. PS1010      | briggsae cbr-mel-28 protein                      | 0  |                                                                                                                                                                                                                                                            | P:GO:0006355;<br>F:GO:0003677 | -                                                                                                      |
|                                | -                                                | 0  |                                                                                                                                                                                                                                                            |                               | -                                                                                                      |
| Polysphondylium pallidum PN500 | checkpoint with forkhead and ring finger domains | 4  | P:GO:0000278;<br>F:GO:0016874;<br>F:GO:0005488;<br>P:GO:0044267                                                                                                                                                                                            | -                             | -                                                                                                      |
| Polysphondylium pallidum PN500 | checkpoint with forkhead and ring finger domains | 4  | P:GO:0000278;<br>F:GO:0016874;<br>F:GO:0005488;<br>P:GO:0044267                                                                                                                                                                                            | -                             | -                                                                                                      |
|                                | -                                                | 0  |                                                                                                                                                                                                                                                            |                               | SignalP (SIGNALP)                                                                                      |
|                                | -                                                | 0  |                                                                                                                                                                                                                                                            |                               | PTHR22979 (PANTHER),<br>PTHR22979:SF1 (PANTHER), SignalP<br>(SIGNALP)                                  |
| Loa loa                        | three prime repair exonuclease 2                 | 0  |                                                                                                                                                                                                                                                            | F:GO:0003676                  | IPR012337; G3DSA:3.30.420.10<br>(GENE3D), PTHR13058 (PANTHER),<br>PTHR13058:SF1 (PANTHER)              |

|                         |                                                                            |    |                                                                                                                                                                                                                                                            |   |                                                                                                                  |
|-------------------------|----------------------------------------------------------------------------|----|------------------------------------------------------------------------------------------------------------------------------------------------------------------------------------------------------------------------------------------------------------|---|------------------------------------------------------------------------------------------------------------------|
| Caenorhabditis briggsae | golgi-specific brefeldin a resistance factor 1                             | 7  | P:GO:0006892;<br>C:GO:0000139;<br>P:GO:0006890;<br>F:GO:0005086;<br>P:GO:0032012;<br>F:GO:0005515;<br>P:GO:0048205                                                                                                                                         | - | IPR000904; G3DSA:1.10.1000.11 (GENE3D), G3DSA:1.10.220.20 (GENE3D), PTHR10663 (PANTHER), PTHR10663:SF8 (PANTHER) |
| Caenorhabditis briggsae | golgi-specific brefeldin a-resistance guanine nucleotide exchange factor 1 | 7  | P:GO:0006892;<br>C:GO:0000139;<br>P:GO:0006890;<br>F:GO:0005086;<br>P:GO:0032012;<br>F:GO:0005515;<br>P:GO:0048205                                                                                                                                         | - | IPR000904; G3DSA:1.10.1000.11 (GENE3D), G3DSA:1.10.220.20 (GENE3D), PTHR10663 (PANTHER), PTHR10663:SF8 (PANTHER) |
| Caenorhabditis briggsae | golgi-specific brefeldin a resistance factor 1                             | 7  | P:GO:0006892;<br>C:GO:0000139;<br>P:GO:0006890;<br>F:GO:0005086;<br>P:GO:0032012;<br>F:GO:0005515;<br>P:GO:0048205                                                                                                                                         | - | IPR000904; G3DSA:1.10.1000.11 (GENE3D), G3DSA:1.10.220.20 (GENE3D), PTHR10663 (PANTHER), PTHR10663:SF8 (PANTHER) |
| Caenorhabditis briggsae | golgi-specific brefeldin a resistance factor 1                             | 7  | P:GO:0006892;<br>C:GO:0000139;<br>P:GO:0006890;<br>F:GO:0005086;<br>P:GO:0032012;<br>F:GO:0005515;<br>P:GO:0048205                                                                                                                                         | - | IPR000904; G3DSA:1.10.1000.11 (GENE3D), G3DSA:1.10.220.20 (GENE3D), PTHR10663 (PANTHER), PTHR10663:SF8 (PANTHER) |
| Caenorhabditis elegans  | golgi-specific brefeldin a-resistance guanine nucleotide exchange factor 1 | 15 | F:GO:0005515;<br>C:GO:0005788;<br>C:GO:0005777;<br>F:GO:0016563;<br>C:GO:0005829;<br>C:GO:0005801;<br>P:GO:0048193;<br>F:GO:0003677;<br>P:GO:0032012;<br>C:GO:0005795;<br>F:GO:0005086;<br>P:GO:0045449;<br>C:GO:0005634;<br>P:GO:0046903;<br>C:GO:0005739 | - | PTHR10663 (PANTHER), PTHR10663:SF8 (PANTHER), SignalP (SIGNALP)                                                  |
| Caenorhabditis briggsae | golgi-specific brefeldin a resistance factor 1                             | 7  | P:GO:0006892;<br>C:GO:0000139;<br>P:GO:0006890;<br>F:GO:0005086;<br>P:GO:0032012;<br>F:GO:0005515;<br>P:GO:0048205                                                                                                                                         | - | IPR000904; G3DSA:1.10.1000.11 (GENE3D), G3DSA:1.10.220.20 (GENE3D), PTHR10663 (PANTHER), PTHR10663:SF8 (PANTHER) |

|                         |                                                                            |    |                                                                                                                                                                                                                                                                                                                                |   |             |                                                                                                                           |
|-------------------------|----------------------------------------------------------------------------|----|--------------------------------------------------------------------------------------------------------------------------------------------------------------------------------------------------------------------------------------------------------------------------------------------------------------------------------|---|-------------|---------------------------------------------------------------------------------------------------------------------------|
| Caenorhabditis elegans  | golgi-specific brefeldin a-resistance guanine nucleotide exchange factor 1 | 15 | F:GO:0005515;<br>C:GO:0005788;<br>C:GO:0005777;<br>F:GO:0016563;<br>C:GO:0005829;<br>C:GO:0005801;<br>P:GO:0048193;<br>F:GO:0003677;<br>P:GO:0032012;<br>C:GO:0005795;<br>F:GO:0005086;<br>P:GO:0045449;<br>C:GO:0005634;<br>P:GO:0046903;<br>C:GO:0005739                                                                     | - |             | PTHR10663 (PANTHER),<br>PTHR10663:SF8 (PANTHER), SignalP<br>(SIGNALP)                                                     |
| Caenorhabditis briggsae | golgi-specific brefeldin a-resistance guanine nucleotide exchange factor 1 | 19 | F:GO:0004871;<br>F:GO:0005515;<br>C:GO:0005788;<br>P:GO:0008610;<br>F:GO:0005525;<br>C:GO:0005777;<br>C:GO:0005829;<br>F:GO:0016563;<br>C:GO:0005801;<br>F:GO:0003677;<br>P:GO:0032012;<br>C:GO:0005795;<br>F:GO:0005086;<br>P:GO:0007186;<br>P:GO:0045449;<br>F:GO:0003824;<br>C:GO:0005634;<br>P:GO:0046903;<br>C:GO:0005739 | - |             | IPR001019; IPR011025;<br>G3DSA:3.40.50.300 (GENE3D),<br>PTHR10218:SF63 (PANTHER),<br>SSF52540 (SUPERFAMILY)               |
| Caenorhabditis briggsae | golgi-specific brefeldin a resistance factor 1                             | 7  | P:GO:0006892;<br>C:GO:0000139;<br>P:GO:0006890;<br>F:GO:0005086;<br>P:GO:0032012;<br>F:GO:0005515;<br>P:GO:0048205                                                                                                                                                                                                             | - |             | IPR000904; G3DSA:1.10.1000.11<br>(GENE3D), G3DSA:1.10.220.20<br>(GENE3D), PTHR10663 (PANTHER),<br>PTHR10663:SF8 (PANTHER) |
| Caenorhabditis elegans  | glycerol ki-se                                                             | 7  | C:GO:0005625;<br>P:GO:0006072;<br>F:GO:0042393;<br>F:GO:0004370;<br>P:GO:0045471;<br>C:GO:0005634;<br>C:GO:0005739                                                                                                                                                                                                             | - | EC:2.7.1.30 | -                                                                                                                         |
| -                       | -                                                                          | 0  |                                                                                                                                                                                                                                                                                                                                |   |             | -                                                                                                                         |
| -                       | -                                                                          | 0  |                                                                                                                                                                                                                                                                                                                                |   |             | -                                                                                                                         |



|                            |                                                                          |    |                                                                                                                                                                       |   |                                                                                                                                                          |
|----------------------------|--------------------------------------------------------------------------|----|-----------------------------------------------------------------------------------------------------------------------------------------------------------------------|---|----------------------------------------------------------------------------------------------------------------------------------------------------------|
| Loa loa                    | dead box atp-dependent r- helicase                                       | 10 | P:GO:0009792;<br>P:GO:0002119;<br>F:GO:0008026;<br>P:GO:0040010;<br>F:GO:0005524;<br>P:GO:0000003;<br>P:GO:0008340;<br>P:GO:0040011;<br>F:GO:0003743;<br>P:GO:0019915 | - | IPR011545; IPR014001; IPR014014;<br>IPR014021; G3DSA:3.40.50.300<br>(GENE3D), PTHR10967 (PANTHER),<br>PTHR10967:SF2 (PANTHER), SSF52540<br>(SUPERFAMILY) |
| -                          | -                                                                        | 0  |                                                                                                                                                                       |   | -                                                                                                                                                        |
| -                          | -                                                                        | 0  |                                                                                                                                                                       |   | SignalP (SIGNALP)                                                                                                                                        |
| -                          | -                                                                        | 0  |                                                                                                                                                                       |   | -                                                                                                                                                        |
| -                          | -                                                                        | 0  |                                                                                                                                                                       |   | -                                                                                                                                                        |
| Caenorhabditis elegans     | hypothetical protein F01G4.6 [Caenorhabditis elegans]                    | 6  | P:GO:0040035;<br>P:GO:0009792;<br>P:GO:0002119;<br>P:GO:0006810;<br>P:GO:0040010;<br>C:GO:0016020                                                                     | - | -                                                                                                                                                        |
| Caenorhabditis elegans     | beta 5                                                                   | 6  | F:GO:0008060;<br>P:GO:0032312;<br>F:GO:0008270;<br>P:GO:0019915;<br>P:GO:0002119;<br>F:GO:0005515                                                                     | - | IPR001164; IPR001849; IPR011993;<br>PTHR23180 (PANTHER),<br>PTHR23180:SF20 (PANTHER),<br>SSF50729 (SUPERFAMILY)                                          |
| -                          | -                                                                        | 0  |                                                                                                                                                                       |   | SignalP (SIGNALP)                                                                                                                                        |
| Loa loa                    | baculoviral iap repeat-containing 2                                      | 1  | F:GO:0005488                                                                                                                                                          | - | IPR001841; PTHR10044 (PANTHER),<br>PTHR10044:SF9 (PANTHER)                                                                                               |
| Caenorhabditis elegans     | vitellogenin structural genes (yolk protein genes) family member (vit-2) | 4  | P:GO:0009792;<br>P:GO:0008340;<br>P:GO:0040010;<br>F:GO:0005515                                                                                                       | - | IPR000215; IPR001747; IPR015816;<br>IPR015819; PTHR23345 (PANTHER)                                                                                       |
| Caenorhabditis elegans     | vitellogenin structural genes (yolk protein genes) family member (vit-2) | 4  | P:GO:0009792;<br>P:GO:0008340;<br>P:GO:0040010;<br>F:GO:0005515                                                                                                       | - | IPR000215; IPR015816; IPR015819;<br>PTHR23345 (PANTHER)                                                                                                  |
| Oscheius sp. (strain CEW1) | vitellogenin structural genes (yolk protein genes) family member (vit-2) | 4  | P:GO:0009792;<br>F:GO:0005515;<br>P:GO:0040010;<br>P:GO:0008340                                                                                                       | - | SignalP (SIGNALP)                                                                                                                                        |
| Caenorhabditis elegans     | vitellogenin structural genes (yolk protein genes) family member (vit-2) | 4  | P:GO:0009792;<br>F:GO:0005515;<br>P:GO:0040010;<br>P:GO:0008340                                                                                                       | - | IPR001747; IPR015816; IPR015819;<br>PTHR23345 (PANTHER)                                                                                                  |
| Caenorhabditis elegans     | vitellogenin structural genes (yolk protein genes) family member (vit-2) | 4  | P:GO:0009792;<br>F:GO:0005515;<br>P:GO:0040010;<br>P:GO:0008340                                                                                                       | - | IPR001747; IPR015816; IPR015819;<br>PTHR23345 (PANTHER)                                                                                                  |
| Caenorhabditis elegans     | vitellogenin structural genes (yolk protein genes) family member (vit-2) | 4  | P:GO:0009792;<br>F:GO:0005515;<br>P:GO:0040010;<br>P:GO:0008340                                                                                                       | - | IPR000215                                                                                                                                                |

|                                         |                                                             |           |                                                                                                                                                                                                                                                                                                                                                                                                                                                                                                                           |          |         |                                                                                                                                                                 |
|-----------------------------------------|-------------------------------------------------------------|-----------|---------------------------------------------------------------------------------------------------------------------------------------------------------------------------------------------------------------------------------------------------------------------------------------------------------------------------------------------------------------------------------------------------------------------------------------------------------------------------------------------------------------------------|----------|---------|-----------------------------------------------------------------------------------------------------------------------------------------------------------------|
| <p>Angiostrongylus cantonensis</p>      | <p>mediator of r- polymerase ii transcription subunit 6</p> | <p>12</p> | <p>P:GO:0006357;<br/>P:GO:0040007;<br/>P:GO:0040027;<br/>P:GO:0040035;<br/>P:GO:0007283;<br/>F:GO:0016455;<br/>F:GO:0005515;<br/>P:GO:0007281;<br/>C:GO:0016592;<br/>P:GO:0048477;<br/>P:GO:0009792;<br/>P:GO:0008406</p>                                                                                                                                                                                                                                                                                                 | <p>-</p> | <p></p> | <p>SignalP (SIGNALP)</p>                                                                                                                                        |
| <p>Arabidopsis lyrata subsp. lyrata</p> | <p>serine threonine ki-se</p>                               | <p>0</p>  | <p>P:GO:0006357;<br/>P:GO:0030154;<br/>P:GO:0033993;<br/>F:GO:0048185;<br/>F:GO:0004872;<br/>F:GO:0004871;<br/>P:GO:0006355;<br/>C:GO:0005886;<br/>F:GO:0004713;<br/>P:GO:0007368;<br/>F:GO:0004712;<br/>P:GO:0009749;<br/>P:GO:0001541;<br/>C:GO:0016021;<br/>C:GO:0016020;<br/>P:GO:0001701;<br/>F:GO:0004674;<br/>F:GO:0004672;<br/>C:GO:0048179;<br/>F:GO:0004709;<br/>P:GO:0007165;<br/>F:GO:0005524;<br/>F:GO:0016301;<br/>F:GO:0000166;<br/>F:GO:0016361;<br/>P:GO:0021549;<br/>P:GO:0006468;<br/>C:GO:0009886</p> | <p></p>  | <p></p> | <p>IPR000719; IPR011009; IPR017441;<br/>IPR017442; G3DSA:3.30.200.20<br/>(GENE3D), PTHR23257 (PANTHER),<br/>PTHR23257:SF80 (PANTHER), SignalP<br/>(SIGNALP)</p> |

|                         |                                                            |    |                                                                                                                                                                                                                                                                                                                                                 |                                                                                                                                     |                                                                                                                   |
|-------------------------|------------------------------------------------------------|----|-------------------------------------------------------------------------------------------------------------------------------------------------------------------------------------------------------------------------------------------------------------------------------------------------------------------------------------------------|-------------------------------------------------------------------------------------------------------------------------------------|-------------------------------------------------------------------------------------------------------------------|
| Homo sapiens            | AF113217_1MSTP037 [Homo sapiens]                           | 20 | C:GO:0005829;<br>F:GO:0005158;<br>P:GO:0007043;<br>C:GO:0032587;<br>C:GO:0043231;<br>P:GO:0007016;<br>F:GO:0017166;<br>F:GO:0030274;<br>P:GO:0007044;<br>C:GO:0005813;<br>P:GO:0007155;<br>C:GO:0005925;<br>P:GO:0030866;<br>C:GO:0005911;<br>F:GO:0003779;<br>C:GO:0015629;<br>P:GO:0006928;<br>F:GO:0005200;<br>C:GO:0005576;<br>P:GO:0006936 | -                                                                                                                                   | IPR007921; SignalP (SIGNALP)                                                                                      |
| Caenorhabditis briggsae | hyphally-regulated cell wall protein                       | 0  |                                                                                                                                                                                                                                                                                                                                                 | P:GO:0060271;<br>F:GO:0008061;<br>F:GO:0005488;<br>P:GO:0060041;<br>P:GO:0006030;<br>P:GO:0010842;<br>P:GO:0007018;<br>C:GO:0005576 | -                                                                                                                 |
| Caenorhabditis briggsae | mucin- partial                                             | 0  |                                                                                                                                                                                                                                                                                                                                                 |                                                                                                                                     | -                                                                                                                 |
| Caenorhabditis briggsae | major facilitator superfamily protein                      | 6  | C:GO:0016021;<br>P:GO:0009792;<br>P:GO:0040007;<br>P:GO:0055085;<br>F:GO:0005215;<br>P:GO:0002119                                                                                                                                                                                                                                               | -                                                                                                                                   | SignalP (SIGNALP)                                                                                                 |
| Loa loa                 | phd-finger family protein                                  | 1  | F:GO:0005488                                                                                                                                                                                                                                                                                                                                    | -                                                                                                                                   | IPR001965; IPR011011; IPR013083;<br>IPR019786; IPR019787; PTHR13793<br>(PANTHER), PTHR13793:SF9<br>(PANTHER)      |
| Equus caballus          | survival of motor neuron telomeric                         | 5  | C:GO:0005737;<br>F:GO:0005488;<br>C:GO:0005654;<br>P:GO:0000398;<br>P:GO:0022618                                                                                                                                                                                                                                                                | -                                                                                                                                   | IPR002999; IPR010304; IPR018351;<br>G3DSA:2.30.30.140 (GENE3D),<br>PTHR12664 (PANTHER), SSF63748<br>(SUPERFAMILY) |
| Caenorhabditis briggsae | 4-coumarate- ligase-like protein                           | 2  | F:GO:0003824;<br>P:GO:0008152                                                                                                                                                                                                                                                                                                                   | -                                                                                                                                   | -                                                                                                                 |
|                         | -                                                          | 0  |                                                                                                                                                                                                                                                                                                                                                 |                                                                                                                                     | -                                                                                                                 |
|                         | -                                                          | 0  |                                                                                                                                                                                                                                                                                                                                                 |                                                                                                                                     | -                                                                                                                 |
|                         | -                                                          | 0  |                                                                                                                                                                                                                                                                                                                                                 |                                                                                                                                     | SignalP (SIGNALP)                                                                                                 |
| Caenorhabditis briggsae | elegans protein partially confirmed by transcript evidence | 1  | P:GO:0040010                                                                                                                                                                                                                                                                                                                                    |                                                                                                                                     | IPR006621; PTHR11161 (PANTHER)                                                                                    |
|                         | -                                                          | 0  |                                                                                                                                                                                                                                                                                                                                                 |                                                                                                                                     | -                                                                                                                 |

|                          |                                                                        |    |                                                                                                                                                                                                                                                                                              |                                                                 |                                                         |                                                                                                                  |
|--------------------------|------------------------------------------------------------------------|----|----------------------------------------------------------------------------------------------------------------------------------------------------------------------------------------------------------------------------------------------------------------------------------------------|-----------------------------------------------------------------|---------------------------------------------------------|------------------------------------------------------------------------------------------------------------------|
| Caenorhabditis elegans   | acp1 protein                                                           | 8  | F:GO:0004725;<br>F:GO:0042802;<br>F:GO:0003993;<br>C:GO:0019717;<br>P:GO:0016311;<br>P:GO:0007268;<br>P:GO:0044267;<br>F:GO:0017124                                                                                                                                                          | -                                                               | EC:3.1.3.48;<br>EC:3.1.3.2                              | IPR000106; IPR002115; IPR017867;<br>G3DSA:3.40.50.270 (GENE3D),<br>PTHR11717:SF7 (PANTHER), SignalP<br>(SIGNALP) |
| Caenorhabditis elegans   | ubiquitin fusion degradation (yeast ufd homolog) family member (ufd-1) | 0  |                                                                                                                                                                                                                                                                                              | F:GO:0005515;<br>P:GO:0006511                                   |                                                         | -                                                                                                                |
| Caenorhabditis elegans   | ubiquitin fusion degradation protein 1 homolog                         | 1  | F:GO:0005515                                                                                                                                                                                                                                                                                 | -                                                               |                                                         | -                                                                                                                |
| Caenorhabditis elegans   | ubiquitin fusion degradation protein 1 homolog                         | 1  | F:GO:0005515                                                                                                                                                                                                                                                                                 | -                                                               |                                                         | -                                                                                                                |
|                          | -                                                                      | 0  |                                                                                                                                                                                                                                                                                              |                                                                 |                                                         | -                                                                                                                |
| Brugia malayi            | male sterility protein                                                 | 6  | P:GO:0008610;<br>F:GO:0050062;<br>F:GO:0005515;<br>C:GO:0005782;<br>P:GO:0044237;<br>C:GO:0016020                                                                                                                                                                                            | -                                                               | EC:1.2.1.50                                             | IPR004262; PTHR11011 (PANTHER),<br>PTHR11011:SF8 (PANTHER)                                                       |
| Ornithorhynchus anatinus | snrnp core protein smx5d                                               | 0  |                                                                                                                                                                                                                                                                                              |                                                                 |                                                         | SignalP (SIGNALP)                                                                                                |
| Drosophila erecta        | GG20442 [Drosophila erecta]                                            | 0  |                                                                                                                                                                                                                                                                                              |                                                                 |                                                         | -                                                                                                                |
| Drosophila erecta        | GG20442 [Drosophila erecta]                                            | 0  |                                                                                                                                                                                                                                                                                              |                                                                 |                                                         | -                                                                                                                |
| Caenorhabditis briggsae  | nucleolar gtp-binding protein 1                                        | 17 | P:GO:0008156;<br>P:GO:0000003;<br>P:GO:0030336;<br>F:GO:0005515;<br>P:GO:0040010;<br>P:GO:0050821;<br>F:GO:0005525;<br>P:GO:0000079;<br>P:GO:0008285;<br>P:GO:0022408;<br>P:GO:0009792;<br>P:GO:0002119;<br>P:GO:0031397;<br>C:GO:0048471;<br>F:GO:0003924;<br>P:GO:0033342;<br>C:GO:0005634 | -                                                               | EC:3.6.5.1;<br>EC:3.6.5.2;<br>EC:3.6.5.3;<br>EC:3.6.5.4 | PTHR11702 (PANTHER),<br>PTHR11702:SF4 (PANTHER)                                                                  |
|                          | -                                                                      | 0  |                                                                                                                                                                                                                                                                                              |                                                                 |                                                         | -                                                                                                                |
| Caenorhabditis briggsae  | krr1 small subunit processome component homolog                        | 6  | P:GO:0010171;<br>P:GO:0002119;<br>F:GO:0003723;<br>P:GO:0018991;<br>P:GO:0040007;<br>C:GO:0005634                                                                                                                                                                                            | -                                                               |                                                         | SignalP (SIGNALP)                                                                                                |
| Brugia malayi            | d domain (prokaryotic heat shock protein) family member (dnj-5)        | 1  | F:GO:0005515                                                                                                                                                                                                                                                                                 | -                                                               |                                                         | IPR001623; IPR006162; IPR015609;<br>PTHR11821:SF36 (PANTHER)                                                     |
| Brugia malayi            | d domain (prokaryotic heat shock protein) family member (dnj-5)        | 0  |                                                                                                                                                                                                                                                                                              | F:GO:0051082;<br>P:GO:0006457;<br>C:GO:0016021;<br>F:GO:0031072 |                                                         | IPR001623; IPR006162; IPR015609;<br>PTHR11821:SF36 (PANTHER), SignalP<br>(SIGNALP)                               |
|                          | -                                                                      | 0  |                                                                                                                                                                                                                                                                                              |                                                                 |                                                         | -                                                                                                                |

|                         |                                                                                       |  |                                                                                    |                                                                                                                                                                       |                                                         |                                                                                                                                                 |
|-------------------------|---------------------------------------------------------------------------------------|--|------------------------------------------------------------------------------------|-----------------------------------------------------------------------------------------------------------------------------------------------------------------------|---------------------------------------------------------|-------------------------------------------------------------------------------------------------------------------------------------------------|
| Caenorhabditis elegans  | dymeclin isoform 1                                                                    |  | P:GO:0009792;<br>C:GO:0005737;<br>5 P:GO:0000003;<br>F:GO:0005515;<br>P:GO:0002119 | -                                                                                                                                                                     |                                                         | IPR019142; PTHR12895 (PANTHER),<br>PTHR12895:SF2 (PANTHER)                                                                                      |
| Pan troglodytes         | guanylate binding protein interferon-inducible                                        |  | P:GO:0006955;<br>4 F:GO:0003924;<br>C:GO:0005886;<br>F:GO:0005525                  | -                                                                                                                                                                     | EC:3.6.5.1;<br>EC:3.6.5.2;<br>EC:3.6.5.3;<br>EC:3.6.5.4 | IPR003191; PTHR10751 (PANTHER),<br>PTHR10751:SF2 (PANTHER)                                                                                      |
| Caenorhabditis briggsae | elegans protein confirmed by transcript evidence                                      |  | F:GO:0047750;<br>4 P:GO:0016125;<br>C:GO:0016021;<br>C:GO:0005783                  | -                                                                                                                                                                     | EC:5.3.3.5                                              | SignalP (SIGNALP)                                                                                                                               |
| -                       | -                                                                                     |  | 0                                                                                  |                                                                                                                                                                       |                                                         | SignalP (SIGNALP)                                                                                                                               |
| -                       | -                                                                                     |  | 0                                                                                  |                                                                                                                                                                       |                                                         | SignalP (SIGNALP)                                                                                                                               |
| -                       | -                                                                                     |  | 0                                                                                  |                                                                                                                                                                       |                                                         | -                                                                                                                                               |
| -                       | -                                                                                     |  | 0                                                                                  |                                                                                                                                                                       |                                                         | -                                                                                                                                               |
| Hydra magnipapillata    | zinc finger Isd1 subclass family protein                                              |  | 0                                                                                  | F:GO:0008061;<br>P:GO:0006030;<br>F:GO:0004872;<br>F:GO:0045735;<br>C:GO:0005576                                                                                      |                                                         | -                                                                                                                                               |
| Hydra magnipapillata    | alpha beta hydrolase fold-1 domain-containing protein                                 |  | 0                                                                                  |                                                                                                                                                                       |                                                         | -                                                                                                                                               |
| Hydra magnipapillata    | zinc finger Isd1 subclass family protein                                              |  | 0                                                                                  | C:GO:0005737;<br>P:GO:0007288;<br>F:GO:0004872;<br>F:GO:0045735                                                                                                       |                                                         | -                                                                                                                                               |
| -                       | -                                                                                     |  | 0                                                                                  |                                                                                                                                                                       |                                                         | -                                                                                                                                               |
| -                       | -                                                                                     |  | 0                                                                                  |                                                                                                                                                                       |                                                         | -                                                                                                                                               |
| Caenorhabditis brenneri | splicing arginine serine-rich 17a                                                     |  | P:GO:0016070;<br>F:GO:0005515;<br>5 P:GO:0050794;<br>P:GO:0010467;<br>C:GO:0005634 | -                                                                                                                                                                     |                                                         | PTHR12484 (PANTHER)                                                                                                                             |
| Caenorhabditis elegans  | ethanolaminephosphotransferase 1                                                      |  | 1 F:GO:0016780                                                                     | -                                                                                                                                                                     | EC:2.7.8.0                                              | -                                                                                                                                               |
| Brugia malayi           | cation transporting atpase protein isoform partially confirmed by transcript evidence |  | C:GO:0016021;<br>F:GO:0015662;<br>5 P:GO:0006754;<br>F:GO:0005524;<br>P:GO:0006812 | -                                                                                                                                                                     |                                                         | IPR001757; PTHR11939:SF54<br>(PANTHER), SSF81665 (SUPERFAMILY)                                                                                  |
| Caenorhabditis briggsae | elegans protein partially confirmed by transcript evidence                            |  | 0                                                                                  | F:GO:0005506;<br>F:GO:0031418;<br>F:GO:0016705;<br>F:GO:0016702;<br>P:GO:0000003;<br>P:GO:0055114;<br>F:GO:0016491;<br>F:GO:0004656;<br>C:GO:0005783;<br>F:GO:0005488 |                                                         | IPR006620; PTHR10869 (PANTHER),<br>PTHR10869:SF4 (PANTHER)                                                                                      |
| Caenorhabditis elegans  | selenophosphate synthetase                                                            |  | P:GO:0007444;<br>F:GO:0004756;<br>5 P:GO:0016260;<br>P:GO:0008283;<br>F:GO:0005524 | -                                                                                                                                                                     | EC:2.7.9.3                                              | IPR000728; IPR004536; IPR010918;<br>IPR016188; IPR017964;<br>G3DSA:3.30.1330.10 (GENE3D),<br>G3DSA:3.90.650.10 (GENE3D),<br>PTHR10256 (PANTHER) |
| Brugia malayi           | udp-glucose:glycoprotein glucosyltransferase containing protein                       |  | 1 F:GO:0016740                                                                     | -                                                                                                                                                                     |                                                         | IPR009448; SignalP (SIGNALP)                                                                                                                    |

|                                           |                                    |    |                                                                                                                                                                                                                                                                                                               |   |                                                                                                                               |
|-------------------------------------------|------------------------------------|----|---------------------------------------------------------------------------------------------------------------------------------------------------------------------------------------------------------------------------------------------------------------------------------------------------------------|---|-------------------------------------------------------------------------------------------------------------------------------|
|                                           | -                                  | 0  |                                                                                                                                                                                                                                                                                                               |   | -                                                                                                                             |
|                                           | -                                  | 0  |                                                                                                                                                                                                                                                                                                               |   | -                                                                                                                             |
|                                           | -                                  | 0  |                                                                                                                                                                                                                                                                                                               |   | -                                                                                                                             |
| Caenorhabditis elegans                    | mitotic phosphoprotein 44          | 1  | P:GO:0006810                                                                                                                                                                                                                                                                                                  | - | IPR007846; PTHR21527 (PANTHER), PTHR21527:SF1 (PANTHER), PS51472 (PROFILE), SSF54928 (SUPERFAMILY)                            |
| Drosophila pseudoobscura<br>pseudoobscura | serine threonine-protein ki-se grp | 15 | P:GO:0007348;<br>P:GO:0000003;<br>P:GO:0040010;<br>F:GO:0004672;<br>P:GO:0040011;<br>P:GO:0051225;<br>P:GO:0016321;<br>P:GO:0009792;<br>P:GO:0000077;<br>P:GO:0002119;<br>P:GO:0010171;<br>F:GO:0031151;<br>P:GO:0051299;<br>C:GO:0005634;<br>P:GO:0019538                                                    | - | IPR000719; IPR011009; IPR015729;<br>IPR017442; IPR020636;<br>G3DSA:1.10.510.10 (GENE3D)                                       |
| Harpegnathos saltator                     | novel protein (zgc:56093)          | 4  | P:GO:0000075;<br>P:GO:0007275;<br>F:GO:0016740;<br>P:GO:0042770                                                                                                                                                                                                                                               | - | IPR000719; IPR011009; IPR015729;<br>IPR017442; IPR020636;<br>G3DSA:1.10.510.10 (GENE3D)                                       |
|                                           | -                                  | 0  |                                                                                                                                                                                                                                                                                                               |   | -                                                                                                                             |
|                                           | -                                  | 0  |                                                                                                                                                                                                                                                                                                               |   | -                                                                                                                             |
| Caenorhabditis briggsae                   | syntaxin 1a                        | 18 | P:GO:0008286;<br>F:GO:0005484;<br>P:GO:0007349;<br>P:GO:0040011;<br>P:GO:0007317;<br>C:GO:0016021;<br>P:GO:0006936;<br>P:GO:0006886;<br>P:GO:0007482;<br>P:GO:0016081;<br>P:GO:0031629;<br>F:GO:0042302;<br>P:GO:0042335;<br>P:GO:0019722;<br>P:GO:0007399;<br>C:GO:0005886;<br>P:GO:0040014;<br>P:GO:0000910 | - | IPR000727; IPR006011; IPR006012;<br>IPR010989; G3DSA:1.20.58.70<br>(GENE3D), PTHR19957 (PANTHER),<br>PTHR19957:SF33 (PANTHER) |

|                         |                                                     |    |                                                                                                                                                                                                                                                                                                               |                                                                                  |                                                                                                                                    |
|-------------------------|-----------------------------------------------------|----|---------------------------------------------------------------------------------------------------------------------------------------------------------------------------------------------------------------------------------------------------------------------------------------------------------------|----------------------------------------------------------------------------------|------------------------------------------------------------------------------------------------------------------------------------|
| Caenorhabditis elegans  | syntaxin 1a                                         | 18 | P:GO:0008286;<br>F:GO:0005484;<br>P:GO:0007349;<br>P:GO:0040011;<br>P:GO:0007317;<br>C:GO:0016021;<br>P:GO:0006936;<br>P:GO:0006886;<br>P:GO:0007482;<br>P:GO:0016081;<br>P:GO:0031629;<br>F:GO:0042302;<br>P:GO:0042335;<br>P:GO:0019722;<br>P:GO:0007399;<br>C:GO:0005886;<br>P:GO:0040014;<br>P:GO:0000910 | -                                                                                | SignalIP (SIGNALP)                                                                                                                 |
| Caenorhabditis briggsae | syntaxin 1a                                         | 18 | P:GO:0008286;<br>F:GO:0005484;<br>P:GO:0007349;<br>P:GO:0040011;<br>P:GO:0007317;<br>C:GO:0016021;<br>P:GO:0006936;<br>P:GO:0006886;<br>P:GO:0007482;<br>P:GO:0016081;<br>P:GO:0031629;<br>F:GO:0042302;<br>P:GO:0042335;<br>P:GO:0019722;<br>P:GO:0007399;<br>C:GO:0005886;<br>P:GO:0040014;<br>P:GO:0000910 | -                                                                                | SignalIP (SIGNALP)                                                                                                                 |
| Caenorhabditis elegans  | variable abnormal morphology family member (vab-10) | 1  | F:GO:0003779                                                                                                                                                                                                                                                                                                  | -                                                                                | IPR002017; IPR018159;<br>G3DSA:1.20.58.60 (GENE3D),<br>PTHR11915 (PANTHER),<br>PTHR11915:SF49 (PANTHER),<br>SSF46966 (SUPERFAMILY) |
| Brugia malayi           | cg15644                                             | 0  |                                                                                                                                                                                                                                                                                                               | P:GO:0000003;<br>P:GO:0040035;<br>F:GO:0008270;<br>P:GO:0002119;<br>P:GO:0040007 | PTHR21330 (PANTHER),<br>PTHR21330:SF1 (PANTHER), PF11789<br>(PFAM)                                                                 |
| Brugia malayi           | 5 -nucleotidase                                     | 4  | F:GO:0008253;<br>F:GO:0005488;<br>P:GO:0046085;<br>C:GO:0005739                                                                                                                                                                                                                                               | -                                                                                | EC:3.1.3.5<br>IPR006434; PF05822 (PFAM),<br>SSF56784 (SUPERFAMILY)                                                                 |
|                         | -                                                   | 0  |                                                                                                                                                                                                                                                                                                               |                                                                                  | -                                                                                                                                  |

|                               |                                                      |   |                                                                                                                                                      |                                                |             |                                                                                                                                     |
|-------------------------------|------------------------------------------------------|---|------------------------------------------------------------------------------------------------------------------------------------------------------|------------------------------------------------|-------------|-------------------------------------------------------------------------------------------------------------------------------------|
| Strongylocentrotus purpuratus | host cell factor 1                                   | 9 | C:GO:0071339;<br>P:GO:0007049;<br>P:GO:0043254;<br>P:GO:0045449;<br>F:GO:0042802;<br>P:GO:0019046;<br>C:GO:0070688;<br>F:GO:0003713;<br>C:GO:0005737 | -                                              | -           | -                                                                                                                                   |
| -                             | -                                                    | 0 | -                                                                                                                                                    | -                                              | -           | -                                                                                                                                   |
| Caenorhabditis briggsae       | glutaryl-coenzyme a dehydroge-se                     | 8 | F:GO:0004361;<br>F:GO:0000062;<br>C:GO:0005743;<br>P:GO:0055114;<br>F:GO:0005515;<br>P:GO:0019395;<br>F:GO:0050660;<br>P:GO:0046949                  | -                                              | EC:1.3.99.7 | IPR006089; IPR006090; IPR006091;<br>IPR009075; PTHR10909 (PANTHER),<br>PTHR10909:SF10 (PANTHER)                                     |
| Caenorhabditis elegans        | glutaryl-coenzyme a dehydroge-se                     | 9 | F:GO:0004361;<br>F:GO:0000062;<br>C:GO:0005743;<br>P:GO:0055114;<br>F:GO:0005515;<br>C:GO:0005759;<br>P:GO:0019395;<br>F:GO:0050660;<br>P:GO:0046949 | -                                              | EC:1.3.99.7 | IPR006089; IPR006090; IPR006091;<br>IPR006092; IPR009075; IPR009100;<br>IPR013786; PTHR10909 (PANTHER),<br>PTHR10909:SF10 (PANTHER) |
| Caenorhabditis elegans        | uridine phosphorylase 2                              | 4 | C:GO:0005737;<br>F:GO:0004850;<br>C:GO:0045098;<br>P:GO:0009116                                                                                      | -                                              | EC:2.4.2.3  | IPR000845; IPR010059; IPR018017;<br>G3DSA:3.40.50.1580 (GENE3D),<br>SSF53167 (SUPERFAMILY)                                          |
| Caenorhabditis elegans        | vacuolar protein sorting-associated protein 45       | 8 | C:GO:0000139;<br>P:GO:0002119;<br>P:GO:0018996;<br>P:GO:0000003;<br>P:GO:0051649;<br>P:GO:0006898;<br>C:GO:0010008;<br>P:GO:0015031                  | -                                              | -           | -                                                                                                                                   |
| Caenorhabditis elegans        | hed family member (ptc-3)                            | 8 | P:GO:0009792;<br>P:GO:0002119;<br>F:GO:0008158;<br>P:GO:0040018;<br>P:GO:0018996;<br>P:GO:0000003;<br>P:GO:0040011;<br>C:GO:0016021                  | -                                              | -           | IPR003392; PTHR10796 (PANTHER),<br>PTHR10796:SF34 (PANTHER),<br>SSF82866 (SUPERFAMILY)                                              |
| Caenorhabditis briggsae       | temporarily assigned gene -me family member (tag-51) | 0 | -                                                                                                                                                    | -                                              | -           | -                                                                                                                                   |
| Caenorhabditis elegans        | r- binding motif protein 7                           | 3 | P:GO:0002119;<br>F:GO:0005488;<br>P:GO:0040010                                                                                                       | -                                              | -           | IPR000504; IPR012677; PTHR13798<br>(PANTHER), SSF54928 (SUPERFAMILY)                                                                |
| Loa loa                       | prefoldin subunit 4                                  | 0 | -                                                                                                                                                    | F:GO:0051082;<br>P:GO:0006457;<br>C:GO:0016272 | -           | IPR002777; G3DSA:1.10.287.370<br>(GENE3D), PTHR21100 (PANTHER),<br>PTHR21100:SF3 (PANTHER)                                          |
| -                             | -                                                    | 0 | -                                                                                                                                                    | -                                              | -           | -                                                                                                                                   |



|                         |                                                          |    |                                                                                                                                                                                                                                                                                                                                                                                                                                                                        |                                                |             |                                                                                                                                                                |
|-------------------------|----------------------------------------------------------|----|------------------------------------------------------------------------------------------------------------------------------------------------------------------------------------------------------------------------------------------------------------------------------------------------------------------------------------------------------------------------------------------------------------------------------------------------------------------------|------------------------------------------------|-------------|----------------------------------------------------------------------------------------------------------------------------------------------------------------|
| Caenorhabditis briggsae | reactive oxygen species modulator 1                      | 6  | P:GO:0001302;<br>P:GO:0008284;<br>P:GO:0010670;<br>P:GO:0034614;<br>C:GO:0016020;<br>C:GO:0005739                                                                                                                                                                                                                                                                                                                                                                      |                                                |             |                                                                                                                                                                |
| Brugia malayi           | protein tyrosine non-receptor type 11                    | 27 | P:GO:0048011;<br>F:GO:0004725;<br>P:GO:0046825;<br>P:GO:0035265;<br>P:GO:0042445;<br>P:GO:0007409;<br>P:GO:0009755;<br>F:GO:0043274;<br>P:GO:0046676;<br>C:GO:0005829;<br>P:GO:0046887;<br>F:GO:0019904;<br>P:GO:0048609;<br>F:GO:0043560;<br>P:GO:0051463;<br>P:GO:0009967;<br>C:GO:0043234;<br>P:GO:0006470;<br>P:GO:0060125;<br>P:GO:0006641;<br>F:GO:0051428;<br>P:GO:0040014;<br>C:GO:0005625;<br>P:GO:0000187;<br>F:GO:0005158;<br>P:GO:0042593;<br>C:GO:0005739 |                                                | EC:3.1.3.48 | IPR000242; IPR000980;<br>G3DSA:3.90.190.10 (GENE3D),<br>PTHR19134 (PANTHER),<br>PTHR19134:SF64 (PANTHER),<br>SSF52799 (SUPERFAMILY), SSF55550<br>(SUPERFAMILY) |
| Loa loa                 | cation transport regulator-like protein 2                | 0  |                                                                                                                                                                                                                                                                                                                                                                                                                                                                        | F:GO:0003674;<br>P:GO:0008150;<br>C:GO:0005575 |             | IPR006840                                                                                                                                                      |
|                         |                                                          | 0  |                                                                                                                                                                                                                                                                                                                                                                                                                                                                        |                                                |             |                                                                                                                                                                |
| Caenorhabditis briggsae | ribosome biogenesis protein bop1                         | 10 | P:GO:0040010;<br>P:GO:0051726;<br>C:GO:0070545;<br>P:GO:0040035;<br>P:GO:0000463;<br>P:GO:0002119;<br>F:GO:0005515;<br>P:GO:0006898;<br>C:GO:0005654;<br>P:GO:0009792                                                                                                                                                                                                                                                                                                  |                                                |             | IPR001680; IPR011046; IPR012953;<br>IPR015943; IPR017986; IPR018087;<br>IPR019781; IPR019782; PTHR17605<br>(PANTHER)                                           |
| Caenorhabditis elegans  | chch domain containing protein                           | 0  |                                                                                                                                                                                                                                                                                                                                                                                                                                                                        |                                                |             | IPR010625                                                                                                                                                      |
| Brugia malayi           | ankyrin repeat domain-containing protein 13c             | 0  |                                                                                                                                                                                                                                                                                                                                                                                                                                                                        |                                                |             | IPR021832; PTHR12447 (PANTHER)                                                                                                                                 |
| Haemonchus contortus    | modulation of locomotion defective family member (mod-1) | 5  | C:GO:0016021;<br>C:GO:0030054;<br>C:GO:0045211;<br>F:GO:0005230;<br>P:GO:0006811                                                                                                                                                                                                                                                                                                                                                                                       |                                                |             | IPR006028; IPR006029; IPR006201;<br>IPR006202; IPR018000;<br>G3DSA:1.20.120.370 (GENE3D),<br>PTHR18945:SF13 (PANTHER)                                          |
| Caenorhabditis briggsae | elegans protein confirmed by transcript evidence         | 0  |                                                                                                                                                                                                                                                                                                                                                                                                                                                                        |                                                |             | SignalP (SIGNALP)                                                                                                                                              |

|                               |                                                            |    |                                                                                                                                                                       |                                                                 |                                                                                                  |
|-------------------------------|------------------------------------------------------------|----|-----------------------------------------------------------------------------------------------------------------------------------------------------------------------|-----------------------------------------------------------------|--------------------------------------------------------------------------------------------------|
| Caenorhabditis briggsae       | hct domain and rld 4                                       | 4  | F:GO:0016874;<br>C:GO:0005622;<br>P:GO:0000003;<br>P:GO:0009987                                                                                                       | -                                                               | IPR000569; PTHR11254 (PANTHER),<br>PTHR11254:SF8 (PANTHER)                                       |
| Caenorhabditis elegans        | rap guanine nucleotide exchange factor 6                   | 4  | F:GO:0005085;<br>C:GO:0005622;<br>P:GO:0051056;<br>F:GO:0005515                                                                                                       | -                                                               | IPR000595; IPR014710; IPR018490;<br>SignalP (SIGNALP)                                            |
| Homo sapiens                  | hCG1989828 [Homo sapiens]                                  | 0  |                                                                                                                                                                       |                                                                 | IPR000488; IPR011029                                                                             |
|                               |                                                            | 0  |                                                                                                                                                                       |                                                                 | -                                                                                                |
| Caenorhabditis elegans        | cleavage and polyadenylation specific factor isoform cra_a | 3  | C:GO:0005654;<br>F:GO:0003723;<br>P:GO:0006397                                                                                                                        | -                                                               | PTHR10644 (PANTHER),<br>PTHR10644:SF2 (PANTHER)                                                  |
|                               |                                                            | 0  |                                                                                                                                                                       |                                                                 | PTHR13902 (PANTHER),<br>PTHR13902:SF12 (PANTHER)                                                 |
|                               |                                                            | 0  |                                                                                                                                                                       |                                                                 | -                                                                                                |
| Caenorhabditis elegans        | metallophosphoesterase domain-containing                   | 2  | F:GO:0005515;<br>F:GO:0016787                                                                                                                                         | -                                                               | -                                                                                                |
| Ancylostoma caninum           | venom-allergen-like protein family member (vap-1)          | 1  | P:GO:0040011                                                                                                                                                          | -                                                               | IPR001283; IPR014044;<br>PTHR10334:SF11 (PANTHER)                                                |
| Brugia malayi                 | hypothetical protein Bm1_07715 [Brugia malayi]             | 0  |                                                                                                                                                                       |                                                                 | -                                                                                                |
|                               |                                                            | 0  |                                                                                                                                                                       |                                                                 | -                                                                                                |
| Loa loa                       | vacuolar protein sorting 37b                               | 0  |                                                                                                                                                                       | C:GO:0031902;<br>C:GO:0016020;<br>C:GO:0005768;<br>P:GO:0015031 | -                                                                                                |
| Caenorhabditis elegans        | 28s ribosomal protein mitochondrial precursor              | 2  | C:GO:0044444;<br>C:GO:0043229                                                                                                                                         | -                                                               | SignalP (SIGNALP)                                                                                |
| Brugia malayi                 | mediator of r- polymerase ii transcription subunit 10      | 10 | P:GO:0040010;<br>P:GO:0006357;<br>P:GO:0040035;<br>F:GO:0016455;<br>P:GO:0002119;<br>P:GO:0040017;<br>P:GO:0040039;<br>C:GO:0016592;<br>P:GO:0002009;<br>P:GO:0009792 | -                                                               | IPR019145; PTHR13345 (PANTHER),<br>PTHR13345:SF2 (PANTHER)                                       |
| Brugia malayi                 | speckle-type poz protein                                   | 3  | P:GO:0000003;<br>P:GO:0006397;<br>F:GO:0005515                                                                                                                        | -                                                               | IPR000210; IPR011333; IPR013069;<br>IPR013089; PTHR23230:SF94<br>(PANTHER)                       |
| Caenorhabditis briggsae       | briggsae cbr-cpg-4 protein                                 | 0  |                                                                                                                                                                       |                                                                 | SignalP (SIGNALP)                                                                                |
| Caenorhabditis elegans        | animal haem peroxidase family protein                      | 0  |                                                                                                                                                                       | P:GO:0055114;<br>F:GO:0020037;<br>P:GO:0006979;<br>F:GO:0004601 | -                                                                                                |
|                               |                                                            | 0  |                                                                                                                                                                       |                                                                 | -                                                                                                |
| Caenorhabditis elegans        | af316599_1 paracaspase                                     | 0  |                                                                                                                                                                       | P:GO:0000003;<br>P:GO:0006508;<br>F:GO:0005515;<br>F:GO:0004197 | -                                                                                                |
| Caenorhabditis elegans        | af316599_1 paracaspase                                     | 0  |                                                                                                                                                                       | P:GO:0000003;<br>P:GO:0006508;<br>F:GO:0005515;<br>F:GO:0004197 | IPR007110; IPR013783; PTHR22576<br>(PANTHER), PTHR22576:SF1<br>(PANTHER), SSF48726 (SUPERFAMILY) |
| Xenopus (Silurana) tropicalis | loc779458 protein                                          | 0  |                                                                                                                                                                       |                                                                 | -                                                                                                |

|                         |                                                            |    |                                                                                                                                                                       |                                                                                                                                                                                                                          |                                                                                                                       |
|-------------------------|------------------------------------------------------------|----|-----------------------------------------------------------------------------------------------------------------------------------------------------------------------|--------------------------------------------------------------------------------------------------------------------------------------------------------------------------------------------------------------------------|-----------------------------------------------------------------------------------------------------------------------|
| Caenorhabditis briggsae | elegans protein confirmed by transcript evidence           | 1  | F:GO:0005515                                                                                                                                                          | -                                                                                                                                                                                                                        | SignalP (SIGNALP)                                                                                                     |
| Caenorhabditis elegans  | elegans protein confirmed by transcript evidence           | 0  |                                                                                                                                                                       |                                                                                                                                                                                                                          |                                                                                                                       |
| Caenorhabditis elegans  | elegans protein confirmed by transcript evidence           | 0  |                                                                                                                                                                       |                                                                                                                                                                                                                          | -                                                                                                                     |
|                         | -                                                          | 0  |                                                                                                                                                                       |                                                                                                                                                                                                                          | -                                                                                                                     |
|                         | -                                                          | 0  |                                                                                                                                                                       |                                                                                                                                                                                                                          | -                                                                                                                     |
| Brugia malayi           | estrogen receptor binding site associated antigen 9-like   | 0  |                                                                                                                                                                       |                                                                                                                                                                                                                          | IPR008610; SignalP (SIGNALP)                                                                                          |
| Caenorhabditis elegans  | briggsae cbr-lpd-6 protein                                 | 0  |                                                                                                                                                                       |                                                                                                                                                                                                                          | PTHR12661 (PANTHER),<br>PTHR12661:SF1 (PANTHER)                                                                       |
| Brugia malayi           | briggsae cbr-mdt-17 protein                                | 0  |                                                                                                                                                                       |                                                                                                                                                                                                                          | -                                                                                                                     |
|                         | -                                                          | 0  |                                                                                                                                                                       |                                                                                                                                                                                                                          | -                                                                                                                     |
| Loa loa                 | c1orf149 homolog                                           | 1  | P:GO:0009987                                                                                                                                                          | -                                                                                                                                                                                                                        | IPR015418; PTHR13476 (PANTHER)                                                                                        |
| Loa loa                 | c1orf149 homolog                                           | 1  | P:GO:0009987                                                                                                                                                          | -                                                                                                                                                                                                                        | IPR015418; PTHR13476 (PANTHER)                                                                                        |
| Caenorhabditis elegans  | map ki-se activating protein c22orf5                       | 1  | F:GO:0016301                                                                                                                                                          | -                                                                                                                                                                                                                        | IPR005178; PTHR23423:SF2<br>(PANTHER)                                                                                 |
| Caenorhabditis elegans  | map ki-se activating protein c22orf5                       | 1  | F:GO:0016301                                                                                                                                                          | -                                                                                                                                                                                                                        | IPR005178; PTHR23423:SF2<br>(PANTHER)                                                                                 |
| Caenorhabditis elegans  | map ki-se activating protein c22orf5                       | 1  | F:GO:0016301                                                                                                                                                          | -                                                                                                                                                                                                                        | IPR005178; PTHR23423:SF2<br>(PANTHER)                                                                                 |
| Caenorhabditis elegans  | elegans protein partially confirmed by transcript evidence | 1  | F:GO:0003677                                                                                                                                                          | -                                                                                                                                                                                                                        | IPR003656                                                                                                             |
| Caenorhabditis elegans  | polybromodomain protein                                    | 10 | P:GO:0009987;<br>P:GO:0040010;<br>F:GO:0005488;<br>C:GO:0005622;<br>P:GO:0040035;<br>P:GO:0010171;<br>P:GO:0002119;<br>P:GO:0040011;<br>P:GO:0002009;<br>P:GO:0009792 | -                                                                                                                                                                                                                        | IPR001487; PTHR10799 (PANTHER),<br>PTHR10799:SF76 (PANTHER)                                                           |
| Loa loa                 | molecular chaperone                                        | 0  |                                                                                                                                                                       | F:GO:0005216;<br>P:GO:0006816;<br>C:GO:0016021;<br>C:GO:0016020;<br>F:GO:0032440;<br>P:GO:0006811;<br>P:GO:0006810;<br>F:GO:0031072;<br>P:GO:0055114;<br>F:GO:0005262;<br>F:GO:0016491;<br>P:GO:0055085;<br>F:GO:0005488 | IPR002110; IPR020683; PTHR18958<br>(PANTHER), PTHR18958:SF298<br>(PANTHER)                                            |
| Caenorhabditis elegans  | n-acetylglucosaminyl-phosphatidylinositol de-n-acetylase   | 0  |                                                                                                                                                                       | F:GO:0000225;<br>F:GO:0016787                                                                                                                                                                                            | IPR003737; G3DSA:3.40.50.10320<br>(GENE3D), PTHR12993:SF2<br>(PANTHER), SignalP (SIGNALP),<br>SSF102588 (SUPERFAMILY) |
| Caenorhabditis elegans  | sulfide quinone reductase                                  | 1  | C:GO:0005743                                                                                                                                                          | -                                                                                                                                                                                                                        | IPR015904; G3DSA:3.50.50.60<br>(GENE3D), SSF51905 (SUPERFAMILY)                                                       |
| Loa loa                 | transportin 3                                              | 1  | F:GO:0005515                                                                                                                                                          | -                                                                                                                                                                                                                        | IPR016024; PTHR12363 (PANTHER),<br>PTHR12363:SF5 (PANTHER), SignalP<br>(SIGNALP)                                      |

|                        |                                                     |   |                                                                                                                    |                                                                                                                                                                                        |            |                                                                                                                      |
|------------------------|-----------------------------------------------------|---|--------------------------------------------------------------------------------------------------------------------|----------------------------------------------------------------------------------------------------------------------------------------------------------------------------------------|------------|----------------------------------------------------------------------------------------------------------------------|
| Caenorhabditis elegans | polymerase i polypeptide 30kda                      | 7 | F:GO:0003899;<br>C:GO:0005654;<br>F:GO:0016757;<br>F:GO:0003677;<br>C:GO:0005736;<br>F:GO:0046983;<br>P:GO:0006360 | -                                                                                                                                                                                      | EC:2.7.7.6 | IPR011261; IPR011262; IPR011263;<br>G3DSA:3.30.1360.10 (GENE3D),<br>PTHR11800 (PANTHER),<br>PTHR11800:SF13 (PANTHER) |
| Loa loa                | ran binding protein 17                              | 4 | F:GO:0005488;<br>P:GO:0055085;<br>P:GO:0006886;<br>C:GO:0005634                                                    | -                                                                                                                                                                                      |            | -                                                                                                                    |
| Caenorhabditis elegans | rho gtpase activating protein 1                     | 5 | F:GO:0005100;<br>C:GO:0043231;<br>P:GO:0007264;<br>C:GO:0005813;<br>F:GO:0005515                                   | -                                                                                                                                                                                      |            | IPR000198; IPR001251; IPR008936;<br>PTHR23176 (PANTHER)                                                              |
| Caenorhabditis elegans | elegans protein confirmed by transcript evidence    | 0 |                                                                                                                    | F:GO:0043169;<br>F:GO:0016787;<br>P:GO:0016998;<br>P:GO:0005975;<br>F:GO:0003824;<br>P:GO:0008340;<br>F:GO:0005515;<br>P:GO:0009253;<br>P:GO:0008152;<br>F:GO:0003796;<br>F:GO:0016798 |            | PTHR23208 (PANTHER),<br>PTHR23208:SF13 (PANTHER), SignalP<br>(SIGNALP)                                               |
| Caenorhabditis elegans | elegans protein confirmed by transcript evidence    | 0 |                                                                                                                    | F:GO:0043169;<br>F:GO:0016787;<br>P:GO:0016998;<br>P:GO:0005975;<br>F:GO:0003824;<br>P:GO:0008340;<br>F:GO:0005515;<br>P:GO:0009253;<br>P:GO:0008152;<br>F:GO:0003796;<br>F:GO:0016798 |            | PTHR23208 (PANTHER),<br>PTHR23208:SF13 (PANTHER), SignalP<br>(SIGNALP)                                               |
| Caenorhabditis elegans | elegans protein confirmed by transcript evidence    | 1 | F:GO:0005515                                                                                                       | -                                                                                                                                                                                      |            | IPR013781; IPR017853; PTHR23208<br>(PANTHER), PTHR23208:SF13<br>(PANTHER), SignalP (SIGNALP)                         |
| Caenorhabditis elegans | elegans protein confirmed by transcript evidence    | 1 | F:GO:0005515                                                                                                       | -                                                                                                                                                                                      |            | IPR013781; IPR017853; PTHR23208<br>(PANTHER), PTHR23208:SF13<br>(PANTHER), SignalP (SIGNALP)                         |
| Caenorhabditis elegans | ubiquitin carboxyl-termi-l hydrolase family protein | 0 |                                                                                                                    | F:GO:0016787;<br>F:GO:0008234;<br>F:GO:0008233;<br>F:GO:0004221;<br>P:GO:0006511                                                                                                       |            | -                                                                                                                    |
| Caenorhabditis elegans | ubiquitin carboxyl-termi-l hydrolase family protein | 0 |                                                                                                                    | F:GO:0016787;<br>F:GO:0008234;<br>F:GO:0008233;<br>F:GO:0004221;<br>P:GO:0006511                                                                                                       |            | -                                                                                                                    |
|                        | -                                                   | 0 |                                                                                                                    |                                                                                                                                                                                        |            | -                                                                                                                    |
|                        | -                                                   | 0 |                                                                                                                    |                                                                                                                                                                                        |            | -                                                                                                                    |

|                             |                                                                 |    |                                                                                                                                                                                                                                                                                              |   |                           |                                                                                                                                                                                    |
|-----------------------------|-----------------------------------------------------------------|----|----------------------------------------------------------------------------------------------------------------------------------------------------------------------------------------------------------------------------------------------------------------------------------------------|---|---------------------------|------------------------------------------------------------------------------------------------------------------------------------------------------------------------------------|
| Caenorhabditis elegans      | dihydropyrimidine dehydroge-se                                  | 17 | C:GO:0005829;<br>F:GO:0004158;<br>P:GO:0006145;<br>P:GO:0006212;<br>F:GO:0046872;<br>P:GO:0055114;<br>F:GO:0009055;<br>F:GO:0017113;<br>F:GO:0051539;<br>P:GO:0006222;<br>P:GO:0006210;<br>F:GO:0042803;<br>F:GO:0050660;<br>P:GO:0006207;<br>F:GO:0050661;<br>P:GO:0006214;<br>F:GO:0010181 | - | EC:1.3.3.1;<br>EC:1.3.1.2 | IPR012135; IPR013785; IPR017896;<br>IPR017900; G3DSA:3.30.70.20<br>(GENE3D), PTHR11938 (PANTHER),<br>PTHR11938:SF6 (PANTHER), SSF51395<br>(SUPERFAMILY), SSF54862<br>(SUPERFAMILY) |
| Loa loa                     | r- polymerase ii 140kd subunit                                  | 10 | F:GO:0003899;<br>P:GO:0040010;<br>P:GO:0008340;<br>P:GO:0000003;<br>C:GO:0005665;<br>F:GO:0003677;<br>P:GO:0002119;<br>F:GO:0032549;<br>P:GO:0009792;<br>P:GO:0006366                                                                                                                        | - | EC:2.7.7.6                | IPR007642; IPR007644; IPR015712;<br>G3DSA:3.90.1100.10 (GENE3D),<br>PTHR20856:SF1 (PANTHER), SSF64484<br>(SUPERFAMILY)                                                             |
| Caenorhabditis elegans      | cholinergic receptor nicotinic alpha polypeptide 1              | 6  | F:GO:0004872;<br>C:GO:0045211;<br>C:GO:0030054;<br>P:GO:0006811;<br>C:GO:0016021;<br>F:GO:0004889                                                                                                                                                                                            | - | -                         | -                                                                                                                                                                                  |
| -                           | -                                                               | 0  | -                                                                                                                                                                                                                                                                                            | - | -                         | -                                                                                                                                                                                  |
| -                           | -                                                               | 0  | -                                                                                                                                                                                                                                                                                            | - | -                         | -                                                                                                                                                                                  |
| Angiostrongylus cantonensis | myelin transcription factor 1-like                              | 0  | -                                                                                                                                                                                                                                                                                            | - | -                         | PD120929 (PRODOM)                                                                                                                                                                  |
| -                           | -                                                               | 0  | -                                                                                                                                                                                                                                                                                            | - | -                         | SignalP (SIGNALP)                                                                                                                                                                  |
| -                           | -                                                               | 0  | -                                                                                                                                                                                                                                                                                            | - | -                         | -                                                                                                                                                                                  |
| Caenorhabditis elegans      | udp-glucose:glycoprotein glucosyltransferase containing protein | 6  | F:GO:0003980;<br>C:GO:0005788;<br>C:GO:0005793;<br>P:GO:0051084;<br>P:GO:0006486;<br>F:GO:0051082                                                                                                                                                                                            | - | -                         | IPR009448; G3DSA:3.90.550.10<br>(GENE3D), SSF53448 (SUPERFAMILY)                                                                                                                   |
| Caenorhabditis briggsae     | yo85_caeel ame: full=uncharacterized protein                    | 1  | P:GO:0009792                                                                                                                                                                                                                                                                                 | - | -                         | PD131032 (PRODOM)                                                                                                                                                                  |
| Caenorhabditis elegans      | swi snf matrix actin dependent regulator of subfamily a-like 1  | 13 | F:GO:0003678;<br>P:GO:0001525;<br>P:GO:0051216;<br>P:GO:0006357;<br>F:GO:0003676;<br>P:GO:0006259;<br>P:GO:0022402;<br>P:GO:0030097;<br>P:GO:0048589;<br>F:GO:0000166;<br>F:GO:0008094;<br>P:GO:0010172;<br>C:GO:0005634                                                                     | - | -                         | IPR000330; IPR001650; IPR003593;<br>IPR010003; IPR014001; IPR014021;<br>G3DSA:3.40.50.300 (GENE3D),<br>PTHR10799 (PANTHER),<br>PTHR10799:SF43 (PANTHER),<br>SSF52540 (SUPERFAMILY) |

|                         |                                                                   |    |                                                                                                                                                                                                                          |   |            |                                                                                                                                                                                    |
|-------------------------|-------------------------------------------------------------------|----|--------------------------------------------------------------------------------------------------------------------------------------------------------------------------------------------------------------------------|---|------------|------------------------------------------------------------------------------------------------------------------------------------------------------------------------------------|
| Caenorhabditis elegans  | swi snf matrix actin dependent regulator of subfamily a-like<br>1 | 13 | F:GO:0003678;<br>P:GO:0001525;<br>P:GO:0051216;<br>P:GO:0006357;<br>F:GO:0003676;<br>P:GO:0006259;<br>P:GO:0022402;<br>P:GO:0030097;<br>P:GO:0048589;<br>F:GO:0000166;<br>F:GO:0008094;<br>P:GO:0010172;<br>C:GO:0005634 | - |            | IPR000330; IPR001650; IPR003593;<br>IPR010003; IPR014001; IPR014021;<br>G3DSA:3.40.50.300 (GENE3D),<br>PTHR10799 (PANTHER),<br>PTHR10799:SF43 (PANTHER),<br>SSF52540 (SUPERFAMILY) |
|                         | succi-te dehydroge-se                                             | 13 | P:GO:0006810;<br>P:GO:0006105;<br>F:GO:0048039;<br>F:GO:0051537;<br>C:GO:0005749;<br>F:GO:0046872;<br>F:GO:0009055;<br>P:GO:0006099;<br>F:GO:0051539;<br>F:GO:0051538;<br>P:GO:0022904;<br>F:GO:0005515;<br>F:GO:0008177 | - | EC:1.3.5.1 | IPR001041; IPR004489; IPR006058;<br>IPR009051; IPR012285; IPR012675;<br>PTHR11921 (PANTHER)                                                                                        |
|                         | succi-te dehydroge-se                                             | 13 | P:GO:0006810;<br>P:GO:0006105;<br>F:GO:0048039;<br>F:GO:0051537;<br>C:GO:0005749;<br>F:GO:0046872;<br>F:GO:0009055;<br>P:GO:0006099;<br>F:GO:0051539;<br>F:GO:0051538;<br>P:GO:0022904;<br>F:GO:0005515;<br>F:GO:0008177 | - | EC:1.3.5.1 | -                                                                                                                                                                                  |
| Caenorhabditis briggsae | briggsae cbr-sdhd-1 protein                                       | 12 | P:GO:0006810;<br>C:GO:0005875;<br>F:GO:0048039;<br>F:GO:0051537;<br>C:GO:0005749;<br>F:GO:0046872;<br>F:GO:0009055;<br>P:GO:0006099;<br>F:GO:0051539;<br>F:GO:0051538;<br>P:GO:0006121;<br>F:GO:0008177                  | - | EC:1.3.5.1 | -                                                                                                                                                                                  |

|                         |                                                            |   |                                                                                                                                     |                                                                                                                                     |                                                                                                                                               |
|-------------------------|------------------------------------------------------------|---|-------------------------------------------------------------------------------------------------------------------------------------|-------------------------------------------------------------------------------------------------------------------------------------|-----------------------------------------------------------------------------------------------------------------------------------------------|
| Caenorhabditis briggsae | apical junction molecule family member (ajm-1)             | 8 | P:GO:0009792;<br>C:GO:0043296;<br>P:GO:0045216;<br>F:GO:0008092;<br>C:GO:0005913;<br>P:GO:0040010;<br>P:GO:0040011;<br>F:GO:0008270 | -                                                                                                                                   | -                                                                                                                                             |
| Caenorhabditis elegans  | peroxin-3 family protein                                   | 0 |                                                                                                                                     | P:GO:0040010;<br>C:GO:0005779;<br>P:GO:0007031                                                                                      | -                                                                                                                                             |
| Caenorhabditis briggsae | ribosomal protein l14p l23e containing protein             | 3 | P:GO:0009792;<br>P:GO:0000003;<br>C:GO:0030529                                                                                      | -                                                                                                                                   | -                                                                                                                                             |
|                         | -                                                          | 0 |                                                                                                                                     |                                                                                                                                     | -                                                                                                                                             |
| Loa loa                 | frap-related protein                                       | 4 | F:GO:0016772;<br>F:GO:0005515;<br>P:GO:0044237;<br>P:GO:0006974                                                                     | -                                                                                                                                   | IPR000276; IPR003151; IPR014009                                                                                                               |
| Loa loa                 | phosphatidylinositol 3- and 4-ki-se family protein         | 8 | P:GO:0044260;<br>F:GO:0016772;<br>F:GO:0005515;<br>C:GO:0016020;<br>P:GO:0006974;<br>P:GO:0044238;<br>C:GO:0043229;<br>P:GO:0065007 | -                                                                                                                                   | IPR000276; IPR003151; IPR014009                                                                                                               |
| Loa loa                 | coronin 2a                                                 | 1 | C:GO:0017053                                                                                                                        | -                                                                                                                                   | IPR015049; IPR015505; IPR015943;<br>SSF101908 (SUPERFAMILY)                                                                                   |
| Loa loa                 | coronin 2a                                                 | 1 | C:GO:0017053                                                                                                                        | -                                                                                                                                   | IPR015049; IPR015505; IPR015943;<br>SSF101908 (SUPERFAMILY)                                                                                   |
| Caenorhabditis elegans  | vitellogenin receptor                                      | 5 | F:GO:0005488;<br>C:GO:0005615;<br>P:GO:0050794;<br>P:GO:0008152;<br>C:GO:0044464                                                    | -                                                                                                                                   | -                                                                                                                                             |
| Myxicola infundibulum   | intermediate filament                                      | 0 |                                                                                                                                     | P:GO:0051258;<br>C:GO:0005882;<br>F:GO:0005102;<br>F:GO:0005198;<br>P:GO:0007165;<br>F:GO:0030674;<br>C:GO:0005577;<br>P:GO:0030168 | -                                                                                                                                             |
| Caenorhabditis briggsae | elegans protein partially confirmed by transcript evidence | 3 | P:GO:0055085;<br>C:GO:0016021;<br>F:GO:0005215                                                                                      | -                                                                                                                                   | IPR000390; IPR005828; IPR005829;<br>IPR016196; IPR020846;<br>G3DSA:1.20.1250.20 (GENE3D),<br>PTHR11600 (PANTHER),<br>PTHR11600:SF27 (PANTHER) |
| Caenorhabditis elegans  | gamma-tubulin interacting protein family member (gip-1)    | 1 | P:GO:0000226                                                                                                                        | -                                                                                                                                   | -                                                                                                                                             |
| Caenorhabditis briggsae | Hypothetical protein CBG16936 [Caenorhabditis briggsae]    | 0 |                                                                                                                                     |                                                                                                                                     | IPR000436; IPR016060; PTHR19325<br>(PANTHER), PTHR19325:SF25<br>(PANTHER)                                                                     |
| Caenorhabditis briggsae | elegans protein confirmed by transcript evidence           | 0 |                                                                                                                                     |                                                                                                                                     | -                                                                                                                                             |

|                          |                                                            |    |                                                                                                                                                                                                                                                                                                                                |                               |             |                                                                                                                              |
|--------------------------|------------------------------------------------------------|----|--------------------------------------------------------------------------------------------------------------------------------------------------------------------------------------------------------------------------------------------------------------------------------------------------------------------------------|-------------------------------|-------------|------------------------------------------------------------------------------------------------------------------------------|
| Loa loa                  | dual specificity phosphatase 22                            | 2  | P:GO:0006796;<br>F:GO:0004721                                                                                                                                                                                                                                                                                                  | -                             | EC:3.1.3.16 | IPR000340; IPR000387; IPR016130;<br>IPR020422; G3DSA:3.90.190.10<br>(GENE3D), PTHR10159 (PANTHER),<br>SSF52799 (SUPERFAMILY) |
| Caenorhabditis elegans   | elegans protein partially confirmed by transcript evidence | 0  |                                                                                                                                                                                                                                                                                                                                |                               |             | -                                                                                                                            |
| Caenorhabditis elegans   | protein ki-se domain containing protein                    | 3  | P:GO:0009987;<br>P:GO:0050896;<br>P:GO:0019915                                                                                                                                                                                                                                                                                 | -                             |             | -                                                                                                                            |
|                          | -                                                          | 0  |                                                                                                                                                                                                                                                                                                                                |                               |             | -                                                                                                                            |
| Caenorhabditis briggsae  | Hypothetical protein CBG16326 [Caenorhabditis briggsae]    | 0  |                                                                                                                                                                                                                                                                                                                                |                               |             | -                                                                                                                            |
|                          | -                                                          | 0  |                                                                                                                                                                                                                                                                                                                                |                               |             | -                                                                                                                            |
| Monodelphis domestica    | cellulosomal scaffolding anchoring                         | 0  |                                                                                                                                                                                                                                                                                                                                |                               |             | -                                                                                                                            |
| Monodelphis domestica    | cellulosomal scaffolding anchoring                         | 0  |                                                                                                                                                                                                                                                                                                                                |                               |             | -                                                                                                                            |
|                          | -                                                          | 0  |                                                                                                                                                                                                                                                                                                                                |                               |             | -                                                                                                                            |
| Nematostella vectensis   | protein                                                    | 0  |                                                                                                                                                                                                                                                                                                                                |                               |             | -                                                                                                                            |
|                          | -                                                          | 0  |                                                                                                                                                                                                                                                                                                                                |                               |             | -                                                                                                                            |
|                          | -                                                          | 0  |                                                                                                                                                                                                                                                                                                                                |                               |             | -                                                                                                                            |
| Caenorhabditis briggsae  | uncoordinated family member (unc-87)                       | 1  | F:GO:0005515                                                                                                                                                                                                                                                                                                                   | -                             |             | IPR000557; PTHR18959 (PANTHER)                                                                                               |
| Homo sapiens             | prosaposin                                                 | 19 | F:GO:0055085;<br>F:GO:0008047;<br>P:GO:0043065;<br>P:GO:0006687;<br>P:GO:0045161;<br>C:GO:0016021;<br>C:GO:0005743;<br>C:GO:0043202;<br>C:GO:0005615;<br>F:GO:0008289;<br>P:GO:0006869;<br>F:GO:0005515;<br>P:GO:0009966;<br>P:GO:0007585;<br>F:GO:0005319;<br>C:GO:0005578;<br>F:GO:0005529;<br>P:GO:0006919;<br>C:GO:0005794 | -                             |             | SignalIP (SIGNALP)                                                                                                           |
| Caenorhabditis elegans   | small subunit processome component 20 homolog              | 3  | F:GO:0005488;<br>C:GO:0031981;<br>P:GO:0006364                                                                                                                                                                                                                                                                                 | -                             |             | IPR016024; PTHR17695 (PANTHER)                                                                                               |
|                          | -                                                          | 0  |                                                                                                                                                                                                                                                                                                                                |                               |             | -                                                                                                                            |
| Caenorhabditis briggsae  | bzip transcription factor family protein                   | 3  | C:GO:0043231;<br>P:GO:0045449;<br>F:GO:0003677                                                                                                                                                                                                                                                                                 | -                             |             | IPR004827; IPR008917; IPR011616;<br>G3DSA:1.20.5.170 (GENE3D),<br>PTHR22952 (PANTHER),<br>PTHR22952:SF6 (PANTHER)            |
| Caenorhabditis briggsae  | bzip transcription factor family protein                   | 3  | C:GO:0043231;<br>P:GO:0045449;<br>F:GO:0003677                                                                                                                                                                                                                                                                                 | -                             |             | IPR004827; IPR008917; IPR011616;<br>G3DSA:1.20.5.170 (GENE3D),<br>PTHR22952 (PANTHER),<br>PTHR22952:SF6 (PANTHER)            |
| Caenorhabditis elegans   | elegans protein partially confirmed by transcript evidence | 0  |                                                                                                                                                                                                                                                                                                                                |                               |             | IPR003582; PTHR21724 (PANTHER)                                                                                               |
| Saccoglossus kowalevskii | r--directed d- polymerase (reverse transcriptase)          | 3  | F:GO:0003723;<br>F:GO:0003964;<br>P:GO:0006278                                                                                                                                                                                                                                                                                 | -                             | EC:2.7.7.49 | IPR000477; IPR015706;<br>PTHR19446:SF101 (PANTHER)                                                                           |
| Caenorhabditis elegans   | tb2 hva22 family protein                                   | 0  |                                                                                                                                                                                                                                                                                                                                | F:GO:0004872;<br>F:GO:0005515 |             | IPR004345; PTHR12300:SF13<br>(PANTHER)                                                                                       |



|                             |                                                                 |   |                                                                                                                                     |   |                                                                                                                                              |
|-----------------------------|-----------------------------------------------------------------|---|-------------------------------------------------------------------------------------------------------------------------------------|---|----------------------------------------------------------------------------------------------------------------------------------------------|
|                             | -                                                               | 0 |                                                                                                                                     |   | SignalP (SIGNALP)                                                                                                                            |
| Brugia malayi               | iws1 c-terminus family protein                                  | 4 | P:GO:0006351;<br>F:GO:0003676;<br>P:GO:0000003;<br>C:GO:0005634                                                                     | - | IPR017923                                                                                                                                    |
| Brugia malayi               | iws1 c-terminus family protein                                  | 3 | P:GO:0006351;<br>F:GO:0003676;<br>C:GO:0005634                                                                                      | - | IPR017923                                                                                                                                    |
| Caenorhabditis elegans      | sft2 domain containing 2                                        | 1 | P:GO:0006810                                                                                                                        | - | IPR007305; IPR011691                                                                                                                         |
| Caenorhabditis elegans      | sft2 domain containing 2                                        | 1 | P:GO:0006810                                                                                                                        | - | IPR007305; IPR011691                                                                                                                         |
| Caenorhabditis elegans      | sy-ptotagmin ix                                                 | 4 | C:GO:0016021;<br>C:GO:0008021;<br>P:GO:0006810;<br>F:GO:0005215                                                                     | - | IPR000008; IPR001565; IPR008973;<br>IPR018029; IPR020477;<br>G3DSA:2.60.40.150 (GENE3D),<br>PTHR10024 (PANTHER),<br>PTHR10024:SF41 (PANTHER) |
|                             | -                                                               | 0 |                                                                                                                                     |   | -                                                                                                                                            |
|                             | -                                                               | 0 |                                                                                                                                     |   | -                                                                                                                                            |
| Caenorhabditis briggsae     | d-j homolog subfamily c member 25                               | 2 | C:GO:0016021;<br>F:GO:0031072                                                                                                       | - | IPR001623; IPR015609; IPR018253;<br>PTHR11821:SF28 (PANTHER)                                                                                 |
| Angiostrongylus cantonensis | dynein heavy chain                                              | 8 | P:GO:0007018;<br>C:GO:0030286;<br>F:GO:0016887;<br>C:GO:0005794;<br>F:GO:0005515;<br>F:GO:0005524;<br>C:GO:0005829;<br>F:GO:0003777 | - | IPR004273; PTHR10676 (PANTHER),<br>PTHR10676:SF28 (PANTHER)                                                                                  |
|                             | -                                                               | 0 |                                                                                                                                     |   | -                                                                                                                                            |
| Caenorhabditis elegans      | potential d-binding protein c17orf49 homolog                    | 1 | F:GO:0005515                                                                                                                        | - | PTHR21397 (PANTHER)                                                                                                                          |
|                             | -                                                               | 0 |                                                                                                                                     |   | -                                                                                                                                            |
| Caenorhabditis elegans      | elegans protein partially confirmed by transcript evidence      | 0 |                                                                                                                                     |   | -                                                                                                                                            |
| Caenorhabditis briggsae     | briggsae cbr-snf-1 protein                                      | 3 | C:GO:0016021;<br>P:GO:0006810;<br>F:GO:0015293                                                                                      | - | IPR000175; PTHR11616:SF12<br>(PANTHER), SignalP (SIGNALP)                                                                                    |
|                             | -                                                               | 0 |                                                                                                                                     |   | -                                                                                                                                            |
|                             | -                                                               | 0 |                                                                                                                                     |   | -                                                                                                                                            |
|                             | -                                                               | 0 |                                                                                                                                     |   | -                                                                                                                                            |
| Caenorhabditis elegans      | bed-type zinc finger transcription factor family member (bed 2) | 2 | F:GO:0005515;<br>F:GO:0003677                                                                                                       | - | PTHR21709 (PANTHER)                                                                                                                          |
| Caenorhabditis elegans      | briggsae cbr-elo-2 protein                                      | 2 | C:GO:0016021;<br>P:GO:0007283                                                                                                       | - | IPR002076                                                                                                                                    |
| Caenorhabditis elegans      | briggsae cbr-elo-2 protein                                      | 2 | C:GO:0016021;<br>P:GO:0007283                                                                                                       | - | IPR002076                                                                                                                                    |
| Caenorhabditis elegans      | elegans protein confirmed by transcript evidence                | 0 |                                                                                                                                     |   | IPR001910; IPR023186                                                                                                                         |
| Caenorhabditis briggsae     | 5 - cytosolic iii                                               | 5 | F:GO:0008253;<br>P:GO:0055086;<br>F:GO:0008665;<br>F:GO:0005488;<br>C:GO:0005783                                                    | - | EC:3.1.3.5<br>IPR006434; PF05822 (PFAM),<br>SSF56784 (SUPERFAMILY)                                                                           |
| Caenorhabditis elegans      | phosphoribosylformylglyci-midine synthase                       | 4 | P:GO:0040010;<br>P:GO:0009168;<br>F:GO:0005515;<br>F:GO:0004642                                                                     | - | EC:6.3.5.3<br>IPR010918; IPR016188; PTHR10099<br>(PANTHER)                                                                                   |
| Caenorhabditis briggsae     | potassium channel tetramerisation domain containing 8           | 4 | C:GO:0005886;<br>F:GO:0005515;<br>P:GO:0006813;<br>F:GO:0005216                                                                     | - | IPR003131; IPR011333; PTHR14499<br>(PANTHER), PTHR14499:SF9<br>(PANTHER)                                                                     |

|                         |                                                            |   |                                                                 |                                                                 |                                                                                    |
|-------------------------|------------------------------------------------------------|---|-----------------------------------------------------------------|-----------------------------------------------------------------|------------------------------------------------------------------------------------|
|                         | -                                                          | 0 |                                                                 |                                                                 | -                                                                                  |
|                         | -                                                          | 0 |                                                                 |                                                                 | -                                                                                  |
|                         | -                                                          | 0 |                                                                 |                                                                 | -                                                                                  |
| Caenorhabditis briggsae | briggsae cbr-smgl-2 protein                                | 2 | F:GO:0005488;<br>F:GO:0016787                                   | -                                                               | IPR011709                                                                          |
| Caenorhabditis elegans  | elegans protein partially confirmed by transcript evidence | 0 |                                                                 |                                                                 | -                                                                                  |
|                         | -                                                          | 0 |                                                                 |                                                                 | -                                                                                  |
|                         | -                                                          | 0 |                                                                 |                                                                 | -                                                                                  |
|                         | -                                                          | 0 |                                                                 |                                                                 | -                                                                                  |
|                         | -                                                          | 0 |                                                                 |                                                                 | -                                                                                  |
|                         | -                                                          | 0 |                                                                 |                                                                 | -                                                                                  |
| Caenorhabditis briggsae | jmjc domain-containing protein 8                           | 0 |                                                                 | F:GO:0003674;<br>P:GO:0008150                                   | IPR003347; IPR014710; IPR022777;<br>PTHR12480 (PANTHER), SSF51197<br>(SUPERFAMILY) |
| Caenorhabditis briggsae | yqvw_caee1 ame: full=uncharacterized protein               | 1 | P:GO:0040011                                                    | -                                                               | -                                                                                  |
|                         | -                                                          | 0 |                                                                 |                                                                 | -                                                                                  |
| Caenorhabditis briggsae | Hypothetical protein CBG18919 [Caenorhabditis briggsae]    | 4 | F:GO:0005488;<br>P:GO:0040010;<br>P:GO:0040011;<br>P:GO:0001703 | -                                                               | IPR015880                                                                          |
| Brugia malayi           | riken cd- 2310021p13 gene                                  | 0 |                                                                 | F:GO:0046872;<br>F:GO:0003674;<br>P:GO:0008150;<br>F:GO:0008270 | IPR007527; PTHR22619 (PANTHER)                                                     |
| Caenorhabditis briggsae | Hypothetical protein CBG13933 [Caenorhabditis briggsae]    | 2 | P:GO:0040010;<br>P:GO:0006898                                   | -                                                               | IPR013136                                                                          |
| Caenorhabditis briggsae | Hypothetical protein CBG13933 [Caenorhabditis briggsae]    | 2 | P:GO:0040010;<br>P:GO:0006898                                   | -                                                               | IPR013136                                                                          |
| Caenorhabditis briggsae | upstream of 140                                            | 1 | P:GO:0000003                                                    | -                                                               | PTHR13002 (PANTHER)                                                                |
|                         | -                                                          | 0 |                                                                 |                                                                 | -                                                                                  |
|                         | -                                                          | 0 |                                                                 |                                                                 | SignalP (SIGNALP)                                                                  |
|                         | -                                                          | 0 |                                                                 |                                                                 | -                                                                                  |
|                         | -                                                          | 0 |                                                                 |                                                                 | -                                                                                  |
|                         | -                                                          | 0 |                                                                 |                                                                 | SignalP (SIGNALP)                                                                  |

|                         |                                               |    |                                                                                                                                                                                                                                                                                                                                                                                                                                                                                        |                            |                                                                                                                         |
|-------------------------|-----------------------------------------------|----|----------------------------------------------------------------------------------------------------------------------------------------------------------------------------------------------------------------------------------------------------------------------------------------------------------------------------------------------------------------------------------------------------------------------------------------------------------------------------------------|----------------------------|-------------------------------------------------------------------------------------------------------------------------|
| Caenorhabditis elegans  | --+ k+ alpha 1 polypeptide                    | 28 | F:GO:001750;<br>F:GO:0043548;<br>P:GO:0045989;<br>P:GO:0045822;<br>F:GO:0003869;<br>P:GO:0015988;<br>C:GO:0005792;<br>C:GO:0016323;<br>C:GO:0042470;<br>F:GO:0043531;<br>F:GO:0031402;<br>P:GO:0006754;<br>F:GO:0019904;<br>C:GO:0042383;<br>F:GO:0005391;<br>P:GO:0045823;<br>P:GO:0042493;<br>P:GO:0031947;<br>C:GO:0005768;<br>P:GO:0010107;<br>P:GO:0016311;<br>C:GO:0005890;<br>P:GO:0002026;<br>C:GO:0005901;<br>P:GO:0006200;<br>F:GO:0005524;<br>P:GO:0008217;<br>F:GO:0030955 | EC:3.1.3.41;<br>EC:3.6.3.9 | IPR001757; IPR008250;<br>G3DSA:1.20.1110.10 (GENE3D),<br>PTHR11939:SF100 (PANTHER)                                      |
| Brugia malayi           | surfeit locus protein 5 containing protein    | 12 | P:GO:0040010;<br>P:GO:0006357;<br>P:GO:0040035;<br>F:GO:0016455;<br>P:GO:0010171;<br>P:GO:0002119;<br>F:GO:0005515;<br>P:GO:0040017;<br>P:GO:0006898;<br>C:GO:0016592;<br>P:GO:0009792;<br>P:GO:0040018                                                                                                                                                                                                                                                                                |                            | IPR009332; PTHR12434:SF2<br>(PANTHER), PF06179 (PFAM)                                                                   |
| Caenorhabditis briggsae | actin-related protein 2 3 complex subunit 1a  | 9  | P:GO:0030833;<br>C:GO:0005885;<br>P:GO:0040010;<br>P:GO:0000003;<br>P:GO:0002119;<br>F:GO:0003779;<br>P:GO:0040011;<br>P:GO:0009792;<br>P:GO:0040018                                                                                                                                                                                                                                                                                                                                   |                            | IPR001680; IPR011046; IPR015943;<br>IPR017986; IPR019781; IPR019782;<br>PTHR10709 (PANTHER),<br>PTHR10709:SF6 (PANTHER) |
| Caenorhabditis briggsae | cell differentiation protein rcd1 homolog     | 5  | P:GO:0019221;<br>P:GO:0045449;<br>F:GO:0005515;<br>P:GO:0007548;<br>C:GO:0005634                                                                                                                                                                                                                                                                                                                                                                                                       |                            | IPR007216; IPR011989                                                                                                    |
| Caenorhabditis elegans  | yrrc_ caeel ame: full=uncharacterized protein | 0  |                                                                                                                                                                                                                                                                                                                                                                                                                                                                                        |                            | PTHR21824 (PANTHER)                                                                                                     |
|                         | -                                             | 0  |                                                                                                                                                                                                                                                                                                                                                                                                                                                                                        |                            | SignalP (SIGNALP)                                                                                                       |
|                         | -                                             | 0  |                                                                                                                                                                                                                                                                                                                                                                                                                                                                                        |                            | SignalP (SIGNALP)                                                                                                       |

|                         |                                                  |    |                                                                                                                                                                                                                                                                                                                                                                                                                                                                        |                               |                            |                                                                                                             |
|-------------------------|--------------------------------------------------|----|------------------------------------------------------------------------------------------------------------------------------------------------------------------------------------------------------------------------------------------------------------------------------------------------------------------------------------------------------------------------------------------------------------------------------------------------------------------------|-------------------------------|----------------------------|-------------------------------------------------------------------------------------------------------------|
| Loa loa                 | zinc matrin type 2                               | 4  | P:GO:0019915;<br>F:GO:0003676;<br>C:GO:0005634;<br>F:GO:0008270                                                                                                                                                                                                                                                                                                                                                                                                        | -                             |                            | IPR000690; IPR003604; IPR007087;<br>IPR015880; IPR022755; SSF57667<br>(SUPERFAMILY)                         |
| -                       | -                                                | 0  |                                                                                                                                                                                                                                                                                                                                                                                                                                                                        |                               |                            | -                                                                                                           |
| Caenorhabditis elegans  | elegans protein confirmed by transcript evidence | 0  |                                                                                                                                                                                                                                                                                                                                                                                                                                                                        |                               |                            | -                                                                                                           |
| -                       | -                                                | 0  |                                                                                                                                                                                                                                                                                                                                                                                                                                                                        |                               |                            | -                                                                                                           |
| -                       | -                                                | 0  |                                                                                                                                                                                                                                                                                                                                                                                                                                                                        |                               |                            | -                                                                                                           |
| -                       | -                                                | 0  |                                                                                                                                                                                                                                                                                                                                                                                                                                                                        |                               |                            | -                                                                                                           |
| -                       | -                                                | 0  |                                                                                                                                                                                                                                                                                                                                                                                                                                                                        |                               |                            | -                                                                                                           |
| Caenorhabditis briggsae | protein disulfide isomerase associated 3         | 10 | F:GO:0004629;<br>F:GO:0003756;<br>P:GO:0043065;<br>P:GO:0006606;<br>P:GO:0045454;<br>F:GO:0004197;<br>C:GO:0005788;<br>F:GO:0005515;<br>P:GO:0007165;<br>P:GO:0006621                                                                                                                                                                                                                                                                                                  | -                             | EC:5.3.4.1;<br>EC:3.4.22.0 | IPR005746; IPR012335; IPR012336;<br>IPR013766; IPR017936; IPR017937;<br>PTHR18929 (PANTHER)                 |
| Brugia malayi           | prostaglandin reductase 2                        | 3  | P:GO:0055114;<br>F:GO:0016491;<br>F:GO:0008270                                                                                                                                                                                                                                                                                                                                                                                                                         | -                             |                            | IPR002085; IPR011032;<br>G3DSA:3.90.180.10 (GENE3D),<br>PTHR11695:SF5 (PANTHER)                             |
| Caenorhabditis briggsae | coiled-coil domain containing 132                | 0  |                                                                                                                                                                                                                                                                                                                                                                                                                                                                        |                               |                            | IPR019514; PTHR13258 (PANTHER)                                                                              |
| Ancylostoma caninum     | venom allergen antigen-like protein 1            | 0  |                                                                                                                                                                                                                                                                                                                                                                                                                                                                        | P:GO:0040011;<br>C:GO:0005576 |                            | IPR001283; IPR002413; IPR013032;<br>IPR014044; IPR018244;<br>PTHR10334:SF11 (PANTHER), SignalP<br>(SIGNALP) |
| -                       | -                                                | 0  |                                                                                                                                                                                                                                                                                                                                                                                                                                                                        |                               |                            | -                                                                                                           |
| -                       | -                                                | 0  |                                                                                                                                                                                                                                                                                                                                                                                                                                                                        |                               |                            | -                                                                                                           |
| Caenorhabditis elegans  | cbp p300 homolog family member (cbp-1)           | 27 | P:GO:0006915;<br>P:GO:0010035;<br>C:GO:0032991;<br>F:GO:0046872;<br>P:GO:0007283;<br>P:GO:0018076;<br>P:GO:0040039;<br>F:GO:0008013;<br>P:GO:0040010;<br>P:GO:0008340;<br>P:GO:0001666;<br>P:GO:0032270;<br>F:GO:0003713;<br>P:GO:0045944;<br>P:GO:0010033;<br>P:GO:0043967;<br>C:GO:0005737;<br>P:GO:0040026;<br>P:GO:0007399;<br>P:GO:0009792;<br>F:GO:0003677;<br>P:GO:0018996;<br>P:GO:0040035;<br>P:GO:0010171;<br>F:GO:0004402;<br>C:GO:0005730;<br>P:GO:0051091 | -                             | EC:2.3.1.48                | IPR000197; PTHR13808 (PANTHER)                                                                              |

|                         |                                                                      |    |                                                                                                                                                                                                                          |                                                                                                                    |                                               |                                                                                                   |
|-------------------------|----------------------------------------------------------------------|----|--------------------------------------------------------------------------------------------------------------------------------------------------------------------------------------------------------------------------|--------------------------------------------------------------------------------------------------------------------|-----------------------------------------------|---------------------------------------------------------------------------------------------------|
| Caenorhabditis elegans  | cbp p300 homolog family member (cbp-1)                               | 13 | P:GO:0008340;<br>P:GO:0040010;<br>F:GO:0003712;<br>P:GO:0040026;<br>P:GO:0007283;<br>P:GO:0018996;<br>C:GO:0005737;<br>P:GO:0040039;<br>P:GO:0009792;<br>P:GO:0010171;<br>P:GO:0045944;<br>C:GO:0005634;<br>P:GO:0040035 | -                                                                                                                  |                                               | IPR000197; PTHR13808 (PANTHER)                                                                    |
| Caenorhabditis elegans  | defective p granules and sterile family member (deps-1)              | 0  |                                                                                                                                                                                                                          |                                                                                                                    |                                               | -                                                                                                 |
| Loa loa                 | dynein heavy chain                                                   | 2  | F:GO:0017111;<br>F:GO:0000166                                                                                                                                                                                            | -                                                                                                                  | EC:3.6.1.15                                   | IPR013594; PTHR10676 (PANTHER),<br>PTHR10676:SF4 (PANTHER)                                        |
| Caenorhabditis elegans  | novel protein                                                        | 2  | F:GO:0005515;<br>P:GO:0009890                                                                                                                                                                                            | -                                                                                                                  |                                               | SignalP (SIGNALP)                                                                                 |
| -                       | -                                                                    | 0  |                                                                                                                                                                                                                          |                                                                                                                    |                                               | -                                                                                                 |
| Caenorhabditis briggsae | Hypothetical protein CBG14775 [Caenorhabditis briggsae]              | 0  |                                                                                                                                                                                                                          |                                                                                                                    |                                               | -                                                                                                 |
| -                       | -                                                                    | 0  |                                                                                                                                                                                                                          |                                                                                                                    |                                               | -                                                                                                 |
| Loa loa                 | elegans protein partially confirmed by transcript evidence           | 5  | F:GO:0005488;<br>P:GO:0006520;<br>F:GO:0008483;<br>P:GO:0019915;<br>F:GO:0016846                                                                                                                                         | -                                                                                                                  | EC:2.6.1.0                                    | IPR004839; IPR015421; IPR015422;<br>IPR015424; PTHR11751 (PANTHER),<br>PTHR11751:SF38 (PANTHER)   |
| Caenorhabditis briggsae | elegans protein confirmed by transcript evidence                     | 0  |                                                                                                                                                                                                                          | P:GO:0006629;<br>C:GO:0016021;<br>F:GO:0016787;<br>F:GO:0004806                                                    |                                               | IPR002921; G3DSA:3.40.50.1820<br>(GENE3D), SignalP (SIGNALP),<br>SSF53474 (SUPERFAMILY)           |
| Caenorhabditis brenneri | propionyl coenzyme a carboxylase beta subunit family member (pccb-1) | 1  | F:GO:0005515                                                                                                                                                                                                             | -                                                                                                                  |                                               | PS51257 (PROFILE)                                                                                 |
| Caenorhabditis elegans  | f-box and leucine-rich repeat protein 11                             | 9  | P:GO:0016568;<br>F:GO:0051864;<br>F:GO:0046872;<br>P:GO:0055114;<br>P:GO:0045449;<br>P:GO:0000003;<br>F:GO:0016702;<br>C:GO:0005634;<br>P:GO:0006974                                                                     | -                                                                                                                  | EC:1.14.11.2<br>7;<br>EC:1.13.11.0            | -                                                                                                 |
| Caenorhabditis elegans  | threonine dehydroge-se                                               | 6  | P:GO:0006694;<br>F:GO:0003854;<br>P:GO:0045226;<br>F:GO:0003978;<br>F:GO:0050662;<br>F:GO:0008831                                                                                                                        | -                                                                                                                  | EC:1.1.1.145<br>; EC:5.1.3.2;<br>EC:1.1.1.133 | IPR001509; IPR016040; PTHR10366<br>(PANTHER), PTHR10366:SF12<br>(PANTHER), SSF51735 (SUPERFAMILY) |
| -                       | -                                                                    | 0  |                                                                                                                                                                                                                          |                                                                                                                    |                                               | -                                                                                                 |
| -                       | -                                                                    | 0  |                                                                                                                                                                                                                          |                                                                                                                    |                                               | -                                                                                                 |
| Caenorhabditis elegans  | elegans protein confirmed by transcript evidence                     | 0  |                                                                                                                                                                                                                          |                                                                                                                    |                                               | -                                                                                                 |
| Caenorhabditis briggsae | Hypothetical protein CBG22835 [Caenorhabditis briggsae]              | 0  |                                                                                                                                                                                                                          | F:GO:0046872;<br>P:GO:0055114;<br>F:GO:0009055;<br>F:GO:0016491;<br>F:GO:0020037;<br>F:GO:0005506;<br>F:GO:0004497 |                                               | -                                                                                                 |

|                         |                                                            |    |                                                                                                                                                                       |   |   |                                                 |
|-------------------------|------------------------------------------------------------|----|-----------------------------------------------------------------------------------------------------------------------------------------------------------------------|---|---|-------------------------------------------------|
| Caenorhabditis briggsae | Hypothetical protein CBG14902 [Caenorhabditis briggsae]    | 6  | P:GO:0010171;<br>P:GO:0040018;<br>P:GO:0018991;<br>P:GO:0040017;<br>P:GO:0040010;<br>P:GO:0007413                                                                     | - | - |                                                 |
|                         | -                                                          | 0  |                                                                                                                                                                       |   |   |                                                 |
| Caenorhabditis elegans  | prolyl carboxy peptidase like family member (pcp-3)        | 2  | F:GO:0005515;<br>F:GO:0070011                                                                                                                                         | - |   | IPR008758; PTHR11010:SF4 (PANTHER)              |
| Caenorhabditis briggsae | prolyl carboxy peptidase like family member (pcp-3)        | 2  | F:GO:0005515;<br>F:GO:0070011                                                                                                                                         | - |   | IPR008758; PTHR11010:SF4 (PANTHER)              |
| Caenorhabditis briggsae | myosin heavy chain                                         | 4  | C:GO:0032982;<br>F:GO:0003779;<br>F:GO:0005524;<br>F:GO:0003774                                                                                                       | - |   | IPR002928; IPR015650; PTHR13140 (PANTHER)       |
|                         | -                                                          | 0  |                                                                                                                                                                       |   |   |                                                 |
|                         | -                                                          | 0  |                                                                                                                                                                       |   |   |                                                 |
| Caenorhabditis briggsae | acetyl- acetyltransferase                                  | 4  | P:GO:0010171;<br>F:GO:0008415;<br>P:GO:0040011;<br>P:GO:0008152                                                                                                       | - |   | IPR002155; IPR016038; IPR016039; IPR020616      |
|                         | -                                                          | 0  |                                                                                                                                                                       |   |   |                                                 |
| Caenorhabditis briggsae | glutamate synthase                                         | 10 | F:GO:0045181;<br>P:GO:0040010;<br>F:GO:0051536;<br>P:GO:0055114;<br>P:GO:0006537;<br>P:GO:0002119;<br>F:GO:0050660;<br>P:GO:0009792;<br>F:GO:0010181;<br>F:GO:0005506 | - |   |                                                 |
| Caenorhabditis elegans  | hypothetical protein F49C12.15 [Caenorhabditis elegans]    | 0  |                                                                                                                                                                       |   |   |                                                 |
| Brugia malayi           | ring and yy1 binding protein                               | 2  | C:GO:0005622;<br>F:GO:0008270                                                                                                                                         | - |   |                                                 |
| Caenorhabditis briggsae | elegans protein partially confirmed by transcript evidence | 0  |                                                                                                                                                                       |   |   |                                                 |
| Caenorhabditis elegans  | serine palmitoyltransferase                                | 1  | F:GO:0016740                                                                                                                                                          | - |   | PTHR13693 (PANTHER),<br>PTHR13693:SF3 (PANTHER) |
|                         | -                                                          | 0  |                                                                                                                                                                       |   |   |                                                 |
|                         | -                                                          | 0  |                                                                                                                                                                       |   |   |                                                 |
|                         | -                                                          | 0  |                                                                                                                                                                       |   |   |                                                 |
|                         | -                                                          | 0  |                                                                                                                                                                       |   |   |                                                 |
|                         | -                                                          | 0  |                                                                                                                                                                       |   |   |                                                 |
| Caenorhabditis briggsae | uncharacterized protein c12orf4                            | 0  |                                                                                                                                                                       |   |   | IPR019311                                       |
|                         | -                                                          | 0  |                                                                                                                                                                       |   |   | SignalP (SIGNALP)                               |

|                           |                                                    |   |                                                                                                                    |                                                                                                                                                                                                                                                                             |             |                                                                                      |
|---------------------------|----------------------------------------------------|---|--------------------------------------------------------------------------------------------------------------------|-----------------------------------------------------------------------------------------------------------------------------------------------------------------------------------------------------------------------------------------------------------------------------|-------------|--------------------------------------------------------------------------------------|
| Rattus norvegicus         | aminoadipate-semialdehyde dehydroge-se             | 0 |                                                                                                                    | F:GO:0016874;<br>P:GO:0006629;<br>F:GO:0000036;<br>P:GO:0006810;<br>F:GO:0000166;<br>F:GO:0005524;<br>F:GO:0003674;<br>P:GO:0055114;<br>F:GO:0031177;<br>F:GO:0016491;<br>F:GO:0003824;<br>C:GO:0005575;<br>F:GO:0048037;<br>P:GO:0008152;<br>P:GO:0008150;<br>F:GO:0004043 |             | IPR011047                                                                            |
| -                         | -                                                  | 0 |                                                                                                                    |                                                                                                                                                                                                                                                                             |             | -                                                                                    |
| Caenorhabditis briggsae   | briggsae cbr-oct-2 protein                         | 4 | P:GO:0019915;<br>C:GO:0016021;<br>P:GO:0055085;<br>F:GO:0005215                                                    | -                                                                                                                                                                                                                                                                           |             | -                                                                                    |
| Brugia malayi             | replication protein a 70 kda d--binding subunit    | 3 | P:GO:0009987;<br>F:GO:0005515;<br>C:GO:0005634                                                                     | -                                                                                                                                                                                                                                                                           |             | IPR004365; IPR012340; IPR016027;<br>PTHR23273 (PANTHER)                              |
| Acyrtosiphon pisum        | briggsae cbr-spt-5 protein                         | 1 | P:GO:0007275                                                                                                       | -                                                                                                                                                                                                                                                                           |             | -                                                                                    |
| Caenorhabditis elegans    | atp-dependent d- helicase pif1                     | 2 | F:GO:0005488;<br>F:GO:0017111                                                                                      | -                                                                                                                                                                                                                                                                           | EC:3.6.1.15 | IPR010285; PTHR23274 (PANTHER),<br>SSF52540 (SUPERFAMILY)                            |
| Caenorhabditis elegans    | glioma tumor suppressor candidate region gene 2    | 4 | P:GO:0000003;<br>P:GO:0040007;<br>P:GO:0006898;<br>P:GO:0002119                                                    | -                                                                                                                                                                                                                                                                           |             | IPR011687; PTHR14211:SF6<br>(PANTHER)                                                |
| Caenorhabditis elegans    | glioma tumor suppressor candidate region gene 2    | 4 | P:GO:0000003;<br>P:GO:0040007;<br>P:GO:0006898;<br>P:GO:0002119                                                    | -                                                                                                                                                                                                                                                                           |             | IPR011687; PTHR14211:SF6<br>(PANTHER)                                                |
| Caenorhabditis elegans    | glioma tumor suppressor candidate region gene 2    | 4 | P:GO:0000003;<br>P:GO:0040007;<br>P:GO:0006898;<br>P:GO:0002119                                                    | -                                                                                                                                                                                                                                                                           |             | IPR011687; PTHR14211:SF6<br>(PANTHER)                                                |
| -                         | -                                                  | 0 |                                                                                                                    |                                                                                                                                                                                                                                                                             |             | -                                                                                    |
| Caenorhabditis briggsae   | histone acetyltransferase type b catalytic subunit | 4 | P:GO:0044238;<br>F:GO:0016747;<br>P:GO:0044260;<br>P:GO:0009792                                                    | -                                                                                                                                                                                                                                                                           | EC:2.3.1.0  | IPR016181; PTHR12046 (PANTHER)                                                       |
| Caenorhabditis sp. PS1010 | briggsae cbr-cdh-4 protein                         | 7 | P:GO:0007411;<br>P:GO:0007163;<br>P:GO:0007155;<br>P:GO:0007413;<br>P:GO:0048513;<br>C:GO:0016323;<br>P:GO:0048546 | -                                                                                                                                                                                                                                                                           |             | IPR002126; IPR015919; IPR020894;<br>PTHR10596 (PANTHER),<br>PTHR10596:SF74 (PANTHER) |
| Ciona intestinalis        | uncharacterized transposase-like protein           | 0 |                                                                                                                    |                                                                                                                                                                                                                                                                             |             | IPR007087; IPR015880                                                                 |

|                         |                                                             |   |                                                                                                                                                      |                                                                 |             |                                                                                            |
|-------------------------|-------------------------------------------------------------|---|------------------------------------------------------------------------------------------------------------------------------------------------------|-----------------------------------------------------------------|-------------|--------------------------------------------------------------------------------------------|
| Caenorhabditis briggsae | cerebral endothelial cell adhesion molecule 1               | 8 | P:GO:0009103;<br>P:GO:0040010;<br>P:GO:0040035;<br>F:GO:0005515;<br>P:GO:0040011;<br>P:GO:0002009;<br>F:GO:0016757;<br>C:GO:0005783                  | -                                                               |             | IPR002654; PTHR10730 (PANTHER)                                                             |
| Caenorhabditis elegans  | isoform cra_a                                               | 0 |                                                                                                                                                      | P:GO:0055114;<br>P:GO:0006099;<br>C:GO:0005576;<br>F:GO:0008924 |             | IPR019443; PTHR15678 (PANTHER)                                                             |
| Haemonchus contortus    | ilin (drosophila ecm protein) homolog family member (ppn-1) | 5 | F:GO:0004222;<br>F:GO:0004867;<br>C:GO:0005578;<br>F:GO:0008270;<br>F:GO:0005515                                                                     | -                                                               | EC:3.4.24.0 | IPR000884; G3DSA:2.20.100.10 (GENE3D), PTHR13723 (PANTHER), PTHR13723:SF18 (PANTHER)       |
| Loa loa                 | family with sequence similarity member a                    | 2 | C:GO:0005622;<br>F:GO:0005515                                                                                                                        | -                                                               |             | -                                                                                          |
| Caenorhabditis elegans  | elegans protein partially confirmed by transcript evidence  | 2 | F:GO:0005515;<br>F:GO:0008233                                                                                                                        | -                                                               |             | IPR006150; PTHR10083 (PANTHER), PTHR10083:SF21 (PANTHER)                                   |
|                         | -                                                           | 0 |                                                                                                                                                      |                                                                 |             | -                                                                                          |
| Caenorhabditis elegans  | eukaryotic translation initiation factor 3 subunit m        | 8 | F:GO:0003743;<br>P:GO:0006413;<br>C:GO:0008180;<br>C:GO:0005852;<br>P:GO:0030154;<br>F:GO:0005515;<br>P:GO:0007275;<br>P:GO:0048477                  | -                                                               |             | IPR000717; IPR011991; PTHR15350 (PANTHER), PTHR15350:SF3 (PANTHER), SSF46785 (SUPERFAMILY) |
| Caenorhabditis elegans  | eukaryotic translation initiation factor 3 subunit m        | 8 | F:GO:0003743;<br>P:GO:0006413;<br>C:GO:0008180;<br>C:GO:0005852;<br>P:GO:0030154;<br>F:GO:0005515;<br>P:GO:0007275;<br>P:GO:0048477                  | -                                                               |             | IPR000717; IPR011991; PTHR15350 (PANTHER), PTHR15350:SF3 (PANTHER), SSF46785 (SUPERFAMILY) |
| Caenorhabditis elegans  | dendritic cell protein                                      | 9 | P:GO:0009987;<br>C:GO:0043231;<br>C:GO:0043234;<br>P:GO:0000003;<br>P:GO:0032501;<br>C:GO:0044446;<br>F:GO:0005515;<br>C:GO:0044444;<br>P:GO:0032502 | -                                                               |             | IPR000717; PTHR15350 (PANTHER), PTHR15350:SF3 (PANTHER), SSF46785 (SUPERFAMILY)            |
| Caenorhabditis elegans  | dendritic cell protein                                      | 9 | P:GO:0009987;<br>C:GO:0043231;<br>C:GO:0043234;<br>P:GO:0000003;<br>P:GO:0032501;<br>C:GO:0044446;<br>F:GO:0005515;<br>C:GO:0044444;<br>P:GO:0032502 | -                                                               |             | IPR000717; PTHR15350 (PANTHER), PTHR15350:SF3 (PANTHER), SSF46785 (SUPERFAMILY)            |



|                             |                                              |   |                                                                                                   |                                                                                                                                                                                                                                                                                                               |              |                                                                                                                                                  |
|-----------------------------|----------------------------------------------|---|---------------------------------------------------------------------------------------------------|---------------------------------------------------------------------------------------------------------------------------------------------------------------------------------------------------------------------------------------------------------------------------------------------------------------|--------------|--------------------------------------------------------------------------------------------------------------------------------------------------|
| Macaca mulatta              | ribosomal protein l3                         | 6 | C:GO:0005730;<br>F:GO:0003735;<br>F:GO:0003723;<br>F:GO:0005515;<br>C:GO:0022625;<br>P:GO:0006414 | -                                                                                                                                                                                                                                                                                                             | -            |                                                                                                                                                  |
| Caenorhabditis briggsae     | briggsae cbr-lem-2 protein                   | 0 |                                                                                                   | C:GO:0005635                                                                                                                                                                                                                                                                                                  |              | IPR003887; IPR011015; PTHR12019 (PANTHER)                                                                                                        |
| Caenorhabditis briggsae     | briggsae cbr-lem-2 protein                   | 0 |                                                                                                   | C:GO:0031965;<br>C:GO:0005637;<br>P:GO:0008283;<br>C:GO:0005635;<br>C:GO:0005634;<br>F:GO:0003677;<br>C:GO:0005694;<br>F:GO:0005521;<br>C:GO:0016021;<br>C:GO:0016020;<br>P:GO:0031047;<br>F:GO:0000166;<br>C:GO:0005737;<br>C:GO:0000785;<br>P:GO:0045449;<br>P:GO:0031053;<br>C:GO:0005654;<br>F:GO:0005515 |              | IPR003887; IPR011015; PTHR12019 (PANTHER)                                                                                                        |
|                             |                                              | 0 |                                                                                                   |                                                                                                                                                                                                                                                                                                               |              |                                                                                                                                                  |
| Anopheles gambiae str. PEST | mannosyl-oligosaccharide alpha- -mannosidase | 4 | C:GO:0016020;<br>P:GO:0008152;<br>F:GO:0004571;<br>F:GO:0005509                                   | -                                                                                                                                                                                                                                                                                                             | EC:3.2.1.113 | -                                                                                                                                                |
| Caenorhabditis briggsae     | leucine-rich ppr-motif containing            | 5 | P:GO:0009792;<br>P:GO:0000003;<br>P:GO:0040007;<br>P:GO:0006898;<br>P:GO:0002119                  | -                                                                                                                                                                                                                                                                                                             |              | -                                                                                                                                                |
|                             |                                              | 0 |                                                                                                   |                                                                                                                                                                                                                                                                                                               |              |                                                                                                                                                  |
| Caenorhabditis briggsae     | ribosomal protein s11 containing protein     | 6 | P:GO:0009792;<br>C:GO:0005840;<br>F:GO:0003735;<br>P:GO:0040010;<br>P:GO:0006898;<br>P:GO:0006412 | -                                                                                                                                                                                                                                                                                                             | EC:3.6.5.3   | IPR001971; PTHR11759-SF4 (PANTHER), SSF53137 (SUPERFAMILY)                                                                                       |
| Caenorhabditis briggsae     | slit-robo rho gtpase activating protein      | 4 | P:GO:0045132;<br>P:GO:0007165;<br>C:GO:0005622;<br>F:GO:0005515                                   | -                                                                                                                                                                                                                                                                                                             |              | IPR000198; IPR008936; PTHR14166 (PANTHER), PTHR14166-SF2 (PANTHER)                                                                               |
| Caenorhabditis elegans      | crumbs homolog 3                             | 0 |                                                                                                   |                                                                                                                                                                                                                                                                                                               |              | -                                                                                                                                                |
|                             |                                              | 0 |                                                                                                   |                                                                                                                                                                                                                                                                                                               |              |                                                                                                                                                  |
| Brugia malayi               | run and fyve domain containing 1             | 1 | F:GO:0005488                                                                                      | -                                                                                                                                                                                                                                                                                                             |              | IPR000306; IPR004012; IPR011011; IPR013083; IPR017455; PTHR22835 (PANTHER), PTHR22835-SF37 (PANTHER), SignalP (SIGNALP), SSF140741 (SUPERFAMILY) |

|                         |                                      |   |                                                                                                                                                      |                                                                                                   |            |                                                                                                                            |
|-------------------------|--------------------------------------|---|------------------------------------------------------------------------------------------------------------------------------------------------------|---------------------------------------------------------------------------------------------------|------------|----------------------------------------------------------------------------------------------------------------------------|
| Caenorhabditis briggsae | #NAME?                               | 9 | C:GO:0005737;<br>P:GO:0009792;<br>F:GO:0046872;<br>C:GO:0005886;<br>P:GO:0019509;<br>F:GO:0005515;<br>P:GO:0005514;<br>C:GO:0005634;<br>F:GO:0051213 | -                                                                                                 |            | IPR004313; IPR011051; IPR014710                                                                                            |
| Caenorhabditis elegans  | uncoordinated family member (unc-52) | 7 | P:GO:0001525;<br>P:GO:0051216;<br>C:GO:0005604;<br>P:GO:0030239;<br>P:GO:0060350;<br>P:GO:0007519;<br>F:GO:0005515                                   | -                                                                                                 |            | IPR003598; IPR007110; IPR013151;<br>IPR013783; PTHR10574 (PANTHER),<br>PTHR10574:SF20 (PANTHER),<br>SSF48726 (SUPERFAMILY) |
| Caenorhabditis briggsae | patched family protein               | 3 | P:GO:0040025;<br>P:GO:0040018;<br>P:GO:0040011                                                                                                       | -                                                                                                 |            | IPR003392; PTHR10796 (PANTHER),<br>PTHR10796:SF14 (PANTHER)                                                                |
| Caenorhabditis briggsae | briggsae cbr-dnj-16 protein          | 3 | P:GO:0006457;<br>F:GO:0051082;<br>F:GO:0031072                                                                                                       | -                                                                                                 |            | IPR001623; IPR015609; IPR018253;<br>PTHR11821:SF20 (PANTHER)                                                               |
| -                       | -                                    | 0 |                                                                                                                                                      |                                                                                                   |            | SignalP (SIGNALP)                                                                                                          |
| -                       | -                                    | 0 |                                                                                                                                                      |                                                                                                   |            | SignalP (SIGNALP)                                                                                                          |
| Caenorhabditis briggsae | isoform cra_a                        | 1 | F:GO:0005488                                                                                                                                         | -                                                                                                 |            | IPR000357; IPR011989                                                                                                       |
| Brugia malayi           | ubiquitin-like protein 5             | 0 |                                                                                                                                                      | F:GO:0003674;<br>P:GO:0008150;<br>C:GO:0005575                                                    |            | -                                                                                                                          |
| Caenorhabditis elegans  | d-se domain containing 2             | 0 |                                                                                                                                                      | F:GO:0016888;<br>F:GO:0016787;<br>P:GO:0008150;<br>F:GO:0004518;<br>C:GO:0005634;<br>C:GO:0005575 |            | -                                                                                                                          |
| -                       | -                                    | 0 |                                                                                                                                                      |                                                                                                   |            | -                                                                                                                          |
| Caenorhabditis elegans  | phosphatidylinositol synthase        | 3 | C:GO:0016021;<br>P:GO:0000003;<br>F:GO:0016780                                                                                                       | -                                                                                                 | EC:2.7.8.0 | PTHR15362 (PANTHER), SignalP (SIGNALP)                                                                                     |
| Caenorhabditis elegans  | phosphatidylinositol synthase        | 3 | C:GO:0016021;<br>P:GO:0000003;<br>F:GO:0016780                                                                                                       | -                                                                                                 | EC:2.7.8.0 | PTHR15362 (PANTHER), SignalP (SIGNALP)                                                                                     |
| Brugia malayi           | innexin family protein               | 5 | P:GO:0040035;<br>P:GO:0040010;<br>P:GO:0040011;<br>C:GO:0044425;<br>P:GO:0002009                                                                     | -                                                                                                 |            | IPR000990                                                                                                                  |
| Caenorhabditis elegans  | transmembrane protein 68             | 1 | F:GO:0003824                                                                                                                                         | -                                                                                                 |            | -                                                                                                                          |
| -                       | -                                    | 0 |                                                                                                                                                      |                                                                                                   |            | -                                                                                                                          |
| -                       | -                                    | 0 |                                                                                                                                                      |                                                                                                   |            | -                                                                                                                          |
| -                       | -                                    | 0 |                                                                                                                                                      |                                                                                                   |            | -                                                                                                                          |
| Caenorhabditis briggsae | chromosome 20 open reading frame 43  | 6 | P:GO:0009792;<br>P:GO:0040007;<br>P:GO:0010171;<br>P:GO:0006898;<br>P:GO:0002119;<br>P:GO:0040011                                                    | -                                                                                                 |            | IPR006735; PF04641 (PFAM)                                                                                                  |

|                         |                                                       |    |                                                                                                                                                                                                                          |                               |              |                                                                                                                             |
|-------------------------|-------------------------------------------------------|----|--------------------------------------------------------------------------------------------------------------------------------------------------------------------------------------------------------------------------|-------------------------------|--------------|-----------------------------------------------------------------------------------------------------------------------------|
| Caenorhabditis briggsae | chromosome 20 open reading frame 43                   | 6  | P:GO:0009792;<br>P:GO:0040007;<br>P:GO:0010171;<br>P:GO:0006898;<br>P:GO:0002119;<br>P:GO:0040011                                                                                                                        | -                             |              | SignalP (SIGNALP)                                                                                                           |
| Caenorhabditis briggsae | zgc:55448 protein                                     | 6  | P:GO:0009792;<br>P:GO:0040007;<br>P:GO:0010171;<br>P:GO:0006898;<br>P:GO:0002119;<br>P:GO:0040011                                                                                                                        | -                             |              | IPR006735; PF04641 (PFAM)                                                                                                   |
| Caenorhabditis briggsae | zgc:55448 protein                                     | 6  | P:GO:0009792;<br>P:GO:0040007;<br>P:GO:0010171;<br>P:GO:0006898;<br>P:GO:0002119;<br>P:GO:0040011                                                                                                                        | -                             |              | IPR006735; PF04641 (PFAM)                                                                                                   |
|                         | -                                                     | 0  |                                                                                                                                                                                                                          |                               |              | -                                                                                                                           |
| Caenorhabditis elegans  | yqy2_caee1: full=uncharacterized protein              | 0  |                                                                                                                                                                                                                          | P:GO:0008152;<br>F:GO:0008080 |              | -                                                                                                                           |
|                         | -                                                     | 0  |                                                                                                                                                                                                                          |                               |              | SignalP (SIGNALP)                                                                                                           |
|                         | -                                                     | 0  |                                                                                                                                                                                                                          |                               |              | -                                                                                                                           |
| Caenorhabditis briggsae | actin related protein 2.3 complex subunit 2           | 13 | F:GO:0003899;<br>C:GO:0005885;<br>F:GO:0003723;<br>P:GO:0006396;<br>C:GO:0031252;<br>C:GO:0042995;<br>C:GO:0005925;<br>F:GO:0003779;<br>P:GO:0006928;<br>F:GO:0005200;<br>C:GO:0005794;<br>F:GO:0000175;<br>P:GO:0030838 | -                             | EC:2.7.7.6   | IPR007188; G3DSA:3.30.1460.20 (GENE3D), SSF69645 (SUPERFAMILY)                                                              |
| Caenorhabditis elegans  | cyclin b                                              | 1  | F:GO:0005515                                                                                                                                                                                                             | -                             |              | IPR004367; IPR006670; IPR006671;<br>IPR011028; IPR013763; IPR014400;<br>PTHR10177 (PANTHER),<br>PTHR10177:SF21 (PANTHER)    |
| Caenorhabditis elegans  | hypothetical protein K04G7.1 [Caenorhabditis elegans] | 3  | P:GO:0009792;<br>P:GO:0000003;<br>P:GO:0006898                                                                                                                                                                           | -                             |              | -                                                                                                                           |
| Caenorhabditis briggsae | mannosyl-oligosaccharide glucosidase                  | 5  | C:GO:0016021;<br>P:GO:0040010;<br>F:GO:0004573;<br>P:GO:0009311;<br>P:GO:0040011                                                                                                                                         | -                             | EC:3.2.1.106 | IPR004888; PTHR10412 (PANTHER)                                                                                              |
| Loa loa                 | integrin alpha fg-gap repeat containing 2             | 0  |                                                                                                                                                                                                                          | P:GO:0007229                  |              | PTHR16317 (PANTHER), SignalP (SIGNALP)                                                                                      |
| Caenorhabditis briggsae | serine protease                                       | 1  | F:GO:0016787                                                                                                                                                                                                             | -                             |              | IPR001254; IPR001314; IPR009003;<br>IPR018114; G3DSA:2.40.10.10 (GENE3D), PTHR19355 (PANTHER),<br>PTHR19355:SF174 (PANTHER) |

|                         |                                                            |   |                                                                                                   |                                                                                                                                                                                                                                                                                              |            |                                                                                                                                |
|-------------------------|------------------------------------------------------------|---|---------------------------------------------------------------------------------------------------|----------------------------------------------------------------------------------------------------------------------------------------------------------------------------------------------------------------------------------------------------------------------------------------------|------------|--------------------------------------------------------------------------------------------------------------------------------|
| Monodelphis domestica   | suppression of tumorigenicity 14 (colon carcinoma)         | 0 |                                                                                                   | P:GO:0016477;<br>F:GO:0004252;<br>C:GO:0016021;<br>C:GO:0016020;<br>F:GO:0016787;<br>C:GO:0019897;<br>F:GO:0008236;<br>F:GO:0003824;<br>C:GO:0005576;<br>F:GO:0005044;<br>F:GO:0008233;<br>C:GO:0016323;<br>P:GO:0006508;<br>P:GO:0008152;<br>C:GO:0005887;<br>C:GO:0005886;<br>C:GO:0005615 |            | IPR001254; IPR001314; IPR009003;<br>IPR018114; G3DSA:2.40.10.10<br>(GENE3D), PTHR19355 (PANTHER),<br>PTHR19355:SF174 (PANTHER) |
| Caenorhabditis briggsae | serine protease                                            | 1 | F:GO:0016787                                                                                      | -                                                                                                                                                                                                                                                                                            |            | IPR001254; IPR001314; IPR009003;<br>IPR018114; G3DSA:2.40.10.10<br>(GENE3D), PTHR19355 (PANTHER),<br>PTHR19355:SF174 (PANTHER) |
| Caenorhabditis briggsae | transmembrane amino acid transporter protein               | 1 | C:GO:0016020                                                                                      | -                                                                                                                                                                                                                                                                                            |            | IPR013057; SignalP (SIGNALP)                                                                                                   |
|                         | -                                                          | 0 |                                                                                                   |                                                                                                                                                                                                                                                                                              |            | -                                                                                                                              |
| Haemonchus contortus    | daf-16b transcription factor                               | 4 | F:GO:0003700;<br>F:GO:0043565;<br>C:GO:0005634;<br>P:GO:0006355                                   | -                                                                                                                                                                                                                                                                                            |            | -                                                                                                                              |
|                         | -                                                          | 0 |                                                                                                   |                                                                                                                                                                                                                                                                                              |            | -                                                                                                                              |
| Caenorhabditis elegans  | titin isoform n2-a                                         | 2 | P:GO:0009792;<br>P:GO:0000003                                                                     | -                                                                                                                                                                                                                                                                                            |            | IPR003599; IPR003961; IPR007110;<br>IPR008957; IPR013098; IPR013783;<br>PTHR10489 (PANTHER), SSF48726<br>(SUPERFAMILY)         |
| Loa loa                 | elegans protein partially confirmed by transcript evidence | 0 |                                                                                                   |                                                                                                                                                                                                                                                                                              |            | -                                                                                                                              |
|                         | -                                                          | 0 |                                                                                                   |                                                                                                                                                                                                                                                                                              |            | -                                                                                                                              |
| Aedes aegypti           | dopa decarboxylase                                         | 3 | P:GO:0044237;<br>F:GO:0016831;<br>P:GO:0044281                                                    | -                                                                                                                                                                                                                                                                                            | EC:4.1.1.0 | -                                                                                                                              |
|                         | -                                                          | 0 |                                                                                                   |                                                                                                                                                                                                                                                                                              |            | -                                                                                                                              |
| Caenorhabditis briggsae | elegans protein partially confirmed by transcript evidence | 0 |                                                                                                   | F:GO:0008270;<br>C:GO:0005622                                                                                                                                                                                                                                                                |            | IPR007087                                                                                                                      |
|                         | -                                                          | 0 |                                                                                                   |                                                                                                                                                                                                                                                                                              |            | SignalP (SIGNALP)                                                                                                              |
| Loa loa                 | mob1 phocein family protein                                | 0 |                                                                                                   |                                                                                                                                                                                                                                                                                              |            | -                                                                                                                              |
| Brugia malayi           | cationic amino acid transporter                            | 6 | P:GO:0019915;<br>C:GO:0016021;<br>P:GO:0006865;<br>F:GO:0015171;<br>C:GO:0005886;<br>P:GO:0055085 | -                                                                                                                                                                                                                                                                                            |            | IPR002293; PTHR11785:SF74<br>(PANTHER), SignalP (SIGNALP)                                                                      |
| Caenorhabditis elegans  | riken cd- 2610029g23 gene                                  | 0 |                                                                                                   | F:GO:0003674;<br>P:GO:0008150;<br>C:GO:0005575                                                                                                                                                                                                                                               |            | -                                                                                                                              |
|                         | -                                                          | 0 |                                                                                                   |                                                                                                                                                                                                                                                                                              |            | -                                                                                                                              |
| Caenorhabditis elegans  | beta-galactosidase                                         | 1 | F:GO:0016787                                                                                      | -                                                                                                                                                                                                                                                                                            |            | IPR001944; IPR013781; IPR017853                                                                                                |
| Heterodera glycines     | venom allergen-like protein                                | 0 |                                                                                                   | F:GO:0009055;<br>P:GO:0019646;<br>P:GO:0006898;<br>C:GO:0005576                                                                                                                                                                                                                              |            | IPR001283; IPR014044;<br>PTHR10334:SF11 (PANTHER)                                                                              |
|                         | -                                                          | 0 |                                                                                                   |                                                                                                                                                                                                                                                                                              |            | -                                                                                                                              |

|                         |                                                       |   |                                                                 |                                                                                                   |             |                                                                                             |
|-------------------------|-------------------------------------------------------|---|-----------------------------------------------------------------|---------------------------------------------------------------------------------------------------|-------------|---------------------------------------------------------------------------------------------|
| Ancylostoma caninum     | secreted protein 5 precursor                          | 0 |                                                                 | P:GO:0040011;<br>C:GO:0005576                                                                     |             | IPR001283; IPR002413; IPR014044;<br>PTHR10334:SF11 (PANTHER)                                |
| Caenorhabditis elegans  | hypothetical protein T12D8.9 [Caenorhabditis elegans] | 0 |                                                                 |                                                                                                   |             | -                                                                                           |
|                         | -                                                     | 0 |                                                                 |                                                                                                   |             | -                                                                                           |
| Loa loa                 | multiple pdz domain protein family member (mpz-1)     | 2 | F:GO:0005515;<br>C:GO:0016021                                   | -                                                                                                 |             | -                                                                                           |
| Caenorhabditis briggsae | udp-glucose pyrophosphatase                           | 0 |                                                                 | F:GO:0046872;<br>F:GO:0016787;<br>F:GO:0016818                                                    |             | IPR000086; IPR015797; PTHR11839<br>(PANTHER), PTHR11839:SF2<br>(PANTHER), PS51462 (PROFILE) |
| Caenorhabditis elegans  | uroca-se domain containing 1                          | 2 | P:GO:0006548;<br>F:GO:0016153                                   | -                                                                                                 | EC:4.2.1.49 | IPR000193                                                                                   |
| Brugia malayi           | zinc finger protein dhhc domain containing            | 2 | C:GO:0016020;<br>F:GO:0008270                                   | -                                                                                                 |             | IPR001594; PTHR22883 (PANTHER),<br>SignalP (SIGNALP)                                        |
|                         | -                                                     | 0 |                                                                 |                                                                                                   |             | -                                                                                           |
| Caenorhabditis elegans  | elegans protein confirmed by transcript evidence      | 2 | P:GO:0040018;<br>P:GO:0040011                                   | -                                                                                                 |             | IPR000615; IPR021134; SignalP<br>(SIGNALP)                                                  |
| Caenorhabditis elegans  | briggsae cbr-zyg-9 protein                            | 1 | F:GO:0005515                                                    | -                                                                                                 |             | PTHR12609 (PANTHER)                                                                         |
| Caenorhabditis elegans  | rnp-1 like r--binding protein                         | 4 | C:GO:0005622;<br>P:GO:0009792;<br>F:GO:0000166;<br>F:GO:0003723 | -                                                                                                 |             | IPR000504; IPR012677; IPR015465;<br>PTHR10432 (PANTHER), SSF54928<br>(SUPERFAMILY)          |
| Haemochus contortus     | galectin                                              | 3 | F:GO:0005515;<br>F:GO:0005529;<br>P:GO:0000003                  | -                                                                                                 |             | SignalP (SIGNALP)                                                                           |
|                         | -                                                     | 0 |                                                                 |                                                                                                   |             | -                                                                                           |
|                         | -                                                     | 0 |                                                                 |                                                                                                   |             | IPR018271; SignalP (SIGNALP)                                                                |
| Caenorhabditis elegans  | isoform cra_a                                         | 1 | P:GO:0009987                                                    | -                                                                                                 |             | -                                                                                           |
| Caenorhabditis elegans  | isoform cra_a                                         | 1 | P:GO:0009987                                                    | -                                                                                                 |             | -                                                                                           |
| Caenorhabditis elegans  | domon domain containing protein                       | 0 |                                                                 | F:GO:0030246;<br>F:GO:0004500;<br>C:GO:0016021;<br>F:GO:0003824;<br>P:GO:0006548;<br>P:GO:0016052 |             | -                                                                                           |
| Drosophila melanogaster | mucin 68d                                             | 0 |                                                                 | F:GO:0008061;<br>P:GO:0006030;<br>C:GO:0005576                                                    |             | -                                                                                           |
| Caenorhabditis briggsae | pap 25a associated domain containing protein          | 4 | P:GO:0040035;<br>P:GO:0009792;<br>P:GO:0007281;<br>P:GO:0040010 | -                                                                                                 |             | PTHR23092 (PANTHER),<br>PTHR23092:SF4 (PANTHER), SSF81631<br>(SUPERFAMILY)                  |
|                         | -                                                     | 0 |                                                                 |                                                                                                   |             | -                                                                                           |
| Caenorhabditis elegans  | loss of heterozygosity 12 chromosomal region 1        | 3 | P:GO:0002119;<br>F:GO:0005515;<br>P:GO:0040007                  | -                                                                                                 |             | IPR018780                                                                                   |
| Brugia malayi           | elegans protein confirmed by transcript evidence      | 0 |                                                                 |                                                                                                   |             | -                                                                                           |

|                        |                                       |    |                                                                                                                                                                                                                                                                                                                                                                                                                                                                         |   |             |                                                                                           |
|------------------------|---------------------------------------|----|-------------------------------------------------------------------------------------------------------------------------------------------------------------------------------------------------------------------------------------------------------------------------------------------------------------------------------------------------------------------------------------------------------------------------------------------------------------------------|---|-------------|-------------------------------------------------------------------------------------------|
| Homo sapiens           | nucleoside diphosphate ki-se b        | 31 | C:GO:0030027;<br>F:GO:0005515;<br>P:GO:0002762;<br>P:GO:0070593;<br>F:GO:0004550;<br>P:GO:0006241;<br>C:GO:0005792;<br>P:GO:0006355;<br>P:GO:0030819;<br>P:GO:0007162;<br>C:GO:0016021;<br>C:GO:0005882;<br>P:GO:0016338;<br>F:GO:0046872;<br>P:GO:0006165;<br>C:GO:0001726;<br>P:GO:0007156;<br>F:GO:0003677;<br>P:GO:0045618;<br>P:GO:0006183;<br>P:GO:0006228;<br>P:GO:0050679;<br>F:GO:0003700;<br>C:GO:0048471;<br>C:GO:0005886;<br>C:GO:0005625;<br>C:GO:0005634; | - | EC:2.7.4.6  | IPR001564                                                                                 |
| Caenorhabditis elegans | tyrosine-protein ki-se pr2            | 6  | P:GO:0042059;<br>P:GO:0040027;<br>F:GO:0004713;<br>F:GO:0000166;<br>P:GO:0048102;<br>P:GO:0009792                                                                                                                                                                                                                                                                                                                                                                       | - | EC:2.7.10.0 | -                                                                                         |
| -                      | -                                     | 0  |                                                                                                                                                                                                                                                                                                                                                                                                                                                                         |   |             | SignalP (SIGNALP)                                                                         |
| Brugia malayi          | variant sh3 domain containing protein | 9  | P:GO:0007427;<br>C:GO:0044441;<br>P:GO:0046425;<br>C:GO:0005768;<br>P:GO:0043409;<br>F:GO:0005515;<br>P:GO:0048013;<br>P:GO:0006886;<br>F:GO:0008268                                                                                                                                                                                                                                                                                                                    | - |             | IPR002014; IPR008942; IPR018205;<br>PTHR13856 (PANTHER),<br>PTHR13856:SF22 (PANTHER)      |
| -                      | -                                     | 0  |                                                                                                                                                                                                                                                                                                                                                                                                                                                                         |   |             | -                                                                                         |
| -                      | -                                     | 0  |                                                                                                                                                                                                                                                                                                                                                                                                                                                                         |   |             | -                                                                                         |
| -                      | -                                     | 0  |                                                                                                                                                                                                                                                                                                                                                                                                                                                                         |   |             | -                                                                                         |
| -                      | -                                     | 0  |                                                                                                                                                                                                                                                                                                                                                                                                                                                                         |   |             | -                                                                                         |
| Caenorhabditis elegans | phosphoglycerate mutase               | 0  |                                                                                                                                                                                                                                                                                                                                                                                                                                                                         |   |             | IPR013078; G3DSA:3.40.50.1240<br>(GENE3D), PTHR23029 (PANTHER),<br>SSF53254 (SUPERFAMILY) |
| -                      | -                                     | 0  |                                                                                                                                                                                                                                                                                                                                                                                                                                                                         |   |             | -                                                                                         |
| Caenorhabditis elegans | sda1 domain containing 1              | 7  | C:GO:0005730;<br>P:GO:0002119;<br>F:GO:0005515;<br>P:GO:0042254;<br>P:GO:0040007;<br>P:GO:0006898;<br>P:GO:0051729                                                                                                                                                                                                                                                                                                                                                      | - |             | IPR007949; IPR016024; PTHR12730<br>(PANTHER)                                              |

|                         |                                                               |   |                                                                                                                    |   |            |                                                                                                                                         |
|-------------------------|---------------------------------------------------------------|---|--------------------------------------------------------------------------------------------------------------------|---|------------|-----------------------------------------------------------------------------------------------------------------------------------------|
| Brugia malayi           | histone h3                                                    | 1 | C:GO:0043229                                                                                                       | - |            | IPR000164; IPR007125; IPR009072                                                                                                         |
|                         | -                                                             | 0 |                                                                                                                    |   |            | -                                                                                                                                       |
|                         | -                                                             | 0 |                                                                                                                    |   |            | -                                                                                                                                       |
| Caenorhabditis elegans  | i in family member (inx-1)                                    | 3 | C:GO:0005921;<br>C:GO:0016021;<br>P:GO:0040011                                                                     | - |            | IPR000990                                                                                                                               |
| Caenorhabditis elegans  | p38 mapk                                                      | 7 | P:GO:0044238;<br>P:GO:0007243;<br>P:GO:0044260;<br>F:GO:0005515;<br>F:GO:0008339;<br>P:GO:0006950;<br>C:GO:0005634 | - |            | IPR011009; G3DSA:1.10.510.10 (GENE3D), PTHR11909 (PANTHER), PTHR11909:SF7 (PANTHER)                                                     |
| Caenorhabditis briggsae | yl54_caeel ame: full=uncharacterized protein                  | 0 |                                                                                                                    |   |            | -                                                                                                                                       |
| Loa loa                 | hypothetical protein LOAG_03906 [Loa loa]                     | 1 | P:GO:0000003                                                                                                       | - |            | -                                                                                                                                       |
| Loa loa                 | ribonuclease iii                                              | 3 | F:GO:0003723;<br>P:GO:0031053;<br>C:GO:0005622                                                                     | - |            | IPR001159; IPR014720; PTHR11207 (PANTHER), SSF54768 (SUPERFAMILY)                                                                       |
| Caenorhabditis elegans  | neuro-I calcium sensor 2                                      | 3 | F:GO:0016491;<br>P:GO:0000003;<br>F:GO:0005509                                                                     | - |            | IPR001125; IPR002048; IPR011992; IPR018247; IPR018248; IPR018249; PTHR23055 (PANTHER), PTHR23055:SF19 (PANTHER), SSF47473 (SUPERFAMILY) |
| Caenorhabditis elegans  | briggsae cbr-age-1 protein                                    | 7 | P:GO:0008340;<br>P:GO:0007611;<br>P:GO:0000003;<br>P:GO:0050920;<br>P:GO:0043053;<br>F:GO:0016301;<br>P:GO:0009792 | - |            | IPR002420; IPR008973; G3DSA:2.60.40.150 (GENE3D)                                                                                        |
| Caenorhabditis briggsae | nematode cuticle collagen n-termi-I domain containing protein | 2 | F:GO:0042302;<br>C:GO:0016021                                                                                      | - |            | PTHR10499 (PANTHER), PTHR10499:SF58 (PANTHER)                                                                                           |
|                         | -                                                             | 0 |                                                                                                                    |   |            | -                                                                                                                                       |
| Caenorhabditis elegans  | hypothetical protein F21F3.7 [Caenorhabditis elegans]         | 0 |                                                                                                                    |   |            | IPR008590                                                                                                                               |
|                         | -                                                             | 0 |                                                                                                                    |   |            | -                                                                                                                                       |
| Caenorhabditis elegans  | elegans protein partially confirmed by transcript evidence    | 1 | F:GO:0005515                                                                                                       | - |            | PTHR22746 (PANTHER), PTHR22746:SF6 (PANTHER)                                                                                            |
| Drosophila grimshawi    | myst histone acetyltransferase                                | 2 | F:GO:0016747;<br>C:GO:0005622                                                                                      | - | EC:2.3.1.0 | -                                                                                                                                       |

|                         |                                  |    |                                                                                                                                                                                                                                                                                                                                                 |   |  |                                                                                                                                                                                                   |
|-------------------------|----------------------------------|----|-------------------------------------------------------------------------------------------------------------------------------------------------------------------------------------------------------------------------------------------------------------------------------------------------------------------------------------------------|---|--|---------------------------------------------------------------------------------------------------------------------------------------------------------------------------------------------------|
| Caenorhabditis briggsae | briggsae cbr-unc-70 protein      | 20 | P:GO:0016199;<br>P:GO:0007026;<br>F:GO:0005546;<br>C:GO:0031594;<br>P:GO:0030721;<br>P:GO:0007009;<br>C:GO:0008091;<br>C:GO:0045170;<br>F:GO:0003779;<br>F:GO:0008017;<br>C:GO:0016328;<br>C:GO:0045169;<br>C:GO:0030424;<br>P:GO:0045478;<br>P:GO:0042062;<br>C:GO:0016327;<br>P:GO:0007274;<br>C:GO:0005811;<br>P:GO:0048790;<br>F:GO:0005200 | - |  | IPR001605; IPR001849; IPR002017;<br>IPR011993; IPR018159;<br>G3DSA:1.20.58.60 (GENE3D),<br>PTHR11915 (PANTHER),<br>PTHR11915:SF48 (PANTHER),<br>SSF46966 (SUPERFAMILY), SSF50729<br>(SUPERFAMILY) |
| Caenorhabditis elegans  | protein                          | 1  | F:GO:0016740                                                                                                                                                                                                                                                                                                                                    | - |  | IPR019410; G3DSA:3.40.50.150<br>(GENE3D), PTHR14614 (PANTHER),<br>SSF53335 (SUPERFAMILY)                                                                                                          |
| Caenorhabditis briggsae | atp-dependent r- helicase ddx54  | 11 | F:GO:0030331;<br>P:GO:0040010;<br>F:GO:0003723;<br>P:GO:0006396;<br>F:GO:0004004;<br>C:GO:0005730;<br>C:GO:0016021;<br>P:GO:0045449;<br>P:GO:0006200;<br>F:GO:0005524;<br>F:GO:0003714                                                                                                                                                          | - |  | IPR000629; IPR011545; IPR014001;<br>IPR014014; IPR014021;<br>G3DSA:3.40.50.300 (GENE3D),<br>PTHR10967 (PANTHER),<br>PTHR10967:SF17 (PANTHER),<br>SSF52540 (SUPERFAMILY)                           |
|                         | -                                | 0  |                                                                                                                                                                                                                                                                                                                                                 |   |  | SignalP (SIGNALP)                                                                                                                                                                                 |
| Caenorhabditis elegans  | immunoglobulin-binding protein 1 | 17 | P:GO:0043154;<br>P:GO:0018991;<br>F:GO:0005515;<br>P:GO:0040007;<br>P:GO:0040017;<br>P:GO:0032873;<br>P:GO:0010553;<br>P:GO:0009792;<br>P:GO:0002009;<br>P:GO:0034612;<br>C:GO:0005813;<br>P:GO:0002119;<br>F:GO:0008601;<br>P:GO:0010171;<br>P:GO:0070555;<br>P:GO:0060632;<br>P:GO:0040035                                                    | - |  | IPR007304; PTHR10933:SF8<br>(PANTHER)                                                                                                                                                             |



|                         |                                 |    |                                                                                                                                                                                                         |   |                                                                                     |
|-------------------------|---------------------------------|----|---------------------------------------------------------------------------------------------------------------------------------------------------------------------------------------------------------|---|-------------------------------------------------------------------------------------|
| Caenorhabditis briggsae | dephospho- ki-se family protein | 0  | F:GO:0016301;<br>P:GO:0009058;<br>F:GO:0005524;<br>P:GO:0015937;<br>F:GO:0016779;<br>C:GO:0005737;<br>F:GO:0004140;<br>F:GO:0003824                                                                     | - |                                                                                     |
|                         | -                               | 0  |                                                                                                                                                                                                         |   | -                                                                                   |
| Loa loa                 | ran binding protein 10          | 0  | F:GO:0008536;<br>C:GO:0005881;<br>P:GO:0000226;<br>F:GO:0048487;<br>F:GO:0005087                                                                                                                        |   | IPR006595; IPR013144; IPR019589;<br>PTHR12864 (PANTHER),<br>PTHR12864:SF1 (PANTHER) |
| Loa loa                 | ran-binding protein 10          | 0  | C:GO:0005737;<br>C:GO:0005634                                                                                                                                                                           |   | IPR006595; IPR013144; IPR019589;<br>PTHR12864 (PANTHER),<br>PTHR12864:SF1 (PANTHER) |
| Loa loa                 | ran binding protein 10          | 0  | F:GO:0008536;<br>C:GO:0005881;<br>P:GO:0000226;<br>F:GO:0048487;<br>F:GO:0005087                                                                                                                        |   | IPR006595; IPR013144; IPR019589;<br>PTHR12864 (PANTHER),<br>PTHR12864:SF1 (PANTHER) |
| Pan troglodytes         | ribosomal protein s19           | 12 | F:GO:0003723;<br>P:GO:0015669;<br>C:GO:0005730;<br>P:GO:0006364;<br>F:GO:0003735;<br>P:GO:0006414;<br>C:GO:0022627;<br>P:GO:0051272;<br>P:GO:0030218;<br>P:GO:0042274;<br>P:GO:0009991;<br>F:GO:0005515 | - | SignalP (SIGNALP)                                                                   |

|                         |                                             |    |                                                                                                                                                                                                                                                                                                                                                                                                                                                                                         |                                                                                                                    |                                                                                                        |
|-------------------------|---------------------------------------------|----|-----------------------------------------------------------------------------------------------------------------------------------------------------------------------------------------------------------------------------------------------------------------------------------------------------------------------------------------------------------------------------------------------------------------------------------------------------------------------------------------|--------------------------------------------------------------------------------------------------------------------|--------------------------------------------------------------------------------------------------------|
| Caenorhabditis briggsae | myosin heavy chain                          | 35 | P:GO:000742;<br>P:GO:0007626;<br>P:GO:0046664;<br>P:GO:0045200;<br>C:GO:0016461;<br>P:GO:0035159;<br>P:GO:0031036;<br>P:GO:0035072;<br>P:GO:0007443;<br>P:GO:0007395;<br>P:GO:0045214;<br>P:GO:0035017;<br>P:GO:0007297;<br>C:GO:0031672;<br>P:GO:0046663;<br>F:GO:0003779;<br>F:GO:0000146;<br>P:GO:0001736;<br>F:GO:0008307;<br>F:GO:0032027;<br>P:GO:0008258;<br>P:GO:0051259;<br>P:GO:0016203;<br>C:GO:0032154;<br>C:GO:0045179;<br>P:GO:0045184;<br>C:GO:0005863;<br>P:GO:0035177; | -                                                                                                                  | -                                                                                                      |
| Macaca mulatta          | ribosomal protein l35a                      | 9  | C:GO:0005840;<br>P:GO:0042273;<br>F:GO:0003735;<br>F:GO:0005515;<br>P:GO:0006364;<br>C:GO:0005829;<br>C:GO:0005739;<br>F:GO:0000049;<br>P:GO:0006414                                                                                                                                                                                                                                                                                                                                    | -                                                                                                                  | IPR001780; IPR009000; IPR018266                                                                        |
| Brugia malayi           | glucosamine-6-phosphate n-acetyltransferase | 4  | P:GO:0000910;<br>P:GO:0000003;<br>F:GO:0008080;<br>F:GO:0005515                                                                                                                                                                                                                                                                                                                                                                                                                         | -                                                                                                                  | -                                                                                                      |
| Brugia malayi           | glucosamine-6-phosphate n-acetyltransferase | 4  | P:GO:0000910;<br>P:GO:0000003;<br>F:GO:0008080;<br>F:GO:0005515                                                                                                                                                                                                                                                                                                                                                                                                                         | -                                                                                                                  | IPR000182; IPR016181; PTHR13355 (PANTHER)                                                              |
| -                       | -                                           | 0  |                                                                                                                                                                                                                                                                                                                                                                                                                                                                                         |                                                                                                                    | -                                                                                                      |
| Caenorhabditis briggsae | periodic tryptophan protein 1 homolog       | 0  |                                                                                                                                                                                                                                                                                                                                                                                                                                                                                         | F:GO:0003674;<br>F:GO:0008415;<br>F:GO:0016740;<br>F:GO:0004402;<br>P:GO:0008150;<br>C:GO:0005634;<br>C:GO:0005575 | IPR001680; IPR011046; IPR015943;<br>IPR017986; IPR019775; IPR019781;<br>IPR019782; PTHR14091 (PANTHER) |
| Loa loa                 | hypothetical protein LOAG_06803 [Loa loa]   | 0  |                                                                                                                                                                                                                                                                                                                                                                                                                                                                                         |                                                                                                                    | -                                                                                                      |
| -                       | -                                           | 0  |                                                                                                                                                                                                                                                                                                                                                                                                                                                                                         |                                                                                                                    | -                                                                                                      |
| -                       | -                                           | 0  |                                                                                                                                                                                                                                                                                                                                                                                                                                                                                         |                                                                                                                    | -                                                                                                      |
| Caenorhabditis briggsae | mgc84616 protein                            | 2  | P:GO:0008152;<br>F:GO:0016757                                                                                                                                                                                                                                                                                                                                                                                                                                                           | -                                                                                                                  | IPR007235; G3DSA:3.40.50.2000 (GENE3D), PTHR12867 (PANTHER), SignalP (SIGNALP)                         |

|                         |                                                       |    |                                                                                                                                                                                                                                                                                              |             |                                                                                                                                                         |
|-------------------------|-------------------------------------------------------|----|----------------------------------------------------------------------------------------------------------------------------------------------------------------------------------------------------------------------------------------------------------------------------------------------|-------------|---------------------------------------------------------------------------------------------------------------------------------------------------------|
| Caenorhabditis briggsae | briggsae cbr-twk-25 protein                           | 0  | C:GO:0016021;<br>C:GO:0016020;<br>F:GO:0005267;<br>P:GO:0006813;<br>P:GO:0006811;<br>F:GO:0005216;<br>P:GO:0006810                                                                                                                                                                           | -           | -                                                                                                                                                       |
|                         | -                                                     | 0  |                                                                                                                                                                                                                                                                                              |             | -                                                                                                                                                       |
|                         | -                                                     | 0  |                                                                                                                                                                                                                                                                                              |             | -                                                                                                                                                       |
| Caenorhabditis elegans  | hypothetical protein D2024.5 [Caenorhabditis elegans] | 4  | P:GO:0002119;<br>P:GO:0009792;<br>P:GO:0040007;<br>P:GO:0040011                                                                                                                                                                                                                              | -           | -                                                                                                                                                       |
| Loa loa                 | esr1 protein                                          | 16 | P:GO:0008156;<br>C:GO:0005654;<br>P:GO:0043517;<br>F:GO:0032405;<br>F:GO:0032407;<br>P:GO:0034446;<br>F:GO:0004674;<br>P:GO:0000077;<br>P:GO:0034644;<br>P:GO:0071480;<br>C:GO:0031527;<br>F:GO:0051015;<br>C:GO:0031258;<br>P:GO:0031532;<br>F:GO:0005518;<br>F:GO:0004888                  | EC:2.7.11.0 | IPR000403; IPR003152; IPR011009;<br>IPR014009; IPR018936;<br>G3DSA:3.30.1010.10 (GENE3D),<br>PTHR11139 (PANTHER),<br>PTHR11139:SF8 (PANTHER)            |
| Loa loa                 | esr1 protein                                          | 17 | P:GO:0000075;<br>F:GO:0004672;<br>P:GO:0007346;<br>F:GO:0032404;<br>P:GO:0071478;<br>P:GO:0042770;<br>P:GO:0009653;<br>P:GO:0007127;<br>P:GO:0006260;<br>P:GO:0006302;<br>P:GO:0006310;<br>C:GO:0044428;<br>P:GO:0065008;<br>P:GO:0030036;<br>P:GO:0007275;<br>P:GO:0051276;<br>C:GO:0031253 | -           | IPR000403; IPR003151; IPR003152;<br>IPR011009; IPR014009; IPR018936;<br>G3DSA:3.30.1010.10 (GENE3D),<br>PTHR11139 (PANTHER),<br>PTHR11139:SF8 (PANTHER) |
| Loa loa                 | esr1 protein                                          | 11 | F:GO:0004672;<br>C:GO:0031253;<br>P:GO:0042770;<br>P:GO:0071478;<br>C:GO:0044428;<br>P:GO:0016043;<br>F:GO:0032404;<br>P:GO:0048523;<br>P:GO:0032502;<br>P:GO:0006260;<br>P:GO:0007049                                                                                                       | -           | IPR000403; IPR003151; IPR003152;<br>IPR011009; IPR014009; IPR018936;<br>G3DSA:3.30.1010.10 (GENE3D),<br>PTHR11139 (PANTHER),<br>PTHR11139:SF8 (PANTHER) |

|                         |                                                            |    |                                                                                                                                                                                                                                                                                                                                                 |   |                               |                                                                                                                                                                             |
|-------------------------|------------------------------------------------------------|----|-------------------------------------------------------------------------------------------------------------------------------------------------------------------------------------------------------------------------------------------------------------------------------------------------------------------------------------------------|---|-------------------------------|-----------------------------------------------------------------------------------------------------------------------------------------------------------------------------|
| Loa loa                 | esr1 protein                                               | 11 | F:GO:0004672;<br>C:GO:0031253;<br>P:GO:0042770;<br>P:GO:0071478;<br>C:GO:0044428;<br>P:GO:0016043;<br>F:GO:0032404;<br>P:GO:0048523;<br>P:GO:0032502;<br>P:GO:0006260;<br>P:GO:0007049                                                                                                                                                          | - |                               | IPR000403; IPR003151; IPR003152;<br>IPR011009; IPR014009; IPR018936;<br>G3DSA:3.30.1010.10 (GENE3D),<br>PTHR11139 (PANTHER),<br>PTHR11139:SF8 (PANTHER)                     |
| Caenorhabditis briggsae | briggsae cbr-pgp-10 protein                                | 4  | F:GO:0042626;<br>P:GO:0055085;<br>F:GO:0005524;<br>C:GO:0016021                                                                                                                                                                                                                                                                                 | - |                               | PTHR19242 (PANTHER),<br>PTHR19242:SF62 (PANTHER), SignalP<br>(SIGNALP)                                                                                                      |
| Homo sapiens            | -dh dehydroge-se subunit 1                                 | 0  |                                                                                                                                                                                                                                                                                                                                                 |   |                               | -                                                                                                                                                                           |
| Caenorhabditis elegans  | gex interacting protein family member (gei-4)              | 1  | F:GO:0005515                                                                                                                                                                                                                                                                                                                                    | - |                               | -                                                                                                                                                                           |
| Caenorhabditis elegans  | gex interacting protein family member (gei-4)              | 1  | F:GO:0005515                                                                                                                                                                                                                                                                                                                                    | - |                               | -                                                                                                                                                                           |
| Drosophila sechellia    | darkener of isoform I                                      | 20 | P:GO:0031987;<br>P:GO:0000381;<br>P:GO:0001964;<br>P:GO:0007548;<br>F:GO:0000166;<br>P:GO:0008362;<br>P:GO:0046777;<br>F:GO:0004712;<br>P:GO:0045494;<br>P:GO:0008407;<br>F:GO:0004674;<br>P:GO:0035071;<br>P:GO:0007350;<br>C:GO:0005875;<br>C:GO:0005783;<br>P:GO:0042051;<br>P:GO:0030717;<br>C:GO:0005634;<br>P:GO:0048854;<br>P:GO:0000165 | - | EC:2.7.112.1<br>; EC:2.7.11.0 | IPR000719; IPR008271; IPR011009;<br>IPR017441; IPR017442;<br>G3DSA:1.10.510.10 (GENE3D),<br>G3DSA:3.30.200.20 (GENE3D),<br>PTHR11295 (PANTHER),<br>PTHR11295:SF33 (PANTHER) |
|                         | -                                                          | 0  |                                                                                                                                                                                                                                                                                                                                                 |   |                               | SignalP (SIGNALP)                                                                                                                                                           |
| Caenorhabditis elegans  | hypothetical protein C24B9.3 [Caenorhabditis elegans]      | 0  |                                                                                                                                                                                                                                                                                                                                                 |   |                               | IPR002035; G3DSA:3.40.50.410<br>(GENE3D), SignalP (SIGNALP),<br>SSF53300 (SUPERFAMILY)                                                                                      |
| Brugia malayi           | lariat debranching enzyme                                  | 9  | P:GO:0040010;<br>P:GO:0000375;<br>P:GO:0000003;<br>P:GO:0040011;<br>P:GO:0006898;<br>F:GO:0008419;<br>P:GO:0006397;<br>P:GO:0009792;<br>C:GO:0005634                                                                                                                                                                                            | - |                               | IPR004843; IPR007708;<br>G3DSA:3.60.21.10 (GENE3D),<br>PTHR12849 (PANTHER), SSF56300<br>(SUPERFAMILY)                                                                       |
| Caenorhabditis elegans  | eya (drosophila eyes absent) homolog family member (eya-1) | 1  | F:GO:0005515                                                                                                                                                                                                                                                                                                                                    | - |                               | PTHR10190 (PANTHER),<br>PTHR10190:SF3 (PANTHER), SignalP<br>(SIGNALP)                                                                                                       |
|                         | -                                                          | 0  |                                                                                                                                                                                                                                                                                                                                                 |   |                               | -                                                                                                                                                                           |
|                         | -                                                          | 0  |                                                                                                                                                                                                                                                                                                                                                 |   |                               | SignalP (SIGNALP)                                                                                                                                                           |

|                        |                                                       |    |                                                                                                                                                                                                                                                                                                                                                                                                    |            |                                                                                                                                                                                |
|------------------------|-------------------------------------------------------|----|----------------------------------------------------------------------------------------------------------------------------------------------------------------------------------------------------------------------------------------------------------------------------------------------------------------------------------------------------------------------------------------------------|------------|--------------------------------------------------------------------------------------------------------------------------------------------------------------------------------|
|                        | -                                                     | 0  |                                                                                                                                                                                                                                                                                                                                                                                                    |            | IPR003618                                                                                                                                                                      |
|                        | -                                                     | 0  |                                                                                                                                                                                                                                                                                                                                                                                                    |            | SignalP (SIGNALP)                                                                                                                                                              |
|                        | -                                                     | 0  |                                                                                                                                                                                                                                                                                                                                                                                                    |            | SignalP (SIGNALP)                                                                                                                                                              |
| Caenorhabditis elegans | phospholipase group ib                                | 23 | P:GO:0002446;<br>P:GO:0030593;<br>P:GO:0010524;<br>P:GO:0048146;<br>P:GO:0010552;<br>P:GO:0046470;<br>P:GO:0032637;<br>F:GO:0005102;<br>P:GO:0032612;<br>P:GO:0015758;<br>C:GO:0005615;<br>F:GO:0032052;<br>P:GO:0050482;<br>P:GO:0045740;<br>P:GO:0032869;<br>P:GO:0051092;<br>P:GO:0050778;<br>F:GO:0043498;<br>P:GO:0044240;<br>F:GO:0047498;<br>F:GO:0005509;<br>P:GO:0000187;<br>P:GO:0019370 |            |                                                                                                                                                                                |
| Caenorhabditis elegans | phospholipase group ib                                | 23 | P:GO:0002446;<br>P:GO:0030593;<br>P:GO:0010524;<br>P:GO:0048146;<br>P:GO:0010552;<br>P:GO:0046470;<br>P:GO:0032637;<br>F:GO:0005102;<br>P:GO:0032612;<br>P:GO:0015758;<br>C:GO:0005615;<br>F:GO:0032052;<br>P:GO:0050482;<br>P:GO:0045740;<br>P:GO:0032869;<br>P:GO:0051092;<br>P:GO:0050778;<br>F:GO:0043498;<br>P:GO:0044240;<br>F:GO:0047498;<br>F:GO:0005509;<br>P:GO:0000187;<br>P:GO:0019370 |            | IPR001211; IPR013090; IPR016090;<br>PTHR11716:SF2 (PANTHER), SignalP (SIGNALP)                                                                                                 |
| Caenorhabditis remanei | phosphoglucomutase 1                                  | 4  | P:GO:0006006;<br>C:GO:0005829;<br>F:GO:0000287;<br>F:GO:0004614                                                                                                                                                                                                                                                                                                                                    | EC:5.4.2.2 | IPR005841; IPR005844; IPR005845;<br>IPR005846; IPR016055; IPR016066;<br>G3DSA:3.30.310.50 (GENE3D),<br>PTHR22573 (PANTHER),<br>PTHR22573:SF5 (PANTHER), SSF55957 (SUPERFAMILY) |
| Caenorhabditis elegans | hypothetical protein F18A1.6 [Caenorhabditis elegans] | 0  |                                                                                                                                                                                                                                                                                                                                                                                                    |            | -                                                                                                                                                                              |

|                         |                                                            |   |                                                                                                   |                                                                                                                                                      |              |                                                                                                                                                                  |
|-------------------------|------------------------------------------------------------|---|---------------------------------------------------------------------------------------------------|------------------------------------------------------------------------------------------------------------------------------------------------------|--------------|------------------------------------------------------------------------------------------------------------------------------------------------------------------|
| Caenorhabditis elegans  | elegans protein confirmed by transcript evidence           | 4 | F:GO:0016757;<br>P:GO:0044237;<br>P:GO:0040010;<br>P:GO:0044238                                   | -                                                                                                                                                    |              | IPR002213; G3DSA:3.40.50.2000<br>(GENE3D), SSF53756 (SUPERFAMILY)                                                                                                |
| -                       | -                                                          | 0 |                                                                                                   |                                                                                                                                                      |              | -                                                                                                                                                                |
| -                       | -                                                          | 0 |                                                                                                   |                                                                                                                                                      |              | -                                                                                                                                                                |
| Caenorhabditis elegans  | elegans protein partially confirmed by transcript evidence | 0 |                                                                                                   |                                                                                                                                                      |              | -                                                                                                                                                                |
| Caenorhabditis elegans  | 1-acyl-sn-glycerol-3-phosphate acyltransferase epsilon     | 4 | P:GO:0044255;<br>F:GO:0046027;<br>C:GO:0005829;<br>C:GO:0005739                                   | -                                                                                                                                                    | EC:2.3.1.158 | -                                                                                                                                                                |
| Caenorhabditis briggsae | uncoordinated family member (unc-83)                       | 0 |                                                                                                   |                                                                                                                                                      |              | -                                                                                                                                                                |
| Loa loa                 | chimerin 2                                                 | 4 | F:GO:0046872;<br>P:GO:0007165;<br>C:GO:0005622;<br>F:GO:0005515                                   | -                                                                                                                                                    |              | IPR000198; IPR002219; IPR008936;<br>IPR020454; G3DSA:3.30.60.20<br>(GENE3D), PTHR23178 (PANTHER),<br>SSF57889 (SUPERFAMILY)                                      |
| Caenorhabditis elegans  | briggsae cbr-mel-47 protein                                | 0 |                                                                                                   | C:GO:0005634;<br>P:GO:0006260;<br>F:GO:0003676;<br>F:GO:0000166;<br>P:GO:0051301;<br>F:GO:0003674;<br>F:GO:0003723;<br>P:GO:0007275;<br>P:GO:0007049 |              | IPR000504; IPR008191; IPR012677;<br>PTHR15597 (PANTHER),<br>PTHR15597:SF10 (PANTHER),<br>SSF54928 (SUPERFAMILY), SSF63748<br>(SUPERFAMILY)                       |
| Caenorhabditis briggsae | regulator of g-protein sig-ling 7                          | 6 | C:GO:0005834;<br>F:GO:0004871;<br>P:GO:0023034;<br>P:GO:0006397;<br>P:GO:0007186;<br>C:GO:0005634 | -                                                                                                                                                    | EC:3.6.5.1   | IPR000591; IPR011991; SSF46785<br>(SUPERFAMILY)                                                                                                                  |
| Caenorhabditis briggsae | d--repair protein rad13                                    | 0 |                                                                                                   | F:GO:0003697;<br>P:GO:0006281;<br>P:GO:0006289;<br>F:GO:0003824;<br>F:GO:0004519;<br>F:GO:0004518;<br>C:GO:0005634;<br>F:GO:0003677                  |              | IPR006084; IPR006086; IPR008918;<br>IPR020045; G3DSA:1.10.150.20<br>(GENE3D), G3DSA:3.40.50.1010<br>(GENE3D), PTHR11081:SF4<br>(PANTHER), SSF88723 (SUPERFAMILY) |
| Caenorhabditis briggsae | briggsae cbr-sur-6 protein                                 | 5 | F:GO:0008601;<br>C:GO:0000159;<br>P:GO:0007165;<br>P:GO:0008219;<br>C:GO:0005741                  | -                                                                                                                                                    |              | IPR000009; IPR011046; IPR015943;<br>IPR019781                                                                                                                    |
| Caenorhabditis briggsae | briggsae cbr-sur-6 protein                                 | 5 | F:GO:0008601;<br>C:GO:0000159;<br>P:GO:0007165;<br>P:GO:0008219;<br>C:GO:0005741                  | -                                                                                                                                                    |              | IPR000009; IPR011046; IPR015943;<br>IPR019781                                                                                                                    |

|                         |                                                            |    |                                                                                                                                                                                                                                                                                                                                                                                                                                                                                          |                                                                                                   |                                                                          |
|-------------------------|------------------------------------------------------------|----|------------------------------------------------------------------------------------------------------------------------------------------------------------------------------------------------------------------------------------------------------------------------------------------------------------------------------------------------------------------------------------------------------------------------------------------------------------------------------------------|---------------------------------------------------------------------------------------------------|--------------------------------------------------------------------------|
| Caenorhabditis elegans  | fork head domain containing protein                        | 34 | P:GO:0009766;<br>P:GO:0007224;<br>P:GO:0061030;<br>P:GO:0050728;<br>P:GO:0002053;<br>P:GO:0010552;<br>P:GO:0001701;<br>P:GO:0060441;<br>P:GO:0071345;<br>P:GO:0045198;<br>P:GO:0016337;<br>P:GO:0048617;<br>P:GO:0051150;<br>P:GO:0048566;<br>P:GO:0010811;<br>P:GO:0071407;<br>F:GO:0016563;<br>P:GO:0048371;<br>P:GO:0030198;<br>P:GO:0030335;<br>P:GO:0060463;<br>P:GO:0001570;<br>P:GO:0060438;<br>P:GO:0001756;<br>F:GO:0043565;<br>F:GO:0003702;<br>P:GO:0043305;<br>P:GO:0090131; | -                                                                                                 | IPR001766; IPR011991; IPR018122;<br>SSF46785 (SUPERFAMILY)               |
| Caenorhabditis briggsae | myosin heavy chain                                         | 4  | C:GO:0032982;<br>F:GO:0003779;<br>F:GO:0005524;<br>F:GO:0003774                                                                                                                                                                                                                                                                                                                                                                                                                          | -                                                                                                 | IPR001609; IPR015650; PTHR13140<br>(PANTHER), SSF52540 (SUPERFAMILY)     |
| Caenorhabditis elegans  | hippocampus abundant transcript 1                          | 5  | P:GO:0015904;<br>P:GO:0055085;<br>C:GO:0016021;<br>P:GO:0046677;<br>F:GO:0015520                                                                                                                                                                                                                                                                                                                                                                                                         | -                                                                                                 | PTHR10074 (PANTHER),<br>PTHR10074:SF17 (PANTHER)                         |
| Caenorhabditis elegans  | hippocampus abundant transcript 1                          | 5  | P:GO:0015904;<br>P:GO:0055085;<br>C:GO:0016021;<br>P:GO:0046677;<br>F:GO:0015520                                                                                                                                                                                                                                                                                                                                                                                                         | -                                                                                                 | PTHR10074 (PANTHER),<br>PTHR10074:SF17 (PANTHER)                         |
| Caenorhabditis elegans  | ferm domain ( -ezrin-radixin-moesin) family member (frm-8) | 1  | F:GO:0005515                                                                                                                                                                                                                                                                                                                                                                                                                                                                             | -                                                                                                 | IPR000299; IPR019748; PTHR13436<br>(PANTHER), PTHR13436:SF1<br>(PANTHER) |
| Ailuropoda melanoleuca  | ribosomal protein l22                                      | 6  | F:GO:0008201;<br>P:GO:0046632;<br>F:GO:0003735;<br>F:GO:0003723;<br>C:GO:0022625;<br>P:GO:0006414                                                                                                                                                                                                                                                                                                                                                                                        | -                                                                                                 | -                                                                        |
| Caenorhabditis elegans  | elegans protein partially confirmed by transcript evidence | 0  |                                                                                                                                                                                                                                                                                                                                                                                                                                                                                          | P:GO:0000003;<br>P:GO:0040011;<br>P:GO:0010171;<br>P:GO:0040010;<br>P:GO:0006898;<br>P:GO:0002119 | -                                                                        |
| Caenorhabditis elegans  | copine family protein                                      | 0  |                                                                                                                                                                                                                                                                                                                                                                                                                                                                                          |                                                                                                   | IPR002035; IPR010734; PTHR10857<br>(PANTHER), SSF53300 (SUPERFAMILY)     |

|                            |                                                       |    |                                                                                                                                                                                                         |                               |                                                                                                             |
|----------------------------|-------------------------------------------------------|----|---------------------------------------------------------------------------------------------------------------------------------------------------------------------------------------------------------|-------------------------------|-------------------------------------------------------------------------------------------------------------|
|                            | -                                                     | 0  |                                                                                                                                                                                                         |                               | SignalP (SIGNALP)                                                                                           |
|                            | -                                                     | 0  |                                                                                                                                                                                                         |                               | SignalP (SIGNALP)                                                                                           |
|                            | -                                                     | 0  |                                                                                                                                                                                                         |                               | SignalP (SIGNALP)                                                                                           |
|                            | -                                                     | 0  |                                                                                                                                                                                                         |                               | -                                                                                                           |
|                            | -                                                     | 0  |                                                                                                                                                                                                         |                               | -                                                                                                           |
|                            | -                                                     | 0  |                                                                                                                                                                                                         |                               | -                                                                                                           |
| Caenorhabditis briggsae    | briggsae cbr-ttl-5 protein                            | 0  |                                                                                                                                                                                                         | F:GO:0004835;<br>P:GO:0006464 | -                                                                                                           |
| Loa loa                    | myc and mondo-like family member (mml-1)              | 6  | P:GO:0009987;<br>P:GO:0006810;<br>C:GO:0043231;<br>P:GO:0050789;<br>P:GO:0040007;<br>P:GO:0007275                                                                                                       | -                             | PTHR15741 (PANTHER),<br>PTHR15741:SF1 (PANTHER)                                                             |
| Loa loa                    | mediator of r- polymerase ii transcription subunit 17 | 4  | F:GO:0003712;<br>F:GO:0016563;<br>C:GO:0005634;<br>P:GO:0006366                                                                                                                                         | -                             | IPR019313; PTHR13114 (PANTHER)                                                                              |
| Caenorhabditis briggsae    | atp-dependent r- helicase                             | 7  | P:GO:0009987;<br>P:GO:0040010;<br>F:GO:0008266;<br>P:GO:0000003;<br>P:GO:0002119;<br>C:GO:0044464;<br>F:GO:0016787                                                                                      | -                             | -                                                                                                           |
|                            | -                                                     | 0  |                                                                                                                                                                                                         |                               | -                                                                                                           |
| Caenorhabditis elegans     | elegans protein confirmed by transcript evidence      | 3  | C:GO:0016021;<br>P:GO:0015986;<br>P:GO:0040013                                                                                                                                                          | -                             | IPR002490; PTHR11629:SF23<br>(PANTHER)                                                                      |
| Caenorhabditis elegans     | elegans protein confirmed by transcript evidence      | 3  | C:GO:0016021;<br>P:GO:0015986;<br>P:GO:0040013                                                                                                                                                          | -                             | IPR002490; PTHR11629:SF23<br>(PANTHER)                                                                      |
| Pongo abelii               | ribosomal protein l5                                  | 8  | C:GO:0005730;<br>P:GO:0006364;<br>P:GO:0042273;<br>F:GO:0003735;<br>P:GO:0006414;<br>F:GO:0005515;<br>C:GO:0022625;<br>F:GO:0008097                                                                     | -                             | IPR005484; IPR005485;<br>G3DSA:3.30.420.100 (GENE3D),<br>SSF53137 (SUPERFAMILY)                             |
|                            | -                                                     | 0  |                                                                                                                                                                                                         |                               | -                                                                                                           |
|                            | -                                                     | 0  |                                                                                                                                                                                                         |                               | -                                                                                                           |
|                            | -                                                     | 0  |                                                                                                                                                                                                         |                               | -                                                                                                           |
| Bursaphelenchus xylophilus | ribosomal protein l5                                  | 12 | P:GO:0040010;<br>P:GO:0044238;<br>P:GO:0044260;<br>F:GO:0019843;<br>P:GO:0040035;<br>P:GO:0010171;<br>P:GO:0002119;<br>P:GO:0042254;<br>C:GO:0030529;<br>P:GO:0010467;<br>P:GO:0009792;<br>C:GO:0005737 | -                             | IPR005484; IPR005485;<br>G3DSA:3.30.420.100 (GENE3D),<br>PTHR23410:SF1 (PANTHER), SSF53137<br>(SUPERFAMILY) |



|                         |                                                                |  |                                                                                                                                       |                               |             |                                                                                                                       |
|-------------------------|----------------------------------------------------------------|--|---------------------------------------------------------------------------------------------------------------------------------------|-------------------------------|-------------|-----------------------------------------------------------------------------------------------------------------------|
| Caenorhabditis elegans  | chromodomain-helicase-d-binding protein 1                      |  | F:GO:0003676;<br>C:GO:0044427;<br>5 F:GO:0000166;<br>F:GO:0004386;<br>P:GO:0006325                                                    | -                             |             | IPR001650; G3DSA:3.40.50.300<br>(GENE3D), PTHR10799 (PANTHER),<br>PTHR10799:SF70 (PANTHER),<br>SSF52540 (SUPERFAMILY) |
|                         | -                                                              |  | 0                                                                                                                                     |                               |             | -                                                                                                                     |
|                         | -                                                              |  | 0                                                                                                                                     |                               |             | -                                                                                                                     |
| Caenorhabditis elegans  | hypothetical protein C18C4.5 [Caenorhabditis elegans]          |  | 0                                                                                                                                     |                               |             | -                                                                                                                     |
|                         | -                                                              |  | 0                                                                                                                                     |                               |             | -                                                                                                                     |
|                         | -                                                              |  | 0                                                                                                                                     |                               |             | -                                                                                                                     |
| Caenorhabditis briggsae | altered response to gravity                                    |  | P:GO:0050896;<br>3 F:GO:0005515;<br>C:GO:0016020                                                                                      | -                             |             | IPR015609; PTHR11821:SF20<br>(PANTHER)                                                                                |
| Caenorhabditis elegans  | -d-dependent adp-ribosyltransferase sirtuin-4                  |  | F:GO:0005515;<br>P:GO:0006974;<br>C:GO:0005759;<br>P:GO:0046676;<br>8 F:GO:0003950;<br>F:GO:0034979;<br>F:GO:0046872;<br>P:GO:0045449 | -                             | EC:2.4.2.30 | IPR003000; G3DSA:3.30.1600.10<br>(GENE3D), G3DSA:3.40.50.1220<br>(GENE3D), SSF52467 (SUPERFAMILY)                     |
| Ancylostoma ceylanicum  | secreted protein 5 precursor                                   |  | 0                                                                                                                                     | P:GO:0006898;<br>C:GO:0005576 |             | IPR014044; SignalP (SIGNALP)                                                                                          |
| Ancylostoma ceylanicum  | secreted protein 5 precursor                                   |  | 0                                                                                                                                     | P:GO:0006898;<br>C:GO:0005576 |             | IPR014044; SignalP (SIGNALP)                                                                                          |
| Ancylostoma ceylanicum  | secreted protein 5 precursor                                   |  | 0                                                                                                                                     | C:GO:0005576                  |             | IPR014044                                                                                                             |
| Ancylostoma ceylanicum  | secreted protein 5 precursor                                   |  | 0                                                                                                                                     | P:GO:0006898;<br>C:GO:0005576 |             | IPR014044; SignalP (SIGNALP)                                                                                          |
| Ancylostoma ceylanicum  | secreted protein 5 precursor                                   |  | 0                                                                                                                                     | P:GO:0006898;<br>C:GO:0005576 |             | IPR014044; SignalP (SIGNALP)                                                                                          |
| Ancylostoma caninum     | secreted protein asp-2                                         |  | 0                                                                                                                                     | C:GO:0005576                  |             | IPR014044                                                                                                             |
| Ancylostoma ceylanicum  | secreted protein 5 precursor                                   |  | 0                                                                                                                                     | P:GO:0006898;<br>C:GO:0005576 |             | IPR014044; SignalP (SIGNALP)                                                                                          |
|                         | -                                                              |  | 0                                                                                                                                     |                               |             | -                                                                                                                     |
|                         | -                                                              |  | 0                                                                                                                                     |                               |             | SignalP (SIGNALP)                                                                                                     |
|                         | -                                                              |  | 0                                                                                                                                     |                               |             | -                                                                                                                     |
|                         | -                                                              |  | 0                                                                                                                                     |                               |             | -                                                                                                                     |
| Ancylostoma ceylanicum  | secreted protein 5 precursor                                   |  | 0                                                                                                                                     | P:GO:0006898;<br>C:GO:0005576 |             | IPR014044; SignalP (SIGNALP)                                                                                          |
| Caenorhabditis elegans  | egg sterile protein partially confirmed by transcript evidence |  | 0                                                                                                                                     | F:GO:0005515                  |             |                                                                                                                       |
|                         | -                                                              |  | 0                                                                                                                                     |                               |             | -                                                                                                                     |
|                         | -                                                              |  | 0                                                                                                                                     |                               |             | -                                                                                                                     |
| Caenorhabditis briggsae | thiamine pyrophosphate central domain containing protein       |  | 6 F:GO:0030976;<br>C:GO:0016021;<br>P:GO:0009792;<br>P:GO:0008152;<br>F:GO:0000287;<br>F:GO:0016740                                   | -                             |             | IPR014044; SignalP (SIGNALP)                                                                                          |
|                         |                                                                |  | 0                                                                                                                                     |                               |             | IPR014044                                                                                                             |
| Caenorhabditis briggsae | Hypothetical protein CBG14163 [Caenorhabditis briggsae]        |  | 1 P:GO:0040010                                                                                                                        | -                             |             | -                                                                                                                     |

|                         |                                                            |   |                                                                                                                                                      |                                                                                                                                                                                                                          |            |                                                         |
|-------------------------|------------------------------------------------------------|---|------------------------------------------------------------------------------------------------------------------------------------------------------|--------------------------------------------------------------------------------------------------------------------------------------------------------------------------------------------------------------------------|------------|---------------------------------------------------------|
| Caenorhabditis briggsae | 39s ribosomal protein mitochondrial                        | 8 | P:GO:0009792;<br>C:GO:0005840;<br>F:GO:0003676;<br>F:GO:0003735;<br>F:GO:0005515;<br>C:GO:0005634;<br>F:GO:0008270;<br>P:GO:0006412                  | -                                                                                                                                                                                                                        | EC:3.6.5.3 | IPR001857; IPR008991;<br>PTHR15680:SF3 (PANTHER)        |
| Caenorhabditis briggsae | Hypothetical protein CBG07071 [Caenorhabditis briggsae]    | 1 | C:GO:0016020                                                                                                                                         | -                                                                                                                                                                                                                        |            | SignalP (SIGNALP)                                       |
| Caenorhabditis elegans  | elegans protein partially confirmed by transcript evidence | 3 | C:GO:0034703;<br>F:GO:0005261;<br>P:GO:0055080                                                                                                       | -                                                                                                                                                                                                                        |            | -                                                       |
| Caenorhabditis elegans  | zinc transporter zip1                                      | 6 | F:GO:0046873;<br>C:GO:0005886;<br>P:GO:0006829;<br>P:GO:0055085;<br>C:GO:0016021;<br>F:GO:0008270                                                    | -                                                                                                                                                                                                                        |            | -                                                       |
| Brugia malayi           | la domain containing protein                               | 0 |                                                                                                                                                      | F:GO:0003676;<br>F:GO:0000166                                                                                                                                                                                            |            | PTHR22792 (PANTHER),<br>PTHR22792:SF7 (PANTHER)         |
| Caenorhabditis elegans  | cell 12a endogluca-se                                      | 0 |                                                                                                                                                      | F:GO:0004725;<br>P:GO:0006629;<br>F:GO:0004721;<br>F:GO:0016787;<br>P:GO:0006470;<br>P:GO:0000272;<br>F:GO:0003824;<br>F:GO:0004872;<br>F:GO:0004553;<br>F:GO:0008810;<br>F:GO:0008970                                   |            | -                                                       |
| Caenorhabditis elegans  | cell 12a endogluca-se                                      | 0 |                                                                                                                                                      | F:GO:0004725;<br>P:GO:0006629;<br>F:GO:0004721;<br>F:GO:0016787;<br>P:GO:0006470;<br>C:GO:0019867;<br>P:GO:0000272;<br>F:GO:0003824;<br>F:GO:0004872;<br>F:GO:0004553;<br>P:GO:0009405;<br>F:GO:0008810;<br>F:GO:0008970 |            | -                                                       |
| Caenorhabditis elegans  | elegans protein partially confirmed by transcript evidence | 2 | F:GO:0016627;<br>P:GO:0006631                                                                                                                        | -                                                                                                                                                                                                                        |            | IPR002655; IPR009075; IPR012258;<br>PTHR10909 (PANTHER) |
| Ciona intestinalis      | uncharacterized transposase-like protein                   | 0 |                                                                                                                                                      |                                                                                                                                                                                                                          |            | -                                                       |
|                         | -                                                          | 0 |                                                                                                                                                      |                                                                                                                                                                                                                          |            | -                                                       |
|                         | -                                                          | 0 |                                                                                                                                                      |                                                                                                                                                                                                                          |            | -                                                       |
| Callithrix jacchus      | ribosomal protein s3a                                      | 9 | P:GO:0006413;<br>F:GO:0003723;<br>P:GO:0006917;<br>C:GO:0005730;<br>F:GO:0003735;<br>P:GO:0006414;<br>C:GO:0022627;<br>P:GO:0030154;<br>F:GO:0005515 | -                                                                                                                                                                                                                        |            | IPR001593; IPR018281                                    |

|                               |                                                     |    |                                                                                                                                                                                                                                                                                              |                                                                                                                    |             |                                                                                                                                                                                            |
|-------------------------------|-----------------------------------------------------|----|----------------------------------------------------------------------------------------------------------------------------------------------------------------------------------------------------------------------------------------------------------------------------------------------|--------------------------------------------------------------------------------------------------------------------|-------------|--------------------------------------------------------------------------------------------------------------------------------------------------------------------------------------------|
| Dictyocaulus viviparus        | elegans protein confirmed by transcript evidence    | 1  | F:GO:0005515                                                                                                                                                                                                                                                                                 | -                                                                                                                  | -           | -                                                                                                                                                                                          |
| Caenorhabditis elegans        | glycerol ki-se                                      | 2  | F:GO:0004370;<br>P:GO:0006072                                                                                                                                                                                                                                                                | -                                                                                                                  | EC:2.7.1.30 | IPR000577; IPR005999; IPR018483;<br>IPR018484; G3DSA:3.30.420.40<br>(GENE3D), SSF53067 (SUPERFAMILY)                                                                                       |
| Caenorhabditis elegans        | uncharacterized protein kiaa0467                    | 0  |                                                                                                                                                                                                                                                                                              |                                                                                                                    |             | -                                                                                                                                                                                          |
| Saccoglossus kowalevskii      | rho gtpase-activating protein 5                     | 0  |                                                                                                                                                                                                                                                                                              | F:GO:0005179;<br>F:GO:0005525;<br>P:GO:0007264;<br>P:GO:0007165;<br>C:GO:0005576;<br>P:GO:0019915;<br>C:GO:0005622 |             | -                                                                                                                                                                                          |
|                               |                                                     |    |                                                                                                                                                                                                                                                                                              |                                                                                                                    |             | IPR000742; IPR006209; IPR006210;<br>IPR013032; IPR013111;<br>G3DSA:2.10.25.10 (GENE3D),<br>PTHR11201 (PANTHER),<br>PTHR11201:SF220 (PANTHER), SignalP<br>(SIGNALP), SSF57196 (SUPERFAMILY) |
| Caenorhabditis briggsae       | exportin 7                                          | 4  | F:GO:0005488;<br>P:GO:0006810;<br>P:GO:0033036;<br>C:GO:0044424                                                                                                                                                                                                                              | -                                                                                                                  |             | IPR011989; IPR014877; PTHR12596<br>(PANTHER), PTHR12596:SF2<br>(PANTHER), SignalP (SIGNALP)                                                                                                |
| Caenorhabditis briggsae       | exportin 7                                          | 4  | F:GO:0005488;<br>P:GO:0006810;<br>P:GO:0033036;<br>C:GO:0044424                                                                                                                                                                                                                              | -                                                                                                                  |             | IPR011989; IPR014877; PTHR12596<br>(PANTHER), PTHR12596:SF2<br>(PANTHER), SignalP (SIGNALP)                                                                                                |
| Loa loa                       | f-box wd repeat-containing protein 1a               | 17 | P:GO:0000209;<br>P:GO:0033598;<br>P:GO:0051437;<br>P:GO:0016055;<br>C:GO:0005829;<br>P:GO:0006511;<br>P:GO:0008285;<br>F:GO:0004842;<br>P:GO:0051726;<br>P:GO:0071407;<br>N:GO:0061136;<br>F:GO:0008013;<br>P:GO:0060444;<br>C:GO:0005634;<br>F:GO:0045309;<br>P:GO:0043122;<br>P:GO:0044419 | -                                                                                                                  | EC:6.3.2.19 | IPR001680; IPR015943; IPR017986;<br>IPR019775; IPR019781; IPR019782;<br>PTHR22844 (PANTHER),<br>PTHR22844:SF10 (PANTHER)                                                                   |
| Caenorhabditis elegans        | ras gtp exchange son of                             | 4  | F:GO:0005089;<br>C:GO:0043229;<br>F:GO:0003677;<br>P:GO:0035023                                                                                                                                                                                                                              | -                                                                                                                  |             | IPR001895; IPR008937; IPR015759                                                                                                                                                            |
|                               |                                                     | 0  |                                                                                                                                                                                                                                                                                              |                                                                                                                    |             | -                                                                                                                                                                                          |
|                               |                                                     | 0  |                                                                                                                                                                                                                                                                                              |                                                                                                                    |             | -                                                                                                                                                                                          |
| Dinoroseobacter shibae DFL 12 | acyl- synthetases (amp-forming) amp-acid ligases ii | 1  | F:GO:0003824                                                                                                                                                                                                                                                                                 | -                                                                                                                  |             | IPR000873; IPR020845;<br>G3DSA:3.40.50.980 (GENE3D),<br>PTHR11968 (PANTHER),<br>PTHR11968:SF43 (PANTHER),<br>SSF56801 (SUPERFAMILY)                                                        |
| Brugia malayi                 | lsm domain-containing protein 1                     | 0  |                                                                                                                                                                                                                                                                                              | F:GO:0003676;<br>C:GO:0030529                                                                                      |             | IPR010920; G3DSA:2.30.30.100<br>(GENE3D), PTHR21617 (PANTHER)                                                                                                                              |

|                         |                                                                    |    |                                                                                                                                                                                        |                                                                                                                                                                                                                                                                                                                                                                                   |                                                                                                                     |
|-------------------------|--------------------------------------------------------------------|----|----------------------------------------------------------------------------------------------------------------------------------------------------------------------------------------|-----------------------------------------------------------------------------------------------------------------------------------------------------------------------------------------------------------------------------------------------------------------------------------------------------------------------------------------------------------------------------------|---------------------------------------------------------------------------------------------------------------------|
| Caenorhabditis elegans  | hypothetical protein C02B10.5 [Caenorhabditis elegans]             | 0  |                                                                                                                                                                                        | P:GO:0010171;<br>P:GO:0009792;<br>F:GO:0005515                                                                                                                                                                                                                                                                                                                                    | -                                                                                                                   |
| Caenorhabditis briggsae | Hypothetical protein CBG19977 [Caenorhabditis briggsae]            | 0  |                                                                                                                                                                                        | P:GO:0010171;<br>P:GO:0009792;<br>F:GO:0005515                                                                                                                                                                                                                                                                                                                                    | PTHR23194 (PANTHER),<br>PTHR23194:SF1 (PANTHER)                                                                     |
| Loa loa                 | low-density lipoprotein receptor repeat class b containing protein | 0  |                                                                                                                                                                                        | P:GO:0008283;<br>C:GO:0016021;<br>C:GO:0016020;<br>P:GO:0006898;<br>P:GO:0006897;<br>C:GO:0030139;<br>C:GO:0005783;<br>F:GO:0005509;<br>C:GO:0031526;<br>F:GO:0004872;<br>C:GO:0005768;<br>C:GO:0005764;<br>C:GO:0005794;<br>C:GO:0005905;<br>C:GO:0005624;<br>P:GO:0006766;<br>P:GO:0006486;<br>P:GO:0006629;<br>F:GO:0005515;<br>C:GO:0016324;<br>F:GO:0017124;<br>P:GO:0030900 | IPR006210; G3DSA:2.10.25.10<br>(GENE3D), PTHR10529 (PANTHER),<br>PTHR10529:SF2 (PANTHER), SSF57196<br>(SUPERFAMILY) |
| Caenorhabditis elegans  | hypothetical protein C27A12.9 [Caenorhabditis elegans]             | 0  |                                                                                                                                                                                        | P:GO:0008152;<br>F:GO:0003824                                                                                                                                                                                                                                                                                                                                                     | SignalP (SIGNALP)                                                                                                   |
| Loa loa                 | hypothetical protein LOAG_03903 [Loa loa]                          | 0  |                                                                                                                                                                                        | P:GO:0008152;<br>F:GO:0003824                                                                                                                                                                                                                                                                                                                                                     | SignalP (SIGNALP)                                                                                                   |
| Caenorhabditis elegans  | ef hand family protein                                             | 1  | F:GO:0005509                                                                                                                                                                           | -                                                                                                                                                                                                                                                                                                                                                                                 | -                                                                                                                   |
| Brugia malayi           | 8-oxoguanine d-                                                    | 11 | F:GO:0034039;<br>F:GO:0008017;<br>F:GO:0003684;<br>C:GO:0005739;<br>P:GO:0045471;<br>P:GO:0045007;<br>P:GO:0071276;<br>P:GO:0051593;<br>P:GO:0032355;<br>P:GO:0042493;<br>C:GO:0005654 | -                                                                                                                                                                                                                                                                                                                                                                                 | IPR012294; IPR012904;<br>G3DSA:1.10.340.30 (GENE3D),<br>PTHR10242 (PANTHER)                                         |
|                         | -                                                                  | 0  |                                                                                                                                                                                        |                                                                                                                                                                                                                                                                                                                                                                                   | IPR016197; G3DSA:2.40.50.40<br>(GENE3D)                                                                             |
| Caenorhabditis elegans  | ectonucleoside triphosphate diphosphohydrolase 4                   | 4  | C:GO:0005794;<br>P:GO:0007275;<br>F:GO:0016787;<br>C:GO:0016020                                                                                                                        | -                                                                                                                                                                                                                                                                                                                                                                                 | IPR000407; PTHR11782:SF5<br>(PANTHER), SignalP (SIGNALP)                                                            |
| Caenorhabditis briggsae | briggsae cbr-ooc-3 protein                                         | 0  |                                                                                                                                                                                        |                                                                                                                                                                                                                                                                                                                                                                                   | PS51257 (PROFILE), SignalP (SIGNALP)                                                                                |
| Caenorhabditis briggsae | briggsae cbr-ooc-3 protein                                         | 0  |                                                                                                                                                                                        |                                                                                                                                                                                                                                                                                                                                                                                   | PS51257 (PROFILE), SignalP (SIGNALP)                                                                                |

|                        |                                    |    |                                                                                                                                                                                                                          |   |            |                                 |
|------------------------|------------------------------------|----|--------------------------------------------------------------------------------------------------------------------------------------------------------------------------------------------------------------------------|---|------------|---------------------------------|
| Caenorhabditis elegans | small subunit ribosomal protein 24 | 9  | P:GO:0040035;<br>P:GO:0009792;<br>P:GO:0002119;<br>C:GO:0005840;<br>F:GO:0003735;<br>P:GO:0008340;<br>P:GO:0040007;<br>P:GO:0006412;<br>F:GO:0000166                                                                     | - | EC:3.6.5.3 | IPR001976; IPR012677; IPR012678 |
| Brugia malayi          | replication factor c subunit 3     | 13 | P:GO:0040010;<br>P:GO:0046683;<br>P:GO:0006260;<br>P:GO:0040035;<br>P:GO:0006297;<br>F:GO:0003677;<br>F:GO:0016887;<br>F:GO:0005515;<br>F:GO:0000166;<br>P:GO:0040011;<br>C:GO:0005654;<br>P:GO:0009792;<br>C:GO:0005663 | - |            | -                               |
| Brugia malayi          | replication factor c subunit 3     | 13 | P:GO:0040010;<br>P:GO:0046683;<br>P:GO:0006260;<br>P:GO:0040035;<br>P:GO:0006297;<br>F:GO:0003677;<br>F:GO:0016887;<br>F:GO:0005515;<br>F:GO:0000166;<br>P:GO:0040011;<br>C:GO:0005654;<br>P:GO:0009792;<br>C:GO:0005663 | - |            | -                               |
| Brugia malayi          | replication factor c subunit 3     | 13 | P:GO:0040010;<br>P:GO:0046683;<br>P:GO:0006260;<br>P:GO:0040035;<br>P:GO:0006297;<br>F:GO:0003677;<br>F:GO:0016887;<br>F:GO:0005515;<br>F:GO:0000166;<br>P:GO:0040011;<br>C:GO:0005654;<br>P:GO:0009792;<br>C:GO:0005663 | - |            | -                               |

|                         |                                                            |    |                                                                                                                                                                                                                          |                                                                                                                    |                                                                                                                                     |
|-------------------------|------------------------------------------------------------|----|--------------------------------------------------------------------------------------------------------------------------------------------------------------------------------------------------------------------------|--------------------------------------------------------------------------------------------------------------------|-------------------------------------------------------------------------------------------------------------------------------------|
| Brugia malayi           | replication factor c subunit 3                             | 13 | P:GO:0040010;<br>P:GO:0046683;<br>P:GO:0006260;<br>P:GO:0040035;<br>P:GO:0006297;<br>F:GO:0003677;<br>F:GO:0016887;<br>F:GO:0005515;<br>F:GO:0000166;<br>P:GO:0040011;<br>C:GO:0005654;<br>P:GO:0009792;<br>C:GO:0005663 | -                                                                                                                  | -                                                                                                                                   |
| Caenorhabditis elegans  | peroxisomal biogenesis factor 5                            | 5  | F:GO:0005515;<br>P:GO:0051179;<br>P:GO:0006996;<br>C:GO:0044444;<br>P:GO:0032501                                                                                                                                         | -                                                                                                                  | IPR001440; IPR011990; IPR013026;<br>IPR019734; PTHR10130 (PANTHER),<br>SSF48452 (SUPERFAMILY)                                       |
| Loa loa                 | major allergen                                             | 0  |                                                                                                                                                                                                                          |                                                                                                                    | SignalP (SIGNALP)                                                                                                                   |
| Loa loa                 | golgin subfamily a member 7                                | 0  |                                                                                                                                                                                                                          | F:GO:0003674;<br>P:GO:0008150                                                                                      | IPR019383; PTHR13254 (PANTHER)                                                                                                      |
| Loa loa                 | golgi golgin subfamily 7                                   | 0  |                                                                                                                                                                                                                          | F:GO:0003674;<br>C:GO:0016020;<br>C:GO:0000139;<br>C:GO:0005794;<br>P:GO:0008150                                   | IPR019383; PTHR13254 (PANTHER)                                                                                                      |
| Caenorhabditis elegans  | rieske-domain protein neverland                            | 4  | F:GO:0051537;<br>P:GO:0055114;<br>F:GO:0046872;<br>F:GO:0016491                                                                                                                                                          | -                                                                                                                  | IPR017941; PTHR21266 (PANTHER),<br>PTHR21266:SF19 (PANTHER)                                                                         |
| Brugia malayi           | smc c-termi-l domain containing protein                    | 1  | F:GO:0005488                                                                                                                                                                                                             | -                                                                                                                  | IPR003395; IPR017871;<br>G3DSA:3.40.50.300 (GENE3D),<br>PTHR18937 (PANTHER),<br>PTHR18937:SF13 (PANTHER),<br>SSF52540 (SUPERFAMILY) |
| Caenorhabditis briggsae | elegans protein partially confirmed by transcript evidence | 0  |                                                                                                                                                                                                                          | P:GO:0019915                                                                                                       | SignalP (SIGNALP)                                                                                                                   |
| Blastocystis hominis    | un-med protein product [Blastocystis hominis]              | 0  |                                                                                                                                                                                                                          |                                                                                                                    | -                                                                                                                                   |
|                         | -                                                          | 0  |                                                                                                                                                                                                                          |                                                                                                                    | -                                                                                                                                   |
| Caenorhabditis briggsae | briggsae cbr-lin-25 protein                                | 0  |                                                                                                                                                                                                                          | P:GO:0030154;<br>C:GO:0005737;<br>P:GO:0007275;<br>P:GO:0007618;<br>P:GO:0001708;<br>C:GO:0005634;<br>P:GO:0018991 | -                                                                                                                                   |
|                         | -                                                          | 0  |                                                                                                                                                                                                                          |                                                                                                                    | -                                                                                                                                   |
| Brugia malayi           | hypothetical protein Bm1_49545 [Brugia malayi]             | 0  |                                                                                                                                                                                                                          |                                                                                                                    | -                                                                                                                                   |

|                         |                                                                          |    |                                                                                                                                                                                                                                                                             |   |                                   |                                                                                          |
|-------------------------|--------------------------------------------------------------------------|----|-----------------------------------------------------------------------------------------------------------------------------------------------------------------------------------------------------------------------------------------------------------------------------|---|-----------------------------------|------------------------------------------------------------------------------------------|
| Caenorhabditis elegans  | phosphatidylinositol 3- alpha polypeptide                                | 16 | P:GO:0008340;<br>P:GO:0043491;<br>C:GO:0005942;<br>F:GO:0043560;<br>F:GO:0046934;<br>P:GO:0007611;<br>P:GO:0000003;<br>P:GO:0050920;<br>P:GO:0043053;<br>P:GO:0006916;<br>F:GO:0016303;<br>P:GO:0006006;<br>P:GO:0009792;<br>C:GO:0030027;<br>P:GO:0040014;<br>P:GO:0006468 | - | EC:2.7.1.153<br>;<br>EC:2.7.1.137 | IPR000403; IPR011009; IPR015433;<br>PTHR10048:SF14 (PANTHER)                             |
| -                       | -                                                                        | 0  |                                                                                                                                                                                                                                                                             |   |                                   | -                                                                                        |
| Caenorhabditis elegans  | uncharacterized protein c22orf9-like protein                             | 0  |                                                                                                                                                                                                                                                                             |   |                                   | IPR019141; PTHR21477 (PANTHER),<br>PTHR21477:SF5 (PANTHER)                               |
| -                       | -                                                                        | 0  |                                                                                                                                                                                                                                                                             |   |                                   | -                                                                                        |
| Nematostella vectensis  | zinc transporter zip12                                                   | 4  | P:GO:0030001;<br>C:GO:0016021;<br>F:GO:0046873;<br>P:GO:0055085                                                                                                                                                                                                             | - |                                   | IPR003689; PTHR16950 (PANTHER),<br>PTHR16950:SF1 (PANTHER), SignalP<br>(SIGNALP)         |
| Caenorhabditis briggsae | serine threonine-protein ki-se d3                                        | 9  | F:GO:0046872;<br>P:GO:0045087;<br>F:GO:0005524;<br>F:GO:0004697;<br>F:GO:0005515;<br>C:GO:0005737;<br>P:GO:0007205;<br>C:GO:0016020;<br>P:GO:0006468                                                                                                                        | - | EC:2.7.11.13                      | IPR002219; IPR015727; IPR020454;<br>G3DSA:3.30.60.20 (GENE3D),<br>SSF57889 (SUPERFAMILY) |
| -                       | -                                                                        | 0  |                                                                                                                                                                                                                                                                             |   |                                   | -                                                                                        |
| Apis mellifera          | probable phospholipid-transporting atpase id                             | 6  | F:GO:0043492;<br>F:GO:0022892;<br>F:GO:0016820;<br>F:GO:0000166;<br>P:GO:0008152;<br>C:GO:0016020                                                                                                                                                                           | - | EC:3.6.3.0                        | -                                                                                        |
| Loa loa                 | riken cd- 1700019e19                                                     | 0  |                                                                                                                                                                                                                                                                             |   |                                   | -                                                                                        |
| Loa loa                 | hypothetical protein LOAG_07497 [Loa loa]                                | 0  |                                                                                                                                                                                                                                                                             |   |                                   | -                                                                                        |
| Loa loa                 | hypothetical protein LOAG_07497 [Loa loa]                                | 0  |                                                                                                                                                                                                                                                                             |   |                                   | -                                                                                        |
| Caenorhabditis elegans  | vitellogenin structural genes (yolk protein genes) family member (vit-2) | 4  | P:GO:0009792;<br>P:GO:0008340;<br>P:GO:0040010;<br>F:GO:0005515                                                                                                                                                                                                             | - |                                   | IPR011030; SignalP (SIGNALP)                                                             |

|                         |                                                                              |    |                                                                                                                                                                                                                                           |   |             |                                                                                                  |
|-------------------------|------------------------------------------------------------------------------|----|-------------------------------------------------------------------------------------------------------------------------------------------------------------------------------------------------------------------------------------------|---|-------------|--------------------------------------------------------------------------------------------------|
| Caenorhabditis elegans  | corepressor interacting with rbpj 1                                          | 13 | P:GO:0006396;<br>C:GO:0005730;<br>P:GO:0040007;<br>C:GO:0016607;<br>P:GO:0040035;<br>F:GO:0016564;<br>C:GO:0000118;<br>P:GO:0000122;<br>P:GO:0010171;<br>P:GO:0002119;<br>P:GO:0001703;<br>C:GO:0005737;<br>F:GO:0042826                  | - |             | IPR019339; PTHR13151 (PANTHER)                                                                   |
| Caenorhabditis elegans  | cbf1 interacting corepressor                                                 | 14 | P:GO:0006396;<br>C:GO:0005730;<br>P:GO:0040007;<br>C:GO:0016607;<br>P:GO:0040035;<br>C:GO:0000118;<br>P:GO:0000122;<br>P:GO:0010171;<br>F:GO:0003714;<br>P:GO:0002119;<br>F:GO:0003700;<br>P:GO:0001703;<br>C:GO:0005737;<br>F:GO:0042826 | - |             | IPR019339; PTHR13151 (PANTHER)                                                                   |
| Caenorhabditis elegans  | corepressor interacting with rbpj 1                                          | 13 | P:GO:0006396;<br>C:GO:0005730;<br>P:GO:0040007;<br>C:GO:0016607;<br>P:GO:0040035;<br>F:GO:0016564;<br>C:GO:0000118;<br>P:GO:0000122;<br>P:GO:0010171;<br>P:GO:0002119;<br>P:GO:0001703;<br>C:GO:0005737;<br>F:GO:0042826                  | - |             | IPR019339; PTHR13151 (PANTHER)                                                                   |
| Caenorhabditis briggsae | phospholipase c gamma                                                        | 5  | F:GO:0004871;<br>F:GO:0005515;<br>F:GO:0004435;<br>P:GO:0009395;<br>P:GO:0007165                                                                                                                                                          | - | EC:3.1.4.11 | IPR000909; IPR001192; IPR017946;<br>PTHR10336 (PANTHER),<br>PTHR10336:SF22 (PANTHER)             |
| Loa loa                 | inositol hexakisphosphate and diphosphoinositol-pentakisphosphate ki-se      | 5  | F:GO:0000827;<br>F:GO:0000832;<br>P:GO:0006020;<br>F:GO:0033857;<br>C:GO:0005829                                                                                                                                                          | - | EC:2.7.4.24 | IPR000560; PTHR12750 (PANTHER),<br>PTHR12750:SF5 (PANTHER), SSF53254<br>(SUPERFAMILY)            |
| -                       | -                                                                            | 0  |                                                                                                                                                                                                                                           |   |             | -                                                                                                |
| -                       | -                                                                            | 0  |                                                                                                                                                                                                                                           |   |             | -                                                                                                |
| Caenorhabditis briggsae | pleckstrin homology domain family h (with 4 domain) member 1                 | 2  | P:GO:0008340;<br>P:GO:0040010                                                                                                                                                                                                             | - |             | IPR001849; IPR011993; PTHR22903<br>(PANTHER), PTHR22903:SF2<br>(PANTHER), SSF50729 (SUPERFAMILY) |
| Caenorhabditis elegans  | smg-associated and lethal protein partially confirmed by transcript evidence | 0  |                                                                                                                                                                                                                                           |   |             | SignalP (SIGNALP)                                                                                |



|                        |                                                            |    |                                                                                                                                                                       |                                                                                                                    |                                                         |                                                                                                      |
|------------------------|------------------------------------------------------------|----|-----------------------------------------------------------------------------------------------------------------------------------------------------------------------|--------------------------------------------------------------------------------------------------------------------|---------------------------------------------------------|------------------------------------------------------------------------------------------------------|
| Callithrix jacchus     | coatomer protein subunit epsilon                           | 8  | C:GO:0030126;<br>C:GO:0005829;<br>P:GO:0006890;<br>P:GO:0006891;<br>F:GO:0005515;<br>P:GO:0048205;<br>F:GO:0005198;<br>P:GO:0015031                                   | -                                                                                                                  | -                                                       |                                                                                                      |
| Caenorhabditis elegans | coiled-coil domain-containing protein 124                  | 2  | C:GO:0005634;<br>F:GO:0003677                                                                                                                                         | -                                                                                                                  |                                                         | IPR000910; IPR010422                                                                                 |
|                        |                                                            | 0  |                                                                                                                                                                       |                                                                                                                    |                                                         |                                                                                                      |
| Haemonchus contortus   | beta-tubulin isotype 1                                     | 6  | P:GO:0007018;<br>F:GO:0005525;<br>P:GO:0051258;<br>F:GO:0005198;<br>F:GO:0003924;<br>C:GO:0005874                                                                     | -                                                                                                                  | EC:3.6.5.1;<br>EC:3.6.5.2;<br>EC:3.6.5.3;<br>EC:3.6.5.4 | IPR000217; IPR002453; IPR003008;<br>IPR008280; IPR017975; IPR018316;<br>IPR023123; SignalP (SIGNALP) |
| Cooperia oncophora     | beta-tubulin isotype 2                                     | 6  | P:GO:0007018;<br>F:GO:0005525;<br>P:GO:0051258;<br>F:GO:0005198;<br>F:GO:0003924;<br>C:GO:0005874                                                                     | -                                                                                                                  | EC:3.6.5.1;<br>EC:3.6.5.2;<br>EC:3.6.5.3;<br>EC:3.6.5.4 | IPR000217; IPR002453; IPR003008;<br>IPR008280; IPR017975; IPR018316;<br>IPR023123; SignalP (SIGNALP) |
| Cooperia oncophora     | beta-tubulin isotype 2                                     | 6  | P:GO:0007018;<br>F:GO:0005525;<br>P:GO:0051258;<br>F:GO:0005198;<br>F:GO:0003924;<br>C:GO:0005874                                                                     | -                                                                                                                  | EC:3.6.5.1;<br>EC:3.6.5.2;<br>EC:3.6.5.3;<br>EC:3.6.5.4 | IPR000217; IPR002453; IPR003008;<br>IPR008280; IPR017975; IPR018316;<br>IPR023123; SignalP (SIGNALP) |
| Caenorhabditis elegans | temporarily assigned gene -me family member (tag-260)      | 1  | F:GO:0005515                                                                                                                                                          | -                                                                                                                  |                                                         | IPR013083; IPR022750; SSF57850<br>(SUPERFAMILY)                                                      |
| Caenorhabditis elegans | temporarily assigned gene -me family member (tag-260)      | 2  | F:GO:0008270;<br>F:GO:0005515                                                                                                                                         | -                                                                                                                  |                                                         | IPR013083; IPR022750; SSF57850<br>(SUPERFAMILY)                                                      |
| Caenorhabditis elegans | ribonucleoside-diphosphate reductase large chain           | 0  |                                                                                                                                                                       | P:GO:0006260;<br>F:GO:0005524;<br>P:GO:0055114;<br>F:GO:0016491;<br>F:GO:0004748;<br>F:GO:0005515;<br>C:GO:0005971 |                                                         |                                                                                                      |
| Caenorhabditis elegans | briggsae cbr-qui-1 protein                                 | 1  | F:GO:0003824                                                                                                                                                          | -                                                                                                                  |                                                         | IPR001680; IPR011046; IPR015943;<br>IPR017986; IPR019781; IPR019782;<br>PTHR19871 (PANTHER)          |
| Caenorhabditis elegans | elegans protein partially confirmed by transcript evidence | 0  |                                                                                                                                                                       |                                                                                                                    |                                                         |                                                                                                      |
| Homo sapiens           | light polypeptide                                          | 10 | C:GO:0008043;<br>F:GO:0008199;<br>P:GO:0006892;<br>P:GO:0055114;<br>F:GO:0042802;<br>C:GO:0022627;<br>P:GO:0006879;<br>P:GO:0016044;<br>F:GO:0016491;<br>P:GO:0006826 | -                                                                                                                  |                                                         |                                                                                                      |

|                         |                                                     |    |                                                                                                                                                                       |                                                                                  |             |                                                                                                                         |
|-------------------------|-----------------------------------------------------|----|-----------------------------------------------------------------------------------------------------------------------------------------------------------------------|----------------------------------------------------------------------------------|-------------|-------------------------------------------------------------------------------------------------------------------------|
| Brugia malayi           | u2-associated sr140 protein                         | 0  |                                                                                                                                                                       | F:GO:0003676;<br>F:GO:0003723;<br>F:GO:0000166;<br>P:GO:0006396;<br>C:GO:0005575 |             | IPR018522                                                                                                               |
|                         |                                                     | 0  |                                                                                                                                                                       |                                                                                  |             |                                                                                                                         |
| Caenorhabditis brenneri | purity of essence                                   | 6  | P:GO:0042066;<br>P:GO:0007291;<br>F:GO:0005516;<br>F:GO:0008270;<br>P:GO:0006260;<br>F:GO:0004842                                                                     | -                                                                                | EC:6.3.2.19 | PTHR21725 (PANTHER)                                                                                                     |
|                         |                                                     |    |                                                                                                                                                                       |                                                                                  |             | IPR003599; IPR007110; IPR013098;<br>IPR013783; PTHR19897 (PANTHER),<br>SSF48726 (SUPERFAMILY)                           |
|                         |                                                     | 0  |                                                                                                                                                                       |                                                                                  |             |                                                                                                                         |
| Caenorhabditis briggsae | glutamate synthase                                  | 10 | P:GO:0006537;<br>P:GO:0009792;<br>F:GO:0045181;<br>P:GO:0002119;<br>F:GO:0051536;<br>F:GO:0005506;<br>F:GO:0010181;<br>P:GO:0040010;<br>P:GO:0055114;<br>F:GO:0050660 | -                                                                                |             | IPR002489; IPR002932; IPR013785;<br>PTHR11938 (PANTHER),<br>PTHR11938:SF1 (PANTHER), SSF51395<br>(SUPERFAMILY)          |
|                         |                                                     | 0  |                                                                                                                                                                       |                                                                                  |             | SignalP (SIGNALP)                                                                                                       |
| Caenorhabditis elegans  | origin recognition complex subunit 2 family protein | 4  | P:GO:0009987;<br>P:GO:0006810;<br>C:GO:0043234;<br>C:GO:0044427                                                                                                       | -                                                                                |             | IPR007220                                                                                                               |
| Caenorhabditis elegans  | microneme protein 4                                 | 4  | F:GO:0005488;<br>P:GO:0044237;<br>P:GO:0007155;<br>F:GO:0003824                                                                                                       | -                                                                                |             | SignalP (SIGNALP)                                                                                                       |
| Caenorhabditis elegans  | microneme protein 4                                 | 6  | F:GO:0005488;<br>P:GO:0007155;<br>F:GO:0004888;<br>F:GO:0003824;<br>P:GO:0044237;<br>C:GO:0016020                                                                     | -                                                                                |             | SignalP (SIGNALP)                                                                                                       |
|                         |                                                     | 0  |                                                                                                                                                                       |                                                                                  |             |                                                                                                                         |
| Caenorhabditis briggsae | cysteinyI-tr- synthetase                            | 5  | C:GO:0005737;<br>P:GO:0006423;<br>F:GO:0005524;<br>F:GO:0000049;<br>F:GO:0004817                                                                                      | -                                                                                | EC:6.1.1.16 | IPR014729; IPR015803; SignalP<br>(SIGNALP), SSF52374 (SUPERFAMILY)                                                      |
| Caenorhabditis briggsae | wd repeat domain 89                                 | 0  |                                                                                                                                                                       | F:GO:0003674;<br>P:GO:0008150;<br>C:GO:0005575                                   |             | IPR001680; IPR011046; IPR015943;<br>IPR017986; IPR019781; IPR019782;<br>PTHR19857 (PANTHER),<br>PTHR19857:SF3 (PANTHER) |
|                         |                                                     | 0  |                                                                                                                                                                       |                                                                                  |             |                                                                                                                         |
| Caenorhabditis elegans  | briggsae cbr-tag-189 protein                        | 4  | C:GO:0000139;<br>C:GO:0005789;<br>P:GO:0006506;<br>F:GO:0008565                                                                                                       | -                                                                                |             |                                                                                                                         |

|                         |                                                  |    |                                                                                                                                                                                        |   |                                                                 |                                                                        |
|-------------------------|--------------------------------------------------|----|----------------------------------------------------------------------------------------------------------------------------------------------------------------------------------------|---|-----------------------------------------------------------------|------------------------------------------------------------------------|
| Caenorhabditis elegans  | adenylate cyclase                                | 9  | C:GO:0016021;<br>F:GO:0004016;<br>P:GO:0007188;<br>P:GO:0009190;<br>P:GO:0002119;<br>F:GO:0000166;<br>P:GO:0040011;<br>P:GO:0040015;<br>C:GO:0005886                                   | - | EC:4.6.1.1                                                      | PTHR11920 (PANTHER),<br>PTHR11920:SF12 (PANTHER), SignalP<br>(SIGNALP) |
| -                       | -                                                | 0  |                                                                                                                                                                                        |   |                                                                 | -                                                                      |
| Caenorhabditis elegans  | karyopherin alpha 2                              | 8  | F:GO:0008565;<br>P:GO:0046015;<br>P:GO:0006259;<br>P:GO:0006606;<br>C:GO:0005643;<br>P:GO:0022403;<br>C:GO:0005737;<br>F:GO:0042826                                                    | - |                                                                 | IPR000225; IPR002652; IPR011989;<br>IPR016024; PTHR23316 (PANTHER)     |
| Caenorhabditis elegans  | importin subunit alpha-3                         | 5  | F:GO:0008565;<br>P:GO:0006606;<br>F:GO:0008022;<br>C:GO:0005643;<br>C:GO:0005737                                                                                                       | - |                                                                 | IPR000225; IPR002652; IPR011989;<br>IPR016024; PTHR23316 (PANTHER)     |
| Caenorhabditis elegans  | importin subunit alpha-3                         | 5  | F:GO:0008565;<br>P:GO:0006606;<br>F:GO:0008022;<br>C:GO:0005643;<br>C:GO:0005737                                                                                                       | - |                                                                 | IPR000225; IPR002652; IPR011989;<br>IPR016024; PTHR23316 (PANTHER)     |
| Caenorhabditis elegans  | importin subunit alpha-3                         | 5  | F:GO:0008565;<br>P:GO:0006606;<br>F:GO:0008022;<br>C:GO:0005643;<br>C:GO:0005737                                                                                                       | - |                                                                 | IPR000225; IPR002652; IPR011989;<br>IPR016024; PTHR23316 (PANTHER)     |
| Caenorhabditis briggsae | cation-transporting atpase                       | 2  | F:GO:0016820;<br>F:GO:0016887                                                                                                                                                          | - | EC:3.6.3.0                                                      | SignalP (SIGNALP)                                                      |
| Caenorhabditis elegans  | elegans protein confirmed by transcript evidence | 3  | P:GO:0009792;<br>P:GO:0008152;<br>P:GO:0000003                                                                                                                                         | - |                                                                 | IPR015324                                                              |
| -                       | -                                                | 0  |                                                                                                                                                                                        |   |                                                                 | -                                                                      |
| -                       | -                                                | 0  |                                                                                                                                                                                        |   |                                                                 | -                                                                      |
| Loa loa                 | variant sh3 domain containing protein            | 11 | P:GO:0043087;<br>P:GO:0006909;<br>F:GO:0005515;<br>P:GO:0006955;<br>P:GO:0007229;<br>C:GO:0005829;<br>P:GO:0008624;<br>P:GO:0042110;<br>P:GO:0045785;<br>F:GO:0030676;<br>C:GO:0005886 | - |                                                                 | IPR000219; PTHR22826 (PANTHER),<br>PTHR22826:SF53 (PANTHER)            |
| Loa loa                 | amine oxidase (flavin containing) domain 1       | 0  |                                                                                                                                                                                        |   | P:GO:0055114;<br>F:GO:0016491;<br>F:GO:0046592;<br>F:GO:0008270 | -                                                                      |
| Caenorhabditis briggsae | erv1 alr family protein                          | 3  | P:GO:0045454;<br>F:GO:0016972;<br>P:GO:0055114                                                                                                                                         | - | EC:1.8.3.2                                                      | PTHR22897 (PANTHER),<br>PTHR22897:SF4 (PANTHER)                        |

|                         |                                               |    |                                                                                                                                                                                                                          |                                                                                                   |             |                                                                                                                           |
|-------------------------|-----------------------------------------------|----|--------------------------------------------------------------------------------------------------------------------------------------------------------------------------------------------------------------------------|---------------------------------------------------------------------------------------------------|-------------|---------------------------------------------------------------------------------------------------------------------------|
| Equus caballus          | proteoglycan 3                                | 0  |                                                                                                                                                                                                                          | F:GO:0046872;<br>F:GO:0005488;<br>F:GO:0005529;<br>C:GO:0005576;<br>P:GO:0009405                  |             | IPR001304; IPR016186; IPR016187;<br>PTHR22801 (PANTHER), SignalP<br>(SIGNALP)                                             |
| Struthio camelus        | venom c-type lectin mannose binding isoform 3 | 0  |                                                                                                                                                                                                                          | F:GO:0046872;<br>F:GO:0005488;<br>F:GO:0005529;<br>C:GO:0005578;<br>C:GO:0005576;<br>P:GO:0009405 |             | IPR001304; IPR016186; IPR016187;<br>PTHR22801 (PANTHER),<br>PTHR22801:SF9 (PANTHER), SignalP<br>(SIGNALP)                 |
| Caenorhabditis briggsae | transaldolase                                 | 8  | P:GO:0009052;<br>F:GO:0004801;<br>P:GO:0032231;<br>P:GO:0035107;<br>P:GO:0007424;<br>P:GO:0009792;<br>C:GO:0005737;<br>P:GO:0002064                                                                                      | -                                                                                                 | EC:2.2.1.2  | -                                                                                                                         |
| Caenorhabditis elegans  | novel protein                                 | 0  |                                                                                                                                                                                                                          | F:GO:0005515                                                                                      |             | -                                                                                                                         |
| Caenorhabditis briggsae | briggsae cbr-hsr-9 protein                    | 1  | P:GO:0032502                                                                                                                                                                                                             | -                                                                                                 |             | -                                                                                                                         |
|                         | -                                             | 0  |                                                                                                                                                                                                                          |                                                                                                   |             | SignalP (SIGNALP)                                                                                                         |
| Caenorhabditis elegans  | intraflagellar transport 57 homolog           | 13 | C:GO:0035085;<br>F:GO:0005198;<br>F:GO:0005515;<br>P:GO:0006919;<br>P:GO:0042073;<br>P:GO:0007635;<br>P:GO:0032006;<br>P:GO:0042462;<br>P:GO:0008104;<br>P:GO:0001539;<br>P:GO:0007368;<br>C:GO:0005932;<br>P:GO:0035058 | -                                                                                                 |             | IPR019530                                                                                                                 |
|                         | -                                             | 0  |                                                                                                                                                                                                                          |                                                                                                   |             | SignalP (SIGNALP)                                                                                                         |
| Caenorhabditis briggsae | mospd2 protein                                | 0  |                                                                                                                                                                                                                          | C:GO:0005856;<br>C:GO:0016021;<br>F:GO:0005198                                                    |             | PTHR19993 (PANTHER)                                                                                                       |
|                         | -                                             | 0  |                                                                                                                                                                                                                          |                                                                                                   |             | SignalP (SIGNALP)                                                                                                         |
| Caenorhabditis briggsae | uncoordi-ated family member (unc-89)          | 2  | F:GO:0004672;<br>C:GO:0044464                                                                                                                                                                                            | -                                                                                                 |             | IPR003598; IPR007110; IPR013098;<br>IPR013783; PTHR19897 (PANTHER),<br>PTHR19897:SF5 (PANTHER), SSF48726<br>(SUPERFAMILY) |
| Caenorhabditis elegans  | phosphoserine aminotransferase                | 3  | F:GO:0030170;<br>F:GO:0004648;<br>P:GO:0006564                                                                                                                                                                           | -                                                                                                 | EC:2.6.1.52 | IPR015422; IPR015424; PTHR21152<br>(PANTHER), PTHR21152:SF1<br>(PANTHER)                                                  |
|                         | -                                             | 0  |                                                                                                                                                                                                                          |                                                                                                   |             | -                                                                                                                         |
|                         | -                                             | 0  |                                                                                                                                                                                                                          |                                                                                                   |             | -                                                                                                                         |
| Caenorhabditis elegans  | adenylate cyclase type 5                      | 4  | F:GO:0004016;<br>P:GO:0009190;<br>C:GO:0016021;<br>F:GO:0000166                                                                                                                                                          | -                                                                                                 | EC:4.6.1.1  | IPR001054; PTHR11920 (PANTHER),<br>PTHR11920:SF14 (PANTHER), SignalP<br>(SIGNALP)                                         |

|                         |                                                      |   |                                                                                                                                                      |                                                                                                                                                                       |             |                                                                                                                                                                        |
|-------------------------|------------------------------------------------------|---|------------------------------------------------------------------------------------------------------------------------------------------------------|-----------------------------------------------------------------------------------------------------------------------------------------------------------------------|-------------|------------------------------------------------------------------------------------------------------------------------------------------------------------------------|
| Caenorhabditis briggsae | er lumen protein retaining receptor                  | 9 | F:GO:0005046;<br>C:GO:0016021;<br>P:GO:0006890;<br>F:GO:0004872;<br>P:GO:0006891;<br>C:GO:0030140;<br>P:GO:0006621;<br>C:GO:0005789;<br>P:GO:0015031 | -                                                                                                                                                                     |             | IPR000133; PTHR10585:SF10 (PANTHER), SignalP (SIGNALP)                                                                                                                 |
|                         | -                                                    | 0 |                                                                                                                                                      |                                                                                                                                                                       |             | -                                                                                                                                                                      |
|                         | -                                                    | 0 |                                                                                                                                                      |                                                                                                                                                                       |             | -                                                                                                                                                                      |
| Brugia malayi           | sex comb on midleg homolog 1                         | 0 |                                                                                                                                                      | P:GO:0045449;<br>C:GO:0005634                                                                                                                                         |             | -                                                                                                                                                                      |
| Loa loa                 | ppwp domain containing protein                       | 3 | P:GO:0000003;<br>F:GO:0003677;<br>P:GO:0006898                                                                                                       | -                                                                                                                                                                     |             | PTHR12550 (PANTHER), PTHR12550:SF3 (PANTHER)                                                                                                                           |
| Caenorhabditis briggsae | spectrin alpha chain                                 | 2 | F:GO:0004725;<br>F:GO:0005509                                                                                                                        | -                                                                                                                                                                     | EC:3.1.3.48 | IPR001452; IPR002017; IPR013315; IPR018159; G3DSA:1.20.58.60 (GENE3D), G3DSA:2.30.30.40 (GENE3D), PTHR11915 (PANTHER), PTHR11915:SF6 (PANTHER), SSF46966 (SUPERFAMILY) |
|                         | -                                                    | 0 |                                                                                                                                                      |                                                                                                                                                                       |             | -                                                                                                                                                                      |
| Caenorhabditis elegans  | major sperm protein                                  | 0 |                                                                                                                                                      | C:GO:0005856;<br>F:GO:0005198;<br>C:GO:0044297;<br>C:GO:0031143;<br>P:GO:0019915                                                                                      |             | IPR000535; IPR008962; PTHR22947 (PANTHER)                                                                                                                              |
| Caenorhabditis elegans  | histone methyltransferase-like family member (met-1) | 0 |                                                                                                                                                      | F:GO:0016740;<br>F:GO:0008168;<br>P:GO:0006259;<br>F:GO:0003677;<br>C:GO:0005634;<br>F:GO:0018024;<br>P:GO:0006281;<br>F:GO:0003824;<br>F:GO:0005515;<br>F:GO:0004518 |             | -                                                                                                                                                                      |
| Caenorhabditis elegans  | pqq enzyme repeat family protein                     | 0 |                                                                                                                                                      | C:GO:0016021;<br>C:GO:0016020;<br>P:GO:0006898;<br>F:GO:0005515                                                                                                       |             | IPR011047; PTHR21573 (PANTHER), SignalP (SIGNALP)                                                                                                                      |
| Caenorhabditis briggsae | tropomyosin                                          | 6 | C:GO:0005737;<br>P:GO:0009790;<br>P:GO:0007015;<br>P:GO:0034609;<br>P:GO:0040011;<br>F:GO:0051015                                                    | -                                                                                                                                                                     |             | -                                                                                                                                                                      |
|                         |                                                      | 0 |                                                                                                                                                      |                                                                                                                                                                       |             |                                                                                                                                                                        |

|                         |                                                       |   |                                                                 |                                                                                                                                                                                                         |                                                                                                                                                    |
|-------------------------|-------------------------------------------------------|---|-----------------------------------------------------------------|---------------------------------------------------------------------------------------------------------------------------------------------------------------------------------------------------------|----------------------------------------------------------------------------------------------------------------------------------------------------|
| Caenorhabditis vulgaris | briggsae cbr-let-23 protein                           | 0 |                                                                 | F:GO:0016740;<br>C:GO:0016020;<br>F:GO:0004672;<br>P:GO:0006468;<br>F:GO:0000166;<br>P:GO:0007169;<br>F:GO:0005524;<br>F:GO:0004714;<br>F:GO:0016301;<br>F:GO:0004713;<br>F:GO:0004872;<br>F:GO:0005515 | -                                                                                                                                                  |
| Caenorhabditis briggsae | briggsae cbr-unc-62 protein                           | 0 |                                                                 | P:GO:0006355;<br>P:GO:0007275;<br>F:GO:0043565;<br>P:GO:0045449;<br>F:GO:0003677;<br>F:GO:0003700;<br>C:GO:0005634                                                                                      | -                                                                                                                                                  |
| Caenorhabditis briggsae | elegans protein confirmed by transcript evidence      | 0 |                                                                 |                                                                                                                                                                                                         | -                                                                                                                                                  |
| Caenorhabditis elegans  | muscle positioning protein 4                          | 2 | F:GO:0005509;<br>F:GO:0005515                                   | -                                                                                                                                                                                                       | IPR000082                                                                                                                                          |
| Caenorhabditis briggsae | sushi domain                                          | 0 |                                                                 | F:GO:0030414;<br>P:GO:0007155;<br>C:GO:0016020;<br>C:GO:0005576                                                                                                                                         | IPR000436; IPR016060                                                                                                                               |
| Brugia malayi           | arginine-glutamic acid dipeptide repeats              | 4 | P:GO:0007163;<br>P:GO:0030334;<br>F:GO:0005515;<br>C:GO:0005634 | -                                                                                                                                                                                                       | IPR000679; IPR000949; IPR001005;<br>IPR001025; IPR009057; IPR013088;<br>PTHR13859 (PANTHER),<br>PTHR13859:SF2 (PANTHER), SSF57716<br>(SUPERFAMILY) |
| Brugia malayi           | arginine-glutamic acid dipeptide repeats              | 4 | P:GO:0007163;<br>P:GO:0030334;<br>F:GO:0005515;<br>C:GO:0005634 | -                                                                                                                                                                                                       | IPR000679; IPR000949; IPR001005;<br>IPR001025; IPR009057; IPR013088;<br>PTHR13859 (PANTHER),<br>PTHR13859:SF2 (PANTHER), SSF57716<br>(SUPERFAMILY) |
| Caenorhabditis elegans  | mitochondrial ribosomal protein s22                   | 4 | P:GO:0002119;<br>P:GO:0000003;<br>P:GO:0040007;<br>P:GO:0006898 | -                                                                                                                                                                                                       | IPR019374; PTHR13071 (PANTHER)                                                                                                                     |
| Caenorhabditis elegans  | hypothetical protein F19C7.1 [Caenorhabditis elegans] | 0 |                                                                 |                                                                                                                                                                                                         | -                                                                                                                                                  |
| -                       | -                                                     | 0 |                                                                 |                                                                                                                                                                                                         | -                                                                                                                                                  |
| -                       | -                                                     | 0 |                                                                 |                                                                                                                                                                                                         | SignalP (SIGNALP)                                                                                                                                  |
| -                       | -                                                     | 0 |                                                                 |                                                                                                                                                                                                         | -                                                                                                                                                  |
| Brugia malayi           | cut5-related partial                                  | 0 |                                                                 | F:GO:0005488;<br>C:GO:0005622;<br>F:GO:0016853                                                                                                                                                          | IPR001357; G3DSA:3.40.50.10190<br>(GENE3D)                                                                                                         |
| -                       | -                                                     | 0 |                                                                 |                                                                                                                                                                                                         | -                                                                                                                                                  |

|                         |                                                          |    |                                                                                                                                                                                                                                                                                                               |                                                                                                   |                                                                                                                                                                                               |
|-------------------------|----------------------------------------------------------|----|---------------------------------------------------------------------------------------------------------------------------------------------------------------------------------------------------------------------------------------------------------------------------------------------------------------|---------------------------------------------------------------------------------------------------|-----------------------------------------------------------------------------------------------------------------------------------------------------------------------------------------------|
| Caenorhabditis briggsae | crooked neck                                             | 18 | P:GO:0008366;<br>P:GO:0007417;<br>F:GO:0005488;<br>C:GO:0071011;<br>P:GO:0000381;<br>P:GO:0007443;<br>P:GO:0040007;<br>P:GO:0008347;<br>C:GO:0016607;<br>P:GO:0000003;<br>P:GO:0018996;<br>P:GO:0002119;<br>P:GO:0007422;<br>P:GO:0048663;<br>P:GO:0007405;<br>C:GO:0071013;<br>P:GO:0009792;<br>P:GO:0007438 | -                                                                                                 | IPR003107; IPR011990; PTHR11246 (PANTHER), PTHR11246:SF3 (PANTHER), SSF48452 (SUPERFAMILY)                                                                                                    |
| Drosophila erecta       | activin receptor type ii                                 | 8  | P:GO:0048666;<br>F:GO:0005515;<br>C:GO:0016020;<br>P:GO:0007178;<br>F:GO:0005024;<br>P:GO:0048513;<br>P:GO:0002009;<br>P:GO:0048598                                                                                                                                                                           | -                                                                                                 | IPR000719; IPR008271; IPR011009; IPR017442; G3DSA:1.10.510.10 (GENE3D), G3DSA:2.10.60.10 (GENE3D), G3DSA:3.30.200.20 (GENE3D), PTHR23255 (PANTHER), SignalP (SIGNALP), SSF57302 (SUPERFAMILY) |
| Caenorhabditis elegans  | hypothetical protein Y37E11AL.2 [Caenorhabditis elegans] | 0  |                                                                                                                                                                                                                                                                                                               | F:GO:0004864;<br>P:GO:0043666;<br>P:GO:0009966                                                    | SignalP (SIGNALP)                                                                                                                                                                             |
|                         | -                                                        | 0  |                                                                                                                                                                                                                                                                                                               |                                                                                                   | -                                                                                                                                                                                             |
|                         | -                                                        | 0  |                                                                                                                                                                                                                                                                                                               |                                                                                                   | SignalP (SIGNALP)                                                                                                                                                                             |
| Brugia malayi           | zinc finger ccch-type containing 12b                     | 0  |                                                                                                                                                                                                                                                                                                               | F:GO:0003676;<br>F:GO:0046872;<br>F:GO:0016787;<br>F:GO:0008270;<br>F:GO:0004519                  | IPR021869; PTHR12876 (PANTHER)                                                                                                                                                                |
|                         | -                                                        | 0  |                                                                                                                                                                                                                                                                                                               |                                                                                                   | -                                                                                                                                                                                             |
|                         | -                                                        | 0  |                                                                                                                                                                                                                                                                                                               |                                                                                                   | SignalP (SIGNALP)                                                                                                                                                                             |
| Caenorhabditis briggsae | splicing factor 3b subunit 5                             | 3  | P:GO:0007052;<br>C:GO:0071011;<br>P:GO:0000398                                                                                                                                                                                                                                                                | -                                                                                                 | -                                                                                                                                                                                             |
| Loa loa                 | mucin-like protein                                       | 0  |                                                                                                                                                                                                                                                                                                               | F:GO:0004553;<br>F:GO:0005525;<br>F:GO:0030248;<br>F:GO:0003924;<br>P:GO:0005975;<br>C:GO:0005576 | -                                                                                                                                                                                             |
|                         | -                                                        | 0  |                                                                                                                                                                                                                                                                                                               |                                                                                                   | SignalP (SIGNALP)                                                                                                                                                                             |
| Caenorhabditis elegans  | ppm1b protein                                            | 2  | F:GO:0046872;<br>F:GO:0004721                                                                                                                                                                                                                                                                                 | -                                                                                                 | EC:3.1.3.16                                                                                                                                                                                   |
|                         | -                                                        | 0  |                                                                                                                                                                                                                                                                                                               |                                                                                                   | -                                                                                                                                                                                             |
| Loa loa                 | smr domain containing protein                            | 0  |                                                                                                                                                                                                                                                                                                               |                                                                                                   | -                                                                                                                                                                                             |
| Caenorhabditis elegans  | kinesin family member 1a                                 | 5  | P:GO:0008089;<br>F:GO:0005524;<br>P:GO:0008152;<br>F:GO:0003777;<br>C:GO:0005874                                                                                                                                                                                                                              | -                                                                                                 | IPR001752; PTHR16012 (PANTHER), PTHR16012:SF104 (PANTHER), SSF52540 (SUPERFAMILY)                                                                                                             |
|                         | -                                                        | 0  |                                                                                                                                                                                                                                                                                                               |                                                                                                   | -                                                                                                                                                                                             |

|                         |                                               |    |                                                                                                                                                                                        |                                                                                                                                                      |                                                                                                                                                          |
|-------------------------|-----------------------------------------------|----|----------------------------------------------------------------------------------------------------------------------------------------------------------------------------------------|------------------------------------------------------------------------------------------------------------------------------------------------------|----------------------------------------------------------------------------------------------------------------------------------------------------------|
| Caenorhabditis briggsae | briggsae cbr-mup-4 protein                    | 2  | F:GO:0005509;<br>F:GO:0005515                                                                                                                                                          | -                                                                                                                                                    | IPR000152; IPR000742; IPR006210;<br>IPR013091; G3DSA:2.10.25.10<br>(GENE3D), PTHR22992 (PANTHER),<br>PTHR22992:SF12 (PANTHER),<br>SSF57196 (SUPERFAMILY) |
| Caenorhabditis elegans  | ph domain containing protein                  | 0  |                                                                                                                                                                                        | C:GO:0005634;<br>P:GO:0007067;<br>C:GO:0005737;<br>P:GO:0051301;<br>F:GO:0003779;<br>F:GO:0005515;<br>C:GO:0005938;<br>P:GO:0007049;<br>C:GO:0005856 | -                                                                                                                                                        |
| Caenorhabditis elegans  | ph domain containing protein                  | 0  |                                                                                                                                                                                        | C:GO:0005634;<br>P:GO:0007067;<br>C:GO:0005737;<br>P:GO:0051301;<br>F:GO:0003779;<br>F:GO:0005515;<br>C:GO:0005938;<br>P:GO:0007049;<br>C:GO:0005856 | -                                                                                                                                                        |
| Caenorhabditis elegans  | ph domain containing protein                  | 0  |                                                                                                                                                                                        | C:GO:0005634;<br>P:GO:0007067;<br>C:GO:0005737;<br>P:GO:0051301;<br>F:GO:0003779;<br>F:GO:0005515;<br>C:GO:0005938;<br>P:GO:0007049;<br>C:GO:0005856 | IPR001849; IPR011993; PTHR21538<br>(PANTHER), PTHR21538:SF11<br>(PANTHER), SSF50729 (SUPERFAMILY)                                                        |
| Loa loa                 | hypothetical protein LOAG_10739 [Loa loa]     | 0  |                                                                                                                                                                                        |                                                                                                                                                      | -                                                                                                                                                        |
|                         | -                                             | 0  |                                                                                                                                                                                        |                                                                                                                                                      | -                                                                                                                                                        |
| Caenorhabditis briggsae | inositol -trisphosphate receptor              | 11 | P:GO:0055085;<br>P:GO:0000280;<br>P:GO:0006979;<br>P:GO:0051209;<br>P:GO:0007629;<br>C:GO:0016021;<br>P:GO:0016319;<br>F:GO:0005220;<br>P:GO:0007591;<br>C:GO:0005789;<br>P:GO:0030322 | -                                                                                                                                                    | IPR015925; PTHR13715:SF2<br>(PANTHER), SignalP (SIGNALP)                                                                                                 |
| Caenorhabditis briggsae | zinc finger ccch domain-containing protein 14 | 0  |                                                                                                                                                                                        | F:GO:0003723;<br>F:GO:0046872;<br>F:GO:0003676;<br>F:GO:0008270;<br>C:GO:0005634                                                                     | -                                                                                                                                                        |
|                         | -                                             | 0  |                                                                                                                                                                                        |                                                                                                                                                      | -                                                                                                                                                        |
|                         | -                                             | 0  |                                                                                                                                                                                        |                                                                                                                                                      | IPR004827                                                                                                                                                |
|                         | -                                             | 0  |                                                                                                                                                                                        |                                                                                                                                                      | -                                                                                                                                                        |
|                         | -                                             | 0  |                                                                                                                                                                                        |                                                                                                                                                      | -                                                                                                                                                        |
|                         | -                                             | 0  |                                                                                                                                                                                        |                                                                                                                                                      | -                                                                                                                                                        |



|                         |                                                                                   |    |                                                                                                                                                                                        |                                                                                                                    |             |                                                                                                                               |
|-------------------------|-----------------------------------------------------------------------------------|----|----------------------------------------------------------------------------------------------------------------------------------------------------------------------------------------|--------------------------------------------------------------------------------------------------------------------|-------------|-------------------------------------------------------------------------------------------------------------------------------|
| Caenorhabditis brenneri | atp-binding sub-family d member 4                                                 | 1  | F:GO:0017111                                                                                                                                                                           | -                                                                                                                  | EC:3.6.1.15 | IPR010509; IPR011527; IPR017940; G3DSA:1.20.1560.10 (GENE3D), PTHR11384 (PANTHER), PTHR11384:SF3 (PANTHER), SignalP (SIGNALP) |
| Loa loa                 | myeloid lymphoid or mixed-lineage leukemia (trithorax drosophila) translocated 10 | 5  | C:GO:0005730;<br>P:GO:0045944;<br>F:GO:0046872;<br>F:GO:0005515;<br>C:GO:0005737                                                                                                       | -                                                                                                                  |             | IPR001965; IPR011011; IPR013083; IPR019786; IPR019787; PTHR13793 (PANTHER), PTHR13793:SF23 (PANTHER)                          |
| Loa loa                 | gag protein                                                                       | 3  | C:GO:0005737;<br>P:GO:0001708;<br>F:GO:0005488                                                                                                                                         | -                                                                                                                  |             | IPR001878; IPR013084; PTHR11544 (PANTHER), PTHR11544:SF3 (PANTHER), SSF57756 (SUPERFAMILY)                                    |
| Loa loa                 | r--binding protein lin-28                                                         | 3  | C:GO:0005737;<br>P:GO:0001708;<br>F:GO:0005488                                                                                                                                         | -                                                                                                                  |             | IPR001878; IPR013084; SSF57756 (SUPERFAMILY)                                                                                  |
| Caenorhabditis briggsae | elegans protein partially confirmed by transcript evidence                        | 0  |                                                                                                                                                                                        | F:GO:0005488;<br>C:GO:0016021;<br>C:GO:0016020;<br>P:GO:0040010;<br>P:GO:0055085;<br>C:GO:0005743;<br>P:GO:0006810 |             | PTHR11662 (PANTHER), PTHR11662:SF9 (PANTHER), SignalP (SIGNALP)                                                               |
| -                       | -                                                                                 | 0  |                                                                                                                                                                                        |                                                                                                                    |             | -                                                                                                                             |
| Caenorhabditis elegans  | g-patch domain containing protein                                                 | 1  | C:GO:0005622                                                                                                                                                                           | -                                                                                                                  |             | IPR000467; PTHR23329 (PANTHER), PTHR23329:SF1 (PANTHER)                                                                       |
| Caenorhabditis elegans  | -t10 protein                                                                      | 10 | P:GO:0040035;<br>C:GO:0005730;<br>P:GO:0009792;<br>P:GO:0002119;<br>F:GO:0008080;<br>F:GO:0005515;<br>F:GO:0005524;<br>P:GO:0040011;<br>P:GO:0008152;<br>P:GO:0040007                  | -                                                                                                                  |             | IPR007807; PTHR10925 (PANTHER), PTHR10925:SF5 (PANTHER)                                                                       |
| Caenorhabditis briggsae | n-acetyltransferase 10                                                            | 10 | P:GO:0040035;<br>P:GO:0009792;<br>P:GO:0002119;<br>F:GO:0008080;<br>F:GO:0005515;<br>P:GO:0040011;<br>P:GO:0008152;<br>P:GO:0040007;<br>C:GO:0005634;<br>F:GO:0000166                  | -                                                                                                                  |             | IPR007807; IPR016181; PTHR10925 (PANTHER), PTHR10925:SF5 (PANTHER)                                                            |
| Brugia malayi           | g10 protein                                                                       | 11 | P:GO:0008340;<br>C:GO:0071011;<br>P:GO:0040007;<br>P:GO:0040035;<br>P:GO:0019915;<br>P:GO:0002119;<br>P:GO:0000398;<br>P:GO:0040011;<br>P:GO:0006898;<br>C:GO:0071013;<br>P:GO:0009792 | -                                                                                                                  |             | IPR001748; IPR018230                                                                                                          |
| -                       | -                                                                                 | 0  |                                                                                                                                                                                        |                                                                                                                    |             | -                                                                                                                             |

|                         |                                                            |  |    |                                                                                                                                                                       |                                                |            |                                                                                                 |
|-------------------------|------------------------------------------------------------|--|----|-----------------------------------------------------------------------------------------------------------------------------------------------------------------------|------------------------------------------------|------------|-------------------------------------------------------------------------------------------------|
| Pristionchus pacificus  | small subunit ribosomal protein 28                         |  | 3  | C:GO:0005840;<br>F:GO:0003735;<br>P:GO:0006412                                                                                                                        | -                                              | EC:3.6.5.3 | IPR000289; IPR012340; IPR016027;<br>PTHR10769:SF1 (PANTHER)                                     |
| Caenorhabditis briggsae | class member 2                                             |  | 2  | F:GO:0004553;<br>F:GO:0005488                                                                                                                                         | -                                              | EC:3.2.1.0 | SignalP (SIGNALP)                                                                               |
| Caenorhabditis briggsae | class member 2                                             |  | 2  | F:GO:0004553;<br>F:GO:0005488                                                                                                                                         | -                                              | EC:3.2.1.0 | SignalP (SIGNALP)                                                                               |
| Caenorhabditis briggsae | zinc finger protein 291                                    |  | 0  |                                                                                                                                                                       | F:GO:0008270;<br>C:GO:0005622                  |            | -                                                                                               |
| Caenorhabditis briggsae | zinc finger protein 291                                    |  | 0  |                                                                                                                                                                       | F:GO:0008270;<br>C:GO:0005622                  |            | -                                                                                               |
| Caenorhabditis elegans  | ubiquitin-conjugating enzyme variant                       |  | 0  |                                                                                                                                                                       | C:GO:0016021                                   |            | IPR019547; PTHR11621 (PANTHER),<br>PTHR11621:SF1 (PANTHER)                                      |
| Caenorhabditis briggsae | briggsae cbr-ora-1 protein                                 |  | 0  |                                                                                                                                                                       |                                                |            | IPR003677; PTHR21593 (PANTHER)                                                                  |
| Caenorhabditis briggsae | briggsae cbr-ora-1 protein                                 |  | 0  |                                                                                                                                                                       |                                                |            | IPR003677; PTHR21593 (PANTHER)                                                                  |
| Caenorhabditis briggsae | briggsae cbr-ora-1 protein                                 |  | 0  |                                                                                                                                                                       |                                                |            | IPR003677; PTHR21593 (PANTHER)                                                                  |
| Caenorhabditis briggsae | uncoordi- ted family member (unc-89)                       |  | 0  |                                                                                                                                                                       | F:GO:0005089;<br>P:GO:0035023;<br>C:GO:0005622 |            | IPR003598; IPR007110; IPR013098;<br>IPR013783; PTHR19897 (PANTHER),<br>SSF48726 (SUPERFAMILY)   |
|                         | -                                                          |  | 0  |                                                                                                                                                                       |                                                |            | -                                                                                               |
|                         | -                                                          |  | 0  |                                                                                                                                                                       |                                                |            | -                                                                                               |
| Brugia malayi           | exosome complex exonuclease rrp4                           |  | 0  |                                                                                                                                                                       | F:GO:0003723;<br>F:GO:0004527                  |            | IPR003029; IPR022967; PTHR21321<br>(PANTHER), PTHR21321:SF2<br>(PANTHER)                        |
| Caenorhabditis elegans  | cg34118 cg34118-pa                                         |  | 0  |                                                                                                                                                                       |                                                |            | IPR016017; SSF110035 (SUPERFAMILY)                                                              |
| Caenorhabditis briggsae | elegans protein confirmed by transcript evidence           |  | 5  | F:GO:0003676;<br>P:GO:0000003;<br>F:GO:0005515;<br>P:GO:0009792;<br>P:GO:0006350                                                                                      | -                                              |            | PS51257 (PROFILE)                                                                               |
| Macaca mulatta          | hepatitis b virus x interacting protein                    |  | 4  | F:GO:0005515;<br>P:GO:0006916;<br>C:GO:0005829;<br>P:GO:0043154                                                                                                       | -                                              |            | PTHR13342 (PANTHER)                                                                             |
| Caenorhabditis briggsae | clathrin coat assembly protein ap-1                        |  | 5  | P:GO:0016192;<br>P:GO:0040025;<br>F:GO:0005515;<br>P:GO:0006886;<br>C:GO:0030121                                                                                      | -                                              |            | IPR008968; G3DSA:2.60.40.1170<br>(GENE3D), PTHR11998 (PANTHER),<br>PTHR11998:SF11 (PANTHER)     |
| Brugia malayi           | hypothetical protein Bm1_12375 [Brugia malayi]             |  | 0  |                                                                                                                                                                       |                                                |            | -                                                                                               |
| Caenorhabditis elegans  | translation initiation factor eif-2b subunit beta          |  | 10 | P:GO:0000003;<br>P:GO:0040010;<br>P:GO:0006898;<br>P:GO:0040018;<br>P:GO:0044237;<br>P:GO:0050896;<br>P:GO:0009792;<br>P:GO:0002119;<br>P:GO:0010171;<br>F:GO:0005488 | -                                              |            | IPR000649; G3DSA:3.40.50.10470<br>(GENE3D), PTHR10233:SF9<br>(PANTHER), SSF100950 (SUPERFAMILY) |
| Caenorhabditis elegans  | elegans protein partially confirmed by transcript evidence |  | 2  | P:GO:0009987;<br>P:GO:0008152                                                                                                                                         | -                                              |            | IPR003886; SignalP (SIGNALP)                                                                    |
|                         | -                                                          |  | 0  |                                                                                                                                                                       |                                                |            | -                                                                                               |
| Caenorhabditis elegans  | protein son-like                                           |  | 2  | C:GO:0005622;<br>F:GO:0003725                                                                                                                                         | -                                              |            | SignalP (SIGNALP)                                                                               |
|                         | -                                                          |  | 0  |                                                                                                                                                                       |                                                |            | -                                                                                               |
|                         | -                                                          |  | 0  |                                                                                                                                                                       |                                                |            | -                                                                                               |

|                             |                                                                                                |    |                                                                                                                                                                       |                                                                                                                                                                                                                                                            |                                                                                                                                                                  |
|-----------------------------|------------------------------------------------------------------------------------------------|----|-----------------------------------------------------------------------------------------------------------------------------------------------------------------------|------------------------------------------------------------------------------------------------------------------------------------------------------------------------------------------------------------------------------------------------------------|------------------------------------------------------------------------------------------------------------------------------------------------------------------|
|                             | -                                                                                              | 0  |                                                                                                                                                                       |                                                                                                                                                                                                                                                            | -                                                                                                                                                                |
| Caenorhabditis elegans      | hypothetical protein F45E4.3 [Caenorhabditis elegans]                                          | 0  |                                                                                                                                                                       | P:GO:0040011                                                                                                                                                                                                                                               | -                                                                                                                                                                |
| Loa loa                     | activator c11orf59-like                                                                        | 0  |                                                                                                                                                                       |                                                                                                                                                                                                                                                            | PTHR13401 (PANTHER), SignalP (SIGNALP)                                                                                                                           |
| Caenorhabditis briggsae     | member ras oncogene family                                                                     | 10 | P:GO:0007264;<br>P:GO:0006355;<br>P:GO:0006913;<br>F:GO:0005524;<br>F:GO:0008134;<br>P:GO:0006886;<br>C:GO:0005737;<br>C:GO:0005634;<br>F:GO:0005525;<br>C:GO:0005886 | -                                                                                                                                                                                                                                                          | IPR001806; IPR002078; IPR003579;<br>IPR005225; IPR013753; IPR015598;<br>IPR020851; G3DSA:3.40.50.300<br>(GENE3D), PTHR11708 (PANTHER),<br>SSF52540 (SUPERFAMILY) |
| Caenorhabditis briggsae     | member ras oncogene family                                                                     | 10 | P:GO:0007264;<br>P:GO:0006355;<br>P:GO:0006913;<br>F:GO:0005524;<br>F:GO:0008134;<br>P:GO:0006886;<br>C:GO:0005737;<br>C:GO:0005634;<br>F:GO:0005525;<br>C:GO:0005886 | -                                                                                                                                                                                                                                                          | IPR001806; IPR002078; IPR003579;<br>IPR005225; IPR013753; IPR015598;<br>IPR020851; G3DSA:3.40.50.300<br>(GENE3D), PTHR11708 (PANTHER),<br>SSF52540 (SUPERFAMILY) |
|                             | -                                                                                              | 0  |                                                                                                                                                                       |                                                                                                                                                                                                                                                            | -                                                                                                                                                                |
| Caenorhabditis briggsae     | 29kda protein from anisakis simplex                                                            | 2  | C:GO:0031672;<br>C:GO:0055120                                                                                                                                         | -                                                                                                                                                                                                                                                          | -                                                                                                                                                                |
| Caenorhabditis briggsae     | Hypothetical protein CBG09826 [Caenorhabditis briggsae]                                        | 0  |                                                                                                                                                                       |                                                                                                                                                                                                                                                            | SignalP (SIGNALP)                                                                                                                                                |
| Caenorhabditis briggsae     | elegans protein partially confirmed by transcript evidence                                     | 0  |                                                                                                                                                                       |                                                                                                                                                                                                                                                            | -                                                                                                                                                                |
| Caenorhabditis elegans      | ankyrin unc44                                                                                  | 1  | F:GO:0005488                                                                                                                                                          | -                                                                                                                                                                                                                                                          | IPR002110; IPR020683; PR01415<br>(PRINTS), PTHR18958 (PANTHER)                                                                                                   |
| Angiostrongylus cantonensis | hypothetical protein [Angiostrongylus cantonensis]                                             | 1  | F:GO:0005488                                                                                                                                                          | -                                                                                                                                                                                                                                                          | -                                                                                                                                                                |
| Caenorhabditis elegans      | rm23_caee1 ame: full=probable 39s ribosomal protein<br>mitochondrial short=l23mt short=mrp-l23 | 0  |                                                                                                                                                                       | F:GO:0003735;<br>P:GO:0006898;<br>C:GO:0030529;<br>C:GO:0005739;<br>F:GO:0000166;<br>P:GO:0006412;<br>P:GO:0000003;<br>P:GO:0002119;<br>P:GO:0009792;<br>C:GO:0005840;<br>P:GO:0002009;<br>C:GO:0005622;<br>P:GO:0040010;<br>P:GO:0040007;<br>P:GO:0040035 | -                                                                                                                                                                |
| Caenorhabditis briggsae     | polymerase iii (d- directed) polypeptide 155kda                                                | 8  | F:GO:0003899;<br>F:GO:0008270;<br>P:GO:0032728;<br>P:GO:0045087;<br>F:GO:0003677;<br>F:GO:0032549;<br>P:GO:0006351;<br>C:GO:0005666                                   | -                                                                                                                                                                                                                                                          | EC:2.7.7.6<br>IPR007081; IPR015700; PTHR19376<br>(PANTHER), SSF64484 (SUPERFAMILY)                                                                               |
|                             | -                                                                                              | 0  |                                                                                                                                                                       |                                                                                                                                                                                                                                                            | SignalP (SIGNALP)                                                                                                                                                |
|                             | -                                                                                              | 0  |                                                                                                                                                                       |                                                                                                                                                                                                                                                            | -                                                                                                                                                                |

|                         |                                                            |    |                                                                                                                                                                                                                                                                                                                                                                                                                                                                                          |                               |            |                                                                            |
|-------------------------|------------------------------------------------------------|----|------------------------------------------------------------------------------------------------------------------------------------------------------------------------------------------------------------------------------------------------------------------------------------------------------------------------------------------------------------------------------------------------------------------------------------------------------------------------------------------|-------------------------------|------------|----------------------------------------------------------------------------|
| Caenorhabditis elegans  | ribosomal protein s5                                       | 11 | P:GO:0006413;<br>F:GO:0003729;<br>P:GO:0008340;<br>P:GO:0040007;<br>F:GO:0003735;<br>P:GO:0006450;<br>P:GO:0000003;<br>C:GO:0022627;<br>P:GO:0002119;<br>F:GO:0005515;<br>P:GO:0009792                                                                                                                                                                                                                                                                                                   | -                             |            | IPR000235; IPR005716; IPR020606                                            |
| Caenorhabditis briggsae | briggsae cbr-apb-3 protein                                 | 31 | C:GO:0000785;<br>P:GO:0008156;<br>C:GO:0030117;<br>P:GO:0008340;<br>P:GO:0000122;<br>P:GO:0051101;<br>C:GO:0035189;<br>P:GO:0000080;<br>P:GO:0007307;<br>P:GO:0031396;<br>P:GO:0040007;<br>F:GO:0008565;<br>P:GO:0007113;<br>P:GO:0006727;<br>P:GO:0016183;<br>P:GO:0007040;<br>C:GO:0005794;<br>P:GO:0006886;<br>P:GO:0008285;<br>P:GO:0019915;<br>P:GO:0009792;<br>P:GO:0042023;<br>P:GO:0002119;<br>C:GO:0008021;<br>P:GO:0010171;<br>F:GO:0010843;<br>F:GO:0008134;<br>F:GO:0016747; | -                             |            | IPR002553; IPR011989; PTHR11134 (PANTHER), PTHR11134:SF1 (PANTHER)         |
| Caenorhabditis elegans  | 2-acylglycerol o-acyltransferase 1                         | 3  | P:GO:0044238;<br>C:GO:0044425                                                                                                                                                                                                                                                                                                                                                                                                                                                            | -                             | EC:2.3.1.0 | IPR007130                                                                  |
| Caenorhabditis briggsae | elegans protein partially confirmed by transcript evidence | 0  |                                                                                                                                                                                                                                                                                                                                                                                                                                                                                          | P:GO:0006508;<br>F:GO:0008168 |            | -                                                                          |
| Caenorhabditis elegans  | elegans protein confirmed by transcript evidence           | 0  |                                                                                                                                                                                                                                                                                                                                                                                                                                                                                          |                               |            | -                                                                          |
| Loa loa                 | hypothetical protein LOAG_11699 [Loa loa]                  | 0  |                                                                                                                                                                                                                                                                                                                                                                                                                                                                                          |                               |            | -                                                                          |
| Caenorhabditis elegans  | n-deacetylase n-sulfotransferase                           | 3  | C:GO:0016020;<br>C:GO:0005794;<br>F:GO:0008146                                                                                                                                                                                                                                                                                                                                                                                                                                           | -                             | EC:2.8.2.0 | IPR021930; PTHR10605 (PANTHER), PTHR10605:SF2 (PANTHER), SignalP (SIGNALP) |
| Caenorhabditis elegans  | n-deacetylase n-sulfotransferase                           | 3  | C:GO:0016020;<br>C:GO:0005794;<br>F:GO:0008146                                                                                                                                                                                                                                                                                                                                                                                                                                           | -                             | EC:2.8.2.0 | IPR021930; PTHR10605 (PANTHER), PTHR10605:SF2 (PANTHER), SignalP (SIGNALP) |
| -                       | -                                                          | 0  |                                                                                                                                                                                                                                                                                                                                                                                                                                                                                          |                               |            | -                                                                          |

|                         |                                                       |   |                                                                                                                                     |                                                                                                                                                      |            |                                                                                                                                     |
|-------------------------|-------------------------------------------------------|---|-------------------------------------------------------------------------------------------------------------------------------------|------------------------------------------------------------------------------------------------------------------------------------------------------|------------|-------------------------------------------------------------------------------------------------------------------------------------|
| Caenorhabditis elegans  | integral membrane protein gpr180                      | 0 |                                                                                                                                     | C:GO:0016021;<br>C:GO:0016020;<br>F:GO:0004930;<br>P:GO:0007165;<br>P:GO:0050909;<br>F:GO:0004872;<br>F:GO:0004871;<br>P:GO:0007186;<br>C:GO:0005886 |            | IPR019336; PTHR23252 (PANTHER),<br>PTHR23252:SF3 (PANTHER)                                                                          |
| Caenorhabditis briggsae | paz domain containing protein                         | 1 | P:GO:0000003                                                                                                                        | -                                                                                                                                                    |            | -                                                                                                                                   |
| Caenorhabditis elegans  | hypothetical protein M04B2.6 [Caenorhabditis elegans] | 0 |                                                                                                                                     |                                                                                                                                                      |            | SignalP (SIGNALP)                                                                                                                   |
| Brugia malayi           | o-linked n-acetylglucosamine ogt                      | 5 | P:GO:0035220;<br>F:GO:0005488;<br>P:GO:0006486;<br>F:GO:0008375;<br>C:GO:0005634                                                    | -                                                                                                                                                    |            | PTHR23083 (PANTHER),<br>PTHR23083:SF21 (PANTHER), SignalP<br>(SIGNALP), SSF48452 (SUPERFAMILY)                                      |
| Loa loa                 | mediator complex subunit rgr-1                        | 6 | P:GO:0006357;<br>P:GO:0040007;<br>F:GO:0016455;<br>P:GO:0002119;<br>C:GO:0016592;<br>P:GO:0009792                                   | -                                                                                                                                                    |            | -                                                                                                                                   |
|                         | -                                                     | 0 |                                                                                                                                     |                                                                                                                                                      |            | SignalP (SIGNALP)                                                                                                                   |
|                         | -                                                     | 0 |                                                                                                                                     |                                                                                                                                                      |            | -                                                                                                                                   |
| Brugia malayi           | isoform a                                             | 0 |                                                                                                                                     | F:GO:0003674;<br>P:GO:0008150;<br>C:GO:0005575                                                                                                       |            | -                                                                                                                                   |
| Caenorhabditis briggsae | briggsae cbr-dnj-15 protein                           | 1 | P:GO:0006974                                                                                                                        | -                                                                                                                                                    |            | IPR009073                                                                                                                           |
| Caenorhabditis elegans  | pyridoxamine 5 -phosphate oxidase                     | 4 | P:GO:0008615;<br>P:GO:0055114;<br>F:GO:0004733;<br>F:GO:0010181                                                                     | -                                                                                                                                                    | EC:1.4.3.5 | IPR000659; IPR009002; IPR011576;<br>IPR012349; IPR019576; IPR019740                                                                 |
| Caenorhabditis elegans  | pyridoxamine 5 -phosphate oxidase                     | 4 | P:GO:0008615;<br>F:GO:0016638;<br>P:GO:0055114;<br>F:GO:0010181                                                                     | -                                                                                                                                                    |            | IPR000659; IPR009002; IPR011576;<br>IPR012349                                                                                       |
| Caenorhabditis elegans  | pyridoxamine 5 -phosphate oxidase                     | 4 | P:GO:0008615;<br>P:GO:0055114;<br>F:GO:0004733;<br>F:GO:0010181                                                                     | -                                                                                                                                                    | EC:1.4.3.5 | IPR000659; IPR009002; IPR011576;<br>IPR012349; IPR019576; IPR019740                                                                 |
| Caenorhabditis briggsae | elegans protein confirmed by transcript evidence      | 0 |                                                                                                                                     |                                                                                                                                                      |            | -                                                                                                                                   |
| Caenorhabditis elegans  | zinc finger ccch type containing 6                    | 8 | P:GO:0040035;<br>P:GO:0009792;<br>P:GO:0002119;<br>F:GO:0046872;<br>P:GO:0040018;<br>P:GO:0040010;<br>P:GO:0040019;<br>P:GO:0040011 | -                                                                                                                                                    |            | IPR000571; IPR003006;<br>G3DSA:4.10.1000.10 (GENE3D),<br>PTHR13119 (PANTHER),<br>PTHR13119:SF5 (PANTHER), SSF90229<br>(SUPERFAMILY) |
|                         | -                                                     | 0 |                                                                                                                                     |                                                                                                                                                      |            | SignalP (SIGNALP)                                                                                                                   |
| Brugia malayi           | proteasome ( macropain) 26s non- 5                    | 1 | F:GO:0005488                                                                                                                        | -                                                                                                                                                    |            | IPR011989; IPR016024; IPR019538;<br>PTHR13554 (PANTHER),<br>PTHR13554:SF6 (PANTHER)                                                 |
| Brugia malayi           | protein                                               | 0 |                                                                                                                                     | F:GO:0004872;<br>F:GO:0004497                                                                                                                        |            | -                                                                                                                                   |
| Brugia malayi           | protein                                               | 2 | P:GO:0055114;<br>F:GO:0070330                                                                                                       | -                                                                                                                                                    |            | -                                                                                                                                   |

|                         |                                                                  |    |                                                                                                                                                                                                         |              |             |                                                                                                                                                           |
|-------------------------|------------------------------------------------------------------|----|---------------------------------------------------------------------------------------------------------------------------------------------------------------------------------------------------------|--------------|-------------|-----------------------------------------------------------------------------------------------------------------------------------------------------------|
| Brugia malayi           | protein                                                          | 2  | P:GO:0055114;<br>F:GO:0070330                                                                                                                                                                           | -            | -           | -                                                                                                                                                         |
| Caenorhabditis elegans  | probable atp-dependent r- helicase ddx56                         | 4  | F:GO:0003676;<br>C:GO:0005730;<br>F:GO:0000166;<br>F:GO:0004386                                                                                                                                         | -            | -           | IPR001650; IPR011545; IPR014001;<br>IPR014021; G3DSA:3.40.50.300<br>(GENE3D), PTHR10967 (PANTHER),<br>PTHR10967:SF29 (PANTHER),<br>SSF52540 (SUPERFAMILY) |
| Caenorhabditis briggsae | amidase family protein                                           | 1  | C:GO:0005811                                                                                                                                                                                            | -            | -           | IPR000120; PTHR11895-SF5<br>(PANTHER), SignalP (SIGNALP)                                                                                                  |
| Caenorhabditis elegans  | hypothetical protein R05G6.1 [Caenorhabditis elegans]            | 0  |                                                                                                                                                                                                         |              |             | -                                                                                                                                                         |
| Caenorhabditis briggsae | elegans fln-2 isoform partially confirmed by transcript evidence | 0  |                                                                                                                                                                                                         | F:GO:0003779 |             | IPR001298; IPR013783; IPR014756;<br>IPR017868; PTHR11915 (PANTHER),<br>PTHR11915:SF24 (PANTHER)                                                           |
| Camponotus floridanus   | cullin 4b                                                        | 4  | P:GO:0071600;<br>P:GO:0035118;<br>P:GO:0045750;<br>P:GO:0045732                                                                                                                                         | -            |             | IPR001373; IPR016159;<br>G3DSA:1.20.1310.10 (GENE3D)                                                                                                      |
| Brugia malayi           | ubiquitin carboxyl-termi-l hydrolase 28                          | 9  | F:GO:0004221;<br>P:GO:0010212;<br>P:GO:0042771;<br>F:GO:0004843;<br>F:GO:0005515;<br>P:GO:0000077;<br>P:GO:0016579;<br>C:GO:0005654;<br>P:GO:0008283                                                    | -            | EC:3.1.2.15 | IPR001394; PTHR10420 (PANTHER),<br>PTHR10420:SF18 (PANTHER),<br>SSF54001 (SUPERFAMILY)                                                                    |
| Loa loa                 | transcription elongation factor spt4                             | 12 | F:GO:0003746;<br>P:GO:0008340;<br>F:GO:0008270;<br>P:GO:0045944;<br>P:GO:0000122;<br>F:GO:0008159;<br>F:GO:0008148;<br>P:GO:0006368;<br>F:GO:0003700;<br>F:GO:0046982;<br>C:GO:0005654;<br>P:GO:0006338 | -            |             | IPR016046; IPR022800; SSF63393<br>(SUPERFAMILY)                                                                                                           |
| Caenorhabditis briggsae | briggsae cbr-cyn-16 protein                                      | 1  | F:GO:0016853                                                                                                                                                                                            | -            |             | -                                                                                                                                                         |
| Brugia malayi           | hypothetical protein Bm1_20725 [Brugia malayi]                   | 0  |                                                                                                                                                                                                         |              |             | -                                                                                                                                                         |
| Caenorhabditis briggsae | 3-oxo-5-alpha-steroid 4-dehydroge-se 3-like                      | 4  | F:GO:0016627;<br>P:GO:0006629;<br>C:GO:0005737;<br>P:GO:0044237                                                                                                                                         | -            |             | PTHR14624 (PANTHER), SignalP<br>(SIGNALP)                                                                                                                 |
|                         | -                                                                | 0  |                                                                                                                                                                                                         |              |             | -                                                                                                                                                         |
| Caenorhabditis elegans  | melanocortin 4 receptor                                          | 4  | F:GO:0004871;<br>P:GO:0023052;<br>P:GO:0065007;<br>C:GO:0016020                                                                                                                                         | -            |             | IPR000276; IPR017452;<br>G3DSA:1.20.1070.10 (GENE3D),<br>PTHR19264 (PANTHER),<br>PTHR19264:SF10 (PANTHER),<br>SSF81321 (SUPERFAMILY)                      |
| Homo sapiens            | -dh dehydroge-se                                                 | 5  | F:GO:0008565;<br>C:GO:0005747;<br>C:GO:0016021;<br>P:GO:0022900;<br>P:GO:0015031                                                                                                                        | -            |             | -                                                                                                                                                         |
| Caenorhabditis briggsae | phosphatidylinositol transfer protein                            | 2  | C:GO:0005622;<br>P:GO:0006810                                                                                                                                                                           | -            |             | IPR001666; G3DSA:3.30.530.20<br>(GENE3D), PTHR10658:SF8<br>(PANTHER), SSF55961 (SUPERFAMILY)                                                              |

|                         |                                                                 |    |                                                                                                                                                                                                                          |                                                                 |             |                                                                                                                                                                                                                    |
|-------------------------|-----------------------------------------------------------------|----|--------------------------------------------------------------------------------------------------------------------------------------------------------------------------------------------------------------------------|-----------------------------------------------------------------|-------------|--------------------------------------------------------------------------------------------------------------------------------------------------------------------------------------------------------------------|
| Caenorhabditis elegans  | sugar transporter family protein                                | 2  | P:GO:0006810;<br>C:GO:0044464                                                                                                                                                                                            | -                                                               |             | IPR005828; IPR005829; IPR016196;<br>IPR020846; G3DSA:1.20.1250.20<br>(GENE3D), PTHR11600 (PANTHER),<br>PTHR11600:SF100 (PANTHER), SignalP<br>(SIGNALP)                                                             |
| Brugia malayi           | conserved oligomeric golgi complex subunit 4                    | 3  | N:GO:0071842;<br>P:GO:0048193;<br>C:GO:0044431                                                                                                                                                                           | -                                                               |             | -                                                                                                                                                                                                                  |
|                         | -                                                               | 0  |                                                                                                                                                                                                                          |                                                                 |             | SignalP (SIGNALP)                                                                                                                                                                                                  |
| Caenorhabditis briggsae | ectonucleoside triphosphate diphosphohydrolase isoform<br>cra_b | 2  | P:GO:0008152;<br>F:GO:0016787                                                                                                                                                                                            | -                                                               |             | IPR000407; PTHR11782:SF7<br>(PANTHER)                                                                                                                                                                              |
| Caenorhabditis briggsae | 1-aminocyclopropane-1-carboxylate synthase                      | 1  | F:GO:0003824                                                                                                                                                                                                             | -                                                               |             | IPR001176; IPR004839; IPR015421;<br>IPR015424; PTHR11751 (PANTHER),<br>PTHR11751:SF26 (PANTHER)                                                                                                                    |
|                         | -                                                               | 0  |                                                                                                                                                                                                                          |                                                                 |             | -                                                                                                                                                                                                                  |
| Caenorhabditis elegans  | atp-binding sub-family b (mdr tap) member 6                     | 13 | C:GO:0005774;<br>P:GO:0071585;<br>P:GO:0070574;<br>F:GO:0015086;<br>F:GO:0020037;<br>F:GO:0015562;<br>C:GO:0005794;<br>P:GO:0015886;<br>F:GO:0015439;<br>C:GO:0005886;<br>P:GO:0006779;<br>F:GO:0005524;<br>C:GO:0031307 | -                                                               | EC:3.6.3.41 | IPR001140; IPR003439; IPR003593;<br>IPR011527; IPR017871; IPR017940;<br>G3DSA:1.20.1560.10 (GENE3D),<br>G3DSA:3.40.50.300 (GENE3D),<br>PTHR19242 (PANTHER),<br>PTHR19242:SF69 (PANTHER),<br>SSF52540 (SUPERFAMILY) |
|                         | -                                                               | 0  |                                                                                                                                                                                                                          |                                                                 |             | -                                                                                                                                                                                                                  |
| Caenorhabditis briggsae | elegans protein confirmed by transcript evidence                | 0  |                                                                                                                                                                                                                          | P:GO:0006629;<br>C:GO:0016021;<br>F:GO:0016787;<br>F:GO:0004806 |             | IPR002921; G3DSA:3.40.50.1820<br>(GENE3D), SignalP (SIGNALP),<br>SSF53474 (SUPERFAMILY)                                                                                                                            |
| Caenorhabditis briggsae | elegans protein confirmed by transcript evidence                | 0  |                                                                                                                                                                                                                          | P:GO:0006629;<br>C:GO:0016021;<br>F:GO:0016787;<br>F:GO:0004806 |             | IPR002921; G3DSA:3.40.50.1820<br>(GENE3D), SignalP (SIGNALP),<br>SSF53474 (SUPERFAMILY)                                                                                                                            |
|                         | -                                                               | 0  |                                                                                                                                                                                                                          |                                                                 |             | -                                                                                                                                                                                                                  |
|                         | -                                                               | 0  |                                                                                                                                                                                                                          |                                                                 |             | -                                                                                                                                                                                                                  |
| Caenorhabditis briggsae | elegans protein partially confirmed by transcript evidence      | 1  | F:GO:0005515                                                                                                                                                                                                             | -                                                               |             | -                                                                                                                                                                                                                  |
| Caenorhabditis briggsae | briggsae cbr-ddr-2 protein                                      | 1  | P:GO:0040010                                                                                                                                                                                                             | -                                                               |             | IPR020685; IPR020742;<br>G3DSA:3.30.200.20 (GENE3D)                                                                                                                                                                |
| Taeniopygia guttata     | ubiquitin specific peptidase 5 (isopeptidase t)                 | 3  | F:GO:0008233;<br>P:GO:0006511;<br>F:GO:0005488                                                                                                                                                                           | -                                                               |             | -                                                                                                                                                                                                                  |
| Taeniopygia guttata     | ubiquitin specific peptidase 5 (isopeptidase t)                 | 3  | F:GO:0008233;<br>P:GO:0006511;<br>F:GO:0005488                                                                                                                                                                           | -                                                               |             | -                                                                                                                                                                                                                  |
| Nematostella vectensis  | sphingosine-1-phosphate phosphatase 1                           | 9  | P:GO:0006915;<br>C:GO:0005624;<br>C:GO:0005794;<br>P:GO:0006668;<br>P:GO:0006670;<br>C:GO:0005783;<br>C:GO:0015629;<br>C:GO:0005739;<br>F:GO:0042392                                                                     | -                                                               |             | IPR000326; IPR016118; PTHR14969<br>(PANTHER), PTHR14969:SF4<br>(PANTHER)                                                                                                                                           |

|                         |                                                 |    |                                                                                                                                                                                                                                                            |                                                |             |                                                                                                                                   |
|-------------------------|-------------------------------------------------|----|------------------------------------------------------------------------------------------------------------------------------------------------------------------------------------------------------------------------------------------------------------|------------------------------------------------|-------------|-----------------------------------------------------------------------------------------------------------------------------------|
| Caenorhabditis elegans  | adenosine deami-se                              | 15 | P:GO:0034656;<br>P:GO:0046700;<br>P:GO:0048534;<br>P:GO:0009168;<br>P:GO:0002684;<br>F:GO:0004000;<br>P:GO:0009792;<br>P:GO:0030154;<br>P:GO:0048523;<br>P:GO:0048522;<br>P:GO:0050896;<br>P:GO:0042278;<br>P:GO:0046649;<br>P:GO:0051239;<br>C:GO:0016020 | -                                              | EC:3.5.4.4  | SignalIP (SIGNALP)                                                                                                                |
| Caenorhabditis elegans  | adenosine deami-se                              | 15 | P:GO:0034656;<br>P:GO:0046700;<br>P:GO:0048534;<br>P:GO:0009168;<br>P:GO:0002684;<br>F:GO:0004000;<br>P:GO:0009792;<br>P:GO:0030154;<br>P:GO:0048523;<br>P:GO:0048522;<br>P:GO:0050896;<br>P:GO:0042278;<br>P:GO:0046649;<br>P:GO:0051239;<br>C:GO:0016020 | -                                              | EC:3.5.4.4  | SignalIP (SIGNALP)                                                                                                                |
| Caenorhabditis briggsae | protein c14orf166                               | 0  |                                                                                                                                                                                                                                                            | F:GO:0005515;<br>F:GO:0042802;<br>F:GO:0003677 |             | -                                                                                                                                 |
| Caenorhabditis briggsae | hypothetical kda protein in chromosome          | 1  | F:GO:0005515                                                                                                                                                                                                                                               | -                                              |             | IPR020830; PTHR23136 (PANTHER),<br>PTHR23136:SF1 (PANTHER)                                                                        |
| Caenorhabditis briggsae | aldo-keto reductase                             | 3  | P:GO:0040010;<br>P:GO:0002119;<br>P:GO:0040011                                                                                                                                                                                                             | -                                              |             | IPR001395; IPR018170; IPR020471;<br>IPR023210; PTHR11732:SF34<br>(PANTHER)                                                        |
| Caenorhabditis briggsae | mitochondrial processing peptidase beta subunit | 8  | P:GO:0009792;<br>P:GO:0002119;<br>F:GO:0004222;<br>P:GO:0040010;<br>P:GO:0000003;<br>P:GO:0008340;<br>P:GO:0006508;<br>F:GO:0008270                                                                                                                        | -                                              | EC:3.4.24.0 | IPR001431; IPR007863; IPR011237;<br>IPR011249; IPR011765; PTHR11851<br>(PANTHER), PTHR11851:SF58<br>(PANTHER), SignalIP (SIGNALP) |



|                              |                                        |    |                                                                                                                                                                                                                                                                                                                                                                  |                                                                                                                    |             |                                                                                                                                                |
|------------------------------|----------------------------------------|----|------------------------------------------------------------------------------------------------------------------------------------------------------------------------------------------------------------------------------------------------------------------------------------------------------------------------------------------------------------------|--------------------------------------------------------------------------------------------------------------------|-------------|------------------------------------------------------------------------------------------------------------------------------------------------|
| Caenorhabditis briggsae      | insulin-degrading enzyme               | 21 | P:GO:0051603;<br>P:GO:0051291;<br>F:GO:0031626;<br>F:GO:0008270;<br>P:GO:0051289;<br>F:GO:0043559;<br>C:GO:0031597;<br>C:GO:0005615;<br>F:GO:0001540;<br>C:GO:0009986;<br>P:GO:0045861;<br>F:GO:0004222;<br>P:GO:0050435;<br>F:GO:0016887;<br>F:GO:0042803;<br>P:GO:0006200;<br>C:GO:0005634;<br>C:GO:0005782;<br>F:GO:0005524;<br>P:GO:0042447;<br>C:GO:0005739 | -                                                                                                                  | EC:3.4.24.0 | IPR001431; IPR007863; IPR011237;<br>IPR011249; IPR011765; IPR018247;<br>PTHR11851 (PANTHER),<br>PTHR11851:SF64 (PANTHER), SignalP<br>(SIGNALP) |
| Brugia malayi                | enhancer of rudimentary homolog        | 4  | P:GO:0007049;<br>P:GO:0042742;<br>P:GO:0006213;<br>F:GO:0005515                                                                                                                                                                                                                                                                                                  | -                                                                                                                  |             | IPR000781; SSF143875 (SUPERFAMILY)                                                                                                             |
| Brugia malayi                | enhancer of rudimentary homolog        | 4  | P:GO:0007049;<br>P:GO:0042742;<br>P:GO:0006213;<br>F:GO:0005515                                                                                                                                                                                                                                                                                                  | -                                                                                                                  |             | -                                                                                                                                              |
| Caenorhabditis elegans       | ankyrin repeat domain protein          | 1  | F:GO:0005515                                                                                                                                                                                                                                                                                                                                                     | -                                                                                                                  |             | IPR002110; IPR020683; PRO1415<br>(PRINTS), PTHR18958 (PANTHER),<br>PTHR18958:SF273 (PANTHER)                                                   |
| Glossina morsitans morsitans | serine protease easter                 | 0  |                                                                                                                                                                                                                                                                                                                                                                  | P:GO:0006508;<br>F:GO:0004252;<br>F:GO:0008236;<br>P:GO:0006911;<br>F:GO:0016787;<br>F:GO:0003824;<br>F:GO:0008233 |             | IPR001254; IPR009003; IPR018114;<br>G3DSA:2.40.10.10 (GENE3D),<br>PTHR19355 (PANTHER),<br>PTHR19355:SF82 (PANTHER)                             |
|                              | -                                      | 0  |                                                                                                                                                                                                                                                                                                                                                                  |                                                                                                                    |             | -                                                                                                                                              |
| Pongo abelii                 | ribosomal protein s10                  | 4  | C:GO:0005730;<br>F:GO:0005515;<br>C:GO:0022627;<br>P:GO:0006414                                                                                                                                                                                                                                                                                                  | -                                                                                                                  |             | -                                                                                                                                              |
|                              | -                                      | 0  |                                                                                                                                                                                                                                                                                                                                                                  |                                                                                                                    |             | SignalP (SIGNALP)                                                                                                                              |
|                              | -                                      | 0  |                                                                                                                                                                                                                                                                                                                                                                  |                                                                                                                    |             | -                                                                                                                                              |
| Haemonchus contortus         | myosin heavy chain                     | 6  | C:GO:0032982;<br>F:GO:0003779;<br>F:GO:0005524;<br>F:GO:0003774;<br>C:GO:0031672;<br>P:GO:0007626                                                                                                                                                                                                                                                                | -                                                                                                                  |             | SignalP (SIGNALP)                                                                                                                              |
| Brugia malayi                | hypothetical kda protein in chromosome | 1  | C:GO:0016020                                                                                                                                                                                                                                                                                                                                                     | -                                                                                                                  |             | PTHR21191 (PANTHER),<br>PTHR21191:SF3 (PANTHER), SignalP<br>(SIGNALP)                                                                          |
| Bombyx mori                  | sericin 2 isoform 1 precursor          | 0  |                                                                                                                                                                                                                                                                                                                                                                  |                                                                                                                    |             | -                                                                                                                                              |
|                              | -                                      | 0  |                                                                                                                                                                                                                                                                                                                                                                  |                                                                                                                    |             | -                                                                                                                                              |
|                              | -                                      | 0  |                                                                                                                                                                                                                                                                                                                                                                  |                                                                                                                    |             | -                                                                                                                                              |

|                          |                                                  |    |                                                                                                                                                                                                                                                                             |  |             |                                                                                                                                                        |
|--------------------------|--------------------------------------------------|----|-----------------------------------------------------------------------------------------------------------------------------------------------------------------------------------------------------------------------------------------------------------------------------|--|-------------|--------------------------------------------------------------------------------------------------------------------------------------------------------|
| Caenorhabditis briggsae  | elegans protein confirmed by transcript evidence | 0  |                                                                                                                                                                                                                                                                             |  |             | -                                                                                                                                                      |
|                          | -                                                | 0  |                                                                                                                                                                                                                                                                             |  |             | -                                                                                                                                                      |
| Brugia malayi            | hypothetical protein Bm1_38255 [Brugia malayi]   | 0  |                                                                                                                                                                                                                                                                             |  |             | -                                                                                                                                                      |
| Caenorhabditis elegans   | hatching enzyme                                  | 2  | F:GO:0008233;<br>P:GO:0007413                                                                                                                                                                                                                                               |  |             | IPR001506; IPR006026;<br>G3DSA:3.40.390.10 (GENE3D),<br>PTHR10127 (PANTHER),<br>PTHR10127:SF73 (PANTHER),<br>SSF55486 (SUPERFAMILY)                    |
| Caenorhabditis elegans   | hatching enzyme                                  | 2  | F:GO:0016787;<br>P:GO:0007413                                                                                                                                                                                                                                               |  |             | IPR001506; IPR006026;<br>G3DSA:3.40.390.10 (GENE3D),<br>PTHR10127 (PANTHER),<br>PTHR10127:SF73 (PANTHER), SignalP<br>(SIGNALP), SSF55486 (SUPERFAMILY) |
| Caenorhabditis elegans   | pten induced ki-se 1                             | 16 | P:GO:0090200;<br>P:GO:0031396;<br>P:GO:0033603;<br>C:GO:0005743;<br>C:GO:0005829;<br>C:GO:0005741;<br>F:GO:0055131;<br>F:GO:0010857;<br>P:GO:0043123;<br>P:GO:0018105;<br>F:GO:0004674;<br>F:GO:0000287;<br>P:GO:0032226;<br>P:GO:0006950;<br>P:GO:0043254;<br>F:GO:0005524 |  | EC:2.7.11.0 | IPR000719; IPR011009; IPR017442;<br>G3DSA:1.10.510.10 (GENE3D),<br>PTHR22972 (PANTHER)                                                                 |
| Trichomonas vaginalis G3 | heavy polypeptide non- isoform cra_a             | 0  |                                                                                                                                                                                                                                                                             |  |             | -                                                                                                                                                      |

|                             |                                                      |    |                                                                                                                                                                       |                               |              |                                                                                                                                       |
|-----------------------------|------------------------------------------------------|----|-----------------------------------------------------------------------------------------------------------------------------------------------------------------------|-------------------------------|--------------|---------------------------------------------------------------------------------------------------------------------------------------|
| Caenorhabditis elegans      | f-box only protein                                   | 6  | P:GO:0060966;<br>F:GO:0008270;<br>P:GO:0070923;<br>F:GO:0004842;<br>F:GO:0005515;<br>C:GO:0048471                                                                     | -                             | EC:6.3.2.19  | IPR006626; IPR011050; IPR012334;<br>IPR022441; PTHR22990 (PANTHER),<br>PTHR22990:SF6 (PANTHER)                                        |
| -                           | -                                                    | 0  |                                                                                                                                                                       |                               |              | -                                                                                                                                     |
| Caenorhabditis elegans      | ortholog of drosophila d gene family member (drsh-1) | 10 | F:GO:0004525;<br>F:GO:0003723;<br>P:GO:0000910;<br>P:GO:0031053;<br>P:GO:0007052;<br>P:GO:0019953;<br>P:GO:0042254;<br>P:GO:0009792;<br>P:GO:0016072;<br>C:GO:0005634 | -                             | EC:3.1.26.3  | IPR000999; PTHR11207 (PANTHER)                                                                                                        |
| Caenorhabditis elegans      | neural stem cell-derived dendrite regulator          | 1  | F:GO:0005515                                                                                                                                                          | -                             |              | G3DSA:3.40.50.1820 (GENE3D),<br>PTHR21493 (PANTHER),<br>PTHR21493:SF6 (PANTHER), SignalP<br>(SIGNALP), SSF53474 (SUPERFAMILY)         |
| Caenorhabditis elegans      | neural stem cell-derived dendrite regulator          | 2  | F:GO:0016787;<br>F:GO:0005515                                                                                                                                         | -                             |              | G3DSA:3.40.50.1820 (GENE3D),<br>PTHR21493 (PANTHER),<br>PTHR21493:SF6 (PANTHER), SignalP<br>(SIGNALP), SSF53474 (SUPERFAMILY)         |
| -                           | -                                                    | 0  |                                                                                                                                                                       |                               |              | -                                                                                                                                     |
| -                           | -                                                    | 0  |                                                                                                                                                                       |                               |              | -                                                                                                                                     |
| -                           | -                                                    | 0  |                                                                                                                                                                       |                               |              | -                                                                                                                                     |
| Caenorhabditis elegans      | cleavage and polyadenylation specificity factor      | 3  | F:GO:0016787;<br>P:GO:0016180;<br>C:GO:0032039                                                                                                                        | -                             |              | -                                                                                                                                     |
| Loa loa                     | late secretory pathway protein avl9 homolog          | 1  | C:GO:0016021                                                                                                                                                          | -                             |              | IPR001194; IPR018307                                                                                                                  |
| Caenorhabditis briggsae     | elegans protein confirmed by transcript evidence     | 5  | P:GO:0006633;<br>F:GO:0016717;<br>F:GO:0005515;<br>F:GO:0020037;<br>P:GO:0055114                                                                                      | -                             | EC:1.14.19.0 | IPR001199; IPR005804; PTHR19353<br>(PANTHER)                                                                                          |
| -                           | -                                                    | 0  |                                                                                                                                                                       |                               |              | SignalP (SIGNALP)                                                                                                                     |
| -                           | -                                                    | 0  |                                                                                                                                                                       |                               |              | -                                                                                                                                     |
| Brugia malayi               | topoisomerase iii alpha                              | 5  | P:GO:0006259;<br>P:GO:0007276;<br>P:GO:0007126;<br>P:GO:0071103;<br>F:GO:0003916                                                                                      | -                             |              | -                                                                                                                                     |
| Angiostrongylus cantonensis | tumor suppressing subtransferable candidate 1        | 0  |                                                                                                                                                                       | F:GO:0003674;<br>F:GO:0005515 |              | IPR001680; IPR015943; IPR017986;<br>IPR019781; IPR019782; PTHR14205<br>(PANTHER), PTHR14205:SF6<br>(PANTHER), SSF101908 (SUPERFAMILY) |
| -                           | -                                                    | 0  |                                                                                                                                                                       |                               |              | -                                                                                                                                     |

|                        |                                                 |    |                                                                                                                                                                                                                                                                                                                                                                                                                                                                        |   |             |                                                              |
|------------------------|-------------------------------------------------|----|------------------------------------------------------------------------------------------------------------------------------------------------------------------------------------------------------------------------------------------------------------------------------------------------------------------------------------------------------------------------------------------------------------------------------------------------------------------------|---|-------------|--------------------------------------------------------------|
| Caenorhabditis elegans | cbp p300 homolog family member (cbp-1)          | 13 | F:GO:0008270;<br>F:GO:0004402;<br>P:GO:0040010;<br>F:GO:0003712;<br>P:GO:0040026;<br>P:GO:0007283;<br>P:GO:0018996;<br>C:GO:0005737;<br>P:GO:0040039;<br>P:GO:0009792;<br>P:GO:0045944;<br>C:GO:0005634;<br>P:GO:0040035                                                                                                                                                                                                                                               | - | EC:2.3.1.48 | IPR001487; IPR010303; IPR019786;<br>PTHR13808 (PANTHER)      |
|                        | -                                               | 0  |                                                                                                                                                                                                                                                                                                                                                                                                                                                                        |   |             | -                                                            |
| Ailuropoda melanoleuca | alpha 1 type i collagen preproprotein isoform 2 | 31 | P:GO:0060351;<br>P:GO:0001957;<br>P:GO:0071363;<br>P:GO:0007605;<br>P:GO:0034505;<br>P:GO:0042542;<br>P:GO:0001649;<br>P:GO:0009612;<br>P:GO:0001568;<br>P:GO:0060325;<br>F:GO:0005201;<br>C:GO:0005615;<br>P:GO:0048706;<br>P:GO:0015031;<br>F:GO:0048407;<br>C:GO:0005737;<br>P:GO:0043434;<br>P:GO:0071300;<br>P:GO:0007601;<br>P:GO:0010812;<br>C:GO:0005584;<br>F:GO:0042802;<br>P:GO:0060346;<br>P:GO:0032964;<br>P:GO:0030199;<br>P:GO:0051591;<br>P:GO:0031960 | - |             | IPR008160; PTHR10499 (PANTHER),<br>PTHR10499:SF122 (PANTHER) |
|                        | -                                               | 0  |                                                                                                                                                                                                                                                                                                                                                                                                                                                                        |   |             | -                                                            |
| Caenorhabditis elegans | proteasome subunit alpha type 3                 | 9  | C:GO:0015630;<br>P:GO:0051436;<br>P:GO:0051437;<br>F:GO:0042802;<br>F:GO:0004298;<br>P:GO:0031145;<br>C:GO:0019773;<br>C:GO:0005737;<br>C:GO:0005634                                                                                                                                                                                                                                                                                                                   | - | EC:3.4.25.0 | -                                                            |
| Homo sapiens           | fam128b protein                                 | 4  | C:GO:0005819;<br>C:GO:0005813;<br>F:GO:0005515;<br>C:GO:0008274                                                                                                                                                                                                                                                                                                                                                                                                        | - |             | -                                                            |

|                         |                                                |    |                                                                                                                                                                                                                                                            |   |            |                                                                                                                                            |
|-------------------------|------------------------------------------------|----|------------------------------------------------------------------------------------------------------------------------------------------------------------------------------------------------------------------------------------------------------------|---|------------|--------------------------------------------------------------------------------------------------------------------------------------------|
| Caenorhabditis briggsae | major facilitator superfamily protein          | 15 | P:GO:0055085;<br>P:GO:0015893;<br>F:GO:0015238;<br>C:GO:0016021;<br>P:GO:0040007;<br>P:GO:0070715;<br>P:GO:0052106;<br>C:GO:0031526;<br>F:GO:0030165;<br>P:GO:0002119;<br>C:GO:0016324;<br>P:GO:0060731;<br>P:GO:0015879;<br>P:GO:0009792;<br>F:GO:0015226 | - |            | IPR011701; IPR016196; IPR020846;<br>G3DSA:1.20.1250.20 (GENE3D),<br>PTHR11600 (PANTHER),<br>PTHR11600:SF42 (PANTHER), SignalP<br>(SIGNALP) |
| Caenorhabditis elegans  | d--directed r- polymerase i subunit rpa1       | 7  | F:GO:0003899;<br>P:GO:0009303;<br>C:GO:0005654;<br>F:GO:0003677;<br>C:GO:0005736;<br>F:GO:0005515;<br>F:GO:0008270                                                                                                                                         | - | EC:2.7.7.6 | -                                                                                                                                          |
| Loa loa                 | drim protein                                   | 11 | C:GO:0005730;<br>C:GO:0030688;<br>P:GO:0000472;<br>P:GO:0008285;<br>C:GO:0030686;<br>F:GO:0005515;<br>C:GO:0032040;<br>P:GO:0000480;<br>C:GO:0005654;<br>C:GO:0005737;<br>P:GO:0000447                                                                     | - |            | -                                                                                                                                          |
| Caenorhabditis brenneri | d--directed r- polymerase iii subunit rpc10    | 9  | F:GO:0003899;<br>P:GO:0050896;<br>F:GO:0030528;<br>F:GO:0008270;<br>P:GO:0006383;<br>P:GO:0045449;<br>F:GO:0003677;<br>C:GO:0005666;<br>C:GO:0005737                                                                                                       | - | EC:2.7.7.6 | IPR001222; G3DSA:2.20.25.10<br>(GENE3D), PTHR11239 (PANTHER),<br>PTHR11239:SF2 (PANTHER), SSF57783<br>(SUPERFAMILY)                        |
| Loa loa                 | paired amphipathic helix repeat family protein | 4  | F:GO:0051287;<br>F:GO:0016616;<br>C:GO:0005634;<br>P:GO:0006355                                                                                                                                                                                            | - | EC:1.1.1.0 | IPR003822; PTHR12346 (PANTHER),<br>PSS1477 (PROFILE)                                                                                       |
| Loa loa                 | paired amphipathic helix repeat family protein | 4  | F:GO:0051287;<br>F:GO:0016616;<br>C:GO:0005634;<br>P:GO:0006355                                                                                                                                                                                            | - | EC:1.1.1.0 | IPR003822; PTHR12346 (PANTHER),<br>PSS1477 (PROFILE)                                                                                       |
| Caenorhabditis briggsae | s-adenosylmethionine decarboxylase             | 5  | P:GO:0006597;<br>P:GO:0008295;<br>F:GO:0016831;<br>P:GO:0040011;<br>P:GO:0007413                                                                                                                                                                           | - | EC:4.1.1.0 | IPR001985; IPR016067                                                                                                                       |
| Brugia malayi           | dehydroge-se reductase sdr family member 7b    | 3  | C:GO:0044464;<br>P:GO:0008152;<br>F:GO:0003824                                                                                                                                                                                                             | - |            | IPR002198; IPR002347; IPR016040;<br>PTHR19410:SF44 (PANTHER), SignalP<br>(SIGNALP), SSF51735 (SUPERFAMILY)                                 |

|                               |                                                            |    |                                                                                                                                                                                                                                                                                                                                |                                                |                                                                                                                                                                                                                                  |
|-------------------------------|------------------------------------------------------------|----|--------------------------------------------------------------------------------------------------------------------------------------------------------------------------------------------------------------------------------------------------------------------------------------------------------------------------------|------------------------------------------------|----------------------------------------------------------------------------------------------------------------------------------------------------------------------------------------------------------------------------------|
|                               | -                                                          | 0  |                                                                                                                                                                                                                                                                                                                                |                                                | -                                                                                                                                                                                                                                |
|                               | -                                                          | 0  |                                                                                                                                                                                                                                                                                                                                |                                                | -                                                                                                                                                                                                                                |
| Caenorhabditis elegans        | elegans protein partially confirmed by transcript evidence | 0  |                                                                                                                                                                                                                                                                                                                                |                                                | -                                                                                                                                                                                                                                |
| Caenorhabditis elegans        | briggsae cbr-acbp-5 protein                                | 0  |                                                                                                                                                                                                                                                                                                                                | F:GO:0005488;<br>F:GO:0000062;<br>P:GO:0010288 | IPR000582; IPR002110; IPR020683;<br>PR01415 (PRINTS), PTHR18958<br>(PANTHER), PTHR18958:SF176<br>(PANTHER)                                                                                                                       |
| Caenorhabditis briggsae       | alpha-amylase                                              | 1  | F:GO:0003824                                                                                                                                                                                                                                                                                                                   | -                                              | IPR013781; IPR017853                                                                                                                                                                                                             |
| Caenorhabditis briggsae       | propionyl- carboxylase                                     | 8  | P:GO:0009792;<br>P:GO:0002119;<br>F:GO:0003723;<br>F:GO:0004485;<br>P:GO:0040010;<br>F:GO:0004525;<br>F:GO:0004658;<br>P:GO:0006396                                                                                                                                                                                            | -                                              | EC:6.4.1.4;<br>EC:3.1.26.3;<br>EC:6.4.1.3<br>IPR000022; IPR011763;<br>G3DSA:3.90.226.10 (GENE3D),<br>PTHR22855 (PANTHER),<br>PTHR22855:SF13 (PANTHER),<br>SSF52096 (SUPERFAMILY)                                                 |
| Brugia malayi                 | hypothetical zinc finger protein in chromosome             | 3  | F:GO:0003676;<br>C:GO:0005622;<br>F:GO:0008270                                                                                                                                                                                                                                                                                 | -                                              | IPR007087; IPR013087; IPR015880;<br>PTHR11389 (PANTHER), SSF57667<br>(SUPERFAMILY)                                                                                                                                               |
| Loa loa                       | ubiquitin                                                  | 5  | C:GO:0005737;<br>P:GO:0000003;<br>P:GO:0040007;<br>C:GO:0005634;<br>P:GO:0002119                                                                                                                                                                                                                                               | -                                              | IPR000626; IPR019954; IPR019955;<br>IPR019956; G3DSA:3.10.20.90<br>(GENE3D), PTHR10666 (PANTHER),<br>PTHR10666:SF9 (PANTHER), SignalP<br>(SIGNALP), SSF54236 (SUPERFAMILY)                                                       |
| Caenorhabditis briggsae       | phospholipase b-like lami- ancestor                        | 0  |                                                                                                                                                                                                                                                                                                                                | P:GO:0008150;<br>C:GO:0005575                  | IPR007000; SignalP (SIGNALP)                                                                                                                                                                                                     |
|                               | -                                                          | 0  |                                                                                                                                                                                                                                                                                                                                |                                                | -                                                                                                                                                                                                                                |
| Strongylocentrotus purpuratus | autophagy related protein atg12-like protein               | 4  | C:GO:0005737;<br>C:GO:0005625;<br>C:GO:0005624;<br>P:GO:0006914                                                                                                                                                                                                                                                                | -                                              | -                                                                                                                                                                                                                                |
|                               | -                                                          | 0  |                                                                                                                                                                                                                                                                                                                                |                                                | -                                                                                                                                                                                                                                |
| Caenorhabditis briggsae       | member ras oncogene isoform cra_a                          | 19 | P:GO:0008103;<br>C:GO:0000139;<br>P:GO:0018125;<br>P:GO:0006913;<br>P:GO:0001745;<br>C:GO:0005626;<br>F:GO:0005525;<br>F:GO:0004767;<br>P:GO:0006887;<br>P:GO:0006886;<br>F:GO:0001671;<br>F:GO:0051117;<br>P:GO:0007264;<br>P:GO:0009792;<br>P:GO:0050790;<br>F:GO:0003924;<br>C:GO:0005634;<br>P:GO:0007293;<br>P:GO:0045451 | -                                              | EC:3.1.4.12;<br>EC:3.6.5.1;<br>EC:3.6.5.2;<br>EC:3.6.5.3;<br>EC:3.6.5.4<br>IPR001806; IPR003579; IPR005225;<br>IPR013753; IPR015600; IPR020851;<br>G3DSA:3.40.50.300 (GENE3D),<br>PTHR11708 (PANTHER), SSF52540<br>(SUPERFAMILY) |
| Caenorhabditis briggsae       | briggsae cbr-imp-3 protein                                 | 0  |                                                                                                                                                                                                                                                                                                                                | F:GO:0004190;<br>C:GO:0016021                  | P551257 (PROFILE), SignalP (SIGNALP)                                                                                                                                                                                             |
| Brugia malayi                 | hypothetical protein [Brugia malayi]                       | 0  |                                                                                                                                                                                                                                                                                                                                |                                                | PTHR13673 (PANTHER)                                                                                                                                                                                                              |
| Caenorhabditis briggsae       | Hypothetical protein CBG14950 [Caenorhabditis briggsae]    | 3  | P:GO:0040018;<br>P:GO:0040035;<br>P:GO:0002119                                                                                                                                                                                                                                                                                 | -                                              | -                                                                                                                                                                                                                                |
|                               | -                                                          | 0  |                                                                                                                                                                                                                                                                                                                                |                                                | -                                                                                                                                                                                                                                |

|                         |                                         |    |                                                                                                                                                                                                                                                                                                               |                               |            |                                                                                                                                                               |
|-------------------------|-----------------------------------------|----|---------------------------------------------------------------------------------------------------------------------------------------------------------------------------------------------------------------------------------------------------------------------------------------------------------------|-------------------------------|------------|---------------------------------------------------------------------------------------------------------------------------------------------------------------|
| Brugia malayi           | ribosomal protein s29                   | 13 | P:GO:0006412;<br>P:GO:0001525;<br>P:GO:0040010;<br>C:GO:0005840;<br>P:GO:0001570;<br>P:GO:0051726;<br>F:GO:0046872;<br>F:GO:0003735;<br>P:GO:0000003;<br>P:GO:0010171;<br>P:GO:0002119;<br>P:GO:0060218;<br>P:GO:0009792                                                                                      | -                             | EC:3.6.5.3 | -                                                                                                                                                             |
| Haemonchus contortus    | myosin heavy chain                      | 6  | C:GO:0032982;<br>F:GO:0003779;<br>F:GO:0005524;<br>F:GO:0003774;<br>C:GO:0031672;<br>P:GO:0007626                                                                                                                                                                                                             | -                             |            | IPR001609; IPR002928; IPR009053;<br>IPR015650; PD936484 (PRODOM),<br>G3DSA:4.10.270.10 (GENE3D),<br>PTHR13140 (PANTHER), SSF52540<br>(SUPERFAMILY)            |
| Haemonchus contortus    | myosin heavy chain                      | 6  | C:GO:0032982;<br>F:GO:0003779;<br>F:GO:0005524;<br>F:GO:0003774;<br>C:GO:0031672;<br>P:GO:0007626                                                                                                                                                                                                             | -                             |            | IPR001609; IPR002928; IPR004009;<br>IPR009053; IPR015650; PD936484<br>(PRODOM), G3DSA:4.10.270.10<br>(GENE3D), PTHR13140 (PANTHER),<br>SSF52540 (SUPERFAMILY) |
| Caenorhabditis briggsae | profilin iii                            | 18 | P:GO:0009653;<br>P:GO:0008340;<br>P:GO:0003006;<br>P:GO:0048610;<br>C:GO:0015629;<br>P:GO:0007283;<br>P:GO:0040011;<br>P:GO:0048468;<br>C:GO:0005737;<br>P:GO:0051179;<br>F:GO:0003779;<br>P:GO:0045927;<br>P:GO:0009792;<br>P:GO:0008361;<br>P:GO:0007015;<br>P:GO:0048477;<br>P:GO:0007399;<br>P:GO:0000910 | -                             |            | -                                                                                                                                                             |
| Caenorhabditis elegans  | proton-coupled amino acid transporter 1 | 0  |                                                                                                                                                                                                                                                                                                               | C:GO:0016021;<br>C:GO:0016020 |            | -                                                                                                                                                             |
|                         |                                         | 0  |                                                                                                                                                                                                                                                                                                               |                               |            | -                                                                                                                                                             |
| Caenorhabditis briggsae | -dh dehydroge-se                        | 7  | P:GO:0009792;<br>P:GO:0002119;<br>C:GO:0005743;<br>C:GO:0070469;<br>P:GO:0006810;<br>P:GO:0040007;<br>P:GO:0022900                                                                                                                                                                                            | -                             |            | PTHR15223 (PANTHER), SignalP<br>(SIGNALP)                                                                                                                     |

|                         |                                        |   |                                                                                                                    |              |            |                                                                       |
|-------------------------|----------------------------------------|---|--------------------------------------------------------------------------------------------------------------------|--------------|------------|-----------------------------------------------------------------------|
| Caenorhabditis briggsae | -dh dehydroge-se                       | 7 | P:GO:0009792;<br>P:GO:0002119;<br>C:GO:0005743;<br>C:GO:0070469;<br>P:GO:0006810;<br>P:GO:0040007;<br>P:GO:0022900 | -            | -          | -                                                                     |
| Caenorhabditis briggsae | e3 ubiquitin-protein ligase ubr2       | 1 | F:GO:0005488                                                                                                       | -            |            | PTHR21497 (PANTHER),<br>PTHR21497:SF6 (PANTHER), SignalP<br>(SIGNALP) |
| Brugia malayi           | saga-associated factor 29-like protein | 0 |                                                                                                                    |              |            | IPR010750; PTHR21539 (PANTHER)                                        |
| Caenorhabditis elegans  | 28s ribosomal protein mitochondrial    | 7 | P:GO:0040010;<br>C:GO:0005840;<br>P:GO:0008340;<br>P:GO:0040035;<br>P:GO:0002119;<br>P:GO:0006898;<br>P:GO:0009792 | -            |            | IPR000754; IPR014721; IPR020568                                       |
| Caenorhabditis briggsae | briggsae cbr-pif-1 protein             | 0 |                                                                                                                    | F:GO:0016887 |            | -                                                                     |
| Caenorhabditis briggsae | glutamine-dependent -d(+) synthetase   | 4 | F:GO:0016810;<br>F:GO:0005524;<br>F:GO:0003952;<br>P:GO:0009435                                                    | -            | EC:6.3.5.1 | -                                                                     |
| -                       | -                                      | 0 |                                                                                                                    |              |            | -                                                                     |
| -                       | -                                      | 0 |                                                                                                                    |              |            | -                                                                     |
